# Supplementary material
Source: publisher figshare collection journal article supplement (https://acs.figshare.com/ndownloader/files/9449239)
Supplement: Supplementary file 1 [file 9449239]

| n  | ε <sub>ij</sub> | ID     | Seq                                     | θ5(Seq) | θ0(Adj) | θ0(Org) | θ0(Host) | θ0(Proc) | θ0(Tech) |
|----|-----------------|--------|-----------------------------------------|---------|---------|---------|----------|----------|----------|
| 1  | 1               | 156229 | AAAIALRGMAKDGK                          | 2.64    | 0.01    | 2.73    | 0.44     | 0.85     | 1.28     |
| 2  | 1               | 156229 | AAAIALRGMAKDGK                          | 2.64    | 0.01    | 2.73    | 0.44     | 0.85     | 1.28     |
| 3  | 1               | 134633 | AAEAFVLHLEFEDAYL                        | 2.71    | 0.01    | 0.78    | 2.79     | 1.13     | 1.28     |
| 4  | 1               | 117731 | AAFYKTFKTV                              | 2.34    | 0.01    | 0.78    | 0.44     | 1.13     | 0.28     |
| 5  | 1               | 167    | AAGLPGKCGVNVYPYK                        | 2.69    | 0.01    | 3.35    | 1.12     | 0.22     | 0.85     |
| 6  | 1               | 238117 | AALCFGRAPYNKNNE                         | 2.65    | 0.01    | 2.56    | 2.02     | 0.22     | 0.85     |
| 7  | 1               | 238117 | AALCFGRAPYNKNNE                         | 2.65    | 0.01    | 2.56    | 1.20     | 0.22     | 0.85     |
| 8  | 1               | 442076 | AALFYTHKFNSGCP                          | 2.62    | 0.01    | 1.96    | 0.68     | 0.22     | 1.34     |
| 9  | 1               | 96059  | AANNAKNAAL                              | 2.37    | 0.01    | 2.39    | 0.44     | 0.85     | 0.28     |
| 10 | 1               | 346    | AAPANDKFTVFEEAFND<br>AIK                | 2.97    | 0.01    | 3.00    | 3.57     | 0.22     | 0.28     |
| 11 | 1               | 510654 | AAPTADSPLTASPPATA<br>PGP                | 3.01    | 4.23    | 2.40    | 0.44     | 1.59     | 1.28     |
| 12 | 1               | 119733 | AAQGARVYAY                              | 2.35    | 0.01    | 0.78    | 2.66     | 0.22     | 0.28     |
| 13 | 1               | 119733 | AAQGARVYAY                              | 2.35    | 0.01    | 0.78    | 1.15     | 0.22     | 0.28     |
| 14 | 1               | 117431 | AARGRGRGMGRGNIF                         | 2.72    | 4.93    | 0.78    | 0.44     | 1.13     | 0.28     |
| 15 | 1               | 117432 | AARGRGRGMGRGNIF                         | 2.72    | 4.63    | 0.78    | 0.44     | 1.13     | 0.28     |
| 16 | 1               | 481    | AAVDSSKAALTSKLDAA<br>YKL                | 2.99    | 0.01    | 3.00    | 1.81     | 0.22     | 0.28     |
| 17 | 1               | 140821 | AAYSKNRRRAVLA                           | 2.48    | 0.01    | 3.01    | 1.12     | 0.22     | 0.28     |
| 18 | 1               | 543    | ACAAGNSSTKNLIYNLTL<br>CELNVTGFQQHF      | 3.32    | 0.01    | 3.42    | 0.68     | 0.22     | 0.28     |
| 19 | 1               | 554    | ACGASNSSTKNLIKNLTL<br>CELNVTGFQQHF      | 3.34    | 0.01    | 3.42    | 0.68     | 0.22     | 0.28     |
| 20 | 1               | 554    | ACGASNSSTKNLIKNLTL<br>CELNVTGFQQHF      | 3.34    | 0.01    | 3.42    | 0.68     | 0.22     | 0.28     |
| 21 | 1               | 153331 | ACISPNQWLCGGGS                          | 2.59    | 0.01    | 0.90    | 0.68     | 0.22     | 1.27     |
| 22 | 1               | 153333 | ACLDAKLQCGGGS                           | 2.63    | 0.01    | 0.90    | 0.68     | 0.22     | 1.27     |
| 23 | 1               | 153334 | ACLEILSWLCGGGS                          | 2.63    | 0.01    | 0.90    | 0.68     | 0.22     | 1.27     |
| 24 | 1               | 153341 | ACQVPHFFGCGGGS                          | 2.60    | 0.01    | 0.90    | 0.68     | 0.22     | 1.27     |
| 25 | 1               | 153346 | ACRDHYPLSCGGGS                          | 2.59    | 0.01    | 0.90    | 0.68     | 0.22     | 1.27     |
| 26 | 1               | 141844 | ACSSISDISPVTYPITLPIIK<br>NISVTAHGINLIDK | 3.51    | 0.01    | 3.13    | 0.68     | 0.22     | 0.28     |
| 27 | 1               | 175720 | ACTSYNEPLCGGGS                          | 2.72    | 0.01    | 0.90    | 1.15     | 0.22     | 0.28     |
| 28 | 1               | 605    | ACVAGDSSTKNLIYTSTL<br>CELNVTGFQQHF      | 3.32    | 0.01    | 3.42    | 0.68     | 0.22     | 0.28     |
| 29 | 1               | 605    | ACVAGDSSTKNLIYTSTL<br>CELNVTGFQQHF      | 3.32    | 0.01    | 3.42    | 0.68     | 0.22     | 0.28     |
| 30 | 1               | 153357 | ACWYSTRDHCGGGS                          | 2.59    | 0.01    | 0.90    | 0.68     | 0.22     | 1.27     |
| 31 | 1               | 80178  | ADAPQGFYVL                              | 2.30    | 0.01    | 3.06    | 0.44     | 0.85     | 0.28     |
| 32 | 1               | 136942 | ADLLANINLKKADGTVK<br>KGSDALANK          | 3.24    | 0.01    | 3.81    | 0.68     | 0.22     | 1.27     |



|    |   |        |                                                      |      |      |      |      |      |      |
|----|---|--------|------------------------------------------------------|------|------|------|------|------|------|
| 33 | 1 | 136942 | ADLLANINLKKADGTVK<br>KGSDALANK                       | 3.24 | 0.01 | 3.81 | 0.68 | 0.22 | 1.27 |
| 34 | 1 | 136943 | ADLLANINLKKADGTVK<br>KGSDALANKGGSEIEKLK<br>NKYEVAGIP | 3.75 | 0.01 | 0.90 | 4.15 | 0.22 | 0.28 |
| 35 | 1 | 136943 | ADLLANINLKKADGTVK<br>KGSDALANKGGSEIEKLK<br>NKYEVAGIP | 3.75 | 0.01 | 0.90 | 4.15 | 0.22 | 0.28 |
| 36 | 1 | 136943 | ADLLANINLKKADGTVK<br>KGSDALANKGGSEIEKLK<br>NKYEVAGIP | 3.75 | 0.01 | 0.90 | 4.15 | 0.22 | 0.28 |
| 37 | 1 | 113257 | ADNKAPQGLLC                                          | 2.38 | 0.01 | 0.90 | 3.06 | 0.22 | 0.28 |
| 38 | 1 | 167480 | ADQPENHQALAEPV                                       | 2.64 | 0.01 | 3.10 | 0.44 | 0.85 | 1.28 |
| 39 | 1 | 167481 | ADQPGNHQALAEPV                                       | 2.62 | 0.01 | 3.18 | 0.44 | 0.85 | 1.28 |
| 40 | 1 | 766    | ADRYFTYEEND                                          | 2.46 | 0.01 | 2.88 | 2.37 | 0.22 | 0.28 |
| 41 | 1 | 226567 | ADSDINIKGTDDIGSNT<br>T                               | 2.93 | 0.01 | 2.56 | 1.12 | 0.22 | 0.28 |
| 42 | 1 | 510795 | ADSPLTASPPATAPGPS<br>AAN                             | 3.00 | 4.45 | 2.40 | 0.44 | 1.59 | 1.28 |
| 43 | 1 | 96062  | ADTIQKGFYY                                           | 2.26 | 0.01 | 2.39 | 0.44 | 0.85 | 0.28 |
| 44 | 1 | 193420 | ADVTIADPT                                            | 2.26 | 0.01 | 2.51 | 0.44 | 2.39 | 0.28 |
| 45 | 1 | 142505 | ADWADWLDYPG                                          | 2.43 | 0.01 | 0.90 | 0.68 | 0.22 | 1.39 |
| 46 | 1 | 895    | AEEVKATPAGELQVIDK<br>VDA                             | 2.96 | 0.01 | 3.00 | 3.06 | 0.22 | 0.28 |
| 47 | 1 | 895    | AEEVKATPAGELQVIDK<br>VDA                             | 2.96 | 0.01 | 3.00 | 1.81 | 0.22 | 0.28 |
| 48 | 1 | 895    | AEEVKATPAGELQVIDK<br>VDA                             | 2.96 | 0.01 | 3.00 | 3.57 | 0.22 | 0.28 |
| 49 | 1 | 119735 | AEFHRWSSYM                                           | 2.28 | 0.01 | 0.78 | 2.66 | 0.22 | 0.28 |
| 50 | 1 | 99876  | AEFRHDSGYE                                           | 2.29 | 0.01 | 0.78 | 1.12 | 0.22 | 0.85 |
| 51 | 1 | 80216  | AEWVLVGQNA                                           | 2.32 | 0.01 | 3.06 | 0.44 | 0.85 | 0.28 |
| 52 | 1 | 1406   | AFTPDWMMMEVAIDNE                                     | 2.66 | 0.01 | 0.90 | 0.68 | 0.22 | 0.28 |
| 53 | 1 | 137800 | AGELGQSRDVLL                                         | 2.45 | 0.01 | 2.21 | 0.44 | 0.85 | 0.28 |
| 54 | 1 | 137800 | AGELGQSRDVLL                                         | 2.45 | 0.01 | 2.21 | 1.20 | 0.22 | 0.28 |
| 55 | 1 | 150108 | AGGTGTEDSHPPYKQ                                      | 2.65 | 0.01 | 3.45 | 1.12 | 0.22 | 0.28 |
| 56 | 1 | 96071  | AGIRPKGAFQ                                           | 2.32 | 0.01 | 2.39 | 0.44 | 0.85 | 0.28 |
| 57 | 1 | 140823 | AGKGVDAGKLGT                                         | 2.52 | 0.01 | 3.01 | 1.12 | 0.22 | 0.28 |
| 58 | 1 | 95058  | AGLQND                                               | 1.88 | 0.01 | 2.40 | 2.52 | 0.22 | 0.28 |
| 59 | 1 | 132143 | AGPCILLARDRCPG                                       | 2.64 | 0.01 | 0.90 | 3.05 | 1.13 | 1.27 |
| 60 | 1 | 110762 | AGSSIVPLEEYPAEIP                                     | 2.76 | 0.01 | 3.72 | 1.20 | 0.22 | 0.28 |
| 61 | 1 | 103792 | AGTELSATGNESGGG                                      | 2.71 | 0.01 | 3.00 | 1.20 | 0.22 | 0.28 |
| 62 | 1 | 1872   | AIDIEEPSGQ                                           | 2.30 | 0.01 | 3.41 | 0.68 | 0.22 | 0.28 |
| 63 | 1 | 99099  | AIDKIADDWDNRHPL                                      | 2.69 | 0.01 | 2.86 | 2.02 | 0.85 | 0.85 |
| 64 | 1 | 2167   | AKEASSYDYILGWFEFGG<br>GVPEHKKEEN                     | 3.19 | 0.01 | 2.22 | 0.44 | 1.59 | 1.34 |
| 65 | 1 | 107084 | AKFRHD                                               | 1.88 | 0.01 | 0.78 | 1.15 | 0.22 | 1.66 |

|    |   |        |                                |      |      |      |      |      |      |
|----|---|--------|--------------------------------|------|------|------|------|------|------|
| 66 | 1 | 95230  | AKQLPPS                        | 2.12 | 0.01 | 0.90 | 2.59 | 0.22 | 0.28 |
| 67 | 1 | 233145 | ALAGKVLRF                      | 2.24 | 0.01 | 0.78 | 3.57 | 0.22 | 0.28 |
| 68 | 1 | 121136 | ALAVTKYQQRNGWSHK               | 2.70 | 0.01 | 0.78 | 0.44 | 1.13 | 0.28 |
| 69 | 1 | 131194 | ALGAQKEAISPPDAASA<br>AP        | 2.92 | 0.01 | 0.78 | 1.20 | 0.22 | 2.02 |
| 70 | 1 | 153359 | ALLPFKDHLPPGGGS                | 2.73 | 0.01 | 0.90 | 0.68 | 0.22 | 1.27 |
| 71 | 1 | 117745 | ALLRNLGKMTA                    | 2.41 | 0.01 | 0.78 | 0.44 | 1.13 | 0.28 |
| 72 | 1 | 107294 | ALPAPIE                        | 2.05 | 0.01 | 0.78 | 0.44 | 1.13 | 0.28 |
| 73 | 1 | 97874  | ALPAREIQQAKKHED                | 2.67 | 0.01 | 2.71 | 2.78 | 0.22 | 0.28 |
| 74 | 1 | 117746 | ALREYRKMDIPAK                  | 2.61 | 0.01 | 0.78 | 0.44 | 1.13 | 0.28 |
| 75 | 1 | 112751 | ALVGDEVELPCRISPGKN<br>ATGMELGW | 3.17 | 0.01 | 0.78 | 0.44 | 1.41 | 0.28 |
| 76 | 1 | 3076   | AMDPIYDEPTTTTSVPL              | 2.77 | 0.01 | 2.45 | 1.12 | 0.22 | 2.92 |
| 77 | 1 | 3158   | AMMIARFKMFPEVKEK<br>GMAA       | 2.96 | 0.01 | 0.78 | 1.20 | 0.22 | 1.57 |
| 78 | 1 | 175728 | AMYLRGISRSLHGIW                | 2.68 | 0.01 | 2.63 | 1.15 | 0.22 | 0.85 |
| 79 | 1 | 3221   | ANAANEADYQAKLTAY<br>QTE        | 2.94 | 0.01 | 3.18 | 2.98 | 0.22 | 0.28 |
| 80 | 1 | 3221   | ANAANEADYQAKLTAY<br>QTE        | 2.94 | 0.01 | 3.18 | 2.98 | 0.22 | 0.28 |
| 81 | 1 | 3221   | ANAANEADYQAKLTAY<br>QTE        | 2.94 | 0.01 | 3.18 | 2.98 | 0.22 | 0.28 |
| 82 | 1 | 142113 | ANASNDSSSHLQLIYNLT<br>LCELNGTD | 3.20 | 0.01 | 3.04 | 2.13 | 0.22 | 1.27 |
| 83 | 1 | 3236   | ANCASILCKCYTTGT                | 2.69 | 0.01 | 2.43 | 0.44 | 0.85 | 0.28 |
| 84 | 1 | 3236   | ANCASILCKCYTTGT                | 2.69 | 0.01 | 2.43 | 2.69 | 0.22 | 0.28 |
| 85 | 1 | 3245   | ANDVDNSNPVVQAEQL<br>NWL        | 2.92 | 0.01 | 2.39 | 0.44 | 2.39 | 0.28 |
| 86 | 1 | 96098  | ANEEIRKRNA                     | 2.35 | 0.01 | 2.39 | 0.44 | 0.85 | 0.28 |
| 87 | 1 | 80414  | ANGGTIHPTI                     | 2.32 | 0.01 | 3.06 | 0.44 | 0.85 | 0.28 |
| 88 | 1 | 111110 | ANKSEVPLDICTSIC                | 2.64 | 0.01 | 1.86 | 0.68 | 0.22 | 0.28 |
| 89 | 1 | 186742 | ANPEYTYHGIPGGCK                | 2.65 | 0.01 | 0.90 | 1.20 | 0.22 | 0.85 |
| 90 | 1 | 97887  | ANSNSSSHLQLIYNL                | 2.70 | 0.01 | 2.71 | 2.78 | 0.22 | 0.28 |
| 91 | 1 | 106256 | ANYGYTFGSGTRLTVV               | 2.73 | 0.01 | 0.78 | 1.12 | 0.22 | 0.85 |
| 92 | 1 | 106256 | ANYGYTFGSGTRLTVV               | 2.73 | 0.01 | 0.78 | 1.12 | 0.22 | 0.85 |
| 93 | 1 | 106256 | ANYGYTFGSGTRLTVV               | 2.73 | 0.01 | 0.78 | 1.12 | 0.22 | 0.85 |
| 94 | 1 | 106256 | ANYGYTFGSGTRLTVV               | 2.73 | 0.01 | 0.78 | 1.12 | 0.22 | 0.85 |
| 95 | 1 | 106256 | ANYGYTFGSGTRLTVV               | 2.73 | 0.01 | 0.78 | 1.12 | 0.22 | 0.85 |
| 96 | 1 | 106256 | ANYGYTFGSGTRLTVV               | 2.73 | 0.01 | 0.78 | 1.12 | 0.22 | 0.28 |

|     |   |        |                                                     |      |      |      |      |      |      |
|-----|---|--------|-----------------------------------------------------|------|------|------|------|------|------|
| 97  | 1 | 106256 | ANYGYTFGSGTRLTVV                                    | 2.73 | 0.01 | 0.78 | 1.12 | 0.22 | 0.28 |
| 98  | 1 | 106256 | ANYGYTFGSGTRLTVV                                    | 2.73 | 0.01 | 0.78 | 1.12 | 0.22 | 0.28 |
| 99  | 1 | 3502   | APCIPYVRGG                                          | 2.29 | 0.01 | 3.33 | 0.44 | 1.23 | 0.85 |
| 100 | 1 | 3502   | APCIPYVRGG                                          | 2.29 | 0.01 | 3.33 | 0.44 | 1.23 | 0.85 |
| 101 | 1 | 489136 | APCRTCT                                             | 2.04 | 0.01 | 0.90 | 0.68 | 0.22 | 0.28 |
| 102 | 1 | 107296 | APIEKTI                                             | 2.02 | 0.01 | 0.78 | 0.44 | 1.13 | 0.28 |
| 103 | 1 | 164463 | APPRLINDSRVLERYLLE<br>AKEAEKIT                      | 3.20 | 0.01 | 0.90 | 1.20 | 0.22 | 2.02 |
| 104 | 1 | 164463 | APPRLINDSRVLERYLLE<br>AKEAEKIT                      | 3.20 | 0.01 | 0.90 | 0.68 | 0.22 | 2.02 |
| 105 | 1 | 511692 | APTADSPLTASPPATAP<br>GPS                            | 3.01 | 4.23 | 2.40 | 0.44 | 1.59 | 1.28 |
| 106 | 1 | 96104  | APTKPTYETE                                          | 2.35 | 0.01 | 2.39 | 0.44 | 0.85 | 0.28 |
| 107 | 1 | 153362 | APWSLRDHLAVTGGGS                                    | 2.72 | 0.01 | 0.90 | 0.68 | 0.22 | 1.27 |
| 108 | 1 | 3936   | AQAFDYVPAWVV                                        | 2.48 | 0.01 | 0.90 | 0.68 | 0.22 | 1.39 |
| 109 | 1 | 189044 | AQCPPGDTVTVGFHDG                                    | 2.74 | 0.01 | 2.92 | 0.68 | 0.22 | 0.28 |
| 110 | 1 | 119753 | AQGARYVYV                                           | 2.36 | 0.01 | 0.78 | 2.66 | 0.22 | 0.28 |
| 111 | 1 | 119753 | AQGARYVYV                                           | 2.36 | 0.01 | 0.78 | 1.15 | 0.22 | 0.28 |
| 112 | 1 | 119754 | AQRLMRYWAN                                          | 2.32 | 0.01 | 0.78 | 2.66 | 0.22 | 0.28 |
| 113 | 1 | 119754 | AQRLMRYWAN                                          | 2.32 | 0.01 | 0.78 | 1.15 | 0.22 | 0.28 |
| 114 | 1 | 96108  | AQYQAEKRV                                           | 2.32 | 0.01 | 2.39 | 0.44 | 0.85 | 0.28 |
| 115 | 1 | 4141   | AREQSCRRPNAQRFGIS<br>NYCQIYPPNANKIREALA<br>QTHSAIAV | 3.69 | 0.01 | 2.78 | 0.44 | 1.23 | 1.27 |
| 116 | 1 | 503966 | ARGGSRERARGRGRGR<br>GEKR                            | 3.02 | 3.67 | 2.48 | 0.44 | 1.74 | 0.28 |
| 117 | 1 | 503963 | ARGGSRERARGRGRGR<br>GEKR                            | 3.02 | 3.40 | 2.48 | 0.44 | 1.74 | 0.28 |
| 118 | 1 | 503964 | ARGGSRERARGRGRGR<br>GEKR                            | 3.02 | 3.89 | 2.48 | 0.44 | 1.74 | 0.28 |
| 119 | 1 | 503965 | ARGGSRERARGRGRGR<br>GEKR                            | 3.02 | 4.03 | 2.48 | 0.44 | 1.74 | 0.28 |
| 120 | 1 | 110784 | ARGHRPLDKKREEAPSL<br>RPA                            | 2.97 | 4.63 | 0.78 | 0.44 | 1.13 | 0.28 |
| 121 | 1 | 110786 | ARGHRPLDKKREEAPSL<br>RPAD                           | 3.02 | 4.63 | 0.90 | 0.44 | 1.13 | 0.28 |
| 122 | 1 | 110787 | ARGHRPLDKKREEAPSL<br>RPVVG                          | 3.60 | 4.93 | 0.90 | 0.44 | 1.13 | 0.28 |
| 123 | 1 | 144594 | ARGISRTKYW                                          | 2.29 | 0.01 | 0.78 | 0.44 | 1.41 | 0.28 |
| 124 | 1 | 144594 | ARGISRTKYW                                          | 2.29 | 0.01 | 0.78 | 0.44 | 1.13 | 0.28 |
| 125 | 1 | 117261 | ARGTPLKCGV                                          | 2.29 | 0.01 | 1.86 | 0.44 | 1.23 | 0.85 |
| 126 | 1 | 4220   | ARQKLKDAER                                          | 2.34 | 0.01 | 3.41 | 0.68 | 0.22 | 0.28 |

|     |   |        |                                                   |      |      |      |      |      |      |
|-----|---|--------|---------------------------------------------------|------|------|------|------|------|------|
| 127 | 1 | 4227   | ARQQTVSALE                                        | 2.31 | 0.01 | 3.41 | 0.68 | 0.22 | 0.28 |
| 128 | 1 | 119757 | ARRRATQLAH                                        | 2.34 | 0.01 | 0.78 | 1.15 | 0.22 | 0.28 |
| 129 | 1 | 226422 | ARTKQTARKSTGGKAPR<br>KQ                           | 2.95 | 3.75 | 0.78 | 0.44 | 1.41 | 0.28 |
| 130 | 1 | 80452  | ARTRTTETGKGVKTEKEK<br>SVGVGRLRVYF                 | 3.31 | 0.01 | 3.04 | 1.12 | 0.22 | 0.28 |
| 131 | 1 | 80452  | ARTRTTETGKGVKTEKEK<br>SVGVGRLRVYF                 | 3.31 | 0.01 | 3.04 | 0.44 | 0.85 | 0.28 |
| 132 | 1 | 112910 | ARVAEHPDARLAWAR                                   | 2.71 | 0.01 | 2.40 | 1.20 | 0.22 | 0.85 |
| 133 | 1 | 119758 | ARVYAYVFEH                                        | 2.34 | 0.01 | 0.78 | 2.66 | 0.22 | 0.28 |
| 134 | 1 | 119758 | ARVYAYVFEH                                        | 2.34 | 0.01 | 0.78 | 1.15 | 0.22 | 0.28 |
| 135 | 1 | 112753 | ARWELNL                                           | 2.02 | 0.01 | 0.90 | 0.44 | 1.13 | 0.28 |
| 136 | 1 | 4331   | ASARGDLAHLTTTHARH<br>LP                           | 2.93 | 0.01 | 2.78 | 2.78 | 0.22 | 1.27 |
| 137 | 1 | 4331   | ASARGDLAHLTTTHARH<br>LP                           | 2.93 | 0.01 | 2.78 | 2.78 | 0.22 | 1.27 |
| 138 | 1 | 4331   | ASARGDLAHLTTTHARH<br>LP                           | 2.93 | 0.01 | 2.78 | 1.15 | 0.22 | 1.27 |
| 139 | 1 | 4331   | ASARGDLAHLTTTHARH<br>LP                           | 2.93 | 0.01 | 2.78 | 1.15 | 0.22 | 1.27 |
| 140 | 1 | 4331   | ASARGDLAHLTTTHARH<br>LP                           | 2.93 | 0.01 | 2.78 | 1.15 | 0.22 | 1.27 |
| 141 | 1 | 4331   | ASARGDLAHLTTTHARH<br>LP                           | 2.93 | 0.01 | 2.78 | 2.78 | 0.22 | 1.27 |
| 142 | 1 | 4470   | ASIDNINKNINCINNDVD<br>NINSNINNINDNIHKINS<br>NVYGN | 3.69 | 0.01 | 2.22 | 0.44 | 1.74 | 0.28 |
| 143 | 1 | 136823 | ASIILEFFL                                         | 2.23 | 0.01 | 3.81 | 0.68 | 0.22 | 0.28 |
| 144 | 1 | 80508  | ATAIFD                                            | 1.91 | 0.01 | 3.16 | 0.68 | 0.22 | 0.28 |
| 145 | 1 | 115598 | ATGMEVGWYRPP                                      | 2.43 | 0.01 | 0.78 | 0.44 | 1.13 | 0.28 |
| 146 | 1 | 115598 | ATGMEVGWYRPP                                      | 2.43 | 0.01 | 0.78 | 0.44 | 1.13 | 0.28 |
| 147 | 1 | 115598 | ATGMEVGWYRPP                                      | 2.43 | 0.01 | 0.78 | 0.44 | 1.41 | 0.28 |
| 148 | 1 | 5114   | ATQAGRFSITPAAPSYTL<br>KL                          | 2.94 | 0.01 | 2.85 | 2.02 | 0.22 | 0.28 |
| 149 | 1 | 5303   | AVDTGSGGGGQPHDTA<br>PRGARKKQ                      | 3.13 | 0.01 | 2.48 | 0.44 | 0.85 | 0.28 |
| 150 | 1 | 5303   | AVDTGSGGGGQPHDTA<br>PRGARKKQ                      | 3.13 | 0.01 | 2.48 | 0.44 | 0.85 | 0.28 |
| 151 | 1 | 121161 | AVEKVKRTKDE                                       | 2.43 | 0.01 | 0.78 | 0.44 | 1.13 | 0.28 |
| 152 | 1 | 5311   | AVEVDPDDVN                                        | 2.34 | 0.01 | 3.41 | 0.68 | 0.22 | 0.28 |
| 153 | 1 | 5333   | AVFVTLYMPQLSY                                     | 2.54 | 0.01 | 0.90 | 1.15 | 0.22 | 1.27 |
| 154 | 1 | 5334   | AVFVTSEMPQLPY                                     | 2.51 | 0.01 | 0.90 | 1.15 | 0.22 | 1.27 |
| 155 | 1 | 5335   | AVFVTSFLPQLSY                                     | 2.56 | 0.01 | 0.90 | 1.15 | 0.22 | 1.27 |
| 156 | 1 | 97913  | AVKQGVVNLVKYAK                                    | 2.65 | 0.01 | 2.71 | 2.78 | 0.22 | 0.28 |
| 157 | 1 | 96126  | AVNVPKVTK                                         | 2.33 | 0.01 | 2.39 | 0.44 | 1.59 | 0.28 |
| 158 | 1 | 5507   | AVPNVRGDLQ                                        | 2.29 | 0.01 | 3.14 | 0.68 | 0.22 | 1.34 |

|     |   |        |                              |      |      |      |      |      |      |
|-----|---|--------|------------------------------|------|------|------|------|------|------|
| 159 | 1 | 230447 | AVRGSDRDGGADGMS              | 2.73 | 0.01 | 0.78 | 0.44 | 1.13 | 0.28 |
| 160 | 1 | 230447 | AVRGSDRDGGADGMS              | 2.73 | 0.01 | 0.78 | 0.44 | 1.13 | 0.28 |
| 161 | 1 | 137812 | AVSLGQNVLSAD                 | 2.50 | 0.01 | 2.21 | 1.20 | 0.22 | 0.28 |
| 162 | 1 | 5683   | AWPACYCYGLPDSVK              | 2.67 | 0.01 | 2.56 | 1.20 | 0.22 | 0.85 |
| 163 | 1 | 5683   | AWPACYCYGLPDSVK              | 2.67 | 0.01 | 2.56 | 0.68 | 0.22 | 0.85 |
| 164 | 1 | 5683   | AWPACYCYGLPDSVK              | 2.67 | 0.01 | 2.56 | 1.20 | 0.22 | 0.85 |
| 165 | 1 | 5683   | AWPACYCYGLPDSVK              | 2.67 | 0.01 | 2.56 | 1.20 | 0.22 | 0.85 |
| 166 | 1 | 161205 | AYFSMVGNWAKVLVVL<br>LLFA     | 2.94 | 0.01 | 2.45 | 2.74 | 0.22 | 1.34 |
| 167 | 1 | 96133  | AYGIKSNVVR                   | 2.28 | 0.01 | 2.39 | 0.44 | 0.85 | 0.28 |
| 168 | 1 | 133527 | AYIGLKDRKRPSSELRRIAS         | 2.91 | 0.01 | 0.78 | 0.68 | 0.22 | 0.85 |
| 169 | 1 | 133527 | AYIGLKDRKRPSSELRRIAS         | 2.91 | 0.01 | 0.78 | 0.68 | 0.22 | 2.35 |
| 170 | 1 | 133527 | AYIGLKDRKRPSSELRRIAS         | 2.91 | 0.01 | 0.78 | 0.68 | 0.22 | 2.35 |
| 171 | 1 | 97921  | AYYTKDTNNN                   | 2.31 | 0.01 | 2.87 | 0.68 | 0.22 | 0.28 |
| 172 | 1 | 97921  | AYYTKDTNNN                   | 2.31 | 0.01 | 2.87 | 1.20 | 0.22 | 0.28 |
| 173 | 1 | 97922  | AYYTKNTNNN                   | 2.33 | 0.01 | 3.45 | 0.68 | 0.22 | 0.28 |
| 174 | 1 | 97922  | AYYTKNTNNN                   | 2.33 | 0.01 | 3.45 | 1.20 | 0.22 | 0.28 |
| 175 | 1 | 238246 | CAATCPTVKPGVNII              | 2.68 | 0.01 | 2.56 | 2.02 | 0.22 | 0.85 |
| 176 | 1 | 78938  | CAPGQNLCY                    | 2.22 | 0.01 | 3.33 | 2.43 | 0.22 | 0.28 |
| 177 | 1 | 78938  | CAPGQNLCY                    | 2.22 | 0.01 | 3.33 | 2.43 | 0.22 | 0.28 |
| 178 | 1 | 6020   | CAQQWPEWYPC                  | 2.43 | 0.01 | 0.90 | 1.15 | 0.22 | 1.27 |
| 179 | 1 | 6020   | CAQQWPEWYPC                  | 2.43 | 0.01 | 0.90 | 1.15 | 0.22 | 0.28 |
| 180 | 1 | 6025   | CARPHGASEESQSVTFN<br>KPLNTPQ | 3.09 | 0.01 | 0.90 | 2.13 | 0.22 | 0.28 |
| 181 | 1 | 6065   | CCNGIRTINGLARTT              | 2.69 | 0.01 | 3.35 | 1.12 | 0.22 | 0.85 |
| 182 | 1 | 94450  | CCNPAC                       | 1.92 | 0.01 | 3.22 | 2.37 | 0.22 | 0.28 |
| 183 | 1 | 94450  | CCNPAC                       | 1.92 | 0.01 | 3.22 | 1.20 | 0.22 | 0.28 |
| 184 | 1 | 94451  | CCNPACG                      | 2.04 | 0.01 | 3.22 | 2.37 | 0.22 | 0.28 |
| 185 | 1 | 94451  | CCNPACG                      | 2.04 | 0.01 | 3.22 | 1.20 | 0.22 | 0.28 |
| 186 | 1 | 94452  | CCNPACGPKY                   | 2.33 | 0.01 | 3.70 | 2.37 | 0.22 | 0.28 |
| 187 | 1 | 94452  | CCNPACGPKY                   | 2.33 | 0.01 | 3.70 | 1.20 | 0.22 | 0.28 |
| 188 | 1 | 94453  | CCNPACGR                     | 2.14 | 0.01 | 3.22 | 2.37 | 0.22 | 0.28 |
| 189 | 1 | 94453  | CCNPACGR                     | 2.14 | 0.01 | 3.22 | 1.20 | 0.22 | 0.28 |
| 190 | 1 | 94454  | CCNPACGRHY                   | 2.31 | 0.01 | 3.22 | 2.37 | 0.22 | 0.28 |
| 191 | 1 | 6104   | CDGYCKTHLKASSGY              | 2.68 | 0.01 | 2.56 | 0.68 | 0.22 | 0.85 |
| 192 | 1 | 110795 | CDLIPNLKLNNG                 | 2.48 | 0.01 | 3.15 | 0.44 | 1.59 | 0.28 |
| 193 | 1 | 164500 | CDSRVLERYLLEAKEAE            | 2.80 | 0.01 | 0.78 | 1.12 | 0.22 | 0.28 |
| 194 | 1 | 238252 | CFGRAPYNKNNENIN              | 2.66 | 0.01 | 2.56 | 2.02 | 0.22 | 0.85 |
| 195 | 1 | 238252 | CFGRAPYNKNNENIN              | 2.66 | 0.01 | 2.56 | 1.20 | 0.22 | 0.85 |
| 196 | 1 | 420588 | CFIQFLSEPT                   | 2.29 | 0.01 | 0.78 | 0.44 | 1.13 | 0.28 |
| 197 | 1 | 6276   | CGAVIDDC                     | 2.14 | 0.01 | 0.90 | 1.15 | 0.22 | 0.28 |

|     |   |        |                                  |      |      |      |      |      |      |
|-----|---|--------|----------------------------------|------|------|------|------|------|------|
| 198 | 1 | 108832 | CGDRGFYFNKPTG                    | 2.54 | 0.01 | 0.78 | 1.15 | 0.22 | 1.34 |
| 199 | 1 | 6283   | CGETGIDSQSQGSFQAP<br>QSSNS       | 3.04 | 0.01 | 0.90 | 0.68 | 0.22 | 0.28 |
| 200 | 1 | 443027 | CGGPPCNIGGVGNNTL<br>TCPT         | 3.00 | 0.01 | 1.96 | 0.68 | 0.22 | 1.34 |
| 201 | 1 | 116286 | CGKGLSATVTGGQKGR<br>GSR          | 2.92 | 0.01 | 1.75 | 3.44 | 0.22 | 0.85 |
| 202 | 1 | 194842 | CGPIPVLDENGLFAPGP<br>C           | 2.86 | 0.01 | 0.90 | 0.68 | 0.22 | 1.34 |
| 203 | 1 | 79524  | CHTTATIPSSAVTC                   | 2.64 | 0.01 | 3.10 | 1.20 | 0.22 | 1.57 |
| 204 | 1 | 420589 | CIPKTFWN                         | 2.10 | 0.01 | 0.78 | 0.44 | 1.13 | 0.28 |
| 205 | 1 | 6474   | CKEDYRYAISSTNEIGLLG<br>AGGLT     | 3.11 | 0.01 | 3.37 | 2.13 | 0.22 | 0.28 |
| 206 | 1 | 108834 | CKPISGHNSLFWYRQT                 | 2.65 | 0.01 | 0.78 | 0.44 | 1.13 | 0.28 |
| 207 | 1 | 108834 | CKPISGHNSLFWYRQT                 | 2.65 | 0.01 | 0.78 | 0.44 | 1.41 | 0.28 |
| 208 | 1 | 108834 | CKPISGHNSLFWYRQT                 | 2.65 | 0.01 | 0.78 | 0.44 | 1.13 | 0.28 |
| 209 | 1 | 108295 | CKRDSTWC                         | 2.13 | 0.01 | 0.90 | 0.68 | 0.22 | 0.28 |
| 210 | 1 | 107305 | CKVSNKA                          | 2.02 | 0.01 | 0.78 | 0.44 | 1.13 | 0.28 |
| 211 | 1 | 225705 | CLVVVDVSHD                       | 2.25 | 0.01 | 3.28 | 0.44 | 0.22 | 0.85 |
| 212 | 1 | 238263 | CNCDRTAALCFGRAP                  | 2.69 | 0.01 | 2.56 | 2.02 | 0.22 | 0.85 |
| 213 | 1 | 238263 | CNCDRTAALCFGRAP                  | 2.69 | 0.01 | 2.56 | 1.20 | 0.22 | 0.85 |
| 214 | 1 | 122720 | CNESSMQSLRQRKSVN<br>ALNS         | 2.96 | 0.01 | 0.78 | 3.01 | 0.22 | 0.28 |
| 215 | 1 | 94468  | CNPAC                            | 1.77 | 0.01 | 3.22 | 2.37 | 0.22 | 0.28 |
| 216 | 1 | 94473  | CNPACGPKYS                       | 2.32 | 0.01 | 3.70 | 2.37 | 0.22 | 0.28 |
| 217 | 1 | 94474  | CNPACGR                          | 2.03 | 0.01 | 3.22 | 2.37 | 0.22 | 0.28 |
| 218 | 1 | 94474  | CNPACGR                          | 2.03 | 0.01 | 3.22 | 1.20 | 0.22 | 0.28 |
| 219 | 1 | 94475  | CNPACGRH                         | 2.13 | 0.01 | 3.22 | 2.37 | 0.22 | 0.28 |
| 220 | 1 | 94476  | CNPACGRHY                        | 2.22 | 0.01 | 3.22 | 2.37 | 0.22 | 0.28 |
| 221 | 1 | 94477  | CNPACGRHYS                       | 2.30 | 0.01 | 3.22 | 2.37 | 0.22 | 0.28 |
| 222 | 1 | 189048 | CPDVREGTTSSDYTTT                 | 2.71 | 0.01 | 2.92 | 0.68 | 0.22 | 0.28 |
| 223 | 1 | 225708 | CPKCPAPELL                       | 2.34 | 0.01 | 3.28 | 0.44 | 0.22 | 0.85 |
| 224 | 1 | 123062 | CPSGRITRQEFQTIYSKFF<br>PEADPKAYA | 3.27 | 0.01 | 1.60 | 2.04 | 0.22 | 0.28 |
| 225 | 1 | 79528  | CPSKKPYEEVTC                     | 2.48 | 0.01 | 3.10 | 1.20 | 0.22 | 1.57 |
| 226 | 1 | 95066  | CQHKQRRCSLSSMEMN<br>TVSG         | 2.92 | 0.01 | 2.25 | 2.04 | 0.22 | 1.57 |
| 227 | 1 | 174069 | CRACYEIKCK                       | 2.34 | 0.01 | 3.10 | 0.44 | 1.23 | 0.85 |
| 228 | 1 | 174069 | CRACYEIKCK                       | 2.34 | 0.01 | 3.10 | 0.44 | 1.23 | 0.85 |
| 229 | 1 | 6925   | CRGFTSFKKPPTPPPEPE<br>T          | 2.92 | 0.01 | 0.90 | 0.68 | 0.22 | 0.28 |
| 230 | 1 | 113311 | CRKLGHPWSV                       | 2.34 | 0.01 | 0.90 | 3.06 | 0.22 | 0.28 |
| 231 | 1 | 110800 | CSSTSENNNGN                      | 2.52 | 0.01 | 3.15 | 0.44 | 1.59 | 0.28 |
| 232 | 1 | 107773 | CSVMHEG                          | 1.99 | 0.01 | 0.78 | 0.44 | 1.13 | 0.28 |

|     |   |        |                                     |      |      |      |      |      |      |
|-----|---|--------|-------------------------------------|------|------|------|------|------|------|
| 233 | 1 | 7110   | CTASARGDLAHLTTXC                    | 2.75 | 4.33 | 0.90 | 0.68 | 0.22 | 1.27 |
| 234 | 1 | 7110   | CTASARGDLAHLTTXC                    | 2.75 | 4.33 | 0.90 | 0.68 | 0.22 | 1.66 |
| 235 | 1 | 147559 | CTVRGLG                             | 2.02 | 0.01 | 0.78 | 2.87 | 0.22 | 0.85 |
| 236 | 1 | 7314   | CVTIMTVDNPASTTNKD<br>KLFVWVKITYKDT  | 3.33 | 0.01 | 2.57 | 0.68 | 0.22 | 0.28 |
| 237 | 1 | 7314   | CVTIMTVDNPASTTNKD<br>KLFVWVKITYKDT  | 3.33 | 0.01 | 2.57 | 0.68 | 0.22 | 0.28 |
| 238 | 1 | 99919  | CVYDPRGHTGTTNQRSP<br>PGE            | 2.91 | 0.01 | 2.16 | 0.44 | 2.39 | 0.28 |
| 239 | 1 | 7332   | CWGELMTLATWVGVN<br>LEDPASRDLV       | 3.15 | 0.01 | 2.71 | 1.20 | 0.22 | 0.28 |
| 240 | 1 | 7332   | CWGELMTLATWVGVN<br>LEDPASRDLV       | 3.15 | 0.01 | 2.71 | 0.44 | 0.85 | 0.28 |
| 241 | 1 | 238271 | CYCAGGSGTPVDEL<br>CYCHGTVIESLESNNYF | 2.67 | 0.01 | 2.56 | 2.02 | 0.22 | 0.85 |
| 242 | 1 | 134336 | NSSGIDVEEKSLFLDIWR<br>NWQ           | 3.59 | 0.01 | 1.75 | 1.20 | 0.22 | 1.27 |
| 243 | 1 | 134337 | CYCQDPYVKEAENLKKY<br>FNA            | 2.94 | 0.01 | 0.78 | 1.20 | 0.22 | 0.28 |
| 244 | 1 | 7347   | CYCYGLPDSEPTKTN                     | 2.67 | 0.01 | 2.56 | 1.20 | 0.22 | 0.85 |
| 245 | 1 | 7348   | CYCYGLPDSVKIWTS                     | 2.65 | 0.01 | 2.56 | 1.20 | 0.22 | 0.85 |
| 246 | 1 | 7348   | CYCYGLPDSVKIWTS                     | 2.65 | 0.01 | 2.56 | 0.68 | 0.22 | 0.85 |
| 247 | 1 | 7348   | CYCYGLPDSVKIWTS                     | 2.65 | 0.01 | 2.56 | 1.20 | 0.22 | 0.85 |
| 248 | 1 | 7348   | CYCYGLPDSVKIWTS                     | 2.65 | 0.01 | 2.56 | 1.20 | 0.22 | 0.85 |
| 249 | 1 | 153815 | CYEQLNDSSEEEDEI                     | 2.68 | 0.01 | 1.86 | 2.37 | 0.22 | 0.28 |
| 250 | 1 | 153815 | CYEQLNDSSEEEDEI                     | 2.68 | 0.01 | 1.86 | 1.12 | 0.22 | 0.28 |
| 251 | 1 | 7374   | CYGLPDSEPTKTNGK                     | 2.66 | 0.01 | 2.56 | 0.68 | 0.22 | 0.85 |
| 252 | 1 | 7375   | CYGLPDSVKIWTSET                     | 2.62 | 0.01 | 2.56 | 1.20 | 0.22 | 0.85 |
| 253 | 1 | 7375   | CYGLPDSVKIWTSET                     | 2.62 | 0.01 | 2.56 | 0.68 | 0.22 | 0.85 |
| 254 | 1 | 7375   | CYGLPDSVKIWTSET                     | 2.62 | 0.01 | 2.56 | 1.20 | 0.22 | 0.85 |
| 255 | 1 | 7375   | CYGLPDSVKIWTSET                     | 2.62 | 0.01 | 2.56 | 1.20 | 0.22 | 0.85 |
| 256 | 1 | 136826 | CYSQVNPTTL                          | 2.28 | 0.01 | 3.81 | 0.68 | 0.22 | 0.28 |
| 257 | 1 | 7443   | CYTTGTIINQDPDKILTYI<br>AADHC        | 3.12 | 0.01 | 2.72 | 0.68 | 0.22 | 0.28 |
| 258 | 1 | 7443   | CYTTGTIINQDPDKILTYI<br>AADHC        | 3.12 | 0.01 | 2.72 | 1.81 | 0.22 | 0.28 |
| 259 | 1 | 99922  | DAEFRHDSGY                          | 2.30 | 0.01 | 0.78 | 0.44 | 1.93 | 0.28 |
| 260 | 1 | 99922  | DAEFRHDSGY                          | 2.30 | 0.01 | 0.78 | 0.68 | 0.22 | 0.28 |
| 261 | 1 | 99922  | DAEFRHDSGY                          | 2.30 | 0.01 | 0.78 | 1.12 | 0.22 | 0.85 |
| 262 | 1 | 104443 | DAEFRHDSGYE                         | 2.40 | 0.01 | 0.78 | 4.23 | 0.22 | 0.28 |
| 263 | 1 | 104443 | DAEFRHDSGYE                         | 2.40 | 0.01 | 0.78 | 3.40 | 0.22 | 0.28 |
| 264 | 1 | 104443 | DAEFRHDSGYE                         | 2.40 | 0.01 | 0.78 | 2.61 | 0.22 | 0.28 |
| 265 | 1 | 99134  | DAEFRHDSGYEVHHQ                     | 2.66 | 0.01 | 0.78 | 2.49 | 0.22 | 1.27 |
| 266 | 1 | 99134  | DAEFRHDSGYEVHHQ                     | 2.66 | 0.01 | 0.78 | 3.00 | 0.22 | 0.28 |
| 267 | 1 | 99134  | DAEFRHDSGYEVHHQ                     | 2.66 | 0.01 | 0.78 | 1.81 | 0.22 | 0.28 |
| 268 | 1 | 7491   | DAEFRHDSGYEVHHQK                    | 2.71 | 0.01 | 0.78 | 4.45 | 0.22 | 0.28 |

|     |   |        |                                                                     |      |      |      |      |      |      |
|-----|---|--------|---------------------------------------------------------------------|------|------|------|------|------|------|
| 269 | 1 | 7492   | DAEFRHDSGYEVHHQKL                                                   | 2.75 | 0.01 | 0.78 | 0.68 | 0.22 | 1.66 |
| 270 | 1 | 7493   | DAEFRHDSGYEVHHQKL<br>VFFAEDVGSNKGAIIGL<br>MVGGVVIA                  | 3.67 | 0.01 | 0.78 | 0.44 | 1.93 | 0.28 |
| 271 | 1 | 7493   | DAEFRHDSGYEVHHQKL<br>VFFAEDVGSNKGAIIGL<br>MVGGVVIA                  | 3.67 | 0.01 | 0.78 | 1.12 | 0.22 | 0.85 |
| 272 | 1 | 7493   | DAEFRHDSGYEVHHQKL<br>VFFAEDVGSNKGAIIGL<br>MVGGVVIA                  | 3.67 | 0.01 | 0.78 | 0.44 | 1.41 | 0.28 |
| 273 | 1 | 7493   | DAEFRHDSGYEVHHQKL<br>VFFAEDVGSNKGAIIGL<br>MVGGVVIA                  | 3.67 | 0.01 | 0.78 | 0.44 | 1.41 | 1.28 |
| 274 | 1 | 157148 | DAEFRHDSGYEVHHQKL<br>VFFAEDVGSNKGAIIGL<br>MVGGVVIATVIVITLVM<br>LKKK | 3.94 | 0.01 | 0.78 | 0.44 | 1.93 | 1.28 |
| 275 | 1 | 157148 | DAEFRHDSGYEVHHQKL<br>VFFAEDVGSNKGAIIGL<br>MVGGVVIATVIVITLVM<br>LKKK | 3.94 | 0.01 | 0.78 | 0.44 | 1.41 | 1.28 |
| 276 | 1 | 99924  | DAEFRHDSGYEVHHQKL<br>VFFAQDVGSNKGAIIGL<br>MVGGVVIA                  | 3.67 | 0.01 | 0.78 | 3.70 | 0.22 | 1.28 |
| 277 | 1 | 103840 | DAEKPAESGGSQPPRAA<br>ARK                                            | 2.96 | 0.01 | 0.78 | 3.89 | 1.13 | 0.28 |
| 278 | 1 | 137816 | DAETLMDAAVDV                                                        | 2.51 | 0.01 | 2.21 | 1.20 | 0.22 | 0.28 |
| 279 | 1 | 111186 | DAHQPTRRVKGDVVA<br>LP                                               | 2.85 | 0.01 | 3.33 | 0.44 | 1.23 | 0.85 |
| 280 | 1 | 7558   | DAKDGKEIDTKHLPSTC                                                   | 2.78 | 0.01 | 3.30 | 1.12 | 0.22 | 1.57 |
| 281 | 1 | 108846 | DALQFVCGDRGFY                                                       | 2.54 | 0.01 | 0.78 | 1.15 | 0.22 | 1.34 |
| 282 | 1 | 78946  | DAWCGSRGK                                                           | 2.21 | 0.01 | 3.33 | 2.43 | 0.22 | 0.28 |
| 283 | 1 | 78946  | DAWCGSRGK                                                           | 2.21 | 0.01 | 3.33 | 2.43 | 0.22 | 0.28 |
| 284 | 1 | 136162 | DAWKMRLSQMYD                                                        | 2.46 | 0.01 | 0.90 | 0.68 | 0.22 | 0.28 |
| 285 | 1 | 136162 | DAWKMRLSQMYD                                                        | 2.46 | 0.01 | 0.90 | 0.68 | 0.22 | 0.28 |
| 286 | 1 | 443122 | DCFRKHPEATYTKCGSG<br>PWL                                            | 2.90 | 0.01 | 1.96 | 0.68 | 0.22 | 1.34 |
| 287 | 1 | 7789   | DDGSIYKLTGIWLSKTS<br>A<br>DS                                        | 2.97 | 0.01 | 3.59 | 3.12 | 0.22 | 0.28 |
| 288 | 1 | 451470 | DDLGEHRR                                                            | 2.10 | 0.01 | 2.04 | 1.20 | 0.22 | 0.85 |
| 289 | 1 | 148558 | DDSKLPVVKVEDKSKLQD<br>TKDKKR                                        | 3.14 | 0.01 | 3.57 | 2.49 | 0.22 | 0.28 |
| 290 | 1 | 148562 | DDSKLPVVKVEDKSKLQ<br>DTKDKKR                                        | 3.15 | 0.01 | 3.57 | 2.49 | 0.22 | 0.28 |
| 291 | 1 | 122295 | DDVWLP                                                              | 1.89 | 0.01 | 2.26 | 2.43 | 0.22 | 1.57 |



|     |   |        |                                    |      |      |      |      |      |      |
|-----|---|--------|------------------------------------|------|------|------|------|------|------|
| 292 | 1 | 419130 | DEDKRDGNNEDNEKLR<br>KPKHKKL        | 3.13 | 0.01 | 1.66 | 3.32 | 0.22 | 0.28 |
| 293 | 1 | 96170  | DEDSYERDP                          | 2.26 | 0.01 | 2.16 | 2.82 | 0.22 | 1.57 |
| 294 | 1 | 95004  | DEESSNAAEEWKYVAM<br>VIDH           | 2.93 | 0.01 | 2.26 | 2.36 | 0.22 | 2.02 |
| 295 | 1 | 187290 | DEKAQRRRKQWWNES<br>K               | 2.75 | 0.01 | 2.59 | 0.44 | 1.74 | 1.34 |
| 296 | 1 | 187290 | DEKAQRRRKQWWNES<br>K               | 2.75 | 0.01 | 2.59 | 0.44 | 1.74 | 1.27 |
| 297 | 1 | 227750 | DEMLSQGFADQIYEIFRF<br>LPKDIQVALFSA | 3.34 | 0.01 | 3.47 | 0.68 | 0.22 | 0.28 |
| 298 | 1 | 119790 | DEQNCSMKLGTWTYDG<br>SVVAINPESDQPDL | 3.31 | 0.01 | 0.78 | 1.20 | 0.22 | 0.85 |
| 299 | 1 | 8147   | DERGTPEYNIALGQR                    | 2.64 | 0.01 | 3.75 | 0.44 | 1.74 | 0.28 |
| 300 | 1 | 140839 | DERGTPEYNIALGQRRR<br>DAV           | 2.93 | 0.01 | 3.01 | 0.68 | 0.22 | 0.85 |
| 301 | 1 | 225622 | DERYRLPTTSIPIHY                    | 2.67 | 0.01 | 3.57 | 2.61 | 0.22 | 0.28 |
| 302 | 1 | 134031 | DEYDEVAMP                          | 2.24 | 0.01 | 0.78 | 0.44 | 1.41 | 1.27 |
| 303 | 1 | 8273   | DFGSLAPRVA                         | 2.29 | 0.01 | 3.14 | 2.37 | 0.22 | 0.85 |
| 304 | 1 | 8273   | DFGSLAPRVA                         | 2.29 | 0.01 | 3.14 | 2.37 | 0.22 | 0.85 |
| 305 | 1 | 225712 | DFLPTDITVEWQSNE                    | 2.65 | 0.01 | 3.28 | 0.44 | 0.22 | 0.85 |
| 306 | 1 | 112473 | DGDMVDTGFGAMNFA<br>DLQTNKSDVPIDI   | 3.28 | 0.01 | 3.25 | 1.12 | 0.22 | 1.48 |
| 307 | 1 | 107315 | DGKEYKC                            | 2.02 | 0.01 | 0.78 | 0.44 | 1.13 | 0.28 |
| 308 | 1 | 8448   | DGNCEDIPHVNEFSAIDL                 | 2.82 | 0.01 | 1.66 | 1.20 | 0.22 | 0.28 |
| 309 | 1 | 161331 | DGSYRSEELNLVIIGPSA<br>D            | 2.88 | 0.01 | 2.08 | 2.49 | 0.22 | 1.57 |
| 310 | 1 | 225713 | DGTEV                              | 1.74 | 0.01 | 3.28 | 0.44 | 0.22 | 0.85 |
| 311 | 1 | 150163 | DGYPTFGEHKQEKDL                    | 2.67 | 0.01 | 3.45 | 0.68 | 0.22 | 0.28 |
| 312 | 1 | 111196 | DGYVARTNIYYHAGT                    | 2.67 | 0.01 | 1.86 | 0.68 | 0.22 | 0.28 |
| 313 | 1 | 8540   | DHGMFTKYNGNL                       | 2.45 | 0.01 | 3.61 | 1.20 | 0.22 | 0.85 |
| 314 | 1 | 174077 | DHYLALLVKY                         | 2.32 | 0.01 | 3.10 | 0.44 | 1.23 | 0.85 |
| 315 | 1 | 119556 | DIGAQAVSPSTSQGADV<br>KKSSCQSK      | 3.19 | 0.01 | 3.33 | 0.44 | 0.85 | 0.28 |
| 316 | 1 | 110562 | DIILECVYCKQQLLRREV<br>YD           | 2.95 | 0.01 | 1.86 | 2.37 | 0.22 | 0.28 |
| 317 | 1 | 127622 | DILFYMPTDSVGLAVID<br>WEEWRPTWT     | 3.18 | 0.01 | 2.95 | 3.16 | 0.22 | 0.28 |
| 318 | 1 | 8761   | DIQEEITRHE                         | 2.33 | 0.01 | 3.41 | 0.68 | 0.22 | 0.28 |
| 319 | 1 | 95310  | DIREVIANGELIFKLDGDI                | 2.91 | 0.01 | 3.45 | 0.44 | 0.22 | 1.57 |
| 320 | 1 | 125377 | DKDAFGGVYSGPSLLDV<br>SQT           | 2.94 | 0.01 | 0.78 | 0.68 | 0.22 | 0.28 |
| 321 | 1 | 8918   | DKLADYKRRM                         | 2.33 | 0.01 | 3.41 | 0.68 | 0.22 | 0.28 |

|     |   |        |                                                                |      |      |      |      |      |      |
|-----|---|--------|----------------------------------------------------------------|------|------|------|------|------|------|
| 322 | 1 | 124016 | DKTEDVDIEEMALKLDN<br>VLL                                       | 2.96 | 0.01 | 0.78 | 0.44 | 1.13 | 0.28 |
| 323 | 1 | 180401 | DLAKSRGVEAARERMF<br>NGE                                        | 2.88 | 4.63 | 0.78 | 0.44 | 1.13 | 0.28 |
| 324 | 1 | 189054 | DLDTHFTQYKLARPYI                                               | 2.72 | 0.01 | 2.92 | 0.68 | 0.22 | 0.28 |
| 325 | 1 | 9106   | DLGSIA                                                         | 1.88 | 0.01 | 3.37 | 0.68 | 0.22 | 0.28 |
| 326 | 1 | 95318  | DLQVLAQK                                                       | 2.14 | 0.01 | 2.96 | 2.59 | 0.22 | 0.28 |
| 327 | 1 | 95318  | DLQVLAQK                                                       | 2.14 | 0.01 | 2.96 | 2.22 | 0.22 | 0.28 |
| 328 | 1 | 9310   | DLVEYIMNYTGNQQSR<br>WGLGSPNC                                   | 3.07 | 0.01 | 3.16 | 0.68 | 0.22 | 0.28 |
| 329 | 1 | 9310   | DLVEYIMNYTGNQQSR<br>WGLGSPNC                                   | 3.07 | 0.01 | 3.16 | 0.68 | 0.22 | 0.28 |
| 330 | 1 | 9310   | DLVEYIMNYTGNQQSR<br>WGLGSPNC                                   | 3.07 | 0.01 | 3.16 | 0.68 | 0.22 | 0.28 |
| 331 | 1 | 186750 | DNANPEYTYHGIPGG                                                | 2.66 | 0.01 | 0.90 | 1.20 | 0.22 | 0.85 |
| 332 | 1 | 81191  | DNIYTFVPEK                                                     | 2.26 | 0.01 | 3.06 | 0.44 | 0.85 | 0.28 |
| 333 | 1 | 9524   | DNPASTTNKDK                                                    | 2.43 | 0.01 | 2.57 | 1.20 | 0.22 | 0.28 |
| 334 | 1 | 9524   | DNPASTTNKDK                                                    | 2.43 | 0.01 | 2.57 | 2.04 | 0.22 | 0.28 |
| 335 | 1 | 9524   | DNPASTTNKDK                                                    | 2.43 | 0.01 | 2.57 | 3.16 | 0.22 | 0.28 |
| 336 | 1 | 81211  | DPLKIKRVHA                                                     | 2.29 | 0.01 | 3.06 | 0.44 | 0.85 | 0.28 |
| 337 | 1 | 9694   | DPNANPNVDPNANPN<br>V                                           | 2.81 | 0.01 | 1.66 | 3.32 | 0.22 | 0.28 |
| 338 | 1 | 144616 | DPRYTCQREF                                                     | 2.29 | 0.01 | 0.78 | 0.44 | 1.13 | 0.28 |
| 339 | 1 | 175785 | DPWIQLMNRTQANLA                                                | 2.66 | 0.01 | 2.63 | 1.15 | 0.22 | 0.85 |
| 340 | 1 | 175785 | DPWIQLMNRTQANLA                                                | 2.66 | 0.01 | 2.63 | 1.15 | 0.22 | 0.85 |
| 341 | 1 | 419586 | DPYSPSQDPYSPSPY                                                | 2.75 | 4.63 | 2.16 | 0.44 | 1.23 | 1.27 |
| 342 | 1 | 419588 | DPYSPSQDPYSPSQDPD<br>RRDPYSPSPY                                | 3.31 | 4.63 | 2.16 | 0.44 | 1.23 | 1.27 |
| 343 | 1 | 102367 | DQNITARIGKPLVLNCK<br>GAPKKPPQQLEWKLN                           | 3.39 | 0.01 | 0.78 | 0.44 | 1.93 | 0.28 |
| 344 | 1 | 9886   | DQPKQYEQHLTDYEKIK<br>EG                                        | 2.91 | 0.01 | 1.66 | 1.20 | 0.22 | 0.28 |
| 345 | 1 | 429522 | DRALYGPTVIDH                                                   | 2.44 | 0.01 | 0.90 | 2.22 | 0.85 | 0.28 |
| 346 | 1 | 136828 | DRAVYENELVATRDVKN<br>GSRGSVGGGKGDCGTP<br>SHSRRQPHVVSQWSRS<br>A | 3.85 | 0.01 | 0.90 | 0.68 | 0.22 | 3.16 |
| 347 | 1 | 136828 | DRAVYENELVATRDVKN<br>GSRGSVGGGKGDCGTP<br>SHSRRQPHVVSQWSRS<br>A | 3.85 | 0.01 | 0.90 | 3.81 | 0.22 | 3.16 |
| 348 | 1 | 230452 | DREQYGQYALAVRGS                                                | 2.68 | 0.01 | 0.78 | 0.44 | 1.13 | 0.28 |
| 349 | 1 | 230452 | DREQYGQYALAVRGS                                                | 2.68 | 0.01 | 0.78 | 0.44 | 1.13 | 0.28 |
| 350 | 1 | 238306 | DRTAALCFGRAPYNK                                                | 2.64 | 0.01 | 2.56 | 2.02 | 0.22 | 0.85 |

|     |   |        |                           |      |      |      |      |      |      |
|-----|---|--------|---------------------------|------|------|------|------|------|------|
| 351 | 1 | 238306 | DRTAALCFGRAPYNK           | 2.64 | 0.01 | 2.56 | 1.20 | 0.22 | 0.85 |
| 352 | 1 | 79188  | DSAVGY                    | 1.88 | 0.01 | 0.90 | 1.15 | 0.22 | 0.28 |
| 353 | 1 | 79189  | DSAVPN                    | 1.88 | 0.01 | 0.90 | 1.15 | 0.22 | 0.28 |
| 354 | 1 | 10124  | DSGCVVSWK                 | 2.22 | 0.01 | 2.87 | 3.04 | 0.22 | 0.28 |
| 355 | 1 | 10124  | DSGCVVSWK                 | 2.22 | 0.01 | 2.87 | 0.44 | 0.85 | 0.28 |
| 356 | 1 | 95070  | DSGVICGRMTCSPTTEE<br>NLLH | 2.94 | 0.01 | 2.25 | 2.04 | 0.22 | 1.57 |
| 357 | 1 | 95070  | DSGVICGRMTCSPTTEE<br>NLLH | 2.94 | 0.01 | 2.25 | 0.68 | 0.22 | 1.27 |
| 358 | 1 | 95070  | DSGVICGRMTCSPTTEE<br>NLLH | 2.94 | 0.01 | 2.25 | 2.04 | 0.22 | 1.27 |
| 359 | 1 | 125384 | DSHYDYTICGDESDMVC<br>TPK  | 2.94 | 0.01 | 0.78 | 1.20 | 0.22 | 1.27 |
| 360 | 1 | 125384 | DSHYDYTICGDESDMVC<br>TPK  | 2.94 | 0.01 | 0.78 | 3.06 | 0.22 | 0.28 |
| 361 | 1 | 187054 | DSIAALKDKPDNPAL           | 2.72 | 0.01 | 2.80 | 3.38 | 0.22 | 0.28 |
| 362 | 1 | 187054 | DSIAALKDKPDNPAL           | 2.72 | 0.01 | 2.80 | 0.68 | 0.22 | 0.28 |
| 363 | 1 | 187054 | DSIAALKDKPDNPAL           | 2.72 | 0.01 | 2.80 | 3.38 | 0.22 | 0.28 |
| 364 | 1 | 187054 | DSIAALKDKPDNPAL           | 2.72 | 0.01 | 2.80 | 0.68 | 0.22 | 0.28 |
| 365 | 1 | 91211  | DSKLTILVKNGGIV            | 2.69 | 0.01 | 3.12 | 1.12 | 0.22 | 0.28 |
| 366 | 1 | 147600 | DSLYTYP                   | 2.02 | 0.01 | 0.78 | 2.87 | 0.22 | 0.85 |
| 367 | 1 | 147600 | DSLYTYP                   | 2.02 | 0.01 | 0.78 | 2.87 | 0.22 | 1.34 |
| 368 | 1 | 510432 | DSPFRLW                   | 1.99 | 0.01 | 0.90 | 0.44 | 1.13 | 0.28 |
| 369 | 1 | 513796 | DSPLTASPPATAPGPSA<br>ANV  | 2.98 | 4.45 | 2.40 | 0.44 | 1.59 | 1.28 |
| 370 | 1 | 111217 | DSTLRLCVQSTHVDIRTL<br>EDL | 3.02 | 0.01 | 1.86 | 2.37 | 0.22 | 0.28 |
| 371 | 1 | 110818 | DSTNNNKYTVTL              | 2.47 | 0.01 | 3.15 | 0.44 | 1.59 | 0.28 |
| 372 | 1 | 10282  | DSYIVVGRGEQQINHH<br>WHKS  | 2.91 | 0.01 | 2.85 | 2.02 | 0.22 | 0.28 |
| 373 | 1 | 113344 | DTFVVSSSDS                | 2.36 | 0.01 | 3.85 | 1.12 | 0.22 | 0.28 |
| 374 | 1 | 117463 | DTIRVDVEPKVKSKKREA<br>VA  | 2.97 | 0.01 | 0.78 | 1.12 | 0.22 | 0.28 |
| 375 | 1 | 110819 | DTKTGTDRETT               | 2.51 | 0.01 | 3.15 | 0.44 | 1.59 | 0.28 |
| 376 | 1 | 97960  | DTNNNLTLVP                | 2.33 | 0.01 | 2.87 | 1.20 | 0.22 | 0.28 |
| 377 | 1 | 153820 | DTPTLHEYMLDLQP            | 2.64 | 0.01 | 1.86 | 1.12 | 0.22 | 0.28 |
| 378 | 1 | 113346 | DTSTTPVPSV                | 2.35 | 0.01 | 1.86 | 1.12 | 0.22 | 0.28 |
| 379 | 1 | 95330  | DVAGLQ                    | 1.88 | 0.01 | 2.40 | 2.52 | 0.22 | 0.28 |
| 380 | 1 | 10639  | DVKFPGGGQIVGGVYLL<br>PRR  | 2.92 | 0.01 | 1.72 | 2.82 | 0.22 | 0.28 |
| 381 | 1 | 137828 | DVLLAGNAEADR              | 2.49 | 0.01 | 2.21 | 0.44 | 0.85 | 0.28 |
| 382 | 1 | 137828 | DVLLAGNAEADR              | 2.49 | 0.01 | 2.21 | 1.20 | 0.22 | 0.28 |
| 383 | 1 | 117279 | DVSMNTHLKAVKMTLK<br>NRE   | 2.89 | 0.01 | 0.78 | 1.12 | 0.22 | 0.28 |
| 384 | 1 | 122321 | DVVLYNNADGDFAIVH          | 2.74 | 0.01 | 2.26 | 2.43 | 0.22 | 1.57 |
| 385 | 1 | 144619 | DYIWNTLNSG                | 2.29 | 0.01 | 0.78 | 0.44 | 1.13 | 0.28 |

|     |   |        |                                        |      |      |      |      |      |      |
|-----|---|--------|----------------------------------------|------|------|------|------|------|------|
| 386 | 1 | 119562 | DYTGKIMWTPPAIFKS                       | 2.70 | 0.01 | 2.26 | 2.43 | 0.22 | 1.57 |
| 387 | 1 | 104452 | EAEDLQVGQVELGGGP<br>GAGSLQPLALEGSLQ    | 3.43 | 0.01 | 0.78 | 4.45 | 0.22 | 1.57 |
| 388 | 1 | 189058 | EANKLAEKTRRQLRENA                      | 2.84 | 4.63 | 0.90 | 0.68 | 0.22 | 0.28 |
| 389 | 1 | 133551 | EAPPPTLPPDMAQVTV<br>GPG                | 2.91 | 0.01 | 0.78 | 0.68 | 0.22 | 0.85 |
| 390 | 1 | 133551 | EAPPPTLPPDMAQVTV<br>GPG                | 2.91 | 0.01 | 0.78 | 0.68 | 0.22 | 2.35 |
| 391 | 1 | 133551 | EAPPPTLPPDMAQVTV<br>GPG                | 2.91 | 0.01 | 0.78 | 0.68 | 0.22 | 2.35 |
| 392 | 1 | 94806  | EATK                                   | 1.57 | 0.01 | 0.90 | 3.55 | 0.22 | 1.57 |
| 393 | 1 | 94494  | ECCNPACGRH                             | 2.31 | 0.01 | 3.22 | 2.37 | 0.22 | 0.28 |
| 394 | 1 | 97976  | ECVQGCCEHKSGLGP                        | 2.68 | 0.01 | 2.71 | 2.78 | 0.22 | 0.28 |
| 395 | 1 | 110824 | EDEIDGPAGQAEPDRAH<br>YNI               | 2.97 | 0.01 | 1.86 | 0.68 | 0.22 | 0.28 |
| 396 | 1 | 110824 | EDEIDGPAGQAEPDRAH<br>YNI               | 2.97 | 0.01 | 1.86 | 2.69 | 0.22 | 0.28 |
| 397 | 1 | 130475 | EDSDARILAAAVWYYSL                      | 2.79 | 4.63 | 1.75 | 3.06 | 0.22 | 0.28 |
| 398 | 1 | 130475 | EDSDARILAAAVWYYSL                      | 2.79 | 4.63 | 1.75 | 3.06 | 0.22 | 0.28 |
| 399 | 1 | 130476 | EDSDARILAAAVWYYSL                      | 2.79 | 0.01 | 1.75 | 3.06 | 0.22 | 0.28 |
| 400 | 1 | 130476 | EDSDARILAAAVWYYSL                      | 2.79 | 0.01 | 1.75 | 3.06 | 0.22 | 0.28 |
| 401 | 1 | 11438  | EDSGSNGKKITCECTKPD<br>S                | 2.93 | 0.01 | 1.66 | 1.20 | 0.22 | 0.28 |
| 402 | 1 | 137834 | EDSRVTENTNGL                           | 2.48 | 0.01 | 2.21 | 1.20 | 0.22 | 0.28 |
| 403 | 1 | 95334  | EDVPQPPVSQFH                           | 2.48 | 0.01 | 2.88 | 1.12 | 0.22 | 0.85 |
| 404 | 1 | 174085 | EDYRFQEGDWPNLKP                        | 2.65 | 0.01 | 3.36 | 0.44 | 1.23 | 0.85 |
| 405 | 1 | 174085 | EDYRFQEGDWPNLKP                        | 2.65 | 0.01 | 3.36 | 0.44 | 1.23 | 0.85 |
| 406 | 1 | 174085 | EDYRFQEGDWPNLKP                        | 2.65 | 0.01 | 3.36 | 0.44 | 1.23 | 0.85 |
| 407 | 1 | 174085 | EDYRFQEGDWPNLKP                        | 2.65 | 0.01 | 3.36 | 0.44 | 1.23 | 0.85 |
| 408 | 1 | 115602 | EEAAMELKVEDP                           | 2.48 | 0.01 | 0.78 | 0.44 | 1.13 | 0.28 |
| 409 | 1 | 115602 | EEAAMELKVEDP                           | 2.48 | 0.01 | 0.78 | 0.44 | 1.13 | 0.28 |
| 410 | 1 | 115602 | EEAAMELKVEDP                           | 2.48 | 0.01 | 0.78 | 0.44 | 1.41 | 0.28 |
| 411 | 1 | 11682  | EEIKEEIKVKEEIKVKEE<br>IKEVKEEIKVKEEIKE | 3.62 | 0.01 | 2.22 | 0.44 | 1.74 | 0.28 |
| 412 | 1 | 11682  | EEIKEEIKVKEEIKVKEE<br>IKEVKEEIKVKEEIKE | 3.62 | 0.01 | 2.22 | 0.44 | 1.74 | 0.28 |
| 413 | 1 | 140841 | EEKPAVLGHDEA                           | 2.47 | 0.01 | 3.01 | 1.12 | 0.22 | 0.28 |

|     |   |        |                                                  |      |      |      |      |      |      |
|-----|---|--------|--------------------------------------------------|------|------|------|------|------|------|
| 414 | 1 | 11792  | EENDKKKEQEKEQSNEN<br>NDQKKDMEAQNLISK             | 3.47 | 0.01 | 2.22 | 0.44 | 1.59 | 1.34 |
| 415 | 1 | 11815  | EENVEENVEENVEENV                                 | 2.81 | 0.01 | 1.66 | 1.12 | 0.22 | 0.28 |
| 416 | 1 | 11821  | EENVEHDAEENVEHDA                                 | 2.80 | 0.01 | 1.66 | 1.12 | 0.22 | 0.28 |
| 417 | 1 | 11821  | EENVEHDAEENVEHDA                                 | 2.80 | 0.01 | 1.66 | 1.12 | 0.22 | 0.28 |
| 418 | 1 | 122746 | EEQEDEIIGFGQELKN                                 | 2.75 | 0.01 | 0.78 | 1.20 | 0.22 | 1.27 |
| 419 | 1 | 122746 | EEQEDEIIGFGQELKN                                 | 2.75 | 0.01 | 0.78 | 1.20 | 0.22 | 1.27 |
| 420 | 1 | 122746 | EEQEDEIIGFGQELKN                                 | 2.75 | 0.01 | 0.78 | 1.20 | 0.22 | 1.27 |
| 421 | 1 | 122746 | EEQEDEIIGFGQELKN                                 | 2.75 | 0.01 | 0.78 | 1.20 | 0.22 | 0.28 |
| 422 | 1 | 122746 | EEQEDEIIGFGQELKN                                 | 2.75 | 0.01 | 0.78 | 1.20 | 0.22 | 0.28 |
| 423 | 1 | 122746 | EEQEDEIIGFGQELKN                                 | 2.75 | 0.01 | 0.78 | 1.20 | 0.22 | 0.28 |
| 424 | 1 | 122746 | EEQEDEIIGFGQELKN                                 | 2.75 | 0.01 | 0.78 | 1.20 | 0.22 | 0.28 |
| 425 | 1 | 122746 | EEQEDEIIGFGQELKN                                 | 2.75 | 0.01 | 0.78 | 1.20 | 0.22 | 2.02 |
| 426 | 1 | 122746 | EEQEDEIIGFGQELKN                                 | 2.75 | 0.01 | 0.78 | 1.20 | 0.22 | 1.34 |
| 427 | 1 | 137395 | EESEDEKRRWGQRDN                                  | 2.69 | 0.01 | 3.12 | 0.44 | 1.23 | 0.85 |
| 428 | 1 | 157186 | EESQRQSQQGQR                                     | 2.53 | 0.01 | 3.65 | 0.44 | 1.23 | 0.85 |
| 429 | 1 | 134357 | EEVRKLKARVDELE                                   | 2.66 | 0.01 | 0.78 | 2.49 | 1.13 | 0.28 |
| 430 | 1 | 11982  | EFEEPHATKQSVIALGSQ<br>EG                         | 2.93 | 0.01 | 2.85 | 2.02 | 0.22 | 0.28 |
| 431 | 1 | 119827 | EFHRWSSYMV                                       | 2.28 | 0.01 | 0.78 | 2.66 | 0.22 | 0.28 |
| 432 | 1 | 105163 | EFRHD                                            | 1.74 | 0.01 | 0.78 | 1.15 | 0.22 | 1.75 |
| 433 | 1 | 107109 | EFRHDS                                           | 1.88 | 3.45 | 0.78 | 1.15 | 0.22 | 1.66 |
| 434 | 1 | 107109 | EFRHDS                                           | 1.88 | 3.45 | 0.78 | 2.82 | 0.22 | 0.28 |
| 435 | 1 | 107109 | EFRHDS                                           | 1.88 | 3.45 | 0.78 | 2.25 | 0.22 | 0.28 |
| 436 | 1 | 186994 | EFRHDSGYEVHHQKLVF<br>FAEDVGSNKGAIIGLMV<br>GGVVIA | 3.61 | 3.45 | 0.78 | 2.88 | 0.22 | 0.28 |
| 437 | 1 | 186994 | EFRHDSGYEVHHQKLVF<br>FAEDVGSNKGAIIGLMV<br>GGVVIA | 3.61 | 3.45 | 0.78 | 2.88 | 0.22 | 0.28 |
| 438 | 1 | 186994 | EFRHDSGYEVHHQKLVF<br>FAEDVGSNKGAIIGLMV<br>GGVVIA | 3.61 | 3.45 | 0.78 | 2.88 | 0.22 | 0.28 |
| 439 | 1 | 186994 | EFRHDSGYEVHHQKLVF<br>FAEDVGSNKGAIIGLMV<br>GGVVIA | 3.61 | 3.45 | 0.78 | 2.88 | 0.22 | 0.28 |
| 440 | 1 | 161340 | EFRLYYNKFKDIASTLN<br>K                           | 2.88 | 0.01 | 2.08 | 2.49 | 0.22 | 1.57 |
| 441 | 1 | 78957  | EFRLGKEEMMAEMLQ<br>RGFEYNESDTKTQLIASF<br>KKQLRK  | 3.64 | 0.01 | 3.78 | 3.23 | 0.22 | 0.28 |
| 442 | 1 | 130800 | EGAKAFFKGA                                       | 2.35 | 0.01 | 0.78 | 0.44 | 1.93 | 0.85 |

|     |   |        |                                                             |      |      |      |      |      |      |
|-----|---|--------|-------------------------------------------------------------|------|------|------|------|------|------|
| 443 | 1 | 187317 | EGDLLLKLNNYRYN                                              | 2.64 | 0.01 | 2.59 | 0.44 | 1.74 | 1.34 |
| 444 | 1 | 107814 | EGLHNHY                                                     | 2.02 | 0.01 | 0.78 | 1.20 | 0.22 | 1.27 |
| 445 | 1 | 107814 | EGLHNHY                                                     | 2.02 | 0.01 | 0.78 | 1.20 | 0.22 | 1.27 |
| 446 | 1 | 12248  | EGQKSAVTEY                                                  | 2.30 | 0.01 | 3.30 | 1.12 | 0.22 | 1.34 |
| 447 | 1 | 12315  | EGYPADSKGCKITCF                                             | 2.64 | 0.01 | 2.56 | 2.02 | 0.22 | 0.85 |
| 448 | 1 | 140458 | EHNDFPMYTWRP                                                | 2.43 | 0.01 | 0.90 | 0.68 | 0.22 | 0.28 |
| 449 | 1 | 140459 | EHWSHDMFSPGD                                                | 2.48 | 0.01 | 0.90 | 0.68 | 0.22 | 0.28 |
| 450 | 1 | 174093 | EIDGKQTHQSVAISR                                             | 2.64 | 0.01 | 3.36 | 0.44 | 1.23 | 0.85 |
| 451 | 1 | 174093 | EIDGKQTHQSVAISR                                             | 2.64 | 0.01 | 3.36 | 0.44 | 1.23 | 0.85 |
| 452 | 1 | 140460 | EKLKHSM                                                     | 2.02 | 0.01 | 0.90 | 0.68 | 0.22 | 0.28 |
| 453 | 1 | 12797  | EKLKKYNNEISSLKKELDI<br>LNEKMGKCT                            | 3.29 | 0.01 | 2.22 | 1.15 | 0.22 | 0.28 |
| 454 | 1 | 12799  | EKLNNLLEGNDSDNDLS<br>LEDF                                   | 3.05 | 0.01 | 2.67 | 0.44 | 0.85 | 0.28 |
| 455 | 1 | 12799  | EKLNNLLEGNDSDNDLS<br>LEDF                                   | 3.05 | 0.01 | 2.67 | 0.44 | 0.85 | 0.28 |
| 456 | 1 | 190736 | EKLRLGYDVILQGDEEKA<br>DQIFLRK                               | 3.22 | 0.01 | 4.15 | 0.44 | 1.74 | 0.28 |
| 457 | 1 | 12821  | EKMNMKMEQMDMK<br>MEKIDVNMDQMDVK<br>MEQMDVKMEQMDVK<br>MKRMNK | 3.85 | 0.01 | 2.22 | 1.15 | 0.22 | 0.28 |
| 458 | 1 | 140844 | EKPAVLGHDEAAYSKNR<br>RAV                                    | 2.92 | 0.01 | 3.01 | 0.68 | 0.22 | 0.85 |
| 459 | 1 | 96239  | EKPTPPVKPT                                                  | 2.36 | 0.01 | 2.39 | 0.44 | 1.59 | 0.28 |
| 460 | 1 | 107341 | EKTISKA                                                     | 2.02 | 0.01 | 0.78 | 0.44 | 1.13 | 0.28 |
| 461 | 1 | 182953 | ELEKDEREQLRILGE                                             | 2.72 | 0.01 | 0.78 | 1.12 | 0.22 | 1.28 |
| 462 | 1 | 119837 | ELIPSTSSAVPLIGK                                             | 2.67 | 0.01 | 2.26 | 2.43 | 0.22 | 1.57 |
| 463 | 1 | 13243  | ELQVIDKVDAAFKVAAT<br>AAN                                    | 2.95 | 0.01 | 3.00 | 3.06 | 0.22 | 0.28 |
| 464 | 1 | 13243  | ELQVIDKVDAAFKVAAT<br>AAN                                    | 2.95 | 0.01 | 3.00 | 1.81 | 0.22 | 0.28 |
| 465 | 1 | 181306 | ELVPQLLQYMYVPPG                                             | 2.70 | 0.01 | 2.82 | 1.15 | 0.22 | 0.28 |
| 466 | 1 | 13320  | ELVVVADHGMFT                                                | 2.43 | 0.01 | 3.61 | 1.20 | 0.22 | 0.85 |
| 467 | 1 | 156278 | EMESHVVTQAGVQWP<br>DLGSLEV                                  | 3.04 | 0.01 | 0.78 | 1.20 | 0.22 | 1.34 |
| 468 | 1 | 81709  | ENDYSANGGT                                                  | 2.30 | 0.01 | 3.06 | 0.44 | 0.85 | 0.28 |
| 469 | 1 | 443485 | ENNSSRCWVALTPTLAA<br>RNA                                    | 2.95 | 0.01 | 1.96 | 0.68 | 0.22 | 1.34 |
| 470 | 1 | 443485 | ENNSSRCWVALTPTLAA<br>RNA                                    | 2.95 | 0.01 | 1.96 | 0.68 | 0.22 | 1.34 |
| 471 | 1 | 13568  | ENPVVHFFANIVTPRTP                                           | 2.80 | 0.01 | 0.90 | 2.25 | 0.22 | 0.28 |
| 472 | 1 | 114799 | ENPVVHFFENIVTPRTP                                           | 2.82 | 0.01 | 0.90 | 2.25 | 0.22 | 0.28 |
| 473 | 1 | 114203 | ENPVVHFFFNIVTPRTP                                           | 2.81 | 0.01 | 0.90 | 2.25 | 0.22 | 0.28 |

|     |   |        |                                     |      |      |      |      |      |      |
|-----|---|--------|-------------------------------------|------|------|------|------|------|------|
| 474 | 1 | 230458 | EPNNLNSKIAFKIIR                     | 2.67 | 0.01 | 0.78 | 0.44 | 1.13 | 0.28 |
| 475 | 1 | 108921 | EPQVYTL                             | 1.99 | 0.01 | 0.78 | 0.44 | 1.13 | 0.28 |
| 476 | 1 | 13763  | EPGQTADWY                           | 2.26 | 0.01 | 3.41 | 0.68 | 0.22 | 0.28 |
| 477 | 1 | 103886 | EQHNPINAGTELSAT                     | 2.67 | 0.01 | 3.00 | 1.20 | 0.22 | 0.28 |
| 478 | 1 | 157218 | EQHRRQQQHQQR                        | 2.53 | 0.01 | 3.65 | 0.44 | 1.23 | 0.85 |
| 479 | 1 | 153827 | EQQYNKPLCDL                         | 2.38 | 0.01 | 1.86 | 2.37 | 0.22 | 0.28 |
| 480 | 1 | 13972  | ERDPANIPWDKD                        | 2.48 | 0.01 | 2.86 | 1.81 | 0.22 | 0.28 |
| 481 | 1 | 443536 | ERMASCRPID                          | 2.29 | 0.01 | 1.96 | 0.68 | 0.22 | 1.34 |
| 482 | 1 | 443536 | ERMASCRPID                          | 2.29 | 0.01 | 1.96 | 0.68 | 0.22 | 1.34 |
| 483 | 1 | 443536 | ERMASCRPID                          | 2.29 | 0.01 | 1.96 | 0.68 | 0.22 | 1.34 |
| 484 | 1 | 443536 | ERMASCRPID                          | 2.29 | 0.01 | 1.96 | 0.68 | 0.22 | 1.34 |
| 485 | 1 | 443537 | ERMASCRPIDKFAQGW<br>GPIT            | 2.90 | 0.01 | 1.96 | 0.68 | 0.22 | 1.34 |
| 486 | 1 | 119844 | ERTVLVSMNY                          | 2.29 | 0.01 | 0.78 | 1.15 | 0.22 | 0.28 |
| 487 | 1 | 111260 | ESDERGPIVKARKNMRQ<br>MVT            | 2.92 | 0.01 | 3.33 | 0.44 | 1.23 | 0.85 |
| 488 | 1 | 95366  | ETDNGPVBHVHAEFSLK<br>AGK            | 2.94 | 0.01 | 2.86 | 0.68 | 0.22 | 0.28 |
| 489 | 1 | 167740 | ETHPLYQSE                           | 2.22 | 0.01 | 2.40 | 2.43 | 0.22 | 0.28 |
| 490 | 1 | 78647  | ETIIQIIIEYGKKFNSSAGD                | 2.87 | 0.01 | 3.11 | 1.12 | 0.22 | 0.28 |
| 491 | 1 | 208013 | ETSEAAATVDLFAFTLDG<br>GK            | 2.96 | 4.45 | 4.08 | 0.44 | 0.85 | 1.28 |
| 492 | 1 | 208013 | ETSEAAATVDLFAFTLDG<br>GK            | 2.96 | 4.45 | 4.08 | 0.44 | 0.85 | 1.28 |
| 493 | 1 | 208013 | ETSEAAATVDLFAFTLDG<br>GK            | 2.96 | 4.45 | 4.08 | 0.44 | 0.85 | 1.28 |
| 494 | 1 | 208019 | ETTEAAATVDLFAFTLDG<br>GK            | 2.98 | 4.45 | 0.90 | 0.44 | 0.85 | 1.48 |
| 495 | 1 | 14670  | EVDNEQPTTRAQKLFA                    | 2.71 | 0.01 | 3.61 | 1.12 | 0.22 | 1.34 |
| 496 | 1 | 14697  | EVFTKKTCLT                          | 2.35 | 0.01 | 1.60 | 0.44 | 1.23 | 0.85 |
| 497 | 1 | 157224 | EVHHQKLFFAEDVGSN<br>KGAIIGLMVGGVVIA | 3.39 | 0.01 | 0.78 | 0.44 | 1.93 | 1.28 |
| 498 | 1 | 157224 | EVHHQKLFFAEDVGSN<br>KGAIIGLMVGGVVIA | 3.39 | 0.01 | 0.78 | 0.44 | 1.41 | 1.28 |
| 499 | 1 | 119851 | EVNQIVETNVRLRQQW                    | 2.76 | 0.01 | 2.26 | 3.65 | 0.22 | 1.57 |
| 500 | 1 | 119851 | EVNQIVETNVRLRQQW                    | 2.76 | 0.01 | 2.26 | 2.25 | 0.22 | 1.57 |
| 501 | 1 | 140461 | EVSLHDMNLATH                        | 2.45 | 0.01 | 0.90 | 0.68 | 0.22 | 0.28 |
| 502 | 1 | 110841 | EVTPAIKSEVSL                        | 2.48 | 0.01 | 3.15 | 0.44 | 1.59 | 0.28 |
| 503 | 1 | 120515 | EVVRAEIMRSFSL                       | 2.63 | 0.01 | 0.78 | 0.44 | 1.13 | 0.85 |
| 504 | 1 | 130485 | EVVTGSPRGDSQSS                      | 2.60 | 0.01 | 0.78 | 1.20 | 0.22 | 1.27 |
| 505 | 1 | 130485 | EVVTGSPRGDSQSS                      | 2.60 | 0.01 | 0.78 | 1.20 | 0.22 | 1.27 |

|     |   |        |                                    |      |      |      |      |      |      |
|-----|---|--------|------------------------------------|------|------|------|------|------|------|
| 506 | 1 | 130485 | EVVTGSPRGDSQSS                     | 2.60 | 0.01 | 0.78 | 0.68 | 0.22 | 1.27 |
| 507 | 1 | 434735 | EWQVAAENSDDTKFK                    | 2.65 | 0.01 | 3.89 | 0.68 | 0.22 | 0.28 |
| 508 | 1 | 434735 | EWQVAAENSDDTKFK                    | 2.65 | 0.01 | 3.89 | 0.68 | 0.22 | 2.12 |
| 509 | 1 | 137844 | EYETDPSVTKMV                       | 2.48 | 0.01 | 2.21 | 1.20 | 0.22 | 0.28 |
| 510 | 1 | 107357 | EYKCKVS                            | 2.02 | 0.01 | 0.78 | 0.44 | 1.13 | 0.28 |
| 511 | 1 | 142150 | EYMLDLQPETTD                       | 2.49 | 0.01 | 1.86 | 0.44 | 1.41 | 0.28 |
| 512 | 1 | 153382 | FAENKKDHFSPGGGGS                   | 2.72 | 0.01 | 0.90 | 0.68 | 0.22 | 1.27 |
| 513 | 1 | 119856 | FAIVHMTKLLLDYTGK                   | 2.69 | 0.01 | 2.26 | 2.43 | 0.22 | 1.57 |
| 514 | 1 | 119857 | FAQRLMRYWA                         | 2.31 | 0.01 | 0.78 | 2.66 | 0.22 | 0.28 |
| 515 | 1 | 119857 | FAQRLMRYWA                         | 2.31 | 0.01 | 0.78 | 1.15 | 0.22 | 0.28 |
| 516 | 1 | 232633 | FASFDVPSKQPTIDIDLC<br>DI           | 2.95 | 0.01 | 2.28 | 0.68 | 0.22 | 0.28 |
| 517 | 1 | 232634 | FASFDVPSKQPTIDIDLT<br>DI           | 2.97 | 0.01 | 0.90 | 0.68 | 0.22 | 0.28 |
| 518 | 1 | 157230 | FDAEFLADAFNV                       | 2.52 | 0.01 | 3.65 | 0.44 | 1.23 | 0.85 |
| 519 | 1 | 186753 | FDDNANPEYTYHGIP                    | 2.65 | 0.01 | 3.36 | 1.20 | 0.22 | 0.85 |
| 520 | 1 | 229638 | FDGREAADAFSPEIV                    | 2.69 | 0.01 | 3.85 | 0.68 | 0.22 | 0.28 |
| 521 | 1 | 137848 | FDRFKGSGPGYY                       | 2.48 | 0.01 | 2.21 | 0.44 | 0.85 | 0.28 |
| 522 | 1 | 137848 | FDRFKGSGPGYY                       | 2.48 | 0.01 | 2.21 | 1.20 | 0.22 | 0.28 |
| 523 | 1 | 181614 | FECGNDKIIGNSDKY                    | 2.67 | 0.01 | 1.66 | 0.44 | 0.85 | 1.28 |
| 524 | 1 | 15509  | FEDVKGTGGESRDLP<br>SG QG           | 2.89 | 0.01 | 3.36 | 0.68 | 0.22 | 0.28 |
| 525 | 1 | 103166 | FEKVVNKESLVISGLRH                  | 2.79 | 0.01 | 0.78 | 1.12 | 0.22 | 0.85 |
| 526 | 1 | 94511  | FEVFNFP                            | 2.17 | 0.01 | 2.38 | 0.68 | 0.22 | 1.75 |
| 527 | 1 | 100035 | FFPASSRDQSSYLQGF<br>SR NT          | 2.94 | 0.01 | 2.16 | 0.44 | 2.39 | 0.28 |
| 528 | 1 | 15893  | FFSDKIAKYI                         | 2.32 | 0.01 | 1.60 | 0.44 | 1.23 | 0.85 |
| 529 | 1 | 82038  | FGDGFYAQGYLETRF<br>VT KASENGSDNFGD | 3.31 | 0.01 | 3.04 | 0.44 | 0.85 | 0.28 |
| 530 | 1 | 150200 | FGEHKQEKDLEYGAC                    | 2.66 | 0.01 | 3.45 | 0.68 | 0.22 | 0.28 |
| 531 | 1 | 181317 | FGEHLQANDLDYGQC                    | 2.66 | 0.01 | 2.82 | 1.15 | 0.22 | 0.28 |
| 532 | 1 | 15973  | FGEWRERVLLNR                       | 2.48 | 0.01 | 3.61 | 1.20 | 0.22 | 0.85 |
| 533 | 1 | 100037 | FGINAENNHRIFLAGD<br>K DNV          | 2.95 | 0.01 | 2.16 | 0.44 | 2.39 | 0.28 |
| 534 | 1 | 230462 | FGNDDRTNTEPNTKI                    | 2.67 | 0.01 | 0.78 | 0.44 | 1.13 | 0.28 |
| 535 | 1 | 16032  | FGPNAGQR                           | 2.12 | 0.01 | 3.42 | 0.44 | 1.23 | 0.85 |
| 536 | 1 | 135458 | FGSDYEDRYR                         | 2.42 | 0.01 | 0.78 | 2.19 | 0.22 | 0.85 |
| 537 | 1 | 135458 | FGSDYEDRYR                         | 2.42 | 0.01 | 0.78 | 2.19 | 0.22 | 0.85 |
| 538 | 1 | 16092  | FHAEWPTPSPWP                       | 2.49 | 0.01 | 0.90 | 0.44 | 1.23 | 0.28 |
| 539 | 1 | 158590 | FHLPWMQ                            | 1.99 | 0.01 | 0.90 | 0.44 | 1.13 | 1.39 |
| 540 | 1 | 233185 | FHPEHF                             | 1.92 | 0.01 | 0.78 | 3.57 | 0.22 | 0.28 |
| 541 | 1 | 82078  | FHQNGQVTEVTT                       | 2.47 | 0.01 | 2.87 | 0.44 | 0.85 | 0.28 |
| 542 | 1 | 187341 | FHRDITFRKLYLKRKL                   | 2.77 | 0.01 | 2.59 | 0.44 | 1.74 | 1.34 |



|     |   |        |                               |      |      |      |      |      |      |
|-----|---|--------|-------------------------------|------|------|------|------|------|------|
| 543 | 1 | 187341 | FHRDITFRKLYLKRRKL             | 2.77 | 0.01 | 2.59 | 0.44 | 1.74 | 1.27 |
| 544 | 1 | 119861 | FHRWSSYMH                     | 2.30 | 0.01 | 0.78 | 2.66 | 0.22 | 0.28 |
| 545 | 1 | 119861 | FHRWSSYMH                     | 2.30 | 0.01 | 0.78 | 1.15 | 0.22 | 0.28 |
| 546 | 1 | 177664 | FIEGGWTGMVDGWYGYHH            | 2.83 | 0.01 | 2.87 | 0.44 | 0.22 | 1.34 |
| 547 | 1 | 230463 | FKIIRQEPSDSPMFI               | 2.69 | 0.01 | 0.78 | 0.44 | 1.13 | 0.28 |
| 548 | 1 | 230463 | FKIIRQEPSDSPMFI               | 2.69 | 0.01 | 0.78 | 0.44 | 1.13 | 0.28 |
| 549 | 1 | 16396  | FKLEKEVAE                     | 2.25 | 0.01 | 4.33 | 1.15 | 0.22 | 0.28 |
| 550 | 1 | 113401 | FKLPGLNSR                     | 2.21 | 0.01 | 2.04 | 0.44 | 0.85 | 0.28 |
| 551 | 1 | 117200 | FKNIVTPRTPPPSQKGGRGLSLSRFSWGA | 3.30 | 0.01 | 0.78 | 0.44 | 1.93 | 0.28 |
| 552 | 1 | 122762 | FKNQKKIRGILESLMCNESS          | 2.92 | 0.01 | 0.78 | 3.01 | 0.22 | 0.28 |
| 553 | 1 | 134050 | FKPPKY                        | 1.90 | 0.01 | 0.78 | 0.44 | 1.41 | 1.27 |
| 554 | 1 | 16790  | FLNTEPSQLPPTAPPLLP<br>HSNLDHI | 3.17 | 0.01 | 2.04 | 0.44 | 1.59 | 0.28 |
| 555 | 1 | 16790  | FLNTEPSQLPPTAPPLLP<br>HSNLDHI | 3.17 | 0.01 | 2.04 | 0.44 | 0.85 | 0.28 |
| 556 | 1 | 16863  | FLPYPPYAKP                    | 2.34 | 0.01 | 1.60 | 0.44 | 1.23 | 0.85 |
| 557 | 1 | 95080  | FLRMKRPGEDKVRPAC<br>QHKQ      | 2.91 | 0.01 | 2.25 | 2.04 | 0.22 | 1.57 |
| 558 | 1 | 119867 | FMESGEWVMKDYRGWKH             | 2.78 | 0.01 | 2.26 | 2.25 | 0.22 | 1.57 |
| 559 | 1 | 79830  | FMQQRPLRMFLGPKQL<br>T         | 2.83 | 0.01 | 2.14 | 3.17 | 0.22 | 0.28 |
| 560 | 1 | 17135  | FNCLGMSNRDFLEGVS<br>GATW      | 2.92 | 0.01 | 2.85 | 2.02 | 0.22 | 0.28 |
| 561 | 1 | 17135  | FNCLGMSNRDFLEGVS<br>GATW      | 2.92 | 0.01 | 2.85 | 2.02 | 0.22 | 1.48 |
| 562 | 1 | 94517  | FNENMAY                       | 2.02 | 0.01 | 2.24 | 3.12 | 0.22 | 0.28 |
| 563 | 1 | 140462 | FNTKHDMQGDTS                  | 2.45 | 0.01 | 0.90 | 0.68 | 0.22 | 0.28 |
| 564 | 1 | 130834 | FPDLGQEVALNANTKN<br>QKIR      | 2.91 | 0.01 | 0.78 | 0.44 | 1.41 | 0.28 |
| 565 | 1 | 130834 | FPDLGQEVALNANTKN<br>QKIR      | 2.91 | 0.01 | 0.78 | 0.44 | 1.41 | 0.28 |
| 566 | 1 | 134052 | FPGKLRRV                      | 2.11 | 0.01 | 0.78 | 0.44 | 1.41 | 1.27 |
| 567 | 1 | 137528 | FQISREDARKIKFNN               | 2.67 | 0.01 | 3.12 | 0.44 | 1.23 | 0.85 |
| 568 | 1 | 17524  | FQQFGRDVSDFDTSVR<br>DPKT      | 2.97 | 0.01 | 2.45 | 2.49 | 0.22 | 0.28 |
| 569 | 1 | 141896 | FRKRKNSTSLQSHIPSDE<br>QL      | 2.93 | 0.01 | 3.13 | 0.68 | 0.22 | 0.28 |
| 570 | 1 | 125413 | FRVTCKDIQRIPSLPPST<br>QT      | 2.94 | 0.01 | 0.78 | 0.68 | 0.22 | 0.28 |
| 571 | 1 | 114342 | FSGFDAEFLADAFNV               | 2.71 | 0.01 | 3.48 | 0.44 | 1.23 | 0.85 |
| 572 | 1 | 110857 | FTGEAYSWSAK                   | 2.48 | 0.01 | 3.15 | 0.44 | 1.59 | 0.28 |
| 573 | 1 | 444105 | FTIFKVRMYVGGVEHRL<br>NAA      | 2.89 | 0.01 | 1.96 | 0.68 | 0.22 | 1.34 |

|     |   |        |                           |      |      |      |      |      |      |
|-----|---|--------|---------------------------|------|------|------|------|------|------|
| 574 | 1 | 137858 | FTPGTEYT                  | 2.14 | 0.01 | 2.21 | 1.20 | 0.22 | 0.28 |
| 575 | 1 | 137859 | FTPGTEYVEVR               | 2.49 | 0.01 | 2.21 | 0.44 | 0.85 | 0.28 |
| 576 | 1 | 137859 | FTPGTEYVEVR               | 2.49 | 0.01 | 2.21 | 1.20 | 0.22 | 0.28 |
| 577 | 1 | 18067  | FTSEFIQASVEYFGITIG<br>G   | 2.97 | 0.01 | 0.90 | 1.12 | 0.22 | 0.28 |
| 578 | 1 | 112982 | FTTVVADTGDFHAID           | 2.71 | 0.01 | 0.78 | 1.20 | 0.22 | 0.85 |
| 579 | 1 | 95082  | FTVTMRRRTLYYGLNLLI<br>PCV | 2.97 | 0.01 | 2.25 | 2.04 | 0.22 | 1.57 |
| 580 | 1 | 18105  | FTYEENPDGEER              | 2.46 | 0.01 | 2.88 | 2.37 | 0.22 | 0.28 |
| 581 | 1 | 18105  | FTYEENPDGEER              | 2.46 | 0.01 | 2.88 | 2.22 | 0.85 | 0.28 |
| 582 | 1 | 108998 | FVCGDRGFYFNK              | 2.48 | 0.01 | 0.78 | 1.15 | 0.22 | 1.34 |
| 583 | 1 | 99260  | FVDRLL                    | 1.86 | 0.01 | 2.86 | 2.02 | 0.85 | 0.85 |
| 584 | 1 | 140026 | FVFNLKDMFSRANRKRK<br>A    | 2.87 | 0.01 | 0.90 | 1.20 | 0.22 | 1.34 |
| 585 | 1 | 230464 | FVKNMNRDSTFIVNK           | 2.69 | 0.01 | 0.78 | 0.44 | 1.13 | 0.28 |
| 586 | 1 | 82487  | FVPEKIYGLI                | 2.29 | 0.01 | 3.06 | 0.44 | 0.85 | 0.28 |
| 587 | 1 | 91344  | FYETVLFKGFESI             | 2.54 | 0.01 | 4.03 | 2.02 | 0.22 | 0.28 |
| 588 | 1 | 125416 | FYNLSKVTHIEIRNTRNLT<br>Y  | 2.95 | 0.01 | 0.78 | 0.44 | 1.13 | 0.28 |
| 589 | 1 | 125416 | FYNLSKVTHIEIRNTRNLT<br>Y  | 2.95 | 0.01 | 0.78 | 0.44 | 1.41 | 0.28 |
| 590 | 1 | 91345  | FYQEVLFKGFHAV             | 2.56 | 0.01 | 4.03 | 2.02 | 0.22 | 0.28 |
| 591 | 1 | 489193 | GACRTCT                   | 2.04 | 0.01 | 0.90 | 0.68 | 0.22 | 0.28 |
| 592 | 1 | 238405 | GAGGSGTPVDELDRC           | 2.67 | 0.01 | 2.56 | 2.02 | 0.22 | 0.85 |
| 593 | 1 | 104789 | GAHGDTTFEY                | 2.31 | 0.01 | 0.78 | 0.44 | 1.13 | 1.27 |
| 594 | 1 | 157292 | GAIIGLM                   | 2.04 | 0.01 | 0.78 | 0.44 | 1.41 | 1.28 |
| 595 | 1 | 162290 | GARGLTGRPGDA              | 2.52 | 0.01 | 2.19 | 4.08 | 0.22 | 0.28 |
| 596 | 1 | 162290 | GARGLTGRPGDA              | 2.52 | 0.01 | 2.19 | 4.08 | 0.22 | 0.28 |
| 597 | 1 | 119888 | GARVYAYVFE                | 2.33 | 0.01 | 0.78 | 2.66 | 0.22 | 0.28 |
| 598 | 1 | 119888 | GARVYAYVFE                | 2.33 | 0.01 | 0.78 | 1.15 | 0.22 | 0.28 |
| 599 | 1 | 186760 | GCKKYENFNDFLKGL           | 2.70 | 0.01 | 0.90 | 1.20 | 0.22 | 0.85 |
| 600 | 1 | 18929  | GCVVSWKNK                 | 2.22 | 0.01 | 2.87 | 0.44 | 0.85 | 0.28 |
| 601 | 1 | 18929  | GCVVSWKNK                 | 2.22 | 0.01 | 2.87 | 3.04 | 0.22 | 0.28 |
| 602 | 1 | 489548 | GDAYIVPHGDHYHYIPK<br>NEL  | 2.95 | 0.01 | 2.70 | 0.44 | 0.85 | 0.28 |
| 603 | 1 | 19005  | GDINKVLEKLGYS             | 2.54 | 0.01 | 2.72 | 1.81 | 0.22 | 0.28 |
| 604 | 1 | 19006  | GDINKVLEKLGYSGGDLL<br>G   | 2.92 | 0.01 | 2.72 | 2.69 | 0.22 | 0.28 |
| 605 | 1 | 19006  | GDINKVLEKLGYSGGDLL<br>G   | 2.92 | 0.01 | 2.72 | 2.16 | 0.22 | 0.28 |
| 606 | 1 | 19006  | GDINKVLEKLGYSGGDLL<br>G   | 2.92 | 0.01 | 2.72 | 3.34 | 0.22 | 0.28 |
| 607 | 1 | 19006  | GDINKVLEKLGYSGGDLL<br>G   | 2.92 | 0.01 | 2.72 | 2.89 | 0.22 | 0.28 |
| 608 | 1 | 19006  | GDINKVLEKLGYSGGDLL<br>G   | 2.92 | 0.01 | 2.72 | 0.68 | 0.22 | 0.28 |

|     |   |        |                              |      |      |      |      |      |      |
|-----|---|--------|------------------------------|------|------|------|------|------|------|
| 609 | 1 | 19016  | GDKPVYEPGFEGAGGKL<br>GYK     | 2.98 | 0.01 | 2.21 | 1.20 | 0.22 | 0.28 |
| 610 | 1 | 161343 | GDLNPPPEAKQVPVSY<br>DS       | 2.87 | 0.01 | 2.08 | 2.25 | 0.22 | 1.57 |
| 611 | 1 | 161343 | GDLNPPPEAKQVPVSY<br>DS       | 2.87 | 0.01 | 2.08 | 2.43 | 0.22 | 1.57 |
| 612 | 1 | 150233 | GDRVADVISSIGDS               | 2.72 | 0.01 | 3.45 | 1.12 | 0.22 | 0.28 |
| 613 | 1 | 140852 | GEEKPAVLGHDE                 | 2.48 | 0.01 | 3.01 | 1.12 | 0.22 | 0.28 |
| 614 | 1 | 19269  | GEGAPPAKRARTDQME             | 2.75 | 0.01 | 2.96 | 0.44 | 0.85 | 1.66 |
| 615 | 1 | 115606 | GEGKVTLRIRNV                 | 2.48 | 0.01 | 0.78 | 0.44 | 1.13 | 0.28 |
| 616 | 1 | 115606 | GEGKVTLRIRNV                 | 2.48 | 0.01 | 0.78 | 0.44 | 1.13 | 0.28 |
| 617 | 1 | 115606 | GEGKVTLRIRNV                 | 2.48 | 0.01 | 0.78 | 0.44 | 1.41 | 0.28 |
| 618 | 1 | 82603  | GEKTREQAVLFGVDHKL<br>HKQLL   | 3.04 | 0.01 | 3.04 | 0.44 | 0.85 | 0.28 |
| 619 | 1 | 19481  | GEYGEVTVDCEPRSGID<br>TNA     | 2.94 | 0.01 | 2.85 | 2.02 | 0.22 | 0.28 |
| 620 | 1 | 140853 | GEYVQILDAHAAYLNAT<br>PAA     | 2.91 | 0.01 | 3.01 | 0.68 | 0.22 | 0.85 |
| 621 | 1 | 19504  | GFCDGYCKTHLKASS              | 2.65 | 0.01 | 2.56 | 0.68 | 0.22 | 0.85 |
| 622 | 1 | 140854 | GFDKYDITGEYVQILDAH<br>AA     | 2.92 | 0.01 | 3.01 | 0.68 | 0.22 | 0.85 |
| 623 | 1 | 110860 | GFFCARGHRPLDKKREE<br>APCLRPA | 3.14 | 4.93 | 0.90 | 0.44 | 1.13 | 0.28 |
| 624 | 1 | 109085 | GFGAMDF                      | 2.05 | 0.01 | 1.86 | 1.15 | 0.22 | 1.34 |
| 625 | 1 | 98060  | GFMVPPGLSSEGLT               | 2.67 | 0.01 | 2.71 | 2.78 | 0.22 | 0.28 |
| 626 | 1 | 19623  | GFSYYRPPWIL                  | 2.36 | 0.01 | 0.90 | 0.68 | 0.22 | 0.28 |
| 627 | 1 | 109095 | GFYFNKPTGYGS                 | 2.50 | 0.01 | 0.78 | 1.15 | 0.22 | 1.34 |
| 628 | 1 | 82633  | GFYVLENDYS                   | 2.29 | 0.01 | 3.06 | 0.44 | 0.85 | 0.28 |
| 629 | 1 | 19868  | GGGWGQPHGGGWGQ<br>PH         | 2.80 | 0.01 | 0.78 | 2.19 | 0.22 | 0.28 |
| 630 | 1 | 19868  | GGGWGQPHGGGWGQ<br>PH         | 2.80 | 0.01 | 0.78 | 2.19 | 0.22 | 1.48 |
| 631 | 1 | 95013  | GGIKKIRLPSDDVWLP             | 2.72 | 0.01 | 2.26 | 2.36 | 0.22 | 2.02 |
| 632 | 1 | 110248 | GGLGIGTSGTGGRGTGY<br>IPL     | 3.00 | 0.01 | 1.86 | 0.68 | 0.22 | 1.34 |
| 633 | 1 | 110862 | GGPTLVSLHELPAETP             | 2.76 | 0.01 | 3.37 | 1.20 | 0.22 | 0.28 |
| 634 | 1 | 503986 | GGRRGRGRERARGGSR<br>ERAR     | 3.02 | 3.97 | 2.48 | 0.44 | 1.74 | 0.28 |
| 635 | 1 | 503987 | GGRRGRGRERARGGSR<br>ERAR     | 3.02 | 3.50 | 2.48 | 0.44 | 1.74 | 0.28 |
| 636 | 1 | 503985 | GGRRGRGRERARGGSR<br>ERAR     | 3.02 | 3.40 | 2.48 | 0.44 | 1.74 | 0.28 |
| 637 | 1 | 503988 | GGSKTSLYNLRRGTALAI<br>PQ     | 2.94 | 3.40 | 2.48 | 0.44 | 1.74 | 0.28 |
| 638 | 1 | 444243 | GGVEHRLNAACNWTRG<br>ERCD     | 2.94 | 0.01 | 1.96 | 0.68 | 0.22 | 1.34 |

|     |   |        |                                 |      |      |      |      |      |      |
|-----|---|--------|---------------------------------|------|------|------|------|------|------|
| 639 | 1 | 444243 | GGVEHRLNAACNWTRG<br>ERCD        | 2.94 | 0.01 | 1.96 | 0.68 | 0.22 | 1.34 |
| 640 | 1 | 225297 | GGVTEHDGNQIDKNNS<br>TD          | 2.84 | 0.01 | 2.61 | 0.68 | 0.22 | 0.28 |
| 641 | 1 | 225297 | GGVTEHDGNQIDKNNS<br>TD          | 2.84 | 0.01 | 2.61 | 0.68 | 0.22 | 0.28 |
| 642 | 1 | 20084  | GGVYLLPRRGPR LGV                | 2.74 | 0.01 | 1.72 | 0.44 | 0.85 | 2.97 |
| 643 | 1 | 82657  | GGYEFLLANDVDNSNPV<br>VQ         | 2.87 | 0.01 | 2.39 | 2.87 | 0.22 | 0.28 |
| 644 | 1 | 100063 | GHALRIPSGFISYILNRHD<br>N        | 2.95 | 0.01 | 2.16 | 0.44 | 2.39 | 0.28 |
| 645 | 1 | 161346 | GHEVLNLTRNGYGSTQY<br>IR         | 2.90 | 0.01 | 2.08 | 2.49 | 0.22 | 1.57 |
| 646 | 1 | 183374 | GHNAVFN                         | 2.02 | 0.01 | 2.86 | 0.44 | 0.85 | 0.28 |
| 647 | 1 | 183375 | GHNAVFNC                        | 2.12 | 0.01 | 2.86 | 0.44 | 0.85 | 0.28 |
| 648 | 1 | 20173  | GHPRTAELLGML                    | 2.48 | 0.01 | 0.90 | 0.68 | 0.22 | 0.28 |
| 649 | 1 | 190770 | GIARGIHNLN                      | 2.34 | 0.01 | 1.86 | 0.68 | 0.22 | 0.28 |
| 650 | 1 | 113000 | GIKQLQARVLAVERY                 | 2.68 | 0.01 | 2.54 | 1.20 | 0.22 | 0.85 |
| 651 | 1 | 20427  | GIRTINGLARTTADR                 | 2.71 | 0.01 | 3.35 | 1.12 | 0.22 | 0.85 |
| 652 | 1 | 20523  | GKCGVSIPIYK                     | 2.32 | 0.01 | 3.33 | 0.44 | 1.23 | 0.85 |
| 653 | 1 | 20523  | GKCGVSIPIYK                     | 2.32 | 0.01 | 3.33 | 0.44 | 1.23 | 0.85 |
| 654 | 1 | 107396 | GKEYKCK                         | 2.04 | 0.01 | 0.78 | 0.44 | 1.13 | 0.28 |
| 655 | 1 | 161347 | GKFATDPAVTLAHELIHA<br>G         | 2.90 | 0.01 | 2.08 | 2.25 | 0.22 | 1.57 |
| 656 | 1 | 140856 | GKGV DAGKLGT V                  | 2.52 | 0.01 | 3.01 | 1.12 | 0.22 | 0.28 |
| 657 | 1 | 118378 | GKKKSKPVNKDRYISKM<br>FLRGDS     | 3.07 | 0.01 | 0.78 | 0.44 | 1.13 | 0.28 |
| 658 | 1 | 96320  | GKKPNIWYSL                      | 2.28 | 0.01 | 2.39 | 0.44 | 0.85 | 0.28 |
| 659 | 1 | 503989 | GKKVGIYPEIKAPWFHH<br>QNGKDIAAET | 3.21 | 0.01 | 3.72 | 0.44 | 1.41 | 0.28 |
| 660 | 1 | 98066  | GKPGSDVYYA                      | 2.31 | 0.01 | 3.08 | 0.68 | 0.22 | 0.28 |
| 661 | 1 | 20770  | GLARTTADRQTACNC                 | 2.70 | 0.01 | 3.35 | 1.12 | 0.22 | 0.85 |
| 662 | 1 | 20838  | GLFGAIAGFIE                     | 2.45 | 0.01 | 3.27 | 0.68 | 0.22 | 1.57 |
| 663 | 1 | 20838  | GLFGAIAGFIE                     | 2.45 | 0.01 | 3.27 | 0.68 | 0.22 | 1.75 |
| 664 | 1 | 20838  | GLFGAIAGFIE                     | 2.45 | 0.01 | 3.27 | 0.68 | 0.22 | 1.57 |
| 665 | 1 | 105835 | GLKGEGEPGA                      | 2.43 | 0.01 | 0.78 | 2.46 | 0.22 | 0.28 |
| 666 | 1 | 105835 | GLKGEGEPGA                      | 2.43 | 0.01 | 0.78 | 2.46 | 0.22 | 0.28 |
| 667 | 1 | 105835 | GLKGEGEPGA                      | 2.43 | 0.01 | 0.78 | 2.46 | 0.22 | 0.28 |
| 668 | 1 | 105835 | GLKGEGEPGA                      | 2.43 | 0.01 | 0.78 | 2.46 | 0.22 | 0.28 |
| 669 | 1 | 105835 | GLKGEGEPGA                      | 2.43 | 0.01 | 0.78 | 2.46 | 0.22 | 0.28 |
| 670 | 1 | 105835 | GLKGEGEPGA                      | 2.43 | 0.01 | 0.78 | 2.46 | 0.22 | 0.28 |
| 671 | 1 | 105835 | GLKGEGEPGA                      | 2.43 | 0.01 | 0.78 | 2.46 | 0.22 | 0.28 |
| 672 | 1 | 105835 | GLKGEGEPGA                      | 2.43 | 0.01 | 0.78 | 2.46 | 0.22 | 0.28 |
| 673 | 1 | 105835 | GLKGEGEPGA                      | 2.43 | 0.01 | 0.78 | 2.46 | 0.22 | 0.28 |
| 674 | 1 | 105835 | GLKGEGEPGA                      | 2.43 | 0.01 | 0.78 | 2.46 | 0.22 | 0.28 |
| 675 | 1 | 105835 | GLKGEGEPGA                      | 2.43 | 0.01 | 0.78 | 2.46 | 0.22 | 0.28 |
| 676 | 1 | 21057  | GLPDSEPTKTNGKCK                 | 2.69 | 0.01 | 2.56 | 1.20 | 0.22 | 0.85 |

|     |   |        |                                                       |      |      |      |      |      |      |
|-----|---|--------|-------------------------------------------------------|------|------|------|------|------|------|
| 677 | 1 | 21057  | GLPDSEPTKTNGKCK                                       | 2.69 | 0.01 | 2.56 | 0.68 | 0.22 | 0.85 |
| 678 | 1 | 21057  | GLPDSEPTKTNGKCK                                       | 2.69 | 0.01 | 2.56 | 2.52 | 0.22 | 0.85 |
| 679 | 1 | 21059  | GLPDSVKIWTSETNK                                       | 2.64 | 0.01 | 2.56 | 1.20 | 0.22 | 0.85 |
| 680 | 1 | 21059  | GLPDSVKIWTSETNK                                       | 2.64 | 0.01 | 2.56 | 0.68 | 0.22 | 0.85 |
| 681 | 1 | 21059  | GLPDSVKIWTSETNK                                       | 2.64 | 0.01 | 2.56 | 1.20 | 0.22 | 0.85 |
| 682 | 1 | 21059  | GLPDSVKIWTSETNK                                       | 2.64 | 0.01 | 2.56 | 2.00 | 0.22 | 0.85 |
| 683 | 1 | 21059  | GLPDSVKIWTSETNK                                       | 2.64 | 0.01 | 2.56 | 2.02 | 0.22 | 0.85 |
| 684 | 1 | 21059  | GLPDSVKIWTSETNK                                       | 2.64 | 0.01 | 2.56 | 1.20 | 0.22 | 0.85 |
| 685 | 1 | 119904 | GLQLIQLISVDEVNQI                                      | 2.77 | 0.01 | 2.26 | 2.43 | 0.22 | 1.57 |
| 686 | 1 | 95416  | GLQNDP                                                | 1.88 | 0.01 | 2.40 | 2.52 | 0.22 | 0.28 |
| 687 | 1 | 115268 | GLQYTPSWLVG                                           | 2.40 | 0.01 | 0.90 | 0.68 | 0.22 | 1.39 |
| 688 | 1 | 119905 | GLRAQACAFW                                            | 2.31 | 0.01 | 0.78 | 1.15 | 0.22 | 0.28 |
| 689 | 1 | 115761 | GLRLIHYSYDV                                           | 2.39 | 0.01 | 2.19 | 0.68 | 0.22 | 0.28 |
| 690 | 1 | 115057 | GLSLSRFSWGAEGQRP<br>FG                                | 2.93 | 0.01 | 0.78 | 0.44 | 1.13 | 0.28 |
| 691 | 1 | 115057 | GLSLSRFSWGAEGQRP<br>FG                                | 2.93 | 0.01 | 0.78 | 0.44 | 1.41 | 0.28 |
| 692 | 1 | 103940 | GLTLPGYKYLGP<br>GNSLD                                 | 2.83 | 0.01 | 3.00 | 1.20 | 0.22 | 0.28 |
| 693 | 1 | 21318  | GMNNMNGDINNIN<br>GD<br>INNMNGDINNMNGDI<br>NNMNGDINNMN | 3.72 | 0.01 | 2.22 | 0.44 | 0.85 | 1.34 |
| 694 | 1 | 21318  | GMNNMNGDINNIN<br>GD<br>INNMNGDINNMNGDI<br>NNMNGDINNMN | 3.72 | 0.01 | 2.22 | 1.15 | 0.22 | 0.28 |
| 695 | 1 | 21373  | GNAEKYDKMDEPQHY<br>G<br>KS                            | 2.84 | 0.01 | 1.66 | 1.20 | 0.22 | 0.28 |
| 696 | 1 | 227770 | GNIEGQWALKNHSLV<br>SL<br>SEQVLVSCDNIDD                | 3.34 | 0.01 | 3.47 | 0.68 | 0.22 | 0.28 |
| 697 | 1 | 174123 | GNIVAVDIKP                                            | 2.31 | 0.01 | 3.10 | 0.44 | 1.23 | 0.85 |
| 698 | 1 | 21471  | GNLNTIRTRVHE                                          | 2.48 | 0.01 | 3.61 | 1.20 | 0.22 | 0.85 |
| 699 | 1 | 153392 | GNTLQCIMLVYCF<br>LGYC<br>C                            | 2.84 | 0.01 | 2.45 | 1.12 | 0.22 | 2.92 |
| 700 | 1 | 148621 | GNVIKDGDNNHQV<br>VLS<br>QEEEELLQNIKKI<br>KEYD         | 3.45 | 0.01 | 3.57 | 2.49 | 0.22 | 0.28 |
| 701 | 1 | 111359 | GPAGQAEPDRAHYN<br>IVT<br>FCC                          | 2.88 | 0.01 | 1.86 | 0.68 | 0.22 | 0.28 |
| 702 | 1 | 111359 | GPAGQAEPDRAHYN<br>IVT<br>FCC                          | 2.88 | 0.01 | 1.86 | 3.22 | 0.22 | 0.28 |
| 703 | 1 | 111359 | GPAGQAEPDRAHYN<br>IVT<br>FCC                          | 2.88 | 0.01 | 1.86 | 2.69 | 0.22 | 0.28 |
| 704 | 1 | 132347 | GPCILLARDRCG                                          | 2.49 | 0.01 | 0.90 | 3.05 | 1.13 | 1.27 |
| 705 | 1 | 21580  | GPCKTCT                                               | 2.04 | 0.01 | 2.58 | 0.68 | 0.22 | 0.28 |
| 706 | 1 | 21580  | GPCKTCT                                               | 2.04 | 0.01 | 2.08 | 0.68 | 0.22 | 1.75 |

|     |   |        |                          |      |      |      |      |      |      |
|-----|---|--------|--------------------------|------|------|------|------|------|------|
| 707 | 1 | 21580  | GPCKTCT                  | 2.04 | 0.01 | 2.08 | 0.68 | 0.22 | 1.75 |
| 708 | 1 | 489212 | GPCRTCT                  | 2.04 | 0.01 | 2.08 | 0.68 | 0.22 | 0.28 |
| 709 | 1 | 489212 | GPCRTCT                  | 2.04 | 0.01 | 2.08 | 0.68 | 0.22 | 0.28 |
| 710 | 1 | 489212 | GPCRTCT                  | 2.04 | 0.01 | 2.08 | 0.68 | 0.22 | 0.28 |
| 711 | 1 | 489212 | GPCRTCT                  | 2.04 | 0.01 | 2.08 | 0.68 | 0.22 | 0.28 |
| 712 | 1 | 489212 | GPCRTCT                  | 2.04 | 0.01 | 2.08 | 0.68 | 0.22 | 0.28 |
| 713 | 1 | 193466 | GPGYANAMP                | 2.26 | 0.01 | 2.51 | 0.44 | 2.39 | 0.28 |
| 714 | 1 | 177074 | GPNSSDADS                | 2.25 | 0.01 | 0.90 | 2.13 | 0.22 | 1.48 |
| 715 | 1 | 134987 | GPPGARGLTGRPGDAG<br>pp   | 2.90 | 4.45 | 0.90 | 3.16 | 0.22 | 0.28 |
| 716 | 1 | 134988 | GPPGARGLTGRPGDAG<br>pp   | 2.90 | 3.24 | 0.90 | 3.16 | 0.22 | 0.28 |
| 717 | 1 | 134989 | GPPGARGLTGRPGDAG<br>pp   | 2.90 | 3.50 | 0.90 | 2.46 | 0.22 | 0.28 |
| 718 | 1 | 134989 | GPPGARGLTGRPGDAG<br>pp   | 2.90 | 3.50 | 0.90 | 2.46 | 0.22 | 0.28 |
| 719 | 1 | 134989 | GPPGARGLTGRPGDAG<br>pp   | 2.90 | 3.50 | 0.90 | 2.46 | 0.22 | 0.28 |
| 720 | 1 | 134988 | GPPGARGLTGRPGDAG<br>pp   | 2.90 | 3.24 | 0.90 | 3.63 | 0.22 | 0.28 |
| 721 | 1 | 107166 | GPPGPQG                  | 2.07 | 0.01 | 0.78 | 0.68 | 0.22 | 1.66 |
| 722 | 1 | 233190 | GPPSSQF                  | 2.02 | 0.01 | 0.90 | 2.71 | 0.22 | 0.28 |
| 723 | 1 | 21763  | GPRLQPY                  | 2.02 | 0.01 | 3.97 | 0.68 | 0.22 | 0.28 |
| 724 | 1 | 21763  | GPRLQPY                  | 2.02 | 0.01 | 3.97 | 1.15 | 0.22 | 0.28 |
| 725 | 1 | 451482 | GPSDTPILPQ               | 2.31 | 0.01 | 0.78 | 1.81 | 0.22 | 0.28 |
| 726 | 1 | 21851  | GQCKWVNGREICNDRD<br>RPTA | 2.92 | 0.01 | 3.24 | 3.27 | 0.22 | 0.28 |
| 727 | 1 | 21851  | GQCKWVNGREICNDRD<br>RPTA | 2.92 | 0.01 | 3.24 | 1.15 | 0.22 | 0.28 |
| 728 | 1 | 122780 | GQELKNPQEETLQAFDS<br>HYD | 2.90 | 0.01 | 0.78 | 1.20 | 0.22 | 1.27 |
| 729 | 1 | 122780 | GQELKNPQEETLQAFDS<br>HYD | 2.90 | 0.01 | 0.78 | 1.20 | 0.22 | 0.28 |
| 730 | 1 | 137883 | GQNVLSADFTPG             | 2.44 | 0.01 | 2.21 | 0.44 | 0.85 | 0.28 |
| 731 | 1 | 137883 | GQNVLSADFTPG             | 2.44 | 0.01 | 2.21 | 1.20 | 0.22 | 0.28 |
| 732 | 1 | 103947 | GQSQQITDSIQTGLH          | 2.72 | 0.01 | 3.00 | 1.20 | 0.22 | 0.28 |
| 733 | 1 | 137884 | GQSRDVLLAGNA             | 2.47 | 0.01 | 2.21 | 0.44 | 0.85 | 0.28 |
| 734 | 1 | 137884 | GQSRDVLLAGNA             | 2.47 | 0.01 | 2.21 | 1.20 | 0.22 | 0.28 |
| 735 | 1 | 22015  | GREGYPADSKGCKIT          | 2.65 | 0.01 | 2.56 | 1.20 | 0.22 | 0.85 |
| 736 | 1 | 22015  | GREGYPADSKGCKIT          | 2.65 | 0.01 | 2.56 | 1.20 | 0.22 | 0.85 |
| 737 | 1 | 22015  | GREGYPADSKGCKIT          | 2.65 | 0.01 | 2.56 | 2.02 | 0.22 | 0.85 |
| 738 | 1 | 22015  | GREGYPADSKGCKIT          | 2.65 | 0.01 | 2.56 | 1.20 | 0.22 | 0.85 |
| 739 | 1 | 117518 | GRGRGRGRGRGRGRG          | 2.75 | 4.93 | 0.78 | 0.44 | 1.13 | 0.28 |
| 740 | 1 | 100081 | GRIRVLQRFDQRSRQFQ<br>NLQ | 2.98 | 0.01 | 2.16 | 0.44 | 2.39 | 0.28 |
| 741 | 1 | 158594 | GRRPFFHPVGE              | 2.42 | 0.01 | 2.43 | 0.44 | 1.74 | 0.28 |

|     |   |        |                                    |      |      |      |      |      |      |
|-----|---|--------|------------------------------------|------|------|------|------|------|------|
| 742 | 1 | 238556 | GRRVTQYCSHACAIP                    | 2.63 | 0.01 | 2.56 | 1.20 | 0.22 | 0.85 |
| 743 | 1 | 22280  | GSAMSRPIIHFGSDYEDR<br>YY           | 2.93 | 0.01 | 0.78 | 2.19 | 0.22 | 0.28 |
| 744 | 1 | 135465 | GSDYEDRYREN                        | 2.50 | 0.01 | 0.78 | 2.19 | 0.22 | 0.85 |
| 745 | 1 | 135465 | GSDYEDRYREN                        | 2.50 | 0.01 | 0.78 | 2.19 | 0.22 | 0.85 |
| 746 | 1 | 503993 | GSGGRGRGGSGGRRGR<br>GRER           | 3.03 | 3.89 | 2.48 | 0.44 | 1.74 | 0.28 |
| 747 | 1 | 503994 | GSGGRGRGGSGGRRGR<br>GRER           | 3.03 | 4.03 | 2.48 | 0.44 | 1.74 | 0.28 |
| 748 | 1 | 117302 | GSGKGKVQFQGKTKF<br>ASDD            | 2.98 | 0.01 | 0.78 | 0.44 | 1.13 | 0.28 |
| 749 | 1 | 238570 | GSGTPVDELDRCKV                     | 2.66 | 0.01 | 2.56 | 2.02 | 0.22 | 0.85 |
| 750 | 1 | 115612 | GSLPQKAQRPQDENG                    | 2.67 | 0.01 | 0.90 | 2.04 | 0.22 | 1.27 |
| 751 | 1 | 113013 | GSLPQKSQRSQDEN                     | 2.61 | 0.01 | 2.95 | 2.04 | 0.22 | 1.27 |
| 752 | 1 | 22507  | GSSGYCAWPACYCYG                    | 2.73 | 0.01 | 2.56 | 1.20 | 0.22 | 0.85 |
| 753 | 1 | 22507  | GSSGYCAWPACYCYG                    | 2.73 | 0.01 | 2.56 | 1.20 | 0.22 | 0.85 |
| 754 | 1 | 110876 | GTDRETTSMIV                        | 2.44 | 0.01 | 3.15 | 0.44 | 1.59 | 0.28 |
| 755 | 1 | 123271 | GTISKNEVLEIVTAIFKMI<br>SPEDTKHLPED | 3.37 | 0.01 | 1.60 | 2.04 | 0.22 | 0.28 |
| 756 | 1 | 22755  | GTLVKITDDQIEV                      | 2.62 | 0.01 | 3.27 | 0.68 | 0.22 | 1.57 |
| 757 | 1 | 22755  | GTLVKITDDQIEV                      | 2.62 | 0.01 | 3.27 | 0.68 | 0.22 | 1.57 |
| 758 | 1 | 242563 | GTSGSSADSPTGLLSP                   | 2.79 | 0.01 | 3.32 | 1.20 | 0.22 | 0.28 |
| 759 | 1 | 108412 | GTTDHVGVPTYDWGK                    | 2.70 | 0.01 | 1.72 | 2.37 | 0.22 | 1.34 |
| 760 | 1 | 140863 | GVDAGKLGTVSY                       | 2.48 | 0.01 | 3.01 | 1.12 | 0.22 | 0.28 |
| 761 | 1 | 117524 | GVDVSMNTHLKAVKM                    | 2.66 | 0.01 | 1.75 | 2.16 | 0.22 | 0.28 |
| 762 | 1 | 96352  | GVTKAAEKQM                         | 2.30 | 0.01 | 0.78 | 0.44 | 1.93 | 0.85 |
| 763 | 1 | 187006 | GVVIAT                             | 1.89 | 4.63 | 0.78 | 2.82 | 0.22 | 0.28 |
| 764 | 1 | 187006 | GVVIAT                             | 1.89 | 4.63 | 0.78 | 2.25 | 0.22 | 0.28 |
| 765 | 1 | 175593 | GWGQ                               | 1.60 | 0.01 | 1.60 | 2.19 | 0.22 | 0.28 |
| 766 | 1 | 175593 | GWGQ                               | 1.60 | 0.01 | 1.60 | 2.19 | 0.22 | 0.28 |
| 767 | 1 | 175593 | GWGQ                               | 1.60 | 0.01 | 1.60 | 2.19 | 0.22 | 0.28 |
| 768 | 1 | 175593 | GWGQ                               | 1.60 | 0.01 | 1.60 | 2.19 | 0.22 | 0.28 |
| 769 | 1 | 175593 | GWGQ                               | 1.60 | 0.01 | 1.60 | 2.19 | 0.22 | 0.28 |
| 770 | 1 | 175593 | GWGQ                               | 1.60 | 0.01 | 1.60 | 2.19 | 0.22 | 0.28 |
| 771 | 1 | 175593 | GWGQ                               | 1.60 | 0.01 | 1.60 | 2.19 | 0.22 | 0.28 |
| 772 | 1 | 122389 | GWSRYIPEGMQGIDYYT<br>PHEETNNEF     | 3.21 | 0.01 | 1.60 | 2.04 | 0.22 | 0.28 |
| 773 | 1 | 103965 | GYKYLPGNSLDQGEPT                   | 2.80 | 0.01 | 3.00 | 1.20 | 0.22 | 0.28 |
| 774 | 1 | 23494  | GYVRSGGAVPPACCN                    | 2.68 | 0.01 | 3.35 | 0.44 | 1.23 | 0.85 |
| 775 | 1 | 111393 | HASVFKGMPIPVLSNSY<br>QISPR         | 3.00 | 0.01 | 3.33 | 0.44 | 1.23 | 0.85 |

|     |   |        |                                 |      |      |      |      |      |      |
|-----|---|--------|---------------------------------|------|------|------|------|------|------|
| 776 | 1 | 110882 | HCTKRGHAKSRPVIRGIH<br>TCPL      | 3.00 | 4.08 | 0.90 | 0.44 | 1.13 | 0.28 |
| 777 | 1 | 94539  | HFEVFNFVPCSIC                   | 2.56 | 0.01 | 2.38 | 0.68 | 0.22 | 1.75 |
| 778 | 1 | 122394 | HFPFDQQNGTMKLGW<br>T            | 2.75 | 0.01 | 2.26 | 2.43 | 0.22 | 1.57 |
| 779 | 1 | 232527 | HFYQITWLPNTFPAR                 | 2.64 | 0.01 | 0.90 | 2.22 | 0.85 | 0.28 |
| 780 | 1 | 23936  | HGPDWASPVCQRHSPD<br>CSRLVG      | 3.05 | 0.01 | 3.16 | 0.68 | 0.22 | 0.28 |
| 781 | 1 | 23936  | HGPDWASPVCQRHSPD<br>CSRLVG      | 3.05 | 0.01 | 3.16 | 0.68 | 0.22 | 0.28 |
| 782 | 1 | 23936  | HGPDWASPVCQRHSPD<br>CSRLVG      | 3.05 | 0.01 | 3.16 | 0.68 | 0.22 | 0.28 |
| 783 | 1 | 153836 | HGPKATLQDIVLHLEP                | 2.72 | 0.01 | 3.11 | 2.37 | 0.22 | 0.28 |
| 784 | 1 | 153837 | HGRLVTLKDIVLDLQP                | 2.73 | 0.01 | 3.03 | 2.37 | 0.22 | 0.28 |
| 785 | 1 | 23947  | HGRVGIYFGMK                     | 2.39 | 0.01 | 2.24 | 1.15 | 0.22 | 0.28 |
| 786 | 1 | 23947  | HGRVGIYFGMK                     | 2.39 | 0.01 | 2.24 | 1.15 | 0.22 | 0.28 |
| 787 | 1 | 24012  | HHPSTNQEQTSLYVQAS               | 2.79 | 0.01 | 3.27 | 0.68 | 0.22 | 1.57 |
| 788 | 1 | 24012  | HHPSTNQEQTSLYVQAS               | 2.79 | 0.01 | 3.27 | 0.68 | 0.22 | 1.57 |
| 789 | 1 | 24120  | HKAEVKKFLNEEQKKNE<br>NKPLKVLIDG | 3.24 | 0.01 | 3.53 | 3.08 | 0.22 | 1.27 |
| 790 | 1 | 95446  | HKQKIIAP                        | 2.13 | 0.01 | 3.48 | 2.59 | 0.22 | 0.28 |
| 791 | 1 | 110284 | HKSAIVTLTYDSEWQRD<br>Q          | 2.80 | 0.01 | 1.86 | 0.44 | 0.85 | 0.28 |
| 792 | 1 | 110284 | HKSAIVTLTYDSEWQRD<br>Q          | 2.80 | 0.01 | 1.86 | 0.44 | 0.85 | 0.28 |
| 793 | 1 | 110284 | HKSAIVTLTYDSEWQRD<br>Q          | 2.80 | 0.01 | 1.86 | 0.44 | 0.85 | 0.28 |
| 794 | 1 | 110284 | HKSAIVTLTYDSEWQRD<br>Q          | 2.80 | 0.01 | 1.86 | 0.44 | 1.74 | 0.28 |
| 795 | 1 | 140868 | HLINTNGSWHINSTA                 | 2.71 | 0.01 | 1.72 | 0.44 | 1.59 | 0.28 |
| 796 | 1 | 117910 | HLLTNHLKSKEVWKAL                | 2.75 | 0.01 | 0.78 | 0.44 | 1.13 | 0.28 |
| 797 | 1 | 24369  | HNDKRADPAFVCRQGV<br>VDRG        | 2.94 | 0.01 | 2.85 | 2.02 | 0.22 | 0.28 |
| 798 | 1 | 419217 | HNMPNDPNRNV DENA<br>NAN         | 2.88 | 0.01 | 1.66 | 3.32 | 0.22 | 1.48 |
| 799 | 1 | 103972 | HNPINAGTELSATGN                 | 2.68 | 0.01 | 3.00 | 1.20 | 0.22 | 0.28 |
| 800 | 1 | 24414  | HNTVPSLWYHNR                    | 2.46 | 0.01 | 0.90 | 0.44 | 1.23 | 0.28 |
| 801 | 1 | 137185 | HNYGVVESFTVQRRV                 | 2.65 | 0.01 | 0.78 | 1.15 | 0.22 | 1.57 |
| 802 | 1 | 137185 | HNYGVVESFTVQRRV                 | 2.65 | 0.01 | 0.78 | 2.74 | 0.22 | 1.57 |
| 803 | 1 | 137185 | HNYGVVESFTVQRRV                 | 2.65 | 0.01 | 0.78 | 0.44 | 1.41 | 1.57 |
| 804 | 1 | 137185 | HNYGVVESFTVQRRV                 | 2.65 | 0.01 | 0.78 | 1.12 | 0.22 | 1.57 |
| 805 | 1 | 225755 | HPEPEGKYRTTEAQK                 | 2.67 | 0.01 | 3.28 | 0.44 | 0.22 | 0.85 |
| 806 | 1 | 186676 | HPTDYSLSYMYP                    | 2.49 | 0.01 | 0.90 | 0.68 | 0.22 | 1.39 |
| 807 | 1 | 186676 | HPTDYSLSYMYP                    | 2.49 | 0.01 | 0.90 | 0.68 | 0.22 | 0.28 |



|     |   |        |                                     |      |      |      |      |      |      |
|-----|---|--------|-------------------------------------|------|------|------|------|------|------|
|     |   |        | HPTDYSLSYMYPGGGHP                   |      |      |      |      |      |      |
| 808 | 1 | 186677 | TDYSLSYMYPGGGHPTD<br>YLSYMYPGKKK    | 3.80 | 0.01 | 0.90 | 3.47 | 0.22 | 0.28 |
| 809 | 1 | 107889 | HQCHQESTRGRSRGRC<br>GRSGS           | 3.05 | 2.84 | 0.90 | 3.16 | 0.22 | 0.28 |
| 810 | 1 | 107441 | HQNWLDG                             | 1.99 | 0.01 | 0.78 | 0.44 | 1.13 | 0.28 |
| 811 | 1 | 24673  | HRFYESGIVFEEYKDYFCI<br>SKWY         | 3.07 | 0.01 | 2.08 | 2.02 | 0.22 | 0.28 |
| 812 | 1 | 119930 | HRWSSYMVHW                          | 2.33 | 0.01 | 0.78 | 2.66 | 0.22 | 0.28 |
| 813 | 1 | 119930 | HRWSSYMVHW                          | 2.33 | 0.01 | 0.78 | 1.15 | 0.22 | 0.28 |
| 814 | 1 | 134405 | HSDLFSKDW SFYLLY                    | 2.77 | 0.01 | 0.78 | 3.03 | 0.22 | 1.27 |
| 815 | 1 | 122401 | HSEAETGPP                           | 2.21 | 0.01 | 0.78 | 0.44 | 1.13 | 1.39 |
| 816 | 1 | 153396 | HSFEPWSARDMLGGGS                    | 2.69 | 0.01 | 0.90 | 0.68 | 0.22 | 1.27 |
| 817 | 1 | 83234  | HSKEIPALTAVETGA                     | 2.66 | 0.01 | 2.57 | 0.44 | 0.85 | 0.28 |
| 818 | 1 | 110888 | HSTKRGHAKSRPVRG                     | 2.71 | 3.89 | 0.78 | 0.44 | 1.13 | 0.28 |
| 819 | 1 | 110887 | HSTKRGHAKSRPVRG                     | 2.71 | 4.93 | 0.78 | 0.44 | 1.13 | 0.28 |
| 820 | 1 | 110892 | HSTKRGHAKSRPVRG<br>HSTKRGHAKSRPVRGH | 2.71 | 4.23 | 0.78 | 0.44 | 1.13 | 0.28 |
| 821 | 1 | 110894 | QCHQESTRGRSRGRCG<br>RSGS            | 3.56 | 4.45 | 0.90 | 0.44 | 1.13 | 0.28 |
| 822 | 1 | 444933 | HTPGCVPCVRENNSSRC<br>WVA            | 2.93 | 0.01 | 1.96 | 0.68 | 0.22 | 1.34 |
| 823 | 1 | 444952 | HVTNDCSNSSIVYEAAD<br>MIM            | 2.93 | 0.01 | 1.96 | 0.68 | 0.22 | 1.34 |
| 824 | 1 | 116357 | HYGSLPQKSQHGRQTQD<br>QDPVVHF        | 3.08 | 0.01 | 0.78 | 1.12 | 0.22 | 1.27 |
| 825 | 1 | 116357 | HYGSLPQKSQHGRQTQD<br>QDPVVHF        | 3.08 | 0.01 | 0.78 | 1.20 | 0.22 | 1.27 |
| 826 | 1 | 174145 | HYLALLVKY                           | 2.24 | 0.01 | 3.10 | 0.44 | 1.23 | 0.85 |
| 827 | 1 | 177084 | IAARPKVKDQHGRM                      | 2.58 | 0.01 | 3.85 | 0.68 | 0.22 | 0.28 |
| 828 | 1 | 177085 | IAARSKVNGQSGRM                      | 2.60 | 0.01 | 4.63 | 0.68 | 0.22 | 0.28 |
| 829 | 1 | 174146 | IAAYHFDLSG                          | 2.28 | 0.01 | 3.10 | 0.44 | 1.23 | 0.85 |
| 830 | 1 | 105869 | IAGFKGEQGPK                         | 2.41 | 0.01 | 2.25 | 2.46 | 0.22 | 0.28 |
| 831 | 1 | 105869 | IAGFKGEQGPK                         | 2.41 | 0.01 | 2.25 | 2.46 | 0.22 | 0.28 |
| 832 | 1 | 105869 | IAGFKGEQGPK                         | 2.41 | 0.01 | 2.25 | 2.46 | 0.22 | 0.28 |
| 833 | 1 | 105869 | IAGFKGEQGPK                         | 2.41 | 0.01 | 2.25 | 2.46 | 0.22 | 0.28 |
| 834 | 1 | 105869 | IAGFKGEQGPK                         | 2.41 | 0.01 | 2.25 | 2.46 | 0.22 | 0.28 |
| 835 | 1 | 177088 | IAKRPKVRDQEGRI                      | 2.62 | 0.01 | 4.63 | 0.68 | 0.22 | 0.28 |
| 836 | 1 | 140870 | IALGQRRADAVKGYLAG<br>KGV            | 2.97 | 0.01 | 3.01 | 1.12 | 0.22 | 0.28 |
| 837 | 1 | 177090 | IASGSQRSTNSAS                       | 2.57 | 0.01 | 2.96 | 0.68 | 0.22 | 1.48 |
| 838 | 1 | 177093 | IATRPKVNGQSGRM                      | 2.57 | 0.01 | 4.93 | 0.68 | 0.22 | 0.28 |
| 839 | 1 | 177099 | IATRSKVNGQNGRM                      | 2.59 | 0.01 | 4.93 | 0.68 | 0.22 | 0.28 |
| 840 | 1 | 177100 | IATRSKVNGQSGRI                      | 2.62 | 0.01 | 4.93 | 0.68 | 0.22 | 0.28 |
| 841 | 1 | 177101 | IATRSKVNGQSGRM                      | 2.59 | 0.01 | 3.09 | 0.68 | 0.22 | 0.28 |

|     |   |        |                                                |      |      |      |      |      |      |
|-----|---|--------|------------------------------------------------|------|------|------|------|------|------|
| 842 | 1 | 94549  | ICCNPACGPK<br>IDAPKPKMKKKEKEMN                 | 2.33 | 0.01 | 3.70 | 2.37 | 0.22 | 0.28 |
| 843 | 1 | 131912 | GETREKSPKLKNGFPHP<br>EPDCN<br>IDAPKPKMKKKEKEMN | 3.57 | 0.01 | 0.78 | 0.44 | 1.13 | 0.85 |
| 844 | 1 | 131912 | GETREKSPKLKNGFPHP<br>EPDCN                     | 3.57 | 0.01 | 0.78 | 0.44 | 1.41 | 0.85 |
| 845 | 1 | 136364 | IDPLMFKYWYNM                                   | 2.45 | 0.01 | 0.90 | 0.68 | 0.22 | 0.28 |
| 846 | 1 | 107446 | IEKTISK                                        | 2.05 | 0.01 | 0.78 | 0.44 | 1.13 | 0.28 |
| 847 | 1 | 117531 | IELKNGTQVHGTITGVD<br>VS                        | 2.90 | 0.01 | 0.78 | 1.12 | 0.22 | 0.28 |
| 848 | 1 | 119939 | IFAQRLMRYW                                     | 2.29 | 0.01 | 0.78 | 2.66 | 0.22 | 0.28 |
| 849 | 1 | 119939 | IFAQRLMRYW                                     | 2.29 | 0.01 | 0.78 | 1.15 | 0.22 | 0.28 |
| 850 | 1 | 26167  | IFSQNMNIKMKMP                                  | 2.56 | 0.01 | 3.42 | 0.44 | 1.23 | 0.85 |
| 851 | 1 | 26179  | IFVHGPTTVESHGNYST<br>QVG                       | 2.94 | 0.01 | 2.85 | 2.02 | 0.22 | 0.28 |
| 852 | 1 | 111418 | IGEHWKGKSPCTNVA                                | 2.62 | 0.01 | 1.86 | 0.68 | 0.22 | 0.28 |
| 853 | 1 | 95094  | IGFRGLDGVHCTPTTDS<br>GVI                       | 2.94 | 0.01 | 2.25 | 2.04 | 0.22 | 1.57 |
| 854 | 1 | 95094  | IGFRGLDGVHCTPTTDS<br>GVI                       | 2.94 | 0.01 | 2.25 | 2.04 | 0.22 | 1.27 |
| 855 | 1 | 137900 | IGGADAETLMDA                                   | 2.48 | 0.01 | 2.21 | 0.44 | 0.85 | 0.28 |
| 856 | 1 | 137900 | IGGADAETLMDA                                   | 2.48 | 0.01 | 2.21 | 1.20 | 0.22 | 0.28 |
| 857 | 1 | 113535 | IGGRVHFFKDISPIA                                | 2.65 | 0.01 | 4.93 | 0.44 | 1.74 | 1.57 |
| 858 | 1 | 114406 | IGGRVHFFKDISPIS                                | 2.67 | 0.01 | 4.93 | 0.44 | 1.74 | 1.57 |
| 859 | 1 | 95459  | IHENEDDLGRGGHELK<br>VTG                        | 2.94 | 0.01 | 2.86 | 0.68 | 0.22 | 0.28 |
| 860 | 1 | 111422 | IHLDPNKFPGFPDTS                                | 2.66 | 0.01 | 1.86 | 0.68 | 0.22 | 0.28 |
| 861 | 1 | 83498  | IHPTILCVYG                                     | 2.30 | 0.01 | 3.06 | 0.44 | 0.85 | 0.28 |
| 862 | 1 | 109332 | IHSMNSTIL                                      | 2.24 | 0.01 | 1.86 | 0.44 | 0.85 | 0.28 |
| 863 | 1 | 109332 | IHSMNSTIL                                      | 2.24 | 0.01 | 1.86 | 0.44 | 0.85 | 0.28 |
| 864 | 1 | 109332 | IHSMNSTIL                                      | 2.24 | 0.01 | 1.86 | 0.44 | 0.85 | 0.28 |
| 865 | 1 | 103986 | IHVLNSESAGQMVQ<br>D                            | 2.78 | 0.01 | 3.00 | 1.20 | 0.22 | 0.28 |
| 866 | 1 | 141924 | IKKQIPRCKDAFNKIES                              | 2.78 | 0.01 | 3.13 | 0.68 | 0.22 | 0.28 |
| 867 | 1 | 111424 | IKMVSEPYGDSLFFY<br>IKTMNTQISTLKNDVHLL          | 2.63 | 0.01 | 1.86 | 0.68 | 0.22 | 0.28 |
| 868 | 1 | 26918  | NEQIDKLNNKGTLSKI<br>SELVQIMDL                  | 3.80 | 0.01 | 2.22 | 1.15 | 0.22 | 0.28 |
| 869 | 1 | 26925  | IKVELTGNSTLSSGYATA<br>RA                       | 2.94 | 0.01 | 3.48 | 1.20 | 0.22 | 0.28 |
| 870 | 1 | 26989  | ILCYCYGLPDSEPTK                                | 2.66 | 0.01 | 2.56 | 1.20 | 0.22 | 0.85 |
| 871 | 1 | 95466  | ILIEMFNKYNSELLNNIIL                            | 2.93 | 0.01 | 3.45 | 0.44 | 0.22 | 1.57 |
| 872 | 1 | 445102 | ILPCSFTTLPALSTGLIHL<br>H                       | 2.98 | 0.01 | 1.96 | 0.68 | 0.22 | 1.34 |

|     |   |        |                           |      |      |      |      |      |      |
|-----|---|--------|---------------------------|------|------|------|------|------|------|
| 873 | 1 | 95467  | INQFYQKFPQ                | 2.33 | 0.01 | 1.60 | 0.44 | 1.23 | 0.85 |
| 874 | 1 | 230476 | INVREGIAFRPASKT           | 2.65 | 0.01 | 0.78 | 0.44 | 1.13 | 0.28 |
| 875 | 1 | 156893 | IPHPKLGDP RPM             | 2.48 | 0.01 | 0.90 | 1.20 | 0.22 | 0.28 |
| 876 | 1 | 114414 | IPKVPPGPNITA              | 2.50 | 4.45 | 2.53 | 0.44 | 1.23 | 1.27 |
| 877 | 1 | 167761 | IPQPQWTPE                 | 2.25 | 0.01 | 2.40 | 2.43 | 0.22 | 0.28 |
| 878 | 1 | 178253 | IPRFK                     | 1.74 | 0.01 | 3.89 | 0.68 | 0.22 | 1.34 |
| 879 | 1 | 178253 | IPRFK                     | 1.74 | 0.01 | 3.89 | 0.68 | 0.22 | 1.34 |
| 880 | 1 | 178253 | IPRFK                     | 1.74 | 0.01 | 3.89 | 0.68 | 0.22 | 1.34 |
| 881 | 1 | 115796 | IQAFLLYQEP                | 2.30 | 0.01 | 1.60 | 0.44 | 1.23 | 0.85 |
| 882 | 1 | 225631 | IQLQVVQATDKLVMH           | 2.68 | 0.01 | 3.57 | 2.61 | 0.22 | 0.28 |
| 883 | 1 | 98122  | IQNSKSAYTP                | 2.29 | 0.01 | 3.08 | 0.68 | 0.22 | 0.28 |
| 884 | 1 | 98122  | IQNSKSAYTP                | 2.29 | 0.01 | 3.08 | 1.20 | 0.22 | 0.28 |
| 885 | 1 | 28229  | IQTAVTRPIITTAGPSD<br>MY   | 2.94 | 0.01 | 3.27 | 1.12 | 0.22 | 0.28 |
| 886 | 1 | 141928 | IRHQRSQTECG               | 2.39 | 0.01 | 3.13 | 0.68 | 0.22 | 0.28 |
| 887 | 1 | 28349  | IRNVNNLART                | 2.32 | 0.01 | 3.33 | 0.44 | 1.23 | 0.85 |
| 888 | 1 | 28349  | IRNVNNLART                | 2.32 | 0.01 | 3.33 | 0.44 | 1.23 | 0.85 |
| 889 | 1 | 28437  | ISASTNCATVK               | 2.41 | 0.01 | 3.33 | 0.44 | 1.23 | 0.85 |
| 890 | 1 | 28437  | ISASTNCATVK               | 2.41 | 0.01 | 3.33 | 0.44 | 1.23 | 0.85 |
| 891 | 1 | 107451 | ISKAKGQ                   | 2.02 | 0.01 | 0.78 | 0.44 | 1.13 | 0.28 |
| 892 | 1 | 99352  | ISKFLT                    | 1.88 | 0.01 | 2.86 | 2.02 | 0.85 | 0.85 |
| 893 | 1 | 119962 | ISPESDRPDLSTFMESG         | 2.79 | 0.01 | 2.26 | 2.43 | 0.22 | 1.57 |
| 894 | 1 | 100169 | ISYILNRHDNQNLRVAKI<br>SM  | 2.94 | 0.01 | 2.16 | 0.44 | 2.39 | 0.28 |
| 895 | 1 | 29290  | IVGPKASK                  | 2.12 | 0.01 | 3.78 | 0.68 | 0.22 | 0.85 |
| 896 | 1 | 161246 | IVPAKSVC GPVYCFTPSP<br>VV | 2.95 | 0.01 | 2.45 | 0.68 | 0.22 | 0.28 |
| 897 | 1 | 161246 | IVPAKSVC GPVYCFTPSP<br>VV | 2.95 | 0.01 | 2.45 | 2.74 | 0.22 | 0.28 |
| 898 | 1 | 161246 | IVPAKSVC GPVYCFTPSP<br>VV | 2.95 | 0.01 | 2.45 | 2.74 | 0.22 | 1.34 |
| 899 | 1 | 161246 | IVPAKSVC GPVYCFTPSP<br>VV | 2.95 | 0.01 | 2.45 | 2.74 | 0.22 | 1.34 |
| 900 | 1 | 161246 | IVPAKSVC GPVYCFTPSP<br>VV | 2.95 | 0.01 | 2.45 | 2.74 | 0.22 | 1.34 |
| 901 | 1 | 133611 | IVSYLCDLAPEAPPPTLPP       | 2.88 | 0.01 | 0.78 | 0.68 | 0.22 | 0.85 |
| 902 | 1 | 133611 | IVSYLCDLAPEAPPPTLPP       | 2.88 | 0.01 | 0.78 | 0.68 | 0.22 | 2.35 |
| 903 | 1 | 133611 | IVSYLCDLAPEAPPPTLPP       | 2.88 | 0.01 | 0.78 | 0.68 | 0.22 | 2.35 |
| 904 | 1 | 194938 | IVTTNRDNAVTTTTNT          | 2.78 | 0.01 | 3.12 | 0.68 | 0.22 | 1.34 |
| 905 | 1 | 194938 | IVTTNRDNAVTTTTNT          | 2.78 | 0.01 | 3.12 | 0.68 | 0.22 | 1.34 |

|     |   |        |                          |      |      |      |      |      |      |
|-----|---|--------|--------------------------|------|------|------|------|------|------|
| 906 | 1 | 445297 | IVYEAADMIMHTPGCVP<br>CVR | 2.93 | 0.01 | 1.96 | 0.68 | 0.22 | 1.34 |
| 907 | 1 | 84138  | IYGLIAKKQS               | 2.31 | 0.01 | 3.06 | 0.44 | 0.85 | 0.28 |
| 908 | 1 | 144697 | IYRNLYWEGS               | 2.29 | 0.01 | 0.78 | 0.44 | 1.41 | 0.28 |
| 909 | 1 | 144697 | IYRNLYWEGS               | 2.29 | 0.01 | 0.78 | 0.44 | 1.13 | 0.28 |
| 910 | 1 | 144697 | IYRNLYWEGS               | 2.29 | 0.01 | 0.78 | 0.44 | 2.35 | 0.28 |
| 911 | 1 | 29745  | KAACPTMGEAHNDKRA<br>DPAF | 2.93 | 0.01 | 2.85 | 2.02 | 0.22 | 0.28 |
| 912 | 1 | 140247 | KAAESEIEKLTTK            | 2.58 | 0.01 | 2.90 | 1.20 | 0.22 | 1.34 |
| 913 | 1 | 119979 | KAEFHRWSSY               | 2.28 | 0.01 | 0.78 | 2.66 | 0.22 | 0.28 |
| 914 | 1 | 119979 | KAEFHRWSSY               | 2.28 | 0.01 | 0.78 | 1.15 | 0.22 | 0.28 |
| 915 | 1 | 84160  | KAGKNYIGYS               | 2.34 | 0.01 | 3.06 | 0.44 | 0.85 | 0.28 |
| 916 | 1 | 98143  | KAGQAAWKQVSEAT           | 2.69 | 0.01 | 2.71 | 2.78 | 0.22 | 0.28 |
| 917 | 1 | 107456 | KALPAPI                  | 2.04 | 0.01 | 0.78 | 0.44 | 1.13 | 0.28 |
| 918 | 1 | 29907  | KANSSYSGNYPYSILFQK<br>F  | 2.91 | 0.01 | 3.59 | 1.12 | 0.22 | 0.28 |
| 919 | 1 | 119980 | KAPQWPPYTA               | 2.32 | 0.01 | 0.78 | 2.66 | 0.22 | 0.28 |
| 920 | 1 | 119980 | KAPQWPPYTA               | 2.32 | 0.01 | 0.78 | 1.15 | 0.22 | 0.28 |
| 921 | 1 | 167765 | KAREAFRRY                | 2.24 | 0.01 | 2.40 | 2.43 | 0.22 | 0.28 |
| 922 | 1 | 225352 | KASEFTGLMDNMRYLY<br>DD   | 2.80 | 0.01 | 2.61 | 0.68 | 0.22 | 0.28 |
| 923 | 1 | 225352 | KASEFTGLMDNMRYLY<br>DD   | 2.80 | 0.01 | 2.61 | 0.68 | 0.22 | 0.28 |
| 924 | 1 | 225352 | KASEFTGLMDNMRYLY<br>DD   | 2.80 | 0.01 | 2.61 | 0.68 | 0.22 | 0.28 |
| 925 | 1 | 225352 | KASEFTGLMDNMRYLY<br>DD   | 2.80 | 0.01 | 2.61 | 0.68 | 0.22 | 0.28 |
| 926 | 1 | 110912 | KATPNDGYFWED             | 2.43 | 0.01 | 3.15 | 0.44 | 1.59 | 0.28 |
| 927 | 1 | 30057  | KCGVNVYPYKISTSTN         | 2.69 | 0.01 | 3.35 | 1.12 | 0.22 | 0.85 |
| 928 | 1 | 107458 | KCKVSNK                  | 2.05 | 0.01 | 0.78 | 0.44 | 1.13 | 0.28 |
| 929 | 1 | 156340 | KDDQIAAAIALRGM           | 2.61 | 0.01 | 2.73 | 0.44 | 0.85 | 1.28 |
| 930 | 1 | 156340 | KDDQIAAAIALRGM           | 2.61 | 0.01 | 2.73 | 0.44 | 0.85 | 1.28 |
| 931 | 1 | 119981 | KDEGSYFLVY               | 2.29 | 0.01 | 0.78 | 2.66 | 0.22 | 0.28 |
| 932 | 1 | 119981 | KDEGSYFLVY               | 2.29 | 0.01 | 0.78 | 1.15 | 0.22 | 0.28 |
| 933 | 1 | 30140  | KDEPNGRASDT              | 2.36 | 0.01 | 3.35 | 2.02 | 0.85 | 0.28 |
| 934 | 1 | 30141  | KDERFFSDKI               | 2.33 | 0.01 | 1.60 | 0.44 | 1.23 | 0.85 |
| 935 | 1 | 84229  | KEEGGKETKDADVDRR         | 2.76 | 0.01 | 4.15 | 1.12 | 0.22 | 0.28 |
| 936 | 1 | 135943 | KEGYKVRDLNITLEFRT<br>TSK | 2.98 | 0.01 | 1.75 | 0.44 | 1.13 | 1.27 |
| 937 | 1 | 96450  | KEKPTPPVKP               | 2.37 | 0.01 | 2.39 | 0.44 | 1.59 | 0.28 |
| 938 | 1 | 180555 | KENREVGDWDR              | 2.31 | 0.01 | 0.78 | 0.68 | 0.22 | 0.28 |
| 939 | 1 | 30553  | KENYIYGTCYYTASDRTA<br>FP | 2.90 | 0.01 | 3.42 | 1.12 | 0.22 | 0.28 |
| 940 | 1 | 30553  | KENYIYGTCYYTASDRTA<br>FP | 2.90 | 0.01 | 3.42 | 1.12 | 0.22 | 0.28 |

|     |   |        |                                       |      |      |      |      |      |      |
|-----|---|--------|---------------------------------------|------|------|------|------|------|------|
| 941 | 1 | 84250  | KEVAREASKKK                           | 2.42 | 0.01 | 4.15 | 1.12 | 0.22 | 0.28 |
| 942 | 1 | 144700 | KEWAKRAALP                            | 2.33 | 0.01 | 0.78 | 0.44 | 2.35 | 0.28 |
| 943 | 1 | 107478 | KEYKCKV                               | 2.05 | 0.01 | 0.78 | 0.44 | 1.13 | 0.28 |
| 944 | 1 | 445420 | KFAQGWGPITYAEPDSS<br>DQR              | 2.90 | 0.01 | 1.96 | 0.68 | 0.22 | 1.34 |
| 945 | 1 | 190809 | KFDKLYIWGVHHPGT                       | 2.64 | 0.01 | 2.36 | 1.20 | 0.22 | 0.28 |
| 946 | 1 | 161357 | KFDKLYKMLTEIYTEDNF<br>V               | 2.91 | 0.01 | 2.08 | 2.49 | 0.22 | 1.57 |
| 947 | 1 | 130524 | KFHPKDIPYQVW                          | 2.46 | 0.01 | 0.90 | 3.57 | 0.22 | 0.28 |
| 948 | 1 | 96453  | KFKEAFLRSV                            | 2.32 | 0.01 | 2.39 | 0.44 | 0.85 | 0.28 |
| 949 | 1 | 107479 | KFNWYVD                               | 1.99 | 0.01 | 0.78 | 1.15 | 0.22 | 0.28 |
| 950 | 1 | 107479 | KFNWYVD                               | 1.99 | 0.01 | 0.78 | 1.15 | 0.22 | 1.27 |
| 951 | 1 | 95493  | KFPQYLQYLY                            | 2.35 | 0.01 | 1.60 | 0.44 | 1.23 | 0.85 |
| 952 | 1 | 232654 | KGAGSSQDACIKFIQYEV<br>DG              | 2.94 | 0.01 | 2.28 | 0.68 | 0.22 | 0.28 |
| 953 | 1 | 232655 | KGAGSSQDATIKFIQYEV<br>DG              | 2.94 | 0.01 | 0.90 | 0.68 | 0.22 | 0.28 |
| 954 | 1 | 105898 | KGEQG                                 | 1.75 | 0.01 | 0.78 | 2.46 | 0.22 | 0.28 |
| 955 | 1 | 105898 | KGEQG                                 | 1.75 | 0.01 | 0.78 | 2.46 | 0.22 | 0.28 |
| 956 | 1 | 105898 | KGEQG                                 | 1.75 | 0.01 | 0.78 | 0.68 | 0.22 | 0.28 |
| 957 | 1 | 105898 | KGEQG                                 | 1.75 | 0.01 | 0.78 | 0.68 | 0.22 | 0.28 |
| 958 | 1 | 30951  | KGWFGKHRGQGS                          | 2.64 | 0.01 | 2.43 | 0.44 | 1.74 | 0.28 |
| 959 | 1 | 137907 | KSGPGYYRLTL                           | 2.48 | 0.01 | 2.21 | 0.44 | 0.85 | 0.28 |
| 960 | 1 | 137907 | KSGPGYYRLTL                           | 2.48 | 0.01 | 2.21 | 1.20 | 0.22 | 0.28 |
| 961 | 1 | 140872 | KGVDAGKLGTVS                          | 2.50 | 0.01 | 3.01 | 1.12 | 0.22 | 0.28 |
| 962 | 1 | 140479 | KHGLLSM                               | 2.01 | 0.01 | 0.90 | 0.68 | 0.22 | 0.28 |
| 963 | 1 | 225361 | KHKNLVEFNSSPYETGYI                    | 2.83 | 0.01 | 2.61 | 0.68 | 0.22 | 0.28 |
| 964 | 1 | 225361 | KHKNLVEFNSSPYETGYI                    | 2.83 | 0.01 | 2.61 | 0.68 | 0.22 | 0.28 |
| 965 | 1 | 225361 | KHKNLVEFNSSPYETGYI                    | 2.83 | 0.01 | 2.61 | 0.68 | 0.22 | 0.28 |
| 966 | 1 | 225361 | KHKNLVEFNSSPYETGYI                    | 2.83 | 0.01 | 2.61 | 0.68 | 0.22 | 0.28 |
| 967 | 1 | 99380  | KIADDWDNRHPLPNA                       | 2.68 | 0.01 | 2.86 | 2.02 | 0.85 | 0.85 |
| 968 | 1 | 119988 | KIFAQRLMRY                            | 2.29 | 0.01 | 0.78 | 2.66 | 0.22 | 0.28 |
| 969 | 1 | 119988 | KIFAQRLMRY                            | 2.29 | 0.01 | 0.78 | 1.15 | 0.22 | 0.28 |
| 970 | 1 | 156697 | KIHAREIFDSRGNPTVE                     | 2.74 | 2.94 | 0.78 | 0.44 | 1.13 | 0.28 |
| 971 | 1 | 119473 | KILKVIRK                              | 2.17 | 0.01 | 0.78 | 0.44 | 0.85 | 0.28 |
| 972 | 1 | 31397  | KIQIEIKKETNQINKDID<br>HIEMNIINLKKKIEF | 3.50 | 0.01 | 2.22 | 1.15 | 0.22 | 0.28 |
| 973 | 1 | 101790 | KISEFYGRKP                            | 2.30 | 0.01 | 3.93 | 0.44 | 1.23 | 0.85 |
| 974 | 1 | 31439  | KITCFLTAAGYCNT                        | 2.65 | 0.01 | 2.56 | 0.68 | 0.22 | 0.85 |
| 975 | 1 | 31439  | KITCFLTAAGYCNT                        | 2.65 | 0.01 | 2.56 | 1.20 | 0.22 | 0.85 |

|      |   |        |                                   |      |      |      |      |      |      |
|------|---|--------|-----------------------------------|------|------|------|------|------|------|
| 976  | 1 | 31518  | KKEEKKEESEEDEDMDG<br>FGLFD        | 3.08 | 0.01 | 0.90 | 3.05 | 1.13 | 1.27 |
| 977  | 1 | 157463 | KKETLICS                          | 2.11 | 0.01 | 0.90 | 0.44 | 1.93 | 1.28 |
| 978  | 1 | 157463 | KKETLICS                          | 2.11 | 0.01 | 0.90 | 0.44 | 1.41 | 1.28 |
| 979  | 1 | 108500 | KKGKKKDPNAPKRPP                   | 2.70 | 0.01 | 0.78 | 0.44 | 1.13 | 1.27 |
| 980  | 1 | 31554  | KKGSSGYCAWPACYC                   | 2.70 | 0.01 | 2.56 | 1.20 | 0.22 | 0.85 |
| 981  | 1 | 148652 | KKIKEYDEDYTITYYYDD<br>D           | 2.94 | 0.01 | 3.57 | 2.49 | 0.22 | 0.28 |
| 982  | 1 | 148653 | KKIKEYDEDYTITYYYDD<br>DDYDDTEYYRK | 3.35 | 0.01 | 3.57 | 2.49 | 0.22 | 0.28 |
| 983  | 1 | 78702  | KKKEEGEDDTARQEIRK<br>AW           | 2.91 | 0.01 | 3.11 | 1.12 | 0.22 | 0.28 |
| 984  | 1 | 98170  | KKRGNGQPVNQLCQM                   | 2.67 | 0.01 | 2.71 | 2.78 | 0.22 | 0.28 |
| 985  | 1 | 31688  | KKRNVEEELHSLRKNYNI<br>INEEIEEIT   | 3.25 | 0.01 | 2.22 | 0.44 | 0.85 | 1.34 |
| 986  | 1 | 31688  | KKRNVEEELHSLRKNYNI<br>INEEIEEIT   | 3.25 | 0.01 | 2.22 | 1.15 | 0.22 | 0.28 |
| 987  | 1 | 31722  | KKTTTKPTKKPT                      | 2.53 | 0.01 | 2.38 | 0.68 | 0.22 | 0.28 |
| 988  | 1 | 189101 | KKWVYNSGKLPRGE                    | 2.73 | 0.01 | 2.92 | 0.68 | 0.22 | 0.28 |
| 989  | 1 | 189102 | KKWVYNSGRLPRGED                   | 2.70 | 0.01 | 2.92 | 0.68 | 0.22 | 0.28 |
| 990  | 1 | 187068 | KKYENFNDFLKGLR                    | 2.63 | 0.01 | 3.36 | 1.20 | 0.22 | 1.27 |
| 991  | 1 | 186768 | KKYENFNDFLKGLRG                   | 2.70 | 0.01 | 0.90 | 1.20 | 0.22 | 0.85 |
| 992  | 1 | 156900 | KLGDPRITTLF                       | 2.44 | 0.01 | 0.90 | 1.20 | 0.22 | 0.28 |
| 993  | 1 | 113051 | KLGGSQEDQIKNAID                   | 2.68 | 0.01 | 0.78 | 1.20 | 0.22 | 0.85 |
| 994  | 1 | 504006 | KLGTVSYGEEKPAVLGH<br>DEAAYSKNR    | 3.19 | 0.01 | 3.72 | 0.44 | 1.41 | 0.28 |
| 995  | 1 | 31916  | KLILAYTPPGARGPQD                  | 2.73 | 0.01 | 3.67 | 1.12 | 0.22 | 1.34 |
| 996  | 1 | 31920  | KLIPNASLIENCTKAEL                 | 2.82 | 0.01 | 3.89 | 3.15 | 0.22 | 0.28 |
| 997  | 1 | 151667 | KLKLYTGEACRTGDR                   | 2.69 | 0.01 | 0.78 | 1.12 | 0.22 | 0.28 |
| 998  | 1 | 120695 | KLLLDYTGKINPGGWNP<br>ADYGGIK      | 3.13 | 0.01 | 0.90 | 2.04 | 0.22 | 2.02 |
| 999  | 1 | 120696 | KLLLDYTGKINPGGYTCC<br>PD          | 2.95 | 0.01 | 0.90 | 2.04 | 0.22 | 1.57 |
| 1000 | 1 | 120696 | KLLLDYTGKINPGGYTCC<br>PD          | 2.95 | 0.01 | 0.90 | 2.04 | 0.22 | 1.57 |
| 1001 | 1 | 120696 | KLLLDYTGKINPGGYTCC<br>PD          | 2.95 | 0.01 | 0.90 | 2.04 | 0.22 | 1.57 |
| 1002 | 1 | 99387  | KLVFFAEDVGSNKG                    | 2.61 | 0.01 | 0.78 | 2.49 | 0.22 | 1.27 |
| 1003 | 1 | 181922 | KMSWDIGRVWNI                      | 2.45 | 0.01 | 0.90 | 3.15 | 0.22 | 0.28 |
| 1004 | 1 | 117319 | KMTLKNREPQLETLSIR<br>GNRIRY       | 3.11 | 0.01 | 0.78 | 1.12 | 0.22 | 0.28 |
| 1005 | 1 | 113055 | KNAIDKLFVLFGAEI                   | 2.69 | 0.01 | 0.78 | 1.20 | 0.22 | 0.85 |
| 1006 | 1 | 135076 | KNDVVNSQNKTEKTE                   | 2.71 | 0.01 | 3.59 | 2.13 | 0.85 | 0.85 |

|      |   |        |                                                                     |      |      |      |      |      |      |
|------|---|--------|---------------------------------------------------------------------|------|------|------|------|------|------|
| 1007 | 1 | 113577 | KNIVTPRTPPPSQGKG                                                    | 2.74 | 0.01 | 0.78 | 0.44 | 1.13 | 1.27 |
| 1008 | 1 | 113577 | KNIVTPRTPPPSQGKG                                                    | 2.74 | 0.01 | 0.78 | 0.44 | 1.13 | 1.27 |
| 1009 | 1 | 113577 | KNIVTPRTPPPSQGKG                                                    | 2.74 | 0.01 | 0.78 | 0.44 | 1.13 | 1.27 |
| 1010 | 1 | 84584  | KNKIERNHKY                                                          | 2.34 | 0.01 | 3.06 | 0.44 | 0.85 | 0.28 |
| 1011 | 1 | 32536  | KNKLNKKWEQINDHIN<br>NLETNINDYNKKIKEGDS<br>QLNNIQLQCENIEQKINK<br>IKE | 3.97 | 0.01 | 2.22 | 0.44 | 0.85 | 1.34 |
| 1012 | 1 | 32536  | KNKLNKKWEQINDHIN<br>NLETNINDYNKKIKEGDS<br>QLNNIQLQCENIEQKINK<br>IKE | 3.97 | 0.01 | 2.22 | 1.15 | 0.22 | 0.28 |
| 1013 | 1 | 100222 | KNSFSLGENPNANP                                                      | 2.63 | 0.01 | 0.90 | 2.63 | 0.22 | 1.48 |
| 1014 | 1 | 32619  | KNTLTPLEELYPT                                                       | 2.58 | 0.01 | 1.66 | 1.20 | 0.22 | 0.28 |
| 1015 | 1 | 91588  | KNVSINVELYFDAT                                                      | 2.57 | 0.01 | 3.12 | 1.12 | 0.22 | 0.28 |
| 1016 | 1 | 156905 | KPGDPRQ                                                             | 2.02 | 0.01 | 0.90 | 1.20 | 0.22 | 0.28 |
| 1017 | 1 | 156906 | KPGDPRS                                                             | 2.02 | 0.01 | 0.90 | 1.20 | 0.22 | 0.28 |
| 1018 | 1 | 32738  | KPIVQYDNF                                                           | 2.18 | 0.01 | 1.66 | 1.20 | 0.22 | 0.28 |
| 1019 | 1 | 32750  | KPKDELDYENDIEKKICK<br>MEKCSSVFNVVNS                                 | 3.39 | 0.01 | 1.66 | 1.20 | 0.22 | 0.28 |
| 1020 | 1 | 32769  | KPKHKKLKQPGDGNP                                                     | 2.72 | 0.01 | 1.66 | 1.20 | 0.22 | 0.28 |
| 1021 | 1 | 96487  | KPTAPTKPTY                                                          | 2.37 | 0.01 | 2.39 | 0.44 | 1.59 | 0.28 |
| 1022 | 1 | 32901  | KPTKKPTFKTTK                                                        | 2.54 | 0.01 | 2.38 | 0.68 | 0.22 | 0.28 |
| 1023 | 1 | 96489  | KPTPPVKPTA                                                          | 2.37 | 0.01 | 2.39 | 0.44 | 1.59 | 0.28 |
| 1024 | 1 | 32913  | KPTTKQRQNKPP                                                        | 2.50 | 0.01 | 2.38 | 0.68 | 0.22 | 0.28 |
| 1025 | 1 | 189103 | KPVGREKYRHPPEQGV                                                    | 2.76 | 0.01 | 2.92 | 0.68 | 0.22 | 0.28 |
| 1026 | 1 | 32951  | KQAEDKVKASREAKKQV<br>EKALEQLEDKVK                                   | 3.36 | 0.01 | 0.90 | 0.68 | 0.22 | 0.28 |
| 1027 | 1 | 95517  | KQKIIAPA                                                            | 2.16 | 0.01 | 3.48 | 2.59 | 0.22 | 0.28 |
| 1028 | 1 | 95518  | KQKIVAPV                                                            | 2.15 | 0.01 | 2.96 | 2.59 | 0.22 | 0.28 |
| 1029 | 1 | 95519  | KQLLPPSG                                                            | 2.12 | 0.01 | 0.90 | 2.59 | 0.22 | 0.28 |
| 1030 | 1 | 96494  | KQMGQTGGSY                                                          | 2.32 | 0.01 | 2.39 | 0.44 | 0.85 | 0.28 |
| 1031 | 1 | 95521  | KQTLPPSV                                                            | 2.11 | 0.01 | 0.90 | 2.59 | 0.22 | 0.28 |
| 1032 | 1 | 95030  | KRASKEKQENKIFADDI                                                   | 2.81 | 0.01 | 2.26 | 2.36 | 0.22 | 2.02 |
| 1033 | 1 | 181696 | KRFDEGQKFECGNDK                                                     | 2.71 | 0.01 | 1.66 | 0.44 | 0.85 | 1.28 |
| 1034 | 1 | 176044 | KRLEGRSKTWFGAYA                                                     | 2.67 | 0.01 | 2.63 | 1.15 | 0.22 | 0.85 |
| 1035 | 1 | 176044 | KRLEGRSKTWFGAYA                                                     | 2.67 | 0.01 | 2.63 | 1.15 | 0.22 | 0.85 |
| 1036 | 1 | 176044 | KRLEGRSKTWFGAYA                                                     | 2.67 | 0.01 | 2.63 | 1.15 | 0.22 | 0.85 |
| 1037 | 1 | 78712  | KRNGVDVDPNKGKWK<br>EHIKEVTEKLKKAQTE                                 | 3.37 | 0.01 | 3.11 | 1.12 | 0.22 | 1.34 |
| 1038 | 1 | 135475 | KRPKPGGW                                                            | 2.16 | 0.01 | 0.78 | 2.19 | 0.22 | 0.85 |

|      |   |        |                           |      |      |      |      |      |      |
|------|---|--------|---------------------------|------|------|------|------|------|------|
| 1039 | 1 | 95524  | KRQIYTDIEMNRLGK           | 2.65 | 0.01 | 3.89 | 1.15 | 0.22 | 0.85 |
| 1040 | 1 | 95524  | KRQIYTDIEMNRLGK           | 2.65 | 0.01 | 3.89 | 1.15 | 0.22 | 1.27 |
| 1041 | 1 | 95524  | KRQIYTDIEMNRLGK           | 2.65 | 0.01 | 3.89 | 1.15 | 0.22 | 1.34 |
| 1042 | 1 | 84685  | KRVHARMAFT                | 2.31 | 0.01 | 3.06 | 0.44 | 0.85 | 0.28 |
| 1043 | 1 | 110926 | KSEKDSTNNNK               | 2.43 | 0.01 | 3.15 | 0.44 | 1.59 | 0.28 |
| 1044 | 1 | 113587 | KSHGRTQDQDPVVHFF<br>KNIVT | 2.98 | 0.01 | 0.78 | 0.44 | 1.13 | 1.27 |
| 1045 | 1 | 113587 | KSHGRTQDQDPVVHFF<br>KNIVT | 2.98 | 0.01 | 0.78 | 0.44 | 1.13 | 1.27 |
| 1046 | 1 | 113587 | KSHGRTQDQDPVVHFF<br>KNIVT | 2.98 | 0.01 | 0.78 | 0.44 | 1.13 | 1.27 |
| 1047 | 1 | 91600  | KSLNAGLAPETTQATLI         | 2.79 | 0.01 | 3.12 | 1.12 | 0.22 | 0.28 |
| 1048 | 1 | 136443 | KSMINAYLDKHPLMTVR<br>KIH  | 2.92 | 0.01 | 0.90 | 2.74 | 0.22 | 1.48 |
| 1049 | 1 | 177140 | KSNVPPTQDADTK             | 2.55 | 0.01 | 2.22 | 2.69 | 0.22 | 1.48 |
| 1050 | 1 | 174172 | KSSWGAIWRI                | 2.32 | 0.01 | 3.10 | 0.44 | 1.23 | 0.85 |
| 1051 | 1 | 174172 | KSSWGAIWRI                | 2.32 | 0.01 | 3.10 | 0.44 | 1.23 | 0.85 |
| 1052 | 1 | 174172 | KSSWGAIWRI                | 2.32 | 0.01 | 3.10 | 0.44 | 1.23 | 0.85 |
| 1053 | 1 | 174172 | KSSWGAIWRI                | 2.32 | 0.01 | 3.10 | 0.44 | 1.23 | 0.85 |
| 1054 | 1 | 110308 | KTCKQAGTCPPDIIPKVE<br>G   | 2.90 | 0.01 | 1.86 | 0.68 | 0.22 | 1.34 |
| 1055 | 1 | 110308 | KTCKQAGTCPPDIIPKVE<br>G   | 2.90 | 0.01 | 1.86 | 0.68 | 0.22 | 1.34 |
| 1056 | 1 | 110308 | KTCKQAGTCPPDIIPKVE<br>G   | 2.90 | 0.01 | 1.86 | 0.68 | 0.22 | 1.34 |
| 1057 | 1 | 110308 | KTCKQAGTCPPDIIPKVE<br>G   | 2.90 | 0.01 | 1.86 | 0.68 | 0.22 | 1.34 |
| 1058 | 1 | 110308 | KTCKQAGTCPPDIIPKVE<br>G   | 2.90 | 0.01 | 1.86 | 0.68 | 0.22 | 1.34 |
| 1059 | 1 | 110308 | KTCKQAGTCPPDIIPKVE<br>G   | 2.90 | 0.01 | 1.86 | 0.68 | 0.22 | 1.34 |
| 1060 | 1 | 110308 | KTCKQAGTCPPDIIPKVE<br>G   | 2.90 | 0.01 | 1.86 | 0.68 | 0.22 | 1.34 |
| 1061 | 1 | 110308 | KTCKQAGTCPPDIIPKVE<br>G   | 2.90 | 0.01 | 1.86 | 0.68 | 0.22 | 1.34 |
| 1062 | 1 | 110308 | KTCKQAGTCPPDIIPKVE<br>G   | 2.90 | 0.01 | 1.86 | 0.68 | 0.22 | 1.34 |
| 1063 | 1 | 107495 | KTISKAK                   | 2.05 | 0.01 | 0.78 | 0.44 | 1.13 | 0.28 |
| 1064 | 1 | 84789  | KTIVLKAGKN                | 2.32 | 0.01 | 3.06 | 0.44 | 0.85 | 0.28 |
| 1065 | 1 | 98187  | KTKSVKSLPGNKPVP           | 2.72 | 0.01 | 2.71 | 2.78 | 0.22 | 0.28 |
| 1066 | 1 | 122452 | KTTKQSFDSLVSQAQYKK<br>NKH | 2.94 | 0.01 | 0.78 | 0.44 | 1.41 | 0.28 |
| 1067 | 1 | 122452 | KTTKQSFDSLVSQAQYKK<br>NKH | 2.94 | 0.01 | 0.78 | 0.44 | 1.41 | 0.28 |
| 1068 | 1 | 33892  | KTTTKPTKKPTF              | 2.54 | 0.01 | 2.38 | 0.68 | 0.22 | 0.28 |
| 1069 | 1 | 79009  | KTWCDAWCG                 | 2.23 | 0.01 | 3.33 | 2.43 | 0.22 | 0.28 |



|      |   |        |                                                  |      |      |      |      |      |      |
|------|---|--------|--------------------------------------------------|------|------|------|------|------|------|
| 1070 | 1 | 79009  | KTWCDAWCG                                        | 2.23 | 0.01 | 3.33 | 2.43 | 0.22 | 0.28 |
| 1071 | 1 | 137539 | KVKDDELVRVIRPSRS                                 | 2.70 | 0.01 | 3.12 | 0.44 | 1.23 | 0.85 |
| 1072 | 1 | 34137  | KVNGGNLFDVSRVTF                                  | 2.67 | 0.01 | 3.75 | 2.37 | 0.22 | 0.28 |
| 1073 | 1 | 96521  | KVTKEKPTPP                                       | 2.35 | 0.01 | 2.39 | 0.44 | 1.59 | 0.28 |
| 1074 | 1 | 96521  | KVTKEKPTPP                                       | 2.35 | 0.01 | 2.39 | 0.44 | 0.85 | 0.28 |
| 1075 | 1 | 34220  | KVTLHHPITRS                                      | 2.45 | 0.01 | 0.90 | 0.68 | 0.22 | 0.28 |
| 1076 | 1 | 230483 | KVVKALDYEQLQSVK                                  | 2.70 | 0.01 | 0.78 | 0.44 | 1.13 | 0.28 |
| 1077 | 1 | 177515 | KYQISVNKYRGTAGNAL<br>MDG                         | 2.92 | 3.37 | 0.78 | 0.44 | 2.26 | 0.28 |
| 1078 | 1 | 177515 | KYQISVNKYRGTAGNAL<br>MDG                         | 2.92 | 3.37 | 0.78 | 0.44 | 1.13 | 0.28 |
| 1079 | 1 | 182394 | LAANFVVAL                                        | 2.27 | 0.01 | 2.51 | 0.44 | 1.74 | 0.28 |
| 1080 | 1 | 96526  | LAANNPA                                          | 2.05 | 0.01 | 2.24 | 0.68 | 0.22 | 1.48 |
| 1081 | 1 | 96526  | LAANNPA                                          | 2.05 | 0.01 | 2.24 | 0.68 | 0.22 | 1.48 |
| 1082 | 1 | 96526  | LAANNPA                                          | 2.05 | 0.01 | 2.24 | 0.68 | 0.22 | 1.48 |
| 1083 | 1 | 96526  | LAANNPA                                          | 2.05 | 0.01 | 2.24 | 0.68 | 0.22 | 1.48 |
| 1084 | 1 | 120014 | LAAQGARVYA                                       | 2.33 | 0.01 | 0.78 | 1.15 | 0.22 | 0.28 |
| 1085 | 1 | 140878 | LAGKGVDAGKLG                                     | 2.53 | 0.01 | 3.01 | 1.12 | 0.22 | 0.28 |
| 1086 | 1 | 148655 | LALQTLPAMC                                       | 2.34 | 0.01 | 1.86 | 0.44 | 1.23 | 0.85 |
| 1087 | 1 | 142439 | LARLARLGEACG                                     | 2.53 | 0.01 | 0.90 | 0.68 | 0.22 | 0.85 |
| 1088 | 1 | 34963  | LASLCNPKPSDAPVT                                  | 2.69 | 0.01 | 0.90 | 0.44 | 0.85 | 0.28 |
| 1089 | 1 | 496686 | LATLVVNRLRAGFRVCA<br>VKAPGFGDRRKAM               | 3.35 | 0.01 | 2.87 | 0.44 | 1.93 | 2.12 |
| 1090 | 1 | 496688 | LATLVVNSLRGTCLKTCAV<br>KAPGFGDRRKEM              | 3.33 | 0.01 | 4.93 | 0.44 | 1.93 | 2.12 |
| 1091 | 1 | 121527 | LCNEKLLKKARIHPFH                                 | 2.72 | 0.01 | 0.78 | 0.44 | 1.13 | 0.28 |
| 1092 | 1 | 141941 | LCNIHDLHKPHQSKPILT<br>DENDTQRTCS                 | 3.29 | 0.01 | 3.13 | 0.68 | 0.22 | 0.28 |
| 1093 | 1 | 98201  | LCQVVEECCHQNKT                                   | 2.67 | 0.01 | 2.71 | 2.78 | 0.22 | 0.28 |
| 1094 | 1 | 140573 | LCRSACVIYIKYSSA                                  | 2.69 | 0.01 | 3.34 | 3.22 | 0.22 | 1.27 |
| 1095 | 1 | 79284  | LDAVPL                                           | 1.91 | 0.01 | 0.90 | 1.15 | 0.22 | 0.28 |
| 1096 | 1 | 164275 | LDELSGTSSQTHDAIRRK<br>DME                        | 2.97 | 0.01 | 2.74 | 1.20 | 0.22 | 0.28 |
| 1097 | 1 | 107501 | LDGKEYK                                          | 2.02 | 0.01 | 0.78 | 0.44 | 1.13 | 0.28 |
| 1098 | 1 | 118877 | LDVEQLGIPEQEYSC                                  | 2.67 | 0.01 | 0.78 | 1.12 | 0.22 | 2.02 |
| 1099 | 1 | 35453  | LEESQVNDDIFNSLVKSV<br>QQEQQHNV                   | 3.22 | 0.01 | 4.03 | 0.68 | 0.22 | 0.28 |
| 1100 | 1 | 35453  | LEESQVNDDIFNSLVKSV<br>QQEQQHNV                   | 3.22 | 0.01 | 4.03 | 2.25 | 0.22 | 0.28 |
| 1101 | 1 | 35453  | LEESQVNDDIFNSLVKSV<br>QQEQQHNV                   | 3.22 | 0.01 | 4.03 | 2.46 | 0.22 | 0.28 |
| 1102 | 1 | 35453  | LEESQVNDDIFNSLVKSV<br>QQEQQHNV                   | 3.22 | 0.01 | 4.03 | 2.82 | 0.22 | 0.28 |
| 1103 | 1 | 117977 | LEKDEREQLRILGEKEAK<br>LAQQSQALQELISELDRR<br>CHSS | 3.65 | 0.01 | 0.78 | 0.44 | 1.13 | 0.28 |

|      |   |        |                            |      |      |      |      |      |      |
|------|---|--------|----------------------------|------|------|------|------|------|------|
|      |   |        | LEKDEREQLRILGEKEAK         |      |      |      |      |      |      |
| 1104 | 1 | 117977 | LAQQSQALQELISELDRR<br>CHSS | 3.65 | 0.01 | 0.78 | 0.44 | 1.13 | 0.28 |
| 1105 | 1 | 35628  | LENLMWKQI                  | 2.22 | 0.01 | 2.87 | 1.20 | 0.22 | 0.28 |
| 1106 | 1 | 117980 | LEPSIPWKSLL                | 2.50 | 0.01 | 2.04 | 0.44 | 2.82 | 0.28 |
| 1107 | 1 | 121542 | LFKPPKYHPDVPYVKR           | 2.76 | 0.01 | 0.78 | 0.44 | 1.13 | 0.28 |
| 1108 | 1 | 121542 | LFKPPKYHPDVPYVKR           | 2.76 | 0.01 | 0.78 | 0.44 | 1.41 | 0.28 |
| 1109 | 1 | 121542 | LFKPPKYHPDVPYVKR           | 2.76 | 0.01 | 0.78 | 0.44 | 1.41 | 1.27 |
| 1110 | 1 | 121542 | LFKPPKYHPDVPYVKR           | 2.76 | 0.01 | 0.78 | 0.44 | 1.13 | 0.28 |
| 1111 | 1 | 121542 | LFKPPKYHPDVPYVKR           | 2.76 | 0.01 | 0.78 | 0.44 | 1.13 | 0.28 |
| 1112 | 1 | 121542 | LFKPPKYHPDVPYVKR           | 2.76 | 0.01 | 0.78 | 0.44 | 1.13 | 0.28 |
| 1113 | 1 | 134132 | LFKPPKYHPDVPYVKRV<br>KT    | 2.92 | 0.01 | 0.78 | 0.44 | 1.41 | 1.27 |
| 1114 | 1 | 420644 | LFWQYFVGKRTVPPGEC          | 2.75 | 0.01 | 0.78 | 0.44 | 1.13 | 0.28 |
| 1115 | 1 | 167618 | LHPGSVNEFD                 | 2.26 | 0.01 | 3.18 | 0.44 | 0.85 | 1.28 |
| 1116 | 1 | 167618 | LHPGSVNEFD                 | 2.26 | 0.01 | 3.18 | 0.44 | 0.85 | 1.28 |
| 1117 | 1 | 167619 | LHPGSVNEFDF                | 2.36 | 0.01 | 3.18 | 0.44 | 0.85 | 1.28 |
| 1118 | 1 | 167619 | LHPGSVNEFDF                | 2.36 | 0.01 | 3.18 | 0.44 | 0.85 | 1.28 |
| 1119 | 1 | 111486 | LIEESAIINAGAP              | 2.55 | 0.01 | 3.25 | 0.68 | 0.22 | 0.28 |
| 1120 | 1 | 111486 | LIEESAIINAGAP              | 2.55 | 0.01 | 3.25 | 0.68 | 0.22 | 0.28 |
| 1121 | 1 | 111486 | LIEESAIINAGAP              | 2.55 | 0.01 | 3.25 | 0.68 | 0.22 | 0.28 |
| 1122 | 1 | 111486 | LIEESAIINAGAP              | 2.55 | 0.01 | 3.03 | 0.68 | 0.22 | 0.28 |
| 1123 | 1 | 111486 | LIEESAIINAGAP              | 2.55 | 0.01 | 3.03 | 0.68 | 0.22 | 0.28 |
| 1124 | 1 | 111486 | LIEESAIINAGAP              | 2.55 | 0.01 | 3.03 | 0.68 | 0.22 | 0.28 |
| 1125 | 1 | 111486 | LIEESAIINAGAP              | 2.55 | 0.01 | 3.03 | 0.68 | 0.22 | 0.28 |
| 1126 | 1 | 111486 | LIEESAIINAGAP              | 2.55 | 0.01 | 3.25 | 0.68 | 0.22 | 0.28 |
| 1127 | 1 | 111486 | LIEESAIINAGAP              | 2.55 | 0.01 | 3.25 | 0.68 | 0.22 | 0.28 |
| 1128 | 1 | 111486 | LIEESAIINAGAP              | 2.55 | 0.01 | 3.03 | 0.68 | 0.22 | 0.28 |
| 1129 | 1 | 111486 | LIEESAIINAGAP              | 2.55 | 0.01 | 3.25 | 1.20 | 0.22 | 1.34 |
| 1130 | 1 | 111486 | LIEESAIINAGAP              | 2.55 | 0.01 | 3.03 | 1.20 | 0.22 | 1.34 |
| 1131 | 1 | 111486 | LIEESAIINAGAP              | 2.55 | 0.01 | 3.25 | 1.20 | 0.22 | 1.34 |
| 1132 | 1 | 111486 | LIEESAIINAGAP              | 2.55 | 0.01 | 3.03 | 1.20 | 0.22 | 1.34 |
| 1133 | 1 | 104039 | LIKCDERGMIPSDLERRI<br>L    | 2.96 | 0.01 | 0.78 | 3.89 | 1.13 | 0.28 |
| 1134 | 1 | 36584  | LIKTSPRSERYA               | 2.45 | 0.01 | 0.90 | 0.44 | 1.23 | 0.28 |
| 1135 | 1 | 153850 | LIRCINCQKPLCPEEKQR<br>HL   | 2.97 | 0.01 | 1.86 | 2.37 | 0.22 | 0.28 |
| 1136 | 1 | 36693  | LIRNAQGFYLST               | 2.44 | 0.01 | 0.90 | 0.68 | 0.22 | 0.28 |
| 1137 | 1 | 117324 | LKCGVNLPLYT                | 2.30 | 0.01 | 1.86 | 0.44 | 1.23 | 0.85 |

|      |   |        |                                |      |      |      |      |      |      |
|------|---|--------|--------------------------------|------|------|------|------|------|------|
| 1138 | 1 | 141947 | LKEEEKEVVRLMVIKLLK<br>KNKL     | 3.09 | 0.01 | 3.13 | 0.68 | 0.22 | 0.28 |
| 1139 | 1 | 36891  | LKIKIASGFGPLITHGSG<br>MDLYK    | 3.08 | 0.01 | 2.72 | 1.12 | 0.22 | 0.28 |
| 1140 | 1 | 96566  | LKIVSPMVVK                     | 2.32 | 0.01 | 2.39 | 0.44 | 0.85 | 0.28 |
| 1141 | 1 | 104040 | LKKMREIIGWPGGSGD<br>GIFS       | 2.93 | 0.01 | 0.78 | 3.89 | 1.13 | 0.28 |
| 1142 | 1 | 36940  | LKLKSIVSWAKKVL                 | 2.66 | 0.01 | 4.33 | 0.68 | 0.22 | 0.28 |
| 1143 | 1 | 96567  | LKNGVVIKSG                     | 2.32 | 0.01 | 2.39 | 0.44 | 0.85 | 0.28 |
| 1144 | 1 | 141948 | LKPREEYQPS                     | 2.30 | 0.01 | 3.13 | 0.68 | 0.22 | 0.28 |
| 1145 | 1 | 98220  | LKSLVLGGRKAVKQG                | 2.72 | 0.01 | 2.71 | 2.78 | 0.22 | 0.28 |
| 1146 | 1 | 37031  | LKTFGEWRERV                    | 2.48 | 0.01 | 3.61 | 1.20 | 0.22 | 0.85 |
| 1147 | 1 | 226063 | LKYNPSRVEAFHRYGTT<br>VNC       | 2.89 | 0.01 | 2.40 | 1.12 | 0.22 | 0.85 |
| 1148 | 1 | 226063 | LKYNPSRVEAFHRYGTT<br>VNC       | 2.89 | 0.01 | 2.40 | 1.12 | 0.22 | 0.85 |
| 1149 | 1 | 226063 | LKYNPSRVEAFHRYGTT<br>VNC       | 2.89 | 0.01 | 2.40 | 1.12 | 0.22 | 0.85 |
| 1150 | 1 | 117569 | LKYYLAPKIEDEEGS                | 2.67 | 0.01 | 0.78 | 1.12 | 0.22 | 1.48 |
| 1151 | 1 | 117569 | LKYYLAPKIEDEEGS                | 2.67 | 0.01 | 0.78 | 1.12 | 0.22 | 2.02 |
| 1152 | 1 | 99425  | LLDAIDKIADDWDNR                | 2.70 | 0.01 | 2.86 | 2.02 | 0.85 | 0.85 |
| 1153 | 1 | 120070 | LLDQRLALQW                     | 2.35 | 0.01 | 0.78 | 1.15 | 0.22 | 0.28 |
| 1154 | 1 | 167775 | LLETHPLYQ                      | 2.23 | 0.01 | 2.40 | 2.43 | 0.22 | 0.28 |
| 1155 | 1 | 238708 | LLTLVVVTIMCLDL                 | 2.71 | 0.01 | 2.56 | 2.02 | 0.22 | 0.85 |
| 1156 | 1 | 238709 | LLTLVVVTIVCLDF                 | 2.71 | 0.01 | 2.56 | 2.02 | 0.22 | 0.85 |
| 1157 | 1 | 37660  | LLPHSNLDHILEPSIPWK<br>SK       | 2.97 | 0.01 | 2.04 | 2.82 | 0.22 | 0.28 |
| 1158 | 1 | 37660  | LLPHSNLDHILEPSIPWK<br>SK       | 2.97 | 0.01 | 2.04 | 2.82 | 0.22 | 0.28 |
| 1159 | 1 | 37660  | LLPHSNLDHILEPSIPWK<br>SK       | 2.97 | 0.01 | 2.04 | 1.81 | 0.22 | 0.28 |
| 1160 | 1 | 37660  | LLPHSNLDHILEPSIPWK<br>SK       | 2.97 | 0.01 | 2.04 | 1.81 | 0.22 | 0.28 |
| 1161 | 1 | 37755  | LLRRQVNEVA                     | 2.31 | 0.01 | 2.24 | 1.12 | 0.22 | 0.85 |
| 1162 | 1 | 37797  | LLSKDKEIEEKNNKKIKELN<br>NDIKKL | 3.22 | 0.01 | 2.22 | 0.44 | 0.85 | 1.34 |
| 1163 | 1 | 137923 | LMDAAVDVVFADG                  | 2.51 | 0.01 | 2.21 | 0.44 | 0.85 | 0.28 |
| 1164 | 1 | 137923 | LMDAAVDVVFADG                  | 2.51 | 0.01 | 2.21 | 1.20 | 0.22 | 0.28 |
| 1165 | 1 | 38113  | LMRTSTGQLLRP                   | 2.49 | 0.01 | 0.90 | 0.68 | 0.22 | 0.28 |
| 1166 | 1 | 120077 | LMRYWANFAR                     | 2.31 | 0.01 | 0.78 | 2.66 | 0.22 | 0.28 |
| 1167 | 1 | 120077 | LMRYWANFAR                     | 2.31 | 0.01 | 0.78 | 1.15 | 0.22 | 0.28 |
| 1168 | 1 | 38174  | LNAQDDFSSTPITMNYN<br>QFL       | 2.94 | 0.01 | 2.18 | 0.68 | 0.22 | 0.28 |
| 1169 | 1 | 446274 | LNNTTRPPQGNWFGCT               | 2.67 | 0.01 | 1.96 | 0.68 | 0.22 | 1.34 |
| 1170 | 1 | 38313  | LNPTIA                         | 1.88 | 0.01 | 3.16 | 0.68 | 0.22 | 0.28 |
| 1171 | 1 | 38313  | LNPTIA                         | 1.88 | 0.01 | 2.40 | 2.52 | 0.22 | 0.28 |

|      |   |        |                                                         |      |      |      |      |      |      |
|------|---|--------|---------------------------------------------------------|------|------|------|------|------|------|
| 1172 | 1 | 38349  | LNTGWLAGLFYHHKF                                         | 2.68 | 0.01 | 2.41 | 2.37 | 0.22 | 0.28 |
| 1173 | 1 | 107511 | LPAPIEK                                                 | 2.02 | 0.01 | 0.78 | 0.44 | 1.13 | 0.28 |
| 1174 | 1 | 115628 | LPCRISPGKNAT                                            | 2.43 | 0.01 | 0.78 | 0.44 | 1.13 | 0.28 |
| 1175 | 1 | 38505  | LP GKCGVNVYPYKIST                                       | 2.66 | 0.01 | 3.35 | 1.12 | 0.22 | 0.85 |
| 1176 | 1 | 38523  | LPHSNLDHILEPSIPWKS<br>K                                 | 2.93 | 0.01 | 2.04 | 2.42 | 0.22 | 0.28 |
| 1177 | 1 | 38523  | LPHSNLDHILEPSIPWKS<br>K                                 | 2.93 | 0.01 | 2.04 | 4.15 | 0.22 | 0.28 |
| 1178 | 1 | 38524  | LPHSNLDHILEPSIPWKS<br>KLLTLV                            | 3.14 | 0.01 | 2.04 | 0.44 | 2.98 | 0.28 |
| 1179 | 1 | 38524  | LPHSNLDHILEPSIPWKS<br>KLLTLV                            | 3.14 | 0.01 | 2.04 | 0.44 | 0.85 | 0.28 |
| 1180 | 1 | 38524  | LPHSNLDHILEPSIPWKS<br>KLLTLV                            | 3.14 | 0.01 | 2.04 | 0.44 | 2.82 | 0.28 |
| 1181 | 1 | 131957 | LPLHAVEKTGRPGQPAL<br>KMPGKLRS DAGLES DTA<br>MKKGETLRKQI | 3.76 | 0.01 | 0.78 | 1.20 | 0.22 | 0.85 |
| 1182 | 1 | 38582  | LPLPLLQSWM                                              | 2.35 | 0.01 | 1.60 | 0.44 | 1.23 | 0.85 |
| 1183 | 1 | 38582  | LPLPLLQSWM                                              | 2.35 | 0.01 | 1.60 | 0.44 | 1.23 | 0.85 |
| 1184 | 1 | 121581 | LP MIWAQKT NTP                                          | 2.45 | 0.01 | 0.78 | 0.44 | 1.13 | 0.28 |
| 1185 | 1 | 38609  | LP NWVKVWDRATNKC                                        | 2.66 | 0.01 | 2.56 | 0.68 | 0.22 | 0.85 |
| 1186 | 1 | 38609  | LP NWVKVWDRATNKC                                        | 2.66 | 0.01 | 2.56 | 2.52 | 0.22 | 0.85 |
| 1187 | 1 | 104049 | LPPKLLTEPTTEGDQH PG<br>T                                | 2.93 | 0.01 | 3.00 | 1.20 | 0.22 | 0.28 |
| 1188 | 1 | 95566  | LPPSVPNL                                                | 2.17 | 0.01 | 0.90 | 2.22 | 0.22 | 0.28 |
| 1189 | 1 | 104051 | LP SDPIGGKSNMHFMN<br>TL                                 | 2.83 | 0.01 | 3.00 | 1.20 | 0.22 | 0.28 |
| 1190 | 1 | 98229  | LP SLAGWWSSASDWF                                        | 2.72 | 0.01 | 2.71 | 2.78 | 0.22 | 0.28 |
| 1191 | 1 | 98231  | LP YSQPQ PFRPQQPY PQ<br>PQPQ                            | 3.06 | 0.01 | 1.86 | 0.44 | 1.93 | 0.28 |
| 1192 | 1 | 95118  | LQFHHHDPQAGKM PR<br>WVRVI                               | 2.90 | 0.01 | 2.25 | 2.04 | 0.22 | 0.28 |
| 1193 | 1 | 95570  | LQNDPT                                                  | 1.88 | 0.01 | 2.40 | 2.52 | 0.22 | 0.28 |
| 1194 | 1 | 148679 | LQQQLVPQLQ                                              | 2.37 | 0.01 | 1.86 | 0.44 | 1.23 | 0.85 |
| 1195 | 1 | 38973  | LQRFNQRSPQLQNL R                                        | 2.73 | 0.01 | 2.72 | 2.13 | 0.22 | 0.85 |
| 1196 | 1 | 95571  | LQVLAQKV                                                | 2.17 | 0.01 | 2.96 | 2.22 | 0.22 | 0.28 |
| 1197 | 1 | 39024  | LQYTPSWMLV                                              | 2.30 | 0.01 | 0.90 | 0.68 | 0.22 | 0.28 |
| 1198 | 1 | 509274 | LRDFIAKWKSDDLIRPY<br>VNQS                               | 3.00 | 0.01 | 3.75 | 0.68 | 0.22 | 0.28 |
| 1199 | 1 | 509275 | LRDFIEKWKGDDHLIRPY<br>VNQS                              | 2.98 | 0.01 | 3.75 | 2.49 | 1.59 | 0.28 |
| 1200 | 1 | 509275 | LRDFIEKWKGDDHLIRPY<br>VNQS                              | 2.98 | 0.01 | 3.75 | 0.68 | 0.22 | 0.28 |

|      |   |        |                                                 |      |      |      |      |      |      |
|------|---|--------|-------------------------------------------------|------|------|------|------|------|------|
| 1201 | 1 | 509276 | LRDFIEKWKSDDDLIRPY<br>VNQS                      | 3.00 | 0.01 | 3.75 | 2.49 | 1.59 | 0.28 |
| 1202 | 1 | 509278 | LRDFITKWKGGDDLIRPY<br>VNQS                      | 2.98 | 0.01 | 3.75 | 2.49 | 1.59 | 0.28 |
| 1203 | 1 | 236433 | LRESEGSTYLMDKLFKKL<br>SE                        | 2.96 | 0.01 | 0.90 | 0.68 | 0.22 | 1.48 |
| 1204 | 1 | 117328 | LRGIARGIHN                                      | 2.33 | 0.01 | 1.86 | 0.44 | 1.23 | 0.85 |
| 1205 | 1 | 156371 | LRKVGDSVKAASKE                                  | 2.62 | 0.01 | 2.73 | 0.44 | 0.85 | 1.28 |
| 1206 | 1 | 118004 | LRLSHLKPS                                       | 2.26 | 0.01 | 0.78 | 0.44 | 1.13 | 0.28 |
| 1207 | 1 | 136855 | LRPASAWTL                                       | 2.24 | 0.01 | 3.81 | 0.68 | 0.22 | 0.28 |
| 1208 | 1 | 120084 | LRQQWIDVRLRWNPAD                                | 2.75 | 0.01 | 2.26 | 3.65 | 0.22 | 1.57 |
| 1209 | 1 | 120084 | LRQQWIDVRLRWNPAD                                | 2.75 | 0.01 | 2.26 | 2.25 | 0.22 | 1.57 |
| 1210 | 1 | 134151 | LRRVIGD                                         | 2.01 | 0.01 | 0.78 | 0.44 | 1.41 | 1.27 |
| 1211 | 1 | 134152 | LRRVLLP                                         | 2.05 | 0.01 | 0.78 | 0.44 | 1.41 | 1.27 |
| 1212 | 1 | 134153 | LRRVLLPLIFRNVEL                                 | 2.72 | 0.01 | 0.78 | 0.44 | 1.41 | 1.27 |
| 1213 | 1 | 39213  | LRSPNGFLLTDQ                                    | 2.45 | 0.01 | 0.90 | 0.68 | 0.22 | 0.28 |
| 1214 | 1 | 39251  | LRYGNVLDVN                                      | 2.34 | 0.01 | 3.41 | 0.68 | 0.22 | 0.28 |
| 1215 | 1 | 135576 | LRYSTGTVSG                                      | 2.33 | 0.01 | 0.78 | 1.12 | 0.22 | 1.34 |
| 1216 | 1 | 135576 | LRYSTGTVSG                                      | 2.33 | 0.01 | 0.78 | 1.12 | 0.22 | 0.28 |
| 1217 | 1 | 137928 | LSADFTPGTEYT                                    | 2.45 | 0.01 | 2.21 | 0.44 | 0.85 | 0.28 |
| 1218 | 1 | 137928 | LSADFTPGTEYT                                    | 2.45 | 0.01 | 2.21 | 1.20 | 0.22 | 0.28 |
| 1219 | 1 | 225635 | LSDDVEGARAAAAQQL<br>SFYETIPSYRNVIAREGLS<br>NAVE | 3.60 | 0.01 | 2.51 | 2.00 | 0.85 | 0.28 |
| 1220 | 1 | 104054 | LSGVERANSVTWNPHK<br>MMGV                        | 2.90 | 0.01 | 0.78 | 3.89 | 1.13 | 0.28 |
| 1221 | 1 | 108019 | LSQPKIVKWDR                                     | 2.36 | 0.01 | 0.78 | 1.15 | 0.22 | 0.28 |
| 1222 | 1 | 108019 | LSQPKIVKWDR                                     | 2.36 | 0.01 | 0.78 | 1.20 | 0.22 | 0.28 |
| 1223 | 1 | 108019 | LSQPKIVKWDR                                     | 2.36 | 0.01 | 0.78 | 1.15 | 0.22 | 0.28 |
| 1224 | 1 | 108019 | LSQPKIVKWDR                                     | 2.36 | 0.01 | 0.78 | 3.03 | 0.22 | 1.27 |
| 1225 | 1 | 232548 | LSTHTKLNKADIQMP                                 | 2.65 | 0.01 | 0.90 | 2.22 | 0.85 | 0.28 |
| 1226 | 1 | 125492 | LSYPSHCCAFKNQKKIRG<br>IL                        | 2.90 | 0.01 | 0.78 | 0.44 | 1.13 | 0.28 |
| 1227 | 1 | 104057 | LTEPTTEGDQHPGTLPA<br>ANT                        | 2.97 | 0.01 | 3.00 | 1.20 | 0.22 | 0.28 |
| 1228 | 1 | 39998  | LTKSGSTYPVLNVT                                  | 2.64 | 0.01 | 3.27 | 0.68 | 0.22 | 1.57 |
| 1229 | 1 | 39998  | LTKSGSTYPVLNVT                                  | 2.64 | 0.01 | 3.27 | 0.68 | 0.22 | 1.57 |
| 1230 | 1 | 98239  | LTLVPAVVGK                                      | 2.33 | 0.01 | 3.08 | 1.20 | 0.22 | 0.28 |
| 1231 | 1 | 153419 | LTPPPWQNPFPFGGS                                 | 2.73 | 0.01 | 0.90 | 0.68 | 0.22 | 1.27 |
| 1232 | 1 | 446506 | LTPTLAARNASVPTTTIR<br>RH                        | 2.96 | 0.01 | 1.96 | 0.68 | 0.22 | 1.34 |
| 1233 | 1 | 114463 | LTSRPAHG                                        | 2.10 | 0.01 | 2.24 | 0.44 | 0.85 | 0.28 |
| 1234 | 1 | 189119 | LVADHSLLSIHSKVK                                 | 2.78 | 0.01 | 2.92 | 0.68 | 0.22 | 0.28 |
| 1235 | 1 | 97484  | LVEETSFIDAGAP                                   | 2.50 | 0.01 | 1.86 | 0.68 | 0.22 | 0.28 |

|      |   |        |                                    |      |      |      |      |      |      |
|------|---|--------|------------------------------------|------|------|------|------|------|------|
| 1236 | 1 | 97484  | LVEETSFIDAGAP                      | 2.50 | 0.01 | 1.86 | 0.68 | 0.22 | 0.28 |
| 1237 | 1 | 97484  | LVEETSFIDAGAP                      | 2.50 | 0.01 | 1.86 | 0.68 | 0.22 | 0.28 |
| 1238 | 1 | 97484  | LVEETSFIDAGAP                      | 2.50 | 0.01 | 1.86 | 0.68 | 0.22 | 0.28 |
| 1239 | 1 | 97484  | LVEETSFIDAGAP                      | 2.50 | 0.01 | 1.86 | 0.68 | 0.22 | 0.28 |
| 1240 | 1 | 97484  | LVEETSFIDAGAP                      | 2.50 | 0.01 | 1.86 | 0.68 | 0.22 | 0.28 |
| 1241 | 1 | 97484  | LVEETSFIDAGAP                      | 2.50 | 0.01 | 1.86 | 0.68 | 0.22 | 0.28 |
| 1242 | 1 | 97484  | LVEETSFIDAGAP                      | 2.50 | 0.01 | 1.86 | 0.68 | 0.22 | 0.28 |
| 1243 | 1 | 97484  | LVEETSFIDAGAP                      | 2.50 | 0.01 | 1.86 | 0.68 | 0.22 | 1.34 |
| 1244 | 1 | 97484  | LVEETSFIDAGAP                      | 2.50 | 0.01 | 1.86 | 0.68 | 0.22 | 1.34 |
| 1245 | 1 | 97484  | LVEETSFIDAGAP                      | 2.50 | 0.01 | 1.86 | 1.20 | 0.22 | 1.34 |
| 1246 | 1 | 118902 | LVFEAPNQEKVSDYE                    | 2.64 | 0.01 | 0.78 | 1.12 | 0.22 | 2.02 |
| 1247 | 1 | 98240  | LVPVVGKPG                          | 2.34 | 0.01 | 3.08 | 1.20 | 0.22 | 0.28 |
| 1248 | 1 | 40541  | LVQLTLQSTNYTCIVCID<br>RASLST       | 3.14 | 0.01 | 2.04 | 0.44 | 0.85 | 0.28 |
| 1249 | 1 | 40563  | LVRMKRA                            | 2.02 | 0.01 | 3.37 | 0.68 | 0.22 | 0.28 |
| 1250 | 1 | 40566  | LVRSDYKFYEDANGTRD<br>HKKGRHT       | 3.10 | 0.01 | 3.10 | 3.63 | 0.22 | 1.66 |
| 1251 | 1 | 187016 | LVSRLKMRGQAF                       | 2.54 | 0.01 | 2.96 | 1.20 | 0.22 | 0.28 |
| 1252 | 1 | 187016 | LVSRLKMRGQAF                       | 2.54 | 0.01 | 2.96 | 1.20 | 0.22 | 0.28 |
| 1253 | 1 | 187016 | LVSRLKMRGQAF                       | 2.54 | 0.01 | 2.96 | 1.20 | 0.22 | 0.28 |
| 1254 | 1 | 227806 | LYFGGVVTLCFGLSLNH<br>GVLVVGFNRQAKP | 3.33 | 0.01 | 3.47 | 0.68 | 0.22 | 0.28 |
| 1255 | 1 | 522367 | LYHPAPSSLPQPGYQPP                  | 2.82 | 0.01 | 0.90 | 2.49 | 0.85 | 0.28 |
| 1256 | 1 | 118011 | LYKEKALS                           | 2.15 | 0.01 | 0.78 | 0.44 | 1.13 | 0.28 |
| 1257 | 1 | 102643 | MASPGSGFWSFG                       | 2.51 | 0.01 | 0.78 | 0.44 | 1.13 | 0.28 |
| 1258 | 1 | 41184  | MCELNVMENNMNNIH<br>SNNNNISTHMDDVIE | 3.36 | 0.01 | 2.22 | 0.44 | 0.85 | 1.34 |
| 1259 | 1 | 41184  | MCELNVMENNMNNIH<br>SNNNNISTHMDDVIE | 3.36 | 0.01 | 2.22 | 1.15 | 0.22 | 0.28 |
| 1260 | 1 | 153420 | MDWINPFPNFNSGGGS                   | 2.75 | 0.01 | 0.90 | 0.68 | 0.22 | 1.27 |
| 1261 | 1 | 140053 | MEDDYNLKDMSRAVT<br>M               | 2.76 | 0.01 | 0.90 | 1.20 | 0.22 | 0.28 |
| 1262 | 1 | 113091 | MESALDQLKQFTTVV                    | 2.63 | 0.01 | 0.78 | 1.20 | 0.22 | 0.85 |
| 1263 | 1 | 113645 | MEVGWYRSPFSRVVHL<br>YRNGK          | 2.96 | 0.01 | 1.75 | 1.81 | 2.25 | 1.75 |
| 1264 | 1 | 153856 | MFQDPQER                           | 2.12 | 0.01 | 1.86 | 1.12 | 0.22 | 0.28 |
| 1265 | 1 | 125498 | MGCSSPPCECHQEEDFR<br>VTC           | 2.91 | 0.01 | 0.78 | 1.20 | 0.22 | 0.28 |
| 1266 | 1 | 125498 | MGCSSPPCECHQEEDFR<br>VTC           | 2.91 | 0.01 | 0.78 | 0.68 | 0.22 | 0.28 |
| 1267 | 1 | 125498 | MGCSSPPCECHQEEDFR<br>VTC           | 2.91 | 0.01 | 0.78 | 0.68 | 0.22 | 0.28 |

|      |   |        |                                                    |      |      |      |      |      |      |
|------|---|--------|----------------------------------------------------|------|------|------|------|------|------|
| 1268 | 1 | 125498 | MGCSSPPCECHQEEDFR<br>VTC                           | 2.91 | 0.01 | 0.78 | 0.68 | 0.22 | 0.28 |
| 1269 | 1 | 125498 | MGCSSPPCECHQEEDFR<br>VTC                           | 2.91 | 0.01 | 0.78 | 3.06 | 0.22 | 0.28 |
| 1270 | 1 | 125498 | MGCSSPPCECHQEEDFR<br>VTC                           | 2.91 | 0.01 | 0.78 | 1.20 | 0.22 | 0.28 |
| 1271 | 1 | 123493 | MGNSKSGALSKEILEELQ<br>LNTKFTEEEEL                  | 3.28 | 0.01 | 1.60 | 2.04 | 0.22 | 0.28 |
| 1272 | 1 | 496786 | MHTFLYNKIQGRISGCA<br>VKAPGFGDMRINQ                 | 3.30 | 0.01 | 3.40 | 0.44 | 1.93 | 2.12 |
| 1273 | 1 | 186697 | MHTNYCRTCFLS                                       | 2.45 | 0.01 | 0.90 | 0.68 | 0.22 | 1.39 |
| 1274 | 1 | 186697 | MHTNYCRTCFLS                                       | 2.45 | 0.01 | 0.90 | 0.68 | 0.22 | 0.28 |
| 1275 | 1 | 104113 | MHVDAAWGGGLLMSR<br>KHKWK                           | 2.94 | 0.01 | 0.78 | 3.89 | 1.13 | 0.28 |
| 1276 | 1 | 182398 | MIAVALAGL                                          | 2.25 | 0.01 | 2.51 | 0.44 | 1.74 | 0.28 |
| 1277 | 1 | 172362 | MIIVSSCAV                                          | 2.23 | 0.01 | 0.78 | 0.44 | 1.74 | 0.28 |
| 1278 | 1 | 118021 | MKCGMWGRA                                          | 2.24 | 0.01 | 0.78 | 0.44 | 1.13 | 0.28 |
| 1279 | 1 | 95119  | MKKPGENIKPLSCKYSYP<br>KH                           | 2.94 | 0.01 | 2.25 | 2.04 | 0.22 | 1.27 |
| 1280 | 1 | 95119  | MKKPGENIKPLSCKYSYP<br>KH                           | 2.94 | 0.01 | 2.25 | 2.04 | 0.22 | 1.27 |
| 1281 | 1 | 95119  | MKKPGENIKPLSCKYSYP<br>KH                           | 2.94 | 0.01 | 2.25 | 2.04 | 0.22 | 1.27 |
| 1282 | 1 | 225433 | MKLFAFIFICVKSCSLLF                                 | 2.88 | 0.01 | 2.61 | 0.68 | 0.22 | 0.28 |
| 1283 | 1 | 225433 | MKLFAFIFICVKSCSLLF                                 | 2.88 | 0.01 | 2.61 | 0.68 | 0.22 | 0.28 |
| 1284 | 1 | 117331 | MKLVRFMLKLSHETVTIE<br>LK                           | 2.97 | 0.01 | 0.78 | 1.12 | 0.22 | 0.28 |
| 1285 | 1 | 117331 | MKLVRFMLKLSHETVTIE<br>LK                           | 2.97 | 0.01 | 1.75 | 2.84 | 1.13 | 0.28 |
| 1286 | 1 | 238768 | MKTLLTLVVVTIMC                                     | 2.71 | 0.01 | 2.56 | 2.02 | 0.22 | 0.85 |
| 1287 | 1 | 98251  | MLGRCLTAGCCSRLL                                    | 2.69 | 0.01 | 2.71 | 2.78 | 0.22 | 0.28 |
| 1288 | 1 | 118520 | MLKNAPMLKSMKNKN<br>QGSAGARGKAAILKAQ                | 3.41 | 0.01 | 0.78 | 0.44 | 1.13 | 0.28 |
| 1289 | 1 | 42057  | MLSHLYVSSKDKENISKE<br>NDDVLDEKEEEAEETEEE<br>ELEEKN | 3.69 | 0.01 | 2.22 | 0.44 | 1.59 | 0.28 |
| 1290 | 1 | 42057  | MLSHLYVSSKDKENISKE<br>NDDVLDEKEEEAEETEEE<br>ELEEKN | 3.69 | 0.01 | 2.22 | 0.44 | 1.59 | 1.34 |
| 1291 | 1 | 104118 | MMIARFKMFPEVKEKG<br>MAAL                           | 2.95 | 0.01 | 0.78 | 3.89 | 1.13 | 0.28 |
| 1292 | 1 | 446644 | MMMWNWSPTTALVVSQ<br>LLRIP                          | 2.91 | 0.01 | 1.96 | 0.68 | 0.22 | 1.34 |

|      |   |        |                    |      |      |      |      |      |      |
|------|---|--------|--------------------|------|------|------|------|------|------|
| 1293 | 1 | 420647 | MNRWALGNLACDLWL    | 2.70 | 0.01 | 0.78 | 0.44 | 1.13 | 0.28 |
| 1294 | 1 | 238772 | MNTLLTLVVVTIVC     | 2.71 | 0.01 | 2.56 | 2.02 | 0.22 | 0.85 |
|      |   |        | MNYTGNQQSRWGLGS    |      |      |      |      |      |      |
| 1295 | 1 | 42252  | PNCHGPDWASPVCQR    | 3.39 | 0.01 | 3.16 | 0.68 | 0.22 | 0.28 |
|      |   |        | HS                 |      |      |      |      |      |      |
|      |   |        | MNYTGNQQSRWGLGS    |      |      |      |      |      |      |
| 1296 | 1 | 42252  | PNCHGPDWASPVCQR    | 3.39 | 0.01 | 3.16 | 0.68 | 0.22 | 0.28 |
|      |   |        | HS                 |      |      |      |      |      |      |
|      |   |        | MNYTGNQQSRWGLGS    |      |      |      |      |      |      |
| 1297 | 1 | 42252  | PNCHGPDWASPVCQR    | 3.39 | 0.01 | 3.16 | 0.68 | 0.22 | 0.28 |
|      |   |        | HS                 |      |      |      |      |      |      |
|      |   |        | MNYTGNQQSRWGLGS    |      |      |      |      |      |      |
| 1298 | 1 | 42252  | PNCHGPDWASPVCQR    | 3.39 | 0.01 | 3.16 | 0.68 | 0.22 | 0.28 |
|      |   |        | HS                 |      |      |      |      |      |      |
|      |   |        | MNYTGNQQSRWGLGS    |      |      |      |      |      |      |
| 1299 | 1 | 42252  | PNCHGPDWASPVCQR    | 3.39 | 0.01 | 3.16 | 0.68 | 0.22 | 0.28 |
|      |   |        | HS                 |      |      |      |      |      |      |
|      |   |        | MNYTGNQQSRWGLGS    |      |      |      |      |      |      |
| 1300 | 1 | 42252  | PNCHGPDWASPVCQR    | 3.39 | 0.01 | 3.16 | 0.68 | 0.22 | 0.28 |
|      |   |        | HS                 |      |      |      |      |      |      |
|      |   |        | MNYTGNQQSRWGLGS    |      |      |      |      |      |      |
| 1301 | 1 | 42252  | PNCHGPDWASPVCQR    | 3.39 | 0.01 | 3.16 | 1.12 | 0.22 | 0.28 |
|      |   |        | HS                 |      |      |      |      |      |      |
|      |   |        | MNYTGNQQSRWGLGS    |      |      |      |      |      |      |
| 1302 | 1 | 42252  | PNCHGPDWASPVCQR    | 3.39 | 0.01 | 3.16 | 1.12 | 0.22 | 0.28 |
|      |   |        | HS                 |      |      |      |      |      |      |
| 1303 | 1 | 115866 | MPIQAFLLYQ         | 2.30 | 0.01 | 1.60 | 0.44 | 1.23 | 0.85 |
| 1304 | 1 | 95120  | MPKWTRVILLNWCAW    | 2.93 | 0.01 | 2.25 | 2.04 | 0.22 | 1.57 |
|      |   |        | FLRMK              |      |      |      |      |      |      |
| 1305 | 1 | 119275 | MPMMGPPPPGMMPV     | 2.80 | 0.01 | 0.78 | 0.44 | 1.13 | 0.28 |
|      |   |        | GP                 |      |      |      |      |      |      |
| 1306 | 1 | 493327 | MQPLNEKQIA         | 2.29 | 0.01 | 0.78 | 1.15 | 0.22 | 1.48 |
| 1307 | 1 | 111571 | MRVTVQPDLSLPSYYS   | 3.06 | 0.01 | 3.33 | 0.44 | 1.23 | 0.85 |
|      |   |        | SPRLV              |      |      |      |      |      |      |
| 1308 | 1 | 86504  | MSAAYDNIYT         | 2.30 | 0.01 | 3.06 | 0.44 | 0.85 | 0.28 |
| 1309 | 1 | 42534  | MSDLTDIQEE         | 2.29 | 0.01 | 3.41 | 0.68 | 0.22 | 0.28 |
| 1310 | 1 | 42541  | MSDNGPQSNQRSAPRI   | 2.79 | 0.01 | 2.45 | 1.12 | 0.22 | 2.92 |
|      |   |        | T                  |      |      |      |      |      |      |
| 1311 | 1 | 104132 | MSENVEQHNPINAGT    | 2.64 | 0.01 | 3.00 | 1.20 | 0.22 | 0.28 |
|      |   |        | MSIAKFEVNNPQVQRQ   |      |      |      |      |      |      |
| 1312 | 1 | 134450 | AFNELIRVVHQLSPESSL | 3.61 | 0.01 | 1.75 | 1.20 | 0.22 | 1.27 |
|      |   |        | RKRKR              |      |      |      |      |      |      |
| 1313 | 1 | 140488 | MSLLGHK            | 2.01 | 0.01 | 0.90 | 0.68 | 0.22 | 0.28 |
| 1314 | 1 | 42618  | MSPARR             | 1.86 | 0.01 | 2.84 | 0.44 | 0.85 | 0.28 |
| 1315 | 1 | 140489 | MSQDGHT            | 1.99 | 0.01 | 0.90 | 0.68 | 0.22 | 0.28 |



|      |   |        |                                 |      |      |      |      |      |      |
|------|---|--------|---------------------------------|------|------|------|------|------|------|
| 1316 | 1 | 141961 | MSRIFRGDNALNMGRP<br>KFLSDQIFNKV | 3.24 | 0.01 | 3.13 | 0.68 | 0.22 | 0.28 |
| 1317 | 1 | 134170 | MVRHENRCVA                      | 2.31 | 0.01 | 0.78 | 0.68 | 0.22 | 1.34 |
| 1318 | 1 | 165129 | MWAAESRKPMMSG                   | 2.47 | 0.01 | 0.90 | 0.44 | 1.23 | 0.28 |
| 1319 | 1 | 118028 | MWGRALRKAIA                     | 2.41 | 0.01 | 0.78 | 0.44 | 1.13 | 0.28 |
| 1320 | 1 | 165130 | MWPAASRKPMMSG                   | 2.49 | 0.01 | 0.90 | 0.44 | 1.23 | 0.85 |
| 1321 | 1 | 99477  | MYACRD                          | 1.88 | 0.01 | 2.86 | 2.02 | 0.85 | 0.85 |
| 1322 | 1 | 43190  | NAKATYEAALKQYEADL               | 2.82 | 0.01 | 2.39 | 3.67 | 0.22 | 0.28 |
| 1323 | 1 | 43190  | NAKATYEAALKQYEADL               | 2.82 | 0.01 | 2.39 | 3.67 | 0.22 | 0.28 |
| 1324 | 1 | 43191  | NAKATYEAALKQYEADL<br>AA         | 2.92 | 0.01 | 2.39 | 3.67 | 0.22 | 0.28 |
| 1325 | 1 | 43191  | NAKATYEAALKQYEADL<br>AA         | 2.92 | 0.01 | 2.39 | 3.67 | 0.22 | 0.28 |
| 1326 | 1 | 43191  | NAKATYEAALKQYEADL<br>AA         | 2.92 | 0.01 | 2.39 | 2.98 | 0.22 | 1.27 |
| 1327 | 1 | 43191  | NAKATYEAALKQYEADL<br>AA         | 2.92 | 0.01 | 2.39 | 2.98 | 0.22 | 0.28 |
| 1328 | 1 | 43195  | NAKGFMPTTAYPFND<br>NSRE         | 2.93 | 0.01 | 3.42 | 1.12 | 0.22 | 0.28 |
| 1329 | 1 | 43195  | NAKGFMPTTAYPFND<br>NSRE         | 2.93 | 0.01 | 3.42 | 1.12 | 0.22 | 0.28 |
| 1330 | 1 | 43195  | NAKGFMPTTAYPFND<br>NSRE         | 2.93 | 0.01 | 3.42 | 1.12 | 0.22 | 0.28 |
| 1331 | 1 | 43195  | NAKGFMPTTAYPFND<br>NSRE         | 2.93 | 0.01 | 3.42 | 1.12 | 0.22 | 0.28 |
| 1332 | 1 | 99485  | NAMRHL                          | 1.88 | 0.01 | 2.86 | 2.02 | 0.85 | 0.85 |
| 1333 | 1 | 43242  | NANPNANPNANP                    | 2.55 | 0.01 | 1.66 | 1.20 | 0.22 | 0.28 |
| 1334 | 1 | 43242  | NANPNANPNANP                    | 2.55 | 0.01 | 1.66 | 0.68 | 0.22 | 0.28 |
| 1335 | 1 | 43242  | NANPNANPNANP                    | 2.55 | 0.01 | 1.66 | 3.32 | 0.22 | 0.28 |
| 1336 | 1 | 43246  | NANPNANPNANPNAN<br>P            | 2.82 | 0.01 | 1.66 | 1.12 | 0.22 | 0.28 |
| 1337 | 1 | 43246  | NANPNANPNANPNAN<br>P            | 2.82 | 0.01 | 1.66 | 1.12 | 0.22 | 0.28 |
| 1338 | 1 | 43248  | NANPNANPNANPNAN<br>PNANP        | 3.03 | 0.01 | 1.66 | 3.32 | 0.22 | 0.28 |
| 1339 | 1 | 43248  | NANPNANPNANPNAN<br>PNANP        | 3.03 | 0.01 | 1.66 | 1.81 | 0.22 | 1.75 |
| 1340 | 1 | 43257  | NANPNVDPNANPNAN<br>PNANP        | 3.03 | 0.01 | 1.66 | 3.32 | 0.22 | 0.28 |
| 1341 | 1 | 43257  | NANPNVDPNANPNAN<br>PNANP        | 3.03 | 0.01 | 1.66 | 1.81 | 0.22 | 1.75 |
| 1342 | 1 | 43257  | NANPNVDPNANPNAN<br>PNANP        | 3.03 | 0.01 | 1.66 | 3.32 | 0.22 | 0.28 |
| 1343 | 1 | 43257  | NANPNVDPNANPNAN<br>PNANP        | 3.03 | 0.01 | 1.66 | 3.32 | 0.22 | 1.48 |

|      |   |        |                                         |      |      |      |      |      |      |
|------|---|--------|-----------------------------------------|------|------|------|------|------|------|
| 1344 | 1 | 43257  | NANPNVDPNANPNAN<br>PNANP                | 3.03 | 0.01 | 1.66 | 1.81 | 0.22 | 1.75 |
| 1345 | 1 | 238785 | NCDRTAALCFGRAPYNK<br>NN                 | 2.88 | 0.01 | 2.56 | 2.02 | 0.22 | 0.85 |
| 1346 | 1 | 238785 | NCDRTAALCFGRAPYNK<br>NN                 | 2.88 | 0.01 | 2.56 | 1.20 | 0.22 | 0.85 |
| 1347 | 1 | 43382  | NCNPLEKWCPTVEQTP<br>WY                  | 2.86 | 0.01 | 0.90 | 1.15 | 0.22 | 1.39 |
| 1348 | 1 | 102658 | NEEFDPVDDGPDDETDL<br>SKL                | 2.95 | 0.01 | 3.44 | 0.68 | 0.22 | 0.28 |
| 1349 | 1 | 181737 | NEIELSARDVLENIG                         | 2.69 | 0.01 | 1.66 | 0.44 | 0.85 | 1.28 |
| 1350 | 1 | 95614  | NEINQFYQKF                              | 2.34 | 0.01 | 1.60 | 0.44 | 1.23 | 0.85 |
| 1351 | 1 | 43701  | NENKLCIKLGQGLTFNS<br>NNI                | 2.96 | 0.01 | 3.42 | 1.12 | 0.22 | 0.28 |
| 1352 | 1 | 186782 | NFNDFLKGLRFFNCN                         | 2.71 | 0.01 | 0.90 | 1.20 | 0.22 | 0.85 |
| 1353 | 1 | 43895  | NFNMLTTHRNINFTAEL<br>FFD                | 2.96 | 0.01 | 3.42 | 1.12 | 0.22 | 0.28 |
| 1354 | 1 | 137935 | NFNTVRYDYYGD                            | 2.49 | 0.01 | 2.21 | 0.44 | 0.85 | 0.28 |
| 1355 | 1 | 187077 | NFSGFTKGTDIADLDAV<br>A                  | 2.85 | 0.01 | 2.80 | 3.38 | 0.22 | 0.28 |
| 1356 | 1 | 187077 | NFSGFTKGTDIADLDAV<br>A                  | 2.85 | 0.01 | 2.80 | 0.68 | 0.22 | 0.28 |
| 1357 | 1 | 187077 | NFSGFTKGTDIADLDAV<br>A                  | 2.85 | 0.01 | 2.80 | 3.38 | 0.22 | 0.28 |
| 1358 | 1 | 187077 | NFSGFTKGTDIADLDAV<br>A                  | 2.85 | 0.01 | 2.80 | 0.68 | 0.22 | 0.28 |
| 1359 | 1 | 94888  | NFSTADSAKIKTLEAEKA<br>ALAARKADLEKALEGAM | 3.51 | 0.01 | 2.24 | 2.89 | 0.22 | 1.27 |
| 1360 | 1 | 451354 | NFTHKTIQQILQQQYKN<br>NT                 | 2.92 | 0.01 | 1.66 | 1.15 | 0.22 | 1.66 |
| 1361 | 1 | 451354 | NFTHKTIQQILQQQYKN<br>NT                 | 2.92 | 0.01 | 1.66 | 1.15 | 0.22 | 1.66 |
| 1362 | 1 | 451354 | NFTHKTIQQILQQQYKN<br>NT                 | 2.92 | 0.01 | 1.66 | 1.15 | 0.22 | 1.66 |
| 1363 | 1 | 44035  | NGNATPQLTKNA                            | 2.50 | 0.01 | 3.24 | 0.44 | 1.23 | 0.85 |
| 1364 | 1 | 44073  | NGSSKYGDTSTNNVRG<br>DLQVLAQKAERTL       | 3.32 | 0.01 | 3.93 | 0.68 | 0.22 | 2.12 |
| 1365 | 1 | 122499 | NGTEGPNFYVPFSNKTG<br>VVRSPFEAPQYYLA     | 3.37 | 0.01 | 1.60 | 2.04 | 0.22 | 0.28 |
| 1366 | 1 | 79619  | NHPPKRQPG                               | 2.23 | 0.01 | 3.10 | 1.20 | 0.22 | 1.57 |
| 1367 | 1 | 100332 | NHRIVQIEAKPNTLVLPK<br>HA                | 2.95 | 0.01 | 2.16 | 0.44 | 2.39 | 0.28 |
| 1368 | 1 | 44250  | NIIRTKKQ                                | 2.12 | 0.01 | 0.90 | 0.68 | 0.22 | 0.28 |
| 1369 | 1 | 44250  | NIIRTKKQ                                | 2.12 | 0.01 | 0.90 | 0.68 | 0.22 | 0.28 |
| 1370 | 1 | 44250  | NIIRTKKQ                                | 2.12 | 0.01 | 0.90 | 0.68 | 0.22 | 0.28 |

|      |   |        |                                                            |      |      |      |      |      |      |
|------|---|--------|------------------------------------------------------------|------|------|------|------|------|------|
| 1371 | 1 | 44250  | NIIRTKKQ                                                   | 2.12 | 0.01 | 0.90 | 0.68 | 0.22 | 0.28 |
| 1372 | 1 | 44250  | NIIRTKKQ                                                   | 2.12 | 0.01 | 0.90 | 0.68 | 0.22 | 0.28 |
| 1373 | 1 | 107531 | NKALPAP                                                    | 2.04 | 0.01 | 0.78 | 0.44 | 1.13 | 0.28 |
| 1374 | 1 | 78752  | NKGKWKEHIKEVTEKLK<br>KA                                    | 2.90 | 0.01 | 3.11 | 1.12 | 0.22 | 0.28 |
| 1375 | 1 | 225448 | NKNIDLFGTNYYYQCY                                           | 2.72 | 0.01 | 2.61 | 0.68 | 0.22 | 0.28 |
| 1376 | 1 | 225449 | NKNIDLFGTNYYYQCYFS                                         | 2.83 | 0.01 | 2.61 | 0.68 | 0.22 | 0.28 |
| 1377 | 1 | 225449 | NKNIDLFGTNYYYQCYFS                                         | 2.83 | 0.01 | 2.61 | 0.68 | 0.22 | 0.28 |
| 1378 | 1 | 225449 | NKNIDLFGTNYYYQCYFS                                         | 2.83 | 0.01 | 2.61 | 0.68 | 0.22 | 0.28 |
| 1379 | 1 | 225449 | NKNIDLFGTNYYYQCYFS                                         | 2.83 | 0.01 | 2.61 | 0.68 | 0.22 | 0.28 |
| 1380 | 1 | 225449 | NKNIDLFGTNYYYQCYFS                                         | 2.83 | 0.01 | 2.61 | 0.68 | 0.22 | 0.28 |
| 1381 | 1 | 141971 | NKPVTDPNPVTDR                                              | 2.58 | 0.01 | 3.13 | 0.68 | 0.22 | 0.28 |
| 1382 | 1 | 230493 | NKVTKQYNMLGGKY                                             | 2.68 | 0.01 | 0.78 | 0.44 | 1.13 | 0.28 |
| 1383 | 1 | 115870 | NKVTLKGGKVT                                                | 2.43 | 0.01 | 2.19 | 0.68 | 0.22 | 0.28 |
| 1384 | 1 | 238800 | NLINFQRMICCTRRSA<br>W                                      | 2.82 | 0.01 | 2.56 | 2.02 | 0.22 | 0.85 |
| 1385 | 1 | 238800 | NLINFQRMICCTRRSA<br>W                                      | 2.82 | 0.01 | 2.56 | 1.20 | 0.22 | 0.85 |
| 1386 | 1 | 44750  | NLISKNNNEKNVKEA<br>AESIMKTLAGLIKGNQI<br>DSTLKDLVEELSKYFKNH | 3.92 | 0.01 | 2.22 | 0.44 | 1.59 | 0.28 |
| 1387 | 1 | 140057 | NLKDMFSRAVTMTAAS<br>RKRAE                                  | 3.00 | 0.01 | 0.90 | 1.20 | 0.22 | 0.28 |
| 1388 | 1 | 44851  | NLQKDEPNGRA                                                | 2.37 | 0.01 | 3.35 | 2.02 | 0.85 | 0.28 |
| 1389 | 1 | 98290  | NLTLVPAVVG                                                 | 2.32 | 0.01 | 3.08 | 1.20 | 0.22 | 0.28 |
| 1390 | 1 | 240906 | NLVRDDLPAITSQEI                                            | 2.63 | 0.01 | 3.81 | 1.12 | 0.22 | 0.28 |
| 1391 | 1 | 123548 | NNDGTLDKFKEYVIALHM<br>TSAGKTNQKLEWA                        | 3.31 | 0.01 | 1.60 | 2.04 | 0.22 | 0.28 |
| 1392 | 1 | 110954 | NNKYTVTLKATP                                               | 2.48 | 0.01 | 3.15 | 0.44 | 1.59 | 0.28 |
| 1393 | 1 | 119502 | NNLGTI                                                     | 1.89 | 0.01 | 0.78 | 0.44 | 0.85 | 0.28 |
| 1394 | 1 | 98294  | NNLTLVPAVV                                                 | 2.32 | 0.01 | 3.08 | 1.20 | 0.22 | 0.28 |
| 1395 | 1 | 98295  | NNNLTLPVAV                                                 | 2.33 | 0.01 | 3.08 | 1.20 | 0.22 | 0.28 |
| 1396 | 1 | 138885 | NNQSPILKLSIH                                               | 2.48 | 0.01 | 0.90 | 2.49 | 0.22 | 0.28 |
| 1397 | 1 | 94619  | NPACGPK                                                    | 2.02 | 0.01 | 3.70 | 2.37 | 0.22 | 0.28 |
| 1398 | 1 | 94621  | NPACGPKYSC                                                 | 2.31 | 0.01 | 3.70 | 2.37 | 0.22 | 0.28 |
| 1399 | 1 | 94625  | NPACGRHYSC                                                 | 2.29 | 0.01 | 3.22 | 2.37 | 0.22 | 0.28 |
| 1400 | 1 | 114495 | NPDEHQRRGQQQFG                                             | 2.67 | 0.01 | 3.48 | 0.44 | 1.23 | 0.85 |
| 1401 | 1 | 510460 | NPFSLLA                                                    | 2.01 | 0.01 | 0.90 | 0.44 | 1.13 | 0.28 |
| 1402 | 1 | 177202 | NPKGKGQEVQEPNQ                                             | 2.60 | 0.01 | 2.22 | 2.69 | 0.22 | 1.48 |

|      |   |        |                                                   |      |      |      |      |      |      |
|------|---|--------|---------------------------------------------------|------|------|------|------|------|------|
| 1403 | 1 | 95635  | NPTKQEHGAPEDSIRHV<br>GDL                          | 2.90 | 0.01 | 2.86 | 0.68 | 0.22 | 0.28 |
| 1404 | 1 | 189130 | NPVGREKYRHPPEHGV                                  | 2.76 | 0.01 | 2.92 | 0.68 | 0.22 | 0.28 |
| 1405 | 1 | 102688 | NPVLPICVRTNEEDPV<br>DDG                           | 2.94 | 0.01 | 3.44 | 0.68 | 0.22 | 0.28 |
| 1406 | 1 | 113670 | NPVVHFFKNIVTP                                     | 2.57 | 0.01 | 0.78 | 0.44 | 1.93 | 0.28 |
| 1407 | 1 | 45597  | NQNNFVHDCVNITIKQ<br>HTVT                          | 2.98 | 0.01 | 0.78 | 2.19 | 0.22 | 0.28 |
| 1408 | 1 | 175625 | NQVYYRPVDQYS                                      | 2.49 | 0.01 | 1.60 | 2.19 | 0.22 | 0.28 |
| 1409 | 1 | 175625 | NQVYYRPVDQYS                                      | 2.49 | 0.01 | 1.60 | 2.19 | 0.22 | 0.28 |
| 1410 | 1 | 189132 | NRYTHKRADQGHYVEM                                  | 2.69 | 0.01 | 2.92 | 0.68 | 0.22 | 0.28 |
| 1411 | 1 | 139186 | NSELLSLINDMPITNDQK<br>KLMSNN                      | 3.13 | 0.01 | 3.00 | 0.68 | 0.22 | 1.34 |
| 1412 | 1 | 230497 | NSKRNPiakITSYQ                                    | 2.67 | 0.01 | 0.78 | 0.44 | 1.13 | 0.28 |
| 1413 | 1 | 98301  | NSKSAYTPAY                                        | 2.33 | 0.01 | 3.08 | 0.68 | 0.22 | 0.28 |
| 1414 | 1 | 135188 | NSQKNDVVNSQNKTE                                   | 2.71 | 0.01 | 3.59 | 2.13 | 0.85 | 0.85 |
| 1415 | 1 | 134176 | NSSYFPGKL                                         | 2.20 | 0.01 | 0.78 | 0.44 | 1.41 | 1.27 |
| 1416 | 1 | 46131  | NTIRTRVHEIVN                                      | 2.52 | 0.01 | 3.61 | 1.20 | 0.22 | 0.85 |
| 1417 | 1 | 98307  | NTNNNLTLVP                                        | 2.36 | 0.01 | 3.45 | 0.68 | 0.22 | 0.28 |
| 1418 | 1 | 98307  | NTNNNLTLVP                                        | 2.36 | 0.01 | 3.45 | 1.20 | 0.22 | 0.28 |
| 1419 | 1 | 95126  | NTVSGQQCSNGNMLYI<br>GFRG                          | 2.93 | 0.01 | 2.25 | 2.04 | 0.22 | 1.57 |
| 1420 | 1 | 135585 | NVKKFFNSNKKKRDDFEK<br>LTNYSVTDLNVQRKAIH<br>ELIQVM | 3.62 | 4.63 | 0.78 | 1.12 | 0.22 | 0.28 |
| 1421 | 1 | 423735 | NVNSKSPVERIT                                      | 2.48 | 0.01 | 0.90 | 0.44 | 1.13 | 0.28 |
| 1422 | 1 | 96714  | NVPKINPKKD                                        | 2.35 | 0.01 | 2.39 | 0.44 | 0.85 | 0.28 |
| 1423 | 1 | 96715  | NVPKVTKKEP                                        | 2.35 | 0.01 | 2.39 | 0.44 | 1.59 | 0.28 |
| 1424 | 1 | 104161 | NVVLKTITESATSPPT                                  | 2.73 | 0.01 | 3.00 | 1.20 | 0.22 | 0.28 |
| 1425 | 1 | 434196 | NWDPTQFPGK                                        | 2.29 | 0.01 | 0.90 | 0.68 | 0.22 | 0.28 |
| 1426 | 1 | 434196 | NWDPTQFPGK                                        | 2.29 | 0.01 | 0.90 | 0.68 | 0.22 | 0.28 |
| 1427 | 1 | 175628 | NWFDIT                                            | 1.88 | 0.01 | 2.54 | 0.44 | 0.85 | 1.34 |
| 1428 | 1 | 450902 | NWVSRLANLTQGEDQY<br>Y                             | 2.74 | 0.01 | 0.78 | 2.79 | 1.13 | 1.28 |
| 1429 | 1 | 107534 | NWYVDGV                                           | 2.02 | 0.01 | 0.78 | 0.44 | 1.13 | 0.28 |
| 1430 | 1 | 46641  | NYKYRYLRHGKLRPFER<br>DISNVP                       | 3.07 | 0.01 | 2.48 | 0.68 | 0.22 | 0.28 |
| 1431 | 1 | 180690 | NYTEGRAVLHVALRNRS<br>NT                           | 2.91 | 4.33 | 0.78 | 0.44 | 1.13 | 0.28 |
| 1432 | 1 | 87178  | NYTYDSNYTP                                        | 2.36 | 0.01 | 3.06 | 0.44 | 0.85 | 0.28 |
| 1433 | 1 | 110957 | PAAVTLAEADRT                                      | 2.49 | 0.01 | 3.15 | 0.44 | 1.59 | 0.28 |
| 1434 | 1 | 46756  | PACYCYGLPDSVKIW                                   | 2.65 | 0.01 | 2.56 | 1.20 | 0.22 | 0.85 |
| 1435 | 1 | 46756  | PACYCYGLPDSVKIW                                   | 2.65 | 0.01 | 2.56 | 0.68 | 0.22 | 0.85 |
| 1436 | 1 | 46756  | PACYCYGLPDSVKIW                                   | 2.65 | 0.01 | 2.56 | 1.20 | 0.22 | 0.85 |

|      |   |        |                                    |      |      |      |      |      |      |
|------|---|--------|------------------------------------|------|------|------|------|------|------|
| 1437 | 1 | 46756  | PACYCYGLPDSVKIW                    | 2.65 | 0.01 | 2.56 | 1.20 | 0.22 | 0.85 |
| 1438 | 1 | 46792  | PAFGANSNNPDWDFN<br>P               | 2.78 | 0.01 | 2.58 | 0.44 | 0.22 | 0.28 |
| 1439 | 1 | 107218 | PAGGPGFP                           | 2.18 | 0.01 | 1.60 | 2.55 | 2.60 | 0.28 |
| 1440 | 1 | 95647  | PAKQLLP                            | 2.13 | 0.01 | 0.90 | 2.59 | 0.22 | 0.28 |
| 1441 | 1 | 107537 | PAPIEKT                            | 2.03 | 0.01 | 0.78 | 0.44 | 1.13 | 0.28 |
| 1442 | 1 | 510469 | PAPSRSQ                            | 2.05 | 0.01 | 0.90 | 0.44 | 1.13 | 0.28 |
| 1443 | 1 | 181414 | PAQVSVPFMSPASAY                    | 2.72 | 0.01 | 2.82 | 1.15 | 0.22 | 0.28 |
| 1444 | 1 | 230500 | PASKTFTVQKGISSK                    | 2.67 | 0.01 | 0.78 | 0.44 | 1.13 | 0.28 |
| 1445 | 1 | 46957  | PASTNRQSGRQPTPISP<br>PLRDSHP       | 3.14 | 0.01 | 2.08 | 0.44 | 0.22 | 0.28 |
| 1446 | 1 | 103460 | PATVINGQFVERCWTH                   | 2.67 | 0.01 | 0.78 | 1.12 | 0.22 | 0.85 |
| 1447 | 1 | 131995 | PAYQGIPVAHISYF                     | 2.62 | 0.01 | 0.90 | 1.20 | 0.22 | 0.28 |
| 1448 | 1 | 98321  | PAYYTKNTNN                         | 2.32 | 0.01 | 3.45 | 1.20 | 0.22 | 0.28 |
| 1449 | 1 | 78224  | PCHNSLILPPFSLSPVPTL<br>GSRSRRAVPVA | 3.35 | 0.01 | 2.04 | 0.44 | 1.59 | 0.28 |
| 1450 | 1 | 78224  | PCHNSLILPPFSLSPVPTL<br>GSRSRRAVPVA | 3.35 | 0.01 | 2.04 | 0.44 | 0.85 | 0.28 |
| 1451 | 1 | 47024  | PCIGYVRSGGAVPPA                    | 2.69 | 0.01 | 3.35 | 0.44 | 1.23 | 0.85 |
| 1452 | 1 | 176370 | PCNFNVSVEDILYGD                    | 2.64 | 0.01 | 2.63 | 1.15 | 0.22 | 0.85 |
| 1453 | 1 | 489312 | PCRTCT                             | 1.91 | 0.01 | 3.81 | 0.68 | 0.22 | 0.28 |
| 1454 | 1 | 47045  | PCSICSNNPTCWAICK                   | 2.76 | 0.01 | 2.38 | 0.68 | 0.22 | 0.28 |
| 1455 | 1 | 47045  | PCSICSNNPTCWAICK                   | 2.76 | 0.01 | 2.38 | 0.44 | 1.59 | 0.28 |
| 1456 | 1 | 102711 | PDDETDLSKLSKDVVQY<br>EQE           | 2.97 | 0.01 | 3.44 | 0.68 | 0.22 | 0.28 |
| 1457 | 1 | 47072  | PDDHLKERSS                         | 2.28 | 0.01 | 3.41 | 0.68 | 0.22 | 0.28 |
| 1458 | 1 | 47078  | PDDVNKNTLQ                         | 2.30 | 0.01 | 3.41 | 0.68 | 0.22 | 0.28 |
| 1459 | 1 | 151327 | PDGAAAGGG                          | 2.24 | 0.01 | 2.51 | 0.68 | 0.22 | 2.12 |
| 1460 | 1 | 95127  | PDITFTVTMRRRTLYYGL<br>NL           | 2.92 | 0.01 | 2.25 | 2.04 | 0.22 | 1.57 |
| 1461 | 1 | 125515 | PDLTKVYSTDIFFILEITD<br>N           | 2.94 | 0.01 | 0.78 | 0.44 | 1.13 | 0.28 |
| 1462 | 1 | 125515 | PDLTKVYSTDIFFILEITD<br>N           | 2.94 | 0.01 | 0.78 | 0.44 | 1.41 | 0.28 |
| 1463 | 1 | 153864 | PDRAHYNIVTFCKCDS<br>TLR            | 2.89 | 0.01 | 1.86 | 2.37 | 0.22 | 0.28 |
| 1464 | 1 | 172634 | PDREFLLRVSYMEIY                    | 2.65 | 0.01 | 0.78 | 2.79 | 1.13 | 1.28 |
| 1465 | 1 | 47202  | PDSEPTKTNGKCKSG                    | 2.71 | 0.01 | 2.56 | 2.52 | 0.22 | 0.85 |
| 1466 | 1 | 47205  | PDSVKIWTSETNKCG                    | 2.64 | 0.01 | 2.56 | 1.20 | 0.22 | 0.85 |
| 1467 | 1 | 47205  | PDSVKIWTSETNKCG                    | 2.64 | 0.01 | 2.56 | 2.02 | 0.22 | 0.85 |
| 1468 | 1 | 47205  | PDSVKIWTSETNKCG                    | 2.64 | 0.01 | 2.56 | 1.20 | 0.22 | 0.85 |
| 1469 | 1 | 103463 | PECPSGYTMNSSNLLC                   | 2.74 | 0.01 | 0.78 | 1.12 | 0.22 | 0.85 |

|      |   |        |                                            |      |      |      |      |      |      |
|------|---|--------|--------------------------------------------|------|------|------|------|------|------|
| 1470 | 1 | 131582 | PEEDDITWTSQQRHGVIGS                        | 2.88 | 0.01 | 1.75 | 0.68 | 0.22 | 0.28 |
| 1471 | 1 | 112813 | PEFAPWA                                    | 2.05 | 0.01 | 0.90 | 0.44 | 1.13 | 0.28 |
| 1472 | 1 | 47283  | PEGENASYHLAYDKDRYTEEEREVYSYLRGTGTPIPDNPNDK | 3.69 | 0.01 | 3.47 | 0.44 | 1.74 | 0.28 |
| 1473 | 1 | 47302  | PEHKKEENMLSHLYVSSKDKENISKEND               | 3.29 | 0.01 | 2.22 | 0.44 | 1.59 | 1.34 |
| 1474 | 1 | 79331  | PELGPPTNPFQAAVARGLRPPLHDPDTEAPTEAC         | 3.47 | 0.01 | 2.85 | 1.12 | 0.22 | 0.28 |
| 1475 | 1 | 118549 | PEPAKSAPAPKKGSKKA<br>V                     | 2.90 | 4.15 | 1.75 | 3.05 | 1.41 | 1.27 |
| 1476 | 1 | 118549 | PEPAKSAPAPKKGSKKA<br>V                     | 2.90 | 4.15 | 1.75 | 0.44 | 1.13 | 1.27 |
| 1477 | 1 | 118550 | PEPAKSAPAPKKGSKKA<br>V                     | 2.90 | 0.01 | 1.75 | 0.44 | 1.13 | 1.27 |
| 1478 | 1 | 117599 | PEPAKSAPAPKKGSKKA<br>VTKAQKKD              | 3.20 | 0.01 | 1.60 | 0.44 | 1.13 | 0.28 |
| 1479 | 1 | 112815 | PEYRGRTELLKDAIGEGK<br>VTLRIRN              | 3.16 | 0.01 | 0.78 | 0.44 | 1.13 | 0.28 |
| 1480 | 1 | 112815 | PEYRGRTELLKDAIGEGK<br>VTLRIRN              | 3.16 | 0.01 | 0.78 | 0.44 | 1.41 | 0.28 |
| 1481 | 1 | 186788 | PEYTYHGIPGGCKKY                            | 2.69 | 0.01 | 0.90 | 1.20 | 0.22 | 0.85 |
| 1482 | 1 | 79960  | PFCFGKDLKRP                                | 2.50 | 0.01 | 2.14 | 3.26 | 0.22 | 0.28 |
| 1483 | 1 | 95128  | PFDVQKCNLKFGSWTY<br>GGWS                   | 2.90 | 0.01 | 2.25 | 2.04 | 0.22 | 1.57 |
| 1484 | 1 | 186790 | PGGCKKYENFNDFLK                            | 2.67 | 0.01 | 0.90 | 1.20 | 0.22 | 0.85 |
| 1485 | 1 | 244265 | PGGSPRGAPGGGFVPR<br>ML                     | 2.87 | 0.01 | 2.96 | 0.44 | 0.85 | 1.66 |
| 1486 | 1 | 98329  | PGKKIKNKNPEKPHF                            | 2.72 | 0.01 | 2.71 | 2.78 | 0.22 | 0.28 |
| 1487 | 1 | 79040  | PGQNLCTYK                                  | 2.18 | 0.01 | 3.33 | 2.43 | 0.22 | 0.28 |
| 1488 | 1 | 79040  | PGQNLCTYK                                  | 2.18 | 0.01 | 3.33 | 2.43 | 0.22 | 0.28 |
| 1489 | 1 | 79040  | PGQNLCTYK                                  | 2.18 | 0.01 | 3.33 | 2.43 | 0.22 | 0.28 |
| 1490 | 1 | 193518 | PGQPFGPGG                                  | 2.26 | 0.01 | 2.51 | 0.44 | 2.39 | 0.28 |
| 1491 | 1 | 167640 | PGSVNEFDF                                  | 2.21 | 0.01 | 3.18 | 0.44 | 0.85 | 1.28 |
| 1492 | 1 | 137944 | PGTEYT                                     | 1.90 | 0.01 | 3.93 | 1.20 | 0.22 | 0.28 |
| 1493 | 1 | 137945 | PGTEYTV                                    | 2.14 | 0.01 | 2.21 | 1.20 | 0.22 | 0.28 |
| 1494 | 1 | 47839  | PHKAAVDVGPLSVGPQ<br>S                      | 2.81 | 0.01 | 3.51 | 0.68 | 0.22 | 0.28 |
| 1495 | 1 | 47839  | PHKAAVDVGPLSVGPQ<br>S                      | 2.81 | 0.01 | 3.51 | 1.15 | 0.22 | 0.28 |
| 1496 | 1 | 107554 | PIEKTIS                                    | 2.02 | 0.01 | 0.78 | 0.44 | 1.13 | 0.28 |
| 1497 | 1 | 104175 | PINAGTELSATGNESG                           | 2.77 | 0.01 | 3.00 | 1.20 | 0.22 | 0.28 |
| 1498 | 1 | 98334  | PIQNSKSAYT                                 | 2.29 | 0.01 | 3.08 | 1.20 | 0.22 | 0.28 |
| 1499 | 1 | 115890 | PIQYVLSRYP                                 | 2.32 | 0.01 | 1.60 | 0.44 | 1.23 | 0.85 |
| 1500 | 1 | 120129 | PKAPQWPPYT                                 | 2.33 | 0.01 | 0.78 | 2.66 | 0.22 | 0.28 |

|      |   |        |                           |      |      |      |      |      |      |
|------|---|--------|---------------------------|------|------|------|------|------|------|
| 1501 | 1 | 120129 | PKAPQWPPYT                | 2.33 | 0.01 | 0.78 | 1.15 | 0.22 | 0.28 |
| 1502 | 1 | 141978 | PKGQTRTLGNSNRERERI        | 2.79 | 0.01 | 3.13 | 0.68 | 0.22 | 0.28 |
| 1503 | 1 | 96735  | PKVTKEKPTP                | 2.37 | 0.01 | 2.39 | 0.44 | 1.59 | 0.28 |
| 1504 | 1 | 158602 | PLELSVY                   | 2.02 | 0.01 | 0.90 | 0.44 | 1.13 | 1.39 |
| 1505 | 1 | 48331  | PLGFFPDHQLDP              | 2.51 | 0.01 | 2.58 | 0.44 | 0.22 | 0.28 |
| 1506 | 1 | 175631 | PLGVGISGHPLLNKLDDT<br>EN  | 2.94 | 0.01 | 1.86 | 0.68 | 0.22 | 2.75 |
| 1507 | 1 | 134183 | PLIFRNV                   | 1.99 | 0.01 | 0.78 | 0.44 | 1.41 | 1.27 |
| 1508 | 1 | 134185 | PLQKTY                    | 1.88 | 0.01 | 0.78 | 0.44 | 1.41 | 1.27 |
| 1509 | 1 | 98337  | PLVQQQQFLGQQQPFP<br>PQQPY | 3.04 | 0.01 | 1.86 | 0.44 | 1.93 | 0.28 |
| 1510 | 1 | 98337  | PLVQQQQFLGQQQPFP<br>PQQPY | 3.04 | 0.01 | 1.86 | 0.44 | 1.93 | 0.28 |
| 1511 | 1 | 98337  | PLVQQQQFLGQQQPFP<br>PQQPY | 3.04 | 0.01 | 1.86 | 0.44 | 2.39 | 0.28 |
| 1512 | 1 | 98337  | PLVQQQQFLGQQQPFP<br>PQQPY | 3.04 | 0.01 | 1.86 | 0.44 | 2.39 | 0.28 |
| 1513 | 1 | 48641  | PNGNVPAAGVTPSKYGL<br>GGD  | 2.91 | 0.01 | 3.48 | 1.20 | 0.22 | 0.28 |
| 1514 | 1 | 115892 | PNGYKVSRSQ                | 2.40 | 0.01 | 2.19 | 0.68 | 0.22 | 0.28 |
| 1515 | 1 | 94644  | PNKKPGKKTTKPTK            | 2.75 | 0.01 | 2.38 | 0.68 | 0.22 | 0.28 |
| 1516 | 1 | 94644  | PNKKPGKKTTKPTK            | 2.75 | 0.01 | 2.38 | 0.68 | 0.22 | 1.75 |
| 1517 | 1 | 48670  | PNLRGDLQVLAQKVART<br>LP   | 2.91 | 0.01 | 2.96 | 2.69 | 0.22 | 1.34 |
| 1518 | 1 | 111634 | PNNNKILVPKVSGLQ           | 2.69 | 0.01 | 1.86 | 0.68 | 0.22 | 0.28 |
| 1519 | 1 | 161444 | PNRVFKVNTNAYYEMS<br>GLE   | 2.85 | 0.01 | 2.08 | 0.68 | 0.22 | 1.57 |
| 1520 | 1 | 161444 | PNRVFKVNTNAYYEMS<br>GLE   | 2.85 | 0.01 | 2.08 | 2.25 | 0.22 | 1.57 |
| 1521 | 1 | 161444 | PNRVFKVNTNAYYEMS<br>GLE   | 2.85 | 0.01 | 2.08 | 2.49 | 0.22 | 1.57 |
| 1522 | 1 | 230503 | PNTKITNTGRQEST            | 2.68 | 0.01 | 0.78 | 0.44 | 1.13 | 0.28 |
| 1523 | 1 | 230503 | PNTKITNTGRQEST            | 2.68 | 0.01 | 0.78 | 0.44 | 1.13 | 0.28 |
| 1524 | 1 | 100389 | PNTLVLPKHADADNILVI<br>QQ  | 2.95 | 0.01 | 2.16 | 0.44 | 2.39 | 0.28 |
| 1525 | 1 | 48739  | PPACCNIGIRTINGLA          | 2.68 | 0.01 | 3.35 | 1.12 | 0.22 | 0.85 |
| 1526 | 1 | 115633 | PPFSRVVHLYRN              | 2.45 | 0.01 | 0.78 | 0.44 | 1.13 | 0.28 |
| 1527 | 1 | 115633 | PPFSRVVHLYRN              | 2.45 | 0.01 | 0.78 | 0.44 | 1.13 | 0.28 |
| 1528 | 1 | 115633 | PPFSRVVHLYRN              | 2.45 | 0.01 | 0.78 | 0.44 | 1.41 | 0.28 |
| 1529 | 1 | 48823  | PPLLESWKDPDYVPPVV<br>HG   | 2.88 | 0.01 | 1.96 | 0.44 | 0.85 | 2.97 |
| 1530 | 1 | 118060 | PPPGMRPP                  | 2.14 | 0.01 | 0.78 | 3.75 | 1.13 | 0.85 |
| 1531 | 1 | 118060 | PPPGMRPP                  | 2.14 | 0.01 | 0.78 | 3.75 | 1.13 | 0.85 |
| 1532 | 1 | 118970 | PPPGRRP                   | 2.06 | 0.01 | 2.43 | 2.25 | 0.22 | 0.28 |
| 1533 | 1 | 98343  | PPPPRVQPRKTKSV            | 2.71 | 0.01 | 2.71 | 2.78 | 0.22 | 0.28 |

|      |   |        |                          |      |      |      |      |      |      |
|------|---|--------|--------------------------|------|------|------|------|------|------|
| 1534 | 1 | 48870  | PPPPSSPTHDPDSDPQI<br>pp  | 2.98 | 0.01 | 2.04 | 0.44 | 1.59 | 0.28 |
| 1535 | 1 | 48870  | PPPPSSPTHDPDSDPQI<br>pp  | 2.98 | 0.01 | 2.04 | 0.44 | 2.82 | 0.28 |
| 1536 | 1 | 48870  | PPPPSSPTHDPDSDPQI<br>pp  | 2.98 | 0.01 | 2.04 | 0.44 | 0.85 | 0.28 |
| 1537 | 1 | 48912  | PPSDIKGKYVKEVEVK         | 2.76 | 0.01 | 3.30 | 1.12 | 0.22 | 2.02 |
| 1538 | 1 | 48912  | PPSDIKGKYVKEVEVK         | 2.76 | 0.01 | 3.30 | 1.12 | 0.22 | 1.57 |
| 1539 | 1 | 48912  | PPSDIKGKYVKEVEVK         | 2.76 | 0.01 | 3.30 | 1.12 | 0.22 | 1.34 |
| 1540 | 1 | 48928  | PPSSPTHDPDSDPQI          | 2.79 | 0.01 | 2.04 | 0.44 | 2.98 | 0.28 |
| 1541 | 1 | 48928  | PPSSPTHDPDSDPQI          | 2.79 | 0.01 | 2.04 | 0.44 | 0.85 | 0.28 |
| 1542 | 1 | 48928  | PPSSPTHDPDSDPQI          | 2.79 | 0.01 | 2.04 | 0.44 | 2.82 | 0.28 |
| 1543 | 1 | 95678  | PPSVPNLR                 | 2.14 | 0.01 | 0.90 | 2.59 | 0.22 | 0.28 |
| 1544 | 1 | 96745  | PPVKPTAPTK               | 2.36 | 0.01 | 2.39 | 0.44 | 1.59 | 0.28 |
| 1545 | 1 | 150502 | PPYKQTQPGADGFEL          | 2.66 | 0.01 | 3.45 | 1.12 | 0.22 | 0.28 |
| 1546 | 1 | 48955  | PPYVEPTAPQVL             | 2.49 | 0.01 | 2.04 | 0.44 | 2.82 | 0.28 |
| 1547 | 1 | 48955  | PPYVEPTAPQVL             | 2.49 | 0.01 | 2.04 | 0.44 | 0.85 | 0.28 |
| 1548 | 1 | 124588 | PQEETLQAFDSHYDYT         | 2.72 | 0.01 | 0.78 | 1.20 | 0.22 | 0.28 |
| 1549 | 1 | 124588 | PQEETLQAFDSHYDYT         | 2.72 | 0.01 | 0.78 | 1.20 | 0.22 | 1.27 |
| 1550 | 1 | 124588 | PQEETLQAFDSHYDYT         | 2.72 | 0.01 | 0.78 | 1.20 | 0.22 | 1.27 |
| 1551 | 1 | 96748  | PQEIRDVLSK               | 2.26 | 0.01 | 2.39 | 0.44 | 0.85 | 0.28 |
| 1552 | 1 | 108074 | PQVYTLP                  | 2.03 | 0.01 | 0.78 | 0.44 | 1.13 | 0.28 |
| 1553 | 1 | 189139 | PRGEGDTFKGKLHVPF         | 2.74 | 0.01 | 2.92 | 0.68 | 0.22 | 0.28 |
| 1554 | 1 | 181764 | PRRRHICDQNLEFLD          | 2.64 | 0.01 | 1.66 | 0.44 | 0.85 | 1.28 |
| 1555 | 1 | 79047  | PSCSPTNMIMDGTASV<br>NIPA | 2.97 | 0.01 | 2.84 | 0.44 | 0.85 | 0.28 |
| 1556 | 1 | 49408  | PSISEGPSYEFS             | 2.52 | 0.01 | 3.61 | 1.20 | 0.22 | 0.85 |
| 1557 | 1 | 49505  | PSSKRFQPFQQFGRD          | 2.70 | 0.01 | 2.45 | 1.12 | 0.22 | 2.92 |
| 1558 | 1 | 95687  | PSVPNLRG                 | 2.13 | 0.01 | 0.90 | 2.59 | 0.22 | 0.28 |
| 1559 | 1 | 49563  | PSYEFSDCSKDY             | 2.49 | 0.01 | 3.61 | 1.20 | 0.22 | 0.85 |
| 1560 | 1 | 523844 | PTADSPLTAAPPATAPG<br>PSA | 3.01 | 3.97 | 0.90 | 0.44 | 1.59 | 1.28 |
| 1561 | 1 | 523845 | PTADSPLTASAPATAPG<br>PSA | 3.02 | 3.97 | 0.90 | 0.44 | 1.59 | 1.28 |
| 1562 | 1 | 523855 | PTADSPLTASPPATAPG<br>PSA | 3.01 | 3.97 | 2.40 | 0.44 | 1.59 | 1.28 |
| 1563 | 1 | 523858 | PTADSPLTASPPATAPG<br>PSA | 3.01 | 4.93 | 2.40 | 0.44 | 1.59 | 1.28 |
| 1564 | 1 | 523857 | PTADSPLTASPPATAPG<br>PSA | 3.01 | 4.93 | 2.40 | 0.44 | 1.59 | 1.28 |
| 1565 | 1 | 523854 | PTADSPLTASPPATAPG<br>PSA | 3.01 | 4.93 | 2.40 | 0.44 | 1.59 | 1.28 |
| 1566 | 1 | 523860 | PTADSPLTASPPATAPG<br>PSA | 3.01 | 4.93 | 2.40 | 0.44 | 1.59 | 1.28 |
| 1567 | 1 | 96755  | PTAPTKPTYE               | 2.36 | 0.01 | 2.39 | 0.44 | 0.85 | 0.28 |
| 1568 | 1 | 144746 | PTEEQVSWLS               | 2.30 | 0.01 | 0.78 | 0.44 | 1.13 | 0.28 |



|      |   |        |                                                            |      |      |      |      |      |      |
|------|---|--------|------------------------------------------------------------|------|------|------|------|------|------|
| 1569 | 1 | 156405 | PTEGTGDWSSEEPEEEQ<br>EETG                                  | 3.03 | 0.01 | 1.60 | 1.20 | 0.22 | 1.34 |
| 1570 | 1 | 49629  | PTGDRHKQPLVAPAKQL<br>L                                     | 2.84 | 0.01 | 2.78 | 1.15 | 0.22 | 1.27 |
| 1571 | 1 | 49629  | PTGDRHKQPLVAPAKQL<br>L                                     | 2.84 | 0.01 | 2.78 | 1.15 | 0.22 | 1.27 |
| 1572 | 1 | 49629  | PTGDRHKQPLVAPAKQL<br>L                                     | 2.84 | 0.01 | 2.78 | 1.15 | 0.22 | 1.27 |
| 1573 | 1 | 49629  | PTGDRHKQPLVAPAKQL<br>L                                     | 2.84 | 0.01 | 2.78 | 1.15 | 0.22 | 1.27 |
| 1574 | 1 | 49631  | PTGIEPDDHL                                                 | 2.31 | 0.01 | 3.41 | 0.68 | 0.22 | 0.28 |
| 1575 | 1 | 96756  | PTKPTYETEK                                                 | 2.37 | 0.01 | 2.39 | 0.44 | 1.59 | 0.28 |
| 1576 | 1 | 96760  | PTPPVKPTAP                                                 | 2.37 | 0.01 | 2.39 | 0.44 | 1.59 | 0.28 |
| 1577 | 1 | 138222 | PTPTPGPSRR                                                 | 2.35 | 0.01 | 0.78 | 0.44 | 1.13 | 0.28 |
| 1578 | 1 | 120138 | PTPVLVWIYG                                                 | 2.32 | 0.01 | 0.78 | 1.15 | 0.22 | 0.28 |
| 1579 | 1 | 122532 | PTTPYLDITYHFIMQRI                                          | 2.80 | 0.01 | 2.26 | 2.43 | 0.22 | 1.57 |
| 1580 | 1 | 185214 | PVEYLQVPS                                                  | 2.24 | 0.01 | 2.86 | 0.44 | 0.85 | 0.28 |
| 1581 | 1 | 185214 | PVEYLQVPS                                                  | 2.24 | 0.01 | 2.86 | 0.44 | 0.85 | 0.28 |
| 1582 | 1 | 96762  | PVKPTAPTKP                                                 | 2.37 | 0.01 | 2.39 | 0.44 | 1.59 | 0.28 |
| 1583 | 1 | 95695  | PVKQTLPP                                                   | 2.12 | 0.01 | 0.90 | 2.59 | 0.22 | 0.28 |
| 1584 | 1 | 110971 | PVSDLNLKIDGL                                               | 2.48 | 0.01 | 3.15 | 0.44 | 1.59 | 0.28 |
| 1585 | 1 | 95696  | PVSQFHIQGQVY                                               | 2.48 | 0.01 | 2.88 | 1.12 | 0.22 | 0.85 |
| 1586 | 1 | 134200 | PVVNSLDPPLLTRY                                             | 2.61 | 0.01 | 0.78 | 0.44 | 1.41 | 1.34 |
| 1587 | 1 | 230504 | PYGIFVINQKTGEIN                                            | 2.66 | 0.01 | 0.78 | 0.44 | 1.13 | 0.28 |
| 1588 | 1 | 230504 | PYGIFVINQKTGEIN                                            | 2.66 | 0.01 | 0.78 | 0.44 | 1.13 | 0.28 |
| 1589 | 1 | 50121  | PYKISTSTNCATVK                                             | 2.61 | 0.01 | 3.35 | 1.12 | 0.22 | 0.85 |
| 1590 | 1 | 50121  | PYKISTSTNCATVK                                             | 2.61 | 0.01 | 3.35 | 0.44 | 1.23 | 0.85 |
| 1591 | 1 | 238903 | PYNKNENINPNRCR                                             | 2.72 | 0.01 | 2.56 | 2.02 | 0.22 | 0.85 |
| 1592 | 1 | 238903 | PYNKNENINPNRCR                                             | 2.72 | 0.01 | 2.56 | 1.20 | 0.22 | 0.85 |
| 1593 | 1 | 462161 | QAAAEAYEPGRS                                               | 2.48 | 0.01 | 2.71 | 2.13 | 0.22 | 1.34 |
| 1594 | 1 | 98357  | QAAAEVYEPGRSLWC                                            | 2.62 | 0.01 | 2.71 | 2.78 | 0.22 | 0.28 |
| 1595 | 1 | 153866 | QAEPDRAHNIVTFCKC<br>DSTLRLCVQSTH                           | 3.29 | 0.01 | 1.86 | 2.37 | 0.22 | 0.28 |
| 1596 | 1 | 119626 | QAVSPSTSQGADVKKSS<br>CQSK                                  | 3.03 | 0.01 | 3.33 | 0.44 | 0.85 | 0.28 |
| 1597 | 1 | 91816  | QCYKASDGALFPLEV                                            | 2.68 | 0.01 | 3.12 | 1.12 | 0.22 | 0.28 |
| 1598 | 1 | 451508 | QDSSSSKAPP                                                 | 2.31 | 0.01 | 0.78 | 1.81 | 0.22 | 0.28 |
| 1599 | 1 | 167795 | QEIPQPQWT                                                  | 2.26 | 0.01 | 2.40 | 2.43 | 0.22 | 0.28 |
| 1600 | 1 | 50636  | QELDCWHYHQYCITS                                            | 2.67 | 0.01 | 3.50 | 2.37 | 0.22 | 0.28 |
| 1601 | 1 | 167651 | QELPPPNAQEL                                                | 2.43 | 0.01 | 3.18 | 0.44 | 0.85 | 1.28 |
| 1602 | 1 | 167651 | QELPPPNAQEL                                                | 2.43 | 0.01 | 3.18 | 0.44 | 0.85 | 1.28 |
| 1603 | 1 | 167651 | QELPPPNAQEL                                                | 2.43 | 0.01 | 3.18 | 0.44 | 1.59 | 1.28 |
| 1604 | 1 | 50650  | QELVDCASQHGCHGDTI<br>PRGIEYIQHNGVVQESY<br>YRYVAREQSCRPNQRF | 3.90 | 0.01 | 2.78 | 0.44 | 1.23 | 1.27 |
| 1605 | 1 | 148759 | QEQVPLVQQQ                                                 | 2.34 | 0.01 | 1.86 | 0.44 | 1.23 | 0.85 |

|      |   |        |                                                                          |      |      |      |      |      |      |
|------|---|--------|--------------------------------------------------------------------------|------|------|------|------|------|------|
| 1606 | 1 | 50761  | QFGPNAGQRMPPRA                                                           | 2.58 | 0.01 | 3.42 | 0.44 | 1.23 | 0.85 |
| 1607 | 1 | 50761  | QFGPNAGQRMPPRA                                                           | 2.58 | 0.01 | 3.42 | 0.44 | 1.23 | 0.85 |
| 1608 | 1 | 50761  | QFGPNAGQRMPPRA                                                           | 2.58 | 0.01 | 3.42 | 0.44 | 1.23 | 0.85 |
| 1609 | 1 | 50823  | QFYQKFPQYL                                                               | 2.36 | 0.01 | 1.60 | 0.44 | 1.23 | 0.85 |
| 1610 | 1 | 120146 | QGARVYAYVF                                                               | 2.33 | 0.01 | 0.78 | 2.66 | 0.22 | 0.28 |
| 1611 | 1 | 120146 | QGARVYAYVF                                                               | 2.33 | 0.01 | 0.78 | 1.15 | 0.22 | 0.28 |
| 1612 | 1 | 156411 | QGNQDSFTPVV                                                              | 2.37 | 0.01 | 0.78 | 0.44 | 1.93 | 1.27 |
| 1613 | 1 | 156411 | QGNQDSFTPVV                                                              | 2.37 | 0.01 | 0.78 | 0.44 | 1.13 | 1.27 |
| 1614 | 1 | 156415 | QGRQQEQEQERQQQQ                                                          | 2.73 | 0.01 | 3.67 | 0.44 | 1.23 | 1.27 |
| 1615 | 1 | 225841 | QGTTFTCVVMHEALH                                                          | 2.65 | 0.01 | 3.28 | 0.44 | 0.22 | 0.85 |
| 1616 | 1 | 104202 | QHGHLLTSSQELERYTF<br>NP                                                  | 2.89 | 0.01 | 3.00 | 1.20 | 0.22 | 0.28 |
| 1617 | 1 | 104205 | QHNPINAGTELSATG                                                          | 2.66 | 0.01 | 3.00 | 1.20 | 0.22 | 0.28 |
| 1618 | 1 | 51030  | QHSTPPKKRKRVEDPKD<br>FPSE                                                | 3.00 | 0.01 | 3.36 | 0.68 | 0.22 | 0.28 |
| 1619 | 1 | 141989 | QKDLVNEFPGLFIRQSRF<br>IPGRPSRRNIRFKP                                     | 3.43 | 0.01 | 3.13 | 0.68 | 0.22 | 0.28 |
| 1620 | 1 | 135234 | QKENSQKNDVVNSQN                                                          | 2.73 | 0.01 | 3.59 | 2.13 | 0.85 | 0.85 |
| 1621 | 1 | 95712  | QKIIAPAK                                                                 | 2.15 | 0.01 | 3.48 | 2.59 | 0.22 | 0.28 |
| 1622 | 1 | 95713  | QKIVAPVK                                                                 | 2.14 | 0.01 | 2.96 | 2.59 | 0.22 | 0.28 |
| 1623 | 1 | 134202 | QKLSVPDGFKVSNSARG<br>W                                                   | 2.82 | 0.01 | 0.78 | 0.44 | 1.41 | 1.27 |
| 1624 | 1 | 108600 | QLINTNGS                                                                 | 2.12 | 0.01 | 1.72 | 2.37 | 0.22 | 1.34 |
| 1625 | 1 | 51372  | QLINTNGSWHINSTA                                                          | 2.68 | 0.01 | 2.45 | 0.44 | 1.59 | 0.28 |
| 1626 | 1 | 51372  | QLINTNGSWHINSTA                                                          | 2.68 | 0.01 | 2.45 | 2.74 | 0.22 | 0.28 |
| 1627 | 1 | 51372  | QLINTNGSWHINSTA                                                          | 2.68 | 0.01 | 2.45 | 2.74 | 0.22 | 1.34 |
| 1628 | 1 | 51372  | QLINTNGSWHINSTA                                                          | 2.68 | 0.01 | 2.45 | 2.74 | 0.22 | 1.34 |
| 1629 | 1 | 51372  | QLINTNGSWHINSTA                                                          | 2.68 | 0.01 | 2.45 | 2.74 | 0.22 | 1.34 |
| 1630 | 1 | 153867 | QLLRREIKNT                                                               | 2.38 | 0.01 | 1.86 | 2.37 | 0.22 | 0.28 |
| 1631 | 1 | 110382 | QLLRREVY                                                                 | 2.12 | 0.01 | 1.86 | 2.37 | 0.22 | 0.28 |
| 1632 | 1 | 51539  | QLSGMLEWQNLR                                                             | 2.48 | 0.01 | 0.90 | 0.44 | 1.23 | 0.28 |
| 1633 | 1 | 156421 | QNAFRISRQEARNLK                                                          | 2.69 | 0.01 | 3.67 | 0.44 | 1.23 | 1.27 |
| 1634 | 1 | 225642 | QNAGVTYDKPPTVQDV<br>AARWDEITDLSAA<br>QNKMEENDMNIIKNDM<br>NIMENDMNIMENDMN | 3.27 | 0.01 | 2.51 | 2.00 | 0.85 | 0.28 |
| 1635 | 1 | 51726  | IIKNDMNIMEKDMNIIK<br>NDMNIIKNNMNIIKNE<br>MNIIKNV                         | 4.24 | 0.01 | 2.22 | 1.15 | 0.22 | 0.28 |
| 1636 | 1 | 51729  | QNKPPNKPNNDF                                                             | 2.52 | 0.01 | 2.38 | 0.68 | 0.22 | 0.28 |
| 1637 | 1 | 51729  | QNKPPNKPNNDF                                                             | 2.52 | 0.01 | 2.38 | 0.68 | 0.22 | 1.75 |
| 1638 | 1 | 98378  | QNSKSAYTPA                                                               | 2.31 | 0.01 | 3.08 | 0.68 | 0.22 | 0.28 |
| 1639 | 1 | 107580 | QNWLDGK                                                                  | 1.99 | 0.01 | 0.78 | 0.44 | 1.13 | 0.28 |
| 1640 | 1 | 153447 | QPAIWINPFPWGGGS                                                          | 2.75 | 0.01 | 0.90 | 0.68 | 0.22 | 1.27 |

|      |   |        |                                         |      |      |      |      |      |      |
|------|---|--------|-----------------------------------------|------|------|------|------|------|------|
| 1641 | 1 | 51798  | QPCHRDMFGFCK                            | 2.45 | 0.01 | 0.90 | 0.68 | 0.22 | 0.28 |
| 1642 | 1 | 174248 | QPEEPFPE                                | 2.17 | 0.01 | 0.90 | 0.44 | 1.23 | 0.85 |
| 1643 | 1 | 98381  | QPFPPQLPYSQPQFRP<br>QQPY                | 3.06 | 0.01 | 1.86 | 0.44 | 1.93 | 0.28 |
| 1644 | 1 | 98381  | QPFPPQLPYSQPQFRP<br>QQPY                | 3.06 | 0.01 | 1.86 | 0.44 | 1.93 | 0.28 |
| 1645 | 1 | 98382  | QPFPPQQYPQPQPFPS<br>QQPY                | 3.07 | 0.01 | 1.86 | 0.44 | 1.93 | 0.28 |
| 1646 | 1 | 98382  | QPFPPQQYPQPQPFPS<br>QQPY                | 3.07 | 0.01 | 1.86 | 0.44 | 1.93 | 0.28 |
| 1647 | 1 | 98382  | QPFPPQQYPQPQPFPS<br>QQPY                | 3.07 | 0.01 | 1.86 | 0.44 | 2.39 | 0.28 |
| 1648 | 1 | 98382  | QPFPPQQYPQPQPFPS<br>QQPY                | 3.07 | 0.01 | 1.86 | 0.44 | 2.39 | 0.28 |
| 1649 | 1 | 99836  | QPFPPQPQ                                | 2.06 | 0.01 | 1.86 | 0.68 | 0.22 | 0.28 |
| 1650 | 1 | 98383  | QPFPPQLPYP                              | 2.46 | 0.01 | 1.86 | 0.68 | 0.22 | 0.28 |
| 1651 | 1 | 98384  | QPFPPQLPYSQPQFR<br>PQQP                 | 3.06 | 0.01 | 1.86 | 0.44 | 1.93 | 0.28 |
| 1652 | 1 | 98386  | QPFPPQQYPQPQPY<br>SQPQQ                 | 3.06 | 0.01 | 1.86 | 0.44 | 1.93 | 0.28 |
| 1653 | 1 | 135491 | QPHGGGWGQPHGGG<br>WGQPHGGGWGQPHG<br>GGW | 3.43 | 0.01 | 0.78 | 2.19 | 0.22 | 0.85 |
| 1654 | 1 | 135491 | QPHGGGWGQPHGGG<br>WGQPHGGGWGQPHG<br>GGW | 3.43 | 0.01 | 0.78 | 2.19 | 0.22 | 0.85 |
| 1655 | 1 | 135491 | QPHGGGWGQPHGGG<br>WGQPHGGGWGQPHG<br>GGW | 3.43 | 0.01 | 0.78 | 2.19 | 0.22 | 0.85 |
| 1656 | 1 | 135491 | QPHGGGWGQPHGGG<br>WGQPHGGGWGQPHG<br>GGW | 3.43 | 0.01 | 0.78 | 2.19 | 0.22 | 0.85 |
| 1657 | 1 | 95728  | QPPVSQFHIQQQ                            | 2.49 | 0.01 | 2.88 | 1.12 | 0.22 | 0.85 |
| 1658 | 1 | 51898  | QPQLPY                                  | 1.92 | 0.01 | 1.86 | 1.15 | 0.22 | 0.28 |
| 1659 | 1 | 51974  | QPTELRYSW                               | 2.18 | 0.01 | 2.87 | 3.04 | 0.22 | 0.28 |
| 1660 | 1 | 51974  | QPTELRYSW                               | 2.18 | 0.01 | 2.87 | 0.44 | 0.85 | 0.28 |
| 1661 | 1 | 98391  | QPVKDSWMSSRGFDE                         | 2.63 | 0.01 | 2.71 | 2.78 | 0.22 | 0.28 |
| 1662 | 1 | 98392  | QPYLQLPFPQQLPYS<br>QPQP                 | 3.07 | 0.01 | 1.86 | 0.44 | 1.93 | 0.28 |
| 1663 | 1 | 104213 | QQFNQQAPLNLENTNN<br>GTL                 | 2.92 | 0.01 | 3.00 | 1.20 | 0.22 | 0.28 |
| 1664 | 1 | 156427 | QQGRQQQQQQGQQ<br>G                      | 2.74 | 0.01 | 3.67 | 0.44 | 1.23 | 1.27 |
| 1665 | 1 | 52042  | QQINHHWHKSGSSIGK<br>AFTT                | 2.93 | 0.01 | 2.85 | 2.02 | 0.22 | 0.28 |

|      |   |        |                                                                     |      |      |      |      |      |      |
|------|---|--------|---------------------------------------------------------------------|------|------|------|------|------|------|
| 1666 | 1 | 52042  | QQINHHWHKSGSSIGK<br>AFTT                                            | 2.93 | 0.01 | 2.85 | 2.02 | 0.22 | 1.48 |
| 1667 | 1 | 98395  | QQKQQQPSSQVSFQ<br>QPLQQY                                            | 3.03 | 0.01 | 1.86 | 0.44 | 1.93 | 0.28 |
| 1668 | 1 | 148836 | QQLVPQLQQP                                                          | 2.36 | 0.01 | 1.86 | 0.44 | 1.23 | 0.85 |
| 1669 | 1 | 228683 | QQPFPQP                                                             | 2.05 | 0.01 | 1.86 | 1.15 | 0.22 | 0.28 |
| 1670 | 1 | 148841 | QQPIPVQPQQ                                                          | 2.35 | 0.01 | 1.86 | 0.44 | 1.23 | 0.85 |
| 1671 | 1 | 148854 | QQQFPEQSQQ                                                          | 2.34 | 0.01 | 1.86 | 0.44 | 1.23 | 0.85 |
| 1672 | 1 | 148855 | QQQFPGQQQQ                                                          | 2.35 | 0.01 | 1.86 | 0.44 | 1.23 | 0.85 |
| 1673 | 1 | 156430 | QQQQQQQFRPSRQEG                                                     | 2.70 | 0.01 | 3.67 | 0.44 | 1.23 | 1.27 |
| 1674 | 1 | 148885 | QQSEQIIPQQ                                                          | 2.34 | 0.01 | 1.86 | 0.44 | 1.23 | 0.85 |
| 1675 | 1 | 186704 | QQSFMEKWLEYEGGGQ<br>QSFMEKWLEYEGGGQQ<br>SFMEKWLEYEGKKK              | 3.80 | 0.01 | 0.90 | 3.47 | 0.22 | 0.28 |
| 1676 | 1 | 148886 | QQSFPLQPQQ                                                          | 2.34 | 0.01 | 1.86 | 0.44 | 1.23 | 0.85 |
| 1677 | 1 | 148887 | QQSFPQQQRP                                                          | 2.35 | 0.01 | 1.86 | 0.44 | 1.23 | 0.85 |
| 1678 | 1 | 148888 | QQSFPQQSQQ                                                          | 2.35 | 0.01 | 1.86 | 0.44 | 1.23 | 0.85 |
| 1679 | 1 | 52198  | QREDPTEKGLDFKLYWT<br>DSQNKKEVISSDN                                  | 3.31 | 0.01 | 2.18 | 1.81 | 0.22 | 0.28 |
| 1680 | 1 | 52198  | QREDPTEKGLDFKLYWT<br>DSQNKKEVISSDN                                  | 3.31 | 0.01 | 2.18 | 0.68 | 0.22 | 0.28 |
| 1681 | 1 | 233257 | QRFGDI                                                              | 1.88 | 0.01 | 0.78 | 3.57 | 0.22 | 0.28 |
| 1682 | 1 | 120156 | QRLMRYWANF                                                          | 2.29 | 0.01 | 0.78 | 2.66 | 0.22 | 0.28 |
| 1683 | 1 | 120156 | QRLMRYWANF                                                          | 2.29 | 0.01 | 0.78 | 1.15 | 0.22 | 0.28 |
| 1684 | 1 | 157812 | QRQSQQGQRREF                                                        | 2.52 | 0.01 | 3.65 | 0.44 | 1.23 | 0.85 |
| 1685 | 1 | 122543 | QRSQDEN                                                             | 2.03 | 0.01 | 2.95 | 2.04 | 0.22 | 1.27 |
| 1686 | 1 | 122543 | QRSQDEN                                                             | 2.03 | 0.01 | 2.95 | 2.04 | 0.22 | 1.27 |
| 1687 | 1 | 100445 | QRSRQFQNLQNHRIVQI<br>EAK                                            | 2.95 | 0.01 | 2.16 | 0.44 | 2.39 | 0.28 |
| 1688 | 1 | 52301  | QSCRRPNAQRFGISNYC<br>QIYPPNANKIREALQAT<br>HSAIAVIIIGIKDLDAFRHY<br>D | 3.93 | 0.01 | 2.78 | 0.44 | 1.23 | 1.27 |
| 1689 | 1 | 114555 | QSENDHRRSIVRVEG                                                     | 2.68 | 0.01 | 3.27 | 0.44 | 1.23 | 0.85 |
| 1690 | 1 | 52362  | QSLDLAEQELVDCASQH<br>GCHGDTIPRGIEYIQHN<br>GVVQESYYRYVAR             | 3.80 | 0.01 | 2.78 | 0.44 | 1.23 | 1.27 |
| 1691 | 1 | 167804 | QSLLETHPL                                                           | 2.23 | 0.01 | 2.40 | 2.43 | 0.22 | 0.28 |
| 1692 | 1 | 125540 | QSLRQRKSVNALNSPLH<br>QEY                                            | 2.95 | 0.01 | 0.78 | 1.20 | 0.22 | 0.28 |
| 1693 | 1 | 226379 | QTCKAAGTCPSDVIPKIE<br>H                                             | 2.87 | 0.01 | 3.21 | 0.68 | 0.22 | 1.34 |
| 1694 | 1 | 226379 | QTCKAAGTCPSDVIPKIE<br>H                                             | 2.87 | 0.01 | 3.21 | 0.68 | 0.22 | 1.34 |

|      |   |        |                                |      |      |      |      |      |      |
|------|---|--------|--------------------------------|------|------|------|------|------|------|
| 1695 | 1 | 96806  | QTELARVQKA                     | 2.32 | 0.01 | 2.39 | 0.44 | 0.85 | 0.28 |
| 1696 | 1 | 177226 | QTESPELQSAPEN                  | 2.58 | 0.01 | 2.22 | 2.69 | 0.22 | 1.48 |
| 1697 | 1 | 174253 | QTINPEDD                       | 2.09 | 0.01 | 0.78 | 1.15 | 0.22 | 1.34 |
| 1698 | 1 | 187081 | QTLKKPADDANKAVND<br>S          | 2.80 | 0.01 | 2.80 | 3.38 | 0.22 | 0.28 |
| 1699 | 1 | 187081 | QTLKKPADDANKAVND<br>S          | 2.80 | 0.01 | 2.80 | 0.68 | 0.22 | 0.28 |
| 1700 | 1 | 187081 | QTLKKPADDANKAVND<br>S          | 2.80 | 0.01 | 2.80 | 3.38 | 0.22 | 0.28 |
| 1701 | 1 | 187081 | QTLKKPADDANKAVND<br>S          | 2.80 | 0.01 | 2.80 | 0.68 | 0.22 | 0.28 |
| 1702 | 1 | 52599  | QTQPSKPTTKQR                   | 2.52 | 0.01 | 2.38 | 0.68 | 0.22 | 0.28 |
| 1703 | 1 | 52600  | QTQQPQQPFP                     | 2.37 | 0.01 | 1.86 | 0.44 | 1.23 | 0.85 |
| 1704 | 1 | 111692 | QTRSHEHGLFSPFGGRS              | 2.80 | 0.01 | 3.33 | 0.44 | 1.23 | 0.85 |
| 1705 | 1 | 99594  | QTYRQWIIAMSEGI                 | 2.67 | 0.01 | 2.86 | 2.02 | 0.85 | 0.85 |
| 1706 | 1 | 225643 | QVVQATDKLVMHNRGL<br>VMSSAKVSSL | 3.20 | 0.01 | 3.57 | 2.61 | 0.22 | 0.28 |
| 1707 | 1 | 114558 | QVVRPERSRQEWERQ                | 2.73 | 0.01 | 3.48 | 0.44 | 1.23 | 0.85 |
| 1708 | 1 | 120163 | QWKAEFHRWS                     | 2.29 | 0.01 | 0.78 | 2.66 | 0.22 | 0.28 |
| 1709 | 1 | 52929  | QYIKANSKFIGITE                 | 2.59 | 0.01 | 2.95 | 0.68 | 0.22 | 0.28 |
| 1710 | 1 | 52929  | QYIKANSKFIGITE                 | 2.59 | 0.01 | 2.95 | 1.20 | 0.22 | 0.28 |
| 1711 | 1 | 193527 | QYPAGGPYP                      | 2.26 | 0.01 | 2.51 | 0.44 | 2.39 | 0.28 |
| 1712 | 1 | 115935 | QYVLSRYPY                      | 2.33 | 0.01 | 1.60 | 0.44 | 1.23 | 0.85 |
| 1713 | 1 | 53067  | RAAIRAS                        | 2.07 | 0.01 | 2.84 | 0.44 | 0.85 | 0.28 |
| 1714 | 1 | 174254 | RACEYICKKE                     | 2.33 | 0.01 | 3.10 | 0.44 | 1.23 | 0.85 |
| 1715 | 1 | 174254 | RACEYICKKE                     | 2.33 | 0.01 | 3.10 | 0.44 | 1.23 | 0.85 |
| 1716 | 1 | 104216 | RAFAPKLSETDSPT                 | 2.61 | 0.01 | 3.00 | 1.20 | 0.22 | 0.28 |
| 1717 | 1 | 238967 | RAPYNKNNENINPNR                | 2.72 | 0.01 | 2.56 | 2.02 | 0.22 | 0.85 |
| 1718 | 1 | 238967 | RAPYNKNNENINPNR                | 2.72 | 0.01 | 2.56 | 1.20 | 0.22 | 0.85 |
| 1719 | 1 | 53195  | RARGRGRGRGEKRP                 | 2.68 | 0.01 | 2.43 | 0.44 | 1.74 | 0.28 |
| 1720 | 1 | 141996 | RCAWEETKNIINDFLEIP<br>EERCT    | 3.07 | 0.01 | 3.13 | 0.68 | 0.22 | 0.28 |
| 1721 | 1 | 53306  | RCQFSVWSWESLRCEFP<br>Y         | 2.86 | 0.01 | 0.90 | 1.15 | 0.22 | 1.39 |
| 1722 | 1 | 98411  | RCSEDDHDDLGMVP                 | 2.63 | 0.01 | 2.71 | 2.78 | 0.22 | 0.28 |
| 1723 | 1 | 153869 | RDGNPYAVCDKCLKFYS<br>KIS       | 2.91 | 0.01 | 1.86 | 2.37 | 0.22 | 0.28 |
| 1724 | 1 | 53634  | RESQAYYQR                      | 2.25 | 0.01 | 0.78 | 2.19 | 0.22 | 0.85 |
| 1725 | 1 | 53634  | RESQAYYQR                      | 2.25 | 0.01 | 0.78 | 2.19 | 0.22 | 0.85 |
| 1726 | 1 | 176431 | REVLQYQFDEMEE                  | 2.53 | 0.01 | 1.72 | 0.44 | 0.85 | 2.97 |
| 1727 | 1 | 153870 | REVYDFAFRDLCIVYRDG<br>NP       | 2.94 | 0.01 | 1.86 | 2.37 | 0.22 | 0.28 |

|      |   |        |                               |      |      |      |      |      |      |
|------|---|--------|-------------------------------|------|------|------|------|------|------|
| 1728 | 1 | 120167 | RFQSSAVMALQEACEAY<br>L        | 2.84 | 0.01 | 1.60 | 2.84 | 1.13 | 1.27 |
| 1729 | 1 | 100462 | RFSTRYGNQNGRIRVLQ<br>RFD      | 2.95 | 0.01 | 2.16 | 0.44 | 2.39 | 0.28 |
| 1730 | 1 | 53839  | RGDLQVLAQK                    | 2.31 | 0.01 | 3.14 | 0.68 | 0.22 | 1.34 |
| 1731 | 1 | 244271 | RGDQQFPWGQQPPPP<br>PRLPLEC    | 3.09 | 0.01 | 2.96 | 0.44 | 0.85 | 1.66 |
| 1732 | 1 | 103545 | RGIHVDIIIDRSKSLTFK<br>Q       | 2.94 | 0.01 | 3.93 | 2.43 | 0.22 | 0.85 |
| 1733 | 1 | 103545 | RGIHVDIIIDRSKSLTFK<br>Q       | 2.94 | 0.01 | 3.93 | 0.44 | 1.59 | 0.28 |
| 1734 | 1 | 53929  | RGNQGFPWDILFPADP<br>PFSPQSC   | 3.08 | 0.01 | 2.96 | 0.44 | 0.85 | 1.66 |
| 1735 | 1 | 54002  | RGTSMDDEADRY                  | 2.48 | 0.01 | 2.88 | 2.37 | 0.22 | 0.28 |
| 1736 | 1 | 119514 | RGWKHWVYYTCCPDT<br>Y          | 2.78 | 0.01 | 2.26 | 3.65 | 0.22 | 1.57 |
| 1737 | 1 | 119514 | RGWKHWVYYTCCPDT<br>Y          | 2.78 | 0.01 | 2.26 | 2.25 | 0.22 | 1.57 |
| 1738 | 1 | 176439 | RHEWNKHGWCNWNIN               | 2.68 | 0.01 | 2.63 | 1.15 | 0.22 | 0.85 |
| 1739 | 1 | 117637 | RIRYFILPDSLPLDTIR<br>VD<br>VE | 3.02 | 0.01 | 0.78 | 1.12 | 0.22 | 0.28 |
| 1740 | 1 | 230510 | RISGVGIDQPPYGIF               | 2.67 | 0.01 | 0.78 | 0.44 | 1.13 | 0.28 |
| 1741 | 1 | 230510 | RISGVGIDQPPYGIF               | 2.67 | 0.01 | 0.78 | 0.44 | 1.13 | 0.28 |
| 1742 | 1 | 131038 | RKIAKDEGAK                    | 2.33 | 0.01 | 0.78 | 0.44 | 1.93 | 0.85 |
| 1743 | 1 | 120173 | RLMRYWANFA                    | 2.32 | 0.01 | 0.78 | 2.66 | 0.22 | 0.28 |
| 1744 | 1 | 120173 | RLMRYWANFA                    | 2.32 | 0.01 | 0.78 | 1.15 | 0.22 | 0.28 |
| 1745 | 1 | 113817 | RLPYFFSDVS                    | 2.30 | 0.01 | 1.86 | 1.12 | 0.22 | 0.28 |
| 1746 | 1 | 88060  | RMAFTEIKVQ                    | 2.26 | 0.01 | 3.06 | 0.44 | 0.85 | 0.28 |
| 1747 | 1 | 99621  | RNAMRHLRPEDTLEE               | 2.67 | 0.01 | 2.86 | 2.02 | 0.85 | 0.85 |
| 1748 | 1 | 115645 | RNGKDQDGDQAP                  | 2.49 | 0.01 | 0.78 | 0.44 | 1.13 | 0.28 |
| 1749 | 1 | 115645 | RNGKDQDGDQAP                  | 2.49 | 0.01 | 0.78 | 0.44 | 1.13 | 0.28 |
| 1750 | 1 | 115645 | RNGKDQDGDQAP                  | 2.49 | 0.01 | 0.78 | 0.44 | 1.41 | 0.28 |
| 1751 | 1 | 88083  | RNHKYDIKLT                    | 2.29 | 0.01 | 3.06 | 0.44 | 0.85 | 0.28 |
| 1752 | 1 | 100478 | RNNPFYFPSRRFSTRY<br>G<br>NQN  | 2.99 | 0.01 | 2.16 | 0.44 | 2.39 | 0.28 |
| 1753 | 1 | 161448 | RNTNLAANFNGQNTEI<br>NNM       | 2.89 | 0.01 | 2.08 | 2.02 | 0.22 | 1.57 |
| 1754 | 1 | 55078  | RNTRHPPWSAE                   | 2.46 | 0.01 | 0.90 | 0.44 | 1.23 | 0.28 |
| 1755 | 1 | 134216 | RNVELQ                        | 1.88 | 0.01 | 0.78 | 0.44 | 1.41 | 1.27 |
| 1756 | 1 | 55304  | RPQPTELRY                     | 2.24 | 0.01 | 2.87 | 3.04 | 0.22 | 0.28 |
| 1757 | 1 | 55304  | RPQPTELRY                     | 2.24 | 0.01 | 2.87 | 0.44 | 0.85 | 0.28 |
| 1758 | 1 | 156444 | RPSRQEGGQGGQQFQ               | 2.73 | 0.01 | 3.67 | 0.44 | 1.23 | 1.27 |
| 1759 | 1 | 189149 | RPVGREKYRHPPAHGV              | 2.76 | 0.01 | 2.92 | 0.68 | 0.22 | 0.28 |

|      |   |        |                         |      |      |      |      |      |      |
|------|---|--------|-------------------------|------|------|------|------|------|------|
| 1760 | 1 | 189150 | RPVGREKYRHPPEHGV        | 2.78 | 0.01 | 2.92 | 0.68 | 0.22 | 0.28 |
| 1761 | 1 | 230512 | RQUESTSSTNYDTSTT        | 2.70 | 0.01 | 0.78 | 0.44 | 1.13 | 0.28 |
| 1762 | 1 | 230512 | RQUESTSSTNYDTSTT        | 2.70 | 0.01 | 0.78 | 0.44 | 1.13 | 0.28 |
| 1763 | 1 | 120180 | RQWKAEFHRW              | 2.32 | 0.01 | 0.78 | 2.66 | 0.22 | 0.28 |
| 1764 | 1 | 120180 | RQWKAEFHRW              | 2.32 | 0.01 | 0.78 | 1.15 | 0.22 | 0.28 |
| 1765 | 1 | 120181 | RRATQLAHLV              | 2.32 | 0.01 | 0.78 | 1.15 | 0.22 | 0.28 |
| 1766 | 1 | 133684 | RRIASQVKYAGSQVAST<br>SE | 2.90 | 0.01 | 0.78 | 0.68 | 0.22 | 0.85 |
| 1767 | 1 | 133684 | RRIASQVKYAGSQVAST<br>SE | 2.90 | 0.01 | 0.78 | 0.68 | 0.22 | 0.85 |
| 1768 | 1 | 120184 | RRRATQLAHL              | 2.33 | 0.01 | 0.78 | 1.15 | 0.22 | 0.28 |
| 1769 | 1 | 55818  | RSDYKFYEDANGTRDHK<br>KG | 2.89 | 0.01 | 3.72 | 3.63 | 0.22 | 1.66 |
| 1770 | 1 | 55818  | RSDYKFYEDANGTRDHK<br>KG | 2.89 | 0.01 | 3.72 | 3.63 | 0.22 | 1.75 |
| 1771 | 1 | 55818  | RSDYKFYEDANGTRDHK<br>KG | 2.89 | 0.01 | 3.72 | 3.63 | 0.22 | 1.75 |
| 1772 | 1 | 55818  | RSDYKFYEDANGTRDHK<br>KG | 2.89 | 0.01 | 3.72 | 3.63 | 0.22 | 1.75 |
| 1773 | 1 | 525422 | RSGYSSPGSPGTPGSRSR      | 2.92 | 4.03 | 0.78 | 0.68 | 0.22 | 0.28 |
| 1774 | 1 | 98425  | RSLWCRIGHDRCS           | 2.69 | 0.01 | 2.71 | 2.78 | 0.22 | 0.28 |
| 1775 | 1 | 447993 | RTALNCNDSLNTGFL         | 2.68 | 0.01 | 1.96 | 0.68 | 0.22 | 1.34 |
| 1776 | 1 | 156448 | RTSFLRALPDEVLAN         | 2.67 | 0.01 | 3.67 | 0.44 | 1.23 | 1.27 |
| 1777 | 1 | 91929  | RTSYVMTFLWSLNA          | 2.59 | 0.01 | 3.12 | 1.12 | 0.22 | 0.28 |
| 1778 | 1 | 119331 | RTVLVSMNYR              | 2.32 | 0.01 | 0.78 | 1.15 | 0.22 | 0.28 |
| 1779 | 1 | 56335  | RVKTRMH                 | 2.13 | 0.01 | 0.78 | 0.44 | 1.41 | 1.27 |
| 1780 | 1 | 120189 | RVYAYVFEHR              | 2.34 | 0.01 | 0.78 | 2.66 | 0.22 | 0.28 |
| 1781 | 1 | 120189 | RVYAYVFEHR              | 2.34 | 0.01 | 0.78 | 1.15 | 0.22 | 0.28 |
| 1782 | 1 | 56496  | RWWQHRPSHTPS            | 2.51 | 0.01 | 0.90 | 0.44 | 1.23 | 0.28 |
| 1783 | 1 | 56534  | RYFTYEENPDGE            | 2.47 | 0.01 | 2.88 | 2.37 | 0.22 | 0.28 |
| 1784 | 1 | 135497 | RYPNQVYYRPM             | 2.43 | 0.01 | 0.78 | 2.19 | 0.22 | 0.85 |
| 1785 | 1 | 135497 | RYPNQVYYRPM             | 2.43 | 0.01 | 0.78 | 2.19 | 0.22 | 0.85 |
| 1786 | 1 | 166938 | RYSRNPV                 | 2.13 | 0.01 | 3.51 | 0.68 | 0.22 | 0.28 |
| 1787 | 1 | 166938 | RYSRNPV                 | 2.13 | 0.01 | 3.51 | 0.68 | 0.22 | 0.28 |
| 1788 | 1 | 56657  | RYSRNPVNV               | 2.34 | 0.01 | 3.14 | 0.68 | 0.22 | 1.34 |
| 1789 | 1 | 104231 | SAADEKFIKETEHAKDYG      | 2.85 | 0.01 | 3.00 | 1.20 | 0.22 | 0.28 |
| 1790 | 1 | 138028 | SAGALQLLVGVC            | 2.49 | 0.01 | 2.21 | 0.44 | 0.85 | 0.28 |
| 1791 | 1 | 138028 | SAGALQLLVGVC            | 2.49 | 0.01 | 2.21 | 1.20 | 0.22 | 0.28 |
| 1792 | 1 | 161280 | SAGRRTAGLVGLTPGA<br>KQN | 2.95 | 0.01 | 2.41 | 2.74 | 0.22 | 1.34 |
| 1793 | 1 | 98436  | SAGTGGADLPTDLPP         | 2.70 | 0.01 | 2.71 | 2.78 | 0.22 | 0.28 |
| 1794 | 1 | 101219 | SALLVREEGLMQNC          | 2.58 | 0.01 | 0.78 | 1.20 | 0.22 | 1.57 |
| 1795 | 1 | 98437  | SAPRHKFQQVEEANL         | 2.62 | 0.01 | 2.71 | 2.78 | 0.22 | 0.28 |
| 1796 | 1 | 95814  | SAQSGASQSGA             | 2.55 | 0.01 | 1.66 | 0.44 | 1.74 | 0.28 |

|      |   |        |                                              |      |      |      |      |      |      |
|------|---|--------|----------------------------------------------|------|------|------|------|------|------|
| 1797 | 1 | 95815  | SAQSGASAQSGT                                 | 2.54 | 0.01 | 1.66 | 0.44 | 1.74 | 0.28 |
| 1798 | 1 | 95819  | SAQSGTSGTSGT                                 | 2.54 | 0.01 | 1.66 | 0.44 | 1.74 | 0.28 |
| 1799 | 1 | 56962  | SARDGIRDAMIGLREEM<br>IEK                     | 2.97 | 0.01 | 2.67 | 0.44 | 0.85 | 0.28 |
| 1800 | 1 | 56978  | SASAEPHKAADVVGPLS<br>VG PQ                   | 3.01 | 0.01 | 3.51 | 0.68 | 0.22 | 0.28 |
| 1801 | 1 | 56978  | SASAEPHKAADVVGPLS<br>VG PQ                   | 3.01 | 0.01 | 3.51 | 1.15 | 0.22 | 0.28 |
| 1802 | 1 | 78268  | SASGSGVRGDFGSLAPR<br>VARQLPASFN YGAIK        | 3.42 | 0.01 | 3.14 | 3.67 | 0.22 | 1.34 |
| 1803 | 1 | 78268  | SASGSGVRGDFGSLAPR<br>VARQLPASFN YGAIK        | 3.42 | 0.01 | 3.14 | 3.67 | 0.22 | 1.27 |
| 1804 | 1 | 57010  | SATAIFDTTTLNPTIAGA<br>GDVKASAEGQLG           | 3.34 | 0.01 | 3.16 | 0.68 | 0.22 | 1.34 |
| 1805 | 1 | 57010  | SATAIFDTTTLNPTIAGA<br>GDVKASAEGQLG           | 3.34 | 0.01 | 3.16 | 0.68 | 0.22 | 1.34 |
| 1806 | 1 | 57010  | SATAIFDTTTLNPTIAGA<br>GDVKASAEGQLG           | 3.34 | 0.01 | 3.16 | 0.68 | 0.22 | 1.34 |
| 1807 | 1 | 98440  | SCLRHGDSSTTIRK                               | 2.65 | 0.01 | 2.71 | 2.78 | 0.22 | 0.28 |
| 1808 | 1 | 122567 | SDEESSNAAEWKYVA<br>MVIDH                     | 2.98 | 0.01 | 2.26 | 2.43 | 0.22 | 1.57 |
| 1809 | 1 | 57320  | SDYEDRYREN                                   | 2.43 | 0.01 | 0.78 | 2.19 | 0.22 | 0.85 |
| 1810 | 1 | 57320  | SDYEDRYREN                                   | 2.43 | 0.01 | 0.78 | 2.19 | 0.22 | 0.85 |
| 1811 | 1 | 142473 | SEAKDGSHGEGK                                 | 2.52 | 0.01 | 0.90 | 0.68 | 0.22 | 0.85 |
| 1812 | 1 | 153885 | SEEEDEIDGPAGQAE PD<br>RAH                    | 2.97 | 0.01 | 1.86 | 2.37 | 0.22 | 0.28 |
| 1813 | 1 | 57451  | SEGPSYEFSDCS                                 | 2.50 | 0.01 | 3.61 | 1.20 | 0.22 | 0.85 |
| 1814 | 1 | 120197 | SEHETRLVANLLENYN                             | 2.74 | 0.01 | 2.26 | 2.43 | 0.22 | 1.57 |
| 1815 | 1 | 57532  | SELPQWI                                      | 1.99 | 0.01 | 0.90 | 1.15 | 0.22 | 1.39 |
| 1816 | 1 | 57556  | SEMPQLP                                      | 2.02 | 0.01 | 0.90 | 1.15 | 0.22 | 1.39 |
| 1817 | 1 | 57557  | SEMPQLPSEMPQLP                               | 2.68 | 0.01 | 0.90 | 1.15 | 0.22 | 1.27 |
| 1818 | 1 | 111016 | SENNGNNGNGG                                  | 2.52 | 0.01 | 3.15 | 0.44 | 1.59 | 0.28 |
| 1819 | 1 | 510481 | SESPGIA                                      | 2.03 | 0.01 | 0.90 | 0.44 | 1.13 | 0.28 |
| 1820 | 1 | 108620 | SETSKEESTPEVKAEDLQ<br>P<br>SEVDMNSPKSKKAKKKE | 2.93 | 0.01 | 4.08 | 2.49 | 0.85 | 0.28 |
| 1821 | 1 | 132057 | EPSQNDISPKTKSLRKKK<br>EPIEKKVV               | 3.70 | 0.01 | 0.78 | 0.44 | 1.13 | 0.85 |
| 1822 | 1 | 173173 | SFEKTADHLFDAAYF                              | 2.67 | 0.01 | 0.78 | 2.79 | 1.13 | 1.28 |
| 1823 | 1 | 158610 | SFGTFLW                                      | 2.02 | 0.01 | 0.90 | 0.44 | 1.13 | 1.39 |
| 1824 | 1 | 57784  | SFGVWIRTPPAYRPPNA<br>PIL                     | 2.92 | 0.01 | 2.71 | 0.44 | 0.85 | 0.28 |
| 1825 | 1 | 95827  | SGASAQSGASAQ                                 | 2.55 | 0.01 | 1.66 | 0.44 | 1.74 | 0.28 |
| 1826 | 1 | 95828  | SGASAQSGTSAQ                                 | 2.54 | 0.01 | 1.66 | 0.44 | 1.74 | 0.28 |
| 1827 | 1 | 131657 | SGLQAEDEADYYCSSY                             | 2.76 | 0.01 | 0.78 | 0.44 | 1.41 | 0.28 |



|      |   |        |                                 |      |      |      |      |      |      |
|------|---|--------|---------------------------------|------|------|------|------|------|------|
| 1828 | 1 | 95833  | SGPSGPSGPSGT                    | 2.55 | 0.01 | 1.66 | 0.44 | 1.74 | 0.28 |
| 1829 | 1 | 135499 | SGRGKGGKGLGKGGAK<br>RHRKVL      | 3.09 | 4.03 | 1.75 | 3.05 | 1.13 | 0.28 |
| 1830 | 1 | 135499 | SGRGKGGKGLGKGGAK<br>RHRKVL      | 3.09 | 4.03 | 1.75 | 0.44 | 1.13 | 0.28 |
| 1831 | 1 | 177293 | SGSQRSTNSASTS                   | 2.60 | 0.01 | 2.96 | 0.68 | 0.22 | 1.48 |
| 1832 | 1 | 174270 | SGTKITFHIE                      | 2.31 | 0.01 | 3.10 | 0.44 | 1.23 | 0.85 |
| 1833 | 1 | 95842  | SGTSAQSGTSGT                    | 2.54 | 0.01 | 1.66 | 0.44 | 1.74 | 0.28 |
| 1834 | 1 | 95843  | SGTSGPSGPSGP                    | 2.55 | 0.01 | 1.66 | 0.44 | 1.74 | 0.28 |
| 1835 | 1 | 95844  | SGTSGPSGPSGT                    | 2.55 | 0.01 | 1.66 | 0.44 | 1.74 | 0.28 |
| 1836 | 1 | 58314  | SGYCAWPACYCYGLP                 | 2.72 | 0.01 | 2.56 | 1.20 | 0.22 | 0.85 |
| 1837 | 1 | 58314  | SGYCAWPACYCYGLP                 | 2.72 | 0.01 | 2.56 | 1.20 | 0.22 | 0.85 |
| 1838 | 1 | 112837 | SGYIPANTTIPF                    | 2.46 | 0.01 | 1.86 | 0.44 | 0.85 | 0.28 |
| 1839 | 1 | 112837 | SGYIPANTTIPF                    | 2.46 | 0.01 | 1.86 | 0.44 | 0.85 | 0.28 |
| 1840 | 1 | 112837 | SGYIPANTTIPF                    | 2.46 | 0.01 | 1.86 | 0.44 | 0.85 | 0.28 |
| 1841 | 1 | 112837 | SGYIPANTTIPF                    | 2.46 | 0.01 | 1.86 | 0.44 | 1.74 | 0.28 |
| 1842 | 1 | 58359  | SHGNYSTQVGATQAGR<br>FSIT        | 2.95 | 0.01 | 2.85 | 2.02 | 0.22 | 0.28 |
| 1843 | 1 | 58378  | SHLLKPQTRTRT                    | 2.48 | 0.01 | 0.90 | 0.44 | 1.23 | 0.28 |
| 1844 | 1 | 58466  | SICSNNPTCWAISK                  | 2.63 | 0.01 | 0.90 | 0.68 | 0.22 | 0.28 |
| 1845 | 1 | 58466  | SICSNNPTCWAISK                  | 2.63 | 0.01 | 0.90 | 1.15 | 0.22 | 0.28 |
| 1846 | 1 | 58466  | SICSNNPTCWAISK                  | 2.63 | 0.01 | 0.90 | 1.15 | 0.22 | 1.75 |
| 1847 | 1 | 58466  | SICSNNPTCWAISK                  | 2.63 | 0.01 | 0.90 | 1.15 | 0.22 | 0.28 |
| 1848 | 1 | 136635 | SIPTYTPDKVTY                    | 2.49 | 0.01 | 0.90 | 0.68 | 0.22 | 0.28 |
| 1849 | 1 | 120946 | SISPESDRPDLSTFMESG<br>EW        | 2.95 | 0.01 | 2.26 | 0.68 | 0.22 | 0.85 |
| 1850 | 1 | 58709  | SISSLNKNIVNYESKIEELE<br>KELKEVK | 3.30 | 0.01 | 2.22 | 0.44 | 1.74 | 0.28 |
| 1851 | 1 | 111780 | SIVSLIEESAIINAGAPEV<br>VP       | 3.03 | 0.01 | 3.03 | 0.68 | 0.22 | 0.28 |
| 1852 | 1 | 111780 | SIVSLIEESAIINAGAPEV<br>VP       | 3.03 | 0.01 | 3.03 | 0.68 | 0.22 | 0.28 |
| 1853 | 1 | 111780 | SIVSLIEESAIINAGAPEV<br>VP       | 3.03 | 0.01 | 3.03 | 0.68 | 0.22 | 0.28 |
| 1854 | 1 | 111780 | SIVSLIEESAIINAGAPEV<br>VP       | 3.03 | 0.01 | 3.03 | 1.20 | 0.22 | 0.28 |
| 1855 | 1 | 111780 | SIVSLIEESAIINAGAPEV<br>VP       | 3.03 | 0.01 | 3.03 | 1.20 | 0.22 | 0.28 |
| 1856 | 1 | 111780 | SIVSLIEESAIINAGAPEV<br>VP       | 3.03 | 0.01 | 3.03 | 1.20 | 0.22 | 0.28 |
| 1857 | 1 | 111780 | SIVSLIEESAIINAGAPEV<br>VP       | 3.03 | 0.01 | 3.03 | 1.20 | 0.22 | 1.34 |
| 1858 | 1 | 111780 | SIVSLIEESAIINAGAPEV<br>VP       | 3.03 | 0.01 | 3.03 | 1.20 | 0.22 | 1.34 |
| 1859 | 1 | 111781 | SIVSLVEETSFIDAGAPTS<br>VP       | 3.01 | 0.01 | 1.86 | 0.68 | 0.22 | 0.28 |

|      |   |        |                           |      |      |      |      |      |      |
|------|---|--------|---------------------------|------|------|------|------|------|------|
| 1860 | 1 | 111781 | SIVSLVEETSFIDAGAPTS<br>VP | 3.01 | 0.01 | 1.86 | 0.68 | 0.22 | 0.28 |
| 1861 | 1 | 111781 | SIVSLVEETSFIDAGAPTS<br>VP | 3.01 | 0.01 | 1.86 | 0.68 | 0.22 | 0.28 |
| 1862 | 1 | 111781 | SIVSLVEETSFIDAGAPTS<br>VP | 3.01 | 0.01 | 1.86 | 0.68 | 0.22 | 0.28 |
| 1863 | 1 | 111781 | SIVSLVEETSFIDAGAPTS<br>VP | 3.01 | 0.01 | 1.86 | 0.68 | 0.22 | 0.28 |
| 1864 | 1 | 111781 | SIVSLVEETSFIDAGAPTS<br>VP | 3.01 | 0.01 | 1.86 | 0.68 | 0.22 | 0.28 |
| 1865 | 1 | 111781 | SIVSLVEETSFIDAGAPTS<br>VP | 3.01 | 0.01 | 1.86 | 0.68 | 0.22 | 0.28 |
| 1866 | 1 | 111781 | SIVSLVEETSFIDAGAPTS<br>VP | 3.01 | 0.01 | 1.86 | 1.20 | 0.22 | 0.28 |
| 1867 | 1 | 111781 | SIVSLVEETSFIDAGAPTS<br>VP | 3.01 | 0.01 | 1.86 | 1.20 | 0.22 | 0.28 |
| 1868 | 1 | 111781 | SIVSLVEETSFIDAGAPTS<br>VP | 3.01 | 0.01 | 1.86 | 1.20 | 0.22 | 0.28 |
| 1869 | 1 | 111781 | SIVSLVEETSFIDAGAPTS<br>VP | 3.01 | 0.01 | 1.86 | 0.68 | 0.22 | 0.28 |
| 1870 | 1 | 111781 | SIVSLVEETSFIDAGAPTS<br>VP | 3.01 | 0.01 | 1.86 | 0.68 | 0.22 | 1.34 |
| 1871 | 1 | 111781 | SIVSLVEETSFIDAGAPTS<br>VP | 3.01 | 0.01 | 1.86 | 1.20 | 0.22 | 1.34 |
| 1872 | 1 | 111781 | SIVSLVEETSFIDAGAPTS<br>VP | 3.01 | 0.01 | 1.86 | 0.68 | 0.22 | 1.34 |
| 1873 | 1 | 111781 | SIVSLVEETSFIDAGAPTS<br>VP | 3.01 | 0.01 | 1.86 | 1.20 | 0.22 | 1.34 |
| 1874 | 1 | 451514 | SKAPPPSLPS                | 2.37 | 0.01 | 0.78 | 1.81 | 0.22 | 0.28 |
| 1875 | 1 | 102804 | SKDVVQYEQEIESLEATY<br>HI  | 2.94 | 0.01 | 3.44 | 0.68 | 0.22 | 0.28 |
| 1876 | 1 | 108131 | SKDWSFY                   | 2.03 | 0.01 | 0.78 | 1.15 | 0.22 | 0.28 |
| 1877 | 1 | 108131 | SKDWSFY                   | 2.03 | 0.01 | 0.78 | 1.20 | 0.22 | 0.28 |
| 1878 | 1 | 108131 | SKDWSFY                   | 2.03 | 0.01 | 0.78 | 1.15 | 0.22 | 0.28 |
| 1879 | 1 | 108131 | SKDWSFY                   | 2.03 | 0.01 | 0.78 | 3.03 | 0.22 | 1.27 |
| 1880 | 1 | 108633 | SKEESTPEVKAEDLQPAV<br>D   | 2.93 | 0.01 | 4.08 | 2.49 | 0.85 | 0.28 |
| 1881 | 1 | 111025 | SKIYDTKTGTDR              | 2.49 | 0.01 | 3.15 | 0.44 | 1.59 | 0.28 |
| 1882 | 1 | 121858 | SKLIKIFQDHPLQKTYN         | 2.78 | 0.01 | 0.78 | 0.44 | 1.41 | 0.28 |
| 1883 | 1 | 121858 | SKLIKIFQDHPLQKTYN         | 2.78 | 0.01 | 0.78 | 0.44 | 1.13 | 0.28 |
| 1884 | 1 | 121858 | SKLIKIFQDHPLQKTYN         | 2.78 | 0.01 | 0.78 | 0.44 | 1.13 | 0.28 |
| 1885 | 1 | 121858 | SKLIKIFQDHPLQKTYN         | 2.78 | 0.01 | 0.78 | 0.44 | 1.13 | 0.28 |

|      |   |        |                                     |      |      |      |      |      |      |
|------|---|--------|-------------------------------------|------|------|------|------|------|------|
| 1886 | 1 | 121858 | SKLIKIFQDHPLQKTYN                   | 2.78 | 0.01 | 0.78 | 0.44 | 1.13 | 0.28 |
| 1887 | 1 | 121858 | SKLIKIFQDHPLQKTYN                   | 2.78 | 0.01 | 0.78 | 0.44 | 1.13 | 0.28 |
| 1888 | 1 | 94687  | SKPTTKQRQNKPPNKP                    | 2.78 | 0.01 | 2.38 | 0.68 | 0.22 | 1.75 |
| 1889 | 1 | 98461  | SKSAYTPAYY                          | 2.34 | 0.01 | 3.08 | 0.68 | 0.22 | 0.28 |
| 1890 | 1 | 108635 | SKVEQEETNPEVLIKDLQ<br>DVAS          | 3.05 | 0.01 | 3.27 | 2.49 | 0.85 | 0.28 |
| 1891 | 1 | 108635 | SKVEQEETNPEVLIKDLQ<br>DVAS          | 3.05 | 0.01 | 3.27 | 0.44 | 0.85 | 0.28 |
| 1892 | 1 | 95859  | SLAARVVK                            | 2.12 | 0.01 | 3.48 | 2.22 | 0.22 | 0.28 |
| 1893 | 1 | 59014  | SLAPCIGYVRSGGAV                     | 2.68 | 0.01 | 3.35 | 0.44 | 1.23 | 0.85 |
| 1894 | 1 | 111785 | SLFFYLRRREQMFVRH                    | 2.68 | 0.01 | 1.86 | 0.68 | 0.22 | 0.28 |
| 1895 | 1 | 96896  | SLLGLKAKKD                          | 2.34 | 0.01 | 2.39 | 0.44 | 0.85 | 0.28 |
| 1896 | 1 | 59403  | SLPRVYEIFGA                         | 2.42 | 0.01 | 0.90 | 0.68 | 0.22 | 0.28 |
| 1897 | 1 | 109929 | SLSLSPG                             | 2.06 | 0.01 | 0.78 | 0.44 | 1.13 | 0.28 |
| 1898 | 1 | 59519  | SLTPLLFNYDVA                        | 2.44 | 0.01 | 0.90 | 0.44 | 1.23 | 0.28 |
| 1899 | 1 | 158281 | SNCFAIRHFENKFAVETL<br>ICSRTVKKNIEEN | 3.41 | 0.01 | 0.90 | 0.44 | 1.41 | 1.28 |
| 1900 | 1 | 107621 | SNKALPA                             | 2.02 | 0.01 | 0.78 | 0.44 | 1.13 | 0.28 |
| 1901 | 1 | 136647 | SNNADYQQLLL                         | 2.46 | 0.01 | 0.90 | 0.68 | 0.22 | 0.28 |
| 1902 | 1 | 88952  | SNYTPKNKIE                          | 2.31 | 0.01 | 3.06 | 0.44 | 0.85 | 0.28 |
| 1903 | 1 | 510483 | SPFFLGP                             | 2.03 | 0.01 | 0.90 | 0.44 | 1.13 | 0.28 |
| 1904 | 1 | 510484 | SPFFLTP                             | 2.03 | 0.01 | 0.90 | 0.44 | 1.13 | 0.28 |
| 1905 | 1 | 510486 | SPFWLAA                             | 1.99 | 0.01 | 0.90 | 0.44 | 1.13 | 0.28 |
| 1906 | 1 | 115649 | SPGKNATGMEVG                        | 2.45 | 0.01 | 0.78 | 0.44 | 1.13 | 0.28 |
| 1907 | 1 | 115649 | SPGKNATGMEVG                        | 2.45 | 0.01 | 0.78 | 0.44 | 1.13 | 0.28 |
| 1908 | 1 | 233278 | SPIQHR                              | 1.99 | 0.01 | 0.90 | 2.71 | 0.22 | 0.28 |
| 1909 | 1 | 526501 | SPLTASPPATAPGPSAA<br>NVS            | 3.00 | 4.33 | 2.40 | 0.44 | 1.59 | 1.28 |
| 1910 | 1 | 230519 | SPMFIINRNTGEIRT                     | 2.68 | 0.01 | 0.78 | 0.44 | 1.13 | 0.28 |
| 1911 | 1 | 230519 | SPMFIINRNTGEIRT                     | 2.68 | 0.01 | 0.78 | 0.44 | 1.13 | 0.28 |
| 1912 | 1 | 60170  | SPNVSVPSSTPLLY                      | 2.77 | 0.01 | 2.04 | 0.44 | 2.98 | 0.28 |
| 1913 | 1 | 60170  | SPNVSVPSSTPLLY                      | 2.77 | 0.01 | 2.04 | 0.44 | 0.85 | 0.28 |
| 1914 | 1 | 60170  | SPNVSVPSSTPLLY                      | 2.77 | 0.01 | 2.04 | 0.44 | 2.82 | 0.28 |
| 1915 | 1 | 120209 | SPTPVLVWIY                          | 2.31 | 0.01 | 0.78 | 1.15 | 0.22 | 0.28 |
| 1916 | 1 | 60292  | SPTRAVNELFGM                        | 2.40 | 0.01 | 0.90 | 0.68 | 0.22 | 0.28 |
| 1917 | 1 | 118148 | SQEGRTTKQ                           | 2.22 | 0.01 | 0.78 | 0.44 | 1.13 | 0.28 |
| 1918 | 1 | 176617 | SQHLPYIEQGMM                        | 2.43 | 0.01 | 2.41 | 0.44 | 0.85 | 2.97 |
| 1919 | 1 | 113879 | SQRSQDEN                            | 2.15 | 0.01 | 2.95 | 2.04 | 0.22 | 0.28 |
| 1920 | 1 | 113879 | SQRSQDEN                            | 2.15 | 0.01 | 2.95 | 2.04 | 0.22 | 1.27 |
| 1921 | 1 | 135501 | SQWNKP                              | 1.88 | 0.01 | 0.78 | 2.19 | 0.22 | 0.85 |
| 1922 | 1 | 181462 | SRAGLSIITMPTTG                      | 2.67 | 0.01 | 2.82 | 1.15 | 0.22 | 0.28 |
| 1923 | 1 | 60623  | SRALRGDMANLTNQ                      | 2.61 | 0.01 | 3.65 | 1.12 | 0.22 | 1.34 |
| 1924 | 1 | 79399  | SRAPPQQPQPRMQTG<br>RGGSAAPRELGP     | 3.31 | 0.01 | 2.85 | 1.12 | 0.22 | 0.28 |

|      |   |        |                                              |      |      |      |      |      |      |
|------|---|--------|----------------------------------------------|------|------|------|------|------|------|
| 1925 | 1 | 108640 | SRCQVCMRRT                                   | 2.32 | 0.01 | 0.78 | 0.44 | 1.13 | 1.27 |
| 1926 | 1 | 233280 | SRDIEVQGFRI                                  | 2.45 | 0.01 | 0.78 | 3.57 | 0.22 | 0.28 |
| 1927 | 1 | 142022 | SRIFRGDN                                     | 2.12 | 0.01 | 3.13 | 0.68 | 0.22 | 0.28 |
| 1928 | 1 | 142023 | SRKKKAAAAIEEDI                               | 2.69 | 0.01 | 3.13 | 0.68 | 0.22 | 0.28 |
| 1929 | 1 | 137576 | SRQEWQQQDECQIDR                              | 2.70 | 0.01 | 3.12 | 0.44 | 1.23 | 0.85 |
| 1930 | 1 | 134547 | SRSNVLLFKEEMQRANK<br>D                       | 2.82 | 0.01 | 4.08 | 1.12 | 0.22 | 1.48 |
| 1931 | 1 | 60819  | SRTLGCSEWIFPVDDG<br>WGERPL                   | 3.03 | 0.01 | 2.08 | 3.04 | 0.22 | 1.75 |
| 1932 | 1 | 115982 | SRYPYGLNY                                    | 2.34 | 0.01 | 1.60 | 0.44 | 1.23 | 0.85 |
| 1933 | 1 | 510493 | SSHLLSE                                      | 2.05 | 0.01 | 0.90 | 0.44 | 1.13 | 0.28 |
| 1934 | 1 | 122591 | SSISSEDLAVLQRDDVR<br>QYLRQYLMGP              | 3.27 | 0.01 | 0.78 | 3.65 | 0.22 | 0.28 |
| 1935 | 1 | 61292  | SSPSSTKSSPSNVKSAS                            | 2.90 | 0.01 | 1.66 | 1.20 | 0.22 | 0.28 |
| 1936 | 1 | 119022 | SSQSSSSGSPRRPPPPGR<br>RPFFHPVGEADYFEYHQ<br>E | 3.53 | 0.01 | 2.43 | 0.44 | 1.13 | 0.28 |
| 1937 | 1 | 111804 | SSTMRARQCRLDQLTSS<br>Q                       | 2.87 | 0.01 | 3.33 | 0.44 | 1.23 | 0.85 |
| 1938 | 1 | 61409  | SSTQVQHLLQT                                  | 2.51 | 0.01 | 0.90 | 0.68 | 0.22 | 0.28 |
| 1939 | 1 | 174281 | SSWGAIWRID                                   | 2.32 | 0.01 | 3.10 | 0.44 | 1.23 | 0.85 |
| 1940 | 1 | 510496 | SSWLPRG                                      | 2.01 | 0.01 | 0.90 | 0.44 | 1.13 | 0.28 |
| 1941 | 1 | 132089 | SSYDGIPLSYLSYL                               | 2.66 | 0.01 | 0.90 | 1.20 | 0.22 | 0.28 |
| 1942 | 1 | 89152  | STAVAQSATPSVSSSISSL<br>RAATSGATAAA           | 3.37 | 0.01 | 2.48 | 0.44 | 0.85 | 0.28 |
| 1943 | 1 | 89152  | STAVAQSATPSVSSSISSL<br>RAATSGATAAA           | 3.37 | 0.01 | 2.48 | 0.44 | 0.85 | 0.28 |
| 1944 | 1 | 226391 | STCKAAGTCPPDVVNKV<br>EG                      | 2.89 | 0.01 | 4.03 | 0.68 | 0.22 | 1.34 |
| 1945 | 1 | 226391 | STCKAAGTCPPDVVNKV<br>EG                      | 2.89 | 0.01 | 4.03 | 0.68 | 0.22 | 1.34 |
| 1946 | 1 | 61630  | STGNLLTRLSSLKTPLNH<br>KS                     | 2.99 | 0.01 | 3.42 | 1.12 | 0.22 | 0.28 |
| 1947 | 1 | 226512 | STKDNFNVYKATRPYLA<br>HC                      | 2.86 | 0.01 | 3.26 | 1.81 | 0.22 | 0.28 |
| 1948 | 1 | 118164 | STKQAAFKAV                                   | 2.33 | 0.01 | 0.78 | 0.44 | 1.13 | 0.28 |
| 1949 | 1 | 61746  | STLPETTVVRRRGRSPRR<br>RT                     | 2.98 | 0.01 | 2.71 | 0.44 | 0.85 | 0.28 |
| 1950 | 1 | 61800  | STNS                                         | 1.60 | 0.01 | 1.66 | 0.68 | 0.22 | 1.48 |
| 1951 | 1 | 120229 | SVFRFSFVPV                                   | 2.37 | 0.01 | 0.78 | 1.15 | 0.22 | 0.28 |
| 1952 | 1 | 62150  | SVIALGSQEGALHQALA<br>GAI                     | 2.99 | 0.01 | 2.85 | 2.02 | 0.22 | 0.28 |
| 1953 | 1 | 62150  | SVIALGSQEGALHQALA<br>GAI                     | 2.99 | 0.01 | 2.85 | 2.02 | 0.22 | 1.48 |
| 1954 | 1 | 181806 | SVPTNLDYVPQFLRW                              | 2.64 | 0.01 | 1.66 | 0.44 | 0.85 | 1.28 |

|      |   |        |                                |      |      |      |      |      |      |
|------|---|--------|--------------------------------|------|------|------|------|------|------|
| 1955 | 1 | 98489  | SVQFVPIQNS                     | 2.34 | 0.01 | 3.08 | 1.20 | 0.22 | 0.28 |
| 1956 | 1 | 156966 | SVTKLGDPRAPR                   | 2.45 | 0.01 | 0.90 | 1.20 | 0.22 | 0.28 |
| 1957 | 1 | 62462  | SWHLPRHSIPPW                   | 2.51 | 0.01 | 0.90 | 0.68 | 0.22 | 0.28 |
| 1958 | 1 | 112845 | SWYARHT                        | 1.99 | 0.01 | 0.90 | 0.44 | 1.13 | 0.28 |
| 1959 | 1 | 112846 | SWYARHY                        | 2.02 | 0.01 | 0.90 | 0.44 | 1.13 | 0.28 |
| 1960 | 1 | 225875 | SYFPEPVTVSWNSGT                | 2.69 | 0.01 | 3.28 | 0.44 | 0.22 | 0.85 |
| 1961 | 1 | 100540 | SYLQGFSRNTLEAAFNA<br>EFN       | 2.96 | 0.01 | 2.16 | 0.44 | 2.39 | 0.28 |
| 1962 | 1 | 161473 | SYYDSTYLSTDNEKDNYL<br>K        | 2.95 | 0.01 | 2.08 | 2.43 | 0.22 | 1.57 |
| 1963 | 1 | 527172 | TADSPLTASPPATAPGPS<br>AA       | 3.00 | 4.23 | 2.40 | 0.44 | 1.59 | 1.28 |
| 1964 | 1 | 226276 | TALPVNSPMNKGDETV<br>MKCIVE     | 3.02 | 0.01 | 0.78 | 1.20 | 0.22 | 1.48 |
| 1965 | 1 | 226276 | TALPVNSPMNKGDETV<br>MKCIVE     | 3.02 | 0.01 | 0.78 | 1.20 | 0.22 | 0.28 |
| 1966 | 1 | 127848 | TANNICIDAVLNFPSLDD<br>DDE      | 2.97 | 0.01 | 2.95 | 3.16 | 0.22 | 0.28 |
| 1967 | 1 | 96940  | TAPTKPTYET                     | 2.36 | 0.01 | 2.39 | 0.44 | 0.85 | 0.28 |
| 1968 | 1 | 63022  | TATRLSSTNSRLC                  | 2.66 | 0.01 | 2.14 | 0.68 | 0.22 | 0.85 |
| 1969 | 1 | 63065  | TCFLTAAGYCNECT                 | 2.70 | 0.01 | 2.56 | 1.20 | 0.22 | 0.85 |
| 1970 | 1 | 63065  | TCFLTAAGYCNECT                 | 2.70 | 0.01 | 2.56 | 1.20 | 0.22 | 0.85 |
| 1971 | 1 | 63092  | TCPGEDCHTMYPFTYRG<br>Y         | 2.86 | 0.01 | 0.90 | 1.15 | 0.22 | 1.39 |
| 1972 | 1 | 239095 | TCPTVKPGVNIICCK                | 2.70 | 0.01 | 2.56 | 2.02 | 0.22 | 0.85 |
| 1973 | 1 | 449059 | TDRFGVPTYNWGENE                | 2.67 | 0.01 | 1.96 | 0.68 | 0.22 | 1.34 |
| 1974 | 1 | 449060 | TDVLLLNTRPPQGN                 | 2.68 | 0.01 | 1.96 | 0.68 | 0.22 | 1.34 |
| 1975 | 1 | 127857 | TDVRYKDDMYHFFCPAI<br>QAQ       | 2.90 | 0.01 | 1.75 | 3.15 | 0.22 | 1.48 |
| 1976 | 1 | 95899  | TDYKKYLLFCME                   | 2.45 | 0.01 | 1.60 | 0.44 | 1.23 | 1.27 |
| 1977 | 1 | 225882 | TEAQKDSGSYFLYS                 | 2.66 | 0.01 | 3.28 | 0.44 | 0.22 | 0.85 |
| 1978 | 1 | 150616 | TEDSHPPYKQTQPGA                | 2.67 | 0.01 | 3.45 | 1.12 | 0.22 | 0.28 |
| 1979 | 1 | 118172 | TEKLLKYL                       | 2.16 | 0.01 | 0.78 | 0.44 | 1.13 | 0.28 |
| 1980 | 1 | 63458  | TELRYSWKT                      | 2.22 | 0.01 | 2.87 | 3.04 | 0.22 | 0.28 |
| 1981 | 1 | 63458  | TELRYSWKT                      | 2.22 | 0.01 | 2.87 | 0.44 | 0.85 | 0.28 |
| 1982 | 1 | 63458  | TELRYSWKT                      | 2.22 | 0.01 | 2.87 | 0.68 | 0.22 | 0.28 |
| 1983 | 1 | 63458  | TELRYSWKT                      | 2.22 | 0.01 | 2.87 | 0.68 | 0.22 | 0.28 |
| 1984 | 1 | 63662  | TFGLQLELT                      | 2.26 | 0.01 | 3.20 | 0.44 | 1.13 | 0.28 |
| 1985 | 1 | 89403  | TFNGAYTPAN                     | 2.34 | 0.01 | 3.06 | 0.44 | 0.85 | 0.28 |
| 1986 | 1 | 178014 | TFRVLRNGTSVFLHPNK<br>WTVK      | 3.00 | 3.55 | 0.90 | 0.44 | 1.13 | 0.28 |
| 1987 | 1 | 449130 | TFSPRRHETVQDCNCSIY<br>PG       | 2.89 | 0.01 | 1.96 | 0.68 | 0.22 | 1.34 |
| 1988 | 1 | 504062 | TGEYVQILDAHAAYLNA<br>TPAAKVLVE | 3.19 | 0.01 | 3.72 | 0.44 | 1.41 | 0.28 |

|      |   |        |                                              |      |      |      |      |      |      |
|------|---|--------|----------------------------------------------|------|------|------|------|------|------|
| 1989 | 1 | 110433 | TGGKPGIAGFKGEQGP<br>GEP                      | 2.99 | 0.01 | 0.78 | 2.46 | 0.22 | 0.28 |
| 1990 | 1 | 89436  | TGSLTTFNGA                                   | 2.33 | 0.01 | 3.06 | 0.44 | 0.85 | 0.28 |
| 1991 | 1 | 225542 | TGYIKFIEGNHGSFWY                             | 2.73 | 0.01 | 2.61 | 0.68 | 0.22 | 0.28 |
| 1992 | 1 | 449204 | THKFNSSGCPERMASCR<br>PID                     | 2.89 | 0.01 | 1.96 | 0.68 | 0.22 | 1.34 |
| 1993 | 1 | 449204 | THKFNSSGCPERMASCR<br>PID                     | 2.89 | 0.01 | 1.96 | 0.68 | 0.22 | 1.34 |
| 1994 | 1 | 449204 | THKFNSSGCPERMASCR<br>PID                     | 2.89 | 0.01 | 1.96 | 0.68 | 0.22 | 1.34 |
| 1995 | 1 | 449204 | THKFNSSGCPERMASCR<br>PID                     | 2.89 | 0.01 | 1.96 | 0.68 | 0.22 | 1.34 |
| 1996 | 1 | 449204 | THKFNSSGCPERMASCR<br>PID                     | 2.89 | 0.01 | 1.96 | 0.68 | 0.22 | 1.34 |
| 1997 | 1 | 449204 | THKFNSSGCPERMASCR<br>PID                     | 2.89 | 0.01 | 1.96 | 0.68 | 0.22 | 1.34 |
| 1998 | 1 | 64391  | TINGLARTTADRQTA                              | 2.70 | 0.01 | 3.35 | 1.12 | 0.22 | 0.85 |
| 1999 | 1 | 107640 | TISKAKG                                      | 2.02 | 0.01 | 0.78 | 0.44 | 1.13 | 0.28 |
| 2000 | 1 | 64542  | TKDTNNNLTL                                   | 2.36 | 0.01 | 2.87 | 0.68 | 0.22 | 0.28 |
| 2001 | 1 | 64542  | TKDTNNNLTL                                   | 2.36 | 0.01 | 2.87 | 1.20 | 0.22 | 0.28 |
| 2002 | 1 | 96967  | TKEKPTPPVK                                   | 2.36 | 0.01 | 2.39 | 0.44 | 1.59 | 0.28 |
| 2003 | 1 | 174295 | TKITFHIEKG                                   | 2.34 | 0.01 | 3.10 | 0.44 | 1.23 | 0.85 |
| 2004 | 1 | 64598  | TKKLNKELSEGKLEKL<br>EKNIKELEETNNTLENDI<br>KV | 3.63 | 0.01 | 2.22 | 0.44 | 0.85 | 1.34 |
| 2005 | 1 | 109978 | TKNQVSL                                      | 1.99 | 0.01 | 0.78 | 0.44 | 1.13 | 0.28 |
| 2006 | 1 | 64628  | TKNTNNNLTL                                   | 2.36 | 0.01 | 3.45 | 0.68 | 0.22 | 0.28 |
| 2007 | 1 | 64628  | TKNTNNNLTL                                   | 2.36 | 0.01 | 3.45 | 1.20 | 0.22 | 0.28 |
| 2008 | 1 | 64628  | TKNTNNNLTL                                   | 2.36 | 0.01 | 3.45 | 1.20 | 0.22 | 1.34 |
| 2009 | 1 | 64644  | TKPTDPTGIE                                   | 2.34 | 0.01 | 3.41 | 0.68 | 0.22 | 0.28 |
| 2010 | 1 | 64648  | TKPTKKPTFKTT                                 | 2.53 | 0.01 | 2.38 | 0.68 | 0.22 | 0.28 |
| 2011 | 1 | 140381 | TKTVNENKQNVDAKVK<br>A                        | 2.84 | 0.01 | 2.90 | 1.20 | 0.22 | 1.34 |
| 2012 | 1 | 140381 | TKTVNENKQNVDAKVK<br>A                        | 2.84 | 0.01 | 2.90 | 1.20 | 0.22 | 1.34 |
| 2013 | 1 | 140507 | TKTWQSM                                      | 2.03 | 0.01 | 0.90 | 0.68 | 0.22 | 0.28 |
| 2014 | 1 | 123777 | TLANKEILRLIQFEPQKVK<br>EKLKEKKL              | 3.25 | 0.01 | 1.60 | 2.04 | 0.22 | 0.28 |
| 2015 | 1 | 161711 | TLDVRMINIEASQLA                              | 2.64 | 0.01 | 3.04 | 1.15 | 0.22 | 0.28 |
| 2016 | 1 | 161711 | TLDVRMINIEASQLA                              | 2.64 | 0.01 | 3.04 | 0.44 | 0.85 | 0.28 |
| 2017 | 1 | 153897 | TLEDLLMGTLGIVCPICS<br>QKPK                   | 3.03 | 0.01 | 1.86 | 2.37 | 0.22 | 0.28 |
| 2018 | 1 | 64783  | TLEVHGVKPAAEEVKAT<br>PAG                     | 2.98 | 0.01 | 3.00 | 1.81 | 0.22 | 0.28 |
| 2019 | 1 | 110437 | TLHEYMLDLQ                                   | 2.31 | 0.01 | 1.86 | 0.44 | 0.85 | 0.28 |
| 2020 | 1 | 64843  | TLIDINGKTKSVFFEYNIR                          | 2.87 | 0.01 | 3.45 | 0.44 | 0.22 | 1.57 |

|      |   |        |                             |      |      |      |      |      |      |
|------|---|--------|-----------------------------|------|------|------|------|------|------|
| 2021 | 1 | 64978  | TLNKDQLLSSSKYTIQRS<br>TG    | 2.95 | 0.01 | 2.67 | 1.12 | 0.22 | 0.28 |
| 2022 | 1 | 64985  | TLNPTI                      | 1.91 | 0.01 | 3.16 | 0.68 | 0.22 | 0.28 |
| 2023 | 1 | 64985  | TLNPTI                      | 1.91 | 0.01 | 2.40 | 2.52 | 0.22 | 0.28 |
| 2024 | 1 | 95916  | TLPPSVPN                    | 2.14 | 0.01 | 0.90 | 2.22 | 0.22 | 0.28 |
| 2025 | 1 | 65097  | TLTKEYEDIVLKSHMNRE<br>SDD   | 2.97 | 0.01 | 1.66 | 1.20 | 0.22 | 0.28 |
| 2026 | 1 | 98529  | TLVPAVVGKP                  | 2.32 | 0.01 | 3.08 | 1.20 | 0.22 | 0.28 |
| 2027 | 1 | 181484 | TMPTMGQTQNTDGYAN            | 2.71 | 0.01 | 2.82 | 1.15 | 0.22 | 0.28 |
| 2028 | 1 | 140384 | TNDDDVKKAAATVAIA            | 2.71 | 0.01 | 2.90 | 1.20 | 0.22 | 1.34 |
| 2029 | 1 | 140384 | TNDDDVKKAAATVAIA            | 2.71 | 0.01 | 2.90 | 1.20 | 0.22 | 1.34 |
| 2030 | 1 | 225650 | TNDDGFYVSSYVADNG<br>ERRYL A | 3.03 | 0.01 | 3.57 | 2.61 | 0.22 | 0.28 |
| 2031 | 1 | 230528 | TNGIRYHYD                   | 2.21 | 0.01 | 2.22 | 0.68 | 0.22 | 0.28 |
| 2032 | 1 | 98532  | TNNNLTLVPA                  | 2.34 | 0.01 | 3.08 | 0.68 | 0.22 | 0.28 |
| 2033 | 1 | 98532  | TNNNLTLVPA                  | 2.34 | 0.01 | 3.08 | 1.20 | 0.22 | 0.28 |
| 2034 | 1 | 230530 | TNVGILKVVKPLDYE             | 2.65 | 0.01 | 0.78 | 0.44 | 1.13 | 0.28 |
| 2035 | 1 | 230530 | TNVGILKVVKPLDYE             | 2.65 | 0.01 | 0.78 | 0.44 | 1.13 | 0.28 |
| 2036 | 1 | 98534  | TPAYYTKDTN                  | 2.33 | 0.01 | 2.87 | 0.68 | 0.22 | 0.28 |
| 2037 | 1 | 98534  | TPAYYTKDTN                  | 2.33 | 0.01 | 2.87 | 1.20 | 0.22 | 0.28 |
| 2038 | 1 | 98535  | TPAYYTKNTN                  | 2.35 | 0.01 | 3.45 | 0.68 | 0.22 | 0.28 |
| 2039 | 1 | 98535  | TPAYYTKNTN                  | 2.35 | 0.01 | 3.45 | 1.20 | 0.22 | 0.28 |
| 2040 | 1 | 131710 | TPDAPGETV                   | 2.24 | 0.01 | 1.75 | 0.68 | 0.22 | 0.28 |
| 2041 | 1 | 65535  | TPDNNQTSPARR                | 2.47 | 0.01 | 2.57 | 3.16 | 0.22 | 0.28 |
| 2042 | 1 | 65535  | TPDNNQTSPARR                | 2.47 | 0.01 | 2.57 | 1.20 | 0.22 | 1.34 |
| 2043 | 1 | 108662 | TPEVKAEDLQPAVD              | 2.63 | 0.01 | 4.08 | 2.49 | 0.85 | 0.28 |
| 2044 | 1 | 108663 | TPEVKAEDLQPAVDGSI<br>EH     | 2.88 | 0.01 | 4.08 | 2.49 | 0.85 | 0.28 |
| 2045 | 1 | 140906 | TPEYNIALGQRRADAVK<br>GYL    | 2.90 | 0.01 | 3.01 | 1.12 | 0.22 | 0.28 |
| 2046 | 1 | 138057 | TPGTEYTV                    | 2.15 | 0.01 | 2.21 | 1.20 | 0.22 | 0.28 |
| 2047 | 1 | 98539  | TPLTRVSAEQWGRL              | 2.60 | 0.01 | 2.71 | 2.78 | 0.22 | 0.28 |
| 2048 | 1 | 117241 | TPPPSQGKGRGLSLSRFS<br>WGA   | 3.00 | 0.01 | 0.78 | 0.44 | 1.93 | 0.28 |
| 2049 | 1 | 96993  | TPPVKPTAPT                  | 2.37 | 0.01 | 2.39 | 0.44 | 1.59 | 0.28 |
| 2050 | 1 | 449357 | TPRCLVDYPYRLWHY             | 2.68 | 0.01 | 1.96 | 0.68 | 0.22 | 1.34 |
| 2051 | 1 | 449357 | TPRCLVDYPYRLWHY             | 2.68 | 0.01 | 1.96 | 0.68 | 0.22 | 1.34 |
| 2052 | 1 | 449357 | TPRCLVDYPYRLWHY             | 2.68 | 0.01 | 1.96 | 0.68 | 0.22 | 1.34 |
| 2053 | 1 | 449357 | TPRCLVDYPYRLWHY             | 2.68 | 0.01 | 1.96 | 0.68 | 0.22 | 1.34 |
| 2054 | 1 | 117242 | TPRTPPPSQGKGRGLSL<br>RFSWGA | 3.14 | 0.01 | 0.78 | 0.44 | 1.93 | 0.28 |
| 2055 | 1 | 134572 | TPRVERNGHSVFLAPYG<br>WMVK   | 2.93 | 4.45 | 0.90 | 0.44 | 1.13 | 1.27 |
| 2056 | 1 | 135326 | TPRVERNGHSVFLAPYG<br>WMVK   | 2.93 | 3.55 | 0.90 | 0.44 | 1.13 | 0.28 |

|      |   |        |                             |      |      |      |      |      |      |
|------|---|--------|-----------------------------|------|------|------|------|------|------|
| 2057 | 1 | 134573 | TPRVERPNHTVFLAPYG<br>WMVK   | 2.95 | 4.63 | 0.90 | 0.44 | 1.13 | 1.27 |
| 2058 | 1 | 65775  | TPSSKRFQPFQQFGRDV<br>SDFT   | 3.02 | 0.01 | 2.45 | 2.49 | 0.22 | 0.28 |
| 2059 | 1 | 153480 | TPSWRNPFPTFYGGGS            | 2.75 | 0.01 | 0.90 | 0.68 | 0.22 | 1.27 |
| 2060 | 1 | 112853 | TPTFMYF                     | 2.05 | 0.01 | 0.90 | 0.44 | 1.13 | 0.28 |
| 2061 | 1 | 65784  | TPTGVHIAPVQT                | 2.50 | 0.01 | 0.90 | 0.44 | 1.23 | 0.28 |
| 2062 | 1 | 153481 | TPTWPLLTIFPSGGGS            | 2.76 | 0.01 | 0.90 | 0.68 | 0.22 | 1.27 |
| 2063 | 1 | 120249 | TPVLVWIYGG                  | 2.29 | 0.01 | 0.78 | 1.15 | 0.22 | 0.28 |
| 2064 | 1 | 120249 | TPVLVWIYGG                  | 2.29 | 0.01 | 0.78 | 2.66 | 0.22 | 0.28 |
| 2065 | 1 | 462223 | TPVTRVSAEQWGRP              | 2.62 | 0.01 | 2.71 | 2.13 | 0.22 | 1.34 |
| 2066 | 1 | 116171 | TQDQDPBBHFFKNIVTP<br>R      | 2.82 | 0.01 | 0.78 | 0.44 | 1.13 | 1.27 |
| 2067 | 1 | 113944 | TQDQDPVVHFFKNIVTP<br>R      | 2.85 | 0.01 | 0.78 | 0.44 | 1.13 | 1.27 |
| 2068 | 1 | 113944 | TQDQDPVVHFFKNIVTP<br>R      | 2.85 | 0.01 | 0.78 | 0.44 | 1.13 | 1.27 |
| 2069 | 1 | 161475 | TQYIRFSPDFTFGFEESLE         | 2.89 | 0.01 | 2.08 | 2.25 | 0.22 | 1.57 |
| 2070 | 1 | 161475 | TQYIRFSPDFTFGFEESLE         | 2.89 | 0.01 | 2.08 | 2.49 | 0.22 | 1.57 |
| 2071 | 1 | 108666 | TRCAQCHTLK                  | 2.32 | 0.01 | 3.45 | 0.44 | 1.23 | 0.28 |
| 2072 | 1 | 66008  | TRDAHGFVQSSL                | 2.42 | 0.01 | 0.90 | 0.68 | 0.22 | 0.28 |
| 2073 | 1 | 66051  | TRLENLMWK                   | 2.21 | 0.01 | 2.87 | 3.04 | 0.22 | 0.28 |
| 2074 | 1 | 66051  | TRLENLMWK                   | 2.21 | 0.01 | 2.87 | 0.44 | 0.85 | 0.28 |
| 2075 | 1 | 66051  | TRLENLMWK                   | 2.21 | 0.01 | 2.87 | 1.20 | 0.22 | 0.28 |
| 2076 | 1 | 139324 | TRLIDERAHAH                 | 2.30 | 0.01 | 2.40 | 0.68 | 0.22 | 0.28 |
| 2077 | 1 | 139324 | TRLIDERAHAH                 | 2.30 | 0.01 | 2.40 | 0.68 | 0.22 | 0.28 |
| 2078 | 1 | 66118  | TRVGKYRPQDKPNTAIN<br>YNPWIG | 3.08 | 0.01 | 3.61 | 0.44 | 0.85 | 1.66 |
| 2079 | 1 | 66118  | TRVGKYRPQDKPNTAIN<br>YNPWIG | 3.08 | 0.01 | 3.61 | 3.63 | 0.22 | 1.66 |
| 2080 | 1 | 66142  | TSADSLGNIDQGS LIETG<br>ES   | 2.98 | 0.01 | 0.90 | 1.12 | 0.22 | 0.28 |
| 2081 | 1 | 441176 | TSLIAGPKAQVEAIQKYI<br>GAEL  | 3.05 | 0.01 | 0.90 | 0.68 | 0.22 | 0.28 |
| 2082 | 1 | 441176 | TSLIAGPKAQVEAIQKYI<br>GAEL  | 3.05 | 0.01 | 0.90 | 0.68 | 0.22 | 0.28 |
| 2083 | 1 | 66311  | TSLNLQKDEPN                 | 2.39 | 0.01 | 3.35 | 2.02 | 0.85 | 0.28 |
| 2084 | 1 | 165360 | TSSISRAPSATTSK              | 2.66 | 0.01 | 0.90 | 0.44 | 1.23 | 0.85 |
| 2085 | 1 | 66555  | TTCTASARGDLAHLTTT<br>HACHL  | 3.07 | 4.45 | 0.90 | 0.68 | 0.22 | 1.66 |
| 2086 | 1 | 66682  | TTKPTKKPTFKT                | 2.54 | 0.01 | 2.38 | 0.68 | 0.22 | 0.28 |
| 2087 | 1 | 140510 | TTTHFLATKFYK                | 2.50 | 0.01 | 0.90 | 0.68 | 0.22 | 0.28 |
| 2088 | 1 | 66862  | TTTKPTKKPTFK                | 2.54 | 0.01 | 2.38 | 0.68 | 0.22 | 0.28 |



|      |   |        |                                                                                                                                           |      |      |      |      |      |      |
|------|---|--------|-------------------------------------------------------------------------------------------------------------------------------------------|------|------|------|------|------|------|
| 2089 | 1 | 66892  | TTTTASARGDLAHLTTT<br>HARHLP                                                                                                               | 3.14 | 0.01 | 2.78 | 2.78 | 0.22 | 1.27 |
| 2090 | 1 | 161715 | TTVESHGKIGATQAGRF                                                                                                                         | 2.77 | 0.01 | 3.04 | 1.15 | 0.22 | 0.28 |
| 2091 | 1 | 161715 | TTVESHGKIGATQAGRF                                                                                                                         | 2.77 | 0.01 | 3.04 | 0.44 | 0.85 | 0.28 |
| 2092 | 1 | 99737  | TVKVGD                                                                                                                                    | 1.90 | 0.01 | 2.24 | 1.20 | 0.22 | 0.28 |
| 2093 | 1 | 97018  | TVTFKATAAT                                                                                                                                | 2.36 | 0.01 | 2.39 | 0.44 | 0.85 | 0.28 |
| 2094 | 1 | 111049 | TVTLKATPNDGY                                                                                                                              | 2.46 | 0.01 | 3.15 | 0.44 | 1.59 | 0.28 |
| 2095 | 1 | 67214  | TVWRNRETLMFEFEPH<br>ATKQ                                                                                                                  | 2.91 | 0.01 | 2.85 | 2.02 | 0.22 | 0.28 |
| 2096 | 1 | 225894 | TWYVDGTEVKTAKTM                                                                                                                           | 2.69 | 0.01 | 3.28 | 0.44 | 1.23 | 0.85 |
| 2097 | 1 | 67327  | TYEEPNDGEERQ                                                                                                                              | 2.46 | 0.01 | 2.88 | 2.22 | 0.85 | 0.28 |
| 2098 | 1 | 121945 | TYKTGHGLRGKLKWRP                                                                                                                          | 2.77 | 0.01 | 0.78 | 0.44 | 1.13 | 0.28 |
| 2099 | 1 | 118189 | TYIKEQKLGL                                                                                                                                | 2.40 | 0.01 | 0.78 | 0.44 | 1.13 | 0.28 |
| 2100 | 1 | 173562 | VAANIVLTV                                                                                                                                 | 2.25 | 0.01 | 0.78 | 0.44 | 1.74 | 0.28 |
| 2101 | 1 | 117664 | VAARGRGRGMGRGNI                                                                                                                           | 2.72 | 4.93 | 0.78 | 0.44 | 1.13 | 0.28 |
| 2102 | 1 | 95945  | VAGLQN                                                                                                                                    | 1.88 | 0.01 | 2.40 | 2.52 | 0.22 | 0.28 |
| 2103 | 1 | 113982 | VAGPRLYSRA                                                                                                                                | 2.31 | 0.01 | 3.97 | 1.12 | 0.22 | 0.28 |
| 2104 | 1 | 67875  | VCRQGVVDRGWGNGC<br>GLFGK                                                                                                                  | 2.96 | 0.01 | 2.85 | 2.02 | 0.22 | 0.28 |
| 2105 | 1 | 67875  | VCRQGVVDRGWGNGC<br>GLFGK                                                                                                                  | 2.96 | 0.01 | 2.85 | 2.02 | 0.22 | 1.34 |
| 2106 | 1 | 122932 | VCTPKSDEFNPCEDIMG<br>YK                                                                                                                   | 2.86 | 0.01 | 0.78 | 1.20 | 0.22 | 1.27 |
| 2107 | 1 | 67931  | VDEKKM                                                                                                                                    | 1.89 | 0.01 | 4.15 | 1.15 | 0.22 | 0.28 |
| 2108 | 1 | 67931  | VDEKKM                                                                                                                                    | 1.89 | 0.01 | 4.15 | 1.15 | 0.22 | 0.28 |
| 2109 | 1 | 67978  | VDHTNFKYNYSVIEGGPI<br>GDTLEKISNEIK                                                                                                        | 3.35 | 0.01 | 2.76 | 1.20 | 0.22 | 0.28 |
| 2110 | 1 | 102882 | VDKCLELAELYNIKNRE<br>G                                                                                                                    | 2.94 | 0.01 | 0.78 | 3.89 | 1.13 | 0.28 |
| 2111 | 1 | 67995  | VDKIEEHILDYDEEINKSR<br>SNLFQLKNEICSLTTEVM<br>ELNNKKNELIEENKNLNL<br>VDQGKKLKKDVEKQKK<br>EIEKL<br>VDKIEEHILDYDEEINKSR<br>SNLFQLKNEICSLTTEVM | 4.30 | 0.01 | 2.22 | 0.44 | 0.85 | 1.34 |
| 2112 | 1 | 67995  | ELNNKKNELIEENKNLNL<br>VDQGKKLKKDVEKQKK<br>EIEKL<br>VDLLVGAAAFCSAMYV<br>GDLC                                                               | 4.30 | 0.01 | 2.22 | 1.15 | 0.22 | 0.28 |
| 2113 | 1 | 449558 | VDLLVGAAAFCSAMYV<br>GDLC                                                                                                                  | 2.97 | 0.01 | 1.96 | 0.68 | 0.22 | 1.34 |
| 2114 | 1 | 142050 | VDMRGDCWSIEY                                                                                                                              | 2.43 | 0.01 | 3.13 | 0.68 | 0.22 | 0.28 |

|      |   |        |                             |      |      |      |      |      |      |
|------|---|--------|-----------------------------|------|------|------|------|------|------|
| 2115 | 1 | 78871  | VDVDPNKGKWKEHIKE<br>VTE     | 2.91 | 0.01 | 3.11 | 1.12 | 0.22 | 0.28 |
| 2116 | 1 | 118196 | VEPTGKRFL                   | 2.18 | 0.01 | 0.78 | 0.44 | 1.13 | 0.28 |
| 2117 | 1 | 104327 | VEQHNPINAGTELSAT            | 2.71 | 0.01 | 3.00 | 1.20 | 0.22 | 0.28 |
| 2118 | 1 | 225564 | VESKSINVEVH                 | 2.43 | 0.01 | 2.61 | 0.68 | 0.22 | 0.28 |
| 2119 | 1 | 225565 | VESKSINVEVHLTKK             | 2.69 | 0.01 | 2.61 | 0.68 | 0.22 | 0.28 |
| 2120 | 1 | 225565 | VESKSINVEVHLTKK             | 2.69 | 0.01 | 2.61 | 0.68 | 0.22 | 0.28 |
| 2121 | 1 | 225565 | VESKSINVEVHLTKK             | 2.69 | 0.01 | 2.61 | 0.68 | 0.22 | 0.28 |
| 2122 | 1 | 225565 | VESKSINVEVHLTKK             | 2.69 | 0.01 | 2.61 | 0.68 | 0.22 | 0.28 |
| 2123 | 1 | 68387  | VETSRSVFHQNGQVTEV<br>TTATGI | 3.09 | 0.01 | 2.90 | 0.44 | 0.22 | 0.28 |
| 2124 | 1 | 125297 | VFFEEQEDEIIGFG              | 2.65 | 0.01 | 0.78 | 0.44 | 1.13 | 1.27 |
| 2125 | 1 | 137579 | VFQQQQQHQSRGRNL             | 2.67 | 0.01 | 3.12 | 0.44 | 1.23 | 0.85 |
| 2126 | 1 | 120270 | VFRFSFVPV                   | 2.35 | 0.01 | 0.78 | 1.15 | 0.22 | 0.28 |
| 2127 | 1 | 114650 | VFSGFDADFLADAFN             | 2.72 | 0.01 | 3.27 | 0.44 | 1.23 | 0.85 |
| 2128 | 1 | 110733 | VGENVPDDLYIKGSG             | 2.66 | 0.01 | 1.86 | 0.68 | 0.22 | 0.28 |
| 2129 | 1 | 189178 | VGFDHGPNRHTCTVAH            | 2.74 | 0.01 | 2.92 | 0.68 | 0.22 | 0.28 |
| 2130 | 1 | 98575  | VGKPGSDVYY                  | 2.32 | 0.01 | 3.08 | 1.20 | 0.22 | 0.28 |
| 2131 | 1 | 111050 | VGPLDIVPEVADPGGPT<br>LV     | 2.94 | 0.01 | 3.37 | 1.20 | 0.22 | 0.28 |
| 2132 | 1 | 111051 | VGPLEVIPEAVDPAGSSI<br>V     | 2.94 | 0.01 | 3.72 | 1.20 | 0.22 | 0.28 |
| 2133 | 1 | 68764  | VGPQSVGPLSVGPQSV<br>GPLS    | 3.02 | 0.01 | 3.51 | 1.15 | 0.22 | 0.28 |
| 2134 | 1 | 119662 | VGRIKSKTDGGTT               | 2.54 | 0.01 | 0.78 | 1.20 | 0.22 | 1.27 |
| 2135 | 1 | 115658 | VGWYRPPFSRVV                | 2.47 | 0.01 | 0.78 | 0.44 | 1.13 | 0.28 |
| 2136 | 1 | 115658 | VGWYRPPFSRVV                | 2.47 | 0.01 | 0.78 | 0.44 | 1.13 | 0.28 |
| 2137 | 1 | 115658 | VGWYRPPFSRVV                | 2.47 | 0.01 | 0.78 | 0.44 | 1.13 | 0.28 |
| 2138 | 1 | 114236 | VGWYRSPFSR                  | 2.31 | 0.01 | 2.19 | 2.04 | 0.22 | 0.28 |
| 2139 | 1 | 114236 | VGWYRSPFSR                  | 2.31 | 0.01 | 2.19 | 2.04 | 0.22 | 0.28 |
| 2140 | 1 | 68846  | VHFFKNIVTPRTP               | 2.55 | 0.01 | 2.95 | 2.04 | 0.22 | 0.28 |
| 2141 | 1 | 68858  | VHILCYCYGLPDSEP             | 2.66 | 0.01 | 2.56 | 1.20 | 0.22 | 0.85 |
| 2142 | 1 | 186716 | VHNMQKDMVLLQ                | 2.49 | 0.01 | 0.90 | 0.68 | 0.22 | 0.28 |
| 2143 | 1 | 113993 | VHTGFGAMDFTTLQ              | 2.60 | 0.01 | 1.86 | 2.37 | 0.22 | 0.28 |
| 2144 | 1 | 112702 | VHTGFGAMDFTTLQA             | 2.67 | 0.01 | 1.86 | 2.37 | 0.22 | 0.28 |
| 2145 | 1 | 68896  | VHTWTEQYK                   | 2.21 | 0.01 | 2.87 | 3.04 | 0.22 | 0.28 |
| 2146 | 1 | 68896  | VHTWTEQYK                   | 2.21 | 0.01 | 2.87 | 0.44 | 0.85 | 0.28 |
| 2147 | 1 | 68896  | VHTWTEQYK                   | 2.21 | 0.01 | 2.87 | 0.68 | 0.22 | 0.28 |
| 2148 | 1 | 95048  | VIFQTPLIKNPDKSAIEG          | 2.86 | 0.01 | 2.26 | 2.36 | 0.22 | 2.02 |
| 2149 | 1 | 136719 | VIKHMRFHADYQAPFLG<br>GGY    | 2.90 | 0.01 | 0.90 | 2.74 | 0.22 | 1.48 |
| 2150 | 1 | 136720 | VIKHMRFHVDYQIAFLG<br>GGY    | 2.92 | 0.01 | 0.90 | 2.74 | 0.22 | 1.48 |

|      |   |        |                              |      |      |      |      |      |      |
|------|---|--------|------------------------------|------|------|------|------|------|------|
| 2151 | 1 | 69068  | VIPLAIEFTPRP                 | 2.48 | 0.01 | 0.90 | 0.44 | 1.23 | 0.28 |
| 2152 | 1 | 137580 | VIRPSRSQSERGSES              | 2.72 | 0.01 | 3.12 | 0.44 | 1.23 | 0.85 |
| 2153 | 1 | 156474 | VKAASKETPPALNK               | 2.62 | 0.01 | 2.73 | 0.44 | 0.85 | 1.28 |
| 2154 | 1 | 69183  | VKAVTTLLKA                   | 2.36 | 0.01 | 2.28 | 2.71 | 0.22 | 0.28 |
| 2155 | 1 | 99760  | VKDGIVD                      | 2.15 | 0.01 | 3.33 | 1.12 | 0.22 | 0.28 |
| 2156 | 1 | 99760  | VKDGIVD                      | 2.15 | 0.01 | 3.33 | 1.12 | 0.22 | 0.28 |
| 2157 | 1 | 117396 | VKNLHNQARS                   | 2.29 | 0.01 | 1.86 | 0.44 | 1.23 | 0.85 |
| 2158 | 1 | 97049  | VKPTAPT KPT                  | 2.36 | 0.01 | 2.39 | 0.44 | 1.59 | 0.28 |
| 2159 | 1 | 97049  | VKPTAPT KPT                  | 2.36 | 0.01 | 2.39 | 0.44 | 0.85 | 0.28 |
| 2160 | 1 | 165442 | VKQMWA AESRKP                | 2.44 | 0.01 | 0.90 | 0.44 | 1.23 | 0.85 |
| 2161 | 1 | 165448 | VKQMWP AESRKP                | 2.45 | 0.01 | 3.78 | 0.44 | 1.23 | 0.85 |
| 2162 | 1 | 95966  | VKQTLPPS                     | 2.11 | 0.01 | 0.90 | 2.59 | 0.22 | 0.28 |
| 2163 | 1 | 69383  | VLAQKVARTLP                  | 2.42 | 0.01 | 3.14 | 0.68 | 0.22 | 1.34 |
| 2164 | 1 | 69441  | VLDVNAIDIE                   | 2.34 | 0.01 | 3.41 | 0.68 | 0.22 | 0.28 |
| 2165 | 1 | 103706 | VLGGGCALLRCIPALDSL<br>TPANED | 3.11 | 0.01 | 0.78 | 1.81 | 0.22 | 0.28 |
| 2166 | 1 | 69540  | VLIELEPPFGDSYIVVGR<br>GE     | 2.95 | 0.01 | 2.85 | 2.02 | 0.22 | 0.28 |
| 2167 | 1 | 69540  | VLIELEPPFGDSYIVVGR<br>GE     | 2.95 | 0.01 | 2.85 | 2.02 | 0.22 | 1.48 |
| 2168 | 1 | 158620 | VLNWHPF                      | 1.99 | 0.01 | 0.90 | 0.44 | 1.13 | 1.39 |
| 2169 | 1 | 95163  | VLPGHQPSNGNMIYSY<br>HTME     | 2.93 | 0.01 | 2.25 | 2.04 | 0.22 | 1.27 |
| 2170 | 1 | 98585  | VLSEISDTLNDINPA              | 2.68 | 0.01 | 2.71 | 2.78 | 0.22 | 0.28 |
| 2171 | 1 | 69782  | VLSRPSYGL                    | 2.33 | 0.01 | 1.60 | 0.44 | 1.23 | 0.85 |
| 2172 | 1 | 107662 | VLTVLHQNW L                  | 2.34 | 0.01 | 0.78 | 1.20 | 0.22 | 0.28 |
| 2173 | 1 | 107662 | VLTVLHQNW L                  | 2.34 | 0.01 | 0.78 | 1.20 | 0.22 | 0.28 |
| 2174 | 1 | 78555  | VNDEEDTNDEEDTNDD<br>ED       | 2.92 | 0.01 | 1.66 | 1.12 | 0.22 | 0.28 |
| 2175 | 1 | 78555  | VNDEEDTNDEEDTNDD<br>ED       | 2.92 | 0.01 | 1.66 | 1.12 | 0.22 | 0.28 |
| 2176 | 1 | 70198  | VNTFVASHKPRGVTHD<br>QLN NF   | 2.96 | 0.01 | 3.05 | 0.44 | 1.23 | 0.28 |
| 2177 | 1 | 97064  | VNVPKVTKEK                   | 2.36 | 0.01 | 2.39 | 0.44 | 1.59 | 0.28 |
| 2178 | 1 | 70216  | VNVPYKISTSTNCAT              | 2.69 | 0.01 | 3.35 | 1.12 | 0.22 | 0.85 |
| 2179 | 1 | 136727 | VNWNSWHKT NLS                | 2.49 | 0.01 | 0.90 | 0.68 | 0.22 | 0.28 |
| 2180 | 1 | 131137 | VPASPPASLLPPASESPE<br>PLSQQW | 3.17 | 0.01 | 0.78 | 1.12 | 0.22 | 2.02 |
| 2181 | 1 | 98589  | VPAVVGKPGS                   | 2.35 | 0.01 | 3.08 | 1.20 | 0.22 | 0.28 |
| 2182 | 1 | 70259  | VPCSICSNNPTCWAICK            | 2.80 | 0.01 | 2.38 | 0.68 | 0.22 | 1.75 |
| 2183 | 1 | 244303 | VPESPFSRTGEGLDVRG<br>TQQFP   | 3.06 | 0.01 | 2.96 | 0.44 | 0.85 | 1.66 |
| 2184 | 1 | 244304 | VPESPFTRRGDGLDIRG<br>DQQFP   | 3.04 | 0.01 | 2.96 | 0.44 | 0.85 | 1.66 |
| 2185 | 1 | 98593  | VPIQNSKSAY                   | 2.29 | 0.01 | 3.08 | 1.20 | 0.22 | 0.28 |
| 2186 | 1 | 97065  | VPKVTKEKPT                   | 2.37 | 0.01 | 2.39 | 0.44 | 1.59 | 0.28 |

|      |   |        |                                    |      |      |      |      |      |      |
|------|---|--------|------------------------------------|------|------|------|------|------|------|
| 2187 | 1 | 95977  | VPNLRGDL                           | 2.12 | 0.01 | 2.96 | 2.59 | 0.22 | 0.28 |
| 2188 | 1 | 70391  | VPNLRGDLQVLAQKVA<br>RTLP           | 2.97 | 0.01 | 3.02 | 2.42 | 0.22 | 1.34 |
| 2189 | 1 | 95979  | VPQPPVSQFHQ                        | 2.51 | 0.01 | 2.88 | 1.12 | 0.22 | 0.85 |
| 2190 | 1 | 98595  | VPRILGKIENAGEMP                    | 2.66 | 0.01 | 2.71 | 2.78 | 0.22 | 0.28 |
| 2191 | 1 | 177357 | VPRNAELGDRQGKIHIP<br>F             | 2.80 | 0.01 | 4.93 | 0.44 | 0.85 | 0.28 |
| 2192 | 1 | 449813 | VPTYNWGENETDVLL                    | 2.67 | 0.01 | 1.96 | 0.68 | 0.22 | 1.34 |
| 2193 | 1 | 134263 | VPYVKR                             | 1.91 | 0.01 | 0.78 | 0.44 | 1.41 | 1.27 |
| 2194 | 1 | 134264 | VPYVKRVKTRMHLFT<br>GI              | 2.82 | 0.01 | 0.78 | 0.44 | 1.41 | 1.27 |
| 2195 | 1 | 98599  | VQFVPIQNSK                         | 2.32 | 0.01 | 3.08 | 1.20 | 0.22 | 0.28 |
| 2196 | 1 | 97069  | VQPQVNKEIR                         | 2.32 | 0.01 | 2.39 | 0.44 | 0.85 | 0.28 |
| 2197 | 1 | 148978 | VQQQQFPGQQ                         | 2.34 | 0.01 | 1.86 | 0.44 | 1.23 | 0.85 |
| 2198 | 1 | 153903 | VQSTHVDIRTLEDLLMG<br>TLGIVCPICSQKP | 3.33 | 0.01 | 1.86 | 2.37 | 0.22 | 0.28 |
| 2199 | 1 | 70696  | VRDAMGFPLLDQ                       | 2.44 | 0.01 | 0.90 | 0.68 | 0.22 | 0.28 |
| 2200 | 1 | 227861 | VRDPAPQFS                          | 2.21 | 0.01 | 3.33 | 0.44 | 0.85 | 2.35 |
| 2201 | 1 | 187034 | VRTPPKSPS                          | 2.25 | 4.33 | 0.78 | 1.81 | 0.22 | 0.28 |
| 2202 | 1 | 187034 | VRTPPKSPS                          | 2.25 | 4.33 | 0.78 | 2.82 | 0.22 | 0.28 |
| 2203 | 1 | 187034 | VRTPPKSPS                          | 2.25 | 4.33 | 0.78 | 2.25 | 0.22 | 0.28 |
| 2204 | 1 | 70879  | VSALEDKLAD                         | 2.33 | 0.01 | 3.41 | 0.68 | 0.22 | 0.28 |
| 2205 | 1 | 138079 | VSDQAVSLGQNV                       | 2.50 | 0.01 | 2.21 | 1.20 | 0.22 | 0.28 |
| 2206 | 1 | 186798 | VSFDDNANPEYTYHG                    | 2.63 | 0.01 | 3.36 | 1.20 | 0.22 | 0.85 |
| 2207 | 1 | 111924 | VSLQYRVFRIHLPD                     | 2.65 | 0.01 | 1.86 | 0.68 | 0.22 | 0.28 |
| 2208 | 1 | 164554 | VSLRLSTLLRALGAQK<br>EA             | 2.97 | 0.01 | 0.78 | 1.20 | 0.22 | 2.02 |
| 2209 | 1 | 108200 | VSLGKWLGHDPKF                      | 2.54 | 0.01 | 0.90 | 2.25 | 0.22 | 0.28 |
| 2210 | 1 | 144811 | VSWLSKEWAK                         | 2.33 | 0.01 | 0.78 | 0.44 | 2.35 | 0.28 |
| 2211 | 1 | 227862 | VTEKDVELLHEIAHYHT<br>QIDELPVDFAAY  | 3.35 | 0.01 | 3.47 | 0.68 | 0.22 | 0.28 |
| 2212 | 1 | 135505 | VTETPLMKEDSILAVRKY<br>FQR          | 2.95 | 0.01 | 0.78 | 1.15 | 0.22 | 0.28 |
| 2213 | 1 | 78559  | VTIQEPVTTQEPVTIEEP                 | 2.91 | 0.01 | 1.66 | 1.12 | 0.22 | 0.28 |
| 2214 | 1 | 78559  | VTIQEPVTTQEPVTIEEP                 | 2.91 | 0.01 | 1.66 | 1.12 | 0.22 | 0.28 |
| 2215 | 1 | 97088  | VTKEKPTPPV                         | 2.36 | 0.01 | 2.39 | 0.44 | 1.59 | 0.28 |
| 2216 | 1 | 118217 | VTKYITKGWKEVH                      | 2.56 | 0.01 | 0.78 | 0.44 | 1.13 | 0.28 |
| 2217 | 1 | 175665 | VTSDAQIFNKPYWLQRA<br>QGH           | 2.86 | 0.01 | 1.86 | 0.68 | 0.22 | 2.75 |
| 2218 | 1 | 71593  | VVADHGMFTKYN                       | 2.42 | 0.01 | 3.61 | 1.20 | 0.22 | 0.85 |
| 2219 | 1 | 98607  | VVGKPGSDVY                         | 2.33 | 0.01 | 3.08 | 1.20 | 0.22 | 0.28 |
| 2220 | 1 | 114671 | VVKRARNEGFEWVSF                    | 2.68 | 0.01 | 3.27 | 0.44 | 1.23 | 0.85 |
| 2221 | 1 | 71789  | VVPPFLQPEV                         | 2.35 | 0.01 | 1.60 | 0.44 | 1.23 | 0.85 |

|      |   |        |                          |      |      |      |      |      |      |
|------|---|--------|--------------------------|------|------|------|------|------|------|
| 2222 | 1 | 71798  | VVQAMYVPPGAPNPKE         | 2.74 | 0.01 | 3.67 | 1.12 | 0.22 | 1.34 |
| 2223 | 1 | 71844  | VVSWKNKEL                | 2.22 | 0.01 | 2.87 | 0.44 | 0.85 | 0.28 |
| 2224 | 1 | 71844  | VVSWKNKEL                | 2.22 | 0.01 | 2.87 | 3.04 | 0.22 | 0.28 |
| 2225 | 1 | 71844  | VVSWKNKEL                | 2.22 | 0.01 | 2.87 | 1.20 | 0.22 | 0.28 |
| 2226 | 1 | 148424 | VYKDPARP                 | 2.12 | 0.01 | 0.78 | 2.87 | 0.22 | 0.85 |
| 2227 | 1 | 148424 | VYKDPARP                 | 2.12 | 0.01 | 0.78 | 2.87 | 0.22 | 1.34 |
| 2228 | 1 | 161294 | WAKVLVLLLLFAGVDAE<br>THV | 2.94 | 0.01 | 2.45 | 2.74 | 0.22 | 1.34 |
| 2229 | 1 | 181510 | WDIDLMGYAQLRRKC          | 2.63 | 0.01 | 2.82 | 1.15 | 0.22 | 0.28 |
| 2230 | 1 | 141105 | WEISQASHYFERHLE          | 2.66 | 0.01 | 0.78 | 1.12 | 0.22 | 0.28 |
| 2231 | 1 | 178366 | WEWWR                    | 1.78 | 0.01 | 2.70 | 0.68 | 0.22 | 0.85 |
| 2232 | 1 | 158622 | WGLDNPP                  | 1.99 | 0.01 | 0.90 | 0.44 | 1.13 | 1.39 |
| 2233 | 1 | 72485  | WGNGCGLFGKGSIDTC<br>AKFA | 2.95 | 0.01 | 2.85 | 2.02 | 0.22 | 1.48 |
| 2234 | 1 | 117690 | WGVPIEKIYNKTSGRSLP<br>W  | 2.88 | 0.01 | 0.90 | 0.44 | 1.13 | 0.28 |
| 2235 | 1 | 133951 | WIFNNF                   | 1.90 | 0.01 | 4.93 | 0.68 | 0.22 | 0.28 |
| 2236 | 1 | 133952 | WIFQNF                   | 1.90 | 0.01 | 4.63 | 0.68 | 0.22 | 0.28 |
| 2237 | 1 | 133953 | WIINNF                   | 1.91 | 0.01 | 4.93 | 0.68 | 0.22 | 0.28 |
| 2238 | 1 | 133954 | WIKENF                   | 1.88 | 0.01 | 4.93 | 0.68 | 0.22 | 0.28 |
| 2239 | 1 | 133956 | WIMSNF                   | 1.88 | 0.01 | 4.93 | 0.68 | 0.22 | 0.28 |
| 2240 | 1 | 133957 | WIRANF                   | 1.88 | 0.01 | 4.93 | 0.68 | 0.22 | 0.28 |
| 2241 | 1 | 133959 | WIRMFN                   | 1.88 | 0.01 | 4.93 | 0.68 | 0.22 | 0.28 |
| 2242 | 1 | 101412 | WIRNNF                   | 1.89 | 0.01 | 3.81 | 0.68 | 0.22 | 0.28 |
| 2243 | 1 | 101412 | WIRNNF                   | 1.89 | 0.01 | 3.81 | 0.68 | 0.22 | 0.28 |
| 2244 | 1 | 101412 | WIRNNF                   | 1.89 | 0.01 | 3.81 | 0.68 | 0.22 | 0.28 |
| 2245 | 1 | 101412 | WIRNNF                   | 1.89 | 0.01 | 3.81 | 0.68 | 0.22 | 0.28 |
| 2246 | 1 | 101412 | WIRNNF                   | 1.89 | 0.01 | 3.81 | 0.68 | 0.22 | 0.28 |
| 2247 | 1 | 101412 | WIRNNF                   | 1.89 | 0.01 | 3.81 | 0.68 | 0.22 | 0.28 |
| 2248 | 1 | 101412 | WIRNNF                   | 1.89 | 0.01 | 3.81 | 0.68 | 0.22 | 0.28 |
| 2249 | 1 | 101412 | WIRNNF                   | 1.89 | 0.01 | 3.81 | 0.68 | 0.22 | 0.28 |
| 2250 | 1 | 101412 | WIRNNF                   | 1.89 | 0.01 | 3.81 | 0.68 | 0.22 | 0.28 |
| 2251 | 1 | 133960 | WIVNNF                   | 1.89 | 0.01 | 4.93 | 0.68 | 0.22 | 0.28 |
| 2252 | 1 | 107684 | WLDGKEY                  | 1.99 | 0.01 | 0.78 | 0.44 | 1.13 | 0.28 |
| 2253 | 1 | 72919  | WNYDNAYCDKLCKDK          | 2.72 | 0.01 | 2.56 | 0.68 | 0.22 | 0.85 |
| 2254 | 1 | 72919  | WNYDNAYCDKLCKDK          | 2.72 | 0.01 | 2.56 | 2.52 | 0.22 | 0.85 |
| 2255 | 1 | 72935  | WPGSNLTPRTQT             | 2.48 | 0.01 | 0.90 | 0.44 | 1.23 | 0.28 |
| 2256 | 1 | 225913 | WQSNEHPEPEGKY            | 2.54 | 0.01 | 3.28 | 0.44 | 0.22 | 0.85 |
| 2257 | 1 | 144816 | WSHNFTNMLG               | 2.29 | 0.01 | 0.78 | 0.44 | 1.13 | 0.28 |
| 2258 | 1 | 144816 | WSHNFTNMLG               | 2.29 | 0.01 | 0.78 | 0.44 | 2.35 | 0.28 |
| 2259 | 1 | 153498 | WSPSKLYSARDHGGGS         | 2.71 | 0.01 | 0.90 | 0.68 | 0.22 | 1.27 |
| 2260 | 1 | 114676 | WSREEQEREERKERE          | 2.74 | 0.01 | 3.27 | 0.44 | 1.23 | 0.85 |

|      |   |        |                                       |      |      |      |      |      |      |
|------|---|--------|---------------------------------------|------|------|------|------|------|------|
| 2261 | 1 | 73114  | WTANGDYKSKGDKPVY<br>EPGF              | 2.93 | 0.01 | 2.21 | 1.20 | 0.22 | 0.28 |
| 2262 | 1 | 97104  | WVGVNLEDPASRDLVV<br>SYVN              | 2.94 | 0.01 | 2.71 | 1.20 | 0.22 | 0.28 |
| 2263 | 1 | 161478 | WVIPERDTFTNPEEGDL<br>NP               | 2.88 | 0.01 | 2.08 | 0.68 | 0.22 | 1.57 |
| 2264 | 1 | 161478 | WVIPERDTFTNPEEGDL<br>NP               | 2.88 | 0.01 | 2.08 | 2.25 | 0.22 | 1.57 |
| 2265 | 1 | 161478 | WVIPERDTFTNPEEGDL<br>NP               | 2.88 | 0.01 | 2.08 | 2.02 | 0.22 | 1.57 |
| 2266 | 1 | 161478 | WVIPERDTFTNPEEGDL<br>NP               | 2.88 | 0.01 | 2.08 | 2.43 | 0.22 | 1.57 |
| 2267 | 1 | 95165  | WVRVILLNWCAWFLR<br>MKKPG              | 2.92 | 0.01 | 2.25 | 2.04 | 0.22 | 0.28 |
| 2268 | 1 | 107267 | WYFDVWGAGTTVTVSS                      | 2.75 | 0.01 | 1.75 | 1.12 | 0.22 | 0.28 |
| 2269 | 1 | 153501 | WYNRCHAANPNGRYY                       | 2.67 | 0.01 | 0.78 | 2.79 | 1.13 | 1.28 |
| 2270 | 1 | 153501 | WYNRCHAANPNGRYY                       | 2.67 | 0.01 | 0.78 | 2.79 | 1.13 | 1.28 |
| 2271 | 1 | 158623 | WYYKPPA                               | 2.02 | 0.01 | 0.90 | 0.44 | 1.13 | 1.39 |
| 2272 | 1 | 449993 | YAEPDSSDQRPYCWHY<br>APRP              | 2.96 | 0.01 | 1.96 | 0.68 | 0.22 | 1.34 |
| 2273 | 1 | 225656 | YAKERQSFGQPIGSYQAI<br>SF              | 2.97 | 0.01 | 2.51 | 2.00 | 0.85 | 0.28 |
| 2274 | 1 | 90667  | YAKTKNYKIKHEKRYFVS<br>PGFQYEL         | 3.13 | 0.01 | 3.04 | 0.44 | 0.85 | 0.28 |
| 2275 | 1 | 112860 | YAQPSE                                | 1.99 | 0.01 | 0.90 | 0.44 | 1.13 | 0.28 |
| 2276 | 1 | 110116 | YCAPLKPAKSA                           | 2.43 | 0.01 | 0.78 | 1.15 | 0.22 | 1.34 |
| 2277 | 1 | 73485  | YCAWPACYCYGLPDS                       | 2.71 | 0.01 | 2.56 | 1.20 | 0.22 | 0.85 |
| 2278 | 1 | 73485  | YCAWPACYCYGLPDS                       | 2.71 | 0.01 | 2.56 | 1.20 | 0.22 | 0.85 |
| 2279 | 1 | 230545 | YDINNKNDDSYRYDISEE<br>ID              | 3.00 | 0.01 | 2.22 | 0.68 | 0.22 | 0.28 |
| 2280 | 1 | 140933 | YDITGEYVQILDAHAAYL<br>NA              | 2.95 | 0.01 | 3.01 | 0.68 | 0.22 | 0.85 |
| 2281 | 1 | 142071 | YDSCSRLLQIIDFYTDIVQ<br>KKYGGGEDCECTRV | 3.43 | 0.01 | 3.13 | 0.68 | 0.22 | 0.28 |
| 2282 | 1 | 73636  | YEDRYRE                               | 2.17 | 0.01 | 0.78 | 2.19 | 0.22 | 0.85 |
| 2283 | 1 | 73636  | YEDRYRE                               | 2.17 | 0.01 | 0.78 | 2.19 | 0.22 | 0.85 |
| 2284 | 1 | 127898 | YEENLGDSIV                            | 2.28 | 0.01 | 0.78 | 1.20 | 0.22 | 0.28 |
| 2285 | 1 | 141108 | YEFQVRVKPLQGEFTTW<br>SPWSQ            | 3.02 | 0.01 | 0.78 | 1.12 | 0.22 | 0.28 |
| 2286 | 1 | 186799 | YENFNDFLKGLRGGN                       | 2.69 | 0.01 | 0.90 | 1.20 | 0.22 | 0.85 |
| 2287 | 1 | 225593 | YETGYIKFIEGNHGSFWY                    | 2.86 | 0.01 | 2.61 | 0.68 | 0.22 | 0.28 |

|      |   |        |                                    |      |      |      |      |      |      |
|------|---|--------|------------------------------------|------|------|------|------|------|------|
| 2288 | 1 | 225593 | YETGYIKFIEGNHGSFWY                 | 2.86 | 0.01 | 2.61 | 0.68 | 0.22 | 0.28 |
| 2289 | 1 | 225593 | YETGYIKFIEGNHGSFWY                 | 2.86 | 0.01 | 2.61 | 0.68 | 0.22 | 0.28 |
| 2290 | 1 | 225593 | YETGYIKFIEGNHGSFWY                 | 2.86 | 0.01 | 2.61 | 0.68 | 0.22 | 0.28 |
| 2291 | 1 | 189183 | YFLIEKGQHEAAIEFFEG<br>MVHDSIKEELRP | 3.30 | 0.01 | 2.78 | 2.89 | 0.22 | 0.28 |
| 2292 | 1 | 73893  | YFSIFNTELSQSNIEERYK                | 2.91 | 0.01 | 3.45 | 0.44 | 0.22 | 1.57 |
| 2293 | 1 | 73920  | YFTYEENPDGEE                       | 2.48 | 0.01 | 2.88 | 2.37 | 0.22 | 0.28 |
| 2294 | 1 | 104354 | YGAFDPLLAVADICKKYK<br>IW           | 2.94 | 0.01 | 0.78 | 3.89 | 1.13 | 0.28 |
| 2295 | 1 | 140934 | YGEEKPAVLGHD                       | 2.44 | 0.01 | 3.01 | 1.12 | 0.22 | 0.28 |
| 2296 | 1 | 230546 | YGKCIAVDAFIKKI                     | 2.62 | 0.01 | 2.22 | 0.68 | 0.22 | 0.28 |
| 2297 | 1 | 134273 | YHPDVP                             | 1.90 | 0.01 | 0.78 | 0.44 | 1.41 | 1.27 |
| 2298 | 1 | 90768  | YIGYSGTGEG                         | 2.36 | 0.01 | 3.06 | 0.44 | 0.85 | 0.28 |
| 2299 | 1 | 116037 | YIPIQYVLSR                         | 2.32 | 0.01 | 1.60 | 0.44 | 1.23 | 0.85 |
| 2300 | 1 | 97117  | YIQMKRIAVG                         | 2.29 | 0.01 | 2.39 | 0.44 | 0.85 | 0.28 |
| 2301 | 1 | 107695 | YKCKVSN                            | 2.02 | 0.01 | 0.78 | 0.44 | 1.13 | 0.28 |
| 2302 | 1 | 74442  | YKDYFCISKWYLKEVKRK<br>PYNLKLK      | 3.14 | 0.01 | 2.08 | 2.02 | 0.22 | 0.28 |
| 2303 | 1 | 125605 | YKEKSKFQDTHNNAHY<br>VFF            | 2.92 | 0.01 | 0.78 | 0.44 | 1.13 | 0.28 |
| 2304 | 1 | 125605 | YKEKSKFQDTHNNAHY<br>VFF            | 2.92 | 0.01 | 0.78 | 1.20 | 0.22 | 0.28 |
| 2305 | 1 | 74497  | YKQKIIAP                           | 2.13 | 0.01 | 3.37 | 0.68 | 0.22 | 0.28 |
| 2306 | 1 | 140936 | YLAGKGVDAGKL                       | 2.51 | 0.01 | 3.01 | 1.12 | 0.22 | 0.28 |
| 2307 | 1 | 140938 | YLNATPAAKVLVEGNTD<br>ERG           | 2.94 | 0.01 | 3.01 | 0.68 | 0.22 | 0.85 |
| 2308 | 1 | 75075  | YMLDLQPETT                         | 2.29 | 0.01 | 1.86 | 2.37 | 0.22 | 0.28 |
| 2309 | 1 | 136897 | YMWLGARFL                          | 2.21 | 0.01 | 3.81 | 0.68 | 0.22 | 0.28 |
| 2310 | 1 | 104362 | YNDDEPNGAIRFTMG                    | 2.63 | 0.01 | 3.00 | 1.20 | 0.22 | 0.28 |
| 2311 | 1 | 75214  | YNRNIVNRLLGDALNGK<br>PEEK          | 2.99 | 0.01 | 3.33 | 0.68 | 0.22 | 0.28 |
| 2312 | 1 | 75245  | YPADSKGCKITCFLT                    | 2.64 | 0.01 | 2.56 | 0.68 | 0.22 | 0.85 |
| 2313 | 1 | 75245  | YPADSKGCKITCFLT                    | 2.64 | 0.01 | 2.56 | 1.20 | 0.22 | 0.85 |
| 2314 | 1 | 75448  | YPYRLWHY                           | 2.15 | 0.01 | 1.96 | 0.68 | 0.22 | 1.34 |
| 2315 | 1 | 75448  | YPYRLWHY                           | 2.15 | 0.01 | 1.96 | 0.68 | 0.22 | 1.34 |
| 2316 | 1 | 137586 | YQAPQQGRQQGQSGR                    | 2.73 | 0.01 | 3.12 | 0.44 | 1.23 | 0.85 |
| 2317 | 1 | 75506  | YQKFALPQYL                         | 2.34 | 0.01 | 1.60 | 0.44 | 1.23 | 0.85 |
| 2318 | 1 | 96023  | YQKFPQYLQY                         | 2.36 | 0.01 | 1.60 | 0.44 | 1.23 | 0.85 |
| 2319 | 1 | 94746  | YREDMEY                            | 2.05 | 0.01 | 2.24 | 3.12 | 0.22 | 0.28 |
| 2320 | 1 | 174328 | YSANEQCRVAFGPKAVA<br>CTFARE        | 3.06 | 0.01 | 0.78 | 1.15 | 0.22 | 1.34 |
| 2321 | 1 | 111973 | YSKISEYRHY                         | 2.34 | 0.01 | 1.86 | 1.12 | 0.22 | 0.28 |

|      |   |        |                           |      |      |      |      |      |      |
|------|---|--------|---------------------------|------|------|------|------|------|------|
| 2322 | 1 | 153907 | YSKISEYRHYCYSLYGTTL<br>E  | 2.96 | 0.01 | 1.86 | 2.37 | 0.22 | 0.28 |
| 2323 | 1 | 104367 | YSNGGPFLTPIVPTAD          | 2.70 | 0.01 | 3.00 | 1.20 | 0.22 | 0.28 |
| 2324 | 1 | 156553 | YSTCYFIM                  | 2.13 | 3.85 | 3.97 | 0.68 | 0.22 | 0.28 |
| 2325 | 1 | 75923  | YSWKTWG                   | 2.02 | 0.01 | 2.87 | 0.68 | 0.22 | 0.28 |
| 2326 | 1 | 75923  | YSWKTWG                   | 2.02 | 0.01 | 2.87 | 0.68 | 0.22 | 0.28 |
| 2327 | 1 | 75923  | YSWKTWG                   | 2.02 | 0.01 | 2.87 | 0.68 | 0.22 | 0.28 |
| 2328 | 1 | 75923  | YSWKTWG                   | 2.02 | 0.01 | 2.87 | 0.68 | 0.22 | 0.28 |
| 2329 | 1 | 75924  | YSWKTWGKA                 | 2.23 | 0.01 | 2.87 | 0.68 | 0.22 | 0.28 |
| 2330 | 1 | 75924  | YSWKTWGKA                 | 2.23 | 0.01 | 2.87 | 0.68 | 0.22 | 0.28 |
| 2331 | 1 | 75924  | YSWKTWGKA                 | 2.23 | 0.01 | 2.87 | 0.68 | 0.22 | 0.28 |
| 2332 | 1 | 75924  | YSWKTWGKA                 | 2.23 | 0.01 | 2.87 | 0.68 | 0.22 | 0.28 |
| 2333 | 1 | 75950  | YTASARGDLAHLTTT           | 2.67 | 0.01 | 2.78 | 2.78 | 0.22 | 1.27 |
| 2334 | 1 | 75952  | YTASARGDLAHLTTTHA<br>RHLP | 3.01 | 0.01 | 2.78 | 2.78 | 0.22 | 1.27 |
| 2335 | 1 | 75952  | YTASARGDLAHLTTTHA<br>RHLP | 3.01 | 0.01 | 2.78 | 1.15 | 0.22 | 1.27 |
| 2336 | 1 | 75952  | YTASARGDLAHLTTTHA<br>RHLP | 3.01 | 0.01 | 2.78 | 1.15 | 0.22 | 1.27 |
| 2337 | 1 | 75952  | YTASARGDLAHLTTTHA<br>RHLP | 3.01 | 0.01 | 2.78 | 1.15 | 0.22 | 1.27 |
| 2338 | 1 | 75952  | YTASARGDLAHLTTTHA<br>RHLP | 3.01 | 0.01 | 2.78 | 1.15 | 0.22 | 1.27 |
| 2339 | 1 | 450372 | YTKCGSGPWLTPrCLVD<br>YPY  | 2.95 | 0.01 | 1.96 | 0.68 | 0.22 | 1.34 |
| 2340 | 1 | 98647  | YTKDTNNNLT                | 2.33 | 0.01 | 2.87 | 0.68 | 0.22 | 0.28 |
| 2341 | 1 | 98647  | YTKDTNNNLT                | 2.33 | 0.01 | 2.87 | 1.20 | 0.22 | 0.28 |
| 2342 | 1 | 98648  | YTKNTNNNLT                | 2.35 | 0.01 | 3.45 | 0.68 | 0.22 | 0.28 |
| 2343 | 1 | 98648  | YTKNTNNNLT                | 2.35 | 0.01 | 3.45 | 1.20 | 0.22 | 0.28 |
| 2344 | 1 | 98650  | YTPAYYTKNT                | 2.35 | 0.01 | 3.45 | 1.20 | 0.22 | 0.28 |
| 2345 | 1 | 112739 | YTTGAVRQIFGDYKTTIC<br>GK  | 2.94 | 0.01 | 0.78 | 4.45 | 0.22 | 0.28 |
| 2346 | 1 | 112739 | YTTGAVRQIFGDYKTTIC<br>GK  | 2.94 | 0.01 | 0.78 | 4.45 | 0.22 | 0.28 |
| 2347 | 1 | 186803 | YTYHGIPHHCKKYEN           | 2.67 | 0.01 | 0.90 | 1.20 | 0.22 | 0.85 |
| 2348 | 1 | 91024  | YVAPAADAPQ                | 2.35 | 0.01 | 3.06 | 0.44 | 0.85 | 0.28 |
| 2349 | 1 | 161302 | YVGGVEHRLEAACNWT<br>RGER  | 2.94 | 0.01 | 2.45 | 2.74 | 0.22 | 0.28 |
| 2350 | 1 | 489865 | YVTSHGDHYHYNGKVP<br>YDA   | 2.96 | 0.01 | 2.70 | 0.44 | 0.85 | 0.28 |
| 2351 | 1 | 102974 | YVVKSFDRSTKVIDFHYP<br>NE  | 2.93 | 0.01 | 0.78 | 3.89 | 1.13 | 0.28 |
| 2352 | 1 | 144823 | YWEGSGIGAI                | 2.33 | 0.01 | 0.78 | 0.44 | 1.13 | 0.28 |
| 2353 | 1 | 144823 | YWEGSGIGAI                | 2.33 | 0.01 | 0.78 | 0.44 | 2.35 | 0.28 |
| 2354 | 1 | 76523  | YYIPLEAVKF                | 2.28 | 0.01 | 2.60 | 0.44 | 1.23 | 0.85 |
| 2355 | 1 | 76542  | YYLQ                      | 1.59 | 0.01 | 2.84 | 0.44 | 0.85 | 0.28 |
| 2356 | 1 | 102271 | YYNSLGFNIK                | 2.30 | 0.01 | 3.93 | 0.44 | 1.23 | 0.85 |



|      |   |        |                          |      |      |      |      |      |      |
|------|---|--------|--------------------------|------|------|------|------|------|------|
| 2357 | 1 | 489867 | YYPGEKVHYDQILEKDG<br>YKW | 2.94 | 0.01 | 2.70 | 0.44 | 0.85 | 0.28 |
| 2358 | 1 | 76616  | YYTKDTNNNL               | 2.33 | 0.01 | 2.87 | 0.68 | 0.22 | 0.28 |
| 2359 | 1 | 76616  | YYTKDTNNNL               | 2.33 | 0.01 | 2.87 | 1.20 | 0.22 | 0.28 |
| 2360 | 1 | 98653  | YYTKNTNNNL               | 2.34 | 0.01 | 3.45 | 0.68 | 0.22 | 0.28 |
| 2361 | 1 | 98653  | YYTKNTNNNL               | 2.34 | 0.01 | 3.45 | 1.20 | 0.22 | 0.28 |
| 2362 | 1 | 124925 | YYVFEEQEDEIIGF           | 2.70 | 0.01 | 0.78 | 1.20 | 0.22 | 1.27 |
| 2363 | 1 | 124925 | YYVFEEQEDEIIGF           | 2.70 | 0.01 | 0.78 | 1.20 | 0.22 | 1.27 |
| 2364 | 1 | 124925 | YYVFEEQEDEIIGF           | 2.70 | 0.01 | 0.78 | 1.20 | 0.22 | 1.27 |
| 2365 | 1 | 124925 | YYVFEEQEDEIIGF           | 2.70 | 0.01 | 0.78 | 1.20 | 0.22 | 0.28 |
| 2366 | 1 | 124925 | YYVFEEQEDEIIGF           | 2.70 | 0.01 | 0.78 | 1.20 | 0.22 | 0.28 |
| 2367 | 1 | 122956 | YYVFEEQEDEIIGFG          | 2.76 | 0.01 | 2.19 | 0.44 | 1.13 | 0.28 |
| 2368 | 0 | 1      | AA                       | 1.04 | 4.93 | 4.93 | 1.12 | 0.22 | 1.57 |
| 2369 | 0 | 151101 | AAA                      | 1.33 | 4.45 | 0.90 | 0.44 | 1.41 | 1.27 |
| 2370 | 0 | 151102 | AAA                      | 1.33 | 4.93 | 0.90 | 0.44 | 1.41 | 1.27 |
| 2371 | 0 | 151101 | AAA                      | 1.33 | 4.45 | 0.90 | 0.44 | 1.41 | 0.28 |
| 2372 | 0 | 151101 | AAA                      | 1.33 | 4.45 | 0.90 | 0.44 | 1.13 | 0.28 |
| 2373 | 0 | 122991 | AAAAAAAT                 | 2.20 | 0.01 | 0.78 | 1.20 | 0.22 | 0.28 |
| 2374 | 0 | 244352 | AAAAAAKQKAAAKKA          | 2.74 | 0.01 | 1.61 | 0.44 | 0.85 | 1.28 |
| 2375 | 0 | 244373 | AAAAAKQKAAAKKAA          | 2.73 | 0.01 | 1.61 | 0.44 | 0.85 | 1.28 |
| 2376 | 0 | 118251 | AAAAAPAK                 | 2.18 | 0.01 | 0.78 | 0.44 | 1.13 | 0.28 |
| 2377 | 0 | 157020 | AAAAASSPSIAP             | 2.53 | 0.01 | 3.40 | 2.49 | 0.85 | 0.28 |
| 2378 | 0 | 244401 | AAAADKPSLFGQAAA          | 2.66 | 0.01 | 1.61 | 0.44 | 0.85 | 1.28 |
| 2379 | 0 | 244411 | AAAAEEEEDDDMGF           | 2.71 | 0.01 | 1.61 | 0.44 | 0.85 | 1.28 |
| 2380 | 0 | 244419 | AAAAPEEEEDDDDF           | 2.72 | 0.01 | 1.61 | 0.44 | 0.85 | 1.28 |
| 2381 | 0 | 135413 | AAAAKAAKYGAA             | 2.52 | 0.01 | 0.78 | 1.20 | 0.22 | 0.28 |
| 2382 | 0 | 244451 | AAAAKQKAAAKKAAA          | 2.73 | 0.01 | 1.61 | 0.44 | 0.85 | 1.28 |
| 2383 | 0 | 244468 | AAAAPAAAAPEEED           | 2.73 | 0.01 | 1.61 | 0.44 | 0.85 | 1.28 |
| 2384 | 0 | 244469 | AAAAPAKAAAPAKA           | 2.74 | 0.01 | 1.61 | 0.44 | 0.85 | 1.28 |
| 2385 | 0 | 244470 | AAAAPAKAAAPAKA           | 2.74 | 0.01 | 1.61 | 0.44 | 0.85 | 1.28 |
| 2386 | 0 | 244471 | AAAAPAKAAAPAKT           | 2.74 | 0.01 | 1.61 | 0.44 | 0.85 | 1.28 |
| 2387 | 0 | 244472 | AAAAPAKAATAPAKA          | 2.74 | 0.01 | 1.61 | 0.44 | 0.85 | 1.28 |
| 2388 | 0 | 244526 | AAADKPSLFGQAAAG          | 2.67 | 0.01 | 1.61 | 0.44 | 0.85 | 1.28 |
| 2389 | 0 | 244595 | AAAAEEEEDDDMGFGL         | 2.69 | 0.01 | 1.61 | 0.44 | 0.85 | 1.28 |
| 2390 | 0 | 244616 | AAAEPEEEDDDDFG           | 2.71 | 0.01 | 1.61 | 0.44 | 0.85 | 1.28 |
| 2391 | 0 | 32     | AAAETGVGVIKSIAP          | 2.69 | 0.01 | 3.63 | 1.20 | 0.22 | 0.28 |
| 2392 | 0 | 32     | AAAETGVGVIKSIAP          | 2.69 | 0.01 | 3.63 | 1.20 | 0.22 | 0.85 |

|      |   |        |                                                  |      |      |      |      |      |      |
|------|---|--------|--------------------------------------------------|------|------|------|------|------|------|
| 2393 | 0 | 32     | AAAETGVGVIKSIAP                                  | 2.69 | 0.01 | 3.63 | 1.20 | 0.22 | 1.34 |
| 2394 | 0 | 33     | AAAGAVVGGLGGYMLG                                 | 2.79 | 0.01 | 1.75 | 2.19 | 0.22 | 1.34 |
| 2395 | 0 | 33     | AAAGAVVGGLGGYMLG                                 | 2.79 | 0.01 | 1.75 | 2.19 | 0.22 | 0.28 |
| 2396 | 0 | 99077  | AAAGAVVGGLGGYMLG<br>SAMSRPMMHFGNDW               | 3.32 | 0.01 | 2.98 | 2.19 | 0.22 | 0.85 |
| 2397 | 0 | 99077  | AAAGAVVGGLGGYMLG<br>SAMSRPMMHFGNDW               | 3.32 | 0.01 | 2.98 | 2.19 | 0.22 | 0.85 |
| 2398 | 0 | 99077  | AAAGAVVGGLGGYMLG<br>SAMSRPMMHFGNDW               | 3.32 | 0.01 | 2.98 | 2.19 | 0.22 | 0.85 |
| 2399 | 0 | 34     | AAAGDK                                           | 1.91 | 0.01 | 2.30 | 0.44 | 0.85 | 1.27 |
| 2400 | 0 | 34     | AAAGDK                                           | 1.91 | 0.01 | 2.30 | 0.44 | 0.85 | 1.27 |
| 2401 | 0 | 244642 | AAAGDKLSLFGQAAA                                  | 2.68 | 0.01 | 1.61 | 0.44 | 0.85 | 1.28 |
| 2402 | 0 | 244643 | AAAGDKPAPFGQAAA                                  | 2.70 | 0.01 | 1.61 | 0.44 | 0.85 | 1.28 |
| 2403 | 0 | 244644 | AAAGDKPPFPGQAAA                                  | 2.69 | 0.01 | 1.61 | 0.44 | 0.85 | 1.28 |
| 2404 | 0 | 244645 | AAAGDKPPFPGQAAE                                  | 2.69 | 0.01 | 1.61 | 0.44 | 0.85 | 1.28 |
| 2405 | 0 | 244646 | AAAGDKPSLFGQAAA                                  | 2.66 | 0.01 | 1.61 | 0.44 | 0.85 | 1.28 |
| 2406 | 0 | 244647 | AAAGDKPSPFGQAAA                                  | 2.68 | 0.01 | 1.61 | 0.44 | 0.85 | 1.28 |
| 2407 | 0 | 244648 | AAAGDKPSPFGQGTAA                                 | 2.69 | 0.01 | 1.61 | 0.44 | 0.85 | 1.28 |
| 2408 | 0 | 103000 | AAAGDLVGPGCAEYA<br>AAAGFMVLQDINCFRP              | 2.69 | 0.01 | 2.04 | 0.44 | 0.85 | 1.28 |
| 2409 | 0 | 36     | HGVSAAQEKISFGKSSQ<br>CREAVGT                     | 3.60 | 0.01 | 2.80 | 1.15 | 0.22 | 0.28 |
| 2410 | 0 | 36     | AAAGFMVLQDINCFRP<br>HGVSAAQEKISFGKSSQ<br>CREAVGT | 3.60 | 0.01 | 2.80 | 1.15 | 0.22 | 2.02 |
| 2411 | 0 | 36     | AAAGFMVLQDINCFRP<br>HGVSAAQEKISFGKSSQ<br>CREAVGT | 3.60 | 0.01 | 2.80 | 1.15 | 0.22 | 1.34 |
| 2412 | 0 | 244654 | AAAGGKPSFPGQAAA                                  | 2.70 | 0.01 | 1.61 | 0.44 | 0.85 | 1.28 |
| 2413 | 0 | 128173 | AAAGYDVEKNNSRIKL                                 | 2.68 | 0.01 | 0.78 | 0.44 | 1.13 | 0.28 |
| 2414 | 0 | 128173 | AAAGYDVEKNNSRIKL                                 | 2.68 | 0.01 | 0.78 | 0.44 | 1.13 | 0.28 |
| 2415 | 0 | 128173 | AAAGYDVEKNNSRIKL                                 | 2.68 | 0.01 | 0.78 | 0.44 | 1.13 | 0.28 |

|      |   |        |                          |      |      |      |      |      |      |
|------|---|--------|--------------------------|------|------|------|------|------|------|
| 2416 | 0 | 167200 | AAAIAYGLDKREGEKNIL<br>VF | 2.94 | 3.24 | 0.78 | 0.44 | 1.13 | 0.28 |
| 2417 | 0 | 244732 | AAAKQKAAAKKAAAP          | 2.74 | 0.01 | 1.61 | 0.44 | 0.85 | 1.28 |
| 2418 | 0 | 49     | AAALPGKCGV               | 2.31 | 0.01 | 3.33 | 0.44 | 1.23 | 0.85 |
| 2419 | 0 | 49     | AAALPGKCGV               | 2.31 | 0.01 | 3.33 | 0.44 | 1.23 | 0.85 |
| 2420 | 0 | 49     | AAALPGKCGV               | 2.31 | 0.01 | 3.33 | 0.44 | 1.23 | 0.85 |
| 2421 | 0 | 244757 | AAAMDKVFTTGFAQE          | 2.66 | 0.01 | 1.61 | 0.44 | 0.85 | 1.28 |
| 2422 | 0 | 244759 | AAAMKTTTATTGDSD          | 2.71 | 0.01 | 1.61 | 0.44 | 0.85 | 1.28 |
| 2423 | 0 | 244760 | AAAMKTTTATTGNSD          | 2.69 | 0.01 | 1.61 | 0.44 | 0.85 | 1.28 |
| 2424 | 0 | 102279 | AAANQT                   | 1.91 | 0.01 | 2.25 | 0.68 | 0.22 | 0.85 |
| 2425 | 0 | 102279 | AAANQT                   | 1.91 | 0.01 | 2.25 | 0.68 | 0.22 | 0.85 |
| 2426 | 0 | 102280 | AAANQTEV                 | 2.12 | 0.01 | 2.25 | 0.68 | 0.22 | 0.85 |
| 2427 | 0 | 102280 | AAANQTEV                 | 2.12 | 0.01 | 2.25 | 0.68 | 0.22 | 0.85 |
| 2428 | 0 | 52     | AAANTSDSQKE              | 2.39 | 0.01 | 0.90 | 0.44 | 1.74 | 0.28 |
| 2429 | 0 | 164560 | AAANVVKSGIFLSVAAG<br>NE  | 2.91 | 0.01 | 3.75 | 0.44 | 1.23 | 0.85 |
| 2430 | 0 | 164560 | AAANVVKSGIFLSVAAG<br>NE  | 2.91 | 0.01 | 3.75 | 0.44 | 1.23 | 1.27 |
| 2431 | 0 | 97157  | AAANYTTA                 | 2.17 | 0.01 | 2.87 | 0.68 | 0.22 | 0.28 |
| 2432 | 0 | 97157  | AAANYTTA                 | 2.17 | 0.01 | 2.87 | 0.68 | 0.22 | 0.28 |
| 2433 | 0 | 97157  | AAANYTTA                 | 2.17 | 0.01 | 2.87 | 1.81 | 0.22 | 0.28 |
| 2434 | 0 | 244776 | AAAPAAAAEEEEDDDD         | 2.73 | 0.01 | 1.61 | 0.44 | 0.85 | 1.28 |
| 2435 | 0 | 128175 | AAAPAEKKVEAKKE           | 2.74 | 0.01 | 0.78 | 0.44 | 1.13 | 0.85 |
| 2436 | 0 | 244780 | AAAPAKAAAPAKAA           | 2.72 | 0.01 | 1.61 | 0.44 | 0.85 | 1.28 |
| 2437 | 0 | 244781 | AAAPAKAAAPAKAAA          | 2.72 | 0.01 | 1.61 | 0.44 | 0.85 | 1.28 |
| 2438 | 0 | 244782 | AAAPAKAAAPPAKAA          | 2.72 | 0.01 | 1.61 | 0.44 | 0.85 | 1.28 |
| 2439 | 0 | 244783 | AAAPAKAAAPPAKTA          | 2.74 | 0.01 | 1.61 | 0.44 | 0.85 | 1.28 |
| 2440 | 0 | 244784 | AAAPAKAATAPAKAA          | 2.73 | 0.01 | 1.61 | 0.44 | 0.85 | 1.28 |
| 2441 | 0 | 510561 | AAAPATAPAAHGV            | 2.59 | 3.97 | 0.90 | 0.44 | 1.59 | 1.28 |
| 2442 | 0 | 510562 | AAAPATAPGAHGV            | 2.59 | 3.97 | 0.90 | 0.44 | 1.59 | 1.28 |
| 2443 | 0 | 510563 | AAAPATAPPAHGV            | 2.59 | 3.97 | 0.90 | 0.44 | 1.59 | 1.28 |
| 2444 | 0 | 510564 | AAAPATAPSAHGV            | 2.58 | 3.97 | 0.90 | 0.44 | 1.59 | 1.28 |
| 2445 | 0 | 510565 | AAAPATAPSAHGV            | 2.58 | 4.93 | 0.90 | 0.44 | 1.59 | 1.28 |
| 2446 | 0 | 244793 | AAAPKKAAAPKKAAA          | 2.73 | 0.01 | 1.61 | 0.44 | 0.85 | 1.28 |
| 2447 | 0 | 244794 | AAAPKKAAAPQKAAA          | 2.73 | 0.01 | 1.61 | 0.44 | 0.85 | 1.28 |
| 2448 | 0 | 244795 | AAAPKKTAAPKKAAA          | 2.73 | 0.01 | 1.61 | 0.44 | 0.85 | 1.28 |
| 2449 | 0 | 244798 | AAAPKNGTATTGDSD          | 2.70 | 0.01 | 1.61 | 0.44 | 0.85 | 1.28 |

|      |   |        |                             |      |      |      |      |      |      |
|------|---|--------|-----------------------------|------|------|------|------|------|------|
| 2450 | 0 | 244803 | AAAPPAKAAAAPAKA             | 2.74 | 0.01 | 1.61 | 0.44 | 0.85 | 1.28 |
| 2451 | 0 | 244804 | AAAPPAKAAAAPVGK             | 2.73 | 0.01 | 1.61 | 0.44 | 0.85 | 1.28 |
| 2452 | 0 | 244805 | AAAPPAKAAAPPAKA             | 2.74 | 0.01 | 1.61 | 0.44 | 0.85 | 1.28 |
| 2453 | 0 | 244806 | AAAPPAKAAAPPAKT             | 2.74 | 0.01 | 1.61 | 0.44 | 0.85 | 1.28 |
| 2454 | 0 | 244807 | AAAPPAKTAAAPAKA             | 2.74 | 0.01 | 1.61 | 0.44 | 0.85 | 1.28 |
| 2455 | 0 | 244811 | AAAPQKAAAPKKTAA             | 2.72 | 0.01 | 1.61 | 0.44 | 0.85 | 1.28 |
| 2456 | 0 | 244812 | AAAPQKAAVAKKAVR             | 2.73 | 0.01 | 1.61 | 0.44 | 0.85 | 1.28 |
| 2457 | 0 | 128176 | AAAPVAAATTAAPAA             | 2.73 | 0.01 | 0.78 | 0.44 | 1.13 | 0.85 |
| 2458 | 0 | 157027 | AAAPVVFAAKT                 | 2.42 | 0.01 | 3.40 | 2.49 | 0.85 | 0.28 |
| 2459 | 0 | 54     | AAAQHGHMHGS                 | 2.42 | 0.01 | 0.90 | 0.44 | 1.74 | 0.28 |
| 2460 | 0 | 112891 | AAAQMPAYQELVEEA             | 2.70 | 0.01 | 0.78 | 1.20 | 0.22 | 0.85 |
| 2461 | 0 | 112891 | AAAQMPAYQELVEEA             | 2.70 | 0.01 | 0.78 | 0.44 | 1.13 | 0.85 |
| 2462 | 0 | 56     | AAARTTS                     | 2.04 | 0.01 | 1.72 | 0.44 | 0.85 | 0.28 |
| 2463 | 0 | 60     | AAASAIQGNVTSIHS             | 2.74 | 0.01 | 2.04 | 0.44 | 0.85 | 0.28 |
| 2464 | 0 | 60     | AAASAIQGNVTSIHS             | 2.74 | 0.01 | 2.04 | 0.44 | 1.59 | 0.28 |
| 2465 | 0 | 103002 | AAASLAAIAIAFLAG             | 2.73 | 0.01 | 2.04 | 0.44 | 0.85 | 1.28 |
| 2466 | 0 | 79741  | AAASSPDAHVPF                | 2.49 | 0.01 | 2.14 | 3.26 | 0.22 | 0.28 |
| 2467 | 0 | 79741  | AAASSPDAHVPF                | 2.49 | 0.01 | 2.14 | 3.55 | 0.22 | 0.28 |
| 2468 | 0 | 65     | AAAVLNLT                    | 2.14 | 0.01 | 3.06 | 1.12 | 0.22 | 0.28 |
| 2469 | 0 | 66     | AAAWGGSGSEAYQGV<br>QQKWDATA | 3.09 | 0.01 | 2.04 | 1.12 | 0.22 | 0.28 |
| 2470 | 0 | 66     | AAAWGGSGSEAYQGV<br>QQKWDATA | 3.09 | 0.01 | 2.04 | 1.12 | 0.22 | 0.85 |
| 2471 | 0 | 66     | AAAWGGSGSEAYQGV<br>QQKWDATA | 3.09 | 0.01 | 2.04 | 1.12 | 0.22 | 0.28 |
| 2472 | 0 | 170161 | AAAWQAVEPSDIAAC             | 2.66 | 0.01 | 0.78 | 0.44 | 1.13 | 0.28 |
| 2473 | 0 | 135414 | AAAYKAA                     | 2.03 | 0.01 | 0.78 | 0.68 | 0.22 | 0.28 |
| 2474 | 0 | 135414 | AAAYKAA                     | 2.03 | 0.01 | 0.78 | 0.68 | 0.22 | 1.48 |
| 2475 | 0 | 135414 | AAAYKAA                     | 2.03 | 0.01 | 0.78 | 0.68 | 0.22 | 0.28 |
| 2476 | 0 | 70     | AACAGNRVRRSVGSSLK<br>C      | 2.87 | 0.01 | 3.42 | 2.37 | 0.22 | 0.28 |
| 2477 | 0 | 121112 | AACDPRHGRYLTVA              | 2.59 | 0.01 | 0.78 | 0.44 | 1.13 | 1.27 |
| 2478 | 0 | 121112 | AACDPRHGRYLTVA              | 2.59 | 0.01 | 0.78 | 0.44 | 1.13 | 0.28 |
| 2479 | 0 | 121112 | AACDPRHGRYLTVA              | 2.59 | 0.01 | 0.78 | 0.44 | 1.13 | 0.28 |
| 2480 | 0 | 121112 | AACDPRHGRYLTVA              | 2.59 | 0.01 | 0.78 | 0.44 | 1.41 | 0.28 |
| 2481 | 0 | 121112 | AACDPRHGRYLTVA              | 2.59 | 0.01 | 0.78 | 0.44 | 1.13 | 0.28 |

|      |   |        |                                     |      |      |      |      |      |      |
|------|---|--------|-------------------------------------|------|------|------|------|------|------|
| 2482 | 0 | 121112 | AACDPRHGRYLTVA                      | 2.59 | 0.01 | 0.78 | 0.44 | 1.13 | 0.28 |
| 2483 | 0 | 121112 | AACDPRHGRYLTVA                      | 2.59 | 0.01 | 0.78 | 0.44 | 1.41 | 0.28 |
| 2484 | 0 | 101459 | AACNCLKQLS                          | 2.32 | 0.01 | 3.33 | 0.44 | 1.23 | 0.85 |
| 2485 | 0 | 101459 | AACNCLKQLS                          | 2.32 | 0.01 | 3.33 | 0.44 | 1.23 | 0.85 |
| 2486 | 0 | 76     | AACRAA                              | 1.90 | 0.01 | 1.96 | 0.44 | 0.85 | 0.28 |
| 2487 | 0 | 230440 | AACREGEDNSKRNP                      | 2.65 | 0.01 | 0.78 | 0.44 | 1.13 | 0.28 |
| 2488 | 0 | 442066 | AACVQTC                             | 2.03 | 0.01 | 0.90 | 2.66 | 0.22 | 1.39 |
| 2489 | 0 | 82     | AADAILHTPGCVPC                      | 2.61 | 0.01 | 2.41 | 0.44 | 0.85 | 0.28 |
| 2490 | 0 | 82     | AADAILHTPGCVPC                      | 2.61 | 0.01 | 2.41 | 0.44 | 1.41 | 0.28 |
| 2491 | 0 | 82     | AADAILHTPGCVPC                      | 2.61 | 0.01 | 2.41 | 0.44 | 0.85 | 0.28 |
| 2492 | 0 | 161200 | AADAILHTPGCVPCVRE<br>GNA            | 2.93 | 0.01 | 2.45 | 0.68 | 0.22 | 0.28 |
| 2493 | 0 | 97158  | AADGQSATA                           | 2.25 | 0.01 | 3.13 | 1.12 | 0.22 | 0.28 |
| 2494 | 0 | 86     | AADHCPVVEVNGVTI                     | 2.65 | 0.01 | 2.43 | 0.44 | 1.59 | 0.28 |
| 2495 | 0 | 245075 | AADKPSLFGQAAAGD                     | 2.68 | 0.01 | 1.61 | 0.44 | 0.85 | 1.28 |
| 2496 | 0 | 89     | AADKPTLDIRMMNIEA                    | 2.72 | 0.01 | 3.61 | 3.01 | 0.22 | 0.28 |
| 2497 | 0 | 89     | AADKPTLDIRMMNIEA                    | 2.72 | 0.01 | 3.22 | 0.68 | 0.22 | 0.28 |
| 2498 | 0 | 89     | AADKPTLDIRMMNIEA                    | 2.72 | 0.01 | 3.22 | 0.68 | 0.22 | 1.34 |
| 2499 | 0 | 89     | AADKPTLDIRMMNIEA                    | 2.72 | 0.01 | 3.22 | 1.15 | 0.22 | 0.28 |
| 2500 | 0 | 90     | AADKPTLDIRMMNIEAT<br>NLAL           | 3.00 | 0.01 | 3.61 | 3.01 | 0.22 | 0.28 |
| 2501 | 0 | 90     | AADKPTLDIRMMNIEAT<br>NLAL           | 3.00 | 0.01 | 3.61 | 0.68 | 0.22 | 0.28 |
| 2502 | 0 | 181540 | AADLGVIPGPSHFSQ                     | 2.65 | 0.01 | 2.86 | 2.37 | 0.22 | 1.28 |
| 2503 | 0 | 92     | AADMIMHTPGCVPC                      | 2.60 | 0.01 | 1.96 | 0.44 | 1.41 | 0.28 |
| 2504 | 0 | 92     | AADMIMHTPGCVPC                      | 2.60 | 0.01 | 1.96 | 0.44 | 0.85 | 0.28 |
| 2505 | 0 | 96     | AADQLPNV                            | 2.11 | 0.01 | 3.06 | 1.12 | 0.22 | 0.28 |
| 2506 | 0 | 127911 | AADRGGADVASIHLTA<br>RAT             | 2.96 | 0.01 | 0.78 | 0.44 | 1.13 | 0.28 |
| 2507 | 0 | 245095 | AADTDSAKGKATGGS                     | 2.73 | 0.01 | 1.61 | 0.44 | 0.85 | 1.28 |
| 2508 | 0 | 245096 | AADTDSAKGKATGSS                     | 2.72 | 0.01 | 1.61 | 0.44 | 0.85 | 1.28 |
| 2509 | 0 | 245110 | AADVEAGDGPDKTTT<br>AADYKSAHKGLKGADA | 2.69 | 0.01 | 1.61 | 0.44 | 0.85 | 1.28 |
| 2510 | 0 | 116231 | QGTLSRLFKLGGRDSRS<br>GSPMAR         | 3.62 | 0.01 | 2.96 | 2.55 | 2.60 | 0.85 |
| 2511 | 0 | 423200 | AADYLCCDDTLEAVG                     | 2.68 | 0.01 | 2.51 | 0.44 | 2.35 | 1.28 |
| 2512 | 0 | 100    | AAEAACFK                            | 2.15 | 0.01 | 3.81 | 0.44 | 1.23 | 1.27 |
| 2513 | 0 | 489440 | AAEAANTLQGFNPQN                     | 2.69 | 0.01 | 2.69 | 3.05 | 0.85 | 1.28 |
| 2514 | 0 | 245184 | AAEAQKQAAEATKA                      | 2.75 | 0.01 | 1.61 | 0.44 | 0.85 | 1.28 |
| 2515 | 0 | 245185 | AAEAQKQAAEATKV                      | 2.74 | 0.01 | 1.61 | 0.44 | 0.85 | 1.28 |
| 2516 | 0 | 245187 | AAEAQKRAAEATKV                      | 2.74 | 0.01 | 1.61 | 0.44 | 0.85 | 1.28 |

|      |   |        |                                     |      |      |      |      |      |      |
|------|---|--------|-------------------------------------|------|------|------|------|------|------|
| 2517 | 0 | 134633 | AAEAFVLVHLFEDAYL                    | 2.71 | 0.01 | 0.78 | 0.44 | 1.41 | 0.28 |
| 2518 | 0 | 134633 | AAEAFVLVHLFEDAYL                    | 2.71 | 0.01 | 0.78 | 0.44 | 1.13 | 0.28 |
| 2519 | 0 | 134633 | AAEAFVLVHLFEDAYL                    | 2.71 | 0.01 | 0.78 | 2.79 | 1.13 | 1.28 |
| 2520 | 0 | 134633 | AAEAFVLVHLFEDAYL                    | 2.71 | 0.01 | 0.78 | 1.81 | 1.41 | 1.28 |
| 2521 | 0 | 134633 | AAEAFVLVHLFEDAYL                    | 2.71 | 0.01 | 0.78 | 1.81 | 1.41 | 1.28 |
| 2522 | 0 | 245236 | AAEAVEAEKRKAAEA                     | 2.75 | 0.01 | 1.61 | 0.44 | 0.85 | 1.28 |
| 2523 | 0 | 101    | AAECPFLPKPKVA                       | 2.57 | 0.01 | 3.00 | 0.44 | 0.85 | 0.28 |
| 2524 | 0 | 245271 | AAEEEEDDDMGFGLF                     | 2.69 | 0.01 | 1.61 | 0.44 | 0.85 | 1.28 |
| 2525 | 0 | 103    | AAEESKLPINPLSNSLLR<br>H             | 2.90 | 0.01 | 1.72 | 0.44 | 0.85 | 0.28 |
| 2526 | 0 | 103    | AAEESKLPINPLSNSLLR<br>H             | 2.90 | 0.01 | 1.72 | 0.44 | 0.85 | 0.28 |
| 2527 | 0 | 121113 | AAEEWKY                             | 2.02 | 0.01 | 2.26 | 1.20 | 0.22 | 0.28 |
| 2528 | 0 | 121113 | AAEEWKY                             | 2.02 | 0.01 | 2.26 | 1.20 | 0.22 | 0.28 |
| 2529 | 0 | 142381 | AAEFATEVKKAT                        | 2.52 | 0.01 | 2.59 | 0.44 | 0.85 | 0.85 |
| 2530 | 0 | 105    | AAEFTINKPK                          | 2.30 | 0.01 | 3.42 | 3.28 | 0.22 | 0.28 |
| 2531 | 0 | 106    | AAEGATPEAKYD                        | 2.49 | 0.01 | 3.22 | 0.44 | 1.23 | 0.85 |
| 2532 | 0 | 245290 | AAEGDKPPFPGQAAA                     | 2.68 | 0.01 | 1.61 | 0.44 | 0.85 | 1.28 |
| 2533 | 0 | 107    | AAEGGGQKQENT                        | 2.49 | 0.01 | 2.30 | 1.15 | 0.22 | 0.85 |
| 2534 | 0 | 170163 | AAEIVGGHEAQPHSR                     | 2.67 | 0.01 | 0.78 | 0.44 | 1.13 | 0.28 |
| 2535 | 0 | 96058  | AAEQMKDKQ                           | 2.34 | 0.01 | 0.78 | 0.44 | 1.93 | 0.85 |
| 2536 | 0 | 238110 | AAEKYHRCSTKLTLY                     | 2.67 | 0.01 | 2.56 | 2.02 | 0.22 | 0.85 |
| 2537 | 0 | 238110 | AAEKYHRCSTKLTLY                     | 2.67 | 0.01 | 2.56 | 1.20 | 0.22 | 0.85 |
| 2538 | 0 | 245372 | AAPEEEEDDDDDFGM                     | 2.69 | 0.01 | 1.61 | 0.44 | 0.85 | 1.28 |
| 2539 | 0 | 130715 | AAEPHRLVSGGCSSAGR<br>GPCARTGQRRPNRG | 3.38 | 0.01 | 0.90 | 0.44 | 1.93 | 0.85 |
| 2540 | 0 | 121    | AAESERFVRQGTGNDEA<br>GAA            | 2.94 | 0.01 | 2.58 | 0.44 | 0.22 | 0.28 |
| 2541 | 0 | 122    | AAESQIRDVDFAAESAN<br>YSKANILAQSGSY  | 3.34 | 0.01 | 3.27 | 3.08 | 0.22 | 0.28 |
| 2542 | 0 | 122    | AAESQIRDVDFAAESAN<br>YSKANILAQSGSY  | 3.34 | 0.01 | 3.27 | 3.08 | 0.22 | 0.28 |
| 2543 | 0 | 122    | AAESQIRDVDFAAESAN<br>YSKANILAQSGSY  | 3.34 | 0.01 | 3.27 | 1.20 | 0.22 | 0.28 |
| 2544 | 0 | 122    | AAESQIRDVDFAAESAN<br>YSKANILAQSGSY  | 3.34 | 0.01 | 3.27 | 3.08 | 0.22 | 0.28 |
| 2545 | 0 | 122    | AAESQIRDVDFAAESAN<br>YSKANILAQSGSY  | 3.34 | 0.01 | 3.27 | 3.08 | 0.22 | 0.28 |
| 2546 | 0 | 97837  | AAETATTE                            | 2.16 | 0.01 | 2.60 | 1.12 | 0.22 | 0.85 |
| 2547 | 0 | 181260 | AAETGASSNASDKNL                     | 2.69 | 0.01 | 2.82 | 1.15 | 0.22 | 0.28 |
| 2548 | 0 | 78601  | AAFQLAEVSTSGLGRAY<br>AGEAAIADNASV   | 3.31 | 0.01 | 2.98 | 2.16 | 0.22 | 0.28 |
| 2549 | 0 | 78601  | AAFQLAEVSTSGLGRAY<br>AGEAAIADNASV   | 3.31 | 0.01 | 2.98 | 1.12 | 0.22 | 0.28 |

|      |   |        |                                   |      |      |      |      |      |      |
|------|---|--------|-----------------------------------|------|------|------|------|------|------|
| 2550 | 0 | 78601  | AAFQLAEVSTSGLGRAY<br>AGEAAIADNASV | 3.31 | 0.01 | 2.98 | 0.44 | 0.85 | 0.28 |
| 2551 | 0 | 78601  | AAFQLAEVSTSGLGRAY<br>AGEAAIADNASV | 3.31 | 0.01 | 2.98 | 1.12 | 0.22 | 0.28 |
| 2552 | 0 | 78601  | AAFQLAEVSTSGLGRAY<br>AGEAAIADNASV | 3.31 | 0.01 | 2.98 | 1.12 | 0.22 | 0.85 |
| 2553 | 0 | 78601  | AAFQLAEVSTSGLGRAY<br>AGEAAIADNASV | 3.31 | 0.01 | 2.98 | 1.12 | 0.22 | 0.85 |
| 2554 | 0 | 122996 | AAFQQGKIPP                        | 2.29 | 0.01 | 0.78 | 0.44 | 1.13 | 0.28 |
| 2555 | 0 | 108259 | AAFSELPLG                         | 2.22 | 0.01 | 0.90 | 0.44 | 1.13 | 1.39 |
| 2556 | 0 | 117731 | AAFYKTFKTV                        | 2.34 | 0.01 | 0.78 | 0.44 | 1.13 | 0.28 |
| 2557 | 0 | 117731 | AAFYKTFKTV                        | 2.34 | 0.01 | 0.78 | 0.44 | 1.41 | 0.28 |
| 2558 | 0 | 143    | AAGAGPRVRQ                        | 2.35 | 4.45 | 2.70 | 0.44 | 0.85 | 0.28 |
| 2559 | 0 | 145    | AAGANPLGLKRGIEKAV                 | 2.81 | 0.01 | 2.59 | 1.15 | 0.22 | 0.28 |
| 2560 | 0 | 145    | AAGANPLGLKRGIEKAV                 | 2.81 | 0.01 | 2.59 | 1.15 | 0.22 | 0.85 |
| 2561 | 0 | 79141  | AAGASQSRPRPPRHAR<br>AQHLPemptPAVT | 3.33 | 0.01 | 2.85 | 1.20 | 0.22 | 0.85 |
| 2562 | 0 | 105640 | AAGAVMRGFVFT                      | 2.51 | 0.01 | 1.60 | 0.44 | 1.13 | 1.27 |
| 2563 | 0 | 245500 | AAGDKLSLFGQAAAG                   | 2.70 | 0.01 | 1.61 | 0.44 | 0.85 | 1.28 |
| 2564 | 0 | 245501 | AAGDKPAPFGQAAAA                   | 2.70 | 0.01 | 1.61 | 0.44 | 0.85 | 1.28 |
| 2565 | 0 | 245502 | AAGDKPAPFGQAAAG                   | 2.71 | 0.01 | 1.61 | 0.44 | 0.85 | 1.28 |
| 2566 | 0 | 245503 | AAGDKPPPFQAAAG                    | 2.70 | 0.01 | 1.61 | 0.44 | 0.85 | 1.28 |
| 2567 | 0 | 245504 | AAGDKPPPFQAAEG                    | 2.69 | 0.01 | 1.61 | 0.44 | 0.85 | 1.28 |
| 2568 | 0 | 245505 | AAGDKPSLFGQAAAG                   | 2.68 | 0.01 | 1.61 | 0.44 | 0.85 | 1.28 |
| 2569 | 0 | 245506 | AAGDKPSPFGQAAAG                   | 2.70 | 0.01 | 1.61 | 0.44 | 0.85 | 1.28 |
| 2570 | 0 | 245507 | AAGDKPSPFGQGTAf                   | 2.70 | 0.01 | 1.61 | 0.44 | 0.85 | 1.28 |
| 2571 | 0 | 151    | AAGFASKTPANQAISMI<br>DGP          | 2.94 | 0.01 | 2.04 | 2.52 | 0.22 | 0.28 |
| 2572 | 0 | 245521 | AAGGFGSAAHTSAPA                   | 2.73 | 0.01 | 1.61 | 0.44 | 0.85 | 1.28 |
| 2573 | 0 | 245522 | AAGGFGSAAHTSTPA                   | 2.73 | 0.01 | 1.61 | 0.44 | 0.85 | 1.28 |
| 2574 | 0 | 245523 | AAGGFGSATHTSAPA                   | 2.73 | 0.01 | 1.61 | 0.44 | 0.85 | 1.28 |
| 2575 | 0 | 245524 | AAGGFGSATHTSTPA                   | 2.73 | 0.01 | 1.61 | 0.44 | 0.85 | 1.28 |
| 2576 | 0 | 245525 | AAGGFGSATNTSAPA                   | 2.73 | 0.01 | 1.61 | 0.44 | 0.85 | 1.28 |
| 2577 | 0 | 245526 | AAGGFGSATTTSAPA                   | 2.73 | 0.01 | 1.61 | 0.44 | 0.85 | 1.28 |
| 2578 | 0 | 245527 | AAGGFGSATTSTPA                    | 2.73 | 0.01 | 1.61 | 0.44 | 0.85 | 1.28 |
| 2579 | 0 | 161580 | AAGGGAAAAKPEESKKE<br>EAK          | 3.00 | 0.01 | 4.63 | 4.15 | 0.22 | 0.28 |
| 2580 | 0 | 161580 | AAGGGAAAAKPEESKKE<br>EAK          | 3.00 | 0.01 | 4.63 | 4.15 | 0.22 | 1.75 |

|      |   |        |                                    |      |      |      |      |      |      |
|------|---|--------|------------------------------------|------|------|------|------|------|------|
| 2581 | 0 | 245542 | AAGGKPSFPGQAAAG                    | 2.71 | 0.01 | 1.61 | 0.44 | 0.85 | 1.28 |
| 2582 | 0 | 154    | AAGGSYSSGDLGKKG                    | 2.71 | 0.01 | 3.75 | 4.08 | 0.22 | 0.28 |
| 2583 | 0 | 97838  | AAGKIAKKNG                         | 2.36 | 0.01 | 3.57 | 0.44 | 0.85 | 0.28 |
| 2584 | 0 | 80130  | AAGLIMTAEP                         | 2.31 | 0.01 | 3.06 | 0.44 | 0.85 | 0.28 |
| 2585 | 0 | 95196  | AAGLIMTAEPKTIVLKAG                 | 2.87 | 0.01 | 2.84 | 2.55 | 0.22 | 0.85 |
| 2586 | 0 | 186740 | AAGLLLLAANPAMAM                    | 2.72 | 0.01 | 0.90 | 1.20 | 0.22 | 0.85 |
| 2587 | 0 | 177    | AAGNVNI                            | 2.03 | 0.01 | 2.04 | 0.68 | 0.22 | 0.28 |
| 2588 | 0 | 187    | AAGTAAQAAVVRFQE                    | 2.70 | 0.01 | 2.04 | 0.68 | 0.22 | 0.28 |
| 2589 | 0 | 187    | AAGTAAQAAVVRFQE                    | 2.70 | 0.01 | 2.04 | 0.44 | 0.85 | 0.28 |
| 2590 | 0 | 132773 | AAGVLHYEQENNHLY                    | 2.68 | 0.01 | 3.16 | 3.16 | 0.22 | 0.28 |
| 2591 | 0 | 170168 | AAGYDVEKNNSRIKL                    | 2.62 | 0.01 | 0.78 | 0.44 | 1.13 | 0.28 |
| 2592 | 0 | 238113 | AAHADWNNQSIVKT                     | 2.58 | 0.01 | 2.14 | 2.65 | 0.22 | 0.85 |
| 2593 | 0 | 138753 | AAHAEINEAGREVVG                    | 2.70 | 0.01 | 2.25 | 0.68 | 2.60 | 1.75 |
| 2594 | 0 | 195    | AAHASARQQWELQGD                    | 2.68 | 0.01 | 2.16 | 0.44 | 1.23 | 0.85 |
| 2595 | 0 | 200    | AAHIPYLEQGMHLAEQF<br>KQK           | 2.94 | 0.01 | 1.96 | 0.44 | 0.85 | 0.28 |
| 2596 | 0 | 103004 | AAHKGLMNIALAISA                    | 2.70 | 0.01 | 2.04 | 0.44 | 0.85 | 1.28 |
| 2597 | 0 | 110759 | AAHRKESYSIYVYKVLKQ<br>VH           | 2.95 | 0.01 | 0.78 | 2.46 | 0.22 | 1.28 |
| 2598 | 0 | 245703 | AAHTSAPAAGGFGSA                    | 2.73 | 0.01 | 1.61 | 0.44 | 0.85 | 1.28 |
| 2599 | 0 | 97839  | AAIEFFEGMVHDSIK                    | 2.64 | 0.01 | 3.18 | 2.78 | 0.22 | 0.28 |
| 2600 | 0 | 223    | AAIGLSMAGSSAMILAA<br>YHP           | 2.97 | 0.01 | 2.04 | 0.44 | 0.85 | 0.28 |
| 2601 | 0 | 224    | AAIGLSMAGSSAMILAA<br>YHPQ          | 3.01 | 0.01 | 3.78 | 1.12 | 0.22 | 0.28 |
| 2602 | 0 | 226461 | AAIQRLKRGCRLYLMSE<br>TPKVPTYR      | 3.17 | 0.01 | 3.26 | 3.16 | 0.22 | 0.28 |
| 2603 | 0 | 227    | AAILEEDDSKDDMEF                    | 2.68 | 0.01 | 1.66 | 1.15 | 0.22 | 0.28 |
| 2604 | 0 | 227    | AAILEEDDSKDDMEF                    | 2.68 | 0.01 | 1.66 | 1.15 | 0.22 | 0.28 |
| 2605 | 0 | 170170 | AAIMHQEQESNT                       | 2.46 | 0.01 | 0.90 | 0.44 | 0.85 | 1.39 |
| 2606 | 0 | 170170 | AAIMHQEQESNT                       | 2.46 | 0.01 | 0.90 | 0.44 | 0.85 | 0.28 |
| 2607 | 0 | 230    | AAINSVKDTTGVEASIDA<br>NGQLLLTSREGR | 3.34 | 0.01 | 3.27 | 3.08 | 0.22 | 0.28 |
| 2608 | 0 | 230    | AAINSVKDTTGVEASIDA<br>NGQLLLTSREGR | 3.34 | 0.01 | 3.27 | 3.08 | 0.22 | 0.28 |
| 2609 | 0 | 230    | AAINSVKDTTGVEASIDA<br>NGQLLLTSREGR | 3.34 | 0.01 | 3.27 | 3.08 | 0.22 | 0.28 |
| 2610 | 0 | 230    | AAINSVKDTTGVEASIDA<br>NGQLLLTSREGR | 3.34 | 0.01 | 3.27 | 3.08 | 0.22 | 0.28 |
| 2611 | 0 | 230    | AAINSVKDTTGVEASIDA<br>NGQLLLTSREGR | 3.34 | 0.01 | 3.27 | 3.08 | 0.22 | 0.28 |



|      |   |        |                                     |      |      |      |      |      |      |
|------|---|--------|-------------------------------------|------|------|------|------|------|------|
| 2612 | 0 | 230    | AAINSVKDDTTGVEASIDA<br>NGQLLLTSREGR | 3.34 | 0.01 | 3.27 | 1.20 | 0.22 | 0.28 |
| 2613 | 0 | 130716 | AAIRGPGVLAGGRSAGA<br>R              | 2.89 | 0.01 | 0.90 | 0.44 | 1.93 | 0.85 |
| 2614 | 0 | 97166  | AAIVVGSAA                           | 2.24 | 0.01 | 3.13 | 1.12 | 0.22 | 0.28 |
| 2615 | 0 | 135415 | AAKAAA                              | 1.89 | 0.01 | 0.78 | 1.20 | 0.22 | 0.28 |
| 2616 | 0 | 130431 | AAKAKPVQKLDDDDDDG<br>DDTYKEERHNKYNS | 3.30 | 0.01 | 4.63 | 0.44 | 0.85 | 0.28 |
| 2617 | 0 | 245808 | AAKAPAPKAAAPAPK                     | 2.74 | 0.01 | 1.61 | 0.44 | 0.85 | 1.28 |
| 2618 | 0 | 100697 | AAKDAKSAGV                          | 2.35 | 0.01 | 3.18 | 3.75 | 0.22 | 0.28 |
| 2619 | 0 | 244    | AAKEEPEESDEDDFGM<br>GGLF            | 2.95 | 0.01 | 2.78 | 2.49 | 0.85 | 0.28 |
| 2620 | 0 | 247    | AAKGTPW                             | 2.01 | 0.01 | 0.90 | 0.44 | 1.23 | 1.27 |
| 2621 | 0 | 247    | AAKGTPW                             | 2.01 | 0.01 | 0.90 | 0.44 | 1.23 | 0.28 |
| 2622 | 0 | 247    | AAKGTPW                             | 2.01 | 0.01 | 0.90 | 0.44 | 1.23 | 1.27 |
| 2623 | 0 | 247    | AAKGTPW                             | 2.01 | 0.01 | 0.90 | 0.44 | 1.23 | 1.27 |
| 2624 | 0 | 247    | AAKGTPW                             | 2.01 | 0.01 | 0.90 | 0.44 | 1.23 | 1.27 |
| 2625 | 0 | 252    | AAKLQD                              | 1.89 | 0.01 | 1.96 | 0.44 | 0.85 | 0.28 |
| 2626 | 0 | 245880 | AAKPAAPKAPKAEK                      | 2.75 | 0.01 | 1.61 | 0.44 | 0.85 | 1.28 |
| 2627 | 0 | 245881 | AAKPAAPKAPKPAK                      | 2.75 | 0.01 | 1.61 | 0.44 | 0.85 | 1.28 |
| 2628 | 0 | 245882 | AAKPAAPKAPKTAAK                     | 2.75 | 0.01 | 1.61 | 0.44 | 0.85 | 1.28 |
| 2629 | 0 | 245883 | AAKPAAPKSAKPAK                      | 2.75 | 0.01 | 1.61 | 0.44 | 0.85 | 1.28 |
| 2630 | 0 | 245884 | AAKPAAPKTAAPKAK                     | 2.74 | 0.01 | 1.61 | 0.44 | 0.85 | 1.28 |
| 2631 | 0 | 245885 | AAKPAAPKTAAPKTAAK                   | 2.75 | 0.01 | 1.61 | 0.44 | 0.85 | 1.28 |
| 2632 | 0 | 245886 | AAKPAAPKPAVKPTVK                    | 2.75 | 0.01 | 1.61 | 0.44 | 0.85 | 1.28 |
| 2633 | 0 | 128193 | AAKPKTAKPKAAKPKK                    | 2.79 | 0.01 | 0.78 | 0.44 | 1.13 | 0.28 |
| 2634 | 0 | 128193 | AAKPKTAKPKAAKPKK                    | 2.79 | 0.01 | 0.78 | 0.44 | 1.13 | 0.28 |
| 2635 | 0 | 128193 | AAKPKTAKPKAAKPKK                    | 2.79 | 0.01 | 0.78 | 1.12 | 0.22 | 0.28 |
| 2636 | 0 | 128193 | AAKPKTAKPKAAKPKK                    | 2.79 | 0.01 | 0.78 | 0.44 | 1.13 | 0.28 |
| 2637 | 0 | 245894 | AAKPPAESPFKNVFG                     | 2.69 | 0.01 | 1.61 | 0.44 | 0.85 | 1.28 |
| 2638 | 0 | 245895 | AAKPPAESPFKSVFG                     | 2.71 | 0.01 | 1.61 | 0.44 | 0.85 | 1.28 |
| 2639 | 0 | 245896 | AAKPPAESPFKSVFG                     | 2.69 | 0.01 | 1.61 | 0.44 | 0.85 | 1.28 |
| 2640 | 0 | 245905 | AAKQKAAAKKAAAPS                     | 2.73 | 0.01 | 1.61 | 0.44 | 0.85 | 1.28 |
| 2641 | 0 | 195000 | AAKQKAAEAAAKQKAA<br>EAC             | 2.97 | 4.93 | 0.90 | 0.44 | 0.85 | 0.28 |
| 2642 | 0 | 195001 | AAKQRAAEAAAKQRAA<br>EC              | 2.90 | 4.93 | 0.90 | 0.44 | 0.85 | 0.28 |

|      |   |        |                             |      |      |      |      |      |      |
|------|---|--------|-----------------------------|------|------|------|------|------|------|
| 2643 | 0 | 245918 | AAKSAAKPAAKPAAK             | 2.75 | 0.01 | 1.61 | 0.44 | 0.85 | 1.28 |
| 2644 | 0 | 189545 | AAKSSADIKKVFEEI             | 2.68 | 0.01 | 3.28 | 0.44 | 1.23 | 0.28 |
| 2645 | 0 | 245927 | AAKTAAKPAAKSAAK             | 2.74 | 0.01 | 1.61 | 0.44 | 0.85 | 1.28 |
| 2646 | 0 | 245928 | AAKTAAKPAKKPAVK             | 2.75 | 0.01 | 1.61 | 0.44 | 0.85 | 1.28 |
| 2647 | 0 | 245929 | AAKTAAKTAAKPAAK             | 2.75 | 0.01 | 1.61 | 0.44 | 0.85 | 1.28 |
| 2648 | 0 | 257    | AAKVLVEGNTDERGT             | 2.67 | 0.01 | 3.75 | 0.44 | 1.74 | 0.28 |
| 2649 | 0 | 79743  | AALAARKADLEKALEGA<br>M      | 2.89 | 0.01 | 3.70 | 1.20 | 0.22 | 0.28 |
| 2650 | 0 | 79743  | AALAARKADLEKALEGA<br>M      | 2.89 | 0.01 | 3.70 | 1.20 | 0.22 | 1.34 |
| 2651 | 0 | 79743  | AALAARKADLEKALEGA<br>M      | 2.89 | 0.01 | 2.24 | 2.89 | 0.22 | 1.27 |
| 2652 | 0 | 266    | AALANSLSLGPQQKV             | 2.69 | 0.01 | 1.72 | 0.68 | 0.22 | 1.66 |
| 2653 | 0 | 266    | AALANSLSLGPQQKV             | 2.69 | 0.01 | 1.72 | 0.68 | 0.22 | 0.28 |
| 2654 | 0 | 266    | AALANSLSLGPQQKV             | 2.69 | 0.01 | 1.72 | 0.68 | 0.22 | 1.66 |
| 2655 | 0 | 266    | AALANSLSLGPQQKV             | 2.69 | 0.01 | 1.72 | 0.68 | 0.22 | 1.66 |
| 2656 | 0 | 266    | AALANSLSLGPQQKV             | 2.69 | 0.01 | 1.72 | 0.68 | 0.22 | 1.66 |
| 2657 | 0 | 267    | AALASFLSGPQQK               | 2.64 | 0.01 | 1.72 | 0.68 | 0.22 | 1.66 |
| 2658 | 0 | 267    | AALASFLSGPQQK               | 2.64 | 0.01 | 1.72 | 0.68 | 0.22 | 0.28 |
| 2659 | 0 | 267    | AALASFLSGPQQK               | 2.64 | 0.01 | 1.72 | 0.68 | 0.22 | 1.66 |
| 2660 | 0 | 267    | AALASFLSGPQQK               | 2.64 | 0.01 | 1.72 | 0.68 | 0.22 | 1.66 |
| 2661 | 0 | 510624 | AALCFGRAPYNKNNENI<br>NPNRCR | 3.09 | 0.01 | 2.56 | 2.02 | 0.22 | 0.85 |
| 2662 | 0 | 273    | AALFFFDID                   | 2.25 | 0.01 | 2.51 | 0.68 | 0.22 | 0.28 |
| 2663 | 0 | 273    | AALFFFDID                   | 2.25 | 0.01 | 2.51 | 0.68 | 0.22 | 2.02 |
| 2664 | 0 | 277    | AALFYAHKFNSSGCPER<br>MAS    | 2.90 | 0.01 | 2.83 | 1.12 | 0.22 | 0.28 |
| 2665 | 0 | 442076 | AALFYTHKFNSSGCP             | 2.62 | 0.01 | 1.96 | 0.68 | 0.22 | 1.34 |
| 2666 | 0 | 442076 | AALFYTHKFNSSGCP             | 2.62 | 0.01 | 1.96 | 0.68 | 0.22 | 1.34 |
| 2667 | 0 | 442076 | AALFYTHKFNSSGCP             | 2.62 | 0.01 | 1.96 | 0.68 | 0.22 | 0.28 |
| 2668 | 0 | 279    | AALGDSLYGAASLNDFG<br>ILA    | 2.98 | 0.01 | 2.57 | 1.20 | 0.22 | 0.85 |
| 2669 | 0 | 279    | AALGDSLYGAASLNDFG<br>ILA    | 2.98 | 0.01 | 2.57 | 1.20 | 0.22 | 1.27 |
| 2670 | 0 | 279    | AALGDSLYGAASLNDFG<br>ILA    | 2.98 | 0.01 | 2.57 | 1.20 | 0.22 | 0.85 |
| 2671 | 0 | 279    | AALGDSLYGAASLNDFG<br>ILA    | 2.98 | 0.01 | 2.57 | 2.04 | 0.22 | 1.27 |
| 2672 | 0 | 279    | AALGDSLYGAASLNDFG<br>ILA    | 2.98 | 0.01 | 2.57 | 2.04 | 0.22 | 0.85 |
| 2673 | 0 | 279    | AALGDSLYGAASLNDFG<br>ILA    | 2.98 | 0.01 | 2.57 | 2.04 | 0.22 | 1.34 |
| 2674 | 0 | 279    | AALGDSLYGAASLNDFG<br>ILA    | 2.98 | 0.01 | 2.57 | 2.04 | 0.22 | 1.34 |
| 2675 | 0 | 280    | AALGHQHAHNEYQAKL<br>AEKD    | 2.97 | 0.01 | 3.85 | 2.42 | 0.22 | 0.28 |

|      |   |        |                           |      |      |      |      |      |      |
|------|---|--------|---------------------------|------|------|------|------|------|------|
| 2676 | 0 | 280    | AALGHQHAHNEYQAKL<br>AEKD  | 2.97 | 0.01 | 3.85 | 2.42 | 0.22 | 1.34 |
| 2677 | 0 | 238118 | AALGRG                    | 1.90 | 0.01 | 2.14 | 2.65 | 0.22 | 0.85 |
| 2678 | 0 | 238119 | AALGRGHSLYASYE            | 2.64 | 0.01 | 2.14 | 2.65 | 0.22 | 0.85 |
| 2679 | 0 | 122071 | AALGSAI                   | 2.04 | 0.01 | 0.90 | 0.44 | 1.13 | 1.27 |
| 2680 | 0 | 281    | AALGVATAAQITAGI           | 2.73 | 0.01 | 2.43 | 0.44 | 1.59 | 0.28 |
| 2681 | 0 | 283    | AALIEEGQR                 | 2.21 | 0.01 | 2.69 | 0.44 | 0.85 | 0.28 |
| 2682 | 0 | 149242 | AALILSKHPNWTNTQ           | 2.65 | 0.01 | 3.67 | 3.16 | 0.22 | 0.28 |
| 2683 | 0 | 293    | AALLQSAR                  | 2.15 | 0.01 | 2.21 | 0.44 | 0.85 | 0.28 |
| 2684 | 0 | 293    | AALLQSAR                  | 2.15 | 0.01 | 2.21 | 1.12 | 0.22 | 0.28 |
| 2685 | 0 | 294    | AALLQSARRG                | 2.34 | 0.01 | 2.21 | 1.12 | 0.22 | 0.28 |
| 2686 | 0 | 294    | AALLQSARRG                | 2.34 | 0.01 | 2.21 | 1.12 | 0.22 | 0.28 |
| 2687 | 0 | 78341  | AALTAENTAIIKRNADA<br>KA   | 2.93 | 0.01 | 2.39 | 0.44 | 1.74 | 0.28 |
| 2688 | 0 | 302    | AALTAENTAIIQRNENA<br>KA   | 2.94 | 0.01 | 2.39 | 0.44 | 1.74 | 1.27 |
| 2689 | 0 | 303    | AALTKAITAMTQA             | 2.59 | 0.01 | 3.22 | 0.44 | 1.23 | 0.85 |
| 2690 | 0 | 307    | AALVSGTATAGWTFGA<br>G     | 2.84 | 0.01 | 2.48 | 0.44 | 0.85 | 0.28 |
| 2691 | 0 | 307    | AALVSGTATAGWTFGA<br>G     | 2.84 | 0.01 | 2.48 | 0.68 | 0.22 | 0.28 |
| 2692 | 0 | 307    | AALVSGTATAGWTFGA<br>G     | 2.84 | 0.01 | 2.48 | 1.20 | 0.22 | 0.28 |
| 2693 | 0 | 125351 | AALWGVKVRHVS              | 2.46 | 0.01 | 0.90 | 0.68 | 0.22 | 1.39 |
| 2694 | 0 | 125351 | AALWGVKVRHVS              | 2.46 | 0.01 | 0.90 | 0.68 | 0.22 | 1.48 |
| 2695 | 0 | 125351 | AALWGVKVRHVS              | 2.46 | 0.01 | 0.90 | 0.44 | 1.13 | 1.27 |
| 2696 | 0 | 125351 | AALWGVKVRHVS              | 2.46 | 0.01 | 0.90 | 0.68 | 0.22 | 1.39 |
| 2697 | 0 | 108722 | AAMAARPHSIDGRVVE<br>PKRAV | 2.99 | 0.01 | 1.75 | 2.69 | 0.22 | 0.28 |
| 2698 | 0 | 108722 | AAMAARPHSIDGRVVE<br>PKRAV | 2.99 | 0.01 | 1.75 | 0.44 | 1.13 | 0.28 |
| 2699 | 0 | 170180 | AAMCMVVTRTEKDSY           | 2.64 | 0.01 | 0.78 | 0.44 | 1.41 | 0.28 |
| 2700 | 0 | 122998 | AAMDLRIGF                 | 2.20 | 0.01 | 2.28 | 2.00 | 0.22 | 0.28 |
| 2701 | 0 | 122998 | AAMDLRIGF                 | 2.20 | 0.01 | 2.28 | 2.00 | 0.22 | 0.28 |
| 2702 | 0 | 122999 | AAMDLRMGF                 | 2.22 | 0.01 | 2.28 | 2.00 | 0.22 | 0.28 |
| 2703 | 0 | 115671 | AAMEL                     | 1.75 | 0.01 | 0.78 | 0.44 | 1.13 | 1.57 |
| 2704 | 0 | 115671 | AAMEL                     | 1.75 | 0.01 | 0.78 | 0.44 | 1.41 | 1.57 |
| 2705 | 0 | 115671 | AAMEL                     | 1.75 | 0.01 | 0.78 | 0.44 | 1.13 | 1.57 |
| 2706 | 0 | 115671 | AAMEL                     | 1.75 | 0.01 | 0.78 | 0.44 | 1.41 | 1.57 |
| 2707 | 0 | 115671 | AAMEL                     | 1.75 | 0.01 | 0.78 | 0.44 | 1.13 | 1.57 |
| 2708 | 0 | 115671 | AAMEL                     | 1.75 | 0.01 | 0.78 | 0.44 | 1.41 | 1.57 |
| 2709 | 0 | 102281 | AAMISLAKKIDVQTGRR<br>PYE  | 2.87 | 0.01 | 3.44 | 0.68 | 0.22 | 0.28 |
| 2710 | 0 | 246125 | AAMKTTTATTGSDG            | 2.71 | 0.01 | 1.61 | 0.44 | 0.85 | 1.28 |
| 2711 | 0 | 246126 | AAMKTTTATTGSDS            | 2.71 | 0.01 | 1.61 | 0.44 | 0.85 | 1.28 |
| 2712 | 0 | 246127 | AAMKTTTATTGNSDG           | 2.70 | 0.01 | 1.61 | 0.44 | 0.85 | 1.28 |

|      |   |        |                                             |      |      |      |      |      |      |
|------|---|--------|---------------------------------------------|------|------|------|------|------|------|
| 2713 | 0 | 314    | AANAHHAANAHH                                | 2.53 | 0.01 | 2.96 | 0.44 | 1.74 | 1.57 |
| 2714 | 0 | 315    | AANAPPADKFKI                                | 2.50 | 0.01 | 3.22 | 0.44 | 1.23 | 0.85 |
| 2715 | 0 | 191139 | AANDCTHNTYWCTYYG                            | 2.75 | 0.01 | 0.90 | 2.84 | 1.13 | 1.27 |
| 2716 | 0 | 191139 | AANDCTHNTYWCTYYG                            | 2.75 | 0.01 | 0.90 | 2.84 | 1.13 | 1.66 |
| 2717 | 0 | 97842  | AANEADYQAK                                  | 2.33 | 0.01 | 3.18 | 3.42 | 0.22 | 0.28 |
| 2718 | 0 | 320    | AANGGPATPAPPAPGP<br>APTGDTKPKKNKKPKNP<br>PP | 3.55 | 0.01 | 3.67 | 0.68 | 0.22 | 0.28 |
| 2719 | 0 | 320    | AANGGPATPAPPAPGP<br>APTGDTKPKKNKKPKNP<br>PP | 3.55 | 0.01 | 3.67 | 0.68 | 0.22 | 1.34 |
| 2720 | 0 | 329    | AANKYKTFVATFGAASN<br>KAF                    | 2.98 | 0.01 | 3.00 | 0.44 | 1.23 | 0.28 |
| 2721 | 0 | 333    | AANNAANAALTAENTAI<br>KK                     | 2.94 | 0.01 | 2.39 | 0.44 | 1.74 | 0.28 |
| 2722 | 0 | 333    | AANNAANAALTAENTAI<br>KK                     | 2.94 | 0.01 | 2.39 | 0.44 | 1.74 | 0.28 |
| 2723 | 0 | 333    | AANNAANAALTAENTAI<br>KK                     | 2.94 | 0.01 | 2.39 | 0.44 | 1.74 | 0.28 |
| 2724 | 0 | 333    | AANNAANAALTAENTAI<br>KK                     | 2.94 | 0.01 | 2.39 | 2.98 | 0.22 | 0.28 |
| 2725 | 0 | 96059  | AANNAKNAAL                                  | 2.37 | 0.01 | 2.39 | 0.44 | 0.85 | 0.28 |
| 2726 | 0 | 337    | AANQDTAKVTIKVLAKV<br>AGTTIQVPGLETGCK        | 3.45 | 0.01 | 4.23 | 0.44 | 1.23 | 0.85 |
| 2727 | 0 | 97167  | AANYTTAV                                    | 2.15 | 0.01 | 2.87 | 0.68 | 0.22 | 0.28 |
| 2728 | 0 | 97167  | AANYTTAV                                    | 2.15 | 0.01 | 2.87 | 1.81 | 0.22 | 0.28 |
| 2729 | 0 | 246207 | AAPAAAAEEEEDDDM                             | 2.73 | 0.01 | 1.61 | 0.44 | 0.85 | 1.28 |
| 2730 | 0 | 246226 | AAPAKAAAAPAKAAA                             | 2.72 | 0.01 | 1.61 | 0.44 | 0.85 | 1.28 |
| 2731 | 0 | 246227 | AAPAKAAAAPAKAAT                             | 2.74 | 0.01 | 1.61 | 0.44 | 0.85 | 1.28 |
| 2732 | 0 | 246228 | AAPAKAAAAPAKAAAP                            | 2.74 | 0.01 | 1.61 | 0.44 | 0.85 | 1.28 |
| 2733 | 0 | 246229 | AAPAKAAAPAKAAA                              | 2.72 | 0.01 | 1.61 | 0.44 | 0.85 | 1.28 |
| 2734 | 0 | 246230 | AAPAKAAAPPAKTAA                             | 2.73 | 0.01 | 1.61 | 0.44 | 0.85 | 1.28 |
| 2735 | 0 | 246231 | AAPAKAATAPAKAAA                             | 2.73 | 0.01 | 1.61 | 0.44 | 0.85 | 1.28 |
| 2736 | 0 | 246232 | AAPAKAATAPAKAAT                             | 2.74 | 0.01 | 1.61 | 0.44 | 0.85 | 1.28 |
| 2737 | 0 | 94762  | AAPAKKAAPAKKAAA                             | 2.73 | 4.63 | 2.86 | 0.44 | 0.85 | 0.28 |

|      |   |        |                                |      |      |      |      |      |      |
|------|---|--------|--------------------------------|------|------|------|------|------|------|
| 2738 | 0 | 94762  | AAPAKKAAPAKKAAA                | 2.73 | 4.63 | 2.86 | 0.44 | 0.22 | 0.28 |
| 2739 | 0 | 94763  | AAPAKKAAPAKKAAA                | 2.73 | 4.63 | 2.86 | 0.44 | 0.85 | 0.28 |
| 2740 | 0 | 94763  | AAPAKKAAPAKKAAA                | 2.73 | 4.63 | 2.86 | 0.44 | 0.22 | 0.28 |
| 2741 | 0 | 128196 | AAPAKVEAKEESEES                | 2.73 | 0.01 | 0.78 | 0.44 | 1.13 | 0.85 |
| 2742 | 0 | 346    | AAPANDKFTVFEEAFND<br>AIK       | 2.97 | 0.01 | 3.00 | 0.44 | 1.23 | 0.28 |
| 2743 | 0 | 346    | AAPANDKFTVFEEAFND<br>AIK       | 2.97 | 0.01 | 3.00 | 0.44 | 1.23 | 0.28 |
| 2744 | 0 | 346    | AAPANDKFTVFEEAFND<br>AIK       | 2.97 | 0.01 | 3.00 | 1.15 | 0.22 | 0.28 |
| 2745 | 0 | 346    | AAPANDKFTVFEEAFND<br>AIK       | 2.97 | 0.01 | 3.00 | 0.68 | 0.22 | 0.28 |
| 2746 | 0 | 346    | AAPANDKFTVFEEAFND<br>AIK       | 2.97 | 0.01 | 3.00 | 3.06 | 0.22 | 0.28 |
| 2747 | 0 | 138133 | AAPAPAAPGAPAAPGA<br>PAPGQAPAVE | 3.27 | 0.01 | 2.51 | 2.22 | 0.85 | 0.28 |
| 2748 | 0 | 99863  | AAPARISVPYVGLA                 | 2.63 | 0.01 | 2.96 | 0.44 | 0.22 | 0.28 |
| 2749 | 0 | 351    | AAPARRTRKPQQPESLE<br>ECDSE     | 3.05 | 0.01 | 2.43 | 0.44 | 1.59 | 0.28 |
| 2750 | 0 | 111084 | AAPDDVLPNPAR                   | 2.50 | 0.01 | 0.90 | 0.44 | 0.85 | 1.39 |
| 2751 | 0 | 170184 | AAPIPTVEEKWRLLP                | 2.65 | 0.01 | 0.78 | 0.44 | 1.41 | 0.28 |
| 2752 | 0 | 361    | AAPKELRITMAS                   | 2.45 | 0.01 | 0.90 | 0.68 | 0.22 | 0.28 |
| 2753 | 0 | 246279 | AAPKKAAPKKAAP                  | 2.74 | 0.01 | 1.61 | 0.44 | 0.85 | 1.28 |
| 2754 | 0 | 246280 | AAPKKAAPQKAAAP                 | 2.74 | 0.01 | 1.61 | 0.44 | 0.85 | 1.28 |
| 2755 | 0 | 246281 | AAPKKAAPQKAAVA                 | 2.75 | 0.01 | 1.61 | 0.44 | 0.85 | 1.28 |
| 2756 | 0 | 246284 | AAPKKAAPKKAAP                  | 2.74 | 0.01 | 1.61 | 0.44 | 0.85 | 1.28 |
| 2757 | 0 | 156840 | AAPKMCSTWCQMWQ                 | 2.62 | 0.01 | 0.90 | 2.74 | 0.22 | 0.85 |
| 2758 | 0 | 156840 | AAPKMCSTWCQMWQ                 | 2.62 | 0.01 | 0.90 | 0.68 | 0.22 | 0.28 |
| 2759 | 0 | 246290 | AAPKNGTATTGDSGD                | 2.70 | 0.01 | 1.61 | 0.44 | 0.85 | 1.28 |
| 2760 | 0 | 134634 | AAPLGTHPSMHP                   | 2.48 | 0.01 | 0.90 | 1.20 | 0.22 | 0.28 |
| 2761 | 0 | 364    | AAPLPPAPD                      | 2.37 | 3.55 | 2.70 | 0.44 | 0.85 | 0.28 |
| 2762 | 0 | 246306 | AAPPAKAAAAPAKAA                | 2.73 | 0.01 | 1.61 | 0.44 | 0.85 | 1.28 |
| 2763 | 0 | 246307 | AAPPAKAAAAPVGKK                | 2.72 | 0.01 | 1.61 | 0.44 | 0.85 | 1.28 |
| 2764 | 0 | 246308 | AAPPAKAAAAPAKAA                | 2.73 | 0.01 | 1.61 | 0.44 | 0.85 | 1.28 |
| 2765 | 0 | 246309 | AAPPAKAAAAPAKTA                | 2.74 | 0.01 | 1.61 | 0.44 | 0.85 | 1.28 |

|      |   |        |                                |      |      |      |      |      |      |
|------|---|--------|--------------------------------|------|------|------|------|------|------|
| 2766 | 0 | 246310 | AAPPAKTAAPAKAA                 | 2.73 | 0.01 | 1.61 | 0.44 | 0.85 | 1.28 |
| 2767 | 0 | 246311 | AAPPAKTAAPAKAA                 | 2.73 | 0.01 | 1.61 | 0.44 | 0.85 | 1.28 |
| 2768 | 0 | 246333 | AAPQKAAAPKKTAA                 | 2.73 | 0.01 | 1.61 | 0.44 | 0.85 | 1.28 |
| 2769 | 0 | 372    | AAPSLH                         | 1.89 | 0.01 | 2.73 | 1.20 | 0.22 | 0.85 |
| 2770 | 0 | 94765  | AAPSTLTAREN                    | 2.49 | 0.01 | 3.03 | 3.28 | 0.22 | 0.28 |
| 2771 | 0 | 94765  | AAPSTLTAREN                    | 2.49 | 0.01 | 3.03 | 3.28 | 0.22 | 0.28 |
| 2772 | 0 | 95198  | AAPTTS                         | 1.91 | 0.01 | 2.40 | 2.52 | 0.22 | 0.28 |
| 2773 | 0 | 379    | AAPVQEGVQQEGA                  | 2.59 | 0.01 | 2.97 | 0.44 | 0.85 | 0.85 |
| 2774 | 0 | 382    | AAPYIEQAQ                      | 2.25 | 0.01 | 2.59 | 0.44 | 0.85 | 0.28 |
| 2775 | 0 | 383    | AAPYIEQAQVIAHQ                 | 2.64 | 0.01 | 2.59 | 0.44 | 1.41 | 0.28 |
| 2776 | 0 | 383    | AAPYIEQAQVIAHQ                 | 2.64 | 0.01 | 2.59 | 0.44 | 0.85 | 0.28 |
| 2777 | 0 | 383    | AAPYIEQAQVIAHQ                 | 2.64 | 0.01 | 2.59 | 0.44 | 0.85 | 0.28 |
| 2778 | 0 | 384    | AAQAALGLLQTASR                 | 2.65 | 0.01 | 2.41 | 0.44 | 0.85 | 0.28 |
| 2779 | 0 | 384    | AAQAALGLLQTASR                 | 2.65 | 0.01 | 2.41 | 0.44 | 0.85 | 0.28 |
| 2780 | 0 | 80148  | AAQAANWVDA                     | 2.35 | 0.01 | 3.06 | 0.44 | 0.85 | 0.28 |
| 2781 | 0 | 138274 | AAQASPSHSST                    | 2.52 | 0.01 | 0.78 | 1.12 | 0.22 | 0.85 |
| 2782 | 0 | 103007 | AAQAVQTAAQNGVRA                | 2.73 | 0.01 | 2.04 | 0.44 | 0.85 | 1.28 |
| 2783 | 0 | 387    | AAQGESSTQKVRPSHTN<br>NPK       | 2.93 | 0.01 | 3.01 | 0.44 | 0.85 | 0.28 |
| 2784 | 0 | 510662 | AAQLWRGRAGRRRYAH<br>PSVR       | 2.95 | 0.01 | 2.40 | 0.44 | 1.59 | 1.28 |
| 2785 | 0 | 156231 | AAQVNNPKA                      | 2.25 | 0.01 | 0.90 | 0.44 | 1.93 | 1.27 |
| 2786 | 0 | 406    | AARALAHGVRVLEDGV<br>NYATGNLPA  | 3.18 | 0.01 | 1.72 | 0.44 | 0.85 | 0.28 |
| 2787 | 0 | 117432 | AARGRGRGMGRGNIF                | 2.72 | 4.63 | 0.78 | 0.44 | 1.13 | 0.28 |
| 2788 | 0 | 416    | AARQPD                         | 2.01 | 0.01 | 2.24 | 1.12 | 0.22 | 0.28 |
| 2789 | 0 | 416    | AARQPD                         | 2.01 | 0.01 | 2.24 | 0.68 | 0.22 | 0.28 |
| 2790 | 0 | 246547 | AARSMEIDGGEWTNG                | 2.65 | 0.01 | 1.61 | 0.44 | 0.85 | 1.28 |
| 2791 | 0 | 112896 | AARTTHYGSLPQKSQRS<br>QDENPVVHF | 3.15 | 0.01 | 2.95 | 0.44 | 1.13 | 2.97 |
| 2792 | 0 | 112896 | AARTTHYGSLPQKSQRS<br>QDENPVVHF | 3.15 | 0.01 | 2.95 | 0.44 | 1.13 | 2.97 |
| 2793 | 0 | 112896 | AARTTHYGSLPQKSQRS<br>QDENPVVHF | 3.15 | 0.01 | 2.95 | 0.44 | 1.41 | 2.97 |
| 2794 | 0 | 419    | AARTTSG                        | 2.02 | 0.01 | 1.72 | 0.44 | 0.85 | 0.28 |
| 2795 | 0 | 120391 | AARYKYFPEVKTGMA                | 2.73 | 0.01 | 0.78 | 1.20 | 0.22 | 0.28 |
| 2796 | 0 | 80152  | AASAGTGALASS                   | 2.51 | 0.01 | 2.48 | 0.44 | 1.59 | 0.28 |
| 2797 | 0 | 95201  | AASAYCSTWD                     | 2.33 | 0.01 | 2.60 | 0.44 | 1.23 | 0.85 |
| 2798 | 0 | 95201  | AASAYCSTWD                     | 2.33 | 0.01 | 2.60 | 1.12 | 0.22 | 0.85 |
| 2799 | 0 | 95201  | AASAYCSTWD                     | 2.33 | 0.01 | 2.60 | 0.44 | 1.23 | 0.85 |

|      |   |        |                          |      |      |      |      |      |      |
|------|---|--------|--------------------------|------|------|------|------|------|------|
| 2800 | 0 | 510675 | AASDALEALADQTDA          | 2.73 | 0.01 | 2.24 | 0.44 | 1.41 | 1.28 |
| 2801 | 0 | 98677  | AASDISLLDA               | 2.36 | 0.01 | 1.60 | 0.44 | 1.23 | 0.85 |
| 2802 | 0 | 426    | AASDISLLDAQSAPLR         | 2.78 | 0.01 | 1.60 | 0.44 | 1.23 | 1.27 |
| 2803 | 0 | 427    | AASDYFADATLGKDISGL<br>DE | 2.96 | 0.01 | 4.33 | 1.20 | 0.22 | 0.28 |
| 2804 | 0 | 428    | AASEALDPHAFHLLLNTY<br>GR | 2.91 | 0.01 | 2.51 | 0.44 | 1.59 | 0.28 |
| 2805 | 0 | 428    | AASEALDPHAFHLLLNTY<br>GR | 2.91 | 0.01 | 2.51 | 0.44 | 1.59 | 0.28 |
| 2806 | 0 | 428    | AASEALDPHAFHLLLNTY<br>GR | 2.91 | 0.01 | 2.51 | 0.44 | 1.59 | 1.34 |
| 2807 | 0 | 123001 | AASEDPR                  | 2.01 | 0.01 | 0.78 | 0.68 | 0.22 | 1.57 |
| 2808 | 0 | 123001 | AASEDPR                  | 2.01 | 0.01 | 0.78 | 0.68 | 0.22 | 1.57 |
| 2809 | 0 | 123001 | AASEDPR                  | 2.01 | 0.01 | 0.78 | 0.68 | 0.22 | 1.48 |
| 2810 | 0 | 123001 | AASEDPR                  | 2.01 | 0.01 | 0.78 | 0.68 | 0.22 | 1.57 |
| 2811 | 0 | 431    | AASGDGTITFTGKVIDAP<br>CG | 2.96 | 0.01 | 4.33 | 0.68 | 0.22 | 0.85 |
| 2812 | 0 | 431    | AASGDGTITFTGKVIDAP<br>CG | 2.96 | 0.01 | 4.33 | 0.68 | 0.22 | 0.85 |
| 2813 | 0 | 431    | AASGDGTITFTGKVIDAP<br>CG | 2.96 | 0.01 | 4.33 | 0.68 | 0.22 | 0.28 |
| 2814 | 0 | 431    | AASGDGTITFTGKVIDAP<br>CG | 2.96 | 0.01 | 4.33 | 0.68 | 0.22 | 0.28 |
| 2815 | 0 | 432    | AASGDPTSPDNIDS           | 2.64 | 0.01 | 2.56 | 2.69 | 0.22 | 0.28 |
| 2816 | 0 | 433    | AASGPKVVIDGKDQNV<br>TGSV | 2.95 | 0.01 | 2.04 | 0.44 | 1.13 | 0.28 |
| 2817 | 0 | 433    | AASGPKVVIDGKDQNV<br>TGSV | 2.95 | 0.01 | 2.04 | 0.44 | 0.22 | 0.28 |
| 2818 | 0 | 132976 | AASIAGLFL                | 2.25 | 0.01 | 2.04 | 0.44 | 1.59 | 0.28 |
| 2819 | 0 | 132976 | AASIAGLFL                | 2.25 | 0.01 | 2.04 | 0.44 | 1.59 | 0.28 |
| 2820 | 0 | 435    | AASKSCPLPQVRALESLE<br>SL | 2.97 | 0.01 | 1.60 | 2.66 | 0.22 | 0.28 |
| 2821 | 0 | 435    | AASKSCPLPQVRALESLE<br>SL | 2.97 | 0.01 | 1.60 | 2.66 | 0.22 | 0.85 |
| 2822 | 0 | 435    | AASKSCPLPQVRALESLE<br>SL | 2.97 | 0.01 | 1.60 | 2.66 | 0.22 | 0.85 |
| 2823 | 0 | 435    | AASKSCPLPQVRALESLE<br>SL | 2.97 | 0.01 | 1.60 | 2.66 | 0.22 | 0.85 |
| 2824 | 0 | 436    | AASKTAYEAKLAQYQAD<br>LA  | 2.94 | 0.01 | 2.39 | 2.98 | 0.22 | 0.28 |
| 2825 | 0 | 436    | AASKTAYEAKLAQYQAD<br>LA  | 2.94 | 0.01 | 2.39 | 2.98 | 0.22 | 0.28 |
| 2826 | 0 | 436    | AASKTAYEAKLAQYQAD<br>LA  | 2.94 | 0.01 | 2.39 | 2.98 | 0.22 | 0.28 |
| 2827 | 0 | 111086 | AASMRTLEAHSK             | 2.47 | 0.01 | 0.90 | 0.44 | 0.85 | 1.39 |
| 2828 | 0 | 133994 | AASPALRLGGPG             | 2.52 | 0.01 | 0.78 | 3.06 | 0.22 | 0.28 |

|      |   |        |                                        |      |      |      |      |      |      |
|------|---|--------|----------------------------------------|------|------|------|------|------|------|
| 2829 | 0 | 446    | AASRAPSRGSRGRRSD<br>SGDDLIARAAKIIQDQQK | 3.52 | 0.01 | 4.33 | 2.49 | 0.22 | 0.85 |
| 2830 | 0 | 510685 | AASSDALEALADQTD                        | 2.72 | 0.01 | 2.24 | 0.44 | 1.41 | 1.28 |
| 2831 | 0 | 79744  | AASSPDA                                | 2.05 | 0.01 | 2.14 | 3.17 | 0.22 | 0.28 |
| 2832 | 0 | 79744  | AASSPDA                                | 2.05 | 0.01 | 2.14 | 3.17 | 0.22 | 0.28 |
| 2833 | 0 | 108726 | AASSRVPIWSRR                           | 2.48 | 0.01 | 0.90 | 1.15 | 0.22 | 1.39 |
| 2834 | 0 | 108726 | AASSRVPIWSRR                           | 2.48 | 0.01 | 0.90 | 1.15 | 0.22 | 0.85 |
| 2835 | 0 | 131338 | AASSYLSLTPEQWKSH                       | 2.72 | 0.01 | 0.78 | 0.44 | 1.41 | 1.27 |
| 2836 | 0 | 131338 | AASSYLSLTPEQWKSH                       | 2.72 | 0.01 | 0.78 | 0.44 | 1.41 | 0.28 |
| 2837 | 0 | 190701 | AASVFCVLSAGAYAAEG<br>GDN               | 2.94 | 0.01 | 3.50 | 2.13 | 0.22 | 0.28 |
| 2838 | 0 | 450    | AASVPE                                 | 1.89 | 0.01 | 1.86 | 0.44 | 1.23 | 0.28 |
| 2839 | 0 | 102284 | AASYASRTVGFAVYWF<br>SRP                | 2.97 | 0.01 | 0.90 | 1.20 | 0.22 | 0.28 |
| 2840 | 0 | 246790 | AATAPAKAAAAAPAKA                       | 2.74 | 0.01 | 1.61 | 0.44 | 0.85 | 1.28 |
| 2841 | 0 | 79502  | AATCPSKKPYEEVTC                        | 2.67 | 0.01 | 3.10 | 0.68 | 0.22 | 1.75 |
| 2842 | 0 | 94422  | AATCPSKKPYEEVTCCST<br>DKCNPHPKQRP      | 3.32 | 0.01 | 3.10 | 1.12 | 0.22 | 1.27 |
| 2843 | 0 | 112897 | AATGAATAAA                             | 2.35 | 0.01 | 3.00 | 2.79 | 0.22 | 0.28 |
| 2844 | 0 | 458    | AATGAGVIKSIAPGSANL<br>NLTNITH          | 3.19 | 0.01 | 3.63 | 3.89 | 0.22 | 0.28 |
| 2845 | 0 | 458    | AATGAGVIKSIAPGSANL<br>NLTNITH          | 3.19 | 0.01 | 3.63 | 4.03 | 0.22 | 0.28 |
| 2846 | 0 | 458    | AATGAGVIKSIAPGSANL<br>NLTNITH          | 3.19 | 0.01 | 3.63 | 3.70 | 0.22 | 0.28 |
| 2847 | 0 | 458    | AATGAGVIKSIAPGSANL<br>NLTNITH          | 3.19 | 0.01 | 3.63 | 3.81 | 0.22 | 0.28 |
| 2848 | 0 | 458    | AATGAGVIKSIAPGSANL<br>NLTNITH          | 3.19 | 0.01 | 3.63 | 3.81 | 0.22 | 0.28 |
| 2849 | 0 | 462    | AATKMSECVLGQSKRV<br>D                  | 2.75 | 0.01 | 2.48 | 0.44 | 0.85 | 0.28 |
| 2850 | 0 | 470    | AATRFBMDLY                             | 2.28 | 4.45 | 2.70 | 0.44 | 0.85 | 0.28 |
| 2851 | 0 | 472    | AATSLNN                                | 2.12 | 0.01 | 3.42 | 0.68 | 0.22 | 0.28 |
| 2852 | 0 | 79503  | AATTVNGGTVHFK                          | 2.55 | 0.01 | 2.24 | 2.43 | 0.22 | 0.28 |
| 2853 | 0 | 79503  | AATTVNGGTVHFK                          | 2.55 | 0.01 | 2.24 | 2.43 | 0.22 | 0.28 |
| 2854 | 0 | 79503  | AATTVNGGTVHFK                          | 2.55 | 0.01 | 2.24 | 2.43 | 0.22 | 0.28 |
| 2855 | 0 | 79503  | AATTVNGGTVHFK                          | 2.55 | 0.01 | 2.24 | 2.43 | 0.22 | 0.28 |
| 2856 | 0 | 246973 | AATVIKTTAATGDS                         | 2.70 | 0.01 | 1.61 | 0.44 | 0.85 | 1.28 |
| 2857 | 0 | 475    | AATVLQLPQGTTLPK                        | 2.70 | 0.01 | 2.91 | 0.44 | 0.85 | 0.28 |
| 2858 | 0 | 475    | AATVLQLPQGTTLPK                        | 2.70 | 0.01 | 2.91 | 0.68 | 0.22 | 0.28 |
| 2859 | 0 | 476    | AATVLQLPQGTTLPKGF<br>YAE               | 2.95 | 0.01 | 3.30 | 4.08 | 0.22 | 0.28 |



|      |   |        |                              |      |      |      |      |      |      |
|------|---|--------|------------------------------|------|------|------|------|------|------|
| 2860 | 0 | 476    | AATVLQLPQGTTLPKGF<br>YAE     | 2.95 | 0.01 | 3.30 | 0.44 | 0.85 | 0.28 |
| 2861 | 0 | 479    | AAVAEAEAG                    | 2.17 | 0.01 | 2.04 | 0.44 | 0.85 | 0.28 |
| 2862 | 0 | 230360 | AAVCVAAAALYAL                | 2.53 | 0.01 | 3.40 | 2.49 | 0.85 | 0.28 |
| 2863 | 0 | 238130 | AAVCVSLLGASSVPP              | 2.70 | 0.01 | 2.56 | 2.02 | 0.22 | 0.85 |
| 2864 | 0 | 238130 | AAVCVSLLGASSVPP              | 2.70 | 0.01 | 2.56 | 1.20 | 0.22 | 0.85 |
| 2865 | 0 | 247003 | AAVDADTAALAALLE              | 2.73 | 0.01 | 1.61 | 0.44 | 0.85 | 1.28 |
| 2866 | 0 | 481    | AAVDSSKAALTSKLDAA<br>YKL     | 2.99 | 0.01 | 3.00 | 0.44 | 1.23 | 0.28 |
| 2867 | 0 | 481    | AAVDSSKAALTSKLDAA<br>YKL     | 2.99 | 0.01 | 3.00 | 0.44 | 1.23 | 0.28 |
| 2868 | 0 | 481    | AAVDSSKAALTSKLDAA<br>YKL     | 2.99 | 0.01 | 3.00 | 1.15 | 0.22 | 0.28 |
| 2869 | 0 | 121116 | AAVELKVEDPFYWINPG<br>V       | 2.81 | 0.01 | 2.19 | 3.81 | 0.22 | 0.28 |
| 2870 | 0 | 486    | AAVEQPEKPAAQPKKQ<br>QRKGRK   | 3.08 | 0.01 | 3.63 | 0.68 | 0.22 | 2.35 |
| 2871 | 0 | 486    | AAVEQPEKPAAQPKKQ<br>QRKGRK   | 3.08 | 0.01 | 3.63 | 0.68 | 0.22 | 0.28 |
| 2872 | 0 | 127913 | AAVGNLIVVTASYRVGV<br>FGF     | 2.96 | 0.01 | 0.78 | 0.44 | 1.13 | 0.28 |
| 2873 | 0 | 178460 | AAVIEKLEAGFKKLE              | 2.70 | 0.01 | 2.36 | 0.44 | 1.23 | 1.28 |
| 2874 | 0 | 178460 | AAVIEKLEAGFKKLE              | 2.70 | 0.01 | 2.36 | 0.44 | 1.23 | 1.27 |
| 2875 | 0 | 178460 | AAVIEKLEAGFKKLE              | 2.70 | 0.01 | 2.36 | 0.44 | 1.23 | 1.28 |
| 2876 | 0 | 112898 | AAVKQSYAAT                   | 2.32 | 0.01 | 3.00 | 2.79 | 0.22 | 0.28 |
| 2877 | 0 | 195002 | AAVKTPSEYRQT                 | 2.44 | 0.01 | 0.90 | 0.68 | 0.22 | 0.28 |
| 2878 | 0 | 493    | AAVLNLTT                     | 2.12 | 0.01 | 3.06 | 1.12 | 0.22 | 0.28 |
| 2879 | 0 | 494    | AAVLNLTTWNPTLL               | 2.63 | 0.01 | 4.15 | 1.15 | 0.22 | 1.34 |
| 2880 | 0 | 494    | AAVLNLTTWNPTLL               | 2.63 | 0.01 | 4.15 | 1.15 | 0.22 | 0.85 |
| 2881 | 0 | 429189 | AAVPVLAFDAARLRLLLE           | 2.82 | 0.01 | 2.43 | 0.44 | 1.59 | 0.28 |
| 2882 | 0 | 429189 | AAVPVLAFDAARLRLLLE           | 2.82 | 0.01 | 2.43 | 0.44 | 1.74 | 1.27 |
| 2883 | 0 | 429189 | AAVPVLAFDAARLRLLLE           | 2.82 | 0.01 | 2.43 | 0.44 | 1.59 | 0.28 |
| 2884 | 0 | 429189 | AAVPVLAFDAARLRLLLE           | 2.82 | 0.01 | 2.43 | 0.44 | 0.85 | 0.28 |
| 2885 | 0 | 429189 | AAVPVLAFDAARLRLLLE           | 2.82 | 0.01 | 2.43 | 0.44 | 0.85 | 0.28 |
| 2886 | 0 | 429189 | AAVPVLAFDAARLRLLLE           | 2.82 | 0.01 | 2.43 | 0.44 | 1.74 | 0.28 |
| 2887 | 0 | 120392 | AAVQAAWAVLVAYFNR<br>LRCGTGDY | 3.12 | 0.01 | 2.86 | 0.44 | 0.85 | 0.28 |
| 2888 | 0 | 115672 | AAVRSPAQIL                   | 2.31 | 0.01 | 1.60 | 0.44 | 1.23 | 0.85 |
| 2889 | 0 | 115672 | AAVRSPAQIL                   | 2.31 | 0.01 | 1.60 | 0.44 | 1.23 | 0.85 |
| 2890 | 0 | 106221 | AAVTPEER                     | 2.12 | 0.01 | 0.78 | 0.68 | 0.22 | 0.85 |
| 2891 | 0 | 106221 | AAVTPEER                     | 2.12 | 0.01 | 0.78 | 0.68 | 0.22 | 2.66 |

|      |   |        |                                   |      |      |      |      |      |      |
|------|---|--------|-----------------------------------|------|------|------|------|------|------|
| 2892 | 0 | 503    | AAVVLPLVGLAGGAAT<br>AGA           | 3.02 | 0.01 | 2.04 | 0.44 | 0.85 | 0.28 |
| 2893 | 0 | 429190 | AAWGGSGSEAYQGVQ<br>QKWDATA        | 3.05 | 0.01 | 2.04 | 0.44 | 0.85 | 0.28 |
| 2894 | 0 | 429190 | AAWGGSGSEAYQGVQ<br>QKWDATA        | 3.05 | 0.01 | 2.04 | 0.44 | 1.93 | 0.28 |
| 2895 | 0 | 130432 | AAYCNTPYMCLH                      | 2.46 | 0.01 | 0.90 | 0.68 | 0.22 | 0.28 |
| 2896 | 0 | 130432 | AAYCNTPYMCLH                      | 2.46 | 0.01 | 0.90 | 0.68 | 0.22 | 1.34 |
| 2897 | 0 | 130432 | AAYCNTPYMCLH                      | 2.46 | 0.01 | 0.90 | 0.68 | 0.22 | 0.28 |
| 2898 | 0 | 130432 | AAYCNTPYMCLH                      | 2.46 | 0.01 | 0.90 | 0.68 | 0.22 | 0.28 |
| 2899 | 0 | 130432 | AAYCNTPYMCLH                      | 2.46 | 0.01 | 0.90 | 0.68 | 0.22 | 1.34 |
| 2900 | 0 | 525    | AAYFVGYLKPTTFMLKY                 | 2.79 | 0.01 | 2.48 | 0.44 | 0.85 | 0.28 |
| 2901 | 0 | 530    | AAYIKLETKGSDPDTSL<br>EG           | 2.94 | 0.01 | 2.21 | 1.20 | 0.22 | 0.28 |
| 2902 | 0 | 227740 | AAYPFVVNATSNLNL                   | 2.75 | 0.01 | 2.72 | 1.20 | 1.59 | 0.28 |
| 2903 | 0 | 535    | AAYTLTPRPI                        | 2.32 | 3.55 | 2.70 | 0.44 | 0.85 | 0.28 |
| 2904 | 0 | 542    | ACAAGNSSTKNLIYNLT<br>CEL          | 3.00 | 0.01 | 3.42 | 0.68 | 0.22 | 0.28 |
| 2905 | 0 | 542    | ACAAGNSSTKNLIYNLT<br>CEL          | 3.00 | 0.01 | 3.42 | 0.68 | 0.22 | 0.28 |
| 2906 | 0 | 542    | ACAAGNSSTKNLIYNLT<br>CEL          | 3.00 | 0.01 | 3.42 | 0.68 | 0.22 | 0.28 |
| 2907 | 0 | 542    | ACAAGNSSTKNLIYNLT<br>CEL          | 3.00 | 0.01 | 3.42 | 0.68 | 0.22 | 0.28 |
| 2908 | 0 | 543    | ACAAGNSSTKNLIYNLT<br>CELNVTGFQQHF | 3.32 | 0.01 | 3.42 | 0.68 | 0.22 | 0.28 |
| 2909 | 0 | 543    | ACAAGNSSTKNLIYNLT<br>CELNVTGFQQHF | 3.32 | 0.01 | 4.33 | 1.15 | 0.22 | 0.28 |
| 2910 | 0 | 543    | ACAAGNSSTKNLIYNLT<br>CELNVTGFQQHF | 3.32 | 0.01 | 4.33 | 1.15 | 0.22 | 0.28 |
| 2911 | 0 | 543    | ACAAGNSSTKNLIYNLT<br>CELNVTGFQQHF | 3.32 | 0.01 | 4.33 | 0.68 | 0.22 | 1.34 |
| 2912 | 0 | 543    | ACAAGNSSTKNLIYNLT<br>CELNVTGFQQHF | 3.32 | 0.01 | 4.33 | 0.68 | 0.22 | 0.28 |
| 2913 | 0 | 127557 | ACAPVPAEPLSK                      | 2.50 | 0.01 | 3.16 | 3.16 | 0.22 | 0.28 |
| 2914 | 0 | 462280 | ACARLGRLPSGRNLVEG<br>DNL          | 2.97 | 0.01 | 1.96 | 2.90 | 0.22 | 0.28 |
| 2915 | 0 | 175711 | ACCDDWPHEC                        | 2.32 | 0.01 | 0.90 | 1.15 | 0.22 | 1.39 |
| 2916 | 0 | 549    | ACCNGIRNVN                        | 2.32 | 0.01 | 3.33 | 0.44 | 1.23 | 0.85 |
| 2917 | 0 | 549    | ACCNGIRNVN                        | 2.32 | 0.01 | 3.33 | 0.44 | 1.23 | 0.85 |
| 2918 | 0 | 549    | ACCNGIRNVN                        | 2.32 | 0.01 | 3.33 | 0.44 | 1.23 | 0.85 |
| 2919 | 0 | 165580 | ACCRSIP                           | 2.01 | 0.01 | 0.90 | 0.44 | 1.23 | 1.39 |
| 2920 | 0 | 165580 | ACCRSIP                           | 2.01 | 0.01 | 0.90 | 0.44 | 1.23 | 1.39 |
| 2921 | 0 | 232702 | ACDPSPN                           | 2.02 | 0.01 | 0.90 | 2.49 | 0.85 | 1.39 |
| 2922 | 0 | 79142  | ACDPSTVMVPWPCS                    | 2.63 | 0.01 | 0.90 | 0.68 | 0.22 | 1.39 |

|      |   |        |                                    |      |      |      |      |      |      |
|------|---|--------|------------------------------------|------|------|------|------|------|------|
|      |   |        | ACDTATCVTHRLAGLLS                  |      |      |      |      |      |      |
| 2923 | 0 | 105643 | RSGGVVKNNFVPTNVG<br>SKAF           | 3.56 | 0.01 | 0.78 | 0.68 | 0.22 | 1.27 |
|      |   |        | ACDTATCVTHRLAGLLS                  |      |      |      |      |      |      |
| 2924 | 0 | 105643 | RSGGVVKNNFVPTNVG<br>SKAF           | 3.56 | 0.01 | 0.78 | 3.14 | 0.22 | 1.27 |
| 2925 | 0 | 98678  | ACESRCKLEYDPRC                     | 2.66 | 0.01 | 2.16 | 0.44 | 1.23 | 0.85 |
| 2926 | 0 | 99867  | ACFEPNTVKAHA                       | 2.46 | 0.01 | 2.88 | 1.20 | 0.22 | 0.85 |
| 2927 | 0 | 153329 | ACFLPHPSRCGGGS                     | 2.61 | 0.01 | 0.90 | 0.68 | 0.22 | 1.39 |
| 2928 | 0 | 99868  | ACGASNSSTKNLIYNLTL<br>CELNVTGLQQHF | 3.33 | 0.01 | 3.42 | 0.68 | 0.22 | 0.28 |
| 2929 | 0 | 175712 | ACGDDWPHECGGGS<br>K                | 2.73 | 0.01 | 0.90 | 1.15 | 0.22 | 0.28 |
| 2930 | 0 | 103010 | ACGGGTNSSSSGAGG                    | 2.71 | 0.01 | 2.04 | 0.44 | 0.85 | 1.28 |
| 2931 | 0 | 144583 | ACGIPINYNASKEWADK<br>KVI           | 2.93 | 0.01 | 2.75 | 3.17 | 0.22 | 0.28 |
| 2932 | 0 | 562    | ACHNTSKPSNTDSVFSLT<br>GK           | 2.93 | 0.01 | 3.37 | 3.23 | 0.22 | 0.28 |
| 2933 | 0 | 562    | ACHNTSKPSNTDSVFSLT<br>GK           | 2.93 | 0.01 | 3.37 | 3.23 | 0.22 | 1.34 |
| 2934 | 0 | 563    | ACHPLFDARCGGKS                     | 2.59 | 0.01 | 0.90 | 0.68 | 0.22 | 1.39 |
| 2935 | 0 | 563    | ACHPLFDARCGGKS                     | 2.59 | 0.01 | 0.90 | 0.68 | 0.22 | 1.27 |
| 2936 | 0 | 563    | ACHPLFDARCGGKS                     | 2.59 | 0.01 | 0.90 | 0.68 | 0.22 | 0.28 |
| 2937 | 0 | 563    | ACHPLFDARCGGKS                     | 2.59 | 0.01 | 0.90 | 0.68 | 0.22 | 1.27 |
| 2938 | 0 | 563    | ACHPLFDARCGGKS                     | 2.59 | 0.01 | 0.90 | 0.68 | 0.22 | 1.75 |
| 2939 | 0 | 153330 | ACILPWKHICGGGS                     | 2.59 | 0.01 | 0.90 | 0.68 | 0.22 | 1.39 |
| 2940 | 0 | 153331 | ACISPNQWLCGGGS                     | 2.59 | 0.01 | 0.90 | 0.68 | 0.22 | 0.28 |
| 2941 | 0 | 153332 | ACKDHATDLCGGGS                     | 2.62 | 0.01 | 0.90 | 0.68 | 0.22 | 1.39 |
| 2942 | 0 | 110760 | ACKDSDWPFCSDDEDWD<br>WPFC          | 2.99 | 0.01 | 0.78 | 1.81 | 1.41 | 2.51 |
| 2943 | 0 | 110760 | ACKDSDWPFCSDDEDWD<br>WPFC          | 2.99 | 0.01 | 0.78 | 1.81 | 1.41 | 1.27 |
| 2944 | 0 | 568    | ACKPLLREDVTFQV                     | 2.56 | 0.01 | 1.96 | 0.44 | 0.85 | 0.28 |
| 2945 | 0 | 568    | ACKPLLREDVTFQV                     | 2.56 | 0.01 | 1.96 | 0.44 | 0.85 | 0.28 |
| 2946 | 0 | 568    | ACKPLLREDVTFQV                     | 2.56 | 0.01 | 1.96 | 0.44 | 1.41 | 0.28 |
| 2947 | 0 | 568    | ACKPLLREDVTFQV                     | 2.56 | 0.01 | 1.96 | 0.44 | 0.85 | 0.28 |
| 2948 | 0 | 175713 | ACKPTWPFEC                         | 2.31 | 0.01 | 0.90 | 1.15 | 0.22 | 1.39 |
| 2949 | 0 | 569    | ACKQNVSSLDEKNSVSV<br>D             | 2.87 | 0.01 | 4.33 | 3.37 | 0.22 | 0.28 |
| 2950 | 0 | 569    | ACKQNVSSLDEKNSVSV<br>D             | 2.87 | 0.01 | 4.33 | 3.37 | 0.22 | 0.28 |
| 2951 | 0 | 570    | ACKRPGSGFFSRLN                     | 2.67 | 0.01 | 3.27 | 0.68 | 0.22 | 1.57 |
| 2952 | 0 | 570    | ACKRPGSGFFSRLN                     | 2.67 | 0.01 | 3.27 | 0.68 | 0.22 | 1.57 |
| 2953 | 0 | 570    | ACKRPGSGFFSRLN                     | 2.67 | 0.01 | 2.36 | 0.44 | 0.85 | 1.57 |
| 2954 | 0 | 570    | ACKRPGSGFFSRLN                     | 2.67 | 0.01 | 2.36 | 1.15 | 0.22 | 1.57 |
| 2955 | 0 | 570    | ACKRPGSGFFSRLN                     | 2.67 | 0.01 | 2.36 | 1.15 | 0.22 | 1.57 |
| 2956 | 0 | 570    | ACKRPGSGFFSRLN                     | 2.67 | 0.01 | 2.36 | 1.15 | 0.22 | 1.57 |

|      |   |        |                          |      |      |      |      |      |      |
|------|---|--------|--------------------------|------|------|------|------|------|------|
| 2957 | 0 | 136113 | ACKRGRQTPVLYAMLD<br>HSRS | 2.90 | 0.01 | 0.78 | 2.04 | 2.60 | 1.75 |
| 2958 | 0 | 136113 | ACKRGRQTPVLYAMLD<br>HSRS | 2.90 | 0.01 | 0.78 | 2.04 | 0.22 | 0.28 |
| 2959 | 0 | 571    | ACKSTQDPMFTPKGCD<br>N    | 2.78 | 0.01 | 3.55 | 1.12 | 0.22 | 1.66 |
| 2960 | 0 | 571    | ACKSTQDPMFTPKGCD<br>N    | 2.78 | 0.01 | 3.55 | 1.12 | 0.22 | 1.66 |
| 2961 | 0 | 571    | ACKSTQDPMFTPKGCD<br>N    | 2.78 | 0.01 | 3.55 | 1.12 | 0.22 | 1.66 |
| 2962 | 0 | 571    | ACKSTQDPMFTPKGCD<br>N    | 2.78 | 0.01 | 3.55 | 1.12 | 0.22 | 1.66 |
| 2963 | 0 | 571    | ACKSTQDPMFTPKGCD<br>N    | 2.78 | 0.01 | 3.55 | 1.12 | 0.22 | 1.66 |
| 2964 | 0 | 571    | ACKSTQDPMFTPKGCD<br>N    | 2.78 | 0.01 | 3.55 | 1.12 | 0.22 | 1.66 |
| 2965 | 0 | 571    | ACKSTQDPMFTPKGCD<br>N    | 2.78 | 0.01 | 3.55 | 1.12 | 0.22 | 1.66 |
| 2966 | 0 | 571    | ACKSTQDPMFTPKGCD<br>N    | 2.78 | 0.01 | 3.55 | 1.12 | 0.22 | 1.66 |
| 2967 | 0 | 571    | ACKSTQDPMFTPKGCD<br>N    | 2.78 | 0.01 | 3.55 | 1.12 | 0.22 | 1.66 |
| 2968 | 0 | 571    | ACKSTQDPMFTPKGCD<br>N    | 2.78 | 0.01 | 3.55 | 1.12 | 0.22 | 1.66 |
| 2969 | 0 | 571    | ACKSTQDPMFTPKGCD<br>N    | 2.78 | 0.01 | 3.55 | 1.12 | 0.22 | 1.66 |
| 2970 | 0 | 571    | ACKSTQDPMFTPKGCD<br>N    | 2.78 | 0.01 | 3.55 | 1.12 | 0.22 | 1.66 |
| 2971 | 0 | 571    | ACKSTQDPMFTPKGCD<br>N    | 2.78 | 0.01 | 3.55 | 1.12 | 0.22 | 1.66 |
| 2972 | 0 | 571    | ACKSTQDPMFTPKGCD<br>N    | 2.78 | 0.01 | 3.55 | 1.12 | 0.22 | 1.66 |
| 2973 | 0 | 571    | ACKSTQDPMFTPKGCD<br>N    | 2.78 | 0.01 | 3.55 | 1.12 | 0.22 | 1.66 |
| 2974 | 0 | 571    | ACKSTQDPMFTPKGCD<br>N    | 2.78 | 0.01 | 3.55 | 1.12 | 0.22 | 1.66 |
| 2975 | 0 | 571    | ACKSTQDPMFTPKGCD<br>N    | 2.78 | 0.01 | 3.55 | 1.12 | 0.22 | 1.66 |
| 2976 | 0 | 571    | ACKSTQDPMFTPKGCD<br>N    | 2.78 | 0.01 | 3.55 | 1.12 | 0.22 | 1.66 |
| 2977 | 0 | 571    | ACKSTQDPMFTPKGCD<br>N    | 2.78 | 0.01 | 3.55 | 1.12 | 0.22 | 1.66 |
| 2978 | 0 | 571    | ACKSTQDPMFTPKGCD<br>N    | 2.78 | 0.01 | 3.55 | 1.12 | 0.22 | 1.66 |
| 2979 | 0 | 571    | ACKSTQDPMFTPKGCD<br>N    | 2.78 | 0.01 | 3.55 | 1.20 | 0.22 | 2.56 |

|      |   |        |                                               |      |      |      |      |      |      |
|------|---|--------|-----------------------------------------------|------|------|------|------|------|------|
| 2980 | 0 | 571    | ACKSTQDPMFTPKGCD<br>N                         | 2.78 | 0.01 | 3.55 | 1.15 | 0.22 | 3.30 |
| 2981 | 0 | 153333 | ACLDAKLQCCGGGS                                | 2.63 | 0.01 | 0.90 | 0.68 | 0.22 | 0.28 |
| 2982 | 0 | 136939 | ACLDVGAVIATPEQLFA<br>AYEDGFEQ                 | 3.16 | 0.01 | 0.78 | 0.68 | 0.22 | 0.28 |
| 2983 | 0 | 136939 | ACLDVGAVIATPEQLFA<br>AYEDGFEQ                 | 3.16 | 0.01 | 0.78 | 0.68 | 0.22 | 0.28 |
| 2984 | 0 | 153334 | ACLEILSWLCGGGS                                | 2.63 | 0.01 | 0.90 | 0.68 | 0.22 | 0.28 |
| 2985 | 0 | 153335 | ACNALNQWLCGGGS                                | 2.64 | 0.01 | 0.90 | 0.68 | 0.22 | 1.39 |
| 2986 | 0 | 175714 | ACNLYNEPFC                                    | 2.31 | 0.01 | 0.90 | 1.15 | 0.22 | 1.39 |
| 2987 | 0 | 175715 | ACNLYNEPLC                                    | 2.33 | 0.01 | 0.90 | 1.15 | 0.22 | 1.39 |
| 2988 | 0 | 79143  | ACNMLRWDKTIPCR                                | 2.57 | 0.01 | 0.90 | 0.68 | 0.22 | 1.39 |
| 2989 | 0 | 153336 | ACNQVLSWLCGGGS                                | 2.61 | 0.01 | 0.90 | 0.68 | 0.22 | 1.39 |
| 2990 | 0 | 105644 | ACNTATCVTHRLAGLLS<br>RSGGMVKSNFVPTNVG<br>SKAF | 3.56 | 0.01 | 0.78 | 0.68 | 0.22 | 1.27 |
| 2991 | 0 | 105644 | ACNTATCVTHRLAGLLS<br>RSGGMVKSNFVPTNVG<br>SKAF | 3.56 | 0.01 | 0.78 | 3.14 | 0.22 | 1.27 |
| 2992 | 0 | 582    | ACNTIGGYECGGGS                                | 2.61 | 0.01 | 0.90 | 3.01 | 0.22 | 0.28 |
| 2993 | 0 | 582    | ACNTIGGYECGGGS                                | 2.61 | 0.01 | 0.90 | 3.01 | 0.22 | 0.28 |
| 2994 | 0 | 153337 | ACNVYEAYWCGGGGS                               | 2.62 | 0.01 | 0.90 | 0.68 | 0.22 | 1.39 |
| 2995 | 0 | 153338 | ACPNFELHWCGGGGS                               | 2.57 | 0.01 | 0.90 | 0.68 | 0.22 | 1.39 |
| 2996 | 0 | 158580 | ACPPSHVLDMRSGTCLA<br>AEGK                     | 2.95 | 4.03 | 0.90 | 0.44 | 0.85 | 2.49 |
| 2997 | 0 | 158580 | ACPPSHVLDMRSGTCLA<br>AEGK                     | 2.95 | 4.03 | 0.90 | 0.44 | 0.85 | 1.66 |
| 2998 | 0 | 158580 | ACPPSHVLDMRSGTCLA<br>AEGK                     | 2.95 | 4.03 | 0.90 | 0.44 | 0.85 | 1.27 |
| 2999 | 0 | 158580 | ACPPSHVLDMRSGTCLA<br>AEGK                     | 2.95 | 4.03 | 0.90 | 0.44 | 0.85 | 1.27 |
| 3000 | 0 | 158580 | ACPPSHVLDMRSGTCLA<br>AEGK                     | 2.95 | 4.03 | 0.90 | 0.44 | 0.85 | 1.27 |
| 3001 | 0 | 158580 | ACPPSHVLDMRSGTCLA<br>AEGK                     | 2.95 | 4.03 | 0.90 | 1.12 | 0.22 | 0.28 |
| 3002 | 0 | 158580 | ACPPSHVLDMRSGTCLA<br>AEGK                     | 2.95 | 4.03 | 0.90 | 0.44 | 0.85 | 1.27 |
| 3003 | 0 | 158580 | ACPPSHVLDMRSGTCLA<br>AEGK                     | 2.95 | 4.03 | 0.90 | 0.44 | 0.85 | 1.27 |
| 3004 | 0 | 153339 | ACPPYETWWCGGGGS                               | 2.60 | 0.01 | 0.90 | 0.68 | 0.22 | 1.39 |
| 3005 | 0 | 79144  | ACPSFIQALTPECM                                | 2.60 | 0.01 | 0.90 | 0.68 | 0.22 | 1.39 |
| 3006 | 0 | 161787 | ACQAFYASSPRKSIHIGA<br>CA                      | 2.95 | 4.45 | 0.90 | 0.44 | 0.85 | 2.49 |
| 3007 | 0 | 161787 | ACQAFYASSPRKSIHIGA<br>CA                      | 2.95 | 4.45 | 0.90 | 0.44 | 0.85 | 0.28 |
| 3008 | 0 | 161787 | ACQAFYASSPRKSIHIGA<br>CA                      | 2.95 | 4.45 | 0.90 | 0.44 | 0.85 | 0.28 |

|      |   |        |                          |      |      |      |      |      |      |
|------|---|--------|--------------------------|------|------|------|------|------|------|
| 3009 | 0 | 115172 | ACQCLVRTPEVDDEALE<br>KFD | 2.95 | 0.01 | 1.60 | 0.44 | 1.23 | 2.51 |
| 3010 | 0 | 79145  | ACQGKPNLPQNTCP           | 2.63 | 0.01 | 0.90 | 0.68 | 0.22 | 1.39 |
| 3011 | 0 | 112442 | ACQKH                    | 1.74 | 0.01 | 1.86 | 1.12 | 0.22 | 0.28 |
| 3012 | 0 | 112443 | ACQKHTPPAP               | 2.34 | 0.01 | 1.86 | 2.37 | 0.22 | 0.28 |
| 3013 | 0 | 111088 | ACQKHTPPAPKEDDPLK<br>KYT | 2.95 | 0.01 | 1.86 | 0.44 | 0.85 | 0.28 |
| 3014 | 0 | 111088 | ACQKHTPPAPKEDDPLK<br>KYT | 2.95 | 0.01 | 1.86 | 0.44 | 1.41 | 0.28 |
| 3015 | 0 | 111088 | ACQKHTPPAPKEDDPLK<br>KYT | 2.95 | 0.01 | 1.86 | 0.44 | 0.85 | 0.28 |
| 3016 | 0 | 111088 | ACQKHTPPAPKEDDPLK<br>KYT | 2.95 | 0.01 | 1.86 | 0.44 | 1.41 | 0.28 |
| 3017 | 0 | 111088 | ACQKHTPPAPKEDDPLK<br>KYT | 2.95 | 0.01 | 1.86 | 0.44 | 0.85 | 0.28 |
| 3018 | 0 | 111088 | ACQKHTPPAPKEDDPLK<br>KYT | 2.95 | 0.01 | 1.86 | 0.44 | 1.41 | 0.28 |
| 3019 | 0 | 111088 | ACQKHTPPAPKEDDPLK<br>KYT | 2.95 | 0.01 | 1.86 | 2.37 | 0.22 | 0.28 |
| 3020 | 0 | 450403 | ACQKHTPPAPKEDPLKK<br>YT  | 2.90 | 0.01 | 1.86 | 0.68 | 0.22 | 0.28 |
| 3021 | 0 | 175716 | ACQLKWPFE                | 2.29 | 0.01 | 0.90 | 1.15 | 0.22 | 1.39 |
| 3022 | 0 | 153340 | ACQMPHWWHCGGGS           | 2.60 | 0.01 | 0.90 | 0.68 | 0.22 | 1.39 |
| 3023 | 0 | 175717 | ACQTSYPYEC               | 2.31 | 0.01 | 0.90 | 1.15 | 0.22 | 1.39 |
| 3024 | 0 | 153341 | ACQVPHFFGCGGGS           | 2.60 | 0.01 | 0.90 | 0.68 | 0.22 | 0.28 |
| 3025 | 0 | 153341 | ACQVPHFFGCGGGS           | 2.60 | 0.01 | 0.90 | 0.44 | 0.85 | 2.35 |
| 3026 | 0 | 589    | ACRAAK                   | 1.92 | 0.01 | 1.96 | 0.44 | 0.85 | 0.28 |
| 3027 | 0 | 153342 | ACRDHFSTHCGGGS           | 2.61 | 0.01 | 0.90 | 0.68 | 0.22 | 1.39 |
| 3028 | 0 | 153343 | ACRDHLYGSCGGGS           | 2.61 | 0.01 | 0.90 | 0.68 | 0.22 | 1.39 |
| 3029 | 0 | 153344 | ACRDHSDLWCGGGS           | 2.61 | 0.01 | 0.90 | 0.68 | 0.22 | 1.39 |
| 3030 | 0 | 153345 | ACRDHYDQMCGGGS           | 2.59 | 0.01 | 0.90 | 0.68 | 0.22 | 1.39 |
| 3031 | 0 | 153346 | ACRDHYPLSCGGGS           | 2.59 | 0.01 | 0.90 | 0.68 | 0.22 | 0.28 |
| 3032 | 0 | 153346 | ACRDHYPLSCGGGS           | 2.59 | 0.01 | 0.90 | 0.44 | 0.85 | 2.35 |
| 3033 | 0 | 153347 | ACRTSNQWLCGGGS           | 2.59 | 0.01 | 0.90 | 0.68 | 0.22 | 1.39 |
| 3034 | 0 | 99869  | ACSDRFLRRPMCLPPHV<br>VFL | 2.94 | 0.01 | 0.90 | 2.00 | 0.22 | 0.28 |
| 3035 | 0 | 595    | ACSFSSIP                 | 2.13 | 0.01 | 2.21 | 1.12 | 0.22 | 0.28 |
| 3036 | 0 | 595    | ACSFSSIP                 | 2.13 | 0.01 | 2.21 | 0.44 | 0.85 | 0.28 |
| 3037 | 0 | 596    | ACSFSSIPNG               | 2.30 | 0.01 | 2.21 | 1.12 | 0.22 | 0.28 |
| 3038 | 0 | 596    | ACSFSSIPNG               | 2.30 | 0.01 | 2.21 | 1.12 | 0.22 | 0.28 |
| 3039 | 0 | 599    | ACSLPEEAHTAIHS           | 2.63 | 0.01 | 2.69 | 0.44 | 0.85 | 0.28 |
| 3040 | 0 | 599    | ACSLPEEAHTAIHS           | 2.63 | 0.01 | 2.69 | 0.44 | 0.85 | 0.28 |
| 3041 | 0 | 600    | ACSLPQEARTAIHS           | 2.60 | 0.01 | 2.69 | 0.44 | 0.85 | 0.28 |
| 3042 | 0 | 600    | ACSLPQEARTAIHS           | 2.60 | 0.01 | 2.69 | 0.44 | 1.41 | 0.28 |
| 3043 | 0 | 600    | ACSLPQEARTAIHS           | 2.60 | 0.01 | 2.69 | 0.44 | 0.85 | 0.28 |
| 3044 | 0 | 175718 | ACSNSWPHEC               | 2.31 | 0.01 | 0.90 | 1.15 | 0.22 | 1.39 |

|      |   |        |                                         |      |      |      |      |      |      |
|------|---|--------|-----------------------------------------|------|------|------|------|------|------|
| 3045 | 0 | 181543 | ACSNYTKWIEIQRKQ                         | 2.64 | 0.01 | 1.66 | 2.36 | 0.22 | 1.28 |
| 3046 | 0 | 141844 | ACSSISDISPVTYPITLPIIK<br>NISVTAHGINLIDK | 3.51 | 0.01 | 3.13 | 2.13 | 0.22 | 0.28 |
| 3047 | 0 | 153348 | ACTALQQWLCGGGS                          | 2.63 | 0.01 | 0.90 | 0.68 | 0.22 | 1.39 |
| 3048 | 0 | 153349 | ACTDFEGMLCGGGS                          | 2.59 | 0.01 | 0.90 | 0.68 | 0.22 | 1.39 |
| 3049 | 0 | 153350 | ACTSPNQWLCGGGS                          | 2.59 | 0.01 | 0.90 | 0.68 | 0.22 | 1.39 |
| 3050 | 0 | 79146  | ACTSQLSVPSCCC                           | 2.61 | 0.01 | 0.90 | 0.68 | 0.22 | 1.39 |
| 3051 | 0 | 175719 | ACTSYNEPLC                              | 2.29 | 0.01 | 0.90 | 1.15 | 0.22 | 1.39 |
| 3052 | 0 | 175720 | ACTSYNEPLCGGGS                          | 2.72 | 0.01 | 0.90 | 1.15 | 0.22 | 1.27 |
| 3053 | 0 | 175721 | ACTVFNEPFC                              | 2.31 | 0.01 | 0.90 | 1.15 | 0.22 | 1.39 |
| 3054 | 0 | 153351 | ACTYSPRDMCGGGS                          | 2.59 | 0.01 | 0.90 | 0.68 | 0.22 | 1.39 |
| 3055 | 0 | 605    | ACVAGDSSTKNLIYTSTL<br>CELNVTGFQQHF      | 3.32 | 0.01 | 4.93 | 0.68 | 0.22 | 0.28 |
| 3056 | 0 | 153352 | ACVLPWSHVCGGGS                          | 2.61 | 0.01 | 0.90 | 0.68 | 0.22 | 1.39 |
| 3057 | 0 | 153352 | ACVLPWSHVCGGGS                          | 2.61 | 0.01 | 0.90 | 0.68 | 0.22 | 0.28 |
| 3058 | 0 | 153353 | ACWALRDPLCGGGS                          | 2.62 | 0.01 | 0.90 | 0.68 | 0.22 | 1.39 |
| 3059 | 0 | 153354 | ACWHPLQWRCGGGS                          | 2.59 | 0.01 | 0.90 | 0.68 | 0.22 | 1.39 |
| 3060 | 0 | 153355 | ACWLPLTRLCGGGS                          | 2.61 | 0.01 | 0.90 | 0.68 | 0.22 | 1.39 |
| 3061 | 0 | 153355 | ACWLPLTRLCGGGS                          | 2.61 | 0.01 | 0.90 | 0.68 | 0.22 | 0.28 |
| 3062 | 0 | 153356 | ACWPSMRDHC GGGS                         | 2.59 | 0.01 | 0.90 | 0.68 | 0.22 | 1.39 |
| 3063 | 0 | 175722 | ACWYDSLIFC                              | 2.29 | 0.01 | 0.90 | 1.15 | 0.22 | 1.39 |
| 3064 | 0 | 153357 | ACWYSTRDHC GGGS                         | 2.59 | 0.01 | 0.90 | 0.68 | 0.22 | 0.28 |
| 3065 | 0 | 608    | ACYCYGLPNWVKVWD                         | 2.66 | 0.01 | 2.56 | 0.68 | 0.22 | 0.85 |
| 3066 | 0 | 610    | ACYLPFQLSCGGKS                          | 2.60 | 0.01 | 0.90 | 0.68 | 0.22 | 1.39 |
| 3067 | 0 | 610    | ACYLPFQLSCGGKS                          | 2.60 | 0.01 | 0.90 | 0.68 | 0.22 | 1.27 |
| 3068 | 0 | 610    | ACYLPFQLSCGGKS                          | 2.60 | 0.01 | 0.90 | 0.68 | 0.22 | 0.28 |
| 3069 | 0 | 610    | ACYLPFQLSCGGKS                          | 2.60 | 0.01 | 0.90 | 0.68 | 0.22 | 1.27 |
| 3070 | 0 | 135439 | ADAAAAAY                                | 2.06 | 0.01 | 0.78 | 1.20 | 0.22 | 0.28 |
| 3071 | 0 | 612    | ADAAPSPTYLPRLS                          | 2.71 | 0.01 | 0.90 | 1.15 | 0.22 | 0.28 |
| 3072 | 0 | 119093 | ADAEFQERLQEDTSF                         | 2.71 | 0.01 | 3.61 | 2.00 | 1.41 | 0.28 |
| 3073 | 0 | 192864 | ADAERAGLFV                              | 2.32 | 0.01 | 3.26 | 0.68 | 0.22 | 0.28 |
| 3074 | 0 | 192864 | ADAERAGLFV                              | 2.32 | 0.01 | 3.26 | 0.68 | 0.22 | 1.48 |
| 3075 | 0 | 623    | ADALLEKG                                | 2.14 | 0.01 | 2.21 | 0.44 | 0.85 | 0.28 |
| 3076 | 0 | 170198 | ADAMSRLARLAPVYL                         | 2.71 | 0.01 | 0.78 | 0.44 | 1.41 | 0.28 |
| 3077 | 0 | 170198 | ADAMSRLARLAPVYL                         | 2.71 | 0.01 | 0.78 | 0.44 | 1.13 | 0.28 |
| 3078 | 0 | 178465 | ADAPAPINFTMLLNM                         | 2.70 | 0.01 | 2.36 | 0.44 | 1.23 | 1.28 |
| 3079 | 0 | 178465 | ADAPAPINFTMLLNM                         | 2.70 | 0.01 | 2.36 | 0.44 | 1.23 | 1.27 |
| 3080 | 0 | 178465 | ADAPAPINFTMLLNM                         | 2.70 | 0.01 | 2.36 | 0.44 | 1.23 | 1.28 |
| 3081 | 0 | 629    | ADAPPGSPAPPPPEHRG<br>GPE                | 2.99 | 0.01 | 2.40 | 0.44 | 1.59 | 0.85 |
| 3082 | 0 | 115674 | ADARM                                   | 1.77 | 0.01 | 0.78 | 0.44 | 1.13 | 1.57 |
| 3083 | 0 | 115674 | ADARM                                   | 1.77 | 0.01 | 0.78 | 0.44 | 1.41 | 1.57 |
| 3084 | 0 | 115674 | ADARM                                   | 1.77 | 0.01 | 0.78 | 0.44 | 1.13 | 1.57 |
| 3085 | 0 | 115674 | ADARM                                   | 1.77 | 0.01 | 0.78 | 0.44 | 1.41 | 1.57 |
| 3086 | 0 | 115674 | ADARM                                   | 1.77 | 0.01 | 0.78 | 0.44 | 1.13 | 1.57 |

|      |   |        |                                            |      |      |      |      |      |      |
|------|---|--------|--------------------------------------------|------|------|------|------|------|------|
| 3087 | 0 | 115674 | ADARM                                      | 1.77 | 0.01 | 0.78 | 0.44 | 1.41 | 1.57 |
| 3088 | 0 | 115674 | ADARM                                      | 1.77 | 0.01 | 0.78 | 3.05 | 1.13 | 0.28 |
| 3089 | 0 | 115674 | ADARM                                      | 1.77 | 0.01 | 0.78 | 3.05 | 1.13 | 1.75 |
| 3090 | 0 | 632    | ADASLKMADPNRFRGK<br>DLP                    | 2.91 | 0.01 | 2.40 | 2.16 | 0.22 | 0.28 |
| 3091 | 0 | 632    | ADASLKMADPNRFRGK<br>DLP                    | 2.91 | 0.01 | 2.40 | 2.16 | 2.25 | 1.75 |
| 3092 | 0 | 632    | ADASLKMADPNRFRGK<br>DLP                    | 2.91 | 0.01 | 2.40 | 2.16 | 0.22 | 1.34 |
| 3093 | 0 | 108261 | ADASVPVMP                                  | 2.26 | 0.01 | 0.90 | 0.44 | 1.13 | 1.39 |
| 3094 | 0 | 637    | ADAVSRKKMD                                 | 2.33 | 3.55 | 2.56 | 0.44 | 0.85 | 0.28 |
| 3095 | 0 | 638    | ADAVSRKKMD                                 | 2.33 | 0.01 | 2.56 | 0.68 | 0.22 | 0.28 |
| 3096 | 0 | 170199 | ADCLGHYGYIDLELP                            | 2.68 | 0.01 | 0.78 | 0.44 | 1.41 | 0.28 |
| 3097 | 0 | 170199 | ADCLGHYGYIDLELP                            | 2.68 | 0.01 | 0.78 | 0.44 | 1.13 | 0.28 |
| 3098 | 0 | 640    | ADCTLWFCPQTSN                              | 2.51 | 0.01 | 0.90 | 0.44 | 1.41 | 0.28 |
| 3099 | 0 | 79504  | ADCTTPT                                    | 2.04 | 0.01 | 0.90 | 1.12 | 0.22 | 1.39 |
| 3100 | 0 | 247437 | ADDDDDDDDDGETK                             | 2.71 | 0.01 | 1.61 | 0.44 | 0.85 | 1.28 |
| 3101 | 0 | 643    | ADDHPGAVAARNDVLS<br>GFS                    | 2.90 | 0.01 | 4.63 | 2.42 | 0.22 | 0.28 |
| 3102 | 0 | 643    | ADDHPGAVAARNDVLS<br>GFS                    | 2.90 | 0.01 | 4.63 | 2.42 | 0.22 | 1.34 |
| 3103 | 0 | 646    | ADDMERIFKRFDTN<br>GDKISLSELTALRTL<br>GSTSA | 3.55 | 0.01 | 2.53 | 0.44 | 1.23 | 1.34 |
| 3104 | 0 | 646    | ADDMERIFKRFDTN<br>GDKISLSELTALRTL<br>GSTSA | 3.55 | 0.01 | 2.53 | 1.12 | 0.22 | 0.28 |
| 3105 | 0 | 646    | ADDMERIFKRFDTN<br>GDKISLSELTALRTL<br>GSTSA | 3.55 | 0.01 | 2.53 | 1.12 | 0.22 | 0.28 |
| 3106 | 0 | 646    | ADDMERIFKRFDTN<br>GDKISLSELTALRTL<br>GSTSA | 3.55 | 0.01 | 2.53 | 0.44 | 1.23 | 2.35 |
| 3107 | 0 | 647    | ADDPLL                                     | 2.02 | 0.01 | 2.85 | 0.68 | 0.22 | 0.28 |
| 3108 | 0 | 648    | ADDPLLRT                                   | 2.12 | 0.01 | 2.85 | 0.44 | 0.22 | 0.28 |
| 3109 | 0 | 510725 | ADDRASGETKASNT<br>HD                       | 2.80 | 0.01 | 2.24 | 0.44 | 1.41 | 1.28 |
| 3110 | 0 | 651    | ADDTPTYLSFAPHRH                            | 2.68 | 0.01 | 0.90 | 0.44 | 1.59 | 1.39 |
| 3111 | 0 | 652    | ADDVILHTPGCVPC                             | 2.60 | 0.01 | 2.59 | 0.44 | 0.85 | 0.28 |
| 3112 | 0 | 652    | ADDVILHTPGCVPC                             | 2.60 | 0.01 | 2.59 | 0.44 | 1.41 | 0.28 |
| 3113 | 0 | 652    | ADDVILHTPGCVPC                             | 2.60 | 0.01 | 2.59 | 0.44 | 0.85 | 0.28 |
| 3114 | 0 | 652    | ADDVILHTPGCVPC                             | 2.60 | 0.01 | 2.59 | 0.44 | 0.85 | 0.28 |
| 3115 | 0 | 654    | ADEELLKNIKNETGF<br>QAQVVKD                 | 3.03 | 0.01 | 2.75 | 1.12 | 0.22 | 0.85 |
| 3116 | 0 | 654    | ADEELLKNIKNETGF<br>QAQVVKD                 | 3.03 | 0.01 | 2.75 | 1.12 | 0.22 | 0.28 |



|      |   |        |                                                    |      |      |      |      |      |      |
|------|---|--------|----------------------------------------------------|------|------|------|------|------|------|
| 3117 | 0 | 654    | ADEELLKNIKNETGFQA<br>QVVKD                         | 3.03 | 0.01 | 2.75 | 1.12 | 0.22 | 1.34 |
| 3118 | 0 | 655    | ADEEQQQALSSQMGF                                    | 2.68 | 0.01 | 2.04 | 0.68 | 0.22 | 0.28 |
| 3119 | 0 | 655    | ADEEQQQALSSQMGF                                    | 2.68 | 0.01 | 2.04 | 0.44 | 0.85 | 0.28 |
| 3120 | 0 | 655    | ADEEQQQALSSQMGF                                    | 2.68 | 0.01 | 2.04 | 0.44 | 0.85 | 1.28 |
| 3121 | 0 | 156601 | ADEPNNLNSK                                         | 2.31 | 0.01 | 0.78 | 1.20 | 0.22 | 0.28 |
| 3122 | 0 | 156601 | ADEPNNLNSK                                         | 2.31 | 0.01 | 0.78 | 1.20 | 0.22 | 1.48 |
| 3123 | 0 | 156601 | ADEPNNLNSK                                         | 2.31 | 0.01 | 0.78 | 1.20 | 0.22 | 0.85 |
| 3124 | 0 | 156601 | ADEPNNLNSK                                         | 2.31 | 0.01 | 0.78 | 1.20 | 0.22 | 0.85 |
| 3125 | 0 | 661    | ADEVQRMMAEIDTDGD<br>GFIDFNEFISFCNANPGL<br>MKDVAKVF | 3.67 | 0.01 | 2.53 | 1.12 | 0.22 | 2.98 |
| 3126 | 0 | 661    | ADEVQRMMAEIDTDGD<br>GFIDFNEFISFCNANPGL<br>MKDVAKVF | 3.67 | 0.01 | 2.53 | 1.12 | 0.22 | 2.98 |
| 3127 | 0 | 661    | ADEVQRMMAEIDTDGD<br>GFIDFNEFISFCNANPGL<br>MKDVAKVF | 3.67 | 0.01 | 2.53 | 1.12 | 0.22 | 2.98 |
| 3128 | 0 | 661    | ADEVQRMMAEIDTDGD<br>GFIDFNEFISFCNANPGL<br>MKDVAKVF | 3.67 | 0.01 | 2.53 | 1.12 | 0.22 | 2.98 |
| 3129 | 0 | 661    | ADEVQRMMAEIDTDGD<br>GFIDFNEFISFCNANPGL<br>MKDVAKVF | 3.67 | 0.01 | 2.53 | 1.12 | 0.22 | 2.98 |
| 3130 | 0 | 661    | ADEVQRMMAEIDTDGD<br>GFIDFNEFISFCNANPGL<br>MKDVAKVF | 3.67 | 0.01 | 2.53 | 1.12 | 0.22 | 2.98 |
| 3131 | 0 | 661    | ADEVQRMMAEIDTDGD<br>GFIDFNEFISFCNANPGL<br>MKDVAKVF | 3.67 | 0.01 | 2.53 | 1.12 | 0.22 | 2.98 |
| 3132 | 0 | 661    | ADEVQRMMAEIDTDGD<br>GFIDFNEFISFCNANPGL<br>MKDVAKVF | 3.67 | 0.01 | 2.53 | 1.12 | 0.22 | 2.98 |
| 3133 | 0 | 661    | ADEVQRMMAEIDTDGD<br>GFIDFNEFISFCNANPGL<br>MKDVAKVF | 3.67 | 0.01 | 2.53 | 0.44 | 1.23 | 0.85 |
| 3134 | 0 | 661    | ADEVQRMMAEIDTDGD<br>GFIDFNEFISFCNANPGL<br>MKDVAKVF | 3.67 | 0.01 | 2.53 | 0.44 | 1.23 | 1.34 |
| 3135 | 0 | 661    | ADEVQRMMAEIDTDGD<br>GFIDFNEFISFCNANPGL<br>MKDVAKVF | 3.67 | 0.01 | 2.53 | 1.12 | 0.22 | 0.28 |

|      |   |        |                                                            |      |      |      |      |      |      |
|------|---|--------|------------------------------------------------------------|------|------|------|------|------|------|
| 3136 | 0 | 661    | ADEVQRMMAEIDTDGD<br>GFIDFNEFISFCNANPGL<br>MKDVAKVF         | 3.67 | 0.01 | 2.53 | 1.12 | 0.22 | 0.28 |
| 3137 | 0 | 661    | ADEVQRMMAEIDTDGD<br>GFIDFNEFISFCNANPGL<br>MKDVAKVF         | 3.67 | 0.01 | 2.53 | 0.44 | 1.23 | 2.35 |
| 3138 | 0 | 97852  | ADEWGPLRTVRKKA                                             | 2.66 | 0.01 | 2.71 | 2.78 | 0.22 | 0.28 |
| 3139 | 0 | 127560 | ADEWLPEGPRD                                                | 2.48 | 0.01 | 3.16 | 3.16 | 0.22 | 0.28 |
| 3140 | 0 | 127914 | ADFAGDL DYNE LAVRS<br>ESMQRQGLLQGMAYTV<br>QGPPGQPGPQGPPGIS | 3.84 | 0.01 | 0.78 | 0.44 | 1.13 | 0.85 |
| 3141 | 0 | 127914 | ADFAGDL DYNE LAVRS<br>ESMQRQGLLQGMAYTV<br>QGPPGQPGPQGPPGIS | 3.84 | 0.01 | 0.78 | 0.44 | 1.13 | 0.85 |
| 3142 | 0 | 227006 | ADFPD SP L L P K F Q E L                                   | 2.70 | 0.01 | 2.48 | 0.44 | 1.59 | 0.28 |
| 3143 | 0 | 137794 | ADFTPGTE                                                   | 2.12 | 0.01 | 2.21 | 0.44 | 0.85 | 0.28 |
| 3144 | 0 | 137794 | ADFTPGTE                                                   | 2.12 | 0.01 | 2.21 | 0.44 | 0.85 | 0.28 |
| 3145 | 0 | 137794 | ADFTPGTE                                                   | 2.12 | 0.01 | 2.21 | 1.20 | 0.22 | 0.28 |
| 3146 | 0 | 187742 | ADFYNP K A G R I S T L N S                                 | 2.70 | 0.01 | 2.72 | 2.13 | 2.39 | 0.85 |
| 3147 | 0 | 247579 | ADGAGGGDGSAGEDL                                            | 2.74 | 0.01 | 1.61 | 0.44 | 0.85 | 1.28 |
| 3148 | 0 | 665    | ADGDALNKVLKAFQG                                            | 2.71 | 0.01 | 4.08 | 2.66 | 0.22 | 0.85 |
| 3149 | 0 | 247601 | ADGDEEDYDVVDDDD                                            | 2.70 | 0.01 | 1.61 | 0.44 | 0.85 | 1.28 |
| 3150 | 0 | 247602 | ADGDEEDYDVVDDLE                                            | 2.71 | 0.01 | 1.61 | 0.44 | 0.85 | 1.28 |
| 3151 | 0 | 106223 | ADGGAQGT A                                                 | 2.28 | 0.01 | 0.90 | 0.44 | 1.13 | 1.27 |
| 3152 | 0 | 121117 | ADGKKIDG                                                   | 2.15 | 0.01 | 0.78 | 0.44 | 1.13 | 0.28 |
| 3153 | 0 | 144190 | ADGLAVIGVLMK                                               | 2.50 | 0.01 | 0.78 | 0.44 | 2.35 | 2.66 |
| 3154 | 0 | 180363 | ADGSSDAAREPRPAP                                            | 2.73 | 0.01 | 0.78 | 0.68 | 0.22 | 0.28 |
| 3155 | 0 | 247679 | ADGVGGGDGSAGEDL                                            | 2.73 | 0.01 | 1.61 | 0.44 | 0.85 | 1.28 |
| 3156 | 0 | 675    | ADHPSYTA AKDEVLSHF<br>SV                                   | 2.89 | 0.01 | 4.63 | 2.42 | 0.22 | 0.28 |
| 3157 | 0 | 675    | ADHPSYTA AKDEVLSHF<br>SV                                   | 2.89 | 0.01 | 4.63 | 2.42 | 0.22 | 1.34 |
| 3158 | 0 | 677    | ADIDKLIDYAASGD                                             | 2.64 | 0.01 | 2.56 | 1.12 | 0.22 | 0.28 |
| 3159 | 0 | 677    | ADIDKLIDYAASGD                                             | 2.64 | 0.01 | 2.56 | 0.44 | 0.85 | 0.28 |
| 3160 | 0 | 181544 | ADIGDIVRGRDMFKP                                            | 2.68 | 0.01 | 2.86 | 2.37 | 0.22 | 1.28 |
| 3161 | 0 | 181544 | ADIGDIVRGRDMFKP                                            | 2.68 | 0.01 | 2.86 | 2.36 | 0.22 | 1.28 |
| 3162 | 0 | 682    | ADIGSVQNQVTSTINNIT<br>VTQVNVKAAESQ                         | 3.38 | 0.01 | 3.27 | 3.08 | 0.22 | 0.28 |
| 3163 | 0 | 682    | ADIGSVQNQVTSTINNIT<br>VTQVNVKAAESQ                         | 3.38 | 0.01 | 3.27 | 3.08 | 0.22 | 0.28 |

|      |   |        |                                    |      |      |      |      |      |      |
|------|---|--------|------------------------------------|------|------|------|------|------|------|
| 3164 | 0 | 682    | ADIGSVQNQVTSTINNIT<br>VTQVNVKAAESQ | 3.38 | 0.01 | 3.27 | 3.08 | 0.22 | 0.28 |
| 3165 | 0 | 682    | ADIGSVQNQVTSTINNIT<br>VTQVNVKAAESQ | 3.38 | 0.01 | 3.27 | 3.08 | 0.22 | 0.28 |
| 3166 | 0 | 682    | ADIGSVQNQVTSTINNIT<br>VTQVNVKAAESQ | 3.38 | 0.01 | 3.27 | 3.08 | 0.22 | 0.28 |
| 3167 | 0 | 682    | ADIGSVQNQVTSTINNIT<br>VTQVNVKAAESQ | 3.38 | 0.01 | 3.27 | 3.08 | 0.22 | 0.28 |
| 3168 | 0 | 682    | ADIGSVQNQVTSTINNIT<br>VTQVNVKAAESQ | 3.38 | 0.01 | 3.27 | 3.08 | 0.22 | 0.28 |
| 3169 | 0 | 158669 | ADIKTALEARKAADT                    | 2.71 | 0.01 | 3.26 | 0.44 | 1.23 | 0.28 |
| 3170 | 0 | 158669 | ADIKTALEARKAADT                    | 2.71 | 0.01 | 3.26 | 0.44 | 1.41 | 0.28 |
| 3171 | 0 | 687    | ADINAVCPSELK                       | 2.44 | 0.01 | 3.42 | 0.44 | 1.23 | 0.85 |
| 3172 | 0 | 688    | ADINNE                             | 1.89 | 0.01 | 1.86 | 0.44 | 1.23 | 0.28 |
| 3173 | 0 | 97853  | ADIPHPKNFIGGEV                     | 2.58 | 0.01 | 2.04 | 0.44 | 2.98 | 0.28 |
| 3174 | 0 | 189551 | ADITAALAACKAEGS                    | 2.68 | 0.01 | 3.28 | 0.44 | 1.23 | 0.28 |
| 3175 | 0 | 189551 | ADITAALAACKAEGS                    | 2.68 | 0.01 | 3.28 | 0.44 | 1.41 | 0.28 |
| 3176 | 0 | 689    | ADIVKYEPTASM                       | 2.44 | 0.01 | 0.90 | 0.68 | 0.22 | 1.39 |
| 3177 | 0 | 106225 | ADIWLTPDPTTP                       | 2.50 | 0.01 | 0.90 | 1.15 | 0.22 | 0.85 |
| 3178 | 0 | 106225 | ADIWLTPDPTTP                       | 2.50 | 0.01 | 0.90 | 1.15 | 0.22 | 0.85 |
| 3179 | 0 | 106225 | ADIWLTPDPTTP                       | 2.50 | 0.01 | 0.90 | 1.15 | 0.22 | 1.34 |
| 3180 | 0 | 106225 | ADIWLTPDPTTP                       | 2.50 | 0.01 | 0.90 | 1.15 | 2.25 | 1.75 |
| 3181 | 0 | 106225 | ADIWLTPDPTTP                       | 2.50 | 0.01 | 0.90 | 1.15 | 2.25 | 1.75 |
| 3182 | 0 | 106225 | ADIWLTPDPTTP                       | 2.50 | 0.01 | 0.90 | 1.15 | 0.22 | 1.39 |
| 3183 | 0 | 123002 | ADKHGMLGS                          | 2.21 | 0.01 | 2.28 | 2.00 | 0.22 | 0.28 |
| 3184 | 0 | 123002 | ADKHGMLGS                          | 2.21 | 0.01 | 2.28 | 2.00 | 0.22 | 0.28 |
| 3185 | 0 | 123003 | ADKHGMLGT                          | 2.21 | 0.01 | 2.28 | 2.00 | 0.22 | 0.28 |
| 3186 | 0 | 142103 | ADKKPEELSVTLVEAYTD<br>VF           | 2.96 | 0.01 | 3.55 | 3.16 | 0.22 | 0.28 |
| 3187 | 0 | 142103 | ADKKPEELSVTLVEAYTD<br>VF           | 2.96 | 0.01 | 3.55 | 3.16 | 0.22 | 0.28 |
| 3188 | 0 | 247742 | ADKPSLFGQAAAGDK                    | 2.69 | 0.01 | 1.61 | 0.44 | 0.85 | 1.28 |
| 3189 | 0 | 697    | ADKSSILFLCDD                       | 2.46 | 0.01 | 2.69 | 1.20 | 0.22 | 0.28 |
| 3190 | 0 | 510760 | ADKVSLEEKQAANQT                    | 2.67 | 0.01 | 2.24 | 0.44 | 1.41 | 1.28 |
| 3191 | 0 | 700    | ADLAAVQKTNAANQAA<br>YQK            | 2.93 | 0.01 | 2.39 | 0.44 | 1.74 | 0.28 |
| 3192 | 0 | 703    | ADLEKALEGAMC                       | 2.50 | 0.01 | 2.24 | 1.20 | 0.22 | 1.34 |
| 3193 | 0 | 703    | ADLEKALEGAMC                       | 2.50 | 0.01 | 2.24 | 1.20 | 0.22 | 0.28 |
| 3194 | 0 | 489447 | ADLEQLCQYIASPVD                    | 2.67 | 0.01 | 2.69 | 3.05 | 0.85 | 1.28 |
| 3195 | 0 | 707    | ADLGDFENSAAAAETGV<br>GVIKSIA       | 3.13 | 0.01 | 2.85 | 3.06 | 0.22 | 0.28 |
| 3196 | 0 | 707    | ADLGDFENSAAAAETGV<br>GVIKSIA       | 3.13 | 0.01 | 2.85 | 4.03 | 0.22 | 0.28 |
| 3197 | 0 | 707    | ADLGDFENSAAAAETGV<br>GVIKSIA       | 3.13 | 0.01 | 2.85 | 3.70 | 0.22 | 0.28 |
| 3198 | 0 | 707    | ADLGDFENSAAAAETGV<br>GVIKSIA       | 3.13 | 0.01 | 2.85 | 3.06 | 0.22 | 0.28 |

|      |   |        |                                       |      |      |      |      |      |      |
|------|---|--------|---------------------------------------|------|------|------|------|------|------|
| 3199 | 0 | 707    | ADLGDFENSAAAAETGV<br>GVIKSIA          | 3.13 | 0.01 | 2.85 | 1.12 | 0.22 | 0.28 |
| 3200 | 0 | 707    | ADLGDFENSAAAAETGV<br>GVIKSIA          | 3.13 | 0.01 | 2.85 | 1.12 | 0.22 | 0.28 |
| 3201 | 0 | 707    | ADLGDFENSAAAAETGV<br>GVIKSIA          | 3.13 | 0.01 | 2.85 | 3.89 | 0.22 | 0.28 |
| 3202 | 0 | 707    | ADLGDFENSAAAAETGV<br>GVIKSIA          | 3.13 | 0.01 | 2.85 | 3.81 | 0.22 | 0.28 |
| 3203 | 0 | 707    | ADLGDFENSAAAAETGV<br>GVIKSIA          | 3.13 | 0.01 | 2.85 | 3.89 | 0.22 | 0.28 |
| 3204 | 0 | 707    | ADLGDFENSAAAAETGV<br>GVIKSIA          | 3.13 | 0.01 | 2.85 | 3.81 | 0.22 | 0.28 |
| 3205 | 0 | 707    | ADLGDFENSAAAAETGV<br>GVIKSIA          | 3.13 | 0.01 | 2.85 | 4.03 | 0.22 | 0.28 |
| 3206 | 0 | 707    | ADLGDFENSAAAAETGV<br>GVIKSIA          | 3.13 | 0.01 | 2.85 | 3.89 | 0.22 | 0.28 |
| 3207 | 0 | 707    | ADLGDFENSAAAAETGV<br>GVIKSIA          | 3.13 | 0.01 | 2.85 | 3.70 | 0.22 | 0.28 |
| 3208 | 0 | 708    | ADLGDFETSVADAATGA<br>GVIKSIA          | 3.15 | 0.01 | 3.63 | 3.89 | 0.22 | 0.28 |
| 3209 | 0 | 708    | ADLGDFETSVADAATGA<br>GVIKSIA          | 3.15 | 0.01 | 3.63 | 3.70 | 0.22 | 0.28 |
| 3210 | 0 | 708    | ADLGDFETSVADAATGA<br>GVIKSIA          | 3.15 | 0.01 | 3.63 | 3.81 | 0.22 | 0.28 |
| 3211 | 0 | 708    | ADLGDFETSVADAATGA<br>GVIKSIA          | 3.15 | 0.01 | 3.63 | 3.89 | 0.22 | 0.28 |
| 3212 | 0 | 708    | ADLGDFETSVADAATGA<br>GVIKSIA          | 3.15 | 0.01 | 3.63 | 3.70 | 0.22 | 0.28 |
| 3213 | 0 | 708    | ADLGDFETSVADAATGA<br>GVIKSIA          | 3.15 | 0.01 | 3.63 | 3.81 | 0.22 | 0.28 |
| 3214 | 0 | 708    | ADLGDFETSVADAATGA<br>GVIKSIA          | 3.15 | 0.01 | 3.63 | 4.03 | 0.22 | 0.28 |
| 3215 | 0 | 708    | ADLGDFETSVADAATGA<br>GVIKSIA          | 3.15 | 0.01 | 3.63 | 3.89 | 0.22 | 0.28 |
| 3216 | 0 | 225940 | ADLGYGPATPAAPAAGY<br>TPATPAAPAEAAPAGK | 3.49 | 0.01 | 2.53 | 1.20 | 0.22 | 0.28 |
| 3217 | 0 | 225940 | ADLGYGPATPAAPAAGY<br>TPATPAAPAEAAPAGK | 3.49 | 0.01 | 2.53 | 1.20 | 0.22 | 0.28 |
| 3218 | 0 | 225940 | ADLGYGPATPAAPAAGY<br>TPATPAAPAEAAPAGK | 3.49 | 0.01 | 2.53 | 1.20 | 0.22 | 0.28 |
| 3219 | 0 | 225940 | ADLGYGPATPAAPAAGY<br>TPATPAAPAEAAPAGK | 3.49 | 0.01 | 2.53 | 1.20 | 0.22 | 0.28 |

|      |   |        |                                                      |      |      |      |      |      |      |
|------|---|--------|------------------------------------------------------|------|------|------|------|------|------|
| 3220 | 0 | 225940 | ADLGYGPATPAAPAAGY<br>TPATPAAPAEAAPAGK                | 3.49 | 0.01 | 2.53 | 1.20 | 0.22 | 0.28 |
| 3221 | 0 | 225940 | ADLGYGPATPAAPAAGY<br>TPATPAAPAEAAPAGK                | 3.49 | 0.01 | 2.53 | 1.20 | 0.22 | 0.28 |
| 3222 | 0 | 225940 | ADLGYGPATPAAPAAGY<br>TPATPAAPAEAAPAGK                | 3.49 | 0.01 | 2.53 | 1.20 | 0.22 | 0.28 |
| 3223 | 0 | 225940 | ADLGYGPATPAAPAAGY<br>TPATPAAPAEAAPAGK                | 3.49 | 0.01 | 2.53 | 1.20 | 0.22 | 0.28 |
| 3224 | 0 | 225940 | ADLGYGPATPAAPAAGY<br>TPATPAAPAEAAPAGK                | 3.49 | 0.01 | 2.53 | 1.20 | 0.22 | 0.28 |
| 3225 | 0 | 225940 | ADLGYGPATPAAPAAGY<br>TPATPAAPAEAAPAGK                | 3.49 | 0.01 | 2.53 | 1.20 | 0.22 | 0.28 |
| 3226 | 0 | 225940 | ADLGYGPATPAAPAAGY<br>TPATPAAPAEAAPAGK                | 3.49 | 0.01 | 2.53 | 1.20 | 0.22 | 1.66 |
| 3227 | 0 | 225940 | ADLGYGPATPAAPAAGY<br>TPATPAAPAEAAPAGK                | 3.49 | 0.01 | 2.53 | 0.44 | 1.23 | 2.35 |
| 3228 | 0 | 709    | ADLIIAQKLASKP                                        | 2.58 | 0.01 | 3.78 | 1.15 | 0.22 | 1.48 |
| 3229 | 0 | 709    | ADLIIAQKLASKP                                        | 2.58 | 0.01 | 3.78 | 1.15 | 0.22 | 0.28 |
| 3230 | 0 | 709    | ADLIIAQKLASKP                                        | 2.58 | 0.01 | 3.78 | 1.15 | 0.22 | 0.28 |
| 3231 | 0 | 709    | ADLIIAQKLASKP                                        | 2.58 | 0.01 | 3.78 | 1.15 | 0.22 | 0.85 |
| 3232 | 0 | 709    | ADLIIAQKLASKP                                        | 2.58 | 0.01 | 3.78 | 1.15 | 0.22 | 0.85 |
| 3233 | 0 | 136942 | ADLLANINLKKADGTVK<br>KGSDALANK                       | 3.24 | 0.01 | 3.81 | 0.68 | 0.22 | 1.27 |
| 3234 | 0 | 136942 | ADLLANINLKKADGTVK<br>KGSDALANK                       | 3.24 | 0.01 | 3.81 | 0.68 | 0.22 | 0.85 |
| 3235 | 0 | 136942 | ADLLANINLKKADGTVK<br>KGSDALANK                       | 3.24 | 0.01 | 3.81 | 0.44 | 0.85 | 0.28 |
| 3236 | 0 | 136943 | ADLLANINLKKADGTVK<br>KGSDALANKGGSEIECLK<br>NKYEVAGIP | 3.75 | 0.01 | 0.90 | 4.15 | 0.22 | 0.28 |
| 3237 | 0 | 136943 | ADLLANINLKKADGTVK<br>KGSDALANKGGSEIECLK<br>NKYEVAGIP | 3.75 | 0.01 | 0.90 | 4.15 | 0.22 | 0.28 |
| 3238 | 0 | 136943 | ADLLANINLKKADGTVK<br>KGSDALANKGGSEIECLK<br>NKYEVAGIP | 3.75 | 0.01 | 0.90 | 4.15 | 0.22 | 0.28 |
| 3239 | 0 | 450405 | ADLMHFT                                              | 1.99 | 0.01 | 0.90 | 0.44 | 1.41 | 1.39 |
| 3240 | 0 | 127561 | ADMLGPLVLSE                                          | 2.48 | 0.01 | 3.16 | 3.16 | 0.22 | 0.28 |
| 3241 | 0 | 720    | ADLPQP                                               | 1.90 | 0.01 | 3.27 | 0.44 | 1.59 | 0.28 |

|      |   |        |                                |      |      |      |      |      |      |
|------|---|--------|--------------------------------|------|------|------|------|------|------|
| 3242 | 0 | 151601 | ADLSLEKAANVQWDE                | 2.68 | 0.01 | 3.61 | 0.44 | 1.41 | 1.66 |
| 3243 | 0 | 151601 | ADLSLEKAANVQWDE                | 2.68 | 0.01 | 3.61 | 0.44 | 1.41 | 1.66 |
| 3244 | 0 | 151601 | ADLSLEKAANVQWDE                | 2.68 | 0.01 | 3.61 | 0.44 | 1.41 | 0.28 |
| 3245 | 0 | 151601 | ADLSLEKAANVQWDE                | 2.68 | 0.01 | 3.61 | 0.44 | 1.41 | 1.66 |
| 3246 | 0 | 151601 | ADLSLEKAANVQWDE                | 2.68 | 0.01 | 3.61 | 0.44 | 1.41 | 0.28 |
| 3247 | 0 | 151601 | ADLSLEKAANVQWDE                | 2.68 | 0.01 | 3.61 | 0.44 | 1.41 | 0.28 |
| 3248 | 0 | 151601 | ADLSLEKAANVQWDE                | 2.68 | 0.01 | 3.61 | 0.44 | 1.41 | 0.28 |
| 3249 | 0 | 151601 | ADLSLEKAANVQWDE                | 2.68 | 0.01 | 3.61 | 0.44 | 1.41 | 1.34 |
| 3250 | 0 | 130434 | ADLSTAIASRSVADKIDL<br>YKHPDNID | 3.25 | 0.01 | 0.78 | 0.44 | 1.13 | 0.28 |
| 3251 | 0 | 130434 | ADLSTAIASRSVADKIDL<br>YKHPDNID | 3.25 | 0.01 | 0.78 | 0.44 | 1.13 | 0.28 |
| 3252 | 0 | 130434 | ADLSTAIASRSVADKIDL<br>YKHPDNID | 3.25 | 0.01 | 0.78 | 0.44 | 1.13 | 1.27 |
| 3253 | 0 | 130434 | ADLSTAIASRSVADKIDL<br>YKHPDNID | 3.25 | 0.01 | 0.78 | 0.44 | 1.13 | 1.27 |
| 3254 | 0 | 723    | ADLVAAQKLATKP                  | 2.58 | 0.01 | 3.00 | 0.44 | 0.85 | 0.28 |
| 3255 | 0 | 723    | ADLVAAQKLATKP                  | 2.58 | 0.01 | 3.00 | 1.15 | 2.39 | 0.28 |
| 3256 | 0 | 165581 | ADMGRGLF                       | 1.99 | 0.01 | 0.90 | 0.44 | 1.23 | 1.39 |
| 3257 | 0 | 240962 | ADMYFSTE                       | 2.10 | 0.01 | 3.35 | 2.37 | 0.22 | 0.85 |
| 3258 | 0 | 510778 | ADNAASDALEALADQ                | 2.73 | 0.01 | 2.24 | 0.44 | 1.41 | 1.28 |
| 3259 | 0 | 113257 | ADNKAPQGLLC                    | 2.38 | 0.01 | 0.90 | 3.06 | 0.22 | 0.85 |
| 3260 | 0 | 178183 | ADNKTKEGRAMNR                  | 2.56 | 0.01 | 3.93 | 0.68 | 0.22 | 0.85 |
| 3261 | 0 | 135633 | ADNKVVCS                       | 2.11 | 0.01 | 0.78 | 0.44 | 2.35 | 0.28 |
| 3262 | 0 | 80192  | ADNLDPGVPKEPIID                | 2.67 | 0.01 | 2.69 | 3.05 | 0.85 | 1.28 |
| 3263 | 0 | 138986 | ADNLTTIAHELQQYIDNL<br>NK       | 2.95 | 0.01 | 3.55 | 3.16 | 0.22 | 0.28 |
| 3264 | 0 | 225220 | ADNMELNDGRLEKTC<br>MY          | 2.82 | 0.01 | 2.61 | 0.68 | 0.22 | 0.28 |
| 3265 | 0 | 225220 | ADNMELNDGRLEKTC<br>MY          | 2.82 | 0.01 | 2.61 | 0.68 | 0.22 | 0.28 |
| 3266 | 0 | 225220 | ADNMELNDGRLEKTC<br>MY          | 2.82 | 0.01 | 2.61 | 0.68 | 0.22 | 0.28 |
| 3267 | 0 | 133494 | ADNPIKWDRART                   | 2.48 | 0.01 | 0.90 | 0.68 | 0.22 | 1.39 |
| 3268 | 0 | 504189 | ADNPIS                         | 1.88 | 0.01 | 3.81 | 0.68 | 0.22 | 0.28 |
| 3269 | 0 | 504189 | ADNPIS                         | 1.88 | 0.01 | 3.81 | 0.68 | 0.22 | 1.48 |
| 3270 | 0 | 504189 | ADNPIS                         | 1.88 | 0.01 | 3.81 | 0.68 | 0.22 | 0.85 |
| 3271 | 0 | 122712 | ADPEGPLPPYFERQ                 | 2.68 | 0.01 | 2.73 | 0.68 | 0.22 | 1.27 |

|      |   |        |                          |      |      |      |      |      |      |
|------|---|--------|--------------------------|------|------|------|------|------|------|
| 3272 | 0 | 122712 | ADPEGPLPPYFERQ           | 2.68 | 0.01 | 2.73 | 0.68 | 0.22 | 2.92 |
| 3273 | 0 | 174365 | ADPFSTNRIPL              | 2.45 | 0.01 | 0.90 | 1.15 | 1.41 | 1.39 |
| 3274 | 0 | 170206 | ADPMWYLKYLNIYVG          | 2.64 | 0.01 | 0.78 | 0.44 | 1.13 | 0.28 |
| 3275 | 0 | 741    | ADPNRFRGKD               | 2.31 | 0.01 | 2.40 | 1.12 | 0.22 | 0.85 |
| 3276 | 0 | 741    | ADPNRFRGKD               | 2.31 | 0.01 | 2.40 | 1.12 | 0.22 | 0.85 |
| 3277 | 0 | 741    | ADPNRFRGKD               | 2.31 | 0.01 | 3.36 | 1.20 | 0.22 | 0.28 |
| 3278 | 0 | 741    | ADPNRFRGKD               | 2.31 | 0.01 | 3.36 | 1.20 | 0.22 | 0.28 |
| 3279 | 0 | 741    | ADPNRFRGKD               | 2.31 | 0.01 | 3.36 | 1.20 | 0.22 | 1.34 |
| 3280 | 0 | 741    | ADPNRFRGKD               | 2.31 | 0.01 | 2.40 | 1.20 | 0.22 | 1.34 |
| 3281 | 0 | 742    | ADPNRFRGKNLP             | 2.48 | 0.01 | 2.40 | 1.12 | 0.22 | 0.85 |
| 3282 | 0 | 742    | ADPNRFRGKNLP             | 2.48 | 0.01 | 2.40 | 1.12 | 0.22 | 0.85 |
| 3283 | 0 | 742    | ADPNRFRGKNLP             | 2.48 | 0.01 | 2.40 | 0.68 | 0.22 | 0.85 |
| 3284 | 0 | 744    | ADPPFS                   | 1.89 | 0.01 | 2.96 | 0.44 | 0.85 | 0.28 |
| 3285 | 0 | 745    | ADPQKQNSVSNDSVTIN<br>VYN | 2.96 | 0.01 | 4.63 | 2.42 | 0.22 | 0.28 |
| 3286 | 0 | 745    | ADPQKQNSVSNDSVTIN<br>VYN | 2.96 | 0.01 | 4.63 | 2.42 | 0.22 | 1.34 |
| 3287 | 0 | 746    | ADPSIMAK                 | 2.13 | 0.01 | 3.05 | 1.20 | 0.22 | 0.28 |
| 3288 | 0 | 97169  | ADPVATKPL                | 2.24 | 0.01 | 3.13 | 1.12 | 0.22 | 0.28 |
| 3289 | 0 | 750    | ADPVPL                   | 1.90 | 0.01 | 3.17 | 1.12 | 0.22 | 0.28 |
| 3290 | 0 | 751    | ADPVTTEGDYVVKISEFY<br>GR | 2.91 | 0.01 | 3.93 | 0.44 | 1.23 | 0.28 |
| 3291 | 0 | 751    | ADPVTTEGDYVVKISEFY<br>GR | 2.91 | 0.01 | 3.93 | 0.44 | 1.74 | 0.28 |
| 3292 | 0 | 751    | ADPVTTEGDYVVKISEFY<br>GR | 2.91 | 0.01 | 3.93 | 1.12 | 0.22 | 0.28 |
| 3293 | 0 | 751    | ADPVTTEGDYVVKISEFY<br>GR | 2.91 | 0.01 | 3.93 | 0.68 | 0.22 | 0.28 |
| 3294 | 0 | 751    | ADPVTTEGDYVVKISEFY<br>GR | 2.91 | 0.01 | 3.93 | 0.68 | 0.22 | 0.28 |
| 3295 | 0 | 751    | ADPVTTEGDYVVKISEFY<br>GR | 2.91 | 0.01 | 3.93 | 0.68 | 0.22 | 3.40 |
| 3296 | 0 | 752    | ADQAQYNQMH               | 2.34 | 0.01 | 2.73 | 0.44 | 0.85 | 0.28 |
| 3297 | 0 | 752    | ADQAQYNQMH               | 2.34 | 0.01 | 2.73 | 0.68 | 0.22 | 0.28 |
| 3298 | 0 | 188026 | ADQDARGWGG               | 2.34 | 0.01 | 2.92 | 1.81 | 0.22 | 0.85 |
| 3299 | 0 | 97170  | ADQELGDAPFLDRLRRD<br>QKS | 2.96 | 0.01 | 3.09 | 0.44 | 0.85 | 0.28 |
| 3300 | 0 | 97170  | ADQELGDAPFLDRLRRD<br>QKS | 2.96 | 0.01 | 3.09 | 0.44 | 0.85 | 0.28 |
| 3301 | 0 | 97170  | ADQELGDAPFLDRLRRD<br>QKS | 2.96 | 0.01 | 3.09 | 0.44 | 1.74 | 0.28 |
| 3302 | 0 | 227010 | ADQKTYSFSTTAAI           | 2.69 | 0.01 | 2.97 | 0.44 | 1.59 | 0.28 |
| 3303 | 0 | 755    | ADQLPNVG                 | 2.10 | 0.01 | 3.06 | 1.12 | 0.22 | 0.28 |
| 3304 | 0 | 125356 | ADQLTPAWR                | 2.22 | 0.01 | 2.45 | 1.15 | 0.22 | 1.27 |
| 3305 | 0 | 125356 | ADQLTPAWR                | 2.22 | 0.01 | 2.45 | 1.15 | 0.22 | 1.27 |
| 3306 | 0 | 125356 | ADQLTPAWR                | 2.22 | 0.01 | 2.45 | 1.15 | 0.22 | 1.27 |
| 3307 | 0 | 167480 | ADQPENHQALAEPV           | 2.64 | 0.01 | 3.10 | 0.44 | 0.85 | 1.28 |

|      |   |        |                                    |      |      |      |      |      |      |
|------|---|--------|------------------------------------|------|------|------|------|------|------|
| 3308 | 0 | 167480 | ADQPENHQALAEPV                     | 2.64 | 0.01 | 3.10 | 0.44 | 1.59 | 1.28 |
| 3309 | 0 | 167481 | ADQPGNHQALAEPV                     | 2.62 | 0.01 | 3.18 | 0.44 | 0.85 | 1.28 |
| 3310 | 0 | 167481 | ADQPGNHQALAEPV                     | 2.62 | 0.01 | 3.18 | 0.44 | 1.59 | 1.28 |
| 3311 | 0 | 247873 | ADQPTQFSVGTPDAA                    | 2.69 | 0.01 | 1.61 | 0.44 | 0.85 | 1.28 |
| 3312 | 0 | 247874 | ADQPVQFSVGTPDAA                    | 2.69 | 0.01 | 1.61 | 0.44 | 0.85 | 1.28 |
| 3313 | 0 | 757    | ADQTVEEHIGYLVKY                    | 2.63 | 0.01 | 2.28 | 0.68 | 0.22 | 0.28 |
| 3314 | 0 | 757    | ADQTVEEHIGYLVKY                    | 2.63 | 0.01 | 2.28 | 0.68 | 0.22 | 0.28 |
| 3315 | 0 | 757    | ADQTVEEHIGYLVKY                    | 2.63 | 0.01 | 2.28 | 1.20 | 0.22 | 0.28 |
| 3316 | 0 | 757    | ADQTVEEHIGYLVKY                    | 2.63 | 0.01 | 2.28 | 1.20 | 0.22 | 0.28 |
| 3317 | 0 | 757    | ADQTVEEHIGYLVKY                    | 2.63 | 0.01 | 2.28 | 1.20 | 0.22 | 1.27 |
| 3318 | 0 | 195003 | ADRAFLDQKPERVP                     | 2.62 | 0.01 | 2.30 | 0.44 | 0.85 | 0.28 |
| 3319 | 0 | 195004 | ADRAFLDQKPERVPC                    | 2.67 | 4.63 | 0.90 | 0.44 | 0.85 | 0.28 |
| 3320 | 0 | 195004 | ADRAFLDQKPERVPC                    | 2.67 | 4.63 | 0.90 | 0.44 | 0.85 | 0.28 |
| 3321 | 0 | 247882 | ADRDAALMATDELT                     | 2.73 | 0.01 | 1.61 | 0.44 | 0.85 | 1.28 |
| 3322 | 0 | 247883 | ADRDATAALMATDELT                   | 2.73 | 0.01 | 1.61 | 0.44 | 0.85 | 1.28 |
| 3323 | 0 | 759    | ADREYCKYTVCTYPG                    | 2.66 | 0.01 | 0.90 | 0.68 | 0.22 | 0.28 |
| 3324 | 0 | 763    | ADRQTACNCLKNLAG                    | 2.69 | 0.01 | 3.35 | 0.44 | 1.23 | 0.85 |
| 3325 | 0 | 766    | ADRYFTYEENPD                       | 2.46 | 0.01 | 2.88 | 2.22 | 0.85 | 0.28 |
| 3326 | 0 | 766    | ADRYFTYEENPD                       | 2.46 | 0.01 | 2.88 | 2.22 | 0.22 | 0.28 |
| 3327 | 0 | 766    | ADRYFTYEENPD                       | 2.46 | 0.01 | 2.88 | 2.37 | 0.22 | 0.28 |
| 3328 | 0 | 766    | ADRYFTYEENPD                       | 2.46 | 0.01 | 2.88 | 2.22 | 0.22 | 0.28 |
| 3329 | 0 | 768    | ADSAQDST                           | 2.17 | 0.01 | 0.90 | 1.15 | 0.22 | 1.27 |
| 3330 | 0 | 177587 | ADSASSSESERNITI                    | 2.71 | 0.01 | 0.78 | 0.44 | 1.13 | 0.85 |
| 3331 | 0 | 226567 | ADSDINIKTGTTDIGSNT<br>T            | 2.93 | 0.01 | 2.56 | 1.20 | 0.22 | 0.28 |
| 3332 | 0 | 226567 | ADSDINIKTGTTDIGSNT<br>T            | 2.93 | 0.01 | 2.56 | 1.20 | 0.22 | 1.34 |
| 3333 | 0 | 226567 | ADSDINIKTGTTDIGSNT<br>T            | 2.93 | 0.01 | 2.56 | 1.20 | 0.22 | 1.75 |
| 3334 | 0 | 239266 | ADSDINIKTGTTDIGSNT<br>TVK          | 3.03 | 0.01 | 2.56 | 1.12 | 0.22 | 0.28 |
| 3335 | 0 | 239266 | ADSDINIKTGTTDIGSNT<br>TVK          | 3.03 | 0.01 | 2.56 | 0.68 | 0.22 | 0.28 |
| 3336 | 0 | 247931 | ADSENSKTGCGEEAS                    | 2.70 | 0.01 | 1.61 | 0.44 | 0.85 | 1.28 |
| 3337 | 0 | 238137 | ADSGFYLDATLRAS                     | 2.64 | 0.01 | 2.14 | 2.65 | 0.22 | 0.85 |
| 3338 | 0 | 769    | ADSGYCYWVHILCYC                    | 2.66 | 0.01 | 2.56 | 1.20 | 0.22 | 0.85 |
| 3339 | 0 | 144584 | ADSKGCKIGGGLPDSVKI                 | 2.85 | 0.01 | 0.90 | 1.20 | 0.22 | 0.85 |
| 3340 | 0 | 770    | ADSKGCKITCFLTAA                    | 2.67 | 0.01 | 2.56 | 1.20 | 0.22 | 0.85 |
| 3341 | 0 | 770    | ADSKGCKITCFLTAA                    | 2.67 | 0.01 | 2.56 | 2.00 | 0.22 | 0.85 |
| 3342 | 0 | 770    | ADSKGCKITCFLTAA                    | 2.67 | 0.01 | 2.56 | 2.02 | 0.22 | 0.85 |
| 3343 | 0 | 770    | ADSKGCKITCFLTAA                    | 2.67 | 0.01 | 2.56 | 1.20 | 0.22 | 0.85 |
| 3344 | 0 | 771    | ADSLRSQANTLGQAISN<br>GNDALGILQTADK | 3.38 | 0.01 | 3.27 | 1.20 | 0.22 | 0.28 |



|      |   |        |                                      |      |      |      |      |      |      |
|------|---|--------|--------------------------------------|------|------|------|------|------|------|
| 3345 | 0 | 771    | ADSLRSQANTLGQAIN<br>GNDALGILQTADK    | 3.38 | 0.01 | 3.27 | 1.20 | 0.22 | 0.28 |
| 3346 | 0 | 121119 | ADSPATPADANAFGF                      | 2.72 | 0.01 | 0.90 | 0.68 | 0.22 | 1.39 |
| 3347 | 0 | 121119 | ADSPATPADANAFGF                      | 2.72 | 0.01 | 0.90 | 0.68 | 0.22 | 0.28 |
| 3348 | 0 | 121119 | ADSPATPADANAFGF                      | 2.72 | 0.01 | 0.90 | 0.68 | 0.22 | 0.28 |
| 3349 | 0 | 774    | ADSVGGKD                             | 2.13 | 0.01 | 4.63 | 0.68 | 0.22 | 0.28 |
| 3350 | 0 | 774    | ADSVGGKD                             | 2.13 | 0.01 | 4.63 | 0.68 | 0.22 | 0.85 |
| 3351 | 0 | 247969 | ADTAALAALLEVLQH                      | 2.71 | 0.01 | 1.61 | 0.44 | 0.85 | 1.28 |
| 3352 | 0 | 777    | ADTDGPPAQF                           | 2.33 | 0.01 | 3.67 | 0.68 | 0.22 | 0.28 |
| 3353 | 0 | 247973 | ADTDSAKGKATGSSA                      | 2.74 | 0.01 | 1.61 | 0.44 | 0.85 | 1.28 |
| 3354 | 0 | 247974 | ADTDSAKGKATGSSA                      | 2.74 | 0.01 | 1.61 | 0.44 | 0.85 | 1.28 |
| 3355 | 0 | 158670 | ADTFNFKTFFHTIGF                      | 2.70 | 0.01 | 3.26 | 0.44 | 1.23 | 0.28 |
| 3356 | 0 | 158670 | ADTFNFKTFFHTIGF                      | 2.70 | 0.01 | 3.26 | 0.44 | 1.41 | 0.28 |
| 3357 | 0 | 778    | ADTIASGA                             | 2.15 | 0.01 | 2.96 | 0.68 | 0.22 | 0.28 |
| 3358 | 0 | 779    | ADTIASGS                             | 2.15 | 0.01 | 2.96 | 0.68 | 0.22 | 0.28 |
| 3359 | 0 | 780    | ADTIASGSQRSTNSASTS<br>TTNNGESQTTTPTA | 3.44 | 0.01 | 1.66 | 0.44 | 0.85 | 0.28 |
| 3360 | 0 | 780    | ADTIASGSQRSTNSASTS<br>TTNNGESQTTTPTA | 3.44 | 0.01 | 1.66 | 0.44 | 1.41 | 0.28 |
| 3361 | 0 | 780    | ADTIASGSQRSTNSASTS<br>TTNNGESQTTTPTA | 3.44 | 0.01 | 1.66 | 0.44 | 0.85 | 0.28 |
| 3362 | 0 | 96062  | ADTIQKGFYY                           | 2.26 | 0.01 | 2.39 | 0.44 | 0.85 | 0.28 |
| 3363 | 0 | 96062  | ADTIQKGFYY                           | 2.26 | 0.01 | 3.18 | 2.98 | 0.22 | 0.28 |
| 3364 | 0 | 116671 | ADTLEQQNKEANNRA                      | 2.69 | 0.01 | 2.36 | 0.44 | 1.23 | 1.28 |
| 3365 | 0 | 116671 | ADTLEQQNKEANNRA                      | 2.69 | 0.01 | 2.36 | 0.44 | 1.23 | 1.27 |
| 3366 | 0 | 116671 | ADTLEQQNKEANNRA                      | 2.69 | 0.01 | 2.36 | 0.44 | 1.23 | 1.28 |
| 3367 | 0 | 783    | ADTQGS                               | 1.88 | 0.01 | 2.40 | 0.44 | 0.85 | 0.28 |
| 3368 | 0 | 784    | ADTSRIGNCGPTIFLGVL<br>ED             | 2.91 | 0.01 | 2.86 | 2.02 | 1.59 | 0.28 |
| 3369 | 0 | 784    | ADTSRIGNCGPTIFLGVL<br>ED             | 2.91 | 0.01 | 2.86 | 2.02 | 0.22 | 0.28 |
| 3370 | 0 | 140144 | ADVEADDFKGLGLK                       | 2.64 | 0.01 | 2.90 | 1.20 | 0.22 | 0.28 |
| 3371 | 0 | 140144 | ADVEADDFKGLGLK                       | 2.64 | 0.01 | 2.90 | 1.20 | 0.22 | 1.34 |
| 3372 | 0 | 140144 | ADVEADDFKGLGLK                       | 2.64 | 0.01 | 2.90 | 1.20 | 0.22 | 1.34 |
| 3373 | 0 | 451463 | ADVGPATPPPPWCEP                      | 2.69 | 0.01 | 2.04 | 1.20 | 0.22 | 0.85 |
| 3374 | 0 | 111089 | ADVMTYIHSMNSTIL                      | 2.66 | 0.01 | 1.86 | 0.68 | 0.22 | 0.28 |
| 3375 | 0 | 105647 | ADVNTFVA                             | 2.15 | 0.01 | 3.05 | 1.20 | 0.22 | 0.28 |
| 3376 | 0 | 118733 | ADVPLVVEYKIADMG                      | 2.66 | 0.01 | 0.78 | 1.12 | 0.22 | 1.48 |
| 3377 | 0 | 193420 | ADVTIADPT                            | 2.26 | 0.01 | 2.51 | 0.44 | 2.39 | 0.28 |
| 3378 | 0 | 193420 | ADVTIADPT                            | 2.26 | 0.01 | 2.51 | 0.44 | 2.39 | 1.27 |
| 3379 | 0 | 793    | ADVTITVNGKVVAKPC                     | 2.75 | 0.01 | 2.24 | 1.20 | 0.22 | 1.27 |

|      |   |        |                                    |      |      |      |      |      |      |
|------|---|--------|------------------------------------|------|------|------|------|------|------|
| 3380 | 0 | 793    | ADVTITVNGKVVAKPC                   | 2.75 | 0.01 | 2.24 | 1.20 | 0.22 | 0.28 |
| 3381 | 0 | 97171  | ADVVISPN                           | 2.22 | 0.01 | 3.13 | 1.12 | 0.22 | 0.28 |
| 3382 | 0 | 796    | ADWADWLDYP                         | 2.36 | 0.01 | 0.90 | 0.68 | 0.22 | 1.39 |
| 3383 | 0 | 142505 | ADWADWLDYPG                        | 2.43 | 0.01 | 0.90 | 0.68 | 0.22 | 1.27 |
| 3384 | 0 | 142505 | ADWADWLDYPG                        | 2.43 | 0.01 | 0.90 | 0.68 | 0.22 | 1.39 |
| 3385 | 0 | 170213 | ADYDNLVLDYEQLR                     | 2.68 | 0.01 | 0.78 | 0.44 | 1.41 | 0.28 |
| 3386 | 0 | 800    | ADYHRVMY                           | 2.12 | 0.01 | 2.21 | 1.12 | 0.22 | 0.28 |
| 3387 | 0 | 800    | ADYHRVMY                           | 2.12 | 0.01 | 2.21 | 0.44 | 0.85 | 0.28 |
| 3388 | 0 | 801    | ADYHRVMYAS                         | 2.32 | 0.01 | 2.21 | 1.12 | 0.22 | 0.28 |
| 3389 | 0 | 801    | ADYHRVMYAS                         | 2.32 | 0.01 | 2.21 | 1.12 | 0.22 | 0.28 |
| 3390 | 0 | 97854  | ADYQAKLTAY                         | 2.34 | 0.01 | 3.18 | 2.98 | 0.22 | 0.28 |
| 3391 | 0 | 137797 | ADYWAGELGQSR                       | 2.46 | 0.01 | 2.21 | 0.44 | 0.85 | 0.28 |
| 3392 | 0 | 137797 | ADYWAGELGQSR                       | 2.46 | 0.01 | 2.21 | 1.20 | 0.22 | 0.28 |
| 3393 | 0 | 149245 | AEAAATEAPAAEAAATE<br>APAAEAPAAEAAK | 3.41 | 0.01 | 2.90 | 0.44 | 1.41 | 1.27 |
| 3394 | 0 | 809    | AEAAGRRLAR                         | 2.38 | 0.01 | 3.18 | 0.44 | 0.85 | 0.28 |
| 3395 | 0 | 809    | AEAAGRRLAR                         | 2.38 | 0.01 | 3.18 | 0.44 | 1.41 | 0.28 |
| 3396 | 0 | 819    | AEAEGGTW                           | 2.16 | 0.01 | 2.04 | 0.44 | 0.85 | 0.28 |
| 3397 | 0 | 820    | AEAELMENVGSLDRLV                   | 2.80 | 0.01 | 3.59 | 2.02 | 0.22 | 0.28 |
| 3398 | 0 | 248177 | AEAELQKAAEATKAA                    | 2.74 | 0.01 | 1.61 | 0.44 | 0.85 | 1.28 |
| 3399 | 0 | 248178 | AEAELQKAAEATKAV                    | 2.74 | 0.01 | 1.61 | 0.44 | 0.85 | 1.28 |
| 3400 | 0 | 248179 | AEAELQKAAEATKVA                    | 2.74 | 0.01 | 1.61 | 0.44 | 0.85 | 1.28 |
| 3401 | 0 | 248180 | AEAELQRAAAATKAV                    | 2.72 | 0.01 | 1.61 | 0.44 | 0.85 | 1.28 |
| 3402 | 0 | 248182 | AEAELQRAAEATKAV                    | 2.73 | 0.01 | 1.61 | 0.44 | 0.85 | 1.28 |
| 3403 | 0 | 248183 | AEAELQRAAEATKDV                    | 2.72 | 0.01 | 1.61 | 0.44 | 0.85 | 1.28 |
| 3404 | 0 | 195005 | AEAELQRAAEATKV                     | 2.67 | 0.01 | 2.30 | 0.44 | 0.85 | 0.28 |
| 3405 | 0 | 248184 | AEAELQRAAEATKVA                    | 2.73 | 0.01 | 1.61 | 0.44 | 0.85 | 1.28 |
| 3406 | 0 | 248186 | AEAELRKAAEATKAA                    | 2.74 | 0.01 | 1.61 | 0.44 | 0.85 | 1.28 |
| 3407 | 0 | 248187 | AEAELRKAAEATKVA                    | 2.74 | 0.01 | 1.61 | 0.44 | 0.85 | 1.28 |
| 3408 | 0 | 243862 | AEAELRDFI                          | 2.24 | 0.01 | 4.08 | 0.68 | 0.22 | 0.28 |
| 3409 | 0 | 243862 | AEAELRDFI                          | 2.24 | 0.01 | 4.08 | 0.68 | 0.22 | 1.48 |
| 3410 | 0 | 243862 | AEAELRDFI                          | 2.24 | 0.01 | 4.08 | 0.68 | 0.22 | 1.48 |
| 3411 | 0 | 243862 | AEAELRDFI                          | 2.24 | 0.01 | 4.08 | 0.68 | 0.22 | 0.85 |
| 3412 | 0 | 243862 | AEAELRDFI                          | 2.24 | 0.01 | 4.08 | 0.68 | 0.22 | 0.85 |
| 3413 | 0 | 243862 | AEAELRDFI                          | 2.24 | 0.01 | 4.08 | 2.49 | 0.22 | 0.28 |
| 3414 | 0 | 243862 | AEAELRDFI                          | 2.24 | 0.01 | 4.08 | 0.68 | 0.22 | 0.28 |
| 3415 | 0 | 423827 | AEAFRDDVRLRQIK                     | 2.61 | 0.01 | 2.89 | 0.68 | 0.22 | 0.85 |
| 3416 | 0 | 423827 | AEAFRDDVRLRQIK                     | 2.61 | 0.01 | 2.89 | 0.68 | 0.22 | 1.48 |
| 3417 | 0 | 423827 | AEAFRDDVRLRQIK                     | 2.61 | 0.01 | 2.89 | 0.68 | 0.22 | 0.28 |
| 3418 | 0 | 423827 | AEAFRDDVRLRQIK                     | 2.61 | 0.01 | 2.89 | 0.68 | 0.22 | 1.48 |
| 3419 | 0 | 423827 | AEAFRDDVRLRQIK                     | 2.61 | 0.01 | 2.89 | 0.68 | 0.22 | 1.48 |
| 3420 | 0 | 423827 | AEAFRDDVRLRQIK                     | 2.61 | 0.01 | 2.89 | 0.68 | 0.22 | 1.48 |
| 3421 | 0 | 423827 | AEAFRDDVRLRQIK                     | 2.61 | 0.01 | 2.89 | 0.68 | 0.22 | 1.48 |
| 3422 | 0 | 423827 | AEAFRDDVRLRQIK                     | 2.61 | 0.01 | 2.89 | 0.68 | 0.22 | 1.48 |

|      |   |        |                                |      |      |      |      |      |      |
|------|---|--------|--------------------------------|------|------|------|------|------|------|
| 3423 | 0 | 423827 | AEAFRDDVRLRQIK                 | 2.61 | 0.01 | 2.89 | 0.68 | 0.22 | 1.48 |
| 3424 | 0 | 423827 | AEAFRDDVRLRQIK                 | 2.61 | 0.01 | 2.89 | 0.68 | 0.22 | 1.48 |
| 3425 | 0 | 423827 | AEAFRDDVRLRQIK                 | 2.61 | 0.01 | 2.89 | 0.68 | 0.22 | 1.48 |
| 3426 | 0 | 423827 | AEAFRDDVRLRQIK                 | 2.61 | 0.01 | 2.89 | 0.68 | 0.22 | 1.48 |
| 3427 | 0 | 423827 | AEAFRDDVRLRQIK                 | 2.61 | 0.01 | 2.89 | 0.68 | 0.22 | 1.48 |
| 3428 | 0 | 423827 | AEAFRDDVRLRQIK                 | 2.61 | 0.01 | 2.89 | 0.68 | 0.22 | 1.48 |
| 3429 | 0 | 423827 | AEAFRDDVRLRQIK                 | 2.61 | 0.01 | 2.89 | 0.68 | 0.22 | 1.48 |
| 3430 | 0 | 423827 | AEAFRDDVRLRQIK                 | 2.61 | 0.01 | 2.89 | 0.68 | 0.22 | 1.48 |
| 3431 | 0 | 423827 | AEAFRDDVRLRQIK                 | 2.61 | 0.01 | 2.89 | 0.68 | 0.22 | 1.48 |
| 3432 | 0 | 423827 | AEAFRDDVRLRQIK                 | 2.61 | 0.01 | 2.89 | 0.68 | 0.22 | 1.48 |
| 3433 | 0 | 423827 | AEAFRDDVRLRQIK                 | 2.61 | 0.01 | 2.89 | 0.68 | 0.22 | 1.48 |
| 3434 | 0 | 423827 | AEAFRDDVRLRQIK                 | 2.61 | 0.01 | 2.89 | 0.68 | 0.22 | 1.48 |
| 3435 | 0 | 423827 | AEAFRDDVRLRQIK                 | 2.61 | 0.01 | 2.89 | 0.68 | 0.22 | 1.48 |
| 3436 | 0 | 423827 | AEAFRDDVRLRQIK                 | 2.61 | 0.01 | 2.89 | 0.68 | 0.22 | 1.48 |
| 3437 | 0 | 423827 | AEAFRDDVRLRQIK                 | 2.61 | 0.01 | 2.89 | 0.68 | 0.22 | 1.48 |
| 3438 | 0 | 423827 | AEAFRDDVRLRQIK                 | 2.61 | 0.01 | 2.89 | 0.68 | 0.22 | 1.48 |
| 3439 | 0 | 423827 | AEAFRDDVRLRQIK                 | 2.61 | 0.01 | 2.89 | 0.68 | 0.22 | 1.48 |
| 3440 | 0 | 423827 | AEAFRDDVRLRQIK                 | 2.61 | 0.01 | 2.89 | 0.68 | 0.22 | 1.48 |
| 3441 | 0 | 423827 | AEAFRDDVRLRQIK                 | 2.61 | 0.01 | 2.89 | 0.68 | 0.22 | 1.48 |
| 3442 | 0 | 240963 | AEALF                          | 1.77 | 0.01 | 3.35 | 1.20 | 0.22 | 0.85 |
| 3443 | 0 | 837    | AEALSTEPKGAAVDSSK<br>AAL       | 2.96 | 0.01 | 3.00 | 0.44 | 1.23 | 0.28 |
| 3444 | 0 | 178474 | AEANQKLDDGARAALLT<br>QAHDLA    | 3.10 | 0.01 | 3.34 | 0.44 | 1.59 | 0.28 |
| 3445 | 0 | 178474 | AEANQKLDDGARAALLT<br>QAHDLA    | 3.10 | 0.01 | 3.34 | 0.44 | 0.85 | 0.28 |
| 3446 | 0 | 842    | AEARAEFAERSVQKL                | 2.71 | 0.01 | 2.36 | 0.44 | 1.23 | 1.28 |
| 3447 | 0 | 842    | AEARAEFAERSVQKL                | 2.71 | 0.01 | 2.36 | 0.44 | 1.23 | 1.27 |
| 3448 | 0 | 843    | AEATKVAEAEKQKA                 | 2.68 | 0.01 | 2.30 | 0.44 | 0.85 | 0.28 |
| 3449 | 0 | 843    | AEATKVAEAEKQKA                 | 2.68 | 0.01 | 2.30 | 1.20 | 0.22 | 0.85 |
| 3450 | 0 | 843    | AEATKVAEAEKQKA                 | 2.68 | 0.01 | 2.30 | 0.44 | 0.85 | 0.28 |
| 3451 | 0 | 248320 | AEAVEAEKRKAAEAT                | 2.74 | 0.01 | 1.61 | 0.44 | 0.85 | 1.28 |
| 3452 | 0 | 248321 | AEAVETEKRKAAEAT                | 2.74 | 0.01 | 1.61 | 0.44 | 0.85 | 1.28 |
| 3453 | 0 | 137606 | AECDWKGKGRWRLWP<br>GASGKTEACGP | 3.22 | 0.01 | 0.90 | 0.68 | 0.22 | 0.28 |
| 3454 | 0 | 137606 | AECDWKGKGRWRLWP<br>GASGKTEACGP | 3.22 | 0.01 | 0.90 | 0.68 | 0.22 | 1.34 |
| 3455 | 0 | 137606 | AECDWKGKGRWRLWP<br>GASGKTEACGP | 3.22 | 0.01 | 0.90 | 0.68 | 0.22 | 2.02 |
| 3456 | 0 | 137606 | AECDWKGKGRWRLWP<br>GASGKTEACGP | 3.22 | 0.01 | 0.90 | 3.59 | 1.93 | 0.28 |
| 3457 | 0 | 137606 | AECDWKGKGRWRLWP<br>GASGKTEACGP | 3.22 | 0.01 | 0.90 | 3.59 | 1.93 | 0.28 |
| 3458 | 0 | 137606 | AECDWKGKGRWRLWP<br>GASGKTEACGP | 3.22 | 0.01 | 0.90 | 3.59 | 1.93 | 1.75 |
| 3459 | 0 | 137606 | AECDWKGKGRWRLWP<br>GASGKTEACGP | 3.22 | 0.01 | 0.90 | 3.59 | 0.22 | 0.28 |

|      |   |        |                                  |      |      |      |      |      |      |
|------|---|--------|----------------------------------|------|------|------|------|------|------|
| 3460 | 0 | 137606 | AECDWGKGGRWRLWP<br>GASGKTEACGP   | 3.22 | 0.01 | 0.90 | 3.59 | 0.22 | 0.28 |
| 3461 | 0 | 137606 | AECDWGKGGRWRLWP<br>GASGKTEACGP   | 3.22 | 0.01 | 0.90 | 3.59 | 0.22 | 0.28 |
| 3462 | 0 | 137606 | AECDWGKGGRWRLWP<br>GASGKTEACGP   | 3.22 | 0.01 | 0.90 | 3.59 | 0.22 | 0.28 |
| 3463 | 0 | 137606 | AECDWGKGGRWRLWP<br>GASGKTEACGP   | 3.22 | 0.01 | 0.90 | 3.59 | 2.25 | 1.75 |
| 3464 | 0 | 137606 | AECDWGKGGRWRLWP<br>GASGKTEACGP   | 3.22 | 0.01 | 0.90 | 1.15 | 0.22 | 1.75 |
| 3465 | 0 | 137606 | AECDWGKGGRWRLWP<br>GASGKTEACGP   | 3.22 | 0.01 | 0.90 | 1.15 | 0.22 | 0.28 |
| 3466 | 0 | 137606 | AECDWGKGGRWRLWP<br>GASGKTEACGP   | 3.22 | 0.01 | 0.90 | 1.15 | 0.22 | 1.48 |
| 3467 | 0 | 137606 | AECDWGKGGRWRLWP<br>GASGKTEACGP   | 3.22 | 0.01 | 0.90 | 1.15 | 0.22 | 1.34 |
| 3468 | 0 | 145703 | AECPNTNRAWNSLEVE<br>DYGFGVFTTNIW | 3.24 | 0.01 | 4.03 | 0.68 | 0.22 | 0.85 |
| 3469 | 0 | 145703 | AECPNTNRAWNSLEVE<br>DYGFGVFTTNIW | 3.24 | 0.01 | 4.03 | 0.68 | 0.22 | 0.85 |
| 3470 | 0 | 145703 | AECPNTNRAWNSLEVE<br>DYGFGVFTTNIW | 3.24 | 0.01 | 4.03 | 0.68 | 0.22 | 1.48 |
| 3471 | 0 | 145703 | AECPNTNRAWNSLEVE<br>DYGFGVFTTNIW | 3.24 | 0.01 | 4.03 | 0.68 | 0.22 | 1.48 |
| 3472 | 0 | 142382 | AEDAAEEAKEAAKK                   | 2.67 | 0.01 | 2.59 | 0.44 | 0.85 | 0.85 |
| 3473 | 0 | 848    | AEDAAEISVPAEIL                   | 2.65 | 0.01 | 2.41 | 0.44 | 0.85 | 0.28 |
| 3474 | 0 | 848    | AEDAAEISVPAEIL                   | 2.65 | 0.01 | 2.41 | 0.44 | 1.41 | 0.28 |
| 3475 | 0 | 848    | AEDAAEISVPAEIL                   | 2.65 | 0.01 | 2.41 | 0.44 | 0.85 | 0.28 |
| 3476 | 0 | 848    | AEDAAEISVPAEIL                   | 2.65 | 0.01 | 2.41 | 0.44 | 0.85 | 0.28 |
| 3477 | 0 | 849    | AEDEDNQGGQ                       | 2.35 | 0.01 | 2.60 | 0.44 | 1.23 | 0.85 |
| 3478 | 0 | 96063  | AEDKEDDAED                       | 2.38 | 0.01 | 0.90 | 0.44 | 1.93 | 0.85 |
| 3479 | 0 | 853    | AEDKVKQLREAKKQVEK<br>ALEQLEDKVQL | 3.34 | 0.01 | 0.90 | 2.42 | 0.22 | 0.28 |
| 3480 | 0 | 853    | AEDKVKQLREAKKQVEK<br>ALEQLEDKVQL | 3.34 | 0.01 | 0.90 | 0.68 | 0.22 | 0.28 |
| 3481 | 0 | 861    | AEDRPLCGSDNKTYGNK<br>CNF         | 2.91 | 0.01 | 2.25 | 0.44 | 1.23 | 0.28 |
| 3482 | 0 | 248418 | AEDVGKKKDEEQEPN                  | 2.68 | 0.01 | 1.61 | 0.44 | 0.85 | 1.28 |
| 3483 | 0 | 105066 | AEDVGSNK                         | 2.10 | 0.01 | 0.78 | 1.20 | 0.22 | 0.28 |
| 3484 | 0 | 99874  | AEDVGSNKGA                       | 2.32 | 0.01 | 0.78 | 1.12 | 0.22 | 0.85 |
| 3485 | 0 | 99084  | AEDVGSNKGAIIGL                   | 2.61 | 0.01 | 0.78 | 2.49 | 0.22 | 1.27 |
| 3486 | 0 | 868    | AEEAFDLWNECAKACV                 | 2.75 | 0.01 | 2.58 | 0.44 | 1.59 | 0.85 |
| 3487 | 0 | 868    | AEEAFDLWNECAKACV                 | 2.75 | 0.01 | 2.58 | 0.44 | 1.59 | 0.85 |
| 3488 | 0 | 868    | AEEAFDLWNECAKACV                 | 2.75 | 0.01 | 2.58 | 0.44 | 1.74 | 1.27 |

|      |   |        |                                     |      |      |      |      |      |      |
|------|---|--------|-------------------------------------|------|------|------|------|------|------|
| 3489 | 0 | 868    | AEEAFDLWNECAKACV                    | 2.75 | 0.01 | 2.58 | 0.44 | 1.74 | 0.28 |
| 3490 | 0 | 868    | AEEAFDLWNECAKACV                    | 2.75 | 0.01 | 2.58 | 0.44 | 1.59 | 1.34 |
| 3491 | 0 | 868    | AEEAFDLWNECAKACV                    | 2.75 | 0.01 | 2.58 | 0.44 | 1.59 | 1.75 |
| 3492 | 0 | 122713 | AEEAFDLWNECAKACVL<br>DLKDGVRSSRMSV  | 3.34 | 0.01 | 2.58 | 2.87 | 0.22 | 0.28 |
| 3493 | 0 | 122713 | AEEAFDLWNECAKACVL<br>DLKDGVRSSRMSV  | 3.34 | 0.01 | 2.58 | 2.87 | 0.22 | 0.28 |
| 3494 | 0 | 122713 | AEEAFDLWNECAKACVL<br>DLKDGVRSSRMSV  | 3.34 | 0.01 | 2.58 | 2.87 | 0.22 | 0.28 |
| 3495 | 0 | 248459 | AEEDDEEDKDDDVKD                     | 2.74 | 0.01 | 1.61 | 0.44 | 0.85 | 1.28 |
| 3496 | 0 | 873    | AEEDKSVTEEIAEEDK                    | 2.77 | 0.01 | 0.90 | 2.42 | 0.22 | 1.27 |
| 3497 | 0 | 874    | AEEDRKRREEADVRNQ<br>AE              | 2.90 | 0.01 | 2.59 | 2.69 | 0.22 | 0.28 |
| 3498 | 0 | 874    | AEEDRKRREEADVRNQ<br>AE              | 2.90 | 0.01 | 2.59 | 1.12 | 0.22 | 0.28 |
| 3499 | 0 | 874    | AEEDRKRREEADVRNQ<br>AE              | 2.90 | 0.01 | 2.59 | 0.68 | 0.22 | 0.28 |
| 3500 | 0 | 874    | AEEDRKRREEADVRNQ<br>AE              | 2.90 | 0.01 | 2.59 | 0.68 | 0.22 | 0.28 |
| 3501 | 0 | 874    | AEEDRKRREEADVRNQ<br>AE              | 2.90 | 0.01 | 2.59 | 0.68 | 0.22 | 0.28 |
| 3502 | 0 | 128211 | AEEDVWEILRQAPPSEY<br>ERIAFYQVTDLRGM | 3.39 | 0.01 | 0.78 | 2.04 | 0.22 | 0.28 |
| 3503 | 0 | 876    | AEEDDDDMGFGLFD                      | 2.70 | 0.01 | 2.30 | 0.44 | 0.85 | 0.28 |
| 3504 | 0 | 876    | AEEDDDDMGFGLFD                      | 2.70 | 0.01 | 2.30 | 0.44 | 1.13 | 0.28 |
| 3505 | 0 | 876    | AEEDDDDMGFGLFD                      | 2.70 | 0.01 | 1.61 | 0.44 | 0.85 | 1.28 |
| 3506 | 0 | 248477 | AEEDDEDEDEEEEEE                     | 2.72 | 0.01 | 1.61 | 0.44 | 0.85 | 1.28 |
| 3507 | 0 | 226462 | AEEREAEALTREALPPLQ                  | 2.90 | 0.01 | 3.26 | 3.16 | 0.22 | 0.28 |
| 3508 | 0 | 879    | AEEGSLDEGAVEEDPDK<br>EGD            | 2.99 | 0.01 | 2.78 | 2.49 | 0.85 | 0.28 |
| 3509 | 0 | 879    | AEEGSLDEGAVEEDPDK<br>EGD            | 2.99 | 0.01 | 2.78 | 4.03 | 0.22 | 0.28 |
| 3510 | 0 | 113259 | AEIEIQTIT                           | 2.35 | 0.01 | 1.86 | 1.12 | 0.22 | 0.28 |
| 3511 | 0 | 128212 | AEEKKVEAKKEESEE                     | 2.74 | 0.01 | 0.78 | 0.44 | 1.13 | 0.85 |
| 3512 | 0 | 881    | AEEKLKKKSSFYQS                      | 2.62 | 0.01 | 2.56 | 0.44 | 0.85 | 0.28 |
| 3513 | 0 | 883    | AEELTPGRFRTIVC                      | 2.58 | 0.01 | 2.56 | 2.69 | 0.22 | 0.28 |
| 3514 | 0 | 885    | AEENVEENVEEVEENVE<br>ENV            | 3.02 | 0.01 | 1.66 | 0.44 | 0.85 | 0.28 |
| 3515 | 0 | 886    | AEENVEH                             | 2.04 | 0.01 | 1.66 | 0.44 | 0.85 | 0.28 |
| 3516 | 0 | 133495 | AEELHRP                             | 2.13 | 0.01 | 0.78 | 0.68 | 0.22 | 2.92 |
| 3517 | 0 | 122073 | AEEQARHVKNGLE                       | 2.54 | 0.01 | 2.72 | 1.20 | 0.22 | 0.28 |
| 3518 | 0 | 122073 | AEEQARHVKNGLE                       | 2.54 | 0.01 | 2.72 | 1.20 | 0.22 | 2.02 |

|      |   |        |                                             |      |      |      |      |      |      |
|------|---|--------|---------------------------------------------|------|------|------|------|------|------|
| 3519 | 0 | 122073 | AEEQARHVKNGL                                | 2.54 | 0.01 | 2.72 | 1.20 | 0.22 | 2.02 |
| 3520 | 0 | 120393 | AEERLLKRLFSGYNK                             | 2.67 | 0.01 | 2.19 | 1.12 | 0.22 | 0.28 |
| 3521 | 0 | 120393 | AEERLLKRLFSGYNK                             | 2.67 | 0.01 | 2.19 | 1.12 | 0.22 | 0.28 |
| 3522 | 0 | 120393 | AEERLLKRLFSGYNK                             | 2.67 | 0.01 | 2.19 | 1.12 | 0.22 | 0.28 |
| 3523 | 0 | 510841 | AEETIADDANDLAPQ                             | 2.69 | 0.01 | 2.24 | 0.44 | 1.41 | 1.28 |
| 3524 | 0 | 97856  | AEETKTEE                                    | 2.14 | 0.01 | 2.60 | 1.12 | 0.22 | 0.85 |
| 3525 | 0 | 893    | AEVEEERLK                                   | 2.34 | 0.01 | 2.60 | 0.44 | 1.23 | 0.85 |
| 3526 | 0 | 895    | AEVKATPAGELQVIDK<br>VDA                     | 2.96 | 0.01 | 3.00 | 0.44 | 1.23 | 0.28 |
| 3527 | 0 | 895    | AEVKATPAGELQVIDK<br>VDA                     | 2.96 | 0.01 | 3.00 | 1.15 | 0.22 | 0.28 |
| 3528 | 0 | 895    | AEVKATPAGELQVIDK<br>VDA                     | 2.96 | 0.01 | 3.00 | 3.27 | 0.22 | 0.28 |
| 3529 | 0 | 895    | AEVKATPAGELQVIDK<br>VDA                     | 2.96 | 0.01 | 3.00 | 3.27 | 0.22 | 0.28 |
| 3530 | 0 | 895    | AEVKATPAGELQVIDK<br>VDA                     | 2.96 | 0.01 | 3.00 | 0.68 | 0.22 | 0.28 |
| 3531 | 0 | 225941 | AAFKVAATAANAAPA<br>NDK<br>AEVKVIPAGELQVIEKV | 3.57 | 0.01 | 2.53 | 0.44 | 1.23 | 2.35 |
| 3532 | 0 | 225941 | AAFKVAATAANAAPA<br>NDK<br>AEVKVIPAGELQVIEKV | 3.57 | 0.01 | 2.53 | 1.20 | 0.22 | 0.28 |
| 3533 | 0 | 225941 | AAFKVAATAANAAPA<br>NDK<br>AEVKVIPAGELQVIEKV | 3.57 | 0.01 | 2.53 | 1.20 | 0.22 | 0.28 |
| 3534 | 0 | 225941 | AAFKVAATAANAAPA<br>NDK<br>AEVKVIPAGELQVIEKV | 3.57 | 0.01 | 2.53 | 1.20 | 0.22 | 0.28 |
| 3535 | 0 | 225941 | AAFKVAATAANAAPA<br>NDK<br>AEVKVIPAGELQVIEKV | 3.57 | 0.01 | 2.53 | 1.20 | 0.22 | 0.28 |
| 3536 | 0 | 225941 | AAFKVAATAANAAPA<br>NDK<br>AEVKVIPAGELQVIEKV | 3.57 | 0.01 | 2.53 | 1.20 | 0.22 | 0.28 |
| 3537 | 0 | 225941 | AAFKVAATAANAAPA<br>NDK<br>AEVKVIPAGELQVIEKV | 3.57 | 0.01 | 2.53 | 1.20 | 0.22 | 0.28 |
| 3538 | 0 | 225941 | AAFKVAATAANAAPA<br>NDK<br>AEVKVIPAGELQVIEKV | 3.57 | 0.01 | 2.53 | 1.20 | 0.22 | 0.28 |
| 3539 | 0 | 225941 | AAFKVAATAANAAPA<br>NDK<br>AEVKVIPAGELQVIEKV | 3.57 | 0.01 | 2.53 | 1.20 | 0.22 | 0.28 |
| 3540 | 0 | 225941 | AAFKVAATAANAAPA<br>NDK                      | 3.57 | 0.01 | 2.53 | 1.20 | 0.22 | 0.28 |

|      |   |        |                         |      |      |      |      |      |      |
|------|---|--------|-------------------------|------|------|------|------|------|------|
|      |   |        | AEEVKVIPAGELQVIEKV      |      |      |      |      |      |      |
| 3541 | 0 | 225941 | DAAFKVAATAANAAPA<br>NDK | 3.57 | 0.01 | 2.53 | 1.20 | 0.22 | 0.28 |
|      |   |        | AEEVKVIPAGELQVIEKV      |      |      |      |      |      |      |
| 3542 | 0 | 225941 | DAAFKVAATAANAAPA<br>NDK | 3.57 | 0.01 | 2.53 | 1.20 | 0.22 | 1.66 |
|      |   |        | AEEVKVIPAGELQVIEKV      |      |      |      |      |      |      |
| 3543 | 0 | 225941 | DAAFKVAATAANAAPA<br>NDK | 3.57 | 0.01 | 2.53 | 1.20 | 0.22 | 2.35 |
|      |   |        | AEEVKVIPAGELQVIEKV      |      |      |      |      |      |      |
| 3544 | 0 | 225941 | DAAFKVAATAANAAPA<br>NDK | 3.57 | 0.01 | 2.53 | 0.44 | 1.23 | 1.66 |
|      |   |        | AEEVKVIPAGELQVIEKV      |      |      |      |      |      |      |
| 3545 | 0 | 225941 | DAAFKVAATAANAAPA<br>NDK | 3.57 | 0.01 | 2.53 | 0.44 | 1.23 | 1.66 |
|      |   |        | AEEVKVIPAGELQVIEKV      |      |      |      |      |      |      |
| 3546 | 0 | 225941 | DAAFKVAATAANAAPA<br>NDK | 3.57 | 0.01 | 2.53 | 0.44 | 1.23 | 1.66 |
|      |   |        | AEEVKVIPAGELQVIEKV      |      |      |      |      |      |      |
| 3547 | 0 | 225941 | DAAFKVAATAANAAPA<br>NDK | 3.57 | 0.01 | 2.53 | 0.44 | 1.23 | 0.28 |
|      |   |        | AEEVKVIPAGELQVIEKV      |      |      |      |      |      |      |
| 3548 | 0 | 225941 | DAAFKVAATAANAAPA<br>NDK | 3.57 | 0.01 | 2.53 | 0.44 | 1.23 | 0.28 |
|      |   |        | AEEVKVIPAGELQVIEKV      |      |      |      |      |      |      |
| 3549 | 0 | 225941 | DAAFKVAATAANAAPA<br>NDK | 3.57 | 0.01 | 2.53 | 0.44 | 1.23 | 0.28 |
|      |   |        | AEEVKVIPAGELQVIEKV      |      |      |      |      |      |      |
| 3550 | 0 | 225941 | DAAFKVAATAANAAPA<br>NDK | 3.57 | 0.01 | 2.53 | 0.44 | 1.23 | 0.28 |
|      |   |        | AEEVKVIPAGELQVIEKV      |      |      |      |      |      |      |
| 3551 | 0 | 225941 | DAAFKVAATAANAAPA<br>NDK | 3.57 | 0.01 | 2.53 | 0.44 | 1.23 | 0.28 |
|      |   |        | AEEVKVIPAGELQVIEKV      |      |      |      |      |      |      |
| 3552 | 0 | 225941 | DAAFKVAATAANAAPA<br>NDK | 3.57 | 0.01 | 2.53 | 0.44 | 1.23 | 0.28 |
|      |   |        | AEEVKVIPAGELQVIEKV      |      |      |      |      |      |      |
| 3553 | 0 | 225941 | DAAFKVAATAANAAPA<br>NDK | 3.57 | 0.01 | 2.53 | 0.44 | 1.23 | 0.28 |
|      |   |        | AEEVKVIPAGELQVIEKV      |      |      |      |      |      |      |
| 3554 | 0 | 225941 | DAAFKVAATAANAAPA<br>NDK | 3.57 | 0.01 | 2.53 | 0.44 | 1.23 | 0.28 |
|      |   |        | AEEVKVIPAGELQVIEKV      |      |      |      |      |      |      |
| 3555 | 0 | 225941 | DAAFKVAATAANAAPA<br>NDK | 3.57 | 0.01 | 2.53 | 0.44 | 1.23 | 0.28 |
| 3556 | 0 | 105068 | AEFDLD                  | 1.90 | 0.01 | 3.97 | 1.20 | 0.22 | 0.28 |
| 3557 | 0 | 105069 | AEFDLDILAGTEAA          | 2.63 | 0.01 | 4.15 | 1.20 | 0.22 | 0.28 |

|      |   |        |                               |      |      |      |      |      |      |
|------|---|--------|-------------------------------|------|------|------|------|------|------|
| 3558 | 0 | 105070 | AEFDLDITAGTEAA                | 2.63 | 0.01 | 3.21 | 1.20 | 0.22 | 0.28 |
| 3559 | 0 | 119735 | AEFHRWSSYM                    | 2.28 | 0.01 | 0.78 | 1.15 | 0.22 | 0.28 |
| 3560 | 0 | 119735 | AEFHRWSSYM                    | 2.28 | 0.01 | 0.78 | 0.68 | 0.22 | 0.28 |
| 3561 | 0 | 510843 | AEFNEIRRVLLEENAGGE<br>QEERGQ  | 3.15 | 0.01 | 2.16 | 0.44 | 1.23 | 1.39 |
| 3562 | 0 | 136118 | AEFPLDIT                      | 2.10 | 0.01 | 3.85 | 0.68 | 0.22 | 0.28 |
| 3563 | 0 | 136118 | AEFPLDIT                      | 2.10 | 0.01 | 3.85 | 0.68 | 0.22 | 0.28 |
| 3564 | 0 | 136118 | AEFPLDIT                      | 2.10 | 0.01 | 3.85 | 0.68 | 0.22 | 0.28 |
| 3565 | 0 | 136118 | AEFPLDIT                      | 2.10 | 0.01 | 3.85 | 0.68 | 0.22 | 0.28 |
| 3566 | 0 | 136118 | AEFPLDIT                      | 2.10 | 0.01 | 3.85 | 0.68 | 0.22 | 0.28 |
| 3567 | 0 | 136118 | AEFPLDIT                      | 2.10 | 0.01 | 3.85 | 0.68 | 0.22 | 0.28 |
| 3568 | 0 | 136118 | AEFPLDIT                      | 2.10 | 0.01 | 3.85 | 0.68 | 0.22 | 0.28 |
| 3569 | 0 | 136118 | AEFPLDIT                      | 2.10 | 0.01 | 3.85 | 0.68 | 0.22 | 1.75 |
| 3570 | 0 | 79505  | AEFPLDITAGTEAATGTK<br>DASIDYH | 3.17 | 0.01 | 3.21 | 2.52 | 0.22 | 0.28 |
| 3571 | 0 | 79505  | AEFPLDITAGTEAATGTK<br>DASIDYH | 3.17 | 0.01 | 3.21 | 2.16 | 0.22 | 0.28 |
| 3572 | 0 | 423641 | AEFPSRGKSS                    | 2.29 | 3.50 | 0.78 | 0.44 | 1.13 | 1.27 |
| 3573 | 0 | 105650 | AEFRH                         | 1.74 | 0.01 | 0.78 | 1.15 | 0.22 | 0.28 |
| 3574 | 0 | 105650 | AEFRH                         | 1.74 | 0.01 | 0.78 | 3.00 | 0.22 | 0.28 |
| 3575 | 0 | 105650 | AEFRH                         | 1.74 | 0.01 | 0.78 | 3.00 | 1.93 | 1.75 |
| 3576 | 0 | 105650 | AEFRH                         | 1.74 | 0.01 | 0.78 | 0.68 | 0.22 | 0.28 |
| 3577 | 0 | 105650 | AEFRH                         | 1.74 | 0.01 | 0.78 | 1.81 | 0.22 | 0.28 |
| 3578 | 0 | 105650 | AEFRH                         | 1.74 | 0.01 | 0.78 | 1.81 | 0.22 | 1.27 |
| 3579 | 0 | 105650 | AEFRH                         | 1.74 | 0.01 | 0.78 | 2.61 | 0.22 | 0.28 |
| 3580 | 0 | 105650 | AEFRH                         | 1.74 | 0.01 | 0.78 | 2.61 | 0.22 | 1.27 |
| 3581 | 0 | 107062 | AEFRHD                        | 1.88 | 0.01 | 0.78 | 1.15 | 0.22 | 1.66 |
| 3582 | 0 | 105651 | AEFRHDS                       | 1.99 | 0.01 | 0.78 | 0.68 | 0.22 | 1.34 |
| 3583 | 0 | 105651 | AEFRHDS                       | 1.99 | 0.01 | 0.78 | 0.68 | 0.22 | 0.28 |
| 3584 | 0 | 105651 | AEFRHDS                       | 1.99 | 0.01 | 0.78 | 0.68 | 0.22 | 1.66 |
| 3585 | 0 | 105651 | AEFRHDS                       | 1.99 | 0.01 | 0.78 | 0.68 | 0.22 | 1.66 |
| 3586 | 0 | 105651 | AEFRHDS                       | 1.99 | 0.01 | 0.78 | 0.68 | 0.22 | 1.66 |
| 3587 | 0 | 105651 | AEFRHDS                       | 1.99 | 0.01 | 0.78 | 1.15 | 0.22 | 1.48 |
| 3588 | 0 | 105651 | AEFRHDS                       | 1.99 | 0.01 | 0.78 | 0.68 | 0.22 | 2.49 |
| 3589 | 0 | 105651 | AEFRHDS                       | 1.99 | 0.01 | 0.78 | 0.68 | 0.22 | 1.66 |
| 3590 | 0 | 105651 | AEFRHDS                       | 1.99 | 0.01 | 0.78 | 0.68 | 0.22 | 1.66 |
| 3591 | 0 | 105651 | AEFRHDS                       | 1.99 | 0.01 | 0.78 | 0.68 | 0.22 | 1.66 |
| 3592 | 0 | 105651 | AEFRHDS                       | 1.99 | 0.01 | 0.78 | 0.68 | 0.22 | 3.25 |
| 3593 | 0 | 118734 | AEFRHDSGY                     | 2.18 | 0.01 | 0.78 | 1.15 | 0.22 | 1.66 |
| 3594 | 0 | 118734 | AEFRHDSGY                     | 2.18 | 0.01 | 0.78 | 1.15 | 0.22 | 1.66 |
| 3595 | 0 | 118734 | AEFRHDSGY                     | 2.18 | 0.01 | 0.78 | 1.15 | 0.22 | 1.66 |
| 3596 | 0 | 118734 | AEFRHDSGY                     | 2.18 | 0.01 | 0.78 | 1.15 | 0.22 | 1.48 |
| 3597 | 0 | 118734 | AEFRHDSGY                     | 2.18 | 0.01 | 0.78 | 1.15 | 0.22 | 1.66 |
| 3598 | 0 | 99876  | AEFRHDSGYE                    | 2.29 | 0.01 | 0.78 | 0.44 | 1.93 | 0.28 |
| 3599 | 0 | 192202 | AEFRHDSGYEVHHQKL              | 2.68 | 0.01 | 0.78 | 1.15 | 0.22 | 0.85 |



|      |   |        |                             |      |      |      |      |      |      |
|------|---|--------|-----------------------------|------|------|------|------|------|------|
| 3600 | 0 | 192202 | AEFRHDSGYEVHHQKL            | 2.68 | 0.01 | 0.78 | 1.15 | 0.22 | 0.28 |
| 3601 | 0 | 192202 | AEFRHDSGYEVHHQKL            | 2.68 | 0.01 | 0.78 | 1.15 | 0.22 | 1.48 |
| 3602 | 0 | 192202 | AEFRHDSGYEVHHQKL            | 2.68 | 0.01 | 0.78 | 1.15 | 0.22 | 1.48 |
| 3603 | 0 | 181265 | AEFTFVVAKPNGELV             | 2.69 | 0.01 | 2.82 | 1.15 | 0.22 | 0.28 |
| 3604 | 0 | 450408 | AEFVQQKNFLVEEEQRQ           | 2.81 | 0.01 | 0.78 | 2.79 | 1.13 | 1.28 |
| 3605 | 0 | 450408 | AEFVQQKNFLVEEEQRQ           | 2.81 | 0.01 | 0.78 | 2.79 | 1.13 | 1.28 |
| 3606 | 0 | 450408 | AEFVQQKNFLVEEEQRQ           | 2.81 | 0.01 | 0.78 | 1.81 | 1.41 | 1.28 |
| 3607 | 0 | 138134 | AEFYLNPDQSGEFMFDF<br>DGDEIF | 3.08 | 0.01 | 0.78 | 0.68 | 0.22 | 0.85 |
| 3608 | 0 | 91093  | AEFYQEVLFKGFE               | 2.56 | 0.01 | 4.03 | 2.02 | 0.22 | 0.28 |
| 3609 | 0 | 914    | AEGCVGRVCDSRAMAV<br>M       | 2.83 | 0.01 | 0.90 | 0.68 | 0.22 | 0.28 |
| 3610 | 0 | 915    | AEGDDPAKA                   | 2.25 | 0.01 | 3.89 | 0.68 | 0.22 | 0.85 |
| 3611 | 0 | 915    | AEGDDPAKA                   | 2.25 | 0.01 | 3.89 | 0.68 | 0.22 | 1.27 |
| 3612 | 0 | 915    | AEGDDPAKA                   | 2.25 | 0.01 | 3.89 | 0.68 | 0.22 | 0.85 |
| 3613 | 0 | 175560 | AEGDDPAKAAFD                | 2.51 | 0.01 | 4.93 | 1.15 | 0.22 | 2.12 |
| 3614 | 0 | 916    | AEGDDPAKAAFDLQ              | 2.68 | 0.01 | 3.89 | 0.68 | 0.22 | 0.85 |
| 3615 | 0 | 248666 | AEGDKPPFPGQAAAG             | 2.69 | 0.01 | 1.61 | 0.44 | 0.85 | 1.28 |
| 3616 | 0 | 917    | AEGDTVIYSK                  | 2.26 | 0.01 | 2.04 | 0.68 | 0.22 | 0.28 |
| 3617 | 0 | 917    | AEGDTVIYSK                  | 2.26 | 0.01 | 2.04 | 0.68 | 0.22 | 0.28 |
| 3618 | 0 | 103013 | AEGDTVIYSKYGGTE             | 2.67 | 0.01 | 2.04 | 0.44 | 0.85 | 1.28 |
| 3619 | 0 | 918    | AEGEFATAPPSHYSWDP<br>AK     | 2.89 | 0.01 | 0.90 | 0.44 | 1.59 | 1.27 |
| 3620 | 0 | 918    | AEGEFATAPPSHYSWDP<br>AK     | 2.89 | 0.01 | 0.90 | 0.44 | 1.59 | 0.28 |
| 3621 | 0 | 919    | AEGEFATASPTHYTSELD<br>PAK   | 3.00 | 0.01 | 0.90 | 0.44 | 1.59 | 0.28 |
| 3622 | 0 | 919    | AEGEFATASPTHYTSELD<br>PAK   | 3.00 | 0.01 | 0.90 | 0.44 | 1.59 | 1.27 |
| 3623 | 0 | 920    | AEGEFCGFVWPFKCHRI<br>GDPACK | 3.04 | 0.01 | 0.90 | 0.68 | 0.22 | 0.28 |
| 3624 | 0 | 920    | AEGEFCGFVWPFKCHRI<br>GDPACK | 3.04 | 0.01 | 0.90 | 0.68 | 0.22 | 0.28 |
| 3625 | 0 | 920    | AEGEFCGFVWPFKCHRI<br>GDPACK | 3.04 | 0.01 | 0.90 | 0.68 | 0.22 | 0.28 |
| 3626 | 0 | 920    | AEGEFCGFVWPFKCHRI<br>GDPACK | 3.04 | 0.01 | 0.90 | 0.68 | 0.22 | 1.27 |
| 3627 | 0 | 921    | AEGEFCSPDPSGVCGD<br>PAK     | 2.98 | 0.01 | 0.90 | 0.68 | 0.22 | 0.28 |

|      |   |     |                               |      |      |      |      |      |      |
|------|---|-----|-------------------------------|------|------|------|------|------|------|
| 3628 | 0 | 921 | AEGEFCSPPDSPGVCGD<br>PAK      | 2.98 | 0.01 | 0.90 | 0.68 | 0.22 | 0.28 |
| 3629 | 0 | 921 | AEGEFCSPPDSPGVCGD<br>PAK      | 2.98 | 0.01 | 0.90 | 0.68 | 0.22 | 0.28 |
| 3630 | 0 | 921 | AEGEFCSPPDSPGVCGD<br>PAK      | 2.98 | 0.01 | 0.90 | 0.68 | 0.22 | 1.27 |
| 3631 | 0 | 922 | AEGEFDYAWDQTHQDP<br>AK        | 2.84 | 0.01 | 0.90 | 2.55 | 0.22 | 0.28 |
| 3632 | 0 | 922 | AEGEFDYAWDQTHQDP<br>AK        | 2.84 | 0.01 | 0.90 | 0.68 | 0.22 | 1.34 |
| 3633 | 0 | 923 | AEGEFGLADLATLTFGST<br>DPAK    | 3.08 | 0.01 | 0.90 | 0.44 | 1.59 | 1.27 |
| 3634 | 0 | 923 | AEGEFGLADLATLTFGST<br>DPAK    | 3.08 | 0.01 | 0.90 | 0.44 | 1.59 | 0.28 |
| 3635 | 0 | 924 | AEGEFKKFPGSSTPKDPA<br>KAAFDSL | 3.20 | 0.01 | 0.90 | 0.44 | 1.59 | 0.28 |
| 3636 | 0 | 924 | AEGEFKKFPGSSTPKDPA<br>KAAFDSL | 3.20 | 0.01 | 0.90 | 0.44 | 1.59 | 1.27 |
| 3637 | 0 | 925 | AEGEFKTLRNTNRLDPA<br>K        | 2.86 | 0.01 | 0.90 | 0.44 | 1.59 | 0.28 |
| 3638 | 0 | 925 | AEGEFKTLRNTNRLDPA<br>K        | 2.86 | 0.01 | 0.90 | 0.44 | 1.59 | 1.27 |
| 3639 | 0 | 926 | AEGEFKTRRNTNYQDPA<br>K        | 2.83 | 0.01 | 0.90 | 0.44 | 1.59 | 1.27 |
| 3640 | 0 | 926 | AEGEFKTRRNTNYQDPA<br>K        | 2.83 | 0.01 | 0.90 | 0.44 | 1.59 | 0.28 |
| 3641 | 0 | 927 | AEGEFKTSVRSVPRARP<br>PINGDPAK | 3.17 | 0.01 | 0.90 | 0.44 | 1.59 | 1.27 |
| 3642 | 0 | 927 | AEGEFKTSVRSVPRARP<br>PINGDPAK | 3.17 | 0.01 | 0.90 | 0.44 | 1.59 | 0.28 |
| 3643 | 0 | 928 | AEGEFKVPFRMLNRQV<br>NGDPAK    | 3.04 | 0.01 | 0.90 | 0.68 | 0.22 | 0.28 |
| 3644 | 0 | 928 | AEGEFKVPFRMLNRQV<br>NGDPAK    | 3.04 | 0.01 | 0.90 | 0.68 | 0.22 | 0.28 |
| 3645 | 0 | 928 | AEGEFKVPFRMLNRQV<br>NGDPAK    | 3.04 | 0.01 | 0.90 | 0.68 | 0.22 | 0.28 |
| 3646 | 0 | 928 | AEGEFKVPFRMLNRQV<br>NGDPAK    | 3.04 | 0.01 | 0.90 | 0.68 | 0.22 | 1.27 |
| 3647 | 0 | 929 | AEGEFSLKGSGGGQLR<br>ALVDPK    | 3.13 | 0.01 | 0.90 | 0.44 | 1.59 | 1.27 |
| 3648 | 0 | 929 | AEGEFSLKGSGGGQLR<br>ALVDPK    | 3.13 | 0.01 | 0.90 | 0.44 | 1.59 | 0.28 |
| 3649 | 0 | 930 | AEGEFMGDICSWCYSSA<br>PDPAK    | 3.03 | 0.01 | 0.90 | 0.68 | 0.22 | 0.28 |
| 3650 | 0 | 930 | AEGEFMGDICSWCYSSA<br>PDPAK    | 3.03 | 0.01 | 0.90 | 0.68 | 0.22 | 0.28 |

|      |   |     |                                  |      |      |      |      |      |      |
|------|---|-----|----------------------------------|------|------|------|------|------|------|
| 3651 | 0 | 930 | AEGEFMGDICSWCYSSA<br>PDPAK       | 3.03 | 0.01 | 0.90 | 0.68 | 0.22 | 0.28 |
| 3652 | 0 | 930 | AEGEFMGDICSWCYSSA<br>PDPAK       | 3.03 | 0.01 | 0.90 | 0.68 | 0.22 | 1.27 |
| 3653 | 0 | 931 | AEGEFMSRTWLMKAH<br>GIESWDPAK     | 3.10 | 0.01 | 0.90 | 0.44 | 1.59 | 0.28 |
| 3654 | 0 | 931 | AEGEFMSRTWLMKAH<br>GIESWDPAK     | 3.10 | 0.01 | 0.90 | 0.44 | 1.59 | 1.27 |
| 3655 | 0 | 932 | AEGEFNSREWLSKAHGI<br>EGMDPAK     | 3.10 | 0.01 | 0.90 | 0.44 | 1.59 | 0.28 |
| 3656 | 0 | 932 | AEGEFNSREWLSKAHGI<br>EGMDPAK     | 3.10 | 0.01 | 0.90 | 0.44 | 1.59 | 1.27 |
| 3657 | 0 | 933 | AEGEFPEDTFPGSKLILS<br>GDPAAAFDSL | 3.34 | 0.01 | 0.90 | 0.44 | 1.59 | 1.27 |
| 3658 | 0 | 933 | AEGEFPEDTFPGSKLILS<br>GDPAAAFDSL | 3.34 | 0.01 | 0.90 | 0.44 | 1.59 | 0.28 |
| 3659 | 0 | 934 | AEGEFPQDARFPGGGD<br>PAK          | 2.93 | 0.01 | 0.90 | 0.44 | 1.59 | 0.28 |
| 3660 | 0 | 934 | AEGEFPQDARFPGGGD<br>PAK          | 2.93 | 0.01 | 0.90 | 0.44 | 1.59 | 1.27 |
| 3661 | 0 | 935 | AEGEFPSRMQFHGDQD<br>YGDPAK       | 3.04 | 0.01 | 0.90 | 0.68 | 0.22 | 0.28 |
| 3662 | 0 | 935 | AEGEFPSRMQFHGDQD<br>YGDPAK       | 3.04 | 0.01 | 0.90 | 0.68 | 0.22 | 0.28 |
| 3663 | 0 | 935 | AEGEFPSRMQFHGDQD<br>YGDPAK       | 3.04 | 0.01 | 0.90 | 0.68 | 0.22 | 0.28 |
| 3664 | 0 | 935 | AEGEFPSRMQFHGDQD<br>YGDPAK       | 3.04 | 0.01 | 0.90 | 0.68 | 0.22 | 1.27 |
| 3665 | 0 | 936 | AEGEFPYLLPRRSREEAV<br>DPAK       | 3.03 | 0.01 | 0.90 | 0.44 | 1.59 | 1.27 |
| 3666 | 0 | 936 | AEGEFPYLLPRRSREEAV<br>DPAK       | 3.03 | 0.01 | 0.90 | 0.44 | 1.59 | 0.28 |
| 3667 | 0 | 937 | AEGEFRELLYAFDDME<br>GDPAAK       | 3.06 | 0.01 | 0.90 | 0.44 | 1.59 | 0.28 |
| 3668 | 0 | 937 | AEGEFRELLYAFDDME<br>GDPAAK       | 3.06 | 0.01 | 0.90 | 0.44 | 1.59 | 1.27 |
| 3669 | 0 | 938 | AEGEFRFWKVPDYDPP<br>AAGGDPAK     | 3.14 | 0.01 | 0.90 | 0.44 | 1.59 | 1.27 |
| 3670 | 0 | 938 | AEGEFRFWKVPDYDPP<br>AAGGDPAK     | 3.14 | 0.01 | 0.90 | 0.44 | 1.59 | 0.28 |
| 3671 | 0 | 939 | AEGEFRLGVRALRKAPD<br>PAK         | 2.98 | 0.01 | 0.90 | 0.44 | 1.59 | 0.28 |
| 3672 | 0 | 939 | AEGEFRLGVRALRKAPD<br>PAK         | 2.98 | 0.01 | 0.90 | 0.44 | 1.59 | 1.27 |
| 3673 | 0 | 940 | AEGEFRSREQLSKLFID<br>LTDPAAK     | 3.13 | 0.01 | 0.90 | 0.44 | 1.59 | 0.28 |

|      |   |        |                              |      |      |      |      |      |      |
|------|---|--------|------------------------------|------|------|------|------|------|------|
| 3674 | 0 | 940    | AEGEFRSREQLSKLFQID<br>LTDPAK | 3.13 | 0.01 | 0.90 | 0.44 | 1.59 | 1.27 |
| 3675 | 0 | 941    | AEGEFSPGVWKAQFQG<br>DKLPDPAK | 3.14 | 0.01 | 0.90 | 0.68 | 0.22 | 0.28 |
| 3676 | 0 | 941    | AEGEFSPGVWKAQFQG<br>DKLPDPAK | 3.14 | 0.01 | 0.90 | 0.68 | 0.22 | 0.28 |
| 3677 | 0 | 941    | AEGEFSPGVWKAQFQG<br>DKLPDPAK | 3.14 | 0.01 | 0.90 | 0.68 | 0.22 | 0.28 |
| 3678 | 0 | 941    | AEGEFSPGVWKAQFQG<br>DKLPDPAK | 3.14 | 0.01 | 0.90 | 0.68 | 0.22 | 1.27 |
| 3679 | 0 | 942    | AEGEFSDMLWMMTP<br>QTGDPK     | 3.01 | 0.01 | 0.90 | 0.68 | 0.22 | 0.28 |
| 3680 | 0 | 942    | AEGEFSDMLWMMTP<br>QTGDPK     | 3.01 | 0.01 | 0.90 | 0.68 | 0.22 | 0.28 |
| 3681 | 0 | 942    | AEGEFSDMLWMMTP<br>QTGDPK     | 3.01 | 0.01 | 0.90 | 0.68 | 0.22 | 0.28 |
| 3682 | 0 | 942    | AEGEFSDMLWMMTP<br>QTGDPK     | 3.01 | 0.01 | 0.90 | 0.68 | 0.22 | 1.27 |
| 3683 | 0 | 943    | AEGEFSTASPTHFLVPLD<br>PAK    | 3.00 | 0.01 | 0.90 | 0.44 | 1.59 | 0.28 |
| 3684 | 0 | 943    | AEGEFSTASPTHFLVPLD<br>PAK    | 3.00 | 0.01 | 0.90 | 0.44 | 1.59 | 1.27 |
| 3685 | 0 | 944    | AEGEFYCSGPPDRVCW<br>GPDPAK   | 3.03 | 0.01 | 0.90 | 0.68 | 0.22 | 0.28 |
| 3686 | 0 | 944    | AEGEFYCSGPPDRVCW<br>GPDPAK   | 3.03 | 0.01 | 0.90 | 0.68 | 0.22 | 0.28 |
| 3687 | 0 | 944    | AEGEFYCSGPPDRVCW<br>GPDPAK   | 3.03 | 0.01 | 0.90 | 0.68 | 0.22 | 0.28 |
| 3688 | 0 | 944    | AEGEFYCSGPPDRVCW<br>GPDPAK   | 3.03 | 0.01 | 0.90 | 0.68 | 0.22 | 1.27 |
| 3689 | 0 | 422173 | AEGFYTTGAVEQIFGDY<br>KTRG    | 3.58 | 0.01 | 1.75 | 1.81 | 0.22 | 0.28 |
| 3690 | 0 | 422173 | AEGFYTTGAVEQIFGDY<br>KTRG    | 3.58 | 0.01 | 1.75 | 1.81 | 0.22 | 2.92 |
| 3691 | 0 | 948    | AEGGTWRI                     | 2.11 | 0.01 | 2.04 | 0.44 | 0.85 | 0.28 |
| 3692 | 0 | 117735 | AEGLMVTGGR                   | 2.30 | 0.01 | 0.78 | 1.12 | 0.22 | 0.85 |
| 3693 | 0 | 145704 | AEGTTTTWKDYDHNQ              | 2.69 | 0.01 | 3.81 | 2.78 | 0.22 | 1.75 |
| 3694 | 0 | 145704 | AEGTTTTWKDYDHNQ              | 2.69 | 0.01 | 3.81 | 2.78 | 0.22 | 0.28 |
| 3695 | 0 | 145704 | AEGTTTTWKDYDHNQ              | 2.69 | 0.01 | 3.81 | 2.78 | 0.22 | 1.34 |
| 3696 | 0 | 145704 | AEGTTTTWKDYDHNQ              | 2.69 | 0.01 | 3.81 | 2.78 | 0.22 | 0.28 |
| 3697 | 0 | 95216  | AEGLYSMLVERD                 | 2.45 | 0.01 | 2.88 | 0.44 | 1.23 | 0.85 |

|      |   |        |                               |      |      |      |      |      |      |
|------|---|--------|-------------------------------|------|------|------|------|------|------|
| 3698 | 0 | 95216  | AEGLYSMLVERD                  | 2.45 | 0.01 | 2.88 | 1.12 | 0.22 | 0.85 |
| 3699 | 0 | 170222 | AEGPPGPQG                     | 2.27 | 0.01 | 0.78 | 0.68 | 0.22 | 1.27 |
| 3700 | 0 | 170222 | AEGPPGPQG                     | 2.27 | 0.01 | 0.78 | 0.68 | 0.22 | 1.27 |
| 3701 | 0 | 952    | AEGQLG                        | 1.90 | 0.01 | 3.45 | 1.15 | 0.22 | 0.85 |
| 3702 | 0 | 952    | AEGQLG                        | 1.90 | 0.01 | 3.45 | 1.15 | 0.22 | 1.39 |
| 3703 | 0 | 952    | AEGQLG                        | 1.90 | 0.01 | 3.45 | 1.15 | 0.22 | 0.85 |
| 3704 | 0 | 952    | AEGQLG                        | 1.90 | 0.01 | 3.16 | 0.68 | 0.22 | 0.28 |
| 3705 | 0 | 952    | AEGQLG                        | 1.90 | 0.01 | 2.40 | 2.52 | 0.22 | 0.28 |
| 3706 | 0 | 952    | AEGQLG                        | 1.90 | 0.01 | 3.03 | 1.20 | 0.22 | 0.28 |
|      |   |        | AEGQRPFGYGGGRASD              |      |      |      |      |      |      |
| 3707 | 0 | 114191 | YKSAHKGFKGVDAQGT<br>L SKIFKLG | 3.63 | 0.01 | 0.78 | 3.45 | 0.22 | 1.57 |
|      |   |        | AEGQRPFGYGGGRASD              |      |      |      |      |      |      |
| 3708 | 0 | 114191 | YKSAHKGFKGVDAQGT<br>L SKIFKLG | 3.63 | 0.01 | 0.78 | 2.25 | 0.22 | 1.57 |
|      |   |        | AEGQRPFGYGGGRASD              |      |      |      |      |      |      |
| 3709 | 0 | 114191 | YKSAHKGFKGVDAQGT<br>L SKIFKLG | 3.63 | 0.01 | 0.78 | 3.45 | 0.22 | 1.57 |
|      |   |        | AEGQRPFGYGGGRASD              |      |      |      |      |      |      |
| 3710 | 0 | 114191 | YKSAHKGFKGVDAQGT<br>L SKIFKLG | 3.63 | 0.01 | 0.78 | 3.45 | 0.22 | 1.57 |
|      |   |        | AEGQRPFGYGGGRASD              |      |      |      |      |      |      |
| 3711 | 0 | 114191 | YKSAHKGFKGVDAQGT<br>L SKIFKLG | 3.63 | 0.01 | 0.78 | 3.45 | 0.22 | 1.57 |
|      |   |        | AEGQRPFGYGGGRASD              |      |      |      |      |      |      |
| 3712 | 0 | 114191 | YKSAHKGFKGVDAQGT<br>L SKIFKLG | 3.63 | 0.01 | 0.78 | 2.25 | 0.22 | 1.57 |
|      |   |        | AEGQRPFGYGGGRASD              |      |      |      |      |      |      |
| 3713 | 0 | 114191 | YKSAHKGFKGVDAQGT<br>L SKIFKLG | 3.63 | 0.01 | 0.78 | 2.25 | 0.22 | 1.57 |
|      |   |        | AEGQRPFGYGGGRASD              |      |      |      |      |      |      |
| 3714 | 0 | 114191 | YKSAHKGFKGVDAQGT<br>L SKIFKLG | 3.63 | 0.01 | 0.78 | 2.25 | 0.22 | 1.57 |
|      |   |        | AEGQRPFGYGGGRASD              |      |      |      |      |      |      |
| 3715 | 0 | 114191 | YKSAHKGFKGVDAQGT<br>L SKIFKLG | 3.63 | 0.01 | 0.78 | 3.45 | 0.22 | 1.57 |
|      |   |        | AEGQRPFGYGGGRASD              |      |      |      |      |      |      |
| 3716 | 0 | 114191 | YKSAHKGFKGVDAQGT<br>L SKIFKLG | 3.63 | 0.01 | 0.78 | 2.25 | 0.22 | 1.57 |
|      |   |        | AEGRAINRRVE                   |      |      |      |      |      |      |
| 3717 | 0 | 953    | AEGRAINRRVE                   | 2.43 | 0.01 | 2.58 | 1.15 | 0.22 | 0.28 |
| 3718 | 0 | 953    | AEGRAINRRVE                   | 2.43 | 0.01 | 2.58 | 1.15 | 0.22 | 0.28 |
| 3719 | 0 | 953    | AEGRAINRRVE                   | 2.43 | 0.01 | 2.58 | 1.15 | 0.22 | 0.28 |
| 3720 | 0 | 953    | AEGRAINRRVE                   | 2.43 | 0.01 | 2.58 | 1.15 | 2.25 | 1.75 |
| 3721 | 0 | 95057  | AEGSSSVEYINNWEQAK             | 2.77 | 0.01 | 3.42 | 1.20 | 0.22 | 0.28 |
| 3722 | 0 | 95057  | AEGSSSVEYINNWEQAK             | 2.77 | 0.01 | 3.42 | 1.20 | 0.22 | 0.28 |

|      |   |        |                                                           |      |      |      |      |      |      |
|------|---|--------|-----------------------------------------------------------|------|------|------|------|------|------|
| 3723 | 0 | 960    | AEHARDHTLRFG                                              | 2.48 | 0.01 | 2.69 | 0.68 | 0.22 | 0.28 |
| 3724 | 0 | 960    | AEHARDHTLRFG                                              | 2.48 | 0.01 | 2.69 | 1.20 | 0.22 | 0.28 |
| 3725 | 0 | 132135 | AEHASRMSVLRAPMS<br>NSQRLLLLSPGSPP                         | 3.34 | 0.01 | 0.78 | 0.44 | 1.13 | 1.39 |
| 3726 | 0 | 968    | AEHQFKEKV                                                 | 2.23 | 0.01 | 2.59 | 0.44 | 0.85 | 0.28 |
| 3727 | 0 | 969    | AEHQKLEEQNKISEASRK                                        | 2.87 | 0.01 | 2.85 | 0.68 | 0.22 | 0.28 |
| 3728 | 0 | 971    | AEHVDTSYECDIPIGA                                          | 2.72 | 0.01 | 2.45 | 2.49 | 0.22 | 0.28 |
| 3729 | 0 | 986    | AEIERMVREAAKYEAE                                          | 2.72 | 0.01 | 2.30 | 0.44 | 0.85 | 0.28 |
| 3730 | 0 | 986    | AEIERMVREAAKYEAE                                          | 2.72 | 0.01 | 2.30 | 0.44 | 1.41 | 0.28 |
| 3731 | 0 | 988    | AEIETCMKTITTILEWLEK<br>NQLAGKDEYEAKNKEAE<br>SVCAPIMSKIYQD | 3.83 | 0.01 | 1.66 | 3.97 | 0.22 | 0.28 |
| 3732 | 0 | 988    | AEIETCMKTITTILEWLEK<br>NQLAGKDEYEAKNKEAE<br>SVCAPIMSKIYQD | 3.83 | 0.01 | 1.66 | 3.97 | 0.22 | 1.27 |
| 3733 | 0 | 125357 | AEIETDKATIGFEVQEEG                                        | 2.87 | 0.01 | 0.78 | 0.44 | 1.13 | 0.28 |
| 3734 | 0 | 125357 | AEIETDKATIGFEVQEEG                                        | 2.87 | 0.01 | 0.78 | 0.44 | 1.13 | 0.28 |
| 3735 | 0 | 125357 | AEIETDKATIGFEVQEEG                                        | 2.87 | 0.01 | 0.78 | 0.44 | 1.13 | 0.28 |
| 3736 | 0 | 125357 | AEIETDKATIGFEVQEEG                                        | 2.87 | 0.01 | 0.78 | 0.44 | 1.13 | 0.28 |
| 3737 | 0 | 125357 | AEIETDKATIGFEVQEEG                                        | 2.87 | 0.01 | 0.78 | 0.44 | 1.41 | 0.28 |
| 3738 | 0 | 124972 | AEIETDKATIGFEVQEEG<br>YL                                  | 2.94 | 0.01 | 2.19 | 0.44 | 1.13 | 0.28 |
| 3739 | 0 | 124972 | AEIETDKATIGFEVQEEG<br>YL                                  | 2.94 | 0.01 | 0.78 | 0.44 | 1.13 | 0.28 |
| 3740 | 0 | 124972 | AEIETDKATIGFEVQEEG<br>YL                                  | 2.94 | 0.01 | 0.78 | 0.44 | 1.13 | 0.28 |
| 3741 | 0 | 124972 | AEIETDKATIGFEVQEEG<br>YL                                  | 2.94 | 0.01 | 0.78 | 0.44 | 1.41 | 0.28 |
| 3742 | 0 | 989    | AEIKKPQADSAWNWPK<br>EYNA                                  | 2.96 | 0.01 | 3.75 | 2.42 | 0.22 | 0.28 |
| 3743 | 0 | 989    | AEIKKPQADSAWNWPK<br>EYNA                                  | 2.96 | 0.01 | 3.75 | 2.42 | 0.22 | 1.34 |
| 3744 | 0 | 989    | AEIKKPQADSAWNWPK<br>EYNA                                  | 2.96 | 0.01 | 3.75 | 2.42 | 0.22 | 1.34 |
| 3745 | 0 | 989    | AEIKKPQADSAWNWPK<br>EYNA                                  | 2.96 | 0.01 | 3.75 | 2.42 | 0.22 | 0.28 |
| 3746 | 0 | 989    | AEIKKPQADSAWNWPK<br>EYNA                                  | 2.96 | 0.01 | 3.75 | 2.42 | 0.22 | 0.28 |

|      |   |        |                                     |      |      |      |      |      |      |
|------|---|--------|-------------------------------------|------|------|------|------|------|------|
| 3747 | 0 | 989    | AEIKKPQADSAWNWPK<br>EYNA            | 2.96 | 0.01 | 3.75 | 2.42 | 0.22 | 0.28 |
| 3748 | 0 | 989    | AEIKKPQADSAWNWPK<br>EYNA            | 2.96 | 0.01 | 3.75 | 2.42 | 0.22 | 0.28 |
| 3749 | 0 | 989    | AEIKKPQADSAWNWPK<br>EYNA            | 2.96 | 0.01 | 3.75 | 2.42 | 0.22 | 0.28 |
| 3750 | 0 | 97175  | AEIQGDSQA                           | 2.24 | 0.01 | 3.13 | 1.12 | 0.22 | 0.28 |
| 3751 | 0 | 196323 | AEIQTLIKELKRLGI                     | 2.70 | 0.01 | 3.72 | 1.12 | 0.22 | 0.28 |
| 3752 | 0 | 78344  | AEIRGERK                            | 2.14 | 0.01 | 3.97 | 0.68 | 0.22 | 0.28 |
| 3753 | 0 | 78344  | AEIRGERK                            | 2.14 | 0.01 | 3.97 | 0.68 | 0.22 | 2.98 |
| 3754 | 0 | 132136 | AEIVGGHEAQPHSRP                     | 2.68 | 0.01 | 0.78 | 1.12 | 0.22 | 0.28 |
| 3755 | 0 | 105653 | AEIVYKSPVVSGD                       | 2.52 | 4.03 | 0.78 | 1.15 | 0.22 | 0.85 |
| 3756 | 0 | 105653 | AEIVYKSPVVSGD                       | 2.52 | 4.03 | 0.78 | 1.15 | 0.22 | 0.28 |
| 3757 | 0 | 106227 | AEIVYKSPVVSGDTSPRH<br>L             | 2.85 | 4.03 | 0.78 | 1.15 | 0.22 | 0.28 |
| 3758 | 0 | 106227 | AEIVYKSPVVSGDTSPRH<br>L             | 2.85 | 4.03 | 0.78 | 1.15 | 0.22 | 0.28 |
| 3759 | 0 | 106228 | AEIVYKSPVVSGDTSPRH<br>L             | 2.85 | 4.15 | 0.78 | 1.15 | 0.22 | 0.28 |
| 3760 | 0 | 106228 | AEIVYKSPVVSGDTSPRH<br>L             | 2.85 | 4.15 | 0.78 | 1.15 | 0.22 | 0.28 |
| 3761 | 0 | 106228 | AEIVYKSPVVSGDTSPRH<br>L             | 2.85 | 4.15 | 0.78 | 1.15 | 0.22 | 0.28 |
| 3762 | 0 | 151110 | AEKA                                | 1.60 | 4.93 | 2.56 | 0.44 | 1.41 | 1.27 |
| 3763 | 0 | 151111 | AEKAA                               | 1.74 | 4.93 | 2.56 | 0.44 | 1.41 | 1.57 |
| 3764 | 0 | 141846 | AEKDHSRLRGDN                        | 2.36 | 0.01 | 3.13 | 0.68 | 0.22 | 0.28 |
| 3765 | 0 | 510858 | AEKEEKSEDKKKSE                      | 2.74 | 0.01 | 2.24 | 0.44 | 1.41 | 1.28 |
| 3766 | 0 | 1014   | AEKKLPKPPKPSFCSAG<br>DTTQYYFDGCMVQN | 3.37 | 0.01 | 4.45 | 0.44 | 0.85 | 0.28 |
| 3767 | 0 | 1015   | AEKKVEAKVEVAENNVS<br>SVA            | 3.01 | 0.01 | 4.63 | 2.42 | 0.22 | 0.28 |
| 3768 | 0 | 1015   | AEKKVEAKVEVAENNVS<br>SVA            | 3.01 | 0.01 | 4.63 | 2.42 | 0.22 | 1.34 |
| 3769 | 0 | 248885 | AEKQKAAEATKAAEA                     | 2.75 | 0.01 | 1.61 | 0.44 | 0.85 | 1.28 |
| 3770 | 0 | 248886 | AEKQKAAEATKAVEA                     | 2.74 | 0.01 | 1.61 | 0.44 | 0.85 | 1.28 |
| 3771 | 0 | 248887 | AEKQKAAEATKAVET                     | 2.74 | 0.01 | 1.61 | 0.44 | 0.85 | 1.28 |
| 3772 | 0 | 1022   | AEKQKAAEATKVAE                      | 2.68 | 0.01 | 2.30 | 0.44 | 0.85 | 0.28 |
| 3773 | 0 | 1022   | AEKQKAAEATKVAE                      | 2.68 | 0.01 | 2.30 | 1.20 | 0.22 | 0.85 |
| 3774 | 0 | 1022   | AEKQKAAEATKVAE                      | 2.68 | 0.01 | 2.30 | 0.44 | 0.85 | 1.27 |
| 3775 | 0 | 248888 | AEKQKAAEATKVAEA                     | 2.74 | 0.01 | 1.61 | 0.44 | 0.85 | 1.28 |
| 3776 | 0 | 248893 | AEKQRAAAATKAVET                     | 2.72 | 0.01 | 1.61 | 0.44 | 0.85 | 1.28 |
| 3777 | 0 | 248895 | AEKQRAAEATKAVET                     | 2.73 | 0.01 | 1.61 | 0.44 | 0.85 | 1.28 |
| 3778 | 0 | 248896 | AEKQRAAEATKDVET                     | 2.72 | 0.01 | 1.61 | 0.44 | 0.85 | 1.28 |
| 3779 | 0 | 248897 | AEKQRAAEATKVAEA                     | 2.73 | 0.01 | 1.61 | 0.44 | 0.85 | 1.28 |
| 3780 | 0 | 1023   | AEKQRLEDLGQKFERLK<br>QRS            | 2.98 | 0.01 | 2.24 | 2.75 | 0.22 | 0.28 |

|      |   |        |                                |      |      |      |      |      |      |
|------|---|--------|--------------------------------|------|------|------|------|------|------|
| 3781 | 0 | 248899 | AEKRKAAEATKAAEA                | 2.75 | 0.01 | 1.61 | 0.44 | 0.85 | 1.28 |
| 3782 | 0 | 248900 | AEKRKAAEATKVAEA                | 2.74 | 0.01 | 1.61 | 0.44 | 0.85 | 1.28 |
| 3783 | 0 | 98681  | AEKTKIPAVF                     | 2.32 | 0.01 | 1.60 | 0.44 | 1.23 | 0.85 |
| 3784 | 0 | 98681  | AEKTKIPAVF                     | 2.32 | 0.01 | 1.60 | 0.44 | 1.23 | 0.85 |
| 3785 | 0 | 98681  | AEKTKIPAVF                     | 2.32 | 0.01 | 1.60 | 0.44 | 2.98 | 0.85 |
| 3786 | 0 | 115173 | AEKTKIPAVFKIDALNEN<br>KV       | 2.97 | 0.01 | 1.60 | 0.44 | 1.23 | 2.51 |
| 3787 | 0 | 238140 | AELA                           | 1.60 | 0.01 | 2.14 | 2.65 | 0.22 | 0.85 |
| 3788 | 0 | 1031   | AELAAANDTIASLQTEL              | 2.82 | 0.01 | 3.59 | 2.02 | 0.22 | 0.28 |
| 3789 | 0 | 123922 | AELALKATL                      | 2.27 | 0.01 | 0.78 | 0.44 | 1.41 | 0.28 |
| 3790 | 0 | 78603  | AELGEYEKLLNSVLEPI              | 2.79 | 0.01 | 3.89 | 3.15 | 0.22 | 0.28 |
| 3791 | 0 | 1045   | AELGGQFHHKSENG                 | 2.60 | 0.01 | 4.45 | 1.15 | 0.22 | 0.85 |
| 3792 | 0 | 1045   | AELGGQFHHKSENG                 | 2.60 | 0.01 | 4.45 | 1.15 | 0.22 | 0.85 |
| 3793 | 0 | 1045   | AELGGQFHHKSENG                 | 2.60 | 0.01 | 4.45 | 1.15 | 0.22 | 0.28 |
| 3794 | 0 | 1047   | AELKSALQSCSAEPLDDD<br>H        | 2.91 | 0.01 | 2.94 | 1.20 | 0.22 | 0.85 |
| 3795 | 0 | 1048   | AELKSALQSCSAEPLDDD<br>HVKAFLDK | 3.22 | 0.01 | 2.94 | 3.04 | 0.22 | 0.85 |
| 3796 | 0 | 1048   | AELKSALQSCSAEPLDDD<br>HVKAFLDK | 3.22 | 0.01 | 2.94 | 0.44 | 0.85 | 0.85 |
| 3797 | 0 | 1048   | AELKSALQSCSAEPLDDD<br>HVKAFLDK | 3.22 | 0.01 | 2.94 | 1.20 | 0.22 | 0.85 |
| 3798 | 0 | 1048   | AELKSALQSCSAEPLDDD<br>HVKAFLDK | 3.22 | 0.01 | 2.94 | 0.44 | 1.74 | 0.85 |
| 3799 | 0 | 170224 | AELMEISEDKTKIRR                | 2.66 | 0.01 | 0.78 | 0.44 | 1.13 | 0.28 |
| 3800 | 0 | 225221 | AELPCRISPGKNATGME<br>VGWYRS    | 3.04 | 0.01 | 1.75 | 1.81 | 0.22 | 0.28 |
| 3801 | 0 | 97177  | AELPF                          | 1.74 | 0.01 | 3.50 | 0.68 | 0.22 | 0.85 |
| 3802 | 0 | 97177  | AELPF                          | 1.74 | 0.01 | 3.50 | 0.68 | 0.22 | 1.48 |
| 3803 | 0 | 97177  | AELPF                          | 1.74 | 0.01 | 3.50 | 0.68 | 0.22 | 0.28 |
| 3804 | 0 | 97177  | AELPF                          | 1.74 | 0.01 | 3.50 | 0.68 | 0.22 | 0.28 |
| 3805 | 0 | 97177  | AELPF                          | 1.74 | 0.01 | 3.50 | 0.68 | 0.22 | 0.28 |
| 3806 | 0 | 97177  | AELPF                          | 1.74 | 0.01 | 3.50 | 0.68 | 0.22 | 0.28 |
| 3807 | 0 | 97177  | AELPF                          | 1.74 | 0.01 | 3.50 | 0.68 | 0.22 | 0.28 |
| 3808 | 0 | 97177  | AELPF                          | 1.74 | 0.01 | 3.50 | 0.68 | 0.22 | 0.28 |
| 3809 | 0 | 97177  | AELPF                          | 1.74 | 0.01 | 3.50 | 0.68 | 0.22 | 0.28 |
| 3810 | 0 | 97177  | AELPF                          | 1.74 | 0.01 | 3.50 | 0.68 | 0.22 | 0.28 |
| 3811 | 0 | 97177  | AELPF                          | 1.74 | 0.01 | 3.50 | 0.68 | 0.22 | 0.28 |
| 3812 | 0 | 97177  | AELPF                          | 1.74 | 0.01 | 3.50 | 0.68 | 0.22 | 0.28 |
| 3813 | 0 | 97177  | AELPF                          | 1.74 | 0.01 | 3.50 | 0.68 | 0.22 | 0.28 |
| 3814 | 0 | 97177  | AELPF                          | 1.74 | 0.01 | 3.50 | 0.68 | 0.22 | 0.28 |
| 3815 | 0 | 97177  | AELPF                          | 1.74 | 0.01 | 3.50 | 0.68 | 0.22 | 0.28 |
| 3816 | 0 | 97177  | AELPF                          | 1.74 | 0.01 | 3.50 | 0.68 | 0.22 | 0.28 |
| 3817 | 0 | 97177  | AELPF                          | 1.74 | 0.01 | 3.50 | 0.68 | 0.22 | 0.28 |
| 3818 | 0 | 97177  | AELPF                          | 1.74 | 0.01 | 3.50 | 0.68 | 0.22 | 0.28 |
| 3819 | 0 | 97177  | AELPF                          | 1.74 | 0.01 | 3.50 | 0.68 | 0.22 | 0.28 |



|      |   |        |                              |      |      |      |      |      |      |
|------|---|--------|------------------------------|------|------|------|------|------|------|
| 3820 | 0 | 97177  | AELPF                        | 1.74 | 0.01 | 3.50 | 0.68 | 0.22 | 0.28 |
| 3821 | 0 | 97177  | AELPF                        | 1.74 | 0.01 | 3.50 | 0.68 | 0.22 | 0.28 |
| 3822 | 0 | 97177  | AELPF                        | 1.74 | 0.01 | 3.50 | 0.68 | 0.22 | 0.28 |
| 3823 | 0 | 135533 | AELSPAAGTGRKRSQM             | 2.79 | 0.01 | 0.78 | 1.12 | 0.22 | 0.28 |
| 3824 | 0 | 135534 | AELSPAAGTGRKRSQM<br>LFRGRASQ | 3.22 | 0.01 | 0.78 | 1.12 | 0.22 | 0.28 |
| 3825 | 0 | 135534 | AELSPAAGTGRKRSQM<br>LFRGRASQ | 3.22 | 0.01 | 0.78 | 1.12 | 1.41 | 0.28 |
| 3826 | 0 | 1062   | AELTGY                       | 1.88 | 0.01 | 2.40 | 0.44 | 0.85 | 0.28 |
| 3827 | 0 | 1064   | AELTGYGTVT                   | 2.33 | 0.01 | 2.40 | 0.44 | 0.85 | 0.28 |
| 3828 | 0 | 1064   | AELTGYGTVT                   | 2.33 | 0.01 | 2.40 | 0.44 | 0.85 | 0.28 |
| 3829 | 0 | 1064   | AELTGYGTVT                   | 2.33 | 0.01 | 2.40 | 0.44 | 0.85 | 0.28 |
| 3830 | 0 | 1064   | AELTGYGTVT                   | 2.33 | 0.01 | 2.40 | 0.44 | 0.85 | 0.28 |
| 3831 | 0 | 117736 | AEMKSLEEKIGCLK               | 2.68 | 0.01 | 0.78 | 3.05 | 1.13 | 0.28 |
| 3832 | 0 | 117736 | AEMKSLEEKIGCLK               | 2.68 | 0.01 | 0.78 | 0.44 | 1.13 | 0.28 |
| 3833 | 0 | 117736 | AEMKSLEEKIGCLK               | 2.68 | 0.01 | 0.78 | 0.44 | 1.41 | 0.28 |
| 3834 | 0 | 105071 | AENEL                        | 1.75 | 0.01 | 3.21 | 1.20 | 0.22 | 0.28 |
| 3835 | 0 | 108262 | AENGPRLLVEAEQAKVF<br>S       | 2.83 | 0.01 | 1.60 | 0.68 | 0.22 | 0.28 |
| 3836 | 0 | 110761 | AENPTNY                      | 2.02 | 0.01 | 3.67 | 0.68 | 0.22 | 0.28 |
| 3837 | 0 | 110761 | AENPTNY                      | 2.02 | 0.01 | 3.67 | 0.68 | 0.22 | 2.02 |
| 3838 | 0 | 80205  | AENQEAGLI                    | 2.33 | 0.01 | 3.06 | 0.44 | 0.85 | 0.28 |
| 3839 | 0 | 141847 | AENSAIKVPLENGS               | 2.62 | 0.01 | 2.73 | 0.44 | 0.85 | 0.28 |
| 3840 | 0 | 1109   | AENSAPTA                     | 2.15 | 0.01 | 3.42 | 0.68 | 0.22 | 0.28 |
| 3841 | 0 | 175561 | AEPANNNWFMLTYFLA<br>AEGC     | 2.94 | 0.01 | 0.90 | 0.68 | 0.22 | 0.28 |
| 3842 | 0 | 175561 | AEPANNNWFMLTYFLA<br>AEGC     | 2.94 | 0.01 | 0.90 | 0.68 | 0.22 | 0.28 |
| 3843 | 0 | 175561 | AEPANNNWFMLTYFLA<br>AEGC     | 2.94 | 0.01 | 0.90 | 0.44 | 0.85 | 0.28 |
| 3844 | 0 | 111091 | AEPDRAHYNIVTFCKC<br>DST      | 2.89 | 0.01 | 1.86 | 3.22 | 0.22 | 0.28 |
| 3845 | 0 | 111091 | AEPDRAHYNIVTFCKC<br>DST      | 2.89 | 0.01 | 1.86 | 2.69 | 0.22 | 0.28 |
| 3846 | 0 | 111091 | AEPDRAHYNIVTFCKC<br>DST      | 2.89 | 0.01 | 1.86 | 3.38 | 0.22 | 0.28 |
| 3847 | 0 | 249142 | AEPEEEDDDDFGMG               | 2.69 | 0.01 | 1.61 | 0.44 | 0.85 | 1.28 |
| 3848 | 0 | 249148 | AEPEAPEKSAEPKP               | 2.75 | 0.01 | 1.61 | 0.44 | 0.85 | 1.28 |
| 3849 | 0 | 95218  | AEPEQS                       | 1.90 | 0.01 | 1.60 | 0.44 | 1.23 | 0.28 |
| 3850 | 0 | 98682  | AEPEQSLACQ                   | 2.34 | 0.01 | 1.60 | 0.44 | 1.23 | 0.85 |
| 3851 | 0 | 96065  | AEPEQSLACQCLVRT              | 2.69 | 0.01 | 1.60 | 0.44 | 1.23 | 0.28 |
| 3852 | 0 | 96065  | AEPEQSLACQCLVRT              | 2.69 | 0.01 | 1.60 | 0.44 | 1.23 | 0.28 |
| 3853 | 0 | 133497 | AEPFYSWDRASR                 | 2.48 | 0.01 | 0.90 | 0.68 | 0.22 | 1.39 |
| 3854 | 0 | 1115   | AEPKPAEPKS                   | 2.37 | 0.01 | 2.30 | 0.44 | 0.85 | 0.28 |
| 3855 | 0 | 249158 | AEPKPAEPKSAELNA              | 2.73 | 0.01 | 1.61 | 0.44 | 0.85 | 1.28 |

|      |   |        |                                 |      |      |      |      |      |      |
|------|---|--------|---------------------------------|------|------|------|------|------|------|
| 3856 | 0 | 249159 | AEPKPAEPKSAEPEP                 | 2.75 | 0.01 | 1.61 | 0.44 | 0.85 | 1.28 |
| 3857 | 0 | 249160 | AEPKPAEPKSAEPPK                 | 2.75 | 0.01 | 1.61 | 0.44 | 0.85 | 1.28 |
| 3858 | 0 | 249161 | AEPKPAEPKSAGPKP                 | 2.75 | 0.01 | 1.61 | 0.44 | 0.85 | 1.28 |
| 3859 | 0 | 249165 | AEPKPAESKSAEPPK                 | 2.75 | 0.01 | 1.61 | 0.44 | 0.85 | 1.28 |
| 3860 | 0 | 249166 | AEPKPAESKSAGPKP                 | 2.75 | 0.01 | 1.61 | 0.44 | 0.85 | 1.28 |
| 3861 | 0 | 1116   | AEPKSAEPKPAEPKS                 | 2.75 | 0.01 | 2.30 | 0.44 | 0.85 | 0.28 |
| 3862 | 0 | 1116   | AEPKSAEPKPAEPKS                 | 2.75 | 0.01 | 1.61 | 0.44 | 0.85 | 1.28 |
| 3863 | 0 | 249171 | AEPKSAEPKPAEPNA                 | 2.75 | 0.01 | 1.61 | 0.44 | 0.85 | 1.28 |
| 3864 | 0 | 249172 | AEPKSAEPKPAEPNS                 | 2.75 | 0.01 | 1.61 | 0.44 | 0.85 | 1.28 |
| 3865 | 0 | 249173 | AEPKSAEPKPAESKS                 | 2.75 | 0.01 | 1.61 | 0.44 | 0.85 | 1.28 |
| 3866 | 0 | 1118   | AEPLLSC                         | 2.01 | 0.01 | 2.43 | 0.68 | 0.22 | 0.28 |
| 3867 | 0 | 249180 | AEPNSAEPKPAEPKS                 | 2.75 | 0.01 | 1.61 | 0.44 | 0.85 | 1.28 |
| 3868 | 0 | 128216 | AEPQNFECTVHWPRSP<br>RDLRGAL     | 3.08 | 0.01 | 2.19 | 1.20 | 0.22 | 1.27 |
| 3869 | 0 | 105072 | AEPRQEFEV                       | 2.23 | 0.01 | 0.78 | 1.15 | 0.22 | 2.92 |
| 3870 | 0 | 105072 | AEPRQEFEV                       | 2.23 | 0.01 | 0.78 | 1.15 | 0.22 | 2.92 |
| 3871 | 0 | 1127   | AEPTAPATTTTPDEMAT<br>QAA        | 2.99 | 0.01 | 2.40 | 0.44 | 1.59 | 0.28 |
| 3872 | 0 | 236709 | AEPWTVRNEDL                     | 2.36 | 0.01 | 0.78 | 0.68 | 0.22 | 2.49 |
| 3873 | 0 | 236709 | AEPWTVRNEDL                     | 2.36 | 0.01 | 0.78 | 0.68 | 0.22 | 2.49 |
| 3874 | 0 | 236709 | AEPWTVRNEDL                     | 2.36 | 0.01 | 0.78 | 0.68 | 0.22 | 2.49 |
| 3875 | 0 | 236709 | AEPWTVRNEDL                     | 2.36 | 0.01 | 0.78 | 0.68 | 0.22 | 0.28 |
| 3876 | 0 | 236709 | AEPWTVRNEDL                     | 2.36 | 0.01 | 0.78 | 0.68 | 0.22 | 1.66 |
| 3877 | 0 | 236709 | AEPWTVRNEDL                     | 2.36 | 0.01 | 0.78 | 0.68 | 0.22 | 1.66 |
| 3878 | 0 | 236709 | AEPWTVRNEDL                     | 2.36 | 0.01 | 0.78 | 0.68 | 0.22 | 1.66 |
| 3879 | 0 | 236709 | AEPWTVRNEDL                     | 2.36 | 0.01 | 0.78 | 0.68 | 0.22 | 1.34 |
| 3880 | 0 | 236709 | AEPWTVRNEDL                     | 2.36 | 0.01 | 0.78 | 0.68 | 0.22 | 3.25 |
| 3881 | 0 | 249211 | AEPYSAEPKPAEPKS                 | 2.75 | 0.01 | 1.61 | 0.44 | 0.85 | 1.28 |
| 3882 | 0 | 249216 | AEQEEISDDDEGED                  | 2.71 | 0.01 | 1.61 | 0.44 | 0.85 | 1.28 |
| 3883 | 0 | 142383 | AEQIQAEQKVKTA                   | 2.65 | 0.01 | 2.59 | 0.44 | 0.85 | 0.85 |
| 3884 | 0 | 149247 | AEQQWALYADGSIRPQ                | 2.71 | 0.01 | 2.75 | 0.68 | 0.22 | 1.66 |
| 3885 | 0 | 149247 | AEQQWALYADGSIRPQ                | 2.71 | 0.01 | 2.75 | 0.68 | 0.22 | 0.28 |
| 3886 | 0 | 149247 | AEQQWALYADGSIRPQ                | 2.71 | 0.01 | 2.75 | 0.68 | 0.22 | 1.34 |
| 3887 | 0 | 149247 | AEQQWALYADGSIRPQ                | 2.71 | 0.01 | 2.75 | 0.68 | 0.22 | 0.28 |
| 3888 | 0 | 182043 | AEQSEGHWKVNCEE                  | 2.64 | 0.01 | 0.78 | 0.44 | 1.13 | 0.85 |
| 3889 | 0 | 99877  | AEQYTHQDEI<br>AERAALEELVKLQGERV | 2.31 | 0.01 | 2.18 | 2.16 | 0.22 | 0.28 |
| 3890 | 0 | 122075 | RGLKQQKASAELIEEEVA<br>KLLKLKAQ  | 3.74 | 0.01 | 0.78 | 0.44 | 1.13 | 0.85 |
| 3891 | 0 | 1146   | AERAVEVDPDDVNK                  | 2.64 | 0.01 | 2.56 | 0.44 | 0.85 | 0.28 |
| 3892 | 0 | 127918 | AERHFQAEPLNWTGS<br>WDAS         | 2.92 | 0.01 | 0.78 | 0.44 | 1.13 | 0.28 |

|      |   |        |                               |      |      |      |      |      |      |
|------|---|--------|-------------------------------|------|------|------|------|------|------|
| 3893 | 0 | 450410 | AERILSV                       | 1.99 | 0.01 | 0.90 | 0.44 | 1.41 | 1.39 |
| 3894 | 0 | 188028 | AERLEEETND                    | 2.31 | 0.01 | 2.92 | 0.68 | 0.22 | 0.85 |
| 3895 | 0 | 188028 | AERLEEETND                    | 2.31 | 0.01 | 2.92 | 1.81 | 0.22 | 0.85 |
| 3896 | 0 | 188028 | AERLEEETND                    | 2.31 | 0.01 | 2.92 | 3.37 | 0.22 | 0.85 |
| 3897 | 0 | 188029 | AERRQEDSAT                    | 2.33 | 0.01 | 2.92 | 0.68 | 0.22 | 0.85 |
| 3898 | 0 | 188029 | AERRQEDSAT                    | 2.33 | 0.01 | 2.92 | 1.81 | 0.22 | 0.85 |
| 3899 | 0 | 188029 | AERRQEDSAT                    | 2.33 | 0.01 | 2.92 | 3.37 | 0.22 | 0.85 |
| 3900 | 0 | 450411 | AERYPDS                       | 1.99 | 0.01 | 0.90 | 0.44 | 1.41 | 1.39 |
| 3901 | 0 | 116917 | AESDDSSTRRH                   | 2.40 | 0.01 | 0.90 | 1.15 | 0.22 | 0.28 |
| 3902 | 0 | 116917 | AESDDSSTRRH                   | 2.40 | 0.01 | 0.90 | 0.44 | 0.85 | 0.28 |
| 3903 | 0 | 1157   | AESEE                         | 1.72 | 0.01 | 2.30 | 0.44 | 0.85 | 0.28 |
| 3904 | 0 | 1157   | AESEE                         | 1.72 | 0.01 | 2.30 | 0.44 | 0.85 | 1.27 |
| 3905 | 0 | 1157   | AESEE                         | 1.72 | 0.01 | 0.78 | 0.44 | 0.85 | 1.27 |
| 3906 | 0 | 182044 | AESGCQEGWERHGGF               | 2.67 | 0.01 | 0.78 | 0.44 | 1.13 | 0.85 |
| 3907 | 0 | 249381 | AESKSAEPKPAEPKS               | 2.75 | 0.01 | 1.61 | 0.44 | 0.85 | 1.28 |
| 3908 | 0 | 1164   | AESLRAVIPPTTTP                | 2.62 | 0.01 | 2.40 | 2.43 | 0.22 | 0.28 |
| 3909 | 0 | 1164   | AESLRAVIPPTTTP                | 2.62 | 0.01 | 2.40 | 2.43 | 0.22 | 0.28 |
| 3910 | 0 | 1164   | AESLRAVIPPTTTP                | 2.62 | 0.01 | 2.40 | 2.43 | 0.22 | 0.28 |
| 3911 | 0 | 510889 | AESNKQNTASTETTT               | 2.71 | 0.01 | 2.24 | 0.44 | 1.41 | 1.28 |
| 3912 | 0 | 1165   | AESPKKP                       | 2.03 | 0.01 | 2.97 | 0.44 | 0.85 | 0.85 |
| 3913 | 0 | 1165   | AESPKKP                       | 2.03 | 0.01 | 2.97 | 0.44 | 0.85 | 0.85 |
| 3914 | 0 | 1165   | AESPKKP                       | 2.03 | 0.01 | 2.97 | 0.44 | 0.85 | 0.28 |
| 3915 | 0 | 1165   | AESPKKP                       | 2.03 | 0.01 | 2.97 | 0.44 | 0.85 | 0.28 |
| 3916 | 0 | 1165   | AESPKKP                       | 2.03 | 0.01 | 2.97 | 0.44 | 0.85 | 2.12 |
| 3917 | 0 | 1165   | AESPKKP                       | 2.03 | 0.01 | 2.97 | 0.44 | 0.85 | 0.28 |
| 3918 | 0 | 164568 | AESRKPMMSGCEV                 | 2.45 | 0.01 | 3.78 | 0.44 | 1.23 | 0.85 |
| 3919 | 0 | 1168   | AESSG                         | 1.75 | 0.01 | 3.89 | 2.88 | 2.26 | 0.85 |
| 3920 | 0 | 181980 | AESSTEGDGSSDDEETIR            | 2.87 | 0.01 | 3.85 | 2.13 | 1.74 | 0.28 |
| 3921 | 0 | 249434 | AESTVIKTTTATTGD               | 2.69 | 0.01 | 1.61 | 0.44 | 0.85 | 1.28 |
| 3922 | 0 | 1171   | AESVSQNN                      | 2.11 | 0.01 | 2.30 | 0.44 | 0.85 | 0.85 |
| 3923 | 0 | 1171   | AESVSQNN                      | 2.11 | 0.01 | 2.30 | 1.15 | 0.22 | 0.85 |
| 3924 | 0 | 249490 | AETEVSRDPTDEHSD               | 2.70 | 0.01 | 1.61 | 0.44 | 0.85 | 1.28 |
| 3925 | 0 | 1179   | AETFEYQIELGGELHVGL<br>LW      | 2.94 | 0.01 | 2.40 | 0.44 | 1.59 | 0.28 |
| 3926 | 0 | 1184   | AETGVGVIKSIAPASKNL<br>DLTNITH | 3.17 | 0.01 | 2.85 | 3.06 | 0.22 | 0.28 |
| 3927 | 0 | 1184   | AETGVGVIKSIAPASKNL<br>DLTNITH | 3.17 | 0.01 | 2.85 | 3.06 | 0.22 | 0.28 |
| 3928 | 0 | 1184   | AETGVGVIKSIAPASKNL<br>DLTNITH | 3.17 | 0.01 | 2.85 | 3.89 | 0.22 | 0.28 |
| 3929 | 0 | 1184   | AETGVGVIKSIAPASKNL<br>DLTNITH | 3.17 | 0.01 | 2.85 | 4.03 | 0.22 | 0.28 |
| 3930 | 0 | 1184   | AETGVGVIKSIAPASKNL<br>DLTNITH | 3.17 | 0.01 | 2.85 | 3.81 | 0.22 | 0.28 |

|      |   |        |                                |      |      |      |      |      |      |
|------|---|--------|--------------------------------|------|------|------|------|------|------|
| 3931 | 0 | 1184   | AETGVGVIKSIAPASKNL<br>DLTNITH  | 3.17 | 0.01 | 2.85 | 3.81 | 0.22 | 0.28 |
| 3932 | 0 | 1185   | AETGVGVIKSIAPASKNL<br>DLTNITHV | 3.21 | 0.01 | 2.85 | 1.15 | 0.22 | 0.85 |
| 3933 | 0 | 1185   | AETGVGVIKSIAPASKNL<br>DLTNITHV | 3.21 | 0.01 | 2.85 | 1.12 | 0.22 | 0.28 |
| 3934 | 0 | 1185   | AETGVGVIKSIAPASKNL<br>DLTNITHV | 3.21 | 0.01 | 2.85 | 1.12 | 0.22 | 0.28 |
| 3935 | 0 | 1186   | AETHL                          | 1.74 | 0.01 | 3.55 | 0.68 | 0.22 | 0.28 |
| 3936 | 0 | 1186   | AETHL                          | 1.74 | 0.01 | 3.55 | 0.68 | 0.22 | 0.28 |
| 3937 | 0 | 1187   | AETHLFTG                       | 2.12 | 0.01 | 3.55 | 0.68 | 0.22 | 0.28 |
| 3938 | 0 | 1188   | AETHLFTGTT                     | 2.31 | 4.63 | 3.55 | 0.68 | 0.22 | 3.30 |
| 3939 | 0 | 1188   | AETHLFTGTT                     | 2.31 | 4.63 | 3.55 | 0.68 | 0.22 | 1.34 |
| 3940 | 0 | 1189   | AETHVTGGNAGRRTAG<br>LVGLLTPG   | 3.16 | 0.01 | 2.68 | 0.44 | 0.85 | 0.28 |
| 3941 | 0 | 105073 | AETIF                          | 1.74 | 0.01 | 3.03 | 1.20 | 0.22 | 0.28 |
| 3942 | 0 | 96067  | AETIFD                         | 1.88 | 0.01 | 3.03 | 1.20 | 0.22 | 0.28 |
| 3943 | 0 | 96067  | AETIFD                         | 1.88 | 0.01 | 2.40 | 3.42 | 0.22 | 0.28 |
| 3944 | 0 | 96067  | AETIFD                         | 1.88 | 0.01 | 2.40 | 3.42 | 0.22 | 0.28 |
| 3945 | 0 | 96067  | AETIFD                         | 1.88 | 0.01 | 2.40 | 2.52 | 0.22 | 0.28 |
| 3946 | 0 | 96067  | AETIFD                         | 1.88 | 0.01 | 2.40 | 2.52 | 0.22 | 0.28 |
| 3947 | 0 | 123005 | AETIFDVTTLNPTIAG               | 2.73 | 0.01 | 2.40 | 2.69 | 0.22 | 0.28 |
| 3948 | 0 | 123005 | AETIFDVTTLNPTIAG               | 2.73 | 0.01 | 2.40 | 3.42 | 0.22 | 0.28 |
| 3949 | 0 | 1190   | AETIHELLVRM                    | 2.38 | 0.01 | 3.14 | 0.68 | 0.22 | 1.27 |
| 3950 | 0 | 1190   | AETIHELLVRM                    | 2.38 | 0.01 | 3.14 | 0.68 | 0.22 | 1.57 |
| 3951 | 0 | 1190   | AETIHELLVRM                    | 2.38 | 0.01 | 3.14 | 0.68 | 0.22 | 1.34 |
| 3952 | 0 | 188031 | AETISNELVSVLQKN                | 2.68 | 0.01 | 1.66 | 0.68 | 0.22 | 0.28 |
| 3953 | 0 | 133775 | AETNRAPFDLAEAE                 | 2.64 | 0.01 | 3.75 | 1.12 | 0.22 | 0.85 |
| 3954 | 0 | 133775 | AETNRAPFDLAEAE                 | 2.64 | 0.01 | 3.75 | 1.12 | 0.22 | 2.02 |
| 3955 | 0 | 133775 | AETNRAPFDLAEAE                 | 2.64 | 0.01 | 3.75 | 1.12 | 0.22 | 1.27 |
| 3956 | 0 | 118735 | AETREERMERKRRE                 | 2.66 | 0.01 | 0.78 | 0.44 | 1.13 | 3.25 |
| 3957 | 0 | 118735 | AETREERMERKRRE                 | 2.66 | 0.01 | 0.78 | 2.79 | 1.13 | 1.28 |
| 3958 | 0 | 118735 | AETREERMERKRRE                 | 2.66 | 0.01 | 0.78 | 1.81 | 1.41 | 1.28 |
| 3959 | 0 | 118735 | AETREERMERKRRE                 | 2.66 | 0.01 | 0.78 | 1.81 | 1.41 | 1.28 |
| 3960 | 0 | 1199   | AETRLNPDQ                      | 2.29 | 0.01 | 3.89 | 0.68 | 0.22 | 0.28 |
| 3961 | 0 | 510420 | AETVESCLAKPH                   | 2.46 | 0.01 | 0.90 | 3.07 | 1.13 | 1.39 |
| 3962 | 0 | 125358 | AETVESCLAKSH                   | 2.48 | 0.01 | 0.90 | 0.44 | 1.23 | 0.28 |
| 3963 | 0 | 114732 | AEVDCSRFPN                     | 2.26 | 0.01 | 2.25 | 0.44 | 1.23 | 0.85 |
| 3964 | 0 | 114732 | AEVDCSRFPN                     | 2.26 | 0.01 | 2.25 | 0.44 | 1.23 | 0.85 |
| 3965 | 0 | 1206   | AEVDCSRFPNATDK                 | 2.58 | 0.01 | 2.25 | 0.44 | 1.23 | 1.27 |
| 3966 | 0 | 1206   | AEVDCSRFPNATDK                 | 2.58 | 0.01 | 2.25 | 1.12 | 0.22 | 1.27 |
| 3967 | 0 | 230200 | AEVDCSRFPNATDKEGK<br>D         | 2.82 | 0.01 | 2.25 | 0.44 | 1.23 | 0.28 |
| 3968 | 0 | 1209   | AEVDCSRFPNATDKEGK<br>DVL       | 2.92 | 0.01 | 2.25 | 0.44 | 1.23 | 0.85 |
| 3969 | 0 | 249578 | AEVDEDEDDDDDDND                | 2.72 | 0.01 | 1.61 | 0.44 | 0.85 | 1.28 |

|      |   |        |                                     |      |      |      |      |      |      |
|------|---|--------|-------------------------------------|------|------|------|------|------|------|
| 3970 | 0 | 151788 | AEVDGNLVTIKH                        | 2.43 | 0.01 | 2.80 | 2.78 | 0.22 | 0.28 |
| 3971 | 0 | 133995 | AEVETDKATVGFE                       | 2.58 | 0.01 | 0.78 | 0.44 | 1.13 | 0.28 |
| 3972 | 0 | 133995 | AEVETDKATVGFE                       | 2.58 | 0.01 | 0.78 | 0.44 | 1.13 | 0.28 |
| 3973 | 0 | 133995 | AEVETDKATVGFE                       | 2.58 | 0.01 | 0.78 | 0.44 | 1.13 | 0.28 |
| 3974 | 0 | 133995 | AEVETDKATVGFE                       | 2.58 | 0.01 | 0.78 | 0.44 | 1.41 | 0.28 |
| 3975 | 0 | 1219   | AEVLKDAIKDLVMTKPA<br>PTC            | 2.97 | 0.01 | 2.43 | 0.44 | 2.82 | 0.28 |
| 3976 | 0 | 1219   | AEVLKDAIKDLVMTKPA<br>PTC            | 2.97 | 0.01 | 2.43 | 0.44 | 2.82 | 0.28 |
| 3977 | 0 | 156603 | AEVLRDGDGP                          | 2.29 | 0.01 | 0.78 | 0.44 | 1.59 | 0.28 |
| 3978 | 0 | 106230 | AEVPPKKCDIK                         | 2.31 | 0.01 | 3.08 | 0.44 | 1.23 | 0.85 |
| 3979 | 0 | 108730 | AEVRKALSRQEMQEVQ<br>SSRSGR          | 3.08 | 0.01 | 1.75 | 0.44 | 1.13 | 0.28 |
| 3980 | 0 | 1225   | AEVSYVHVNGAK                        | 2.48 | 0.01 | 3.24 | 0.68 | 2.25 | 1.75 |
| 3981 | 0 | 1225   | AEVSYVHVNGAK                        | 2.48 | 0.01 | 3.24 | 0.68 | 2.25 | 1.75 |
| 3982 | 0 | 1236   | AEYAAANP                            | 2.15 | 0.01 | 3.20 | 2.22 | 0.85 | 0.28 |
| 3983 | 0 | 170227 | AEYEDGFSLPYGWTP                     | 2.66 | 0.01 | 0.78 | 0.44 | 1.13 | 0.28 |
| 3984 | 0 | 170228 | AEYGKKAKSETFRLL                     | 2.67 | 0.01 | 0.78 | 0.44 | 1.41 | 0.28 |
| 3985 | 0 | 114733 | AEYRGRVSLVEDHIAEGS<br>VAVRIQE       | 3.18 | 0.01 | 1.60 | 0.44 | 1.13 | 0.28 |
| 3986 | 0 | 114733 | AEYRGRVSLVEDHIAEGS<br>VAVRIQE       | 3.18 | 0.01 | 1.60 | 0.44 | 1.41 | 0.28 |
| 3987 | 0 | 114733 | AEYRGRVSLVEDHIAEGS<br>VAVRIQE       | 3.18 | 0.01 | 1.60 | 0.44 | 1.59 | 0.28 |
| 3988 | 0 | 149607 | AEYSMYSAPRR                         | 2.50 | 0.01 | 0.90 | 2.37 | 0.22 | 0.28 |
| 3989 | 0 | 114192 | AEYWNSQPEILERTRAE                   | 2.78 | 3.55 | 1.75 | 3.81 | 0.22 | 0.28 |
| 3990 | 0 | 114192 | AEYWNSQPEILERTRAE                   | 2.78 | 3.55 | 1.75 | 3.81 | 2.25 | 1.75 |
| 3991 | 0 | 137374 | AEYWNSQPEILERTRAE<br>DTVCRHNYEGPETH | 3.38 | 0.01 | 1.75 | 3.59 | 0.22 | 0.28 |
| 3992 | 0 | 137374 | AEYWNSQPEILERTRAE<br>DTVCRHNYEGPETH | 3.38 | 0.01 | 1.75 | 3.59 | 0.22 | 0.28 |
| 3993 | 0 | 137374 | AEYWNSQPEILERTRAE<br>DTVCRHNYEGPETH | 3.38 | 0.01 | 1.75 | 3.59 | 0.22 | 0.85 |
| 3994 | 0 | 114193 | AEYYNKQYLEQTRAELD<br>T              | 2.87 | 3.55 | 1.75 | 3.81 | 0.22 | 0.28 |
| 3995 | 0 | 114193 | AEYYNKQYLEQTRAELD<br>T              | 2.87 | 3.55 | 1.75 | 3.81 | 2.25 | 1.75 |
| 3996 | 0 | 112901 | AEYYNKQYLEQTRAELD<br>T              | 2.87 | 0.01 | 1.75 | 2.25 | 0.22 | 0.28 |
| 3997 | 0 | 112901 | AEYYNKQYLEQTRAELD<br>T              | 2.87 | 0.01 | 1.75 | 2.25 | 0.22 | 0.28 |

|      |   |        |                          |      |      |      |      |      |      |
|------|---|--------|--------------------------|------|------|------|------|------|------|
| 3998 | 0 | 112901 | AEYYNKQYLEQTRAELD<br>T   | 2.87 | 0.01 | 1.75 | 2.25 | 0.22 | 0.28 |
| 3999 | 0 | 112901 | AEYYNKQYLEQTRAELD<br>T   | 2.87 | 0.01 | 1.75 | 2.25 | 2.25 | 1.75 |
| 4000 | 0 | 1248   | AFAFAGNHVSPTHYVPE<br>SDA | 2.95 | 0.01 | 1.72 | 0.44 | 0.85 | 0.28 |
| 4001 | 0 | 1250   | AFAKPLASDPLF             | 2.52 | 0.01 | 0.90 | 2.74 | 0.22 | 1.27 |
| 4002 | 0 | 1254   | AFAQAPTHQLSL             | 2.50 | 0.01 | 0.90 | 0.68 | 0.22 | 0.28 |
| 4003 | 0 | 1254   | AFAQAPTHQLSL             | 2.50 | 0.01 | 0.90 | 0.68 | 0.22 | 1.27 |
| 4004 | 0 | 1254   | AFAQAPTHQLSL             | 2.50 | 0.01 | 0.90 | 0.44 | 1.59 | 0.28 |
| 4005 | 0 | 1257   | AFASNRTFDITVSGLGTA<br>PK | 2.94 | 0.01 | 2.48 | 1.20 | 0.22 | 0.28 |
| 4006 | 0 | 1257   | AFASNRTFDITVSGLGTA<br>PK | 2.94 | 0.01 | 2.48 | 1.20 | 0.22 | 0.28 |
| 4007 | 0 | 1257   | AFASNRTFDITVSGLGTA<br>PK | 2.94 | 0.01 | 2.48 | 1.20 | 0.22 | 2.12 |
| 4008 | 0 | 1258   | AFASRGNHDSPTHYVPE<br>SD  | 2.88 | 0.01 | 1.96 | 0.44 | 0.85 | 0.28 |
| 4009 | 0 | 1259   | AFASRGNHVAPTHYVTE<br>SD  | 2.88 | 0.01 | 1.72 | 0.44 | 0.85 | 0.28 |
| 4010 | 0 | 1260   | AFASRGNHVAPTHYVTE<br>SDA | 2.94 | 0.01 | 4.15 | 0.44 | 0.85 | 0.28 |
| 4011 | 0 | 1260   | AFASRGNHVAPTHYVTE<br>SDA | 2.94 | 0.01 | 4.15 | 0.44 | 0.85 | 0.28 |
| 4012 | 0 | 1260   | AFASRGNHVAPTHYVTE<br>SDA | 2.94 | 0.01 | 4.15 | 0.44 | 0.85 | 0.28 |
| 4013 | 0 | 1260   | AFASRGNHVAPTHYVTE<br>SDA | 2.94 | 0.01 | 4.15 | 0.44 | 0.85 | 0.28 |
| 4014 | 0 | 1261   | AFASRGNHVAPTHYVVE<br>SDA | 2.93 | 0.01 | 1.72 | 0.44 | 0.85 | 0.28 |
| 4015 | 0 | 1261   | AFASRGNHVAPTHYVVE<br>SDA | 2.93 | 0.01 | 4.03 | 0.44 | 0.85 | 0.28 |
| 4016 | 0 | 1261   | AFASRGNHVAPTHYVVE<br>SDA | 2.93 | 0.01 | 4.03 | 0.44 | 0.85 | 0.28 |
| 4017 | 0 | 1261   | AFASRGNHVAPTHYVVE<br>SDA | 2.93 | 0.01 | 4.03 | 0.44 | 0.85 | 0.28 |
| 4018 | 0 | 1261   | AFASRGNHVAPTHYVVE<br>SDA | 2.93 | 0.01 | 4.03 | 0.44 | 0.85 | 0.28 |
| 4019 | 0 | 1262   | AFASRGNHVSPAHYVPE<br>SDA | 2.95 | 0.01 | 1.72 | 0.44 | 0.85 | 0.28 |
| 4020 | 0 | 1263   | AFASRGNHVSPRHYVPE<br>SE  | 2.91 | 0.01 | 1.96 | 0.44 | 0.85 | 0.28 |
| 4021 | 0 | 1265   | AFASRGNHVSPTHYVPE<br>SDA | 2.94 | 0.01 | 1.72 | 0.44 | 0.85 | 0.28 |
| 4022 | 0 | 1265   | AFASRGNHVSPTHYVPE<br>SDA | 2.94 | 0.01 | 4.15 | 0.44 | 0.85 | 0.28 |

|      |   |        |                                    |      |      |      |      |      |      |
|------|---|--------|------------------------------------|------|------|------|------|------|------|
| 4023 | 0 | 1265   | AFASRGNHVSPTHYVPE<br>SDA           | 2.94 | 0.01 | 4.15 | 0.44 | 0.85 | 0.28 |
| 4024 | 0 | 1265   | AFASRGNHVSPTHYVPE<br>SDA           | 2.94 | 0.01 | 4.15 | 0.44 | 1.13 | 0.28 |
| 4025 | 0 | 1265   | AFASRGNHVSPTHYVPE<br>SDA           | 2.94 | 0.01 | 1.72 | 0.44 | 0.85 | 0.28 |
| 4026 | 0 | 1265   | AFASRGNHVSPTHYVPE<br>SDA           | 2.94 | 0.01 | 4.15 | 0.44 | 0.85 | 0.28 |
| 4027 | 0 | 1265   | AFASRGNHVSPTHYVPE<br>SDA           | 2.94 | 0.01 | 1.72 | 0.44 | 0.85 | 0.28 |
| 4028 | 0 | 1266   | AFASRGNHVSPTHYVPE<br>SDAAAR        | 3.07 | 0.01 | 1.72 | 0.44 | 1.59 | 0.28 |
| 4029 | 0 | 95220  | AFCGPVGAHG                         | 2.34 | 0.01 | 2.60 | 0.44 | 1.23 | 0.85 |
| 4030 | 0 | 1276   | AFDEMEECASHLPYIEQ<br>GMQ           | 2.91 | 0.01 | 2.41 | 0.44 | 0.85 | 0.28 |
| 4031 | 0 | 128218 | AFDKHMNL                           | 2.10 | 0.01 | 0.78 | 0.44 | 1.13 | 0.28 |
| 4032 | 0 | 103017 | AFDLRLLFKRNICH                     | 2.67 | 0.01 | 2.04 | 0.44 | 0.85 | 1.28 |
| 4033 | 0 | 1284   | AFDQATRVYQDLGGPS<br>QAPLPC         | 3.03 | 0.01 | 2.43 | 0.44 | 1.59 | 0.28 |
| 4034 | 0 | 99088  | AFDQFRQTYRQWIE                     | 2.67 | 0.01 | 2.86 | 2.02 | 0.85 | 0.85 |
| 4035 | 0 | 1289   | AFDYSRPGLLDPVFA                    | 2.68 | 0.01 | 0.90 | 1.15 | 0.22 | 0.85 |
| 4036 | 0 | 180080 | AFFGVMPRGTTPRAPV<br>R              | 2.83 | 0.01 | 4.15 | 2.22 | 0.22 | 0.28 |
| 4037 | 0 | 136120 | AFFPNMVNMLVLGKHL<br>GIPK           | 2.95 | 0.01 | 0.78 | 0.44 | 1.13 | 0.28 |
| 4038 | 0 | 1298   | AFFSFCETNG                         | 2.31 | 0.01 | 0.78 | 0.44 | 1.74 | 0.28 |
| 4039 | 0 | 1299   | AFFSILQDMRNTIM                     | 2.58 | 0.01 | 2.56 | 2.69 | 0.22 | 0.28 |
| 4040 | 0 | 1299   | AFFSILQDMRNTIM                     | 2.58 | 0.01 | 2.56 | 0.44 | 0.85 | 0.28 |
| 4041 | 0 | 78923  | AFGANS                             | 1.91 | 0.01 | 2.08 | 0.68 | 0.22 | 0.28 |
| 4042 | 0 | 152395 | AFGFNEPNGN                         | 2.35 | 0.01 | 2.18 | 2.16 | 0.22 | 0.28 |
| 4043 | 0 | 1305   | AFGSIKDFKVQEAGGTT<br>RGVFPYKRDAAGR | 3.34 | 0.01 | 3.65 | 2.22 | 0.22 | 0.28 |
| 4044 | 0 | 78345  | AFGSMAKKGEEQNVRS<br>AG             | 2.84 | 0.01 | 3.22 | 1.20 | 0.22 | 1.27 |
| 4045 | 0 | 80221  | AFGVGDDESK                         | 2.30 | 0.01 | 3.06 | 0.44 | 0.85 | 0.28 |
| 4046 | 0 | 132979 | AFHYESQ                            | 1.99 | 0.01 | 0.78 | 0.44 | 1.93 | 1.75 |
| 4047 | 0 | 132979 | AFHYESQ                            | 1.99 | 0.01 | 0.78 | 0.44 | 2.35 | 1.27 |
| 4048 | 0 | 132979 | AFHYESQ                            | 1.99 | 0.01 | 2.96 | 1.20 | 2.60 | 1.75 |
| 4049 | 0 | 132979 | AFHYESQ                            | 1.99 | 0.01 | 2.96 | 1.20 | 0.22 | 1.34 |
| 4050 | 0 | 132979 | AFHYESQ                            | 1.99 | 0.01 | 2.96 | 1.20 | 0.22 | 1.34 |
| 4051 | 0 | 132979 | AFHYESQ                            | 1.99 | 0.01 | 2.96 | 1.20 | 0.22 | 1.34 |
| 4052 | 0 | 423205 | AFIRRRRPPHHTQLV                    | 2.64 | 0.01 | 2.51 | 0.44 | 2.35 | 1.28 |
| 4053 | 0 | 1330   | AFKGGNGAKKG                        | 2.45 | 0.01 | 2.24 | 1.20 | 0.22 | 0.28 |
| 4054 | 0 | 1330   | AFKGGNGAKKG                        | 2.45 | 0.01 | 2.24 | 1.20 | 0.22 | 0.28 |
| 4055 | 0 | 1330   | AFKGGNGAKKG                        | 2.45 | 0.01 | 2.24 | 0.68 | 0.22 | 1.75 |
| 4056 | 0 | 1330   | AFKGGNGAKKG                        | 2.45 | 0.01 | 2.24 | 0.68 | 0.22 | 0.28 |
| 4057 | 0 | 1330   | AFKGGNGAKKG                        | 2.45 | 0.01 | 2.24 | 0.68 | 0.22 | 0.28 |

|      |   |        |                                         |      |      |      |      |      |      |
|------|---|--------|-----------------------------------------|------|------|------|------|------|------|
| 4058 | 0 | 1336   | AFKVAATAANAAPAND<br>KFTV                | 3.00 | 0.01 | 3.00 | 0.44 | 1.23 | 0.28 |
| 4059 | 0 | 99090  | AFLDVVPGQAGQKQI                         | 2.68 | 0.01 | 2.86 | 2.02 | 0.85 | 0.85 |
| 4060 | 0 | 103018 | AFLHWAITDGNKASF                         | 2.65 | 0.01 | 2.04 | 0.44 | 0.85 | 1.28 |
| 4061 | 0 | 423206 | AFLHYFTTLKQYLRN                         | 2.67 | 0.01 | 2.51 | 0.44 | 2.35 | 1.28 |
| 4062 | 0 | 158672 | AFLKAGDADGDGMIG                         | 2.72 | 0.01 | 3.26 | 0.44 | 1.23 | 0.28 |
| 4063 | 0 | 158672 | AFLKAGDADGDGMIG                         | 2.72 | 0.01 | 3.26 | 0.44 | 1.41 | 0.28 |
| 4064 | 0 | 115675 | AFLLYQEPVL                              | 2.31 | 0.01 | 1.60 | 0.44 | 1.23 | 0.85 |
| 4065 | 0 | 115675 | AFLLYQEPVL                              | 2.31 | 0.01 | 1.60 | 0.44 | 1.23 | 0.85 |
| 4066 | 0 | 156236 | AFLPVGAFNSDNFKSKG<br>RG                 | 2.91 | 0.01 | 3.44 | 0.44 | 0.85 | 0.28 |
| 4067 | 0 | 156236 | AFLPVGAFNSDNFKSKG<br>RG                 | 2.91 | 0.01 | 3.44 | 0.44 | 1.59 | 0.28 |
| 4068 | 0 | 156236 | AFLPVGAFNSDNFKSKG<br>RG                 | 2.91 | 0.01 | 3.44 | 0.44 | 0.85 | 0.28 |
| 4069 | 0 | 156236 | AFLPVGAFNSDNFKSKG<br>RG                 | 2.91 | 0.01 | 3.44 | 0.44 | 1.59 | 0.28 |
| 4070 | 0 | 135893 | AFLQDVMNILLQ                            | 2.46 | 0.01 | 0.78 | 0.44 | 1.13 | 0.28 |
| 4071 | 0 | 77826  | AFLRHAAL                                | 2.16 | 0.01 | 0.78 | 0.44 | 1.41 | 0.28 |
| 4072 | 0 | 77826  | AFLRHAAL                                | 2.16 | 0.01 | 0.78 | 0.44 | 1.41 | 0.28 |
| 4073 | 0 | 131814 | AFLSVDHLGGGGESM                         | 2.65 | 0.01 | 0.78 | 0.44 | 1.13 | 0.85 |
| 4074 | 0 | 106232 | AFMTPFPESLTP                            | 2.49 | 0.01 | 0.90 | 1.15 | 0.22 | 1.39 |
| 4075 | 0 | 92285  | AFNGGDGVDT                              | 2.33 | 0.01 | 2.67 | 2.00 | 0.22 | 0.28 |
| 4076 | 0 | 92285  | AFNGGDGVDT                              | 2.33 | 0.01 | 2.67 | 2.00 | 0.22 | 0.28 |
| 4077 | 0 | 92285  | AFNGGDGVDT                              | 2.33 | 0.01 | 2.67 | 2.00 | 0.22 | 0.28 |
| 4078 | 0 | 105075 | AFNHFGGLIQR                             | 2.45 | 0.01 | 4.93 | 0.44 | 1.23 | 0.85 |
| 4079 | 0 | 105076 | AFNHFGGLMQR                             | 2.45 | 0.01 | 4.33 | 0.44 | 1.23 | 0.85 |
| 4080 | 0 | 105078 | AFNHFGIQLVQR                            | 2.45 | 0.01 | 4.23 | 0.44 | 1.23 | 0.85 |
| 4081 | 0 | 105079 | AFNHFGKRLIQR                            | 2.45 | 0.01 | 4.63 | 0.44 | 1.23 | 0.85 |
| 4082 | 0 | 105080 | AFNHFGRLVQR                             | 2.48 | 0.01 | 4.45 | 0.44 | 1.23 | 0.85 |
| 4083 | 0 | 105081 | AFNKFTDNVDQR                            | 2.48 | 0.01 | 4.08 | 0.44 | 1.23 | 0.85 |
| 4084 | 0 | 156842 | AFNKTGVSPYSKTLVLQT<br>SEKALQQYPSERELRGI | 3.53 | 0.01 | 0.78 | 0.44 | 2.82 | 1.39 |
| 4085 | 0 | 1366   | AFNPAY                                  | 1.91 | 0.01 | 0.90 | 0.68 | 0.22 | 1.39 |
| 4086 | 0 | 1367   | AFNQFGPNAGQR                            | 2.52 | 0.01 | 3.42 | 1.15 | 0.22 | 0.28 |
| 4087 | 0 | 1367   | AFNQFGPNAGQR                            | 2.52 | 0.01 | 3.42 | 1.15 | 0.22 | 0.85 |
| 4088 | 0 | 1367   | AFNQFGPNAGQR                            | 2.52 | 0.01 | 3.42 | 1.15 | 0.22 | 0.85 |
| 4089 | 0 | 1367   | AFNQFGPNAGQR                            | 2.52 | 0.01 | 3.42 | 0.44 | 1.23 | 2.35 |
| 4090 | 0 | 1367   | AFNQFGPNAGQR                            | 2.52 | 0.01 | 3.42 | 0.44 | 1.23 | 0.85 |
| 4091 | 0 | 1368   | AFNRASD                                 | 2.03 | 0.01 | 0.90 | 0.44 | 1.23 | 1.27 |
| 4092 | 0 | 1368   | AFNRASD                                 | 2.03 | 0.01 | 0.90 | 0.44 | 1.23 | 0.28 |
| 4093 | 0 | 105084 | AFNRFGGLVQR                             | 2.48 | 0.01 | 4.33 | 0.44 | 1.23 | 0.85 |
| 4094 | 0 | 123930 | AFNTLPDRKASPPSGL<br>WSPAYASH            | 3.15 | 0.01 | 2.19 | 0.44 | 1.13 | 0.28 |



|      |   |        |                          |      |      |      |      |      |      |
|------|---|--------|--------------------------|------|------|------|------|------|------|
| 4095 | 0 | 475489 | AFNTNITDMLDSRLKKR<br>N   | 2.84 | 0.01 | 3.12 | 0.68 | 0.22 | 0.28 |
| 4096 | 0 | 99881  | AFNYMDKFNE               | 2.31 | 0.01 | 2.18 | 2.16 | 0.22 | 0.28 |
| 4097 | 0 | 167860 | AFPAESKSVIIGCTGGSP<br>E  | 2.90 | 0.01 | 2.75 | 0.44 | 1.59 | 2.51 |
| 4098 | 0 | 167860 | AFPAESKSVIIGCTGGSP<br>E  | 2.90 | 0.01 | 2.75 | 0.44 | 0.85 | 2.51 |
| 4099 | 0 | 167860 | AFPAESKSVIIGCTGGSP<br>E  | 2.90 | 0.01 | 2.75 | 0.44 | 0.85 | 2.51 |
| 4100 | 0 | 135440 | AFPAVT                   | 1.91 | 0.01 | 0.78 | 1.20 | 0.22 | 0.28 |
| 4101 | 0 | 99091  | AFPGSGEQVEKLIKN          | 2.64 | 0.01 | 2.16 | 0.44 | 1.23 | 1.48 |
| 4102 | 0 | 1373   | AFPL                     | 1.57 | 0.01 | 3.17 | 1.15 | 2.26 | 1.27 |
| 4103 | 0 | 1373   | AFPL                     | 1.57 | 0.01 | 3.17 | 1.15 | 2.26 | 0.28 |
| 4104 | 0 | 97181  | AFPLPTDA                 | 2.15 | 0.01 | 2.87 | 0.68 | 0.22 | 0.28 |
| 4105 | 0 | 97181  | AFPLPTDA                 | 2.15 | 0.01 | 2.87 | 1.81 | 0.22 | 0.28 |
| 4106 | 0 | 114258 | AFQISREEARRLKYN          | 2.65 | 0.01 | 3.48 | 0.44 | 1.23 | 0.85 |
| 4107 | 0 | 1379   | AFQNRLESIK               | 2.26 | 0.01 | 2.73 | 0.44 | 0.85 | 0.28 |
| 4108 | 0 | 118736 | AFQQGKIPP                | 2.20 | 0.01 | 0.78 | 0.44 | 1.13 | 0.28 |
| 4109 | 0 | 91100  | AFQTPVHS                 | 2.10 | 0.01 | 2.90 | 2.71 | 0.22 | 0.28 |
| 4110 | 0 | 91100  | AFQTPVHS                 | 2.10 | 0.01 | 2.90 | 2.71 | 0.22 | 0.85 |
| 4111 | 0 | 91100  | AFQTPVHS                 | 2.10 | 0.01 | 2.90 | 2.71 | 0.22 | 0.85 |
| 4112 | 0 | 91100  | AFQTPVHS                 | 2.10 | 0.01 | 2.90 | 2.71 | 0.22 | 2.12 |
| 4113 | 0 | 91100  | AFQTPVHS                 | 2.10 | 0.01 | 2.90 | 2.71 | 0.22 | 1.34 |
| 4114 | 0 | 153249 | AFRANTANPDWDFNP          | 2.72 | 0.01 | 2.08 | 0.68 | 0.22 | 0.28 |
| 4115 | 0 | 1385   | AFRELADA                 | 2.15 | 0.01 | 2.21 | 1.12 | 0.22 | 0.28 |
| 4116 | 0 | 1385   | AFRELADA                 | 2.15 | 0.01 | 2.21 | 0.44 | 0.85 | 0.28 |
| 4117 | 0 | 1386   | AFRELADALL               | 2.34 | 0.01 | 2.21 | 1.12 | 0.22 | 0.28 |
| 4118 | 0 | 1386   | AFRELADALL               | 2.34 | 0.01 | 2.21 | 1.12 | 0.22 | 0.28 |
| 4119 | 0 | 125667 | AFRFGHATIHPLVRRLLDA<br>S | 2.89 | 0.01 | 0.78 | 1.20 | 0.22 | 0.28 |
| 4120 | 0 | 125667 | AFRFGHATIHPLVRRLLDA<br>S | 2.89 | 0.01 | 0.78 | 1.20 | 0.22 | 0.28 |
| 4121 | 0 | 423207 | AFRFTPANTTTNSST          | 2.72 | 0.01 | 2.51 | 0.44 | 2.35 | 1.28 |
| 4122 | 0 | 130437 | AFRGHIAREE               | 2.32 | 0.01 | 0.78 | 3.53 | 0.22 | 0.28 |
| 4123 | 0 | 130437 | AFRGHIAREE               | 2.32 | 0.01 | 0.78 | 3.89 | 0.22 | 0.28 |
| 4124 | 0 | 130438 | AFRGHIAREEAKK            | 2.55 | 0.01 | 0.78 | 3.53 | 0.22 | 0.28 |
| 4125 | 0 | 130438 | AFRGHIAREEAKK            | 2.55 | 0.01 | 0.78 | 3.89 | 0.22 | 0.28 |
| 4126 | 0 | 1387   | AFRLEEIAAI               | 2.34 | 0.01 | 3.85 | 0.44 | 1.23 | 0.85 |
| 4127 | 0 | 1390   | AFRPSSSS                 | 2.12 | 0.01 | 3.72 | 0.44 | 0.85 | 1.34 |
| 4128 | 0 | 137798 | AFRQQFQYAVEV             | 2.52 | 0.01 | 2.21 | 0.44 | 0.85 | 0.28 |
| 4129 | 0 | 1391   | AFRRYQEE                 | 2.10 | 0.01 | 2.40 | 2.43 | 0.22 | 0.28 |
| 4130 | 0 | 167720 | AFRRYQEER                | 2.25 | 0.01 | 2.40 | 2.43 | 0.22 | 0.28 |
| 4131 | 0 | 1393   | AFRTPNPKNPPARPGP<br>IRP  | 2.98 | 0.01 | 2.40 | 0.44 | 1.59 | 0.28 |
| 4132 | 0 | 196940 | AFRVDGDSPESRLT           | 2.59 | 0.01 | 0.78 | 1.12 | 0.22 | 1.48 |
| 4133 | 0 | 196940 | AFRVDGDSPESRLT           | 2.59 | 0.01 | 0.78 | 1.12 | 0.22 | 1.34 |

|      |   |        |                          |      |      |      |      |      |      |
|------|---|--------|--------------------------|------|------|------|------|------|------|
| 4134 | 0 | 196940 | AFRVDGDSPESRLT           | 2.59 | 0.01 | 0.78 | 0.44 | 1.13 | 2.02 |
| 4135 | 0 | 113262 | AFSDPSIIEV               | 2.30 | 0.01 | 3.97 | 1.12 | 0.22 | 0.28 |
| 4136 | 0 | 419104 | AFSDSVSVSTEDSGLTVV<br>RD | 2.97 | 0.01 | 3.50 | 2.13 | 0.22 | 0.28 |
| 4137 | 0 | 144586 | AFSDYEGKGVALQSS          | 2.65 | 0.01 | 2.24 | 1.12 | 0.22 | 0.28 |
| 4138 | 0 | 144586 | AFSDYEGKGVALQSS          | 2.65 | 0.01 | 2.24 | 1.12 | 0.22 | 0.28 |
| 4139 | 0 | 144586 | AFSDYEGKGVALQSS          | 2.65 | 0.01 | 2.24 | 1.12 | 0.22 | 0.28 |
| 4140 | 0 | 138283 | AFSFEAQGGGLA             | 2.43 | 0.01 | 0.78 | 1.20 | 0.22 | 1.27 |
| 4141 | 0 | 138283 | AFSFEAQGGGLA             | 2.43 | 0.01 | 0.78 | 1.20 | 0.22 | 1.27 |
| 4142 | 0 | 138283 | AFSFEAQGGGLA             | 2.43 | 0.01 | 0.78 | 1.20 | 0.22 | 0.28 |
| 4143 | 0 | 138283 | AFSFEAQGGGLA             | 2.43 | 0.01 | 0.78 | 1.20 | 0.22 | 0.28 |
| 4144 | 0 | 1396   | AFSKIRDF                 | 2.12 | 0.01 | 3.27 | 2.82 | 0.22 | 0.28 |
| 4145 | 0 | 127919 | AFSLPDRSLSAIPLFDVSF<br>E | 2.98 | 0.01 | 2.40 | 1.12 | 0.22 | 0.28 |
| 4146 | 0 | 127919 | AFSLPDRSLSAIPLFDVSF<br>E | 2.98 | 0.01 | 2.40 | 0.44 | 0.85 | 0.28 |
| 4147 | 0 | 127919 | AFSLPDRSLSAIPLFDVSF<br>E | 2.98 | 0.01 | 2.40 | 2.75 | 0.22 | 0.28 |
| 4148 | 0 | 127919 | AFSLPDRSLSAIPLFDVSF<br>E | 2.98 | 0.01 | 2.40 | 2.75 | 0.22 | 0.28 |
| 4149 | 0 | 127919 | AFSLPDRSLSAIPLFDVSF<br>E | 2.98 | 0.01 | 2.40 | 2.75 | 0.22 | 0.85 |
| 4150 | 0 | 127919 | AFSLPDRSLSAIPLFDVSF<br>E | 2.98 | 0.01 | 2.40 | 2.75 | 0.22 | 1.34 |
| 4151 | 0 | 1402   | AFSVAAPVTVTR             | 2.51 | 0.01 | 2.69 | 0.68 | 0.22 | 0.28 |
| 4152 | 0 | 1402   | AFSVAAPVTVTR             | 2.51 | 0.01 | 2.69 | 1.20 | 0.22 | 0.28 |
| 4153 | 0 | 1403   | AFSVPQANARSSENAES<br>SA  | 2.93 | 0.01 | 3.78 | 1.12 | 0.22 | 0.28 |
| 4154 | 0 | 1403   | AFSVPQANARSSENAES<br>SA  | 2.93 | 0.01 | 4.15 | 1.12 | 0.22 | 0.28 |
| 4155 | 0 | 1403   | AFSVPQANARSSENAES<br>SA  | 2.93 | 0.01 | 4.15 | 1.12 | 0.22 | 0.28 |
| 4156 | 0 | 1403   | AFSVPQANARSSENAES<br>SA  | 2.93 | 0.01 | 4.15 | 1.12 | 0.22 | 0.28 |
| 4157 | 0 | 167205 | AFSYHIH                  | 2.02 | 0.01 | 0.90 | 2.37 | 0.22 | 1.39 |
| 4158 | 0 | 167482 | AFTGPLRPFF               | 2.31 | 0.01 | 0.78 | 0.44 | 1.13 | 0.85 |
| 4159 | 0 | 1406   | AFTPDWMMMEVAIDNE         | 2.66 | 0.01 | 0.90 | 0.68 | 0.22 | 1.27 |
| 4160 | 0 | 1406   | AFTPDWMMMEVAIDNE         | 2.66 | 0.01 | 0.90 | 0.68 | 0.22 | 0.28 |
| 4161 | 0 | 1406   | AFTPDWMMMEVAIDNE         | 2.66 | 0.01 | 0.90 | 0.68 | 0.22 | 1.66 |
| 4162 | 0 | 1406   | AFTPDWMMMEVAIDNE         | 2.66 | 0.01 | 0.90 | 0.68 | 0.22 | 1.66 |
| 4163 | 0 | 1406   | AFTPDWMMMEVAIDNE         | 2.66 | 0.01 | 0.90 | 0.68 | 0.22 | 1.66 |

|      |   |        |                                    |      |      |      |      |      |      |
|------|---|--------|------------------------------------|------|------|------|------|------|------|
| 4164 | 0 | 1406   | AFTPDWMMMEVAIDNE                   | 2.66 | 0.01 | 0.90 | 0.68 | 0.22 | 0.28 |
| 4165 | 0 | 1416   | AFVSTSSRRYTEVY                     | 2.69 | 0.01 | 2.14 | 0.44 | 0.22 | 0.28 |
| 4166 | 0 | 1416   | AFVSTSSRRYTEVY                     | 2.69 | 0.01 | 2.14 | 0.44 | 0.22 | 0.28 |
| 4167 | 0 | 1416   | AFVSTSSRRYTEVY                     | 2.69 | 0.01 | 2.14 | 3.00 | 0.22 | 0.28 |
| 4168 | 0 | 510421 | AFYPNNTVSRLA                       | 2.45 | 0.01 | 0.90 | 3.07 | 1.13 | 1.39 |
| 4169 | 0 | 167861 | AGAAGSAKSAAGTASH<br>VSI            | 2.95 | 0.01 | 2.75 | 0.44 | 0.85 | 2.51 |
| 4170 | 0 | 128225 | AGAAKRKASGPPVSEL                   | 2.76 | 0.01 | 0.78 | 0.44 | 1.13 | 0.28 |
| 4171 | 0 | 128225 | AGAAKRKASGPPVSEL                   | 2.76 | 0.01 | 0.78 | 0.44 | 1.13 | 0.28 |
| 4172 | 0 | 128225 | AGAAKRKASGPPVSEL                   | 2.76 | 0.01 | 0.78 | 1.12 | 0.22 | 0.28 |
| 4173 | 0 | 128225 | AGAAKRKASGPPVSEL                   | 2.76 | 0.01 | 0.78 | 0.44 | 1.13 | 0.28 |
| 4174 | 0 | 117258 | AGAARDALQGFKITQN<br>NAMKISFAKK     | 3.19 | 0.01 | 0.78 | 0.44 | 1.13 | 0.28 |
| 4175 | 0 | 117258 | AGAARDALQGFKITQN<br>NAMKISFAKK     | 3.19 | 0.01 | 0.78 | 0.44 | 1.13 | 0.28 |
| 4176 | 0 | 117258 | AGAARDALQGFKITQN<br>NAMKISFAKK     | 3.19 | 0.01 | 0.78 | 0.44 | 1.13 | 0.28 |
| 4177 | 0 | 117258 | AGAARDALQGFKITQN<br>NAMKISFAKK     | 3.19 | 0.01 | 0.78 | 0.44 | 1.13 | 0.28 |
| 4178 | 0 | 117258 | AGAARDALQGFKITQN<br>NAMKISFAKK     | 3.19 | 0.01 | 0.78 | 0.44 | 1.13 | 0.28 |
| 4179 | 0 | 117258 | AGAARDALQGFKITQN<br>NAMKISFAKK     | 3.19 | 0.01 | 0.78 | 0.44 | 1.13 | 0.28 |
| 4180 | 0 | 117258 | AGAARDALQGFKITQN<br>NAMKISFAKK     | 3.19 | 0.01 | 0.78 | 0.44 | 1.13 | 0.28 |
| 4181 | 0 | 117258 | AGAARDALQGFKITQN<br>NAMKISFAKK     | 3.19 | 0.01 | 0.78 | 0.44 | 1.13 | 0.28 |
| 4182 | 0 | 117258 | AGAARDALQGFKITQN<br>NAMKISFAKK     | 3.19 | 0.01 | 0.78 | 0.44 | 1.13 | 0.28 |
| 4183 | 0 | 117258 | AGAARDALQGFKITQN<br>NAMKISFAKK     | 3.19 | 0.01 | 0.78 | 0.44 | 1.13 | 0.28 |
| 4184 | 0 | 117258 | AGAARDALQGFKITQN<br>NAMKISFAKK     | 3.19 | 0.01 | 0.78 | 0.44 | 1.41 | 0.28 |
| 4185 | 0 | 117258 | AGAARDALQGFKITQN<br>NAMKISFAKK     | 3.19 | 0.01 | 0.78 | 3.44 | 0.22 | 0.28 |
| 4186 | 0 | 117258 | AGAARDALQGFKITQN<br>NAMKISFAKK     | 3.19 | 0.01 | 0.78 | 3.44 | 0.22 | 0.28 |
| 4187 | 0 | 95223  | AGAFARAVEGAEVIEVR<br>AIGSTSVMLNACY | 3.35 | 0.01 | 3.65 | 2.22 | 0.22 | 0.28 |
| 4188 | 0 | 503962 | AGAGAGGAGAGGAGA<br>GGGAG           | 3.02 | 0.01 | 2.48 | 0.44 | 1.74 | 0.28 |

|      |   |        |                           |      |      |      |      |      |      |
|------|---|--------|---------------------------|------|------|------|------|------|------|
| 4189 | 0 | 503962 | AGAGAGGAGAGGAGA<br>GGGAG  | 3.02 | 0.01 | 2.48 | 0.44 | 1.74 | 0.28 |
| 4190 | 0 | 1430   | AGAGDV                    | 1.92 | 0.01 | 2.40 | 2.52 | 0.22 | 0.28 |
| 4191 | 0 | 1431   | AGAGGA                    | 1.90 | 0.01 | 4.03 | 3.97 | 0.22 | 0.28 |
| 4192 | 0 | 1431   | AGAGGA                    | 1.90 | 0.01 | 4.03 | 3.97 | 0.22 | 0.28 |
| 4193 | 0 | 227016 | AGAGGGAGAGGAGGA           | 2.74 | 0.01 | 2.48 | 0.44 | 1.59 | 0.28 |
| 4194 | 0 | 227017 | AGAGGGAGAGGGAGG           | 2.73 | 0.01 | 2.48 | 0.44 | 1.59 | 0.28 |
| 4195 | 0 | 227018 | AGAGGGAGGAGAGGG           | 2.73 | 0.01 | 2.48 | 0.44 | 1.59 | 0.28 |
| 4196 | 0 | 1433   | AGAGGGAGGAGAGGG<br>AGGAG  | 3.02 | 0.01 | 2.48 | 0.44 | 1.13 | 0.28 |
| 4197 | 0 | 1433   | AGAGGGAGGAGAGGG<br>AGGAG  | 3.02 | 0.01 | 2.48 | 1.20 | 0.22 | 0.28 |
| 4198 | 0 | 1433   | AGAGGGAGGAGAGGG<br>AGGAG  | 3.02 | 0.01 | 2.48 | 1.20 | 0.22 | 1.48 |
| 4199 | 0 | 1433   | AGAGGGAGGAGAGGG<br>AGGAG  | 3.02 | 0.01 | 2.48 | 0.44 | 1.59 | 0.28 |
| 4200 | 0 | 1433   | AGAGGGAGGAGAGGG<br>AGGAG  | 3.02 | 0.01 | 2.43 | 0.44 | 2.82 | 0.28 |
| 4201 | 0 | 1433   | AGAGGGAGGAGAGGG<br>AGGAG  | 3.02 | 0.01 | 2.43 | 0.44 | 2.82 | 0.28 |
| 4202 | 0 | 1433   | AGAGGGAGGAGAGGG<br>AGGAG  | 3.02 | 0.01 | 2.43 | 0.44 | 1.59 | 0.28 |
| 4203 | 0 | 1433   | AGAGGGAGGAGAGGG<br>AGGAG  | 3.02 | 0.01 | 2.43 | 0.44 | 1.59 | 0.28 |
| 4204 | 0 | 1433   | AGAGGGAGGAGAGGG<br>AGGAG  | 3.02 | 0.01 | 2.43 | 0.44 | 0.85 | 0.28 |
| 4205 | 0 | 1433   | AGAGGGAGGAGAGGG<br>AGGAG  | 3.02 | 0.01 | 2.43 | 0.44 | 0.85 | 0.28 |
| 4206 | 0 | 1433   | AGAGGGAGGAGAGGG<br>AGGAG  | 3.02 | 0.01 | 2.43 | 0.44 | 0.85 | 0.28 |
| 4207 | 0 | 1433   | AGAGGGAGGAGAGGG<br>AGGAG  | 3.02 | 0.01 | 2.43 | 1.12 | 0.22 | 0.85 |
| 4208 | 0 | 1433   | AGAGGGAGGAGAGGG<br>AGGAG  | 3.02 | 0.01 | 2.43 | 0.44 | 1.59 | 0.28 |
| 4209 | 0 | 1433   | AGAGGGAGGAGAGGG<br>AGGAG  | 3.02 | 0.01 | 2.43 | 1.12 | 0.22 | 1.27 |
| 4210 | 0 | 1433   | AGAGGGAGGAGAGGG<br>AGGAG  | 3.02 | 0.01 | 2.43 | 0.44 | 1.74 | 0.28 |
| 4211 | 0 | 1433   | AGAGGGAGGAGAGGG<br>AGGAG  | 3.02 | 0.01 | 2.43 | 0.44 | 0.85 | 0.28 |
| 4212 | 0 | 1433   | AGAGGGAGGAGAGGG<br>AGGAG  | 3.02 | 0.01 | 4.03 | 0.44 | 1.59 | 0.28 |
| 4213 | 0 | 1434   | AGAGGGAGGAGAGGG<br>AGGAGA | 3.06 | 0.01 | 4.03 | 0.44 | 1.13 | 0.28 |

|      |   |        |                             |      |      |      |      |      |      |
|------|---|--------|-----------------------------|------|------|------|------|------|------|
| 4214 | 0 | 1434   | AGAGGGAGGAGAGGG<br>AGGAGA   | 3.06 | 0.01 | 4.03 | 0.44 | 1.13 | 0.28 |
| 4215 | 0 | 1434   | AGAGGGAGGAGAGGG<br>AGGAGA   | 3.06 | 0.01 | 4.03 | 0.44 | 1.13 | 0.28 |
| 4216 | 0 | 1434   | AGAGGGAGGAGAGGG<br>AGGAGA   | 3.06 | 0.01 | 4.03 | 0.44 | 1.13 | 0.28 |
| 4217 | 0 | 1434   | AGAGGGAGGAGAGGG<br>AGGAGA   | 3.06 | 0.01 | 4.03 | 0.44 | 1.13 | 0.85 |
| 4218 | 0 | 119738 | AGAGGGAGGAGAGGG<br>AGGAGC   | 3.07 | 0.01 | 2.43 | 0.44 | 0.85 | 0.28 |
| 4219 | 0 | 119738 | AGAGGGAGGAGAGGG<br>AGGAGC   | 3.07 | 0.01 | 2.43 | 0.44 | 1.74 | 0.28 |
| 4220 | 0 | 136122 | AGAGGGAGGAGAGGG<br>AGGAGG   | 3.05 | 0.01 | 2.43 | 0.44 | 1.74 | 0.28 |
| 4221 | 0 | 136122 | AGAGGGAGGAGAGGG<br>AGGAGG   | 3.05 | 0.01 | 2.43 | 0.44 | 1.74 | 0.28 |
| 4222 | 0 | 227019 | AGAGGGAGGAGGAGA             | 2.75 | 0.01 | 2.48 | 0.44 | 1.59 | 0.28 |
| 4223 | 0 | 227020 | AGAGGGAGGAGGAGG             | 2.73 | 0.01 | 2.48 | 0.44 | 1.59 | 0.28 |
| 4224 | 0 | 1437   | AGAGRRVG                    | 2.17 | 0.01 | 2.40 | 2.43 | 0.22 | 0.28 |
| 4225 | 0 | 167721 | AGAGRRVGL                   | 2.27 | 0.01 | 2.40 | 2.43 | 0.22 | 0.28 |
| 4226 | 0 | 127563 | AGAGRVTSARAGST              | 2.75 | 0.01 | 0.78 | 0.44 | 1.13 | 0.85 |
| 4227 | 0 | 103021 | AGAGTVATTPASSPV             | 2.73 | 0.01 | 2.04 | 0.44 | 0.85 | 1.28 |
| 4228 | 0 | 1439   | AGAHWGVLAG                  | 2.36 | 0.01 | 2.68 | 0.44 | 0.85 | 0.28 |
| 4229 | 0 | 1439   | AGAHWGVLAG                  | 2.36 | 0.01 | 2.68 | 2.74 | 0.22 | 0.28 |
| 4230 | 0 | 227742 | AGAKKAGAKKAVRKVA<br>TPKK    | 3.00 | 0.01 | 2.78 | 0.68 | 0.22 | 0.28 |
| 4231 | 0 | 1445   | AGAKSAIL                    | 2.15 | 0.01 | 3.78 | 1.12 | 0.22 | 0.28 |
| 4232 | 0 | 1445   | AGAKSAIL                    | 2.15 | 0.01 | 3.78 | 1.12 | 0.22 | 0.28 |
| 4233 | 0 | 123010 | AGAMIPPPPS                  | 2.34 | 0.01 | 0.78 | 1.12 | 0.22 | 0.85 |
| 4234 | 0 | 187623 | AGAMTVRDVAAAADLA<br>LQAGDA  | 3.08 | 0.01 | 2.14 | 1.20 | 0.22 | 0.28 |
| 4235 | 0 | 187624 | AGAMTVRDVAAAADLA<br>LQAGDAL | 3.12 | 0.01 | 2.14 | 1.20 | 0.22 | 0.28 |
| 4236 | 0 | 1448   | AGAPDRARGQYP                | 2.52 | 0.01 | 0.90 | 1.15 | 2.26 | 0.85 |
| 4237 | 0 | 1448   | AGAPDRARGQYP                | 2.52 | 0.01 | 0.90 | 1.15 | 2.26 | 1.39 |
| 4238 | 0 | 1448   | AGAPDRARGQYP                | 2.52 | 0.01 | 0.90 | 0.68 | 0.22 | 0.28 |
| 4239 | 0 | 107064 | AGAPGFPG                    | 2.18 | 0.01 | 1.60 | 2.55 | 0.22 | 0.28 |
| 4240 | 0 | 107064 | AGAPGFPG                    | 2.18 | 0.01 | 1.60 | 2.55 | 2.60 | 0.28 |
| 4241 | 0 | 1450   | AGAPSAEQRER                 | 2.43 | 0.01 | 2.40 | 1.15 | 0.22 | 0.28 |
| 4242 | 0 | 1450   | AGAPSAEQRER                 | 2.43 | 0.01 | 2.40 | 1.15 | 0.22 | 2.02 |
| 4243 | 0 | 1450   | AGAPSAEQRER                 | 2.43 | 0.01 | 2.40 | 1.15 | 0.22 | 0.85 |
| 4244 | 0 | 189555 | AGARALSDAETKVFL             | 2.67 | 0.01 | 3.28 | 0.44 | 1.23 | 0.28 |
| 4245 | 0 | 1453   | AGARRGDLAHLAAHA<br>RHLP     | 3.01 | 0.01 | 3.78 | 3.67 | 0.22 | 1.75 |

|      |   |        |                                   |      |      |      |      |      |      |
|------|---|--------|-----------------------------------|------|------|------|------|------|------|
| 4246 | 0 | 1453   | AGARRGDLAHLAAAAHA<br>RHLP         | 3.01 | 0.01 | 3.78 | 3.67 | 0.22 | 1.34 |
| 4247 | 0 | 1453   | AGARRGDLAHLAAAAHA<br>RHLP         | 3.01 | 0.01 | 3.78 | 3.67 | 0.22 | 1.75 |
| 4248 | 0 | 1453   | AGARRGDLAHLAAAAHA<br>RHLP         | 3.01 | 0.01 | 3.78 | 2.22 | 2.25 | 1.34 |
| 4249 | 0 | 1453   | AGARRGDLAHLAAAAHA<br>RHLP         | 3.01 | 0.01 | 3.78 | 2.22 | 2.25 | 1.75 |
| 4250 | 0 | 1454   | AGASDIRDQSRNWLP<br>PCYR           | 2.94 | 0.01 | 3.19 | 0.44 | 1.59 | 1.27 |
| 4251 | 0 | 191161 | AGAVIRGKKGSG                      | 2.51 | 0.01 | 2.76 | 1.20 | 0.22 | 0.28 |
| 4252 | 0 | 1457   | AGAVVGGLGGYMLGSA<br>MS            | 2.90 | 0.01 | 2.52 | 1.20 | 0.22 | 0.28 |
| 4253 | 0 | 1460   | AGCLIGAEHVDTSYECD                 | 2.78 | 0.01 | 2.48 | 0.44 | 0.85 | 0.28 |
| 4254 | 0 | 1460   | AGCLIGAEHVDTSYECD                 | 2.78 | 0.01 | 2.48 | 1.20 | 0.22 | 0.28 |
| 4255 | 0 | 1461   | AGCTALSAVDDVPGC                   | 2.70 | 0.01 | 0.90 | 1.15 | 0.22 | 0.28 |
| 4256 | 0 | 113265 | AGDAQAFGENRFYYTA<br>GSSSPTHAKSAHV | 3.29 | 0.01 | 0.78 | 2.61 | 0.22 | 0.28 |
| 4257 | 0 | 1463   | AGDCAVRQ                          | 2.13 | 0.01 | 3.72 | 2.37 | 0.22 | 0.85 |
| 4258 | 0 | 1464   | AGDDDLGDGDLNGDDRR                 | 2.77 | 0.01 | 4.33 | 1.15 | 0.22 | 0.28 |
| 4259 | 0 | 1465   | AGDGEPPEDDDSATGL<br>AFRT          | 2.96 | 0.01 | 2.40 | 0.44 | 1.59 | 0.85 |
| 4260 | 0 | 250191 | AGDKLSLFGQAAAGD                   | 2.70 | 0.01 | 1.61 | 0.44 | 0.85 | 1.28 |
| 4261 | 0 | 250192 | AGDKPAPFGQAAAAD                   | 2.71 | 0.01 | 1.61 | 0.44 | 0.85 | 1.28 |
| 4262 | 0 | 250193 | AGDKPAPFGQAAAGD                   | 2.72 | 0.01 | 1.61 | 0.44 | 0.85 | 1.28 |
| 4263 | 0 | 250194 | AGDKPPFPGQAAAGD                   | 2.71 | 0.01 | 1.61 | 0.44 | 0.85 | 1.28 |
| 4264 | 0 | 250195 | AGDKPPFPGQAAEGD                   | 2.70 | 0.01 | 1.61 | 0.44 | 0.85 | 1.28 |
| 4265 | 0 | 250196 | AGDKPSLFGQAAAGD                   | 2.69 | 0.01 | 1.61 | 0.44 | 0.85 | 1.28 |
| 4266 | 0 | 250197 | AGDKPSPFGQAAAGD                   | 2.70 | 0.01 | 1.61 | 0.44 | 0.85 | 1.28 |
| 4267 | 0 | 250198 | AGDKPSPFGQAAAGG                   | 2.69 | 0.01 | 1.61 | 0.44 | 0.85 | 1.28 |
| 4268 | 0 | 250199 | AGDKPSPFGQGTAFD                   | 2.71 | 0.01 | 1.61 | 0.44 | 0.85 | 1.28 |
| 4269 | 0 | 137799 | AGDL DAGMFDV                      | 2.52 | 0.01 | 2.21 | 1.20 | 0.22 | 0.28 |
| 4270 | 0 | 1470   | AGDLESSVDDPRSEEDK<br>RFE          | 2.95 | 0.01 | 2.82 | 0.44 | 0.85 | 0.28 |
| 4271 | 0 | 1470   | AGDLESSVDDPRSEEDK<br>RFE          | 2.95 | 0.01 | 2.82 | 0.44 | 1.41 | 0.28 |
| 4272 | 0 | 133776 | AGDLSKVDAKQPGDY                   | 2.69 | 0.01 | 3.67 | 0.44 | 1.13 | 1.27 |

|      |   |        |                              |      |      |      |      |      |      |
|------|---|--------|------------------------------|------|------|------|------|------|------|
| 4273 | 0 | 133776 | AGDLSKVDAKQPGDY              | 2.69 | 0.01 | 3.67 | 0.44 | 1.13 | 0.28 |
| 4274 | 0 | 133776 | AGDLSKVDAKQPGDY              | 2.69 | 0.01 | 3.67 | 0.44 | 1.93 | 0.28 |
| 4275 | 0 | 133776 | AGDLSKVDAKQPGDY              | 2.69 | 0.01 | 3.67 | 0.44 | 1.41 | 0.28 |
| 4276 | 0 | 192866 | AGDLTKLTTEKTIVAGL<br>LA      | 2.98 | 0.01 | 3.47 | 2.00 | 0.22 | 0.28 |
| 4277 | 0 | 1476   | AGDQSYFL                     | 2.10 | 0.01 | 3.55 | 0.68 | 0.22 | 0.28 |
| 4278 | 0 | 1477   | AGDR                         | 1.57 | 0.01 | 2.59 | 0.44 | 1.59 | 0.28 |
| 4279 | 0 | 1477   | AGDR                         | 1.57 | 0.01 | 2.59 | 1.15 | 0.22 | 0.85 |
| 4280 | 0 | 1478   | AGDRAGDR                     | 2.18 | 0.01 | 0.90 | 3.03 | 0.22 | 0.28 |
| 4281 | 0 | 1478   | AGDRAGDR                     | 2.18 | 0.01 | 0.90 | 3.03 | 0.22 | 1.48 |
| 4282 | 0 | 1478   | AGDRAGDR                     | 2.18 | 0.01 | 0.90 | 3.03 | 0.22 | 1.34 |
| 4283 | 0 | 1479   | AGDRAGDRAGDRAGD<br>RAGDRAGDR | 3.21 | 0.01 | 0.90 | 3.03 | 0.22 | 0.28 |
| 4284 | 0 | 1479   | AGDRAGDRAGDRAGD<br>RAGDRAGDR | 3.21 | 0.01 | 0.90 | 0.44 | 1.74 | 0.28 |
| 4285 | 0 | 1479   | AGDRAGDRAGDRAGD<br>RAGDRAGDR | 3.21 | 0.01 | 0.90 | 0.44 | 1.74 | 0.28 |
| 4286 | 0 | 1479   | AGDRAGDRAGDRAGD<br>RAGDRAGDR | 3.21 | 0.01 | 0.90 | 3.97 | 0.22 | 0.28 |
| 4287 | 0 | 1479   | AGDRAGDRAGDRAGD<br>RAGDRAGDR | 3.21 | 0.01 | 0.90 | 0.68 | 0.22 | 0.28 |
| 4288 | 0 | 1479   | AGDRAGDRAGDRAGD<br>RAGDRAGDR | 3.21 | 0.01 | 0.90 | 0.68 | 0.22 | 0.28 |
| 4289 | 0 | 1479   | AGDRAGDRAGDRAGD<br>RAGDRAGDR | 3.21 | 0.01 | 0.90 | 0.68 | 0.22 | 1.48 |
| 4290 | 0 | 1480   | AGDSSTKNLIYTSTLCEL<br>NV     | 2.93 | 0.01 | 3.42 | 0.68 | 0.22 | 0.28 |
| 4291 | 0 | 1480   | AGDSSTKNLIYTSTLCEL<br>NV     | 2.93 | 0.01 | 3.42 | 0.68 | 0.22 | 0.28 |
| 4292 | 0 | 80238  | AGDVKA                       | 1.91 | 0.01 | 2.40 | 2.52 | 0.22 | 0.28 |
| 4293 | 0 | 1482   | AGDVKT                       | 1.88 | 0.01 | 3.03 | 1.20 | 0.22 | 0.28 |
| 4294 | 0 | 1487   | AGEDAGDAVSPRQLA              | 2.69 | 0.01 | 2.40 | 1.15 | 2.26 | 0.28 |
| 4295 | 0 | 108739 | AGEFGDLRRARA                 | 2.52 | 0.01 | 0.90 | 1.15 | 0.22 | 1.39 |
| 4296 | 0 | 475504 | AGEG                         | 1.57 | 0.01 | 1.60 | 1.12 | 0.22 | 0.85 |
| 4297 | 0 | 227743 | AGEKDNVVRQIERQVQ             | 2.75 | 0.01 | 2.72 | 1.20 | 1.59 | 0.28 |
| 4298 | 0 | 112028 | AGEKVTM                      | 1.99 | 0.01 | 0.78 | 0.44 | 1.13 | 0.28 |
| 4299 | 0 | 134859 | AGENLNTSKFKKNEF              | 2.69 | 0.01 | 3.59 | 2.13 | 0.85 | 0.85 |
| 4300 | 0 | 1497   | AGEPYVIEQGMMMDPAK            | 2.73 | 0.01 | 0.90 | 0.44 | 1.59 | 1.27 |
| 4301 | 0 | 1497   | AGEPYVIEQGMMMDPAK            | 2.73 | 0.01 | 0.90 | 0.44 | 1.59 | 0.28 |
| 4302 | 0 | 105086 | AGESHGPDQGH                  | 2.49 | 0.01 | 2.75 | 0.44 | 1.23 | 0.85 |
| 4303 | 0 | 122254 | AGETKPSSSLSIGSIISKSP         | 2.97 | 0.01 | 0.78 | 0.44 | 1.13 | 0.28 |

|      |   |        |                                     |      |      |      |      |      |      |
|------|---|--------|-------------------------------------|------|------|------|------|------|------|
| 4304 | 0 | 122254 | AGETKPSSSLSIGSIISKSP                | 2.97 | 0.01 | 0.78 | 0.44 | 1.13 | 1.27 |
| 4305 | 0 | 1499   | AGEVKANAEG                          | 2.36 | 0.01 | 3.42 | 3.28 | 0.22 | 0.28 |
| 4306 | 0 | 80239  | AGEVRIGEINNGIQVGA<br>KYDANDIVA      | 3.23 | 0.01 | 3.04 | 1.12 | 0.22 | 0.28 |
| 4307 | 0 | 80239  | AGEVRIGEINNGIQVGA<br>KYDANDIVA      | 3.23 | 0.01 | 3.04 | 1.12 | 0.22 | 0.28 |
| 4308 | 0 | 80239  | AGEVRIGEINNGIQVGA<br>KYDANDIVA      | 3.23 | 0.01 | 3.04 | 1.81 | 0.22 | 0.28 |
| 4309 | 0 | 80239  | AGEVRIGEINNGIQVGA<br>KYDANDIVA      | 3.23 | 0.01 | 3.04 | 1.12 | 0.22 | 0.28 |
| 4310 | 0 | 1506   | AGFGSALASLREAPP                     | 2.70 | 0.01 | 4.33 | 1.15 | 0.22 | 0.28 |
| 4311 | 0 | 234026 | AGFGSK                              | 1.90 | 0.01 | 0.90 | 0.68 | 0.22 | 0.28 |
| 4312 | 0 | 1508   | AGFIYRETFCITTIYKTGQ<br>PAADHYYSKVTA | 3.35 | 0.01 | 2.14 | 1.20 | 0.22 | 0.28 |
| 4313 | 0 | 1508   | AGFIYRETFCITTIYKTGQ<br>PAADHYYSKVTA | 3.35 | 0.01 | 2.14 | 1.20 | 0.22 | 0.28 |
| 4314 | 0 | 1508   | AGFIYRETFCITTIYKTGQ<br>PAADHYYSKVTA | 3.35 | 0.01 | 2.14 | 1.20 | 0.22 | 1.34 |
| 4315 | 0 | 1508   | AGFIYRETFCITTIYKTGQ<br>PAADHYYSKVTA | 3.35 | 0.01 | 2.14 | 0.44 | 0.22 | 0.28 |
| 4316 | 0 | 1508   | AGFIYRETFCITTIYKTGQ<br>PAADHYYSKVTA | 3.35 | 0.01 | 2.14 | 1.20 | 0.22 | 0.28 |
| 4317 | 0 | 106235 | AGFNVPW                             | 1.99 | 0.01 | 0.90 | 0.44 | 1.13 | 1.39 |
| 4318 | 0 | 106235 | AGFNVPW                             | 1.99 | 0.01 | 0.90 | 0.44 | 1.13 | 0.28 |
| 4319 | 0 | 106235 | AGFNVPW                             | 1.99 | 0.01 | 0.90 | 0.44 | 1.13 | 1.39 |
| 4320 | 0 | 103022 | AGFTAPATLLSALG                      | 2.73 | 0.01 | 2.04 | 0.44 | 0.85 | 1.28 |
| 4321 | 0 | 423209 | AGGAAAGPRPPPPPM                     | 2.73 | 0.01 | 2.51 | 0.44 | 2.35 | 1.28 |
| 4322 | 0 | 1517   | AGGAEG                              | 1.94 | 0.01 | 4.03 | 3.97 | 0.22 | 0.28 |
| 4323 | 0 | 1517   | AGGAEG                              | 1.94 | 0.01 | 4.03 | 3.97 | 0.22 | 0.28 |
| 4324 | 0 | 227021 | AGGAGAGGAGAGGAG                     | 2.75 | 0.01 | 2.48 | 0.44 | 1.59 | 0.28 |
| 4325 | 0 | 227022 | AGGAGAGGAGGAGAG                     | 2.75 | 0.01 | 2.48 | 0.44 | 1.59 | 0.28 |
| 4326 | 0 | 227023 | AGGAGAGGGAGAGGA                     | 2.74 | 0.01 | 2.48 | 0.44 | 1.59 | 0.28 |
| 4327 | 0 | 1518   | AGGAGAGGGAGGA                       | 2.61 | 0.01 | 2.43 | 0.44 | 1.59 | 0.28 |
| 4328 | 0 | 227024 | AGGAGAGGGAGGAGG                     | 2.73 | 0.01 | 2.48 | 0.44 | 1.59 | 0.28 |
| 4329 | 0 | 98683  | AGGAGE                              | 1.94 | 0.01 | 4.03 | 3.97 | 0.22 | 0.28 |
| 4330 | 0 | 98684  | AGGEGG                              | 1.90 | 0.01 | 4.03 | 3.97 | 0.22 | 0.28 |
| 4331 | 0 | 227025 | AGGGAGGAGAGGGAG                     | 2.74 | 0.01 | 2.48 | 0.44 | 1.59 | 0.28 |
| 4332 | 0 | 190383 | AGGGAPMADNNEGAD                     | 2.72 | 0.01 | 3.61 | 2.00 | 1.41 | 0.28 |



|      |   |        |                                    |      |      |      |      |      |      |
|------|---|--------|------------------------------------|------|------|------|------|------|------|
| 4333 | 0 | 1522   | AGGGHNGVFD PDSG                    | 2.69 | 0.01 | 2.04 | 0.44 | 0.85 | 1.28 |
| 4334 | 0 | 1523   | AGGGQQQNNEGANAP<br>NEDSV           | 2.98 | 0.01 | 2.59 | 3.05 | 1.41 | 0.28 |
| 4335 | 0 | 1523   | AGGGQQQNNEGANAP<br>NEDSV           | 2.98 | 0.01 | 2.59 | 0.44 | 0.85 | 0.28 |
| 4336 | 0 | 1523   | AGGGQQQNNEGANAP<br>NEDSV           | 2.98 | 0.01 | 2.59 | 3.05 | 0.85 | 0.28 |
| 4337 | 0 | 144195 | AGGSGSADDVVDA                      | 2.68 | 0.01 | 2.51 | 2.22 | 0.22 | 0.28 |
| 4338 | 0 | 144195 | AGGSGSADDVVDA                      | 2.68 | 0.01 | 2.51 | 3.26 | 0.22 | 0.28 |
| 4339 | 0 | 144195 | AGGSGSADDVVDA                      | 2.68 | 0.01 | 2.51 | 3.26 | 0.22 | 0.28 |
| 4340 | 0 | 1528   | AGGIAL                             | 1.92 | 0.01 | 4.08 | 2.66 | 0.22 | 0.28 |
| 4341 | 0 | 250499 | AGGKPSFPGQAAAGD                    | 2.70 | 0.01 | 1.61 | 0.44 | 0.85 | 1.28 |
| 4342 | 0 | 250500 | AGGKPSFPGQAAAGG                    | 2.70 | 0.01 | 1.61 | 0.44 | 0.85 | 1.28 |
| 4343 | 0 | 1531   | AGGLTTTWKEYSHDLQ                   | 2.68 | 0.01 | 3.37 | 2.13 | 0.22 | 0.28 |
| 4344 | 0 | 1531   | AGGLTTTWKEYSHDLQ                   | 2.68 | 0.01 | 3.37 | 2.13 | 0.22 | 0.28 |
| 4345 | 0 | 1531   | AGGLTTTWKEYSHDLQ                   | 2.68 | 0.01 | 3.37 | 2.13 | 0.22 | 0.28 |
| 4346 | 0 | 128232 | AGGPAPAAGAAPAGG                    | 2.74 | 0.01 | 0.78 | 0.44 | 1.13 | 0.85 |
| 4347 | 0 | 108741 | AGGPGFPG                           | 2.17 | 0.01 | 1.60 | 2.55 | 2.60 | 0.28 |
| 4348 | 0 | 1533   | AGGQLFYSRPVVSANGE<br>PTVKLYTS      | 3.15 | 0.01 | 2.53 | 0.44 | 0.85 | 0.28 |
| 4349 | 0 | 1534   | AGGQLFYSRPVVSANGE<br>PTVKLYTSVENAQ | 3.34 | 0.01 | 2.70 | 1.15 | 0.22 | 0.28 |
| 4350 | 0 | 1534   | AGGQLFYSRPVVSANGE<br>PTVKLYTSVENAQ | 3.34 | 0.01 | 2.53 | 0.44 | 0.85 | 0.28 |
| 4351 | 0 | 1534   | AGGQLFYSRPVVSANGE<br>PTVKLYTSVENAQ | 3.34 | 0.01 | 2.53 | 0.44 | 0.85 | 0.28 |
| 4352 | 0 | 238171 | AGGRWHLGGLAGYT                     | 2.65 | 0.01 | 2.14 | 2.65 | 0.22 | 0.85 |
| 4353 | 0 | 1536   | AGGSGRP                            | 2.04 | 0.01 | 3.10 | 0.68 | 0.22 | 0.28 |
| 4354 | 0 | 1536   | AGGSGRP                            | 2.04 | 0.01 | 3.10 | 0.68 | 0.22 | 1.34 |
| 4355 | 0 | 1536   | AGGSGRP                            | 2.04 | 0.01 | 3.10 | 0.68 | 0.22 | 0.85 |
| 4356 | 0 | 1536   | AGGSGRP                            | 2.04 | 0.01 | 3.10 | 0.68 | 0.22 | 1.27 |
| 4357 | 0 | 1536   | AGGSGRP                            | 2.04 | 0.01 | 3.10 | 0.68 | 0.22 | 0.28 |
| 4358 | 0 | 1536   | AGGSGRP                            | 2.04 | 0.01 | 3.10 | 0.68 | 0.22 | 1.34 |
| 4359 | 0 | 1536   | AGGSGRP                            | 2.04 | 0.01 | 3.10 | 0.68 | 0.22 | 1.75 |
| 4360 | 0 | 1536   | AGGSGRP                            | 2.04 | 0.01 | 3.10 | 0.68 | 0.22 | 1.75 |
| 4361 | 0 | 150108 | AGGTGTEDSHPPYKQ                    | 2.65 | 0.01 | 3.45 | 1.15 | 0.22 | 0.28 |
| 4362 | 0 | 150108 | AGGTGTEDSHPPYKQ                    | 2.65 | 0.01 | 3.45 | 1.15 | 0.22 | 1.34 |
| 4363 | 0 | 150108 | AGGTGTEDSHPPYKQ                    | 2.65 | 0.01 | 2.60 | 0.68 | 0.22 | 0.28 |
| 4364 | 0 | 150108 | AGGTGTEDSHPPYKQ                    | 2.65 | 0.01 | 2.60 | 0.68 | 0.22 | 0.28 |
| 4365 | 0 | 150108 | AGGTGTEDSHPPYKQ                    | 2.65 | 0.01 | 2.60 | 0.68 | 0.22 | 0.28 |

|      |   |        |                                 |      |      |      |      |      |      |
|------|---|--------|---------------------------------|------|------|------|------|------|------|
| 4366 | 0 | 1544   | AGGYKAADMWGPSSD                 | 2.69 | 0.01 | 2.04 | 0.44 | 0.85 | 1.28 |
| 4367 | 0 | 1545   | AGGYKAADMWGPSSD<br>PAWER        | 2.95 | 0.01 | 3.78 | 1.12 | 0.22 | 0.28 |
| 4368 | 0 | 1545   | AGGYKAADMWGPSSD<br>PAWER        | 2.95 | 0.01 | 2.04 | 0.44 | 0.85 | 0.28 |
| 4369 | 0 | 1547   | AGHATLREHLRDIKAEN<br>TDA        | 2.97 | 0.01 | 2.40 | 3.01 | 2.25 | 1.75 |
| 4370 | 0 | 1547   | AGHATLREHLRDIKAEN<br>TDA        | 2.97 | 0.01 | 2.40 | 3.01 | 0.22 | 1.34 |
| 4371 | 0 | 1547   | AGHATLREHLRDIKAEN<br>TDA        | 2.97 | 0.01 | 2.40 | 3.01 | 0.22 | 0.28 |
| 4372 | 0 | 1547   | AGHATLREHLRDIKAEN<br>TDA        | 2.97 | 0.01 | 2.40 | 3.01 | 0.22 | 1.34 |
| 4373 | 0 | 192867 | AGHNANGSTTAQVLKD<br>FVKA        | 2.94 | 0.01 | 3.47 | 2.00 | 0.22 | 0.28 |
| 4374 | 0 | 1554   | AGIAYFSMVG                      | 2.32 | 0.01 | 2.68 | 2.74 | 0.22 | 0.28 |
| 4375 | 0 | 1557   | AGIDYMKDPNNPGH<br>MMVNPVLLNIPQG | 3.27 | 0.01 | 4.33 | 1.15 | 2.26 | 1.48 |
| 4376 | 0 | 1557   | AGIDYMKDPNNPGH<br>MMVNPVLLNIPQG | 3.27 | 0.01 | 4.33 | 1.15 | 2.26 | 1.34 |
| 4377 | 0 | 250657 | AGIKTTTATTGDSGD                 | 2.72 | 0.01 | 1.61 | 0.44 | 0.85 | 1.28 |
| 4378 | 0 | 189561 | AGILNDADITAALAA                 | 2.72 | 0.01 | 3.28 | 0.44 | 1.23 | 0.28 |
| 4379 | 0 | 96071  | AGIRPKGAFQ                      | 2.32 | 0.01 | 2.39 | 0.44 | 0.85 | 0.28 |
| 4380 | 0 | 1570   | AGISYKTKW                       | 2.21 | 0.01 | 0.90 | 0.44 | 1.23 | 1.39 |
| 4381 | 0 | 1570   | AGISYKTKW                       | 2.21 | 0.01 | 0.90 | 0.44 | 1.23 | 0.28 |
| 4382 | 0 | 1570   | AGISYKTKW                       | 2.21 | 0.01 | 0.90 | 0.44 | 1.23 | 0.28 |
| 4383 | 0 | 423210 | AGIVLTV                         | 2.02 | 0.01 | 4.93 | 0.44 | 1.41 | 0.28 |
| 4384 | 0 | 1573   | AGKALTGLSTGTSQNTRI<br>SLRP      | 3.07 | 0.01 | 2.75 | 0.44 | 1.59 | 0.28 |
| 4385 | 0 | 1573   | AGKALTGLSTGTSQNTRI<br>SLRP      | 3.07 | 0.01 | 2.75 | 0.44 | 1.59 | 1.34 |
| 4386 | 0 | 1573   | AGKALTGLSTGTSQNTRI<br>SLRP      | 3.07 | 0.01 | 2.75 | 0.44 | 1.59 | 2.02 |
| 4387 | 0 | 1575   | AGKKESTVMTSGSA                  | 2.64 | 0.01 | 2.94 | 2.00 | 0.22 | 0.28 |
| 4388 | 0 | 1575   | AGKKESTVMTSGSA                  | 2.64 | 0.01 | 2.94 | 2.00 | 0.22 | 0.28 |
| 4389 | 0 | 1577   | AGKLGTVSYGEEKPA                 | 2.68 | 0.01 | 3.75 | 0.44 | 1.74 | 0.28 |
| 4390 | 0 | 140825 | AGKLGTVSYGEEKPAVL<br>GHD        | 2.94 | 0.01 | 3.01 | 1.12 | 0.22 | 0.28 |
| 4391 | 0 | 140825 | AGKLGTVSYGEEKPAVL<br>GHD        | 2.94 | 0.01 | 3.01 | 0.68 | 0.22 | 0.85 |
| 4392 | 0 | 193421 | AGKLSFPAN                       | 2.22 | 0.01 | 2.51 | 0.44 | 2.39 | 0.28 |
| 4393 | 0 | 193421 | AGKLSFPAN                       | 2.22 | 0.01 | 2.51 | 0.44 | 2.39 | 0.28 |
| 4394 | 0 | 1578   | AGKNQSQKKKK                     | 2.40 | 0.01 | 2.80 | 1.15 | 0.22 | 0.28 |
| 4395 | 0 | 1578   | AGKNQSQKKKK                     | 2.40 | 0.01 | 2.80 | 1.15 | 0.22 | 0.28 |
| 4396 | 0 | 1578   | AGKNQSQKKKK                     | 2.40 | 0.01 | 2.80 | 1.15 | 0.22 | 0.28 |
| 4397 | 0 | 1584   | AGKREM                          | 1.88 | 0.01 | 3.24 | 1.12 | 0.22 | 0.28 |

|      |   |        |                                     |      |      |      |      |      |      |
|------|---|--------|-------------------------------------|------|------|------|------|------|------|
| 4398 | 0 | 1585   | AGKREIVIIT                          | 2.28 | 0.01 | 2.66 | 0.68 | 0.22 | 0.28 |
| 4399 | 0 | 1585   | AGKREIVIIT                          | 2.28 | 0.01 | 2.66 | 0.68 | 0.22 | 0.28 |
| 4400 | 0 | 1585   | AGKREIVIIT                          | 2.28 | 0.01 | 2.66 | 0.68 | 0.22 | 0.28 |
| 4401 | 0 | 1585   | AGKREIVIIT                          | 2.28 | 0.01 | 2.66 | 0.68 | 0.22 | 0.28 |
| 4402 | 0 | 1585   | AGKREIVIIT                          | 2.28 | 0.01 | 2.66 | 0.68 | 0.22 | 0.28 |
| 4403 | 0 | 1585   | AGKREIVIIT                          | 2.28 | 0.01 | 2.66 | 0.68 | 0.22 | 0.28 |
| 4404 | 0 | 175725 | AGKREGRSKTWFGA                      | 2.69 | 0.01 | 2.63 | 1.15 | 0.22 | 0.85 |
| 4405 | 0 | 175725 | AGKREGRSKTWFGA                      | 2.69 | 0.01 | 2.63 | 1.15 | 0.22 | 0.85 |
| 4406 | 0 | 175725 | AGKREGRSKTWFGA                      | 2.69 | 0.01 | 2.63 | 1.15 | 0.22 | 0.85 |
| 4407 | 0 | 175725 | AGKREGRSKTWFGA                      | 2.69 | 0.01 | 2.63 | 1.15 | 0.22 | 0.85 |
| 4408 | 0 | 175725 | AGKREGRSKTWFGA                      | 2.69 | 0.01 | 2.63 | 1.15 | 0.22 | 0.85 |
| 4409 | 0 | 250737 | AGKSSEEGEIDDDSD                     | 2.72 | 0.01 | 1.61 | 0.44 | 0.85 | 1.28 |
| 4410 | 0 | 237627 | AGLAASAIHWSGILGVM                   | 2.83 | 0.01 | 3.19 | 0.44 | 1.74 | 0.85 |
| 4411 | 0 | 237627 | AGLAASAIHWSGILGVM                   | 2.83 | 0.01 | 3.19 | 0.44 | 0.22 | 0.85 |
| 4412 | 0 | 1595   | AGLFLTTEAV                          | 2.33 | 0.01 | 3.20 | 0.44 | 1.41 | 0.28 |
| 4413 | 0 | 135441 | AGLGAGIP                            | 2.17 | 0.01 | 0.78 | 0.68 | 0.22 | 1.48 |
| 4414 | 0 | 135441 | AGLGAGIP                            | 2.17 | 0.01 | 0.78 | 0.68 | 0.22 | 0.28 |
| 4415 | 0 | 135441 | AGLGAGIP                            | 2.17 | 0.01 | 0.78 | 0.68 | 0.22 | 0.28 |
| 4416 | 0 | 135442 | AGLGGL                              | 1.90 | 0.01 | 0.78 | 1.20 | 0.22 | 0.28 |
| 4417 | 0 | 135443 | AGLGGV                              | 1.90 | 0.01 | 0.78 | 1.20 | 0.22 | 0.28 |
| 4418 | 0 | 135444 | AGLGGVLGGAGQFPLG<br>GVAARPGFGLS     | 3.28 | 0.01 | 0.78 | 1.20 | 0.22 | 0.28 |
| 4419 | 0 | 1602   | AGLLELNGW                           | 2.25 | 0.01 | 0.90 | 2.55 | 0.22 | 0.28 |
| 4420 | 0 | 136123 | AGLPNHNAMLLT                        | 2.49 | 0.01 | 0.90 | 2.74 | 0.22 | 0.85 |
| 4421 | 0 | 136123 | AGLPNHNAMLLT                        | 2.49 | 0.01 | 0.90 | 2.74 | 0.22 | 0.85 |
| 4422 | 0 | 95058  | AGLQND                              | 1.88 | 0.01 | 3.47 | 0.68 | 0.22 | 0.28 |
| 4423 | 0 | 95058  | AGLQND                              | 1.88 | 0.01 | 3.47 | 0.68 | 0.22 | 0.85 |
| 4424 | 0 | 95058  | AGLQND                              | 1.88 | 0.01 | 3.47 | 0.68 | 0.22 | 2.02 |
| 4425 | 0 | 95058  | AGLQND                              | 1.88 | 0.01 | 3.47 | 0.68 | 0.22 | 1.34 |
| 4426 | 0 | 95058  | AGLQND                              | 1.88 | 0.01 | 3.47 | 0.68 | 0.22 | 1.34 |
| 4427 | 0 | 95058  | AGLQND                              | 1.88 | 0.01 | 3.47 | 1.20 | 0.22 | 0.28 |
| 4428 | 0 | 95058  | AGLQND                              | 1.88 | 0.01 | 2.40 | 2.52 | 0.22 | 0.28 |
| 4429 | 0 | 95058  | AGLQND                              | 1.88 | 0.01 | 2.40 | 2.52 | 0.22 | 0.28 |
| 4430 | 0 | 238174 | AGMVSFYNITDHGSLIYS                  | 2.82 | 0.01 | 0.78 | 0.44 | 1.13 | 0.28 |
| 4431 | 0 | 130720 | AGMVTSTTLAWGLLL<br>MILH             | 2.96 | 0.01 | 0.78 | 0.44 | 1.13 | 0.28 |
| 4432 | 0 | 1617   | AGNASRDGRPS                         | 2.43 | 0.01 | 3.78 | 0.68 | 0.22 | 1.27 |
| 4433 | 0 | 111096 | AGNDRMH                             | 1.99 | 0.01 | 0.90 | 0.44 | 0.85 | 1.39 |
| 4434 | 0 | 170247 | AGNEKEEGETADTVG                     | 2.72 | 0.01 | 0.78 | 0.44 | 1.13 | 0.28 |
| 4435 | 0 | 130721 | AGNGGLLGADFAGDLD<br>YNELAVRVSESMQRQ | 3.39 | 0.01 | 0.78 | 0.68 | 0.22 | 1.39 |
| 4436 | 0 | 170248 | AGNINQSLTLGRVI                      | 2.68 | 0.01 | 0.78 | 0.44 | 1.41 | 0.28 |
| 4437 | 0 | 97186  | AGNKEGASRITQIK                      | 2.69 | 0.01 | 2.84 | 0.44 | 0.85 | 0.28 |

|      |   |        |                                |      |      |      |      |      |      |
|------|---|--------|--------------------------------|------|------|------|------|------|------|
| 4438 | 0 | 97187  | AGNMAGGVQ                      | 2.25 | 0.01 | 3.13 | 1.12 | 0.22 | 0.28 |
| 4439 | 0 | 170250 | AGNMMGKDIYEG                   | 2.55 | 0.01 | 3.38 | 0.44 | 0.85 | 2.51 |
|      |   |        | AGNNNTHHQDTGEESA               |      |      |      |      |      |      |
| 4440 | 0 | 156605 | SSGKLGLITNTIAGVAGLI<br>TGRRRTR | 3.68 | 0.01 | 3.28 | 0.68 | 0.22 | 0.28 |
|      |   |        | AGNNNTHHQDTGEESA               |      |      |      |      |      |      |
| 4441 | 0 | 156605 | SSGKLGLITNTIAGVAGLI<br>TGRRRTR | 3.68 | 0.01 | 3.28 | 0.68 | 0.22 | 2.02 |
|      |   |        | AGNNNTHHQDTGEESA               |      |      |      |      |      |      |
| 4442 | 0 | 156605 | SSGKLGLITNTIAGVAGLI<br>TGRRRTR | 3.68 | 0.01 | 3.28 | 0.68 | 0.22 | 1.75 |
|      |   |        | AGNNNTHHQDTGEESA               |      |      |      |      |      |      |
| 4443 | 0 | 156605 | SSGKLGLITNTIAGVAGLI<br>TGRRRTR | 3.68 | 0.01 | 3.28 | 0.68 | 0.22 | 0.28 |
|      |   |        | AGNNNTHHQDTGEESA               |      |      |      |      |      |      |
| 4444 | 0 | 156605 | SSGKLGLITNTIAGVAGLI<br>TGRRRTR | 3.68 | 0.01 | 3.28 | 0.68 | 0.22 | 1.48 |
| 4445 | 0 | 110182 | AGNPGADG                       | 2.17 | 0.01 | 1.60 | 2.61 | 0.22 | 0.28 |
| 4446 | 0 | 1628   | AGNTLMPAFSVPQ                  | 2.52 | 0.01 | 3.78 | 1.12 | 0.22 | 0.28 |
| 4447 | 0 | 108744 | AGNYGEELLPVD                   | 2.45 | 0.01 | 0.90 | 1.15 | 0.22 | 1.39 |
| 4448 | 0 | 509329 | AGNYR                          | 1.74 | 0.01 | 1.75 | 1.12 | 0.22 | 0.85 |
| 4449 | 0 | 132142 | AGPCILLAPDRCPG                 | 2.64 | 0.01 | 0.90 | 3.05 | 1.13 | 1.27 |
| 4450 | 0 | 132143 | AGPCILLARDRCPG                 | 2.64 | 0.01 | 0.90 | 3.05 | 1.13 | 1.66 |
| 4451 | 0 | 132144 | AGPCLLLAPDRCPG                 | 2.65 | 0.01 | 0.90 | 3.05 | 1.13 | 1.27 |
| 4452 | 0 | 107080 | AGPDCSSLPNSMRCS                | 2.68 | 0.01 | 0.90 | 0.44 | 1.23 | 0.28 |
| 4453 | 0 | 78924  | AGPEWLL                        | 1.99 | 0.01 | 3.47 | 2.16 | 0.22 | 1.27 |
| 4454 | 0 | 78924  | AGPEWLL                        | 1.99 | 0.01 | 3.47 | 2.16 | 0.22 | 1.27 |
| 4455 | 0 | 1634   | AGPGVAGS                       | 2.17 | 0.01 | 2.04 | 0.44 | 0.85 | 0.28 |
| 4456 | 0 | 134860 | AGPKAQVEAIQKY                  | 2.56 | 0.01 | 3.38 | 0.68 | 0.22 | 1.48 |
| 4457 | 0 | 134860 | AGPKAQVEAIQKY                  | 2.56 | 0.01 | 3.38 | 0.68 | 0.22 | 0.28 |
| 4458 | 0 | 134860 | AGPKAQVEAIQKY                  | 2.56 | 0.01 | 3.38 | 0.68 | 0.22 | 1.34 |
| 4459 | 0 | 134860 | AGPKAQVEAIQKY                  | 2.56 | 0.01 | 3.38 | 0.68 | 0.22 | 0.85 |
| 4460 | 0 | 134860 | AGPKAQVEAIQKY                  | 2.56 | 0.01 | 3.38 | 0.68 | 0.22 | 0.28 |
| 4461 | 0 | 134860 | AGPKAQVEAIQKY                  | 2.56 | 0.01 | 3.38 | 0.68 | 0.22 | 0.85 |
| 4462 | 0 | 134860 | AGPKAQVEAIQKY                  | 2.56 | 0.01 | 3.38 | 0.68 | 0.22 | 0.85 |
| 4463 | 0 | 134860 | AGPKAQVEAIQKY                  | 2.56 | 0.01 | 3.38 | 0.68 | 0.22 | 0.28 |
| 4464 | 0 | 134860 | AGPKAQVEAIQKY                  | 2.56 | 0.01 | 3.38 | 0.68 | 0.22 | 0.28 |
| 4465 | 0 | 134860 | AGPKAQVEAIQKY                  | 2.56 | 0.01 | 3.38 | 0.68 | 0.22 | 0.28 |
| 4466 | 0 | 134860 | AGPKAQVEAIQKY                  | 2.56 | 0.01 | 3.38 | 0.68 | 0.22 | 0.28 |
| 4467 | 0 | 250910 | AGPKPAEPKSAEPKP                | 2.75 | 0.01 | 1.61 | 0.44 | 0.85 | 1.28 |
| 4468 | 0 | 108748 | AGPPGPVG                       | 2.17 | 0.01 | 1.60 | 2.55 | 2.60 | 0.28 |
|      |   |        | AGPRVRQPARPLGSAW               |      |      |      |      |      |      |
| 4469 | 0 | 1646   | RDQAQRPVAV                     | 3.21 | 0.01 | 2.53 | 0.44 | 0.85 | 0.28 |
|      |   |        | AGPRVRQPARPLGSAW               |      |      |      |      |      |      |
| 4470 | 0 | 1646   | RDQAQRPVAV                     | 3.21 | 0.01 | 2.53 | 0.44 | 0.85 | 0.28 |
| 4471 | 0 | 238183 | AGQKICFKWKKGK                  | 2.69 | 0.01 | 2.56 | 2.02 | 0.22 | 0.85 |
| 4472 | 0 | 238183 | AGQKICFKWKKGK                  | 2.69 | 0.01 | 2.56 | 1.20 | 0.22 | 0.85 |

|      |   |        |                                               |      |      |      |      |      |      |
|------|---|--------|-----------------------------------------------|------|------|------|------|------|------|
| 4473 | 0 | 99096  | AGQKQILLDAIDKIA                               | 2.73 | 0.01 | 2.86 | 2.02 | 0.85 | 0.85 |
| 4474 | 0 | 511023 | AGQKTDDMLNSNDMI                               | 2.66 | 0.01 | 2.24 | 0.44 | 1.41 | 1.28 |
| 4475 | 0 | 92294  | AGQPKQVTKQSAKEVR<br>QKILNKPRQK RTP            | 3.33 | 0.01 | 3.35 | 0.68 | 0.22 | 0.28 |
| 4476 | 0 | 92294  | AGQPKQVTKQSAKEVR<br>QKILNKPRQK RTP            | 3.33 | 0.01 | 3.35 | 0.68 | 0.22 | 0.28 |
| 4477 | 0 | 108267 | AGQRGIV                                       | 2.02 | 0.01 | 0.78 | 2.46 | 0.22 | 0.28 |
| 4478 | 0 | 1656   | AGQRMPRARYGLV                                 | 2.56 | 0.01 | 3.42 | 0.44 | 1.23 | 0.85 |
| 4479 | 0 | 1656   | AGQRMPRARYGLV                                 | 2.56 | 0.01 | 3.42 | 0.44 | 1.23 | 0.85 |
| 4480 | 0 | 1656   | AGQRMPRARYGLV                                 | 2.56 | 0.01 | 3.42 | 0.44 | 1.23 | 0.85 |
| 4481 | 0 | 230361 | AGQSVPSL                                      | 2.21 | 0.01 | 3.40 | 2.49 | 0.85 | 0.28 |
| 4482 | 0 | 131293 | AGRAREYV                                      | 2.15 | 0.01 | 0.78 | 0.44 | 1.13 | 2.02 |
| 4483 | 0 | 1660   | AGRDLL                                        | 1.86 | 0.01 | 0.90 | 2.02 | 0.22 | 0.28 |
| 4484 | 0 | 1662   | AGRDRG                                        | 1.91 | 0.01 | 0.90 | 2.02 | 0.22 | 0.28 |
| 4485 | 0 | 118255 | AGRGRGRGRGRGRGRG<br>RGRGSL                    | 3.12 | 0.01 | 1.75 | 0.44 | 1.13 | 0.85 |
| 4486 | 0 | 118255 | AGRGRGRGRGRGRGRG<br>RGRGSL                    | 3.12 | 0.01 | 1.75 | 0.44 | 1.13 | 0.85 |
| 4487 | 0 | 118255 | AGRGRGRGRGRGRGRG<br>RGRGSL                    | 3.12 | 0.01 | 1.75 | 0.44 | 1.41 | 0.85 |
| 4488 | 0 | 118255 | AGRGRGRGRGRGRGRG<br>RGRGSL                    | 3.12 | 0.01 | 1.75 | 0.44 | 1.13 | 0.85 |
| 4489 | 0 | 118255 | AGRGRGRGRGRGRGRG<br>RGRGSL                    | 3.12 | 0.01 | 1.75 | 0.44 | 1.13 | 0.85 |
| 4490 | 0 | 130722 | AGRMFPELGRGPHRQH<br>GGGAQAPRAPRLHLVT<br>AVSGR | 3.57 | 0.01 | 0.90 | 0.44 | 1.93 | 0.85 |
| 4491 | 0 | 1666   | AGRMIPKG                                      | 2.12 | 0.01 | 2.40 | 2.43 | 0.22 | 0.28 |
| 4492 | 0 | 167722 | AGRMIPKGT                                     | 2.21 | 0.01 | 2.40 | 2.43 | 0.22 | 0.28 |
| 4493 | 0 | 99884  | AGRNSWNCDFSQ                                  | 2.45 | 0.01 | 2.88 | 0.44 | 1.23 | 0.85 |
| 4494 | 0 | 80250  | AGRPK                                         | 1.74 | 0.01 | 3.59 | 0.44 | 0.85 | 0.28 |
| 4495 | 0 | 80250  | AGRPK                                         | 1.74 | 0.01 | 3.59 | 0.44 | 0.85 | 0.28 |
| 4496 | 0 | 1670   | AGRRVGGRRRGRSNSG                              | 2.79 | 0.01 | 2.59 | 0.44 | 0.85 | 0.28 |
| 4497 | 0 | 1671   | AGRRVGLS                                      | 2.13 | 0.01 | 2.40 | 2.43 | 0.22 | 0.28 |
| 4498 | 0 | 167723 | AGRRVGLSN                                     | 2.22 | 0.01 | 2.40 | 2.43 | 0.22 | 0.28 |
| 4499 | 0 | 161203 | AGRTTAGLVLLTPGAK<br>QNI                       | 2.96 | 0.01 | 2.45 | 0.68 | 0.22 | 0.28 |
| 4500 | 0 | 251068 | AGSDEEDQDEDEDEG                               | 2.74 | 0.01 | 1.61 | 0.44 | 0.85 | 1.28 |
| 4501 | 0 | 1676   | AGSGASDL                                      | 2.17 | 0.01 | 2.04 | 0.44 | 0.85 | 0.28 |
| 4502 | 0 | 150963 | AGSGIIISDTPVHDC                               | 2.66 | 0.01 | 2.87 | 0.44 | 0.85 | 0.28 |
| 4503 | 0 | 127564 | AGSGLREDLLSLQEPGSK<br>TYSK                    | 3.04 | 0.01 | 0.78 | 1.12 | 0.22 | 0.85 |
| 4504 | 0 | 195122 | AGSIAAATGFVKKDQ                               | 2.66 | 0.01 | 0.78 | 3.40 | 0.22 | 0.28 |
| 4505 | 0 | 195122 | AGSIAAATGFVKKDQ                               | 2.66 | 0.01 | 0.78 | 3.40 | 0.22 | 0.28 |
| 4506 | 0 | 195122 | AGSIAAATGFVKKDQ                               | 2.66 | 0.01 | 0.78 | 3.40 | 0.22 | 0.28 |

|      |   |        |                                    |      |      |      |      |      |      |
|------|---|--------|------------------------------------|------|------|------|------|------|------|
| 4507 | 0 | 195122 | AGSIAAATGFVKKDQ                    | 2.66 | 0.01 | 0.78 | 3.40 | 0.22 | 1.48 |
| 4508 | 0 | 195122 | AGSIAAATGFVKKDQ                    | 2.66 | 0.01 | 0.78 | 3.40 | 0.22 | 2.02 |
| 4509 | 0 | 1681   | AGSLQGQWRGAAGTA                    | 2.72 | 0.01 | 2.04 | 0.68 | 0.22 | 0.28 |
| 4510 | 0 | 94772  | AGSSGQDL                           | 2.13 | 0.01 | 4.93 | 1.20 | 0.22 | 1.27 |
| 4511 | 0 | 110762 | AGSSIVPLEEYPAEIP                   | 2.76 | 0.01 | 3.72 | 1.20 | 0.22 | 0.28 |
| 4512 | 0 | 110762 | AGSSIVPLEEYPAEIP                   | 2.76 | 0.01 | 3.72 | 1.20 | 0.22 | 0.28 |
| 4513 | 0 | 110762 | AGSSIVPLEEYPAEIP                   | 2.76 | 0.01 | 3.72 | 1.20 | 0.22 | 0.85 |
| 4514 | 0 | 110762 | AGSSIVPLEEYPAEIP                   | 2.76 | 0.01 | 3.72 | 1.20 | 0.22 | 0.85 |
| 4515 | 0 | 110762 | AGSSIVPLEEYPAEIP                   | 2.76 | 0.01 | 3.72 | 1.20 | 0.22 | 1.48 |
| 4516 | 0 | 110762 | AGSSIVPLEEYPAEIP                   | 2.76 | 0.01 | 3.72 | 1.20 | 2.25 | 1.75 |
| 4517 | 0 | 110762 | AGSSIVPLEEYPAEIP                   | 2.76 | 0.01 | 3.72 | 1.20 | 2.25 | 1.75 |
| 4518 | 0 | 177591 | AGTAVQDSRSHVYAH                    | 2.69 | 0.01 | 2.04 | 3.01 | 0.22 | 0.28 |
| 4519 | 0 | 105088 | AGTDGV                             | 1.90 | 0.01 | 3.45 | 1.20 | 0.22 | 0.28 |
| 4520 | 0 | 103792 | AGTELSATGNESGGG                    | 2.71 | 0.01 | 3.00 | 1.20 | 0.22 | 1.34 |
| 4521 | 0 | 103792 | AGTELSATGNESGGG                    | 2.71 | 0.01 | 3.00 | 1.20 | 0.22 | 0.85 |
| 4522 | 0 | 80251  | AGTGALASSAPS                       | 2.53 | 0.01 | 2.48 | 0.44 | 1.59 | 0.28 |
| 4523 | 0 | 181887 | AGTGDDIARMWR                       | 2.49 | 0.01 | 0.90 | 3.15 | 0.22 | 1.39 |
| 4524 | 0 | 1696   | AGTHTPGAT                          | 2.27 | 0.01 | 0.90 | 0.44 | 1.23 | 1.39 |
| 4525 | 0 | 167206 | AGTIAGLNVMRIINEPTA<br>AA           | 2.94 | 3.24 | 0.78 | 0.44 | 1.13 | 0.28 |
| 4526 | 0 | 1698   | AGTK                               | 1.57 | 0.01 | 3.38 | 1.15 | 0.22 | 0.85 |
| 4527 | 0 | 1698   | AGTK                               | 1.57 | 0.01 | 3.38 | 1.15 | 0.22 | 1.34 |
| 4528 | 0 | 111097 | AGTMGDTVPPQSLYIKGT<br>GMR          | 2.91 | 0.01 | 3.11 | 3.14 | 0.22 | 0.28 |
| 4529 | 0 | 1700   | AGTN                               | 1.57 | 0.01 | 3.38 | 1.15 | 0.22 | 0.85 |
| 4530 | 0 | 1700   | AGTN                               | 1.57 | 0.01 | 3.38 | 1.15 | 0.22 | 1.34 |
| 4531 | 0 | 1704   | AGTQTPVNGNSPWAPT<br>APLPGDMNPANWPR | 3.36 | 0.01 | 2.76 | 0.44 | 1.74 | 0.28 |
| 4532 | 0 | 167862 | AGTTSSCTSKAVTLSSLIP                | 2.92 | 0.01 | 2.75 | 0.44 | 0.85 | 2.51 |
| 4533 | 0 | 111098 | AGTVGENVPDDLIIKGS<br>GST           | 2.92 | 0.01 | 1.86 | 3.14 | 0.22 | 0.28 |
| 4534 | 0 | 103029 | AGTVNIGASDAYLSE                    | 2.67 | 0.01 | 2.04 | 0.44 | 0.85 | 1.28 |
| 4535 | 0 | 96075  | AGTWYSLAMAASDIS                    | 2.68 | 0.01 | 1.60 | 0.44 | 1.23 | 0.28 |
| 4536 | 0 | 78925  | AGTYDFAIAAPQANAKI<br>WIA           | 2.95 | 0.01 | 2.84 | 0.44 | 0.85 | 0.28 |
| 4537 | 0 | 99097  | AGVALSRLVLRNAL                     | 2.73 | 0.01 | 2.16 | 0.44 | 1.23 | 1.48 |
| 4538 | 0 | 99097  | AGVALSRLVLRNAL                     | 2.73 | 0.01 | 2.16 | 0.44 | 1.23 | 1.48 |
| 4539 | 0 | 99097  | AGVALSRLVLRNAL                     | 2.73 | 0.01 | 2.16 | 0.44 | 1.23 | 0.85 |
| 4540 | 0 | 97188  | AGVATATG                           | 2.18 | 0.01 | 2.87 | 1.81 | 0.22 | 0.28 |
| 4541 | 0 | 108752 | AGVDTDWEPHGR                       | 2.45 | 0.01 | 0.90 | 1.15 | 0.22 | 1.39 |
| 4542 | 0 | 142384 | AGVLRQEQANSV                       | 2.48 | 0.01 | 0.90 | 0.68 | 0.22 | 0.85 |
| 4543 | 0 | 78607  | AGVMYQFNEANRIGLA<br>YHSKVDIDFADR   | 3.25 | 0.01 | 2.98 | 2.16 | 0.22 | 0.28 |

|      |   |        |                                  |      |      |      |      |      |      |
|------|---|--------|----------------------------------|------|------|------|------|------|------|
| 4544 | 0 | 78607  | AGVMYQFNEANRIGLA<br>YHSKVDIDFADR | 3.25 | 0.01 | 2.98 | 1.12 | 0.22 | 0.28 |
| 4545 | 0 | 78607  | AGVMYQFNEANRIGLA<br>YHSKVDIDFADR | 3.25 | 0.01 | 2.98 | 0.44 | 0.85 | 0.28 |
| 4546 | 0 | 78607  | AGVMYQFNEANRIGLA<br>YHSKVDIDFADR | 3.25 | 0.01 | 2.98 | 1.12 | 0.22 | 0.28 |
| 4547 | 0 | 78607  | AGVMYQFNEANRIGLA<br>YHSKVDIDFADR | 3.25 | 0.01 | 2.98 | 1.12 | 0.22 | 0.85 |
| 4548 | 0 | 78607  | AGVMYQFNEANRIGLA<br>YHSKVDIDFADR | 3.25 | 0.01 | 2.98 | 1.12 | 0.22 | 0.85 |
| 4549 | 0 | 1722   | AGVRRGDLAHLAAHA<br>RHLP          | 3.00 | 0.01 | 3.78 | 3.67 | 0.22 | 1.34 |
| 4550 | 0 | 1722   | AGVRRGDLAHLAAHA<br>RHLP          | 3.00 | 0.01 | 3.78 | 3.67 | 0.22 | 1.75 |
| 4551 | 0 | 133999 | AGWILTELEQSATVMKS                | 2.78 | 0.01 | 0.78 | 0.68 | 0.22 | 1.66 |
| 4552 | 0 | 133999 | AGWILTELEQSATVMKS                | 2.78 | 0.01 | 0.78 | 0.68 | 0.22 | 1.39 |
| 4553 | 0 | 133999 | AGWILTELEQSATVMKS                | 2.78 | 0.01 | 0.78 | 0.68 | 0.22 | 1.39 |
| 4554 | 0 | 1725   | AGWISPGG                         | 2.11 | 0.01 | 2.83 | 3.03 | 0.22 | 0.28 |
| 4555 | 0 | 1725   | AGWISPGG                         | 2.11 | 0.01 | 2.83 | 3.03 | 0.22 | 0.28 |
| 4556 | 0 | 1725   | AGWISPGG                         | 2.11 | 0.01 | 2.83 | 3.03 | 0.22 | 0.85 |
| 4557 | 0 | 1731   | AGYCNECTLKKGSS                   | 2.65 | 0.01 | 2.56 | 2.00 | 0.22 | 0.85 |
| 4558 | 0 | 1731   | AGYCNECTLKKGSS                   | 2.65 | 0.01 | 2.56 | 2.02 | 0.22 | 0.85 |
| 4559 | 0 | 1731   | AGYCNECTLKKGSS                   | 2.65 | 0.01 | 2.56 | 1.20 | 0.22 | 0.85 |
| 4560 | 0 | 120396 | AGYIPFDQDL                       | 2.29 | 0.01 | 2.18 | 2.16 | 0.22 | 0.28 |
| 4561 | 0 | 238196 | AGYTRGDRGFTGDG                   | 2.66 | 0.01 | 2.14 | 2.65 | 0.22 | 0.85 |
| 4562 | 0 | 1740   | AHAAYLNATPAAKVL                  | 2.69 | 0.01 | 3.75 | 0.44 | 1.74 | 0.28 |
| 4563 | 0 | 140826 | AHAAYLNATPAAKVLVE<br>GNT         | 2.96 | 0.01 | 3.01 | 1.12 | 0.22 | 0.28 |
| 4564 | 0 | 188037 | AHADQDARGW                       | 2.34 | 0.01 | 2.92 | 1.81 | 0.22 | 0.85 |
| 4565 | 0 | 175726 | AHAIALFLNQVHRSRAQ<br>FAK         | 2.97 | 0.01 | 2.04 | 0.44 | 0.85 | 0.28 |
| 4566 | 0 | 175726 | AHAIALFLNQVHRSRAQ<br>FAK         | 2.97 | 0.01 | 2.04 | 0.44 | 0.85 | 0.28 |
| 4567 | 0 | 1746   | AHAYSGYDVDPY                     | 2.50 | 0.01 | 0.78 | 1.15 | 0.22 | 1.66 |
| 4568 | 0 | 1746   | AHAYSGYDVDPY                     | 2.50 | 0.01 | 0.78 | 1.15 | 0.22 | 1.27 |
| 4569 | 0 | 1746   | AHAYSGYDVDPY                     | 2.50 | 0.01 | 0.78 | 1.15 | 0.22 | 0.28 |
| 4570 | 0 | 132982 | AHCLRDIPQRLVNV                   | 2.59 | 0.01 | 0.78 | 0.44 | 1.13 | 0.85 |
| 4571 | 0 | 132982 | AHCLRDIPQRLVNV                   | 2.59 | 0.01 | 0.78 | 0.44 | 1.13 | 1.27 |
| 4572 | 0 | 132145 | AHDPPAQVLQELNVT                  | 2.68 | 0.01 | 0.78 | 1.12 | 0.22 | 0.28 |
| 4573 | 0 | 182047 | AHEFCKKEGSNLLTI                  | 2.62 | 0.01 | 0.78 | 0.44 | 1.13 | 0.85 |
| 4574 | 0 | 131815 | AHELWKVPLPPKNIT                  | 2.65 | 0.01 | 0.78 | 0.44 | 1.13 | 0.85 |
| 4575 | 0 | 1753   | AHETSLNAAGNSVIHYT<br>NIN         | 2.96 | 0.01 | 3.17 | 0.68 | 0.22 | 0.28 |

|      |   |        |                             |      |      |      |      |      |      |
|------|---|--------|-----------------------------|------|------|------|------|------|------|
| 4576 | 0 | 1753   | AHETSLNAAGNSVIHYT<br>NIN    | 2.96 | 0.01 | 3.17 | 0.68 | 0.22 | 0.28 |
| 4577 | 0 | 1753   | AHETSLNAAGNSVIHYT<br>NIN    | 2.96 | 0.01 | 3.17 | 0.68 | 0.22 | 0.85 |
| 4578 | 0 | 1753   | AHETSLNAAGNSVIHYT<br>NIN    | 2.96 | 0.01 | 3.17 | 0.68 | 0.22 | 0.28 |
| 4579 | 0 | 141602 | AHFNGSLRSLTQ                | 2.45 | 0.01 | 0.90 | 0.68 | 0.22 | 0.28 |
| 4580 | 0 | 1758   | AHFTDEFKRKNKGKDL<br>TNL     | 2.95 | 0.01 | 2.30 | 0.44 | 0.85 | 0.28 |
| 4581 | 0 | 1758   | AHFTDEFKRKNKGKDL<br>TNL     | 2.95 | 0.01 | 2.30 | 0.44 | 1.41 | 0.28 |
| 4582 | 0 | 91109  | AHFVQQTP                    | 2.11 | 0.01 | 2.90 | 2.71 | 0.22 | 0.28 |
| 4583 | 0 | 91109  | AHFVQQTP                    | 2.11 | 0.01 | 2.90 | 2.71 | 0.22 | 0.85 |
| 4584 | 0 | 91109  | AHFVQQTP                    | 2.11 | 0.01 | 2.90 | 2.71 | 0.22 | 2.12 |
| 4585 | 0 | 91109  | AHFVQQTP                    | 2.11 | 0.01 | 2.90 | 2.71 | 0.22 | 1.34 |
| 4586 | 0 | 135894 | AHGCLFDRRLCS                | 2.46 | 0.01 | 0.78 | 0.44 | 1.41 | 0.28 |
| 4587 | 0 | 1763   | AHGINPNIR                   | 2.23 | 0.01 | 2.69 | 0.44 | 0.85 | 2.66 |
| 4588 | 0 | 98686  | AHGRSQVLQQST                | 2.46 | 0.01 | 1.86 | 0.44 | 1.93 | 1.27 |
| 4589 | 0 | 97864  | AHGRSQVLQQSTYQL<br>QELCC    | 2.98 | 0.01 | 1.86 | 0.44 | 1.93 | 0.28 |
| 4590 | 0 | 97864  | AHGRSQVLQQSTYQL<br>QELCC    | 2.98 | 0.01 | 1.86 | 0.44 | 1.93 | 0.28 |
| 4591 | 0 | 97864  | AHGRSQVLQQSTYQL<br>QELCC    | 2.98 | 0.01 | 1.86 | 0.44 | 2.39 | 0.28 |
| 4592 | 0 | 1765   | AHGSETAWAD                  | 2.32 | 0.01 | 2.84 | 0.68 | 0.22 | 0.28 |
| 4593 | 0 | 1771   | AHHAAD                      | 1.93 | 0.01 | 1.66 | 1.20 | 0.22 | 0.85 |
| 4594 | 0 | 1772   | AHHAADAHHAADAH<br>AAD       | 2.92 | 0.01 | 1.66 | 1.20 | 0.22 | 0.85 |
| 4595 | 0 | 1772   | AHHAADAHHAADAH<br>AAD       | 2.92 | 0.01 | 1.66 | 1.20 | 0.22 | 0.85 |
| 4596 | 0 | 1772   | AHHAADAHHAADAH<br>AAD       | 2.92 | 0.01 | 1.66 | 1.20 | 0.22 | 0.85 |
| 4597 | 0 | 1773   | AHHAADAHHAADAH<br>AADAHHAAD | 3.20 | 0.01 | 0.90 | 1.20 | 0.22 | 0.85 |
| 4598 | 0 | 1773   | AHHAADAHHAADAH<br>AADAHHAAD | 3.20 | 0.01 | 0.90 | 1.20 | 0.22 | 0.85 |
| 4599 | 0 | 1773   | AHHAADAHHAADAH<br>AADAHHAAD | 3.20 | 0.01 | 0.90 | 1.20 | 0.22 | 0.85 |
| 4600 | 0 | 1773   | AHHAADAHHAADAH<br>AADAHHAAD | 3.20 | 0.01 | 0.90 | 1.20 | 0.22 | 0.85 |
| 4601 | 0 | 1773   | AHHAADAHHAADAH<br>AADAHHAAD | 3.20 | 0.01 | 0.90 | 1.20 | 0.22 | 0.85 |
| 4602 | 0 | 1773   | AHHAADAHHAADAH<br>AADAHHAAD | 3.20 | 0.01 | 0.90 | 1.20 | 0.22 | 0.85 |
| 4603 | 0 | 1773   | AHHAADAHHAADAH<br>AADAHHAAD | 3.20 | 0.01 | 0.90 | 1.20 | 0.22 | 0.85 |



|      |   |        |                                    |      |      |      |      |      |      |
|------|---|--------|------------------------------------|------|------|------|------|------|------|
| 4604 | 0 | 1773   | AHHAADAHHAADAHH<br>AADAHHAAD       | 3.20 | 0.01 | 0.90 | 1.20 | 0.22 | 0.85 |
| 4605 | 0 | 137375 | AHHFSE                             | 1.89 | 0.01 | 0.78 | 1.12 | 0.22 | 0.28 |
| 4606 | 0 | 1777   | AHIKSKKKGDKKFKGSV<br>ANMSLGGGSSRTL | 3.36 | 0.01 | 3.28 | 0.44 | 1.23 | 0.85 |
| 4607 | 0 | 106238 | AHILRWGNES                         | 2.26 | 0.01 | 2.75 | 0.44 | 1.23 | 0.85 |
| 4608 | 0 | 79507  | AHIPWLL                            | 1.99 | 0.01 | 0.90 | 1.12 | 0.22 | 1.39 |
| 4609 | 0 | 1784   | AHIRHHKMPVTNLRH                    | 2.66 | 0.01 | 0.90 | 0.68 | 0.22 | 1.39 |
| 4610 | 0 | 1785   | AHIRHHKMPVTTSAT                    | 2.68 | 0.01 | 0.90 | 0.68 | 0.22 | 1.39 |
| 4611 | 0 | 112029 | AHIWWND                            | 2.01 | 0.01 | 0.78 | 0.44 | 1.13 | 0.28 |
| 4612 | 0 | 143808 | AHKDHVVSTWVP                       | 2.47 | 0.01 | 0.90 | 0.68 | 0.22 | 1.39 |
| 4613 | 0 | 79508  | AHKSTLR                            | 1.99 | 0.01 | 0.90 | 1.12 | 0.22 | 1.39 |
| 4614 | 0 | 1790   | AHKWYSQWLPHR                       | 2.45 | 0.01 | 0.90 | 0.68 | 0.22 | 0.28 |
| 4615 | 0 | 1790   | AHKWYSQWLPHR                       | 2.45 | 0.01 | 0.90 | 0.68 | 0.22 | 0.28 |
| 4616 | 0 | 1790   | AHKWYSQWLPHR                       | 2.45 | 0.01 | 0.90 | 0.44 | 0.85 | 0.28 |
| 4617 | 0 | 132147 | AHLDETVWERPHEFW                    | 2.66 | 0.01 | 0.78 | 0.68 | 0.22 | 2.35 |
| 4618 | 0 | 132147 | AHLDETVWERPHEFW                    | 2.66 | 0.01 | 0.78 | 0.68 | 0.22 | 1.48 |
| 4619 | 0 | 1792   | AHLHIPRWNLMS                       | 2.45 | 0.01 | 0.90 | 1.20 | 0.22 | 0.28 |
| 4620 | 0 | 1794   | AHLKAYAKINEESL                     | 2.63 | 0.01 | 2.40 | 2.43 | 0.22 | 0.28 |
| 4621 | 0 | 1794   | AHLKAYAKINEESL                     | 2.63 | 0.01 | 2.40 | 2.43 | 0.22 | 0.28 |
| 4622 | 0 | 1794   | AHLKAYAKINEESL                     | 2.63 | 0.01 | 2.40 | 2.43 | 0.22 | 0.28 |
| 4623 | 0 | 238198 | AHLLVLAAVCVSLLG                    | 2.72 | 0.01 | 2.56 | 2.02 | 0.22 | 0.85 |
| 4624 | 0 | 238198 | AHLLVLAAVCVSLLG                    | 2.72 | 0.01 | 2.56 | 1.20 | 0.22 | 0.85 |
| 4625 | 0 | 1795   | AHLQGEPIEVDNLPEDM<br>KRLQLDDKKPSGL | 3.32 | 0.01 | 4.45 | 0.68 | 0.22 | 0.85 |
| 4626 | 0 | 1796   | AHLRLPTRTSMPKVT                    | 2.68 | 0.01 | 0.90 | 0.68 | 0.22 | 1.39 |
| 4627 | 0 | 1799   | AHLSLRGLPVCAFSS                    | 2.67 | 0.01 | 2.08 | 0.44 | 0.85 | 0.28 |
| 4628 | 0 | 1799   | AHLSLRGLPVCAFSS                    | 2.67 | 0.01 | 2.08 | 0.44 | 0.85 | 0.28 |
| 4629 | 0 | 1802   | AHMFQRSPFQRYPNS                    | 2.68 | 0.01 | 0.90 | 0.68 | 0.22 | 1.39 |
| 4630 | 0 | 225681 | AHPASSTKVDKRIEP                    | 2.66 | 0.01 | 3.28 | 0.44 | 0.22 | 0.85 |
| 4631 | 0 | 1807   | AHPLHPANLVANTVNA<br>MFH            | 2.94 | 0.01 | 2.40 | 0.68 | 0.22 | 0.85 |
| 4632 | 0 | 1807   | AHPLHPANLVANTVNA<br>MFH            | 2.94 | 0.01 | 2.40 | 0.68 | 0.22 | 2.02 |
| 4633 | 0 | 1807   | AHPLHPANLVANTVNA<br>MFH            | 2.94 | 0.01 | 2.40 | 0.68 | 0.22 | 0.85 |
| 4634 | 0 | 153358 | AHPPWPLQYVFRGGGS                   | 2.69 | 0.01 | 0.90 | 0.68 | 0.22 | 1.39 |
| 4635 | 0 | 153358 | AHPPWPLQYVFRGGGS                   | 2.69 | 0.01 | 0.90 | 0.68 | 0.22 | 0.28 |
| 4636 | 0 | 193145 | AHQNTLDENFEGE                      | 2.54 | 0.01 | 3.04 | 1.12 | 0.22 | 0.28 |
| 4637 | 0 | 193145 | AHQNTLDENFEGE                      | 2.54 | 0.01 | 3.04 | 1.12 | 0.22 | 0.28 |
| 4638 | 0 | 1811   | AHQWHFPRSRSTTTN                    | 2.66 | 0.01 | 0.90 | 0.68 | 0.22 | 1.39 |
| 4639 | 0 | 115677 | AHRET                              | 1.74 | 0.01 | 0.78 | 0.44 | 1.13 | 1.57 |

|      |   |        |                           |      |      |      |      |      |      |
|------|---|--------|---------------------------|------|------|------|------|------|------|
| 4640 | 0 | 115677 | AHRET                     | 1.74 | 0.01 | 0.78 | 0.44 | 1.41 | 1.57 |
| 4641 | 0 | 115677 | AHRET                     | 1.74 | 0.01 | 0.78 | 0.44 | 1.13 | 1.57 |
| 4642 | 0 | 115677 | AHRET                     | 1.74 | 0.01 | 0.78 | 0.44 | 1.41 | 1.57 |
| 4643 | 0 | 115677 | AHRET                     | 1.74 | 0.01 | 0.78 | 0.44 | 1.13 | 1.57 |
| 4644 | 0 | 140151 | AHRPPSPA                  | 2.17 | 0.01 | 0.78 | 0.44 | 1.13 | 0.28 |
| 4645 | 0 | 79509  | AHRPTLL                   | 1.99 | 0.01 | 0.90 | 1.12 | 0.22 | 1.39 |
| 4646 | 0 | 132149 | AHRRREPTREITDYR           | 2.69 | 0.01 | 0.90 | 2.46 | 0.22 | 0.28 |
| 4647 | 0 | 132149 | AHRRREPTREITDYR           | 2.69 | 0.01 | 0.90 | 2.46 | 0.22 | 1.39 |
| 4648 | 0 | 510422 | AHSAANFNVKGW              | 2.47 | 0.01 | 0.90 | 3.07 | 1.13 | 1.39 |
| 4649 | 0 | 196941 | AHSANNFDVKGI              | 2.45 | 0.01 | 0.90 | 0.44 | 1.41 | 1.39 |
| 4650 | 0 | 196941 | AHSANNFDVKGI              | 2.45 | 0.01 | 0.90 | 0.44 | 1.41 | 1.48 |
| 4651 | 0 | 196941 | AHSANNFDVKGI              | 2.45 | 0.01 | 0.90 | 0.44 | 1.41 | 1.34 |
| 4652 | 0 | 196941 | AHSANNFDVKGI              | 2.45 | 0.01 | 0.90 | 0.44 | 1.41 | 0.28 |
| 4653 | 0 | 196941 | AHSANNFDVKGI              | 2.45 | 0.01 | 0.90 | 0.44 | 1.41 | 1.34 |
| 4654 | 0 | 196941 | AHSANNFDVKGI              | 2.45 | 0.01 | 0.90 | 0.44 | 1.41 | 1.34 |
| 4655 | 0 | 510423 | AHSANNFNVKGI              | 2.48 | 0.01 | 0.90 | 3.07 | 1.13 | 1.39 |
| 4656 | 0 | 156843 | AHSEMGRATMT               | 2.50 | 0.01 | 0.90 | 2.74 | 0.22 | 0.85 |
| 4657 | 0 | 156843 | AHSEMGRATMT               | 2.50 | 0.01 | 0.90 | 2.22 | 1.59 | 0.85 |
| 4658 | 0 | 156843 | AHSEMGRATMT               | 2.50 | 0.01 | 0.90 | 0.68 | 0.22 | 0.28 |
| 4659 | 0 | 99886  | AHSKEVPALTAVET            | 2.64 | 0.01 | 2.96 | 1.12 | 0.22 | 0.28 |
| 4660 | 0 | 99886  | AHSKEVPALTAVET            | 2.64 | 0.01 | 2.96 | 0.44 | 0.22 | 0.28 |
| 4661 | 0 | 182048 | AHSSCQMGGTLLSI            | 2.66 | 0.01 | 0.78 | 0.44 | 1.13 | 0.85 |
| 4662 | 0 | 133499 | AHSSPRSVWYEW              | 2.47 | 0.01 | 0.90 | 0.44 | 0.85 | 0.28 |
| 4663 | 0 | 1816   | AHSSRLYSPTISKHR           | 2.68 | 0.01 | 0.90 | 0.68 | 0.22 | 1.39 |
| 4664 | 0 | 1820   | AHTDFAGAEAAWGATL<br>DTFFG | 3.03 | 0.01 | 3.05 | 1.20 | 0.22 | 0.28 |
| 4665 | 0 | 1820   | AHTDFAGAEAAWGATL<br>DTFFG | 3.03 | 0.01 | 3.05 | 0.44 | 1.23 | 0.28 |
| 4666 | 0 | 167207 | AHTHSKERVQTI              | 2.45 | 0.01 | 0.90 | 0.44 | 0.85 | 1.39 |
| 4667 | 0 | 251589 | AHTSAPAAGGFGSAA           | 2.72 | 0.01 | 1.61 | 0.44 | 0.85 | 1.28 |
| 4668 | 0 | 251590 | AHTSAPAAGGFGSAT           | 2.73 | 0.01 | 1.61 | 0.44 | 0.85 | 1.28 |
| 4669 | 0 | 251591 | AHTSAPAVGGFGSAT           | 2.72 | 0.01 | 1.61 | 0.44 | 0.85 | 1.28 |
| 4670 | 0 | 251593 | AHTSTPAVGGFGSAT           | 2.72 | 0.01 | 1.61 | 0.44 | 0.85 | 1.28 |
| 4671 | 0 | 1822   | AHTTSDPWHPPG              | 2.47 | 0.01 | 2.85 | 0.68 | 0.22 | 0.28 |
| 4672 | 0 | 1822   | AHTTSDPWHPPG              | 2.47 | 0.01 | 2.85 | 0.68 | 0.22 | 1.34 |
| 4673 | 0 | 1827   | AHWGVLAGIAYFSMVG<br>NWAK  | 2.94 | 0.01 | 2.83 | 0.44 | 0.85 | 0.28 |
| 4674 | 0 | 1827   | AHWGVLAGIAYFSMVG<br>NWAK  | 2.94 | 0.01 | 2.83 | 0.44 | 0.85 | 0.28 |
| 4675 | 0 | 1827   | AHWGVLAGIAYFSMVG<br>NWAK  | 2.94 | 0.01 | 2.83 | 0.44 | 0.85 | 0.28 |
| 4676 | 0 | 138757 | AHWSGHCLL                 | 2.22 | 0.01 | 0.78 | 0.68 | 2.60 | 1.75 |
| 4677 | 0 | 1830   | AHWVDWV                   | 2.04 | 0.01 | 3.53 | 3.08 | 0.22 | 0.28 |
| 4678 | 0 | 181080 | AHYGSLPQKSHGRTQ           | 2.66 | 0.01 | 0.78 | 0.44 | 1.13 | 0.28 |
| 4679 | 0 | 111100 | AHYNIVTFCKCDSTLRL<br>CV   | 2.91 | 0.01 | 1.86 | 3.22 | 0.22 | 0.28 |

|      |   |        |                              |      |      |      |      |      |      |
|------|---|--------|------------------------------|------|------|------|------|------|------|
| 4680 | 0 | 111100 | AHYNIVTFCKCDSTLRL<br>CV      | 2.91 | 0.01 | 1.86 | 2.69 | 0.22 | 0.28 |
| 4681 | 0 | 170265 | AHYNPPPIEFT                  | 2.44 | 0.01 | 4.63 | 4.93 | 0.22 | 0.28 |
| 4682 | 0 | 170265 | AHYNPPPIEFT                  | 2.44 | 0.01 | 4.63 | 2.00 | 0.22 | 1.34 |
| 4683 | 0 | 1848   | AIKLEDAKELLESS               | 2.71 | 0.01 | 2.43 | 0.44 | 1.59 | 0.28 |
| 4684 | 0 | 121129 | AIALREYR                     | 2.15 | 0.01 | 0.78 | 0.44 | 1.13 | 0.28 |
| 4685 | 0 | 121129 | AIALREYR                     | 2.15 | 0.01 | 0.78 | 2.79 | 1.13 | 1.28 |
| 4686 | 0 | 121129 | AIALREYR                     | 2.15 | 0.01 | 0.78 | 2.79 | 1.13 | 1.28 |
| 4687 | 0 | 121129 | AIALREYR                     | 2.15 | 0.01 | 0.78 | 1.81 | 1.41 | 1.28 |
| 4688 | 0 | 117437 | AIALREYRKKMDIPA              | 2.68 | 0.01 | 0.78 | 0.68 | 0.22 | 0.28 |
| 4689 | 0 | 117437 | AIALREYRKKMDIPA              | 2.68 | 0.01 | 0.78 | 0.68 | 0.22 | 0.28 |
| 4690 | 0 | 117437 | AIALREYRKKMDIPA              | 2.68 | 0.01 | 0.78 | 0.68 | 0.22 | 0.28 |
| 4691 | 0 | 117437 | AIALREYRKKMDIPA              | 2.68 | 0.01 | 0.78 | 0.68 | 0.22 | 0.28 |
| 4692 | 0 | 117437 | AIALREYRKKMDIPA              | 2.68 | 0.01 | 0.78 | 0.68 | 0.22 | 0.85 |
| 4693 | 0 | 117437 | AIALREYRKKMDIPA              | 2.68 | 0.01 | 0.78 | 0.44 | 1.13 | 0.28 |
| 4694 | 0 | 117437 | AIALREYRKKMDIPA              | 2.68 | 0.01 | 0.78 | 0.44 | 1.13 | 0.28 |
| 4695 | 0 | 117437 | AIALREYRKKMDIPA              | 2.68 | 0.01 | 0.78 | 0.44 | 1.13 | 0.28 |
| 4696 | 0 | 103031 | AIANAYWSPQARRRF              | 2.67 | 0.01 | 2.04 | 0.44 | 0.85 | 1.28 |
| 4697 | 0 | 178120 | AIASAPASRYLTDMTLEE<br>MS     | 2.96 | 0.01 | 3.51 | 1.12 | 0.22 | 1.27 |
| 4698 | 0 | 131343 | AIAWHQQ                      | 2.02 | 0.01 | 0.78 | 1.15 | 0.22 | 0.28 |
| 4699 | 0 | 1859   | AIAYYRGKDSSIIKDGD<br>L VVC   | 2.99 | 0.01 | 3.59 | 0.44 | 0.85 | 0.28 |
| 4700 | 0 | 1861   | AICKRIPDKKPGKKT              | 2.69 | 0.01 | 2.67 | 0.44 | 0.85 | 0.28 |
| 4701 | 0 | 94429  | AICKRIPNKKPG                 | 2.48 | 0.01 | 2.38 | 0.68 | 0.22 | 0.28 |
| 4702 | 0 | 94429  | AICKRIPNKKPG                 | 2.48 | 0.01 | 2.38 | 0.44 | 1.74 | 0.28 |
| 4703 | 0 | 94429  | AICKRIPNKKPG                 | 2.48 | 0.01 | 2.38 | 0.44 | 1.74 | 0.28 |
| 4704 | 0 | 121130 | AICSQCSD                     | 2.14 | 0.01 | 0.78 | 0.44 | 1.13 | 0.28 |
| 4705 | 0 | 1864   | AICWESPWWAPEILVY<br>NKTISSGP | 3.18 | 0.01 | 2.69 | 0.68 | 0.22 | 0.28 |
| 4706 | 0 | 150964 | AIDEITNKVNSVIEK              | 2.70 | 0.01 | 2.87 | 0.44 | 0.85 | 0.28 |
| 4707 | 0 | 504254 | AIDHD                        | 1.75 | 0.01 | 3.81 | 0.68 | 0.22 | 0.28 |
| 4708 | 0 | 504254 | AIDHD                        | 1.75 | 0.01 | 3.81 | 0.68 | 0.22 | 1.48 |
| 4709 | 0 | 504254 | AIDHD                        | 1.75 | 0.01 | 3.81 | 0.68 | 0.22 | 0.85 |
| 4710 | 0 | 187040 | AIDITRK                      | 2.02 | 0.01 | 3.53 | 0.68 | 0.22 | 0.28 |
| 4711 | 0 | 187040 | AIDITRK                      | 2.02 | 0.01 | 3.53 | 0.68 | 0.22 | 0.85 |
| 4712 | 0 | 187040 | AIDITRK                      | 2.02 | 0.01 | 3.53 | 0.68 | 0.22 | 0.28 |
| 4713 | 0 | 187040 | AIDITRK                      | 2.02 | 0.01 | 3.53 | 0.68 | 0.22 | 0.28 |
| 4714 | 0 | 1878   | AIDNLRASLETTNQA              | 2.68 | 0.01 | 2.43 | 0.44 | 1.59 | 0.28 |
| 4715 | 0 | 1880   | AIDREQSAAIREWA               | 2.65 | 0.01 | 2.59 | 0.44 | 0.85 | 0.28 |
| 4716 | 0 | 1885   | AIDTRPW                      | 1.99 | 0.01 | 0.90 | 0.44 | 0.85 | 1.39 |
| 4717 | 0 | 511097 | AIEAASSDALEALAD              | 2.74 | 0.01 | 2.24 | 0.44 | 1.41 | 1.28 |
| 4718 | 0 | 120398 | AIEGVKYI                     | 2.12 | 0.01 | 2.26 | 3.55 | 0.22 | 0.28 |
| 4719 | 0 | 120398 | AIEGVKYI                     | 2.12 | 0.01 | 2.26 | 3.55 | 0.22 | 0.28 |
| 4720 | 0 | 120398 | AIEGVKYI                     | 2.12 | 0.01 | 2.26 | 3.55 | 0.22 | 0.28 |
| 4721 | 0 | 97189  | AIEKGEHQLLYLQHQL             | 2.76 | 0.01 | 3.67 | 0.44 | 1.23 | 0.28 |
| 4722 | 0 | 1890   | AIEPCTVGHRRYFT               | 2.56 | 0.01 | 2.40 | 0.44 | 1.59 | 0.28 |

|      |   |        |                                   |      |      |      |      |      |      |
|------|---|--------|-----------------------------------|------|------|------|------|------|------|
| 4723 | 0 | 1895   | AIERMKDTLR                        | 2.29 | 0.01 | 2.66 | 0.68 | 0.22 | 0.28 |
| 4724 | 0 | 95227  | AIESATGTTSGDELSKKV<br>CGKGTTSGSTN | 3.33 | 0.01 | 3.65 | 2.22 | 0.22 | 0.28 |
| 4725 | 0 | 94430  | AIFD                              | 1.57 | 0.01 | 2.40 | 1.15 | 0.22 | 0.85 |
| 4726 | 0 | 94430  | AIFD                              | 1.57 | 0.01 | 2.40 | 1.15 | 0.22 | 0.28 |
| 4727 | 0 | 94430  | AIFD                              | 1.57 | 0.01 | 2.40 | 1.15 | 0.22 | 0.85 |
| 4728 | 0 | 94430  | AIFD                              | 1.57 | 0.01 | 2.40 | 1.15 | 0.22 | 0.85 |
| 4729 | 0 | 94430  | AIFD                              | 1.57 | 0.01 | 2.40 | 1.15 | 0.22 | 0.28 |
| 4730 | 0 | 80272  | AIFD TT                           | 1.86 | 0.01 | 3.16 | 0.68 | 0.22 | 0.28 |
| 4731 | 0 | 80272  | AIFD TT                           | 1.86 | 0.01 | 2.40 | 2.52 | 0.22 | 0.28 |
| 4732 | 0 | 119551 | AIFKSYCEIIVTHFPFD                 | 2.75 | 0.01 | 2.26 | 1.81 | 0.22 | 1.57 |
| 4733 | 0 | 119551 | AIFKSYCEIIVTHFPFD                 | 2.75 | 0.01 | 2.26 | 1.81 | 0.22 | 1.57 |
| 4734 | 0 | 119551 | AIFKSYCEIIVTHFPFD                 | 2.75 | 0.01 | 2.26 | 1.81 | 0.22 | 1.57 |
| 4735 | 0 | 119551 | AIFKSYCEIIVTHFPFD                 | 2.75 | 0.01 | 2.26 | 1.81 | 0.22 | 1.57 |
| 4736 | 0 | 119551 | AIFKSYCEIIVTHFPFD                 | 2.75 | 0.01 | 2.26 | 1.15 | 0.22 | 1.57 |
| 4737 | 0 | 119551 | AIFKSYCEIIVTHFPFD                 | 2.75 | 0.01 | 2.26 | 1.12 | 0.22 | 1.57 |
| 4738 | 0 | 119551 | AIFKSYCEIIVTHFPFD                 | 2.75 | 0.01 | 2.26 | 3.65 | 0.22 | 1.57 |
| 4739 | 0 | 119551 | AIFKSYCEIIVTHFPFD                 | 2.75 | 0.01 | 2.26 | 2.25 | 0.22 | 1.57 |
| 4740 | 0 | 119741 | AIFKSYGEIIVTHFPFD                 | 2.75 | 0.01 | 2.26 | 1.15 | 0.22 | 1.57 |
| 4741 | 0 | 119741 | AIFKSYGEIIVTHFPFD                 | 2.75 | 0.01 | 2.26 | 0.44 | 1.41 | 1.57 |
| 4742 | 0 | 119741 | AIFKSYGEIIVTHFPFD                 | 2.75 | 0.01 | 2.26 | 0.44 | 1.13 | 1.57 |
| 4743 | 0 | 119741 | AIFKSYGEIIVTHFPFD                 | 2.75 | 0.01 | 2.26 | 2.43 | 0.22 | 1.57 |
| 4744 | 0 | 119741 | AIFKSYGEIIVTHFPFD                 | 2.75 | 0.01 | 2.26 | 2.43 | 0.22 | 1.57 |
| 4745 | 0 | 131817 | AIFLSFQHLL                        | 2.31 | 0.01 | 0.78 | 0.44 | 1.93 | 0.28 |
| 4746 | 0 | 123013 | AIFSQFGQILDILV                    | 2.63 | 0.01 | 0.78 | 1.20 | 0.22 | 0.28 |
| 4747 | 0 | 79748  | AIFTKPKA                          | 2.15 | 0.01 | 3.81 | 0.68 | 0.22 | 0.85 |
| 4748 | 0 | 79748  | AIFTKPKA                          | 2.15 | 0.01 | 3.81 | 0.68 | 0.22 | 0.85 |
| 4749 | 0 | 131344 | AIGDRSKTDRENSVSIG                 | 2.79 | 0.01 | 3.53 | 0.44 | 1.13 | 0.28 |
| 4750 | 0 | 131344 | AIGDRSKTDRENSVSIG                 | 2.79 | 0.01 | 3.53 | 0.44 | 1.13 | 0.28 |
| 4751 | 0 | 131344 | AIGDRSKTDRENSVSIG                 | 2.79 | 0.01 | 3.53 | 0.44 | 1.13 | 0.28 |
| 4752 | 0 | 131344 | AIGDRSKTDRENSVSIG                 | 2.79 | 0.01 | 3.53 | 0.44 | 1.41 | 0.28 |
| 4753 | 0 | 131344 | AIGDRSKTDRENSVSIG                 | 2.79 | 0.01 | 3.53 | 0.44 | 1.41 | 0.28 |
| 4754 | 0 | 131344 | AIGDRSKTDRENSVSIG                 | 2.79 | 0.01 | 3.53 | 0.44 | 1.41 | 0.28 |
| 4755 | 0 | 131344 | AIGDRSKTDRENSVSIG                 | 2.79 | 0.01 | 3.53 | 0.44 | 0.85 | 0.28 |
| 4756 | 0 | 131344 | AIGDRSKTDRENSVSIG                 | 2.79 | 0.01 | 3.53 | 0.44 | 1.13 | 1.27 |
| 4757 | 0 | 131344 | AIGDRSKTDRENSVSIG                 | 2.79 | 0.01 | 3.53 | 0.44 | 0.85 | 0.28 |
| 4758 | 0 | 131344 | AIGDRSKTDRENSVSIG                 | 2.79 | 0.01 | 3.53 | 0.44 | 0.85 | 0.28 |

|      |   |        |                          |      |      |      |      |      |      |
|------|---|--------|--------------------------|------|------|------|------|------|------|
| 4759 | 0 | 131344 | AIGDRSKTDRENSVSIG        | 2.79 | 0.01 | 3.53 | 0.44 | 1.41 | 0.28 |
| 4760 | 0 | 131344 | AIGDRSKTDRENSVSIG        | 2.79 | 0.01 | 3.53 | 0.44 | 0.85 | 0.28 |
| 4761 | 0 | 131344 | AIGDRSKTDRENSVSIG        | 2.79 | 0.01 | 3.53 | 0.44 | 1.41 | 0.28 |
| 4762 | 0 | 131344 | AIGDRSKTDRENSVSIG        | 2.79 | 0.01 | 3.53 | 0.44 | 0.85 | 0.28 |
| 4763 | 0 | 131344 | AIGDRSKTDRENSVSIG        | 2.79 | 0.01 | 3.53 | 0.44 | 0.85 | 0.28 |
| 4764 | 0 | 131344 | AIGDRSKTDRENSVSIG        | 2.79 | 0.01 | 3.53 | 0.44 | 1.41 | 0.28 |
| 4765 | 0 | 475611 | AIGLAWIPYF               | 2.32 | 0.01 | 3.28 | 3.16 | 0.22 | 0.28 |
| 4766 | 0 | 475611 | AIGLAWIPYF               | 2.32 | 0.01 | 3.28 | 3.16 | 0.22 | 0.28 |
| 4767 | 0 | 475611 | AIGLAWIPYF               | 2.32 | 0.01 | 3.28 | 3.16 | 0.22 | 0.28 |
| 4768 | 0 | 475611 | AIGLAWIPYF               | 2.32 | 0.01 | 3.28 | 3.16 | 0.22 | 0.28 |
| 4769 | 0 | 475611 | AIGLAWIPYF               | 2.32 | 0.01 | 3.28 | 3.16 | 0.22 | 0.28 |
| 4770 | 0 | 475611 | AIGLAWIPYF               | 2.32 | 0.01 | 3.28 | 3.16 | 0.22 | 1.27 |
| 4771 | 0 | 475611 | AIGLAWIPYF               | 2.32 | 0.01 | 3.28 | 3.16 | 0.22 | 1.75 |
| 4772 | 0 | 181266 | AIGNFFSRAGLVSII          | 2.68 | 0.01 | 2.82 | 1.15 | 0.22 | 0.28 |
| 4773 | 0 | 1925   | AIGSANFHSYKKMSQFI<br>DKK | 2.93 | 0.01 | 2.22 | 0.44 | 1.74 | 0.28 |
| 4774 | 0 | 1939   | AIIEVDNEQPTTRAQK         | 2.72 | 0.01 | 3.61 | 2.37 | 0.22 | 0.28 |
| 4775 | 0 | 1939   | AIIEVDNEQPTTRAQK         | 2.72 | 0.01 | 3.61 | 1.12 | 0.22 | 0.28 |
| 4776 | 0 | 1939   | AIIEVDNEQPTTRAQK         | 2.72 | 0.01 | 3.61 | 1.12 | 0.22 | 1.34 |
| 4777 | 0 | 174049 | AIIGLMVGGVV              | 2.40 | 0.01 | 0.78 | 1.15 | 0.22 | 2.49 |
| 4778 | 0 | 174049 | AIIGLMVGGVV              | 2.40 | 0.01 | 0.78 | 1.15 | 0.22 | 0.28 |
| 4779 | 0 | 174049 | AIIGLMVGGVV              | 2.40 | 0.01 | 0.78 | 1.15 | 0.22 | 1.48 |
| 4780 | 0 | 174049 | AIIGLMVGGVV              | 2.40 | 0.01 | 0.78 | 1.15 | 0.22 | 1.48 |
| 4781 | 0 | 174049 | AIIGLMVGGVV              | 2.40 | 0.01 | 0.78 | 1.15 | 0.22 | 1.75 |
| 4782 | 0 | 174049 | AIIGLMVGGVV              | 2.40 | 0.01 | 0.78 | 1.15 | 0.22 | 0.28 |
| 4783 | 0 | 174049 | AIIGLMVGGVV              | 2.40 | 0.01 | 0.78 | 1.15 | 0.22 | 1.66 |
| 4784 | 0 | 174049 | AIIGLMVGGVV              | 2.40 | 0.01 | 0.78 | 1.15 | 0.22 | 1.66 |
| 4785 | 0 | 174049 | AIIGLMVGGVV              | 2.40 | 0.01 | 0.78 | 1.15 | 0.22 | 1.66 |
| 4786 | 0 | 174049 | AIIGLMVGGVV              | 2.40 | 0.01 | 0.78 | 1.15 | 0.22 | 1.66 |
| 4787 | 0 | 174049 | AIIGLMVGGVV              | 2.40 | 0.01 | 0.78 | 1.15 | 0.22 | 1.66 |
| 4788 | 0 | 174049 | AIIGLMVGGVV              | 2.40 | 0.01 | 0.78 | 1.15 | 0.22 | 1.66 |
| 4789 | 0 | 174049 | AIIGLMVGGVV              | 2.40 | 0.01 | 0.78 | 1.15 | 0.22 | 1.66 |
| 4790 | 0 | 174049 | AIIGLMVGGVV              | 2.40 | 0.01 | 0.78 | 1.15 | 0.22 | 1.66 |
| 4791 | 0 | 174049 | AIIGLMVGGVV              | 2.40 | 0.01 | 0.78 | 1.15 | 0.22 | 1.66 |
| 4792 | 0 | 174049 | AIIGLMVGGVV              | 2.40 | 0.01 | 0.78 | 1.15 | 0.22 | 1.66 |
| 4793 | 0 | 174049 | AIIGLMVGGVV              | 2.40 | 0.01 | 0.78 | 1.15 | 0.22 | 1.66 |
| 4794 | 0 | 174049 | AIIGLMVGGVV              | 2.40 | 0.01 | 0.78 | 1.15 | 0.22 | 1.66 |
| 4795 | 0 | 105090 | AIIGLMVGGVVIA            | 2.59 | 0.01 | 0.78 | 1.15 | 0.22 | 0.85 |
| 4796 | 0 | 105090 | AIIGLMVGGVVIA            | 2.59 | 0.01 | 0.78 | 1.15 | 0.22 | 0.28 |
| 4797 | 0 | 105090 | AIIGLMVGGVVIA            | 2.59 | 0.01 | 0.78 | 1.15 | 0.22 | 0.28 |
| 4798 | 0 | 105090 | AIIGLMVGGVVIA            | 2.59 | 0.01 | 0.78 | 1.15 | 0.22 | 1.75 |

|      |   |        |                    |      |      |      |      |      |      |
|------|---|--------|--------------------|------|------|------|------|------|------|
| 4799 | 0 | 105090 | AIIGLMVGGVVIA      | 2.59 | 0.01 | 0.78 | 1.15 | 0.22 | 0.85 |
| 4800 | 0 | 1948   | AIILLTCAVHPELI     | 2.63 | 0.01 | 1.96 | 0.44 | 0.85 | 0.28 |
| 4801 | 0 | 1951   | AIIPDREVL          | 2.20 | 0.01 | 2.41 | 0.44 | 0.85 | 0.28 |
| 4802 | 0 | 1963   | AIKATRVTELLYRLK    | 2.70 | 0.01 | 0.90 | 1.12 | 0.22 | 0.28 |
| 4803 | 0 | 1963   | AIKATRVTELLYRLK    | 2.70 | 0.01 | 0.90 | 1.12 | 0.22 | 0.28 |
| 4804 | 0 | 1963   | AIKATRVTELLYRLK    | 2.70 | 0.01 | 0.90 | 1.12 | 0.22 | 0.28 |
| 4805 | 0 | 1966   | AIKDLKKPCITLGKAPDL | 3.67 | 0.01 | 4.63 | 0.68 | 0.22 | 2.02 |
|      |   |        | NKAYKSVLSGMNAAKL   |      |      |      |      |      |      |
|      |   |        | DPDDVCS            |      |      |      |      |      |      |
| 4806 | 0 | 1966   | AIKDLKKPCITLGKAPDL | 3.67 | 0.01 | 4.63 | 0.68 | 0.22 | 2.35 |
|      |   |        | NKAYKSVLSGMNAAKL   |      |      |      |      |      |      |
|      |   |        | DPDDVCS            |      |      |      |      |      |      |
| 4807 | 0 | 134637 | AIKDNRAVHA         | 2.32 | 0.01 | 2.30 | 1.20 | 0.22 | 1.27 |
| 4808 | 0 | 1967   | AIKDTTSD           | 2.13 | 0.01 | 2.99 | 0.44 | 0.85 | 0.28 |
| 4809 | 0 | 1975   | AIKKRNADAKADYEAKL  | 2.94 | 0.01 | 2.39 | 0.44 | 1.74 | 0.28 |
|      |   |        | AK                 |      |      |      |      |      |      |
|      |   |        | AIKKRNADAKADYEAKL  |      |      |      |      |      |      |
| 4810 | 0 | 1975   | AK                 | 2.94 | 0.01 | 2.39 | 0.44 | 1.74 | 0.28 |
|      |   |        | AIKKRNADAKADYEAKL  |      |      |      |      |      |      |
|      |   |        | AK                 |      |      |      |      |      |      |
| 4811 | 0 | 1975   | AIKKRNADAKADYEAKL  | 2.94 | 0.01 | 2.39 | 2.98 | 0.22 | 0.28 |
|      |   |        | AK                 |      |      |      |      |      |      |
|      |   |        | AIKKRNADAKADYEAKL  |      |      |      |      |      |      |
| 4812 | 0 | 80282  | AIKSAENATK         | 2.34 | 0.01 | 3.06 | 0.44 | 0.85 | 0.28 |
| 4813 | 0 | 110766 | AIKSEVSLTGAL       | 2.48 | 0.01 | 3.15 | 3.53 | 0.22 | 1.27 |
| 4814 | 0 | 110766 | AIKSEVSLTGAL       | 2.48 | 0.01 | 3.15 | 3.53 | 0.22 | 0.28 |
| 4815 | 0 | 110766 | AIKSEVSLTGAL       | 2.48 | 0.01 | 3.15 | 0.44 | 1.59 | 0.28 |
| 4816 | 0 | 1982   | AIKSLT             | 1.88 | 0.01 | 1.96 | 0.44 | 0.85 | 0.28 |
| 4817 | 0 | 2005   | AILSSLTVTQLLR      | 2.61 | 0.01 | 2.41 | 0.44 | 0.85 | 0.28 |
| 4818 | 0 | 2009   | AILTPTPVNPSTAPA    | 2.72 | 0.01 | 2.76 | 0.44 | 1.59 | 0.28 |
| 4819 | 0 | 2023   | AIMGPPTKFSLSFL     | 2.67 | 0.01 | 3.12 | 0.44 | 1.23 | 1.57 |
| 4820 | 0 | 232714 | AIMMLVGRRLLVPWIM   | 2.69 | 0.01 | 2.89 | 1.12 | 0.22 | 1.28 |
| 4821 | 0 | 232714 | AIMMLVGRRLLVPWIM   | 2.69 | 0.01 | 2.89 | 1.12 | 0.22 | 1.28 |
| 4822 | 0 | 232714 | AIMMLVGRRLLVPWIM   | 2.69 | 0.01 | 2.89 | 1.12 | 0.22 | 1.28 |
| 4823 | 0 | 108758 | AIMPKEFDKSEW       | 2.45 | 0.01 | 0.90 | 1.15 | 0.22 | 1.39 |
| 4824 | 0 | 123014 | AIMRYIADK          | 2.24 | 0.01 | 2.28 | 2.00 | 0.22 | 0.28 |
| 4825 | 0 | 123014 | AIMRYIADK          | 2.24 | 0.01 | 2.28 | 2.00 | 0.22 | 0.28 |
| 4826 | 0 | 123014 | AIMRYIADK          | 2.24 | 0.01 | 2.28 | 2.00 | 0.22 | 0.28 |
| 4827 | 0 | 141603 | AINASSDLNLIGFGI    | 2.71 | 0.01 | 3.65 | 0.44 | 1.23 | 1.28 |
| 4828 | 0 | 151792 | AINEGQNKPEI        | 2.41 | 0.01 | 0.78 | 0.44 | 1.93 | 0.28 |
| 4829 | 0 | 2039   | AINPESDQPDLSNF     | 2.61 | 0.01 | 0.78 | 0.44 | 1.13 | 0.28 |
| 4830 | 0 | 2039   | AINPESDQPDLSNF     | 2.61 | 0.01 | 0.78 | 0.44 | 1.13 | 1.48 |
| 4831 | 0 | 2039   | AINPESDQPDLSNF     | 2.61 | 0.01 | 0.78 | 0.44 | 1.13 | 1.57 |
| 4832 | 0 | 122077 | AINPESDQPDLSNFMES  | 3.38 | 0.01 | 0.78 | 1.20 | 0.22 | 0.85 |
|      |   |        | GEWVIKESRGWKHSV    |      |      |      |      |      |      |
|      |   |        |                    |      |      |      |      |      |      |
| 4833 | 0 | 2040   | AINRRVE            | 2.01 | 0.01 | 2.58 | 1.15 | 0.22 | 0.28 |

|      |   |        |                            |      |      |      |      |      |      |
|------|---|--------|----------------------------|------|------|------|------|------|------|
| 4834 | 0 | 2040   | AINRRVE                    | 2.01 | 0.01 | 2.58 | 1.15 | 2.25 | 1.75 |
| 4835 | 0 | 137514 | AIPAGVAHWCYNEGN            | 2.67 | 0.01 | 3.12 | 0.44 | 1.23 | 0.85 |
| 4836 | 0 | 238200 | AIPASYEFVHCCQTD            | 2.62 | 0.01 | 2.56 | 2.02 | 0.22 | 0.85 |
| 4837 | 0 | 131346 | AIPDRFS                    | 1.99 | 0.01 | 0.78 | 1.15 | 0.22 | 0.28 |
| 4838 | 0 | 2045   | AIPHDIDLGESRVVIQDY<br>D    | 2.87 | 0.01 | 2.70 | 0.44 | 0.85 | 0.28 |
| 4839 | 0 | 2046   | AIPLEVIK                   | 2.12 | 0.01 | 1.96 | 0.44 | 0.85 | 2.66 |
| 4840 | 0 | 115678 | AIPPKKNQDK                 | 2.32 | 0.01 | 1.60 | 0.44 | 1.23 | 0.85 |
| 4841 | 0 | 115678 | AIPPKKNQDK                 | 2.32 | 0.01 | 1.60 | 0.44 | 1.23 | 0.85 |
| 4842 | 0 | 2052   | AIPTDPRNVGGDLDPSSI<br>PD   | 2.95 | 0.01 | 2.58 | 0.44 | 0.22 | 0.28 |
| 4843 | 0 | 2053   | AIPTNFSISITTEVMPV          | 2.80 | 0.01 | 2.48 | 0.44 | 0.85 | 0.28 |
| 4844 | 0 | 2053   | AIPTNFSISITTEVMPV          | 2.80 | 0.01 | 2.48 | 0.68 | 0.22 | 0.28 |
| 4845 | 0 | 2053   | AIPTNFSISITTEVMPV          | 2.80 | 0.01 | 2.48 | 1.20 | 0.22 | 0.28 |
| 4846 | 0 | 227744 | AIPVNKPGRYDDFFLS           | 2.67 | 0.01 | 2.72 | 1.20 | 1.59 | 0.28 |
| 4847 | 0 | 151793 | AIQHESGILGP                | 2.39 | 0.01 | 0.78 | 0.44 | 1.93 | 1.27 |
| 4848 | 0 | 134001 | AIQHESGILGPLLYGEVG<br>DT   | 2.92 | 0.01 | 0.78 | 0.44 | 2.35 | 0.28 |
| 4849 | 0 | 132984 | AIQNIRLRHENKDL             | 2.61 | 4.03 | 2.24 | 1.20 | 0.22 | 1.48 |
| 4850 | 0 | 132984 | AIQNIRLRHENKDL             | 2.61 | 4.03 | 2.24 | 1.20 | 0.22 | 1.48 |
| 4851 | 0 | 132984 | AIQNIRLRHENKDL             | 2.61 | 4.03 | 2.24 | 1.20 | 0.22 | 1.48 |
| 4852 | 0 | 132984 | AIQNIRLRHENKDL             | 2.61 | 4.03 | 2.24 | 1.20 | 0.22 | 1.27 |
| 4853 | 0 | 127923 | AIQVGTSWKQVDQFLG<br>VPYA   | 2.92 | 0.01 | 0.78 | 0.44 | 1.13 | 0.28 |
| 4854 | 0 | 2066   | AIREDNNTLKLDRCNN<br>NNQYVS | 3.04 | 0.01 | 2.95 | 0.44 | 0.22 | 0.28 |
| 4855 | 0 | 165582 | AISPPDAASAAPLRTITA<br>DT   | 3.00 | 0.01 | 0.78 | 0.44 | 0.85 | 0.28 |
| 4856 | 0 | 2092   | AISSVLNDILSRDKVE           | 2.81 | 0.01 | 2.48 | 0.44 | 0.85 | 0.28 |
| 4857 | 0 | 2092   | AISSVLNDILSRDKVE           | 2.81 | 0.01 | 2.48 | 0.68 | 0.22 | 0.28 |
| 4858 | 0 | 2094   | AISTFTTNLTEYPLSRVD<br>LG   | 2.96 | 0.01 | 2.40 | 0.68 | 0.22 | 0.28 |
| 4859 | 0 | 102297 | AITCAHTLSIKSRRRCQYVF<br>K  | 2.93 | 0.01 | 0.90 | 1.20 | 0.22 | 0.28 |
| 4860 | 0 | 2103   | AITFGGLLGE                 | 2.32 | 0.01 | 0.78 | 0.44 | 1.74 | 0.28 |
| 4861 | 0 | 420735 | AITFGGLLGEK                | 2.40 | 0.01 | 0.78 | 1.12 | 1.41 | 0.28 |
| 4862 | 0 | 2104   | AITGGGEFTDSKGNVISV<br>AS   | 2.96 | 0.01 | 4.33 | 1.20 | 0.22 | 0.28 |
| 4863 | 0 | 117438 | AIVTKYITKGWKEVHELY<br>KE   | 2.96 | 0.01 | 0.78 | 0.44 | 1.13 | 0.28 |
| 4864 | 0 | 99100  | AIVTVRGGLRILSPD            | 2.67 | 0.01 | 2.16 | 0.44 | 1.23 | 1.48 |
| 4865 | 0 | 2128   | AIVVEYSSSVKLT              | 2.53 | 0.01 | 3.04 | 1.15 | 0.22 | 0.28 |
| 4866 | 0 | 79510  | AIWQHGV                    | 1.99 | 0.01 | 0.90 | 1.12 | 0.22 | 1.39 |
| 4867 | 0 | 94775  | AIWQVEQKASIA               | 2.50 | 0.01 | 2.87 | 0.44 | 0.22 | 0.28 |
| 4868 | 0 | 120399 | AIWRRIRVVPFEVVIPAD<br>EQD  | 3.02 | 0.01 | 2.86 | 0.44 | 0.85 | 0.28 |

|      |   |        |                                             |      |      |      |      |      |      |
|------|---|--------|---------------------------------------------|------|------|------|------|------|------|
| 4869 | 0 | 79511  | AIWSTRT                                     | 2.02 | 0.01 | 0.90 | 1.12 | 0.22 | 1.39 |
| 4870 | 0 | 79512  | AIWYPHV                                     | 1.99 | 0.01 | 0.90 | 1.12 | 0.22 | 1.39 |
| 4871 | 0 | 123016 | AIYENEIHALWADLP                             | 2.69 | 0.01 | 3.16 | 3.16 | 0.22 | 0.28 |
| 4872 | 0 | 123016 | AIYENEIHALWADLP                             | 2.69 | 0.01 | 3.16 | 3.16 | 0.22 | 1.48 |
| 4873 | 0 | 123016 | AIYENEIHALWADLP                             | 2.69 | 0.01 | 3.16 | 3.16 | 0.22 | 3.16 |
| 4874 | 0 | 123016 | AIYENEIHALWADLP                             | 2.69 | 0.01 | 3.16 | 3.16 | 1.41 | 0.28 |
| 4875 | 0 | 123016 | AIYENEIHALWADLP                             | 2.69 | 0.01 | 3.16 | 3.16 | 0.22 | 0.28 |
| 4876 | 0 | 123016 | AIYENEIHALWADLP                             | 2.69 | 0.01 | 3.16 | 3.16 | 0.22 | 3.16 |
| 4877 | 0 | 123016 | AIYENEIHALWADLP                             | 2.69 | 0.01 | 3.16 | 3.16 | 0.22 | 0.28 |
| 4878 | 0 | 2132   | AIYESRIIKRKYKNKDDKE<br>V                    | 2.96 | 0.01 | 1.66 | 2.63 | 0.22 | 0.28 |
| 4879 | 0 | 2133   | AIYGAA                                      | 1.89 | 0.01 | 2.40 | 0.44 | 0.85 | 0.28 |
| 4880 | 0 | 2136   | AIYHTENAYVSVVSSH<br>NR                      | 2.91 | 0.01 | 2.36 | 1.15 | 2.26 | 2.66 |
| 4881 | 0 | 127924 | AIYHTENAYVSVVSSHYS<br>R                     | 2.92 | 0.01 | 4.93 | 1.15 | 0.22 | 2.66 |
| 4882 | 0 | 97190  | AIYKKSQHMTEVVRCP<br>HHERCSDGDGLAPPQH<br>LIR | 3.49 | 0.01 | 1.75 | 1.81 | 0.22 | 2.02 |
| 4883 | 0 | 252103 | AKAAAAAPAKAAAAAPA                           | 2.74 | 0.01 | 1.61 | 0.44 | 0.85 | 1.28 |
| 4884 | 0 | 252104 | AKAAAAAPAKAAAPPA                            | 2.74 | 0.01 | 1.61 | 0.44 | 0.85 | 1.28 |
| 4885 | 0 | 252105 | AKAAAAAPAKAATAPA                            | 2.75 | 0.01 | 1.61 | 0.44 | 0.85 | 1.28 |
| 4886 | 0 | 252143 | AKAAAPAKAAAAAPAK                            | 2.74 | 0.01 | 1.61 | 0.44 | 0.85 | 1.28 |
| 4887 | 0 | 252144 | AKAAAPAKAAAPPAK                             | 2.74 | 0.01 | 1.61 | 0.44 | 0.85 | 1.28 |
| 4888 | 0 | 252146 | AKAAAPPAKAAAAAPA                            | 2.75 | 0.01 | 1.61 | 0.44 | 0.85 | 1.28 |
| 4889 | 0 | 252147 | AKAAAPPAKAAAAAPV                            | 2.74 | 0.01 | 1.61 | 0.44 | 0.85 | 1.28 |
| 4890 | 0 | 252148 | AKAAAPPAKAAAPPA                             | 2.75 | 0.01 | 1.61 | 0.44 | 0.85 | 1.28 |
| 4891 | 0 | 252149 | AKAAAPPAKTAAAPA                             | 2.75 | 0.01 | 1.61 | 0.44 | 0.85 | 1.28 |
| 4892 | 0 | 252150 | AKAAAPPAKTAAPPA                             | 2.75 | 0.01 | 1.61 | 0.44 | 0.85 | 1.28 |
| 4893 | 0 | 135445 | AKAAQFG                                     | 2.04 | 0.01 | 0.78 | 1.20 | 0.22 | 0.28 |
| 4894 | 0 | 252180 | AKAATAPAKAAAAAPA                            | 2.75 | 0.01 | 1.61 | 0.44 | 0.85 | 1.28 |
| 4895 | 0 | 153251 | AKAFSYWTPFDGKSLYS<br>ST                     | 2.91 | 0.01 | 0.90 | 1.15 | 2.26 | 0.28 |
| 4896 | 0 | 153251 | AKAFSYWTPFDGKSLYS<br>ST                     | 2.91 | 0.01 | 0.90 | 1.15 | 2.26 | 1.34 |
| 4897 | 0 | 106242 | AKAHILRWGN                                  | 2.30 | 0.01 | 2.75 | 0.44 | 1.23 | 0.85 |



|      |   |        |                          |      |      |      |      |      |      |
|------|---|--------|--------------------------|------|------|------|------|------|------|
| 4898 | 0 | 121132 | AKAKAKAK                 | 2.16 | 0.01 | 0.90 | 0.44 | 1.13 | 0.28 |
| 4899 | 0 | 175445 | AKAKTDHGAE               | 2.34 | 3.55 | 0.78 | 3.01 | 0.22 | 2.66 |
| 4900 | 0 | 175445 | AKAKTDHGAE               | 2.34 | 3.55 | 0.78 | 3.01 | 0.22 | 2.49 |
| 4901 | 0 | 77827  | AKALKVEV                 | 2.17 | 0.01 | 3.72 | 0.68 | 0.22 | 1.34 |
| 4902 | 0 | 77827  | AKALKVEV                 | 2.17 | 0.01 | 3.72 | 0.68 | 0.22 | 0.28 |
| 4903 | 0 | 252233 | AKAPAPKAAAPAPKA          | 2.75 | 0.01 | 1.61 | 0.44 | 0.85 | 1.28 |
| 4904 | 0 | 98687  | AKAPPAPKPAPQPGP          | 2.75 | 0.01 | 2.14 | 0.68 | 0.22 | 0.28 |
| 4905 | 0 | 135446 | AKAQLR                   | 1.91 | 0.01 | 0.78 | 1.20 | 0.22 | 0.28 |
| 4906 | 0 | 131347 | AKAQTREDL                | 2.32 | 0.01 | 0.78 | 1.12 | 0.22 | 0.28 |
| 4907 | 0 | 117742 | AKAQTREDLRTLTRY          | 2.76 | 0.01 | 0.78 | 1.12 | 0.22 | 0.28 |
| 4908 | 0 | 117742 | AKAQTREDLRTLTRY          | 2.76 | 0.01 | 0.78 | 0.44 | 1.13 | 0.28 |
| 4909 | 0 | 117742 | AKAQTREDLRTLTRY          | 2.76 | 0.01 | 0.78 | 0.44 | 1.13 | 0.28 |
| 4910 | 0 | 117742 | AKAQTREDLRTLTRY          | 2.76 | 0.01 | 0.78 | 0.44 | 1.41 | 0.28 |
| 4911 | 0 | 117742 | AKAQTREDLRTLTRY          | 2.76 | 0.01 | 0.78 | 0.44 | 1.41 | 0.28 |
| 4912 | 0 | 117742 | AKAQTREDLRTLTRY          | 2.76 | 0.01 | 0.78 | 0.44 | 1.41 | 0.28 |
| 4913 | 0 | 117742 | AKAQTREDLRTLTRY          | 2.76 | 0.01 | 0.78 | 0.44 | 1.41 | 0.28 |
| 4914 | 0 | 117742 | AKAQTREDLRTLTRY          | 2.76 | 0.01 | 0.78 | 0.44 | 1.41 | 0.28 |
| 4915 | 0 | 117742 | AKAQTREDLRTLTRY          | 2.76 | 0.01 | 0.78 | 0.44 | 1.13 | 0.28 |
| 4916 | 0 | 117742 | AKAQTREDLRTLTRY          | 2.76 | 0.01 | 0.78 | 0.44 | 1.13 | 0.28 |
| 4917 | 0 | 117742 | AKAQTREDLRTLTRY          | 2.76 | 0.01 | 0.78 | 1.12 | 0.22 | 0.28 |
| 4918 | 0 | 117742 | AKAQTREDLRTLTRY          | 2.76 | 0.01 | 0.78 | 1.12 | 0.22 | 0.28 |
| 4919 | 0 | 117742 | AKAQTREDLRTLTRY          | 2.76 | 0.01 | 0.78 | 1.12 | 0.22 | 0.28 |
| 4920 | 0 | 117742 | AKAQTREDLRTLTRY          | 2.76 | 0.01 | 0.78 | 1.12 | 0.22 | 0.28 |
| 4921 | 0 | 117742 | AKAQTREDLRTLTRY          | 2.76 | 0.01 | 0.78 | 1.12 | 0.22 | 0.28 |
| 4922 | 0 | 117742 | AKAQTREDLRTLTRY          | 2.76 | 0.01 | 0.78 | 1.12 | 0.22 | 0.28 |
| 4923 | 0 | 117742 | AKAQTREDLRTLTRY          | 2.76 | 0.01 | 0.78 | 0.44 | 1.13 | 1.27 |
| 4924 | 0 | 117742 | AKAQTREDLRTLTRY          | 2.76 | 0.01 | 0.78 | 0.44 | 1.13 | 0.28 |
| 4925 | 0 | 117742 | AKAQTREDLRTLTRY          | 2.76 | 0.01 | 0.78 | 0.44 | 1.13 | 0.28 |
| 4926 | 0 | 117742 | AKAQTREDLRTLTRY          | 2.76 | 0.01 | 0.78 | 0.44 | 1.41 | 0.28 |
| 4927 | 0 | 117742 | AKAQTREDLRTLTRY          | 2.76 | 0.01 | 0.78 | 0.44 | 1.13 | 1.27 |
| 4928 | 0 | 117742 | AKAQTREDLRTLTRY          | 2.76 | 0.01 | 0.78 | 0.44 | 1.41 | 1.27 |
| 4929 | 0 | 117742 | AKAQTREDLRTLTRY          | 2.76 | 0.01 | 0.78 | 0.44 | 2.39 | 0.28 |
| 4930 | 0 | 131348 | AKAQTRENL                | 2.30 | 0.01 | 0.78 | 1.12 | 0.22 | 0.28 |
| 4931 | 0 | 177596 | AKATKDVERNLSRDL          | 2.69 | 0.01 | 0.78 | 0.44 | 1.13 | 0.85 |
| 4932 | 0 | 2156   | AKAVAAWTLKAAA            | 2.58 | 0.01 | 0.90 | 1.81 | 0.22 | 0.28 |
| 4933 | 0 | 2156   | AKAVAAWTLKAAA            | 2.58 | 0.01 | 0.90 | 1.81 | 0.22 | 1.34 |
| 4934 | 0 | 192870 | AKAVGVSHPNIDSKVCV<br>TKK | 2.94 | 0.01 | 3.47 | 2.00 | 0.22 | 0.28 |
| 4935 | 0 | 2157   | AKAVYQQFVEFYEKVTG<br>TDL | 2.96 | 0.01 | 2.75 | 1.12 | 0.22 | 1.34 |
| 4936 | 0 | 2157   | AKAVYQQFVEFYEKVTG<br>TDL | 2.96 | 0.01 | 2.75 | 1.12 | 0.22 | 0.85 |
| 4937 | 0 | 2158   | AKAVYQQFYEFYEKV          | 2.73 | 0.01 | 2.75 | 0.44 | 0.85 | 0.28 |
| 4938 | 0 | 170279 | AKDGAGGNAPKAA            | 2.58 | 0.01 | 3.38 | 0.44 | 0.85 | 2.51 |
| 4939 | 0 | 2163   | AKDISFQNYT               | 2.26 | 0.01 | 1.66 | 0.44 | 1.74 | 0.28 |

|      |   |        |                                 |      |      |      |      |      |      |
|------|---|--------|---------------------------------|------|------|------|------|------|------|
| 4940 | 0 | 192872 | AKDLVALNRDEKTIVAG<br>LLA        | 2.96 | 0.01 | 3.47 | 2.00 | 0.22 | 0.28 |
| 4941 | 0 | 107083 | AKDVKFGADARALML                 | 2.71 | 0.01 | 2.19 | 2.97 | 0.22 | 0.28 |
| 4942 | 0 | 118740 | AKEASSYDYILGWEFGG<br>G          | 2.83 | 0.01 | 3.34 | 0.68 | 0.22 | 0.28 |
| 4943 | 0 | 118740 | AKEASSYDYILGWEFGG<br>G          | 2.83 | 0.01 | 3.34 | 0.68 | 0.22 | 1.48 |
| 4944 | 0 | 2167   | AKEASSYDYILGWEFGG<br>GVPEHKKEEN | 3.19 | 0.01 | 1.66 | 0.44 | 0.85 | 0.28 |
| 4945 | 0 | 2167   | AKEASSYDYILGWEFGG<br>GVPEHKKEEN | 3.19 | 0.01 | 1.66 | 0.44 | 0.85 | 2.12 |
| 4946 | 0 | 2167   | AKEASSYDYILGWEFGG<br>GVPEHKKEEN | 3.19 | 0.01 | 1.66 | 0.44 | 1.74 | 0.28 |
| 4947 | 0 | 2167   | AKEASSYDYILGWEFGG<br>GVPEHKKEEN | 3.19 | 0.01 | 1.66 | 0.44 | 1.74 | 1.48 |
| 4948 | 0 | 2167   | AKEASSYDYILGWEFGG<br>GVPEHKKEEN | 3.19 | 0.01 | 1.66 | 0.44 | 0.85 | 1.34 |
| 4949 | 0 | 2167   | AKEASSYDYILGWEFGG<br>GVPEHKKEEN | 3.19 | 0.01 | 1.66 | 0.44 | 0.85 | 0.28 |
| 4950 | 0 | 2167   | AKEASSYDYILGWEFGG<br>GVPEHKKEEN | 3.19 | 0.01 | 1.66 | 0.44 | 0.85 | 0.85 |
| 4951 | 0 | 2167   | AKEASSYDYILGWEFGG<br>GVPEHKKEEN | 3.19 | 0.01 | 1.66 | 1.15 | 0.22 | 0.85 |
| 4952 | 0 | 2167   | AKEASSYDYILGWEFGG<br>GVPEHKKEEN | 3.19 | 0.01 | 1.66 | 0.44 | 0.85 | 1.34 |
| 4953 | 0 | 2167   | AKEASSYDYILGWEFGG<br>GVPEHKKEEN | 3.19 | 0.01 | 1.66 | 1.15 | 0.22 | 0.85 |
| 4954 | 0 | 2167   | AKEASSYDYILGWEFGG<br>GVPEHKKEEN | 3.19 | 0.01 | 2.22 | 0.44 | 1.59 | 0.28 |
| 4955 | 0 | 2167   | AKEASSYDYILGWEFGG<br>GVPEHKKEEN | 3.19 | 0.01 | 2.22 | 0.44 | 1.59 | 1.48 |
| 4956 | 0 | 2167   | AKEASSYDYILGWEFGG<br>GVPEHKKEEN | 3.19 | 0.01 | 2.22 | 0.44 | 2.39 | 0.28 |
| 4957 | 0 | 2167   | AKEASSYDYILGWEFGG<br>GVPEHKKEEN | 3.19 | 0.01 | 2.22 | 0.44 | 1.59 | 1.75 |
| 4958 | 0 | 2167   | AKEASSYDYILGWEFGG<br>GVPEHKKEEN | 3.19 | 0.01 | 3.34 | 0.68 | 0.22 | 0.28 |
| 4959 | 0 | 2167   | AKEASSYDYILGWEFGG<br>GVPEHKKEEN | 3.19 | 0.01 | 3.34 | 0.68 | 0.22 | 1.48 |
| 4960 | 0 | 2167   | AKEASSYDYILGWEFGG<br>GVPEHKKEEN | 3.19 | 0.01 | 3.34 | 1.20 | 0.22 | 0.28 |
| 4961 | 0 | 2167   | AKEASSYDYILGWEFGG<br>GVPEHKKEEN | 3.19 | 0.01 | 3.34 | 1.20 | 0.22 | 1.48 |
| 4962 | 0 | 2167   | AKEASSYDYILGWEFGG<br>GVPEHKKEEN | 3.19 | 0.01 | 2.22 | 0.44 | 1.74 | 1.27 |

|      |   |        |                                        |      |      |      |      |      |      |
|------|---|--------|----------------------------------------|------|------|------|------|------|------|
| 4963 | 0 | 2167   | AKEASSYDYILGWEFGG<br>GVPEHKKEEN        | 3.19 | 0.01 | 2.22 | 0.44 | 1.74 | 0.28 |
| 4964 | 0 | 2167   | AKEASSYDYILGWEFGG<br>GVPEHKKEEN        | 3.19 | 0.01 | 2.22 | 0.44 | 1.74 | 1.27 |
| 4965 | 0 | 2167   | AKEASSYDYILGWEFGG<br>GVPEHKKEEN        | 3.19 | 0.01 | 2.22 | 1.81 | 0.22 | 0.28 |
| 4966 | 0 | 2167   | AKEASSYDYILGWEFGG<br>GVPEHKKEEN        | 3.19 | 0.01 | 2.22 | 0.68 | 0.22 | 0.28 |
| 4967 | 0 | 2167   | AKEASSYDYILGWEFGG<br>GVPEHKKEEN        | 3.19 | 0.01 | 2.22 | 0.68 | 0.22 | 0.28 |
| 4968 | 0 | 110767 | AKEEISFVATFS                           | 2.49 | 0.01 | 3.15 | 1.12 | 0.22 | 1.27 |
| 4969 | 0 | 156845 | AKEEKNATAKTFLKQD<br>WDGA               | 3.01 | 0.01 | 3.70 | 1.81 | 0.22 | 0.28 |
| 4970 | 0 | 156845 | AKEEKNATAKTFLKQD<br>WDGA               | 3.01 | 0.01 | 3.70 | 2.49 | 0.22 | 0.28 |
| 4971 | 0 | 156845 | AKEEKNATAKTFLKQD<br>WDGA               | 3.01 | 0.01 | 3.70 | 2.49 | 0.22 | 0.28 |
| 4972 | 0 | 156845 | AKEEKNATAKTFLKQD<br>WDGA               | 3.01 | 0.01 | 3.70 | 1.81 | 0.22 | 1.48 |
| 4973 | 0 | 156845 | AKEEKNATAKTFLKQD<br>WDGA               | 3.01 | 0.01 | 3.70 | 1.81 | 2.25 | 1.75 |
| 4974 | 0 | 156845 | AKEEKNATAKTFLKQD<br>WDGA               | 3.01 | 0.01 | 3.70 | 1.81 | 0.22 | 0.28 |
| 4975 | 0 | 156845 | AKEEKNATAKTFLKQD<br>WDGA               | 3.01 | 0.01 | 3.70 | 1.81 | 0.22 | 0.28 |
| 4976 | 0 | 156845 | AKEEKNATAKTFLKQD<br>WDGA               | 3.01 | 0.01 | 3.70 | 1.81 | 0.22 | 0.28 |
| 4977 | 0 | 167484 | AKEPKRRSA                              | 2.34 | 0.01 | 0.78 | 0.44 | 1.13 | 0.85 |
| 4978 | 0 | 131818 | AKEERRY                                | 2.02 | 0.01 | 2.93 | 0.44 | 1.13 | 0.28 |
| 4979 | 0 | 131818 | AKEERRY                                | 2.02 | 0.01 | 2.93 | 0.44 | 2.82 | 0.28 |
| 4980 | 0 | 131818 | AKEERRY                                | 2.02 | 0.01 | 2.93 | 0.44 | 1.13 | 0.85 |
| 4981 | 0 | 131819 | AKEERRYLRDER                           | 2.51 | 0.01 | 2.93 | 1.20 | 0.22 | 0.85 |
| 4982 | 0 | 2169   | AKEFEAAA                               | 2.14 | 0.01 | 2.66 | 2.61 | 0.22 | 0.28 |
| 4983 | 0 | 170281 | AKEFEKEISATKATV                        | 2.72 | 0.01 | 0.78 | 0.44 | 1.13 | 0.28 |
| 4984 | 0 | 2172   | AKEKLQEQQSDLEQERL<br>AKEKLQEQQSDLEQERL | 3.53 | 0.01 | 1.66 | 0.44 | 0.85 | 0.28 |
| 4985 | 0 | 2172   | AKEKLQEQQSDLEQERL<br>AKEKLQEQQSDLEQERL | 3.53 | 0.01 | 1.66 | 0.44 | 1.41 | 0.28 |
| 4986 | 0 | 2172   | AKEKLQEQQSDLEQERL<br>AKEKLQEQQSDLEQERL | 3.53 | 0.01 | 1.66 | 0.44 | 0.85 | 0.28 |
| 4987 | 0 | 152405 | AKENQLSQIL                             | 2.31 | 0.01 | 2.18 | 2.16 | 0.22 | 0.28 |
| 4988 | 0 | 99102  | AKEPYPEFVDRLLSQ                        | 2.63 | 0.01 | 2.86 | 2.02 | 0.85 | 0.85 |
| 4989 | 0 | 2179   | AKEVLKGY                               | 2.12 | 0.01 | 2.97 | 1.20 | 0.22 | 0.28 |

|      |   |        |                                                |      |      |      |      |      |      |
|------|---|--------|------------------------------------------------|------|------|------|------|------|------|
| 4990 | 0 | 167208 | AKFEELNMDLFRSTMKP<br>VQK                       | 2.90 | 3.40 | 0.78 | 0.44 | 1.13 | 0.28 |
| 4991 | 0 | 134640 | AKFEVNNPQVQRQAFN<br>ELIRVVHQLLPESLRKRK<br>RSRC | 3.61 | 0.01 | 1.75 | 1.20 | 0.22 | 0.28 |
| 4992 | 0 | 134640 | AKFEVNNPQVQRQAFN<br>ELIRVVHQLLPESLRKRK<br>RSRC | 3.61 | 0.01 | 1.75 | 1.20 | 0.22 | 0.28 |
| 4993 | 0 | 134640 | AKFEVNNPQVQRQAFN<br>ELIRVVHQLLPESLRKRK<br>RSRC | 3.61 | 0.01 | 1.75 | 1.20 | 0.22 | 1.34 |
| 4994 | 0 | 134640 | AKFEVNNPQVQRQAFN<br>ELIRVVHQLLPESLRKRK<br>RSRC | 3.61 | 0.01 | 1.75 | 1.20 | 0.22 | 1.27 |
| 4995 | 0 | 2186   | AKFFADKPDESTLSP<br>REHYEKFERMIKEHTEK<br>NKK    | 3.58 | 0.01 | 3.51 | 0.44 | 0.85 | 0.28 |
| 4996 | 0 | 2186   | AKFFADKPDESTLSP<br>REHYEKFERMIKEHTEK<br>NKK    | 3.58 | 0.01 | 3.51 | 0.44 | 0.85 | 0.28 |
| 4997 | 0 | 111104 | AKFNNARIPGFM                                   | 2.47 | 0.01 | 0.90 | 0.44 | 0.85 | 1.39 |
| 4998 | 0 | 107084 | AKFRHD                                         | 1.88 | 0.01 | 0.78 | 1.15 | 0.22 | 2.49 |
| 4999 | 0 | 2190   | AKFSDTIGKRDEQIT                                | 2.66 | 0.01 | 2.86 | 1.12 | 0.22 | 0.28 |
| 5000 | 0 | 2190   | AKFSDTIGKRDEQIT                                | 2.66 | 0.01 | 2.86 | 1.12 | 0.22 | 0.28 |
| 5001 | 0 | 489463 | AKFSISIDQILEAHN                                | 2.67 | 0.01 | 2.69 | 3.05 | 0.85 | 1.28 |
| 5002 | 0 | 105670 | AKFTQFAG                                       | 2.15 | 0.01 | 3.05 | 1.20 | 0.22 | 0.28 |
| 5003 | 0 | 2192   | AKFVAAWTLKAAA                                  | 2.57 | 0.01 | 0.90 | 0.68 | 0.22 | 0.28 |
| 5004 | 0 | 2193   | AKGHSLPRLVTS                                   | 2.45 | 0.01 | 0.90 | 1.20 | 0.22 | 1.39 |
| 5005 | 0 | 2193   | AKGHSLPRLVTS                                   | 2.45 | 0.01 | 0.90 | 0.68 | 2.25 | 1.75 |
| 5006 | 0 | 252436 | AKGKATGGSAGEDGE                                | 2.73 | 0.01 | 1.61 | 0.44 | 0.85 | 1.28 |
| 5007 | 0 | 252437 | AKGKATGGSAGEDSD                                | 2.73 | 0.01 | 1.61 | 0.44 | 0.85 | 1.28 |
| 5008 | 0 | 252438 | AKGKATGSSAGEDGE                                | 2.73 | 0.01 | 1.61 | 0.44 | 0.85 | 1.28 |
| 5009 | 0 | 118741 | AKGKPDAAKKGVVKA<br>EKS                         | 3.07 | 0.01 | 0.78 | 0.44 | 1.13 | 0.28 |
| 5010 | 0 | 118741 | AKGKPDAAKKGVVKA<br>EKS                         | 3.07 | 0.01 | 0.78 | 0.44 | 1.13 | 0.28 |
| 5011 | 0 | 165583 | AKGTDNW                                        | 1.99 | 0.01 | 0.90 | 0.44 | 1.23 | 1.39 |
| 5012 | 0 | 2198   | AKGVEFR                                        | 1.99 | 0.01 | 2.14 | 0.44 | 0.22 | 0.28 |
| 5013 | 0 | 2198   | AKGVEFR                                        | 1.99 | 0.01 | 2.14 | 0.44 | 0.85 | 0.28 |
| 5014 | 0 | 122715 | AKHDLDIKPT                                     | 2.31 | 0.01 | 2.58 | 2.87 | 0.22 | 0.28 |
| 5015 | 0 | 122715 | AKHDLDIKPT                                     | 2.31 | 0.01 | 2.58 | 2.87 | 0.22 | 0.28 |
| 5016 | 0 | 122715 | AKHDLDIKPT                                     | 2.31 | 0.01 | 2.58 | 2.87 | 0.22 | 0.28 |
| 5017 | 0 | 119552 | AKHYHKEYRQMYRTEIR<br>MARMARKAGNFYVPAE<br>P     | 3.47 | 0.01 | 0.78 | 0.44 | 1.13 | 0.85 |
| 5018 | 0 | 96081  | AKIDDPDTSK                                     | 2.33 | 0.01 | 0.78 | 0.44 | 1.93 | 0.85 |

|      |   |        |                                   |      |      |      |      |      |      |
|------|---|--------|-----------------------------------|------|------|------|------|------|------|
| 5019 | 0 | 2207   | AKIENAIMISDQRANL<br>GAFQNRLESIKDS | 3.36 | 0.01 | 2.73 | 0.44 | 0.85 | 0.28 |
| 5020 | 0 | 78101  | AKINAS                            | 1.91 | 0.01 | 0.90 | 2.02 | 1.59 | 0.28 |
| 5021 | 0 | 111106 | AKIQLPTLNEDLT                     | 2.54 | 0.01 | 3.81 | 4.33 | 0.85 | 0.85 |
| 5022 | 0 | 187220 | AKITRTLSPFS                       | 2.48 | 0.01 | 0.90 | 0.68 | 0.22 | 0.28 |
| 5023 | 0 | 128259 | AKKAGAAKAKKPAGAA                  | 2.80 | 0.01 | 0.78 | 0.44 | 1.13 | 0.28 |
| 5024 | 0 | 128259 | AKKAGAAKAKKPAGAA                  | 2.80 | 0.01 | 0.78 | 0.44 | 1.13 | 0.28 |
| 5025 | 0 | 128259 | AKKAGAAKAKKPAGAA                  | 2.80 | 0.01 | 0.78 | 1.12 | 0.22 | 0.28 |
| 5026 | 0 | 128259 | AKKAGAAKAKKPAGAA                  | 2.80 | 0.01 | 0.78 | 0.44 | 1.13 | 0.28 |
| 5027 | 0 | 181187 | AKKAILITDAAKDKG                   | 2.73 | 0.01 | 2.97 | 0.44 | 0.85 | 0.28 |
| 5028 | 0 | 232715 | AKKDWFDYGYIDAP                    | 2.70 | 0.01 | 2.89 | 1.12 | 0.22 | 1.28 |
| 5029 | 0 | 232715 | AKKDWFDYGYIDAP                    | 2.70 | 0.01 | 2.89 | 1.12 | 0.22 | 1.28 |
| 5030 | 0 | 232715 | AKKDWFDYGYIDAP                    | 2.70 | 0.01 | 2.89 | 1.12 | 0.22 | 1.28 |
| 5031 | 0 | 232715 | AKKDWFDYGYIDAP                    | 2.70 | 0.01 | 2.89 | 1.12 | 0.22 | 1.28 |
| 5032 | 0 | 232715 | AKKDWFDYGYIDAP                    | 2.70 | 0.01 | 2.89 | 1.12 | 0.22 | 1.28 |
| 5033 | 0 | 170287 | AKKEQLADARRDLKS                   | 2.71 | 0.01 | 0.78 | 0.44 | 1.41 | 0.28 |
| 5034 | 0 | 127926 | AKKGEKVPKGKKGKA                   | 2.74 | 0.01 | 2.73 | 1.12 | 0.22 | 0.28 |
| 5035 | 0 | 127926 | AKKGEKVPKGKKGKA                   | 2.74 | 0.01 | 2.73 | 0.44 | 1.13 | 0.28 |
| 5036 | 0 | 132153 | AKKK                              | 1.56 | 0.01 | 0.78 | 0.68 | 0.22 | 0.85 |
| 5037 | 0 | 132153 | AKKK                              | 1.56 | 0.01 | 0.78 | 0.68 | 0.22 | 0.85 |
| 5038 | 0 | 132153 | AKKK                              | 1.56 | 0.01 | 0.78 | 0.68 | 0.22 | 0.28 |
| 5039 | 0 | 2212   | AKKKKPEKPH                        | 2.35 | 0.01 | 2.80 | 2.13 | 0.22 | 1.27 |
| 5040 | 0 | 2215   | AKKPAGKGSPSTLQTPG                 | 2.84 | 0.01 | 1.66 | 1.20 | 0.22 | 0.85 |
| 5041 | 0 | 252558 | AKKPAVKPTVKPAAK                   | 2.75 | 0.01 | 1.61 | 0.44 | 0.85 | 1.28 |
| 5042 | 0 | 80315  | AKKQSNLFGA                        | 2.31 | 0.01 | 3.06 | 0.44 | 0.85 | 0.28 |
| 5043 | 0 | 2220   | AKKQVEKALEEANSKLA<br>ALE          | 3.00 | 0.01 | 2.85 | 2.42 | 0.22 | 0.28 |
| 5044 | 0 | 2220   | AKKQVEKALEEANSKLA<br>ALE          | 3.00 | 0.01 | 2.85 | 2.42 | 0.22 | 0.28 |
| 5045 | 0 | 2220   | AKKQVEKALEEANSKLA<br>ALE          | 3.00 | 0.01 | 2.85 | 0.44 | 0.85 | 0.28 |
| 5046 | 0 | 104417 | AKKQVEKALEEANSKLA<br>ALE          | 3.00 | 0.01 | 2.24 | 2.04 | 0.22 | 0.28 |
| 5047 | 0 | 104417 | AKKQVEKALEEANSKLA<br>ALE          | 3.00 | 0.01 | 2.24 | 2.04 | 0.22 | 0.28 |
| 5048 | 0 | 2226   | AKKVPETFPELKPGESRH<br>TS          | 2.94 | 0.01 | 2.82 | 0.44 | 0.85 | 0.28 |
| 5049 | 0 | 2226   | AKKVPETFPELKPGESRH<br>TS          | 2.94 | 0.01 | 2.82 | 0.44 | 1.41 | 0.28 |
| 5050 | 0 | 225621 | AKLEEARANEDHAAIFL                 | 2.80 | 0.01 | 2.51 | 2.00 | 0.85 | 0.28 |
| 5051 | 0 | 511197 | AKLEEEKQISDASRQ                   | 2.69 | 0.01 | 2.24 | 0.44 | 1.41 | 1.28 |

|      |   |        |                                                                                                        |      |      |      |      |      |      |
|------|---|--------|--------------------------------------------------------------------------------------------------------|------|------|------|------|------|------|
| 5052 | 0 | 119745 | AKLFKDYSSVVRPVED                                                                                       | 2.72 | 0.01 | 0.78 | 2.04 | 0.22 | 0.28 |
| 5053 | 0 | 119745 | AKLFKDYSSVVRPVED                                                                                       | 2.72 | 0.01 | 0.78 | 1.12 | 0.22 | 0.28 |
| 5054 | 0 | 119745 | AKLFKDYSSVVRPVED                                                                                       | 2.72 | 0.01 | 0.78 | 1.81 | 0.22 | 0.28 |
| 5055 | 0 | 79751  | AKLGAAASSPDA                                                                                           | 2.50 | 0.01 | 2.14 | 3.26 | 0.22 | 0.28 |
| 5056 | 0 | 79751  | AKLGAAASSPDA                                                                                           | 2.50 | 0.01 | 2.14 | 3.55 | 0.22 | 0.28 |
| 5057 | 0 | 252587 | AKLGKSVGLTAALSP                                                                                        | 2.71 | 0.01 | 1.61 | 0.44 | 0.85 | 1.28 |
| 5058 | 0 | 224634 | AKLHKLGFITIAKNGDSPI<br>TVPPNGYFRFE                                                                     | 3.32 | 0.01 | 4.03 | 1.12 | 0.22 | 2.66 |
| 5059 | 0 | 156846 | AKLITCSKTCSKWQ                                                                                         | 2.63 | 0.01 | 0.90 | 2.74 | 0.22 | 0.85 |
| 5060 | 0 | 156846 | AKLITCSKTCSKWQ                                                                                         | 2.63 | 0.01 | 0.90 | 0.68 | 0.22 | 0.28 |
| 5061 | 0 | 2237   | AKLQDC                                                                                                 | 1.88 | 0.01 | 1.96 | 0.44 | 0.85 | 0.28 |
| 5062 | 0 | 80318  | AKLTDASNSHNS                                                                                           | 2.50 | 0.01 | 2.87 | 0.44 | 0.85 | 0.28 |
| 5063 | 0 | 2242   | AKLTLVLTCKGSQIL                                                                                        | 2.68 | 0.01 | 3.38 | 1.12 | 0.22 | 0.28 |
| 5064 | 0 | 2242   | AKLTLVLTCKGSQIL                                                                                        | 2.68 | 0.01 | 3.38 | 1.12 | 0.22 | 0.28 |
| 5065 | 0 | 134002 | AKLVTLQAHPLQQSYD                                                                                       | 2.77 | 0.01 | 2.25 | 0.44 | 1.41 | 1.27 |
| 5066 | 0 | 134002 | AKLVTLQAHPLQQSYD                                                                                       | 2.77 | 0.01 | 2.25 | 0.68 | 1.41 | 1.27 |
| 5067 | 0 | 123017 | AKMKGTFVER                                                                                             | 2.29 | 0.01 | 0.78 | 1.20 | 0.22 | 0.28 |
| 5068 | 0 | 2246   | AKMLSTELH                                                                                              | 2.21 | 0.01 | 2.87 | 0.44 | 0.85 | 0.28 |
| 5069 | 0 | 174864 | AKMNILIRDKRF                                                                                           | 2.48 | 0.01 | 2.18 | 2.71 | 0.22 | 0.28 |
| 5070 | 0 | 2250   | AKNEVF                                                                                                 | 1.88 | 0.01 | 1.96 | 0.44 | 0.85 | 0.28 |
| 5071 | 0 | 2253   | AKNKPTLDFELIKTEAKQ<br>PAT                                                                              | 3.02 | 0.01 | 2.30 | 0.68 | 0.22 | 0.28 |
| 5072 | 0 | 2253   | AKNKPTLDFELIKTEAKQ<br>PAT                                                                              | 3.02 | 0.01 | 2.30 | 0.68 | 0.22 | 0.28 |
| 5073 | 0 | 2253   | AKNKPTLDFELIKTEAKQ<br>PAT                                                                              | 3.02 | 0.01 | 2.30 | 2.65 | 0.22 | 0.28 |
| 5074 | 0 | 2253   | AKNKPTLDFELIKTEAKQ<br>PAT                                                                              | 3.02 | 0.01 | 2.30 | 2.65 | 0.22 | 0.28 |
| 5075 | 0 | 2253   | AKNKPTLDFELIKTEAKQ<br>PAT                                                                              | 3.02 | 0.01 | 2.30 | 2.65 | 0.22 | 0.28 |
| 5076 | 0 | 2253   | AKNKPTLDFELIKTEAKQ<br>PAT                                                                              | 3.02 | 0.01 | 2.30 | 0.68 | 0.22 | 1.34 |
| 5077 | 0 | 2253   | AKNKPTLDFELIKTEAKQ<br>PAT                                                                              | 3.02 | 0.01 | 2.30 | 0.68 | 0.22 | 0.28 |
| 5078 | 0 | 2253   | AKNKPTLDFELIKTEAKQ<br>PAT                                                                              | 3.02 | 0.01 | 2.30 | 2.65 | 0.22 | 0.28 |
| 5079 | 0 | 181188 | AKNNTNRHYSRLRKLKTG<br>TASVAVALTVLGAGFAN<br>QAKNTTNRHYSRLRKLKT<br>GTASVAVALTVVGAGLV<br>AGASREAKKQVEKALE | 4.41 | 0.01 | 0.90 | 0.68 | 0.22 | 0.28 |

|      |   |        |                                                                                                      |      |      |      |      |      |      |
|------|---|--------|------------------------------------------------------------------------------------------------------|------|------|------|------|------|------|
| 5080 | 0 | 181188 | AKNNTNRHYSLRKLKTG<br>TASVAVALTVLGAGFAN<br>QAKNTTNRHYSLRKLKT<br>GTASVAVALTVVGAGLV<br>AGASREAKKQVEKALE | 4.41 | 0.01 | 0.90 | 0.68 | 0.22 | 1.34 |
| 5081 | 0 | 181188 | AKNNTNRHYSLRKLKTG<br>TASVAVALTVLGAGFAN<br>QAKNTTNRHYSLRKLKT<br>GTASVAVALTVVGAGLV<br>AGASREAKKQVEKALE | 4.41 | 0.01 | 0.90 | 0.68 | 0.22 | 1.34 |
| 5082 | 0 | 181188 | AKNNTNRHYSLRKLKTG<br>TASVAVALTVLGAGFAN<br>QAKNTTNRHYSLRKLKT<br>GTASVAVALTVVGAGLV<br>AGASREAKKQVEKALE | 4.41 | 0.01 | 0.90 | 0.68 | 0.22 | 1.34 |
| 5083 | 0 | 181188 | AKNNTNRHYSLRKLKTG<br>TASVAVALTVLGAGFAN<br>QAKNTTNRHYSLRKLKT<br>GTASVAVALTVVGAGLV<br>AGASREAKKQVEKALE | 4.41 | 0.01 | 0.90 | 0.68 | 0.22 | 1.34 |
| 5084 | 0 | 138137 | AKNPPTLIWKHT                                                                                         | 2.46 | 0.01 | 0.90 | 0.44 | 1.13 | 0.28 |
| 5085 | 0 | 252653 | AKPAAKAPAPKAekk                                                                                      | 2.74 | 0.01 | 1.61 | 0.44 | 0.85 | 1.28 |
| 5086 | 0 | 252654 | AKPAAKPAAKPAAKP                                                                                      | 2.75 | 0.01 | 1.61 | 0.44 | 0.85 | 1.28 |
| 5087 | 0 | 252655 | AKPAAKPAAKPAAKT                                                                                      | 2.75 | 0.01 | 1.61 | 0.44 | 0.85 | 1.28 |
| 5088 | 0 | 252656 | AKPAAKPAAKTAAKP                                                                                      | 2.75 | 0.01 | 1.61 | 0.44 | 0.85 | 1.28 |
| 5089 | 0 | 252657 | AKPAAKSAAKPAAKP                                                                                      | 2.75 | 0.01 | 1.61 | 0.44 | 0.85 | 1.28 |
| 5090 | 0 | 252658 | AKPAAKTAAKPAKPP                                                                                      | 2.75 | 0.01 | 1.61 | 0.44 | 0.85 | 1.28 |
| 5091 | 0 | 252659 | AKPAAKTAAKTAAKP                                                                                      | 2.75 | 0.01 | 1.61 | 0.44 | 0.85 | 1.28 |
| 5092 | 0 | 252660 | AKPAKKPAVKPTVKP                                                                                      | 2.75 | 0.01 | 1.61 | 0.44 | 0.85 | 1.28 |
| 5093 | 0 | 127927 | AKPAPPKPEPKPKKA                                                                                      | 2.75 | 0.01 | 2.73 | 1.12 | 0.22 | 0.28 |
| 5094 | 0 | 127927 | AKPAPPKPEPKPKKA                                                                                      | 2.75 | 0.01 | 2.73 | 0.44 | 1.13 | 0.28 |
| 5095 | 0 | 165584 | AKPASWA                                                                                              | 2.05 | 0.01 | 0.90 | 0.44 | 1.23 | 1.39 |
| 5096 | 0 | 165584 | AKPASWA                                                                                              | 2.05 | 0.01 | 0.90 | 0.44 | 1.23 | 1.39 |
| 5097 | 0 | 135636 | AKPGQFPW                                                                                             | 2.12 | 0.01 | 0.78 | 0.44 | 2.35 | 0.28 |
| 5098 | 0 | 252682 | AKPPAESPFKNVFGA                                                                                      | 2.70 | 0.01 | 1.61 | 0.44 | 0.85 | 1.28 |
| 5099 | 0 | 252684 | AKPPAESPFKSVFGA                                                                                      | 2.72 | 0.01 | 1.61 | 0.44 | 0.85 | 1.28 |
| 5100 | 0 | 252685 | AKPPAESPFKSVFGA                                                                                      | 2.70 | 0.01 | 1.61 | 0.44 | 0.85 | 1.28 |
| 5101 | 0 | 2261   | AKPRKISVDRGNNGH                                                                                      | 2.65 | 0.01 | 2.59 | 0.44 | 0.85 | 0.28 |
| 5102 | 0 | 2261   | AKPRKISVDRGNNGH                                                                                      | 2.65 | 0.01 | 2.59 | 0.44 | 0.85 | 0.28 |
| 5103 | 0 | 97191  | AKPTGSAA                                                                                             | 2.12 | 0.01 | 2.87 | 0.68 | 0.22 | 0.28 |
| 5104 | 0 | 128264 | AKPTTTTGNAPSTLT                                                                                      | 2.81 | 0.01 | 3.03 | 0.68 | 0.22 | 0.28 |

|      |   |        |                                                       |      |      |      |      |      |      |
|------|---|--------|-------------------------------------------------------|------|------|------|------|------|------|
| 5105 | 0 | 511216 | AKQDSIISNLTEQK                                        | 2.66 | 0.01 | 2.24 | 0.44 | 1.41 | 1.28 |
| 5106 | 0 | 132155 | AKQELE                                                | 1.90 | 0.01 | 0.78 | 0.68 | 0.22 | 0.85 |
| 5107 | 0 | 132155 | AKQELE                                                | 1.90 | 0.01 | 0.78 | 0.68 | 0.22 | 0.85 |
| 5108 | 0 | 252717 | AKQKAAAKKAAAPSG                                       | 2.72 | 0.01 | 1.61 | 0.44 | 0.85 | 1.28 |
| 5109 | 0 | 95230  | AKQLLPPS                                              | 2.12 | 0.01 | 0.90 | 2.59 | 0.22 | 0.28 |
| 5110 | 0 | 95230  | AKQLLPPS                                              | 2.12 | 0.01 | 0.90 | 2.22 | 0.22 | 0.28 |
| 5111 | 0 | 164578 | AKQMWPASRKP                                           | 2.48 | 0.01 | 0.90 | 0.44 | 1.23 | 0.85 |
| 5112 | 0 | 433758 | AKQNIQLINTNGSWHINS                                    | 2.85 | 0.01 | 1.72 | 3.27 | 0.22 | 0.28 |
| 5113 | 0 | 2270   | AKQPATLR                                              | 2.13 | 0.01 | 2.40 | 0.68 | 0.22 | 0.28 |
| 5114 | 0 | 2270   | AKQPATLR                                              | 2.13 | 0.01 | 2.40 | 1.12 | 0.22 | 0.28 |
| 5115 | 0 | 2270   | AKQPATLR                                              | 2.13 | 0.01 | 2.40 | 1.12 | 0.22 | 0.28 |
| 5116 | 0 | 2270   | AKQPATLR                                              | 2.13 | 0.01 | 2.40 | 1.12 | 0.22 | 0.28 |
| 5117 | 0 | 2270   | AKQPATLR                                              | 2.13 | 0.01 | 2.40 | 1.12 | 0.22 | 0.28 |
| 5118 | 0 | 252728 | AKQSEREDEENDEE                                        | 2.69 | 0.01 | 1.61 | 0.44 | 0.85 | 1.28 |
| 5119 | 0 | 490096 | AKQTAEETKQNVDAKV<br>KAAETAAGKAEAAAAGTA<br>NTAADKAEAVA | 3.77 | 0.01 | 3.81 | 2.71 | 0.22 | 2.12 |
| 5120 | 0 | 490096 | AKQTAEETKQNVDAKV<br>KAAETAAGKAEAAAAGTA<br>NTAADKAEAVA | 3.77 | 0.01 | 3.81 | 2.71 | 0.22 | 1.66 |
| 5121 | 0 | 490096 | AKQTAEETKQNVDAKV<br>KAAETAAGKAEAAAAGTA<br>NTAADKAEAVA | 3.77 | 0.01 | 3.81 | 2.71 | 0.22 | 1.66 |
| 5122 | 0 | 490096 | AKQTAEETKQNVDAKV<br>KAAETAAGKAEAAAAGTA<br>NTAADKAEAVA | 3.77 | 0.01 | 3.81 | 2.71 | 0.22 | 1.66 |
| 5123 | 0 | 490096 | AKQTAEETKQNVDAKV<br>KAAETAAGKAEAAAAGTA<br>NTAADKAEAVA | 3.77 | 0.01 | 3.81 | 2.71 | 0.22 | 1.66 |
| 5124 | 0 | 490096 | AKQTAEETKQNVDAKV<br>KAAETAAGKAEAAAAGTA<br>NTAADKAEAVA | 3.77 | 0.01 | 3.81 | 2.71 | 0.22 | 1.66 |
| 5125 | 0 | 490096 | AKQTAEETKQNVDAKV<br>KAAETAAGKAEAAAAGTA<br>NTAADKAEAVA | 3.77 | 0.01 | 3.81 | 2.71 | 0.22 | 1.66 |



|      |   |        |                                                       |      |      |      |      |      |      |
|------|---|--------|-------------------------------------------------------|------|------|------|------|------|------|
| 5126 | 0 | 490096 | AKQTAEETKQNVDKVV<br>KAAETAAGKAEAAAAGTA<br>NTAADKAEAVA | 3.77 | 0.01 | 3.81 | 2.71 | 0.22 | 1.66 |
| 5127 | 0 | 490096 | AKQTAEETKQNVDKVV<br>KAAETAAGKAEAAAAGTA<br>NTAADKAEAVA | 3.77 | 0.01 | 3.81 | 2.71 | 0.22 | 1.34 |
| 5128 | 0 | 490096 | AKQTAEETKQNVDKVV<br>KAAETAAGKAEAAAAGTA<br>NTAADKAEAVA | 3.77 | 0.01 | 3.81 | 2.71 | 0.22 | 1.66 |
| 5129 | 0 | 490096 | AKQTAEETKQNVDKVV<br>KAAETAAGKAEAAAAGTA<br>NTAADKAEAVA | 3.77 | 0.01 | 3.81 | 2.71 | 0.22 | 1.66 |
| 5130 | 0 | 490096 | AKQTAEETKQNVDKVV<br>KAAETAAGKAEAAAAGTA<br>NTAADKAEAVA | 3.77 | 0.01 | 3.81 | 2.71 | 0.22 | 1.66 |
| 5131 | 0 | 490096 | AKQTAEETKQNVDKVV<br>KAAETAAGKAEAAAAGTA<br>NTAADKAEAVA | 3.77 | 0.01 | 3.81 | 2.71 | 0.22 | 3.93 |
| 5132 | 0 | 165585 | AKQTDTM                                               | 2.02 | 0.01 | 0.90 | 0.44 | 1.23 | 1.39 |
| 5133 | 0 | 2271   | AKQYNICCKFKELLD                                       | 2.64 | 0.01 | 2.93 | 1.81 | 0.22 | 0.28 |
| 5134 | 0 | 2271   | AKQYNICCKFKELLD                                       | 2.64 | 0.01 | 2.93 | 1.81 | 0.22 | 0.28 |
| 5135 | 0 | 2272   | AKQYNICCKFKELLDKTS<br>RT                              | 2.90 | 0.01 | 2.93 | 2.69 | 0.22 | 0.28 |
| 5136 | 0 | 167209 | AKRALSSQHQARIEIESF<br>YE                              | 2.96 | 3.40 | 0.78 | 0.44 | 1.13 | 0.28 |
| 5137 | 0 | 167210 | AKRALSSQHQARIEIESF<br>YE                              | 2.96 | 0.01 | 0.78 | 0.44 | 1.13 | 0.28 |
| 5138 | 0 | 2273   | AKREAIVKADEDDNEET                                     | 2.82 | 0.01 | 3.10 | 0.68 | 0.22 | 1.27 |
| 5139 | 0 | 2273   | AKREAIVKADEDDNEET                                     | 2.82 | 0.01 | 3.10 | 0.68 | 0.22 | 0.28 |
| 5140 | 0 | 170302 | AKRESAFLRSENLEL                                       | 2.72 | 0.01 | 0.78 | 0.44 | 1.13 | 0.28 |
| 5141 | 0 | 92303  | AKRFKINAI                                             | 2.26 | 0.01 | 3.59 | 1.15 | 0.22 | 0.28 |
| 5142 | 0 | 92303  | AKRFKINAI                                             | 2.26 | 0.01 | 3.59 | 1.15 | 0.22 | 0.85 |
| 5143 | 0 | 2274   | AKRKMDPDNPDEGPS                                       | 2.68 | 0.01 | 2.51 | 0.44 | 2.35 | 1.28 |
| 5144 | 0 | 2276   | AKRLRSMHVFILDYD                                       | 2.64 | 0.01 | 2.40 | 1.12 | 0.22 | 0.28 |
| 5145 | 0 | 252771 | AKSAAKPAAKPAAKP                                       | 2.75 | 0.01 | 1.61 | 0.44 | 0.85 | 1.28 |
| 5146 | 0 | 252772 | AKSANKPASKPAAKP                                       | 2.75 | 0.01 | 1.61 | 0.44 | 0.85 | 1.28 |
| 5147 | 0 | 115175 | AKSCQAQPTTMARHPH<br>PHLS                              | 2.96 | 0.01 | 1.60 | 0.44 | 1.41 | 0.28 |

|      |   |        |                                           |      |      |      |      |      |      |
|------|---|--------|-------------------------------------------|------|------|------|------|------|------|
| 5148 | 0 | 115175 | AKSCQAQPTTMARHPH<br>PHLS                  | 2.96 | 0.01 | 1.60 | 0.44 | 1.93 | 0.28 |
| 5149 | 0 | 181550 | AKSFMPSLVMSQ                              | 2.48 | 0.01 | 0.90 | 0.68 | 0.22 | 0.28 |
| 5150 | 0 | 150965 | AKSFYKNLIWLVKKG                           | 2.65 | 0.01 | 2.87 | 0.44 | 0.85 | 0.28 |
| 5151 | 0 | 118257 | AKSIDLKDKYKNI                             | 2.57 | 0.01 | 0.78 | 0.44 | 1.74 | 0.85 |
| 5152 | 0 | 118257 | AKSIDLKDKYKNI                             | 2.57 | 0.01 | 0.78 | 0.44 | 1.74 | 0.85 |
| 5153 | 0 | 102301 | AKSKNHTTHN                                | 2.34 | 0.01 | 0.78 | 3.16 | 0.22 | 1.48 |
| 5154 | 0 | 2285   | AKSMDVRR                                  | 2.09 | 0.01 | 2.40 | 2.43 | 0.22 | 0.28 |
| 5155 | 0 | 118258 | AKSPEKAK                                  | 2.17 | 0.01 | 0.78 | 0.44 | 1.13 | 0.85 |
| 5156 | 0 | 118258 | AKSPEKAK                                  | 2.17 | 0.01 | 0.78 | 0.44 | 1.13 | 0.85 |
| 5157 | 0 | 118258 | AKSPEKAK                                  | 2.17 | 0.01 | 0.78 | 0.44 | 1.13 | 0.28 |
| 5158 | 0 | 118258 | AKSPEKAK                                  | 2.17 | 0.01 | 0.78 | 0.44 | 1.13 | 0.28 |
| 5159 | 0 | 118258 | AKSPEKAK                                  | 2.17 | 0.01 | 0.78 | 0.44 | 1.13 | 0.28 |
| 5160 | 0 | 118258 | AKSPEKAK                                  | 2.17 | 0.01 | 0.78 | 0.44 | 1.13 | 0.28 |
| 5161 | 0 | 118258 | AKSPEKAK                                  | 2.17 | 0.01 | 0.78 | 0.44 | 1.13 | 0.28 |
| 5162 | 0 | 164579 | AKSRGANGKYVMNMSL<br>GGE                   | 2.91 | 0.01 | 3.75 | 0.44 | 1.23 | 0.85 |
| 5163 | 0 | 450423 | AKSRGVEAARERMFNG<br>E                     | 2.81 | 0.01 | 0.78 | 1.81 | 1.41 | 1.28 |
| 5164 | 0 | 2286   | AKSSPYQKKT                                | 2.31 | 0.01 | 2.16 | 0.44 | 1.23 | 0.85 |
| 5165 | 0 | 2286   | AKSSPYQKKT                                | 2.31 | 0.01 | 2.16 | 0.44 | 1.23 | 0.85 |
| 5166 | 0 | 98688  | AKSSPYQKKTENPCA                           | 2.67 | 0.01 | 2.16 | 0.44 | 1.23 | 1.48 |
| 5167 | 0 | 98688  | AKSSPYQKKTENPCA                           | 2.67 | 0.01 | 2.16 | 0.44 | 1.23 | 1.48 |
| 5168 | 0 | 79752  | AKSSYKPGRFGGKRIQQ<br>AILS                 | 3.00 | 0.01 | 3.59 | 1.12 | 0.22 | 0.85 |
| 5169 | 0 | 2288   | AKSTWYGKPTGAGPKD<br>NGGACGYKDVD           | 3.26 | 0.01 | 3.67 | 0.44 | 1.23 | 0.85 |
| 5170 | 0 | 252820 | AKTAAAPAKAAAPAK                           | 2.75 | 0.01 | 1.61 | 0.44 | 0.85 | 1.28 |
| 5171 | 0 | 252823 | AKTAAKPAAKSAAKP                           | 2.75 | 0.01 | 1.61 | 0.44 | 0.85 | 1.28 |
| 5172 | 0 | 252824 | AKTAAKPAKKPAVKP                           | 2.75 | 0.01 | 1.61 | 0.44 | 0.85 | 1.28 |
| 5173 | 0 | 252825 | AKTAAKTAAKPAAKS                           | 2.75 | 0.01 | 1.61 | 0.44 | 0.85 | 1.28 |
| 5174 | 0 | 252826 | AKTAAPPAKAAAPPA                           | 2.75 | 0.01 | 1.61 | 0.44 | 0.85 | 1.28 |
| 5175 | 0 | 142385 | AKTAATNAEKKKTK                            | 2.68 | 0.01 | 2.59 | 0.44 | 0.85 | 0.85 |
| 5176 | 0 | 511227 | AKTADTPATSKATIR                           | 2.72 | 0.01 | 2.24 | 0.44 | 1.41 | 1.28 |
| 5177 | 0 | 252840 | AKTAVSKAAAPKAA                            | 2.72 | 0.01 | 1.61 | 0.44 | 0.85 | 1.28 |
| 5178 | 0 | 192873 | AKTDSYWTRDYGWFA<br>MYD                    | 2.91 | 2.84 | 2.84 | 0.44 | 1.74 | 0.28 |
| 5179 | 0 | 92304  | AKTIADGITS AEDKEYGV<br>LNNSDYIPTSGNTVGYTF | 3.54 | 0.01 | 4.45 | 0.68 | 0.22 | 0.28 |
| 5180 | 0 | 181889 | AKTLYPLYSSPI                              | 2.48 | 0.01 | 0.90 | 3.15 | 0.22 | 1.39 |
| 5181 | 0 | 134003 | AKTQGPYDVVVLPGG                           | 2.64 | 0.01 | 2.19 | 1.15 | 0.22 | 0.28 |
| 5182 | 0 | 170305 | AKTQMIMEDWDFLQL                           | 2.66 | 0.01 | 0.78 | 0.44 | 1.41 | 0.28 |
| 5183 | 0 | 2308   | AKTRIINRRKRELS                            | 2.62 | 0.01 | 3.93 | 3.26 | 0.22 | 0.28 |

|      |   |        |                                      |      |      |      |      |      |      |
|------|---|--------|--------------------------------------|------|------|------|------|------|------|
| 5184 | 0 | 2308   | AKTRIINRRRKRELS                      | 2.62 | 0.01 | 3.93 | 3.26 | 0.22 | 0.28 |
| 5185 | 0 | 2309   | AKTTLLKIL                            | 2.26 | 0.01 | 2.61 | 0.44 | 0.85 | 0.28 |
| 5186 | 0 | 118259 | AKVEAKEESEESDEDMG<br>FGLFD           | 3.07 | 0.01 | 0.78 | 0.44 | 1.13 | 0.28 |
| 5187 | 0 | 118259 | AKVEAKEESEESDEDMG<br>FGLFD           | 3.07 | 0.01 | 0.78 | 0.44 | 1.13 | 1.27 |
| 5188 | 0 | 118259 | AKVEAKEESEESDEDMG<br>FGLFD           | 3.07 | 0.01 | 0.78 | 0.44 | 1.13 | 0.28 |
| 5189 | 0 | 108268 | AKVFSRRGGNVTLPCKF<br>YR              | 2.86 | 0.01 | 1.60 | 0.68 | 0.22 | 0.28 |
| 5190 | 0 | 2319   | AKVNIKPLEDKIL                        | 2.56 | 0.01 | 3.59 | 1.20 | 0.22 | 0.28 |
| 5191 | 0 | 2319   | AKVNIKPLEDKIL                        | 2.56 | 0.01 | 3.59 | 1.20 | 0.22 | 0.28 |
| 5192 | 0 | 2319   | AKVNIKPLEDKIL                        | 2.56 | 0.01 | 3.59 | 1.20 | 0.22 | 0.28 |
| 5193 | 0 | 2319   | AKVNIKPLEDKIL                        | 2.56 | 0.01 | 3.59 | 1.20 | 0.22 | 0.28 |
| 5194 | 0 | 2319   | AKVNIKPLEDKIL                        | 2.56 | 0.01 | 3.59 | 1.20 | 0.22 | 0.28 |
| 5195 | 0 | 2319   | AKVNIKPLEDKIL                        | 2.56 | 0.01 | 3.59 | 1.20 | 0.22 | 0.28 |
| 5196 | 0 | 2319   | AKVNIKPLEDKIL                        | 2.56 | 0.01 | 3.59 | 1.20 | 0.22 | 0.85 |
| 5197 | 0 | 2319   | AKVNIKPLEDKIL                        | 2.56 | 0.01 | 3.59 | 1.20 | 0.22 | 0.85 |
| 5198 | 0 | 99891  | AKVPLKTDANDQIG                       | 2.60 | 0.01 | 2.96 | 1.12 | 0.22 | 0.28 |
| 5199 | 0 | 103037 | AKVRRERMGHIELAA                      | 2.67 | 0.01 | 2.04 | 0.44 | 0.85 | 1.28 |
| 5200 | 0 | 2322   | AKWAVPTTRTDDKLR                      | 2.69 | 0.01 | 2.43 | 3.34 | 0.22 | 0.28 |
| 5201 | 0 | 2322   | AKWAVPTTRTDDKLR                      | 2.69 | 0.01 | 2.43 | 3.34 | 0.22 | 0.28 |
| 5202 | 0 | 2322   | AKWAVPTTRTDDKLR                      | 2.69 | 0.01 | 2.43 | 0.44 | 0.85 | 0.28 |
| 5203 | 0 | 450426 | AKYEAGS                              | 2.03 | 0.01 | 0.90 | 0.44 | 1.41 | 1.39 |
| 5204 | 0 | 135448 | AKYGAA                               | 1.89 | 0.01 | 0.78 | 1.20 | 0.22 | 0.28 |
| 5205 | 0 | 115680 | AKYIPIQYVL                           | 2.31 | 0.01 | 1.60 | 0.44 | 1.23 | 0.85 |
| 5206 | 0 | 115680 | AKYIPIQYVL                           | 2.31 | 0.01 | 1.60 | 0.44 | 1.23 | 0.85 |
| 5207 | 0 | 2348   | AKYIPIQYVLSRYP                       | 2.61 | 0.01 | 1.60 | 0.44 | 1.23 | 0.85 |
| 5208 | 0 | 136126 | AKYNQLLRIEEEELGSKA                   | 2.78 | 2.84 | 0.78 | 0.44 | 1.13 | 0.28 |
| 5209 | 0 | 136126 | AKYNQLLRIEEEELGSKA                   | 2.78 | 2.84 | 0.78 | 0.44 | 1.13 | 0.28 |
| 5210 | 0 | 191176 | AKYSCQKTMCYGLV                       | 2.59 | 0.01 | 0.90 | 2.84 | 1.13 | 1.27 |
| 5211 | 0 | 191176 | AKYSCQKTMCYGLV                       | 2.59 | 0.01 | 0.90 | 2.84 | 1.13 | 1.66 |
| 5212 | 0 | 106245 | AKYSKHPDATLV                         | 2.46 | 0.01 | 0.90 | 1.15 | 0.22 | 1.39 |
| 5213 | 0 | 108269 | AKYSNQRAQ                            | 2.24 | 0.01 | 0.90 | 0.44 | 1.13 | 1.39 |
| 5214 | 0 | 2365   | ALAALAEKSFSSS                        | 2.64 | 0.01 | 2.59 | 0.44 | 0.85 | 0.28 |
| 5215 | 0 | 2365   | ALAALAEKSFSSS                        | 2.64 | 0.01 | 2.59 | 0.44 | 0.85 | 0.28 |
| 5216 | 0 | 2365   | ALAALAEKSFSSS                        | 2.64 | 0.01 | 2.59 | 0.44 | 0.85 | 0.28 |
| 5217 | 0 | 2365   | ALAALAEKSFSSS                        | 2.64 | 0.01 | 2.59 | 0.44 | 1.41 | 0.28 |
| 5218 | 0 | 187625 | ALA AVL NPHIFTRIGAA<br>QTS LADGAAGPA | 3.34 | 0.01 | 2.14 | 1.20 | 0.22 | 0.28 |
| 5219 | 0 | 2375   | ALADPSLKMADPNRFR<br>GKDLP            | 3.02 | 0.01 | 0.90 | 1.12 | 0.22 | 0.85 |
| 5220 | 0 | 2375   | ALADPSLKMADPNRFR<br>GKDLP            | 3.02 | 0.01 | 0.90 | 1.12 | 0.22 | 0.85 |

|      |   |        |                           |      |      |      |      |      |      |
|------|---|--------|---------------------------|------|------|------|------|------|------|
| 5221 | 0 | 2375   | ALADPSLKMADPNRFR<br>GKDLP | 3.02 | 0.01 | 0.90 | 0.68 | 0.22 | 0.85 |
| 5222 | 0 | 137803 | ALADRASSFMVD              | 2.49 | 0.01 | 2.21 | 1.20 | 0.22 | 0.28 |
| 5223 | 0 | 123937 | ALAEVRKLKARVD             | 2.66 | 0.01 | 0.78 | 1.12 | 0.22 | 0.85 |
| 5224 | 0 | 123937 | ALAEVRKLKARVD             | 2.66 | 0.01 | 0.78 | 0.44 | 1.13 | 0.85 |
| 5225 | 0 | 2378   | ALAELATKTFGSSG            | 2.64 | 0.01 | 1.96 | 0.44 | 0.85 | 0.28 |
| 5226 | 0 | 2378   | ALAELATKTFGSSG            | 2.64 | 0.01 | 1.96 | 0.44 | 0.85 | 0.28 |
| 5227 | 0 | 2378   | ALAELATKTFGSSG            | 2.64 | 0.01 | 1.96 | 0.44 | 0.85 | 0.28 |
| 5228 | 0 | 2379   | ALAELATKTFGSSGSSAV<br>DS  | 2.98 | 0.01 | 1.72 | 0.44 | 0.85 | 0.28 |
| 5229 | 0 | 2379   | ALAELATKTFGSSGSSAV<br>DS  | 2.98 | 0.01 | 1.72 | 0.44 | 1.13 | 0.28 |
| 5230 | 0 | 2379   | ALAELATKTFGSSGSSAV<br>DS  | 2.98 | 0.01 | 1.72 | 0.44 | 1.93 | 0.28 |
| 5231 | 0 | 2380   | ALAELATRSFGSSS            | 2.63 | 0.01 | 2.41 | 0.44 | 0.85 | 0.28 |
| 5232 | 0 | 2380   | ALAELATRSFGSSS            | 2.63 | 0.01 | 2.41 | 0.44 | 0.85 | 0.28 |
| 5233 | 0 | 233145 | ALAGKVLRF                 | 2.24 | 0.01 | 0.78 | 0.44 | 1.13 | 0.28 |
| 5234 | 0 | 192874 | ALAKTSGKDFVKFANAV<br>VGI  | 2.96 | 0.01 | 3.47 | 2.00 | 0.22 | 0.28 |
| 5235 | 0 | 192875 | ALAKTSGKDIVQFAKAV<br>GVS  | 2.97 | 0.01 | 3.47 | 2.00 | 0.22 | 0.28 |
| 5236 | 0 | 2433   | ALALLLDRLNQLESKV          | 2.80 | 0.01 | 2.91 | 0.44 | 0.85 | 0.28 |
| 5237 | 0 | 2438   | ALANVYDLPDDFFP            | 2.64 | 0.01 | 2.40 | 2.43 | 0.22 | 0.28 |
| 5238 | 0 | 108272 | ALARLMPGS                 | 2.24 | 0.01 | 0.90 | 0.44 | 1.13 | 1.39 |
| 5239 | 0 | 238202 | ALASQARWTGATRA            | 2.65 | 0.01 | 2.14 | 2.65 | 0.22 | 0.85 |
| 5240 | 0 | 106247 | ALASQGQ                   | 2.05 | 0.01 | 0.90 | 3.00 | 1.93 | 0.28 |
| 5241 | 0 | 80335  | ALASSAPSTAVA              | 2.53 | 0.01 | 2.48 | 0.44 | 1.59 | 0.28 |
| 5242 | 0 | 121136 | ALAVTKYQRNGWSHK           | 2.70 | 0.01 | 0.78 | 0.44 | 1.41 | 0.28 |
| 5243 | 0 | 138290 | ALCAYQAEPNTE              | 2.48 | 0.01 | 0.78 | 1.12 | 0.22 | 0.85 |
| 5244 | 0 | 423214 | ALCFCLCEAVETNA            | 2.71 | 0.01 | 2.51 | 0.44 | 2.35 | 1.28 |
| 5245 | 0 | 96085  | ALCSEKLDQWLCEKL           | 2.70 | 4.63 | 1.60 | 0.44 | 1.23 | 0.28 |
| 5246 | 0 | 96085  | ALCSEKLDQWLCEKL           | 2.70 | 4.63 | 1.60 | 0.44 | 1.23 | 1.27 |
| 5247 | 0 | 238203 | ALCWVCAQSRKHRDHA<br>MV    | 2.84 | 0.01 | 0.78 | 0.44 | 1.13 | 0.28 |
| 5248 | 0 | 149254 | ALDKWAS                   | 2.03 | 0.01 | 2.54 | 0.44 | 0.85 | 2.49 |
| 5249 | 0 | 149255 | ALDKWD                    | 1.90 | 0.01 | 2.54 | 0.44 | 0.85 | 2.49 |
| 5250 | 0 | 149256 | ALDKWQN                   | 1.99 | 0.01 | 2.54 | 0.44 | 0.85 | 2.49 |
| 5251 | 0 | 138138 | ALDLL                     | 1.72 | 0.01 | 0.78 | 0.68 | 0.22 | 0.28 |
| 5252 | 0 | 138138 | ALDLL                     | 1.72 | 0.01 | 0.78 | 0.68 | 0.22 | 0.28 |
| 5253 | 0 | 188044 | ALDNADIDLE                | 2.36 | 0.01 | 2.92 | 0.68 | 0.22 | 0.85 |
| 5254 | 0 | 188044 | ALDNADIDLE                | 2.36 | 0.01 | 2.92 | 1.81 | 0.22 | 0.85 |
| 5255 | 0 | 188044 | ALDNADIDLE                | 2.36 | 0.01 | 2.92 | 3.37 | 0.22 | 0.85 |
| 5256 | 0 | 146764 | ALDSKSYTSILYG             | 2.56 | 0.01 | 1.60 | 0.44 | 0.85 | 0.85 |
| 5257 | 0 | 2486   | ALDTSNKF                  | 2.10 | 0.01 | 3.06 | 1.12 | 0.22 | 0.28 |
| 5258 | 0 | 511256 | ALEALADQTDALQSE           | 2.73 | 0.01 | 2.24 | 0.44 | 1.41 | 1.28 |

|      |   |        |                                        |      |      |      |      |      |      |
|------|---|--------|----------------------------------------|------|------|------|------|------|------|
| 5259 | 0 | 511256 | ALEALADQTDALQSE                        | 2.73 | 0.01 | 2.24 | 0.44 | 1.41 | 1.28 |
| 5260 | 0 | 106248 | ALEAYAFDIA                             | 2.34 | 0.01 | 2.75 | 0.44 | 1.23 | 0.85 |
| 5261 | 0 | 164583 | ALEGVSAGNACARIVQL<br>ATSSISRAPSGTTSK   | 3.41 | 0.01 | 3.75 | 0.44 | 1.23 | 0.85 |
| 5262 | 0 | 164583 | ALEGVSAGNACARIVQL<br>ATSSISRAPSGTTSK   | 3.41 | 0.01 | 3.75 | 0.44 | 1.23 | 1.27 |
| 5263 | 0 | 106250 | ALEGWGGHWR                             | 2.32 | 0.01 | 2.75 | 0.44 | 1.23 | 0.85 |
| 5264 | 0 | 253304 | ALEMLRES DGECAP                        | 2.69 | 0.01 | 1.61 | 0.44 | 0.85 | 1.28 |
| 5265 | 0 | 122259 | ALELVPLSLSDIEQIANES<br>EDVLEEIEEEEINTD | 3.47 | 0.01 | 2.22 | 0.44 | 1.74 | 1.34 |
| 5266 | 0 | 122259 | ALELVPLSLSDIEQIANES<br>EDVLEEIEEEEINTD | 3.47 | 0.01 | 2.22 | 0.44 | 1.74 | 0.28 |
| 5267 | 0 | 122259 | ALELVPLSLSDIEQIANES<br>EDVLEEIEEEEINTD | 3.47 | 0.01 | 2.22 | 0.44 | 1.74 | 0.28 |
| 5268 | 0 | 122259 | ALELVPLSLSDIEQIANES<br>EDVLEEIEEEEINTD | 3.47 | 0.01 | 2.22 | 0.44 | 1.74 | 0.28 |
| 5269 | 0 | 122259 | ALELVPLSLSDIEQIANES<br>EDVLEEIEEEEINTD | 3.47 | 0.01 | 2.22 | 0.44 | 1.74 | 0.28 |
| 5270 | 0 | 130441 | ALENATRDYFII                           | 2.44 | 4.93 | 0.78 | 3.06 | 0.22 | 0.28 |
| 5271 | 0 | 186822 | ALEPDNRVEY                             | 2.29 | 0.01 | 3.12 | 2.37 | 0.22 | 2.66 |
| 5272 | 0 | 141523 | ALEPPHNLPVP                            | 2.43 | 0.01 | 4.33 | 0.68 | 0.22 | 1.48 |
| 5273 | 0 | 141523 | ALEPPHNLPVP                            | 2.43 | 0.01 | 4.33 | 0.68 | 0.22 | 1.34 |
| 5274 | 0 | 141523 | ALEPPHNLPVP                            | 2.43 | 0.01 | 4.33 | 0.68 | 0.22 | 0.85 |
| 5275 | 0 | 141523 | ALEPPHNLPVP                            | 2.43 | 0.01 | 4.33 | 0.68 | 0.22 | 0.28 |
| 5276 | 0 | 419107 | ALEPYVSR                               | 2.10 | 0.01 | 2.19 | 2.97 | 0.22 | 2.66 |
| 5277 | 0 | 96088  | ALESPEHCSPHHTALRQ<br>AIL               | 2.96 | 0.01 | 2.71 | 0.44 | 0.85 | 0.28 |
| 5278 | 0 | 121140 | ALFAPRDP                               | 2.15 | 0.01 | 0.78 | 0.44 | 1.13 | 0.28 |
| 5279 | 0 | 2550   | ALGALGRFDEAMQDQ                        | 2.71 | 0.01 | 2.59 | 0.68 | 0.22 | 0.28 |
| 5280 | 0 | 2550   | ALGALGRFDEAMQDQ                        | 2.71 | 0.01 | 2.59 | 1.12 | 0.22 | 0.28 |
| 5281 | 0 | 131194 | ALGAQKEAISPPDAASA<br>AP                | 2.92 | 0.01 | 0.78 | 1.20 | 0.22 | 1.27 |
| 5282 | 0 | 131194 | ALGAQKEAISPPDAASA<br>AP                | 2.92 | 0.01 | 0.78 | 1.20 | 0.22 | 3.25 |
| 5283 | 0 | 131194 | ALGAQKEAISPPDAASA<br>AP                | 2.92 | 0.01 | 0.78 | 1.20 | 0.22 | 0.28 |
| 5284 | 0 | 131194 | ALGAQKEAISPPDAASA<br>AP                | 2.92 | 0.01 | 0.78 | 1.20 | 0.22 | 1.34 |
| 5285 | 0 | 131194 | ALGAQKEAISPPDAASA<br>AP                | 2.92 | 0.01 | 0.78 | 1.20 | 0.22 | 1.27 |
| 5286 | 0 | 118260 | ALGGNSSPSAKDIKK                        | 2.68 | 0.01 | 0.78 | 0.44 | 1.13 | 0.85 |
| 5287 | 0 | 2558   | ALGGWGLHQPPQIFLK<br>ILP                | 2.96 | 0.01 | 2.75 | 0.44 | 0.85 | 0.85 |

|      |   |        |                             |      |      |      |      |      |      |
|------|---|--------|-----------------------------|------|------|------|------|------|------|
| 5288 | 0 | 2566   | ALGLLQQASKQAEAAAP<br>VV     | 2.91 | 0.01 | 1.72 | 0.44 | 0.85 | 0.28 |
| 5289 | 0 | 2567   | ALGLLQTAS                   | 2.25 | 0.01 | 2.41 | 0.44 | 0.85 | 0.28 |
| 5290 | 0 | 147493 | ALGLPPFLN                   | 2.24 | 0.01 | 3.24 | 0.68 | 0.22 | 0.28 |
| 5291 | 0 | 2583   | ALGLTSLFSPGPIQH             | 2.68 | 0.01 | 1.72 | 0.68 | 0.22 | 0.28 |
| 5292 | 0 | 115032 | ALGQGPQFIFQYEEEEER          | 2.84 | 0.01 | 0.78 | 0.44 | 1.13 | 0.28 |
| 5293 | 0 | 2594   | ALGQRRADAVKGYLA             | 2.70 | 0.01 | 3.75 | 0.44 | 1.74 | 0.28 |
| 5294 | 0 | 475700 | ALGS                        | 1.57 | 0.01 | 1.75 | 1.12 | 0.22 | 0.85 |
| 5295 | 0 | 450427 | ALGTRMI                     | 1.99 | 0.01 | 0.90 | 0.44 | 1.41 | 1.39 |
| 5296 | 0 | 2598   | ALGVINTLEWIPRFK             | 2.62 | 0.01 | 2.43 | 0.68 | 0.22 | 0.28 |
| 5297 | 0 | 2598   | ALGVINTLEWIPRFK             | 2.62 | 0.01 | 2.43 | 0.68 | 0.22 | 0.28 |
| 5298 | 0 | 2598   | ALGVINTLEWIPRFK             | 2.62 | 0.01 | 2.43 | 0.44 | 0.85 | 0.28 |
| 5299 | 0 | 78926  | ALGY                        | 1.57 | 0.01 | 2.24 | 0.68 | 0.22 | 2.02 |
| 5300 | 0 | 253432 | ALHEVLQYGRLLDDF             | 2.63 | 0.01 | 1.61 | 0.44 | 0.85 | 1.28 |
| 5301 | 0 | 180961 | ALHHHASRDAPE                | 2.48 | 0.01 | 0.90 | 0.68 | 0.22 | 1.27 |
| 5302 | 0 | 180961 | ALHHHASRDAPE                | 2.48 | 0.01 | 0.90 | 0.68 | 0.22 | 1.27 |
| 5303 | 0 | 180961 | ALHHHASRDAPE                | 2.48 | 0.01 | 0.90 | 0.68 | 0.22 | 1.27 |
| 5304 | 0 | 2608   | ALHQALAGAIPVEFSNT<br>VK     | 2.91 | 0.01 | 2.85 | 2.02 | 0.22 | 0.28 |
| 5305 | 0 | 2609   | ALHQALQDPRVRGL              | 2.64 | 0.01 | 2.08 | 1.20 | 0.22 | 0.28 |
| 5306 | 0 | 2609   | ALHQALQDPRVRGL              | 2.64 | 0.01 | 2.08 | 3.67 | 0.22 | 0.28 |
| 5307 | 0 | 2609   | ALHQALQDPRVRGL              | 2.64 | 0.01 | 2.08 | 3.42 | 0.22 | 0.28 |
| 5308 | 0 | 2609   | ALHQALQDPRVRGL              | 2.64 | 0.01 | 2.08 | 4.23 | 0.22 | 0.28 |
| 5309 | 0 | 2610   | ALHQSMLENSQAIDNL            | 2.71 | 0.01 | 2.43 | 0.44 | 1.59 | 0.28 |
| 5310 | 0 | 2611   | ALHQVF                      | 1.88 | 0.01 | 2.40 | 0.44 | 0.85 | 0.28 |
| 5311 | 0 | 2612   | ALHQVFGAIYGAAFSGV<br>SWT    | 2.94 | 0.01 | 2.40 | 0.44 | 0.85 | 0.28 |
| 5312 | 0 | 2612   | ALHQVFGAIYGAAFSGV<br>SWT    | 2.94 | 0.01 | 2.40 | 0.44 | 0.85 | 0.28 |
| 5313 | 0 | 2612   | ALHQVFGAIYGAAFSGV<br>SWT    | 2.94 | 0.01 | 2.40 | 0.44 | 0.85 | 0.28 |
| 5314 | 0 | 2612   | ALHQVFGAIYGAAFSGV<br>SWT    | 2.94 | 0.01 | 2.40 | 0.44 | 0.85 | 0.28 |
| 5315 | 0 | 2621   | ALIDQKVKEI                  | 2.31 | 3.55 | 2.56 | 0.44 | 0.85 | 0.28 |
| 5316 | 0 | 2624   | ALIEEGQRM                   | 2.20 | 0.01 | 2.69 | 0.44 | 0.85 | 0.28 |
| 5317 | 0 | 79151  | ALIENYTDVFDDTQVEM<br>IDEVTN | 3.09 | 0.01 | 4.45 | 1.15 | 0.22 | 0.85 |
| 5318 | 0 | 79151  | ALIENYTDVFDDTQVEM<br>IDEVTN | 3.09 | 0.01 | 4.45 | 1.15 | 0.22 | 0.85 |
| 5319 | 0 | 134641 | ALILLAQMGR                  | 2.33 | 0.01 | 0.78 | 4.03 | 2.26 | 0.85 |
| 5320 | 0 | 134641 | ALILLAQMGR                  | 2.33 | 0.01 | 0.78 | 4.03 | 2.26 | 1.34 |
| 5321 | 0 | 161081 | ALILMHELIHVLHGLYGI<br>K     | 2.92 | 0.01 | 2.08 | 0.44 | 1.93 | 1.57 |
| 5322 | 0 | 115684 | ALINNQFLPY                  | 2.30 | 0.01 | 1.60 | 0.44 | 1.23 | 0.85 |
| 5323 | 0 | 115684 | ALINNQFLPY                  | 2.30 | 0.01 | 1.60 | 0.44 | 1.23 | 0.85 |

|      |   |        |                                     |      |      |      |      |      |      |
|------|---|--------|-------------------------------------|------|------|------|------|------|------|
| 5324 | 0 | 115177 | ALINNQFLPYPPYAKPAA<br>VR            | 2.94 | 0.01 | 1.60 | 0.44 | 1.23 | 1.28 |
| 5325 | 0 | 115177 | ALINNQFLPYPPYAKPAA<br>VR            | 2.94 | 0.01 | 1.60 | 0.44 | 1.23 | 1.28 |
| 5326 | 0 | 2642   | ALINSTKIYSYFSPVISKV<br>NQGA         | 3.08 | 0.01 | 2.95 | 0.44 | 0.22 | 0.28 |
| 5327 | 0 | 98691  | ALKALPMHIR                          | 2.32 | 0.01 | 1.60 | 0.44 | 1.23 | 0.85 |
| 5328 | 0 | 98691  | ALKALPMHIR                          | 2.32 | 0.01 | 1.60 | 0.44 | 1.23 | 0.85 |
| 5329 | 0 | 98691  | ALKALPMHIR                          | 2.32 | 0.01 | 1.60 | 0.44 | 2.98 | 0.85 |
| 5330 | 0 | 120402 | ALKASGLVPE                          | 2.32 | 0.01 | 2.18 | 2.16 | 0.22 | 0.28 |
| 5331 | 0 | 120402 | ALKASGLVPE                          | 2.32 | 0.01 | 2.18 | 2.16 | 0.22 | 0.28 |
| 5332 | 0 | 108766 | ALKGAELLIHGS                        | 2.49 | 0.01 | 0.90 | 1.15 | 0.22 | 1.39 |
| 5333 | 0 | 144589 | ALKHLPNDPM                          | 2.31 | 0.01 | 0.78 | 0.44 | 1.13 | 0.28 |
| 5334 | 0 | 152410 | ALKIAFGFNE                          | 2.32 | 0.01 | 2.18 | 2.16 | 0.22 | 0.28 |
| 5335 | 0 | 419108 | ALKKPWLDLLRN                        | 2.47 | 0.01 | 0.90 | 0.44 | 1.93 | 1.27 |
| 5336 | 0 | 2677   | ALKTELEDTLSTATQQE<br>LR             | 2.99 | 0.01 | 0.78 | 0.44 | 0.85 | 0.28 |
| 5337 | 0 | 2677   | ALKTELEDTLSTATQQE<br>LR             | 2.99 | 0.01 | 0.78 | 0.44 | 1.13 | 0.28 |
| 5338 | 0 | 2677   | ALKTELEDTLSTATQQE<br>LR             | 2.99 | 0.01 | 0.78 | 0.44 | 1.13 | 0.28 |
| 5339 | 0 | 2677   | ALKTELEDTLSTATQQE<br>LR             | 2.99 | 0.01 | 0.78 | 0.44 | 1.93 | 0.28 |
| 5340 | 0 | 2677   | ALKTELEDTLSTATQQE<br>LR             | 2.99 | 0.01 | 0.78 | 0.44 | 1.93 | 0.28 |
| 5341 | 0 | 149622 | ALLDAENVNRKVTTQ                     | 2.67 | 0.01 | 3.67 | 1.12 | 0.22 | 0.28 |
| 5342 | 0 | 2691   | ALLDPRVRGLYFP                       | 2.55 | 0.01 | 3.07 | 1.15 | 2.26 | 1.27 |
| 5343 | 0 | 2695   | ALLDPSQGMGPSLIGLA<br>MGD            | 2.99 | 0.01 | 3.78 | 1.12 | 0.22 | 0.28 |
| 5344 | 0 | 2695   | ALLDPSQGMGPSLIGLA<br>MGD            | 2.99 | 0.01 | 2.04 | 0.44 | 0.85 | 0.28 |
| 5345 | 0 | 78927  | ALLEETITAKGVRSPPAIR<br>G            | 2.96 | 0.01 | 2.84 | 0.44 | 0.85 | 0.28 |
| 5346 | 0 | 99892  | ALLHEHYVYA                          | 2.35 | 0.01 | 2.18 | 2.16 | 0.22 | 0.28 |
| 5347 | 0 | 2715   | ALLLNQELLLNPTHQIYP<br>VTQPLAPVHNPIV | 3.42 | 0.01 | 0.78 | 1.12 | 0.22 | 3.25 |
| 5348 | 0 | 489468 | ALLLPPISLVNLSTA                     | 2.70 | 0.01 | 2.69 | 3.05 | 0.85 | 1.28 |
| 5349 | 0 | 2720   | ALLNPSRVYTFSSDYVK<br>K              | 2.85 | 0.01 | 2.08 | 0.44 | 0.22 | 1.57 |
| 5350 | 0 | 2720   | ALLNPSRVYTFSSDYVK<br>K              | 2.85 | 0.01 | 2.08 | 2.02 | 0.22 | 1.57 |
| 5351 | 0 | 2720   | ALLNPSRVYTFSSDYVK<br>K              | 2.85 | 0.01 | 2.08 | 1.15 | 0.22 | 1.57 |
| 5352 | 0 | 2720   | ALLNPSRVYTFSSDYVK<br>K              | 2.85 | 0.01 | 2.08 | 2.49 | 0.22 | 1.57 |

|      |   |        |                              |      |      |      |      |      |      |
|------|---|--------|------------------------------|------|------|------|------|------|------|
| 5353 | 0 | 2720   | ALLNPSRVYTFSSDYVK<br>K       | 2.85 | 0.01 | 3.16 | 0.44 | 1.93 | 1.57 |
| 5354 | 0 | 2720   | ALLNPSRVYTFSSDYVK<br>K       | 2.85 | 0.01 | 2.08 | 0.68 | 0.22 | 1.57 |
| 5355 | 0 | 103800 | ALLNTPPPYQVSCGGES<br>DRASAGH | 3.07 | 0.01 | 4.23 | 0.44 | 1.59 | 0.28 |
| 5356 | 0 | 153359 | ALLPFKDHLPPYGGGS             | 2.73 | 0.01 | 0.90 | 0.68 | 0.22 | 0.28 |
| 5357 | 0 | 153359 | ALLPFKDHLPPYGGGS             | 2.73 | 0.01 | 0.90 | 0.44 | 0.85 | 2.35 |
| 5358 | 0 | 2724   | ALLQSARR                     | 2.13 | 0.01 | 2.21 | 1.12 | 0.22 | 0.28 |
| 5359 | 0 | 2724   | ALLQSARR                     | 2.13 | 0.01 | 2.21 | 0.44 | 0.85 | 0.28 |
| 5360 | 0 | 2725   | ALLQSARRGE                   | 2.32 | 0.01 | 2.21 | 1.12 | 0.22 | 0.28 |
| 5361 | 0 | 135895 | ALLRCIPALDSLTPANED<br>C      | 2.91 | 0.01 | 0.78 | 0.44 | 1.13 | 0.28 |
| 5362 | 0 | 135895 | ALLRCIPALDSLTPANED<br>C      | 2.91 | 0.01 | 0.78 | 0.44 | 0.85 | 0.28 |
| 5363 | 0 | 2729   | ALLRFVNPDTGRVLFECK<br>LHKS   | 3.00 | 0.01 | 4.45 | 0.68 | 0.22 | 0.85 |
| 5364 | 0 | 2729   | ALLRFVNPDTGRVLFECK<br>LHKS   | 3.00 | 0.01 | 4.45 | 0.68 | 0.22 | 0.85 |
| 5365 | 0 | 2729   | ALLRFVNPDTGRVLFECK<br>LHKS   | 3.00 | 0.01 | 4.45 | 0.68 | 0.22 | 1.27 |
| 5366 | 0 | 128276 | ALLRNLGK                     | 2.14 | 0.01 | 0.78 | 0.44 | 1.13 | 0.28 |
| 5367 | 0 | 117745 | ALLRNLGKMTA                  | 2.41 | 0.01 | 0.78 | 0.44 | 1.13 | 0.28 |
| 5368 | 0 | 117745 | ALLRNLGKMTA                  | 2.41 | 0.01 | 0.78 | 0.44 | 1.41 | 0.28 |
| 5369 | 0 | 117745 | ALLRNLGKMTA                  | 2.41 | 0.01 | 1.75 | 4.08 | 0.22 | 0.85 |
| 5370 | 0 | 138140 | ALLSKVTGPPMPD                | 2.59 | 0.01 | 2.51 | 1.20 | 0.22 | 0.28 |
| 5371 | 0 | 165586 | ALLVNSSQPWEPLQLHV<br>DKA     | 2.94 | 0.01 | 0.78 | 0.44 | 0.85 | 0.28 |
| 5372 | 0 | 180962 | ALLWEAAPDQRLS                | 2.55 | 0.01 | 0.90 | 0.68 | 0.22 | 1.27 |
| 5373 | 0 | 180962 | ALLWEAAPDQRLS                | 2.55 | 0.01 | 0.90 | 0.68 | 0.22 | 1.27 |
| 5374 | 0 | 180962 | ALLWEAAPDQRLS                | 2.55 | 0.01 | 0.90 | 0.68 | 0.22 | 1.27 |
| 5375 | 0 | 180962 | ALLWEAAPDQRLS                | 2.55 | 0.01 | 0.90 | 0.68 | 0.22 | 1.27 |
| 5376 | 0 | 99104  | ALMLPHFNSKAMVIV              | 2.67 | 0.01 | 2.16 | 0.44 | 1.23 | 1.48 |
| 5377 | 0 | 99104  | ALMLPHFNSKAMVIV              | 2.67 | 0.01 | 2.16 | 0.44 | 1.23 | 1.48 |
| 5378 | 0 | 180366 | ALMRGKSTEEARKELQA<br>AG      | 2.92 | 4.45 | 0.78 | 0.44 | 1.13 | 0.28 |
| 5379 | 0 | 180366 | ALMRGKSTEEARKELQA<br>AG      | 2.92 | 4.45 | 0.78 | 0.44 | 1.13 | 0.28 |
| 5380 | 0 | 180366 | ALMRGKSTEEARKELQA<br>AG      | 2.92 | 4.45 | 0.78 | 0.44 | 1.41 | 0.28 |
| 5381 | 0 | 103038 | ALMSGNFSNGILWRG              | 2.68 | 0.01 | 2.04 | 0.44 | 0.85 | 1.28 |
| 5382 | 0 | 178522 | ALMTWGDKFSSQEAD              | 2.64 | 0.01 | 2.36 | 0.44 | 1.23 | 1.28 |
| 5383 | 0 | 2769   | ALNCYW                       | 1.88 | 0.01 | 2.45 | 0.44 | 0.85 | 1.34 |
| 5384 | 0 | 2769   | ALNCYW                       | 1.88 | 0.01 | 2.45 | 0.44 | 0.85 | 1.34 |
| 5385 | 0 | 2769   | ALNCYW                       | 1.88 | 0.01 | 2.45 | 0.44 | 0.85 | 1.34 |



|      |   |      |                                                                                                                                                                                                                                                                                                                                                                                                                                                                                                                         |      |      |      |      |      |      |
|------|---|------|-------------------------------------------------------------------------------------------------------------------------------------------------------------------------------------------------------------------------------------------------------------------------------------------------------------------------------------------------------------------------------------------------------------------------------------------------------------------------------------------------------------------------|------|------|------|------|------|------|
| 5386 | 0 | 2770 | ALNCYWPLNDYGYFTTT<br>GIGYQPYRVVLSFEL                                                                                                                                                                                                                                                                                                                                                                                                                                                                                    | 3.39 | 3.55 | 2.45 | 0.44 | 0.85 | 0.28 |
| 5387 | 0 | 2772 | ALNDLCIKVNNWDLFFS<br>PS                                                                                                                                                                                                                                                                                                                                                                                                                                                                                                 | 2.88 | 0.01 | 3.03 | 0.68 | 0.22 | 1.57 |
| 5388 | 0 | 2772 | ALNDLCIKVNNWDLFFS<br>PS                                                                                                                                                                                                                                                                                                                                                                                                                                                                                                 | 2.88 | 0.01 | 3.03 | 3.33 | 0.22 | 1.57 |
| 5389 | 0 | 2772 | ALNDLCIKVNNWDLFFS<br>PS                                                                                                                                                                                                                                                                                                                                                                                                                                                                                                 | 2.88 | 0.01 | 2.08 | 0.44 | 0.22 | 1.57 |
| 5390 | 0 | 2772 | ALNDLCIKVNNWDLFFS<br>PS                                                                                                                                                                                                                                                                                                                                                                                                                                                                                                 | 2.88 | 0.01 | 2.08 | 1.15 | 0.22 | 1.57 |
| 5391 | 0 | 2772 | ALNDLCIKVNNWDLFFS<br>PS                                                                                                                                                                                                                                                                                                                                                                                                                                                                                                 | 2.88 | 0.01 | 2.08 | 2.49 | 0.22 | 1.57 |
| 5392 | 0 | 2772 | ALNDLCIKVNNWDLFFS<br>PS                                                                                                                                                                                                                                                                                                                                                                                                                                                                                                 | 2.88 | 0.01 | 3.16 | 0.44 | 1.93 | 1.57 |
| 5393 | 0 | 2774 | ALNDLCIKVNNWDLFFS<br>PSEDNFTNDLNKGEEITS<br>DTNIEAAEENISLDLIQQ<br>YYLTFNFDNEPENISIENL<br>SSDIIGQLELMPNIERFP<br>NGKKYELDKYTMFHLYR<br>AQEFEHGKSRIALTNSV<br>NEALLNPSRVYFFSSDY<br>VKKVNKATEAAMFLGW<br>VEQLVYDFTDETSEVSTT<br>DKIADITIIIPYIGPALNIG<br>NMLYKDDFVGALIFSGA<br>VILLEFIPEIAIPVLGTFAL<br>VSYIANKVLTVQTIDNAL<br>SKRNEKWDEVYKYIVTN<br>WLAKVNTQIDLIRKKMK<br>EALENQAEATKAIINYQY<br>NQYTEEEKNNINFNIDD<br>LSSKLNESINKAMININK<br>FLNQCSVSYLMNSMIPY<br>GVKRLEDFDASLKDALLK<br>YIYDNRGTLIGQVDRLKD<br>KVNNTLSTDIPFQLSKYV<br>DNQ | 6.01 | 0.01 | 2.08 | 0.68 | 0.22 | 0.28 |

|      |   |      |                      |      |      |      |      |      |      |
|------|---|------|----------------------|------|------|------|------|------|------|
|      |   |      | ALNDLCIKVNNWDLFFS    |      |      |      |      |      |      |
|      |   |      | PSEDNFTNDLNKGEEITS   |      |      |      |      |      |      |
|      |   |      | DTNIEAAEENISLDLIQQ   |      |      |      |      |      |      |
|      |   |      | YYLTFNFDNEPENISIENL  |      |      |      |      |      |      |
|      |   |      | SSDIIGQLELMPNIERFP   |      |      |      |      |      |      |
|      |   |      | NGKKYELDKYTMFHLYR    |      |      |      |      |      |      |
|      |   |      | AQEFEHGKSRIALTNSV    |      |      |      |      |      |      |
|      |   |      | NEALLNPSRVYTFSSDY    |      |      |      |      |      |      |
|      |   |      | VKKV NKATEAAMFLGW    |      |      |      |      |      |      |
|      |   |      | VEQLVYDFTDETSEVSTT   |      |      |      |      |      |      |
|      |   |      | DKIADITIIIPYIGPALNIG |      |      |      |      |      |      |
| 5394 | 0 | 2774 | NMLYKDDFVGALIFSGA    | 6.01 | 0.01 | 2.08 | 0.44 | 0.22 | 0.28 |
|      |   |      | VILLEFIPEIAIPVLGTFAL |      |      |      |      |      |      |
|      |   |      | VSYIANKVLTVQTIDNAL   |      |      |      |      |      |      |
|      |   |      | SKRNEKWDEVYKYIVTN    |      |      |      |      |      |      |
|      |   |      | WLAKVNTQIDLIRKKMK    |      |      |      |      |      |      |
|      |   |      | EALENQAEATKAIINYQY   |      |      |      |      |      |      |
|      |   |      | NQYTEEEKNNINFNIDD    |      |      |      |      |      |      |
|      |   |      | LSSKLNESINKAMININK   |      |      |      |      |      |      |
|      |   |      | FLNQCSVSYLMNSMIPY    |      |      |      |      |      |      |
|      |   |      | GVKRLEDFDASLKDALLK   |      |      |      |      |      |      |
|      |   |      | YIYDNRGTLIGQVDRDKD   |      |      |      |      |      |      |
|      |   |      | KVNNTLSTDIPFQLSKYV   |      |      |      |      |      |      |
|      |   |      | DNQ                  |      |      |      |      |      |      |

|      |   |      |                      |      |      |      |      |      |      |
|------|---|------|----------------------|------|------|------|------|------|------|
|      |   |      | ALNDLCIKVNNWDLFFS    |      |      |      |      |      |      |
|      |   |      | PSEDNFTNDLNKGEEITS   |      |      |      |      |      |      |
|      |   |      | DTNIEAAEENISLDLIQQ   |      |      |      |      |      |      |
|      |   |      | YYLTFNFDNEPENISIENL  |      |      |      |      |      |      |
|      |   |      | SSDIIGQLELMPNIERFP   |      |      |      |      |      |      |
|      |   |      | NGKKYELDKYTMFHLYR    |      |      |      |      |      |      |
|      |   |      | AQEFEHGKSRIALTNSV    |      |      |      |      |      |      |
|      |   |      | NEALLNPSRVYTFSSDY    |      |      |      |      |      |      |
|      |   |      | VKKV NKATEAAMFLGW    |      |      |      |      |      |      |
|      |   |      | VEQLVYDFTDETSEVSTT   |      |      |      |      |      |      |
|      |   |      | DKIADITIIIPYIGPALNIG |      |      |      |      |      |      |
| 5395 | 0 | 2774 | NMLYKDDFVGALIFSGA    | 6.01 | 0.01 | 3.30 | 1.15 | 0.22 | 0.28 |
|      |   |      | VILLEFIPEIAIPVLGTFAL |      |      |      |      |      |      |
|      |   |      | VSYIANKVLTVQTIDNAL   |      |      |      |      |      |      |
|      |   |      | SKRNEKWDEVYKYIVTN    |      |      |      |      |      |      |
|      |   |      | WLAKVNTQIDLIRKKMK    |      |      |      |      |      |      |
|      |   |      | EALENQAEATKAIINYQY   |      |      |      |      |      |      |
|      |   |      | NQYTEEEKNNINFNIDD    |      |      |      |      |      |      |
|      |   |      | LSSKLNESINKAMININK   |      |      |      |      |      |      |
|      |   |      | FLNQCSVSYLMNSMIPY    |      |      |      |      |      |      |
|      |   |      | GVKRLEDFDASLKDALLK   |      |      |      |      |      |      |
|      |   |      | YIYDNRGTLIGQVDRDKD   |      |      |      |      |      |      |
|      |   |      | KVNNTLSTDIPFQLSKYV   |      |      |      |      |      |      |
|      |   |      | DNQ                  |      |      |      |      |      |      |

|      |   |      |                      |      |      |      |      |      |      |
|------|---|------|----------------------|------|------|------|------|------|------|
|      |   |      | ALNDLCIKVNNWDLFFS    |      |      |      |      |      |      |
|      |   |      | PSEDNFTNDLNKGEEITS   |      |      |      |      |      |      |
|      |   |      | DTNIEAAEENISLDLIQQ   |      |      |      |      |      |      |
|      |   |      | YYLTFNFDNEPENISIENL  |      |      |      |      |      |      |
|      |   |      | SSDIIGQLELMPNIERFP   |      |      |      |      |      |      |
|      |   |      | NGKKYELDKYTMFHLYR    |      |      |      |      |      |      |
|      |   |      | AQEFEHGKSRIALTNSV    |      |      |      |      |      |      |
|      |   |      | NEALLNPSRVYTFSSDY    |      |      |      |      |      |      |
|      |   |      | VKKV NKATEAAMFLGW    |      |      |      |      |      |      |
|      |   |      | VEQLVYDFTDETSEVSTT   |      |      |      |      |      |      |
|      |   |      | DKIADITIIIPYIGPALNIG |      |      |      |      |      |      |
| 5396 | 0 | 2774 | NMLYKDDFVGALIFSGA    | 6.01 | 0.01 | 3.30 | 1.15 | 0.22 | 1.34 |
|      |   |      | VILLEFIPEIAIPVLGTFAL |      |      |      |      |      |      |
|      |   |      | VSYIANKVLTVQTIDNAL   |      |      |      |      |      |      |
|      |   |      | SKRNEKWDEVYKYIVTN    |      |      |      |      |      |      |
|      |   |      | WLAKVNTQIDLIRKKMK    |      |      |      |      |      |      |
|      |   |      | EALENQAEATKAIINYQY   |      |      |      |      |      |      |
|      |   |      | NQYTEEEKNNINFNIDD    |      |      |      |      |      |      |
|      |   |      | LSSKLNESINKAMININK   |      |      |      |      |      |      |
|      |   |      | FLNQCSVSYLMNSMIPY    |      |      |      |      |      |      |
|      |   |      | GVKRLEDFDASLKDALLK   |      |      |      |      |      |      |
|      |   |      | YIYDNRGTLIGQVDRDKD   |      |      |      |      |      |      |
|      |   |      | KVNNTLSTDIPFQLSKYV   |      |      |      |      |      |      |
|      |   |      | DNQ                  |      |      |      |      |      |      |

|      |   |      |                      |      |      |      |      |      |      |
|------|---|------|----------------------|------|------|------|------|------|------|
|      |   |      | ALNDLCIKVNNWDLFFS    |      |      |      |      |      |      |
|      |   |      | PSEDNFTNDLNKGEEITS   |      |      |      |      |      |      |
|      |   |      | DTNIEAAEENISLDLIQQ   |      |      |      |      |      |      |
|      |   |      | YYLTFNFDNEPENISIENL  |      |      |      |      |      |      |
|      |   |      | SSDIIGQLELMPNIERFP   |      |      |      |      |      |      |
|      |   |      | NGKKYELDKYTMFHLYR    |      |      |      |      |      |      |
|      |   |      | AQEFEHGKSRIALTNSV    |      |      |      |      |      |      |
|      |   |      | NEALLNPSRVYTFSSDY    |      |      |      |      |      |      |
|      |   |      | VKKV NKATEAAMFLGW    |      |      |      |      |      |      |
|      |   |      | VEQLVYDFTDETSEVSTT   |      |      |      |      |      |      |
|      |   |      | DKIADITIIIPYIGPALNIG |      |      |      |      |      |      |
|      |   |      | NMLYKDDFVGALIFSGA    |      |      |      |      |      |      |
|      |   |      | VILLEFIPEIAIPVLGTFAL |      |      |      |      |      |      |
| 5397 | 0 | 2775 | VSYIANKVLTVQTIDNAL   | 6.20 | 0.01 | 2.08 | 0.68 | 0.22 | 1.34 |
|      |   |      | SKRNEKWDEVYKYIVTN    |      |      |      |      |      |      |
|      |   |      | WLAKVNTQIDLIRKKMK    |      |      |      |      |      |      |
|      |   |      | EALENQAEATKAIINYQY   |      |      |      |      |      |      |
|      |   |      | NQYTEEEKNNINFNIDD    |      |      |      |      |      |      |
|      |   |      | LSSKLNESINKAMININK   |      |      |      |      |      |      |
|      |   |      | FLNQCSVSYLMNSMIPY    |      |      |      |      |      |      |
|      |   |      | GVKRLEDFDASLKDALLK   |      |      |      |      |      |      |
|      |   |      | YIYDNRGTLIGQVDRDKD   |      |      |      |      |      |      |
|      |   |      | KVNNTLSTDIPFQLSKYV   |      |      |      |      |      |      |
|      |   |      | DNQRLLSTFTEYIKNIINT  |      |      |      |      |      |      |
|      |   |      | SILNLRYESNHLIDLSRYA  |      |      |      |      |      |      |
|      |   |      | SKINIGSKVNFDPIDKNQ   |      |      |      |      |      |      |
|      |   |      | IQLFNLESSKIEVILKNAIV |      |      |      |      |      |      |
|      |   |      | VNCAVEMESTCEIAUR     |      |      |      |      |      |      |

|      |   |      |                      |      |      |      |      |      |      |
|------|---|------|----------------------|------|------|------|------|------|------|
|      |   |      | ALNDLCIKVNNWDLFFS    |      |      |      |      |      |      |
|      |   |      | PSEDNFTNDLNKGEEITS   |      |      |      |      |      |      |
|      |   |      | DTNIEAAEENISLDLIQQ   |      |      |      |      |      |      |
|      |   |      | YYLTFNFDNEPENISIENL  |      |      |      |      |      |      |
|      |   |      | SSDIIGQLELMPNIERFP   |      |      |      |      |      |      |
|      |   |      | NGKKYELDKYTMFHLYR    |      |      |      |      |      |      |
|      |   |      | AQFEHKGKSRIALTNSV    |      |      |      |      |      |      |
|      |   |      | NEALLNPSRVYTFSSDY    |      |      |      |      |      |      |
|      |   |      | VKKV NKATEAAMFLGW    |      |      |      |      |      |      |
|      |   |      | VEQLVYDFTDETSEVSTT   |      |      |      |      |      |      |
|      |   |      | DKIADITIIIPYIGPALNIG |      |      |      |      |      |      |
|      |   |      | NMLYKDDFVGALIFSGA    |      |      |      |      |      |      |
|      |   |      | VILLEFIPEIAIPVLGTFAL |      |      |      |      |      |      |
| 5398 | 0 | 2775 | VSYIANKVLTVQTIDNAL   | 6.20 | 0.01 | 2.08 | 0.68 | 0.22 | 0.85 |
|      |   |      | SKRNEKWDEVYKYIVTN    |      |      |      |      |      |      |
|      |   |      | WLAKVNTQIDLIRKKMK    |      |      |      |      |      |      |
|      |   |      | EALNQAEATKAIINYQY    |      |      |      |      |      |      |
|      |   |      | NQYTEEEKNNINFNIDD    |      |      |      |      |      |      |
|      |   |      | LSSKLNESINKAMININK   |      |      |      |      |      |      |
|      |   |      | FLNQCSVSYLMNSMIPY    |      |      |      |      |      |      |
|      |   |      | GVKRLEDFDASLKDALLK   |      |      |      |      |      |      |
|      |   |      | YIYDNRGTLIGQVDRDKD   |      |      |      |      |      |      |
|      |   |      | KVNNTLSTDIPFQLSKYV   |      |      |      |      |      |      |
|      |   |      | DNQRLLSTFTEYIKNIINT  |      |      |      |      |      |      |
|      |   |      | SILNLRYESNHLIDLSRYA  |      |      |      |      |      |      |
|      |   |      | SKINIGSKVNFDPIDKNQ   |      |      |      |      |      |      |
|      |   |      | IQLFNLESSKIEVILKNAIV |      |      |      |      |      |      |
|      |   |      | VNCAVEMESTCEIAUD     |      |      |      |      |      |      |

|      |   |      |                      |      |      |      |      |      |      |
|------|---|------|----------------------|------|------|------|------|------|------|
|      |   |      | ALNDLCIKVNNWDLFFS    |      |      |      |      |      |      |
|      |   |      | PSEDNFTNDLNKGEEITS   |      |      |      |      |      |      |
|      |   |      | DTNIEAAEENISLDLIQQ   |      |      |      |      |      |      |
|      |   |      | YYLTFNFDNEPENISIENL  |      |      |      |      |      |      |
|      |   |      | SSDIIGQLELMPNIERFP   |      |      |      |      |      |      |
|      |   |      | NGKKYELDKYTMFHLYR    |      |      |      |      |      |      |
|      |   |      | AQEFEHGKSRIALTNSV    |      |      |      |      |      |      |
|      |   |      | NEALLNPSRVYTFSSDY    |      |      |      |      |      |      |
|      |   |      | VKKV NKATEAAMFLGW    |      |      |      |      |      |      |
|      |   |      | VEQLVYDFTDETSEVSTT   |      |      |      |      |      |      |
|      |   |      | DKIADITIIIPYIGPALNIG |      |      |      |      |      |      |
|      |   |      | NMLYKDDFVGALIFSGA    |      |      |      |      |      |      |
|      |   |      | VILLEFIPEIAIPVLGTFAL |      |      |      |      |      |      |
| 5399 | 0 | 2775 | VSYIANKVLTVQTIDNAL   | 6.20 | 0.01 | 2.08 | 0.68 | 0.22 | 0.28 |
|      |   |      | SKRNEKWDEVYKYIVTN    |      |      |      |      |      |      |
|      |   |      | WLAKVNTQIDLIRKKMK    |      |      |      |      |      |      |
|      |   |      | EALENQAEATKAIINYQY   |      |      |      |      |      |      |
|      |   |      | NQYTEEEKNNINFNIDD    |      |      |      |      |      |      |
|      |   |      | LSSKLNESINKAMININK   |      |      |      |      |      |      |
|      |   |      | FLNQCSVSYLMNSMIPY    |      |      |      |      |      |      |
|      |   |      | GVKRLEDFDASLKDALLK   |      |      |      |      |      |      |
|      |   |      | YIYDNRGTLIGQVDRDKD   |      |      |      |      |      |      |
|      |   |      | KVNNTLSTDIPFQLSKYV   |      |      |      |      |      |      |
|      |   |      | DNQRLLSTFTEYIKNIINT  |      |      |      |      |      |      |
|      |   |      | SILNLRYESNHLIDLSRYA  |      |      |      |      |      |      |
|      |   |      | SKINIGSKVNFDPIDKNQ   |      |      |      |      |      |      |
|      |   |      | IQLFNLESSKIEVILKNAIV |      |      |      |      |      |      |
|      |   |      | VNCAVEMESTCEIAUR     |      |      |      |      |      |      |

|      |   |      |                      |      |      |      |      |      |      |
|------|---|------|----------------------|------|------|------|------|------|------|
|      |   |      | ALNDLCIKVNNWDLFFS    |      |      |      |      |      |      |
|      |   |      | PSEDNFTNDLNKGEEITS   |      |      |      |      |      |      |
|      |   |      | DTNIEAAEENISLDLIQQ   |      |      |      |      |      |      |
|      |   |      | YYLTFNFDNEPENISIENL  |      |      |      |      |      |      |
|      |   |      | SSDIIGQLELMPNIERFP   |      |      |      |      |      |      |
|      |   |      | NGKKYELDKYTMFHLYR    |      |      |      |      |      |      |
|      |   |      | AQFEHKGSRIALTNSV     |      |      |      |      |      |      |
|      |   |      | NEALLNPSRVYTFSSDY    |      |      |      |      |      |      |
|      |   |      | VKKVNKATEAAMFLGW     |      |      |      |      |      |      |
|      |   |      | VEQLVYDFTDETSEVSTT   |      |      |      |      |      |      |
|      |   |      | DKIADITIIIPYIGPALNIG |      |      |      |      |      |      |
|      |   |      | NMLYKDDFVGALIFSGA    |      |      |      |      |      |      |
|      |   |      | VILLEFIPEIAIPVLGTFAL |      |      |      |      |      |      |
| 5400 | 0 | 2775 | VSYIANKVLTVQIDNAL    | 6.20 | 0.01 | 2.08 | 0.68 | 0.22 | 1.34 |
|      |   |      | SKRNEKWDEVYKYIVTN    |      |      |      |      |      |      |
|      |   |      | WLAKVNTQIDLIRKKMK    |      |      |      |      |      |      |
|      |   |      | EALNQAEATKAIINYQY    |      |      |      |      |      |      |
|      |   |      | NQYTEEEKNNINFNIDD    |      |      |      |      |      |      |
|      |   |      | LSSKLNESINKAMININK   |      |      |      |      |      |      |
|      |   |      | FLNQCSVSYLMNSMIPY    |      |      |      |      |      |      |
|      |   |      | GVKRLEDFDASLKDALLK   |      |      |      |      |      |      |
|      |   |      | YIYDNRGTLIGQVDRDKD   |      |      |      |      |      |      |
|      |   |      | KVNNTLSTDIPFQLSKYV   |      |      |      |      |      |      |
|      |   |      | DNQRLLSTFTEYIKNIINT  |      |      |      |      |      |      |
|      |   |      | SILNLRYESNHLIDLSRYA  |      |      |      |      |      |      |
|      |   |      | SKINIGSKVNFDPIDKNQ   |      |      |      |      |      |      |
|      |   |      | IQLFNLESSKIEVILKNAIV |      |      |      |      |      |      |
|      |   |      | VNCAVEMESTCEIAUR     |      |      |      |      |      |      |



|      |   |      |                      |      |      |      |      |      |      |
|------|---|------|----------------------|------|------|------|------|------|------|
|      |   |      | ALNDLCIKVNNWDLFFS    |      |      |      |      |      |      |
|      |   |      | PSEDNFTNDLNKGEEITS   |      |      |      |      |      |      |
|      |   |      | DTNIEAAEENISLDLIQQ   |      |      |      |      |      |      |
|      |   |      | YYLTFNFDNEPENISIENL  |      |      |      |      |      |      |
|      |   |      | SSDIIGQLELMPNIERFP   |      |      |      |      |      |      |
|      |   |      | NGKKYELDKYTMFHLYR    |      |      |      |      |      |      |
|      |   |      | AQEFEHGKSRIALTNSV    |      |      |      |      |      |      |
|      |   |      | NEALLNPSRVYTFSSDY    |      |      |      |      |      |      |
|      |   |      | VKKV NKATEAAMFLGW    |      |      |      |      |      |      |
|      |   |      | VEQLVYDFTDETSEVSTT   |      |      |      |      |      |      |
|      |   |      | DKIADITIIIPYIGPALNIG |      |      |      |      |      |      |
| 5401 | 0 | 2774 | NMLYKDDFVGALIFSGA    | 6.01 | 0.01 | 3.30 | 1.15 | 0.22 | 1.66 |
|      |   |      | VILLEFIPEIAIPVLGTFAL |      |      |      |      |      |      |
|      |   |      | VSYIANKVLTVQTIDNAL   |      |      |      |      |      |      |
|      |   |      | SKRNEKWDEVYKYIVTN    |      |      |      |      |      |      |
|      |   |      | WLAKVNTQIDLIRKKMK    |      |      |      |      |      |      |
|      |   |      | EALENQAEATKAIINYQY   |      |      |      |      |      |      |
|      |   |      | NQYTEEEKNNINFNIDD    |      |      |      |      |      |      |
|      |   |      | LSSKLNESINKAMININK   |      |      |      |      |      |      |
|      |   |      | FLNQCSVSYLMNSMIPY    |      |      |      |      |      |      |
|      |   |      | GVKRLEDFDASLKDALLK   |      |      |      |      |      |      |
|      |   |      | YIYDNRGTLIGQVDRDKD   |      |      |      |      |      |      |
|      |   |      | KVNNTLSTDIPFQLSKYV   |      |      |      |      |      |      |
|      |   |      | DNQ                  |      |      |      |      |      |      |

|      |   |      |                      |      |      |      |      |      |      |
|------|---|------|----------------------|------|------|------|------|------|------|
|      |   |      | ALNDLCIKVNNWDLFFS    |      |      |      |      |      |      |
|      |   |      | PSEDNFTNDLNKGEEITS   |      |      |      |      |      |      |
|      |   |      | DTNIEAAEENISLDLIQQ   |      |      |      |      |      |      |
|      |   |      | YYLTFNFDNEPENISIENL  |      |      |      |      |      |      |
|      |   |      | SSDIIGQLELMPNIERFP   |      |      |      |      |      |      |
|      |   |      | NGKKYELDKYTMFHLYR    |      |      |      |      |      |      |
|      |   |      | AQEFEHGKSRIALTNSV    |      |      |      |      |      |      |
|      |   |      | NEALLNPSRVYTFSSDY    |      |      |      |      |      |      |
|      |   |      | VKKV NKATEAAMFLGW    |      |      |      |      |      |      |
|      |   |      | VEQLVYDFTDETSEVSTT   |      |      |      |      |      |      |
|      |   |      | DKIADITIIIPYIGPALNIG |      |      |      |      |      |      |
| 5402 | 0 | 2774 | NMLYKDDFVGALIFSGA    | 6.01 | 0.01 | 3.30 | 1.15 | 0.22 | 1.66 |
|      |   |      | VILLEFIPEIAIPVLGTFAL |      |      |      |      |      |      |
|      |   |      | VSYIANKVLTVQTIDNAL   |      |      |      |      |      |      |
|      |   |      | SKRNEKWDEVYKYIVTN    |      |      |      |      |      |      |
|      |   |      | WLAKVNTQIDLIRKKMK    |      |      |      |      |      |      |
|      |   |      | EALENQAEATKAIINYQY   |      |      |      |      |      |      |
|      |   |      | NQYTEEEKNNINFNIDD    |      |      |      |      |      |      |
|      |   |      | LSSKLNESINKAMININK   |      |      |      |      |      |      |
|      |   |      | FLNQCSVSYLMNSMIPY    |      |      |      |      |      |      |
|      |   |      | GVKRLEDFDASLKDALLK   |      |      |      |      |      |      |
|      |   |      | YIYDNRGTLIGQVDRDKD   |      |      |      |      |      |      |
|      |   |      | KVNNTLSTDIPFQLSKYV   |      |      |      |      |      |      |
|      |   |      | DNQ                  |      |      |      |      |      |      |

|      |   |      |                      |      |      |      |      |      |      |
|------|---|------|----------------------|------|------|------|------|------|------|
|      |   |      | ALNDLCIKVNNWDLFFS    |      |      |      |      |      |      |
|      |   |      | PSEDNFTNDLNKGEEITS   |      |      |      |      |      |      |
|      |   |      | DTNIEAAEENISLDLIQQ   |      |      |      |      |      |      |
|      |   |      | YYLTFNFDNEPENISIENL  |      |      |      |      |      |      |
|      |   |      | SSDIIGQLELMPNIERFP   |      |      |      |      |      |      |
|      |   |      | NGKKYELDKYTMFHLYR    |      |      |      |      |      |      |
|      |   |      | AQEFEHGKSRIALTNSV    |      |      |      |      |      |      |
|      |   |      | NEALLNPSRVYTFSSDY    |      |      |      |      |      |      |
|      |   |      | VKKV NKATEAAMFLGW    |      |      |      |      |      |      |
|      |   |      | VEQLVYDFTDETSEVSTT   |      |      |      |      |      |      |
|      |   |      | DKIADITIIIPYIGPALNIG |      |      |      |      |      |      |
| 5403 | 0 | 2774 | NMLYKDDFVGALIFSGA    | 6.01 | 0.01 | 3.30 | 1.15 | 0.22 | 1.66 |
|      |   |      | VILLEFIPEIAIPVLGTFAL |      |      |      |      |      |      |
|      |   |      | VSYIANKVLTVQTIDNAL   |      |      |      |      |      |      |
|      |   |      | SKRNEKWDEVYKYIVTN    |      |      |      |      |      |      |
|      |   |      | WLAKVNTQIDLIRKKMK    |      |      |      |      |      |      |
|      |   |      | EALENQAEATKAIINYQY   |      |      |      |      |      |      |
|      |   |      | NQYTEEEKNNINFNIDD    |      |      |      |      |      |      |
|      |   |      | LSSKLNESINKAMININK   |      |      |      |      |      |      |
|      |   |      | FLNQCSVSYLMNSMIPY    |      |      |      |      |      |      |
|      |   |      | GVKRLEDFDASLKDALLK   |      |      |      |      |      |      |
|      |   |      | YIYDNRGTLIGQVDRDKD   |      |      |      |      |      |      |
|      |   |      | KVNNTLSTDIPFQLSKYV   |      |      |      |      |      |      |
|      |   |      | DNQ                  |      |      |      |      |      |      |

|      |   |      |                      |      |      |      |      |      |      |
|------|---|------|----------------------|------|------|------|------|------|------|
|      |   |      | ALNDLCIKVNNWDLFFS    |      |      |      |      |      |      |
|      |   |      | PSEDNFTNDLNKGEEITS   |      |      |      |      |      |      |
|      |   |      | DTNIEAAEENISLDLIQQ   |      |      |      |      |      |      |
|      |   |      | YYLTFNFDNEPENISIENL  |      |      |      |      |      |      |
|      |   |      | SSDIIGQLELMPNIERFP   |      |      |      |      |      |      |
|      |   |      | NGKKYELDKYTMFHLYR    |      |      |      |      |      |      |
|      |   |      | AQEFEHGKSRIALTNSV    |      |      |      |      |      |      |
|      |   |      | NEALLNPSRVYTFSSDY    |      |      |      |      |      |      |
|      |   |      | VKKV NKATEAAMFLGW    |      |      |      |      |      |      |
|      |   |      | VEQLVYDFTDETSEVSTT   |      |      |      |      |      |      |
|      |   |      | DKIADITIIIPYIGPALNIG |      |      |      |      |      |      |
| 5404 | 0 | 2774 | NMLYKDDFVGALIFSGA    | 6.01 | 0.01 | 3.30 | 1.15 | 0.22 | 1.66 |
|      |   |      | VILLEFIPEIAIPVLGTFAL |      |      |      |      |      |      |
|      |   |      | VSYIANKVLTVQTIDNAL   |      |      |      |      |      |      |
|      |   |      | SKRNEKWDEVYKYIVTN    |      |      |      |      |      |      |
|      |   |      | WLAKVNTQIDLIRKKMK    |      |      |      |      |      |      |
|      |   |      | EALENQAEATKAIINYQY   |      |      |      |      |      |      |
|      |   |      | NQYTEEEKNNINFNIDD    |      |      |      |      |      |      |
|      |   |      | LSSKLNESINKAMININK   |      |      |      |      |      |      |
|      |   |      | FLNQCSVSYLMNSMIPY    |      |      |      |      |      |      |
|      |   |      | GVKRLEDFDASLKDALLK   |      |      |      |      |      |      |
|      |   |      | YIYDNRGTLIGQVDRDKD   |      |      |      |      |      |      |
|      |   |      | KVNNTLSTDIPFQLSKYV   |      |      |      |      |      |      |
|      |   |      | DNQ                  |      |      |      |      |      |      |

|      |   |      |                                                                                                                                                                                                                                                                                                                                                                                                                                                                                                                          |      |      |      |      |      |      |
|------|---|------|--------------------------------------------------------------------------------------------------------------------------------------------------------------------------------------------------------------------------------------------------------------------------------------------------------------------------------------------------------------------------------------------------------------------------------------------------------------------------------------------------------------------------|------|------|------|------|------|------|
| 5405 | 0 | 2774 | ALNDLCIKVNNWDLFFS<br>PSEDNFTNDLNKGEEITS<br>DTNIEAAEENISLDLIQQ<br>YYLTFNFDNEPENISIENL<br>SSDIIGQLELMPNIERFP<br>NGKKYELDKYTMFHLYR<br>AQEFEHGKSRIALTNSV<br>NEALLNPSRVYTFSSDY<br>VKKV NKATEAAMFLGW<br>VEQLVYDFTDETSEVSTT<br>DKIADITIIIPYIGPALNIG<br>NMLYKDDFVGALIFSGA<br>VILLEFIPEIAIPVLGTFAL<br>VSYIANKVLTVQTIDNAL<br>SKRNEKWDEVYKYIVTN<br>WLAKVNTQIDLIRKKMK<br>EALENQAEATKAIINYQY<br>NQYTEEEKNNINFNIDD<br>LSSKLNESINKAMININK<br>FLNQCSVSYLMNSMIPY<br>GVKRLEDFDASLKDALLK<br>YIYDNRGTLIGQVDRDKD<br>KVNNTLSTDIPFQLSKYV<br>DNQ | 6.01 | 0.01 | 3.30 | 1.15 | 0.22 | 1.66 |
|------|---|------|--------------------------------------------------------------------------------------------------------------------------------------------------------------------------------------------------------------------------------------------------------------------------------------------------------------------------------------------------------------------------------------------------------------------------------------------------------------------------------------------------------------------------|------|------|------|------|------|------|

|      |   |       |                                                                                                                                                                                                                                                                                                                                                                                                                                                                                                                          |      |      |      |      |      |      |
|------|---|-------|--------------------------------------------------------------------------------------------------------------------------------------------------------------------------------------------------------------------------------------------------------------------------------------------------------------------------------------------------------------------------------------------------------------------------------------------------------------------------------------------------------------------------|------|------|------|------|------|------|
|      |   |       | ALNDLCIKVNNWDLFFS<br>PSEDNFTNDLNKGEEITS<br>DTNIEAAEENISLDLIQQ<br>YYLTFNFDNEPENISIENL<br>SSDIIGQLELMPNIERFP<br>NGKKYELDKYTMFHLYR<br>AQEFEHGKSRIALTNSV<br>NEALLNPSRVYTFSSDY<br>VKKV NKATEAAMFLGW<br>VEQLVYDFTDETSEVSTT<br>DKIADITIIIPYIGPALNIG<br>NMPLYKDDFVGALIFSGA<br>VILFEIPEIAIPVLGTFAL<br>VSYIANKVLTVQTIDNAL<br>SKRNEKWDEVYKYIVTN<br>WLAKVNTQIDLIRKKMK<br>EALENQAEATKAIINYQY<br>NQYTEEEKNNINFNIDD<br>LSSKLNESINKAMININK<br>FLNQCSVSYLMNSMIPY<br>GVKRLEDFDASLKDALLK<br>YIYDNRGTLIGQVDRDKD<br>KVNNTLSTDIPFQLSKYV<br>DNQ |      |      |      |      |      |      |
| 5406 | 0 | 2774  |                                                                                                                                                                                                                                                                                                                                                                                                                                                                                                                          | 6.01 | 0.01 | 3.30 | 1.15 | 0.22 | 1.66 |
| 5407 | 0 | 80367 | ALNDNAGRHNSE                                                                                                                                                                                                                                                                                                                                                                                                                                                                                                             | 2.48 | 0.01 | 2.87 | 0.44 | 0.22 | 0.28 |
| 5408 | 0 | 2777  | ALNELNSFGDLINP                                                                                                                                                                                                                                                                                                                                                                                                                                                                                                           | 2.61 | 0.01 | 3.34 | 0.44 | 1.74 | 0.28 |
| 5409 | 0 | 96091 | ALNENKVLVLDTDYK                                                                                                                                                                                                                                                                                                                                                                                                                                                                                                          | 2.70 | 0.01 | 1.60 | 0.44 | 1.23 | 0.28 |
| 5410 | 0 | 2780  | ALNGNGDPNNMDKAV<br>KLY                                                                                                                                                                                                                                                                                                                                                                                                                                                                                                   | 2.87 | 0.01 | 2.97 | 0.68 | 0.22 | 0.28 |
| 5411 | 0 | 2780  | ALNGNGDPNNMDKAV<br>KLY                                                                                                                                                                                                                                                                                                                                                                                                                                                                                                   | 2.87 | 0.01 | 2.97 | 0.68 | 0.22 | 0.28 |
| 5412 | 0 | 2780  | ALNGNGDPNNMDKAV<br>KLY                                                                                                                                                                                                                                                                                                                                                                                                                                                                                                   | 2.87 | 0.01 | 2.97 | 0.68 | 0.22 | 2.35 |
| 5413 | 0 | 2780  | ALNGNGDPNNMDKAV<br>KLY                                                                                                                                                                                                                                                                                                                                                                                                                                                                                                   | 2.87 | 0.01 | 2.97 | 0.68 | 0.22 | 1.48 |
| 5414 | 0 | 2780  | ALNGNGDPNNMDKAV<br>KLY                                                                                                                                                                                                                                                                                                                                                                                                                                                                                                   | 2.87 | 0.01 | 2.97 | 0.68 | 0.22 | 0.28 |
| 5415 | 0 | 2780  | ALNGNGDPNNMDKAV<br>KLY                                                                                                                                                                                                                                                                                                                                                                                                                                                                                                   | 2.87 | 0.01 | 2.97 | 0.68 | 0.22 | 0.28 |
| 5416 | 0 | 2780  | ALNGNGDPNNMDKAV<br>KLY                                                                                                                                                                                                                                                                                                                                                                                                                                                                                                   | 2.87 | 0.01 | 2.97 | 0.68 | 0.22 | 0.28 |
| 5417 | 0 | 2780  | ALNGNGDPNNMDKAV<br>KLY                                                                                                                                                                                                                                                                                                                                                                                                                                                                                                   | 2.87 | 0.01 | 2.97 | 0.68 | 0.22 | 0.28 |

|      |   |        |                                                     |      |      |      |      |      |      |
|------|---|--------|-----------------------------------------------------|------|------|------|------|------|------|
| 5418 | 0 | 2785   | ALNIWDRFDVFCTLGAT<br>TGYLKGN                        | 3.14 | 0.01 | 3.21 | 2.16 | 0.22 | 0.28 |
| 5419 | 0 | 2785   | ALNIWDRFDVFCTLGAT<br>TGYLKGN                        | 3.14 | 0.01 | 3.21 | 2.16 | 0.22 | 0.28 |
| 5420 | 0 | 2785   | ALNIWDRFDVFCTLGAT<br>TGYLKGN                        | 3.14 | 0.01 | 3.21 | 2.16 | 0.22 | 0.28 |
| 5421 | 0 | 2785   | ALNIWDRFDVFCTLGAT<br>TGYLKGN                        | 3.14 | 0.01 | 3.21 | 2.16 | 0.22 | 0.28 |
| 5422 | 0 | 2785   | ALNIWDRFDVFCTLGAT<br>TGYLKGN                        | 3.14 | 0.01 | 3.21 | 2.16 | 0.22 | 0.28 |
| 5423 | 0 | 80369  | ALNIWDRFDVFCTLGAT<br>TGYLKGN SFDVTTLNPTI<br>AGAGDVK | 3.68 | 0.01 | 0.90 | 2.52 | 0.22 | 0.28 |
| 5424 | 0 | 80369  | ALNIWDRFDVFCTLGAT<br>TGYLKGN SFDVTTLNPTI<br>AGAGDVK | 3.68 | 0.01 | 0.90 | 4.23 | 0.22 | 0.28 |
| 5425 | 0 | 80369  | ALNIWDRFDVFCTLGAT<br>TGYLKGN SFDVTTLNPTI<br>AGAGDVK | 3.68 | 0.01 | 0.90 | 3.16 | 0.22 | 0.28 |
| 5426 | 0 | 79514  | ALNIWDRFDVFCTLGAT<br>TGYLKGN SPTTSDVAGL<br>EKDPVA   | 3.62 | 0.01 | 0.90 | 2.16 | 0.22 | 0.28 |
| 5427 | 0 | 79514  | ALNIWDRFDVFCTLGAT<br>TGYLKGN SPTTSDVAGL<br>EKDPVA   | 3.62 | 0.01 | 0.90 | 2.16 | 0.22 | 0.28 |
| 5428 | 0 | 79514  | ALNIWDRFDVFCTLGAT<br>TGYLKGN SPTTSDVAGL<br>EKDPVA   | 3.62 | 0.01 | 0.90 | 2.16 | 0.22 | 0.28 |
| 5429 | 0 | 2790   | ALNNRFQIKGVELKS                                     | 2.63 | 0.01 | 2.36 | 0.68 | 0.22 | 0.28 |
| 5430 | 0 | 237636 | ALNTLTNIKVQLIRMME<br>G                              | 2.83 | 0.01 | 3.19 | 0.44 | 1.74 | 0.85 |
| 5431 | 0 | 237636 | ALNTLTNIKVQLIRMME<br>G                              | 2.83 | 0.01 | 3.19 | 0.44 | 0.22 | 0.85 |
| 5432 | 0 | 2806   | ALNYQAQALEEIIKYRYNI                                 | 2.93 | 0.01 | 2.08 | 0.44 | 1.93 | 1.57 |
| 5433 | 0 | 2806   | ALNYQAQALEEIIKYRYNI                                 | 2.93 | 0.01 | 2.08 | 2.43 | 0.22 | 1.57 |
| 5434 | 0 | 2806   | ALNYQAQALEEIIKYRYNI                                 | 2.93 | 0.01 | 3.45 | 0.44 | 0.22 | 1.57 |
| 5435 | 0 | 2809   | ALPDYASQPGKPPR                                      | 2.61 | 0.01 | 2.58 | 0.44 | 0.22 | 0.28 |
| 5436 | 0 | 79152  | ALPHIV                                              | 1.88 | 0.01 | 0.90 | 0.68 | 0.22 | 1.39 |
| 5437 | 0 | 167868 | ALPIQKSVQLGSFDKV                                    | 2.73 | 0.01 | 2.75 | 0.44 | 1.59 | 2.51 |
| 5438 | 0 | 167868 | ALPIQKSVQLGSFDKV                                    | 2.73 | 0.01 | 2.75 | 0.44 | 0.85 | 2.51 |
| 5439 | 0 | 167868 | ALPIQKSVQLGSFDKV                                    | 2.73 | 0.01 | 2.75 | 0.44 | 0.85 | 2.51 |
| 5440 | 0 | 2816   | ALPKNTVGGTIL                                        | 2.46 | 0.01 | 3.78 | 1.12 | 0.22 | 0.28 |
| 5441 | 0 | 2816   | ALPKNTVGGTIL                                        | 2.46 | 0.01 | 3.78 | 1.12 | 0.22 | 0.28 |
| 5442 | 0 | 253747 | ALPLEEEEDVGPRHV                                     | 2.67 | 0.01 | 1.61 | 0.44 | 0.85 | 1.28 |

|      |   |        |                                                   |      |      |      |      |      |      |
|------|---|--------|---------------------------------------------------|------|------|------|------|------|------|
| 5443 | 0 | 133507 | ALPLHGSPWKWY                                      | 2.48 | 0.01 | 0.90 | 0.44 | 0.85 | 1.39 |
| 5444 | 0 | 450429 | ALPL LDA                                          | 2.05 | 0.01 | 0.90 | 0.44 | 1.41 | 1.39 |
| 5445 | 0 | 442330 | ALPMHI                                            | 1.88 | 0.01 | 1.60 | 2.66 | 0.22 | 0.85 |
| 5446 | 0 | 115179 | ALPMHIRLSFNPTQLEE<br>QCH                          | 2.90 | 0.01 | 1.60 | 0.44 | 1.23 | 2.51 |
| 5447 | 0 | 127572 | ALPPPYM                                           | 2.02 | 0.01 | 0.90 | 0.44 | 1.13 | 1.39 |
| 5448 | 0 | 127572 | ALPPPYM                                           | 2.02 | 0.01 | 0.90 | 0.44 | 1.13 | 1.39 |
| 5449 | 0 | 253761 | ALPQEEEEEDVGPRHV                                  | 2.65 | 0.01 | 1.61 | 0.44 | 0.85 | 1.28 |
| 5450 | 0 | 253762 | ALPQEEQEDVGPRHV                                   | 2.68 | 0.01 | 1.61 | 0.44 | 0.85 | 1.28 |
| 5451 | 0 | 95237  | ALPQYLKTVY                                        | 2.31 | 0.01 | 1.60 | 0.44 | 1.23 | 0.85 |
| 5452 | 0 | 123020 | ALPSIKAYM                                         | 2.22 | 0.01 | 2.28 | 2.00 | 0.22 | 0.28 |
| 5453 | 0 | 170327 | ALPTHMNWVMPV                                      | 2.48 | 0.01 | 0.90 | 0.44 | 0.85 | 1.39 |
| 5454 | 0 | 227032 | ALPVVLENARILKNCVD<br>AKMTEEDKENALSLLDKI<br>YTSPLC | 3.66 | 0.01 | 3.08 | 1.12 | 0.22 | 0.28 |
| 5455 | 0 | 2830   | ALPVWARP                                          | 2.15 | 0.01 | 2.68 | 0.44 | 1.59 | 0.28 |
| 5456 | 0 | 181268 | ALQAAETGASSNASD                                   | 2.70 | 0.01 | 2.82 | 1.15 | 0.22 | 0.28 |
| 5457 | 0 | 119749 | ALQEACEAYLVGLF                                    | 2.64 | 0.01 | 1.60 | 2.84 | 1.13 | 1.27 |
| 5458 | 0 | 119749 | ALQEACEAYLVGLF                                    | 2.64 | 0.01 | 1.60 | 2.84 | 1.13 | 1.27 |
| 5459 | 0 | 2838   | ALQEQCRFPNITNSHVPI<br>LQERP                       | 3.06 | 0.01 | 2.04 | 0.44 | 0.85 | 0.28 |
| 5460 | 0 | 79153  | ALQREAAERSEDEIK                                   | 2.70 | 0.01 | 4.08 | 1.12 | 0.22 | 0.28 |
| 5461 | 0 | 79153  | ALQREAAERSEDEIK                                   | 2.70 | 0.01 | 4.08 | 1.12 | 0.22 | 0.85 |
| 5462 | 0 | 79153  | ALQREAAERSEDEIK                                   | 2.70 | 0.01 | 4.08 | 1.12 | 0.22 | 0.85 |
| 5463 | 0 | 79153  | ALQREAAERSEDEIK                                   | 2.70 | 0.01 | 4.08 | 1.12 | 0.22 | 0.85 |
| 5464 | 0 | 79153  | ALQREAAERSEDEIK                                   | 2.70 | 0.01 | 4.08 | 1.12 | 0.22 | 0.85 |
| 5465 | 0 | 79153  | ALQREAAERSEDEIK                                   | 2.70 | 0.01 | 4.08 | 1.12 | 0.22 | 1.27 |
| 5466 | 0 | 98694  | ALQTL PAMCNVY                                     | 2.46 | 0.01 | 1.86 | 0.44 | 1.93 | 1.27 |
| 5467 | 0 | 181269 | ALQVLPTAANTEASS                                   | 2.68 | 0.01 | 2.82 | 1.15 | 0.22 | 0.28 |
| 5468 | 0 | 122262 | ALRCRRISKEEYHLYKDG<br>HL                          | 2.93 | 0.01 | 0.78 | 0.44 | 1.13 | 0.28 |
| 5469 | 0 | 122262 | ALRCRRISKEEYHLYKDG<br>HL                          | 2.93 | 0.01 | 0.78 | 0.44 | 1.13 | 1.27 |
| 5470 | 0 | 128280 | ALREYRKK                                          | 2.11 | 0.01 | 0.78 | 0.44 | 1.13 | 0.28 |
| 5471 | 0 | 434807 | ALREYRKKMDIP                                      | 2.44 | 0.01 | 0.78 | 0.44 | 1.13 | 0.28 |
| 5472 | 0 | 434807 | ALREYRKKMDIP                                      | 2.44 | 0.01 | 0.78 | 0.44 | 1.13 | 0.28 |
| 5473 | 0 | 140648 | ALREYRKKMDIPA                                     | 2.53 | 0.01 | 0.78 | 0.44 | 1.13 | 1.27 |
| 5474 | 0 | 117746 | ALREYRKKMDIPAK                                    | 2.61 | 0.01 | 0.78 | 0.44 | 1.13 | 0.28 |
| 5475 | 0 | 117746 | ALREYRKKMDIPAK                                    | 2.61 | 0.01 | 0.78 | 0.44 | 1.41 | 0.28 |
| 5476 | 0 | 418802 | ALRINTDPDFTE                                      | 2.45 | 0.01 | 0.90 | 1.12 | 0.22 | 1.39 |
| 5477 | 0 | 134006 | ALRMEVLGCEAQDLY                                   | 2.67 | 0.01 | 0.78 | 0.44 | 1.41 | 1.34 |
| 5478 | 0 | 134006 | ALRMEVLGCEAQDLY                                   | 2.67 | 0.01 | 0.78 | 1.12 | 0.22 | 0.28 |
| 5479 | 0 | 134006 | ALRMEVLGCEAQDLY                                   | 2.67 | 0.01 | 0.78 | 1.12 | 0.22 | 0.28 |
| 5480 | 0 | 134006 | ALRMEVLGCEAQDLY                                   | 2.67 | 0.01 | 0.78 | 1.15 | 0.22 | 0.85 |
| 5481 | 0 | 253949 | ALRVSPYSIFLQELA                                   | 2.67 | 0.01 | 1.61 | 0.44 | 0.85 | 1.28 |
| 5482 | 0 | 146167 | ALSENKLRV                                         | 2.21 | 0.01 | 0.90 | 1.20 | 0.22 | 1.39 |
| 5483 | 0 | 187626 | ALSIDSMTALGA                                      | 2.50 | 0.01 | 2.14 | 1.20 | 0.22 | 1.39 |



|      |   |        |                                    |      |      |      |      |      |      |
|------|---|--------|------------------------------------|------|------|------|------|------|------|
| 5484 | 0 | 79515  | ALSIIGK                            | 2.01 | 0.01 | 0.90 | 1.12 | 0.22 | 1.39 |
| 5485 | 0 | 136053 | ALSPTMT                            | 2.02 | 0.01 | 0.78 | 1.12 | 0.22 | 0.28 |
| 5486 | 0 | 2891   | ALSRCTLNRRNALRRP                   | 2.71 | 0.01 | 2.72 | 0.44 | 1.23 | 0.85 |
| 5487 | 0 | 2894   | ALSRLVLRNALRRP                     | 2.73 | 0.01 | 2.16 | 0.44 | 1.23 | 0.85 |
| 5488 | 0 | 2894   | ALSRLVLRNALRRP                     | 2.73 | 0.01 | 2.16 | 0.44 | 1.23 | 1.48 |
| 5489 | 0 | 2894   | ALSRLVLRNALRRP                     | 2.73 | 0.01 | 2.16 | 0.44 | 1.23 | 1.48 |
| 5490 | 0 | 2894   | ALSRLVLRNALRRP                     | 2.73 | 0.01 | 2.16 | 0.44 | 1.23 | 0.85 |
| 5491 | 0 | 253999 | ALSSFLLKDKKKVAT                    | 2.69 | 0.01 | 1.61 | 0.44 | 0.85 | 1.28 |
| 5492 | 0 | 2896   | ALSSQGGMSPEPTPL                    | 2.69 | 0.01 | 0.90 | 0.44 | 1.59 | 0.85 |
| 5493 | 0 | 2896   | ALSSQGGMSPEPTPL                    | 2.69 | 0.01 | 0.90 | 0.44 | 1.59 | 0.85 |
| 5494 | 0 | 450432 | ALSSQHQARIEIESFYE                  | 2.81 | 0.01 | 0.78 | 2.79 | 1.13 | 1.28 |
| 5495 | 0 | 450432 | ALSSQHQARIEIESFYE                  | 2.81 | 0.01 | 0.78 | 2.79 | 1.13 | 1.28 |
| 5496 | 0 | 450432 | ALSSQHQARIEIESFYE                  | 2.81 | 0.01 | 0.78 | 2.79 | 1.13 | 1.28 |
| 5497 | 0 | 450432 | ALSSQHQARIEIESFYE                  | 2.81 | 0.01 | 0.78 | 1.81 | 1.41 | 1.28 |
| 5498 | 0 | 450432 | ALSSQHQARIEIESFYE                  | 2.81 | 0.01 | 0.78 | 1.81 | 1.41 | 1.28 |
| 5499 | 0 | 450432 | ALSSQHQARIEIESFYE                  | 2.81 | 0.01 | 0.78 | 1.81 | 1.41 | 1.28 |
| 5500 | 0 | 2899   | ALSTGLIH                           | 2.12 | 0.01 | 2.45 | 0.44 | 0.85 | 0.28 |
| 5501 | 0 | 2902   | ALSTGLIHLHQN                       | 2.48 | 0.01 | 2.68 | 0.44 | 0.85 | 0.28 |
| 5502 | 0 | 190200 | ALSTPTFSTLPA                       | 2.53 | 0.01 | 0.90 | 0.68 | 2.25 | 1.75 |
| 5503 | 0 | 190200 | ALSTPTFSTLPA                       | 2.53 | 0.01 | 0.90 | 1.15 | 2.25 | 1.75 |
| 5504 | 0 | 190200 | ALSTPTFSTLPA                       | 2.53 | 0.01 | 0.90 | 1.15 | 0.22 | 0.28 |
| 5505 | 0 | 190200 | ALSTPTFSTLPA                       | 2.53 | 0.01 | 0.90 | 1.15 | 0.22 | 0.28 |
| 5506 | 0 | 2909   | ALSTQQEPFRDLKKYLPS<br>KDKSVVSLQDRA | 3.35 | 0.01 | 3.67 | 1.12 | 0.22 | 0.28 |
| 5507 | 0 | 2909   | ALSTQQEPFRDLKKYLPS<br>KDKSVVSLQDRA | 3.35 | 0.01 | 2.98 | 2.16 | 0.22 | 0.28 |
| 5508 | 0 | 2909   | ALSTQQEPFRDLKKYLPS<br>KDKSVVSLQDRA | 3.35 | 0.01 | 2.98 | 2.37 | 0.22 | 0.28 |
| 5509 | 0 | 2909   | ALSTQQEPFRDLKKYLPS<br>KDKSVVSLQDRA | 3.35 | 0.01 | 2.98 | 1.12 | 0.22 | 0.28 |
| 5510 | 0 | 2909   | ALSTQQEPFRDLKKYLPS<br>KDKSVVSLQDRA | 3.35 | 0.01 | 2.98 | 0.44 | 0.85 | 0.28 |
| 5511 | 0 | 2909   | ALSTQQEPFRDLKKYLPS<br>KDKSVVSLQDRA | 3.35 | 0.01 | 2.98 | 1.12 | 0.22 | 0.28 |
| 5512 | 0 | 2909   | ALSTQQEPFRDLKKYLPS<br>KDKSVVSLQDRA | 3.35 | 0.01 | 2.98 | 1.12 | 0.22 | 0.85 |
| 5513 | 0 | 2909   | ALSTQQEPFRDLKKYLPS<br>KDKSVVSLQDRA | 3.35 | 0.01 | 2.98 | 1.12 | 0.22 | 0.85 |
| 5514 | 0 | 97197  | ALSTTDSF                           | 2.13 | 0.01 | 2.87 | 0.68 | 0.22 | 0.28 |
| 5515 | 0 | 121144 | ALSVETEK                           | 2.12 | 0.01 | 0.78 | 1.12 | 0.22 | 0.28 |
| 5516 | 0 | 2925   | ALTGAT                             | 1.92 | 0.01 | 2.40 | 0.44 | 0.85 | 0.28 |
| 5517 | 0 | 2926   | ALTGCR                             | 1.88 | 0.01 | 1.86 | 0.44 | 1.23 | 0.28 |
| 5518 | 0 | 103040 | ALTGLGDKFGESIVN                    | 2.64 | 0.01 | 2.04 | 0.44 | 0.85 | 1.28 |
| 5519 | 0 | 234472 | ALTGYNQPITLKVNTLIN<br>YNS          | 3.00 | 0.01 | 1.75 | 1.20 | 0.22 | 0.85 |
| 5520 | 0 | 436383 | ALTLH                              | 1.75 | 0.01 | 3.61 | 0.68 | 0.22 | 1.48 |
| 5521 | 0 | 436383 | ALTLH                              | 1.75 | 0.01 | 3.61 | 0.68 | 0.22 | 0.28 |

|      |   |        |                                                                |      |      |      |      |      |      |
|------|---|--------|----------------------------------------------------------------|------|------|------|------|------|------|
| 5522 | 0 | 436383 | ALTLH                                                          | 1.75 | 0.01 | 3.61 | 0.68 | 0.22 | 1.34 |
| 5523 | 0 | 436383 | ALTLH                                                          | 1.75 | 0.01 | 3.61 | 0.68 | 0.22 | 1.75 |
| 5524 | 0 | 436383 | ALTLH                                                          | 1.75 | 0.01 | 3.61 | 0.68 | 0.22 | 0.85 |
| 5525 | 0 | 436383 | ALTLH                                                          | 1.75 | 0.01 | 3.61 | 0.68 | 0.22 | 1.39 |
| 5526 | 0 | 436383 | ALTLH                                                          | 1.75 | 0.01 | 3.61 | 0.68 | 0.22 | 1.34 |
| 5527 | 0 | 436383 | ALTLH                                                          | 1.75 | 0.01 | 3.61 | 0.68 | 0.22 | 1.34 |
| 5528 | 0 | 99896  | ALTLSLPKQQDSLP                                                 | 2.64 | 0.01 | 2.96 | 1.12 | 0.22 | 0.28 |
| 5529 | 0 | 232722 | ALTPQLL                                                        | 2.00 | 0.01 | 0.90 | 2.49 | 0.85 | 1.39 |
| 5530 | 0 | 2936   | ALTPTLAARN                                                     | 2.35 | 0.01 | 1.72 | 0.44 | 0.85 | 0.28 |
| 5531 | 0 | 511338 | ALTSQIVARNEKLN                                                 | 2.67 | 0.01 | 2.24 | 0.44 | 1.41 | 1.28 |
| 5532 | 0 | 95238  | ALTTELTAENQEAGLI<br>MTAEP                                      | 3.07 | 0.01 | 2.84 | 2.55 | 0.22 | 0.85 |
| 5533 | 0 | 2944   | ALTTQKGAPWGLGSISH<br>KGQASTDIYD                                | 3.29 | 0.01 | 2.75 | 1.20 | 0.22 | 0.85 |
| 5534 | 0 | 511341 | ALTVLGAGFANQTEV                                                | 2.71 | 0.01 | 2.24 | 0.44 | 1.41 | 1.28 |
| 5535 | 0 | 156848 | ALTVRCTAPCPQRN<br>ALTWNGGWDNGVTTS                              | 2.64 | 0.01 | 0.90 | 2.74 | 0.22 | 0.85 |
| 5536 | 0 | 144205 | NWVQYEHTRNSRIPEGL<br>AGGTEGKFNEKATQDF<br>VD<br>ALTWNGGWDNGVTTS | 3.85 | 0.01 | 3.63 | 0.68 | 0.22 | 0.85 |
| 5537 | 0 | 144205 | NWVQYEHTRNSRIPEGL<br>AGGTEGKFNEKATQDF<br>VD                    | 3.85 | 0.01 | 3.63 | 0.68 | 0.22 | 2.12 |
| 5538 | 0 | 107739 | ALVDASLKMADPNRFR<br>GKDLP                                      | 3.00 | 0.01 | 2.40 | 0.68 | 0.22 | 0.28 |
| 5539 | 0 | 107739 | ALVDASLKMADPNRFR<br>GKDLP                                      | 3.00 | 0.01 | 2.40 | 0.68 | 0.22 | 0.28 |
| 5540 | 0 | 191177 | ALVFGIYEETVPT                                                  | 2.44 | 0.01 | 2.76 | 1.20 | 0.22 | 0.28 |
| 5541 | 0 | 132993 | ALVGDEVELPCRISPGKN<br>ATGME                                    | 3.05 | 0.01 | 0.78 | 3.57 | 0.22 | 0.28 |
| 5542 | 0 | 132993 | ALVGDEVELPCRISPGKN<br>ATGME                                    | 3.05 | 0.01 | 0.78 | 3.57 | 0.22 | 0.28 |
| 5543 | 0 | 132993 | ALVGDEVELPCRISPGKN<br>ATGME                                    | 3.05 | 0.01 | 0.78 | 3.57 | 0.22 | 0.28 |
| 5544 | 0 | 112751 | ALVGDEVELPCRISPGKN<br>ATGMELGW                                 | 3.17 | 0.01 | 0.78 | 0.44 | 1.13 | 0.28 |
| 5545 | 0 | 112751 | ALVGDEVELPCRISPGKN<br>ATGMELGW                                 | 3.17 | 0.01 | 0.78 | 0.44 | 1.41 | 0.28 |
| 5546 | 0 | 112751 | ALVGDEVELPCRISPGKN<br>ATGMELGW                                 | 3.17 | 0.01 | 0.78 | 0.44 | 1.13 | 0.28 |
| 5547 | 0 | 112751 | ALVGDEVELPCRISPGKN<br>ATGMELGW                                 | 3.17 | 0.01 | 0.78 | 0.44 | 1.59 | 0.28 |
| 5548 | 0 | 137516 | ALVLPHWNLNSHSII                                                | 2.68 | 0.01 | 3.12 | 0.44 | 1.23 | 0.85 |
| 5549 | 0 | 2975   | ALVNIPISENLA                                                   | 2.51 | 0.01 | 0.90 | 2.13 | 0.22 | 0.28 |
| 5550 | 0 | 2975   | ALVNIPISENLA                                                   | 2.51 | 0.01 | 0.90 | 2.13 | 0.22 | 0.28 |
| 5551 | 0 | 2976   | ALVNNSHMTPLW                                                   | 2.44 | 0.01 | 0.90 | 2.13 | 0.22 | 1.39 |

|      |   |        |                                 |      |      |      |      |      |      |
|------|---|--------|---------------------------------|------|------|------|------|------|------|
| 5552 | 0 | 2977   | ALVNSPLTRAPM                    | 2.48 | 0.01 | 0.90 | 2.13 | 0.22 | 1.39 |
| 5553 | 0 | 2978   | ALVNWHGVYNYR                    | 2.48 | 0.01 | 0.90 | 2.13 | 0.22 | 1.39 |
| 5554 | 0 | 2979   | ALVPDKEVL                       | 2.23 | 0.01 | 2.59 | 0.44 | 0.85 | 0.28 |
| 5555 | 0 | 2981   | ALVREGLRNV                      | 2.33 | 0.01 | 3.20 | 0.44 | 1.41 | 0.28 |
| 5556 | 0 | 132994 | ALVREGLRNVAAG                   | 2.59 | 0.01 | 2.04 | 0.44 | 1.59 | 0.28 |
| 5557 | 0 | 131823 | ALVRYSSKEEVVKAQ                 | 2.68 | 0.01 | 0.78 | 0.44 | 1.13 | 0.85 |
| 5558 | 0 | 80394  | ALVSAGWLQEGK                    | 2.48 | 0.01 | 2.87 | 0.44 | 0.85 | 0.28 |
| 5559 | 0 | 134642 | ALVVKGKVNINEFIDLT<br>MEKILPSMFT | 3.27 | 0.01 | 2.72 | 1.15 | 0.22 | 0.85 |
| 5560 | 0 | 2992   | ALVVSQLLR                       | 2.23 | 0.01 | 1.96 | 0.44 | 0.85 | 1.34 |
| 5561 | 0 | 97199  | ALWNASYTA                       | 2.24 | 0.01 | 3.13 | 1.12 | 0.22 | 0.28 |
| 5562 | 0 | 510424 | ALWPPIPHAWVH                    | 2.52 | 0.01 | 0.90 | 3.07 | 1.13 | 1.39 |
| 5563 | 0 | 187105 | ALWPPNLHAWVP                    | 2.52 | 0.01 | 0.90 | 0.44 | 1.41 | 1.39 |
| 5564 | 0 | 187105 | ALWPPNLHAWVP                    | 2.52 | 0.01 | 0.90 | 0.44 | 1.41 | 1.34 |
| 5565 | 0 | 187105 | ALWPPNLHAWVP                    | 2.52 | 0.01 | 0.90 | 0.44 | 1.41 | 0.28 |
| 5566 | 0 | 187105 | ALWPPNLHAWVP                    | 2.52 | 0.01 | 0.90 | 2.22 | 0.85 | 0.28 |
| 5567 | 0 | 187105 | ALWPPNLHAWVP                    | 2.52 | 0.01 | 0.90 | 3.07 | 1.13 | 1.39 |
| 5568 | 0 | 187105 | ALWPPNLHAWVP                    | 2.52 | 0.01 | 0.90 | 3.07 | 1.13 | 1.66 |
| 5569 | 0 | 187105 | ALWPPNLHAWVP                    | 2.52 | 0.01 | 0.90 | 3.07 | 1.13 | 1.66 |
| 5570 | 0 | 187105 | ALWPPNLHAWVP                    | 2.52 | 0.01 | 0.90 | 3.07 | 1.13 | 1.66 |
| 5571 | 0 | 187105 | ALWPPNLHAWVP                    | 2.52 | 0.01 | 0.90 | 3.07 | 1.13 | 1.66 |
| 5572 | 0 | 187105 | ALWPPNLHAWVP                    | 2.52 | 0.01 | 0.90 | 3.07 | 1.13 | 1.66 |
| 5573 | 0 | 187105 | ALWPPNLHAWVP                    | 2.52 | 0.01 | 0.90 | 3.07 | 1.13 | 1.66 |
| 5574 | 0 | 187105 | ALWPPNLHAWVP                    | 2.52 | 0.01 | 0.90 | 3.07 | 1.13 | 1.66 |
| 5575 | 0 | 187105 | ALWPPNLHAWVP                    | 2.52 | 0.01 | 0.90 | 3.07 | 1.13 | 1.66 |
| 5576 | 0 | 187105 | ALWPPNLHAWVP                    | 2.52 | 0.01 | 0.90 | 3.07 | 1.13 | 1.66 |
| 5577 | 0 | 187105 | ALWPPNLHAWVP                    | 2.52 | 0.01 | 0.90 | 3.07 | 1.13 | 1.66 |
| 5578 | 0 | 187105 | ALWPPNLHAWVP                    | 2.52 | 0.01 | 0.90 | 3.07 | 1.13 | 1.66 |
| 5579 | 0 | 187105 | ALWPPNLHAWVP                    | 2.52 | 0.01 | 0.90 | 3.07 | 1.13 | 1.66 |
| 5580 | 0 | 187105 | ALWPPNLHAWVP                    | 2.52 | 0.01 | 0.90 | 3.07 | 1.13 | 1.27 |
| 5581 | 0 | 187105 | ALWPPNLHAWVP                    | 2.52 | 0.01 | 0.90 | 3.07 | 1.13 | 1.27 |
| 5582 | 0 | 187105 | ALWPPNLHAWVP                    | 2.52 | 0.01 | 0.90 | 0.44 | 1.13 | 1.27 |
| 5583 | 0 | 187105 | ALWPPNLHAWVP                    | 2.52 | 0.01 | 0.90 | 3.07 | 1.13 | 1.27 |
| 5584 | 0 | 187105 | ALWPPNLHAWVP                    | 2.52 | 0.01 | 0.90 | 3.07 | 1.13 | 1.27 |
| 5585 | 0 | 187105 | ALWPPNLHAWVP                    | 2.52 | 0.01 | 0.90 | 3.07 | 1.13 | 1.27 |
| 5586 | 0 | 510425 | ALWPPNLQAGVP                    | 2.50 | 0.01 | 0.90 | 3.07 | 1.13 | 1.39 |
| 5587 | 0 | 510426 | ALWPPNLQAWAP                    | 2.53 | 0.01 | 0.90 | 3.07 | 1.13 | 1.39 |
| 5588 | 0 | 510427 | ALWPPNPQALVP                    | 2.52 | 0.01 | 0.90 | 3.07 | 1.13 | 1.39 |
| 5589 | 0 | 3012   | ALYASTLPPYPR                    | 2.52 | 0.01 | 0.90 | 0.68 | 0.22 | 0.28 |
| 5590 | 0 | 80395  | ALYASVAVQQQD                    | 2.50 | 0.01 | 2.87 | 0.44 | 0.22 | 0.28 |
| 5591 | 0 | 127932 | ALYHTENAYSVVSSHYS<br>R          | 2.92 | 0.01 | 3.48 | 1.15 | 0.22 | 2.66 |
| 5592 | 0 | 3044   | ALYTDEDLLFDLEKQK                | 2.76 | 0.01 | 1.66 | 1.12 | 0.22 | 1.48 |
| 5593 | 0 | 3044   | ALYTDEDLLFDLEKQK                | 2.76 | 0.01 | 1.66 | 1.12 | 0.22 | 1.34 |
| 5594 | 0 | 429233 | ALYTLPPDSLH                     | 2.48 | 0.01 | 0.90 | 2.22 | 0.85 | 0.28 |
| 5595 | 0 | 98696  | AMAASDISLL                      | 2.33 | 0.01 | 1.60 | 0.44 | 1.23 | 0.85 |
| 5596 | 0 | 3053   | AMAAWSERAGEA                    | 2.52 | 0.01 | 2.14 | 0.44 | 2.98 | 1.27 |

|      |   |        |                                                  |      |      |      |      |      |      |
|------|---|--------|--------------------------------------------------|------|------|------|------|------|------|
| 5597 | 0 | 3053   | AMAAWSERAGEA<br>AMALEPVAGAAIAAPLT                | 2.52 | 0.01 | 2.14 | 0.44 | 0.85 | 1.27 |
| 5598 | 0 | 224635 | GQQNIIDPWIMNNFVQ<br>APGGE                        | 3.58 | 0.01 | 4.03 | 1.12 | 0.22 | 2.66 |
| 5599 | 0 | 98697  | AMCNVYIPPYCT                                     | 2.46 | 0.01 | 1.86 | 0.44 | 1.93 | 1.27 |
| 5600 | 0 | 3069   | AMDAWNQPSGISSPPS<br>PSLN                         | 2.96 | 0.01 | 3.01 | 0.44 | 0.85 | 0.28 |
| 5601 | 0 | 3073   | AMDHEGCKFSCFIRP                                  | 2.62 | 0.01 | 2.56 | 2.02 | 0.22 | 0.85 |
| 5602 | 0 | 3076   | AMDPIYDEPTTTTSVPL                                | 2.77 | 0.01 | 2.45 | 0.44 | 0.85 | 1.48 |
| 5603 | 0 | 3076   | AMDPIYDEPTTTTSVPL                                | 2.77 | 0.01 | 2.45 | 1.12 | 0.22 | 2.92 |
| 5604 | 0 | 127573 | AMDPPYS                                          | 2.01 | 0.01 | 0.90 | 0.44 | 1.13 | 1.39 |
| 5605 | 0 | 144591 | AMDRLSRIPFPT                                     | 2.45 | 0.01 | 0.90 | 0.68 | 0.22 | 0.28 |
| 5606 | 0 | 3080   | AMEDIKQMEA                                       | 2.34 | 0.01 | 1.60 | 0.44 | 1.23 | 0.28 |
| 5607 | 0 | 103042 | AMEDLVRAYHAMSSST                                 | 2.66 | 0.01 | 2.04 | 0.44 | 0.85 | 1.28 |
| 5608 | 0 | 3082   | AMEKLGQDSQALGQAI<br>YEATQAASK                    | 3.18 | 0.01 | 2.59 | 1.12 | 0.22 | 0.28 |
| 5609 | 0 | 3082   | AMEKLGQDSQALGQAI<br>YEATQAASK                    | 3.18 | 0.01 | 2.59 | 0.44 | 0.85 | 1.27 |
| 5610 | 0 | 3082   | AMEKLGQDSQALGQAI<br>YEATQAASK                    | 3.18 | 0.01 | 2.59 | 1.12 | 0.22 | 0.28 |
| 5611 | 0 | 80398  | AMELVGKTLA                                       | 2.32 | 0.01 | 3.06 | 0.44 | 0.85 | 0.28 |
| 5612 | 0 | 3086   | AMEQMAGSSEQAAEA<br>MEVASQARQMVMQAM<br>RTIGTHPSSS | 3.63 | 0.01 | 2.97 | 1.15 | 2.26 | 0.85 |
| 5613 | 0 | 189205 | AMFGLKTDGVDLAYMS                                 | 2.74 | 0.01 | 2.92 | 3.61 | 0.22 | 0.28 |
| 5614 | 0 | 3092   | AMFTCK                                           | 1.88 | 0.01 | 2.40 | 0.44 | 0.85 | 0.28 |
| 5615 | 0 | 80400  | AMGPNLVLPDQKPPSR<br>QSQTGSKVA                    | 3.16 | 0.01 | 3.27 | 0.68 | 0.22 | 0.28 |
| 5616 | 0 | 80400  | AMGPNLVLPDQKPPSR<br>QSQTGSKVA                    | 3.16 | 0.01 | 3.27 | 1.20 | 0.22 | 0.28 |
| 5617 | 0 | 80400  | AMGPNLVLPDQKPPSR<br>QSQTGSKVA                    | 3.16 | 0.01 | 3.27 | 3.16 | 0.22 | 0.28 |
| 5618 | 0 | 80400  | AMGPNLVLPDQKPPSR<br>QSQTGSKVA                    | 3.16 | 0.01 | 3.27 | 1.20 | 0.22 | 0.28 |
| 5619 | 0 | 80400  | AMGPNLVLPDQKPPSR<br>QSQTGSKVA                    | 3.16 | 0.01 | 3.27 | 1.20 | 0.22 | 0.28 |
| 5620 | 0 | 80400  | AMGPNLVLPDQKPPSR<br>QSQTGSKVA                    | 3.16 | 0.01 | 3.27 | 1.20 | 0.22 | 0.28 |
| 5621 | 0 | 80400  | AMGPNLVLPDQKPPSR<br>QSQTGSKVA                    | 3.16 | 0.01 | 3.27 | 1.20 | 0.22 | 0.28 |
| 5622 | 0 | 80400  | AMGPNLVLPDQKPPSR<br>QSQTGSKVA                    | 3.16 | 0.01 | 3.27 | 1.20 | 0.22 | 1.48 |
| 5623 | 0 | 120403 | AMGSKGNRTDSC                                     | 2.45 | 0.01 | 2.19 | 1.12 | 0.22 | 0.28 |

|      |   |        |                   |      |      |      |      |      |      |
|------|---|--------|-------------------|------|------|------|------|------|------|
| 5624 | 0 | 120403 | AMGSKGNRTDSC      | 2.45 | 0.01 | 2.19 | 0.68 | 0.22 | 0.28 |
| 5625 | 0 | 170339 | AMGTIGYNQRNRIDT   | 2.68 | 0.01 | 0.78 | 0.44 | 1.13 | 0.28 |
| 5626 | 0 | 77831  | AMGYNKNNDSLL      | 2.44 | 0.01 | 0.90 | 1.15 | 0.22 | 0.85 |
| 5627 | 0 | 111109 | AMGYQHP           | 1.99 | 0.01 | 0.90 | 0.44 | 0.85 | 1.39 |
| 5628 | 0 | 239414 | AMIAATDAEEPRAKAFQ | 2.72 | 0.01 | 2.70 | 0.68 | 0.22 | 0.28 |
| 5629 | 0 | 239414 | AMIAATDAEEPRAKAFQ | 2.72 | 0.01 | 2.70 | 0.68 | 0.22 | 0.28 |
| 5630 | 0 | 239414 | AMIAATDAEEPRAKAFQ | 2.72 | 0.01 | 2.70 | 0.68 | 0.22 | 0.28 |
| 5631 | 0 | 239414 | AMIAATDAEEPRAKAFQ | 2.72 | 0.01 | 2.70 | 0.68 | 0.22 | 1.48 |
| 5632 | 0 | 239414 | AMIAATDAEEPRAKAFQ | 2.72 | 0.01 | 2.70 | 0.68 | 0.22 | 1.48 |
| 5633 | 0 | 239414 | AMIAATDAEEPRAKAFQ | 2.72 | 0.01 | 2.70 | 0.68 | 0.22 | 1.48 |
| 5634 | 0 | 239414 | AMIAATDAEEPRAKAFQ | 2.72 | 0.01 | 2.70 | 0.68 | 0.22 | 1.48 |
| 5635 | 0 | 239414 | AMIAATDAEEPRAKAFQ | 2.72 | 0.01 | 2.70 | 0.68 | 0.22 | 1.48 |
| 5636 | 0 | 239414 | AMIAATDAEEPRAKAFQ | 2.72 | 0.01 | 2.70 | 0.68 | 0.22 | 1.48 |
| 5637 | 0 | 239414 | AMIAATDAEEPRAKAFQ | 2.72 | 0.01 | 2.70 | 0.68 | 0.22 | 1.48 |
| 5638 | 0 | 239414 | AMIAATDAEEPRAKAFQ | 2.72 | 0.01 | 2.70 | 0.68 | 0.22 | 1.48 |
| 5639 | 0 | 239414 | AMIAATDAEEPRAKAFQ | 2.72 | 0.01 | 2.70 | 0.68 | 0.22 | 1.48 |
| 5640 | 0 | 239414 | AMIAATDAEEPRAKAFQ | 2.72 | 0.01 | 2.70 | 0.68 | 0.22 | 1.48 |
| 5641 | 0 | 239414 | AMIAATDAEEPRAKAFQ | 2.72 | 0.01 | 2.70 | 0.68 | 0.22 | 1.48 |
| 5642 | 0 | 239414 | AMIAATDAEEPRAKAFQ | 2.72 | 0.01 | 2.70 | 0.68 | 0.22 | 1.48 |
| 5643 | 0 | 239414 | AMIAATDAEEPRAKAFQ | 2.72 | 0.01 | 2.70 | 0.68 | 0.22 | 1.48 |
| 5644 | 0 | 239414 | AMIAATDAEEPRAKAFQ | 2.72 | 0.01 | 2.70 | 0.68 | 0.22 | 1.48 |
| 5645 | 0 | 239414 | AMIAATDAEEPRAKAFQ | 2.72 | 0.01 | 2.70 | 0.68 | 0.22 | 1.48 |
| 5646 | 0 | 239414 | AMIAATDAEEPRAKAFQ | 2.72 | 0.01 | 2.70 | 0.68 | 0.22 | 1.48 |
| 5647 | 0 | 239414 | AMIAATDAEEPRAKAFQ | 2.72 | 0.01 | 2.70 | 0.68 | 0.22 | 1.48 |
| 5648 | 0 | 239414 | AMIAATDAEEPRAKAFQ | 2.72 | 0.01 | 2.70 | 0.68 | 0.22 | 1.48 |

|                                                                                  |   |        |                                                                                                             |      |      |      |      |      |      |
|----------------------------------------------------------------------------------|---|--------|-------------------------------------------------------------------------------------------------------------|------|------|------|------|------|------|
| 5649                                                                             | 0 | 239414 | AMIAATDAEEPRAKAFQ                                                                                           | 2.72 | 0.01 | 2.70 | 0.68 | 0.22 | 1.48 |
| 5650                                                                             | 0 | 239414 | AMIAATDAEEPRAKAFQ                                                                                           | 2.72 | 0.01 | 2.70 | 0.68 | 0.22 | 1.48 |
| 5651                                                                             | 0 | 239414 | AMIAATDAEEPRAKAFQ                                                                                           | 2.72 | 0.01 | 2.70 | 0.68 | 0.22 | 1.48 |
| 5652                                                                             | 0 | 239414 | AMIAATDAEEPRAKAFQ                                                                                           | 2.72 | 0.01 | 2.70 | 0.68 | 0.22 | 1.48 |
| 5653                                                                             | 0 | 239414 | AMIAATDAEEPRAKAFQ                                                                                           | 2.72 | 0.01 | 2.70 | 0.68 | 0.22 | 1.48 |
| 5654                                                                             | 0 | 239414 | AMIAATDAEEPRAKAFQ                                                                                           | 2.72 | 0.01 | 2.70 | 0.68 | 0.22 | 1.48 |
| AMININKFLNQCSVSYL<br>MNSMIPYGVKRLEDFD<br>ASLKDALLKYIYDNRGTLI<br>GQVDRLKDKVNNTLST |   |        |                                                                                                             |      |      |      |      |      |      |
| 5655                                                                             | 0 | 3113   | DIPFQLSKYVDNQRLST<br>FTEYIKNIINTSILNLRYES<br>NHLIDLSRYASKINIGSKV<br>NFDPIDKNQIQLFNLESS<br>KIEVILKNAIVYNSMYE | 5.05 | 0.01 | 2.08 | 3.23 | 0.22 | 0.85 |
| AMININKFLNQCSVSYL<br>MNSMIPYGVKRLEDFD<br>ASLKDALLKYIYDNRGTLI<br>GQVDRLKDKVNNTLST |   |        |                                                                                                             |      |      |      |      |      |      |
| 5656                                                                             | 0 | 3113   | DIPFQLSKYVDNQRLST<br>FTEYIKNIINTSILNLRYES<br>NHLIDLSRYASKINIGSKV<br>NFDPIDKNQIQLFNLESS<br>KIEVILKNAIVYNSMYE | 5.05 | 0.01 | 2.08 | 3.23 | 0.22 | 0.28 |
| AMININKFLNQCSVSYL<br>MNSMIPYGVKRLEDFD<br>ASLKDALLKYIYDNRGTLI<br>GQVDRLKDKVNNTLST |   |        |                                                                                                             |      |      |      |      |      |      |
| 5657                                                                             | 0 | 3113   | DIPFQLSKYVDNQRLST<br>FTEYIKNIINTSILNLRYES<br>NHLIDLSRYASKINIGSKV<br>NFDPIDKNQIQLFNLESS<br>KIEVILKNAIVYNSMYE | 5.05 | 0.01 | 2.08 | 2.02 | 0.22 | 0.85 |
| 5658                                                                             | 0 | 117747 | AMKISFAKK                                                                                                   | 2.24 | 0.01 | 0.78 | 0.44 | 1.13 | 0.28 |

|      |   |        |                                    |      |      |      |      |      |      |
|------|---|--------|------------------------------------|------|------|------|------|------|------|
| 5659 | 0 | 116674 | AMKLEKDNAMDRADT                    | 2.71 | 0.01 | 3.15 | 0.44 | 1.23 | 0.85 |
| 5660 | 0 | 116674 | AMKLEKDNAMDRADT                    | 2.71 | 0.01 | 2.36 | 0.44 | 1.23 | 1.28 |
| 5661 | 0 | 116674 | AMKLEKDNAMDRADT                    | 2.71 | 0.01 | 2.36 | 0.44 | 1.23 | 1.27 |
| 5662 | 0 | 116674 | AMKLEKDNAMDRADT                    | 2.71 | 0.01 | 2.36 | 0.44 | 1.23 | 1.28 |
| 5663 | 0 | 107740 | AMKNSFYDYEYIIKCDM<br>LTNIQFKDIKRKL | 3.33 | 0.01 | 0.90 | 1.12 | 0.22 | 0.28 |
| 5664 | 0 | 254277 | AMKNTTATGDSGDGS                    | 2.72 | 0.01 | 1.61 | 0.44 | 0.85 | 1.28 |
| 5665 | 0 | 254278 | AMKNTTATTGSDSS                     | 2.69 | 0.01 | 1.61 | 0.44 | 0.85 | 1.28 |
| 5666 | 0 | 3127   | AMKPDLQNTLMAVPR                    | 2.67 | 0.01 | 2.59 | 0.44 | 0.85 | 0.28 |
| 5667 | 0 | 79755  | AMKPYEVTPTRM                       | 2.48 | 0.01 | 2.14 | 3.26 | 0.22 | 0.28 |
| 5668 | 0 | 254288 | AMKTTAATTGSDGS                     | 2.72 | 0.01 | 1.61 | 0.44 | 0.85 | 1.28 |
| 5669 | 0 | 254290 | AMKTTTATTGSDGS                     | 2.72 | 0.01 | 1.61 | 0.44 | 0.85 | 1.28 |
| 5670 | 0 | 254291 | AMKTTTATTGSDSS                     | 2.70 | 0.01 | 1.61 | 0.44 | 0.85 | 1.28 |
| 5671 | 0 | 254292 | AMKTTTATTGNSDGS                    | 2.70 | 0.01 | 1.61 | 0.44 | 0.85 | 1.28 |
| 5672 | 0 | 254293 | AMKTTTTTTGSDGS                     | 2.70 | 0.01 | 1.61 | 0.44 | 0.85 | 1.28 |
| 5673 | 0 | 180368 | AMLPYDQYLHRFAAYFQ<br>QG            | 2.90 | 3.24 | 0.78 | 0.44 | 1.13 | 0.28 |
| 5674 | 0 | 180368 | AMLPYDQYLHRFAAYFQ<br>QG            | 2.90 | 3.24 | 0.78 | 0.44 | 1.13 | 0.28 |
| 5675 | 0 | 180368 | AMLPYDQYLHRFAAYFQ<br>QG            | 2.90 | 3.24 | 0.78 | 0.44 | 1.41 | 0.28 |
| 5676 | 0 | 419109 | AMLVQPA                            | 2.03 | 0.01 | 0.90 | 0.44 | 1.93 | 1.39 |
| 5677 | 0 | 103043 | AMMARDTAEAAKWGG                    | 2.67 | 0.01 | 2.04 | 0.44 | 0.85 | 1.28 |
| 5678 | 0 | 120404 | AMMIARFKMFPEVKEK                   | 2.77 | 0.01 | 0.78 | 1.20 | 0.22 | 0.28 |
| 5679 | 0 | 3158   | AMMIARFKMFPEVKEK<br>GMAA           | 2.96 | 0.01 | 0.78 | 1.20 | 0.22 | 2.02 |
| 5680 | 0 | 3158   | AMMIARFKMFPEVKEK<br>GMAA           | 2.96 | 0.01 | 0.78 | 1.20 | 0.22 | 1.57 |
| 5681 | 0 | 3158   | AMMIARFKMFPEVKEK<br>GMAA           | 2.96 | 0.01 | 0.78 | 1.20 | 0.22 | 1.57 |
| 5682 | 0 | 123025 | AMPPQQLM                           | 2.14 | 0.01 | 0.78 | 1.20 | 0.22 | 0.28 |
| 5683 | 0 | 123025 | AMPPQQLM                           | 2.14 | 0.01 | 0.78 | 0.44 | 1.13 | 0.28 |
| 5684 | 0 | 193426 | AMPTLGPIK                          | 2.21 | 0.01 | 2.51 | 0.44 | 2.39 | 0.28 |
| 5685 | 0 | 193426 | AMPTLGPIK                          | 2.21 | 0.01 | 2.51 | 0.44 | 2.39 | 0.28 |
| 5686 | 0 | 419110 | AMPVEPD                            | 2.02 | 0.01 | 0.90 | 0.44 | 1.93 | 1.27 |
| 5687 | 0 | 238207 | AMQGAVVHLQRATIRR<br>GDAP           | 2.94 | 0.01 | 2.14 | 2.65 | 0.22 | 0.85 |
| 5688 | 0 | 3176   | AMQMAYRF                           | 2.15 | 0.01 | 2.45 | 0.44 | 0.85 | 1.34 |
| 5689 | 0 | 3176   | AMQMAYRF                           | 2.15 | 0.01 | 2.45 | 0.44 | 0.85 | 1.34 |
| 5690 | 0 | 3180   | AMQWNSTAFH                         | 2.30 | 0.01 | 2.58 | 1.15 | 0.22 | 0.28 |

|      |   |        |                                         |      |      |      |      |      |      |
|------|---|--------|-----------------------------------------|------|------|------|------|------|------|
| 5691 | 0 | 419111 | AMRVEPHTYKNH                            | 2.43 | 0.01 | 0.90 | 0.44 | 1.93 | 1.39 |
| 5692 | 0 | 139684 | AMRVMEPKPSPFAEAV<br>CP                  | 2.87 | 0.01 | 3.93 | 2.00 | 0.22 | 0.28 |
| 5693 | 0 | 139684 | AMRVMEPKPSPFAEAV<br>CP                  | 2.87 | 0.01 | 3.93 | 1.12 | 0.22 | 0.28 |
| 5694 | 0 | 139684 | AMRVMEPKPSPFAEAV<br>CP                  | 2.87 | 0.01 | 3.93 | 2.00 | 0.22 | 0.28 |
| 5695 | 0 | 450433 | AMSHSKQ                                 | 2.02 | 0.01 | 0.90 | 0.44 | 1.23 | 1.39 |
| 5696 | 0 | 450433 | AMSHSKQ                                 | 2.02 | 0.01 | 0.90 | 0.44 | 1.41 | 1.39 |
| 5697 | 0 | 450434 | AMSPLNK                                 | 1.99 | 0.01 | 0.90 | 0.44 | 1.23 | 1.39 |
| 5698 | 0 | 3193   | AMSRPMIHFGNDWED<br>RYYRENMYRY           | 3.15 | 0.01 | 1.75 | 2.19 | 0.22 | 0.28 |
| 5699 | 0 | 3193   | AMSRPMIHFGNDWED<br>RYYRENMYRY           | 3.15 | 0.01 | 1.75 | 2.19 | 0.22 | 0.28 |
| 5700 | 0 | 3193   | AMSRPMIHFGNDWED<br>RYYRENMYRY           | 3.15 | 0.01 | 1.75 | 2.19 | 0.22 | 0.28 |
| 5701 | 0 | 3193   | AMSRPMIHFGNDWED<br>RYYRENMYRY           | 3.15 | 0.01 | 1.75 | 2.19 | 0.22 | 2.12 |
| 5702 | 0 | 3193   | AMSRPMIHFGNDWED<br>RYYRENMYRY           | 3.15 | 0.01 | 1.75 | 2.19 | 0.22 | 2.02 |
| 5703 | 0 | 3193   | AMSRPMIHFGNDWED<br>RYYRENMYRY           | 3.15 | 0.01 | 1.75 | 2.19 | 0.22 | 0.85 |
| 5704 | 0 | 3194   | AMSRPMMHFGNDWE<br>DRYYRENMYRY           | 3.16 | 0.01 | 2.98 | 2.19 | 0.22 | 0.28 |
| 5705 | 0 | 3195   | AMSRPMMHFGNDWE<br>DRYYRENMYRYPNQVY<br>Y | 3.35 | 0.01 | 2.98 | 2.19 | 0.22 | 2.12 |
| 5706 | 0 | 144592 | AMTDPKLDHMRH                            | 2.48 | 0.01 | 0.90 | 0.68 | 0.22 | 0.28 |
| 5707 | 0 | 79756  | AMTHLSPALADVPYVLV<br>KTNMNVTS           | 3.18 | 0.01 | 2.14 | 3.17 | 0.22 | 0.28 |
| 5708 | 0 | 3200   | AMTPTVATRDGKLPAT<br>QLRR                | 2.95 | 0.01 | 2.83 | 0.44 | 0.85 | 0.28 |
| 5709 | 0 | 3200   | AMTPTVATRDGKLPAT<br>QLRR                | 2.95 | 0.01 | 2.83 | 0.44 | 0.85 | 0.28 |
| 5710 | 0 | 3201   | AMTQAQKAGKPA                            | 2.52 | 0.01 | 3.22 | 0.44 | 1.23 | 0.85 |
| 5711 | 0 | 186660 | AMTQWRATSNMG                            | 2.48 | 0.01 | 0.90 | 0.68 | 0.22 | 1.39 |
| 5712 | 0 | 189042 | AMVDSAMSRNVSVQD<br>SAGVP                | 2.98 | 0.01 | 1.75 | 0.68 | 0.22 | 0.28 |
| 5713 | 0 | 3204   | AMVKLQ                                  | 1.88 | 0.01 | 1.86 | 0.44 | 1.23 | 0.28 |
| 5714 | 0 | 227036 | AMVNVISGPKVLMKQ                         | 2.66 | 0.01 | 2.97 | 0.44 | 1.59 | 0.28 |
| 5715 | 0 | 138758 | AMVYLGAkdSTRtQI                         | 2.63 | 0.01 | 2.25 | 0.68 | 2.60 | 1.75 |
| 5716 | 0 | 138758 | AMVYLGAkdSTRtQI                         | 2.63 | 0.01 | 2.25 | 0.68 | 0.22 | 0.28 |
| 5717 | 0 | 175727 | AMYLrgISR                               | 2.21 | 0.01 | 2.63 | 1.15 | 0.22 | 0.85 |
| 5718 | 0 | 175727 | AMYLrgISR                               | 2.21 | 0.01 | 2.63 | 1.15 | 0.22 | 1.48 |
| 5719 | 0 | 175727 | AMYLrgISR                               | 2.21 | 0.01 | 2.63 | 1.15 | 0.22 | 1.48 |
| 5720 | 0 | 175727 | AMYLrgISR                               | 2.21 | 0.01 | 2.63 | 1.15 | 0.22 | 0.85 |



|      |   |        |                                |      |      |      |      |      |      |
|------|---|--------|--------------------------------|------|------|------|------|------|------|
| 5721 | 0 | 175728 | AMYLRGISRSLHGIW                | 2.68 | 0.01 | 2.63 | 1.15 | 0.22 | 0.85 |
| 5722 | 0 | 175728 | AMYLRGISRSLHGIW                | 2.68 | 0.01 | 2.63 | 1.15 | 0.22 | 0.85 |
| 5723 | 0 | 97881  | ANAANEADYQ                     | 2.36 | 0.01 | 2.39 | 2.98 | 0.22 | 0.28 |
| 5724 | 0 | 3221   | ANAANEADYQAKLTAY<br>QTE        | 2.94 | 0.01 | 2.39 | 0.68 | 0.22 | 0.28 |
| 5725 | 0 | 3221   | ANAANEADYQAKLTAY<br>QTE        | 2.94 | 0.01 | 2.39 | 0.68 | 0.22 | 0.28 |
| 5726 | 0 | 3221   | ANAANEADYQAKLTAY<br>QTE        | 2.94 | 0.01 | 2.39 | 0.68 | 0.22 | 0.28 |
| 5727 | 0 | 3221   | ANAANEADYQAKLTAY<br>QTE        | 2.94 | 0.01 | 2.39 | 0.68 | 0.22 | 0.28 |
| 5728 | 0 | 3221   | ANAANEADYQAKLTAY<br>QTE        | 2.94 | 0.01 | 2.39 | 0.68 | 0.22 | 0.28 |
| 5729 | 0 | 3221   | ANAANEADYQAKLTAY<br>QTE        | 2.94 | 0.01 | 2.39 | 0.44 | 1.74 | 0.28 |
| 5730 | 0 | 3221   | ANAANEADYQAKLTAY<br>QTE        | 2.94 | 0.01 | 2.39 | 0.44 | 1.74 | 0.28 |
| 5731 | 0 | 3221   | ANAANEADYQAKLTAY<br>QTE        | 2.94 | 0.01 | 2.39 | 2.98 | 0.22 | 0.28 |
| 5732 | 0 | 3221   | ANAANEADYQAKLTAY<br>QTE        | 2.94 | 0.01 | 2.39 | 2.98 | 0.22 | 0.28 |
| 5733 | 0 | 3221   | ANAANEADYQAKLTAY<br>QTE        | 2.94 | 0.01 | 2.39 | 2.98 | 0.22 | 0.28 |
| 5734 | 0 | 3221   | ANAANEADYQAKLTAY<br>QTE        | 2.94 | 0.01 | 3.18 | 2.42 | 0.22 | 0.28 |
| 5735 | 0 | 3221   | ANAANEADYQAKLTAY<br>QTE        | 2.94 | 0.01 | 3.18 | 2.42 | 0.22 | 0.28 |
| 5736 | 0 | 3221   | ANAANEADYQAKLTAY<br>QTE        | 2.94 | 0.01 | 3.18 | 3.75 | 0.22 | 0.28 |
| 5737 | 0 | 3221   | ANAANEADYQAKLTAY<br>QTE        | 2.94 | 0.01 | 3.18 | 3.75 | 0.22 | 0.28 |
| 5738 | 0 | 3221   | ANAANEADYQAKLTAY<br>QTE        | 2.94 | 0.01 | 3.18 | 3.22 | 0.22 | 0.28 |
| 5739 | 0 | 3221   | ANAANEADYQAKLTAY<br>QTE        | 2.94 | 0.01 | 3.18 | 3.75 | 0.22 | 0.28 |
| 5740 | 0 | 3222   | ANAEALNNLL                     | 2.35 | 0.01 | 3.16 | 0.68 | 0.22 | 0.28 |
| 5741 | 0 | 3222   | ANAEALNNLL                     | 2.35 | 0.01 | 3.16 | 0.68 | 0.22 | 0.28 |
| 5742 | 0 | 511370 | ANAESNKQNTASTET                | 2.73 | 0.01 | 2.24 | 0.44 | 1.41 | 1.28 |
| 5743 | 0 | 3228   | ANANNAVKN                      | 2.28 | 0.01 | 3.37 | 1.12 | 0.22 | 0.28 |
| 5744 | 0 | 3229   | ANANRDTDRDGIPDE                | 2.71 | 0.01 | 3.97 | 1.12 | 0.22 | 0.85 |
| 5745 | 0 | 3230   | ANARSSENAESSA                  | 2.61 | 0.01 | 4.15 | 1.12 | 0.22 | 0.28 |
| 5746 | 0 | 3230   | ANARSSENAESSA                  | 2.61 | 0.01 | 4.15 | 1.12 | 0.22 | 0.28 |
| 5747 | 0 | 3230   | ANARSSENAESSA                  | 2.61 | 0.01 | 4.15 | 1.12 | 0.22 | 0.28 |
| 5748 | 0 | 142112 | ANASNDSSSHLQLIYNLT<br>LCELNG   | 3.11 | 0.01 | 3.04 | 2.13 | 0.22 | 0.28 |
| 5749 | 0 | 142113 | ANASNDSSSHLQLIYNLT<br>LCELNGTD | 3.20 | 0.01 | 3.04 | 2.13 | 0.22 | 0.28 |

|      |   |        |                                    |      |      |      |      |      |      |
|------|---|--------|------------------------------------|------|------|------|------|------|------|
| 5750 | 0 | 3233   | ANASNDSSSHLQLIYNLT<br>LCELNGTDWLAN | 3.34 | 0.01 | 3.04 | 2.13 | 0.22 | 0.28 |
| 5751 | 0 | 3233   | ANASNDSSSHLQLIYNLT<br>LCELNGTDWLAN | 3.34 | 0.01 | 3.04 | 2.13 | 0.22 | 0.28 |
| 5752 | 0 | 3233   | ANASNDSSSHLQLIYNLT<br>LCELNGTDWLAN | 3.34 | 0.01 | 3.04 | 2.13 | 0.22 | 0.28 |
| 5753 | 0 | 192893 | ANAVVGISHPNIEKKVC<br>VTK           | 2.94 | 0.01 | 3.47 | 2.00 | 0.22 | 0.28 |
| 5754 | 0 | 3236   | ANCASILCKCYTTGT                    | 2.69 | 0.01 | 2.43 | 0.68 | 0.22 | 0.28 |
| 5755 | 0 | 3236   | ANCASILCKCYTTGT                    | 2.69 | 0.01 | 2.43 | 2.69 | 0.22 | 0.28 |
| 5756 | 0 | 3236   | ANCASILCKCYTTGT                    | 2.69 | 0.01 | 2.43 | 0.68 | 0.22 | 0.28 |
| 5757 | 0 | 3236   | ANCASILCKCYTTGT                    | 2.69 | 0.01 | 2.43 | 2.69 | 0.22 | 0.28 |
| 5758 | 0 | 3236   | ANCASILCKCYTTGT                    | 2.69 | 0.01 | 2.43 | 0.68 | 0.22 | 1.34 |
| 5759 | 0 | 3236   | ANCASILCKCYTTGT                    | 2.69 | 0.01 | 2.43 | 2.69 | 0.22 | 1.34 |
| 5760 | 0 | 3236   | ANCASILCKCYTTGT                    | 2.69 | 0.01 | 2.43 | 0.68 | 2.60 | 1.75 |
| 5761 | 0 | 3236   | ANCASILCKCYTTGT                    | 2.69 | 0.01 | 2.43 | 2.69 | 2.60 | 1.75 |
| 5762 | 0 | 124986 | ANCLNTCKNK                         | 2.35 | 0.01 | 0.78 | 0.68 | 0.22 | 0.28 |
| 5763 | 0 | 124986 | ANCLNTCKNK                         | 2.35 | 0.01 | 0.78 | 0.68 | 0.22 | 1.34 |
| 5764 | 0 | 78102  | AND<br>ANDCISRPDTKTEFVTKI          | 1.37 | 0.01 | 3.89 | 1.15 | 0.22 | 2.02 |
| 5765 | 0 | 78103  | QAATTESQLNEIKRSIRS<br>AI           | 3.61 | 0.01 | 3.89 | 1.15 | 0.22 | 2.02 |
| 5766 | 0 | 3238   | ANDHLSILEAWSNDTP<br>YLHD           | 3.00 | 0.01 | 2.39 | 2.87 | 0.22 | 0.28 |
| 5767 | 0 | 3238   | ANDHLSILEAWSNDTP<br>YLHD           | 3.00 | 0.01 | 2.39 | 2.87 | 0.22 | 0.28 |
| 5768 | 0 | 3238   | ANDHLSILEAWSNDTP<br>YLHD           | 3.00 | 0.01 | 2.39 | 2.87 | 0.22 | 1.34 |
| 5769 | 0 | 181272 | ANDLDYGQCPNNMMG                    | 2.66 | 0.01 | 2.82 | 1.15 | 0.22 | 0.28 |
| 5770 | 0 | 3242   | ANDPPP                             | 1.88 | 0.01 | 3.37 | 0.68 | 0.22 | 0.28 |
| 5771 | 0 | 3242   | ANDPPP                             | 1.88 | 0.01 | 3.37 | 0.68 | 0.22 | 0.85 |
| 5772 | 0 | 3242   | ANDPPP                             | 1.88 | 0.01 | 3.37 | 0.68 | 0.22 | 0.85 |
| 5773 | 0 | 3242   | ANDPPP                             | 1.88 | 0.01 | 3.37 | 0.68 | 0.22 | 1.34 |
| 5774 | 0 | 3242   | ANDPPP                             | 1.88 | 0.01 | 3.37 | 0.68 | 0.22 | 1.34 |
| 5775 | 0 | 3242   | ANDPPP                             | 1.88 | 0.01 | 3.37 | 0.68 | 0.22 | 1.48 |
| 5776 | 0 | 3243   | ANDQGNRTTPSYVAFT<br>DSERL          | 2.97 | 0.01 | 2.30 | 0.44 | 0.85 | 0.28 |
| 5777 | 0 | 3243   | ANDQGNRTTPSYVAFT<br>DSERL          | 2.97 | 0.01 | 2.30 | 0.44 | 1.41 | 0.28 |
| 5778 | 0 | 80408  | ANDVDNSNPVVQ                       | 2.50 | 0.01 | 2.39 | 2.87 | 0.22 | 0.28 |
| 5779 | 0 | 80408  | ANDVDNSNPVVQ                       | 2.50 | 0.01 | 2.39 | 2.87 | 0.22 | 0.28 |
| 5780 | 0 | 80408  | ANDVDNSNPVVQ                       | 2.50 | 0.01 | 2.39 | 2.87 | 0.22 | 0.28 |
| 5781 | 0 | 3245   | ANDVDNSNPVVQAEQL<br>NWL            | 2.92 | 0.01 | 2.39 | 0.44 | 0.85 | 0.28 |
| 5782 | 0 | 3245   | ANDVDNSNPVVQAEQL<br>NWL            | 2.92 | 0.01 | 2.39 | 0.44 | 0.85 | 0.28 |

|      |   |        |                                             |      |      |      |      |      |      |
|------|---|--------|---------------------------------------------|------|------|------|------|------|------|
| 5783 | 0 | 3245   | ANDVDNSNPVVQAEQL<br>NWL                     | 2.92 | 0.01 | 2.39 | 0.44 | 2.39 | 0.28 |
| 5784 | 0 | 3245   | ANDVDNSNPVVQAEQL<br>NWL                     | 2.92 | 0.01 | 2.39 | 0.44 | 2.39 | 1.27 |
| 5785 | 0 | 3245   | ANDVDNSNPVVQAEQL<br>NWL                     | 2.92 | 0.01 | 2.39 | 0.44 | 2.39 | 1.27 |
| 5786 | 0 | 3245   | ANDVDNSNPVVQAEQL<br>NWL                     | 2.92 | 0.01 | 2.39 | 0.68 | 0.22 | 0.28 |
| 5787 | 0 | 3245   | ANDVDNSNPVVQAEQL<br>NWL                     | 2.92 | 0.01 | 2.39 | 0.68 | 0.22 | 1.34 |
| 5788 | 0 | 3245   | ANDVDNSNPVVQAEQL<br>NWL                     | 2.92 | 0.01 | 2.39 | 0.68 | 0.22 | 1.34 |
| 5789 | 0 | 3245   | ANDVDNSNPVVQAEQL<br>NWL                     | 2.92 | 0.01 | 2.39 | 0.68 | 0.22 | 0.28 |
| 5790 | 0 | 3245   | ANDVDNSNPVVQAEQL<br>NWL                     | 2.92 | 0.01 | 2.39 | 0.68 | 0.22 | 1.34 |
| 5791 | 0 | 3245   | ANDVDNSNPVVQAEQL<br>NWL                     | 2.92 | 0.01 | 2.39 | 2.87 | 0.22 | 0.28 |
| 5792 | 0 | 3245   | ANDVDNSNPVVQAEQL<br>NWL                     | 2.92 | 0.01 | 2.39 | 2.87 | 0.22 | 0.28 |
| 5793 | 0 | 3245   | ANDVDNSNPVVQAEQL<br>NWL                     | 2.92 | 0.01 | 2.39 | 2.87 | 0.22 | 0.28 |
| 5794 | 0 | 3245   | ANDVDNSNPVVQAEQL<br>NWL                     | 2.92 | 0.01 | 2.39 | 2.87 | 0.22 | 0.28 |
| 5795 | 0 | 3245   | ANDVDNSNPVVQAEQL<br>NWL                     | 2.92 | 0.01 | 2.39 | 2.87 | 0.22 | 0.28 |
| 5796 | 0 | 3245   | ANDVDNSNPVVQAEQL<br>NWL                     | 2.92 | 0.01 | 2.39 | 2.87 | 0.22 | 0.28 |
| 5797 | 0 | 3245   | ANDVDNSNPVVQAEQL<br>NWL                     | 2.92 | 0.01 | 2.39 | 2.87 | 0.22 | 0.28 |
| 5798 | 0 | 3245   | ANDVDNSNPVVQAEQL<br>NWL                     | 2.92 | 0.01 | 2.39 | 2.87 | 0.22 | 0.28 |
| 5799 | 0 | 3245   | ANDVDNSNPVVQAEQL<br>NWL                     | 2.92 | 0.01 | 2.39 | 2.87 | 0.22 | 0.28 |
| 5800 | 0 | 3245   | ANDVDNSNPVVQAEQL<br>NWL                     | 2.92 | 0.01 | 2.39 | 2.87 | 0.22 | 1.75 |
| 5801 | 0 | 3245   | ANDVDNSNPVVQAEQL<br>NWL                     | 2.92 | 0.01 | 2.39 | 2.87 | 0.22 | 1.34 |
| 5802 | 0 | 142530 | ANDYTTEYASASVRGRFI<br>VS                    | 2.94 | 0.01 | 0.90 | 0.68 | 0.22 | 0.28 |
| 5803 | 0 | 142530 | ANDYTTEYASASVRGRFI<br>VS                    | 2.94 | 0.01 | 0.90 | 0.68 | 0.22 | 0.28 |
| 5804 | 0 | 97884  | ANEADYQAKL                                  | 2.32 | 0.01 | 3.18 | 2.98 | 0.22 | 0.28 |
| 5805 | 0 | 156849 | ANEDAAQGIANWDAV<br>QDIANEDGFHGIDIEDA<br>AQG | 3.53 | 0.01 | 0.78 | 0.44 | 2.82 | 1.39 |

|      |   |        |                                    |      |      |      |      |      |      |
|------|---|--------|------------------------------------|------|------|------|------|------|------|
| 5806 | 0 | 3249   | ANEECRNAMRHLRPED<br>TLEEKMYACRDIG  | 3.29 | 0.01 | 2.86 | 2.02 | 1.59 | 0.28 |
| 5807 | 0 | 3249   | ANEECRNAMRHLRPED<br>TLEEKMYACRDIG  | 3.29 | 0.01 | 2.86 | 0.68 | 0.22 | 0.28 |
| 5808 | 0 | 3249   | ANEECRNAMRHLRPED<br>TLEEKMYACRDIG  | 3.29 | 0.01 | 2.86 | 2.02 | 0.85 | 0.28 |
| 5809 | 0 | 3249   | ANEECRNAMRHLRPED<br>TLEEKMYACRDIG  | 3.29 | 0.01 | 2.86 | 2.02 | 0.85 | 0.28 |
| 5810 | 0 | 95244  | ANEEYSIGS                          | 2.31 | 0.01 | 1.60 | 0.44 | 1.23 | 0.85 |
| 5811 | 0 | 96098  | ANEEIRKRNA                         | 2.35 | 0.01 | 2.39 | 0.44 | 0.85 | 0.28 |
| 5812 | 0 | 3250   | ANEGAPSSRFHP                       | 2.47 | 0.01 | 0.90 | 0.44 | 0.85 | 0.28 |
| 5813 | 0 | 170342 | ANEKVTSDADPMWYL                    | 2.63 | 0.01 | 0.78 | 0.44 | 1.41 | 0.28 |
| 5814 | 0 | 3274   | ANETIYNTTLKYGDV                    | 2.65 | 0.01 | 2.51 | 4.03 | 1.74 | 1.34 |
| 5815 | 0 | 3274   | ANETIYNTTLKYGDV                    | 2.65 | 0.01 | 2.51 | 4.03 | 1.74 | 1.48 |
| 5816 | 0 | 3274   | ANETIYNTTLKYGDV                    | 2.65 | 0.01 | 2.51 | 4.03 | 1.74 | 1.27 |
| 5817 | 0 | 3274   | ANETIYNTTLKYGDV                    | 2.65 | 0.01 | 2.51 | 4.03 | 1.74 | 1.27 |
| 5818 | 0 | 3274   | ANETIYNTTLKYGDV                    | 2.65 | 0.01 | 2.76 | 0.44 | 1.74 | 0.28 |
| 5819 | 0 | 3274   | ANETIYNTTLKYGDV                    | 2.65 | 0.01 | 2.76 | 1.81 | 0.22 | 0.28 |
| 5820 | 0 | 3274   | ANETIYNTTLKYGDV                    | 2.65 | 0.01 | 2.76 | 1.81 | 0.22 | 0.28 |
| 5821 | 0 | 3274   | ANETIYNTTLKYGDV                    | 2.65 | 0.01 | 2.76 | 1.81 | 0.22 | 0.28 |
| 5822 | 0 | 3274   | ANETIYNTTLKYGDV                    | 2.65 | 0.01 | 2.76 | 1.81 | 0.22 | 0.28 |
| 5823 | 0 | 3275   | ANETIYNTTLKYGDVVG<br>VNT           | 2.96 | 0.01 | 2.51 | 0.44 | 1.59 | 0.28 |
| 5824 | 0 | 3275   | ANETIYNTTLKYGDVVG<br>VNT           | 2.96 | 0.01 | 2.51 | 0.44 | 1.59 | 1.34 |
| 5825 | 0 | 3275   | ANETIYNTTLKYGDVVG<br>VNT           | 2.96 | 0.01 | 2.51 | 0.44 | 1.59 | 1.66 |
| 5826 | 0 | 107742 | ANEYLKKHCSKPCPCND<br>MQEITKYTNIGNE | 3.31 | 0.01 | 0.90 | 1.12 | 0.22 | 0.28 |
| 5827 | 0 | 149625 | ANFDQFNKYGVS                       | 2.45 | 0.01 | 3.53 | 0.68 | 0.22 | 0.28 |
| 5828 | 0 | 149625 | ANFDQFNKYGVS                       | 2.45 | 0.01 | 3.53 | 0.68 | 0.22 | 0.28 |
| 5829 | 0 | 181554 | ANFFRNISGNMKAFT                    | 2.69 | 0.01 | 1.66 | 2.37 | 0.22 | 1.28 |
| 5830 | 0 | 181554 | ANFFRNISGNMKAFT                    | 2.69 | 0.01 | 1.66 | 2.36 | 0.22 | 1.28 |
| 5831 | 0 | 136818 | ANFIIFRPVV                         | 2.30 | 0.01 | 3.97 | 0.68 | 0.22 | 0.85 |
| 5832 | 0 | 136818 | ANFIIFRPVV                         | 2.30 | 0.01 | 3.97 | 1.81 | 0.22 | 1.75 |
| 5833 | 0 | 136818 | ANFIIFRPVV                         | 2.30 | 0.01 | 3.97 | 1.81 | 0.22 | 0.28 |
| 5834 | 0 | 136818 | ANFIIFRPVV                         | 2.30 | 0.01 | 3.97 | 1.81 | 0.22 | 0.28 |
| 5835 | 0 | 136818 | ANFIIFRPVV                         | 2.30 | 0.01 | 3.97 | 1.81 | 0.22 | 0.28 |
| 5836 | 0 | 136818 | ANFIIFRPVV                         | 2.30 | 0.01 | 3.97 | 1.81 | 0.22 | 0.28 |
| 5837 | 0 | 136818 | ANFIIFRPVV                         | 2.30 | 0.01 | 3.97 | 1.81 | 0.22 | 0.28 |
| 5838 | 0 | 136818 | ANFIIFRPVV                         | 2.30 | 0.01 | 3.97 | 1.81 | 0.22 | 0.28 |
| 5839 | 0 | 136818 | ANFIIFRPVV                         | 2.30 | 0.01 | 3.97 | 1.81 | 0.22 | 0.28 |
| 5840 | 0 | 3286   | ANGAGGNQPANGAGG<br>NQPANGAGGNQP    | 3.31 | 0.01 | 0.90 | 0.44 | 1.74 | 0.28 |
| 5841 | 0 | 3288   | ANGAGNQPG                          | 2.27 | 0.01 | 2.59 | 0.44 | 0.85 | 0.28 |

|      |   |      |                                           |      |      |      |      |      |      |
|------|---|------|-------------------------------------------|------|------|------|------|------|------|
| 5842 | 0 | 3288 | ANGAGNQPG                                 | 2.27 | 0.01 | 2.59 | 1.81 | 0.22 | 0.28 |
| 5843 | 0 | 3288 | ANGAGNQPG                                 | 2.27 | 0.01 | 2.59 | 2.16 | 0.22 | 0.28 |
| 5844 | 0 | 3289 | ANGAGNQPGANGAGG<br>QAA                    | 2.91 | 0.01 | 2.59 | 0.44 | 0.85 | 0.28 |
| 5845 | 0 | 3289 | ANGAGNQPGANGAGG<br>QAA                    | 2.91 | 0.01 | 2.59 | 3.05 | 0.85 | 0.28 |
| 5846 | 0 | 3289 | ANGAGNQPGANGAGG<br>QAA                    | 2.91 | 0.01 | 2.59 | 3.05 | 1.41 | 0.28 |
| 5847 | 0 | 3289 | ANGAGNQPGANGAGG<br>QAA                    | 2.91 | 0.01 | 2.59 | 0.44 | 0.85 | 0.28 |
| 5848 | 0 | 3290 | ANGAGNQPGANGAGN<br>QPG                    | 2.93 | 0.01 | 2.59 | 2.89 | 0.22 | 0.28 |
| 5849 | 0 | 3290 | ANGAGNQPGANGAGN<br>QPG                    | 2.93 | 0.01 | 2.59 | 1.15 | 0.22 | 0.28 |
| 5850 | 0 | 3290 | ANGAGNQPGANGAGN<br>QPG                    | 2.93 | 0.01 | 2.59 | 1.15 | 0.22 | 1.48 |
| 5851 | 0 | 3290 | ANGAGNQPGANGAGN<br>QPG                    | 2.93 | 0.01 | 2.59 | 1.15 | 0.22 | 0.28 |
| 5852 | 0 | 3290 | ANGAGNQPGANGAGN<br>QPG                    | 2.93 | 0.01 | 2.59 | 1.81 | 0.22 | 0.28 |
| 5853 | 0 | 3290 | ANGAGNQPGANGAGN<br>QPG                    | 2.93 | 0.01 | 2.59 | 0.68 | 0.22 | 0.28 |
| 5854 | 0 | 3290 | ANGAGNQPGANGAGN<br>QPG                    | 2.93 | 0.01 | 2.59 | 3.06 | 0.22 | 0.28 |
| 5855 | 0 | 3290 | ANGAGNQPGANGAGN<br>QPG                    | 2.93 | 0.01 | 2.59 | 3.42 | 0.22 | 0.28 |
| 5856 | 0 | 3290 | ANGAGNQPGANGAGN<br>QPG                    | 2.93 | 0.01 | 2.59 | 3.05 | 1.41 | 0.28 |
| 5857 | 0 | 3290 | ANGAGNQPGANGAGN<br>QPG                    | 2.93 | 0.01 | 2.59 | 0.44 | 0.85 | 0.28 |
| 5858 | 0 | 3291 | ANGAGNQPGANGAGN<br>QPGANGAGNQPG           | 3.32 | 0.01 | 2.59 | 0.44 | 1.74 | 0.28 |
| 5859 | 0 | 3291 | ANGAGNQPGANGAGN<br>QPGANGAGNQPG           | 3.32 | 0.01 | 2.59 | 0.44 | 0.85 | 0.28 |
| 5860 | 0 | 3291 | ANGAGNQPGANGAGN<br>QPGANGAGNQPG           | 3.32 | 0.01 | 2.59 | 0.44 | 0.85 | 1.57 |
| 5861 | 0 | 3291 | ANGAGNQPGANGAGN<br>QPGANGAGNQPG           | 3.32 | 0.01 | 2.59 | 0.44 | 1.74 | 1.57 |
| 5862 | 0 | 3292 | ANGAGNQPGANGAGN<br>QPGANGAGNQPGANG<br>AGN | 3.52 | 0.01 | 4.45 | 4.08 | 1.59 | 0.28 |

|      |   |        |                                              |      |      |      |      |      |      |
|------|---|--------|----------------------------------------------|------|------|------|------|------|------|
| 5863 | 0 | 3292   | ANGAGNQPGANGAGN<br>QPGANGAGNQPGANG<br>AGN    | 3.52 | 0.01 | 4.45 | 4.63 | 1.59 | 0.28 |
| 5864 | 0 | 3292   | ANGAGNQPGANGAGN<br>QPGANGAGNQPGANG<br>AGN    | 3.52 | 0.01 | 4.45 | 0.44 | 1.74 | 0.28 |
| 5865 | 0 | 3293   | ANGAGNQPGANGAGN<br>QPGANGAGNQPGANG<br>AGNQPG | 3.60 | 0.01 | 2.59 | 0.44 | 1.74 | 0.28 |
| 5866 | 0 | 3293   | ANGAGNQPGANGAGN<br>QPGANGAGNQPGANG<br>AGNQPG | 3.60 | 0.01 | 2.59 | 0.44 | 1.74 | 0.28 |
| 5867 | 0 | 3293   | ANGAGNQPGANGAGN<br>QPGANGAGNQPGANG<br>AGNQPG | 3.60 | 0.01 | 2.59 | 1.15 | 0.22 | 0.28 |
| 5868 | 0 | 3293   | ANGAGNQPGANGAGN<br>QPGANGAGNQPGANG<br>AGNQPG | 3.60 | 0.01 | 2.59 | 1.15 | 0.22 | 0.28 |
| 5869 | 0 | 3293   | ANGAGNQPGANGAGN<br>QPGANGAGNQPGANG<br>AGNQPG | 3.60 | 0.01 | 2.59 | 1.15 | 0.22 | 0.28 |
| 5870 | 0 | 3293   | ANGAGNQPGANGAGN<br>QPGANGAGNQPGANG<br>AGNQPG | 3.60 | 0.01 | 2.59 | 2.16 | 0.22 | 0.28 |
| 5871 | 0 | 3293   | ANGAGNQPGANGAGN<br>QPGANGAGNQPGANG<br>AGNQPG | 3.60 | 0.01 | 2.59 | 0.44 | 1.74 | 0.28 |
| 5872 | 0 | 3295   | ANGAGNQPPGEDGAG<br>NQPG                      | 2.96 | 0.01 | 2.59 | 0.44 | 0.85 | 0.28 |
| 5873 | 0 | 3298   | ANGGASGQVK                                   | 2.34 | 0.01 | 2.90 | 0.68 | 0.22 | 2.49 |
| 5874 | 0 | 254633 | ANGGSTSSTPPSGTE                              | 2.72 | 0.01 | 1.61 | 0.44 | 0.85 | 1.28 |
| 5875 | 0 | 134322 | ANGILNVTAVEKSTGK                             | 2.75 | 0.01 | 1.66 | 0.68 | 0.22 | 1.39 |
| 5876 | 0 | 134322 | ANGILNVTAVEKSTGK                             | 2.75 | 0.01 | 1.66 | 0.68 | 0.22 | 0.85 |
| 5877 | 0 | 134322 | ANGILNVTAVEKSTGK                             | 2.75 | 0.01 | 1.66 | 0.68 | 0.22 | 0.85 |
| 5878 | 0 | 238208 | ANGLRVRDE                                    | 2.21 | 0.01 | 2.14 | 2.65 | 0.22 | 0.85 |
| 5879 | 0 | 238209 | ANGLRVRDEGGSSV                               | 2.61 | 0.01 | 2.14 | 2.65 | 0.22 | 0.85 |
| 5880 | 0 | 136134 | ANGWGVMSHRSGET<br>EDT                        | 2.84 | 3.40 | 0.78 | 0.44 | 1.13 | 0.28 |
| 5881 | 0 | 136134 | ANGWGVMSHRSGET<br>EDT                        | 2.84 | 3.40 | 0.78 | 0.44 | 1.41 | 0.28 |
| 5882 | 0 | 136134 | ANGWGVMSHRSGET<br>EDT                        | 2.84 | 3.40 | 0.78 | 0.44 | 1.13 | 0.28 |
| 5883 | 0 | 101479 | ANIHEFNPDVLL                                 | 2.43 | 0.01 | 0.90 | 0.44 | 0.85 | 1.39 |
| 5884 | 0 | 157091 | ANIKGVPTRAET                                 | 2.46 | 0.01 | 3.40 | 2.49 | 0.85 | 0.28 |

|      |   |        |                               |      |      |      |      |      |      |
|------|---|--------|-------------------------------|------|------|------|------|------|------|
| 5885 | 0 | 149025 | ANILSRR                       | 1.99 | 0.01 | 0.90 | 2.13 | 1.59 | 1.39 |
| 5886 | 0 | 3320   | ANIQLVEKDKALSNA               | 2.69 | 0.01 | 3.15 | 0.44 | 1.23 | 0.85 |
| 5887 | 0 | 3320   | ANIQLVEKDKALSNA               | 2.69 | 0.01 | 2.36 | 0.44 | 1.23 | 1.28 |
| 5888 | 0 | 3320   | ANIQLVEKDKALSNA               | 2.69 | 0.01 | 2.36 | 0.44 | 1.23 | 1.27 |
| 5889 | 0 | 3320   | ANIQLVEKDKALSNA               | 2.69 | 0.01 | 2.36 | 0.44 | 1.23 | 1.28 |
| 5890 | 0 | 3320   | ANIQLVEKDKALSNA               | 2.69 | 0.01 | 2.36 | 0.44 | 1.23 | 1.27 |
| 5891 | 0 | 139686 | ANIREEMRRLQRRKQLC<br>F        | 2.83 | 0.01 | 3.65 | 2.00 | 0.22 | 0.28 |
| 5892 | 0 | 152415 | ANIRYVNTGT                    | 2.31 | 0.01 | 2.18 | 2.16 | 0.22 | 0.28 |
| 5893 | 0 | 149026 | ANITQSS                       | 1.99 | 0.01 | 0.90 | 2.13 | 1.59 | 1.39 |
| 5894 | 0 | 79517  | ANIVPNTALNQAVVELY<br>TDTTFAWS | 3.14 | 0.01 | 3.21 | 2.16 | 0.22 | 0.28 |
| 5895 | 0 | 79517  | ANIVPNTALNQAVVELY<br>TDTTFAWS | 3.14 | 0.01 | 3.21 | 2.16 | 0.22 | 0.28 |
| 5896 | 0 | 79517  | ANIVPNTALNQAVVELY<br>TDTTFAWS | 3.14 | 0.01 | 3.21 | 2.16 | 0.22 | 0.28 |
| 5897 | 0 | 79517  | ANIVPNTALNQAVVELY<br>TDTTFAWS | 3.14 | 0.01 | 3.21 | 2.16 | 0.22 | 0.28 |
| 5898 | 0 | 79517  | ANIVPNTALNQAVVELY<br>TDTTFAWS | 3.14 | 0.01 | 3.21 | 2.16 | 0.22 | 0.28 |
| 5899 | 0 | 3325   | ANKEGIVVWVATEGALN             | 2.75 | 0.01 | 2.91 | 0.44 | 0.85 | 0.28 |
| 5900 | 0 | 3330   | ANKKRTLGAREVQTAVR<br>IVL      | 2.96 | 0.01 | 3.78 | 2.49 | 0.85 | 0.28 |
| 5901 | 0 | 254701 | ANKPASKPAAKPAAK               | 2.75 | 0.01 | 1.61 | 0.44 | 0.85 | 1.28 |
| 5902 | 0 | 95246  | ANKPYSWRSK                    | 2.31 | 0.01 | 2.60 | 0.44 | 1.23 | 0.85 |
| 5903 | 0 | 138141 | ANKTSPFLMWRL                  | 2.43 | 0.01 | 0.90 | 0.44 | 1.13 | 0.28 |
| 5904 | 0 | 138141 | ANKTSPFLMWRL                  | 2.43 | 0.01 | 0.90 | 0.44 | 1.13 | 1.27 |
| 5905 | 0 | 142386 | ANKYQISVNKYRGTAGN<br>AL       | 2.90 | 3.40 | 0.78 | 0.44 | 1.13 | 0.28 |
| 5906 | 0 | 511391 | ANLALQLASATEDKA               | 2.71 | 0.01 | 2.24 | 0.44 | 1.41 | 1.28 |
| 5907 | 0 | 3341   | ANLFSGEGAQTAQ                 | 2.56 | 0.01 | 2.97 | 0.44 | 0.85 | 0.85 |
| 5908 | 0 | 3342   | ANLGAFQ NRL                   | 2.34 | 0.01 | 2.73 | 0.44 | 0.85 | 0.28 |
| 5909 | 0 | 226005 | ANLNNGFYPPVASSEVGF<br>V NK    | 2.96 | 0.01 | 3.93 | 3.16 | 0.22 | 0.28 |
| 5910 | 0 | 511400 | ANLVAQKEAAEKAAA               | 2.71 | 0.01 | 2.24 | 0.44 | 1.41 | 1.28 |
| 5911 | 0 | 3350   | ANLVGMTFRA                    | 2.30 | 0.01 | 2.97 | 0.44 | 0.85 | 0.28 |
| 5912 | 0 | 240860 | ANMERIMKAQALRDNS<br>TMGYMMAKK | 3.14 | 3.67 | 0.78 | 0.44 | 1.13 | 0.28 |
| 5913 | 0 | 117441 | ANNGNLQLRNKEVTWE<br>VLEG      | 2.96 | 3.55 | 0.78 | 0.44 | 1.13 | 0.28 |
| 5914 | 0 | 117260 | ANNGNLQLRNKEVTWE<br>VLEG      | 2.96 | 0.01 | 0.78 | 0.44 | 1.13 | 1.27 |
| 5915 | 0 | 117260 | ANNGNLQLRNKEVTWE<br>VLEG      | 2.96 | 0.01 | 0.78 | 0.44 | 1.13 | 0.28 |

|      |   |        |                           |      |      |      |      |      |      |
|------|---|--------|---------------------------|------|------|------|------|------|------|
| 5916 | 0 | 117260 | ANNGNLQLRNKEVTWE<br>VLEG  | 2.96 | 0.01 | 0.78 | 0.68 | 0.22 | 1.27 |
| 5917 | 0 | 117260 | ANNGNLQLRNKEVTWE<br>VLEG  | 2.96 | 0.01 | 0.78 | 0.68 | 0.22 | 0.28 |
| 5918 | 0 | 117260 | ANNGNLQLRNKEVTWE<br>VLEG  | 2.96 | 0.01 | 0.78 | 0.68 | 0.22 | 0.28 |
| 5919 | 0 | 117260 | ANNGNLQLRNKEVTWE<br>VLEG  | 2.96 | 0.01 | 0.78 | 1.20 | 0.22 | 0.28 |
| 5920 | 0 | 117260 | ANNGNLQLRNKEVTWE<br>VLEG  | 2.96 | 0.01 | 0.78 | 1.20 | 0.22 | 1.27 |
| 5921 | 0 | 117260 | ANNGNLQLRNKEVTWE<br>VLEG  | 2.96 | 0.01 | 0.78 | 1.20 | 0.22 | 0.28 |
| 5922 | 0 | 117260 | ANNGNLQLRNKEVTWE<br>VLEG  | 2.96 | 0.01 | 0.78 | 1.20 | 0.22 | 0.28 |
| 5923 | 0 | 117260 | ANNGNLQLRNKEVTWE<br>VLEG  | 2.96 | 0.01 | 0.78 | 1.20 | 0.22 | 0.28 |
| 5924 | 0 | 117260 | ANNGNLQLRNKEVTWE<br>VLEG  | 2.96 | 0.01 | 0.78 | 1.20 | 0.22 | 0.28 |
| 5925 | 0 | 117260 | ANNGNLQLRNKEVTWE<br>VLEG  | 2.96 | 0.01 | 0.78 | 1.20 | 0.22 | 0.28 |
| 5926 | 0 | 117260 | ANNGNLQLRNKEVTWE<br>VLEG  | 2.96 | 0.01 | 0.78 | 1.20 | 0.22 | 0.28 |
| 5927 | 0 | 117260 | ANNGNLQLRNKEVTWE<br>VLEG  | 2.96 | 0.01 | 0.78 | 1.20 | 0.22 | 0.28 |
| 5928 | 0 | 130728 | ANNPLYKEATSTFTNITY<br>RGT | 2.98 | 0.01 | 0.78 | 0.44 | 1.13 | 1.27 |
| 5929 | 0 | 178544 | ANNQKIMRNLWNEIA           | 2.69 | 0.01 | 2.36 | 0.44 | 1.23 | 1.28 |
| 5930 | 0 | 178544 | ANNQKIMRNLWNEIA           | 2.69 | 0.01 | 2.36 | 0.44 | 1.23 | 1.27 |
| 5931 | 0 | 178544 | ANNQKIMRNLWNEIA           | 2.69 | 0.01 | 2.36 | 0.44 | 1.23 | 1.28 |
| 5932 | 0 | 3367   | ANNSANNGKKNAEE            | 2.72 | 0.01 | 1.66 | 0.44 | 0.85 | 0.28 |
| 5933 | 0 | 3367   | ANNSANNGKKNAEE            | 2.72 | 0.01 | 1.66 | 1.12 | 0.22 | 0.28 |
| 5934 | 0 | 186741 | ANPAMAMGNLGANSI           | 2.72 | 0.01 | 0.90 | 1.20 | 0.22 | 0.85 |
| 5935 | 0 | 110768 | ANPENYFT                  | 2.12 | 0.01 | 3.15 | 1.12 | 0.22 | 1.27 |
| 5936 | 0 | 110769 | ANPENYFTNGEA              | 2.50 | 0.01 | 3.15 | 3.53 | 0.22 | 0.28 |
| 5937 | 0 | 110769 | ANPENYFTNGEA              | 2.50 | 0.01 | 3.15 | 0.44 | 1.59 | 0.28 |
| 5938 | 0 | 3375   | ANPGADAE                  | 2.15 | 0.01 | 2.96 | 0.68 | 0.22 | 0.28 |
| 5939 | 0 | 3379   | ANPNENPNANPNANP<br>NANPN  | 3.03 | 4.63 | 0.90 | 0.44 | 0.22 | 0.28 |
| 5940 | 0 | 3379   | ANPNENPNANPNANP<br>NANPN  | 3.03 | 4.63 | 0.90 | 0.68 | 0.22 | 0.28 |
| 5941 | 0 | 3381   | ANPNPYTSRRSV              | 2.48 | 0.01 | 2.14 | 2.90 | 0.22 | 0.28 |



|      |   |        |                                       |      |      |      |      |      |      |
|------|---|--------|---------------------------------------|------|------|------|------|------|------|
| 5942 | 0 | 3381   | ANPNPYTSRRSV                          | 2.48 | 0.01 | 2.14 | 2.90 | 0.22 | 0.28 |
| 5943 | 0 | 3382   | ANPPDH                                | 1.89 | 0.01 | 2.53 | 2.37 | 0.22 | 0.28 |
| 5944 | 0 | 3382   | ANPPDH                                | 1.89 | 0.01 | 2.53 | 0.44 | 1.59 | 0.28 |
| 5945 | 0 | 3382   | ANPPDH                                | 1.89 | 0.01 | 2.53 | 0.44 | 1.59 | 0.28 |
| 5946 | 0 | 3383   | ANPPDHSAPLGVTRPSA<br>PPL              | 2.96 | 0.01 | 2.53 | 2.37 | 0.22 | 0.28 |
| 5947 | 0 | 3383   | ANPPDHSAPLGVTRPSA<br>PPL              | 2.96 | 0.01 | 2.53 | 2.37 | 0.22 | 0.28 |
| 5948 | 0 | 3384   | ANPPDHSAPLGVTRPSA<br>PPLPHVVDLPQLGPRR | 3.45 | 0.01 | 2.53 | 0.44 | 0.85 | 0.85 |
| 5949 | 0 | 3384   | ANPPDHSAPLGVTRPSA<br>PPLPHVVDLPQLGPRR | 3.45 | 0.01 | 2.53 | 3.16 | 0.22 | 1.39 |
| 5950 | 0 | 3385   | ANPPPASTNRQSGRQ                       | 2.70 | 0.01 | 2.08 | 0.68 | 0.22 | 0.28 |
| 5951 | 0 | 3385   | ANPPPASTNRQSGRQ                       | 2.70 | 0.01 | 2.08 | 0.68 | 0.22 | 0.28 |
| 5952 | 0 | 161082 | ANPS                                  | 1.57 | 0.01 | 0.78 | 0.68 | 0.22 | 0.28 |
| 5953 | 0 | 161082 | ANPS                                  | 1.57 | 0.01 | 0.78 | 0.68 | 0.22 | 2.12 |
| 5954 | 0 | 161082 | ANPS                                  | 1.57 | 0.01 | 0.78 | 1.15 | 0.22 | 3.13 |
| 5955 | 0 | 161082 | ANPS                                  | 1.57 | 0.01 | 0.78 | 0.68 | 0.22 | 2.12 |
| 5956 | 0 | 161083 | ANPSEKNSP                             | 2.25 | 0.01 | 0.78 | 1.15 | 0.22 | 2.49 |
| 5957 | 0 | 161083 | ANPSEKNSP                             | 2.25 | 0.01 | 0.78 | 1.15 | 0.22 | 0.28 |
| 5958 | 0 | 161083 | ANPSEKNSP                             | 2.25 | 0.01 | 0.78 | 1.15 | 0.22 | 2.12 |
| 5959 | 0 | 161083 | ANPSEKNSP                             | 2.25 | 0.01 | 0.78 | 1.15 | 0.22 | 3.13 |
| 5960 | 0 | 161083 | ANPSEKNSP                             | 2.25 | 0.01 | 0.78 | 1.15 | 0.22 | 2.98 |
| 5961 | 0 | 78609  | ANPSPHQVYN                            | 2.31 | 0.01 | 3.27 | 1.12 | 0.22 | 0.28 |
| 5962 | 0 | 78609  | ANPSPHQVYN                            | 2.31 | 0.01 | 3.27 | 1.12 | 0.22 | 0.28 |
| 5963 | 0 | 78609  | ANPSPHQVYN                            | 2.31 | 0.01 | 3.27 | 1.12 | 0.22 | 0.28 |
| 5964 | 0 | 189043 | ANPTRQWIERPTTVNF                      | 2.72 | 0.01 | 2.92 | 0.68 | 0.22 | 0.28 |
| 5965 | 0 | 189043 | ANPTRQWIERPTTVNF                      | 2.72 | 0.01 | 2.92 | 2.49 | 0.22 | 0.28 |
| 5966 | 0 | 3388   | ANPVCRLWMCPIV                         | 2.60 | 0.01 | 0.90 | 0.44 | 1.41 | 0.28 |
| 5967 | 0 | 121147 | ANPVEIRRGVMLAVD                       | 2.66 | 0.01 | 2.19 | 2.97 | 0.22 | 0.28 |
| 5968 | 0 | 97203  | ANQAFKLTS                             | 2.22 | 0.01 | 3.13 | 1.12 | 0.22 | 0.28 |
| 5969 | 0 | 94434  | ANQCDFNHDDCRNTAK<br>YQVG              | 2.93 | 0.01 | 3.65 | 0.68 | 0.22 | 0.28 |
| 5970 | 0 | 94434  | ANQCDFNHDDCRNTAK<br>YQVG              | 2.93 | 0.01 | 3.65 | 0.68 | 0.22 | 0.28 |
| 5971 | 0 | 3394   | ANQPGH                                | 1.88 | 0.01 | 3.27 | 0.44 | 1.59 | 0.28 |
| 5972 | 0 | 3396   | ANQPGHLAPLGEIRPSA<br>PPL              | 2.96 | 0.01 | 3.27 | 2.37 | 0.22 | 0.28 |
| 5973 | 0 | 3396   | ANQPGHLAPLGEIRPSA<br>PPL              | 2.96 | 0.01 | 3.27 | 2.37 | 0.22 | 0.28 |

|      |   |        |                                       |      |      |      |      |      |      |
|------|---|--------|---------------------------------------|------|------|------|------|------|------|
| 5974 | 0 | 3397   | ANQPGHLAPLGEIRPSA<br>PPLPPVADLPQPGLRR | 3.45 | 0.01 | 3.27 | 0.44 | 0.85 | 0.85 |
| 5975 | 0 | 3397   | ANQPGHLAPLGEIRPSA<br>PPLPPVADLPQPGLRR | 3.45 | 0.01 | 3.27 | 3.16 | 0.22 | 0.85 |
| 5976 | 0 | 240861 | ANQRSAPQWMLPLLL                       | 2.68 | 0.01 | 3.81 | 0.44 | 1.41 | 1.28 |
| 5977 | 0 | 229071 | ANQSKAEKDYD                           | 2.42 | 0.01 | 2.70 | 0.68 | 0.22 | 0.28 |
| 5978 | 0 | 229071 | ANQSKAEKDYD                           | 2.42 | 0.01 | 2.70 | 0.68 | 0.22 | 0.28 |
| 5979 | 0 | 229072 | ANQSKAEKDYDAAVK                       | 2.70 | 0.01 | 2.70 | 0.68 | 0.22 | 0.28 |
| 5980 | 0 | 111111 | ANQSLPDRLYKS                          | 2.45 | 0.01 | 0.90 | 0.44 | 0.85 | 1.39 |
| 5981 | 0 | 102309 | ANQTEV                                | 1.88 | 0.01 | 2.25 | 0.68 | 0.22 | 0.85 |
| 5982 | 0 | 102309 | ANQTEV                                | 1.88 | 0.01 | 2.25 | 0.68 | 0.22 | 0.85 |
| 5983 | 0 | 102309 | ANQTEV                                | 1.88 | 0.01 | 2.25 | 0.68 | 0.22 | 0.85 |
| 5984 | 0 | 102309 | ANQTEV                                | 1.88 | 0.01 | 2.25 | 0.68 | 0.22 | 1.48 |
| 5985 | 0 | 102310 | ANQTEVEM                              | 2.12 | 0.01 | 2.25 | 0.68 | 0.22 | 0.85 |
| 5986 | 0 | 102310 | ANQTEVEM                              | 2.12 | 0.01 | 2.25 | 0.68 | 0.22 | 0.85 |
| 5987 | 0 | 102311 | ANQTEVEMEN                            | 2.33 | 0.01 | 2.25 | 0.68 | 0.22 | 0.85 |
| 5988 | 0 | 102311 | ANQTEVEMEN                            | 2.33 | 0.01 | 2.25 | 0.68 | 0.22 | 0.85 |
| 5989 | 0 | 3399   | ANRAVKPTGSAAIGL                       | 2.66 | 0.01 | 2.04 | 0.44 | 0.85 | 1.28 |
| 5990 | 0 | 3400   | ANRAVKPTGSAAIGLSM<br>AGS              | 2.95 | 0.01 | 2.04 | 0.44 | 0.85 | 0.28 |
| 5991 | 0 | 3402   | ANRHVKPTGSAAVVG                       | 2.66 | 0.01 | 2.04 | 0.44 | 0.85 | 1.28 |
| 5992 | 0 | 106254 | ANRLSLL                               | 2.00 | 0.01 | 0.90 | 0.68 | 0.22 | 1.39 |
| 5993 | 0 | 3404   | ANRMAAEAQKQVKSQ<br>SL                 | 2.87 | 0.01 | 0.78 | 0.44 | 1.41 | 0.28 |
| 5994 | 0 | 77832  | ANSFWVNHPTIT                          | 2.45 | 0.01 | 0.90 | 1.15 | 0.22 | 1.39 |
| 5995 | 0 | 99108  | ANSLDNWFRIFP                          | 2.45 | 0.01 | 0.90 | 1.12 | 0.22 | 1.39 |
| 5996 | 0 | 105678 | ANSYGLPREQARQLK                       | 2.67 | 0.01 | 2.16 | 0.44 | 1.23 | 0.85 |
| 5997 | 0 | 3426   | ANTANPDWDFNPNKD                       | 2.72 | 0.01 | 2.08 | 0.68 | 0.22 | 0.28 |
| 5998 | 0 | 254949 | ANTLLYSDDDELFLSQ                      | 2.67 | 0.01 | 1.61 | 0.44 | 0.85 | 1.28 |
| 5999 | 0 | 489472 | ANTLQGFNPQNGTLT                       | 2.72 | 0.01 | 2.69 | 3.05 | 0.85 | 1.28 |
| 6000 | 0 | 167211 | ANTTPRH                               | 2.01 | 0.01 | 0.90 | 1.15 | 0.22 | 1.39 |
| 6001 | 0 | 3438   | ANVPPADKYKTFEAA                       | 2.66 | 0.01 | 3.67 | 0.44 | 1.23 | 0.85 |
| 6002 | 0 | 3442   | ANVVGTRQ                              | 2.11 | 0.01 | 3.20 | 1.15 | 0.22 | 0.28 |
| 6003 | 0 | 3444   | ANVVQRNAPSWGLSRI<br>EGIV              | 3.54 | 0.01 | 3.28 | 0.44 | 1.23 | 1.39 |
| 6004 | 0 | 164593 | ANVVQSNVPSWGLARI<br>SSK               | 2.89 | 0.01 | 3.75 | 0.44 | 1.23 | 0.85 |
| 6005 | 0 | 196335 | ANWTPYL                               | 1.99 | 0.01 | 0.90 | 0.44 | 1.23 | 1.39 |
| 6006 | 0 | 107086 | ANYGYTFGSG                            | 2.33 | 0.01 | 0.78 | 1.12 | 0.22 | 0.28 |
| 6007 | 0 | 107086 | ANYGYTFGSG                            | 2.33 | 0.01 | 0.78 | 1.12 | 0.22 | 0.28 |
| 6008 | 0 | 107086 | ANYGYTFGSG                            | 2.33 | 0.01 | 0.78 | 1.12 | 0.22 | 0.28 |

|      |   |        |                        |      |      |      |      |      |      |
|------|---|--------|------------------------|------|------|------|------|------|------|
| 6009 | 0 | 106256 | ANYGYTFGSGTRLTVV       | 2.73 | 0.01 | 0.78 | 1.12 | 0.22 | 0.28 |
| 6010 | 0 | 106256 | ANYGYTFGSGTRLTVV       | 2.73 | 0.01 | 0.78 | 1.12 | 0.22 | 0.28 |
| 6011 | 0 | 106256 | ANYGYTFGSGTRLTVV       | 2.73 | 0.01 | 0.78 | 1.12 | 0.22 | 0.28 |
| 6012 | 0 | 106256 | ANYGYTFGSGTRLTVV       | 2.73 | 0.01 | 0.78 | 1.12 | 0.22 | 0.85 |
| 6013 | 0 | 106256 | ANYGYTFGSGTRLTVV       | 2.73 | 0.01 | 0.78 | 1.12 | 0.22 | 0.85 |
| 6014 | 0 | 106256 | ANYGYTFGSGTRLTVV       | 2.73 | 0.01 | 0.78 | 1.12 | 0.22 | 0.85 |
| 6015 | 0 | 106256 | ANYGYTFGSGTRLTVV       | 2.73 | 0.01 | 0.78 | 1.12 | 0.22 | 0.85 |
| 6016 | 0 | 106256 | ANYGYTFGSGTRLTVV       | 2.73 | 0.01 | 0.78 | 1.12 | 0.22 | 0.85 |
| 6017 | 0 | 106256 | ANYGYTFGSGTRLTVV       | 2.73 | 0.01 | 0.78 | 1.12 | 0.22 | 0.85 |
| 6018 | 0 | 106256 | ANYGYTFGSGTRLTVV       | 2.73 | 0.01 | 0.78 | 1.12 | 0.22 | 0.85 |
| 6019 | 0 | 106256 | ANYGYTFGSGTRLTVV       | 2.73 | 0.01 | 0.78 | 1.12 | 0.22 | 0.85 |
| 6020 | 0 | 106256 | ANYGYTFGSGTRLTVV       | 2.73 | 0.01 | 0.78 | 1.12 | 0.22 | 0.85 |
| 6021 | 0 | 106256 | ANYGYTFGSGTRLTVV       | 2.73 | 0.01 | 0.78 | 1.12 | 0.22 | 0.85 |
| 6022 | 0 | 106256 | ANYGYTFGSGTRLTVV       | 2.73 | 0.01 | 0.78 | 1.12 | 0.22 | 0.85 |
| 6023 | 0 | 106256 | ANYGYTFGSGTRLTVV       | 2.73 | 0.01 | 0.78 | 1.12 | 0.22 | 0.28 |
| 6024 | 0 | 106256 | ANYGYTFGSGTRLTVV       | 2.73 | 0.01 | 0.78 | 1.12 | 0.22 | 0.28 |
| 6025 | 0 | 106256 | ANYGYTFGSGTRLTVV       | 2.73 | 0.01 | 0.78 | 1.12 | 0.22 | 0.28 |
| 6026 | 0 | 106256 | ANYGYTFGSGTRLTVV       | 2.73 | 0.01 | 0.78 | 1.12 | 0.22 | 0.28 |
| 6027 | 0 | 106256 | ANYGYTFGSGTRLTVV       | 2.73 | 0.01 | 0.78 | 1.12 | 0.22 | 0.28 |
| 6028 | 0 | 106256 | ANYGYTFGSGTRLTVV       | 2.73 | 0.01 | 0.78 | 1.12 | 0.22 | 0.28 |
| 6029 | 0 | 106256 | ANYGYTFGSGTRLTVV       | 2.73 | 0.01 | 0.78 | 1.12 | 0.22 | 0.85 |
| 6030 | 0 | 106256 | ANYGYTFGSGTRLTVV       | 2.73 | 0.01 | 0.78 | 1.12 | 0.22 | 0.85 |
| 6031 | 0 | 106257 | ANYIGSDKYFHARGNYD<br>A | 2.86 | 0.01 | 0.78 | 1.12 | 0.22 | 0.28 |
| 6032 | 0 | 103049 | ANYTNLSLRLDNNL         | 2.64 | 0.01 | 3.93 | 2.43 | 0.22 | 0.85 |

|      |   |        |                            |      |      |      |      |      |      |
|------|---|--------|----------------------------|------|------|------|------|------|------|
| 6033 | 0 | 103049 | ANYTNLSRLDNNL              | 2.64 | 0.01 | 3.93 | 0.44 | 1.59 | 0.28 |
| 6034 | 0 | 97205  | ANYTTAVD                   | 2.14 | 0.01 | 2.87 | 0.68 | 0.22 | 0.28 |
| 6035 | 0 | 97205  | ANYTTAVD                   | 2.14 | 0.01 | 2.87 | 1.81 | 0.22 | 0.28 |
| 6036 | 0 | 255019 | APAAAAEEEEEDDDMG           | 2.71 | 0.01 | 1.61 | 0.44 | 0.85 | 1.28 |
| 6037 | 0 | 255020 | APAAAAEPEEEDDDD            | 2.72 | 0.01 | 1.61 | 0.44 | 0.85 | 1.28 |
| 6038 | 0 | 128289 | APAAGAAPAGGPAPS            | 2.75 | 0.01 | 0.78 | 0.44 | 1.13 | 0.85 |
| 6039 | 0 | 255028 | APAAGGFGSAAHTSA            | 2.73 | 0.01 | 1.61 | 0.44 | 0.85 | 1.28 |
| 6040 | 0 | 255029 | APAAGGFGSAAHTST            | 2.73 | 0.01 | 1.61 | 0.44 | 0.85 | 1.28 |
| 6041 | 0 | 255030 | APAAGGFGSATHTSA            | 2.73 | 0.01 | 1.61 | 0.44 | 0.85 | 1.28 |
| 6042 | 0 | 255031 | APAAGGFGSATHTST            | 2.73 | 0.01 | 1.61 | 0.44 | 0.85 | 1.28 |
| 6043 | 0 | 255032 | APAAGGFGSATTSTA            | 2.73 | 0.01 | 1.61 | 0.44 | 0.85 | 1.28 |
| 6044 | 0 | 255033 | APAAGGFGSATTST             | 2.74 | 0.01 | 1.61 | 0.44 | 0.85 | 1.28 |
| 6045 | 0 | 118266 | APAAGSAPAAAAEKK            | 2.71 | 0.01 | 0.78 | 0.44 | 1.13 | 0.85 |
| 6046 | 0 | 118266 | APAAGSAPAAAAEKK            | 2.71 | 0.01 | 0.78 | 0.44 | 1.13 | 0.85 |
| 6047 | 0 | 255044 | APAAPAAPAAAAEAT            | 2.75 | 0.01 | 1.61 | 0.44 | 0.85 | 1.28 |
| 6048 | 0 | 255067 | APADRDAALMATDE             | 2.71 | 0.01 | 1.61 | 0.44 | 0.85 | 1.28 |
| 6049 | 0 | 97889  | APAEPEAP                   | 2.18 | 0.01 | 2.60 | 0.68 | 0.22 | 0.85 |
| 6050 | 0 | 3474   | APAEPEAPAPETEKAEV<br>EK    | 3.02 | 0.01 | 2.60 | 0.68 | 0.22 | 1.27 |
| 6051 | 0 | 97207  | APAFADVVI                  | 2.25 | 0.01 | 3.13 | 1.12 | 0.22 | 0.28 |
| 6052 | 0 | 3476   | APAHDTPPVPDVS<br>AILRRQYNL | 3.15 | 0.01 | 2.53 | 0.44 | 0.85 | 0.28 |
| 6053 | 0 | 3476   | APAHDTPPVPDVS<br>AILRRQYNL | 3.15 | 0.01 | 2.53 | 0.44 | 0.85 | 0.28 |
| 6054 | 0 | 158581 | APAHHP                     | 2.03 | 0.01 | 0.90 | 0.44 | 1.13 | 1.39 |
| 6055 | 0 | 158581 | APAHHP                     | 2.03 | 0.01 | 0.90 | 0.44 | 1.13 | 0.85 |
| 6056 | 0 | 158582 | APAHQIP                    | 2.05 | 0.01 | 0.90 | 0.44 | 1.13 | 1.39 |
| 6057 | 0 | 435888 | APAIPAS                    | 2.06 | 0.01 | 0.90 | 0.68 | 0.22 | 0.28 |
| 6058 | 0 | 435888 | APAIPAS                    | 2.06 | 0.01 | 0.90 | 0.68 | 0.22 | 1.27 |
| 6059 | 0 | 435888 | APAIPAS                    | 2.06 | 0.01 | 0.90 | 0.68 | 0.22 | 1.27 |
| 6060 | 0 | 435888 | APAIPAS                    | 2.06 | 0.01 | 0.90 | 0.68 | 0.22 | 0.28 |
| 6061 | 0 | 435888 | APAIPAS                    | 2.06 | 0.01 | 0.90 | 0.68 | 0.22 | 0.28 |
| 6062 | 0 | 255103 | APAKAAAAPAKAAA             | 2.72 | 0.01 | 1.61 | 0.44 | 0.85 | 1.28 |
| 6063 | 0 | 255104 | APAKAAAAPAKAAAP            | 2.74 | 0.01 | 1.61 | 0.44 | 0.85 | 1.28 |
| 6064 | 0 | 255105 | APAKAAAAPAKAATA            | 2.75 | 0.01 | 1.61 | 0.44 | 0.85 | 1.28 |
| 6065 | 0 | 255106 | APAKAAAAPAKAAAP            | 2.73 | 0.01 | 1.61 | 0.44 | 0.85 | 1.28 |
| 6066 | 0 | 255107 | APAKAAAAPPAAARSA           | 2.74 | 0.01 | 1.61 | 0.44 | 0.85 | 1.28 |

|      |   |        |                          |      |      |      |      |      |      |
|------|---|--------|--------------------------|------|------|------|------|------|------|
| 6067 | 0 | 255108 | APAKAAAPPAKAAAP          | 2.74 | 0.01 | 1.61 | 0.44 | 0.85 | 1.28 |
| 6068 | 0 | 255109 | APAKAAAPPAKTAAA          | 2.73 | 0.01 | 1.61 | 0.44 | 0.85 | 1.28 |
| 6069 | 0 | 255110 | APAKAATAPAKAAAA          | 2.73 | 0.01 | 1.61 | 0.44 | 0.85 | 1.28 |
| 6070 | 0 | 255111 | APAKAATAPAKAATA          | 2.76 | 0.01 | 1.61 | 0.44 | 0.85 | 1.28 |
| 6071 | 0 | 95247  | APAKQLLP                 | 2.16 | 0.01 | 0.90 | 2.59 | 0.22 | 0.28 |
| 6072 | 0 | 511450 | APAKTADTPATSKAT          | 2.75 | 0.01 | 2.24 | 0.44 | 1.41 | 1.28 |
| 6073 | 0 | 117749 | APAMIPP                  | 2.03 | 0.01 | 0.78 | 0.44 | 1.13 | 0.28 |
| 6074 | 0 | 450437 | APANTFT                  | 2.05 | 0.01 | 0.90 | 0.44 | 1.41 | 1.39 |
| 6075 | 0 | 255133 | APAPKAAAPAKAAA           | 2.73 | 0.01 | 1.61 | 0.44 | 0.85 | 1.28 |
| 6076 | 0 | 127578 | APAPRTRYPTRAPSG          | 2.73 | 0.01 | 0.78 | 0.44 | 1.13 | 0.85 |
| 6077 | 0 | 178121 | APAPTARNKLTSE            | 2.56 | 3.33 | 0.78 | 0.44 | 1.13 | 0.28 |
| 6078 | 0 | 136054 | APAPTP                   | 1.92 | 0.01 | 0.78 | 2.04 | 0.22 | 0.28 |
| 6079 | 0 | 3486   | APAPTPTFAGTQTPVNG<br>NSP | 2.99 | 0.01 | 2.76 | 0.44 | 1.59 | 0.28 |
| 6080 | 0 | 3487   | APARGEPAAG               | 2.37 | 3.55 | 2.70 | 0.44 | 0.85 | 0.28 |
| 6081 | 0 | 3488   | APARQLP                  | 2.05 | 0.01 | 0.90 | 1.15 | 0.22 | 1.39 |
| 6082 | 0 | 3488   | APARQLP                  | 2.05 | 0.01 | 0.90 | 1.15 | 0.22 | 1.66 |
| 6083 | 0 | 3488   | APARQLP                  | 2.05 | 0.01 | 0.90 | 1.15 | 0.22 | 1.66 |
| 6084 | 0 | 3488   | APARQLP                  | 2.05 | 0.01 | 0.90 | 1.15 | 0.22 | 1.66 |
| 6085 | 0 | 255173 | APAVGGFGSATTSA           | 2.72 | 0.01 | 1.61 | 0.44 | 0.85 | 1.28 |
| 6086 | 0 | 3493   | APAVKYTVFETALKKAIT<br>AM | 2.96 | 0.01 | 3.00 | 0.44 | 1.23 | 0.28 |
| 6087 | 0 | 3493   | APAVKYTVFETALKKAIT<br>AM | 2.96 | 0.01 | 3.00 | 1.15 | 0.22 | 0.28 |
| 6088 | 0 | 3493   | APAVKYTVFETALKKAIT<br>AM | 2.96 | 0.01 | 3.00 | 3.27 | 0.22 | 0.28 |
| 6089 | 0 | 3493   | APAVKYTVFETALKKAIT<br>AM | 2.96 | 0.01 | 3.00 | 3.27 | 0.22 | 0.28 |
| 6090 | 0 | 3493   | APAVKYTVFETALKKAIT<br>AM | 2.96 | 0.01 | 3.00 | 1.81 | 0.22 | 0.28 |
| 6091 | 0 | 3502   | APCIPYVRGG               | 2.29 | 0.01 | 3.33 | 0.44 | 1.23 | 0.85 |
| 6092 | 0 | 230444 | APDDPAWQNIFNLRR          | 2.66 | 0.01 | 0.90 | 0.44 | 0.85 | 0.85 |
| 6093 | 0 | 230444 | APDDPAWQNIFNLRR          | 2.66 | 0.01 | 0.90 | 2.89 | 0.22 | 0.85 |
| 6094 | 0 | 151795 | APDDRSYKSQY              | 2.40 | 0.01 | 0.78 | 0.44 | 1.13 | 0.28 |
| 6095 | 0 | 134010 | APDDRSYKSQYLNNGP<br>QRIG | 2.93 | 0.01 | 0.78 | 0.44 | 2.35 | 0.28 |
| 6096 | 0 | 127933 | APDDSFKKLEDRFTNLKF       | 2.85 | 0.01 | 2.40 | 2.75 | 0.22 | 0.28 |
| 6097 | 0 | 127933 | APDDSFKKLEDRFTNLKF       | 2.85 | 0.01 | 2.40 | 2.75 | 0.22 | 0.85 |

|      |   |        |                               |      |      |      |      |      |      |
|------|---|--------|-------------------------------|------|------|------|------|------|------|
| 6098 | 0 | 127933 | APDDSFKKLED RFTNLKF           | 2.85 | 0.01 | 2.40 | 2.75 | 0.22 | 1.34 |
| 6099 | 0 | 136136 | APDGAVFQLDRP                  | 2.48 | 0.01 | 3.48 | 3.70 | 0.85 | 1.34 |
| 6100 | 0 | 3507   | APDKEILYEA FDEM               | 2.62 | 0.01 | 2.69 | 0.44 | 0.85 | 0.28 |
| 6101 | 0 | 3507   | APDKEILYEA FDEM               | 2.62 | 0.01 | 2.69 | 0.44 | 0.85 | 0.28 |
| 6102 | 0 | 3507   | APDKEILYEA FDEM               | 2.62 | 0.01 | 2.69 | 0.44 | 0.85 | 0.28 |
| 6103 | 0 | 3507   | APDKEILYEA FDEM               | 2.62 | 0.01 | 2.69 | 0.44 | 0.85 | 0.28 |
| 6104 | 0 | 3507   | APDKEILYEA FDEM               | 2.62 | 0.01 | 2.69 | 0.44 | 1.41 | 0.28 |
| 6105 | 0 | 3508   | APDKEVLYEA FDEM               | 2.62 | 0.01 | 2.69 | 0.44 | 0.85 | 0.28 |
| 6106 | 0 | 3508   | APDKEVLYEA FDEM               | 2.62 | 0.01 | 2.69 | 0.44 | 1.41 | 0.28 |
| 6107 | 0 | 3508   | APDKEVLYEA FDEM               | 2.62 | 0.01 | 2.69 | 0.44 | 0.85 | 0.28 |
| 6108 | 0 | 3508   | APDKEVLYEA FDEM               | 2.62 | 0.01 | 2.69 | 0.44 | 0.85 | 0.28 |
| 6109 | 0 | 3508   | APDKEVLYEA FDEM               | 2.62 | 0.01 | 2.69 | 0.44 | 0.85 | 0.28 |
| 6110 | 0 | 120406 | APDMFEYMNK                    | 2.29 | 0.01 | 2.18 | 2.16 | 0.22 | 0.28 |
| 6111 | 0 | 120406 | APDMFEYMNK                    | 2.29 | 0.01 | 2.18 | 2.16 | 0.22 | 0.28 |
| 6112 | 0 | 180963 | APDPPLSRR                     | 2.22 | 0.01 | 2.04 | 0.68 | 0.22 | 1.27 |
| 6113 | 0 | 180963 | APDPPLSRR                     | 2.22 | 0.01 | 2.04 | 0.68 | 0.22 | 1.27 |
| 6114 | 0 | 180963 | APDPPLSRR                     | 2.22 | 0.01 | 2.04 | 0.68 | 0.22 | 1.27 |
| 6115 | 0 | 180963 | APDPPLSRR                     | 2.22 | 0.01 | 2.04 | 0.68 | 0.22 | 1.27 |
| 6116 | 0 | 180963 | APDPPLSRR                     | 2.22 | 0.01 | 2.04 | 0.68 | 0.22 | 1.27 |
| 6117 | 0 | 180963 | APDPPLSRR                     | 2.22 | 0.01 | 2.04 | 0.68 | 0.22 | 1.27 |
| 6118 | 0 | 180963 | APDPPLSRR                     | 2.22 | 0.01 | 2.04 | 0.68 | 0.22 | 1.27 |
| 6119 | 0 | 180963 | APDPPLSRR                     | 2.22 | 0.01 | 2.04 | 0.68 | 0.22 | 1.27 |
| 6120 | 0 | 180963 | APDPPLSRR                     | 2.22 | 0.01 | 2.04 | 0.68 | 0.22 | 1.27 |
| 6121 | 0 | 180963 | APDPPLSRR                     | 2.22 | 0.01 | 2.04 | 0.68 | 0.22 | 1.27 |
| 6122 | 0 | 180963 | APDPPLSRR                     | 2.22 | 0.01 | 2.04 | 0.68 | 0.22 | 1.27 |
| 6123 | 0 | 139689 | APDPSVITLNS                   | 2.45 | 0.01 | 2.75 | 1.20 | 0.22 | 0.28 |
| 6124 | 0 | 136137 | APDRKGFRLLLASPRSCY<br>KL      | 2.96 | 0.01 | 0.78 | 0.44 | 1.13 | 0.28 |
| 6125 | 0 | 99110  | APDRRVEI                      | 2.11 | 0.01 | 2.24 | 0.68 | 0.22 | 0.28 |
| 6126 | 0 | 3514   | APDTR                         | 1.74 | 0.01 | 0.78 | 3.97 | 0.22 | 1.34 |
| 6127 | 0 | 3514   | APDTR                         | 1.74 | 0.01 | 0.78 | 3.97 | 0.22 | 2.12 |
| 6128 | 0 | 3516   | APDTRP                        | 1.90 | 0.01 | 0.78 | 0.68 | 0.22 | 1.34 |
| 6129 | 0 | 3516   | APDTRP                        | 1.90 | 0.01 | 0.78 | 0.68 | 0.22 | 2.12 |
| 6130 | 0 | 3516   | APDTRP                        | 1.90 | 0.01 | 0.78 | 0.68 | 0.22 | 2.49 |
| 6131 | 0 | 3516   | APDTRP                        | 1.90 | 0.01 | 0.78 | 0.68 | 0.22 | 2.49 |
| 6132 | 0 | 3516   | APDTRP                        | 1.90 | 0.01 | 0.78 | 0.68 | 0.22 | 2.49 |
| 6133 | 0 | 3516   | APDTRP                        | 1.90 | 0.01 | 0.78 | 0.68 | 0.22 | 2.49 |
| 6134 | 0 | 3516   | APDTRP                        | 1.90 | 0.01 | 0.78 | 0.68 | 0.22 | 2.75 |
| 6135 | 0 | 3516   | APDTRP                        | 1.90 | 0.01 | 0.78 | 0.68 | 0.22 | 2.75 |
| 6136 | 0 | 3516   | APDTRP                        | 1.90 | 0.01 | 0.78 | 0.68 | 0.22 | 2.75 |
| 6137 | 0 | 3516   | APDTRP                        | 1.90 | 0.01 | 0.78 | 0.68 | 0.22 | 2.75 |
| 6138 | 0 | 3517   | APDTRPAP                      | 2.17 | 0.01 | 0.78 | 0.68 | 0.22 | 1.34 |
| 6139 | 0 | 3517   | APDTRPAP                      | 2.17 | 0.01 | 0.78 | 0.68 | 0.22 | 2.12 |
| 6140 | 0 | 131354 | APDVQDCPECTLQENPF<br>FSQPGAPI | 3.15 | 0.01 | 0.78 | 1.12 | 0.22 | 2.56 |

|      |   |        |                                                 |      |      |      |      |      |      |
|------|---|--------|-------------------------------------------------|------|------|------|------|------|------|
| 6141 | 0 | 131354 | APDVQDCPECTLQENPF<br>FSQPGAPI                   | 3.15 | 0.01 | 0.78 | 1.12 | 0.22 | 2.56 |
| 6142 | 0 | 131354 | APDVQDCPECTLQENPF<br>FSQPGAPI                   | 3.15 | 0.01 | 0.78 | 1.12 | 0.22 | 2.56 |
| 6143 | 0 | 131354 | APDVQDCPECTLQENPF<br>FSQPGAPI                   | 3.15 | 0.01 | 0.78 | 1.12 | 0.22 | 2.56 |
| 6144 | 0 | 131354 | APDVQDCPECTLQENPF<br>FSQPGAPI                   | 3.15 | 0.01 | 0.78 | 1.12 | 0.22 | 0.28 |
| 6145 | 0 | 131354 | APDVQDCPECTLQENPF<br>FSQPGAPI                   | 3.15 | 0.01 | 0.78 | 1.12 | 0.22 | 2.56 |
| 6146 | 0 | 3518   | APDYVPPTVHGCALPPR                               | 2.79 | 0.01 | 2.59 | 0.44 | 0.85 | 0.28 |
| 6147 | 0 | 3518   | APDYVPPTVHGCALPPR                               | 2.79 | 0.01 | 2.59 | 0.44 | 0.85 | 0.28 |
| 6148 | 0 | 3518   | APDYVPPTVHGCALPPR                               | 2.79 | 0.01 | 2.59 | 0.44 | 0.85 | 0.28 |
| 6149 | 0 | 3518   | APDYVPPTVHGCALPPR                               | 2.79 | 0.01 | 2.59 | 0.44 | 0.85 | 0.28 |
| 6150 | 0 | 475831 | APEAESTMDDKKEVECK<br>C                          | 2.86 | 0.01 | 0.90 | 0.68 | 0.22 | 0.28 |
| 6151 | 0 | 3524   | APEARQ                                          | 1.91 | 0.01 | 1.96 | 0.44 | 0.85 | 0.28 |
| 6152 | 0 | 3525   | APEARQAIKSLT                                    | 2.46 | 0.01 | 1.96 | 0.44 | 0.85 | 0.28 |
| 6153 | 0 | 3526   | APEARQAIRSLT                                    | 2.48 | 0.01 | 1.96 | 0.44 | 0.85 | 0.28 |
| 6154 | 0 | 3528   | APEDQSPETRRLDRLSR                               | 2.88 | 0.01 | 3.14 | 1.20 | 0.22 | 0.28 |
| 6155 | 0 | 3528   | APEDQSPETRRLDRLSR                               | 2.88 | 0.01 | 3.14 | 2.13 | 1.59 | 0.28 |
| 6156 | 0 | 3528   | APEDQSPETRRLDRLSR                               | 2.88 | 0.01 | 3.14 | 2.13 | 0.22 | 0.28 |
| 6157 | 0 | 3528   | APEDQSPETRRLDRLSR                               | 2.88 | 0.01 | 3.14 | 2.49 | 0.22 | 0.28 |
| 6158 | 0 | 3528   | APEDQSPETRRLDRLSR                               | 2.88 | 0.01 | 3.14 | 2.49 | 0.22 | 0.28 |
| 6159 | 0 | 164204 | APEHSQLRHMDP                                    | 2.45 | 0.01 | 0.90 | 1.20 | 0.22 | 1.39 |
| 6160 | 0 | 3538   | APENAYQAYAAPQLFPV<br>SDITQ                      | 3.03 | 0.01 | 2.43 | 0.44 | 1.59 | 0.28 |
| 6161 | 0 | 3539   | APENKGTG                                        | 2.12 | 0.01 | 3.42 | 0.68 | 0.22 | 0.28 |
| 6162 | 0 | 142387 | APENKGTGQHGHMHG<br>SRNNHPQNTSDSQKEC<br>TDGNKENC | 3.65 | 0.01 | 1.66 | 0.44 | 1.74 | 0.28 |
| 6163 | 0 | 142387 | APENKGTGQHGHMHG<br>SRNNHPQNTSDSQKEC<br>TDGNKENC | 3.65 | 0.01 | 1.66 | 0.44 | 1.74 | 0.28 |
| 6164 | 0 | 3542   | APETEK                                          | 1.90 | 0.01 | 2.60 | 0.68 | 0.22 | 0.85 |
| 6165 | 0 | 3542   | APETEK                                          | 1.90 | 0.01 | 2.60 | 0.68 | 0.22 | 1.27 |
| 6166 | 0 | 115591 | APEYRGRTLLK                                     | 2.46 | 0.01 | 0.78 | 0.44 | 1.41 | 0.28 |
| 6167 | 0 | 115591 | APEYRGRTLLK                                     | 2.46 | 0.01 | 0.78 | 0.44 | 1.13 | 0.28 |

|      |   |        |                                           |      |      |      |      |      |      |
|------|---|--------|-------------------------------------------|------|------|------|------|------|------|
| 6168 | 0 | 115591 | APEYRGRTTELLK                             | 2.46 | 0.01 | 0.78 | 0.44 | 1.13 | 0.28 |
| 6169 | 0 | 115591 | APEYRGRTTELLK                             | 2.46 | 0.01 | 0.78 | 0.44 | 1.13 | 0.28 |
| 6170 | 0 | 115591 | APEYRGRTTELLK                             | 2.46 | 0.01 | 0.78 | 0.44 | 1.41 | 0.28 |
| 6171 | 0 | 114737 | APFDVIGPQEPILAVVGE<br>DAELPCRL            | 3.22 | 0.01 | 1.60 | 0.44 | 1.13 | 0.28 |
| 6172 | 0 | 114737 | APFDVIGPQEPILAVVGE<br>DAELPCRL            | 3.22 | 0.01 | 1.60 | 0.44 | 1.41 | 0.28 |
| 6173 | 0 | 114737 | APFDVIGPQEPILAVVGE<br>DAELPCRL            | 3.22 | 0.01 | 1.60 | 0.44 | 1.59 | 0.28 |
| 6174 | 0 | 255309 | APFGQAAAADKPSLF                           | 2.68 | 0.01 | 1.61 | 0.44 | 0.85 | 1.28 |
| 6175 | 0 | 255310 | APFGQAAAAGDKLSLF                          | 2.69 | 0.01 | 1.61 | 0.44 | 0.85 | 1.28 |
| 6176 | 0 | 255311 | APFGQAAAAGDKPAPF                          | 2.73 | 0.01 | 1.61 | 0.44 | 0.85 | 1.28 |
| 6177 | 0 | 255312 | APFGQAAAAGDKPSPF                          | 2.70 | 0.01 | 1.61 | 0.44 | 0.85 | 1.28 |
| 6178 | 0 | 511498 | APFPPRPRFRRALRTDPE<br>GV                  | 2.98 | 0.01 | 2.40 | 0.44 | 1.59 | 1.28 |
| 6179 | 0 | 188647 | APGANQEGGAA                               | 2.42 | 0.01 | 3.97 | 1.81 | 0.22 | 0.28 |
| 6180 | 0 | 3558   | APGANQEGGAAAPGA<br>NQEGGAA                | 3.09 | 0.01 | 3.97 | 2.42 | 0.22 | 0.28 |
| 6181 | 0 | 3559   | APGANQEGGAAAPGA<br>NQEGGAAAPGANQEG<br>GAA | 3.49 | 0.01 | 3.97 | 0.44 | 0.85 | 0.28 |
| 6182 | 0 | 3559   | APGANQEGGAAAPGA<br>NQEGGAAAPGANQEG<br>GAA | 3.49 | 0.01 | 3.97 | 1.15 | 0.22 | 0.28 |
| 6183 | 0 | 3559   | APGANQEGGAAAPGA<br>NQEGGAAAPGANQEG<br>GAA | 3.49 | 0.01 | 3.97 | 1.15 | 0.22 | 0.28 |
| 6184 | 0 | 3559   | APGANQEGGAAAPGA<br>NQEGGAAAPGANQEG<br>GAA | 3.49 | 0.01 | 3.97 | 4.08 | 1.59 | 0.28 |
| 6185 | 0 | 3559   | APGANQEGGAAAPGA<br>NQEGGAAAPGANQEG<br>GAA | 3.49 | 0.01 | 3.97 | 0.44 | 1.74 | 0.28 |
| 6186 | 0 | 138144 | APGAPAPGQAPAVE                            | 2.68 | 0.01 | 2.51 | 1.20 | 0.22 | 0.28 |
| 6187 | 0 | 138144 | APGAPAPGQAPAVE                            | 2.68 | 0.01 | 2.51 | 1.20 | 0.22 | 0.28 |
| 6188 | 0 | 138145 | APGAPAPNGQPAPA                            | 2.69 | 0.01 | 2.51 | 1.20 | 0.22 | 0.28 |
| 6189 | 0 | 108278 | APGEDGRPGPPGP                             | 2.60 | 4.93 | 0.78 | 0.68 | 0.22 | 0.28 |
| 6190 | 0 | 3562   | APGEKDGKIVPA                              | 2.50 | 0.01 | 4.33 | 0.68 | 0.22 | 0.28 |
| 6191 | 0 | 3562   | APGEKDGKIVPA                              | 2.50 | 0.01 | 4.33 | 0.68 | 0.22 | 0.28 |
| 6192 | 0 | 3565   | APGEVTAFCS                                | 2.30 | 3.55 | 2.70 | 0.44 | 0.85 | 0.28 |
| 6193 | 0 | 108782 | APGFPGAR                                  | 2.17 | 0.01 | 1.60 | 2.55 | 2.60 | 0.28 |
| 6194 | 0 | 3567   | APGGGF                                    | 1.91 | 0.01 | 2.96 | 0.44 | 0.85 | 0.28 |
| 6195 | 0 | 114738 | APGGTLQQLFYSFNVGQ<br>SELV                 | 2.99 | 0.01 | 2.19 | 2.04 | 0.22 | 0.28 |
| 6196 | 0 | 3568   | APGICIDVDNEDLFFIAD<br>K                   | 2.89 | 0.01 | 3.45 | 0.44 | 0.22 | 1.57 |



|      |   |      |                      |      |      |      |      |      |      |
|------|---|------|----------------------|------|------|------|------|------|------|
|      |   |      | APGICIDVDNEDLFFIAD   |      |      |      |      |      |      |
|      |   |      | KNSFSDDLKNERIEYDT    |      |      |      |      |      |      |
|      |   |      | QSNYIENRSSIDELIDTN   |      |      |      |      |      |      |
|      |   |      | LISKIELPSENTESLTDFN  |      |      |      |      |      |      |
|      |   |      | VDVPVYEKQPAIKKIFTD   |      |      |      |      |      |      |
|      |   |      | ENTIFQYLYSQTFLDIRD   |      |      |      |      |      |      |
|      |   |      | ISLTSSFDDALLFSNKVYS  |      |      |      |      |      |      |
|      |   |      | FFSMDYIKTANKVVEAG    |      |      |      |      |      |      |
|      |   |      | LFAGWVKQIVDDFVIEA    |      |      |      |      |      |      |
|      |   |      | NKSSTMDKIADISLIVPYI  |      |      |      |      |      |      |
|      |   |      | GLALNVGNETAKGNFE     |      |      |      |      |      |      |
|      |   |      | NAFEIAGASILLEFIPELLI |      |      |      |      |      |      |
|      |   |      | PVVGAFLLSYIDNKNKII   |      |      |      |      |      |      |
| 6197 | 0 | 3569 | KTIDNALTKRDEKWIDM    | 6.20 | 0.01 | 4.33 | 1.15 | 0.22 | 0.28 |
|      |   |      | YGLIVAQWLSTVNTQFY    |      |      |      |      |      |      |
|      |   |      | TIKEGMYKALNYQAQAL    |      |      |      |      |      |      |
|      |   |      | EEIIKYKYNIESEKEKNIN  |      |      |      |      |      |      |
|      |   |      | IDFNDINSKLNEGINQAV   |      |      |      |      |      |      |
|      |   |      | DNINNFINECSVSYLMK    |      |      |      |      |      |      |
|      |   |      | KMIPLAVEKLLDFDNTLK   |      |      |      |      |      |      |
|      |   |      | KNLLNYIDENKLYLIGSAE  |      |      |      |      |      |      |
|      |   |      | YEKSKVDKHLKTIIPFELS  |      |      |      |      |      |      |
|      |   |      | MYTNNTILIEIFNKYNSEI  |      |      |      |      |      |      |
|      |   |      | LNNIILNLRYRDNNLIDLS  |      |      |      |      |      |      |
|      |   |      | GYGANVEVYDGVLEND     |      |      |      |      |      |      |
|      |   |      | KNQFKLTSSTNSEIRVTQ   |      |      |      |      |      |      |
|      |   |      | NQNIIFNSMFLDFSVSF    |      |      |      |      |      |      |
|      |   |      | MMNDKVMNDG           |      |      |      |      |      |      |

|      |   |      |                      |      |      |      |      |      |      |
|------|---|------|----------------------|------|------|------|------|------|------|
|      |   |      | APGICIDVDNEDLFFIAD   |      |      |      |      |      |      |
|      |   |      | KNSFSDDLKNERIEYDT    |      |      |      |      |      |      |
|      |   |      | QSNYIENRSSIDELIDTN   |      |      |      |      |      |      |
|      |   |      | LISKIELPSENTESLTDFN  |      |      |      |      |      |      |
|      |   |      | VDVPVYEKQPAIKKIFTD   |      |      |      |      |      |      |
|      |   |      | ENTIFQYLYSQTFLDIRD   |      |      |      |      |      |      |
|      |   |      | ISLTSSFDDALLFSNKVYS  |      |      |      |      |      |      |
|      |   |      | FFSMDYIKTANKVVEAG    |      |      |      |      |      |      |
|      |   |      | LFAGWVKQIVDDFVIEA    |      |      |      |      |      |      |
|      |   |      | NKSSTMDKIADISLIVPYI  |      |      |      |      |      |      |
|      |   |      | GLALNVGNETAKGNFE     |      |      |      |      |      |      |
|      |   |      | NAFEIAGASILLEFIPELLI |      |      |      |      |      |      |
|      |   |      | PVVGAFLLSYIDNKNKII   |      |      |      |      |      |      |
| 6198 | 0 | 3569 | KTIDNALTKRDEKWIDM    | 6.20 | 0.01 | 4.33 | 1.15 | 0.22 | 0.28 |
|      |   |      | YGLIVAQWLSTVNTQFY    |      |      |      |      |      |      |
|      |   |      | TIKEGMYKALNYQAQAL    |      |      |      |      |      |      |
|      |   |      | EEIIKYKYNIESEKEKNIN  |      |      |      |      |      |      |
|      |   |      | IDFNDINSKLNEGINQAV   |      |      |      |      |      |      |
|      |   |      | DNINNFINECSVSYLMK    |      |      |      |      |      |      |
|      |   |      | KMIPLAVEKLLDFDNTLK   |      |      |      |      |      |      |
|      |   |      | KNLLNYIDENKLYLIGSAE  |      |      |      |      |      |      |
|      |   |      | YEKSKVDKHLKTIIPFELS  |      |      |      |      |      |      |
|      |   |      | MYTNNTILIEIFNKYNSEI  |      |      |      |      |      |      |
|      |   |      | LNNIILNLRYRDNNLIDLS  |      |      |      |      |      |      |
|      |   |      | GYGANVEVYDGVELND     |      |      |      |      |      |      |
|      |   |      | KNQFKLTSSTNSEIRVTQ   |      |      |      |      |      |      |
|      |   |      | NQNIIFNSMFLDFSVSF    |      |      |      |      |      |      |
|      |   |      | MMNDKVMNDG           |      |      |      |      |      |      |

|      |   |      |                      |      |      |      |      |      |      |
|------|---|------|----------------------|------|------|------|------|------|------|
|      |   |      | APGICIDVDNEDLFFIAD   |      |      |      |      |      |      |
|      |   |      | KNSFSDDLKNERIEYNT    |      |      |      |      |      |      |
|      |   |      | QSNYIENDFPINELIDTD   |      |      |      |      |      |      |
|      |   |      | LISKIELPSENTESLTDFN  |      |      |      |      |      |      |
|      |   |      | VDVPVYEKQPAIKKIFTD   |      |      |      |      |      |      |
|      |   |      | ENTIFQYLYSQTFFPLDIRD |      |      |      |      |      |      |
|      |   |      | ISLTSSFDDALLFSNKVYS  |      |      |      |      |      |      |
|      |   |      | FFSMDYIKTANKVVEAG    |      |      |      |      |      |      |
|      |   |      | LFAGWVKQIVNDFVIEA    |      |      |      |      |      |      |
|      |   |      | NKSNTMDKIADISLIVPYI  |      |      |      |      |      |      |
|      |   |      | GLALNVGNETAKGNFE     |      |      |      |      |      |      |
|      |   |      | NAFEIAGASILLEFIPELLI |      |      |      |      |      |      |
| 6199 | 0 | 3570 | PVVGAFLLSYIDNKNKII   | 6.10 | 0.01 | 4.45 | 0.68 | 0.22 | 0.85 |
|      |   |      | KTIDNALTKRNEKWSD     |      |      |      |      |      |      |
|      |   |      | MYGLIVAQWLSTVNTQ     |      |      |      |      |      |      |
|      |   |      | FYTIKEGMYKALNYQAQ    |      |      |      |      |      |      |
|      |   |      | ALEEEIKYRYNIYSEKEKSN |      |      |      |      |      |      |
|      |   |      | INIDFNDINSKLNEGINQ   |      |      |      |      |      |      |
|      |   |      | AIDNINNFINGCSVSYLM   |      |      |      |      |      |      |
|      |   |      | KKMIPLAVEKLLDFDNTL   |      |      |      |      |      |      |
|      |   |      | KKNLLNYIDENKLYLIGSA  |      |      |      |      |      |      |
|      |   |      | EYEKSKVNKYLKTIMPF    |      |      |      |      |      |      |
|      |   |      | LSIYTNDTILIEFMFNKYNS |      |      |      |      |      |      |
|      |   |      | EILNNIILNLRYKDNNLID  |      |      |      |      |      |      |
|      |   |      | LSGYGAKVEVYDGVELN    |      |      |      |      |      |      |

|      |   |      |                      |      |      |      |      |      |      |
|------|---|------|----------------------|------|------|------|------|------|------|
|      |   |      | APGICIDVDNEDLFFIAD   |      |      |      |      |      |      |
|      |   |      | KNSFSDDLKNERIEYNT    |      |      |      |      |      |      |
|      |   |      | QSNYIENDFPINELIDTD   |      |      |      |      |      |      |
|      |   |      | LISKIELPSENTESLTDFN  |      |      |      |      |      |      |
|      |   |      | VDVPVYEKQPAIKKIFTD   |      |      |      |      |      |      |
|      |   |      | ENTIFQYLYSQTFFPLDIRD |      |      |      |      |      |      |
|      |   |      | ISLTSSFDDALLFSNKVYS  |      |      |      |      |      |      |
|      |   |      | FFSMDYIKTANKVVEAG    |      |      |      |      |      |      |
|      |   |      | LFAGWVKQIVNDFVIEA    |      |      |      |      |      |      |
|      |   |      | NKSNTMDKIADISLIVPYI  |      |      |      |      |      |      |
|      |   |      | GLALNVGNETAKGNFE     |      |      |      |      |      |      |
|      |   |      | NAFEIAGASILLEFIPELLI |      |      |      |      |      |      |
| 6200 | 0 | 3570 | PVVGAFLLSYIDNKNKII   | 6.10 | 0.01 | 4.45 | 0.68 | 0.22 | 0.28 |
|      |   |      | KTIDNALTKRNEKWSD     |      |      |      |      |      |      |
|      |   |      | MYGLIVAQWLSTVNTQ     |      |      |      |      |      |      |
|      |   |      | FYTIKEGMYKALNYQAQ    |      |      |      |      |      |      |
|      |   |      | ALEEEIKYRYNIYSEKEKSN |      |      |      |      |      |      |
|      |   |      | INIDFNDINSKLNEGINQ   |      |      |      |      |      |      |
|      |   |      | AIDNINNFINGCSVSYLM   |      |      |      |      |      |      |
|      |   |      | KKMIPLAVEKLLDFDNTL   |      |      |      |      |      |      |
|      |   |      | KKNLLNYIDENKLYLIGSA  |      |      |      |      |      |      |
|      |   |      | EYEKSKVNKYLKTIMPFD   |      |      |      |      |      |      |
|      |   |      | LSIYTNDTILIEMFNKYNS  |      |      |      |      |      |      |
|      |   |      | EILNNIILNLRYKDNNLID  |      |      |      |      |      |      |
|      |   |      | LSGYGAKVEVYDGVELN    |      |      |      |      |      |      |

|      |   |      |                      |      |      |      |      |      |      |
|------|---|------|----------------------|------|------|------|------|------|------|
|      |   |      | APGICIDVDNEDLFFIAD   |      |      |      |      |      |      |
|      |   |      | KNSFSDDLKNERIEYNT    |      |      |      |      |      |      |
|      |   |      | QSNYIENDFPINELIDTD   |      |      |      |      |      |      |
|      |   |      | LISKIELPSENTESLTDFN  |      |      |      |      |      |      |
|      |   |      | VDVPVYEKQPAIKKIFTD   |      |      |      |      |      |      |
|      |   |      | ENTIFQYLYSQTFFPLDIRD |      |      |      |      |      |      |
|      |   |      | ISLTSSFDDALLFSNKVYS  |      |      |      |      |      |      |
|      |   |      | FFSMDYIKTANKVVEAG    |      |      |      |      |      |      |
|      |   |      | LFAGWVKQIVNDFVIEA    |      |      |      |      |      |      |
|      |   |      | NKSNTMDKIADISLIVPYI  |      |      |      |      |      |      |
|      |   |      | GLALNVGNETAKGNFE     |      |      |      |      |      |      |
|      |   |      | NAFEIAGASILLEFIPELLI |      |      |      |      |      |      |
| 6201 | 0 | 3570 | PVVGAFLLSYIDNKNKII   | 6.10 | 0.01 | 4.45 | 0.68 | 0.22 | 1.34 |
|      |   |      | KTIDNALTKRNEKWSD     |      |      |      |      |      |      |
|      |   |      | MYGLIVAQWLSTVNTQ     |      |      |      |      |      |      |
|      |   |      | FYTIKEGMYKALNYQAQ    |      |      |      |      |      |      |
|      |   |      | ALEEEIKYRYNIYSEKEKSN |      |      |      |      |      |      |
|      |   |      | INIDFNDINSKLNEGINQ   |      |      |      |      |      |      |
|      |   |      | AIDNINNFINGCSVSYLM   |      |      |      |      |      |      |
|      |   |      | KKMIPLAVEKLLDFDNTL   |      |      |      |      |      |      |
|      |   |      | KKNLLNYIDENKLYLIGSA  |      |      |      |      |      |      |
|      |   |      | EYEKSKVNKYLKTIMPF    |      |      |      |      |      |      |
|      |   |      | LSIYTNDTILIEFMFNKYS  |      |      |      |      |      |      |
|      |   |      | EILNNIILNLRYKDNNLID  |      |      |      |      |      |      |
|      |   |      | LSGYGAKVEVYDGVELN    |      |      |      |      |      |      |

|      |   |      |                      |      |      |      |      |      |      |
|------|---|------|----------------------|------|------|------|------|------|------|
|      |   |      | APGICIDVDNEDLFFIAD   |      |      |      |      |      |      |
|      |   |      | KNSFSDDLKNERIEYNT    |      |      |      |      |      |      |
|      |   |      | QSNYIENDFPINELIDTD   |      |      |      |      |      |      |
|      |   |      | LISKIELPSENTESLTDFN  |      |      |      |      |      |      |
|      |   |      | VDVPVYEKQPAIKKIFTD   |      |      |      |      |      |      |
|      |   |      | ENTIFQYLYSQTFPLDIRD  |      |      |      |      |      |      |
|      |   |      | ISLTSSFDDALLFSNKVYS  |      |      |      |      |      |      |
|      |   |      | FFSMDYIKTANKVVEAG    |      |      |      |      |      |      |
|      |   |      | LFAGWVKQIVNDFVIEA    |      |      |      |      |      |      |
|      |   |      | NKSNTMDKIADISLIVPYI  |      |      |      |      |      |      |
|      |   |      | GLALNVGNETAKGNFE     |      |      |      |      |      |      |
|      |   |      | NAFEIAGASILLEFIPELLI |      |      |      |      |      |      |
|      |   |      | PVVGAFLLSYIDNKNKII   |      |      |      |      |      |      |
| 6202 | 0 | 3571 | KTIDNALTKRNEKWSD     | 6.20 | 0.01 | 2.08 | 1.15 | 0.22 | 0.85 |
|      |   |      | MYGLIVAQWLSTVNTQ     |      |      |      |      |      |      |
|      |   |      | FYTIKEGMYKALNYQAA    |      |      |      |      |      |      |
|      |   |      | ALEEIIKYRYNIYSEKEKSN |      |      |      |      |      |      |
|      |   |      | INIDFNDINSKLNEGINQ   |      |      |      |      |      |      |
|      |   |      | AIDNINNFINGCSVSYLM   |      |      |      |      |      |      |
|      |   |      | KKMIPLAVEKLLDFDNTL   |      |      |      |      |      |      |
|      |   |      | KKNLLNYIDENKLYLIGSA  |      |      |      |      |      |      |
|      |   |      | EYEKSKVNKYLKTIMPF    |      |      |      |      |      |      |
|      |   |      | LSIYTNDTILIEFMFNKYNS |      |      |      |      |      |      |
|      |   |      | EILNNIILNLRYKDNNLID  |      |      |      |      |      |      |
|      |   |      | LSGYGAKVEVYDGVELN    |      |      |      |      |      |      |
|      |   |      | DKNQFKLTSSANSKIRVT   |      |      |      |      |      |      |
|      |   |      | QNQNIIFNSVFLDFSVSF   |      |      |      |      |      |      |
|      |   |      | MMNDKVMKDC           |      |      |      |      |      |      |

|      |   |        |                      |      |      |      |      |      |      |
|------|---|--------|----------------------|------|------|------|------|------|------|
|      |   |        | APGICIDVDNEDLFFIAD   |      |      |      |      |      |      |
|      |   |        | KNSFSDDLKNERIEYNT    |      |      |      |      |      |      |
|      |   |        | QSNYIENDFPINELILDTD  |      |      |      |      |      |      |
|      |   |        | LISKIELPSENTESLTDFN  |      |      |      |      |      |      |
|      |   |        | VDVPVYEKQPAIKKIFTD   |      |      |      |      |      |      |
|      |   |        | ENTIFQYLYSQTFPLDIRD  |      |      |      |      |      |      |
|      |   |        | ISLTSSFDDALLFSNKVYS  |      |      |      |      |      |      |
|      |   |        | FFSMDYIKTANKVVEAG    |      |      |      |      |      |      |
|      |   |        | LFAGWVKQIVNDFVIEA    |      |      |      |      |      |      |
|      |   |        | NKSNTMDKIADISLIVPYI  |      |      |      |      |      |      |
|      |   |        | GLALNVGNETAKGNFE     |      |      |      |      |      |      |
|      |   |        | NAFEIAGASILLEFIPELLI |      |      |      |      |      |      |
|      |   |        | PVVGAFLLSYIDNKNKII   |      |      |      |      |      |      |
| 6203 | 0 | 3571   | KTIDNALTKRNEKWSD     | 6.20 | 0.01 | 2.08 | 1.15 | 0.22 | 1.34 |
|      |   |        | MYGLIVAQWLSTVNTQ     |      |      |      |      |      |      |
|      |   |        | FYTIKEGMYKALNYQAA    |      |      |      |      |      |      |
|      |   |        | ALEEIIKYRYNIYSEKEKSN |      |      |      |      |      |      |
|      |   |        | INIDFNDINSKLNEGINQ   |      |      |      |      |      |      |
|      |   |        | AIDNINNFINGCSVSYLM   |      |      |      |      |      |      |
|      |   |        | KKMIPLAVEKLLDFDNTL   |      |      |      |      |      |      |
|      |   |        | KKNLLNYIDENKLYLIGSA  |      |      |      |      |      |      |
|      |   |        | EYEKSKVNKYLTIMPFD    |      |      |      |      |      |      |
|      |   |        | LSIYTNDTILIEFMFNKYNS |      |      |      |      |      |      |
|      |   |        | EILNNIILNLRYKDNNLID  |      |      |      |      |      |      |
|      |   |        | LSGYGAKVEVYDGVELN    |      |      |      |      |      |      |
|      |   |        | DKNQFKLTSSANSKIRVT   |      |      |      |      |      |      |
|      |   |        | QNQNIIFNSVFLDFSVSF   |      |      |      |      |      |      |
| 6204 | 0 | 3572   | APGITTAEQ            | 2.33 | 3.55 | 2.70 | 0.44 | 0.85 | 0.28 |
| 6205 | 0 | 3574   | APGLPWALQGKRRGA      | 2.71 | 0.01 | 3.50 | 2.22 | 0.22 | 0.28 |
| 6206 | 0 | 117750 | APGMRPP              | 2.00 | 0.01 | 0.78 | 0.44 | 1.13 | 0.28 |
| 6207 | 0 | 117750 | APGMRPP              | 2.00 | 0.01 | 0.78 | 3.05 | 1.13 | 0.28 |
| 6208 | 0 | 123027 | APGMRPPMGG           | 2.33 | 0.01 | 0.78 | 0.44 | 1.13 | 0.28 |
| 6209 | 0 | 123027 | APGMRPPMGG           | 2.33 | 0.01 | 0.78 | 0.44 | 1.13 | 0.85 |
| 6210 | 0 | 108785 | APGPAGEE             | 2.15 | 0.01 | 1.60 | 2.55 | 2.60 | 0.28 |
|      |   |        | APGPDGNNGAQGPPGL     |      |      |      |      |      |      |
| 6211 | 0 | 3577   | QGVQGGKGEQGPAGP      | 3.80 | 0.01 | 1.60 | 0.44 | 1.23 | 0.28 |
|      |   |        | PGFQGLPGPAGTAGE      |      |      |      |      |      |      |
| 6212 | 0 | 3578   | APGPGEVW             | 2.14 | 0.01 | 2.85 | 0.44 | 0.22 | 0.28 |
| 6213 | 0 | 227041 | APGPGPQPGPLRESI      | 2.70 | 0.01 | 2.48 | 0.44 | 1.59 | 0.28 |
| 6214 | 0 | 423217 | APGPTVANKRDEKHR      | 2.67 | 0.01 | 2.51 | 0.44 | 2.35 | 1.28 |
| 6215 | 0 | 3581   | APGQCNMVVERLGD       | 2.56 | 0.01 | 3.34 | 1.12 | 0.22 | 0.85 |
| 6216 | 0 | 123028 | APGQIPPG             | 2.15 | 0.01 | 0.78 | 1.20 | 0.22 | 0.28 |
| 6217 | 0 | 3582   | APGRVPALLIPPWAW      | 2.70 | 0.01 | 0.90 | 0.68 | 0.22 | 1.39 |

|      |   |        |                          |      |      |      |      |      |      |
|------|---|--------|--------------------------|------|------|------|------|------|------|
| 6218 | 0 | 118268 | APGSAAPAAGSAPAA          | 2.74 | 0.01 | 0.78 | 0.44 | 0.85 | 0.85 |
| 6219 | 0 | 120407 | APGYKHEIKYNC             | 2.45 | 0.01 | 2.19 | 1.12 | 0.22 | 0.28 |
| 6220 | 0 | 120407 | APGYKHEIKYNC             | 2.45 | 0.01 | 2.19 | 1.12 | 0.22 | 0.28 |
| 6221 | 0 | 120407 | APGYKHEIKYNC             | 2.45 | 0.01 | 2.19 | 1.12 | 0.22 | 0.28 |
| 6222 | 0 | 120407 | APGYKHEIKYNC             | 2.45 | 0.01 | 2.19 | 0.68 | 0.22 | 0.28 |
| 6223 | 0 | 120407 | APGYKHEIKYNC             | 2.45 | 0.01 | 2.19 | 0.68 | 0.22 | 3.30 |
| 6224 | 0 | 79156  | APHELRL                  | 1.88 | 0.01 | 0.90 | 0.68 | 0.22 | 1.39 |
| 6225 | 0 | 130729 | APHKHKASLSIY             | 2.50 | 0.01 | 0.90 | 0.44 | 1.13 | 1.27 |
| 6226 | 0 | 130729 | APHKHKASLSIY             | 2.50 | 0.01 | 0.90 | 0.44 | 1.13 | 0.28 |
| 6227 | 0 | 3592   | APHLPYIEQGMQLAEQF<br>KQK | 2.95 | 0.01 | 1.96 | 0.44 | 0.85 | 0.28 |
| 6228 | 0 | 135896 | APHLTRAYAKDV             | 2.46 | 0.01 | 0.78 | 0.44 | 1.41 | 0.28 |
| 6229 | 0 | 156850 | APHNKWPHLNPP             | 2.49 | 0.01 | 0.90 | 2.74 | 0.22 | 0.85 |
| 6230 | 0 | 156850 | APHNKWPHLNPP             | 2.49 | 0.01 | 0.90 | 2.22 | 1.59 | 0.85 |
| 6231 | 0 | 156850 | APHNKWPHLNPP             | 2.49 | 0.01 | 0.90 | 0.68 | 0.22 | 0.28 |
| 6232 | 0 | 3594   | APHRVLATVYNGECRYS<br>RNA | 2.94 | 0.01 | 3.51 | 2.59 | 0.22 | 0.28 |
| 6233 | 0 | 3594   | APHRVLATVYNGECRYS<br>RNA | 2.94 | 0.01 | 3.51 | 2.59 | 0.22 | 0.28 |
| 6234 | 0 | 3594   | APHRVLATVYNGECRYS<br>RNA | 2.94 | 0.01 | 3.51 | 2.59 | 0.22 | 0.28 |
| 6235 | 0 | 132780 | APHWGQN                  | 1.99 | 0.01 | 0.90 | 0.44 | 1.41 | 1.39 |
| 6236 | 0 | 3598   | APIDTCISECITPNGSI        | 2.81 | 0.01 | 3.27 | 0.68 | 0.22 | 1.57 |
| 6237 | 0 | 3598   | APIDTCISECITPNGSI        | 2.81 | 0.01 | 3.27 | 0.68 | 0.22 | 1.57 |
| 6238 | 0 | 95060  | APIDTGISEGITPNGSI        | 2.83 | 0.01 | 0.90 | 0.44 | 0.85 | 1.57 |
| 6239 | 0 | 95060  | APIDTGISEGITPNGSI        | 2.83 | 0.01 | 0.90 | 1.15 | 0.22 | 1.57 |
| 6240 | 0 | 95060  | APIDTGISEGITPNGSI        | 2.83 | 0.01 | 0.90 | 1.15 | 0.22 | 1.57 |
| 6241 | 0 | 95060  | APIDTGISEGITPNGSI        | 2.83 | 0.01 | 0.90 | 1.15 | 0.22 | 1.57 |
| 6242 | 0 | 255422 | APIEATATKTTTATT          | 2.72 | 0.01 | 1.61 | 0.44 | 0.85 | 1.28 |
| 6243 | 0 | 143818 | APIQAHPLGLIR             | 2.50 | 0.01 | 0.90 | 0.44 | 0.85 | 0.28 |
| 6244 | 0 | 143818 | APIQAHPLGLIR             | 2.50 | 0.01 | 0.90 | 1.20 | 0.22 | 1.39 |
| 6245 | 0 | 132164 | APIRR                    | 1.72 | 0.01 | 0.78 | 0.68 | 0.22 | 0.85 |
| 6246 | 0 | 132164 | APIRR                    | 1.72 | 0.01 | 0.78 | 0.68 | 0.22 | 0.85 |
| 6247 | 0 | 226464 | APIYIYGNSYLFERN          | 2.66 | 0.01 | 2.73 | 0.44 | 0.85 | 0.28 |
| 6248 | 0 | 255442 | APKAAAPAKAAAAA           | 2.72 | 0.01 | 1.61 | 0.44 | 0.85 | 1.28 |
| 6249 | 0 | 3612   | APKAPTEAAK               | 2.36 | 3.55 | 3.55 | 1.12 | 0.22 | 0.85 |
| 6250 | 0 | 3614   | APKATTDEQKMIEKINV<br>GFK | 2.93 | 0.01 | 3.00 | 0.44 | 1.23 | 0.28 |
| 6251 | 0 | 3616   | APKEAELD                 | 2.15 | 0.01 | 2.83 | 1.12 | 0.22 | 0.28 |
| 6252 | 0 | 111113 | APKEDPLKKYTFWEV          | 2.65 | 0.01 | 1.86 | 0.68 | 0.22 | 0.28 |
| 6253 | 0 | 511576 | APKEMPLESAEKEEK          | 2.73 | 0.01 | 2.24 | 0.44 | 1.41 | 1.28 |
| 6254 | 0 | 229605 | APKHKEMPFKYPVEPF<br>TER  | 2.96 | 0.01 | 1.60 | 0.44 | 1.23 | 1.28 |
| 6255 | 0 | 3618   | APKKAANKRAAKKSAPK<br>KAV | 3.01 | 0.01 | 3.97 | 0.44 | 0.85 | 0.28 |



|      |   |        |                                    |      |      |      |      |      |      |
|------|---|--------|------------------------------------|------|------|------|------|------|------|
| 6256 | 0 | 255460 | APKKAAAPKKAAAPQ                    | 2.74 | 0.01 | 1.61 | 0.44 | 0.85 | 1.28 |
| 6257 | 0 | 255461 | APKKAAAPQKAAAPK                    | 2.74 | 0.01 | 1.61 | 0.44 | 0.85 | 1.28 |
| 6258 | 0 | 255462 | APKKAAAPQKAAVAK                    | 2.75 | 0.01 | 1.61 | 0.44 | 0.85 | 1.28 |
| 6259 | 0 | 3619   | APKKAVKKAVKAAKKAV<br>KKA           | 3.03 | 0.01 | 3.97 | 0.44 | 0.85 | 0.28 |
| 6260 | 0 | 3619   | APKKAVKKAVKAAKKAV<br>KKA           | 3.03 | 0.01 | 3.97 | 0.44 | 0.85 | 0.28 |
| 6261 | 0 | 255467 | APKKTAAAPKKAAAPQ                   | 2.74 | 0.01 | 1.61 | 0.44 | 0.85 | 1.28 |
| 6262 | 0 | 255478 | APKNGTATTGSDSGS                    | 2.71 | 0.01 | 1.61 | 0.44 | 0.85 | 1.28 |
| 6263 | 0 | 127580 | APKNSSV                            | 2.01 | 0.01 | 0.90 | 0.44 | 1.13 | 1.39 |
| 6264 | 0 | 98698  | APKPAPQPGP                         | 2.37 | 0.01 | 2.14 | 0.68 | 0.22 | 0.28 |
| 6265 | 0 | 98698  | APKPAPQPGP                         | 2.37 | 0.01 | 2.14 | 0.68 | 0.22 | 0.28 |
| 6266 | 0 | 98699  | APKPAPQPGPQPPQP                    | 2.75 | 0.01 | 2.14 | 0.68 | 0.22 | 0.28 |
| 6267 | 0 | 229075 | APKPE                              | 1.75 | 0.01 | 2.70 | 0.68 | 0.22 | 0.28 |
| 6268 | 0 | 229076 | APKPEQPA                           | 2.17 | 0.01 | 2.70 | 0.68 | 0.22 | 0.28 |
| 6269 | 0 | 181273 | APKPTSRDSFAWQTA                    | 2.69 | 0.01 | 2.82 | 1.15 | 0.22 | 0.28 |
| 6270 | 0 | 135897 | APKRPGPAGELL                       | 2.50 | 0.01 | 0.78 | 0.44 | 1.13 | 0.28 |
| 6271 | 0 | 135897 | APKRPGPAGELL                       | 2.50 | 0.01 | 0.78 | 0.44 | 1.41 | 0.28 |
| 6272 | 0 | 3625   | APKS                               | 1.57 | 0.01 | 3.38 | 2.22 | 0.85 | 0.85 |
| 6273 | 0 | 128297 | APKSPAKAKAVKPKAA                   | 2.80 | 0.01 | 0.78 | 0.44 | 1.13 | 0.28 |
| 6274 | 0 | 128297 | APKSPAKAKAVKPKAA                   | 2.80 | 0.01 | 0.78 | 0.44 | 1.13 | 0.28 |
| 6275 | 0 | 128297 | APKSPAKAKAVKPKAA                   | 2.80 | 0.01 | 0.78 | 0.44 | 1.13 | 0.28 |
| 6276 | 0 | 128297 | APKSPAKAKAVKPKAA                   | 2.80 | 0.01 | 0.78 | 1.12 | 0.22 | 0.28 |
| 6277 | 0 | 128297 | APKSPAKAKAVKPKAA                   | 2.80 | 0.01 | 0.78 | 1.12 | 0.22 | 0.28 |
| 6278 | 0 | 191184 | APKTCAHSTYYCSYEM                   | 2.75 | 0.01 | 0.90 | 2.84 | 1.13 | 1.39 |
| 6279 | 0 | 191184 | APKTCAHSTYYCSYEM                   | 2.75 | 0.01 | 0.90 | 2.84 | 1.13 | 1.66 |
| 6280 | 0 | 125363 | APKTYVSVSGMV                       | 2.48 | 0.01 | 0.90 | 0.68 | 0.22 | 1.27 |
| 6281 | 0 | 125363 | APKTYVSVSGMV                       | 2.48 | 0.01 | 0.90 | 0.68 | 0.22 | 1.48 |
| 6282 | 0 | 125363 | APKTYVSVSGMV                       | 2.48 | 0.01 | 0.90 | 0.44 | 1.13 | 1.27 |
| 6283 | 0 | 125363 | APKTYVSVSGMV                       | 2.48 | 0.01 | 0.90 | 0.68 | 0.22 | 1.39 |
| 6284 | 0 | 178547 | APLFDPIIEDYHVGf                    | 2.65 | 0.01 | 2.36 | 0.44 | 1.23 | 1.28 |
| 6285 | 0 | 3636   | APLGEI                             | 1.88 | 0.01 | 3.27 | 0.44 | 1.59 | 0.28 |
| 6286 | 0 | 3639   | APLGVT                             | 1.88 | 0.01 | 2.53 | 0.44 | 1.59 | 0.28 |
| 6287 | 0 | 496342 | APLKQIAANAGKEGAIIF<br>QQVMSRSANEGY | 3.32 | 0.01 | 2.87 | 0.44 | 1.93 | 2.12 |

|      |   |        |                                    |      |      |      |      |      |      |
|------|---|--------|------------------------------------|------|------|------|------|------|------|
| 6288 | 0 | 496342 | APLKQIAANAGKEGAIIF<br>QQVMSRSANEGY | 3.32 | 0.01 | 2.87 | 0.44 | 1.93 | 2.12 |
| 6289 | 0 | 462283 | APLQPEQL                           | 2.16 | 0.01 | 0.78 | 1.12 | 0.22 | 1.28 |
| 6290 | 0 | 98700  | APLRVYVEEL                         | 2.32 | 0.01 | 1.60 | 0.44 | 1.23 | 0.85 |
| 6291 | 0 | 98700  | APLRVYVEEL                         | 2.32 | 0.01 | 1.60 | 0.44 | 1.23 | 0.85 |
| 6292 | 0 | 98700  | APLRVYVEEL                         | 2.32 | 0.01 | 1.60 | 0.44 | 2.98 | 0.85 |
| 6293 | 0 | 115184 | APLRVYVEELKPTPEGDL<br>EI           | 2.94 | 0.01 | 1.60 | 0.44 | 1.23 | 1.28 |
| 6294 | 0 | 3648   | APLSPLLPLQDGTNTHI<br>MATEASNY      | 3.15 | 0.01 | 2.53 | 0.44 | 0.85 | 0.28 |
| 6295 | 0 | 3649   | APLSPLLPLQDGTNTHI<br>MATEASNYAQYRV | 3.32 | 0.01 | 2.53 | 0.44 | 0.85 | 0.28 |
| 6296 | 0 | 3650   | APLTAVAPAHDTPPVPD<br>V             | 2.91 | 0.01 | 2.53 | 0.44 | 0.85 | 0.28 |
| 6297 | 0 | 3651   | APLTAVAPAHDTPPVPD<br>VDSRGAIL      | 3.19 | 0.01 | 2.53 | 0.44 | 0.85 | 0.28 |
| 6298 | 0 | 3651   | APLTAVAPAHDTPPVPD<br>VDSRGAIL      | 3.19 | 0.01 | 2.53 | 0.44 | 0.85 | 0.28 |
| 6299 | 0 | 238213 | APLTLCLNIGSQGSTDY                  | 2.84 | 0.01 | 0.78 | 0.44 | 1.13 | 0.28 |
| 6300 | 0 | 238213 | APLTLCLNIGSQGSTDY                  | 2.84 | 0.01 | 0.78 | 0.44 | 1.13 | 0.28 |
| 6301 | 0 | 3652   | APLTRGSCRKRNRSPER                  | 2.79 | 0.01 | 3.36 | 0.44 | 2.82 | 0.28 |
| 6302 | 0 | 3654   | APMFITGREMLASIDTLK                 | 2.82 | 0.01 | 3.10 | 0.44 | 1.59 | 0.28 |
| 6303 | 0 | 3654   | APMFITGREMLASIDTLK                 | 2.82 | 0.01 | 2.75 | 0.44 | 0.85 | 2.51 |
| 6304 | 0 | 3654   | APMFITGREMLASIDTLK                 | 2.82 | 0.01 | 2.75 | 0.44 | 0.85 | 2.51 |
| 6305 | 0 | 3654   | APMFITGREMLASIDTLK                 | 2.82 | 0.01 | 2.75 | 0.44 | 0.85 | 2.51 |
| 6306 | 0 | 167485 | APMIVTGGGMLAAINT                   | 2.75 | 0.01 | 3.10 | 0.44 | 0.85 | 1.28 |
| 6307 | 0 | 3655   | APMIVTGGGMLAAINTL<br>K             | 2.85 | 0.01 | 3.10 | 0.44 | 1.59 | 0.28 |
| 6308 | 0 | 3655   | APMIVTGGGMLAAINTL<br>K             | 2.85 | 0.01 | 2.75 | 0.44 | 1.59 | 1.28 |
| 6309 | 0 | 3655   | APMIVTGGGMLAAINTL<br>K             | 2.85 | 0.01 | 2.75 | 0.44 | 0.85 | 1.28 |
| 6310 | 0 | 147503 | APMSDGAHVQ                         | 2.22 | 0.01 | 3.24 | 3.57 | 0.85 | 0.28 |
| 6311 | 0 | 3656   | APMSTPSATSVR                       | 2.52 | 0.01 | 3.42 | 0.44 | 0.85 | 0.28 |
| 6312 | 0 | 3656   | APMSTPSATSVR                       | 2.52 | 0.01 | 3.42 | 0.68 | 0.22 | 0.28 |
| 6313 | 0 | 3656   | APMSTPSATSVR                       | 2.52 | 0.01 | 3.85 | 0.68 | 0.22 | 0.28 |
| 6314 | 0 | 3656   | APMSTPSATSVR                       | 2.52 | 0.01 | 3.85 | 0.68 | 0.22 | 1.48 |
| 6315 | 0 | 3656   | APMSTPSATSVR                       | 2.52 | 0.01 | 3.85 | 0.68 | 0.22 | 1.48 |
| 6316 | 0 | 3656   | APMSTPSATSVR                       | 2.52 | 0.01 | 0.90 | 2.13 | 0.22 | 0.28 |

|      |   |        |                          |      |      |      |      |      |      |
|------|---|--------|--------------------------|------|------|------|------|------|------|
| 6317 | 0 | 3659   | APNADTIA                 | 2.15 | 0.01 | 2.96 | 0.68 | 0.22 | 0.28 |
| 6318 | 0 | 3659   | APNADTIA                 | 2.15 | 0.01 | 2.96 | 0.68 | 0.22 | 0.28 |
| 6319 | 0 | 181555 | APNEANFFRNISGNM          | 2.68 | 0.01 | 1.66 | 2.37 | 0.22 | 1.28 |
| 6320 | 0 | 181555 | APNEANFFRNISGNM          | 2.68 | 0.01 | 1.66 | 2.36 | 0.22 | 1.28 |
| 6321 | 0 | 152419 | APNNYYPSKNLAPI           | 2.64 | 0.01 | 2.18 | 0.44 | 0.22 | 0.28 |
| 6322 | 0 | 419112 | APNVTDVPPFAA             | 2.49 | 0.01 | 0.90 | 1.15 | 0.22 | 1.39 |
| 6323 | 0 | 255605 | APPAKAAAAPAKAAA          | 2.73 | 0.01 | 1.61 | 0.44 | 0.85 | 1.28 |
| 6324 | 0 | 255606 | APPAKAAAAPVGKKA          | 2.74 | 0.01 | 1.61 | 0.44 | 0.85 | 1.28 |
| 6325 | 0 | 255607 | APPAKAAAPAKAAA           | 2.73 | 0.01 | 1.61 | 0.44 | 0.85 | 1.28 |
| 6326 | 0 | 255608 | APPAKAAAPAKTAA           | 2.73 | 0.01 | 1.61 | 0.44 | 0.85 | 1.28 |
| 6327 | 0 | 103809 | APPAKRARGLTLPGYKY        | 2.84 | 0.01 | 3.00 | 1.20 | 0.22 | 0.85 |
| 6328 | 0 | 103809 | APPAKRARGLTLPGYKY        | 2.84 | 0.01 | 3.00 | 1.20 | 0.22 | 0.28 |
| 6329 | 0 | 255609 | APPAKTAAAPAKAAA          | 2.73 | 0.01 | 1.61 | 0.44 | 0.85 | 1.28 |
| 6330 | 0 | 255610 | APPAKTAAPAKAAA           | 2.73 | 0.01 | 1.61 | 0.44 | 0.85 | 1.28 |
| 6331 | 0 | 78104  | APPASEQET                | 2.25 | 0.01 | 2.60 | 0.44 | 1.23 | 0.85 |
| 6332 | 0 | 141604 | APPDDGPP                 | 2.14 | 0.01 | 0.78 | 0.44 | 1.13 | 0.28 |
| 6333 | 0 | 141604 | APPDDGPP                 | 2.14 | 0.01 | 0.78 | 0.44 | 1.13 | 0.28 |
| 6334 | 0 | 141604 | APPDDGPP                 | 2.14 | 0.01 | 0.78 | 0.44 | 1.41 | 0.28 |
| 6335 | 0 | 3676   | APPGSPAPPPPEHRGGP<br>EEF | 2.98 | 0.01 | 2.40 | 0.44 | 1.59 | 0.85 |
| 6336 | 0 | 158583 | APPHLPP                  | 2.03 | 0.01 | 0.90 | 0.44 | 1.13 | 1.39 |
| 6337 | 0 | 158584 | APPHQMP                  | 2.04 | 0.01 | 0.90 | 0.44 | 1.13 | 1.39 |
| 6338 | 0 | 158585 | APPHVMP                  | 2.04 | 0.01 | 0.90 | 0.44 | 1.13 | 1.39 |
| 6339 | 0 | 158585 | APPHVMP                  | 2.04 | 0.01 | 0.90 | 0.44 | 1.13 | 0.85 |
| 6340 | 0 | 96102  | APPLLPH                  | 2.05 | 0.01 | 2.04 | 0.44 | 0.85 | 0.28 |
| 6341 | 0 | 96102  | APPLLPH                  | 2.05 | 0.01 | 2.04 | 0.44 | 0.85 | 0.85 |
| 6342 | 0 | 96102  | APPLLPH                  | 2.05 | 0.01 | 2.04 | 0.44 | 0.85 | 1.34 |
| 6343 | 0 | 96102  | APPLLPH                  | 2.05 | 0.01 | 2.04 | 0.44 | 0.85 | 1.34 |
| 6344 | 0 | 96102  | APPLLPH                  | 2.05 | 0.01 | 2.04 | 0.44 | 0.85 | 1.27 |
| 6345 | 0 | 141605 | APPLLPHSNL               | 2.35 | 0.01 | 2.04 | 1.81 | 0.22 | 0.28 |
| 6346 | 0 | 141605 | APPLLPHSNL               | 2.35 | 0.01 | 2.04 | 1.81 | 0.22 | 0.28 |
| 6347 | 0 | 141605 | APPLLPHSNL               | 2.35 | 0.01 | 2.04 | 1.81 | 0.22 | 1.34 |
| 6348 | 0 | 141605 | APPLLPHSNL               | 2.35 | 0.01 | 2.04 | 1.81 | 0.22 | 2.12 |
| 6349 | 0 | 96103  | APPLLPHSNLDHI            | 2.57 | 0.01 | 2.04 | 0.44 | 0.85 | 1.27 |
| 6350 | 0 | 96103  | APPLLPHSNLDHI            | 2.57 | 0.01 | 2.04 | 1.20 | 0.22 | 0.28 |
| 6351 | 0 | 96103  | APPLLPHSNLDHI            | 2.57 | 0.01 | 2.04 | 3.37 | 0.22 | 0.28 |
| 6352 | 0 | 3683   | APPLLPHSNLDHIL           | 2.64 | 0.01 | 2.04 | 2.36 | 0.22 | 0.28 |

|      |   |        |                                 |      |      |      |      |      |      |
|------|---|--------|---------------------------------|------|------|------|------|------|------|
| 6353 | 0 | 3684   | APPLPH                          | 1.92 | 0.01 | 2.53 | 0.44 | 1.59 | 0.28 |
| 6354 | 0 | 3684   | APPLPH                          | 1.92 | 0.01 | 2.53 | 0.44 | 1.59 | 0.28 |
| 6355 | 0 | 3685   | APPLPP                          | 1.90 | 0.01 | 3.27 | 0.44 | 1.59 | 0.28 |
| 6356 | 0 | 3686   | APPLRAWKSRARAV                  | 2.64 | 0.01 | 2.69 | 0.44 | 0.85 | 0.28 |
| 6357 | 0 | 3687   | APPLRTWKSARAV                   | 2.63 | 0.01 | 2.69 | 0.44 | 0.85 | 0.28 |
| 6358 | 0 | 3688   | APPMPPQPPRAHGQHY<br>GHHHHQLPFLG | 3.27 | 0.01 | 4.63 | 0.44 | 1.59 | 0.28 |
| 6359 | 0 | 123030 | APPPAGAMIP                      | 2.37 | 0.01 | 0.78 | 1.12 | 0.22 | 0.85 |
| 6360 | 0 | 187270 | APPPASTNRQSGRQPTP               | 2.84 | 0.01 | 2.08 | 0.68 | 0.22 | 1.48 |
| 6361 | 0 | 187270 | APPPASTNRQSGRQPTP               | 2.84 | 0.01 | 2.08 | 0.68 | 0.22 | 0.28 |
| 6362 | 0 | 117752 | APPPGMRPPM                      | 2.35 | 0.01 | 0.78 | 3.05 | 1.13 | 0.28 |
| 6363 | 0 | 229884 | APPPISGGGYRARPAKA<br>AAT        | 2.96 | 3.24 | 0.78 | 0.44 | 1.13 | 1.28 |
| 6364 | 0 | 229885 | APPPISGGGYRARPAKA<br>AAT        | 2.96 | 3.67 | 0.78 | 0.44 | 1.13 | 1.28 |
| 6365 | 0 | 229884 | APPPISGGGYRARPAKA<br>AAT        | 2.96 | 3.24 | 0.78 | 0.44 | 1.41 | 1.28 |
| 6366 | 0 | 229885 | APPPISGGGYRARPAKA<br>AAT        | 2.96 | 3.67 | 0.78 | 0.44 | 1.41 | 1.28 |
| 6367 | 0 | 229884 | APPPISGGGYRARPAKA<br>AAT        | 2.96 | 3.24 | 0.78 | 0.44 | 1.13 | 1.28 |
| 6368 | 0 | 229885 | APPPISGGGYRARPAKA<br>AAT        | 2.96 | 3.67 | 0.78 | 0.44 | 1.13 | 1.28 |
| 6369 | 0 | 229884 | APPPISGGGYRARPAKA<br>AAT        | 2.96 | 3.24 | 0.78 | 0.44 | 1.13 | 1.28 |
| 6370 | 0 | 229885 | APPPISGGGYRARPAKA<br>AAT        | 2.96 | 3.67 | 0.78 | 0.44 | 1.13 | 1.28 |
| 6371 | 0 | 3693   | APPPPEHRGGPEEFEGA<br>GDG        | 2.99 | 0.01 | 2.40 | 1.15 | 0.22 | 0.85 |
| 6372 | 0 | 3693   | APPPPEHRGGPEEFEGA<br>GDG        | 2.99 | 0.01 | 2.40 | 1.15 | 0.22 | 1.27 |
| 6373 | 0 | 3693   | APPPPEHRGGPEEFEGA<br>GDG        | 2.99 | 0.01 | 2.40 | 1.15 | 0.22 | 0.85 |
| 6374 | 0 | 3693   | APPPPEHRGGPEEFEGA<br>GDG        | 2.99 | 0.01 | 2.40 | 1.15 | 0.22 | 1.27 |
| 6375 | 0 | 3693   | APPPPEHRGGPEEFEGA<br>GDG        | 2.99 | 0.01 | 2.40 | 1.15 | 0.22 | 1.27 |
| 6376 | 0 | 3693   | APPPPEHRGGPEEFEGA<br>GDG        | 2.99 | 0.01 | 2.40 | 0.44 | 1.59 | 0.85 |
| 6377 | 0 | 3693   | APPPPEHRGGPEEFEGA<br>GDG        | 2.99 | 0.01 | 2.40 | 0.44 | 1.59 | 0.85 |
| 6378 | 0 | 3698   | APPQA                           | 1.78 | 0.01 | 2.40 | 0.68 | 0.22 | 0.85 |
| 6379 | 0 | 3698   | APPQA                           | 1.78 | 0.01 | 2.40 | 0.68 | 0.22 | 1.27 |
| 6380 | 0 | 164461 | APPRLICDSRVLERYILEA<br>REAENV   | 3.21 | 4.63 | 4.08 | 0.68 | 0.22 | 0.85 |

|      |   |        |                                 |      |      |      |      |      |      |
|------|---|--------|---------------------------------|------|------|------|------|------|------|
| 6381 | 0 | 164461 | APPRLICDSRVLERYILEA<br>REAENV   | 3.21 | 4.63 | 4.08 | 0.68 | 0.22 | 0.28 |
| 6382 | 0 | 164596 | APPRLICDSRVLERYLLEA<br>K        | 2.94 | 0.01 | 0.78 | 0.68 | 0.22 | 0.28 |
| 6383 | 0 | 164596 | APPRLICDSRVLERYLLEA<br>K        | 2.94 | 0.01 | 0.78 | 0.68 | 0.22 | 0.28 |
| 6384 | 0 | 164596 | APPRLICDSRVLERYLLEA<br>K        | 2.94 | 0.01 | 0.78 | 0.68 | 0.22 | 1.66 |
| 6385 | 0 | 164596 | APPRLICDSRVLERYLLEA<br>K        | 2.94 | 0.01 | 0.78 | 0.68 | 0.22 | 1.66 |
| 6386 | 0 | 164596 | APPRLICDSRVLERYLLEA<br>K        | 2.94 | 0.01 | 0.78 | 0.68 | 0.22 | 1.66 |
| 6387 | 0 | 164596 | APPRLICDSRVLERYLLEA<br>K        | 2.94 | 0.01 | 0.78 | 0.68 | 0.22 | 1.27 |
| 6388 | 0 | 164596 | APPRLICDSRVLERYLLEA<br>K        | 2.94 | 0.01 | 0.78 | 0.68 | 0.22 | 1.34 |
| 6389 | 0 | 164596 | APPRLICDSRVLERYLLEA<br>K        | 2.94 | 0.01 | 0.78 | 0.44 | 0.85 | 0.28 |
| 6390 | 0 | 164596 | APPRLICDSRVLERYLLEA<br>K        | 2.94 | 0.01 | 0.78 | 0.44 | 0.85 | 1.27 |
| 6391 | 0 | 164462 | APPRLINDSRVLERY                 | 2.65 | 0.01 | 0.90 | 1.20 | 0.22 | 2.02 |
| 6392 | 0 | 164463 | APPRLINDSRVLERYLLE<br>AKEAEKIT  | 3.20 | 0.01 | 0.90 | 0.68 | 0.22 | 1.57 |
| 6393 | 0 | 164463 | APPRLINDSRVLERYLLE<br>AKEAEKIT  | 3.20 | 0.01 | 0.90 | 0.68 | 0.22 | 2.02 |
| 6394 | 0 | 164463 | APPRLINDSRVLERYLLE<br>AKEAEKIT  | 3.20 | 0.01 | 0.90 | 0.68 | 0.22 | 1.57 |
| 6395 | 0 | 164463 | APPRLINDSRVLERYLLE<br>AKEAEKIT  | 3.20 | 0.01 | 0.90 | 0.68 | 0.22 | 2.02 |
| 6396 | 0 | 164463 | APPRLINDSRVLERYLLE<br>AKEAEKIT  | 3.20 | 0.01 | 0.90 | 1.20 | 0.22 | 2.02 |
| 6397 | 0 | 164463 | APPRLINDSRVLERYLLE<br>AKEAEKIT  | 3.20 | 0.01 | 0.90 | 1.20 | 0.22 | 2.02 |
| 6398 | 0 | 164463 | APPRLINDSRVLERYLLE<br>AKEAEKIT  | 3.20 | 0.01 | 0.90 | 1.20 | 0.22 | 2.02 |
| 6399 | 0 | 164463 | APPRLINDSRVLERYLLE<br>AKEAEKIT  | 3.20 | 0.01 | 0.90 | 0.68 | 0.22 | 2.02 |
| 6400 | 0 | 123032 | APPSHEKK                        | 2.10 | 0.01 | 2.28 | 2.00 | 0.22 | 0.28 |
| 6401 | 0 | 423219 | APPSPVKGRGSRGV                  | 2.73 | 0.01 | 2.51 | 0.44 | 2.35 | 1.28 |
| 6402 | 0 | 3702   | APPSQFPWTHCYQPRL                | 2.77 | 0.01 | 3.01 | 0.44 | 0.85 | 0.28 |
| 6403 | 0 | 3704   | APPTLPQPPCAHGQHY<br>GHHHHQLPFLG | 3.27 | 0.01 | 3.16 | 0.44 | 1.59 | 0.28 |
| 6404 | 0 | 181556 | APPTYLDYVPQFLRW                 | 2.66 | 0.01 | 1.66 | 0.44 | 0.85 | 1.28 |
| 6405 | 0 | 511642 | APQAPAKTADTPATS                 | 2.73 | 0.01 | 2.24 | 0.44 | 1.41 | 1.28 |
| 6406 | 0 | 255700 | APQARKQQGRDAPQA                 | 2.73 | 0.01 | 1.61 | 0.44 | 0.85 | 1.28 |

|      |   |        |                                      |      |      |      |      |      |      |
|------|---|--------|--------------------------------------|------|------|------|------|------|------|
| 6407 | 0 | 255701 | APQARKQQGRNAPRS                      | 2.71 | 0.01 | 1.61 | 0.44 | 0.85 | 1.28 |
| 6408 | 0 | 255702 | APQARKQQGRNEPQA                      | 2.72 | 0.01 | 1.61 | 0.44 | 0.85 | 1.28 |
| 6409 | 0 | 123034 | APQCLEDFF                            | 2.21 | 0.01 | 2.28 | 2.00 | 0.22 | 0.28 |
| 6410 | 0 | 3719   | APQIVRGASEDVRKQPY<br>NLTIA           | 3.00 | 0.01 | 2.40 | 1.12 | 0.22 | 0.85 |
| 6411 | 0 | 3719   | APQIVRGASEDVRKQPY<br>NLTIA           | 3.00 | 0.01 | 2.40 | 1.12 | 0.22 | 0.85 |
| 6412 | 0 | 255717 | APQKAAAPKKTAAPK                      | 2.74 | 0.01 | 1.61 | 0.44 | 0.85 | 1.28 |
| 6413 | 0 | 153361 | APQNAKDHLPGYGGGS                     | 2.72 | 0.01 | 0.90 | 0.68 | 0.22 | 1.39 |
| 6414 | 0 | 3757   | APQPGPQPQPQPQP<br>EAPAPQ             | 3.12 | 0.01 | 2.14 | 0.68 | 0.22 | 0.28 |
| 6415 | 0 | 130731 | APQPLCGVGRAPSWG<br>SRPGCPARCLLTAVSGR | 3.47 | 0.01 | 0.90 | 0.44 | 1.93 | 0.85 |
| 6416 | 0 | 80425  | APQQIDISNTRATQSQF<br>D               | 2.87 | 0.01 | 3.05 | 1.12 | 0.22 | 0.28 |
| 6417 | 0 | 80425  | APQQIDISNTRATQSQF<br>D               | 2.87 | 0.01 | 3.05 | 1.12 | 0.22 | 0.28 |
| 6418 | 0 | 80425  | APQQIDISNTRATQSQF<br>D               | 2.87 | 0.01 | 3.05 | 1.12 | 0.22 | 0.28 |
| 6419 | 0 | 80425  | APQQIDISNTRATQSQF<br>D               | 2.87 | 0.01 | 3.05 | 1.12 | 0.22 | 0.28 |
| 6420 | 0 | 80425  | APQQIDISNTRATQSQF<br>D               | 2.87 | 0.01 | 3.05 | 1.12 | 0.22 | 0.28 |
| 6421 | 0 | 80425  | APQQIDISNTRATQSQF<br>D               | 2.87 | 0.01 | 3.05 | 1.12 | 0.22 | 0.28 |
| 6422 | 0 | 80425  | APQQIDISNTRATQSQF<br>D               | 2.87 | 0.01 | 3.05 | 1.12 | 0.22 | 0.28 |
| 6423 | 0 | 80425  | APQQIDISNTRATQSQF<br>D               | 2.87 | 0.01 | 3.05 | 1.12 | 0.22 | 0.28 |
| 6424 | 0 | 80425  | APQQIDISNTRATQSQF<br>D               | 2.87 | 0.01 | 3.05 | 1.12 | 0.22 | 0.28 |
| 6425 | 0 | 80425  | APQQIDISNTRATQSQF<br>D               | 2.87 | 0.01 | 3.05 | 1.12 | 0.22 | 0.28 |
| 6426 | 0 | 97892  | APQVLPVMHPHGAPPN                     | 2.76 | 0.01 | 2.04 | 0.44 | 2.98 | 0.28 |
| 6427 | 0 | 237640 | APRFTAMARVWGRT                       | 2.64 | 0.01 | 0.90 | 0.44 | 1.23 | 0.28 |
| 6428 | 0 | 237640 | APRFTAMARVWGRT                       | 2.64 | 0.01 | 0.90 | 0.44 | 1.23 | 1.27 |
| 6429 | 0 | 237641 | APRFTKMARVWGRT                       | 2.62 | 0.01 | 0.90 | 0.44 | 1.23 | 1.27 |
| 6430 | 0 | 237642 | APRGTKMARVWGRT                       | 2.64 | 0.01 | 4.08 | 0.44 | 1.23 | 0.28 |
| 6431 | 0 | 237642 | APRGTKMARVWGRT                       | 2.64 | 0.01 | 4.08 | 0.44 | 1.23 | 1.27 |
| 6432 | 0 | 123035 | APRIMHHM                             | 2.13 | 0.01 | 0.78 | 1.20 | 0.22 | 0.28 |

|      |   |        |                                    |      |      |      |      |      |      |
|------|---|--------|------------------------------------|------|------|------|------|------|------|
| 6433 | 0 | 3779   | APRITFGGPTDSTDNNQ<br>N             | 2.84 | 0.01 | 2.45 | 0.44 | 0.85 | 1.48 |
| 6434 | 0 | 3780   | APRIVLDVAS                         | 2.32 | 0.01 | 2.60 | 0.44 | 1.23 | 0.85 |
| 6435 | 0 | 450438 | APRNVPP                            | 2.00 | 0.01 | 0.90 | 0.44 | 1.23 | 1.39 |
| 6436 | 0 | 108280 | APRRLFDIA                          | 2.23 | 0.01 | 0.90 | 0.44 | 1.13 | 1.39 |
| 6437 | 0 | 255845 | APSGKKSAAAAAPAK                    | 2.75 | 0.01 | 1.61 | 0.44 | 0.85 | 1.28 |
| 6438 | 0 | 158586 | APSHPPP                            | 2.01 | 0.01 | 0.90 | 0.44 | 1.13 | 1.39 |
| 6439 | 0 | 3815   | APSLPAGYL                          | 2.26 | 0.01 | 0.90 | 0.44 | 1.59 | 0.28 |
| 6440 | 0 | 164540 | APSPSLPDPKFESKA                    | 2.72 | 0.01 | 1.75 | 0.68 | 0.22 | 1.27 |
| 6441 | 0 | 164540 | APSPSLPDPKFESKA                    | 2.72 | 0.01 | 1.75 | 0.68 | 0.22 | 1.27 |
| 6442 | 0 | 164540 | APSPSLPDPKFESKA                    | 2.72 | 0.01 | 1.75 | 0.68 | 0.22 | 1.48 |
| 6443 | 0 | 164540 | APSPSLPDPKFESKA                    | 2.72 | 0.01 | 1.75 | 0.68 | 0.22 | 0.85 |
| 6444 | 0 | 164540 | APSPSLPDPKFESKA                    | 2.72 | 0.01 | 1.75 | 0.68 | 0.22 | 1.48 |
| 6445 | 0 | 3820   | APSQGGVNSPVNV                      | 2.58 | 0.01 | 2.97 | 0.44 | 0.85 | 0.85 |
|      |   |        | APSQGGVNSPVNVTTT                   |      |      |      |      |      |      |
| 6446 | 0 | 3821   | VDANTSLAKIENAIMIS<br>DQRANLGAFQNR  | 3.77 | 0.01 | 4.33 | 0.44 | 0.85 | 0.85 |
| 6447 | 0 | 255886 | AP SRLREIDGSLSSS                   | 2.67 | 0.01 | 1.61 | 0.44 | 0.85 | 1.28 |
| 6448 | 0 | 3824   | APSRPFVSLRANDVLWL<br>SLTAAEYDQSTYG | 3.33 | 0.01 | 2.53 | 0.44 | 0.85 | 0.28 |
| 6449 | 0 | 3824   | APSRPFVSLRANDVLWL<br>SLTAAEYDQSTYG | 3.33 | 0.01 | 2.53 | 0.44 | 0.85 | 0.28 |
| 6450 | 0 | 108281 | APSSLAGNG                          | 2.25 | 0.01 | 0.90 | 0.44 | 1.13 | 1.39 |
| 6451 | 0 | 3825   | APSSPGTPGVAAATQAA<br>NGG           | 2.97 | 0.01 | 3.67 | 0.68 | 0.22 | 0.28 |
| 6452 | 0 | 3825   | APSSPGTPGVAAATQAA<br>NGG           | 2.97 | 0.01 | 3.67 | 0.68 | 0.22 | 1.34 |
| 6453 | 0 | 3825   | APSSPGTPGVAAATQAA<br>NGG           | 2.97 | 0.01 | 3.67 | 0.68 | 0.22 | 1.34 |
| 6454 | 0 | 3825   | APSSPGTPGVAAATQAA<br>NGG           | 2.97 | 0.01 | 3.67 | 0.68 | 0.22 | 1.34 |
| 6455 | 0 | 128303 | APSTAAAPAEKKVE                     | 2.72 | 0.01 | 0.78 | 0.44 | 1.13 | 0.85 |
| 6456 | 0 | 131358 | APSVTLF                            | 1.99 | 0.01 | 0.78 | 0.44 | 1.41 | 0.28 |
| 6457 | 0 | 131358 | APSVTLF                            | 1.99 | 0.01 | 0.78 | 0.44 | 1.13 | 0.28 |
| 6458 | 0 | 3828   | APSWGLSRI                          | 2.21 | 0.01 | 3.28 | 0.44 | 1.23 | 0.85 |
| 6459 | 0 | 136055 | APTAEEANAQHAVTKPR                  | 2.75 | 0.01 | 2.25 | 0.68 | 0.22 | 0.85 |
| 6460 | 0 | 136055 | APTAEEANAQHAVTKPR                  | 2.75 | 0.01 | 2.25 | 0.68 | 0.22 | 0.85 |
| 6461 | 0 | 3854   | APTEAAKPAP                         | 2.37 | 3.55 | 3.55 | 1.12 | 0.22 | 0.85 |
| 6462 | 0 | 3856   | APTGDTKPKKNKKPKNP                  | 2.85 | 0.01 | 3.67 | 0.68 | 0.22 | 1.34 |
| 6463 | 0 | 3861   | APTHWCYYPPLI                       | 2.45 | 0.01 | 0.90 | 1.15 | 0.22 | 0.28 |
| 6464 | 0 | 3861   | APTHWCYYPPLI                       | 2.45 | 0.01 | 0.90 | 1.15 | 0.22 | 0.28 |
| 6465 | 0 | 3862   | APTHYVTESDASQR                     | 2.60 | 0.01 | 2.69 | 0.44 | 0.85 | 0.28 |
| 6466 | 0 | 3862   | APTHYVTESDASQR                     | 2.60 | 0.01 | 2.69 | 0.44 | 0.85 | 0.28 |

|      |   |        |                          |      |      |      |      |      |      |
|------|---|--------|--------------------------|------|------|------|------|------|------|
| 6467 | 0 | 3862   | APTHYVTESDASQR           | 2.60 | 0.01 | 2.69 | 0.44 | 0.85 | 0.28 |
| 6468 | 0 | 3862   | APTHYVTESDASQR           | 2.60 | 0.01 | 2.69 | 0.44 | 0.85 | 0.28 |
| 6469 | 0 | 3862   | APTHYVTESDASQR           | 2.60 | 0.01 | 2.69 | 0.44 | 0.85 | 0.28 |
| 6470 | 0 | 3862   | APTHYVTESDASQR           | 2.60 | 0.01 | 2.69 | 0.44 | 0.85 | 0.28 |
| 6471 | 0 | 3862   | APTHYVTESDASQR           | 2.60 | 0.01 | 2.69 | 0.44 | 0.85 | 0.28 |
| 6472 | 0 | 3862   | APTHYVTESDASQR           | 2.60 | 0.01 | 2.69 | 0.44 | 0.85 | 0.28 |
| 6473 | 0 | 3863   | APTIEAITRPIQVA           | 2.65 | 0.01 | 2.40 | 2.43 | 0.22 | 0.28 |
| 6474 | 0 | 3863   | APTIEAITRPIQVA           | 2.65 | 0.01 | 2.40 | 2.43 | 0.22 | 0.28 |
| 6475 | 0 | 3863   | APTIEAITRPIQVA           | 2.65 | 0.01 | 2.40 | 2.43 | 0.22 | 0.28 |
| 6476 | 0 | 3872   | APTQCSQTWPCPSHL          | 2.70 | 0.01 | 0.90 | 1.15 | 0.22 | 1.27 |
| 6477 | 0 | 3873   | APTQEVKKET               | 2.32 | 3.55 | 3.55 | 1.12 | 0.22 | 0.85 |
| 6478 | 0 | 92346  | APTSMLDQSL               | 2.31 | 0.01 | 2.67 | 2.00 | 0.22 | 0.28 |
| 6479 | 0 | 92346  | APTSMLDQSL               | 2.31 | 0.01 | 2.67 | 2.00 | 0.22 | 0.28 |
| 6480 | 0 | 3878   | APTTPPPTSTHATPRPTT<br>PG | 3.00 | 0.01 | 2.40 | 0.44 | 1.59 | 0.28 |
| 6481 | 0 | 510428 | APTTQRVFWNQS             | 2.44 | 0.01 | 0.90 | 3.07 | 1.13 | 1.39 |
| 6482 | 0 | 95251  | APTTSD                   | 1.89 | 0.01 | 2.40 | 2.52 | 0.22 | 0.28 |
| 6483 | 0 | 256029 | APTTTTTNAPSRLRE          | 2.69 | 0.01 | 1.61 | 0.44 | 0.85 | 1.28 |
| 6484 | 0 | 141606 | APTVIDYLNKRCHGEI         | 2.65 | 0.01 | 2.86 | 2.55 | 0.22 | 0.28 |
| 6485 | 0 | 195007 | APTYSW                   | 1.88 | 0.01 | 2.45 | 0.68 | 0.22 | 1.34 |
| 6486 | 0 | 195007 | APTYSW                   | 1.88 | 0.01 | 2.45 | 0.68 | 0.22 | 1.39 |
| 6487 | 0 | 195007 | APTYSW                   | 1.88 | 0.01 | 2.45 | 0.68 | 0.22 | 0.85 |
| 6488 | 0 | 195007 | APTYSW                   | 1.88 | 0.01 | 2.45 | 0.68 | 0.22 | 0.28 |
| 6489 | 0 | 3880   | APTYSWGGA                | 2.13 | 0.01 | 2.68 | 1.15 | 0.22 | 0.28 |
| 6490 | 0 | 3880   | APTYSWGGA                | 2.13 | 0.01 | 2.45 | 2.36 | 0.22 | 1.34 |
| 6491 | 0 | 3880   | APTYSWGGA                | 2.13 | 0.01 | 2.68 | 2.36 | 0.22 | 1.39 |
| 6492 | 0 | 3881   | APTYSWGGE                | 2.10 | 0.01 | 4.03 | 1.15 | 0.22 | 0.28 |
| 6493 | 0 | 134867 | APVCVWERLSPYRRCV         | 2.81 | 4.63 | 0.90 | 0.44 | 1.13 | 0.28 |
| 6494 | 0 | 134868 | APVCVWERLSPYRRCV         | 2.81 | 0.01 | 0.90 | 0.44 | 1.13 | 0.28 |
| 6495 | 0 | 134869 | APVCVWERLSPYRRCV<br>PAEG | 3.02 | 4.63 | 0.90 | 0.44 | 1.13 | 0.28 |
| 6496 | 0 | 107744 | APVDSRTYTRVADHI          | 2.69 | 0.01 | 0.90 | 0.44 | 1.13 | 1.27 |
| 6497 | 0 | 107744 | APVDSRTYTRVADHI          | 2.69 | 0.01 | 0.90 | 0.44 | 1.13 | 1.48 |
| 6498 | 0 | 3886   | APVDSVFDRAFSAYL          | 2.71 | 0.01 | 0.90 | 1.15 | 0.22 | 0.85 |
| 6499 | 0 | 3886   | APVDSVFDRAFSAYL          | 2.71 | 0.01 | 0.90 | 1.15 | 0.22 | 1.27 |
| 6500 | 0 | 534669 | APVEHVVADAGAFLRH         | 2.75 | 0.01 | 0.78 | 0.68 | 0.22 | 0.28 |
| 6501 | 0 | 534669 | APVEHVVADAGAFLRH         | 2.75 | 0.01 | 0.78 | 0.68 | 0.22 | 2.92 |
| 6502 | 0 | 534669 | APVEHVVADAGAFLRH         | 2.75 | 0.01 | 0.78 | 0.68 | 0.22 | 2.92 |
| 6503 | 0 | 534669 | APVEHVVADAGAFLRH         | 2.75 | 0.01 | 0.78 | 0.68 | 0.22 | 2.92 |
| 6504 | 0 | 534669 | APVEHVVADAGAFLRH         | 2.75 | 0.01 | 0.78 | 0.68 | 0.22 | 2.92 |



|      |   |        |                          |      |      |      |      |      |      |
|------|---|--------|--------------------------|------|------|------|------|------|------|
| 6505 | 0 | 95252  | APVKQTLP                 | 2.12 | 0.01 | 0.90 | 2.59 | 0.22 | 0.28 |
| 6506 | 0 | 3893   | APVQEGVQQE               | 2.34 | 0.01 | 2.73 | 0.44 | 0.85 | 0.28 |
| 6507 | 0 | 3893   | APVQEGVQQE               | 2.34 | 0.01 | 2.73 | 1.15 | 0.22 | 0.28 |
| 6508 | 0 | 3900   | APVTVTRFVNAS             | 2.50 | 0.01 | 2.69 | 0.68 | 0.22 | 0.28 |
| 6509 | 0 | 3900   | APVTVTRFVNAS             | 2.50 | 0.01 | 2.69 | 1.20 | 0.22 | 0.28 |
| 6510 | 0 | 79518  | APWELPL                  | 2.04 | 0.01 | 0.90 | 1.12 | 0.22 | 1.39 |
| 6511 | 0 | 181890 | APWHLSSQYSRT             | 2.45 | 0.01 | 0.90 | 3.15 | 0.22 | 1.39 |
| 6512 | 0 | 243782 | APWNAPTWLLPP             | 2.50 | 0.01 | 0.90 | 0.44 | 0.22 | 1.39 |
| 6513 | 0 | 153362 | APWSLRDHLAVTGGGS         | 2.72 | 0.01 | 0.90 | 0.68 | 0.22 | 0.28 |
| 6514 | 0 | 153362 | APWSLRDHLAVTGGGS         | 2.72 | 0.01 | 0.90 | 0.44 | 0.85 | 2.35 |
| 6515 | 0 | 136138 | APYDTPWPSPSL             | 2.49 | 0.01 | 0.90 | 2.74 | 0.22 | 0.28 |
| 6516 | 0 | 136138 | APYDTPWPSPSL             | 2.49 | 0.01 | 0.90 | 2.74 | 0.22 | 0.85 |
| 6517 | 0 | 3912   | APYHFDLSGHAFGAM          | 2.69 | 0.01 | 2.53 | 0.44 | 1.23 | 0.85 |
| 6518 | 0 | 3912   | APYHFDLSGHAFGAM          | 2.69 | 0.01 | 2.53 | 0.44 | 1.23 | 0.85 |
| 6519 | 0 | 3919   | APYIEQAQV                | 2.24 | 0.01 | 2.59 | 0.44 | 0.85 | 0.28 |
| 6520 | 0 | 111115 | APYKLAMRDQA              | 2.40 | 0.01 | 0.90 | 0.44 | 0.85 | 1.39 |
| 6521 | 0 | 120408 | APYNVRRLLPPPVEP          | 2.69 | 0.01 | 2.86 | 0.44 | 0.85 | 0.28 |
| 6522 | 0 | 102313 | APYWTLYSW                | 2.23 | 0.01 | 4.03 | 0.68 | 0.22 | 0.28 |
| 6523 | 0 | 102313 | APYWTLYSW                | 2.23 | 0.01 | 4.03 | 0.68 | 0.22 | 0.28 |
| 6524 | 0 | 3933   | AQAANGGASGQVKVTK<br>VT   | 2.90 | 0.01 | 2.90 | 0.44 | 0.22 | 1.27 |
| 6525 | 0 | 3933   | AQAANGGASGQVKVTK<br>VT   | 2.90 | 0.01 | 2.90 | 0.44 | 0.22 | 0.28 |
| 6526 | 0 | 3934   | AQAAVVRFQEAAANKQ         | 2.70 | 0.01 | 2.04 | 0.44 | 0.85 | 0.28 |
| 6527 | 0 | 144208 | AQAGGPDGAAAGGG           | 2.66 | 0.01 | 2.51 | 2.22 | 0.22 | 0.28 |
| 6528 | 0 | 144208 | AQAGGPDGAAAGGG           | 2.66 | 0.01 | 2.51 | 3.26 | 0.22 | 0.28 |
| 6529 | 0 | 144208 | AQAGGPDGAAAGGG           | 2.66 | 0.01 | 2.51 | 3.26 | 0.22 | 0.28 |
| 6530 | 0 | 3938   | AQAHTTRGLTNLFSSG         | 2.74 | 0.01 | 1.96 | 0.44 | 0.85 | 1.27 |
| 6531 | 0 | 3938   | AQAHTTRGLTNLFSSG         | 2.74 | 0.01 | 1.96 | 0.44 | 0.85 | 0.28 |
| 6532 | 0 | 3938   | AQAHTTRGLTNLFSSG         | 2.74 | 0.01 | 1.96 | 0.44 | 0.85 | 0.28 |
| 6533 | 0 | 3938   | AQAHTTRGLTNLFSSG         | 2.74 | 0.01 | 1.96 | 0.44 | 0.85 | 1.27 |
| 6534 | 0 | 511760 | AQAPAKDMPSGPTPQH<br>IPLF | 2.94 | 4.33 | 2.40 | 0.44 | 1.59 | 1.28 |
| 6535 | 0 | 511761 | AQAPAKDMPSGPTPQH<br>IPLF | 2.94 | 4.23 | 2.40 | 0.44 | 1.59 | 1.28 |
| 6536 | 0 | 511762 | AQAPAKDMPSGPTPQH<br>IPLF | 2.94 | 0.01 | 2.40 | 0.44 | 1.59 | 1.28 |

|      |   |        |                                                             |      |      |      |      |      |      |
|------|---|--------|-------------------------------------------------------------|------|------|------|------|------|------|
| 6537 | 0 | 534670 | AQAPAPNTAPVPDVDS<br>RGSILRRQYNLSTSPPLTLT<br>VPQSSNSILYAASLN | 3.88 | 0.01 | 2.70 | 0.68 | 0.22 | 0.28 |
| 6538 | 0 | 534670 | AQAPAPNTAPVPDVDS<br>RGSILRRQYNLSTSPPLTLT<br>VPQSSNSILYAASLN | 3.88 | 0.01 | 2.70 | 0.68 | 0.22 | 0.28 |
| 6539 | 0 | 534670 | AQAPAPNTAPVPDVDS<br>RGSILRRQYNLSTSPPLTLT<br>VPQSSNSILYAASLN | 3.88 | 0.01 | 2.70 | 0.68 | 0.22 | 1.48 |
| 6540 | 0 | 511763 | AQAQEWTPRSVTEIKSE<br>LVL                                    | 2.95 | 0.01 | 2.24 | 0.44 | 1.41 | 1.28 |
| 6541 | 0 | 103055 | AQAQHLTMANIVTSA                                             | 2.69 | 0.01 | 2.04 | 0.44 | 0.85 | 1.28 |
| 6542 | 0 | 193427 | AQATKLMQC                                                   | 2.24 | 0.01 | 2.51 | 0.44 | 2.39 | 0.28 |
| 6543 | 0 | 193427 | AQATKLMQC                                                   | 2.24 | 0.01 | 2.51 | 0.44 | 2.39 | 0.28 |
| 6544 | 0 | 108282 | AQAYDLSPS                                                   | 2.24 | 0.01 | 0.90 | 0.44 | 1.13 | 1.39 |
| 6545 | 0 | 189044 | AQCPPGDTVTVGFHDG                                            | 2.74 | 0.01 | 2.92 | 3.61 | 0.22 | 0.28 |
| 6546 | 0 | 256163 | AQEEGQYDAADVEAG                                             | 2.73 | 0.01 | 1.61 | 0.44 | 0.85 | 1.28 |
| 6547 | 0 | 463650 | AQEKGLPEPTVTNEE                                             | 2.66 | 0.01 | 1.66 | 0.44 | 0.85 | 1.28 |
| 6548 | 0 | 463651 | AQEKGLPEPTVTNEEYV<br>EELKKGILDMGIK                          | 3.34 | 0.01 | 1.66 | 0.44 | 0.85 | 1.28 |
| 6549 | 0 | 463651 | AQEKGLPEPTVTNEEYV<br>EELKKGILDMGIK                          | 3.34 | 0.01 | 1.66 | 0.44 | 0.85 | 1.28 |
| 6550 | 0 | 151797 | AQEKISFGKSSQ                                                | 2.48 | 0.01 | 2.80 | 2.78 | 0.22 | 0.28 |
| 6551 | 0 | 195008 | AQELAREKKLADRA                                              | 2.66 | 0.01 | 2.30 | 0.44 | 0.85 | 0.28 |
| 6552 | 0 | 3952   | AQEPPRQ                                                     | 2.03 | 0.01 | 4.15 | 0.68 | 0.22 | 0.85 |
| 6553 | 0 | 3952   | AQEPPRQ                                                     | 2.03 | 0.01 | 4.15 | 0.68 | 0.22 | 1.66 |
| 6554 | 0 | 3952   | AQEPPRQ                                                     | 2.03 | 0.01 | 4.15 | 0.68 | 0.22 | 1.66 |
| 6555 | 0 | 3952   | AQEPPRQ                                                     | 2.03 | 0.01 | 4.15 | 0.68 | 0.22 | 1.66 |
| 6556 | 0 | 3952   | AQEPPRQ                                                     | 2.03 | 0.01 | 4.15 | 0.68 | 0.22 | 2.98 |
| 6557 | 0 | 3952   | AQEPPRQ                                                     | 2.03 | 0.01 | 4.15 | 0.68 | 0.22 | 0.28 |
| 6558 | 0 | 3959   | AQFDQIASGLSQERN                                             | 2.67 | 0.01 | 2.59 | 0.68 | 0.22 | 0.28 |
| 6559 | 0 | 3959   | AQFDQIASGLSQERN                                             | 2.67 | 0.01 | 2.59 | 1.12 | 0.22 | 0.28 |
| 6560 | 0 | 3962   | AQFPFNASDSVGQQ                                              | 2.62 | 0.01 | 3.17 | 0.68 | 0.22 | 0.28 |
| 6561 | 0 | 106261 | AQFRHDW                                                     | 1.99 | 0.01 | 0.90 | 1.81 | 0.22 | 0.28 |
| 6562 | 0 | 511777 | AQGAEHQRELTATETEL<br>HNAQ                                   | 3.04 | 0.01 | 2.24 | 0.44 | 1.41 | 1.28 |
| 6563 | 0 | 97210  | AQGALERELKRTDLNI                                            | 2.74 | 0.01 | 3.67 | 0.44 | 1.23 | 0.28 |
| 6564 | 0 | 99898  | AQGALTSLPKQQD                                               | 2.63 | 0.01 | 2.96 | 1.12 | 0.22 | 0.28 |
| 6565 | 0 | 114740 | AQGHRPQDE                                                   | 2.21 | 0.01 | 1.60 | 1.12 | 0.22 | 1.27 |
| 6566 | 0 | 114740 | AQGHRPQDE                                                   | 2.21 | 0.01 | 1.60 | 1.12 | 0.22 | 2.56 |
| 6567 | 0 | 114740 | AQGHRPQDE                                                   | 2.21 | 0.01 | 1.60 | 1.12 | 0.22 | 2.56 |

|      |   |        |                              |      |      |      |      |      |      |
|------|---|--------|------------------------------|------|------|------|------|------|------|
| 6568 | 0 | 114740 | AQGHRPQDE                    | 2.21 | 0.01 | 1.60 | 2.61 | 0.22 | 2.56 |
| 6569 | 0 | 114740 | AQGHRPQDE                    | 2.21 | 0.01 | 1.60 | 1.20 | 0.22 | 1.27 |
| 6570 | 0 | 115593 | AQGHRPQDEN                   | 2.29 | 0.01 | 1.60 | 1.12 | 0.22 | 2.56 |
| 6571 | 0 | 115593 | AQGHRPQDEN                   | 2.29 | 0.01 | 1.60 | 1.12 | 0.22 | 2.56 |
| 6572 | 0 | 115593 | AQGHRPQDEN                   | 2.29 | 0.01 | 1.60 | 2.61 | 0.22 | 2.56 |
| 6573 | 0 | 115593 | AQGHRPQDEN                   | 2.29 | 0.01 | 1.60 | 2.04 | 0.22 | 1.27 |
| 6574 | 0 | 79519  | AQGNSVK                      | 1.99 | 0.01 | 0.90 | 1.12 | 0.22 | 1.39 |
| 6575 | 0 | 108790 | AQGPRGEP                     | 2.14 | 0.01 | 1.60 | 2.61 | 0.22 | 0.28 |
| 6576 | 0 | 108790 | AQGPRGEP                     | 2.14 | 0.01 | 1.60 | 2.55 | 2.60 | 0.28 |
| 6577 | 0 | 94783  | AQGQDL                       | 1.90 | 0.01 | 4.63 | 1.20 | 0.22 | 1.27 |
| 6578 | 0 | 94783  | AQGQDL                       | 1.90 | 0.01 | 4.63 | 1.20 | 0.22 | 1.27 |
| 6579 | 0 | 113279 | AQGQQPGQGQQGQQ               | 2.67 | 0.01 | 1.86 | 0.44 | 1.23 | 0.85 |
| 6580 | 0 | 3971   | AQGQYSNTLLRIYRDNK<br>SIN     | 2.94 | 0.01 | 2.56 | 1.12 | 0.22 | 0.28 |
| 6581 | 0 | 3971   | AQGQYSNTLLRIYRDNK<br>SIN     | 2.94 | 0.01 | 2.56 | 1.12 | 0.22 | 0.28 |
| 6582 | 0 | 3972   | AQGQYSNTLLRIYRDNK<br>TIN     | 2.94 | 0.01 | 2.56 | 3.12 | 0.22 | 0.28 |
| 6583 | 0 | 3973   | AQGRNVRTFTSFFSPG             | 2.74 | 0.01 | 1.96 | 0.44 | 0.85 | 0.28 |
| 6584 | 0 | 3973   | AQGRNVRTFTSFFSPG             | 2.74 | 0.01 | 1.96 | 0.44 | 0.85 | 0.28 |
| 6585 | 0 | 97895  | AQGSVQPQQLPQFEEIR<br>NLAL    | 2.99 | 0.01 | 1.86 | 0.44 | 1.93 | 0.28 |
| 6586 | 0 | 112037 | AQGTLSKIFKLGRDSRS<br>GSPMARR | 3.16 | 0.01 | 0.78 | 0.44 | 1.13 | 0.28 |
| 6587 | 0 | 112037 | AQGTLSKIFKLGRDSRS<br>GSPMARR | 3.16 | 0.01 | 0.78 | 0.44 | 1.13 | 3.25 |
| 6588 | 0 | 112037 | AQGTLSKIFKLGRDSRS<br>GSPMARR | 3.16 | 0.01 | 0.78 | 0.44 | 1.13 | 3.25 |
| 6589 | 0 | 442744 | AQHRTHL                      | 2.02 | 0.01 | 0.90 | 2.66 | 0.22 | 1.39 |
| 6590 | 0 | 175568 | AQIFNKPYWL                   | 2.26 | 0.01 | 1.86 | 0.68 | 0.22 | 2.75 |
| 6591 | 0 | 489474 | AQIFWVNTSSFNTTQ              | 2.68 | 0.01 | 2.69 | 3.05 | 0.85 | 1.28 |
| 6592 | 0 | 115689 | AQILQWQVLS                   | 2.33 | 0.01 | 1.60 | 0.44 | 1.23 | 0.85 |
| 6593 | 0 | 115689 | AQILQWQVLS                   | 2.33 | 0.01 | 1.60 | 0.44 | 1.23 | 0.85 |
| 6594 | 0 | 187271 | AQIWTAMMYSVK                 | 2.45 | 0.01 | 2.59 | 0.44 | 1.74 | 0.28 |
| 6595 | 0 | 511794 | AQKEAAEKAAAEALA              | 2.75 | 0.01 | 2.24 | 0.44 | 1.41 | 1.28 |
| 6596 | 0 | 3983   | AQKFNGLTVLPPLLTDD            | 2.76 | 0.01 | 2.48 | 0.44 | 0.85 | 0.28 |
| 6597 | 0 | 3983   | AQKFNGLTVLPPLLTDD            | 2.76 | 0.01 | 2.48 | 0.68 | 0.22 | 0.28 |
| 6598 | 0 | 256304 | AQKGNVRKLQPQPQK              | 2.70 | 0.01 | 1.61 | 0.44 | 0.85 | 1.28 |
| 6599 | 0 | 181557 | AQKHYAHDGSGNYY               | 2.68 | 0.01 | 1.66 | 2.36 | 0.22 | 1.28 |
| 6600 | 0 | 95253  | AQKKII                       | 1.88 | 0.01 | 1.60 | 0.44 | 1.23 | 0.28 |

|      |   |        |                                              |      |      |      |      |      |      |
|------|---|--------|----------------------------------------------|------|------|------|------|------|------|
| 6601 | 0 | 3985   | AQKKIIAEKT                                   | 2.35 | 0.01 | 1.60 | 0.44 | 1.23 | 0.85 |
| 6602 | 0 | 3985   | AQKKIIAEKT                                   | 2.35 | 0.01 | 1.60 | 0.44 | 1.23 | 0.85 |
| 6603 | 0 | 3985   | AQKKIIAEKT                                   | 2.35 | 0.01 | 1.60 | 0.44 | 1.23 | 0.85 |
| 6604 | 0 | 3985   | AQKKIIAEKT                                   | 2.35 | 0.01 | 1.60 | 0.44 | 1.23 | 0.85 |
| 6605 | 0 | 3985   | AQKKIIAEKT                                   | 2.35 | 0.01 | 1.60 | 0.44 | 2.98 | 0.85 |
| 6606 | 0 | 3986   | AQKKIIAEKTKI                                 | 2.53 | 0.01 | 1.60 | 0.44 | 1.23 | 0.85 |
| 6607 | 0 | 115185 | AQKKIIAEKTKIPAVFKID<br>A                     | 2.98 | 0.01 | 1.60 | 0.44 | 1.23 | 1.28 |
| 6608 | 0 | 3988   | AQKLAIDQLTADKAKA                             | 2.84 | 0.01 | 3.59 | 2.02 | 0.22 | 0.28 |
| 6609 | 0 | 419117 | AQKLRPDISTY                                  | 2.34 | 0.01 | 0.90 | 0.44 | 1.93 | 1.39 |
| 6610 | 0 | 3992   | AQKVARTL                                     | 2.13 | 0.01 | 2.88 | 1.12 | 0.22 | 0.28 |
| 6611 | 0 | 95254  | AQKVARTP                                     | 2.13 | 0.01 | 0.90 | 2.59 | 0.22 | 0.28 |
| 6612 | 0 | 423220 | AQLDLEADPTAREGE                              | 2.71 | 0.01 | 2.51 | 0.44 | 1.59 | 1.28 |
| 6613 | 0 | 156851 | AQMIIRLSSPGN                                 | 2.43 | 0.01 | 0.90 | 2.74 | 0.22 | 0.85 |
| 6614 | 0 | 156851 | AQMIIRLSSPGN                                 | 2.43 | 0.01 | 0.90 | 0.68 | 0.22 | 0.28 |
| 6615 | 0 | 4013   | AQNFRNIMHGSDSFFYT<br>FTS                     | 2.93 | 0.01 | 3.37 | 3.23 | 0.22 | 0.28 |
| 6616 | 0 | 4013   | AQNFRNIMHGSDSFFYT<br>FTS                     | 2.93 | 0.01 | 3.37 | 3.23 | 0.22 | 1.34 |
| 6617 | 0 | 4013   | AQNFRNIMHGSDSFFYT<br>FTS                     | 2.93 | 0.01 | 3.37 | 3.23 | 0.22 | 0.28 |
| 6618 | 0 | 161594 | AQNILGIAKDPYRSGSTT<br>AGISDIMVTEEQEVAPT<br>N | 3.52 | 0.01 | 3.81 | 3.55 | 0.22 | 0.85 |
| 6619 | 0 | 170368 | AQNIMESFENPFRMF                              | 2.68 | 0.01 | 0.78 | 0.44 | 1.41 | 0.28 |
| 6620 | 0 | 117191 | AQPGSGKGKVQFQGKK<br>TKFASDD                  | 3.11 | 4.63 | 0.78 | 0.44 | 1.41 | 0.28 |
| 6621 | 0 | 117191 | AQPGSGKGKVQFQGKK<br>TKFASDD                  | 3.11 | 4.63 | 0.78 | 0.44 | 1.13 | 0.28 |
| 6622 | 0 | 117192 | AQPGSGKGKVQFQGKK<br>TKFASDD                  | 3.11 | 0.01 | 0.78 | 0.44 | 1.41 | 0.28 |
| 6623 | 0 | 117192 | AQPGSGKGKVQFQGKK<br>TKFASDD                  | 3.11 | 0.01 | 0.78 | 0.44 | 1.13 | 0.28 |
| 6624 | 0 | 4021   | AQPGYPWP                                     | 2.14 | 0.01 | 1.72 | 0.44 | 0.85 | 0.28 |
| 6625 | 0 | 4023   | AQPGYPWPLY                                   | 2.33 | 0.01 | 2.68 | 0.44 | 0.85 | 0.28 |
| 6626 | 0 | 4023   | AQPGYPWPLY                                   | 2.33 | 0.01 | 2.68 | 2.74 | 0.22 | 0.28 |
| 6627 | 0 | 4024   | AQPGYPWPLYGNEG                               | 2.63 | 0.01 | 2.41 | 0.44 | 1.59 | 0.28 |
| 6628 | 0 | 4024   | AQPGYPWPLYGNEG                               | 2.63 | 0.01 | 1.72 | 3.63 | 0.22 | 0.28 |
| 6629 | 0 | 4027   | AQPHEPGSYTNVFDHLD<br>WIK                     | 2.86 | 0.01 | 3.89 | 1.12 | 0.22 | 0.28 |
| 6630 | 0 | 4027   | AQPHEPGSYTNVFDHLD<br>WIK                     | 2.86 | 0.01 | 3.89 | 1.12 | 0.22 | 0.28 |
| 6631 | 0 | 4028   | AQPHEPGSYTNVFDHLD<br>WIQ                     | 2.88 | 0.01 | 0.90 | 1.12 | 0.22 | 0.28 |
| 6632 | 0 | 4028   | AQPHEPGSYTNVFDHLD<br>WIQ                     | 2.88 | 0.01 | 0.90 | 1.12 | 0.22 | 0.28 |

|      |   |        |                                        |      |      |      |      |      |      |
|------|---|--------|----------------------------------------|------|------|------|------|------|------|
| 6633 | 0 | 4029   | AQPHKPGSYTNVFDHLD<br>WIK               | 2.88 | 0.01 | 0.90 | 1.12 | 0.22 | 0.28 |
| 6634 | 0 | 4029   | AQPHKPGSYTNVFDHLD<br>WIK               | 2.88 | 0.01 | 0.90 | 1.12 | 0.22 | 0.28 |
| 6635 | 0 | 140158 | AQPHSRPY                               | 2.12 | 0.01 | 0.78 | 0.44 | 1.13 | 0.28 |
| 6636 | 0 | 4031   | AQPKLAAA                               | 2.13 | 0.01 | 3.06 | 1.12 | 0.22 | 0.28 |
| 6637 | 0 | 79520  | AQPKLAKPVLDTTTLNP<br>TIAGKGTV          | 3.19 | 0.01 | 3.21 | 2.69 | 0.22 | 0.28 |
| 6638 | 0 | 79520  | AQPKLAKPVLDTTTLNP<br>TIAGKGTV          | 3.19 | 0.01 | 3.21 | 2.16 | 0.22 | 0.28 |
| 6639 | 0 | 4032   | AQPKSA                                 | 1.91 | 0.01 | 2.40 | 2.52 | 0.22 | 0.28 |
| 6640 | 0 | 181558 | AQPLKVGL                               | 2.12 | 0.01 | 3.81 | 1.15 | 0.22 | 0.28 |
| 6641 | 0 | 181558 | AQPLKVGL                               | 2.12 | 0.01 | 3.81 | 1.15 | 0.22 | 0.85 |
| 6642 | 0 | 181558 | AQPLKVGL                               | 2.12 | 0.01 | 3.81 | 1.15 | 0.22 | 1.48 |
| 6643 | 0 | 149630 | AQPPKSEGWTLR                           | 2.42 | 0.01 | 0.90 | 2.37 | 0.22 | 0.28 |
| 6644 | 0 | 78350  | AQPQSPD                                | 2.04 | 0.01 | 0.90 | 0.68 | 0.22 | 1.39 |
| 6645 | 0 | 4037   | AQPREPGSYTNVFDHLD<br>WIK               | 2.84 | 0.01 | 0.90 | 1.12 | 0.22 | 0.28 |
| 6646 | 0 | 4038   | AQPVKIDNASPAST                         | 2.62 | 0.01 | 2.45 | 1.12 | 0.22 | 0.28 |
| 6647 | 0 | 4038   | AQPVKIDNASPAST                         | 2.62 | 0.01 | 2.45 | 1.12 | 0.22 | 0.85 |
| 6648 | 0 | 4038   | AQPVKIDNASPAST                         | 2.62 | 0.01 | 2.45 | 1.12 | 0.22 | 1.34 |
| 6649 | 0 | 4040   | AQPVLQTLCAQPSNTVT<br>CGQHVTLYCSTSGNNVT | 3.50 | 0.01 | 3.36 | 0.68 | 0.22 | 2.12 |
| 6650 | 0 | 123037 | AQPVRLFLE                              | 2.21 | 0.01 | 2.28 | 2.00 | 0.22 | 0.28 |
| 6651 | 0 | 123038 | AQPVRLLE                               | 2.21 | 0.01 | 0.90 | 2.00 | 0.22 | 0.28 |
| 6652 | 0 | 173922 | AQQPQQLPQQQQI                          | 2.60 | 0.01 | 1.86 | 0.44 | 1.23 | 0.85 |
| 6653 | 0 | 80440  | AQQPSTATSVDPAP                         | 2.59 | 0.01 | 3.75 | 0.44 | 0.85 | 0.28 |
| 6654 | 0 | 4052   | AQRAIDSQNMTKAAQS<br>LNSI               | 2.96 | 0.01 | 2.85 | 1.12 | 0.22 | 0.28 |
| 6655 | 0 | 4052   | AQRAIDSQNMTKAAQS<br>LNSI               | 2.96 | 0.01 | 2.85 | 1.12 | 0.22 | 0.28 |
| 6656 | 0 | 115594 | AQRPQDEN                               | 2.12 | 0.01 | 0.90 | 1.12 | 0.22 | 2.56 |
| 6657 | 0 | 115594 | AQRPQDEN                               | 2.12 | 0.01 | 0.90 | 1.12 | 0.22 | 2.56 |
| 6658 | 0 | 115594 | AQRPQDEN                               | 2.12 | 0.01 | 0.90 | 2.61 | 0.22 | 2.56 |
| 6659 | 0 | 4059   | AQRVEFLLKAWAEK                         | 2.63 | 0.01 | 2.69 | 0.44 | 0.85 | 0.28 |
| 6660 | 0 | 4059   | AQRVEFLLKAWAEK                         | 2.63 | 0.01 | 2.69 | 0.44 | 0.85 | 0.28 |
| 6661 | 0 | 4059   | AQRVEFLLKAWAEK                         | 2.63 | 0.01 | 2.69 | 0.44 | 1.41 | 0.28 |
| 6662 | 0 | 4059   | AQRVEFLLKAWAEK                         | 2.63 | 0.01 | 2.69 | 0.44 | 0.85 | 0.28 |
| 6663 | 0 | 4059   | AQRVEFLLKAWAEK                         | 2.63 | 0.01 | 2.69 | 0.44 | 0.85 | 0.28 |
| 6664 | 0 | 108283 | AQSAITACW                              | 2.24 | 0.01 | 0.90 | 0.44 | 1.13 | 1.39 |
| 6665 | 0 | 4061   | AQSAKFQFKPEEM                          | 2.64 | 0.01 | 3.34 | 1.12 | 0.22 | 0.85 |
| 6666 | 0 | 256567 | AQSEADADDDDPQRP                        | 2.71 | 0.01 | 1.61 | 0.44 | 0.85 | 1.28 |
| 6667 | 0 | 256568 | AQSEADADVDDPQRP                        | 2.71 | 0.01 | 1.61 | 0.44 | 0.85 | 1.28 |
| 6668 | 0 | 450440 | AQSLETS                                | 2.02 | 0.01 | 0.90 | 0.44 | 1.41 | 1.39 |

|      |   |        |                              |      |      |      |      |      |      |
|------|---|--------|------------------------------|------|------|------|------|------|------|
| 6669 | 0 | 422194 | AQSQRAPDRVLC                 | 2.48 | 0.01 | 0.78 | 0.68 | 0.22 | 0.28 |
| 6670 | 0 | 238219 | AQSRKHRDHAMVPLEE<br>AA       | 2.82 | 0.01 | 0.78 | 0.44 | 1.13 | 0.28 |
| 6671 | 0 | 4071   | AQSRNVRTFTGLFTSG             | 2.75 | 0.01 | 1.96 | 0.44 | 0.85 | 0.28 |
| 6672 | 0 | 4071   | AQSRNVRTFTGLFTSG             | 2.75 | 0.01 | 1.96 | 0.44 | 0.85 | 0.28 |
| 6673 | 0 | 4071   | AQSRNVRTFTGLFTSG             | 2.75 | 0.01 | 1.96 | 0.44 | 0.85 | 1.27 |
| 6674 | 0 | 191189 | AQSSSFQFKPQ                  | 2.51 | 0.01 | 2.76 | 1.20 | 0.22 | 0.28 |
| 6675 | 0 | 78351  | AQSSSFQFKPQEITGI             | 2.79 | 0.01 | 2.76 | 0.44 | 1.23 | 1.39 |
| 6676 | 0 | 4074   | AQSTMKAEELTPGR               | 2.59 | 0.01 | 2.56 | 2.69 | 0.22 | 0.28 |
| 6677 | 0 | 131828 | AQSTSARNSDSKLTW              | 2.69 | 0.01 | 0.78 | 0.44 | 1.13 | 0.85 |
| 6678 | 0 | 4077   | AQSVPYGVSIKAPA               | 2.71 | 0.01 | 3.67 | 3.16 | 0.22 | 0.28 |
| 6679 | 0 | 4079   | AQTASGLVSM                   | 2.32 | 0.01 | 2.83 | 0.44 | 0.85 | 0.28 |
| 6680 | 0 | 4080   | AQTFLATCINGVCW               | 2.60 | 0.01 | 2.41 | 0.44 | 0.85 | 0.28 |
| 6681 | 0 | 4080   | AQTFLATCINGVCW               | 2.60 | 0.01 | 2.41 | 0.44 | 0.85 | 0.28 |
| 6682 | 0 | 226006 | AQTGNKTRLAFAGLKYA<br>DVG     | 2.95 | 0.01 | 2.24 | 0.68 | 0.22 | 0.28 |
| 6683 | 0 | 164205 | AQTLSGTLASHT                 | 2.52 | 0.01 | 0.90 | 1.20 | 0.22 | 0.28 |
| 6684 | 0 | 115690 | AQTQSLVYPF                   | 2.29 | 0.01 | 1.60 | 0.44 | 1.23 | 0.85 |
| 6685 | 0 | 115690 | AQTQSLVYPF                   | 2.29 | 0.01 | 1.60 | 0.44 | 1.23 | 0.85 |
| 6686 | 0 | 130734 | AQTTANPSCPEGT                | 2.56 | 0.01 | 0.90 | 2.97 | 0.22 | 0.28 |
| 6687 | 0 | 102316 | AQVATISANGDK                 | 2.46 | 0.01 | 0.78 | 0.44 | 1.13 | 0.28 |
| 6688 | 0 | 102316 | AQVATISANGDK                 | 2.46 | 0.01 | 0.78 | 0.44 | 1.41 | 0.28 |
| 6689 | 0 | 4089   | AQVATVSS                     | 2.14 | 0.01 | 2.99 | 0.44 | 0.85 | 0.28 |
| 6690 | 0 | 4091   | AQVIAEHQF                    | 2.24 | 0.01 | 2.59 | 0.44 | 0.85 | 0.28 |
| 6691 | 0 | 4094   | AQVTLPIRTPNA                 | 2.48 | 0.01 | 0.90 | 0.44 | 1.23 | 0.28 |
| 6692 | 0 | 4096   | AQVVKDYFTLKGAAAPV<br>AHFQG   | 3.04 | 0.01 | 2.75 | 1.12 | 0.22 | 0.28 |
| 6693 | 0 | 4096   | AQVVKDYFTLKGAAAPV<br>AHFQG   | 3.04 | 0.01 | 2.75 | 1.12 | 0.22 | 1.34 |
| 6694 | 0 | 4096   | AQVVKDYFTLKGAAAPV<br>AHFQG   | 3.04 | 0.01 | 2.75 | 1.12 | 0.22 | 0.85 |
| 6695 | 0 | 106263 | AQWSPNPDMSVS                 | 2.48 | 0.01 | 0.90 | 1.15 | 0.22 | 1.39 |
| 6696 | 0 | 4098   | AQYAAQNRRLDLLFW              | 2.73 | 0.01 | 3.01 | 0.44 | 0.85 | 0.28 |
| 6697 | 0 | 227046 | AQYKALPVVLENARILKN<br>CVDKMT | 3.14 | 0.01 | 3.08 | 1.12 | 0.22 | 0.28 |
| 6698 | 0 | 96108  | AQYQAEKRV                    | 2.32 | 0.01 | 2.39 | 0.44 | 0.85 | 0.28 |
| 6699 | 0 | 450441 | AQYVAVG                      | 2.05 | 0.01 | 0.90 | 0.44 | 1.23 | 1.39 |
| 6700 | 0 | 137108 | ARAAVDTYCRHNYGV              | 2.68 | 0.01 | 0.78 | 2.74 | 0.22 | 1.57 |
| 6701 | 0 | 137108 | ARAAVDTYCRHNYGV              | 2.68 | 0.01 | 0.78 | 1.12 | 0.22 | 1.57 |

|      |   |        |                                                     |      |      |      |      |      |      |
|------|---|--------|-----------------------------------------------------|------|------|------|------|------|------|
| 6702 | 0 | 242327 | ARAHQMSPSPFVEVP                                     | 2.69 | 0.01 | 3.33 | 1.20 | 0.22 | 0.85 |
| 6703 | 0 | 118271 | ARALMLQGVDLLA                                       | 2.57 | 0.01 | 0.78 | 0.44 | 1.74 | 0.85 |
| 6704 | 0 | 4121   | ARATIRYRPLVPNAVGG<br>YAISISFW                       | 3.16 | 0.01 | 2.53 | 0.44 | 0.85 | 0.28 |
| 6705 | 0 | 4122   | ARATIRYRPLVPNAVGG<br>YAISISFWPQTTT                  | 3.33 | 0.01 | 2.53 | 0.44 | 0.85 | 0.28 |
| 6706 | 0 | 4122   | ARATIRYRPLVPNAVGG<br>YAISISFWPQTTT                  | 3.33 | 0.01 | 2.53 | 0.44 | 0.85 | 0.28 |
| 6707 | 0 | 4127   | ARDDIQKDINKMESELIN<br>VSNEINRLD                     | 3.26 | 0.01 | 2.22 | 0.44 | 1.74 | 0.28 |
| 6708 | 0 | 4127   | ARDDIQKDINKMESELIN<br>VSNEINRLD                     | 3.26 | 0.01 | 2.22 | 0.44 | 1.74 | 0.28 |
| 6709 | 0 | 4127   | ARDDIQKDINKMESELIN<br>VSNEINRLD                     | 3.26 | 0.01 | 1.66 | 0.44 | 1.59 | 0.28 |
| 6710 | 0 | 170372 | ARDDTHYLLIYDKM                                      | 2.67 | 0.01 | 0.78 | 0.44 | 1.13 | 0.28 |
| 6711 | 0 | 4129   | ARDLICAQKFNGLTVLP                                   | 2.74 | 0.01 | 2.48 | 0.68 | 0.22 | 0.28 |
| 6712 | 0 | 106264 | ARDMWRAYSMDMREAN<br>YI                              | 2.82 | 0.01 | 0.78 | 1.12 | 0.22 | 0.85 |
| 6713 | 0 | 190388 | ARDNADYSVDMLTSE                                     | 2.67 | 0.01 | 3.61 | 2.00 | 1.41 | 0.28 |
| 6714 | 0 | 135898 | ARDTQGLGWGAS                                        | 2.48 | 0.01 | 0.90 | 2.16 | 0.22 | 2.12 |
| 6715 | 0 | 4132   | ARDVLAVVSK                                          | 2.33 | 0.01 | 2.59 | 0.44 | 0.85 | 0.28 |
| 6716 | 0 | 4132   | ARDVLAVVSK                                          | 2.33 | 0.01 | 2.59 | 0.44 | 0.85 | 0.28 |
| 6717 | 0 | 4132   | ARDVLAVVSK                                          | 2.33 | 0.01 | 2.59 | 0.44 | 1.74 | 0.28 |
| 6718 | 0 | 4132   | ARDVLAVVSK                                          | 2.33 | 0.01 | 2.04 | 0.44 | 0.85 | 0.28 |
| 6719 | 0 | 4132   | ARDVLAVVSK                                          | 2.33 | 0.01 | 2.04 | 0.44 | 0.85 | 0.28 |
| 6720 | 0 | 4132   | ARDVLAVVSK                                          | 2.33 | 0.01 | 2.04 | 0.44 | 1.74 | 0.28 |
| 6721 | 0 | 4134   | AREAFRRY                                            | 2.16 | 0.01 | 2.40 | 2.43 | 0.22 | 0.28 |
| 6722 | 0 | 137519 | AREERFEWISFKTND                                     | 2.66 | 0.01 | 3.12 | 0.44 | 1.23 | 0.85 |
| 6723 | 0 | 119432 | AREETDKEEPASKQQKT<br>ENG                            | 2.95 | 0.01 | 0.78 | 0.44 | 1.13 | 0.28 |
| 6724 | 0 | 4140   | AREQSCRRPNAQRFGIS<br>NYCQIYPPNANKIREALA<br>QPQRYCRH | 3.71 | 0.01 | 2.78 | 0.44 | 1.23 | 1.57 |
| 6725 | 0 | 4140   | AREQSCRRPNAQRFGIS<br>NYCQIYPPNANKIREALA<br>QPQRYCRH | 3.71 | 0.01 | 2.78 | 0.44 | 1.23 | 1.57 |
| 6726 | 0 | 4140   | AREQSCRRPNAQRFGIS<br>NYCQIYPPNANKIREALA<br>QPQRYCRH | 3.71 | 0.01 | 2.78 | 1.12 | 0.22 | 1.57 |
| 6727 | 0 | 4142   | AREQSCRRPNAQRFGIS<br>NYCQIYPPNVNKIREALA<br>QTHSAIAV | 3.69 | 0.01 | 2.78 | 0.44 | 1.23 | 0.28 |
| 6728 | 0 | 4142   | AREQSCRRPNAQRFGIS<br>NYCQIYPPNVNKIREALA<br>QTHSAIAV | 3.69 | 0.01 | 2.78 | 0.68 | 0.22 | 0.28 |

|      |   |        |                          |      |      |      |      |      |      |
|------|---|--------|--------------------------|------|------|------|------|------|------|
| 6729 | 0 | 4143   | ARFLAEEADRKYDEV          | 2.70 | 0.01 | 2.36 | 0.44 | 1.23 | 1.28 |
| 6730 | 0 | 4143   | ARFLAEEADRKYDEV          | 2.70 | 0.01 | 2.36 | 0.44 | 1.23 | 1.27 |
| 6731 | 0 | 4143   | ARFLAEEADRKYDEV          | 2.70 | 0.01 | 2.36 | 0.44 | 1.23 | 1.28 |
| 6732 | 0 | 80446  | ARGACVTIMTVDNPA          | 2.67 | 0.01 | 2.57 | 0.44 | 0.85 | 0.28 |
|      |   |        | ARGACVTIMTVDNPA          |      |      |      |      |      |      |
| 6733 | 0 | 4146   | TNKDKLFAVWKITYKDT<br>V   | 3.48 | 0.01 | 2.57 | 1.20 | 0.22 | 0.28 |
|      |   |        | ARGACVTIMTVDNPA          |      |      |      |      |      |      |
| 6734 | 0 | 4146   | TNKDKLFAVWKITYKDT<br>V   | 3.48 | 0.01 | 2.57 | 1.20 | 0.22 | 1.34 |
| 6735 | 0 | 107745 | ARGAQPPGATGFP            | 2.67 | 0.01 | 0.78 | 0.44 | 1.13 | 0.28 |
| 6736 | 0 | 107745 | ARGAQPPGATGFP            | 2.67 | 0.01 | 0.78 | 0.44 | 1.93 | 0.28 |
| 6737 | 0 | 79157  | ARGDLAXARGDLAXAR<br>GDLA | 3.02 | 0.01 | 0.90 | 2.59 | 0.22 | 1.34 |
| 6738 | 0 | 79157  | ARGDLAXARGDLAXAR<br>GDLA | 3.02 | 0.01 | 0.90 | 1.20 | 0.22 | 1.34 |
| 6739 | 0 | 79157  | ARGDLAXARGDLAXAR<br>GDLA | 3.02 | 0.01 | 0.90 | 1.20 | 0.22 | 1.34 |
| 6740 | 0 | 79157  | ARGDLAXARGDLAXAR<br>GDLA | 3.02 | 0.01 | 0.90 | 1.20 | 0.22 | 1.34 |
| 6741 | 0 | 79157  | ARGDLAXARGDLAXAR<br>GDLA | 3.02 | 0.01 | 0.90 | 2.59 | 0.22 | 0.85 |
| 6742 | 0 | 79157  | ARGDLAXARGDLAXAR<br>GDLA | 3.02 | 0.01 | 0.90 | 1.20 | 0.22 | 0.85 |
| 6743 | 0 | 167871 | ARGDLQVLTPKA             | 2.46 | 0.01 | 3.02 | 0.68 | 0.22 | 1.48 |
| 6744 | 0 | 167871 | ARGDLQVLTPKA             | 2.46 | 0.01 | 3.02 | 0.68 | 0.22 | 0.85 |
| 6745 | 0 | 167871 | ARGDLQVLTPKA             | 2.46 | 0.01 | 3.02 | 0.68 | 0.22 | 1.34 |
| 6746 | 0 | 167871 | ARGDLQVLTPKA             | 2.46 | 0.01 | 3.02 | 0.68 | 0.22 | 1.34 |
| 6747 | 0 | 167871 | ARGDLQVLTPKA             | 2.46 | 0.01 | 3.02 | 0.68 | 0.22 | 1.48 |
| 6748 | 0 | 167871 | ARGDLQVLTPKA             | 2.46 | 0.01 | 3.02 | 0.68 | 0.22 | 1.48 |
| 6749 | 0 | 167871 | ARGDLQVLTPKA             | 2.46 | 0.01 | 3.02 | 0.68 | 0.22 | 0.85 |
| 6750 | 0 | 167871 | ARGDLQVLTPKA             | 2.46 | 0.01 | 3.02 | 0.68 | 0.22 | 0.28 |
| 6751 | 0 | 503966 | ARGGSRERARGRGRGR<br>GEKR | 3.02 | 3.67 | 2.48 | 0.44 | 1.74 | 0.28 |
| 6752 | 0 | 503966 | ARGGSRERARGRGRGR<br>GEKR | 3.02 | 3.67 | 2.48 | 0.44 | 1.74 | 0.28 |
| 6753 | 0 | 503963 | ARGGSRERARGRGRGR<br>GEKR | 3.02 | 3.40 | 2.48 | 0.44 | 1.74 | 0.28 |
| 6754 | 0 | 503964 | ARGGSRERARGRGRGR<br>GEKR | 3.02 | 3.89 | 2.48 | 0.44 | 1.74 | 0.28 |
| 6755 | 0 | 503965 | ARGGSRERARGRGRGR<br>GEKR | 3.02 | 4.03 | 2.48 | 0.44 | 1.74 | 0.28 |
| 6756 | 0 | 107746 | ARGHRPLDKKREEAPSL<br>RPA | 2.97 | 4.45 | 0.78 | 0.44 | 1.13 | 0.28 |
| 6757 | 0 | 107746 | ARGHRPLDKKREEAPSL<br>RPA | 2.97 | 4.45 | 0.78 | 0.44 | 1.13 | 0.28 |



|      |   |        |                          |      |      |      |      |      |      |
|------|---|--------|--------------------------|------|------|------|------|------|------|
| 6758 | 0 | 107746 | ARGHRPLDKKREEAPSL<br>RPA | 2.97 | 4.45 | 0.78 | 0.44 | 1.13 | 0.28 |
| 6759 | 0 | 110772 | ARGHRPLDKKREEAPSL<br>RPA | 2.97 | 3.97 | 0.78 | 0.44 | 1.13 | 0.28 |
| 6760 | 0 | 110770 | ARGHRPLDKKREEAPSL<br>RPA | 2.97 | 3.24 | 0.78 | 0.44 | 1.13 | 0.28 |
| 6761 | 0 | 110771 | ARGHRPLDKKREEAPSL<br>RPA | 2.97 | 4.93 | 0.78 | 0.44 | 1.13 | 0.28 |
| 6762 | 0 | 110783 | ARGHRPLDKKREEAPSL<br>RPA | 2.97 | 4.93 | 0.78 | 0.44 | 1.13 | 0.28 |
| 6763 | 0 | 110782 | ARGHRPLDKKREEAPSL<br>RPA | 2.97 | 2.94 | 0.78 | 0.44 | 1.13 | 0.28 |
| 6764 | 0 | 110781 | ARGHRPLDKKREEAPSL<br>RPA | 2.97 | 3.93 | 0.78 | 0.44 | 1.13 | 0.28 |
| 6765 | 0 | 110779 | ARGHRPLDKKREEAPSL<br>RPA | 2.97 | 4.93 | 0.78 | 0.44 | 1.13 | 0.28 |
| 6766 | 0 | 110778 | ARGHRPLDKKREEAPSL<br>RPA | 2.97 | 4.93 | 0.78 | 0.44 | 1.13 | 0.28 |
| 6767 | 0 | 110780 | ARGHRPLDKKREEAPSL<br>RPA | 2.97 | 4.93 | 0.78 | 0.44 | 1.13 | 0.28 |
| 6768 | 0 | 110777 | ARGHRPLDKKREEAPSL<br>RPA | 2.97 | 4.45 | 0.78 | 0.44 | 1.13 | 0.28 |
| 6769 | 0 | 110775 | ARGHRPLDKKREEAPSL<br>RPA | 2.97 | 4.93 | 0.78 | 0.44 | 1.13 | 0.28 |
| 6770 | 0 | 110773 | ARGHRPLDKKREEAPSL<br>RPA | 2.97 | 3.67 | 0.78 | 0.44 | 1.13 | 0.28 |
| 6771 | 0 | 110774 | ARGHRPLDKKREEAPSL<br>RPA | 2.97 | 4.93 | 0.78 | 0.44 | 1.13 | 0.28 |
| 6772 | 0 | 110776 | ARGHRPLDKKREEAPSL<br>RPA | 2.97 | 4.93 | 0.78 | 0.44 | 1.13 | 0.28 |
| 6773 | 0 | 110785 | ARGHRPLDKKREEAPSL<br>RPA | 2.97 | 0.01 | 0.78 | 0.44 | 1.13 | 0.28 |
| 6774 | 0 | 144594 | ARGISRTKYW               | 2.29 | 0.01 | 0.78 | 0.44 | 1.41 | 0.28 |
| 6775 | 0 | 144594 | ARGISRTKYW               | 2.29 | 0.01 | 0.78 | 0.44 | 1.13 | 0.28 |
| 6776 | 0 | 144594 | ARGISRTKYW               | 2.29 | 0.01 | 0.78 | 0.44 | 2.35 | 0.28 |
| 6777 | 0 | 106265 | ARGLT                    | 1.74 | 0.01 | 1.75 | 2.46 | 0.22 | 1.75 |
| 6778 | 0 | 106265 | ARGLT                    | 1.74 | 0.01 | 1.75 | 2.46 | 0.22 | 1.48 |
| 6779 | 0 | 106265 | ARGLT                    | 1.74 | 0.01 | 0.78 | 2.46 | 0.22 | 0.28 |
| 6780 | 0 | 106265 | ARGLT                    | 1.74 | 0.01 | 1.75 | 2.46 | 0.22 | 1.48 |
| 6781 | 0 | 106265 | ARGLT                    | 1.74 | 0.01 | 1.75 | 2.46 | 0.22 | 1.75 |
| 6782 | 0 | 106265 | ARGLT                    | 1.74 | 0.01 | 0.78 | 2.46 | 0.22 | 0.28 |
| 6783 | 0 | 108285 | ARGLTGRP                 | 2.14 | 0.01 | 0.78 | 2.46 | 0.22 | 0.28 |
| 6784 | 0 | 108796 | ARGLTGRPGDA              | 2.43 | 4.03 | 2.19 | 3.16 | 0.22 | 0.28 |
| 6785 | 0 | 108796 | ARGLTGRPGDA              | 2.43 | 4.03 | 2.19 | 2.46 | 0.22 | 1.75 |
| 6786 | 0 | 108796 | ARGLTGRPGDA              | 2.43 | 4.03 | 2.19 | 2.46 | 0.22 | 0.28 |
| 6787 | 0 | 108796 | ARGLTGRPGDA              | 2.43 | 4.03 | 2.19 | 2.46 | 0.22 | 0.28 |
| 6788 | 0 | 195081 | ARGLTGRPGDA              | 2.43 | 4.08 | 0.78 | 0.44 | 1.13 | 1.28 |

|      |   |        |                            |      |      |      |      |      |      |
|------|---|--------|----------------------------|------|------|------|------|------|------|
| 6789 | 0 | 195081 | ARGLTGRPGDA                | 2.43 | 4.08 | 0.78 | 0.44 | 1.41 | 1.28 |
| 6790 | 0 | 195081 | ARGLTGRPGDA                | 2.43 | 4.08 | 0.78 | 0.44 | 1.13 | 0.28 |
| 6791 | 0 | 195081 | ARGLTGRPGDA                | 2.43 | 4.08 | 0.78 | 0.44 | 1.41 | 1.28 |
| 6792 | 0 | 195081 | ARGLTGRPGDA                | 2.43 | 4.08 | 0.78 | 0.44 | 1.13 | 1.28 |
| 6793 | 0 | 107087 | ARGLTGRPGDA                | 2.43 | 0.01 | 0.78 | 0.44 | 1.13 | 0.28 |
| 6794 | 0 | 107087 | ARGLTGRPGDA                | 2.43 | 0.01 | 0.78 | 0.44 | 1.41 | 0.28 |
| 6795 | 0 | 107087 | ARGLTGRPGDA                | 2.43 | 0.01 | 0.78 | 0.44 | 1.41 | 0.28 |
| 6796 | 0 | 107087 | ARGLTGRPGDA                | 2.43 | 0.01 | 0.78 | 0.44 | 1.13 | 0.28 |
| 6797 | 0 | 107087 | ARGLTGRPGDA                | 2.43 | 0.01 | 0.78 | 0.44 | 1.13 | 0.28 |
| 6798 | 0 | 107087 | ARGLTGRPGDA                | 2.43 | 0.01 | 0.78 | 0.44 | 1.93 | 0.28 |
| 6799 | 0 | 107087 | ARGLTGRPGDA                | 2.43 | 0.01 | 0.78 | 3.18 | 0.22 | 0.28 |
| 6800 | 0 | 107087 | ARGLTGRPGDA                | 2.43 | 0.01 | 0.78 | 3.18 | 0.22 | 0.28 |
| 6801 | 0 | 107087 | ARGLTGRPGDA                | 2.43 | 0.01 | 0.78 | 2.46 | 0.22 | 0.28 |
| 6802 | 0 | 107087 | ARGLTGRPGDA                | 2.43 | 0.01 | 0.78 | 3.18 | 0.22 | 0.28 |
| 6803 | 0 | 107087 | ARGLTGRPGDA                | 2.43 | 0.01 | 0.78 | 3.18 | 0.22 | 2.92 |
| 6804 | 0 | 107087 | ARGLTGRPGDA                | 2.43 | 0.01 | 2.19 | 3.16 | 0.22 | 0.28 |
| 6805 | 0 | 107087 | ARGLTGRPGDA                | 2.43 | 0.01 | 1.60 | 2.46 | 2.60 | 1.75 |
| 6806 | 0 | 107087 | ARGLTGRPGDA                | 2.43 | 0.01 | 1.60 | 2.46 | 0.22 | 0.28 |
| 6807 | 0 | 107087 | ARGLTGRPGDA                | 2.43 | 0.01 | 1.60 | 2.46 | 0.22 | 0.28 |
| 6808 | 0 | 107087 | ARGLTGRPGDA                | 2.43 | 0.01 | 0.78 | 0.44 | 1.41 | 0.28 |
| 6809 | 0 | 107087 | ARGLTGRPGDA                | 2.43 | 0.01 | 0.78 | 0.44 | 1.13 | 0.28 |
| 6810 | 0 | 107087 | ARGLTGRPGDA                | 2.43 | 0.01 | 0.78 | 0.44 | 1.41 | 0.28 |
| 6811 | 0 | 107087 | ARGLTGRPGDA                | 2.43 | 0.01 | 0.78 | 0.44 | 1.13 | 0.28 |
| 6812 | 0 | 176968 | ARGLTGRPGDAG               | 2.52 | 4.03 | 0.78 | 1.15 | 0.22 | 0.28 |
| 6813 | 0 | 176969 | ARGLTGRPGDAG               | 2.52 | 4.08 | 0.78 | 1.15 | 0.22 | 0.28 |
| 6814 | 0 | 434722 | ARGLTGRPGDAK               | 2.50 | 4.08 | 0.78 | 0.44 | 1.13 | 0.28 |
| 6815 | 0 | 108799 | ARGPPGPT                   | 2.16 | 0.01 | 1.60 | 2.55 | 2.60 | 0.28 |
| 6816 | 0 | 117443 | ARGRGRGMGRGNIFQ            | 2.72 | 4.93 | 0.78 | 0.44 | 1.13 | 0.28 |
| 6817 | 0 | 4149   | ARGSLAVTI                  | 2.22 | 0.01 | 3.44 | 1.15 | 0.22 | 1.27 |
| 6818 | 0 | 4149   | ARGSLAVTI                  | 2.22 | 0.01 | 3.44 | 1.15 | 0.22 | 1.34 |
| 6819 | 0 | 4149   | ARGSLAVTI                  | 2.22 | 0.01 | 3.44 | 1.15 | 0.22 | 1.27 |
| 6820 | 0 | 4149   | ARGSLAVTI                  | 2.22 | 0.01 | 3.44 | 2.49 | 0.22 | 0.28 |
| 6821 | 0 | 4149   | ARGSLAVTI                  | 2.22 | 0.01 | 3.44 | 0.68 | 0.22 | 0.28 |
| 6822 | 0 | 4149   | ARGSLAVTI                  | 2.22 | 0.01 | 3.44 | 0.68 | 0.22 | 1.34 |
| 6823 | 0 | 434589 | ARHLREYQDLLNVKMAL          | 2.78 | 4.45 | 0.78 | 0.44 | 1.13 | 0.28 |
| 6824 | 0 | 4157   | ARIAGINIPDHKHAVIAL<br>TSIY | 3.02 | 0.01 | 2.24 | 0.68 | 0.22 | 0.28 |
| 6825 | 0 | 174867 | ARIIFNGKDLNL               | 2.46 | 0.01 | 2.18 | 2.71 | 0.22 | 0.28 |
| 6826 | 0 | 123040 | ARISMIEGA                  | 2.24 | 0.01 | 2.28 | 2.00 | 0.22 | 0.28 |
| 6827 | 0 | 123040 | ARISMIEGA                  | 2.24 | 0.01 | 2.28 | 2.00 | 0.22 | 0.28 |
| 6828 | 0 | 123040 | ARISMIEGA                  | 2.24 | 0.01 | 2.28 | 2.00 | 0.22 | 0.28 |
| 6829 | 0 | 99901  | ARISVPYVGLANAY             | 2.62 | 0.01 | 2.96 | 0.44 | 0.22 | 0.28 |
| 6830 | 0 | 4166   | ARIYYRYDGFAY               | 2.52 | 0.01 | 1.75 | 0.68 | 0.22 | 0.28 |
| 6831 | 0 | 4166   | ARIYYRYDGFAY               | 2.52 | 0.01 | 1.75 | 0.68 | 0.22 | 0.28 |
| 6832 | 0 | 116676 | ARKLAMVEADLERAE            | 2.72 | 0.01 | 2.36 | 0.44 | 1.23 | 1.28 |

|      |   |        |                               |      |      |      |      |      |      |
|------|---|--------|-------------------------------|------|------|------|------|------|------|
| 6833 | 0 | 116676 | ARKLAMVEADLERAE               | 2.72 | 0.01 | 2.36 | 0.44 | 1.23 | 1.27 |
| 6834 | 0 | 116676 | ARKLAMVEADLERAE               | 2.72 | 0.01 | 2.36 | 0.44 | 1.23 | 1.28 |
| 6835 | 0 | 256968 | ARKQQGRDAPQARKQ               | 2.73 | 0.01 | 1.61 | 0.44 | 0.85 | 1.28 |
| 6836 | 0 | 256970 | ARKQQGRNEPQARRQ               | 2.71 | 0.01 | 1.61 | 0.44 | 0.85 | 1.28 |
| 6837 | 0 | 119433 | ARKVKGAAG                     | 2.27 | 0.01 | 0.90 | 0.44 | 1.13 | 0.28 |
| 6838 | 0 | 140828 | ARLAEYHAKATEHLSTLS<br>EKAKPA  | 3.17 | 0.01 | 0.78 | 0.68 | 0.22 | 0.28 |
| 6839 | 0 | 442814 | ARLHTSS                       | 1.99 | 0.01 | 0.90 | 2.66 | 0.22 | 1.39 |
| 6840 | 0 | 4180   | ARLIVF                        | 1.88 | 0.01 | 1.96 | 0.44 | 0.85 | 0.28 |
| 6841 | 0 | 99114  | ARLKEGDVFIMPAAH               | 2.62 | 0.01 | 2.16 | 0.44 | 1.23 | 1.48 |
| 6842 | 0 | 110789 | ARLKSWFEPLVEDMQR<br>QWAG      | 2.92 | 4.93 | 0.78 | 2.46 | 0.22 | 1.28 |
| 6843 | 0 | 111118 | ARLLFGI                       | 2.01 | 0.01 | 0.90 | 0.44 | 0.85 | 1.39 |
| 6844 | 0 | 133517 | ARLLIGTSPDFF                  | 2.42 | 0.01 | 0.90 | 0.44 | 0.85 | 0.28 |
| 6845 | 0 | 170380 | ARLLNLGRHSLDHLL               | 2.70 | 0.01 | 0.78 | 0.44 | 1.13 | 0.28 |
| 6846 | 0 | 4188   | ARLPPSLHL                     | 2.24 | 0.01 | 0.90 | 1.15 | 0.22 | 1.39 |
| 6847 | 0 | 127935 | ARLSAKPAPPKPEPK               | 2.73 | 0.01 | 2.73 | 1.12 | 0.22 | 0.28 |
| 6848 | 0 | 127935 | ARLSAKPAPPKPEPK               | 2.73 | 0.01 | 2.73 | 0.44 | 1.13 | 0.28 |
| 6849 | 0 | 119434 | ARLSVVRNG                     | 2.22 | 0.01 | 0.90 | 0.44 | 1.13 | 0.28 |
| 6850 | 0 | 170381 | ARLTMMWEEVTCPIC               | 2.64 | 0.01 | 0.78 | 0.44 | 1.41 | 0.28 |
| 6851 | 0 | 120410 | ARLVVLASGTGSLLR               | 2.72 | 0.01 | 2.86 | 0.44 | 0.85 | 0.28 |
| 6852 | 0 | 112038 | ARMRDGA                       | 2.05 | 0.01 | 0.78 | 0.44 | 1.13 | 0.28 |
| 6853 | 0 | 111120 | ARMRLYDPNQAALQA               | 2.70 | 0.01 | 3.20 | 1.12 | 0.22 | 0.85 |
| 6854 | 0 | 182057 | ARNCAVYKANKTLLP               | 2.68 | 0.01 | 0.78 | 0.44 | 1.13 | 0.85 |
| 6855 | 0 | 511923 | ARNEKLKNQARSAYK               | 2.71 | 0.01 | 2.24 | 0.44 | 1.41 | 1.28 |
| 6856 | 0 | 4201   | ARNIHVEAGEATGLAW<br>DPWWTVINK | 3.15 | 0.01 | 3.97 | 0.68 | 0.22 | 0.85 |
| 6857 | 0 | 4201   | ARNIHVEAGEATGLAW<br>DPWWTVINK | 3.15 | 0.01 | 3.97 | 0.68 | 0.22 | 0.85 |
| 6858 | 0 | 175729 | ARPADYMLALSVAGGSL<br>PVV      | 2.96 | 0.01 | 2.04 | 0.44 | 0.85 | 0.28 |
| 6859 | 0 | 175729 | ARPADYMLALSVAGGSL<br>PVV      | 2.96 | 0.01 | 2.04 | 0.44 | 0.85 | 0.28 |
| 6860 | 0 | 4210   | ARPDYNPL                      | 2.12 | 0.01 | 2.68 | 0.44 | 1.59 | 0.28 |
| 6861 | 0 | 4213   | ARPKQRRPQGLPNNT               | 2.68 | 0.01 | 3.30 | 0.68 | 0.22 | 0.28 |
| 6862 | 0 | 187752 | ARPSRADFYNPAGRI               | 2.74 | 0.01 | 2.72 | 2.13 | 2.39 | 1.27 |
| 6863 | 0 | 4217   | ARQAIK                        | 1.91 | 0.01 | 1.96 | 0.44 | 0.85 | 0.28 |
| 6864 | 0 | 175730 | ARQGAARVTSWLGRQ               | 2.70 | 0.01 | 2.63 | 1.15 | 0.22 | 0.85 |
| 6865 | 0 | 175730 | ARQGAARVTSWLGRQ               | 2.70 | 0.01 | 2.63 | 1.15 | 0.22 | 0.85 |

|      |   |        |                              |      |      |      |      |      |      |
|------|---|--------|------------------------------|------|------|------|------|------|------|
| 6866 | 0 | 175730 | ARQGAARVTSWLGRQ              | 2.70 | 0.01 | 2.63 | 1.15 | 0.22 | 0.85 |
| 6867 | 0 | 175730 | ARQGAARVTSWLGRQ              | 2.70 | 0.01 | 2.63 | 1.15 | 0.22 | 0.85 |
| 6868 | 0 | 170383 | ARQKFLELHNSLR                | 2.54 | 0.01 | 3.38 | 0.44 | 0.85 | 2.51 |
| 6869 | 0 | 4219   | ARQKLKDAER                   | 2.34 | 3.55 | 2.56 | 0.44 | 0.85 | 0.28 |
| 6870 | 0 | 122269 | ARQNLKDAGE                   | 2.30 | 0.01 | 1.60 | 0.68 | 0.22 | 0.85 |
| 6871 | 0 | 122269 | ARQNLKDAGE                   | 2.30 | 0.01 | 1.60 | 0.68 | 0.22 | 0.28 |
| 6872 | 0 | 122269 | ARQNLKDAGE                   | 2.30 | 0.01 | 1.60 | 0.68 | 0.22 | 1.27 |
| 6873 | 0 | 122269 | ARQNLKDAGE                   | 2.30 | 0.01 | 1.60 | 1.15 | 0.22 | 0.85 |
| 6874 | 0 | 4224   | ARQPDLI                      | 1.99 | 0.01 | 2.24 | 1.12 | 0.22 | 0.28 |
| 6875 | 0 | 4224   | ARQPDLI                      | 1.99 | 0.01 | 2.24 | 0.68 | 0.22 | 0.28 |
| 6876 | 0 | 194705 | ARQPYGFFLETEETFQP<br>G       | 2.86 | 0.01 | 3.42 | 2.37 | 0.85 | 0.28 |
| 6877 | 0 | 4225   | ARQPYGFFLETEEVYQP<br>G       | 2.84 | 0.01 | 4.23 | 1.12 | 0.22 | 0.85 |
| 6878 | 0 | 4225   | ARQPYGFFLETEEVYQP<br>G       | 2.84 | 0.01 | 4.23 | 1.12 | 0.22 | 0.85 |
| 6879 | 0 | 4225   | ARQPYGFFLETEEVYQP<br>G       | 2.84 | 0.01 | 4.23 | 1.12 | 0.22 | 2.98 |
| 6880 | 0 | 4225   | ARQPYGFFLETEEVYQP<br>G       | 2.84 | 0.01 | 4.63 | 1.12 | 0.22 | 0.85 |
| 6881 | 0 | 4225   | ARQPYGFFLETEEVYQP<br>G       | 2.84 | 0.01 | 4.63 | 0.68 | 0.22 | 1.27 |
| 6882 | 0 | 4226   | ARQQTVSALE                   | 2.31 | 3.55 | 2.56 | 0.44 | 0.85 | 0.28 |
| 6883 | 0 | 4228   | ARQQTVSALEDKLA               | 2.61 | 0.01 | 2.56 | 2.69 | 0.22 | 0.28 |
| 6884 | 0 | 511944 | ARQQWELQEDRRCQSQ<br>LERANLRP | 3.15 | 0.01 | 2.16 | 0.44 | 1.23 | 1.39 |
| 6885 | 0 | 511944 | ARQQWELQEDRRCQSQ<br>LERANLRP | 3.15 | 0.01 | 2.16 | 0.44 | 1.23 | 0.85 |
| 6886 | 0 | 128316 | ARRCYND                      | 2.01 | 0.01 | 0.78 | 0.44 | 1.13 | 1.27 |
| 6887 | 0 | 77772  | ARRGMFSPYQSN                 | 2.44 | 0.01 | 4.63 | 0.44 | 1.59 | 0.28 |
| 6888 | 0 | 114268 | ARRLKYNRQETTLVR              | 2.67 | 0.01 | 3.48 | 0.44 | 1.23 | 0.85 |
| 6889 | 0 | 4247   | ARRPEGRT                     | 2.14 | 0.01 | 1.72 | 0.44 | 0.85 | 0.28 |
| 6890 | 0 | 257192 | ARRQQGRNEPQARKQ              | 2.72 | 0.01 | 1.61 | 0.44 | 0.85 | 1.28 |
| 6891 | 0 | 121153 | ARRRAEPMML                   | 2.25 | 0.01 | 0.90 | 2.46 | 0.22 | 0.28 |
| 6892 | 0 | 119757 | ARRRATQLAH                   | 2.34 | 0.01 | 0.78 | 2.66 | 0.22 | 0.28 |
| 6893 | 0 | 4250   | ARRRGDSTASLLSP               | 2.63 | 0.01 | 2.59 | 0.44 | 1.41 | 0.28 |
| 6894 | 0 | 4256   | ARSATTTTS                    | 2.16 | 0.01 | 3.72 | 0.44 | 0.85 | 1.34 |
| 6895 | 0 | 181559 | ARSFADIGDIVRGRD              | 2.72 | 0.01 | 2.86 | 2.37 | 0.22 | 1.28 |
| 6896 | 0 | 181559 | ARSFADIGDIVRGRD              | 2.72 | 0.01 | 2.86 | 2.36 | 0.22 | 1.28 |
| 6897 | 0 | 181559 | ARSFADIGDIVRGRD              | 2.72 | 0.01 | 3.26 | 2.37 | 0.22 | 1.28 |
| 6898 | 0 | 149633 | ARSFNFPILENS                 | 2.48 | 0.01 | 3.53 | 0.68 | 0.22 | 0.28 |
| 6899 | 0 | 149633 | ARSFNFPILENS                 | 2.48 | 0.01 | 3.53 | 0.68 | 0.22 | 0.28 |
| 6900 | 0 | 4259   | ARSLATLFSPGARQQ              | 2.69 | 0.01 | 1.72 | 0.68 | 0.22 | 0.28 |

|      |   |        |                                |      |      |      |      |      |      |
|------|---|--------|--------------------------------|------|------|------|------|------|------|
| 6901 | 0 | 4260   | ARSLDWTKVTL DGRPLS<br>TIQQYSKT | 3.15 | 0.01 | 2.53 | 0.44 | 0.85 | 0.28 |
| 6902 | 0 | 105682 | ARSLFGVD                       | 2.10 | 0.01 | 0.90 | 3.01 | 0.22 | 0.28 |
| 6903 | 0 | 4261   | ARSLVNLFTP GARQN               | 2.67 | 0.01 | 1.72 | 0.68 | 0.22 | 0.28 |
| 6904 | 0 | 257237 | ARSMEIDGGEWTNGT                | 2.66 | 0.01 | 1.61 | 0.44 | 0.85 | 1.28 |
| 6905 | 0 | 4264   | ARSVLETLAGHV DALG              | 2.75 | 0.01 | 3.41 | 0.68 | 0.22 | 0.85 |
| 6906 | 0 | 113281 | ARTAHYGSLPQKSHG                | 2.67 | 0.01 | 0.78 | 0.68 | 0.22 | 0.85 |
| 6907 | 0 | 113281 | ARTAHYGSLPQKSHG                | 2.67 | 0.01 | 0.78 | 0.68 | 0.22 | 1.48 |
| 6908 | 0 | 113281 | ARTAHYGSLPQKSHG                | 2.67 | 0.01 | 0.78 | 0.68 | 0.22 | 1.48 |
| 6909 | 0 | 113281 | ARTAHYGSLPQKSHG                | 2.67 | 0.01 | 0.78 | 0.68 | 0.22 | 1.48 |
| 6910 | 0 | 113281 | ARTAHYGSLPQKSHG                | 2.67 | 0.01 | 0.78 | 0.44 | 1.13 | 1.27 |
| 6911 | 0 | 113281 | ARTAHYGSLPQKSHG                | 2.67 | 0.01 | 0.78 | 0.44 | 1.13 | 1.27 |
| 6912 | 0 | 113281 | ARTAHYGSLPQKSHG                | 2.67 | 0.01 | 0.78 | 0.44 | 1.13 | 1.27 |
| 6913 | 0 | 4266   | ARTEGIIGKEWYKM VFN<br>DFD      | 2.90 | 0.01 | 2.22 | 0.44 | 1.74 | 0.28 |
| 6914 | 0 | 4268   | ARTGEG                         | 1.90 | 0.01 | 2.96 | 0.44 | 0.85 | 0.28 |
| 6915 | 0 | 510429 | ARTKQTARKSTG                   | 2.52 | 3.93 | 0.78 | 0.44 | 1.41 | 2.49 |
| 6916 | 0 | 510429 | ARTKQTARKSTG                   | 2.52 | 3.93 | 0.78 | 0.44 | 1.41 | 2.75 |
| 6917 | 0 | 510429 | ARTKQTARKSTG                   | 2.52 | 3.93 | 0.78 | 0.44 | 1.41 | 0.85 |
| 6918 | 0 | 510429 | ARTKQTARKSTG                   | 2.52 | 3.93 | 0.78 | 0.44 | 1.41 | 0.28 |
| 6919 | 0 | 510429 | ARTKQTARKSTG                   | 2.52 | 3.93 | 0.78 | 0.44 | 1.41 | 1.48 |
| 6920 | 0 | 510430 | ARTKQTARKSTGGKAP               | 2.78 | 3.75 | 0.78 | 0.44 | 1.41 | 2.49 |
| 6921 | 0 | 510430 | ARTKQTARKSTGGKAP               | 2.78 | 3.75 | 0.78 | 0.44 | 1.41 | 2.75 |
| 6922 | 0 | 510430 | ARTKQTARKSTGGKAP               | 2.78 | 3.75 | 0.78 | 0.44 | 1.41 | 0.85 |
| 6923 | 0 | 510430 | ARTKQTARKSTGGKAP               | 2.78 | 3.75 | 0.78 | 0.44 | 1.41 | 1.48 |
| 6924 | 0 | 510430 | ARTKQTARKSTGGKAP               | 2.78 | 3.75 | 0.78 | 0.44 | 1.41 | 0.28 |
| 6925 | 0 | 226420 | ARTKQTARKSTGGKAPR<br>KQ        | 2.95 | 3.93 | 0.78 | 0.44 | 1.13 | 0.28 |
| 6926 | 0 | 226420 | ARTKQTARKSTGGKAPR<br>KQ        | 2.95 | 3.93 | 0.78 | 0.44 | 1.13 | 0.28 |
| 6927 | 0 | 226420 | ARTKQTARKSTGGKAPR<br>KQ        | 2.95 | 3.93 | 0.78 | 0.44 | 1.41 | 0.28 |
| 6928 | 0 | 226420 | ARTKQTARKSTGGKAPR<br>KQ        | 2.95 | 3.93 | 0.78 | 0.44 | 1.41 | 0.28 |
| 6929 | 0 | 226422 | ARTKQTARKSTGGKAPR<br>KQ        | 2.95 | 3.75 | 0.78 | 0.44 | 1.13 | 0.28 |
| 6930 | 0 | 226422 | ARTKQTARKSTGGKAPR<br>KQ        | 2.95 | 3.75 | 0.78 | 0.44 | 1.13 | 0.28 |
| 6931 | 0 | 226422 | ARTKQTARKSTGGKAPR<br>KQ        | 2.95 | 3.75 | 0.78 | 0.44 | 1.41 | 0.28 |

|      |   |        |                                 |      |      |      |      |      |      |
|------|---|--------|---------------------------------|------|------|------|------|------|------|
| 6932 | 0 | 226421 | ARTKQTARKSTGGKAPR<br>KQ         | 2.95 | 4.33 | 0.78 | 0.44 | 1.13 | 0.28 |
| 6933 | 0 | 226421 | ARTKQTARKSTGGKAPR<br>KQ         | 2.95 | 4.33 | 0.78 | 0.44 | 1.13 | 0.28 |
| 6934 | 0 | 226421 | ARTKQTARKSTGGKAPR<br>KQ         | 2.95 | 4.33 | 0.78 | 0.44 | 1.41 | 0.28 |
| 6935 | 0 | 226421 | ARTKQTARKSTGGKAPR<br>KQ         | 2.95 | 4.33 | 0.78 | 0.44 | 1.41 | 0.28 |
| 6936 | 0 | 226422 | ARTKQTARKSTGGKAPR<br>KQ         | 2.95 | 3.75 | 0.78 | 0.44 | 1.13 | 0.28 |
| 6937 | 0 | 226422 | ARTKQTARKSTGGKAPR<br>KQ         | 2.95 | 3.75 | 0.78 | 0.44 | 1.13 | 0.28 |
| 6938 | 0 | 226422 | ARTKQTARKSTGGKAPR<br>KQ         | 2.95 | 3.75 | 0.78 | 0.44 | 1.41 | 0.28 |
| 6939 | 0 | 226422 | ARTKQTARKSTGGKAPR<br>KQ         | 2.95 | 3.75 | 0.78 | 0.44 | 1.41 | 1.27 |
| 6940 | 0 | 226422 | ARTKQTARKSTGGKAPR<br>KQ         | 2.95 | 3.75 | 0.78 | 0.44 | 1.41 | 1.27 |
| 6941 | 0 | 226422 | ARTKQTARKSTGGKAPR<br>KQ         | 2.95 | 3.75 | 0.78 | 0.44 | 1.41 | 1.27 |
| 6942 | 0 | 226423 | ARTKQTARKSTGGKAPR<br>KQ         | 2.95 | 0.01 | 0.78 | 0.44 | 1.13 | 0.28 |
| 6943 | 0 | 226423 | ARTKQTARKSTGGKAPR<br>KQ         | 2.95 | 0.01 | 0.78 | 0.44 | 1.13 | 0.28 |
| 6944 | 0 | 226423 | ARTKQTARKSTGGKAPR<br>KQ         | 2.95 | 0.01 | 0.78 | 0.44 | 1.41 | 0.28 |
| 6945 | 0 | 226423 | ARTKQTARKSTGGKAPR<br>KQ         | 2.95 | 0.01 | 0.78 | 0.44 | 1.41 | 0.28 |
| 6946 | 0 | 188813 | ARTKQTARKSTGGKAPR<br>KQLA       | 3.04 | 4.45 | 0.78 | 0.44 | 1.13 | 1.28 |
| 6947 | 0 | 188814 | ARTKQTARKSTGGKAPR<br>KQLA       | 3.04 | 4.93 | 0.78 | 0.44 | 1.13 | 1.28 |
| 6948 | 0 | 120411 | ARTKQTARKSTGGKAPR<br>KQLA       | 3.04 | 0.01 | 1.60 | 0.44 | 1.13 | 0.28 |
| 6949 | 0 | 120411 | ARTKQTARKSTGGKAPR<br>KQLA       | 3.04 | 0.01 | 1.60 | 0.44 | 1.41 | 0.28 |
| 6950 | 0 | 120411 | ARTKQTARKSTGGKAPR<br>KQLA       | 3.04 | 0.01 | 1.60 | 1.20 | 0.22 | 0.28 |
| 6951 | 0 | 120411 | ARTKQTARKSTGGKAPR<br>KQLA       | 3.04 | 0.01 | 1.60 | 0.44 | 1.13 | 0.28 |
| 6952 | 0 | 4271   | ARTMQYVD                        | 2.10 | 0.01 | 2.99 | 0.44 | 0.85 | 0.28 |
| 6953 | 0 | 80452  | ARTRTTETGKGVKTEKEK<br>SVGVLRYVF | 3.31 | 0.01 | 3.04 | 1.12 | 0.22 | 0.28 |
| 6954 | 0 | 80452  | ARTRTTETGKGVKTEKEK<br>SVGVLRYVF | 3.31 | 0.01 | 3.04 | 1.12 | 0.22 | 0.28 |
| 6955 | 0 | 80452  | ARTRTTETGKGVKTEKEK<br>SVGVLRYVF | 3.31 | 0.01 | 3.04 | 1.81 | 0.22 | 0.28 |

|      |   |        |                                            |      |      |      |      |      |      |
|------|---|--------|--------------------------------------------|------|------|------|------|------|------|
| 6956 | 0 | 80452  | ARTRTTETGKGVKTEKEK<br>SVGGLRVYF            | 3.31 | 0.01 | 3.04 | 2.37 | 0.22 | 0.28 |
| 6957 | 0 | 80452  | ARTRTTETGKGVKTEKEK<br>SVGGLRVYF            | 3.31 | 0.01 | 3.10 | 0.68 | 0.22 | 0.28 |
| 6958 | 0 | 80452  | ARTRTTETGKGVKTEKEK<br>SVGGLRVYF            | 3.31 | 0.01 | 3.10 | 0.68 | 0.22 | 2.56 |
| 6959 | 0 | 80452  | ARTRTTETGKGVKTEKEK<br>SVGGLRVYF            | 3.31 | 0.01 | 3.10 | 0.68 | 0.22 | 2.56 |
| 6960 | 0 | 80452  | ARTRTTETGKGVKTEKEK<br>SVGGLRVYF            | 3.31 | 0.01 | 3.10 | 0.68 | 0.22 | 2.56 |
| 6961 | 0 | 80452  | ARTRTTETGKGVKTEKEK<br>SVGGLRVYF            | 3.31 | 0.01 | 3.10 | 0.68 | 0.22 | 0.85 |
| 6962 | 0 | 80452  | ARTRTTETGKGVKTEKEK<br>SVGGLRVYF            | 3.31 | 0.01 | 3.10 | 0.68 | 0.22 | 0.85 |
| 6963 | 0 | 4273   | ARTTSGL                                    | 2.01 | 0.01 | 1.72 | 0.44 | 0.85 | 0.28 |
| 6964 | 0 | 111123 | ARTYNQNLIRHVGGG                            | 2.63 | 0.01 | 3.20 | 1.12 | 0.22 | 0.85 |
| 6965 | 0 | 128318 | ARVDELERIRRSILPY                           | 2.74 | 0.01 | 0.78 | 0.44 | 1.13 | 0.85 |
| 6966 | 0 | 95061  | ARVEQRTDLDKLVIEME<br>TNGT                  | 2.98 | 0.01 | 2.24 | 2.25 | 0.22 | 2.02 |
| 6967 | 0 | 95061  | ARVEQRTDLDKLVIEME<br>TNGT                  | 2.98 | 0.01 | 2.24 | 2.25 | 0.22 | 2.02 |
| 6968 | 0 | 95061  | ARVEQRTDLDKLVIEME<br>TNGT                  | 2.98 | 0.01 | 2.24 | 2.25 | 0.22 | 1.34 |
| 6969 | 0 | 423222 | ARVFCLSADWIRFLS                            | 2.69 | 0.01 | 2.51 | 0.44 | 2.35 | 1.28 |
| 6970 | 0 | 170386 | ARVTKPKTAKPKKAA                            | 2.72 | 0.01 | 0.78 | 0.44 | 1.13 | 0.28 |
| 6971 | 0 | 238223 | ARWTGATRAVDLS                              | 2.64 | 0.01 | 2.14 | 2.65 | 0.22 | 0.85 |
| 6972 | 0 | 4283   | ARWVEW                                     | 1.90 | 0.01 | 3.53 | 3.08 | 0.22 | 1.39 |
| 6973 | 0 | 181891 | ARYDAIWNSEAL                               | 2.46 | 0.01 | 0.90 | 3.15 | 0.22 | 0.28 |
| 6974 | 0 | 99902  | ARYEKWEKIK                                 | 2.33 | 0.01 | 2.18 | 2.16 | 0.22 | 0.28 |
| 6975 | 0 | 119760 | ARYRCCRSQSRYYRQ<br>RQRSRRRRRRSCQTRRR<br>AM | 3.56 | 0.01 | 0.78 | 1.12 | 0.22 | 0.28 |
| 6976 | 0 | 119760 | ARYRCCRSQSRYYRQ<br>RQRSRRRRRRSCQTRRR<br>AM | 3.56 | 0.01 | 0.78 | 1.15 | 0.22 | 0.85 |
| 6977 | 0 | 119760 | ARYRCCRSQSRYYRQ<br>RQRSRRRRRRSCQTRRR<br>AM | 3.56 | 0.01 | 0.78 | 1.15 | 0.22 | 0.85 |
| 6978 | 0 | 4296   | ASAACR                                     | 1.92 | 0.01 | 1.96 | 0.44 | 0.85 | 0.28 |
| 6979 | 0 | 511989 | ASAAKTPPTTPAPTTTPP<br>TS                   | 3.02 | 3.97 | 2.40 | 0.44 | 1.59 | 1.28 |
| 6980 | 0 | 511990 | ASAAKTPPTTPAPTTTPP<br>TS                   | 3.02 | 4.08 | 2.40 | 0.44 | 1.59 | 1.28 |
| 6981 | 0 | 511987 | ASAAKTPPTTPAPTTTPP<br>TS                   | 3.02 | 4.33 | 2.40 | 0.44 | 1.59 | 1.28 |
| 6982 | 0 | 511988 | ASAAKTPPTTPAPTTTPP<br>TS                   | 3.02 | 4.23 | 2.40 | 0.44 | 1.59 | 1.28 |

|      |   |        |                                               |      |      |      |      |      |      |
|------|---|--------|-----------------------------------------------|------|------|------|------|------|------|
| 6983 | 0 | 511991 | ASAAKTPPTTPAPTTPPP<br>TS                      | 3.02 | 0.01 | 2.40 | 0.44 | 1.59 | 1.28 |
| 6984 | 0 | 511992 | ASAAPTADSPLTASPPAT<br>AP                      | 3.02 | 4.93 | 2.40 | 0.44 | 1.59 | 1.28 |
| 6985 | 0 | 121154 | ASAARLTMMW                                    | 2.32 | 0.01 | 0.78 | 0.44 | 1.13 | 0.28 |
| 6986 | 0 | 121154 | ASAARLTMMW                                    | 2.32 | 0.01 | 0.78 | 0.44 | 1.13 | 0.28 |
| 6987 | 0 | 121154 | ASAARLTMMW                                    | 2.32 | 0.01 | 0.78 | 0.44 | 1.13 | 0.28 |
| 6988 | 0 | 121154 | ASAARLTMMW                                    | 2.32 | 0.01 | 0.78 | 0.44 | 1.13 | 0.28 |
| 6989 | 0 | 121154 | ASAARLTMMW                                    | 2.32 | 0.01 | 0.78 | 0.44 | 1.13 | 0.28 |
| 6990 | 0 | 121154 | ASAARLTMMW                                    | 2.32 | 0.01 | 0.78 | 0.44 | 1.13 | 1.27 |
| 6991 | 0 | 121154 | ASAARLTMMW                                    | 2.32 | 0.01 | 0.78 | 1.12 | 0.22 | 0.85 |
| 6992 | 0 | 170387 | ASAEAVFASEVKKMQ                               | 2.71 | 0.01 | 0.78 | 0.44 | 1.41 | 0.28 |
| 6993 | 0 | 80456  | ASAEQG                                        | 1.91 | 0.01 | 2.40 | 2.52 | 0.22 | 0.28 |
| 6994 | 0 | 80456  | ASAEQG                                        | 1.91 | 0.01 | 3.45 | 1.20 | 0.22 | 0.28 |
| 6995 | 0 | 4308   | ASAFSRPGLPVEYLQ                               | 2.67 | 0.01 | 2.59 | 0.44 | 0.85 | 0.28 |
| 6996 | 0 | 80457  | ASAGTGALASSA                                  | 2.53 | 0.01 | 2.48 | 0.44 | 1.59 | 0.28 |
| 6997 | 0 | 130737 | ASAISVAR                                      | 2.17 | 0.01 | 0.78 | 0.44 | 1.93 | 1.27 |
| 6998 | 0 | 4317   | ASALEEEE                                      | 2.14 | 0.01 | 3.53 | 2.61 | 0.22 | 0.28 |
| 6999 | 0 | 4323   | ASAPTAASGAAAA<br>PAAAAEEEEDDMGFG              | 3.42 | 0.01 | 2.30 | 0.44 | 0.85 | 0.28 |
| 7000 | 0 | 4323   | ASAPTAASGAAAA<br>PAAAAEEEEDDMGFG              | 3.42 | 0.01 | 2.30 | 0.44 | 1.13 | 0.28 |
| 7001 | 0 | 4324   | ASAPTAASGAAAA<br>PAAAAEEEEDDMGFG<br>LFD       | 3.51 | 0.01 | 2.30 | 0.44 | 0.85 | 0.28 |
| 7002 | 0 | 4324   | ASAPTAASGAAAA<br>PAAAAEEEEDDMGFG<br>LFD       | 3.51 | 0.01 | 2.30 | 0.44 | 1.13 | 0.28 |
| 7003 | 0 | 115034 | ASAQKRPSQRSKYLASA<br>STMDHARHGFLPRHRD<br>TGIL | 3.56 | 0.01 | 1.60 | 1.20 | 0.22 | 1.27 |
| 7004 | 0 | 115034 | ASAQKRPSQRSKYLASA<br>STMDHARHGFLPRHRD<br>TGIL | 3.56 | 0.01 | 1.60 | 1.20 | 0.22 | 1.27 |
| 7005 | 0 | 4330   | ASARGDLAHLTTT                                 | 2.55 | 0.01 | 2.78 | 1.15 | 0.22 | 0.28 |
| 7006 | 0 | 4330   | ASARGDLAHLTTT                                 | 2.55 | 0.01 | 2.78 | 1.15 | 0.22 | 1.27 |
| 7007 | 0 | 4330   | ASARGDLAHLTTT                                 | 2.55 | 0.01 | 2.78 | 1.15 | 0.22 | 0.28 |
| 7008 | 0 | 4330   | ASARGDLAHLTTT                                 | 2.55 | 0.01 | 2.78 | 1.15 | 0.22 | 1.27 |
| 7009 | 0 | 4330   | ASARGDLAHLTTT                                 | 2.55 | 0.01 | 2.78 | 1.15 | 0.22 | 0.28 |
| 7010 | 0 | 4330   | ASARGDLAHLTTT                                 | 2.55 | 0.01 | 2.78 | 1.15 | 0.22 | 1.27 |
| 7011 | 0 | 4331   | ASARGDLAHLTTTHARH<br>LP                       | 2.93 | 0.01 | 2.78 | 2.78 | 0.22 | 0.85 |
| 7012 | 0 | 4331   | ASARGDLAHLTTTHARH<br>LP                       | 2.93 | 0.01 | 2.78 | 2.78 | 2.25 | 1.75 |



|      |   |        |                         |      |      |      |      |      |      |
|------|---|--------|-------------------------|------|------|------|------|------|------|
| 7013 | 0 | 4331   | ASARGDLAHLTTTHARH<br>LP | 2.93 | 0.01 | 2.78 | 2.78 | 0.22 | 0.85 |
| 7014 | 0 | 4331   | ASARGDLAHLTTTHARH<br>LP | 2.93 | 0.01 | 2.78 | 2.78 | 0.22 | 0.85 |
| 7015 | 0 | 4331   | ASARGDLAHLTTTHARH<br>LP | 2.93 | 0.01 | 2.78 | 2.78 | 0.22 | 0.85 |
| 7016 | 0 | 4331   | ASARGDLAHLTTTHARH<br>LP | 2.93 | 0.01 | 2.78 | 2.78 | 0.22 | 0.85 |
| 7017 | 0 | 4331   | ASARGDLAHLTTTHARH<br>LP | 2.93 | 0.01 | 2.78 | 0.68 | 0.22 | 0.85 |
| 7018 | 0 | 4331   | ASARGDLAHLTTTHARH<br>LP | 2.93 | 0.01 | 2.78 | 0.68 | 0.22 | 0.85 |
| 7019 | 0 | 4331   | ASARGDLAHLTTTHARH<br>LP | 2.93 | 0.01 | 2.78 | 0.68 | 0.22 | 0.85 |
| 7020 | 0 | 4331   | ASARGDLAHLTTTHARH<br>LP | 2.93 | 0.01 | 2.78 | 2.78 | 2.25 | 1.75 |
| 7021 | 0 | 4331   | ASARGDLAHLTTTHARH<br>LP | 2.93 | 0.01 | 2.78 | 0.68 | 0.22 | 1.34 |
| 7022 | 0 | 4331   | ASARGDLAHLTTTHARH<br>LP | 2.93 | 0.01 | 2.78 | 0.68 | 0.22 | 0.28 |
| 7023 | 0 | 4331   | ASARGDLAHLTTTHARH<br>LP | 2.93 | 0.01 | 2.78 | 0.68 | 0.22 | 0.85 |
| 7024 | 0 | 4331   | ASARGDLAHLTTTHARH<br>LP | 2.93 | 0.01 | 2.78 | 0.68 | 0.22 | 0.85 |
| 7025 | 0 | 4331   | ASARGDLAHLTTTHARH<br>LP | 2.93 | 0.01 | 2.78 | 0.68 | 0.22 | 1.34 |
| 7026 | 0 | 4331   | ASARGDLAHLTTTHARH<br>LP | 2.93 | 0.01 | 2.78 | 1.15 | 0.22 | 1.34 |
| 7027 | 0 | 4331   | ASARGDLAHLTTTHARH<br>LP | 2.93 | 0.01 | 2.78 | 0.68 | 0.22 | 0.85 |
| 7028 | 0 | 4331   | ASARGDLAHLTTTHARH<br>LP | 2.93 | 0.01 | 2.78 | 0.68 | 0.22 | 0.85 |
| 7029 | 0 | 4331   | ASARGDLAHLTTTHARH<br>LP | 2.93 | 0.01 | 2.78 | 0.68 | 0.22 | 0.28 |
| 7030 | 0 | 4331   | ASARGDLAHLTTTHARH<br>LP | 2.93 | 0.01 | 2.78 | 0.68 | 0.22 | 0.85 |
| 7031 | 0 | 4331   | ASARGDLAHLTTTHARH<br>LP | 2.93 | 0.01 | 2.78 | 1.15 | 0.22 | 0.28 |
| 7032 | 0 | 4331   | ASARGDLAHLTTTHARH<br>LP | 2.93 | 0.01 | 3.18 | 1.15 | 0.22 | 0.28 |
| 7033 | 0 | 4331   | ASARGDLAHLTTTHARH<br>LP | 2.93 | 0.01 | 2.78 | 0.68 | 0.22 | 0.85 |
| 7034 | 0 | 4331   | ASARGDLAHLTTTHARH<br>LP | 2.93 | 0.01 | 2.78 | 0.68 | 0.22 | 0.28 |
| 7035 | 0 | 4331   | ASARGDLAHLTTTHARH<br>LP | 2.93 | 0.01 | 2.78 | 0.68 | 0.22 | 1.34 |
| 7036 | 0 | 131360 | ASASLGA                 | 2.06 | 0.01 | 0.78 | 1.15 | 0.22 | 0.28 |

|      |   |        |                                    |      |      |      |      |      |      |
|------|---|--------|------------------------------------|------|------|------|------|------|------|
| 7037 | 0 | 4334   | ASATKDGSYKITGTAT<br>GVD            | 2.98 | 0.01 | 2.04 | 0.44 | 1.13 | 0.28 |
| 7038 | 0 | 4334   | ASATKDGSYKITGTAT<br>GVD            | 2.98 | 0.01 | 2.04 | 0.44 | 0.22 | 0.28 |
| 7039 | 0 | 116677 | ASATQLYKTCKQAGTCP<br>PD            | 2.91 | 0.01 | 1.86 | 0.68 | 0.22 | 1.27 |
| 7040 | 0 | 116677 | ASATQLYKTCKQAGTCP<br>PD            | 2.91 | 0.01 | 1.86 | 0.68 | 0.22 | 0.28 |
| 7041 | 0 | 116677 | ASATQLYKTCKQAGTCP<br>PD            | 2.91 | 0.01 | 1.86 | 0.68 | 0.22 | 0.28 |
| 7042 | 0 | 116677 | ASATQLYKTCKQAGTCP<br>PD            | 2.91 | 0.01 | 1.86 | 0.68 | 0.22 | 1.34 |
| 7043 | 0 | 116677 | ASATQLYKTCKQAGTCP<br>PD            | 2.91 | 0.01 | 1.86 | 0.68 | 0.22 | 1.75 |
| 7044 | 0 | 116677 | ASATQLYKTCKQAGTCP<br>PD            | 2.91 | 0.01 | 1.86 | 1.12 | 0.22 | 0.28 |
| 7045 | 0 | 180085 | ASATQLYKTCKQAGTCP<br>PDI           | 2.94 | 0.01 | 1.86 | 0.68 | 0.22 | 1.27 |
| 7046 | 0 | 104732 | ASAYCSTWDA                         | 2.34 | 0.01 | 2.60 | 0.44 | 1.23 | 0.85 |
| 7047 | 0 | 4352   | ASCPVQQYPSGPCEASV<br>CDT           | 2.96 | 0.01 | 0.90 | 2.69 | 2.26 | 0.85 |
| 7048 | 0 | 157111 | ASDACDKIRYQSLT                     | 2.60 | 0.01 | 3.47 | 2.49 | 0.85 | 0.28 |
| 7049 | 0 | 512008 | ASDALEALADQTDAL                    | 2.73 | 0.01 | 2.24 | 0.44 | 1.41 | 1.28 |
| 7050 | 0 | 4363   | ASDILTLSSTTETAAPAV<br>ADARKPPSGKKK | 3.38 | 0.01 | 3.36 | 0.44 | 1.59 | 0.28 |
| 7051 | 0 | 4363   | ASDILTLSSTTETAAPAV<br>ADARKPPSGKKK | 3.38 | 0.01 | 3.36 | 0.44 | 2.82 | 0.28 |
| 7052 | 0 | 96113  | ASDISLLDAQSAPLR                    | 2.72 | 0.01 | 1.60 | 0.44 | 1.23 | 0.28 |
| 7053 | 0 | 96113  | ASDISLLDAQSAPLR                    | 2.72 | 0.01 | 1.60 | 0.44 | 1.23 | 0.28 |
| 7054 | 0 | 181278 | ASDKNLIETRCVLNH                    | 2.62 | 0.01 | 2.82 | 1.15 | 0.22 | 0.28 |
| 7055 | 0 | 112911 | ASDLEKIHLDEKFSR                    | 2.68 | 0.01 | 0.78 | 0.44 | 1.13 | 0.85 |
| 7056 | 0 | 106270 | ASDLMHRLYH                         | 2.31 | 0.01 | 2.75 | 0.44 | 1.23 | 0.85 |
| 7057 | 0 | 4364   | ASDLRSSS                           | 2.12 | 0.01 | 2.04 | 0.44 | 0.85 | 0.28 |
| 7058 | 0 | 191191 | ASDRCRQDTFFCDWR                    | 2.69 | 0.01 | 0.90 | 2.84 | 1.13 | 1.39 |
| 7059 | 0 | 191191 | ASDRCRQDTFFCDWR                    | 2.69 | 0.01 | 0.90 | 2.84 | 1.13 | 1.66 |
| 7060 | 0 | 133518 | ASDVVKKMVGTVESA                    | 2.76 | 0.01 | 3.45 | 1.12 | 0.22 | 0.85 |
| 7061 | 0 | 133518 | ASDVVKKMVGTVESA                    | 2.76 | 0.01 | 3.45 | 1.12 | 0.22 | 0.85 |
| 7062 | 0 | 133518 | ASDVVKKMVGTVESA                    | 2.76 | 0.01 | 3.45 | 0.44 | 0.85 | 0.28 |
| 7063 | 0 | 112912 | ASDYKS                             | 1.90 | 0.01 | 0.78 | 1.15 | 0.22 | 3.25 |
| 7064 | 0 | 112912 | ASDYKS                             | 1.90 | 0.01 | 0.78 | 3.81 | 0.22 | 0.85 |
| 7065 | 0 | 112912 | ASDYKS                             | 1.90 | 0.01 | 0.78 | 3.81 | 0.22 | 0.85 |
| 7066 | 0 | 112912 | ASDYKS                             | 1.90 | 0.01 | 0.78 | 3.81 | 0.22 | 0.85 |

|      |   |        |                          |      |      |      |      |      |      |
|------|---|--------|--------------------------|------|------|------|------|------|------|
| 7067 | 0 | 112912 | ASDYKS                   | 1.90 | 0.01 | 0.78 | 3.81 | 0.22 | 0.85 |
| 7068 | 0 | 112912 | ASDYKS                   | 1.90 | 0.01 | 0.78 | 3.81 | 0.22 | 0.85 |
| 7069 | 0 | 112912 | ASDYKS                   | 1.90 | 0.01 | 0.78 | 3.81 | 0.22 | 0.85 |
| 7070 | 0 | 112912 | ASDYKS                   | 1.90 | 0.01 | 0.78 | 3.81 | 0.22 | 0.85 |
| 7071 | 0 | 112912 | ASDYKS                   | 1.90 | 0.01 | 0.78 | 3.81 | 0.22 | 0.85 |
| 7072 | 0 | 112912 | ASDYKS                   | 1.90 | 0.01 | 0.78 | 3.81 | 0.22 | 0.85 |
| 7073 | 0 | 97897  | ASEQETAD                 | 2.15 | 0.01 | 2.60 | 1.12 | 0.22 | 0.85 |
| 7074 | 0 | 96114  | ASFAEAPFSN               | 2.36 | 0.01 | 0.90 | 0.44 | 1.93 | 0.85 |
| 7075 | 0 | 105684 | ASFDKVKGDPVGILYAV<br>FKA | 2.97 | 0.01 | 3.05 | 1.20 | 0.22 | 0.28 |
| 7076 | 0 | 105684 | ASFDKVKGDPVGILYAV<br>FKA | 2.97 | 0.01 | 3.05 | 0.44 | 1.23 | 0.28 |
| 7077 | 0 | 4396   | ASFDRS                   | 1.90 | 0.01 | 0.90 | 0.44 | 1.59 | 1.39 |
| 7078 | 0 | 4397   | ASFEAQGALANIAVDKA        | 2.78 | 0.01 | 1.75 | 4.93 | 0.22 | 1.34 |
| 7079 | 0 | 4397   | ASFEAQGALANIAVDKA        | 2.78 | 0.01 | 1.75 | 0.68 | 0.22 | 0.28 |
| 7080 | 0 | 4397   | ASFEAQGALANIAVDKA        | 2.78 | 0.01 | 1.75 | 1.15 | 0.22 | 2.12 |
| 7081 | 0 | 4397   | ASFEAQGALANIAVDKA        | 2.78 | 0.01 | 1.75 | 1.15 | 0.22 | 2.12 |
| 7082 | 0 | 4397   | ASFEAQGALANIAVDKA        | 2.78 | 0.01 | 1.75 | 1.15 | 0.22 | 1.48 |
| 7083 | 0 | 4397   | ASFEAQGALANIAVDKA        | 2.78 | 0.01 | 1.75 | 1.15 | 0.22 | 2.02 |
| 7084 | 0 | 4397   | ASFEAQGALANIAVDKA        | 2.78 | 0.01 | 1.75 | 1.15 | 0.22 | 1.48 |
| 7085 | 0 | 4397   | ASFEAQGALANIAVDKA        | 2.78 | 0.01 | 1.75 | 4.63 | 0.22 | 1.48 |
| 7086 | 0 | 4397   | ASFEAQGALANIAVDKA        | 2.78 | 0.01 | 1.75 | 4.63 | 0.22 | 2.12 |
| 7087 | 0 | 127585 | ASFEPFSN                 | 2.14 | 0.01 | 0.78 | 0.44 | 1.93 | 0.28 |
| 7088 | 0 | 127585 | ASFEPFSN                 | 2.14 | 0.01 | 0.78 | 0.44 | 1.23 | 0.28 |
| 7089 | 0 | 4401   | ASFFD                    | 1.75 | 0.01 | 2.18 | 0.68 | 0.22 | 0.85 |
| 7090 | 0 | 4401   | ASFFD                    | 1.75 | 0.01 | 2.18 | 0.68 | 0.22 | 0.28 |
| 7091 | 0 | 4401   | ASFFD                    | 1.75 | 0.01 | 2.18 | 0.68 | 0.22 | 1.66 |
| 7092 | 0 | 4401   | ASFFD                    | 1.75 | 0.01 | 2.18 | 0.68 | 0.22 | 1.66 |
| 7093 | 0 | 4401   | ASFFD                    | 1.75 | 0.01 | 2.18 | 0.68 | 0.22 | 1.66 |
| 7094 | 0 | 4401   | ASFFD                    | 1.75 | 0.01 | 2.18 | 0.68 | 0.22 | 1.66 |
| 7095 | 0 | 4401   | ASFFD                    | 1.75 | 0.01 | 2.18 | 0.68 | 0.22 | 1.66 |
| 7096 | 0 | 4401   | ASFFD                    | 1.75 | 0.01 | 2.18 | 0.68 | 0.22 | 1.66 |
| 7097 | 0 | 4401   | ASFFD                    | 1.75 | 0.01 | 2.18 | 0.68 | 0.22 | 1.66 |
| 7098 | 0 | 4401   | ASFFD                    | 1.75 | 0.01 | 2.18 | 0.68 | 0.22 | 1.66 |
| 7099 | 0 | 4401   | ASFFD                    | 1.75 | 0.01 | 2.18 | 0.68 | 0.22 | 1.66 |
| 7100 | 0 | 4401   | ASFFD                    | 1.75 | 0.01 | 2.18 | 0.68 | 0.22 | 0.28 |
| 7101 | 0 | 4401   | ASFFD                    | 1.75 | 0.01 | 2.18 | 0.68 | 0.22 | 1.34 |
| 7102 | 0 | 123043 | ASFGAGDAP                | 2.26 | 0.01 | 2.28 | 2.00 | 0.22 | 0.28 |

|      |   |        |                                                |      |      |      |      |      |      |
|------|---|--------|------------------------------------------------|------|------|------|------|------|------|
| 7103 | 0 | 123044 | ASFGGGDAA                                      | 2.24 | 0.01 | 2.28 | 2.00 | 0.22 | 0.28 |
| 7104 | 0 | 105685 | ASFKKNIGRNRSPDI                                | 2.67 | 0.01 | 2.16 | 0.44 | 1.23 | 0.85 |
| 7105 | 0 | 105685 | ASFKKNIGRNRSPDI                                | 2.67 | 0.01 | 2.16 | 0.44 | 1.23 | 1.27 |
| 7106 | 0 | 103061 | ASFLDQVHFQPLPPA                                | 2.70 | 0.01 | 2.04 | 0.44 | 0.85 | 1.28 |
| 7107 | 0 | 4406   | ASFRLFARTRSMWSF                                | 2.72 | 0.01 | 2.45 | 0.68 | 0.22 | 0.28 |
| 7108 | 0 | 237645 | ASFTVSSEKTILTMGEYG                             | 2.83 | 0.01 | 3.19 | 0.44 | 0.85 | 0.85 |
| 7109 | 0 | 237645 | ASFTVSSEKTILTMGEYG                             | 2.83 | 0.01 | 3.19 | 0.44 | 0.85 | 0.85 |
| 7110 | 0 | 237645 | ASFTVSSEKTILTMGEYG                             | 2.83 | 0.01 | 3.19 | 0.44 | 0.22 | 0.85 |
| 7111 | 0 | 4412   | ASGAKEEAEKKAAEQRA<br>LL                        | 2.93 | 0.01 | 3.93 | 0.44 | 0.85 | 0.28 |
| 7112 | 0 | 4413   | ASGASAVGFRERSPTEQ<br>KTCDDVNTEPVVPGRE<br>QPRAE | 3.59 | 0.01 | 4.15 | 2.13 | 0.22 | 0.85 |
| 7113 | 0 | 4413   | ASGASAVGFRERSPTEQ<br>KTCDDVNTEPVVPGRE<br>QPRAE | 3.59 | 0.01 | 4.15 | 2.37 | 0.22 | 0.85 |
| 7114 | 0 | 4413   | ASGASAVGFRERSPTEQ<br>KTCDDVNTEPVVPGRE<br>QPRAE | 3.59 | 0.01 | 4.15 | 2.37 | 0.22 | 0.85 |
| 7115 | 0 | 91136  | ASGAVVDFQLESI                                  | 2.53 | 0.01 | 4.03 | 0.68 | 0.22 | 2.35 |
| 7116 | 0 | 101490 | ASGEVPVKPSEG                                   | 2.51 | 0.01 | 3.10 | 1.15 | 0.22 | 0.28 |
| 7117 | 0 | 101490 | ASGEVPVKPSEG                                   | 2.51 | 0.01 | 3.10 | 1.15 | 0.22 | 1.48 |
| 7118 | 0 | 101490 | ASGEVPVKPSEG                                   | 2.51 | 0.01 | 3.10 | 1.15 | 0.22 | 1.48 |
| 7119 | 0 | 101490 | ASGEVPVKPSEG                                   | 2.51 | 0.01 | 3.10 | 1.15 | 0.22 | 0.85 |
| 7120 | 0 | 158694 | ASGFIEVEELKLFLQ                                | 2.67 | 0.01 | 3.26 | 0.44 | 1.23 | 0.28 |
| 7121 | 0 | 4417   | ASGGSVASGGSVASG                                | 2.76 | 0.01 | 3.57 | 0.44 | 0.85 | 0.28 |
| 7122 | 0 | 4417   | ASGGSVASGGSVASG                                | 2.76 | 0.01 | 3.57 | 2.71 | 0.22 | 0.28 |
| 7123 | 0 | 4420   | ASGKEAKVCTISPIMGYS<br>TP                       | 2.95 | 0.01 | 2.75 | 0.44 | 1.59 | 0.28 |
| 7124 | 0 | 4424   | ASGLTSLFSPGSKQH                                | 2.68 | 0.01 | 1.72 | 0.68 | 0.22 | 0.28 |
| 7125 | 0 | 4427   | ASGLVSMFSV                                     | 2.33 | 0.01 | 2.83 | 0.44 | 0.85 | 0.28 |
| 7126 | 0 | 4427   | ASGLVSMFSV                                     | 2.33 | 0.01 | 2.83 | 1.12 | 0.22 | 0.28 |
| 7127 | 0 | 4427   | ASGLVSMFSV                                     | 2.33 | 0.01 | 2.83 | 0.44 | 0.85 | 0.28 |
| 7128 | 0 | 108802 | ASGPLGPK                                       | 2.14 | 0.01 | 1.60 | 2.55 | 2.60 | 0.28 |
| 7129 | 0 | 4429   | ASGQ                                           | 1.57 | 0.01 | 2.87 | 0.68 | 0.22 | 0.28 |
| 7130 | 0 | 4429   | ASGQ                                           | 1.57 | 0.01 | 2.87 | 1.15 | 0.22 | 1.34 |
| 7131 | 0 | 4429   | ASGQ                                           | 1.57 | 0.01 | 2.87 | 1.15 | 0.22 | 1.34 |
| 7132 | 0 | 4429   | ASGQ                                           | 1.57 | 0.01 | 2.87 | 1.15 | 0.22 | 2.12 |
| 7133 | 0 | 4429   | ASGQ                                           | 1.57 | 0.01 | 2.87 | 1.15 | 0.22 | 2.35 |
| 7134 | 0 | 4429   | ASGQ                                           | 1.57 | 0.01 | 2.87 | 0.68 | 0.22 | 0.28 |
| 7135 | 0 | 4429   | ASGQ                                           | 1.57 | 0.01 | 2.87 | 0.68 | 0.22 | 1.34 |
| 7136 | 0 | 4429   | ASGQ                                           | 1.57 | 0.01 | 2.87 | 0.68 | 0.22 | 1.75 |
| 7137 | 0 | 4431   | ASGQVK                                         | 1.88 | 0.01 | 2.87 | 0.68 | 0.22 | 0.28 |

|      |   |        |                                                   |      |      |      |      |      |      |
|------|---|--------|---------------------------------------------------|------|------|------|------|------|------|
| 7138 | 0 | 4444   | ASHAHKSHRKPKRSWN<br>VYVG                          | 2.97 | 0.01 | 3.78 | 2.49 | 0.85 | 0.28 |
| 7139 | 0 | 138146 | ASHLDYGSALLSKV                                    | 2.63 | 0.01 | 2.51 | 1.20 | 0.22 | 0.28 |
| 7140 | 0 | 4448   | ASHLEQYGTNEYS                                     | 2.54 | 0.01 | 2.95 | 3.38 | 0.22 | 0.28 |
| 7141 | 0 | 4450   | ASHLPYFEQGMQLAEQ<br>FKQK                          | 2.95 | 0.01 | 2.41 | 0.44 | 0.85 | 0.28 |
| 7142 | 0 | 4451   | ASHLPYIEQGMHLAEQF<br>KQK                          | 2.94 | 0.01 | 2.41 | 0.44 | 0.85 | 0.28 |
| 7143 | 0 | 4452   | ASHLPYIEQGMQLAAEF<br>KQK                          | 2.93 | 0.01 | 1.96 | 0.44 | 0.85 | 0.28 |
| 7144 | 0 | 4453   | ASHLPYIEQGMQLAEQF<br>KQK                          | 2.94 | 0.01 | 2.41 | 0.44 | 0.85 | 0.28 |
| 7145 | 0 | 4454   | ASHLPYIEQGMQLAEQL<br>KQK                          | 2.95 | 0.01 | 1.96 | 0.44 | 0.85 | 0.28 |
| 7146 | 0 | 4455   | ASHLPYIEQGVQLAEQF<br>KQK                          | 2.94 | 0.01 | 1.96 | 0.44 | 0.85 | 0.28 |
| 7147 | 0 | 4459   | ASHPLGRCLSHT                                      | 2.48 | 0.01 | 0.90 | 0.44 | 0.85 | 0.28 |
| 7148 | 0 | 4463   | ASHTVKPRHHPTQRR                                   | 2.67 | 0.01 | 0.90 | 0.68 | 0.22 | 1.39 |
| 7149 | 0 | 167872 | ASHVSIFAMVIGLIGSIA<br>ACVA                        | 3.08 | 0.01 | 2.75 | 0.44 | 1.59 | 2.51 |
| 7150 | 0 | 167872 | ASHVSIFAMVIGLIGSIA<br>ACVA                        | 3.08 | 0.01 | 2.75 | 0.44 | 0.85 | 2.51 |
| 7151 | 0 | 167872 | ASHVSIFAMVIGLIGSIA<br>ACVA                        | 3.08 | 0.01 | 2.75 | 0.44 | 0.85 | 2.51 |
| 7152 | 0 | 167872 | ASHVSIFAMVIGLIGSIA<br>ACVA                        | 3.08 | 0.01 | 2.75 | 0.44 | 0.85 | 2.51 |
| 7153 | 0 | 97212  | ASIAGMFLT                                         | 2.30 | 0.01 | 2.84 | 0.44 | 0.85 | 0.28 |
| 7154 | 0 | 4467   | ASICQMFCFWRGDLVF<br>DFQV                          | 2.93 | 0.01 | 3.17 | 0.44 | 0.85 | 0.28 |
| 7155 | 0 | 4467   | ASICQMFCFWRGDLVF<br>DFQV                          | 2.93 | 0.01 | 3.17 | 0.44 | 0.85 | 0.28 |
| 7156 | 0 | 4467   | ASICQMFCFWRGDLVF<br>DFQV                          | 2.93 | 0.01 | 2.82 | 1.12 | 0.22 | 1.66 |
| 7157 | 0 | 4467   | ASICQMFCFWRGDLVF<br>DFQV                          | 2.93 | 0.01 | 2.82 | 1.12 | 0.22 | 1.66 |
| 7158 | 0 | 4467   | ASICQMFCFWRGDLVF<br>DFQV                          | 2.93 | 0.01 | 2.82 | 1.12 | 0.22 | 1.66 |
| 7159 | 0 | 4467   | ASICQMFCFWRGDLVF<br>DFQV                          | 2.93 | 0.01 | 2.82 | 1.12 | 0.22 | 1.66 |
| 7160 | 0 | 4470   | ASIDNINKNINCINNDVD<br>NINSNINNINDNIHKINS<br>NVYGN | 3.69 | 0.01 | 2.22 | 0.44 | 1.74 | 0.28 |
| 7161 | 0 | 4471   | ASIDWREYGYVTEVKDQ<br>GNC                          | 2.90 | 0.01 | 2.28 | 3.63 | 0.22 | 0.28 |
| 7162 | 0 | 193147 | ASIGETIIDDKNYYFN                                  | 2.70 | 0.01 | 3.04 | 1.12 | 0.22 | 0.28 |
| 7163 | 0 | 4482   | ASILCKCYTTGTIIN                                   | 2.67 | 0.01 | 2.43 | 0.44 | 1.59 | 0.28 |
| 7164 | 0 | 4486   | ASINKFVV                                          | 2.09 | 0.01 | 3.42 | 0.68 | 0.22 | 0.28 |

|      |   |        |                            |      |      |      |      |      |      |
|------|---|--------|----------------------------|------|------|------|------|------|------|
| 7165 | 0 | 4487   | ASINKFVVLISATLVLSFAI       | 2.99 | 0.01 | 2.22 | 1.81 | 0.22 | 0.28 |
| 7166 | 0 | 4488   | ASINKV                     | 1.88 | 0.01 | 0.90 | 1.15 | 0.22 | 0.28 |
| 7167 | 0 | 167214 | ASINSSL                    | 2.03 | 0.01 | 0.90 | 2.37 | 0.22 | 1.39 |
| 7168 | 0 | 174395 | ASISNLTLSRFM               | 2.48 | 0.01 | 0.90 | 1.15 | 1.41 | 1.39 |
| 7169 | 0 | 4498   | ASKAALIEEGQRMAEML<br>KSK   | 2.98 | 0.01 | 1.96 | 0.44 | 0.85 | 0.28 |
| 7170 | 0 | 108286 | ASKAKARPV                  | 2.26 | 0.01 | 0.90 | 0.44 | 1.13 | 1.39 |
| 7171 | 0 | 132170 | ASKAPANGGNIR               | 2.49 | 0.01 | 0.90 | 1.15 | 0.22 | 1.39 |
| 7172 | 0 | 132171 | ASKAPANGGNRR               | 2.49 | 0.01 | 0.90 | 1.15 | 0.22 | 1.39 |
| 7173 | 0 | 4499   | ASKATLIEEGQRIAEMLK<br>SK   | 2.96 | 0.01 | 1.96 | 0.44 | 0.85 | 0.28 |
| 7174 | 0 | 120412 | ASKEKQENKIFADDIDIS<br>D    | 2.94 | 0.01 | 2.26 | 2.04 | 0.22 | 1.57 |
| 7175 | 0 | 120412 | ASKEKQENKIFADDIDIS<br>D    | 2.94 | 0.01 | 2.26 | 0.68 | 0.22 | 2.02 |
| 7176 | 0 | 120412 | ASKEKQENKIFADDIDIS<br>D    | 2.94 | 0.01 | 2.26 | 0.68 | 0.22 | 0.28 |
| 7177 | 0 | 170400 | ASKKKPAGPSVSELI            | 2.69 | 0.01 | 0.78 | 0.44 | 1.41 | 0.28 |
| 7178 | 0 | 170400 | ASKKKPAGPSVSELI            | 2.69 | 0.01 | 0.78 | 0.44 | 1.13 | 0.28 |
| 7179 | 0 | 170402 | ASKKSVKTPKKAKKP            | 2.74 | 0.01 | 0.78 | 0.44 | 1.41 | 0.28 |
| 7180 | 0 | 4504   | ASKLCLGWLWG                | 2.43 | 0.01 | 2.08 | 2.37 | 0.22 | 0.28 |
| 7181 | 0 | 4507   | ASKNLDLTNITHVE             | 2.59 | 0.01 | 3.63 | 1.20 | 0.22 | 0.28 |
| 7182 | 0 | 4507   | ASKNLDLTNITHVE             | 2.59 | 0.01 | 3.63 | 1.20 | 0.22 | 0.85 |
| 7183 | 0 | 4507   | ASKNLDLTNITHVE             | 2.59 | 0.01 | 3.63 | 1.20 | 0.22 | 1.34 |
| 7184 | 0 | 257986 | ASKPAAKPAAKAPAP            | 2.76 | 0.01 | 1.61 | 0.44 | 0.85 | 1.28 |
| 7185 | 0 | 127589 | ASKPEDWDER                 | 2.31 | 0.01 | 0.78 | 0.44 | 1.93 | 0.28 |
| 7186 | 0 | 158695 | ASKSADDVKKAFKVI            | 2.73 | 0.01 | 3.26 | 0.44 | 1.23 | 0.28 |
| 7187 | 0 | 158695 | ASKSADDVKKAFKVI            | 2.73 | 0.01 | 3.26 | 0.44 | 1.41 | 0.28 |
| 7188 | 0 | 149634 | ASKSDLPLDIQNEIC            | 2.66 | 0.01 | 3.67 | 1.12 | 0.22 | 0.28 |
| 7189 | 0 | 4519   | ASLEDAKKEGPDVVVL<br>PGGNLG | 3.09 | 0.01 | 0.78 | 1.15 | 2.26 | 0.85 |
| 7190 | 0 | 4528   | ASLKDALLKYIYDNRGTLI        | 2.91 | 0.01 | 3.03 | 0.68 | 0.22 | 1.57 |
| 7191 | 0 | 4528   | ASLKDALLKYIYDNRGTLI        | 2.91 | 0.01 | 3.03 | 3.33 | 0.22 | 1.57 |
| 7192 | 0 | 4528   | ASLKDALLKYIYDNRGTLI        | 2.91 | 0.01 | 2.08 | 0.44 | 0.22 | 1.57 |
| 7193 | 0 | 4528   | ASLKDALLKYIYDNRGTLI        | 2.91 | 0.01 | 2.08 | 2.02 | 0.22 | 1.57 |
| 7194 | 0 | 4528   | ASLKDALLKYIYDNRGTLI        | 2.91 | 0.01 | 2.08 | 1.15 | 0.22 | 1.57 |
| 7195 | 0 | 4528   | ASLKDALLKYIYDNRGTLI        | 2.91 | 0.01 | 2.08 | 2.49 | 0.22 | 1.57 |
| 7196 | 0 | 4528   | ASLKDALLKYIYDNRGTLI        | 2.91 | 0.01 | 3.16 | 0.44 | 1.93 | 1.57 |

|      |   |        |                                          |      |      |      |      |      |      |
|------|---|--------|------------------------------------------|------|------|------|------|------|------|
| 7197 | 0 | 4528   | ASLKDALLKYIYDNRGTLI                      | 2.91 | 0.01 | 2.08 | 0.68 | 0.22 | 1.57 |
| 7198 | 0 | 4528   | ASLKDALLKYIYDNRGTLI                      | 2.91 | 0.01 | 2.08 | 2.25 | 0.22 | 1.57 |
| 7199 | 0 | 4530   | ASLKMADPNRFR                             | 2.46 | 0.01 | 2.40 | 1.15 | 0.22 | 0.28 |
| 7200 | 0 | 4530   | ASLKMADPNRFR                             | 2.46 | 0.01 | 2.40 | 0.68 | 2.25 | 1.75 |
| 7201 | 0 | 4531   | ASLKMADPNRFRGKD                          | 2.67 | 0.01 | 2.40 | 0.68 | 0.22 | 1.75 |
| 7202 | 0 | 4534   | ASLLTTAEVV                               | 2.32 | 0.01 | 0.78 | 1.20 | 0.22 | 0.28 |
| 7203 | 0 | 4542   | ASLQEILTRL                               | 2.31 | 0.01 | 3.16 | 0.68 | 0.22 | 0.28 |
| 7204 | 0 | 4542   | ASLQEILTRL                               | 2.31 | 0.01 | 3.16 | 0.68 | 0.22 | 0.28 |
| 7205 | 0 | 4543   | ASLQNLLSAS                               | 2.36 | 0.01 | 1.75 | 0.68 | 0.22 | 0.28 |
| 7206 | 0 | 4543   | ASLQNLLSAS                               | 2.36 | 0.01 | 1.75 | 0.68 | 0.22 | 0.28 |
| 7207 | 0 | 4544   | ASLREAPPA                                | 2.25 | 0.01 | 4.33 | 1.15 | 0.22 | 0.28 |
| 7208 | 0 | 135899 | ASLYHVVYEVNLV                            | 2.49 | 0.01 | 0.78 | 0.44 | 1.41 | 0.28 |
| 7209 | 0 | 4556   | ASMLGTVTNSPGVPAV<br>PWGA                 | 2.98 | 0.01 | 2.04 | 0.44 | 2.98 | 0.28 |
| 7210 | 0 | 4556   | ASMLGTVTNSPGVPAV<br>PWGA                 | 2.98 | 0.01 | 2.04 | 0.44 | 0.85 | 0.28 |
| 7211 | 0 | 127595 | ASNGIPSSGMDTGRPAL<br>ADT                 | 2.96 | 0.01 | 2.19 | 0.44 | 1.13 | 0.28 |
| 7212 | 0 | 422207 | ASNSSLHTCQRH                             | 2.55 | 0.01 | 0.78 | 2.37 | 0.22 | 0.28 |
| 7213 | 0 | 422207 | ASNSSLHTCQRH                             | 2.55 | 0.01 | 0.78 | 0.68 | 0.22 | 0.28 |
| 7214 | 0 | 107747 | ASNTNYITSTLK                             | 2.49 | 0.01 | 0.90 | 0.68 | 0.22 | 1.39 |
| 7215 | 0 | 4654   | ASNTSPASAPNALTVAAI<br>NKSNNARASFSNYGSVVD | 3.50 | 0.01 | 2.75 | 1.20 | 0.22 | 0.85 |
| 7216 | 0 | 4654   | ASNTSPASAPNALTVAAI<br>NKSNNARASFSNYGSVVD | 3.50 | 0.01 | 2.75 | 0.44 | 1.23 | 0.85 |
| 7217 | 0 | 133520 | ASNWTDVFRVTDR                            | 2.48 | 0.01 | 0.90 | 0.68 | 0.22 | 1.39 |
| 7218 | 0 | 125366 | ASPASHGNNNIS                             | 2.50 | 0.01 | 0.90 | 0.44 | 1.23 | 0.28 |
| 7219 | 0 | 165587 | ASPKSLL                                  | 2.00 | 0.01 | 0.90 | 0.44 | 1.23 | 1.39 |
| 7220 | 0 | 165587 | ASPKSLL                                  | 2.00 | 0.01 | 0.90 | 0.44 | 1.23 | 1.39 |
| 7221 | 0 | 512067 | ASPPATAPGPSAANVS<br>AAT                  | 3.01 | 3.97 | 2.40 | 0.44 | 1.59 | 1.28 |
| 7222 | 0 | 504100 | ASPLQEGFSAESRKL                          | 2.69 | 0.01 | 3.89 | 0.44 | 1.74 | 1.28 |
| 7223 | 0 | 461951 | ASPSHVGWWSFA                             | 2.49 | 0.01 | 2.71 | 1.12 | 0.22 | 1.48 |
| 7224 | 0 | 461951 | ASPSHVGWWSFA                             | 2.49 | 0.01 | 2.71 | 1.12 | 0.22 | 1.48 |
| 7225 | 0 | 4681   | ASPTGYDWRADW                             | 2.48 | 0.01 | 2.69 | 0.68 | 0.22 | 0.28 |
| 7226 | 0 | 4681   | ASPTGYDWRADW                             | 2.48 | 0.01 | 2.69 | 1.20 | 0.22 | 0.28 |
| 7227 | 0 | 79158  | ASPYGNA                                  | 2.03 | 0.01 | 3.85 | 3.55 | 0.22 | 0.28 |
| 7228 | 0 | 79158  | ASPYGNA                                  | 2.03 | 0.01 | 3.33 | 1.12 | 0.22 | 0.28 |
| 7229 | 0 | 4690   | ASQASNVFQGVFLTNN<br>MLQHDC               | 3.03 | 0.01 | 3.48 | 1.12 | 0.22 | 0.85 |
| 7230 | 0 | 4691   | ASQASNVFQGVFLTTP<br>MQKDDC               | 3.00 | 0.01 | 3.48 | 1.12 | 0.22 | 0.28 |

|      |   |        |                |      |      |      |      |      |      |
|------|---|--------|----------------|------|------|------|------|------|------|
| 7231 | 0 | 4701   | ASQKIQLI       | 2.14 | 0.01 | 1.72 | 0.68 | 0.22 | 1.66 |
| 7232 | 0 | 4701   | ASQKIQLI       | 2.14 | 0.01 | 1.72 | 0.68 | 0.22 | 1.66 |
| 7233 | 0 | 4701   | ASQKIQLI       | 2.14 | 0.01 | 1.72 | 0.68 | 0.22 | 1.66 |
| 7234 | 0 | 4701   | ASQKIQLI       | 2.14 | 0.01 | 1.72 | 0.68 | 0.22 | 1.66 |
| 7235 | 0 | 4701   | ASQKIQLI       | 2.14 | 0.01 | 1.72 | 0.68 | 0.22 | 1.66 |
| 7236 | 0 | 4701   | ASQKIQLI       | 2.14 | 0.01 | 1.72 | 0.68 | 0.22 | 1.66 |
| 7237 | 0 | 4701   | ASQKIQLI       | 2.14 | 0.01 | 1.72 | 0.68 | 0.22 | 1.66 |
| 7238 | 0 | 4701   | ASQKIQLI       | 2.14 | 0.01 | 1.72 | 0.68 | 0.22 | 1.66 |
| 7239 | 0 | 4701   | ASQKIQLI       | 2.14 | 0.01 | 1.72 | 0.68 | 0.22 | 1.66 |
| 7240 | 0 | 4701   | ASQKIQLI       | 2.14 | 0.01 | 1.72 | 0.68 | 0.22 | 1.66 |
| 7241 | 0 | 4701   | ASQKIQLI       | 2.14 | 0.01 | 1.72 | 0.68 | 0.22 | 1.66 |
| 7242 | 0 | 4701   | ASQKIQLI       | 2.14 | 0.01 | 1.72 | 0.68 | 0.22 | 1.66 |
| 7243 | 0 | 4701   | ASQKIQLI       | 2.14 | 0.01 | 1.72 | 0.68 | 0.22 | 1.66 |
| 7244 | 0 | 4701   | ASQKIQLI       | 2.14 | 0.01 | 1.72 | 0.68 | 0.22 | 1.66 |
| 7245 | 0 | 4701   | ASQKIQLI       | 2.14 | 0.01 | 1.72 | 0.68 | 0.22 | 1.66 |
| 7246 | 0 | 4701   | ASQKIQLI       | 2.14 | 0.01 | 1.72 | 0.68 | 0.22 | 1.66 |
| 7247 | 0 | 4701   | ASQKIQLI       | 2.14 | 0.01 | 1.72 | 0.68 | 0.22 | 1.66 |
| 7248 | 0 | 4701   | ASQKIQLI       | 2.14 | 0.01 | 1.72 | 0.68 | 0.22 | 1.66 |
| 7249 | 0 | 4701   | ASQKIQLI       | 2.14 | 0.01 | 1.72 | 0.68 | 0.22 | 1.66 |
| 7250 | 0 | 4701   | ASQKIQLI       | 2.14 | 0.01 | 1.72 | 0.68 | 0.22 | 1.66 |
| 7251 | 0 | 4701   | ASQKIQLI       | 2.14 | 0.01 | 1.72 | 0.68 | 0.22 | 1.66 |
| 7252 | 0 | 4701   | ASQKIQLI       | 2.14 | 0.01 | 1.72 | 0.68 | 0.22 | 0.28 |
| 7253 | 0 | 4701   | ASQKIQLI       | 2.14 | 0.01 | 1.72 | 0.68 | 0.22 | 0.28 |
| 7254 | 0 | 4701   | ASQKIQLI       | 2.14 | 0.01 | 1.72 | 0.68 | 0.22 | 0.28 |
| 7255 | 0 | 4701   | ASQKIQLI       | 2.14 | 0.01 | 1.72 | 0.68 | 0.22 | 0.28 |
| 7256 | 0 | 4701   | ASQKIQLI       | 2.14 | 0.01 | 1.72 | 0.68 | 0.22 | 2.02 |
| 7257 | 0 | 4702   | ASQKIQLV       | 2.12 | 0.01 | 1.72 | 2.74 | 0.22 | 0.28 |
| 7258 | 0 | 4702   | ASQKIQLV       | 2.12 | 0.01 | 1.72 | 2.74 | 0.22 | 1.34 |
| 7259 | 0 | 112453 | ASQKRPSQR      | 2.25 | 3.89 | 0.78 | 3.70 | 0.22 | 0.28 |
| 7260 | 0 | 112453 | ASQKRPSQR      | 2.25 | 3.89 | 0.78 | 3.70 | 0.22 | 0.28 |
| 7261 | 0 | 112453 | ASQKRPSQR      | 2.25 | 3.89 | 0.78 | 0.68 | 0.22 | 0.28 |
| 7262 | 0 | 112453 | ASQKRPSQR      | 2.25 | 3.89 | 0.78 | 0.68 | 0.22 | 0.28 |
| 7263 | 0 | 111125 | ASQKRPSQR      | 2.25 | 3.55 | 0.78 | 3.70 | 0.22 | 1.27 |
| 7264 | 0 | 111125 | ASQKRPSQR      | 2.25 | 3.55 | 0.78 | 3.70 | 0.22 | 0.28 |
| 7265 | 0 | 111125 | ASQKRPSQR      | 2.25 | 3.55 | 0.78 | 3.70 | 0.22 | 0.28 |
| 7266 | 0 | 112453 | ASQKRPSQR      | 2.25 | 3.89 | 0.78 | 1.15 | 0.22 | 0.28 |
| 7267 | 0 | 112453 | ASQKRPSQR      | 2.25 | 3.89 | 0.78 | 1.15 | 0.22 | 1.27 |
| 7268 | 0 | 112453 | ASQKRPSQR      | 2.25 | 3.89 | 0.78 | 1.15 | 0.22 | 0.28 |
| 7269 | 0 | 112453 | ASQKRPSQR      | 2.25 | 3.89 | 0.78 | 1.15 | 0.22 | 0.28 |
| 7270 | 0 | 112453 | ASQKRPSQR      | 2.25 | 3.89 | 0.78 | 1.15 | 0.22 | 0.28 |
| 7271 | 0 | 112453 | ASQKRPSQR      | 2.25 | 3.89 | 0.78 | 3.70 | 0.22 | 1.27 |
| 7272 | 0 | 4706   | ASQKRPSQR      | 2.25 | 0.01 | 0.78 | 3.70 | 0.22 | 1.27 |
| 7273 | 0 | 4710   | ASQKRPSQRHGSKY | 2.63 | 0.01 | 2.96 | 3.18 | 0.22 | 1.27 |
| 7274 | 0 | 4710   | ASQKRPSQRHGSKY | 2.63 | 0.01 | 2.96 | 3.18 | 0.22 | 0.28 |
| 7275 | 0 | 4710   | ASQKRPSQRHGSKY | 2.63 | 0.01 | 2.96 | 3.18 | 0.22 | 0.28 |
| 7276 | 0 | 4710   | ASQKRPSQRHGSKY | 2.63 | 0.01 | 2.96 | 3.18 | 0.22 | 0.28 |
| 7277 | 0 | 4710   | ASQKRPSQRHGSKY | 2.63 | 0.01 | 2.96 | 3.18 | 0.22 | 0.28 |



|      |   |        |                                                      |      |      |      |      |      |      |
|------|---|--------|------------------------------------------------------|------|------|------|------|------|------|
| 7278 | 0 | 4710   | ASQKRPSQRHGSKY                                       | 2.63 | 0.01 | 2.96 | 3.18 | 0.22 | 0.28 |
| 7279 | 0 | 4710   | ASQKRPSQRHGSKY                                       | 2.63 | 0.01 | 2.96 | 3.18 | 0.22 | 0.28 |
| 7280 | 0 | 4710   | ASQKRPSQRHGSKY                                       | 2.63 | 0.01 | 2.96 | 3.18 | 0.22 | 0.28 |
| 7281 | 0 | 4715   | ASQKRPSQRHGSKYLAT<br>AST                             | 2.97 | 0.01 | 0.78 | 0.44 | 0.22 | 0.28 |
| 7282 | 0 | 116273 | ASQKRPSQRHGSKYLAT<br>ASTMDHARHGFLPRHR<br>DTGILDSIGR  | 3.72 | 0.01 | 2.96 | 2.55 | 2.60 | 0.85 |
| 7283 | 0 | 112456 | ASQKRPSQRHGSKYLAT<br>ASTMDHARHGFLPRHR<br>DTGILDSIGRF | 3.74 | 0.01 | 0.78 | 1.12 | 0.22 | 1.27 |
| 7284 | 0 | 112456 | ASQKRPSQRHGSKYLAT<br>ASTMDHARHGFLPRHR<br>DTGILDSIGRF | 3.74 | 0.01 | 0.78 | 2.00 | 0.22 | 1.27 |
| 7285 | 0 | 429015 | ASQKRPSQRS                                           | 2.35 | 0.01 | 1.75 | 1.12 | 0.22 | 2.92 |
| 7286 | 0 | 114746 | ASQKRPSQRSKYLATAST<br>MD                             | 2.97 | 0.01 | 1.75 | 0.44 | 1.13 | 2.97 |
| 7287 | 0 | 114746 | ASQKRPSQRSKYLATAST<br>MD                             | 2.97 | 0.01 | 1.75 | 0.44 | 1.13 | 2.97 |
| 7288 | 0 | 114746 | ASQKRPSQRSKYLATAST<br>MD                             | 2.97 | 0.01 | 1.75 | 0.44 | 1.41 | 2.97 |
| 7289 | 0 | 114746 | ASQKRPSQRSKYLATAST<br>MD                             | 2.97 | 0.01 | 1.75 | 2.25 | 0.22 | 0.28 |
| 7290 | 0 | 4718   | ASQLPYIEQGMQLAEQF<br>KQK                             | 2.95 | 0.01 | 2.41 | 0.44 | 0.85 | 0.28 |
| 7291 | 0 | 4721   | ASQPGSSEPSNPVSSGH<br>SVSTVSVSQSTSSEKQD<br>TIQ        | 3.60 | 0.01 | 3.93 | 0.68 | 0.22 | 0.28 |
| 7292 | 0 | 4721   | ASQPGSSEPSNPVSSGH<br>SVSTVSVSQSTSSEKQD<br>TIQ        | 3.60 | 0.01 | 3.93 | 0.68 | 0.22 | 0.85 |
| 7293 | 0 | 4721   | ASQPGSSEPSNPVSSGH<br>SVSTVSVSQSTSSEKQD<br>TIQ        | 3.60 | 0.01 | 3.93 | 0.68 | 0.22 | 1.48 |
| 7294 | 0 | 4721   | ASQPGSSEPSNPVSSGH<br>SVSTVSVSQSTSSEKQD<br>TIQ        | 3.60 | 0.01 | 3.93 | 0.68 | 0.22 | 0.28 |
| 7295 | 0 | 4721   | ASQPGSSEPSNPVSSGH<br>SVSTVSVSQSTSSEKQD<br>TIQ        | 3.60 | 0.01 | 3.93 | 0.68 | 0.22 | 0.85 |
| 7296 | 0 | 4721   | ASQPGSSEPSNPVSSGH<br>SVSTVSVSQSTSSEKQD<br>TIQ        | 3.60 | 0.01 | 3.93 | 0.68 | 0.22 | 1.48 |
| 7297 | 0 | 229083 | ASQSKAEKDYD                                          | 2.43 | 0.01 | 2.70 | 0.68 | 0.22 | 0.28 |
| 7298 | 0 | 229084 | ASQSKAEKDYDAAMK                                      | 2.71 | 0.01 | 2.70 | 0.68 | 0.22 | 0.28 |
| 7299 | 0 | 229085 | ASQSKAEKDYDAAVK                                      | 2.71 | 0.01 | 2.70 | 0.68 | 0.22 | 0.28 |

|      |   |        |                                                                      |      |      |      |      |      |      |
|------|---|--------|----------------------------------------------------------------------|------|------|------|------|------|------|
| 7300 | 0 | 229085 | ASQSKAEKDYDAAVK                                                      | 2.71 | 0.01 | 2.70 | 0.68 | 0.22 | 0.28 |
| 7301 | 0 | 112754 | ASQYRPSQR                                                            | 2.25 | 3.89 | 0.90 | 4.93 | 0.22 | 0.28 |
| 7302 | 0 | 4732   | ASRAALIEEGQRIA                                                       | 2.64 | 0.01 | 2.69 | 0.44 | 0.85 | 0.28 |
| 7303 | 0 | 175745 | ASRAALIEEGQRIAE                                                      | 2.72 | 0.01 | 2.69 | 0.44 | 0.85 | 2.97 |
| 7304 | 0 | 4733   | ASRAALIEEGQRIAEMLK<br>SK                                             | 2.98 | 0.01 | 1.96 | 0.44 | 0.85 | 0.28 |
| 7305 | 0 | 4734   | ASRAALLEEGQRIAEML<br>KSK                                             | 2.97 | 0.01 | 1.96 | 0.44 | 0.85 | 0.28 |
| 7306 | 0 | 4736   | ASRDKAFVSKDLADKL                                                     | 2.84 | 0.01 | 3.59 | 2.02 | 0.22 | 0.28 |
| 7307 | 0 | 79521  | ASRDLVVS YVNTNMGL<br>KFRQLLWFHISCLTFGRE<br>TVIEY                     | 3.57 | 0.01 | 2.71 | 0.44 | 0.85 | 0.28 |
| 7308 | 0 | 4737   | ASREAK                                                               | 1.91 | 0.01 | 2.24 | 0.68 | 0.22 | 0.28 |
| 7309 | 0 | 4737   | ASREAK                                                               | 1.91 | 0.01 | 2.24 | 0.68 | 0.22 | 0.28 |
| 7310 | 0 | 4737   | ASREAK                                                               | 1.91 | 0.01 | 2.24 | 0.68 | 0.22 | 1.48 |
| 7311 | 0 | 165588 | ASREAKKKVEADLAASR<br>EAKKQVEKALEASREAK<br>KKVEADLAASREAKKQV<br>EKALE | 4.01 | 0.01 | 0.90 | 2.42 | 0.22 | 0.28 |
| 7312 | 0 | 165588 | ASREAKKKVEADLAASR<br>EAKKQVEKALEASREAK<br>KKVEADLAASREAKKQV<br>EKALE | 4.01 | 0.01 | 0.90 | 2.42 | 0.22 | 0.28 |
| 7313 | 0 | 165588 | ASREAKKKVEADLAASR<br>EAKKQVEKALEASREAK<br>KKVEADLAASREAKKQV<br>EKALE | 4.01 | 0.01 | 0.90 | 2.42 | 0.22 | 0.28 |
| 7314 | 0 | 165588 | ASREAKKKVEADLAASR<br>EAKKQVEKALEASREAK<br>KKVEADLAASREAKKQV<br>EKALE | 4.01 | 0.01 | 0.90 | 2.42 | 0.22 | 1.48 |
| 7315 | 0 | 165588 | ASREAKKKVEADLAASR<br>EAKKQVEKALEASREAK<br>KKVEADLAASREAKKQV<br>EKALE | 4.01 | 0.01 | 0.90 | 2.42 | 0.22 | 2.12 |
| 7316 | 0 | 165588 | ASREAKKKVEADLAASR<br>EAKKQVEKALEASREAK<br>KKVEADLAASREAKKQV<br>EKALE | 4.01 | 0.01 | 0.90 | 2.42 | 0.22 | 1.34 |
| 7317 | 0 | 165588 | ASREAKKKVEADLAASR<br>EAKKQVEKALEASREAK<br>KKVEADLAASREAKKQV<br>EKALE | 4.01 | 0.01 | 0.90 | 2.42 | 0.22 | 1.48 |

|      |   |        |                                                                      |      |      |      |      |      |      |
|------|---|--------|----------------------------------------------------------------------|------|------|------|------|------|------|
| 7318 | 0 | 165588 | ASREAKKKVEADLAASR<br>EAKKQVEKALEASREAK<br>KKVEADLAASREAKKQV<br>EKALE | 4.01 | 0.01 | 0.90 | 2.42 | 0.22 | 2.12 |
| 7319 | 0 | 4739   | ASREAKKQVEKA                                                         | 2.52 | 0.01 | 2.85 | 4.08 | 0.85 | 0.28 |
| 7320 | 0 | 4740   | ASREAKKQVEKALE                                                       | 2.65 | 0.01 | 2.24 | 2.42 | 2.25 | 1.75 |
| 7321 | 0 | 4740   | ASREAKKQVEKALE                                                       | 2.65 | 0.01 | 2.24 | 2.42 | 0.22 | 0.28 |
| 7322 | 0 | 4740   | ASREAKKQVEKALE                                                       | 2.65 | 0.01 | 2.24 | 0.68 | 0.22 | 0.28 |
| 7323 | 0 | 4740   | ASREAKKQVEKALE                                                       | 2.65 | 0.01 | 2.24 | 0.68 | 0.22 | 0.28 |
| 7324 | 0 | 4740   | ASREAKKQVEKALE                                                       | 2.65 | 0.01 | 2.24 | 0.68 | 2.25 | 1.75 |
| 7325 | 0 | 4740   | ASREAKKQVEKALE                                                       | 2.65 | 0.01 | 2.24 | 2.42 | 0.22 | 1.34 |
| 7326 | 0 | 4740   | ASREAKKQVEKALE                                                       | 2.65 | 0.01 | 2.24 | 0.44 | 0.85 | 0.28 |
| 7327 | 0 | 4740   | ASREAKKQVEKALE                                                       | 2.65 | 0.01 | 2.24 | 0.68 | 0.22 | 0.28 |
| 7328 | 0 | 4740   | ASREAKKQVEKALE                                                       | 2.65 | 0.01 | 2.24 | 1.15 | 0.22 | 0.28 |
| 7329 | 0 | 4740   | ASREAKKQVEKALE                                                       | 2.65 | 0.01 | 3.37 | 2.42 | 0.22 | 0.28 |
| 7330 | 0 | 4740   | ASREAKKQVEKALE                                                       | 2.65 | 0.01 | 3.37 | 2.42 | 0.22 | 1.75 |
| 7331 | 0 | 4740   | ASREAKKQVEKALE                                                       | 2.65 | 0.01 | 3.37 | 2.42 | 0.22 | 0.28 |
| 7332 | 0 | 258347 | ASREKDGEDTTSEDE                                                      | 2.71 | 0.01 | 1.61 | 0.44 | 0.85 | 1.28 |
| 7333 | 0 | 258348 | ASREQDGEDTTSEGE                                                      | 2.71 | 0.01 | 1.61 | 0.44 | 0.85 | 1.28 |
| 7334 | 0 | 122271 | ASRETKELRQEERQP                                                      | 2.69 | 0.01 | 3.81 | 0.44 | 1.13 | 0.28 |
| 7335 | 0 | 122271 | ASRETKELRQEERQP                                                      | 2.69 | 0.01 | 3.81 | 0.44 | 1.41 | 0.28 |
| 7336 | 0 | 4746   | ASRGNHVSPTHYVPESD<br>AAARVTAI                                        | 3.16 | 0.01 | 1.72 | 0.44 | 1.59 | 0.28 |
| 7337 | 0 | 4749   | ASRGTSMDDEAD                                                         | 2.50 | 0.01 | 2.88 | 2.22 | 0.85 | 0.28 |
| 7338 | 0 | 4749   | ASRGTSMDDEAD                                                         | 2.50 | 0.01 | 2.88 | 2.37 | 0.22 | 0.28 |
| 7339 | 0 | 4749   | ASRGTSMDDEAD                                                         | 2.50 | 0.01 | 2.88 | 2.22 | 0.22 | 0.28 |
| 7340 | 0 | 142116 | ASRKGLRRDLASREAK<br>KQV                                              | 2.97 | 0.01 | 2.24 | 0.44 | 0.85 | 0.28 |
| 7341 | 0 | 142116 | ASRKGLRRDLASREAK<br>KQV                                              | 2.97 | 0.01 | 2.24 | 0.44 | 1.74 | 0.28 |
| 7342 | 0 | 142116 | ASRKGLRRDLASREAK<br>KQV                                              | 2.97 | 0.01 | 2.24 | 1.15 | 0.22 | 0.28 |
| 7343 | 0 | 77773  | ASRNKANDYTTEYSASV<br>KGRFIVS                                         | 3.12 | 0.01 | 1.75 | 0.68 | 0.22 | 0.28 |
| 7344 | 0 | 77773  | ASRNKANDYTTEYSASV<br>KGRFIVS                                         | 3.12 | 0.01 | 1.75 | 0.68 | 0.22 | 0.28 |
| 7345 | 0 | 77773  | ASRNKANDYTTEYSASV<br>KGRFIVS                                         | 3.12 | 0.01 | 1.75 | 0.68 | 0.22 | 0.28 |
| 7346 | 0 | 77773  | ASRNKANDYTTEYSASV<br>KGRFIVS                                         | 3.12 | 0.01 | 1.75 | 1.15 | 0.22 | 1.27 |
| 7347 | 0 | 77773  | ASRNKANDYTTEYSASV<br>KGRFIVS                                         | 3.12 | 0.01 | 1.75 | 1.15 | 0.22 | 0.28 |
| 7348 | 0 | 77773  | ASRNKANDYTTEYSASV<br>KGRFIVS                                         | 3.12 | 0.01 | 1.75 | 0.68 | 0.22 | 1.27 |
| 7349 | 0 | 77773  | ASRNKANDYTTEYSASV<br>KGRFIVS                                         | 3.12 | 0.01 | 1.75 | 0.68 | 0.22 | 1.27 |

|      |   |        |                              |      |      |      |      |      |      |
|------|---|--------|------------------------------|------|------|------|------|------|------|
| 7350 | 0 | 77773  | ASRNKANDYTTEYSASV<br>KGRFIVS | 3.12 | 0.01 | 1.75 | 0.68 | 0.22 | 1.27 |
| 7351 | 0 | 77773  | ASRNKANDYTTEYSASV<br>KGRFIVS | 3.12 | 0.01 | 1.75 | 0.68 | 0.22 | 1.27 |
| 7352 | 0 | 77773  | ASRNKANDYTTEYSASV<br>KGRFIVS | 3.12 | 0.01 | 1.75 | 0.68 | 0.22 | 1.27 |
| 7353 | 0 | 77773  | ASRNKANDYTTEYSASV<br>KGRFIVS | 3.12 | 0.01 | 1.75 | 0.68 | 0.22 | 1.57 |
| 7354 | 0 | 77773  | ASRNKANDYTTEYSASV<br>KGRFIVS | 3.12 | 0.01 | 1.75 | 0.68 | 1.41 | 0.28 |
| 7355 | 0 | 77773  | ASRNKANDYTTEYSASV<br>KGRFIVS | 3.12 | 0.01 | 1.75 | 0.44 | 1.41 | 1.57 |
| 7356 | 0 | 4754   | ASRQAEVIA                    | 2.24 | 0.01 | 2.41 | 0.44 | 0.85 | 0.28 |
| 7357 | 0 | 512082 | ASRQGLRRDLASRE               | 2.72 | 0.01 | 2.24 | 0.44 | 1.41 | 1.28 |
| 7358 | 0 | 512082 | ASRQGLRRDLASRE               | 2.72 | 0.01 | 2.24 | 0.44 | 1.41 | 1.28 |
| 7359 | 0 | 512083 | ASRQSLRRDLASRE               | 2.73 | 0.01 | 2.24 | 0.44 | 1.41 | 1.28 |
| 7360 | 0 | 4763   | ASSAAEFLAAFNVFSEAA<br>RC     | 2.98 | 0.01 | 2.78 | 2.49 | 0.85 | 0.28 |
| 7361 | 0 | 125367 | ASSAFKAPRPGPETLQFT           | 2.85 | 0.01 | 2.73 | 1.20 | 0.22 | 0.28 |
| 7362 | 0 | 125367 | ASSAFKAPRPGPETLQFT           | 2.85 | 0.01 | 2.73 | 1.20 | 0.22 | 0.28 |
| 7363 | 0 | 125367 | ASSAFKAPRPGPETLQFT           | 2.85 | 0.01 | 2.73 | 1.20 | 0.22 | 1.48 |
| 7364 | 0 | 80493  | ASSAPSTAVAQS                 | 2.53 | 0.01 | 2.48 | 0.44 | 1.59 | 0.28 |
| 7365 | 0 | 4764   | ASSAVDDAPWAVITF              | 2.69 | 0.01 | 0.90 | 1.15 | 0.22 | 0.28 |
| 7366 | 0 | 512084 | ASSDALEALADQTDA              | 2.73 | 0.01 | 2.24 | 0.44 | 1.41 | 1.28 |
| 7367 | 0 | 141607 | ASSDLNLIGFGINAK              | 2.70 | 0.01 | 3.65 | 0.44 | 1.23 | 1.27 |
| 7368 | 0 | 115035 | ASSDSSNTE                    | 2.25 | 0.01 | 2.19 | 2.04 | 0.22 | 0.28 |
| 7369 | 0 | 115035 | ASSDSSNTE                    | 2.25 | 0.01 | 2.19 | 2.04 | 0.22 | 2.12 |
| 7370 | 0 | 258410 | ASSEDEEEDDADGDE              | 2.74 | 0.01 | 1.61 | 0.44 | 0.85 | 1.28 |
| 7371 | 0 | 258411 | ASSEDKEEDDADGDE              | 2.74 | 0.01 | 1.61 | 0.44 | 0.85 | 1.28 |
| 7372 | 0 | 4765   | ASSEETPAWMMEGVF<br>EAW       | 2.91 | 0.01 | 0.90 | 0.68 | 0.22 | 1.39 |
| 7373 | 0 | 4770   | ASSGIGPE                     | 2.13 | 0.01 | 2.21 | 1.12 | 0.22 | 0.28 |
| 7374 | 0 | 4770   | ASSGIGPE                     | 2.13 | 0.01 | 2.21 | 0.44 | 0.85 | 0.28 |
| 7375 | 0 | 4771   | ASSGIGPEKA                   | 2.33 | 0.01 | 2.21 | 1.12 | 0.22 | 0.28 |
| 7376 | 0 | 4771   | ASSGIGPEKA                   | 2.33 | 0.01 | 2.21 | 1.12 | 0.22 | 0.28 |
| 7377 | 0 | 232733 | ASSHILALNYAHWHY              | 2.71 | 0.01 | 2.89 | 1.12 | 0.22 | 1.28 |
| 7378 | 0 | 232733 | ASSHILALNYAHWHY              | 2.71 | 0.01 | 2.89 | 1.12 | 0.22 | 1.28 |
| 7379 | 0 | 232733 | ASSHILALNYAHWHY              | 2.71 | 0.01 | 2.89 | 1.12 | 0.22 | 1.28 |
| 7380 | 0 | 232733 | ASSHILALNYAHWHY              | 2.71 | 0.01 | 2.89 | 1.12 | 0.22 | 1.28 |
| 7381 | 0 | 232733 | ASSHILALNYAHWHY              | 2.71 | 0.01 | 2.89 | 1.12 | 0.22 | 1.28 |
| 7382 | 0 | 4774   | ASSHRALARLRTACERAK<br>RT     | 2.99 | 0.01 | 2.78 | 2.49 | 0.85 | 0.28 |
| 7383 | 0 | 4774   | ASSHRALARLRTACERAK<br>RT     | 2.99 | 0.01 | 2.78 | 0.44 | 0.85 | 0.28 |

|      |   |        |                               |      |      |      |      |      |      |
|------|---|--------|-------------------------------|------|------|------|------|------|------|
| 7384 | 0 | 181280 | ASSHRLGTGVVPALQ               | 2.67 | 0.01 | 2.82 | 1.15 | 0.22 | 0.28 |
| 7385 | 0 | 167060 | ASSLGGNQDTQY                  | 2.45 | 0.01 | 1.75 | 3.75 | 1.13 | 0.28 |
| 7386 | 0 | 167060 | ASSLGGNQDTQY                  | 2.45 | 0.01 | 1.75 | 3.75 | 1.13 | 1.75 |
| 7387 | 0 | 167060 | ASSLGGNQDTQY                  | 2.45 | 0.01 | 1.75 | 3.75 | 1.13 | 1.75 |
| 7388 | 0 | 130740 | ASSLLASSP                     | 2.28 | 0.01 | 0.90 | 0.44 | 1.13 | 1.39 |
| 7389 | 0 | 141859 | ASSNSAQGSDESLIA               | 2.70 | 0.01 | 0.78 | 1.12 | 0.22 | 0.28 |
| 7390 | 0 | 141859 | ASSNSAQGSDESLIA               | 2.70 | 0.01 | 0.78 | 1.12 | 0.22 | 0.28 |
| 7391 | 0 | 141859 | ASSNSAQGSDESLIA               | 2.70 | 0.01 | 0.78 | 1.12 | 0.22 | 0.28 |
| 7392 | 0 | 141859 | ASSNSAQGSDESLIA               | 2.70 | 0.01 | 0.78 | 1.12 | 0.22 | 2.12 |
| 7393 | 0 | 141859 | ASSNSAQGSDESLIA               | 2.70 | 0.01 | 0.78 | 1.12 | 0.22 | 2.12 |
| 7394 | 0 | 141859 | ASSNSAQGSDESLIA               | 2.70 | 0.01 | 0.78 | 1.12 | 0.22 | 0.28 |
| 7395 | 0 | 141859 | ASSNSAQGSDESLIA               | 2.70 | 0.01 | 0.78 | 1.12 | 0.22 | 0.28 |
| 7396 | 0 | 79760  | ASSPDAHVPFCF                  | 2.49 | 0.01 | 2.14 | 3.26 | 0.22 | 0.28 |
| 7397 | 0 | 79760  | ASSPDAHVPFCF                  | 2.49 | 0.01 | 2.14 | 3.55 | 0.22 | 0.28 |
| 7398 | 0 | 79761  | ASSPDAHVPFCFGKDLK<br>RPGSSPME | 3.15 | 0.01 | 2.14 | 3.26 | 0.22 | 0.28 |
| 7399 | 0 | 79761  | ASSPDAHVPFCFGKDLK<br>RPGSSPME | 3.15 | 0.01 | 2.14 | 3.55 | 0.22 | 0.28 |
| 7400 | 0 | 79761  | ASSPDAHVPFCFGKDLK<br>RPGSSPME | 3.15 | 0.01 | 2.14 | 1.12 | 0.22 | 0.28 |
| 7401 | 0 | 97899  | ASSQTEYEASPLTPL               | 2.72 | 0.01 | 2.71 | 2.78 | 0.22 | 0.28 |
| 7402 | 0 | 99117  | ASSRDQSSYLQGFSR               | 2.69 | 0.01 | 2.16 | 0.44 | 1.23 | 1.48 |
| 7403 | 0 | 4782   | ASSRSSRSRGNRSRNST             | 2.85 | 0.01 | 2.91 | 0.44 | 0.85 | 0.28 |
| 7404 | 0 | 258486 | ASSSDDAQTGVGTEGG              | 2.68 | 0.01 | 1.61 | 0.44 | 0.85 | 1.28 |
| 7405 | 0 | 238232 | ASSVPPRPLNLINFQ               | 2.67 | 0.01 | 2.56 | 2.02 | 0.22 | 0.85 |
| 7406 | 0 | 238232 | ASSVPPRPLNLINFQ               | 2.67 | 0.01 | 2.56 | 1.20 | 0.22 | 0.85 |
| 7407 | 0 | 190390 | ASSWALNGRNSLMNP               | 2.70 | 0.01 | 3.97 | 2.00 | 1.41 | 0.28 |
| 7408 | 0 | 4789   | ASTAAPPYTNEQAYQM<br>LLAL      | 2.97 | 0.01 | 3.75 | 0.68 | 0.22 | 0.28 |
| 7409 | 0 | 4789   | ASTAAPPYTNEQAYQM<br>LLAL      | 2.97 | 0.01 | 3.75 | 0.68 | 0.22 | 1.48 |
| 7410 | 0 | 4789   | ASTAAPPYTNEQAYQM<br>LLAL      | 2.97 | 0.01 | 3.75 | 0.68 | 0.22 | 1.48 |
| 7411 | 0 | 4789   | ASTAAPPYTNEQAYQM<br>LLAL      | 2.97 | 0.01 | 3.75 | 0.68 | 0.22 | 1.48 |
| 7412 | 0 | 128333 | ASTDYYKR                      | 2.11 | 0.01 | 0.78 | 0.44 | 1.13 | 0.28 |
| 7413 | 0 | 512105 | ASTETTTTNEQPKPE               | 2.69 | 0.01 | 2.24 | 0.44 | 1.41 | 1.28 |
| 7414 | 0 | 4792   | ASTGGAYQSYKFIPALEA<br>AV      | 2.92 | 0.01 | 3.00 | 0.44 | 1.23 | 0.28 |
| 7415 | 0 | 4792   | ASTGGAYQSYKFIPALEA<br>AV      | 2.92 | 0.01 | 3.00 | 0.44 | 1.23 | 0.28 |
| 7416 | 0 | 4792   | ASTGGAYQSYKFIPALEA<br>AV      | 2.92 | 0.01 | 3.00 | 1.15 | 0.22 | 0.28 |
| 7417 | 0 | 4792   | ASTGGAYQSYKFIPALEA<br>AV      | 2.92 | 0.01 | 3.00 | 3.27 | 0.22 | 0.28 |

|      |   |        |                              |      |      |      |      |      |      |
|------|---|--------|------------------------------|------|------|------|------|------|------|
| 7418 | 0 | 4792   | ASTGGAYQSYKFIPALEA<br>AV     | 2.92 | 0.01 | 3.00 | 3.27 | 0.22 | 0.28 |
| 7419 | 0 | 4792   | ASTGGAYQSYKFIPALEA<br>AV     | 2.92 | 0.01 | 3.00 | 1.81 | 0.22 | 0.28 |
| 7420 | 0 | 180378 | ASTNGLINFIKQQREARV<br>Q      | 2.88 | 4.33 | 0.78 | 0.44 | 1.13 | 0.28 |
| 7421 | 0 | 180378 | ASTNGLINFIKQQREARV<br>Q      | 2.88 | 4.33 | 0.78 | 0.44 | 1.13 | 0.28 |
| 7422 | 0 | 180378 | ASTNGLINFIKQQREARV<br>Q      | 2.88 | 4.33 | 0.78 | 0.44 | 1.41 | 0.28 |
| 7423 | 0 | 4802   | ASTNRQSGRQPTPISPPL<br>RDSHPQ | 3.13 | 0.01 | 2.08 | 0.44 | 0.85 | 0.28 |
| 7424 | 0 | 258601 | ASTPKVNGRETIDPD              | 2.64 | 0.01 | 1.61 | 0.44 | 0.85 | 1.28 |
| 7425 | 0 | 112047 | ASTRESG                      | 2.02 | 0.01 | 0.78 | 0.44 | 1.13 | 0.28 |
| 7426 | 0 | 96119  | ASTRGDLAHLTAT                | 2.58 | 0.01 | 4.03 | 1.15 | 0.22 | 0.85 |
| 7427 | 0 | 96119  | ASTRGDLAHLTAT                | 2.58 | 0.01 | 4.03 | 1.15 | 0.22 | 0.85 |
| 7428 | 0 | 4810   | ASTTNCIGSQCLMTN              | 2.68 | 0.01 | 0.90 | 0.68 | 0.22 | 0.28 |
| 7429 | 0 | 4815   | ASVASGASGGSGNSK              | 2.74 | 0.01 | 1.66 | 0.44 | 0.85 | 0.28 |
| 7430 | 0 | 114748 | ASVDKRHDGG                   | 2.29 | 0.01 | 2.25 | 0.44 | 1.23 | 0.85 |
| 7431 | 0 | 114748 | ASVDKRHDGG                   | 2.29 | 0.01 | 2.25 | 0.44 | 1.23 | 0.85 |
| 7432 | 0 | 119553 | ASVSEGDAVVNAVVSQET<br>PA     | 2.93 | 0.01 | 3.27 | 0.44 | 0.85 | 0.28 |
| 7433 | 0 | 119553 | ASVSEGDAVVNAVVSQET<br>PA     | 2.93 | 0.01 | 3.27 | 2.49 | 0.85 | 0.28 |
| 7434 | 0 | 119553 | ASVSEGDAVVNAVVSQET<br>PA     | 2.93 | 0.01 | 3.27 | 1.15 | 0.22 | 0.85 |
| 7435 | 0 | 119553 | ASVSEGDAVVNAVVSQET<br>PA     | 2.93 | 0.01 | 3.27 | 1.15 | 0.22 | 0.28 |
| 7436 | 0 | 119553 | ASVSEGDAVVNAVVSQET<br>PA     | 2.93 | 0.01 | 3.27 | 1.12 | 0.22 | 0.28 |
| 7437 | 0 | 119553 | ASVSEGDAVVNAVVSQET<br>PA     | 2.93 | 0.01 | 3.27 | 1.15 | 0.22 | 1.75 |
| 7438 | 0 | 119553 | ASVSEGDAVVNAVVSQET<br>PA     | 2.93 | 0.01 | 3.27 | 1.81 | 0.22 | 0.28 |
| 7439 | 0 | 164603 | ASVTFWTLDNVD                 | 2.48 | 0.01 | 3.78 | 0.44 | 1.23 | 0.85 |
| 7440 | 0 | 132173 | ASVTSVQLPQQDQPV              | 2.71 | 0.01 | 0.78 | 1.12 | 0.22 | 0.28 |
| 7441 | 0 | 4833   | ASWAIKWEYVLLFLLA<br>DA       | 2.94 | 0.01 | 2.83 | 0.44 | 0.85 | 0.28 |
| 7442 | 0 | 4834   | ASWDWRKKG                    | 2.30 | 0.01 | 2.72 | 0.44 | 1.23 | 0.85 |
| 7443 | 0 | 4838   | ASWFTALTQHGKEELRF<br>PRGQ    | 2.98 | 0.01 | 2.45 | 0.44 | 0.85 | 1.28 |
| 7444 | 0 | 176802 | ASWHQHMKHKP                  | 2.48 | 0.01 | 0.90 | 0.68 | 0.22 | 1.27 |
| 7445 | 0 | 238234 | ASYEYSGPKLAMP                | 2.64 | 0.01 | 2.14 | 2.65 | 0.22 | 0.85 |
| 7446 | 0 | 4849   | ASYKVMTRSSHQSLV              | 2.66 | 0.01 | 2.43 | 0.44 | 1.59 | 0.28 |
| 7447 | 0 | 4853   | ASYNKSLGAAPIRTQPR<br>WNY     | 2.93 | 0.01 | 0.90 | 0.68 | 0.22 | 0.28 |

|      |   |        |                          |      |      |      |      |      |      |
|------|---|--------|--------------------------|------|------|------|------|------|------|
| 7448 | 0 | 97213  | ASYTADPVA                | 2.24 | 0.01 | 3.13 | 1.12 | 0.22 | 0.28 |
| 7449 | 0 | 4856   | ASYVKKPKEDVD             | 2.49 | 0.01 | 2.14 | 0.44 | 0.22 | 0.28 |
| 7450 | 0 | 4856   | ASYVKKPKEDVD             | 2.49 | 0.01 | 2.14 | 0.44 | 0.85 | 0.28 |
| 7451 | 0 | 4864   | ATAANAAPTNDK             | 2.52 | 0.01 | 3.22 | 0.44 | 1.23 | 0.85 |
| 7452 | 0 | 80506  | ATAASVGLRHKF             | 2.45 | 0.01 | 2.87 | 0.44 | 0.22 | 0.28 |
| 7453 | 0 | 108287 | ATADYPQKS                | 2.22 | 0.01 | 0.90 | 0.44 | 1.13 | 1.39 |
| 7454 | 0 | 450447 | ATAEWHP                  | 2.03 | 0.01 | 0.90 | 0.44 | 1.41 | 1.39 |
| 7455 | 0 | 80508  | ATAIFD                   | 1.91 | 0.01 | 2.40 | 2.52 | 0.22 | 0.28 |
| 7456 | 0 | 4884   | ATALDTSN                 | 2.15 | 0.01 | 3.06 | 1.12 | 0.22 | 0.28 |
| 7457 | 0 | 4885   | ATALDTSNKFADFLQI         | 2.75 | 0.01 | 3.06 | 1.12 | 0.22 | 0.28 |
| 7458 | 0 | 4885   | ATALDTSNKFADFLQI         | 2.75 | 0.01 | 3.06 | 2.00 | 0.85 | 0.28 |
| 7459 | 0 | 4885   | ATALDTSNKFADFLQI         | 2.75 | 0.01 | 3.06 | 2.22 | 1.93 | 0.28 |
| 7460 | 0 | 4886   | ATALPKNETPEVTKAEET<br>KT | 3.00 | 0.01 | 2.60 | 0.68 | 0.22 | 1.27 |
| 7461 | 0 | 258820 | ATAMKNNTTATGSDSG         | 2.72 | 0.01 | 1.61 | 0.44 | 0.85 | 1.28 |
| 7462 | 0 | 258821 | ATAMKNNTTATTGSDS         | 2.71 | 0.01 | 1.61 | 0.44 | 0.85 | 1.28 |
| 7463 | 0 | 258822 | ATAMKTTAATTGSDS          | 2.72 | 0.01 | 1.61 | 0.44 | 0.85 | 1.28 |
| 7464 | 0 | 258824 | ATAMKTTTATTGSDS          | 2.72 | 0.01 | 1.61 | 0.44 | 0.85 | 1.28 |
| 7465 | 0 | 258825 | ATAMKTTTTTTGSDS          | 2.70 | 0.01 | 1.61 | 0.44 | 0.85 | 1.28 |
| 7466 | 0 | 258846 | ATAPAKAAAAPAKAA          | 2.73 | 0.01 | 1.61 | 0.44 | 0.85 | 1.28 |
| 7467 | 0 | 512133 | ATAPGPSAANVSVAATT<br>ATP | 3.01 | 4.93 | 2.40 | 0.44 | 1.59 | 1.28 |
| 7468 | 0 | 4890   | ATAPPTHFW                | 2.25 | 0.01 | 0.90 | 0.44 | 0.85 | 1.39 |
| 7469 | 0 | 258854 | ATAQEEGQYDAADVE          | 2.71 | 0.01 | 1.61 | 0.44 | 0.85 | 1.28 |
| 7470 | 0 | 127602 | ATARRKRRWATRGA           | 2.73 | 0.01 | 0.78 | 0.44 | 1.13 | 0.85 |
| 7471 | 0 | 112048 | ATASTMDHARHGFLPR<br>HRDT | 2.97 | 0.01 | 0.78 | 0.44 | 0.22 | 0.28 |
| 7472 | 0 | 258897 | ATATKNNTTATTGSDS         | 2.73 | 0.01 | 1.61 | 0.44 | 0.85 | 1.28 |
| 7473 | 0 | 258898 | ATATKTTTATTGSDS          | 2.73 | 0.01 | 1.61 | 0.44 | 0.85 | 1.28 |
| 7474 | 0 | 258899 | ATATKTTTATTGNSD          | 2.72 | 0.01 | 1.61 | 0.44 | 0.85 | 1.28 |
| 7475 | 0 | 258908 | ATAVKATTATTGSDS          | 2.73 | 0.01 | 1.61 | 0.44 | 0.85 | 1.28 |
| 7476 | 0 | 258909 | ATAVKATTATTGESD          | 2.71 | 0.01 | 1.61 | 0.44 | 0.85 | 1.28 |
| 7477 | 0 | 4907   | ATCDKLFGYYERGIPLPC<br>AL | 2.93 | 0.01 | 0.90 | 0.44 | 1.59 | 1.27 |
| 7478 | 0 | 4907   | ATCDKLFGYYERGIPLPC<br>AL | 2.93 | 0.01 | 0.90 | 0.44 | 1.59 | 1.66 |
| 7479 | 0 | 4907   | ATCDKLFGYYERGIPLPC<br>AL | 2.93 | 0.01 | 0.90 | 0.44 | 1.59 | 1.66 |
| 7480 | 0 | 4907   | ATCDKLFGYYERGIPLPC<br>AL | 2.93 | 0.01 | 0.90 | 0.44 | 1.59 | 1.66 |
| 7481 | 0 | 4907   | ATCDKLFGYYERGIPLPC<br>AL | 2.93 | 0.01 | 0.90 | 0.44 | 1.59 | 1.66 |

|      |   |        |                          |      |      |      |      |      |      |
|------|---|--------|--------------------------|------|------|------|------|------|------|
| 7482 | 0 | 4907   | ATCDKLFGYERGYIPLPC<br>AL | 2.93 | 0.01 | 0.90 | 0.44 | 1.59 | 0.85 |
| 7483 | 0 | 4911   | ATCMQADLEVMTST           | 2.62 | 0.01 | 2.69 | 0.44 | 0.85 | 0.28 |
| 7484 | 0 | 4911   | ATCMQADLEVMTST           | 2.62 | 0.01 | 2.69 | 0.44 | 0.85 | 0.28 |
| 7485 | 0 | 4911   | ATCMQADLEVMTST           | 2.62 | 0.01 | 2.69 | 0.44 | 0.85 | 0.28 |
| 7486 | 0 | 4911   | ATCMQADLEVMTST           | 2.62 | 0.01 | 2.69 | 0.44 | 1.41 | 0.28 |
| 7487 | 0 | 4912   | ATCMQVNLEIMTST           | 2.59 | 0.01 | 2.69 | 0.44 | 1.41 | 0.28 |
| 7488 | 0 | 4912   | ATCMQVNLEIMTST           | 2.59 | 0.01 | 2.69 | 0.44 | 0.85 | 0.28 |
| 7489 | 0 | 4912   | ATCMQVNLEIMTST           | 2.59 | 0.01 | 2.69 | 0.44 | 0.85 | 0.28 |
| 7490 | 0 | 4912   | ATCMQVNLEIMTST           | 2.59 | 0.01 | 2.69 | 0.44 | 0.85 | 0.28 |
| 7491 | 0 | 135900 | ATCRFYTLDSIK             | 2.43 | 0.01 | 3.21 | 0.44 | 1.13 | 0.28 |
| 7492 | 0 | 450448 | ATDEIVP                  | 1.99 | 0.01 | 0.90 | 0.44 | 1.23 | 1.39 |
| 7493 | 0 | 114749 | ATDKEGKDVL               | 2.31 | 0.01 | 2.25 | 0.44 | 1.23 | 0.85 |
| 7494 | 0 | 114749 | ATDKEGKDVL               | 2.31 | 0.01 | 2.25 | 0.44 | 1.23 | 0.85 |
| 7495 | 0 | 4923   | ATDKEGKDVLVCNK           | 2.61 | 0.01 | 2.25 | 0.44 | 1.23 | 1.27 |
| 7496 | 0 | 4923   | ATDKEGKDVLVCNK           | 2.61 | 0.01 | 2.25 | 1.12 | 0.22 | 1.27 |
| 7497 | 0 | 4924   | ATDLLAAYPLYSPSL          | 2.73 | 0.01 | 0.90 | 0.44 | 1.41 | 0.28 |
| 7498 | 0 | 175751 | ATDTELKEIQGMMDA          | 2.68 | 0.01 | 2.63 | 1.15 | 0.22 | 0.85 |
| 7499 | 0 | 4935   | ATEEVGAAKIPAGELQIV       | 3.71 | 0.01 | 3.67 | 0.44 | 1.23 | 0.85 |
|      |   |        | DKIDAAFRIAATAANAA        |      |      |      |      |      |      |
|      |   |        | PVNDKFTV                 |      |      |      |      |      |      |
| 7500 | 0 | 4935   | ATEEVGAAKIPAGELQIV       | 3.71 | 0.01 | 3.67 | 0.44 | 1.23 | 1.27 |
|      |   |        | DKIDAAFRIAATAANAA        |      |      |      |      |      |      |
| 7501 | 0 | 149640 | PVNDKFTV                 | 2.50 | 0.01 | 0.90 | 2.37 | 0.22 | 0.28 |
|      |   |        | ATEIPIALSRP              |      |      |      |      |      |      |
| 7502 | 0 | 4938   | ATEINDNSWKDTLS           | 2.61 | 0.01 | 3.29 | 1.20 | 0.22 | 0.85 |
| 7503 | 0 | 4938   | ATEINDNSWKDTLS           | 2.61 | 0.01 | 3.29 | 1.20 | 0.22 | 1.57 |
| 7504 | 0 | 259023 | ATEKKKNPEAASKKA          | 2.72 | 0.01 | 1.61 | 0.44 | 0.85 | 1.28 |
| 7505 | 0 | 4941   | ATEKSNVVRGWV             | 2.45 | 0.01 | 2.45 | 0.44 | 0.85 | 2.35 |
| 7506 | 0 | 4941   | ATEKSNVVRGWV             | 2.45 | 0.01 | 2.45 | 0.44 | 0.85 | 0.28 |
| 7507 | 0 | 4941   | ATEKSNVVRGWV             | 2.45 | 0.01 | 2.45 | 0.68 | 0.22 | 0.28 |
| 7508 | 0 | 4941   | ATEKSNVVRGWV             | 2.45 | 0.01 | 2.45 | 0.68 | 0.22 | 0.28 |
| 7509 | 0 | 4941   | ATEKSNVVRGWV             | 2.45 | 0.01 | 2.45 | 0.68 | 0.22 | 2.97 |
| 7510 | 0 | 4942   | ATELNNALQNLARTISEA       | 3.15 | 0.01 | 3.53 | 2.61 | 0.22 | 0.28 |
|      |   |        | GQAMAS                   |      |      |      |      |      |      |
| 7511 | 0 | 4942   | ATELNNALQNLARTISEA       | 3.15 | 0.01 | 3.53 | 3.16 | 0.85 | 0.28 |
|      |   |        | GQAMAS                   |      |      |      |      |      |      |
| 7512 | 0 | 165589 | ATETSYR                  | 2.02 | 0.01 | 0.90 | 0.44 | 1.23 | 1.39 |
| 7513 | 0 | 165589 | ATETSYR                  | 2.02 | 0.01 | 0.90 | 0.44 | 1.23 | 1.39 |
| 7514 | 0 | 4949   | ATEVEQKE                 | 2.14 | 0.01 | 2.99 | 0.44 | 0.85 | 0.28 |
| 7515 | 0 | 170413 | ATFFAKMLDHEYTTK          | 2.67 | 0.01 | 0.78 | 0.44 | 1.41 | 0.28 |
| 7516 | 0 | 238238 | ATFTLANKD                | 2.24 | 0.01 | 2.14 | 2.65 | 0.22 | 0.85 |
| 7517 | 0 | 259108 | ATGEAPSQPGASSGE          | 2.73 | 0.01 | 1.61 | 0.44 | 0.85 | 1.28 |
| 7518 | 0 | 4968   | ATGFKQSSKALQRPVAS        | 2.80 | 0.01 | 0.78 | 3.72 | 0.22 | 0.28 |
| 7519 | 0 | 4968   | ATGFKQSSKALQRPVAS        | 2.80 | 0.01 | 0.78 | 3.72 | 0.22 | 0.28 |



|      |   |        |                                                      |      |      |      |      |      |      |
|------|---|--------|------------------------------------------------------|------|------|------|------|------|------|
| 7520 | 0 | 130741 | ATGFVKKDQ                                            | 2.20 | 0.01 | 0.78 | 1.15 | 0.22 | 0.85 |
| 7521 | 0 | 130741 | ATGFVKKDQ                                            | 2.20 | 0.01 | 0.78 | 1.15 | 0.22 | 0.85 |
| 7522 | 0 | 130741 | ATGFVKKDQ                                            | 2.20 | 0.01 | 0.78 | 1.15 | 0.22 | 0.85 |
| 7523 | 0 | 130741 | ATGFVKKDQ                                            | 2.20 | 0.01 | 0.78 | 1.15 | 0.22 | 0.85 |
| 7524 | 0 | 130741 | ATGFVKKDQ                                            | 2.20 | 0.01 | 0.78 | 1.15 | 0.22 | 0.85 |
| 7525 | 0 | 130741 | ATGFVKKDQ                                            | 2.20 | 0.01 | 0.78 | 1.15 | 0.22 | 1.27 |
| 7526 | 0 | 116080 | ATGGTLQQLFYSITVGQ<br>V                               | 2.86 | 0.01 | 1.75 | 4.23 | 2.25 | 1.75 |
| 7527 | 0 | 116080 | ATGGTLQQLFYSITVGQ<br>V                               | 2.86 | 0.01 | 1.75 | 1.81 | 0.22 | 0.28 |
| 7528 | 0 | 116080 | ATGGTLQQLFYSITVGQ<br>V                               | 2.86 | 0.01 | 1.75 | 1.81 | 0.22 | 1.34 |
| 7529 | 0 | 116080 | ATGGTLQQLFYSITVGQ<br>V                               | 2.86 | 0.01 | 1.75 | 1.81 | 2.25 | 1.75 |
| 7530 | 0 | 80521  | ATGIVDLGSKIG                                         | 2.48 | 0.01 | 2.87 | 0.44 | 0.85 | 0.28 |
| 7531 | 0 | 167061 | ATGKPPQYIAV                                          | 2.38 | 0.01 | 0.78 | 0.44 | 1.41 | 0.28 |
| 7532 | 0 | 167061 | ATGKPPQYIAV                                          | 2.38 | 0.01 | 0.78 | 0.44 | 1.41 | 0.28 |
| 7533 | 0 | 226008 | ATGLKYDANNIYLAANY<br>GET                             | 2.97 | 0.01 | 2.24 | 0.68 | 0.22 | 0.28 |
| 7534 | 0 | 4972   | ATGLRNVPQIESRGLFG<br>AIAGFIEG                        | 3.17 | 0.01 | 4.63 | 0.68 | 0.22 | 0.28 |
| 7535 | 0 | 115598 | ATGMEVGWYRPP                                         | 2.43 | 0.01 | 0.78 | 0.44 | 1.41 | 0.28 |
| 7536 | 0 | 115598 | ATGMEVGWYRPP                                         | 2.43 | 0.01 | 0.78 | 0.44 | 1.13 | 0.28 |
| 7537 | 0 | 4979   | ATGNLPGCSF                                           | 2.29 | 0.01 | 1.72 | 0.44 | 0.85 | 0.28 |
| 7538 | 0 | 107750 | ATGPLGPKGQTGEPGIA<br>GFKGEQGPK                       | 3.25 | 0.01 | 1.60 | 2.46 | 0.22 | 0.28 |
| 7539 | 0 | 4990   | ATGVDMANPMSPVNK<br>SFEIE                             | 2.94 | 0.01 | 3.53 | 0.68 | 0.22 | 0.28 |
| 7540 | 0 | 4990   | ATGVDMANPMSPVNK<br>SFEIE                             | 2.94 | 0.01 | 2.04 | 0.44 | 1.13 | 0.28 |
| 7541 | 0 | 4990   | ATGVDMANPMSPVNK<br>SFEIE                             | 2.94 | 0.01 | 2.04 | 0.44 | 0.22 | 0.28 |
| 7542 | 0 | 4992   | ATGWQTIDGKKYYFNT<br>NTAEAATGWQTIDGKK<br>YYFNTNTAIAST | 3.75 | 0.01 | 3.04 | 1.15 | 0.22 | 2.98 |
| 7543 | 0 | 4992   | ATGWQTIDGKKYYFNT<br>NTAEAATGWQTIDGKK<br>YYFNTNTAIAST | 3.75 | 0.01 | 3.04 | 1.12 | 0.22 | 2.98 |
| 7544 | 0 | 4992   | ATGWQTIDGKKYYFNT<br>NTAEAATGWQTIDGKK<br>YYFNTNTAIAST | 3.75 | 0.01 | 3.04 | 0.68 | 0.22 | 0.85 |
| 7545 | 0 | 4992   | ATGWQTIDGKKYYFNT<br>NTAEAATGWQTIDGKK<br>YYFNTNTAIAST | 3.75 | 0.01 | 3.04 | 2.37 | 0.22 | 0.85 |
| 7546 | 0 | 4992   | ATGWQTIDGKKYYFNT<br>NTAEAATGWQTIDGKK<br>YYFNTNTAIAST | 3.75 | 0.01 | 3.04 | 0.68 | 0.22 | 0.85 |

|                   |   |        |                                       |      |      |      |      |      |      |
|-------------------|---|--------|---------------------------------------|------|------|------|------|------|------|
| 7547              | 0 | 99119  | ATHAKSSPYQKKTEN                       | 2.67 | 0.01 | 2.16 | 0.44 | 1.23 | 1.48 |
| 7548              | 0 | 99119  | ATHAKSSPYQKKTEN                       | 2.67 | 0.01 | 2.16 | 0.44 | 1.23 | 1.48 |
| 7549              | 0 | 174869 | ATHCKEMTWI                            | 2.29 | 0.01 | 3.10 | 0.44 | 1.23 | 0.85 |
| 7550              | 0 | 101495 | ATHDEAIQEMLDLSAEVI<br>ETAS            | 3.07 | 0.01 | 3.11 | 1.20 | 0.22 | 0.28 |
| 7551              | 0 | 4994   | ATHFMRI                               | 1.99 | 0.01 | 0.90 | 1.12 | 0.22 | 1.39 |
| 7552              | 0 | 188060 | ATHGDEGRNN                            | 2.29 | 0.01 | 2.92 | 1.81 | 0.22 | 0.85 |
| 7553              | 0 | 259190 | ATHTSAPAAGGFGSA                       | 2.73 | 0.01 | 1.61 | 0.44 | 0.85 | 1.28 |
| 7554              | 0 | 259192 | ATHTSTPAAGGFGSA                       | 2.73 | 0.01 | 1.61 | 0.44 | 0.85 | 1.28 |
| 7555              | 0 | 259200 | ATIEEEGEFDEEEQY                       | 2.67 | 0.01 | 1.61 | 0.44 | 0.85 | 1.28 |
| 7556              | 0 | 103067 | ATIPQGEQSTGKIYF                       | 2.66 | 0.01 | 2.04 | 0.44 | 0.85 | 1.28 |
| 7557              | 0 | 98706  | ATIRR                                 | 1.72 | 0.01 | 2.14 | 0.68 | 0.22 | 0.28 |
| 7558              | 0 | 77837  | ATISPTGLVYQT                          | 2.45 | 0.01 | 0.90 | 1.15 | 0.22 | 1.39 |
| 7559              | 0 | 259228 | ATKAAEAQKAAEA                         | 2.75 | 0.01 | 1.61 | 0.44 | 0.85 | 1.28 |
| 7560              | 0 | 259247 | ATKAVETEKQKAAEA                       | 2.74 | 0.01 | 1.61 | 0.44 | 0.85 | 1.28 |
| 7561              | 0 | 259249 | ATKAVETEKRKAAEA                       | 2.74 | 0.01 | 1.61 | 0.44 | 0.85 | 1.28 |
| 7562              | 0 | 259252 | ATKDVETEKQKAAEA                       | 2.73 | 0.01 | 1.61 | 0.44 | 0.85 | 1.28 |
| 7563              | 0 | 450450 | ATKHYYT                               | 2.00 | 0.01 | 0.90 | 0.44 | 1.23 | 1.39 |
| 7564              | 0 | 123048 | ATKKAVQG                              | 2.14 | 0.01 | 0.78 | 1.20 | 0.22 | 0.28 |
| 7565              | 0 | 123048 | ATKKAVQG                              | 2.14 | 0.01 | 0.78 | 0.44 | 1.13 | 0.28 |
| ATKKEEEKKGGDRNTGL |   |        |                                       |      |      |      |      |      |      |
| 7566              | 0 | 128338 | SRDKDKKREEMKEVAKK<br>EDDEKVKGERRNTDTR | 3.88 | 0.01 | 0.78 | 0.44 | 1.13 | 0.85 |
| ATKKEEEKKGGDRNTGL |   |        |                                       |      |      |      |      |      |      |
| 7567              | 0 | 128338 | SRDKDKKREEMKEVAKK<br>EDDEKVKGERRNTDTR | 3.88 | 0.01 | 0.78 | 0.44 | 1.13 | 0.85 |
| ATKKEEEKKGGDRNTGL |   |        |                                       |      |      |      |      |      |      |
| 7568              | 0 | 128338 | SRDKDKKREEMKEVAKK<br>EDDEKVKGERRNTDTR | 3.88 | 0.01 | 0.78 | 0.44 | 1.13 | 0.85 |
| 7569              | 0 | 259281 | ATKNTTATTGSDSGS                       | 2.73 | 0.01 | 1.61 | 0.44 | 0.85 | 1.28 |
| 7570              | 0 | 259282 | ATKNTTATTGSDSS                        | 2.71 | 0.01 | 1.61 | 0.44 | 0.85 | 1.28 |
| 7571              | 0 | 259297 | ATKTTTATTGSDGG                        | 2.72 | 0.01 | 1.61 | 0.44 | 0.85 | 1.28 |
| 7572              | 0 | 259298 | ATKTTTATTGSDGS                        | 2.73 | 0.01 | 1.61 | 0.44 | 0.85 | 1.28 |
| 7573              | 0 | 259299 | ATKTTTATTGNSDGG                       | 2.70 | 0.01 | 1.61 | 0.44 | 0.85 | 1.28 |
| 7574              | 0 | 195009 | ATKVAEAEKQKAAE                        | 2.67 | 0.01 | 2.30 | 0.44 | 0.85 | 0.28 |
| 7575              | 0 | 259301 | ATKVAEAEKQKAAEA                       | 2.74 | 0.01 | 1.61 | 0.44 | 0.85 | 1.28 |
| 7576              | 0 | 259304 | ATKVAEAEKRKAAEA                       | 2.74 | 0.01 | 1.61 | 0.44 | 0.85 | 1.28 |
| 7577              | 0 | 106274 | ATLAPNPQSMMV                          | 2.47 | 0.01 | 0.90 | 1.15 | 0.22 | 1.39 |
| 7578              | 0 | 5029   | ATLCSALYVG                            | 2.32 | 0.01 | 2.68 | 0.44 | 0.85 | 0.28 |
| 7579              | 0 | 117760 | ATLDDIKEWLEDKGQ                       | 2.68 | 0.01 | 0.78 | 3.05 | 1.13 | 0.28 |
| 7580              | 0 | 117760 | ATLDDIKEWLEDKGQ                       | 2.68 | 0.01 | 0.78 | 0.44 | 1.13 | 0.28 |
| 7581              | 0 | 5032   | ATLEPKTGPRDGGTV                       | 2.67 | 0.01 | 3.75 | 2.37 | 0.22 | 0.28 |
| 7582              | 0 | 242349 | ATLKRTHDWDPL                          | 2.48 | 0.01 | 3.33 | 1.20 | 0.22 | 0.85 |
| 7583              | 0 | 242350 | ATLKRTHDWDPLHSP                       | 2.68 | 0.01 | 3.32 | 1.20 | 0.22 | 0.85 |

|      |   |        |                                     |      |      |      |      |      |      |
|------|---|--------|-------------------------------------|------|------|------|------|------|------|
| 7584 | 0 | 242350 | ATLKRTHDWDPLHSP                     | 2.68 | 0.01 | 3.32 | 1.20 | 0.22 | 0.85 |
| 7585 | 0 | 242350 | ATLKRTHDWDPLHSP                     | 2.68 | 0.01 | 3.33 | 1.20 | 0.22 | 0.85 |
| 7586 | 0 | 5047   | ATLRKY                              | 1.88 | 0.01 | 2.40 | 0.44 | 0.85 | 0.28 |
| 7587 | 0 | 5048   | ATLRKYCI                            | 2.10 | 0.01 | 2.40 | 0.44 | 0.85 | 0.28 |
| 7588 | 0 | 5048   | ATLRKYCI                            | 2.10 | 0.01 | 2.40 | 0.44 | 0.85 | 0.28 |
| 7589 | 0 | 5048   | ATLRKYCI                            | 2.10 | 0.01 | 2.40 | 0.44 | 0.85 | 0.28 |
| 7590 | 0 | 5048   | ATLRKYCI                            | 2.10 | 0.01 | 2.40 | 0.44 | 0.85 | 0.28 |
| 7591 | 0 | 5049   | ATLSALLPVHPR                        | 2.49 | 0.01 | 0.90 | 0.68 | 0.22 | 1.39 |
| 7592 | 0 | 131365 | ATLVCLI                             | 2.02 | 0.01 | 0.78 | 0.44 | 1.41 | 0.28 |
| 7593 | 0 | 131365 | ATLVCLI                             | 2.02 | 0.01 | 0.78 | 0.44 | 1.13 | 0.28 |
| 7594 | 0 | 131365 | ATLVCLI                             | 2.02 | 0.01 | 0.78 | 0.44 | 1.13 | 1.27 |
| 7595 | 0 | 5054   | ATLVVNRIRGGF                        | 2.45 | 0.01 | 2.40 | 0.44 | 2.39 | 0.28 |
| 7596 | 0 | 5054   | ATLVVNRIRGGF                        | 2.45 | 0.01 | 2.40 | 1.20 | 0.22 | 0.28 |
| 7597 | 0 | 5054   | ATLVVNRIRGGF                        | 2.45 | 0.01 | 2.40 | 0.44 | 1.59 | 0.28 |
| 7598 | 0 | 5054   | ATLVVNRIRGGF                        | 2.45 | 0.01 | 2.40 | 0.44 | 1.59 | 0.28 |
| 7599 | 0 | 5054   | ATLVVNRIRGGF                        | 2.45 | 0.01 | 2.40 | 0.44 | 1.59 | 0.28 |
| 7600 | 0 | 5054   | ATLVVNRIRGGF                        | 2.45 | 0.01 | 2.40 | 0.44 | 1.59 | 0.28 |
| 7601 | 0 | 5054   | ATLVVNRIRGGF                        | 2.45 | 0.01 | 2.40 | 0.44 | 0.85 | 0.28 |
| 7602 | 0 | 135901 | ATLYSVHQRIDVKDTKE<br>ALEKIEEEQNKS   | 3.30 | 0.01 | 0.90 | 0.68 | 0.22 | 0.28 |
| 7603 | 0 | 5057   | ATMILAYAMRVPEVI                     | 2.69 | 0.01 | 2.69 | 0.44 | 0.85 | 0.28 |
| 7604 | 0 | 5059   | ATMPCLSHPSVCKHLY                    | 2.73 | 0.01 | 0.90 | 0.44 | 1.41 | 0.28 |
| 7605 | 0 | 182381 | ATMQERLGMALH                        | 2.48 | 0.01 | 0.90 | 0.68 | 0.22 | 0.28 |
| 7606 | 0 | 101497 | ATMWWEW                             | 2.04 | 0.01 | 0.90 | 0.44 | 0.85 | 1.39 |
| 7607 | 0 | 147530 | ATNFGDIGV                           | 2.21 | 0.01 | 3.24 | 1.12 | 0.22 | 0.28 |
| 7608 | 0 | 5066   | ATNGDTHLGGEDFDN                     | 2.69 | 0.01 | 2.30 | 0.44 | 0.85 | 0.28 |
| 7609 | 0 | 5066   | ATNGDTHLGGEDFDN                     | 2.69 | 0.01 | 2.30 | 0.44 | 1.41 | 0.28 |
| 7610 | 0 | 167215 | ATNGDTHLGGEDFDQR<br>VMEH            | 2.92 | 0.01 | 0.78 | 0.44 | 1.13 | 0.28 |
| 7611 | 0 | 108289 | ATNIFIEGT                           | 2.23 | 0.01 | 0.90 | 0.44 | 1.13 | 1.39 |
| 7612 | 0 | 120414 | ATNLIKSGVA                          | 2.30 | 0.01 | 2.18 | 2.16 | 0.22 | 0.28 |
| 7613 | 0 | 107753 | ATNMKMSNMHTLIGA                     | 2.69 | 0.01 | 0.90 | 0.44 | 1.13 | 1.39 |
| 7614 | 0 | 5072   | ATNREKMI                            | 2.10 | 0.01 | 2.99 | 0.44 | 0.85 | 0.28 |
| 7615 | 0 | 259427 | ATNTSAPAAGGFGSA                     | 2.73 | 0.01 | 1.61 | 0.44 | 0.85 | 1.28 |
| 7616 | 0 | 189045 | ATPAQAQEVHKVVRD<br>WIRKHVDAGIADKVRI | 3.39 | 0.01 | 2.74 | 0.68 | 0.22 | 0.28 |
| 7617 | 0 | 189045 | ATPAQAQEVHKVVRD<br>WIRKHVDAGIADKVRI | 3.39 | 0.01 | 2.74 | 0.68 | 0.22 | 0.28 |
| 7618 | 0 | 189045 | ATPAQAQEVHKVVRD<br>WIRKHVDAGIADKVRI | 3.39 | 0.01 | 2.74 | 0.68 | 0.22 | 0.28 |

|      |   |        |                                     |      |      |      |      |      |      |
|------|---|--------|-------------------------------------|------|------|------|------|------|------|
| 7619 | 0 | 189045 | ATPAQAQEVHKVVRD<br>WIRKHVDAGIADKVRI | 3.39 | 0.01 | 2.74 | 0.68 | 0.22 | 0.28 |
| 7620 | 0 | 189045 | ATPAQAQEVHKVVRD<br>WIRKHVDAGIADKVRI | 3.39 | 0.01 | 2.74 | 0.68 | 0.22 | 0.28 |
| 7621 | 0 | 189045 | ATPAQAQEVHKVVRD<br>WIRKHVDAGIADKVRI | 3.39 | 0.01 | 2.74 | 0.68 | 0.22 | 0.28 |
| 7622 | 0 | 189045 | ATPAQAQEVHKVVRD<br>WIRKHVDAGIADKVRI | 3.39 | 0.01 | 2.74 | 0.68 | 0.22 | 0.28 |
| 7623 | 0 | 189045 | ATPAQAQEVHKVVRD<br>WIRKHVDAGIADKVRI | 3.39 | 0.01 | 2.74 | 0.68 | 0.22 | 0.28 |
| 7624 | 0 | 189045 | ATPAQAQEVHKVVRD<br>WIRKHVDAGIADKVRI | 3.39 | 0.01 | 2.74 | 0.68 | 0.22 | 1.48 |
| 7625 | 0 | 189045 | ATPAQAQEVHKVVRD<br>WIRKHVDAGIADKVRI | 3.39 | 0.01 | 2.74 | 0.68 | 0.22 | 1.34 |
| 7626 | 0 | 189045 | ATPAQAQEVHKVVRD<br>WIRKHVDAGIADKVRI | 3.39 | 0.01 | 2.74 | 0.68 | 0.22 | 0.28 |
| 7627 | 0 | 97900  | ATPEKEEP                            | 2.15 | 0.01 | 2.60 | 1.12 | 0.22 | 0.85 |
| 7628 | 0 | 5076   | ATPERPRL                            | 2.14 | 0.01 | 2.85 | 0.44 | 0.22 | 0.28 |
| 7629 | 0 | 128340 | ATPKKSAKKTPKKAKK                    | 2.80 | 0.01 | 0.78 | 0.44 | 1.13 | 0.28 |
| 7630 | 0 | 128340 | ATPKKSAKKTPKKAKK                    | 2.80 | 0.01 | 0.78 | 0.44 | 1.13 | 0.28 |
| 7631 | 0 | 128340 | ATPKKSAKKTPKKAKK                    | 2.80 | 0.01 | 0.78 | 1.12 | 0.22 | 0.28 |
| 7632 | 0 | 128340 | ATPKKSAKKTPKKAKK                    | 2.80 | 0.01 | 0.78 | 0.44 | 1.13 | 0.28 |
| 7633 | 0 | 128340 | ATPKKSAKKTPKKAKK                    | 2.80 | 0.01 | 0.78 | 1.12 | 0.22 | 0.28 |
| 7634 | 0 | 128340 | ATPKKSAKKTPKKAKK                    | 2.80 | 0.01 | 0.78 | 2.79 | 1.13 | 1.28 |
| 7635 | 0 | 128340 | ATPKKSAKKTPKKAKK                    | 2.80 | 0.01 | 0.78 | 1.81 | 1.41 | 1.28 |
| 7636 | 0 | 128341 | ATPPPGIM                            | 2.12 | 0.01 | 0.78 | 0.44 | 1.13 | 0.28 |
| 7637 | 0 | 139475 | ATPRAHEVSE                          | 2.32 | 0.01 | 0.78 | 0.68 | 0.22 | 0.28 |
| 7638 | 0 | 139475 | ATPRAHEVSE                          | 2.32 | 0.01 | 0.78 | 0.68 | 0.22 | 0.28 |
| 7639 | 0 | 139475 | ATPRAHEVSE                          | 2.32 | 0.01 | 0.78 | 0.68 | 0.22 | 1.66 |
| 7640 | 0 | 139475 | ATPRAHEVSE                          | 2.32 | 0.01 | 0.78 | 0.68 | 0.22 | 1.66 |
| 7641 | 0 | 139475 | ATPRAHEVSE                          | 2.32 | 0.01 | 0.78 | 0.68 | 0.22 | 1.66 |
| 7642 | 0 | 139475 | ATPRAHEVSE                          | 2.32 | 0.01 | 0.78 | 0.68 | 0.22 | 1.66 |

|      |   |        |                                                 |      |      |      |      |      |      |
|------|---|--------|-------------------------------------------------|------|------|------|------|------|------|
| 7643 | 0 | 139475 | ATPRAHEVSE                                      | 2.32 | 0.01 | 0.78 | 0.68 | 0.22 | 1.48 |
| 7644 | 0 | 512182 | ATPSDVPTTPFASAKPDS<br>SVTA                      | 3.09 | 0.01 | 2.24 | 0.44 | 1.41 | 1.28 |
| 7645 | 0 | 99909  | ATPTPTPKAAGS                                    | 2.52 | 0.01 | 2.88 | 0.44 | 1.23 | 0.85 |
| 7646 | 0 | 123049 | ATPVVGAV                                        | 2.17 | 0.01 | 0.78 | 1.20 | 0.22 | 0.28 |
| 7647 | 0 | 5109   | ATPYHPPATP                                      | 2.37 | 0.01 | 2.40 | 1.12 | 0.22 | 0.85 |
| 7648 | 0 | 5109   | ATPYHPPATP                                      | 2.37 | 0.01 | 3.36 | 1.20 | 0.22 | 0.28 |
| 7649 | 0 | 5109   | ATPYHPPATP                                      | 2.37 | 0.01 | 3.36 | 1.20 | 0.22 | 0.28 |
| 7650 | 0 | 5109   | ATPYHPPATP                                      | 2.37 | 0.01 | 3.36 | 1.20 | 0.22 | 0.28 |
| 7651 | 0 | 5109   | ATPYHPPATP                                      | 2.37 | 0.01 | 2.40 | 1.20 | 0.22 | 1.34 |
| 7652 | 0 | 5109   | ATPYHPPATP                                      | 2.37 | 0.01 | 2.40 | 1.20 | 0.22 | 1.34 |
| 7653 | 0 | 5112   | ATQAATVAVTPEETAVA<br>SPP                        | 2.99 | 0.01 | 2.40 | 0.44 | 1.59 | 0.28 |
| 7654 | 0 | 170421 | ATQLTTEKIRELENS                                 | 2.67 | 0.01 | 0.78 | 0.44 | 1.41 | 0.28 |
| 7655 | 0 | 229088 | ATQRKDEAEA                                      | 2.34 | 0.01 | 2.70 | 0.68 | 0.22 | 0.28 |
| 7656 | 0 | 100755 | ATQRLANFLV                                      | 2.32 | 0.01 | 0.78 | 1.20 | 0.22 | 1.48 |
| 7657 | 0 | 80531  | ATQRPQTNESAPRSVAP<br>TTMGPKRIGTGDRNLN<br>VQGTYL | 3.63 | 0.01 | 3.27 | 0.68 | 0.22 | 0.28 |
| 7658 | 0 | 80531  | ATQRPQTNESAPRSVAP<br>TTMGPKRIGTGDRNLN<br>VQGTYL | 3.63 | 0.01 | 3.27 | 1.20 | 0.22 | 0.28 |
| 7659 | 0 | 80531  | ATQRPQTNESAPRSVAP<br>TTMGPKRIGTGDRNLN<br>VQGTYL | 3.63 | 0.01 | 3.27 | 3.16 | 0.22 | 0.28 |
| 7660 | 0 | 80531  | ATQRPQTNESAPRSVAP<br>TTMGPKRIGTGDRNLN<br>VQGTYL | 3.63 | 0.01 | 3.27 | 3.16 | 0.22 | 0.28 |
| 7661 | 0 | 106278 | ATQRRQIEAG                                      | 2.33 | 0.01 | 2.75 | 0.44 | 1.23 | 0.85 |
| 7662 | 0 | 233152 | ATQVEQHHRRTDNDST<br>A                           | 2.80 | 0.01 | 3.28 | 0.68 | 0.22 | 0.28 |
| 7663 | 0 | 233152 | ATQVEQHHRRTDNDST<br>A                           | 2.80 | 0.01 | 3.28 | 0.68 | 0.22 | 2.02 |
| 7664 | 0 | 233152 | ATQVEQHHRRTDNDST<br>A                           | 2.80 | 0.01 | 3.28 | 0.68 | 0.22 | 0.85 |
| 7665 | 0 | 233152 | ATQVEQHHRRTDNDST<br>A                           | 2.80 | 0.01 | 3.28 | 0.68 | 0.22 | 1.75 |
| 7666 | 0 | 137112 | ATR                                             | 1.37 | 4.93 | 2.72 | 2.37 | 0.22 | 3.40 |
| 7667 | 0 | 5127   | ATREEVKAAIP                                     | 2.40 | 0.01 | 3.50 | 2.37 | 1.59 | 0.28 |
| 7668 | 0 | 177480 | ATREGVKAAIP                                     | 2.38 | 0.01 | 3.50 | 2.37 | 0.85 | 0.28 |
| 7669 | 0 | 177480 | ATREGVKAAIP                                     | 2.38 | 0.01 | 3.50 | 2.37 | 0.85 | 0.28 |
| 7670 | 0 | 78932  | ATRKTSERSQPRGRRQPI                              | 2.86 | 0.01 | 3.81 | 0.44 | 0.85 | 0.28 |
| 7671 | 0 | 170424 | ATRLFPDFFTRVALY                                 | 2.70 | 0.01 | 0.78 | 0.44 | 1.13 | 0.28 |
| 7672 | 0 | 140657 | ATRLNNEVL                                       | 2.22 | 0.01 | 2.93 | 1.81 | 0.22 | 0.28 |
| 7673 | 0 | 122274 | ATRIPLDDPRMVPP                                  | 2.67 | 0.01 | 0.90 | 1.15 | 0.22 | 1.39 |
| 7674 | 0 | 5131   | ATRPNAATASAP                                    | 2.53 | 0.01 | 2.30 | 0.68 | 0.22 | 0.85 |

|      |   |       |                                |      |      |      |      |      |      |
|------|---|-------|--------------------------------|------|------|------|------|------|------|
| 7675 | 0 | 5132  | ATRQAQDIQ                      | 2.26 | 0.01 | 2.69 | 0.44 | 0.85 | 0.28 |
| 7676 | 0 | 94786 | ATRRVDDATVAIRSAIN<br>NLIVELIRG | 3.22 | 0.01 | 2.72 | 0.68 | 0.22 | 0.28 |
| 7677 | 0 | 94786 | ATRRVDDATVAIRSAIN<br>NLIVELIRG | 3.22 | 0.01 | 2.72 | 0.68 | 0.22 | 0.28 |
| 7678 | 0 | 94786 | ATRRVDDATVAIRSAIN<br>NLIVELIRG | 3.22 | 0.01 | 2.72 | 0.68 | 0.22 | 1.66 |
| 7679 | 0 | 94786 | ATRRVDDATVAIRSAIN<br>NLIVELIRG | 3.22 | 0.01 | 2.72 | 0.68 | 0.22 | 1.66 |
| 7680 | 0 | 94786 | ATRRVDDATVAIRSAIN<br>NLIVELIRG | 3.22 | 0.01 | 2.72 | 0.68 | 0.22 | 1.66 |
| 7681 | 0 | 94786 | ATRRVDDATVAIRSAIN<br>NLIVELIRG | 3.22 | 0.01 | 2.72 | 0.68 | 0.22 | 1.66 |
| 7682 | 0 | 94786 | ATRRVDDATVAIRSAIN<br>NLIVELIRG | 3.22 | 0.01 | 2.72 | 0.68 | 0.22 | 1.66 |
| 7683 | 0 | 94786 | ATRRVDDATVAIRSAIN<br>NLIVELIRG | 3.22 | 0.01 | 2.72 | 0.68 | 0.22 | 1.66 |
| 7684 | 0 | 94786 | ATRRVDDATVAIRSAIN<br>NLIVELIRG | 3.22 | 0.01 | 2.72 | 0.68 | 0.22 | 1.66 |
| 7685 | 0 | 94786 | ATRRVDDATVAIRSAIN<br>NLIVELIRG | 3.22 | 0.01 | 2.72 | 0.68 | 0.22 | 1.66 |
| 7686 | 0 | 94786 | ATRRVDDATVAIRSAIN<br>NLIVELIRG | 3.22 | 0.01 | 2.72 | 0.68 | 0.22 | 1.66 |
| 7687 | 0 | 94786 | ATRRVDDATVAIRSAIN<br>NLIVELIRG | 3.22 | 0.01 | 2.72 | 0.68 | 0.22 | 1.66 |
| 7688 | 0 | 94786 | ATRRVDDATVAIRSAIN<br>NLIVELIRG | 3.22 | 0.01 | 2.72 | 0.68 | 0.22 | 1.66 |
| 7689 | 0 | 94786 | ATRRVDDATVAIRSAIN<br>NLIVELIRG | 3.22 | 0.01 | 2.72 | 0.68 | 0.22 | 1.66 |
| 7690 | 0 | 94786 | ATRRVDDATVAIRSAIN<br>NLIVELIRG | 3.22 | 0.01 | 2.72 | 0.68 | 0.22 | 1.66 |
| 7691 | 0 | 94786 | ATRRVDDATVAIRSAIN<br>NLIVELIRG | 3.22 | 0.01 | 2.72 | 0.68 | 0.22 | 1.66 |
| 7692 | 0 | 94786 | ATRRVDDATVAIRSAIN<br>NLIVELIRG | 3.22 | 0.01 | 2.72 | 0.68 | 0.22 | 1.66 |
| 7693 | 0 | 94786 | ATRRVDDATVAIRSAIN<br>NLIVELIRG | 3.22 | 0.01 | 2.72 | 0.68 | 0.22 | 1.66 |
| 7694 | 0 | 94786 | ATRRVDDATVAIRSAIN<br>NLIVELIRG | 3.22 | 0.01 | 2.72 | 0.68 | 0.22 | 1.66 |
| 7695 | 0 | 94786 | ATRRVDDATVAIRSAIN<br>NLIVELIRG | 3.22 | 0.01 | 2.72 | 0.68 | 0.22 | 1.66 |
| 7696 | 0 | 94786 | ATRRVDDATVAIRSAIN<br>NLIVELIRG | 3.22 | 0.01 | 2.72 | 0.68 | 0.22 | 1.66 |
| 7697 | 0 | 94786 | ATRRVDDATVAIRSAIN<br>NLIVELIRG | 3.22 | 0.01 | 2.72 | 0.68 | 0.22 | 1.66 |
| 7698 | 0 | 94786 | ATRRVDDATVAIRSAIN<br>NLIVELIRG | 3.22 | 0.01 | 2.72 | 0.68 | 0.22 | 1.66 |

|      |   |        |                                      |      |      |      |      |      |      |
|------|---|--------|--------------------------------------|------|------|------|------|------|------|
| 7699 | 0 | 94786  | ATRRVDDATVAIRSAIN<br>NLIVELIRG       | 3.22 | 0.01 | 2.72 | 0.68 | 0.22 | 1.66 |
| 7700 | 0 | 94786  | ATRRVDDATVAIRSAIN<br>NLIVELIRG       | 3.22 | 0.01 | 2.72 | 0.68 | 0.22 | 1.66 |
| 7701 | 0 | 94786  | ATRRVDDATVAIRSAIN<br>NLIVELIRG       | 3.22 | 0.01 | 2.72 | 0.68 | 0.22 | 1.66 |
| 7702 | 0 | 94786  | ATRRVDDATVAIRSAIN<br>NLIVELIRG       | 3.22 | 0.01 | 2.72 | 0.68 | 0.22 | 1.66 |
| 7703 | 0 | 94786  | ATRRVDDATVAIRSAIN<br>NLIVELIRG       | 3.22 | 0.01 | 2.72 | 0.68 | 0.22 | 1.66 |
| 7704 | 0 | 94786  | ATRRVDDATVAIRSAIN<br>NLIVELIRG       | 3.22 | 0.01 | 2.72 | 0.68 | 0.22 | 1.66 |
| 7705 | 0 | 434590 | ATRSSAVRLRSSVPGVR                    | 2.84 | 4.93 | 0.78 | 0.44 | 1.13 | 0.28 |
| 7706 | 0 | 181892 | ATRYDDIWASTA                         | 2.49 | 0.01 | 0.90 | 3.15 | 0.22 | 0.28 |
| 7707 | 0 | 259659 | ATSAKLGKSVGLTAA                      | 2.72 | 0.01 | 1.61 | 0.44 | 0.85 | 1.28 |
| 7708 | 0 | 5138   | ATSGLVMLCIHGSPVNS<br>YTNTPYTGALGLL   | 3.35 | 0.01 | 2.70 | 0.44 | 0.85 | 0.28 |
| 7709 | 0 | 5138   | ATSGLVMLCIHGSPVNS<br>YTNTPYTGALGLL   | 3.35 | 0.01 | 2.70 | 0.44 | 0.85 | 0.28 |
| 7710 | 0 | 196346 | ATSRFKIIRAYTRIY                      | 2.72 | 0.01 | 3.72 | 1.12 | 0.22 | 0.28 |
| 7711 | 0 | 5147   | ATSRSTMQLASFFTPG                     | 2.75 | 0.01 | 1.96 | 0.44 | 0.85 | 1.27 |
| 7712 | 0 | 5147   | ATSRSTMQLASFFTPG                     | 2.75 | 0.01 | 1.96 | 0.44 | 0.85 | 0.28 |
| 7713 | 0 | 5147   | ATSRSTMQLASFFTPG                     | 2.75 | 0.01 | 1.96 | 0.44 | 0.85 | 0.28 |
| 7714 | 0 | 5147   | ATSRSTMQLASFFTPG                     | 2.75 | 0.01 | 1.96 | 0.44 | 0.85 | 1.27 |
| 7715 | 0 | 5148   | ATSRSTSQLTSLFSFG                     | 2.78 | 0.01 | 1.96 | 0.44 | 0.85 | 0.28 |
| 7716 | 0 | 5148   | ATSRSTSQLTSLFSFG                     | 2.78 | 0.01 | 1.96 | 0.44 | 0.85 | 0.28 |
| 7717 | 0 | 101499 | ATSSNAGADPNTTNLRP<br>TTYDTWC         | 3.13 | 0.01 | 0.78 | 1.12 | 0.22 | 0.85 |
| 7718 | 0 | 101499 | ATSSNAGADPNTTNLRP<br>TTYDTWC         | 3.13 | 0.01 | 0.78 | 1.12 | 0.22 | 1.27 |
| 7719 | 0 | 5153   | ATSSYTFSYIAQE                        | 2.58 | 0.01 | 3.38 | 1.12 | 0.22 | 0.28 |
| 7720 | 0 | 241178 | ATSTQPATSNT                          | 2.45 | 0.01 | 0.90 | 0.68 | 0.22 | 0.28 |
| 7721 | 0 | 259766 | ATTATTGSDSSTAA                       | 2.73 | 0.01 | 1.61 | 0.44 | 0.85 | 1.28 |
| 7722 | 0 | 259767 | ATTATTGESDGSTAV                      | 2.73 | 0.01 | 1.61 | 0.44 | 0.85 | 1.28 |
| 7723 | 0 | 226466 | ATTEEIEVHMPPDTPDR<br>T               | 2.86 | 0.01 | 3.26 | 3.16 | 0.22 | 0.28 |
| 7724 | 0 | 225944 | ATTEEQKLIKINAGFKA<br>ALAAAAGVQPADKYR | 3.42 | 0.01 | 2.53 | 1.20 | 0.22 | 0.28 |
| 7725 | 0 | 225944 | ATTEEQKLIKINAGFKA<br>ALAAAAGVQPADKYR | 3.42 | 0.01 | 2.53 | 1.20 | 0.22 | 0.28 |

|      |   |        |                                      |      |      |      |      |      |      |
|------|---|--------|--------------------------------------|------|------|------|------|------|------|
| 7726 | 0 | 225944 | ATTEEQKLIKINAGFKA<br>ALAAAAGVQPADKYR | 3.42 | 0.01 | 2.53 | 1.20 | 0.22 | 0.28 |
| 7727 | 0 | 225944 | ATTEEQKLIKINAGFKA<br>ALAAAAGVQPADKYR | 3.42 | 0.01 | 2.53 | 1.20 | 0.22 | 0.28 |
| 7728 | 0 | 225944 | ATTEEQKLIKINAGFKA<br>ALAAAAGVQPADKYR | 3.42 | 0.01 | 2.53 | 1.20 | 0.22 | 0.28 |
| 7729 | 0 | 225944 | ATTEEQKLIKINAGFKA<br>ALAAAAGVQPADKYR | 3.42 | 0.01 | 2.53 | 1.20 | 0.22 | 0.28 |
| 7730 | 0 | 225944 | ATTEEQKLIKINAGFKA<br>ALAAAAGVQPADKYR | 3.42 | 0.01 | 2.53 | 1.20 | 0.22 | 0.28 |
| 7731 | 0 | 225944 | ATTEEQKLIKINAGFKA<br>ALAAAAGVQPADKYR | 3.42 | 0.01 | 2.53 | 1.20 | 0.22 | 0.28 |
| 7732 | 0 | 225944 | ATTEEQKLIKINAGFKA<br>ALAAAAGVQPADKYR | 3.42 | 0.01 | 2.53 | 1.20 | 0.22 | 0.28 |
| 7733 | 0 | 225944 | ATTEEQKLIKINAGFKA<br>ALAAAAGVQPADKYR | 3.42 | 0.01 | 2.53 | 1.20 | 0.22 | 0.28 |
| 7734 | 0 | 225944 | ATTEEQKLIKINAGFKA<br>ALAAAAGVQPADKYR | 3.42 | 0.01 | 2.53 | 1.20 | 0.22 | 1.66 |
| 7735 | 0 | 225944 | ATTEEQKLIKINAGFKA<br>ALAAAAGVQPADKYR | 3.42 | 0.01 | 2.53 | 0.44 | 1.23 | 2.35 |
| 7736 | 0 | 225944 | ATTEEQKLIKINAGFKA<br>ALAAAAGVQPADKYR | 3.42 | 0.01 | 2.53 | 1.20 | 0.22 | 2.35 |
| 7737 | 0 | 225944 | ATTEEQKLIKINAGFKA<br>ALAAAAGVQPADKYR | 3.42 | 0.01 | 2.53 | 0.44 | 1.23 | 0.28 |
| 7738 | 0 | 225944 | ATTEEQKLIKINAGFKA<br>ALAAAAGVQPADKYR | 3.42 | 0.01 | 2.53 | 0.44 | 1.23 | 0.28 |
| 7739 | 0 | 225944 | ATTEEQKLIKINAGFKA<br>ALAAAAGVQPADKYR | 3.42 | 0.01 | 2.53 | 0.44 | 1.23 | 0.28 |
| 7740 | 0 | 225944 | ATTEEQKLIKINAGFKA<br>ALAAAAGVQPADKYR | 3.42 | 0.01 | 2.53 | 0.44 | 1.23 | 1.66 |



|      |   |        |                                      |      |      |      |      |      |      |
|------|---|--------|--------------------------------------|------|------|------|------|------|------|
| 7741 | 0 | 225944 | ATTEEQKLIKINAGFKA<br>ALAAAAGVQPADKYR | 3.42 | 0.01 | 2.53 | 0.44 | 1.23 | 1.66 |
| 7742 | 0 | 225944 | ATTEEQKLIKINAGFKA<br>ALAAAAGVQPADKYR | 3.42 | 0.01 | 2.53 | 0.44 | 1.23 | 1.66 |
| 7743 | 0 | 225944 | ATTEEQKLIKINAGFKA<br>ALAAAAGVQPADKYR | 3.42 | 0.01 | 2.53 | 0.44 | 1.23 | 0.28 |
| 7744 | 0 | 225944 | ATTEEQKLIKINAGFKA<br>ALAAAAGVQPADKYR | 3.42 | 0.01 | 2.53 | 0.44 | 1.23 | 0.28 |
| 7745 | 0 | 225944 | ATTEEQKLIKINAGFKA<br>ALAAAAGVQPADKYR | 3.42 | 0.01 | 2.53 | 0.44 | 1.23 | 0.28 |
| 7746 | 0 | 225944 | ATTEEQKLIKINAGFKA<br>ALAAAAGVQPADKYR | 3.42 | 0.01 | 2.53 | 0.44 | 1.23 | 0.28 |
| 7747 | 0 | 225944 | ATTEEQKLIKINAGFKA<br>ALAAAAGVQPADKYR | 3.42 | 0.01 | 2.53 | 0.44 | 1.23 | 0.28 |
| 7748 | 0 | 225944 | ATTEEQKLIKINAGFKA<br>ALAAAAGVQPADKYR | 3.42 | 0.01 | 2.53 | 0.44 | 1.23 | 0.28 |
| 7749 | 0 | 225944 | ATTEEQKLIKINAGFKA<br>ALAAAAGVQPADKYR | 3.42 | 0.01 | 2.53 | 0.44 | 1.23 | 0.28 |
| 7750 | 0 | 5169   | ATTKLAEASQAADES                      | 2.70 | 0.01 | 3.15 | 0.44 | 1.23 | 0.85 |
| 7751 | 0 | 227054 | ATTQNDRMPGPELSG                      | 2.63 | 0.01 | 2.97 | 0.44 | 0.85 | 0.28 |
| 7752 | 0 | 102323 | ATTSPARENIFYMRWLS<br>DLRE            | 2.93 | 0.01 | 3.44 | 0.68 | 0.22 | 0.28 |
| 7753 | 0 | 259866 | ATTSAPAAGGFGSA                       | 2.73 | 0.01 | 1.61 | 0.44 | 0.85 | 1.28 |
| 7754 | 0 | 259869 | ATTTSTPAAGGFGSA                      | 2.74 | 0.01 | 1.61 | 0.44 | 0.85 | 1.28 |
| 7755 | 0 | 5179   | ATTVPAS                              | 2.04 | 0.01 | 0.90 | 0.44 | 0.85 | 1.39 |
| 7756 | 0 | 259928 | ATVIKTTTAATGDSD                      | 2.70 | 0.01 | 1.61 | 0.44 | 0.85 | 1.28 |
| 7757 | 0 | 5196   | ATVLAQALVREGLRN                      | 2.71 | 0.01 | 2.04 | 1.20 | 2.60 | 1.75 |
| 7758 | 0 | 5196   | ATVLAQALVREGLRN                      | 2.71 | 0.01 | 2.04 | 1.81 | 2.60 | 1.75 |
| 7759 | 0 | 5196   | ATVLAQALVREGLRN                      | 2.71 | 0.01 | 2.04 | 1.20 | 0.22 | 0.85 |
| 7760 | 0 | 5196   | ATVLAQALVREGLRN                      | 2.71 | 0.01 | 2.04 | 1.20 | 0.22 | 0.85 |
| 7761 | 0 | 5196   | ATVLAQALVREGLRN                      | 2.71 | 0.01 | 2.04 | 1.20 | 0.22 | 0.85 |
| 7762 | 0 | 5196   | ATVLAQALVREGLRN                      | 2.71 | 0.01 | 2.04 | 1.20 | 0.22 | 1.48 |
| 7763 | 0 | 118275 | ATVLARSIAKEGF                        | 2.52 | 0.01 | 0.78 | 0.44 | 1.74 | 0.85 |
| 7764 | 0 | 118275 | ATVLARSIAKEGF                        | 2.52 | 0.01 | 0.78 | 0.44 | 1.59 | 0.85 |
| 7765 | 0 | 118275 | ATVLARSIAKEGF                        | 2.52 | 0.01 | 0.78 | 0.44 | 1.74 | 0.85 |
| 7766 | 0 | 118275 | ATVLARSIAKEGF                        | 2.52 | 0.01 | 0.78 | 1.20 | 0.22 | 0.85 |
| 7767 | 0 | 118275 | ATVLARSIAKEGF                        | 2.52 | 0.01 | 0.78 | 1.20 | 0.22 | 0.85 |
| 7768 | 0 | 118275 | ATVLARSIAKEGF                        | 2.52 | 0.01 | 0.78 | 1.20 | 0.22 | 0.85 |

|      |   |        |                                  |      |      |      |      |      |      |
|------|---|--------|----------------------------------|------|------|------|------|------|------|
| 7769 | 0 | 118275 | ATVLARSIAKEGF                    | 2.52 | 0.01 | 0.78 | 1.20 | 0.22 | 0.85 |
| 7770 | 0 | 118275 | ATVLARSIAKEGF                    | 2.52 | 0.01 | 0.78 | 1.20 | 0.22 | 1.48 |
| 7771 | 0 | 138304 | ATVQLPQ                          | 2.02 | 0.01 | 0.78 | 1.12 | 0.22 | 0.28 |
| 7772 | 0 | 138304 | ATVQLPQ                          | 2.02 | 0.01 | 0.78 | 0.44 | 1.13 | 0.28 |
| 7773 | 0 | 138304 | ATVQLPQ                          | 2.02 | 0.01 | 0.78 | 0.44 | 1.13 | 0.28 |
| 7774 | 0 | 138304 | ATVQLPQ                          | 2.02 | 0.01 | 0.78 | 0.44 | 1.41 | 0.28 |
| 7775 | 0 | 138304 | ATVQLPQ                          | 2.02 | 0.01 | 0.78 | 0.44 | 1.13 | 1.27 |
| 7776 | 0 | 138304 | ATVQLPQ                          | 2.02 | 0.01 | 0.78 | 1.12 | 0.22 | 1.48 |
| 7777 | 0 | 138304 | ATVQLPQ                          | 2.02 | 0.01 | 0.78 | 1.12 | 0.22 | 0.28 |
| 7778 | 0 | 138304 | ATVQLPQ                          | 2.02 | 0.01 | 0.78 | 1.12 | 0.22 | 0.28 |
| 7779 | 0 | 5205   | ATVSSNGD                         | 2.11 | 0.01 | 2.99 | 0.44 | 0.85 | 0.28 |
| 7780 | 0 | 5206   | ATVSSQSF                         | 2.14 | 0.01 | 2.21 | 1.12 | 0.22 | 0.28 |
| 7781 | 0 | 5206   | ATVSSQSF                         | 2.14 | 0.01 | 2.21 | 0.44 | 0.85 | 0.28 |
| 7782 | 0 | 5207   | ATVSSQSFR                        | 2.31 | 0.01 | 2.21 | 1.12 | 0.22 | 0.28 |
| 7783 | 0 | 5207   | ATVSSQSFR                        | 2.31 | 0.01 | 2.21 | 1.12 | 0.22 | 0.28 |
| 7784 | 0 | 131367 | ATWSPSKARLHLQGRSN<br>AWR         | 2.95 | 0.01 | 0.78 | 0.44 | 2.35 | 0.28 |
| 7785 | 0 | 5214   | ATWSRPIYFDIT                     | 2.45 | 0.01 | 0.90 | 0.44 | 1.59 | 0.28 |
| 7786 | 0 | 227055 | ATWTDDTPTGSNGAL                  | 2.70 | 0.01 | 2.97 | 0.44 | 1.59 | 0.28 |
| 7787 | 0 | 234036 | ATWTPN                           | 1.90 | 0.01 | 0.90 | 0.68 | 0.22 | 0.28 |
| 7788 | 0 | 5218   | ATWVCGPCT                        | 2.23 | 0.01 | 0.90 | 1.15 | 2.26 | 0.28 |
| 7789 | 0 | 144873 | ATWVDLVLEGDSCLTI                 | 2.73 | 0.01 | 3.04 | 0.68 | 0.22 | 1.48 |
| 7790 | 0 | 144873 | ATWVDLVLEGDSCLTI                 | 2.73 | 0.01 | 3.04 | 0.68 | 0.22 | 1.48 |
| 7791 | 0 | 144873 | ATWVDLVLEGDSCLTI                 | 2.73 | 0.01 | 3.04 | 0.68 | 0.22 | 1.48 |
| 7792 | 0 | 144873 | ATWVDLVLEGDSCLTI                 | 2.73 | 0.01 | 3.04 | 0.68 | 0.22 | 0.28 |
| 7793 | 0 | 144873 | ATWVDLVLEGDSCLTI                 | 2.73 | 0.01 | 3.04 | 0.68 | 0.22 | 0.28 |
| 7794 | 0 | 144873 | ATWVDLVLEGDSCLTI                 | 2.73 | 0.01 | 3.04 | 0.68 | 0.22 | 1.48 |
| 7795 | 0 | 144873 | ATWVDLVLEGDSCLTI                 | 2.73 | 0.01 | 3.04 | 0.68 | 0.22 | 0.28 |
| 7796 | 0 | 133525 | ATWYEWNPWVS                      | 2.46 | 0.01 | 0.90 | 0.44 | 0.85 | 1.39 |
| 7797 | 0 | 5219   | ATYDISRVEHAIVYHIYST<br>GRLSSYYYP | 3.27 | 0.01 | 2.88 | 0.68 | 0.22 | 0.28 |
| 7798 | 0 | 5219   | ATYDISRVEHAIVYHIYST<br>GRLSSYYYP | 3.27 | 0.01 | 2.88 | 0.68 | 0.22 | 1.48 |
| 7799 | 0 | 5219   | ATYDISRVEHAIVYHIYST<br>GRLSSYYYP | 3.27 | 0.01 | 2.88 | 0.68 | 0.22 | 1.48 |
| 7800 | 0 | 97902  | ATYEAALKQY                       | 2.33 | 0.01 | 2.39 | 0.68 | 0.22 | 0.28 |
| 7801 | 0 | 95263  | ATYHLYNSQD                       | 2.29 | 0.01 | 2.60 | 0.44 | 1.23 | 0.85 |
| 7802 | 0 | 95263  | ATYHLYNSQD                       | 2.29 | 0.01 | 2.60 | 1.12 | 0.22 | 0.85 |
| 7803 | 0 | 95263  | ATYHLYNSQD                       | 2.29 | 0.01 | 2.60 | 0.44 | 1.23 | 0.85 |
| 7804 | 0 | 78107  | ATYQSEYLAHRRIPP                  | 2.64 | 0.01 | 2.14 | 1.12 | 0.22 | 1.34 |
| 7805 | 0 | 78107  | ATYQSEYLAHRRIPP                  | 2.64 | 0.01 | 2.14 | 1.12 | 0.22 | 0.28 |
| 7806 | 0 | 78107  | ATYQSEYLAHRRIPP                  | 2.64 | 0.01 | 2.14 | 1.12 | 0.22 | 0.85 |
| 7807 | 0 | 161204 | ATYSRCGSGPWITPRCM<br>VDY         | 2.93 | 0.01 | 2.45 | 0.68 | 0.22 | 0.28 |
| 7808 | 0 | 168234 | ATYTTDAQSYHM                     | 2.49 | 0.01 | 0.90 | 0.44 | 0.85 | 1.39 |
| 7809 | 0 | 5232   | ATYTTGGAQS                       | 2.34 | 0.01 | 1.72 | 3.27 | 0.22 | 1.27 |
| 7810 | 0 | 5232   | ATYTTGGAQS                       | 2.34 | 0.01 | 1.72 | 3.27 | 0.22 | 1.66 |

|      |   |      |                                     |      |      |      |      |      |      |
|------|---|------|-------------------------------------|------|------|------|------|------|------|
| 7811 | 0 | 5232 | ATYTTGGAQS                          | 2.34 | 0.01 | 1.72 | 3.27 | 0.22 | 1.66 |
| 7812 | 0 | 5232 | ATYTTGGAQS                          | 2.34 | 0.01 | 1.72 | 3.27 | 0.22 | 1.66 |
| 7813 | 0 | 5233 | ATYTTGGAQSHTLRGVT<br>SFFSPGASQKIQLI | 3.37 | 0.01 | 1.72 | 0.68 | 0.22 | 0.28 |
| 7814 | 0 | 5233 | ATYTTGGAQSHTLRGVT<br>SFFSPGASQKIQLI | 3.37 | 0.01 | 1.72 | 2.74 | 0.22 | 1.66 |
| 7815 | 0 | 5233 | ATYTTGGAQSHTLRGVT<br>SFFSPGASQKIQLI | 3.37 | 0.01 | 1.72 | 2.74 | 0.22 | 1.66 |
| 7816 | 0 | 5233 | ATYTTGGAQSHTLRGVT<br>SFFSPGASQKIQLI | 3.37 | 0.01 | 1.72 | 3.27 | 0.22 | 0.28 |
| 7817 | 0 | 5233 | ATYTTGGAQSHTLRGVT<br>SFFSPGASQKIQLI | 3.37 | 0.01 | 1.72 | 2.74 | 0.22 | 0.28 |
| 7818 | 0 | 5233 | ATYTTGGAQSHTLRGVT<br>SFFSPGASQKIQLI | 3.37 | 0.01 | 1.72 | 0.44 | 0.85 | 0.28 |
| 7819 | 0 | 5233 | ATYTTGGAQSHTLRGVT<br>SFFSPGASQKIQLI | 3.37 | 0.01 | 1.72 | 1.15 | 0.22 | 0.28 |
| 7820 | 0 | 5233 | ATYTTGGAQSHTLRGVT<br>SFFSPGASQKIQLI | 3.37 | 0.01 | 1.72 | 2.74 | 0.22 | 2.02 |
| 7821 | 0 | 5234 | ATYTTGGSAAKTAHRLA<br>SFFTVGPKQD     | 3.22 | 0.01 | 1.72 | 0.44 | 0.85 | 0.28 |
| 7822 | 0 | 5234 | ATYTTGGSAAKTAHRLA<br>SFFTVGPKQD     | 3.22 | 0.01 | 1.72 | 0.44 | 0.85 | 0.28 |
| 7823 | 0 | 5234 | ATYTTGGSAAKTAHRLA<br>SFFTVGPKQD     | 3.22 | 0.01 | 1.72 | 0.68 | 0.22 | 0.28 |
| 7824 | 0 | 5234 | ATYTTGGSAAKTAHRLA<br>SFFTVGPKQD     | 3.22 | 0.01 | 1.72 | 0.68 | 0.22 | 0.28 |
| 7825 | 0 | 5234 | ATYTTGGSAAKTAHRLA<br>SFFTVGPKQD     | 3.22 | 0.01 | 1.72 | 0.44 | 0.85 | 0.28 |
| 7826 | 0 | 5234 | ATYTTGGSAAKTAHRLA<br>SFFTVGPKQD     | 3.22 | 0.01 | 1.72 | 0.44 | 0.85 | 0.28 |
| 7827 | 0 | 5234 | ATYTTGGSAAKTAHRLA<br>SFFTVGPKQD     | 3.22 | 0.01 | 1.72 | 1.20 | 0.22 | 0.28 |
| 7828 | 0 | 5234 | ATYTTGGSAAKTAHRLA<br>SFFTVGPKQD     | 3.22 | 0.01 | 1.72 | 1.12 | 0.22 | 0.28 |
| 7829 | 0 | 5234 | ATYTTGGSAAKTAHRLA<br>SFFTVGPKQD     | 3.22 | 0.01 | 1.72 | 1.12 | 0.22 | 0.28 |
| 7830 | 0 | 5235 | ATYTTGGTAGHYTSKFA<br>SLFSSGSSQKIQLI | 3.41 | 0.01 | 1.72 | 2.74 | 0.22 | 0.28 |
| 7831 | 0 | 5235 | ATYTTGGTAGHYTSKFA<br>SLFSSGSSQKIQLI | 3.41 | 0.01 | 1.72 | 3.27 | 0.22 | 0.28 |
| 7832 | 0 | 5235 | ATYTTGGTAGHYTSKFA<br>SLFSSGSSQKIQLI | 3.41 | 0.01 | 1.72 | 3.27 | 0.22 | 0.28 |
| 7833 | 0 | 5241 | AVAADNSSTKNLTSNLT<br>LCELNVTGFQQHF  | 3.34 | 0.01 | 0.90 | 1.81 | 0.22 | 0.28 |
| 7834 | 0 | 5241 | AVAADNSSTKNLTSNLT<br>LCELNVTGFQQHF  | 3.34 | 0.01 | 0.90 | 0.68 | 0.22 | 0.28 |

|      |   |        |                                        |      |      |      |      |      |      |
|------|---|--------|----------------------------------------|------|------|------|------|------|------|
| 7835 | 0 | 5244   | AVAASNNPELTTLTAALS<br>GQ               | 2.96 | 0.01 | 3.59 | 2.79 | 0.22 | 0.28 |
| 7836 | 0 | 119109 | AVAATASIAGAPTQYPP<br>GRGTPPPPVGRATPPPG | 3.50 | 0.01 | 0.78 | 0.44 | 1.13 | 0.85 |
| 7837 | 0 | 102324 | AVADICKKYKIW                           | 2.50 | 0.01 | 0.78 | 0.44 | 1.13 | 0.28 |
| 7838 | 0 | 5247   | AVADVTPKQLKAAL                         | 2.64 | 0.01 | 3.28 | 0.44 | 1.23 | 0.85 |
| 7839 | 0 | 5249   | AVAEAEGG                               | 2.15 | 0.01 | 2.04 | 0.44 | 0.85 | 0.28 |
| 7840 | 0 | 131830 | AVAEELHRP                              | 2.33 | 0.01 | 0.78 | 1.12 | 0.22 | 1.48 |
| 7841 | 0 | 120415 | AVAGRGRGRGRGRGR                        | 2.76 | 0.01 | 0.78 | 3.01 | 0.22 | 0.28 |
| 7842 | 0 | 192898 | AVAKDLVALNRDEKTIV<br>AGL               | 2.97 | 0.01 | 3.47 | 2.00 | 0.22 | 0.28 |
| 7843 | 0 | 5261   | AVALADLGDFENSA                         | 2.64 | 0.01 | 3.63 | 1.20 | 0.22 | 0.28 |
| 7844 | 0 | 5261   | AVALADLGDFENSA                         | 2.64 | 0.01 | 3.63 | 1.20 | 0.22 | 0.85 |
| 7845 | 0 | 5261   | AVALADLGDFENSA                         | 2.64 | 0.01 | 3.63 | 1.20 | 0.22 | 1.34 |
| 7846 | 0 | 120416 | AVALREYRKMDIPA                         | 2.66 | 0.01 | 1.75 | 4.08 | 0.22 | 0.28 |
| 7847 | 0 | 120416 | AVALREYRKMDIPA                         | 2.66 | 0.01 | 1.75 | 4.08 | 0.22 | 0.85 |
| 7848 | 0 | 120416 | AVALREYRKMDIPA                         | 2.66 | 0.01 | 1.75 | 4.08 | 0.22 | 0.85 |
| 7849 | 0 | 120416 | AVALREYRKMDIPA                         | 2.66 | 0.01 | 1.75 | 4.08 | 0.22 | 0.85 |
| 7850 | 0 | 512224 | AVALTVLGAGFANQT                        | 2.72 | 0.01 | 2.24 | 0.44 | 1.41 | 1.28 |
| 7851 | 0 | 5264   | AVAPAHDTPPVPDVDS<br>RGAILRRQYNLSTS     | 3.34 | 0.01 | 2.53 | 0.44 | 0.85 | 0.28 |
| 7852 | 0 | 5264   | AVAPAHDTPPVPDVDS<br>RGAILRRQYNLSTS     | 3.34 | 0.01 | 2.53 | 0.44 | 0.85 | 0.28 |
| 7853 | 0 | 5270   | AVARSAQSLTSLFVSG                       | 2.77 | 0.01 | 1.96 | 0.44 | 0.85 | 0.28 |
| 7854 | 0 | 5270   | AVARSAQSLTSLFVSG                       | 2.77 | 0.01 | 1.96 | 0.44 | 0.85 | 0.28 |
| 7855 | 0 | 5274   | AVASPPATASVESSLPA<br>AA                | 2.99 | 0.01 | 2.40 | 0.44 | 1.59 | 0.28 |
| 7856 | 0 | 5275   | AVASRRRPTTAGAAPLT<br>AVAPAHDT          | 3.19 | 0.01 | 2.53 | 0.44 | 0.85 | 0.28 |
| 7857 | 0 | 5275   | AVASRRRPTTAGAAPLT<br>AVAPAHDT          | 3.19 | 0.01 | 2.53 | 0.44 | 0.85 | 0.28 |
| 7858 | 0 | 5283   | AVAVSPPAAAGDLVGP<br>GCAE               | 2.98 | 0.01 | 3.59 | 2.79 | 0.22 | 0.28 |
| 7859 | 0 | 5284   | AVAYPVSAYVPAWVS                        | 2.75 | 0.01 | 0.90 | 0.68 | 0.22 | 1.39 |
| 7860 | 0 | 5286   | AVCLGGLIGIPALIC                        | 2.73 | 0.01 | 2.43 | 0.44 | 1.59 | 0.28 |
| 7861 | 0 | 116927 | AVCRTSMCSIQSAPP                        | 2.67 | 0.01 | 0.78 | 0.44 | 1.13 | 0.28 |
| 7862 | 0 | 116927 | AVCRTSMCSIQSAPP                        | 2.67 | 0.01 | 0.78 | 0.44 | 1.41 | 0.28 |
| 7863 | 0 | 230446 | AVCSSSPSVVVSART                        | 2.71 | 0.01 | 0.78 | 0.44 | 1.13 | 0.28 |
| 7864 | 0 | 260127 | AVDADTAALAALEV                         | 2.73 | 0.01 | 1.61 | 0.44 | 0.85 | 1.28 |
| 7865 | 0 | 107092 | AVDAVIAELKKQSKP                        | 2.69 | 0.01 | 2.19 | 2.97 | 0.22 | 0.28 |
| 7866 | 0 | 119775 | AVDNDGKTINKIDID                        | 2.72 | 0.01 | 0.78 | 2.04 | 0.22 | 0.28 |
| 7867 | 0 | 450452 | AVDPQYG                                | 1.99 | 0.01 | 0.90 | 0.44 | 1.23 | 1.39 |
| 7868 | 0 | 5298   | AVDSAARIHDFRYSQLA<br>KLG               | 2.93 | 0.01 | 2.75 | 0.44 | 0.85 | 0.85 |

|      |   |        |                              |      |      |      |      |      |      |
|------|---|--------|------------------------------|------|------|------|------|------|------|
| 7869 | 0 | 5303   | AVDTGSGGGGQPHDTA<br>PRGARKKQ | 3.13 | 0.01 | 2.43 | 0.44 | 1.59 | 0.28 |
| 7870 | 0 | 5303   | AVDTGSGGGGQPHDTA<br>PRGARKKQ | 3.13 | 0.01 | 2.48 | 0.44 | 1.59 | 0.28 |
| 7871 | 0 | 5303   | AVDTGSGGGGQPHDTA<br>PRGARKKQ | 3.13 | 0.01 | 2.48 | 0.44 | 1.59 | 0.28 |
| 7872 | 0 | 5303   | AVDTGSGGGGQPHDTA<br>PRGARKKQ | 3.13 | 0.01 | 2.48 | 0.44 | 0.85 | 0.28 |
| 7873 | 0 | 5303   | AVDTGSGGGGQPHDTA<br>PRGARKKQ | 3.13 | 0.01 | 2.48 | 0.44 | 0.85 | 0.28 |
| 7874 | 0 | 111130 | AVDTGVLGTSYPPSA              | 2.70 | 0.01 | 3.20 | 1.12 | 0.22 | 0.85 |
| 7875 | 0 | 137809 | AVDVFADGQPKL                 | 2.48 | 0.01 | 2.21 | 1.20 | 0.22 | 0.28 |
| 7876 | 0 | 260183 | AVEAEKRKAAEATKA              | 2.74 | 0.01 | 1.61 | 0.44 | 0.85 | 1.28 |
| 7877 | 0 | 260184 | AVEAEKRKAAEATKV              | 2.74 | 0.01 | 1.61 | 0.44 | 0.85 | 1.28 |
| 7878 | 0 | 118276 | AVEEGIVLGGGCA                | 2.57 | 0.01 | 0.78 | 0.44 | 1.74 | 0.85 |
| 7879 | 0 | 121161 | AVEKVKRTKDE                  | 2.43 | 0.01 | 0.78 | 0.44 | 1.41 | 0.28 |
| 7880 | 0 | 121161 | AVEKVKRTKDE                  | 2.43 | 0.01 | 0.78 | 1.12 | 0.22 | 0.28 |
| 7881 | 0 | 165590 | AVESNDK                      | 1.99 | 0.01 | 0.90 | 0.44 | 1.23 | 1.39 |
| 7882 | 0 | 165590 | AVESNDK                      | 1.99 | 0.01 | 0.90 | 0.44 | 1.23 | 1.39 |
| 7883 | 0 | 260285 | AVETEKQKAAEATKV              | 2.74 | 0.01 | 1.61 | 0.44 | 0.85 | 1.28 |
| 7884 | 0 | 260286 | AVETEKQRAAEATKV              | 2.73 | 0.01 | 1.61 | 0.44 | 0.85 | 1.28 |
| 7885 | 0 | 260287 | AVETEKRKAAEATKA              | 2.74 | 0.01 | 1.61 | 0.44 | 0.85 | 1.28 |
| 7886 | 0 | 260288 | AVETEKRKAAEATKI              | 2.73 | 0.01 | 1.61 | 0.44 | 0.85 | 1.28 |
| 7887 | 0 | 260289 | AVETEKRKAAEATKV              | 2.74 | 0.01 | 1.61 | 0.44 | 0.85 | 1.28 |
| 7888 | 0 | 5310   | AVEVDPDDVN                   | 2.34 | 3.55 | 2.56 | 0.44 | 0.85 | 0.28 |
| 7889 | 0 | 5311   | AVEVDPDDVN                   | 2.34 | 0.01 | 4.08 | 2.69 | 0.22 | 0.28 |
| 7890 | 0 | 5312   | AVEVDPDDVKNKNTL              | 2.62 | 0.01 | 2.56 | 0.44 | 0.85 | 0.28 |
| 7891 | 0 | 509341 | AVEWGAGMPSYS                 | 2.48 | 0.01 | 0.90 | 0.68 | 0.22 | 0.28 |
| 7892 | 0 | 149269 | AVFDEGKSW                    | 2.18 | 0.01 | 0.78 | 0.44 | 1.93 | 2.66 |
| 7893 | 0 | 149642 | AVFYTTN                      | 2.01 | 0.01 | 0.90 | 2.37 | 0.22 | 0.28 |
| 7894 | 0 | 152433 | AVGADESvvk                   | 2.33 | 0.01 | 2.18 | 2.16 | 0.22 | 0.28 |
| 7895 | 0 | 118752 | AVGADESvvKEA                 | 2.51 | 0.01 | 2.18 | 0.44 | 0.22 | 0.28 |
| 7896 | 0 | 108291 | AVGADESvvKEAHREVI<br>NS      | 2.91 | 0.01 | 2.18 | 0.68 | 0.22 | 0.28 |
| 7897 | 0 | 108291 | AVGADESvvKEAHREVI<br>NS      | 2.91 | 0.01 | 2.18 | 0.68 | 0.22 | 0.28 |
| 7898 | 0 | 108291 | AVGADESvvKEAHREVI<br>NS      | 2.91 | 0.01 | 2.18 | 0.68 | 0.22 | 0.85 |
| 7899 | 0 | 108291 | AVGADESvvKEAHREVI<br>NS      | 2.91 | 0.01 | 2.18 | 0.68 | 0.22 | 1.34 |
| 7900 | 0 | 108291 | AVGADESvvKEAHREVI<br>NS      | 2.91 | 0.01 | 2.18 | 0.68 | 0.22 | 1.75 |
| 7901 | 0 | 108291 | AVGADESvvKEAHREVI<br>NS      | 2.91 | 0.01 | 2.18 | 0.68 | 0.22 | 0.28 |
| 7902 | 0 | 111133 | AVGGEPLDLQGLVQN              | 2.70 | 0.01 | 3.81 | 4.33 | 0.85 | 0.85 |
| 7903 | 0 | 5344   | AVGGYAISIS                   | 2.35 | 4.45 | 2.70 | 0.44 | 0.85 | 0.28 |

|      |   |        |                              |      |      |      |      |      |      |
|------|---|--------|------------------------------|------|------|------|------|------|------|
| 7904 | 0 | 5346   | AVGIMTVTMTFKLGPRK<br>ATG     | 2.97 | 0.01 | 2.75 | 0.44 | 0.85 | 0.85 |
| 7905 | 0 | 142389 | AVGNSRGACLAC                 | 2.50 | 0.01 | 0.90 | 0.68 | 0.22 | 0.85 |
| 7906 | 0 | 5350   | AVGPGRWDED                   | 2.31 | 0.01 | 2.04 | 0.68 | 0.22 | 0.28 |
| 7907 | 0 | 5350   | AVGPGRWDED                   | 2.31 | 0.01 | 2.04 | 0.68 | 0.22 | 0.28 |
| 7908 | 0 | 5352   | AVGPN                        | 1.74 | 0.01 | 1.66 | 1.15 | 0.22 | 0.28 |
| 7909 | 0 | 5352   | AVGPN                        | 1.74 | 0.01 | 1.66 | 1.15 | 0.22 | 1.48 |
| 7910 | 0 | 78934  | AVGQKVTLKWDAPNGT<br>PNPN     | 2.97 | 0.01 | 2.84 | 0.44 | 0.85 | 0.28 |
| 7911 | 0 | 120418 | AVGTYNTRKYDC                 | 2.45 | 0.01 | 2.19 | 1.12 | 0.22 | 0.28 |
| 7912 | 0 | 120418 | AVGTYNTRKYDC                 | 2.45 | 0.01 | 2.19 | 1.12 | 0.22 | 0.28 |
| 7913 | 0 | 5356   | AVGYRASRTVSLFSPG             | 2.75 | 0.01 | 3.10 | 0.44 | 0.85 | 0.28 |
| 7914 | 0 | 5356   | AVGYRASRTVSLFSPG             | 2.75 | 0.01 | 3.10 | 0.44 | 0.85 | 0.28 |
| 7915 | 0 | 118277 | AVHGERLHLFCEKDGKA<br>LCWVCAQ | 3.13 | 0.01 | 0.78 | 0.44 | 1.13 | 0.28 |
| 7916 | 0 | 118277 | AVHGERLHLFCEKDGKA<br>LCWVCAQ | 3.13 | 0.01 | 0.78 | 0.44 | 1.13 | 0.28 |
| 7917 | 0 | 5367   | AVIEPIVAT                    | 2.26 | 0.01 | 2.59 | 0.44 | 0.85 | 0.28 |
| 7918 | 0 | 5368   | AVIEPIVATNWQKL               | 2.60 | 0.01 | 2.59 | 0.44 | 0.85 | 0.28 |
| 7919 | 0 | 5368   | AVIEPIVATNWQKL               | 2.60 | 0.01 | 2.59 | 0.44 | 1.41 | 0.28 |
| 7920 | 0 | 5368   | AVIEPIVATNWQKL               | 2.60 | 0.01 | 2.59 | 0.44 | 0.85 | 0.28 |
| 7921 | 0 | 5368   | AVIEPIVATNWQKL               | 2.60 | 0.01 | 2.59 | 0.44 | 0.85 | 0.28 |
| 7922 | 0 | 5380   | AVILLMCAVHPTLV               | 2.63 | 0.01 | 2.41 | 0.44 | 1.41 | 0.28 |
| 7923 | 0 | 5380   | AVILLMCAVHPTLV               | 2.63 | 0.01 | 2.41 | 0.44 | 0.85 | 0.28 |
| 7924 | 0 | 5380   | AVILLMCAVHPTLV               | 2.63 | 0.01 | 2.41 | 0.44 | 0.85 | 0.28 |
| 7925 | 0 | 142545 | AVILNDNFVTKATAL              | 2.71 | 0.01 | 3.06 | 2.13 | 0.22 | 0.28 |
| 7926 | 0 | 142545 | AVILNDNFVTKATAL              | 2.71 | 0.01 | 3.06 | 0.68 | 0.22 | 0.28 |
| 7927 | 0 | 5385   | AVIRGKKGSG                   | 2.32 | 0.01 | 3.85 | 0.44 | 1.23 | 0.85 |
| 7928 | 0 | 5387   | AVIRRANNVLKNEMKRY<br>KGL     | 2.96 | 0.01 | 2.67 | 0.44 | 0.85 | 0.28 |
| 7929 | 0 | 5387   | AVIRRANNVLKNEMKRY<br>KGL     | 2.96 | 0.01 | 2.67 | 1.12 | 0.22 | 0.28 |
| 7930 | 0 | 5387   | AVIRRANNVLKNEMKRY<br>KGL     | 2.96 | 0.01 | 2.67 | 1.12 | 0.22 | 0.28 |
| 7931 | 0 | 5387   | AVIRRANNVLKNEMKRY<br>KGL     | 2.96 | 0.01 | 2.67 | 1.12 | 0.22 | 0.85 |
| 7932 | 0 | 5391   | AVITWRALNK                   | 2.30 | 0.01 | 2.60 | 0.44 | 1.23 | 0.85 |
| 7933 | 0 | 260505 | AVKATTATTGSDSDS              | 2.71 | 0.01 | 1.61 | 0.44 | 0.85 | 1.28 |
| 7934 | 0 | 260506 | AVKATTATTGESDGS              | 2.71 | 0.01 | 1.61 | 0.44 | 0.85 | 1.28 |
| 7935 | 0 | 5396   | AVKDSKSRG                    | 2.23 | 0.01 | 3.28 | 0.44 | 1.23 | 0.85 |
| 7936 | 0 | 243879 | AVKGFR                       | 1.88 | 0.01 | 0.78 | 0.44 | 2.39 | 0.28 |
| 7937 | 0 | 243879 | AVKGFR                       | 1.88 | 0.01 | 0.78 | 0.44 | 2.39 | 0.28 |
| 7938 | 0 | 243879 | AVKGFR                       | 1.88 | 0.01 | 0.78 | 0.44 | 1.23 | 0.28 |
| 7939 | 0 | 243879 | AVKGFR                       | 1.88 | 0.01 | 0.78 | 0.44 | 1.23 | 0.28 |
| 7940 | 0 | 130447 | AVKIQAAFRGHIAREE             | 2.73 | 0.01 | 0.78 | 0.44 | 1.41 | 0.28 |
| 7941 | 0 | 229091 | AVKKYEAAKKE                  | 2.45 | 0.01 | 2.70 | 0.68 | 0.22 | 0.28 |
| 7942 | 0 | 97913  | AVKQGVVNLVKYAK               | 2.65 | 0.01 | 2.71 | 1.15 | 0.22 | 1.48 |

|      |   |        |                                                                            |      |      |      |      |      |      |
|------|---|--------|----------------------------------------------------------------------------|------|------|------|------|------|------|
| 7943 | 0 | 97913  | AVKQGVVNLVKYAK                                                             | 2.65 | 0.01 | 2.71 | 2.13 | 0.22 | 0.28 |
| 7944 | 0 | 97913  | AVKQGVVNLVKYAK                                                             | 2.65 | 0.01 | 2.71 | 2.13 | 0.22 | 0.28 |
| 7945 | 0 | 120419 | AVKYTGTYGG                                                                 | 2.33 | 0.01 | 2.18 | 2.16 | 0.22 | 0.28 |
| 7946 | 0 | 5423   | AVLEDPYILLVSSKVS                                                           | 2.74 | 0.01 | 2.04 | 2.04 | 0.22 | 0.28 |
| 7947 | 0 | 149644 | AVLELQPLDRPTWQV                                                            | 2.68 | 0.01 | 4.03 | 1.12 | 0.22 | 0.28 |
| 7948 | 0 | 5429   | AVLFFGRCVS                                                                 | 2.30 | 0.01 | 2.25 | 0.68 | 0.22 | 0.85 |
| 7949 | 0 | 97219  | AVLGAGNMA                                                                  | 2.26 | 0.01 | 3.13 | 1.12 | 0.22 | 0.28 |
| 7950 | 0 | 140830 | AVLGHDEAAYSK                                                               | 2.45 | 0.01 | 3.01 | 1.12 | 0.22 | 0.28 |
| 7951 | 0 | 140831 | AVLGHDEAAYSKNRRAY<br>LAY                                                   | 2.94 | 0.01 | 3.01 | 1.12 | 0.22 | 0.28 |
| 7952 | 0 | 5431   | AVLHTA                                                                     | 1.91 | 0.01 | 2.40 | 0.44 | 0.85 | 0.28 |
| 7953 | 0 | 112461 | AVLKLMGRGTKF                                                               | 2.48 | 0.01 | 1.60 | 2.04 | 0.22 | 0.28 |
| 7954 | 0 | 112461 | AVLKLMGRGTKF<br>AVLKYENNVNMNIRQFN                                          | 2.48 | 0.01 | 1.60 | 2.04 | 0.22 | 0.28 |
| 7955 | 0 | 233361 | CSPHPYWLPNFMDFVT<br>WSLP                                                   | 3.48 | 0.01 | 0.78 | 4.93 | 0.22 | 1.39 |
| 7956 | 0 | 5437   | AVLLGACS                                                                   | 2.14 | 0.01 | 2.21 | 1.12 | 0.22 | 0.28 |
| 7957 | 0 | 5437   | AVLLGACS                                                                   | 2.14 | 0.01 | 2.21 | 0.44 | 0.85 | 0.28 |
| 7958 | 0 | 5438   | AVLLGACSF                                                                  | 2.33 | 0.01 | 2.21 | 1.12 | 0.22 | 0.28 |
| 7959 | 0 | 108825 | AVLMLPVWACLS                                                               | 2.50 | 0.01 | 0.90 | 1.15 | 0.22 | 1.39 |
| 7960 | 0 | 108825 | AVLMLPVWACLS                                                               | 2.50 | 0.01 | 0.90 | 1.15 | 0.22 | 0.85 |
| 7961 | 0 | 5442   | AVLNLTW                                                                    | 2.13 | 0.01 | 3.06 | 1.12 | 0.22 | 0.28 |
| 7962 | 0 | 115036 | AVLPVLLQITVGLVFLCL<br>Q                                                    | 2.97 | 0.01 | 0.78 | 4.15 | 0.22 | 0.28 |
| 7963 | 0 | 127609 | AVLRAPQNPPPPGPQ                                                            | 2.70 | 0.01 | 4.23 | 0.44 | 1.13 | 0.85 |
| 7964 | 0 | 5450   | AVLRDC                                                                     | 1.88 | 0.01 | 1.86 | 0.44 | 1.23 | 0.28 |
| 7965 | 0 | 240862 | AVLRDDLPAITSSLS                                                            | 2.71 | 0.01 | 4.93 | 0.44 | 1.41 | 0.28 |
| 7966 | 0 | 240863 | AVLRDDLPAITSSLT                                                            | 2.70 | 0.01 | 4.93 | 0.44 | 1.41 | 0.28 |
| 7967 | 0 | 5463   | AVLTGYSLFQKEKMVLN<br>EGTS                                                  | 2.98 | 4.93 | 3.57 | 2.63 | 0.22 | 0.85 |
| 7968 | 0 | 232737 | AVLTLAAWLWSKWL                                                             | 2.73 | 0.01 | 2.89 | 1.12 | 0.22 | 1.28 |
| 7969 | 0 | 232737 | AVLTLAAWLWSKWL                                                             | 2.73 | 0.01 | 2.89 | 1.12 | 0.22 | 1.28 |
| 7970 | 0 | 78108  | AVLTSAETKSKPVAAG<br>PVKPRRKKVISNTTPYTI<br>ADNIPPEKLPINTPIPNPL<br>LPLARPHGK | 4.11 | 0.01 | 3.89 | 1.15 | 0.22 | 0.85 |
| 7971 | 0 | 5467   | AVLTSMILTDPHITAETA<br>KR                                                   | 2.94 | 0.01 | 1.72 | 0.44 | 0.85 | 0.28 |
| 7972 | 0 | 5476   | AVMRERGVYDTV                                                               | 2.48 | 0.01 | 0.90 | 1.15 | 2.26 | 1.39 |
| 7973 | 0 | 5476   | AVMRERGVYDTV                                                               | 2.48 | 0.01 | 0.90 | 1.15 | 2.26 | 0.85 |
| 7974 | 0 | 97221  | AVMVQKVKEG                                                                 | 2.33 | 0.01 | 2.84 | 0.44 | 0.85 | 0.28 |
| 7975 | 0 | 5481   | AVNDT                                                                      | 1.74 | 0.01 | 3.00 | 0.68 | 0.22 | 0.28 |
| 7976 | 0 | 5481   | AVNDT                                                                      | 1.74 | 0.01 | 3.00 | 0.68 | 0.22 | 0.85 |

|      |   |        |                          |      |      |      |      |      |      |
|------|---|--------|--------------------------|------|------|------|------|------|------|
| 7977 | 0 | 146786 | AVNGDWPLPTKLPLVG<br>GH   | 2.84 | 0.01 | 3.45 | 0.44 | 1.23 | 0.28 |
| 7978 | 0 | 147535 | AVNGNMALD                | 2.24 | 0.01 | 3.24 | 3.57 | 0.85 | 0.28 |
| 7979 | 0 | 91158  | AVNGNMALDDIHAQI          | 2.68 | 0.01 | 4.15 | 1.20 | 0.22 | 0.28 |
| 7980 | 0 | 91158  | AVNGNMALDDIHAQI          | 2.68 | 0.01 | 4.15 | 1.20 | 0.22 | 0.28 |
| 7981 | 0 | 5484   | AVNHIH                   | 1.90 | 0.01 | 1.96 | 0.44 | 0.85 | 0.28 |
| 7982 | 0 | 96127  | AVNVPKVTKKPTPPVK<br>PT   | 2.96 | 0.01 | 2.39 | 0.44 | 1.59 | 0.28 |
| 7983 | 0 | 150970 | AVPADHGAHLSLRGLPV<br>CAF | 2.97 | 0.01 | 2.08 | 0.68 | 0.22 | 0.28 |
| 7984 | 0 | 260713 | AVPEGEEYPTAEAE           | 2.73 | 0.01 | 1.61 | 0.44 | 0.85 | 1.28 |
| 7985 | 0 | 260714 | AVPEGEEYPTAERP           | 2.72 | 0.01 | 1.61 | 0.44 | 0.85 | 1.28 |
| 7986 | 0 | 135639 | AVPFPCGR                 | 2.12 | 0.01 | 0.78 | 0.44 | 2.35 | 0.28 |
| 7987 | 0 | 5502   | AVPLYNRFSY               | 2.29 | 0.01 | 2.60 | 0.44 | 1.23 | 0.85 |
| 7988 | 0 | 5505   | AVPNLRGDLQVLAQKV<br>ARTL | 2.97 | 0.01 | 3.18 | 2.37 | 2.25 | 1.75 |
| 7989 | 0 | 5507   | AVPNVRGDLQ               | 2.29 | 0.01 | 3.14 | 2.22 | 0.22 | 0.28 |
| 7990 | 0 | 5507   | AVPNVRGDLQ               | 2.29 | 0.01 | 3.14 | 2.22 | 0.22 | 0.28 |
| 7991 | 0 | 5507   | AVPNVRGDLQ               | 2.29 | 0.01 | 3.14 | 2.22 | 0.22 | 0.28 |
| 7992 | 0 | 5507   | AVPNVRGDLQ               | 2.29 | 0.01 | 3.14 | 2.22 | 0.22 | 0.28 |
| 7993 | 0 | 5507   | AVPNVRGDLQ               | 2.29 | 0.01 | 3.14 | 0.68 | 0.22 | 0.28 |
| 7994 | 0 | 5507   | AVPNVRGDLQ               | 2.29 | 0.01 | 3.14 | 0.68 | 0.22 | 0.28 |
| 7995 | 0 | 5512   | AVPTGVAFWLYNDHD          | 2.65 | 0.01 | 2.16 | 0.44 | 1.23 | 0.85 |
| 7996 | 0 | 78109  | AVPTKA                   | 1.91 | 0.01 | 0.90 | 2.02 | 1.59 | 1.39 |
| 7997 | 0 | 167726 | AVPVIKTPP                | 2.22 | 0.01 | 2.40 | 2.43 | 0.22 | 0.28 |
| 7998 | 0 | 115694 | AVPYPQRDMP               | 2.31 | 0.01 | 1.60 | 0.44 | 1.23 | 0.85 |
| 7999 | 0 | 115694 | AVPYPQRDMP               | 2.31 | 0.01 | 1.60 | 0.44 | 1.23 | 0.85 |
| 8000 | 0 | 5519   | AVQAFILTGGKSKQTEG<br>LLL | 2.94 | 0.01 | 2.78 | 0.44 | 0.85 | 0.28 |
| 8001 | 0 | 5520   | AVQGFNW                  | 1.99 | 0.01 | 0.90 | 1.12 | 0.22 | 1.39 |
| 8002 | 0 | 123052 | AVQGGGAT                 | 2.15 | 0.01 | 0.78 | 1.20 | 0.22 | 0.28 |
| 8003 | 0 | 123053 | AVQGPVPG                 | 2.16 | 0.01 | 0.78 | 1.20 | 0.22 | 0.28 |
| 8004 | 0 | 167487 | AVQGPVPGMP               | 2.35 | 0.01 | 0.78 | 0.44 | 1.13 | 0.85 |
| 8005 | 0 | 139695 | AVQKRKVEVGTKPAAF<br>ML   | 2.83 | 0.01 | 3.51 | 2.49 | 0.22 | 1.27 |
| 8006 | 0 | 118278 | AVQNWLVPTVSP             | 2.66 | 0.01 | 3.78 | 0.44 | 1.13 | 0.85 |
| 8007 | 0 | 102326 | AVQPQVNKEIRNNNDI<br>NIDR | 2.97 | 0.01 | 2.39 | 0.68 | 0.22 | 0.28 |
| 8008 | 0 | 130744 | AVREKVFVDVIRCFKRHG       | 2.84 | 0.01 | 1.75 | 4.33 | 0.22 | 0.28 |
| 8009 | 0 | 238242 | AVRIGGRYVV               | 2.32 | 0.01 | 0.78 | 0.44 | 1.13 | 1.34 |
| 8010 | 0 | 238242 | AVRIGGRYVV               | 2.32 | 0.01 | 0.78 | 0.44 | 1.13 | 0.28 |
| 8011 | 0 | 238242 | AVRIGGRYVV               | 2.32 | 0.01 | 0.78 | 0.44 | 1.13 | 1.66 |
| 8012 | 0 | 238242 | AVRIGGRYVV               | 2.32 | 0.01 | 0.78 | 0.44 | 1.13 | 1.66 |



|      |   |        |                                       |      |      |      |      |      |      |
|------|---|--------|---------------------------------------|------|------|------|------|------|------|
| 8013 | 0 | 238242 | AVRIGGRYVV                            | 2.32 | 0.01 | 0.78 | 0.44 | 1.13 | 1.66 |
| 8014 | 0 | 238242 | AVRIGGRYVV                            | 2.32 | 0.01 | 0.78 | 0.44 | 1.13 | 1.66 |
| 8015 | 0 | 238242 | AVRIGGRYVV                            | 2.32 | 0.01 | 0.78 | 0.44 | 1.13 | 1.66 |
| 8016 | 0 | 238242 | AVRIGGRYVV                            | 2.32 | 0.01 | 0.78 | 0.44 | 1.13 | 1.66 |
| 8017 | 0 | 238242 | AVRIGGRYVV                            | 2.32 | 0.01 | 0.78 | 0.44 | 1.13 | 1.66 |
| 8018 | 0 | 238242 | AVRIGGRYVV                            | 2.32 | 0.01 | 0.78 | 0.44 | 1.13 | 1.66 |
| 8019 | 0 | 238242 | AVRIGGRYVV                            | 2.32 | 0.01 | 0.78 | 0.44 | 1.13 | 1.66 |
| 8020 | 0 | 238242 | AVRIGGRYVV                            | 2.32 | 0.01 | 0.78 | 0.44 | 1.13 | 1.66 |
| 8021 | 0 | 238242 | AVRIGGRYVV                            | 2.32 | 0.01 | 0.78 | 0.44 | 1.13 | 1.66 |
| 8022 | 0 | 238242 | AVRIGGRYVV                            | 2.32 | 0.01 | 0.78 | 0.44 | 1.13 | 0.85 |
| 8023 | 0 | 512278 | AVRKEQQQRGRREQE<br>WEEEEDEE           | 3.13 | 0.01 | 2.16 | 0.44 | 1.23 | 1.39 |
| 8024 | 0 | 135902 | AVSAHGCLFDRR                          | 2.44 | 0.01 | 0.78 | 0.44 | 1.41 | 0.28 |
| 8025 | 0 | 107093 | AVSGIGTQTSIPYPS                       | 2.70 | 0.01 | 0.90 | 0.44 | 1.23 | 0.28 |
| 8026 | 0 | 260956 | AVSKAAAPKAAAPK                        | 2.74 | 0.01 | 1.61 | 0.44 | 0.85 | 1.28 |
| 8027 | 0 | 137811 | AVSLGQNV                              | 2.12 | 0.01 | 2.21 | 1.20 | 0.22 | 0.28 |
| 8028 | 0 | 137811 | AVSLGQNV                              | 2.12 | 0.01 | 2.21 | 0.44 | 0.85 | 0.28 |
| 8029 | 0 | 137811 | AVSLGQNV                              | 2.12 | 0.01 | 2.21 | 0.44 | 0.85 | 0.28 |
| 8030 | 0 | 137811 | AVSLGQNV                              | 2.12 | 0.01 | 2.21 | 1.20 | 0.22 | 0.28 |
| 8031 | 0 | 107757 | AVSNRPLKDDTYRL                        | 2.65 | 0.01 | 0.90 | 0.44 | 1.13 | 1.39 |
| 8032 | 0 | 122277 | AVSNVIASLTCGRRFEYD<br>DPRFLRLDLAQEGLK | 3.44 | 0.01 | 0.78 | 0.44 | 1.13 | 0.28 |
| 8033 | 0 | 261003 | AVSSVVPSPADSEN                        | 2.71 | 0.01 | 1.61 | 0.44 | 0.85 | 1.28 |
| 8034 | 0 | 114750 | AVSVDCEYP                             | 2.31 | 0.01 | 2.25 | 0.44 | 1.23 | 0.85 |
| 8035 | 0 | 230201 | AVSVDCEYKPDCTAE<br>DRP                | 2.97 | 0.01 | 2.25 | 0.44 | 1.23 | 0.28 |
| 8036 | 0 | 5558   | AVTFASFDVPSKQPT                       | 2.71 | 0.01 | 2.28 | 0.68 | 0.22 | 0.28 |
| 8037 | 0 | 5558   | AVTFASFDVPSKQPT                       | 2.71 | 0.01 | 2.28 | 0.68 | 0.22 | 0.28 |
| 8038 | 0 | 5558   | AVTFASFDVPSKQPT                       | 2.71 | 0.01 | 2.28 | 1.20 | 0.22 | 0.28 |
| 8039 | 0 | 5558   | AVTFASFDVPSKQPT                       | 2.71 | 0.01 | 2.28 | 1.20 | 0.22 | 0.28 |
| 8040 | 0 | 5558   | AVTFASFDVPSKQPT                       | 2.71 | 0.01 | 2.28 | 1.20 | 0.22 | 1.27 |
| 8041 | 0 | 5559   | AVTFASKG                              | 1.99 | 0.01 | 0.90 | 0.44 | 1.23 | 1.27 |
| 8042 | 0 | 5559   | AVTFASKG                              | 1.99 | 0.01 | 0.90 | 0.44 | 1.23 | 0.28 |
| 8043 | 0 | 5560   | AVTGID                                | 1.88 | 0.01 | 0.90 | 0.44 | 1.59 | 1.39 |
| 8044 | 0 | 182671 | AVTKA                                 | 1.77 | 4.45 | 0.78 | 1.12 | 0.22 | 1.28 |
| 8045 | 0 | 182671 | AVTKA                                 | 1.77 | 4.45 | 0.78 | 1.12 | 0.22 | 1.28 |
| 8046 | 0 | 182671 | AVTKA                                 | 1.77 | 4.45 | 0.78 | 1.12 | 0.22 | 1.27 |
| 8047 | 0 | 152435 | AVTKENTIIN                            | 2.32 | 0.01 | 2.18 | 2.16 | 0.22 | 0.28 |
| 8048 | 0 | 118754 | AVTKENTIINPS                          | 2.46 | 0.01 | 2.18 | 0.44 | 0.22 | 0.28 |
| 8049 | 0 | 5562   | AVTKGTINDPEA                          | 2.46 | 0.01 | 2.24 | 1.20 | 0.22 | 1.34 |
| 8050 | 0 | 5562   | AVTKGTINDPEA                          | 2.46 | 0.01 | 2.24 | 1.20 | 0.22 | 0.28 |
| 8051 | 0 | 5563   | AVTKGTINDPQAAKEAL<br>DKY              | 2.93 | 0.01 | 2.85 | 1.20 | 0.22 | 1.27 |
| 8052 | 0 | 5563   | AVTKGTINDPQAAKEAL<br>DKY              | 2.93 | 0.01 | 2.85 | 1.20 | 0.22 | 0.28 |

|      |   |        |                          |      |      |      |      |      |      |
|------|---|--------|--------------------------|------|------|------|------|------|------|
| 8053 | 0 | 5563   | AVTKGTINDPQAAKEAL<br>DKY | 2.93 | 0.01 | 2.85 | 1.20 | 0.22 | 1.34 |
| 8054 | 0 | 5564   | AVTLAHELIHAGHR           | 2.64 | 0.01 | 2.08 | 0.68 | 0.22 | 1.57 |
| 8055 | 0 | 5564   | AVTLAHELIHAGHR           | 2.64 | 0.01 | 2.08 | 2.25 | 0.22 | 1.57 |
| 8056 | 0 | 5568   | AVTMGPKGRT               | 2.31 | 0.01 | 0.78 | 0.44 | 1.41 | 0.28 |
| 8057 | 0 | 5568   | AVTMGPKGRT               | 2.31 | 0.01 | 0.78 | 1.20 | 0.22 | 0.28 |
| 8058 | 0 | 149028 | AVTNATQ                  | 2.05 | 0.01 | 0.90 | 2.13 | 1.59 | 1.39 |
| 8059 | 0 | 175125 | AVTPEERHLS               | 2.28 | 0.01 | 0.78 | 0.68 | 0.22 | 0.28 |
| 8060 | 0 | 175125 | AVTPEERHLS               | 2.28 | 0.01 | 0.78 | 0.68 | 0.22 | 1.48 |
| 8061 | 0 | 175125 | AVTPEERHLS               | 2.28 | 0.01 | 0.78 | 0.68 | 0.22 | 1.48 |
| 8062 | 0 | 175125 | AVTPEERHLS               | 2.28 | 0.01 | 0.78 | 0.68 | 0.22 | 1.75 |
| 8063 | 0 | 512305 | AVTPEETAVASPPATAS<br>VES | 3.02 | 4.08 | 2.40 | 0.44 | 1.59 | 1.28 |
| 8064 | 0 | 512303 | AVTPEETAVASPPATAS<br>VES | 3.02 | 4.63 | 2.40 | 0.44 | 1.59 | 1.28 |
| 8065 | 0 | 512304 | AVTPEETAVASPPATAS<br>VES | 3.02 | 4.23 | 2.40 | 0.44 | 1.59 | 1.28 |
| 8066 | 0 | 512306 | AVTPEETAVASPPATAS<br>VES | 3.02 | 0.01 | 2.40 | 0.44 | 1.59 | 1.28 |
| 8067 | 0 | 5575   | AVTPLGPPAAEY             | 2.48 | 0.01 | 0.78 | 1.12 | 0.22 | 0.28 |
| 8068 | 0 | 5575   | AVTPLGPPAAEY             | 2.48 | 0.01 | 0.78 | 1.12 | 0.22 | 0.28 |
| 8069 | 0 | 5575   | AVTPLGPPAAEY             | 2.48 | 0.01 | 0.78 | 1.12 | 0.22 | 0.28 |
| 8070 | 0 | 5575   | AVTPLGPPAAEY             | 2.48 | 0.01 | 0.78 | 1.12 | 0.22 | 0.85 |
| 8071 | 0 | 5576   | AVTPLGPPDAEY             | 2.47 | 0.01 | 0.78 | 1.12 | 0.22 | 0.28 |
| 8072 | 0 | 5576   | AVTPLGPPDAEY             | 2.47 | 0.01 | 0.78 | 1.12 | 0.22 | 0.28 |
| 8073 | 0 | 5582   | AVTRGTINDPQRAKE          | 2.65 | 0.01 | 2.85 | 1.12 | 0.22 | 0.85 |
| 8074 | 0 | 5582   | AVTRGTINDPQRAKE          | 2.65 | 0.01 | 2.85 | 1.12 | 0.22 | 0.28 |
| 8075 | 0 | 5582   | AVTRGTINDPQRAKE          | 2.65 | 0.01 | 2.85 | 1.12 | 0.22 | 0.28 |
| 8076 | 0 | 5582   | AVTRGTINDPQRAKE          | 2.65 | 0.01 | 2.85 | 0.68 | 0.22 | 0.28 |
| 8077 | 0 | 5582   | AVTRGTINDPQRAKE          | 2.65 | 0.01 | 2.85 | 1.12 | 0.22 | 1.34 |
| 8078 | 0 | 5582   | AVTRGTINDPQRAKE          | 2.65 | 0.01 | 2.85 | 0.68 | 0.22 | 0.28 |
| 8079 | 0 | 5582   | AVTRGTINDPQRAKE          | 2.65 | 0.01 | 2.85 | 0.68 | 2.25 | 1.75 |
| 8080 | 0 | 5582   | AVTRGTINDPQRAKE          | 2.65 | 0.01 | 2.85 | 0.68 | 0.22 | 1.34 |
| 8081 | 0 | 5583   | AVTRGTINDPQRAKEAL<br>D   | 2.82 | 0.01 | 2.85 | 0.68 | 0.22 | 0.28 |
| 8082 | 0 | 5584   | AVTRGTINDPQRAKEAL<br>DKY | 2.92 | 0.01 | 2.85 | 2.42 | 0.22 | 0.28 |
| 8083 | 0 | 5584   | AVTRGTINDPQRAKEAL<br>DKY | 2.92 | 0.01 | 2.85 | 2.42 | 0.22 | 1.34 |
| 8084 | 0 | 5586   | AVTRGTINDPQRAKEAL<br>DYE | 2.92 | 0.01 | 0.90 | 2.52 | 0.22 | 0.28 |
| 8085 | 0 | 5586   | AVTRGTINDPQRAKEAL<br>DYE | 2.92 | 0.01 | 0.90 | 2.52 | 0.22 | 1.34 |
| 8086 | 0 | 5586   | AVTRGTINDPQRAKEAL<br>DYE | 2.92 | 0.01 | 2.24 | 2.42 | 0.22 | 1.34 |
| 8087 | 0 | 120420 | AVTYTEHAKRKTVTAM         | 2.77 | 0.01 | 1.60 | 0.44 | 1.13 | 0.28 |

|      |   |        |                                |      |      |      |      |      |      |
|------|---|--------|--------------------------------|------|------|------|------|------|------|
| 8088 | 0 | 489486 | AVVAARAQGRYTDDG<br>YIFN        | 2.94 | 0.01 | 2.70 | 0.44 | 0.85 | 0.28 |
| 8089 | 0 | 5591   | AVVAPDKEVLYEAFDEM<br>EEC       | 2.96 | 0.01 | 1.96 | 0.44 | 0.85 | 0.28 |
| 8090 | 0 | 5592   | AVVAVPSYIPTWIG                 | 2.63 | 0.01 | 0.90 | 0.68 | 0.22 | 1.39 |
| 8091 | 0 | 114751 | AVVGEDAELPCRLSPNV<br>SAKGMELRW | 3.20 | 0.01 | 1.60 | 0.44 | 1.13 | 0.28 |
| 8092 | 0 | 114751 | AVVGEDAELPCRLSPNV<br>SAKGMELRW | 3.20 | 0.01 | 1.60 | 0.44 | 1.41 | 0.28 |
| 8093 | 0 | 114751 | AVVGEDAELPCRLSPNV<br>SAKGMELRW | 3.20 | 0.01 | 1.60 | 0.44 | 1.59 | 0.28 |
| 8094 | 0 | 5597   | AVVGGLGGY                      | 2.26 | 0.01 | 1.75 | 2.19 | 0.22 | 0.28 |
| 8095 | 0 | 5597   | AVVGGLGGY                      | 2.26 | 0.01 | 1.75 | 2.19 | 0.22 | 0.85 |
| 8096 | 0 | 5597   | AVVGGLGGY                      | 2.26 | 0.01 | 1.75 | 2.19 | 0.22 | 0.85 |
| 8097 | 0 | 5597   | AVVGGLGGY                      | 2.26 | 0.01 | 1.75 | 2.19 | 0.22 | 0.85 |
| 8098 | 0 | 5597   | AVVGGLGGY                      | 2.26 | 0.01 | 1.75 | 1.15 | 0.22 | 1.48 |
| 8099 | 0 | 97916  | AVVGKPGSDV                     | 2.33 | 0.01 | 3.08 | 0.68 | 0.22 | 0.28 |
| 8100 | 0 | 97916  | AVVGKPGSDV                     | 2.33 | 0.01 | 3.08 | 1.20 | 0.22 | 0.28 |
| 8101 | 0 | 5604   | AVVLKAGNEGLE                   | 2.51 | 0.01 | 3.33 | 0.44 | 1.23 | 0.85 |
| 8102 | 0 | 429447 | AVVPVLAYAAARLLL                | 2.71 | 0.01 | 3.67 | 0.44 | 1.74 | 0.28 |
| 8103 | 0 | 429447 | AVVPVLAYAAARLLL                | 2.71 | 0.01 | 3.67 | 0.44 | 1.74 | 1.27 |
| 8104 | 0 | 429447 | AVVPVLAYAAARLLL                | 2.71 | 0.01 | 3.67 | 0.44 | 1.74 | 0.28 |
| 8105 | 0 | 429447 | AVVPVLAYAAARLLL                | 2.71 | 0.01 | 2.51 | 0.44 | 0.85 | 0.28 |
| 8106 | 0 | 429447 | AVVPVLAYAAARLLL                | 2.71 | 0.01 | 2.51 | 0.44 | 0.85 | 0.28 |
| 8107 | 0 | 429447 | AVVPVLAYAAARLLL                | 2.71 | 0.01 | 2.51 | 0.44 | 1.74 | 0.28 |
| 8108 | 0 | 120421 | AVVRFQEAAANKQK                 | 2.56 | 0.01 | 2.86 | 0.44 | 0.85 | 0.28 |
| 8109 | 0 | 423229 | AVVWGNARLDALMSA                | 2.68 | 0.01 | 2.51 | 0.44 | 2.35 | 1.28 |
| 8110 | 0 | 5609   | AVVYNNEGTVNELG                 | 2.64 | 0.01 | 3.67 | 0.68 | 0.22 | 0.28 |
| 8111 | 0 | 5609   | AVVYNNEGTVNELG                 | 2.64 | 0.01 | 3.67 | 0.68 | 0.22 | 0.85 |
| 8112 | 0 | 5609   | AVVYNNEGTVNELG                 | 2.64 | 0.01 | 3.04 | 1.12 | 0.22 | 0.28 |
| 8113 | 0 | 5609   | AVVYNNEGTVNELG                 | 2.64 | 0.01 | 3.04 | 1.12 | 0.22 | 0.28 |
| 8114 | 0 | 5609   | AVVYNNEGTVNELG                 | 2.64 | 0.01 | 3.04 | 1.12 | 0.22 | 0.28 |
| 8115 | 0 | 79162  | AVWEWMWWDA                     | 2.35 | 0.01 | 0.90 | 0.68 | 0.22 | 0.28 |
| 8116 | 0 | 79163  | AVWQWMWVEY                     | 2.33 | 0.01 | 0.90 | 0.68 | 0.22 | 0.28 |
| 8117 | 0 | 112054 | AVYFCHQ                        | 1.99 | 0.01 | 0.78 | 0.44 | 1.13 | 0.28 |
| 8118 | 0 | 127610 | AVYFKEQFLD                     | 2.29 | 0.01 | 0.78 | 0.44 | 1.13 | 0.28 |
| 8119 | 0 | 5641   | AVYYCTRGYHGSSLY                | 2.67 | 0.01 | 1.75 | 0.68 | 0.22 | 0.28 |
| 8120 | 0 | 127938 | AWAKRARGNVFMYHA<br>PENYG       | 2.94 | 0.01 | 0.78 | 0.44 | 1.13 | 0.28 |
| 8121 | 0 | 5645   | AWDFGS                         | 1.88 | 0.01 | 2.40 | 0.44 | 0.85 | 0.28 |
| 8122 | 0 | 5648   | AWDMMMNWS                      | 2.23 | 0.01 | 1.72 | 0.44 | 0.85 | 0.85 |
| 8123 | 0 | 5648   | AWDMMMNWS                      | 2.23 | 0.01 | 1.72 | 0.44 | 0.85 | 0.85 |
| 8124 | 0 | 5648   | AWDMMMNWS                      | 2.23 | 0.01 | 1.72 | 0.44 | 0.85 | 0.85 |
| 8125 | 0 | 78936  | AWDMMMNWSPTTAL<br>V            | 2.66 | 0.01 | 3.81 | 0.44 | 0.85 | 0.28 |
| 8126 | 0 | 112055 | AWFAYWG                        | 2.05 | 0.01 | 0.78 | 0.44 | 1.13 | 0.28 |

|      |   |        |                            |      |      |      |      |      |      |
|------|---|--------|----------------------------|------|------|------|------|------|------|
| 8127 | 0 | 5660   | AWGDK                      | 1.74 | 0.01 | 4.33 | 3.16 | 0.22 | 0.28 |
| 8128 | 0 | 462289 | AWGGQDGSCHPVALGL<br>VGAP   | 2.96 | 0.01 | 1.96 | 2.90 | 0.22 | 0.28 |
| 8129 | 0 | 5661   | AWGGSGSEAYQGVQQ<br>KWDATEL | 3.13 | 0.01 | 3.53 | 2.61 | 0.22 | 0.28 |
| 8130 | 0 | 5661   | AWGGSGSEAYQGVQQ<br>KWDATEL | 3.13 | 0.01 | 3.53 | 3.16 | 0.85 | 0.28 |
| 8131 | 0 | 131369 | AWHQQQP                    | 2.02 | 0.01 | 0.78 | 0.44 | 1.41 | 0.28 |
| 8132 | 0 | 131369 | AWHQQQP                    | 2.02 | 0.01 | 0.78 | 0.44 | 1.13 | 0.28 |
| 8133 | 0 | 131833 | AWINPFVKQFSNISF            | 2.68 | 0.01 | 0.78 | 0.44 | 1.13 | 0.85 |
| 8134 | 0 | 5670   | AWITEDCPVP                 | 2.29 | 0.01 | 2.69 | 0.44 | 0.85 | 0.28 |
| 8135 | 0 | 107303 | AWKYENGNDKHYADSV<br>NG     | 2.86 | 0.01 | 0.78 | 1.12 | 0.22 | 0.85 |
| 8136 | 0 | 107303 | AWKYENGNDKHYADSV<br>NG     | 2.86 | 0.01 | 0.78 | 1.12 | 0.22 | 0.28 |
| 8137 | 0 | 111135 | AWLAQFVLP                  | 2.24 | 0.01 | 2.60 | 0.44 | 1.23 | 0.85 |
| 8138 | 0 | 5674   | AWLVHR                     | 1.88 | 0.01 | 2.40 | 0.44 | 0.85 | 0.28 |
| 8139 | 0 | 5675   | AWLVHRQWFLDLPLPW           | 2.75 | 0.01 | 2.40 | 0.44 | 0.85 | 0.28 |
| 8140 | 0 | 5675   | AWLVHRQWFLDLPLPW           | 2.75 | 0.01 | 2.40 | 0.44 | 0.85 | 0.28 |
| 8141 | 0 | 5675   | AWLVHRQWFLDLPLPW           | 2.75 | 0.01 | 2.40 | 0.44 | 0.85 | 0.28 |
| 8142 | 0 | 5675   | AWLVHRQWFLDLPLPW           | 2.75 | 0.01 | 2.40 | 0.44 | 0.85 | 0.28 |
| 8143 | 0 | 107758 | AWNCCVKQTP                 | 2.28 | 0.01 | 0.90 | 0.44 | 1.13 | 1.27 |
| 8144 | 0 | 107758 | AWNCCVKQTP                 | 2.28 | 0.01 | 0.90 | 0.44 | 1.13 | 0.28 |
| 8145 | 0 | 97223  | AWNPSLLG                   | 2.11 | 0.01 | 2.87 | 0.68 | 0.22 | 0.28 |
| 8146 | 0 | 5683   | AWPACYCYGLPDSVK            | 2.67 | 0.01 | 2.56 | 2.00 | 0.22 | 0.85 |
| 8147 | 0 | 5683   | AWPACYCYGLPDSVK            | 2.67 | 0.01 | 2.56 | 2.02 | 0.22 | 0.85 |
| 8148 | 0 | 5684   | AWPACYCYGVPDHIK            | 2.67 | 0.01 | 2.56 | 2.02 | 0.22 | 0.85 |
| 8149 | 0 | 5685   | AWPAGAGR                   | 2.17 | 0.01 | 2.40 | 2.43 | 0.22 | 0.28 |
| 8150 | 0 | 236156 | AWWKAHRDQVWKAIT            | 2.69 | 0.01 | 1.66 | 0.44 | 0.85 | 1.28 |
| 8151 | 0 | 5709   | AWYYVPLGTQ                 | 2.28 | 0.01 | 1.60 | 0.44 | 1.23 | 0.28 |
| 8152 | 0 | 5709   | AWYYVPLGTQ                 | 2.28 | 0.01 | 1.60 | 0.44 | 1.23 | 0.28 |
| 8153 | 0 | 115189 | AWYYVPLGTQYTDAPSF<br>SDI   | 2.93 | 0.01 | 1.60 | 0.44 | 1.23 | 2.51 |
| 8154 | 0 | 130448 | AYAKDVKFGADA               | 2.52 | 0.01 | 0.78 | 0.44 | 1.13 | 0.28 |
| 8155 | 0 | 130448 | AYAKDVKFGADA               | 2.52 | 0.01 | 0.78 | 0.44 | 1.41 | 0.28 |
| 8156 | 0 | 5728   | AYANSTQEETF                | 2.41 | 0.01 | 3.29 | 1.20 | 0.22 | 1.57 |
| 8157 | 0 | 5728   | AYANSTQEETF                | 2.41 | 0.01 | 3.29 | 1.20 | 0.22 | 0.85 |
| 8158 | 0 | 146178 | AYAPPGAQPPTSRL             | 2.63 | 0.01 | 2.96 | 0.44 | 0.22 | 0.28 |
| 8159 | 0 | 450454 | AYASDSY                    | 2.06 | 0.01 | 0.90 | 0.44 | 1.41 | 1.39 |
| 8160 | 0 | 104737 | AYCSTWDANK                 | 2.30 | 0.01 | 2.60 | 0.44 | 1.23 | 0.85 |
| 8161 | 0 | 77841  | AYDFLYNYL                  | 2.25 | 0.01 | 0.78 | 0.44 | 1.23 | 0.28 |
| 8162 | 0 | 77841  | AYDFLYNYL                  | 2.25 | 0.01 | 0.78 | 0.44 | 1.41 | 0.28 |

|      |   |        |                             |      |      |      |      |      |      |
|------|---|--------|-----------------------------|------|------|------|------|------|------|
| 8163 | 0 | 77841  | AYDFLYNYL                   | 2.25 | 0.01 | 0.78 | 0.44 | 1.41 | 0.28 |
| 8164 | 0 | 118755 | AYDTEYV                     | 2.02 | 0.01 | 0.90 | 1.15 | 0.22 | 1.39 |
| 8165 | 0 | 194841 | AYENANPECQ                  | 2.34 | 0.01 | 3.78 | 0.44 | 0.85 | 0.28 |
| 8166 | 0 | 5755   | AYEQPIERTVVGHQTLR<br>DIFVWG | 3.04 | 0.01 | 3.00 | 0.44 | 0.85 | 0.28 |
| 8167 | 0 | 5755   | AYEQPIERTVVGHQTLR<br>DIFVWG | 3.04 | 0.01 | 3.00 | 0.44 | 0.85 | 0.28 |
| 8168 | 0 | 5755   | AYEQPIERTVVGHQTLR<br>DIFVWG | 3.04 | 0.01 | 3.00 | 0.44 | 0.85 | 0.28 |
| 8169 | 0 | 5755   | AYEQPIERTVVGHQTLR<br>DIFVWG | 3.04 | 0.01 | 3.00 | 0.44 | 0.85 | 0.28 |
| 8170 | 0 | 5755   | AYEQPIERTVVGHQTLR<br>DIFVWG | 3.04 | 0.01 | 3.00 | 0.44 | 0.85 | 0.28 |
| 8171 | 0 | 5755   | AYEQPIERTVVGHQTLR<br>DIFVWG | 3.04 | 0.01 | 3.00 | 0.44 | 2.39 | 0.28 |
| 8172 | 0 | 5755   | AYEQPIERTVVGHQTLR<br>DIFVWG | 3.04 | 0.01 | 3.00 | 0.44 | 2.39 | 0.28 |
| 8173 | 0 | 5755   | AYEQPIERTVVGHQTLR<br>DIFVWG | 3.04 | 0.01 | 3.00 | 2.22 | 0.85 | 0.28 |
| 8174 | 0 | 5755   | AYEQPIERTVVGHQTLR<br>DIFVWG | 3.04 | 0.01 | 3.00 | 2.22 | 0.22 | 0.28 |
| 8175 | 0 | 5755   | AYEQPIERTVVGHQTLR<br>DIFVWG | 3.04 | 0.01 | 3.00 | 2.22 | 0.22 | 0.28 |
| 8176 | 0 | 5755   | AYEQPIERTVVGHQTLR<br>DIFVWG | 3.04 | 0.01 | 3.00 | 2.22 | 0.22 | 0.28 |
| 8177 | 0 | 5755   | AYEQPIERTVVGHQTLR<br>DIFVWG | 3.04 | 0.01 | 3.00 | 2.22 | 0.22 | 0.28 |
| 8178 | 0 | 5755   | AYEQPIERTVVGHQTLR<br>DIFVWG | 3.04 | 0.01 | 3.00 | 2.22 | 0.22 | 0.28 |
| 8179 | 0 | 5755   | AYEQPIERTVVGHQTLR<br>DIFVWG | 3.04 | 0.01 | 3.00 | 2.22 | 0.22 | 0.28 |
| 8180 | 0 | 5755   | AYEQPIERTVVGHQTLR<br>DIFVWG | 3.04 | 0.01 | 3.00 | 3.57 | 0.22 | 0.28 |
| 8181 | 0 | 5760   | AYESGYNLP                   | 2.21 | 0.01 | 0.90 | 0.68 | 0.22 | 0.28 |
| 8182 | 0 | 170446 | AYFGQKDSVCGVSEC             | 2.66 | 0.01 | 0.78 | 0.44 | 1.41 | 0.28 |
| 8183 | 0 | 5771   | AYFLYQQQGRLDKL              | 2.61 | 0.01 | 0.78 | 1.20 | 0.22 | 0.28 |
| 8184 | 0 | 5771   | AYFLYQQQGRLDKL              | 2.61 | 0.01 | 0.78 | 1.20 | 0.22 | 0.28 |
| 8185 | 0 | 5771   | AYFLYQQQGRLDKL              | 2.61 | 0.01 | 0.78 | 1.20 | 0.22 | 1.48 |
| 8186 | 0 | 5771   | AYFLYQQQGRLDKL              | 2.61 | 0.01 | 0.78 | 1.20 | 0.22 | 1.48 |
| 8187 | 0 | 5771   | AYFLYQQQGRLDKL              | 2.61 | 0.01 | 0.78 | 1.20 | 0.22 | 2.02 |
| 8188 | 0 | 106298 | AYFNLHPTTQLV                | 2.44 | 0.01 | 0.90 | 1.15 | 0.22 | 1.39 |
| 8189 | 0 | 5773   | AYFPREGVVFVNGTSWF           | 2.78 | 0.01 | 2.48 | 0.44 | 0.85 | 0.28 |
| 8190 | 0 | 5773   | AYFPREGVVFVNGTSWF           | 2.78 | 0.01 | 2.48 | 0.68 | 0.22 | 0.28 |
| 8191 | 0 | 5780   | AYFYPELFRQ                  | 2.31 | 0.01 | 1.60 | 0.44 | 1.23 | 0.28 |
| 8192 | 0 | 5780   | AYFYPELFRQ                  | 2.31 | 0.01 | 1.60 | 0.44 | 1.23 | 0.28 |

|      |   |        |                                     |      |      |      |      |      |      |
|------|---|--------|-------------------------------------|------|------|------|------|------|------|
| 8193 | 0 | 5781   | AYFYPELFRQFYQLDAYP                  | 2.89 | 0.01 | 1.60 | 0.44 | 1.74 | 0.28 |
| 8194 | 0 | 5781   | AYFYPELFRQFYQLDAYP                  | 2.89 | 0.01 | 1.60 | 0.44 | 1.23 | 0.28 |
| 8195 | 0 | 5785   | AYGGIIKDAPPGAGFIYR<br>ETFC          | 3.04 | 0.01 | 2.14 | 1.15 | 0.22 | 1.27 |
| 8196 | 0 | 5785   | AYGGIIKDAPPGAGFIYR<br>ETFC          | 3.04 | 0.01 | 2.14 | 1.15 | 0.22 | 0.28 |
| 8197 | 0 | 5785   | AYGGIIKDAPPGAGFIYR<br>ETFC          | 3.04 | 0.01 | 2.14 | 1.20 | 0.22 | 0.28 |
| 8198 | 0 | 96133  | AYGIKSNVVR                          | 2.28 | 0.01 | 2.39 | 0.44 | 0.85 | 0.28 |
| 8199 | 0 | 96133  | AYGIKSNVVR                          | 2.28 | 0.01 | 2.39 | 0.44 | 0.85 | 0.28 |
| 8200 | 0 | 131834 | AYGSNYS GDKCSGPN                    | 2.70 | 0.01 | 0.78 | 0.44 | 1.13 | 0.85 |
| 8201 | 0 | 5795   | AYICWNYDNAYCDKL                     | 2.71 | 0.01 | 2.56 | 1.20 | 0.22 | 0.85 |
| 8202 | 0 | 77842  | AYIDFEMKI                           | 2.21 | 0.01 | 0.78 | 0.44 | 1.23 | 0.28 |
| 8203 | 0 | 77842  | AYIDFEMKI                           | 2.21 | 0.01 | 0.78 | 0.44 | 1.23 | 0.28 |
| 8204 | 0 | 77842  | AYIDFEMKI                           | 2.21 | 0.01 | 0.78 | 0.44 | 1.41 | 0.28 |
| 8205 | 0 | 77842  | AYIDFEMKI                           | 2.21 | 0.01 | 0.78 | 0.44 | 1.41 | 0.28 |
| 8206 | 0 | 189584 | AYINCFGCETHA                        | 2.46 | 0.01 | 0.90 | 3.16 | 2.60 | 1.75 |
| 8207 | 0 | 189585 | AYINCYGCETHA                        | 2.48 | 0.01 | 0.90 | 3.16 | 2.60 | 1.75 |
| 8208 | 0 | 116680 | AYKEQIKTLTNKLKA                     | 2.71 | 0.01 | 3.15 | 0.44 | 1.23 | 0.85 |
| 8209 | 0 | 225945 | AYKLAYKTAEGATPEAKY<br>DAYVATLSEALRI | 3.40 | 0.01 | 2.53 | 1.20 | 0.22 | 0.28 |
| 8210 | 0 | 225945 | AYKLAYKTAEGATPEAKY<br>DAYVATLSEALRI | 3.40 | 0.01 | 2.53 | 1.20 | 0.22 | 0.28 |
| 8211 | 0 | 225945 | AYKLAYKTAEGATPEAKY<br>DAYVATLSEALRI | 3.40 | 0.01 | 2.53 | 1.20 | 0.22 | 0.28 |
| 8212 | 0 | 225945 | AYKLAYKTAEGATPEAKY<br>DAYVATLSEALRI | 3.40 | 0.01 | 2.53 | 1.20 | 0.22 | 0.28 |
| 8213 | 0 | 225945 | AYKLAYKTAEGATPEAKY<br>DAYVATLSEALRI | 3.40 | 0.01 | 2.53 | 1.20 | 0.22 | 0.28 |
| 8214 | 0 | 225945 | AYKLAYKTAEGATPEAKY<br>DAYVATLSEALRI | 3.40 | 0.01 | 2.53 | 1.20 | 0.22 | 0.28 |
| 8215 | 0 | 225945 | AYKLAYKTAEGATPEAKY<br>DAYVATLSEALRI | 3.40 | 0.01 | 2.53 | 1.20 | 0.22 | 0.28 |
| 8216 | 0 | 225945 | AYKLAYKTAEGATPEAKY<br>DAYVATLSEALRI | 3.40 | 0.01 | 2.53 | 1.20 | 0.22 | 0.28 |
| 8217 | 0 | 225945 | AYKLAYKTAEGATPEAKY<br>DAYVATLSEALRI | 3.40 | 0.01 | 2.53 | 1.20 | 0.22 | 0.28 |
| 8218 | 0 | 225945 | AYKLAYKTAEGATPEAKY<br>DAYVATLSEALRI | 3.40 | 0.01 | 2.53 | 1.20 | 0.22 | 0.28 |
| 8219 | 0 | 225945 | AYKLAYKTAEGATPEAKY<br>DAYVATLSEALRI | 3.40 | 0.01 | 2.53 | 1.20 | 0.22 | 1.66 |
| 8220 | 0 | 225945 | AYKLAYKTAEGATPEAKY<br>DAYVATLSEALRI | 3.40 | 0.01 | 2.53 | 0.44 | 1.23 | 2.35 |
| 8221 | 0 | 116930 | AYKLPQTDDST                         | 2.38 | 0.01 | 0.90 | 1.15 | 0.22 | 0.28 |
| 8222 | 0 | 116930 | AYKLPQTDDST                         | 2.38 | 0.01 | 0.90 | 0.44 | 0.85 | 0.28 |

|      |   |        |                               |      |      |      |      |      |      |
|------|---|--------|-------------------------------|------|------|------|------|------|------|
| 8223 | 0 | 261443 | AYKRALPLEEEEDVG               | 2.66 | 0.01 | 1.61 | 0.44 | 0.85 | 1.28 |
| 8224 | 0 | 5853   | AYKSAEGATPEAKYDDY<br>VAT      | 2.97 | 0.01 | 3.00 | 1.15 | 0.22 | 0.28 |
| 8225 | 0 | 5853   | AYKSAEGATPEAKYDDY<br>VAT      | 2.97 | 0.01 | 3.00 | 3.06 | 0.22 | 0.28 |
| 8226 | 0 | 143831 | AYLED                         | 1.74 | 0.01 | 0.78 | 0.44 | 1.41 | 1.27 |
| 8227 | 0 | 143831 | AYLED                         | 1.74 | 0.01 | 0.78 | 0.44 | 1.41 | 1.27 |
| 8228 | 0 | 134645 | AYLLTLHAGRVTLP                | 2.69 | 0.01 | 0.78 | 0.44 | 1.13 | 0.28 |
| 8229 | 0 | 170448 | AYLLTLKDTFFDRAK               | 2.71 | 0.01 | 0.78 | 0.44 | 1.41 | 0.28 |
| 8230 | 0 | 170448 | AYLLTLKDTFFDRAK               | 2.71 | 0.01 | 0.78 | 0.44 | 1.13 | 0.28 |
| 8231 | 0 | 5865   | AYLSPIDLNLQAK                 | 2.54 | 0.01 | 4.15 | 1.12 | 0.22 | 0.85 |
| 8232 | 0 | 5865   | AYLSPIDLNLQAK                 | 2.54 | 0.01 | 4.15 | 1.12 | 0.22 | 1.27 |
| 8233 | 0 | 5865   | AYLSPIDLNLQAK                 | 2.54 | 0.01 | 4.15 | 1.12 | 0.22 | 2.92 |
| 8234 | 0 | 5867   | AYLTEAKVEKL                   | 2.43 | 0.01 | 2.85 | 1.12 | 0.22 | 1.57 |
| 8235 | 0 | 5867   | AYLTEAKVEKL                   | 2.43 | 0.01 | 3.24 | 1.12 | 0.22 | 0.28 |
| 8236 | 0 | 5867   | AYLTEAKVEKL                   | 2.43 | 0.01 | 2.85 | 1.12 | 0.22 | 0.28 |
| 8237 | 0 | 5869   | AYLTVGDVNTQGISGDS<br>KKLASEES | 3.16 | 0.01 | 2.75 | 0.44 | 1.59 | 0.28 |
| 8238 | 0 | 122282 | AYLVGLFEDTNLCAI               | 2.65 | 0.01 | 1.60 | 0.44 | 1.13 | 0.28 |
| 8239 | 0 | 122282 | AYLVGLFEDTNLCAI               | 2.65 | 0.01 | 1.60 | 0.44 | 1.13 | 0.28 |
| 8240 | 0 | 123054 | AYMESNRFI                     | 2.18 | 0.01 | 2.28 | 2.00 | 0.22 | 0.28 |
| 8241 | 0 | 5879   | AYNAAGGH                      | 2.15 | 0.01 | 4.08 | 1.81 | 0.22 | 0.28 |
| 8242 | 0 | 180900 | AYNFVESIINLFQVVHNS<br>YN      | 2.95 | 0.01 | 3.42 | 1.81 | 0.22 | 0.28 |
| 8243 | 0 | 105112 | AYNHFGEGLIQR                  | 2.43 | 0.01 | 4.93 | 0.44 | 1.23 | 0.85 |
| 8244 | 0 | 105114 | AYNHFGKRLDQR                  | 2.43 | 0.01 | 4.08 | 0.44 | 1.23 | 0.85 |
| 8245 | 0 | 176977 | AYNLGEGDT                     | 2.21 | 0.01 | 0.90 | 2.13 | 0.22 | 0.28 |
| 8246 | 0 | 176977 | AYNLGEGDT                     | 2.21 | 0.01 | 0.90 | 2.13 | 0.22 | 1.48 |
| 8247 | 0 | 140167 | AYNNGQEINGFKA                 | 2.56 | 0.01 | 2.90 | 1.20 | 0.22 | 0.28 |
| 8248 | 0 | 140167 | AYNNGQEINGFKA                 | 2.56 | 0.01 | 2.90 | 1.20 | 0.22 | 1.34 |
| 8249 | 0 | 140167 | AYNNGQEINGFKA                 | 2.56 | 0.01 | 2.90 | 1.20 | 0.22 | 1.34 |
| 8250 | 0 | 5890   | AYPDV                         | 1.74 | 0.01 | 1.86 | 0.44 | 1.23 | 0.28 |
| 8251 | 0 | 152436 | AYPIVHVDME                    | 2.29 | 0.01 | 2.18 | 2.16 | 0.22 | 0.28 |
| 8252 | 0 | 5900   | AYQKALAAYQAELKRVQ<br>EA       | 2.95 | 0.01 | 2.39 | 2.98 | 0.22 | 0.28 |
| 8253 | 0 | 156852 | AYQLGYSPPLPNPH                | 2.69 | 0.01 | 0.90 | 2.74 | 0.22 | 0.85 |
| 8254 | 0 | 5904   | AYQQGVTVDSIGMLPRF<br>IPE      | 2.89 | 0.01 | 2.40 | 1.12 | 0.22 | 0.85 |
| 8255 | 0 | 97917  | AYQTELARVQ                    | 2.32 | 0.01 | 2.39 | 0.68 | 0.22 | 0.28 |
| 8256 | 0 | 5907   | AYQVRNSTGLYHVTND<br>CPNS      | 2.91 | 0.01 | 2.83 | 0.44 | 0.85 | 0.28 |
| 8257 | 0 | 261497 | AYRPVDPSAYKRALP               | 2.71 | 0.01 | 1.61 | 0.44 | 0.85 | 1.28 |
| 8258 | 0 | 261498 | AYRPVDPSAYKRESP               | 2.71 | 0.01 | 1.61 | 0.44 | 0.85 | 1.28 |
| 8259 | 0 | 78937  | AYSDDFFVGRV                   | 2.39 | 0.01 | 2.24 | 0.68 | 0.22 | 2.02 |
| 8260 | 0 | 78937  | AYSDDFFVGRV                   | 2.39 | 0.01 | 2.24 | 0.68 | 0.22 | 0.85 |
| 8261 | 0 | 78937  | AYSDDFFVGRV                   | 2.39 | 0.01 | 2.24 | 0.68 | 0.22 | 0.85 |
| 8262 | 0 | 78937  | AYSDDFFVGRV                   | 2.39 | 0.01 | 2.24 | 0.68 | 0.22 | 0.85 |

|      |   |        |                          |      |      |      |      |      |      |
|------|---|--------|--------------------------|------|------|------|------|------|------|
| 8263 | 0 | 78937  | AYSDDFFVGRV              | 2.39 | 0.01 | 2.24 | 0.68 | 0.22 | 0.85 |
| 8264 | 0 | 78937  | AYSDDFFVGRV              | 2.39 | 0.01 | 2.24 | 0.68 | 0.22 | 0.85 |
| 8265 | 0 | 78937  | AYSDDFFVGRV              | 2.39 | 0.01 | 2.24 | 0.68 | 0.22 | 0.85 |
| 8266 | 0 | 78937  | AYSDDFFVGRV              | 2.39 | 0.01 | 2.24 | 0.68 | 0.22 | 0.85 |
| 8267 | 0 | 99910  | AYSHFYDGFQVPL            | 2.60 | 0.01 | 2.96 | 0.44 | 0.22 | 0.28 |
| 8268 | 0 | 114752 | AYSIEFGTNI               | 2.29 | 0.01 | 2.25 | 0.44 | 1.23 | 0.85 |
| 8269 | 0 | 114752 | AYSIEFGTNI               | 2.29 | 0.01 | 2.25 | 0.44 | 1.23 | 0.85 |
| 8270 | 0 | 114752 | AYSIEFGTNI               | 2.29 | 0.01 | 2.25 | 0.44 | 2.98 | 0.85 |
| 8271 | 0 | 170450 | AYSKPTIKLANP             | 2.48 | 0.01 | 0.90 | 0.44 | 0.85 | 1.39 |
| 8272 | 0 | 170450 | AYSKPTIKLANP             | 2.48 | 0.01 | 0.90 | 0.44 | 0.85 | 0.28 |
| 8273 | 0 | 5924   | AYSMSFSWDWSGHNY          | 2.68 | 0.01 | 3.38 | 1.12 | 0.22 | 0.28 |
| 8274 | 0 | 97918  | AYSNANKECQKLLQA          | 2.70 | 0.01 | 2.04 | 0.44 | 2.98 | 0.28 |
| 8275 | 0 | 79767  | AYSNCYPYDVPDYASLR        | 2.82 | 4.93 | 3.72 | 2.25 | 0.22 | 2.66 |
| 8276 | 0 | 5925   | AYSNCYPYDVPDYASLR        | 2.82 | 0.01 | 3.93 | 1.15 | 0.22 | 2.66 |
| 8277 | 0 | 5925   | AYSNCYPYDVPDYASLR        | 2.82 | 0.01 | 3.72 | 1.15 | 0.22 | 2.66 |
| 8278 | 0 | 5925   | AYSNCYPYDVPDYASLR        | 2.82 | 0.01 | 4.45 | 1.15 | 0.22 | 2.66 |
| 8279 | 0 | 5927   | AYSNNIAIPTNFSISI         | 2.84 | 0.01 | 2.48 | 0.44 | 0.85 | 0.28 |
| 8280 | 0 | 5927   | AYSNNIAIPTNFSISI         | 2.84 | 0.01 | 2.48 | 0.68 | 0.22 | 0.28 |
| 8281 | 0 | 5931   | AYSPASKTF                | 2.24 | 0.01 | 2.66 | 2.61 | 0.22 | 0.28 |
| 8282 | 0 | 5932   | AYSPASKTFESYRV           | 2.62 | 0.01 | 2.24 | 0.68 | 0.22 | 0.28 |
| 8283 | 0 | 77843  | AYSPTGLVWHPG             | 2.45 | 0.01 | 0.90 | 1.15 | 0.22 | 0.85 |
| 8284 | 0 | 509347 | AYSTMYIDILLTGVE          | 2.65 | 0.01 | 4.08 | 1.20 | 0.22 | 0.85 |
| 8285 | 0 | 97919  | AYTPAYYTKD               | 2.35 | 0.01 | 2.90 | 0.68 | 0.22 | 0.28 |
| 8286 | 0 | 97919  | AYTPAYYTKD               | 2.35 | 0.01 | 2.90 | 1.20 | 0.22 | 0.28 |
| 8287 | 0 | 97920  | AYTPAYYTKN               | 2.35 | 0.01 | 3.45 | 0.68 | 0.22 | 0.28 |
| 8288 | 0 | 97920  | AYTPAYYTKN               | 2.35 | 0.01 | 3.45 | 1.20 | 0.22 | 0.28 |
| 8289 | 0 | 103078 | AYVITSVDEEMRHNE          | 2.64 | 0.01 | 2.04 | 0.44 | 0.85 | 1.28 |
| 8290 | 0 | 112058 | AYWGQGT                  | 2.02 | 0.01 | 0.78 | 0.44 | 1.13 | 0.28 |
| 8291 | 0 | 5960   | BVKFPGGGZIVGGVYLL<br>PRR | 2.92 | 0.01 | 2.68 | 0.44 | 0.85 | 0.85 |
| 8292 | 0 | 5960   | BVKFPGGGZIVGGVYLL<br>PRR | 2.92 | 0.01 | 2.68 | 2.74 | 0.85 | 0.85 |
| 8293 | 0 | 94790  | CAADKEILDESCLKWKQR       | 2.79 | 0.01 | 0.90 | 3.16 | 0.22 | 0.28 |
| 8294 | 0 | 94790  | CAADKEILDESCLKWKQR       | 2.79 | 0.01 | 0.90 | 3.16 | 0.22 | 0.28 |
| 8295 | 0 | 111139 | CAAISTSETTYKNTN          | 2.69 | 0.01 | 1.86 | 0.68 | 0.22 | 0.28 |
| 8296 | 0 | 5961   | CAALANSLSLGPQQKV         | 2.74 | 0.01 | 1.72 | 0.68 | 0.22 | 0.28 |
| 8297 | 0 | 5962   | CAALASLFLSLGPQQK         | 2.75 | 0.01 | 1.72 | 0.68 | 0.22 | 0.28 |
| 8298 | 0 | 5962   | CAALASLFLSLGPQQK         | 2.75 | 0.01 | 1.72 | 0.68 | 0.22 | 1.66 |
| 8299 | 0 | 5962   | CAALASLFLSLGPQQK         | 2.75 | 0.01 | 1.72 | 0.68 | 0.22 | 1.66 |



|      |   |        |                             |      |      |      |      |      |      |
|------|---|--------|-----------------------------|------|------|------|------|------|------|
| 8300 | 0 | 422986 | CAARQATREVKEMKKV<br>T       | 2.82 | 0.01 | 0.78 | 0.44 | 1.13 | 0.28 |
| 8301 | 0 | 238246 | CAATCPTVKPGVNII             | 2.68 | 0.01 | 2.56 | 1.20 | 0.22 | 0.85 |
| 8302 | 0 | 512369 | CAATCPTVKPGVNIICCK<br>TDNCN | 3.11 | 0.01 | 2.56 | 2.02 | 0.22 | 0.85 |
| 8303 | 0 | 100768 | CACDQKPCSCSKVDVNY<br>AF     | 2.91 | 0.01 | 0.78 | 1.20 | 0.22 | 2.02 |
| 8304 | 0 | 112464 | CADARMYGVLPWNA              | 2.57 | 0.01 | 0.78 | 2.25 | 0.22 | 0.28 |
| 8305 | 0 | 112059 | CADARMYGVLPWNAFP<br>GKV     | 2.86 | 0.01 | 1.60 | 2.04 | 0.22 | 1.27 |
| 8306 | 0 | 5967   | CADARMYGVLPWNAFP<br>GKVC    | 2.92 | 0.01 | 0.78 | 2.25 | 0.22 | 1.27 |
| 8307 | 0 | 5967   | CADARMYGVLPWNAFP<br>GKVC    | 2.92 | 0.01 | 0.78 | 1.20 | 0.22 | 1.48 |
| 8308 | 0 | 5967   | CADARMYGVLPWNAFP<br>GKVC    | 2.92 | 0.01 | 0.78 | 1.20 | 0.22 | 1.48 |
| 8309 | 0 | 5967   | CADARMYGVLPWNAFP<br>GKVC    | 2.92 | 0.01 | 0.78 | 1.12 | 0.22 | 0.28 |
| 8310 | 0 | 5969   | CADGYTAETINEAIIKICG         | 2.93 | 0.01 | 2.86 | 1.81 | 0.22 | 0.85 |
| 8311 | 0 | 5969   | CADGYTAETINEAIIKICG         | 2.93 | 0.01 | 2.86 | 1.81 | 0.22 | 0.85 |
| 8312 | 0 | 133528 | CADQKPGEC                   | 2.22 | 0.01 | 0.90 | 1.15 | 0.22 | 0.28 |
| 8313 | 0 | 133528 | CADQKPGEC                   | 2.22 | 0.01 | 0.90 | 1.15 | 0.22 | 0.28 |
| 8314 | 0 | 133528 | CADQKPGEC                   | 2.22 | 0.01 | 0.90 | 1.15 | 0.22 | 2.12 |
| 8315 | 0 | 133528 | CADQKPGEC                   | 2.22 | 0.01 | 0.90 | 1.15 | 0.22 | 1.27 |
| 8316 | 0 | 133528 | CADQKPGEC                   | 2.22 | 0.01 | 0.90 | 1.15 | 0.22 | 1.66 |
| 8317 | 0 | 5970   | CADSWGLDLRC                 | 2.42 | 0.01 | 0.90 | 1.15 | 0.22 | 1.39 |
| 8318 | 0 | 5971   | CADVSQPVC                   | 2.24 | 0.01 | 0.90 | 0.44 | 0.85 | 1.39 |
| 8319 | 0 | 182061 | CAEEGGTLVAIESEV             | 2.69 | 0.01 | 0.78 | 0.44 | 1.13 | 0.85 |
| 8320 | 0 | 5972   | CAEETKNGGVPFKCKNN           | 2.78 | 0.01 | 3.45 | 0.44 | 1.59 | 0.28 |
| 8321 | 0 | 418954 | CAELCDPSNKPGLHLL            | 2.65 | 0.01 | 3.10 | 0.68 | 0.22 | 0.28 |
| 8322 | 0 | 418954 | CAELCDPSNKPGLHLL            | 2.65 | 0.01 | 3.10 | 0.68 | 0.22 | 0.28 |
| 8323 | 0 | 418954 | CAELCDPSNKPGLHLL            | 2.65 | 0.01 | 3.10 | 0.68 | 0.22 | 1.75 |
| 8324 | 0 | 418954 | CAELCDPSNKPGLHLL            | 2.65 | 0.01 | 3.10 | 0.68 | 0.22 | 1.75 |
| 8325 | 0 | 121163 | CAEPMTLPENYFSERP<br>HPPPPC  | 3.06 | 0.01 | 0.90 | 2.04 | 0.22 | 1.27 |
| 8326 | 0 | 121163 | CAEPMTLPENYFSERP<br>HPPPPC  | 3.06 | 0.01 | 0.90 | 2.04 | 0.22 | 0.28 |
| 8327 | 0 | 121163 | CAEPMTLPENYFSERP<br>HPPPPC  | 3.06 | 0.01 | 0.90 | 2.04 | 0.22 | 1.75 |
| 8328 | 0 | 121163 | CAEPMTLPENYFSERP<br>HPPPPC  | 3.06 | 0.01 | 0.90 | 2.04 | 0.22 | 0.28 |
| 8329 | 0 | 121163 | CAEPMTLPENYFSERP<br>HPPPPC  | 3.06 | 0.01 | 0.90 | 2.04 | 0.22 | 0.28 |

|      |   |        |                               |      |      |      |      |      |      |
|------|---|--------|-------------------------------|------|------|------|------|------|------|
| 8330 | 0 | 121163 | CAEPMTLPENYFSERP<br>HPPPPC    | 3.06 | 0.01 | 0.90 | 2.04 | 0.22 | 0.28 |
| 8331 | 0 | 121163 | CAEPMTLPENYFSERP<br>HPPPPC    | 3.06 | 0.01 | 0.90 | 2.04 | 0.22 | 0.28 |
| 8332 | 0 | 121163 | CAEPMTLPENYFSERP<br>HPPPPC    | 3.06 | 0.01 | 0.90 | 2.04 | 0.22 | 1.34 |
| 8333 | 0 | 121163 | CAEPMTLPENYFSERP<br>HPPPPC    | 3.06 | 0.01 | 0.90 | 2.04 | 0.22 | 1.75 |
| 8334 | 0 | 111140 | CAEPNNLLC                     | 2.25 | 0.01 | 0.90 | 0.44 | 0.85 | 1.39 |
| 8335 | 0 | 118279 | CAFTGPLRPFSPGFN               | 2.75 | 0.01 | 0.78 | 0.44 | 1.13 | 0.28 |
| 8336 | 0 | 118279 | CAFTGPLRPFSPGFN               | 2.75 | 0.01 | 0.78 | 0.44 | 1.13 | 0.28 |
| 8337 | 0 | 5977   | CAGFEKIPC                     | 2.22 | 0.01 | 0.90 | 0.44 | 0.85 | 1.39 |
| 8338 | 0 | 127612 | CAGWALWRCALRWAE               | 2.73 | 0.01 | 0.78 | 0.44 | 1.13 | 0.85 |
| 8339 | 0 | 114754 | CAHKVEQGAS                    | 2.29 | 0.01 | 2.25 | 0.44 | 1.23 | 0.85 |
| 8340 | 0 | 114754 | CAHKVEQGAS                    | 2.29 | 0.01 | 2.25 | 0.44 | 1.23 | 0.85 |
| 8341 | 0 | 230202 | CAHKVEQGASVDKRHD<br>GGCR      | 2.96 | 0.01 | 2.25 | 0.44 | 1.23 | 0.28 |
| 8342 | 0 | 5990   | CAISGGYPVC                    | 2.31 | 0.01 | 0.90 | 0.44 | 1.23 | 2.35 |
| 8343 | 0 | 5990   | CAISGGYPVC                    | 2.31 | 0.01 | 0.90 | 0.44 | 1.23 | 2.35 |
| 8344 | 0 | 5990   | CAISGGYPVC                    | 2.31 | 0.01 | 0.90 | 0.44 | 1.23 | 2.35 |
| 8345 | 0 | 5992   | CAKKVWRDHRGTI                 | 2.50 | 0.01 | 0.90 | 0.68 | 0.22 | 0.28 |
| 8346 | 0 | 5994   | CAKSPRYTLD                    | 2.26 | 0.01 | 2.69 | 1.12 | 0.22 | 0.28 |
| 8347 | 0 | 5994   | CAKSPRYTLD                    | 2.26 | 0.01 | 2.69 | 1.12 | 0.22 | 1.27 |
| 8348 | 0 | 5994   | CAKSPRYTLD                    | 2.26 | 0.01 | 2.69 | 1.12 | 0.22 | 0.28 |
| 8349 | 0 | 111141 | CAKVQADC                      | 2.25 | 0.01 | 0.90 | 0.44 | 0.85 | 1.39 |
| 8350 | 0 | 5995   | CALAATDVGHKKENAA<br>NVNGTVG   | 3.09 | 0.01 | 3.48 | 1.20 | 0.22 | 0.28 |
| 8351 | 0 | 106300 | CALEGWGGHW                    | 2.32 | 0.01 | 2.75 | 0.44 | 1.23 | 0.85 |
| 8352 | 0 | 5999   | CALGLTSLFSPGPIQH              | 2.73 | 0.01 | 1.72 | 0.68 | 0.22 | 0.28 |
| 8353 | 0 | 111142 | CALHPPQC                      | 2.25 | 0.01 | 0.90 | 0.44 | 0.85 | 1.39 |
| 8354 | 0 | 236157 | CALPDPSTLTPRSVRSV<br>PGEMRLAS | 3.22 | 0.01 | 4.08 | 1.20 | 0.22 | 0.85 |
| 8355 | 0 | 236157 | CALPDPSTLTPRSVRSV<br>PGEMRLAS | 3.22 | 0.01 | 4.08 | 1.20 | 0.22 | 2.92 |
| 8356 | 0 | 236157 | CALPDPSTLTPRSVRSV<br>PGEMRLAS | 3.22 | 0.01 | 4.08 | 1.20 | 0.22 | 0.28 |
| 8357 | 0 | 236157 | CALPDPSTLTPRSVRSV<br>PGEMRLAS | 3.22 | 0.01 | 4.08 | 1.20 | 0.22 | 1.34 |
| 8358 | 0 | 6007   | CAMFTC                        | 1.91 | 0.01 | 2.40 | 0.44 | 0.85 | 0.28 |
| 8359 | 0 | 226009 | CAMQDAVSTSCVNKTD<br>NSCQ      | 2.98 | 0.01 | 3.55 | 3.16 | 0.22 | 0.28 |
| 8360 | 0 | 226010 | CAMQDSGLQCINGTNS<br>RCQT      | 2.95 | 0.01 | 3.93 | 3.16 | 0.22 | 0.28 |
| 8361 | 0 | 6011   | CANLLLQYGSFCTQLNR<br>ALSGIA   | 3.09 | 0.01 | 2.45 | 1.20 | 0.22 | 0.85 |

|      |   |        |                             |      |      |      |      |      |      |
|------|---|--------|-----------------------------|------|------|------|------|------|------|
| 8362 | 0 | 6011   | CANLLLQYGSFCTQLNR<br>ALSGIA | 3.09 | 0.01 | 2.45 | 0.44 | 0.85 | 0.28 |
| 8363 | 0 | 125772 | CAPEPGIPGETRG               | 2.57 | 0.01 | 0.78 | 1.20 | 0.22 | 0.28 |
| 8364 | 0 | 125772 | CAPEPGIPGETRG               | 2.57 | 0.01 | 0.78 | 1.20 | 0.22 | 0.28 |
| 8365 | 0 | 125772 | CAPEPGIPGETRG               | 2.57 | 0.01 | 0.78 | 1.20 | 0.22 | 0.28 |
| 8366 | 0 | 125772 | CAPEPGIPGETRG               | 2.57 | 0.01 | 0.78 | 1.20 | 0.22 | 0.28 |
| 8367 | 0 | 6015   | CAPESIEFPVSEARVLED          | 2.85 | 0.01 | 0.78 | 0.44 | 0.85 | 0.28 |
| 8368 | 0 | 6015   | CAPESIEFPVSEARVLED          | 2.85 | 0.01 | 0.78 | 0.44 | 1.13 | 0.28 |
| 8369 | 0 | 6015   | CAPESIEFPVSEARVLED          | 2.85 | 0.01 | 0.78 | 1.12 | 0.22 | 0.28 |
| 8370 | 0 | 6015   | CAPESIEFPVSEARVLED          | 2.85 | 0.01 | 0.78 | 1.12 | 0.22 | 0.28 |
| 8371 | 0 | 6015   | CAPESIEFPVSEARVLED          | 2.85 | 0.01 | 0.78 | 1.15 | 0.22 | 0.28 |
| 8372 | 0 | 6015   | CAPESIEFPVSEARVLED          | 2.85 | 0.01 | 0.78 | 1.15 | 0.22 | 0.28 |
| 8373 | 0 | 6015   | CAPESIEFPVSEARVLED          | 2.85 | 0.01 | 0.78 | 0.44 | 1.13 | 0.28 |
| 8374 | 0 | 6015   | CAPESIEFPVSEARVLED          | 2.85 | 0.01 | 0.78 | 0.44 | 1.13 | 0.85 |
| 8375 | 0 | 6015   | CAPESIEFPVSEARVLED          | 2.85 | 0.01 | 0.78 | 0.44 | 1.13 | 1.34 |
| 8376 | 0 | 6015   | CAPESIEFPVSEARVLED          | 2.85 | 0.01 | 0.78 | 0.44 | 1.13 | 1.75 |
| 8377 | 0 | 78938  | CAPGQNLCY                   | 2.22 | 0.01 | 3.33 | 2.43 | 0.22 | 0.28 |
| 8378 | 0 | 78938  | CAPGQNLCY                   | 2.22 | 0.01 | 3.33 | 2.43 | 0.22 | 0.28 |
| 8379 | 0 | 78938  | CAPGQNLCY                   | 2.22 | 0.01 | 3.33 | 2.43 | 0.22 | 0.28 |
| 8380 | 0 | 78938  | CAPGQNLCY                   | 2.22 | 0.01 | 3.33 | 2.43 | 0.22 | 0.28 |
| 8381 | 0 | 78938  | CAPGQNLCY                   | 2.22 | 0.01 | 3.33 | 2.43 | 0.22 | 0.28 |
| 8382 | 0 | 78938  | CAPGQNLCY                   | 2.22 | 0.01 | 3.33 | 2.43 | 0.22 | 0.28 |
| 8383 | 0 | 78938  | CAPGQNLCY                   | 2.22 | 0.01 | 3.33 | 2.43 | 0.22 | 1.34 |
| 8384 | 0 | 78938  | CAPGQNLCY                   | 2.22 | 0.01 | 3.33 | 2.43 | 0.22 | 1.75 |
| 8385 | 0 | 131836 | CAPGSCFPGV                  | 2.34 | 0.01 | 3.28 | 0.68 | 0.22 | 1.27 |
| 8386 | 0 | 131836 | CAPGSCFPGV                  | 2.34 | 0.01 | 3.28 | 0.68 | 0.22 | 0.85 |
| 8387 | 0 | 170452 | CAPICPPPSIPTFA              | 2.73 | 0.01 | 0.78 | 0.44 | 1.41 | 0.28 |
| 8388 | 0 | 105696 | CAPLKPAKSA                  | 2.35 | 0.01 | 0.78 | 3.75 | 0.22 | 1.27 |
| 8389 | 0 | 105696 | CAPLKPAKSA                  | 2.35 | 0.01 | 0.78 | 3.75 | 0.22 | 1.27 |
| 8390 | 0 | 139698 | CAPPPSSQF                   | 2.23 | 0.01 | 2.75 | 1.20 | 0.22 | 0.28 |
| 8391 | 0 | 139698 | CAPPPSSQF                   | 2.23 | 0.01 | 2.75 | 0.68 | 0.22 | 0.28 |
| 8392 | 0 | 139698 | CAPPPSSQF                   | 2.23 | 0.01 | 2.75 | 0.68 | 0.22 | 0.28 |
| 8393 | 0 | 139698 | CAPPPSSQF                   | 2.23 | 0.01 | 2.75 | 0.68 | 0.22 | 0.28 |
| 8394 | 0 | 139698 | CAPPPSSQF                   | 2.23 | 0.01 | 2.75 | 0.68 | 0.22 | 1.66 |
| 8395 | 0 | 96136  | CAQKKIIAEKTKIPA             | 2.71 | 0.01 | 1.60 | 0.44 | 1.23 | 0.28 |
| 8396 | 0 | 6020   | CAQQWPEWYPC                 | 2.43 | 0.01 | 0.90 | 1.15 | 0.22 | 1.39 |
| 8397 | 0 | 6020   | CAQQWPEWYPC                 | 2.43 | 0.01 | 0.90 | 0.68 | 0.22 | 0.28 |

|      |   |        |                              |      |      |      |      |      |      |
|------|---|--------|------------------------------|------|------|------|------|------|------|
| 8398 | 0 | 117765 | CAQTDRHSLS                   | 2.29 | 0.01 | 2.83 | 1.12 | 0.22 | 0.28 |
| 8399 | 0 | 117765 | CAQTDRHSLS                   | 2.29 | 0.01 | 2.83 | 1.12 | 0.22 | 0.28 |
| 8400 | 0 | 117765 | CAQTDRHSLS                   | 2.29 | 0.01 | 2.83 | 1.12 | 0.22 | 0.28 |
| 8401 | 0 | 117765 | CAQTDRHSLS                   | 2.29 | 0.01 | 2.83 | 0.44 | 1.13 | 0.28 |
| 8402 | 0 | 117765 | CAQTDRHSLS                   | 2.29 | 0.01 | 2.83 | 0.44 | 1.13 | 0.28 |
| 8403 | 0 | 117765 | CAQTDRHSLS                   | 2.29 | 0.01 | 2.83 | 1.12 | 0.22 | 0.28 |
| 8404 | 0 | 95268  | CAQVYNKLGMY                  | 2.43 | 0.01 | 2.88 | 0.44 | 1.23 | 0.85 |
| 8405 | 0 | 95268  | CAQVYNKLGMY                  | 2.43 | 0.01 | 2.88 | 1.12 | 0.22 | 0.85 |
| 8406 | 0 | 6023   | CAREYGTNRWVC                 | 2.46 | 0.01 | 0.90 | 0.44 | 1.23 | 1.39 |
| 8407 | 0 | 6023   | CAREYGTNRWVC                 | 2.46 | 0.01 | 0.90 | 0.44 | 1.23 | 1.39 |
| 8408 | 0 | 79523  | CARIWNGTQRACTFWA<br>VNAYS    | 2.99 | 0.01 | 2.85 | 0.44 | 1.59 | 0.28 |
| 8409 | 0 | 112062 | CARMRDG                      | 2.02 | 0.01 | 0.78 | 0.44 | 1.13 | 0.28 |
| 8410 | 0 | 6025   | CARPHGASEESQSVTFN<br>KPLNTPQ | 3.09 | 0.01 | 0.90 | 2.13 | 0.22 | 0.28 |
| 8411 | 0 | 6027   | CARSLATLFSPPGARQQ            | 2.73 | 0.01 | 1.72 | 0.68 | 0.22 | 0.28 |
| 8412 | 0 | 6027   | CARSLATLFSPPGARQQ            | 2.73 | 0.01 | 1.72 | 0.68 | 0.22 | 1.27 |
| 8413 | 0 | 6028   | CARSLVNLFPPGARQN             | 2.71 | 0.01 | 1.72 | 0.68 | 0.22 | 0.28 |
| 8414 | 0 | 238247 | CASGETICYKTFWNT              | 2.65 | 0.01 | 2.56 | 2.02 | 0.22 | 0.85 |
| 8415 | 0 | 238247 | CASGETICYKTFWNT              | 2.65 | 0.01 | 2.56 | 1.20 | 0.22 | 0.85 |
| 8416 | 0 | 6031   | CASGLTSLFSPGSKQH             | 2.73 | 0.01 | 1.72 | 0.68 | 0.22 | 0.28 |
| 8417 | 0 | 103822 | CASHLPYIEQGMQLAEQ<br>FKQ     | 2.91 | 0.01 | 1.72 | 0.44 | 0.85 | 0.28 |
| 8418 | 0 | 103822 | CASHLPYIEQGMQLAEQ<br>FKQ     | 2.91 | 0.01 | 1.72 | 0.44 | 0.85 | 0.28 |
| 8419 | 0 | 6032   | CASHLPYIEQGMQLAEQ<br>FKQKA   | 3.02 | 0.01 | 1.96 | 0.44 | 1.59 | 2.35 |
| 8420 | 0 | 6032   | CASHLPYIEQGMQLAEQ<br>FKQKA   | 3.02 | 0.01 | 1.96 | 0.68 | 0.22 | 1.48 |
| 8421 | 0 | 6032   | CASHLPYIEQGMQLAEQ<br>FKQKA   | 3.02 | 0.01 | 1.96 | 0.68 | 0.22 | 0.28 |
| 8422 | 0 | 6034   | CASKAALIEEGQRMAL<br>MLKS     | 2.96 | 0.01 | 1.96 | 0.44 | 0.85 | 0.28 |
| 8423 | 0 | 80615  | CASPYEGRYRDMYDALR            | 2.79 | 0.01 | 2.14 | 3.44 | 0.22 | 0.28 |
| 8424 | 0 | 80615  | CASPYEGRYRDMYDALR            | 2.79 | 0.01 | 2.14 | 3.44 | 0.22 | 0.28 |
| 8425 | 0 | 6040   | CASYHTVSLLRSTSQKS            | 2.79 | 0.01 | 2.48 | 0.44 | 0.85 | 0.28 |
| 8426 | 0 | 6040   | CASYHTVSLLRSTSQKS            | 2.79 | 0.01 | 2.48 | 1.20 | 0.22 | 0.28 |
| 8427 | 0 | 261862 | CATAQEEGQYDAADV              | 2.68 | 0.01 | 1.61 | 0.44 | 0.85 | 1.28 |
| 8428 | 0 | 135449 | CATLRVYKGG                   | 2.26 | 0.01 | 0.90 | 0.44 | 1.41 | 1.27 |

|      |   |        |                 |      |      |      |      |      |      |
|------|---|--------|-----------------|------|------|------|------|------|------|
| 8429 | 0 | 135449 | CATLRVYKGG      | 2.26 | 0.01 | 0.90 | 0.44 | 1.41 | 0.28 |
| 8430 | 0 | 135449 | CATLRVYKGG      | 2.26 | 0.01 | 0.90 | 0.44 | 1.41 | 1.34 |
| 8431 | 0 | 135449 | CATLRVYKGG      | 2.26 | 0.01 | 0.90 | 0.44 | 1.13 | 0.28 |
| 8432 | 0 | 135449 | CATLRVYKGG      | 2.26 | 0.01 | 0.90 | 0.44 | 1.41 | 1.75 |
| 8433 | 0 | 135449 | CATLRVYKGG      | 2.26 | 0.01 | 0.90 | 0.44 | 1.41 | 1.75 |
| 8434 | 0 | 132194 | CATRLFPDFFTRVAL | 2.69 | 0.01 | 0.78 | 0.44 | 1.13 | 0.85 |
| 8435 | 0 | 132194 | CATRLFPDFFTRVAL | 2.69 | 0.01 | 0.78 | 0.44 | 1.13 | 1.27 |
| 8436 | 0 | 80618  | CAVFVRDQGSV     | 2.39 | 0.01 | 2.14 | 3.44 | 0.22 | 0.28 |
| 8437 | 0 | 6044   | CAVFVRSGQPVIGA  | 2.61 | 0.01 | 2.14 | 1.12 | 0.22 | 0.28 |
| 8438 | 0 | 6050   | CAVRQHRL        | 2.12 | 0.01 | 3.72 | 2.37 | 0.22 | 0.85 |
| 8439 | 0 | 116284 | CAYSVAHLC       | 2.24 | 0.01 | 0.90 | 3.00 | 0.22 | 1.27 |
| 8440 | 0 | 116284 | CAYSVAHLC       | 2.24 | 0.01 | 0.90 | 3.00 | 0.22 | 1.27 |
| 8441 | 0 | 122718 | CCAFKNQKKIRGILE | 2.64 | 0.01 | 0.78 | 3.01 | 0.22 | 1.27 |
| 8442 | 0 | 122718 | CCAFKNQKKIRGILE | 2.64 | 0.01 | 0.78 | 3.01 | 0.22 | 0.28 |
| 8443 | 0 | 141608 | CCAIRGSFYDLEDIK | 2.69 | 0.01 | 1.66 | 1.20 | 0.22 | 0.28 |
| 8444 | 0 | 105697 | CCAVLNGAY       | 2.22 | 0.01 | 0.90 | 3.01 | 0.22 | 0.28 |
| 8445 | 0 | 509348 | CCCTKPSDGNCTCIP | 2.69 | 0.01 | 2.08 | 0.68 | 0.22 | 2.75 |
| 8446 | 0 | 509348 | CCCTKPSDGNCTCIP | 2.69 | 0.01 | 2.08 | 0.68 | 0.22 | 1.34 |
| 8447 | 0 | 509348 | CCCTKPSDGNCTCIP | 2.69 | 0.01 | 2.08 | 0.68 | 0.22 | 1.75 |
| 8448 | 0 | 509348 | CCCTKPSDGNCTCIP | 2.69 | 0.01 | 2.08 | 0.68 | 0.22 | 1.75 |
| 8449 | 0 | 6059   | CCDLAP          | 1.89 | 0.01 | 1.96 | 0.44 | 0.85 | 0.28 |
| 8450 | 0 | 6060   | CCDLAPEARQAIKS  | 2.58 | 0.01 | 1.96 | 0.44 | 0.85 | 0.28 |
| 8451 | 0 | 6060   | CCDLAPEARQAIKS  | 2.58 | 0.01 | 1.96 | 0.44 | 0.85 | 0.28 |
| 8452 | 0 | 6060   | CCDLAPEARQAIKS  | 2.58 | 0.01 | 1.96 | 0.44 | 0.85 | 0.28 |
| 8453 | 0 | 6060   | CCDLAPEARQAIKS  | 2.58 | 0.01 | 1.96 | 0.44 | 1.41 | 0.28 |
| 8454 | 0 | 6060   | CCDLAPEARQAIKS  | 2.58 | 0.01 | 1.96 | 0.44 | 0.85 | 0.28 |
| 8455 | 0 | 6061   | CCDLDPQARVAIKS  | 2.58 | 0.01 | 2.41 | 0.44 | 0.85 | 0.28 |
| 8456 | 0 | 6061   | CCDLDPQARVAIKS  | 2.58 | 0.01 | 2.41 | 0.44 | 0.85 | 0.28 |
| 8457 | 0 | 6061   | CCDLDPQARVAIKS  | 2.58 | 0.01 | 2.41 | 0.44 | 0.85 | 0.28 |
| 8458 | 0 | 6061   | CCDLDPQARVAIKS  | 2.58 | 0.01 | 2.41 | 0.44 | 1.41 | 0.28 |
| 8459 | 0 | 6061   | CCDLDPQARVAIKS  | 2.58 | 0.01 | 2.41 | 0.44 | 0.85 | 0.28 |
| 8460 | 0 | 91165  | CCELCCNPACAGCY  | 2.64 | 0.01 | 3.75 | 2.13 | 0.22 | 0.28 |
| 8461 | 0 | 91165  | CCELCCNPACAGCY  | 2.64 | 0.01 | 3.75 | 2.22 | 0.22 | 1.34 |
| 8462 | 0 | 91165  | CCELCCNPACAGCY  | 2.64 | 0.01 | 3.75 | 2.13 | 0.22 | 1.34 |
| 8463 | 0 | 91165  | CCELCCNPACAGCY  | 2.64 | 0.01 | 3.75 | 2.22 | 0.22 | 1.34 |
| 8464 | 0 | 91165  | CCELCCNPACAGCY  | 2.64 | 0.01 | 3.75 | 2.13 | 0.22 | 1.34 |
| 8465 | 0 | 91165  | CCELCCNPACAGCY  | 2.64 | 0.01 | 3.75 | 2.22 | 0.22 | 1.75 |
| 8466 | 0 | 91165  | CCELCCNPACAGCY  | 2.64 | 0.01 | 3.75 | 2.13 | 0.22 | 1.75 |
| 8467 | 0 | 146795 | CCELCCNPQCAGCY  | 2.63 | 0.01 | 0.90 | 1.12 | 0.22 | 0.85 |
| 8468 | 0 | 146795 | CCELCCNPQCAGCY  | 2.63 | 0.01 | 0.90 | 1.12 | 0.22 | 0.28 |
| 8469 | 0 | 146795 | CCELCCNPQCAGCY  | 2.63 | 0.01 | 0.90 | 1.12 | 0.22 | 0.28 |
| 8470 | 0 | 146795 | CCELCCNPQCAGCY  | 2.63 | 0.01 | 0.90 | 1.12 | 0.22 | 1.34 |
| 8471 | 0 | 146795 | CCELCCNPQCAGCY  | 2.63 | 0.01 | 0.90 | 1.12 | 0.22 | 1.34 |
| 8472 | 0 | 94441  | CCHPAC          | 1.92 | 0.01 | 3.22 | 2.37 | 0.22 | 0.28 |
| 8473 | 0 | 94441  | CCHPAC          | 1.92 | 0.01 | 3.22 | 1.20 | 0.22 | 0.28 |
| 8474 | 0 | 94442  | CCHPACG         | 2.04 | 0.01 | 3.22 | 2.37 | 0.22 | 0.28 |
| 8475 | 0 | 94442  | CCHPACG         | 2.04 | 0.01 | 3.22 | 1.20 | 0.22 | 0.28 |

|      |   |        |                                                  |      |      |      |      |      |      |
|------|---|--------|--------------------------------------------------|------|------|------|------|------|------|
| 8476 | 0 | 94443  | CCHPACGK                                         | 2.14 | 0.01 | 3.22 | 2.37 | 0.22 | 0.28 |
| 8477 | 0 | 94444  | CCHPACGKH                                        | 2.25 | 0.01 | 3.22 | 2.37 | 0.22 | 0.28 |
| 8478 | 0 | 94445  | CCHPACGKHF                                       | 2.33 | 0.01 | 3.22 | 2.37 | 0.22 | 0.28 |
| 8479 | 0 | 94445  | CCHPACGKHF                                       | 2.33 | 0.01 | 3.22 | 2.37 | 0.22 | 0.28 |
| 8480 | 0 | 94446  | CCHPACGKN                                        | 2.23 | 0.01 | 4.23 | 2.37 | 0.22 | 0.28 |
| 8481 | 0 | 94447  | CCHPACGKNY                                       | 2.31 | 0.01 | 4.23 | 2.37 | 0.22 | 0.28 |
| 8482 | 0 | 94447  | CCHPACGKNY                                       | 2.31 | 0.01 | 4.23 | 1.20 | 0.22 | 0.28 |
| 8483 | 0 | 94447  | CCHPACGKNY                                       | 2.31 | 0.01 | 4.23 | 1.20 | 0.22 | 0.28 |
| 8484 | 0 | 102333 | CCKRNDEVLFRLNHAE<br>TLR                          | 2.94 | 0.01 | 3.44 | 0.68 | 0.22 | 0.28 |
| 8485 | 0 | 99121  | CCNELNEFENNQRCM                                  | 2.70 | 0.01 | 2.16 | 0.44 | 1.23 | 1.48 |
| 8486 | 0 | 6067   | CCNLEPEARKVISS                                   | 2.56 | 0.01 | 2.59 | 0.44 | 0.85 | 0.28 |
| 8487 | 0 | 6067   | CCNLEPEARKVISS                                   | 2.56 | 0.01 | 2.59 | 0.44 | 0.85 | 0.28 |
| 8488 | 0 | 6067   | CCNLEPEARKVISS                                   | 2.56 | 0.01 | 2.59 | 0.44 | 0.85 | 0.28 |
| 8489 | 0 | 6067   | CCNLEPEARKVISS                                   | 2.56 | 0.01 | 2.59 | 0.44 | 0.85 | 0.28 |
| 8490 | 0 | 6067   | CCNLEPEARKVISS                                   | 2.56 | 0.01 | 2.59 | 0.44 | 1.41 | 0.28 |
| 8491 | 0 | 94449  | CCNPA                                            | 1.75 | 0.01 | 3.22 | 2.37 | 0.22 | 0.28 |
| 8492 | 0 | 94454  | CCNPACGRHY                                       | 2.31 | 0.01 | 3.22 | 1.20 | 0.22 | 0.28 |
| 8493 | 0 | 6068   | CCPDKNKS                                         | 2.13 | 0.01 | 4.15 | 3.03 | 0.22 | 0.28 |
| 8494 | 0 | 6068   | CCPDKNKS                                         | 2.13 | 0.01 | 4.15 | 3.03 | 0.22 | 0.28 |
| 8495 | 0 | 6068   | CCPDKNKS                                         | 2.13 | 0.01 | 4.15 | 3.03 | 0.22 | 0.85 |
| 8496 | 0 | 6068   | CCPDKNKS                                         | 2.13 | 0.01 | 4.15 | 3.03 | 0.22 | 0.85 |
| 8497 | 0 | 6073   | CCRGRCNKKGEQVGM                                  | 2.69 | 0.01 | 2.43 | 0.44 | 1.59 | 0.28 |
| 8498 | 0 | 6074   | CCRHKQKDVGDVKQTL<br>PPS                          | 2.88 | 0.01 | 0.90 | 4.08 | 0.22 | 0.28 |
| 8499 | 0 | 6075   | CCRHKQKDVGPVKQTL<br>PPS                          | 2.88 | 0.01 | 0.90 | 4.08 | 0.22 | 0.28 |
| 8500 | 0 | 6076   | CCRHKQKIIAPAKQLLPP<br>SGSGRRGDMGSLAARV<br>VKQPCG | 3.63 | 0.01 | 0.90 | 2.37 | 2.25 | 1.75 |
| 8501 | 0 | 6076   | CCRHKQKIIAPAKQLLPP<br>SGSGRRGDMGSLAARV<br>VKQPCG | 3.63 | 0.01 | 0.90 | 2.22 | 0.22 | 1.34 |
| 8502 | 0 | 6076   | CCRHKQKIIAPAKQLLPP<br>SGSGRRGDMGSLAARV<br>VKQPCG | 3.63 | 0.01 | 0.90 | 2.22 | 0.22 | 1.34 |
| 8503 | 0 | 6076   | CCRHKQKIIAPAKQLLPP<br>SGSGRRGDMGSLAARV<br>VKQPCG | 3.63 | 0.01 | 0.90 | 2.37 | 2.25 | 1.75 |
| 8504 | 0 | 6076   | CCRHKQKIIAPAKQLLPP<br>SGSGRRGDMGSLAARV<br>VKQPCG | 3.63 | 0.01 | 0.90 | 2.37 | 2.25 | 1.75 |
| 8505 | 0 | 6076   | CCRHKQKIIAPAKQLLPP<br>SGSGRRGDMGSLAARV<br>VKQPCG | 3.63 | 0.01 | 0.90 | 2.37 | 0.22 | 1.34 |

|      |   |       |                                                  |      |      |      |      |      |      |
|------|---|-------|--------------------------------------------------|------|------|------|------|------|------|
| 8506 | 0 | 6076  | CCRHKQKIIAPAKQLLPP<br>SGSGRRGDMGSLAARV<br>VKQPCG | 3.63 | 0.01 | 0.90 | 2.37 | 0.22 | 0.28 |
| 8507 | 0 | 6076  | CCRHKQKIIAPAKQLLPP<br>SGSGRRGDMGSLAARV<br>VKQPCG | 3.63 | 0.01 | 0.90 | 2.37 | 0.22 | 0.28 |
| 8508 | 0 | 6076  | CCRHKQKIIAPAKQLLPP<br>SGSGRRGDMGSLAARV<br>VKQPCG | 3.63 | 0.01 | 0.90 | 2.37 | 0.22 | 0.28 |
| 8509 | 0 | 6076  | CCRHKQKIIAPAKQLLPP<br>SGSGRRGDMGSLAARV<br>VKQPCG | 3.63 | 0.01 | 0.90 | 2.37 | 0.22 | 0.28 |
| 8510 | 0 | 6076  | CCRHKQKIIAPAKQLLPP<br>SGSGRRGDMGSLAARV<br>VKQPCG | 3.63 | 0.01 | 0.90 | 2.37 | 0.22 | 0.28 |
| 8511 | 0 | 6076  | CCRHKQKIIAPAKQLLPP<br>SGSGRRGDMGSLAARV<br>VKQPCG | 3.63 | 0.01 | 0.90 | 2.22 | 2.25 | 1.75 |
| 8512 | 0 | 6076  | CCRHKQKIIAPAKQLLPP<br>SGSGRRGDMGSLAARV<br>VKQPCG | 3.63 | 0.01 | 0.90 | 2.37 | 0.22 | 0.28 |
| 8513 | 0 | 6076  | CCRHKQKIIAPAKQLLPP<br>SGSGRRGDMGSLAARV<br>VKQPCG | 3.63 | 0.01 | 0.90 | 2.59 | 0.22 | 1.75 |
| 8514 | 0 | 6076  | CCRHKQKIIAPAKQLLPP<br>SGSGRRGDMGSLAARV<br>VKQPCG | 3.63 | 0.01 | 0.90 | 2.59 | 0.22 | 1.34 |
| 8515 | 0 | 95270 | CCRHKQKIIAPAKQLLPP<br>SVPNLRGDLQVLAQKVA<br>RTPCG | 3.63 | 0.01 | 0.90 | 2.59 | 0.22 | 1.75 |
| 8516 | 0 | 95270 | CCRHKQKIIAPAKQLLPP<br>SVPNLRGDLQVLAQKVA<br>RTPCG | 3.63 | 0.01 | 0.90 | 2.59 | 0.22 | 1.75 |
| 8517 | 0 | 95270 | CCRHKQKIIAPAKQLLPP<br>SVPNLRGDLQVLAQKVA<br>RTPCG | 3.63 | 0.01 | 0.90 | 2.59 | 0.22 | 1.34 |
| 8518 | 0 | 6077  | CCRHKQKIVAPVKQTLP<br>PS                          | 2.88 | 0.01 | 0.90 | 4.08 | 0.22 | 0.28 |
| 8519 | 0 | 95271 | CCRHKQKIVAPVKQTLP<br>PSGSGRRGDMGSLAAR<br>VVKQPCG | 3.63 | 0.01 | 0.90 | 2.59 | 0.22 | 1.75 |
| 8520 | 0 | 95271 | CCRHKQKIVAPVKQTLP<br>PSGSGRRGDMGSLAAR<br>VVKQPCG | 3.63 | 0.01 | 0.90 | 2.59 | 0.22 | 1.34 |
| 8521 | 0 | 6078  | CCRHKQKIVAPVKQTLP<br>PSVPNLRGDLQVLAQKV<br>ARTPCG | 3.64 | 0.01 | 0.90 | 2.37 | 2.25 | 1.75 |

|      |   |      |                                                  |      |      |      |      |      |      |
|------|---|------|--------------------------------------------------|------|------|------|------|------|------|
| 8522 | 0 | 6078 | CCRHKQKIVAPVKQTLP<br>PSVPNLRGDLQVLAQKV<br>ARTPCG | 3.64 | 0.01 | 0.90 | 2.37 | 0.22 | 0.28 |
| 8523 | 0 | 6078 | CCRHKQKIVAPVKQTLP<br>PSVPNLRGDLQVLAQKV<br>ARTPCG | 3.64 | 0.01 | 0.90 | 2.37 | 0.22 | 0.28 |
| 8524 | 0 | 6078 | CCRHKQKIVAPVKQTLP<br>PSVPNLRGDLQVLAQKV<br>ARTPCG | 3.64 | 0.01 | 0.90 | 2.37 | 0.22 | 0.28 |
| 8525 | 0 | 6078 | CCRHKQKIVAPVKQTLP<br>PSVPNLRGDLQVLAQKV<br>ARTPCG | 3.64 | 0.01 | 0.90 | 2.37 | 0.22 | 1.34 |
| 8526 | 0 | 6078 | CCRHKQKIVAPVKQTLP<br>PSVPNLRGDLQVLAQKV<br>ARTPCG | 3.64 | 0.01 | 0.90 | 2.22 | 0.22 | 1.34 |
| 8527 | 0 | 6078 | CCRHKQKIVAPVKQTLP<br>PSVPNLRGDLQVLAQKV<br>ARTPCG | 3.64 | 0.01 | 0.90 | 2.37 | 0.22 | 0.28 |
| 8528 | 0 | 6078 | CCRHKQKIVAPVKQTLP<br>PSVPNLRGDLQVLAQKV<br>ARTPCG | 3.64 | 0.01 | 0.90 | 2.37 | 2.25 | 1.75 |
| 8529 | 0 | 6078 | CCRHKQKIVAPVKQTLP<br>PSVPNLRGDLQVLAQKV<br>ARTPCG | 3.64 | 0.01 | 0.90 | 2.22 | 0.22 | 1.34 |
| 8530 | 0 | 6078 | CCRHKQKIVAPVKQTLP<br>PSVPNLRGDLQVLAQKV<br>ARTPCG | 3.64 | 0.01 | 0.90 | 2.37 | 0.22 | 0.28 |
| 8531 | 0 | 6078 | CCRHKQKIVAPVKQTLP<br>PSVPNLRGDLQVLAQKV<br>ARTPCG | 3.64 | 0.01 | 0.90 | 2.37 | 2.25 | 1.75 |
| 8532 | 0 | 6078 | CCRHKQKIVAPVKQTLP<br>PSVPNLRGDLQVLAQKV<br>ARTPCG | 3.64 | 0.01 | 0.90 | 2.22 | 2.25 | 1.75 |
| 8533 | 0 | 6078 | CCRHKQKIVAPVKQTLP<br>PSVPNLRGDLQVLAQKV<br>ARTPCG | 3.64 | 0.01 | 0.90 | 2.22 | 0.22 | 0.28 |
| 8534 | 0 | 6078 | CCRHKQKIVAPVKQTLP<br>PSVPNLRGDLQVLAQKV<br>ARTPCG | 3.64 | 0.01 | 0.90 | 3.57 | 0.22 | 1.34 |
| 8535 | 0 | 6078 | CCRHKQKIVAPVKQTLP<br>PSVPNLRGDLQVLAQKV<br>ARTPCG | 3.64 | 0.01 | 0.90 | 3.57 | 2.25 | 1.75 |
| 8536 | 0 | 6078 | CCRHKQKIVAPVKQTLP<br>PSVPNLRGDLQVLAQKV<br>ARTPCG | 3.64 | 0.01 | 0.90 | 3.57 | 0.22 | 1.57 |



|      |   |      |                                                  |      |      |      |      |      |      |
|------|---|------|--------------------------------------------------|------|------|------|------|------|------|
| 8537 | 0 | 6078 | CCRHKQKIVAPVKQTLP<br>PSVPNLRGDLQVLAQKV<br>ARTPCG | 3.64 | 0.01 | 0.90 | 3.57 | 0.22 | 0.28 |
| 8538 | 0 | 6078 | CCRHKQKIVAPVKQTLP<br>PSVPNLRGDLQVLAQKV<br>ARTPCG | 3.64 | 0.01 | 0.90 | 2.37 | 0.22 | 0.28 |
| 8539 | 0 | 6078 | CCRHKQKIVAPVKQTLP<br>PSVPNLRGDLQVLAQKV<br>ARTPCG | 3.64 | 0.01 | 0.90 | 4.08 | 0.22 | 0.28 |
| 8540 | 0 | 6078 | CCRHKQKIVAPVKQTLP<br>PSVPNLRGDLQVLAQKV<br>ARTPCG | 3.64 | 0.01 | 0.90 | 2.59 | 0.22 | 1.34 |
| 8541 | 0 | 6078 | CCRHKQKIVAPVKQTLP<br>PSVPNLRGDLQVLAQKV<br>ARTPCG | 3.64 | 0.01 | 0.90 | 3.57 | 0.22 | 1.34 |
| 8542 | 0 | 6078 | CCRHKQKIVAPVKQTLP<br>PSVPNLRGDLQVLAQKV<br>ARTPCG | 3.64 | 0.01 | 0.90 | 2.00 | 0.22 | 1.27 |
| 8543 | 0 | 6078 | CCRHKQKIVAPVKQTLP<br>PSVPNLRGDLQVLAQKV<br>ARTPCG | 3.64 | 0.01 | 0.90 | 2.00 | 0.22 | 0.28 |
| 8544 | 0 | 6078 | CCRHKQKIVAPVKQTLP<br>PSVPNLRGDLQVLAQKV<br>ARTPCG | 3.64 | 0.01 | 0.90 | 2.00 | 0.22 | 0.28 |
| 8545 | 0 | 6078 | CCRHKQKIVAPVKQTLP<br>PSVPNLRGDLQVLAQKV<br>ARTPCG | 3.64 | 0.01 | 0.90 | 2.00 | 0.22 | 1.27 |
| 8546 | 0 | 6078 | CCRHKQKIVAPVKQTLP<br>PSVPNLRGDLQVLAQKV<br>ARTPCG | 3.64 | 0.01 | 0.90 | 2.00 | 0.22 | 1.27 |
| 8547 | 0 | 6078 | CCRHKQKIVAPVKQTLP<br>PSVPNLRGDLQVLAQKV<br>ARTPCG | 3.64 | 0.01 | 0.90 | 2.00 | 0.22 | 1.27 |
| 8548 | 0 | 6078 | CCRHKQKIVAPVKQTLP<br>PSVPNLRGDLQVLAQKV<br>ARTPCG | 3.64 | 0.01 | 0.90 | 2.00 | 0.22 | 1.34 |
| 8549 | 0 | 6078 | CCRHKQKIVAPVKQTLP<br>PSVPNLRGDLQVLAQKV<br>ARTPCG | 3.64 | 0.01 | 0.90 | 2.00 | 0.22 | 1.75 |
| 8550 | 0 | 6078 | CCRHKQKIVAPVKQTLP<br>PSVPNLRGDLQVLAQKV<br>ARTPCG | 3.64 | 0.01 | 0.90 | 2.59 | 0.22 | 1.75 |
| 8551 | 0 | 6078 | CCRHKQKIVAPVKQTLP<br>PSVPNLRGDLQVLAQKV<br>ARTPCG | 3.64 | 0.01 | 0.90 | 2.59 | 0.22 | 1.75 |

|      |   |      |                                                 |      |      |      |      |      |      |
|------|---|------|-------------------------------------------------|------|------|------|------|------|------|
| 8552 | 0 | 6078 | CCRHKQKIVAPVKQTL<br>PSVPNLRGDLQVLAQKV<br>ARTPCG | 3.64 | 0.01 | 0.90 | 2.59 | 0.22 | 1.34 |
| 8553 | 0 | 6078 | CCRHKQKIVAPVKQTL<br>PSVPNLRGDLQVLAQKV<br>ARTPCG | 3.64 | 0.01 | 0.90 | 4.93 | 0.22 | 0.28 |
| 8554 | 0 | 6079 | CCRHKQKIVDPVKQTL<br>PS                          | 2.88 | 0.01 | 0.90 | 4.08 | 0.22 | 0.28 |
| 8555 | 0 | 6080 | CCRHKQKIVGDVKQTL<br>PS                          | 2.86 | 0.01 | 0.90 | 4.08 | 0.22 | 0.28 |
| 8556 | 0 | 6082 | CCRHKQPLIAPAKQLLP<br>SASARRGDLAHLAAHA<br>RHPCG  | 3.65 | 0.01 | 0.90 | 2.22 | 0.22 | 1.34 |
| 8557 | 0 | 6082 | CCRHKQPLIAPAKQLLP<br>SASARRGDLAHLAAHA<br>RHPCG  | 3.65 | 0.01 | 0.90 | 2.22 | 0.22 | 1.34 |
| 8558 | 0 | 6082 | CCRHKQPLIAPAKQLLP<br>SASARRGDLAHLAAHA<br>RHPCG  | 3.65 | 0.01 | 0.90 | 2.22 | 0.22 | 1.34 |
| 8559 | 0 | 6082 | CCRHKQPLIAPAKQLLP<br>SASARRGDLAHLAAHA<br>RHPCG  | 3.65 | 0.01 | 0.90 | 2.37 | 2.25 | 1.75 |
| 8560 | 0 | 6082 | CCRHKQPLIAPAKQLLP<br>SASARRGDLAHLAAHA<br>RHPCG  | 3.65 | 0.01 | 0.90 | 2.37 | 2.25 | 1.75 |
| 8561 | 0 | 6082 | CCRHKQPLIAPAKQLLP<br>SASARRGDLAHLAAHA<br>RHPCG  | 3.65 | 0.01 | 0.90 | 2.37 | 0.22 | 1.34 |
| 8562 | 0 | 6082 | CCRHKQPLIAPAKQLLP<br>SASARRGDLAHLAAHA<br>RHPCG  | 3.65 | 0.01 | 0.90 | 2.37 | 0.22 | 0.28 |
| 8563 | 0 | 6082 | CCRHKQPLIAPAKQLLP<br>SASARRGDLAHLAAHA<br>RHPCG  | 3.65 | 0.01 | 0.90 | 2.37 | 0.22 | 1.34 |
| 8564 | 0 | 6082 | CCRHKQPLIAPAKQLLP<br>SASARRGDLAHLAAHA<br>RHPCG  | 3.65 | 0.01 | 0.90 | 2.37 | 2.25 | 1.75 |
| 8565 | 0 | 6082 | CCRHKQPLIAPAKQLLP<br>SASARRGDLAHLAAHA<br>RHPCG  | 3.65 | 0.01 | 0.90 | 2.37 | 0.22 | 0.28 |
| 8566 | 0 | 6082 | CCRHKQPLIAPAKQLLP<br>SASARRGDLAHLAAHA<br>RHPCG  | 3.65 | 0.01 | 0.90 | 2.37 | 0.22 | 0.28 |
| 8567 | 0 | 6082 | CCRHKQPLIAPAKQLLP<br>SASARRGDLAHLAAHA<br>RHPCG  | 3.65 | 0.01 | 0.90 | 2.37 | 0.22 | 0.28 |

|      |   |        |                                      |      |      |      |      |      |      |
|------|---|--------|--------------------------------------|------|------|------|------|------|------|
|      |   |        | CCRHKQPLIAPAKQLLP                    |      |      |      |      |      |      |
| 8568 | 0 | 6082   | SASARRGDLAHLAAHA<br>RHPCG            | 3.65 | 0.01 | 0.90 | 2.37 | 0.22 | 0.28 |
|      |   |        | CCRHKQPLIAPAKQLLP                    |      |      |      |      |      |      |
| 8569 | 0 | 6082   | SASARRGDLAHLAAHA<br>RHPCG            | 3.65 | 0.01 | 0.90 | 2.37 | 0.22 | 0.28 |
| 8570 | 0 | 95272  | CCSQWGWCGS                           | 2.36 | 0.01 | 2.60 | 0.44 | 1.23 | 0.85 |
| 8571 | 0 | 95272  | CCSQWGWCGS                           | 2.36 | 0.01 | 2.60 | 1.12 | 0.22 | 0.85 |
| 8572 | 0 | 95272  | CCSQWGWCGS                           | 2.36 | 0.01 | 2.60 | 0.44 | 1.23 | 0.85 |
| 8573 | 0 | 79165  | CCTMPNCTLYVLCE                       | 2.63 | 0.01 | 0.90 | 0.68 | 0.22 | 1.39 |
| 8574 | 0 | 114277 | CDAISNFFKNIGYAN<br>CDALIDALNRRKAQLLA | 2.67 | 0.01 | 4.93 | 0.44 | 1.41 | 1.57 |
| 8575 | 0 | 156853 | RVNKEHEHKLKVVRDQI<br>SH              | 3.54 | 0.01 | 0.78 | 0.44 | 2.82 | 1.39 |
| 8576 | 0 | 111144 | CDATTLH                              | 2.01 | 0.01 | 0.90 | 0.44 | 0.85 | 1.39 |
| 8577 | 0 | 6093   | CDCDRTAA                             | 2.14 | 0.01 | 3.10 | 0.68 | 0.22 | 0.28 |
| 8578 | 0 | 6093   | CDCDRTAA                             | 2.14 | 0.01 | 3.10 | 0.68 | 0.22 | 1.34 |
| 8579 | 0 | 6093   | CDCDRTAA                             | 2.14 | 0.01 | 3.10 | 0.68 | 0.22 | 0.85 |
| 8580 | 0 | 6093   | CDCDRTAA                             | 2.14 | 0.01 | 3.10 | 0.68 | 0.22 | 1.27 |
| 8581 | 0 | 6093   | CDCDRTAA                             | 2.14 | 0.01 | 3.10 | 0.68 | 0.22 | 0.28 |
| 8582 | 0 | 6093   | CDCDRTAA                             | 2.14 | 0.01 | 3.10 | 0.68 | 0.22 | 1.34 |
| 8583 | 0 | 6093   | CDCDRTAA                             | 2.14 | 0.01 | 3.10 | 0.68 | 0.22 | 1.75 |
| 8584 | 0 | 6093   | CDCDRTAA                             | 2.14 | 0.01 | 3.10 | 0.68 | 0.22 | 1.75 |
| 8585 | 0 | 113302 | CDDDDNDGVPSRD<br>NCRLV               | 2.97 | 4.63 | 0.78 | 1.81 | 0.22 | 0.28 |
| 8586 | 0 | 113302 | CDDDDNDGVPSRD<br>NCRLV               | 2.97 | 4.63 | 0.78 | 3.61 | 0.22 | 0.28 |
| 8587 | 0 | 110794 | CDDDDNDGVPSRD<br>NCRLV               | 2.97 | 0.01 | 0.78 | 2.46 | 0.22 | 2.51 |
| 8588 | 0 | 110794 | CDDDDNDGVPSRD<br>NCRLV               | 2.97 | 0.01 | 0.78 | 2.46 | 0.22 | 1.27 |
| 8589 | 0 | 125370 | CDDPRFQ                              | 2.01 | 0.01 | 0.78 | 1.12 | 0.22 | 1.57 |
| 8590 | 0 | 125370 | CDDPRFQ                              | 2.01 | 0.01 | 0.78 | 1.12 | 0.22 | 0.28 |
| 8591 | 0 | 128358 | CDEFKIK                              | 2.12 | 0.01 | 0.78 | 0.44 | 1.13 | 0.28 |
| 8592 | 0 | 243783 | CDELNEMENTQR                         | 2.48 | 0.01 | 2.16 | 0.44 | 1.23 | 1.28 |
| 8593 | 0 | 132196 | CDGIIQGIDSFVIWG                      | 2.70 | 0.01 | 0.78 | 0.44 | 1.41 | 0.28 |
| 8594 | 0 | 187277 | CDGKINYTDKKVCKVP                     | 2.75 | 0.01 | 2.59 | 0.44 | 1.74 | 1.34 |
| 8595 | 0 | 187277 | CDGKINYTDKKVCKVP                     | 2.75 | 0.01 | 2.59 | 0.44 | 1.74 | 1.27 |
| 8596 | 0 | 187277 | CDGKINYTDKKVCKVP                     | 2.75 | 0.01 | 2.59 | 0.44 | 1.74 | 0.28 |
| 8597 | 0 | 423231 | CDGPPGSPTDSARHM                      | 2.68 | 0.01 | 2.51 | 0.44 | 2.35 | 1.28 |
| 8598 | 0 | 135833 | CDGWMLGECILV                         | 2.48 | 0.01 | 0.90 | 1.15 | 0.22 | 0.28 |
| 8599 | 0 | 135833 | CDGWMLGECILV                         | 2.48 | 0.01 | 0.90 | 1.15 | 0.22 | 1.27 |
| 8600 | 0 | 135833 | CDGWMLGECILV                         | 2.48 | 0.01 | 0.90 | 0.68 | 0.22 | 0.28 |

|      |   |        |                             |      |      |      |      |      |      |
|------|---|--------|-----------------------------|------|------|------|------|------|------|
| 8601 | 0 | 6104   | CDGYCKTHLKASSGY             | 2.68 | 0.01 | 2.56 | 2.02 | 0.22 | 0.85 |
| 8602 | 0 | 6104   | CDGYCKTHLKASSGY             | 2.68 | 0.01 | 2.56 | 2.52 | 0.22 | 0.85 |
| 8603 | 0 | 6106   | CDICTNTMDVIKKML             | 2.70 | 0.01 | 2.28 | 0.68 | 0.22 | 0.28 |
| 8604 | 0 | 6106   | CDICTNTMDVIKKML             | 2.70 | 0.01 | 2.28 | 1.20 | 0.22 | 0.28 |
| 8605 | 0 | 6106   | CDICTNTMDVIKKML             | 2.70 | 0.01 | 2.28 | 1.20 | 0.22 | 0.28 |
| 8606 | 0 | 6106   | CDICTNTMDVIKKML             | 2.70 | 0.01 | 2.28 | 1.20 | 0.22 | 1.27 |
| 8607 | 0 | 227058 | CDIENNPGLCYASQM             | 2.62 | 0.01 | 2.97 | 0.44 | 1.59 | 0.28 |
| 8608 | 0 | 227058 | CDIENNPGLCYASQM             | 2.62 | 0.01 | 2.97 | 0.44 | 0.85 | 0.28 |
| 8609 | 0 | 6109   | CDIKDPIRLEPGGPD             | 2.69 | 0.01 | 3.41 | 0.44 | 1.23 | 1.57 |
| 8610 | 0 | 106301 | CDIKTTLPPI                  | 2.31 | 0.01 | 3.08 | 0.44 | 1.23 | 0.85 |
| 8611 | 0 | 106302 | CDIKTTLPPIA                 | 2.48 | 0.01 | 3.08 | 0.44 | 1.23 | 0.85 |
| 8612 | 0 | 6110   | CDIPIGAGICASYHTVS           | 2.80 | 0.01 | 2.48 | 0.44 | 0.85 | 0.28 |
| 8613 | 0 | 115190 | CDKFLDDDLT                  | 2.33 | 0.01 | 1.60 | 0.44 | 1.23 | 0.85 |
| 8614 | 0 | 134015 | CDKNTGDYYEDSYED             | 2.70 | 0.01 | 0.78 | 1.20 | 0.22 | 0.28 |
| 8615 | 0 | 134015 | CDKNTGDYYEDSYED             | 2.70 | 0.01 | 0.78 | 1.20 | 0.22 | 0.85 |
| 8616 | 0 | 134015 | CDKNTGDYYEDSYED             | 2.70 | 0.01 | 0.78 | 0.44 | 1.41 | 0.85 |
| 8617 | 0 | 134015 | CDKNTGDYYEDSYED             | 2.70 | 0.01 | 0.78 | 0.44 | 1.41 | 1.34 |
| 8618 | 0 | 134015 | CDKNTGDYYEDSYED             | 2.70 | 0.01 | 0.78 | 0.44 | 1.41 | 1.34 |
| 8619 | 0 | 134015 | CDKNTGDYYEDSYED             | 2.70 | 0.01 | 0.78 | 1.12 | 0.22 | 0.28 |
| 8620 | 0 | 134015 | CDKNTGDYYEDSYED             | 2.70 | 0.01 | 0.78 | 1.12 | 0.22 | 0.28 |
| 8621 | 0 | 6118   | CDLAPE                      | 1.88 | 0.01 | 1.96 | 0.44 | 0.85 | 0.28 |
| 8622 | 0 | 153364 | CDLEDNRDRSELSP              | 2.59 | 0.01 | 1.72 | 0.68 | 0.22 | 0.28 |
| 8623 | 0 | 110795 | CDLIPNLKLNG                 | 2.48 | 0.01 | 3.15 | 3.53 | 0.22 | 0.28 |
| 8624 | 0 | 134646 | CDLPQTHSLGNRRALILL<br>AQMGR | 3.05 | 0.01 | 0.78 | 0.68 | 0.22 | 0.85 |
| 8625 | 0 | 134646 | CDLPQTHSLGNRRALILL<br>AQMGR | 3.05 | 0.01 | 0.78 | 0.68 | 0.22 | 0.85 |
| 8626 | 0 | 134646 | CDLPQTHSLGNRRALILL<br>AQMGR | 3.05 | 0.01 | 0.78 | 0.68 | 0.22 | 0.85 |
| 8627 | 0 | 120423 | CDLPQTHSLGSRRT              | 2.60 | 0.01 | 0.78 | 0.44 | 1.13 | 0.85 |
| 8628 | 0 | 6123   | CDNPASTTNKDKDNPA<br>K       | 3.52 | 0.01 | 0.90 | 1.20 | 0.22 | 0.28 |
| 8629 | 0 | 6123   | CDNPASTTNKDKDNPA<br>K       | 3.52 | 0.01 | 0.90 | 1.20 | 0.22 | 1.34 |
| 8630 | 0 | 6123   | CDNPASTTNKDKDNPA<br>K       | 3.52 | 0.01 | 0.90 | 1.20 | 0.22 | 0.28 |
| 8631 | 0 | 6123   | CDNPASTTNKDKDNPA<br>K       | 3.52 | 0.01 | 0.90 | 1.15 | 0.22 | 1.27 |
| 8632 | 0 | 121164 | CDNPQAEAEAHAFVF             | 2.68 | 0.01 | 0.90 | 0.68 | 0.22 | 1.39 |
| 8633 | 0 | 121164 | CDNPQAEAEAHAFVF             | 2.68 | 0.01 | 0.90 | 0.68 | 0.22 | 0.28 |

|      |   |        |                              |      |      |      |      |      |      |
|------|---|--------|------------------------------|------|------|------|------|------|------|
| 8634 | 0 | 121164 | CDNPQAEAEAHAFVF              | 2.68 | 0.01 | 0.90 | 0.68 | 0.22 | 0.28 |
| 8635 | 0 | 150971 | CDNTCMESVKNGTYD              | 2.67 | 0.01 | 2.87 | 0.44 | 0.85 | 0.28 |
| 8636 | 0 | 6125   | CDPLDDAC                     | 2.16 | 0.01 | 0.90 | 1.15 | 0.22 | 0.28 |
| 8637 | 0 | 6127   | CDPPIDLDC                    | 2.27 | 0.01 | 0.90 | 1.15 | 0.22 | 0.28 |
| 8638 | 0 | 141609 | CDPPKRADTCGDNSNI             | 2.73 | 0.01 | 2.86 | 2.55 | 0.22 | 0.28 |
| 8639 | 0 | 6128   | CDPQPDFSC                    | 2.26 | 0.01 | 0.90 | 1.15 | 0.22 | 0.28 |
| 8640 | 0 | 6129   | CDPTMDY                      | 2.02 | 0.01 | 0.90 | 1.15 | 0.22 | 0.28 |
| 8641 | 0 | 6135   | CDQTTGETIYTKKTCTVS<br>EEF    | 2.98 | 0.01 | 3.45 | 0.44 | 1.59 | 0.28 |
| 8642 | 0 | 106304 | CDRSYTTRRW                   | 2.31 | 0.01 | 2.75 | 0.44 | 1.23 | 0.85 |
| 8643 | 0 | 164500 | CDSRVLERYLLEAKEAE            | 2.80 | 0.01 | 0.78 | 1.12 | 0.22 | 0.28 |
| 8644 | 0 | 164500 | CDSRVLERYLLEAKEAE            | 2.80 | 0.01 | 0.78 | 1.12 | 0.22 | 0.28 |
| 8645 | 0 | 164500 | CDSRVLERYLLEAKEAE            | 2.80 | 0.01 | 0.78 | 1.12 | 0.22 | 0.85 |
| 8646 | 0 | 164500 | CDSRVLERYLLEAKEAE            | 2.80 | 0.01 | 0.78 | 1.12 | 0.22 | 1.27 |
| 8647 | 0 | 6139   | CDSSDRPRVYTIT                | 2.55 | 0.01 | 3.44 | 1.15 | 0.22 | 1.27 |
| 8648 | 0 | 6139   | CDSSDRPRVYTIT                | 2.55 | 0.01 | 3.44 | 1.15 | 0.22 | 1.27 |
| 8649 | 0 | 6139   | CDSSDRPRVYTIT                | 2.55 | 0.01 | 3.44 | 1.15 | 0.22 | 1.34 |
| 8650 | 0 | 6139   | CDSSDRPRVYTIT                | 2.55 | 0.01 | 3.44 | 2.49 | 0.22 | 0.28 |
| 8651 | 0 | 6139   | CDSSDRPRVYTIT                | 2.55 | 0.01 | 3.44 | 0.68 | 0.22 | 0.28 |
| 8652 | 0 | 6139   | CDSSDRPRVYTIT                | 2.55 | 0.01 | 3.44 | 0.68 | 0.22 | 1.34 |
| 8653 | 0 | 434726 | CDSSDRPRVYTITAAYDE<br>QDYQIR | 3.12 | 0.01 | 0.90 | 0.68 | 0.22 | 0.28 |
| 8654 | 0 | 6140   | CDTAGLAGLFLNLGPKQT           | 2.79 | 0.01 | 1.72 | 0.68 | 0.22 | 0.28 |
| 8655 | 0 | 6141   | CDTATRTYSVQVRGSM<br>DYVS     | 2.96 | 0.01 | 2.78 | 2.49 | 0.85 | 0.28 |
| 8656 | 0 | 178616 | CDTFRHALMTWGDKF              | 2.64 | 0.01 | 2.36 | 0.44 | 1.23 | 1.28 |
| 8657 | 0 | 178616 | CDTFRHALMTWGDKF              | 2.64 | 0.01 | 2.36 | 0.44 | 1.23 | 1.27 |
| 8658 | 0 | 178616 | CDTFRHALMTWGDKF              | 2.64 | 0.01 | 2.36 | 0.44 | 1.23 | 1.28 |
| 8659 | 0 | 133531 | CDTLKPGEC                    | 2.22 | 0.01 | 0.90 | 1.15 | 0.22 | 0.28 |
| 8660 | 0 | 133531 | CDTLKPGEC                    | 2.22 | 0.01 | 0.90 | 1.15 | 0.22 | 0.28 |
| 8661 | 0 | 133531 | CDTLKPGEC                    | 2.22 | 0.01 | 0.90 | 1.15 | 0.22 | 2.12 |
| 8662 | 0 | 133531 | CDTLKPGEC                    | 2.22 | 0.01 | 0.90 | 1.15 | 0.22 | 1.27 |
| 8663 | 0 | 133531 | CDTLKPGEC                    | 2.22 | 0.01 | 0.90 | 1.15 | 0.22 | 1.66 |
| 8664 | 0 | 174408 | CDWAPHFTC                    | 2.22 | 0.01 | 0.90 | 1.15 | 1.41 | 1.39 |
| 8665 | 0 | 6142   | CDWYFVPTDEGWTND              | 2.66 | 0.01 | 2.95 | 3.38 | 0.22 | 0.28 |

|      |   |        |                                      |      |      |      |      |      |      |
|------|---|--------|--------------------------------------|------|------|------|------|------|------|
| 8666 | 0 | 243784 | CEALQQIMENQCD                        | 2.56 | 0.01 | 2.16 | 0.44 | 1.23 | 1.28 |
| 8667 | 0 | 243785 | CEALQQIMENQSD                        | 2.53 | 0.01 | 2.16 | 0.44 | 1.23 | 1.28 |
| 8668 | 0 | 6149   | CECTKPDSYPLFDGIFCS<br>SSN            | 2.97 | 0.01 | 3.57 | 0.44 | 0.85 | 0.28 |
| 8669 | 0 | 123058 | CEDFTKKIEAFYRASPHA<br>AR             | 2.91 | 0.01 | 0.90 | 3.12 | 0.22 | 0.28 |
| 8670 | 0 | 123058 | CEDFTKKIEAFYRASPHA<br>AR             | 2.91 | 0.01 | 0.90 | 3.12 | 0.22 | 0.28 |
| 8671 | 0 | 123058 | CEDFTKKIEAFYRASPHA<br>AR             | 2.91 | 0.01 | 0.90 | 3.12 | 0.22 | 0.28 |
| 8672 | 0 | 123058 | CEDFTKKIEAFYRASPHA<br>AR             | 2.91 | 0.01 | 0.90 | 3.12 | 0.22 | 0.28 |
| 8673 | 0 | 123058 | CEDFTKKIEAFYRASPHA<br>AR             | 2.91 | 0.01 | 0.90 | 2.55 | 0.22 | 0.28 |
| 8674 | 0 | 123058 | CEDFTKKIEAFYRASPHA<br>AR             | 2.91 | 0.01 | 0.90 | 2.55 | 0.22 | 0.28 |
| 8675 | 0 | 123058 | CEDFTKKIEAFYRASPHA<br>AR             | 2.91 | 0.01 | 0.90 | 3.12 | 0.22 | 3.16 |
| 8676 | 0 | 123058 | CEDFTKKIEAFYRASPHA<br>AR             | 2.91 | 0.01 | 0.90 | 2.55 | 0.22 | 3.16 |
| 8677 | 0 | 170458 | CEDLVRHGYNYLGKD                      | 2.66 | 0.01 | 0.78 | 0.44 | 1.41 | 0.28 |
| 8678 | 0 | 132782 | CEDSCRSGFTYVLHEGEC<br>CGRCLPSACEVVTG | 3.41 | 0.01 | 0.78 | 0.68 | 0.22 | 1.39 |
| 8679 | 0 | 6155   | CEDTITYKCPLLQNEPE<br>DIDCW           | 3.08 | 0.01 | 2.30 | 0.68 | 0.22 | 0.28 |
| 8680 | 0 | 6155   | CEDTITYKCPLLQNEPE<br>DIDCW           | 3.08 | 0.01 | 2.30 | 0.68 | 0.22 | 0.28 |
| 8681 | 0 | 6155   | CEDTITYKCPLLQNEPE<br>DIDCW           | 3.08 | 0.01 | 2.30 | 0.68 | 0.22 | 0.28 |
| 8682 | 0 | 141610 | CEEEKGPLDLMNEVLN                     | 2.74 | 0.01 | 1.66 | 1.20 | 0.22 | 0.28 |
| 8683 | 0 | 141610 | CEEEKGPLDLMNEVLN                     | 2.74 | 0.01 | 1.66 | 2.55 | 0.22 | 0.28 |
| 8684 | 0 | 141610 | CEEEKGPLDLMNEVLN                     | 2.74 | 0.01 | 2.86 | 2.55 | 0.22 | 0.28 |
| 8685 | 0 | 135834 | CEFRDGAGSICG                         | 2.48 | 0.01 | 0.90 | 2.69 | 0.22 | 0.28 |
| 8686 | 0 | 135834 | CEFRDGAGSICG                         | 2.48 | 0.01 | 0.90 | 2.69 | 0.22 | 1.27 |
| 8687 | 0 | 135834 | CEFRDGAGSICG                         | 2.48 | 0.01 | 0.90 | 0.68 | 0.22 | 0.28 |
| 8688 | 0 | 79166  | CEGNLACLS                            | 2.24 | 0.01 | 4.45 | 0.68 | 0.22 | 0.28 |
| 8689 | 0 | 6171   | CEKAKRAVRGRQDRPKE<br>FP              | 2.91 | 0.01 | 3.97 | 1.20 | 0.22 | 0.85 |
| 8690 | 0 | 6171   | CEKAKRAVRGRQDRPKE<br>FP              | 2.91 | 0.01 | 3.97 | 1.20 | 0.22 | 1.34 |
| 8691 | 0 | 115700 | CEKDERFFSD                           | 2.32 | 0.01 | 1.60 | 0.44 | 1.23 | 0.85 |
| 8692 | 0 | 115700 | CEKDERFFSD                           | 2.32 | 0.01 | 1.60 | 0.44 | 1.23 | 0.85 |
| 8693 | 0 | 6173   | CEKDERFFSDKIAK                       | 2.62 | 0.01 | 1.60 | 0.44 | 1.23 | 0.85 |

|      |   |        |                                       |      |      |      |      |      |      |
|------|---|--------|---------------------------------------|------|------|------|------|------|------|
| 8694 | 0 | 238250 | CEKDGKALCWVCAQSR<br>KH                | 2.82 | 0.01 | 0.78 | 0.44 | 1.13 | 0.28 |
| 8695 | 0 | 167875 | CEKEFGISASSCKCDN                      | 2.75 | 0.01 | 2.75 | 0.44 | 1.59 | 2.51 |
| 8696 | 0 | 167875 | CEKEFGISASSCKCDN                      | 2.75 | 0.01 | 2.75 | 0.44 | 0.85 | 2.51 |
| 8697 | 0 | 167875 | CEKEFGISASSCKCDN                      | 2.75 | 0.01 | 2.75 | 0.44 | 0.85 | 2.51 |
| 8698 | 0 | 167875 | CEKEFGISASSCKCDN                      | 2.75 | 0.01 | 2.75 | 0.44 | 0.85 | 2.51 |
| 8699 | 0 | 6175   | CEKMAL                                | 1.88 | 0.01 | 1.96 | 0.44 | 0.85 | 0.28 |
| 8700 | 0 | 182063 | CEKMQDTSGHGVNTS                       | 2.64 | 0.01 | 0.78 | 0.44 | 1.13 | 0.85 |
| 8701 | 0 | 130747 | CELSPSSRC                             | 2.25 | 0.01 | 0.90 | 0.44 | 1.13 | 1.39 |
| 8702 | 0 | 147543 | CELTNITI                              | 2.14 | 0.01 | 0.78 | 2.87 | 0.22 | 1.34 |
| 8703 | 0 | 6190   | CEQIREAI                              | 2.14 | 0.01 | 2.99 | 0.44 | 0.85 | 0.28 |
| 8704 | 0 | 6194   | CEQVLRRLAVVTSTEGIH<br>QLQ             | 2.94 | 0.01 | 3.55 | 2.22 | 0.22 | 0.28 |
| 8705 | 0 | 6194   | CEQVLRRLAVVTSTEGIH<br>QLQ             | 2.94 | 0.01 | 3.55 | 2.22 | 0.22 | 0.28 |
| 8706 | 0 | 119783 | CERPQIDIQEMRIGPMA<br>WYSMGIGGTAGNSSRA | 3.43 | 0.01 | 4.93 | 0.44 | 0.85 | 0.28 |
| 8707 | 0 | 107765 | CESAQRPFGCC                           | 2.37 | 0.01 | 0.90 | 2.46 | 0.22 | 1.27 |
| 8708 | 0 | 107765 | CESAQRPFGCC                           | 2.37 | 0.01 | 0.90 | 2.46 | 0.22 | 0.28 |
| 8709 | 0 | 79167  | CESLKGSTGKLAVG                        | 2.63 | 0.01 | 2.86 | 0.44 | 0.85 | 0.28 |
| 8710 | 0 | 79167  | CESLKGSTGKLAVG                        | 2.63 | 0.01 | 2.86 | 0.44 | 0.85 | 0.28 |
| 8711 | 0 | 79167  | CESLKGSTGKLAVG                        | 2.63 | 0.01 | 2.86 | 0.44 | 0.85 | 0.28 |
| 8712 | 0 | 79167  | CESLKGSTGKLAVG                        | 2.63 | 0.01 | 2.86 | 0.44 | 0.85 | 0.28 |
| 8713 | 0 | 79167  | CESLKGSTGKLAVG                        | 2.63 | 0.01 | 2.86 | 0.44 | 0.85 | 0.28 |
| 8714 | 0 | 79167  | CESLKGSTGKLAVG                        | 2.63 | 0.01 | 2.86 | 0.68 | 0.22 | 1.57 |
| 8715 | 0 | 99122  | CESRCTKLEYDPRCV                       | 2.67 | 0.01 | 2.16 | 0.44 | 1.23 | 1.48 |
| 8716 | 0 | 6200   | CESSLCLMYSLGPPA                       | 2.69 | 0.01 | 0.90 | 0.44 | 1.41 | 0.28 |
| 8717 | 0 | 182064 | CESTLPYICKKYLNH<br>CETDDLDEEDTSIYLSPP | 2.66 | 0.01 | 0.78 | 0.44 | 1.13 | 0.85 |
| 8718 | 0 | 6203   | PVPPVQVVAKRLRPDPT<br>PRT              | 3.58 | 0.01 | 2.76 | 0.44 | 1.59 | 0.28 |
| 8719 | 0 | 102334 | CETDKWKYENPCKKMC<br>TVSD              | 2.94 | 0.01 | 3.44 | 0.68 | 0.22 | 0.28 |
| 8720 | 0 | 6204   | CETEFSKL                              | 2.12 | 0.01 | 1.66 | 1.15 | 0.22 | 0.28 |
| 8721 | 0 | 6205   | CETEFSKLY                             | 2.21 | 0.01 | 1.66 | 1.15 | 0.22 | 0.28 |
| 8722 | 0 | 6205   | CETEFSKLY                             | 2.21 | 0.01 | 1.66 | 1.15 | 0.22 | 0.85 |
| 8723 | 0 | 6205   | CETEFSKLY                             | 2.21 | 0.01 | 1.66 | 1.15 | 0.22 | 0.85 |
| 8724 | 0 | 141611 | CETNTGEV                              | 2.14 | 0.01 | 0.78 | 0.44 | 1.13 | 0.28 |
| 8725 | 0 | 141611 | CETNTGEV                              | 2.14 | 0.01 | 0.78 | 0.44 | 1.13 | 0.28 |
| 8726 | 0 | 141611 | CETNTGEV                              | 2.14 | 0.01 | 0.78 | 0.44 | 1.41 | 0.28 |
| 8727 | 0 | 6210   | CEYNVFHNKTFELPRA                      | 2.69 | 0.01 | 4.23 | 2.25 | 0.22 | 1.27 |
| 8728 | 0 | 6210   | CEYNVFHNKTFELPRA                      | 2.69 | 0.01 | 4.23 | 2.25 | 0.22 | 0.28 |

|      |   |        |                               |      |      |      |      |      |      |
|------|---|--------|-------------------------------|------|------|------|------|------|------|
| 8729 | 0 | 6210   | CEYNVFHNKTFELPRA              | 2.69 | 0.01 | 4.23 | 0.68 | 0.22 | 0.28 |
| 8730 | 0 | 161088 | CEYYDPDYLNTNDKKNIF<br>L       | 2.90 | 0.01 | 2.08 | 0.44 | 1.93 | 1.57 |
| 8731 | 0 | 6215   | CFDPQIQAIVSSPCHN              | 2.73 | 0.01 | 2.04 | 0.44 | 0.85 | 0.28 |
| 8732 | 0 | 6215   | CFDPQIQAIVSSPCHN              | 2.73 | 0.01 | 2.04 | 0.44 | 0.85 | 0.28 |
| 8733 | 0 | 6215   | CFDPQIQAIVSSPCHN              | 2.73 | 0.01 | 2.04 | 0.44 | 0.85 | 0.28 |
| 8734 | 0 | 6219   | CFDVFKELK                     | 2.23 | 0.01 | 2.25 | 0.44 | 1.23 | 1.27 |
| 8735 | 0 | 6222   | CFDYAPYVSAVDDIC               | 2.70 | 0.01 | 0.90 | 1.15 | 0.22 | 0.28 |
| 8736 | 0 | 6222   | CFDYAPYVSAVDDIC               | 2.70 | 0.01 | 0.90 | 0.44 | 1.74 | 0.28 |
| 8737 | 0 | 116681 | CFEGQEKAHNQDLGL               | 2.66 | 0.01 | 1.60 | 1.12 | 0.22 | 0.28 |
| 8738 | 0 | 116681 | CFEGQEKAHNQDLGL               | 2.66 | 0.01 | 1.60 | 0.44 | 1.13 | 0.28 |
| 8739 | 0 | 6223   | CFEIKCTKPEACSGEPVV<br>V       | 2.89 | 0.01 | 2.53 | 0.44 | 1.23 | 0.85 |
| 8740 | 0 | 6223   | CFEIKCTKPEACSGEPVV<br>V       | 2.89 | 0.01 | 2.53 | 0.44 | 1.23 | 0.85 |
| 8741 | 0 | 489906 | CFFAWRSLPNC                   | 2.38 | 0.01 | 0.90 | 0.68 | 0.22 | 1.39 |
| 8742 | 0 | 489906 | CFFAWRSLPNC                   | 2.38 | 0.01 | 0.90 | 0.68 | 0.22 | 0.85 |
| 8743 | 0 | 489906 | CFFAWRSLPNC                   | 2.38 | 0.01 | 0.90 | 0.44 | 1.23 | 1.27 |
| 8744 | 0 | 130449 | CFFPNLSYC                     | 2.23 | 0.01 | 0.90 | 0.68 | 0.22 | 0.28 |
| 8745 | 0 | 130449 | CFFPNLSYC                     | 2.23 | 0.01 | 0.90 | 0.68 | 0.22 | 1.34 |
| 8746 | 0 | 130449 | CFFPNLSYC                     | 2.23 | 0.01 | 0.90 | 0.68 | 0.22 | 0.28 |
| 8747 | 0 | 130449 | CFFPNLSYC                     | 2.23 | 0.01 | 0.90 | 0.68 | 0.22 | 0.28 |
| 8748 | 0 | 130449 | CFFPNLSYC                     | 2.23 | 0.01 | 0.90 | 0.68 | 0.22 | 1.34 |
| 8749 | 0 | 140170 | CFGDSGGP                      | 2.13 | 0.01 | 0.78 | 0.44 | 1.13 | 0.28 |
| 8750 | 0 | 147545 | CFGHKPWMC                     | 2.22 | 0.01 | 0.90 | 0.44 | 1.41 | 1.39 |
| 8751 | 0 | 79768  | CFGKDLKRPGSS                  | 2.45 | 0.01 | 2.14 | 3.26 | 0.22 | 0.28 |
| 8752 | 0 | 6225   | CFGKDLKRPGSSPMEV              | 2.70 | 0.01 | 2.14 | 1.15 | 0.22 | 0.28 |
| 8753 | 0 | 79769  | CFGKDLKRPGSSPMEV<br>MLRAVFMQQ | 3.13 | 0.01 | 2.14 | 3.26 | 0.22 | 0.28 |
| 8754 | 0 | 79769  | CFGKDLKRPGSSPMEV<br>MLRAVFMQQ | 3.13 | 0.01 | 2.14 | 3.55 | 0.22 | 0.28 |
| 8755 | 0 | 6226   | CFGNSEY                       | 1.99 | 0.01 | 3.10 | 0.68 | 0.22 | 0.28 |
| 8756 | 0 | 6226   | CFGNSEY                       | 1.99 | 0.01 | 3.10 | 0.68 | 0.22 | 1.34 |
| 8757 | 0 | 6226   | CFGNSEY                       | 1.99 | 0.01 | 3.10 | 0.68 | 0.22 | 0.85 |
| 8758 | 0 | 6226   | CFGNSEY                       | 1.99 | 0.01 | 3.10 | 0.68 | 0.22 | 1.27 |
| 8759 | 0 | 6226   | CFGNSEY                       | 1.99 | 0.01 | 3.10 | 0.68 | 0.22 | 0.28 |
| 8760 | 0 | 6226   | CFGNSEY                       | 1.99 | 0.01 | 3.10 | 0.68 | 0.22 | 1.34 |
| 8761 | 0 | 6226   | CFGNSEY                       | 1.99 | 0.01 | 3.10 | 0.68 | 0.22 | 1.75 |
| 8762 | 0 | 6226   | CFGNSEY                       | 1.99 | 0.01 | 3.10 | 0.68 | 0.22 | 1.75 |
| 8763 | 0 | 147546 | CFGSLPWMC                     | 2.22 | 0.01 | 0.90 | 0.44 | 1.41 | 1.39 |
| 8764 | 0 | 134017 | CFHQGKEYAPG                   | 2.36 | 0.01 | 0.78 | 0.68 | 0.22 | 1.27 |
| 8765 | 0 | 134017 | CFHQGKEYAPG                   | 2.36 | 0.01 | 0.78 | 0.68 | 0.22 | 1.34 |



|      |   |        |                                    |      |      |      |      |      |      |
|------|---|--------|------------------------------------|------|------|------|------|------|------|
| 8766 | 0 | 420588 | CFIQFLSEPT                         | 2.29 | 0.01 | 0.78 | 0.44 | 1.41 | 0.28 |
| 8767 | 0 | 6228   | CFIRPAGFCDGYCKT                    | 2.67 | 0.01 | 2.56 | 2.02 | 0.22 | 0.85 |
| 8768 | 0 | 6229   | CFIRPSGYCGRECGI                    | 2.71 | 0.01 | 2.56 | 2.02 | 0.22 | 0.85 |
| 8769 | 0 | 244173 | CFKCCRRTGRLFKYRHLK<br>D            | 2.92 | 0.01 | 3.61 | 0.44 | 0.85 | 0.28 |
| 8770 | 0 | 135903 | CFKEHSSLAFWKTDASD<br>VKPC          | 2.98 | 0.01 | 0.78 | 0.44 | 1.13 | 1.27 |
| 8771 | 0 | 135903 | CFKEHSSLAFWKTDASD<br>VKPC          | 2.98 | 0.01 | 0.78 | 0.44 | 1.13 | 0.28 |
| 8772 | 0 | 135903 | CFKEHSSLAFWKTDASD<br>VKPC          | 2.98 | 0.01 | 0.78 | 0.44 | 1.13 | 1.27 |
| 8773 | 0 | 135903 | CFKEHSSLAFWKTDASD<br>VKPC          | 2.98 | 0.01 | 0.78 | 0.44 | 1.13 | 1.27 |
| 8774 | 0 | 135903 | CFKEHSSLAFWKTDASD<br>VKPC          | 2.98 | 0.01 | 0.78 | 0.44 | 1.13 | 0.28 |
| 8775 | 0 | 6232   | CFKGVRLDGTPC                       | 2.46 | 0.01 | 0.90 | 0.44 | 1.23 | 1.39 |
| 8776 | 0 | 6232   | CFKGVRLDGTPC                       | 2.46 | 0.01 | 0.90 | 0.44 | 1.23 | 1.39 |
| 8777 | 0 | 6233   | CFKKPPKYPPALPI                     | 2.64 | 0.01 | 2.59 | 0.44 | 1.41 | 0.28 |
| 8778 | 0 | 6233   | CFKKPPKYPPALPI                     | 2.64 | 0.01 | 2.59 | 0.44 | 0.85 | 0.28 |
| 8779 | 0 | 6233   | CFKKPPKYPPALPI                     | 2.64 | 0.01 | 2.59 | 0.44 | 0.85 | 0.28 |
| 8780 | 0 | 6238   | CFLFSGCFALREQA                     | 2.70 | 0.01 | 2.72 | 0.44 | 1.23 | 0.85 |
| 8781 | 0 | 6241   | CFLNISNTHVSV                       | 2.48 | 0.01 | 3.01 | 0.44 | 0.85 | 0.28 |
| 8782 | 0 | 423232 | CFLRTLRLVTPVGF                     | 2.72 | 0.01 | 2.51 | 0.44 | 2.35 | 1.28 |
| 8783 | 0 | 144597 | CFLTAAGYGGGLPDSVKI                 | 2.79 | 0.01 | 0.90 | 1.20 | 0.22 | 0.85 |
| 8784 | 0 | 157127 | CFNLFLNSQEKHY                      | 2.54 | 0.01 | 0.90 | 0.44 | 1.93 | 1.28 |
| 8785 | 0 | 157127 | CFNLFLNSQEKHY                      | 2.54 | 0.01 | 0.90 | 0.44 | 1.41 | 1.28 |
| 8786 | 0 | 157127 | CFNLFLNSQEKHY                      | 2.54 | 0.01 | 0.90 | 0.44 | 1.41 | 1.28 |
| 8787 | 0 | 6246   | CFNPAHTLTLSQP                      | 2.54 | 0.01 | 3.00 | 0.44 | 0.85 | 0.28 |
| 8788 | 0 | 6249   | CFPYCYPSESA                        | 2.43 | 0.01 | 0.90 | 0.68 | 0.22 | 1.39 |
| 8789 | 0 | 6249   | CFPYCYPSESA                        | 2.43 | 0.01 | 0.90 | 0.68 | 0.22 | 1.27 |
| 8790 | 0 | 6249   | CFPYCYPSESA                        | 2.43 | 0.01 | 0.90 | 0.68 | 0.22 | 0.85 |
| 8791 | 0 | 6249   | CFPYCYPSESA                        | 2.43 | 0.01 | 0.90 | 0.68 | 0.22 | 0.85 |
| 8792 | 0 | 6249   | CFPYCYPSESA                        | 2.43 | 0.01 | 0.90 | 0.68 | 0.22 | 0.85 |
| 8793 | 0 | 6249   | CFPYCYPSESA                        | 2.43 | 0.01 | 0.90 | 0.68 | 0.22 | 0.85 |
| 8794 | 0 | 6249   | CFPYCYPSESA                        | 2.43 | 0.01 | 0.90 | 0.68 | 0.22 | 0.28 |
| 8795 | 0 | 6249   | CFPYCYPSESA                        | 2.43 | 0.01 | 0.90 | 0.68 | 0.22 | 1.39 |
| 8796 | 0 | 6249   | CFPYCYPSESA                        | 2.43 | 0.01 | 0.90 | 0.68 | 0.22 | 1.27 |
| 8797 | 0 | 6249   | CFPYCYPSESA                        | 2.43 | 0.01 | 0.90 | 0.68 | 0.22 | 3.40 |
| 8798 | 0 | 6249   | CFPYCYPSESA                        | 2.43 | 0.01 | 0.90 | 0.68 | 0.22 | 0.85 |
| 8799 | 0 | 6249   | CFPYCYPSESA                        | 2.43 | 0.01 | 0.90 | 0.68 | 0.22 | 0.85 |
| 8800 | 0 | 6249   | CFPYCYPSESA                        | 2.43 | 0.01 | 0.90 | 1.12 | 0.22 | 0.85 |
| 8801 | 0 | 6249   | CFPYCYPSESA                        | 2.43 | 0.01 | 0.90 | 0.44 | 1.23 | 0.85 |
| 8802 | 0 | 6250   | CFQQACKGKIQALCE                    | 2.70 | 0.01 | 2.72 | 1.12 | 0.22 | 0.28 |
| 8803 | 0 | 6251   | CFQQACKGKIQALCENP<br>EWAPLKDNRIIPS | 3.30 | 0.01 | 2.72 | 0.44 | 1.59 | 0.28 |

|      |   |        |                                   |      |      |      |      |      |      |
|------|---|--------|-----------------------------------|------|------|------|------|------|------|
| 8804 | 0 | 6252   | CFQQACKNKIQALCENP<br>EWAPLKDHRIPS | 3.30 | 0.01 | 0.90 | 0.44 | 0.85 | 0.28 |
| 8805 | 0 | 164207 | CFQVLSRSC                         | 2.24 | 0.01 | 0.90 | 1.20 | 0.22 | 0.28 |
| 8806 | 0 | 6254   | CFRGLDVAGNVC                      | 2.48 | 0.01 | 0.90 | 0.44 | 1.23 | 1.39 |
| 8807 | 0 | 6254   | CFRGLDVAGNVC                      | 2.48 | 0.01 | 0.90 | 0.44 | 1.23 | 1.39 |
| 8808 | 0 | 6255   | CFRHLDER                          | 2.12 | 0.01 | 1.66 | 1.15 | 0.22 | 0.28 |
| 8809 | 0 | 153366 | CFRKHPEATYSR                      | 2.43 | 0.01 | 1.72 | 0.68 | 0.22 | 0.28 |
| 8810 | 0 | 144598 | CFVGTHPQLRC                       | 2.37 | 0.01 | 0.90 | 0.68 | 0.22 | 0.28 |
| 8811 | 0 | 144598 | CFVGTHPQLRC                       | 2.37 | 0.01 | 0.90 | 0.68 | 0.22 | 1.48 |
| 8812 | 0 | 144598 | CFVGTHPQLRC                       | 2.37 | 0.01 | 0.90 | 0.68 | 0.22 | 1.27 |
| 8813 | 0 | 6262   | CFVHGTMGHFILAKCPP<br>GEF          | 2.93 | 0.01 | 3.13 | 2.43 | 0.22 | 0.28 |
| 8814 | 0 | 6271   | CGAATSL                           | 2.10 | 0.01 | 3.42 | 0.68 | 0.22 | 0.28 |
| 8815 | 0 | 174065 | CGACYRIKCK                        | 2.34 | 0.01 | 3.10 | 0.44 | 1.23 | 0.85 |
| 8816 | 0 | 174065 | CGACYRIKCK                        | 2.34 | 0.01 | 3.10 | 0.44 | 1.23 | 0.85 |
| 8817 | 0 | 151813 | CGADSYEMEEDGVRKC                  | 2.73 | 3.81 | 0.78 | 0.68 | 0.22 | 2.49 |
| 8818 | 0 | 151813 | CGADSYEMEEDGVRKC                  | 2.73 | 3.81 | 0.78 | 0.68 | 0.22 | 2.49 |
| 8819 | 0 | 151813 | CGADSYEMEEDGVRKC                  | 2.73 | 3.81 | 0.78 | 0.68 | 0.22 | 1.66 |
| 8820 | 0 | 151813 | CGADSYEMEEDGVRKC                  | 2.73 | 3.81 | 0.78 | 0.68 | 0.22 | 1.66 |
| 8821 | 0 | 151813 | CGADSYEMEEDGVRKC                  | 2.73 | 3.81 | 0.78 | 0.68 | 0.22 | 1.66 |
| 8822 | 0 | 151813 | CGADSYEMEEDGVRKC                  | 2.73 | 3.81 | 0.78 | 0.68 | 0.22 | 1.66 |
| 8823 | 0 | 151813 | CGADSYEMEEDGVRKC                  | 2.73 | 3.81 | 0.78 | 0.68 | 0.22 | 0.85 |
| 8824 | 0 | 151813 | CGADSYEMEEDGVRKC                  | 2.73 | 3.81 | 0.78 | 0.68 | 0.22 | 2.12 |
| 8825 | 0 | 151813 | CGADSYEMEEDGVRKC                  | 2.73 | 3.81 | 0.78 | 0.68 | 0.22 | 2.12 |
| 8826 | 0 | 151813 | CGADSYEMEEDGVRKC                  | 2.73 | 3.81 | 0.78 | 0.68 | 0.22 | 1.75 |
| 8827 | 0 | 151813 | CGADSYEMEEDGVRKC                  | 2.73 | 3.81 | 0.78 | 0.68 | 0.22 | 1.75 |
| 8828 | 0 | 151813 | CGADSYEMEEDGVRKC                  | 2.73 | 3.81 | 0.78 | 0.68 | 0.22 | 2.02 |
| 8829 | 0 | 151813 | CGADSYEMEEDGVRKC                  | 2.73 | 3.81 | 0.78 | 0.68 | 0.22 | 2.02 |
| 8830 | 0 | 6276   | CGAVIDDC                          | 2.14 | 0.01 | 0.90 | 1.15 | 0.22 | 1.39 |
| 8831 | 0 | 6276   | CGAVIDDC                          | 2.14 | 0.01 | 0.90 | 1.15 | 0.22 | 1.27 |
| 8832 | 0 | 6276   | CGAVIDDC                          | 2.14 | 0.01 | 0.90 | 1.15 | 0.22 | 0.28 |
| 8833 | 0 | 6276   | CGAVIDDC                          | 2.14 | 0.01 | 0.90 | 0.68 | 0.22 | 0.28 |
| 8834 | 0 | 6277   | CGDELEAETQNVYAAGC                 | 2.79 | 0.01 | 0.90 | 1.12 | 0.22 | 0.28 |

|      |   |        |                                                       |      |      |      |      |      |      |
|------|---|--------|-------------------------------------------------------|------|------|------|------|------|------|
| 8835 | 0 | 6278   | CGDELEAETQNVYAAPN<br>ANPYSLFQKEKMVLPNA<br>NPPANKKNAGC | 3.75 | 0.01 | 0.90 | 0.44 | 1.74 | 0.28 |
| 8836 | 0 | 6278   | CGDELEAETQNVYAAPN<br>ANPYSLFQKEKMVLPNA<br>NPPANKKNAGC | 3.75 | 0.01 | 0.90 | 0.44 | 1.74 | 0.28 |
| 8837 | 0 | 6278   | CGDELEAETQNVYAAPN<br>ANPYSLFQKEKMVLPNA<br>NPPANKKNAGC | 3.75 | 0.01 | 0.90 | 0.44 | 0.22 | 0.28 |
| 8838 | 0 | 6278   | CGDELEAETQNVYAAPN<br>ANPYSLFQKEKMVLPNA<br>NPPANKKNAGC | 3.75 | 0.01 | 0.90 | 0.44 | 1.74 | 0.28 |
| 8839 | 0 | 6278   | CGDELEAETQNVYAAPN<br>ANPYSLFQKEKMVLPNA<br>NPPANKKNAGC | 3.75 | 0.01 | 0.90 | 2.74 | 0.22 | 0.28 |
| 8840 | 0 | 6278   | CGDELEAETQNVYAAPN<br>ANPYSLFQKEKMVLPNA<br>NPPANKKNAGC | 3.75 | 0.01 | 0.90 | 0.44 | 0.22 | 0.28 |
| 8841 | 0 | 6278   | CGDELEAETQNVYAAPN<br>ANPYSLFQKEKMVLPNA<br>NPPANKKNAGC | 3.75 | 0.01 | 0.90 | 0.44 | 0.22 | 0.28 |
| 8842 | 0 | 6278   | CGDELEAETQNVYAAPN<br>ANPYSLFQKEKMVLPNA<br>NPPANKKNAGC | 3.75 | 0.01 | 0.90 | 0.44 | 0.22 | 0.28 |
| 8843 | 0 | 6278   | CGDELEAETQNVYAAPN<br>ANPYSLFQKEKMVLPNA<br>NPPANKKNAGC | 3.75 | 0.01 | 0.90 | 1.20 | 0.22 | 0.28 |
| 8844 | 0 | 6278   | CGDELEAETQNVYAAPN<br>ANPYSLFQKEKMVLPNA<br>NPPANKKNAGC | 3.75 | 0.01 | 0.90 | 1.20 | 0.22 | 0.28 |
| 8845 | 0 | 108832 | CGDRGFYFNKPTG                                         | 2.54 | 0.01 | 0.78 | 1.15 | 0.22 | 0.28 |
| 8846 | 0 | 108832 | CGDRGFYFNKPTG                                         | 2.54 | 0.01 | 0.78 | 1.15 | 0.22 | 1.57 |
| 8847 | 0 | 108832 | CGDRGFYFNKPTG                                         | 2.54 | 0.01 | 0.78 | 1.15 | 0.22 | 1.66 |
| 8848 | 0 | 108832 | CGDRGFYFNKPTG                                         | 2.54 | 0.01 | 0.78 | 1.15 | 0.22 | 0.28 |
| 8849 | 0 | 108832 | CGDRGFYFNKPTG                                         | 2.54 | 0.01 | 0.78 | 1.15 | 0.22 | 1.57 |
| 8850 | 0 | 108832 | CGDRGFYFNKPTG                                         | 2.54 | 0.01 | 0.78 | 1.15 | 0.22 | 1.57 |
| 8851 | 0 | 108832 | CGDRGFYFNKPTG                                         | 2.54 | 0.01 | 0.78 | 1.15 | 0.22 | 1.57 |

|      |   |        |                                    |      |      |      |      |      |      |
|------|---|--------|------------------------------------|------|------|------|------|------|------|
| 8852 | 0 | 95274  | CGDSFNPLFS                         | 2.31 | 0.01 | 2.60 | 0.44 | 1.23 | 0.85 |
| 8853 | 0 | 6281   | CGELGVDC                           | 2.15 | 0.01 | 0.90 | 1.15 | 0.22 | 1.39 |
| 8854 | 0 | 187760 | CGENN                              | 1.72 | 0.01 | 3.65 | 2.02 | 0.22 | 0.85 |
| 8855 | 0 | 6283   | CGETGIDSQSQGSFQAP<br>QSSNS         | 3.04 | 0.01 | 0.90 | 3.23 | 0.22 | 0.28 |
| 8856 | 0 | 6283   | CGETGIDSQSQGSFQAP<br>QSSNS         | 3.04 | 0.01 | 0.90 | 0.68 | 0.22 | 0.28 |
| 8857 | 0 | 6283   | CGETGIDSQSQGSFQAP<br>QSSNS         | 3.04 | 0.01 | 0.90 | 1.81 | 0.22 | 2.12 |
| 8858 | 0 | 6286   | CGFADLMGYIPLVGAPL<br>GGAARALA      | 3.17 | 0.01 | 1.72 | 0.44 | 1.41 | 2.97 |
| 8859 | 0 | 6286   | CGFADLMGYIPLVGAPL<br>GGAARALA      | 3.17 | 0.01 | 1.72 | 0.44 | 1.41 | 2.97 |
| 8860 | 0 | 149278 | CGGEKAAEAPAAEAPAA<br>EAPATEAPAAEAP | 3.40 | 0.01 | 2.90 | 0.44 | 1.41 | 1.27 |
| 8861 | 0 | 6290   | CGGLTNLFLSGSQQKV                   | 2.74 | 0.01 | 1.72 | 0.68 | 0.22 | 0.28 |
| 8862 | 0 | 443027 | CGGPPCNIGGVGNNTL<br>TCPT           | 3.00 | 0.01 | 1.96 | 0.68 | 0.22 | 1.34 |
| 8863 | 0 | 443027 | CGGPPCNIGGVGNNTL<br>TCPT           | 3.00 | 0.01 | 1.96 | 0.68 | 0.22 | 1.34 |
| 8864 | 0 | 443027 | CGGPPCNIGGVGNNTL<br>TCPT           | 3.00 | 0.01 | 1.96 | 0.68 | 0.22 | 1.34 |
| 8865 | 0 | 443027 | CGGPPCNIGGVGNNTL<br>TCPT           | 3.00 | 0.01 | 1.96 | 0.68 | 0.22 | 0.28 |
| 8866 | 0 | 6292   | CGGTPPSLPTC                        | 2.44 | 0.01 | 0.90 | 0.44 | 1.23 | 1.39 |
| 8867 | 0 | 6293   | CGGTRRPIASC                        | 2.40 | 0.01 | 0.90 | 0.44 | 1.23 | 1.39 |
| 8868 | 0 | 6294   | CGGVAGLFKMGSQQKL                   | 2.74 | 0.01 | 1.72 | 0.68 | 0.22 | 0.28 |
| 8869 | 0 | 6295   | CGGVHFAYC                          | 2.23 | 0.01 | 0.90 | 0.44 | 0.85 | 1.39 |
| 8870 | 0 | 103082 | CGGVSTANATVYMID                    | 2.65 | 0.01 | 2.04 | 0.44 | 0.85 | 1.28 |
| 8871 | 0 | 103083 | CGGVYDDKTGCA                       | 2.49 | 0.01 | 0.90 | 2.71 | 0.22 | 0.28 |
| 8872 | 0 | 79770  | CGIAAKLGAAAS                       | 2.49 | 0.01 | 2.14 | 3.26 | 0.22 | 0.28 |
| 8873 | 0 | 79771  | CGIAAKLGAAASSPDAH<br>VPFCFGKD      | 3.17 | 0.01 | 2.14 | 3.17 | 0.22 | 0.28 |
| 8874 | 0 | 6299   | CGIKKGSSGYCAWPA                    | 2.69 | 0.01 | 2.56 | 2.02 | 0.22 | 0.85 |
| 8875 | 0 | 6302   | CGIVPASQVCGPVYCFT<br>PSP           | 2.97 | 0.01 | 1.96 | 0.68 | 0.22 | 1.34 |
| 8876 | 0 | 6302   | CGIVPASQVCGPVYCFT<br>PSP           | 2.97 | 0.01 | 1.96 | 0.68 | 0.22 | 1.34 |
| 8877 | 0 | 6302   | CGIVPASQVCGPVYCFT<br>PSP           | 2.97 | 0.01 | 1.96 | 0.68 | 0.22 | 1.34 |
| 8878 | 0 | 6302   | CGIVPASQVCGPVYCFT<br>PSP           | 2.97 | 0.01 | 1.96 | 0.68 | 0.22 | 0.28 |
| 8879 | 0 | 116286 | CGKGLSATVTGGQKGR<br>GSR            | 2.92 | 0.01 | 1.75 | 3.44 | 0.22 | 0.85 |

|      |   |        |                                 |      |      |      |      |      |      |
|------|---|--------|---------------------------------|------|------|------|------|------|------|
| 8880 | 0 | 116286 | CGKGLSATVTGGQKGR<br>GSR         | 2.92 | 0.01 | 1.75 | 3.44 | 0.22 | 0.85 |
| 8881 | 0 | 116286 | CGKGLSATVTGGQKGR<br>GSR         | 2.92 | 0.01 | 1.75 | 3.44 | 0.22 | 0.85 |
| 8882 | 0 | 116286 | CGKGLSATVTGGQKGR<br>GSR         | 2.92 | 0.01 | 1.75 | 3.44 | 0.22 | 0.85 |
| 8883 | 0 | 116286 | CGKGLSATVTGGQKGR<br>GSR         | 2.92 | 0.01 | 1.75 | 3.44 | 0.22 | 0.85 |
| 8884 | 0 | 116286 | CGKGLSATVTGGQKGR<br>GSR         | 2.92 | 0.01 | 1.75 | 3.44 | 0.22 | 0.85 |
| 8885 | 0 | 116286 | CGKGLSATVTGGQKGR<br>GSR         | 2.92 | 0.01 | 1.75 | 3.44 | 0.22 | 0.85 |
| 8886 | 0 | 116286 | CGKGLSATVTGGQKGR<br>GSR         | 2.92 | 0.01 | 1.75 | 3.44 | 0.22 | 2.66 |
| 8887 | 0 | 116286 | CGKGLSATVTGGQKGR<br>GSR         | 2.92 | 0.01 | 1.75 | 3.44 | 0.22 | 0.28 |
| 8888 | 0 | 6304   | CGKKSKEFHPDKGGDEE<br>KMKKMN     | 3.09 | 0.01 | 0.90 | 3.89 | 1.59 | 0.28 |
| 8889 | 0 | 6304   | CGKKSKEFHPDKGGDEE<br>KMKKMN     | 3.09 | 0.01 | 0.90 | 0.68 | 0.22 | 0.28 |
| 8890 | 0 | 463949 | CGKNEEFLNDRCDICDE<br>MLDPEASFWG | 3.22 | 0.01 | 0.90 | 0.44 | 0.85 | 1.28 |
| 8891 | 0 | 108833 | CGKRALRESLNR                    | 2.48 | 0.01 | 0.90 | 1.15 | 0.22 | 1.39 |
| 8892 | 0 | 6309   | CGLFGK                          | 1.90 | 0.01 | 2.40 | 0.44 | 0.85 | 0.28 |
| 8893 | 0 | 237656 | CGLFGKGSIVACVKAAC<br>E          | 2.87 | 0.01 | 3.19 | 0.44 | 0.22 | 0.85 |
| 8894 | 0 | 170468 | CGLLKIIHEKYKTNK                 | 2.66 | 0.01 | 0.78 | 0.44 | 1.13 | 0.28 |
| 8895 | 0 | 96141  | CGLRAPQ                         | 1.99 | 0.01 | 2.16 | 2.82 | 0.22 | 1.57 |
| 8896 | 0 | 243786 | CGLRAPQRCDLDV                   | 2.56 | 0.01 | 2.16 | 0.44 | 1.23 | 1.28 |
| 8897 | 0 | 6314   | CGLRAPQRCDLDVES                 | 2.67 | 0.01 | 2.16 | 0.44 | 1.23 | 0.85 |
| 8898 | 0 | 6317   | CGMFTGLFNQGAQQKL                | 2.74 | 0.01 | 1.72 | 0.68 | 0.22 | 0.28 |
| 8899 | 0 | 6318   | CGNANPNANPNANPN<br>ANPGC        | 3.03 | 0.01 | 0.90 | 1.12 | 0.22 | 0.28 |
| 8900 | 0 | 6323   | CGNGTPNELGGANIPAE<br>FLE        | 2.97 | 0.01 | 2.04 | 0.44 | 0.85 | 0.28 |
| 8901 | 0 | 132200 | CGNRGPSLRTTTVTG                 | 2.69 | 0.01 | 2.82 | 0.68 | 0.22 | 1.27 |
| 8902 | 0 | 132200 | CGNRGPSLRTTTVTG                 | 2.69 | 0.01 | 2.82 | 0.68 | 0.22 | 1.48 |
| 8903 | 0 | 132200 | CGNRGPSLRTTTVTG                 | 2.69 | 0.01 | 2.82 | 0.68 | 0.22 | 1.48 |
| 8904 | 0 | 132200 | CGNRGPSLRTTTVTG                 | 2.69 | 0.01 | 2.82 | 0.68 | 0.22 | 1.48 |
| 8905 | 0 | 132200 | CGNRGPSLRTTTVTG                 | 2.69 | 0.01 | 2.82 | 0.68 | 0.22 | 1.48 |
| 8906 | 0 | 132200 | CGNRGPSLRTTTVTG                 | 2.69 | 0.01 | 2.82 | 0.68 | 0.22 | 0.28 |
| 8907 | 0 | 132200 | CGNRGPSLRTTTVTG                 | 2.69 | 0.01 | 2.82 | 0.68 | 0.22 | 0.28 |
| 8908 | 0 | 132200 | CGNRGPSLRTTTVTG                 | 2.69 | 0.01 | 2.82 | 0.68 | 0.22 | 0.28 |
| 8909 | 0 | 132200 | CGNRGPSLRTTTVTG                 | 2.69 | 0.01 | 2.82 | 0.68 | 0.22 | 0.28 |
| 8910 | 0 | 6329   | CGPFFLAASVC                     | 2.40 | 0.01 | 0.90 | 0.44 | 0.22 | 1.39 |
| 8911 | 0 | 6329   | CGPFFLAASVC                     | 2.40 | 0.01 | 0.90 | 0.68 | 0.22 | 0.28 |

|      |   |        |                                                            |      |      |      |      |      |      |
|------|---|--------|------------------------------------------------------------|------|------|------|------|------|------|
| 8912 | 0 | 6329   | CGPFFLAASVC                                                | 2.40 | 0.01 | 0.90 | 1.81 | 0.22 | 0.28 |
| 8913 | 0 | 6330   | CGPFFLSPTSC                                                | 2.43 | 0.01 | 0.90 | 0.44 | 0.22 | 1.39 |
| 8914 | 0 | 6331   | CGPFYLSAPQC                                                | 2.40 | 0.01 | 0.90 | 0.44 | 0.22 | 1.39 |
| 8915 | 0 | 194842 | CGPIPVLDENGLFAPGP<br>C                                     | 2.86 | 0.01 | 0.90 | 0.68 | 0.22 | 0.28 |
| 8916 | 0 | 194842 | CGPIPVLDENGLFAPGP<br>C                                     | 2.86 | 0.01 | 0.90 | 0.68 | 0.22 | 0.28 |
| 8917 | 0 | 194842 | CGPIPVLDENGLFAPGP<br>C                                     | 2.86 | 0.01 | 0.90 | 0.68 | 0.22 | 0.28 |
| 8918 | 0 | 194842 | CGPIPVLDENGLFAPGP<br>C                                     | 2.86 | 0.01 | 0.90 | 1.15 | 0.22 | 1.75 |
| 8919 | 0 | 194842 | CGPIPVLDENGLFAPGP<br>C                                     | 2.86 | 0.01 | 0.90 | 1.15 | 0.22 | 1.34 |
| 8920 | 0 | 194842 | CGPIPVLDENGLFAPGP<br>C                                     | 2.86 | 0.01 | 0.90 | 0.68 | 0.22 | 1.75 |
| 8921 | 0 | 99913  | CGPIQPGGACFE                                               | 2.49 | 0.01 | 2.88 | 0.44 | 1.23 | 0.85 |
| 8922 | 0 | 6332   | CGPKLSTDLIKNQCVNF                                          | 2.76 | 0.01 | 2.48 | 0.44 | 0.85 | 0.28 |
| 8923 | 0 | 6332   | CGPKLSTDLIKNQCVNF                                          | 2.76 | 0.01 | 2.48 | 0.68 | 0.22 | 0.28 |
| 8924 | 0 | 6332   | CGPKLSTDLIKNQCVNF                                          | 2.76 | 0.01 | 2.48 | 1.20 | 0.22 | 0.28 |
| 8925 | 0 | 6333   | CGPKLSTDLIKNQCVNF<br>NFNGLTGTGVLTPSSKR<br>FQPFQQFG         | 3.69 | 0.01 | 2.48 | 0.44 | 0.85 | 0.28 |
| 8926 | 0 | 6334   | CGPKLSTDLIKNQCVNF<br>NFNGLTGTGVLTPSSKR<br>FQPFQQFGRDVSDFTD | 3.88 | 0.01 | 2.45 | 0.44 | 0.85 | 0.85 |
| 8927 | 0 | 99914  | CGQGIDCGPIQP                                               | 2.53 | 0.01 | 2.88 | 1.20 | 0.22 | 0.85 |
| 8928 | 0 | 6338   | CGQPVTRTDDDTVA                                             | 2.61 | 0.01 | 3.30 | 1.12 | 0.22 | 1.57 |
| 8929 | 0 | 6338   | CGQPVTRTDDDTVA                                             | 2.61 | 0.01 | 3.30 | 1.12 | 0.22 | 1.57 |
| 8930 | 0 | 6338   | CGQPVTRTDDDTVA                                             | 2.61 | 0.01 | 3.30 | 1.12 | 0.22 | 0.85 |
| 8931 | 0 | 6338   | CGQPVTRTDDDTVA                                             | 2.61 | 0.01 | 3.59 | 1.20 | 0.22 | 0.28 |
| 8932 | 0 | 6338   | CGQPVTRTDDDTVA                                             | 2.61 | 0.01 | 3.59 | 1.20 | 0.22 | 0.28 |
| 8933 | 0 | 6341   | CGRECGIKKGSSGYC                                            | 2.70 | 0.01 | 2.56 | 2.02 | 0.22 | 0.85 |
| 8934 | 0 | 142390 | CGRLIRSELPRL                                               | 2.49 | 0.01 | 0.90 | 0.68 | 0.22 | 0.85 |
| 8935 | 0 | 79168  | CGRNAYC                                                    | 2.03 | 0.01 | 4.93 | 1.12 | 0.22 | 0.85 |
| 8936 | 0 | 99124  | CGRNQKPSRLTRSANNV<br>LLEY                                  | 2.95 | 0.01 | 0.90 | 0.68 | 0.22 | 1.48 |
| 8937 | 0 | 99124  | CGRNQKPSRLTRSANNV<br>LLEY                                  | 2.95 | 0.01 | 0.90 | 0.68 | 0.22 | 1.48 |
| 8938 | 0 | 99124  | CGRNQKPSRLTRSANNV<br>LLEY                                  | 2.95 | 0.01 | 0.90 | 0.68 | 0.22 | 0.85 |
| 8939 | 0 | 99124  | CGRNQKPSRLTRSANNV<br>LLEY                                  | 2.95 | 0.01 | 0.90 | 0.68 | 0.22 | 1.75 |
| 8940 | 0 | 178618 | CGRSLQGYPFNPCLT                                            | 2.67 | 0.01 | 2.36 | 0.44 | 1.23 | 1.28 |

|      |   |        |                                    |      |      |      |      |      |      |
|------|---|--------|------------------------------------|------|------|------|------|------|------|
| 8941 | 0 | 178618 | CGRSLQGYPFNPCLT                    | 2.67 | 0.01 | 2.36 | 0.44 | 1.23 | 1.27 |
| 8942 | 0 | 178618 | CGRSLQGYPFNPCLT                    | 2.67 | 0.01 | 2.36 | 0.44 | 1.23 | 1.28 |
| 8943 | 0 | 189207 | CGRSMEGYPFNPCLT                    | 2.65 | 0.01 | 3.63 | 0.44 | 1.23 | 0.85 |
| 8944 | 0 | 189207 | CGRSMEGYPFNPCLT                    | 2.65 | 0.01 | 3.63 | 0.44 | 1.23 | 0.85 |
| 8945 | 0 | 189207 | CGRSMEGYPFNPCLT                    | 2.65 | 0.01 | 3.63 | 0.44 | 1.23 | 0.85 |
| 8946 | 0 | 189207 | CGRSMEGYPFNPCLT                    | 2.65 | 0.01 | 3.63 | 0.68 | 0.22 | 1.34 |
| 8947 | 0 | 6343   | CGRVCLRC                           | 2.17 | 0.01 | 0.90 | 3.48 | 0.22 | 0.28 |
| 8948 | 0 | 6343   | CGRVCLRC                           | 2.17 | 0.01 | 0.90 | 3.48 | 0.22 | 1.27 |
| 8949 | 0 | 6343   | CGRVCLRC                           | 2.17 | 0.01 | 0.90 | 1.15 | 0.22 | 2.56 |
| 8950 | 0 | 6343   | CGRVCLRC                           | 2.17 | 0.01 | 0.90 | 3.48 | 0.22 | 2.56 |
| 8951 | 0 | 6343   | CGRVCLRC                           | 2.17 | 0.01 | 0.90 | 3.48 | 0.22 | 2.56 |
| 8952 | 0 | 6343   | CGRVCLRC                           | 2.17 | 0.01 | 0.90 | 3.48 | 0.22 | 2.56 |
| 8953 | 0 | 6343   | CGRVCLRC                           | 2.17 | 0.01 | 0.90 | 3.48 | 0.22 | 2.56 |
| 8954 | 0 | 6343   | CGRVCLRC                           | 2.17 | 0.01 | 0.90 | 3.48 | 0.22 | 2.56 |
| 8955 | 0 | 146181 | CGSMMATGKILVAY                     | 2.58 | 0.01 | 2.96 | 0.44 | 0.22 | 0.28 |
| 8956 | 0 | 104739 | CGSTDEYCSP                         | 2.32 | 0.01 | 2.60 | 0.44 | 1.23 | 0.85 |
| 8957 | 0 | 6352   | CGSVAGA                            | 2.04 | 0.01 | 4.23 | 0.68 | 0.22 | 0.28 |
| 8958 | 0 | 6355   | CGSVFLVGQLFTFSPRR<br>HWT           | 2.94 | 0.01 | 2.83 | 0.44 | 0.85 | 0.28 |
| 8959 | 0 | 6357   | CGSVFLVSQLFTLSPRRH<br>ET           | 2.94 | 0.01 | 2.83 | 1.12 | 0.22 | 0.28 |
| 8960 | 0 | 123979 | CGTAKRVTGNQAV                      | 2.56 | 0.01 | 2.73 | 3.65 | 0.22 | 0.28 |
| 8961 | 0 | 123979 | CGTAKRVTGNQAV                      | 2.56 | 0.01 | 2.73 | 3.65 | 0.22 | 0.28 |
| 8962 | 0 | 123979 | CGTAKRVTGNQAV                      | 2.56 | 0.01 | 2.73 | 3.65 | 0.22 | 1.34 |
| 8963 | 0 | 114756 | CGTDGVTYDN                         | 2.33 | 0.01 | 2.25 | 0.44 | 1.23 | 0.85 |
| 8964 | 0 | 122287 | CGTPSHSRRQPHVM                     | 2.60 | 0.01 | 0.78 | 1.20 | 0.22 | 1.48 |
| 8965 | 0 | 95277  | CGTTDSTATTKISEVFTE                 | 2.85 | 0.01 | 3.65 | 2.22 | 0.22 | 0.28 |
| 8966 | 0 | 101510 | CGTTDSTATTKISEVFTE<br>GTDTLISVEGNK | 3.35 | 0.01 | 3.72 | 3.42 | 0.22 | 0.28 |
| 8967 | 0 | 122719 | CGVDFEIKAFATHSTDVE<br>ED           | 2.94 | 0.01 | 1.60 | 2.04 | 0.22 | 0.28 |
| 8968 | 0 | 140545 | CGVDGRWPRW                         | 2.33 | 0.01 | 0.90 | 0.68 | 0.22 | 0.28 |
| 8969 | 0 | 130452 | CGVKSLLTSMYCAAC                    | 2.67 | 3.70 | 0.90 | 0.44 | 1.93 | 1.27 |
| 8970 | 0 | 490744 | CGVPFLSLDRGSSLR                    | 2.69 | 0.01 | 0.90 | 1.15 | 0.22 | 1.39 |
| 8971 | 0 | 6361   | CGVVNNKVAT                         | 2.32 | 4.63 | 0.90 | 0.68 | 0.22 | 0.28 |
| 8972 | 0 | 6361   | CGVVNNKVAT                         | 2.32 | 4.63 | 0.90 | 0.68 | 0.22 | 1.34 |
| 8973 | 0 | 6362   | CGVVVLQC                           | 2.15 | 0.01 | 0.90 | 1.15 | 0.22 | 1.39 |
| 8974 | 0 | 6365   | CGWAGWLLSPRG                       | 2.48 | 0.01 | 2.68 | 0.44 | 0.85 | 0.28 |
| 8975 | 0 | 6367   | CGYGGPANKKNAGC                     | 2.66 | 0.01 | 0.90 | 1.12 | 0.22 | 0.28 |
| 8976 | 0 | 6371   | CGYSLFQKEKMVLGC                    | 2.67 | 0.01 | 0.90 | 1.12 | 0.22 | 0.28 |
| 8977 | 0 | 6374   | CHARKAVAHINS                       | 2.48 | 0.01 | 2.68 | 0.44 | 0.85 | 0.28 |
| 8978 | 0 | 6375   | CHARKAVTHINS                       | 2.45 | 0.01 | 2.41 | 0.44 | 0.85 | 0.28 |
| 8979 | 0 | 103830 | CHAVKVGNPSC                        | 2.40 | 0.01 | 0.90 | 3.65 | 0.22 | 1.27 |
| 8980 | 0 | 103830 | CHAVKVGNPSC                        | 2.40 | 0.01 | 0.90 | 3.65 | 0.22 | 2.92 |
| 8981 | 0 | 103830 | CHAVKVGNPSC                        | 2.40 | 0.01 | 0.90 | 3.65 | 0.22 | 0.85 |
| 8982 | 0 | 103830 | CHAVKVGNPSC                        | 2.40 | 0.01 | 0.90 | 3.65 | 0.22 | 0.85 |

|      |   |        |                                    |      |      |      |      |      |      |
|------|---|--------|------------------------------------|------|------|------|------|------|------|
| 8983 | 0 | 103830 | CHAVKVGNPSC                        | 2.40 | 0.01 | 0.90 | 0.44 | 1.13 | 0.28 |
| 8984 | 0 | 132783 | CHAWSNRRTC                         | 2.31 | 0.01 | 0.90 | 0.44 | 2.35 | 1.27 |
| 8985 | 0 | 6385   | CHGIFTLTWEIWGY                     | 2.61 | 0.01 | 2.69 | 1.12 | 0.22 | 0.28 |
| 8986 | 0 | 6385   | CHGIFTLTWEIWGY                     | 2.61 | 0.01 | 2.69 | 1.12 | 0.22 | 0.28 |
| 8987 | 0 | 6385   | CHGIFTLTWEIWGY                     | 2.61 | 0.01 | 2.69 | 1.12 | 0.22 | 0.28 |
| 8988 | 0 | 116682 | CHGRGTCNYYANAYS                    | 2.70 | 0.01 | 1.60 | 1.12 | 0.22 | 0.28 |
| 8989 | 0 | 116682 | CHGRGTCNYYANAYS                    | 2.70 | 0.01 | 1.60 | 0.44 | 1.13 | 0.28 |
| 8990 | 0 | 6386   | CHGSEPCIHRGKPF                     | 2.68 | 0.01 | 2.78 | 0.68 | 0.22 | 0.28 |
| 8991 | 0 | 6386   | CHGSEPCIHRGKPF                     | 2.68 | 0.01 | 2.78 | 0.68 | 0.22 | 1.75 |
| 8992 | 0 | 6386   | CHGSEPCIHRGKPF                     | 2.68 | 0.01 | 2.78 | 0.68 | 0.22 | 0.28 |
| 8993 | 0 | 164614 | CHGSEPCIHRGKPFQLE<br>AVFEANQNSKTAK | 3.35 | 0.01 | 2.78 | 0.44 | 1.23 | 0.85 |
| 8994 | 0 | 164614 | CHGSEPCIHRGKPFQLE<br>AVFEANQNSKTAK | 3.35 | 0.01 | 2.78 | 1.12 | 0.22 | 0.28 |
| 8995 | 0 | 164614 | CHGSEPCIHRGKPFQLE<br>AVFEANQNSKTAK | 3.35 | 0.01 | 2.78 | 0.44 | 1.23 | 2.35 |
| 8996 | 0 | 164614 | CHGSEPCIHRGKPFQLE<br>AVFEANQNSKTAK | 3.35 | 0.01 | 2.78 | 0.68 | 0.22 | 1.34 |
| 8997 | 0 | 164614 | CHGSEPCIHRGKPFQLE<br>AVFEANQNSKTAK | 3.35 | 0.01 | 2.78 | 1.12 | 0.22 | 0.28 |
| 8998 | 0 | 164614 | CHGSEPCIHRGKPFQLE<br>AVFEANQNSKTAK | 3.35 | 0.01 | 2.78 | 1.12 | 0.22 | 0.85 |
| 8999 | 0 | 180388 | CHHLDKSIKEDVQFADS<br>RI            | 2.87 | 0.01 | 2.93 | 0.68 | 0.22 | 0.28 |
| 9000 | 0 | 180388 | CHHLDKSIKEDVQFADS<br>RI            | 2.87 | 0.01 | 2.93 | 0.68 | 0.22 | 0.28 |
| 9001 | 0 | 180388 | CHHLDKSIKEDVQFADS<br>RI            | 2.87 | 0.01 | 2.93 | 0.68 | 0.22 | 0.28 |
| 9002 | 0 | 180388 | CHHLDKSIKEDVQFADS<br>RI            | 2.87 | 0.01 | 2.93 | 0.68 | 0.22 | 0.28 |
| 9003 | 0 | 180388 | CHHLDKSIKEDVQFADS<br>RI            | 2.87 | 0.01 | 2.93 | 0.68 | 0.22 | 1.34 |
| 9004 | 0 | 180388 | CHHLDKSIKEDVQFADS<br>RI            | 2.87 | 0.01 | 2.93 | 0.68 | 2.25 | 1.75 |
| 9005 | 0 | 180388 | CHHLDKSIKEDVQFADS<br>RI            | 2.87 | 0.01 | 2.93 | 0.68 | 2.60 | 1.75 |
| 9006 | 0 | 180388 | CHHLDKSIKEDVQFADS<br>RI            | 2.87 | 0.01 | 2.93 | 0.68 | 0.22 | 0.28 |
| 9007 | 0 | 180388 | CHHLDKSIKEDVQFADS<br>RI            | 2.87 | 0.01 | 2.93 | 0.68 | 0.22 | 0.28 |
| 9008 | 0 | 180388 | CHHLDKSIKEDVQFADS<br>RI            | 2.87 | 0.01 | 2.93 | 0.68 | 0.22 | 1.34 |
| 9009 | 0 | 180388 | CHHLDKSIKEDVQFADS<br>RI            | 2.87 | 0.01 | 2.93 | 0.68 | 0.22 | 0.28 |
| 9010 | 0 | 180388 | CHHLDKSIKEDVQFADS<br>RI            | 2.87 | 0.01 | 2.93 | 0.68 | 0.22 | 0.28 |



|      |   |        |                              |      |      |      |      |      |      |
|------|---|--------|------------------------------|------|------|------|------|------|------|
| 9011 | 0 | 180388 | CHHLDKSIKEDVQFADS<br>RI      | 2.87 | 0.01 | 2.93 | 0.68 | 0.22 | 1.34 |
| 9012 | 0 | 6389   | CHHSPEEYQPC                  | 2.42 | 0.01 | 0.90 | 1.15 | 0.22 | 1.27 |
| 9013 | 0 | 489907 | CHKLRCDKAIA                  | 2.42 | 0.01 | 0.90 | 0.68 | 0.22 | 1.39 |
| 9014 | 0 | 489907 | CHKLRCDKAIA                  | 2.42 | 0.01 | 0.90 | 0.44 | 1.23 | 1.27 |
| 9015 | 0 | 489907 | CHKLRCDKAIA                  | 2.42 | 0.01 | 0.90 | 0.68 | 0.22 | 0.85 |
| 9016 | 0 | 489907 | CHKLRCDKAIA                  | 2.42 | 0.01 | 0.90 | 0.68 | 0.22 | 0.28 |
| 9017 | 0 | 167216 | CHMRNTIHC                    | 2.24 | 0.01 | 0.90 | 0.68 | 0.22 | 1.39 |
| 9018 | 0 | 167216 | CHMRNTIHC                    | 2.24 | 0.01 | 0.90 | 0.68 | 0.22 | 0.85 |
| 9019 | 0 | 167216 | CHMRNTIHC                    | 2.24 | 0.01 | 0.90 | 0.68 | 0.22 | 1.39 |
| 9020 | 0 | 167216 | CHMRNTIHC                    | 2.24 | 0.01 | 0.90 | 0.68 | 0.22 | 0.85 |
| 9021 | 0 | 6402   | CHPSDGKCN                    | 2.22 | 0.01 | 1.66 | 1.15 | 0.22 | 1.34 |
| 9022 | 0 | 6402   | CHPSDGKCN                    | 2.22 | 0.01 | 1.66 | 0.44 | 1.74 | 0.28 |
| 9023 | 0 | 6402   | CHPSDGKCN                    | 2.22 | 0.01 | 1.66 | 1.15 | 0.22 | 0.28 |
| 9024 | 0 | 6402   | CHPSDGKCN                    | 2.22 | 0.01 | 1.66 | 1.15 | 0.22 | 1.48 |
| 9025 | 0 | 6402   | CHPSDGKCN                    | 2.22 | 0.01 | 1.66 | 1.15 | 0.22 | 0.28 |
| 9026 | 0 | 125372 | CHQEEDFRVTCKDIQRIP<br>SL     | 2.91 | 0.01 | 0.78 | 0.44 | 1.13 | 1.34 |
| 9027 | 0 | 177481 | CHQESTRGRSRGRC               | 2.65 | 3.33 | 0.78 | 0.44 | 2.26 | 0.28 |
| 9028 | 0 | 177481 | CHQESTRGRSRGRC               | 2.65 | 3.33 | 0.78 | 0.44 | 2.26 | 0.28 |
| 9029 | 0 | 177481 | CHQESTRGRSRGRC               | 2.65 | 3.33 | 0.78 | 0.44 | 2.26 | 0.28 |
| 9030 | 0 | 6403   | CHQLGKQRC                    | 2.24 | 0.01 | 0.90 | 0.44 | 0.85 | 1.39 |
| 9031 | 0 | 112063 | CHQYLSS                      | 1.99 | 0.01 | 0.78 | 0.44 | 1.13 | 0.28 |
| 9032 | 0 | 6405   | CHRPHPGP                     | 2.16 | 0.01 | 3.72 | 0.44 | 0.85 | 1.34 |
| 9033 | 0 | 118280 | CHSSALELLQEVIIV              | 2.67 | 0.01 | 0.78 | 0.44 | 1.13 | 0.28 |
| 9034 | 0 | 118280 | CHSSALELLQEVIIV              | 2.67 | 0.01 | 0.78 | 0.44 | 1.13 | 0.28 |
| 9035 | 0 | 167217 | CHSSLLNPC                    | 2.25 | 0.01 | 0.90 | 0.68 | 0.22 | 1.39 |
| 9036 | 0 | 167217 | CHSSLLNPC                    | 2.25 | 0.01 | 0.90 | 0.68 | 0.22 | 0.85 |
| 9037 | 0 | 167217 | CHSSLLNPC                    | 2.25 | 0.01 | 0.90 | 0.68 | 0.22 | 1.39 |
| 9038 | 0 | 167217 | CHSSLLNPC                    | 2.25 | 0.01 | 0.90 | 0.68 | 0.22 | 0.85 |
| 9039 | 0 | 187629 | CHSTDSTTILGIGTVL             | 2.76 | 0.01 | 1.96 | 0.68 | 0.22 | 0.28 |
| 9040 | 0 | 187629 | CHSTDSTTILGIGTVL             | 2.76 | 0.01 | 1.96 | 0.68 | 0.22 | 0.28 |
| 9041 | 0 | 423233 | CHTETTHIRFKETNT              | 2.69 | 0.01 | 2.51 | 0.44 | 2.35 | 1.28 |
| 9042 | 0 | 106305 | CHTHEGGQLH                   | 2.32 | 0.01 | 2.75 | 0.44 | 1.23 | 0.85 |
| 9043 | 0 | 79524  | CHTTATIPSSAVTC               | 2.64 | 0.01 | 3.10 | 0.68 | 0.22 | 1.75 |
| 9044 | 0 | 79524  | CHTTATIPSSAVTC               | 2.64 | 0.01 | 3.10 | 0.68 | 0.22 | 1.57 |
| 9045 | 0 | 79524  | CHTTATIPSSAVTC               | 2.64 | 0.01 | 3.10 | 2.43 | 0.22 | 1.57 |
| 9046 | 0 | 79524  | CHTTATIPSSAVTC               | 2.64 | 0.01 | 3.10 | 0.68 | 0.22 | 1.57 |
| 9047 | 0 | 79524  | CHTTATIPSSAVTC               | 2.64 | 0.01 | 3.10 | 0.68 | 0.22 | 1.57 |
| 9048 | 0 | 79524  | CHTTATIPSSAVTC               | 2.64 | 0.01 | 3.10 | 2.25 | 0.22 | 1.57 |
| 9049 | 0 | 94464  | CHTTATSPISAVTCPPGE<br>NLCYRK | 3.09 | 0.01 | 3.10 | 1.12 | 0.22 | 1.27 |
| 9050 | 0 | 134878 | CHWDPFSL SAYFPGGGS<br>C      | 2.84 | 4.33 | 0.90 | 0.44 | 1.13 | 1.27 |
| 9051 | 0 | 134878 | CHWDPFSL SAYFPGGGS<br>C      | 2.84 | 4.33 | 0.90 | 0.44 | 1.13 | 0.28 |

|      |   |        |                                                                                                                                                                                      |      |      |      |      |      |      |
|------|---|--------|--------------------------------------------------------------------------------------------------------------------------------------------------------------------------------------|------|------|------|------|------|------|
| 9052 | 0 | 134878 | CHWDPFSL SAYFPGGGS<br>C                                                                                                                                                              | 2.84 | 4.33 | 0.90 | 0.44 | 1.13 | 0.28 |
| 9053 | 0 | 134878 | CHWDPFSL SAYFPGGGS<br>C                                                                                                                                                              | 2.84 | 4.33 | 0.90 | 0.44 | 1.13 | 0.28 |
| 9054 | 0 | 97924  | CHYMKC                                                                                                                                                                               | 1.91 | 0.01 | 2.78 | 0.44 | 1.23 | 1.57 |
| 9055 | 0 | 121173 | CIAAKKIQSVGNKS                                                                                                                                                                       | 2.69 | 0.01 | 0.78 | 0.44 | 1.13 | 0.85 |
| 9056 | 0 | 121173 | CIAAKKIQSVGNKS                                                                                                                                                                       | 2.69 | 0.01 | 0.78 | 0.44 | 1.41 | 0.85 |
| 9057 | 0 | 164161 | CIAMIEFNTSSDKTEHDK<br>IG                                                                                                                                                             | 2.92 | 0.01 | 4.23 | 2.37 | 0.22 | 0.28 |
| 9058 | 0 | 107768 | CIAPKRHNSAC                                                                                                                                                                          | 2.40 | 0.01 | 0.90 | 2.46 | 0.22 | 1.27 |
| 9059 | 0 | 107768 | CIAPKRHNSAC                                                                                                                                                                          | 2.40 | 0.01 | 0.90 | 2.46 | 0.22 | 0.28 |
| 9060 | 0 | 113304 | CIEAKISNTTTDSRCPTQ<br>GEATLVEEQDTNFVCRR<br>TFV                                                                                                                                       | 3.56 | 0.01 | 2.82 | 0.68 | 0.22 | 0.85 |
| 9061 | 0 | 113306 | CIEAKLTNTTTESRCPTQ<br>GEP SLNEEQDKRFLCKH<br>SMVDRGWGNGCGLFG<br>KGGIVTCAMFTCKKNM<br>EGKVVL PENL                                                                                       | 4.28 | 0.01 | 2.30 | 0.68 | 0.22 | 0.85 |
| 9062 | 0 | 113307 | CIEAKLTNTTTESRCPTQ<br>GEP SLNEEQDKRFLCKH<br>SMVDRGWGNGCGLFG<br>KGGIVTCAMFTCKKNM<br>EGKVVL PENLEYTIVITPH<br>SGEEHAVGNDTGKHGK<br>EIKITPQSSITEAELTGYG<br>TVTMECSPRTGLDFNE<br>MVLLQMEDKA | 4.95 | 0.01 | 2.30 | 0.68 | 0.22 | 0.85 |
| 9063 | 0 | 6412   | CIEFVQQEVDYIIDH                                                                                                                                                                      | 2.68 | 0.01 | 2.28 | 0.68 | 0.22 | 0.28 |
| 9064 | 0 | 6412   | CIEFVQQEVDYIIDH                                                                                                                                                                      | 2.68 | 0.01 | 2.28 | 1.20 | 0.22 | 0.28 |
| 9065 | 0 | 6412   | CIEFVQQEVDYIIDH                                                                                                                                                                      | 2.68 | 0.01 | 2.28 | 1.20 | 0.22 | 0.28 |
| 9066 | 0 | 6412   | CIEFVQQEVDYIIDH                                                                                                                                                                      | 2.68 | 0.01 | 2.28 | 1.20 | 0.22 | 1.27 |
| 9067 | 0 | 99915  | CIFPLCLGRPIAASYPPKT<br>R                                                                                                                                                             | 2.94 | 0.01 | 0.90 | 2.00 | 0.22 | 0.28 |
| 9068 | 0 | 147548 | CIGHLPWMC                                                                                                                                                                            | 2.22 | 0.01 | 0.90 | 0.44 | 1.41 | 1.39 |
| 9069 | 0 | 130751 | CIGSPSTNC                                                                                                                                                                            | 2.24 | 0.01 | 0.90 | 0.44 | 1.13 | 1.39 |
| 9070 | 0 | 147549 | CIGTLPWMC                                                                                                                                                                            | 2.22 | 0.01 | 0.90 | 0.44 | 1.41 | 1.39 |
| 9071 | 0 | 157130 | CIIEEN                                                                                                                                                                               | 1.91 | 0.01 | 0.90 | 0.44 | 1.93 | 1.28 |
| 9072 | 0 | 157130 | CIIEEN                                                                                                                                                                               | 1.91 | 0.01 | 0.90 | 0.44 | 1.41 | 1.28 |
| 9073 | 0 | 510431 | CIHRGKPFQLEAVFEAN<br>QNTKTA                                                                                                                                                          | 3.09 | 0.01 | 2.78 | 1.12 | 0.22 | 0.85 |
| 9074 | 0 | 510431 | CIHRGKPFQLEAVFEAN<br>QNTKTA                                                                                                                                                          | 3.09 | 0.01 | 2.78 | 0.68 | 0.22 | 1.75 |
| 9075 | 0 | 6422   | CIITSLTGR                                                                                                                                                                            | 2.22 | 0.01 | 1.96 | 0.44 | 0.85 | 1.34 |
| 9076 | 0 | 141862 | CIKTLMTNVETYFK                                                                                                                                                                       | 2.59 | 0.01 | 2.73 | 0.44 | 0.85 | 0.28 |

|      |   |        |                          |      |      |      |      |      |      |
|------|---|--------|--------------------------|------|------|------|------|------|------|
| 9077 | 0 | 6429   | CILRQLRHLP SRVRYPHY<br>S | 2.92 | 0.01 | 2.04 | 0.44 | 0.85 | 0.28 |
| 9078 | 0 | 6429   | CILRQLRHLP SRVRYPHY<br>S | 2.92 | 0.01 | 2.04 | 1.20 | 0.22 | 2.02 |
| 9079 | 0 | 6429   | CILRQLRHLP SRVRYPHY<br>S | 2.92 | 0.01 | 2.04 | 0.44 | 2.98 | 0.28 |
| 9080 | 0 | 78939  | CINHRGYWVC               | 2.30 | 0.01 | 0.90 | 0.68 | 0.22 | 1.27 |
| 9081 | 0 | 78939  | CINHRGYWVC               | 2.30 | 0.01 | 0.90 | 0.68 | 0.22 | 2.51 |
| 9082 | 0 | 78939  | CINHRGYWVC               | 2.30 | 0.01 | 0.90 | 0.68 | 0.22 | 1.57 |
| 9083 | 0 | 78939  | CINHRGYWVC               | 2.30 | 0.01 | 0.90 | 1.12 | 0.22 | 0.85 |
| 9084 | 0 | 111149 | CIPASGQTC                | 2.22 | 0.01 | 0.90 | 0.44 | 0.85 | 1.39 |
| 9085 | 0 | 187279 | CIPDRRYQLCMK             | 2.45 | 0.01 | 2.59 | 0.44 | 1.74 | 0.28 |
| 9086 | 0 | 134333 | CIPISSWAFARFLW           | 2.69 | 0.01 | 3.07 | 0.44 | 0.22 | 1.34 |
| 9087 | 0 | 134333 | CIPISSWAFARFLW           | 2.69 | 0.01 | 3.07 | 0.44 | 0.22 | 1.66 |
| 9088 | 0 | 134333 | CIPISSWAFARFLW           | 2.69 | 0.01 | 3.07 | 0.44 | 0.22 | 0.28 |
| 9089 | 0 | 420589 | CIPKTFWN                 | 2.10 | 0.01 | 0.78 | 0.44 | 1.41 | 0.28 |
| 9090 | 0 | 99916  | CIPPLCKLRLHE             | 2.49 | 0.01 | 0.90 | 2.00 | 0.22 | 0.28 |
| 9091 | 0 | 131373 | CIPTEYTMHIERRECA Y       | 2.81 | 0.01 | 0.78 | 1.12 | 0.22 | 0.28 |
| 9092 | 0 | 131373 | CIPTEYTMHIERRECA Y       | 2.81 | 0.01 | 0.78 | 1.12 | 0.22 | 0.28 |
| 9093 | 0 | 131373 | CIPTEYTMHIERRECA Y       | 2.81 | 0.01 | 0.78 | 1.12 | 0.22 | 0.28 |
| 9094 | 0 | 131373 | CIPTEYTMHIERRECA Y       | 2.81 | 0.01 | 0.78 | 1.12 | 0.22 | 0.28 |
| 9095 | 0 | 131373 | CIPTEYTMHIERRECA Y       | 2.81 | 0.01 | 0.78 | 1.12 | 0.22 | 0.28 |
| 9096 | 0 | 182065 | CIQAGKSVLTLENCK          | 2.65 | 0.01 | 0.78 | 0.44 | 1.13 | 0.85 |
| 9097 | 0 | 161089 | CISDPNININIYKNKFKDK      | 2.94 | 0.01 | 2.08 | 0.44 | 1.93 | 1.57 |
| 9098 | 0 | 6455   | CITQYERESQAYY            | 2.53 | 0.01 | 0.78 | 0.68 | 0.22 | 0.85 |
| 9099 | 0 | 6455   | CITQYERESQAYY            | 2.53 | 0.01 | 0.78 | 0.68 | 0.22 | 0.28 |
| 9100 | 0 | 6455   | CITQYERESQAYY            | 2.53 | 0.01 | 0.78 | 0.68 | 0.22 | 2.92 |
| 9101 | 0 | 6455   | CITQYERESQAYY            | 2.53 | 0.01 | 0.78 | 0.68 | 0.22 | 2.92 |
| 9102 | 0 | 6455   | CITQYERESQAYY            | 2.53 | 0.01 | 0.78 | 0.68 | 0.22 | 0.28 |
| 9103 | 0 | 6455   | CITQYERESQAYY            | 2.53 | 0.01 | 0.78 | 0.68 | 0.22 | 0.28 |
| 9104 | 0 | 6455   | CITQYERESQAYY            | 2.53 | 0.01 | 0.78 | 0.68 | 0.22 | 0.85 |
| 9105 | 0 | 6455   | CITQYERESQAYY            | 2.53 | 0.01 | 0.78 | 0.68 | 0.22 | 0.28 |
| 9106 | 0 | 6455   | CITQYERESQAYY            | 2.53 | 0.01 | 0.78 | 0.68 | 0.22 | 0.28 |
| 9107 | 0 | 6456   | CITQYERESQAYYQRGS        | 2.80 | 0.01 | 0.78 | 3.48 | 0.22 | 0.28 |
| 9108 | 0 | 6456   | CITQYERESQAYYQRGS        | 2.80 | 0.01 | 0.78 | 3.48 | 0.22 | 0.28 |
| 9109 | 0 | 6456   | CITQYERESQAYYQRGS        | 2.80 | 0.01 | 0.78 | 1.12 | 0.22 | 1.48 |
| 9110 | 0 | 177482 | CITQYQRESQAYY            | 2.53 | 0.01 | 1.60 | 2.19 | 0.22 | 0.85 |
| 9111 | 0 | 177482 | CITQYQRESQAYY            | 2.53 | 0.01 | 1.60 | 2.19 | 0.22 | 0.85 |

|      |   |        |                                              |      |      |      |      |      |      |
|------|---|--------|----------------------------------------------|------|------|------|------|------|------|
| 9112 | 0 | 177482 | CITQYQRESQAYY                                | 2.53 | 0.01 | 1.60 | 2.19 | 0.22 | 0.85 |
| 9113 | 0 | 177482 | CITQYQRESQAYY                                | 2.53 | 0.01 | 1.60 | 2.19 | 0.22 | 0.85 |
| 9114 | 0 | 6457   | CITQYQRESQAYYQRG                             | 2.74 | 0.01 | 2.52 | 2.19 | 0.22 | 0.28 |
| 9115 | 0 | 6457   | CITQYQRESQAYYQRG                             | 2.74 | 0.01 | 2.52 | 2.19 | 0.22 | 2.12 |
| 9116 | 0 | 6458   | CITQYQRESQAYYQRGASVI                         | 2.95 | 0.01 | 2.52 | 1.20 | 0.22 | 0.28 |
| 9117 | 0 | 80699  | CITTIYKTG                                    | 2.25 | 0.01 | 2.14 | 3.44 | 0.22 | 0.28 |
| 9118 | 0 | 6459   | CITTIYKTGQPAADHYYSKVTA                       | 3.02 | 0.01 | 2.14 | 1.20 | 0.22 | 0.28 |
| 9119 | 0 | 6459   | CITTIYKTGQPAADHYYSKVTA                       | 3.02 | 0.01 | 2.14 | 1.20 | 0.22 | 0.28 |
| 9120 | 0 | 6459   | CITTIYKTGQPAADHYYSKVTA                       | 3.02 | 0.01 | 2.14 | 1.20 | 0.22 | 1.34 |
| 9121 | 0 | 6459   | CITTIYKTGQPAADHYYSKVTA                       | 3.02 | 0.01 | 2.14 | 1.20 | 0.22 | 0.85 |
| 9122 | 0 | 6462   | CIVNRRTSFFNLGPSQR                            | 2.76 | 0.01 | 1.72 | 0.68 | 0.22 | 0.28 |
| 9123 | 0 | 106306 | CIVRATKGIS                                   | 2.29 | 0.01 | 3.08 | 0.44 | 1.23 | 0.85 |
| 9124 | 0 | 189589 | CKAEGSFDHKAFFTK                              | 2.67 | 0.01 | 3.28 | 0.44 | 1.23 | 0.28 |
| 9125 | 0 | 189589 | CKAEGSFDHKAFFTK                              | 2.67 | 0.01 | 3.28 | 0.44 | 1.41 | 0.28 |
| 9126 | 0 | 150155 | CKAFSNSYPYDVPDYASL                           | 2.85 | 3.70 | 0.90 | 0.68 | 0.22 | 0.28 |
| 9127 | 0 | 150155 | CKAFSNSYPYDVPDYASL                           | 2.85 | 3.70 | 0.90 | 0.68 | 0.22 | 0.28 |
| 9128 | 0 | 150155 | CKAFSNSYPYDVPDYASL                           | 2.85 | 3.70 | 0.90 | 0.68 | 0.22 | 0.28 |
| 9129 | 0 | 150155 | CKAFSNSYPYDVPDYASL                           | 2.85 | 3.70 | 0.90 | 0.68 | 0.22 | 0.28 |
| 9130 | 0 | 150155 | CKAFSNSYPYDVPDYASL                           | 2.85 | 3.70 | 0.90 | 0.68 | 0.22 | 0.28 |
| 9131 | 0 | 150155 | CKAFSNSYPYDVPDYASL                           | 2.85 | 3.70 | 0.90 | 0.68 | 0.22 | 0.28 |
| 9132 | 0 | 150155 | CKAFSNSYPYDVPDYASL                           | 2.85 | 3.70 | 0.90 | 0.68 | 0.22 | 0.28 |
| 9133 | 0 | 150155 | CKAFSNSYPYDVPDYASL                           | 2.85 | 3.70 | 0.90 | 0.68 | 0.22 | 0.28 |
| 9134 | 0 | 150155 | CKAFSNSYPYDVPDYASL                           | 2.85 | 3.70 | 0.90 | 0.68 | 0.22 | 0.28 |
| 9135 | 0 | 150155 | CKAFSNSYPYDVPDYASL                           | 2.85 | 3.70 | 0.90 | 0.68 | 0.22 | 0.28 |
| 9136 | 0 | 150155 | CKAFSNSYPYDVPDYASL                           | 2.85 | 3.70 | 0.90 | 0.68 | 2.25 | 1.75 |
| 9137 | 0 | 6467   | CKAILTPTDLAVSNPLTV<br>YLAWVPANSPATPTQIL<br>R | 3.53 | 0.01 | 4.03 | 0.68 | 0.22 | 0.28 |

|      |   |        |                                                              |      |      |      |      |      |      |
|------|---|--------|--------------------------------------------------------------|------|------|------|------|------|------|
| 9138 | 0 | 6467   | CKAILTPTDLAVSNPLTV<br>YLAWVPANSPATPTQIL<br>R                 | 3.53 | 0.01 | 4.03 | 0.68 | 0.22 | 0.28 |
| 9139 | 0 | 6467   | CKAILTPTDLAVSNPLTV<br>YLAWVPANSPATPTQIL<br>R                 | 3.53 | 0.01 | 4.03 | 0.68 | 0.22 | 0.85 |
| 9140 | 0 | 119784 | CKAKAQTDREDLRTLL                                             | 2.75 | 0.01 | 0.78 | 0.44 | 1.13 | 0.28 |
| 9141 | 0 | 131374 | CKAKAQTDREDLRTLLRY                                           | 2.86 | 0.01 | 0.78 | 2.36 | 0.22 | 1.48 |
| 9142 | 0 | 131374 | CKAKAQTDREDLRTLLRY                                           | 2.86 | 0.01 | 0.78 | 2.36 | 0.22 | 0.28 |
| 9143 | 0 | 131374 | CKAKAQTDREDLRTLLRY                                           | 2.86 | 0.01 | 0.78 | 2.36 | 0.22 | 0.28 |
| 9144 | 0 | 131374 | CKAKAQTDREDLRTLLRY                                           | 2.86 | 0.01 | 0.78 | 2.36 | 0.22 | 0.28 |
| 9145 | 0 | 131374 | CKAKAQTDREDLRTLLRY                                           | 2.86 | 0.01 | 0.78 | 2.36 | 0.22 | 1.48 |
| 9146 | 0 | 131374 | CKAKAQTDREDLRTLLRY                                           | 2.86 | 0.01 | 0.78 | 2.36 | 0.22 | 1.27 |
| 9147 | 0 | 6469   | CKALQEQCRFPN                                                 | 2.46 | 0.01 | 2.04 | 1.20 | 0.22 | 1.34 |
| 9148 | 0 | 6469   | CKALQEQCRFPN                                                 | 2.46 | 0.01 | 2.04 | 1.20 | 0.22 | 1.34 |
| 9149 | 0 | 489908 | CKASSCDTGHC                                                  | 2.41 | 0.01 | 0.90 | 0.68 | 0.22 | 1.39 |
| 9150 | 0 | 489908 | CKASSCDTGHC                                                  | 2.41 | 0.01 | 0.90 | 0.44 | 1.23 | 1.27 |
| 9151 | 0 | 489908 | CKASSCDTGHC                                                  | 2.41 | 0.01 | 0.90 | 0.68 | 0.22 | 0.85 |
| 9152 | 0 | 133533 | CKCGKCNT                                                     | 2.17 | 0.01 | 1.60 | 0.68 | 0.22 | 0.28 |
| 9153 | 0 | 106307 | CKCIVRATKG                                                   | 2.32 | 0.01 | 3.08 | 0.44 | 1.23 | 0.85 |
| 9154 | 0 | 106308 | CKCIVRATKGIS                                                 | 2.48 | 0.01 | 3.08 | 0.44 | 1.23 | 0.85 |
| 9155 | 0 | 95283  | CKDKENGDTVFT                                                 | 2.48 | 0.01 | 2.88 | 0.44 | 1.23 | 0.85 |
| 9156 | 0 | 238258 | CKDNGTKCKAFVCNC                                              | 2.71 | 0.01 | 2.56 | 2.02 | 0.22 | 0.85 |
| 9157 | 0 | 238258 | CKDNGTKCKAFVCNC                                              | 2.71 | 0.01 | 2.56 | 1.20 | 0.22 | 0.85 |
| 9158 | 0 | 158703 | CKEADIKTALEARKA                                              | 2.70 | 0.01 | 3.26 | 0.44 | 1.23 | 0.28 |
| 9159 | 0 | 158703 | CKEADIKTALEARKA                                              | 2.70 | 0.01 | 3.26 | 0.44 | 1.41 | 0.28 |
| 9160 | 0 | 6473   | CKEDHRYAISTTNEIGHL<br>GAEGLT                                 | 3.11 | 0.01 | 4.33 | 0.68 | 0.22 | 0.28 |
| 9161 | 0 | 180087 | CKEDYRYAISSTGGSSGG<br>ELLFDGTPSTGGSSGGI<br>ECTAVSPTTLRTEVVKT | 3.91 | 0.01 | 0.90 | 2.13 | 0.22 | 1.66 |
| 9162 | 0 | 180087 | CKEDYRYAISSTGGSSGG<br>ELLFDGTPSTGGSSGGI<br>ECTAVSPTTLRTEVVKT | 3.91 | 0.01 | 0.90 | 2.13 | 0.22 | 1.66 |
| 9163 | 0 | 180087 | CKEDYRYAISSTGGSSGG<br>ELLFDGTPSTGGSSGGI<br>ECTAVSPTTLRTEVVKT | 3.91 | 0.01 | 0.90 | 2.13 | 0.22 | 1.66 |

|      |   |        |                               |      |      |      |      |      |      |
|------|---|--------|-------------------------------|------|------|------|------|------|------|
| 9164 | 0 | 6474   | CKEDYRYAISSTNEIGLLG<br>AGGLT  | 3.11 | 0.01 | 3.37 | 2.13 | 0.22 | 0.28 |
| 9165 | 0 | 6474   | CKEDYRYAISSTNEIGLLG<br>AGGLT  | 3.11 | 0.01 | 3.37 | 2.13 | 0.22 | 2.12 |
| 9166 | 0 | 6474   | CKEDYRYAISSTNEIGLLG<br>AGGLT  | 3.11 | 0.01 | 3.37 | 2.13 | 0.22 | 1.34 |
| 9167 | 0 | 6474   | CKEDYRYAISSTNEIGLLG<br>AGGLT  | 3.11 | 0.01 | 3.37 | 2.13 | 2.25 | 1.75 |
| 9168 | 0 | 6474   | CKEDYRYAISSTNEIGLLG<br>AGGLT  | 3.11 | 0.01 | 3.37 | 2.13 | 0.22 | 0.28 |
| 9169 | 0 | 6474   | CKEDYRYAISSTNEIGLLG<br>AGGLT  | 3.11 | 0.01 | 3.21 | 2.13 | 0.22 | 1.34 |
| 9170 | 0 | 6474   | CKEDYRYAISSTNEIGLLG<br>AGGLT  | 3.11 | 0.01 | 3.21 | 1.12 | 0.22 | 0.85 |
| 9171 | 0 | 6474   | CKEDYRYAISSTNEIGLLG<br>AGGLT  | 3.11 | 0.01 | 3.21 | 2.13 | 0.22 | 1.75 |
| 9172 | 0 | 6474   | CKEDYRYAISSTNEIGLLG<br>AGGLT  | 3.11 | 0.01 | 3.21 | 0.68 | 0.22 | 0.28 |
| 9173 | 0 | 111150 | CKEGKKSPC                     | 2.25 | 0.01 | 0.90 | 0.44 | 0.85 | 1.39 |
| 9174 | 0 | 115192 | CKEVVRNANEEYSIGSS<br>SE       | 2.93 | 0.01 | 1.60 | 0.44 | 1.23 | 1.28 |
| 9175 | 0 | 6476   | CKFDEDDSEPVLKGVKL<br>HYT      | 2.92 | 0.01 | 2.45 | 0.44 | 0.85 | 1.48 |
| 9176 | 0 | 6476   | CKFDEDDSEPVLKGVKL<br>HYT      | 2.92 | 0.01 | 2.45 | 1.12 | 0.22 | 2.92 |
| 9177 | 0 | 6478   | CKFTLVLTCKGSQVL               | 2.71 | 0.01 | 3.03 | 1.12 | 0.22 | 0.28 |
| 9178 | 0 | 6478   | CKFTLVLTCKGSQVL               | 2.71 | 0.01 | 3.03 | 1.12 | 0.22 | 0.28 |
| 9179 | 0 | 108294 | CKFYRDPTAFGSGTHKIR<br>IKWTKLT | 3.14 | 0.01 | 1.60 | 0.68 | 0.22 | 0.28 |
| 9180 | 0 | 6479   | CKGKIQALCENPEWA               | 2.67 | 0.01 | 2.72 | 0.68 | 0.22 | 1.34 |
| 9181 | 0 | 6479   | CKGKIQALCENPEWA               | 2.67 | 0.01 | 2.72 | 0.68 | 0.22 | 0.28 |
| 9182 | 0 | 6479   | CKGKIQALCENPEWA               | 2.67 | 0.01 | 2.72 | 0.68 | 0.22 | 0.28 |
| 9183 | 0 | 6479   | CKGKIQALCENPEWA               | 2.67 | 0.01 | 2.72 | 0.68 | 0.22 | 2.12 |
| 9184 | 0 | 6479   | CKGKIQALCENPEWA               | 2.67 | 0.01 | 2.72 | 0.68 | 0.22 | 2.12 |
| 9185 | 0 | 6479   | CKGKIQALCENPEWA               | 2.67 | 0.01 | 2.72 | 0.68 | 0.22 | 1.34 |
| 9186 | 0 | 6479   | CKGKIQALCENPEWA               | 2.67 | 0.01 | 2.72 | 0.68 | 0.22 | 1.34 |
| 9187 | 0 | 6479   | CKGKIQALCENPEWA               | 2.67 | 0.01 | 2.72 | 0.68 | 0.22 | 1.75 |
| 9188 | 0 | 6479   | CKGKIQALCENPEWA               | 2.67 | 0.01 | 2.43 | 0.68 | 0.22 | 0.28 |
| 9189 | 0 | 6479   | CKGKIQALCENPEWA               | 2.67 | 0.01 | 2.43 | 0.68 | 0.22 | 2.12 |
| 9190 | 0 | 6480   | CKGLNGLFDLGPKQKI              | 2.75 | 0.01 | 1.72 | 0.68 | 0.22 | 0.28 |
| 9191 | 0 | 6480   | CKGLNGLFDLGPKQKI              | 2.75 | 0.01 | 1.72 | 0.68 | 0.22 | 1.66 |
| 9192 | 0 | 6480   | CKGLNGLFDLGPKQKI              | 2.75 | 0.01 | 1.72 | 0.68 | 0.22 | 1.66 |
| 9193 | 0 | 6482   | CKGTHGGTGAGAGAGG<br>AGAG      | 3.02 | 0.01 | 2.43 | 0.44 | 2.82 | 0.28 |
| 9194 | 0 | 6482   | CKGTHGGTGAGAGAGG<br>AGAG      | 3.02 | 0.01 | 2.43 | 0.44 | 2.82 | 0.28 |

|      |   |        |                           |      |      |      |      |      |      |
|------|---|--------|---------------------------|------|------|------|------|------|------|
| 9195 | 0 | 6482   | CKGTHGGTGAGAGAGG<br>AGAG  | 3.02 | 0.01 | 2.43 | 0.44 | 1.59 | 0.28 |
| 9196 | 0 | 6482   | CKGTHGGTGAGAGAGG<br>AGAG  | 3.02 | 0.01 | 2.43 | 0.44 | 1.59 | 0.28 |
| 9197 | 0 | 6484   | CKHSMV                    | 1.88 | 0.01 | 2.40 | 0.44 | 0.85 | 0.28 |
| 9198 | 0 | 6487   | CKIPFEIMDLEKRHVLGR<br>L   | 2.88 | 0.01 | 2.30 | 2.65 | 0.22 | 0.28 |
| 9199 | 0 | 6487   | CKIPFEIMDLEKRHVLGR<br>L   | 2.88 | 0.01 | 2.30 | 2.65 | 0.22 | 0.28 |
| 9200 | 0 | 6487   | CKIPFEIMDLEKRHVLGR<br>L   | 2.88 | 0.01 | 2.30 | 2.65 | 0.22 | 0.28 |
| 9201 | 0 | 6487   | CKIPFEIMDLEKRHVLGR<br>L   | 2.88 | 0.01 | 2.30 | 0.68 | 0.22 | 0.28 |
| 9202 | 0 | 6487   | CKIPFEIMDLEKRHVLGR<br>L   | 2.88 | 0.01 | 2.30 | 0.68 | 0.22 | 0.28 |
| 9203 | 0 | 182067 | CKKAGHVLSDAESGC           | 2.68 | 0.01 | 0.78 | 0.44 | 1.13 | 0.85 |
| 9204 | 0 | 182067 | CKKAGHVLSDAESGC           | 2.68 | 0.01 | 0.78 | 0.44 | 1.41 | 0.85 |
| 9205 | 0 | 6495   | CKKNME                    | 1.89 | 0.01 | 2.40 | 0.44 | 0.85 | 0.28 |
| 9206 | 0 | 6496   | CKKNMEGKVVL PENLEY<br>TIV | 2.94 | 0.01 | 2.30 | 2.65 | 0.22 | 0.28 |
| 9207 | 0 | 6496   | CKKNMEGKVVL PENLEY<br>TIV | 2.94 | 0.01 | 2.30 | 2.65 | 0.22 | 0.28 |
| 9208 | 0 | 6496   | CKKNMEGKVVL PENLEY<br>TIV | 2.94 | 0.01 | 2.30 | 0.68 | 0.22 | 0.28 |
| 9209 | 0 | 6496   | CKKNMEGKVVL PENLEY<br>TIV | 2.94 | 0.01 | 2.30 | 2.65 | 0.22 | 0.28 |
| 9210 | 0 | 6496   | CKKNMEGKVVL PENLEY<br>TIV | 2.94 | 0.01 | 2.30 | 2.65 | 0.22 | 0.28 |
| 9211 | 0 | 186747 | CKKYENFNDFLKGLR           | 2.68 | 0.01 | 3.36 | 1.20 | 0.22 | 0.28 |
| 9212 | 0 | 186747 | CKKYENFNDFLKGLR           | 2.68 | 0.01 | 3.36 | 1.20 | 0.22 | 0.28 |
| 9213 | 0 | 186747 | CKKYENFNDFLKGLR           | 2.68 | 0.01 | 3.36 | 1.20 | 0.22 | 1.34 |
| 9214 | 0 | 103085 | CKKYKIWMHVDAAWG           | 2.65 | 0.01 | 0.78 | 0.44 | 1.13 | 1.27 |
| 9215 | 0 | 150972 | CKLRGVAPLHLGKC            | 2.64 | 0.01 | 2.87 | 0.68 | 0.22 | 2.35 |
| 9216 | 0 | 6500   | CKLSCFIRPSGYCGR           | 2.69 | 0.01 | 2.56 | 2.02 | 0.22 | 0.85 |
| 9217 | 0 | 6501   | CKLSQGAPDSC               | 2.40 | 0.01 | 0.90 | 1.15 | 0.22 | 1.39 |
| 9218 | 0 | 6501   | CKLSQGAPDSC               | 2.40 | 0.01 | 0.90 | 1.15 | 0.22 | 1.27 |
| 9219 | 0 | 6501   | CKLSQGAPDSC               | 2.40 | 0.01 | 0.90 | 1.15 | 0.22 | 0.28 |
| 9220 | 0 | 6501   | CKLSQGAPDSC               | 2.40 | 0.01 | 0.90 | 1.15 | 0.22 | 0.28 |
| 9221 | 0 | 6501   | CKLSQGAPDSC               | 2.40 | 0.01 | 0.90 | 0.68 | 0.22 | 0.28 |
| 9222 | 0 | 133534 | CKLTANPSLAADV             | 2.52 | 0.01 | 4.63 | 2.97 | 0.22 | 1.48 |
| 9223 | 0 | 113308 | CKLTGTCPD                 | 2.33 | 0.01 | 3.85 | 1.12 | 0.22 | 0.28 |
| 9224 | 0 | 137119 | CKMPDRGACALGKKP           | 2.70 | 0.01 | 3.19 | 0.44 | 1.23 | 0.28 |
| 9225 | 0 | 102335 | CKMWADAFTSSRGKVV<br>EC    | 2.80 | 0.01 | 3.81 | 1.20 | 0.22 | 1.57 |

|      |   |        |                         |      |      |      |      |      |      |
|------|---|--------|-------------------------|------|------|------|------|------|------|
| 9226 | 0 | 102335 | CKMWADAFTSSRGKVV<br>EC  | 2.80 | 0.01 | 3.81 | 2.43 | 0.22 | 1.57 |
| 9227 | 0 | 102335 | CKMWADAFTSSRGKVV<br>EC  | 2.80 | 0.01 | 3.81 | 0.68 | 0.22 | 1.57 |
| 9228 | 0 | 102335 | CKMWADAFTSSRGKVV<br>EC  | 2.80 | 0.01 | 3.81 | 0.68 | 0.22 | 1.57 |
| 9229 | 0 | 102335 | CKMWADAFTSSRGKVV<br>EC  | 2.80 | 0.01 | 3.81 | 2.25 | 0.22 | 1.57 |
| 9230 | 0 | 102335 | CKMWADAFTSSRGKVV<br>EC  | 2.80 | 0.01 | 3.81 | 2.25 | 0.22 | 1.57 |
| 9231 | 0 | 79525  | CKMWADAFTSSRGKVV<br>ECG | 2.86 | 0.01 | 0.90 | 0.68 | 0.22 | 1.75 |
| 9232 | 0 | 79525  | CKMWADAFTSSRGKVV<br>ECG | 2.86 | 0.01 | 0.90 | 0.68 | 0.22 | 1.57 |
| 9233 | 0 | 141612 | CKNIGAYNTTSGTVNK        | 2.75 | 0.01 | 2.86 | 0.44 | 1.74 | 0.28 |
| 9234 | 0 | 135642 | CKNKEKKC                | 2.17 | 0.01 | 0.78 | 0.44 | 1.13 | 1.27 |
| 9235 | 0 | 135642 | CKNKEKKC                | 2.17 | 0.01 | 0.78 | 0.44 | 1.13 | 0.28 |
| 9236 | 0 | 135642 | CKNKEKKC                | 2.17 | 0.01 | 0.78 | 0.44 | 1.13 | 1.27 |
| 9237 | 0 | 135642 | CKNKEKKC                | 2.17 | 0.01 | 0.78 | 0.44 | 1.13 | 1.27 |
| 9238 | 0 | 135642 | CKNKEKKC                | 2.17 | 0.01 | 0.78 | 0.44 | 1.13 | 0.28 |
| 9239 | 0 | 133535 | CKPGEVQQC               | 2.23 | 0.01 | 0.90 | 1.15 | 0.22 | 0.28 |
| 9240 | 0 | 133535 | CKPGEVQQC               | 2.23 | 0.01 | 0.90 | 1.15 | 0.22 | 0.28 |
| 9241 | 0 | 133535 | CKPGEVQQC               | 2.23 | 0.01 | 0.90 | 1.15 | 0.22 | 2.12 |
| 9242 | 0 | 133535 | CKPGEVQQC               | 2.23 | 0.01 | 0.90 | 1.15 | 0.22 | 1.27 |
| 9243 | 0 | 133535 | CKPGEVQQC               | 2.23 | 0.01 | 0.90 | 1.15 | 0.22 | 1.66 |
| 9244 | 0 | 6510   | CKPIDAERGLC             | 2.37 | 0.01 | 0.90 | 1.15 | 0.22 | 1.39 |
| 9245 | 0 | 6510   | CKPIDAERGLC             | 2.37 | 0.01 | 0.90 | 1.15 | 0.22 | 0.28 |
| 9246 | 0 | 114196 | CKPISGHNSLFQWYRQT       | 2.71 | 0.01 | 0.78 | 0.44 | 2.98 | 1.27 |
| 9247 | 0 | 108834 | CKPISGHNSLFWYRQT        | 2.65 | 0.01 | 0.78 | 0.44 | 1.41 | 0.28 |
| 9248 | 0 | 108834 | CKPISGHNSLFWYRQT        | 2.65 | 0.01 | 0.78 | 0.44 | 1.41 | 0.28 |
| 9249 | 0 | 108834 | CKPISGHNSLFWYRQT        | 2.65 | 0.01 | 0.78 | 0.44 | 1.41 | 0.28 |
| 9250 | 0 | 108834 | CKPISGHNSLFWYRQT        | 2.65 | 0.01 | 0.78 | 0.44 | 1.41 | 0.28 |
| 9251 | 0 | 108834 | CKPISGHNSLFWYRQT        | 2.65 | 0.01 | 0.78 | 0.44 | 1.41 | 0.28 |
| 9252 | 0 | 108834 | CKPISGHNSLFWYRQT        | 2.65 | 0.01 | 0.78 | 0.44 | 1.41 | 0.28 |
| 9253 | 0 | 108834 | CKPISGHNSLFWYRQT        | 2.65 | 0.01 | 0.78 | 0.44 | 1.41 | 0.28 |
| 9254 | 0 | 108834 | CKPISGHNSLFWYRQT        | 2.65 | 0.01 | 0.78 | 0.44 | 1.41 | 0.28 |



|      |   |        |                  |      |      |      |      |      |      |
|------|---|--------|------------------|------|------|------|------|------|------|
| 9255 | 0 | 108834 | CKPISGHNSLFWYRQT | 2.65 | 0.01 | 0.78 | 0.44 | 1.41 | 0.28 |
| 9256 | 0 | 108834 | CKPISGHNSLFWYRQT | 2.65 | 0.01 | 0.78 | 0.44 | 1.13 | 0.28 |
| 9257 | 0 | 108834 | CKPISGHNSLFWYRQT | 2.65 | 0.01 | 0.78 | 0.44 | 1.13 | 0.28 |
| 9258 | 0 | 108834 | CKPISGHNSLFWYRQT | 2.65 | 0.01 | 0.78 | 0.44 | 1.13 | 0.28 |
| 9259 | 0 | 108834 | CKPISGHNSLFWYRQT | 2.65 | 0.01 | 0.78 | 0.44 | 1.41 | 0.28 |
| 9260 | 0 | 108834 | CKPISGHNSLFWYRQT | 2.65 | 0.01 | 0.78 | 0.44 | 1.13 | 0.28 |
| 9261 | 0 | 108834 | CKPISGHNSLFWYRQT | 2.65 | 0.01 | 0.78 | 0.44 | 1.13 | 0.28 |
| 9262 | 0 | 108834 | CKPISGHNSLFWYRQT | 2.65 | 0.01 | 0.78 | 0.44 | 1.41 | 1.27 |
| 9263 | 0 | 108834 | CKPISGHNSLFWYRQT | 2.65 | 0.01 | 0.78 | 0.44 | 1.13 | 0.28 |
| 9264 | 0 | 108834 | CKPISGHNSLFWYRQT | 2.65 | 0.01 | 0.78 | 0.44 | 1.13 | 0.28 |
| 9265 | 0 | 108834 | CKPISGHNSLFWYRQT | 2.65 | 0.01 | 0.78 | 0.44 | 1.13 | 0.28 |
| 9266 | 0 | 108834 | CKPISGHNSLFWYRQT | 2.65 | 0.01 | 0.78 | 0.44 | 1.13 | 0.28 |
| 9267 | 0 | 108834 | CKPISGHNSLFWYRQT | 2.65 | 0.01 | 0.78 | 0.44 | 1.13 | 0.28 |
| 9268 | 0 | 108834 | CKPISGHNSLFWYRQT | 2.65 | 0.01 | 0.78 | 0.44 | 1.41 | 0.28 |
| 9269 | 0 | 108834 | CKPISGHNSLFWYRQT | 2.65 | 0.01 | 0.78 | 4.15 | 1.13 | 1.27 |
| 9270 | 0 | 108834 | CKPISGHNSLFWYRQT | 2.65 | 0.01 | 0.78 | 4.15 | 1.13 | 1.27 |
| 9271 | 0 | 108834 | CKPISGHNSLFWYRQT | 2.65 | 0.01 | 0.78 | 0.44 | 1.41 | 0.28 |
| 9272 | 0 | 108834 | CKPISGHNSLFWYRQT | 2.65 | 0.01 | 0.78 | 0.44 | 1.13 | 0.28 |
| 9273 | 0 | 108834 | CKPISGHNSLFWYRQT | 2.65 | 0.01 | 0.78 | 0.44 | 1.41 | 0.28 |
| 9274 | 0 | 108834 | CKPISGHNSLFWYRQT | 2.65 | 0.01 | 0.78 | 0.44 | 1.13 | 0.28 |
| 9275 | 0 | 108834 | CKPISGHNSLFWYRQT | 2.65 | 0.01 | 0.78 | 0.44 | 1.13 | 0.28 |
| 9276 | 0 | 133536 | CKPVENRAC        | 2.22 | 0.01 | 0.90 | 1.15 | 0.22 | 0.28 |
| 9277 | 0 | 133536 | CKPVENRAC        | 2.22 | 0.01 | 0.90 | 1.15 | 0.22 | 0.28 |
| 9278 | 0 | 133536 | CKPVENRAC        | 2.22 | 0.01 | 0.90 | 1.15 | 0.22 | 2.12 |
| 9279 | 0 | 133536 | CKPVENRAC        | 2.22 | 0.01 | 0.90 | 1.15 | 0.22 | 1.27 |
| 9280 | 0 | 133536 | CKPVENRAC        | 2.22 | 0.01 | 0.90 | 1.15 | 0.22 | 1.66 |

|      |   |        |                                                 |      |      |      |      |      |      |
|------|---|--------|-------------------------------------------------|------|------|------|------|------|------|
| 9281 | 0 | 177421 | CKQAGTCP                                        | 2.13 | 0.01 | 1.86 | 0.68 | 0.22 | 0.28 |
| 9282 | 0 | 145725 | CKQAGTCPP                                       | 2.22 | 0.01 | 1.86 | 0.68 | 0.22 | 1.34 |
| 9283 | 0 | 145725 | CKQAGTCPP                                       | 2.22 | 0.01 | 1.86 | 0.68 | 0.22 | 1.34 |
| 9284 | 0 | 145725 | CKQAGTCPP                                       | 2.22 | 0.01 | 1.86 | 0.68 | 0.22 | 0.28 |
| 9285 | 0 | 145725 | CKQAGTCPP                                       | 2.22 | 0.01 | 1.86 | 0.68 | 0.22 | 0.28 |
| 9286 | 0 | 145725 | CKQAGTCPP                                       | 2.22 | 0.01 | 1.86 | 0.68 | 0.22 | 1.34 |
| 9287 | 0 | 145725 | CKQAGTCPP                                       | 2.22 | 0.01 | 1.86 | 0.68 | 0.22 | 0.28 |
| 9288 | 0 | 145725 | CKQAGTCPP                                       | 2.22 | 0.01 | 1.86 | 0.68 | 0.22 | 0.28 |
| 9289 | 0 | 145726 | CKQAGTCPPD                                      | 2.31 | 0.01 | 1.86 | 0.68 | 0.22 | 0.28 |
| 9290 | 0 | 145726 | CKQAGTCPPD                                      | 2.31 | 0.01 | 1.86 | 0.68 | 0.22 | 0.28 |
| 9291 | 0 | 108295 | CKRDSTWC                                        | 2.13 | 0.01 | 0.90 | 0.44 | 0.22 | 1.27 |
| 9292 | 0 | 6516   | CKRGPDSG                                        | 2.12 | 0.01 | 3.04 | 1.12 | 0.22 | 0.28 |
| 9293 | 0 | 6517   | CKRGPDSGFFSRLNWLY                               | 2.77 | 0.01 | 3.04 | 1.12 | 0.22 | 0.28 |
| 9294 | 0 | 6517   | CKRGPDSGFFSRLNWLY                               | 2.77 | 0.01 | 3.04 | 1.12 | 0.22 | 0.28 |
| 9295 | 0 | 6517   | CKRGPDSGFFSRLNWLY                               | 2.77 | 0.01 | 3.04 | 1.12 | 0.22 | 0.28 |
| 9296 | 0 | 6518   | CKRGPDSGFFSRLNWLY<br>KSGSTYPVQNVTMPNN<br>DNS    | 3.51 | 0.01 | 3.04 | 1.12 | 0.22 | 0.28 |
| 9297 | 0 | 6518   | CKRGPDSGFFSRLNWLY<br>KSGSTYPVQNVTMPNN<br>DNS    | 3.51 | 0.01 | 3.04 | 1.12 | 0.22 | 0.28 |
| 9298 | 0 | 94465  | CKRIPNKKPGKK                                    | 2.49 | 0.01 | 2.38 | 0.68 | 0.22 | 0.28 |
| 9299 | 0 | 94465  | CKRIPNKKPGKK                                    | 2.49 | 0.01 | 2.38 | 0.44 | 1.74 | 0.28 |
| 9300 | 0 | 94465  | CKRIPNKKPGKK<br>CKSQVADKDDPTNKFY                | 2.49 | 0.01 | 2.38 | 0.44 | 1.74 | 0.28 |
| 9301 | 0 | 6520   | QSVIQLGNGFLDVFTSF<br>GGLVAE                     | 3.60 | 0.01 | 2.73 | 0.44 | 0.85 | 0.28 |
| 9302 | 0 | 6520   | CKSQVADKDDPTNKFY<br>QSVIQLGNGFLDVFTSF<br>GGLVAE | 3.60 | 0.01 | 2.73 | 0.44 | 0.85 | 0.28 |
| 9303 | 0 | 79526  | CKTANGTAIPIGGGSAN<br>VYVNLAPV                   | 3.17 | 0.01 | 2.24 | 1.12 | 0.22 | 0.85 |
| 9304 | 0 | 79526  | CKTANGTAIPIGGGSAN<br>VYVNLAPV                   | 3.17 | 0.01 | 2.24 | 1.12 | 0.22 | 1.34 |
| 9305 | 0 | 79526  | CKTANGTAIPIGGGSAN<br>VYVNLAPV                   | 3.17 | 0.01 | 2.24 | 1.12 | 0.22 | 1.75 |
| 9306 | 0 | 79526  | CKTANGTAIPIGGGSAN<br>VYVNLAPV                   | 3.17 | 0.01 | 2.24 | 2.43 | 0.22 | 1.75 |
| 9307 | 0 | 79526  | CKTANGTAIPIGGGSAN<br>VYVNLAPV                   | 3.17 | 0.01 | 2.24 | 2.43 | 0.22 | 0.28 |
| 9308 | 0 | 79526  | CKTANGTAIPIGGGSAN<br>VYVNLAPV                   | 3.17 | 0.01 | 2.24 | 2.43 | 0.22 | 0.28 |
| 9309 | 0 | 79526  | CKTANGTAIPIGGGSAN<br>VYVNLAPV                   | 3.17 | 0.01 | 2.24 | 2.43 | 0.22 | 0.28 |

|      |   |       |                                                        |      |      |      |      |      |      |
|------|---|-------|--------------------------------------------------------|------|------|------|------|------|------|
| 9310 | 0 | 79526 | CKTANGTAIPIGGGSAN<br>VYVNLAPV                          | 3.17 | 0.01 | 2.24 | 2.43 | 0.22 | 0.28 |
| 9311 | 0 | 79526 | CKTANGTAIPIGGGSAN<br>VYVNLAPV                          | 3.17 | 0.01 | 2.24 | 2.43 | 0.22 | 0.28 |
| 9312 | 0 | 79526 | CKTANGTAIPIGGGSAN<br>VYVNLAPV                          | 3.17 | 0.01 | 2.24 | 2.43 | 0.22 | 0.28 |
| 9313 | 0 | 79526 | CKTANGTAIPIGGGSAN<br>VYVNLAPV                          | 3.17 | 0.01 | 2.24 | 2.43 | 0.22 | 0.28 |
| 9314 | 0 | 79526 | CKTANGTAIPIGGGSAN<br>VYVNLAPV                          | 3.17 | 0.01 | 2.24 | 2.43 | 0.22 | 0.28 |
| 9315 | 0 | 79526 | CKTANGTAIPIGGGSAN<br>VYVNLAPV                          | 3.17 | 0.01 | 2.24 | 2.43 | 0.22 | 0.28 |
| 9316 | 0 | 6523  | CKTANGTAIPIGGGSAN<br>VYVNLAPVV                         | 3.20 | 0.01 | 2.24 | 1.20 | 0.22 | 1.27 |
| 9317 | 0 | 6523  | CKTANGTAIPIGGGSAN<br>VYVNLAPVV                         | 3.20 | 0.01 | 2.24 | 1.20 | 0.22 | 0.28 |
| 9318 | 0 | 6523  | CKTANGTAIPIGGGSAN<br>VYVNLAPVV                         | 3.20 | 0.01 | 2.24 | 1.20 | 0.22 | 1.34 |
| 9319 | 0 | 6524  | CKTC                                                   | 1.60 | 0.01 | 2.08 | 0.68 | 0.22 | 1.27 |
| 9320 | 0 | 6524  | CKTC                                                   | 1.60 | 0.01 | 2.08 | 0.68 | 0.22 | 0.28 |
| 9321 | 0 | 6524  | CKTC                                                   | 1.60 | 0.01 | 2.08 | 0.68 | 0.22 | 1.27 |
| 9322 | 0 | 6527  | CKTCTTPAQGNSKFPSC<br>CCTKPTDGNC                        | 3.26 | 0.01 | 3.28 | 1.15 | 2.26 | 1.48 |
| 9323 | 0 | 6527  | CKTCTTPAQGNSKFPSC<br>CCTKPTDGNC                        | 3.26 | 0.01 | 3.28 | 2.37 | 0.22 | 1.48 |
| 9324 | 0 | 6527  | CKTCTTPAQGNSKFPSC<br>CCTKPTDGNC                        | 3.26 | 0.01 | 3.28 | 1.12 | 0.22 | 1.48 |
| 9325 | 0 | 6528  | CKTCTTPAQGNSMF                                         | 2.59 | 0.01 | 2.58 | 2.25 | 0.22 | 0.28 |
| 9326 | 0 | 6529  | CKTCTTPAQGNSMFPSC<br>CCTKPTDGNCTCIIPSS<br>WAFAKYLWEWAS | 3.78 | 0.01 | 2.08 | 0.68 | 0.22 | 0.28 |
| 9327 | 0 | 6529  | CKTCTTPAQGNSMFPSC<br>CCTKPTDGNCTCIIPSS<br>WAFAKYLWEWAS | 3.78 | 0.01 | 2.08 | 0.68 | 0.22 | 0.28 |
| 9328 | 0 | 6529  | CKTCTTPAQGNSMFPSC<br>CCTKPTDGNCTCIIPSS<br>WAFAKYLWEWAS | 3.78 | 0.01 | 2.08 | 0.68 | 0.22 | 0.28 |
| 9329 | 0 | 6529  | CKTCTTPAQGNSMFPSC<br>CCTKPTDGNCTCIIPSS<br>WAFAKYLWEWAS | 3.78 | 0.01 | 2.58 | 1.15 | 2.26 | 0.28 |

|      |   |        |                                                        |      |      |      |      |      |      |
|------|---|--------|--------------------------------------------------------|------|------|------|------|------|------|
| 9330 | 0 | 6529   | CKTCTTPAQGNSMFPSC<br>CCTKPTDGNCTCIPISS<br>WAFAKYLWEWAS | 3.78 | 0.01 | 2.58 | 1.15 | 2.26 | 0.28 |
| 9331 | 0 | 6529   | CKTCTTPAQGNSMFPSC<br>CCTKPTDGNCTCIPISS<br>WAFAKYLWEWAS | 3.78 | 0.01 | 2.58 | 0.44 | 0.22 | 0.28 |
| 9332 | 0 | 6529   | CKTCTTPAQGNSMFPSC<br>CCTKPTDGNCTCIPISS<br>WAFAKYLWEWAS | 3.78 | 0.01 | 2.58 | 0.44 | 0.22 | 1.27 |
| 9333 | 0 | 6529   | CKTCTTPAQGNSMFPSC<br>CCTKPTDGNCTCIPISS<br>WAFAKYLWEWAS | 3.78 | 0.01 | 2.58 | 0.68 | 0.22 | 0.28 |
| 9334 | 0 | 6529   | CKTCTTPAQGNSMFPSC<br>CCTKPTDGNCTCIPISS<br>WAFAKYLWEWAS | 3.78 | 0.01 | 2.58 | 0.68 | 0.22 | 0.28 |
| 9335 | 0 | 6529   | CKTCTTPAQGNSMFPSC<br>CCTKPTDGNCTCIPISS<br>WAFAKYLWEWAS | 3.78 | 0.01 | 2.58 | 0.68 | 0.22 | 0.28 |
| 9336 | 0 | 6529   | CKTCTTPAQGNSMFPSC<br>CCTKPTDGNCTCIPISS<br>WAFAKYLWEWAS | 3.78 | 0.01 | 2.58 | 2.59 | 0.22 | 0.28 |
| 9337 | 0 | 6529   | CKTCTTPAQGNSMFPSC<br>CCTKPTDGNCTCIPISS<br>WAFAKYLWEWAS | 3.78 | 0.01 | 2.58 | 2.59 | 0.22 | 0.28 |
| 9338 | 0 | 6529   | CKTCTTPAQGNSMFPSC<br>CCTKPTDGNCTCIPISS<br>WAFAKYLWEWAS | 3.78 | 0.01 | 2.58 | 2.59 | 0.22 | 0.28 |
| 9339 | 0 | 6529   | CKTCTTPAQGNSMFPSC<br>CCTKPTDGNCTCIPISS<br>WAFAKYLWEWAS | 3.78 | 0.01 | 2.58 | 2.59 | 0.22 | 1.27 |
| 9340 | 0 | 6529   | CKTCTTPAQGNSMFPSC<br>CCTKPTDGNCTCIPISS<br>WAFAKYLWEWAS | 3.78 | 0.01 | 2.58 | 0.68 | 0.22 | 1.27 |
| 9341 | 0 | 6530   | CKTHLKASSGYCAWP                                        | 2.66 | 0.01 | 2.56 | 2.02 | 0.22 | 0.85 |
| 9342 | 0 | 6530   | CKTHLKASSGYCAWP                                        | 2.66 | 0.01 | 2.56 | 0.68 | 0.22 | 0.85 |
| 9343 | 0 | 142561 | CKVMVHDPHSLA                                           | 2.45 | 0.01 | 1.75 | 0.68 | 0.22 | 0.28 |

|      |   |        |                                         |      |      |      |      |      |      |
|------|---|--------|-----------------------------------------|------|------|------|------|------|------|
| 9344 | 0 | 142561 | CKVMVHDPHSLA                            | 2.45 | 0.01 | 1.75 | 0.68 | 0.22 | 1.27 |
| 9345 | 0 | 142561 | CKVMVHDPHSLA                            | 2.45 | 0.01 | 1.75 | 0.68 | 0.22 | 1.27 |
| 9346 | 0 | 6532   | CKVQRQYDEQQKEQC                         | 2.72 | 0.01 | 3.12 | 0.44 | 1.23 | 1.57 |
| 9347 | 0 | 141863 | CKWHVDNPIDEATA                          | 2.57 | 0.01 | 2.73 | 0.44 | 0.85 | 0.28 |
| 9348 | 0 | 114280 | CKWSVAHLC                               | 2.22 | 0.01 | 0.90 | 2.46 | 0.22 | 0.28 |
| 9349 | 0 | 114280 | CKWSVAHLC                               | 2.22 | 0.01 | 0.90 | 3.00 | 0.22 | 1.27 |
| 9350 | 0 | 114280 | CKWSVAHLC                               | 2.22 | 0.01 | 0.90 | 3.00 | 0.22 | 1.27 |
| 9351 | 0 | 108296 | CKYAWSRC                                | 2.13 | 0.01 | 0.90 | 0.44 | 0.22 | 1.27 |
| 9352 | 0 | 503970 | CKYGESPVTNVRGDLQV<br>LAQKAARTLPTSFNYGAI | 3.47 | 0.01 | 3.02 | 0.44 | 1.41 | 0.28 |
| 9353 | 0 | 503970 | CKYGESPVTNVRGDLQV<br>LAQKAARTLPTSFNYGAI | 3.47 | 0.01 | 3.02 | 0.44 | 1.41 | 2.12 |
| 9354 | 0 | 503970 | CKYGESPVTNVRGDLQV<br>LAQKAARTLPTSFNYGAI | 3.47 | 0.01 | 3.02 | 0.44 | 1.41 | 0.28 |
| 9355 | 0 | 503970 | CKYGESPVTNVRGDLQV<br>LAQKAARTLPTSFNYGAI | 3.47 | 0.01 | 3.02 | 0.44 | 1.41 | 1.66 |
| 9356 | 0 | 503970 | CKYGESPVTNVRGDLQV<br>LAQKAARTLPTSFNYGAI | 3.47 | 0.01 | 3.02 | 0.44 | 1.41 | 1.66 |
| 9357 | 0 | 503970 | CKYGESPVTNVRGDLQV<br>LAQKAARTLPTSFNYGAI | 3.47 | 0.01 | 3.02 | 0.44 | 1.41 | 0.28 |
| 9358 | 0 | 108297 | CKYLWSKC                                | 2.15 | 0.01 | 0.90 | 0.44 | 0.22 | 1.27 |
| 9359 | 0 | 108297 | CKYLWSKC                                | 2.15 | 0.01 | 0.90 | 0.68 | 0.22 | 0.28 |
| 9360 | 0 | 108298 | CKYSMSKC                                | 2.17 | 0.01 | 0.90 | 0.44 | 0.22 | 1.39 |
| 9361 | 0 | 108299 | CKYWLSRC                                | 2.13 | 0.01 | 0.90 | 0.44 | 0.22 | 1.27 |
| 9362 | 0 | 108299 | CKYWLSRC                                | 2.13 | 0.01 | 0.90 | 0.68 | 0.22 | 0.28 |
| 9363 | 0 | 108300 | CKYWWSKC                                | 2.16 | 0.01 | 0.90 | 0.44 | 0.22 | 1.27 |
| 9364 | 0 | 77844  | CLAAPTGLKLAP                            | 2.51 | 0.01 | 0.90 | 1.15 | 0.22 | 1.39 |
| 9365 | 0 | 134019 | CLAEGGKIMKIPGTCCD<br>TCEEPECNDITA       | 3.33 | 0.01 | 0.78 | 1.12 | 0.22 | 1.39 |
| 9366 | 0 | 132201 | CLAMGWGRVGAHDPP                         | 2.64 | 0.01 | 0.78 | 1.12 | 0.22 | 0.28 |
| 9367 | 0 | 132201 | CLAMGWGRVGAHDPP                         | 2.64 | 0.01 | 0.78 | 0.44 | 1.13 | 0.28 |
| 9368 | 0 | 99126  | CLAPDRRV                                | 2.11 | 0.01 | 2.24 | 0.68 | 0.22 | 0.28 |
| 9369 | 0 | 6540   | CLAVLLGA                                | 2.15 | 0.01 | 2.21 | 0.44 | 0.85 | 0.28 |
| 9370 | 0 | 6540   | CLAVLLGA                                | 2.15 | 0.01 | 2.21 | 1.12 | 0.22 | 0.28 |
| 9371 | 0 | 6541   | CLAVLLGACS                              | 2.35 | 0.01 | 2.21 | 1.12 | 0.22 | 0.28 |
| 9372 | 0 | 6541   | CLAVLLGACS                              | 2.35 | 0.01 | 2.21 | 1.12 | 0.22 | 0.28 |
| 9373 | 0 | 130752 | CLAVLWVVKSTPAS                          | 2.62 | 0.01 | 1.75 | 4.15 | 1.13 | 0.28 |
| 9374 | 0 | 130752 | CLAVLWVVKSTPAS                          | 2.62 | 0.01 | 1.75 | 4.15 | 1.13 | 1.75 |

|      |   |        |                                       |      |      |      |      |      |      |
|------|---|--------|---------------------------------------|------|------|------|------|------|------|
| 9375 | 0 | 6546   | CLDDREC                               | 2.04 | 0.01 | 4.45 | 0.68 | 0.22 | 0.28 |
| 9376 | 0 | 6546   | CLDDREC                               | 2.04 | 0.01 | 4.45 | 0.68 | 0.22 | 0.28 |
| 9377 | 0 | 6546   | CLDDREC                               | 2.04 | 0.01 | 4.45 | 0.68 | 0.22 | 0.28 |
| 9378 | 0 | 130753 | CLDLQAPLYKKIIKKLLES                   | 2.88 | 0.01 | 0.78 | 0.44 | 0.22 | 0.28 |
| 9379 | 0 | 6548   | CLDNIKDNVGMEDYIK<br>KNKKPYSLFQKEKMVLG | 3.46 | 0.01 | 0.90 | 0.44 | 1.74 | 0.28 |
| 9380 | 0 | 238261 | CLDPFVEPVSIIEGHSFC                    | 2.86 | 0.01 | 0.78 | 0.44 | 1.13 | 0.28 |
| 9381 | 0 | 238261 | CLDPFVEPVSIIEGHSFC                    | 2.86 | 0.01 | 0.78 | 0.44 | 1.13 | 0.28 |
| 9382 | 0 | 108301 | CLDQDAVIASFDQLYDA<br>WRSGLDWC         | 3.17 | 0.01 | 1.60 | 0.68 | 0.22 | 0.28 |
| 9383 | 0 | 6549   | CLDSSRGIC                             | 2.23 | 0.01 | 0.90 | 0.44 | 0.85 | 1.39 |
| 9384 | 0 | 111151 | CLEASYFRC                             | 2.22 | 0.01 | 0.90 | 0.44 | 0.85 | 1.39 |
| 9385 | 0 | 136153 | CLEEKVCSLLEPLGLQCT<br>FI              | 2.94 | 0.01 | 0.78 | 0.44 | 1.13 | 0.28 |
| 9386 | 0 | 190393 | CLEYFPSQMLRTGNN                       | 2.60 | 0.01 | 3.19 | 2.00 | 1.41 | 0.28 |
| 9387 | 0 | 135905 | CLFDRRLCSHLE                          | 2.49 | 0.01 | 0.78 | 0.44 | 1.41 | 0.28 |
| 9388 | 0 | 130453 | CLFFQNGKVKCAAC                        | 2.62 | 3.70 | 0.90 | 0.44 | 1.93 | 1.27 |
| 9389 | 0 | 6559   | CLFKDWEELGEEIRLKV                     | 2.78 | 0.01 | 2.71 | 0.68 | 0.22 | 0.28 |
| 9390 | 0 | 6559   | CLFKDWEELGEEIRLKV                     | 2.78 | 0.01 | 2.71 | 0.68 | 0.22 | 0.28 |
| 9391 | 0 | 6559   | CLFKDWEELGEEIRLKV                     | 2.78 | 0.01 | 2.71 | 0.68 | 0.22 | 0.28 |
| 9392 | 0 | 6559   | CLFKDWEELGEEIRLKV                     | 2.78 | 0.01 | 2.71 | 0.68 | 0.22 | 2.02 |
| 9393 | 0 | 6559   | CLFKDWEELGEEIRLKV                     | 2.78 | 0.01 | 2.71 | 0.68 | 0.22 | 0.28 |
| 9394 | 0 | 130454 | CLFPNNSYC                             | 2.23 | 0.01 | 0.90 | 0.68 | 0.22 | 0.28 |
| 9395 | 0 | 130454 | CLFPNNSYC                             | 2.23 | 0.01 | 0.90 | 0.68 | 0.22 | 1.34 |
| 9396 | 0 | 130454 | CLFPNNSYC                             | 2.23 | 0.01 | 0.90 | 0.68 | 0.22 | 0.28 |
| 9397 | 0 | 130454 | CLFPNNSYC                             | 2.23 | 0.01 | 0.90 | 0.68 | 0.22 | 0.28 |
| 9398 | 0 | 130454 | CLFPNNSYC                             | 2.23 | 0.01 | 0.90 | 0.68 | 0.22 | 1.34 |
| 9399 | 0 | 6561   | CLFYASEMSEKGFKVIF                     | 2.78 | 0.01 | 2.80 | 1.12 | 0.22 | 2.02 |
| 9400 | 0 | 6561   | CLFYASEMSEKGFKVIF                     | 2.78 | 0.01 | 2.80 | 1.12 | 0.22 | 2.02 |
| 9401 | 0 | 6562   | CLGDINARDLICAQKFN                     | 2.80 | 0.01 | 2.48 | 1.20 | 0.22 | 0.28 |
| 9402 | 0 | 6568   | CLGGLTMV                              | 2.23 | 0.01 | 2.43 | 0.68 | 0.22 | 2.12 |
| 9403 | 0 | 6568   | CLGGLTMV                              | 2.23 | 0.01 | 2.43 | 0.68 | 0.22 | 1.66 |
| 9404 | 0 | 6568   | CLGGLTMV                              | 2.23 | 0.01 | 2.43 | 0.68 | 0.22 | 1.34 |
| 9405 | 0 | 6568   | CLGGLTMV                              | 2.23 | 0.01 | 2.43 | 0.68 | 0.22 | 2.12 |
| 9406 | 0 | 6568   | CLGGLTMV                              | 2.23 | 0.01 | 2.43 | 0.68 | 0.22 | 2.12 |

|      |   |        |                                                 |      |      |      |      |      |      |
|------|---|--------|-------------------------------------------------|------|------|------|------|------|------|
| 9407 | 0 | 6568   | CLGGLTMTV<br>CLGHHAVPNGTLVKTIT                  | 2.23 | 0.01 | 2.43 | 0.68 | 0.22 | 1.48 |
| 9408 | 0 | 6570   | NDQIEVTNATELVQSSS<br>TGKIC<br>CLGHHAVPNGTLVKTIT | 3.60 | 0.01 | 3.04 | 1.12 | 0.22 | 0.28 |
| 9409 | 0 | 6570   | NDQIEVTNATELVQSSS<br>TGKIC<br>CLGHHAVPNGTLVKTIT | 3.60 | 0.01 | 3.04 | 1.12 | 0.22 | 0.28 |
| 9410 | 0 | 6570   | NDQIEVTNATELVQSSS<br>TGKIC                      | 3.60 | 0.01 | 3.04 | 1.12 | 0.22 | 0.28 |
| 9411 | 0 | 6571   | CLGASFLIRGPKQNI                                 | 2.71 | 0.01 | 1.72 | 0.68 | 0.22 | 0.28 |
| 9412 | 0 | 135451 | CLGKAC                                          | 1.91 | 0.01 | 0.78 | 1.20 | 0.22 | 0.28 |
| 9413 | 0 | 6574   | CLGQNSQSPTS<br>CPPTCPGYRWMCLRRFI                | 3.46 | 0.01 | 2.08 | 1.12 | 0.22 | 2.02 |
| 9414 | 0 | 6574   | CLGQNSQSPTS<br>CPPTCPGYRWMCLRRFI                | 3.46 | 0.01 | 2.08 | 1.12 | 0.22 | 2.02 |
| 9415 | 0 | 136154 | CLHCKYTLQQQA                                    | 2.48 | 0.01 | 0.90 | 2.74 | 0.22 | 0.28 |
| 9416 | 0 | 136154 | CLHCKYTLQQQA                                    | 2.48 | 0.01 | 0.90 | 2.74 | 0.22 | 0.85 |
| 9417 | 0 | 106310 | CLHFVKGEK                                       | 2.30 | 0.01 | 3.08 | 0.44 | 1.23 | 0.85 |
| 9418 | 0 | 6578   | CLHPDKDSC                                       | 2.24 | 0.01 | 0.90 | 0.68 | 0.22 | 0.28 |
| 9419 | 0 | 135452 | CLKDRHDF                                        | 2.12 | 0.01 | 0.78 | 1.12 | 0.22 | 0.28 |
| 9420 | 0 | 135452 | CLKDRHDF                                        | 2.12 | 0.01 | 0.78 | 1.12 | 0.22 | 0.28 |
| 9421 | 0 | 135452 | CLKDRHDF                                        | 2.12 | 0.01 | 0.78 | 1.12 | 0.22 | 0.28 |
| 9422 | 0 | 135452 | CLKDRHDF                                        | 2.12 | 0.01 | 0.78 | 1.12 | 0.22 | 0.28 |
| 9423 | 0 | 135452 | CLKDRHDF                                        | 2.12 | 0.01 | 0.78 | 1.12 | 0.22 | 0.28 |
| 9424 | 0 | 130754 | CLKRSKLRC                                       | 2.27 | 0.01 | 0.90 | 0.44 | 1.13 | 1.39 |
| 9425 | 0 | 230205 | CLLCAHKVEQGASVDKR<br>HDG                        | 2.94 | 0.01 | 2.25 | 0.44 | 1.23 | 0.28 |
| 9426 | 0 | 114757 | CLLCAYSIEF                                      | 2.31 | 0.01 | 2.25 | 0.44 | 1.23 | 0.85 |
| 9427 | 0 | 114757 | CLLCAYSIEF                                      | 2.31 | 0.01 | 2.25 | 0.44 | 1.23 | 0.85 |
| 9428 | 0 | 114757 | CLLCAYSIEF                                      | 2.31 | 0.01 | 2.25 | 0.44 | 2.98 | 0.85 |
| 9429 | 0 | 138835 | CLNSFLRSC                                       | 2.26 | 0.01 | 0.90 | 2.49 | 0.22 | 0.28 |
| 9430 | 0 | 106311 | CLPFVQGKEK                                      | 2.29 | 0.01 | 3.08 | 0.44 | 1.23 | 0.85 |
| 9431 | 0 | 145119 | CLPKPLPKGTEDNDQRA<br>T                          | 2.84 | 0.01 | 0.78 | 1.20 | 0.22 | 0.28 |
| 9432 | 0 | 124998 | CLQMNNKDMVAIKHLL<br>SE                          | 2.80 | 0.01 | 2.25 | 3.12 | 0.22 | 0.28 |
| 9433 | 0 | 124998 | CLQMNNKDMVAIKHLL<br>SE                          | 2.80 | 0.01 | 2.25 | 2.55 | 0.22 | 0.28 |
| 9434 | 0 | 124998 | CLQMNNKDMVAIKHLL<br>SE                          | 2.80 | 0.01 | 2.25 | 2.55 | 0.22 | 0.28 |
| 9435 | 0 | 124998 | CLQMNNKDMVAIKHLL<br>SE                          | 2.80 | 0.01 | 2.25 | 3.12 | 0.22 | 0.28 |
| 9436 | 0 | 6623   | CLSATCDCTLCGP                                   | 2.58 | 0.01 | 0.90 | 0.44 | 1.41 | 0.28 |
| 9437 | 0 | 238262 | CLSGICYKKITRGSS                                 | 2.68 | 0.01 | 2.56 | 2.02 | 0.22 | 0.85 |

|      |   |        |                                              |      |      |      |      |      |      |
|------|---|--------|----------------------------------------------|------|------|------|------|------|------|
| 9438 | 0 | 238262 | CLSGICYKKITRGSS                              | 2.68 | 0.01 | 2.56 | 1.20 | 0.22 | 0.85 |
| 9439 | 0 | 6632   | CLTFGRETVIEW                                 | 2.45 | 0.01 | 2.08 | 0.44 | 0.85 | 0.28 |
| 9440 | 0 | 6632   | CLTFGRETVIEW                                 | 2.45 | 0.01 | 2.08 | 0.44 | 0.85 | 1.27 |
| 9441 | 0 | 6632   | CLTFGRETVIEW                                 | 2.45 | 0.01 | 2.08 | 0.68 | 0.22 | 0.28 |
| 9442 | 0 | 6632   | CLTFGRETVIEW                                 | 2.45 | 0.01 | 2.08 | 0.68 | 0.22 | 1.27 |
| 9443 | 0 | 6632   | CLTFGRETVIEW                                 | 2.45 | 0.01 | 2.08 | 0.68 | 0.22 | 0.28 |
| 9444 | 0 | 6632   | CLTFGRETVIEW                                 | 2.45 | 0.01 | 2.08 | 0.68 | 0.22 | 2.35 |
| 9445 | 0 | 6632   | CLTFGRETVIEW                                 | 2.45 | 0.01 | 2.08 | 0.68 | 0.22 | 0.85 |
| 9446 | 0 | 133537 | CLTINTTVCA                                   | 2.33 | 0.01 | 1.60 | 0.68 | 0.22 | 0.28 |
| 9447 | 0 | 180901 | CLTSDSNIRETVVKI                              | 2.65 | 0.01 | 2.75 | 0.68 | 0.22 | 1.34 |
| 9448 | 0 | 180901 | CLTSDSNIRETVVKI                              | 2.65 | 0.01 | 2.75 | 0.68 | 0.22 | 1.66 |
| 9449 | 0 | 180901 | CLTSDSNIRETVVKI                              | 2.65 | 0.01 | 2.75 | 0.68 | 0.22 | 0.28 |
| 9450 | 0 | 180901 | CLTSDSNIRETVVKI                              | 2.65 | 0.01 | 2.75 | 0.68 | 0.22 | 0.28 |
| 9451 | 0 | 180901 | CLTSDSNIRETVVKI                              | 2.65 | 0.01 | 2.75 | 0.68 | 0.22 | 1.27 |
| 9452 | 0 | 180901 | CLTSDSNIRETVVKI                              | 2.65 | 0.01 | 2.75 | 0.68 | 0.22 | 0.28 |
| 9453 | 0 | 180901 | CLTSDSNIRETVVKI                              | 2.65 | 0.01 | 2.75 | 0.68 | 0.22 | 0.28 |
| 9454 | 0 | 151816 | CLTSQAAKQRLE                                 | 2.46 | 0.01 | 2.71 | 2.78 | 0.22 | 0.28 |
| 9455 | 0 | 151816 | CLTSQAAKQRLE                                 | 2.46 | 0.01 | 2.71 | 2.78 | 0.22 | 1.34 |
| 9456 | 0 | 151817 | CLTSQAASQRLE                                 | 2.48 | 0.01 | 2.71 | 2.78 | 0.22 | 0.28 |
| 9457 | 0 | 151817 | CLTSQAASQRLE                                 | 2.48 | 0.01 | 2.71 | 2.78 | 0.22 | 1.34 |
| 9458 | 0 | 237664 | CLVASTNRGCRAI                                | 2.54 | 0.01 | 0.78 | 0.44 | 1.13 | 1.28 |
| 9459 | 0 | 98710  | CLVRTPEVDD                                   | 2.29 | 0.01 | 1.60 | 0.44 | 1.23 | 0.85 |
| 9460 | 0 | 96146  | CLVRTPEVDDEALEK                              | 2.67 | 0.01 | 1.60 | 0.44 | 1.23 | 0.28 |
| 9461 | 0 | 78111  | CLVRTPEVDDEALEKFDK<br>AL                     | 2.96 | 0.01 | 1.60 | 0.44 | 1.23 | 1.28 |
| 9462 | 0 | 78111  | CLVRTPEVDDEALEKFDK<br>AL                     | 2.96 | 0.01 | 1.60 | 0.44 | 1.23 | 2.51 |
| 9463 | 0 | 6641   | CLVSFGLSC                                    | 2.26 | 0.01 | 0.90 | 0.44 | 0.85 | 1.39 |
| 9464 | 0 | 78112  | CMARQAESSEAMAAW<br>SERAGEAMVLVYYESIA<br>Y SF | 3.50 | 0.01 | 2.14 | 1.12 | 0.22 | 0.28 |
| 9465 | 0 | 78112  | CMARQAESSEAMAAW<br>SERAGEAMVLVYYESIA<br>Y SF | 3.50 | 0.01 | 2.14 | 1.12 | 0.22 | 1.34 |
| 9466 | 0 | 78112  | CMARQAESSEAMAAW<br>SERAGEAMVLVYYESIA<br>Y SF | 3.50 | 0.01 | 2.14 | 1.12 | 0.22 | 0.28 |
| 9467 | 0 | 6650   | CMENNSGWKVSLNYGE<br>IIW                      | 2.88 | 0.01 | 3.03 | 0.68 | 0.22 | 1.57 |
| 9468 | 0 | 6650   | CMENNSGWKVSLNYGE<br>IIW                      | 2.88 | 0.01 | 3.03 | 3.33 | 0.22 | 1.57 |
| 9469 | 0 | 6650   | CMENNSGWKVSLNYGE<br>IIW                      | 2.88 | 0.01 | 2.08 | 0.44 | 0.22 | 1.57 |
| 9470 | 0 | 6650   | CMENNSGWKVSLNYGE<br>IIW                      | 2.88 | 0.01 | 2.08 | 1.15 | 0.22 | 1.57 |
| 9471 | 0 | 6650   | CMENNSGWKVSLNYGE<br>IIW                      | 2.88 | 0.01 | 2.08 | 2.49 | 0.22 | 1.57 |



|      |   |        |                                    |      |      |      |      |      |      |
|------|---|--------|------------------------------------|------|------|------|------|------|------|
| 9472 | 0 | 6650   | CMENNSGWKVSLNYGE<br>IIW            | 2.88 | 0.01 | 2.08 | 2.25 | 0.22 | 1.57 |
| 9473 | 0 | 6650   | CMENNSGWKVSLNYGE<br>IIW            | 2.88 | 0.01 | 3.16 | 0.44 | 1.93 | 1.57 |
| 9474 | 0 | 6650   | CMENNSGWKVSLNYGE<br>IIW            | 2.88 | 0.01 | 2.08 | 0.44 | 0.22 | 1.57 |
| 9475 | 0 | 6650   | CMENNSGWKVSLNYGE<br>IIW            | 2.88 | 0.01 | 2.08 | 1.15 | 0.22 | 1.57 |
| 9476 | 0 | 6650   | CMENNSGWKVSLNYGE<br>IIW            | 2.88 | 0.01 | 2.08 | 0.68 | 0.22 | 1.57 |
| 9477 | 0 | 6650   | CMENNSGWKVSLNYGE<br>IIW            | 2.88 | 0.01 | 2.08 | 0.68 | 0.22 | 1.57 |
| 9478 | 0 | 6650   | CMENNSGWKVSLNYGE<br>IIW            | 2.88 | 0.01 | 2.08 | 2.25 | 0.22 | 1.57 |
| 9479 | 0 | 6650   | CMENNSGWKVSLNYGE<br>IIW            | 2.88 | 0.01 | 2.08 | 0.68 | 0.22 | 1.57 |
| 9480 | 0 | 6650   | CMENNSGWKVSLNYGE<br>IIW            | 2.88 | 0.01 | 2.08 | 2.25 | 0.22 | 1.57 |
| 9481 | 0 | 96147  | CMENSAEPEQSLACQ                    | 2.71 | 0.01 | 1.60 | 0.44 | 1.23 | 0.28 |
| 9482 | 0 | 96147  | CMENSAEPEQSLACQ                    | 2.71 | 0.01 | 1.60 | 0.44 | 1.23 | 0.28 |
| 9483 | 0 | 115193 | CMENSAEPEQSLACQCL<br>VRT           | 2.95 | 0.01 | 1.60 | 0.44 | 1.23 | 2.51 |
| 9484 | 0 | 167218 | CMEPKSRYC                          | 2.22 | 0.01 | 0.90 | 0.68 | 0.22 | 0.85 |
| 9485 | 0 | 167218 | CMEPKSRYC                          | 2.22 | 0.01 | 0.90 | 0.68 | 0.22 | 0.85 |
| 9486 | 0 | 167218 | CMEPKSRYC                          | 2.22 | 0.01 | 0.90 | 0.68 | 0.22 | 1.39 |
| 9487 | 0 | 167218 | CMEPKSRYC                          | 2.22 | 0.01 | 0.90 | 0.68 | 0.22 | 1.39 |
| 9488 | 0 | 463953 | CMGKSTYLTEPILTEEHF<br>NLTHKPVYDFSS | 3.31 | 0.01 | 1.66 | 0.44 | 0.85 | 1.28 |
| 9489 | 0 | 6657   | CMKKDDQIAAAMVLRG<br>MAKDGKFALK     | 3.21 | 0.01 | 0.90 | 0.44 | 0.85 | 0.28 |
| 9490 | 0 | 111154 | CMKNMKQPC                          | 2.26 | 0.01 | 0.90 | 0.44 | 0.85 | 1.39 |
| 9491 | 0 | 111156 | CMNKPAYAC                          | 2.24 | 0.01 | 0.90 | 0.44 | 0.85 | 1.39 |
| 9492 | 0 | 111157 | CMPYGLAC                           | 2.22 | 0.01 | 0.90 | 0.44 | 0.85 | 1.39 |
| 9493 | 0 | 6663   | CMQWMRSMRG                         | 2.33 | 0.01 | 3.89 | 0.44 | 1.23 | 0.85 |
| 9494 | 0 | 6665   | CMRLGSSIC                          | 2.23 | 0.01 | 0.90 | 0.44 | 0.85 | 1.39 |
| 9495 | 0 | 131376 | CMTRDINGKLFLPKYALS<br>QDV          | 2.91 | 0.01 | 0.78 | 1.12 | 0.22 | 2.56 |
| 9496 | 0 | 131376 | CMTRDINGKLFLPKYALS<br>QDV          | 2.91 | 0.01 | 0.78 | 1.12 | 0.22 | 2.56 |
| 9497 | 0 | 131376 | CMTRDINGKLFLPKYALS<br>QDV          | 2.91 | 0.01 | 0.78 | 1.12 | 0.22 | 2.56 |
| 9498 | 0 | 131376 | CMTRDINGKLFLPKYALS<br>QDV          | 2.91 | 0.01 | 0.78 | 1.12 | 0.22 | 2.56 |
| 9499 | 0 | 131376 | CMTRDINGKLFLPKYALS<br>QDV          | 2.91 | 0.01 | 0.78 | 1.12 | 0.22 | 0.28 |
| 9500 | 0 | 131376 | CMTRDINGKLFLPKYALS<br>QDV          | 2.91 | 0.01 | 0.78 | 1.12 | 0.22 | 2.56 |

|      |   |        |                              |      |      |      |      |      |      |
|------|---|--------|------------------------------|------|------|------|------|------|------|
| 9501 | 0 | 133786 | CMTSPWRC                     | 2.13 | 0.01 | 0.90 | 1.15 | 0.22 | 0.28 |
| 9502 | 0 | 6670   | CMTTAQGTSMYPSC               | 2.63 | 0.01 | 3.45 | 0.68 | 0.22 | 1.57 |
| 9503 | 0 | 6670   | CMTTAQGTSMYPSC               | 2.63 | 0.01 | 3.45 | 0.68 | 0.22 | 1.57 |
| 9504 | 0 | 6670   | CMTTAQGTSMYPSC               | 2.63 | 0.01 | 3.45 | 0.68 | 0.22 | 1.57 |
| 9505 | 0 | 6670   | CMTTAQGTSMYPSC               | 2.63 | 0.01 | 3.45 | 0.68 | 0.22 | 1.57 |
| 9506 | 0 | 6670   | CMTTAQGTSMYPSC               | 2.63 | 0.01 | 3.45 | 0.68 | 0.22 | 1.57 |
| 9507 | 0 | 6670   | CMTTAQGTSMYPSC               | 2.63 | 0.01 | 3.45 | 0.68 | 0.22 | 1.57 |
| 9508 | 0 | 6670   | CMTTAQGTSMYPSC               | 2.63 | 0.01 | 3.45 | 0.68 | 0.22 | 1.57 |
| 9509 | 0 | 6670   | CMTTAQGTSMYPSC               | 2.63 | 0.01 | 3.45 | 0.68 | 0.22 | 1.57 |
| 9510 | 0 | 6670   | CMTTAQGTSMYPSC               | 2.63 | 0.01 | 3.45 | 0.68 | 0.22 | 1.57 |
| 9511 | 0 | 6670   | CMTTAQGTSMYPSC               | 2.63 | 0.01 | 2.71 | 0.68 | 0.22 | 1.57 |
| 9512 | 0 | 95062  | CMTTAQGTSMYPSCCC<br>TKPTDGNC | 3.13 | 0.01 | 2.08 | 0.68 | 0.22 | 2.35 |
| 9513 | 0 | 95062  | CMTTAQGTSMYPSCCC<br>TKPTDGNC | 3.13 | 0.01 | 2.08 | 0.44 | 0.22 | 2.35 |
| 9514 | 0 | 95062  | CMTTAQGTSMYPSCCC<br>TKPTDGNC | 3.13 | 0.01 | 2.08 | 0.44 | 0.22 | 2.35 |
| 9515 | 0 | 6675   | CMYSNNNVEDMYSNN<br>NVED      | 2.93 | 0.01 | 0.90 | 1.12 | 0.22 | 2.02 |
| 9516 | 0 | 6675   | CMYSNNNVEDMYSNN<br>NVED      | 2.93 | 0.01 | 0.90 | 1.12 | 0.22 | 1.48 |
| 9517 | 0 | 135453 | CNAEVVVPWEKK                 | 2.52 | 0.01 | 0.78 | 0.44 | 1.13 | 1.27 |
| 9518 | 0 | 111158 | CNASTSMQC                    | 2.24 | 0.01 | 0.90 | 0.44 | 0.85 | 1.39 |
| 9519 | 0 | 106312 | CNATQRRQIE                   | 2.30 | 0.01 | 2.75 | 0.44 | 1.23 | 0.85 |
| 9520 | 0 | 187764 | CNCG                         | 1.60 | 0.01 | 3.65 | 2.02 | 0.22 | 0.85 |
| 9521 | 0 | 187764 | CNCG                         | 1.60 | 0.01 | 3.65 | 2.02 | 0.22 | 0.85 |
| 9522 | 0 | 77776  | CNCKAPETALCARRCQQ<br>H       | 2.84 | 0.01 | 3.57 | 0.68 | 0.22 | 1.57 |
| 9523 | 0 | 443028 | CNDSLNTGFLAALFY              | 2.67 | 0.01 | 1.96 | 0.68 | 0.22 | 1.34 |
| 9524 | 0 | 443028 | CNDSLNTGFLAALFY              | 2.67 | 0.01 | 1.96 | 0.68 | 0.22 | 1.34 |
| 9525 | 0 | 443028 | CNDSLNTGFLAALFY              | 2.67 | 0.01 | 1.96 | 0.68 | 0.22 | 1.34 |
| 9526 | 0 | 443028 | CNDSLNTGFLAALFY              | 2.67 | 0.01 | 1.96 | 0.68 | 0.22 | 0.28 |
| 9527 | 0 | 240971 | CNEKLLKKARIC                 | 2.48 | 4.63 | 0.90 | 0.44 | 1.13 | 0.28 |
| 9528 | 0 | 240971 | CNEKLLKKARIC                 | 2.48 | 4.63 | 0.90 | 0.44 | 1.13 | 0.28 |
| 9529 | 0 | 6688   | CNEKSFKDILPKLTENPW<br>Q      | 2.88 | 0.01 | 4.08 | 3.38 | 0.22 | 0.85 |
| 9530 | 0 | 6688   | CNEKSFKDILPKLTENPW<br>Q      | 2.88 | 0.01 | 4.08 | 3.38 | 0.22 | 0.28 |
| 9531 | 0 | 243787 | CNELNEFENNQR                 | 2.50 | 0.01 | 2.16 | 0.44 | 1.23 | 1.28 |
| 9532 | 0 | 237665 | CNFAAAGRFTCQTG               | 2.64 | 0.01 | 0.90 | 0.44 | 1.23 | 0.28 |
| 9533 | 0 | 237665 | CNFAAAGRFTCQTG               | 2.64 | 0.01 | 0.90 | 0.44 | 1.23 | 1.27 |
| 9534 | 0 | 237665 | CNFAAAGRFTCQTG               | 2.64 | 0.01 | 0.90 | 0.68 | 2.60 | 1.75 |
| 9535 | 0 | 237665 | CNFAAAGRFTCQTG               | 2.64 | 0.01 | 0.90 | 0.68 | 0.22 | 1.75 |
| 9536 | 0 | 108302 | CNFASRNDYSYWLSTPE<br>PMP     | 2.91 | 0.01 | 1.60 | 1.12 | 0.22 | 1.27 |
| 9537 | 0 | 108302 | CNFASRNDYSYWLSTPE<br>PMP     | 2.91 | 0.01 | 1.60 | 0.44 | 1.13 | 0.28 |

|      |   |        |                                   |      |      |      |      |      |      |
|------|---|--------|-----------------------------------|------|------|------|------|------|------|
| 9538 | 0 | 6692   | CNFCNAVVES                        | 2.33 | 0.01 | 2.25 | 0.44 | 1.23 | 0.85 |
| 9539 | 0 | 6692   | CNFCNAVVES                        | 2.33 | 0.01 | 2.25 | 0.44 | 1.23 | 0.85 |
| 9540 | 0 | 6692   | CNFCNAVVES                        | 2.33 | 0.01 | 2.25 | 0.44 | 1.23 | 0.85 |
| 9541 | 0 | 237666 | CNFNAAGRFTCQTG                    | 2.64 | 0.01 | 0.90 | 0.44 | 1.23 | 1.27 |
| 9542 | 0 | 237666 | CNFNAAGRFTCQTG                    | 2.64 | 0.01 | 0.90 | 0.68 | 2.60 | 1.75 |
| 9543 | 0 | 237666 | CNFNAAGRFTCQTG                    | 2.64 | 0.01 | 0.90 | 0.68 | 0.22 | 1.75 |
| 9544 | 0 | 237667 | CNFNAAGRFTCQTG                    | 2.64 | 0.01 | 4.08 | 0.44 | 1.23 | 0.28 |
| 9545 | 0 | 237667 | CNFNAAGRFTCQTG                    | 2.64 | 0.01 | 4.08 | 0.44 | 1.23 | 1.27 |
| 9546 | 0 | 243788 | CNFRAPQRCDLDV                     | 2.54 | 0.01 | 2.16 | 0.44 | 1.23 | 1.28 |
| 9547 | 0 | 111159 | CNFTHPGYC                         | 2.22 | 0.01 | 0.90 | 0.44 | 0.85 | 1.39 |
| 9548 | 0 | 102337 | CNGETKYFRCEEKNGNT<br>SWN          | 2.96 | 0.01 | 3.44 | 0.68 | 0.22 | 0.28 |
| 9549 | 0 | 144599 | CNGTHPSLRLC                       | 2.40 | 0.01 | 0.90 | 0.68 | 0.22 | 0.28 |
| 9550 | 0 | 144599 | CNGTHPSLRLC                       | 2.40 | 0.01 | 0.90 | 0.68 | 0.22 | 1.48 |
| 9551 | 0 | 144599 | CNGTHPSLRLC                       | 2.40 | 0.01 | 0.90 | 0.68 | 0.22 | 1.27 |
| 9552 | 0 | 6696   | CNICEGDSACLSLCQDR                 | 2.80 | 0.01 | 4.63 | 2.22 | 1.59 | 0.28 |
| 9553 | 0 | 6696   | CNICEGDSACLSLCQDR                 | 2.80 | 0.01 | 4.63 | 2.00 | 0.22 | 0.28 |
| 9554 | 0 | 6697   | CNIGGLGNNTLICPTDCF<br>RK          | 2.96 | 0.01 | 2.83 | 1.12 | 0.22 | 0.28 |
| 9555 | 0 | 503972 | CNIRVTVCSDDGVDLP<br>PWF           | 2.92 | 0.01 | 2.48 | 0.44 | 1.74 | 0.28 |
| 9556 | 0 | 115194 | CNISCDKFLD                        | 2.32 | 0.01 | 1.60 | 0.44 | 1.23 | 0.85 |
| 9557 | 0 | 230206 | CNKDLRPICGTDGVITYT<br>NDC         | 2.95 | 0.01 | 2.25 | 0.44 | 1.23 | 0.28 |
| 9558 | 0 | 6702   | CNKKGEQVGMSRPGL                   | 2.63 | 0.01 | 2.43 | 0.44 | 1.59 | 0.28 |
| 9559 | 0 | 111160 | CNKLSRPVC                         | 2.22 | 0.01 | 0.90 | 0.44 | 0.85 | 1.39 |
| 9560 | 0 | 133538 | CNKPGERTC                         | 2.22 | 0.01 | 0.90 | 1.15 | 0.22 | 0.28 |
| 9561 | 0 | 133538 | CNKPGERTC                         | 2.22 | 0.01 | 0.90 | 1.15 | 0.22 | 0.28 |
| 9562 | 0 | 133538 | CNKPGERTC                         | 2.22 | 0.01 | 0.90 | 1.15 | 0.22 | 2.12 |
| 9563 | 0 | 133538 | CNKPGERTC                         | 2.22 | 0.01 | 0.90 | 1.15 | 0.22 | 1.27 |
| 9564 | 0 | 133538 | CNKPGERTC                         | 2.22 | 0.01 | 0.90 | 1.15 | 0.22 | 1.66 |
| 9565 | 0 | 233452 | CNLGCRSSVCDYMVNA<br>AADDEEMKLYVEN | 3.30 | 0.01 | 1.86 | 0.44 | 1.23 | 0.85 |
| 9566 | 0 | 233452 | CNLGCRSSVCDYMVNA<br>AADDEEMKLYVEN | 3.30 | 0.01 | 1.86 | 1.20 | 0.22 | 0.85 |
| 9567 | 0 | 140546 | CNLWEVMHGTC                       | 2.37 | 0.01 | 0.90 | 0.68 | 0.22 | 1.39 |
| 9568 | 0 | 140546 | CNLWEVMHGTC                       | 2.37 | 0.01 | 0.90 | 0.68 | 0.22 | 1.27 |
| 9569 | 0 | 140546 | CNLWEVMHGTC                       | 2.37 | 0.01 | 0.90 | 0.68 | 0.22 | 0.85 |
| 9570 | 0 | 140546 | CNLWEVMHGTC                       | 2.37 | 0.01 | 0.90 | 0.44 | 1.13 | 1.27 |
| 9571 | 0 | 6709   | CNNKPSNRC                         | 2.26 | 0.01 | 0.90 | 0.68 | 0.22 | 0.28 |
| 9572 | 0 | 6712   | CNNPHRIL                          | 2.11 | 0.01 | 3.04 | 1.12 | 0.22 | 0.28 |
| 9573 | 0 | 6712   | CNNPHRIL                          | 2.11 | 0.01 | 3.04 | 1.12 | 0.22 | 0.28 |

|      |   |        |                    |      |      |      |      |      |      |
|------|---|--------|--------------------|------|------|------|------|------|------|
| 9574 | 0 | 6712   | CNNPHRIL           | 2.11 | 0.01 | 3.04 | 1.12 | 0.22 | 0.28 |
| 9575 | 0 | 6713   | CNNPHRILDGINC      | 2.56 | 0.01 | 3.04 | 1.12 | 0.22 | 0.28 |
| 9576 | 0 | 6713   | CNNPHRILDGINC      | 2.56 | 0.01 | 3.04 | 1.12 | 0.22 | 0.28 |
| 9577 | 0 | 6713   | CNNPHRILDGINC      | 2.56 | 0.01 | 3.04 | 1.12 | 0.22 | 0.28 |
| 9578 | 0 | 6714   | CNNPHRILDGINCTLIDA | 3.49 | 0.01 | 3.04 | 1.12 | 0.22 | 0.28 |
|      |   |        | LLGDPHCDGFQNEKWD   |      |      |      |      |      |      |
|      |   |        | L                  |      |      |      |      |      |      |
| 9579 | 0 | 6714   | CNNPHRILDGINCTLIDA | 3.49 | 0.01 | 3.04 | 1.12 | 0.22 | 0.28 |
|      |   |        | LLGDPHCDGFQNEKWD   |      |      |      |      |      |      |
|      |   |        | L                  |      |      |      |      |      |      |
| 9580 | 0 | 6714   | CNNPHRILDGINCTLIDA | 3.49 | 0.01 | 3.04 | 1.12 | 0.22 | 0.28 |
|      |   |        | LLGDPHCDGFQNEKWD   |      |      |      |      |      |      |
|      |   |        | L                  |      |      |      |      |      |      |
| 9581 | 0 | 174416 | CNNQNMPLC          | 2.26 | 0.01 | 0.90 | 1.15 | 1.41 | 1.39 |
| 9582 | 0 | 174417 | CNNRNMPLC          | 2.26 | 0.01 | 0.90 | 1.15 | 1.41 | 1.39 |
| 9583 | 0 | 174418 | CNNSHMPLC          | 2.23 | 0.01 | 0.90 | 1.15 | 1.41 | 1.39 |
| 9584 | 0 | 174419 | CNNSKMRLC          | 2.23 | 0.01 | 0.90 | 1.15 | 1.41 | 1.39 |
| 9585 | 0 | 174420 | CNNSNMPLC          | 2.26 | 0.01 | 0.90 | 1.15 | 1.41 | 1.27 |
| 9586 | 0 | 174420 | CNNSNMPLC          | 2.26 | 0.01 | 0.90 | 1.81 | 0.22 | 0.28 |
| 9587 | 0 | 174420 | CNNSNMPLC          | 2.26 | 0.01 | 0.90 | 1.81 | 0.22 | 0.28 |
| 9588 | 0 | 174420 | CNNSNMPLC          | 2.26 | 0.01 | 0.90 | 1.81 | 0.22 | 1.48 |
| 9589 | 0 | 174420 | CNNSNMPLC          | 2.26 | 0.01 | 0.90 | 1.81 | 0.22 | 0.28 |
| 9590 | 0 | 174420 | CNNSNMPLC          | 2.26 | 0.01 | 0.90 | 1.81 | 0.22 | 0.28 |
| 9591 | 0 | 174420 | CNNSNMPLC          | 2.26 | 0.01 | 0.90 | 1.81 | 0.22 | 1.48 |
| 9592 | 0 | 174420 | CNNSNMPLC          | 2.26 | 0.01 | 0.90 | 0.44 | 1.41 | 0.28 |
| 9593 | 0 | 174420 | CNNSNMPLC          | 2.26 | 0.01 | 0.90 | 0.44 | 1.41 | 0.28 |
| 9594 | 0 | 174420 | CNNSNMPLC          | 2.26 | 0.01 | 0.90 | 0.44 | 1.93 | 0.28 |
| 9595 | 0 | 174420 | CNNSNMPLC          | 2.26 | 0.01 | 0.90 | 0.44 | 1.93 | 0.28 |
| 9596 | 0 | 174420 | CNNSNMPLC          | 2.26 | 0.01 | 0.90 | 1.15 | 1.41 | 1.39 |
| 9597 | 0 | 174420 | CNNSNMPLC          | 2.26 | 0.01 | 0.90 | 0.44 | 1.93 | 0.28 |
| 9598 | 0 | 174421 | CNNWKMPLC          | 2.23 | 0.01 | 0.90 | 1.15 | 1.41 | 1.39 |
| 9599 | 0 | 174422 | CNNWNMPLC          | 2.26 | 0.01 | 0.90 | 1.15 | 1.41 | 1.39 |
| 9600 | 0 | 174423 | CNNYNMPLC          | 2.26 | 0.01 | 0.90 | 1.15 | 1.41 | 1.39 |
| 9601 | 0 | 94467  | CNPA               | 1.57 | 0.01 | 3.22 | 2.37 | 0.22 | 0.28 |
| 9602 | 0 | 94467  | CNPA               | 1.57 | 0.01 | 3.22 | 1.20 | 0.22 | 0.28 |
| 9603 | 0 | 94468  | CNPAC              | 1.77 | 0.01 | 3.22 | 1.20 | 0.22 | 0.28 |
| 9604 | 0 | 94469  | CNPACG             | 1.91 | 0.01 | 3.22 | 2.37 | 0.22 | 0.28 |
| 9605 | 0 | 94469  | CNPACG             | 1.91 | 0.01 | 3.22 | 1.20 | 0.22 | 0.28 |
| 9606 | 0 | 94470  | CNPACGP            | 2.05 | 0.01 | 3.70 | 2.37 | 0.22 | 0.28 |
| 9607 | 0 | 94470  | CNPACGP            | 2.05 | 0.01 | 3.70 | 1.20 | 0.22 | 0.28 |
| 9608 | 0 | 94471  | CNPACGPK           | 2.15 | 0.01 | 3.70 | 2.37 | 0.22 | 0.28 |
| 9609 | 0 | 94471  | CNPACGPK           | 2.15 | 0.01 | 3.70 | 1.20 | 0.22 | 0.28 |
| 9610 | 0 | 94472  | CNPACGPKY          | 2.24 | 0.01 | 3.70 | 2.37 | 0.22 | 0.28 |
| 9611 | 0 | 94472  | CNPACGPKY          | 2.24 | 0.01 | 3.70 | 1.20 | 0.22 | 0.28 |
| 9612 | 0 | 94473  | CNPACGPKYS         | 2.32 | 0.01 | 3.70 | 1.20 | 0.22 | 0.28 |
| 9613 | 0 | 94475  | CNPACGRH           | 2.13 | 0.01 | 3.22 | 1.20 | 0.22 | 0.28 |
| 9614 | 0 | 94476  | CNPACGRHY          | 2.22 | 0.01 | 3.22 | 1.20 | 0.22 | 0.28 |

|      |   |        |                                     |      |      |      |      |      |      |
|------|---|--------|-------------------------------------|------|------|------|------|------|------|
| 9615 | 0 | 94477  | CNPACGRHYS                          | 2.30 | 0.01 | 3.22 | 1.20 | 0.22 | 0.28 |
| 9616 | 0 | 6721   | CNPPDCPGVGTG                        | 2.52 | 0.01 | 2.56 | 2.69 | 2.26 | 0.85 |
| 9617 | 0 | 114758 | CNRAFNPVCG                          | 2.32 | 0.01 | 2.25 | 0.44 | 1.23 | 0.85 |
| 9618 | 0 | 6722   | CNRAFNPVCGTDGVTY<br>DN              | 2.86 | 0.01 | 2.25 | 0.44 | 1.23 | 0.85 |
| 9619 | 0 | 6723   | CNRFAGMFSLGARQKI                    | 2.71 | 0.01 | 1.72 | 0.68 | 0.22 | 0.28 |
| 9620 | 0 | 6724   | CNRLGGLFNFGPKQKI                    | 2.75 | 0.01 | 1.72 | 0.68 | 0.22 | 0.28 |
| 9621 | 0 | 6725   | CNRLPRELC                           | 2.26 | 0.01 | 0.90 | 0.44 | 0.85 | 1.39 |
| 9622 | 0 | 119785 | CNRPGRGIKQIGPMSVY<br>SGLADLGGNNWSRI | 3.38 | 0.01 | 4.63 | 0.44 | 0.85 | 0.28 |
| 9623 | 0 | 119785 | CNRPGRGIKQIGPMSVY<br>SGLADLGGNNWSRI | 3.38 | 0.01 | 4.63 | 0.44 | 0.85 | 0.28 |
| 9624 | 0 | 167219 | CNSKLH AFC                          | 2.22 | 0.01 | 0.90 | 0.68 | 0.22 | 0.85 |
| 9625 | 0 | 167219 | CNSKLH AFC                          | 2.22 | 0.01 | 0.90 | 0.68 | 0.22 | 0.85 |
| 9626 | 0 | 167219 | CNSKLH AFC                          | 2.22 | 0.01 | 0.90 | 0.68 | 0.22 | 1.39 |
| 9627 | 0 | 167219 | CNSKLH AFC                          | 2.22 | 0.01 | 0.90 | 0.68 | 0.22 | 1.39 |
| 9628 | 0 | 117773 | CNSRQTDREDELI                       | 2.54 | 0.01 | 3.34 | 1.12 | 0.22 | 0.28 |
| 9629 | 0 | 117773 | CNSRQTDREDELI                       | 2.54 | 0.01 | 3.34 | 0.44 | 1.74 | 0.28 |
| 9630 | 0 | 117773 | CNSRQTDREDELI                       | 2.54 | 0.01 | 3.34 | 0.44 | 1.74 | 0.28 |
| 9631 | 0 | 117773 | CNSRQTDREDELI                       | 2.54 | 0.01 | 3.34 | 0.44 | 1.13 | 0.28 |
| 9632 | 0 | 117773 | CNSRQTDREDELI                       | 2.54 | 0.01 | 3.34 | 0.44 | 1.13 | 0.28 |
| 9633 | 0 | 117773 | CNSRQTDREDELI                       | 2.54 | 0.01 | 3.34 | 2.36 | 0.22 | 1.48 |
| 9634 | 0 | 117773 | CNSRQTDREDELI                       | 2.54 | 0.01 | 3.34 | 0.44 | 0.85 | 0.28 |
| 9635 | 0 | 117773 | CNSRQTDREDELI                       | 2.54 | 0.01 | 3.34 | 2.36 | 0.22 | 0.28 |
| 9636 | 0 | 117773 | CNSRQTDREDELI                       | 2.54 | 0.01 | 3.34 | 2.36 | 0.22 | 0.28 |
| 9637 | 0 | 117773 | CNSRQTDREDELI                       | 2.54 | 0.01 | 3.34 | 2.36 | 0.22 | 0.28 |
| 9638 | 0 | 117773 | CNSRQTDREDELI                       | 2.54 | 0.01 | 3.34 | 2.36 | 0.22 | 1.48 |
| 9639 | 0 | 117773 | CNSRQTDREDELI                       | 2.54 | 0.01 | 3.34 | 0.44 | 1.13 | 0.28 |
| 9640 | 0 | 117773 | CNSRQTDREDELI                       | 2.54 | 0.01 | 3.34 | 0.44 | 1.41 | 0.28 |
| 9641 | 0 | 117773 | CNSRQTDREDELI                       | 2.54 | 0.01 | 3.34 | 0.44 | 1.13 | 0.28 |
| 9642 | 0 | 117773 | CNSRQTDREDELI                       | 2.54 | 0.01 | 3.34 | 0.44 | 1.13 | 1.27 |
| 9643 | 0 | 117773 | CNSRQTDREDELI                       | 2.54 | 0.01 | 3.34 | 0.44 | 1.41 | 1.27 |
| 9644 | 0 | 117773 | CNSRQTDREDELI                       | 2.54 | 0.01 | 3.34 | 0.44 | 2.39 | 0.28 |
| 9645 | 0 | 119786 | CNSRQTDREDELI A                     | 2.65 | 0.01 | 3.34 | 0.44 | 1.13 | 0.28 |
| 9646 | 0 | 111161 | CNSSSMNSC                           | 2.28 | 0.01 | 0.90 | 0.44 | 0.85 | 1.39 |
| 9647 | 0 | 6730   | CNTHG IASLFAFGPAQK                  | 2.76 | 0.01 | 1.72 | 0.68 | 0.22 | 0.28 |
| 9648 | 0 | 97231  | CNTKCQTP                            | 2.15 | 0.01 | 3.50 | 0.68 | 0.22 | 1.48 |
| 9649 | 0 | 97231  | CNTKCQTP                            | 2.15 | 0.01 | 3.50 | 0.68 | 0.22 | 0.85 |
| 9650 | 0 | 97231  | CNTKCQTP                            | 2.15 | 0.01 | 3.50 | 2.74 | 0.22 | 2.35 |
| 9651 | 0 | 97231  | CNTKCQTP                            | 2.15 | 0.01 | 3.50 | 2.74 | 0.22 | 2.35 |
| 9652 | 0 | 97231  | CNTKCQTP                            | 2.15 | 0.01 | 3.50 | 0.44 | 0.85 | 2.35 |
| 9653 | 0 | 97231  | CNTKCQTP                            | 2.15 | 0.01 | 2.94 | 0.68 | 0.22 | 0.28 |

|      |   |        |                          |      |      |      |      |      |      |
|------|---|--------|--------------------------|------|------|------|------|------|------|
| 9654 | 0 | 97231  | CNTKCQTP                 | 2.15 | 0.01 | 2.94 | 0.68 | 0.22 | 0.28 |
| 9655 | 0 | 148521 | CNTKCQTPMGAINSS          | 2.65 | 0.01 | 2.94 | 3.08 | 0.22 | 0.28 |
| 9656 | 0 | 148521 | CNTKCQTPMGAINSS          | 2.65 | 0.01 | 2.94 | 0.44 | 0.85 | 0.28 |
| 9657 | 0 | 148521 | CNTKCQTPMGAINSS          | 2.65 | 0.01 | 2.94 | 3.08 | 0.22 | 0.28 |
| 9658 | 0 | 148521 | CNTKCQTPMGAINSS          | 2.65 | 0.01 | 2.94 | 3.08 | 0.22 | 0.28 |
| 9659 | 0 | 148521 | CNTKCQTPMGAINSS          | 2.65 | 0.01 | 2.94 | 3.08 | 0.22 | 0.28 |
| 9660 | 0 | 148521 | CNTKCQTPMGAINSS          | 2.65 | 0.01 | 2.94 | 3.08 | 0.22 | 0.28 |
| 9661 | 0 | 148521 | CNTKCQTPMGAINSS          | 2.65 | 0.01 | 2.94 | 3.08 | 0.22 | 0.28 |
| 9662 | 0 | 148521 | CNTKCQTPMGAINSS          | 2.65 | 0.01 | 2.94 | 3.08 | 0.22 | 0.28 |
| 9663 | 0 | 148521 | CNTKCQTPMGAINSS          | 2.65 | 0.01 | 2.94 | 3.08 | 0.22 | 0.28 |
| 9664 | 0 | 148521 | CNTKCQTPMGAINSS          | 2.65 | 0.01 | 2.94 | 3.08 | 0.22 | 0.28 |
| 9665 | 0 | 148521 | CNTKCQTPMGAINSS          | 2.65 | 0.01 | 2.94 | 3.08 | 0.22 | 0.28 |
| 9666 | 0 | 148521 | CNTKCQTPMGAINSS          | 2.65 | 0.01 | 2.94 | 3.08 | 0.22 | 0.28 |
| 9667 | 0 | 148521 | CNTKCQTPMGAINSS          | 2.65 | 0.01 | 2.94 | 3.08 | 0.22 | 0.28 |
| 9668 | 0 | 148521 | CNTKCQTPMGAINSS          | 2.65 | 0.01 | 2.94 | 3.08 | 0.22 | 0.28 |
| 9669 | 0 | 148521 | CNTKCQTPMGAINSS          | 2.65 | 0.01 | 2.94 | 3.08 | 0.22 | 0.28 |
| 9670 | 0 | 111162 | CNTRLLHNC                | 2.25 | 0.01 | 0.90 | 0.44 | 0.85 | 1.39 |
| 9671 | 0 | 128378 | CNVGAGGPAPAAGAA          | 2.72 | 0.01 | 0.78 | 0.44 | 1.13 | 0.85 |
| 9672 | 0 | 119554 | CNVNHKPS                 | 2.12 | 0.01 | 0.78 | 0.44 | 1.93 | 0.28 |
| 9673 | 0 | 6737   | CNWTRGER                 | 2.12 | 0.01 | 4.08 | 1.15 | 0.22 | 0.28 |
| 9674 | 0 | 6737   | CNWTRGER                 | 2.12 | 0.01 | 4.08 | 1.15 | 0.22 | 0.28 |
| 9675 | 0 | 6737   | CNWTRGER                 | 2.12 | 0.01 | 1.72 | 0.68 | 0.22 | 0.28 |
| 9676 | 0 | 6739   | CNWTRGERCDLEDRDR<br>SELS | 2.98 | 0.01 | 1.96 | 0.68 | 0.22 | 1.34 |
| 9677 | 0 | 6739   | CNWTRGERCDLEDRDR<br>SELS | 2.98 | 0.01 | 1.96 | 0.68 | 0.22 | 0.28 |
| 9678 | 0 | 175779 | CNWYNIDPWIQLMNR          | 2.66 | 0.01 | 2.63 | 1.15 | 0.22 | 0.85 |
| 9679 | 0 | 175779 | CNWYNIDPWIQLMNR          | 2.66 | 0.01 | 2.63 | 1.15 | 0.22 | 0.85 |
| 9680 | 0 | 175779 | CNWYNIDPWIQLMNR          | 2.66 | 0.01 | 2.63 | 1.15 | 0.22 | 0.85 |
| 9681 | 0 | 114281 | CNYKTHSWC                | 2.22 | 0.01 | 0.90 | 2.46 | 0.22 | 0.28 |
| 9682 | 0 | 6742   | CNYSKFWYLEHAK            | 2.51 | 0.01 | 3.70 | 2.37 | 0.22 | 0.28 |
| 9683 | 0 | 6742   | CNYSKFWYLEHAK            | 2.51 | 0.01 | 3.70 | 0.44 | 0.85 | 0.28 |
| 9684 | 0 | 6742   | CNYSKFWYLEHAK            | 2.51 | 0.01 | 3.70 | 2.61 | 0.22 | 0.28 |
| 9685 | 0 | 6742   | CNYSKFWYLEHAK            | 2.51 | 0.01 | 3.70 | 1.15 | 0.22 | 0.28 |
| 9686 | 0 | 6742   | CNYSKFWYLEHAK            | 2.51 | 0.01 | 3.70 | 1.15 | 0.22 | 1.48 |
| 9687 | 0 | 6742   | CNYSKFWYLEHAK            | 2.51 | 0.01 | 3.70 | 1.15 | 0.22 | 1.48 |
| 9688 | 0 | 6742   | CNYSKFWYLEHAK            | 2.51 | 0.01 | 3.70 | 1.15 | 0.22 | 1.48 |
| 9689 | 0 | 6742   | CNYSKFWYLEHAK            | 2.51 | 0.01 | 3.70 | 1.15 | 0.22 | 1.48 |
| 9690 | 0 | 6742   | CNYSKFWYLEHAK            | 2.51 | 0.01 | 3.70 | 1.15 | 0.22 | 1.48 |
| 9691 | 0 | 6742   | CNYSKFWYLEHAK            | 2.51 | 0.01 | 3.70 | 1.15 | 0.22 | 1.48 |
| 9692 | 0 | 6742   | CNYSKFWYLEHAK            | 2.51 | 0.01 | 3.70 | 1.15 | 0.22 | 1.48 |
| 9693 | 0 | 189590 | CNYSKY                   | 1.90 | 0.01 | 3.47 | 0.44 | 0.85 | 0.28 |
| 9694 | 0 | 189590 | CNYSKY                   | 1.90 | 0.01 | 3.47 | 0.44 | 0.85 | 0.28 |

|      |   |        |                               |      |      |      |      |      |      |
|------|---|--------|-------------------------------|------|------|------|------|------|------|
| 9695 | 0 | 6743   | CNYSKYWYLNHHTTTG              | 2.66 | 0.01 | 3.47 | 2.37 | 0.22 | 0.28 |
| 9696 | 0 | 6743   | CNYSKYWYLNHHTTTG              | 2.66 | 0.01 | 3.47 | 1.12 | 0.22 | 0.28 |
| 9697 | 0 | 114282 | CNYSVAHLC                     | 2.22 | 0.01 | 0.90 | 2.46 | 0.22 | 1.27 |
| 9698 | 0 | 114282 | CNYSVAHLC                     | 2.22 | 0.01 | 0.90 | 3.00 | 0.22 | 1.27 |
| 9699 | 0 | 114282 | CNYSVAHLC                     | 2.22 | 0.01 | 0.90 | 3.00 | 0.22 | 1.27 |
| 9700 | 0 | 116684 | CNYYSNSYSFWLASLDP<br>KR       | 2.89 | 0.01 | 1.60 | 1.12 | 0.22 | 1.27 |
| 9701 | 0 | 116684 | CNYYSNSYSFWLASLDP<br>KR       | 2.89 | 0.01 | 1.60 | 0.44 | 1.13 | 0.28 |
| 9702 | 0 | 116685 | CPAGWISLWKGFS                 | 2.54 | 0.01 | 1.60 | 1.12 | 0.22 | 1.27 |
| 9703 | 0 | 116685 | CPAGWISLWKGFS                 | 2.54 | 0.01 | 1.60 | 0.44 | 1.13 | 0.28 |
| 9704 | 0 | 123985 | CPCGSCCSWWKWLLGL<br>LL        | 2.88 | 0.01 | 0.78 | 0.44 | 1.13 | 0.85 |
| 9705 | 0 | 123985 | CPCGSCCSWWKWLLGL<br>LL        | 2.88 | 0.01 | 0.78 | 0.44 | 1.13 | 0.85 |
| 9706 | 0 | 123985 | CPCGSCCSWWKWLLGL<br>LL        | 2.88 | 0.01 | 0.78 | 0.44 | 1.13 | 0.85 |
| 9707 | 0 | 123985 | CPCGSCCSWWKWLLGL<br>LL        | 2.88 | 0.01 | 0.78 | 0.44 | 1.13 | 0.85 |
| 9708 | 0 | 6757   | CPECRPLGLQGCAFQST<br>VAELQRLK | 3.17 | 0.01 | 2.53 | 0.44 | 0.85 | 0.28 |
| 9709 | 0 | 6757   | CPECRPLGLQGCAFQST<br>VAELQRLK | 3.17 | 0.01 | 2.53 | 0.44 | 0.85 | 0.28 |
| 9710 | 0 | 134020 | CPEEPQLRMKNNEEAE<br>DYDD      | 2.92 | 0.01 | 0.78 | 1.20 | 0.22 | 0.28 |
| 9711 | 0 | 134020 | CPEEPQLRMKNNEEAE<br>DYDD      | 2.92 | 0.01 | 0.78 | 1.20 | 0.22 | 0.85 |
| 9712 | 0 | 134020 | CPEEPQLRMKNNEEAE<br>DYDD      | 2.92 | 0.01 | 0.78 | 0.44 | 1.41 | 0.85 |
| 9713 | 0 | 134020 | CPEEPQLRMKNNEEAE<br>DYDD      | 2.92 | 0.01 | 0.78 | 0.44 | 1.41 | 1.34 |
| 9714 | 0 | 134020 | CPEEPQLRMKNNEEAE<br>DYDD      | 2.92 | 0.01 | 0.78 | 0.44 | 1.41 | 1.34 |
| 9715 | 0 | 134020 | CPEEPQLRMKNNEEAE<br>DYDD      | 2.92 | 0.01 | 0.78 | 1.12 | 0.22 | 0.28 |
| 9716 | 0 | 134020 | CPEEPQLRMKNNEEAE<br>DYDD      | 2.92 | 0.01 | 0.78 | 1.12 | 0.22 | 0.28 |
| 9717 | 0 | 6759   | CPENSGCF                      | 2.13 | 0.01 | 1.66 | 1.15 | 0.22 | 0.28 |
| 9718 | 0 | 6761   | CPFDTSPVVKGYNTTLL<br>NGSAF    | 3.06 | 0.01 | 3.37 | 2.13 | 0.22 | 1.34 |
| 9719 | 0 | 6761   | CPFDTSPVVKGYNTTLL<br>NGSAF    | 3.06 | 0.01 | 3.37 | 2.13 | 2.25 | 1.75 |
| 9720 | 0 | 135643 | CPFGFEGK                      | 2.14 | 0.01 | 0.78 | 0.44 | 2.35 | 0.28 |
| 9721 | 0 | 6762   | CPFIKPEVKPGTPA                | 2.61 | 0.01 | 2.56 | 1.12 | 0.22 | 0.28 |
| 9722 | 0 | 6763   | CPFLKQNEPEDIDCW               | 2.67 | 0.01 | 2.30 | 0.68 | 0.22 | 1.27 |
| 9723 | 0 | 6763   | CPFLKQNEPEDIDCW               | 2.67 | 0.01 | 2.30 | 0.68 | 0.22 | 1.34 |
| 9724 | 0 | 6763   | CPFLKQNEPEDIDCW               | 2.67 | 0.01 | 2.30 | 0.68 | 0.22 | 0.85 |

|      |   |       |                              |      |      |      |      |      |      |
|------|---|-------|------------------------------|------|------|------|------|------|------|
| 9725 | 0 | 6763  | CPFLKQNEPEDIDCW              | 2.67 | 0.01 | 2.30 | 0.68 | 0.22 | 0.85 |
| 9726 | 0 | 6763  | CPFLKQNEPEDIDCW              | 2.67 | 0.01 | 2.30 | 0.68 | 0.22 | 0.85 |
| 9727 | 0 | 6763  | CPFLKQNEPEDIDCW              | 2.67 | 0.01 | 2.30 | 0.68 | 0.22 | 0.85 |
| 9728 | 0 | 6763  | CPFLKQNEPEDIDCW              | 2.67 | 0.01 | 2.30 | 0.68 | 0.22 | 0.85 |
| 9729 | 0 | 6764  | CPFLPKPKVASEAFMST<br>NKM     | 2.95 | 0.01 | 3.00 | 1.15 | 0.22 | 0.85 |
| 9730 | 0 | 6764  | CPFLPKPKVASEAFMST<br>NKM     | 2.95 | 0.01 | 3.00 | 1.15 | 0.22 | 1.48 |
| 9731 | 0 | 6764  | CPFLPKPKVASEAFMST<br>NKM     | 2.95 | 0.01 | 3.00 | 1.15 | 0.22 | 0.85 |
| 9732 | 0 | 78615 | CPGHANRKQCGG                 | 2.46 | 0.01 | 3.27 | 1.12 | 0.22 | 0.28 |
| 9733 | 0 | 78615 | CPGHANRKQCGG                 | 2.46 | 0.01 | 3.27 | 1.12 | 0.22 | 0.28 |
| 9734 | 0 | 78615 | CPGHANRKQCGG                 | 2.46 | 0.01 | 3.27 | 1.12 | 0.22 | 0.28 |
| 9735 | 0 | 78615 | CPGHANRKQCGG                 | 2.46 | 0.01 | 3.27 | 1.12 | 0.22 | 1.34 |
| 9736 | 0 | 6771  | CPHPDKASC                    | 2.24 | 0.01 | 0.90 | 0.68 | 0.22 | 0.28 |
| 9737 | 0 | 6777  | CPKDELRPLEKVLESKTR<br>AI     | 2.95 | 0.01 | 2.82 | 0.44 | 0.85 | 0.28 |
| 9738 | 0 | 6782  | CPKNRKDSC                    | 2.24 | 0.01 | 0.90 | 0.68 | 0.22 | 0.28 |
| 9739 | 0 | 6784  | CPKTALTEPPTLAYSPNR<br>QIC    | 2.98 | 0.01 | 4.08 | 3.38 | 0.22 | 0.85 |
| 9740 | 0 | 6796  | CPKYVKQNTLKLATGLR<br>NVPQIES | 3.09 | 0.01 | 0.90 | 0.68 | 0.22 | 0.28 |
| 9741 | 0 | 6796  | CPKYVKQNTLKLATGLR<br>NVPQIES | 3.09 | 0.01 | 0.90 | 0.68 | 0.22 | 0.28 |
| 9742 | 0 | 6798  | CPKYVKQNTLKLATGMR<br>NVPEKQT | 3.11 | 0.01 | 3.78 | 0.68 | 0.22 | 0.28 |
| 9743 | 0 | 6798  | CPKYVKQNTLKLATGMR<br>NVPEKQT | 3.11 | 0.01 | 3.78 | 0.68 | 0.22 | 0.28 |
| 9744 | 0 | 6798  | CPKYVKQNTLKLATGMR<br>NVPEKQT | 3.11 | 0.01 | 4.15 | 0.68 | 0.22 | 0.28 |
| 9745 | 0 | 6798  | CPKYVKQNTLKLATGMR<br>NVPEKQT | 3.11 | 0.01 | 4.15 | 0.68 | 0.22 | 0.28 |
| 9746 | 0 | 6798  | CPKYVKQNTLKLATGMR<br>NVPEKQT | 3.11 | 0.01 | 4.15 | 0.68 | 0.22 | 0.28 |
| 9747 | 0 | 6798  | CPKYVKQNTLKLATGMR<br>NVPEKQT | 3.11 | 0.01 | 4.15 | 0.68 | 0.22 | 0.28 |
| 9748 | 0 | 6798  | CPKYVKQNTLKLATGMR<br>NVPEKQT | 3.11 | 0.01 | 4.15 | 0.68 | 0.22 | 0.28 |
| 9749 | 0 | 6798  | CPKYVKQNTLKLATGMR<br>NVPEKQT | 3.11 | 0.01 | 4.15 | 0.68 | 0.22 | 0.28 |
| 9750 | 0 | 6798  | CPKYVKQNTLKLATGMR<br>NVPEKQT | 3.11 | 0.01 | 3.27 | 1.20 | 0.22 | 1.57 |
| 9751 | 0 | 6798  | CPKYVKQNTLKLATGMR<br>NVPEKQT | 3.11 | 0.01 | 3.27 | 1.20 | 0.22 | 1.57 |
| 9752 | 0 | 6798  | CPKYVKQNTLKLATGMR<br>NVPEKQT | 3.11 | 0.01 | 3.27 | 1.20 | 0.22 | 1.57 |



|      |   |        |                                    |      |      |      |      |      |      |
|------|---|--------|------------------------------------|------|------|------|------|------|------|
| 9753 | 0 | 6798   | CPKYVKQNTLKLATGMR<br>NVPEKQT       | 3.11 | 0.01 | 3.27 | 1.20 | 0.22 | 1.57 |
| 9754 | 0 | 6799   | CPKYVKQNTLKLATGMR<br>NVPEKQTR      | 3.15 | 0.01 | 3.04 | 1.12 | 0.22 | 0.28 |
| 9755 | 0 | 6799   | CPKYVKQNTLKLATGMR<br>NVPEKQTR      | 3.15 | 0.01 | 3.04 | 1.12 | 0.22 | 0.28 |
| 9756 | 0 | 6799   | CPKYVKQNTLKLATGMR<br>NVPEKQTR      | 3.15 | 0.01 | 3.04 | 1.12 | 0.22 | 0.28 |
| 9757 | 0 | 6799   | CPKYVKQNTLKLATGMR<br>NVPEKQTR      | 3.15 | 0.01 | 3.04 | 1.12 | 0.22 | 2.02 |
| 9758 | 0 | 6800   | CPKYVKSEKLVLATGLRN<br>VPEKQT       | 3.11 | 0.01 | 0.90 | 0.68 | 0.22 | 0.28 |
| 9759 | 0 | 6800   | CPKYVKSEKLVLATGLRN<br>VPEKQT       | 3.11 | 0.01 | 0.90 | 0.68 | 0.22 | 0.28 |
| 9760 | 0 | 118281 | CPLNIGSQGSTDY                      | 2.51 | 0.01 | 0.78 | 0.44 | 1.13 | 0.28 |
| 9761 | 0 | 127939 | CPLPPRSPPVPPPRK                    | 2.77 | 0.01 | 1.72 | 0.44 | 0.85 | 0.28 |
| 9762 | 0 | 127939 | CPLPPRSPPVPPPRK                    | 2.77 | 0.01 | 1.72 | 0.44 | 0.85 | 0.28 |
| 9763 | 0 | 420792 | CPNGYQCKMMAFMG                     | 2.61 | 0.01 | 3.19 | 0.44 | 1.23 | 1.28 |
| 9764 | 0 | 420792 | CPNGYQCKMMAFMG                     | 2.61 | 0.01 | 3.19 | 0.44 | 1.23 | 1.28 |
| 9765 | 0 | 229100 | CPNKSPLVC                          | 2.24 | 0.01 | 0.90 | 0.68 | 0.22 | 1.39 |
| 9766 | 0 | 229101 | CPNKSPRIC                          | 2.24 | 0.01 | 0.90 | 0.68 | 0.22 | 1.39 |
| 9767 | 0 | 229102 | CPNKSPTRC                          | 2.24 | 0.01 | 0.90 | 0.68 | 0.22 | 1.39 |
| 9768 | 0 | 6816   | CPNSLTPADPTMDY                     | 2.61 | 0.01 | 0.90 | 1.15 | 0.22 | 1.27 |
| 9769 | 0 | 6816   | CPNSLTPADPTMDY                     | 2.61 | 0.01 | 0.90 | 1.15 | 0.22 | 1.66 |
| 9770 | 0 | 145729 | CPPDIIPK                           | 2.15 | 0.01 | 1.86 | 0.68 | 0.22 | 0.28 |
| 9771 | 0 | 145729 | CPPDIIPK                           | 2.15 | 0.01 | 1.86 | 0.68 | 0.22 | 0.28 |
| 9772 | 0 | 145729 | CPPDIIPK                           | 2.15 | 0.01 | 1.86 | 0.68 | 0.22 | 0.28 |
| 9773 | 0 | 110198 | CPPDIIPKVEGKTIA                    | 2.68 | 0.01 | 1.86 | 0.68 | 0.22 | 1.34 |
| 9774 | 0 | 110198 | CPPDIIPKVEGKTIA                    | 2.68 | 0.01 | 1.86 | 0.68 | 0.22 | 0.28 |
| 9775 | 0 | 110198 | CPPDIIPKVEGKTIA                    | 2.68 | 0.01 | 1.86 | 0.68 | 0.22 | 1.34 |
| 9776 | 0 | 110198 | CPPDIIPKVEGKTIA                    | 2.68 | 0.01 | 1.86 | 1.12 | 0.22 | 0.28 |
| 9777 | 0 | 110198 | CPPDIIPKVEGKTIA                    | 2.68 | 0.01 | 1.86 | 1.12 | 0.22 | 0.28 |
| 9778 | 0 | 110198 | CPPDIIPKVEGKTIA                    | 2.68 | 0.01 | 1.86 | 1.12 | 0.22 | 1.34 |
| 9779 | 0 | 110198 | CPPDIIPKVEGKTIA                    | 2.68 | 0.01 | 1.86 | 1.12 | 0.22 | 1.34 |
| 9780 | 0 | 111164 | CPPDVIPKVEGTTIA                    | 2.67 | 0.01 | 3.89 | 1.12 | 0.22 | 0.28 |
| 9781 | 0 | 132784 | CPPGMVRHENRCVALE<br>RCPCFHQGKEYAPG | 3.33 | 0.01 | 0.78 | 0.68 | 0.22 | 1.39 |
| 9782 | 0 | 6820   | CPPHPNLRGICR                       | 2.50 | 0.01 | 0.90 | 0.68 | 0.22 | 0.28 |
| 9783 | 0 | 111165 | CPPLELINTVIQDGD                    | 2.65 | 0.01 | 1.86 | 0.68 | 0.22 | 0.28 |
| 9784 | 0 | 149647 | CPPLELKNKHIEDGD                    | 2.67 | 0.01 | 3.67 | 1.12 | 0.22 | 0.28 |
| 9785 | 0 | 6824   | CPPLRAWHRARAV                      | 2.64 | 0.01 | 2.59 | 0.44 | 0.85 | 0.28 |
| 9786 | 0 | 164466 | CPPPPTG                            | 2.04 | 4.15 | 0.90 | 2.37 | 0.22 | 2.35 |
| 9787 | 0 | 164466 | CPPPPTG                            | 2.04 | 4.15 | 0.90 | 2.22 | 0.22 | 2.35 |
| 9788 | 0 | 164466 | CPPPPTG                            | 2.04 | 4.15 | 0.90 | 2.22 | 0.22 | 0.28 |

|      |   |        |                          |      |      |      |      |      |      |
|------|---|--------|--------------------------|------|------|------|------|------|------|
| 9789 | 0 | 164466 | CPPPPTG                  | 2.04 | 4.15 | 0.90 | 2.37 | 0.22 | 0.28 |
| 9790 | 0 | 164466 | CPPPPTG                  | 2.04 | 4.15 | 0.90 | 2.37 | 0.22 | 1.34 |
| 9791 | 0 | 164466 | CPPPPTG                  | 2.04 | 4.15 | 0.90 | 2.37 | 0.22 | 1.75 |
| 9792 | 0 | 6825   | CPPRRRAG                 | 2.14 | 0.01 | 2.04 | 0.44 | 0.85 | 0.28 |
| 9793 | 0 | 6825   | CPPRRRAG                 | 2.14 | 0.01 | 2.04 | 0.44 | 0.85 | 0.28 |
| 9794 | 0 | 6825   | CPPRRRAG                 | 2.14 | 0.01 | 2.04 | 0.44 | 0.85 | 0.28 |
| 9795 | 0 | 103834 | CPRDLNGKSGC              | 2.40 | 0.01 | 0.90 | 0.44 | 1.13 | 0.28 |
| 9796 | 0 | 103834 | CPRDLNGKSGC              | 2.40 | 0.01 | 0.90 | 0.44 | 1.41 | 0.28 |
| 9797 | 0 | 103834 | CPRDLNGKSGC              | 2.40 | 0.01 | 0.90 | 1.12 | 0.22 | 0.28 |
| 9798 | 0 | 103834 | CPRDLNGKSGC              | 2.40 | 0.01 | 0.90 | 0.44 | 1.13 | 0.28 |
| 9799 | 0 | 103834 | CPRDLNGKSGC              | 2.40 | 0.01 | 0.90 | 1.12 | 0.22 | 2.92 |
| 9800 | 0 | 99128  | CPRHYEEPHTQGRRS          | 2.66 | 0.01 | 2.16 | 0.44 | 1.23 | 1.48 |
| 9801 | 0 | 6832   | CPRPPRAVAYYGPVDY<br>K    | 2.88 | 0.01 | 2.57 | 1.20 | 0.22 | 1.34 |
| 9802 | 0 | 6832   | CPRPPRAVAYYGPVDY<br>K    | 2.88 | 0.01 | 2.57 | 1.20 | 0.22 | 1.27 |
| 9803 | 0 | 6832   | CPRPPRAVAYYGPVDY<br>K    | 2.88 | 0.01 | 2.57 | 1.20 | 0.22 | 0.85 |
| 9804 | 0 | 6832   | CPRPPRAVAYYGPVDY<br>K    | 2.88 | 0.01 | 2.57 | 2.04 | 0.22 | 1.27 |
| 9805 | 0 | 6832   | CPRPPRAVAYYGPVDY<br>K    | 2.88 | 0.01 | 2.57 | 2.04 | 0.22 | 0.85 |
| 9806 | 0 | 6832   | CPRPPRAVAYYGPVDY<br>K    | 2.88 | 0.01 | 2.57 | 2.04 | 0.22 | 0.85 |
| 9807 | 0 | 6832   | CPRPPRAVAYYGPVDY<br>K    | 2.88 | 0.01 | 2.57 | 2.04 | 0.22 | 0.85 |
| 9808 | 0 | 6834   | CPRSPRYTLD               | 2.31 | 0.01 | 2.69 | 1.12 | 0.22 | 0.28 |
| 9809 | 0 | 6834   | CPRSPRYTLD               | 2.31 | 0.01 | 2.69 | 1.12 | 0.22 | 1.27 |
| 9810 | 0 | 181564 | CPSCKTECTNYKKWI          | 2.68 | 0.01 | 2.86 | 2.36 | 0.22 | 1.28 |
| 9811 | 0 | 6839   | CPSGTYEGNSPFHPLAD<br>NKF | 2.91 | 0.01 | 2.45 | 1.12 | 0.22 | 2.92 |
| 9812 | 0 | 79528  | CPSKKPYEEVTC             | 2.48 | 0.01 | 3.10 | 0.68 | 0.22 | 1.75 |
| 9813 | 0 | 79528  | CPSKKPYEEVTC             | 2.48 | 0.01 | 3.10 | 2.43 | 0.22 | 1.57 |
| 9814 | 0 | 79528  | CPSKKPYEEVTC             | 2.48 | 0.01 | 3.10 | 0.68 | 0.22 | 1.57 |
| 9815 | 0 | 79528  | CPSKKPYEEVTC             | 2.48 | 0.01 | 3.10 | 0.68 | 0.22 | 1.57 |
| 9816 | 0 | 79528  | CPSKKPYEEVTC             | 2.48 | 0.01 | 3.10 | 2.25 | 0.22 | 1.57 |
| 9817 | 0 | 105700 | CPSTYEPAQQGRRH           | 2.63 | 0.01 | 2.16 | 0.44 | 1.23 | 0.85 |
| 9818 | 0 | 78353  | CPSVKNGIEINCCTTDRC<br>NN | 2.93 | 0.01 | 4.23 | 1.12 | 0.22 | 1.27 |
| 9819 | 0 | 110798 | CPTGCQLQEALLQQERP<br>IRN | 2.95 | 4.63 | 0.78 | 1.81 | 1.41 | 2.51 |
| 9820 | 0 | 110798 | CPTGCQLQEALLQQERP<br>IRN | 2.95 | 4.63 | 0.78 | 1.81 | 1.41 | 1.27 |
| 9821 | 0 | 123063 | CPTMTRVLQGVLPALPQ        | 2.81 | 0.01 | 0.78 | 1.15 | 0.22 | 1.27 |
| 9822 | 0 | 123063 | CPTMTRVLQGVLPALPQ        | 2.81 | 0.01 | 0.78 | 1.15 | 0.22 | 1.57 |

|      |   |        |                                                  |      |      |      |      |      |      |
|------|---|--------|--------------------------------------------------|------|------|------|------|------|------|
| 9823 | 0 | 123064 | CPTMTRVLQGVLPALPQ<br>VVC                         | 2.97 | 0.01 | 0.78 | 1.12 | 0.22 | 1.57 |
| 9824 | 0 | 123064 | CPTMTRVLQGVLPALPQ<br>VVC                         | 2.97 | 0.01 | 0.78 | 1.15 | 0.22 | 1.57 |
| 9825 | 0 | 123064 | CPTMTRVLQGVLPALPQ<br>VVC                         | 2.97 | 0.01 | 0.78 | 1.15 | 0.22 | 1.27 |
| 9826 | 0 | 6862   | CPVVIGYANGSCNQDAS<br>SAA                         | 2.94 | 0.01 | 2.78 | 2.49 | 0.85 | 0.28 |
| 9827 | 0 | 111166 | CPVYIKPC                                         | 2.15 | 0.01 | 0.90 | 0.44 | 0.85 | 1.39 |
| 9828 | 0 | 123987 | CPYTGDNQTKLI                                     | 2.51 | 0.01 | 2.73 | 3.65 | 0.22 | 0.28 |
| 9829 | 0 | 123987 | CPYTGDNQTKLI                                     | 2.51 | 0.01 | 2.73 | 3.65 | 0.22 | 0.28 |
| 9830 | 0 | 182070 | CQADNSALIDITSLA                                  | 2.70 | 0.01 | 0.78 | 0.44 | 1.13 | 0.85 |
| 9831 | 0 | 133787 | CQALVRMLAKKPGWK                                  | 2.66 | 0.01 | 0.78 | 0.44 | 1.13 | 0.28 |
| 9832 | 0 | 133787 | CQALVRMLAKKPGWK                                  | 2.66 | 0.01 | 0.78 | 0.44 | 1.41 | 0.28 |
| 9833 | 0 | 133787 | CQALVRMLAKKPGWK                                  | 2.66 | 0.01 | 0.78 | 0.44 | 1.93 | 0.28 |
| 9834 | 0 | 115195 | CQAQPTTMARHPHPL<br>SFMA                          | 2.95 | 0.01 | 1.60 | 0.44 | 1.23 | 2.51 |
| 9835 | 0 | 115195 | CQAQPTTMARHPHPL<br>SFMA                          | 2.95 | 0.01 | 1.60 | 0.44 | 1.41 | 0.28 |
| 9836 | 0 | 115195 | CQAQPTTMARHPHPL<br>SFMA                          | 2.95 | 0.01 | 1.60 | 0.44 | 1.93 | 0.28 |
| 9837 | 0 | 98713  | CQCLVRTPEV                                       | 2.32 | 0.01 | 1.60 | 0.44 | 1.23 | 0.85 |
| 9838 | 0 | 98713  | CQCLVRTPEV                                       | 2.32 | 0.01 | 1.60 | 0.44 | 1.23 | 0.85 |
| 9839 | 0 | 6867   | CQCPDTPKGEIGCI                                   | 2.70 | 0.01 | 4.03 | 4.33 | 0.22 | 0.28 |
| 9840 | 0 | 111167 | CQDKILTHYENDSTD                                  | 2.64 | 0.01 | 1.86 | 0.44 | 0.85 | 0.28 |
| 9841 | 0 | 6872   | CQEKECKECCCPRIKAF<br>KKFINTFEKAQIGKEAPE<br>FKAPA | 3.68 | 0.01 | 4.63 | 0.44 | 0.85 | 0.85 |
| 9842 | 0 | 6872   | CQEKECKECCCPRIKAF<br>KKFINTFEKAQIGKEAPE<br>FKAPA | 3.68 | 0.01 | 4.63 | 0.44 | 0.85 | 0.28 |
| 9843 | 0 | 130757 | CQEPGGLVVPPTDAP                                  | 2.66 | 0.01 | 0.78 | 0.68 | 0.22 | 2.56 |
| 9844 | 0 | 130757 | CQEPGGLVVPPTDAP                                  | 2.66 | 0.01 | 0.78 | 0.68 | 0.22 | 2.56 |
| 9845 | 0 | 130757 | CQEPGGLVVPPTDAP                                  | 2.66 | 0.01 | 0.78 | 0.68 | 0.22 | 2.56 |
| 9846 | 0 | 130757 | CQEPGGLVVPPTDAP                                  | 2.66 | 0.01 | 0.78 | 0.68 | 0.22 | 2.56 |
| 9847 | 0 | 130757 | CQEPGGLVVPPTDAP                                  | 2.66 | 0.01 | 0.78 | 0.68 | 0.22 | 2.56 |
| 9848 | 0 | 130757 | CQEPGGLVVPPTDAP                                  | 2.66 | 0.01 | 0.78 | 0.68 | 0.22 | 2.56 |
| 9849 | 0 | 130757 | CQEPGGLVVPPTDAP                                  | 2.66 | 0.01 | 0.78 | 0.68 | 0.22 | 2.56 |
| 9850 | 0 | 130757 | CQEPGGLVVPPTDAP                                  | 2.66 | 0.01 | 0.78 | 0.68 | 0.22 | 2.56 |
| 9851 | 0 | 130757 | CQEPGGLVVPPTDAP                                  | 2.66 | 0.01 | 0.78 | 0.68 | 0.22 | 2.56 |
| 9852 | 0 | 130757 | CQEPGGLVVPPTDAP                                  | 2.66 | 0.01 | 0.78 | 0.68 | 0.22 | 1.27 |
| 9853 | 0 | 130757 | CQEPGGLVVPPTDAP                                  | 2.66 | 0.01 | 0.78 | 0.68 | 0.22 | 1.34 |
| 9854 | 0 | 423235 | CQEYLHPFGFVEGPG                                  | 2.68 | 0.01 | 2.51 | 0.44 | 2.35 | 1.28 |

|      |   |        |                   |      |      |      |      |      |      |
|------|---|--------|-------------------|------|------|------|------|------|------|
| 9855 | 0 | 125789 | CQGDGYRVFGQCAG    | 2.71 | 0.01 | 1.75 | 0.68 | 0.22 | 0.28 |
| 9856 | 0 | 135644 | CQGDSGGP          | 2.13 | 0.01 | 0.78 | 0.44 | 2.35 | 0.28 |
| 9857 | 0 | 147555 | CQGHLPWMC         | 2.22 | 0.01 | 0.90 | 0.44 | 1.41 | 1.39 |
| 9858 | 0 | 130455 | CQGNQDSFTPVVCAAC  | 2.72 | 3.70 | 0.90 | 0.44 | 1.93 | 1.27 |
| 9859 | 0 | 114283 | CQIESWDHNDQQFQC   | 2.69 | 0.01 | 3.48 | 0.44 | 1.23 | 0.85 |
| 9860 | 0 | 6875   | CQIFANILLN        | 2.32 | 0.01 | 3.16 | 0.68 | 0.22 | 0.28 |
| 9861 | 0 | 6875   | CQIFANILLN        | 2.32 | 0.01 | 3.16 | 0.68 | 0.22 | 0.28 |
| 9862 | 0 | 6883   | CQIYPPNANKIREALAQ | 2.79 | 0.01 | 2.78 | 1.12 | 0.22 | 0.85 |
| 9863 | 0 | 6883   | CQIYPPNANKIREALAQ | 2.79 | 0.01 | 2.78 | 1.12 | 0.22 | 0.28 |
| 9864 | 0 | 6883   | CQIYPPNANKIREALAQ | 2.79 | 0.01 | 2.78 | 1.12 | 0.22 | 1.27 |
| 9865 | 0 | 6883   | CQIYPPNANKIREALAQ | 2.79 | 0.01 | 2.78 | 0.44 | 1.23 | 1.34 |
| 9866 | 0 | 6884   | CQKAGGVAL         | 2.22 | 0.01 | 0.90 | 1.20 | 0.22 | 0.85 |
| 9867 | 0 | 6884   | CQKAGGVAL         | 2.22 | 0.01 | 0.90 | 1.20 | 0.22 | 0.85 |
| 9868 | 0 | 164209 | CQKLSQAAC         | 2.25 | 0.01 | 0.90 | 1.20 | 0.22 | 0.28 |
| 9869 | 0 | 111169 | CQLDSQKIC         | 2.24 | 0.01 | 0.90 | 0.44 | 0.85 | 1.39 |
| 9870 | 0 | 174424 | CQNSHMPLC         | 2.22 | 0.01 | 0.90 | 1.15 | 1.41 | 1.39 |
| 9871 | 0 | 99129  | CQQEPDDLKQKACES   | 2.69 | 0.01 | 2.16 | 0.44 | 1.23 | 1.48 |
| 9872 | 0 | 6892   | CQQFLSVRALC       | 2.41 | 0.01 | 0.90 | 0.44 | 1.23 | 1.39 |
| 9873 | 0 | 6892   | CQQFLSVRALC       | 2.41 | 0.01 | 0.90 | 0.68 | 0.22 | 1.27 |
| 9874 | 0 | 6893   | CQQLAD            | 1.89 | 0.01 | 1.86 | 0.44 | 1.23 | 0.28 |
| 9875 | 0 | 148554 | CQQLLQIPEQ        | 2.34 | 0.01 | 1.86 | 0.44 | 1.74 | 0.28 |
| 9876 | 0 | 164210 | CQQLSRNHC         | 2.23 | 0.01 | 0.90 | 1.20 | 0.22 | 0.28 |
| 9877 | 0 | 149280 | CQQLWQIPEQ        | 2.33 | 0.01 | 1.86 | 0.44 | 1.93 | 0.85 |
| 9878 | 0 | 6895   | CQQTLSVRALC       | 2.41 | 0.01 | 0.90 | 0.68 | 0.22 | 0.28 |
| 9879 | 0 | 6895   | CQQTLSVRALC       | 2.41 | 0.01 | 0.90 | 0.68 | 2.60 | 1.75 |
| 9880 | 0 | 6895   | CQQTLSVRALC       | 2.41 | 0.01 | 0.90 | 0.44 | 1.23 | 0.28 |
| 9881 | 0 | 106313 | CQQYGSSPQTFG      | 2.48 | 0.01 | 0.78 | 1.12 | 0.22 | 0.85 |
| 9882 | 0 | 106313 | CQQYGSSPQTFG      | 2.48 | 0.01 | 0.78 | 1.12 | 0.22 | 0.85 |
| 9883 | 0 | 106313 | CQQYGSSPQTFG      | 2.48 | 0.01 | 0.78 | 1.12 | 0.22 | 0.85 |
| 9884 | 0 | 106313 | CQQYGSSPQTFG      | 2.48 | 0.01 | 0.78 | 1.12 | 0.22 | 0.85 |
| 9885 | 0 | 106313 | CQQYGSSPQTFG      | 2.48 | 0.01 | 0.78 | 1.12 | 0.22 | 0.85 |
| 9886 | 0 | 106313 | CQQYGSSPQTFG      | 2.48 | 0.01 | 0.78 | 1.12 | 0.22 | 0.85 |
| 9887 | 0 | 106313 | CQQYGSSPQTFG      | 2.48 | 0.01 | 0.78 | 1.12 | 0.22 | 0.85 |
| 9888 | 0 | 106313 | CQQYGSSPQTFG      | 2.48 | 0.01 | 0.78 | 1.12 | 0.22 | 0.85 |
| 9889 | 0 | 106313 | CQQYGSSPQTFG      | 2.48 | 0.01 | 0.78 | 1.12 | 0.22 | 0.85 |
| 9890 | 0 | 106313 | CQQYGSSPQTFG      | 2.48 | 0.01 | 0.78 | 1.12 | 0.22 | 0.85 |
| 9891 | 0 | 106313 | CQQYGSSPQTFG      | 2.48 | 0.01 | 0.78 | 1.12 | 0.22 | 0.85 |
| 9892 | 0 | 106313 | CQQYGSSPQTFG      | 2.48 | 0.01 | 0.78 | 1.12 | 0.22 | 0.85 |
| 9893 | 0 | 106313 | CQQYGSSPQTFG      | 2.48 | 0.01 | 0.78 | 1.12 | 0.22 | 0.85 |
| 9894 | 0 | 106313 | CQQYGSSPQTFG      | 2.48 | 0.01 | 0.78 | 1.12 | 0.22 | 0.85 |

|      |   |        |                                    |      |      |      |      |      |      |
|------|---|--------|------------------------------------|------|------|------|------|------|------|
| 9895 | 0 | 106313 | CQQYGSSPQTFG                       | 2.48 | 0.01 | 0.78 | 1.12 | 0.22 | 0.28 |
| 9896 | 0 | 144600 | CQREFALKHL                         | 2.29 | 0.01 | 0.78 | 0.44 | 1.13 | 0.28 |
| 9897 | 0 | 144600 | CQREFALKHL                         | 2.29 | 0.01 | 0.78 | 0.44 | 1.13 | 0.28 |
| 9898 | 0 | 144600 | CQREFALKHL                         | 2.29 | 0.01 | 0.78 | 0.44 | 1.41 | 0.28 |
| 9899 | 0 | 144600 | CQREFALKHL                         | 2.29 | 0.01 | 0.78 | 0.44 | 2.35 | 0.28 |
| 9900 | 0 | 164211 | CQRLSGPYC                          | 2.22 | 0.01 | 0.90 | 1.20 | 0.22 | 0.28 |
| 9901 | 0 | 6897   | CQRQFEEQQRFR                       | 2.52 | 0.01 | 3.12 | 0.44 | 1.23 | 0.85 |
| 9902 | 0 | 134021 | CQSIAAPSKTS                        | 2.40 | 0.01 | 1.60 | 1.20 | 0.22 | 1.27 |
| 9903 | 0 | 134021 | CQSIAAPSKTS                        | 2.40 | 0.01 | 1.60 | 1.20 | 0.22 | 1.27 |
| 9904 | 0 | 6900   | CQTPVNGNSPWAPTAP<br>LPGDM          | 2.98 | 0.01 | 2.76 | 0.44 | 1.59 | 0.28 |
| 9905 | 0 | 170490 | CQVGIFLDYEAGMVS                    | 2.62 | 0.01 | 0.78 | 0.44 | 1.41 | 0.28 |
| 9906 | 0 | 170490 | CQVGIFLDYEAGMVS                    | 2.62 | 0.01 | 0.78 | 0.44 | 1.13 | 0.28 |
| 9907 | 0 | 78113  | CQVGSSNSAFVSTSSSR<br>RYTEVYL       | 3.10 | 0.01 | 2.14 | 1.12 | 0.22 | 0.28 |
| 9908 | 0 | 78113  | CQVGSSNSAFVSTSSSR<br>RYTEVYL       | 3.10 | 0.01 | 2.14 | 1.12 | 0.22 | 0.28 |
| 9909 | 0 | 94792  | CQWASPYGNAC                        | 2.40 | 0.01 | 3.33 | 1.12 | 0.22 | 1.27 |
| 9910 | 0 | 94792  | CQWASPYGNAC<br>CQYVLVQDYCGSNPGTF   | 2.40 | 0.01 | 3.33 | 1.12 | 0.22 | 2.56 |
| 9911 | 0 | 132785 | RILVGNKGCSHPSVKCK<br>KRVTILVEGGEIE | 3.79 | 0.01 | 0.78 | 0.68 | 0.22 | 1.39 |
| 9912 | 0 | 6906   | CRAAKL                             | 1.89 | 0.01 | 1.96 | 0.44 | 0.85 | 0.28 |
| 9913 | 0 | 230448 | CRALNAQGLDVEKPL                    | 2.64 | 0.01 | 0.78 | 0.44 | 1.13 | 0.28 |
| 9914 | 0 | 6909   | CRAMVK                             | 1.88 | 0.01 | 1.86 | 0.44 | 1.23 | 0.28 |
| 9915 | 0 | 6914   | CRCEGLRMMMMMRMQ                    | 2.65 | 0.01 | 4.08 | 0.44 | 1.23 | 0.28 |
| 9916 | 0 | 263336 | CRDEGGDEGNDEAEG                    | 2.73 | 0.01 | 1.61 | 0.44 | 0.85 | 1.28 |
| 9917 | 0 | 99130  | CRDIGT                             | 1.88 | 0.01 | 2.86 | 2.02 | 0.85 | 0.85 |
| 9918 | 0 | 227064 | CRDKLSSTNQLRSVG                    | 2.66 | 0.01 | 2.97 | 0.44 | 1.59 | 0.28 |
| 9919 | 0 | 130758 | CREPVGSASWAHFRLVL<br>ILVEK         | 3.02 | 0.01 | 0.90 | 0.44 | 1.93 | 0.85 |
| 9920 | 0 | 6918   | CRFPNITNSHVPILQE                   | 2.69 | 0.01 | 2.04 | 1.20 | 0.22 | 2.02 |
| 9921 | 0 | 6918   | CRFPNITNSHVPILQE                   | 2.69 | 0.01 | 2.04 | 1.20 | 0.22 | 0.85 |
| 9922 | 0 | 6918   | CRFPNITNSHVPILQE                   | 2.69 | 0.01 | 2.04 | 0.44 | 1.59 | 1.57 |
| 9923 | 0 | 6918   | CRFPNITNSHVPILQE                   | 2.69 | 0.01 | 2.04 | 0.44 | 2.98 | 0.28 |
| 9924 | 0 | 6919   | CRFPNITNSHVPILQERP<br>PLENR        | 3.07 | 0.01 | 2.04 | 0.44 | 0.85 | 0.28 |
| 9925 | 0 | 6919   | CRFPNITNSHVPILQERP<br>PLENR        | 3.07 | 0.01 | 2.04 | 0.44 | 1.59 | 0.28 |
| 9926 | 0 | 78114  | CRFPNITNSHVPILQERP<br>PLENRVLTGWGL | 3.33 | 0.01 | 2.04 | 0.44 | 1.59 | 0.28 |
| 9927 | 0 | 78114  | CRFPNITNSHVPILQERP<br>PLENRVLTGWGL | 3.33 | 0.01 | 2.04 | 0.44 | 2.82 | 0.28 |
| 9928 | 0 | 78114  | CRFPNITNSHVPILQERP<br>PLENRVLTGWGL | 3.33 | 0.01 | 2.04 | 0.44 | 0.85 | 0.28 |

|      |   |        |                                    |      |      |      |      |      |      |
|------|---|--------|------------------------------------|------|------|------|------|------|------|
| 9929 | 0 | 6921   | CRFPNITNSHVPILQERP<br>PLENRVLTGYGL | 3.33 | 0.01 | 0.90 | 0.44 | 0.85 | 0.28 |
| 9930 | 0 | 6921   | CRFPNITNSHVPILQERP<br>PLENRVLTGYGL | 3.33 | 0.01 | 0.90 | 0.44 | 0.85 | 0.28 |
| 9931 | 0 | 6924   | CRGDDFPAWYC                        | 2.38 | 0.01 | 0.90 | 1.15 | 0.22 | 1.39 |
| 9932 | 0 | 6924   | CRGDDFPAWYC                        | 2.38 | 0.01 | 0.90 | 1.15 | 0.22 | 0.28 |
| 9933 | 0 | 6925   | CRGFTSFKKPPTPPPEPE<br>T            | 2.92 | 0.01 | 0.90 | 3.89 | 1.59 | 0.28 |
| 9934 | 0 | 6925   | CRGFTSFKKPPTPPPEPE<br>T            | 2.92 | 0.01 | 0.90 | 0.68 | 0.22 | 0.28 |
| 9935 | 0 | 6925   | CRGFTSFKKPPTPPPEPE<br>T            | 2.92 | 0.01 | 0.90 | 0.68 | 0.22 | 0.28 |
| 9936 | 0 | 6925   | CRGFTSFKKPPTPPPEPE<br>T            | 2.92 | 0.01 | 0.90 | 0.68 | 0.22 | 1.75 |
| 9937 | 0 | 6925   | CRGFTSFKKPPTPPPEPE<br>T            | 2.92 | 0.01 | 0.90 | 0.68 | 0.22 | 0.28 |
| 9938 | 0 | 6925   | CRGFTSFKKPPTPPPEPE<br>T            | 2.92 | 0.01 | 0.90 | 0.68 | 0.22 | 2.12 |
| 9939 | 0 | 6925   | CRGFTSFKKPPTPPPEPE<br>T            | 2.92 | 0.01 | 0.90 | 0.68 | 0.22 | 1.75 |
| 9940 | 0 | 6926   | CRGGEPPSPKTCGSYTYT<br>YQ           | 2.98 | 0.01 | 2.40 | 0.44 | 1.59 | 0.28 |
| 9941 | 0 | 190720 | CRIHIGPGRAFYTC                     | 2.62 | 4.33 | 0.90 | 0.44 | 0.85 | 2.49 |
| 9942 | 0 | 190720 | CRIHIGPGRAFYTC                     | 2.62 | 4.33 | 0.90 | 0.44 | 0.85 | 1.34 |
| 9943 | 0 | 190720 | CRIHIGPGRAFYTC                     | 2.62 | 4.33 | 0.90 | 0.44 | 0.85 | 3.13 |
| 9944 | 0 | 190720 | CRIHIGPGRAFYTC                     | 2.62 | 4.33 | 0.90 | 0.44 | 0.85 | 3.13 |
| 9945 | 0 | 133023 | CRISPGKNATGMEVGW<br>YRPPFSR        | 3.02 | 0.01 | 0.78 | 2.61 | 0.22 | 0.28 |
| 9946 | 0 | 133023 | CRISPGKNATGMEVGW<br>YRPPFSR        | 3.02 | 0.01 | 0.78 | 3.57 | 0.22 | 0.28 |
| 9947 | 0 | 133023 | CRISPGKNATGMEVGW<br>YRPPFSR        | 3.02 | 0.01 | 0.78 | 3.57 | 0.22 | 0.28 |
| 9948 | 0 | 133023 | CRISPGKNATGMEVGW<br>YRPPFSR        | 3.02 | 0.01 | 0.78 | 3.57 | 0.22 | 0.28 |
| 9949 | 0 | 133023 | CRISPGKNATGMEVGW<br>YRPPFSR        | 3.02 | 0.01 | 0.78 | 3.57 | 0.22 | 0.28 |
| 9950 | 0 | 133023 | CRISPGKNATGMEVGW<br>YRPPFSR        | 3.02 | 0.01 | 0.78 | 3.57 | 0.22 | 0.28 |
| 9951 | 0 | 114759 | CRKELAAVSV                         | 2.30 | 0.01 | 2.25 | 0.44 | 1.23 | 0.85 |
| 9952 | 0 | 114759 | CRKELAAVSV                         | 2.30 | 0.01 | 2.25 | 0.44 | 1.23 | 0.85 |
| 9953 | 0 | 230207 | CRKELAAVSVDCSEYPKP<br>DC           | 2.96 | 0.01 | 2.25 | 0.44 | 1.23 | 0.28 |
| 9954 | 0 | 113311 | CRKLGHPWSV                         | 2.34 | 0.01 | 0.90 | 3.06 | 0.22 | 0.85 |
| 9955 | 0 | 6931   | CRLRMD                             | 1.90 | 0.01 | 2.40 | 0.44 | 0.85 | 0.28 |
| 9956 | 0 | 434730 | CRLRSSVESTRGSRPAP<br>PPARGLT       | 3.19 | 4.63 | 0.90 | 0.44 | 1.13 | 1.27 |

|      |   |        |                                 |      |      |      |      |      |      |
|------|---|--------|---------------------------------|------|------|------|------|------|------|
| 9957 | 0 | 434730 | CRLRSSVESTGRSRPAP<br>PPARGLT    | 3.19 | 4.63 | 0.90 | 2.04 | 2.60 | 1.75 |
| 9958 | 0 | 434731 | CRLRSSVESTGRSRPAP<br>PPARGLT    | 3.19 | 0.01 | 0.90 | 2.04 | 2.60 | 1.75 |
| 9959 | 0 | 503973 | CRLTPLSRLPFGMAPGP<br>GPQ        | 2.96 | 0.01 | 2.48 | 0.44 | 1.74 | 0.28 |
| 9960 | 0 | 94479  | CRNTAKYQVGQNIAISS<br>TTA        | 2.93 | 0.01 | 3.65 | 0.68 | 0.22 | 0.28 |
| 9961 | 0 | 94479  | CRNTAKYQVGQNIAISS<br>TTA        | 2.93 | 0.01 | 3.65 | 0.68 | 0.22 | 0.28 |
| 9962 | 0 | 130456 | CRPQVNNPKEWSCAAC                | 2.72 | 0.01 | 0.90 | 0.44 | 1.93 | 1.27 |
| 9963 | 0 | 6937   | CRQCTISYQDMYTPPYC<br>CCLKPTAGNC | 3.21 | 0.01 | 3.89 | 1.12 | 0.22 | 1.48 |
| 9964 | 0 | 6938   | CRQLGKQRC                       | 2.26 | 0.01 | 0.90 | 0.44 | 0.85 | 1.39 |
| 9965 | 0 | 130457 | CRQPGNNYC                       | 2.23 | 0.01 | 0.90 | 0.68 | 0.22 | 0.28 |
| 9966 | 0 | 130457 | CRQPGNNYC                       | 2.23 | 0.01 | 0.90 | 0.68 | 0.22 | 1.34 |
| 9967 | 0 | 130457 | CRQPGNNYC                       | 2.23 | 0.01 | 0.90 | 0.68 | 0.22 | 0.28 |
| 9968 | 0 | 130457 | CRQPGNNYC                       | 2.23 | 0.01 | 0.90 | 0.68 | 0.22 | 0.28 |
| 9969 | 0 | 130457 | CRQPGNNYC                       | 2.23 | 0.01 | 0.90 | 0.68 | 0.22 | 1.34 |
| 9970 | 0 | 130759 | CRQSRKRPC                       | 2.26 | 0.01 | 0.90 | 0.44 | 1.13 | 1.39 |
| 9971 | 0 | 6940   | CRQTRTMPGC                      | 2.34 | 0.01 | 0.90 | 0.68 | 0.22 | 1.27 |
| 9972 | 0 | 6940   | CRQTRTMPGC                      | 2.34 | 0.01 | 0.90 | 0.68 | 0.22 | 1.39 |
| 9973 | 0 | 78940  | CRRHNYGFWVC                     | 2.38 | 0.01 | 0.90 | 0.68 | 0.22 | 1.27 |
| 9974 | 0 | 78940  | CRRHNYGFWVC                     | 2.38 | 0.01 | 0.90 | 0.68 | 0.22 | 1.57 |
| 9975 | 0 | 78940  | CRRHNYGFWVC                     | 2.38 | 0.01 | 0.90 | 1.12 | 0.22 | 0.85 |
| 9976 | 0 | 145123 | CRRRYRRPRG                      | 2.36 | 0.01 | 2.40 | 3.41 | 0.22 | 0.28 |
| 9977 | 0 | 145123 | CRRRYRRPRG                      | 2.36 | 0.01 | 2.40 | 3.41 | 0.22 | 0.28 |
| 9978 | 0 | 145123 | CRRRYRRPRG                      | 2.36 | 0.01 | 2.40 | 1.15 | 0.22 | 0.28 |
| 9979 | 0 | 145123 | CRRRYRRPRG                      | 2.36 | 0.01 | 2.40 | 1.15 | 0.22 | 0.28 |
| 9980 | 0 | 145123 | CRRRYRRPRG                      | 2.36 | 0.01 | 2.40 | 1.15 | 0.22 | 0.28 |
| 9981 | 0 | 145123 | CRRRYRRPRG                      | 2.36 | 0.01 | 2.40 | 1.15 | 0.22 | 0.85 |
| 9982 | 0 | 145123 | CRRRYRRPRG                      | 2.36 | 0.01 | 2.40 | 1.15 | 0.22 | 0.85 |
| 9983 | 0 | 145123 | CRRRYRRPRG                      | 2.36 | 0.01 | 2.40 | 1.15 | 0.22 | 1.34 |
| 9984 | 0 | 145123 | CRRRYRRPRG                      | 2.36 | 0.01 | 2.40 | 1.15 | 0.22 | 1.75 |
| 9985 | 0 | 145123 | CRRRYRRPRG                      | 2.36 | 0.01 | 2.40 | 1.15 | 0.22 | 1.75 |
| 9986 | 0 | 131844 | CRRSTTDC                        | 2.15 | 0.01 | 0.78 | 0.68 | 0.22 | 1.57 |
| 9987 | 0 | 6941   | CRRVASFLIRGSAQKI                | 2.73 | 0.01 | 1.72 | 0.68 | 0.22 | 0.28 |
| 9988 | 0 | 6942   | CRSACVYFTEYENSG                 | 2.67 | 0.01 | 3.78 | 1.15 | 0.22 | 0.28 |
| 9989 | 0 | 6946   | CRTCAHPGEHA                     | 2.42 | 0.01 | 0.90 | 0.44 | 0.22 | 1.39 |
| 9990 | 0 | 6946   | CRTCAHPGEHA                     | 2.42 | 0.01 | 0.90 | 0.68 | 0.22 | 0.28 |
| 9991 | 0 | 6946   | CRTCAHPGEHA                     | 2.42 | 0.01 | 0.90 | 1.81 | 0.22 | 0.28 |
| 9992 | 0 | 489138 | CRTCT                           | 1.77 | 0.01 | 3.81 | 0.68 | 0.22 | 0.28 |
| 9993 | 0 | 118760 | CRTCTTPAQ                       | 2.25 | 0.01 | 2.08 | 0.68 | 0.22 | 0.28 |
| 9994 | 0 | 118760 | CRTCTTPAQ                       | 2.25 | 0.01 | 2.08 | 0.68 | 0.22 | 0.28 |
| 9995 | 0 | 118760 | CRTCTTPAQ                       | 2.25 | 0.01 | 2.08 | 0.68 | 0.22 | 0.28 |
| 9996 | 0 | 118760 | CRTCTTPAQ                       | 2.25 | 0.01 | 2.08 | 0.68 | 0.22 | 0.28 |

|       |   |        |                                                         |      |      |      |      |      |      |
|-------|---|--------|---------------------------------------------------------|------|------|------|------|------|------|
| 9997  | 0 | 118760 | CRTCTTPAQ                                               | 2.25 | 0.01 | 2.08 | 0.68 | 0.22 | 0.28 |
| 9998  | 0 | 118760 | CRTCTTPAQ                                               | 2.25 | 0.01 | 2.08 | 0.68 | 0.22 | 0.28 |
| 9999  | 0 | 118760 | CRTCTTPAQ                                               | 2.25 | 0.01 | 2.08 | 0.68 | 0.22 | 0.28 |
| 10000 | 0 | 6948   | CRTCTTPAQGTSMY                                          | 2.61 | 0.01 | 2.08 | 0.68 | 0.22 | 0.28 |
| 10001 | 0 | 6952   | CRTLTMFSLGARQKI                                         | 2.71 | 0.01 | 1.72 | 0.68 | 0.22 | 0.28 |
| 10002 | 0 | 6952   | CRTLTMFSLGARQKI                                         | 2.71 | 0.01 | 1.72 | 0.68 | 0.22 | 1.66 |
| 10003 | 0 | 6952   | CRTLTMFSLGARQKI                                         | 2.71 | 0.01 | 1.72 | 0.68 | 0.22 | 1.66 |
| 10004 | 0 | 6953   | CRTNYGYS                                                | 2.12 | 0.01 | 2.73 | 1.20 | 0.22 | 0.85 |
| 10005 | 0 | 133788 | CRTSPWRC                                                | 2.15 | 0.01 | 0.90 | 1.15 | 0.22 | 0.28 |
| 10006 | 0 | 138836 | CRTVYPSEETGE                                            | 2.54 | 0.01 | 0.78 | 0.44 | 2.26 | 1.27 |
| 10007 | 0 | 134334 | CRVNHVTLSPKIVK                                          | 2.64 | 0.01 | 0.78 | 3.03 | 0.22 | 1.27 |
| 10008 | 0 | 78354  | CRVWNQTDRTQ                                             | 2.41 | 0.01 | 3.45 | 0.44 | 0.85 | 0.28 |
| 10009 | 0 | 6956   | CRWPDVLLWC                                              | 2.33 | 0.01 | 0.90 | 1.20 | 0.22 | 0.85 |
| 10010 | 0 | 6956   | CRWPDVLLWC                                              | 2.33 | 0.01 | 0.90 | 1.20 | 0.22 | 0.85 |
| 10011 | 0 | 136156 | CRWSVRLSVPSL                                            | 2.51 | 0.01 | 3.48 | 3.70 | 0.85 | 1.34 |
| 10012 | 0 | 136156 | CRWSVRLSVPSL                                            | 2.51 | 0.01 | 3.48 | 0.68 | 0.22 | 1.34 |
| 10013 | 0 | 97933  | CRYDKNTDVNV                                             | 2.41 | 0.01 | 4.15 | 1.15 | 0.22 | 2.12 |
| 10014 | 0 | 6960   | CRYNRNAVPNLRGDLQ<br>VLAQKVARTLP                         | 3.25 | 0.01 | 3.26 | 2.22 | 0.22 | 0.28 |
| 10015 | 0 | 6960   | CRYNRNAVPNLRGDLQ<br>VLAQKVARTLP                         | 3.25 | 0.01 | 3.26 | 2.59 | 0.22 | 0.28 |
| 10016 | 0 | 6960   | CRYNRNAVPNLRGDLQ<br>VLAQKVARTLP                         | 3.25 | 0.01 | 3.26 | 2.59 | 2.25 | 1.75 |
| 10017 | 0 | 134650 | CRYTPRRNIP                                              | 2.32 | 0.01 | 0.78 | 0.44 | 1.13 | 0.85 |
| 10018 | 0 | 134650 | CRYTPRRNIP                                              | 2.32 | 0.01 | 0.78 | 3.05 | 1.13 | 0.85 |
| 10019 | 0 | 6963   | CSAGICFSE                                               | 2.24 | 0.01 | 0.90 | 0.68 | 0.22 | 0.28 |
| 10020 | 0 | 80795  | CSAGQRTLTVV                                             | 2.26 | 0.01 | 3.06 | 0.44 | 0.85 | 0.28 |
| 10021 | 0 | 6964   | CSALYRFNRE                                              | 2.29 | 4.93 | 2.70 | 0.44 | 0.85 | 0.28 |
| 10022 | 0 | 161207 | CSALYVGDLGCVFLVG<br>QLF                                 | 2.98 | 0.01 | 2.45 | 0.68 | 0.22 | 0.28 |
| 10023 | 0 | 161207 | CSALYVGDLGCVFLVG<br>QLF                                 | 2.98 | 0.01 | 2.45 | 0.68 | 0.22 | 1.27 |
| 10024 | 0 | 6973   | CSASFIMPPSI                                             | 2.51 | 0.01 | 3.61 | 1.20 | 0.22 | 0.85 |
| 10025 | 0 | 95291  | CSATAIFDTTTLNPTIAG<br>AGDVKASACAAPTTSDV<br>AGLQNDPTTNVA | 3.81 | 0.01 | 0.90 | 2.52 | 0.22 | 0.28 |
| 10026 | 0 | 95291  | CSATAIFDTTTLNPTIAG<br>AGDVKASACAAPTTSDV<br>AGLQNDPTTNVA | 3.81 | 0.01 | 0.90 | 2.52 | 0.22 | 1.34 |
| 10027 | 0 | 95291  | CSATAIFDTTTLNPTIAG<br>AGDVKASACAAPTTSDV<br>AGLQNDPTTNVA | 3.81 | 0.01 | 0.90 | 2.52 | 0.22 | 0.85 |



|       |   |       |                                                          |      |      |      |      |      |      |
|-------|---|-------|----------------------------------------------------------|------|------|------|------|------|------|
| 10028 | 0 | 95291 | CSATAIFDTTTTLNPTIAG<br>AGDVKASACAAPTTSDV<br>AGLQNDPTTNVA | 3.81 | 0.01 | 0.90 | 2.52 | 0.22 | 0.85 |
| 10029 | 0 | 95291 | CSATAIFDTTTTLNPTIAG<br>AGDVKASACAAPTTSDV<br>AGLQNDPTTNVA | 3.81 | 0.01 | 0.90 | 2.52 | 0.22 | 0.85 |
| 10030 | 0 | 95291 | CSATAIFDTTTTLNPTIAG<br>AGDVKASACAAPTTSDV<br>AGLQNDPTTNVA | 3.81 | 0.01 | 0.90 | 2.52 | 0.22 | 0.85 |
| 10031 | 0 | 95291 | CSATAIFDTTTTLNPTIAG<br>AGDVKASACAAPTTSDV<br>AGLQNDPTTNVA | 3.81 | 0.01 | 0.90 | 2.52 | 0.22 | 0.85 |
| 10032 | 0 | 95291 | CSATAIFDTTTTLNPTIAG<br>AGDVKASACAAPTTSDV<br>AGLQNDPTTNVA | 3.81 | 0.01 | 0.90 | 2.52 | 0.22 | 0.85 |
| 10033 | 0 | 95291 | CSATAIFDTTTTLNPTIAG<br>AGDVKASACAAPTTSDV<br>AGLQNDPTTNVA | 3.81 | 0.01 | 0.90 | 2.52 | 0.22 | 0.85 |
| 10034 | 0 | 95291 | CSATAIFDTTTTLNPTIAG<br>AGDVKASACAAPTTSDV<br>AGLQNDPTTNVA | 3.81 | 0.01 | 0.90 | 2.52 | 0.22 | 0.85 |
| 10035 | 0 | 95291 | CSATAIFDTTTTLNPTIAG<br>AGDVKASACAAPTTSDV<br>AGLQNDPTTNVA | 3.81 | 0.01 | 0.90 | 2.52 | 0.22 | 0.85 |
| 10036 | 0 | 95291 | CSATAIFDTTTTLNPTIAG<br>AGDVKASACAAPTTSDV<br>AGLQNDPTTNVA | 3.81 | 0.01 | 0.90 | 2.52 | 0.22 | 0.85 |
| 10037 | 0 | 95291 | CSATAIFDTTTTLNPTIAG<br>AGDVKASACAAPTTSDV<br>AGLQNDPTTNVA | 3.81 | 0.01 | 0.90 | 2.52 | 0.22 | 0.85 |
| 10038 | 0 | 95291 | CSATAIFDTTTTLNPTIAG<br>AGDVKASACAAPTTSDV<br>AGLQNDPTTNVA | 3.81 | 0.01 | 0.90 | 2.52 | 0.22 | 0.85 |

|       |   |        |                                                          |      |      |      |      |      |      |
|-------|---|--------|----------------------------------------------------------|------|------|------|------|------|------|
| 10039 | 0 | 95291  | CSATAIFDTTTTLNPTIAG<br>AGDVKASACAAPTTSDV<br>AGLQNDPTTNVA | 3.81 | 0.01 | 0.90 | 2.52 | 0.22 | 0.85 |
| 10040 | 0 | 95291  | CSATAIFDTTTTLNPTIAG<br>AGDVKASACAAPTTSDV<br>AGLQNDPTTNVA | 3.81 | 0.01 | 0.90 | 2.52 | 0.22 | 1.34 |
| 10041 | 0 | 95291  | CSATAIFDTTTTLNPTIAG<br>AGDVKASACAAPTTSDV<br>AGLQNDPTTNVA | 3.81 | 0.01 | 0.90 | 2.52 | 0.22 | 1.34 |
| 10042 | 0 | 95291  | CSATAIFDTTTTLNPTIAG<br>AGDVKASACAAPTTSDV<br>AGLQNDPTTNVA | 3.81 | 0.01 | 0.90 | 2.52 | 0.22 | 1.34 |
| 10043 | 0 | 95291  | CSATAIFDTTTTLNPTIAG<br>AGDVKASACAAPTTSDV<br>AGLQNDPTTNVA | 3.81 | 0.01 | 0.90 | 2.52 | 0.22 | 1.34 |
| 10044 | 0 | 95291  | CSATAIFDTTTTLNPTIAG<br>AGDVKASACAAPTTSDV<br>AGLQNDPTTNVA | 3.81 | 0.01 | 0.90 | 2.52 | 0.22 | 1.34 |
| 10045 | 0 | 135645 | CSCTEGYR                                                 | 2.13 | 0.01 | 0.78 | 0.44 | 2.35 | 0.28 |
| 10046 | 0 | 137386 | CSDEALPLGSPRC                                            | 2.56 | 0.01 | 0.78 | 0.68 | 0.22 | 2.12 |
| 10047 | 0 | 122288 | CSDETIWLEPEVLFSGPR<br>QAFEFPQINYQK                       | 3.30 | 0.01 | 0.78 | 2.04 | 0.22 | 0.28 |
| 10048 | 0 | 6979   | CSDTIDAGKD                                               | 2.31 | 0.01 | 0.90 | 1.15 | 0.22 | 0.28 |
| 10049 | 0 | 6979   | CSDTIDAGKD                                               | 2.31 | 0.01 | 0.90 | 1.15 | 0.22 | 0.28 |
| 10050 | 0 | 6979   | CSDTIDAGKD                                               | 2.31 | 0.01 | 0.90 | 1.15 | 0.22 | 0.28 |
| 10051 | 0 | 6979   | CSDTIDAGKD                                               | 2.31 | 0.01 | 0.90 | 2.88 | 0.22 | 0.28 |
| 10052 | 0 | 230673 | CSENDHDELGFMVPP                                          | 2.62 | 0.01 | 2.71 | 2.13 | 0.22 | 1.28 |
| 10053 | 0 | 6983   | CSETFTNKLKEKH                                            | 2.56 | 0.01 | 2.73 | 0.44 | 0.85 | 0.85 |
| 10054 | 0 | 6983   | CSETFTNKLKEKH                                            | 2.56 | 0.01 | 2.73 | 1.15 | 0.22 | 0.85 |
| 10055 | 0 | 6984   | CSETFTNKLKEKHTDLGK<br>EGV                                | 3.00 | 0.01 | 2.73 | 0.44 | 0.85 | 0.28 |
| 10056 | 0 | 6984   | CSETFTNKLKEKHTDLGK<br>EGV                                | 3.00 | 0.01 | 2.73 | 1.15 | 0.22 | 0.85 |
| 10057 | 0 | 6984   | CSETFTNKLKEKHTDLGK<br>EGV                                | 3.00 | 0.01 | 2.73 | 1.15 | 0.22 | 1.48 |
| 10058 | 0 | 6984   | CSETFTNKLKEKHTDLGK<br>EGV                                | 3.00 | 0.01 | 2.73 | 1.15 | 0.22 | 1.34 |
| 10059 | 0 | 6985   | CSEYKPDCTAE                                              | 2.48 | 0.01 | 2.25 | 0.44 | 1.23 | 0.85 |
| 10060 | 0 | 6986   | CSEYREPLLC                                               | 2.33 | 0.01 | 0.90 | 0.68 | 0.22 | 0.28 |
| 10061 | 0 | 6986   | CSEYREPLLC                                               | 2.33 | 0.01 | 0.90 | 0.68 | 2.60 | 1.75 |
| 10062 | 0 | 6986   | CSEYREPLLC                                               | 2.33 | 0.01 | 0.90 | 0.44 | 1.23 | 1.39 |

|       |   |        |                               |      |      |      |      |      |      |
|-------|---|--------|-------------------------------|------|------|------|------|------|------|
| 10063 | 0 | 6986   | CSEYREPLLC                    | 2.33 | 0.01 | 0.90 | 0.44 | 1.23 | 0.28 |
| 10064 | 0 | 130760 | CSFHYQNRC                     | 2.22 | 0.01 | 0.90 | 0.44 | 1.13 | 1.39 |
| 10065 | 0 | 112069 | CSFSGFS                       | 2.04 | 0.01 | 0.78 | 0.44 | 1.13 | 0.28 |
| 10066 | 0 | 122081 | CSFSKSSNSWFPVEGPA<br>DICQCC   | 3.05 | 0.01 | 3.26 | 3.81 | 0.22 | 0.28 |
| 10067 | 0 | 122081 | CSFSKSSNSWFPVEGPA<br>DICQCC   | 3.05 | 0.01 | 3.26 | 3.81 | 0.22 | 0.28 |
| 10068 | 0 | 6995   | CSFSSIPN                      | 2.13 | 0.01 | 2.21 | 0.44 | 0.85 | 0.28 |
| 10069 | 0 | 6995   | CSFSSIPN                      | 2.13 | 0.01 | 2.21 | 1.12 | 0.22 | 0.28 |
| 10070 | 0 | 6996   | CSFSSIPNGT                    | 2.30 | 0.01 | 2.21 | 1.12 | 0.22 | 0.28 |
| 10071 | 0 | 6996   | CSFSSIPNGT                    | 2.30 | 0.01 | 2.21 | 1.12 | 0.22 | 0.28 |
| 10072 | 0 | 125791 | CSFWSKYIQLK                   | 2.45 | 0.01 | 2.19 | 2.25 | 1.41 | 0.28 |
| 10073 | 0 | 125791 | CSFWSKYIQLK                   | 2.45 | 0.01 | 2.19 | 2.25 | 0.22 | 0.28 |
| 10074 | 0 | 125791 | CSFWSKYIQLK                   | 2.45 | 0.01 | 1.75 | 2.25 | 0.22 | 0.28 |
| 10075 | 0 | 125792 | CSFWSKYIQLKDADGA<br>K         | 2.82 | 0.01 | 2.19 | 2.25 | 0.22 | 0.28 |
| 10076 | 0 | 125792 | CSFWSKYIQLKDADGA<br>K         | 2.82 | 0.01 | 2.19 | 2.25 | 0.22 | 0.28 |
| 10077 | 0 | 125792 | CSFWSKYIQLKDADGA<br>K         | 2.82 | 0.01 | 2.19 | 2.25 | 0.22 | 0.28 |
| 10078 | 0 | 125792 | CSFWSKYIQLKDADGA<br>K         | 2.82 | 0.01 | 2.19 | 2.25 | 0.22 | 0.28 |
| 10079 | 0 | 125792 | CSFWSKYIQLKDADGA<br>K         | 2.82 | 0.01 | 2.19 | 2.25 | 0.22 | 0.28 |
| 10080 | 0 | 125792 | CSFWSKYIQLKDADGA<br>K         | 2.82 | 0.01 | 2.19 | 2.25 | 0.22 | 0.28 |
| 10081 | 0 | 125793 | CSFWSKYISLKTSADGA<br>K        | 2.89 | 0.01 | 0.78 | 2.25 | 0.22 | 0.28 |
| 10082 | 0 | 125793 | CSFWSKYISLKTSADGA<br>K        | 2.89 | 0.01 | 0.78 | 2.25 | 0.22 | 0.28 |
| 10083 | 0 | 125793 | CSFWSKYISLKTSADGA<br>K        | 2.89 | 0.01 | 0.78 | 2.25 | 1.41 | 0.28 |
| 10084 | 0 | 115140 | CSFWSSEWVSDDISFTW<br>RYQPEGGR | 3.14 | 0.01 | 0.78 | 0.44 | 1.13 | 0.28 |
| 10085 | 0 | 7000   | CSGFVGLFSPGPSQRI              | 2.75 | 0.01 | 1.72 | 0.68 | 0.22 | 0.28 |
| 10086 | 0 | 7001   | CSGFVSLAPGAKQN                | 2.65 | 0.01 | 1.72 | 0.68 | 0.22 | 0.28 |
| 10087 | 0 | 7003   | CSGLSSLFTPGPKQI               | 2.73 | 0.01 | 1.72 | 0.68 | 0.22 | 0.28 |
| 10088 | 0 | 7004   | CSGLVGLFTPGAKQNI              | 2.69 | 0.01 | 1.72 | 0.68 | 0.22 | 1.66 |
| 10089 | 0 | 7004   | CSGLVGLFTPGAKQNI              | 2.69 | 0.01 | 1.72 | 0.68 | 0.22 | 0.28 |
| 10090 | 0 | 7004   | CSGLVGLFTPGAKQNI              | 2.69 | 0.01 | 1.72 | 0.68 | 0.22 | 1.66 |
| 10091 | 0 | 242389 | CSGPSSPTGASGLLSP              | 2.78 | 0.01 | 3.33 | 1.20 | 0.22 | 0.28 |
| 10092 | 0 | 242389 | CSGPSSPTGASGLLSP              | 2.78 | 0.01 | 3.33 | 1.20 | 2.25 | 1.75 |
| 10093 | 0 | 242389 | CSGPSSPTGASGLLSP              | 2.78 | 0.01 | 3.33 | 1.20 | 2.25 | 1.75 |
| 10094 | 0 | 242389 | CSGPSSPTGASGLLSP              | 2.78 | 0.01 | 3.33 | 1.20 | 0.22 | 0.85 |
| 10095 | 0 | 242389 | CSGPSSPTGASGLLSP              | 2.78 | 0.01 | 3.33 | 1.20 | 0.22 | 0.85 |
| 10096 | 0 | 242389 | CSGPSSPTGASGLLSP              | 2.78 | 0.01 | 3.33 | 1.20 | 0.22 | 0.85 |
| 10097 | 0 | 7005   | CSGPTTIRGQFS                  | 2.46 | 0.01 | 2.72 | 0.68 | 0.22 | 0.28 |

|       |   |        |                        |      |      |      |      |      |      |
|-------|---|--------|------------------------|------|------|------|------|------|------|
| 10098 | 0 | 7005   | CSGPPTTIRGQFS          | 2.46 | 0.01 | 2.72 | 2.69 | 0.22 | 0.28 |
| 10099 | 0 | 7005   | CSGPPTTIRGQFS          | 2.46 | 0.01 | 2.72 | 3.34 | 0.22 | 1.57 |
| 10100 | 0 | 7005   | CSGPPTTIRGQFS          | 2.46 | 0.01 | 2.72 | 0.68 | 0.22 | 0.28 |
| 10101 | 0 | 134022 | CSGRKHKENVKDYQK        | 2.70 | 0.01 | 0.78 | 0.44 | 1.13 | 0.85 |
| 10102 | 0 | 144601 | CSGTHPSISSC            | 2.43 | 0.01 | 0.90 | 0.68 | 0.22 | 0.28 |
| 10103 | 0 | 144601 | CSGTHPSISSC            | 2.43 | 0.01 | 0.90 | 0.68 | 0.22 | 1.48 |
| 10104 | 0 | 144601 | CSGTHPSISSC            | 2.43 | 0.01 | 0.90 | 0.68 | 0.22 | 1.27 |
| 10105 | 0 | 106315 | CSGTKKLSEE             | 2.30 | 0.01 | 3.08 | 0.44 | 1.23 | 0.85 |
| 10106 | 0 | 106316 | CSGTKKLSEEVK           | 2.48 | 0.01 | 3.08 | 0.44 | 1.23 | 0.85 |
| 10107 | 0 | 94480  | CSICSNNPTCWA           | 2.49 | 0.01 | 2.38 | 0.44 | 1.74 | 0.28 |
| 10108 | 0 | 7009   | CSICSNNPTCWAICK        | 2.70 | 0.01 | 2.38 | 0.68 | 0.22 | 0.85 |
| 10109 | 0 | 7009   | CSICSNNPTCWAICK        | 2.70 | 0.01 | 2.38 | 0.68 | 0.22 | 0.28 |
| 10110 | 0 | 7009   | CSICSNNPTCWAICK        | 2.70 | 0.01 | 2.38 | 0.68 | 0.22 | 1.75 |
| 10111 | 0 | 140547 | CSIGEALSHGC            | 2.42 | 0.01 | 0.90 | 0.68 | 0.22 | 1.39 |
| 10112 | 0 | 140547 | CSIGEALSHGC            | 2.42 | 0.01 | 0.90 | 0.68 | 0.22 | 1.27 |
| 10113 | 0 | 140547 | CSIGEALSHGC            | 2.42 | 0.01 | 0.90 | 0.68 | 0.22 | 0.85 |
| 10114 | 0 | 140547 | CSIGEALSHGC            | 2.42 | 0.01 | 0.90 | 0.44 | 1.13 | 1.27 |
| 10115 | 0 | 114286 | CSIKTHSWC              | 2.24 | 0.01 | 0.90 | 2.46 | 0.22 | 0.28 |
| 10116 | 0 | 7011   | CSISNIETVIE            | 2.43 | 0.01 | 2.67 | 0.68 | 0.22 | 0.28 |
| 10117 | 0 | 114287 | CSISTHSWC              | 2.26 | 0.01 | 0.90 | 2.46 | 0.22 | 0.28 |
| 10118 | 0 | 7013   | CSIYGSTIAGS            | 2.43 | 0.01 | 0.90 | 1.15 | 0.22 | 1.27 |
| 10119 | 0 | 130459 | CSKARLHLQGRSNACAA<br>C | 2.87 | 3.70 | 0.90 | 0.44 | 1.93 | 1.27 |
| 10120 | 0 | 106317 | CSKIQSTIFRGY           | 2.45 | 0.01 | 3.08 | 0.44 | 1.23 | 0.85 |
| 10121 | 0 | 7021   | CSKPKNRTC              | 2.24 | 0.01 | 0.90 | 0.68 | 0.22 | 0.28 |
| 10122 | 0 | 117777 | CSLPMIWAQKTNTP         | 2.57 | 0.01 | 0.78 | 0.44 | 1.13 | 0.28 |
| 10123 | 0 | 140548 | CSLSDAFNGSC            | 2.42 | 0.01 | 0.90 | 0.68 | 0.22 | 1.39 |
| 10124 | 0 | 140548 | CSLSDAFNGSC            | 2.42 | 0.01 | 0.90 | 0.68 | 0.22 | 0.85 |
| 10125 | 0 | 95294  | CSNGGLDLDV             | 2.32 | 0.01 | 2.60 | 0.44 | 1.23 | 0.85 |
| 10126 | 0 | 7046   | CSNKSQR                | 2.04 | 0.01 | 0.90 | 0.44 | 1.59 | 0.28 |
| 10127 | 0 | 112759 | CSNNAITPGDC            | 2.38 | 0.01 | 3.21 | 0.68 | 0.22 | 0.28 |
| 10128 | 0 | 112759 | CSNNAITPGDC            | 2.38 | 0.01 | 3.21 | 0.68 | 0.22 | 0.28 |
| 10129 | 0 | 94481  | CSNNPTCWAICK           | 2.47 | 0.01 | 2.38 | 0.68 | 0.22 | 0.28 |
| 10130 | 0 | 94481  | CSNNPTCWAICK           | 2.47 | 0.01 | 2.38 | 0.68 | 0.22 | 0.28 |
| 10131 | 0 | 94481  | CSNNPTCWAICK           | 2.47 | 0.01 | 2.38 | 0.44 | 1.59 | 0.28 |
| 10132 | 0 | 94481  | CSNNPTCWAICK           | 2.47 | 0.01 | 2.38 | 0.44 | 1.74 | 0.28 |
| 10133 | 0 | 167220 | CSNRMATTC              | 2.23 | 0.01 | 0.90 | 0.68 | 0.22 | 0.85 |
| 10134 | 0 | 167220 | CSNRMATTC              | 2.23 | 0.01 | 0.90 | 0.68 | 0.22 | 1.39 |
| 10135 | 0 | 167220 | CSNRMATTC              | 2.23 | 0.01 | 0.90 | 0.68 | 0.22 | 0.85 |
| 10136 | 0 | 167220 | CSNRMATTC              | 2.23 | 0.01 | 0.90 | 0.68 | 0.22 | 1.39 |
| 10137 | 0 | 7048   | CSNSDKPKCGGS           | 2.51 | 0.01 | 0.90 | 1.15 | 0.22 | 1.48 |
| 10138 | 0 | 7048   | CSNSDKPKCGGS           | 2.51 | 0.01 | 0.90 | 1.15 | 0.22 | 1.27 |
| 10139 | 0 | 7048   | CSNSDKPKCGGS           | 2.51 | 0.01 | 0.90 | 1.15 | 0.22 | 1.48 |
| 10140 | 0 | 7048   | CSNSDKPKCGGS           | 2.51 | 0.01 | 0.90 | 1.15 | 0.22 | 1.48 |
| 10141 | 0 | 7048   | CSNSDKPKCGGS           | 2.51 | 0.01 | 0.90 | 1.15 | 0.22 | 1.48 |
| 10142 | 0 | 122289 | CSNSSSQFIHGP           | 2.60 | 0.01 | 1.75 | 1.20 | 0.22 | 1.48 |

|       |   |        |                                          |      |      |      |      |      |      |
|-------|---|--------|------------------------------------------|------|------|------|------|------|------|
| 10143 | 0 | 122289 | CSNSSSSQFQIHGP                           | 2.60 | 0.01 | 1.75 | 1.20 | 0.22 | 3.16 |
| 10144 | 0 | 122721 | CSNSSSSQFQIHGPR                          | 2.65 | 0.01 | 1.75 | 0.68 | 0.22 | 0.28 |
| 10145 | 0 | 122721 | CSNSSSSQFQIHGPR                          | 2.65 | 0.01 | 1.75 | 3.15 | 2.60 | 1.75 |
| 10146 | 0 | 122721 | CSNSSSSQFQIHGPR                          | 2.65 | 0.01 | 1.75 | 3.15 | 0.22 | 1.48 |
| 10147 | 0 | 122721 | CSNSSSSQFQIHGPR                          | 2.65 | 0.01 | 1.75 | 3.15 | 0.22 | 0.28 |
| 10148 | 0 | 122721 | CSNSSSSQFQIHGPR                          | 2.65 | 0.01 | 1.75 | 3.15 | 0.22 | 0.28 |
| 10149 | 0 | 122721 | CSNSSSSQFQIHGPR                          | 2.65 | 0.01 | 1.75 | 3.15 | 0.22 | 1.48 |
| 10150 | 0 | 122721 | CSNSSSSQFQIHGPR                          | 2.65 | 0.01 | 1.75 | 3.15 | 0.22 | 0.28 |
| 10151 | 0 | 122290 | CSNSSSSQFQIHGPRQ                         | 2.72 | 0.01 | 1.75 | 2.89 | 0.22 | 0.28 |
| 10152 | 0 | 122290 | CSNSSSSQFQIHGPRQ                         | 2.72 | 0.01 | 1.75 | 2.89 | 0.22 | 1.48 |
| 10153 | 0 | 122290 | CSNSSSSQFQIHGPRQ                         | 2.72 | 0.01 | 1.75 | 2.89 | 0.22 | 3.16 |
| 10154 | 0 | 134023 | CSPDGEWRRRLGR                            | 2.47 | 0.01 | 0.78 | 3.06 | 0.22 | 0.28 |
| 10155 | 0 | 95296  | CSPDHNCQSN                               | 2.34 | 0.01 | 2.60 | 0.44 | 1.23 | 0.85 |
| 10156 | 0 | 7055   | CSPHHTALRQ                               | 2.28 | 0.01 | 3.28 | 0.44 | 1.59 | 0.28 |
| 10157 | 0 | 111170 | CSPLTHAIC                                | 2.22 | 0.01 | 0.90 | 0.44 | 0.85 | 1.39 |
| 10158 | 0 | 7057   | CSPRTG                                   | 1.88 | 0.01 | 2.40 | 0.44 | 0.85 | 0.28 |
| 10159 | 0 | 7058   | CSQAAPYIE                                | 2.20 | 0.01 | 2.59 | 0.44 | 0.85 | 0.28 |
| 10160 | 0 | 7059   | CSQHCPYIEQGMMLAE<br>QFKQ                 | 2.91 | 0.01 | 0.90 | 0.44 | 0.85 | 0.28 |
| 10161 | 0 | 7061   | CSQHLPYIE                                | 2.18 | 0.01 | 2.41 | 0.44 | 0.85 | 0.28 |
| 10162 | 0 | 7063   | CSQHLPYIEQGMQLA                          | 2.64 | 0.01 | 2.41 | 0.44 | 1.41 | 0.28 |
| 10163 | 0 | 7063   | CSQHLPYIEQGMQLA                          | 2.64 | 0.01 | 2.41 | 0.44 | 0.85 | 0.28 |
| 10164 | 0 | 7063   | CSQHLPYIEQGMQLA                          | 2.64 | 0.01 | 2.41 | 0.44 | 0.85 | 0.28 |
| 10165 | 0 | 7063   | CSQHLPYIEQGMQLA                          | 2.64 | 0.01 | 2.41 | 0.44 | 0.85 | 0.28 |
| 10166 | 0 | 7063   | CSQHLPYIEQGMQLA                          | 2.64 | 0.01 | 2.41 | 0.44 | 0.85 | 0.28 |
| 10167 | 0 | 7064   | CSQNPLAELKCSVKSFE                        | 2.80 | 0.01 | 2.48 | 0.44 | 0.85 | 0.28 |
| 10168 | 0 | 7064   | CSQNPLAELKCSVKSFE                        | 2.80 | 0.01 | 2.48 | 0.68 | 0.22 | 0.28 |
| 10169 | 0 | 7064   | CSQNPLAELKCSVKSFE                        | 2.80 | 0.01 | 2.48 | 1.20 | 0.22 | 0.28 |
| 10170 | 0 | 7065   | CSQNPLAELKCSVKSFEI                       | 2.84 | 0.01 | 2.45 | 1.81 | 0.22 | 1.34 |
| 10171 | 0 | 7066   | CSQNPLAELKCSVKSFEI<br>DKGIYQTSNFRVVPSPGD | 3.47 | 0.01 | 2.48 | 0.44 | 0.85 | 0.28 |
| 10172 | 0 | 104744 | CSQWGWCGST                               | 2.36 | 0.01 | 2.60 | 0.44 | 1.23 | 0.85 |
| 10173 | 0 | 114760 | CSRFPNATDK                               | 2.26 | 0.01 | 2.25 | 0.44 | 1.23 | 0.85 |
| 10174 | 0 | 114760 | CSRFPNATDK                               | 2.26 | 0.01 | 2.25 | 0.44 | 1.23 | 0.85 |
| 10175 | 0 | 130761 | CSRTSSRTC                                | 2.27 | 0.01 | 0.90 | 0.44 | 1.13 | 1.39 |
| 10176 | 0 | 157147 | CSRTVKKNIIEEN                            | 2.53 | 0.01 | 0.90 | 0.44 | 1.93 | 1.28 |
| 10177 | 0 | 157147 | CSRTVKKNIIEEN                            | 2.53 | 0.01 | 0.90 | 0.44 | 1.41 | 1.28 |
| 10178 | 0 | 157147 | CSRTVKKNIIEEN                            | 2.53 | 0.01 | 0.90 | 0.44 | 1.41 | 1.28 |
| 10179 | 0 | 157147 | CSRTVKKNIIEEN                            | 2.53 | 0.01 | 0.90 | 3.70 | 0.22 | 1.28 |

|       |   |        |                             |      |      |      |      |      |      |
|-------|---|--------|-----------------------------|------|------|------|------|------|------|
| 10180 | 0 | 111171 | CSSGPIAPC                   | 2.25 | 0.01 | 0.90 | 0.44 | 0.85 | 1.39 |
| 10181 | 0 | 7084   | CSSLEKTKHRLQNEIEDL          | 2.83 | 0.01 | 0.78 | 0.44 | 1.41 | 0.28 |
| 10182 | 0 | 130460 | CSSSQDGHQWTLCAAC            | 2.73 | 3.70 | 0.90 | 0.44 | 1.93 | 1.27 |
| 10183 | 0 | 7089   | CSSSTSHATSSTHNGSHT<br>SRTTS | 3.13 | 0.01 | 2.51 | 1.20 | 0.22 | 0.85 |
| 10184 | 0 | 138837 | CSSWYRGAC                   | 2.23 | 0.01 | 0.90 | 2.49 | 0.22 | 0.28 |
| 10185 | 0 | 230208 | CSSYANTTSEDGKVMVL<br>CNR    | 2.90 | 0.01 | 2.25 | 0.44 | 1.23 | 0.28 |
| 10186 | 0 | 79529  | CSTDKCNHPPKRQPG             | 2.67 | 0.01 | 3.10 | 0.68 | 0.22 | 1.75 |
| 10187 | 0 | 7092   | CSTKAIGRTILKENIKYEV<br>A    | 2.93 | 0.01 | 2.85 | 2.02 | 0.22 | 0.28 |
| 10188 | 0 | 7093   | CSTLVEKDVAPKDELEM<br>LAW    | 2.95 | 0.01 | 3.37 | 3.23 | 0.22 | 1.34 |
| 10189 | 0 | 7093   | CSTLVEKDVAPKDELEM<br>LAW    | 2.95 | 0.01 | 3.37 | 3.23 | 0.22 | 0.28 |
| 10190 | 0 | 151819 | CSTSQAARQRLE                | 2.48 | 0.01 | 2.80 | 2.78 | 0.22 | 0.28 |
| 10191 | 0 | 104745 | CSTWDANKPY                  | 2.26 | 0.01 | 2.60 | 0.44 | 1.23 | 0.85 |
| 10192 | 0 | 138152 | CSVMHEA                     | 1.99 | 0.01 | 0.78 | 0.44 | 1.13 | 0.28 |
| 10193 | 0 | 107773 | CSVMHEG                     | 1.99 | 0.01 | 0.78 | 1.20 | 0.22 | 0.28 |
| 10194 | 0 | 107773 | CSVMHEG                     | 1.99 | 0.01 | 0.78 | 1.20 | 0.22 | 0.28 |
| 10195 | 0 | 107773 | CSVMHEG                     | 1.99 | 0.01 | 0.78 | 1.15 | 0.22 | 1.27 |
| 10196 | 0 | 107773 | CSVMHEG                     | 1.99 | 0.01 | 0.78 | 0.44 | 1.13 | 1.27 |
| 10197 | 0 | 107773 | CSVMHEG                     | 1.99 | 0.01 | 0.78 | 0.44 | 1.13 | 0.28 |
| 10198 | 0 | 107773 | CSVMHEG                     | 1.99 | 0.01 | 0.78 | 0.44 | 1.13 | 0.28 |
| 10199 | 0 | 7097   | CSVSYLMKKMIPLAVEKL<br>L     | 2.89 | 0.01 | 2.08 | 0.44 | 1.93 | 1.57 |
| 10200 | 0 | 7097   | CSVSYLMKKMIPLAVEKL<br>L     | 2.89 | 0.01 | 2.08 | 2.02 | 0.22 | 1.57 |
| 10201 | 0 | 7097   | CSVSYLMKKMIPLAVEKL<br>L     | 2.89 | 0.01 | 3.45 | 0.44 | 0.22 | 1.57 |
| 10202 | 0 | 7099   | CSVTCGVGVRRRRVN<br>AANK     | 2.97 | 0.01 | 2.59 | 0.44 | 0.85 | 0.28 |
| 10203 | 0 | 7100   | CSVTCGVGVRRRSRVN<br>A       | 2.84 | 0.01 | 0.90 | 3.33 | 0.22 | 0.28 |
| 10204 | 0 | 7100   | CSVTCGVGVRRRSRVN<br>A       | 2.84 | 0.01 | 0.90 | 1.12 | 0.22 | 0.28 |
| 10205 | 0 | 7100   | CSVTCGVGVRRRSRVN<br>A       | 2.84 | 0.01 | 0.90 | 1.12 | 0.22 | 0.28 |
| 10206 | 0 | 7100   | CSVTCGVGVRRRSRVN<br>A       | 2.84 | 0.01 | 0.90 | 1.12 | 0.22 | 0.28 |
| 10207 | 0 | 7100   | CSVTCGVGVRRRSRVN<br>A       | 2.84 | 0.01 | 0.90 | 1.12 | 0.22 | 0.28 |
| 10208 | 0 | 102340 | CTANSWNVIPSCQQKC<br>DIPS    | 2.94 | 0.01 | 3.44 | 0.68 | 0.22 | 0.28 |
| 10209 | 0 | 7107   | CTARENPAYG                  | 2.29 | 0.01 | 3.42 | 3.28 | 0.22 | 0.28 |

|       |   |        |                                      |      |      |      |      |      |      |
|-------|---|--------|--------------------------------------|------|------|------|------|------|------|
| 10210 | 0 | 7108   | CTARVAGLFNPGSQQR                     | 2.70 | 0.01 | 1.72 | 0.68 | 0.22 | 0.28 |
| 10211 | 0 | 7109   | CTARVAGLFSPGSQQR                     | 2.72 | 0.01 | 1.72 | 0.68 | 0.22 | 0.28 |
| 10212 | 0 | 7110   | CTASARGDLAHLTTXC                     | 2.75 | 4.33 | 0.90 | 0.68 | 0.22 | 1.66 |
| 10213 | 0 | 7110   | CTASARGDLAHLTTXC                     | 2.75 | 4.33 | 0.90 | 0.68 | 0.22 | 1.66 |
| 10214 | 0 | 7112   | CTASNKNRGIKTFSNG                     | 2.80 | 0.01 | 2.38 | 0.68 | 0.22 | 0.28 |
| 10215 | 0 | 7112   | CTASNKNRGIKTFSNG                     | 2.80 | 0.01 | 2.38 | 0.68 | 0.22 | 0.85 |
| 10216 | 0 | 164541 | CTAVSP TTLRTEVVK                     | 2.67 | 0.01 | 3.21 | 1.20 | 0.22 | 0.28 |
| 10217 | 0 | 164541 | CTAVSP TTLRTEVVK                     | 2.67 | 0.01 | 3.21 | 1.20 | 0.22 | 2.35 |
| 10218 | 0 | 164541 | CTAVSP TTLRTEVVK                     | 2.67 | 0.01 | 3.21 | 1.20 | 0.22 | 1.34 |
| 10219 | 0 | 164541 | CTAVSP TTLRTEVVK                     | 2.67 | 0.01 | 3.21 | 1.20 | 0.22 | 1.34 |
| 10220 | 0 | 164541 | CTAVSP TTLRTEVVK                     | 2.67 | 0.01 | 3.21 | 1.20 | 0.22 | 1.75 |
| 10221 | 0 | 7113   | CTAVSP TTLRTEVVKTFR<br>REK           | 3.00 | 0.01 | 3.37 | 2.13 | 2.25 | 1.75 |
| 10222 | 0 | 7124   | CTDGNKEN                             | 2.12 | 0.01 | 3.42 | 0.68 | 0.22 | 0.28 |
| 10223 | 0 | 7127   | CTD TDKLF                            | 2.14 | 0.01 | 2.83 | 1.12 | 0.22 | 0.28 |
| 10224 | 0 | 7128   | CTDVSTAIHADQLTPAW                    | 2.78 | 0.01 | 2.48 | 0.44 | 0.85 | 0.28 |
| 10225 | 0 | 7128   | CTDVSTAIHADQLTPAW                    | 2.78 | 0.01 | 2.48 | 0.68 | 0.22 | 0.28 |
| 10226 | 0 | 7128   | CTDVSTAIHADQLTPAW                    | 2.78 | 0.01 | 2.48 | 1.20 | 0.22 | 0.28 |
| 10227 | 0 | 7129   | CTDVSTAIHADQLTPAW<br>RIYSTGNNVFQTQAG | 3.37 | 0.01 | 2.48 | 0.44 | 0.85 | 0.28 |
| 10228 | 0 | 230364 | CTECDTGYS LTSDYQCK<br>AITT           | 2.99 | 0.01 | 3.40 | 2.49 | 0.85 | 0.28 |
| 10229 | 0 | 230364 | CTECDTGYS LTSDYQCK<br>AITT           | 2.99 | 0.01 | 3.40 | 2.49 | 0.22 | 0.28 |
| 10230 | 0 | 7134   | CTEKFTFSKNPADTG                      | 2.66 | 0.01 | 3.61 | 1.81 | 0.22 | 0.28 |
| 10231 | 0 | 7134   | CTEKFTFSKNPADTG                      | 2.66 | 0.01 | 3.22 | 1.15 | 0.22 | 0.28 |
| 10232 | 0 | 7134   | CTEKFTFSKNPADTG                      | 2.66 | 0.01 | 3.22 | 0.68 | 0.22 | 0.28 |
| 10233 | 0 | 133026 | CTFVPRRKAG                           | 2.28 | 0.01 | 0.78 | 0.44 | 1.13 | 0.85 |
| 10234 | 0 | 132206 | CTFVPRRKAGICFGDS                     | 2.71 | 0.01 | 0.78 | 0.44 | 1.13 | 0.28 |
| 10235 | 0 | 7143   | CTGDARHC                             | 2.13 | 0.01 | 0.90 | 0.44 | 0.85 | 1.39 |
| 10236 | 0 | 7143   | CTGDARHC                             | 2.13 | 0.01 | 0.90 | 1.12 | 0.22 | 1.34 |
| 10237 | 0 | 7144   | CTGDKENVYPSQNF GH<br>MHKSEKDRGC      | 3.17 | 0.01 | 0.90 | 1.15 | 0.22 | 0.28 |
| 10238 | 0 | 7144   | CTGDKENVYPSQNF GH<br>MHKSEKDRGC      | 3.17 | 0.01 | 0.90 | 2.59 | 0.22 | 0.28 |
| 10239 | 0 | 7144   | CTGDKENVYPSQNF GH<br>MHKSEKDRGC      | 3.17 | 0.01 | 0.90 | 2.59 | 0.22 | 1.34 |
| 10240 | 0 | 7144   | CTGDKENVYPSQNF GH<br>MHKSEKDRGC      | 3.17 | 0.01 | 0.90 | 2.59 | 0.22 | 1.75 |

|       |   |        |                                                   |      |      |      |      |      |      |
|-------|---|--------|---------------------------------------------------|------|------|------|------|------|------|
| 10241 | 0 | 7144   | CTGDKENVYPSQNFGH<br>MHKSEKDRGC                    | 3.17 | 0.01 | 0.90 | 2.59 | 0.22 | 3.30 |
| 10242 | 0 | 227066 | CTGESQTGNTGGGQAG<br>NTVGDQAGSTGGSPQG<br>STGASQPGS | 3.69 | 0.01 | 3.28 | 0.44 | 1.59 | 0.28 |
| 10243 | 0 | 227066 | CTGESQTGNTGGGQAG<br>NTVGDQAGSTGGSPQG<br>STGASQPGS | 3.69 | 0.01 | 3.28 | 0.44 | 1.59 | 0.28 |
| 10244 | 0 | 227066 | CTGESQTGNTGGGQAG<br>NTVGDQAGSTGGSPQG<br>STGASQPGS | 3.69 | 0.01 | 3.28 | 0.44 | 1.59 | 0.28 |
| 10245 | 0 | 227066 | CTGESQTGNTGGGQAG<br>NTVGDQAGSTGGSPQG<br>STGASQPGS | 3.69 | 0.01 | 3.28 | 0.44 | 1.59 | 0.28 |
| 10246 | 0 | 227066 | CTGESQTGNTGGGQAG<br>NTVGDQAGSTGGSPQG<br>STGASQPGS | 3.69 | 0.01 | 3.28 | 0.44 | 1.59 | 0.28 |
| 10247 | 0 | 7145   | CTGFSKHNNMGSQQKV                                  | 2.71 | 0.01 | 1.72 | 0.68 | 0.22 | 0.28 |
| 10248 | 0 | 7146   | CTGFSNLFNLGSQQKV                                  | 2.74 | 0.01 | 1.72 | 0.68 | 0.22 | 0.28 |
| 10249 | 0 | 7147   | CTGGLVSLFNPGPSQD                                  | 2.73 | 0.01 | 1.72 | 0.68 | 0.22 | 0.28 |
| 10250 | 0 | 227067 | CTGGSPQGSTGASQPG<br>SSSEPSNPVSSEPSNPVS<br>SGHSVS  | 3.66 | 0.01 | 3.28 | 0.44 | 1.59 | 0.28 |
| 10251 | 0 | 7149   | CTGKFKIVKEIAETQHGTI<br>VIRVQYEGDGSPC              | 3.39 | 0.01 | 2.30 | 0.68 | 0.22 | 0.28 |
| 10252 | 0 | 7149   | CTGKFKIVKEIAETQHGTI<br>VIRVQYEGDGSPC              | 3.39 | 0.01 | 2.30 | 2.65 | 0.22 | 0.28 |
| 10253 | 0 | 7149   | CTGKFKIVKEIAETQHGTI<br>VIRVQYEGDGSPC              | 3.39 | 0.01 | 2.30 | 2.65 | 0.22 | 0.28 |
| 10254 | 0 | 7149   | CTGKFKIVKEIAETQHGTI<br>VIRVQYEGDGSPC              | 3.39 | 0.01 | 2.30 | 2.65 | 0.22 | 0.28 |
| 10255 | 0 | 7149   | CTGKFKIVKEIAETQHGTI<br>VIRVQYEGDGSPC              | 3.39 | 0.01 | 2.30 | 2.65 | 0.22 | 0.28 |
| 10256 | 0 | 7149   | CTGKFKIVKEIAETQHGTI<br>VIRVQYEGDGSPC              | 3.39 | 0.01 | 2.30 | 2.65 | 0.22 | 0.28 |
| 10257 | 0 | 7149   | CTGKFKIVKEIAETQHGTI<br>VIRVQYEGDGSPC              | 3.39 | 0.01 | 2.30 | 2.65 | 0.22 | 0.28 |
| 10258 | 0 | 7149   | CTGKFKIVKEIAETQHGTI<br>VIRVQYEGDGSPC              | 3.39 | 0.01 | 2.30 | 2.65 | 0.22 | 0.28 |
| 10259 | 0 | 147558 | CTGTQPWMC                                         | 2.24 | 0.01 | 0.90 | 0.44 | 1.41 | 1.39 |
| 10260 | 0 | 111172 | CTHPEILFC                                         | 2.22 | 0.01 | 0.90 | 0.44 | 0.85 | 1.39 |
| 10261 | 0 | 7155   | CTIAALGSSDRDTV                                    | 2.64 | 0.01 | 3.59 | 0.44 | 0.85 | 0.28 |
| 10262 | 0 | 116687 | CTIERSEMFKPTSTLKA<br>GELRT                        | 3.08 | 0.01 | 1.60 | 1.12 | 0.22 | 0.28 |



|       |   |        |                                        |      |      |      |      |      |      |
|-------|---|--------|----------------------------------------|------|------|------|------|------|------|
| 10263 | 0 | 116687 | CTIERSEMFKPTSTLKA<br>GELRT             | 3.08 | 0.01 | 1.60 | 0.44 | 1.13 | 0.28 |
| 10264 | 0 | 7160   | CTINYTIFKIRMYVGGVE<br>HR               | 2.92 | 0.01 | 2.83 | 0.44 | 0.85 | 0.28 |
| 10265 | 0 | 7161   | CTIPAQGTSMFPSCCCT<br>KPSDGNC           | 3.12 | 0.01 | 2.08 | 0.44 | 0.85 | 1.57 |
| 10266 | 0 | 7161   | CTIPAQGTSMFPSCCCT<br>KPSDGNC           | 3.12 | 0.01 | 2.08 | 0.68 | 0.22 | 2.75 |
| 10267 | 0 | 7161   | CTIPAQGTSMFPSCCCT<br>KPSDGNC           | 3.12 | 0.01 | 2.08 | 0.68 | 0.22 | 1.34 |
| 10268 | 0 | 7161   | CTIPAQGTSMFPSCCCT<br>KPSDGNC           | 3.12 | 0.01 | 2.08 | 0.68 | 0.22 | 1.75 |
| 10269 | 0 | 7161   | CTIPAQGTSMFPSCCCT<br>KPSDGNC           | 3.12 | 0.01 | 2.08 | 0.68 | 0.22 | 1.75 |
| 10270 | 0 | 7162   | CTIPAQGTSVFPSCCCTK<br>PSDGNC           | 3.12 | 0.01 | 2.08 | 0.44 | 0.85 | 1.57 |
| 10271 | 0 | 7165   | CTKKKSS                                | 2.02 | 0.01 | 0.90 | 1.15 | 0.22 | 0.28 |
| 10272 | 0 | 111173 | CTKMKKNIC                              | 2.25 | 0.01 | 0.90 | 0.44 | 0.85 | 1.39 |
| 10273 | 0 | 7168   | CTKPEACSGEPVVVHITD<br>DNEEPIAPYHFDLSGH | 3.44 | 0.01 | 2.53 | 0.44 | 1.23 | 0.85 |
| 10274 | 0 | 7168   | CTKPEACSGEPVVVHITD<br>DNEEPIAPYHFDLSGH | 3.44 | 0.01 | 2.53 | 0.44 | 1.23 | 0.85 |
| 10275 | 0 | 95003  | CTKPSDGNC                              | 2.22 | 0.01 | 2.71 | 0.44 | 0.22 | 2.35 |
| 10276 | 0 | 134335 | CTKPSDGNCCT                            | 2.32 | 0.01 | 3.07 | 0.44 | 0.22 | 0.28 |
| 10277 | 0 | 134335 | CTKPSDGNCCT                            | 2.32 | 0.01 | 3.07 | 0.44 | 0.22 | 1.34 |
| 10278 | 0 | 134335 | CTKPSDGNCCT                            | 2.32 | 0.01 | 3.07 | 0.44 | 0.22 | 1.66 |
| 10279 | 0 | 7171   | CTKPTDGNC                              | 2.24 | 0.01 | 2.08 | 1.15 | 2.26 | 1.57 |
| 10280 | 0 | 7171   | CTKPTDGNC                              | 2.24 | 0.01 | 2.08 | 0.44 | 0.85 | 1.57 |
| 10281 | 0 | 7171   | CTKPTDGNC                              | 2.24 | 0.01 | 2.08 | 0.44 | 0.85 | 1.57 |
| 10282 | 0 | 7171   | CTKPTDGNC                              | 2.24 | 0.01 | 2.08 | 1.12 | 0.22 | 1.57 |
| 10283 | 0 | 7171   | CTKPTDGNC                              | 2.24 | 0.01 | 2.08 | 1.12 | 0.22 | 1.57 |
| 10284 | 0 | 7171   | CTKPTDGNC                              | 2.24 | 0.01 | 2.08 | 2.37 | 0.22 | 1.57 |
| 10285 | 0 | 7171   | CTKPTDGNC                              | 2.24 | 0.01 | 2.08 | 2.37 | 0.22 | 1.57 |
| 10286 | 0 | 7171   | CTKPTDGNC                              | 2.24 | 0.01 | 2.08 | 2.37 | 0.22 | 1.57 |
| 10287 | 0 | 7171   | CTKPTDGNC                              | 2.24 | 0.01 | 2.08 | 2.13 | 0.22 | 1.57 |
| 10288 | 0 | 7171   | CTKPTDGNC                              | 2.24 | 0.01 | 2.08 | 0.68 | 0.22 | 0.28 |
| 10289 | 0 | 7171   | CTKPTDGNC                              | 2.24 | 0.01 | 3.97 | 0.44 | 1.59 | 1.27 |
| 10290 | 0 | 7171   | CTKPTDGNC                              | 2.24 | 0.01 | 3.97 | 1.12 | 0.22 | 1.57 |
| 10291 | 0 | 7171   | CTKPTDGNC                              | 2.24 | 0.01 | 3.97 | 1.12 | 0.22 | 1.27 |
| 10292 | 0 | 7171   | CTKPTDGNC                              | 2.24 | 0.01 | 3.97 | 1.12 | 0.22 | 1.27 |
| 10293 | 0 | 7171   | CTKPTDGNC                              | 2.24 | 0.01 | 3.97 | 1.12 | 0.22 | 1.27 |
| 10294 | 0 | 7171   | CTKPTDGNC                              | 2.24 | 0.01 | 2.08 | 0.44 | 0.22 | 1.57 |
| 10295 | 0 | 7171   | CTKPTDGNC                              | 2.24 | 0.01 | 2.08 | 0.44 | 0.22 | 1.57 |
| 10296 | 0 | 7171   | CTKPTDGNC                              | 2.24 | 0.01 | 3.45 | 0.68 | 0.22 | 1.57 |
| 10297 | 0 | 7171   | CTKPTDGNC                              | 2.24 | 0.01 | 3.45 | 0.68 | 0.22 | 1.57 |

|       |   |        |                          |      |      |      |      |      |      |
|-------|---|--------|--------------------------|------|------|------|------|------|------|
| 10298 | 0 | 7171   | CTKPTDGNC                | 2.24 | 0.01 | 3.45 | 0.68 | 0.22 | 1.57 |
| 10299 | 0 | 7171   | CTKPTDGNC                | 2.24 | 0.01 | 3.45 | 0.68 | 0.22 | 1.57 |
| 10300 | 0 | 7171   | CTKPTDGNC                | 2.24 | 0.01 | 3.45 | 0.68 | 0.22 | 1.57 |
| 10301 | 0 | 7171   | CTKPTDGNC                | 2.24 | 0.01 | 3.45 | 0.68 | 0.22 | 1.57 |
| 10302 | 0 | 7171   | CTKPTDGNC                | 2.24 | 0.01 | 3.45 | 0.68 | 0.22 | 1.57 |
| 10303 | 0 | 7171   | CTKPTDGNC                | 2.24 | 0.01 | 3.45 | 0.68 | 0.22 | 1.57 |
| 10304 | 0 | 7171   | CTKPTDGNC                | 2.24 | 0.01 | 2.08 | 0.68 | 0.22 | 0.28 |
| 10305 | 0 | 7171   | CTKPTDGNC                | 2.24 | 0.01 | 2.08 | 1.81 | 0.22 | 0.28 |
| 10306 | 0 | 7171   | CTKPTDGNC                | 2.24 | 0.01 | 2.08 | 0.68 | 0.22 | 0.28 |
| 10307 | 0 | 7171   | CTKPTDGNC                | 2.24 | 0.01 | 2.08 | 0.68 | 0.22 | 0.28 |
| 10308 | 0 | 7171   | CTKPTDGNC                | 2.24 | 0.01 | 2.08 | 1.12 | 0.22 | 1.57 |
| 10309 | 0 | 7171   | CTKPTDGNC                | 2.24 | 0.01 | 2.08 | 1.12 | 0.22 | 1.57 |
| 10310 | 0 | 7173   | CTKPTDGNCTCIPISSW<br>AF  | 2.94 | 0.01 | 3.28 | 0.44 | 1.59 | 1.27 |
| 10311 | 0 | 7173   | CTKPTDGNCTCIPISSW<br>AF  | 2.94 | 0.01 | 3.28 | 1.12 | 0.22 | 1.57 |
| 10312 | 0 | 117448 | CTLAEK                   | 1.88 | 0.01 | 0.78 | 0.44 | 1.13 | 0.85 |
| 10313 | 0 | 225710 | CTLIDALLGDPQCDGFQ<br>NK  | 2.89 | 0.01 | 3.97 | 1.12 | 0.22 | 1.28 |
| 10314 | 0 | 225710 | CTLIDALLGDPQCDGFQ<br>NK  | 2.89 | 0.01 | 3.97 | 1.12 | 0.22 | 1.28 |
| 10315 | 0 | 144603 | CTLKKGSSGGGLPDSVKI       | 2.85 | 0.01 | 0.90 | 1.20 | 0.22 | 0.85 |
| 10316 | 0 | 170500 | CTLKRYTNQTFDKVM          | 2.64 | 0.01 | 0.78 | 0.44 | 1.41 | 0.28 |
| 10317 | 0 | 111174 | CTLSHGPSC                | 2.24 | 0.01 | 0.90 | 0.44 | 0.85 | 1.39 |
| 10318 | 0 | 78942  | CTLSVFGYWVC              | 2.40 | 0.01 | 0.90 | 0.68 | 0.22 | 1.39 |
| 10319 | 0 | 7180   | CTLTTSPRLPVF             | 2.48 | 0.01 | 4.03 | 1.12 | 0.22 | 0.85 |
| 10320 | 0 | 7180   | CTLTTSPRLPVF             | 2.48 | 0.01 | 4.03 | 1.12 | 0.22 | 2.02 |
| 10321 | 0 | 127614 | CTNDSVLLGPPGATNAS<br>NGI | 2.95 | 0.01 | 2.19 | 0.44 | 1.13 | 0.28 |
| 10322 | 0 | 7187   | CTNGLTALFTPQAKQN         | 2.75 | 0.01 | 1.72 | 0.68 | 0.22 | 0.28 |
| 10323 | 0 | 7187   | CTNGLTALFTPQAKQN         | 2.75 | 0.01 | 1.72 | 0.68 | 0.22 | 1.27 |
| 10324 | 0 | 181568 | CTNILKQNFNIVSDF          | 2.66 | 0.01 | 2.86 | 2.36 | 0.22 | 1.28 |
| 10325 | 0 | 7188   | CTPATLLLC                | 2.26 | 0.01 | 0.90 | 0.44 | 0.85 | 1.39 |
| 10326 | 0 | 146808 | CTPKSDEFNPCEDIMGY<br>KFL | 2.92 | 0.01 | 0.78 | 2.49 | 0.22 | 0.85 |
| 10327 | 0 | 7193   | CTPPALNCYWPLNDYGF        | 2.80 | 0.01 | 2.48 | 0.44 | 0.85 | 0.28 |
| 10328 | 0 | 7193   | CTPPALNCYWPLNDYGF        | 2.80 | 0.01 | 2.48 | 1.20 | 0.22 | 0.28 |
| 10329 | 0 | 7201   | CTQSLAGLFRPGASQN         | 2.73 | 0.01 | 1.72 | 0.68 | 0.22 | 0.28 |
| 10330 | 0 | 108303 | CTRHPCQA                 | 2.22 | 0.01 | 0.90 | 0.44 | 1.13 | 1.39 |
| 10331 | 0 | 78943  | CTRLHTGYWVC              | 2.40 | 0.01 | 0.90 | 0.68 | 0.22 | 1.39 |
| 10332 | 0 | 130763 | CTRWAGRPC                | 2.24 | 0.01 | 0.90 | 0.44 | 1.13 | 1.39 |

|       |   |        |                                    |      |      |      |      |      |      |
|-------|---|--------|------------------------------------|------|------|------|------|------|------|
| 10333 | 0 | 7205   | CTSGFTGLFSSGAKQT                   | 2.76 | 0.01 | 1.72 | 0.68 | 0.22 | 0.28 |
| 10334 | 0 | 111176 | CTSICKYPDYIKMVS                    | 2.69 | 0.01 | 1.86 | 0.68 | 0.22 | 0.28 |
| 10335 | 0 | 181569 | CTSLARSFADIGDIV                    | 2.66 | 0.01 | 3.26 | 2.37 | 0.22 | 1.28 |
| 10336 | 0 | 7207   | CTSPAQGTSMFPSCCCT<br>KPTDGNC       | 3.13 | 0.01 | 2.08 | 1.15 | 0.22 | 0.28 |
| 10337 | 0 | 7208   | CTSPYDGKYWSMYSRL                   | 2.71 | 0.01 | 2.14 | 1.12 | 0.22 | 0.28 |
| 10338 | 0 | 7208   | CTSPYDGKYWSMYSRL                   | 2.71 | 0.01 | 2.14 | 1.12 | 0.22 | 0.28 |
| 10339 | 0 | 7208   | CTSPYDGKYWSMYSRL                   | 2.71 | 0.01 | 2.14 | 1.12 | 0.22 | 0.85 |
| 10340 | 0 | 7209   | CTSRFASLFNLGPQQQ                   | 2.70 | 0.01 | 1.72 | 0.68 | 0.22 | 1.27 |
| 10341 | 0 | 7209   | CTSRFASLFNLGPQQQ                   | 2.70 | 0.01 | 1.72 | 0.68 | 0.22 | 0.28 |
| 10342 | 0 | 7210   | CTSSLTSIFTQGAQN                    | 2.73 | 0.01 | 1.72 | 0.68 | 0.22 | 0.28 |
| 10343 | 0 | 7214   | CTTAVPWN                           | 2.11 | 0.01 | 2.54 | 3.53 | 0.22 | 0.28 |
| 10344 | 0 | 7214   | CTTAVPWN                           | 2.11 | 0.01 | 2.54 | 0.44 | 1.59 | 0.28 |
| 10345 | 0 | 7216   | CTTFDDVQAPNYTQHTS<br>SMR           | 2.89 | 0.01 | 2.45 | 1.12 | 0.22 | 2.92 |
| 10346 | 0 | 7217   | CTTFDDVQAPNYTQHTS<br>SMRGVYYPDEIFR | 3.29 | 0.01 | 2.48 | 0.44 | 0.85 | 0.28 |
| 10347 | 0 | 128388 | CTTHQPRSPRLDLK                     | 2.60 | 0.01 | 0.78 | 1.20 | 0.22 | 1.27 |
| 10348 | 0 | 7221   | CTTPAGNSMFPSCCCTK<br>PTDGNC        | 3.10 | 0.01 | 0.90 | 2.37 | 2.26 | 0.28 |
| 10349 | 0 | 7221   | CTTPAGNSMFPSCCCTK<br>PTDGNC        | 3.10 | 0.01 | 0.90 | 2.37 | 2.26 | 0.28 |
| 10350 | 0 | 7221   | CTTPAGNSMFPSCCCTK<br>PTDGNC        | 3.10 | 0.01 | 0.90 | 0.44 | 0.22 | 0.28 |
| 10351 | 0 | 7222   | CTTPAHGTSMFPSCCCT<br>KPTDGNC       | 3.13 | 0.01 | 2.08 | 1.15 | 0.22 | 0.28 |
| 10352 | 0 | 7224   | CTTPAQGASMFPSCCCT<br>KPTDGNC       | 3.13 | 0.01 | 0.90 | 2.37 | 2.26 | 0.28 |
| 10353 | 0 | 7224   | CTTPAQGASMFPSCCCT<br>KPTDGNC       | 3.13 | 0.01 | 0.90 | 0.44 | 0.22 | 0.28 |
| 10354 | 0 | 7225   | CTTPAQGNSMFASCCC<br>TKPTDGNC       | 3.13 | 0.01 | 0.90 | 2.37 | 2.26 | 0.28 |
| 10355 | 0 | 7225   | CTTPAQGNSMFASCCC<br>TKPTDGNC       | 3.13 | 0.01 | 0.90 | 2.37 | 2.26 | 0.28 |
| 10356 | 0 | 7225   | CTTPAQGNSMFASCCC<br>TKPTDGNC       | 3.13 | 0.01 | 0.90 | 0.44 | 0.22 | 0.28 |
| 10357 | 0 | 7226   | CTTPAQGNSMFPACCC<br>TKATDGNC       | 3.13 | 0.01 | 0.90 | 2.37 | 2.26 | 0.28 |
| 10358 | 0 | 7226   | CTTPAQGNSMFPACCC<br>TKATDGNC       | 3.13 | 0.01 | 0.90 | 2.37 | 2.26 | 0.28 |
| 10359 | 0 | 7226   | CTTPAQGNSMFPACCC<br>TKATDGNC       | 3.13 | 0.01 | 0.90 | 0.44 | 0.22 | 0.28 |

|       |   |      |                              |      |      |      |      |      |      |
|-------|---|------|------------------------------|------|------|------|------|------|------|
| 10360 | 0 | 7227 | CTTPAQGNSMFPACCC<br>TKPTDGNC | 3.13 | 4.23 | 0.90 | 2.37 | 2.26 | 0.28 |
| 10361 | 0 | 7227 | CTTPAQGNSMFPACCC<br>TKPTDGNC | 3.13 | 4.23 | 0.90 | 0.44 | 0.22 | 0.28 |
| 10362 | 0 | 7227 | CTTPAQGNSMFPACCC<br>TKPTDGNC | 3.13 | 4.23 | 0.90 | 0.44 | 0.22 | 0.28 |
| 10363 | 0 | 7227 | CTTPAQGNSMFPACCC<br>TKPTDGNC | 3.13 | 4.23 | 0.90 | 1.12 | 2.26 | 0.28 |
| 10364 | 0 | 7228 | CTTPAQGNSMFPACCC<br>TKPTDGNC | 3.13 | 0.01 | 0.90 | 2.37 | 2.26 | 0.28 |
| 10365 | 0 | 7228 | CTTPAQGNSMFPACCC<br>TKPTDGNC | 3.13 | 0.01 | 0.90 | 0.44 | 0.22 | 0.28 |
| 10366 | 0 | 7228 | CTTPAQGNSMFPACCC<br>TKPTDGNC | 3.13 | 0.01 | 0.90 | 0.44 | 0.22 | 0.28 |
| 10367 | 0 | 7229 | CTTPAQGNSMFPACCC<br>TKPTNGNC | 3.14 | 0.01 | 0.90 | 2.37 | 2.26 | 0.28 |
| 10368 | 0 | 7229 | CTTPAQGNSMFPACCC<br>TKPTNGNC | 3.14 | 0.01 | 0.90 | 0.44 | 0.22 | 0.28 |
| 10369 | 0 | 7230 | CTTPAQGNSMFPSC               | 2.61 | 0.01 | 4.93 | 0.68 | 0.22 | 0.85 |
| 10370 | 0 | 7232 | CTTPAQGNSMFPSCCCT<br>KPTDGNC | 3.13 | 4.23 | 0.90 | 2.37 | 2.26 | 0.28 |
| 10371 | 0 | 7232 | CTTPAQGNSMFPSCCCT<br>KPTDGNC | 3.13 | 4.23 | 0.90 | 0.44 | 0.22 | 0.28 |
| 10372 | 0 | 7232 | CTTPAQGNSMFPSCCCT<br>KPTDGNC | 3.13 | 4.23 | 0.90 | 0.44 | 0.22 | 0.28 |
| 10373 | 0 | 7232 | CTTPAQGNSMFPSCCCT<br>KPTDGNC | 3.13 | 4.23 | 0.90 | 1.12 | 2.26 | 0.28 |
| 10374 | 0 | 7231 | CTTPAQGNSMFPSCCCT<br>KPTDGNC | 3.13 | 4.93 | 2.08 | 1.15 | 0.22 | 0.28 |
| 10375 | 0 | 7233 | CTTPAQGNSMFPSCCCT<br>KPTDGNC | 3.13 | 0.01 | 2.08 | 0.44 | 2.39 | 0.28 |
| 10376 | 0 | 7233 | CTTPAQGNSMFPSCCCT<br>KPTDGNC | 3.13 | 0.01 | 2.08 | 0.44 | 0.85 | 0.85 |
| 10377 | 0 | 7233 | CTTPAQGNSMFPSCCCT<br>KPTDGNC | 3.13 | 0.01 | 2.08 | 0.44 | 0.85 | 0.28 |
| 10378 | 0 | 7233 | CTTPAQGNSMFPSCCCT<br>KPTDGNC | 3.13 | 0.01 | 2.08 | 2.37 | 0.22 | 0.28 |
| 10379 | 0 | 7233 | CTTPAQGNSMFPSCCCT<br>KPTDGNC | 3.13 | 0.01 | 2.58 | 0.44 | 0.85 | 0.28 |
| 10380 | 0 | 7233 | CTTPAQGNSMFPSCCCT<br>KPTDGNC | 3.13 | 0.01 | 2.08 | 2.02 | 0.22 | 0.28 |
| 10381 | 0 | 7233 | CTTPAQGNSMFPSCCCT<br>KPTDGNC | 3.13 | 0.01 | 2.08 | 0.44 | 0.22 | 0.28 |
| 10382 | 0 | 7233 | CTTPAQGNSMFPSCCCT<br>KPTDGNC | 3.13 | 0.01 | 2.08 | 0.44 | 0.85 | 0.28 |
| 10383 | 0 | 7233 | CTTPAQGNSMFPSCCCT<br>KPTDGNC | 3.13 | 0.01 | 2.08 | 0.68 | 0.22 | 0.28 |

|       |   |      |                              |      |      |      |      |      |      |
|-------|---|------|------------------------------|------|------|------|------|------|------|
| 10384 | 0 | 7233 | CTTPAQGNSMFPSCCCT<br>KPTDGNC | 3.13 | 0.01 | 2.08 | 0.68 | 0.22 | 0.28 |
| 10385 | 0 | 7233 | CTTPAQGNSMFPSCCCT<br>KPTDGNC | 3.13 | 0.01 | 2.08 | 1.12 | 0.22 | 0.28 |
| 10386 | 0 | 7233 | CTTPAQGNSMFPSCCCT<br>KPTDGNC | 3.13 | 0.01 | 2.08 | 1.12 | 0.22 | 0.28 |
| 10387 | 0 | 7233 | CTTPAQGNSMFPSCCCT<br>KPTDGNC | 3.13 | 0.01 | 2.08 | 1.12 | 0.22 | 2.35 |
| 10388 | 0 | 7233 | CTTPAQGNSMFPSCCCT<br>KPTDGNC | 3.13 | 0.01 | 2.08 | 0.44 | 0.22 | 0.28 |
| 10389 | 0 | 7233 | CTTPAQGNSMFPSCCCT<br>KPTDGNC | 3.13 | 0.01 | 3.28 | 1.12 | 2.26 | 0.28 |
| 10390 | 0 | 7233 | CTTPAQGNSMFPSCCCT<br>KPTDGNC | 3.13 | 0.01 | 2.08 | 1.81 | 0.22 | 0.28 |
| 10391 | 0 | 7233 | CTTPAQGNSMFPSCCCT<br>KPTDGNC | 3.13 | 0.01 | 2.08 | 0.68 | 0.22 | 2.97 |
| 10392 | 0 | 7233 | CTTPAQGNSMFPSCCCT<br>KPTDGNC | 3.13 | 0.01 | 2.08 | 1.20 | 0.22 | 0.28 |
| 10393 | 0 | 7233 | CTTPAQGNSMFPSCCCT<br>KPTDGNC | 3.13 | 0.01 | 2.08 | 2.25 | 0.22 | 0.28 |
| 10394 | 0 | 7233 | CTTPAQGNSMFPSCCCT<br>KPTDGNC | 3.13 | 0.01 | 2.08 | 3.67 | 0.22 | 0.28 |
| 10395 | 0 | 7233 | CTTPAQGNSMFPSCCCT<br>KPTDGNC | 3.13 | 0.01 | 2.08 | 3.42 | 0.22 | 0.28 |
| 10396 | 0 | 7233 | CTTPAQGNSMFPSCCCT<br>KPTDGNC | 3.13 | 0.01 | 2.08 | 2.82 | 0.22 | 0.28 |
| 10397 | 0 | 7233 | CTTPAQGNSMFPSCCCT<br>KPTDGNC | 3.13 | 0.01 | 2.08 | 3.57 | 0.22 | 0.28 |
| 10398 | 0 | 7233 | CTTPAQGNSMFPSCCCT<br>KPTDGNC | 3.13 | 0.01 | 2.08 | 4.23 | 0.22 | 0.28 |
| 10399 | 0 | 7233 | CTTPAQGNSMFPSCCCT<br>KPTDGNC | 3.13 | 0.01 | 2.08 | 1.20 | 0.22 | 0.28 |
| 10400 | 0 | 7233 | CTTPAQGNSMFPSCCCT<br>KPTDGNC | 3.13 | 0.01 | 2.08 | 2.02 | 0.22 | 0.28 |
| 10401 | 0 | 7233 | CTTPAQGNSMFPSCCCT<br>KPTDGNC | 3.13 | 0.01 | 2.08 | 1.20 | 0.22 | 0.28 |
| 10402 | 0 | 7233 | CTTPAQGNSMFPSCCCT<br>KPTDGNC | 3.13 | 0.01 | 2.08 | 2.61 | 0.22 | 0.28 |
| 10403 | 0 | 7233 | CTTPAQGNSMFPSCCCT<br>KPTDGNC | 3.13 | 0.01 | 2.08 | 2.61 | 0.22 | 0.28 |
| 10404 | 0 | 7233 | CTTPAQGNSMFPSCCCT<br>KPTDGNC | 3.13 | 0.01 | 2.08 | 2.61 | 0.22 | 0.28 |
| 10405 | 0 | 7233 | CTTPAQGNSMFPSCCCT<br>KPTDGNC | 3.13 | 0.01 | 2.08 | 1.12 | 0.22 | 0.28 |
| 10406 | 0 | 7233 | CTTPAQGNSMFPSCCCT<br>KPTDGNC | 3.13 | 0.01 | 2.08 | 2.02 | 0.22 | 0.28 |

|       |   |        |                              |      |      |      |      |      |      |
|-------|---|--------|------------------------------|------|------|------|------|------|------|
| 10407 | 0 | 7233   | CTTPAQGNSMFPSCCCT<br>KPTDGNC | 3.13 | 0.01 | 2.08 | 2.02 | 0.22 | 2.98 |
| 10408 | 0 | 7233   | CTTPAQGNSMFPSCCCT<br>KPTDGNC | 3.13 | 0.01 | 2.08 | 0.44 | 0.85 | 0.28 |
| 10409 | 0 | 7234   | CTTPAQGNSMFPSCCCT<br>KPTNGNC | 3.14 | 0.01 | 0.90 | 0.44 | 0.85 | 0.28 |
| 10410 | 0 | 7235   | CTTPAQGTSMFPSCCCT<br>KPTDGNC | 3.13 | 0.01 | 2.08 | 1.15 | 0.22 | 0.28 |
| 10411 | 0 | 7237   | CTTPQGNSMFPSCCCTK<br>PTDGNC  | 3.10 | 0.01 | 0.90 | 2.37 | 2.26 | 0.28 |
| 10412 | 0 | 7237   | CTTPQGNSMFPSCCCTK<br>PTDGNC  | 3.10 | 0.01 | 0.90 | 0.44 | 0.22 | 0.28 |
| 10413 | 0 | 7237   | CTTPQGNSMFPSCCCTK<br>PTDGNC  | 3.10 | 0.01 | 0.90 | 0.44 | 0.22 | 0.28 |
| 10414 | 0 | 7237   | CTTPQGNSMFPSCCCTK<br>PTDGNC  | 3.10 | 0.01 | 0.90 | 1.12 | 2.26 | 0.28 |
| 10415 | 0 | 7238   | CTTSGFASLFRLGPSQK            | 2.79 | 0.01 | 1.72 | 0.68 | 0.22 | 0.28 |
| 10416 | 0 | 7239   | CTTSGLASLFNSGARQH            | 2.79 | 0.01 | 1.72 | 0.68 | 0.22 | 1.66 |
| 10417 | 0 | 7239   | CTTSGLASLFNSGARQH            | 2.79 | 0.01 | 1.72 | 0.68 | 0.22 | 0.28 |
| 10418 | 0 | 7240   | CTTSTRGDLAHVTAUC             | 2.73 | 0.01 | 0.90 | 2.59 | 0.22 | 0.28 |
| 10419 | 0 | 147559 | CTVRGLG                      | 2.02 | 0.01 | 0.78 | 2.87 | 0.22 | 1.34 |
| 10420 | 0 | 7242   | CTVSEEFPTITPNQGRCF<br>YCQCS  | 3.08 | 0.01 | 3.45 | 0.44 | 1.59 | 0.28 |
| 10421 | 0 | 7244   | CTWQQWERELQGYD               | 2.61 | 0.01 | 3.50 | 2.37 | 0.22 | 0.28 |
| 10422 | 0 | 7244   | CTWQQWERELQGYD               | 2.61 | 0.01 | 3.50 | 2.37 | 0.22 | 2.02 |
| 10423 | 0 | 7244   | CTWQQWERELQGYD               | 2.61 | 0.01 | 3.50 | 3.26 | 0.22 | 0.28 |
| 10424 | 0 | 7244   | CTWQQWERELQGYD               | 2.61 | 0.01 | 3.50 | 3.26 | 0.85 | 0.28 |
| 10425 | 0 | 91172  | CTWQQWERGLQGYD               | 2.61 | 0.01 | 3.81 | 3.26 | 0.22 | 1.39 |
| 10426 | 0 | 7245   | CTYEITTRECKTC                | 2.59 | 0.01 | 3.45 | 0.44 | 1.59 | 0.28 |
| 10427 | 0 | 122291 | CTYILDPEKLTLRATYDN           | 2.84 | 0.01 | 0.78 | 2.66 | 0.22 | 0.28 |
| 10428 | 0 | 122291 | CTYILDPEKLTLRATYDN           | 2.84 | 0.01 | 0.78 | 2.66 | 0.22 | 0.28 |
| 10429 | 0 | 122291 | CTYILDPEKLTLRATYDN           | 2.84 | 0.01 | 0.78 | 2.66 | 0.22 | 0.28 |
| 10430 | 0 | 122291 | CTYILDPEKLTLRATYDN           | 2.84 | 0.01 | 0.78 | 2.66 | 0.22 | 1.48 |
| 10431 | 0 | 122291 | CTYILDPEKLTLRATYDN           | 2.84 | 0.01 | 0.78 | 2.66 | 0.22 | 1.34 |
| 10432 | 0 | 122292 | CTYILDPEKLTLRVPYKA           | 2.84 | 0.01 | 2.96 | 2.66 | 0.22 | 0.28 |
| 10433 | 0 | 122292 | CTYILDPEKLTLRVPYKA           | 2.84 | 0.01 | 2.96 | 2.66 | 0.22 | 0.28 |

|       |   |        |                                                     |      |      |      |      |      |      |
|-------|---|--------|-----------------------------------------------------|------|------|------|------|------|------|
| 10434 | 0 | 122292 | CTYILDPEKLTLRVPYKA                                  | 2.84 | 0.01 | 2.96 | 2.66 | 0.22 | 0.28 |
| 10435 | 0 | 122292 | CTYILDPEKLTLRVPYKA                                  | 2.84 | 0.01 | 2.96 | 2.66 | 0.22 | 1.48 |
| 10436 | 0 | 122292 | CTYILDPEKLTLRVPYKA                                  | 2.84 | 0.01 | 2.96 | 2.66 | 0.22 | 1.34 |
| 10437 | 0 | 7246   | CTYSFVSLLSPGAKQN                                    | 2.68 | 0.01 | 1.72 | 0.68 | 0.22 | 0.28 |
| 10438 | 0 | 131381 | CTYVLDPENL                                          | 2.29 | 0.01 | 2.73 | 0.68 | 0.22 | 1.27 |
| 10439 | 0 | 131381 | CTYVLDPENL                                          | 2.29 | 0.01 | 2.73 | 0.68 | 0.22 | 0.85 |
| 10440 | 0 | 131381 | CTYVLDPENL                                          | 2.29 | 0.01 | 2.73 | 0.68 | 0.22 | 1.27 |
| 10441 | 0 | 131381 | CTYVLDPENL                                          | 2.29 | 0.01 | 2.73 | 0.68 | 0.22 | 1.48 |
| 10442 | 0 | 131381 | CTYVLDPENL                                          | 2.29 | 0.01 | 2.73 | 0.68 | 0.22 | 1.48 |
| 10443 | 0 | 131381 | CTYVLDPENL                                          | 2.29 | 0.01 | 2.73 | 0.68 | 0.22 | 1.48 |
| 10444 | 0 | 122293 | CTYVLDPENLTLKAPYEA                                  | 2.85 | 0.01 | 2.73 | 2.66 | 0.22 | 0.28 |
| 10445 | 0 | 122293 | CTYVLDPENLTLKAPYEA                                  | 2.85 | 0.01 | 2.73 | 2.66 | 0.22 | 0.28 |
| 10446 | 0 | 122293 | CTYVLDPENLTLKAPYEA                                  | 2.85 | 0.01 | 2.73 | 2.66 | 0.22 | 0.28 |
| 10447 | 0 | 122293 | CTYVLDPENLTLKAPYEA                                  | 2.85 | 0.01 | 2.73 | 2.66 | 0.22 | 1.48 |
| 10448 | 0 | 122293 | CTYVLDPENLTLKAPYEA                                  | 2.85 | 0.01 | 2.73 | 1.12 | 0.22 | 0.28 |
| 10449 | 0 | 122293 | CTYVLDPENLTLKAPYEA                                  | 2.85 | 0.01 | 2.73 | 1.12 | 0.22 | 0.28 |
| 10450 | 0 | 122293 | CTYVLDPENLTLKAPYEA                                  | 2.85 | 0.01 | 2.73 | 1.12 | 0.22 | 1.48 |
| 10451 | 0 | 122293 | CTYVLDPENLTLKAPYEA                                  | 2.85 | 0.01 | 2.73 | 1.12 | 0.22 | 3.16 |
| 10452 | 0 | 122293 | CTYVLDPENLTLKAPYEA                                  | 2.85 | 0.01 | 2.73 | 2.43 | 0.22 | 0.28 |
| 10453 | 0 | 122293 | CTYVLDPENLTLKAPYEA                                  | 2.85 | 0.01 | 2.73 | 2.43 | 0.22 | 0.28 |
| 10454 | 0 | 122293 | CTYVLDPENLTLKAPYEA                                  | 2.85 | 0.01 | 2.73 | 2.43 | 0.22 | 1.48 |
| 10455 | 0 | 122293 | CTYVLDPENLTLKAPYEA                                  | 2.85 | 0.01 | 2.73 | 2.43 | 0.22 | 3.16 |
| 10456 | 0 | 103090 | CVAYIGISFLDQASQ                                     | 2.66 | 0.01 | 2.04 | 0.44 | 0.85 | 1.28 |
| 10457 | 0 | 7249   | CVCRSRTMSLQKTVEK<br>LFD                             | 2.95 | 0.01 | 2.94 | 3.04 | 0.22 | 0.85 |
| 10458 | 0 | 7249   | CVCRSRTMSLQKTVEK<br>LFD                             | 2.95 | 0.01 | 2.94 | 1.20 | 0.22 | 0.85 |
| 10459 | 0 | 7250   | CVCRSRTMSLQKTVEK<br>LFD<br>ELDKDKSGKISCAEL<br>KSALQ | 3.64 | 0.01 | 2.94 | 3.04 | 0.22 | 0.85 |

|       |   |        |                                                             |      |      |      |      |      |      |
|-------|---|--------|-------------------------------------------------------------|------|------|------|------|------|------|
| 10460 | 0 | 7250   | CVCRSCRTMSLQKTVEK<br>LFDELDKDKSGKISCAEL<br>KSALQ            | 3.64 | 0.01 | 2.94 | 1.20 | 0.22 | 0.85 |
| 10461 | 0 | 7250   | CVCRSCRTMSLQKTVEK<br>LFDELDKDKSGKISCAEL<br>KSALQ            | 3.64 | 0.01 | 2.94 | 0.68 | 0.22 | 0.85 |
| 10462 | 0 | 7251   | CVCRSCRTMSLQKTVEK<br>LFDELDKDKSGKISCAEL<br>KSALQSCSAEPLDDDH | 3.87 | 0.01 | 2.94 | 3.04 | 0.22 | 0.85 |
| 10463 | 0 | 7251   | CVCRSCRTMSLQKTVEK<br>LFDELDKDKSGKISCAEL<br>KSALQSCSAEPLDDDH | 3.87 | 0.01 | 2.94 | 1.20 | 0.22 | 0.85 |
| 10464 | 0 | 7251   | CVCRSCRTMSLQKTVEK<br>LFDELDKDKSGKISCAEL<br>KSALQSCSAEPLDDDH | 3.87 | 0.01 | 2.94 | 0.68 | 0.22 | 0.85 |
| 10465 | 0 | 77777  | CVEKSVTRFFSLGLTVAD<br>VASLCEMEIQNHTAYCD<br>KVRTP            | 3.60 | 0.01 | 3.59 | 0.44 | 0.85 | 0.28 |
| 10466 | 0 | 139022 | CVEWLRRYLENGKDKLE<br>RADPPKT                                | 3.10 | 0.01 | 0.78 | 1.12 | 0.22 | 0.28 |
| 10467 | 0 | 139022 | CVEWLRRYLENGKDKLE<br>RADPPKT                                | 3.10 | 0.01 | 0.78 | 3.23 | 0.22 | 0.28 |
| 10468 | 0 | 139022 | CVEWLRRYLENGKDKLE<br>RADPPKT                                | 3.10 | 0.01 | 0.78 | 1.12 | 0.22 | 2.02 |
| 10469 | 0 | 7266   | CVFKDWEELGEEIRLKV                                           | 2.78 | 0.01 | 3.97 | 1.12 | 0.22 | 1.57 |
| 10470 | 0 | 7266   | CVFKDWEELGEEIRLKV                                           | 2.78 | 0.01 | 3.97 | 1.12 | 0.22 | 1.57 |
| 10471 | 0 | 7266   | CVFKDWEELGEEIRLKV                                           | 2.78 | 0.01 | 3.97 | 1.12 | 0.22 | 1.57 |
| 10472 | 0 | 7266   | CVFKDWEELGEEIRLKV                                           | 2.78 | 0.01 | 3.97 | 1.12 | 0.22 | 1.57 |
| 10473 | 0 | 7268   | CVGSQV                                                      | 1.90 | 0.01 | 1.86 | 0.44 | 1.23 | 0.28 |
| 10474 | 0 | 7269   | CVHPDKDSC                                                   | 2.24 | 0.01 | 0.90 | 0.68 | 0.22 | 0.28 |
| 10475 | 0 | 120426 | CVIQGVGVGTETPLMK                                            | 2.66 | 0.01 | 0.78 | 0.44 | 1.41 | 0.85 |
| 10476 | 0 | 115197 | CVKKILDKVG                                                  | 2.33 | 0.01 | 1.60 | 0.44 | 1.23 | 0.85 |
| 10477 | 0 | 115197 | CVKKILDKVG                                                  | 2.33 | 0.01 | 1.60 | 0.44 | 1.23 | 0.85 |
| 10478 | 0 | 115197 | CVKKILDKVG                                                  | 2.33 | 0.01 | 1.60 | 0.44 | 2.98 | 0.85 |
| 10479 | 0 | 7274   | CVKKQCPE                                                    | 2.14 | 0.01 | 1.66 | 1.15 | 0.22 | 0.28 |
| 10480 | 0 | 7277   | CVKSQTTRIN                                                  | 2.28 | 0.01 | 3.35 | 0.68 | 0.22 | 0.28 |
| 10481 | 0 | 7277   | CVKSQTTRIN                                                  | 2.28 | 0.01 | 3.35 | 0.68 | 2.25 | 1.75 |
| 10482 | 0 | 7277   | CVKSQTTRIN                                                  | 2.28 | 0.01 | 3.35 | 0.68 | 0.22 | 1.34 |
| 10483 | 0 | 7279   | CVLADSESGGHITHS                                             | 2.65 | 0.01 | 2.43 | 0.44 | 0.85 | 0.28 |



|       |   |        |                                 |      |      |      |      |      |      |
|-------|---|--------|---------------------------------|------|------|------|------|------|------|
| 10484 | 0 | 7280   | CVLAWNTRNIDATSTG<br>N           | 2.78 | 0.01 | 2.48 | 0.44 | 0.85 | 0.28 |
| 10485 | 0 | 7283   | CVLESHYEC                       | 2.24 | 0.01 | 0.90 | 0.44 | 0.85 | 1.39 |
| 10486 | 0 | 7293   | CVNITIKQH                       | 2.21 | 0.01 | 1.75 | 1.81 | 0.22 | 0.28 |
| 10487 | 0 | 226012 | CVNKTDNSCQTCFERG<br>DLIW        | 2.90 | 0.01 | 3.55 | 3.16 | 0.22 | 0.28 |
| 10488 | 0 | 117449 | CVP                             | 1.37 | 0.01 | 0.78 | 0.44 | 1.13 | 0.85 |
| 10489 | 0 | 117449 | CVP                             | 1.37 | 0.01 | 0.78 | 0.44 | 1.13 | 0.85 |
| 10490 | 0 | 117449 | CVP                             | 1.37 | 0.01 | 0.78 | 0.44 | 1.13 | 0.85 |
| 10491 | 0 | 117449 | CVP                             | 1.37 | 0.01 | 0.78 | 0.44 | 1.41 | 0.85 |
| 10492 | 0 | 7298   | CVQPEK                          | 1.88 | 0.01 | 1.96 | 0.44 | 0.85 | 0.28 |
| 10493 | 0 | 111177 | CVQSTHVDIRTLEDLL                | 2.71 | 0.01 | 1.86 | 1.12 | 0.22 | 0.28 |
| 10494 | 0 | 121183 | CVRGEYSTCSAFRVF                 | 2.69 | 0.01 | 0.90 | 0.68 | 0.22 | 1.39 |
| 10495 | 0 | 121183 | CVRGEYSTCSAFRVF                 | 2.69 | 0.01 | 0.90 | 0.68 | 0.22 | 0.28 |
| 10496 | 0 | 121183 | CVRGEYSTCSAFRVF                 | 2.69 | 0.01 | 0.90 | 0.68 | 0.22 | 0.28 |
| 10497 | 0 | 7309   | CVRSNEEFDPVDDGPD<br>DETDLSKLSKD | 3.24 | 0.01 | 4.23 | 2.61 | 0.22 | 0.28 |
| 10498 | 0 | 264136 | CVSLAARSMEIDGGE                 | 2.64 | 0.01 | 1.61 | 0.44 | 0.85 | 1.28 |
| 10499 | 0 | 238270 | CVSLLGASSVPPRPL                 | 2.70 | 0.01 | 2.56 | 2.02 | 0.22 | 0.85 |
| 10500 | 0 | 238270 | CVSLLGASSVPPRPL                 | 2.70 | 0.01 | 2.56 | 1.20 | 0.22 | 0.85 |
| 10501 | 0 | 242401 | CVSPSTAPARAHQMSP                | 2.75 | 0.01 | 3.33 | 1.20 | 0.22 | 0.28 |
| 10502 | 0 | 242401 | CVSPSTAPARAHQMSP                | 2.75 | 0.01 | 3.33 | 1.20 | 0.22 | 0.28 |
| 10503 | 0 | 242401 | CVSPSTAPARAHQMSP                | 2.75 | 0.01 | 3.33 | 1.20 | 2.25 | 1.75 |
| 10504 | 0 | 242401 | CVSPSTAPARAHQMSP                | 2.75 | 0.01 | 3.33 | 1.20 | 2.25 | 1.75 |
| 10505 | 0 | 242401 | CVSPSTAPARAHQMSP                | 2.75 | 0.01 | 3.33 | 1.20 | 0.22 | 0.85 |
| 10506 | 0 | 242401 | CVSPSTAPARAHQMSP                | 2.75 | 0.01 | 3.33 | 1.20 | 0.22 | 0.85 |
| 10507 | 0 | 242401 | CVSPSTAPARAHQMSP                | 2.75 | 0.01 | 3.33 | 1.20 | 0.22 | 0.85 |
| 10508 | 0 | 242401 | CVSPSTAPARAHQMSP                | 2.75 | 0.01 | 3.33 | 1.20 | 0.22 | 0.85 |
| 10509 | 0 | 242401 | CVSPSTAPARAHQMSP                | 2.75 | 0.01 | 3.33 | 1.20 | 0.22 | 0.85 |
| 10510 | 0 | 242401 | CVSPSTAPARAHQMSP                | 2.75 | 0.01 | 3.33 | 1.20 | 0.22 | 0.85 |
| 10511 | 0 | 242401 | CVSPSTAPARAHQMSP                | 2.75 | 0.01 | 3.33 | 1.20 | 0.22 | 0.85 |
| 10512 | 0 | 242401 | CVSPSTAPARAHQMSP                | 2.75 | 0.01 | 3.33 | 1.20 | 0.22 | 0.85 |
| 10513 | 0 | 242401 | CVSPSTAPARAHQMSP                | 2.75 | 0.01 | 3.33 | 1.20 | 0.22 | 0.85 |

|       |   |        |                                    |      |      |      |      |      |      |
|-------|---|--------|------------------------------------|------|------|------|------|------|------|
| 10514 | 0 | 242401 | CVSPSTAPARAHQMSP                   | 2.75 | 0.01 | 3.33 | 1.20 | 0.22 | 0.85 |
| 10515 | 0 | 117779 | CVSYRNPAE                          | 2.18 | 0.01 | 0.78 | 0.44 | 1.41 | 0.85 |
| 10516 | 0 | 117779 | CVSYRNPAE                          | 2.18 | 0.01 | 0.78 | 0.44 | 1.13 | 0.85 |
| 10517 | 0 | 149649 | CVTDRELENGACPPLE                   | 2.66 | 0.01 | 3.67 | 1.12 | 0.22 | 0.28 |
| 10518 | 0 | 7311   | CVTGHWRC                           | 2.13 | 0.01 | 2.04 | 0.44 | 0.85 | 0.28 |
| 10519 | 0 | 7311   | CVTGHWRC                           | 2.13 | 0.01 | 2.04 | 0.44 | 0.85 | 0.28 |
| 10520 | 0 | 7311   | CVTGHWRC                           | 2.13 | 0.01 | 2.04 | 0.44 | 0.85 | 0.28 |
| 10521 | 0 | 7313   | CVTIMTVDNPASTTNKD<br>K             | 2.84 | 0.01 | 2.57 | 1.20 | 0.22 | 1.34 |
| 10522 | 0 | 7313   | CVTIMTVDNPASTTNKD<br>K             | 2.84 | 0.01 | 2.57 | 1.20 | 0.22 | 1.27 |
| 10523 | 0 | 7313   | CVTIMTVDNPASTTNKD<br>K             | 2.84 | 0.01 | 2.57 | 1.20 | 0.22 | 0.85 |
| 10524 | 0 | 7313   | CVTIMTVDNPASTTNKD<br>K             | 2.84 | 0.01 | 2.57 | 2.04 | 0.22 | 1.27 |
| 10525 | 0 | 7313   | CVTIMTVDNPASTTNKD<br>K             | 2.84 | 0.01 | 2.57 | 2.04 | 0.22 | 0.85 |
| 10526 | 0 | 7313   | CVTIMTVDNPASTTNKD<br>K             | 2.84 | 0.01 | 2.57 | 2.04 | 0.22 | 1.57 |
| 10527 | 0 | 7313   | CVTIMTVDNPASTTNKD<br>K             | 2.84 | 0.01 | 2.57 | 1.20 | 0.22 | 0.85 |
| 10528 | 0 | 7313   | CVTIMTVDNPASTTNKD<br>K             | 2.84 | 0.01 | 2.57 | 1.20 | 0.22 | 0.85 |
| 10529 | 0 | 7313   | CVTIMTVDNPASTTNKD<br>K             | 2.84 | 0.01 | 2.57 | 1.20 | 0.22 | 0.85 |
| 10530 | 0 | 7313   | CVTIMTVDNPASTTNKD<br>K             | 2.84 | 0.01 | 2.57 | 1.20 | 0.22 | 0.85 |
| 10531 | 0 | 7313   | CVTIMTVDNPASTTNKD<br>K             | 2.84 | 0.01 | 2.57 | 2.04 | 0.22 | 0.85 |
| 10532 | 0 | 7313   | CVTIMTVDNPASTTNKD<br>K             | 2.84 | 0.01 | 2.57 | 2.04 | 0.22 | 0.85 |
| 10533 | 0 | 7313   | CVTIMTVDNPASTTNKD<br>K             | 2.84 | 0.01 | 2.57 | 2.04 | 0.22 | 0.85 |
| 10534 | 0 | 7313   | CVTIMTVDNPASTTNKD<br>K             | 2.84 | 0.01 | 2.57 | 2.04 | 0.22 | 0.85 |
| 10535 | 0 | 7314   | CVTIMTVDNPASTTNKD<br>KLFAVWKITYKDT | 3.33 | 0.01 | 2.57 | 1.20 | 0.22 | 0.28 |
| 10536 | 0 | 7314   | CVTIMTVDNPASTTNKD<br>KLFAVWKITYKDT | 3.33 | 0.01 | 2.57 | 1.20 | 0.22 | 1.34 |
| 10537 | 0 | 7314   | CVTIMTVDNPASTTNKD<br>KLFAVWKITYKDT | 3.33 | 0.01 | 2.57 | 1.15 | 0.22 | 1.27 |
| 10538 | 0 | 7314   | CVTIMTVDNPASTTNKD<br>KLFAVWKITYKDT | 3.33 | 0.01 | 2.57 | 1.15 | 0.22 | 2.02 |
| 10539 | 0 | 7314   | CVTIMTVDNPASTTNKD<br>KLFAVWKITYKDT | 3.33 | 0.01 | 2.57 | 1.20 | 0.22 | 0.28 |

|       |   |        |                                                         |      |      |      |      |      |      |
|-------|---|--------|---------------------------------------------------------|------|------|------|------|------|------|
| 10540 | 0 | 7314   | CVTIMTVDNPASTTNKD<br>KLFAVWKITYKDT                      | 3.33 | 0.01 | 2.57 | 1.20 | 0.22 | 1.34 |
| 10541 | 0 | 7314   | CVTIMTVDNPASTTNKD<br>KLFAVWKITYKDT                      | 3.33 | 0.01 | 2.57 | 0.68 | 0.22 | 0.28 |
| 10542 | 0 | 7314   | CVTIMTVDNPASTTNKD<br>KLFAVWKITYKDT                      | 3.33 | 0.01 | 2.57 | 0.68 | 0.22 | 2.02 |
| 10543 | 0 | 7314   | CVTIMTVDNPASTTNKD<br>KLFAVWKITYKDT                      | 3.33 | 0.01 | 2.57 | 0.68 | 0.22 | 0.28 |
| 10544 | 0 | 7314   | CVTIMTVDNPASTTNKD<br>KLFAVWKITYKDT                      | 3.33 | 0.01 | 2.57 | 0.68 | 0.22 | 1.34 |
| 10545 | 0 | 7317   | CVTQTVDFS LDPTFTI                                       | 2.75 | 0.01 | 2.41 | 2.42 | 0.22 | 0.28 |
| 10546 | 0 | 7318   | CVTQYQKESQAYYD                                          | 2.60 | 0.01 | 1.75 | 1.12 | 0.22 | 0.28 |
| 10547 | 0 | 7318   | CVTQYQKESQAYYD                                          | 2.60 | 0.01 | 1.75 | 1.12 | 0.22 | 0.28 |
| 10548 | 0 | 7318   | CVTQYQKESQAYYD                                          | 2.60 | 0.01 | 1.75 | 1.12 | 0.22 | 0.28 |
| 10549 | 0 | 7318   | CVTQYQKESQAYYD                                          | 2.60 | 0.01 | 1.75 | 1.12 | 0.22 | 0.85 |
| 10550 | 0 | 7318   | CVTQYQKESQAYYD                                          | 2.60 | 0.01 | 1.75 | 1.12 | 0.22 | 1.48 |
| 10551 | 0 | 7318   | CVTQYQKESQAYYD                                          | 2.60 | 0.01 | 1.75 | 1.12 | 0.22 | 0.28 |
| 10552 | 0 | 79173  | CVTSWLWSEGE GAVFY<br>RVDLHFINLGTP                       | 3.23 | 0.01 | 2.85 | 1.20 | 0.22 | 0.85 |
| 10553 | 0 | 79173  | CVTSWLWSEGE GAVFY<br>RVDLHFINLGTP                       | 3.23 | 0.01 | 2.85 | 1.12 | 0.22 | 0.28 |
| 10554 | 0 | 105701 | CVVGC GGGV                                              | 2.28 | 0.01 | 0.90 | 3.01 | 0.22 | 0.28 |
| 10555 | 0 | 121184 | CVWGAYSTPRPFRVS                                         | 2.66 | 0.01 | 0.90 | 0.68 | 0.22 | 1.39 |
| 10556 | 0 | 121184 | CVWGAYSTPRPFRVS                                         | 2.66 | 0.01 | 0.90 | 0.68 | 0.22 | 0.28 |
| 10557 | 0 | 121184 | CVWGAYSTPRPFRVS                                         | 2.66 | 0.01 | 0.90 | 0.68 | 0.22 | 0.28 |
| 10558 | 0 | 133028 | CVWLWENC                                                | 2.15 | 0.01 | 0.90 | 1.12 | 0.22 | 1.39 |
| 10559 | 0 | 133029 | CVWLWEQC                                                | 2.15 | 0.01 | 0.90 | 1.12 | 0.22 | 1.39 |
| 10560 | 0 | 7323   | CVWNNKTPNS                                              | 2.31 | 0.01 | 2.66 | 0.68 | 0.22 | 0.28 |
| 10561 | 0 | 7323   | CVWNNKTPNS                                              | 2.31 | 0.01 | 2.66 | 0.68 | 0.22 | 0.28 |
| 10562 | 0 | 105702 | CVYDQYGTEFEDYSYES                                       | 2.81 | 0.01 | 0.90 | 3.17 | 0.22 | 0.85 |
| 10563 | 0 | 105702 | CVYDQYGTEFEDYSYES                                       | 2.81 | 0.01 | 0.90 | 3.17 | 0.22 | 1.27 |
| 10564 | 0 | 135835 | CWAFSGVAATESAY                                          | 2.61 | 0.01 | 2.78 | 1.12 | 0.22 | 1.57 |
| 10565 | 0 | 135835 | CWAFSGVAATESAY                                          | 2.61 | 0.01 | 2.78 | 1.12 | 0.22 | 1.57 |
| 10566 | 0 | 7325   | CWAFSGVAATESAYLAH<br>RNQSLDLAEQELVDCAS<br>QHGCHGDTIPRGI | 3.78 | 0.01 | 2.78 | 0.44 | 1.23 | 1.57 |
| 10567 | 0 | 7325   | CWAFSGVAATESAYLAH<br>RNQSLDLAEQELVDCAS<br>QHGCHGDTIPRGI | 3.78 | 0.01 | 2.78 | 0.44 | 1.23 | 1.57 |
| 10568 | 0 | 7325   | CWAFSGVAATESAYLAH<br>RNQSLDLAEQELVDCAS<br>QHGCHGDTIPRGI | 3.78 | 0.01 | 2.78 | 1.12 | 0.22 | 1.57 |

|       |   |        |                                     |      |      |      |      |      |      |
|-------|---|--------|-------------------------------------|------|------|------|------|------|------|
|       |   |        | CWAFSGVAATESAYLAH                   |      |      |      |      |      |      |
| 10569 | 0 | 7325   | RNQSLDLAEQELVDCAS<br>QHGHCHGDTIPRGI | 3.78 | 0.01 | 2.78 | 0.44 | 1.23 | 1.27 |
| 10570 | 0 | 94482  | CWAICKRIPNKK                        | 2.48 | 0.01 | 2.38 | 0.44 | 1.74 | 0.28 |
| 10571 | 0 | 94482  | CWAICKRIPNKK                        | 2.48 | 0.01 | 2.38 | 0.44 | 1.74 | 0.28 |
| 10572 | 0 | 7329   | CWGELMTLATWV                        | 2.48 | 0.01 | 2.08 | 0.68 | 2.26 | 0.85 |
| 10573 | 0 | 7329   | CWGELMTLATWV                        | 2.48 | 0.01 | 2.08 | 0.44 | 1.59 | 0.85 |
| 10574 | 0 | 7332   | CWGELMTLATWVGVN<br>LEDPASRDLV       | 3.15 | 0.01 | 2.08 | 1.12 | 0.22 | 0.28 |
| 10575 | 0 | 7332   | CWGELMTLATWVGVN<br>LEDPASRDLV       | 3.15 | 0.01 | 2.08 | 1.12 | 0.22 | 0.28 |
| 10576 | 0 | 7332   | CWGELMTLATWVGVN<br>LEDPASRDLV       | 3.15 | 0.01 | 2.08 | 1.12 | 0.22 | 0.28 |
| 10577 | 0 | 130461 | CWNYCLP                             | 2.03 | 0.01 | 0.90 | 0.68 | 0.22 | 0.28 |
| 10578 | 0 | 130461 | CWNYCLP                             | 2.03 | 0.01 | 0.90 | 0.68 | 0.22 | 1.34 |
| 10579 | 0 | 130461 | CWNYCLP                             | 2.03 | 0.01 | 0.90 | 0.68 | 0.22 | 0.28 |
| 10580 | 0 | 130461 | CWNYCLP                             | 2.03 | 0.01 | 0.90 | 0.68 | 0.22 | 0.28 |
| 10581 | 0 | 130461 | CWNYCLP                             | 2.03 | 0.01 | 0.90 | 0.68 | 0.22 | 1.34 |
| 10582 | 0 | 168275 | CWTSPLHEAIH                         | 2.45 | 0.01 | 0.90 | 0.44 | 0.85 | 1.39 |
| 10583 | 0 | 7342   | CWVDNEEDIDVILK                      | 2.62 | 0.01 | 2.95 | 3.38 | 0.22 | 0.28 |
| 10584 | 0 | 7343   | CWVDNEEDIDVILKKSTI                  | 2.84 | 0.01 | 2.95 | 3.38 | 0.22 | 0.28 |
| 10585 | 0 | 7345   | CXTC                                | 1.60 | 0.01 | 2.08 | 1.15 | 0.22 | 1.27 |
| 10586 | 0 | 7345   | CXTC                                | 1.60 | 0.01 | 2.08 | 1.15 | 0.22 | 0.28 |
| 10587 | 0 | 144604 | CYAIRN                              | 1.88 | 0.01 | 3.85 | 0.68 | 0.22 | 1.48 |
| 10588 | 0 | 144604 | CYAIRN                              | 1.88 | 0.01 | 3.85 | 0.68 | 0.22 | 1.48 |
| 10589 | 0 | 144604 | CYAIRN                              | 1.88 | 0.01 | 3.85 | 0.68 | 0.22 | 0.85 |
|       |   |        | CYCHGTVIESLESNNYF                   |      |      |      |      |      |      |
| 10590 | 0 | 134336 | NSSGIDVEEKSLFLDIWR<br>NWQ           | 3.59 | 0.01 | 1.75 | 3.59 | 0.22 | 1.27 |
|       |   |        | CYCHGTVIESLESNNYF                   |      |      |      |      |      |      |
| 10591 | 0 | 134336 | NSSGIDVEEKSLFLDIWR<br>NWQ           | 3.59 | 0.01 | 1.75 | 3.59 | 0.22 | 1.27 |
|       |   |        | CYCHGTVIESLESNNYF                   |      |      |      |      |      |      |
| 10592 | 0 | 134336 | NSSGIDVEEKSLFLDIWR<br>NWQ           | 3.59 | 0.01 | 1.75 | 1.20 | 0.22 | 1.27 |
|       |   |        | CYCHGTVIESLESNNYF                   |      |      |      |      |      |      |
| 10593 | 0 | 134336 | NSSGIDVEEKSLFLDIWR<br>NWQ           | 3.59 | 0.01 | 1.75 | 3.59 | 0.22 | 1.34 |
|       |   |        | CYCHGTVIESLESNNYF                   |      |      |      |      |      |      |
| 10594 | 0 | 134336 | NSSGIDVEEKSLFLDIWR<br>NWQ           | 3.59 | 0.01 | 1.75 | 1.20 | 0.22 | 1.34 |
|       |   |        | CYCQDPYVKEAENLKKY<br>FNA            |      |      |      |      |      |      |
| 10595 | 0 | 134337 | CYCQDPYVKEAENLKKY<br>FNA            | 2.94 | 0.01 | 0.78 | 1.20 | 0.22 | 1.34 |
|       |   |        | CYCQDPYVKEAENLKKY<br>FNA            |      |      |      |      |      |      |
| 10596 | 0 | 134337 | CYCQDPYVKEAENLKKY<br>FNA            | 2.94 | 0.01 | 0.78 | 1.20 | 0.22 | 0.28 |

|       |   |        |                                                          |      |      |      |      |      |      |
|-------|---|--------|----------------------------------------------------------|------|------|------|------|------|------|
| 10597 | 0 | 134337 | CYCQDPYVKEAENLKKY<br>FNA                                 | 2.94 | 0.01 | 0.78 | 1.20 | 0.22 | 0.28 |
| 10598 | 0 | 134337 | CYCQDPYVKEAENLKKY<br>FNA                                 | 2.94 | 0.01 | 0.78 | 1.12 | 0.22 | 0.28 |
| 10599 | 0 | 134337 | CYCQDPYVKEAENLKKY<br>FNA                                 | 2.94 | 0.01 | 0.78 | 1.12 | 0.22 | 0.28 |
| 10600 | 0 | 134337 | CYCQDPYVKEAENLKKY<br>FNA                                 | 2.94 | 0.01 | 0.78 | 1.12 | 1.41 | 0.28 |
| 10601 | 0 | 135540 | CYCQDPYVKEAENLKKY<br>FNAGHSDVADNGTLFL<br>GILKNWKEESDRKIM | 3.78 | 4.45 | 0.78 | 1.12 | 0.22 | 0.28 |
| 10602 | 0 | 135540 | CYCQDPYVKEAENLKKY<br>FNAGHSDVADNGTLFL<br>GILKNWKEESDRKIM | 3.78 | 4.45 | 0.78 | 1.12 | 0.22 | 0.28 |
| 10603 | 0 | 135540 | CYCQDPYVKEAENLKKY<br>FNAGHSDVADNGTLFL<br>GILKNWKEESDRKIM | 3.78 | 4.45 | 0.78 | 1.12 | 1.41 | 0.28 |
| 10604 | 0 | 7347   | CYCYGLPDSEPTKTN                                          | 2.67 | 0.01 | 2.56 | 2.02 | 0.22 | 0.85 |
| 10605 | 0 | 7347   | CYCYGLPDSEPTKTN                                          | 2.67 | 0.01 | 2.56 | 0.68 | 0.22 | 0.85 |
| 10606 | 0 | 7348   | CYCYGLPDSVKIWTS                                          | 2.65 | 0.01 | 2.56 | 2.00 | 0.22 | 0.85 |
| 10607 | 0 | 7348   | CYCYGLPDSVKIWTS                                          | 2.65 | 0.01 | 2.56 | 2.02 | 0.22 | 0.85 |
| 10608 | 0 | 7349   | CYCYGVPDHIKVWDY                                          | 2.69 | 0.01 | 2.56 | 2.02 | 0.22 | 0.85 |
| 10609 | 0 | 7355   | CYDLSCNQTVCQ                                             | 2.48 | 0.01 | 2.56 | 2.69 | 2.26 | 0.85 |
| 10610 | 0 | 153815 | CYEQLNDSSEEEDEI                                          | 2.68 | 0.01 | 1.86 | 1.12 | 0.22 | 2.02 |
| 10611 | 0 | 111182 | CYETGPWAC                                                | 2.22 | 0.01 | 0.90 | 0.44 | 0.85 | 1.39 |
| 10612 | 0 | 130462 | CYFTNMFATWCAAC                                           | 2.64 | 3.70 | 0.90 | 0.44 | 1.93 | 1.27 |
| 10613 | 0 | 238272 | CYGAAEKYHRCSTKL                                          | 2.66 | 0.01 | 2.56 | 2.02 | 0.22 | 0.85 |
| 10614 | 0 | 238272 | CYGAAEKYHRCSTKL                                          | 2.66 | 0.01 | 2.56 | 1.20 | 0.22 | 0.85 |
| 10615 | 0 | 7367   | CYGDWA                                                   | 1.88 | 0.01 | 1.86 | 0.44 | 1.23 | 0.28 |
| 10616 | 0 | 7374   | CYGLPDSEPTKTNGK                                          | 2.66 | 0.01 | 2.56 | 2.02 | 0.22 | 0.85 |
| 10617 | 0 | 7374   | CYGLPDSEPTKTNGK                                          | 2.66 | 0.01 | 2.56 | 2.52 | 0.22 | 0.85 |
| 10618 | 0 | 7375   | CYGLPDSVKIWTSET                                          | 2.62 | 0.01 | 2.56 | 2.00 | 0.22 | 0.85 |
| 10619 | 0 | 7375   | CYGLPDSVKIWTSET                                          | 2.62 | 0.01 | 2.56 | 2.02 | 0.22 | 0.85 |
| 10620 | 0 | 7376   | CYGLTTLFDPGPRQQI                                         | 2.71 | 0.01 | 1.72 | 0.68 | 0.22 | 0.28 |
| 10621 | 0 | 111183 | CYGMLGNNLPPPSEV                                          | 2.65 | 0.01 | 3.20 | 1.12 | 0.22 | 0.85 |
| 10622 | 0 | 114290 | CYGNWFSNC                                                | 2.24 | 0.01 | 0.90 | 2.46 | 0.22 | 0.28 |
| 10623 | 0 | 118762 | CYGSFAKPTN                                               | 2.26 | 0.01 | 4.23 | 0.68 | 0.22 | 0.28 |
| 10624 | 0 | 118762 | CYGSFAKPTN                                               | 2.26 | 0.01 | 4.23 | 0.68 | 0.22 | 0.85 |
| 10625 | 0 | 118762 | CYGSFAKPTN                                               | 2.26 | 0.01 | 4.23 | 0.68 | 0.22 | 0.28 |
| 10626 | 0 | 118762 | CYGSFAKPTN                                               | 2.26 | 0.01 | 4.23 | 0.68 | 0.22 | 1.27 |
| 10627 | 0 | 118762 | CYGSFAKPTN                                               | 2.26 | 0.01 | 4.23 | 0.68 | 0.22 | 0.28 |
| 10628 | 0 | 118763 | CYGSFARPMN                                               | 2.26 | 0.01 | 4.23 | 0.68 | 0.22 | 0.28 |
| 10629 | 0 | 118763 | CYGSFARPMN                                               | 2.26 | 0.01 | 4.23 | 0.68 | 0.22 | 0.28 |
| 10630 | 0 | 118763 | CYGSFARPMN                                               | 2.26 | 0.01 | 4.23 | 0.68 | 0.22 | 0.85 |

|       |   |        |                        |      |      |      |      |      |      |
|-------|---|--------|------------------------|------|------|------|------|------|------|
| 10631 | 0 | 118763 | CYGSFARPMN             | 2.26 | 0.01 | 4.23 | 0.68 | 0.22 | 0.28 |
| 10632 | 0 | 118763 | CYGSFARPMN             | 2.26 | 0.01 | 4.23 | 0.68 | 0.22 | 1.27 |
| 10633 | 0 | 118764 | CYGSFARPTN             | 2.26 | 0.01 | 3.12 | 0.68 | 0.22 | 0.85 |
| 10634 | 0 | 118764 | CYGSFARPTN             | 2.26 | 0.01 | 3.12 | 0.68 | 0.22 | 0.28 |
| 10635 | 0 | 118764 | CYGSFARPTN             | 2.26 | 0.01 | 3.12 | 0.68 | 0.22 | 1.27 |
| 10636 | 0 | 118764 | CYGSFARPTN             | 2.26 | 0.01 | 3.12 | 0.68 | 0.22 | 0.28 |
| 10637 | 0 | 118764 | CYGSFARPTN             | 2.26 | 0.01 | 3.12 | 0.68 | 0.22 | 0.28 |
| 10638 | 0 | 147562 | CYGSLPWMC              | 2.22 | 0.01 | 0.90 | 0.44 | 1.41 | 1.39 |
| 10639 | 0 | 147563 | CYGTEPWMC              | 2.22 | 0.01 | 0.90 | 0.44 | 1.41 | 1.39 |
| 10640 | 0 | 147564 | CYGTKPWMC              | 2.22 | 0.01 | 0.90 | 0.44 | 1.41 | 0.85 |
| 10641 | 0 | 147564 | CYGTKPWMC              | 2.22 | 0.01 | 0.90 | 0.44 | 1.41 | 0.28 |
| 10642 | 0 | 147564 | CYGTKPWMC              | 2.22 | 0.01 | 0.90 | 0.68 | 0.22 | 0.28 |
| 10643 | 0 | 147564 | CYGTKPWMC              | 2.22 | 0.01 | 0.90 | 0.68 | 0.22 | 0.28 |
| 10644 | 0 | 147564 | CYGTKPWMC              | 2.22 | 0.01 | 0.90 | 0.44 | 1.41 | 1.39 |
| 10645 | 0 | 7381   | CYGVDPHIKVWDYAT        | 2.64 | 0.01 | 2.56 | 2.02 | 0.22 | 0.85 |
| 10646 | 0 | 7381   | CYGVDPHIKVWDYAT        | 2.64 | 0.01 | 2.56 | 0.68 | 0.22 | 0.85 |
| 10647 | 0 | 7381   | CYGVDPHIKVWDYAT        | 2.64 | 0.01 | 2.56 | 2.52 | 0.22 | 0.85 |
| 10648 | 0 | 7383   | CYGVSATKLNDLCFSNV      | 2.78 | 0.01 | 2.48 | 0.44 | 0.85 | 0.28 |
| 10649 | 0 | 7383   | CYGVSATKLNDLCFSNV      | 2.78 | 0.01 | 2.48 | 1.20 | 0.22 | 0.28 |
| 10650 | 0 | 182071 | CYKIDTVLRSFDQAS        | 2.62 | 0.01 | 0.78 | 0.44 | 1.13 | 0.85 |
| 10651 | 0 | 7394   | CYKKVWADHRGTI          | 2.48 | 0.01 | 0.90 | 0.68 | 0.22 | 0.28 |
| 10652 | 0 | 7395   | CYKKVWRAHRGTI          | 2.50 | 0.01 | 0.90 | 0.68 | 0.22 | 0.28 |
| 10653 | 0 | 7396   | CYKKVWRDHAGTI          | 2.48 | 0.01 | 0.90 | 0.68 | 0.22 | 0.28 |
| 10654 | 0 | 7397   | CYKKVWRDHRGTI          | 2.50 | 0.01 | 4.93 | 0.68 | 0.22 | 1.27 |
| 10655 | 0 | 7397   | CYKKVWRDHRGTI          | 2.50 | 0.01 | 0.90 | 0.68 | 0.22 | 0.28 |
| 10656 | 0 | 7397   | CYKKVWRDHRGTI          | 2.50 | 0.01 | 0.90 | 0.68 | 0.22 | 0.28 |
| 10657 | 0 | 94483  | CYKKVWRDHRGTIIERG<br>C | 2.82 | 0.01 | 3.89 | 0.68 | 0.22 | 0.28 |
| 10658 | 0 | 94483  | CYKKVWRDHRGTIIERG<br>C | 2.82 | 0.01 | 3.89 | 0.68 | 0.22 | 0.28 |
| 10659 | 0 | 94483  | CYKKVWRDHRGTIIERG<br>C | 2.82 | 0.01 | 3.89 | 0.68 | 0.22 | 1.34 |
| 10660 | 0 | 94483  | CYKKVWRDHRGTIIERG<br>C | 2.82 | 0.01 | 3.89 | 0.68 | 0.22 | 0.28 |
| 10661 | 0 | 94483  | CYKKVWRDHRGTIIERG<br>C | 2.82 | 0.01 | 3.89 | 0.68 | 0.22 | 0.28 |
| 10662 | 0 | 94483  | CYKKVWRDHRGTIIERG<br>C | 2.82 | 0.01 | 3.89 | 0.68 | 0.22 | 0.28 |
| 10663 | 0 | 94483  | CYKKVWRDHRGTIIERG<br>C | 2.82 | 0.01 | 3.89 | 0.68 | 0.22 | 1.27 |
| 10664 | 0 | 94483  | CYKKVWRDHRGTIIERG<br>C | 2.82 | 0.01 | 3.89 | 0.68 | 0.22 | 0.28 |
| 10665 | 0 | 94483  | CYKKVWRDHRGTIIERG<br>C | 2.82 | 0.01 | 3.89 | 0.68 | 0.22 | 1.27 |

|       |   |        |                                |      |      |      |      |      |      |
|-------|---|--------|--------------------------------|------|------|------|------|------|------|
| 10666 | 0 | 94483  | CYKKVWRDHRGTIIERG<br>C         | 2.82 | 0.01 | 3.89 | 0.68 | 0.22 | 1.27 |
| 10667 | 0 | 94483  | CYKKVWRDHRGTIIERG<br>C         | 2.82 | 0.01 | 3.89 | 0.68 | 0.22 | 1.34 |
| 10668 | 0 | 133539 | CYKPGEWAC                      | 2.22 | 0.01 | 0.90 | 1.15 | 0.22 | 0.28 |
| 10669 | 0 | 133539 | CYKPGEWAC                      | 2.22 | 0.01 | 0.90 | 1.15 | 0.22 | 0.28 |
| 10670 | 0 | 133539 | CYKPGEWAC                      | 2.22 | 0.01 | 0.90 | 1.15 | 0.22 | 2.12 |
| 10671 | 0 | 133539 | CYKPGEWAC                      | 2.22 | 0.01 | 0.90 | 1.15 | 0.22 | 1.27 |
| 10672 | 0 | 133539 | CYKPGEWAC                      | 2.22 | 0.01 | 0.90 | 1.15 | 0.22 | 1.66 |
| 10673 | 0 | 123067 | CYNPKFEEL                      | 2.20 | 0.01 | 2.28 | 2.00 | 0.22 | 0.28 |
| 10674 | 0 | 123068 | CYNPKFEEV                      | 2.20 | 0.01 | 2.28 | 2.00 | 0.22 | 0.28 |
| 10675 | 0 | 123068 | CYNPKFEEV                      | 2.20 | 0.01 | 2.28 | 2.00 | 0.22 | 0.28 |
| 10676 | 0 | 167221 | CYNPRLHIC                      | 2.22 | 0.01 | 0.90 | 0.68 | 0.22 | 0.85 |
| 10677 | 0 | 167221 | CYNPRLHIC                      | 2.22 | 0.01 | 0.90 | 0.68 | 0.22 | 1.39 |
| 10678 | 0 | 167221 | CYNPRLHIC                      | 2.22 | 0.01 | 0.90 | 0.68 | 0.22 | 0.85 |
| 10679 | 0 | 167221 | CYNPRLHIC                      | 2.22 | 0.01 | 0.90 | 0.68 | 0.22 | 1.39 |
| 10680 | 0 | 176979 | CYPGDFNDYEELK                  | 2.52 | 0.01 | 3.09 | 0.68 | 0.22 | 0.28 |
| 10681 | 0 | 7424   | CYPKLGALTHC                    | 2.40 | 0.01 | 0.90 | 1.15 | 0.22 | 1.27 |
| 10682 | 0 | 7425   | CYPKNPRENKLKQP                 | 2.63 | 0.01 | 2.59 | 0.44 | 1.74 | 1.27 |
| 10683 | 0 | 196357 | CYPLAYFAKAYENKL                | 2.70 | 0.01 | 3.72 | 1.12 | 0.22 | 0.28 |
| 10684 | 0 | 7428   | CYPYDVPDY                      | 2.26 | 0.01 | 3.04 | 1.12 | 0.22 | 2.02 |
| 10685 | 0 | 7434   | CYRGARVDGLMC                   | 2.48 | 0.01 | 0.90 | 0.44 | 1.23 | 1.39 |
| 10686 | 0 | 7434   | CYRGARVDGLMC                   | 2.48 | 0.01 | 0.90 | 0.44 | 1.23 | 1.39 |
| 10687 | 0 | 7435   | CYRGVTLAGHRC                   | 2.48 | 0.01 | 0.90 | 0.44 | 1.23 | 1.39 |
| 10688 | 0 | 7435   | CYRGVTLAGHRC                   | 2.48 | 0.01 | 0.90 | 0.44 | 1.23 | 1.39 |
| 10689 | 0 | 133789 | CYRSPWRC                       | 2.15 | 0.01 | 0.90 | 1.15 | 0.22 | 0.28 |
| 10690 | 0 | 182072 | CYSFSTVLDSMSFEA                | 2.66 | 0.01 | 0.78 | 0.44 | 1.13 | 0.85 |
| 10691 | 0 | 7441   | CYSRQYSNR                      | 2.25 | 0.01 | 1.66 | 1.15 | 0.22 | 0.28 |
| 10692 | 0 | 7443   | CYTTGTIINQDPDKILTYI<br>AADHC   | 3.12 | 0.01 | 2.72 | 2.69 | 0.22 | 0.28 |
| 10693 | 0 | 7444   | CYTVSDSSFFSYGEIPFG<br>VTDGPRY  | 3.17 | 0.01 | 3.67 | 1.12 | 0.22 | 0.28 |
| 10694 | 0 | 7444   | CYTVSDSSFFSYGEIPFG<br>VTDGPRY  | 3.17 | 0.01 | 3.67 | 1.12 | 0.22 | 0.28 |
| 10695 | 0 | 7444   | CYTVSDSSFFSYGEIPFG<br>VTDGPRY  | 3.17 | 0.01 | 3.67 | 1.12 | 0.22 | 1.34 |
| 10696 | 0 | 7444   | CYTVSDSSFFSYGEIPFG<br>VTDGPRY  | 3.17 | 0.01 | 3.67 | 3.93 | 0.22 | 0.28 |
| 10697 | 0 | 7444   | CYTVSDSSFFSYGEIPFG<br>VTDGPRY  | 3.17 | 0.01 | 3.67 | 3.93 | 0.22 | 1.34 |
| 10698 | 0 | 7445   | CYTVSDSSFFSYGEIPFG<br>VTDGPRYC | 3.22 | 0.01 | 3.51 | 1.20 | 0.22 | 1.57 |
| 10699 | 0 | 7445   | CYTVSDSSFFSYGEIPFG<br>VTDGPRYC | 3.22 | 0.01 | 3.51 | 4.23 | 0.22 | 1.57 |
| 10700 | 0 | 7445   | CYTVSDSSFFSYGEIPFG<br>VTDGPRYC | 3.22 | 0.01 | 3.51 | 1.20 | 0.22 | 1.34 |

|       |   |        |                                |      |      |      |      |      |      |
|-------|---|--------|--------------------------------|------|------|------|------|------|------|
| 10701 | 0 | 7445   | CYTVSDSSFFSYGEIPFG<br>VTDGPRYC | 3.22 | 0.01 | 3.51 | 4.23 | 0.22 | 1.34 |
| 10702 | 0 | 7445   | CYTVSDSSFFSYGEIPFG<br>VTDGPRYC | 3.22 | 0.01 | 3.51 | 1.20 | 0.22 | 1.57 |
| 10703 | 0 | 7445   | CYTVSDSSFFSYGEIPFG<br>VTDGPRYC | 3.22 | 0.01 | 3.51 | 1.20 | 0.22 | 1.57 |
| 10704 | 0 | 7452   | CYWPLNDYGfYTTTGIG              | 2.78 | 0.01 | 2.48 | 0.44 | 0.85 | 0.28 |
| 10705 | 0 | 116688 | CYYASRNDKSYWLS                 | 2.61 | 0.01 | 1.60 | 1.12 | 0.22 | 0.28 |
| 10706 | 0 | 116688 | CYYASRNDKSYWLS                 | 2.61 | 0.01 | 1.60 | 0.44 | 1.13 | 0.28 |
| 10707 | 0 | 195209 | CYYHKS                         | 1.89 | 0.01 | 0.78 | 1.15 | 0.22 | 1.57 |
| 10708 | 0 | 264257 | DAAALMATDELTEA                 | 2.73 | 0.01 | 1.61 | 0.44 | 0.85 | 1.28 |
| 10709 | 0 | 7459   | DAADGT                         | 1.92 | 0.01 | 3.17 | 1.12 | 0.22 | 0.28 |
| 10710 | 0 | 240864 | DAADIGKTIH                     | 2.33 | 0.01 | 2.90 | 0.68 | 0.22 | 0.85 |
| 10711 | 0 | 240864 | DAADIGKTIH                     | 2.33 | 0.01 | 2.90 | 0.68 | 0.22 | 0.28 |
| 10712 | 0 | 240864 | DAADIGKTIH                     | 2.33 | 0.01 | 2.90 | 0.68 | 0.22 | 0.28 |
| 10713 | 0 | 7461   | DAADL                          | 1.78 | 0.01 | 3.97 | 0.68 | 0.22 | 1.34 |
| 10714 | 0 | 7461   | DAADL                          | 1.78 | 0.01 | 3.97 | 0.68 | 0.22 | 0.28 |
| 10715 | 0 | 7461   | DAADL                          | 1.78 | 0.01 | 3.97 | 1.20 | 0.22 | 0.28 |
| 10716 | 0 | 264274 | DAADVEAGDGPDKTT                | 2.70 | 0.01 | 1.61 | 0.44 | 0.85 | 1.28 |
| 10717 | 0 | 142391 | DAANIAHQKWLKAT                 | 2.61 | 0.01 | 2.59 | 0.44 | 0.85 | 0.85 |
| 10718 | 0 | 137127 | DAASPREEPRAP                   | 2.52 | 0.01 | 0.78 | 1.12 | 0.22 | 1.57 |
| 10719 | 0 | 137127 | DAASPREEPRAP                   | 2.52 | 0.01 | 0.78 | 1.12 | 0.22 | 2.02 |
| 10720 | 0 | 137127 | DAASPREEPRAP                   | 2.52 | 0.01 | 0.78 | 1.12 | 0.22 | 2.02 |
| 10721 | 0 | 7472   | DAATAQTLQAFLHWAIT<br>DGN       | 2.96 | 0.01 | 2.04 | 0.44 | 0.85 | 0.28 |
| 10722 | 0 | 7472   | DAATAQTLQAFLHWAIT<br>DGN       | 2.96 | 0.01 | 2.04 | 0.44 | 1.59 | 0.28 |
| 10723 | 0 | 7474   | DAAVAEAE                       | 2.17 | 0.01 | 2.04 | 0.44 | 0.85 | 0.28 |
| 10724 | 0 | 7480   | DADDPLLR                       | 2.15 | 0.01 | 2.85 | 0.44 | 0.22 | 0.28 |
| 10725 | 0 | 264415 | DADEEDEGEDEEEVE                | 2.75 | 0.01 | 1.61 | 0.44 | 0.85 | 1.28 |
| 10726 | 0 | 264425 | DADGDEEDYDVVDDD                | 2.71 | 0.01 | 1.61 | 0.44 | 0.85 | 1.28 |
| 10727 | 0 | 264426 | DADGDEEDYDVVDDL                | 2.71 | 0.01 | 1.61 | 0.44 | 0.85 | 1.28 |
| 10728 | 0 | 78944  | DADGDGHGWKPGNAP<br>GIAGY       | 2.98 | 0.01 | 2.84 | 0.44 | 0.85 | 0.28 |
| 10729 | 0 | 158708 | DADGDGMIGIDFAV                 | 2.72 | 0.01 | 3.26 | 0.44 | 1.23 | 0.28 |
| 10730 | 0 | 158708 | DADGDGMIGIDFAV                 | 2.72 | 0.01 | 3.26 | 0.44 | 1.41 | 0.28 |
| 10731 | 0 | 80885  | DADIGNEYDQVV                   | 2.46 | 0.01 | 2.87 | 0.44 | 0.85 | 0.28 |
| 10732 | 0 | 99920  | DADNILVIQQGQATVTV<br>ANG       | 2.99 | 0.01 | 2.16 | 0.44 | 2.39 | 0.28 |
| 10733 | 0 | 264449 | DADTAALAALEVLQ                 | 2.73 | 0.01 | 1.61 | 0.44 | 0.85 | 1.28 |
| 10734 | 0 | 7488   | DADYHRVM                       | 2.13 | 0.01 | 2.21 | 1.12 | 0.22 | 0.28 |
| 10735 | 0 | 7488   | DADYHRVM                       | 2.13 | 0.01 | 2.21 | 0.44 | 0.85 | 0.28 |
| 10736 | 0 | 7489   | DADYHRVMYA                     | 2.34 | 0.01 | 2.21 | 1.12 | 0.22 | 0.28 |
| 10737 | 0 | 7489   | DADYHRVMYA                     | 2.34 | 0.01 | 2.21 | 1.12 | 0.22 | 0.28 |



|       |   |        |                                                    |      |      |      |      |      |      |
|-------|---|--------|----------------------------------------------------|------|------|------|------|------|------|
| 10738 | 0 | 96160  | DAEDKDEDEE                                         | 2.36 | 0.01 | 0.90 | 0.44 | 1.93 | 0.85 |
| 10739 | 0 | 512402 | DAEETIADDANDLAP                                    | 2.71 | 0.01 | 2.24 | 0.44 | 1.41 | 1.28 |
| 10740 | 0 | 146185 | DAEFGH                                             | 1.88 | 0.01 | 1.75 | 3.00 | 1.93 | 0.28 |
| 10741 | 0 | 146185 | DAEFGH                                             | 1.88 | 0.01 | 1.75 | 3.00 | 1.93 | 1.75 |
| 10742 | 0 | 146185 | DAEFGH                                             | 1.88 | 0.01 | 1.75 | 2.61 | 0.22 | 0.85 |
| 10743 | 0 | 146185 | DAEFGH                                             | 1.88 | 0.01 | 1.75 | 2.61 | 0.22 | 1.34 |
| 10744 | 0 | 107307 | DAEFGHDSGF                                         | 2.34 | 0.01 | 1.75 | 0.68 | 1.41 | 1.34 |
| 10745 | 0 | 107307 | DAEFGHDSGF                                         | 2.34 | 0.01 | 1.75 | 0.68 | 1.41 | 0.28 |
| 10746 | 0 | 107307 | DAEFGHDSGF                                         | 2.34 | 0.01 | 1.75 | 0.68 | 1.41 | 0.28 |
| 10747 | 0 | 107307 | DAEFGHDSGF                                         | 2.34 | 0.01 | 1.75 | 0.68 | 0.22 | 1.34 |
| 10748 | 0 | 107307 | DAEFGHDSGF                                         | 2.34 | 0.01 | 1.75 | 0.68 | 0.22 | 0.28 |
| 10749 | 0 | 107307 | DAEFGHDSGF                                         | 2.34 | 0.01 | 1.75 | 0.68 | 0.22 | 0.28 |
| 10750 | 0 | 107307 | DAEFGHDSGF                                         | 2.34 | 0.01 | 1.75 | 0.68 | 1.41 | 1.34 |
| 10751 | 0 | 107307 | DAEFGHDSGF                                         | 2.34 | 0.01 | 1.75 | 0.68 | 0.22 | 1.34 |
| 10752 | 0 | 107307 | DAEFGHDSGF                                         | 2.34 | 0.01 | 1.75 | 0.68 | 0.22 | 1.34 |
| 10753 | 0 | 146813 | DAEFGHDSGFEVRHQK                                   | 2.74 | 0.01 | 1.75 | 0.68 | 0.22 | 0.28 |
| 10754 | 0 | 146813 | DAEFGHDSGFEVRHQK                                   | 2.74 | 0.01 | 1.75 | 0.68 | 0.22 | 0.28 |
| 10755 | 0 | 146813 | DAEFGHDSGFEVRHQK                                   | 2.74 | 0.01 | 1.75 | 0.68 | 0.22 | 1.27 |
| 10756 | 0 | 146813 | DAEFGHDSGFEVRHQK                                   | 2.74 | 0.01 | 1.75 | 0.68 | 0.22 | 1.27 |
| 10757 | 0 | 146813 | DAEFGHDSGFEVRHQK                                   | 2.74 | 0.01 | 1.75 | 0.68 | 0.22 | 1.27 |
| 10758 | 0 | 146813 | DAEFGHDSGFEVRHQK                                   | 2.74 | 0.01 | 1.75 | 0.68 | 0.22 | 1.27 |
| 10759 | 0 | 144874 | DAEFGHDSGFEVRHQKL<br>VFFAEDVGSNKGAIIGL<br>MVGGVV   | 3.62 | 0.01 | 1.75 | 0.44 | 1.41 | 1.34 |
| 10760 | 0 | 144874 | DAEFGHDSGFEVRHQKL<br>VFFAEDVGSNKGAIIGL<br>MVGGVV   | 3.62 | 0.01 | 1.75 | 0.44 | 1.41 | 1.75 |
| 10761 | 0 | 106320 | DAEFGHDSGFEVRHQKL<br>VFFAEDVGSNKGAIIGL<br>MVGGVVIA | 3.68 | 0.01 | 1.75 | 0.68 | 0.22 | 0.85 |
| 10762 | 0 | 106320 | DAEFGHDSGFEVRHQKL<br>VFFAEDVGSNKGAIIGL<br>MVGGVVIA | 3.68 | 0.01 | 1.75 | 0.68 | 0.22 | 0.85 |
| 10763 | 0 | 106320 | DAEFGHDSGFEVRHQKL<br>VFFAEDVGSNKGAIIGL<br>MVGGVVIA | 3.68 | 0.01 | 1.75 | 1.81 | 0.22 | 0.28 |
| 10764 | 0 | 102344 | DAEFR                                              | 1.74 | 0.01 | 0.78 | 1.15 | 0.22 | 1.34 |
| 10765 | 0 | 102344 | DAEFR                                              | 1.74 | 0.01 | 0.78 | 1.15 | 0.22 | 1.48 |
| 10766 | 0 | 102344 | DAEFR                                              | 1.74 | 0.01 | 0.78 | 1.15 | 0.22 | 1.75 |
| 10767 | 0 | 102344 | DAEFR                                              | 1.74 | 0.01 | 0.78 | 3.00 | 0.22 | 0.28 |
| 10768 | 0 | 102344 | DAEFR                                              | 1.74 | 0.01 | 0.78 | 3.00 | 0.22 | 1.48 |

|       |   |        |         |      |      |      |      |      |      |
|-------|---|--------|---------|------|------|------|------|------|------|
| 10769 | 0 | 102344 | DAEFR   | 1.74 | 0.01 | 0.78 | 3.00 | 1.93 | 1.75 |
| 10770 | 0 | 102344 | DAEFR   | 1.74 | 0.01 | 0.78 | 1.15 | 0.22 | 0.28 |
| 10771 | 0 | 102344 | DAEFR   | 1.74 | 0.01 | 0.78 | 1.15 | 0.22 | 0.85 |
| 10772 | 0 | 102344 | DAEFR   | 1.74 | 0.01 | 0.78 | 0.68 | 0.22 | 1.75 |
| 10773 | 0 | 102344 | DAEFR   | 1.74 | 0.01 | 0.78 | 1.15 | 0.22 | 1.57 |
| 10774 | 0 | 102344 | DAEFR   | 1.74 | 0.01 | 0.78 | 1.15 | 0.22 | 1.75 |
| 10775 | 0 | 102344 | DAEFR   | 1.74 | 0.01 | 0.78 | 1.15 | 0.22 | 1.75 |
| 10776 | 0 | 102344 | DAEFR   | 1.74 | 0.01 | 0.78 | 1.15 | 0.22 | 1.27 |
| 10777 | 0 | 102344 | DAEFR   | 1.74 | 0.01 | 0.78 | 1.15 | 0.22 | 1.34 |
| 10778 | 0 | 102344 | DAEFR   | 1.74 | 0.01 | 0.78 | 1.15 | 0.22 | 1.48 |
| 10779 | 0 | 102344 | DAEFR   | 1.74 | 0.01 | 0.78 | 0.68 | 0.22 | 0.85 |
| 10780 | 0 | 102344 | DAEFR   | 1.74 | 0.01 | 0.78 | 1.15 | 0.22 | 0.28 |
| 10781 | 0 | 102344 | DAEFR   | 1.74 | 0.01 | 0.78 | 1.15 | 0.22 | 0.28 |
| 10782 | 0 | 102344 | DAEFR   | 1.74 | 0.01 | 0.78 | 1.15 | 0.22 | 0.28 |
| 10783 | 0 | 106321 | DAEFRH  | 1.88 | 0.01 | 0.78 | 3.16 | 0.22 | 0.28 |
| 10784 | 0 | 106321 | DAEFRH  | 1.88 | 0.01 | 0.78 | 3.16 | 0.22 | 1.48 |
| 10785 | 0 | 106321 | DAEFRH  | 1.88 | 0.01 | 0.78 | 3.16 | 2.25 | 1.75 |
| 10786 | 0 | 106321 | DAEFRH  | 1.88 | 0.01 | 0.78 | 0.68 | 0.22 | 0.28 |
| 10787 | 0 | 106321 | DAEFRH  | 1.88 | 0.01 | 0.78 | 0.68 | 0.22 | 1.48 |
| 10788 | 0 | 106321 | DAEFRH  | 1.88 | 0.01 | 0.78 | 0.68 | 0.22 | 1.27 |
| 10789 | 0 | 106321 | DAEFRH  | 1.88 | 0.01 | 0.78 | 0.68 | 0.22 | 1.27 |
| 10790 | 0 | 106321 | DAEFRH  | 1.88 | 0.01 | 0.78 | 0.44 | 1.13 | 0.28 |
| 10791 | 0 | 106321 | DAEFRH  | 1.88 | 0.01 | 0.78 | 0.44 | 1.13 | 0.28 |
| 10792 | 0 | 106321 | DAEFRH  | 1.88 | 0.01 | 0.78 | 0.44 | 1.13 | 1.48 |
| 10793 | 0 | 106321 | DAEFRH  | 1.88 | 0.01 | 0.78 | 1.15 | 0.22 | 2.49 |
| 10794 | 0 | 106321 | DAEFRH  | 1.88 | 0.01 | 0.78 | 1.15 | 0.22 | 2.75 |
| 10795 | 0 | 106321 | DAEFRH  | 1.88 | 0.01 | 0.78 | 1.15 | 0.22 | 2.75 |
| 10796 | 0 | 106321 | DAEFRH  | 1.88 | 0.01 | 0.78 | 1.15 | 0.22 | 2.75 |
| 10797 | 0 | 105127 | DAEFRHD | 2.03 | 0.01 | 0.78 | 3.00 | 1.93 | 0.28 |
| 10798 | 0 | 105127 | DAEFRHD | 2.03 | 0.01 | 0.78 | 1.12 | 0.22 | 1.27 |
| 10799 | 0 | 105127 | DAEFRHD | 2.03 | 0.01 | 0.78 | 1.12 | 0.22 | 1.27 |
| 10800 | 0 | 105127 | DAEFRHD | 2.03 | 0.01 | 0.78 | 1.12 | 0.22 | 1.27 |
| 10801 | 0 | 105127 | DAEFRHD | 2.03 | 0.01 | 0.78 | 1.15 | 0.22 | 0.28 |
| 10802 | 0 | 105127 | DAEFRHD | 2.03 | 0.01 | 0.78 | 3.00 | 0.22 | 0.28 |
| 10803 | 0 | 105127 | DAEFRHD | 2.03 | 0.01 | 0.78 | 3.16 | 0.22 | 1.27 |
| 10804 | 0 | 105127 | DAEFRHD | 2.03 | 0.01 | 0.78 | 2.79 | 0.22 | 1.27 |
| 10805 | 0 | 105127 | DAEFRHD | 2.03 | 0.01 | 0.78 | 1.81 | 0.22 | 1.27 |
| 10806 | 0 | 105127 | DAEFRHD | 2.03 | 0.01 | 0.78 | 0.68 | 0.22 | 1.66 |
| 10807 | 0 | 105127 | DAEFRHD | 2.03 | 0.01 | 0.78 | 0.68 | 0.22 | 1.66 |
| 10808 | 0 | 105127 | DAEFRHD | 2.03 | 0.01 | 0.78 | 0.68 | 0.22 | 1.66 |
| 10809 | 0 | 105127 | DAEFRHD | 2.03 | 0.01 | 0.78 | 0.68 | 0.22 | 1.66 |
| 10810 | 0 | 105127 | DAEFRHD | 2.03 | 0.01 | 0.78 | 0.68 | 0.22 | 1.66 |
| 10811 | 0 | 105127 | DAEFRHD | 2.03 | 0.01 | 0.78 | 0.68 | 0.22 | 1.66 |
| 10812 | 0 | 105127 | DAEFRHD | 2.03 | 0.01 | 0.78 | 0.68 | 0.22 | 3.13 |
| 10813 | 0 | 105127 | DAEFRHD | 2.03 | 0.01 | 0.78 | 1.15 | 0.22 | 2.92 |
| 10814 | 0 | 105127 | DAEFRHD | 2.03 | 0.01 | 0.78 | 1.15 | 0.22 | 1.34 |
| 10815 | 0 | 105127 | DAEFRHD | 2.03 | 0.01 | 0.78 | 1.81 | 0.22 | 0.28 |

|       |   |        |           |      |      |      |      |      |      |
|-------|---|--------|-----------|------|------|------|------|------|------|
| 10816 | 0 | 105127 | DAEFRHD   | 2.03 | 0.01 | 0.78 | 0.68 | 0.22 | 0.28 |
| 10817 | 0 | 105127 | DAEFRHD   | 2.03 | 0.01 | 0.78 | 0.68 | 0.22 | 1.48 |
| 10818 | 0 | 105127 | DAEFRHD   | 2.03 | 0.01 | 0.78 | 0.68 | 0.22 | 1.48 |
| 10819 | 0 | 105127 | DAEFRHD   | 2.03 | 0.01 | 0.78 | 0.68 | 0.22 | 1.75 |
| 10820 | 0 | 105127 | DAEFRHD   | 2.03 | 0.01 | 0.78 | 0.68 | 0.22 | 0.28 |
| 10821 | 0 | 105127 | DAEFRHD   | 2.03 | 0.01 | 0.78 | 1.15 | 0.22 | 2.49 |
| 10822 | 0 | 105127 | DAEFRHD   | 2.03 | 0.01 | 0.78 | 1.15 | 0.22 | 2.49 |
| 10823 | 0 | 105127 | DAEFRHD   | 2.03 | 0.01 | 0.78 | 1.15 | 0.22 | 1.66 |
| 10824 | 0 | 105127 | DAEFRHD   | 2.03 | 0.01 | 0.78 | 1.15 | 0.22 | 1.66 |
| 10825 | 0 | 105127 | DAEFRHD   | 2.03 | 0.01 | 0.78 | 1.15 | 0.22 | 1.66 |
| 10826 | 0 | 99921  | DAEFRHDS  | 2.13 | 0.01 | 0.78 | 0.44 | 1.93 | 1.27 |
| 10827 | 0 | 99921  | DAEFRHDS  | 2.13 | 0.01 | 0.78 | 1.15 | 0.22 | 2.49 |
| 10828 | 0 | 99921  | DAEFRHDS  | 2.13 | 0.01 | 0.78 | 1.15 | 0.22 | 2.49 |
| 10829 | 0 | 99921  | DAEFRHDS  | 2.13 | 0.01 | 0.78 | 3.00 | 1.93 | 0.28 |
| 10830 | 0 | 99921  | DAEFRHDS  | 2.13 | 0.01 | 0.78 | 3.00 | 1.93 | 0.28 |
| 10831 | 0 | 99921  | DAEFRHDS  | 2.13 | 0.01 | 0.78 | 1.15 | 0.22 | 1.66 |
| 10832 | 0 | 99921  | DAEFRHDS  | 2.13 | 0.01 | 0.78 | 2.19 | 0.22 | 3.25 |
| 10833 | 0 | 99921  | DAEFRHDS  | 2.13 | 0.01 | 0.78 | 2.19 | 0.22 | 1.66 |
| 10834 | 0 | 99921  | DAEFRHDS  | 2.13 | 0.01 | 0.78 | 2.19 | 0.22 | 1.66 |
| 10835 | 0 | 99921  | DAEFRHDS  | 2.13 | 0.01 | 0.78 | 2.19 | 0.22 | 1.66 |
| 10836 | 0 | 99921  | DAEFRHDS  | 2.13 | 0.01 | 0.78 | 2.19 | 0.22 | 1.66 |
| 10837 | 0 | 99921  | DAEFRHDS  | 2.13 | 0.01 | 0.78 | 2.19 | 0.22 | 1.66 |
| 10838 | 0 | 99921  | DAEFRHDS  | 2.13 | 0.01 | 0.78 | 2.19 | 0.22 | 1.66 |
| 10839 | 0 | 99921  | DAEFRHDS  | 2.13 | 0.01 | 0.78 | 2.19 | 0.22 | 1.66 |
| 10840 | 0 | 99921  | DAEFRHDS  | 2.13 | 0.01 | 0.78 | 2.19 | 0.22 | 1.66 |
| 10841 | 0 | 99921  | DAEFRHDS  | 2.13 | 0.01 | 0.78 | 2.19 | 0.22 | 1.66 |
| 10842 | 0 | 99921  | DAEFRHDS  | 2.13 | 0.01 | 0.78 | 2.19 | 0.22 | 1.66 |
| 10843 | 0 | 99921  | DAEFRHDS  | 2.13 | 0.01 | 0.78 | 2.19 | 0.22 | 1.66 |
| 10844 | 0 | 99921  | DAEFRHDS  | 2.13 | 0.01 | 0.78 | 2.19 | 0.22 | 1.66 |
| 10845 | 0 | 99921  | DAEFRHDS  | 2.13 | 0.01 | 0.78 | 2.19 | 0.22 | 1.66 |
| 10846 | 0 | 99921  | DAEFRHDS  | 2.13 | 0.01 | 0.78 | 2.19 | 0.22 | 1.66 |
| 10847 | 0 | 99921  | DAEFRHDS  | 2.13 | 0.01 | 0.78 | 2.19 | 0.22 | 1.66 |
| 10848 | 0 | 99921  | DAEFRHDS  | 2.13 | 0.01 | 0.78 | 2.19 | 0.22 | 1.66 |
| 10849 | 0 | 99921  | DAEFRHDS  | 2.13 | 0.01 | 0.78 | 2.19 | 0.22 | 1.66 |
| 10850 | 0 | 99921  | DAEFRHDS  | 2.13 | 0.01 | 0.78 | 2.19 | 0.22 | 1.66 |
| 10851 | 0 | 99921  | DAEFRHDS  | 2.13 | 0.01 | 0.78 | 2.19 | 0.22 | 1.66 |
| 10852 | 0 | 99921  | DAEFRHDS  | 2.13 | 0.01 | 0.78 | 2.19 | 0.22 | 1.66 |
| 10853 | 0 | 99921  | DAEFRHDS  | 2.13 | 0.01 | 0.78 | 2.19 | 0.22 | 1.66 |
| 10854 | 0 | 99921  | DAEFRHDS  | 2.13 | 0.01 | 0.78 | 2.19 | 0.22 | 1.34 |
| 10855 | 0 | 99921  | DAEFRHDS  | 2.13 | 0.01 | 0.78 | 2.19 | 0.22 | 0.28 |
| 10856 | 0 | 99921  | DAEFRHDS  | 2.13 | 0.01 | 0.78 | 2.19 | 0.22 | 1.48 |
| 10857 | 0 | 99921  | DAEFRHDS  | 2.13 | 0.01 | 0.78 | 2.19 | 0.22 | 0.28 |
| 10858 | 0 | 106322 | DAEFRHDSG | 2.22 | 0.01 | 0.78 | 1.81 | 0.22 | 0.28 |
| 10859 | 0 | 106322 | DAEFRHDSG | 2.22 | 0.01 | 0.78 | 1.81 | 0.22 | 0.28 |
| 10860 | 0 | 106322 | DAEFRHDSG | 2.22 | 0.01 | 0.78 | 1.15 | 0.22 | 0.85 |
| 10861 | 0 | 106322 | DAEFRHDSG | 2.22 | 0.01 | 0.78 | 1.20 | 0.22 | 1.27 |
| 10862 | 0 | 106322 | DAEFRHDSG | 2.22 | 0.01 | 0.78 | 1.20 | 0.22 | 1.34 |

|       |   |        |             |      |      |      |      |      |      |
|-------|---|--------|-------------|------|------|------|------|------|------|
| 10863 | 0 | 106322 | DAEFRHDSG   | 2.22 | 0.01 | 0.78 | 3.59 | 0.22 | 0.28 |
| 10864 | 0 | 106322 | DAEFRHDSG   | 2.22 | 0.01 | 0.78 | 3.59 | 0.22 | 1.48 |
| 10865 | 0 | 106322 | DAEFRHDSG   | 2.22 | 0.01 | 0.78 | 0.68 | 0.22 | 0.28 |
| 10866 | 0 | 106322 | DAEFRHDSG   | 2.22 | 0.01 | 0.78 | 0.68 | 0.22 | 1.34 |
| 10867 | 0 | 106322 | DAEFRHDSG   | 2.22 | 0.01 | 0.78 | 0.68 | 0.22 | 1.48 |
| 10868 | 0 | 106322 | DAEFRHDSG   | 2.22 | 0.01 | 0.78 | 2.16 | 0.22 | 2.02 |
| 10869 | 0 | 99922  | DAEFRHDSGY  | 2.30 | 0.01 | 0.78 | 1.12 | 0.22 | 1.48 |
| 10870 | 0 | 99922  | DAEFRHDSGY  | 2.30 | 0.01 | 0.78 | 1.15 | 0.22 | 0.28 |
| 10871 | 0 | 99922  | DAEFRHDSGY  | 2.30 | 0.01 | 0.78 | 1.20 | 0.22 | 0.85 |
| 10872 | 0 | 99922  | DAEFRHDSGY  | 2.30 | 0.01 | 0.78 | 1.20 | 0.22 | 1.27 |
| 10873 | 0 | 99922  | DAEFRHDSGY  | 2.30 | 0.01 | 0.78 | 0.68 | 0.22 | 1.34 |
| 10874 | 0 | 99922  | DAEFRHDSGY  | 2.30 | 0.01 | 0.78 | 0.68 | 1.41 | 1.34 |
| 10875 | 0 | 99922  | DAEFRHDSGY  | 2.30 | 0.01 | 0.78 | 0.68 | 0.22 | 1.34 |
| 10876 | 0 | 99922  | DAEFRHDSGY  | 2.30 | 0.01 | 0.78 | 0.68 | 0.22 | 0.28 |
| 10877 | 0 | 99922  | DAEFRHDSGY  | 2.30 | 0.01 | 0.78 | 0.68 | 0.22 | 0.28 |
| 10878 | 0 | 99922  | DAEFRHDSGY  | 2.30 | 0.01 | 0.78 | 0.68 | 1.41 | 1.34 |
| 10879 | 0 | 99922  | DAEFRHDSGY  | 2.30 | 0.01 | 0.78 | 0.68 | 1.41 | 0.28 |
| 10880 | 0 | 99922  | DAEFRHDSGY  | 2.30 | 0.01 | 0.78 | 0.68 | 1.41 | 0.28 |
| 10881 | 0 | 99922  | DAEFRHDSGY  | 2.30 | 0.01 | 0.78 | 0.68 | 0.22 | 1.34 |
| 10882 | 0 | 99922  | DAEFRHDSGY  | 2.30 | 0.01 | 0.78 | 0.68 | 0.22 | 0.28 |
| 10883 | 0 | 99922  | DAEFRHDSGY  | 2.30 | 0.01 | 0.78 | 0.68 | 0.22 | 1.27 |
| 10884 | 0 | 99922  | DAEFRHDSGY  | 2.30 | 0.01 | 0.78 | 0.68 | 0.22 | 1.48 |
| 10885 | 0 | 99922  | DAEFRHDSGY  | 2.30 | 0.01 | 0.78 | 1.15 | 0.22 | 2.92 |
| 10886 | 0 | 99922  | DAEFRHDSGY  | 2.30 | 0.01 | 0.78 | 0.68 | 0.22 | 0.28 |
| 10887 | 0 | 99922  | DAEFRHDSGY  | 2.30 | 0.01 | 0.78 | 1.15 | 0.22 | 0.28 |
| 10888 | 0 | 99922  | DAEFRHDSGY  | 2.30 | 0.01 | 0.78 | 1.15 | 0.22 | 0.28 |
| 10889 | 0 | 99922  | DAEFRHDSGY  | 2.30 | 0.01 | 0.78 | 1.15 | 0.22 | 0.28 |
| 10890 | 0 | 99922  | DAEFRHDSGY  | 2.30 | 0.01 | 0.78 | 1.15 | 0.22 | 2.92 |
| 10891 | 0 | 99922  | DAEFRHDSGY  | 2.30 | 0.01 | 0.78 | 1.15 | 0.22 | 1.34 |
| 10892 | 0 | 99922  | DAEFRHDSGY  | 2.30 | 0.01 | 0.78 | 1.81 | 0.22 | 1.27 |
| 10893 | 0 | 99922  | DAEFRHDSGY  | 2.30 | 0.01 | 0.78 | 1.81 | 0.22 | 1.48 |
| 10894 | 0 | 99922  | DAEFRHDSGY  | 2.30 | 0.01 | 0.78 | 0.68 | 0.22 | 0.28 |
| 10895 | 0 | 99922  | DAEFRHDSGY  | 2.30 | 0.01 | 0.78 | 0.68 | 0.22 | 0.28 |
| 10896 | 0 | 104443 | DAEFRHDSGYE | 2.40 | 0.01 | 0.78 | 1.81 | 0.22 | 1.27 |
| 10897 | 0 | 104443 | DAEFRHDSGYE | 2.40 | 0.01 | 0.78 | 1.81 | 0.22 | 1.48 |
| 10898 | 0 | 104443 | DAEFRHDSGYE | 2.40 | 0.01 | 0.78 | 3.16 | 0.22 | 0.28 |
| 10899 | 0 | 104443 | DAEFRHDSGYE | 2.40 | 0.01 | 0.78 | 1.81 | 0.22 | 1.27 |
| 10900 | 0 | 104443 | DAEFRHDSGYE | 2.40 | 0.01 | 0.78 | 3.00 | 1.93 | 0.28 |
| 10901 | 0 | 104443 | DAEFRHDSGYE | 2.40 | 0.01 | 0.78 | 3.00 | 1.93 | 1.75 |
| 10902 | 0 | 104443 | DAEFRHDSGYE | 2.40 | 0.01 | 0.78 | 3.16 | 0.22 | 0.28 |
| 10903 | 0 | 104443 | DAEFRHDSGYE | 2.40 | 0.01 | 0.78 | 3.16 | 0.22 | 1.48 |
| 10904 | 0 | 104443 | DAEFRHDSGYE | 2.40 | 0.01 | 0.78 | 3.16 | 0.22 | 1.27 |
| 10905 | 0 | 104443 | DAEFRHDSGYE | 2.40 | 0.01 | 0.78 | 3.16 | 0.22 | 1.75 |
| 10906 | 0 | 104443 | DAEFRHDSGYE | 2.40 | 0.01 | 0.78 | 3.16 | 0.22 | 1.34 |
| 10907 | 0 | 104443 | DAEFRHDSGYE | 2.40 | 0.01 | 0.78 | 3.16 | 0.22 | 1.66 |
| 10908 | 0 | 104443 | DAEFRHDSGYE | 2.40 | 0.01 | 0.78 | 0.68 | 0.22 | 1.27 |
| 10909 | 0 | 104443 | DAEFRHDSGYE | 2.40 | 0.01 | 0.78 | 0.68 | 0.22 | 1.27 |

|       |   |        |             |      |      |      |      |      |      |
|-------|---|--------|-------------|------|------|------|------|------|------|
| 10910 | 0 | 104443 | DAEFRHDSGYE | 2.40 | 0.01 | 0.78 | 0.68 | 0.22 | 1.48 |
| 10911 | 0 | 104443 | DAEFRHDSGYE | 2.40 | 0.01 | 0.78 | 0.68 | 0.22 | 1.75 |
| 10912 | 0 | 104443 | DAEFRHDSGYE | 2.40 | 0.01 | 0.78 | 1.15 | 0.22 | 2.66 |
| 10913 | 0 | 104443 | DAEFRHDSGYE | 2.40 | 0.01 | 0.78 | 1.15 | 0.22 | 2.66 |
| 10914 | 0 | 104443 | DAEFRHDSGYE | 2.40 | 0.01 | 0.78 | 1.81 | 0.22 | 1.27 |
| 10915 | 0 | 104443 | DAEFRHDSGYE | 2.40 | 0.01 | 0.78 | 1.81 | 0.22 | 0.28 |
| 10916 | 0 | 104443 | DAEFRHDSGYE | 2.40 | 0.01 | 0.78 | 0.44 | 1.41 | 1.27 |
| 10917 | 0 | 104443 | DAEFRHDSGYE | 2.40 | 0.01 | 0.78 | 0.44 | 1.41 | 1.27 |
| 10918 | 0 | 104443 | DAEFRHDSGYE | 2.40 | 0.01 | 0.78 | 0.44 | 1.41 | 1.48 |
| 10919 | 0 | 104443 | DAEFRHDSGYE | 2.40 | 0.01 | 0.78 | 0.44 | 1.41 | 1.34 |
| 10920 | 0 | 104443 | DAEFRHDSGYE | 2.40 | 0.01 | 0.78 | 0.44 | 1.41 | 1.75 |
| 10921 | 0 | 104443 | DAEFRHDSGYE | 2.40 | 0.01 | 0.78 | 3.40 | 0.22 | 0.28 |
| 10922 | 0 | 104443 | DAEFRHDSGYE | 2.40 | 0.01 | 0.78 | 3.40 | 0.22 | 0.28 |
| 10923 | 0 | 104443 | DAEFRHDSGYE | 2.40 | 0.01 | 0.78 | 1.15 | 0.22 | 1.75 |
| 10924 | 0 | 104443 | DAEFRHDSGYE | 2.40 | 0.01 | 0.78 | 0.68 | 0.22 | 0.28 |
| 10925 | 0 | 104443 | DAEFRHDSGYE | 2.40 | 0.01 | 0.78 | 1.81 | 0.22 | 0.28 |
| 10926 | 0 | 104443 | DAEFRHDSGYE | 2.40 | 0.01 | 0.78 | 4.23 | 2.25 | 1.75 |
| 10927 | 0 | 104443 | DAEFRHDSGYE | 2.40 | 0.01 | 0.78 | 1.81 | 0.22 | 0.28 |
| 10928 | 0 | 104443 | DAEFRHDSGYE | 2.40 | 0.01 | 0.78 | 1.81 | 0.22 | 1.27 |
| 10929 | 0 | 104443 | DAEFRHDSGYE | 2.40 | 0.01 | 0.78 | 1.81 | 0.22 | 0.28 |
| 10930 | 0 | 104443 | DAEFRHDSGYE | 2.40 | 0.01 | 0.78 | 1.20 | 0.22 | 0.28 |
| 10931 | 0 | 104443 | DAEFRHDSGYE | 2.40 | 0.01 | 0.78 | 1.20 | 0.22 | 0.28 |
| 10932 | 0 | 104443 | DAEFRHDSGYE | 2.40 | 0.01 | 0.78 | 1.20 | 0.22 | 0.28 |
| 10933 | 0 | 104443 | DAEFRHDSGYE | 2.40 | 0.01 | 0.78 | 1.20 | 0.22 | 0.28 |
| 10934 | 0 | 104443 | DAEFRHDSGYE | 2.40 | 0.01 | 0.78 | 1.20 | 0.22 | 0.28 |
| 10935 | 0 | 104443 | DAEFRHDSGYE | 2.40 | 0.01 | 0.78 | 1.20 | 0.22 | 1.66 |
| 10936 | 0 | 104443 | DAEFRHDSGYE | 2.40 | 0.01 | 0.78 | 1.20 | 0.22 | 1.66 |
| 10937 | 0 | 104443 | DAEFRHDSGYE | 2.40 | 0.01 | 0.78 | 1.20 | 0.22 | 1.66 |
| 10938 | 0 | 104443 | DAEFRHDSGYE | 2.40 | 0.01 | 0.78 | 1.20 | 0.22 | 1.34 |
| 10939 | 0 | 104443 | DAEFRHDSGYE | 2.40 | 0.01 | 0.78 | 1.20 | 0.22 | 1.48 |
| 10940 | 0 | 104443 | DAEFRHDSGYE | 2.40 | 0.01 | 0.78 | 2.61 | 0.22 | 0.28 |
| 10941 | 0 | 104443 | DAEFRHDSGYE | 2.40 | 0.01 | 0.78 | 2.61 | 0.22 | 1.48 |
| 10942 | 0 | 104443 | DAEFRHDSGYE | 2.40 | 0.01 | 0.78 | 2.61 | 0.22 | 1.66 |
| 10943 | 0 | 104443 | DAEFRHDSGYE | 2.40 | 0.01 | 0.78 | 2.61 | 0.22 | 1.34 |
| 10944 | 0 | 104443 | DAEFRHDSGYE | 2.40 | 0.01 | 0.78 | 0.44 | 1.41 | 2.49 |
| 10945 | 0 | 104443 | DAEFRHDSGYE | 2.40 | 0.01 | 0.78 | 0.44 | 1.41 | 0.85 |
| 10946 | 0 | 104443 | DAEFRHDSGYE | 2.40 | 0.01 | 0.78 | 0.44 | 1.41 | 0.85 |
| 10947 | 0 | 104443 | DAEFRHDSGYE | 2.40 | 0.01 | 0.78 | 0.44 | 1.41 | 2.98 |
| 10948 | 0 | 104443 | DAEFRHDSGYE | 2.40 | 0.01 | 0.78 | 0.44 | 1.41 | 2.98 |
| 10949 | 0 | 104443 | DAEFRHDSGYE | 2.40 | 0.01 | 0.78 | 0.44 | 1.41 | 2.98 |
| 10950 | 0 | 104443 | DAEFRHDSGYE | 2.40 | 0.01 | 0.78 | 0.44 | 1.41 | 1.48 |
| 10951 | 0 | 104443 | DAEFRHDSGYE | 2.40 | 0.01 | 0.78 | 0.44 | 1.41 | 1.75 |
| 10952 | 0 | 104443 | DAEFRHDSGYE | 2.40 | 0.01 | 0.78 | 0.44 | 1.41 | 0.28 |
| 10953 | 0 | 104443 | DAEFRHDSGYE | 2.40 | 0.01 | 0.78 | 0.44 | 1.41 | 1.75 |
| 10954 | 0 | 104443 | DAEFRHDSGYE | 2.40 | 0.01 | 0.78 | 0.44 | 1.41 | 1.66 |
| 10955 | 0 | 104443 | DAEFRHDSGYE | 2.40 | 0.01 | 0.78 | 0.44 | 1.41 | 1.66 |
| 10956 | 0 | 104443 | DAEFRHDSGYE | 2.40 | 0.01 | 0.78 | 0.44 | 1.41 | 1.34 |

|       |   |        |                                       |      |      |      |      |      |      |
|-------|---|--------|---------------------------------------|------|------|------|------|------|------|
| 10957 | 0 | 104443 | DAEFRHDSGYE                           | 2.40 | 0.01 | 0.78 | 0.44 | 1.41 | 0.85 |
| 10958 | 0 | 107098 | DAEFRHDSGYEDAEFRH<br>DSGYE            | 3.09 | 0.01 | 0.90 | 4.23 | 0.22 | 0.28 |
| 10959 | 0 | 107098 | DAEFRHDSGYEDAEFRH<br>DSGYE            | 3.09 | 0.01 | 0.90 | 4.23 | 0.22 | 1.48 |
| 10960 | 0 | 107098 | DAEFRHDSGYEDAEFRH<br>DSGYE            | 3.09 | 0.01 | 0.90 | 4.23 | 0.22 | 0.85 |
| 10961 | 0 | 107098 | DAEFRHDSGYEDAEFRH<br>DSGYE            | 3.09 | 0.01 | 0.90 | 4.23 | 0.22 | 1.75 |
| 10962 | 0 | 105128 | DAEFRHDSGYEDAEFRH<br>DSGYEDAEFRHDSGYE | 3.50 | 0.01 | 0.90 | 1.81 | 0.22 | 0.28 |
| 10963 | 0 | 105128 | DAEFRHDSGYEDAEFRH<br>DSGYEDAEFRHDSGYE | 3.50 | 0.01 | 0.90 | 4.23 | 2.25 | 1.75 |
| 10964 | 0 | 103838 | DAEFRHDSGYEV                          | 2.46 | 0.01 | 0.78 | 1.15 | 0.22 | 1.75 |
| 10965 | 0 | 103838 | DAEFRHDSGYEV                          | 2.46 | 0.01 | 0.78 | 1.15 | 2.26 | 0.85 |
| 10966 | 0 | 103838 | DAEFRHDSGYEV                          | 2.46 | 0.01 | 0.78 | 0.68 | 0.22 | 0.28 |
| 10967 | 0 | 103838 | DAEFRHDSGYEV                          | 2.46 | 0.01 | 0.78 | 0.68 | 0.22 | 0.28 |
| 10968 | 0 | 103838 | DAEFRHDSGYEV                          | 2.46 | 0.01 | 0.78 | 0.68 | 0.22 | 0.85 |
| 10969 | 0 | 103838 | DAEFRHDSGYEV                          | 2.46 | 0.01 | 0.78 | 3.16 | 0.22 | 0.28 |
| 10970 | 0 | 103838 | DAEFRHDSGYEV                          | 2.46 | 0.01 | 0.78 | 3.16 | 0.22 | 1.66 |
| 10971 | 0 | 103838 | DAEFRHDSGYEV                          | 2.46 | 0.01 | 0.78 | 3.16 | 0.22 | 1.66 |
| 10972 | 0 | 103838 | DAEFRHDSGYEV                          | 2.46 | 0.01 | 0.78 | 3.16 | 0.22 | 1.66 |
| 10973 | 0 | 103838 | DAEFRHDSGYEV                          | 2.46 | 0.01 | 0.78 | 3.16 | 0.22 | 1.48 |
| 10974 | 0 | 103838 | DAEFRHDSGYEV                          | 2.46 | 0.01 | 0.78 | 2.59 | 0.22 | 0.28 |
| 10975 | 0 | 103838 | DAEFRHDSGYEV                          | 2.46 | 0.01 | 0.78 | 3.16 | 0.22 | 0.28 |
| 10976 | 0 | 103838 | DAEFRHDSGYEV                          | 2.46 | 0.01 | 0.78 | 3.16 | 2.25 | 1.75 |
| 10977 | 0 | 103838 | DAEFRHDSGYEV                          | 2.46 | 0.01 | 0.78 | 3.16 | 0.22 | 1.34 |
| 10978 | 0 | 103839 | DAEFRHDSGYEVH                         | 2.54 | 0.01 | 0.78 | 0.68 | 0.22 | 0.28 |
| 10979 | 0 | 103839 | DAEFRHDSGYEVH                         | 2.54 | 0.01 | 0.78 | 0.68 | 0.22 | 1.48 |
| 10980 | 0 | 103839 | DAEFRHDSGYEVH                         | 2.54 | 0.01 | 0.78 | 0.68 | 0.22 | 1.75 |
| 10981 | 0 | 103839 | DAEFRHDSGYEVH                         | 2.54 | 0.01 | 0.78 | 0.68 | 0.22 | 1.48 |
| 10982 | 0 | 103839 | DAEFRHDSGYEVH                         | 2.54 | 0.01 | 0.78 | 1.12 | 0.22 | 1.48 |
| 10983 | 0 | 103839 | DAEFRHDSGYEVH                         | 2.54 | 0.01 | 0.78 | 0.68 | 0.22 | 0.28 |
| 10984 | 0 | 103839 | DAEFRHDSGYEVH                         | 2.54 | 0.01 | 0.78 | 1.81 | 0.22 | 0.28 |
| 10985 | 0 | 103839 | DAEFRHDSGYEVH                         | 2.54 | 0.01 | 0.78 | 0.68 | 0.22 | 0.28 |
| 10986 | 0 | 103839 | DAEFRHDSGYEVH                         | 2.54 | 0.01 | 0.78 | 0.68 | 0.22 | 0.28 |
| 10987 | 0 | 103839 | DAEFRHDSGYEVH                         | 2.54 | 0.01 | 0.78 | 0.68 | 0.22 | 0.85 |
| 10988 | 0 | 99134  | DAEFRHDSGYEVHHQ                       | 2.66 | 0.01 | 0.78 | 3.16 | 1.93 | 0.28 |
| 10989 | 0 | 99134  | DAEFRHDSGYEVHHQ                       | 2.66 | 0.01 | 0.78 | 3.16 | 1.93 | 1.75 |
| 10990 | 0 | 99134  | DAEFRHDSGYEVHHQ                       | 2.66 | 0.01 | 0.78 | 0.68 | 0.22 | 0.28 |
| 10991 | 0 | 99134  | DAEFRHDSGYEVHHQ                       | 2.66 | 0.01 | 0.78 | 0.68 | 0.22 | 1.48 |
| 10992 | 0 | 99134  | DAEFRHDSGYEVHHQ                       | 2.66 | 0.01 | 0.78 | 0.68 | 0.22 | 1.27 |
| 10993 | 0 | 99134  | DAEFRHDSGYEVHHQ                       | 2.66 | 0.01 | 0.78 | 4.45 | 0.22 | 1.48 |
| 10994 | 0 | 99134  | DAEFRHDSGYEVHHQ                       | 2.66 | 0.01 | 0.78 | 4.45 | 0.22 | 0.28 |
| 10995 | 0 | 99134  | DAEFRHDSGYEVHHQ                       | 2.66 | 0.01 | 0.78 | 4.45 | 0.22 | 1.27 |

|       |   |       |                  |      |      |      |      |      |      |
|-------|---|-------|------------------|------|------|------|------|------|------|
| 10996 | 0 | 99134 | DAEFRHDSGYEVHHQ  | 2.66 | 0.01 | 0.78 | 3.00 | 0.22 | 0.28 |
| 10997 | 0 | 99134 | DAEFRHDSGYEVHHQ  | 2.66 | 0.01 | 0.78 | 1.81 | 0.22 | 1.27 |
| 10998 | 0 | 99134 | DAEFRHDSGYEVHHQ  | 2.66 | 0.01 | 0.78 | 3.00 | 1.93 | 0.28 |
| 10999 | 0 | 99134 | DAEFRHDSGYEVHHQ  | 2.66 | 0.01 | 0.78 | 3.00 | 1.93 | 1.75 |
| 11000 | 0 | 99134 | DAEFRHDSGYEVHHQ  | 2.66 | 0.01 | 0.78 | 3.16 | 0.22 | 1.27 |
| 11001 | 0 | 99134 | DAEFRHDSGYEVHHQ  | 2.66 | 0.01 | 0.78 | 2.79 | 0.22 | 1.27 |
| 11002 | 0 | 99134 | DAEFRHDSGYEVHHQ  | 2.66 | 0.01 | 0.78 | 3.00 | 1.93 | 1.27 |
| 11003 | 0 | 99134 | DAEFRHDSGYEVHHQ  | 2.66 | 0.01 | 0.78 | 1.81 | 0.22 | 1.27 |
| 11004 | 0 | 99134 | DAEFRHDSGYEVHHQ  | 2.66 | 0.01 | 0.78 | 3.00 | 1.93 | 1.27 |
| 11005 | 0 | 99134 | DAEFRHDSGYEVHHQ  | 2.66 | 0.01 | 0.78 | 3.00 | 1.93 | 0.28 |
| 11006 | 0 | 99134 | DAEFRHDSGYEVHHQ  | 2.66 | 0.01 | 0.78 | 3.00 | 1.93 | 0.28 |
| 11007 | 0 | 99134 | DAEFRHDSGYEVHHQ  | 2.66 | 0.01 | 0.78 | 3.00 | 1.93 | 1.48 |
| 11008 | 0 | 99134 | DAEFRHDSGYEVHHQ  | 2.66 | 0.01 | 0.78 | 3.00 | 1.93 | 1.27 |
| 11009 | 0 | 99134 | DAEFRHDSGYEVHHQ  | 2.66 | 0.01 | 0.78 | 3.00 | 1.93 | 1.27 |
| 11010 | 0 | 99134 | DAEFRHDSGYEVHHQ  | 2.66 | 0.01 | 0.78 | 3.00 | 1.93 | 1.27 |
| 11011 | 0 | 99134 | DAEFRHDSGYEVHHQ  | 2.66 | 0.01 | 0.78 | 3.00 | 1.93 | 1.75 |
| 11012 | 0 | 99134 | DAEFRHDSGYEVHHQ  | 2.66 | 0.01 | 0.78 | 1.15 | 0.22 | 0.85 |
| 11013 | 0 | 99134 | DAEFRHDSGYEVHHQ  | 2.66 | 0.01 | 0.78 | 1.81 | 0.22 | 0.85 |
| 11014 | 0 | 99134 | DAEFRHDSGYEVHHQ  | 2.66 | 0.01 | 0.78 | 3.16 | 1.13 | 1.75 |
| 11015 | 0 | 99134 | DAEFRHDSGYEVHHQ  | 2.66 | 0.01 | 0.78 | 4.63 | 0.22 | 0.28 |
| 11016 | 0 | 99134 | DAEFRHDSGYEVHHQ  | 2.66 | 0.01 | 0.78 | 3.40 | 0.22 | 0.28 |
| 11017 | 0 | 99134 | DAEFRHDSGYEVHHQ  | 2.66 | 0.01 | 0.78 | 3.00 | 1.93 | 1.75 |
| 11018 | 0 | 99134 | DAEFRHDSGYEVHHQ  | 2.66 | 0.01 | 0.78 | 3.15 | 0.22 | 0.28 |
| 11019 | 0 | 99134 | DAEFRHDSGYEVHHQ  | 2.66 | 0.01 | 0.78 | 0.68 | 0.22 | 0.28 |
| 11020 | 0 | 99134 | DAEFRHDSGYEVHHQ  | 2.66 | 0.01 | 0.78 | 1.81 | 0.22 | 1.27 |
| 11021 | 0 | 99134 | DAEFRHDSGYEVHHQ  | 2.66 | 0.01 | 0.78 | 1.81 | 0.22 | 0.28 |
| 11022 | 0 | 99134 | DAEFRHDSGYEVHHQ  | 2.66 | 0.01 | 0.78 | 1.81 | 0.22 | 0.28 |
| 11023 | 0 | 99134 | DAEFRHDSGYEVHHQ  | 2.66 | 0.01 | 0.78 | 1.81 | 0.22 | 1.66 |
| 11024 | 0 | 99134 | DAEFRHDSGYEVHHQ  | 2.66 | 0.01 | 0.78 | 1.15 | 0.22 | 0.28 |
| 11025 | 0 | 99134 | DAEFRHDSGYEVHHQ  | 2.66 | 0.01 | 0.78 | 1.15 | 0.22 | 0.28 |
| 11026 | 0 | 99134 | DAEFRHDSGYEVHHQ  | 2.66 | 0.01 | 0.78 | 2.79 | 0.22 | 0.28 |
| 11027 | 0 | 99134 | DAEFRHDSGYEVHHQ  | 2.66 | 0.01 | 0.78 | 2.79 | 0.22 | 1.48 |
| 11028 | 0 | 99134 | DAEFRHDSGYEVHHQ  | 2.66 | 0.01 | 0.78 | 2.79 | 0.22 | 0.28 |
| 11029 | 0 | 99134 | DAEFRHDSGYEVHHQ  | 2.66 | 0.01 | 0.78 | 2.79 | 0.22 | 1.27 |
| 11030 | 0 | 99134 | DAEFRHDSGYEVHHQ  | 2.66 | 0.01 | 0.78 | 2.79 | 0.22 | 1.27 |
| 11031 | 0 | 99134 | DAEFRHDSGYEVHHQ  | 2.66 | 0.01 | 0.78 | 3.59 | 1.93 | 1.75 |
| 11032 | 0 | 99134 | DAEFRHDSGYEVHHQ  | 2.66 | 0.01 | 0.78 | 1.15 | 0.22 | 0.28 |
| 11033 | 0 | 99134 | DAEFRHDSGYEVHHQ  | 2.66 | 0.01 | 0.78 | 3.59 | 1.93 | 0.28 |
| 11034 | 0 | 99134 | DAEFRHDSGYEVHHQ  | 2.66 | 0.01 | 0.78 | 3.59 | 1.93 | 1.48 |
| 11035 | 0 | 99134 | DAEFRHDSGYEVHHQ  | 2.66 | 0.01 | 0.78 | 3.59 | 1.93 | 1.27 |
| 11036 | 0 | 99134 | DAEFRHDSGYEVHHQ  | 2.66 | 0.01 | 0.78 | 3.59 | 1.93 | 1.27 |
| 11037 | 0 | 99134 | DAEFRHDSGYEVHHQ  | 2.66 | 0.01 | 0.78 | 3.59 | 1.93 | 0.28 |
| 11038 | 0 | 7491  | DAEFRHDSGYEVHHQK | 2.71 | 0.01 | 0.78 | 0.44 | 1.41 | 0.28 |
| 11039 | 0 | 7491  | DAEFRHDSGYEVHHQK | 2.71 | 0.01 | 0.78 | 0.44 | 1.41 | 2.56 |

|       |   |      |                  |      |      |      |      |      |      |
|-------|---|------|------------------|------|------|------|------|------|------|
| 11040 | 0 | 7491 | DAEFRHDSGYEVHHQK | 2.71 | 0.01 | 0.78 | 0.44 | 1.41 | 1.48 |
| 11041 | 0 | 7491 | DAEFRHDSGYEVHHQK | 2.71 | 0.01 | 0.78 | 0.44 | 1.93 | 0.28 |
| 11042 | 0 | 7491 | DAEFRHDSGYEVHHQK | 2.71 | 0.01 | 0.78 | 0.44 | 1.93 | 0.28 |
| 11043 | 0 | 7491 | DAEFRHDSGYEVHHQK | 2.71 | 0.01 | 0.78 | 0.44 | 1.93 | 0.28 |
| 11044 | 0 | 7491 | DAEFRHDSGYEVHHQK | 2.71 | 0.01 | 0.78 | 0.44 | 1.93 | 0.28 |
| 11045 | 0 | 7491 | DAEFRHDSGYEVHHQK | 2.71 | 0.01 | 0.78 | 0.44 | 1.93 | 0.28 |
| 11046 | 0 | 7491 | DAEFRHDSGYEVHHQK | 2.71 | 0.01 | 0.78 | 0.44 | 1.93 | 0.28 |
| 11047 | 0 | 7491 | DAEFRHDSGYEVHHQK | 2.71 | 0.01 | 0.78 | 0.44 | 1.93 | 0.28 |
| 11048 | 0 | 7491 | DAEFRHDSGYEVHHQK | 2.71 | 0.01 | 0.78 | 0.44 | 1.93 | 0.28 |
| 11049 | 0 | 7491 | DAEFRHDSGYEVHHQK | 2.71 | 0.01 | 0.78 | 1.15 | 0.22 | 1.48 |
| 11050 | 0 | 7491 | DAEFRHDSGYEVHHQK | 2.71 | 0.01 | 0.78 | 1.15 | 0.22 | 1.27 |
| 11051 | 0 | 7491 | DAEFRHDSGYEVHHQK | 2.71 | 0.01 | 0.78 | 0.68 | 0.22 | 2.49 |
| 11052 | 0 | 7491 | DAEFRHDSGYEVHHQK | 2.71 | 0.01 | 0.78 | 3.59 | 0.22 | 0.28 |
| 11053 | 0 | 7491 | DAEFRHDSGYEVHHQK | 2.71 | 0.01 | 0.78 | 0.68 | 0.22 | 0.28 |
| 11054 | 0 | 7491 | DAEFRHDSGYEVHHQK | 2.71 | 0.01 | 0.78 | 0.68 | 0.22 | 0.85 |
| 11055 | 0 | 7491 | DAEFRHDSGYEVHHQK | 2.71 | 0.01 | 0.78 | 2.61 | 0.22 | 0.28 |
| 11056 | 0 | 7491 | DAEFRHDSGYEVHHQK | 2.71 | 0.01 | 0.78 | 2.61 | 0.22 | 1.48 |
| 11057 | 0 | 7491 | DAEFRHDSGYEVHHQK | 2.71 | 0.01 | 0.78 | 1.15 | 0.22 | 1.34 |
| 11058 | 0 | 7491 | DAEFRHDSGYEVHHQK | 2.71 | 0.01 | 0.78 | 0.44 | 1.41 | 0.28 |
| 11059 | 0 | 7491 | DAEFRHDSGYEVHHQK | 2.71 | 0.01 | 0.78 | 0.44 | 1.41 | 1.27 |
| 11060 | 0 | 7491 | DAEFRHDSGYEVHHQK | 2.71 | 0.01 | 0.78 | 1.81 | 0.22 | 0.28 |
| 11061 | 0 | 7491 | DAEFRHDSGYEVHHQK | 2.71 | 0.01 | 0.78 | 1.81 | 0.22 | 0.28 |
| 11062 | 0 | 7491 | DAEFRHDSGYEVHHQK | 2.71 | 0.01 | 0.78 | 0.68 | 0.22 | 0.28 |



|       |   |      |                  |      |      |      |      |      |      |
|-------|---|------|------------------|------|------|------|------|------|------|
| 11063 | 0 | 7491 | DAEFRHDSGYEVHHQK | 2.71 | 0.01 | 0.78 | 0.68 | 0.22 | 0.28 |
| 11064 | 0 | 7491 | DAEFRHDSGYEVHHQK | 2.71 | 0.01 | 0.78 | 0.68 | 0.22 | 0.28 |
| 11065 | 0 | 7491 | DAEFRHDSGYEVHHQK | 2.71 | 0.01 | 0.78 | 0.68 | 0.22 | 0.28 |
| 11066 | 0 | 7491 | DAEFRHDSGYEVHHQK | 2.71 | 0.01 | 0.78 | 0.68 | 0.22 | 0.28 |
| 11067 | 0 | 7491 | DAEFRHDSGYEVHHQK | 2.71 | 0.01 | 0.78 | 1.15 | 0.22 | 0.28 |
| 11068 | 0 | 7491 | DAEFRHDSGYEVHHQK | 2.71 | 0.01 | 0.78 | 1.15 | 0.22 | 0.28 |
| 11069 | 0 | 7491 | DAEFRHDSGYEVHHQK | 2.71 | 0.01 | 0.78 | 1.15 | 0.22 | 1.75 |
| 11070 | 0 | 7491 | DAEFRHDSGYEVHHQK | 2.71 | 0.01 | 0.78 | 1.15 | 0.22 | 1.48 |
| 11071 | 0 | 7491 | DAEFRHDSGYEVHHQK | 2.71 | 0.01 | 0.78 | 3.00 | 1.93 | 0.28 |
| 11072 | 0 | 7491 | DAEFRHDSGYEVHHQK | 2.71 | 0.01 | 0.78 | 1.15 | 0.22 | 0.28 |
| 11073 | 0 | 7491 | DAEFRHDSGYEVHHQK | 2.71 | 0.01 | 0.78 | 1.15 | 2.26 | 1.27 |
| 11074 | 0 | 7491 | DAEFRHDSGYEVHHQK | 2.71 | 0.01 | 0.78 | 1.15 | 0.22 | 0.28 |
| 11075 | 0 | 7491 | DAEFRHDSGYEVHHQK | 2.71 | 0.01 | 0.78 | 1.15 | 0.22 | 1.75 |
| 11076 | 0 | 7491 | DAEFRHDSGYEVHHQK | 2.71 | 0.01 | 0.78 | 1.15 | 0.22 | 1.48 |
| 11077 | 0 | 7491 | DAEFRHDSGYEVHHQK | 2.71 | 0.01 | 0.78 | 1.15 | 0.22 | 0.28 |
| 11078 | 0 | 7491 | DAEFRHDSGYEVHHQK | 2.71 | 0.01 | 0.78 | 1.12 | 0.22 | 2.02 |
| 11079 | 0 | 7491 | DAEFRHDSGYEVHHQK | 2.71 | 0.01 | 0.78 | 1.12 | 0.22 | 1.34 |
| 11080 | 0 | 7491 | DAEFRHDSGYEVHHQK | 2.71 | 0.01 | 0.78 | 0.68 | 0.22 | 1.27 |
| 11081 | 0 | 7491 | DAEFRHDSGYEVHHQK | 2.71 | 0.01 | 0.78 | 0.68 | 0.22 | 0.28 |
| 11082 | 0 | 7491 | DAEFRHDSGYEVHHQK | 2.71 | 0.01 | 0.78 | 0.68 | 0.22 | 0.28 |
| 11083 | 0 | 7491 | DAEFRHDSGYEVHHQK | 2.71 | 0.01 | 0.78 | 1.15 | 0.22 | 1.66 |
| 11084 | 0 | 7491 | DAEFRHDSGYEVHHQK | 2.71 | 0.01 | 0.78 | 1.15 | 0.22 | 1.66 |
| 11085 | 0 | 7491 | DAEFRHDSGYEVHHQK | 2.71 | 0.01 | 0.78 | 1.15 | 0.22 | 1.66 |

|       |   |      |                  |      |      |      |      |      |      |
|-------|---|------|------------------|------|------|------|------|------|------|
| 11086 | 0 | 7491 | DAEFRHDSGYEVHHQK | 2.71 | 0.01 | 0.78 | 1.15 | 0.22 | 1.48 |
| 11087 | 0 | 7491 | DAEFRHDSGYEVHHQK | 2.71 | 0.01 | 0.78 | 0.68 | 0.22 | 0.28 |
| 11088 | 0 | 7491 | DAEFRHDSGYEVHHQK | 2.71 | 0.01 | 0.78 | 0.68 | 0.22 | 0.28 |
| 11089 | 0 | 7491 | DAEFRHDSGYEVHHQK | 2.71 | 0.01 | 0.78 | 0.68 | 0.22 | 0.28 |
| 11090 | 0 | 7491 | DAEFRHDSGYEVHHQK | 2.71 | 0.01 | 0.78 | 0.68 | 0.22 | 0.28 |
| 11091 | 0 | 7491 | DAEFRHDSGYEVHHQK | 2.71 | 0.01 | 0.78 | 0.68 | 0.22 | 0.28 |
| 11092 | 0 | 7491 | DAEFRHDSGYEVHHQK | 2.71 | 0.01 | 0.78 | 1.15 | 0.22 | 1.66 |
| 11093 | 0 | 7491 | DAEFRHDSGYEVHHQK | 2.71 | 0.01 | 0.78 | 1.15 | 0.22 | 1.66 |
| 11094 | 0 | 7491 | DAEFRHDSGYEVHHQK | 2.71 | 0.01 | 0.78 | 1.15 | 0.22 | 1.66 |
| 11095 | 0 | 7491 | DAEFRHDSGYEVHHQK | 2.71 | 0.01 | 0.78 | 0.68 | 0.22 | 2.02 |
| 11096 | 0 | 7491 | DAEFRHDSGYEVHHQK | 2.71 | 0.01 | 0.78 | 0.68 | 0.22 | 0.85 |
| 11097 | 0 | 7491 | DAEFRHDSGYEVHHQK | 2.71 | 0.01 | 0.78 | 0.68 | 0.22 | 0.85 |
| 11098 | 0 | 7491 | DAEFRHDSGYEVHHQK | 2.71 | 0.01 | 0.78 | 1.15 | 0.22 | 0.85 |
| 11099 | 0 | 7491 | DAEFRHDSGYEVHHQK | 2.71 | 0.01 | 0.78 | 1.15 | 0.22 | 2.02 |
| 11100 | 0 | 7491 | DAEFRHDSGYEVHHQK | 2.71 | 0.01 | 0.78 | 1.15 | 0.22 | 1.66 |
| 11101 | 0 | 7491 | DAEFRHDSGYEVHHQK | 2.71 | 0.01 | 0.78 | 1.15 | 0.22 | 0.85 |
| 11102 | 0 | 7491 | DAEFRHDSGYEVHHQK | 2.71 | 0.01 | 0.78 | 1.15 | 0.22 | 2.02 |
| 11103 | 0 | 7491 | DAEFRHDSGYEVHHQK | 2.71 | 0.01 | 0.78 | 1.15 | 0.22 | 2.02 |
| 11104 | 0 | 7491 | DAEFRHDSGYEVHHQK | 2.71 | 0.01 | 0.78 | 1.15 | 0.22 | 0.28 |
| 11105 | 0 | 7491 | DAEFRHDSGYEVHHQK | 2.71 | 0.01 | 0.78 | 1.15 | 0.22 | 2.02 |
| 11106 | 0 | 7491 | DAEFRHDSGYEVHHQK | 2.71 | 0.01 | 0.78 | 1.15 | 0.22 | 2.02 |
| 11107 | 0 | 7491 | DAEFRHDSGYEVHHQK | 2.71 | 0.01 | 0.78 | 1.15 | 0.22 | 0.28 |
| 11108 | 0 | 7491 | DAEFRHDSGYEVHHQK | 2.71 | 0.01 | 0.78 | 1.15 | 0.22 | 2.02 |

|       |   |      |                   |      |      |      |      |      |      |
|-------|---|------|-------------------|------|------|------|------|------|------|
| 11109 | 0 | 7491 | DAEFRHDSGYEVHHQK  | 2.71 | 0.01 | 0.78 | 0.68 | 0.22 | 0.85 |
| 11110 | 0 | 7491 | DAEFRHDSGYEVHHQK  | 2.71 | 0.01 | 0.78 | 0.68 | 0.22 | 1.66 |
| 11111 | 0 | 7491 | DAEFRHDSGYEVHHQK  | 2.71 | 0.01 | 0.78 | 0.68 | 0.22 | 1.66 |
| 11112 | 0 | 7491 | DAEFRHDSGYEVHHQK  | 2.71 | 0.01 | 0.78 | 0.68 | 0.22 | 1.34 |
| 11113 | 0 | 7491 | DAEFRHDSGYEVHHQK  | 2.71 | 0.01 | 0.78 | 1.15 | 0.22 | 1.66 |
| 11114 | 0 | 7491 | DAEFRHDSGYEVHHQK  | 2.71 | 0.01 | 0.78 | 1.15 | 0.22 | 1.66 |
| 11115 | 0 | 7491 | DAEFRHDSGYEVHHQK  | 2.71 | 0.01 | 0.78 | 1.15 | 0.22 | 1.66 |
| 11116 | 0 | 7491 | DAEFRHDSGYEVHHQK  | 2.71 | 0.01 | 0.78 | 1.15 | 0.22 | 1.66 |
| 11117 | 0 | 7491 | DAEFRHDSGYEVHHQK  | 2.71 | 0.01 | 0.78 | 1.15 | 0.22 | 1.66 |
| 11118 | 0 | 7491 | DAEFRHDSGYEVHHQK  | 2.71 | 0.01 | 0.78 | 1.81 | 0.22 | 0.28 |
| 11119 | 0 | 7491 | DAEFRHDSGYEVHHQK  | 2.71 | 0.01 | 0.78 | 1.15 | 0.22 | 0.85 |
| 11120 | 0 | 7491 | DAEFRHDSGYEVHHQK  | 2.71 | 0.01 | 0.78 | 1.15 | 0.22 | 0.85 |
| 11121 | 0 | 7491 | DAEFRHDSGYEVHHQK  | 2.71 | 0.01 | 0.78 | 1.12 | 0.22 | 0.28 |
| 11122 | 0 | 7491 | DAEFRHDSGYEVHHQK  | 2.71 | 0.01 | 0.78 | 0.44 | 1.41 | 0.28 |
| 11123 | 0 | 7491 | DAEFRHDSGYEVHHQK  | 2.71 | 0.01 | 0.78 | 0.68 | 0.22 | 1.48 |
| 11124 | 0 | 7491 | DAEFRHDSGYEVHHQK  | 2.71 | 0.01 | 0.78 | 1.15 | 0.22 | 0.28 |
| 11125 | 0 | 7491 | DAEFRHDSGYEVHHQK  | 2.71 | 0.01 | 0.78 | 1.15 | 0.22 | 0.85 |
| 11126 | 0 | 7492 | DAEFRHDSGYEVHHQKL | 2.75 | 0.01 | 0.78 | 1.15 | 2.26 | 2.66 |
| 11127 | 0 | 7492 | DAEFRHDSGYEVHHQKL | 2.75 | 0.01 | 0.78 | 0.68 | 0.22 | 1.66 |
| 11128 | 0 | 7492 | DAEFRHDSGYEVHHQKL | 2.75 | 0.01 | 0.78 | 0.68 | 0.22 | 1.34 |
| 11129 | 0 | 7492 | DAEFRHDSGYEVHHQKL | 2.75 | 0.01 | 0.78 | 0.68 | 0.22 | 1.48 |
| 11130 | 0 | 7492 | DAEFRHDSGYEVHHQKL | 2.75 | 0.01 | 0.78 | 0.68 | 0.22 | 1.75 |
| 11131 | 0 | 7492 | DAEFRHDSGYEVHHQKL | 2.75 | 0.01 | 0.78 | 1.15 | 0.22 | 1.48 |

|       |   |      |                   |      |      |      |      |      |      |
|-------|---|------|-------------------|------|------|------|------|------|------|
| 11132 | 0 | 7492 | DAEFRHDSGYEVHHQKL | 2.75 | 0.01 | 0.78 | 1.15 | 0.22 | 1.66 |
| 11133 | 0 | 7492 | DAEFRHDSGYEVHHQKL | 2.75 | 0.01 | 0.78 | 1.15 | 0.22 | 0.85 |
| 11134 | 0 | 7492 | DAEFRHDSGYEVHHQKL | 2.75 | 0.01 | 0.78 | 1.15 | 0.22 | 0.85 |
| 11135 | 0 | 7492 | DAEFRHDSGYEVHHQKL | 2.75 | 0.01 | 0.78 | 1.15 | 0.22 | 2.92 |
| 11136 | 0 | 7492 | DAEFRHDSGYEVHHQKL | 2.75 | 0.01 | 0.78 | 1.15 | 0.22 | 0.85 |
| 11137 | 0 | 7492 | DAEFRHDSGYEVHHQKL | 2.75 | 0.01 | 0.78 | 1.15 | 0.22 | 0.28 |
| 11138 | 0 | 7492 | DAEFRHDSGYEVHHQKL | 2.75 | 0.01 | 0.78 | 1.15 | 0.22 | 0.28 |
| 11139 | 0 | 7492 | DAEFRHDSGYEVHHQKL | 2.75 | 0.01 | 0.78 | 1.15 | 0.22 | 0.85 |
| 11140 | 0 | 7492 | DAEFRHDSGYEVHHQKL | 2.75 | 0.01 | 0.78 | 1.15 | 0.22 | 0.85 |
| 11141 | 0 | 7492 | DAEFRHDSGYEVHHQKL | 2.75 | 0.01 | 0.78 | 1.15 | 0.22 | 2.66 |
| 11142 | 0 | 7492 | DAEFRHDSGYEVHHQKL | 2.75 | 0.01 | 0.78 | 1.15 | 0.22 | 0.85 |
| 11143 | 0 | 7492 | DAEFRHDSGYEVHHQKL | 2.75 | 0.01 | 0.78 | 1.15 | 0.22 | 0.28 |
| 11144 | 0 | 7492 | DAEFRHDSGYEVHHQKL | 2.75 | 0.01 | 0.78 | 1.15 | 0.22 | 1.66 |
| 11145 | 0 | 7492 | DAEFRHDSGYEVHHQKL | 2.75 | 0.01 | 0.78 | 1.15 | 0.22 | 1.34 |
| 11146 | 0 | 7492 | DAEFRHDSGYEVHHQKL | 2.75 | 0.01 | 0.78 | 1.15 | 0.22 | 1.66 |
| 11147 | 0 | 7492 | DAEFRHDSGYEVHHQKL | 2.75 | 0.01 | 0.78 | 1.15 | 0.22 | 1.66 |
| 11148 | 0 | 7492 | DAEFRHDSGYEVHHQKL | 2.75 | 0.01 | 0.78 | 1.15 | 0.22 | 1.66 |
| 11149 | 0 | 7492 | DAEFRHDSGYEVHHQKL | 2.75 | 0.01 | 0.78 | 1.15 | 0.22 | 1.66 |
| 11150 | 0 | 7492 | DAEFRHDSGYEVHHQKL | 2.75 | 0.01 | 0.78 | 1.15 | 0.22 | 1.48 |
| 11151 | 0 | 7492 | DAEFRHDSGYEVHHQKL | 2.75 | 0.01 | 0.78 | 1.15 | 0.22 | 1.48 |
| 11152 | 0 | 7492 | DAEFRHDSGYEVHHQKL | 2.75 | 0.01 | 0.78 | 1.15 | 0.22 | 1.27 |
| 11153 | 0 | 7492 | DAEFRHDSGYEVHHQKL | 2.75 | 0.01 | 0.78 | 1.15 | 0.22 | 0.28 |
| 11154 | 0 | 7492 | DAEFRHDSGYEVHHQKL | 2.75 | 0.01 | 0.78 | 1.15 | 0.22 | 0.85 |

|       |   |        |                                                    |      |      |      |      |      |      |
|-------|---|--------|----------------------------------------------------|------|------|------|------|------|------|
| 11155 | 0 | 7492   | DAEFRHDSGYEVHHQKL                                  | 2.75 | 0.01 | 0.78 | 1.15 | 0.22 | 0.85 |
| 11156 | 0 | 7492   | DAEFRHDSGYEVHHQKL                                  | 2.75 | 0.01 | 0.78 | 1.15 | 0.22 | 0.28 |
| 11157 | 0 | 7492   | DAEFRHDSGYEVHHQKL                                  | 2.75 | 0.01 | 0.78 | 1.15 | 0.22 | 0.85 |
| 11158 | 0 | 7492   | DAEFRHDSGYEVHHQKL                                  | 2.75 | 0.01 | 0.78 | 1.15 | 0.22 | 1.48 |
| 11159 | 0 | 7492   | DAEFRHDSGYEVHHQKL                                  | 2.75 | 0.01 | 0.78 | 1.15 | 0.22 | 0.28 |
| 11160 | 0 | 7492   | DAEFRHDSGYEVHHQKL                                  | 2.75 | 0.01 | 0.78 | 1.15 | 0.22 | 1.48 |
| 11161 | 0 | 7492   | DAEFRHDSGYEVHHQKL                                  | 2.75 | 0.01 | 0.78 | 0.44 | 1.93 | 0.28 |
| 11162 | 0 | 7492   | DAEFRHDSGYEVHHQKL                                  | 2.75 | 0.01 | 0.78 | 0.44 | 1.41 | 0.28 |
| 11163 | 0 | 7492   | DAEFRHDSGYEVHHQKL                                  | 2.75 | 0.01 | 0.78 | 1.15 | 0.22 | 0.85 |
| 11164 | 0 | 7492   | DAEFRHDSGYEVHHQKL                                  | 2.75 | 0.01 | 0.78 | 1.15 | 0.22 | 0.85 |
| 11165 | 0 | 7492   | DAEFRHDSGYEVHHQKL                                  | 2.75 | 0.01 | 0.78 | 1.15 | 0.22 | 0.85 |
| 11166 | 0 | 139479 | DAEFRHDSGYEVHHQKL<br>VFFA                          | 2.97 | 0.01 | 0.78 | 3.00 | 1.93 | 1.75 |
| 11167 | 0 | 105129 | DAEFRHDSGYEVHHQKL<br>VFFAEDGGSNKGAIIGL<br>MVGGVVIA | 3.66 | 0.01 | 0.78 | 0.68 | 0.22 | 1.48 |
| 11168 | 0 | 105129 | DAEFRHDSGYEVHHQKL<br>VFFAEDGGSNKGAIIGL<br>MVGGVVIA | 3.66 | 0.01 | 0.90 | 0.68 | 0.22 | 0.28 |
| 11169 | 0 | 105129 | DAEFRHDSGYEVHHQKL<br>VFFAEDGGSNKGAIIGL<br>MVGGVVIA | 3.66 | 0.01 | 0.90 | 0.68 | 0.22 | 0.28 |
| 11170 | 0 | 105129 | DAEFRHDSGYEVHHQKL<br>VFFAEDGGSNKGAIIGL<br>MVGGVVIA | 3.66 | 0.01 | 0.90 | 0.68 | 0.22 | 0.28 |
| 11171 | 0 | 105129 | DAEFRHDSGYEVHHQKL<br>VFFAEDGGSNKGAIIGL<br>MVGGVVIA | 3.66 | 0.01 | 0.90 | 0.68 | 0.22 | 0.28 |
| 11172 | 0 | 105129 | DAEFRHDSGYEVHHQKL<br>VFFAEDGGSNKGAIIGL<br>MVGGVVIA | 3.66 | 0.01 | 0.90 | 0.68 | 0.22 | 0.28 |
| 11173 | 0 | 105129 | DAEFRHDSGYEVHHQKL<br>VFFAEDGGSNKGAIIGL<br>MVGGVVIA | 3.66 | 0.01 | 0.90 | 0.68 | 0.22 | 0.28 |

|       |   |        |                                                    |      |      |      |      |      |      |
|-------|---|--------|----------------------------------------------------|------|------|------|------|------|------|
| 11174 | 0 | 105129 | DAEFRHDSGYEVHHQKL<br>VFFAEDGGSNKGAIIGL<br>MVGGVVIA | 3.66 | 0.01 | 0.90 | 0.68 | 0.22 | 1.48 |
| 11175 | 0 | 107308 | DAEFRHDSGYEVHHQKL<br>VFFAEDV                       | 3.11 | 0.01 | 0.78 | 1.12 | 0.22 | 1.48 |
| 11176 | 0 | 177483 | DAEFRHDSGYEVHHQKL<br>VFFAEDVGCNKGAIIGL<br>MVGGVV   | 3.60 | 0.01 | 0.90 | 0.44 | 1.41 | 0.28 |
| 11177 | 0 | 177483 | DAEFRHDSGYEVHHQKL<br>VFFAEDVGCNKGAIIGL<br>MVGGVV   | 3.60 | 0.01 | 0.90 | 0.44 | 1.41 | 2.02 |
| 11178 | 0 | 99923  | DAEFRHDSGYEVHHQKL<br>VFFAEDVGSNK                   | 3.26 | 0.01 | 0.78 | 0.44 | 1.41 | 0.28 |
| 11179 | 0 | 99923  | DAEFRHDSGYEVHHQKL<br>VFFAEDVGSNK                   | 3.26 | 0.01 | 0.78 | 0.44 | 1.93 | 1.48 |
| 11180 | 0 | 99923  | DAEFRHDSGYEVHHQKL<br>VFFAEDVGSNK                   | 3.26 | 0.01 | 0.78 | 0.44 | 1.93 | 1.27 |
| 11181 | 0 | 99923  | DAEFRHDSGYEVHHQKL<br>VFFAEDVGSNK                   | 3.26 | 0.01 | 0.78 | 0.44 | 1.93 | 1.27 |
| 11182 | 0 | 99923  | DAEFRHDSGYEVHHQKL<br>VFFAEDVGSNK                   | 3.26 | 0.01 | 0.78 | 0.44 | 1.93 | 0.28 |
| 11183 | 0 | 99923  | DAEFRHDSGYEVHHQKL<br>VFFAEDVGSNK                   | 3.26 | 0.01 | 0.78 | 0.44 | 1.93 | 0.28 |
| 11184 | 0 | 99923  | DAEFRHDSGYEVHHQKL<br>VFFAEDVGSNK                   | 3.26 | 0.01 | 0.78 | 0.44 | 1.93 | 0.28 |
| 11185 | 0 | 99923  | DAEFRHDSGYEVHHQKL<br>VFFAEDVGSNK                   | 3.26 | 0.01 | 0.78 | 0.44 | 1.93 | 0.28 |
| 11186 | 0 | 99923  | DAEFRHDSGYEVHHQKL<br>VFFAEDVGSNK                   | 3.26 | 0.01 | 0.78 | 0.44 | 1.93 | 0.28 |
| 11187 | 0 | 99923  | DAEFRHDSGYEVHHQKL<br>VFFAEDVGSNK                   | 3.26 | 0.01 | 0.78 | 0.44 | 1.93 | 0.28 |
| 11188 | 0 | 99923  | DAEFRHDSGYEVHHQKL<br>VFFAEDVGSNK                   | 3.26 | 0.01 | 0.78 | 0.44 | 1.93 | 0.28 |
| 11189 | 0 | 99923  | DAEFRHDSGYEVHHQKL<br>VFFAEDVGSNK                   | 3.26 | 0.01 | 0.78 | 1.15 | 0.22 | 1.27 |
| 11190 | 0 | 99923  | DAEFRHDSGYEVHHQKL<br>VFFAEDVGSNK                   | 3.26 | 0.01 | 0.78 | 1.15 | 0.22 | 1.48 |
| 11191 | 0 | 99923  | DAEFRHDSGYEVHHQKL<br>VFFAEDVGSNK                   | 3.26 | 0.01 | 0.78 | 1.15 | 0.22 | 1.27 |
| 11192 | 0 | 99923  | DAEFRHDSGYEVHHQKL<br>VFFAEDVGSNK                   | 3.26 | 0.01 | 0.78 | 1.15 | 0.22 | 1.34 |
| 11193 | 0 | 99923  | DAEFRHDSGYEVHHQKL<br>VFFAEDVGSNK                   | 3.26 | 0.01 | 0.78 | 0.68 | 0.22 | 2.49 |
| 11194 | 0 | 99923  | DAEFRHDSGYEVHHQKL<br>VFFAEDVGSNK                   | 3.26 | 0.01 | 0.78 | 1.81 | 0.22 | 0.28 |
| 11195 | 0 | 99923  | DAEFRHDSGYEVHHQKL<br>VFFAEDVGSNK                   | 3.26 | 0.01 | 0.78 | 1.12 | 0.22 | 1.48 |

|       |   |        |                                                  |      |      |      |      |      |      |
|-------|---|--------|--------------------------------------------------|------|------|------|------|------|------|
| 11196 | 0 | 99923  | DAEFRHDSGYEVHHQKL<br>VFFAEDVGSNK                 | 3.26 | 0.01 | 0.78 | 3.16 | 0.22 | 0.28 |
| 11197 | 0 | 99923  | DAEFRHDSGYEVHHQKL<br>VFFAEDVGSNK                 | 3.26 | 0.01 | 0.78 | 1.20 | 0.22 | 1.27 |
| 11198 | 0 | 99923  | DAEFRHDSGYEVHHQKL<br>VFFAEDVGSNK                 | 3.26 | 0.01 | 0.78 | 1.20 | 0.22 | 1.48 |
| 11199 | 0 | 99923  | DAEFRHDSGYEVHHQKL<br>VFFAEDVGSNK                 | 3.26 | 0.01 | 0.78 | 1.12 | 0.22 | 1.27 |
| 11200 | 0 | 99923  | DAEFRHDSGYEVHHQKL<br>VFFAEDVGSNK                 | 3.26 | 0.01 | 0.78 | 1.20 | 0.22 | 0.28 |
| 11201 | 0 | 99923  | DAEFRHDSGYEVHHQKL<br>VFFAEDVGSNK                 | 3.26 | 0.01 | 0.78 | 1.15 | 0.22 | 1.34 |
| 11202 | 0 | 99923  | DAEFRHDSGYEVHHQKL<br>VFFAEDVGSNK                 | 3.26 | 0.01 | 0.78 | 2.25 | 0.22 | 0.28 |
| 11203 | 0 | 99923  | DAEFRHDSGYEVHHQKL<br>VFFAEDVGSNK                 | 3.26 | 0.01 | 0.78 | 0.68 | 0.22 | 0.28 |
| 11204 | 0 | 99923  | DAEFRHDSGYEVHHQKL<br>VFFAEDVGSNK                 | 3.26 | 0.01 | 0.78 | 0.68 | 0.22 | 0.28 |
| 11205 | 0 | 99923  | DAEFRHDSGYEVHHQKL<br>VFFAEDVGSNK                 | 3.26 | 0.01 | 0.78 | 0.68 | 0.22 | 1.27 |
| 11206 | 0 | 99923  | DAEFRHDSGYEVHHQKL<br>VFFAEDVGSNK                 | 3.26 | 0.01 | 0.78 | 1.15 | 0.22 | 1.48 |
| 11207 | 0 | 99923  | DAEFRHDSGYEVHHQKL<br>VFFAEDVGSNK                 | 3.26 | 0.01 | 0.78 | 1.15 | 0.22 | 0.85 |
| 11208 | 0 | 99923  | DAEFRHDSGYEVHHQKL<br>VFFAEDVGSNK                 | 3.26 | 0.01 | 0.78 | 1.15 | 0.22 | 0.28 |
| 11209 | 0 | 99923  | DAEFRHDSGYEVHHQKL<br>VFFAEDVGSNK                 | 3.26 | 0.01 | 0.78 | 1.15 | 0.22 | 0.28 |
| 11210 | 0 | 99923  | DAEFRHDSGYEVHHQKL<br>VFFAEDVGSNK                 | 3.26 | 0.01 | 0.78 | 1.12 | 0.22 | 0.85 |
| 11211 | 0 | 99923  | DAEFRHDSGYEVHHQKL<br>VFFAEDVGSNK                 | 3.26 | 0.01 | 0.78 | 0.44 | 1.93 | 0.28 |
| 11212 | 0 | 99923  | DAEFRHDSGYEVHHQKL<br>VFFAEDVGSNK                 | 3.26 | 0.01 | 0.78 | 1.81 | 0.22 | 1.27 |
| 11213 | 0 | 99923  | DAEFRHDSGYEVHHQKL<br>VFFAEDVGSNK                 | 3.26 | 0.01 | 0.78 | 3.00 | 1.93 | 1.27 |
| 11214 | 0 | 99923  | DAEFRHDSGYEVHHQKL<br>VFFAEDVGSNK                 | 3.26 | 0.01 | 0.78 | 1.15 | 0.22 | 1.75 |
| 11215 | 0 | 103096 | DAEFRHDSGYEVHHQKL<br>VFFAEDVGSNKGAIIG            | 3.42 | 0.01 | 0.78 | 0.68 | 0.22 | 1.48 |
| 11216 | 0 | 103096 | DAEFRHDSGYEVHHQKL<br>VFFAEDVGSNKGAIIG            | 3.42 | 0.01 | 0.78 | 0.68 | 0.22 | 0.28 |
| 11217 | 0 | 103097 | DAEFRHDSGYEVHHQKL<br>VFFAEDVGSNKGAIIGL<br>MVGGVV | 3.61 | 0.01 | 0.78 | 3.16 | 0.22 | 0.28 |

|       |   |        |                   |      |      |      |      |      |      |
|-------|---|--------|-------------------|------|------|------|------|------|------|
|       |   |        | DAEFRHDSGYEVHHQKL |      |      |      |      |      |      |
| 11218 | 0 | 103097 | VFFAEDVGSNKGAIIGL | 3.61 | 0.01 | 0.78 | 3.16 | 2.25 | 1.75 |
|       |   |        | MVGGVV            |      |      |      |      |      |      |
|       |   |        | DAEFRHDSGYEVHHQKL |      |      |      |      |      |      |
| 11219 | 0 | 103097 | VFFAEDVGSNKGAIIGL | 3.61 | 0.01 | 0.78 | 0.44 | 1.93 | 2.66 |
|       |   |        | MVGGVV            |      |      |      |      |      |      |
|       |   |        | DAEFRHDSGYEVHHQKL |      |      |      |      |      |      |
| 11220 | 0 | 103097 | VFFAEDVGSNKGAIIGL | 3.61 | 0.01 | 0.78 | 0.44 | 1.93 | 1.34 |
|       |   |        | MVGGVV            |      |      |      |      |      |      |
|       |   |        | DAEFRHDSGYEVHHQKL |      |      |      |      |      |      |
| 11221 | 0 | 103097 | VFFAEDVGSNKGAIIGL | 3.61 | 0.01 | 0.78 | 0.44 | 1.93 | 1.57 |
|       |   |        | MVGGVV            |      |      |      |      |      |      |
|       |   |        | DAEFRHDSGYEVHHQKL |      |      |      |      |      |      |
| 11222 | 0 | 103097 | VFFAEDVGSNKGAIIGL | 3.61 | 0.01 | 0.78 | 0.44 | 1.93 | 0.28 |
|       |   |        | MVGGVV            |      |      |      |      |      |      |
|       |   |        | DAEFRHDSGYEVHHQKL |      |      |      |      |      |      |
| 11223 | 0 | 103097 | VFFAEDVGSNKGAIIGL | 3.61 | 0.01 | 0.78 | 0.44 | 1.41 | 0.28 |
|       |   |        | MVGGVV            |      |      |      |      |      |      |
|       |   |        | DAEFRHDSGYEVHHQKL |      |      |      |      |      |      |
| 11224 | 0 | 103097 | VFFAEDVGSNKGAIIGL | 3.61 | 0.01 | 0.78 | 3.16 | 0.22 | 0.28 |
|       |   |        | MVGGVV            |      |      |      |      |      |      |
|       |   |        | DAEFRHDSGYEVHHQKL |      |      |      |      |      |      |
| 11225 | 0 | 103097 | VFFAEDVGSNKGAIIGL | 3.61 | 0.01 | 0.78 | 3.00 | 0.22 | 0.28 |
|       |   |        | MVGGVV            |      |      |      |      |      |      |
|       |   |        | DAEFRHDSGYEVHHQKL |      |      |      |      |      |      |
| 11226 | 0 | 103097 | VFFAEDVGSNKGAIIGL | 3.61 | 0.01 | 0.78 | 3.00 | 0.22 | 1.48 |
|       |   |        | MVGGVV            |      |      |      |      |      |      |
|       |   |        | DAEFRHDSGYEVHHQKL |      |      |      |      |      |      |
| 11227 | 0 | 103097 | VFFAEDVGSNKGAIIGL | 3.61 | 0.01 | 0.78 | 3.00 | 0.22 | 0.28 |
|       |   |        | MVGGVV            |      |      |      |      |      |      |
|       |   |        | DAEFRHDSGYEVHHQKL |      |      |      |      |      |      |
| 11228 | 0 | 103097 | VFFAEDVGSNKGAIIGL | 3.61 | 0.01 | 0.78 | 3.00 | 1.93 | 0.28 |
|       |   |        | MVGGVV            |      |      |      |      |      |      |
|       |   |        | DAEFRHDSGYEVHHQKL |      |      |      |      |      |      |
| 11229 | 0 | 103097 | VFFAEDVGSNKGAIIGL | 3.61 | 0.01 | 0.78 | 1.12 | 0.22 | 1.48 |
|       |   |        | MVGGVV            |      |      |      |      |      |      |
|       |   |        | DAEFRHDSGYEVHHQKL |      |      |      |      |      |      |
| 11230 | 0 | 103097 | VFFAEDVGSNKGAIIGL | 3.61 | 0.01 | 0.78 | 1.15 | 0.22 | 0.85 |
|       |   |        | MVGGVV            |      |      |      |      |      |      |
|       |   |        | DAEFRHDSGYEVHHQKL |      |      |      |      |      |      |
| 11231 | 0 | 103097 | VFFAEDVGSNKGAIIGL | 3.61 | 0.01 | 0.78 | 1.15 | 0.22 | 0.28 |
|       |   |        | MVGGVV            |      |      |      |      |      |      |
|       |   |        | DAEFRHDSGYEVHHQKL |      |      |      |      |      |      |
| 11232 | 0 | 103097 | VFFAEDVGSNKGAIIGL | 3.61 | 0.01 | 0.78 | 1.15 | 0.22 | 0.28 |
|       |   |        | MVGGVV            |      |      |      |      |      |      |



|       |   |        |                   |      |      |      |      |      |      |
|-------|---|--------|-------------------|------|------|------|------|------|------|
|       |   |        | DAEFRHDSGYEVHHQKL |      |      |      |      |      |      |
| 11233 | 0 | 103097 | VFFAEDVGSNKGAIIGL | 3.61 | 0.01 | 0.78 | 1.15 | 0.22 | 0.85 |
|       |   |        | MVGGVV            |      |      |      |      |      |      |
|       |   |        | DAEFRHDSGYEVHHQKL |      |      |      |      |      |      |
| 11234 | 0 | 103097 | VFFAEDVGSNKGAIIGL | 3.61 | 0.01 | 0.78 | 1.81 | 0.22 | 0.28 |
|       |   |        | MVGGVV            |      |      |      |      |      |      |
|       |   |        | DAEFRHDSGYEVHHQKL |      |      |      |      |      |      |
| 11235 | 0 | 103097 | VFFAEDVGSNKGAIIGL | 3.61 | 0.01 | 0.78 | 3.16 | 0.22 | 0.28 |
|       |   |        | MVGGVV            |      |      |      |      |      |      |
|       |   |        | DAEFRHDSGYEVHHQKL |      |      |      |      |      |      |
| 11236 | 0 | 103097 | VFFAEDVGSNKGAIIGL | 3.61 | 0.01 | 0.78 | 1.12 | 0.22 | 1.27 |
|       |   |        | MVGGVV            |      |      |      |      |      |      |
|       |   |        | DAEFRHDSGYEVHHQKL |      |      |      |      |      |      |
| 11237 | 0 | 103097 | VFFAEDVGSNKGAIIGL | 3.61 | 0.01 | 0.78 | 0.68 | 0.22 | 0.28 |
|       |   |        | MVGGVV            |      |      |      |      |      |      |
|       |   |        | DAEFRHDSGYEVHHQKL |      |      |      |      |      |      |
| 11238 | 0 | 103097 | VFFAEDVGSNKGAIIGL | 3.61 | 0.01 | 0.78 | 0.68 | 0.22 | 1.48 |
|       |   |        | MVGGVV            |      |      |      |      |      |      |
|       |   |        | DAEFRHDSGYEVHHQKL |      |      |      |      |      |      |
| 11239 | 0 | 103097 | VFFAEDVGSNKGAIIGL | 3.61 | 0.01 | 0.78 | 1.12 | 0.22 | 1.27 |
|       |   |        | MVGGVV            |      |      |      |      |      |      |
|       |   |        | DAEFRHDSGYEVHHQKL |      |      |      |      |      |      |
| 11240 | 0 | 103097 | VFFAEDVGSNKGAIIGL | 3.61 | 0.01 | 0.78 | 1.12 | 0.22 | 1.48 |
|       |   |        | MVGGVV            |      |      |      |      |      |      |
|       |   |        | DAEFRHDSGYEVHHQKL |      |      |      |      |      |      |
| 11241 | 0 | 103097 | VFFAEDVGSNKGAIIGL | 3.61 | 0.01 | 0.78 | 1.12 | 0.22 | 1.34 |
|       |   |        | MVGGVV            |      |      |      |      |      |      |
|       |   |        | DAEFRHDSGYEVHHQKL |      |      |      |      |      |      |
| 11242 | 0 | 103097 | VFFAEDVGSNKGAIIGL | 3.61 | 0.01 | 0.78 | 2.79 | 0.22 | 1.27 |
|       |   |        | MVGGVV            |      |      |      |      |      |      |
|       |   |        | DAEFRHDSGYEVHHQKL |      |      |      |      |      |      |
| 11243 | 0 | 103097 | VFFAEDVGSNKGAIIGL | 3.61 | 0.01 | 0.78 | 1.81 | 0.22 | 1.27 |
|       |   |        | MVGGVV            |      |      |      |      |      |      |
|       |   |        | DAEFRHDSGYEVHHQKL |      |      |      |      |      |      |
| 11244 | 0 | 103097 | VFFAEDVGSNKGAIIGL | 3.61 | 0.01 | 0.78 | 1.81 | 0.22 | 0.28 |
|       |   |        | MVGGVV            |      |      |      |      |      |      |
|       |   |        | DAEFRHDSGYEVHHQKL |      |      |      |      |      |      |
| 11245 | 0 | 103097 | VFFAEDVGSNKGAIIGL | 3.61 | 0.01 | 0.78 | 2.36 | 0.22 | 0.28 |
|       |   |        | MVGGVV            |      |      |      |      |      |      |
|       |   |        | DAEFRHDSGYEVHHQKL |      |      |      |      |      |      |
| 11246 | 0 | 103097 | VFFAEDVGSNKGAIIGL | 3.61 | 0.01 | 0.78 | 1.15 | 0.22 | 0.85 |
|       |   |        | MVGGVV            |      |      |      |      |      |      |
|       |   |        | DAEFRHDSGYEVHHQKL |      |      |      |      |      |      |
| 11247 | 0 | 103097 | VFFAEDVGSNKGAIIGL | 3.61 | 0.01 | 0.78 | 1.15 | 0.22 | 1.66 |
|       |   |        | MVGGVV            |      |      |      |      |      |      |

|       |   |        |                   |      |      |      |      |      |      |
|-------|---|--------|-------------------|------|------|------|------|------|------|
|       |   |        | DAEFRHDSGYEVHHQKL |      |      |      |      |      |      |
| 11248 | 0 | 103097 | VFFAEDVGSNKGAIIGL | 3.61 | 0.01 | 0.78 | 1.15 | 0.22 | 2.98 |
|       |   |        | MVGGVV            |      |      |      |      |      |      |
|       |   |        | DAEFRHDSGYEVHHQKL |      |      |      |      |      |      |
| 11249 | 0 | 103097 | VFFAEDVGSNKGAIIGL | 3.61 | 0.01 | 0.78 | 3.16 | 0.22 | 0.28 |
|       |   |        | MVGGVV            |      |      |      |      |      |      |
|       |   |        | DAEFRHDSGYEVHHQKL |      |      |      |      |      |      |
| 11250 | 0 | 103097 | VFFAEDVGSNKGAIIGL | 3.61 | 0.01 | 0.78 | 3.00 | 0.22 | 0.28 |
|       |   |        | MVGGVV            |      |      |      |      |      |      |
|       |   |        | DAEFRHDSGYEVHHQKL |      |      |      |      |      |      |
| 11251 | 0 | 103097 | VFFAEDVGSNKGAIIGL | 3.61 | 0.01 | 0.78 | 0.68 | 0.22 | 1.27 |
|       |   |        | MVGGVV            |      |      |      |      |      |      |
|       |   |        | DAEFRHDSGYEVHHQKL |      |      |      |      |      |      |
| 11252 | 0 | 103097 | VFFAEDVGSNKGAIIGL | 3.61 | 0.01 | 0.78 | 1.15 | 0.22 | 1.66 |
|       |   |        | MVGGVV            |      |      |      |      |      |      |
|       |   |        | DAEFRHDSGYEVHHQKL |      |      |      |      |      |      |
| 11253 | 0 | 103097 | VFFAEDVGSNKGAIIGL | 3.61 | 0.01 | 0.78 | 1.15 | 0.22 | 1.66 |
|       |   |        | MVGGVV            |      |      |      |      |      |      |
|       |   |        | DAEFRHDSGYEVHHQKL |      |      |      |      |      |      |
| 11254 | 0 | 103097 | VFFAEDVGSNKGAIIGL | 3.61 | 0.01 | 0.78 | 1.15 | 0.22 | 1.66 |
|       |   |        | MVGGVV            |      |      |      |      |      |      |
|       |   |        | DAEFRHDSGYEVHHQKL |      |      |      |      |      |      |
| 11255 | 0 | 103097 | VFFAEDVGSNKGAIIGL | 3.61 | 0.01 | 0.78 | 1.15 | 0.22 | 1.48 |
|       |   |        | MVGGVV            |      |      |      |      |      |      |
|       |   |        | DAEFRHDSGYEVHHQKL |      |      |      |      |      |      |
| 11256 | 0 | 103097 | VFFAEDVGSNKGAIIGL | 3.61 | 0.01 | 0.78 | 0.44 | 1.41 | 0.28 |
|       |   |        | MVGGVV            |      |      |      |      |      |      |
|       |   |        | DAEFRHDSGYEVHHQKL |      |      |      |      |      |      |
| 11257 | 0 | 103097 | VFFAEDVGSNKGAIIGL | 3.61 | 0.01 | 0.78 | 0.68 | 0.22 | 0.28 |
|       |   |        | MVGGVV            |      |      |      |      |      |      |
|       |   |        | DAEFRHDSGYEVHHQKL |      |      |      |      |      |      |
| 11258 | 0 | 103097 | VFFAEDVGSNKGAIIGL | 3.61 | 0.01 | 0.78 | 0.68 | 0.22 | 1.34 |
|       |   |        | MVGGVV            |      |      |      |      |      |      |
|       |   |        | DAEFRHDSGYEVHHQKL |      |      |      |      |      |      |
| 11259 | 0 | 103097 | VFFAEDVGSNKGAIIGL | 3.61 | 0.01 | 0.78 | 0.68 | 0.22 | 2.02 |
|       |   |        | MVGGVV            |      |      |      |      |      |      |
|       |   |        | DAEFRHDSGYEVHHQKL |      |      |      |      |      |      |
| 11260 | 0 | 103097 | VFFAEDVGSNKGAIIGL | 3.61 | 0.01 | 0.78 | 0.44 | 1.93 | 1.28 |
|       |   |        | MVGGVV            |      |      |      |      |      |      |
|       |   |        | DAEFRHDSGYEVHHQKL |      |      |      |      |      |      |
| 11261 | 0 | 103097 | VFFAEDVGSNKGAIIGL | 3.61 | 0.01 | 0.78 | 0.68 | 0.22 | 1.48 |
|       |   |        | MVGGVV            |      |      |      |      |      |      |
|       |   |        | DAEFRHDSGYEVHHQKL |      |      |      |      |      |      |
| 11262 | 0 | 103097 | VFFAEDVGSNKGAIIGL | 3.61 | 0.01 | 0.78 | 0.68 | 0.22 | 0.85 |
|       |   |        | MVGGVV            |      |      |      |      |      |      |

|       |   |        |                   |      |      |      |      |      |      |
|-------|---|--------|-------------------|------|------|------|------|------|------|
|       |   |        | DAEFRHDSGYEVHHQKL |      |      |      |      |      |      |
| 11263 | 0 | 103097 | VFFAEDVGSNKGAIIGL | 3.61 | 0.01 | 0.78 | 1.12 | 0.22 | 1.48 |
|       |   |        | MVGGVV            |      |      |      |      |      |      |
|       |   |        | DAEFRHDSGYEVHHQKL |      |      |      |      |      |      |
| 11264 | 0 | 103097 | VFFAEDVGSNKGAIIGL | 3.61 | 0.01 | 0.78 | 1.12 | 0.22 | 1.48 |
|       |   |        | MVGGVV            |      |      |      |      |      |      |
|       |   |        | DAEFRHDSGYEVHHQKL |      |      |      |      |      |      |
| 11265 | 0 | 103097 | VFFAEDVGSNKGAIIGL | 3.61 | 0.01 | 0.78 | 1.20 | 0.22 | 2.56 |
|       |   |        | MVGGVV            |      |      |      |      |      |      |
|       |   |        | DAEFRHDSGYEVHHQKL |      |      |      |      |      |      |
| 11266 | 0 | 103097 | VFFAEDVGSNKGAIIGL | 3.61 | 0.01 | 0.78 | 1.20 | 0.22 | 2.56 |
|       |   |        | MVGGVV            |      |      |      |      |      |      |
|       |   |        | DAEFRHDSGYEVHHQKL |      |      |      |      |      |      |
| 11267 | 0 | 103097 | VFFAEDVGSNKGAIIGL | 3.61 | 0.01 | 0.78 | 1.20 | 0.22 | 2.56 |
|       |   |        | MVGGVV            |      |      |      |      |      |      |
|       |   |        | DAEFRHDSGYEVHHQKL |      |      |      |      |      |      |
| 11268 | 0 | 103097 | VFFAEDVGSNKGAIIGL | 3.61 | 0.01 | 0.78 | 1.20 | 0.22 | 2.56 |
|       |   |        | MVGGVV            |      |      |      |      |      |      |
|       |   |        | DAEFRHDSGYEVHHQKL |      |      |      |      |      |      |
| 11269 | 0 | 103097 | VFFAEDVGSNKGAIIGL | 3.61 | 0.01 | 0.78 | 1.20 | 0.22 | 1.48 |
|       |   |        | MVGGVV            |      |      |      |      |      |      |
|       |   |        | DAEFRHDSGYEVHHQKL |      |      |      |      |      |      |
| 11270 | 0 | 103097 | VFFAEDVGSNKGAIIGL | 3.61 | 0.01 | 0.78 | 1.20 | 0.22 | 0.28 |
|       |   |        | MVGGVV            |      |      |      |      |      |      |
|       |   |        | DAEFRHDSGYEVHHQKL |      |      |      |      |      |      |
| 11271 | 0 | 103097 | VFFAEDVGSNKGAIIGL | 3.61 | 0.01 | 0.78 | 0.44 | 1.41 | 1.28 |
|       |   |        | MVGGVV            |      |      |      |      |      |      |
|       |   |        | DAEFRHDSGYEVHHQKL |      |      |      |      |      |      |
| 11272 | 0 | 103097 | VFFAEDVGSNKGAIIGL | 3.61 | 0.01 | 0.78 | 3.70 | 0.22 | 1.28 |
|       |   |        | MVGGVV            |      |      |      |      |      |      |
|       |   |        | DAEFRHDSGYEVHHQKL |      |      |      |      |      |      |
| 11273 | 0 | 103097 | VFFAEDVGSNKGAIIGL | 3.61 | 0.01 | 0.78 | 0.44 | 1.13 | 0.28 |
|       |   |        | MVGGVV            |      |      |      |      |      |      |
|       |   |        | DAEFRHDSGYEVHHQKL |      |      |      |      |      |      |
| 11274 | 0 | 103097 | VFFAEDVGSNKGAIIGL | 3.61 | 0.01 | 0.78 | 1.20 | 0.22 | 0.85 |
|       |   |        | MVGGVV            |      |      |      |      |      |      |
|       |   |        | DAEFRHDSGYEVHHQKL |      |      |      |      |      |      |
| 11275 | 0 | 103097 | VFFAEDVGSNKGAIIGL | 3.61 | 0.01 | 0.78 | 3.16 | 0.22 | 0.28 |
|       |   |        | MVGGVV            |      |      |      |      |      |      |
|       |   |        | DAEFRHDSGYEVHHQKL |      |      |      |      |      |      |
| 11276 | 0 | 103097 | VFFAEDVGSNKGAIIGL | 3.61 | 0.01 | 0.78 | 3.16 | 0.22 | 0.28 |
|       |   |        | MVGGVV            |      |      |      |      |      |      |
|       |   |        | DAEFRHDSGYEVHHQKL |      |      |      |      |      |      |
| 11277 | 0 | 103097 | VFFAEDVGSNKGAIIGL | 3.61 | 0.01 | 0.78 | 3.16 | 2.25 | 1.75 |
|       |   |        | MVGGVV            |      |      |      |      |      |      |

|       |   |        |                   |      |      |      |      |      |      |
|-------|---|--------|-------------------|------|------|------|------|------|------|
|       |   |        | DAEFRHDSGYEVHHQKL |      |      |      |      |      |      |
| 11278 | 0 | 103097 | VFFAEDVGSNKGAIIGL | 3.61 | 0.01 | 0.78 | 0.44 | 1.41 | 0.28 |
|       |   |        | MVGGVV            |      |      |      |      |      |      |
|       |   |        | DAEFRHDSGYEVHHQKL |      |      |      |      |      |      |
| 11279 | 0 | 103097 | VFFAEDVGSNKGAIIGL | 3.61 | 0.01 | 0.78 | 0.44 | 1.41 | 1.27 |
|       |   |        | MVGGVV            |      |      |      |      |      |      |
|       |   |        | DAEFRHDSGYEVHHQKL |      |      |      |      |      |      |
| 11280 | 0 | 103097 | VFFAEDVGSNKGAIIGL | 3.61 | 0.01 | 0.78 | 0.44 | 1.41 | 0.28 |
|       |   |        | MVGGVV            |      |      |      |      |      |      |
|       |   |        | DAEFRHDSGYEVHHQKL |      |      |      |      |      |      |
| 11281 | 0 | 103097 | VFFAEDVGSNKGAIIGL | 3.61 | 0.01 | 0.78 | 0.68 | 0.22 | 0.85 |
|       |   |        | MVGGVV            |      |      |      |      |      |      |
|       |   |        | DAEFRHDSGYEVHHQKL |      |      |      |      |      |      |
| 11282 | 0 | 103097 | VFFAEDVGSNKGAIIGL | 3.61 | 0.01 | 0.78 | 0.68 | 0.22 | 0.28 |
|       |   |        | MVGGVV            |      |      |      |      |      |      |
|       |   |        | DAEFRHDSGYEVHHQKL |      |      |      |      |      |      |
| 11283 | 0 | 103097 | VFFAEDVGSNKGAIIGL | 3.61 | 0.01 | 0.78 | 0.68 | 0.22 | 0.28 |
|       |   |        | MVGGVV            |      |      |      |      |      |      |
|       |   |        | DAEFRHDSGYEVHHQKL |      |      |      |      |      |      |
| 11284 | 0 | 103097 | VFFAEDVGSNKGAIIGL | 3.61 | 0.01 | 0.78 | 1.15 | 0.22 | 0.28 |
|       |   |        | MVGGVV            |      |      |      |      |      |      |
|       |   |        | DAEFRHDSGYEVHHQKL |      |      |      |      |      |      |
| 11285 | 0 | 103097 | VFFAEDVGSNKGAIIGL | 3.61 | 0.01 | 0.78 | 1.12 | 0.22 | 0.85 |
|       |   |        | MVGGVV            |      |      |      |      |      |      |
|       |   |        | DAEFRHDSGYEVHHQKL |      |      |      |      |      |      |
| 11286 | 0 | 7493   | VFFAEDVGSNKGAIIGL | 3.67 | 0.01 | 0.78 | 1.15 | 0.22 | 1.48 |
|       |   |        | MVGGVVIA          |      |      |      |      |      |      |
|       |   |        | DAEFRHDSGYEVHHQKL |      |      |      |      |      |      |
| 11287 | 0 | 7493   | VFFAEDVGSNKGAIIGL | 3.67 | 0.01 | 0.78 | 1.15 | 0.22 | 2.66 |
|       |   |        | MVGGVVIA          |      |      |      |      |      |      |
|       |   |        | DAEFRHDSGYEVHHQKL |      |      |      |      |      |      |
| 11288 | 0 | 7493   | VFFAEDVGSNKGAIIGL | 3.67 | 0.01 | 0.78 | 1.81 | 0.22 | 0.28 |
|       |   |        | MVGGVVIA          |      |      |      |      |      |      |
|       |   |        | DAEFRHDSGYEVHHQKL |      |      |      |      |      |      |
| 11289 | 0 | 7493   | VFFAEDVGSNKGAIIGL | 3.67 | 0.01 | 0.78 | 3.16 | 0.22 | 0.28 |
|       |   |        | MVGGVVIA          |      |      |      |      |      |      |
|       |   |        | DAEFRHDSGYEVHHQKL |      |      |      |      |      |      |
| 11290 | 0 | 7493   | VFFAEDVGSNKGAIIGL | 3.67 | 0.01 | 0.78 | 3.16 | 2.25 | 1.75 |
|       |   |        | MVGGVVIA          |      |      |      |      |      |      |
|       |   |        | DAEFRHDSGYEVHHQKL |      |      |      |      |      |      |
| 11291 | 0 | 7493   | VFFAEDVGSNKGAIIGL | 3.67 | 0.01 | 0.78 | 2.49 | 0.22 | 0.28 |
|       |   |        | MVGGVVIA          |      |      |      |      |      |      |
|       |   |        | DAEFRHDSGYEVHHQKL |      |      |      |      |      |      |
| 11292 | 0 | 7493   | VFFAEDVGSNKGAIIGL | 3.67 | 0.01 | 0.78 | 2.49 | 0.22 | 0.28 |
|       |   |        | MVGGVVIA          |      |      |      |      |      |      |

|       |   |      |                                                    |      |      |      |      |      |      |
|-------|---|------|----------------------------------------------------|------|------|------|------|------|------|
| 11293 | 0 | 7493 | DAEFRHDSGYEVHHQKL<br>VFFAEDVGSNKGAIIGL<br>MVGGVVIA | 3.67 | 0.01 | 0.78 | 2.49 | 0.22 | 1.48 |
| 11294 | 0 | 7493 | DAEFRHDSGYEVHHQKL<br>VFFAEDVGSNKGAIIGL<br>MVGGVVIA | 3.67 | 0.01 | 0.78 | 0.44 | 1.93 | 0.85 |
| 11295 | 0 | 7493 | DAEFRHDSGYEVHHQKL<br>VFFAEDVGSNKGAIIGL<br>MVGGVVIA | 3.67 | 0.01 | 0.78 | 3.16 | 1.93 | 1.75 |
| 11296 | 0 | 7493 | DAEFRHDSGYEVHHQKL<br>VFFAEDVGSNKGAIIGL<br>MVGGVVIA | 3.67 | 0.01 | 0.78 | 3.16 | 1.93 | 0.28 |
| 11297 | 0 | 7493 | DAEFRHDSGYEVHHQKL<br>VFFAEDVGSNKGAIIGL<br>MVGGVVIA | 3.67 | 0.01 | 0.78 | 0.68 | 0.22 | 0.28 |
| 11298 | 0 | 7493 | DAEFRHDSGYEVHHQKL<br>VFFAEDVGSNKGAIIGL<br>MVGGVVIA | 3.67 | 0.01 | 0.78 | 3.16 | 1.93 | 0.28 |
| 11299 | 0 | 7493 | DAEFRHDSGYEVHHQKL<br>VFFAEDVGSNKGAIIGL<br>MVGGVVIA | 3.67 | 0.01 | 0.78 | 0.44 | 1.93 | 0.28 |
| 11300 | 0 | 7493 | DAEFRHDSGYEVHHQKL<br>VFFAEDVGSNKGAIIGL<br>MVGGVVIA | 3.67 | 0.01 | 0.78 | 0.44 | 1.41 | 0.28 |
| 11301 | 0 | 7493 | DAEFRHDSGYEVHHQKL<br>VFFAEDVGSNKGAIIGL<br>MVGGVVIA | 3.67 | 0.01 | 0.78 | 0.44 | 1.41 | 1.48 |
| 11302 | 0 | 7493 | DAEFRHDSGYEVHHQKL<br>VFFAEDVGSNKGAIIGL<br>MVGGVVIA | 3.67 | 0.01 | 0.78 | 0.44 | 1.41 | 1.27 |
| 11303 | 0 | 7493 | DAEFRHDSGYEVHHQKL<br>VFFAEDVGSNKGAIIGL<br>MVGGVVIA | 3.67 | 0.01 | 0.78 | 0.44 | 1.41 | 1.34 |
| 11304 | 0 | 7493 | DAEFRHDSGYEVHHQKL<br>VFFAEDVGSNKGAIIGL<br>MVGGVVIA | 3.67 | 0.01 | 0.78 | 0.44 | 1.41 | 1.75 |
| 11305 | 0 | 7493 | DAEFRHDSGYEVHHQKL<br>VFFAEDVGSNKGAIIGL<br>MVGGVVIA | 3.67 | 0.01 | 0.78 | 1.81 | 0.22 | 0.28 |
| 11306 | 0 | 7493 | DAEFRHDSGYEVHHQKL<br>VFFAEDVGSNKGAIIGL<br>MVGGVVIA | 3.67 | 0.01 | 0.78 | 3.16 | 1.93 | 1.75 |
| 11307 | 0 | 7493 | DAEFRHDSGYEVHHQKL<br>VFFAEDVGSNKGAIIGL<br>MVGGVVIA | 3.67 | 0.01 | 0.78 | 3.16 | 0.22 | 0.28 |

|       |   |      |                                                    |      |      |      |      |      |      |
|-------|---|------|----------------------------------------------------|------|------|------|------|------|------|
| 11308 | 0 | 7493 | DAEFRHDSGYEVHHQKL<br>VFFAEDVGSNKGAIIGL<br>MVGGVVIA | 3.67 | 0.01 | 0.78 | 3.16 | 1.93 | 1.75 |
| 11309 | 0 | 7493 | DAEFRHDSGYEVHHQKL<br>VFFAEDVGSNKGAIIGL<br>MVGGVVIA | 3.67 | 0.01 | 0.78 | 3.00 | 1.93 | 0.85 |
| 11310 | 0 | 7493 | DAEFRHDSGYEVHHQKL<br>VFFAEDVGSNKGAIIGL<br>MVGGVVIA | 3.67 | 0.01 | 0.78 | 3.00 | 1.93 | 1.48 |
| 11311 | 0 | 7493 | DAEFRHDSGYEVHHQKL<br>VFFAEDVGSNKGAIIGL<br>MVGGVVIA | 3.67 | 0.01 | 0.78 | 1.15 | 0.22 | 0.28 |
| 11312 | 0 | 7493 | DAEFRHDSGYEVHHQKL<br>VFFAEDVGSNKGAIIGL<br>MVGGVVIA | 3.67 | 0.01 | 0.78 | 0.68 | 0.22 | 0.85 |
| 11313 | 0 | 7493 | DAEFRHDSGYEVHHQKL<br>VFFAEDVGSNKGAIIGL<br>MVGGVVIA | 3.67 | 0.01 | 0.78 | 3.16 | 1.93 | 1.75 |
| 11314 | 0 | 7493 | DAEFRHDSGYEVHHQKL<br>VFFAEDVGSNKGAIIGL<br>MVGGVVIA | 3.67 | 0.01 | 0.78 | 1.81 | 0.22 | 1.27 |
| 11315 | 0 | 7493 | DAEFRHDSGYEVHHQKL<br>VFFAEDVGSNKGAIIGL<br>MVGGVVIA | 3.67 | 0.01 | 0.78 | 0.68 | 0.22 | 0.28 |
| 11316 | 0 | 7493 | DAEFRHDSGYEVHHQKL<br>VFFAEDVGSNKGAIIGL<br>MVGGVVIA | 3.67 | 0.01 | 0.78 | 0.68 | 0.22 | 0.28 |
| 11317 | 0 | 7493 | DAEFRHDSGYEVHHQKL<br>VFFAEDVGSNKGAIIGL<br>MVGGVVIA | 3.67 | 0.01 | 0.78 | 0.68 | 0.22 | 0.28 |
| 11318 | 0 | 7493 | DAEFRHDSGYEVHHQKL<br>VFFAEDVGSNKGAIIGL<br>MVGGVVIA | 3.67 | 0.01 | 0.78 | 0.68 | 0.22 | 0.28 |
| 11319 | 0 | 7493 | DAEFRHDSGYEVHHQKL<br>VFFAEDVGSNKGAIIGL<br>MVGGVVIA | 3.67 | 0.01 | 0.78 | 0.68 | 0.22 | 0.28 |
| 11320 | 0 | 7493 | DAEFRHDSGYEVHHQKL<br>VFFAEDVGSNKGAIIGL<br>MVGGVVIA | 3.67 | 0.01 | 0.78 | 0.68 | 0.22 | 0.28 |
| 11321 | 0 | 7493 | DAEFRHDSGYEVHHQKL<br>VFFAEDVGSNKGAIIGL<br>MVGGVVIA | 3.67 | 0.01 | 0.78 | 3.00 | 1.93 | 1.75 |
| 11322 | 0 | 7493 | DAEFRHDSGYEVHHQKL<br>VFFAEDVGSNKGAIIGL<br>MVGGVVIA | 3.67 | 0.01 | 0.78 | 1.81 | 0.22 | 0.28 |

|       |   |      |                                                    |      |      |      |      |      |      |
|-------|---|------|----------------------------------------------------|------|------|------|------|------|------|
| 11323 | 0 | 7493 | DAEFRHDSGYEVHHQKL<br>VFFAEDVGSNKGAIIGL<br>MVGGVVIA | 3.67 | 0.01 | 0.78 | 3.16 | 0.22 | 0.28 |
| 11324 | 0 | 7493 | DAEFRHDSGYEVHHQKL<br>VFFAEDVGSNKGAIIGL<br>MVGGVVIA | 3.67 | 0.01 | 0.78 | 3.16 | 0.22 | 0.28 |
| 11325 | 0 | 7493 | DAEFRHDSGYEVHHQKL<br>VFFAEDVGSNKGAIIGL<br>MVGGVVIA | 3.67 | 0.01 | 0.78 | 0.68 | 0.22 | 1.48 |
| 11326 | 0 | 7493 | DAEFRHDSGYEVHHQKL<br>VFFAEDVGSNKGAIIGL<br>MVGGVVIA | 3.67 | 0.01 | 0.78 | 0.68 | 0.22 | 0.28 |
| 11327 | 0 | 7493 | DAEFRHDSGYEVHHQKL<br>VFFAEDVGSNKGAIIGL<br>MVGGVVIA | 3.67 | 0.01 | 0.78 | 0.68 | 0.22 | 0.28 |
| 11328 | 0 | 7493 | DAEFRHDSGYEVHHQKL<br>VFFAEDVGSNKGAIIGL<br>MVGGVVIA | 3.67 | 0.01 | 0.78 | 1.81 | 0.22 | 0.28 |
| 11329 | 0 | 7493 | DAEFRHDSGYEVHHQKL<br>VFFAEDVGSNKGAIIGL<br>MVGGVVIA | 3.67 | 0.01 | 0.78 | 3.16 | 0.22 | 0.28 |
| 11330 | 0 | 7493 | DAEFRHDSGYEVHHQKL<br>VFFAEDVGSNKGAIIGL<br>MVGGVVIA | 3.67 | 0.01 | 0.78 | 3.00 | 1.93 | 1.27 |
| 11331 | 0 | 7493 | DAEFRHDSGYEVHHQKL<br>VFFAEDVGSNKGAIIGL<br>MVGGVVIA | 3.67 | 0.01 | 0.78 | 1.81 | 0.22 | 1.27 |
| 11332 | 0 | 7493 | DAEFRHDSGYEVHHQKL<br>VFFAEDVGSNKGAIIGL<br>MVGGVVIA | 3.67 | 0.01 | 0.78 | 1.15 | 0.22 | 0.85 |
| 11333 | 0 | 7493 | DAEFRHDSGYEVHHQKL<br>VFFAEDVGSNKGAIIGL<br>MVGGVVIA | 3.67 | 0.01 | 0.78 | 0.44 | 1.41 | 2.35 |
| 11334 | 0 | 7493 | DAEFRHDSGYEVHHQKL<br>VFFAEDVGSNKGAIIGL<br>MVGGVVIA | 3.67 | 0.01 | 0.78 | 0.68 | 0.22 | 0.28 |
| 11335 | 0 | 7493 | DAEFRHDSGYEVHHQKL<br>VFFAEDVGSNKGAIIGL<br>MVGGVVIA | 3.67 | 0.01 | 0.78 | 3.16 | 0.22 | 1.27 |
| 11336 | 0 | 7493 | DAEFRHDSGYEVHHQKL<br>VFFAEDVGSNKGAIIGL<br>MVGGVVIA | 3.67 | 0.01 | 0.78 | 3.16 | 0.22 | 0.28 |
| 11337 | 0 | 7493 | DAEFRHDSGYEVHHQKL<br>VFFAEDVGSNKGAIIGL<br>MVGGVVIA | 3.67 | 0.01 | 0.78 | 4.23 | 1.93 | 0.28 |

|       |   |      |                                                    |      |      |      |      |      |      |
|-------|---|------|----------------------------------------------------|------|------|------|------|------|------|
| 11338 | 0 | 7493 | DAEFRHDSGYEVHHQKL<br>VFFAEDVGSNKGAIIGL<br>MVGGVVIA | 3.67 | 0.01 | 0.78 | 4.23 | 1.93 | 1.75 |
| 11339 | 0 | 7493 | DAEFRHDSGYEVHHQKL<br>VFFAEDVGSNKGAIIGL<br>MVGGVVIA | 3.67 | 0.01 | 0.78 | 4.63 | 0.22 | 0.28 |
| 11340 | 0 | 7493 | DAEFRHDSGYEVHHQKL<br>VFFAEDVGSNKGAIIGL<br>MVGGVVIA | 3.67 | 0.01 | 0.78 | 0.44 | 1.93 | 0.28 |
| 11341 | 0 | 7493 | DAEFRHDSGYEVHHQKL<br>VFFAEDVGSNKGAIIGL<br>MVGGVVIA | 3.67 | 0.01 | 0.78 | 4.23 | 1.41 | 0.28 |
| 11342 | 0 | 7493 | DAEFRHDSGYEVHHQKL<br>VFFAEDVGSNKGAIIGL<br>MVGGVVIA | 3.67 | 0.01 | 0.78 | 3.40 | 0.22 | 0.28 |
| 11343 | 0 | 7493 | DAEFRHDSGYEVHHQKL<br>VFFAEDVGSNKGAIIGL<br>MVGGVVIA | 3.67 | 0.01 | 0.78 | 3.40 | 0.22 | 0.28 |
| 11344 | 0 | 7493 | DAEFRHDSGYEVHHQKL<br>VFFAEDVGSNKGAIIGL<br>MVGGVVIA | 3.67 | 0.01 | 0.78 | 0.68 | 0.22 | 0.28 |
| 11345 | 0 | 7493 | DAEFRHDSGYEVHHQKL<br>VFFAEDVGSNKGAIIGL<br>MVGGVVIA | 3.67 | 0.01 | 0.78 | 0.68 | 0.22 | 0.28 |
| 11346 | 0 | 7493 | DAEFRHDSGYEVHHQKL<br>VFFAEDVGSNKGAIIGL<br>MVGGVVIA | 3.67 | 0.01 | 0.78 | 0.68 | 0.22 | 0.28 |
| 11347 | 0 | 7493 | DAEFRHDSGYEVHHQKL<br>VFFAEDVGSNKGAIIGL<br>MVGGVVIA | 3.67 | 0.01 | 0.78 | 0.68 | 0.22 | 0.28 |
| 11348 | 0 | 7493 | DAEFRHDSGYEVHHQKL<br>VFFAEDVGSNKGAIIGL<br>MVGGVVIA | 3.67 | 0.01 | 0.78 | 0.68 | 0.22 | 0.28 |
| 11349 | 0 | 7493 | DAEFRHDSGYEVHHQKL<br>VFFAEDVGSNKGAIIGL<br>MVGGVVIA | 3.67 | 0.01 | 0.78 | 0.68 | 0.22 | 0.28 |
| 11350 | 0 | 7493 | DAEFRHDSGYEVHHQKL<br>VFFAEDVGSNKGAIIGL<br>MVGGVVIA | 3.67 | 0.01 | 0.78 | 0.68 | 0.22 | 0.28 |
| 11351 | 0 | 7493 | DAEFRHDSGYEVHHQKL<br>VFFAEDVGSNKGAIIGL<br>MVGGVVIA | 3.67 | 0.01 | 0.78 | 0.68 | 0.22 | 0.28 |
| 11352 | 0 | 7493 | DAEFRHDSGYEVHHQKL<br>VFFAEDVGSNKGAIIGL<br>MVGGVVIA | 3.67 | 0.01 | 0.78 | 0.68 | 0.22 | 0.28 |



|       |   |      |                                                    |      |      |      |      |      |      |
|-------|---|------|----------------------------------------------------|------|------|------|------|------|------|
| 11353 | 0 | 7493 | DAEFRHDSGYEVHHQKL<br>VFFAEDVGSNKGAIIGL<br>MVGGVVIA | 3.67 | 0.01 | 0.78 | 0.68 | 0.22 | 0.28 |
| 11354 | 0 | 7493 | DAEFRHDSGYEVHHQKL<br>VFFAEDVGSNKGAIIGL<br>MVGGVVIA | 3.67 | 0.01 | 0.78 | 3.40 | 0.22 | 0.28 |
| 11355 | 0 | 7493 | DAEFRHDSGYEVHHQKL<br>VFFAEDVGSNKGAIIGL<br>MVGGVVIA | 3.67 | 0.01 | 0.78 | 3.40 | 0.22 | 0.28 |
| 11356 | 0 | 7493 | DAEFRHDSGYEVHHQKL<br>VFFAEDVGSNKGAIIGL<br>MVGGVVIA | 3.67 | 0.01 | 0.78 | 3.70 | 2.25 | 1.75 |
| 11357 | 0 | 7493 | DAEFRHDSGYEVHHQKL<br>VFFAEDVGSNKGAIIGL<br>MVGGVVIA | 3.67 | 0.01 | 0.78 | 0.44 | 1.41 | 0.28 |
| 11358 | 0 | 7493 | DAEFRHDSGYEVHHQKL<br>VFFAEDVGSNKGAIIGL<br>MVGGVVIA | 3.67 | 0.01 | 0.78 | 0.44 | 1.41 | 0.28 |
| 11359 | 0 | 7493 | DAEFRHDSGYEVHHQKL<br>VFFAEDVGSNKGAIIGL<br>MVGGVVIA | 3.67 | 0.01 | 0.78 | 3.00 | 0.22 | 0.28 |
| 11360 | 0 | 7493 | DAEFRHDSGYEVHHQKL<br>VFFAEDVGSNKGAIIGL<br>MVGGVVIA | 3.67 | 0.01 | 0.78 | 3.00 | 0.22 | 0.28 |
| 11361 | 0 | 7493 | DAEFRHDSGYEVHHQKL<br>VFFAEDVGSNKGAIIGL<br>MVGGVVIA | 3.67 | 0.01 | 0.78 | 3.00 | 1.93 | 1.75 |
| 11362 | 0 | 7493 | DAEFRHDSGYEVHHQKL<br>VFFAEDVGSNKGAIIGL<br>MVGGVVIA | 3.67 | 0.01 | 0.78 | 0.44 | 1.41 | 0.28 |
| 11363 | 0 | 7493 | DAEFRHDSGYEVHHQKL<br>VFFAEDVGSNKGAIIGL<br>MVGGVVIA | 3.67 | 0.01 | 0.78 | 0.44 | 1.41 | 1.66 |
| 11364 | 0 | 7493 | DAEFRHDSGYEVHHQKL<br>VFFAEDVGSNKGAIIGL<br>MVGGVVIA | 3.67 | 0.01 | 0.78 | 3.15 | 0.22 | 0.28 |
| 11365 | 0 | 7493 | DAEFRHDSGYEVHHQKL<br>VFFAEDVGSNKGAIIGL<br>MVGGVVIA | 3.67 | 0.01 | 0.78 | 3.15 | 0.22 | 0.85 |
| 11366 | 0 | 7493 | DAEFRHDSGYEVHHQKL<br>VFFAEDVGSNKGAIIGL<br>MVGGVVIA | 3.67 | 0.01 | 0.78 | 3.15 | 0.22 | 0.85 |
| 11367 | 0 | 7493 | DAEFRHDSGYEVHHQKL<br>VFFAEDVGSNKGAIIGL<br>MVGGVVIA | 3.67 | 0.01 | 0.78 | 3.15 | 0.22 | 0.28 |

|       |   |      |                                                    |      |      |      |      |      |      |
|-------|---|------|----------------------------------------------------|------|------|------|------|------|------|
| 11368 | 0 | 7493 | DAEFRHDSGYEVHHQKL<br>VFFAEDVGSNKGAIIGL<br>MVGGVVIA | 3.67 | 0.01 | 0.78 | 0.44 | 1.93 | 1.28 |
| 11369 | 0 | 7493 | DAEFRHDSGYEVHHQKL<br>VFFAEDVGSNKGAIIGL<br>MVGGVVIA | 3.67 | 0.01 | 0.78 | 3.12 | 0.22 | 0.28 |
| 11370 | 0 | 7493 | DAEFRHDSGYEVHHQKL<br>VFFAEDVGSNKGAIIGL<br>MVGGVVIA | 3.67 | 0.01 | 0.78 | 1.15 | 0.22 | 0.28 |
| 11371 | 0 | 7493 | DAEFRHDSGYEVHHQKL<br>VFFAEDVGSNKGAIIGL<br>MVGGVVIA | 3.67 | 0.01 | 0.78 | 1.15 | 0.22 | 1.66 |
| 11372 | 0 | 7493 | DAEFRHDSGYEVHHQKL<br>VFFAEDVGSNKGAIIGL<br>MVGGVVIA | 3.67 | 0.01 | 0.78 | 1.15 | 0.22 | 1.66 |
| 11373 | 0 | 7493 | DAEFRHDSGYEVHHQKL<br>VFFAEDVGSNKGAIIGL<br>MVGGVVIA | 3.67 | 0.01 | 0.78 | 1.15 | 0.22 | 1.66 |
| 11374 | 0 | 7493 | DAEFRHDSGYEVHHQKL<br>VFFAEDVGSNKGAIIGL<br>MVGGVVIA | 3.67 | 0.01 | 0.78 | 3.00 | 1.93 | 0.28 |
| 11375 | 0 | 7493 | DAEFRHDSGYEVHHQKL<br>VFFAEDVGSNKGAIIGL<br>MVGGVVIA | 3.67 | 0.01 | 0.78 | 3.00 | 1.93 | 0.28 |
| 11376 | 0 | 7493 | DAEFRHDSGYEVHHQKL<br>VFFAEDVGSNKGAIIGL<br>MVGGVVIA | 3.67 | 0.01 | 0.78 | 1.12 | 0.22 | 1.48 |
| 11377 | 0 | 7493 | DAEFRHDSGYEVHHQKL<br>VFFAEDVGSNKGAIIGL<br>MVGGVVIA | 3.67 | 0.01 | 0.78 | 3.16 | 1.93 | 0.28 |
| 11378 | 0 | 7493 | DAEFRHDSGYEVHHQKL<br>VFFAEDVGSNKGAIIGL<br>MVGGVVIA | 3.67 | 0.01 | 0.78 | 0.44 | 1.41 | 0.28 |
| 11379 | 0 | 7493 | DAEFRHDSGYEVHHQKL<br>VFFAEDVGSNKGAIIGL<br>MVGGVVIA | 3.67 | 0.01 | 0.78 | 0.68 | 0.22 | 1.34 |
| 11380 | 0 | 7493 | DAEFRHDSGYEVHHQKL<br>VFFAEDVGSNKGAIIGL<br>MVGGVVIA | 3.67 | 0.01 | 0.78 | 0.68 | 0.22 | 1.75 |
| 11381 | 0 | 7493 | DAEFRHDSGYEVHHQKL<br>VFFAEDVGSNKGAIIGL<br>MVGGVVIA | 3.67 | 0.01 | 0.78 | 1.81 | 0.22 | 0.28 |
| 11382 | 0 | 7493 | DAEFRHDSGYEVHHQKL<br>VFFAEDVGSNKGAIIGL<br>MVGGVVIA | 3.67 | 0.01 | 0.78 | 0.68 | 0.22 | 0.28 |

|       |   |      |                                                    |      |      |      |      |      |      |
|-------|---|------|----------------------------------------------------|------|------|------|------|------|------|
| 11383 | 0 | 7493 | DAEFRHDSGYEVHHQKL<br>VFFAEDVGSNKGAIIGL<br>MVGGVVIA | 3.67 | 0.01 | 0.78 | 3.40 | 0.22 | 0.28 |
| 11384 | 0 | 7493 | DAEFRHDSGYEVHHQKL<br>VFFAEDVGSNKGAIIGL<br>MVGGVVIA | 3.67 | 0.01 | 0.78 | 3.40 | 0.22 | 0.28 |
| 11385 | 0 | 7493 | DAEFRHDSGYEVHHQKL<br>VFFAEDVGSNKGAIIGL<br>MVGGVVIA | 3.67 | 0.01 | 0.78 | 1.12 | 0.22 | 1.48 |
| 11386 | 0 | 7493 | DAEFRHDSGYEVHHQKL<br>VFFAEDVGSNKGAIIGL<br>MVGGVVIA | 3.67 | 0.01 | 0.78 | 1.12 | 0.22 | 1.48 |
| 11387 | 0 | 7493 | DAEFRHDSGYEVHHQKL<br>VFFAEDVGSNKGAIIGL<br>MVGGVVIA | 3.67 | 0.01 | 0.78 | 1.15 | 0.22 | 0.28 |
| 11388 | 0 | 7493 | DAEFRHDSGYEVHHQKL<br>VFFAEDVGSNKGAIIGL<br>MVGGVVIA | 3.67 | 0.01 | 0.78 | 1.15 | 0.22 | 1.48 |
| 11389 | 0 | 7493 | DAEFRHDSGYEVHHQKL<br>VFFAEDVGSNKGAIIGL<br>MVGGVVIA | 3.67 | 0.01 | 0.78 | 0.68 | 0.22 | 0.28 |
| 11390 | 0 | 7493 | DAEFRHDSGYEVHHQKL<br>VFFAEDVGSNKGAIIGL<br>MVGGVVIA | 3.67 | 0.01 | 0.78 | 0.68 | 0.22 | 0.28 |
| 11391 | 0 | 7493 | DAEFRHDSGYEVHHQKL<br>VFFAEDVGSNKGAIIGL<br>MVGGVVIA | 3.67 | 0.01 | 0.78 | 0.68 | 0.22 | 0.28 |
| 11392 | 0 | 7493 | DAEFRHDSGYEVHHQKL<br>VFFAEDVGSNKGAIIGL<br>MVGGVVIA | 3.67 | 0.01 | 0.78 | 0.68 | 0.22 | 1.48 |
| 11393 | 0 | 7493 | DAEFRHDSGYEVHHQKL<br>VFFAEDVGSNKGAIIGL<br>MVGGVVIA | 3.67 | 0.01 | 0.78 | 0.44 | 1.93 | 1.28 |
| 11394 | 0 | 7493 | DAEFRHDSGYEVHHQKL<br>VFFAEDVGSNKGAIIGL<br>MVGGVVIA | 3.67 | 0.01 | 0.78 | 0.44 | 1.41 | 1.28 |
| 11395 | 0 | 7493 | DAEFRHDSGYEVHHQKL<br>VFFAEDVGSNKGAIIGL<br>MVGGVVIA | 3.67 | 0.01 | 0.78 | 0.44 | 1.93 | 1.34 |
| 11396 | 0 | 7493 | DAEFRHDSGYEVHHQKL<br>VFFAEDVGSNKGAIIGL<br>MVGGVVIA | 3.67 | 0.01 | 0.78 | 0.44 | 1.41 | 1.34 |
| 11397 | 0 | 7493 | DAEFRHDSGYEVHHQKL<br>VFFAEDVGSNKGAIIGL<br>MVGGVVIA | 3.67 | 0.01 | 0.78 | 3.70 | 0.22 | 1.28 |

|       |   |      |                                                    |      |      |      |      |      |      |
|-------|---|------|----------------------------------------------------|------|------|------|------|------|------|
| 11398 | 0 | 7493 | DAEFRHDSGYEVHHQKL<br>VFFAEDVGSNKGAIIGL<br>MVGGVVIA | 3.67 | 0.01 | 0.78 | 1.20 | 0.22 | 0.28 |
| 11399 | 0 | 7493 | DAEFRHDSGYEVHHQKL<br>VFFAEDVGSNKGAIIGL<br>MVGGVVIA | 3.67 | 0.01 | 0.78 | 2.87 | 0.22 | 0.28 |
| 11400 | 0 | 7493 | DAEFRHDSGYEVHHQKL<br>VFFAEDVGSNKGAIIGL<br>MVGGVVIA | 3.67 | 0.01 | 0.78 | 0.68 | 0.22 | 0.28 |
| 11401 | 0 | 7493 | DAEFRHDSGYEVHHQKL<br>VFFAEDVGSNKGAIIGL<br>MVGGVVIA | 3.67 | 0.01 | 0.78 | 0.68 | 0.22 | 0.28 |
| 11402 | 0 | 7493 | DAEFRHDSGYEVHHQKL<br>VFFAEDVGSNKGAIIGL<br>MVGGVVIA | 3.67 | 0.01 | 0.78 | 1.81 | 0.22 | 0.28 |
| 11403 | 0 | 7493 | DAEFRHDSGYEVHHQKL<br>VFFAEDVGSNKGAIIGL<br>MVGGVVIA | 3.67 | 0.01 | 0.78 | 0.44 | 1.41 | 1.34 |
| 11404 | 0 | 7493 | DAEFRHDSGYEVHHQKL<br>VFFAEDVGSNKGAIIGL<br>MVGGVVIA | 3.67 | 0.01 | 0.78 | 3.40 | 0.22 | 0.28 |
| 11405 | 0 | 7493 | DAEFRHDSGYEVHHQKL<br>VFFAEDVGSNKGAIIGL<br>MVGGVVIA | 3.67 | 0.01 | 0.78 | 3.59 | 1.93 | 0.28 |
| 11406 | 0 | 7493 | DAEFRHDSGYEVHHQKL<br>VFFAEDVGSNKGAIIGL<br>MVGGVVIA | 3.67 | 0.01 | 0.78 | 1.15 | 0.22 | 0.28 |
| 11407 | 0 | 7493 | DAEFRHDSGYEVHHQKL<br>VFFAEDVGSNKGAIIGL<br>MVGGVVIA | 3.67 | 0.01 | 0.78 | 0.68 | 0.22 | 0.28 |
| 11408 | 0 | 7493 | DAEFRHDSGYEVHHQKL<br>VFFAEDVGSNKGAIIGL<br>MVGGVVIA | 3.67 | 0.01 | 0.78 | 0.68 | 0.22 | 0.85 |
| 11409 | 0 | 7493 | DAEFRHDSGYEVHHQKL<br>VFFAEDVGSNKGAIIGL<br>MVGGVVIA | 3.67 | 0.01 | 0.78 | 1.20 | 0.22 | 1.75 |
| 11410 | 0 | 7493 | DAEFRHDSGYEVHHQKL<br>VFFAEDVGSNKGAIIGL<br>MVGGVVIA | 3.67 | 0.01 | 0.78 | 3.59 | 2.25 | 1.75 |
| 11411 | 0 | 7493 | DAEFRHDSGYEVHHQKL<br>VFFAEDVGSNKGAIIGL<br>MVGGVVIA | 3.67 | 0.01 | 0.78 | 3.16 | 0.22 | 0.28 |
| 11412 | 0 | 7493 | DAEFRHDSGYEVHHQKL<br>VFFAEDVGSNKGAIIGL<br>MVGGVVIA | 3.67 | 0.01 | 0.78 | 1.20 | 0.22 | 0.28 |

|       |   |        |                                                                     |      |      |      |      |      |      |
|-------|---|--------|---------------------------------------------------------------------|------|------|------|------|------|------|
| 11413 | 0 | 7493   | DAEFRHDSGYEVHHQKL<br>VFFAEDVGSNKGAIIGL<br>MVGGVVIA                  | 3.67 | 0.01 | 0.78 | 1.20 | 0.22 | 0.28 |
| 11414 | 0 | 7493   | DAEFRHDSGYEVHHQKL<br>VFFAEDVGSNKGAIIGL<br>MVGGVVIA                  | 3.67 | 0.01 | 0.78 | 1.20 | 0.22 | 0.28 |
| 11415 | 0 | 7493   | DAEFRHDSGYEVHHQKL<br>VFFAEDVGSNKGAIIGL<br>MVGGVVIA                  | 3.67 | 0.01 | 0.78 | 1.20 | 0.22 | 0.28 |
| 11416 | 0 | 7493   | DAEFRHDSGYEVHHQKL<br>VFFAEDVGSNKGAIIGL<br>MVGGVVIA                  | 3.67 | 0.01 | 0.78 | 1.20 | 0.22 | 0.28 |
| 11417 | 0 | 7493   | DAEFRHDSGYEVHHQKL<br>VFFAEDVGSNKGAIIGL<br>MVGGVVIA                  | 3.67 | 0.01 | 0.78 | 1.20 | 0.22 | 1.48 |
| 11418 | 0 | 7493   | DAEFRHDSGYEVHHQKL<br>VFFAEDVGSNKGAIIGL<br>MVGGVVIA                  | 3.67 | 0.01 | 0.78 | 1.15 | 0.22 | 1.34 |
| 11419 | 0 | 7493   | DAEFRHDSGYEVHHQKL<br>VFFAEDVGSNKGAIIGL<br>MVGGVVIA                  | 3.67 | 0.01 | 0.78 | 1.15 | 0.22 | 0.28 |
| 11420 | 0 | 7493   | DAEFRHDSGYEVHHQKL<br>VFFAEDVGSNKGAIIGL<br>MVGGVVIA                  | 3.67 | 0.01 | 0.78 | 1.15 | 0.22 | 1.48 |
| 11421 | 0 | 7493   | DAEFRHDSGYEVHHQKL<br>VFFAEDVGSNKGAIIGL<br>MVGGVVIA                  | 3.67 | 0.01 | 0.78 | 1.15 | 0.22 | 1.75 |
| 11422 | 0 | 7493   | DAEFRHDSGYEVHHQKL<br>VFFAEDVGSNKGAIIGL<br>MVGGVVIA                  | 3.67 | 0.01 | 0.78 | 1.12 | 0.22 | 0.85 |
| 11423 | 0 | 7494   | DAEFRHDSGYEVHHQKL<br>VFFAEDVGSNKGAIIGL<br>MVGGVVIAT                 | 3.68 | 0.01 | 0.78 | 0.44 | 1.41 | 0.28 |
| 11424 | 0 | 7494   | DAEFRHDSGYEVHHQKL<br>VFFAEDVGSNKGAIIGL<br>MVGGVVIAT                 | 3.68 | 0.01 | 0.78 | 0.44 | 1.41 | 0.28 |
| 11425 | 0 | 7494   | DAEFRHDSGYEVHHQKL<br>VFFAEDVGSNKGAIIGL<br>MVGGVVIAT                 | 3.68 | 0.01 | 0.78 | 1.12 | 0.22 | 2.56 |
| 11426 | 0 | 157148 | DAEFRHDSGYEVHHQKL<br>VFFAEDVGSNKGAIIGL<br>MVGGVVIATVIVITLVM<br>LKKK | 3.94 | 0.01 | 0.78 | 0.44 | 1.41 | 1.28 |
| 11427 | 0 | 106323 | DAEFRHDSGYEVHHQKL<br>VFFAEDVGSNKGALYI<br>VIVLPIAL                   | 3.68 | 0.01 | 0.90 | 1.12 | 0.22 | 0.85 |

|       |   |        |                                                    |      |      |      |      |      |      |
|-------|---|--------|----------------------------------------------------|------|------|------|------|------|------|
| 11428 | 0 | 106324 | DAEFRHDSGYEVHHQKL<br>VFFAEDVGSNKVVGAIL<br>MSVIVLAV | 3.67 | 0.01 | 0.90 | 1.12 | 0.22 | 0.85 |
| 11429 | 0 | 139024 | DAEFRHDSGYEVHHQKL<br>VFFAEDVGSSA                   | 3.27 | 0.01 | 0.78 | 1.15 | 0.22 | 1.48 |
| 11430 | 0 | 157150 | DAEFRHDSGYEVHHQKL<br>VFFAGDVGSNKGAIIGL<br>MVGGVVIA | 3.67 | 0.01 | 0.78 | 0.44 | 1.41 | 1.28 |
| 11431 | 0 | 157151 | DAEFRHDSGYEVHHQKL<br>VFFAKDVGSNKGAIIGL<br>MVGGVVIA | 3.67 | 0.01 | 0.78 | 0.44 | 1.93 | 1.28 |
| 11432 | 0 | 157151 | DAEFRHDSGYEVHHQKL<br>VFFAKDVGSNKGAIIGL<br>MVGGVVIA | 3.67 | 0.01 | 0.78 | 0.44 | 1.41 | 1.28 |
| 11433 | 0 | 105130 | DAEFRHDSGYEVHHQKL<br>VFFAMDVGSNKGAIIGL<br>MVGGVVIA | 3.67 | 0.01 | 0.78 | 0.68 | 0.22 | 1.48 |
| 11434 | 0 | 105130 | DAEFRHDSGYEVHHQKL<br>VFFAMDVGSNKGAIIGL<br>MVGGVVIA | 3.67 | 0.01 | 0.90 | 0.68 | 0.22 | 0.28 |
| 11435 | 0 | 105130 | DAEFRHDSGYEVHHQKL<br>VFFAMDVGSNKGAIIGL<br>MVGGVVIA | 3.67 | 0.01 | 0.90 | 0.68 | 0.22 | 0.28 |
| 11436 | 0 | 105130 | DAEFRHDSGYEVHHQKL<br>VFFAMDVGSNKGAIIGL<br>MVGGVVIA | 3.67 | 0.01 | 0.90 | 0.68 | 0.22 | 0.28 |
| 11437 | 0 | 105130 | DAEFRHDSGYEVHHQKL<br>VFFAMDVGSNKGAIIGL<br>MVGGVVIA | 3.67 | 0.01 | 0.90 | 0.68 | 0.22 | 0.28 |
| 11438 | 0 | 105130 | DAEFRHDSGYEVHHQKL<br>VFFAMDVGSNKGAIIGL<br>MVGGVVIA | 3.67 | 0.01 | 0.90 | 0.68 | 0.22 | 0.28 |
| 11439 | 0 | 105130 | DAEFRHDSGYEVHHQKL<br>VFFAMDVGSNKGAIIGL<br>MVGGVVIA | 3.67 | 0.01 | 0.90 | 0.68 | 0.22 | 0.28 |
| 11440 | 0 | 105130 | DAEFRHDSGYEVHHQKL<br>VFFAMDVGSNKGAIIGL<br>MVGGVVIA | 3.67 | 0.01 | 0.90 | 0.68 | 0.22 | 1.48 |
| 11441 | 0 | 157152 | DAEFRHDSGYEVHHQKL<br>VFFAQDVGSNKGAIIGL<br>MVGGVV   | 3.61 | 0.01 | 0.78 | 0.44 | 1.93 | 1.28 |
| 11442 | 0 | 157152 | DAEFRHDSGYEVHHQKL<br>VFFAQDVGSNKGAIIGL<br>MVGGVV   | 3.61 | 0.01 | 0.78 | 0.44 | 1.41 | 1.28 |
| 11443 | 0 | 157152 | DAEFRHDSGYEVHHQKL<br>VFFAQDVGSNKGAIIGL<br>MVGGVV   | 3.61 | 0.01 | 0.78 | 0.44 | 1.41 | 1.28 |

|       |   |       |                                                    |      |      |      |      |      |      |
|-------|---|-------|----------------------------------------------------|------|------|------|------|------|------|
| 11444 | 0 | 99924 | DAEFRHDSGYEVHHQKL<br>VFFAQDVGSNKGAIIGL<br>MVGGVVIA | 3.67 | 0.01 | 0.78 | 0.44 | 1.41 | 0.28 |
| 11445 | 0 | 99924 | DAEFRHDSGYEVHHQKL<br>VFFAQDVGSNKGAIIGL<br>MVGGVVIA | 3.67 | 0.01 | 0.78 | 0.68 | 0.22 | 0.28 |
| 11446 | 0 | 99924 | DAEFRHDSGYEVHHQKL<br>VFFAQDVGSNKGAIIGL<br>MVGGVVIA | 3.67 | 0.01 | 0.78 | 0.68 | 0.22 | 0.28 |
| 11447 | 0 | 99924 | DAEFRHDSGYEVHHQKL<br>VFFAQDVGSNKGAIIGL<br>MVGGVVIA | 3.67 | 0.01 | 0.78 | 0.68 | 0.22 | 0.28 |
| 11448 | 0 | 99924 | DAEFRHDSGYEVHHQKL<br>VFFAQDVGSNKGAIIGL<br>MVGGVVIA | 3.67 | 0.01 | 0.78 | 0.68 | 0.22 | 0.28 |
| 11449 | 0 | 99924 | DAEFRHDSGYEVHHQKL<br>VFFAQDVGSNKGAIIGL<br>MVGGVVIA | 3.67 | 0.01 | 0.78 | 0.68 | 0.22 | 0.28 |
| 11450 | 0 | 99924 | DAEFRHDSGYEVHHQKL<br>VFFAQDVGSNKGAIIGL<br>MVGGVVIA | 3.67 | 0.01 | 0.78 | 0.68 | 0.22 | 0.28 |
| 11451 | 0 | 99924 | DAEFRHDSGYEVHHQKL<br>VFFAQDVGSNKGAIIGL<br>MVGGVVIA | 3.67 | 0.01 | 0.78 | 0.68 | 0.22 | 1.48 |
| 11452 | 0 | 99924 | DAEFRHDSGYEVHHQKL<br>VFFAQDVGSNKGAIIGL<br>MVGGVVIA | 3.67 | 0.01 | 0.78 | 3.16 | 0.22 | 0.28 |
| 11453 | 0 | 99924 | DAEFRHDSGYEVHHQKL<br>VFFAQDVGSNKGAIIGL<br>MVGGVVIA | 3.67 | 0.01 | 0.78 | 3.00 | 0.22 | 0.28 |
| 11454 | 0 | 99924 | DAEFRHDSGYEVHHQKL<br>VFFAQDVGSNKGAIIGL<br>MVGGVVIA | 3.67 | 0.01 | 0.78 | 0.44 | 1.41 | 1.28 |
| 11455 | 0 | 99925 | DAEFRHDSGYEVHHQKL<br>VFFGEDVGSNKGAIIGL<br>MVGGVVIA | 3.67 | 0.01 | 0.78 | 0.44 | 1.41 | 0.28 |
| 11456 | 0 | 99925 | DAEFRHDSGYEVHHQKL<br>VFFGEDVGSNKGAIIGL<br>MVGGVVIA | 3.67 | 0.01 | 0.78 | 0.68 | 0.22 | 1.48 |
| 11457 | 0 | 99925 | DAEFRHDSGYEVHHQKL<br>VFFGEDVGSNKGAIIGL<br>MVGGVVIA | 3.67 | 0.01 | 0.78 | 0.68 | 0.22 | 0.28 |
| 11458 | 0 | 99925 | DAEFRHDSGYEVHHQKL<br>VFFGEDVGSNKGAIIGL<br>MVGGVVIA | 3.67 | 0.01 | 0.78 | 0.68 | 0.22 | 0.28 |

|       |   |        |                                                    |      |      |      |      |      |      |
|-------|---|--------|----------------------------------------------------|------|------|------|------|------|------|
| 11459 | 0 | 99925  | DAEFRHDSGYEVHHQKL<br>VFFGEDVGSNKGAIIGL<br>MVGGVVIA | 3.67 | 0.01 | 0.78 | 0.68 | 0.22 | 0.28 |
| 11460 | 0 | 99925  | DAEFRHDSGYEVHHQKL<br>VFFGEDVGSNKGAIIGL<br>MVGGVVIA | 3.67 | 0.01 | 0.78 | 0.68 | 0.22 | 0.28 |
| 11461 | 0 | 99925  | DAEFRHDSGYEVHHQKL<br>VFFGEDVGSNKGAIIGL<br>MVGGVVIA | 3.67 | 0.01 | 0.78 | 0.68 | 0.22 | 0.28 |
| 11462 | 0 | 99925  | DAEFRHDSGYEVHHQKL<br>VFFGEDVGSNKGAIIGL<br>MVGGVVIA | 3.67 | 0.01 | 0.78 | 0.68 | 0.22 | 0.28 |
| 11463 | 0 | 99925  | DAEFRHDSGYEVHHQKL<br>VFFGEDVGSNKGAIIGL<br>MVGGVVIA | 3.67 | 0.01 | 0.78 | 0.68 | 0.22 | 1.48 |
| 11464 | 0 | 105131 | DAEFRHDSGYEVHHQKL<br>VFFGQDVGSNKGAIIGL<br>MVGGVVIA | 3.67 | 0.01 | 0.78 | 0.68 | 0.22 | 1.48 |
| 11465 | 0 | 105131 | DAEFRHDSGYEVHHQKL<br>VFFGQDVGSNKGAIIGL<br>MVGGVVIA | 3.67 | 0.01 | 0.90 | 0.68 | 0.22 | 0.28 |
| 11466 | 0 | 105131 | DAEFRHDSGYEVHHQKL<br>VFFGQDVGSNKGAIIGL<br>MVGGVVIA | 3.67 | 0.01 | 0.90 | 0.68 | 0.22 | 0.28 |
| 11467 | 0 | 105131 | DAEFRHDSGYEVHHQKL<br>VFFGQDVGSNKGAIIGL<br>MVGGVVIA | 3.67 | 0.01 | 0.90 | 0.68 | 0.22 | 0.28 |
| 11468 | 0 | 105131 | DAEFRHDSGYEVHHQKL<br>VFFGQDVGSNKGAIIGL<br>MVGGVVIA | 3.67 | 0.01 | 0.90 | 0.68 | 0.22 | 0.28 |
| 11469 | 0 | 105131 | DAEFRHDSGYEVHHQKL<br>VFFGQDVGSNKGAIIGL<br>MVGGVVIA | 3.67 | 0.01 | 0.90 | 0.68 | 0.22 | 0.28 |
| 11470 | 0 | 105131 | DAEFRHDSGYEVHHQKL<br>VFFGQDVGSNKGAIIGL<br>MVGGVVIA | 3.67 | 0.01 | 0.90 | 0.68 | 0.22 | 0.28 |
| 11471 | 0 | 105131 | DAEFRHDSGYEVHHQKL<br>VFFGQDVGSNKGAIIGL<br>MVGGVVIA | 3.67 | 0.01 | 0.90 | 0.68 | 0.22 | 1.48 |
| 11472 | 0 | 7496   | DAEKAVEVDPDDV                                      | 2.60 | 0.01 | 3.00 | 0.44 | 0.85 | 0.28 |
| 11473 | 0 | 7496   | DAEKAVEVDPDDV                                      | 2.60 | 0.01 | 3.00 | 1.15 | 2.39 | 0.28 |
| 11474 | 0 | 226835 | DAENPGGEVFNDNKKG<br>LSRV                           | 2.94 | 0.01 | 1.61 | 2.82 | 0.22 | 0.28 |
| 11475 | 0 | 226835 | DAENPGGEVFNDNKKG<br>LSRV                           | 2.94 | 0.01 | 1.61 | 0.44 | 0.85 | 0.28 |
| 11476 | 0 | 226835 | DAENPGGEVFNDNKKG<br>LSRV                           | 2.94 | 0.01 | 1.61 | 2.82 | 0.22 | 0.85 |



|       |   |        |                          |      |      |      |      |      |      |
|-------|---|--------|--------------------------|------|------|------|------|------|------|
| 11477 | 0 | 226835 | DAENPGGEVFNDNKKG<br>LSRV | 2.94 | 0.01 | 1.61 | 2.82 | 0.22 | 1.34 |
| 11478 | 0 | 170508 | DAETVALDAKRESAF          | 2.69 | 0.01 | 0.78 | 0.44 | 1.41 | 0.28 |
| 11479 | 0 | 7501   | DAEVAGTQWFDPGKS<br>PVFG  | 2.95 | 0.01 | 0.90 | 2.63 | 0.22 | 1.48 |
| 11480 | 0 | 161323 | DAEVAGTQWFHPSGKS<br>PVFG | 2.93 | 0.01 | 0.90 | 2.74 | 0.22 | 1.48 |
| 11481 | 0 | 161324 | DAEVAGTQWFHPSGKT<br>PVFG | 2.93 | 0.01 | 0.90 | 2.74 | 0.22 | 1.48 |
| 11482 | 0 | 7502   | DAEVAGTQWFTPSGKT<br>PVFG | 2.95 | 0.01 | 0.90 | 2.63 | 0.22 | 1.48 |
| 11483 | 0 | 7503   | DAEVAGTQYFHPSGKSP<br>VFG | 2.93 | 0.01 | 0.90 | 2.63 | 0.22 | 1.48 |
| 11484 | 0 | 7503   | DAEVAGTQYFHPSGKSP<br>VFG | 2.93 | 0.01 | 0.90 | 2.63 | 2.25 | 1.75 |
| 11485 | 0 | 7503   | DAEVAGTQYFHPSGKSP<br>VFG | 2.93 | 0.01 | 0.90 | 2.74 | 0.22 | 1.75 |
| 11486 | 0 | 7503   | DAEVAGTQYFHPSGKSP<br>VFG | 2.93 | 0.01 | 0.90 | 2.74 | 0.22 | 1.48 |
| 11487 | 0 | 7503   | DAEVAGTQYFHPSGKSP<br>VFG | 2.93 | 0.01 | 0.90 | 2.74 | 0.22 | 1.75 |
| 11488 | 0 | 7503   | DAEVAGTQYFHPSGKSP<br>VFG | 2.93 | 0.01 | 0.90 | 2.74 | 0.22 | 1.48 |
| 11489 | 0 | 7503   | DAEVAGTQYFHPSGKSP<br>VFG | 2.93 | 0.01 | 0.90 | 2.74 | 0.22 | 0.85 |
| 11490 | 0 | 7503   | DAEVAGTQYFHPSGKSP<br>VFG | 2.93 | 0.01 | 0.90 | 2.63 | 0.22 | 1.48 |
| 11491 | 0 | 161327 | DAEVAGTQYFLPSGKTP<br>VFG | 2.93 | 0.01 | 0.90 | 2.74 | 0.22 | 1.75 |
| 11492 | 0 | 161329 | DAEVAGTQYMHPGKS<br>PVFG  | 2.91 | 0.01 | 0.90 | 2.74 | 0.22 | 1.75 |
| 11493 | 0 | 161329 | DAEVAGTQYMHPGKS<br>PVFG  | 2.91 | 0.01 | 0.90 | 2.74 | 0.22 | 1.48 |
| 11494 | 0 | 161330 | DAEVAGTQYRHPSGKTP<br>VFG | 2.91 | 0.01 | 0.90 | 2.74 | 0.22 | 1.48 |
| 11495 | 0 | 264548 | DAEVDEDEDDDDDDN          | 2.72 | 0.01 | 1.61 | 0.44 | 0.85 | 1.28 |
| 11496 | 0 | 138315 | DAFGGVYS                 | 2.11 | 0.01 | 0.78 | 1.15 | 0.22 | 0.85 |
| 11497 | 0 | 7512   | DAGDHRAAA                | 2.24 | 0.01 | 0.90 | 2.71 | 0.22 | 1.39 |
| 11498 | 0 | 7513   | DAGDHSHPQ                | 2.24 | 0.01 | 0.90 | 2.71 | 0.22 | 1.39 |
| 11499 | 0 | 7514   | DAGDSAYSQ                | 2.26 | 0.01 | 0.90 | 2.71 | 0.22 | 1.39 |
| 11500 | 0 | 7515   | DAGDSGYLT                | 2.24 | 0.01 | 0.90 | 2.71 | 0.22 | 1.39 |
| 11501 | 0 | 7516   | DAGEGGPRV                | 2.22 | 0.01 | 0.90 | 2.71 | 0.22 | 1.39 |
| 11502 | 0 | 7517   | DAGESSGTGAEVVPFN         | 2.73 | 0.01 | 2.75 | 0.44 | 0.85 | 0.28 |
| 11503 | 0 | 7518   | DAGEVYPGP                | 2.23 | 0.01 | 0.90 | 2.71 | 0.22 | 1.39 |
| 11504 | 0 | 137817 | DAGMFDAVSRAT             | 2.48 | 0.01 | 2.21 | 0.44 | 0.85 | 0.28 |

|       |   |        |                            |      |      |      |      |      |      |
|-------|---|--------|----------------------------|------|------|------|------|------|------|
| 11505 | 0 | 137817 | DAGMFDVSRAT                | 2.48 | 0.01 | 2.21 | 1.20 | 0.22 | 0.28 |
| 11506 | 0 | 107774 | DAGPQGKVGPS                | 2.41 | 0.01 | 0.78 | 0.44 | 1.13 | 0.28 |
| 11507 | 0 | 107309 | DAGPYVSPTFFAH              | 2.52 | 0.01 | 0.78 | 1.12 | 0.22 | 0.85 |
| 11508 | 0 | 107309 | DAGPYVSPTFFAH              | 2.52 | 0.01 | 0.78 | 1.12 | 0.22 | 0.28 |
| 11509 | 0 | 108844 | DAGVIQSPRHEVTEMG           | 2.69 | 0.01 | 0.78 | 0.44 | 1.13 | 0.28 |
| 11510 | 0 | 108844 | DAGVIQSPRHEVTEMG           | 2.69 | 0.01 | 0.78 | 0.44 | 1.13 | 0.28 |
| 11511 | 0 | 108844 | DAGVIQSPRHEVTEMG           | 2.69 | 0.01 | 0.78 | 0.44 | 1.13 | 0.28 |
| 11512 | 0 | 108844 | DAGVIQSPRHEVTEMG           | 2.69 | 0.01 | 0.78 | 0.44 | 1.41 | 0.28 |
| 11513 | 0 | 108844 | DAGVIQSPRHEVTEMG           | 2.69 | 0.01 | 0.78 | 0.44 | 1.41 | 0.28 |
| 11514 | 0 | 108844 | DAGVIQSPRHEVTEMG           | 2.69 | 0.01 | 0.78 | 0.44 | 1.41 | 0.28 |
| 11515 | 0 | 108844 | DAGVIQSPRHEVTEMG           | 2.69 | 0.01 | 0.78 | 0.44 | 1.41 | 0.28 |
| 11516 | 0 | 108845 | DAGVIQSPRHEVTEMG<br>Q      | 2.76 | 0.01 | 0.78 | 1.12 | 0.22 | 0.28 |
| 11517 | 0 | 7528   | DAHFLSQTKQSGENLPY<br>LVA   | 2.90 | 0.01 | 1.72 | 0.44 | 0.85 | 0.28 |
| 11518 | 0 | 7532   | DAHHAAD                    | 2.05 | 0.01 | 1.66 | 1.15 | 0.22 | 0.28 |
| 11519 | 0 | 7532   | DAHHAAD                    | 2.05 | 0.01 | 1.66 | 1.15 | 0.22 | 0.85 |
| 11520 | 0 | 7533   | DAHHAADAHHATDAH<br>HA      | 2.87 | 0.01 | 1.66 | 1.20 | 0.22 | 0.85 |
| 11521 | 0 | 7533   | DAHHAADAHHATDAH<br>HA      | 2.87 | 0.01 | 1.66 | 1.20 | 0.22 | 0.85 |
| 11522 | 0 | 7534   | DAHHADAHHADAHHA            | 2.75 | 0.01 | 1.66 | 1.20 | 0.22 | 0.85 |
| 11523 | 0 | 7534   | DAHHADAHHADAHHA            | 2.75 | 0.01 | 1.66 | 1.20 | 0.22 | 0.85 |
| 11524 | 0 | 7535   | DAHHAHHA                   | 2.16 | 0.01 | 1.66 | 1.15 | 0.22 | 0.28 |
| 11525 | 0 | 7535   | DAHHAHHA                   | 2.16 | 0.01 | 1.66 | 1.15 | 0.22 | 0.85 |
| 11526 | 0 | 189592 | DAHKKNLYDHAL               | 2.51 | 0.01 | 3.47 | 0.44 | 0.85 | 0.28 |
| 11527 | 0 | 79773  | DAHVPFCFGKDL               | 2.46 | 0.01 | 2.14 | 3.26 | 0.22 | 0.28 |
| 11528 | 0 | 114291 | DAIGEGKVTLRIRNVRF<br>DEGGF | 3.08 | 0.01 | 0.78 | 3.57 | 0.22 | 0.28 |
| 11529 | 0 | 450463 | DAIPTSV                    | 1.99 | 0.01 | 0.90 | 0.44 | 1.23 | 1.39 |
| 11530 | 0 | 450463 | DAIPTSV                    | 1.99 | 0.01 | 0.90 | 0.44 | 1.23 | 1.39 |
| 11531 | 0 | 97938  | DAKATYEAAV                 | 2.32 | 0.01 | 2.39 | 2.42 | 0.22 | 0.28 |
| 11532 | 0 | 97938  | DAKATYEAAV                 | 2.32 | 0.01 | 2.39 | 2.42 | 0.22 | 0.28 |
| 11533 | 0 | 7557   | DAKDALEPYWKSDS             | 2.64 | 0.01 | 2.40 | 2.43 | 0.22 | 0.28 |
| 11534 | 0 | 7557   | DAKDALEPYWKSDS             | 2.64 | 0.01 | 2.40 | 2.43 | 0.22 | 0.28 |
| 11535 | 0 | 7558   | DAKDGKEIDTKHLPSTC          | 2.78 | 0.01 | 3.30 | 1.12 | 0.22 | 1.57 |

|       |   |        |                           |      |      |      |      |      |      |
|-------|---|--------|---------------------------|------|------|------|------|------|------|
| 11536 | 0 | 7558   | DAKDGKEIDTKHLPSTC         | 2.78 | 0.01 | 3.30 | 1.12 | 0.22 | 0.85 |
| 11537 | 0 | 7558   | DAKDGKEIDTKHLPSTC         | 2.78 | 0.01 | 3.59 | 1.20 | 0.22 | 0.28 |
| 11538 | 0 | 7558   | DAKDGKEIDTKHLPSTC         | 2.78 | 0.01 | 3.59 | 1.20 | 0.22 | 0.28 |
| 11539 | 0 | 7558   | DAKDGKEIDTKHLPSTC         | 2.78 | 0.01 | 3.59 | 1.20 | 0.22 | 0.28 |
| 11540 | 0 | 7559   | DAKFRPN                   | 1.99 | 0.01 | 4.15 | 0.68 | 0.22 | 3.13 |
| 11541 | 0 | 7561   | DAKLTWRND                 | 2.22 | 0.01 | 4.15 | 1.15 | 0.22 | 0.28 |
| 11542 | 0 | 7561   | DAKLTWRND                 | 2.22 | 0.01 | 4.15 | 1.15 | 0.22 | 0.28 |
| 11543 | 0 | 7562   | DAKMTEEDKENALS            | 2.63 | 0.01 | 3.08 | 0.44 | 1.23 | 1.57 |
| 11544 | 0 | 7562   | DAKMTEEDKENALS            | 2.63 | 0.01 | 3.08 | 0.44 | 1.23 | 1.27 |
| 11545 | 0 | 7562   | DAKMTEEDKENALS            | 2.63 | 0.01 | 3.08 | 0.44 | 1.23 | 1.27 |
| 11546 | 0 | 7562   | DAKMTEEDKENALS            | 2.63 | 0.01 | 3.08 | 0.44 | 1.23 | 1.57 |
| 11547 | 0 | 135647 | DAKPGQFP                  | 2.12 | 0.01 | 0.78 | 0.44 | 2.35 | 0.28 |
| 11548 | 0 | 135906 | DALAVDQMGRFG              | 2.48 | 0.01 | 0.90 | 2.16 | 0.22 | 1.27 |
| 11549 | 0 | 512422 | DALEALADQTDALQS           | 2.73 | 0.01 | 2.24 | 0.44 | 1.41 | 1.28 |
| 11550 | 0 | 116689 | DALENQLKEARFLAE           | 2.70 | 0.01 | 2.36 | 0.44 | 1.23 | 1.28 |
| 11551 | 0 | 116689 | DALENQLKEARFLAE           | 2.70 | 0.01 | 2.36 | 0.44 | 1.23 | 1.27 |
| 11552 | 0 | 116689 | DALENQLKEARFLAE           | 2.70 | 0.01 | 2.36 | 0.44 | 1.23 | 1.28 |
| 11553 | 0 | 151824 | DALEPDNRVEYEAGTVE<br>A    | 2.86 | 0.01 | 3.12 | 0.68 | 0.22 | 2.66 |
| 11554 | 0 | 138316 | DALGNVTS                  | 2.10 | 0.01 | 3.53 | 1.15 | 0.22 | 0.85 |
| 11555 | 0 | 95300  | DALNEN                    | 1.90 | 0.01 | 1.60 | 0.44 | 1.23 | 0.28 |
| 11556 | 0 | 98723  | DALNENKVLV                | 2.33 | 0.01 | 1.60 | 0.44 | 1.23 | 0.85 |
| 11557 | 0 | 98723  | DALNENKVLV                | 2.33 | 0.01 | 1.60 | 0.44 | 1.23 | 0.85 |
| 11558 | 0 | 95301  | DALNENKVLVLD              | 2.52 | 0.01 | 1.60 | 0.44 | 1.23 | 1.27 |
| 11559 | 0 | 108846 | DALQFVCGDRGFY             | 2.54 | 0.01 | 0.78 | 1.15 | 0.22 | 0.28 |
| 11560 | 0 | 108846 | DALQFVCGDRGFY             | 2.54 | 0.01 | 0.78 | 1.15 | 0.22 | 0.28 |
| 11561 | 0 | 108846 | DALQFVCGDRGFY             | 2.54 | 0.01 | 0.78 | 1.15 | 0.22 | 1.57 |
| 11562 | 0 | 108846 | DALQFVCGDRGFY             | 2.54 | 0.01 | 0.78 | 1.15 | 0.22 | 1.57 |
| 11563 | 0 | 434593 | DALRQAKQESTEYRRQV         | 2.79 | 4.93 | 0.78 | 0.44 | 1.13 | 0.28 |
| 11564 | 0 | 80893  | DALRRLLYMIYMSG            | 2.61 | 0.01 | 2.14 | 3.44 | 0.22 | 0.28 |
| 11565 | 0 | 180395 | DALSGMEGRKKKFES           | 2.66 | 0.01 | 0.78 | 0.68 | 0.22 | 0.28 |
| 11566 | 0 | 7585   | DALTLRTATNIW              | 2.49 | 0.01 | 3.24 | 0.44 | 1.23 | 0.85 |
| 11567 | 0 | 133540 | DALVAKAQEVS               | 2.41 | 0.01 | 3.45 | 1.12 | 0.22 | 0.85 |
| 11568 | 0 | 133540 | DALVAKAQEVS               | 2.41 | 0.01 | 3.45 | 1.12 | 0.22 | 0.85 |
| 11569 | 0 | 133540 | DALVAKAQEVS               | 2.41 | 0.01 | 3.45 | 0.44 | 0.85 | 0.28 |
| 11570 | 0 | 7600   | DANFDSIRVDAVDNVD<br>ADLLQ | 3.02 | 0.01 | 2.39 | 2.36 | 0.22 | 0.28 |
| 11571 | 0 | 7600   | DANFDSIRVDAVDNVD<br>ADLLQ | 3.02 | 0.01 | 2.39 | 2.36 | 0.22 | 0.28 |
| 11572 | 0 | 7600   | DANFDSIRVDAVDNVD<br>ADLLQ | 3.02 | 0.01 | 2.39 | 2.87 | 0.22 | 0.28 |

|       |   |      |                           |      |      |      |      |      |      |
|-------|---|------|---------------------------|------|------|------|------|------|------|
| 11573 | 0 | 7600 | DANFDSIRVDAVDNVD<br>ADLLQ | 3.02 | 0.01 | 2.39 | 2.87 | 0.22 | 0.28 |
| 11574 | 0 | 7600 | DANFDSIRVDAVDNVD<br>ADLLQ | 3.02 | 0.01 | 2.39 | 2.87 | 0.22 | 0.28 |
| 11575 | 0 | 7600 | DANFDSIRVDAVDNVD<br>ADLLQ | 3.02 | 0.01 | 2.39 | 2.87 | 0.22 | 1.34 |
| 11576 | 0 | 7600 | DANFDSIRVDAVDNVD<br>ADLLQ | 3.02 | 0.01 | 2.39 | 0.68 | 0.22 | 0.28 |
| 11577 | 0 | 7600 | DANFDSIRVDAVDNVD<br>ADLLQ | 3.02 | 0.01 | 2.39 | 0.68 | 0.22 | 0.28 |
| 11578 | 0 | 7600 | DANFDSIRVDAVDNVD<br>ADLLQ | 3.02 | 0.01 | 2.39 | 0.68 | 0.22 | 0.28 |
| 11579 | 0 | 7600 | DANFDSIRVDAVDNVD<br>ADLLQ | 3.02 | 0.01 | 2.39 | 0.68 | 0.22 | 1.34 |
| 11580 | 0 | 7600 | DANFDSIRVDAVDNVD<br>ADLLQ | 3.02 | 0.01 | 2.39 | 0.68 | 0.22 | 1.27 |
| 11581 | 0 | 7600 | DANFDSIRVDAVDNVD<br>ADLLQ | 3.02 | 0.01 | 2.39 | 0.68 | 0.22 | 1.34 |
| 11582 | 0 | 7600 | DANFDSIRVDAVDNVD<br>ADLLQ | 3.02 | 0.01 | 2.39 | 2.36 | 0.22 | 1.34 |
| 11583 | 0 | 7600 | DANFDSIRVDAVDNVD<br>ADLLQ | 3.02 | 0.01 | 2.39 | 2.36 | 0.22 | 1.34 |
| 11584 | 0 | 7600 | DANFDSIRVDAVDNVD<br>ADLLQ | 3.02 | 0.01 | 3.51 | 3.59 | 0.22 | 0.28 |
| 11585 | 0 | 7600 | DANFDSIRVDAVDNVD<br>ADLLQ | 3.02 | 0.01 | 3.51 | 3.59 | 0.22 | 1.34 |
| 11586 | 0 | 7600 | DANFDSIRVDAVDNVD<br>ADLLQ | 3.02 | 0.01 | 3.51 | 3.59 | 0.22 | 1.34 |
| 11587 | 0 | 7600 | DANFDSIRVDAVDNVD<br>ADLLQ | 3.02 | 0.01 | 3.51 | 3.59 | 0.22 | 1.75 |
| 11588 | 0 | 7600 | DANFDSIRVDAVDNVD<br>ADLLQ | 3.02 | 0.01 | 3.51 | 3.59 | 0.22 | 1.75 |
| 11589 | 0 | 7600 | DANFDSIRVDAVDNVD<br>ADLLQ | 3.02 | 0.01 | 3.51 | 3.59 | 0.22 | 0.28 |
| 11590 | 0 | 7600 | DANFDSIRVDAVDNVD<br>ADLLQ | 3.02 | 0.01 | 3.51 | 3.59 | 0.22 | 0.28 |
| 11591 | 0 | 7600 | DANFDSIRVDAVDNVD<br>ADLLQ | 3.02 | 0.01 | 3.51 | 3.59 | 0.22 | 0.28 |
| 11592 | 0 | 7600 | DANFDSIRVDAVDNVD<br>ADLLQ | 3.02 | 0.01 | 3.51 | 3.59 | 0.22 | 0.28 |
| 11593 | 0 | 7600 | DANFDSIRVDAVDNVD<br>ADLLQ | 3.02 | 0.01 | 2.39 | 2.87 | 0.22 | 0.28 |
| 11594 | 0 | 7600 | DANFDSIRVDAVDNVD<br>ADLLQ | 3.02 | 0.01 | 2.39 | 2.87 | 0.22 | 0.28 |
| 11595 | 0 | 7600 | DANFDSIRVDAVDNVD<br>ADLLQ | 3.02 | 0.01 | 2.39 | 2.87 | 2.25 | 1.75 |

|       |   |        |                             |      |      |      |      |      |      |
|-------|---|--------|-----------------------------|------|------|------|------|------|------|
| 11596 | 0 | 7600   | DANFDSIRVDAVDNVD<br>ADLLQ   | 3.02 | 0.01 | 2.39 | 2.87 | 0.22 | 1.34 |
| 11597 | 0 | 7600   | DANFDSIRVDAVDNVD<br>ADLLQ   | 3.02 | 0.01 | 2.39 | 2.87 | 2.25 | 1.75 |
| 11598 | 0 | 7600   | DANFDSIRVDAVDNVD<br>ADLLQ   | 3.02 | 0.01 | 4.15 | 2.87 | 0.22 | 0.28 |
| 11599 | 0 | 7600   | DANFDSIRVDAVDNVD<br>ADLLQ   | 3.02 | 0.01 | 4.15 | 2.87 | 2.25 | 1.75 |
| 11600 | 0 | 7600   | DANFDSIRVDAVDNVD<br>ADLLQ   | 3.02 | 0.01 | 4.15 | 2.87 | 2.25 | 1.75 |
| 11601 | 0 | 7600   | DANFDSIRVDAVDNVD<br>ADLLQ   | 3.02 | 0.01 | 4.15 | 2.87 | 0.22 | 0.28 |
| 11602 | 0 | 7600   | DANFDSIRVDAVDNVD<br>ADLLQ   | 3.02 | 0.01 | 4.15 | 2.87 | 0.22 | 0.28 |
| 11603 | 0 | 7600   | DANFDSIRVDAVDNVD<br>ADLLQ   | 3.02 | 0.01 | 4.15 | 2.87 | 0.22 | 1.34 |
| 11604 | 0 | 80896  | DANFDSIRVDAVDNVD<br>ADVQQIA | 3.13 | 0.01 | 2.39 | 2.87 | 0.22 | 0.28 |
| 11605 | 0 | 80896  | DANFDSIRVDAVDNVD<br>ADVQQIA | 3.13 | 0.01 | 2.39 | 2.87 | 0.22 | 0.28 |
| 11606 | 0 | 80896  | DANFDSIRVDAVDNVD<br>ADVQQIA | 3.13 | 0.01 | 2.39 | 2.87 | 0.22 | 0.28 |
| 11607 | 0 | 80896  | DANFDSIRVDAVDNVD<br>ADVQQIA | 3.13 | 0.01 | 2.39 | 2.87 | 0.22 | 0.28 |
| 11608 | 0 | 80896  | DANFDSIRVDAVDNVD<br>ADVQQIA | 3.13 | 0.01 | 2.39 | 2.87 | 0.22 | 1.34 |
| 11609 | 0 | 141613 | DANKKACCAIRGSFYD            | 2.72 | 0.01 | 1.66 | 2.55 | 0.22 | 0.28 |
| 11610 | 0 | 141613 | DANKKACCAIRGSFYD            | 2.72 | 0.01 | 1.66 | 1.20 | 0.22 | 0.28 |
| 11611 | 0 | 141613 | DANKKACCAIRGSFYD            | 2.72 | 0.01 | 2.86 | 2.55 | 0.22 | 0.28 |
| 11612 | 0 | 104746 | DANKPYSWRS                  | 2.29 | 0.01 | 2.60 | 0.44 | 1.23 | 0.85 |
| 11613 | 0 | 125003 | DANLVFEFARHNLKDA<br>GEAE    | 3.01 | 0.01 | 0.78 | 0.68 | 0.22 | 0.85 |
| 11614 | 0 | 125003 | DANLVFEFARHNLKDA<br>GEAE    | 3.01 | 0.01 | 0.78 | 0.68 | 0.22 | 0.28 |
| 11615 | 0 | 125003 | DANLVFEFARHNLKDA<br>GEAE    | 3.01 | 0.01 | 0.78 | 0.68 | 0.22 | 1.27 |
| 11616 | 0 | 125003 | DANLVFEFARHNLKDA<br>GEAE    | 3.01 | 0.01 | 0.78 | 0.68 | 0.22 | 0.85 |
| 11617 | 0 | 125003 | DANLVFEFARHNLKDA<br>GEAE    | 3.01 | 0.01 | 0.78 | 0.68 | 0.22 | 0.28 |
| 11618 | 0 | 125003 | DANLVFEFARHNLKDA<br>GEAE    | 3.01 | 0.01 | 0.78 | 0.68 | 0.22 | 1.27 |
| 11619 | 0 | 80899  | DANYLTGSLT                  | 2.31 | 0.01 | 3.06 | 0.44 | 0.85 | 0.28 |
| 11620 | 0 | 125004 | DAPDTDWCD SIP               | 2.50 | 0.01 | 3.26 | 0.68 | 0.22 | 1.48 |

|       |   |        |                                             |      |      |      |      |      |      |
|-------|---|--------|---------------------------------------------|------|------|------|------|------|------|
| 11621 | 0 | 125004 | DAPDTDWCD SIP                               | 2.50 | 0.01 | 3.26 | 0.68 | 0.22 | 1.48 |
| 11622 | 0 | 125004 | DAPDTDWCD SIP                               | 2.50 | 0.01 | 3.26 | 0.68 | 0.22 | 2.56 |
| 11623 | 0 | 125004 | DAPDTDWCD SIP                               | 2.50 | 0.01 | 3.26 | 0.68 | 0.22 | 1.34 |
| 11624 | 0 | 125004 | DAPDTDWCD SIP                               | 2.50 | 0.01 | 3.26 | 0.68 | 0.22 | 2.56 |
| 11625 | 0 | 125004 | DAPDTDWCD SIP                               | 2.50 | 0.01 | 3.26 | 0.68 | 0.22 | 2.56 |
| 11626 | 0 | 125004 | DAPDTDWCD SIP                               | 2.50 | 0.01 | 3.26 | 0.68 | 0.22 | 2.56 |
| 11627 | 0 | 122294 | DAPDTDWCD SIPARDRL<br>P                     | 2.87 | 0.01 | 3.26 | 0.68 | 0.22 | 0.28 |
| 11628 | 0 | 509227 | DAPF                                        | 1.57 | 0.01 | 2.94 | 0.68 | 0.22 | 1.48 |
| 11629 | 0 | 509227 | DAPF                                        | 1.57 | 0.01 | 2.94 | 0.68 | 0.22 | 1.28 |
| 11630 | 0 | 509227 | DAPF                                        | 1.57 | 0.01 | 2.94 | 0.68 | 0.22 | 0.85 |
| 11631 | 0 | 7611   | DAPGYDPIWFL<br>DAPGYDPIWFLNTEPSQ            | 2.40 | 0.01 | 2.04 | 1.20 | 0.22 | 1.34 |
| 11632 | 0 | 7612   | LPPTAPPLPHSNLDHIL<br>E<br>DAPGYDPIWFLNTEPSQ | 3.52 | 0.01 | 2.04 | 0.44 | 0.85 | 0.85 |
| 11633 | 0 | 7612   | LPPTAPPLPHSNLDHIL<br>E<br>DAPGYDPIWFLNTEPSQ | 3.52 | 0.01 | 2.04 | 0.44 | 0.85 | 0.85 |
| 11634 | 0 | 7612   | LPPTAPPLPHSNLDHIL<br>E<br>DAPGYDPIWFLNTEPSQ | 3.52 | 0.01 | 2.04 | 1.20 | 0.22 | 1.34 |
| 11635 | 0 | 7612   | LPPTAPPLPHSNLDHIL<br>E                      | 3.52 | 0.01 | 2.04 | 1.20 | 0.22 | 1.34 |
| 11636 | 0 | 7613   | DAPHWLASPPFA                                | 2.48 | 0.01 | 0.90 | 0.68 | 0.22 | 1.39 |
| 11637 | 0 | 97235  | DAPKTFSMGAKPTGSA<br>AANYTTAVDRPNPA          | 3.35 | 0.01 | 2.87 | 0.68 | 0.22 | 0.28 |
| 11638 | 0 | 97235  | DAPKTFSMGAKPTGSA<br>AANYTTAVDRPNPA          | 3.35 | 0.01 | 2.87 | 0.68 | 0.22 | 0.28 |
| 11639 | 0 | 97235  | DAPKTFSMGAKPTGSA<br>AANYTTAVDRPNPA          | 3.35 | 0.01 | 2.87 | 1.81 | 0.22 | 0.28 |
| 11640 | 0 | 97235  | DAPKTFSMGAKPTGSA<br>AANYTTAVDRPNPA          | 3.35 | 0.01 | 2.87 | 1.81 | 0.22 | 0.28 |
| 11641 | 0 | 78945  | DAPNGTPNPNPNPNPN<br>PNPG                    | 3.02 | 0.01 | 2.84 | 0.44 | 0.85 | 0.28 |
| 11642 | 0 | 264906 | DAPQARKQQGRDAPQ                             | 2.73 | 0.01 | 1.61 | 0.44 | 0.85 | 1.28 |
| 11643 | 0 | 264907 | DAPQARKQQGRNAPR                             | 2.71 | 0.01 | 1.61 | 0.44 | 0.85 | 1.28 |
| 11644 | 0 | 264908 | DAPQARKQQGRNEPQ                             | 2.70 | 0.01 | 1.61 | 0.44 | 0.85 | 1.28 |
| 11645 | 0 | 178122 | DAPRAVFPSIVGRPRHQ<br>GVMV                   | 3.00 | 4.63 | 0.78 | 0.44 | 1.13 | 0.28 |

|       |   |        |                                                  |      |      |      |      |      |      |
|-------|---|--------|--------------------------------------------------|------|------|------|------|------|------|
| 11646 | 0 | 7616   | DAPSFSDIPN                                       | 2.34 | 0.01 | 1.60 | 0.44 | 1.23 | 0.28 |
| 11647 | 0 | 7616   | DAPSFSDIPN                                       | 2.34 | 0.01 | 1.60 | 0.44 | 1.23 | 0.28 |
| 11648 | 0 | 115199 | DAPSFSDIPNPIGSENSE<br>KT                         | 2.97 | 0.01 | 1.60 | 0.44 | 1.23 | 1.28 |
| 11649 | 0 | 115199 | DAPSFSDIPNPIGSENSE<br>KT                         | 2.97 | 0.01 | 1.60 | 0.44 | 1.23 | 1.28 |
| 11650 | 0 | 229619 | DAPSFSDIPNPIGSENSG<br>KT                         | 2.97 | 0.01 | 1.60 | 0.44 | 1.23 | 1.28 |
| 11651 | 0 | 229619 | DAPSFSDIPNPIGSENSG<br>KT                         | 2.97 | 0.01 | 4.08 | 0.44 | 1.23 | 1.28 |
| 11652 | 0 | 98724  | DAQSAPLRVY                                       | 2.29 | 0.01 | 1.60 | 0.44 | 1.23 | 0.85 |
| 11653 | 0 | 98724  | DAQSAPLRVY                                       | 2.29 | 0.01 | 1.60 | 0.44 | 1.23 | 0.85 |
| 11654 | 0 | 190650 | DAQSCMVTVTVQARA                                  | 2.70 | 0.01 | 2.75 | 2.13 | 0.22 | 0.28 |
| 11655 | 0 | 145737 | DARAYDTEV                                        | 2.24 | 0.01 | 2.54 | 0.68 | 0.22 | 2.12 |
| 11656 | 0 | 145737 | DARAYDTEV                                        | 2.24 | 0.01 | 2.54 | 0.68 | 0.22 | 2.12 |
| 11657 | 0 | 145737 | DARAYDTEV                                        | 2.24 | 0.01 | 2.54 | 0.68 | 0.22 | 2.12 |
| 11658 | 0 | 145737 | DARAYDTEV                                        | 2.24 | 0.01 | 2.54 | 0.68 | 0.22 | 2.12 |
| 11659 | 0 | 188078 | DARGWGGDSG                                       | 2.36 | 0.01 | 2.92 | 1.81 | 0.22 | 0.85 |
| 11660 | 0 | 7626   | DARKAFIEGKEGIEQVEC<br>ASTVCQN                    | 3.15 | 0.01 | 3.45 | 4.08 | 0.22 | 0.28 |
| 11661 | 0 | 418806 | DARMWGHMTTML                                     | 2.46 | 0.01 | 0.90 | 1.12 | 0.22 | 1.39 |
| 11662 | 0 | 7629   | DARSVNGEFPRHVKLKN<br>EIE                         | 2.91 | 0.01 | 4.63 | 2.42 | 0.22 | 0.28 |
| 11663 | 0 | 7629   | DARSVNGEFPRHVKLKN<br>EIE                         | 2.91 | 0.01 | 4.63 | 2.42 | 0.22 | 1.34 |
| 11664 | 0 | 7629   | DARSVNGEFPRHVKLKN<br>EIE                         | 2.91 | 0.01 | 2.24 | 2.75 | 0.22 | 0.28 |
| 11665 | 0 | 7629   | DARSVNGEFPRHVKLKN<br>EIE                         | 2.91 | 0.01 | 2.24 | 2.75 | 0.22 | 1.34 |
| 11666 | 0 | 7631   | DARTMQYV                                         | 2.10 | 0.01 | 2.99 | 0.44 | 0.85 | 0.28 |
| 11667 | 0 | 509447 | DASKALRSSGMP                                     | 2.46 | 0.01 | 0.90 | 1.12 | 0.22 | 1.27 |
| 11668 | 0 | 509447 | DASKALRSSGMP                                     | 2.46 | 0.01 | 0.90 | 1.12 | 0.22 | 2.56 |
| 11669 | 0 | 7644   | DASLRLSSGLRINSAAD<br>DASGMAIADSLR                | 3.40 | 0.01 | 3.27 | 1.20 | 0.22 | 0.28 |
| 11670 | 0 | 7644   | DASLRLSSGLRINSAAD<br>DASGMAIADSLR                | 3.40 | 0.01 | 3.27 | 1.20 | 0.22 | 0.28 |
| 11671 | 0 | 7649   | DASREAKKQVEKALEEA<br>NSK                         | 2.97 | 0.01 | 4.45 | 0.68 | 0.22 | 0.28 |
| 11672 | 0 | 512448 | DASRQGLRRDLASR                                   | 2.73 | 0.01 | 2.24 | 0.44 | 1.41 | 1.28 |
| 11673 | 0 | 7650   | DATCTEEDSGSSRKKITC<br>ECTKPDS                    | 3.19 | 0.01 | 3.78 | 0.44 | 0.85 | 0.28 |
| 11674 | 0 | 265121 | DATIEEEGEFDEEEQ                                  | 2.70 | 0.01 | 1.61 | 0.44 | 0.85 | 1.28 |
| 11675 | 0 | 462293 | DATKSIIFEA                                       | 2.40 | 0.01 | 0.78 | 1.12 | 0.22 | 1.28 |
| 11676 | 0 | 7654   | DATMTDEVVAATTNSIL<br>TQSAMAMIAQANQVP<br>QYVLSLLR | 3.64 | 0.01 | 2.97 | 0.68 | 0.22 | 0.85 |

|                  |   |        |                    |      |      |      |      |      |      |
|------------------|---|--------|--------------------|------|------|------|------|------|------|
| 11677            | 0 | 161560 | DATPEDLGARL        | 2.42 | 0.01 | 0.90 | 1.15 | 0.22 | 2.49 |
| 11678            | 0 | 161560 | DATPEDLGARL        | 2.42 | 0.01 | 0.90 | 1.15 | 0.22 | 0.28 |
| 11679            | 0 | 161561 | DATPEDLNAKL        | 2.42 | 0.01 | 0.90 | 1.15 | 0.22 | 2.49 |
| 11680            | 0 | 161561 | DATPEDLNAKL        | 2.42 | 0.01 | 0.90 | 1.15 | 0.22 | 0.28 |
| 11681            | 0 | 162056 | DATPEWLGARL        | 2.39 | 4.93 | 0.90 | 1.15 | 0.22 | 2.49 |
| 11682            | 0 | 112931 | DATTNPSLILAAAQM    | 2.65 | 0.01 | 0.78 | 1.20 | 0.22 | 0.85 |
| 11683            | 0 | 112931 | DATTNPSLILAAAQM    | 2.65 | 0.01 | 0.78 | 0.44 | 1.13 | 0.85 |
| 11684            | 0 | 97236  | DAVATTHSWIPKRNRSIL | 2.81 | 0.01 | 3.09 | 0.44 | 0.85 | 0.28 |
| DAVHGIANKDAAQGIA |   |        |                    |      |      |      |      |      |      |
| 11685            | 0 | 156855 | NWDAVQDIANEDGFH    | 3.56 | 0.01 | 0.78 | 0.44 | 2.82 | 1.39 |
| GIDNE            |   |        |                    |      |      |      |      |      |      |
| 11686            | 0 | 140834 | DAVKGYLAGKGV       | 2.51 | 0.01 | 3.01 | 1.12 | 0.22 | 0.28 |
| 11687            | 0 | 140835 | DAVKGYLAGKGVDAGK   | 3.01 | 0.01 | 3.01 | 1.12 | 0.22 | 0.28 |
| LGTV             |   |        |                    |      |      |      |      |      |      |
| 11688            | 0 | 140835 | DAVKGYLAGKGVDAGK   | 3.01 | 0.01 | 3.01 | 0.68 | 0.22 | 0.85 |
| LGTV             |   |        |                    |      |      |      |      |      |      |
| 11689            | 0 | 7661   | DAVLAPHIGGEAGSS    | 2.66 | 0.01 | 2.40 | 1.12 | 0.22 | 0.28 |
| 11690            | 0 | 7665   | DAVP               | 1.57 | 0.01 | 3.42 | 1.15 | 0.22 | 0.28 |
| 11691            | 0 | 7665   | DAVP               | 1.57 | 0.01 | 3.42 | 1.15 | 0.22 | 0.85 |
| 11692            | 0 | 79176  | DAVPNM             | 1.88 | 0.01 | 3.42 | 1.15 | 0.22 | 0.28 |
| 11693            | 0 | 79176  | DAVPNM             | 1.88 | 0.01 | 3.42 | 3.00 | 0.22 | 1.27 |
| 11694            | 0 | 79176  | DAVPNM             | 1.88 | 0.01 | 3.42 | 3.00 | 0.22 | 0.28 |
| 11695            | 0 | 79177  | DAVPYL             | 1.88 | 0.01 | 0.90 | 1.15 | 0.22 | 0.28 |
| 11696            | 0 | 79177  | DAVPYL             | 1.88 | 0.01 | 0.90 | 3.00 | 0.22 | 0.28 |
| 11697            | 0 | 79177  | DAVPYL             | 1.88 | 0.01 | 0.90 | 3.00 | 0.22 | 0.28 |
| 11698            | 0 | 7671   | DAVSRKKMDTKPTD     | 2.63 | 0.01 | 2.56 | 1.12 | 0.22 | 0.28 |
| 11699            | 0 | 7671   | DAVSRKKMDTKPTD     | 2.63 | 0.01 | 2.56 | 0.44 | 0.85 | 0.28 |
| 11700            | 0 | 7672   | DAVSSPAQPD         | 2.35 | 4.23 | 2.70 | 0.44 | 0.85 | 0.28 |
| 11701            | 0 | 7673   | DAVTE              | 1.74 | 0.01 | 3.81 | 1.15 | 0.22 | 0.85 |
| 11702            | 0 | 7673   | DAVTE              | 1.74 | 0.01 | 3.81 | 1.15 | 0.22 | 1.27 |
| 11703            | 0 | 7673   | DAVTE              | 1.74 | 0.01 | 3.81 | 1.15 | 0.22 | 0.28 |
| 11704            | 0 | 7673   | DAVTE              | 1.74 | 0.01 | 3.81 | 1.15 | 0.22 | 1.34 |
| 11705            | 0 | 7674   | DAVTELDKN          | 2.22 | 0.01 | 3.81 | 1.15 | 0.22 | 0.85 |
| 11706            | 0 | 7674   | DAVTELDKN          | 2.22 | 0.01 | 3.81 | 1.15 | 0.22 | 1.27 |
| 11707            | 0 | 7674   | DAVTELDKN          | 2.22 | 0.01 | 3.81 | 1.15 | 0.22 | 0.28 |
| 11708            | 0 | 7674   | DAVTELDKN          | 2.22 | 0.01 | 3.81 | 1.15 | 0.22 | 1.34 |
| 11709            | 0 | 7674   | DAVTELDKN          | 2.22 | 0.01 | 3.81 | 1.15 | 0.22 | 1.75 |
| 11710            | 0 | 7675   | DAVTPLRIFIVPPPAEYE | 2.92 | 0.01 | 2.43 | 1.12 | 0.22 | 0.28 |
| Q                |   |        |                    |      |      |      |      |      |      |
| 11711            | 0 | 7675   | DAVTPLRIFIVPPPAEYE | 2.92 | 0.01 | 2.43 | 1.12 | 0.22 | 0.28 |
| Q                |   |        |                    |      |      |      |      |      |      |
| 11712            | 0 | 7675   | DAVTPLRIFIVPPPAEYE | 2.92 | 0.01 | 2.43 | 1.12 | 0.22 | 0.28 |
| Q                |   |        |                    |      |      |      |      |      |      |
| 11713            | 0 | 7675   | DAVTPLRIFIVPPPAEYE | 2.92 | 0.01 | 2.43 | 1.12 | 0.22 | 0.85 |
| Q                |   |        |                    |      |      |      |      |      |      |
| 11714            | 0 | 78946  | DAWCGSRGK          | 2.21 | 0.01 | 3.33 | 2.43 | 0.22 | 0.28 |



|       |   |        |                          |      |      |      |      |      |      |
|-------|---|--------|--------------------------|------|------|------|------|------|------|
| 11715 | 0 | 78946  | DAWCGSRGK                | 2.21 | 0.01 | 3.33 | 2.43 | 0.22 | 0.28 |
| 11716 | 0 | 78946  | DAWCGSRGK                | 2.21 | 0.01 | 3.33 | 2.43 | 0.22 | 0.28 |
| 11717 | 0 | 78946  | DAWCGSRGK                | 2.21 | 0.01 | 3.33 | 2.43 | 0.22 | 0.28 |
| 11718 | 0 | 78946  | DAWCGSRGK                | 2.21 | 0.01 | 3.33 | 2.43 | 0.22 | 0.28 |
| 11719 | 0 | 78946  | DAWCGSRGK                | 2.21 | 0.01 | 3.33 | 2.43 | 0.22 | 0.28 |
| 11720 | 0 | 78946  | DAWCGSRGK                | 2.21 | 0.01 | 3.33 | 2.43 | 0.22 | 1.34 |
| 11721 | 0 | 78946  | DAWCGSRGK                | 2.21 | 0.01 | 3.33 | 2.43 | 0.22 | 1.75 |
| 11722 | 0 | 136162 | DAWKMRLSQMYD             | 2.46 | 0.01 | 0.90 | 2.74 | 0.22 | 0.28 |
| 11723 | 0 | 136162 | DAWKMRLSQMYD             | 2.46 | 0.01 | 0.90 | 2.22 | 0.22 | 0.28 |
| 11724 | 0 | 136162 | DAWKMRLSQMYD             | 2.46 | 0.01 | 0.90 | 2.74 | 0.22 | 0.85 |
| 11725 | 0 | 136162 | DAWKMRLSQMYD             | 2.46 | 0.01 | 0.90 | 0.68 | 0.22 | 0.28 |
| 11726 | 0 | 7680   | DAWREGEEFVVEFDL          | 2.69 | 0.01 | 2.59 | 0.44 | 0.85 | 0.28 |
| 11727 | 0 | 7680   | DAWREGEEFVVEFDL          | 2.69 | 0.01 | 2.59 | 0.44 | 0.85 | 0.28 |
| 11728 | 0 | 7682   | DAWREGEEFVVEFDLPG<br>IKA | 2.94 | 0.01 | 2.59 | 0.68 | 0.22 | 0.28 |
| 11729 | 0 | 7682   | DAWREGEEFVVEFDLPG<br>IKA | 2.94 | 0.01 | 2.59 | 2.42 | 0.22 | 0.28 |
| 11730 | 0 | 7682   | DAWREGEEFVVEFDLPG<br>IKA | 2.94 | 0.01 | 2.59 | 2.42 | 0.22 | 0.28 |
| 11731 | 0 | 7682   | DAWREGEEFVVEFDLPG<br>IKA | 2.94 | 0.01 | 2.59 | 2.42 | 0.22 | 0.28 |
| 11732 | 0 | 178640 | DAYANNQKIMRNLWN          | 2.66 | 0.01 | 2.36 | 0.44 | 1.23 | 1.28 |
| 11733 | 0 | 178640 | DAYANNQKIMRNLWN          | 2.66 | 0.01 | 2.36 | 0.44 | 1.23 | 1.27 |
| 11734 | 0 | 178640 | DAYANNQKIMRNLWN          | 2.66 | 0.01 | 2.36 | 0.44 | 1.23 | 1.28 |
| 11735 | 0 | 7689   | DAYPSGAWYY               | 2.31 | 0.01 | 1.60 | 0.44 | 1.23 | 0.28 |
| 11736 | 0 | 7689   | DAYPSGAWYY               | 2.31 | 0.01 | 1.60 | 0.44 | 1.23 | 0.28 |
| 11737 | 0 | 115200 | DAYPSGAWYYVPLGTQ<br>YTDA | 2.96 | 0.01 | 1.60 | 0.44 | 1.23 | 1.28 |
| 11738 | 0 | 265266 | DAYRPVDPSAYKRAL          | 2.71 | 0.01 | 1.61 | 0.44 | 0.85 | 1.28 |
| 11739 | 0 | 265267 | DAYRPVDPSAYKRES          | 2.71 | 0.01 | 1.61 | 0.44 | 0.85 | 1.28 |
| 11740 | 0 | 118284 | DAYVLLSEKKISS            | 2.51 | 0.01 | 0.78 | 0.44 | 1.74 | 0.85 |
| 11741 | 0 | 118284 | DAYVLLSEKKISS            | 2.51 | 0.01 | 0.78 | 0.44 | 1.59 | 0.85 |
| 11742 | 0 | 118284 | DAYVLLSEKKISS            | 2.51 | 0.01 | 0.78 | 0.44 | 1.74 | 0.85 |
| 11743 | 0 | 118285 | DAYVLLSEKKISSIQSIV       | 2.85 | 0.01 | 0.78 | 1.20 | 0.22 | 0.85 |
| 11744 | 0 | 118285 | DAYVLLSEKKISSIQSIV       | 2.85 | 0.01 | 0.78 | 1.20 | 0.22 | 0.85 |
| 11745 | 0 | 118285 | DAYVLLSEKKISSIQSIV       | 2.85 | 0.01 | 0.78 | 1.20 | 0.22 | 0.85 |
| 11746 | 0 | 118285 | DAYVLLSEKKISSIQSIV       | 2.85 | 0.01 | 0.78 | 1.20 | 0.22 | 0.85 |
| 11747 | 0 | 118285 | DAYVLLSEKKISSIQSIV       | 2.85 | 0.01 | 0.78 | 1.20 | 0.22 | 1.48 |
| 11748 | 0 | 230449 | DCAANQQVITYRISGV         | 2.62 | 0.01 | 0.78 | 0.44 | 1.13 | 0.28 |

|       |   |        |                          |      |      |      |      |      |      |
|-------|---|--------|--------------------------|------|------|------|------|------|------|
| 11749 | 0 | 7698   | DCCQQL                   | 1.91 | 0.01 | 1.86 | 0.44 | 1.23 | 0.28 |
| 11750 | 0 | 79178  | DCEIPKIPMDRKCW           | 2.64 | 0.01 | 0.90 | 0.68 | 0.22 | 1.39 |
| 11751 | 0 | 79179  | DCFNSKNWEHAQCT           | 2.57 | 0.01 | 0.90 | 0.68 | 0.22 | 1.39 |
| 11752 | 0 | 161209 | DCFRKHPEATYSRCGSG<br>PWL | 2.90 | 0.01 | 2.45 | 0.68 | 0.22 | 0.28 |
| 11753 | 0 | 443122 | DCFRKHPEATYTKCGSG<br>PWL | 2.90 | 0.01 | 1.96 | 0.68 | 0.22 | 1.34 |
| 11754 | 0 | 443122 | DCFRKHPEATYTKCGSG<br>PWL | 2.90 | 0.01 | 1.96 | 0.68 | 0.22 | 0.28 |
| 11755 | 0 | 104747 | DCGDSFNPLF               | 2.32 | 0.01 | 2.60 | 0.44 | 1.23 | 0.85 |
| 11756 | 0 | 182074 | DCGKEGYGFVCEKMQ          | 2.68 | 0.01 | 0.78 | 0.44 | 1.13 | 0.85 |
| 11757 | 0 | 182074 | DCGKEGYGFVCEKMQ          | 2.68 | 0.01 | 0.78 | 0.44 | 1.41 | 0.85 |
| 11758 | 0 | 7704   | DCHAPTYLPAEVDGD          | 2.67 | 0.01 | 2.43 | 0.44 | 0.85 | 0.28 |
| 11759 | 0 | 7705   | DCHLLGTEELSGIPPPR<br>GV  | 2.91 | 0.01 | 2.30 | 0.44 | 0.85 | 0.28 |
| 11760 | 0 | 7705   | DCHLLGTEELSGIPPPR<br>GV  | 2.91 | 0.01 | 2.30 | 0.44 | 1.41 | 0.28 |
| 11761 | 0 | 7713   | DCLLCAYSIEF              | 2.38 | 0.01 | 2.25 | 0.44 | 1.23 | 0.85 |
| 11762 | 0 | 7715   | DCLLCAYSIEFGTNISKEH<br>D | 2.91 | 0.01 | 2.25 | 0.44 | 1.23 | 0.28 |
| 11763 | 0 | 78618  | DCLPTTLFQPARAPVTLT<br>AW | 2.96 | 0.01 | 2.04 | 0.44 | 1.59 | 0.28 |
| 11764 | 0 | 78355  | DCLSDVAGLQNDPTTW<br>CW   | 2.83 | 0.01 | 0.90 | 0.68 | 0.22 | 0.28 |
| 11765 | 0 | 78355  | DCLSDVAGLQNDPTTW<br>CW   | 2.83 | 0.01 | 0.90 | 0.68 | 0.22 | 0.28 |
| 11766 | 0 | 243886 | DCLTESNLIKVR             | 2.43 | 0.01 | 0.78 | 0.44 | 1.23 | 0.28 |
| 11767 | 0 | 243886 | DCLTESNLIKVR             | 2.43 | 0.01 | 0.78 | 0.44 | 2.39 | 0.28 |
| 11768 | 0 | 243886 | DCLTESNLIKVR             | 2.43 | 0.01 | 0.78 | 0.44 | 1.23 | 0.28 |
| 11769 | 0 | 243886 | DCLTESNLIKVR             | 2.43 | 0.01 | 0.78 | 0.44 | 2.39 | 0.28 |
| 11770 | 0 | 7717   | DCNFCRQMTGASLKKG<br>SYPL | 2.89 | 0.01 | 3.85 | 1.15 | 0.22 | 2.02 |
| 11771 | 0 | 7717   | DCNFCRQMTGASLKKG<br>SYPL | 2.89 | 0.01 | 3.85 | 1.15 | 0.22 | 2.02 |
| 11772 | 0 | 7717   | DCNFCRQMTGASLKKG<br>SYPL | 2.89 | 0.01 | 4.33 | 1.15 | 0.22 | 1.34 |
| 11773 | 0 | 7717   | DCNFCRQMTGASLKKG<br>SYPL | 2.89 | 0.01 | 4.33 | 1.15 | 0.22 | 1.34 |
| 11774 | 0 | 7718   | DCNGHGHVAGTVGGT<br>KYGL  | 2.96 | 0.01 | 4.63 | 0.44 | 1.23 | 0.28 |
| 11775 | 0 | 79181  | DCQVRRCSRDSHCE           | 2.65 | 0.01 | 0.90 | 0.68 | 0.22 | 1.39 |
| 11776 | 0 | 7725   | DCRQKGGDKGQSQQQ<br>G     | 2.78 | 0.01 | 4.33 | 2.37 | 0.85 | 0.28 |
| 11777 | 0 | 114761 | DCSEYPKPD                | 2.34 | 0.01 | 2.25 | 0.44 | 1.23 | 0.85 |
| 11778 | 0 | 106326 | DCSKIQSTIF               | 2.31 | 0.01 | 3.08 | 0.44 | 1.23 | 0.85 |

|       |   |        |                                |      |      |      |      |      |      |
|-------|---|--------|--------------------------------|------|------|------|------|------|------|
| 11779 | 0 | 230209 | DCSRFPNATDKE                   | 2.44 | 0.01 | 2.25 | 0.44 | 1.23 | 0.28 |
| 11780 | 0 | 7730   | DCSRFPNATDKEGKD                | 2.65 | 0.01 | 2.25 | 0.44 | 1.23 | 0.28 |
| 11781 | 0 | 7730   | DCSRFPNATDKEGKD                | 2.65 | 0.01 | 2.25 | 0.44 | 1.23 | 0.28 |
| 11782 | 0 | 117781 | DCT                            | 1.37 | 0.01 | 0.78 | 0.44 | 1.13 | 0.85 |
| 11783 | 0 | 117781 | DCT                            | 1.37 | 0.01 | 0.78 | 0.44 | 1.41 | 0.85 |
| 11784 | 0 | 114762 | DCTAEDRPLC                     | 2.32 | 0.01 | 2.25 | 0.44 | 1.23 | 0.85 |
| 11785 | 0 | 230210 | DCTAEDRPLCGSDNKTY<br>GNK       | 2.94 | 0.01 | 2.25 | 0.44 | 1.23 | 0.28 |
| 11786 | 0 | 7734   | DCTLIDALLGDPH                  | 2.55 | 0.01 | 3.78 | 0.68 | 0.22 | 0.28 |
| 11787 | 0 | 193430 | DCTPNVSGG                      | 2.18 | 0.01 | 2.51 | 0.44 | 2.39 | 0.28 |
| 11788 | 0 | 193430 | DCTPNVSGG                      | 2.18 | 0.01 | 2.51 | 0.44 | 2.39 | 0.28 |
| 11789 | 0 | 181572 | DCTQTNLSHNQIFVD                | 2.67 | 0.01 | 3.26 | 2.37 | 0.22 | 1.28 |
| 11790 | 0 | 113316 | DCVMATGLYHCKPLVDI<br>LILPGYVQA | 3.20 | 0.01 | 0.78 | 2.61 | 0.22 | 0.28 |
| 11791 | 0 | 167224 | DCWQMDRKTCP                    | 2.46 | 0.01 | 0.90 | 1.15 | 0.22 | 1.39 |
| 11792 | 0 | 7740   | DDAAD                          | 1.77 | 0.01 | 2.59 | 0.44 | 1.74 | 0.28 |
| 11793 | 0 | 265381 | DDADGDEEDYDVVDD                | 2.71 | 0.01 | 1.61 | 0.44 | 0.85 | 1.28 |
| 11794 | 0 | 512480 | DDAETIADDANDLA                 | 2.72 | 0.01 | 2.24 | 0.44 | 1.41 | 1.28 |
| 11795 | 0 | 121187 | DDALETDE                       | 2.16 | 0.01 | 4.33 | 0.68 | 0.22 | 2.35 |
| 11796 | 0 | 121187 | DDALETDE                       | 2.16 | 0.01 | 4.33 | 0.68 | 0.22 | 2.35 |
| 11797 | 0 | 121187 | DDALETDE                       | 2.16 | 0.01 | 4.33 | 0.68 | 0.22 | 2.35 |
| 11798 | 0 | 121187 | DDALETDE                       | 2.16 | 0.01 | 4.33 | 0.68 | 0.22 | 0.85 |
| 11799 | 0 | 423238 | DDAPTYEQAMGLCP                 | 2.65 | 0.01 | 2.51 | 0.44 | 2.35 | 1.28 |
| 11800 | 0 | 7745   | DDASVDFVAEPVKLP                | 2.70 | 0.01 | 3.02 | 0.68 | 0.22 | 0.85 |
| 11801 | 0 | 7745   | DDASVDFVAEPVKLP                | 2.70 | 0.01 | 3.02 | 1.81 | 0.22 | 0.85 |
| 11802 | 0 | 146816 | DDASVNGVRKRKQ                  | 2.55 | 0.01 | 1.60 | 0.44 | 0.85 | 0.85 |
| 11803 | 0 | 79775  | DDATVAIRSAINNLIVELI<br>R       | 2.96 | 0.01 | 2.72 | 0.68 | 0.22 | 1.66 |
| 11804 | 0 | 79775  | DDATVAIRSAINNLIVELI<br>R       | 2.96 | 0.01 | 2.72 | 0.68 | 0.22 | 1.66 |
| 11805 | 0 | 79775  | DDATVAIRSAINNLIVELI<br>R       | 2.96 | 0.01 | 2.72 | 0.68 | 0.22 | 0.28 |
| 11806 | 0 | 79775  | DDATVAIRSAINNLIVELI<br>R       | 2.96 | 0.01 | 2.72 | 0.68 | 0.22 | 0.28 |
| 11807 | 0 | 79775  | DDATVAIRSAINNLIVELI<br>R       | 2.96 | 0.01 | 2.72 | 1.12 | 0.22 | 0.28 |
| 11808 | 0 | 79775  | DDATVAIRSAINNLIVELI<br>R       | 2.96 | 0.01 | 2.72 | 0.68 | 0.22 | 0.28 |
| 11809 | 0 | 79775  | DDATVAIRSAINNLIVELI<br>R       | 2.96 | 0.01 | 2.72 | 0.68 | 0.22 | 0.28 |
| 11810 | 0 | 94795  | DDATVAIRSAINNLIVELI<br>RG      | 3.00 | 0.01 | 2.72 | 0.68 | 0.22 | 0.28 |
| 11811 | 0 | 94795  | DDATVAIRSAINNLIVELI<br>RG      | 3.00 | 0.01 | 2.72 | 0.68 | 0.22 | 0.28 |
| 11812 | 0 | 265466 | DDDDDDDDDDGETKA                | 2.71 | 0.01 | 1.61 | 0.44 | 0.85 | 1.28 |

|       |   |        |                  |      |      |      |      |      |      |
|-------|---|--------|------------------|------|------|------|------|------|------|
| 11813 | 0 | 265467 | DDDDDDDDGETKAE   | 2.71 | 0.01 | 1.61 | 0.44 | 0.85 | 1.28 |
| 11814 | 0 | 265469 | DDDDDDDEPEEGSKE  | 2.71 | 0.01 | 1.61 | 0.44 | 0.85 | 1.28 |
| 11815 | 0 | 265471 | DDDDDDPEEEEEKEKS | 2.72 | 0.01 | 1.61 | 0.44 | 0.85 | 1.28 |
| 11816 | 0 | 265472 | DDDDDDPEPEEGSKEE | 2.70 | 0.01 | 1.61 | 0.44 | 0.85 | 1.28 |
| 11817 | 0 | 265474 | DDDDDDNDNDADGEE  | 2.71 | 0.01 | 1.61 | 0.44 | 0.85 | 1.28 |
| 11818 | 0 | 265478 | DDDDNDNDADGEEE   | 2.71 | 0.01 | 1.61 | 0.44 | 0.85 | 1.28 |
| 11819 | 0 | 265484 | DDDDEEDDSDEAEAQ  | 2.74 | 0.01 | 1.61 | 0.44 | 0.85 | 1.28 |
| 11820 | 0 | 265485 | DDDDEGEDEEEGPSP  | 2.72 | 0.01 | 1.61 | 0.44 | 0.85 | 1.28 |
| 11821 | 0 | 265495 | DDDDNDNDADGEEED  | 2.72 | 0.01 | 1.61 | 0.44 | 0.85 | 1.28 |
| 11822 | 0 | 265497 | DDDDPAADAAGTREE  | 2.70 | 0.01 | 1.61 | 0.44 | 0.85 | 1.28 |
| 11823 | 0 | 265498 | DDDDPAADAAGTRKE  | 2.69 | 0.01 | 1.61 | 0.44 | 0.85 | 1.28 |
| 11824 | 0 | 265499 | DDDDPAADGAGTREE  | 2.70 | 0.01 | 1.61 | 0.44 | 0.85 | 1.28 |
| 11825 | 0 | 265507 | DDDEDEEENEEDAEM  | 2.74 | 0.01 | 1.61 | 0.44 | 0.85 | 1.28 |
| 11826 | 0 | 423239 | DDDEDPTYDELPSRP  | 2.70 | 0.01 | 2.51 | 0.44 | 2.35 | 1.28 |
| 11827 | 0 | 265508 | DDDEEDDSDEAEAEQ  | 2.74 | 0.01 | 1.61 | 0.44 | 0.85 | 1.28 |
| 11828 | 0 | 265511 | DDDEGEDEEEGPSP   | 2.71 | 0.01 | 1.61 | 0.44 | 0.85 | 1.28 |
| 11829 | 0 | 265522 | DDDGNDADDVCRFS   | 2.68 | 0.01 | 1.61 | 0.44 | 0.85 | 1.28 |
| 11830 | 0 | 238273 | DDDGIALYVAGEQAQ  | 2.68 | 0.01 | 2.14 | 2.65 | 0.22 | 0.85 |
| 11831 | 0 | 7754   | DDDIPF           | 1.91 | 0.01 | 3.21 | 0.68 | 0.22 | 1.48 |
| 11832 | 0 | 7754   | DDDIPF           | 1.91 | 0.01 | 3.21 | 0.68 | 0.22 | 0.28 |
| 11833 | 0 | 161211 | DDDKGQEDLNMIVMK  | 2.67 | 0.01 | 2.74 | 0.44 | 0.85 | 0.28 |
| 11834 | 0 | 106327 | DDDKLEQIRRDYTSQA | 2.69 | 0.01 | 1.60 | 0.68 | 0.22 | 0.85 |
| 11835 | 0 | 106327 | DDDKLEQIRRDYTSQA | 2.69 | 0.01 | 1.60 | 0.68 | 0.22 | 0.85 |
| 11836 | 0 | 106327 | DDDKLEQIRRDYTSQA | 2.69 | 0.01 | 1.60 | 0.68 | 0.22 | 2.02 |
| 11837 | 0 | 106327 | DDDKLEQIRRDYTSQA | 2.69 | 0.01 | 1.60 | 0.68 | 0.22 | 0.85 |
| 11838 | 0 | 106327 | DDDKLEQIRRDYTSQA | 2.69 | 0.01 | 1.60 | 0.68 | 0.22 | 1.39 |
| 11839 | 0 | 106327 | DDDKLEQIRRDYTSQA | 2.69 | 0.01 | 1.60 | 0.68 | 0.22 | 1.39 |
| 11840 | 0 | 106327 | DDDKLEQIRRDYTSQA | 2.69 | 0.01 | 1.60 | 0.68 | 0.22 | 1.39 |
| 11841 | 0 | 106327 | DDDKLEQIRRDYTSQA | 2.69 | 0.01 | 1.60 | 0.68 | 0.22 | 1.39 |
| 11842 | 0 | 106327 | DDDKLEQIRRDYTSQA | 2.69 | 0.01 | 1.60 | 0.68 | 0.22 | 1.39 |
| 11843 | 0 | 106327 | DDDKLEQIRRDYTSQA | 2.69 | 0.01 | 1.60 | 0.68 | 0.22 | 1.39 |
| 11844 | 0 | 106327 | DDDKLEQIRRDYTSQA | 2.69 | 0.01 | 1.60 | 0.68 | 0.22 | 1.39 |
| 11845 | 0 | 106327 | DDDKLEQIRRDYTSQA | 2.69 | 0.01 | 1.60 | 0.68 | 0.22 | 1.39 |
| 11846 | 0 | 106327 | DDDKLEQIRRDYTSQA | 2.69 | 0.01 | 1.60 | 0.68 | 0.22 | 1.39 |
| 11847 | 0 | 106327 | DDDKLEQIRRDYTSQA | 2.69 | 0.01 | 1.60 | 0.68 | 0.22 | 1.39 |
| 11848 | 0 | 106327 | DDDKLEQIRRDYTSQA | 2.69 | 0.01 | 1.60 | 0.68 | 0.22 | 1.39 |
| 11849 | 0 | 106327 | DDDKLEQIRRDYTSQA | 2.69 | 0.01 | 1.60 | 0.68 | 0.22 | 1.39 |
| 11850 | 0 | 106327 | DDDKLEQIRRDYTSQA | 2.69 | 0.01 | 1.60 | 0.68 | 0.22 | 1.39 |

|       |   |        |                      |      |      |      |      |      |      |
|-------|---|--------|----------------------|------|------|------|------|------|------|
| 11851 | 0 | 106327 | DDDKLEQIRRDYTSGA     | 2.69 | 0.01 | 1.60 | 0.68 | 0.22 | 1.39 |
| 11852 | 0 | 106327 | DDDKLEQIRRDYTSGA     | 2.69 | 0.01 | 1.60 | 0.68 | 0.22 | 1.39 |
| 11853 | 0 | 106327 | DDDKLEQIRRDYTSGA     | 2.69 | 0.01 | 1.60 | 0.68 | 0.22 | 1.39 |
| 11854 | 0 | 106327 | DDDKLEQIRRDYTSGA     | 2.69 | 0.01 | 1.60 | 0.68 | 0.22 | 1.39 |
| 11855 | 0 | 7756   | DDDMGFGLFD           | 2.36 | 0.01 | 2.30 | 0.44 | 0.85 | 0.28 |
| 11856 | 0 | 7756   | DDDMGFGLFD           | 2.36 | 0.01 | 2.30 | 0.44 | 1.13 | 0.28 |
| 11857 | 0 | 7756   | DDDMGFGLFD           | 2.36 | 0.01 | 2.30 | 2.89 | 0.22 | 0.28 |
| 11858 | 0 | 7756   | DDDMGFGLFD           | 2.36 | 0.01 | 2.30 | 1.15 | 0.22 | 0.28 |
| 11859 | 0 | 7756   | DDDMGFGLFD           | 2.36 | 0.01 | 2.30 | 0.44 | 1.13 | 0.28 |
| 11860 | 0 | 7756   | DDDMGFGLFD           | 2.36 | 0.01 | 2.30 | 0.44 | 0.85 | 0.28 |
| 11861 | 0 | 7756   | DDDMGFGLFD           | 2.36 | 0.01 | 2.30 | 0.44 | 1.13 | 1.27 |
| 11862 | 0 | 7756   | DDDMGFGLFD           | 2.36 | 0.01 | 2.30 | 0.44 | 0.85 | 1.27 |
| 11863 | 0 | 7756   | DDDMGFGLFD           | 2.36 | 0.01 | 2.30 | 0.44 | 0.85 | 1.27 |
| 11864 | 0 | 7756   | DDDMGFGLFD           | 2.36 | 0.01 | 2.30 | 0.44 | 1.13 | 1.27 |
| 11865 | 0 | 7756   | DDDMGFGLFD           | 2.36 | 0.01 | 0.78 | 0.44 | 1.13 | 0.28 |
| 11866 | 0 | 7756   | DDDMGFGLFD           | 2.36 | 0.01 | 0.78 | 0.44 | 1.13 | 2.02 |
| 11867 | 0 | 7756   | DDDMGFGLFD           | 2.36 | 0.01 | 0.78 | 0.44 | 1.13 | 1.34 |
| 11868 | 0 | 7756   | DDDMGFGLFD           | 2.36 | 0.01 | 0.78 | 0.44 | 1.13 | 0.85 |
| 11869 | 0 | 7756   | DDDMGFGLFD           | 2.36 | 0.01 | 0.78 | 0.44 | 1.13 | 0.85 |
| 11870 | 0 | 7756   | DDDMGFGLFD           | 2.36 | 0.01 | 0.78 | 0.44 | 1.13 | 0.28 |
| 11871 | 0 | 450464 | DDDNDGVPSRDNCRL<br>V | 2.82 | 4.23 | 0.78 | 2.79 | 1.13 | 1.28 |
| 11872 | 0 | 450464 | DDDNDGVPSRDNCRL<br>V | 2.82 | 4.23 | 0.78 | 1.81 | 1.41 | 1.28 |
| 11873 | 0 | 450464 | DDDNDGVPSRDNCRL<br>V | 2.82 | 4.23 | 0.78 | 1.81 | 1.41 | 1.28 |
| 11874 | 0 | 265542 | DDDNDNDADGEEEDN      | 2.73 | 0.01 | 1.61 | 0.44 | 0.85 | 1.28 |
| 11875 | 0 | 265546 | DDDPAAADAAGTREET     | 2.69 | 0.01 | 1.61 | 0.44 | 0.85 | 1.28 |
| 11876 | 0 | 265547 | DDDPAAADAAGTRKEK     | 2.70 | 0.01 | 1.61 | 0.44 | 0.85 | 1.28 |
| 11877 | 0 | 265548 | DDDPAADGAGTAEGK      | 2.72 | 0.01 | 1.61 | 0.44 | 0.85 | 1.28 |
| 11878 | 0 | 265550 | DDDPAADGAGTREET      | 2.70 | 0.01 | 1.61 | 0.44 | 0.85 | 1.28 |
| 11879 | 0 | 265551 | DDDPADVAGTAEGK       | 2.70 | 0.01 | 1.61 | 0.44 | 0.85 | 1.28 |
| 11880 | 0 | 125799 | DDDRYSDL             | 2.15 | 0.01 | 0.78 | 1.20 | 0.22 | 0.28 |
| 11881 | 0 | 125799 | DDDRYSDL             | 2.15 | 0.01 | 0.78 | 1.20 | 0.22 | 0.28 |
| 11882 | 0 | 265560 | DDSDVQNEIKVLDD       | 2.67 | 0.01 | 1.61 | 0.44 | 0.85 | 1.28 |
| 11883 | 0 | 194712 | DDDSTGIT             | 2.14 | 0.01 | 3.61 | 1.12 | 0.22 | 0.28 |
| 11884 | 0 | 194712 | DDDSTGIT             | 2.14 | 0.01 | 3.61 | 1.12 | 0.22 | 1.34 |
| 11885 | 0 | 194712 | DDDSTGIT             | 2.14 | 0.01 | 3.61 | 1.12 | 0.22 | 0.28 |
| 11886 | 0 | 194712 | DDDSTGIT             | 2.14 | 0.01 | 3.61 | 1.12 | 0.22 | 0.28 |
| 11887 | 0 | 99136  | DDDTFT               | 1.91 | 0.01 | 2.24 | 1.20 | 0.22 | 0.28 |
| 11888 | 0 | 7761   | DDEADRYFTYEE         | 2.49 | 0.01 | 2.88 | 2.22 | 0.85 | 0.28 |
| 11889 | 0 | 7761   | DDEADRYFTYEE         | 2.49 | 0.01 | 2.88 | 2.37 | 0.22 | 0.28 |
| 11890 | 0 | 7761   | DDEADRYFTYEE         | 2.49 | 0.01 | 2.88 | 2.22 | 0.22 | 0.28 |

|       |   |        |                                                |      |      |      |      |      |      |
|-------|---|--------|------------------------------------------------|------|------|------|------|------|------|
| 11891 | 0 | 95306  | DDEALE                                         | 1.90 | 0.01 | 1.60 | 0.44 | 1.23 | 0.28 |
| 11892 | 0 | 98725  | DDEALEKFDK                                     | 2.35 | 0.01 | 1.60 | 0.44 | 1.23 | 0.85 |
| 11893 | 0 | 98725  | DDEALEKFDK                                     | 2.35 | 0.01 | 1.60 | 0.44 | 1.23 | 0.85 |
| 11894 | 0 | 98725  | DDEALEKFDK                                     | 2.35 | 0.01 | 1.60 | 0.44 | 2.98 | 0.85 |
| 11895 | 0 | 7762   | DDEASSQSKPLATQPPV<br>LALSNAPRRRVSPTRGR<br>RRHT | 3.58 | 0.01 | 2.40 | 1.15 | 0.22 | 0.28 |
| 11896 | 0 | 7762   | DDEASSQSKPLATQPPV<br>LALSNAPRRRVSPTRGR<br>RRHT | 3.58 | 0.01 | 2.40 | 1.15 | 0.22 | 2.02 |
| 11897 | 0 | 7762   | DDEASSQSKPLATQPPV<br>LALSNAPRRRVSPTRGR<br>RRHT | 3.58 | 0.01 | 2.40 | 1.15 | 0.22 | 0.85 |
| 11898 | 0 | 7762   | DDEASSQSKPLATQPPV<br>LALSNAPRRRVSPTRGR<br>RRHT | 3.58 | 0.01 | 2.40 | 1.15 | 0.22 | 2.35 |
| 11899 | 0 | 265585 | DDEDEEENEEDAEMS                                | 2.73 | 0.01 | 1.61 | 0.44 | 0.85 | 1.28 |
| 11900 | 0 | 7763   | DDEDLDEFKPIVQYDNF<br>QD                        | 2.91 | 0.01 | 1.66 | 0.44 | 0.85 | 0.28 |
| 11901 | 0 | 188081 | DDEDTKPVPNRSTKGG<br>QQKN                       | 2.94 | 0.01 | 3.21 | 2.88 | 0.22 | 0.28 |
| 11902 | 0 | 188081 | DDEDTKPVPNRSTKGG<br>QQKN                       | 2.94 | 0.01 | 3.21 | 2.88 | 0.22 | 0.28 |
| 11903 | 0 | 265589 | DDEEDDSDEAEAQEG                                | 2.74 | 0.01 | 1.61 | 0.44 | 0.85 | 1.28 |
| 11904 | 0 | 265590 | DDEEDKDDDKDEEE<br>DDEETTALVCDNGSGLV            | 2.73 | 0.01 | 1.61 | 0.44 | 0.85 | 1.28 |
| 11905 | 0 | 132787 | KAGFAGDDAPRAVFPSI<br>VGRPR                     | 3.60 | 0.01 | 2.96 | 1.12 | 0.22 | 0.85 |
| 11906 | 0 | 265600 | DDEGEDEEEGPSPT                                 | 2.72 | 0.01 | 1.61 | 0.44 | 0.85 | 1.28 |
| 11907 | 0 | 7765   | DDEHVEEPTVA                                    | 2.41 | 0.01 | 1.66 | 0.44 | 0.85 | 0.28 |
| 11908 | 0 | 7765   | DDEHVEEPTVA                                    | 2.41 | 0.01 | 1.66 | 0.44 | 0.85 | 0.28 |
| 11909 | 0 | 7765   | DDEHVEEPTVA                                    | 2.41 | 0.01 | 1.66 | 0.44 | 0.85 | 0.28 |
| 11910 | 0 | 7765   | DDEHVEEPTVA                                    | 2.41 | 0.01 | 1.66 | 0.44 | 0.85 | 0.28 |
| 11911 | 0 | 7765   | DDEHVEEPTVA                                    | 2.41 | 0.01 | 1.66 | 1.81 | 0.22 | 0.28 |
| 11912 | 0 | 7765   | DDEHVEEPTVA                                    | 2.41 | 0.01 | 4.08 | 0.44 | 2.39 | 1.57 |
| 11913 | 0 | 7766   | DDEHVEEPTVADDEHVE<br>EPTVA                     | 3.09 | 0.01 | 1.66 | 1.15 | 0.22 | 0.28 |
| 11914 | 0 | 7766   | DDEHVEEPTVADDEHVE<br>EPTVA                     | 3.09 | 0.01 | 1.66 | 2.74 | 0.22 | 0.28 |
| 11915 | 0 | 7766   | DDEHVEEPTVADDEHVE<br>EPTVA                     | 3.09 | 0.01 | 1.66 | 0.44 | 0.85 | 0.28 |
| 11916 | 0 | 7766   | DDEHVEEPTVADDEHVE<br>EPTVA                     | 3.09 | 0.01 | 1.66 | 0.44 | 0.85 | 0.28 |
| 11917 | 0 | 7766   | DDEHVEEPTVADDEHVE<br>EPTVA                     | 3.09 | 0.01 | 1.66 | 0.44 | 0.85 | 0.28 |
| 11918 | 0 | 7766   | DDEHVEEPTVADDEHVE<br>EPTVA                     | 3.09 | 0.01 | 1.66 | 0.44 | 1.74 | 0.28 |

|       |   |      |                                       |      |      |      |      |      |      |
|-------|---|------|---------------------------------------|------|------|------|------|------|------|
| 11919 | 0 | 7766 | DDEHVEEPTVADDEHVE<br>EPTVA            | 3.09 | 0.01 | 1.66 | 0.44 | 0.85 | 0.28 |
| 11920 | 0 | 7766 | DDEHVEEPTVADDEHVE<br>EPTVA            | 3.09 | 0.01 | 1.66 | 1.15 | 0.22 | 1.34 |
| 11921 | 0 | 7766 | DDEHVEEPTVADDEHVE<br>EPTVA            | 3.09 | 0.01 | 1.66 | 1.15 | 0.22 | 0.28 |
| 11922 | 0 | 7766 | DDEHVEEPTVADDEHVE<br>EPTVA            | 3.09 | 0.01 | 1.66 | 0.44 | 1.74 | 0.28 |
| 11923 | 0 | 7766 | DDEHVEEPTVADDEHVE<br>EPTVA            | 3.09 | 0.01 | 1.66 | 0.44 | 1.74 | 0.28 |
| 11924 | 0 | 7766 | DDEHVEEPTVADDEHVE<br>EPTVA            | 3.09 | 0.01 | 1.66 | 1.12 | 0.22 | 1.34 |
| 11925 | 0 | 7766 | DDEHVEEPTVADDEHVE<br>EPTVA            | 3.09 | 0.01 | 1.66 | 0.44 | 0.85 | 0.28 |
| 11926 | 0 | 7766 | DDEHVEEPTVADDEHVE<br>EPTVA            | 3.09 | 0.01 | 1.66 | 2.25 | 0.22 | 0.28 |
| 11927 | 0 | 7766 | DDEHVEEPTVADDEHVE<br>EPTVA            | 3.09 | 0.01 | 1.66 | 2.25 | 0.22 | 0.28 |
| 11928 | 0 | 7766 | DDEHVEEPTVADDEHVE<br>EPTVA            | 3.09 | 0.01 | 1.66 | 2.25 | 0.22 | 0.28 |
| 11929 | 0 | 7766 | DDEHVEEPTVADDEHVE<br>EPTVA            | 3.09 | 0.01 | 1.66 | 2.25 | 0.22 | 0.28 |
| 11930 | 0 | 7766 | DDEHVEEPTVADDEHVE<br>EPTVA            | 3.09 | 0.01 | 1.66 | 2.25 | 0.22 | 0.28 |
| 11931 | 0 | 7766 | DDEHVEEPTVADDEHVE<br>EPTVA            | 3.09 | 0.01 | 1.66 | 2.25 | 0.22 | 1.34 |
| 11932 | 0 | 7766 | DDEHVEEPTVADDEHVE<br>EPTVA            | 3.09 | 0.01 | 1.66 | 2.25 | 0.22 | 0.28 |
| 11933 | 0 | 7766 | DDEHVEEPTVADDEHVE<br>EPTVA            | 3.09 | 0.01 | 1.66 | 3.57 | 0.22 | 0.28 |
| 11934 | 0 | 7766 | DDEHVEEPTVADDEHVE<br>EPTVA            | 3.09 | 0.01 | 1.66 | 0.44 | 0.85 | 0.28 |
| 11935 | 0 | 7766 | DDEHVEEPTVADDEHVE<br>EPTVA            | 3.09 | 0.01 | 1.66 | 1.81 | 0.22 | 0.28 |
| 11936 | 0 | 7766 | DDEHVEEPTVADDEHVE<br>EPTVA            | 3.09 | 0.01 | 1.66 | 2.25 | 0.22 | 0.28 |
| 11937 | 0 | 7766 | DDEHVEEPTVADDEHVE<br>EPTVA            | 3.09 | 0.01 | 1.66 | 3.57 | 0.22 | 0.28 |
| 11938 | 0 | 7766 | DDEHVEEPTVADDEHVE<br>EPTVA            | 3.09 | 0.01 | 1.66 | 1.81 | 0.22 | 1.34 |
| 11939 | 0 | 7767 | DDEHVEEPTVADDEHVE<br>EPTVADDEHVEEPTVA | 3.49 | 0.01 | 0.90 | 0.44 | 0.85 | 0.28 |
| 11940 | 0 | 7767 | DDEHVEEPTVADDEHVE<br>EPTVADDEHVEEPTVA | 3.49 | 0.01 | 1.66 | 0.44 | 0.85 | 0.28 |

|       |   |        |                                       |      |      |      |      |      |      |
|-------|---|--------|---------------------------------------|------|------|------|------|------|------|
| 11941 | 0 | 7767   | DDEHVEEPTVADDEHVE<br>EPTVADDEHVEEPTVA | 3.49 | 0.01 | 0.90 | 0.44 | 0.85 | 0.28 |
| 11942 | 0 | 7767   | DDEHVEEPTVADDEHVE<br>EPTVADDEHVEEPTVA | 3.49 | 0.01 | 1.66 | 0.44 | 1.74 | 0.28 |
| 11943 | 0 | 7767   | DDEHVEEPTVADDEHVE<br>EPTVADDEHVEEPTVA | 3.49 | 0.01 | 0.90 | 3.70 | 0.22 | 0.28 |
| 11944 | 0 | 7767   | DDEHVEEPTVADDEHVE<br>EPTVADDEHVEEPTVA | 3.49 | 0.01 | 0.90 | 3.70 | 0.22 | 0.28 |
| 11945 | 0 | 7767   | DDEHVEEPTVADDEHVE<br>EPTVADDEHVEEPTVA | 3.49 | 0.01 | 0.90 | 0.44 | 1.74 | 0.28 |
| 11946 | 0 | 7767   | DDEHVEEPTVADDEHVE<br>EPTVADDEHVEEPTVA | 3.49 | 0.01 | 1.66 | 0.44 | 0.85 | 0.28 |
| 11947 | 0 | 7767   | DDEHVEEPTVADDEHVE<br>EPTVADDEHVEEPTVA | 3.49 | 0.01 | 1.66 | 0.44 | 1.74 | 0.28 |
| 11948 | 0 | 7768   | DDEIYGNDGHP                           | 2.41 | 0.01 | 4.23 | 1.12 | 0.22 | 0.85 |
| 11949 | 0 | 7768   | DDEIYGNDGHP                           | 2.41 | 0.01 | 4.23 | 0.68 | 0.22 | 0.85 |
| 11950 | 0 | 7768   | DDEIYGNDGHP                           | 2.41 | 0.01 | 4.23 | 0.68 | 0.22 | 1.34 |
| 11951 | 0 | 265614 | DDEKEVEKIDSENSK                       | 2.73 | 0.01 | 1.61 | 0.44 | 0.85 | 1.28 |
| 11952 | 0 | 7769   | DDELYAKEFMSTLKYLS<br>HKRY             | 3.04 | 0.01 | 2.86 | 1.81 | 0.22 | 0.85 |
| 11953 | 0 | 7769   | DDELYAKEFMSTLKYLS<br>HKRY             | 3.04 | 0.01 | 2.86 | 2.89 | 0.22 | 0.85 |
| 11954 | 0 | 80920  | DDESKVAKLT                            | 2.30 | 0.01 | 3.06 | 0.44 | 0.85 | 0.28 |
| 11955 | 0 | 7771   | DDFHTDEDKLDTNSVYE<br>PYY              | 2.93 | 0.01 | 3.27 | 2.89 | 0.22 | 0.28 |
| 11956 | 0 | 7771   | DDFHTDEDKLDTNSVYE<br>PYY              | 2.93 | 0.01 | 3.27 | 3.16 | 0.22 | 0.28 |
| 11957 | 0 | 7771   | DDFHTDEDKLDTNSVYE<br>PYY              | 2.93 | 0.01 | 3.27 | 0.44 | 0.85 | 0.28 |
| 11958 | 0 | 238274 | DDFTCVKKWEGGRR                        | 2.63 | 0.01 | 2.56 | 2.02 | 0.22 | 0.85 |
| 11959 | 0 | 238274 | DDFTCVKKWEGGRR                        | 2.63 | 0.01 | 2.56 | 1.20 | 0.22 | 0.85 |
| 11960 | 0 | 512518 | DDFTCVKKWEGGRRV<br>TQYCSHAC           | 3.06 | 0.01 | 2.56 | 2.02 | 0.22 | 0.85 |
| 11961 | 0 | 7774   | DDFTNESSQKTTIDKISD<br>VSTIV           | 3.11 | 0.01 | 2.95 | 0.44 | 0.22 | 0.28 |
| 11962 | 0 | 7778   | DDGDKGSDVESYSSMP<br>PLE               | 2.91 | 0.01 | 1.72 | 0.44 | 0.85 | 0.28 |
| 11963 | 0 | 117451 | DDGFFYIPKD                            | 2.32 | 0.01 | 2.95 | 1.20 | 0.22 | 1.57 |



|       |   |        |                          |      |      |      |      |      |      |
|-------|---|--------|--------------------------|------|------|------|------|------|------|
| 11964 | 0 | 117451 | DDGFFYIPKD               | 2.32 | 0.01 | 2.95 | 1.20 | 0.22 | 1.48 |
| 11965 | 0 | 238275 | DDGIALYVAGEQAQ           | 2.62 | 0.01 | 2.14 | 2.65 | 0.22 | 0.85 |
| 11966 | 0 | 7782   | DDGKGDRSHKNEDESA<br>LASK | 2.97 | 0.01 | 4.15 | 0.68 | 0.22 | 0.28 |
| 11967 | 0 | 7782   | DDGKGDRSHKNEDESA<br>LASK | 2.97 | 0.01 | 4.15 | 0.68 | 0.22 | 0.85 |
| 11968 | 0 | 7782   | DDGKGDRSHKNEDESA<br>LASK | 2.97 | 0.01 | 4.15 | 0.68 | 0.22 | 0.85 |
| 11969 | 0 | 7788   | DDGPYAPFPPRPRFRRA<br>LRT | 2.98 | 0.01 | 2.40 | 0.44 | 1.59 | 0.28 |
| 11970 | 0 | 7789   | DDGSIYKLTGIWLSKTS<br>A   | 2.97 | 0.01 | 3.59 | 1.12 | 0.22 | 0.28 |
| 11971 | 0 | 503974 | DDGVDLPPWFPPMVEG<br>AAAE | 2.95 | 0.01 | 2.48 | 0.44 | 1.74 | 0.28 |
| 11972 | 0 | 503974 | DDGVDLPPWFPPMVEG<br>AAAE | 2.95 | 0.01 | 2.48 | 0.44 | 1.74 | 0.28 |
| 11973 | 0 | 174072 | DDHGGACGYK               | 2.32 | 0.01 | 3.10 | 0.44 | 1.23 | 0.85 |
| 11974 | 0 | 174072 | DDHGGACGYK               | 2.32 | 0.01 | 3.10 | 0.44 | 1.23 | 0.85 |
| 11975 | 0 | 174072 | DDHGGACGYK               | 2.32 | 0.01 | 3.10 | 0.44 | 1.23 | 0.85 |
| 11976 | 0 | 174072 | DDHGGACGYK               | 2.32 | 0.01 | 3.10 | 0.44 | 1.23 | 0.85 |
| 11977 | 0 | 116937 | DDHSTRCWVS               | 2.30 | 0.01 | 0.90 | 1.15 | 0.22 | 0.28 |
| 11978 | 0 | 116937 | DDHSTRCWVS               | 2.30 | 0.01 | 0.90 | 0.44 | 0.85 | 0.28 |
| 11979 | 0 | 115201 | DDIMCVKKIL               | 2.31 | 0.01 | 1.60 | 0.44 | 1.23 | 0.85 |
| 11980 | 0 | 115201 | DDIMCVKKIL               | 2.31 | 0.01 | 1.60 | 0.44 | 1.23 | 0.85 |
| 11981 | 0 | 227076 | DDIPFPGPINDDNP           | 2.72 | 0.01 | 2.97 | 0.44 | 1.59 | 0.28 |
| 11982 | 0 | 227076 | DDIPFPGPINDDNP           | 2.72 | 0.01 | 2.97 | 0.44 | 0.85 | 0.28 |
| 11983 | 0 | 7803   | DDIVGYIMHGISTINKE<br>MK  | 2.88 | 0.01 | 1.66 | 0.44 | 0.85 | 0.28 |
| 11984 | 0 | 7807   | DDKDPQFKDNVILLNK         | 2.75 | 0.01 | 2.45 | 1.20 | 0.22 | 0.85 |
| 11985 | 0 | 7808   | DDKDPQFKDNVILLNKH<br>IDA | 2.95 | 0.01 | 2.45 | 0.44 | 0.85 | 1.48 |
| 11986 | 0 | 7809   | DDKEKDPQYRALMG<br>EN     | 2.94 | 0.01 | 3.75 | 2.42 | 0.22 | 0.28 |
| 11987 | 0 | 7809   | DDKEKDPQYRALMG<br>EN     | 2.94 | 0.01 | 3.75 | 2.42 | 0.22 | 1.34 |
| 11988 | 0 | 7809   | DDKEKDPQYRALMG<br>EN     | 2.94 | 0.01 | 3.75 | 2.42 | 0.22 | 0.28 |
| 11989 | 0 | 7809   | DDKEKDPQYRALMG<br>EN     | 2.94 | 0.01 | 3.75 | 2.42 | 0.22 | 0.28 |
| 11990 | 0 | 7809   | DDKEKDPQYRALMG<br>EN     | 2.94 | 0.01 | 3.75 | 2.42 | 0.22 | 0.28 |
| 11991 | 0 | 7809   | DDKEKDPQYRALMG<br>EN     | 2.94 | 0.01 | 3.75 | 2.42 | 0.22 | 0.28 |
| 11992 | 0 | 7809   | DDKEKDPQYRALMG<br>EN     | 2.94 | 0.01 | 3.75 | 2.42 | 0.22 | 0.28 |
| 11993 | 0 | 177626 | DDKKKKEAAQKKATE          | 2.72 | 0.01 | 0.78 | 0.44 | 1.13 | 0.85 |

|       |   |        |                                    |      |      |      |      |      |      |
|-------|---|--------|------------------------------------|------|------|------|------|------|------|
| 11994 | 0 | 7812   | DDKLRMETCFQQACK                    | 2.64 | 0.01 | 2.43 | 0.68 | 0.22 | 0.28 |
| 11995 | 0 | 7812   | DDKLRMETCFQQACK                    | 2.64 | 0.01 | 2.43 | 3.34 | 0.22 | 0.28 |
| 11996 | 0 | 7812   | DDKLRMETCFQQACK                    | 2.64 | 0.01 | 2.43 | 0.44 | 0.85 | 0.28 |
| 11997 | 0 | 107779 | DDKSKMKVCDLIGDCG<br>CKHKTKLDELDEWN | 3.34 | 0.01 | 0.90 | 1.12 | 0.22 | 0.28 |
| 11998 | 0 | 7817   | DDLDDKCKNDGW                       | 2.51 | 0.01 | 2.69 | 1.20 | 0.22 | 0.28 |
| 11999 | 0 | 7818   | DDLDEGIEKSSEELSEEK                 | 2.90 | 0.01 | 1.66 | 0.44 | 0.85 | 0.28 |
| 12000 | 0 | 92437  | DDLIAKGNGK                         | 2.32 | 0.01 | 2.67 | 2.00 | 0.22 | 0.28 |
| 12001 | 0 | 434681 | DDLPAIT                            | 2.03 | 0.01 | 3.81 | 1.12 | 0.22 | 0.28 |
| 12002 | 0 | 7822   | DDLPTTMFQPVRAPIQ<br>TAW            | 2.92 | 0.01 | 3.01 | 0.44 | 0.85 | 0.28 |
| 12003 | 0 | 170528 | DDLRSVEETLKVERD                    | 2.71 | 0.01 | 0.78 | 0.44 | 1.41 | 0.28 |
| 12004 | 0 | 115202 | DDLTDIMCV                          | 2.32 | 0.01 | 1.60 | 0.44 | 1.23 | 0.85 |
| 12005 | 0 | 120428 | DDLVGAGVIDAVA                      | 2.60 | 0.01 | 2.86 | 0.44 | 0.85 | 0.28 |
| 12006 | 0 | 7828   | DDMEFKASPSVVKTS                    | 2.66 | 0.01 | 1.66 | 1.15 | 0.22 | 0.28 |
| 12007 | 0 | 7828   | DDMEFKASPSVVKTS                    | 2.66 | 0.01 | 1.66 | 1.15 | 0.22 | 0.28 |
| 12008 | 0 | 512556 | DDMLNSNDMIKLAPK                    | 2.70 | 0.01 | 2.24 | 0.44 | 1.41 | 1.28 |
| 12009 | 0 | 7830   | DDMPGCYPMCTLNK                     | 2.60 | 0.01 | 0.90 | 0.44 | 1.41 | 0.28 |
| 12010 | 0 | 122723 | DDMTQIGDQRVSLIDDE<br>PSYGKGSD      | 3.15 | 0.01 | 2.19 | 1.12 | 0.22 | 1.27 |
| 12011 | 0 | 122723 | DDMTQIGDQRVSLIDDE<br>PSYGKGSD      | 3.15 | 0.01 | 2.19 | 1.12 | 0.22 | 0.85 |
| 12012 | 0 | 122723 | DDMTQIGDQRVSLIDDE<br>PSYGKGSD      | 3.15 | 0.01 | 2.19 | 1.12 | 0.22 | 1.48 |
| 12013 | 0 | 122723 | DDMTQIGDQRVSLIDDE<br>PSYGKGSD      | 3.15 | 0.01 | 2.19 | 1.12 | 0.22 | 1.34 |
| 12014 | 0 | 122723 | DDMTQIGDQRVSLIDDE<br>PSYGKGSD      | 3.15 | 0.01 | 2.19 | 1.12 | 0.22 | 3.16 |
| 12015 | 0 | 122723 | DDMTQIGDQRVSLIDDE<br>PSYGKGSD      | 3.15 | 0.01 | 2.19 | 1.12 | 0.22 | 0.28 |
| 12016 | 0 | 265848 | DDNDNDADGEEEDNE                    | 2.74 | 0.01 | 1.61 | 0.44 | 0.85 | 1.28 |
| 12017 | 0 | 7833   | DDNGDRPPEPAAQGES<br>STQK           | 2.94 | 0.01 | 3.01 | 0.44 | 0.85 | 0.28 |
| 12018 | 0 | 114293 | DDNGLEETICTLRLR                    | 2.68 | 0.01 | 3.27 | 0.44 | 1.23 | 0.85 |
| 12019 | 0 | 7836   | DDNGTEEWRCLLGYKK<br>GEGN           | 2.94 | 0.01 | 3.00 | 0.68 | 0.22 | 0.28 |
| 12020 | 0 | 7836   | DDNGTEEWRCLLGYKK<br>GEGN           | 2.94 | 0.01 | 3.33 | 0.68 | 0.22 | 0.28 |
| 12021 | 0 | 7836   | DDNGTEEWRCLLGYKK<br>GEGN           | 2.94 | 0.01 | 3.33 | 0.68 | 0.22 | 0.28 |
| 12022 | 0 | 265881 | DDPAADAAGTREEKQ                    | 2.68 | 0.01 | 1.61 | 0.44 | 0.85 | 1.28 |
| 12023 | 0 | 265882 | DDPAADAAGTRKEKQ                    | 2.69 | 0.01 | 1.61 | 0.44 | 0.85 | 1.28 |

|       |   |        |                        |      |      |      |      |      |      |
|-------|---|--------|------------------------|------|------|------|------|------|------|
| 12024 | 0 | 265883 | DDPAADGAGTAEGKQ        | 2.71 | 0.01 | 1.61 | 0.44 | 0.85 | 1.28 |
| 12025 | 0 | 265885 | DDPAADGAGTREEKQ        | 2.69 | 0.01 | 1.61 | 0.44 | 0.85 | 1.28 |
| 12026 | 0 | 265887 | DDPAADVAGTAEGKQ        | 2.69 | 0.01 | 1.61 | 0.44 | 0.85 | 1.28 |
| 12027 | 0 | 7840   | DDPAKAAFDSLQASA        | 2.71 | 0.01 | 3.89 | 0.68 | 0.22 | 0.85 |
| 12028 | 0 | 7841   | DDPF                   | 1.59 | 0.01 | 4.03 | 0.68 | 0.22 | 0.85 |
| 12029 | 0 | 7841   | DDPF                   | 1.59 | 0.01 | 4.03 | 0.68 | 0.22 | 2.98 |
| 12030 | 0 | 7842   | DDPFRS                 | 1.89 | 0.01 | 4.03 | 0.68 | 0.22 | 0.85 |
| 12031 | 0 | 7846   | DDPLLGNQ               | 2.12 | 0.01 | 2.40 | 2.43 | 0.22 | 0.28 |
| 12032 | 0 | 7847   | DDPLLRTA               | 2.12 | 0.01 | 2.85 | 0.44 | 0.22 | 0.28 |
| 12033 | 0 | 7849   | DDPPATVYRYD            | 2.42 | 0.01 | 2.14 | 2.90 | 0.22 | 0.28 |
| 12034 | 0 | 7849   | DDPPATVYRYD            | 2.42 | 0.01 | 2.14 | 2.90 | 0.22 | 0.28 |
| 12035 | 0 | 7849   | DDPPATVYRYD            | 2.42 | 0.01 | 2.14 | 1.12 | 0.22 | 0.28 |
| 12036 | 0 | 78115  | DDPPATVYRYDSRPP        | 2.69 | 0.01 | 2.14 | 1.12 | 0.22 | 0.28 |
| 12037 | 0 | 78115  | DDPPATVYRYDSRPP        | 2.69 | 0.01 | 2.14 | 1.12 | 0.22 | 0.28 |
| 12038 | 0 | 78115  | DDPPATVYRYDSRPP        | 2.69 | 0.01 | 2.14 | 1.12 | 0.22 | 1.34 |
| 12039 | 0 | 78115  | DDPPATVYRYDSRPP        | 2.69 | 0.01 | 2.14 | 1.12 | 0.22 | 0.28 |
| 12040 | 0 | 7850   | DDPPATVYRYDSRPPED      | 2.81 | 0.01 | 2.14 | 0.44 | 0.22 | 0.28 |
| 12041 | 0 | 7850   | DDPPATVYRYDSRPPED      | 2.81 | 0.01 | 2.14 | 3.00 | 0.22 | 0.28 |
| 12042 | 0 | 7850   | DDPPATVYRYDSRPPED      | 2.81 | 0.01 | 2.14 | 0.44 | 0.22 | 0.28 |
| 12043 | 0 | 7850   | DDPPATVYRYDSRPPED      | 2.81 | 0.01 | 2.14 | 0.44 | 0.22 | 0.28 |
| 12044 | 0 | 7850   | DDPPATVYRYDSRPPED      | 2.81 | 0.01 | 2.14 | 0.44 | 0.22 | 0.28 |
| 12045 | 0 | 7850   | DDPPATVYRYDSRPPED      | 2.81 | 0.01 | 2.14 | 0.68 | 0.22 | 0.28 |
| 12046 | 0 | 7850   | DDPPATVYRYDSRPPED      | 2.81 | 0.01 | 2.14 | 0.68 | 0.22 | 0.28 |
| 12047 | 0 | 7850   | DDPPATVYRYDSRPPED      | 2.81 | 0.01 | 2.14 | 0.68 | 2.25 | 1.75 |
| 12048 | 0 | 7850   | DDPPATVYRYDSRPPED      | 2.81 | 0.01 | 2.14 | 0.68 | 0.22 | 1.34 |
| 12049 | 0 | 7850   | DDPPATVYRYDSRPPED      | 2.81 | 0.01 | 2.14 | 0.44 | 0.22 | 0.28 |
| 12050 | 0 | 7851   | DDPPATVYRYDSRPPED<br>V | 2.87 | 0.01 | 2.14 | 1.15 | 0.22 | 1.27 |
| 12051 | 0 | 7851   | DDPPATVYRYDSRPPED<br>V | 2.87 | 0.01 | 2.14 | 1.15 | 0.22 | 0.28 |
| 12052 | 0 | 7851   | DDPPATVYRYDSRPPED<br>V | 2.87 | 0.01 | 2.14 | 1.20 | 0.22 | 0.28 |
| 12053 | 0 | 7851   | DDPPATVYRYDSRPPED<br>V | 2.87 | 0.01 | 2.14 | 1.15 | 0.22 | 0.85 |

|       |   |        |                                                        |      |      |      |      |      |      |
|-------|---|--------|--------------------------------------------------------|------|------|------|------|------|------|
| 12054 | 0 | 7851   | DDPPATVYRYDSRPPED<br>V                                 | 2.87 | 0.01 | 2.14 | 1.12 | 0.22 | 0.28 |
| 12055 | 0 | 7851   | DDPPATVYRYDSRPPED<br>V                                 | 2.87 | 0.01 | 2.14 | 1.12 | 0.22 | 0.28 |
| 12056 | 0 | 7851   | DDPPATVYRYDSRPPED<br>V                                 | 2.87 | 0.01 | 2.14 | 1.12 | 0.22 | 1.34 |
| 12057 | 0 | 7851   | DDPPATVYRYDSRPPED<br>V                                 | 2.87 | 0.01 | 2.14 | 1.12 | 0.22 | 0.28 |
| 12058 | 0 | 7851   | DDPPATVYRYDSRPPED<br>V                                 | 2.87 | 0.01 | 2.14 | 1.12 | 0.22 | 0.85 |
| 12059 | 0 | 7852   | DDPPKDGKDDLPKEEK<br>KDD                                | 2.98 | 0.01 | 3.00 | 0.68 | 0.22 | 0.28 |
| 12060 | 0 | 195211 | DDPRFQ                                                 | 1.89 | 0.01 | 0.78 | 1.15 | 0.22 | 2.35 |
| 12061 | 0 | 195211 | DDPRFQ                                                 | 1.89 | 0.01 | 0.78 | 1.15 | 0.22 | 2.51 |
| 12062 | 0 | 195211 | DDPRFQ                                                 | 1.89 | 0.01 | 0.78 | 1.15 | 0.22 | 1.57 |
| 12063 | 0 | 123995 | DDPRFQDSSSSKAPPSL<br>PSPSRLPGPSDTPILPQ                 | 3.51 | 0.01 | 0.78 | 1.20 | 0.22 | 1.57 |
| 12064 | 0 | 168292 | DDPSTTSDARKMPVIHS<br>VSHT                              | 3.01 | 0.01 | 3.93 | 2.02 | 1.59 | 0.85 |
| 12065 | 0 | 157158 | DDQCQRQLQR                                             | 2.35 | 0.01 | 2.16 | 0.44 | 1.23 | 0.85 |
| 12066 | 0 | 157158 | DDQCQRQLQR                                             | 2.35 | 0.01 | 2.16 | 0.44 | 1.23 | 0.85 |
| 12067 | 0 | 7864   | DDQPSSHQPLFY                                           | 2.47 | 0.01 | 2.40 | 1.12 | 0.22 | 0.85 |
| 12068 | 0 | 7864   | DDQPSSHQPLFY                                           | 2.47 | 0.01 | 2.40 | 1.12 | 0.22 | 0.85 |
| 12069 | 0 | 7864   | DDQPSSHQPLFY                                           | 2.47 | 0.01 | 2.40 | 1.12 | 0.22 | 0.85 |
| 12070 | 0 | 7865   | DDQTYISPSLFV                                           | 2.44 | 0.01 | 3.30 | 1.12 | 0.22 | 0.28 |
| 12071 | 0 | 7865   | DDQTYISPSLFV                                           | 2.44 | 0.01 | 3.30 | 1.12 | 0.22 | 0.28 |
| 12072 | 0 | 7865   | DDQTYISPSLFV                                           | 2.44 | 0.01 | 3.30 | 1.12 | 0.22 | 1.34 |
| 12073 | 0 | 123072 | DDREKWLGD                                              | 2.23 | 0.01 | 2.28 | 2.00 | 0.22 | 0.28 |
| 12074 | 0 | 123073 | DDREKWMSE                                              | 2.22 | 0.01 | 2.28 | 2.00 | 0.22 | 0.28 |
| 12075 | 0 | 7866   | DDRHKIVNVDQRQYGD<br>VFKGD                              | 3.01 | 0.01 | 3.27 | 2.89 | 0.22 | 0.28 |
| 12076 | 0 | 7866   | DDRHKIVNVDQRQYGD<br>VFKGD                              | 3.01 | 0.01 | 3.27 | 3.16 | 0.22 | 0.28 |
| 12077 | 0 | 7866   | DDRHKIVNVDQRQYGD<br>VFKGD                              | 3.01 | 0.01 | 3.27 | 1.15 | 0.22 | 0.28 |
| 12078 | 0 | 118288 | DDRLNKVISELNGKN                                        | 2.67 | 0.01 | 0.78 | 0.44 | 1.13 | 0.85 |
| 12079 | 0 | 7867   | DDRRAGFGSA                                             | 2.33 | 0.01 | 4.33 | 1.15 | 0.22 | 0.28 |
| 12080 | 0 | 236161 | DDRTEVPQLVNANQYS<br>PCVSIVPSTVWEDGDYY<br>RKQLSPLEGGGWL | 3.76 | 0.01 | 4.08 | 1.20 | 0.22 | 0.28 |
| 12081 | 0 | 236161 | DDRTEVPQLVNANQYS<br>PCVSIVPSTVWEDGDYY<br>RKQLSPLEGGGWL | 3.76 | 0.01 | 4.08 | 1.20 | 0.22 | 0.85 |

|       |   |        |                                    |      |      |      |      |      |      |
|-------|---|--------|------------------------------------|------|------|------|------|------|------|
|       |   |        | DDRTEVPQLVNANQYS                   |      |      |      |      |      |      |
| 12082 | 0 | 236161 | PCVSIVPSTVWEDGDYY<br>RKQLSPLEGGGWL | 3.76 | 0.01 | 4.08 | 1.20 | 0.22 | 2.92 |
| 12083 | 0 | 265964 | DDSDVQNEIKVLDDG                    | 2.67 | 0.01 | 1.61 | 0.44 | 0.85 | 1.28 |
| 12084 | 0 | 7868   | DDSEPVKGVKLHYT                     | 2.65 | 0.01 | 2.48 | 0.44 | 0.85 | 0.28 |
| 12085 | 0 | 148557 | DDSKLPVVKVEDKSKLQD                 | 2.88 | 0.01 | 3.57 | 2.49 | 0.22 | 0.28 |
| 12086 | 0 | 148558 | DDSKLPVVKVEDKSKLQD<br>TKDKKR       | 3.14 | 0.01 | 3.57 | 0.44 | 0.85 | 0.28 |
| 12087 | 0 | 148559 | DDSKLPVIKVEDKSKLQD                 | 2.88 | 0.01 | 3.57 | 2.49 | 0.22 | 0.28 |
| 12088 | 0 | 148560 | DDSKLPVIKVEDKSKLQD<br>TKDKKR       | 3.14 | 0.01 | 3.57 | 2.49 | 0.22 | 0.28 |
| 12089 | 0 | 148560 | DDSKLPVIKVEDKSKLQD<br>TKDKKR       | 3.14 | 0.01 | 3.57 | 1.12 | 0.22 | 0.85 |
| 12090 | 0 | 148560 | DDSKLPVIKVEDKSKLQD<br>TKDKKR       | 3.14 | 0.01 | 3.57 | 1.12 | 0.22 | 0.85 |
| 12091 | 0 | 148560 | DDSKLPVIKVEDKSKLQD<br>TKDKKR       | 3.14 | 0.01 | 3.57 | 1.12 | 0.22 | 0.85 |
| 12092 | 0 | 148560 | DDSKLPVIKVEDKSKLQD<br>TKDKKR       | 3.14 | 0.01 | 3.57 | 1.12 | 0.22 | 0.85 |
| 12093 | 0 | 148560 | DDSKLPVIKVEDKSKLQD<br>TKDKKR       | 3.14 | 0.01 | 3.57 | 0.44 | 0.85 | 0.28 |
| 12094 | 0 | 148561 | DDSKLPVVKVEDKSKLQ<br>D             | 2.89 | 0.01 | 3.57 | 2.49 | 0.22 | 0.28 |
| 12095 | 0 | 148562 | DDSKLPVVKVEDKSKLQ<br>DTDKKR        | 3.15 | 0.01 | 3.57 | 0.44 | 0.85 | 0.28 |
| 12096 | 0 | 230111 | DDSLNGIQKAQKIQAIYK<br>TL           | 2.95 | 0.01 | 3.19 | 0.44 | 1.23 | 1.28 |
| 12097 | 0 | 7874   | DDSPDLPKLKPDPTLC                   | 2.84 | 0.01 | 1.60 | 0.44 | 1.23 | 0.28 |
| 12098 | 0 | 188082 | DDTAAVAGVG                         | 2.36 | 0.01 | 2.92 | 1.81 | 0.22 | 0.85 |
| 12099 | 0 | 99137  | DDTFTV                             | 1.90 | 0.01 | 2.24 | 1.20 | 0.22 | 0.28 |
| 12100 | 0 | 99137  | DDTFTV                             | 1.90 | 0.01 | 2.24 | 1.20 | 0.22 | 0.28 |
| 12101 | 0 | 134028 | DDTIS                              | 1.75 | 0.01 | 0.78 | 0.68 | 0.22 | 2.35 |
| 12102 | 0 | 134028 | DDTIS                              | 1.75 | 0.01 | 0.78 | 0.68 | 0.22 | 1.34 |
| 12103 | 0 | 227079 | DDTPTGSNGALRPGI                    | 2.67 | 0.01 | 2.97 | 0.44 | 1.59 | 0.28 |
| 12104 | 0 | 7879   | DDVAGDGTTTATVLA                    | 2.73 | 0.01 | 2.04 | 2.97 | 0.22 | 0.28 |
| 12105 | 0 | 266065 | DDVEDGDGEDEEEGQ                    | 2.73 | 0.01 | 1.61 | 0.44 | 0.85 | 1.28 |
| 12106 | 0 | 7885   | DDVNKNTLQARQQT                     | 2.61 | 0.01 | 2.56 | 2.69 | 0.22 | 0.28 |
| 12107 | 0 | 7885   | DDVNKNTLQARQQT                     | 2.61 | 0.01 | 3.16 | 2.69 | 0.22 | 0.28 |
| 12108 | 0 | 7885   | DDVNKNTLQARQQT                     | 2.61 | 0.01 | 3.16 | 2.69 | 0.22 | 0.28 |
| 12109 | 0 | 133034 | DDVTYFGRNAYNETKLK                  | 2.77 | 0.01 | 0.90 | 1.20 | 0.22 | 0.85 |
| 12110 | 0 | 133035 | DDVTYFRTKGPGRCH                    | 2.65 | 0.01 | 0.90 | 1.20 | 0.22 | 0.85 |
| 12111 | 0 | 122295 | DDVWLP                             | 1.89 | 0.01 | 2.26 | 2.43 | 0.22 | 1.57 |

|       |   |        |                              |      |      |      |      |      |      |
|-------|---|--------|------------------------------|------|------|------|------|------|------|
| 12112 | 0 | 99138  | DDWDNRHPLPNAPLV              | 2.70 | 0.01 | 2.86 | 2.02 | 0.85 | 0.85 |
| 12113 | 0 | 7895   | DDYNYWTPINKKEFL              | 2.64 | 0.01 | 1.66 | 1.15 | 0.22 | 0.28 |
| 12114 | 0 | 7895   | DDYNYWTPINKKEFL              | 2.64 | 0.01 | 1.66 | 1.15 | 0.22 | 0.28 |
| 12115 | 0 | 7896   | DDYQSFF                      | 2.00 | 0.01 | 1.66 | 1.15 | 0.22 | 0.28 |
| 12116 | 0 | 94484  | DDYRQK                       | 1.89 | 0.01 | 2.24 | 3.12 | 0.22 | 0.85 |
| 12117 | 0 | 94484  | DDYRQK                       | 1.89 | 0.01 | 2.24 | 3.12 | 0.22 | 0.85 |
| 12118 | 0 | 94484  | DDYRQK                       | 1.89 | 0.01 | 2.24 | 3.12 | 0.22 | 0.85 |
| 12119 | 0 | 138839 | DE                           | 1.10 | 0.01 | 0.78 | 0.44 | 2.35 | 2.12 |
| 12120 | 0 | 266139 | DEAAAPKNGTATTGD              | 2.70 | 0.01 | 1.61 | 0.44 | 0.85 | 1.28 |
| 12121 | 0 | 140836 | DEAAYSKNRRAV                 | 2.46 | 0.01 | 3.01 | 1.12 | 0.22 | 0.28 |
| 12122 | 0 | 7901   | DEADRYFTYEYP                 | 2.49 | 0.01 | 2.88 | 2.22 | 0.85 | 0.28 |
| 12123 | 0 | 7901   | DEADRYFTYEYP                 | 2.49 | 0.01 | 2.88 | 2.37 | 0.22 | 0.28 |
| 12124 | 0 | 7901   | DEADRYFTYEYP                 | 2.49 | 0.01 | 2.88 | 2.22 | 0.22 | 0.28 |
| 12125 | 0 | 7902   | DEAEEEDENPYVFED              | 2.71 | 0.01 | 3.12 | 0.44 | 1.23 | 1.57 |
| 12126 | 0 | 266160 | DEAEEEEDEDEEEEE              | 2.72 | 0.01 | 1.61 | 0.44 | 0.85 | 1.28 |
| 12127 | 0 | 115702 | DEAELPSRISPGKNA              | 2.66 | 0.01 | 0.90 | 1.81 | 0.22 | 0.28 |
| 12128 | 0 | 115702 | DEAELPSRISPGKNA              | 2.66 | 0.01 | 1.75 | 1.81 | 0.22 | 0.28 |
| 12129 | 0 | 105704 | DEAFRHDSGY                   | 2.30 | 0.01 | 0.78 | 1.15 | 0.22 | 2.35 |
| 12130 | 0 | 105705 | DEAFRHDSGYQVH                | 2.52 | 0.01 | 0.90 | 1.12 | 0.22 | 2.35 |
| 12131 | 0 | 7903   | DEAGTLAPTGMFIA               | 2.61 | 0.01 | 3.34 | 1.12 | 0.22 | 0.85 |
| 12132 | 0 | 7905   | DEAIAVNIYAANVANLFS           | 3.56 | 0.01 | 2.97 | 0.44 | 0.85 | 0.85 |
|       |   |        | GEGAQTAQAAPVQEGV<br>QQE      |      |      |      |      |      |      |
| 12133 | 0 | 115204 | DEALEKFDKALKALPMHI<br>RL     | 2.97 | 0.01 | 1.60 | 0.44 | 1.23 | 1.28 |
| 12134 | 0 | 7909   | DEALNNR                      | 2.01 | 0.01 | 3.72 | 1.15 | 0.22 | 2.66 |
| 12135 | 0 | 7910   | DEALNNRFQIKGVELKS<br>GYKDWIL | 3.09 | 0.01 | 3.93 | 1.15 | 0.22 | 2.66 |
| 12136 | 0 | 7912   | DEANQRATKMLGSG               | 2.57 | 0.01 | 4.45 | 1.20 | 0.22 | 0.85 |
| 12137 | 0 | 266199 | DEAQFQQHQQHEHPA              | 2.72 | 0.01 | 1.61 | 0.44 | 0.85 | 1.28 |
| 12138 | 0 | 266203 | DEAQVQQHQQRHERPA             | 2.71 | 0.01 | 1.61 | 0.44 | 0.85 | 1.28 |
| 12139 | 0 | 7920   | DECHAQDATSILGI               | 2.60 | 0.01 | 2.59 | 0.44 | 0.85 | 0.28 |
| 12140 | 0 | 7921   | DECHAVDSTTILGI               | 2.59 | 0.01 | 2.69 | 0.44 | 0.85 | 0.28 |
| 12141 | 0 | 147573 | DECQCEAIKYIAEDQ              | 2.72 | 0.01 | 2.75 | 0.44 | 1.23 | 0.28 |
| 12142 | 0 | 147573 | DECQCEAIKYIAEDQ              | 2.72 | 0.01 | 2.75 | 0.44 | 1.23 | 1.34 |
| 12143 | 0 | 266242 | DEDDDDDDNDNDADG              | 2.73 | 0.01 | 1.61 | 0.44 | 0.85 | 1.28 |
| 12144 | 0 | 266243 | DEDDDGDNDADDVCR              | 2.70 | 0.01 | 1.61 | 0.44 | 0.85 | 1.28 |
| 12145 | 0 | 266244 | DEDEEEEEEEEEEEK              | 2.74 | 0.01 | 1.61 | 0.44 | 0.85 | 1.28 |
| 12146 | 0 | 266251 | DEDEDDDDDDNDNDA              | 2.74 | 0.01 | 1.61 | 0.44 | 0.85 | 1.28 |
| 12147 | 0 | 266256 | DEDEEEMDDDEVQPM              | 2.73 | 0.01 | 1.61 | 0.44 | 0.85 | 1.28 |

|       |   |        |                             |      |      |      |      |      |      |
|-------|---|--------|-----------------------------|------|------|------|------|------|------|
| 12148 | 0 | 134029 | DEDENQSPRSFQKKTR            | 2.75 | 0.01 | 0.78 | 0.44 | 1.41 | 1.34 |
| 12149 | 0 | 134029 | DEDENQSPRSFQKKTR            | 2.75 | 0.01 | 0.78 | 1.12 | 0.22 | 0.28 |
| 12150 | 0 | 134029 | DEDENQSPRSFQKKTR            | 2.75 | 0.01 | 0.78 | 1.12 | 0.22 | 0.28 |
| 12151 | 0 | 7932   | DEDEYEYDEEDRRRG             | 2.73 | 0.01 | 2.16 | 0.44 | 1.23 | 0.85 |
| 12152 | 0 | 7935   | DEMGFY                      | 1.91 | 0.01 | 3.81 | 0.44 | 1.23 | 1.27 |
| 12153 | 0 | 7938   | DEDKLDTNSVYEPYHS<br>DHA     | 2.94 | 0.01 | 3.27 | 2.89 | 0.22 | 0.28 |
| 12154 | 0 | 7938   | DEDKLDTNSVYEPYHS<br>DHA     | 2.94 | 0.01 | 3.27 | 3.16 | 0.22 | 0.28 |
| 12155 | 0 | 7939   | DEDKRDGN                    | 2.15 | 0.01 | 3.29 | 1.20 | 0.22 | 0.28 |
| 12156 | 0 | 419130 | DEDKRDGNNEDNEKLR<br>KPKHKKL | 3.13 | 0.01 | 1.66 | 3.32 | 0.22 | 0.28 |
| 12157 | 0 | 419130 | DEDKRDGNNEDNEKLR<br>KPKHKKL | 3.13 | 0.01 | 1.66 | 3.32 | 0.22 | 1.48 |
| 12158 | 0 | 7945   | DEDSOSSGYPPNRQ              | 2.69 | 0.01 | 2.76 | 0.44 | 1.59 | 0.28 |
| 12159 | 0 | 7947   | DEDSYGRDPYSPSQD             | 2.72 | 0.01 | 2.16 | 0.44 | 1.23 | 0.85 |
| 12160 | 0 | 7947   | DEDSYGRDPYSPSQD             | 2.72 | 0.01 | 2.16 | 2.90 | 0.22 | 0.85 |
| 12161 | 0 | 178123 | DEDVKNAIGVLIGGLEW<br>NDN    | 2.97 | 0.01 | 3.51 | 1.12 | 0.22 | 1.27 |
| 12162 | 0 | 188084 | DEDVSDIERR                  | 2.34 | 0.01 | 2.92 | 0.68 | 0.22 | 0.85 |
| 12163 | 0 | 188084 | DEDVSDIERR                  | 2.34 | 0.01 | 2.92 | 1.81 | 0.22 | 0.85 |
| 12164 | 0 | 188084 | DEDVSDIERR                  | 2.34 | 0.01 | 2.92 | 3.37 | 0.22 | 0.85 |
| 12165 | 0 | 226332 | DEDVSDIERRIARRLAER          | 2.90 | 0.01 | 2.92 | 2.87 | 0.22 | 0.28 |
| 12166 | 0 | 7951   | DEEDD                       | 1.73 | 0.01 | 4.08 | 0.68 | 0.22 | 0.28 |
| 12167 | 0 | 7951   | DEEDD                       | 1.73 | 0.01 | 4.08 | 0.68 | 0.22 | 0.28 |
| 12168 | 0 | 266308 | DEEDKDDDVKDEEEE             | 2.73 | 0.01 | 1.61 | 0.44 | 0.85 | 1.28 |
| 12169 | 0 | 96171  | DEEDKEEDEE                  | 2.37 | 0.01 | 0.78 | 0.44 | 1.93 | 0.85 |
| 12170 | 0 | 266316 | DEEEDDADGDEEDYD             | 2.74 | 0.01 | 1.61 | 0.44 | 0.85 | 1.28 |
| 12171 | 0 | 266320 | DEEEDEEEDEEDYEE             | 2.74 | 0.01 | 1.61 | 0.44 | 0.85 | 1.28 |
| 12172 | 0 | 266327 | DEEEDEEEDEEEDDEE            | 2.73 | 0.01 | 1.61 | 0.44 | 0.85 | 1.28 |
| 12173 | 0 | 266328 | DEEEDEEEDEEGEEV             | 2.75 | 0.01 | 1.61 | 0.44 | 0.85 | 1.28 |
| 12174 | 0 | 99140  | DEEEEGSNREVRRT              | 2.67 | 0.01 | 2.16 | 0.44 | 1.23 | 1.48 |
| 12175 | 0 | 7959   | DEEEYDEDEYDE                | 2.74 | 0.01 | 2.16 | 0.44 | 1.23 | 0.85 |
| 12176 | 0 | 127618 | DEEKDKGLQTSQ                | 2.49 | 0.01 | 0.78 | 0.44 | 1.41 | 0.28 |
| 12177 | 0 | 266374 | DEEKEDEEEDEE                | 2.74 | 0.01 | 1.61 | 0.44 | 0.85 | 1.28 |
| 12178 | 0 | 266379 | DEELKDEEKEDEE               | 2.74 | 0.01 | 1.61 | 0.44 | 0.85 | 1.28 |
| 12179 | 0 | 99141  | DEELQEGHVLVVPQN             | 2.69 | 0.01 | 2.16 | 0.44 | 1.23 | 1.48 |
| 12180 | 0 | 7969   | DEEMEQAKRNHLRVVD<br>SL      | 2.83 | 0.01 | 0.78 | 0.44 | 1.41 | 0.28 |
| 12181 | 0 | 7971   | DEENRKRIEARNLEN             | 2.76 | 0.01 | 1.66 | 0.44 | 1.74 | 0.28 |
| 12182 | 0 | 7971   | DEENRKRIEARNLEN             | 2.76 | 0.01 | 1.66 | 0.68 | 0.22 | 0.28 |
| 12183 | 0 | 266397 | DEEQEKKEEEEDG               | 2.73 | 0.01 | 1.61 | 0.44 | 0.85 | 1.28 |

|       |   |        |                                                           |      |      |      |      |      |      |
|-------|---|--------|-----------------------------------------------------------|------|------|------|------|------|------|
| 12184 | 0 | 181288 | DEEQQRESESESESELRR<br>HKNKNPFL                            | 3.22 | 0.01 | 2.72 | 0.44 | 1.23 | 1.27 |
| 12185 | 0 | 7975   | DEERM                                                     | 1.75 | 0.01 | 3.15 | 0.44 | 1.23 | 0.85 |
| 12186 | 0 | 7976   | DEERMDALENQLKEAR<br>MLAEEDRKYDEVARKLA<br>MVEADLERAEERAESG | 3.86 | 0.01 | 0.90 | 0.44 | 1.23 | 0.28 |
| 12187 | 0 | 95004  | DEESSNAAEEWKYVAM<br>VIDH                                  | 2.93 | 0.01 | 2.26 | 2.36 | 0.22 | 1.27 |
| 12188 | 0 | 95004  | DEESSNAAEEWKYVAM<br>VIDH                                  | 2.93 | 0.01 | 2.26 | 2.04 | 0.22 | 1.27 |
| 12189 | 0 | 95004  | DEESSNAAEEWKYVAM<br>VIDH                                  | 2.93 | 0.01 | 2.26 | 2.04 | 0.22 | 1.27 |
| 12190 | 0 | 7979   | DEFDPLVAEEDEREVS<br>PAEILR                                | 3.12 | 0.01 | 1.72 | 0.44 | 0.85 | 0.28 |
| 12191 | 0 | 240865 | DEFNDDLPAITSFIL                                           | 2.68 | 0.01 | 4.93 | 0.44 | 1.41 | 0.28 |
| 12192 | 0 | 143328 | DEGDTLDYDYYPEE                                            | 2.64 | 0.01 | 0.78 | 1.15 | 0.22 | 0.28 |
| 12193 | 0 | 143328 | DEGDTLDYDYYPEE                                            | 2.64 | 0.01 | 0.78 | 1.15 | 0.22 | 0.28 |
| 12194 | 0 | 143328 | DEGDTLDYDYYPEE                                            | 2.64 | 0.01 | 0.78 | 1.15 | 0.22 | 0.28 |
| 12195 | 0 | 143328 | DEGDTLDYDYYPEE                                            | 2.64 | 0.01 | 0.78 | 1.15 | 0.22 | 2.35 |
| 12196 | 0 | 266457 | DEGEDEEGPSPPTP                                            | 2.73 | 0.01 | 1.61 | 0.44 | 0.85 | 1.28 |
| 12197 | 0 | 7996   | DEGESPTPAT                                                | 2.33 | 0.01 | 3.50 | 2.37 | 1.59 | 0.28 |
| 12198 | 0 | 7996   | DEGESPTPAT                                                | 2.33 | 0.01 | 3.50 | 1.12 | 0.22 | 0.28 |
| 12199 | 0 | 266469 | DEGGDEGNDEAEGGN                                           | 2.75 | 0.01 | 1.61 | 0.44 | 0.85 | 1.28 |
| 12200 | 0 | 115599 | DEGGFTCFRRDH                                              | 2.48 | 0.01 | 0.78 | 0.44 | 1.41 | 0.28 |
| 12201 | 0 | 115599 | DEGGFTCFRRDH                                              | 2.48 | 0.01 | 0.78 | 0.44 | 1.13 | 0.28 |
| 12202 | 0 | 115599 | DEGGFTCFRRDH                                              | 2.48 | 0.01 | 0.78 | 0.44 | 1.13 | 0.28 |
| 12203 | 0 | 115599 | DEGGFTCFRRDH                                              | 2.48 | 0.01 | 0.78 | 0.44 | 1.13 | 0.28 |
| 12204 | 0 | 115599 | DEGGFTCFRRDH                                              | 2.48 | 0.01 | 0.78 | 0.44 | 1.41 | 0.28 |
| 12205 | 0 | 112472 | DEGGYTCFFRDHSYQ                                           | 2.65 | 0.01 | 1.75 | 3.22 | 0.22 | 0.28 |
| 12206 | 0 | 112472 | DEGGYTCFFRDHSYQ                                           | 2.65 | 0.01 | 1.75 | 3.22 | 0.22 | 0.28 |
| 12207 | 0 | 112472 | DEGGYTCFFRDHSYQ                                           | 2.65 | 0.01 | 1.75 | 3.22 | 2.60 | 1.75 |
| 12208 | 0 | 112472 | DEGGYTCFFRDHSYQ                                           | 2.65 | 0.01 | 1.75 | 3.22 | 0.22 | 0.28 |
| 12209 | 0 | 112472 | DEGGYTCFFRDHSYQ                                           | 2.65 | 0.01 | 1.75 | 3.22 | 0.22 | 0.28 |
| 12210 | 0 | 112472 | DEGGYTCFFRDHSYQ                                           | 2.65 | 0.01 | 1.75 | 2.25 | 0.22 | 0.28 |
| 12211 | 0 | 112472 | DEGGYTCFFRDHSYQ                                           | 2.65 | 0.01 | 1.75 | 2.25 | 0.22 | 1.75 |
| 12212 | 0 | 99142  | DEGHALRIPSGFISY                                           | 2.64 | 0.01 | 2.16 | 0.44 | 1.23 | 1.48 |
| 12213 | 0 | 7998   | DEGKQSLTK                                                 | 2.21 | 0.01 | 2.04 | 1.12 | 0.22 | 0.28 |
| 12214 | 0 | 266492 | DEGLLPVDNDGDES                                            | 2.70 | 0.01 | 1.61 | 0.44 | 0.85 | 1.28 |
| 12215 | 0 | 8000   | DEGPKDITDSLPA<br>MW<br>RDKA                               | 2.94 | 0.01 | 3.78 | 2.42 | 0.22 | 0.28 |
| 12216 | 0 | 8000   | DEGPKDITDSLPA<br>MW<br>RDKA                               | 2.94 | 0.01 | 3.78 | 2.42 | 0.22 | 1.34 |
| 12217 | 0 | 188085 | DEGRNNGVDH                                                | 2.33 | 0.01 | 2.92 | 1.81 | 0.22 | 0.85 |
| 12218 | 0 | 266523 | DEHGVDPTGT<br>YQ<br>GDS                                   | 2.69 | 0.01 | 1.61 | 0.44 | 0.85 | 1.28 |
| 12219 | 0 | 8004   | DEHLMCDIEGT<br>GQH                                        | 2.62 | 0.01 | 3.34 | 1.12 | 0.22 | 0.85 |



|       |   |        |                                |      |      |      |      |      |      |
|-------|---|--------|--------------------------------|------|------|------|------|------|------|
| 12220 | 0 | 161607 | DEHQDKIYPSFQ                   | 2.46 | 0.01 | 0.78 | 0.44 | 1.23 | 0.85 |
| 12221 | 0 | 266533 | DEHSDFLTMGSKMIA                | 2.65 | 0.01 | 1.61 | 0.44 | 0.85 | 1.28 |
| 12222 | 0 | 188656 | DEIDGPAGQAEPD                  | 2.60 | 0.01 | 1.86 | 0.68 | 0.22 | 0.28 |
| 12223 | 0 | 188656 | DEIDGPAGQAEPD                  | 2.60 | 0.01 | 1.86 | 0.68 | 0.22 | 0.28 |
| 12224 | 0 | 188656 | DEIDGPAGQAEPD                  | 2.60 | 0.01 | 1.86 | 0.68 | 0.22 | 0.28 |
| 12225 | 0 | 188656 | DEIDGPAGQAEPD                  | 2.60 | 0.01 | 1.86 | 0.68 | 0.22 | 2.75 |
| 12226 | 0 | 188656 | DEIDGPAGQAEPD                  | 2.60 | 0.01 | 1.86 | 0.68 | 0.22 | 2.75 |
| 12227 | 0 | 188656 | DEIDGPAGQAEPD                  | 2.60 | 0.01 | 1.86 | 0.68 | 0.22 | 2.75 |
| 12228 | 0 | 188656 | DEIDGPAGQAEPD                  | 2.60 | 0.01 | 1.86 | 0.68 | 0.22 | 2.75 |
| 12229 | 0 | 188656 | DEIDGPAGQAEPD                  | 2.60 | 0.01 | 1.86 | 0.68 | 0.22 | 2.75 |
| 12230 | 0 | 188656 | DEIDGPAGQAEPD                  | 2.60 | 0.01 | 1.86 | 0.68 | 0.22 | 2.75 |
| 12231 | 0 | 188656 | DEIDGPAGQAEPD                  | 2.60 | 0.01 | 1.86 | 0.68 | 0.22 | 0.28 |
| 12232 | 0 | 108848 | DEIDGVNH                       | 2.13 | 0.01 | 3.11 | 0.68 | 0.22 | 0.28 |
| 12233 | 0 | 108848 | DEIDGVNH                       | 2.13 | 0.01 | 3.11 | 0.68 | 0.22 | 1.48 |
| 12234 | 0 | 108848 | DEIDGVNH                       | 2.13 | 0.01 | 3.11 | 0.68 | 0.22 | 0.28 |
| 12235 | 0 | 108848 | DEIDGVNH                       | 2.13 | 0.01 | 3.11 | 0.68 | 0.22 | 2.02 |
| 12236 | 0 | 8010   | DEIDKYIQ                       | 2.15 | 0.01 | 3.63 | 1.15 | 0.22 | 1.34 |
| 12237 | 0 | 8010   | DEIDKYIQ                       | 2.15 | 0.01 | 3.63 | 1.15 | 0.22 | 1.34 |
| 12238 | 0 | 8011   | DEIDRMVNDAEKYKAED<br>EENRKRIEA | 3.24 | 0.01 | 1.66 | 1.12 | 0.22 | 2.02 |
| 12239 | 0 | 8011   | DEIDRMVNDAEKYKAED<br>EENRKRIEA | 3.24 | 0.01 | 1.66 | 3.97 | 0.22 | 0.28 |
| 12240 | 0 | 8011   | DEIDRMVNDAEKYKAED<br>EENRKRIEA | 3.24 | 0.01 | 1.66 | 1.12 | 0.22 | 0.28 |
| 12241 | 0 | 8011   | DEIDRMVNDAEKYKAED<br>EENRKRIEA | 3.24 | 0.01 | 1.66 | 1.12 | 0.22 | 0.28 |
| 12242 | 0 | 8011   | DEIDRMVNDAEKYKAED<br>EENRKRIEA | 3.24 | 0.01 | 1.66 | 2.63 | 0.22 | 0.28 |
| 12243 | 0 | 8011   | DEIDRMVNDAEKYKAED<br>EENRKRIEA | 3.24 | 0.01 | 1.66 | 2.63 | 0.22 | 0.28 |
| 12244 | 0 | 134339 | DEIIGFGQELKNPQEETL<br>QAFD     | 3.04 | 0.01 | 0.78 | 0.44 | 1.13 | 1.34 |
| 12245 | 0 | 512634 | DEINYDDKGKEVITK                | 2.70 | 0.01 | 2.24 | 0.44 | 1.41 | 1.28 |
| 12246 | 0 | 108849 | DEIPEPAVPCGG                   | 2.47 | 0.01 | 0.90 | 1.15 | 0.22 | 1.39 |
| 12247 | 0 | 434594 | DEIQNMKEEMARHLRE<br>Y          | 2.77 | 4.93 | 0.78 | 0.44 | 1.13 | 0.28 |
| 12248 | 0 | 8035   | DEIVSYNTKNKPLN                 | 2.59 | 0.01 | 2.95 | 3.38 | 0.22 | 0.28 |
| 12249 | 0 | 187290 | DEKAQRRKQWWNES<br>K            | 2.75 | 0.01 | 2.59 | 0.44 | 1.74 | 0.28 |
| 12250 | 0 | 187290 | DEKAQRRKQWWNES<br>K            | 2.75 | 0.01 | 2.59 | 1.12 | 0.22 | 1.34 |
| 12251 | 0 | 266573 | DEKEDNDDDDDEPE                 | 2.72 | 0.01 | 1.61 | 0.44 | 0.85 | 1.28 |
| 12252 | 0 | 8040   | DEKELKKTLPKGKTS                | 2.70 | 0.01 | 3.37 | 0.68 | 0.22 | 0.85 |
| 12253 | 0 | 266582 | DEKEVEKIDSSENSKL               | 2.72 | 0.01 | 1.61 | 0.44 | 0.85 | 1.28 |
| 12254 | 0 | 8043   | DEKGIMRTGLISFENNN<br>YYFNENGE  | 3.15 | 0.01 | 3.04 | 2.75 | 0.22 | 0.28 |

|       |   |        |                                                    |      |      |      |      |      |      |
|-------|---|--------|----------------------------------------------------|------|------|------|------|------|------|
| 12255 | 0 | 8043   | DEKGIMRTGLISFENNN<br>YYFNENGE                      | 3.15 | 0.01 | 3.04 | 2.75 | 0.22 | 0.28 |
| 12256 | 0 | 8043   | DEKGIMRTGLISFENNN<br>YYFNENGE                      | 3.15 | 0.01 | 3.04 | 2.75 | 0.22 | 0.28 |
| 12257 | 0 | 8044   | DEKINDYLEEIKNEQNKI<br>DKTIDDI                      | 3.21 | 0.01 | 1.66 | 0.44 | 1.74 | 0.28 |
| 12258 | 0 | 8044   | DEKINDYLEEIKNEQNKI<br>DKTIDDI                      | 3.21 | 0.01 | 1.66 | 0.44 | 1.74 | 0.28 |
| 12259 | 0 | 118289 | DEKKEESEESDDDMG                                    | 2.72 | 0.01 | 0.78 | 0.44 | 1.13 | 0.85 |
| 12260 | 0 | 144609 | DEKLRDYIWN                                         | 2.30 | 0.01 | 0.78 | 0.44 | 1.13 | 0.28 |
| 12261 | 0 | 423241 | DEKNIFTPIKKPGTS                                    | 2.67 | 0.01 | 2.51 | 0.44 | 2.35 | 1.28 |
| 12262 | 0 | 8050   | DEKTS DGRSVKSVVTKD<br>SES                          | 3.00 | 0.01 | 2.93 | 0.68 | 0.22 | 0.28 |
| 12263 | 0 | 8050   | DEKTS DGRSVKSVVTKD<br>SES                          | 3.00 | 0.01 | 2.93 | 1.81 | 0.22 | 0.28 |
| 12264 | 0 | 8050   | DEKTS DGRSVKSVVTKD<br>SES                          | 3.00 | 0.01 | 2.93 | 2.69 | 0.22 | 0.28 |
| 12265 | 0 | 94485  | DELA KIAQT WANQCDF<br>NHDD                         | 2.92 | 0.01 | 3.65 | 0.68 | 0.22 | 0.28 |
| 12266 | 0 | 94485  | DELA KIAQT WANQCDF<br>NHDD                         | 2.92 | 0.01 | 3.65 | 0.68 | 0.22 | 0.28 |
| 12267 | 0 | 107783 | DELDEWNDVDMRDPC<br>KYKGV LIPRRRRLC                 | 3.32 | 0.01 | 0.90 | 1.12 | 0.22 | 0.28 |
| 12268 | 0 | 8061   | DELDVVEGMQFDRGYL<br>S                              | 2.79 | 0.01 | 2.93 | 0.44 | 1.59 | 0.28 |
| 12269 | 0 | 8066   | DELEAETQNVYAA                                      | 2.53 | 0.01 | 1.66 | 2.63 | 0.22 | 0.28 |
| 12270 | 0 | 8066   | DELEAETQNVYAA                                      | 2.53 | 0.01 | 1.66 | 2.63 | 0.22 | 0.28 |
| 12271 | 0 | 8066   | DELEAETQNVYAA                                      | 2.53 | 0.01 | 1.66 | 2.74 | 0.22 | 0.28 |
| 12272 | 0 | 8066   | DELEAETQNVYAA                                      | 2.53 | 0.01 | 1.66 | 1.20 | 0.22 | 0.28 |
| 12273 | 0 | 8066   | DELEAETQNVYAA                                      | 2.53 | 0.01 | 3.81 | 2.63 | 0.22 | 0.28 |
| 12274 | 0 | 8066   | DELEAETQNVYAA                                      | 2.53 | 0.01 | 3.81 | 2.63 | 0.22 | 0.85 |
| 12275 | 0 | 8067   | DELEAETQNVYAAPNA<br>NPYSLFQKEKMVLPNAN<br>PPANKKNAG | 3.68 | 0.01 | 0.90 | 1.15 | 0.22 | 3.13 |
| 12276 | 0 | 128406 | DELERIRRSILPYGDS                                   | 2.76 | 0.01 | 0.78 | 0.44 | 1.13 | 0.85 |
| 12277 | 0 | 8070   | DELFNELLNSVDVNGEV<br>KENILEESQ                     | 3.23 | 0.01 | 1.66 | 2.74 | 0.22 | 0.28 |
| 12278 | 0 | 8070   | DELFNELLNSVDVNGEV<br>KENILEESQ                     | 3.23 | 0.01 | 1.66 | 3.67 | 0.22 | 0.28 |
| 12279 | 0 | 8071   | DELGFMVPPGLSSE                                     | 2.61 | 0.01 | 2.71 | 2.13 | 0.22 | 0.85 |
| 12280 | 0 | 8076   | DELKDQMEED                                         | 2.35 | 0.01 | 2.71 | 0.68 | 0.22 | 0.28 |
| 12281 | 0 | 8076   | DELKDQMEED                                         | 2.35 | 0.01 | 2.71 | 2.78 | 0.22 | 0.28 |
| 12282 | 0 | 8076   | DELKDQMEED                                         | 2.35 | 0.01 | 2.71 | 0.68 | 0.22 | 0.85 |
| 12283 | 0 | 8076   | DELKDQMEED                                         | 2.35 | 0.01 | 2.71 | 0.68 | 0.22 | 1.48 |
| 12284 | 0 | 115704 | DELQDKIHFPF                                        | 2.30 | 0.01 | 1.60 | 0.44 | 1.23 | 0.85 |
| 12285 | 0 | 115704 | DELQDKIHFPF                                        | 2.30 | 0.01 | 1.60 | 0.44 | 1.23 | 0.85 |
| 12286 | 0 | 8083   | DELQDKIHFPFAQ                                      | 2.46 | 0.01 | 1.60 | 0.44 | 1.23 | 0.85 |

|       |   |        |                              |      |      |      |      |      |      |
|-------|---|--------|------------------------------|------|------|------|------|------|------|
| 12287 | 0 | 8083   | DELQDKIHPFAQ                 | 2.46 | 0.01 | 1.60 | 0.44 | 1.23 | 0.85 |
| 12288 | 0 | 115205 | DELQDKIHPFAQTQSLV<br>YPF     | 2.92 | 0.01 | 1.60 | 0.44 | 1.23 | 2.51 |
| 12289 | 0 | 266685 | DELSFSDFLLMTRE               | 2.70 | 0.01 | 1.61 | 0.44 | 0.85 | 1.28 |
| 12290 | 0 | 225711 | DELSKNKVSVCCLVK              | 2.70 | 0.01 | 3.28 | 0.44 | 0.22 | 0.85 |
| 12291 | 0 | 108851 | DELTKNQ                      | 1.99 | 0.01 | 0.78 | 0.44 | 1.13 | 0.28 |
| 12292 | 0 | 512653 | DEMATQAATVAVTPEE<br>TAVA     | 2.99 | 4.23 | 2.40 | 0.44 | 1.59 | 1.28 |
| 12293 | 0 | 512654 | DEMATQAATVAVTPEE<br>TAVA     | 2.99 | 4.08 | 2.40 | 0.44 | 1.59 | 1.28 |
| 12294 | 0 | 512652 | DEMATQAATVAVTPEE<br>TAVA     | 2.99 | 4.23 | 2.40 | 0.44 | 1.59 | 1.28 |
| 12295 | 0 | 512655 | DEMATQAATVAVTPEE<br>TAVA     | 2.99 | 0.01 | 2.40 | 0.44 | 1.59 | 1.28 |
| 12296 | 0 | 8095   | DEMEECSQHLPYIEQG<br>MMLA     | 2.92 | 0.01 | 1.72 | 0.44 | 0.85 | 0.28 |
| 12297 | 0 | 150833 | DEMKVIDDVQQLEK               | 2.64 | 0.01 | 2.75 | 0.44 | 0.85 | 0.28 |
| 12298 | 0 | 103102 | DEMTRVIWKLKIDML              | 2.69 | 0.01 | 2.04 | 0.44 | 0.85 | 1.28 |
| 12299 | 0 | 240866 | DEMTSLSEYVSRMKETQ<br>KSIYYIT | 3.13 | 3.40 | 0.78 | 0.44 | 1.13 | 0.28 |
| 12300 | 0 | 8101   | DENANANNA                    | 2.26 | 0.01 | 3.37 | 1.12 | 0.22 | 0.28 |
| 12301 | 0 | 187046 | DENGIVLD                     | 2.13 | 0.01 | 3.53 | 0.68 | 0.22 | 0.28 |
| 12302 | 0 | 187046 | DENGIVLD                     | 2.13 | 0.01 | 3.53 | 0.68 | 0.22 | 0.85 |
| 12303 | 0 | 187046 | DENGIVLD                     | 2.13 | 0.01 | 3.53 | 0.68 | 0.22 | 0.28 |
| 12304 | 0 | 187046 | DENGIVLD                     | 2.13 | 0.01 | 3.53 | 0.68 | 0.22 | 0.28 |
| 12305 | 0 | 227751 | DENNPFFYFRSSNSFQT            | 2.74 | 0.01 | 2.72 | 1.20 | 1.59 | 0.28 |
| 12306 | 0 | 8112   | DENPVVHFF                    | 2.20 | 0.01 | 1.75 | 4.93 | 0.22 | 2.12 |
| 12307 | 0 | 114764 | DENPVVHFFK                   | 2.29 | 0.01 | 0.78 | 0.68 | 0.22 | 1.57 |
| 12308 | 0 | 114764 | DENPVVHFFK                   | 2.29 | 0.01 | 0.78 | 0.68 | 0.22 | 1.57 |
| 12309 | 0 | 114764 | DENPVVHFFK                   | 2.29 | 0.01 | 0.78 | 0.68 | 0.22 | 1.57 |
| 12310 | 0 | 113321 | DENPVVHFFKNIVTPRT            | 2.78 | 0.01 | 0.78 | 0.44 | 1.13 | 1.75 |
| 12311 | 0 | 113321 | DENPVVHFFKNIVTPRT            | 2.78 | 0.01 | 0.78 | 0.44 | 1.13 | 1.57 |
| 12312 | 0 | 113321 | DENPVVHFFKNIVTPRT            | 2.78 | 0.01 | 0.78 | 0.44 | 1.13 | 1.57 |
| 12313 | 0 | 113321 | DENPVVHFFKNIVTPRT            | 2.78 | 0.01 | 0.78 | 0.44 | 0.22 | 1.75 |
| 12314 | 0 | 174073 | DENSKQKKWDPLKKE              | 2.69 | 0.01 | 3.36 | 0.44 | 1.23 | 0.85 |
| 12315 | 0 | 174073 | DENSKQKKWDPLKKE              | 2.69 | 0.01 | 3.36 | 0.44 | 1.23 | 0.85 |
| 12316 | 0 | 174073 | DENSKQKKWDPLKKE              | 2.69 | 0.01 | 3.36 | 0.44 | 1.23 | 0.85 |
| 12317 | 0 | 174073 | DENSKQKKWDPLKKE              | 2.69 | 0.01 | 3.36 | 0.44 | 1.23 | 0.85 |
| 12318 | 0 | 8119   | DEPAGE                       | 1.90 | 0.01 | 2.69 | 0.44 | 0.85 | 0.28 |
| 12319 | 0 | 8119   | DEPAGE                       | 1.90 | 0.01 | 2.69 | 1.12 | 0.22 | 0.28 |
| 12320 | 0 | 8119   | DEPAGE                       | 1.90 | 0.01 | 2.69 | 0.44 | 0.85 | 0.85 |
| 12321 | 0 | 8119   | DEPAGE                       | 1.90 | 0.01 | 2.69 | 1.81 | 0.22 | 0.85 |

|       |   |        |                                   |      |      |      |      |      |      |
|-------|---|--------|-----------------------------------|------|------|------|------|------|------|
| 12322 | 0 | 103842 | DEPNGAIRFTMGYQH                   | 2.60 | 0.01 | 3.00 | 2.13 | 0.22 | 0.28 |
| 12323 | 0 | 181574 | DEPNNKYCSGDGHDC                   | 2.68 | 0.01 | 1.66 | 2.36 | 0.22 | 1.28 |
| 12324 | 0 | 140837 | DEPPQSPWDRVKDLA                   | 2.67 | 0.01 | 0.78 | 0.68 | 0.22 | 0.28 |
| 12325 | 0 | 140838 | DEPPQSPWDRVKDLAT<br>VYV           | 2.88 | 0.01 | 0.78 | 0.68 | 0.22 | 0.28 |
| 12326 | 0 | 8127   | DEPTLLYVLFEVFDV                   | 2.72 | 0.01 | 3.38 | 0.44 | 1.74 | 0.85 |
| 12327 | 0 | 8130   | DEQDYQIR                          | 2.15 | 0.01 | 3.59 | 2.49 | 0.22 | 0.85 |
| 12328 | 0 | 8130   | DEQDYQIR                          | 2.15 | 0.01 | 3.59 | 1.15 | 0.22 | 0.85 |
| 12329 | 0 | 8131   | DEQEQQEEQEQQEEQE<br>Q             | 2.87 | 0.01 | 3.36 | 0.44 | 2.82 | 0.28 |
| 12330 | 0 | 8132   | DEQFIPK                           | 1.99 | 3.93 | 2.58 | 4.03 | 0.22 | 1.34 |
| 12331 | 0 | 8132   | DEQFIPK                           | 1.99 | 3.93 | 2.58 | 0.68 | 0.22 | 1.34 |
| 12332 | 0 | 8132   | DEQFIPK                           | 1.99 | 3.93 | 2.58 | 4.03 | 0.22 | 1.34 |
| 12333 | 0 | 8132   | DEQFIPK                           | 1.99 | 3.93 | 2.58 | 0.68 | 0.22 | 1.34 |
| 12334 | 0 | 8132   | DEQFIPK                           | 1.99 | 3.93 | 2.58 | 4.03 | 0.22 | 0.85 |
| 12335 | 0 | 8132   | DEQFIPK                           | 1.99 | 3.93 | 2.58 | 0.68 | 0.22 | 0.85 |
| 12336 | 0 | 8132   | DEQFIPK                           | 1.99 | 3.93 | 2.58 | 4.03 | 0.22 | 0.85 |
| 12337 | 0 | 8132   | DEQFIPK                           | 1.99 | 3.93 | 2.58 | 0.68 | 0.22 | 0.85 |
| 12338 | 0 | 8132   | DEQFIPK                           | 1.99 | 3.93 | 2.58 | 0.68 | 0.22 | 1.27 |
| 12339 | 0 | 8132   | DEQFIPK                           | 1.99 | 3.93 | 2.58 | 0.68 | 0.22 | 1.27 |
| 12340 | 0 | 8133   | DEQFIPK                           | 1.99 | 0.01 | 3.61 | 0.68 | 0.22 | 1.27 |
| 12341 | 0 | 8133   | DEQFIPK                           | 1.99 | 0.01 | 3.61 | 0.68 | 0.22 | 3.13 |
| 12342 | 0 | 8133   | DEQFIPK                           | 1.99 | 0.01 | 3.61 | 0.68 | 0.22 | 0.28 |
| 12343 | 0 | 187775 | DEQIPSHPPRRPSHGK                  | 2.74 | 0.01 | 2.72 | 2.13 | 2.39 | 1.27 |
| 12344 | 0 | 8139   | DEQLERKIHRYQQ                     | 2.53 | 0.01 | 3.34 | 1.12 | 0.22 | 0.85 |
| 12345 | 0 | 119790 | DEQNCSMKLGTWYDYG<br>SVVAINPESDQPD | 3.31 | 0.01 | 0.78 | 1.20 | 0.22 | 2.02 |
| 12346 | 0 | 119790 | DEQNCSMKLGTWYDYG<br>SVVAINPESDQPD | 3.31 | 0.01 | 0.78 | 1.20 | 0.22 | 2.02 |
| 12347 | 0 | 8143   | DEREECKC                          | 2.15 | 0.01 | 1.66 | 1.15 | 0.22 | 0.28 |
| 12348 | 0 | 8144   | DEREVSVP                          | 2.14 | 0.01 | 2.68 | 0.44 | 1.59 | 0.28 |
| 12349 | 0 | 140839 | DERGTPEYNIALGQRRRA<br>DAV         | 2.93 | 0.01 | 3.01 | 1.12 | 0.22 | 0.28 |
| 12350 | 0 | 140839 | DERGTPEYNIALGQRRRA<br>DAV         | 2.93 | 0.01 | 3.01 | 0.68 | 0.22 | 0.85 |
| 12351 | 0 | 226153 | DERILSILRHQNLL                    | 2.61 | 0.01 | 0.78 | 1.20 | 0.22 | 1.48 |
| 12352 | 0 | 186832 | DERLIKQLKSEDNRGGIV<br>KVKD        | 3.06 | 0.01 | 3.12 | 2.37 | 0.22 | 2.66 |
| 12353 | 0 | 167879 | DERQQEPEEPVSQRAS                  | 2.77 | 0.01 | 2.75 | 0.44 | 1.59 | 2.51 |
| 12354 | 0 | 167879 | DERQQEPEEPVSQRAS                  | 2.77 | 0.01 | 2.75 | 0.44 | 0.85 | 2.51 |

|       |   |        |                                                                                    |      |      |      |      |      |      |
|-------|---|--------|------------------------------------------------------------------------------------|------|------|------|------|------|------|
| 12355 | 0 | 167879 | DERQQEPEEPVSQRAS                                                                   | 2.77 | 0.01 | 2.75 | 0.44 | 0.85 | 2.51 |
| 12356 | 0 | 167879 | DERQQEPEEPVSQRAS                                                                   | 2.77 | 0.01 | 2.75 | 0.44 | 0.85 | 2.51 |
| 12357 | 0 | 8156   | DERTLTKE                                                                           | 2.14 | 0.01 | 3.18 | 1.12 | 0.22 | 0.28 |
| 12358 | 0 | 225622 | DERYRLPTTSIPIHY                                                                    | 2.67 | 0.01 | 3.57 | 2.75 | 0.22 | 0.28 |
| 12359 | 0 | 225622 | DERYRLPTTSIPIHY                                                                    | 2.67 | 0.01 | 3.57 | 0.68 | 0.22 | 0.28 |
| 12360 | 0 | 225622 | DERYRLPTTSIPIHY                                                                    | 2.67 | 0.01 | 3.57 | 0.68 | 0.22 | 0.28 |
| 12361 | 0 | 225622 | DERYRLPTTSIPIHY                                                                    | 2.67 | 0.01 | 3.57 | 0.68 | 0.22 | 0.85 |
| 12362 | 0 | 225622 | DERYRLPTTSIPIHY                                                                    | 2.67 | 0.01 | 3.85 | 0.68 | 0.22 | 0.28 |
| 12363 | 0 | 225622 | DERYRLPTTSIPIHY                                                                    | 2.67 | 0.01 | 3.85 | 0.68 | 0.22 | 0.28 |
| 12364 | 0 | 8159   | DESAKGPNLTEISKKITDS<br>NA<br>DESAPIPIDTSSPSRVQS                                    | 3.01 | 0.01 | 4.63 | 0.68 | 0.22 | 0.85 |
| 12365 | 0 | 8160   | RGVEDGGRSPKSSMNE<br>EGASR                                                          | 3.64 | 0.01 | 3.93 | 0.44 | 0.85 | 0.28 |
| 12366 | 0 | 8164   | DESERMRKVLENRSL                                                                    | 2.70 | 0.01 | 3.15 | 0.44 | 1.23 | 0.85 |
| 12367 | 0 | 8164   | DESERMRKVLENRSL                                                                    | 2.70 | 0.01 | 2.36 | 0.44 | 1.23 | 1.28 |
| 12368 | 0 | 8164   | DESERMRKVLENRSL                                                                    | 2.70 | 0.01 | 2.36 | 0.44 | 1.23 | 1.27 |
| 12369 | 0 | 8164   | DESERMRKVLENRSL                                                                    | 2.70 | 0.01 | 2.36 | 0.44 | 1.23 | 1.28 |
| 12370 | 0 | 423242 | DESGRPRRIANRIGD                                                                    | 2.70 | 0.01 | 2.51 | 0.44 | 2.35 | 1.28 |
| 12371 | 0 | 152446 | DESVVKEAHR                                                                         | 2.30 | 0.01 | 2.18 | 2.16 | 0.22 | 0.28 |
|       |   |        | DESVVKEAHREVINSSTE<br>GLLLNIDKDIRKILSGYIVE<br>IEDTEGLKEVINDRYDML                   |      |      |      |      |      |      |
| 12372 | 0 | 8176   | NISSLRQDGKTFIDFKKY<br>NDKLPLYISNPYKVV<br>YAVTKENTIINPSENGDT<br>STNGIKKILIFSCKGYEIG | 4.82 | 0.01 | 2.18 | 4.23 | 0.22 | 0.85 |
|       |   |        | DESVVKEAHREVINSSTE<br>GLLLNIDKDIRKILSGYIVE<br>IEDTEGLKEVINDRYDML                   |      |      |      |      |      |      |
| 12373 | 0 | 8176   | NISSLRQDGKTFIDFKKY<br>NDKLPLYISNPYKVV<br>YAVTKENTIINPSENGDT<br>STNGIKKILIFSCKGYEIG | 4.82 | 0.01 | 2.18 | 4.23 | 0.22 | 1.75 |
| 12374 | 0 | 151609 | DETPMRGETRKV                                                                       | 2.48 | 0.01 | 0.90 | 0.44 | 1.41 | 0.28 |
| 12375 | 0 | 151609 | DETPMRGETRKV                                                                       | 2.48 | 0.01 | 0.90 | 0.44 | 1.41 | 0.28 |
| 12376 | 0 | 151609 | DETPMRGETRKV                                                                       | 2.48 | 0.01 | 0.90 | 0.44 | 1.41 | 0.28 |
| 12377 | 0 | 151609 | DETPMRGETRKV                                                                       | 2.48 | 0.01 | 0.90 | 0.44 | 1.41 | 0.28 |
| 12378 | 0 | 151609 | DETPMRGETRKV                                                                       | 2.48 | 0.01 | 0.90 | 0.44 | 1.41 | 1.66 |
| 12379 | 0 | 151609 | DETPMRGETRKV                                                                       | 2.48 | 0.01 | 0.90 | 0.44 | 1.41 | 1.66 |
| 12380 | 0 | 151609 | DETPMRGETRKV                                                                       | 2.48 | 0.01 | 0.90 | 0.44 | 1.41 | 1.66 |
| 12381 | 0 | 151609 | DETPMRGETRKV                                                                       | 2.48 | 0.01 | 0.90 | 0.44 | 1.41 | 1.34 |
| 12382 | 0 | 151609 | DETPMRGETRKV                                                                       | 2.48 | 0.01 | 0.90 | 0.44 | 1.41 | 1.34 |

|       |   |        |                                                   |      |      |      |      |      |      |
|-------|---|--------|---------------------------------------------------|------|------|------|------|------|------|
| 12383 | 0 | 151609 | DETPMRGETRKV                                      | 2.48 | 0.01 | 0.90 | 0.44 | 1.41 | 1.27 |
| 12384 | 0 | 266942 | DETQVQQHQREHPA                                    | 2.70 | 0.01 | 1.61 | 0.44 | 0.85 | 1.28 |
| 12385 | 0 | 187047 | DETTLVRS                                          | 2.11 | 0.01 | 3.53 | 0.68 | 0.22 | 0.28 |
| 12386 | 0 | 187047 | DETTLVRS                                          | 2.11 | 0.01 | 3.53 | 0.68 | 0.22 | 0.85 |
| 12387 | 0 | 187047 | DETTLVRS                                          | 2.11 | 0.01 | 3.53 | 0.68 | 0.22 | 0.28 |
| 12388 | 0 | 187047 | DETTLVRS                                          | 2.11 | 0.01 | 3.53 | 0.68 | 0.22 | 0.28 |
| 12389 | 0 | 187047 | DETTLVRS                                          | 2.11 | 0.01 | 3.53 | 0.68 | 0.22 | 0.28 |
| 12390 | 0 | 227084 | DETVPQSVREAFNNL                                   | 2.63 | 0.01 | 2.97 | 0.44 | 1.59 | 0.28 |
| 12391 | 0 | 227084 | DETVPQSVREAFNNL                                   | 2.63 | 0.01 | 2.97 | 0.44 | 0.85 | 0.28 |
| 12392 | 0 | 8188   | DEVARKLAMVEADLE                                   | 2.72 | 0.01 | 3.15 | 0.44 | 1.23 | 0.85 |
| 12393 | 0 | 8188   | DEVARKLAMVEADLE                                   | 2.72 | 0.01 | 2.36 | 0.44 | 1.23 | 1.28 |
| 12394 | 0 | 8188   | DEVARKLAMVEADLE                                   | 2.72 | 0.01 | 2.36 | 0.44 | 1.23 | 1.27 |
| 12395 | 0 | 8188   | DEVARKLAMVEADLE                                   | 2.72 | 0.01 | 2.36 | 0.44 | 1.23 | 1.28 |
| 12396 | 0 | 233160 | DEVDKASA                                          | 2.15 | 0.01 | 3.61 | 2.00 | 0.85 | 0.85 |
| 12397 | 0 | 266958 | DEVEEDEKEDNDDDD                                   | 2.72 | 0.01 | 1.61 | 0.44 | 0.85 | 1.28 |
| 12398 | 0 | 8195   | DEVGLRTPQRFTDLV                                   | 2.69 | 0.01 | 2.72 | 0.44 | 0.85 | 0.28 |
| 12399 | 0 | 115141 | DEVGTFKERIQWVGDP<br>RWKDGSI                       | 3.17 | 0.01 | 0.78 | 0.44 | 1.13 | 0.28 |
| 12400 | 0 | 115141 | DEVGTFKERIQWVGDP<br>RWKDGSI                       | 3.17 | 0.01 | 0.78 | 0.44 | 1.41 | 0.28 |
| 12401 | 0 | 108852 | DEVPAHVDGELN<br>DEVQRMMAEIDTDGD                   | 2.48 | 0.01 | 0.90 | 1.15 | 0.22 | 1.39 |
| 12402 | 0 | 497870 | GFIDFNEFISFCNANPGL<br>MKDVAKVF<br>DEVQRMMAEIDTDGD | 3.65 | 0.01 | 2.53 | 0.44 | 1.23 | 1.27 |
| 12403 | 0 | 497870 | GFIDFNEFISFCNANPGL<br>MKDVAKVF<br>DEVQRMMAEIDTDGD | 3.65 | 0.01 | 2.53 | 0.44 | 1.23 | 1.27 |
| 12404 | 0 | 497870 | GFIDFNEFISFCNANPGL<br>MKDVAKVF<br>DEVQRMMAEIDTDGD | 3.65 | 0.01 | 2.53 | 0.44 | 1.23 | 0.85 |
| 12405 | 0 | 497870 | GFIDFNEFISFCNANPGL<br>MKDVAKVF<br>DEVQRMMAEIDTDGD | 3.65 | 0.01 | 2.53 | 0.44 | 1.23 | 2.35 |
| 12406 | 0 | 497870 | GFIDFNEFISFCNANPGL<br>MKDVAKVF<br>DEVQRMMAEIDTDGD | 3.65 | 0.01 | 2.53 | 0.44 | 1.23 | 2.35 |
| 12407 | 0 | 497870 | GFIDFNEFISFCNANPGL<br>MKDVAKVF<br>DEVQRMMAEIDTDGD | 3.65 | 0.01 | 2.53 | 0.44 | 1.23 | 2.35 |
| 12408 | 0 | 497870 | GFIDFNEFISFCNANPGL<br>MKDVAKVF<br>DEVQRMMAEIDTDGD | 3.65 | 0.01 | 2.53 | 0.44 | 1.23 | 2.35 |
| 12409 | 0 | 497870 | GFIDFNEFISFCNANPGL<br>MKDVAKVF                    | 3.65 | 0.01 | 2.53 | 0.44 | 1.23 | 2.35 |

|       |   |        |                                |      |      |      |      |      |      |
|-------|---|--------|--------------------------------|------|------|------|------|------|------|
|       |   |        | DEVQRMMAEIDTDGD                |      |      |      |      |      |      |
| 12410 | 0 | 497870 | GFIDFNEFISFCNANPGL<br>MKDVAKVF | 3.65 | 0.01 | 2.53 | 0.44 | 1.23 | 2.35 |
|       |   |        | DEVQRMMAEIDTDGD                |      |      |      |      |      |      |
| 12411 | 0 | 497870 | GFIDFNEFISFCNANPGL<br>MKDVAKVF | 3.65 | 0.01 | 2.53 | 1.12 | 0.22 | 2.35 |
|       |   |        | DEVQRMMAEIDTDGD                |      |      |      |      |      |      |
| 12412 | 0 | 497870 | GFIDFNEFISFCNANPGL<br>MKDVAKVF | 3.65 | 0.01 | 2.53 | 1.12 | 0.22 | 2.35 |
|       |   |        | DEVQRMMAEIDTDGD                |      |      |      |      |      |      |
| 12413 | 0 | 497870 | GFIDFNEFISFCNANPGL<br>MKDVAKVF | 3.65 | 0.01 | 2.53 | 0.44 | 1.23 | 1.66 |
|       |   |        | DEVQRMMAEIDTDGD                |      |      |      |      |      |      |
| 12414 | 0 | 497870 | GFIDFNEFISFCNANPGL<br>MKDVAKVF | 3.65 | 0.01 | 2.53 | 0.44 | 1.23 | 1.66 |
|       |   |        | DEVQRMMAEIDTDGD                |      |      |      |      |      |      |
| 12415 | 0 | 497870 | GFIDFNEFISFCNANPGL<br>MKDVAKVF | 3.65 | 0.01 | 2.53 | 0.44 | 1.23 | 1.66 |
|       |   |        | DEVQRMMAEIDTDGD                |      |      |      |      |      |      |
| 12416 | 0 | 497870 | GFIDFNEFISFCNANPGL<br>MKDVAKVF | 3.65 | 0.01 | 2.53 | 0.44 | 1.23 | 1.66 |
|       |   |        | DEVQRMMAEIDTDGD                |      |      |      |      |      |      |
| 12417 | 0 | 497870 | GFIDFNEFISFCNANPGL<br>MKDVAKVF | 3.65 | 0.01 | 2.53 | 0.44 | 1.23 | 1.66 |
|       |   |        | DEVQRMMAEIDTDGD                |      |      |      |      |      |      |
| 12418 | 0 | 497870 | GFIDFNEFISFCNANPGL<br>MKDVAKVF | 3.65 | 0.01 | 2.53 | 0.44 | 1.23 | 1.66 |
|       |   |        | DEVQRMMAEIDTDGD                |      |      |      |      |      |      |
| 12419 | 0 | 497870 | GFIDFNEFISFCNANPGL<br>MKDVAKVF | 3.65 | 0.01 | 2.53 | 0.44 | 1.23 | 0.85 |
|       |   |        | DEVQRMMAEIDTDGD                |      |      |      |      |      |      |
| 12420 | 0 | 497870 | GFIDFNEFISFCNANPGL<br>MKDVAKVF | 3.65 | 0.01 | 2.53 | 0.44 | 1.23 | 0.85 |
|       |   |        | DEVQRMMAEIDTDGD                |      |      |      |      |      |      |
| 12421 | 0 | 497870 | GFIDFNEFISFCNANPGL<br>MKDVAKVF | 3.65 | 0.01 | 2.53 | 0.44 | 1.23 | 0.85 |
|       |   |        | DEVQRMMAEIDTDGD                |      |      |      |      |      |      |
| 12422 | 0 | 497870 | GFIDFNEFISFCNANPGL<br>MKDVAKVF | 3.65 | 0.01 | 2.53 | 0.44 | 1.23 | 0.85 |
|       |   |        | DEVQRMMAEIDTDGD                |      |      |      |      |      |      |
| 12423 | 0 | 497870 | GFIDFNEFISFCNANPGL<br>MKDVAKVF | 3.65 | 0.01 | 2.53 | 0.44 | 1.23 | 0.85 |
|       |   |        | DEVQRMMAEIDTDGD                |      |      |      |      |      |      |
| 12424 | 0 | 497870 | GFIDFNEFISFCNANPGL<br>MKDVAKVF | 3.65 | 0.01 | 2.53 | 0.44 | 1.23 | 0.85 |
|       |   |        | DEVQRMMAEIDTDGD                |      |      |      |      |      |      |
| 12425 | 0 | 8216   | DEWWKVIKKDVWNVIS<br>WVF        | 2.93 | 0.01 | 1.66 | 0.44 | 0.85 | 0.28 |

|       |   |        |                                     |      |      |      |      |      |      |
|-------|---|--------|-------------------------------------|------|------|------|------|------|------|
| 12426 | 0 | 104748 | DEYCSPDHNC                          | 2.32 | 0.01 | 2.60 | 0.44 | 1.23 | 0.85 |
| 12427 | 0 | 8217   | DEYCSPDHNCQSNCKDS<br>GEG            | 2.97 | 0.01 | 2.60 | 1.15 | 0.22 | 0.28 |
| 12428 | 0 | 8217   | DEYCSPDHNCQSNCKDS<br>GEG            | 2.97 | 0.01 | 2.60 | 1.15 | 0.22 | 0.85 |
| 12429 | 0 | 8218   | DEYDDAADAAGDRAP                     | 2.73 | 0.01 | 2.40 | 1.15 | 2.26 | 0.28 |
| 12430 | 0 | 8218   | DEYDDAADAAGDRAP                     | 2.73 | 0.01 | 2.40 | 1.15 | 2.26 | 0.85 |
| 12431 | 0 | 8219   | DEYEYDEEDRRRGRG                     | 2.74 | 0.01 | 2.16 | 0.44 | 1.23 | 0.85 |
| 12432 | 0 | 127619 | DEYKRFMNYWTASNE                     | 2.64 | 0.01 | 4.23 | 0.44 | 1.13 | 0.85 |
| 12433 | 0 | 8226   | DEYSNQNNFVHDC                       | 2.53 | 0.01 | 0.78 | 0.68 | 0.22 | 0.28 |
| 12434 | 0 | 8226   | DEYSNQNNFVHDC                       | 2.53 | 0.01 | 0.78 | 0.68 | 0.22 | 2.92 |
| 12435 | 0 | 103843 | DF                                  | 1.10 | 0.01 | 0.78 | 0.44 | 1.13 | 2.02 |
| 12436 | 0 | 8231   | DFAGVYGKTLSDYWSKY<br>YDKFKLLLKNYYI  | 3.34 | 0.01 | 2.24 | 0.68 | 0.22 | 0.85 |
| 12437 | 0 | 8231   | DFAGVYGKTLSDYWSKY<br>YDKFKLLLKNYYI  | 3.34 | 0.01 | 2.24 | 0.68 | 0.22 | 1.34 |
| 12438 | 0 | 8231   | DFAGVYGKTLSDYWSKY<br>YDKFKLLLKNYYI  | 3.34 | 0.01 | 2.24 | 0.68 | 0.22 | 0.85 |
| 12439 | 0 | 8231   | DFAGVYGKTLSDYWSKY<br>YDKFKLLLKNYYI  | 3.34 | 0.01 | 2.24 | 0.68 | 0.22 | 0.85 |
| 12440 | 0 | 92451  | DFAKEVPNYK                          | 2.29 | 0.01 | 2.67 | 2.00 | 0.22 | 0.28 |
| 12441 | 0 | 8233   | DFALELEFRNLTPGNTNT<br>RVSRYSS       | 3.16 | 0.01 | 2.53 | 0.44 | 0.85 | 0.28 |
| 12442 | 0 | 8234   | DFALELEFRNLTPGNTNT<br>RVSRYSSSTARHR | 3.34 | 0.01 | 2.70 | 1.15 | 0.22 | 0.28 |
| 12443 | 0 | 8234   | DFALELEFRNLTPGNTNT<br>RVSRYSSSTARHR | 3.34 | 0.01 | 2.53 | 0.44 | 0.85 | 0.28 |
| 12444 | 0 | 8234   | DFALELEFRNLTPGNTNT<br>RVSRYSSSTARHR | 3.34 | 0.01 | 2.53 | 0.44 | 0.85 | 0.28 |
| 12445 | 0 | 8235   | DFAQGWGP                            | 2.12 | 0.01 | 4.08 | 1.15 | 0.22 | 0.28 |
| 12446 | 0 | 8235   | DFAQGWGP                            | 2.12 | 0.01 | 1.72 | 1.15 | 0.22 | 0.28 |
| 12447 | 0 | 8235   | DFAQGWGP                            | 2.12 | 0.01 | 2.45 | 2.36 | 0.22 | 0.28 |
| 12448 | 0 | 161212 | DFAQGWGPISYANGSG<br>LDER            | 2.92 | 0.01 | 2.45 | 0.68 | 0.22 | 0.28 |
| 12449 | 0 | 8237   | DFASLYPSIIQAHNLC                    | 2.70 | 0.01 | 4.08 | 0.68 | 0.22 | 0.28 |
| 12450 | 0 | 120433 | DFAVTHLTKAHLFYDGR<br>V              | 2.86 | 0.01 | 2.19 | 1.12 | 0.22 | 0.28 |
| 12451 | 0 | 120433 | DFAVTHLTKAHLFYDGR<br>V              | 2.86 | 0.01 | 2.19 | 1.12 | 0.22 | 0.28 |
| 12452 | 0 | 120433 | DFAVTHLTKAHLFYDGR<br>V              | 2.86 | 0.01 | 2.19 | 1.12 | 0.22 | 0.28 |
| 12453 | 0 | 8239   | DFCGKGYHLMSFPQAA<br>P               | 2.75 | 0.01 | 2.48 | 0.44 | 0.85 | 0.28 |
| 12454 | 0 | 106330 | DFDCSKIQST                          | 2.32 | 0.01 | 3.08 | 0.44 | 1.23 | 0.85 |



|       |   |        |                              |      |      |      |      |      |      |
|-------|---|--------|------------------------------|------|------|------|------|------|------|
| 12455 | 0 | 8241   | DFDEMEECASHLPYIEQ<br>GMQ     | 2.91 | 0.01 | 1.72 | 0.44 | 0.85 | 0.28 |
| 12456 | 0 | 137128 | DFDRAQRACLQNSAIIA<br>TPEQLQA | 3.12 | 0.01 | 0.78 | 0.68 | 0.22 | 0.28 |
| 12457 | 0 | 8252   | DFDSVPQIHG                   | 2.30 | 0.01 | 2.56 | 1.20 | 0.22 | 0.28 |
| 12458 | 0 | 166699 | DFEDVWN                      | 2.03 | 0.01 | 0.78 | 0.68 | 0.22 | 1.27 |
| 12459 | 0 | 166699 | DFEDVWN                      | 2.03 | 0.01 | 0.78 | 0.68 | 0.22 | 0.85 |
| 12460 | 0 | 241666 | DFEDVWNSSYG                  | 2.38 | 0.01 | 0.78 | 0.68 | 0.22 | 1.27 |
| 12461 | 0 | 241666 | DFEDVWNSSYG                  | 2.38 | 0.01 | 0.78 | 0.68 | 0.22 | 1.66 |
| 12462 | 0 | 241666 | DFEDVWNSSYG                  | 2.38 | 0.01 | 0.78 | 0.68 | 0.22 | 1.66 |
| 12463 | 0 | 241666 | DFEDVWNSSYG                  | 2.38 | 0.01 | 0.78 | 0.68 | 0.22 | 1.66 |
| 12464 | 0 | 241666 | DFEDVWNSSYG                  | 2.38 | 0.01 | 0.78 | 0.68 | 0.22 | 1.66 |
| 12465 | 0 | 241666 | DFEDVWNSSYG                  | 2.38 | 0.01 | 0.78 | 0.68 | 0.22 | 1.66 |
| 12466 | 0 | 241666 | DFEDVWNSSYG                  | 2.38 | 0.01 | 0.78 | 0.68 | 0.22 | 1.66 |
| 12467 | 0 | 241666 | DFEDVWNSSYG                  | 2.38 | 0.01 | 0.78 | 0.68 | 0.22 | 2.12 |
| 12468 | 0 | 241666 | DFEDVWNSSYG                  | 2.38 | 0.01 | 0.78 | 0.68 | 0.22 | 2.56 |
| 12469 | 0 | 241666 | DFEDVWNSSYG                  | 2.38 | 0.01 | 0.78 | 0.68 | 0.22 | 1.66 |
| 12470 | 0 | 241666 | DFEDVWNSSYG                  | 2.38 | 0.01 | 0.78 | 0.68 | 0.22 | 1.66 |
| 12471 | 0 | 241666 | DFEDVWNSSYG                  | 2.38 | 0.01 | 0.78 | 0.68 | 0.22 | 1.66 |
| 12472 | 0 | 241666 | DFEDVWNSSYG                  | 2.38 | 0.01 | 0.78 | 0.68 | 0.22 | 3.30 |
| 12473 | 0 | 8254   | DFEEDTLPKV                   | 2.31 | 0.01 | 2.56 | 1.20 | 0.22 | 0.28 |
| 12474 | 0 | 8258   | DFEGRANWGKTIPQGD<br>ADEDGNG  | 3.08 | 0.01 | 3.28 | 0.44 | 1.23 | 0.85 |
| 12475 | 0 | 8259   | DFELIK                       | 1.88 | 0.01 | 2.40 | 0.44 | 0.85 | 0.28 |
| 12476 | 0 | 137387 | DFESCDSITGM                  | 2.40 | 0.01 | 0.78 | 1.20 | 0.22 | 0.85 |
| 12477 | 0 | 236162 | DFFADPAHSLLSHAITTS<br>PSAISK | 3.15 | 0.01 | 2.30 | 0.44 | 0.85 | 2.66 |
| 12478 | 0 | 195011 | DFFIVPVSG                    | 2.22 | 0.01 | 2.24 | 1.15 | 0.22 | 0.85 |
| 12479 | 0 | 195011 | DFFIVPVSG                    | 2.22 | 0.01 | 2.24 | 1.15 | 0.22 | 0.85 |
| 12480 | 0 | 8265   | DFFNLNQEWVRVYTYKYF<br>KK     | 2.87 | 0.01 | 2.08 | 0.44 | 1.93 | 1.57 |
| 12481 | 0 | 8265   | DFFNLNQEWVRVYTYKYF<br>KK     | 2.87 | 0.01 | 2.08 | 2.02 | 0.22 | 1.57 |
| 12482 | 0 | 8265   | DFFNLNQEWVRVYTYKYF<br>KK     | 2.87 | 0.01 | 3.45 | 0.44 | 0.22 | 1.57 |
| 12483 | 0 | 138326 | DFFTRVA                      | 2.01 | 0.01 | 0.78 | 1.12 | 0.22 | 0.28 |
| 12484 | 0 | 144610 | DFFTYK                       | 1.89 | 0.01 | 3.85 | 0.68 | 0.22 | 1.48 |
| 12485 | 0 | 144610 | DFFTYK                       | 1.89 | 0.01 | 3.85 | 0.68 | 0.22 | 1.48 |
| 12486 | 0 | 144610 | DFFTYK                       | 1.89 | 0.01 | 3.85 | 0.68 | 0.22 | 0.85 |
| 12487 | 0 | 8267   | DFFVRSIGSKGGKL               | 2.61 | 0.01 | 3.59 | 3.04 | 0.22 | 0.28 |
| 12488 | 0 | 8267   | DFFVRSIGSKGGKL               | 2.61 | 0.01 | 3.59 | 3.04 | 0.22 | 0.28 |
| 12489 | 0 | 8267   | DFFVRSIGSKGGKL               | 2.61 | 0.01 | 3.59 | 3.04 | 0.22 | 0.28 |
| 12490 | 0 | 8267   | DFFVRSIGSKGGKL               | 2.61 | 0.01 | 3.59 | 3.04 | 0.22 | 0.28 |
| 12491 | 0 | 119794 | DFGGIETLRVPSELV              | 2.65 | 0.01 | 0.78 | 3.81 | 0.22 | 0.28 |
| 12492 | 0 | 8271   | DFGPLFSDPGFRSAS              | 2.72 | 0.01 | 0.90 | 1.15 | 0.22 | 1.27 |
| 12493 | 0 | 8271   | DFGPLFSDPGFRSAS              | 2.72 | 0.01 | 0.90 | 1.15 | 0.22 | 0.85 |
| 12494 | 0 | 8273   | DFGSLAPRVA                   | 2.29 | 0.01 | 3.14 | 2.59 | 0.22 | 0.85 |

|       |   |        |                     |      |      |      |      |      |      |
|-------|---|--------|---------------------|------|------|------|------|------|------|
| 12495 | 0 | 8273   | DFGSLAPRVA          | 2.29 | 0.01 | 3.14 | 2.59 | 0.22 | 0.85 |
| 12496 | 0 | 8273   | DFGSLAPRVA          | 2.29 | 0.01 | 3.14 | 2.37 | 0.22 | 1.27 |
| 12497 | 0 | 8273   | DFGSLAPRVA          | 2.29 | 0.01 | 3.14 | 2.37 | 0.22 | 0.85 |
| 12498 | 0 | 136827 | DFGSVGGVL           | 2.24 | 0.01 | 3.81 | 0.68 | 0.22 | 0.28 |
| 12499 | 0 | 136827 | DFGSVGGVL           | 2.24 | 0.01 | 3.81 | 0.68 | 0.22 | 1.34 |
| 12500 | 0 | 136827 | DFGSVGGVL           | 2.24 | 0.01 | 3.81 | 0.68 | 0.22 | 1.34 |
| 12501 | 0 | 136827 | DFGSVGGVL           | 2.24 | 0.01 | 3.81 | 0.68 | 0.22 | 1.34 |
| 12502 | 0 | 136827 | DFGSVGGVL           | 2.24 | 0.01 | 3.81 | 0.68 | 0.22 | 1.34 |
| 12503 | 0 | 99933  | DFGVLAVRVVNDHN      | 2.63 | 0.01 | 2.96 | 0.44 | 0.22 | 0.28 |
| 12504 | 0 | 125011 | DFHFEVFNFP          | 2.43 | 0.01 | 2.67 | 0.68 | 0.22 | 0.85 |
| 12505 | 0 | 125011 | DFHFEVFNFP          | 2.43 | 0.01 | 2.67 | 0.68 | 0.22 | 0.85 |
| 12506 | 0 | 8275   | DFHFEVFNFP          | 2.49 | 0.01 | 2.38 | 0.68 | 0.22 | 0.28 |
| 12507 | 0 | 8275   | DFHFEVFNFP          | 2.49 | 0.01 | 2.38 | 0.68 | 0.22 | 0.28 |
| 12508 | 0 | 8275   | DFHFEVFNFP          | 2.49 | 0.01 | 2.38 | 0.68 | 0.22 | 0.28 |
| 12509 | 0 | 8275   | DFHFEVFNFP          | 2.49 | 0.01 | 2.38 | 0.44 | 1.59 | 0.28 |
| 12510 | 0 | 8275   | DFHFEVFNFP          | 2.49 | 0.01 | 2.38 | 0.44 | 1.74 | 0.28 |
| 12511 | 0 | 8275   | DFHFEVFNFP          | 2.49 | 0.01 | 2.38 | 0.44 | 1.74 | 0.28 |
| 12512 | 0 | 450473 | DFHPDVL             | 2.03 | 0.01 | 0.90 | 0.44 | 1.41 | 1.39 |
| 12513 | 0 | 134884 | DFIVIFEKIREFVP      | 2.71 | 0.01 | 3.59 | 2.13 | 0.85 | 0.85 |
| 12514 | 0 | 8286   | DFLDVIYYKLNIKEINKSL | 3.73 | 0.01 | 2.22 | 0.44 | 1.74 | 0.28 |
|       |   |        | TEVKNELTELQKNQEEA   |      |      |      |      |      |      |
|       |   |        | KNILAFK             |      |      |      |      |      |      |
| 12515 | 0 | 8286   | DFLDVIYYKLNIKEINKSL | 3.73 | 0.01 | 2.22 | 0.44 | 1.74 | 0.28 |
|       |   |        | TEVKNELTELQKNQEEA   |      |      |      |      |      |      |
| 12516 | 0 | 8287   | KNILAFK             | 3.73 | 0.01 | 2.22 | 0.44 | 1.74 | 0.28 |
|       |   |        | DFLEVTDF            |      |      |      |      |      |      |
| 12517 | 0 | 123075 | DFLGKNPYL           | 2.21 | 0.01 | 2.28 | 2.00 | 0.22 | 0.28 |
| 12518 | 0 | 103104 | DFLIEEIERLGQDL      | 2.65 | 0.01 | 0.78 | 0.44 | 1.13 | 0.28 |
| 12519 | 0 | 103104 | DFLIEEIERLGQDL      | 2.65 | 0.01 | 0.78 | 0.44 | 1.13 | 0.28 |
| 12520 | 0 | 103104 | DFLIEEIERLGQDL      | 2.65 | 0.01 | 0.78 | 0.68 | 0.22 | 0.28 |
| 12521 | 0 | 103104 | DFLIEEIERLGQDL      | 2.65 | 0.01 | 0.78 | 1.20 | 0.22 | 0.28 |
| 12522 | 0 | 103104 | DFLIEEIERLGQDL      | 2.65 | 0.01 | 0.78 | 0.68 | 0.22 | 1.39 |
| 12523 | 0 | 103104 | DFLIEEIERLGQDL      | 2.65 | 0.01 | 0.78 | 0.68 | 0.22 | 1.39 |
| 12524 | 0 | 103104 | DFLIEEIERLGQDL      | 2.65 | 0.01 | 0.78 | 0.68 | 0.22 | 1.39 |
| 12525 | 0 | 103104 | DFLIEEIERLGQDL      | 2.65 | 0.01 | 0.78 | 0.68 | 0.22 | 1.39 |
| 12526 | 0 | 103104 | DFLIEEIERLGQDL      | 2.65 | 0.01 | 0.78 | 0.68 | 0.22 | 1.39 |
| 12527 | 0 | 103104 | DFLIEEIERLGQDL      | 2.65 | 0.01 | 0.78 | 0.68 | 0.22 | 1.39 |
| 12528 | 0 | 103104 | DFLIEEIERLGQDL      | 2.65 | 0.01 | 0.78 | 1.20 | 0.22 | 1.39 |
| 12529 | 0 | 103104 | DFLIEEIERLGQDL      | 2.65 | 0.01 | 0.78 | 1.20 | 0.22 | 1.39 |
| 12530 | 0 | 103104 | DFLIEEIERLGQDL      | 2.65 | 0.01 | 0.78 | 1.20 | 0.22 | 1.39 |
| 12531 | 0 | 103104 | DFLIEEIERLGQDL      | 2.65 | 0.01 | 0.78 | 1.20 | 0.22 | 1.39 |
| 12532 | 0 | 103104 | DFLIEEIERLGQDL      | 2.65 | 0.01 | 0.78 | 1.20 | 0.22 | 1.39 |
| 12533 | 0 | 103104 | DFLIEEIERLGQDL      | 2.65 | 0.01 | 0.78 | 1.20 | 0.22 | 1.39 |
| 12534 | 0 | 103104 | DFLIEEIERLGQDL      | 2.65 | 0.01 | 0.78 | 1.20 | 0.22 | 1.39 |
| 12535 | 0 | 103104 | DFLIEEIERLGQDL      | 2.65 | 0.01 | 0.78 | 1.20 | 0.22 | 1.39 |
| 12536 | 0 | 78356  | DFLIRYLNSTPFPF      | 2.69 | 0.01 | 0.90 | 0.68 | 0.22 | 0.28 |
| 12537 | 0 | 267111 | DFLLMTREVDDTMA      | 2.68 | 0.01 | 1.61 | 0.44 | 0.85 | 1.28 |

|       |   |        |                          |      |      |      |      |      |      |
|-------|---|--------|--------------------------|------|------|------|------|------|------|
| 12538 | 0 | 99934  | DFLSTEEKEF               | 2.33 | 0.01 | 2.18 | 2.16 | 0.22 | 0.28 |
| 12539 | 0 | 112935 | DFLTISPKLLGELLQ          | 2.65 | 0.01 | 0.78 | 1.20 | 0.22 | 0.85 |
| 12540 | 0 | 112935 | DFLTISPKLLGELLQ          | 2.65 | 0.01 | 0.78 | 0.44 | 1.13 | 0.85 |
| 12541 | 0 | 77848  | DFMIQGGDF                | 2.25 | 0.01 | 0.78 | 0.44 | 1.23 | 0.28 |
| 12542 | 0 | 77848  | DFMIQGGDF                | 2.25 | 0.01 | 0.78 | 0.44 | 1.23 | 0.28 |
| 12543 | 0 | 77848  | DFMIQGGDF                | 2.25 | 0.01 | 0.78 | 0.44 | 1.41 | 0.28 |
| 12544 | 0 | 77848  | DFMIQGGDF                | 2.25 | 0.01 | 0.78 | 0.44 | 1.41 | 0.28 |
| 12545 | 0 | 106331 | DFMLTQPHSVSESPGKT<br>VT  | 2.88 | 0.01 | 0.78 | 1.12 | 0.22 | 1.48 |
| 12546 | 0 | 106331 | DFMLTQPHSVSESPGKT<br>VT  | 2.88 | 0.01 | 0.78 | 1.12 | 0.22 | 0.28 |
| 12547 | 0 | 106331 | DFMLTQPHSVSESPGKT<br>VT  | 2.88 | 0.01 | 0.78 | 1.12 | 0.22 | 0.28 |
| 12548 | 0 | 106331 | DFMLTQPHSVSESPGKT<br>VT  | 2.88 | 0.01 | 0.78 | 1.12 | 0.22 | 0.28 |
| 12549 | 0 | 106331 | DFMLTQPHSVSESPGKT<br>VT  | 2.88 | 0.01 | 0.78 | 1.12 | 0.22 | 0.28 |
| 12550 | 0 | 106331 | DFMLTQPHSVSESPGKT<br>VT  | 2.88 | 0.01 | 0.78 | 1.12 | 0.22 | 0.28 |
| 12551 | 0 | 123076 | DFMLYETLD                | 2.24 | 0.01 | 2.28 | 2.00 | 0.22 | 0.28 |
| 12552 | 0 | 423244 | DFMRDFTQLLESCDI          | 2.66 | 0.01 | 2.51 | 0.44 | 2.35 | 1.28 |
| 12553 | 0 | 123077 | DFMVYEALD                | 2.22 | 0.01 | 2.28 | 2.00 | 0.22 | 0.28 |
| 12554 | 0 | 123077 | DFMVYEALD                | 2.22 | 0.01 | 2.28 | 2.00 | 0.22 | 0.28 |
| 12555 | 0 | 8294   | DFNEMV                   | 1.88 | 0.01 | 2.40 | 0.44 | 0.85 | 0.28 |
| 12556 | 0 | 144611 | DFNGSFDMNGTITA           | 2.64 | 0.01 | 2.24 | 1.12 | 0.22 | 0.28 |
| 12557 | 0 | 144611 | DFNGSFDMNGTITA           | 2.64 | 0.01 | 2.24 | 1.12 | 0.22 | 0.28 |
| 12558 | 0 | 144611 | DFNGSFDMNGTITA           | 2.64 | 0.01 | 2.24 | 1.12 | 0.22 | 0.28 |
| 12559 | 0 | 190396 | DFNRFHCHFSRPDWQ          | 2.69 | 0.01 | 3.19 | 2.00 | 1.41 | 0.28 |
| 12560 | 0 | 78357  | DFPAGYLNDSTLFPP          | 2.67 | 0.01 | 0.90 | 0.68 | 0.22 | 0.28 |
| 12561 | 0 | 8303   | DFPIQNLPGY               | 2.29 | 0.01 | 1.75 | 0.68 | 0.22 | 0.28 |
| 12562 | 0 | 8303   | DFPIQNLPGY               | 2.29 | 0.01 | 1.75 | 0.68 | 0.22 | 0.28 |
| 12563 | 0 | 123078 | DFPKLKEFK                | 2.25 | 0.01 | 2.28 | 2.00 | 0.22 | 0.28 |
| 12564 | 0 | 123078 | DFPKLKEFK                | 2.25 | 0.01 | 2.28 | 2.00 | 0.22 | 0.28 |
| 12565 | 0 | 8305   | DFQATITRARFEELC          | 2.67 | 0.01 | 2.30 | 0.44 | 1.41 | 0.28 |
| 12566 | 0 | 116943 | DFRDYSTRPFAL             | 2.48 | 0.01 | 0.90 | 1.15 | 0.22 | 0.28 |
| 12567 | 0 | 116943 | DFRDYSTRPFAL             | 2.48 | 0.01 | 0.90 | 0.44 | 0.85 | 0.28 |
| 12568 | 0 | 149030 | DFRFESSLSINDHA           | 2.61 | 0.01 | 0.90 | 2.36 | 0.22 | 1.39 |
| 12569 | 0 | 97240  | DFRNEFDHLLIEQANH         | 2.75 | 0.01 | 3.67 | 0.44 | 1.23 | 0.28 |
| 12570 | 0 | 130464 | DFRVT                    | 1.74 | 0.01 | 0.78 | 1.15 | 0.22 | 2.75 |
| 12571 | 0 | 96175  | DFRWYGPKYITHSIRSFT<br>PS | 2.95 | 0.01 | 3.89 | 0.68 | 0.22 | 1.34 |
| 12572 | 0 | 116944 | DFRYSTRPFAL              | 2.39 | 0.01 | 0.90 | 1.15 | 0.22 | 0.28 |
| 12573 | 0 | 116944 | DFRYSTRPFAL              | 2.39 | 0.01 | 0.90 | 0.44 | 0.85 | 0.28 |
| 12574 | 0 | 188827 | DFSGPYLPSLPTLDA          | 2.71 | 0.01 | 4.63 | 2.02 | 0.22 | 0.28 |
| 12575 | 0 | 99935  | DFSQTATLTNTN             | 2.49 | 0.01 | 2.88 | 1.20 | 0.22 | 0.85 |

|       |   |        |                                                                    |      |      |      |      |      |      |
|-------|---|--------|--------------------------------------------------------------------|------|------|------|------|------|------|
| 12576 | 0 | 8322   | DFSRQLQNSMSGASA                                                    | 2.68 | 0.01 | 2.91 | 0.44 | 0.85 | 0.28 |
| 12577 | 0 | 99936  | DFSVEFLEQN                                                         | 2.31 | 0.01 | 2.18 | 2.16 | 0.22 | 0.28 |
| 12578 | 0 | 175574 | DFTFGFEESLEVDTNPLLG                                                | 2.92 | 0.01 | 2.08 | 1.12 | 0.22 | 0.85 |
| 12579 | 0 | 137820 | DFTPGTEY                                                           | 2.12 | 0.01 | 2.21 | 1.20 | 0.22 | 0.28 |
| 12580 | 0 | 137820 | DFTPGTEY                                                           | 2.12 | 0.01 | 2.21 | 0.44 | 0.85 | 0.28 |
| 12581 | 0 | 137820 | DFTPGTEY                                                           | 2.12 | 0.01 | 2.21 | 0.44 | 0.85 | 0.28 |
| 12582 | 0 | 137820 | DFTPGTEY                                                           | 2.12 | 0.01 | 2.21 | 1.20 | 0.22 | 0.28 |
| 12583 | 0 | 133795 | DFTYDQVAFNGLPQF                                                    | 2.67 | 0.01 | 0.78 | 0.44 | 1.13 | 0.28 |
| 12584 | 0 | 133795 | DFTYDQVAFNGLPQF                                                    | 2.67 | 0.01 | 0.78 | 0.44 | 1.41 | 0.28 |
| 12585 | 0 | 133795 | DFTYDQVAFNGLPQF                                                    | 2.67 | 0.01 | 0.78 | 0.44 | 1.93 | 0.28 |
| 12586 | 0 | 8329   | DFVEGV                                                             | 1.90 | 0.01 | 2.40 | 0.44 | 0.85 | 0.28 |
| 12587 | 0 | 8334   | DFVYMSPFYGYREGSHT<br>EHTS                                          | 3.00 | 0.01 | 3.67 | 0.68 | 0.22 | 0.28 |
| 12588 | 0 | 8334   | DFVYMSPFYGYREGSHT<br>EHTS                                          | 3.00 | 0.01 | 3.67 | 0.68 | 0.22 | 1.34 |
| 12589 | 0 | 8334   | DFVYMSPFYGYREGSHT<br>EHTS                                          | 3.00 | 0.01 | 3.67 | 0.68 | 0.22 | 1.34 |
| 12590 | 0 | 8334   | DFVYMSPFYGYREGSHT<br>EHTS                                          | 3.00 | 0.01 | 3.67 | 0.68 | 0.22 | 1.34 |
| 12591 | 0 | 98728  | DFWATWCGPCKMVAP<br>VLEEI                                           | 2.90 | 0.01 | 2.04 | 0.44 | 0.85 | 0.28 |
| 12592 | 0 | 98728  | DFWATWCGPCKMVAP<br>VLEEI                                           | 2.90 | 0.01 | 2.04 | 0.44 | 2.98 | 0.28 |
| 12593 | 0 | 8335   | DFWGNPLMYNKEYYMF<br>NAG                                            | 2.88 | 0.01 | 3.45 | 0.44 | 0.22 | 1.57 |
| 12594 | 0 | 141614 | DFYSWKHWGSTT                                                       | 2.45 | 0.01 | 0.90 | 0.68 | 0.22 | 1.39 |
| 12595 | 0 | 243895 | DGAARFERYLAALPRKL<br>AAWENARGVDFGSRTQ<br>ADAL                      | 3.54 | 0.01 | 3.34 | 1.12 | 0.22 | 0.28 |
| 12596 | 0 | 243895 | DGAARFERYLAALPRKL<br>AAWENARGVDFGSRTQ<br>ADAL                      | 3.54 | 0.01 | 3.34 | 1.12 | 0.22 | 0.28 |
| 12597 | 0 | 243895 | DGAARFERYLAALPRKL<br>AAWENARGVDFGSRTQ<br>ADAL                      | 3.54 | 0.01 | 3.34 | 1.12 | 0.22 | 0.28 |
| 12598 | 0 | 243895 | DGAARFERYLAALPRKL<br>AAWENARGVDFGSRTQ<br>ADAL                      | 3.54 | 0.01 | 3.34 | 1.12 | 0.22 | 0.28 |
| 12599 | 0 | 243895 | DGAARFERYLAALPRKL<br>AAWENARGVDFGSRTQ<br>ADAL                      | 3.54 | 0.01 | 3.34 | 1.12 | 0.22 | 1.34 |
| 12600 | 0 | 179964 | DGADGRNFYHVNWG<br>WGGVSDGFFRLDALNP<br>SALGTGGGAGGFNGYQ<br>SAVVGIKP | 3.93 | 0.01 | 2.24 | 1.12 | 0.22 | 0.85 |

|       |   |        |                                                                    |      |      |      |      |      |      |
|-------|---|--------|--------------------------------------------------------------------|------|------|------|------|------|------|
| 12601 | 0 | 179964 | DGADGRNFYHVNWG<br>WGGVSDGFFRLDALNP<br>SALGTGGGAGGFNGYQ<br>SAVVGIKP | 3.93 | 0.01 | 2.24 | 3.03 | 0.22 | 0.28 |
| 12602 | 0 | 179964 | DGADGRNFYHVNWG<br>WGGVSDGFFRLDALNP<br>SALGTGGGAGGFNGYQ<br>SAVVGIKP | 3.93 | 0.01 | 2.24 | 3.03 | 0.22 | 1.75 |
| 12603 | 0 | 8347   | DGAHHDGAHH                                                         | 2.36 | 0.01 | 2.96 | 0.44 | 1.74 | 1.57 |
| 12604 | 0 | 8350   | DGANTQVVAKPAGAV                                                    | 2.70 | 0.01 | 1.66 | 0.44 | 0.85 | 0.28 |
| 12605 | 0 | 233470 | DGASGGGEEDFDEAKLA<br>QARE                                          | 3.01 | 0.01 | 3.67 | 2.61 | 0.85 | 1.28 |
| 12606 | 0 | 142576 | DGASYSWMYEA                                                        | 2.41 | 0.01 | 0.90 | 0.68 | 0.22 | 1.27 |
| 12607 | 0 | 142576 | DGASYSWMYEA                                                        | 2.41 | 0.01 | 0.90 | 1.15 | 0.22 | 1.39 |
| 12608 | 0 | 142576 | DGASYSWMYEA                                                        | 2.41 | 0.01 | 0.90 | 2.84 | 0.22 | 1.39 |
| 12609 | 0 | 142576 | DGASYSWMYEA                                                        | 2.41 | 0.01 | 0.90 | 0.68 | 0.22 | 1.39 |
| 12610 | 0 | 142576 | DGASYSWMYEA                                                        | 2.41 | 0.01 | 0.90 | 2.84 | 0.22 | 1.39 |
| 12611 | 0 | 142576 | DGASYSWMYEA                                                        | 2.41 | 0.01 | 0.90 | 2.84 | 0.22 | 1.39 |
| 12612 | 0 | 8355   | DGAVQPDGG                                                          | 2.24 | 0.01 | 3.05 | 1.20 | 0.22 | 0.28 |
| 12613 | 0 | 8355   | DGAVQPDGG                                                          | 2.24 | 0.01 | 3.05 | 1.20 | 0.22 | 0.28 |
| 12614 | 0 | 8355   | DGAVQPDGG                                                          | 2.24 | 0.01 | 3.05 | 1.20 | 0.22 | 1.34 |
| 12615 | 0 | 8355   | DGAVQPDGG                                                          | 2.24 | 0.01 | 3.05 | 0.68 | 0.22 | 0.28 |
| 12616 | 0 | 8355   | DGAVQPDGG                                                          | 2.24 | 0.01 | 3.05 | 1.20 | 0.22 | 0.28 |
| 12617 | 0 | 8355   | DGAVQPDGG                                                          | 2.24 | 0.01 | 3.24 | 3.57 | 0.85 | 0.28 |
| 12618 | 0 | 8356   | DGAVQPDGGQPAVRN<br>ERA                                             | 2.88 | 0.01 | 3.05 | 1.20 | 0.22 | 0.28 |
| 12619 | 0 | 8356   | DGAVQPDGGQPAVRN<br>ERA                                             | 2.88 | 0.01 | 3.05 | 1.20 | 0.22 | 1.34 |
| 12620 | 0 | 8356   | DGAVQPDGGQPAVRN<br>ERA                                             | 2.88 | 0.01 | 3.05 | 2.37 | 0.22 | 0.28 |
| 12621 | 0 | 8356   | DGAVQPDGGQPAVRN<br>ERA                                             | 2.88 | 0.01 | 3.05 | 2.37 | 0.22 | 1.34 |
| 12622 | 0 | 112074 | DGAWFAY                                                            | 2.02 | 0.01 | 0.78 | 0.44 | 1.13 | 0.28 |
| 12623 | 0 | 267320 | DGDAEVDEDEDDDDD                                                    | 2.72 | 0.01 | 1.61 | 0.44 | 0.85 | 1.28 |
| 12624 | 0 | 8359   | DGDALTLRTATN<br>DGDAVQGIADWDTVH                                    | 2.52 | 0.01 | 3.24 | 0.44 | 1.23 | 0.85 |
| 12625 | 0 | 156856 | GFANRGIANEEAVHGIP<br>EVAV                                          | 3.54 | 0.01 | 0.78 | 0.44 | 2.82 | 1.39 |
| 12626 | 0 | 267336 | DGDEEDYDVVDDDDD                                                    | 2.71 | 0.01 | 1.61 | 0.44 | 0.85 | 1.28 |
| 12627 | 0 | 267337 | DGDEEDYDVVDDLEE                                                    | 2.72 | 0.01 | 1.61 | 0.44 | 0.85 | 1.28 |
| 12628 | 0 | 267340 | DGDESIDEEEEKEVE                                                    | 2.72 | 0.01 | 1.61 | 0.44 | 0.85 | 1.28 |
| 12629 | 0 | 267341 | DGDESSDKEDAEP TA                                                   | 2.71 | 0.01 | 1.61 | 0.44 | 0.85 | 1.28 |
| 12630 | 0 | 119439 | DGDFAIVHMTKLLLDYT<br>GKI                                           | 2.94 | 0.01 | 2.26 | 2.04 | 0.22 | 0.28 |

|       |   |        |                                  |      |      |      |      |      |      |
|-------|---|--------|----------------------------------|------|------|------|------|------|------|
| 12631 | 0 | 119439 | DGDFAIVHMTKLLLDYT<br>GKI         | 2.94 | 0.01 | 2.26 | 2.04 | 0.22 | 0.28 |
| 12632 | 0 | 119439 | DGDFAIVHMTKLLLDYT<br>GKI         | 2.94 | 0.01 | 2.26 | 2.04 | 0.22 | 0.28 |
| 12633 | 0 | 118290 | DGDFAIVKFTKVLLDYTG<br>HI         | 2.96 | 0.01 | 2.19 | 2.04 | 0.22 | 0.28 |
| 12634 | 0 | 118290 | DGDFAIVKFTKVLLDYTG<br>HI         | 2.96 | 0.01 | 2.19 | 2.04 | 0.22 | 0.28 |
| 12635 | 0 | 118290 | DGDFAIVKFTKVLLDYTG<br>HI         | 2.96 | 0.01 | 2.19 | 2.04 | 0.22 | 0.28 |
| 12636 | 0 | 118290 | DGDFAIVKFTKVLLDYTG<br>HI         | 2.96 | 0.01 | 2.19 | 2.04 | 0.22 | 0.28 |
| 12637 | 0 | 118290 | DGDFAIVKFTKVLLDYTG<br>HI         | 2.96 | 0.01 | 2.19 | 2.04 | 2.60 | 1.75 |
| 12638 | 0 | 118290 | DGDFAIVKFTKVLLDYTG<br>HI         | 2.96 | 0.01 | 2.19 | 2.04 | 0.22 | 0.28 |
| 12639 | 0 | 118290 | DGDFAIVKFTKVLLDYTG<br>HI         | 2.96 | 0.01 | 2.19 | 2.04 | 0.22 | 0.28 |
| 12640 | 0 | 118290 | DGDFAIVKFTKVLLDYTG<br>HI         | 2.96 | 0.01 | 2.19 | 2.04 | 0.22 | 0.28 |
| 12641 | 0 | 8360   | DGDGAAAMRYTEAM<br>TK             | 2.82 | 0.01 | 3.40 | 0.44 | 0.85 | 0.28 |
| 12642 | 0 | 8360   | DGDGAAAMRYTEAM<br>TK             | 2.82 | 0.01 | 3.40 | 0.44 | 1.74 | 0.28 |
| 12643 | 0 | 434733 | DGDLKNDTTGYKGEGR                 | 2.76 | 0.01 | 3.89 | 0.68 | 0.22 | 0.28 |
| 12644 | 0 | 434733 | DGDLKNDTTGYKGEGR                 | 2.76 | 0.01 | 3.89 | 0.68 | 0.22 | 0.28 |
| 12645 | 0 | 462297 | DGDLPLPDDY                       | 2.36 | 0.01 | 0.78 | 1.12 | 0.22 | 1.28 |
| 12646 | 0 | 112473 | DGDMVDTGFGAMNFA<br>DLQTNKSDVPIDI | 3.28 | 0.01 | 3.85 | 1.12 | 0.22 | 0.28 |
| 12647 | 0 | 112473 | DGDMVDTGFGAMNFA<br>DLQTNKSDVPIDI | 3.28 | 0.01 | 3.25 | 1.12 | 0.22 | 0.85 |
| 12648 | 0 | 267359 | DGDNEDEEVEDEAKI                  | 2.72 | 0.01 | 1.61 | 0.44 | 0.85 | 1.28 |
| 12649 | 0 | 8363   | DGDNLFPKVA                       | 2.30 | 0.01 | 2.76 | 0.44 | 1.23 | 1.27 |
| 12650 | 0 | 8363   | DGDNLFPKVA                       | 2.30 | 0.01 | 2.76 | 0.44 | 1.23 | 1.27 |
| 12651 | 0 | 267361 | DGDPAADGAGTAEGK                  | 2.73 | 0.01 | 1.61 | 0.44 | 0.85 | 1.28 |
| 12652 | 0 | 114295 | DGDSPVTVSLLHTN                   | 2.69 | 0.01 | 3.48 | 0.44 | 1.23 | 0.85 |
| 12653 | 0 | 138153 | DGDYGA                           | 1.92 | 0.01 | 0.78 | 4.93 | 0.22 | 0.28 |
| 12654 | 0 | 138153 | DGDYGA                           | 1.92 | 0.01 | 0.78 | 1.15 | 0.22 | 0.28 |
| 12655 | 0 | 114771 | DGECKETVPM                       | 2.29 | 0.01 | 2.25 | 0.44 | 1.23 | 0.85 |
| 12656 | 0 | 114771 | DGECKETVPM                       | 2.29 | 0.01 | 2.25 | 0.44 | 1.23 | 0.85 |
| 12657 | 0 | 181577 | DGEDCTNILKQNFNI                  | 2.67 | 0.01 | 2.86 | 2.36 | 0.22 | 1.28 |
| 12658 | 0 | 80996  | DGEEQVEYPLKPI                    | 2.53 | 0.01 | 3.53 | 1.12 | 0.22 | 0.28 |
| 12659 | 0 | 80996  | DGEEQVEYPLKPI                    | 2.53 | 0.01 | 3.53 | 1.12 | 0.22 | 0.28 |
| 12660 | 0 | 80996  | DGEEQVEYPLKPI                    | 2.53 | 0.01 | 3.53 | 1.12 | 0.22 | 0.28 |

|       |   |        |                                  |      |      |      |      |      |      |
|-------|---|--------|----------------------------------|------|------|------|------|------|------|
| 12661 | 0 | 80996  | DGEEQVEYPLKPI                    | 2.53 | 0.01 | 3.53 | 1.12 | 0.22 | 0.28 |
| 12662 | 0 | 80996  | DGEEQVEYPLKPI                    | 2.53 | 0.01 | 3.53 | 1.12 | 0.22 | 0.28 |
| 12663 | 0 | 80996  | DGEEQVEYPLKPI                    | 2.53 | 0.01 | 3.53 | 1.12 | 0.22 | 0.28 |
| 12664 | 0 | 80996  | DGEEQVEYPLKPI                    | 2.53 | 0.01 | 3.53 | 1.12 | 0.22 | 0.28 |
| 12665 | 0 | 80996  | DGEEQVEYPLKPI                    | 2.53 | 0.01 | 3.53 | 1.12 | 0.22 | 0.28 |
| 12666 | 0 | 80996  | DGEEQVEYPLKPI                    | 2.53 | 0.01 | 3.53 | 1.12 | 0.22 | 0.28 |
| 12667 | 0 | 80996  | DGEEQVEYPLKPI                    | 2.53 | 0.01 | 3.53 | 1.12 | 0.22 | 0.28 |
| 12668 | 0 | 80996  | DGEEQVEYPLKPI                    | 2.53 | 0.01 | 3.53 | 1.12 | 0.22 | 0.28 |
| 12669 | 0 | 80996  | DGEEQVEYPLKPI                    | 2.53 | 0.01 | 3.53 | 1.12 | 0.22 | 0.28 |
| 12670 | 0 | 8370   | DGEERQSYWFEN                     | 2.45 | 0.01 | 2.88 | 2.37 | 0.22 | 0.28 |
| 12671 | 0 | 8370   | DGEERQSYWFEN                     | 2.45 | 0.01 | 2.88 | 2.22 | 0.85 | 0.28 |
| 12672 | 0 | 8371   | DGEGAP                           | 1.90 | 0.01 | 2.96 | 0.44 | 0.85 | 0.28 |
| 12673 | 0 | 8371   | DGEGAP                           | 1.90 | 0.01 | 2.96 | 3.67 | 0.22 | 0.28 |
| 12674 | 0 | 118766 | DGEGRGDGGGEGHGQ<br>G             | 2.80 | 0.01 | 0.90 | 0.68 | 0.22 | 0.28 |
| 12675 | 0 | 118766 | DGEGRGDGGGEGHGQ<br>G             | 2.80 | 0.01 | 0.90 | 0.68 | 0.22 | 0.28 |
| 12676 | 0 | 118766 | DGEGRGDGGGEGHGQ<br>G             | 2.80 | 0.01 | 0.90 | 0.68 | 0.22 | 0.28 |
| 12677 | 0 | 118766 | DGEGRGDGGGEGHGQ<br>G             | 2.80 | 0.01 | 0.90 | 0.68 | 0.22 | 0.28 |
| 12678 | 0 | 118766 | DGEGRGDGGGEGHGQ<br>G             | 2.80 | 0.01 | 0.90 | 0.68 | 0.22 | 1.27 |
| 12679 | 0 | 118766 | DGEGRGDGGGEGHGQ<br>G             | 2.80 | 0.01 | 0.90 | 0.68 | 0.22 | 0.28 |
| 12680 | 0 | 267441 | DGEICRDEGGDEGND                  | 2.73 | 0.01 | 1.61 | 0.44 | 0.85 | 1.28 |
| 12681 | 0 | 8372   | DGEKRIPLDV                       | 2.30 | 0.01 | 2.04 | 0.68 | 0.22 | 0.28 |
| 12682 | 0 | 8372   | DGEKRIPLDV                       | 2.30 | 0.01 | 2.04 | 0.68 | 0.22 | 0.28 |
| 12683 | 0 | 123079 | DGEKWFSKK                        | 2.21 | 0.01 | 2.28 | 2.00 | 0.22 | 0.28 |
| 12684 | 0 | 136167 | DGEPDVPPGAIEQGPAD<br>DPGEGPSTGPR | 3.30 | 0.01 | 2.43 | 0.44 | 1.74 | 0.28 |
| 12685 | 0 | 136167 | DGEPDVPPGAIEQGPAD<br>DPGEGPSTGPR | 3.30 | 0.01 | 2.43 | 0.44 | 1.74 | 0.28 |
| 12686 | 0 | 136167 | DGEPDVPPGAIEQGPAD<br>DPGEGPSTGPR | 3.30 | 0.01 | 2.43 | 0.44 | 1.74 | 0.28 |
| 12687 | 0 | 8379   | DGEPPEDDDSATGLAFR<br>TPN         | 2.95 | 0.01 | 2.40 | 1.15 | 0.22 | 0.85 |
| 12688 | 0 | 8379   | DGEPPEDDDSATGLAFR<br>TPN         | 2.95 | 0.01 | 2.40 | 0.44 | 1.59 | 0.85 |
| 12689 | 0 | 8381   | DGERVPKNNRLSKKYSE<br>LSE         | 2.95 | 0.01 | 4.63 | 2.42 | 0.22 | 0.28 |
| 12690 | 0 | 8381   | DGERVPKNNRLSKKYSE<br>LSE         | 2.95 | 0.01 | 4.63 | 2.42 | 0.22 | 1.34 |
| 12691 | 0 | 140549 | DGEWPREGWS                       | 2.33 | 0.01 | 0.90 | 0.68 | 0.22 | 0.28 |
| 12692 | 0 | 99937  | DGFAKVPLKTDAND                   | 2.62 | 0.01 | 2.96 | 1.12 | 0.22 | 0.28 |
| 12693 | 0 | 8383   | DGFKVSNSSA                       | 2.30 | 0.01 | 0.78 | 0.44 | 1.74 | 0.28 |
| 12694 | 0 | 170549 | DGFLSILCNNLHELQ                  | 2.65 | 0.01 | 0.78 | 0.44 | 1.13 | 0.28 |

|       |   |        |                                    |      |      |      |      |      |      |
|-------|---|--------|------------------------------------|------|------|------|------|------|------|
| 12695 | 0 | 132789 | DGFMDFEVYSHQTKP                    | 2.63 | 0.01 | 3.16 | 3.16 | 0.22 | 0.28 |
| 12696 | 0 | 170550 | DGFSLPYGWTPGVKR                    | 2.64 | 0.01 | 0.78 | 0.44 | 1.13 | 0.28 |
| 12697 | 0 | 230213 | DGGCRKELAAVSVCSE<br>YPK            | 2.94 | 0.01 | 2.25 | 0.44 | 1.23 | 0.28 |
| 12698 | 0 | 8388   | DGGGGHSHDSGHGGG<br>D               | 2.80 | 0.01 | 2.43 | 0.68 | 0.22 | 0.28 |
| 12699 | 0 | 8388   | DGGGGHSHDSGHGGG<br>D               | 2.80 | 0.01 | 2.43 | 0.68 | 0.22 | 0.28 |
| 12700 | 0 | 8388   | DGGGGHSHDSGHGGG<br>D               | 2.80 | 0.01 | 2.43 | 0.68 | 0.22 | 0.85 |
| 12701 | 0 | 238282 | DGGHITGGRAAGVA                     | 2.64 | 0.01 | 2.14 | 2.65 | 0.22 | 0.85 |
| 12702 | 0 | 238282 | DGGHITGGRAAGVA                     | 2.64 | 0.01 | 2.14 | 2.65 | 0.22 | 0.85 |
| 12703 | 0 | 8391   | DGGKMOVQV                          | 2.13 | 0.01 | 2.21 | 0.44 | 0.85 | 0.28 |
| 12704 | 0 | 8391   | DGGKMOVQV                          | 2.13 | 0.01 | 2.21 | 1.12 | 0.22 | 0.28 |
| 12705 | 0 | 8392   | DGGKMOVQVVY                        | 2.31 | 0.01 | 2.21 | 1.12 | 0.22 | 0.28 |
| 12706 | 0 | 91187  | DGGQPAV                            | 2.01 | 0.01 | 3.05 | 1.20 | 0.22 | 0.28 |
| 12707 | 0 | 147577 | DGGQPAVRN                          | 2.20 | 0.01 | 3.24 | 1.12 | 0.22 | 0.28 |
| 12708 | 0 | 147577 | DGGQPAVRN                          | 2.20 | 0.01 | 3.24 | 0.68 | 0.22 | 0.28 |
| 12709 | 0 | 8400   | DGGSILKISNKYHTKGDH<br>EVKAEQVKASKE | 3.35 | 0.01 | 2.76 | 1.12 | 0.22 | 2.35 |
| 12710 | 0 | 8400   | DGGSILKISNKYHTKGDH<br>EVKAEQVKASKE | 3.35 | 0.01 | 2.76 | 0.44 | 1.23 | 0.28 |
| 12711 | 0 | 8400   | DGGSILKISNKYHTKGDH<br>EVKAEQVKASKE | 3.35 | 0.01 | 2.76 | 0.44 | 1.23 | 0.28 |
| 12712 | 0 | 8400   | DGGSILKISNKYHTKGDH<br>EVKAEQVKASKE | 3.35 | 0.01 | 2.76 | 1.20 | 0.22 | 0.28 |
| 12713 | 0 | 8400   | DGGSILKISNKYHTKGDH<br>EVKAEQVKASKE | 3.35 | 0.01 | 2.76 | 0.68 | 0.22 | 0.28 |
| 12714 | 0 | 8400   | DGGSILKISNKYHTKGDH<br>EVKAEQVKASKE | 3.35 | 0.01 | 2.76 | 0.68 | 0.22 | 0.28 |
| 12715 | 0 | 267599 | DGHDFIREHIQIRTA                    | 2.69 | 0.01 | 1.61 | 0.44 | 0.85 | 1.28 |
| 12716 | 0 | 419132 | DGHRVPTYRLKT                       | 2.45 | 0.01 | 0.90 | 0.44 | 1.93 | 1.27 |
| 12717 | 0 | 267617 | DGIEQVEEEEEDE                      | 2.72 | 0.01 | 1.61 | 0.44 | 0.85 | 1.28 |
| 12718 | 0 | 143840 | DGIGNRERPGFRFERS<br>GH             | 2.92 | 0.01 | 0.78 | 0.44 | 1.41 | 0.28 |
| 12719 | 0 | 420590 | DGILASPGVLRGAHNLD                  | 2.80 | 4.23 | 3.44 | 0.68 | 0.22 | 0.28 |
| 12720 | 0 | 420590 | DGILASPGVLRGAHNLD                  | 2.80 | 4.23 | 3.44 | 0.68 | 0.22 | 0.85 |
| 12721 | 0 | 420590 | DGILASPGVLRGAHNLD                  | 2.80 | 4.23 | 3.44 | 0.68 | 0.22 | 1.48 |
| 12722 | 0 | 420590 | DGILASPGVLRGAHNLD                  | 2.80 | 4.23 | 3.44 | 0.68 | 0.22 | 0.85 |
| 12723 | 0 | 420590 | DGILASPGVLRGAHNLD                  | 2.80 | 4.23 | 3.44 | 0.68 | 0.22 | 2.02 |
| 12724 | 0 | 8408   | DGIMHTRCHCGAEI                     | 2.61 | 0.01 | 2.41 | 0.44 | 0.85 | 0.28 |
| 12725 | 0 | 8408   | DGIMHTRCHCGAEI                     | 2.61 | 0.01 | 2.41 | 0.44 | 1.41 | 0.28 |



|       |   |        |                                                             |      |      |      |      |      |      |
|-------|---|--------|-------------------------------------------------------------|------|------|------|------|------|------|
| 12726 | 0 | 8408   | DGIMHTRCHCGAEI                                              | 2.61 | 0.01 | 2.41 | 0.44 | 0.85 | 0.28 |
| 12727 | 0 | 8408   | DGIMHTRCHCGAEI                                              | 2.61 | 0.01 | 2.41 | 0.44 | 0.85 | 0.28 |
| 12728 | 0 | 8409   | DGIMQTTCPGCAQI                                              | 2.62 | 0.01 | 1.96 | 0.44 | 0.85 | 0.28 |
| 12729 | 0 | 8409   | DGIMQTTCPGCAQI                                              | 2.62 | 0.01 | 1.96 | 0.44 | 1.41 | 0.28 |
| 12730 | 0 | 108856 | DGIPGAKG                                                    | 2.14 | 0.01 | 1.60 | 2.55 | 2.60 | 0.28 |
| 12731 | 0 | 238283 | DGIRRFLGTVTVKAGK                                            | 2.74 | 0.01 | 2.14 | 2.65 | 0.22 | 0.85 |
| 12732 | 0 | 8413   | DGIYFAATEKSNVVRGW                                           | 2.71 | 0.01 | 2.48 | 0.44 | 0.85 | 0.28 |
| 12733 | 0 | 121194 | DGKAKVKDEPQRRSA                                             | 2.68 | 0.01 | 0.78 | 0.44 | 1.13 | 1.27 |
| 12734 | 0 | 95308  | DGKGYERGHI                                                  | 2.31 | 0.01 | 2.60 | 1.12 | 0.22 | 0.85 |
| 12735 | 0 | 136056 | DGKKWQTYRGNSTG                                              | 2.60 | 0.01 | 0.78 | 1.20 | 0.22 | 0.28 |
| 12736 | 0 | 136056 | DGKKWQTYRGNSTG                                              | 2.60 | 0.01 | 0.78 | 1.20 | 0.22 | 0.28 |
| 12737 | 0 | 8421   | DGKNAKDRKEAWERIR<br>QAIPR                                   | 3.02 | 0.01 | 2.30 | 0.68 | 0.22 | 0.28 |
| 12738 | 0 | 8421   | DGKNAKDRKEAWERIR<br>QAIPR                                   | 3.02 | 0.01 | 2.30 | 0.68 | 0.22 | 1.34 |
| 12739 | 0 | 8424   | DGKSVKLE                                                    | 2.12 | 0.01 | 3.27 | 2.02 | 0.22 | 0.28 |
| 12740 | 0 | 8424   | DGKSVKLE                                                    | 2.12 | 0.01 | 3.27 | 2.82 | 0.22 | 0.28 |
| 12741 | 0 | 8425   | DGKTFIDFKKYNDKLPLYI<br>SNPNYKVNYYA                          | 3.36 | 0.01 | 2.18 | 0.68 | 0.22 | 0.85 |
| 12742 | 0 | 8426   | DGKTFIDFKKYNDKLPLYI<br>SNPNYKVNYYAVTKENT<br>IINPSENGDTSTNGI | 3.90 | 0.01 | 2.18 | 1.20 | 0.22 | 2.35 |
| 12743 | 0 | 8426   | DGKTFIDFKKYNDKLPLYI<br>SNPNYKVNYYAVTKENT<br>IINPSENGDTSTNGI | 3.90 | 0.01 | 2.18 | 0.68 | 0.22 | 2.12 |
| 12744 | 0 | 8426   | DGKTFIDFKKYNDKLPLYI<br>SNPNYKVNYYAVTKENT<br>IINPSENGDTSTNGI | 3.90 | 0.01 | 2.18 | 0.68 | 0.22 | 0.85 |
| 12745 | 0 | 8426   | DGKTFIDFKKYNDKLPLYI<br>SNPNYKVNYYAVTKENT<br>IINPSENGDTSTNGI | 3.90 | 0.01 | 2.18 | 0.68 | 0.22 | 1.34 |
| 12746 | 0 | 107102 | DGKTLNDELEIIEGM                                             | 2.70 | 0.01 | 2.19 | 2.97 | 0.22 | 0.28 |
| 12747 | 0 | 8429   | DGKTLVSKKVT                                                 | 2.50 | 0.01 | 2.73 | 0.44 | 0.85 | 0.28 |
| 12748 | 0 | 8429   | DGKTLVSKKVT                                                 | 2.50 | 0.01 | 2.73 | 0.44 | 0.85 | 0.28 |
| 12749 | 0 | 8431   | DGKVMVLCNRA                                                 | 2.36 | 0.01 | 2.25 | 0.44 | 1.23 | 0.85 |
| 12750 | 0 | 170551 | DGKVPKDLLCNLELE                                             | 2.70 | 0.01 | 0.78 | 0.44 | 1.13 | 0.28 |
| 12751 | 0 | 136169 | DGKWHTVKTEYIKRKAF                                           | 2.76 | 0.01 | 1.75 | 2.84 | 1.13 | 0.28 |
| 12752 | 0 | 453058 | DGLPDNPQRRALYKEL<br>LEGSM LGG                               | 3.15 | 0.01 | 2.40 | 2.82 | 0.22 | 0.28 |
| 12753 | 0 | 8439   | DGLRAQDDYNGWDINT<br>PAF                                     | 2.88 | 0.01 | 3.85 | 1.12 | 0.22 | 0.85 |

|       |   |        |                          |      |      |      |      |      |      |
|-------|---|--------|--------------------------|------|------|------|------|------|------|
| 12754 | 0 | 8439   | DGLRAQDDYNGWDINT<br>PAF  | 2.88 | 0.01 | 3.85 | 1.81 | 0.22 | 0.85 |
| 12755 | 0 | 177627 | DGLRNSTGLGSQNKF          | 2.68 | 0.01 | 0.78 | 0.44 | 1.13 | 0.85 |
| 12756 | 0 | 149656 | DGLSDFLKSTP              | 2.48 | 0.01 | 3.53 | 0.68 | 0.22 | 0.28 |
| 12757 | 0 | 149656 | DGLSDFLKSTP              | 2.48 | 0.01 | 3.53 | 0.68 | 0.22 | 0.28 |
| 12758 | 0 | 175780 | DGMTNTIENARQGAA          | 2.66 | 0.01 | 2.63 | 1.15 | 0.22 | 0.85 |
| 12759 | 0 | 8448   | DGNCEDIPHVNEFSAIDL       | 2.82 | 0.01 | 1.66 | 1.20 | 0.22 | 0.28 |
| 12760 | 0 | 8448   | DGNCEDIPHVNEFSAIDL       | 2.82 | 0.01 | 1.66 | 2.43 | 0.22 | 0.28 |
| 12761 | 0 | 8448   | DGNCEDIPHVNEFSAIDL       | 2.82 | 0.01 | 1.66 | 0.44 | 1.74 | 0.28 |
| 12762 | 0 | 8448   | DGNCEDIPHVNEFSAIDL       | 2.82 | 0.01 | 1.66 | 0.68 | 0.22 | 0.28 |
| 12763 | 0 | 8448   | DGNCEDIPHVNEFSAIDL       | 2.82 | 0.01 | 1.66 | 1.20 | 0.22 | 0.28 |
| 12764 | 0 | 8448   | DGNCEDIPHVNEFSAIDL       | 2.82 | 0.01 | 2.96 | 0.44 | 1.74 | 0.28 |
| 12765 | 0 | 151830 | DGNNGDSSTYQYI            | 2.49 | 0.01 | 2.80 | 2.78 | 0.22 | 0.28 |
| 12766 | 0 | 99938  | DGNGRFVFTD               | 2.34 | 0.01 | 2.18 | 2.16 | 0.22 | 0.28 |
| 12767 | 0 | 8455   | DGNINLTDSTSNKS           | 2.72 | 0.01 | 1.66 | 1.15 | 0.22 | 0.28 |
| 12768 | 0 | 8455   | DGNINLTDSTSNKS           | 2.72 | 0.01 | 1.66 | 1.15 | 0.22 | 0.28 |
| 12769 | 0 | 174075 | DGNIVAVDIK               | 2.34 | 0.01 | 3.10 | 0.44 | 1.23 | 0.85 |
| 12770 | 0 | 8457   | DGNKENC                  | 2.14 | 0.01 | 3.42 | 0.68 | 0.22 | 0.28 |
| 12771 | 0 | 8464   | DGNPPEVKS                | 2.97 | 0.01 | 3.53 | 2.52 | 0.22 | 0.28 |
| 12772 | 0 | 8464   | DGNPPEVKS                | 2.97 | 0.01 | 2.04 | 0.44 | 1.13 | 0.28 |
| 12773 | 0 | 8464   | DGNPPEVKS                | 2.97 | 0.01 | 2.04 | 0.44 | 0.22 | 0.28 |
| 12774 | 0 | 225258 | DGNQIDKNNSTDNSHN<br>IL   | 2.87 | 0.01 | 2.61 | 0.68 | 0.22 | 0.28 |
| 12775 | 0 | 225258 | DGNQIDKNNSTDNSHN<br>IL   | 2.87 | 0.01 | 2.61 | 0.68 | 0.22 | 0.28 |
| 12776 | 0 | 225258 | DGNQIDKNNSTDNSHN<br>IL   | 2.87 | 0.01 | 2.61 | 0.68 | 0.22 | 0.28 |
| 12777 | 0 | 111193 | DGPAGQAEPDRAHYNI         | 2.74 | 0.01 | 1.86 | 0.68 | 0.22 | 1.27 |
| 12778 | 0 | 111193 | DGPAGQAEPDRAHYNI         | 2.74 | 0.01 | 1.86 | 1.12 | 0.22 | 0.28 |
| 12779 | 0 | 111193 | DGPAGQAEPDRAHYNI         | 2.74 | 0.01 | 1.86 | 0.68 | 0.22 | 2.02 |
| 12780 | 0 | 170554 | DGP EEI ECTKLGNWS        | 2.64 | 0.01 | 0.78 | 0.44 | 1.41 | 0.28 |
| 12781 | 0 | 132210 | DGPPGELGPD               | 2.37 | 0.01 | 0.78 | 0.44 | 1.13 | 0.28 |
| 12782 | 0 | 8469   | DGPQKSVSQGGVSLDLY<br>SKL | 2.99 | 0.01 | 4.63 | 2.42 | 0.22 | 0.28 |

|       |   |        |                                              |      |      |      |      |      |      |
|-------|---|--------|----------------------------------------------|------|------|------|------|------|------|
| 12783 | 0 | 8469   | DGPQKSVSQGGVSLDLY<br>SKL                     | 2.99 | 0.01 | 4.63 | 2.42 | 0.22 | 1.34 |
| 12784 | 0 | 102352 | DGPSYHVAFKNSRGLRH<br>S                       | 2.82 | 0.01 | 0.90 | 0.44 | 0.85 | 0.28 |
| 12785 | 0 | 99939  | DGQDLLFTNQ                                   | 2.33 | 0.01 | 2.18 | 2.16 | 0.22 | 0.28 |
| 12786 | 0 | 99939  | DGQDLLFTNQ                                   | 2.33 | 0.01 | 2.18 | 2.16 | 0.22 | 0.28 |
| 12787 | 0 | 117456 | DGQFCH                                       | 1.88 | 0.01 | 0.78 | 0.44 | 1.13 | 0.85 |
| 12788 | 0 | 117456 | DGQFCH                                       | 1.88 | 0.01 | 0.78 | 0.44 | 1.13 | 0.85 |
| 12789 | 0 | 117456 | DGQFCH                                       | 1.88 | 0.01 | 0.78 | 0.44 | 1.13 | 0.85 |
| 12790 | 0 | 117456 | DGQFCH                                       | 1.88 | 0.01 | 0.78 | 0.44 | 1.41 | 0.85 |
| 12791 | 0 | 8473   | DGQPAGDR                                     | 2.15 | 0.01 | 2.59 | 0.44 | 1.59 | 0.28 |
| 12792 | 0 | 8474   | DGQPAGDRAAGQPAG<br>DRADGQPAGDRADGQ<br>PAG    | 3.51 | 0.01 | 2.59 | 4.08 | 1.59 | 0.28 |
| 12793 | 0 | 8474   | DGQPAGDRAAGQPAG<br>DRADGQPAGDRADGQ<br>PAG    | 3.51 | 0.01 | 2.59 | 0.44 | 1.74 | 0.28 |
| 12794 | 0 | 8475   | DGQPAGDRADGQPAG<br>DRA                       | 2.92 | 0.01 | 4.08 | 1.15 | 0.22 | 1.57 |
| 12795 | 0 | 8475   | DGQPAGDRADGQPAG<br>DRA                       | 2.92 | 0.01 | 4.08 | 1.15 | 0.22 | 1.57 |
| 12796 | 0 | 8475   | DGQPAGDRADGQPAG<br>DRA                       | 2.92 | 0.01 | 2.59 | 1.15 | 0.22 | 0.28 |
| 12797 | 0 | 8475   | DGQPAGDRADGQPAG<br>DRA                       | 2.92 | 0.01 | 2.59 | 1.15 | 0.22 | 0.85 |
| 12798 | 0 | 8476   | DGQPAGDRADGQPAG<br>DRADGQPAGDRADGQ<br>PAGDRA | 3.60 | 0.01 | 2.59 | 0.44 | 0.85 | 0.28 |
| 12799 | 0 | 108857 | DGQPGPAG                                     | 2.16 | 0.01 | 1.60 | 2.55 | 2.60 | 0.28 |
| 12800 | 0 | 128412 | DGQRHHLIINEAMLEDA<br>GHYALCTSGGQALRE         | 3.39 | 0.01 | 0.78 | 2.04 | 0.22 | 0.28 |
| 12801 | 0 | 228025 | DGR                                          | 1.37 | 0.01 | 1.75 | 2.19 | 0.22 | 0.85 |
| 12802 | 0 | 194911 | DGRDAVAGALAPEIVLY<br>TEN                     | 2.95 | 0.01 | 3.12 | 0.68 | 0.22 | 1.34 |
| 12803 | 0 | 194911 | DGRDAVAGALAPEIVLY<br>TEN                     | 2.95 | 0.01 | 3.12 | 0.68 | 0.22 | 1.34 |
| 12804 | 0 | 194912 | DGREAADAFSPEIVLYTE<br>N                      | 2.86 | 0.01 | 3.85 | 0.68 | 0.22 | 1.34 |
| 12805 | 0 | 194912 | DGREAADAFSPEIVLYTE<br>N                      | 2.86 | 0.01 | 3.85 | 0.68 | 2.25 | 1.75 |
| 12806 | 0 | 194912 | DGREAADAFSPEIVLYTE<br>N                      | 2.86 | 0.01 | 3.85 | 0.68 | 0.22 | 1.34 |
| 12807 | 0 | 111194 | DGRFSYQNLFDAIVD                              | 2.65 | 0.01 | 3.20 | 1.12 | 0.22 | 0.85 |
| 12808 | 0 | 8478   | DGRGAQVYIGNG                                 | 2.48 | 0.01 | 3.24 | 0.44 | 1.23 | 0.85 |
| 12809 | 0 | 8479   | DGRPGGAGNASRDGRP<br>SGGG                     | 2.99 | 0.01 | 3.78 | 0.68 | 0.22 | 0.85 |

|       |   |        |                              |      |      |      |      |      |      |
|-------|---|--------|------------------------------|------|------|------|------|------|------|
| 12810 | 0 | 133542 | DGRRDVVVR SATFYL             | 2.67 | 0.01 | 0.90 | 1.15 | 0.22 | 0.28 |
| 12811 | 0 | 133542 | DGRRDVVVR SATFYL             | 2.67 | 0.01 | 0.90 | 1.15 | 0.22 | 0.28 |
| 12812 | 0 | 133542 | DGRRDVVVR SATFYL             | 2.67 | 0.01 | 0.90 | 1.15 | 0.22 | 2.12 |
| 12813 | 0 | 133542 | DGRRDVVVR SATFYL             | 2.67 | 0.01 | 0.90 | 1.15 | 0.22 | 1.27 |
| 12814 | 0 | 133542 | DGRRDVVVR SATFYL             | 2.67 | 0.01 | 0.90 | 1.15 | 0.22 | 1.66 |
| 12815 | 0 | 450474 | DGRYYIN                      | 2.01 | 0.01 | 0.90 | 0.44 | 1.23 | 1.39 |
| 12816 | 0 | 236500 | DGSAATPLTRVSAEQ              | 2.66 | 0.01 | 3.70 | 2.13 | 0.22 | 1.28 |
| 12817 | 0 | 107784 | DGSFFLY                      | 2.01 | 0.01 | 0.78 | 1.20 | 0.22 | 0.28 |
| 12818 | 0 | 107784 | DGSFFLY                      | 2.01 | 0.01 | 0.78 | 1.15 | 0.22 | 0.28 |
| 12819 | 0 | 107784 | DGSFFLY                      | 2.01 | 0.01 | 0.78 | 1.20 | 0.22 | 0.28 |
| 12820 | 0 | 107784 | DGSFFLY                      | 2.01 | 0.01 | 0.78 | 1.20 | 0.22 | 1.27 |
| 12821 | 0 | 107784 | DGSFFLY                      | 2.01 | 0.01 | 0.78 | 0.44 | 1.13 | 1.27 |
| 12822 | 0 | 181581 | DGSGNYYKLREDWWA              | 2.65 | 0.01 | 1.66 | 2.36 | 0.22 | 1.28 |
| 12823 | 0 | 131391 | DGSHTRG                      | 2.02 | 0.01 | 0.78 | 1.15 | 0.22 | 0.28 |
| 12824 | 0 | 131391 | DGSHTRG                      | 2.02 | 0.01 | 0.78 | 0.44 | 1.41 | 0.28 |
| 12825 | 0 | 233161 | DGSI                         | 1.57 | 0.01 | 2.75 | 1.20 | 0.22 | 1.27 |
| 12826 | 0 | 8493   | DGSLGDIEPYDSS                | 2.56 | 0.01 | 2.92 | 1.12 | 2.26 | 0.28 |
| 12827 | 0 | 8494   | DGSNVLAALAALAE               | 2.64 | 0.01 | 2.59 | 0.44 | 0.85 | 0.28 |
| 12828 | 0 | 8494   | DGSNVLAALAALAE               | 2.64 | 0.01 | 2.59 | 0.44 | 1.41 | 0.28 |
| 12829 | 0 | 8494   | DGSNVLAALAALAE               | 2.64 | 0.01 | 2.59 | 0.44 | 0.85 | 0.28 |
| 12830 | 0 | 8494   | DGSNVLAALAALAE               | 2.64 | 0.01 | 2.59 | 0.44 | 0.85 | 0.28 |
| 12831 | 0 | 192906 | DGSTSSGGGTAAETLKN<br>FVR     | 2.92 | 0.01 | 3.47 | 2.00 | 0.22 | 0.28 |
| 12832 | 0 | 161331 | DGSYRSEELNLVIIGPSA<br>D      | 2.88 | 0.01 | 2.08 | 0.68 | 0.22 | 1.57 |
| 12833 | 0 | 161331 | DGSYRSEELNLVIIGPSA<br>D      | 2.88 | 0.01 | 2.08 | 2.25 | 0.22 | 1.57 |
| 12834 | 0 | 161331 | DGSYRSEELNLVIIGPSA<br>D      | 2.88 | 0.01 | 2.08 | 2.02 | 0.22 | 1.57 |
| 12835 | 0 | 161331 | DGSYRSEELNLVIIGPSA<br>D      | 2.88 | 0.01 | 2.08 | 2.43 | 0.22 | 1.57 |
| 12836 | 0 | 8501   | DGKTTCDTNNKRIEDA<br>RKAFIEGK | 3.19 | 0.01 | 3.45 | 4.08 | 0.22 | 0.28 |
| 12837 | 0 | 120436 | DGTKVSIS                     | 2.12 | 0.01 | 2.26 | 2.36 | 0.22 | 1.27 |
| 12838 | 0 | 120436 | DGTKVSIS                     | 2.12 | 0.01 | 2.26 | 2.36 | 0.22 | 0.28 |
| 12839 | 0 | 120436 | DGTKVSIS                     | 2.12 | 0.01 | 2.26 | 2.36 | 0.22 | 0.85 |
| 12840 | 0 | 120436 | DGTKVSIS                     | 2.12 | 0.01 | 2.26 | 2.36 | 0.22 | 0.85 |
| 12841 | 0 | 121197 | DGTKVSI SPESDRPDL            | 2.74 | 0.01 | 2.26 | 2.36 | 0.22 | 0.85 |
| 12842 | 0 | 8503   | DGTRDTLPQSPGP                | 2.58 | 0.01 | 3.17 | 0.44 | 0.85 | 0.85 |
| 12843 | 0 | 8505   | DGTSYKKSD FSS                | 2.49 | 0.01 | 2.69 | 0.68 | 0.22 | 0.28 |
| 12844 | 0 | 8505   | DGTSYKKSD FSS                | 2.49 | 0.01 | 2.69 | 1.20 | 0.22 | 0.28 |
| 12845 | 0 | 118291 | DGTTTATVLARSI                | 2.54 | 0.01 | 0.78 | 0.44 | 1.74 | 0.85 |
| 12846 | 0 | 8508   | DGVAVLKVGG                   | 2.33 | 0.01 | 0.78 | 0.44 | 1.13 | 0.28 |
| 12847 | 0 | 8508   | DGVAVLKVGG                   | 2.33 | 0.01 | 0.78 | 1.20 | 0.22 | 0.28 |
| 12848 | 0 | 268186 | DGVDSREQDGEVTT S             | 2.71 | 0.01 | 1.61 | 0.44 | 0.85 | 1.28 |
| 12849 | 0 | 8510   | DGVFNNPI                     | 2.11 | 0.01 | 3.55 | 0.68 | 0.22 | 0.28 |

|       |   |        |                                    |      |      |      |      |      |      |
|-------|---|--------|------------------------------------|------|------|------|------|------|------|
| 12850 | 0 | 113325 | DGVGDVCQDDFDADK<br>VVDKI           | 2.98 | 0.01 | 0.78 | 1.81 | 0.22 | 0.28 |
| 12851 | 0 | 113325 | DGVGDVCQDDFDADK<br>VVDKI           | 2.98 | 0.01 | 0.78 | 3.61 | 0.22 | 0.28 |
| 12852 | 0 | 268199 | DGVGGGDGSAGEDLL                    | 2.71 | 0.01 | 1.61 | 0.44 | 0.85 | 1.28 |
| 12853 | 0 | 8512   | DGVITVEEAKGIEDELVD<br>VEGMQFDRGYLS | 3.33 | 0.01 | 2.93 | 0.44 | 1.59 | 0.28 |
| 12854 | 0 | 101538 | DGVMQGAISIIQGE                     | 2.69 | 0.01 | 3.11 | 1.20 | 0.22 | 0.28 |
| 12855 | 0 | 8514   | DGVMSTRPCGAAI                      | 2.58 | 0.01 | 2.59 | 0.44 | 0.85 | 0.28 |
| 12856 | 0 | 108860 | DGVNH                              | 1.74 | 0.01 | 3.11 | 0.68 | 0.22 | 0.28 |
| 12857 | 0 | 108860 | DGVNH                              | 1.74 | 0.01 | 3.11 | 0.68 | 0.22 | 1.48 |
| 12858 | 0 | 108860 | DGVNH                              | 1.74 | 0.01 | 3.11 | 3.70 | 0.22 | 0.28 |
| 12859 | 0 | 108861 | DGVNHQ                             | 1.88 | 0.01 | 3.11 | 0.68 | 0.22 | 0.28 |
| 12860 | 0 | 108861 | DGVNHQ                             | 1.88 | 0.01 | 3.11 | 0.68 | 0.22 | 1.48 |
| 12861 | 0 | 108861 | DGVNHQ                             | 1.88 | 0.01 | 3.11 | 0.68 | 0.22 | 0.28 |
| 12862 | 0 | 108862 | DGVNHQHL                           | 2.12 | 0.01 | 3.11 | 0.68 | 0.22 | 0.28 |
| 12863 | 0 | 108862 | DGVNHQHL                           | 2.12 | 0.01 | 3.11 | 0.68 | 0.22 | 1.48 |
| 12864 | 0 | 108862 | DGVNHQHL                           | 2.12 | 0.01 | 3.11 | 0.68 | 0.22 | 0.28 |
| 12865 | 0 | 79778  | DGVREARSG                          | 2.23 | 0.01 | 4.63 | 1.12 | 0.22 | 0.85 |
| 12866 | 0 | 79778  | DGVREARSG                          | 2.23 | 0.01 | 4.63 | 1.12 | 0.22 | 0.85 |
| 12867 | 0 | 8517   | DGVRHLHRYAPVCKPLLR<br>E            | 2.83 | 0.01 | 1.72 | 0.44 | 0.85 | 0.28 |
| 12868 | 0 | 114772 | DGVTYTNDCL                         | 2.32 | 0.01 | 2.25 | 0.44 | 1.23 | 0.85 |
| 12869 | 0 | 124008 | DGVVLVD                            | 2.07 | 0.01 | 1.60 | 0.68 | 0.22 | 0.28 |
| 12870 | 0 | 124008 | DGVVLVD                            | 2.07 | 0.01 | 1.60 | 0.68 | 0.22 | 0.28 |
| 12871 | 0 | 124008 | DGVVLVD                            | 2.07 | 0.01 | 1.60 | 0.68 | 0.22 | 0.28 |
| 12872 | 0 | 124008 | DGVVLVD                            | 2.07 | 0.01 | 1.60 | 0.68 | 0.22 | 1.27 |
| 12873 | 0 | 124008 | DGVVLVD                            | 2.07 | 0.01 | 1.60 | 1.15 | 0.22 | 0.85 |
| 12874 | 0 | 124008 | DGVVLVD                            | 2.07 | 0.01 | 1.60 | 2.04 | 0.22 | 1.27 |
| 12875 | 0 | 124008 | DGVVLVD                            | 2.07 | 0.01 | 1.60 | 2.04 | 0.22 | 0.85 |
| 12876 | 0 | 124008 | DGVVLVD                            | 2.07 | 0.01 | 1.60 | 2.04 | 0.22 | 0.85 |
| 12877 | 0 | 124008 | DGVVLVD                            | 2.07 | 0.01 | 1.60 | 2.04 | 0.22 | 0.85 |
| 12878 | 0 | 124008 | DGVVLVD                            | 2.07 | 0.01 | 1.60 | 2.04 | 0.22 | 0.85 |
| 12879 | 0 | 124008 | DGVVLVD                            | 2.07 | 0.01 | 1.60 | 2.04 | 0.22 | 0.85 |
| 12880 | 0 | 103105 | DGYPIINYEYAIVNN                    | 2.68 | 0.01 | 2.04 | 0.44 | 0.85 | 1.28 |
| 12881 | 0 | 150163 | DGYPTFGEHKQEKDL                    | 2.67 | 0.01 | 3.45 | 0.68 | 0.22 | 0.28 |
| 12882 | 0 | 150163 | DGYPTFGEHKQEKDL                    | 2.67 | 0.01 | 3.45 | 0.68 | 0.22 | 1.34 |
| 12883 | 0 | 150163 | DGYPTFGEHKQEKDL                    | 2.67 | 0.01 | 3.45 | 0.68 | 0.22 | 1.34 |
| 12884 | 0 | 8526   | DGYPVEYDNCAYICW                    | 2.67 | 0.01 | 2.56 | 1.20 | 0.22 | 0.85 |
| 12885 | 0 | 170556 | DGYVWQVTDMNRLHR                    | 2.65 | 0.01 | 0.78 | 0.44 | 1.41 | 0.28 |
| 12886 | 0 | 170556 | DGYVWQVTDMNRLHR                    | 2.65 | 0.01 | 0.78 | 0.44 | 1.13 | 0.28 |
| 12887 | 0 | 117276 | DGYVWQVTDMNRLHR<br>FLCFGS          | 2.95 | 0.01 | 0.78 | 0.44 | 1.13 | 1.27 |
| 12888 | 0 | 117276 | DGYVWQVTDMNRLHR<br>FLCFGS          | 2.95 | 0.01 | 0.78 | 0.44 | 1.13 | 0.28 |

|       |   |        |                          |      |      |      |      |      |      |
|-------|---|--------|--------------------------|------|------|------|------|------|------|
| 12889 | 0 | 117276 | DGYVWQVTDMNRLHR<br>FLCFG | 2.95 | 0.01 | 0.78 | 0.44 | 1.13 | 0.28 |
| 12890 | 0 | 117276 | DGYVWQVTDMNRLHR<br>FLCFG | 2.95 | 0.01 | 0.78 | 0.44 | 1.13 | 0.28 |
| 12891 | 0 | 117276 | DGYVWQVTDMNRLHR<br>FLCFG | 2.95 | 0.01 | 0.78 | 3.44 | 0.22 | 0.28 |
| 12892 | 0 | 117276 | DGYVWQVTDMNRLHR<br>FLCFG | 2.95 | 0.01 | 0.78 | 3.44 | 0.22 | 0.28 |
| 12893 | 0 | 114773 | DHARHGFLPRHRD            | 2.58 | 0.01 | 0.78 | 1.15 | 0.22 | 0.28 |
| 12894 | 0 | 114773 | DHARHGFLPRHRD            | 2.58 | 0.01 | 0.78 | 1.15 | 0.22 | 0.28 |
| 12895 | 0 | 114773 | DHARHGFLPRHRD            | 2.58 | 0.01 | 0.78 | 1.15 | 0.22 | 0.28 |
| 12896 | 0 | 114773 | DHARHGFLPRHRD            | 2.58 | 0.01 | 0.78 | 1.15 | 0.22 | 0.28 |
| 12897 | 0 | 114773 | DHARHGFLPRHRD            | 2.58 | 0.01 | 0.78 | 1.15 | 0.22 | 0.28 |
| 12898 | 0 | 114773 | DHARHGFLPRHRD            | 2.58 | 0.01 | 0.78 | 1.15 | 0.22 | 0.28 |
| 12899 | 0 | 114773 | DHARHGFLPRHRD            | 2.58 | 0.01 | 0.78 | 1.15 | 0.22 | 0.28 |
| 12900 | 0 | 114773 | DHARHGFLPRHRD            | 2.58 | 0.01 | 0.78 | 1.15 | 0.22 | 0.28 |
| 12901 | 0 | 114773 | DHARHGFLPRHRD            | 2.58 | 0.01 | 0.78 | 1.15 | 0.22 | 0.28 |
| 12902 | 0 | 114197 | DHARHGFLPRHRDTGIL        | 2.82 | 0.01 | 0.78 | 3.45 | 0.22 | 1.57 |
| 12903 | 0 | 114197 | DHARHGFLPRHRDTGIL        | 2.82 | 0.01 | 0.78 | 3.45 | 0.22 | 1.57 |
| 12904 | 0 | 114197 | DHARHGFLPRHRDTGIL        | 2.82 | 0.01 | 0.78 | 3.45 | 0.22 | 1.57 |
| 12905 | 0 | 114197 | DHARHGFLPRHRDTGIL        | 2.82 | 0.01 | 0.78 | 3.45 | 0.22 | 1.57 |
| 12906 | 0 | 114197 | DHARHGFLPRHRDTGIL        | 2.82 | 0.01 | 0.78 | 3.45 | 0.22 | 1.57 |
| 12907 | 0 | 114197 | DHARHGFLPRHRDTGIL        | 2.82 | 0.01 | 0.78 | 3.45 | 0.22 | 1.57 |
| 12908 | 0 | 114197 | DHARHGFLPRHRDTGIL        | 2.82 | 0.01 | 0.78 | 3.45 | 0.22 | 1.57 |
| 12909 | 0 | 114197 | DHARHGFLPRHRDTGIL        | 2.82 | 0.01 | 0.78 | 3.45 | 0.22 | 1.57 |
| 12910 | 0 | 114197 | DHARHGFLPRHRDTGIL        | 2.82 | 0.01 | 0.78 | 3.45 | 0.22 | 1.57 |
| 12911 | 0 | 8529   | DHARPTSVWLSR             | 2.45 | 0.01 | 0.90 | 0.68 | 0.22 | 0.85 |
| 12912 | 0 | 8530   | DHCPVVEVNGVTIQV          | 2.66 | 0.01 | 2.43 | 0.44 | 0.85 | 0.28 |
| 12913 | 0 | 512873 | DHDHEHEDENEAKDE          | 2.75 | 0.01 | 2.24 | 0.44 | 1.41 | 1.28 |
| 12914 | 0 | 141615 | DHDRLIRRTAQI             | 2.49 | 0.01 | 0.90 | 0.68 | 0.22 | 0.28 |
| 12915 | 0 | 108312 | DHDRVIHIQAENGPRLL<br>VEA | 2.94 | 0.01 | 1.60 | 0.68 | 0.22 | 0.28 |
| 12916 | 0 | 8533   | DHEEDNNT                 | 2.15 | 0.01 | 2.99 | 0.44 | 0.85 | 0.28 |
| 12917 | 0 | 8535   | DHEGCKFSCFIRPAG          | 2.64 | 0.01 | 2.56 | 2.02 | 0.22 | 0.85 |
| 12918 | 0 | 8536   | DHEGCKLSCFIRPSG          | 2.64 | 0.01 | 2.56 | 2.02 | 0.22 | 0.85 |
| 12919 | 0 | 489141 | DHEGTHSTKRGHAKSRP<br>VRD | 2.97 | 3.37 | 0.78 | 0.44 | 1.13 | 0.28 |

|       |   |        |                          |      |      |      |      |      |      |
|-------|---|--------|--------------------------|------|------|------|------|------|------|
| 12920 | 0 | 107788 | DHEGTHSTKRGHAKSRP<br>VRG | 2.96 | 4.45 | 0.78 | 0.44 | 1.13 | 0.28 |
| 12921 | 0 | 107788 | DHEGTHSTKRGHAKSRP<br>VRG | 2.96 | 4.45 | 0.78 | 0.44 | 1.13 | 0.28 |
| 12922 | 0 | 107788 | DHEGTHSTKRGHAKSRP<br>VRG | 2.96 | 4.45 | 0.78 | 0.44 | 1.13 | 0.28 |
| 12923 | 0 | 268292 | DHEKQHQSDDETQVQQ         | 2.70 | 0.01 | 1.61 | 0.44 | 0.85 | 1.28 |
| 12924 | 0 | 268293 | DHEKQQQSDEAQFQQ          | 2.69 | 0.01 | 1.61 | 0.44 | 0.85 | 1.28 |
| 12925 | 0 | 268294 | DHEKQQQSDEAQVQQ          | 2.69 | 0.01 | 1.61 | 0.44 | 0.85 | 1.28 |
| 12926 | 0 | 268295 | DHEKQQQSDDETQVQQ         | 2.69 | 0.01 | 1.61 | 0.44 | 0.85 | 1.28 |
| 12927 | 0 | 170560 | DHEYTTKEIFRKNFF          | 2.65 | 0.01 | 0.78 | 0.44 | 1.13 | 0.28 |
| 12928 | 0 | 106336 | DHFADGYDEV               | 2.32 | 0.01 | 2.75 | 0.44 | 1.23 | 0.85 |
| 12929 | 0 | 178659 | DHFLFKEGDRFLQAA          | 2.67 | 0.01 | 2.36 | 0.44 | 1.23 | 1.28 |
| 12930 | 0 | 175451 | DHGAE                    | 1.74 | 4.23 | 0.78 | 3.01 | 0.22 | 2.49 |
| 12931 | 0 | 99144  | DHGLFTQHIMPD             | 2.46 | 0.01 | 0.90 | 1.12 | 0.22 | 1.39 |
| 12932 | 0 | 236101 | DHGLPGYNAWR              | 2.36 | 0.01 | 0.78 | 0.44 | 1.41 | 2.66 |
| 12933 | 0 | 236101 | DHGLPGYNAWR              | 2.36 | 0.01 | 0.78 | 0.44 | 1.13 | 2.66 |
| 12934 | 0 | 236101 | DHGLPGYNAWR              | 2.36 | 0.01 | 0.78 | 3.41 | 0.22 | 2.66 |
| 12935 | 0 | 108313 | DHHSNYTVDHDRVIHI<br>QA   | 2.91 | 0.01 | 1.60 | 0.68 | 0.22 | 0.28 |
| 12936 | 0 | 117786 | DHILEPSIPWKS             | 2.48 | 0.01 | 2.04 | 2.66 | 0.22 | 0.28 |
| 12937 | 0 | 117786 | DHILEPSIPWKS             | 2.48 | 0.01 | 2.04 | 0.44 | 2.82 | 0.28 |
| 12938 | 0 | 8544   | DHILEPSIPWKSLLTLV<br>QL  | 2.94 | 0.01 | 2.04 | 0.44 | 0.85 | 0.28 |
| 12939 | 0 | 8544   | DHILEPSIPWKSLLTLV<br>QL  | 2.94 | 0.01 | 2.04 | 0.44 | 0.85 | 0.28 |
| 12940 | 0 | 8544   | DHILEPSIPWKSLLTLV<br>QL  | 2.94 | 0.01 | 2.04 | 0.44 | 0.85 | 0.28 |
| 12941 | 0 | 8544   | DHILEPSIPWKSLLTLV<br>QL  | 2.94 | 0.01 | 2.04 | 0.44 | 0.85 | 0.28 |
| 12942 | 0 | 8544   | DHILEPSIPWKSLLTLV<br>QL  | 2.94 | 0.01 | 2.04 | 0.44 | 0.85 | 0.28 |
| 12943 | 0 | 8544   | DHILEPSIPWKSLLTLV<br>QL  | 2.94 | 0.01 | 2.04 | 2.66 | 0.22 | 0.28 |
| 12944 | 0 | 8544   | DHILEPSIPWKSLLTLV<br>QL  | 2.94 | 0.01 | 2.04 | 2.66 | 0.22 | 0.28 |
| 12945 | 0 | 8544   | DHILEPSIPWKSLLTLV<br>QL  | 2.94 | 0.01 | 2.04 | 2.66 | 0.22 | 0.28 |
| 12946 | 0 | 8544   | DHILEPSIPWKSLLTLV<br>QL  | 2.94 | 0.01 | 2.04 | 2.66 | 0.22 | 0.28 |
| 12947 | 0 | 8544   | DHILEPSIPWKSLLTLV<br>QL  | 2.94 | 0.01 | 2.04 | 0.44 | 0.85 | 0.28 |

|       |   |        |                                         |      |      |      |      |      |      |
|-------|---|--------|-----------------------------------------|------|------|------|------|------|------|
| 12948 | 0 | 8544   | DHILEPSIPWWSKLLTLV<br>QL                | 2.94 | 0.01 | 2.04 | 0.44 | 2.82 | 0.28 |
| 12949 | 0 | 8544   | DHILEPSIPWWSKLLTLV<br>QL                | 2.94 | 0.01 | 2.04 | 0.44 | 0.85 | 1.27 |
| 12950 | 0 | 8544   | DHILEPSIPWWSKLLTLV<br>QL                | 2.94 | 0.01 | 2.04 | 0.44 | 0.85 | 1.27 |
| 12951 | 0 | 8544   | DHILEPSIPWWSKLLTLV<br>QL                | 2.94 | 0.01 | 2.04 | 0.44 | 2.82 | 1.27 |
| 12952 | 0 | 8545   | DHILEPSIPWWSKLLTLV<br>QLTLQSTNYTCIVCIDR | 3.49 | 0.01 | 2.04 | 0.44 | 0.85 | 0.28 |
| 12953 | 0 | 8545   | DHILEPSIPWWSKLLTLV<br>QLTLQSTNYTCIVCIDR | 3.49 | 0.01 | 2.04 | 0.44 | 0.85 | 0.28 |
| 12954 | 0 | 139027 | DHIPSDYDDVGSNSGDI<br>SNNYDDVGSNNGDIS    | 3.46 | 0.01 | 4.15 | 0.68 | 0.22 | 0.28 |
| 12955 | 0 | 139027 | DHIPSDYDDVGSNSGDI<br>SNNYDDVGSNNGDIS    | 3.46 | 0.01 | 4.15 | 0.68 | 0.22 | 0.28 |
| 12956 | 0 | 112076 | DHKNYLA                                 | 1.99 | 0.01 | 0.78 | 0.44 | 1.13 | 0.28 |
| 12957 | 0 | 8547   | DHKPQTTKPKEV                            | 2.48 | 0.01 | 2.38 | 0.44 | 1.59 | 0.28 |
| 12958 | 0 | 8547   | DHKPQTTKPKEV                            | 2.48 | 0.01 | 2.38 | 0.44 | 1.74 | 0.28 |
| 12959 | 0 | 8547   | DHKPQTTKPKEV                            | 2.48 | 0.01 | 2.38 | 0.44 | 1.74 | 0.28 |
| 12960 | 0 | 186749 | DHLFACWLEHHHHHH                         | 2.67 | 0.01 | 0.90 | 1.20 | 0.22 | 0.85 |
| 12961 | 0 | 170563 | DHLGVIPRAIHDFQ                          | 2.67 | 0.01 | 0.78 | 0.44 | 1.13 | 0.28 |
| 12962 | 0 | 133039 | DHLKDYKESNEIKLK                         | 2.71 | 0.01 | 0.90 | 1.20 | 0.22 | 0.85 |
| 12963 | 0 | 150164 | DHLLLEPLLPLKSKLLTLLS<br>S               | 2.98 | 0.01 | 0.90 | 0.44 | 0.85 | 1.27 |
| 12964 | 0 | 150164 | DHLLLEPLLPLKSKLLTLLS<br>S               | 2.98 | 0.01 | 0.90 | 0.44 | 0.85 | 1.27 |
| 12965 | 0 | 150164 | DHLLLEPLLPLKSKLLTLLS<br>S               | 2.98 | 0.01 | 0.90 | 0.44 | 2.82 | 1.27 |
| 12966 | 0 | 8552   | DHLPSPW                                 | 2.02 | 0.01 | 0.90 | 0.44 | 1.23 | 1.27 |
| 12967 | 0 | 8552   | DHLPSPW                                 | 2.02 | 0.01 | 0.90 | 0.44 | 1.23 | 0.28 |
| 12968 | 0 | 178124 | DHMAIIKKYTSGRQEK<br>N PAL               | 2.86 | 0.01 | 3.51 | 1.12 | 0.22 | 1.27 |
| 12969 | 0 | 8554   | DHMSIYKFMGRSHFLCT<br>FTF                | 2.93 | 0.01 | 2.82 | 0.44 | 0.85 | 0.28 |
| 12970 | 0 | 8557   | DHNSPYIWPRNDYDGFL<br>ENA                | 2.92 | 0.01 | 3.27 | 1.15 | 0.22 | 0.28 |
| 12971 | 0 | 8560   | DHPLQKTY                                | 2.10 | 0.01 | 0.78 | 0.44 | 1.74 | 0.28 |
| 12972 | 0 | 8561   | DHPLQKTYNY                              | 2.29 | 0.01 | 0.78 | 0.44 | 1.74 | 0.28 |
| 12973 | 0 | 8561   | DHPLQKTYNY                              | 2.29 | 0.01 | 0.78 | 0.44 | 1.74 | 0.28 |
| 12974 | 0 | 8561   | DHPLQKTYNY                              | 2.29 | 0.01 | 0.78 | 1.12 | 0.22 | 0.28 |
| 12975 | 0 | 8562   | DHQLDPAFG                               | 2.22 | 0.01 | 2.58 | 0.68 | 0.22 | 2.02 |



|       |   |        |                                 |      |      |      |      |      |      |
|-------|---|--------|---------------------------------|------|------|------|------|------|------|
| 12976 | 0 | 8562   | DHQLDPAFG                       | 2.22 | 0.01 | 2.58 | 0.68 | 0.22 | 2.02 |
| 12977 | 0 | 8563   | DHQLDPAFKANSENPD<br>WDLNPHKDNWP | 3.26 | 0.01 | 3.28 | 0.68 | 0.22 | 0.28 |
| 12978 | 0 | 153252 | DHQLDPAFRANTANP                 | 2.69 | 0.01 | 2.08 | 0.68 | 0.22 | 0.28 |
| 12979 | 0 | 153252 | DHQLDPAFRANTANP                 | 2.69 | 0.01 | 2.08 | 0.68 | 0.22 | 0.28 |
| 12980 | 0 | 153252 | DHQLDPAFRANTANP                 | 2.69 | 0.01 | 2.08 | 0.68 | 0.22 | 0.28 |
| 12981 | 0 | 227752 | DHQNLKIIKLAIPVNK                | 2.75 | 0.01 | 2.72 | 1.20 | 1.59 | 0.28 |
| 12982 | 0 | 138154 | DHRSPPWLTSLTIS                  | 2.68 | 0.01 | 0.90 | 0.44 | 1.13 | 1.39 |
| 12983 | 0 | 8565   | DHSAPL                          | 1.88 | 0.01 | 2.53 | 0.44 | 1.59 | 0.28 |
| 12984 | 0 | 8566   | DHSDLVAEKQRL                    | 2.46 | 0.01 | 3.85 | 2.42 | 0.22 | 0.28 |
| 12985 | 0 | 8566   | DHSDLVAEKQRL                    | 2.46 | 0.01 | 3.85 | 2.42 | 0.22 | 1.34 |
| 12986 | 0 | 8567   | DHSDLVAEKQRLEDLGQ<br>KFE        | 2.95 | 0.01 | 2.24 | 2.75 | 0.22 | 1.34 |
| 12987 | 0 | 8567   | DHSDLVAEKQRLEDLGQ<br>KFE        | 2.95 | 0.01 | 2.24 | 2.75 | 0.22 | 0.28 |
| 12988 | 0 | 164214 | DHSNNTSGPWV                     | 2.48 | 0.01 | 0.90 | 1.20 | 0.22 | 1.39 |
| 12989 | 0 | 131199 | DHSPFYLSTAHY                    | 2.48 | 0.01 | 0.90 | 0.44 | 1.13 | 1.39 |
| 12990 | 0 | 131199 | DHSPFYLSTAHY                    | 2.48 | 0.01 | 0.90 | 0.44 | 1.13 | 1.39 |
| 12991 | 0 | 131200 | DHSSADLINPVA                    | 2.47 | 0.01 | 0.90 | 0.44 | 1.13 | 1.39 |
| 12992 | 0 | 131200 | DHSSADLINPVA                    | 2.47 | 0.01 | 0.90 | 0.44 | 1.13 | 1.39 |
| 12993 | 0 | 115600 | DHSYQEEAAMEL                    | 2.46 | 0.01 | 0.78 | 0.44 | 1.41 | 0.28 |
| 12994 | 0 | 115600 | DHSYQEEAAMEL                    | 2.46 | 0.01 | 0.78 | 0.44 | 1.13 | 0.28 |
| 12995 | 0 | 115600 | DHSYQEEAAMEL                    | 2.46 | 0.01 | 0.78 | 0.44 | 1.13 | 0.28 |
| 12996 | 0 | 115600 | DHSYQEEAAMEL                    | 2.46 | 0.01 | 0.78 | 0.44 | 1.13 | 0.28 |
| 12997 | 0 | 115600 | DHSYQEEAAMEL                    | 2.46 | 0.01 | 0.78 | 0.44 | 1.41 | 0.28 |
| 12998 | 0 | 125374 | DHTFMQRYHTHQ                    | 2.49 | 0.01 | 0.90 | 0.68 | 0.22 | 1.39 |
| 12999 | 0 | 125374 | DHTFMQRYHTHQ                    | 2.49 | 0.01 | 0.90 | 0.68 | 0.22 | 0.28 |
| 13000 | 0 | 125375 | DHTLFAASHNHR                    | 2.46 | 0.01 | 0.90 | 0.68 | 0.22 | 1.27 |
| 13001 | 0 | 125375 | DHTLFAASHNHR                    | 2.46 | 0.01 | 0.90 | 0.68 | 0.22 | 0.28 |
| 13002 | 0 | 125375 | DHTLFAASHNHR                    | 2.46 | 0.01 | 0.90 | 2.13 | 0.22 | 0.28 |
| 13003 | 0 | 125376 | DHTLFSTGSHG                     | 2.51 | 0.01 | 0.90 | 0.68 | 0.22 | 1.39 |
| 13004 | 0 | 125376 | DHTLFSTGSHG                     | 2.51 | 0.01 | 0.90 | 0.68 | 0.22 | 0.28 |
| 13005 | 0 | 8575   | DHTLRFGSKSPF                    | 2.45 | 0.01 | 2.69 | 0.68 | 0.22 | 0.28 |
| 13006 | 0 | 8575   | DHTLRFGSKSPF                    | 2.45 | 0.01 | 2.69 | 1.20 | 0.22 | 0.28 |
| 13007 | 0 | 133041 | DHVVDYKESNETKLK                 | 2.69 | 0.01 | 0.90 | 1.20 | 0.22 | 0.85 |
| 13008 | 0 | 133041 | DHVVDYKESNETKLK                 | 2.69 | 0.01 | 0.90 | 1.81 | 0.22 | 0.28 |
| 13009 | 0 | 8579   | DHVLDHVQ                        | 2.17 | 0.01 | 2.40 | 2.43 | 0.22 | 0.28 |
| 13010 | 0 | 8580   | DHVQTMEE                        | 2.09 | 0.01 | 2.40 | 2.43 | 0.22 | 0.28 |
| 13011 | 0 | 435899 | DHYDTSSKTVKYD                   | 2.66 | 0.01 | 3.10 | 2.87 | 0.22 | 1.75 |
| 13012 | 0 | 174077 | DHYLALLVKY                      | 2.32 | 0.01 | 3.10 | 0.44 | 1.23 | 0.85 |
| 13013 | 0 | 168325 | DHYWHRNTLSH                     | 2.48 | 0.01 | 0.90 | 0.44 | 0.85 | 1.39 |
| 13014 | 0 | 8593   | DIAYNLMNPFLGKLFND<br>YNH        | 2.95 | 0.01 | 2.86 | 2.89 | 0.22 | 0.85 |

|       |   |        |                                                         |      |      |      |      |      |      |
|-------|---|--------|---------------------------------------------------------|------|------|------|------|------|------|
| 13015 | 0 | 107789 | DICKYKRDPKLFKDCYSS<br>AISEVERLKKVY                      | 3.35 | 0.01 | 0.90 | 1.12 | 0.22 | 0.28 |
| 13016 | 0 | 8594   | DICLGTDISVKQGDV                                         | 2.69 | 0.01 | 1.66 | 0.44 | 0.85 | 0.28 |
| 13017 | 0 | 8599   | DIDFDSVPQI                                              | 2.34 | 0.01 | 2.56 | 1.20 | 0.22 | 0.28 |
| 13018 | 0 | 100777 | DIDFLIEEIERLGQDL                                        | 2.78 | 0.01 | 0.78 | 1.20 | 0.22 | 2.02 |
| 13019 | 0 | 100777 | DIDFLIEEIERLGQDL                                        | 2.78 | 0.01 | 0.78 | 1.12 | 0.22 | 1.34 |
| 13020 | 0 | 100777 | DIDFLIEEIERLGQDL                                        | 2.78 | 0.01 | 0.78 | 1.20 | 0.22 | 1.57 |
| 13021 | 0 | 100777 | DIDFLIEEIERLGQDL                                        | 2.78 | 0.01 | 0.78 | 1.20 | 0.22 | 1.57 |
| 13022 | 0 | 100777 | DIDFLIEEIERLGQDL                                        | 2.78 | 0.01 | 0.78 | 1.20 | 0.22 | 1.57 |
| 13023 | 0 | 100777 | DIDFLIEEIERLGQDL                                        | 2.78 | 0.01 | 0.78 | 1.20 | 0.22 | 1.57 |
| 13024 | 0 | 100777 | DIDFLIEEIERLGQDL                                        | 2.78 | 0.01 | 0.78 | 1.20 | 0.22 | 1.57 |
| 13025 | 0 | 100777 | DIDFLIEEIERLGQDL                                        | 2.78 | 0.01 | 0.78 | 1.20 | 0.22 | 1.57 |
| 13026 | 0 | 100777 | DIDFLIEEIERLGQDL                                        | 2.78 | 0.01 | 0.78 | 1.12 | 0.22 | 1.27 |
| 13027 | 0 | 489143 | DIDIKIRSCRGSCSRALAR<br>E                                | 2.98 | 3.37 | 0.78 | 0.44 | 1.13 | 0.28 |
| 13028 | 0 | 8602   | DIDLGESRVVIQDYDNQ<br>HEQ                                | 2.94 | 0.01 | 2.70 | 0.44 | 0.85 | 0.28 |
| 13029 | 0 | 8607   | DIDPYKEFG                                               | 2.22 | 0.01 | 2.08 | 0.68 | 0.22 | 0.28 |
| 13030 | 0 | 8607   | DIDPYKEFG                                               | 2.22 | 0.01 | 2.08 | 0.68 | 0.22 | 0.28 |
| 13031 | 0 | 8607   | DIDPYKEFG                                               | 2.22 | 0.01 | 2.08 | 0.68 | 0.22 | 0.85 |
| 13032 | 0 | 8607   | DIDPYKEFG                                               | 2.22 | 0.01 | 2.08 | 0.68 | 0.22 | 0.28 |
| 13033 | 0 | 8609   | DIDPYKEFGATVELLSFLP<br>SDFFPSVRDLLDTAAALY<br>RDALESPEHC | 3.79 | 0.01 | 2.08 | 1.12 | 0.22 | 2.35 |
| 13034 | 0 | 79531  | DIDPYKEFGATVELLSFLP<br>SDFFPSVRDLLDTASA                 | 3.50 | 0.01 | 2.71 | 0.44 | 0.85 | 0.28 |
| 13035 | 0 | 187631 | DIDRGEEKKGKDSSGEV<br>L                                  | 2.88 | 0.01 | 1.75 | 0.68 | 0.22 | 0.85 |
| 13036 | 0 | 187631 | DIDRGEEKKGKDSSGEV<br>L                                  | 2.88 | 0.01 | 1.75 | 0.68 | 0.22 | 0.85 |
| 13037 | 0 | 187631 | DIDRGEEKKGKDSSGEV<br>L                                  | 2.88 | 0.01 | 1.75 | 0.68 | 0.22 | 2.02 |
| 13038 | 0 | 187631 | DIDRGEEKKGKDSSGEV<br>L                                  | 2.88 | 0.01 | 1.75 | 0.68 | 0.22 | 1.48 |
| 13039 | 0 | 187631 | DIDRGEEKKGKDSSGEV<br>L                                  | 2.88 | 0.01 | 1.75 | 0.68 | 0.22 | 1.48 |
| 13040 | 0 | 187631 | DIDRGEEKKGKDSSGEV<br>L                                  | 2.88 | 0.01 | 1.75 | 0.68 | 0.22 | 1.48 |
| 13041 | 0 | 116947 | DIDYSDYSTR                                              | 2.36 | 0.01 | 0.90 | 1.15 | 0.22 | 0.28 |
| 13042 | 0 | 116947 | DIDYSDYSTR                                              | 2.36 | 0.01 | 0.90 | 0.44 | 0.85 | 0.28 |
| 13043 | 0 | 8628   | DIEKKIAKMEKASSVFNV<br>VNS                               | 3.01 | 0.01 | 0.90 | 1.20 | 0.22 | 0.28 |
| 13044 | 0 | 8628   | DIEKKIAKMEKASSVFNV<br>VNS                               | 3.01 | 0.01 | 0.90 | 1.15 | 0.22 | 0.28 |
| 13045 | 0 | 8632   | DIEKKICKMEKCSSVFNV<br>VNS                               | 3.01 | 0.01 | 1.66 | 1.20 | 0.22 | 0.28 |

|       |   |        |                               |      |      |      |      |      |      |
|-------|---|--------|-------------------------------|------|------|------|------|------|------|
| 13046 | 0 | 8632   | DIEKKICKMEKCSSVFNV<br>VNS     | 3.01 | 0.01 | 1.66 | 2.43 | 0.22 | 0.28 |
| 13047 | 0 | 8634   | DIELLKKILAGGFIQKYDS<br>VMQ    | 3.02 | 0.01 | 0.90 | 1.15 | 0.22 | 1.27 |
| 13048 | 0 | 8634   | DIELLKKILAGGFIQKYDS<br>VMQ    | 3.02 | 0.01 | 0.90 | 1.12 | 0.22 | 1.27 |
| 13049 | 0 | 8634   | DIELLKKILAGGFIQKYDS<br>VMQ    | 3.02 | 0.01 | 0.90 | 1.15 | 0.22 | 1.27 |
| 13050 | 0 | 8634   | DIELLKKILAGGFIQKYDS<br>VMQ    | 3.02 | 0.01 | 0.90 | 1.15 | 0.22 | 1.27 |
| 13051 | 0 | 8634   | DIELLKKILAGGFIQKYDS<br>VMQ    | 3.02 | 0.01 | 0.90 | 1.15 | 0.22 | 0.28 |
| 13052 | 0 | 8634   | DIELLKKILAGGFIQKYDS<br>VMQ    | 3.02 | 0.01 | 0.90 | 1.15 | 0.22 | 0.28 |
| 13053 | 0 | 8634   | DIELLKKILAGGFIQKYDS<br>VMQ    | 3.02 | 0.01 | 0.90 | 0.68 | 0.22 | 0.28 |
| 13054 | 0 | 8634   | DIELLKKILAGGFIQKYDS<br>VMQ    | 3.02 | 0.01 | 0.90 | 1.15 | 0.22 | 0.85 |
| 13055 | 0 | 8634   | DIELLKKILAGGFIQKYDS<br>VMQ    | 3.02 | 0.01 | 0.90 | 0.68 | 0.22 | 0.28 |
| 13056 | 0 | 188092 | DIERRIAMRL                    | 2.33 | 0.01 | 2.92 | 1.81 | 0.22 | 0.85 |
| 13057 | 0 | 188092 | DIERRIAMRL                    | 2.33 | 0.01 | 2.92 | 3.37 | 0.22 | 0.85 |
| 13058 | 0 | 8636   | DIETPRAGKKESTV                | 2.58 | 0.01 | 2.94 | 2.00 | 0.22 | 0.28 |
| 13059 | 0 | 8636   | DIETPRAGKKESTV                | 2.58 | 0.01 | 2.94 | 2.00 | 0.22 | 0.28 |
| 13060 | 0 | 8637   | DIETPRAGKKESTVMTS<br>GSA      | 2.94 | 0.01 | 2.94 | 4.03 | 0.22 | 0.28 |
| 13061 | 0 | 8637   | DIETPRAGKKESTVMTS<br>GSA      | 2.94 | 0.01 | 2.94 | 4.03 | 0.22 | 0.28 |
| 13062 | 0 | 8637   | DIETPRAGKKESTVMTS<br>GSA      | 2.94 | 0.01 | 2.94 | 2.00 | 0.22 | 0.28 |
| 13063 | 0 | 8637   | DIETPRAGKKESTVMTS<br>GSA      | 2.94 | 0.01 | 2.94 | 2.00 | 0.22 | 0.28 |
| 13064 | 0 | 8637   | DIETPRAGKKESTVMTS<br>GSA      | 2.94 | 0.01 | 2.94 | 2.00 | 0.22 | 0.28 |
| 13065 | 0 | 8637   | DIETPRAGKKESTVMTS<br>GSA      | 2.94 | 0.01 | 2.94 | 2.00 | 0.22 | 1.34 |
| 13066 | 0 | 8644   | DIFTNSRGKRASKG                | 2.61 | 0.01 | 3.36 | 1.15 | 0.22 | 0.28 |
| 13067 | 0 | 8644   | DIFTNSRGKRASKG                | 2.61 | 0.01 | 3.36 | 0.68 | 0.22 | 0.85 |
| 13068 | 0 | 8644   | DIFTNSRGKRASKG                | 2.61 | 0.01 | 3.36 | 0.68 | 0.22 | 1.48 |
| 13069 | 0 | 119556 | DIGAQAVSPSTSQGADV<br>KKSSCQSK | 3.19 | 0.01 | 3.33 | 2.49 | 0.85 | 0.28 |
| 13070 | 0 | 8646   | DIGDIVRGKDLY                  | 2.50 | 0.01 | 1.66 | 0.44 | 0.85 | 0.28 |
| 13071 | 0 | 8646   | DIGDIVRGKDLY                  | 2.50 | 0.01 | 1.66 | 0.44 | 0.85 | 0.28 |
| 13072 | 0 | 8647   | DIGGNRR                       | 2.00 | 0.01 | 2.93 | 0.44 | 0.85 | 0.28 |

|       |   |        |                                                          |      |      |      |      |      |      |
|-------|---|--------|----------------------------------------------------------|------|------|------|------|------|------|
| 13073 | 0 | 162076 | DIGRGAVMYVAGGKVS<br>WAPRGGNEVKFEPVPG<br>ELKLIANRLRTSFPPH | 3.80 | 0.01 | 2.71 | 0.68 | 0.22 | 1.48 |
| 13074 | 0 | 162076 | DIGRGAVMYVAGGKVS<br>WAPRGGNEVKFEPVPG<br>ELKLIANRLRTSFPPH | 3.80 | 0.01 | 2.71 | 0.68 | 0.22 | 0.85 |
| 13075 | 0 | 162076 | DIGRGAVMYVAGGKVS<br>WAPRGGNEVKFEPVPG<br>ELKLIANRLRTSFPPH | 3.80 | 0.01 | 2.71 | 0.68 | 0.22 | 0.28 |
| 13076 | 0 | 162076 | DIGRGAVMYVAGGKVS<br>WAPRGGNEVKFEPVPG<br>ELKLIANRLRTSFPPH | 3.80 | 0.01 | 2.71 | 0.68 | 0.22 | 0.85 |
| 13077 | 0 | 115206 | DIGSESTEDQAMEDIKQ<br>MEA                                 | 2.98 | 0.01 | 1.60 | 0.44 | 1.23 | 2.51 |
| 13078 | 0 | 99145  | DIGTTK                                                   | 1.89 | 0.01 | 2.86 | 2.02 | 0.85 | 0.85 |
| 13079 | 0 | 8661   | DIHVKMRKVIMNNDKS<br>ELI                                  | 2.96 | 0.01 | 0.90 | 2.63 | 0.22 | 1.48 |
| 13080 | 0 | 141616 | DIKGNDLVHDEYTKYI                                         | 2.80 | 0.01 | 1.66 | 1.20 | 0.22 | 0.28 |
| 13081 | 0 | 141616 | DIKGNDLVHDEYTKYI                                         | 2.80 | 0.01 | 1.66 | 2.55 | 0.22 | 0.28 |
| 13082 | 0 | 181290 | DIKCTSTSRDKITTL                                          | 2.71 | 0.01 | 2.82 | 1.15 | 0.22 | 0.28 |
| 13083 | 0 | 189597 | DIKKVFEIIDQDKSD                                          | 2.71 | 0.01 | 3.28 | 0.44 | 1.23 | 0.28 |
| 13084 | 0 | 189597 | DIKKVFEIIDQDKSD                                          | 2.71 | 0.01 | 3.28 | 0.44 | 1.41 | 0.28 |
| 13085 | 0 | 81048  | DIKLTITGPG                                               | 2.33 | 0.01 | 3.06 | 0.44 | 0.85 | 0.28 |
| 13086 | 0 | 190397 | DIKQMEAESISSEE                                           | 2.68 | 0.01 | 1.60 | 0.44 | 1.23 | 0.28 |
| 13087 | 0 | 8688   | DIKVQFQSGGNNSPAVY<br>LLD                                 | 2.91 | 0.01 | 2.04 | 0.44 | 0.85 | 0.28 |
| 13088 | 0 | 8688   | DIKVQFQSGGNNSPAVY<br>LLD                                 | 2.91 | 0.01 | 2.04 | 0.44 | 2.98 | 0.28 |
| 13089 | 0 | 8693   | DIKYTWNVPKIAPKSEN<br>VVVTVKVMGDDGVLAC<br>AIATHAKIRD      | 3.68 | 0.01 | 2.78 | 0.68 | 2.60 | 1.75 |
| 13090 | 0 | 8697   | DILFPA                                                   | 1.88 | 0.01 | 2.96 | 0.44 | 0.85 | 0.28 |
| 13091 | 0 | 8697   | DILFPA                                                   | 1.88 | 0.01 | 2.96 | 3.67 | 0.22 | 0.28 |
| 13092 | 0 | 8698   | DILFPADPPFSPQSC                                          | 2.70 | 0.01 | 2.96 | 0.44 | 0.85 | 0.28 |
| 13093 | 0 | 127622 | DILFYMPTDSVGLAVID<br>WEEWRPTWT                           | 3.18 | 0.01 | 2.95 | 3.16 | 0.22 | 0.85 |
| 13094 | 0 | 127622 | DILFYMPTDSVGLAVID<br>WEEWRPTWT                           | 3.18 | 0.01 | 2.95 | 3.16 | 0.22 | 0.85 |
| 13095 | 0 | 127622 | DILFYMPTDSVGLAVID<br>WEEWRPTWT                           | 3.18 | 0.01 | 2.95 | 3.16 | 0.22 | 1.34 |
| 13096 | 0 | 127622 | DILFYMPTDSVGLAVID<br>WEEWRPTWT                           | 3.18 | 0.01 | 2.95 | 3.16 | 0.22 | 1.34 |

|       |   |        |                                    |      |      |      |      |      |      |
|-------|---|--------|------------------------------------|------|------|------|------|------|------|
| 13097 | 0 | 127622 | DILFYMPDTSVGLAVID<br>WEEWRPTWT     | 3.18 | 0.01 | 2.95 | 3.16 | 0.22 | 1.48 |
| 13098 | 0 | 175782 | DILYGDHECGSLLQD                    | 2.68 | 0.01 | 2.63 | 1.15 | 0.22 | 0.85 |
| 13099 | 0 | 106340 | DIMPCLHFKVGE                       | 2.40 | 0.01 | 3.08 | 0.44 | 1.23 | 0.85 |
| 13100 | 0 | 110804 | DIMRLREKLQEEMLQRE<br>EAE           | 2.98 | 4.93 | 0.78 | 2.46 | 0.22 | 1.28 |
| 13101 | 0 | 137132 | DINCFRPHGVSA                       | 2.40 | 0.01 | 2.80 | 2.78 | 0.22 | 0.28 |
| 13102 | 0 | 226584 | DINIKTGTTDIGSNTTVK<br>T            | 2.95 | 0.01 | 2.56 | 1.20 | 0.22 | 0.28 |
| 13103 | 0 | 226584 | DINIKTGTTDIGSNTTVK<br>T            | 2.95 | 0.01 | 2.56 | 1.20 | 0.22 | 1.34 |
| 13104 | 0 | 226584 | DINIKTGTTDIGSNTTVK<br>T            | 2.95 | 0.01 | 2.56 | 1.20 | 0.22 | 0.28 |
| 13105 | 0 | 226584 | DINIKTGTTDIGSNTTVK<br>T            | 2.95 | 0.01 | 2.56 | 1.20 | 0.22 | 1.34 |
| 13106 | 0 | 226584 | DINIKTGTTDIGSNTTVK<br>T            | 2.95 | 0.01 | 2.56 | 1.20 | 0.22 | 1.75 |
| 13107 | 0 | 226584 | DINIKTGTTDIGSNTTVK<br>T            | 2.95 | 0.01 | 2.56 | 1.12 | 0.22 | 0.28 |
| 13108 | 0 | 8730   | DINKRKYD                           | 2.15 | 0.01 | 1.66 | 0.44 | 1.74 | 0.28 |
| 13109 | 0 | 8731   | DINKVLEKLGYSGGD                    | 2.68 | 0.01 | 2.43 | 0.44 | 1.59 | 0.28 |
| 13110 | 0 | 144229 | DINQGHQSARAGTYATT<br>LPAGREG       | 3.10 | 0.01 | 3.63 | 0.68 | 0.22 | 2.12 |
| 13111 | 0 | 144229 | DINQGHQSARAGTYATT<br>LPAGREG       | 3.10 | 0.01 | 3.63 | 0.68 | 0.22 | 0.85 |
| 13112 | 0 | 8738   | DINSTNNLDNMLSEIN<br>SIQNNIHTYI     | 3.26 | 0.01 | 1.66 | 0.44 | 1.74 | 0.28 |
| 13113 | 0 | 8738   | DINSTNNLDNMLSEIN<br>SIQNNIHTYI     | 3.26 | 0.01 | 1.66 | 0.44 | 1.74 | 0.28 |
| 13114 | 0 | 135908 | DINTVTTVAQSR                       | 2.46 | 0.01 | 3.21 | 0.44 | 1.13 | 0.28 |
| 13115 | 0 | 181984 | DIPCRPLPYQNLHPLLML<br>LKKQHKIVLSQQ | 3.33 | 0.01 | 3.89 | 2.13 | 1.74 | 0.28 |
| 13116 | 0 | 146189 | DIPEEIKQ                           | 2.13 | 0.01 | 0.78 | 3.75 | 0.22 | 0.28 |
| 13117 | 0 | 146189 | DIPEEIKQ                           | 2.13 | 0.01 | 0.78 | 3.75 | 0.22 | 0.28 |
| 13118 | 0 | 146189 | DIPEEIKQ                           | 2.13 | 0.01 | 0.78 | 3.75 | 0.22 | 1.27 |
| 13119 | 0 | 146189 | DIPEEIKQ                           | 2.13 | 0.01 | 0.78 | 3.75 | 0.22 | 0.28 |
| 13120 | 0 | 476993 | DIPEN                              | 1.74 | 0.01 | 1.75 | 1.12 | 0.22 | 0.85 |
| 13121 | 0 | 8748   | DIPFP                              | 1.75 | 0.01 | 3.21 | 0.68 | 0.22 | 1.48 |
| 13122 | 0 | 8748   | DIPFP                              | 1.75 | 0.01 | 3.21 | 0.68 | 0.22 | 0.28 |
| 13123 | 0 | 8748   | DIPFP                              | 1.75 | 0.01 | 3.21 | 0.68 | 0.22 | 1.48 |
| 13124 | 0 | 8748   | DIPFP                              | 1.75 | 0.01 | 3.21 | 0.68 | 0.22 | 1.48 |
| 13125 | 0 | 8753   | DIPLHTLHRQIMMTNN<br>AEDKSF         | 2.99 | 0.01 | 2.86 | 2.89 | 0.22 | 0.85 |
| 13126 | 0 | 8754   | DIPNPIGSEN                         | 2.33 | 0.01 | 1.60 | 0.44 | 1.23 | 0.28 |
| 13127 | 0 | 8754   | DIPNPIGSEN                         | 2.33 | 0.01 | 1.60 | 0.44 | 1.23 | 0.28 |
| 13128 | 0 | 190398 | DIPNPIGSENSEKTT                    | 2.68 | 0.01 | 1.60 | 0.44 | 1.23 | 0.28 |

|       |   |        |                         |      |      |      |      |      |      |
|-------|---|--------|-------------------------|------|------|------|------|------|------|
| 13129 | 0 | 8756   | DIPNPIGSENSEKTTMPL<br>W | 2.88 | 0.01 | 1.60 | 0.44 | 1.23 | 0.28 |
| 13130 | 0 | 8756   | DIPNPIGSENSEKTTMPL<br>W | 2.88 | 0.01 | 1.60 | 0.44 | 1.23 | 1.27 |
| 13131 | 0 | 8756   | DIPNPIGSENSEKTTMPL<br>W | 2.88 | 0.01 | 1.60 | 0.44 | 1.23 | 0.28 |
| 13132 | 0 | 8756   | DIPNPIGSENSEKTTMPL<br>W | 2.88 | 0.01 | 1.60 | 2.82 | 0.22 | 0.28 |
| 13133 | 0 | 8756   | DIPNPIGSENSEKTTMPL<br>W | 2.88 | 0.01 | 1.60 | 0.44 | 1.23 | 0.28 |
| 13134 | 0 | 8756   | DIPNPIGSENSEKTTMPL<br>W | 2.88 | 0.01 | 1.60 | 1.12 | 0.22 | 1.27 |
| 13135 | 0 | 8756   | DIPNPIGSENSEKTTMPL<br>W | 2.88 | 0.01 | 1.60 | 0.44 | 1.23 | 2.51 |
| 13136 | 0 | 195012 | DIQDQQPDTVDA            | 2.51 | 0.01 | 3.51 | 0.44 | 0.85 | 1.27 |
| 13137 | 0 | 195012 | DIQDQQPDTVDA            | 2.51 | 0.01 | 3.51 | 0.68 | 0.22 | 1.27 |
| 13138 | 0 | 195012 | DIQDQQPDTVDA            | 2.51 | 0.01 | 3.51 | 0.68 | 0.22 | 0.28 |
| 13139 | 0 | 195012 | DIQDQQPDTVDA            | 2.51 | 0.01 | 3.51 | 0.68 | 0.22 | 0.85 |
| 13140 | 0 | 195012 | DIQDQQPDTVDA            | 2.51 | 0.01 | 3.51 | 0.68 | 0.22 | 0.85 |
| 13141 | 0 | 195012 | DIQDQQPDTVDA            | 2.51 | 0.01 | 3.51 | 0.68 | 0.22 | 0.85 |
| 13142 | 0 | 195012 | DIQDQQPDTVDA            | 2.51 | 0.01 | 3.51 | 0.68 | 0.22 | 0.85 |
| 13143 | 0 | 8760   | DIQEDITRHE              | 2.34 | 0.01 | 4.15 | 2.69 | 0.22 | 0.28 |
| 13144 | 0 | 98729  | DIQKVAGTWY              | 2.26 | 0.01 | 1.60 | 0.44 | 1.23 | 0.85 |
| 13145 | 0 | 96178  | DIQKVAGTWYSLAMA         | 2.62 | 0.01 | 1.60 | 0.44 | 1.23 | 0.28 |
| 13146 | 0 | 96178  | DIQKVAGTWYSLAMA         | 2.62 | 0.01 | 1.60 | 0.44 | 1.23 | 0.28 |
| 13147 | 0 | 78117  | DIQKVAGTWYSLAMAA        | 2.67 | 0.01 | 1.60 | 0.68 | 0.22 | 0.28 |
| 13148 | 0 | 106341 | DIQMTQSPSSLSASVGD<br>RV | 2.89 | 0.01 | 0.78 | 1.12 | 0.22 | 1.48 |
| 13149 | 0 | 106341 | DIQMTQSPSSLSASVGD<br>RV | 2.89 | 0.01 | 0.78 | 1.12 | 0.22 | 1.48 |
| 13150 | 0 | 106341 | DIQMTQSPSSLSASVGD<br>RV | 2.89 | 0.01 | 0.78 | 1.12 | 0.22 | 0.28 |
| 13151 | 0 | 106341 | DIQMTQSPSSLSASVGD<br>RV | 2.89 | 0.01 | 0.78 | 1.12 | 0.22 | 0.28 |
| 13152 | 0 | 99945  | DIRDSLSEEE              | 2.33 | 0.01 | 2.18 | 0.68 | 0.22 | 0.28 |
| 13153 | 0 | 99945  | DIRDSLSEEE              | 2.33 | 0.01 | 2.18 | 0.68 | 0.22 | 1.34 |
| 13154 | 0 | 99945  | DIRDSLSEEE              | 2.33 | 0.01 | 2.18 | 0.68 | 0.22 | 1.27 |
| 13155 | 0 | 8770   | DIREVIANGEIIFKLDGDI     | 2.91 | 0.01 | 2.08 | 0.44 | 1.93 | 1.57 |
| 13156 | 0 | 8770   | DIREVIANGEIIFKLDGDI     | 2.91 | 0.01 | 2.08 | 2.43 | 0.22 | 1.57 |
| 13157 | 0 | 152455 | DIRKILSGYI              | 2.31 | 0.01 | 2.18 | 2.16 | 0.22 | 0.28 |
| 13158 | 0 | 8772   | DIRLTKRHLRHSHAV         | 2.68 | 0.01 | 0.90 | 0.68 | 0.22 | 1.39 |
| 13159 | 0 | 227094 | DIRRGPLVAEGGVGW         | 2.67 | 0.01 | 2.48 | 0.44 | 1.59 | 0.28 |

|       |   |        |                                               |      |      |      |      |      |      |
|-------|---|--------|-----------------------------------------------|------|------|------|------|------|------|
| 13160 | 0 | 8773   | DIRTLEDLLMGTLGIVCPI<br>C                      | 2.96 | 0.01 | 1.86 | 3.22 | 0.22 | 0.28 |
| 13161 | 0 | 8773   | DIRTLEDLLMGTLGIVCPI<br>C                      | 2.96 | 0.01 | 1.86 | 2.69 | 0.22 | 0.28 |
| 13162 | 0 | 8774   | DIRVEE                                        | 1.86 | 0.01 | 1.96 | 0.44 | 0.85 | 0.28 |
| 13163 | 0 | 136057 | DISAFAD                                       | 2.05 | 0.01 | 0.78 | 2.04 | 0.22 | 0.28 |
| 13164 | 0 | 187296 | DISEATQVEQHHRRT                               | 2.66 | 0.01 | 2.97 | 0.44 | 1.59 | 0.28 |
| 13165 | 0 | 187296 | DISEATQVEQHHRRT                               | 2.66 | 0.01 | 2.97 | 0.44 | 0.85 | 0.28 |
| 13166 | 0 | 8777   | DISEATQVEQHHRRTDN<br>D                        | 2.84 | 0.01 | 3.21 | 0.68 | 0.22 | 0.28 |
| 13167 | 0 | 115207 | DISLLDAQSAPLRVYVEE<br>LK                      | 2.94 | 0.01 | 1.60 | 0.44 | 1.23 | 2.51 |
| 13168 | 0 | 8781   | DISLQDKI                                      | 2.15 | 0.01 | 3.53 | 2.61 | 0.22 | 0.28 |
| 13169 | 0 | 8785   | DISQLTQAIVKNHKNLLK                            | 2.84 | 0.01 | 2.04 | 0.44 | 0.85 | 1.57 |
| 13170 | 0 | 8785   | DISQLTQAIVKNHKNLLK                            | 2.84 | 0.01 | 2.04 | 0.44 | 1.59 | 1.57 |
| 13171 | 0 | 165591 | DISRGLF                                       | 1.99 | 0.01 | 0.90 | 0.44 | 1.23 | 1.39 |
| 13172 | 0 | 136171 | DISTEEAYKLKNGRQEVE<br>VFRPFQSRYEKEEEKERE<br>R | 3.54 | 0.01 | 4.33 | 0.44 | 1.23 | 0.28 |
| 13173 | 0 | 8789   | DISTKEAFRLKN                                  | 2.43 | 0.01 | 3.33 | 0.44 | 1.23 | 0.85 |
| 13174 | 0 | 8790   | DISTKQTQ                                      | 2.14 | 0.01 | 3.53 | 2.61 | 0.22 | 0.28 |
| 13175 | 0 | 152458 | DITEFDNFND                                    | 2.36 | 0.01 | 2.18 | 2.16 | 0.22 | 0.28 |
| 13176 | 0 | 8800   | DITKD                                         | 1.77 | 0.01 | 2.69 | 1.12 | 0.22 | 0.28 |
| 13177 | 0 | 98731  | DITNPINLRE                                    | 2.31 | 0.01 | 2.16 | 0.44 | 1.23 | 0.85 |
| 13178 | 0 | 98732  | DITNPINLREGEPLD                               | 2.71 | 0.01 | 2.16 | 0.44 | 1.23 | 0.85 |
| 13179 | 0 | 8803   | DITPQEFSKKYLQAP                               | 2.63 | 0.01 | 2.72 | 0.44 | 1.23 | 0.85 |
| 13180 | 0 | 8804   | DITRHEQQLIVARQ                                | 2.61 | 0.01 | 2.56 | 2.69 | 0.22 | 0.28 |
| 13181 | 0 | 8804   | DITRHEQQLIVARQ                                | 2.61 | 0.01 | 3.16 | 2.69 | 0.22 | 0.28 |
| 13182 | 0 | 8804   | DITRHEQQLIVARQ                                | 2.61 | 0.01 | 3.16 | 2.69 | 0.22 | 0.28 |
| 13183 | 0 | 509508 | DITSFPLSVYAP                                  | 2.45 | 0.01 | 0.78 | 0.68 | 0.22 | 0.85 |
| 13184 | 0 | 509508 | DITSFPLSVYAP                                  | 2.45 | 0.01 | 0.78 | 0.68 | 0.22 | 2.75 |
| 13185 | 0 | 81074  | DIVAKIAYGRNTYKYNES<br>DEHKQQLNG               | 3.22 | 0.01 | 3.04 | 1.12 | 0.22 | 0.28 |
| 13186 | 0 | 81074  | DIVAKIAYGRNTYKYNES<br>DEHKQQLNG               | 3.22 | 0.01 | 3.04 | 1.12 | 0.22 | 0.28 |
| 13187 | 0 | 81074  | DIVAKIAYGRNTYKYNES<br>DEHKQQLNG               | 3.22 | 0.01 | 3.10 | 1.12 | 0.22 | 0.28 |
| 13188 | 0 | 81074  | DIVAKIAYGRNTYKYNES<br>DEHKQQLNG               | 3.22 | 0.01 | 3.10 | 1.12 | 0.22 | 0.28 |
| 13189 | 0 | 8805   | DIVGPKAS                                      | 2.10 | 0.01 | 3.78 | 0.68 | 0.22 | 0.85 |
| 13190 | 0 | 106342 | DIVMTQSPDSLAVSL                               | 2.69 | 0.01 | 0.78 | 1.15 | 0.22 | 2.56 |
| 13191 | 0 | 106342 | DIVMTQSPDSLAVSL                               | 2.69 | 0.01 | 0.78 | 1.15 | 0.22 | 1.27 |
| 13192 | 0 | 106343 | DIVMTQSPLSLPVTPE<br>PA                        | 2.89 | 0.01 | 0.78 | 1.12 | 0.22 | 0.28 |

|       |   |        |                          |      |      |      |      |      |      |
|-------|---|--------|--------------------------|------|------|------|------|------|------|
| 13193 | 0 | 106344 | DIVMTQSPNSLAVSLGE<br>RA  | 2.86 | 0.01 | 0.78 | 1.12 | 0.22 | 0.28 |
| 13194 | 0 | 170570 | DIVNKMTHFSQKFCA          | 2.62 | 0.01 | 0.78 | 0.44 | 1.41 | 0.28 |
| 13195 | 0 | 170571 | DIWMGGVSEPLKRKG          | 2.64 | 0.01 | 0.78 | 0.44 | 1.13 | 0.28 |
| 13196 | 0 | 99946  | DIYGKDALLH               | 2.31 | 0.01 | 2.18 | 2.16 | 0.22 | 0.28 |
| 13197 | 0 | 8825   | DIYHSLSRAR               | 2.31 | 0.01 | 1.96 | 0.44 | 0.85 | 1.34 |
| 13198 | 0 | 119557 | DIYPGGGYTDYNEKFKG        | 2.80 | 0.01 | 1.75 | 1.20 | 0.22 | 1.27 |
| 13199 | 0 | 189053 | DIYPSCISNTCPPD           | 2.70 | 0.01 | 3.67 | 0.68 | 0.22 | 0.28 |
| 13200 | 0 | 8832   | DKAAAICFRNSMDT           | 2.58 | 0.01 | 3.97 | 0.68 | 0.22 | 0.28 |
| 13201 | 0 | 8832   | DKAAAICFRNSMDT           | 2.58 | 0.01 | 3.97 | 3.48 | 0.22 | 0.28 |
| 13202 | 0 | 8834   | DKAAEAIINELKKASKKV<br>GG | 2.95 | 0.01 | 2.93 | 0.44 | 1.59 | 0.28 |
| 13203 | 0 | 133543 | DKAFAV                   | 1.90 | 0.01 | 3.59 | 0.68 | 0.22 | 0.28 |
| 13204 | 0 | 8836   | DKAFAVSKDLADKLAAK        | 2.85 | 0.01 | 3.59 | 2.02 | 0.22 | 0.28 |
| 13205 | 0 | 8839   | DKAKADAELAAANDTIA        | 2.84 | 0.01 | 3.59 | 2.02 | 0.22 | 0.28 |
| 13206 | 0 | 98733  | DKALKALPMH               | 2.33 | 0.01 | 1.60 | 0.44 | 1.23 | 0.85 |
| 13207 | 0 | 98733  | DKALKALPMH               | 2.33 | 0.01 | 1.60 | 0.44 | 1.23 | 0.85 |
| 13208 | 0 | 106345 | DKANVLFRC                | 2.30 | 0.01 | 2.75 | 0.44 | 1.23 | 0.85 |
| 13209 | 0 | 8841   | DKARELLNKYDVENSML<br>QAN | 2.95 | 0.01 | 3.13 | 1.20 | 0.22 | 0.28 |
| 13210 | 0 | 8841   | DKARELLNKYDVENSML<br>QAN | 2.95 | 0.01 | 3.13 | 1.20 | 0.22 | 0.28 |
| 13211 | 0 | 8841   | DKARELLNKYDVENSML<br>QAN | 2.95 | 0.01 | 3.13 | 1.20 | 0.22 | 1.34 |
| 13212 | 0 | 8841   | DKARELLNKYDVENSML<br>QAN | 2.95 | 0.01 | 3.13 | 1.20 | 0.22 | 0.28 |
| 13213 | 0 | 8841   | DKARELLNKYDVENSML<br>QAN | 2.95 | 0.01 | 3.13 | 1.20 | 0.22 | 0.28 |
| 13214 | 0 | 8841   | DKARELLNKYDVENSML<br>QAN | 2.95 | 0.01 | 3.13 | 1.20 | 0.22 | 1.34 |
| 13215 | 0 | 8841   | DKARELLNKYDVENSML<br>QAN | 2.95 | 0.01 | 3.13 | 1.20 | 0.22 | 0.28 |
| 13216 | 0 | 8841   | DKARELLNKYDVENSML<br>QAN | 2.95 | 0.01 | 3.13 | 1.20 | 0.22 | 1.34 |
| 13217 | 0 | 8841   | DKARELLNKYDVENSML<br>QAN | 2.95 | 0.01 | 3.13 | 1.20 | 0.22 | 0.28 |
| 13218 | 0 | 8841   | DKARELLNKYDVENSML<br>QAN | 2.95 | 0.01 | 3.13 | 1.20 | 0.22 | 1.34 |
| 13219 | 0 | 8841   | DKARELLNKYDVENSML<br>QAN | 2.95 | 0.01 | 3.13 | 1.20 | 0.22 | 0.28 |
| 13220 | 0 | 8841   | DKARELLNKYDVENSML<br>QAN | 2.95 | 0.01 | 3.13 | 1.20 | 0.22 | 1.34 |
| 13221 | 0 | 8841   | DKARELLNKYDVENSML<br>QAN | 2.95 | 0.01 | 3.13 | 1.20 | 0.22 | 0.28 |



|       |   |        |                                       |      |      |      |      |      |      |
|-------|---|--------|---------------------------------------|------|------|------|------|------|------|
| 13222 | 0 | 8841   | DKARELLNKYDVENSML<br>QAN              | 2.95 | 0.01 | 3.13 | 1.20 | 0.22 | 1.34 |
| 13223 | 0 | 8841   | DKARELLNKYDVENSML<br>QAN              | 2.95 | 0.01 | 3.13 | 1.20 | 0.22 | 0.28 |
| 13224 | 0 | 136058 | DKATV                                 | 1.74 | 0.01 | 0.78 | 1.12 | 0.22 | 0.28 |
| 13225 | 0 | 8843   | DKAWLV                                | 1.88 | 0.01 | 2.40 | 0.44 | 0.85 | 0.28 |
| 13226 | 0 | 8845   | DKCPDTPANVTVDAN                       | 2.72 | 0.01 | 2.58 | 2.43 | 0.22 | 0.28 |
| 13227 | 0 | 125377 | DKDAFGGVYSGPSLLDV<br>SQT              | 2.94 | 0.01 | 0.78 | 0.44 | 1.13 | 0.28 |
| 13228 | 0 | 125377 | DKDAFGGVYSGPSLLDV<br>SQT              | 2.94 | 0.01 | 0.78 | 1.20 | 0.22 | 0.28 |
| 13229 | 0 | 125377 | DKDAFGGVYSGPSLLDV<br>SQT              | 2.94 | 0.01 | 0.78 | 0.68 | 0.22 | 0.28 |
| 13230 | 0 | 125377 | DKDAFGGVYSGPSLLDV<br>SQT              | 2.94 | 0.01 | 0.78 | 3.06 | 0.22 | 0.28 |
| 13231 | 0 | 513030 | DKDDHDHEHEDENEA                       | 2.74 | 0.01 | 2.24 | 0.44 | 1.41 | 1.28 |
| 13232 | 0 | 268712 | DKEDDDGDNDADDV                        | 2.72 | 0.01 | 1.61 | 0.44 | 0.85 | 1.28 |
| 13233 | 0 | 152459 | DKDIRKILSG                            | 2.34 | 0.01 | 2.18 | 2.16 | 0.22 | 0.28 |
| 13234 | 0 | 268724 | DKDPAADGAGTQEEK                       | 2.71 | 0.01 | 1.61 | 0.44 | 0.85 | 1.28 |
| 13235 | 0 | 268741 | DKEEDDADGDEEDYD                       | 2.74 | 0.01 | 1.61 | 0.44 | 0.85 | 1.28 |
| 13236 | 0 | 268743 | DKEEEEDDDDDDEP                        | 2.74 | 0.01 | 1.61 | 0.44 | 0.85 | 1.28 |
| 13237 | 0 | 268744 | DKEEEEEDEEDEEE                        | 2.73 | 0.01 | 1.61 | 0.44 | 0.85 | 1.28 |
| 13238 | 0 | 153370 | DKEGIPPDQQLIFA                        | 2.65 | 0.01 | 1.60 | 0.68 | 0.22 | 0.28 |
| 13239 | 0 | 153370 | DKEGIPPDQQLIFA                        | 2.65 | 0.01 | 1.60 | 0.68 | 0.22 | 0.28 |
| 13240 | 0 | 114775 | DKEGKDVLC                             | 2.34 | 0.01 | 2.25 | 0.44 | 1.23 | 0.85 |
| 13241 | 0 | 230214 | DKEGKDVLCNKDLRPI<br>CGT               | 2.95 | 0.01 | 2.25 | 0.44 | 1.23 | 0.28 |
| 13242 | 0 | 8857   | DKEILYEF                              | 2.21 | 0.01 | 2.69 | 0.44 | 0.85 | 0.28 |
| 13243 | 0 | 496387 | DKEKLQERLAKLSGGVA<br>VIRVGAATEIEMK    | 3.35 | 0.01 | 2.87 | 0.44 | 1.93 | 2.12 |
| 13244 | 0 | 496387 | DKEKLQERLAKLSGGVA<br>VIRVGAATEIEMK    | 3.35 | 0.01 | 2.87 | 0.44 | 1.93 | 2.12 |
| 13245 | 0 | 131846 | DKELE                                 | 1.75 | 0.01 | 0.78 | 1.20 | 0.22 | 0.85 |
| 13246 | 0 | 99147  | DKELFT                                | 1.88 | 0.01 | 2.24 | 1.20 | 0.22 | 0.28 |
| 13247 | 0 | 8859   | DKENALSLLDKIYT                        | 2.61 | 0.01 | 3.08 | 0.68 | 0.22 | 1.27 |
| 13248 | 0 | 8859   | DKENALSLLDKIYT                        | 2.61 | 0.01 | 3.08 | 0.68 | 0.22 | 1.57 |
| 13249 | 0 | 95312  | DKENGDTVTFTEV                         | 2.50 | 0.01 | 2.88 | 0.44 | 1.23 | 0.85 |
| 13250 | 0 | 95313  | DKENGDTVTFTEVGYTRA<br>EGLYSMLVERDHKNE | 3.41 | 0.01 | 2.88 | 0.44 | 1.23 | 0.28 |
| 13251 | 0 | 95313  | DKENGDTVTFTEVGYTRA<br>EGLYSMLVERDHKNE | 3.41 | 0.01 | 2.88 | 1.12 | 0.22 | 0.28 |

|       |   |        |                               |      |      |      |      |      |      |
|-------|---|--------|-------------------------------|------|------|------|------|------|------|
| 13252 | 0 | 132213 | DKERERRRSR                    | 2.36 | 0.01 | 0.78 | 0.44 | 1.13 | 0.28 |
| 13253 | 0 | 8865   | DKEVLYQQY                     | 2.22 | 0.01 | 2.59 | 0.44 | 0.85 | 0.28 |
| 13254 | 0 | 8866   | DKEYGVLNNSD                   | 2.38 | 0.01 | 3.10 | 0.68 | 0.22 | 0.28 |
| 13255 | 0 | 8866   | DKEYGVLNNSD                   | 2.38 | 0.01 | 3.10 | 0.68 | 0.22 | 0.28 |
| 13256 | 0 | 170575 | DKFLKEQIKLDEGWV               | 2.69 | 0.01 | 0.78 | 0.44 | 1.13 | 0.28 |
| 13257 | 0 | 134887 | DKFLKGELLEKVLEK               | 2.73 | 0.01 | 3.59 | 2.13 | 0.85 | 0.85 |
| 13258 | 0 | 123086 | DKFNMGLDL                     | 2.24 | 0.01 | 2.28 | 2.00 | 0.22 | 0.28 |
| 13259 | 0 | 123086 | DKFNMGLDL                     | 2.24 | 0.01 | 2.28 | 2.00 | 0.22 | 0.28 |
| 13260 | 0 | 164634 | DKFVIFLDVKHFSPEDLT<br>VKVQDDF | 3.18 | 0.01 | 0.78 | 0.44 | 1.13 | 0.28 |
| 13261 | 0 | 164634 | DKFVIFLDVKHFSPEDLT<br>VKVQDDF | 3.18 | 0.01 | 0.78 | 0.44 | 1.13 | 0.28 |
| 13262 | 0 | 164634 | DKFVIFLDVKHFSPEDLT<br>VKVQDDF | 3.18 | 0.01 | 0.78 | 0.44 | 1.41 | 0.28 |
| 13263 | 0 | 164634 | DKFVIFLDVKHFSPEDLT<br>VKVQDDF | 3.18 | 0.01 | 0.78 | 0.44 | 1.41 | 0.28 |
| 13264 | 0 | 167881 | DKGATLTIKKEAFPAESK<br>S       | 2.91 | 0.01 | 2.75 | 0.44 | 1.59 | 2.51 |
| 13265 | 0 | 167881 | DKGATLTIKKEAFPAESK<br>S       | 2.91 | 0.01 | 2.75 | 0.44 | 0.85 | 2.51 |
| 13266 | 0 | 167881 | DKGATLTIKKEAFPAESK<br>S       | 2.91 | 0.01 | 2.75 | 0.44 | 0.85 | 2.51 |
| 13267 | 0 | 8875   | DKGIAIPHDIDLGESRVVI<br>QDYDNQ | 3.14 | 0.01 | 2.53 | 0.44 | 0.85 | 0.28 |
| 13268 | 0 | 8875   | DKGIAIPHDIDLGESRVVI<br>QDYDNQ | 3.14 | 0.01 | 2.53 | 0.44 | 0.85 | 0.28 |
| 13269 | 0 | 117789 | DKGQVINIQMRRTLH               | 2.63 | 0.01 | 0.78 | 0.44 | 1.13 | 0.28 |
| 13270 | 0 | 8877   | DKGSDVESYSSMPPLEG<br>EP       | 2.92 | 0.01 | 1.72 | 0.44 | 0.85 | 0.28 |
| 13271 | 0 | 420819 | DKGTPCTQEGGVKP                | 2.62 | 0.01 | 3.19 | 0.44 | 1.23 | 1.28 |
| 13272 | 0 | 123087 | DKHGMIGST                     | 2.21 | 0.01 | 2.28 | 2.00 | 0.22 | 0.28 |
| 13273 | 0 | 8880   | DKHIEQYLKK                    | 2.29 | 0.01 | 3.29 | 2.42 | 0.22 | 0.28 |
| 13274 | 0 | 8887   | DKIDWRESGYVTELKDQ<br>GNC      | 2.90 | 0.01 | 3.85 | 0.44 | 0.85 | 0.28 |
| 13275 | 0 | 8887   | DKIDWRESGYVTELKDQ<br>GNC      | 2.90 | 0.01 | 3.85 | 0.44 | 0.85 | 0.28 |
| 13276 | 0 | 8887   | DKIDWRESGYVTELKDQ<br>GNC      | 2.90 | 0.01 | 3.85 | 0.44 | 0.85 | 0.28 |
| 13277 | 0 | 8887   | DKIDWRESGYVTELKDQ<br>GNC      | 2.90 | 0.01 | 3.85 | 0.44 | 0.85 | 0.28 |
| 13278 | 0 | 8887   | DKIDWRESGYVTELKDQ<br>GNC      | 2.90 | 0.01 | 3.85 | 0.44 | 0.85 | 0.28 |
| 13279 | 0 | 8887   | DKIDWRESGYVTELKDQ<br>GNC      | 2.90 | 0.01 | 3.85 | 0.44 | 0.85 | 0.28 |
| 13280 | 0 | 8888   | DKIDWRESGYVTEVKDQ<br>GNC      | 2.92 | 0.01 | 3.85 | 0.44 | 0.85 | 0.28 |

|       |   |        |                            |      |      |      |      |      |      |
|-------|---|--------|----------------------------|------|------|------|------|------|------|
| 13281 | 0 | 8888   | DKIDWRESGYVTEVKDQ<br>GNC   | 2.92 | 0.01 | 3.85 | 0.44 | 0.85 | 0.28 |
| 13282 | 0 | 8888   | DKIDWRESGYVTEVKDQ<br>GNC   | 2.92 | 0.01 | 3.85 | 0.44 | 0.85 | 0.28 |
| 13283 | 0 | 8888   | DKIDWRESGYVTEVKDQ<br>GNC   | 2.92 | 0.01 | 3.85 | 0.44 | 0.85 | 0.28 |
| 13284 | 0 | 8888   | DKIDWRESGYVTEVKDQ<br>GNC   | 2.92 | 0.01 | 3.85 | 0.44 | 0.85 | 0.28 |
| 13285 | 0 | 8888   | DKIDWRESGYVTEVKDQ<br>GNC   | 2.92 | 0.01 | 3.85 | 0.44 | 0.85 | 0.28 |
| 13286 | 0 | 8888   | DKIDWRESGYVTEVKDQ<br>GNC   | 2.92 | 0.01 | 2.28 | 3.63 | 0.22 | 0.28 |
| 13287 | 0 | 8888   | DKIDWRESGYVTEVKDQ<br>GNC   | 2.92 | 0.01 | 2.28 | 3.63 | 0.22 | 0.28 |
| 13288 | 0 | 8888   | DKIDWRESGYVTEVKDQ<br>GNC   | 2.92 | 0.01 | 2.28 | 3.63 | 1.74 | 0.28 |
| 13289 | 0 | 122082 | DKIEDMAMLTFLHEPAV<br>LYNLK | 3.02 | 0.01 | 0.78 | 0.68 | 0.22 | 0.85 |
| 13290 | 0 | 122082 | DKIEDMAMLTFLHEPAV<br>LYNLK | 3.02 | 0.01 | 0.78 | 0.68 | 0.22 | 0.85 |
| 13291 | 0 | 122082 | DKIEDMAMLTFLHEPAV<br>LYNLK | 3.02 | 0.01 | 0.78 | 0.68 | 0.22 | 0.28 |
| 13292 | 0 | 122082 | DKIEDMAMLTFLHEPAV<br>LYNLK | 3.02 | 0.01 | 0.78 | 0.68 | 0.22 | 0.85 |
| 13293 | 0 | 115709 | DKIHPFAQTQ                 | 2.29 | 0.01 | 1.60 | 0.44 | 1.23 | 0.85 |
| 13294 | 0 | 115709 | DKIHPFAQTQ                 | 2.29 | 0.01 | 1.60 | 0.44 | 1.23 | 0.85 |
| 13295 | 0 | 8898   | DKILVQAGEAETMTP            | 2.64 | 0.01 | 2.59 | 0.44 | 0.85 | 0.28 |
| 13296 | 0 | 8898   | DKILVQAGEAETMTP            | 2.64 | 0.01 | 2.59 | 0.44 | 0.85 | 0.28 |
| 13297 | 0 | 8898   | DKILVQAGEAETMTP            | 2.64 | 0.01 | 2.59 | 0.44 | 0.85 | 0.28 |
| 13298 | 0 | 8898   | DKILVQAGEAETMTP            | 2.64 | 0.01 | 2.59 | 0.44 | 1.74 | 0.28 |
| 13299 | 0 | 8900   | DKILVQANEAEETTA            | 2.66 | 0.01 | 2.04 | 0.44 | 1.74 | 0.28 |
| 13300 | 0 | 8900   | DKILVQANEAEETTA            | 2.66 | 0.01 | 2.04 | 0.44 | 0.85 | 0.28 |
| 13301 | 0 | 8900   | DKILVQANEAEETTA            | 2.66 | 0.01 | 2.04 | 0.44 | 1.74 | 0.28 |
| 13302 | 0 | 181585 | DKIRDYGIKSAGGAC            | 2.70 | 0.01 | 1.66 | 2.36 | 0.22 | 1.28 |
| 13303 | 0 | 133798 | DKIRGEGMRYIIILD            | 2.69 | 0.01 | 0.78 | 0.44 | 1.13 | 0.28 |
| 13304 | 0 | 133798 | DKIRGEGMRYIIILD            | 2.69 | 0.01 | 0.78 | 0.44 | 1.41 | 0.28 |
| 13305 | 0 | 133798 | DKIRGEGMRYIIILD            | 2.69 | 0.01 | 0.78 | 0.44 | 1.93 | 0.28 |
| 13306 | 0 | 108866 | DKIVLQKYHTINGHNAE<br>VRKA  | 2.97 | 0.01 | 1.75 | 3.05 | 1.41 | 0.28 |
| 13307 | 0 | 108866 | DKIVLQKYHTINGHNAE<br>VRKA  | 2.97 | 0.01 | 1.75 | 0.44 | 1.13 | 0.28 |
| 13308 | 0 | 513051 | DKIYSLNYNELEVLA            | 2.68 | 0.01 | 2.24 | 0.44 | 1.41 | 1.28 |
| 13309 | 0 | 8906   | DKKAINLDKAQQKLD            | 2.73 | 0.01 | 2.73 | 0.44 | 0.85 | 0.28 |
| 13310 | 0 | 8906   | DKKAINLDKAQQKLD            | 2.73 | 0.01 | 2.73 | 0.44 | 0.85 | 0.28 |
| 13311 | 0 | 8907   | DKKDKEDK                   | 2.18 | 0.01 | 3.85 | 2.00 | 0.85 | 0.85 |
| 13312 | 0 | 8907   | DKKDKEDK                   | 2.18 | 0.01 | 3.85 | 2.00 | 0.85 | 0.85 |
| 13313 | 0 | 8907   | DKKDKEDK                   | 2.18 | 0.01 | 3.85 | 2.00 | 0.85 | 0.85 |

|       |   |        |                              |      |      |      |      |      |      |
|-------|---|--------|------------------------------|------|------|------|------|------|------|
| 13314 | 0 | 8907   | DKKDKEDK                     | 2.18 | 0.01 | 3.85 | 2.00 | 0.85 | 0.85 |
| 13315 | 0 | 476997 | DKKEVECKCTKEGFEPLF           | 2.87 | 0.01 | 3.12 | 0.68 | 0.22 | 0.28 |
| 13316 | 0 | 230368 | DKKQKAREERFAASLQR<br>RLERRKA | 3.16 | 0.01 | 3.33 | 2.49 | 0.85 | 0.28 |
| 13317 | 0 | 230368 | DKKQKAREERFAASLQR<br>RLERRKA | 3.16 | 0.01 | 3.33 | 2.49 | 0.22 | 0.28 |
| 13318 | 0 | 167882 | DKKSTAAVILTPTENHFT           | 2.80 | 0.01 | 2.75 | 0.44 | 0.85 | 2.51 |
| 13319 | 0 | 167882 | DKKSTAAVILTPTENHFT           | 2.80 | 0.01 | 2.75 | 0.44 | 0.85 | 2.51 |
| 13320 | 0 | 167882 | DKKSTAAVILTPTENHFT           | 2.80 | 0.01 | 2.75 | 0.44 | 0.85 | 2.51 |
| 13321 | 0 | 167883 | DKKSTAAVILTPTENHFT<br>L      | 2.86 | 0.01 | 3.18 | 0.44 | 1.59 | 2.51 |
| 13322 | 0 | 167883 | DKKSTAAVILTPTENHFT<br>L      | 2.86 | 0.01 | 3.18 | 0.44 | 0.85 | 2.51 |
| 13323 | 0 | 167883 | DKKSTAAVILTPTENHFT<br>L      | 2.86 | 0.01 | 3.18 | 0.44 | 0.85 | 2.51 |
| 13324 | 0 | 167883 | DKKSTAAVILTPTENHFT<br>L      | 2.86 | 0.01 | 3.18 | 0.44 | 0.85 | 2.51 |
| 13325 | 0 | 8916   | DKKTEETTLLEDRL               | 2.72 | 0.01 | 2.96 | 0.68 | 0.22 | 0.28 |
| 13326 | 0 | 8916   | DKKTEETTLLEDRL               | 2.72 | 0.01 | 2.96 | 1.15 | 0.22 | 0.28 |
| 13327 | 0 | 8916   | DKKTEETTLLEDRL               | 2.72 | 0.01 | 2.96 | 0.68 | 0.22 | 0.28 |
| 13328 | 0 | 8916   | DKKTEETTLLEDRL               | 2.72 | 0.01 | 2.96 | 0.68 | 0.22 | 0.28 |
| 13329 | 0 | 8916   | DKKTEETTLLEDRL               | 2.72 | 0.01 | 2.96 | 1.15 | 0.22 | 0.28 |
| 13330 | 0 | 8916   | DKKTEETTLLEDRL               | 2.72 | 0.01 | 2.96 | 0.68 | 0.22 | 0.28 |
| 13331 | 0 | 8916   | DKKTEETTLLEDRL               | 2.72 | 0.01 | 3.18 | 0.68 | 0.22 | 0.28 |
| 13332 | 0 | 8916   | DKKTEETTLLEDRL               | 2.72 | 0.01 | 3.18 | 0.68 | 0.22 | 0.28 |
| 13333 | 0 | 8916   | DKKTEETTLLEDRL               | 2.72 | 0.01 | 3.18 | 0.68 | 0.22 | 0.28 |
| 13334 | 0 | 8916   | DKKTEETTLLEDRL               | 2.72 | 0.01 | 3.18 | 0.68 | 0.22 | 0.28 |
| 13335 | 0 | 8916   | DKKTEETTLLEDRL               | 2.72 | 0.01 | 3.18 | 0.68 | 0.22 | 0.28 |
| 13336 | 0 | 8916   | DKKTEETTLLEDRL               | 2.72 | 0.01 | 3.18 | 0.68 | 0.22 | 0.28 |
| 13337 | 0 | 8916   | DKKTEETTLLEDRL               | 2.72 | 0.01 | 3.18 | 0.68 | 0.22 | 0.28 |
| 13338 | 0 | 8916   | DKKTEETTLLEDRL               | 2.72 | 0.01 | 3.18 | 0.68 | 0.22 | 0.28 |
| 13339 | 0 | 8916   | DKKTEETTLLEDRL               | 2.72 | 0.01 | 3.18 | 0.68 | 0.22 | 0.28 |
| 13340 | 0 | 8916   | DKKTEETTLLEDRL               | 2.72 | 0.01 | 3.18 | 0.68 | 0.22 | 0.28 |
| 13341 | 0 | 8916   | DKKTEETTLLEDRL               | 2.72 | 0.01 | 3.18 | 0.68 | 0.22 | 0.28 |
| 13342 | 0 | 8916   | DKKTEETTLLEDRL               | 2.72 | 0.01 | 3.18 | 0.68 | 0.22 | 1.48 |
| 13343 | 0 | 144613 | DKKVILFALPGAFTPVCS<br>AR     | 2.92 | 0.01 | 2.75 | 3.17 | 0.22 | 0.28 |
| 13344 | 0 | 8917   | DKLADYKRRM                   | 2.33 | 4.23 | 2.56 | 0.44 | 0.85 | 0.28 |
| 13345 | 0 | 8918   | DKLADYKRRM                   | 2.33 | 0.01 | 2.56 | 0.68 | 0.22 | 0.28 |
| 13346 | 0 | 8920   | DKLAKEQKSKQNIGALK<br>Q       | 2.87 | 0.01 | 2.85 | 1.15 | 0.22 | 0.28 |
| 13347 | 0 | 8920   | DKLAKEQKSKQNIGALK<br>Q       | 2.87 | 0.01 | 2.85 | 1.15 | 0.22 | 0.85 |

|       |   |        |                            |      |      |      |      |      |      |
|-------|---|--------|----------------------------|------|------|------|------|------|------|
| 13348 | 0 | 8920   | DKLAKEQKSKQNIGALK<br>Q     | 2.87 | 0.01 | 2.85 | 0.68 | 0.22 | 0.28 |
| 13349 | 0 | 8921   | DKLCKDKKADSGYCY            | 2.71 | 0.01 | 2.56 | 0.68 | 0.22 | 0.85 |
| 13350 | 0 | 8921   | DKLCKDKKADSGYCY            | 2.71 | 0.01 | 2.56 | 2.52 | 0.22 | 0.85 |
| 13351 | 0 | 8922   | DKLCVWNNKT                 | 2.30 | 0.01 | 2.66 | 0.68 | 0.22 | 0.28 |
| 13352 | 0 | 8922   | DKLCVWNNKT                 | 2.30 | 0.01 | 2.66 | 0.68 | 0.22 | 0.28 |
| 13353 | 0 | 170577 | DKLDNPGGPTVG               | 2.50 | 0.01 | 0.90 | 0.44 | 0.85 | 0.28 |
| 13354 | 0 | 170577 | DKLDNPGGPTVG               | 2.50 | 0.01 | 0.90 | 0.44 | 0.85 | 1.39 |
| 13355 | 0 | 8923   | DKLDPTDYRGGIPSLLKK<br>GKDI | 3.07 | 0.01 | 3.72 | 0.68 | 0.22 | 0.28 |
| 13356 | 0 | 423248 | DKLIAWMTWLSSRAT            | 2.67 | 0.01 | 2.51 | 0.44 | 1.59 | 1.28 |
| 13357 | 0 | 8927   | DKLIDYAASGDPTS             | 2.61 | 0.01 | 2.56 | 1.12 | 0.22 | 0.28 |
| 13358 | 0 | 92463  | DKLISSVSAF                 | 2.31 | 0.01 | 2.67 | 2.00 | 0.22 | 0.28 |
| 13359 | 0 | 92463  | DKLISSVSAF                 | 2.31 | 0.01 | 2.67 | 2.00 | 0.22 | 0.28 |
| 13360 | 0 | 92463  | DKLISSVSAF                 | 2.31 | 0.01 | 2.67 | 2.00 | 0.22 | 0.28 |
| 13361 | 0 | 8930   | DKLKQQRDTLSTQKET           | 2.78 | 0.01 | 2.24 | 0.44 | 1.13 | 0.28 |
| 13362 | 0 | 8930   | DKLKQQRDTLSTQKET           | 2.78 | 0.01 | 2.24 | 0.44 | 1.41 | 0.28 |
| 13363 | 0 | 170578 | DKLREKISEKTIQIS            | 2.70 | 0.01 | 0.78 | 0.44 | 1.13 | 0.28 |
| 13364 | 0 | 268893 | DKLSLFGQAAAGDKP            | 2.69 | 0.01 | 1.61 | 0.44 | 0.85 | 1.28 |
| 13365 | 0 | 8936   | DKLTTREIEQVE               | 2.46 | 0.01 | 3.29 | 1.12 | 0.22 | 0.85 |
| 13366 | 0 | 8936   | DKLTTREIEQVE               | 2.46 | 0.01 | 3.29 | 1.12 | 0.22 | 1.34 |
| 13367 | 0 | 8936   | DKLTTREIEQVE               | 2.46 | 0.01 | 3.29 | 1.12 | 0.22 | 0.85 |
| 13368 | 0 | 8936   | DKLTTREIEQVE               | 2.46 | 0.01 | 3.29 | 1.12 | 0.22 | 0.85 |
| 13369 | 0 | 8936   | DKLTTREIEQVE               | 2.46 | 0.01 | 3.29 | 1.12 | 0.22 | 0.85 |
| 13370 | 0 | 8936   | DKLTTREIEQVE               | 2.46 | 0.01 | 3.29 | 1.12 | 0.22 | 0.85 |
| 13371 | 0 | 8936   | DKLTTREIEQVE               | 2.46 | 0.01 | 3.29 | 1.12 | 0.22 | 0.85 |
| 13372 | 0 | 8936   | DKLTTREIEQVE               | 2.46 | 0.01 | 3.29 | 1.12 | 0.22 | 0.85 |
| 13373 | 0 | 8937   | DKLTTREIEQVELLKRIYD<br>KL  | 3.02 | 0.01 | 4.33 | 0.44 | 0.85 | 0.28 |
| 13374 | 0 | 8937   | DKLTTREIEQVELLKRIYD<br>KL  | 3.02 | 0.01 | 4.33 | 0.44 | 0.22 | 0.28 |
| 13375 | 0 | 8937   | DKLTTREIEQVELLKRIYD<br>KL  | 3.02 | 0.01 | 4.33 | 0.44 | 1.74 | 0.28 |
| 13376 | 0 | 8937   | DKLTTREIEQVELLKRIYD<br>KL  | 3.02 | 0.01 | 4.33 | 0.44 | 1.74 | 0.28 |
| 13377 | 0 | 238291 | DKLVVMQDASGQHR             | 2.59 | 0.01 | 2.14 | 2.65 | 0.22 | 0.85 |
| 13378 | 0 | 238291 | DKLVVMQDASGQHR             | 2.59 | 0.01 | 2.14 | 2.65 | 0.22 | 0.85 |
| 13379 | 0 | 8939   | DKLYIWGVVHHPSTN            | 2.53 | 0.01 | 2.36 | 0.44 | 0.85 | 1.57 |
| 13380 | 0 | 8939   | DKLYIWGVVHHPSTN            | 2.53 | 0.01 | 2.36 | 1.15 | 0.22 | 1.57 |
| 13381 | 0 | 8939   | DKLYIWGVVHHPSTN            | 2.53 | 0.01 | 2.36 | 1.15 | 0.22 | 1.57 |
| 13382 | 0 | 8939   | DKLYIWGVVHHPSTN            | 2.53 | 0.01 | 2.36 | 1.15 | 0.22 | 1.57 |
| 13383 | 0 | 8942   | DKNEKGQHEIVEVEEILP<br>E    | 2.91 | 0.01 | 1.66 | 0.44 | 1.74 | 0.28 |
| 13384 | 0 | 8942   | DKNEKGQHEIVEVEEILP<br>E    | 2.91 | 0.01 | 4.33 | 1.20 | 0.22 | 0.85 |

|       |   |        |                                                |      |      |      |      |      |      |
|-------|---|--------|------------------------------------------------|------|------|------|------|------|------|
| 13385 | 0 | 8942   | DKNEKGQHEIVEVEEILP<br>E                        | 2.91 | 0.01 | 1.66 | 0.44 | 0.85 | 0.28 |
| 13386 | 0 | 8942   | DKNEKGQHEIVEVEEILP<br>E                        | 2.91 | 0.01 | 4.33 | 1.20 | 0.22 | 0.85 |
| 13387 | 0 | 8942   | DKNEKGQHEIVEVEEILP<br>E                        | 2.91 | 0.01 | 4.33 | 1.20 | 0.22 | 0.85 |
| 13388 | 0 | 8943   | DKNEKGQHEIVEVEEILP<br>EDKNEKGQHEIVEVEEIL<br>PE | 3.62 | 0.01 | 0.90 | 1.20 | 0.22 | 0.85 |
| 13389 | 0 | 8943   | DKNEKGQHEIVEVEEILP<br>EDKNEKGQHEIVEVEEIL<br>PE | 3.62 | 0.01 | 0.90 | 1.20 | 0.22 | 0.85 |
| 13390 | 0 | 8943   | DKNEKGQHEIVEVEEILP<br>EDKNEKGQHEIVEVEEIL<br>PE | 3.62 | 0.01 | 0.90 | 1.20 | 0.22 | 0.85 |
| 13391 | 0 | 8943   | DKNEKGQHEIVEVEEILP<br>EDKNEKGQHEIVEVEEIL<br>PE | 3.62 | 0.01 | 0.90 | 1.20 | 0.22 | 0.85 |
| 13392 | 0 | 8943   | DKNEKGQHEIVEVEEILP<br>EDKNEKGQHEIVEVEEIL<br>PE | 3.62 | 0.01 | 0.90 | 1.20 | 0.22 | 0.85 |
| 13393 | 0 | 8943   | DKNEKGQHEIVEVEEILP<br>EDKNEKGQHEIVEVEEIL<br>PE | 3.62 | 0.01 | 0.90 | 1.20 | 0.22 | 0.85 |
| 13394 | 0 | 8944   | DKNEKGQHEIVEVEEILP<br>EEPLIEEVEVIEHEVKENK<br>D | 3.62 | 0.01 | 0.90 | 1.20 | 0.22 | 0.85 |
| 13395 | 0 | 8944   | DKNEKGQHEIVEVEEILP<br>EEPLIEEVEVIEHEVKENK<br>D | 3.62 | 0.01 | 0.90 | 1.20 | 0.22 | 0.85 |
| 13396 | 0 | 8944   | DKNEKGQHEIVEVEEILP<br>EEPLIEEVEVIEHEVKENK<br>D | 3.62 | 0.01 | 0.90 | 1.20 | 0.22 | 0.85 |
| 13397 | 0 | 8944   | DKNEKGQHEIVEVEEILP<br>EEPLIEEVEVIEHEVKENK<br>D | 3.62 | 0.01 | 0.90 | 1.20 | 0.22 | 0.85 |
| 13398 | 0 | 8944   | DKNEKGQHEIVEVEEILP<br>EEPLIEEVEVIEHEVKENK<br>D | 3.62 | 0.01 | 0.90 | 1.20 | 0.22 | 0.85 |
| 13399 | 0 | 8946   | DKNIDISIKYDPRKDSEVF<br>ANRVITDDIEL             | 3.34 | 0.01 | 3.21 | 3.14 | 0.22 | 0.28 |
| 13400 | 0 | 8946   | DKNIDISIKYDPRKDSEVF<br>ANRVITDDIEL             | 3.34 | 0.01 | 3.21 | 3.14 | 0.22 | 0.28 |
| 13401 | 0 | 8946   | DKNIDISIKYDPRKDSEVF<br>ANRVITDDIEL             | 3.34 | 0.01 | 3.21 | 3.14 | 0.22 | 0.28 |
| 13402 | 0 | 148565 | DKNKLQDVKDNKPSDV<br>KL                         | 2.90 | 0.01 | 3.33 | 0.44 | 0.85 | 0.28 |

|       |   |        |                              |      |      |      |      |      |      |
|-------|---|--------|------------------------------|------|------|------|------|------|------|
| 13403 | 0 | 148565 | DKNKLQDVKDNKPSDV<br>KL       | 2.90 | 0.01 | 3.33 | 2.49 | 0.22 | 0.28 |
| 13404 | 0 | 148566 | DKNKLQDVKDNKPSDV<br>KLPVIKAE | 3.15 | 0.01 | 3.33 | 0.44 | 0.85 | 0.28 |
| 13405 | 0 | 148566 | DKNKLQDVKDNKPSDV<br>KLPVIKAE | 3.15 | 0.01 | 3.33 | 2.49 | 0.22 | 0.28 |
| 13406 | 0 | 148566 | DKNKLQDVKDNKPSDV<br>KLPVIKAE | 3.15 | 0.01 | 3.33 | 2.49 | 0.22 | 0.28 |
| 13407 | 0 | 8951   | DKNNSDIE                     | 2.14 | 0.01 | 2.99 | 0.44 | 0.85 | 0.28 |
| 13408 | 0 | 268945 | DKPAPFGQAAAADKP              | 2.71 | 0.01 | 1.61 | 0.44 | 0.85 | 1.28 |
| 13409 | 0 | 268946 | DKPAPFGQAAAAGDKL             | 2.70 | 0.01 | 1.61 | 0.44 | 0.85 | 1.28 |
| 13410 | 0 | 268947 | DKPAPFGQAAAAGDKP             | 2.72 | 0.01 | 1.61 | 0.44 | 0.85 | 1.28 |
| 13411 | 0 | 8959   | DKPEKTAAPASDPTGG<br>MGGMDF   | 3.07 | 0.01 | 2.59 | 1.15 | 0.22 | 0.28 |
| 13412 | 0 | 8959   | DKPEKTAAPASDPTGG<br>MGGMDF   | 3.07 | 0.01 | 2.59 | 1.15 | 0.22 | 0.85 |
| 13413 | 0 | 8960   | DKPGSKKTQGEKFFLIHS<br>AD     | 2.92 | 0.01 | 2.82 | 0.44 | 0.85 | 0.28 |
| 13414 | 0 | 268951 | DKPPFPGQAAAAGDKL             | 2.69 | 0.01 | 1.61 | 0.44 | 0.85 | 1.28 |
| 13415 | 0 | 268952 | DKPPFPGQAAAAGDKP             | 2.71 | 0.01 | 1.61 | 0.44 | 0.85 | 1.28 |
| 13416 | 0 | 268953 | DKPPFPGQAAEGDKP              | 2.70 | 0.01 | 1.61 | 0.44 | 0.85 | 1.28 |
| 13417 | 0 | 268955 | DKPSLFGQAAAAGDKP             | 2.69 | 0.01 | 1.61 | 0.44 | 0.85 | 1.28 |
| 13418 | 0 | 268956 | DKPSPFGQAAAAGDKP             | 2.70 | 0.01 | 1.61 | 0.44 | 0.85 | 1.28 |
| 13419 | 0 | 268957 | DKPSPFGQAAAAGGKP             | 2.69 | 0.01 | 1.61 | 0.44 | 0.85 | 1.28 |
| 13420 | 0 | 268958 | DKPSPFGQGTAFDAS              | 2.71 | 0.01 | 1.61 | 0.44 | 0.85 | 1.28 |
| 13421 | 0 | 8972   | DKPSYQFGGH                   | 2.28 | 0.01 | 2.56 | 1.20 | 0.22 | 0.28 |
| 13422 | 0 | 8972   | DKPSYQFGGH                   | 2.28 | 0.01 | 2.56 | 1.20 | 0.22 | 0.28 |
| 13423 | 0 | 8972   | DKPSYQFGGH                   | 2.28 | 0.01 | 2.56 | 1.20 | 0.22 | 0.28 |
| 13424 | 0 | 513078 | DKQISDASRQGLRRD              | 2.70 | 0.01 | 2.24 | 0.44 | 1.41 | 1.28 |
| 13425 | 0 | 8974   | DKQLLPVINKQSCSIS             | 2.74 | 0.01 | 2.38 | 1.12 | 0.22 | 0.28 |
| 13426 | 0 | 127623 | DKRAPPLIPNVPLLWVW<br>NAPTEF  | 3.07 | 0.01 | 2.95 | 3.16 | 0.22 | 0.28 |
| 13427 | 0 | 8976   | DKRDGNNEDNEKLRKP<br>KHKKL    | 3.03 | 0.01 | 1.66 | 1.15 | 0.22 | 0.28 |
| 13428 | 0 | 8976   | DKRDGNNEDNEKLRKP<br>KHKKL    | 3.03 | 0.01 | 1.66 | 1.15 | 0.22 | 1.27 |
| 13429 | 0 | 8976   | DKRDGNNEDNEKLRKP<br>KHKKL    | 3.03 | 0.01 | 1.66 | 1.15 | 0.22 | 1.34 |
| 13430 | 0 | 8976   | DKRDGNNEDNEKLRKP<br>KHKKL    | 3.03 | 0.01 | 1.66 | 3.32 | 0.22 | 0.28 |

|       |   |        |                                    |      |      |      |      |      |      |
|-------|---|--------|------------------------------------|------|------|------|------|------|------|
| 13431 | 0 | 8976   | DKRDGNNEDNEKL RKP<br>KHKKL         | 3.03 | 0.01 | 1.66 | 3.32 | 0.22 | 0.28 |
| 13432 | 0 | 8977   | DKRDGNNEDNENLRKP<br>KHKKL          | 3.03 | 0.01 | 1.66 | 1.15 | 0.22 | 0.28 |
| 13433 | 0 | 8978   | DKRDGNNEDNETLRKP<br>KHKKL          | 3.02 | 0.01 | 3.37 | 1.15 | 0.22 | 0.28 |
| 13434 | 0 | 8981   | DKRFLC                             | 1.88 | 0.01 | 2.40 | 0.44 | 0.85 | 0.28 |
| 13435 | 0 | 8982   | DKRFLCKHSMVDRG                     | 2.60 | 0.01 | 2.40 | 0.68 | 0.22 | 0.28 |
| 13436 | 0 | 124013 | DKRQLQSGQ                          | 2.23 | 0.01 | 0.90 | 0.44 | 1.13 | 1.39 |
| 13437 | 0 | 8986   | DKSINLMDKNLYGYTDE<br>EIFKASAEYKILE | 3.36 | 0.01 | 3.21 | 3.14 | 0.22 | 0.28 |
| 13438 | 0 | 8986   | DKSINLMDKNLYGYTDE<br>EIFKASAEYKILE | 3.36 | 0.01 | 3.21 | 3.14 | 0.22 | 0.28 |
| 13439 | 0 | 8986   | DKSINLMDKNLYGYTDE<br>EIFKASAEYKILE | 3.36 | 0.01 | 3.21 | 3.14 | 0.22 | 0.28 |
| 13440 | 0 | 156857 | DKSKKCEKNCAPMV                     | 2.61 | 0.01 | 0.90 | 2.74 | 0.22 | 0.85 |
| 13441 | 0 | 148567 | DKSKLQDVKDNKPSDVK<br>L             | 2.90 | 0.01 | 3.33 | 0.44 | 0.85 | 0.28 |
| 13442 | 0 | 148567 | DKSKLQDVKDNKPSDVK<br>L             | 2.90 | 0.01 | 3.33 | 2.49 | 0.22 | 0.28 |
| 13443 | 0 | 148568 | DKSKLQDVKDNKPSDVK<br>LPVIAE        | 3.15 | 0.01 | 3.33 | 0.44 | 0.85 | 0.28 |
| 13444 | 0 | 148568 | DKSKLQDVKDNKPSDVK<br>LPVIAE        | 3.15 | 0.01 | 3.33 | 2.49 | 0.22 | 0.28 |
| 13445 | 0 | 148568 | DKSKLQDVKDNKPSDVK<br>LPVIAE        | 3.15 | 0.01 | 3.33 | 2.49 | 0.22 | 0.28 |
| 13446 | 0 | 148569 | DKSKLRDVKDNKSTDVK<br>L             | 2.90 | 0.01 | 3.33 | 0.44 | 0.85 | 0.28 |
| 13447 | 0 | 148569 | DKSKLRDVKDNKSTDVK<br>L             | 2.90 | 0.01 | 3.33 | 2.49 | 0.22 | 0.28 |
| 13448 | 0 | 148570 | DKSKLRDVKDNKSTDVK<br>LPVVAE        | 3.15 | 0.01 | 3.33 | 0.44 | 0.85 | 0.28 |
| 13449 | 0 | 148570 | DKSKLRDVKDNKSTDVK<br>LPVVAE        | 3.15 | 0.01 | 3.33 | 2.49 | 0.22 | 0.28 |
| 13450 | 0 | 148570 | DKSKLRDVKDNKSTDVK<br>LPVVAE        | 3.15 | 0.01 | 3.33 | 2.49 | 0.22 | 0.28 |
| 13451 | 0 | 462300 | DKSKPDK                            | 2.06 | 0.01 | 0.78 | 1.12 | 0.22 | 1.28 |
| 13452 | 0 | 108867 | DKSRWQE                            | 1.99 | 0.01 | 0.78 | 0.44 | 1.13 | 0.28 |
| 13453 | 0 | 119558 | DKSRWQQG                           | 2.11 | 0.01 | 0.78 | 0.44 | 1.93 | 0.28 |
| 13454 | 0 | 8989   | DKSRYGGLG                          | 2.23 | 0.01 | 2.70 | 0.68 | 0.22 | 0.85 |
| 13455 | 0 | 8989   | DKSRYGGLG                          | 2.23 | 0.01 | 2.70 | 0.68 | 0.22 | 0.85 |
| 13456 | 0 | 8989   | DKSRYGGLG                          | 2.23 | 0.01 | 2.70 | 0.68 | 0.22 | 0.85 |
| 13457 | 0 | 8989   | DKSRYGGLG                          | 2.23 | 0.01 | 2.70 | 0.68 | 0.22 | 0.85 |
| 13458 | 0 | 8989   | DKSRYGGLG                          | 2.23 | 0.01 | 2.70 | 0.68 | 0.22 | 0.85 |
| 13459 | 0 | 124015 | DKTEDVDIEE                         | 2.34 | 0.01 | 0.78 | 0.44 | 1.13 | 1.27 |
| 13460 | 0 | 124016 | DKTEDVDIEEMALKLDN<br>VLL           | 2.96 | 0.01 | 0.78 | 0.44 | 1.13 | 1.27 |



|       |   |        |                                     |      |      |      |      |      |      |
|-------|---|--------|-------------------------------------|------|------|------|------|------|------|
| 13461 | 0 | 8994   | DKTEIPTINT                          | 2.33 | 0.01 | 1.60 | 0.44 | 1.23 | 0.85 |
| 13462 | 0 | 8994   | DKTEIPTINT                          | 2.33 | 0.01 | 1.60 | 0.44 | 1.23 | 0.85 |
| 13463 | 0 | 8994   | DKTEIPTINT                          | 2.33 | 0.01 | 1.60 | 0.44 | 1.23 | 0.85 |
| 13464 | 0 | 115208 | DKTEIPTINTIASGEPTST<br>P            | 2.98 | 0.01 | 1.60 | 0.44 | 1.23 | 2.51 |
| 13465 | 0 | 142407 | DKTIAAAKKAKKARE                     | 2.71 | 0.01 | 2.59 | 0.44 | 0.85 | 0.85 |
| 13466 | 0 | 180399 | DKVDEERYDIEAKVTK                    | 2.77 | 0.01 | 0.78 | 0.68 | 0.22 | 0.28 |
| 13467 | 0 | 8997   | DKVEDGKERNVLIFDL                    | 2.75 | 0.01 | 2.30 | 0.44 | 0.85 | 0.28 |
| 13468 | 0 | 187048 | DKVGHDFSGNDDISD                     | 2.70 | 0.01 | 3.36 | 1.20 | 0.22 | 0.28 |
| 13469 | 0 | 187048 | DKVGHDFSGNDDISD                     | 2.70 | 0.01 | 3.36 | 1.20 | 0.22 | 1.27 |
| 13470 | 0 | 115209 | DKVGINYWLA                          | 2.26 | 0.01 | 1.60 | 0.44 | 1.23 | 0.85 |
| 13471 | 0 | 115209 | DKVGINYWLA                          | 2.26 | 0.01 | 1.60 | 0.44 | 1.23 | 0.85 |
| 13472 | 0 | 115209 | DKVGINYWLA                          | 2.26 | 0.01 | 1.60 | 0.44 | 2.98 | 0.85 |
| 13473 | 0 | 513099 | DKVKEDKQISDASRQ                     | 2.71 | 0.01 | 2.24 | 0.44 | 1.41 | 1.28 |
| 13474 | 0 | 513100 | DKVKEEKQISDASRQ                     | 2.70 | 0.01 | 2.24 | 0.44 | 1.41 | 1.28 |
| 13475 | 0 | 120441 | DKVLPLVAIVVSVGLAVS<br>YD            | 2.98 | 0.01 | 2.86 | 0.44 | 0.85 | 0.28 |
| 13476 | 0 | 102360 | DKVNFFRMVISNPAATH<br>QDIDFLIEEIERLG | 3.34 | 0.01 | 0.78 | 0.44 | 1.13 | 0.85 |
| 13477 | 0 | 135650 | DKVSFFCKNKEKKC                      | 2.63 | 0.01 | 0.78 | 0.44 | 1.13 | 0.28 |
| 13478 | 0 | 135650 | DKVSFFCKNKEKKC                      | 2.63 | 0.01 | 0.78 | 0.44 | 1.41 | 0.28 |
| 13479 | 0 | 135650 | DKVSFFCKNKEKKC                      | 2.63 | 0.01 | 0.78 | 0.44 | 1.13 | 1.27 |
| 13480 | 0 | 135650 | DKVSFFCKNKEKKC                      | 2.63 | 0.01 | 0.78 | 0.44 | 1.13 | 1.27 |
| 13481 | 0 | 513101 | DKVSLEEKQAANQTA                     | 2.67 | 0.01 | 2.24 | 0.44 | 1.41 | 1.28 |
| 13482 | 0 | 78118  | DKVTIDGYETLIMSDEST                  | 2.86 | 0.01 | 2.72 | 0.68 | 0.22 | 0.28 |
| 13483 | 0 | 167885 | DKVVPSREVVSES LAP                   | 2.75 | 0.01 | 2.75 | 0.44 | 0.85 | 2.51 |
| 13484 | 0 | 167885 | DKVVPSREVVSES LAP                   | 2.75 | 0.01 | 2.75 | 0.44 | 0.85 | 2.51 |
| 13485 | 0 | 167885 | DKVVPSREVVSES LAP                   | 2.75 | 0.01 | 2.75 | 0.44 | 1.59 | 2.51 |
| 13486 | 0 | 9005   | DKYEIEKDVAAYIKKEFD<br>RKY           | 3.03 | 0.01 | 3.10 | 3.06 | 0.22 | 0.28 |
| 13487 | 0 | 9007   | DKYFKNHTSPDVDLGD                    | 2.72 | 0.01 | 2.45 | 1.12 | 0.22 | 2.92 |
| 13488 | 0 | 453091 | DKYGVKIPDEDLA                       | 2.54 | 0.01 | 2.04 | 1.15 | 0.22 | 0.28 |
| 13489 | 0 | 9011   | DKYYFNPETKKACKGINL<br>IDDIKYY       | 3.15 | 0.01 | 3.04 | 2.75 | 0.22 | 0.28 |
| 13490 | 0 | 9011   | DKYYFNPETKKACKGINL<br>IDDIKYY       | 3.15 | 0.01 | 3.04 | 2.75 | 0.22 | 0.85 |
| 13491 | 0 | 9011   | DKYYFNPETKKACKGINL<br>IDDIKYY       | 3.15 | 0.01 | 3.04 | 2.75 | 0.22 | 0.28 |
| 13492 | 0 | 100779 | DLAHLT                              | 1.90 | 0.01 | 4.03 | 1.12 | 0.22 | 0.28 |
| 13493 | 0 | 9018   | DLAHLTA                             | 2.04 | 0.01 | 4.08 | 1.12 | 0.22 | 0.28 |
| 13494 | 0 | 9018   | DLAHLTA                             | 2.04 | 0.01 | 4.08 | 1.12 | 0.22 | 0.28 |
| 13495 | 0 | 9018   | DLAHLTA                             | 2.04 | 0.01 | 4.08 | 1.12 | 0.22 | 0.28 |

|       |   |        |                                                       |      |      |      |      |      |      |
|-------|---|--------|-------------------------------------------------------|------|------|------|------|------|------|
| 13496 | 0 | 9018   | DLAHLTA                                               | 2.04 | 0.01 | 4.08 | 1.12 | 0.22 | 0.28 |
| 13497 | 0 | 9018   | DLAHLTA                                               | 2.04 | 0.01 | 4.08 | 1.12 | 0.22 | 0.28 |
| 13498 | 0 | 9018   | DLAHLTA                                               | 2.04 | 0.01 | 4.08 | 1.12 | 0.22 | 0.28 |
| 13499 | 0 | 9018   | DLAHLTA                                               | 2.04 | 0.01 | 4.08 | 1.12 | 0.22 | 1.34 |
| 13500 | 0 | 102361 | DLAIPATEFFSTKADKKP<br>EA                              | 2.97 | 0.01 | 3.44 | 0.68 | 0.22 | 0.28 |
| 13501 | 0 | 180401 | DLAKSRGVEAARERMF<br>NGE                               | 2.88 | 4.63 | 0.78 | 0.44 | 1.41 | 0.28 |
| 13502 | 0 | 9026   | DLAPEA                                                | 1.90 | 0.01 | 1.96 | 0.44 | 0.85 | 0.28 |
| 13503 | 0 | 122725 | DLASINLQRGRDHG                                        | 2.62 | 0.01 | 0.78 | 1.20 | 0.22 | 0.28 |
| 13504 | 0 | 122725 | DLASINLQRGRDHG                                        | 2.62 | 0.01 | 0.78 | 1.20 | 0.22 | 0.28 |
| 13505 | 0 | 112079 | DLAVYFC                                               | 1.99 | 0.01 | 0.78 | 0.44 | 1.13 | 0.28 |
| 13506 | 0 | 9035   | DLCKHNNGDCGDDKLC<br>EYVGNRRVKCKCKEGYK<br>LEGIECVELLSL | 3.77 | 0.01 | 1.66 | 1.20 | 0.22 | 0.85 |
| 13507 | 0 | 9035   | DLCKHNNGDCGDDKLC<br>EYVGNRRVKCKCKEGYK<br>LEGIECVELLSL | 3.77 | 0.01 | 1.66 | 1.20 | 0.22 | 0.85 |
| 13508 | 0 | 9035   | DLCKHNNGDCGDDKLC<br>EYVGNRRVKCKCKEGYK<br>LEGIECVELLSL | 3.77 | 0.01 | 1.66 | 1.20 | 0.22 | 0.85 |
| 13509 | 0 | 9035   | DLCKHNNGDCGDDKLC<br>EYVGNRRVKCKCKEGYK<br>LEGIECVELLSL | 3.77 | 0.01 | 1.66 | 0.44 | 0.85 | 0.28 |
| 13510 | 0 | 9038   | DLDANGILNVSAEEKGT<br>GKR                              | 2.94 | 0.01 | 2.78 | 0.44 | 0.85 | 0.28 |
| 13511 | 0 | 9039   | DLDASREAKKQLEAEHQ<br>K                                | 2.89 | 0.01 | 2.85 | 0.68 | 0.22 | 0.28 |
| 13512 | 0 | 142125 | DLDASREAKKQLEAEQQ<br>KLE                              | 3.00 | 0.01 | 2.24 | 0.44 | 0.85 | 0.28 |
| 13513 | 0 | 142125 | DLDASREAKKQLEAEQQ<br>KLE                              | 3.00 | 0.01 | 2.24 | 0.44 | 1.74 | 0.28 |
| 13514 | 0 | 9043   | DLDFAFDASLSPFMIRE<br>AG                               | 2.97 | 0.01 | 2.82 | 0.44 | 0.85 | 0.28 |
| 13515 | 0 | 9043   | DLDFAFDASLSPFMIRE<br>AG                               | 2.97 | 0.01 | 2.82 | 0.44 | 1.41 | 0.28 |
| 13516 | 0 | 9044   | DLDGAA                                                | 1.89 | 0.01 | 3.17 | 0.68 | 0.22 | 1.27 |
| 13517 | 0 | 9044   | DLDGAA                                                | 1.89 | 0.01 | 3.17 | 0.68 | 0.22 | 2.02 |
| 13518 | 0 | 9044   | DLDGAA                                                | 1.89 | 0.01 | 3.17 | 0.68 | 0.22 | 0.28 |
| 13519 | 0 | 242419 | DLDGVKPLILRDCSVAG<br>WLLGNPMCDEFINVPE<br>WSYIVEK      | 3.62 | 0.01 | 3.72 | 0.68 | 0.22 | 1.48 |
| 13520 | 0 | 242419 | DLDGVKPLILRDCSVAG<br>WLLGNPMCDEFINVPE<br>WSYIVEK      | 3.62 | 0.01 | 3.72 | 0.68 | 0.22 | 1.48 |
| 13521 | 0 | 227754 | DLDIFLSSVDINEGAL                                      | 2.75 | 0.01 | 2.72 | 1.20 | 1.59 | 0.28 |

|       |   |        |                                       |      |      |      |      |      |      |
|-------|---|--------|---------------------------------------|------|------|------|------|------|------|
| 13522 | 0 | 122726 | DLDPSSIPDKEQAISALP<br>DYASQPGKPPREDLK | 3.46 | 0.01 | 2.58 | 2.87 | 0.22 | 0.28 |
| 13523 | 0 | 122726 | DLDPSSIPDKEQAISALP<br>DYASQPGKPPREDLK | 3.46 | 0.01 | 2.58 | 2.87 | 0.22 | 0.28 |
| 13524 | 0 | 122726 | DLDPSSIPDKEQAISALP<br>DYASQPGKPPREDLK | 3.46 | 0.01 | 2.58 | 2.87 | 0.22 | 0.28 |
| 13525 | 0 | 122726 | DLDPSSIPDKEQAISALP<br>DYASQPGKPPREDLK | 3.46 | 0.01 | 2.58 | 2.87 | 0.22 | 1.34 |
| 13526 | 0 | 189054 | DLDTHFTQYKLARPYI                      | 2.72 | 0.01 | 2.92 | 0.68 | 0.22 | 0.28 |
| 13527 | 0 | 189054 | DLDTHFTQYKLARPYI                      | 2.72 | 0.01 | 2.92 | 0.68 | 0.22 | 0.28 |
| 13528 | 0 | 189054 | DLDTHFTQYKLARPYI                      | 2.72 | 0.01 | 2.92 | 0.68 | 0.22 | 1.48 |
| 13529 | 0 | 189054 | DLDTHFTQYKLARPYI                      | 2.72 | 0.01 | 2.92 | 0.68 | 0.22 | 0.28 |
| 13530 | 0 | 189054 | DLDTHFTQYKLARPYI                      | 2.72 | 0.01 | 2.92 | 3.61 | 0.22 | 0.28 |
| 13531 | 0 | 95315  | DLDVNVFRQL                            | 2.34 | 0.01 | 2.60 | 1.12 | 0.22 | 0.85 |
| 13532 | 0 | 141617 | DLEDIIKGNDLVHDEY                      | 2.75 | 0.01 | 1.66 | 2.55 | 0.22 | 0.28 |
| 13533 | 0 | 141617 | DLEDIIKGNDLVHDEY                      | 2.75 | 0.01 | 1.66 | 1.20 | 0.22 | 0.28 |
| 13534 | 0 | 170589 | DLEHSNDALKAQDLK                       | 2.71 | 0.01 | 0.78 | 0.44 | 1.13 | 0.28 |
| 13535 | 0 | 98734  | DLEILLQKWE                            | 2.32 | 0.01 | 1.60 | 0.44 | 1.23 | 0.85 |
| 13536 | 0 | 98734  | DLEILLQKWE                            | 2.32 | 0.01 | 1.60 | 0.44 | 1.23 | 0.85 |
| 13537 | 0 | 9068   | DLERAEEAETGESK                        | 2.70 | 0.01 | 3.15 | 0.44 | 1.23 | 0.85 |
| 13538 | 0 | 230451 | DLERPLELRVRVLDI                       | 2.73 | 0.01 | 0.78 | 0.44 | 1.13 | 0.28 |
| 13539 | 0 | 105715 | DLESIKGT                              | 2.10 | 0.01 | 3.05 | 1.20 | 0.22 | 0.28 |
| 13540 | 0 | 434734 | DLESTTNTNTGKKS                        | 2.64 | 0.01 | 3.89 | 0.68 | 0.22 | 0.28 |
| 13541 | 0 | 189055 | DLETHFTQYKLARPYI                      | 2.69 | 0.01 | 2.92 | 0.68 | 0.22 | 0.28 |
| 13542 | 0 | 120442 | DLFALAPSLT                            | 2.33 | 0.01 | 2.18 | 2.16 | 0.22 | 0.28 |
| 13543 | 0 | 135836 | DLFGNVLLGQRLDQG                       | 2.72 | 0.01 | 0.90 | 1.15 | 0.22 | 0.28 |
| 13544 | 0 | 135836 | DLFGNVLLGQRLDQG                       | 2.72 | 0.01 | 0.90 | 1.15 | 0.22 | 1.27 |
| 13545 | 0 | 135836 | DLFGNVLLGQRLDQG                       | 2.72 | 0.01 | 0.90 | 0.68 | 0.22 | 0.28 |
| 13546 | 0 | 81130  | DLFHVNGRDTMNIIVDE<br>NKY              | 2.91 | 0.01 | 0.90 | 2.74 | 0.22 | 1.48 |
| 13547 | 0 | 81130  | DLFHVNGRDTMNIIVDE<br>NKY              | 2.91 | 0.01 | 0.90 | 2.74 | 0.22 | 0.85 |
| 13548 | 0 | 81131  | DLFHVNGRDTMNNIVD<br>ENKY              | 2.91 | 0.01 | 0.90 | 2.74 | 0.22 | 1.48 |
| 13549 | 0 | 81131  | DLFHVNGRDTMNNIVD<br>ENKY              | 2.91 | 0.01 | 0.90 | 2.74 | 0.22 | 0.85 |
| 13550 | 0 | 122303 | DLFSAGMVTSTTLAW<br>GLLLM              | 3.00 | 0.01 | 0.78 | 0.44 | 1.13 | 0.85 |
| 13551 | 0 | 143845 | DLFVTAW                               | 1.99 | 0.01 | 0.90 | 0.44 | 1.13 | 1.39 |
| 13552 | 0 | 9094   | DLGDISGINASVVNIQK                     | 2.81 | 0.01 | 2.48 | 0.44 | 0.85 | 0.28 |
| 13553 | 0 | 9095   | DLGEAIREQPEQARLALT<br>LA              | 2.98 | 0.01 | 2.58 | 0.44 | 0.22 | 0.28 |

|       |   |        |                                   |      |      |      |      |      |      |
|-------|---|--------|-----------------------------------|------|------|------|------|------|------|
| 13554 | 0 | 238292 | DLGLSDKLVVMQDA                    | 2.63 | 0.01 | 2.14 | 2.65 | 0.22 | 0.85 |
| 13555 | 0 | 9103   | DLGPLAAR                          | 2.13 | 0.01 | 3.78 | 1.15 | 0.22 | 0.28 |
| 13556 | 0 | 9103   | DLGPLAAR                          | 2.13 | 0.01 | 3.78 | 1.15 | 0.22 | 1.34 |
| 13557 | 0 | 9104   | DLGQAKRVVIN                       | 2.35 | 0.01 | 3.53 | 1.15 | 0.22 | 0.85 |
| 13558 | 0 | 178670 | DLGQVFRRRLTSAVNE                  | 2.63 | 0.01 | 2.36 | 0.44 | 1.23 | 1.28 |
| 13559 | 0 | 178670 | DLGQVFRRRLTSAVNE                  | 2.63 | 0.01 | 2.36 | 0.44 | 1.23 | 1.27 |
| 13560 | 0 | 178670 | DLGQVFRRRLTSAVNE                  | 2.63 | 0.01 | 2.36 | 0.44 | 1.23 | 1.28 |
| 13561 | 0 | 9106   | DLGSIA                            | 1.88 | 0.01 | 3.37 | 0.68 | 0.22 | 1.34 |
| 13562 | 0 | 9106   | DLGSIA                            | 1.88 | 0.01 | 3.37 | 0.68 | 0.22 | 1.57 |
| 13563 | 0 | 9106   | DLGSIA                            | 1.88 | 0.01 | 3.37 | 0.68 | 0.22 | 0.28 |
| 13564 | 0 | 9106   | DLGSIA                            | 1.88 | 0.01 | 3.18 | 1.12 | 0.22 | 0.28 |
| 13565 | 0 | 9107   | DLGSIAA                           | 1.99 | 0.01 | 3.37 | 1.12 | 0.22 | 1.34 |
| 13566 | 0 | 9107   | DLGSIAA                           | 1.99 | 0.01 | 3.37 | 1.12 | 0.22 | 0.28 |
| 13567 | 0 | 9108   | DLGTTL                            | 1.90 | 0.01 | 3.75 | 1.15 | 0.22 | 0.28 |
| 13568 | 0 | 9109   | DLGVRV                            | 1.90 | 0.01 | 1.96 | 0.44 | 0.85 | 0.28 |
|       |   |        | DLGWGVVGTHAAPAH                   |      |      |      |      |      |      |
| 13569 | 0 | 132215 | GQALGAVGHWLVLLW<br>QL             | 3.45 | 0.01 | 0.90 | 0.44 | 1.13 | 0.28 |
| 13570 | 0 | 9111   | DLHQQIHGR                         | 2.22 | 0.01 | 0.90 | 1.15 | 0.22 | 1.39 |
| 13571 | 0 | 179776 | DLIARAANKI                        | 2.24 | 0.01 | 3.44 | 0.68 | 0.22 | 0.28 |
| 13572 | 0 | 179776 | DLIARAANKI                        | 2.24 | 0.01 | 3.44 | 0.68 | 0.22 | 0.28 |
| 13573 | 0 | 179776 | DLIARAANKI                        | 2.24 | 0.01 | 3.44 | 0.68 | 0.22 | 0.28 |
| 13574 | 0 | 179776 | DLIARAANKI                        | 2.24 | 0.01 | 3.44 | 0.68 | 0.22 | 0.85 |
| 13575 | 0 | 179776 | DLIARAANKI                        | 2.24 | 0.01 | 3.44 | 0.68 | 0.22 | 0.85 |
| 13576 | 0 | 179776 | DLIARAANKI                        | 2.24 | 0.01 | 3.44 | 0.68 | 0.22 | 0.85 |
| 13577 | 0 | 179776 | DLIARAANKI                        | 2.24 | 0.01 | 3.44 | 0.68 | 0.22 | 0.85 |
| 13578 | 0 | 179776 | DLIARAANKI                        | 2.24 | 0.01 | 3.44 | 0.68 | 0.22 | 0.85 |
| 13579 | 0 | 179776 | DLIARAANKI                        | 2.24 | 0.01 | 3.44 | 0.68 | 0.22 | 0.85 |
| 13580 | 0 | 179776 | DLIARAANKI                        | 2.24 | 0.01 | 3.44 | 0.68 | 0.22 | 0.85 |
|       |   |        | DLIARAANKI IQDQKKGS               |      |      |      |      |      |      |
| 13581 | 0 | 9115   | RITKAKADEMAHRRYCK<br>RTIPPNYRVDQV | 3.77 | 0.01 | 4.33 | 2.49 | 0.22 | 0.85 |
| 13582 | 0 | 9118   | DLIAYKQ                           | 1.99 | 0.01 | 2.14 | 0.44 | 0.22 | 0.28 |
| 13583 | 0 | 9118   | DLIAYKQ                           | 1.99 | 0.01 | 2.14 | 0.44 | 0.85 | 0.28 |
| 13584 | 0 | 9126   | DLIGQKLGLKLLRY                    | 2.69 | 0.01 | 2.43 | 0.44 | 1.59 | 0.28 |
| 13585 | 0 | 9132   | DLIPLLR                           | 2.03 | 0.01 | 2.24 | 1.12 | 0.22 | 0.28 |
| 13586 | 0 | 9132   | DLIPLLR                           | 2.03 | 0.01 | 2.24 | 0.68 | 0.22 | 0.28 |
| 13587 | 0 | 9134   | DLIQEGNIGLMKAV                    | 2.59 | 0.01 | 2.24 | 2.66 | 0.22 | 1.27 |
| 13588 | 0 | 9134   | DLIQEGNIGLMKAV                    | 2.59 | 0.01 | 2.24 | 2.66 | 0.22 | 0.28 |
| 13589 | 0 | 9134   | DLIQEGNIGLMKAV                    | 2.59 | 0.01 | 2.24 | 2.66 | 0.22 | 0.28 |
| 13590 | 0 | 9134   | DLIQEGNIGLMKAV                    | 2.59 | 0.01 | 2.24 | 2.66 | 0.22 | 0.28 |
| 13591 | 0 | 9134   | DLIQEGNIGLMKAV                    | 2.59 | 0.01 | 2.24 | 2.66 | 0.22 | 0.28 |
| 13592 | 0 | 9134   | DLIQEGNIGLMKAV                    | 2.59 | 0.01 | 2.24 | 2.66 | 0.22 | 0.28 |
| 13593 | 0 | 99948  | DLISEVAQGALTS                     | 2.61 | 0.01 | 2.96 | 1.12 | 0.22 | 0.28 |

|       |   |        |                     |      |      |      |      |      |      |
|-------|---|--------|---------------------|------|------|------|------|------|------|
|       |   |        | DLKCSLPHRNESNKWTC   |      |      |      |      |      |      |
| 13594 | 0 | 97948  | AARRKGSRRDSLYIAGR   | 3.59 | 0.01 | 4.03 | 2.00 | 0.22 | 1.34 |
|       |   |        | DFWGR               |      |      |      |      |      |      |
|       |   |        | DLKCSLPHRNESNKWTC   |      |      |      |      |      |      |
| 13595 | 0 | 97948  | AARRKGSRRDSLYIAGR   | 3.59 | 0.01 | 4.03 | 2.00 | 0.22 | 0.85 |
|       |   |        | DFWGR               |      |      |      |      |      |      |
| 13596 | 0 | 119443 | DLKLRRSSSVGYIS      | 2.61 | 0.01 | 2.26 | 1.12 | 0.22 | 1.57 |
| 13597 | 0 | 119443 | DLKLRRSSSVGYIS      | 2.61 | 0.01 | 2.26 | 1.12 | 0.22 | 1.57 |
| 13598 | 0 | 119443 | DLKLRRSSSVGYIS      | 2.61 | 0.01 | 2.26 | 1.12 | 2.25 | 1.75 |
| 13599 | 0 | 119443 | DLKLRRSSSVGYIS      | 2.61 | 0.01 | 2.26 | 1.12 | 0.22 | 1.57 |
| 13600 | 0 | 119443 | DLKLRRSSSVGYIS      | 2.61 | 0.01 | 2.26 | 2.04 | 0.22 | 1.75 |
| 13601 | 0 | 79781  | DLKRPGSSPMEV        | 2.44 | 0.01 | 2.14 | 3.26 | 0.22 | 0.28 |
| 13602 | 0 | 79781  | DLKRPGSSPMEV        | 2.44 | 0.01 | 2.14 | 3.55 | 0.22 | 0.28 |
| 13603 | 0 | 9154   | DLKTNNEGLK          | 2.32 | 0.01 | 2.85 | 1.20 | 0.22 | 0.28 |
| 13604 | 0 | 9154   | DLKTNNEGLK          | 2.32 | 0.01 | 2.85 | 1.20 | 0.22 | 0.28 |
| 13605 | 0 | 9157   | DLLALSADQALQPPCPN   | 3.11 | 0.01 | 2.04 | 1.20 | 0.22 | 0.28 |
|       |   |        | LVSYS               |      |      |      |      |      |      |
| 13606 | 0 | 9157   | DLLALSADQALQPPCPN   | 3.11 | 0.01 | 2.04 | 1.20 | 0.22 | 0.28 |
|       |   |        | LVSYS               |      |      |      |      |      |      |
| 13607 | 0 | 9157   | DLLALSADQALQPPCPN   | 3.11 | 0.01 | 2.04 | 1.20 | 0.22 | 0.28 |
|       |   |        | LVSYS               |      |      |      |      |      |      |
| 13608 | 0 | 9157   | DLLALSADQALQPPCPN   | 3.11 | 0.01 | 2.04 | 1.20 | 0.22 | 2.12 |
|       |   |        | LVSYS               |      |      |      |      |      |      |
| 13609 | 0 | 9157   | DLLALSADQALQPPCPN   | 3.11 | 0.01 | 2.04 | 0.44 | 0.85 | 0.28 |
|       |   |        | LVSYS               |      |      |      |      |      |      |
| 13610 | 0 | 9157   | DLLALSADQALQPPCPN   | 3.11 | 0.01 | 2.04 | 0.44 | 1.59 | 0.28 |
|       |   |        | LVSYS               |      |      |      |      |      |      |
| 13611 | 0 | 9161   | DLL EDT             | 1.92 | 0.01 | 1.96 | 0.44 | 0.85 | 0.28 |
| 13612 | 0 | 181587 | DLLGNVLVTAKYEGD     | 2.69 | 0.01 | 1.66 | 2.36 | 0.22 | 1.28 |
|       |   |        | DLLILFKDDYFAKKNEER  |      |      |      |      |      |      |
| 13613 | 0 | 117458 | KQNKVEAKLRAKQEQE    | 3.71 | 0.01 | 0.78 | 0.44 | 1.13 | 0.28 |
|       |   |        | AKQKLEED            |      |      |      |      |      |      |
| 13614 | 0 | 134341 | DLLKNGERIEKVEHSD    | 2.73 | 0.01 | 0.78 | 3.03 | 0.22 | 1.27 |
| 13615 | 0 | 108870 | DLLMGTLGIVCPICSQKP  | 2.83 | 0.01 | 1.86 | 2.49 | 0.22 | 0.28 |
| 13616 | 0 | 145136 | DLLPSRDR            | 2.16 | 3.50 | 0.78 | 0.44 | 1.13 | 1.28 |
| 13617 | 0 | 145137 | DLLPSRDR            | 2.16 | 3.70 | 0.78 | 0.44 | 1.13 | 1.28 |
| 13618 | 0 | 423250 | DLLREVQRNLTRTMA     | 2.68 | 0.01 | 2.51 | 0.44 | 1.59 | 1.28 |
| 13619 | 0 | 117459 | DLLRLSHLKPSSEGLAIVT | 2.92 | 0.01 | 0.78 | 0.44 | 1.13 | 0.28 |
|       |   |        | K                   |      |      |      |      |      |      |
| 13620 | 0 | 117459 | DLLRLSHLKPSSEGLAIVT | 2.92 | 0.01 | 0.78 | 0.44 | 1.13 | 0.28 |
|       |   |        | K                   |      |      |      |      |      |      |
| 13621 | 0 | 419136 | DLLRPSEKNKFF        | 2.44 | 0.01 | 0.90 | 0.44 | 1.93 | 1.39 |
| 13622 | 0 | 196384 | DLLSPAR             | 2.01 | 0.01 | 0.90 | 0.44 | 1.23 | 1.39 |
| 13623 | 0 | 181291 | DLMGYAQLRRKCELF     | 2.63 | 0.01 | 2.82 | 1.15 | 0.22 | 0.28 |
| 13624 | 0 | 9203   | DLMGYIPLV           | 2.21 | 0.01 | 1.72 | 0.68 | 0.22 | 0.28 |
| 13625 | 0 | 106346 | DLMHRLYHVP          | 2.31 | 0.01 | 2.75 | 0.44 | 1.23 | 0.85 |

|       |   |        |                        |      |      |      |      |      |      |
|-------|---|--------|------------------------|------|------|------|------|------|------|
| 13626 | 0 | 9210   | DLMMIEEYPYVVIL         | 2.62 | 0.01 | 2.78 | 0.44 | 1.23 | 1.57 |
| 13627 | 0 | 9210   | DLMMIEEYPYVVIL         | 2.62 | 0.01 | 2.78 | 0.44 | 1.23 | 1.57 |
| 13628 | 0 | 141618 | DLMNEVLNKMDKKYSA       | 2.75 | 0.01 | 1.66 | 1.20 | 0.22 | 0.28 |
| 13629 | 0 | 141618 | DLMNEVLNKMDKKYSA       | 2.75 | 0.01 | 1.66 | 2.55 | 0.22 | 0.28 |
| 13630 | 0 | 141618 | DLMNEVLNKMDKKYSA       | 2.75 | 0.01 | 2.86 | 2.55 | 0.22 | 0.28 |
| 13631 | 0 | 170599 | DLMTYKGEVLGITRF        | 2.64 | 0.01 | 0.78 | 0.44 | 1.13 | 0.28 |
| 13632 | 0 | 104753 | DLNAASAYCS             | 2.33 | 0.01 | 2.60 | 0.44 | 1.23 | 0.85 |
| 13633 | 0 | 9216   | DLNF                   | 1.57 | 0.01 | 2.18 | 2.75 | 0.22 | 0.28 |
| 13634 | 0 | 9216   | DLNF                   | 1.57 | 0.01 | 2.18 | 0.68 | 0.22 | 0.28 |
| 13635 | 0 | 97244  | DLNILERFNYEEAQL        | 2.72 | 0.01 | 3.67 | 0.44 | 1.23 | 0.28 |
| 13636 | 0 | 141619 | DLNLIGFGINAKNNQ        | 2.69 | 0.01 | 3.65 | 0.44 | 1.23 | 1.28 |
| 13637 | 0 | 232624 | DLNLPRLNALSALL         | 2.70 | 0.01 | 2.28 | 0.68 | 0.22 | 0.28 |
| 13638 | 0 | 232624 | DLNLPRLNALSALL         | 2.70 | 0.01 | 2.28 | 0.68 | 0.22 | 0.28 |
| 13639 | 0 | 450481 | DLNMPIS                | 1.99 | 0.01 | 0.90 | 0.44 | 1.41 | 1.39 |
| 13640 | 0 | 101546 | DLNPLDPLAQQS           | 2.51 | 0.01 | 3.10 | 1.15 | 0.22 | 0.28 |
| 13641 | 0 | 101546 | DLNPLDPLAQQS           | 2.51 | 0.01 | 3.10 | 1.15 | 0.22 | 1.48 |
| 13642 | 0 | 101546 | DLNPLDPLAQQS           | 2.51 | 0.01 | 3.10 | 1.15 | 0.22 | 1.48 |
| 13643 | 0 | 101546 | DLNPLDPLAQQS           | 2.51 | 0.01 | 3.10 | 1.15 | 0.22 | 0.85 |
| 13644 | 0 | 101546 | DLNPLDPLAQQS           | 2.51 | 0.01 | 3.10 | 1.15 | 0.22 | 0.28 |
| 13645 | 0 | 101546 | DLNPLDPLAQQS           | 2.51 | 0.01 | 3.10 | 1.15 | 0.22 | 1.48 |
| 13646 | 0 | 101546 | DLNPLDPLAQQS           | 2.51 | 0.01 | 3.10 | 1.15 | 0.22 | 1.48 |
| 13647 | 0 | 101546 | DLNPLDPLAQQS           | 2.51 | 0.01 | 3.10 | 1.15 | 0.22 | 0.85 |
| 13648 | 0 | 116951 | DLNTNRTQMVLH           | 2.48 | 0.01 | 0.90 | 1.15 | 0.22 | 0.28 |
| 13649 | 0 | 116951 | DLNTNRTQMVLH           | 2.48 | 0.01 | 0.90 | 0.44 | 0.85 | 0.28 |
| 13650 | 0 | 9232   | DLPDYGDYGEDLFDY        | 2.73 | 0.01 | 0.78 | 1.15 | 0.22 | 0.28 |
| 13651 | 0 | 9232   | DLPDYGDYGEDLFDY        | 2.73 | 0.01 | 0.78 | 1.15 | 0.22 | 1.66 |
| 13652 | 0 | 9232   | DLPDYGDYGEDLFDY        | 2.73 | 0.01 | 0.78 | 1.15 | 0.22 | 1.27 |
| 13653 | 0 | 78361  | DLPGGMLNDKVRGML        | 2.70 | 0.01 | 0.90 | 0.68 | 0.22 | 0.28 |
| 13654 | 0 | 78361  | DLPGGMLNDKVRGML        | 2.70 | 0.01 | 0.90 | 0.68 | 0.22 | 0.28 |
| 13655 | 0 | 9234   | DLPKEKKDDLPKEKKD<br>DP | 3.01 | 0.01 | 3.00 | 0.68 | 0.22 | 0.28 |
| 13656 | 0 | 167886 | DLPLEGTTPNG            | 2.50 | 0.01 | 2.60 | 0.68 | 0.22 | 0.28 |
| 13657 | 0 | 167886 | DLPLEGTTPNG            | 2.50 | 0.01 | 2.60 | 0.68 | 0.22 | 1.48 |
| 13658 | 0 | 167887 | DLPLEGTTPNGYAN         | 2.69 | 0.01 | 2.60 | 0.68 | 0.22 | 0.28 |
| 13659 | 0 | 9235   | DLPLPW                 | 1.91 | 0.01 | 2.40 | 0.44 | 0.85 | 0.28 |
| 13660 | 0 | 123091 | DLPNLPYYI              | 2.24 | 0.01 | 2.28 | 2.00 | 0.22 | 0.28 |
| 13661 | 0 | 9238   | DLPLQG                 | 1.90 | 0.01 | 2.53 | 0.44 | 1.59 | 0.28 |
| 13662 | 0 | 9239   | DLPPQG                 | 1.90 | 0.01 | 3.27 | 0.44 | 1.59 | 0.28 |
| 13663 | 0 | 77851  | DLPRWPGWYKNR           | 2.48 | 0.01 | 0.90 | 1.15 | 0.22 | 1.39 |
| 13664 | 0 | 9242   | DLPSGFNTLKPIFKLPL      | 2.81 | 0.01 | 2.48 | 0.44 | 0.85 | 0.28 |
| 13665 | 0 | 123092 | DLPTTMKMW              | 2.22 | 0.01 | 2.28 | 2.00 | 0.22 | 0.28 |

|       |   |        |                                      |      |      |      |      |      |      |
|-------|---|--------|--------------------------------------|------|------|------|------|------|------|
| 13666 | 0 | 108316 | DLQDVASHESGVSDQP<br>AQVVTER          | 3.09 | 0.01 | 3.27 | 2.49 | 0.85 | 0.28 |
| 13667 | 0 | 108316 | DLQDVASHESGVSDQP<br>AQVVTER          | 3.09 | 0.01 | 3.27 | 0.44 | 0.85 | 0.28 |
| 13668 | 0 | 132793 | DLQEAKYETFS                          | 2.36 | 0.01 | 0.78 | 0.68 | 0.22 | 1.39 |
| 13669 | 0 | 105137 | DLQN                                 | 1.57 | 0.01 | 3.97 | 1.20 | 0.22 | 0.28 |
| 13670 | 0 | 9253   | DLQPSLIS                             | 2.14 | 0.01 | 0.90 | 1.15 | 0.22 | 0.28 |
| 13671 | 0 | 100784 | DLQVLA                               | 1.90 | 0.01 | 3.02 | 1.12 | 0.22 | 0.28 |
| 13672 | 0 | 100784 | DLQVLA                               | 1.90 | 0.01 | 3.02 | 1.12 | 0.22 | 0.28 |
| 13673 | 0 | 9258   | DLQVLAQKVA                           | 2.35 | 0.01 | 3.26 | 2.37 | 0.22 | 0.85 |
| 13674 | 0 | 9258   | DLQVLAQKVA                           | 2.35 | 0.01 | 3.26 | 2.59 | 0.22 | 0.85 |
| 13675 | 0 | 9258   | DLQVLAQKVA                           | 2.35 | 0.01 | 3.26 | 2.59 | 0.22 | 0.85 |
| 13676 | 0 | 139029 | DLQVLT                               | 1.90 | 0.01 | 3.02 | 0.68 | 0.22 | 1.39 |
| 13677 | 0 | 139029 | DLQVLT                               | 1.90 | 0.01 | 3.02 | 0.68 | 0.22 | 0.85 |
| 13678 | 0 | 139029 | DLQVLT                               | 1.90 | 0.01 | 3.02 | 0.68 | 0.22 | 0.85 |
| 13679 | 0 | 139029 | DLQVLT                               | 1.90 | 0.01 | 3.02 | 0.68 | 0.22 | 1.27 |
| 13680 | 0 | 139029 | DLQVLT                               | 1.90 | 0.01 | 3.02 | 0.68 | 0.22 | 1.48 |
| 13681 | 0 | 139029 | DLQVLT                               | 1.90 | 0.01 | 3.02 | 0.68 | 0.22 | 1.34 |
| 13682 | 0 | 139029 | DLQVLT                               | 1.90 | 0.01 | 3.02 | 0.68 | 0.22 | 1.75 |
| 13683 | 0 | 132217 | DLRGKFK                              | 2.02 | 0.01 | 0.78 | 0.68 | 0.22 | 0.85 |
| 13684 | 0 | 132217 | DLRGKFK                              | 2.02 | 0.01 | 0.78 | 0.68 | 0.22 | 0.85 |
| 13685 | 0 | 128431 | DLRGMLKRLKGMRRDE<br>KKSTAFQKKLEPAYQV | 3.39 | 0.01 | 0.78 | 2.04 | 0.22 | 0.28 |
| 13686 | 0 | 114776 | DLRPICGTDG                           | 2.32 | 0.01 | 2.25 | 0.44 | 1.23 | 0.85 |
| 13687 | 0 | 114776 | DLRPICGTDG                           | 2.32 | 0.01 | 2.25 | 0.44 | 1.23 | 0.85 |
| 13688 | 0 | 230215 | DLRPICGTDGVTYTNDC<br>LLC             | 2.96 | 0.01 | 2.25 | 0.44 | 1.23 | 0.28 |
| 13689 | 0 | 123093 | DLRQGLSRI                            | 2.23 | 0.01 | 2.28 | 2.00 | 0.22 | 0.28 |
| 13690 | 0 | 489505 | DLRSQYQNLWLQAWK                      | 2.68 | 0.01 | 2.69 | 3.05 | 0.85 | 1.28 |
| 13691 | 0 | 9268   | DLRSSGC                              | 2.12 | 0.01 | 2.04 | 0.44 | 0.85 | 0.28 |
| 13692 | 0 | 146839 | DLRTL                                | 1.75 | 0.01 | 0.78 | 0.68 | 0.22 | 0.85 |
| 13693 | 0 | 146839 | DLRTL                                | 1.75 | 0.01 | 0.78 | 0.68 | 0.22 | 0.85 |
| 13694 | 0 | 146839 | DLRTL                                | 1.75 | 0.01 | 0.78 | 0.68 | 0.22 | 0.85 |
| 13695 | 0 | 146839 | DLRTL                                | 1.75 | 0.01 | 0.78 | 0.68 | 0.22 | 0.85 |
| 13696 | 0 | 146839 | DLRTL                                | 1.75 | 0.01 | 0.78 | 0.68 | 0.22 | 0.85 |
| 13697 | 0 | 146839 | DLRTL                                | 1.75 | 0.01 | 0.78 | 0.68 | 0.22 | 0.85 |
| 13698 | 0 | 146839 | DLRTL                                | 1.75 | 0.01 | 0.78 | 0.68 | 0.22 | 1.34 |
| 13699 | 0 | 187632 | DLAARGADISGEGR                       | 2.72 | 0.01 | 2.14 | 1.20 | 0.22 | 0.28 |
| 13700 | 0 | 120444 | DLSEEEKNSM                           | 2.31 | 0.01 | 2.18 | 2.16 | 0.22 | 0.28 |
| 13701 | 0 | 227095 | DLSIHGRPCQAPEW                       | 2.62 | 0.01 | 2.48 | 0.44 | 1.59 | 0.28 |
| 13702 | 0 | 152463 | DLSIPSSELE                           | 2.34 | 0.01 | 2.18 | 2.16 | 0.22 | 0.28 |
| 13703 | 0 | 9276   | DLSKLSKDVVQYEQEIES<br>LE             | 2.99 | 0.01 | 3.10 | 1.15 | 0.22 | 0.28 |
| 13704 | 0 | 9278   | DLSLLGKARKVVVTKD                     | 2.75 | 0.01 | 3.20 | 2.04 | 0.22 | 0.28 |

|       |   |        |                              |      |      |      |      |      |      |
|-------|---|--------|------------------------------|------|------|------|------|------|------|
| 13705 | 0 | 9278   | DLSLLGKARKVVVTKD             | 2.75 | 0.01 | 3.20 | 2.04 | 0.22 | 1.27 |
| 13706 | 0 | 9278   | DLSLLGKARKVVVTKD             | 2.75 | 0.01 | 2.04 | 0.44 | 1.13 | 0.28 |
| 13707 | 0 | 9278   | DLSLLGKARKVVVTKD             | 2.75 | 0.01 | 2.04 | 0.44 | 1.13 | 0.28 |
| 13708 | 0 | 9278   | DLSLLGKARKVVVTKD             | 2.75 | 0.01 | 2.04 | 0.44 | 1.41 | 0.28 |
| 13709 | 0 | 9278   | DLSLLGKARKVVVTKD             | 2.75 | 0.01 | 2.04 | 0.44 | 1.41 | 0.28 |
| 13710 | 0 | 9278   | DLSLLGKARKVVVTKD             | 2.75 | 0.01 | 2.04 | 0.44 | 1.13 | 0.28 |
| 13711 | 0 | 9278   | DLSLLGKARKVVVTKD             | 2.75 | 0.01 | 2.04 | 0.44 | 1.13 | 0.28 |
| 13712 | 0 | 9278   | DLSLLGKARKVVVTKD             | 2.75 | 0.01 | 2.04 | 0.44 | 1.13 | 0.28 |
| 13713 | 0 | 9278   | DLSLLGKARKVVVTKD             | 2.75 | 0.01 | 2.04 | 0.44 | 1.13 | 1.27 |
| 13714 | 0 | 9278   | DLSLLGKARKVVVTKD             | 2.75 | 0.01 | 2.04 | 0.44 | 1.13 | 1.27 |
| 13715 | 0 | 9281   | DLSNCMVALGELKLA              | 2.66 | 0.01 | 2.43 | 0.44 | 0.85 | 0.28 |
| 13716 | 0 | 99149  | DLSNNFGKLFVVKPD              | 2.68 | 0.01 | 2.16 | 0.44 | 1.23 | 1.48 |
| 13717 | 0 | 99149  | DLSNNFGKLFVVKPD              | 2.68 | 0.01 | 2.16 | 0.44 | 1.23 | 1.28 |
| 13718 | 0 | 99149  | DLSNNFGKLFVVKPD              | 2.68 | 0.01 | 2.16 | 0.44 | 1.23 | 1.27 |
| 13719 | 0 | 99149  | DLSNNFGKLFVVKPD              | 2.68 | 0.01 | 2.16 | 0.44 | 1.23 | 1.28 |
| 13720 | 0 | 122728 | DLSTAIASRSVADKILDLY          | 2.93 | 0.01 | 0.78 | 1.20 | 0.22 | 0.28 |
| 13721 | 0 | 122728 | DLSTAIASRSVADKILDLY          | 2.93 | 0.01 | 0.78 | 1.20 | 0.22 | 1.27 |
| 13722 | 0 | 9288   | DLSVLGSRRPFFVWA              | 2.66 | 0.01 | 0.90 | 0.44 | 1.59 | 1.39 |
| 13723 | 0 | 105138 | DLTA                         | 1.57 | 0.01 | 3.03 | 1.20 | 0.22 | 0.28 |
| 13724 | 0 | 103853 | DLTASLMVALDTNNT              | 2.71 | 0.01 | 3.00 | 1.20 | 0.22 | 0.28 |
| 13725 | 0 | 92470  | DLTFEKVKHN                   | 2.29 | 0.01 | 2.67 | 2.00 | 0.22 | 0.28 |
| 13726 | 0 | 143850 | DLTIMPWSLYPP                 | 2.45 | 0.01 | 0.90 | 0.44 | 1.13 | 1.39 |
| 13727 | 0 | 9302   | DLTLNDLETDVCTMDKC<br>AGI     | 2.95 | 0.01 | 4.08 | 2.42 | 0.22 | 0.28 |
| 13728 | 0 | 9305   | DLTNITHVEKLC                 | 2.45 | 0.01 | 3.63 | 1.20 | 0.22 | 0.28 |
| 13729 | 0 | 165593 | DLTWAPK                      | 1.99 | 0.01 | 0.90 | 0.44 | 1.23 | 1.39 |
| 13730 | 0 | 165593 | DLTWAPK                      | 1.99 | 0.01 | 0.90 | 0.44 | 1.23 | 1.39 |
| 13731 | 0 | 9310   | DLVEYIMNYTGNQQSR<br>WGLGSPNC | 3.07 | 0.01 | 3.16 | 0.68 | 0.22 | 0.28 |
| 13732 | 0 | 9310   | DLVEYIMNYTGNQQSR<br>WGLGSPNC | 3.07 | 0.01 | 3.16 | 0.68 | 0.22 | 0.28 |
| 13733 | 0 | 9310   | DLVEYIMNYTGNQQSR<br>WGLGSPNC | 3.07 | 0.01 | 3.16 | 0.68 | 0.22 | 0.28 |
| 13734 | 0 | 9310   | DLVEYIMNYTGNQQSR<br>WGLGSPNC | 3.07 | 0.01 | 3.16 | 0.68 | 0.22 | 0.28 |



|       |   |        |                           |      |      |      |      |      |      |
|-------|---|--------|---------------------------|------|------|------|------|------|------|
| 13735 | 0 | 9319   | DLVKFISDKIKFLNP           | 2.71 | 0.01 | 2.43 | 3.34 | 0.22 | 0.28 |
| 13736 | 0 | 9319   | DLVKFISDKIKFLNP           | 2.71 | 0.01 | 2.43 | 3.34 | 0.22 | 0.28 |
| 13737 | 0 | 9319   | DLVKFISDKIKFLNP           | 2.71 | 0.01 | 2.43 | 0.44 | 0.85 | 0.28 |
| 13738 | 0 | 9319   | DLVKFISDKIKFLNP           | 2.71 | 0.01 | 2.72 | 3.34 | 0.22 | 0.28 |
| 13739 | 0 | 9319   | DLVKFISDKIKFLNP           | 2.71 | 0.01 | 2.72 | 3.34 | 0.22 | 0.28 |
| 13740 | 0 | 509515 | DLVLDCL                   | 2.06 | 0.01 | 1.75 | 1.12 | 0.22 | 0.85 |
| 13741 | 0 | 119803 | DLVLYNNADGDFAIVH          | 2.75 | 0.01 | 2.26 | 1.15 | 0.22 | 1.57 |
| 13742 | 0 | 119803 | DLVLYNNADGDFAIVH          | 2.75 | 0.01 | 2.26 | 1.12 | 0.22 | 1.57 |
| 13743 | 0 | 119560 | DLVLYNNADGDFAIVK          | 2.75 | 0.01 | 0.78 | 1.15 | 0.22 | 1.57 |
| 13744 | 0 | 119560 | DLVLYNNADGDFAIVK          | 2.75 | 0.01 | 0.78 | 0.44 | 1.13 | 1.57 |
| 13745 | 0 | 119560 | DLVLYNNADGDFAIVK          | 2.75 | 0.01 | 0.78 | 2.04 | 0.22 | 0.28 |
| 13746 | 0 | 503975 | DLVMTKPAPTCNIRVTV<br>CSF  | 2.91 | 0.01 | 2.48 | 0.44 | 1.74 | 0.28 |
| 13747 | 0 | 127944 | DLVNCNLNTNCVAVAFS<br>LPD  | 2.98 | 0.01 | 2.40 | 1.12 | 0.22 | 0.28 |
| 13748 | 0 | 127944 | DLVNCNLNTNCVAVAFS<br>LPD  | 2.98 | 0.01 | 2.40 | 0.44 | 0.85 | 0.28 |
| 13749 | 0 | 127944 | DLVNCNLNTNCVAVAFS<br>LPD  | 2.98 | 0.01 | 2.40 | 2.75 | 0.22 | 0.28 |
| 13750 | 0 | 127944 | DLVNCNLNTNCVAVAFS<br>LPD  | 2.98 | 0.01 | 2.40 | 2.75 | 0.22 | 0.28 |
| 13751 | 0 | 127944 | DLVNCNLNTNCVAVAFS<br>LPD  | 2.98 | 0.01 | 2.40 | 2.75 | 0.22 | 0.85 |
| 13752 | 0 | 127944 | DLVNCNLNTNCVAVAFS<br>LPD  | 2.98 | 0.01 | 2.40 | 2.75 | 0.22 | 1.34 |
| 13753 | 0 | 232755 | DLWGGSLSYIGFTNF           | 2.68 | 0.01 | 2.89 | 1.12 | 0.22 | 1.28 |
| 13754 | 0 | 232755 | DLWGGSLSYIGFTNF           | 2.68 | 0.01 | 2.89 | 1.12 | 0.22 | 1.28 |
| 13755 | 0 | 232755 | DLWGGSLSYIGFTNF           | 2.68 | 0.01 | 2.89 | 1.12 | 0.22 | 1.28 |
| 13756 | 0 | 232755 | DLWGGSLSYIGFTNF           | 2.68 | 0.01 | 2.89 | 1.12 | 0.22 | 1.28 |
| 13757 | 0 | 232755 | DLWGGSLSYIGFTNF           | 2.68 | 0.01 | 2.89 | 1.12 | 0.22 | 1.28 |
| 13758 | 0 | 79185  | DLWSVL                    | 1.90 | 0.01 | 0.90 | 0.68 | 0.22 | 1.39 |
| 13759 | 0 | 110808 | DLYCYEQLNDSSEE            | 2.63 | 0.01 | 1.86 | 0.44 | 0.85 | 0.85 |
| 13760 | 0 | 108873 | DLYCYEQLNDSSEEEDEI<br>DG  | 2.96 | 0.01 | 1.86 | 2.49 | 0.22 | 0.28 |
| 13761 | 0 | 9341   | DLYGGSIGYFLTDDVELA<br>LSY | 3.01 | 0.01 | 2.58 | 2.43 | 0.22 | 0.28 |
| 13762 | 0 | 134343 | DLYIK                     | 1.74 | 0.01 | 3.21 | 0.68 | 0.22 | 1.39 |
| 13763 | 0 | 134343 | DLYIK                     | 1.74 | 0.01 | 3.21 | 0.68 | 0.22 | 1.34 |
| 13764 | 0 | 9343   | DLYKSNHNNV                | 2.30 | 0.01 | 2.43 | 1.20 | 0.22 | 0.28 |
| 13765 | 0 | 9343   | DLYKSNHNNV                | 2.30 | 0.01 | 2.43 | 1.20 | 0.22 | 0.28 |
| 13766 | 0 | 9343   | DLYKSNHNNV                | 2.30 | 0.01 | 2.43 | 1.20 | 0.22 | 0.28 |
| 13767 | 0 | 9343   | DLYKSNHNNV                | 2.30 | 0.01 | 2.43 | 1.20 | 0.22 | 0.28 |

|       |   |        |                                     |      |      |      |      |      |      |
|-------|---|--------|-------------------------------------|------|------|------|------|------|------|
| 13768 | 0 | 9343   | DLYKSNHNNV                          | 2.30 | 0.01 | 2.43 | 1.20 | 0.22 | 0.28 |
| 13769 | 0 | 443201 | DLYKTCKQAGTCPSDVI<br>NKV            | 2.92 | 0.01 | 4.93 | 1.12 | 0.22 | 0.28 |
| 13770 | 0 | 189056 | DLYKTCKQSGTCPPD                     | 2.68 | 0.01 | 3.11 | 0.68 | 0.22 | 0.28 |
| 13771 | 0 | 443202 | DLYKTCKQSGTCPPDVV<br>PKV            | 2.96 | 0.01 | 3.11 | 1.12 | 0.22 | 0.28 |
| 13772 | 0 | 243901 | DLYLENPEIKIR                        | 2.48 | 0.01 | 0.78 | 0.44 | 1.23 | 0.28 |
| 13773 | 0 | 243901 | DLYLENPEIKIR                        | 2.48 | 0.01 | 0.78 | 0.44 | 1.23 | 0.28 |
| 13774 | 0 | 243901 | DLYLENPEIKIR                        | 2.48 | 0.01 | 0.78 | 0.44 | 2.39 | 0.28 |
| 13775 | 0 | 443203 | DLYRTCKQSGTCPPDVI<br>NKV            | 2.91 | 0.01 | 4.93 | 1.12 | 0.22 | 0.28 |
| 13776 | 0 | 443204 | DLYRTCKQSGTCPPDVV<br>DKV            | 2.94 | 0.01 | 4.93 | 1.12 | 0.22 | 0.28 |
| 13777 | 0 | 125839 | DLYTHSEYYNHAIWQT<br>GPGC            | 2.94 | 0.01 | 0.78 | 0.44 | 1.13 | 0.28 |
| 13778 | 0 | 125839 | DLYTHSEYYNHAIWQT<br>GPGC            | 2.94 | 0.01 | 0.78 | 0.44 | 1.41 | 0.28 |
| 13779 | 0 | 125839 | DLYTHSEYYNHAIWQT<br>GPGC            | 2.94 | 0.01 | 0.78 | 0.44 | 1.13 | 0.28 |
| 13780 | 0 | 133045 | DMAILTGGQVISEEV                     | 2.64 | 0.01 | 2.04 | 2.97 | 0.22 | 0.28 |
| 13781 | 0 | 9352   | DMANPMSPVNKSFEIE<br>VTCS            | 2.93 | 0.01 | 2.04 | 2.52 | 0.22 | 0.28 |
| 13782 | 0 | 9352   | DMANPMSPVNKSFEIE<br>VTCS            | 2.93 | 0.01 | 2.04 | 2.52 | 0.22 | 0.85 |
| 13783 | 0 | 9352   | DMANPMSPVNKSFEIE<br>VTCS            | 2.93 | 0.01 | 2.04 | 2.52 | 0.22 | 0.28 |
| 13784 | 0 | 9352   | DMANPMSPVNKSFEIE<br>VTCS            | 2.93 | 0.01 | 2.04 | 2.52 | 0.22 | 0.28 |
| 13785 | 0 | 9352   | DMANPMSPVNKSFEIE<br>VTCS            | 2.93 | 0.01 | 2.04 | 2.52 | 0.22 | 0.28 |
| 13786 | 0 | 9352   | DMANPMSPVNKSFEIE<br>VTCS            | 2.93 | 0.01 | 2.04 | 2.52 | 0.22 | 0.85 |
| 13787 | 0 | 134344 | DMAQVTVGPGLLGVST<br>L               | 2.81 | 0.01 | 0.78 | 0.68 | 0.22 | 1.39 |
| 13788 | 0 | 134344 | DMAQVTVGPGLLGVST<br>L               | 2.81 | 0.01 | 0.78 | 0.68 | 0.22 | 0.85 |
| 13789 | 0 | 78623  | DMDDFSRQLQ                          | 2.33 | 0.01 | 4.45 | 0.68 | 0.22 | 0.85 |
| 13790 | 0 | 188100 | DMEYERTTEW                          | 2.32 | 0.01 | 2.92 | 0.68 | 0.22 | 0.85 |
| 13791 | 0 | 9362   | DMFQIGKYG                           | 2.21 | 0.01 | 0.90 | 0.44 | 1.23 | 0.28 |
| 13792 | 0 | 9362   | DMFQIGKYG                           | 2.21 | 0.01 | 0.90 | 0.44 | 1.23 | 1.39 |
| 13793 | 0 | 9362   | DMFQIGKYG                           | 2.21 | 0.01 | 0.90 | 0.44 | 1.23 | 0.28 |
| 13794 | 0 | 178673 | DMFTQRQVAEFKEGF                     | 2.66 | 0.01 | 2.36 | 0.44 | 1.23 | 1.28 |
| 13795 | 0 | 178673 | DMFTQRQVAEFKEGF                     | 2.66 | 0.01 | 2.36 | 0.44 | 1.23 | 1.27 |
| 13796 | 0 | 178673 | DMFTQRQVAEFKEGF<br>DMGCVINWKGKELKCG | 2.66 | 0.01 | 2.36 | 0.44 | 1.23 | 1.28 |
| 13797 | 0 | 145742 | SGIFVTNEVHTWTEQYK<br>FQADSPK        | 3.60 | 0.01 | 4.03 | 0.68 | 0.22 | 0.85 |

|       |   |        |                   |      |      |      |      |      |      |
|-------|---|--------|-------------------|------|------|------|------|------|------|
|       |   |        | DMGCVINWKGKELKCG  |      |      |      |      |      |      |
| 13798 | 0 | 145742 | SGIFVTNEVHTWTEQYK | 3.60 | 0.01 | 4.03 | 0.68 | 0.22 | 1.48 |
|       |   |        | FQADSPK           |      |      |      |      |      |      |
| 13799 | 0 | 118296 | DMGFGLFD          | 2.17 | 0.01 | 0.78 | 0.44 | 1.13 | 0.28 |
| 13800 | 0 | 114777 | DMGHGLRLIHYSYDVNS | 2.97 | 0.01 | 2.19 | 2.04 | 0.22 | 0.28 |
|       |   |        | TEKG              |      |      |      |      |      |      |
| 13801 | 0 | 114777 | DMGHGLRLIHYSYDVNS | 2.97 | 0.01 | 2.19 | 1.12 | 0.22 | 0.28 |
|       |   |        | TEKG              |      |      |      |      |      |      |
| 13802 | 0 | 114777 | DMGHGLRLIHYSYDVNS | 2.97 | 0.01 | 2.19 | 1.12 | 0.22 | 0.28 |
|       |   |        | TEKG              |      |      |      |      |      |      |
| 13803 | 0 | 114777 | DMGHGLRLIHYSYDVNS | 2.97 | 0.01 | 2.19 | 1.12 | 0.22 | 0.28 |
|       |   |        | TEKG              |      |      |      |      |      |      |
| 13804 | 0 | 114777 | DMGHGLRLIHYSYDVNS | 2.97 | 0.01 | 2.19 | 1.12 | 0.22 | 0.28 |
|       |   |        | TEKG              |      |      |      |      |      |      |
| 13805 | 0 | 114777 | DMGHGLRLIHYSYDVNS | 2.97 | 0.01 | 2.19 | 2.04 | 0.22 | 0.28 |
|       |   |        | TEKG              |      |      |      |      |      |      |
| 13806 | 0 | 114777 | DMGHGLRLIHYSYDVNS | 2.97 | 0.01 | 2.19 | 2.04 | 0.22 | 0.28 |
|       |   |        | TEKG              |      |      |      |      |      |      |
| 13807 | 0 | 114777 | DMGHGLRLIHYSYDVNS | 2.97 | 0.01 | 2.19 | 2.04 | 0.22 | 0.28 |
|       |   |        | TEKG              |      |      |      |      |      |      |
| 13808 | 0 | 114777 | DMGHGLRLIHYSYDVNS | 2.97 | 0.01 | 2.19 | 2.04 | 0.22 | 1.27 |
|       |   |        | TEKG              |      |      |      |      |      |      |
| 13809 | 0 | 114777 | DMGHGLRLIHYSYDVNS | 2.97 | 0.01 | 2.19 | 1.20 | 0.22 | 1.27 |
|       |   |        | TEKG              |      |      |      |      |      |      |
| 13810 | 0 | 114777 | DMGHGLRLIHYSYDVNS | 2.97 | 0.01 | 2.19 | 1.20 | 0.22 | 2.12 |
|       |   |        | TEKG              |      |      |      |      |      |      |
| 13811 | 0 | 114777 | DMGHGLRLIHYSYDVNS | 2.97 | 0.01 | 2.19 | 2.04 | 0.22 | 1.75 |
|       |   |        | TEKG              |      |      |      |      |      |      |
| 13812 | 0 | 114777 | DMGHGLRLIHYSYDVNS | 2.97 | 0.01 | 2.19 | 1.20 | 0.22 | 1.75 |
|       |   |        | TEKG              |      |      |      |      |      |      |
| 13813 | 0 | 114777 | DMGHGLRLIHYSYDVNS | 2.97 | 0.01 | 2.19 | 1.20 | 0.22 | 0.28 |
|       |   |        | TEKG              |      |      |      |      |      |      |
| 13814 | 0 | 114777 | DMGHGLRLIHYSYDVNS | 2.97 | 0.01 | 2.19 | 1.20 | 0.22 | 0.28 |
|       |   |        | TEKG              |      |      |      |      |      |      |
| 13815 | 0 | 114777 | DMGHGLRLIHYSYDVNS | 2.97 | 0.01 | 2.19 | 1.20 | 0.22 | 0.28 |
|       |   |        | TEKG              |      |      |      |      |      |      |
| 13816 | 0 | 114777 | DMGHGLRLIHYSYDVNS | 2.97 | 0.01 | 2.19 | 1.20 | 0.22 | 0.28 |
|       |   |        | TEKG              |      |      |      |      |      |      |
| 13817 | 0 | 114777 | DMGHGLRLIHYSYDVNS | 2.97 | 0.01 | 2.19 | 1.20 | 0.22 | 0.28 |
|       |   |        | TEKG              |      |      |      |      |      |      |
| 13818 | 0 | 114777 | DMGHGLRLIHYSYDVNS | 2.97 | 0.01 | 2.19 | 2.04 | 0.22 | 0.28 |
|       |   |        | TEKG              |      |      |      |      |      |      |
| 13819 | 0 | 111206 | DMGPGRS           | 2.02 | 0.01 | 0.90 | 0.44 | 0.85 | 1.39 |
| 13820 | 0 | 95319  | DMGSLAAR          | 2.11 | 0.01 | 3.48 | 2.22 | 0.22 | 0.28 |
| 13821 | 0 | 9365   | DMIAAYTAALVSGTATA | 2.80 | 0.01 | 2.48 | 0.44 | 0.85 | 0.28 |

|       |   |        |                                  |      |      |      |      |      |      |
|-------|---|--------|----------------------------------|------|------|------|------|------|------|
| 13822 | 0 | 9365   | DMIAAYTAALVSGTATA                | 2.80 | 0.01 | 2.48 | 0.68 | 0.22 | 0.28 |
| 13823 | 0 | 513265 | DMIKLAPKEMPLESA                  | 2.70 | 0.01 | 2.24 | 0.44 | 1.41 | 1.28 |
| 13824 | 0 | 9377   | DMLNISQH                         | 2.10 | 0.01 | 1.66 | 1.15 | 0.22 | 0.28 |
| 13825 | 0 | 513268 | DMLNSNDMIKLAPKE                  | 2.69 | 0.01 | 2.24 | 0.44 | 1.41 | 1.28 |
| 13826 | 0 | 9383   | DMMMWNWSPT                       | 2.21 | 0.01 | 1.72 | 0.44 | 0.85 | 0.85 |
| 13827 | 0 | 225260 | DMMPESGEKFYPTKYLLI               | 2.82 | 0.01 | 2.61 | 0.68 | 0.22 | 0.28 |
| 13828 | 0 | 225260 | DMMPESGEKFYPTKYLLI               | 2.82 | 0.01 | 2.61 | 0.68 | 0.22 | 0.28 |
| 13829 | 0 | 225260 | DMMPESGEKFYPTKYLLI               | 2.82 | 0.01 | 2.61 | 0.68 | 0.22 | 0.28 |
| 13830 | 0 | 191258 | DMMRCTTTRWKCSTD<br>M             | 2.77 | 0.01 | 0.90 | 2.84 | 1.13 | 1.39 |
| 13831 | 0 | 191258 | DMMRCTTTRWKCSTD<br>M             | 2.77 | 0.01 | 0.90 | 2.84 | 1.13 | 1.66 |
| 13832 | 0 | 144614 | DMMYGGMRGM                       | 2.37 | 0.01 | 0.78 | 0.44 | 1.41 | 0.28 |
| 13833 | 0 | 144614 | DMMYGGMRGM                       | 2.37 | 0.01 | 0.78 | 0.44 | 1.41 | 0.28 |
| 13834 | 0 | 144614 | DMMYGGMRGM                       | 2.37 | 0.01 | 0.78 | 0.44 | 1.13 | 0.28 |
| 13835 | 0 | 144614 | DMMYGGMRGM                       | 2.37 | 0.01 | 0.78 | 0.44 | 2.35 | 0.28 |
| 13836 | 0 | 78624  | DMNEKQKPYFEFYDDF<br>KP           | 2.94 | 0.01 | 3.11 | 1.12 | 0.22 | 0.28 |
| 13837 | 0 | 78624  | DMNEKQKPYFEFYDDF<br>KP           | 2.94 | 0.01 | 3.11 | 1.12 | 0.22 | 0.28 |
| 13838 | 0 | 78624  | DMNEKQKPYFEFYDDF<br>KP           | 2.94 | 0.01 | 3.11 | 1.15 | 0.22 | 0.28 |
| 13839 | 0 | 78624  | DMNEKQKPYFEFYDDF<br>KP           | 2.94 | 0.01 | 3.11 | 2.02 | 0.22 | 0.28 |
| 13840 | 0 | 78624  | DMNEKQKPYFEFYDDF<br>KP           | 2.94 | 0.01 | 3.11 | 1.12 | 0.22 | 0.28 |
| 13841 | 0 | 9392   | DMPQSYIQNQEKYKK                  | 2.66 | 0.01 | 3.50 | 3.26 | 0.22 | 1.27 |
| 13842 | 0 | 106347 | DMQLYPVLPTPH                     | 2.48 | 0.01 | 0.90 | 1.15 | 0.22 | 0.85 |
| 13843 | 0 | 106347 | DMQLYPVLPTPH                     | 2.48 | 0.01 | 0.90 | 1.15 | 0.22 | 0.85 |
| 13844 | 0 | 106347 | DMQLYPVLPTPH                     | 2.48 | 0.01 | 0.90 | 1.15 | 0.22 | 1.34 |
| 13845 | 0 | 106347 | DMQLYPVLPTPH                     | 2.48 | 0.01 | 0.90 | 1.15 | 0.22 | 1.39 |
| 13846 | 0 | 77853  | DMQYRSPTGLST                     | 2.45 | 0.01 | 0.90 | 1.15 | 0.22 | 1.39 |
| 13847 | 0 | 9399   | DMRNTIMASK                       | 2.29 | 4.23 | 2.56 | 0.44 | 0.85 | 0.28 |
| 13848 | 0 | 9401   | DMRNTIMASKTVGTA                  | 2.66 | 4.63 | 2.56 | 0.44 | 0.85 | 0.28 |
| 13849 | 0 | 122307 | DMSPYEAYKRGII DRGQ<br>YLQ        | 2.93 | 0.01 | 0.78 | 0.44 | 1.13 | 0.28 |
| 13850 | 0 | 122307 | DMSPYEAYKRGII DRGQ<br>YLQ        | 2.93 | 0.01 | 0.78 | 0.44 | 1.13 | 1.27 |
| 13851 | 0 | 156858 | DMSYYYALPTYT                     | 2.48 | 0.01 | 0.90 | 2.74 | 0.22 | 0.85 |
| 13852 | 0 | 443206 | DMTFRHVGSKLIVAMSS<br>WLQKASGSLPY | 3.23 | 0.01 | 0.78 | 0.44 | 1.93 | 0.28 |

|       |   |        |                                  |      |      |      |      |      |      |
|-------|---|--------|----------------------------------|------|------|------|------|------|------|
| 13853 | 0 | 443206 | DMTFRHVGSKLIVAMSS<br>WLQKASGSLPY | 3.23 | 0.01 | 0.78 | 0.44 | 1.41 | 0.28 |
| 13854 | 0 | 152464 | DMTLKEALKI                       | 2.31 | 0.01 | 2.18 | 2.16 | 0.22 | 0.28 |
| 13855 | 0 | 78121  | DMTMLK                           | 1.90 | 0.01 | 0.90 | 2.02 | 1.59 | 1.39 |
| 13856 | 0 | 230369 | DMVALQEEAKSVRDRR<br>LALIEIMR     | 3.14 | 0.01 | 3.33 | 2.49 | 0.85 | 0.28 |
| 13857 | 0 | 170606 | DMVFGASTKQIDVYR                  | 2.63 | 0.01 | 0.78 | 0.44 | 1.13 | 0.28 |
| 13858 | 0 | 95320  | DMVLNETLRL                       | 2.31 | 0.01 | 2.19 | 0.44 | 1.23 | 0.85 |
| 13859 | 0 | 240974 | DMYFST                           | 1.88 | 0.01 | 3.35 | 1.20 | 0.22 | 0.85 |
| 13860 | 0 | 135837 | DMYGDIRLTGLI                     | 2.50 | 0.01 | 0.90 | 1.15 | 0.22 | 0.28 |
| 13861 | 0 | 135837 | DMYGDIRLTGLI                     | 2.50 | 0.01 | 0.90 | 1.15 | 0.22 | 1.27 |
| 13862 | 0 | 135837 | DMYGDIRLTGLI                     | 2.50 | 0.01 | 0.90 | 0.68 | 0.22 | 0.28 |
| 13863 | 0 | 105140 | DN                               | 1.10 | 0.01 | 3.47 | 1.20 | 0.22 | 0.28 |
| 13864 | 0 | 513282 | DNAASDALEALADQT                  | 2.72 | 0.01 | 2.24 | 0.44 | 1.41 | 1.28 |
| 13865 | 0 | 188101 | DNADIDLETK<br>DNAGTNLYNELEMNYY   | 2.32 | 0.01 | 2.92 | 1.81 | 0.22 | 0.85 |
| 13866 | 0 | 9424   | GKQENWYSLKKNRSRLG<br>ENDDGNNN    | 3.66 | 0.01 | 3.29 | 0.44 | 0.85 | 0.28 |
| 13867 | 0 | 116691 | DNAMDRADTLEQQNK                  | 2.68 | 0.01 | 3.15 | 0.44 | 1.23 | 0.85 |
| 13868 | 0 | 116691 | DNAMDRADTLEQQNK                  | 2.68 | 0.01 | 2.36 | 0.44 | 1.23 | 1.28 |
| 13869 | 0 | 116691 | DNAMDRADTLEQQNK                  | 2.68 | 0.01 | 2.36 | 0.44 | 1.23 | 1.27 |
| 13870 | 0 | 116691 | DNAMDRADTLEQQNK                  | 2.68 | 0.01 | 2.36 | 0.44 | 1.23 | 1.28 |
| 13871 | 0 | 110810 | DNASLARLDLERKVESL<br>QEE         | 2.97 | 0.01 | 0.78 | 2.46 | 0.22 | 1.28 |
| 13872 | 0 | 238295 | DNATWVMTDNSNVGA                  | 2.71 | 0.01 | 2.14 | 2.65 | 0.22 | 0.85 |
| 13873 | 0 | 238296 | DNATWVMTDNSNVGA<br>LRLA          | 2.91 | 0.01 | 2.14 | 2.65 | 0.22 | 0.85 |
| 13874 | 0 | 190401 | DNAYFGYSTPWGYFD                  | 2.69 | 0.01 | 3.97 | 2.00 | 1.41 | 0.28 |
| 13875 | 0 | 269797 | DNDDDDDDDEPEEEKE                 | 2.73 | 0.01 | 1.61 | 0.44 | 0.85 | 1.28 |
| 13876 | 0 | 269798 | DNDDDDLEEAEERS                   | 2.71 | 0.01 | 1.61 | 0.44 | 0.85 | 1.28 |
| 13877 | 0 | 181896 | DNDEPGSRYNWW                     | 2.46 | 0.01 | 0.90 | 3.15 | 0.22 | 0.28 |
| 13878 | 0 | 269802 | DNDGDESSDKEDAEP                  | 2.71 | 0.01 | 1.61 | 0.44 | 0.85 | 1.28 |
| 13879 | 0 | 79782  | DNDGPVAAGEARPVPE<br>EYLQ         | 2.96 | 0.01 | 3.45 | 1.15 | 0.22 | 0.85 |
| 13880 | 0 | 79782  | DNDGPVAAGEARPVPE<br>EYLQ         | 2.96 | 0.01 | 3.45 | 1.15 | 0.22 | 2.35 |
| 13881 | 0 | 79782  | DNDGPVAAGEARPVPE<br>EYLQ         | 2.96 | 0.01 | 3.45 | 1.15 | 0.22 | 1.48 |
| 13882 | 0 | 114778 | DNECLLCAHK                       | 2.30 | 0.01 | 2.25 | 0.44 | 1.23 | 0.85 |
| 13883 | 0 | 9441   | DNECLLCAHKVEQGASV<br>DKR         | 2.93 | 0.01 | 2.25 | 0.44 | 1.23 | 0.28 |

|       |   |        |                                     |      |      |      |      |      |      |
|-------|---|--------|-------------------------------------|------|------|------|------|------|------|
| 13884 | 0 | 177484 | DNEEGFFSARGHRPLDK<br>KRE            | 2.93 | 3.37 | 0.78 | 0.44 | 2.26 | 0.28 |
| 13885 | 0 | 177484 | DNEEGFFSARGHRPLDK<br>KRE            | 2.93 | 3.37 | 0.78 | 0.44 | 1.13 | 0.28 |
| 13886 | 0 | 9446   | DNEEPIAPYHF                         | 2.38 | 0.01 | 2.53 | 0.44 | 1.23 | 0.85 |
| 13887 | 0 | 78362  | DNEEPIAPYHFDLSGHAF<br>G             | 2.89 | 0.01 | 3.22 | 1.20 | 0.22 | 1.27 |
| 13888 | 0 | 9449   | DNEILQIVDELSEDITKYF<br>MKL          | 3.04 | 0.01 | 1.66 | 0.44 | 0.85 | 0.28 |
| 13889 | 0 | 9450   | DNEILQIVKELSEKITKYF<br>MKL          | 3.03 | 0.01 | 1.66 | 0.44 | 0.85 | 0.28 |
| 13890 | 0 | 269853 | DNEKQQQSDEAQVQQ                     | 2.69 | 0.01 | 1.61 | 0.44 | 0.85 | 1.28 |
| 13891 | 0 | 9454   | DNENHATVSDSKLV                      | 2.62 | 0.01 | 3.45 | 1.15 | 0.22 | 1.39 |
| 13892 | 0 | 9454   | DNENHATVSDSKLV                      | 2.62 | 0.01 | 3.45 | 1.15 | 0.22 | 0.85 |
| 13893 | 0 | 9454   | DNENHATVSDSKLV                      | 2.62 | 0.01 | 3.45 | 1.15 | 0.22 | 0.85 |
| 13894 | 0 | 78950  | DNENPLSGKAGGVVKV<br>TYPGLTKV        | 3.13 | 0.01 | 3.42 | 2.88 | 0.22 | 0.28 |
| 13895 | 0 | 78950  | DNENPLSGKAGGVVKV<br>TYPGLTKV        | 3.13 | 0.01 | 3.42 | 2.88 | 0.22 | 0.28 |
| 13896 | 0 | 99950  | DNEQPTTRAQKLFA                      | 2.58 | 0.01 | 2.96 | 1.12 | 0.22 | 0.28 |
| 13897 | 0 | 125015 | DNESSYSRGFDMTYTE                    | 2.75 | 0.01 | 0.78 | 0.68 | 0.22 | 0.28 |
| 13898 | 0 | 125015 | DNESSYSRGFDMTYTE                    | 2.75 | 0.01 | 0.78 | 0.68 | 0.22 | 2.12 |
| 13899 | 0 | 125015 | DNESSYSRGFDMTYTE                    | 2.75 | 0.01 | 0.78 | 0.68 | 0.22 | 0.85 |
| 13900 | 0 | 125015 | DNESSYSRGFDMTYTE                    | 2.75 | 0.01 | 0.78 | 0.68 | 0.22 | 1.27 |
| 13901 | 0 | 125015 | DNESSYSRGFDMTYTE                    | 2.75 | 0.01 | 0.78 | 0.68 | 0.22 | 1.34 |
| 13902 | 0 | 128436 | DNESSYSRGFDMTYTEF<br>DYDLCNEVVDTVCS | 3.41 | 0.01 | 0.78 | 0.68 | 0.22 | 0.28 |
| 13903 | 0 | 128436 | DNESSYSRGFDMTYTEF<br>DYDLCNEVVDTVCS | 3.41 | 0.01 | 0.78 | 0.68 | 0.22 | 1.27 |
| 13904 | 0 | 128436 | DNESSYSRGFDMTYTEF<br>DYDLCNEVVDTVCS | 3.41 | 0.01 | 0.78 | 0.68 | 0.22 | 1.48 |
| 13905 | 0 | 78122  | DNFPCSKLTNRTIGNQW<br>N              | 2.80 | 0.01 | 3.67 | 0.68 | 0.22 | 0.85 |
| 13906 | 0 | 142581 | DNFVTKATALTYDPY                     | 2.69 | 0.01 | 3.06 | 2.13 | 0.22 | 0.28 |
| 13907 | 0 | 9463   | DNGKAIYERARERALQE<br>LGP            | 2.95 | 0.01 | 4.15 | 2.42 | 0.22 | 0.28 |
| 13908 | 0 | 9463   | DNGKAIYERARERALQE<br>LGP            | 2.95 | 0.01 | 4.15 | 2.42 | 0.22 | 1.34 |

|       |   |        |                                               |      |      |      |      |      |      |
|-------|---|--------|-----------------------------------------------|------|------|------|------|------|------|
| 13909 | 0 | 9463   | DNGKAIYERARERALQE<br>LGP                      | 2.95 | 0.01 | 4.15 | 2.42 | 0.22 | 1.34 |
| 13910 | 0 | 9463   | DNGKAIYERARERALQE<br>LGP                      | 2.95 | 0.01 | 4.15 | 2.42 | 0.22 | 0.28 |
| 13911 | 0 | 9463   | DNGKAIYERARERALQE<br>LGP                      | 2.95 | 0.01 | 4.15 | 2.42 | 0.22 | 0.28 |
| 13912 | 0 | 9463   | DNGKAIYERARERALQE<br>LGP                      | 2.95 | 0.01 | 4.15 | 2.42 | 0.22 | 0.28 |
| 13913 | 0 | 9463   | DNGKAIYERARERALQE<br>LGP                      | 2.95 | 0.01 | 2.24 | 2.42 | 0.22 | 0.28 |
| 13914 | 0 | 9463   | DNGKAIYERARERALQE<br>LGP                      | 2.95 | 0.01 | 2.24 | 2.42 | 0.22 | 1.34 |
| 13915 | 0 | 9463   | DNGKAIYERARERALQE<br>LGP                      | 2.95 | 0.01 | 2.24 | 2.42 | 2.25 | 1.75 |
| 13916 | 0 | 9464   | DNGKAIYERARERALQE<br>LGPC                     | 2.98 | 0.01 | 2.24 | 2.42 | 0.22 | 0.28 |
| 13917 | 0 | 9464   | DNGKAIYERARERALQE<br>LGPC                     | 2.98 | 0.01 | 3.78 | 2.42 | 0.22 | 0.28 |
| 13918 | 0 | 9464   | DNGKAIYERARERALQE<br>LGPC                     | 2.98 | 0.01 | 3.78 | 2.42 | 0.22 | 0.28 |
| 13919 | 0 | 9464   | DNGKAIYERARERALQE<br>LGPC                     | 2.98 | 0.01 | 3.78 | 2.42 | 0.22 | 0.28 |
| 13920 | 0 | 9464   | DNGKAIYERARERALQE<br>LGPC                     | 2.98 | 0.01 | 3.78 | 2.42 | 0.22 | 1.34 |
| 13921 | 0 | 9467   | DNGREGKD                                      | 2.15 | 0.01 | 3.29 | 1.20 | 0.22 | 0.28 |
| 13922 | 0 | 175784 | DNGTNGIQHAMYL RG                              | 2.64 | 0.01 | 2.63 | 1.15 | 0.22 | 0.85 |
| 13923 | 0 | 175784 | DNGTNGIQHAMYL RG                              | 2.64 | 0.01 | 2.63 | 1.15 | 0.22 | 0.85 |
| 13924 | 0 | 175784 | DNGTNGIQHAMYL RG                              | 2.64 | 0.01 | 2.63 | 1.15 | 0.22 | 0.85 |
| 13925 | 0 | 181897 | DNHEHRFWHWDS                                  | 2.50 | 0.01 | 0.90 | 3.15 | 0.22 | 1.39 |
| 13926 | 0 | 116953 | DNHSPVNIAHKL                                  | 2.45 | 0.01 | 0.90 | 0.44 | 0.85 | 1.39 |
| 13927 | 0 | 9472   | DNIDSPNAPWVFAC                                | 2.62 | 0.01 | 2.56 | 2.69 | 0.22 | 0.28 |
| 13928 | 0 | 9474   | DNIGNANIGFGN                                  | 2.52 | 0.01 | 2.86 | 0.44 | 0.85 | 0.28 |
| 13929 | 0 | 9474   | DNIGNANIGFGN                                  | 2.52 | 0.01 | 2.86 | 0.44 | 0.85 | 0.28 |
| 13930 | 0 | 9474   | DNIGNANIGFGN                                  | 2.52 | 0.01 | 2.86 | 0.44 | 0.85 | 0.28 |
| 13931 | 0 | 9475   | DNIGNANIGFGN RGDA<br>NIGIGNIGDRNLGIGNT<br>GNW | 3.58 | 0.01 | 2.86 | 0.44 | 0.85 | 0.28 |
| 13932 | 0 | 9475   | DNIGNANIGFGN RGDA<br>NIGIGNIGDRNLGIGNT<br>GNW | 3.58 | 0.01 | 2.86 | 0.44 | 0.85 | 0.28 |
| 13933 | 0 | 9475   | DNIGNANIGFGN RGDA<br>NIGIGNIGDRNLGIGNT<br>GNW | 3.58 | 0.01 | 2.86 | 0.44 | 0.85 | 0.28 |

|       |   |        |                                    |      |      |      |      |      |      |
|-------|---|--------|------------------------------------|------|------|------|------|------|------|
| 13934 | 0 | 9477   | DNIHVKMFKVIENNDKS<br>ELI           | 2.96 | 0.01 | 0.90 | 2.63 | 0.22 | 1.48 |
| 13935 | 0 | 9477   | DNIHVKMFKVIENNDKS<br>ELI           | 2.96 | 0.01 | 0.90 | 2.63 | 2.25 | 1.75 |
| 13936 | 0 | 9477   | DNIHVKMFKVIENNDKS<br>ELI           | 2.96 | 0.01 | 0.90 | 2.63 | 0.22 | 1.48 |
| 13937 | 0 | 9477   | DNIHVKMFKVIENNDKS<br>ELI           | 2.96 | 0.01 | 0.90 | 2.63 | 2.25 | 1.75 |
| 13938 | 0 | 9478   | DNIHVKMFKVIMNNDK<br>SELI           | 2.96 | 0.01 | 0.90 | 2.74 | 0.22 | 1.48 |
| 13939 | 0 | 9479   | DNIHVKMRKVIMNNDK<br>SELI           | 2.96 | 0.01 | 0.90 | 2.63 | 0.22 | 1.48 |
| 13940 | 0 | 9480   | DNIKDC                             | 1.91 | 0.01 | 2.45 | 0.44 | 0.85 | 1.34 |
| 13941 | 0 | 9480   | DNIKDC                             | 1.91 | 0.01 | 2.45 | 0.44 | 0.85 | 1.34 |
| 13942 | 0 | 9483   | DNILVKMFKTMINNDKS<br>ELI           | 2.96 | 0.01 | 0.90 | 2.63 | 0.22 | 1.48 |
| 13943 | 0 | 9487   | DNILVKMFKVIMNNDKS<br>ELI           | 2.97 | 0.01 | 0.90 | 2.63 | 0.22 | 1.48 |
| 13944 | 0 | 232625 | DNKLKIQNVI                         | 2.33 | 0.01 | 3.10 | 0.68 | 0.22 | 2.75 |
| 13945 | 0 | 232625 | DNKLKIQNVI                         | 2.33 | 0.01 | 3.10 | 0.68 | 0.22 | 0.28 |
| 13946 | 0 | 232625 | DNKLKIQNVI                         | 2.33 | 0.01 | 3.10 | 0.68 | 0.22 | 2.75 |
| 13947 | 0 | 232625 | DNKLKIQNVI                         | 2.33 | 0.01 | 3.10 | 0.68 | 0.22 | 2.75 |
| 13948 | 0 | 232625 | DNKLKIQNVI                         | 2.33 | 0.01 | 3.10 | 0.68 | 0.22 | 1.48 |
| 13949 | 0 | 162081 | DNKMQFESSYEGYFLA<br>CEKERDLFKLILKK | 3.35 | 0.01 | 0.78 | 1.15 | 0.22 | 0.28 |
| 13950 | 0 | 230216 | DNKTYGNKCNFCNAV<br>V<br>ESNG       | 2.94 | 0.01 | 2.25 | 0.44 | 1.23 | 0.28 |
| 13951 | 0 | 159280 | DNKTYGNKSNFSNAV                    | 2.68 | 0.01 | 0.90 | 0.68 | 0.22 | 1.75 |
| 13952 | 0 | 159280 | DNKTYGNKSNFSNAV                    | 2.68 | 0.01 | 0.90 | 0.68 | 0.22 | 1.75 |
| 13953 | 0 | 9498   | DNKYLPK                            | 2.02 | 0.01 | 4.93 | 0.68 | 0.22 | 3.13 |
| 13954 | 0 | 91203  | DNLAPMSDGAVQPDG                    | 2.69 | 0.01 | 3.05 | 1.20 | 0.22 | 0.28 |
| 13955 | 0 | 91203  | DNLAPMSDGAVQPDG                    | 2.69 | 0.01 | 3.05 | 1.20 | 0.22 | 0.28 |
| 13956 | 0 | 227097 | DNLTYVQLESRFTPQ                    | 2.64 | 0.01 | 2.97 | 0.44 | 1.59 | 0.28 |
| 13957 | 0 | 233163 | DNMITN                             | 1.90 | 0.01 | 3.61 | 2.00 | 0.85 | 0.85 |
| 13958 | 0 | 9511   | DNNDSGHSTGADTG                     | 2.66 | 0.01 | 2.69 | 0.44 | 0.85 | 0.28 |
| 13959 | 0 | 9511   | DNNDSGHSTGADTG                     | 2.66 | 0.01 | 2.69 | 0.44 | 1.41 | 0.28 |
| 13960 | 0 | 9515   | DNNKTAT                            | 2.03 | 0.01 | 4.93 | 1.15 | 0.22 | 1.34 |
| 13961 | 0 | 9516   | DNNLVSGP                           | 2.11 | 0.01 | 1.66 | 0.68 | 0.22 | 1.48 |
| 13962 | 0 | 9516   | DNNLVSGP                           | 2.11 | 0.01 | 1.66 | 0.68 | 0.22 | 0.28 |
| 13963 | 0 | 9516   | DNNLVSGP                           | 2.11 | 0.01 | 1.66 | 0.68 | 0.22 | 0.28 |
| 13964 | 0 | 9516   | DNNLVSGP                           | 2.11 | 0.01 | 1.66 | 0.68 | 0.22 | 2.98 |
| 13965 | 0 | 9516   | DNNLVSGP                           | 2.11 | 0.01 | 1.66 | 1.12 | 0.22 | 0.28 |
| 13966 | 0 | 9516   | DNNLVSGP                           | 2.11 | 0.01 | 1.66 | 1.12 | 0.22 | 0.28 |



|       |   |      |                 |      |      |      |      |      |      |
|-------|---|------|-----------------|------|------|------|------|------|------|
| 13967 | 0 | 9516 | DNNLVSGP        | 2.11 | 0.01 | 1.66 | 1.15 | 0.22 | 0.28 |
| 13968 | 0 | 9516 | DNNLVSGP        | 2.11 | 0.01 | 1.66 | 1.12 | 0.22 | 1.34 |
| 13969 | 0 | 9516 | DNNLVSGP        | 2.11 | 0.01 | 1.66 | 1.15 | 0.22 | 1.34 |
| 13970 | 0 | 9516 | DNNLVSGP        | 2.11 | 0.01 | 1.66 | 1.15 | 0.22 | 0.28 |
| 13971 | 0 | 9516 | DNNLVSGP        | 2.11 | 0.01 | 1.66 | 1.15 | 0.22 | 1.48 |
| 13972 | 0 | 9516 | DNNLVSGP        | 2.11 | 0.01 | 1.66 | 1.12 | 0.22 | 0.85 |
| 13973 | 0 | 9516 | DNNLVSGP        | 2.11 | 0.01 | 1.66 | 1.15 | 0.22 | 1.48 |
| 13974 | 0 | 9516 | DNNLVSGP        | 2.11 | 0.01 | 1.66 | 0.68 | 0.22 | 0.85 |
| 13975 | 0 | 9516 | DNNLVSGP        | 2.11 | 0.01 | 1.66 | 1.15 | 0.22 | 0.85 |
| 13976 | 0 | 9516 | DNNLVSGP        | 2.11 | 0.01 | 1.66 | 0.68 | 0.22 | 1.75 |
| 13977 | 0 | 9516 | DNNLVSGP        | 2.11 | 0.01 | 1.66 | 0.68 | 0.22 | 0.28 |
| 13978 | 0 | 9516 | DNNLVSGP        | 2.11 | 0.01 | 1.66 | 0.68 | 0.22 | 1.48 |
| 13979 | 0 | 9520 | DNNQTSP         | 2.01 | 0.01 | 2.57 | 0.68 | 0.22 | 1.27 |
| 13980 | 0 | 9520 | DNNQTSP         | 2.01 | 0.01 | 2.57 | 0.68 | 0.22 | 1.34 |
| 13981 | 0 | 9520 | DNNQTSP         | 2.01 | 0.01 | 2.57 | 0.68 | 0.22 | 0.85 |
| 13982 | 0 | 9520 | DNNQTSP         | 2.01 | 0.01 | 2.57 | 1.12 | 0.22 | 1.34 |
| 13983 | 0 | 9520 | DNNQTSP         | 2.01 | 0.01 | 2.57 | 1.12 | 0.22 | 1.34 |
| 13984 | 0 | 9521 | DNNTGNRS        | 2.14 | 0.01 | 2.99 | 0.44 | 0.85 | 0.28 |
| 13985 | 0 | 9522 | DNNVNNMDNNVNNV  | 3.53 | 0.01 | 2.22 | 0.44 | 1.74 | 0.28 |
|       |   |      | DNNVNNVDNNLNNVD |      |      |      |      |      |      |
|       |   |      | NNVNN           |      |      |      |      |      |      |
| 13986 | 0 | 9522 | DNNVNNMDNNVNNV  | 3.53 | 0.01 | 2.22 | 0.44 | 1.74 | 0.28 |
|       |   |      | DNNVNNVDNNLNNVD |      |      |      |      |      |      |
|       |   |      | NNVNN           |      |      |      |      |      |      |
| 13987 | 0 | 9522 | DNNVNNMDNNVNNV  | 3.53 | 0.01 | 2.22 | 0.44 | 1.74 | 0.28 |
|       |   |      | DNNVNNVDNNLNNVD |      |      |      |      |      |      |
|       |   |      | NNVNN           |      |      |      |      |      |      |
| 13988 | 0 | 9523 | DNNYGKTIINNDFNF | 2.71 | 0.01 | 1.66 | 1.15 | 0.22 | 0.28 |
| 13989 | 0 | 9523 | DNNYGKTIINNDFNF | 2.71 | 0.01 | 1.66 | 1.15 | 0.22 | 0.28 |
| 13990 | 0 | 9524 | DNPASTTNKDK     | 2.43 | 0.01 | 3.51 | 1.15 | 0.22 | 1.48 |
| 13991 | 0 | 9524 | DNPASTTNKDK     | 2.43 | 0.01 | 3.51 | 0.68 | 0.22 | 0.28 |
| 13992 | 0 | 9524 | DNPASTTNKDK     | 2.43 | 0.01 | 3.51 | 0.68 | 0.22 | 0.28 |
| 13993 | 0 | 9524 | DNPASTTNKDK     | 2.43 | 0.01 | 3.51 | 0.68 | 0.22 | 0.28 |
| 13994 | 0 | 9524 | DNPASTTNKDK     | 2.43 | 0.01 | 3.51 | 0.68 | 0.22 | 0.28 |
| 13995 | 0 | 9524 | DNPASTTNKDK     | 2.43 | 0.01 | 3.51 | 0.68 | 0.22 | 1.34 |
| 13996 | 0 | 9524 | DNPASTTNKDK     | 2.43 | 0.01 | 3.51 | 0.68 | 0.22 | 0.28 |
| 13997 | 0 | 9524 | DNPASTTNKDK     | 2.43 | 0.01 | 3.51 | 1.15 | 0.22 | 0.85 |
| 13998 | 0 | 9524 | DNPASTTNKDK     | 2.43 | 0.01 | 3.51 | 0.68 | 0.22 | 0.28 |
| 13999 | 0 | 9524 | DNPASTTNKDK     | 2.43 | 0.01 | 3.51 | 1.15 | 2.26 | 0.28 |
| 14000 | 0 | 9524 | DNPASTTNKDK     | 2.43 | 0.01 | 2.57 | 1.20 | 0.22 | 1.34 |
| 14001 | 0 | 9524 | DNPASTTNKDK     | 2.43 | 0.01 | 2.57 | 3.16 | 0.22 | 1.34 |
| 14002 | 0 | 9524 | DNPASTTNKDK     | 2.43 | 0.01 | 2.57 | 1.20 | 0.22 | 1.34 |
| 14003 | 0 | 9524 | DNPASTTNKDK     | 2.43 | 0.01 | 2.57 | 3.16 | 0.22 | 1.34 |
| 14004 | 0 | 9524 | DNPASTTNKDK     | 2.43 | 0.01 | 2.57 | 1.15 | 0.22 | 0.28 |
| 14005 | 0 | 9524 | DNPASTTNKDK     | 2.43 | 0.01 | 2.57 | 1.12 | 0.22 | 1.34 |
| 14006 | 0 | 9524 | DNPASTTNKDK     | 2.43 | 0.01 | 2.57 | 1.12 | 0.22 | 1.34 |
| 14007 | 0 | 9524 | DNPASTTNKDK     | 2.43 | 0.01 | 2.57 | 1.15 | 0.22 | 1.34 |

|       |   |        |                              |      |      |      |      |      |      |
|-------|---|--------|------------------------------|------|------|------|------|------|------|
| 14008 | 0 | 9524   | DNPASTTNKDK                  | 2.43 | 0.01 | 2.57 | 1.15 | 0.22 | 2.49 |
| 14009 | 0 | 9524   | DNPASTTNKDK                  | 2.43 | 0.01 | 2.57 | 1.15 | 0.22 | 2.02 |
| 14010 | 0 | 9524   | DNPASTTNKDK                  | 2.43 | 0.01 | 2.57 | 1.20 | 0.22 | 0.28 |
| 14011 | 0 | 9524   | DNPASTTNKDK                  | 2.43 | 0.01 | 2.57 | 1.20 | 0.22 | 1.34 |
| 14012 | 0 | 9524   | DNPASTTNKDK                  | 2.43 | 0.01 | 2.57 | 0.68 | 0.22 | 0.28 |
| 14013 | 0 | 9524   | DNPASTTNKDK                  | 2.43 | 0.01 | 2.57 | 1.20 | 0.22 | 0.28 |
| 14014 | 0 | 9524   | DNPASTTNKDK                  | 2.43 | 0.01 | 3.51 | 1.20 | 0.22 | 0.28 |
| 14015 | 0 | 9524   | DNPASTTNKDK                  | 2.43 | 0.01 | 3.51 | 0.68 | 0.22 | 0.28 |
| 14016 | 0 | 9524   | DNPASTTNKDK                  | 2.43 | 0.01 | 2.57 | 1.15 | 0.22 | 0.85 |
| 14017 | 0 | 9524   | DNPASTTNKDK                  | 2.43 | 0.01 | 3.51 | 1.15 | 0.22 | 0.85 |
| 14018 | 0 | 9524   | DNPASTTNKDK                  | 2.43 | 0.01 | 3.51 | 1.15 | 0.22 | 0.28 |
| 14019 | 0 | 9524   | DNPASTTNKDK                  | 2.43 | 0.01 | 3.51 | 2.46 | 0.22 | 1.27 |
| 14020 | 0 | 9524   | DNPASTTNKDK                  | 2.43 | 0.01 | 3.51 | 1.15 | 0.22 | 0.28 |
| 14021 | 0 | 9524   | DNPASTTNKDK                  | 2.43 | 0.01 | 3.51 | 2.46 | 0.22 | 1.27 |
| 14022 | 0 | 9524   | DNPASTTNKDK                  | 2.43 | 0.01 | 3.51 | 0.68 | 0.22 | 0.28 |
| 14023 | 0 | 9524   | DNPASTTNKDK                  | 2.43 | 0.01 | 2.57 | 1.15 | 0.22 | 2.98 |
| 14024 | 0 | 9526   | DNPASTTNKDKL                 | 2.49 | 0.01 | 2.57 | 1.20 | 0.22 | 0.28 |
| 14025 | 0 | 9526   | DNPASTTNKDKL                 | 2.49 | 0.01 | 2.57 | 1.20 | 0.22 | 1.34 |
| 14026 | 0 | 9526   | DNPASTTNKDKL                 | 2.49 | 0.01 | 3.51 | 1.15 | 0.22 | 2.02 |
| 14027 | 0 | 9526   | DNPASTTNKDKL                 | 2.49 | 0.01 | 3.51 | 1.15 | 0.22 | 1.34 |
| 14028 | 0 | 9526   | DNPASTTNKDKL                 | 2.49 | 0.01 | 3.51 | 1.15 | 0.22 | 1.34 |
| 14029 | 0 | 9528   | DNPASTTNKDKLFAVW<br>KITYKDTV | 3.12 | 0.01 | 2.57 | 1.20 | 0.22 | 0.28 |
| 14030 | 0 | 9528   | DNPASTTNKDKLFAVW<br>KITYKDTV | 3.12 | 0.01 | 2.57 | 1.20 | 0.22 | 1.34 |
| 14031 | 0 | 9528   | DNPASTTNKDKLFAVW<br>KITYKDTV | 3.12 | 0.01 | 2.57 | 1.15 | 0.22 | 1.27 |
| 14032 | 0 | 181985 | DNPNYNVQDNEEKN               | 2.64 | 0.01 | 3.85 | 2.13 | 1.74 | 0.28 |
| 14033 | 0 | 101549 | DNPQHLL                      | 1.99 | 0.01 | 0.90 | 0.44 | 0.85 | 1.39 |
| 14034 | 0 | 141620 | DNPRPNDKTGS                  | 2.42 | 0.01 | 3.40 | 1.20 | 0.22 | 0.28 |
| 14035 | 0 | 141620 | DNPRPNDKTGS                  | 2.42 | 0.01 | 3.40 | 1.20 | 0.22 | 0.28 |
| 14036 | 0 | 141620 | DNPRPNDKTGS                  | 2.42 | 0.01 | 3.40 | 1.20 | 0.22 | 0.28 |
| 14037 | 0 | 141620 | DNPRPNDKTGS                  | 2.42 | 0.01 | 3.40 | 1.20 | 0.22 | 1.34 |
| 14038 | 0 | 9537   | DNPRYTDAHNAVTQGR<br>TVP      | 2.91 | 0.01 | 4.63 | 2.42 | 0.22 | 0.28 |
| 14039 | 0 | 9537   | DNPRYTDAHNAVTQGR<br>TVP      | 2.91 | 0.01 | 4.63 | 2.42 | 0.22 | 1.34 |
| 14040 | 0 | 9538   | DNPSSVPKAAELYDKIK            | 2.84 | 0.01 | 4.63 | 2.42 | 0.22 | 0.28 |
| 14041 | 0 | 9538   | DNPSSVPKAAELYDKIK            | 2.84 | 0.01 | 4.63 | 2.42 | 0.22 | 1.34 |
| 14042 | 0 | 9539   | DNPSSVPVKKAAELYDKI<br>K      | 2.90 | 0.01 | 4.63 | 2.42 | 0.22 | 0.28 |
| 14043 | 0 | 9539   | DNPSSVPVKKAAELYDKI<br>K      | 2.90 | 0.01 | 4.63 | 2.42 | 0.22 | 1.34 |
| 14044 | 0 | 187049 | DNQANDAGKKLAKNL              | 2.73 | 0.01 | 3.36 | 1.20 | 0.22 | 1.27 |

|       |   |        |                                                     |      |      |      |      |      |      |
|-------|---|--------|-----------------------------------------------------|------|------|------|------|------|------|
| 14045 | 0 | 170613 | DNQHAPLLYGVL DHR                                    | 2.67 | 0.01 | 0.78 | 0.44 | 1.41 | 0.28 |
| 14046 | 0 | 9541   | DNQHEQDRPTSPAPS<br>RPFS                             | 2.97 | 0.01 | 2.70 | 0.44 | 0.85 | 0.28 |
| 14047 | 0 | 9543   | DNQLQNGIKRVKEFL                                     | 2.66 | 0.01 | 2.80 | 1.15 | 0.22 | 1.27 |
| 14048 | 0 | 98736  | DNRAG                                               | 1.74 | 0.01 | 2.14 | 0.44 | 0.85 | 0.28 |
| 14049 | 0 | 188829 | DNRRPIWNLAH MVNA                                    | 2.65 | 0.01 | 4.63 | 2.02 | 0.22 | 0.28 |
| 14050 | 0 | 113333 | DNSINIAPDPDFLDIVAL<br>HR                            | 2.97 | 0.01 | 1.86 | 2.37 | 0.22 | 0.28 |
| 14051 | 0 | 97246  | DNSIRIGSKGDV FVIREP<br>FISCSHLECRTFFLTQGAL<br>LNDKH | 3.67 | 0.01 | 3.09 | 0.44 | 0.85 | 0.28 |
| 14052 | 0 | 435903 | DNSPYAGWQVQNNKP<br>FDGKD                            | 2.94 | 0.01 | 3.10 | 2.87 | 0.22 | 1.75 |
| 14053 | 0 | 187300 | DNSTHNTPVYKLDIS                                     | 2.67 | 0.01 | 2.97 | 0.44 | 1.59 | 0.28 |
| 14054 | 0 | 97247  | DNTFVTTSL                                           | 2.22 | 0.01 | 3.13 | 1.12 | 0.22 | 0.28 |
| 14055 | 0 | 125383 | DNTGLTRVPMDAFQVG<br>KFPEDFESCD                      | 3.17 | 0.01 | 0.78 | 0.44 | 1.13 | 1.39 |
| 14056 | 0 | 144615 | DNTSIYGGGLVSPAI                                     | 2.64 | 0.01 | 2.24 | 1.12 | 0.22 | 0.28 |
| 14057 | 0 | 144615 | DNTSIYGGGLVSPAI                                     | 2.64 | 0.01 | 2.24 | 1.12 | 0.22 | 0.28 |
| 14058 | 0 | 144615 | DNTSIYGGGLVSPAI                                     | 2.64 | 0.01 | 2.24 | 1.12 | 0.22 | 0.28 |
| 14059 | 0 | 164218 | DNTSPSE                                             | 2.02 | 0.01 | 0.90 | 1.20 | 0.22 | 1.39 |
| 14060 | 0 | 9557   | DNTVRET                                             | 2.02 | 0.01 | 2.57 | 1.20 | 0.22 | 1.34 |
| 14061 | 0 | 9557   | DNTVRET                                             | 2.02 | 0.01 | 2.57 | 1.20 | 0.22 | 1.34 |
| 14062 | 0 | 9557   | DNTVRET                                             | 2.02 | 0.01 | 2.57 | 1.20 | 0.22 | 0.28 |
| 14063 | 0 | 9557   | DNTVRET                                             | 2.02 | 0.01 | 2.57 | 2.04 | 0.22 | 0.28 |
| 14064 | 0 | 9557   | DNTVRET                                             | 2.02 | 0.01 | 2.57 | 3.16 | 0.22 | 0.28 |
| 14065 | 0 | 9557   | DNTVRET                                             | 2.02 | 0.01 | 2.57 | 1.12 | 0.22 | 1.34 |
| 14066 | 0 | 128439 | DNVGSKMQMQIRMSL                                     | 2.65 | 0.01 | 0.78 | 0.44 | 1.13 | 0.85 |
| 14067 | 0 | 9571   | DNVLDHLTGRSC                                        | 2.46 | 0.01 | 2.14 | 3.70 | 0.22 | 0.28 |
| 14068 | 0 | 122308 | DNVNSVTQRGN NNNYN<br>NNLERGLGSG                     | 3.17 | 0.01 | 2.22 | 0.44 | 1.74 | 0.28 |
| 14069 | 0 | 122308 | DNVNSVTQRGN NNNYN<br>NNLERGLGSG                     | 3.17 | 0.01 | 2.22 | 0.44 | 1.74 | 1.34 |
| 14070 | 0 | 122308 | DNVNSVTQRGN NNNYN<br>NNLERGLGSG                     | 3.17 | 0.01 | 2.22 | 0.44 | 1.74 | 0.28 |
| 14071 | 0 | 141621 | DNWHGSNRP                                           | 2.21 | 0.01 | 3.40 | 1.20 | 0.22 | 0.28 |
| 14072 | 0 | 141621 | DNWHGSNRP                                           | 2.21 | 0.01 | 3.40 | 1.20 | 0.22 | 0.28 |
| 14073 | 0 | 141621 | DNWHGSNRP                                           | 2.21 | 0.01 | 3.40 | 1.20 | 0.22 | 0.28 |
| 14074 | 0 | 141621 | DNWHGSNRP                                           | 2.21 | 0.01 | 3.40 | 1.20 | 0.22 | 1.34 |
| 14075 | 0 | 450487 | DNYDSTA                                             | 2.03 | 0.01 | 0.90 | 0.44 | 1.23 | 1.39 |
| 14076 | 0 | 9582   | DNYWSFSDSTY WTLRYS<br>SG                            | 2.92 | 0.01 | 0.90 | 0.44 | 0.85 | 0.28 |
| 14077 | 0 | 9582   | DNYWSFSDSTY WTLRYS<br>SG                            | 2.92 | 0.01 | 0.90 | 1.15 | 0.22 | 0.28 |

|       |   |        |                            |      |      |      |      |      |      |
|-------|---|--------|----------------------------|------|------|------|------|------|------|
| 14078 | 0 | 9582   | DNYWSFSDSTYWTLRYS<br>SG    | 2.92 | 0.01 | 0.90 | 1.15 | 0.22 | 0.28 |
| 14079 | 0 | 78951  | DPA                        | 1.37 | 0.01 | 2.08 | 0.68 | 0.22 | 0.28 |
| 14080 | 0 | 78951  | DPA                        | 1.37 | 0.01 | 2.08 | 0.68 | 0.22 | 0.28 |
| 14081 | 0 | 78951  | DPA                        | 1.37 | 0.01 | 2.08 | 0.68 | 0.22 | 0.28 |
| 14082 | 0 | 78951  | DPA                        | 1.37 | 0.01 | 2.08 | 0.68 | 0.22 | 0.28 |
| 14083 | 0 | 270140 | DPAADAAGTREEKQN            | 2.67 | 0.01 | 1.61 | 0.44 | 0.85 | 1.28 |
| 14084 | 0 | 270141 | DPAADAAGTRKEKQN            | 2.68 | 0.01 | 1.61 | 0.44 | 0.85 | 1.28 |
| 14085 | 0 | 270142 | DPAADGAETREEKKN            | 2.69 | 0.01 | 1.61 | 0.44 | 0.85 | 1.28 |
| 14086 | 0 | 270144 | DPAADGAGTAEGKQN            | 2.70 | 0.01 | 1.61 | 0.44 | 0.85 | 1.28 |
| 14087 | 0 | 270146 | DPAADGAGTQEEKQN            | 2.69 | 0.01 | 1.61 | 0.44 | 0.85 | 1.28 |
| 14088 | 0 | 9583   | DPADNANPDADSESNG<br>EPNADP | 3.11 | 0.01 | 1.66 | 0.44 | 1.74 | 1.27 |
| 14089 | 0 | 9583   | DPADNANPDADSESNG<br>EPNADP | 3.11 | 0.01 | 1.66 | 1.15 | 0.22 | 2.35 |
| 14090 | 0 | 9583   | DPADNANPDADSESNG<br>EPNADP | 3.11 | 0.01 | 1.66 | 1.15 | 0.22 | 1.57 |
| 14091 | 0 | 9583   | DPADNANPDADSESNG<br>EPNADP | 3.11 | 0.01 | 1.66 | 0.44 | 1.74 | 1.57 |
| 14092 | 0 | 240975 | DPAEEADAP                  | 2.27 | 0.01 | 3.33 | 0.44 | 0.85 | 0.28 |
| 14093 | 0 | 240975 | DPAEEADAP                  | 2.27 | 0.01 | 3.33 | 0.44 | 0.85 | 0.28 |
| 14094 | 0 | 240975 | DPAEEADAP                  | 2.27 | 0.01 | 3.33 | 0.44 | 0.85 | 0.28 |
| 14095 | 0 | 240975 | DPAEEADAP                  | 2.27 | 0.01 | 3.33 | 2.49 | 0.22 | 0.28 |
| 14096 | 0 | 240975 | DPAEEADAP                  | 2.27 | 0.01 | 3.33 | 2.49 | 0.85 | 0.28 |
| 14097 | 0 | 9585   | DPAF                       | 1.57 | 0.01 | 2.08 | 1.15 | 0.22 | 1.34 |
| 14098 | 0 | 9585   | DPAF                       | 1.57 | 0.01 | 2.08 | 1.15 | 0.22 | 0.85 |
| 14099 | 0 | 9585   | DPAF                       | 1.57 | 0.01 | 2.08 | 1.15 | 0.22 | 1.34 |
| 14100 | 0 | 9585   | DPAF                       | 1.57 | 0.01 | 2.08 | 1.15 | 0.22 | 0.85 |
| 14101 | 0 | 9585   | DPAF                       | 1.57 | 0.01 | 2.08 | 0.68 | 0.22 | 0.28 |
| 14102 | 0 | 9585   | DPAF                       | 1.57 | 0.01 | 2.08 | 0.68 | 0.22 | 0.28 |
| 14103 | 0 | 9585   | DPAF                       | 1.57 | 0.01 | 2.08 | 0.68 | 0.22 | 0.28 |
| 14104 | 0 | 9585   | DPAF                       | 1.57 | 0.01 | 2.08 | 0.68 | 0.22 | 0.28 |
| 14105 | 0 | 9585   | DPAF                       | 1.57 | 0.01 | 2.08 | 0.68 | 0.22 | 0.28 |
| 14106 | 0 | 78952  | DPAFGA                     | 1.90 | 0.01 | 2.08 | 0.68 | 0.22 | 0.28 |
| 14107 | 0 | 9586   | DPAFR                      | 1.74 | 0.01 | 2.08 | 0.68 | 0.22 | 0.28 |
| 14108 | 0 | 9586   | DPAFR                      | 1.74 | 0.01 | 2.08 | 0.68 | 0.22 | 1.27 |
| 14109 | 0 | 9586   | DPAFR                      | 1.74 | 0.01 | 2.08 | 0.44 | 1.59 | 1.27 |
| 14110 | 0 | 9586   | DPAFR                      | 1.74 | 0.01 | 2.08 | 0.44 | 1.59 | 1.27 |
| 14111 | 0 | 9586   | DPAFR                      | 1.74 | 0.01 | 2.08 | 1.15 | 2.26 | 1.27 |
| 14112 | 0 | 9586   | DPAFR                      | 1.74 | 0.01 | 2.08 | 1.15 | 2.26 | 1.27 |
| 14113 | 0 | 9586   | DPAFR                      | 1.74 | 0.01 | 2.08 | 0.68 | 0.22 | 2.98 |
| 14114 | 0 | 9586   | DPAFR                      | 1.74 | 0.01 | 2.08 | 0.68 | 0.22 | 0.28 |
| 14115 | 0 | 9586   | DPAFR                      | 1.74 | 0.01 | 2.08 | 0.68 | 0.22 | 1.27 |

|       |   |        |                                   |      |      |      |      |      |      |
|-------|---|--------|-----------------------------------|------|------|------|------|------|------|
| 14116 | 0 | 9586   | DPAFR                             | 1.74 | 0.01 | 2.08 | 0.68 | 0.22 | 0.28 |
| 14117 | 0 | 153253 | DPAFRANTANPDWDFN<br>PNKDTWPDANKVG | 3.35 | 0.01 | 2.08 | 0.68 | 0.22 | 0.28 |
| 14118 | 0 | 153253 | DPAFRANTANPDWDFN<br>PNKDTWPDANKVG | 3.35 | 0.01 | 2.08 | 0.68 | 0.22 | 0.28 |
| 14119 | 0 | 153253 | DPAFRANTANPDWDFN<br>PNKDTWPDANKVG | 3.35 | 0.01 | 2.08 | 0.68 | 0.22 | 0.28 |
| 14120 | 0 | 153253 | DPAFRANTANPDWDFN<br>PNKDTWPDANKVG | 3.35 | 0.01 | 2.08 | 0.68 | 0.22 | 0.28 |
| 14121 | 0 | 153253 | DPAFRANTANPDWDFN<br>PNKDTWPDANKVG | 3.35 | 0.01 | 2.08 | 0.68 | 0.22 | 1.34 |
| 14122 | 0 | 153253 | DPAFRANTANPDWDFN<br>PNKDTWPDANKVG | 3.35 | 0.01 | 2.08 | 0.68 | 0.22 | 0.28 |
| 14123 | 0 | 153253 | DPAFRANTANPDWDFN<br>PNKDTWPDANKVG | 3.35 | 0.01 | 2.08 | 0.68 | 0.22 | 0.28 |
| 14124 | 0 | 153253 | DPAFRANTANPDWDFN<br>PNKDTWPDANKVG | 3.35 | 0.01 | 2.08 | 0.68 | 0.22 | 0.28 |
| 14125 | 0 | 153253 | DPAFRANTANPDWDFN<br>PNKDTWPDANKVG | 3.35 | 0.01 | 2.08 | 0.68 | 0.22 | 0.28 |
| 14126 | 0 | 153253 | DPAFRANTANPDWDFN<br>PNKDTWPDANKVG | 3.35 | 0.01 | 2.08 | 0.68 | 0.22 | 0.28 |
| 14127 | 0 | 9588   | DPAFSL                            | 1.88 | 0.01 | 0.90 | 1.15 | 0.22 | 0.85 |
| 14128 | 0 | 9588   | DPAFSL                            | 1.88 | 0.01 | 0.90 | 1.15 | 0.22 | 1.27 |
| 14129 | 0 | 9589   | DPAFSLNSRAFPAPF                   | 2.72 | 0.01 | 0.90 | 1.15 | 0.22 | 1.27 |
| 14130 | 0 | 9589   | DPAFSLNSRAFPAPF                   | 2.72 | 0.01 | 0.90 | 1.15 | 0.22 | 0.85 |
| 14131 | 0 | 9591   | DPAKAAFD                          | 2.16 | 0.01 | 3.89 | 0.68 | 0.22 | 0.85 |
| 14132 | 0 | 9591   | DPAKAAFD                          | 2.16 | 0.01 | 3.89 | 0.68 | 0.22 | 1.27 |
| 14133 | 0 | 9591   | DPAKAAFD                          | 2.16 | 0.01 | 3.89 | 0.68 | 0.22 | 0.85 |
| 14134 | 0 | 9592   | DPAKAAFD SLQASAT                  | 2.70 | 0.01 | 3.89 | 0.68 | 0.22 | 0.85 |
| 14135 | 0 | 9595   | DPALLMHელიHVLHGLY<br>G            | 2.90 | 0.01 | 2.95 | 0.44 | 0.22 | 1.27 |
| 14136 | 0 | 9595   | DPALLMHელიHVLHGLY<br>G            | 2.90 | 0.01 | 2.95 | 1.12 | 0.22 | 0.28 |
| 14137 | 0 | 9595   | DPALLMHელიHVLHGLY<br>G            | 2.90 | 0.01 | 2.95 | 1.12 | 0.22 | 0.28 |
| 14138 | 0 | 9595   | DPALLMHელიHVLHGLY<br>G            | 2.90 | 0.01 | 2.95 | 1.12 | 0.22 | 0.28 |

|       |   |        |                              |      |      |      |      |      |      |
|-------|---|--------|------------------------------|------|------|------|------|------|------|
| 14139 | 0 | 9597   | DPAPPNANDPAPPNAN             | 2.81 | 0.01 | 3.01 | 1.81 | 0.22 | 0.28 |
| 14140 | 0 | 9597   | DPAPPNANDPAPPNAN             | 2.81 | 0.01 | 3.01 | 1.81 | 0.22 | 0.28 |
| 14141 | 0 | 9597   | DPAPPNANDPAPPNAN             | 2.81 | 0.01 | 3.01 | 1.15 | 2.25 | 1.75 |
| 14142 | 0 | 9597   | DPAPPNANDPAPPNAN             | 2.81 | 0.01 | 3.01 | 1.81 | 2.25 | 1.75 |
| 14143 | 0 | 9597   | DPAPPNANDPAPPNAN             | 2.81 | 0.01 | 3.01 | 1.15 | 0.22 | 1.75 |
| 14144 | 0 | 9597   | DPAPPNANDPAPPNAN             | 2.81 | 0.01 | 3.01 | 1.81 | 0.22 | 0.28 |
| 14145 | 0 | 9597   | DPAPPNANDPAPPNAN             | 2.81 | 0.01 | 3.01 | 1.81 | 0.22 | 0.28 |
| 14146 | 0 | 9598   | DPAPPNANDPAPPNAN<br>D        | 2.87 | 0.01 | 3.01 | 1.15 | 0.22 | 1.27 |
| 14147 | 0 | 9598   | DPAPPNANDPAPPNAN<br>D        | 2.87 | 0.01 | 3.01 | 2.16 | 0.22 | 1.27 |
| 14148 | 0 | 9599   | DPAPPNANDPAPPNAN<br>DPAPPNAN | 3.20 | 0.01 | 3.01 | 1.15 | 0.22 | 0.28 |
| 14149 | 0 | 9599   | DPAPPNANDPAPPNAN<br>DPAPPNAN | 3.20 | 0.01 | 3.01 | 1.15 | 0.22 | 0.28 |
| 14150 | 0 | 9599   | DPAPPNANDPAPPNAN<br>DPAPPNAN | 3.20 | 0.01 | 3.01 | 1.15 | 0.22 | 0.28 |
| 14151 | 0 | 122730 | DPAQPPRD                     | 2.16 | 0.01 | 0.78 | 0.44 | 1.13 | 1.57 |
| 14152 | 0 | 122730 | DPAQPPRD                     | 2.16 | 0.01 | 0.78 | 2.66 | 0.22 | 0.28 |
| 14153 | 0 | 122730 | DPAQPPRD                     | 2.16 | 0.01 | 0.78 | 2.66 | 0.22 | 0.28 |
| 14154 | 0 | 122730 | DPAQPPRD                     | 2.16 | 0.01 | 0.78 | 2.66 | 0.22 | 0.28 |
| 14155 | 0 | 122730 | DPAQPPRD                     | 2.16 | 0.01 | 2.19 | 2.66 | 0.22 | 0.28 |
| 14156 | 0 | 122730 | DPAQPPRD                     | 2.16 | 0.01 | 2.19 | 2.66 | 0.22 | 0.28 |
| 14157 | 0 | 122730 | DPAQPPRD                     | 2.16 | 0.01 | 2.19 | 2.66 | 0.22 | 0.28 |
| 14158 | 0 | 122730 | DPAQPPRD                     | 2.16 | 0.01 | 2.19 | 2.66 | 0.22 | 0.28 |
| 14159 | 0 | 122730 | DPAQPPRD                     | 2.16 | 0.01 | 2.19 | 2.66 | 0.22 | 0.28 |
| 14160 | 0 | 122730 | DPAQPPRD                     | 2.16 | 0.01 | 2.19 | 2.66 | 0.22 | 0.28 |
| 14161 | 0 | 124023 | DPAQPPRDLTE                  | 2.41 | 0.01 | 0.78 | 0.44 | 1.13 | 1.57 |
| 14162 | 0 | 124024 | DPAQPPRDLTEAFLA              | 2.70 | 0.01 | 0.78 | 0.44 | 1.13 | 1.57 |
| 14163 | 0 | 9600   | DPARDCVHNICIFAG              | 2.67 | 0.01 | 0.90 | 0.68 | 0.22 | 0.28 |
| 14164 | 0 | 111207 | DPASLFH                      | 1.99 | 0.01 | 0.90 | 0.44 | 0.85 | 1.39 |
| 14165 | 0 | 9601   | DPASRD                       | 1.91 | 0.01 | 2.08 | 1.15 | 0.22 | 2.98 |
| 14166 | 0 | 9602   | DPASRE                       | 1.88 | 0.01 | 2.08 | 1.81 | 0.22 | 0.28 |
| 14167 | 0 | 9603   | DPCII                        | 1.72 | 0.01 | 3.72 | 0.44 | 1.23 | 0.85 |
| 14168 | 0 | 170616 | DPCLLTNRSARIPCF              | 2.65 | 0.01 | 0.78 | 0.44 | 1.13 | 0.28 |
| 14169 | 0 | 101550 | DPDD                         | 1.55 | 0.01 | 4.93 | 0.44 | 0.85 | 0.28 |
| 14170 | 0 | 9609   | DPDI                         | 1.60 | 0.01 | 4.03 | 0.68 | 0.22 | 0.28 |
| 14171 | 0 | 9609   | DPDI                         | 1.60 | 0.01 | 4.03 | 0.68 | 0.22 | 1.48 |
| 14172 | 0 | 9609   | DPDI                         | 1.60 | 0.01 | 4.03 | 0.68 | 0.22 | 0.28 |
| 14173 | 0 | 9609   | DPDI                         | 1.60 | 0.01 | 4.03 | 0.68 | 0.22 | 0.28 |

|       |   |        |                          |      |      |      |      |      |      |
|-------|---|--------|--------------------------|------|------|------|------|------|------|
| 14174 | 0 | 9610   | DPDIGQSK                 | 2.13 | 0.01 | 4.03 | 0.68 | 0.22 | 0.28 |
| 14175 | 0 | 9610   | DPDIGQSK                 | 2.13 | 0.01 | 4.03 | 0.68 | 0.22 | 1.48 |
| 14176 | 0 | 9610   | DPDIGQSK                 | 2.13 | 0.01 | 4.03 | 0.68 | 0.22 | 0.28 |
| 14177 | 0 | 9610   | DPDIGQSK                 | 2.13 | 0.01 | 4.03 | 0.68 | 0.22 | 0.28 |
| 14178 | 0 | 240976 | DPDINGS                  | 2.03 | 0.01 | 3.35 | 1.20 | 0.22 | 0.85 |
| 14179 | 0 | 240977 | DPDINGSK                 | 2.13 | 0.01 | 3.35 | 2.37 | 0.22 | 0.85 |
| 14180 | 0 | 9611   | DPDKDVDIMV               | 2.36 | 0.01 | 2.04 | 0.68 | 0.22 | 1.27 |
| 14181 | 0 | 9611   | DPDKDVDIMV               | 2.36 | 0.01 | 2.04 | 0.68 | 0.22 | 0.28 |
| 14182 | 0 | 9611   | DPDKDVDIMV               | 2.36 | 0.01 | 2.04 | 0.68 | 0.22 | 0.85 |
| 14183 | 0 | 9613   | DPDKDVDIMVRDGQLTI<br>KAE | 2.94 | 0.01 | 2.04 | 0.68 | 0.22 | 1.27 |
| 14184 | 0 | 9613   | DPDKDVDIMVRDGQLTI<br>KAE | 2.94 | 0.01 | 2.04 | 0.68 | 0.22 | 0.28 |
| 14185 | 0 | 9614   | DPDKILTYIAA              | 2.39 | 0.01 | 2.43 | 0.68 | 0.22 | 0.28 |
| 14186 | 0 | 9614   | DPDKILTYIAA              | 2.39 | 0.01 | 2.43 | 0.68 | 0.22 | 0.28 |
| 14187 | 0 | 9614   | DPDKILTYIAA              | 2.39 | 0.01 | 2.72 | 0.68 | 0.22 | 2.97 |
| 14188 | 0 | 78627  | DPDPPDANDPAPPNAN         | 2.81 | 0.01 | 3.01 | 0.68 | 0.22 | 0.28 |
| 14189 | 0 | 78627  | DPDPPDANDPAPPNAN         | 2.81 | 0.01 | 3.01 | 0.68 | 0.22 | 1.48 |
| 14190 | 0 | 78627  | DPDPPDANDPAPPNAN         | 2.81 | 0.01 | 3.01 | 0.68 | 0.22 | 1.48 |
| 14191 | 0 | 78627  | DPDPPDANDPAPPNAN         | 2.81 | 0.01 | 3.01 | 0.68 | 0.22 | 1.34 |
| 14192 | 0 | 111208 | DPDVNRFIDKYGQ            | 2.52 | 0.01 | 3.81 | 1.12 | 0.22 | 0.85 |
| 14193 | 0 | 9619   | DPDYVPPVVHGCPLPPT        | 2.81 | 0.01 | 1.96 | 0.44 | 0.85 | 0.28 |
| 14194 | 0 | 9619   | DPDYVPPVVHGCPLPPT        | 2.81 | 0.01 | 1.96 | 0.44 | 0.85 | 0.28 |
| 14195 | 0 | 9619   | DPDYVPPVVHGCPLPPT        | 2.81 | 0.01 | 1.96 | 0.44 | 0.85 | 0.28 |
| 14196 | 0 | 9619   | DPDYVPPVVHGCPLPPT        | 2.81 | 0.01 | 1.96 | 0.44 | 0.85 | 0.28 |
| 14197 | 0 | 9620   | DPEDLD                   | 1.92 | 0.01 | 3.17 | 0.68 | 0.22 | 2.02 |
| 14198 | 0 | 9620   | DPEDLD                   | 1.92 | 0.01 | 3.17 | 0.68 | 0.22 | 1.27 |
| 14199 | 0 | 9620   | DPEDLD                   | 1.92 | 0.01 | 3.17 | 0.68 | 0.22 | 0.28 |
| 14200 | 0 | 9621   | DPEDSALL                 | 2.12 | 0.01 | 2.40 | 1.15 | 0.22 | 0.85 |
| 14201 | 0 | 9621   | DPEDSALL                 | 2.12 | 0.01 | 2.40 | 1.15 | 0.22 | 1.34 |
| 14202 | 0 | 9621   | DPEDSALL                 | 2.12 | 0.01 | 2.40 | 1.15 | 0.22 | 0.28 |
| 14203 | 0 | 9621   | DPEDSALL                 | 2.12 | 0.01 | 2.40 | 1.15 | 0.22 | 0.85 |
| 14204 | 0 | 9621   | DPEDSALL                 | 2.12 | 0.01 | 2.40 | 1.15 | 0.22 | 1.48 |
| 14205 | 0 | 9621   | DPEDSALL                 | 2.12 | 0.01 | 2.40 | 1.15 | 0.22 | 0.85 |
| 14206 | 0 | 9621   | DPEDSALL                 | 2.12 | 0.01 | 2.40 | 1.15 | 0.22 | 0.85 |
| 14207 | 0 | 9621   | DPEDSALL                 | 2.12 | 0.01 | 2.40 | 1.15 | 0.22 | 0.85 |
| 14208 | 0 | 120448 | DPEFLNLIKS               | 2.29 | 0.01 | 2.18 | 2.16 | 0.22 | 0.28 |
| 14209 | 0 | 145746 | DPEIVMHSF                | 2.18 | 0.01 | 2.54 | 0.68 | 0.22 | 2.12 |
| 14210 | 0 | 145746 | DPEIVMHSF                | 2.18 | 0.01 | 2.54 | 0.68 | 0.22 | 2.12 |

|       |   |        |                           |      |      |      |      |      |      |
|-------|---|--------|---------------------------|------|------|------|------|------|------|
| 14211 | 0 | 145746 | DPEIVMHSF                 | 2.18 | 0.01 | 2.54 | 0.68 | 0.22 | 2.12 |
| 14212 | 0 | 145746 | DPEIVMHSF                 | 2.18 | 0.01 | 2.54 | 0.68 | 0.22 | 2.12 |
| 14213 | 0 | 143851 | DPEQPAPLFLVS              | 2.48 | 0.01 | 0.90 | 0.44 | 0.85 | 0.28 |
| 14214 | 0 | 143851 | DPEQPAPLFLVS              | 2.48 | 0.01 | 0.90 | 1.20 | 0.22 | 0.28 |
| 14215 | 0 | 9629   | DPESPEKKKLS               | 2.42 | 0.01 | 2.83 | 0.68 | 0.22 | 0.85 |
| 14216 | 0 | 9629   | DPESPEKKKLS               | 2.42 | 0.01 | 2.83 | 0.68 | 0.22 | 0.85 |
| 14217 | 0 | 9629   | DPESPEKKKLS               | 2.42 | 0.01 | 2.83 | 0.68 | 0.22 | 0.85 |
| 14218 | 0 | 9629   | DPESPEKKKLS               | 2.42 | 0.01 | 2.83 | 0.68 | 0.22 | 0.85 |
| 14219 | 0 | 9629   | DPESPEKKKLS               | 2.42 | 0.01 | 2.83 | 0.68 | 0.22 | 0.85 |
| 14220 | 0 | 9629   | DPESPEKKKLS               | 2.42 | 0.01 | 2.83 | 0.68 | 0.22 | 0.85 |
| 14221 | 0 | 9629   | DPESPEKKKLS               | 2.42 | 0.01 | 2.83 | 0.68 | 0.22 | 0.85 |
| 14222 | 0 | 9629   | DPESPEKKKLS               | 2.42 | 0.01 | 2.83 | 0.68 | 0.22 | 0.28 |
| 14223 | 0 | 9629   | DPESPEKKKLS               | 2.42 | 0.01 | 2.83 | 0.68 | 0.22 | 0.28 |
| 14224 | 0 | 9633   | DPFFPWPRTTFD              | 2.52 | 0.01 | 0.90 | 0.44 | 0.85 | 0.28 |
| 14225 | 0 | 9634   | DPFNEEKRSVDNN             | 2.61 | 0.01 | 2.30 | 0.68 | 0.22 | 0.85 |
| 14226 | 0 | 170617 | DPFVEPVSIIEGHSF           | 2.68 | 0.01 | 0.78 | 0.44 | 1.41 | 0.28 |
| 14227 | 0 | 170617 | DPFVEPVSIIEGHSF           | 2.68 | 0.01 | 0.78 | 0.44 | 1.13 | 0.28 |
| 14228 | 0 | 115601 | DPFYWVSPGVLV              | 2.48 | 0.01 | 0.78 | 0.44 | 1.41 | 0.28 |
| 14229 | 0 | 115601 | DPFYWVSPGVLV              | 2.48 | 0.01 | 0.78 | 0.44 | 1.13 | 0.28 |
| 14230 | 0 | 115601 | DPFYWVSPGVLV              | 2.48 | 0.01 | 0.78 | 0.44 | 1.13 | 0.28 |
| 14231 | 0 | 115601 | DPFYWVSPGVLV              | 2.48 | 0.01 | 0.78 | 0.44 | 1.13 | 0.28 |
| 14232 | 0 | 115601 | DPFYWVSPGVLV              | 2.48 | 0.01 | 0.78 | 0.44 | 1.41 | 0.28 |
| 14233 | 0 | 9635   | DPGDLVEYIMNYTGNQ<br>QSR   | 2.85 | 0.01 | 3.16 | 0.44 | 1.59 | 0.28 |
| 14234 | 0 | 503976 | DPGEGPSTGPRGQGDG<br>GRRK  | 2.98 | 3.24 | 2.48 | 0.44 | 1.74 | 0.28 |
| 14235 | 0 | 503976 | DPGEGPSTGPRGQGDG<br>GRRK  | 2.98 | 3.24 | 2.48 | 0.44 | 1.74 | 0.28 |
| 14236 | 0 | 118770 | DPGEGPSTGPRGQGDG<br>GRRK  | 2.98 | 0.01 | 2.43 | 0.44 | 1.13 | 1.27 |
| 14237 | 0 | 118770 | DPGEGPSTGPRGQGDG<br>GRRK  | 2.98 | 0.01 | 2.43 | 0.44 | 1.41 | 1.27 |
| 14238 | 0 | 176993 | DPGLSLGDD                 | 2.25 | 0.01 | 0.90 | 2.13 | 0.22 | 0.28 |
| 14239 | 0 | 176993 | DPGLSLGDD                 | 2.25 | 0.01 | 0.90 | 2.13 | 0.22 | 1.48 |
| 14240 | 0 | 145144 | DPGQLRLWRLAS              | 2.48 | 0.01 | 0.90 | 0.44 | 1.13 | 1.27 |
| 14241 | 0 | 145144 | DPGQLRLWRLAS              | 2.48 | 0.01 | 0.90 | 0.44 | 1.13 | 0.28 |
| 14242 | 0 | 227099 | DPGTNTTTEDHKIMA           | 2.65 | 0.01 | 2.97 | 0.44 | 1.59 | 0.28 |
| 14243 | 0 | 227099 | DPGTNTTTEDHKIMA           | 2.65 | 0.01 | 2.97 | 0.44 | 0.85 | 0.28 |
| 14244 | 0 | 112939 | DPGVKSVTKIYNYYK           | 2.67 | 0.01 | 0.78 | 1.20 | 0.22 | 0.85 |
| 14245 | 0 | 156859 | DPHVFKS                   | 1.99 | 0.01 | 0.90 | 2.74 | 0.22 | 0.85 |
| 14246 | 0 | 98737  | DPIELINLCTNALG            | 2.61 | 0.01 | 2.72 | 1.12 | 0.22 | 0.28 |
| 14247 | 0 | 111209 | DPIIGFLSSIRSPLL           | 2.69 | 0.01 | 2.60 | 0.44 | 1.23 | 0.85 |
| 14248 | 0 | 9652   | DPILRSLAYSNNANKECQK<br>LL | 2.92 | 0.01 | 2.04 | 0.44 | 1.59 | 0.28 |
| 14249 | 0 | 9653   | DPIPANLVGM                | 2.29 | 0.01 | 2.97 | 0.44 | 0.85 | 0.28 |
| 14250 | 0 | 108874 | DPISGHVSLF                | 2.29 | 0.01 | 0.78 | 0.44 | 1.41 | 0.28 |
| 14251 | 0 | 108874 | DPISGHVSLF                | 2.29 | 0.01 | 0.78 | 0.44 | 1.41 | 0.28 |



|       |   |        |                                |      |      |      |      |      |      |
|-------|---|--------|--------------------------------|------|------|------|------|------|------|
| 14252 | 0 | 108874 | DPISGHVSLF                     | 2.29 | 0.01 | 0.78 | 0.44 | 1.41 | 0.28 |
| 14253 | 0 | 108874 | DPISGHVSLF                     | 2.29 | 0.01 | 0.78 | 0.44 | 1.13 | 0.28 |
| 14254 | 0 | 108874 | DPISGHVSLF                     | 2.29 | 0.01 | 0.78 | 0.44 | 1.13 | 0.28 |
| 14255 | 0 | 108874 | DPISGHVSLF                     | 2.29 | 0.01 | 0.78 | 0.44 | 1.13 | 0.28 |
| 14256 | 0 | 9654   | DPISRD                         | 1.91 | 0.01 | 2.08 | 1.15 | 0.22 | 1.57 |
| 14257 | 0 | 9654   | DPISRD                         | 1.91 | 0.01 | 2.08 | 1.15 | 0.22 | 1.27 |
| 14258 | 0 | 9654   | DPISRD                         | 1.91 | 0.01 | 2.08 | 1.15 | 0.22 | 1.27 |
| 14259 | 0 | 181292 | DPIYSNKLKGFFEITPEKN<br>PQLRDLD | 3.19 | 0.01 | 2.72 | 0.44 | 1.23 | 1.27 |
| 14260 | 0 | 119806 | DPKAPQWPPY                     | 2.32 | 0.01 | 0.78 | 2.66 | 0.22 | 0.28 |
| 14261 | 0 | 119806 | DPKAPQWPPY                     | 2.32 | 0.01 | 0.78 | 1.15 | 0.22 | 0.28 |
| 14262 | 0 | 9657   | DPKHVCVDTRDIPKNAG<br>CFR       | 2.94 | 0.01 | 3.00 | 2.42 | 0.22 | 0.28 |
| 14263 | 0 | 174079 | DPKKPLKGPF                     | 2.35 | 0.01 | 3.10 | 0.44 | 1.23 | 0.85 |
| 14264 | 0 | 174079 | DPKKPLKGPF                     | 2.35 | 0.01 | 3.10 | 0.44 | 1.23 | 0.85 |
| 14265 | 0 | 174079 | DPKKPLKGPF                     | 2.35 | 0.01 | 3.10 | 0.44 | 1.23 | 0.85 |
| 14266 | 0 | 9661   | DPKSLSKGEIASTFESQN<br>ST       | 2.93 | 0.01 | 3.17 | 0.68 | 0.22 | 0.28 |
| 14267 | 0 | 9661   | DPKSLSKGEIASTFESQN<br>ST       | 2.93 | 0.01 | 3.17 | 0.68 | 0.22 | 0.28 |
| 14268 | 0 | 9661   | DPKSLSKGEIASTFESQN<br>ST       | 2.93 | 0.01 | 3.17 | 0.68 | 0.22 | 0.85 |
| 14269 | 0 | 9661   | DPKSLSKGEIASTFESQN<br>ST       | 2.93 | 0.01 | 3.17 | 0.68 | 0.22 | 0.28 |
| 14270 | 0 | 9662   | DPKTSEILDISPCSFGGV             | 2.83 | 0.01 | 2.45 | 1.81 | 0.22 | 1.34 |
| 14271 | 0 | 101554 | DPLAQQS                        | 2.01 | 0.01 | 3.10 | 1.15 | 0.22 | 0.28 |
| 14272 | 0 | 101554 | DPLAQQS                        | 2.01 | 0.01 | 3.10 | 1.15 | 0.22 | 1.48 |
| 14273 | 0 | 101554 | DPLAQQS                        | 2.01 | 0.01 | 3.10 | 1.15 | 0.22 | 1.48 |
| 14274 | 0 | 101554 | DPLAQQS                        | 2.01 | 0.01 | 3.10 | 1.15 | 0.22 | 0.85 |
| 14275 | 0 | 462304 | DPLGRDFLL                      | 2.24 | 0.01 | 0.78 | 1.12 | 0.22 | 1.28 |
| 14276 | 0 | 125842 | DPLIRGLLARPAK                  | 2.56 | 0.01 | 0.78 | 1.20 | 0.22 | 0.28 |
| 14277 | 0 | 125842 | DPLIRGLLARPAK                  | 2.56 | 0.01 | 0.78 | 1.20 | 0.22 | 0.28 |
| 14278 | 0 | 9669   | DPLLGNQS                       | 2.11 | 0.01 | 2.40 | 2.43 | 0.22 | 0.28 |
| 14279 | 0 | 167731 | DPLLGNQSL                      | 2.23 | 0.01 | 2.40 | 2.43 | 0.22 | 0.28 |
| 14280 | 0 | 9673   | DPLLRTAP                       | 2.13 | 0.01 | 2.85 | 0.44 | 0.22 | 0.28 |
| 14281 | 0 | 9674   | DPLLRTAPGPGEVWVTP<br>VIGSQ     | 3.02 | 0.01 | 3.16 | 0.68 | 0.22 | 0.28 |
| 14282 | 0 | 9674   | DPLLRTAPGPGEVWVTP<br>VIGSQ     | 3.02 | 0.01 | 3.16 | 1.12 | 0.22 | 0.28 |
| 14283 | 0 | 151612 | DPLLTGNYKEAS                   | 2.42 | 0.01 | 0.90 | 1.15 | 0.22 | 0.28 |
| 14284 | 0 | 95322  | DPLPSGYQFNPEATKAA<br>SPG       | 2.92 | 0.01 | 2.39 | 2.25 | 0.22 | 0.28 |
| 14285 | 0 | 462305 | DPLRPYRELDI                    | 2.52 | 0.01 | 0.78 | 1.12 | 0.22 | 1.28 |
| 14286 | 0 | 106349 | DPLRPQREGC                     | 2.31 | 0.01 | 2.25 | 1.12 | 0.22 | 1.27 |
| 14287 | 0 | 106349 | DPLRPQREGC                     | 2.31 | 0.01 | 2.25 | 1.12 | 0.22 | 2.02 |
| 14288 | 0 | 9677   | DPLTSLHAMQRR                   | 2.43 | 0.01 | 0.90 | 0.44 | 0.85 | 0.28 |

|       |   |        |                                         |      |      |      |      |      |      |
|-------|---|--------|-----------------------------------------|------|------|------|------|------|------|
| 14289 | 0 | 9677   | DPLTSLHAMQRR                            | 2.43 | 0.01 | 0.90 | 0.68 | 0.22 | 0.28 |
| 14290 | 0 | 9679   | DPLVAEED                                | 2.14 | 0.01 | 2.68 | 0.44 | 1.59 | 0.28 |
|       |   |        | DPLVFPSDEFDASISQVN                      |      |      |      |      |      |      |
| 14291 | 0 | 227906 | EKINQSLAFIRKSDELLHH<br>VNAGK            | 3.68 | 0.01 | 2.38 | 1.20 | 0.22 | 0.28 |
|       |   |        |                                         |      |      |      |      |      |      |
| 14292 | 0 | 95068  | DPLVVGQEHYDTARGV<br>QSILQRYQELKDIIAILGM | 3.49 | 0.01 | 3.63 | 3.06 | 0.22 | 0.85 |
|       |   |        |                                         |      |      |      |      |      |      |
| 14293 | 0 | 95068  | DPLVVGQEHYDTARGV<br>QSILQRYQELKDIIAILGM | 3.49 | 0.01 | 3.63 | 3.06 | 0.22 | 0.85 |
|       |   |        |                                         |      |      |      |      |      |      |
| 14294 | 0 | 9684   | DPMFTPK                                 | 2.02 | 0.01 | 3.55 | 0.68 | 0.22 | 1.27 |
| 14295 | 0 | 9684   | DPMFTPK                                 | 2.02 | 0.01 | 3.55 | 0.68 | 0.22 | 3.13 |
| 14296 | 0 | 9689   | DPNANP                                  | 1.91 | 0.01 | 3.33 | 0.68 | 0.22 | 0.28 |
| 14297 | 0 | 9689   | DPNANP                                  | 1.91 | 0.01 | 3.33 | 0.68 | 0.22 | 0.85 |
| 14298 | 0 | 9689   | DPNANP                                  | 1.91 | 0.01 | 3.33 | 0.68 | 0.22 | 0.85 |
| 14299 | 0 | 9689   | DPNANP                                  | 1.91 | 0.01 | 3.33 | 0.68 | 0.22 | 1.34 |
| 14300 | 0 | 9689   | DPNANP                                  | 1.91 | 0.01 | 3.33 | 0.68 | 0.22 | 1.34 |
| 14301 | 0 | 9690   | DPNANPNV                                | 2.16 | 0.01 | 1.66 | 4.45 | 0.22 | 0.28 |
| 14302 | 0 | 9690   | DPNANPNV                                | 2.16 | 0.01 | 1.66 | 1.81 | 0.22 | 0.28 |
|       |   |        |                                         |      |      |      |      |      |      |
| 14303 | 0 | 9692   | DPNANPNVDPNANP                          | 2.69 | 0.01 | 1.66 | 0.44 | 0.85 | 0.28 |
|       |   |        |                                         |      |      |      |      |      |      |
| 14304 | 0 | 9693   | DPNANPNVDPNANPN<br>ANPNANPNANP          | 3.28 | 0.01 | 0.90 | 0.44 | 1.74 | 0.28 |
|       |   |        |                                         |      |      |      |      |      |      |
| 14305 | 0 | 9694   | DPNANPNVDPNANPN<br>V                    | 2.81 | 0.01 | 1.66 | 1.81 | 0.22 | 0.28 |
|       |   |        |                                         |      |      |      |      |      |      |
| 14306 | 0 | 9694   | DPNANPNVDPNANPN<br>V                    | 2.81 | 0.01 | 1.66 | 1.81 | 0.22 | 1.48 |
|       |   |        |                                         |      |      |      |      |      |      |
| 14307 | 0 | 9694   | DPNANPNVDPNANPN<br>V                    | 2.81 | 0.01 | 1.66 | 2.16 | 0.22 | 0.28 |
|       |   |        |                                         |      |      |      |      |      |      |
| 14308 | 0 | 9694   | DPNANPNVDPNANPN<br>V                    | 2.81 | 0.01 | 1.66 | 2.16 | 0.22 | 1.48 |
|       |   |        |                                         |      |      |      |      |      |      |
| 14309 | 0 | 9694   | DPNANPNVDPNANPN<br>V                    | 2.81 | 0.01 | 1.66 | 3.01 | 0.22 | 0.28 |
|       |   |        |                                         |      |      |      |      |      |      |
| 14310 | 0 | 9694   | DPNANPNVDPNANPN<br>V                    | 2.81 | 0.01 | 1.66 | 3.01 | 0.22 | 1.48 |
|       |   |        |                                         |      |      |      |      |      |      |
| 14311 | 0 | 9694   | DPNANPNVDPNANPN<br>V                    | 2.81 | 0.01 | 3.37 | 3.33 | 0.22 | 0.28 |
|       |   |        |                                         |      |      |      |      |      |      |
| 14312 | 0 | 9694   | DPNANPNVDPNANPN<br>V                    | 2.81 | 0.01 | 3.37 | 0.44 | 1.74 | 0.28 |
|       |   |        |                                         |      |      |      |      |      |      |
| 14313 | 0 | 9694   | DPNANPNVDPNANPN<br>V                    | 2.81 | 0.01 | 3.37 | 0.44 | 0.22 | 0.28 |
|       |   |        |                                         |      |      |      |      |      |      |
| 14314 | 0 | 9694   | DPNANPNVDPNANPN<br>V                    | 2.81 | 0.01 | 1.66 | 1.15 | 0.22 | 0.28 |
|       |   |        |                                         |      |      |      |      |      |      |
| 14315 | 0 | 9694   | DPNANPNVDPNANPN<br>V                    | 2.81 | 0.01 | 1.66 | 3.70 | 0.22 | 0.28 |

|       |   |      |                                                          |      |      |      |      |      |      |
|-------|---|------|----------------------------------------------------------|------|------|------|------|------|------|
| 14316 | 0 | 9694 | DPNANPNVDPNANPN<br>V                                     | 2.81 | 0.01 | 1.66 | 0.68 | 0.22 | 0.28 |
| 14317 | 0 | 9694 | DPNANPNVDPNANPN<br>V                                     | 2.81 | 0.01 | 1.66 | 4.03 | 0.22 | 0.28 |
| 14318 | 0 | 9694 | DPNANPNVDPNANPN<br>V                                     | 2.81 | 0.01 | 1.66 | 3.32 | 0.22 | 0.28 |
| 14319 | 0 | 9694 | DPNANPNVDPNANPN<br>V                                     | 2.81 | 0.01 | 1.66 | 1.20 | 0.22 | 0.28 |
| 14320 | 0 | 9694 | DPNANPNVDPNANPN<br>V                                     | 2.81 | 0.01 | 1.66 | 3.32 | 0.22 | 0.28 |
| 14321 | 0 | 9695 | DPNANPNVDPNANPN<br>VNANPNANPNANP                         | 3.36 | 0.01 | 0.90 | 0.44 | 0.22 | 0.28 |
| 14322 | 0 | 9695 | DPNANPNVDPNANPN<br>VNANPNANPNANP                         | 3.36 | 0.01 | 0.90 | 0.44 | 0.22 | 1.48 |
| 14323 | 0 | 9695 | DPNANPNVDPNANPN<br>VNANPNANPNANP                         | 3.36 | 0.01 | 0.90 | 2.52 | 0.22 | 0.28 |
| 14324 | 0 | 9695 | DPNANPNVDPNANPN<br>VNANPNANPNANP                         | 3.36 | 0.01 | 0.90 | 2.16 | 0.22 | 0.28 |
| 14325 | 0 | 9695 | DPNANPNVDPNANPN<br>VNANPNANPNANP                         | 3.36 | 0.01 | 0.90 | 0.68 | 0.22 | 0.28 |
| 14326 | 0 | 9695 | DPNANPNVDPNANPN<br>VNANPNANPNANP                         | 3.36 | 0.01 | 0.90 | 2.52 | 0.22 | 1.48 |
| 14327 | 0 | 9695 | DPNANPNVDPNANPN<br>VNANPNANPNANP                         | 3.36 | 0.01 | 0.90 | 2.16 | 0.22 | 1.48 |
| 14328 | 0 | 9695 | DPNANPNVDPNANPN<br>VNANPNANPNANP                         | 3.36 | 0.01 | 0.90 | 0.68 | 0.22 | 1.48 |
| 14329 | 0 | 9695 | DPNANPNVDPNANPN<br>VNANPNANPNANP                         | 3.36 | 0.01 | 0.90 | 0.44 | 0.22 | 0.28 |
| 14330 | 0 | 9696 | DPNANPNVDPNANPN<br>VNANPNANPNANPEYL<br>NKIQNSLSTEWSPCSVT | 3.83 | 0.01 | 0.90 | 0.44 | 0.22 | 0.28 |
| 14331 | 0 | 9696 | DPNANPNVDPNANPN<br>VNANPNANPNANPEYL<br>NKIQNSLSTEWSPCSVT | 3.83 | 0.01 | 0.90 | 0.44 | 0.22 | 1.48 |

|       |   |        |                                                          |      |      |      |      |      |      |
|-------|---|--------|----------------------------------------------------------|------|------|------|------|------|------|
| 14332 | 0 | 9696   | DPNANPNVDPNANPN<br>VNANPNANPNANPEYL<br>NKIQNSLSTEWSPCSVT | 3.83 | 0.01 | 0.90 | 1.81 | 0.22 | 0.28 |
| 14333 | 0 | 9696   | DPNANPNVDPNANPN<br>VNANPNANPNANPEYL<br>NKIQNSLSTEWSPCSVT | 3.83 | 0.01 | 0.90 | 1.81 | 0.22 | 1.75 |
| 14334 | 0 | 9696   | DPNANPNVDPNANPN<br>VNANPNANPNANPEYL<br>NKIQNSLSTEWSPCSVT | 3.83 | 0.01 | 0.90 | 1.81 | 0.22 | 1.34 |
| 14335 | 0 | 167490 | DPNAPKRPPS                                               | 2.32 | 0.01 | 0.78 | 0.44 | 1.13 | 0.85 |
| 14336 | 0 | 138157 | DPNAPPPPPADPNA                                           | 2.68 | 0.01 | 2.51 | 1.20 | 0.22 | 0.28 |
| 14337 | 0 | 138157 | DPNAPPPPPADPNA                                           | 2.68 | 0.01 | 2.51 | 1.20 | 0.22 | 0.28 |
| 14338 | 0 | 9697   | DPNAVCETDKWKYENP<br>CKKM                                 | 2.94 | 0.01 | 3.10 | 1.15 | 0.22 | 0.28 |
| 14339 | 0 | 9697   | DPNAVCETDKWKYENP<br>CKKM                                 | 2.94 | 0.01 | 3.10 | 1.15 | 0.22 | 0.28 |
| 14340 | 0 | 9698   | DPNFDCQPIECKIQEIVIT<br>EKDGIK                            | 3.18 | 0.01 | 3.45 | 4.08 | 0.22 | 0.28 |
| 14341 | 0 | 141622 | DPNGWTGTDNNFSI                                           | 2.63 | 0.01 | 3.40 | 1.20 | 0.22 | 0.28 |
| 14342 | 0 | 141622 | DPNGWTGTDNNFSI                                           | 2.63 | 0.01 | 3.40 | 1.20 | 0.22 | 0.28 |
| 14343 | 0 | 141622 | DPNGWTGTDNNFSI                                           | 2.63 | 0.01 | 3.40 | 1.20 | 0.22 | 0.28 |
| 14344 | 0 | 141622 | DPNGWTGTDNNFSI                                           | 2.63 | 0.01 | 3.40 | 1.20 | 0.22 | 0.28 |
| 14345 | 0 | 141622 | DPNGWTGTDNNFSI                                           | 2.63 | 0.01 | 3.40 | 1.20 | 0.22 | 1.34 |
| 14346 | 0 | 122083 | DPNIKVLDDCWATS                                           | 2.64 | 0.01 | 0.78 | 0.68 | 0.22 | 0.85 |
| 14347 | 0 | 122083 | DPNIKVLDDCWATS                                           | 2.64 | 0.01 | 0.78 | 0.68 | 0.22 | 0.85 |
| 14348 | 0 | 122083 | DPNIKVLDDCWATS                                           | 2.64 | 0.01 | 0.78 | 0.68 | 0.22 | 1.48 |
| 14349 | 0 | 122083 | DPNIKVLDDCWATS                                           | 2.64 | 0.01 | 0.78 | 0.68 | 0.22 | 1.48 |
| 14350 | 0 | 122083 | DPNIKVLDDCWATS                                           | 2.64 | 0.01 | 0.78 | 0.68 | 0.22 | 1.34 |
| 14351 | 0 | 122083 | DPNIKVLDDCWATS                                           | 2.64 | 0.01 | 1.75 | 1.20 | 0.22 | 3.16 |
| 14352 | 0 | 122083 | DPNIKVLDDCWATS                                           | 2.64 | 0.01 | 0.78 | 1.20 | 0.22 | 0.28 |
| 14353 | 0 | 122083 | DPNIKVLDDCWATS                                           | 2.64 | 0.01 | 0.78 | 1.20 | 0.22 | 1.48 |
| 14354 | 0 | 122083 | DPNIKVLDDCWATS                                           | 2.64 | 0.01 | 0.78 | 1.20 | 0.22 | 1.34 |
| 14355 | 0 | 9705   | DPNKYVSKHSWF                                             | 2.45 | 0.01 | 0.90 | 0.68 | 0.22 | 1.39 |
| 14356 | 0 | 9707   | DPNNMDKAVKLYRKLK<br>REITFHGAKEIALSY                      | 3.34 | 0.01 | 3.85 | 0.68 | 0.22 | 0.85 |
| 14357 | 0 | 9714   | DPNTNSF                                                  | 2.02 | 0.01 | 0.90 | 1.15 | 0.22 | 0.28 |
| 14358 | 0 | 150836 | DPNWFIDITAQLWEFSQ<br>EL                                  | 2.84 | 0.01 | 0.90 | 0.44 | 0.85 | 2.49 |
| 14359 | 0 | 145145 | DPPERPDSP                                                | 2.28 | 0.01 | 2.40 | 3.41 | 0.22 | 0.28 |
| 14360 | 0 | 145145 | DPPERPDSP                                                | 2.28 | 0.01 | 2.40 | 3.41 | 0.22 | 0.28 |
| 14361 | 0 | 145145 | DPPERPDSP                                                | 2.28 | 0.01 | 2.40 | 1.15 | 0.22 | 0.28 |
| 14362 | 0 | 145145 | DPPERPDSP                                                | 2.28 | 0.01 | 2.40 | 1.15 | 0.22 | 0.28 |
| 14363 | 0 | 145145 | DPPERPDSP                                                | 2.28 | 0.01 | 2.40 | 1.15 | 0.22 | 0.28 |
| 14364 | 0 | 145145 | DPPERPDSP                                                | 2.28 | 0.01 | 2.40 | 1.15 | 0.22 | 0.85 |

|       |   |        |                  |      |      |      |      |      |      |
|-------|---|--------|------------------|------|------|------|------|------|------|
| 14365 | 0 | 145145 | DPPERPDSP        | 2.28 | 0.01 | 2.40 | 1.15 | 0.22 | 0.85 |
| 14366 | 0 | 145145 | DPPERPDSP        | 2.28 | 0.01 | 2.40 | 1.15 | 0.22 | 1.34 |
| 14367 | 0 | 145145 | DPPERPDSP        | 2.28 | 0.01 | 2.40 | 1.15 | 0.22 | 1.75 |
| 14368 | 0 | 145145 | DPPERPDSP        | 2.28 | 0.01 | 2.40 | 1.15 | 0.22 | 1.75 |
| 14369 | 0 | 9719   | DPPFSP           | 1.92 | 0.01 | 2.96 | 0.44 | 0.85 | 0.28 |
| 14370 | 0 | 131847 | DPPKSNQSLGWGDSS  | 2.68 | 0.01 | 0.78 | 0.44 | 1.13 | 0.85 |
| 14371 | 0 | 131847 | DPPKSNQSLGWGDSS  | 2.68 | 0.01 | 0.78 | 0.44 | 1.13 | 0.85 |
| 14372 | 0 | 9722   | DPPPPNPNDPPPPNPN | 2.80 | 0.01 | 3.01 | 2.16 | 0.22 | 1.57 |
| 14373 | 0 | 9722   | DPPPPNPNDPPPPNPN | 2.80 | 0.01 | 3.01 | 2.16 | 0.22 | 1.57 |
| 14374 | 0 | 9722   | DPPPPNPNDPPPPNPN | 2.80 | 0.01 | 3.01 | 2.16 | 0.22 | 1.57 |
| 14375 | 0 | 9722   | DPPPPNPNDPPPPNPN | 2.80 | 0.01 | 3.01 | 1.15 | 2.25 | 1.75 |
| 14376 | 0 | 9722   | DPPPPNPNDPPPPNPN | 2.80 | 0.01 | 3.01 | 2.36 | 2.25 | 1.75 |
| 14377 | 0 | 9722   | DPPPPNPNDPPPPNPN | 2.80 | 0.01 | 4.23 | 1.81 | 0.22 | 0.28 |
| 14378 | 0 | 9722   | DPPPPNPNDPPPPNPN | 2.80 | 0.01 | 4.23 | 4.93 | 0.22 | 0.28 |
| 14379 | 0 | 9722   | DPPPPNPNDPPPPNPN | 2.80 | 0.01 | 4.23 | 4.93 | 0.22 | 0.28 |
| 14380 | 0 | 9722   | DPPPPNPNDPPPPNPN | 2.80 | 0.01 | 3.01 | 2.16 | 0.22 | 1.27 |
| 14381 | 0 | 9722   | DPPPPNPNDPPPPNPN | 2.80 | 0.01 | 3.01 | 1.15 | 2.25 | 1.75 |
| 14382 | 0 | 9722   | DPPPPNPNDPPPPNPN | 2.80 | 0.01 | 3.01 | 1.15 | 2.25 | 1.75 |
| 14383 | 0 | 9722   | DPPPPNPNDPPPPNPN | 2.80 | 0.01 | 3.01 | 2.16 | 0.22 | 0.28 |
| 14384 | 0 | 9722   | DPPPPNPNDPPPPNPN | 2.80 | 0.01 | 3.01 | 2.16 | 0.22 | 1.48 |
| 14385 | 0 | 9722   | DPPPPNPNDPPPPNPN | 2.80 | 0.01 | 3.01 | 0.68 | 0.22 | 0.28 |
| 14386 | 0 | 9722   | DPPPPNPNDPPPPNPN | 2.80 | 0.01 | 3.01 | 0.68 | 0.22 | 0.28 |
| 14387 | 0 | 9722   | DPPPPNPNDPPPPNPN | 2.80 | 0.01 | 3.01 | 1.15 | 2.25 | 1.75 |
| 14388 | 0 | 9722   | DPPPPNPNDPPPPNPN | 2.80 | 0.01 | 3.01 | 1.15 | 2.25 | 1.75 |
| 14389 | 0 | 9722   | DPPPPNPNDPPPPNPN | 2.80 | 0.01 | 3.01 | 1.15 | 0.22 | 0.28 |
| 14390 | 0 | 9722   | DPPPPNPNDPPPPNPN | 2.80 | 0.01 | 3.01 | 1.15 | 0.22 | 0.28 |

|       |   |        |                              |      |      |      |      |      |      |
|-------|---|--------|------------------------------|------|------|------|------|------|------|
| 14391 | 0 | 9722   | DPPPPNPNDPPPPNPN             | 2.80 | 0.01 | 3.01 | 1.15 | 0.22 | 1.48 |
| 14392 | 0 | 9722   | DPPPPNPNDPPPPNPN             | 2.80 | 0.01 | 3.01 | 1.81 | 0.22 | 0.28 |
| 14393 | 0 | 9722   | DPPPPNPNDPPPPNPN             | 2.80 | 0.01 | 3.01 | 1.12 | 0.22 | 0.85 |
| 14394 | 0 | 9722   | DPPPPNPNDPPPPNPN             | 2.80 | 0.01 | 3.01 | 2.52 | 0.22 | 0.28 |
| 14395 | 0 | 9722   | DPPPPNPNDPPPPNPN             | 2.80 | 0.01 | 3.01 | 2.52 | 0.22 | 0.28 |
| 14396 | 0 | 9722   | DPPPPNPNDPPPPNPN             | 2.80 | 0.01 | 3.01 | 0.68 | 2.25 | 1.75 |
| 14397 | 0 | 9723   | DPPPPNPNDPPPPNPN<br>D        | 2.86 | 0.01 | 3.01 | 1.15 | 0.22 | 1.27 |
| 14398 | 0 | 9723   | DPPPPNPNDPPPPNPN<br>D        | 2.86 | 0.01 | 3.01 | 1.15 | 0.22 | 1.57 |
| 14399 | 0 | 9723   | DPPPPNPNDPPPPNPN<br>D        | 2.86 | 0.01 | 3.01 | 4.23 | 0.22 | 1.57 |
| 14400 | 0 | 9723   | DPPPPNPNDPPPPNPN<br>D        | 2.86 | 0.01 | 3.01 | 4.23 | 0.22 | 1.57 |
| 14401 | 0 | 9723   | DPPPPNPNDPPPPNPN<br>D        | 2.86 | 0.01 | 3.01 | 0.68 | 0.22 | 1.27 |
| 14402 | 0 | 9723   | DPPPPNPNDPPPPNPN<br>D        | 2.86 | 0.01 | 3.01 | 0.68 | 0.22 | 1.48 |
| 14403 | 0 | 9723   | DPPPPNPNDPPPPNPN<br>D        | 2.86 | 0.01 | 3.01 | 0.68 | 0.22 | 1.57 |
| 14404 | 0 | 9723   | DPPPPNPNDPPPPNPN<br>D        | 2.86 | 0.01 | 3.01 | 0.68 | 0.22 | 1.34 |
| 14405 | 0 | 9723   | DPPPPNPNDPPPPNPN<br>D        | 2.86 | 0.01 | 3.01 | 0.68 | 0.22 | 0.28 |
| 14406 | 0 | 9723   | DPPPPNPNDPPPPNPN<br>D        | 2.86 | 0.01 | 3.01 | 0.68 | 0.22 | 1.75 |
| 14407 | 0 | 9723   | DPPPPNPNDPPPPNPN<br>D        | 2.86 | 0.01 | 3.01 | 0.68 | 0.22 | 1.75 |
| 14408 | 0 | 9724   | DPPPPNPNDPPPPNPN<br>DPPPPNPN | 3.19 | 0.01 | 3.01 | 1.81 | 0.22 | 0.28 |
| 14409 | 0 | 9724   | DPPPPNPNDPPPPNPN<br>DPPPPNPN | 3.19 | 0.01 | 3.01 | 1.81 | 0.22 | 1.48 |
| 14410 | 0 | 9724   | DPPPPNPNDPPPPNPN<br>DPPPPNPN | 3.19 | 0.01 | 3.01 | 1.15 | 2.25 | 1.75 |
| 14411 | 0 | 189057 | DPPREIS                      | 2.01 | 0.01 | 0.90 | 2.13 | 0.22 | 0.28 |
| 14412 | 0 | 189057 | DPPREIS                      | 2.01 | 0.01 | 0.90 | 3.41 | 0.22 | 0.28 |
| 14413 | 0 | 124027 | DPPYVCLPGA                   | 2.31 | 0.01 | 0.90 | 0.44 | 1.13 | 1.39 |
| 14414 | 0 | 9733   | DPQARVAIKSLT                 | 2.43 | 0.01 | 2.41 | 0.44 | 0.85 | 0.28 |
| 14415 | 0 | 9736   | DPQFPILAEI                   | 2.31 | 0.01 | 3.16 | 0.68 | 0.22 | 0.28 |
| 14416 | 0 | 9736   | DPQFPILAEI                   | 2.31 | 0.01 | 3.16 | 0.68 | 0.22 | 0.28 |

|       |   |        |                             |      |      |      |      |      |      |
|-------|---|--------|-----------------------------|------|------|------|------|------|------|
| 14417 | 0 | 227100 | DPRAPHLPPQWDGSA             | 2.68 | 0.01 | 2.48 | 0.44 | 1.59 | 0.28 |
| 14418 | 0 | 233164 | DPRFLRLLD                   | 2.27 | 0.01 | 0.78 | 0.44 | 1.13 | 0.28 |
| 14419 | 0 | 233164 | DPRFLRLLD                   | 2.27 | 0.01 | 0.78 | 3.57 | 0.22 | 0.28 |
| 14420 | 0 | 168366 | DPRILPFTSPSPGDFVDV<br>ERRSS | 3.09 | 0.01 | 3.89 | 2.02 | 1.59 | 0.28 |
| 14421 | 0 | 168366 | DPRILPFTSPSPGDFVDV<br>ERRSS | 3.09 | 0.01 | 3.89 | 2.02 | 1.59 | 0.85 |
| 14422 | 0 | 170620 | DPRITVAWCKKWGVP             | 2.65 | 0.01 | 0.78 | 0.44 | 1.13 | 0.28 |
| 14423 | 0 | 9751   | DPRRRSRNLGKVIDTLTC<br>GL    | 2.94 | 0.01 | 3.10 | 0.44 | 0.85 | 0.28 |
| 14424 | 0 | 131848 | DPRVLSNSGWGQTPI             | 2.64 | 0.01 | 0.78 | 0.44 | 1.13 | 0.85 |
| 14425 | 0 | 9753   | DPRVRGLY                    | 2.12 | 0.01 | 2.71 | 2.52 | 0.22 | 1.57 |
| 14426 | 0 | 9753   | DPRVRGLY                    | 2.12 | 0.01 | 2.71 | 2.52 | 0.22 | 1.57 |
| 14427 | 0 | 9753   | DPRVRGLY                    | 2.12 | 0.01 | 2.08 | 1.15 | 0.22 | 0.28 |
| 14428 | 0 | 9753   | DPRVRGLY                    | 2.12 | 0.01 | 2.08 | 1.15 | 0.22 | 0.28 |
| 14429 | 0 | 9753   | DPRVRGLY                    | 2.12 | 0.01 | 2.08 | 3.22 | 0.22 | 1.57 |
| 14430 | 0 | 9753   | DPRVRGLY                    | 2.12 | 0.01 | 2.08 | 3.22 | 0.22 | 1.57 |
| 14431 | 0 | 9753   | DPRVRGLY                    | 2.12 | 0.01 | 2.08 | 0.68 | 0.22 | 0.85 |
| 14432 | 0 | 9753   | DPRVRGLY                    | 2.12 | 0.01 | 2.58 | 2.25 | 0.22 | 1.57 |
| 14433 | 0 | 9753   | DPRVRGLY                    | 2.12 | 0.01 | 2.08 | 0.68 | 0.22 | 1.34 |
| 14434 | 0 | 9754   | DPRVRGLYF                   | 2.21 | 0.01 | 2.71 | 2.52 | 0.22 | 0.28 |
| 14435 | 0 | 9754   | DPRVRGLYF                   | 2.21 | 0.01 | 2.08 | 1.15 | 0.22 | 0.28 |
| 14436 | 0 | 9754   | DPRVRGLYF                   | 2.21 | 0.01 | 2.08 | 1.15 | 0.22 | 0.28 |
| 14437 | 0 | 9754   | DPRVRGLYF                   | 2.21 | 0.01 | 2.08 | 1.15 | 0.22 | 0.28 |
| 14438 | 0 | 9755   | DPRVRGLYFPA                 | 2.39 | 0.01 | 2.71 | 0.68 | 0.22 | 1.57 |
| 14439 | 0 | 9755   | DPRVRGLYFPA                 | 2.39 | 0.01 | 2.71 | 0.68 | 0.22 | 1.57 |
| 14440 | 0 | 9755   | DPRVRGLYFPA                 | 2.39 | 0.01 | 2.71 | 0.68 | 0.22 | 2.35 |
| 14441 | 0 | 9755   | DPRVRGLYFPA                 | 2.39 | 0.01 | 2.71 | 3.20 | 0.22 | 1.57 |
| 14442 | 0 | 9756   | DPRVRGLYFPAGG               | 2.53 | 0.01 | 2.71 | 2.52 | 0.22 | 1.57 |
| 14443 | 0 | 9756   | DPRVRGLYFPAGG               | 2.53 | 0.01 | 2.71 | 2.42 | 0.22 | 1.57 |
| 14444 | 0 | 9756   | DPRVRGLYFPAGG               | 2.53 | 0.01 | 2.71 | 3.20 | 0.22 | 1.57 |
| 14445 | 0 | 9756   | DPRVRGLYFPAGG               | 2.53 | 0.01 | 2.71 | 3.20 | 0.22 | 1.57 |
| 14446 | 0 | 9756   | DPRVRGLYFPAGG               | 2.53 | 0.01 | 2.71 | 3.20 | 0.22 | 1.57 |
| 14447 | 0 | 9756   | DPRVRGLYFPAGG               | 2.53 | 0.01 | 2.71 | 3.20 | 0.22 | 1.57 |
| 14448 | 0 | 9757   | DPRVRGLYFPAGGSSSG<br>TV     | 2.89 | 0.01 | 2.08 | 2.74 | 0.22 | 0.28 |
| 14449 | 0 | 9757   | DPRVRGLYFPAGGSSSG<br>TV     | 2.89 | 0.01 | 2.08 | 2.74 | 2.25 | 1.75 |
| 14450 | 0 | 9757   | DPRVRGLYFPAGGSSSG<br>TV     | 2.89 | 0.01 | 2.08 | 2.74 | 0.22 | 1.48 |
| 14451 | 0 | 9757   | DPRVRGLYFPAGGSSSG<br>TV     | 2.89 | 0.01 | 2.71 | 3.20 | 0.22 | 1.57 |
| 14452 | 0 | 9757   | DPRVRGLYFPAGGSSSG<br>TV     | 2.89 | 0.01 | 2.71 | 3.20 | 0.22 | 1.57 |

|       |   |        |                                                    |      |      |      |      |      |      |
|-------|---|--------|----------------------------------------------------|------|------|------|------|------|------|
| 14453 | 0 | 9757   | DPRVRGLYFPAGGSSSG<br>TV                            | 2.89 | 0.01 | 2.71 | 3.20 | 0.22 | 1.57 |
| 14454 | 0 | 9759   | DPRVRGLYLPA                                        | 2.41 | 0.01 | 3.28 | 0.68 | 0.22 | 1.57 |
| 14455 | 0 | 9759   | DPRVRGLYLPA                                        | 2.41 | 0.01 | 3.28 | 0.68 | 0.22 | 1.57 |
| 14456 | 0 | 9759   | DPRVRGLYLPA                                        | 2.41 | 0.01 | 2.58 | 3.27 | 0.22 | 0.28 |
| 14457 | 0 | 9759   | DPRVRGLYLPA                                        | 2.41 | 0.01 | 2.58 | 2.42 | 0.22 | 0.28 |
| 14458 | 0 | 9759   | DPRVRGLYLPA                                        | 2.41 | 0.01 | 2.58 | 3.67 | 0.22 | 0.28 |
| 14459 | 0 | 9759   | DPRVRGLYLPA                                        | 2.41 | 0.01 | 2.58 | 2.52 | 0.22 | 0.28 |
| 14460 | 0 | 9759   | DPRVRGLYLPA                                        | 2.41 | 0.01 | 2.58 | 2.52 | 0.22 | 0.28 |
| 14461 | 0 | 9759   | DPRVRGLYLPA                                        | 2.41 | 0.01 | 2.58 | 3.67 | 0.22 | 0.28 |
| 14462 | 0 | 9760   | DPRVRGLYLPAGGSSSG<br>TV                            | 2.91 | 0.01 | 2.58 | 2.25 | 0.22 | 1.57 |
| 14463 | 0 | 9761   | DPRVRGLYLPAGGSSSG<br>TVNPAPNIASHISSISART<br>GDPVTN | 3.70 | 0.01 | 2.58 | 2.52 | 0.22 | 0.28 |
| 14464 | 0 | 9761   | DPRVRGLYLPAGGSSSG<br>TVNPAPNIASHISSISART<br>GDPVTN | 3.70 | 0.01 | 2.58 | 2.52 | 0.22 | 0.28 |
| 14465 | 0 | 9761   | DPRVRGLYLPAGGSSSG<br>TVNPAPNIASHISSISART<br>GDPVTN | 3.70 | 0.01 | 2.58 | 2.52 | 0.22 | 0.28 |
| 14466 | 0 | 9761   | DPRVRGLYLPAGGSSSG<br>TVNPAPNIASHISSISART<br>GDPVTN | 3.70 | 0.01 | 2.58 | 4.93 | 0.22 | 0.28 |
| 14467 | 0 | 9761   | DPRVRGLYLPAGGSSSG<br>TVNPAPNIASHISSISART<br>GDPVTN | 3.70 | 0.01 | 2.58 | 2.52 | 0.22 | 0.28 |
| 14468 | 0 | 9761   | DPRVRGLYLPAGGSSSG<br>TVNPAPNIASHISSISART<br>GDPVTN | 3.70 | 0.01 | 2.58 | 2.52 | 0.22 | 0.28 |
| 14469 | 0 | 103112 | DPRYNQLLGPLPFRH                                    | 2.68 | 0.01 | 2.04 | 0.44 | 0.85 | 1.28 |
| 14470 | 0 | 144616 | DPRYTCQREF                                         | 2.29 | 0.01 | 0.78 | 0.44 | 1.13 | 0.28 |
| 14471 | 0 | 144616 | DPRYTCQREF                                         | 2.29 | 0.01 | 0.78 | 0.44 | 1.41 | 0.28 |
| 14472 | 0 | 144616 | DPRYTCQREF                                         | 2.29 | 0.01 | 0.78 | 0.44 | 2.35 | 0.28 |
| 14473 | 0 | 144616 | DPRYTCQREF                                         | 2.29 | 0.01 | 0.78 | 2.79 | 1.13 | 1.28 |
| 14474 | 0 | 144616 | DPRYTCQREF                                         | 2.29 | 0.01 | 0.78 | 2.79 | 1.13 | 1.28 |
| 14475 | 0 | 144616 | DPRYTCQREF                                         | 2.29 | 0.01 | 0.78 | 1.81 | 1.41 | 1.28 |
| 14476 | 0 | 144616 | DPRYTCQREF                                         | 2.29 | 0.01 | 0.78 | 1.81 | 1.41 | 1.28 |
| 14477 | 0 | 270451 | DPSAYKRALPLEEEE                                    | 2.66 | 0.01 | 1.61 | 0.44 | 0.85 | 1.28 |
| 14478 | 0 | 270452 | DPSAYKRALPLEEQE                                    | 2.68 | 0.01 | 1.61 | 0.44 | 0.85 | 1.28 |
| 14479 | 0 | 270453 | DPSAYKRALPQEEEE                                    | 2.64 | 0.01 | 1.61 | 0.44 | 0.85 | 1.28 |
| 14480 | 0 | 270454 | DPSAYKRALPQEEQE                                    | 2.68 | 0.01 | 1.61 | 0.44 | 0.85 | 1.28 |
| 14481 | 0 | 105717 | DPSIMAKF                                           | 2.10 | 0.01 | 3.05 | 1.20 | 0.22 | 0.28 |
| 14482 | 0 | 105718 | DPSIMAKFTQFAGKDLE<br>SIK                           | 2.94 | 0.01 | 3.05 | 1.20 | 0.22 | 0.28 |
| 14483 | 0 | 105718 | DPSIMAKFTQFAGKDLE<br>SIK                           | 2.94 | 0.01 | 3.05 | 0.44 | 1.23 | 0.28 |



|       |   |        |                          |      |      |      |      |      |      |
|-------|---|--------|--------------------------|------|------|------|------|------|------|
| 14484 | 0 | 145147 | DPSLKMADPNRFR            | 2.54 | 0.01 | 2.40 | 3.41 | 0.22 | 0.28 |
| 14485 | 0 | 145147 | DPSLKMADPNRFR            | 2.54 | 0.01 | 2.40 | 3.41 | 0.22 | 0.28 |
| 14486 | 0 | 105141 | DPT                      | 1.37 | 0.01 | 3.47 | 1.20 | 0.22 | 0.28 |
| 14487 | 0 | 270492 | DPTDEHSDFLTMGSK          | 2.67 | 0.01 | 1.61 | 0.44 | 0.85 | 1.28 |
| 14488 | 0 | 116954 | DPTDYSTRPHMW             | 2.48 | 0.01 | 0.90 | 1.15 | 0.22 | 0.28 |
| 14489 | 0 | 116954 | DPTDYSTRPHMW             | 2.48 | 0.01 | 0.90 | 0.44 | 0.85 | 0.28 |
| 14490 | 0 | 116954 | DPTDYSTRPHMW             | 2.48 | 0.01 | 0.90 | 0.44 | 0.85 | 1.39 |
| 14491 | 0 | 270496 | DPTGTYQGDSDLQLE          | 2.71 | 0.01 | 1.61 | 0.44 | 0.85 | 1.28 |
| 14492 | 0 | 100792 | DPTLGVFASA               | 2.29 | 0.01 | 3.18 | 3.22 | 0.22 | 0.28 |
| 14493 | 0 | 489508 | DPTPADLEQLCQYIA          | 2.69 | 0.01 | 2.69 | 3.05 | 0.85 | 1.28 |
| 14494 | 0 | 124028 | DPTQPPRH                 | 2.13 | 0.01 | 4.08 | 2.66 | 0.22 | 0.28 |
| 14495 | 0 | 124028 | DPTQPPRH                 | 2.13 | 0.01 | 4.08 | 2.66 | 0.22 | 0.28 |
| 14496 | 0 | 193432 | DPTRNVKGD                | 2.22 | 0.01 | 2.51 | 0.44 | 2.39 | 0.28 |
| 14497 | 0 | 193432 | DPTRNVKGD                | 2.22 | 0.01 | 2.51 | 0.44 | 2.39 | 0.28 |
| 14498 | 0 | 9789   | DPTSPDDIES               | 2.35 | 0.01 | 3.41 | 0.68 | 0.22 | 0.28 |
| 14499 | 0 | 95323  | DPTTNV                   | 1.89 | 0.01 | 2.40 | 2.52 | 0.22 | 0.28 |
| 14500 | 0 | 95323  | DPTTNV                   | 1.89 | 0.01 | 2.40 | 2.52 | 0.22 | 0.28 |
| 14501 | 0 | 95323  | DPTTNV                   | 1.89 | 0.01 | 2.40 | 2.52 | 0.22 | 0.28 |
| 14502 | 0 | 423253 | DPTYDELPSRPPQKH          | 2.66 | 0.01 | 2.51 | 0.44 | 2.35 | 1.28 |
| 14503 | 0 | 9794   | DPVAALFFF                | 2.21 | 0.01 | 2.51 | 0.68 | 0.22 | 0.28 |
| 14504 | 0 | 9794   | DPVAALFFF                | 2.21 | 0.01 | 2.51 | 0.68 | 0.22 | 2.02 |
| 14505 | 0 | 9798   | DPVG                     | 1.57 | 0.01 | 2.40 | 1.81 | 0.22 | 0.28 |
| 14506 | 0 | 127626 | DPVGHPAAPRAPGPE          | 2.71 | 0.01 | 2.43 | 0.44 | 1.13 | 0.85 |
| 14507 | 0 | 110812 | DPVGPLDPSIVSLVEESS<br>FI | 2.98 | 0.01 | 0.90 | 2.66 | 0.22 | 0.28 |
| 14508 | 0 | 110812 | DPVGPLDPSIVSLVEESS<br>FI | 2.98 | 0.01 | 0.90 | 2.66 | 0.22 | 0.28 |
| 14509 | 0 | 110812 | DPVGPLDPSIVSLVEESS<br>FI | 2.98 | 0.01 | 0.90 | 2.66 | 0.22 | 1.34 |
| 14510 | 0 | 110812 | DPVGPLDPSIVSLVEESS<br>FI | 2.98 | 0.01 | 1.86 | 1.12 | 0.22 | 0.28 |
| 14511 | 0 | 110812 | DPVGPLDPSIVSLVEESS<br>FI | 2.98 | 0.01 | 1.86 | 1.12 | 0.22 | 0.28 |
| 14512 | 0 | 110812 | DPVGPLDPSIVSLVEESS<br>FI | 2.98 | 0.01 | 1.86 | 1.12 | 0.22 | 0.28 |
| 14513 | 0 | 110812 | DPVGPLDPSIVSLVEESS<br>FI | 2.98 | 0.01 | 1.86 | 1.12 | 0.22 | 0.28 |
| 14514 | 0 | 110812 | DPVGPLDPSIVSLVEESS<br>FI | 2.98 | 0.01 | 1.86 | 1.12 | 0.22 | 1.34 |
| 14515 | 0 | 110812 | DPVGPLDPSIVSLVEESS<br>FI | 2.98 | 0.01 | 1.86 | 1.12 | 0.22 | 1.34 |
| 14516 | 0 | 110812 | DPVGPLDPSIVSLVEESS<br>FI | 2.98 | 0.01 | 1.86 | 1.12 | 0.22 | 1.34 |
| 14517 | 0 | 110812 | DPVGPLDPSIVSLVEESS<br>FI | 2.98 | 0.01 | 1.86 | 1.12 | 0.22 | 1.34 |

|       |   |        |                                    |      |      |      |      |      |      |
|-------|---|--------|------------------------------------|------|------|------|------|------|------|
| 14518 | 0 | 110812 | DPVGPLDPSIVSLVEESS<br>FI           | 2.98 | 0.01 | 0.90 | 2.66 | 0.22 | 1.34 |
| 14519 | 0 | 110812 | DPVGPLDPSIVSLVEESS<br>FI           | 2.98 | 0.01 | 0.90 | 2.66 | 0.22 | 1.34 |
| 14520 | 0 | 110812 | DPVGPLDPSIVSLVEESS<br>FI           | 2.98 | 0.01 | 0.90 | 2.66 | 0.22 | 1.34 |
| 14521 | 0 | 145747 | DPVGPSDP                           | 2.17 | 0.01 | 1.86 | 0.68 | 0.22 | 0.28 |
| 14522 | 0 | 145747 | DPVGPSDP                           | 2.17 | 0.01 | 1.86 | 0.68 | 0.22 | 0.28 |
| 14523 | 0 | 111211 | DPVGPSDPSIVSLVEETS<br>F            | 2.92 | 0.01 | 1.86 | 1.12 | 0.22 | 0.28 |
| 14524 | 0 | 111211 | DPVGPSDPSIVSLVEETS<br>F            | 2.92 | 0.01 | 1.86 | 1.12 | 0.22 | 0.28 |
| 14525 | 0 | 111211 | DPVGPSDPSIVSLVEETS<br>F            | 2.92 | 0.01 | 1.86 | 1.12 | 0.22 | 0.28 |
| 14526 | 0 | 111211 | DPVGPSDPSIVSLVEETS<br>F            | 2.92 | 0.01 | 1.86 | 1.12 | 0.22 | 0.28 |
| 14527 | 0 | 111211 | DPVGPSDPSIVSLVEETS<br>F            | 2.92 | 0.01 | 1.86 | 1.12 | 0.22 | 1.34 |
| 14528 | 0 | 111211 | DPVGPSDPSIVSLVEETS<br>F            | 2.92 | 0.01 | 1.86 | 1.12 | 0.22 | 1.34 |
| 14529 | 0 | 111211 | DPVGPSDPSIVSLVEETS<br>F            | 2.92 | 0.01 | 1.86 | 1.12 | 0.22 | 1.34 |
| 14530 | 0 | 154400 | DPVGPSDPSIVSLVEETS<br>FI           | 2.97 | 0.01 | 1.86 | 1.12 | 0.22 | 1.34 |
| 14531 | 0 | 154400 | DPVGPSDPSIVSLVEETS<br>FI           | 2.97 | 0.01 | 1.86 | 1.12 | 0.22 | 1.34 |
| 14532 | 0 | 9802   | DPVIDLLQ                           | 2.14 | 0.01 | 2.66 | 2.61 | 0.22 | 0.28 |
| 14533 | 0 | 9804   | DPVIDRLYLSSHGVR                    | 2.68 | 0.01 | 2.43 | 0.44 | 0.85 | 0.28 |
| 14534 | 0 | 9808   | DPVTTTVENYGGETQI                   | 2.73 | 0.01 | 2.88 | 1.12 | 0.22 | 0.28 |
| 14535 | 0 | 116292 | DPVVHFFKNIVTP                      | 2.54 | 0.01 | 0.78 | 0.44 | 1.13 | 1.75 |
| 14536 | 0 | 175785 | DPWIQLMNRTQANLA                    | 2.66 | 0.01 | 2.63 | 1.15 | 0.22 | 0.85 |
| 14537 | 0 | 175785 | DPWIQLMNRTQANLA                    | 2.66 | 0.01 | 2.63 | 1.15 | 0.22 | 0.85 |
| 14538 | 0 | 107796 | DPYNKYKGVLIIPRCQLC<br>FSRIVRGPANLR | 3.33 | 0.01 | 0.90 | 1.12 | 0.22 | 0.28 |
| 14539 | 0 | 191080 | DPYRS                              | 1.74 | 0.01 | 4.03 | 3.55 | 0.22 | 0.85 |
| 14540 | 0 | 191080 | DPYRS                              | 1.74 | 0.01 | 4.03 | 3.55 | 0.22 | 0.85 |
| 14541 | 0 | 243790 | DPYSPS                             | 1.91 | 0.01 | 2.16 | 0.44 | 1.23 | 1.28 |
| 14542 | 0 | 9818   | DPYSPSPYDRRGAGS                    | 2.73 | 0.01 | 2.16 | 0.44 | 1.23 | 1.48 |
| 14543 | 0 | 9818   | DPYSPSPYDRRGAGS                    | 2.73 | 0.01 | 2.16 | 0.44 | 1.23 | 0.85 |
| 14544 | 0 | 9819   | DPYSPSQDPDRDPY                     | 2.74 | 0.01 | 2.16 | 0.44 | 1.23 | 0.85 |
| 14545 | 0 | 9819   | DPYSPSQDPDRDPY                     | 2.74 | 0.01 | 2.16 | 2.90 | 0.22 | 0.85 |
| 14546 | 0 | 9819   | DPYSPSQDPDRDPY                     | 2.74 | 0.01 | 2.16 | 0.44 | 1.23 | 0.85 |
| 14547 | 0 | 419586 | DPYSPSQDPYSPSPY                    | 2.75 | 4.63 | 2.16 | 0.44 | 1.23 | 1.34 |
| 14548 | 0 | 419588 | DPYSPSQDPYSPSQDPD<br>RRDPYSPSPY    | 3.31 | 4.63 | 2.16 | 0.44 | 1.23 | 1.34 |

|       |   |        |                                      |      |      |      |      |      |      |
|-------|---|--------|--------------------------------------|------|------|------|------|------|------|
| 14549 | 0 | 419589 | DPYSPSQDPYSPSQDPD<br>RRDPYSPSPY      | 3.31 | 0.01 | 2.16 | 0.44 | 1.23 | 1.27 |
| 14550 | 0 | 187050 | DPYVKRTIK                            | 2.21 | 0.01 | 4.63 | 0.68 | 0.22 | 0.28 |
| 14551 | 0 | 187051 | DPYVKRTVK                            | 2.23 | 0.01 | 3.81 | 0.68 | 0.22 | 0.85 |
| 14552 | 0 | 187051 | DPYVKRTVK                            | 2.23 | 0.01 | 3.81 | 0.68 | 0.22 | 0.85 |
| 14553 | 0 | 187051 | DPYVKRTVK                            | 2.23 | 0.01 | 3.81 | 0.68 | 0.22 | 1.48 |
| 14554 | 0 | 187051 | DPYVKRTVK                            | 2.23 | 0.01 | 3.81 | 0.68 | 0.22 | 0.28 |
| 14555 | 0 | 187051 | DPYVKRTVK                            | 2.23 | 0.01 | 3.81 | 0.68 | 0.22 | 0.28 |
| 14556 | 0 | 187051 | DPYVKRTVK                            | 2.23 | 0.01 | 3.81 | 0.68 | 0.22 | 0.28 |
| 14557 | 0 | 187051 | DPYVKRTVK                            | 2.23 | 0.01 | 3.81 | 0.68 | 0.22 | 0.28 |
| 14558 | 0 | 187052 | DPYVKRTVR                            | 2.23 | 0.01 | 4.63 | 0.68 | 0.22 | 0.28 |
| 14559 | 0 | 131849 | DPYVTPGSVINNLSI                      | 2.67 | 0.01 | 0.78 | 0.44 | 1.13 | 0.85 |
| 14560 | 0 | 106350 | DQAANEWGRSGKDPN<br>H                 | 2.71 | 0.01 | 0.78 | 1.12 | 0.22 | 0.85 |
| 14561 | 0 | 9822   | DQAMEDIKQM                           | 2.34 | 0.01 | 1.60 | 0.44 | 1.23 | 0.28 |
| 14562 | 0 | 9822   | DQAMEDIKQM                           | 2.34 | 0.01 | 1.60 | 0.44 | 1.23 | 0.28 |
| 14563 | 0 | 97950  | DQANPDYHYV                           | 2.32 | 0.01 | 3.57 | 0.44 | 0.85 | 0.28 |
| 14564 | 0 | 9826   | DQAQRPAVASRRRPTT<br>AG               | 2.86 | 0.01 | 2.53 | 0.44 | 0.85 | 0.28 |
| 14565 | 0 | 128446 | DQAVFKCEVSDENVRG<br>VWLKNGKELVPDSRIK | 3.39 | 0.01 | 0.78 | 2.04 | 0.22 | 0.28 |
| 14566 | 0 | 137824 | DQAVSLGQ                             | 2.12 | 0.01 | 2.21 | 1.20 | 0.22 | 0.28 |
| 14567 | 0 | 137824 | DQAVSLGQ                             | 2.12 | 0.01 | 2.21 | 0.44 | 0.85 | 0.28 |
| 14568 | 0 | 137824 | DQAVSLGQ                             | 2.12 | 0.01 | 2.21 | 0.44 | 0.85 | 0.28 |
| 14569 | 0 | 137824 | DQAVSLGQ                             | 2.12 | 0.01 | 2.21 | 1.20 | 0.22 | 0.28 |
| 14570 | 0 | 95324  | DQCSNGGLDL                           | 2.33 | 0.01 | 2.60 | 0.44 | 1.23 | 0.85 |
| 14571 | 0 | 188105 | DQDARGWGGD                           | 2.35 | 0.01 | 2.92 | 1.81 | 0.22 | 0.85 |
| 14572 | 0 | 158718 | DQDASGFIEVEELKL                      | 2.66 | 0.01 | 3.26 | 0.44 | 1.23 | 0.28 |
| 14573 | 0 | 189603 | DQDKSDFVEEDELKL                      | 2.72 | 0.01 | 3.28 | 0.44 | 1.23 | 0.28 |
| 14574 | 0 | 120450 | DQDLSKKHGQ                           | 2.33 | 0.01 | 2.18 | 2.16 | 0.22 | 0.28 |
| 14575 | 0 | 120450 | DQDLSKKHGQ                           | 2.33 | 0.01 | 2.18 | 2.16 | 0.22 | 0.28 |
| 14576 | 0 | 9832   | DQDLV                                | 1.77 | 0.01 | 1.72 | 0.68 | 0.22 | 1.66 |
| 14577 | 0 | 9832   | DQDLV                                | 1.77 | 0.01 | 1.72 | 0.68 | 0.22 | 1.27 |
| 14578 | 0 | 170623 | DQERSLMFMQWGQLL                      | 2.66 | 0.01 | 0.78 | 0.44 | 1.41 | 0.28 |
| 14579 | 0 | 170623 | DQERSLMFMQWGQLL                      | 2.66 | 0.01 | 0.78 | 0.44 | 1.13 | 0.28 |
| 14580 | 0 | 102365 | DQFAQAYRGDRNFFNE<br>LTST             | 2.94 | 0.01 | 0.90 | 1.20 | 0.22 | 0.28 |
| 14581 | 0 | 102365 | DQFAQAYRGDRNFFNE<br>LTST             | 2.94 | 0.01 | 0.90 | 0.44 | 0.85 | 0.28 |
| 14582 | 0 | 137134 | DQFCPEDAKCERGKL                      | 2.67 | 0.01 | 3.19 | 0.44 | 1.23 | 0.28 |
| 14583 | 0 | 9845   | DQGNSDTSWNFAAKYL<br>LETI             | 2.90 | 0.01 | 0.90 | 2.63 | 0.22 | 1.48 |
| 14584 | 0 | 9846   | DQGNSDTSYIFASKYHE                    | 2.76 | 0.01 | 0.90 | 2.63 | 0.22 | 1.48 |

|       |   |        |                          |      |      |      |      |      |      |
|-------|---|--------|--------------------------|------|------|------|------|------|------|
| 14585 | 0 | 161335 | DQGNSITAWIRAAKFHL<br>ETI | 2.89 | 0.01 | 0.90 | 2.74 | 0.22 | 1.48 |
| 14586 | 0 | 161335 | DQGNSITAWIRAAKFHL<br>ETI | 2.89 | 0.01 | 0.90 | 2.74 | 0.22 | 1.75 |
| 14587 | 0 | 161336 | DQGNTITAWNRAAKFH<br>LETI | 2.90 | 0.01 | 0.90 | 2.74 | 0.22 | 1.48 |
| 14588 | 0 | 161336 | DQGNTITAWNRAAKFH<br>LETI | 2.90 | 0.01 | 0.90 | 2.74 | 0.22 | 1.75 |
| 14589 | 0 | 9847   | DQGPPLMTDGGGGDP<br>H     | 2.76 | 0.01 | 0.90 | 0.68 | 0.22 | 0.28 |
| 14590 | 0 | 9847   | DQGPPLMTDGGGGDP<br>H     | 2.76 | 0.01 | 0.90 | 0.68 | 0.22 | 0.85 |
| 14591 | 0 | 9847   | DQGPPLMTDGGGGDP<br>H     | 2.76 | 0.01 | 0.90 | 0.68 | 0.22 | 0.28 |
| 14592 | 0 | 78364  | DQHGWD                   | 1.91 | 0.01 | 0.90 | 0.68 | 0.22 | 0.28 |
| 14593 | 0 | 191261 | DQIDCTKELQLCQLKE         | 2.79 | 0.01 | 0.90 | 2.84 | 1.13 | 1.39 |
| 14594 | 0 | 191261 | DQIDCTKELQLCQLKE         | 2.79 | 0.01 | 0.90 | 2.84 | 1.13 | 1.66 |
| 14595 | 0 | 111212 | DQIKVSTAILT              | 2.48 | 0.01 | 2.60 | 0.44 | 1.23 | 0.85 |
| 14596 | 0 | 9853   | DQILRSMKGLSSTSI          | 2.68 | 0.01 | 2.43 | 0.44 | 1.59 | 0.28 |
| 14597 | 0 | 105721 | DQISTVQA                 | 2.12 | 0.01 | 3.05 | 1.20 | 0.22 | 0.28 |
| 14598 | 0 | 9856   | DQKAREAF                 | 2.12 | 0.01 | 2.40 | 2.43 | 0.22 | 0.28 |
| 14599 | 0 | 167733 | DQKAREAFR                | 2.23 | 0.01 | 2.40 | 2.43 | 0.22 | 0.28 |
| 14600 | 0 | 9863   | DQKPISNLGNIHASNNI<br>MF  | 2.87 | 0.01 | 3.03 | 3.33 | 0.22 | 1.57 |
| 14601 | 0 | 9863   | DQKPISNLGNIHASNNI<br>MF  | 2.87 | 0.01 | 2.08 | 2.02 | 0.22 | 1.57 |
| 14602 | 0 | 9863   | DQKPISNLGNIHASNNI<br>MF  | 2.87 | 0.01 | 2.08 | 2.49 | 0.22 | 1.57 |
| 14603 | 0 | 9863   | DQKPISNLGNIHASNNI<br>MF  | 2.87 | 0.01 | 3.16 | 0.44 | 1.93 | 1.57 |
| 14604 | 0 | 9863   | DQKPISNLGNIHASNNI<br>MF  | 2.87 | 0.01 | 2.08 | 2.02 | 0.22 | 1.57 |
| 14605 | 0 | 78628  | DQKPPSR                  | 2.01 | 0.01 | 3.27 | 1.12 | 0.22 | 0.28 |
| 14606 | 0 | 78628  | DQKPPSR                  | 2.01 | 0.01 | 3.27 | 1.12 | 0.22 | 0.28 |
| 14607 | 0 | 78628  | DQKPPSR                  | 2.01 | 0.01 | 3.27 | 1.12 | 0.22 | 0.28 |
| 14608 | 0 | 78628  | DQKPPSR                  | 2.01 | 0.01 | 3.27 | 1.12 | 0.22 | 1.34 |
| 14609 | 0 | 78629  | DQKPPSRQSQIESR           | 2.64 | 0.01 | 3.27 | 1.12 | 0.22 | 0.28 |
| 14610 | 0 | 78629  | DQKPPSRQSQIESR           | 2.64 | 0.01 | 3.27 | 1.12 | 0.22 | 0.28 |
| 14611 | 0 | 78629  | DQKPPSRQSQIESR           | 2.64 | 0.01 | 3.27 | 1.12 | 0.22 | 0.28 |
| 14612 | 0 | 78629  | DQKPPSRQSQIESR           | 2.64 | 0.01 | 3.27 | 1.12 | 0.22 | 1.34 |
| 14613 | 0 | 164221 | DQLLSGSTPWSF             | 2.46 | 0.01 | 0.90 | 1.20 | 0.22 | 0.28 |
| 14614 | 0 | 9871   | DQLPNVGI                 | 2.10 | 0.01 | 3.06 | 1.12 | 0.22 | 0.28 |
| 14615 | 0 | 99951  | DQLTGNYACG               | 2.45 | 0.01 | 2.88 | 1.20 | 0.22 | 0.85 |
| 14616 | 0 | 182382 | DQLWFERLTHQQ             | 2.45 | 0.01 | 0.90 | 0.68 | 0.22 | 0.28 |
| 14617 | 0 | 182382 | DQLWFERLTHQQ             | 2.45 | 0.01 | 0.90 | 0.68 | 0.22 | 0.28 |
| 14618 | 0 | 112940 | DQMAVEKLSDGIRKF          | 2.63 | 0.01 | 0.78 | 0.44 | 1.13 | 0.85 |

|       |   |        |                                      |      |      |      |      |      |      |
|-------|---|--------|--------------------------------------|------|------|------|------|------|------|
| 14619 | 0 | 102367 | DQNITARIGKPLVLNCK<br>GAPKKPPQQLEWKLN | 3.39 | 0.01 | 0.78 | 0.44 | 1.41 | 0.28 |
| 14620 | 0 | 102367 | DQNITARIGKPLVLNCK<br>GAPKKPPQQLEWKLN | 3.39 | 0.01 | 0.78 | 0.68 | 0.22 | 0.28 |
| 14621 | 0 | 102367 | DQNITARIGKPLVLNCK<br>GAPKKPPQQLEWKLN | 3.39 | 0.01 | 0.78 | 0.68 | 0.22 | 2.12 |
| 14622 | 0 | 102367 | DQNITARIGKPLVLNCK<br>GAPKKPPQQLEWKLN | 3.39 | 0.01 | 0.78 | 0.68 | 0.22 | 0.85 |
| 14623 | 0 | 102367 | DQNITARIGKPLVLNCK<br>GAPKKPPQQLEWKLN | 3.39 | 0.01 | 0.78 | 0.68 | 0.22 | 1.27 |
| 14624 | 0 | 136178 | DQNQFQKAET                           | 2.31 | 0.01 | 0.78 | 1.15 | 0.22 | 1.27 |
| 14625 | 0 | 187633 | DQNRYEYIWGLY                         | 2.45 | 0.01 | 2.14 | 1.20 | 0.22 | 0.28 |
| 14626 | 0 | 101558 | DQPDQHQ                              | 2.06 | 0.01 | 3.10 | 1.15 | 0.22 | 0.28 |
| 14627 | 0 | 101558 | DQPDQHQ                              | 2.06 | 0.01 | 3.10 | 1.15 | 0.22 | 1.48 |
| 14628 | 0 | 101558 | DQPDQHQ                              | 2.06 | 0.01 | 3.10 | 1.15 | 0.22 | 0.85 |
| 14629 | 0 | 101558 | DQPDQHQ                              | 2.06 | 0.01 | 3.10 | 1.15 | 0.22 | 0.28 |
| 14630 | 0 | 101558 | DQPDQHQ                              | 2.06 | 0.01 | 3.10 | 1.15 | 0.22 | 1.48 |
| 14631 | 0 | 101558 | DQPDQHQ                              | 2.06 | 0.01 | 3.10 | 1.15 | 0.22 | 1.48 |
| 14632 | 0 | 101558 | DQPDQHQ                              | 2.06 | 0.01 | 3.10 | 1.15 | 0.22 | 0.85 |
| 14633 | 0 | 101558 | DQPDQHQ                              | 2.06 | 0.01 | 3.10 | 1.15 | 0.22 | 0.28 |
| 14634 | 0 | 101558 | DQPDQHQ                              | 2.06 | 0.01 | 3.10 | 1.15 | 0.22 | 1.48 |
| 14635 | 0 | 101558 | DQPDQHQ                              | 2.06 | 0.01 | 3.10 | 1.15 | 0.22 | 1.48 |
| 14636 | 0 | 101558 | DQPDQHQ                              | 2.06 | 0.01 | 3.10 | 1.15 | 0.22 | 0.85 |
| 14637 | 0 | 9886   | DQPKQYEQHLTDYEKIK<br>EG              | 2.91 | 0.01 | 1.66 | 1.20 | 0.22 | 0.28 |
| 14638 | 0 | 9886   | DQPKQYEQHLTDYEKIK<br>EG              | 2.91 | 0.01 | 1.66 | 2.43 | 0.22 | 0.28 |
| 14639 | 0 | 242426 | DQPLFTFRQVGLICE                      | 2.64 | 0.01 | 3.33 | 1.20 | 0.22 | 0.85 |
| 14640 | 0 | 130469 | DQPPTSrvPSLR                         | 2.49 | 0.01 | 0.90 | 3.18 | 1.41 | 1.39 |
| 14641 | 0 | 130469 | DQPPTSrvPSLR                         | 2.49 | 0.01 | 0.90 | 3.18 | 1.41 | 0.28 |
| 14642 | 0 | 130469 | DQPPTSrvPSLR                         | 2.49 | 0.01 | 0.90 | 3.18 | 1.41 | 0.85 |
| 14643 | 0 | 130469 | DQPPTSrvPSLR                         | 2.49 | 0.01 | 0.90 | 3.18 | 1.41 | 1.34 |
| 14644 | 0 | 270684 | DQPTQFSVGTPDAAN                      | 2.68 | 0.01 | 1.61 | 0.44 | 0.85 | 1.28 |
| 14645 | 0 | 9888   | DQPVDHHRYTEANDAV<br>LQGR             | 2.93 | 0.01 | 4.63 | 2.42 | 0.22 | 0.28 |
| 14646 | 0 | 9888   | DQPVDHHRYTEANDAV<br>LQGR             | 2.93 | 0.01 | 4.63 | 2.42 | 0.22 | 1.34 |
| 14647 | 0 | 270686 | DQPVQFSVGTPDAAN                      | 2.68 | 0.01 | 1.61 | 0.44 | 0.85 | 1.28 |
| 14648 | 0 | 134654 | DQQNQFQKAET                          | 2.41 | 0.01 | 0.78 | 0.68 | 0.22 | 1.57 |
| 14649 | 0 | 134654 | DQQNQFQKAET                          | 2.41 | 0.01 | 0.78 | 0.68 | 0.22 | 1.34 |

|       |   |        |                                      |      |      |      |      |      |      |
|-------|---|--------|--------------------------------------|------|------|------|------|------|------|
| 14650 | 0 | 134654 | DQQNQFQKAET                          | 2.41 | 0.01 | 0.78 | 0.68 | 0.22 | 1.27 |
| 14651 | 0 | 137136 | DQQTQIAKDTAQT                        | 2.61 | 0.01 | 2.96 | 1.15 | 0.22 | 0.28 |
| 14652 | 0 | 137136 | DQQTQIAKDTAQT                        | 2.61 | 0.01 | 2.96 | 1.15 | 0.22 | 1.57 |
| 14653 | 0 | 137136 | DQQTQIAKDTAQT                        | 2.61 | 0.01 | 2.96 | 1.15 | 0.22 | 1.27 |
| 14654 | 0 | 9889   | DQRENWFKYHGF                         | 2.43 | 0.01 | 0.90 | 0.44 | 1.59 | 0.28 |
| 14655 | 0 | 9889   | DQRENWFKYHGF                         | 2.43 | 0.01 | 0.90 | 0.44 | 1.59 | 0.28 |
| 14656 | 0 | 9889   | DQRENWFKYHGF                         | 2.43 | 0.01 | 0.90 | 0.44 | 1.59 | 0.28 |
| 14657 | 0 | 9889   | DQRENWFKYHGF                         | 2.43 | 0.01 | 0.90 | 0.44 | 1.59 | 0.28 |
| 14658 | 0 | 9895   | DQRPYCWHYA                           | 2.29 | 0.01 | 1.72 | 0.44 | 0.85 | 0.28 |
| 14659 | 0 | 9896   | DQRPYCWHYP                           | 2.31 | 0.01 | 1.72 | 0.44 | 0.85 | 0.28 |
| 14660 | 0 | 9897   | DQRPYCWHYPP                          | 2.38 | 0.01 | 2.68 | 1.15 | 0.22 | 1.34 |
| 14661 | 0 | 9899   | DQRPYCWHYPPKPCGIV<br>PA              | 2.87 | 0.01 | 2.83 | 0.44 | 0.85 | 0.28 |
| 14662 | 0 | 9899   | DQRPYCWHYPPKPCGIV<br>PA              | 2.87 | 0.01 | 2.83 | 0.44 | 0.85 | 0.28 |
| 14663 | 0 | 157171 | DQRSQEERER                           | 2.36 | 0.01 | 3.27 | 0.44 | 1.23 | 0.85 |
| 14664 | 0 | 157171 | DQRSQEERER                           | 2.36 | 0.01 | 3.27 | 0.44 | 1.23 | 0.85 |
| 14665 | 0 | 9902   | DQRTGREQ                             | 2.14 | 0.01 | 3.51 | 2.36 | 0.22 | 0.28 |
| 14666 | 0 | 9902   | DQRTGREQ                             | 2.14 | 0.01 | 3.51 | 2.02 | 2.39 | 0.28 |
| 14667 | 0 | 9902   | DQRTGREQ                             | 2.14 | 0.01 | 3.51 | 1.12 | 0.22 | 0.28 |
| 14668 | 0 | 124029 | DQSIGDLIAEAMDKV                      | 2.67 | 0.01 | 4.63 | 0.44 | 1.13 | 0.28 |
| 14669 | 0 | 124029 | DQSIGDLIAEAMDKV                      | 2.67 | 0.01 | 4.63 | 0.44 | 1.13 | 0.28 |
| 14670 | 0 | 92477  | DQSLSSLQFA                           | 2.34 | 0.01 | 2.67 | 2.00 | 0.22 | 0.28 |
| 14671 | 0 | 92477  | DQSLSSLQFA                           | 2.34 | 0.01 | 2.67 | 2.00 | 0.22 | 0.28 |
| 14672 | 0 | 92477  | DQSLSSLQFA                           | 2.34 | 0.01 | 2.67 | 2.00 | 0.22 | 0.28 |
| 14673 | 0 | 170630 | DQTCNSPPCPPL                         | 2.48 | 0.01 | 0.90 | 0.44 | 0.85 | 1.39 |
| 14674 | 0 | 100796 | DQTGDHYTGQ                           | 2.36 | 0.01 | 3.18 | 2.98 | 0.22 | 0.28 |
| 14675 | 0 | 9913   | DQTIDWFQPNKRNQ                       | 2.69 | 0.01 | 4.23 | 2.13 | 0.22 | 0.28 |
| 14676 | 0 | 270777 | DQTSAAAAANDSSPA                      | 2.71 | 0.01 | 1.61 | 0.44 | 0.85 | 1.28 |
| 14677 | 0 | 9915   | DQVDVKDCANHEIKK                      | 2.67 | 0.01 | 2.78 | 0.44 | 1.23 | 1.57 |
| 14678 | 0 | 9915   | DQVDVKDCANHEIKK                      | 2.67 | 0.01 | 2.78 | 0.44 | 1.23 | 1.57 |
| 14679 | 0 | 164636 | DQVDVKDCANHEIKKVL<br>VPGCHGSEPCIHRGK | 3.43 | 0.01 | 2.78 | 1.12 | 0.22 | 0.28 |
| 14680 | 0 | 164636 | DQVDVKDCANHEIKKVL<br>VPGCHGSEPCIHRGK | 3.43 | 0.01 | 2.78 | 0.44 | 1.23 | 2.35 |
| 14681 | 0 | 164636 | DQVDVKDCANHEIKKVL<br>VPGCHGSEPCIHRGK | 3.43 | 0.01 | 2.78 | 0.68 | 0.22 | 1.34 |
| 14682 | 0 | 164636 | DQVDVKDCANHEIKKVL<br>VPGCHGSEPCIHRGK | 3.43 | 0.01 | 2.78 | 1.12 | 0.22 | 0.85 |

|       |   |        |                                                   |      |      |      |      |      |      |
|-------|---|--------|---------------------------------------------------|------|------|------|------|------|------|
| 14683 | 0 | 164636 | DQVDVKDCANHEIKKVL<br>VPGCHGSEPCIHRGK              | 3.43 | 0.01 | 2.78 | 1.12 | 0.22 | 0.85 |
| 14684 | 0 | 9918   | DQVDVKDCANNEIKKV<br>MVDGCHGS                      | 3.11 | 0.01 | 3.72 | 0.44 | 1.23 | 0.85 |
| 14685 | 0 | 9918   | DQVDVKDCANNEIKKV<br>MVDGCHGS                      | 3.11 | 0.01 | 3.72 | 0.44 | 1.23 | 1.27 |
| 14686 | 0 | 9924   | DQVHFQPLPPAVVKLSD<br>ALI                          | 2.95 | 0.01 | 2.04 | 0.44 | 0.85 | 0.28 |
| 14687 | 0 | 9924   | DQVHFQPLPPAVVKLSD<br>ALI                          | 2.95 | 0.01 | 2.04 | 2.52 | 0.22 | 0.28 |
| 14688 | 0 | 9924   | DQVHFQPLPPAVVKLSD<br>ALI                          | 2.95 | 0.01 | 2.04 | 0.44 | 1.59 | 0.28 |
| 14689 | 0 | 236163 | DQVPTYFDYVPQYLR                                   | 2.71 | 0.01 | 1.66 | 0.44 | 0.85 | 1.28 |
| 14690 | 0 | 116693 | DQVQESLLKANIQLV                                   | 2.68 | 0.01 | 2.36 | 0.44 | 1.23 | 1.28 |
| 14691 | 0 | 116693 | DQVQESLLKANIQLV                                   | 2.68 | 0.01 | 2.36 | 0.44 | 1.23 | 1.27 |
| 14692 | 0 | 9926   | DQVQLQHSYDSVANFV<br>GEDEDSIPSKMYLDETPE<br>YFVNVEA | 3.65 | 0.01 | 4.63 | 1.15 | 0.22 | 1.27 |
| 14693 | 0 | 142408 | DQVTKKEKTIKKA                                     | 2.64 | 0.01 | 2.59 | 0.44 | 0.85 | 0.85 |
| 14694 | 0 | 9928   | DQWTAVGSK                                         | 2.18 | 0.01 | 0.90 | 1.12 | 0.22 | 0.85 |
| 14695 | 0 | 9929   | DQYCADVAAEELMNA                                   | 2.68 | 0.01 | 2.72 | 0.44 | 0.85 | 0.28 |
| 14696 | 0 | 9934   | DRAAGQPAG                                         | 2.25 | 0.01 | 2.59 | 0.68 | 0.22 | 1.27 |
| 14697 | 0 | 9935   | DRAAGQPAGDRAAGQ<br>PAGDR                          | 3.02 | 0.01 | 2.59 | 0.44 | 0.85 | 0.28 |
| 14698 | 0 | 9936   | DRAAGQPAGDRAAGQ<br>PAGDRA                         | 3.07 | 0.01 | 4.08 | 2.52 | 0.22 | 0.28 |
| 14699 | 0 | 9938   | DRAAGQPAGDRAAGQ<br>PAGDRC                         | 3.06 | 0.01 | 2.59 | 3.05 | 0.85 | 0.28 |
| 14700 | 0 | 9938   | DRAAGQPAGDRAAGQ<br>PAGDRC                         | 3.06 | 0.01 | 2.59 | 3.05 | 1.41 | 0.28 |
| 14701 | 0 | 9938   | DRAAGQPAGDRAAGQ<br>PAGDRC                         | 3.06 | 0.01 | 2.59 | 2.52 | 0.22 | 0.28 |
| 14702 | 0 | 9938   | DRAAGQPAGDRAAGQ<br>PAGDRC                         | 3.06 | 0.01 | 2.59 | 2.42 | 0.22 | 0.28 |
| 14703 | 0 | 9938   | DRAAGQPAGDRAAGQ<br>PAGDRC                         | 3.06 | 0.01 | 2.59 | 3.27 | 0.22 | 0.28 |
| 14704 | 0 | 9938   | DRAAGQPAGDRAAGQ<br>PAGDRC                         | 3.06 | 0.01 | 2.59 | 4.15 | 0.22 | 0.28 |
| 14705 | 0 | 9939   | DRAAGQPAGDRADGQ<br>PAGDR                          | 3.02 | 0.01 | 2.59 | 3.05 | 0.85 | 0.28 |
| 14706 | 0 | 9939   | DRAAGQPAGDRADGQ<br>PAGDR                          | 3.02 | 0.01 | 2.59 | 0.44 | 0.85 | 0.28 |
| 14707 | 0 | 9939   | DRAAGQPAGDRADGQ<br>PAGDR                          | 3.02 | 0.01 | 2.59 | 2.52 | 0.22 | 0.28 |

|       |   |        |                          |      |      |      |      |      |      |
|-------|---|--------|--------------------------|------|------|------|------|------|------|
| 14708 | 0 | 9939   | DRAAGQPAGDRADGQ<br>PAGDR | 3.02 | 0.01 | 2.59 | 2.42 | 0.22 | 0.28 |
| 14709 | 0 | 9939   | DRAAGQPAGDRADGQ<br>PAGDR | 3.02 | 0.01 | 2.59 | 3.27 | 0.22 | 0.28 |
| 14710 | 0 | 9939   | DRAAGQPAGDRADGQ<br>PAGDR | 3.02 | 0.01 | 2.59 | 4.15 | 0.22 | 0.28 |
| 14711 | 0 | 9940   | DRAAGQPAGNGAGGQ<br>AAGGN | 3.00 | 0.01 | 2.59 | 0.44 | 0.85 | 0.28 |
| 14712 | 0 | 9940   | DRAAGQPAGNGAGGQ<br>AAGGN | 3.00 | 0.01 | 2.59 | 3.05 | 0.85 | 0.28 |
| 14713 | 0 | 9940   | DRAAGQPAGNGAGGQ<br>AAGGN | 3.00 | 0.01 | 2.59 | 3.05 | 1.41 | 0.28 |
| 14714 | 0 | 9940   | DRAAGQPAGNGAGGQ<br>AAGGN | 3.00 | 0.01 | 2.59 | 2.52 | 0.22 | 0.28 |
| 14715 | 0 | 9940   | DRAAGQPAGNGAGGQ<br>AAGGN | 3.00 | 0.01 | 2.59 | 2.42 | 0.22 | 0.28 |
| 14716 | 0 | 9940   | DRAAGQPAGNGAGGQ<br>AAGGN | 3.00 | 0.01 | 2.59 | 3.27 | 0.22 | 0.28 |
| 14717 | 0 | 9940   | DRAAGQPAGNGAGGQ<br>AAGGN | 3.00 | 0.01 | 2.59 | 4.15 | 0.22 | 0.28 |
| 14718 | 0 | 232757 | DRAALSL                  | 2.03 | 0.01 | 0.90 | 2.49 | 0.85 | 1.39 |
| 14719 | 0 | 9941   | DRADGQPAG                | 2.26 | 0.01 | 2.59 | 0.68 | 0.22 | 1.27 |
| 14720 | 0 | 188660 | DRADGQPAGD               | 2.36 | 0.01 | 2.59 | 0.68 | 0.22 | 0.85 |
| 14721 | 0 | 188660 | DRADGQPAGD               | 2.36 | 0.01 | 2.59 | 1.81 | 0.22 | 0.28 |
| 14722 | 0 | 9942   | DRADGQPAGDRAAGQ<br>PAG   | 2.92 | 0.01 | 2.59 | 2.42 | 0.22 | 1.48 |
| 14723 | 0 | 9943   | DRADGQPAGDRAAGQ<br>PAGDR | 3.02 | 0.01 | 2.59 | 3.05 | 0.85 | 0.28 |
| 14724 | 0 | 9943   | DRADGQPAGDRAAGQ<br>PAGDR | 3.02 | 0.01 | 2.59 | 0.44 | 0.85 | 0.28 |
| 14725 | 0 | 9943   | DRADGQPAGDRAAGQ<br>PAGDR | 3.02 | 0.01 | 2.59 | 2.52 | 0.22 | 0.28 |
| 14726 | 0 | 9943   | DRADGQPAGDRAAGQ<br>PAGDR | 3.02 | 0.01 | 2.59 | 2.42 | 0.22 | 0.28 |
| 14727 | 0 | 9943   | DRADGQPAGDRAAGQ<br>PAGDR | 3.02 | 0.01 | 2.59 | 3.27 | 0.22 | 0.28 |
| 14728 | 0 | 9943   | DRADGQPAGDRAAGQ<br>PAGDR | 3.02 | 0.01 | 2.59 | 4.15 | 0.22 | 0.28 |
| 14729 | 0 | 9944   | DRADGQPAGDRADGQ<br>PAGDR | 3.02 | 0.01 | 2.59 | 0.44 | 0.85 | 0.28 |
| 14730 | 0 | 9944   | DRADGQPAGDRADGQ<br>PAGDR | 3.02 | 0.01 | 2.59 | 3.05 | 0.85 | 0.28 |
| 14731 | 0 | 9944   | DRADGQPAGDRADGQ<br>PAGDR | 3.02 | 0.01 | 2.59 | 2.52 | 0.22 | 0.28 |
| 14732 | 0 | 9944   | DRADGQPAGDRADGQ<br>PAGDR | 3.02 | 0.01 | 2.59 | 2.42 | 0.22 | 0.28 |



|       |   |        |                                                                |      |      |      |      |      |      |
|-------|---|--------|----------------------------------------------------------------|------|------|------|------|------|------|
| 14733 | 0 | 9944   | DRADGQPAGDRADGQ<br>PAGDR                                       | 3.02 | 0.01 | 2.59 | 3.27 | 0.22 | 0.28 |
| 14734 | 0 | 9944   | DRADGQPAGDRADGQ<br>PAGDR                                       | 3.02 | 0.01 | 2.59 | 4.15 | 0.22 | 0.28 |
| 14735 | 0 | 9945   | DRADGQPAGDRADGQ<br>PAGDRAAGQPAGDRAA<br>GQPAGDRADGQPAG          | 3.82 | 0.01 | 2.59 | 0.44 | 0.85 | 0.28 |
| 14736 | 0 | 419146 | DRADGQPAGDRADGQ<br>PAGDRAAGQPAGDRAD<br>GQPAG                   | 3.60 | 0.01 | 2.59 | 1.81 | 0.22 | 1.75 |
| 14737 | 0 | 419146 | DRADGQPAGDRADGQ<br>PAGDRAAGQPAGDRAD<br>GQPAG                   | 3.60 | 0.01 | 2.59 | 3.32 | 0.22 | 0.28 |
| 14738 | 0 | 419146 | DRADGQPAGDRADGQ<br>PAGDRAAGQPAGDRAD<br>GQPAG                   | 3.60 | 0.01 | 2.59 | 3.32 | 0.22 | 1.48 |
| 14739 | 0 | 143673 | DRANLGTLRGYY                                                   | 2.47 | 0.01 | 0.78 | 0.68 | 0.22 | 1.27 |
| 14740 | 0 | 9949   | DRARRLLWWHYNCL                                                 | 2.61 | 0.01 | 2.40 | 2.43 | 0.22 | 0.28 |
| 14741 | 0 | 9949   | DRARRLLWWHYNCL                                                 | 2.61 | 0.01 | 2.40 | 2.43 | 0.22 | 0.28 |
| 14742 | 0 | 9949   | DRARRLLWWHYNCL                                                 | 2.61 | 0.01 | 2.40 | 2.43 | 0.22 | 0.28 |
| 14743 | 0 | 9951   | DRASLST                                                        | 2.02 | 0.01 | 2.04 | 0.44 | 0.85 | 0.28 |
| 14744 | 0 | 97954  | DRASLSTWHVLYSPN                                                | 2.64 | 0.01 | 2.04 | 0.44 | 2.98 | 0.28 |
| 14745 | 0 | 128455 | DRATWKSNYFLKIIQ                                                | 2.61 | 0.01 | 0.78 | 0.44 | 1.13 | 0.85 |
| 14746 | 0 | 122310 | DRAVYENELVATRDVKN<br>GSRGSV                                    | 3.10 | 0.01 | 3.26 | 0.68 | 0.22 | 1.27 |
| 14747 | 0 | 122310 | DRAVYENELVATRDVKN<br>GSRGSV                                    | 3.10 | 0.01 | 3.26 | 0.68 | 0.22 | 2.51 |
| 14748 | 0 | 122310 | DRAVYENELVATRDVKN<br>GSRGSV                                    | 3.10 | 0.01 | 3.26 | 0.68 | 0.22 | 2.51 |
| 14749 | 0 | 122310 | DRAVYENELVATRDVKN<br>GSRGSV                                    | 3.10 | 0.01 | 3.26 | 0.68 | 0.22 | 3.16 |
| 14750 | 0 | 122310 | DRAVYENELVATRDVKN<br>GSRGSV                                    | 3.10 | 0.01 | 3.26 | 0.68 | 0.22 | 0.28 |
| 14751 | 0 | 122310 | DRAVYENELVATRDVKN<br>GSRGSV                                    | 3.10 | 0.01 | 3.26 | 3.81 | 0.22 | 0.28 |
| 14752 | 0 | 136828 | DRAVYENELVATRDVKN<br>GSRGSVGGGKGDCGTP<br>SHSRRQPHVVSQWSRS<br>A | 3.85 | 0.01 | 0.90 | 0.68 | 0.22 | 1.27 |
| 14753 | 0 | 136828 | DRAVYENELVATRDVKN<br>GSRGSVGGGKGDCGTP<br>SHSRRQPHVVSQWSRS<br>A | 3.85 | 0.01 | 0.90 | 3.81 | 0.22 | 0.28 |

|       |   |        |                                                                |      |      |      |      |      |      |
|-------|---|--------|----------------------------------------------------------------|------|------|------|------|------|------|
| 14754 | 0 | 136828 | DRAVYENELVATRDVKN<br>GSRGSVGGGKGDCGTP<br>SHSRRQPHVVSQWSRS<br>A | 3.85 | 0.01 | 0.90 | 0.68 | 0.22 | 1.48 |
| 14755 | 0 | 136828 | DRAVYENELVATRDVKN<br>GSRGSVGGGKGDCGTP<br>SHSRRQPHVVSQWSRS<br>A | 3.85 | 0.01 | 0.90 | 0.68 | 0.22 | 1.48 |
| 14756 | 0 | 136828 | DRAVYENELVATRDVKN<br>GSRGSVGGGKGDCGTP<br>SHSRRQPHVVSQWSRS<br>A | 3.85 | 0.01 | 0.90 | 3.81 | 0.22 | 1.48 |
| 14757 | 0 | 136828 | DRAVYENELVATRDVKN<br>GSRGSVGGGKGDCGTP<br>SHSRRQPHVVSQWSRS<br>A | 3.85 | 0.01 | 0.90 | 0.68 | 0.22 | 1.27 |
| 14758 | 0 | 136828 | DRAVYENELVATRDVKN<br>GSRGSVGGGKGDCGTP<br>SHSRRQPHVVSQWSRS<br>A | 3.85 | 0.01 | 0.90 | 3.81 | 0.22 | 0.28 |
| 14759 | 0 | 9953   | DRCGEDDHDELGF MVP                                              | 2.73 | 0.01 | 2.71 | 2.13 | 0.22 | 0.85 |
| 14760 | 0 | 9956   | DRCTTFDDVQAPNYTQ<br>H                                          | 2.77 | 0.01 | 2.48 | 0.44 | 0.85 | 0.28 |
| 14761 | 0 | 9956   | DRCTTFDDVQAPNYTQ<br>H                                          | 2.77 | 0.01 | 2.48 | 0.68 | 0.22 | 0.28 |
| 14762 | 0 | 9956   | DRCTTFDDVQAPNYTQ<br>H                                          | 2.77 | 0.01 | 2.48 | 1.20 | 0.22 | 0.28 |
| 14763 | 0 | 270821 | DRDAAALMATDELTT                                                | 2.71 | 0.01 | 1.61 | 0.44 | 0.85 | 1.28 |
| 14764 | 0 | 270823 | DRDATAALMATDELTT                                               | 2.72 | 0.01 | 1.61 | 0.44 | 0.85 | 1.28 |
| 14765 | 0 | 178688 | DRDKDGVIGKTDLRG                                                | 2.72 | 0.01 | 2.36 | 0.44 | 1.23 | 1.28 |
| 14766 | 0 | 178688 | DRDKDGVIGKTDLRG                                                | 2.72 | 0.01 | 2.36 | 0.44 | 1.23 | 1.27 |
| 14767 | 0 | 164637 | DRDLQTGGI                                                      | 2.23 | 0.01 | 3.57 | 0.68 | 0.22 | 1.27 |
| 14768 | 0 | 164637 | DRDLQTGGI                                                      | 2.23 | 0.01 | 3.57 | 0.68 | 0.22 | 0.28 |
| 14769 | 0 | 164637 | DRDLQTGGI                                                      | 2.23 | 0.01 | 3.57 | 0.68 | 0.22 | 0.28 |
| 14770 | 0 | 164637 | DRDLQTGGI                                                      | 2.23 | 0.01 | 3.57 | 0.68 | 0.22 | 0.28 |
| 14771 | 0 | 164637 | DRDLQTGGI                                                      | 2.23 | 0.01 | 3.57 | 0.68 | 0.22 | 0.28 |
| 14772 | 0 | 164637 | DRDLQTGGI                                                      | 2.23 | 0.01 | 3.57 | 0.68 | 0.22 | 0.28 |
| 14773 | 0 | 99155  | DREDLRTLLR                                                     | 2.36 | 0.01 | 0.78 | 0.68 | 0.22 | 1.27 |
| 14774 | 0 | 99155  | DREDLRTLLR                                                     | 2.36 | 0.01 | 0.78 | 0.68 | 0.22 | 1.27 |
| 14775 | 0 | 99155  | DREDLRTLLR                                                     | 2.36 | 0.01 | 0.78 | 0.68 | 0.22 | 1.27 |
| 14776 | 0 | 99155  | DREDLRTLLR                                                     | 2.36 | 0.01 | 0.78 | 0.68 | 0.22 | 1.27 |
| 14777 | 0 | 99155  | DREDLRTLLR                                                     | 2.36 | 0.01 | 0.78 | 0.68 | 0.22 | 1.27 |
| 14778 | 0 | 270855 | DREFDYEDDYEGYK                                                 | 2.73 | 0.01 | 1.61 | 0.44 | 0.85 | 1.28 |
| 14779 | 0 | 9964   | DREKLQERLAKLAGGVA<br>VIHV                                      | 3.01 | 0.01 | 4.93 | 0.44 | 0.85 | 0.85 |
| 14780 | 0 | 138840 | DREQAPNLVYM                                                    | 2.34 | 0.01 | 0.78 | 0.68 | 0.22 | 0.85 |

|       |   |        |                                                      |      |      |      |      |      |      |
|-------|---|--------|------------------------------------------------------|------|------|------|------|------|------|
| 14781 | 0 | 138840 | DREQAPNLVYM                                          | 2.34 | 0.01 | 0.78 | 0.68 | 0.22 | 0.28 |
| 14782 | 0 | 138840 | DREQAPNLVYM                                          | 2.34 | 0.01 | 0.78 | 0.68 | 0.22 | 1.34 |
| 14783 | 0 | 9966   | DREVLREF                                             | 2.23 | 0.01 | 2.41 | 0.44 | 0.85 | 0.28 |
| 14784 | 0 | 103113 | DRFADFPALPLDPSA                                      | 2.73 | 0.01 | 2.04 | 0.44 | 0.85 | 1.28 |
| 14785 | 0 | 443256 | DRFKPIRTGISPLALIKG<br>MTRPLSTLIS                     | 3.30 | 0.01 | 0.78 | 0.44 | 1.93 | 0.28 |
| 14786 | 0 | 443256 | DRFKPIRTGISPLALIKG<br>MTRPLSTLIS                     | 3.30 | 0.01 | 0.78 | 0.44 | 1.41 | 0.28 |
| 14787 | 0 | 270881 | DRFLAAAMDKVFTTG                                      | 2.66 | 0.01 | 1.61 | 0.44 | 0.85 | 1.28 |
| 14788 | 0 | 238305 | DRGCAATCPTVKPGV                                      | 2.69 | 0.01 | 2.56 | 1.20 | 0.22 | 0.85 |
| 14789 | 0 | 238305 | DRGCAATCPTVKPGV                                      | 2.69 | 0.01 | 2.56 | 2.02 | 0.22 | 0.85 |
| 14790 | 0 | 133545 | DRGDQSTDYGIFQINSR                                    | 2.82 | 0.01 | 1.75 | 4.08 | 0.22 | 1.75 |
| 14791 | 0 | 133545 | DRGDQSTDYGIFQINSR                                    | 2.82 | 0.01 | 1.75 | 4.08 | 0.22 | 1.75 |
| 14792 | 0 | 127627 | DRGEGNMLWIDWLSK                                      | 2.67 | 0.01 | 4.23 | 0.44 | 1.13 | 0.85 |
| 14793 | 0 | 108876 | DRGEGPRINARC                                         | 2.48 | 0.01 | 0.90 | 1.15 | 0.22 | 1.39 |
| 14794 | 0 | 108877 | DRGFYFNKPTGY                                         | 2.48 | 0.01 | 0.78 | 1.15 | 0.22 | 0.28 |
| 14795 | 0 | 108877 | DRGFYFNKPTGY                                         | 2.48 | 0.01 | 0.78 | 1.15 | 0.22 | 0.28 |
| 14796 | 0 | 108877 | DRGFYFNKPTGY                                         | 2.48 | 0.01 | 0.78 | 1.15 | 0.22 | 1.57 |
| 14797 | 0 | 108877 | DRGFYFNKPTGY                                         | 2.48 | 0.01 | 0.78 | 1.15 | 0.22 | 1.57 |
| 14798 | 0 | 170635 | DRGMLDMCGFDTGAL                                      | 2.71 | 0.01 | 0.78 | 0.44 | 1.41 | 0.28 |
| 14799 | 0 | 9978   | DRGWGN                                               | 1.90 | 0.01 | 2.40 | 0.44 | 0.85 | 0.28 |
| 14800 | 0 | 9979   | DRGWGNGC                                             | 2.14 | 0.01 | 2.40 | 1.12 | 0.22 | 0.28 |
| 14801 | 0 | 9979   | DRGWGNGC                                             | 2.14 | 0.01 | 2.40 | 1.12 | 0.22 | 0.28 |
| 14802 | 0 | 94491  | DRGWGNHCGLFGKGS                                      | 2.71 | 0.01 | 3.72 | 1.15 | 0.22 | 1.34 |
| 14803 | 0 | 94491  | DRGWGNHCGLFGKGS                                      | 2.71 | 0.01 | 3.72 | 1.15 | 0.22 | 0.28 |
| 14804 | 0 | 9980   | DRGYISQY                                             | 2.12 | 0.01 | 2.99 | 0.44 | 0.85 | 0.28 |
| 14805 | 0 | 9982   | DRHFLN                                               | 1.88 | 0.01 | 2.61 | 0.44 | 0.85 | 0.28 |
| 14806 | 0 | 9983   | DRHFLNNVC                                            | 2.20 | 0.01 | 2.61 | 0.44 | 0.85 | 0.28 |
| 14807 | 0 | 9984   | DRHIDRLAKRQRPGE                                      | 2.67 | 0.01 | 2.40 | 1.12 | 0.22 | 0.28 |
| 14808 | 0 | 114305 | DRHPVYFFKSACPPN<br>DRIARLMALAPQPSQAL                 | 2.62 | 0.01 | 2.76 | 0.44 | 1.74 | 1.57 |
| 14809 | 0 | 9986   | PYQTEYLAPRSFAPMRP<br>PRRGLSGLWR<br>DRIARLMALAPQPSQAL | 3.73 | 0.01 | 2.59 | 0.44 | 0.85 | 0.28 |
| 14810 | 0 | 9986   | PYQTEYLAPRSFAPMRP<br>PRRGLSGLWR                      | 3.73 | 0.01 | 2.59 | 0.44 | 0.85 | 0.85 |
| 14811 | 0 | 122311 | DRIQRTQPLTAIPLL                                      | 2.70 | 0.01 | 0.90 | 1.15 | 0.22 | 1.39 |
| 14812 | 0 | 122732 | DRKASPPSGLWSPAY                                      | 2.68 | 0.01 | 2.19 | 0.44 | 1.13 | 1.57 |
| 14813 | 0 | 9990   | DRKKEMLE                                             | 2.13 | 0.01 | 2.99 | 0.44 | 0.85 | 0.28 |
| 14814 | 0 | 240978 | DRKQTRPG                                             | 2.12 | 0.01 | 3.35 | 2.37 | 0.22 | 0.85 |
| 14815 | 0 | 123098 | DRKREKRK                                             | 2.16 | 0.01 | 2.96 | 1.20 | 0.22 | 0.28 |

|       |   |        |                                    |      |      |      |      |      |      |
|-------|---|--------|------------------------------------|------|------|------|------|------|------|
| 14816 | 0 | 123098 | DRKREKRK                           | 2.16 | 0.01 | 2.96 | 1.20 | 0.22 | 0.28 |
| 14817 | 0 | 95325  | DRLATALGKMTKGEAKK<br>WGNAIESATGTTS | 3.35 | 0.01 | 3.65 | 2.22 | 0.22 | 0.28 |
| 14818 | 0 | 99158  | DRLLSIKSEGHQPQE                    | 2.65 | 0.01 | 2.86 | 2.02 | 0.85 | 0.85 |
| 14819 | 0 | 10007  | DRLLTTLSPAQ                        | 2.46 | 0.01 | 0.90 | 2.22 | 0.85 | 1.39 |
| 14820 | 0 | 128457 | DRLNKVISELNGKNI                    | 2.68 | 0.01 | 0.78 | 0.44 | 1.13 | 0.85 |
| 14821 | 0 | 10010  | DRLNQLESKVSGKGQQ<br>QQ             | 2.84 | 0.01 | 2.91 | 0.44 | 0.85 | 0.28 |
| 14822 | 0 | 134346 | DRLQGMAPAAGADLDK<br>IGLHSDS        | 3.09 | 0.01 | 0.78 | 2.49 | 1.13 | 0.28 |
| 14823 | 0 | 168372 | DRLQGMAPAAGADLDK<br>IGLHSDSQ       | 3.14 | 0.01 | 0.78 | 1.12 | 0.22 | 1.75 |
| 14824 | 0 | 10012  | DRLQGRQQEQ                         | 2.35 | 0.01 | 2.16 | 0.44 | 1.23 | 0.85 |
| 14825 | 0 | 10016  | DRLSSANLYINGVLMGS<br>AEI           | 2.94 | 0.01 | 2.95 | 3.38 | 0.22 | 0.28 |
| 14826 | 0 | 132794 | DRLYAQYPVPTP                       | 2.48 | 0.01 | 0.90 | 1.15 | 0.22 | 1.39 |
| 14827 | 0 | 132794 | DRLYAQYPVPTP                       | 2.48 | 0.01 | 0.90 | 1.15 | 0.22 | 1.34 |
| 14828 | 0 | 141534 | DRMNLQTLRGYY                       | 2.45 | 0.01 | 0.78 | 0.68 | 0.22 | 1.27 |
| 14829 | 0 | 141534 | DRMNLQTLRGYY                       | 2.45 | 0.01 | 0.78 | 0.68 | 0.22 | 0.85 |
| 14830 | 0 | 141534 | DRMNLQTLRGYY                       | 2.45 | 0.01 | 0.78 | 0.68 | 0.22 | 1.39 |
| 14831 | 0 | 141534 | DRMNLQTLRGYY                       | 2.45 | 0.01 | 0.78 | 0.68 | 0.22 | 1.39 |
| 14832 | 0 | 141534 | DRMNLQTLRGYY                       | 2.45 | 0.01 | 0.78 | 0.68 | 0.22 | 1.39 |
| 14833 | 0 | 141534 | DRMNLQTLRGYY                       | 2.45 | 0.01 | 0.78 | 0.68 | 0.22 | 1.39 |
| 14834 | 0 | 141534 | DRMNLQTLRGYY                       | 2.45 | 0.01 | 0.78 | 0.68 | 0.22 | 1.39 |
| 14835 | 0 | 141534 | DRMNLQTLRGYY                       | 2.45 | 0.01 | 0.78 | 0.68 | 0.22 | 1.27 |
| 14836 | 0 | 117799 | DRNGTHLDA                          | 2.22 | 0.01 | 0.78 | 0.44 | 1.13 | 0.85 |
| 14837 | 0 | 117799 | DRNGTHLDA                          | 2.22 | 0.01 | 0.78 | 0.44 | 1.13 | 0.85 |
| 14838 | 0 | 10021  | DRNIYLVQR                          | 2.21 | 0.01 | 0.90 | 1.15 | 0.22 | 1.39 |
| 14839 | 0 | 10022  | DRNLGIGNTGNW                       | 2.49 | 0.01 | 2.86 | 0.44 | 0.85 | 0.28 |
| 14840 | 0 | 10022  | DRNLGIGNTGNW                       | 2.49 | 0.01 | 2.86 | 0.44 | 0.85 | 0.28 |
| 14841 | 0 | 10022  | DRNLGIGNTGNW                       | 2.49 | 0.01 | 2.86 | 0.44 | 0.85 | 0.28 |
| 14842 | 0 | 10024  | DRNMYLNT                           | 2.12 | 0.01 | 3.78 | 0.68 | 0.22 | 0.85 |
| 14843 | 0 | 137390 | DRNTQIYKAQAQTDRES<br>LRNLRG        | 3.08 | 0.01 | 0.78 | 1.12 | 0.22 | 2.02 |
| 14844 | 0 | 137390 | DRNTQIYKAQAQTDRES<br>LRNLRG        | 3.08 | 0.01 | 0.78 | 1.12 | 0.22 | 1.34 |
| 14845 | 0 | 232627 | DRNTQRQTVRYSVSE                    | 2.70 | 0.01 | 2.28 | 0.68 | 0.22 | 0.28 |
| 14846 | 0 | 232627 | DRNTQRQTVRYSVSE                    | 2.70 | 0.01 | 2.28 | 0.68 | 0.22 | 0.28 |
| 14847 | 0 | 232627 | DRNTQRQTVRYSVSE                    | 2.70 | 0.01 | 2.28 | 0.68 | 0.22 | 0.28 |
| 14848 | 0 | 130772 | DRPEDLDVPPALADFIH<br>QQRT          | 2.99 | 0.01 | 0.78 | 0.44 | 1.13 | 0.28 |
| 14849 | 0 | 130772 | DRPEDLDVPPALADFIH<br>QQRT          | 2.99 | 0.01 | 0.78 | 0.44 | 1.41 | 0.28 |
| 14850 | 0 | 10036  | DRPTSPAPSRPFSVLRA<br>NDVLWLSLTAAE  | 3.37 | 0.01 | 2.53 | 0.44 | 0.85 | 0.28 |
| 14851 | 0 | 125843 | DRPVVY                             | 1.90 | 4.93 | 0.90 | 1.15 | 0.22 | 0.28 |
| 14852 | 0 | 10037  | DRPVVY                             | 1.90 | 0.01 | 0.90 | 1.15 | 0.22 | 0.28 |

|       |   |        |                          |      |      |      |      |      |      |
|-------|---|--------|--------------------------|------|------|------|------|------|------|
| 14853 | 0 | 10037  | DRPVYPY                  | 1.90 | 0.01 | 0.90 | 1.15 | 0.22 | 3.13 |
| 14854 | 0 | 145149 | DRQHLPLIK                | 2.21 | 3.67 | 0.78 | 0.44 | 1.13 | 1.28 |
| 14855 | 0 | 157172 | DRQMVQHFKR               | 2.31 | 0.01 | 2.16 | 0.44 | 1.23 | 0.85 |
| 14856 | 0 | 157172 | DRQMVQHFKR               | 2.31 | 0.01 | 2.16 | 0.44 | 1.23 | 0.85 |
| 14857 | 0 | 10040  | DRRCQSQLER               | 2.33 | 0.01 | 2.16 | 0.44 | 1.23 | 0.85 |
| 14858 | 0 | 10040  | DRRCQSQLER               | 2.33 | 0.01 | 2.16 | 0.44 | 1.23 | 0.85 |
| 14859 | 0 | 10040  | DRRCQSQLER               | 2.33 | 0.01 | 2.16 | 0.44 | 1.23 | 0.85 |
| 14860 | 0 | 10040  | DRRCQSQLER               | 2.33 | 0.01 | 2.16 | 0.44 | 1.23 | 1.27 |
| 14861 | 0 | 10040  | DRRCQSQLER               | 2.33 | 0.01 | 2.16 | 0.44 | 1.23 | 0.85 |
| 14862 | 0 | 10040  | DRRCQSQLER               | 2.33 | 0.01 | 2.16 | 0.44 | 1.74 | 0.85 |
| 14863 | 0 | 10041  | DRRCQSQLERANLRP          | 2.68 | 0.01 | 2.16 | 0.44 | 1.23 | 0.85 |
| 14864 | 0 | 10041  | DRRCQSQLERANLRP          | 2.68 | 0.01 | 2.16 | 2.90 | 0.22 | 0.85 |
| 14865 | 0 | 10041  | DRRCQSQLERANLRP          | 2.68 | 0.01 | 2.16 | 2.90 | 0.22 | 0.85 |
| 14866 | 0 | 116695 | DRRDPYSPYDRRG            | 2.74 | 0.01 | 2.16 | 0.44 | 1.23 | 0.85 |
| 14867 | 0 | 135910 | DRRLCSHLEVCI             | 2.46 | 0.01 | 0.78 | 0.44 | 1.41 | 0.28 |
| 14868 | 0 | 99160  | DRRQPRREEGGRWGP          | 2.72 | 0.01 | 2.16 | 0.44 | 1.23 | 1.48 |
| 14869 | 0 | 127628 | DRRREGPDSPRQPP           | 2.71 | 0.01 | 0.78 | 0.44 | 1.13 | 0.85 |
| 14870 | 0 | 10045  | DRRRGRGSRGRGNGI          | 2.73 | 0.01 | 2.16 | 0.44 | 1.23 | 0.85 |
| 14871 | 0 | 105726 | DRRRGRGSRGSGNGI          | 2.73 | 0.01 | 2.16 | 0.44 | 1.23 | 0.85 |
| 14872 | 0 | 10048  | DRRWHR                   | 1.92 | 0.01 | 0.90 | 0.44 | 1.59 | 1.39 |
| 14873 | 0 | 195013 | DRSGAPTYSWGAND           | 2.62 | 0.01 | 2.45 | 0.44 | 0.85 | 0.28 |
| 14874 | 0 | 161214 | DRSGAPTYSWGANDTD<br>VFVL | 2.94 | 0.01 | 2.45 | 0.68 | 0.22 | 0.28 |
| 14875 | 0 | 161214 | DRSGAPTYSWGANDTD<br>VFVL | 2.94 | 0.01 | 2.45 | 0.68 | 0.22 | 1.27 |
| 14876 | 0 | 10050  | DRSGAPTYSWGENDTD<br>VFVL | 2.92 | 0.01 | 2.83 | 0.44 | 0.85 | 0.28 |
| 14877 | 0 | 105727 | DRSGYSSPGSPG             | 2.52 | 4.93 | 0.78 | 1.15 | 0.22 | 0.28 |
| 14878 | 0 | 106352 | DRSYTTRRWL               | 2.31 | 0.01 | 2.75 | 0.44 | 1.23 | 0.85 |
| 14879 | 0 | 10057  | DRTAVTGASYFTSVDQS<br>SVH | 2.96 | 0.01 | 2.82 | 0.44 | 0.85 | 0.28 |
| 14880 | 0 | 226014 | DRTNLQEAQPLGNGKK<br>AEQW | 2.94 | 0.01 | 2.24 | 0.68 | 0.22 | 0.28 |
| 14881 | 0 | 226014 | DRTNLQEAQPLGNGKK<br>AEQW | 2.94 | 0.01 | 2.24 | 3.57 | 0.22 | 0.28 |
| 14882 | 0 | 143674 | DRVALRNLLRRY             | 2.49 | 0.01 | 0.78 | 0.68 | 0.22 | 1.27 |
| 14883 | 0 | 143675 | DRVDLGTLRGY              | 2.50 | 0.01 | 0.78 | 0.68 | 0.22 | 1.27 |
| 14884 | 0 | 143676 | DRVGLRNLRGY              | 2.49 | 0.01 | 0.78 | 0.68 | 0.22 | 1.27 |
| 14885 | 0 | 143676 | DRVGLRNLRGY              | 2.49 | 0.01 | 0.78 | 0.68 | 0.22 | 2.12 |
| 14886 | 0 | 143677 | DRVNLRKLRGY              | 2.47 | 0.01 | 0.78 | 0.68 | 0.22 | 1.27 |
| 14887 | 0 | 143678 | DRVNLRNLRGY              | 2.49 | 0.01 | 0.78 | 0.68 | 0.22 | 1.27 |
| 14888 | 0 | 135911 | DRVRSITLGNST             | 2.48 | 0.01 | 3.34 | 0.44 | 1.13 | 0.28 |
| 14889 | 0 | 10064  | DRVVKEMRRQLEMIDK<br>LTT  | 2.90 | 0.01 | 3.29 | 1.15 | 0.22 | 0.28 |
| 14890 | 0 | 10064  | DRVVKEMRRQLEMIDK<br>LTT  | 2.90 | 0.01 | 3.29 | 1.15 | 0.22 | 0.85 |

|       |   |        |                                      |      |      |      |      |      |      |
|-------|---|--------|--------------------------------------|------|------|------|------|------|------|
| 14891 | 0 | 10064  | DRVVKEMRRQLEMIDK<br>LTT              | 2.90 | 0.01 | 3.29 | 1.15 | 0.22 | 0.85 |
| 14892 | 0 | 10064  | DRVVKEMRRQLEMIDK<br>LTT              | 2.90 | 0.01 | 3.29 | 1.15 | 0.22 | 0.85 |
| 14893 | 0 | 10064  | DRVVKEMRRQLEMIDK<br>LTT              | 2.90 | 0.01 | 3.29 | 1.15 | 0.22 | 0.85 |
| 14894 | 0 | 156860 | DRWNSMWKESLL                         | 2.45 | 0.01 | 0.90 | 2.74 | 0.22 | 0.85 |
| 14895 | 0 | 156860 | DRWNSMWKESLL                         | 2.45 | 0.01 | 0.90 | 2.22 | 1.59 | 0.85 |
| 14896 | 0 | 127629 | DRWSSLF                              | 2.01 | 0.01 | 0.90 | 0.44 | 1.13 | 1.39 |
| 14897 | 0 | 152471 | DRYDMLNISS                           | 2.30 | 0.01 | 2.18 | 2.16 | 0.22 | 0.28 |
| 14898 | 0 | 10067  | DRYFTYEPPNDG                         | 2.47 | 0.01 | 2.88 | 2.22 | 0.85 | 0.28 |
| 14899 | 0 | 10067  | DRYFTYEPPNDG                         | 2.47 | 0.01 | 2.88 | 2.22 | 0.22 | 0.28 |
| 14900 | 0 | 10067  | DRYFTYEPPNDG                         | 2.47 | 0.01 | 2.88 | 2.37 | 0.22 | 0.28 |
| 14901 | 0 | 10067  | DRYFTYEPPNDG                         | 2.47 | 0.01 | 2.88 | 2.37 | 0.22 | 0.28 |
| 14902 | 0 | 10067  | DRYFTYEPPNDG                         | 2.47 | 0.01 | 2.88 | 2.22 | 0.22 | 0.28 |
| 14903 | 0 | 10069  | DRYIPYSP                             | 2.14 | 0.01 | 1.66 | 1.15 | 0.22 | 1.34 |
| 14904 | 0 | 10069  | DRYIPYSP                             | 2.14 | 0.01 | 1.66 | 1.15 | 0.22 | 0.28 |
| 14905 | 0 | 10069  | DRYIPYSP                             | 2.14 | 0.01 | 1.66 | 1.15 | 0.22 | 1.34 |
| 14906 | 0 | 10069  | DRYIPYSP                             | 2.14 | 0.01 | 1.66 | 1.15 | 0.22 | 0.28 |
| 14907 | 0 | 10069  | DRYIPYSP                             | 2.14 | 0.01 | 1.66 | 0.44 | 1.74 | 0.28 |
| 14908 | 0 | 10069  | DRYIPYSP                             | 2.14 | 0.01 | 1.66 | 1.15 | 0.22 | 0.28 |
| 14909 | 0 | 120452 | DRYRHLVALSITDFGAA<br>GPRSSWRA        | 3.15 | 0.01 | 2.86 | 0.44 | 0.85 | 0.28 |
| 14910 | 0 | 10074  | DRYTDAHNAVQTQGRV<br>PLRNLLLEMDKNSKLR | 3.39 | 0.01 | 4.93 | 2.42 | 0.22 | 0.28 |
| 14911 | 0 | 10075  | DRYYREN                              | 2.03 | 0.01 | 0.78 | 0.68 | 0.22 | 0.28 |
| 14912 | 0 | 229977 | DRYYREN                              | 2.13 | 0.01 | 2.52 | 3.15 | 0.22 | 0.85 |
| 14913 | 0 | 229977 | DRYYREN                              | 2.13 | 0.01 | 2.52 | 3.15 | 0.22 | 0.85 |
| 14914 | 0 | 228041 | DRYYRENMYRYPN                        | 2.59 | 0.01 | 2.98 | 2.19 | 0.22 | 0.85 |
| 14915 | 0 | 10076  | DRYYRENMYRYPNQV                      | 2.70 | 0.01 | 2.52 | 2.19 | 0.22 | 0.28 |
| 14916 | 0 | 124031 | DSAFDVLSFTAEEKAGV<br>YK              | 2.91 | 0.01 | 1.75 | 0.68 | 0.22 | 0.28 |
| 14917 | 0 | 124031 | DSAFDVLSFTAEEKAGV<br>YK              | 2.91 | 0.01 | 1.75 | 0.68 | 0.22 | 0.28 |
| 14918 | 0 | 124031 | DSAFDVLSFTAEEKAGV<br>YK              | 2.91 | 0.01 | 1.75 | 0.68 | 0.22 | 0.28 |
| 14919 | 0 | 271197 | DSAKGKATGGSAGED                      | 2.73 | 0.01 | 1.61 | 0.44 | 0.85 | 1.28 |
| 14920 | 0 | 271198 | DSAKGKATGGSAGED                      | 2.73 | 0.01 | 1.61 | 0.44 | 0.85 | 1.28 |
| 14921 | 0 | 513740 | DSAKKATRLKAAAKA                      | 2.72 | 0.01 | 2.24 | 0.44 | 1.41 | 1.28 |
| 14922 | 0 | 133546 | DSARAAY                              | 2.03 | 0.01 | 3.59 | 0.68 | 0.22 | 0.28 |
| 14923 | 0 | 107798 | DSARNTFKTTTAPYS                      | 2.66 | 0.01 | 0.90 | 0.44 | 1.13 | 1.39 |
| 14924 | 0 | 226540 | DSARVLRDARAVLS                       | 2.68 | 0.01 | 2.51 | 0.44 | 1.13 | 0.28 |
| 14925 | 0 | 226540 | DSARVLRDARAVLS                       | 2.68 | 0.01 | 2.51 | 0.44 | 1.41 | 0.28 |
| 14926 | 0 | 10080  | DSAVAEFFQSFPSGEPS<br>NSK             | 2.96 | 0.01 | 2.82 | 0.44 | 0.85 | 0.28 |

|       |   |        |                          |      |      |      |      |      |      |
|-------|---|--------|--------------------------|------|------|------|------|------|------|
| 14927 | 0 | 10080  | DSAVAEFFQSFPSGEPS<br>NSK | 2.96 | 0.01 | 2.82 | 0.44 | 1.41 | 0.28 |
| 14928 | 0 | 79188  | DSAVGY                   | 1.88 | 0.01 | 0.90 | 3.00 | 0.22 | 1.27 |
| 14929 | 0 | 79188  | DSAVGY                   | 1.88 | 0.01 | 0.90 | 1.15 | 0.22 | 0.28 |
| 14930 | 0 | 79189  | DSAVPN                   | 1.88 | 0.01 | 0.90 | 3.00 | 0.22 | 0.28 |
| 14931 | 0 | 79189  | DSAVPN                   | 1.88 | 0.01 | 0.90 | 1.15 | 0.22 | 0.28 |
| 14932 | 0 | 127948 | DSDARVEAAATWYYSLE<br>HST | 2.94 | 0.01 | 0.78 | 0.44 | 1.13 | 0.28 |
| 14933 | 0 | 157173 | DSDDTEEGEDEG             | 2.54 | 0.01 | 3.40 | 2.49 | 0.85 | 0.28 |
| 14934 | 0 | 10090  | DSDFPIQNLP               | 2.32 | 0.01 | 1.75 | 0.68 | 0.22 | 0.28 |
| 14935 | 0 | 10090  | DSDFPIQNLP               | 2.32 | 0.01 | 1.75 | 0.68 | 0.22 | 0.28 |
| 14936 | 0 | 10090  | DSDFPIQNLP               | 2.32 | 0.01 | 1.75 | 0.68 | 0.22 | 0.28 |
| 14937 | 0 | 125845 | DSDFPIQNLPYGVFS          | 2.67 | 0.01 | 1.75 | 0.68 | 0.22 | 0.28 |
| 14938 | 0 | 189604 | DSDGDGKIGVDEFGA          | 2.71 | 0.01 | 3.28 | 0.44 | 1.23 | 0.28 |
| 14939 | 0 | 99952  | DSDGQDLLFT               | 2.33 | 0.01 | 2.18 | 2.16 | 0.22 | 0.28 |
| 14940 | 0 | 108878 | DSDGSFF                  | 2.03 | 0.01 | 0.78 | 0.44 | 1.13 | 0.28 |
| 14941 | 0 | 170641 | DSDIEWLQKDFGLYV          | 2.65 | 0.01 | 0.78 | 0.44 | 1.41 | 0.28 |
| 14942 | 0 | 170641 | DSDIEWLQKDFGLYV          | 2.65 | 0.01 | 0.78 | 0.44 | 1.13 | 0.28 |
| 14943 | 0 | 271314 | DSDLQLERINVYFDE          | 2.67 | 0.01 | 1.61 | 0.44 | 0.85 | 1.28 |
| 14944 | 0 | 134656 | DSDMGRMGPI               | 2.34 | 0.01 | 1.60 | 1.12 | 0.22 | 0.28 |
| 14945 | 0 | 10098  | DSDSESDSDSDSDSDSD        | 2.88 | 0.01 | 3.40 | 0.44 | 1.74 | 0.28 |
| 14946 | 0 | 10098  | DSDSESDSDSDSDSDSD        | 2.88 | 0.01 | 3.40 | 0.44 | 0.85 | 0.28 |
| 14947 | 0 | 140014 | DSDVGE                   | 1.91 | 0.01 | 0.78 | 0.68 | 0.22 | 2.12 |
| 14948 | 0 | 140014 | DSDVGE                   | 1.91 | 0.01 | 0.78 | 0.68 | 0.22 | 1.34 |
| 14949 | 0 | 137138 | DSDVGEFRAVTELGR          | 2.69 | 0.01 | 0.78 | 1.15 | 0.22 | 1.57 |
| 14950 | 0 | 137138 | DSDVGEFRAVTELGR          | 2.69 | 0.01 | 0.78 | 2.74 | 0.22 | 1.57 |
| 14951 | 0 | 181986 | DSEAKGEETEETASSSIT<br>S  | 2.98 | 0.01 | 3.85 | 2.13 | 1.74 | 0.28 |
| 14952 | 0 | 229133 | DSEDDTAA                 | 2.13 | 0.01 | 2.70 | 0.68 | 0.22 | 0.28 |
| 14953 | 0 | 170643 | DSEEDDEEEDDEDE           | 2.76 | 0.01 | 0.78 | 0.44 | 1.13 | 0.28 |
| 14954 | 0 | 229978 | DSEEERQEYVLTQQG          | 2.66 | 0.01 | 0.78 | 0.44 | 1.93 | 1.27 |
| 14955 | 0 | 229978 | DSEEERQEYVLTQQG          | 2.66 | 0.01 | 0.78 | 0.44 | 1.93 | 0.28 |
| 14956 | 0 | 229978 | DSEEERQEYVLTQQG          | 2.66 | 0.01 | 0.78 | 0.44 | 2.39 | 0.28 |
| 14957 | 0 | 271389 | DSENSKTGCGEASD           | 2.70 | 0.01 | 1.61 | 0.44 | 0.85 | 1.28 |
| 14958 | 0 | 10106  | DSEPFPRQKHKKVD           | 2.61 | 0.01 | 1.66 | 0.44 | 1.74 | 0.28 |
| 14959 | 0 | 10106  | DSEPFPRQKHKKVD           | 2.61 | 0.01 | 1.66 | 0.44 | 0.85 | 0.28 |
| 14960 | 0 | 10108  | DSERLIGDAAKNQVAM<br>NPHN | 2.89 | 0.01 | 2.78 | 0.44 | 0.85 | 0.28 |
| 14961 | 0 | 10109  | DSESGGHITH               | 2.32 | 0.01 | 2.43 | 1.20 | 0.22 | 0.28 |
| 14962 | 0 | 10109  | DSESGGHITH               | 2.32 | 0.01 | 2.43 | 1.20 | 0.22 | 0.28 |
| 14963 | 0 | 10109  | DSESGGHITH               | 2.32 | 0.01 | 2.43 | 1.20 | 0.22 | 0.28 |
| 14964 | 0 | 10109  | DSESGGHITH               | 2.32 | 0.01 | 2.43 | 1.20 | 0.22 | 0.28 |
| 14965 | 0 | 10109  | DSESGGHITH               | 2.32 | 0.01 | 2.43 | 1.20 | 0.22 | 0.28 |
| 14966 | 0 | 10109  | DSESGGHITH               | 2.32 | 0.01 | 2.43 | 1.15 | 2.26 | 0.28 |
| 14967 | 0 | 10109  | DSESGGHITH               | 2.32 | 0.01 | 2.43 | 1.15 | 2.26 | 0.28 |

|       |   |        |                                                  |      |      |      |      |      |      |
|-------|---|--------|--------------------------------------------------|------|------|------|------|------|------|
| 14968 | 0 | 135838 | DSFGNWRLWAPIG                                    | 2.51 | 0.01 | 0.90 | 1.15 | 0.22 | 0.28 |
| 14969 | 0 | 135838 | DSFGNWRLWAPIG                                    | 2.51 | 0.01 | 0.90 | 1.15 | 0.22 | 1.27 |
| 14970 | 0 | 10113  | DSFKEELDKYFKNHTSPD<br>VDLGDISGINASVV             | 3.39 | 0.01 | 2.45 | 1.12 | 0.22 | 0.28 |
| 14971 | 0 | 10113  | DSFKEELDKYFKNHTSPD<br>VDLGDISGINASVV             | 3.39 | 0.01 | 2.45 | 1.15 | 0.22 | 0.28 |
| 14972 | 0 | 10113  | DSFKEELDKYFKNHTSPD<br>VDLGDISGINASVV             | 3.39 | 0.01 | 2.45 | 2.37 | 0.22 | 0.28 |
| 14973 | 0 | 111215 | DSFTPRA                                          | 1.99 | 0.01 | 0.90 | 0.44 | 0.85 | 1.39 |
| 14974 | 0 | 10123  | DSGASSTASSSH                                     | 2.51 | 0.01 | 2.69 | 1.20 | 0.22 | 0.28 |
| 14975 | 0 | 158721 | DSGCAIDLQRRELKCG                                 | 2.73 | 0.01 | 3.93 | 0.68 | 0.22 | 0.28 |
| 14976 | 0 | 132233 | DSGCVINWKGRELKC                                  | 2.64 | 0.01 | 2.82 | 0.68 | 0.22 | 0.28 |
| 14977 | 0 | 132233 | DSGCVINWKGRELKC                                  | 2.64 | 0.01 | 2.82 | 0.68 | 0.22 | 1.27 |
| 14978 | 0 | 132233 | DSGCVINWKGRELKC                                  | 2.64 | 0.01 | 2.82 | 0.68 | 0.22 | 1.48 |
| 14979 | 0 | 132233 | DSGCVINWKGRELKC                                  | 2.64 | 0.01 | 2.82 | 0.68 | 0.22 | 0.28 |
| 14980 | 0 | 145749 | DSGCVVNWKGRELKCG<br>SGIFVTNEVHTWTEQYK<br>FQADSPK | 3.60 | 0.01 | 4.15 | 0.68 | 0.22 | 0.85 |
| 14981 | 0 | 145749 | DSGCVVNWKGRELKCG<br>SGIFVTNEVHTWTEQYK<br>FQADSPK | 3.60 | 0.01 | 4.15 | 0.68 | 0.22 | 1.48 |
| 14982 | 0 | 10125  | DSGCVVSWKNKELKC                                  | 2.67 | 0.01 | 2.30 | 0.44 | 0.85 | 0.28 |
| 14983 | 0 | 10125  | DSGCVVSWKNKELKC                                  | 2.67 | 0.01 | 2.30 | 0.44 | 0.85 | 1.34 |
| 14984 | 0 | 10125  | DSGCVVSWKNKELKC                                  | 2.67 | 0.01 | 2.30 | 0.44 | 0.85 | 1.34 |
| 14985 | 0 | 10125  | DSGCVVSWKNKELKC                                  | 2.67 | 0.01 | 2.30 | 0.44 | 0.85 | 1.34 |
| 14986 | 0 | 10125  | DSGCVVSWKNKELKC                                  | 2.67 | 0.01 | 2.30 | 0.44 | 0.85 | 1.34 |
| 14987 | 0 | 145750 | DSGCVVSWKNKELKCG<br>SGIFITDNVHTWTEQYK<br>FQPESPS | 3.62 | 0.01 | 4.03 | 0.68 | 0.22 | 0.85 |
| 14988 | 0 | 145750 | DSGCVVSWKNKELKCG<br>SGIFITDNVHTWTEQYK<br>FQPESPS | 3.62 | 0.01 | 4.03 | 0.68 | 0.22 | 1.48 |
| 14989 | 0 | 10126  | DSGDGRQTITNP                                     | 2.48 | 0.01 | 3.53 | 0.68 | 0.22 | 0.28 |
| 14990 | 0 | 10126  | DSGDGRQTITNP                                     | 2.48 | 0.01 | 3.53 | 0.68 | 0.22 | 0.85 |
| 14991 | 0 | 193172 | DSGDISSTVINFS                                    | 2.58 | 0.01 | 3.04 | 1.12 | 0.22 | 0.28 |
| 14992 | 0 | 120454 | DSGEKM                                           | 1.88 | 0.01 | 2.26 | 2.36 | 0.22 | 0.28 |
| 14993 | 0 | 10127  | DSGERLMQPTQMSAQ                                  | 2.66 | 0.01 | 3.41 | 1.15 | 0.22 | 0.85 |
| 14994 | 0 | 10127  | DSGERLMQPTQMSAQ                                  | 2.66 | 0.01 | 3.41 | 1.15 | 0.22 | 1.48 |
| 14995 | 0 | 271438 | DSGGEGSSGPGASPP                                  | 2.72 | 0.01 | 1.61 | 0.44 | 0.85 | 1.28 |
| 14996 | 0 | 107799 | DSGHRGYSGSQASDNE<br>GH                           | 2.87 | 4.63 | 0.78 | 0.44 | 1.13 | 0.85 |



|       |   |        |                                     |      |      |      |      |      |      |
|-------|---|--------|-------------------------------------|------|------|------|------|------|------|
| 14997 | 0 | 107799 | DSGHRGYSGSQASDNE<br>GH              | 2.87 | 4.63 | 0.78 | 0.44 | 1.41 | 0.85 |
| 14998 | 0 | 132795 | DSGKGLRLIYYSITENDL<br>QKG           | 3.00 | 0.01 | 1.75 | 0.68 | 0.22 | 0.28 |
| 14999 | 0 | 10131  | DSGSRTPPDELALS                      | 2.63 | 0.01 | 2.69 | 0.44 | 0.85 | 0.28 |
| 15000 | 0 | 10131  | DSGSRTPPDELALS                      | 2.63 | 0.01 | 2.69 | 0.44 | 0.85 | 0.28 |
| 15001 | 0 | 10131  | DSGSRTPPDELALS                      | 2.63 | 0.01 | 2.69 | 0.44 | 1.41 | 0.28 |
| 15002 | 0 | 10134  | DSGTRK                              | 1.88 | 0.01 | 3.85 | 1.15 | 0.22 | 1.34 |
| 15003 | 0 | 10134  | DSGTRK                              | 1.88 | 0.01 | 3.85 | 1.20 | 0.22 | 2.35 |
| 15004 | 0 | 99955  | DSGYEVHHQK                          | 2.28 | 0.01 | 0.78 | 0.44 | 1.93 | 0.28 |
| 15005 | 0 | 180902 | DSGYEVHHQKLVF                       | 2.50 | 0.01 | 0.78 | 0.68 | 0.22 | 0.28 |
| 15006 | 0 | 10135  | DSGYHSLDPNAVCTD                     | 2.70 | 0.01 | 4.23 | 2.61 | 0.22 | 0.28 |
| 15007 | 0 | 125384 | DSHYDYTICGDSSEDMVC<br>TPK           | 2.94 | 0.01 | 0.78 | 0.44 | 1.13 | 0.28 |
| 15008 | 0 | 125384 | DSHYDYTICGDSSEDMVC<br>TPK           | 2.94 | 0.01 | 0.78 | 0.44 | 1.13 | 0.28 |
| 15009 | 0 | 125384 | DSHYDYTICGDSSEDMVC<br>TPK           | 2.94 | 0.01 | 0.78 | 0.44 | 1.13 | 0.28 |
| 15010 | 0 | 125384 | DSHYDYTICGDSSEDMVC<br>TPK           | 2.94 | 0.01 | 0.78 | 0.44 | 1.13 | 1.34 |
| 15011 | 0 | 125384 | DSHYDYTICGDSSEDMVC<br>TPK           | 2.94 | 0.01 | 0.78 | 0.68 | 0.22 | 0.28 |
| 15012 | 0 | 125384 | DSHYDYTICGDSSEDMVC<br>TPK           | 2.94 | 0.01 | 0.78 | 1.20 | 0.22 | 0.28 |
| 15013 | 0 | 187054 | DSIAALKDKPDNPAL                     | 2.72 | 0.01 | 2.80 | 0.68 | 0.22 | 1.27 |
| 15014 | 0 | 187054 | DSIAALKDKPDNPAL                     | 2.72 | 0.01 | 2.80 | 0.68 | 0.22 | 0.28 |
| 15015 | 0 | 187054 | DSIAALKDKPDNPAL                     | 2.72 | 0.01 | 2.80 | 0.68 | 0.22 | 0.28 |
| 15016 | 0 | 187054 | DSIAALKDKPDNPAL                     | 2.72 | 0.01 | 2.80 | 0.68 | 0.22 | 1.27 |
| 15017 | 0 | 114199 | DSIGRFFGGDRGAPKRG<br>SGKDSHHPARTAHY | 3.40 | 0.01 | 0.78 | 3.45 | 0.22 | 1.57 |
| 15018 | 0 | 114199 | DSIGRFFGGDRGAPKRG<br>SGKDSHHPARTAHY | 3.40 | 0.01 | 0.78 | 3.45 | 0.22 | 1.57 |
| 15019 | 0 | 114199 | DSIGRFFGGDRGAPKRG<br>SGKDSHHPARTAHY | 3.40 | 0.01 | 0.78 | 3.45 | 0.22 | 1.57 |
| 15020 | 0 | 10144  | DSILFVPTTVDPASFSD<br>NS             | 2.97 | 0.01 | 2.78 | 2.49 | 0.85 | 0.28 |
| 15021 | 0 | 127630 | DSISVPYKRREG                        | 2.44 | 0.01 | 0.90 | 3.06 | 0.22 | 0.85 |
| 15022 | 0 | 10149  | DSITWQLQAAVLHV                      | 2.60 | 0.01 | 2.69 | 0.44 | 0.85 | 0.28 |
| 15023 | 0 | 10149  | DSITWQLQAAVLHV                      | 2.60 | 0.01 | 2.69 | 0.44 | 1.41 | 0.28 |
| 15024 | 0 | 103116 | DSIYYVDANASIQEM                     | 2.68 | 0.01 | 2.04 | 0.44 | 0.85 | 1.28 |
| 15025 | 0 | 10152  | DSKGNVPAGVTPSKYGL<br>GGD            | 2.96 | 0.01 | 2.21 | 1.20 | 0.22 | 0.28 |

|       |   |        |                          |      |      |      |      |      |      |
|-------|---|--------|--------------------------|------|------|------|------|------|------|
| 15026 | 0 | 10152  | DSKGNVPAGVTPSKYGL<br>GGD | 2.96 | 0.01 | 2.21 | 1.20 | 0.22 | 0.28 |
| 15027 | 0 | 10152  | DSKGNVPAGVTPSKYGL<br>GGD | 2.96 | 0.01 | 2.21 | 1.20 | 0.22 | 0.28 |
| 15028 | 0 | 10152  | DSKGNVPAGVTPSKYGL<br>GGD | 2.96 | 0.01 | 2.21 | 1.20 | 0.22 | 0.28 |
| 15029 | 0 | 10152  | DSKGNVPAGVTPSKYGL<br>GGD | 2.96 | 0.01 | 2.21 | 1.20 | 0.22 | 0.28 |
| 15030 | 0 | 141623 | DSKLNEIFGSSDTNDI         | 2.75 | 0.01 | 1.66 | 2.55 | 0.22 | 0.28 |
| 15031 | 0 | 98738  | DSKLTILTKCGSQI           | 2.70 | 0.01 | 4.63 | 1.12 | 0.22 | 0.28 |
| 15032 | 0 | 98738  | DSKLTILTKCGSQI           | 2.70 | 0.01 | 4.63 | 1.12 | 0.22 | 0.28 |
| 15033 | 0 | 91211  | DSKLTILVKNGGIV           | 2.69 | 0.01 | 3.12 | 1.12 | 0.22 | 0.28 |
| 15034 | 0 | 10155  | DSKNFNFE                 | 2.14 | 0.01 | 2.99 | 0.44 | 0.85 | 0.28 |
| 15035 | 0 | 122733 | DSKPTIISRAN              | 2.38 | 0.01 | 2.26 | 3.55 | 0.22 | 0.28 |
| 15036 | 0 | 142128 | DSKSRDTPKNANKHT<br>WKKT  | 2.97 | 0.01 | 3.55 | 3.16 | 0.22 | 0.28 |
| 15037 | 0 | 10159  | DSLIDIERNVVTVR           | 2.70 | 0.01 | 2.59 | 0.44 | 0.85 | 0.28 |
| 15038 | 0 | 10159  | DSLIDIERNVVTVR           | 2.70 | 0.01 | 2.59 | 0.44 | 0.85 | 0.28 |
| 15039 | 0 | 10164  | DSLKEKLQ                 | 2.14 | 0.01 | 1.66 | 0.44 | 1.74 | 0.28 |
| 15040 | 0 | 10167  | DSLNTGWLAGLFYHHKF<br>NSS | 2.92 | 0.01 | 2.83 | 0.44 | 0.85 | 0.28 |
| 15041 | 0 | 10167  | DSLNTGWLAGLFYHHKF<br>NSS | 2.92 | 0.01 | 2.83 | 0.44 | 0.85 | 0.28 |
| 15042 | 0 | 10167  | DSLNTGWLAGLFYHHKF<br>NSS | 2.92 | 0.01 | 2.83 | 0.44 | 0.85 | 0.28 |
| 15043 | 0 | 10168  | DSLPHPPQATDDSGH          | 2.69 | 0.01 | 2.43 | 0.68 | 0.22 | 0.28 |
| 15044 | 0 | 10168  | DSLPHPPQATDDSGH          | 2.69 | 0.01 | 2.43 | 0.68 | 0.22 | 0.28 |
| 15045 | 0 | 10168  | DSLPHPPQATDDSGH          | 2.69 | 0.01 | 2.43 | 0.68 | 0.22 | 0.85 |
| 15046 | 0 | 10170  | DSLRYMYVMMPGF            | 2.45 | 0.01 | 0.90 | 0.44 | 1.59 | 0.28 |
| 15047 | 0 | 10170  | DSLRYMYVMMPGF            | 2.45 | 0.01 | 0.90 | 0.44 | 1.59 | 0.28 |
| 15048 | 0 | 10170  | DSLRYMYVMMPGF            | 2.45 | 0.01 | 0.90 | 0.44 | 1.59 | 0.28 |
| 15049 | 0 | 10170  | DSLRYMYVMMPGF            | 2.45 | 0.01 | 0.90 | 0.44 | 1.59 | 0.28 |
| 15050 | 0 | 10170  | DSLRYMYVMMPGF            | 2.45 | 0.01 | 0.90 | 0.44 | 1.59 | 0.28 |
| 15051 | 0 | 10170  | DSLRYMYVMMPGF            | 2.45 | 0.01 | 0.90 | 0.44 | 1.59 | 0.28 |
| 15052 | 0 | 10171  | DSLSEEEKELNRIQVDS        | 2.86 | 4.23 | 2.18 | 0.68 | 0.22 | 1.34 |
| 15053 | 0 | 10171  | DSLSEEEKELNRIQVDS        | 2.86 | 4.23 | 2.18 | 0.68 | 0.22 | 0.28 |
| 15054 | 0 | 10171  | DSLSEEEKELNRIQVDS        | 2.86 | 4.23 | 2.18 | 0.68 | 0.22 | 1.34 |
| 15055 | 0 | 10171  | DSLSEEEKELNRIQVDS        | 2.86 | 4.23 | 2.18 | 0.68 | 0.22 | 1.66 |
| 15056 | 0 | 150173 | DSLSPRRAGAKAGPGLS<br>PGT | 2.98 | 0.01 | 2.59 | 0.44 | 0.85 | 0.28 |
| 15057 | 0 | 132235 | DSMDRIE                  | 2.03 | 0.01 | 0.78 | 0.44 | 1.13 | 0.85 |
| 15058 | 0 | 128463 | DSMDRIEKDRLQGMAP         | 2.72 | 0.01 | 0.78 | 0.44 | 1.13 | 0.85 |

|       |   |        |                                           |      |      |      |      |      |      |
|-------|---|--------|-------------------------------------------|------|------|------|------|------|------|
| 15059 | 0 | 125385 | DSMDRIEKDRLQGMAP<br>AAG                   | 2.89 | 0.01 | 0.78 | 0.44 | 1.13 | 0.85 |
| 15060 | 0 | 125385 | DSMDRIEKDRLQGMAP<br>AAG                   | 2.89 | 0.01 | 0.78 | 0.44 | 1.13 | 0.85 |
| 15061 | 0 | 125385 | DSMDRIEKDRLQGMAP<br>AAG                   | 2.89 | 0.01 | 0.78 | 0.44 | 1.13 | 0.85 |
| 15062 | 0 | 125385 | DSMDRIEKDRLQGMAP<br>AAG                   | 2.89 | 0.01 | 0.78 | 0.44 | 1.13 | 0.85 |
| 15063 | 0 | 125385 | DSMDRIEKDRLQGMAP<br>AAG                   | 2.89 | 0.01 | 0.78 | 0.44 | 1.13 | 1.27 |
| 15064 | 0 | 233165 | DSMITN                                    | 1.88 | 0.01 | 3.61 | 1.20 | 0.22 | 0.85 |
| 15065 | 0 | 233166 | DSMITNLL                                  | 2.09 | 0.01 | 3.61 | 2.00 | 0.85 | 0.85 |
| 15066 | 0 | 10179  | DSMNHHGDARSKLREE<br>LAELTAEIKYSVI         | 3.33 | 0.01 | 3.21 | 3.14 | 0.22 | 0.28 |
| 15067 | 0 | 10179  | DSMNHHGDARSKLREE<br>LAELTAEIKYSVI         | 3.33 | 0.01 | 3.21 | 3.14 | 0.22 | 0.28 |
| 15068 | 0 | 10179  | DSMNHHGDARSKLREE<br>LAELTAEIKYSVI         | 3.33 | 0.01 | 3.21 | 3.14 | 0.22 | 0.28 |
| 15069 | 0 | 10181  | DSMNNHKDDMNNYN<br>DNINNYVESMNNYDDI<br>MNK | 3.48 | 0.01 | 2.22 | 0.44 | 1.74 | 0.28 |
| 15070 | 0 | 10181  | DSMNNHKDDMNNYN<br>DNINNYVESMNNYDDI<br>MNK | 3.48 | 0.01 | 2.22 | 0.44 | 1.74 | 0.28 |
| 15071 | 0 | 10181  | DSMNNHKDDMNNYN<br>DNINNYVESMNNYDDI<br>MNK | 3.48 | 0.01 | 2.22 | 0.44 | 1.74 | 0.28 |
| 15072 | 0 | 10181  | DSMNNHKDDMNNYN<br>DNINNYVESMNNYDDI<br>MNK | 3.48 | 0.01 | 2.22 | 0.44 | 0.85 | 1.48 |
| 15073 | 0 | 10181  | DSMNNHKDDMNNYN<br>DNINNYVESMNNYDDI<br>MNK | 3.48 | 0.01 | 2.22 | 1.15 | 0.22 | 0.28 |
| 15074 | 0 | 116957 | DSMNTDDSTRPR                              | 2.51 | 0.01 | 0.90 | 1.15 | 0.22 | 0.28 |
| 15075 | 0 | 116957 | DSMNTDDSTRPR                              | 2.51 | 0.01 | 0.90 | 0.44 | 0.85 | 0.28 |
| 15076 | 0 | 116958 | DSMNTDTSTRPR                              | 2.52 | 0.01 | 0.90 | 1.15 | 0.22 | 0.28 |
| 15077 | 0 | 116958 | DSMNTDTSTRPR                              | 2.52 | 0.01 | 0.90 | 0.44 | 0.85 | 0.28 |
| 15078 | 0 | 10190  | DSNKKDDENN                                | 2.34 | 0.01 | 2.22 | 1.20 | 0.22 | 0.85 |
| 15079 | 0 | 144618 | DSNLDWSHNF                                | 2.34 | 0.01 | 0.78 | 0.44 | 1.13 | 0.28 |
| 15080 | 0 | 10192  | DSNNLPILEFIQ                              | 2.46 | 0.01 | 3.33 | 0.44 | 1.23 | 0.85 |
| 15081 | 0 | 133802 | DSPAPIIKLGG                               | 2.37 | 0.01 | 4.23 | 0.68 | 0.22 | 0.85 |
| 15082 | 0 | 133802 | DSPAPIIKLGG                               | 2.37 | 0.01 | 4.23 | 0.68 | 0.22 | 0.85 |
| 15083 | 0 | 133802 | DSPAPIIKLGG                               | 2.37 | 0.01 | 4.23 | 0.68 | 0.22 | 0.85 |
| 15084 | 0 | 133802 | DSPAPIIKLGG                               | 2.37 | 0.01 | 4.23 | 0.68 | 0.22 | 0.85 |
| 15085 | 0 | 133802 | DSPAPIIKLGG                               | 2.37 | 0.01 | 4.23 | 2.49 | 0.22 | 0.85 |
| 15086 | 0 | 10200  | DSPDADLIEANLLWRQE<br>MG                   | 2.87 | 0.01 | 1.72 | 0.44 | 0.85 | 0.28 |

|       |   |        |                                           |      |      |      |      |      |      |
|-------|---|--------|-------------------------------------------|------|------|------|------|------|------|
| 15087 | 0 | 115211 | DSPEVIESPPEINTVQVT<br>ST                  | 2.98 | 0.01 | 1.60 | 0.44 | 1.23 | 1.28 |
| 15088 | 0 | 510432 | DSPFRLW                                   | 1.99 | 0.01 | 0.90 | 0.44 | 1.41 | 0.28 |
| 15089 | 0 | 139482 | DSPGSGNARPNNPDW                           | 2.71 | 2.84 | 0.78 | 0.44 | 1.13 | 0.28 |
| 15090 | 0 | 450495 | DSPGSGNARPNNPDW                           | 2.71 | 0.01 | 0.78 | 2.79 | 1.13 | 1.28 |
| 15091 | 0 | 450495 | DSPGSGNARPNNPDW                           | 2.71 | 0.01 | 0.78 | 1.81 | 1.41 | 1.28 |
| 15092 | 0 | 450495 | DSPGSGNARPNNPDW                           | 2.71 | 0.01 | 0.78 | 1.81 | 1.41 | 1.28 |
| 15093 | 0 | 10204  | DSPIEQPRIIPNGGTLTN                        | 2.84 | 0.01 | 3.37 | 3.23 | 0.22 | 0.28 |
| 15094 | 0 | 10204  | DSPIEQPRIIPNGGTLTN                        | 2.84 | 0.01 | 3.37 | 3.23 | 0.22 | 1.34 |
| 15095 | 0 | 10204  | DSPIEQPRIIPNGGTLTN                        | 2.84 | 0.01 | 3.37 | 3.23 | 0.22 | 0.28 |
| 15096 | 0 | 165594 | DSPRGVF                                   | 1.99 | 0.01 | 0.90 | 0.44 | 1.23 | 1.39 |
| 15097 | 0 | 165594 | DSPRGVF                                   | 1.99 | 0.01 | 0.90 | 0.44 | 1.23 | 1.39 |
| 15098 | 0 | 99956  | DSPSINLDVR                                | 2.32 | 0.01 | 2.18 | 2.16 | 0.22 | 0.28 |
| 15099 | 0 | 156861 | DSQKPKCHCTMTQ                             | 2.63 | 0.01 | 0.90 | 2.74 | 0.22 | 0.85 |
| 15100 | 0 | 156260 | DSQPQQFQQQQQQQ<br>Q                       | 2.71 | 0.01 | 3.67 | 0.44 | 1.23 | 1.27 |
| 15101 | 0 | 10220  | DSQTITNPAYDE                              | 2.46 | 0.01 | 3.53 | 1.12 | 0.22 | 0.28 |
| 15102 | 0 | 238307 | DSQTTTCLSGICYKK                           | 2.64 | 0.01 | 2.56 | 2.02 | 0.22 | 0.85 |
| 15103 | 0 | 238307 | DSQTTTCLSGICYKK                           | 2.64 | 0.01 | 2.56 | 1.20 | 0.22 | 0.85 |
| 15104 | 0 | 238307 | DSQTTTCLSGICYKK                           | 2.64 | 0.01 | 2.56 | 2.02 | 0.22 | 0.85 |
| 15105 | 0 | 238307 | DSQTTTCLSGICYKK                           | 2.64 | 0.01 | 2.56 | 1.20 | 0.22 | 0.85 |
| 15106 | 0 | 119127 | DSRCPTQGEAVLPEE                           | 2.62 | 0.01 | 3.45 | 0.44 | 1.59 | 0.28 |
| 15107 | 0 | 119127 | DSRCPTQGEAVLPEE                           | 2.62 | 0.01 | 3.45 | 0.44 | 1.59 | 0.28 |
| 15108 | 0 | 271751 | DSREQDGEDATSE GK                          | 2.71 | 0.01 | 1.61 | 0.44 | 0.85 | 1.28 |
| 15109 | 0 | 271752 | DSREQDGEGTTSEGH                           | 2.71 | 0.01 | 1.61 | 0.44 | 0.85 | 1.28 |
| 15110 | 0 | 271753 | DSREQDGEVTTSEGE                           | 2.71 | 0.01 | 1.61 | 0.44 | 0.85 | 1.28 |
| 15111 | 0 | 10221  | DSRGAILRRQYNLSTSP<br>L<br>TSSVATG         | 3.15 | 0.01 | 2.53 | 0.44 | 0.85 | 0.28 |
| 15112 | 0 | 107800 | DSRGNPTVE                                 | 2.18 | 0.01 | 4.03 | 0.44 | 1.13 | 0.28 |
| 15113 | 0 | 107800 | DSRGNPTVE                                 | 2.18 | 0.01 | 4.03 | 0.44 | 1.41 | 0.28 |
| 15114 | 0 | 135653 | DSRGNPTVEVDFTT                            | 2.60 | 0.01 | 2.69 | 0.68 | 0.22 | 0.28 |
| 15115 | 0 | 135653 | DSRGNPTVEVDFTT                            | 2.60 | 0.01 | 2.69 | 0.68 | 0.22 | 0.28 |
| 15116 | 0 | 10222  | DSRGSLSPR                                 | 2.34 | 0.01 | 1.96 | 0.44 | 0.85 | 1.34 |
| 15117 | 0 | 128464 | DSRIKVSHIGRVHKL<br>TID<br>DVTPADEADYSFVPE | 3.44 | 0.01 | 0.78 | 2.04 | 0.22 | 0.28 |
| 15118 | 0 | 164503 | DSRVLERY                                  | 2.12 | 0.01 | 0.78 | 1.20 | 0.22 | 1.27 |
| 15119 | 0 | 164503 | DSRVLERY                                  | 2.12 | 0.01 | 0.78 | 1.20 | 0.22 | 1.57 |
| 15120 | 0 | 164503 | DSRVLERY                                  | 2.12 | 0.01 | 0.78 | 1.20 | 0.22 | 1.57 |
| 15121 | 0 | 10226  | DSSAATKKTA AW                             | 2.51 | 0.01 | 2.73 | 0.44 | 0.85 | 0.28 |

|       |   |        |                    |      |      |      |      |      |      |
|-------|---|--------|--------------------|------|------|------|------|------|------|
| 15122 | 0 | 10226  | DSSAATKKTAAW       | 2.51 | 0.01 | 2.73 | 0.44 | 0.85 | 0.28 |
| 15123 | 0 | 10227  | DSSAHGTPSTPA       | 2.51 | 0.01 | 2.30 | 3.01 | 0.22 | 1.27 |
| 15124 | 0 | 10227  | DSSAHGTPSTPA       | 2.51 | 0.01 | 2.30 | 1.12 | 0.22 | 1.27 |
| 15125 | 0 | 10227  | DSSAHGTPSTPA       | 2.51 | 0.01 | 2.30 | 0.68 | 0.22 | 2.02 |
| 15126 | 0 | 10227  | DSSAHGTPSTPA       | 2.51 | 0.01 | 2.30 | 0.68 | 0.22 | 1.27 |
| 15127 | 0 | 10227  | DSSAHGTPSTPA       | 2.51 | 0.01 | 2.30 | 0.68 | 0.22 | 0.85 |
| 15128 | 0 | 10227  | DSSAHGTPSTPA       | 2.51 | 0.01 | 2.30 | 3.01 | 0.22 | 0.85 |
| 15129 | 0 | 10227  | DSSAHGTPSTPA       | 2.51 | 0.01 | 2.30 | 0.68 | 0.22 | 1.48 |
| 15130 | 0 | 10227  | DSSAHGTPSTPA       | 2.51 | 0.01 | 2.30 | 0.44 | 0.85 | 0.28 |
| 15131 | 0 | 10227  | DSSAHGTPSTPA       | 2.51 | 0.01 | 2.30 | 3.01 | 0.22 | 1.34 |
| 15132 | 0 | 10227  | DSSAHGTPSTPA       | 2.51 | 0.01 | 2.30 | 3.01 | 0.22 | 0.28 |
| 15133 | 0 | 10227  | DSSAHGTPSTPA       | 2.51 | 0.01 | 2.30 | 0.68 | 0.22 | 0.85 |
| 15134 | 0 | 10227  | DSSAHGTPSTPA       | 2.51 | 0.01 | 2.30 | 0.68 | 0.22 | 0.85 |
| 15135 | 0 | 10227  | DSSAHGTPSTPA       | 2.51 | 0.01 | 2.30 | 3.01 | 0.22 | 0.85 |
| 15136 | 0 | 10227  | DSSAHGTPSTPA       | 2.51 | 0.01 | 2.30 | 3.01 | 0.22 | 0.85 |
|       |   |        | DSSCRILTSDFQDCNKL  |      |      |      |      |      |      |
| 15137 | 0 | 134348 | VDPEPYLDVCIYDTCSC  | 3.60 | 0.01 | 0.78 | 0.68 | 0.22 | 1.39 |
|       |   |        | SIG                |      |      |      |      |      |      |
| 15138 | 0 | 111216 | DSSEEEDEIDGPAGQAE  | 2.98 | 0.01 | 1.86 | 0.68 | 0.22 | 0.28 |
|       |   |        | PDR                |      |      |      |      |      |      |
| 15139 | 0 | 111216 | DSSEEEDEIDGPAGQAE  | 2.98 | 0.01 | 1.86 | 3.22 | 0.22 | 0.28 |
|       |   |        | PDR                |      |      |      |      |      |      |
| 15140 | 0 | 111216 | DSSEEEDEIDGPAGQAE  | 2.98 | 0.01 | 1.86 | 2.69 | 0.22 | 0.28 |
|       |   |        | PDR                |      |      |      |      |      |      |
| 15141 | 0 | 111216 | DSSEEEDEIDGPAGQAE  | 2.98 | 0.01 | 1.86 | 3.38 | 0.22 | 0.28 |
|       |   |        | PDR                |      |      |      |      |      |      |
| 15142 | 0 | 10232  | DSSFFSYGE          | 2.25 | 0.01 | 3.51 | 1.15 | 0.22 | 0.28 |
| 15143 | 0 | 10240  | DSSPDYTFTSAR       | 2.50 | 0.01 | 0.90 | 1.15 | 0.22 | 0.28 |
| 15144 | 0 | 10240  | DSSPDYTFTSAR       | 2.50 | 0.01 | 0.90 | 1.15 | 0.22 | 0.28 |
| 15145 | 0 | 78123  | DSSPSV             | 1.92 | 0.01 | 0.90 | 2.02 | 1.59 | 0.28 |
| 15146 | 0 | 10244  | DSSSAGGQQQESSVSS   | 2.76 | 0.01 | 3.41 | 3.42 | 0.22 | 0.85 |
| 15147 | 0 | 10244  | DSSSAGGQQQESSVSS   | 2.76 | 0.01 | 3.41 | 3.42 | 0.22 | 0.85 |
| 15148 | 0 | 10245  | DSSSDSQTITNP       | 2.51 | 0.01 | 3.53 | 1.12 | 0.22 | 0.28 |
| 15149 | 0 | 127631 | DSSSIFISPRPG       | 2.50 | 0.01 | 3.16 | 3.16 | 0.22 | 0.28 |
| 15150 | 0 | 145150 | DSSTYQYIYNLT       | 2.48 | 0.01 | 2.80 | 0.68 | 0.22 | 0.28 |
| 15151 | 0 | 145150 | DSSTYQYIYNLT       | 2.48 | 0.01 | 2.80 | 0.68 | 0.22 | 0.85 |
| 15152 | 0 | 145150 | DSSTYQYIYNLT       | 2.48 | 0.01 | 2.80 | 0.68 | 0.22 | 0.28 |
| 15153 | 0 | 145150 | DSSTYQYIYNLT       | 2.48 | 0.01 | 2.80 | 2.78 | 0.22 | 0.28 |
| 15154 | 0 | 133548 | DSSWYTWQPPTW       | 2.49 | 0.01 | 0.90 | 0.44 | 0.85 | 0.28 |
| 15155 | 0 | 153818 | DSTLRLCVQSTHVDIR   | 2.75 | 0.01 | 1.86 | 2.37 | 0.22 | 0.28 |
| 15156 | 0 | 153818 | DSTLRLCVQSTHVDIR   | 2.75 | 0.01 | 1.86 | 1.12 | 0.22 | 0.28 |
| 15157 | 0 | 110817 | DSTLRLCVQSTHVDIRTL | 2.91 | 0.01 | 1.86 | 3.89 | 2.82 | 0.28 |
|       |   |        | E                  |      |      |      |      |      |      |
| 15158 | 0 | 110817 | DSTLRLCVQSTHVDIRTL | 2.91 | 0.01 | 1.86 | 0.44 | 0.85 | 0.28 |
|       |   |        | E                  |      |      |      |      |      |      |

|       |   |        |                                          |      |      |      |      |      |      |
|-------|---|--------|------------------------------------------|------|------|------|------|------|------|
| 15159 | 0 | 110818 | DSTNNNKYTVTL                             | 2.47 | 0.01 | 3.15 | 1.12 | 0.22 | 1.27 |
| 15160 | 0 | 10254  | DSTRTQINK                                | 2.21 | 0.01 | 2.25 | 0.44 | 1.23 | 1.27 |
| 15161 | 0 | 10254  | DSTRTQINK                                | 2.21 | 0.01 | 2.25 | 1.12 | 0.22 | 2.02 |
| 15162 | 0 | 271966 | DSTTGDDGCDGDDGD                          | 2.75 | 0.01 | 1.61 | 0.44 | 0.85 | 1.28 |
| 15163 | 0 | 10259  | DSTVTE                                   | 1.90 | 0.01 | 1.96 | 0.44 | 0.85 | 0.28 |
| 15164 | 0 | 10260  | DSTVTENDIR                               | 2.32 | 0.01 | 1.96 | 0.44 | 0.85 | 1.34 |
| 15165 | 0 | 10261  | DSTVTENDIRVEESIQCY<br>CDLAPEARQAIKSLTERL | 3.55 | 0.01 | 2.45 | 1.15 | 0.22 | 0.85 |
| 15166 | 0 | 10261  | DSTVTENDIRVEESIQCY<br>CDLAPEARQAIKSLTERL | 3.55 | 0.01 | 2.45 | 1.15 | 0.22 | 2.02 |
| 15167 | 0 | 10261  | DSTVTENDIRVEESIQCY<br>CDLAPEARQAIKSLTERL | 3.55 | 0.01 | 2.45 | 1.15 | 0.22 | 0.85 |
| 15168 | 0 | 271974 | DSVASREKDGEDTTS                          | 2.70 | 0.01 | 1.61 | 0.44 | 0.85 | 1.28 |
| 15169 | 0 | 271982 | DSVDSREQDGEDATS                          | 2.71 | 0.01 | 1.61 | 0.44 | 0.85 | 1.28 |
| 15170 | 0 | 271983 | DSVDSREQDGEGTTS                          | 2.71 | 0.01 | 1.61 | 0.44 | 0.85 | 1.28 |
| 15171 | 0 | 102371 | DSVFYLDNLLPSTLDYFT<br>YL                 | 2.99 | 0.01 | 3.44 | 0.68 | 0.22 | 0.28 |
| 15172 | 0 | 156262 | DSVKAASKETPPAL                           | 2.62 | 0.01 | 2.73 | 0.44 | 0.85 | 1.28 |
| 15173 | 0 | 122734 | DSVPKWDR LPC                             | 2.40 | 0.01 | 3.08 | 1.12 | 0.22 | 0.28 |
| 15174 | 0 | 122734 | DSVPKWDR LPC                             | 2.40 | 0.01 | 3.08 | 1.12 | 0.22 | 1.48 |
| 15175 | 0 | 237685 | DSVTPTSVMABA                             | 2.51 | 0.01 | 0.90 | 1.20 | 0.22 | 1.39 |
| 15176 | 0 | 237685 | DSVTPTSVMABA                             | 2.51 | 0.01 | 0.90 | 1.20 | 0.22 | 0.85 |
| 15177 | 0 | 237685 | DSVTPTSVMABA                             | 2.51 | 0.01 | 0.90 | 1.20 | 0.22 | 1.34 |
| 15178 | 0 | 237685 | DSVTPTSVMABA                             | 2.51 | 0.01 | 0.90 | 1.20 | 0.22 | 0.28 |
| 15179 | 0 | 237685 | DSVTPTSVMABA                             | 2.51 | 0.01 | 0.90 | 1.20 | 0.22 | 0.28 |
| 15180 | 0 | 237685 | DSVTPTSVMABA                             | 2.51 | 0.01 | 0.90 | 1.20 | 0.22 | 0.28 |
| 15181 | 0 | 78365  | DSWDHEQA                                 | 2.13 | 0.01 | 3.97 | 0.68 | 0.22 | 0.28 |
| 15182 | 0 | 134034 | DSYEDISAYLLSKNNAIEP<br>R                 | 2.95 | 0.01 | 0.78 | 0.44 | 2.35 | 0.28 |
| 15183 | 0 | 99161  | DSYERDPYSPSQDPY                          | 2.73 | 0.01 | 2.16 | 0.44 | 1.23 | 1.48 |
| 15184 | 0 | 113342 | DSYFRGAPKLLYVRLSHN<br>SL                 | 2.93 | 4.23 | 0.78 | 1.81 | 0.22 | 0.28 |
| 15185 | 0 | 113342 | DSYFRGAPKLLYVRLSHN<br>SL                 | 2.93 | 4.23 | 0.78 | 3.61 | 0.22 | 0.28 |
| 15186 | 0 | 10277  | DSYGRDPYSPSQDPY                          | 2.73 | 0.01 | 2.16 | 0.44 | 1.23 | 0.85 |
| 15187 | 0 | 10277  | DSYGRDPYSPSQDPY                          | 2.73 | 0.01 | 2.16 | 2.90 | 0.22 | 0.85 |
| 15188 | 0 | 10277  | DSYGRDPYSPSQDPY                          | 2.73 | 0.01 | 2.16 | 0.44 | 1.23 | 0.85 |
| 15189 | 0 | 10278  | DSYIII                                   | 1.88 | 0.01 | 2.40 | 0.44 | 0.85 | 0.28 |
| 15190 | 0 | 112945 | DSYTLTEELAYAEIRVK                        | 2.79 | 0.01 | 0.78 | 0.44 | 1.13 | 2.97 |
| 15191 | 0 | 112945 | DSYTLTEELAYAEIRVK                        | 2.79 | 0.01 | 0.78 | 0.44 | 1.41 | 2.97 |
| 15192 | 0 | 170653 | DSYVVAFSDEMVP CP                         | 2.69 | 0.01 | 0.78 | 0.44 | 1.41 | 0.28 |
| 15193 | 0 | 170653 | DSYVVAFSDEMVP CP                         | 2.69 | 0.01 | 0.78 | 0.44 | 1.13 | 0.28 |
| 15194 | 0 | 117195 | DT                                       | 1.10 | 0.01 | 2.70 | 1.15 | 0.22 | 1.34 |

[illegible]

|       |   |        |                               |      |      |      |      |      |      |
|-------|---|--------|-------------------------------|------|------|------|------|------|------|
| 15242 | 0 | 140665 | DTAAQI                        | 1.89 | 0.01 | 0.78 | 1.15 | 0.22 | 2.12 |
| 15243 | 0 | 140665 | DTAAQI                        | 1.89 | 0.01 | 0.78 | 1.15 | 0.22 | 2.12 |
| 15244 | 0 | 140665 | DTAAQI                        | 1.89 | 0.01 | 0.78 | 1.15 | 0.22 | 2.12 |
| 15245 | 0 | 140665 | DTAAQI                        | 1.89 | 0.01 | 0.78 | 1.15 | 0.22 | 2.12 |
| 15246 | 0 | 140665 | DTAAQI                        | 1.89 | 0.01 | 0.78 | 1.15 | 0.22 | 2.12 |
| 15247 | 0 | 140665 | DTAAQI                        | 1.89 | 0.01 | 0.78 | 1.15 | 0.22 | 2.12 |
| 15248 | 0 | 140665 | DTAAQI                        | 1.89 | 0.01 | 0.78 | 1.15 | 0.22 | 2.12 |
| 15249 | 0 | 140665 | DTAAQI                        | 1.89 | 0.01 | 0.78 | 1.15 | 0.22 | 2.12 |
| 15250 | 0 | 140665 | DTAAQI                        | 1.89 | 0.01 | 0.78 | 1.15 | 0.22 | 2.12 |
| 15251 | 0 | 140665 | DTAAQI                        | 1.89 | 0.01 | 0.78 | 1.15 | 0.22 | 2.12 |
| 15252 | 0 | 140665 | DTAAQI                        | 1.89 | 0.01 | 0.78 | 1.15 | 0.22 | 2.12 |
| 15253 | 0 | 140665 | DTAAQI                        | 1.89 | 0.01 | 0.78 | 0.44 | 1.41 | 1.27 |
| 15254 | 0 | 140665 | DTAAQI                        | 1.89 | 0.01 | 0.78 | 0.44 | 1.41 | 1.27 |
| 15255 | 0 | 140665 | DTAAQI                        | 1.89 | 0.01 | 0.78 | 1.15 | 0.22 | 2.12 |
| 15256 | 0 | 140665 | DTAAQI                        | 1.89 | 0.01 | 0.78 | 1.15 | 0.22 | 2.12 |
| 15257 | 0 | 140665 | DTAAQI                        | 1.89 | 0.01 | 0.78 | 1.15 | 0.22 | 2.12 |
| 15258 | 0 | 140665 | DTAAQI                        | 1.89 | 0.01 | 0.78 | 1.15 | 0.22 | 2.12 |
| 15259 | 0 | 140665 | DTAAQI                        | 1.89 | 0.01 | 0.78 | 1.15 | 0.22 | 2.12 |
| 15260 | 0 | 140665 | DTAAQI                        | 1.89 | 0.01 | 0.78 | 1.15 | 0.22 | 2.12 |
| 15261 | 0 | 140665 | DTAAQI                        | 1.89 | 0.01 | 0.78 | 1.15 | 0.22 | 2.12 |
| 15262 | 0 | 140665 | DTAAQI                        | 1.89 | 0.01 | 0.78 | 1.15 | 0.22 | 2.12 |
| 15263 | 0 | 140665 | DTAAQI                        | 1.89 | 0.01 | 0.78 | 1.15 | 0.22 | 2.12 |
| 15264 | 0 | 140665 | DTAAQI                        | 1.89 | 0.01 | 0.78 | 1.15 | 0.22 | 2.12 |
| 15265 | 0 | 140665 | DTAAQI                        | 1.89 | 0.01 | 0.78 | 1.15 | 0.22 | 2.12 |
| 15266 | 0 | 140665 | DTAAQI                        | 1.89 | 0.01 | 0.78 | 1.15 | 0.22 | 2.12 |
| 15267 | 0 | 140665 | DTAAQI                        | 1.89 | 0.01 | 0.78 | 1.15 | 0.22 | 2.12 |
| 15268 | 0 | 177485 | DTADSSKYEPLM                  | 2.45 | 0.01 | 0.90 | 1.20 | 0.22 | 1.27 |
| 15269 | 0 | 177485 | DTADSSKYEPLM                  | 2.45 | 0.01 | 0.90 | 3.78 | 0.22 | 1.75 |
| 15270 | 0 | 177485 | DTADSSKYEPLM                  | 2.45 | 0.01 | 0.90 | 3.78 | 0.22 | 0.28 |
| 15271 | 0 | 10291  | DTAGLAGLFLNLPKQT              | 2.75 | 0.01 | 1.72 | 0.68 | 0.22 | 0.28 |
| 15272 | 0 | 10292  | DTAGQEQQYDV                   | 2.41 | 0.01 | 3.35 | 2.02 | 0.85 | 0.28 |
| 15273 | 0 | 10292  | DTAGQEQQYDV                   | 2.41 | 0.01 | 3.35 | 2.02 | 0.85 | 0.28 |
| 15274 | 0 | 137733 | DTALTIQALKLV                  | 2.49 | 0.01 | 0.90 | 0.68 | 0.22 | 0.28 |
| 15275 | 0 | 137734 | DTALTKAALKLV                  | 2.52 | 0.01 | 0.90 | 0.68 | 0.22 | 1.27 |
| 15276 | 0 | 137734 | DTALTKAALKLV                  | 2.52 | 0.01 | 0.90 | 0.68 | 0.22 | 0.85 |
| 15277 | 0 | 137735 | DTALTREALRLV                  | 2.51 | 0.01 | 0.90 | 0.68 | 0.22 | 0.28 |
| 15278 | 0 | 137735 | DTALTREALRLV                  | 2.51 | 0.01 | 0.90 | 0.68 | 0.22 | 0.85 |
| 15279 | 0 | 137736 | DTALTVAALKLV                  | 2.52 | 0.01 | 0.90 | 0.68 | 0.22 | 0.28 |
| 15280 | 0 | 137737 | DTALTYAGLKL                   | 2.49 | 0.01 | 0.90 | 0.68 | 0.22 | 0.28 |
| 15281 | 0 | 10298  | DTAWDF                        | 1.91 | 0.01 | 2.40 | 0.44 | 0.85 | 0.28 |
| 15282 | 0 | 95329  | DTDGKGYERG                    | 2.34 | 0.01 | 2.60 | 1.12 | 0.22 | 0.85 |
| 15283 | 0 | 10312  | DTDGDKVSLFECR                 | 2.66 | 0.01 | 2.93 | 0.44 | 0.85 | 0.28 |
| 15284 | 0 | 149289 | DTDLDGWPENLVCVA<br>NATYHCKKDN | 3.19 | 0.01 | 0.78 | 2.88 | 0.22 | 0.85 |
| 15285 | 0 | 149289 | DTDLDGWPENLVCVA<br>NATYHCKKDN | 3.19 | 0.01 | 0.78 | 2.88 | 0.22 | 0.28 |



|       |   |        |                                                    |      |      |      |      |      |      |
|-------|---|--------|----------------------------------------------------|------|------|------|------|------|------|
| 15286 | 0 | 149289 | DTDLDGWPNENLVCVA<br>NATYHCKKDN                     | 3.19 | 0.01 | 0.78 | 2.88 | 0.22 | 0.28 |
| 15287 | 0 | 149290 | DTDLDGWPSLENLVCVA<br>NATYHCKKDN                    | 3.18 | 0.01 | 0.78 | 2.88 | 0.22 | 0.28 |
| 15288 | 0 | 149290 | DTDLDGWPSLENLVCVA<br>NATYHCKKDN                    | 3.18 | 0.01 | 0.78 | 2.88 | 0.22 | 0.28 |
| 15289 | 0 | 149290 | DTDLDGWPSLENLVCVA<br>NATYHCKKDN                    | 3.18 | 0.01 | 0.78 | 2.88 | 0.22 | 0.85 |
| 15290 | 0 | 272162 | DTDSAKGKATGGSAG                                    | 2.74 | 0.01 | 1.61 | 0.44 | 0.85 | 1.28 |
| 15291 | 0 | 272163 | DTDSAKGKATGSSAG                                    | 2.74 | 0.01 | 1.61 | 0.44 | 0.85 | 1.28 |
| 15292 | 0 | 10320  | DTDSGYDVDPDY                                       | 2.43 | 0.01 | 0.78 | 1.15 | 0.22 | 0.28 |
| 15293 | 0 | 10320  | DTDSGYDVDPDY                                       | 2.43 | 0.01 | 0.78 | 1.15 | 0.22 | 1.66 |
| 15294 | 0 | 10320  | DTDSGYDVDPDY                                       | 2.43 | 0.01 | 0.78 | 1.15 | 0.22 | 1.27 |
| 15295 | 0 | 10323  | DTDVLLNNTTRPPQGN<br>WFGC                           | 2.93 | 0.01 | 3.10 | 1.81 | 0.22 | 0.28 |
| 15296 | 0 | 103117 | DTDY                                               | 1.60 | 0.01 | 1.60 | 2.89 | 0.22 | 0.28 |
| 15297 | 0 | 103117 | DTDY                                               | 1.60 | 0.01 | 1.60 | 2.89 | 0.22 | 0.28 |
| 15298 | 0 | 103117 | DTDY                                               | 1.60 | 0.01 | 1.60 | 2.89 | 0.22 | 0.28 |
| 15299 | 0 | 103117 | DTDY                                               | 1.60 | 0.01 | 0.78 | 2.89 | 0.22 | 0.28 |
| 15300 | 0 | 103117 | DTDY                                               | 1.60 | 0.01 | 0.78 | 2.89 | 0.22 | 0.28 |
| 15301 | 0 | 96195  | DTDYKKYLLFCMENS                                    | 2.65 | 0.01 | 1.60 | 0.44 | 1.23 | 0.28 |
| 15302 | 0 | 10326  | DTEEDKPKYE                                         | 2.36 | 0.01 | 2.56 | 1.20 | 0.22 | 0.28 |
| 15303 | 0 | 10326  | DTEEDKPKYE                                         | 2.36 | 0.01 | 2.56 | 1.20 | 0.22 | 0.28 |
| 15304 | 0 | 131398 | DTEGDKVRATR                                        | 2.42 | 0.01 | 0.78 | 0.44 | 0.22 | 1.27 |
| 15305 | 0 | 152479 | DTEGLKEVIN                                         | 2.29 | 0.01 | 2.18 | 2.16 | 0.22 | 0.28 |
| 15306 | 0 | 137738 | DTELTKQALKLV                                       | 2.49 | 0.01 | 0.90 | 0.68 | 0.22 | 0.28 |
| 15307 | 0 | 137738 | DTELTKQALKLV                                       | 2.49 | 0.01 | 0.90 | 0.68 | 0.22 | 0.28 |
| 15308 | 0 | 153372 | DTELTKQALRLV                                       | 2.48 | 0.01 | 0.90 | 0.68 | 0.22 | 1.66 |
| 15309 | 0 | 153372 | DTELTKQALRLV                                       | 2.48 | 0.01 | 0.90 | 0.68 | 0.22 | 0.28 |
| 15310 | 0 | 153372 | DTELTKQALRLV                                       | 2.48 | 0.01 | 0.90 | 0.68 | 0.22 | 0.28 |
| 15311 | 0 | 137739 | DTELTKQGLKLV                                       | 2.49 | 0.01 | 0.90 | 0.68 | 0.22 | 0.28 |
| 15312 | 0 | 227106 | DTEPISDSSESLPANGPD<br>SPTVKPPRNLQNICETGK<br>NFKLVV | 3.67 | 0.01 | 3.28 | 1.15 | 0.22 | 0.28 |
| 15313 | 0 | 227106 | DTEPISDSSESLPANGPD<br>SPTVKPPRNLQNICETGK<br>NFKLVV | 3.67 | 0.01 | 3.28 | 3.33 | 0.22 | 0.28 |
| 15314 | 0 | 227106 | DTEPISDSSESLPANGPD<br>SPTVKPPRNLQNICETGK<br>NFKLVV | 3.67 | 0.01 | 3.28 | 3.33 | 0.22 | 0.28 |
| 15315 | 0 | 462308 | DTFESMP                                            | 1.99 | 0.01 | 0.78 | 1.12 | 0.22 | 1.28 |
| 15316 | 0 | 10336  | DTFNPVYPYDTE                                       | 2.50 | 0.01 | 3.03 | 0.68 | 0.22 | 0.85 |
| 15317 | 0 | 10336  | DTFNPVYPYDTE                                       | 2.50 | 0.01 | 3.03 | 0.68 | 0.22 | 1.27 |
| 15318 | 0 | 10336  | DTFNPVYPYDTE                                       | 2.50 | 0.01 | 3.03 | 0.68 | 0.22 | 0.85 |
| 15319 | 0 | 99163  | DTFTVK                                             | 1.90 | 0.01 | 2.24 | 1.20 | 0.22 | 0.28 |
| 15320 | 0 | 158723 | DTGCAIDISRQELRCG                                   | 2.74 | 0.01 | 3.05 | 0.68 | 0.22 | 0.28 |
| 15321 | 0 | 158723 | DTGCAIDISRQELRCG                                   | 2.74 | 0.01 | 3.05 | 0.68 | 0.22 | 0.28 |

|       |   |        |                                |      |      |      |      |      |      |
|-------|---|--------|--------------------------------|------|------|------|------|------|------|
| 15322 | 0 | 158723 | DTGCAIDISRQELRCG               | 2.74 | 0.01 | 3.05 | 0.68 | 0.22 | 1.48 |
| 15323 | 0 | 158723 | DTGCAIDISRQELRCG               | 2.74 | 0.01 | 3.05 | 0.68 | 0.22 | 1.48 |
| 15324 | 0 | 158723 | DTGCAIDISRQELRCG               | 2.74 | 0.01 | 3.05 | 0.68 | 0.22 | 0.28 |
| 15325 | 0 | 158723 | DTGCAIDISRQELRCG               | 2.74 | 0.01 | 3.05 | 0.68 | 0.22 | 0.28 |
| 15326 | 0 | 158723 | DTGCAIDISRQELRCG               | 2.74 | 0.01 | 3.05 | 0.68 | 0.22 | 0.28 |
| 15327 | 0 | 158723 | DTGCAIDISRQELRCG               | 2.74 | 0.01 | 3.05 | 2.49 | 0.22 | 0.28 |
| 15328 | 0 | 158723 | DTGCAIDISRQELRCG               | 2.74 | 0.01 | 3.05 | 2.43 | 0.22 | 0.28 |
| 15329 | 0 | 158723 | DTGCAIDISRQELRCG               | 2.74 | 0.01 | 3.04 | 0.68 | 0.22 | 0.85 |
| 15330 | 0 | 158723 | DTGCAIDISRQELRCG               | 2.74 | 0.01 | 3.04 | 0.68 | 0.22 | 0.85 |
| 15331 | 0 | 10340  | DTGCAIDITRKEMRC                | 2.69 | 0.01 | 4.33 | 0.44 | 0.85 | 0.28 |
| 15332 | 0 | 158724 | DTGCAIDITRKEMRCG               | 2.75 | 0.01 | 3.04 | 0.68 | 0.22 | 0.28 |
| 15333 | 0 | 158725 | DTGCAIDITRRELKCG               | 2.75 | 0.01 | 3.22 | 0.68 | 0.22 | 0.28 |
| 15334 | 0 | 118309 | DTGHGLRLIHYSYGAGST<br>EKG      | 3.00 | 0.01 | 1.75 | 1.20 | 0.22 | 0.28 |
| 15335 | 0 | 118309 | DTGHGLRLIHYSYGAGST<br>EKG      | 3.00 | 0.01 | 1.75 | 1.20 | 0.22 | 0.28 |
| 15336 | 0 | 118309 | DTGHGLRLIHYSYGAGST<br>EKG      | 3.00 | 0.01 | 1.75 | 1.20 | 0.22 | 0.28 |
| 15337 | 0 | 118309 | DTGHGLRLIHYSYGAGST<br>EKG      | 3.00 | 0.01 | 1.75 | 1.20 | 0.22 | 0.28 |
| 15338 | 0 | 118309 | DTGHGLRLIHYSYGAGST<br>EKG      | 3.00 | 0.01 | 1.75 | 1.20 | 0.22 | 0.28 |
| 15339 | 0 | 118309 | DTGHGLRLIHYSYGAGST<br>EKG      | 3.00 | 0.01 | 1.75 | 1.20 | 0.22 | 0.28 |
| 15340 | 0 | 10344  | DTGHHR                         | 1.89 | 0.01 | 0.90 | 2.02 | 0.22 | 0.28 |
| 15341 | 0 | 10346  | DTGKHG                         | 1.90 | 0.01 | 2.40 | 0.44 | 0.85 | 0.28 |
| 15342 | 0 | 141624 | DTGSLVWLSQRS                   | 2.48 | 0.01 | 0.90 | 0.68 | 0.22 | 0.28 |
| 15343 | 0 | 196396 | DTHFPICIFCCGCCCHRSK<br>CGMCCKT | 3.17 | 0.01 | 0.78 | 1.12 | 0.22 | 0.28 |
| 15344 | 0 | 196396 | DTHFPICIFCCGCCCHRSK<br>CGMCCKT | 3.17 | 0.01 | 0.78 | 3.75 | 0.22 | 1.66 |
| 15345 | 0 | 196396 | DTHFPICIFCCGCCCHRSK<br>CGMCCKT | 3.17 | 0.01 | 0.78 | 3.75 | 0.22 | 1.66 |
| 15346 | 0 | 196396 | DTHFPICIFCCGCCCHRSK<br>CGMCCKT | 3.17 | 0.01 | 0.78 | 1.81 | 0.22 | 1.66 |
| 15347 | 0 | 196396 | DTHFPICIFCCGCCCHRSK<br>CGMCCKT | 3.17 | 0.01 | 0.78 | 3.75 | 0.22 | 1.66 |
| 15348 | 0 | 196396 | DTHFPICIFCCGCCCHRSK<br>CGMCCKT | 3.17 | 0.01 | 0.78 | 3.75 | 0.22 | 1.66 |
| 15349 | 0 | 196396 | DTHFPICIFCCGCCCHRSK<br>CGMCCKT | 3.17 | 0.01 | 0.78 | 3.75 | 0.22 | 1.34 |
| 15350 | 0 | 196396 | DTHFPICIFCCGCCCHRSK<br>CGMCCKT | 3.17 | 0.01 | 0.78 | 3.75 | 0.22 | 1.34 |
| 15351 | 0 | 230454 | DTHGSVF                        | 1.99 | 0.01 | 3.97 | 0.68 | 0.22 | 0.28 |
| 15352 | 0 | 230454 | DTHGSVF                        | 1.99 | 0.01 | 3.97 | 0.68 | 0.22 | 0.28 |
| 15353 | 0 | 230454 | DTHGSVF                        | 1.99 | 0.01 | 3.97 | 0.68 | 0.22 | 0.85 |
| 15354 | 0 | 137391 | DTHKRDTY                       | 2.15 | 0.01 | 0.78 | 1.12 | 0.22 | 0.28 |

|       |   |        |                                     |      |      |      |      |      |      |
|-------|---|--------|-------------------------------------|------|------|------|------|------|------|
| 15355 | 0 | 137391 | DTHKRDTY                            | 2.15 | 0.01 | 0.78 | 1.12 | 0.22 | 0.28 |
| 15356 | 0 | 137391 | DTHKRDTY                            | 2.15 | 0.01 | 0.78 | 1.12 | 0.22 | 0.28 |
| 15357 | 0 | 137391 | DTHKRDTY                            | 2.15 | 0.01 | 0.78 | 1.12 | 0.22 | 0.28 |
| 15358 | 0 | 10349  | DTHLGGEDFDNRLVTFF<br>TEE            | 2.95 | 0.01 | 2.78 | 0.44 | 0.85 | 0.28 |
| 15359 | 0 | 434682 | DTHSKRTLLIKTVETRDG<br>QVI           | 3.00 | 3.97 | 0.78 | 0.44 | 1.13 | 0.28 |
| 15360 | 0 | 434682 | DTHSKRTLLIKTVETRDG<br>QVI           | 3.00 | 3.97 | 0.78 | 0.44 | 1.13 | 0.28 |
| 15361 | 0 | 434682 | DTHSKRTLLIKTVETRDG<br>QVI           | 3.00 | 3.97 | 0.78 | 0.44 | 1.41 | 0.28 |
| 15362 | 0 | 434682 | DTHSKRTLLIKTVETRDG<br>QVI           | 3.00 | 3.97 | 0.78 | 0.44 | 1.13 | 1.27 |
| 15363 | 0 | 10350  | DTHTTGGVAGRDTLRFT<br>GFFSFGPKQK     | 3.24 | 0.01 | 1.96 | 1.15 | 0.22 | 0.28 |
| 15364 | 0 | 10350  | DTHTTGGVAGRDTLRFT<br>GFFSFGPKQK     | 3.24 | 0.01 | 1.96 | 0.44 | 0.85 | 0.28 |
| 15365 | 0 | 10351  | DTHVTGAVQGHGAFTL<br>TSLFTSGASQKIQLV | 3.40 | 0.01 | 1.72 | 0.68 | 0.22 | 0.28 |
| 15366 | 0 | 10352  | DTHVTGGAAARGASGL<br>ANLFTSGPAQK     | 3.22 | 0.01 | 0.90 | 0.44 | 0.85 | 0.28 |
| 15367 | 0 | 10353  | DTHVTGGAQAKTTNRL<br>VSMFASGPSQK     | 3.21 | 0.01 | 4.15 | 0.44 | 0.85 | 0.28 |
| 15368 | 0 | 10354  | DTHVVGGATERTAYSLT<br>GLFTAGPKQN     | 3.20 | 0.01 | 1.72 | 0.44 | 0.85 | 0.28 |
| 15369 | 0 | 10354  | DTHVVGGATERTAYSLT<br>GLFTAGPKQN     | 3.20 | 0.01 | 1.72 | 0.44 | 0.85 | 0.28 |
| 15370 | 0 | 10354  | DTHVVGGATERTAYSLT<br>GLFTAGPKQN     | 3.20 | 0.01 | 1.72 | 0.68 | 0.22 | 0.28 |
| 15371 | 0 | 10354  | DTHVVGGATERTAYSLT<br>GLFTAGPKQN     | 3.20 | 0.01 | 1.72 | 0.68 | 0.22 | 0.28 |
| 15372 | 0 | 10354  | DTHVVGGATERTAYSLT<br>GLFTAGPKQN     | 3.20 | 0.01 | 1.72 | 1.12 | 0.22 | 0.28 |
| 15373 | 0 | 10354  | DTHVVGGATERTAYSLT<br>GLFTAGPKQN     | 3.20 | 0.01 | 1.72 | 1.12 | 0.22 | 0.28 |
| 15374 | 0 | 100803 | DTHWLRS                             | 1.99 | 0.01 | 0.90 | 0.44 | 1.13 | 1.39 |
| 15375 | 0 | 10358  | DTIASGSQRSTNSAS                     | 2.70 | 0.01 | 1.66 | 1.15 | 0.22 | 0.28 |
| 15376 | 0 | 10358  | DTIASGSQRSTNSAS                     | 2.70 | 0.01 | 1.66 | 2.52 | 0.22 | 1.48 |
| 15377 | 0 | 10358  | DTIASGSQRSTNSAS                     | 2.70 | 0.01 | 1.66 | 1.15 | 0.22 | 0.85 |
| 15378 | 0 | 10377  | DTKCSSTGLVAA                        | 2.44 | 0.01 | 2.56 | 2.69 | 2.26 | 0.85 |
| 15379 | 0 | 10380  | DTKEPGVLMGGQSES                     | 2.65 | 0.01 | 2.24 | 1.15 | 0.22 | 0.85 |
| 15380 | 0 | 10381  | DTKEPGVLMGGQSESV                    | 2.72 | 0.01 | 2.24 | 1.15 | 0.22 | 0.28 |
| 15381 | 0 | 10381  | DTKEPGVLMGGQSESV                    | 2.72 | 0.01 | 2.24 | 0.68 | 0.22 | 0.28 |
| 15382 | 0 | 10386  | DTKKNLERKKEHGDILAE<br>DLYGRLEIP     | 3.24 | 0.01 | 1.66 | 2.74 | 0.22 | 0.28 |

|       |   |        |                                                       |      |      |      |      |      |      |
|-------|---|--------|-------------------------------------------------------|------|------|------|------|------|------|
| 15383 | 0 | 10386  | DTKKNLERKKEHGDILAE<br>DLYGRLEIP                       | 3.24 | 0.01 | 1.66 | 3.67 | 0.22 | 0.28 |
| 15384 | 0 | 10386  | DTKKNLERKKEHGDILAE<br>DLYGRLEIP                       | 3.24 | 0.01 | 1.66 | 0.44 | 1.74 | 0.28 |
| 15385 | 0 | 10387  | DTKPTDPTGIEPDDHLKE<br>RSSLRVGNVLDVNAIDIE<br>EPSGQTADW | 3.74 | 0.01 | 4.08 | 2.69 | 2.25 | 1.75 |
| 15386 | 0 | 10387  | DTKPTDPTGIEPDDHLKE<br>RSSLRVGNVLDVNAIDIE<br>EPSGQTADW | 3.74 | 0.01 | 4.08 | 2.69 | 0.22 | 0.28 |
| 15387 | 0 | 141625 | DTKRARTDWWENETIT                                      | 2.76 | 0.01 | 1.66 | 1.20 | 0.22 | 0.28 |
| 15388 | 0 | 141625 | DTKRARTDWWENETIT                                      | 2.76 | 0.01 | 1.66 | 2.55 | 0.22 | 0.28 |
| 15389 | 0 | 141625 | DTKRARTDWWENETIT                                      | 2.76 | 0.01 | 2.86 | 2.55 | 0.22 | 0.28 |
| 15390 | 0 | 181589 | DTKSPTLSESHKSAR                                       | 2.68 | 0.01 | 3.26 | 2.37 | 0.22 | 1.28 |
| 15391 | 0 | 477096 | DTKTIINKVASVAENK                                      | 2.76 | 0.01 | 4.45 | 3.85 | 0.22 | 2.66 |
| 15392 | 0 | 477096 | DTKTIINKVASVAENK                                      | 2.76 | 0.01 | 4.45 | 3.85 | 0.22 | 2.02 |
| 15393 | 0 | 477096 | DTKTIINKVASVAENK                                      | 2.76 | 0.01 | 4.45 | 3.85 | 0.22 | 1.48 |
| 15394 | 0 | 142130 | DTKVMKCVLEVISD                                        | 2.62 | 0.01 | 1.75 | 1.20 | 0.22 | 0.28 |
| 15395 | 0 | 142130 | DTKVMKCVLEVISD                                        | 2.62 | 0.01 | 1.75 | 3.75 | 0.22 | 0.28 |
| 15396 | 0 | 142130 | DTKVMKCVLEVISD                                        | 2.62 | 0.01 | 1.75 | 3.75 | 1.13 | 0.28 |
| 15397 | 0 | 150975 | DTLCIGYHANNSTDT                                       | 2.66 | 0.01 | 2.87 | 0.44 | 0.85 | 0.28 |
| 15398 | 0 | 451471 | DTLDDGRRQLD                                           | 2.44 | 0.01 | 2.04 | 1.20 | 0.22 | 0.85 |
| 15399 | 0 | 153819 | DTLEQQNKEANNRAEK<br>SE                                | 2.85 | 0.01 | 3.93 | 0.44 | 1.23 | 1.27 |
| 15400 | 0 | 10397  | DTLHGHGFTNWF                                          | 2.49 | 0.01 | 0.90 | 0.68 | 0.22 | 1.39 |
| 15401 | 0 | 10397  | DTLHGHGFTNWF                                          | 2.49 | 0.01 | 0.90 | 0.68 | 0.22 | 1.27 |
| 15402 | 0 | 107324 | DTLKAGLIR                                             | 2.21 | 0.01 | 0.78 | 2.36 | 0.22 | 0.28 |
| 15403 | 0 | 107324 | DTLKAGLIR                                             | 2.21 | 0.01 | 0.78 | 2.36 | 0.22 | 0.28 |
| 15404 | 0 | 107324 | DTLKAGLIR                                             | 2.21 | 0.01 | 0.78 | 2.36 | 0.22 | 0.85 |
| 15405 | 0 | 107324 | DTLKAGLIR                                             | 2.21 | 0.01 | 0.78 | 2.36 | 0.22 | 0.85 |
| 15406 | 0 | 101566 | DTLLSVEGNKDTINLQG<br>MANNINNLSKEDK                    | 3.35 | 0.01 | 3.41 | 3.42 | 0.22 | 0.28 |
| 15407 | 0 | 103118 | DTLNGGEYTVFAPTN                                       | 2.65 | 0.01 | 2.04 | 0.44 | 0.85 | 1.28 |
| 15408 | 0 | 10406  | DTLNKVDA                                              | 2.13 | 0.01 | 2.04 | 0.44 | 0.85 | 0.28 |
| 15409 | 0 | 167232 | DTLPLFI                                               | 2.02 | 0.01 | 0.90 | 1.15 | 0.22 | 1.39 |
| 15410 | 0 | 423257 | DTLREMALKAFMEAN                                       | 2.68 | 0.01 | 2.51 | 0.44 | 2.35 | 1.28 |
| 15411 | 0 | 170655 | DTLSEIEWNPATKLL                                       | 2.64 | 0.01 | 0.78 | 0.44 | 1.41 | 0.28 |
| 15412 | 0 | 139711 | DTLTTLIKDLEKLGTSMK<br>KINLELYTP                       | 3.26 | 0.01 | 4.15 | 1.15 | 0.22 | 1.27 |
| 15413 | 0 | 139711 | DTLTTLIKDLEKLGTSMK<br>KINLELYTP                       | 3.26 | 0.01 | 4.15 | 1.15 | 0.22 | 1.39 |
| 15414 | 0 | 139711 | DTLTTLIKDLEKLGTSMK<br>KINLELYTP                       | 3.26 | 0.01 | 4.15 | 1.15 | 0.22 | 1.34 |
| 15415 | 0 | 10421  | DTMKSMQRDED                                           | 2.42 | 0.01 | 2.75 | 0.68 | 0.22 | 0.28 |

|       |   |        |                                    |      |      |      |      |      |      |
|-------|---|--------|------------------------------------|------|------|------|------|------|------|
| 15416 | 0 | 10421  | DTMKSMQRDED                        | 2.42 | 0.01 | 2.75 | 0.68 | 0.22 | 0.28 |
| 15417 | 0 | 10421  | DTMKSMQRDED                        | 2.42 | 0.01 | 2.75 | 0.68 | 0.22 | 0.28 |
| 15418 | 0 | 10431  | DTNKDKPSYQ                         | 2.32 | 0.01 | 2.56 | 1.20 | 0.22 | 0.28 |
| 15419 | 0 | 10432  | DTNLSSTIIKEGIDKTV                  | 2.85 | 0.01 | 1.60 | 2.04 | 2.60 | 1.75 |
| 15420 | 0 | 10433  | DTNNN                              | 1.73 | 0.01 | 3.08 | 1.15 | 0.22 | 1.66 |
| 15421 | 0 | 10433  | DTNNN                              | 1.73 | 0.01 | 2.87 | 1.15 | 0.22 | 2.12 |
| 15422 | 0 | 10433  | DTNNN                              | 1.73 | 0.01 | 2.87 | 1.15 | 0.22 | 1.34 |
| 15423 | 0 | 10433  | DTNNN                              | 1.73 | 0.01 | 2.87 | 1.15 | 0.22 | 1.34 |
| 15424 | 0 | 10433  | DTNNN                              | 1.73 | 0.01 | 2.87 | 1.15 | 0.22 | 2.35 |
| 15425 | 0 | 97960  | DTNNNLTLVP                         | 2.33 | 0.01 | 2.87 | 0.68 | 0.22 | 0.28 |
| 15426 | 0 | 10436  | DTNSVYEPYYHSDHAES<br>SWV           | 2.95 | 0.01 | 3.27 | 2.89 | 0.22 | 0.28 |
| 15427 | 0 | 10436  | DTNSVYEPYYHSDHAES<br>SWV           | 2.95 | 0.01 | 3.27 | 3.16 | 0.22 | 0.28 |
| 15428 | 0 | 10438  | DTPDCXGNEKCLEYA                    | 2.65 | 0.01 | 0.90 | 0.44 | 1.41 | 0.28 |
| 15429 | 0 | 119810 | DTPILPQ                            | 2.02 | 0.01 | 0.78 | 0.68 | 0.22 | 0.28 |
| 15430 | 0 | 137740 | DTPLTAQALKLV                       | 2.49 | 0.01 | 0.90 | 0.68 | 0.22 | 0.28 |
| 15431 | 0 | 137741 | DTPLTHAALTLV                       | 2.50 | 0.01 | 0.90 | 0.68 | 0.22 | 0.28 |
| 15432 | 0 | 137742 | DTPLTHAGLKL                        | 2.48 | 0.01 | 0.90 | 0.68 | 0.22 | 0.28 |
| 15433 | 0 | 137743 | DTPLTIAGLKL                        | 2.48 | 0.01 | 0.90 | 0.68 | 0.22 | 1.27 |
| 15434 | 0 | 137743 | DTPLTIAGLKL                        | 2.48 | 0.01 | 0.90 | 0.68 | 0.22 | 0.85 |
| 15435 | 0 | 137743 | DTPLTIAGLKL                        | 2.48 | 0.01 | 0.90 | 0.68 | 0.22 | 1.66 |
| 15436 | 0 | 137743 | DTPLTIAGLKL                        | 2.48 | 0.01 | 0.90 | 0.68 | 0.22 | 0.28 |
| 15437 | 0 | 137743 | DTPLTIAGLKL                        | 2.48 | 0.01 | 0.90 | 0.68 | 0.22 | 0.28 |
| 15438 | 0 | 137744 | DTPLTRQALKLV                       | 2.48 | 0.01 | 0.90 | 0.68 | 0.22 | 1.27 |
| 15439 | 0 | 137744 | DTPLTRQALKLV                       | 2.48 | 0.01 | 0.90 | 0.68 | 0.22 | 0.85 |
| 15440 | 0 | 137745 | DTPLTTAALALV                       | 2.52 | 0.01 | 0.90 | 0.68 | 0.22 | 0.28 |
| 15441 | 0 | 97252  | DTPLTTAALRLV                       | 2.49 | 0.01 | 0.90 | 0.68 | 0.22 | 2.12 |
| 15442 | 0 | 97252  | DTPLTTAALRLV                       | 2.49 | 0.01 | 0.90 | 0.68 | 0.22 | 1.27 |
| 15443 | 0 | 97252  | DTPLTTAALRLV                       | 2.49 | 0.01 | 0.90 | 0.68 | 0.22 | 0.28 |
| 15444 | 0 | 97252  | DTPLTTAALRLV                       | 2.49 | 0.01 | 0.90 | 0.68 | 0.22 | 1.27 |
| 15445 | 0 | 97252  | DTPLTTAALRLV                       | 2.49 | 0.01 | 0.90 | 0.68 | 0.22 | 0.28 |
| 15446 | 0 | 97252  | DTPLTTAALRLV                       | 2.49 | 0.01 | 0.90 | 0.68 | 0.22 | 1.27 |
| 15447 | 0 | 97252  | DTPLTTAALRLV                       | 2.49 | 0.01 | 0.90 | 0.68 | 0.22 | 1.66 |
| 15448 | 0 | 97252  | DTPLTTAALRLV                       | 2.49 | 0.01 | 0.90 | 0.68 | 0.22 | 0.28 |
| 15449 | 0 | 97252  | DTPLTTAALRLV                       | 2.49 | 0.01 | 0.90 | 0.68 | 0.22 | 0.28 |
| 15450 | 0 | 137746 | DTPLTVQGLKL                        | 2.49 | 0.01 | 0.90 | 0.68 | 0.22 | 0.28 |
| 15451 | 0 | 137747 | DTPLTYAGLRLV                       | 2.48 | 0.01 | 0.90 | 0.68 | 0.22 | 0.28 |
| 15452 | 0 | 137747 | DTPLTYAGLRLV                       | 2.48 | 0.01 | 0.90 | 0.68 | 0.22 | 0.85 |
| 15453 | 0 | 108323 | DTPPPCPRCP                         | 2.36 | 0.01 | 0.78 | 0.68 | 0.22 | 0.28 |
| 15454 | 0 | 10450  | DTPPVDPVDSRGAILRR<br>QYNLSTSPLTSSV | 3.35 | 0.01 | 2.53 | 0.44 | 0.85 | 0.28 |
| 15455 | 0 | 10450  | DTPPVDPVDSRGAILRR<br>QYNLSTSPLTSSV | 3.35 | 0.01 | 2.53 | 0.44 | 0.85 | 0.28 |
| 15456 | 0 | 10452  | DTPTATE                            | 2.04 | 0.01 | 1.66 | 1.15 | 0.22 | 0.28 |
| 15457 | 0 | 113345 | DTPTLH                             | 1.90 | 0.01 | 1.86 | 1.15 | 0.22 | 0.85 |

|       |   |        |                               |      |      |      |      |      |      |
|-------|---|--------|-------------------------------|------|------|------|------|------|------|
| 15458 | 0 | 113345 | DTPTLH                        | 1.90 | 0.01 | 1.86 | 1.15 | 0.22 | 1.48 |
| 15459 | 0 | 142131 | DTPTLHEYMLDL                  | 2.50 | 0.01 | 1.86 | 0.44 | 1.41 | 0.28 |
| 15460 | 0 | 153820 | DTPTLHEYMLDLQP                | 2.64 | 0.01 | 1.86 | 1.12 | 0.22 | 2.02 |
| 15461 | 0 | 153820 | DTPTLHEYMLDLQP                | 2.64 | 0.01 | 1.86 | 1.12 | 0.22 | 2.02 |
| 15462 | 0 | 153820 | DTPTLHEYMLDLQP                | 2.64 | 0.01 | 1.86 | 1.12 | 0.22 | 2.02 |
| 15463 | 0 | 10458  | DTPYLDITYHFVMQRLPL            | 2.84 | 0.01 | 0.78 | 1.81 | 0.22 | 0.28 |
| 15464 | 0 | 10458  | DTPYLDITYHFVMQRLPL            | 2.84 | 0.01 | 0.78 | 1.81 | 0.22 | 1.57 |
| 15465 | 0 | 115212 | DTQAIVQNND                    | 2.33 | 0.01 | 1.60 | 0.44 | 1.23 | 0.85 |
| 15466 | 0 | 10463  | DTQGSN                        | 1.88 | 0.01 | 2.40 | 0.44 | 0.85 | 0.28 |
| 15467 | 0 | 10464  | DTQGSNWIQKETLVTFK<br>NPHAKKQD | 3.12 | 0.01 | 2.30 | 0.68 | 0.22 | 0.28 |
| 15468 | 0 | 10464  | DTQGSNWIQKETLVTFK<br>NPHAKKQD | 3.12 | 0.01 | 2.30 | 0.68 | 0.22 | 0.28 |
| 15469 | 0 | 10464  | DTQGSNWIQKETLVTFK<br>NPHAKKQD | 3.12 | 0.01 | 2.30 | 2.65 | 0.22 | 0.28 |
| 15470 | 0 | 10464  | DTQGSNWIQKETLVTFK<br>NPHAKKQD | 3.12 | 0.01 | 2.30 | 2.65 | 0.22 | 0.28 |
| 15471 | 0 | 10464  | DTQGSNWIQKETLVTFK<br>NPHAKKQD | 3.12 | 0.01 | 2.30 | 2.65 | 0.22 | 0.28 |
| 15472 | 0 | 10464  | DTQGSNWIQKETLVTFK<br>NPHAKKQD | 3.12 | 0.01 | 2.30 | 2.65 | 0.22 | 0.28 |
| 15473 | 0 | 10464  | DTQGSNWIQKETLVTFK<br>NPHAKKQD | 3.12 | 0.01 | 2.30 | 2.65 | 0.22 | 0.28 |
| 15474 | 0 | 10464  | DTQGSNWIQKETLVTFK<br>NPHAKKQD | 3.12 | 0.01 | 2.30 | 2.65 | 0.22 | 0.28 |
| 15475 | 0 | 10464  | DTQGSNWIQKETLVTFK<br>NPHAKKQD | 3.12 | 0.01 | 2.30 | 2.65 | 0.22 | 0.28 |
| 15476 | 0 | 10464  | DTQGSNWIQKETLVTFK<br>NPHAKKQD | 3.12 | 0.01 | 2.30 | 0.68 | 0.22 | 0.28 |
| 15477 | 0 | 10464  | DTQGSNWIQKETLVTFK<br>NPHAKKQD | 3.12 | 0.01 | 2.30 | 0.68 | 0.22 | 0.28 |
| 15478 | 0 | 182383 | DTQLGRELLTHR                  | 2.48 | 0.01 | 0.90 | 0.68 | 0.22 | 0.28 |
| 15479 | 0 | 182383 | DTQLGRELLTHR                  | 2.48 | 0.01 | 0.90 | 0.68 | 0.22 | 0.28 |
| 15480 | 0 | 137748 | DTQLTLEALKLV                  | 2.49 | 0.01 | 0.90 | 0.68 | 0.22 | 0.28 |
| 15481 | 0 | 137748 | DTQLTLEALKLV                  | 2.49 | 0.01 | 0.90 | 0.68 | 0.22 | 0.85 |
| 15482 | 0 | 137749 | DTQLTYAGLKL                   | 2.48 | 0.01 | 0.90 | 0.68 | 0.22 | 0.28 |
| 15483 | 0 | 238312 | DTQQSIPGNEERFDSYP<br>M        | 2.80 | 0.01 | 0.78 | 0.44 | 1.13 | 0.28 |
| 15484 | 0 | 238312 | DTQQSIPGNEERFDSYP<br>M        | 2.80 | 0.01 | 0.78 | 0.44 | 1.13 | 0.28 |
| 15485 | 0 | 10473  | DTQTGMAGQTPQVET               | 2.76 | 0.01 | 2.24 | 0.68 | 0.22 | 0.28 |
| 15486 | 0 | 10476  | DTRCFD                        | 1.91 | 0.01 | 1.96 | 0.44 | 0.85 | 0.28 |
| 15487 | 0 | 142409 | DTRIAQQIWLRR                  | 2.46 | 0.01 | 0.90 | 0.68 | 0.22 | 0.85 |
| 15488 | 0 | 164224 | DTRITKR                       | 2.04 | 0.01 | 0.90 | 1.20 | 0.22 | 1.39 |

|       |   |        |                                               |      |      |      |      |      |      |
|-------|---|--------|-----------------------------------------------|------|------|------|------|------|------|
| 15489 | 0 | 10480  | DTRTEATSQASDDATAG<br>ATTTQAPV                 | 3.19 | 0.01 | 4.45 | 0.44 | 0.85 | 0.28 |
| 15490 | 0 | 122319 | DTSDLEKKNIPDLSNDN<br>NYYSLIYKNYKDNDKS         | 3.48 | 0.01 | 2.22 | 0.44 | 1.74 | 0.28 |
| 15491 | 0 | 122319 | DTSDLEKKNIPDLSNDN<br>NYYSLIYKNYKDNDKS         | 3.48 | 0.01 | 2.22 | 0.44 | 1.74 | 1.34 |
| 15492 | 0 | 122319 | DTSDLEKKNIPDLSNDN<br>NYYSLIYKNYKDNDKS         | 3.48 | 0.01 | 2.22 | 0.44 | 1.74 | 0.28 |
| 15493 | 0 | 170658 | DTSGLRHVQLAFFPP                               | 2.61 | 0.01 | 0.78 | 0.44 | 1.13 | 0.28 |
| 15494 | 0 | 134035 | DTSLEEAKTQGPYDV                               | 2.64 | 0.01 | 2.19 | 1.15 | 0.22 | 0.28 |
| 15495 | 0 | 10486  | DTSNKFAD                                      | 2.13 | 0.01 | 3.06 | 1.12 | 0.22 | 0.28 |
| 15496 | 0 | 10492  | DTSTAPTDPTERTVW                               | 2.71 | 0.01 | 3.97 | 1.20 | 0.22 | 0.85 |
| 15497 | 0 | 104756 | DTTFEYQDLC                                    | 2.31 | 0.01 | 0.78 | 0.44 | 1.13 | 1.27 |
| 15498 | 0 | 513893 | DTTGSGKRRAQIMEDLD<br>KWIDDHGGTPA              | 3.24 | 0.01 | 2.24 | 0.44 | 1.41 | 1.28 |
| 15499 | 0 | 10495  | DTTIMA                                        | 1.89 | 0.01 | 1.96 | 0.44 | 0.85 | 0.28 |
| 15500 | 0 | 10496  | DTTIP                                         | 1.75 | 0.01 | 3.21 | 0.68 | 0.22 | 1.48 |
| 15501 | 0 | 10496  | DTTIP                                         | 1.75 | 0.01 | 3.21 | 0.68 | 0.22 | 0.28 |
| 15502 | 0 | 10496  | DTTIP                                         | 1.75 | 0.01 | 3.21 | 0.68 | 0.22 | 1.48 |
| 15503 | 0 | 188113 | DTTIPDVVVD                                    | 2.35 | 0.01 | 3.21 | 2.88 | 0.22 | 0.28 |
| 15504 | 0 | 188113 | DTTIPDVVVD                                    | 2.35 | 0.01 | 3.21 | 2.88 | 0.22 | 0.28 |
| 15505 | 0 | 188113 | DTTIPDVVVD                                    | 2.35 | 0.01 | 3.21 | 2.88 | 0.22 | 0.28 |
| 15506 | 0 | 188113 | DTTIPDVVVD                                    | 2.35 | 0.01 | 3.21 | 2.88 | 0.22 | 0.28 |
| 15507 | 0 | 188113 | DTTIPDVVVD                                    | 2.35 | 0.01 | 3.21 | 2.88 | 0.22 | 0.28 |
| 15508 | 0 | 10497  | DTTIPGELIPAGDYAITN<br>GTGNDITTATGYDTADII<br>K | 3.59 | 0.01 | 4.15 | 1.15 | 0.22 | 0.85 |
| 15509 | 0 | 10497  | DTTIPGELIPAGDYAITN<br>GTGNDITTATGYDTADII<br>K | 3.59 | 0.01 | 4.15 | 1.15 | 0.22 | 0.85 |
| 15510 | 0 | 10497  | DTTIPGELIPAGDYAITN<br>GTGNDITTATGYDTADII<br>K | 3.59 | 0.01 | 4.15 | 1.15 | 0.22 | 0.85 |
| 15511 | 0 | 424231 | DTTQGRFD                                      | 2.14 | 0.01 | 3.16 | 0.68 | 0.22 | 0.85 |
| 15512 | 0 | 424231 | DTTQGRFD                                      | 2.14 | 0.01 | 3.16 | 0.68 | 0.22 | 0.28 |
| 15513 | 0 | 424231 | DTTQGRFD                                      | 2.14 | 0.01 | 3.16 | 0.68 | 0.22 | 0.85 |
| 15514 | 0 | 424231 | DTTQGRFD                                      | 2.14 | 0.01 | 3.16 | 0.68 | 0.22 | 0.85 |
| 15515 | 0 | 424231 | DTTQGRFD                                      | 2.14 | 0.01 | 3.16 | 0.68 | 0.22 | 0.28 |
| 15516 | 0 | 424231 | DTTQGRFD                                      | 2.14 | 0.01 | 3.16 | 0.68 | 0.22 | 0.28 |
| 15517 | 0 | 424231 | DTTQGRFD                                      | 2.14 | 0.01 | 3.16 | 0.68 | 0.22 | 0.28 |
| 15518 | 0 | 424231 | DTTQGRFD                                      | 2.14 | 0.01 | 3.16 | 0.68 | 0.22 | 1.75 |
| 15519 | 0 | 424231 | DTTQGRFD                                      | 2.14 | 0.01 | 3.16 | 0.68 | 0.22 | 0.28 |
| 15520 | 0 | 424231 | DTTQGRFD                                      | 2.14 | 0.01 | 3.16 | 0.68 | 0.22 | 0.28 |
| 15521 | 0 | 424231 | DTTQGRFD                                      | 2.14 | 0.01 | 3.16 | 0.68 | 0.22 | 0.28 |

|       |   |        |                                 |      |      |      |      |      |      |
|-------|---|--------|---------------------------------|------|------|------|------|------|------|
| 15522 | 0 | 424231 | DTTQGRFD                        | 2.14 | 0.01 | 3.16 | 0.68 | 0.22 | 0.28 |
| 15523 | 0 | 424231 | DTTQGRFD                        | 2.14 | 0.01 | 3.16 | 0.68 | 0.22 | 0.28 |
| 15524 | 0 | 424231 | DTTQGRFD                        | 2.14 | 0.01 | 3.16 | 0.68 | 0.22 | 0.28 |
| 15525 | 0 | 424231 | DTTQGRFD                        | 2.14 | 0.01 | 3.16 | 0.68 | 0.22 | 0.28 |
| 15526 | 0 | 424231 | DTTQGRFD                        | 2.14 | 0.01 | 3.16 | 0.68 | 0.22 | 0.28 |
| 15527 | 0 | 424231 | DTTQGRFD                        | 2.14 | 0.01 | 3.16 | 0.68 | 0.22 | 0.28 |
| 15528 | 0 | 424231 | DTTQGRFD                        | 2.14 | 0.01 | 3.16 | 0.68 | 0.22 | 0.28 |
| 15529 | 0 | 424231 | DTTQGRFD                        | 2.14 | 0.01 | 3.16 | 0.68 | 2.25 | 1.75 |
| 15530 | 0 | 111218 | DTTRSTNMSLCAAIS                 | 2.67 | 0.01 | 1.86 | 0.68 | 0.22 | 0.28 |
| 15531 | 0 | 10499  | DTTSDYEK                        | 2.14 | 0.01 | 2.99 | 0.44 | 0.85 | 0.28 |
| 15532 | 0 | 81306  | DTTTLN                          | 1.91 | 0.01 | 2.40 | 2.52 | 0.22 | 0.28 |
| 15533 | 0 | 10503  | DTTVTGGQAARTTQSFT<br>SLFPPGPSQK | 3.25 | 0.01 | 0.90 | 0.44 | 0.85 | 0.28 |
| 15534 | 0 | 10504  | DTTVTGGQAARTTQSFT<br>SLFTPGPSQK | 3.25 | 0.01 | 0.90 | 0.44 | 0.85 | 0.28 |
| 15535 | 0 | 143853 | DTVGA                           | 1.74 | 0.01 | 0.78 | 0.44 | 1.41 | 2.12 |
| 15536 | 0 | 143853 | DTVGA                           | 1.74 | 0.01 | 0.78 | 0.44 | 1.41 | 1.48 |
| 15537 | 0 | 143853 | DTVGA                           | 1.74 | 0.01 | 0.78 | 0.44 | 1.41 | 2.12 |
| 15538 | 0 | 238313 | DTVGAGNGMRRC                    | 2.46 | 0.01 | 0.90 | 3.41 | 0.22 | 0.28 |
| 15539 | 0 | 10510  | DTVIYSKYGG                      | 2.29 | 0.01 | 2.04 | 0.68 | 0.22 | 0.28 |
| 15540 | 0 | 10510  | DTVIYSKYGG                      | 2.29 | 0.01 | 2.04 | 0.68 | 0.22 | 0.28 |
| 15541 | 0 | 423258 | DTVLLMHFFYTHYRS                 | 2.66 | 0.01 | 2.51 | 0.44 | 2.35 | 1.28 |
| 15542 | 0 | 99963  | DTVQLRRKLEFFTY                  | 2.59 | 0.01 | 2.96 | 0.44 | 0.22 | 0.28 |
| 15543 | 0 | 102374 | DTVTCPNAECQPLQLEH<br>GSC        | 2.93 | 0.01 | 3.44 | 0.68 | 0.22 | 0.28 |
| 15544 | 0 | 10518  | DTVTPi                          | 1.90 | 0.01 | 1.96 | 0.44 | 0.85 | 0.28 |
| 15545 | 0 | 10519  | DTVTVEDLKQRGISAERP<br>LVYISS    | 3.10 | 0.01 | 2.70 | 0.68 | 0.22 | 0.85 |
| 15546 | 0 | 10519  | DTVTVEDLKQRGISAERP<br>LVYISS    | 3.10 | 0.01 | 2.70 | 0.68 | 0.22 | 0.28 |
| 15547 | 0 | 106357 | DTWEPF                          | 1.88 | 0.01 | 0.78 | 0.68 | 0.22 | 1.27 |
| 15548 | 0 | 106357 | DTWEPF                          | 1.88 | 0.01 | 0.78 | 0.68 | 0.22 | 2.35 |
| 15549 | 0 | 138159 | DTWPTARLTSSMQYI                 | 2.63 | 0.01 | 0.90 | 0.44 | 1.13 | 1.39 |
| 15550 | 0 | 108327 | DTYDALHMQTLAPR                  | 2.62 | 0.01 | 1.75 | 1.12 | 0.22 | 2.02 |
| 15551 | 0 | 10525  | DTYEEVLELAQE                    | 2.49 | 0.01 | 2.69 | 1.20 | 0.22 | 0.28 |
| 15552 | 0 | 142594 | DTYPAHTANEVSE                   | 2.54 | 0.01 | 0.78 | 0.44 | 1.41 | 1.27 |
| 15553 | 0 | 112486 | DTYRF                           | 1.74 | 0.01 | 1.86 | 1.12 | 0.22 | 0.28 |
| 15554 | 0 | 112486 | DTYRF                           | 1.74 | 0.01 | 1.86 | 2.37 | 0.22 | 0.28 |
| 15555 | 0 | 10529  | DTYRYI                          | 1.90 | 0.01 | 3.67 | 1.15 | 0.22 | 0.85 |
| 15556 | 0 | 10529  | DTYRYI                          | 1.90 | 0.01 | 3.67 | 0.68 | 0.22 | 2.02 |
| 15557 | 0 | 10529  | DTYRYI                          | 1.90 | 0.01 | 3.67 | 0.68 | 0.22 | 0.28 |
| 15558 | 0 | 149665 | DTYSASPVTDPDSTS                 | 2.73 | 0.01 | 4.03 | 1.12 | 0.22 | 0.28 |
| 15559 | 0 | 10531  | DTYTQKLSVP                      | 2.29 | 0.01 | 0.78 | 0.44 | 1.74 | 0.28 |
| 15560 | 0 | 10532  | DTYVTGGAQGRTTRGF<br>AGLFTSGPAQK | 3.24 | 0.01 | 0.90 | 0.44 | 0.85 | 0.28 |



|       |   |        |                          |      |      |      |      |      |      |
|-------|---|--------|--------------------------|------|------|------|------|------|------|
|       |   |        | DVADNGTLFLGILKNWK        |      |      |      |      |      |      |
| 15561 | 0 | 135543 | EESDRKIMQSQIVSFYFK<br>L  | 3.50 | 4.23 | 0.78 | 1.12 | 0.22 | 0.28 |
|       |   |        | DVADNGTLFLGILKNWK        |      |      |      |      |      |      |
| 15562 | 0 | 135543 | EESDRKIMQSQIVSFYFK<br>L  | 3.50 | 4.23 | 0.78 | 1.12 | 0.22 | 0.28 |
|       |   |        | DVADNGTLFLGILKNWK        |      |      |      |      |      |      |
| 15563 | 0 | 135543 | EESDRKIMQSQIVSFYFK<br>L  | 3.50 | 4.23 | 0.78 | 1.12 | 0.22 | 0.28 |
|       |   |        | DVADNGTLFLGILKNWK        |      |      |      |      |      |      |
| 15564 | 0 | 135543 | EESDRKIMQSQIVSFYFK<br>L  | 3.50 | 4.23 | 0.78 | 1.12 | 0.22 | 0.28 |
|       |   |        | DVADNGTLFLGILKNWK        |      |      |      |      |      |      |
| 15565 | 0 | 135543 | EESDRKIMQSQIVSFYFK<br>L  | 3.50 | 4.23 | 0.78 | 1.12 | 1.41 | 0.28 |
| 15566 | 0 | 105148 | DVAGL                    | 1.74 | 0.01 | 3.21 | 1.20 | 0.22 | 0.28 |
| 15567 | 0 | 105148 | DVAGL                    | 1.74 | 0.01 | 3.89 | 1.20 | 0.22 | 0.28 |
| 15568 | 0 | 105148 | DVAGL                    | 1.74 | 0.01 | 4.15 | 1.20 | 0.22 | 0.28 |
| 15569 | 0 | 105148 | DVAGL                    | 1.74 | 0.01 | 3.47 | 1.20 | 0.22 | 0.28 |
| 15570 | 0 | 10538  | DVAGLEKDPVA              | 2.42 | 0.01 | 3.36 | 1.15 | 0.22 | 1.39 |
| 15571 | 0 | 10538  | DVAGLEKDPVA              | 2.42 | 0.01 | 3.36 | 1.15 | 0.22 | 0.85 |
| 15572 | 0 | 10538  | DVAGLEKDPVA              | 2.42 | 0.01 | 3.36 | 1.15 | 0.22 | 0.85 |
| 15573 | 0 | 10538  | DVAGLEKDPVA              | 2.42 | 0.01 | 3.36 | 1.15 | 0.22 | 1.34 |
| 15574 | 0 | 10539  | DVAGLEKDPVAN             | 2.48 | 0.01 | 3.36 | 2.46 | 0.22 | 0.28 |
| 15575 | 0 | 10539  | DVAGLEKDPVAN             | 2.48 | 0.01 | 3.36 | 2.46 | 0.22 | 0.28 |
| 15576 | 0 | 10539  | DVAGLEKDPVAN             | 2.48 | 0.01 | 3.36 | 2.46 | 0.22 | 0.28 |
| 15577 | 0 | 10539  | DVAGLEKDPVAN             | 2.48 | 0.01 | 3.36 | 2.46 | 0.22 | 1.34 |
| 15578 | 0 | 95330  | DVAGLQ                   | 1.88 | 0.01 | 2.40 | 2.52 | 0.22 | 0.28 |
| 15579 | 0 | 95330  | DVAGLQ                   | 1.88 | 0.01 | 2.40 | 2.52 | 0.22 | 0.28 |
| 15580 | 0 | 272722 | DVASREQDGEDTTSE          | 2.70 | 0.01 | 1.61 | 0.44 | 0.85 | 1.28 |
| 15581 | 0 | 272725 | DVATEKKKNPEAASK          | 2.68 | 0.01 | 1.61 | 0.44 | 0.85 | 1.28 |
| 15582 | 0 | 146852 | DVAVFARGPQAH             | 2.54 | 0.01 | 1.60 | 0.44 | 0.85 | 0.85 |
| 15583 | 0 | 175578 | DVCEYYDPDYLNT            | 2.56 | 0.01 | 3.45 | 1.12 | 0.22 | 0.85 |
| 15584 | 0 | 175578 | DVCEYYDPDYLNT            | 2.56 | 0.01 | 3.45 | 1.12 | 0.22 | 0.85 |
| 15585 | 0 | 116697 | DVCNFASTRNDYSYWLST<br>P  | 2.82 | 0.01 | 1.60 | 1.12 | 0.22 | 1.27 |
| 15586 | 0 | 116697 | DVCNFASTRNDYSYWLST<br>P  | 2.82 | 0.01 | 1.60 | 0.44 | 1.13 | 0.28 |
| 15587 | 0 | 10550  | DVCSDSDNDGVCDNV          | 2.75 | 0.01 | 2.58 | 2.43 | 0.22 | 0.28 |
| 15588 | 0 | 10550  | DVCSDSDNDGVCDNV          | 2.75 | 0.01 | 2.58 | 2.43 | 0.22 | 0.28 |
| 15589 | 0 | 131852 | DVDEPLEVFISA             | 2.48 | 0.01 | 0.78 | 0.44 | 1.13 | 0.28 |
| 15590 | 0 | 131853 | DVDEPLEVFISAPRS          | 2.69 | 0.01 | 0.78 | 0.44 | 1.13 | 0.28 |
| 15591 | 0 | 10551  | DVDGINYWTKAITGGGE<br>FTD | 2.94 | 0.01 | 4.33 | 1.20 | 0.22 | 0.28 |

|       |   |        |                                    |      |      |      |      |      |      |
|-------|---|--------|------------------------------------|------|------|------|------|------|------|
| 15592 | 0 | 10551  | DVDGINYWTKAITGGGE<br>FTD           | 2.94 | 0.01 | 4.33 | 2.00 | 0.22 | 0.28 |
| 15593 | 0 | 10555  | DVDKPPFDGMTACGNE<br>PIF            | 2.88 | 0.01 | 3.10 | 1.15 | 0.22 | 1.57 |
| 15594 | 0 | 10555  | DVDKPPFDGMTACGNE<br>PIF            | 2.88 | 0.01 | 3.10 | 1.15 | 0.22 | 0.28 |
| 15595 | 0 | 10555  | DVDKPPFDGMTACGNE<br>PIF            | 2.88 | 0.01 | 3.10 | 1.15 | 0.22 | 0.28 |
| 15596 | 0 | 10555  | DVDKPPFDGMTACGNE<br>PIF            | 2.88 | 0.01 | 3.10 | 1.15 | 0.22 | 0.28 |
| 15597 | 0 | 10562  | DVDSRGAILRRQYNLSTS<br>PLTSSVATGTNL | 3.35 | 0.01 | 2.53 | 0.44 | 0.85 | 0.28 |
| 15598 | 0 | 227109 | DVDTEDTNIELRTTLKET<br>N            | 2.94 | 0.01 | 3.28 | 0.44 | 1.59 | 0.28 |
| 15599 | 0 | 434600 | DVDVSKPDLTAALRDVR                  | 2.82 | 4.33 | 0.78 | 0.44 | 1.13 | 0.28 |
| 15600 | 0 | 272800 | DVEDGDGEDEEEGQL                    | 2.73 | 0.01 | 1.61 | 0.44 | 0.85 | 1.28 |
| 15601 | 0 | 10579  | DVELSLRSSDIA                       | 2.49 | 0.01 | 3.72 | 0.44 | 1.23 | 0.85 |
| 15602 | 0 | 10579  | DVELSLRSSDIA                       | 2.49 | 0.01 | 3.72 | 0.44 | 1.23 | 1.27 |
| 15603 | 0 | 10579  | DVELSLRSSDIA                       | 2.49 | 0.01 | 3.72 | 0.44 | 1.23 | 1.34 |
| 15604 | 0 | 10579  | DVELSLRSSDIA                       | 2.49 | 0.01 | 3.72 | 0.44 | 1.23 | 0.85 |
| 15605 | 0 | 10580  | DVENSMQLQAN                        | 2.29 | 0.01 | 3.13 | 1.20 | 0.22 | 0.28 |
| 15606 | 0 | 10580  | DVENSMQLQAN                        | 2.29 | 0.01 | 3.13 | 1.20 | 0.22 | 0.28 |
| 15607 | 0 | 10580  | DVENSMQLQAN                        | 2.29 | 0.01 | 3.13 | 1.20 | 0.22 | 0.28 |
| 15608 | 0 | 10580  | DVENSMQLQAN                        | 2.29 | 0.01 | 3.13 | 1.20 | 0.22 | 0.28 |
| 15609 | 0 | 10580  | DVENSMQLQAN                        | 2.29 | 0.01 | 3.13 | 1.20 | 0.22 | 0.28 |
| 15610 | 0 | 10580  | DVENSMQLQAN                        | 2.29 | 0.01 | 3.13 | 1.20 | 0.22 | 0.28 |
| 15611 | 0 | 10580  | DVENSMQLQAN                        | 2.29 | 0.01 | 3.13 | 1.20 | 0.22 | 0.28 |
| 15612 | 0 | 10580  | DVENSMQLQAN                        | 2.29 | 0.01 | 3.13 | 1.20 | 0.22 | 0.28 |
| 15613 | 0 | 10581  | DVENVDGLSLWEMYK                    | 2.67 | 0.01 | 1.66 | 0.44 | 0.85 | 0.28 |
| 15614 | 0 | 117464 | DVEPKVKSKKREAVA                    | 2.71 | 4.93 | 0.78 | 0.44 | 1.13 | 0.28 |
| 15615 | 0 | 117465 | DVEPKVKSKKREAVA                    | 2.71 | 0.01 | 0.78 | 0.44 | 1.13 | 0.28 |
| 15616 | 0 | 121219 | DVEPKVKSKKREAVAG                   | 2.76 | 0.01 | 0.78 | 0.44 | 1.13 | 0.28 |
| 15617 | 0 | 121219 | DVEPKVKSKKREAVAG                   | 2.76 | 0.01 | 0.78 | 3.05 | 1.13 | 0.28 |
| 15618 | 0 | 227756 | DVERLLKKQRESYFVD                   | 2.74 | 0.01 | 2.72 | 1.20 | 1.59 | 0.28 |
| 15619 | 0 | 177639 | DVERNLSDLVQEEE                     | 2.70 | 0.01 | 0.78 | 0.44 | 1.13 | 0.85 |
| 15620 | 0 | 10584  | DVESYSSMPPLEGE PGD<br>PDL          | 2.98 | 0.01 | 1.72 | 0.44 | 0.85 | 0.28 |
| 15621 | 0 | 10584  | DVESYSSMPPLEGE PGD<br>PDL          | 2.98 | 0.01 | 1.72 | 0.44 | 0.85 | 0.28 |
| 15622 | 0 | 272837 | DVETEKQKAAEATKV                    | 2.73 | 0.01 | 1.61 | 0.44 | 0.85 | 1.28 |
| 15623 | 0 | 272838 | DVETEKQRAAEATKV                    | 2.71 | 0.01 | 1.61 | 0.44 | 0.85 | 1.28 |
| 15624 | 0 | 118311 | DVEVNEKKDRVTD                      | 2.59 | 0.01 | 0.78 | 0.44 | 1.74 | 0.85 |
| 15625 | 0 | 10588  | DVFGANYYYQ                         | 2.29 | 0.01 | 2.56 | 0.68 | 0.22 | 0.28 |

|       |   |        |                                              |      |      |      |      |      |      |
|-------|---|--------|----------------------------------------------|------|------|------|------|------|------|
| 15626 | 0 | 99167  | DVFIMPAAHPVAINA                              | 2.70 | 0.01 | 2.16 | 0.44 | 1.23 | 1.48 |
| 15627 | 0 | 10594  | DVFQNGFTAWGNND                               | 2.63 | 0.01 | 2.14 | 0.44 | 0.85 | 1.27 |
| 15628 | 0 | 10594  | DVFQNGFTAWGNND                               | 2.63 | 0.01 | 2.14 | 0.44 | 2.98 | 1.27 |
| 15629 | 0 | 135545 | DVFYPYPYASGS                                 | 2.49 | 0.01 | 0.90 | 0.68 | 0.22 | 0.28 |
| 15630 | 0 | 135545 | DVFYPYPYASGS                                 | 2.49 | 0.01 | 0.90 | 0.68 | 0.22 | 1.66 |
| 15631 | 0 | 135545 | DVFYPYPYASGS                                 | 2.49 | 0.01 | 0.90 | 0.68 | 0.22 | 1.66 |
| 15632 | 0 | 135545 | DVFYPYPYASGS                                 | 2.49 | 0.01 | 0.90 | 0.68 | 0.22 | 1.66 |
| 15633 | 0 | 135545 | DVFYPYPYASGS                                 | 2.49 | 0.01 | 0.90 | 0.68 | 0.22 | 1.66 |
| 15634 | 0 | 135545 | DVFYPYPYASGS                                 | 2.49 | 0.01 | 0.90 | 0.68 | 0.22 | 1.66 |
| 15635 | 0 | 135545 | DVFYPYPYASGS                                 | 2.49 | 0.01 | 0.90 | 0.68 | 0.22 | 1.66 |
| 15636 | 0 | 135545 | DVFYPYPYASGS                                 | 2.49 | 0.01 | 0.90 | 0.68 | 0.22 | 2.49 |
| 15637 | 0 | 10600  | DVGCAVDTERMELRCG<br>EGL                      | 2.93 | 0.01 | 3.72 | 0.68 | 0.22 | 0.28 |
| 15638 | 0 | 156862 | DVGDPRLR                                     | 2.03 | 0.01 | 0.90 | 1.20 | 0.22 | 0.28 |
| 15639 | 0 | 272890 | DVGEKKDEEQEKKEE                              | 2.72 | 0.01 | 1.61 | 0.44 | 0.85 | 1.28 |
| 15640 | 0 | 10604  | DVGEYFDNLSVKIGS                              | 2.67 | 0.01 | 4.08 | 2.66 | 0.22 | 0.85 |
| 15641 | 0 | 176995 | DVGGGTGTE                                    | 2.26 | 0.01 | 0.90 | 2.13 | 0.22 | 0.28 |
| 15642 | 0 | 176995 | DVGGGTGTE                                    | 2.26 | 0.01 | 0.90 | 2.13 | 0.22 | 1.48 |
| 15643 | 0 | 272900 | DVGKKKDEEQEPNEE                              | 2.69 | 0.01 | 1.61 | 0.44 | 0.85 | 1.28 |
| 15644 | 0 | 99964  | DVGMHVKEKE                                   | 2.33 | 0.01 | 2.18 | 2.16 | 0.22 | 0.28 |
| 15645 | 0 | 272911 | DVGPRHVDPDHRST                               | 2.71 | 0.01 | 1.61 | 0.44 | 0.85 | 1.28 |
| 15646 | 0 | 103121 | DVGSLNGTYVNPV                                | 2.66 | 0.01 | 2.04 | 0.44 | 0.85 | 1.28 |
| 15647 | 0 | 99965  | DVGSNKGAI                                    | 2.29 | 0.01 | 0.78 | 1.12 | 0.22 | 0.85 |
| 15648 | 0 | 10607  | DVGVLPPHWAPGALDD<br>GPYA                     | 2.98 | 0.01 | 2.40 | 0.44 | 1.59 | 0.28 |
| 15649 | 0 | 450497 | DVHKLGN                                      | 1.99 | 0.01 | 0.90 | 0.44 | 1.41 | 1.39 |
| 15650 | 0 | 10611  | DVHNIKEDYNLLQQYLN<br>YMKNEMEQLK              | 3.27 | 0.01 | 1.66 | 0.44 | 1.74 | 0.28 |
| 15651 | 0 | 10611  | DVHNIKEDYNLLQQYLN<br>YMKNEMEQLK              | 3.27 | 0.01 | 1.66 | 0.44 | 1.74 | 0.28 |
| 15652 | 0 | 106358 | DVHVMNV                                      | 2.04 | 0.01 | 0.90 | 3.00 | 1.93 | 0.28 |
| 15653 | 0 | 10614  | DVIAILPVDELKALFQEKL<br>E                     | 2.98 | 0.01 | 3.57 | 0.68 | 0.22 | 1.27 |
| 15654 | 0 | 10614  | DVIAILPVDELKALFQEKL<br>E                     | 2.98 | 0.01 | 3.57 | 0.68 | 0.22 | 1.27 |
| 15655 | 0 | 10614  | DVIAILPVDELKALFQEKL<br>E                     | 2.98 | 0.01 | 3.57 | 0.68 | 0.22 | 0.85 |
| 15656 | 0 | 150175 | DVISSIGDSVSRAL                               | 2.70 | 0.01 | 4.33 | 0.68 | 0.22 | 1.48 |
| 15657 | 0 | 150175 | DVISSIGDSVSRAL                               | 2.70 | 0.01 | 4.33 | 0.68 | 0.22 | 0.28 |
| 15658 | 0 | 150175 | DVISSIGDSVSRAL                               | 2.70 | 0.01 | 4.33 | 0.68 | 0.22 | 2.12 |
| 15659 | 0 | 150175 | DVISSIGDSVSRAL                               | 2.70 | 0.01 | 4.33 | 0.68 | 0.22 | 0.28 |
| 15660 | 0 | 230716 | DVISSIGDSVSRALTHA<br>LPAPTQNTQVSSHRLD<br>TGK | 3.58 | 0.01 | 2.60 | 1.20 | 0.22 | 0.85 |

|       |   |        |                                               |      |      |      |      |      |      |
|-------|---|--------|-----------------------------------------------|------|------|------|------|------|------|
| 15661 | 0 | 230716 | DVIESSIGDSVSRALTHA<br>LPAPTQNTQVSSHRLD<br>TGK | 3.58 | 0.01 | 2.60 | 0.44 | 0.85 | 0.85 |
| 15662 | 0 | 230716 | DVIESSIGDSVSRALTHA<br>LPAPTQNTQVSSHRLD<br>TGK | 3.58 | 0.01 | 2.60 | 0.44 | 0.85 | 0.28 |
| 15663 | 0 | 130777 | DVIGQVRRPEMGDQAH<br>MPYT                      | 2.93 | 0.01 | 0.78 | 0.44 | 1.13 | 0.28 |
| 15664 | 0 | 174083 | DVIPANWKPD                                    | 2.32 | 0.01 | 3.10 | 0.44 | 1.23 | 0.85 |
| 15665 | 0 | 174083 | DVIPANWKPD                                    | 2.32 | 0.01 | 3.10 | 0.44 | 1.23 | 0.85 |
| 15666 | 0 | 174083 | DVIPANWKPD                                    | 2.32 | 0.01 | 3.10 | 0.44 | 1.23 | 0.85 |
| 15667 | 0 | 174083 | DVIPANWKPD                                    | 2.32 | 0.01 | 3.10 | 0.44 | 1.23 | 0.85 |
| 15668 | 0 | 174083 | DVIPANWKPD                                    | 2.32 | 0.01 | 3.10 | 0.44 | 1.23 | 0.85 |
| 15669 | 0 | 81325  | DVKASA                                        | 1.90 | 0.01 | 2.40 | 2.52 | 0.22 | 0.28 |
| 15670 | 0 | 148575 | DVKDNKPSDVKLPVIKA<br>E                        | 2.87 | 0.01 | 3.33 | 0.44 | 0.85 | 0.28 |
| 15671 | 0 | 148575 | DVKDNKPSDVKLPVIKA<br>E                        | 2.87 | 0.01 | 3.33 | 2.49 | 0.22 | 0.28 |
| 15672 | 0 | 148576 | DVKDNKSTDVKLPVVKA<br>E                        | 2.87 | 0.01 | 3.33 | 0.44 | 0.85 | 0.28 |
| 15673 | 0 | 148576 | DVKDNKSTDVKLPVVKA<br>E                        | 2.87 | 0.01 | 3.33 | 2.49 | 0.22 | 0.28 |
| 15674 | 0 | 10632  | DVKFDFDKSKVKENSYA<br>DIKN                     | 3.03 | 0.01 | 2.58 | 2.43 | 0.22 | 0.28 |
| 15675 | 0 | 10632  | DVKFDFDKSKVKENSYA<br>DIKN                     | 3.03 | 0.01 | 2.58 | 2.43 | 0.22 | 1.34 |
| 15676 | 0 | 10636  | DVKFPGGGQI                                    | 2.29 | 0.01 | 2.68 | 0.44 | 0.85 | 0.28 |
| 15677 | 0 | 10638  | DVKFPGGGQIVGGVYLL<br>P                        | 2.84 | 0.01 | 3.18 | 0.44 | 1.59 | 0.28 |
| 15678 | 0 | 10638  | DVKFPGGGQIVGGVYLL<br>P                        | 2.84 | 0.01 | 3.18 | 0.44 | 1.59 | 0.28 |
| 15679 | 0 | 10638  | DVKFPGGGQIVGGVYLL<br>P                        | 2.84 | 0.01 | 3.18 | 0.44 | 1.59 | 0.28 |
| 15680 | 0 | 10639  | DVKFPGGGQIVGGVYLL<br>PRR                      | 2.92 | 0.01 | 1.72 | 0.68 | 0.22 | 1.57 |
| 15681 | 0 | 10639  | DVKFPGGGQIVGGVYLL<br>PRR                      | 2.92 | 0.01 | 1.72 | 0.68 | 0.22 | 1.48 |
| 15682 | 0 | 10639  | DVKFPGGGQIVGGVYLL<br>PRR                      | 2.92 | 0.01 | 1.72 | 0.68 | 0.22 | 1.57 |
| 15683 | 0 | 10639  | DVKFPGGGQIVGGVYLL<br>PRR                      | 2.92 | 0.01 | 1.72 | 0.44 | 0.85 | 0.28 |
| 15684 | 0 | 10639  | DVKFPGGGQIVGGVYLL<br>PRR                      | 2.92 | 0.01 | 1.72 | 0.44 | 0.85 | 0.28 |
| 15685 | 0 | 10639  | DVKFPGGGQIVGGVYLL<br>PRR                      | 2.92 | 0.01 | 3.10 | 1.15 | 0.22 | 0.28 |
| 15686 | 0 | 10639  | DVKFPGGGQIVGGVYLL<br>PRR                      | 2.92 | 0.01 | 3.10 | 0.44 | 0.85 | 0.28 |

|       |   |        |                                             |      |      |      |      |      |      |
|-------|---|--------|---------------------------------------------|------|------|------|------|------|------|
| 15687 | 0 | 10639  | DVKFPGGGQIVGGVYLL<br>PRR                    | 2.92 | 0.01 | 3.18 | 1.15 | 0.22 | 0.85 |
| 15688 | 0 | 10639  | DVKFPGGGQIVGGVYLL<br>PRR                    | 2.92 | 0.01 | 1.72 | 0.68 | 0.22 | 0.28 |
| 15689 | 0 | 10639  | DVKFPGGGQIVGGVYLL<br>PRR                    | 2.92 | 0.01 | 1.72 | 1.81 | 0.22 | 0.28 |
| 15690 | 0 | 10640  | DVKFPGGGQIVGGVYLL<br>PRRGPRLG               | 3.18 | 0.01 | 1.72 | 0.44 | 0.85 | 0.28 |
| 15691 | 0 | 10640  | DVKFPGGGQIVGGVYLL<br>PRRGPRLG               | 3.18 | 0.01 | 1.72 | 0.44 | 0.85 | 0.28 |
| 15692 | 0 | 462310 | DVKFPGGGQIVGGVYLL<br>PRRGPRLGVRATRKTSE<br>R | 3.48 | 0.01 | 1.96 | 2.90 | 0.22 | 0.28 |
| 15693 | 0 | 158728 | DVKKAFKVIDQDASG                             | 2.70 | 0.01 | 3.26 | 0.44 | 1.23 | 0.28 |
| 15694 | 0 | 120458 | DVKLRWNPDDYGGIKII<br>RV                     | 2.89 | 0.01 | 2.19 | 1.12 | 0.22 | 0.28 |
| 15695 | 0 | 120458 | DVKLRWNPDDYGGIKII<br>RV                     | 2.89 | 0.01 | 2.19 | 1.12 | 0.22 | 0.28 |
| 15696 | 0 | 120458 | DVKLRWNPDDYGGIKII<br>RV                     | 2.89 | 0.01 | 2.19 | 1.12 | 0.22 | 0.28 |
| 15697 | 0 | 10646  | DVKMMERVVEQMCVT<br>QYQKE                    | 2.97 | 0.01 | 1.75 | 3.40 | 0.22 | 0.28 |
| 15698 | 0 | 137827 | DVKS AIEG                                   | 2.10 | 0.01 | 2.26 | 2.36 | 0.22 | 0.28 |
| 15699 | 0 | 137827 | DVKS AIEG                                   | 2.10 | 0.01 | 2.26 | 2.36 | 0.22 | 2.98 |
| 15700 | 0 | 137827 | DVKS AIEG                                   | 2.10 | 0.01 | 2.26 | 2.04 | 0.22 | 0.85 |
| 15701 | 0 | 137827 | DVKS AIEG                                   | 2.10 | 0.01 | 2.26 | 2.04 | 0.22 | 0.85 |
| 15702 | 0 | 137827 | DVKS AIEG                                   | 2.10 | 0.01 | 2.26 | 2.04 | 0.22 | 0.85 |
| 15703 | 0 | 95007  | DVKS AIEGVKYIAEH                            | 2.68 | 0.01 | 2.26 | 2.36 | 0.22 | 2.02 |
| 15704 | 0 | 10648  | DVKTGAE                                     | 1.99 | 0.01 | 4.15 | 0.68 | 0.22 | 1.34 |
| 15705 | 0 | 10648  | DVKTGAE                                     | 1.99 | 0.01 | 4.15 | 0.68 | 0.22 | 0.28 |
| 15706 | 0 | 150976 | DVLC LRPVGAESRRRPV<br>SGP                   | 2.96 | 0.01 | 2.08 | 0.68 | 0.22 | 0.28 |
| 15707 | 0 | 91218  | DVLEATYAMVQH VAK                            | 2.66 | 0.01 | 3.81 | 3.26 | 0.22 | 1.39 |
| 15708 | 0 | 91218  | DVLEATYAMVQH VAK                            | 2.66 | 0.01 | 3.50 | 3.26 | 0.22 | 0.28 |
| 15709 | 0 | 91218  | DVLEATYAMVQH VAK                            | 2.66 | 0.01 | 3.50 | 3.26 | 0.85 | 0.28 |
| 15710 | 0 | 181590 | DVLEKIATGIYNQEK                             | 2.64 | 0.01 | 1.66 | 2.36 | 0.22 | 1.28 |
| 15711 | 0 | 181590 | DVLEKIATGIYNQEK                             | 2.64 | 0.01 | 1.66 | 0.44 | 0.85 | 1.28 |
| 15712 | 0 | 181591 | DVLENIGIGIYNQEK                             | 2.68 | 0.01 | 2.86 | 2.37 | 0.22 | 1.28 |
| 15713 | 0 | 225719 | DVLFTWYVDGTEV                               | 2.56 | 0.01 | 3.28 | 0.44 | 1.23 | 0.85 |
| 15714 | 0 | 79797  | DVLIRWGEVA                                  | 2.29 | 0.01 | 3.81 | 0.68 | 0.22 | 0.85 |
| 15715 | 0 | 79797  | DVLIRWGEVA                                  | 2.29 | 0.01 | 3.81 | 0.68 | 0.22 | 0.85 |
| 15716 | 0 | 10664  | DVLLLLNTR                                   | 2.23 | 0.01 | 1.96 | 0.44 | 0.85 | 1.34 |
| 15717 | 0 | 10665  | DVLNKN                                      | 1.90 | 0.01 | 3.51 | 1.15 | 0.22 | 0.28 |
| 15718 | 0 | 10668  | DVLQIAS                                     | 1.99 | 0.01 | 3.06 | 1.15 | 0.22 | 0.28 |

|       |   |        |                    |      |      |      |      |      |      |
|-------|---|--------|--------------------|------|------|------|------|------|------|
| 15719 | 0 | 10668  | DVLQIAS            | 1.99 | 0.01 | 3.06 | 1.15 | 0.22 | 0.28 |
| 15720 | 0 | 10677  | DVNAIDIEEPSGQT     | 2.59 | 0.01 | 2.56 | 1.12 | 0.22 | 0.28 |
| 15721 | 0 | 10677  | DVNAIDIEEPSGQT     | 2.59 | 0.01 | 2.56 | 0.44 | 0.85 | 0.28 |
| 15722 | 0 | 133549 | DVNGKLFL           | 2.12 | 0.01 | 1.60 | 0.68 | 0.22 | 0.28 |
| 15723 | 0 | 10683  | DVNKSAQL           | 2.10 | 0.01 | 2.83 | 1.12 | 0.22 | 0.28 |
|       |   |        | DVNKSTLQARQQTVSAL  |      |      |      |      |      |      |
| 15724 | 0 | 10685  | EDKLADYKRRMADAVS   | 3.77 | 0.01 | 4.08 | 2.69 | 0.22 | 0.28 |
|       |   |        | RKKMDTKPTDPT       |      |      |      |      |      |      |
| 15725 | 0 | 10686  | DVNLHSSR           | 2.11 | 0.01 | 2.45 | 0.44 | 0.85 | 1.34 |
| 15726 | 0 | 10686  | DVNLHSSR           | 2.11 | 0.01 | 2.45 | 0.44 | 0.85 | 1.34 |
| 15727 | 0 | 10686  | DVNLHSSR           | 2.11 | 0.01 | 2.45 | 0.44 | 0.85 | 1.34 |
| 15728 | 0 | 10686  | DVNLHSSR           | 2.11 | 0.01 | 2.45 | 0.44 | 0.85 | 1.34 |
| 15729 | 0 | 273059 | DVNSGTDGDESIDEE    | 2.70 | 0.01 | 1.61 | 0.44 | 0.85 | 1.28 |
| 15730 | 0 | 175786 | DVNVVTQARNRPTTL    | 2.68 | 0.01 | 2.63 | 1.15 | 0.22 | 0.85 |
| 15731 | 0 | 175786 | DVNVVTQARNRPTTL    | 2.68 | 0.01 | 2.63 | 1.15 | 0.22 | 0.85 |
| 15732 | 0 | 175786 | DVNVVTQARNRPTTL    | 2.68 | 0.01 | 2.63 | 1.15 | 0.22 | 0.85 |
| 15733 | 0 | 175786 | DVNVVTQARNRPTTL    | 2.68 | 0.01 | 2.63 | 1.15 | 0.22 | 0.85 |
| 15734 | 0 | 111219 | DVNVYHIFFQMSLWLPS  | 2.87 | 0.01 | 1.86 | 0.68 | 0.22 | 0.28 |
|       |   |        | EAT                |      |      |      |      |      |      |
| 15735 | 0 | 111219 | DVNVYHIFFQMSLWLPS  | 2.87 | 0.01 | 1.86 | 0.68 | 0.22 | 0.28 |
|       |   |        | EAT                |      |      |      |      |      |      |
| 15736 | 0 | 10691  | DVPDYAS            | 2.03 | 0.01 | 3.04 | 3.65 | 0.22 | 2.49 |
| 15737 | 0 | 10692  | DVPDYASL           | 2.13 | 0.01 | 3.04 | 1.15 | 2.26 | 2.49 |
| 15738 | 0 | 10692  | DVPDYASL           | 2.13 | 0.01 | 3.04 | 1.15 | 2.26 | 0.28 |
| 15739 | 0 | 10695  | DVPSERYLGY         | 2.29 | 0.01 | 1.60 | 0.44 | 1.23 | 0.28 |
| 15740 | 0 | 10695  | DVPSERYLGY         | 2.29 | 0.01 | 1.60 | 0.44 | 1.23 | 0.28 |
| 15741 | 0 | 115213 | DVPSERYLGYLEQLRLK  | 2.95 | 0.01 | 1.60 | 0.44 | 1.23 | 1.28 |
|       |   |        | KY                 |      |      |      |      |      |      |
|       |   |        | DVPVEGSSSSSSSSSSSS |      |      |      |      |      |      |
| 15742 | 0 | 206269 | SSSSSSSSSSTSTVAPAN | 3.60 | 4.93 | 0.90 | 0.44 | 0.85 | 1.28 |
|       |   |        | K                  |      |      |      |      |      |      |
| 15743 | 0 | 206271 | DVPVEGSSSSSSSSSSSS | 3.43 | 4.93 | 4.08 | 0.44 | 0.85 | 1.28 |
|       |   |        | SSSSTSTVAPANK      |      |      |      |      |      |      |
| 15744 | 0 | 206273 | DVPVEGSSSSSSSSTSTV | 3.08 | 4.93 | 0.90 | 0.44 | 0.85 | 1.28 |
|       |   |        | APANK              |      |      |      |      |      |      |
| 15745 | 0 | 127950 | DVPVVTSTVTAGVGPSP  | 3.00 | 0.01 | 2.40 | 2.75 | 0.22 | 0.28 |
|       |   |        | DIT                |      |      |      |      |      |      |
| 15746 | 0 | 127950 | DVPVVTSTVTAGVGPSP  | 3.00 | 0.01 | 2.40 | 2.75 | 0.22 | 0.85 |
|       |   |        | DIT                |      |      |      |      |      |      |
| 15747 | 0 | 10701  | DVPYVKRVKTWRMH     | 2.61 | 0.01 | 0.78 | 0.44 | 1.74 | 0.28 |
| 15748 | 0 | 10701  | DVPYVKRVKTWRMH     | 2.61 | 0.01 | 0.78 | 1.12 | 0.22 | 0.28 |
| 15749 | 0 | 10701  | DVPYVKRVKTWRMH     | 2.61 | 0.01 | 0.78 | 1.12 | 0.22 | 0.28 |
| 15750 | 0 | 121222 | DVQGNRYRTIEPFRVA   | 2.62 | 0.01 | 0.90 | 0.68 | 0.22 | 1.39 |
| 15751 | 0 | 121222 | DVQGNRYRTIEPFRVA   | 2.62 | 0.01 | 0.90 | 0.68 | 0.22 | 0.28 |
| 15752 | 0 | 121222 | DVQGNRYRTIEPFRVA   | 2.62 | 0.01 | 0.90 | 0.68 | 0.22 | 0.28 |
| 15753 | 0 | 128476 | DVQLIKTGDKVGASE    | 2.67 | 0.01 | 0.78 | 0.44 | 1.13 | 0.85 |

|       |   |        |                           |      |      |      |      |      |      |
|-------|---|--------|---------------------------|------|------|------|------|------|------|
| 15754 | 0 | 111220 | DVQSLASNPSPAAGDW          | 2.68 | 0.01 | 3.20 | 1.12 | 0.22 | 0.85 |
| 15755 | 0 | 531361 | DVQTGRRPYE                | 2.28 | 0.01 | 3.10 | 0.68 | 0.22 | 2.49 |
| 15756 | 0 | 531361 | DVQTGRRPYE                | 2.28 | 0.01 | 3.10 | 0.68 | 0.22 | 0.28 |
| 15757 | 0 | 531361 | DVQTGRRPYE                | 2.28 | 0.01 | 3.10 | 0.68 | 0.22 | 0.28 |
| 15758 | 0 | 10710  | DVRCVAQH                  | 2.12 | 0.01 | 3.72 | 2.37 | 0.22 | 0.85 |
| 15759 | 0 | 139713 | DVRHEIPVLPNR              | 2.48 | 0.01 | 2.75 | 1.20 | 0.22 | 0.28 |
| 15760 | 0 | 139713 | DVRHEIPVLPNR              | 2.48 | 0.01 | 2.75 | 0.68 | 0.22 | 0.28 |
| 15761 | 0 | 139713 | DVRHEIPVLPNR              | 2.48 | 0.01 | 2.75 | 0.68 | 0.22 | 0.28 |
| 15762 | 0 | 139713 | DVRHEIPVLPNR              | 2.48 | 0.01 | 2.75 | 0.68 | 0.22 | 0.28 |
| 15763 | 0 | 139713 | DVRHEIPVLPNR              | 2.48 | 0.01 | 2.75 | 0.68 | 0.22 | 0.28 |
| 15764 | 0 | 139713 | DVRHEIPVLPNR              | 2.48 | 0.01 | 2.75 | 0.68 | 0.22 | 1.66 |
| 15765 | 0 | 139713 | DVRHEIPVLPNR              | 2.48 | 0.01 | 2.75 | 2.61 | 0.22 | 2.35 |
| 15766 | 0 | 139713 | DVRHEIPVLPNR              | 2.48 | 0.01 | 2.75 | 0.44 | 0.22 | 2.35 |
| 15767 | 0 | 139713 | DVRHEIPVLPNR              | 2.48 | 0.01 | 2.75 | 0.68 | 0.22 | 0.28 |
| 15768 | 0 | 110820 | DVRQQYESVAAKNLQE<br>AEEW  | 2.93 | 3.81 | 0.78 | 1.81 | 1.41 | 2.51 |
| 15769 | 0 | 110820 | DVRQQYESVAAKNLQE<br>AEEW  | 2.93 | 3.81 | 0.78 | 1.81 | 1.41 | 1.27 |
| 15770 | 0 | 110821 | DVRQQYESVAAKNLQE<br>AEEW  | 2.93 | 0.01 | 0.78 | 1.81 | 1.41 | 2.51 |
| 15771 | 0 | 110821 | DVRQQYESVAAKNLQE<br>AEEW  | 2.93 | 0.01 | 0.78 | 1.81 | 1.41 | 1.27 |
| 15772 | 0 | 10714  | DVRRIEGG                  | 2.10 | 0.01 | 2.40 | 2.43 | 0.22 | 0.28 |
| 15773 | 0 | 477123 | DVRSSGLEKLKNSKLIN         | 2.86 | 0.01 | 3.12 | 0.68 | 0.22 | 0.28 |
| 15774 | 0 | 188117 | DVSDIERRIA                | 2.33 | 0.01 | 2.92 | 0.68 | 0.22 | 0.85 |
| 15775 | 0 | 188117 | DVSDIERRIA                | 2.33 | 0.01 | 2.92 | 1.81 | 0.22 | 0.85 |
| 15776 | 0 | 107326 | DVSDMFSK                  | 2.15 | 0.01 | 0.78 | 2.36 | 0.22 | 0.28 |
| 15777 | 0 | 107326 | DVSDMFSK                  | 2.15 | 0.01 | 0.78 | 2.36 | 0.22 | 0.85 |
| 15778 | 0 | 10721  | DVSEKSGNFKHLREFVF         | 2.79 | 0.01 | 2.48 | 0.44 | 0.85 | 0.28 |
| 15779 | 0 | 10721  | DVSEKSGNFKHLREFVF         | 2.79 | 0.01 | 2.48 | 1.20 | 0.22 | 0.28 |
| 15780 | 0 | 170667 | DVSERLQMFDDPRNK           | 2.64 | 0.01 | 0.78 | 0.44 | 1.41 | 0.28 |
| 15781 | 0 | 170667 | DVSERLQMFDDPRNK           | 2.64 | 0.01 | 0.78 | 0.44 | 1.13 | 0.28 |
| 15782 | 0 | 188118 | DVSESEESLSDDDFFD          | 2.73 | 0.01 | 1.66 | 1.20 | 0.22 | 0.28 |
| 15783 | 0 | 188118 | DVSESEESLSDDDFFD          | 2.73 | 0.01 | 1.66 | 0.68 | 0.22 | 0.28 |
| 15784 | 0 | 107327 | DVSHEDP                   | 2.03 | 0.01 | 0.78 | 0.44 | 1.13 | 0.28 |
| 15785 | 0 | 240979 | DVSIR                     | 1.74 | 0.01 | 3.35 | 1.20 | 0.22 | 0.85 |
| 15786 | 0 | 127951 | DVSLKKVIWKDGVSFVG<br>VGAD | 3.03 | 0.01 | 2.40 | 2.75 | 0.22 | 0.28 |
| 15787 | 0 | 127951 | DVSLKKVIWKDGVSFVG<br>VGAD | 3.03 | 0.01 | 2.40 | 2.75 | 0.22 | 0.85 |

|       |   |        |                                        |      |      |      |      |      |      |
|-------|---|--------|----------------------------------------|------|------|------|------|------|------|
| 15788 | 0 | 127951 | DVSLKKVIWKDGVSVFVG<br>VGAD             | 3.03 | 0.01 | 2.40 | 2.75 | 0.22 | 1.34 |
| 15789 | 0 | 125386 | DVSQTSVTALPSKGLEHL<br>KE               | 2.95 | 0.01 | 0.78 | 0.44 | 1.41 | 0.28 |
| 15790 | 0 | 125386 | DVSQTSVTALPSKGLEHL<br>KE               | 2.95 | 0.01 | 0.78 | 0.44 | 1.13 | 0.28 |
| 15791 | 0 | 125386 | DVSQTSVTALPSKGLEHL<br>KE               | 2.95 | 0.01 | 0.78 | 1.20 | 0.22 | 0.28 |
| 15792 | 0 | 125386 | DVSQTSVTALPSKGLEHL<br>KE               | 2.95 | 0.01 | 0.78 | 0.68 | 0.22 | 0.28 |
| 15793 | 0 | 125386 | DVSQTSVTALPSKGLEHL<br>KE               | 2.95 | 0.01 | 0.78 | 0.68 | 0.22 | 0.28 |
| 15794 | 0 | 125387 | DVSVAVSTPAGLITPIVF<br>NAHIKGV          | 3.17 | 0.01 | 0.78 | 0.44 | 1.13 | 0.28 |
| 15795 | 0 | 125387 | DVSVAVSTPAGLITPIVF<br>NAHIKGV          | 3.17 | 0.01 | 0.78 | 0.44 | 1.13 | 0.28 |
| 15796 | 0 | 105152 | DVT                                    | 1.37 | 0.01 | 3.47 | 1.20 | 0.22 | 0.28 |
| 15797 | 0 | 10746  | DVTAAAGAGP                             | 2.34 | 4.23 | 2.70 | 0.44 | 0.85 | 0.28 |
| 15798 | 0 | 135655 | DVTCNIKN                               | 2.12 | 0.01 | 0.78 | 0.44 | 2.35 | 0.28 |
| 15799 | 0 | 10748  | DVTFQV                                 | 1.90 | 0.01 | 1.96 | 0.44 | 0.85 | 0.28 |
| 15800 | 0 | 10748  | DVTFQV                                 | 1.90 | 0.01 | 1.96 | 0.44 | 0.85 | 0.28 |
| 15801 | 0 | 10748  | DVTFQV                                 | 1.90 | 0.01 | 1.96 | 0.44 | 1.41 | 0.28 |
| 15802 | 0 | 10748  | DVTFQV                                 | 1.90 | 0.01 | 1.96 | 0.44 | 0.85 | 0.28 |
| 15803 | 0 | 10748  | DVTFQV                                 | 1.90 | 0.01 | 1.96 | 0.44 | 0.85 | 0.28 |
| 15804 | 0 | 10749  | DVTHLTNDVTHLTNDVT<br>HLTNDVTHLTNDVTHLT | 3.54 | 0.01 | 2.22 | 0.44 | 1.74 | 0.28 |
| 15805 | 0 | 181987 | DVTLEGLYQEHLW                          | 2.60 | 0.01 | 3.85 | 2.13 | 1.74 | 0.28 |
| 15806 | 0 | 81337  | DVTLYGTIKAGV                           | 2.48 | 0.01 | 2.87 | 0.44 | 0.22 | 0.28 |
| 15807 | 0 | 10753  | DVTRIESDSKVIVL                         | 2.64 | 0.01 | 2.69 | 0.44 | 0.85 | 0.28 |
| 15808 | 0 | 10753  | DVTRIESDSKVIVL                         | 2.64 | 0.01 | 2.69 | 0.44 | 1.41 | 0.28 |
| 15809 | 0 | 10754  | DVTRIESESKVVVL                         | 2.61 | 0.01 | 2.69 | 0.44 | 0.85 | 0.28 |
| 15810 | 0 | 10754  | DVTRIESESKVVVL                         | 2.61 | 0.01 | 2.69 | 0.44 | 1.41 | 0.28 |
| 15811 | 0 | 105153 | DVTTL                                  | 1.75 | 0.01 | 3.47 | 1.20 | 0.22 | 0.28 |
| 15812 | 0 | 10757  | DVTTLN                                 | 1.89 | 0.01 | 3.03 | 1.20 | 0.22 | 0.28 |
| 15813 | 0 | 10757  | DVTTLN                                 | 1.89 | 0.01 | 3.97 | 1.20 | 0.22 | 0.28 |
| 15814 | 0 | 10757  | DVTTLN                                 | 1.89 | 0.01 | 2.40 | 3.42 | 0.22 | 0.28 |
| 15815 | 0 | 10757  | DVTTLN                                 | 1.89 | 0.01 | 2.40 | 2.52 | 0.22 | 0.28 |
| 15816 | 0 | 122320 | DVTVGPLIFL                             | 2.31 | 0.01 | 0.78 | 1.20 | 0.22 | 1.48 |
| 15817 | 0 | 10768  | DVVDGMNFNRGY                           | 2.49 | 0.01 | 2.40 | 1.20 | 0.22 | 0.28 |
| 15818 | 0 | 10768  | DVVDGMNFNRGY                           | 2.49 | 0.01 | 2.40 | 0.44 | 1.59 | 0.28 |
| 15819 | 0 | 10768  | DVVDGMNFNRGY                           | 2.49 | 0.01 | 2.40 | 0.44 | 1.59 | 0.28 |
| 15820 | 0 | 10768  | DVVDGMNFNRGY                           | 2.49 | 0.01 | 2.40 | 0.44 | 1.59 | 0.28 |
| 15821 | 0 | 10768  | DVVDGMNFNRGY                           | 2.49 | 0.01 | 2.40 | 0.44 | 1.59 | 0.28 |
| 15822 | 0 | 10770  | DVVGVGRL                               | 2.16 | 0.01 | 3.57 | 0.68 | 0.22 | 0.28 |
| 15823 | 0 | 10770  | DVVGVGRL                               | 2.16 | 0.01 | 3.57 | 0.68 | 0.22 | 1.34 |
| 15824 | 0 | 10770  | DVVGVGRL                               | 2.16 | 0.01 | 3.57 | 0.68 | 0.22 | 0.28 |



|       |   |        |                                             |      |      |      |      |      |      |
|-------|---|--------|---------------------------------------------|------|------|------|------|------|------|
| 15825 | 0 | 10774  | DVVLMKVPTIPKFRDITQ<br>HF                    | 2.95 | 0.01 | 2.82 | 0.44 | 0.85 | 0.28 |
| 15826 | 0 | 122321 | DVVLYNNADGDFAIVH                            | 2.74 | 0.01 | 2.26 | 2.43 | 0.22 | 1.57 |
| 15827 | 0 | 10778  | DVVNQNAQALNTLVKQ<br>L                       | 2.84 | 0.01 | 2.48 | 0.44 | 0.85 | 0.28 |
| 15828 | 0 | 10778  | DVVNQNAQALNTLVKQ<br>L                       | 2.84 | 0.01 | 2.48 | 0.68 | 0.22 | 0.28 |
| 15829 | 0 | 99169  | DVVPQGAGQKQILLD                             | 2.69 | 0.01 | 2.86 | 2.02 | 0.85 | 0.85 |
| 15830 | 0 | 103125 | DVVQHVARRPGESPP                             | 2.65 | 0.01 | 2.04 | 0.44 | 0.85 | 1.28 |
| 15831 | 0 | 227110 | DVVRAPGVPAMQPQY                             | 2.70 | 0.01 | 2.48 | 0.44 | 1.59 | 0.28 |
| 15832 | 0 | 10779  | DVVRDLPSGFNTLKPI                            | 2.71 | 0.01 | 2.45 | 1.12 | 0.22 | 2.92 |
| 15833 | 0 | 10781  | DVVS KLPLAVMG                               | 2.47 | 0.01 | 2.68 | 0.44 | 0.85 | 0.28 |
| 15834 | 0 | 10782  | DVVSTL                                      | 1.89 | 0.01 | 1.96 | 0.44 | 0.85 | 0.28 |
| 15835 | 0 | 10783  | DVVSTLPQAVMG                                | 2.45 | 0.01 | 1.96 | 0.44 | 0.85 | 0.28 |
| 15836 | 0 | 10784  | DVVSTLPQVVMG                                | 2.46 | 0.01 | 1.96 | 0.44 | 0.85 | 0.28 |
| 15837 | 0 | 10785  | DVVTGATV                                    | 2.16 | 0.01 | 2.21 | 1.12 | 0.22 | 0.28 |
| 15838 | 0 | 10785  | DVVTGATV                                    | 2.16 | 0.01 | 2.21 | 0.44 | 0.85 | 0.28 |
| 15839 | 0 | 10787  | DVVTKLPLAVMG                                | 2.47 | 0.01 | 2.41 | 0.44 | 0.85 | 0.28 |
| 15840 | 0 | 10789  | DVVVLG                                      | 1.91 | 0.01 | 2.40 | 0.44 | 0.85 | 0.28 |
| 15841 | 0 | 117281 | DVVYALKRQGRTLYGFG<br>G                      | 2.83 | 0.01 | 1.60 | 0.44 | 1.13 | 0.28 |
| 15842 | 0 | 111221 | DVWKPVPCQICVCDDDB<br>GVLCDVICDELKDCPN<br>AK | 3.51 | 0.01 | 2.52 | 1.12 | 0.22 | 1.27 |
| 15843 | 0 | 10792  | DVYA                                        | 1.57 | 0.01 | 2.69 | 0.68 | 0.22 | 0.28 |
| 15844 | 0 | 10794  | DVYSFSLA                                    | 2.12 | 0.01 | 2.25 | 0.44 | 1.23 | 0.85 |
| 15845 | 0 | 106363 | DVYWLMPDPPTS                                | 2.47 | 0.01 | 0.90 | 1.15 | 0.22 | 0.85 |
| 15846 | 0 | 106363 | DVYWLMPDPPTS                                | 2.47 | 0.01 | 0.90 | 1.15 | 0.22 | 0.85 |
| 15847 | 0 | 106363 | DVYWLMPDPPTS                                | 2.47 | 0.01 | 0.90 | 1.15 | 0.22 | 1.34 |
| 15848 | 0 | 106363 | DVYWLMPDPPTS                                | 2.47 | 0.01 | 0.90 | 1.15 | 2.25 | 1.75 |
| 15849 | 0 | 106363 | DVYWLMPDPPTS                                | 2.47 | 0.01 | 0.90 | 1.15 | 2.25 | 1.75 |
| 15850 | 0 | 106363 | DVYWLMPDPPTS                                | 2.47 | 0.01 | 0.90 | 1.15 | 0.22 | 1.39 |
| 15851 | 0 | 97963  | DVYYAGLNYK                                  | 2.31 | 0.01 | 3.08 | 0.68 | 0.22 | 0.28 |
| 15852 | 0 | 97963  | DVYYAGLNYK                                  | 2.31 | 0.01 | 3.08 | 1.20 | 0.22 | 0.28 |
| 15853 | 0 | 125021 | DWC                                         | 1.37 | 0.01 | 3.26 | 0.68 | 0.22 | 0.28 |
| 15854 | 0 | 125021 | DWC                                         | 1.37 | 0.01 | 3.26 | 0.68 | 0.22 | 1.48 |
| 15855 | 0 | 125021 | DWC                                         | 1.37 | 0.01 | 3.26 | 0.68 | 0.22 | 1.48 |
| 15856 | 0 | 125021 | DWC                                         | 1.37 | 0.01 | 3.26 | 0.68 | 0.22 | 2.56 |
| 15857 | 0 | 125021 | DWC                                         | 1.37 | 0.01 | 3.26 | 0.68 | 0.22 | 1.34 |
| 15858 | 0 | 125021 | DWC                                         | 1.37 | 0.01 | 3.26 | 0.68 | 0.22 | 2.56 |
| 15859 | 0 | 125021 | DWC                                         | 1.37 | 0.01 | 3.26 | 0.68 | 0.22 | 2.56 |
| 15860 | 0 | 125021 | DWC                                         | 1.37 | 0.01 | 3.26 | 0.68 | 0.22 | 2.56 |
| 15861 | 0 | 187310 | DWDCNTKKDVCIPD                              | 2.63 | 0.01 | 2.59 | 0.44 | 1.74 | 0.28 |
| 15862 | 0 | 187310 | DWDCNTKKDVCIPD                              | 2.63 | 0.01 | 2.59 | 0.44 | 1.74 | 1.34 |

|       |   |        |                                  |      |      |      |      |      |      |
|-------|---|--------|----------------------------------|------|------|------|------|------|------|
| 15863 | 0 | 187310 | DWDCNTKKDVCIPD                   | 2.63 | 0.01 | 2.59 | 0.44 | 1.74 | 1.27 |
| 15864 | 0 | 170671 | DWDFLQLQCALYINS                  | 2.67 | 0.01 | 0.78 | 0.44 | 1.41 | 0.28 |
| 15865 | 0 | 170671 | DWDFLQLQCALYINS                  | 2.67 | 0.01 | 0.78 | 0.44 | 1.13 | 0.28 |
| 15866 | 0 | 10799  | DWDFNPNKDTWPDAN                  | 2.72 | 0.01 | 2.08 | 0.68 | 0.22 | 0.28 |
| 15867 | 0 | 140555 | DWDYGALMWA                       | 2.34 | 0.01 | 0.90 | 0.68 | 0.22 | 0.28 |
| 15868 | 0 | 10800  | DWEDRYY                          | 2.02 | 0.01 | 1.75 | 2.19 | 0.22 | 0.28 |
| 15869 | 0 | 10800  | DWEDRYY                          | 2.02 | 0.01 | 1.75 | 2.19 | 0.22 | 0.85 |
| 15870 | 0 | 10800  | DWEDRYY                          | 2.02 | 0.01 | 2.98 | 2.19 | 0.22 | 0.28 |
| 15871 | 0 | 10801  | DWEDRYYRE                        | 2.27 | 0.01 | 1.75 | 1.12 | 0.22 | 0.85 |
| 15872 | 0 | 10801  | DWEDRYYRE                        | 2.27 | 0.01 | 1.75 | 1.20 | 0.22 | 0.28 |
| 15873 | 0 | 10801  | DWEDRYYRE                        | 2.27 | 0.01 | 1.75 | 2.04 | 0.22 | 0.28 |
| 15874 | 0 | 10801  | DWEDRYYRE                        | 2.27 | 0.01 | 1.75 | 1.20 | 0.22 | 0.28 |
| 15875 | 0 | 10801  | DWEDRYYRE                        | 2.27 | 0.01 | 1.75 | 1.20 | 0.22 | 2.02 |
| 15876 | 0 | 10801  | DWEDRYYRE                        | 2.27 | 0.01 | 1.75 | 1.20 | 0.22 | 1.48 |
| 15877 | 0 | 10801  | DWEDRYYRE                        | 2.27 | 0.01 | 1.75 | 1.20 | 0.22 | 1.34 |
| 15878 | 0 | 10801  | DWEDRYYRE                        | 2.27 | 0.01 | 1.75 | 1.15 | 0.22 | 1.48 |
| 15879 | 0 | 10801  | DWEDRYYRE                        | 2.27 | 0.01 | 1.75 | 1.15 | 0.22 | 0.85 |
| 15880 | 0 | 10801  | DWEDRYYRE                        | 2.27 | 0.01 | 1.75 | 2.19 | 0.22 | 0.85 |
| 15881 | 0 | 10802  | DWEDRYYRENMNR                    | 2.59 | 0.01 | 2.98 | 2.19 | 0.22 | 2.12 |
| 15882 | 0 | 10803  | DWEDRYYRENMYPN                   | 2.59 | 0.01 | 1.75 | 2.19 | 0.22 | 1.34 |
| 15883 | 0 | 10803  | DWEDRYYRENMYPN                   | 2.59 | 0.01 | 1.75 | 2.19 | 0.22 | 0.28 |
| 15884 | 0 | 10804  | DWEDRYYRENMYPN<br>QVYYRPVDQYSN   | 3.31 | 0.01 | 1.75 | 1.81 | 0.22 | 0.28 |
| 15885 | 0 | 10804  | DWEDRYYRENMYPN<br>QVYYRPVDQYSN   | 3.31 | 0.01 | 1.75 | 1.81 | 0.22 | 0.28 |
| 15886 | 0 | 10805  | DWEDRYYRENMYPN<br>QVYYRPVDQYSNQN | 3.38 | 0.01 | 1.75 | 2.19 | 0.22 | 1.48 |
| 15887 | 0 | 10805  | DWEDRYYRENMYPN<br>QVYYRPVDQYSNQN | 3.38 | 0.01 | 1.75 | 2.19 | 0.22 | 2.12 |
| 15888 | 0 | 10805  | DWEDRYYRENMYPN<br>QVYYRPVDQYSNQN | 3.38 | 0.01 | 1.75 | 2.19 | 0.22 | 0.28 |
| 15889 | 0 | 10805  | DWEDRYYRENMYPN<br>QVYYRPVDQYSNQN | 3.38 | 0.01 | 1.75 | 1.81 | 0.22 | 0.28 |
| 15890 | 0 | 10805  | DWEDRYYRENMYPN<br>QVYYRPVDQYSNQN | 3.38 | 0.01 | 1.75 | 2.19 | 0.22 | 0.28 |
| 15891 | 0 | 10805  | DWEDRYYRENMYPN<br>QVYYRPVDQYSNQN | 3.38 | 0.01 | 1.75 | 2.19 | 0.22 | 0.28 |
| 15892 | 0 | 10805  | DWEDRYYRENMYPN<br>QVYYRPVDQYSNQN | 3.38 | 0.01 | 1.75 | 2.19 | 0.22 | 0.28 |

|       |   |        |                                   |      |      |      |      |      |      |
|-------|---|--------|-----------------------------------|------|------|------|------|------|------|
| 15893 | 0 | 10805  | DWEDRYRENMYRYPN<br>QVYYRPVDQYSNQN | 3.38 | 0.01 | 1.75 | 1.81 | 0.22 | 0.28 |
| 15894 | 0 | 10805  | DWEDRYRENMYRYPN<br>QVYYRPVDQYSNQN | 3.38 | 0.01 | 1.75 | 2.19 | 0.22 | 0.28 |
| 15895 | 0 | 10805  | DWEDRYRENMYRYPN<br>QVYYRPVDQYSNQN | 3.38 | 0.01 | 1.75 | 2.19 | 0.22 | 0.28 |
| 15896 | 0 | 10805  | DWEDRYRENMYRYPN<br>QVYYRPVDQYSNQN | 3.38 | 0.01 | 1.75 | 2.19 | 0.22 | 0.28 |
| 15897 | 0 | 10805  | DWEDRYRENMYRYPN<br>QVYYRPVDQYSNQN | 3.38 | 0.01 | 1.75 | 2.19 | 0.22 | 0.28 |
| 15898 | 0 | 10805  | DWEDRYRENMYRYPN<br>QVYYRPVDQYSNQN | 3.38 | 0.01 | 1.75 | 2.19 | 0.22 | 0.28 |
| 15899 | 0 | 10805  | DWEDRYRENMYRYPN<br>QVYYRPVDQYSNQN | 3.38 | 0.01 | 1.75 | 1.81 | 0.22 | 0.28 |
| 15900 | 0 | 10808  | DWERPTYELSI                       | 2.45 | 0.01 | 0.90 | 0.68 | 0.22 | 0.85 |
| 15901 | 0 | 135546 | DWEYS                             | 1.74 | 0.01 | 0.90 | 0.44 | 1.13 | 1.27 |
| 15902 | 0 | 135546 | DWEYS                             | 1.74 | 0.01 | 0.90 | 0.44 | 1.13 | 1.27 |
| 15903 | 0 | 135546 | DWEYS                             | 1.74 | 0.01 | 0.90 | 0.44 | 1.13 | 1.27 |
| 15904 | 0 | 135546 | DWEYS                             | 1.74 | 0.01 | 0.90 | 0.68 | 0.22 | 0.28 |
| 15905 | 0 | 135546 | DWEYS                             | 1.74 | 0.01 | 0.90 | 0.68 | 0.22 | 1.27 |
| 15906 | 0 | 135546 | DWEYS                             | 1.74 | 0.01 | 0.90 | 0.68 | 0.22 | 1.27 |
| 15907 | 0 | 138763 | DWEYSEGL                          | 2.12 | 0.01 | 0.90 | 0.68 | 0.22 | 0.28 |
| 15908 | 0 | 117140 | DWEYSVWLSN                        | 2.31 | 0.01 | 0.78 | 0.44 | 1.13 | 0.28 |
| 15909 | 0 | 117140 | DWEYSVWLSN                        | 2.31 | 0.01 | 0.78 | 0.44 | 1.41 | 0.28 |
| 15910 | 0 | 117140 | DWEYSVWLSN                        | 2.31 | 0.01 | 0.90 | 0.68 | 0.22 | 1.27 |
| 15911 | 0 | 117140 | DWEYSVWLSN                        | 2.31 | 0.01 | 0.90 | 0.68 | 0.22 | 0.28 |
| 15912 | 0 | 117140 | DWEYSVWLSN                        | 2.31 | 0.01 | 0.90 | 0.68 | 0.22 | 0.28 |
| 15913 | 0 | 117140 | DWEYSVWLSN                        | 2.31 | 0.01 | 0.90 | 0.68 | 0.22 | 0.28 |
| 15914 | 0 | 117140 | DWEYSVWLSN                        | 2.31 | 0.01 | 0.90 | 0.68 | 0.22 | 0.28 |
| 15915 | 0 | 117140 | DWEYSVWLSN                        | 2.31 | 0.01 | 0.90 | 0.68 | 0.22 | 0.28 |
| 15916 | 0 | 117140 | DWEYSVWLSN                        | 2.31 | 0.01 | 0.90 | 0.68 | 0.22 | 0.28 |
| 15917 | 0 | 117140 | DWEYSVWLSN                        | 2.31 | 0.01 | 0.90 | 0.68 | 0.22 | 0.28 |
| 15918 | 0 | 117140 | DWEYSVWLSN                        | 2.31 | 0.01 | 0.90 | 0.68 | 0.22 | 0.28 |
| 15919 | 0 | 117140 | DWEYSVWLSN                        | 2.31 | 0.01 | 0.90 | 0.68 | 0.22 | 0.28 |
| 15920 | 0 | 117140 | DWEYSVWLSN                        | 2.31 | 0.01 | 0.90 | 0.68 | 0.22 | 0.28 |
| 15921 | 0 | 117140 | DWEYSVWLSN                        | 2.31 | 0.01 | 0.90 | 0.68 | 0.22 | 0.28 |
| 15922 | 0 | 117140 | DWEYSVWLSN                        | 2.31 | 0.01 | 0.90 | 0.68 | 0.22 | 0.28 |
| 15923 | 0 | 117140 | DWEYSVWLSN                        | 2.31 | 0.01 | 0.90 | 0.68 | 2.60 | 1.75 |
| 15924 | 0 | 117140 | DWEYSVWLSN                        | 2.31 | 0.01 | 0.90 | 0.68 | 0.22 | 0.28 |
| 15925 | 0 | 135547 | DWEYSVWLSN                        | 2.31 | 0.01 | 0.90 | 0.44 | 1.13 | 1.27 |

|       |   |        |                          |      |      |      |      |      |      |
|-------|---|--------|--------------------------|------|------|------|------|------|------|
| 15926 | 0 | 135547 | DWEYSVWSLN               | 2.31 | 0.01 | 0.90 | 0.44 | 1.13 | 1.27 |
| 15927 | 0 | 139484 | DWFKAFYDKVAEKFEA<br>F    | 2.90 | 4.23 | 0.90 | 3.85 | 2.25 | 1.75 |
| 15928 | 0 | 131294 | DWGLPIPSPP               | 2.43 | 0.01 | 0.78 | 0.44 | 2.35 | 0.28 |
| 15929 | 0 | 10810  | DWGSQHYDP                | 2.22 | 4.93 | 0.90 | 1.15 | 0.22 | 0.85 |
| 15930 | 0 | 10812  | DWICEVLSDFKTWL           | 2.60 | 0.01 | 2.41 | 0.44 | 1.41 | 0.28 |
| 15931 | 0 | 10812  | DWICEVLSDFKTWL           | 2.60 | 0.01 | 2.41 | 0.44 | 0.85 | 0.28 |
| 15932 | 0 | 10812  | DWICEVLSDFKTWL           | 2.60 | 0.01 | 2.41 | 0.44 | 0.85 | 0.28 |
| 15933 | 0 | 10813  | DWICTVLTDFTWL            | 2.64 | 0.01 | 1.96 | 0.44 | 0.85 | 0.28 |
| 15934 | 0 | 10813  | DWICTVLTDFTWL            | 2.64 | 0.01 | 1.96 | 0.44 | 1.41 | 0.28 |
| 15935 | 0 | 10813  | DWICTVLTDFTWL            | 2.64 | 0.01 | 1.96 | 0.44 | 0.85 | 0.28 |
| 15936 | 0 | 10813  | DWICTVLTDFTWL            | 2.64 | 0.01 | 1.96 | 0.44 | 0.85 | 0.28 |
| 15937 | 0 | 138347 | DWIRSTL                  | 1.99 | 0.01 | 0.78 | 1.12 | 0.22 | 0.28 |
| 15938 | 0 | 10815  | DWIWNQMHIDECKNE          | 2.70 | 0.01 | 1.75 | 2.04 | 0.22 | 2.12 |
| 15939 | 0 | 10815  | DWIWNQMHIDECKNE          | 2.70 | 0.01 | 1.75 | 2.04 | 0.22 | 0.28 |
| 15940 | 0 | 10817  | DWLEDTLSEGIRQWWK<br>LKPG | 2.94 | 0.01 | 3.19 | 0.44 | 1.59 | 1.27 |
| 15941 | 0 | 119561 | DWLNGKEY                 | 2.10 | 0.01 | 0.78 | 0.44 | 1.93 | 0.28 |
| 15942 | 0 | 489512 | DWLNLVQSAQRLNPR          | 2.68 | 0.01 | 2.69 | 3.05 | 0.85 | 1.28 |
| 15943 | 0 | 10820  | DWPAIWRKQ                | 2.21 | 0.01 | 0.90 | 1.15 | 0.22 | 1.27 |
| 15944 | 0 | 130470 | DWPALIFDQDML             | 2.48 | 0.01 | 0.90 | 0.44 | 0.22 | 1.75 |
| 15945 | 0 | 130470 | DWPALIFDQDML             | 2.48 | 0.01 | 0.90 | 3.57 | 2.25 | 1.75 |
| 15946 | 0 | 130470 | DWPALIFDQDML             | 2.48 | 0.01 | 0.90 | 3.57 | 0.22 | 0.28 |
| 15947 | 0 | 130470 | DWPALIFDQDML             | 2.48 | 0.01 | 0.90 | 0.44 | 0.22 | 0.28 |
| 15948 | 0 | 130471 | DWPAVIFEDTRA             | 2.46 | 0.01 | 0.90 | 0.44 | 0.22 | 1.75 |
| 15949 | 0 | 130471 | DWPAVIFEDTRA             | 2.46 | 0.01 | 0.90 | 0.44 | 0.22 | 0.28 |
| 15950 | 0 | 130471 | DWPAVIFEDTRA             | 2.46 | 0.01 | 0.90 | 3.57 | 0.22 | 3.40 |
| 15951 | 0 | 10821  | DWPERIRDFM               | 2.32 | 0.01 | 3.41 | 0.68 | 0.22 | 0.28 |
| 15952 | 0 | 122741 | DWRDAEKCDIC              | 2.42 | 0.01 | 0.78 | 0.68 | 0.22 | 0.85 |
| 15953 | 0 | 122741 | DWRDAEKCDIC              | 2.42 | 0.01 | 0.78 | 0.68 | 0.22 | 1.27 |
| 15954 | 0 | 122741 | DWRDAEKCDIC              | 2.42 | 0.01 | 0.78 | 0.68 | 0.22 | 0.85 |
| 15955 | 0 | 140556 | DWRHFMES                 | 2.10 | 0.01 | 0.90 | 0.68 | 0.22 | 1.39 |
| 15956 | 0 | 140556 | DWRHFMES                 | 2.10 | 0.01 | 0.90 | 0.68 | 0.22 | 0.85 |
| 15957 | 0 | 132241 | DWRKNID                  | 2.03 | 0.01 | 0.78 | 0.68 | 0.22 | 0.85 |
| 15958 | 0 | 132241 | DWRKNID                  | 2.03 | 0.01 | 0.78 | 0.68 | 0.22 | 0.85 |
| 15959 | 0 | 132242 | DWRKNIDALS               | 2.30 | 0.01 | 0.78 | 0.68 | 0.22 | 0.85 |
| 15960 | 0 | 132242 | DWRKNIDALS               | 2.30 | 0.01 | 0.78 | 0.68 | 0.22 | 0.85 |
| 15961 | 0 | 10824  | DWSERIREFM               | 2.31 | 0.01 | 2.56 | 0.68 | 0.22 | 0.28 |
| 15962 | 0 | 137829 | DWTFQTLVMLETVPR          | 2.66 | 0.01 | 0.78 | 2.74 | 0.22 | 1.57 |
| 15963 | 0 | 137829 | DWTFQTLVMLETVPR          | 2.66 | 0.01 | 0.78 | 1.15 | 0.22 | 1.57 |
| 15964 | 0 | 137829 | DWTFQTLVMLETVPR          | 2.66 | 0.01 | 0.78 | 0.44 | 2.26 | 1.57 |
| 15965 | 0 | 10831  | DWTKVTL DGRPLSTIQ        | 2.72 | 0.01 | 2.70 | 0.44 | 0.85 | 0.28 |
| 15966 | 0 | 10832  | DWVCSILTDFKNWL           | 2.60 | 0.01 | 2.69 | 0.44 | 1.41 | 0.28 |

|       |   |        |                                              |      |      |      |      |      |      |
|-------|---|--------|----------------------------------------------|------|------|------|------|------|------|
| 15967 | 0 | 10832  | DWVCSILTDFKNWL                               | 2.60 | 0.01 | 2.69 | 0.44 | 0.85 | 0.28 |
| 15968 | 0 | 10832  | DWVCSILTDFKNWL                               | 2.60 | 0.01 | 2.69 | 0.44 | 0.85 | 0.28 |
| 15969 | 0 | 10833  | DWVCSVLADFKAWL                               | 2.64 | 0.01 | 2.59 | 0.44 | 1.41 | 0.28 |
| 15970 | 0 | 10833  | DWVCSVLADFKAWL                               | 2.64 | 0.01 | 2.59 | 0.44 | 0.85 | 0.28 |
| 15971 | 0 | 10834  | DWVCTILTDFKNWL                               | 2.62 | 0.01 | 2.69 | 0.44 | 1.41 | 0.28 |
| 15972 | 0 | 10834  | DWVCTILTDFKNWL                               | 2.62 | 0.01 | 2.69 | 0.44 | 0.85 | 0.28 |
| 15973 | 0 | 10834  | DWVCTILTDFKNWL                               | 2.62 | 0.01 | 2.69 | 0.44 | 0.85 | 0.28 |
| 15974 | 0 | 10835  | DWVKGFPIIDSSC                                | 2.45 | 0.01 | 2.69 | 0.68 | 0.22 | 0.28 |
| 15975 | 0 | 10835  | DWVKGFPIIDSSC                                | 2.45 | 0.01 | 2.69 | 1.20 | 0.22 | 0.28 |
| 15976 | 0 | 180414 | DWVSLWKGFSS                                  | 2.41 | 0.01 | 1.75 | 3.41 | 0.22 | 0.28 |
| 15977 | 0 | 10841  | DWYSPACGKAGCQTYK<br>WETF                     | 2.93 | 0.01 | 2.04 | 0.44 | 0.85 | 0.28 |
| 15978 | 0 | 10842  | DWYSPACGKAGCQTYK<br>WETL                     | 2.93 | 0.01 | 3.78 | 0.44 | 0.85 | 0.28 |
| 15979 | 0 | 106365 | DWYSPFPTSQFA                                 | 2.48 | 0.01 | 0.90 | 1.15 | 0.22 | 1.39 |
| 15980 | 0 | 10843  | DWYTIGVYVIGFTL                               | 2.63 | 0.01 | 2.56 | 2.69 | 0.22 | 0.28 |
| 15981 | 0 | 10845  | DYAFEHVYVG                                   | 2.30 | 0.01 | 3.16 | 0.68 | 0.22 | 0.28 |
| 15982 | 0 | 10845  | DYAFEHVYVG                                   | 2.30 | 0.01 | 3.16 | 0.68 | 0.22 | 0.28 |
| 15983 | 0 | 107803 | DYANPRNTPRVADNL                              | 2.71 | 0.01 | 0.90 | 0.44 | 1.13 | 1.39 |
| 15984 | 0 | 10850  | DYASLRSLVASSGTLEFIN<br>EGFNWTGVTQNGGSSA<br>C | 3.51 | 0.01 | 3.04 | 1.12 | 0.22 | 0.28 |
| 15985 | 0 | 10850  | DYASLRSLVASSGTLEFIN<br>EGFNWTGVTQNGGSSA<br>C | 3.51 | 0.01 | 3.04 | 1.12 | 0.22 | 0.28 |
| 15986 | 0 | 10850  | DYASLRSLVASSGTLEFIN<br>EGFNWTGVTQNGGSSA<br>C | 3.51 | 0.01 | 3.04 | 1.12 | 0.22 | 0.28 |
| 15987 | 0 | 10852  | DYAWDDFYAMGD                                 | 2.52 | 0.01 | 0.90 | 2.71 | 0.22 | 1.39 |
| 15988 | 0 | 10853  | DYAWDQTHQ                                    | 2.24 | 0.01 | 0.90 | 2.71 | 0.22 | 1.39 |
| 15989 | 0 | 10853  | DYAWDQTHQ                                    | 2.24 | 0.01 | 0.90 | 0.68 | 0.22 | 1.34 |
| 15990 | 0 | 10853  | DYAWDQTHQ                                    | 2.24 | 0.01 | 0.90 | 0.68 | 0.22 | 1.75 |
| 15991 | 0 | 229137 | DYDAAVKKSEAAKDD                              | 2.72 | 0.01 | 2.70 | 0.68 | 0.22 | 0.28 |
| 15992 | 0 | 229138 | DYDAAVKKYEA                                  | 2.44 | 0.01 | 2.70 | 0.68 | 0.22 | 0.28 |
| 15993 | 0 | 229138 | DYDAAVKKYEA                                  | 2.44 | 0.01 | 2.70 | 0.68 | 0.22 | 0.28 |
| 15994 | 0 | 134037 | DYDDTIS                                      | 2.04 | 0.01 | 0.78 | 1.20 | 0.22 | 2.35 |
| 15995 | 0 | 134037 | DYDDTIS                                      | 2.04 | 0.01 | 0.78 | 1.20 | 0.22 | 1.57 |
| 15996 | 0 | 134037 | DYDDTIS                                      | 2.04 | 0.01 | 0.78 | 1.20 | 0.22 | 1.34 |
| 15997 | 0 | 10860  | DYDGYGWRE                                    | 2.26 | 0.01 | 0.90 | 0.68 | 0.22 | 0.28 |
| 15998 | 0 | 120460 | DYDLFALAPS                                   | 2.34 | 0.01 | 2.18 | 2.16 | 0.22 | 0.28 |
| 15999 | 0 | 10863  | DYDNQHEQDRPTPSA<br>PSR                       | 2.91 | 0.01 | 2.53 | 2.37 | 0.22 | 0.28 |
| 16000 | 0 | 10863  | DYDNQHEQDRPTPSA<br>PSR                       | 2.91 | 0.01 | 2.53 | 2.37 | 0.22 | 0.28 |
| 16001 | 0 | 10863  | DYDNQHEQDRPTPSA<br>PSR                       | 2.91 | 0.01 | 2.53 | 2.37 | 0.22 | 0.85 |

|       |   |        |                                   |      |      |      |      |      |      |
|-------|---|--------|-----------------------------------|------|------|------|------|------|------|
| 16002 | 0 | 10864  | DYDNQHEQDRPTPSPA<br>PSRPFVLRANDVL | 3.35 | 0.01 | 2.70 | 1.15 | 0.22 | 0.28 |
| 16003 | 0 | 10864  | DYDNQHEQDRPTPSPA<br>PSRPFVLRANDVL | 3.35 | 0.01 | 2.53 | 0.44 | 0.85 | 0.28 |
| 16004 | 0 | 10864  | DYDNQHEQDRPTPSPA<br>PSRPFVLRANDVL | 3.35 | 0.01 | 2.53 | 0.44 | 0.85 | 0.28 |
| 16005 | 0 | 135454 | DYEDRY                            | 1.92 | 0.01 | 0.78 | 2.19 | 0.22 | 0.85 |
| 16006 | 0 | 229980 | DYEDRYR                           | 2.17 | 0.01 | 2.52 | 3.15 | 0.22 | 0.85 |
| 16007 | 0 | 229980 | DYEDRYR                           | 2.17 | 0.01 | 2.52 | 3.15 | 0.22 | 0.85 |
| 16008 | 0 | 229980 | DYEDRYR                           | 2.17 | 0.01 | 2.52 | 3.15 | 0.22 | 0.85 |
| 16009 | 0 | 229980 | DYEDRYR                           | 2.17 | 0.01 | 2.52 | 3.15 | 0.22 | 0.85 |
| 16010 | 0 | 10868  | DYEDRYRE                          | 2.27 | 0.01 | 0.78 | 2.19 | 0.22 | 2.02 |
| 16011 | 0 | 10868  | DYEDRYRE                          | 2.27 | 0.01 | 0.78 | 2.19 | 0.22 | 0.28 |
| 16012 | 0 | 10868  | DYEDRYRE                          | 2.27 | 0.01 | 1.60 | 1.15 | 0.22 | 1.48 |
| 16013 | 0 | 10868  | DYEDRYRE                          | 2.27 | 0.01 | 0.78 | 1.20 | 0.22 | 0.28 |
| 16014 | 0 | 10868  | DYEDRYRE                          | 2.27 | 0.01 | 1.60 | 1.15 | 0.22 | 2.92 |
| 16015 | 0 | 10868  | DYEDRYRE                          | 2.27 | 0.01 | 1.60 | 1.15 | 0.22 | 0.85 |
| 16016 | 0 | 10868  | DYEDRYRE                          | 2.27 | 0.01 | 1.60 | 2.19 | 0.22 | 0.85 |
| 16017 | 0 | 10868  | DYEDRYRE                          | 2.27 | 0.01 | 1.60 | 2.19 | 0.22 | 0.85 |
| 16018 | 0 | 10868  | DYEDRYRE                          | 2.27 | 0.01 | 1.60 | 2.19 | 0.22 | 0.28 |
| 16019 | 0 | 10868  | DYEDRYRE                          | 2.27 | 0.01 | 1.60 | 2.19 | 0.22 | 0.28 |
| 16020 | 0 | 10868  | DYEDRYRE                          | 2.27 | 0.01 | 1.60 | 2.19 | 0.22 | 0.28 |
| 16021 | 0 | 10868  | DYEDRYRE                          | 2.27 | 0.01 | 1.60 | 2.19 | 0.22 | 0.28 |
| 16022 | 0 | 10868  | DYEDRYRE                          | 2.27 | 0.01 | 1.60 | 2.19 | 0.22 | 0.28 |
| 16023 | 0 | 10868  | DYEDRYRE                          | 2.27 | 0.01 | 1.60 | 2.19 | 0.22 | 1.48 |
| 16024 | 0 | 10868  | DYEDRYRE                          | 2.27 | 0.01 | 1.60 | 2.19 | 0.22 | 1.48 |
| 16025 | 0 | 10868  | DYEDRYRE                          | 2.27 | 0.01 | 1.60 | 2.19 | 0.22 | 1.48 |
| 16026 | 0 | 10868  | DYEDRYRE                          | 2.27 | 0.01 | 1.60 | 2.19 | 0.22 | 1.48 |
| 16027 | 0 | 10868  | DYEDRYRE                          | 2.27 | 0.01 | 0.78 | 2.19 | 0.22 | 1.48 |
| 16028 | 0 | 10868  | DYEDRYRE                          | 2.27 | 0.01 | 0.78 | 2.19 | 0.22 | 0.85 |
| 16029 | 0 | 10868  | DYEDRYRE                          | 2.27 | 0.01 | 0.78 | 2.19 | 0.22 | 0.85 |
| 16030 | 0 | 10868  | DYEDRYRE                          | 2.27 | 0.01 | 0.78 | 2.19 | 0.22 | 0.85 |
| 16031 | 0 | 10868  | DYEDRYRE                          | 2.27 | 0.01 | 0.78 | 2.19 | 0.22 | 0.85 |
| 16032 | 0 | 10868  | DYEDRYRE                          | 2.27 | 0.01 | 0.78 | 1.15 | 2.26 | 0.85 |
| 16033 | 0 | 10868  | DYEDRYRE                          | 2.27 | 0.01 | 0.78 | 1.15 | 0.22 | 0.85 |
| 16034 | 0 | 10868  | DYEDRYRE                          | 2.27 | 0.01 | 4.45 | 2.19 | 0.22 | 0.85 |
| 16035 | 0 | 10868  | DYEDRYRE                          | 2.27 | 0.01 | 4.45 | 2.19 | 0.22 | 0.85 |
| 16036 | 0 | 10868  | DYEDRYRE                          | 2.27 | 0.01 | 4.45 | 2.19 | 0.22 | 0.85 |
| 16037 | 0 | 10868  | DYEDRYRE                          | 2.27 | 0.01 | 1.60 | 2.19 | 0.22 | 0.85 |
| 16038 | 0 | 10868  | DYEDRYRE                          | 2.27 | 0.01 | 1.60 | 2.19 | 0.22 | 0.85 |
| 16039 | 0 | 10868  | DYEDRYRE                          | 2.27 | 0.01 | 0.78 | 2.19 | 0.22 | 0.28 |
| 16040 | 0 | 10868  | DYEDRYRE                          | 2.27 | 0.01 | 0.78 | 2.19 | 0.22 | 2.02 |
| 16041 | 0 | 10868  | DYEDRYRE                          | 2.27 | 0.01 | 0.78 | 2.19 | 0.22 | 2.02 |
| 16042 | 0 | 10868  | DYEDRYRE                          | 2.27 | 0.01 | 0.78 | 2.19 | 0.22 | 2.02 |
| 16043 | 0 | 10868  | DYEDRYRE                          | 2.27 | 0.01 | 2.52 | 2.19 | 0.22 | 0.85 |
| 16044 | 0 | 10868  | DYEDRYRE                          | 2.27 | 0.01 | 2.52 | 2.19 | 0.22 | 0.85 |
| 16045 | 0 | 10868  | DYEDRYRE                          | 2.27 | 0.01 | 2.52 | 2.19 | 0.22 | 0.85 |

|       |   |        |                          |      |      |      |      |      |      |
|-------|---|--------|--------------------------|------|------|------|------|------|------|
| 16046 | 0 | 10868  | DYEDRYRE                 | 2.27 | 0.01 | 2.52 | 2.19 | 0.22 | 0.85 |
| 16047 | 0 | 10868  | DYEDRYRE                 | 2.27 | 0.01 | 2.52 | 2.19 | 0.22 | 2.92 |
| 16048 | 0 | 10869  | DYEDRYREN                | 2.36 | 0.01 | 0.78 | 1.15 | 2.26 | 0.85 |
| 16049 | 0 | 10869  | DYEDRYREN                | 2.36 | 0.01 | 0.78 | 1.15 | 2.26 | 0.85 |
| 16050 | 0 | 10869  | DYEDRYREN                | 2.36 | 0.01 | 0.78 | 1.15 | 2.26 | 0.85 |
| 16051 | 0 | 10869  | DYEDRYREN                | 2.36 | 0.01 | 0.78 | 2.19 | 0.22 | 2.02 |
| 16052 | 0 | 10869  | DYEDRYREN                | 2.36 | 0.01 | 0.78 | 2.19 | 0.22 | 0.28 |
| 16053 | 0 | 10876  | DYEKQINKLKN              | 2.41 | 0.01 | 2.83 | 0.68 | 0.22 | 0.85 |
| 16054 | 0 | 10876  | DYEKQINKLKN              | 2.41 | 0.01 | 2.83 | 0.68 | 0.22 | 0.85 |
| 16055 | 0 | 10876  | DYEKQINKLKN              | 2.41 | 0.01 | 2.83 | 0.68 | 0.22 | 0.85 |
| 16056 | 0 | 10876  | DYEKQINKLKN              | 2.41 | 0.01 | 2.83 | 0.68 | 0.22 | 0.85 |
| 16057 | 0 | 10876  | DYEKQINKLKN              | 2.41 | 0.01 | 2.83 | 0.68 | 0.22 | 0.85 |
| 16058 | 0 | 10876  | DYEKQINKLKN              | 2.41 | 0.01 | 2.83 | 0.68 | 0.22 | 0.85 |
| 16059 | 0 | 10876  | DYEKQINKLKN              | 2.41 | 0.01 | 2.83 | 0.68 | 0.22 | 0.28 |
| 16060 | 0 | 10876  | DYEKQINKLKN              | 2.41 | 0.01 | 2.83 | 0.68 | 0.22 | 0.85 |
| 16061 | 0 | 10876  | DYEKQINKLKN              | 2.41 | 0.01 | 2.83 | 0.68 | 0.22 | 0.28 |
| 16062 | 0 | 10876  | DYEKQINKLKN              | 2.41 | 0.01 | 2.83 | 0.68 | 0.22 | 0.28 |
| 16063 | 0 | 10880  | DYEPVVH                  | 2.12 | 0.01 | 2.68 | 0.44 | 1.59 | 0.28 |
| 16064 | 0 | 170674 | DYEQLRTEKEEMELK          | 2.70 | 0.01 | 0.78 | 0.44 | 1.13 | 0.28 |
| 16065 | 0 | 78630  | DYGEILTEKVEDLYKGV<br>L   | 2.93 | 0.01 | 3.11 | 1.15 | 0.22 | 0.28 |
| 16066 | 0 | 78630  | DYGEILTEKVEDLYKGV<br>L   | 2.93 | 0.01 | 3.11 | 1.12 | 0.22 | 0.28 |
| 16067 | 0 | 78630  | DYGEILTEKVEDLYKGV<br>L   | 2.93 | 0.01 | 3.11 | 1.15 | 0.22 | 0.28 |
| 16068 | 0 | 78630  | DYGEILTEKVEDLYKGV<br>L   | 2.93 | 0.01 | 3.11 | 1.12 | 0.22 | 0.28 |
| 16069 | 0 | 10888  | DYGGDSTTPRPRYNATT<br>YLP | 2.96 | 0.01 | 2.48 | 1.20 | 0.22 | 0.28 |
| 16070 | 0 | 10888  | DYGGDSTTPRPRYNATT<br>YLP | 2.96 | 0.01 | 2.48 | 1.20 | 0.22 | 0.28 |
| 16071 | 0 | 10888  | DYGGDSTTPRPRYNATT<br>YLP | 2.96 | 0.01 | 2.48 | 1.20 | 0.22 | 2.12 |
| 16072 | 0 | 443328 | DYHLKPC                  | 1.99 | 0.01 | 0.90 | 2.66 | 0.22 | 1.39 |
| 16073 | 0 | 10892  | DYHRVMY                  | 2.02 | 0.01 | 2.21 | 1.12 | 0.22 | 0.28 |
| 16074 | 0 | 10892  | DYHRVMY                  | 2.02 | 0.01 | 2.21 | 0.44 | 0.85 | 0.28 |
| 16075 | 0 | 10892  | DYHRVMY                  | 2.02 | 0.01 | 2.21 | 1.20 | 0.22 | 0.85 |
| 16076 | 0 | 10892  | DYHRVMY                  | 2.02 | 0.01 | 2.21 | 1.12 | 0.22 | 0.28 |
| 16077 | 0 | 10892  | DYHRVMY                  | 2.02 | 0.01 | 2.21 | 1.12 | 0.22 | 0.28 |
| 16078 | 0 | 10893  | DYHRVMYASS               | 2.29 | 0.01 | 2.21 | 1.12 | 0.22 | 0.28 |
| 16079 | 0 | 10893  | DYHRVMYASS               | 2.29 | 0.01 | 2.21 | 1.12 | 0.22 | 0.28 |
| 16080 | 0 | 97964  | DYHYVGWAG                | 2.31 | 0.01 | 3.57 | 0.44 | 0.85 | 0.28 |
| 16081 | 0 | 232628 | DYIIDHVDQHNATEI          | 2.69 | 0.01 | 2.28 | 0.68 | 0.22 | 0.28 |
| 16082 | 0 | 232628 | DYIIDHVDQHNATEI          | 2.69 | 0.01 | 2.28 | 0.68 | 0.22 | 0.28 |
| 16083 | 0 | 232628 | DYIIDHVDQHNATEI          | 2.69 | 0.01 | 2.28 | 0.68 | 0.22 | 0.28 |
| 16084 | 0 | 10902  | DYINRWIFVTITNNRLN<br>NS  | 2.90 | 0.01 | 3.03 | 0.68 | 0.22 | 1.57 |

|       |   |        |                                     |      |      |      |      |      |      |
|-------|---|--------|-------------------------------------|------|------|------|------|------|------|
| 16085 | 0 | 10902  | DYINRWIFVTITNNRLN<br>NS             | 2.90 | 0.01 | 3.03 | 3.33 | 0.22 | 1.57 |
| 16086 | 0 | 10902  | DYINRWIFVTITNNRLN<br>NS             | 2.90 | 0.01 | 2.08 | 2.49 | 0.22 | 1.57 |
| 16087 | 0 | 10902  | DYINRWIFVTITNNRLN<br>NS             | 2.90 | 0.01 | 2.08 | 0.68 | 0.22 | 1.57 |
| 16088 | 0 | 10902  | DYINRWIFVTITNNRLN<br>NS             | 2.90 | 0.01 | 2.08 | 2.25 | 0.22 | 1.57 |
| 16089 | 0 | 144619 | DYIWNTLNSG                          | 2.29 | 0.01 | 0.78 | 0.44 | 1.13 | 0.28 |
| 16090 | 0 | 144619 | DYIWNTLNSG                          | 2.29 | 0.01 | 0.78 | 0.44 | 1.41 | 0.28 |
| 16091 | 0 | 144619 | DYIWNTLNSG                          | 2.29 | 0.01 | 0.78 | 0.44 | 2.35 | 0.28 |
| 16092 | 0 | 10908  | DYKDDDDK                            | 2.17 | 0.01 | 0.90 | 0.68 | 0.22 | 2.92 |
| 16093 | 0 | 10908  | DYKDDDDK                            | 2.17 | 0.01 | 0.90 | 2.13 | 0.22 | 0.28 |
| 16094 | 0 | 10908  | DYKDDDDK                            | 2.17 | 0.01 | 0.90 | 1.15 | 0.22 | 2.56 |
| 16095 | 0 | 10908  | DYKDDDDK                            | 2.17 | 0.01 | 0.90 | 1.15 | 0.22 | 2.12 |
| 16096 | 0 | 10908  | DYKDDDDK                            | 2.17 | 0.01 | 0.90 | 1.81 | 0.22 | 0.28 |
| 16097 | 0 | 186662 | DYKLSDKWAQHA                        | 2.48 | 0.01 | 0.90 | 0.68 | 0.22 | 1.39 |
| 16098 | 0 | 127632 | DYKNSSV                             | 2.01 | 0.01 | 0.90 | 0.44 | 1.13 | 1.39 |
| 16099 | 0 | 158734 | DYKYFPLTPTGLARVI                    | 2.71 | 0.01 | 3.93 | 0.68 | 0.22 | 0.28 |
| 16100 | 0 | 135839 | DYMGNIQDFDT                         | 2.47 | 0.01 | 0.90 | 1.15 | 0.22 | 0.28 |
| 16101 | 0 | 135839 | DYMGNIQDFDT                         | 2.47 | 0.01 | 0.90 | 1.15 | 0.22 | 1.27 |
| 16102 | 0 | 135839 | DYMGNIQDFDT                         | 2.47 | 0.01 | 0.90 | 0.68 | 0.22 | 0.28 |
| 16103 | 0 | 127952 | DYMTQARGQRSSLAED                    | 2.73 | 0.01 | 0.78 | 0.68 | 0.22 | 3.16 |
| 16104 | 0 | 10932  | DYNPLLE                             | 2.11 | 0.01 | 2.68 | 0.44 | 1.59 | 0.28 |
| 16105 | 0 | 10934  | DYPARAHTFDDFCPECR<br>PLGLQGCAFAQSTV | 3.33 | 0.01 | 2.53 | 0.44 | 0.85 | 0.28 |
| 16106 | 0 | 10934  | DYPARAHTFDDFCPECR<br>PLGLQGCAFAQSTV | 3.33 | 0.01 | 2.53 | 0.44 | 0.85 | 0.28 |
| 16107 | 0 | 181899 | DYPPYLDRYAHW                        | 2.49 | 0.01 | 0.90 | 3.15 | 0.22 | 1.39 |
| 16108 | 0 | 97254  | DYPQYSEEARLKREEISG<br>VKLESIGIYQI   | 3.32 | 0.01 | 3.09 | 0.44 | 0.85 | 0.28 |
| 16109 | 0 | 97254  | DYPQYSEEARLKREEISG<br>VKLESIGIYQI   | 3.32 | 0.01 | 2.94 | 0.44 | 0.85 | 0.28 |
| 16110 | 0 | 97254  | DYPQYSEEARLKREEISG<br>VKLESIGIYQI   | 3.32 | 0.01 | 2.94 | 0.44 | 0.85 | 0.28 |
| 16111 | 0 | 77858  | DYPSLSATDI                          | 2.32 | 0.01 | 0.78 | 0.44 | 1.23 | 0.28 |
| 16112 | 0 | 77858  | DYPSLSATDI                          | 2.32 | 0.01 | 0.78 | 0.44 | 1.23 | 0.28 |
| 16113 | 0 | 77858  | DYPSLSATDI                          | 2.32 | 0.01 | 0.78 | 0.44 | 1.41 | 0.28 |
| 16114 | 0 | 77858  | DYPSLSATDI                          | 2.32 | 0.01 | 0.78 | 0.44 | 1.41 | 0.28 |
| 16115 | 0 | 97966  | DYQAKLTAYQ                          | 2.33 | 0.01 | 2.39 | 2.52 | 0.22 | 0.28 |
| 16116 | 0 | 97966  | DYQAKLTAYQ                          | 2.33 | 0.01 | 3.18 | 2.98 | 0.22 | 0.28 |
| 16117 | 0 | 10943  | DYQGMLPVCP                          | 2.29 | 0.01 | 3.45 | 0.68 | 0.22 | 0.28 |
| 16118 | 0 | 10943  | DYQGMLPVCP                          | 2.29 | 0.01 | 3.45 | 0.68 | 0.22 | 1.27 |
| 16119 | 0 | 10943  | DYQGMLPVCP                          | 2.29 | 0.01 | 3.45 | 0.68 | 0.22 | 0.28 |
| 16120 | 0 | 10944  | DYQGMLPVCPLIPGSST<br>TSTGPC         | 3.09 | 0.01 | 2.08 | 2.37 | 0.22 | 0.28 |



|       |   |        |                                    |      |      |      |      |      |      |
|-------|---|--------|------------------------------------|------|------|------|------|------|------|
| 16121 | 0 | 10944  | DYQGMLPVCPLIPGSST<br>TSTGPC        | 3.09 | 0.01 | 2.08 | 0.68 | 0.22 | 0.28 |
| 16122 | 0 | 10946  | DYQHKEGR                           | 2.10 | 0.01 | 2.21 | 1.12 | 0.22 | 0.28 |
| 16123 | 0 | 10946  | DYQHKEGR                           | 2.10 | 0.01 | 2.21 | 0.44 | 0.85 | 0.28 |
| 16124 | 0 | 141626 | DYRSWGAVPLQL                       | 2.43 | 0.01 | 0.90 | 0.68 | 0.22 | 1.39 |
| 16125 | 0 | 10955  | DYRYAISS                           | 2.11 | 0.01 | 3.37 | 2.13 | 2.25 | 1.75 |
| 16126 | 0 | 419151 | DYSPGTTSTPTPPRPAS<br>YG            | 3.00 | 0.01 | 3.50 | 2.13 | 0.22 | 0.28 |
| 16127 | 0 | 119562 | DYTGKIMWTTPPAIFKS                  | 2.70 | 0.01 | 2.26 | 1.15 | 0.22 | 1.57 |
| 16128 | 0 | 119562 | DYTGKIMWTTPPAIFKS                  | 2.70 | 0.01 | 2.26 | 1.12 | 0.22 | 1.57 |
| 16129 | 0 | 119562 | DYTGKIMWTTPPAIFKS                  | 2.70 | 0.01 | 2.26 | 2.43 | 0.22 | 1.57 |
| 16130 | 0 | 174447 | DYTNSVSMRYLS                       | 2.48 | 0.01 | 0.90 | 1.15 | 1.41 | 1.39 |
| 16131 | 0 | 187634 | DYTVSADAIALA                       | 2.50 | 0.01 | 2.14 | 1.20 | 0.22 | 0.28 |
| 16132 | 0 | 10975  | DYVKKV NKATEAAMFL<br>GWV           | 2.86 | 0.01 | 2.08 | 0.44 | 0.22 | 1.57 |
| 16133 | 0 | 10975  | DYVKKV NKATEAAMFL<br>GWV           | 2.86 | 0.01 | 2.08 | 2.02 | 0.22 | 1.57 |
| 16134 | 0 | 10975  | DYVKKV NKATEAAMFL<br>GWV           | 2.86 | 0.01 | 2.08 | 2.49 | 0.22 | 1.57 |
| 16135 | 0 | 10975  | DYVKKV NKATEAAMFL<br>GWV           | 2.86 | 0.01 | 2.08 | 0.68 | 0.22 | 1.57 |
| 16136 | 0 | 423261 | DYVLKFLTRLAEAAT                    | 2.67 | 0.01 | 2.51 | 0.44 | 2.35 | 1.28 |
| 16137 | 0 | 137830 | DYVMNFNTVRYD                       | 2.50 | 0.01 | 2.21 | 0.44 | 0.85 | 0.28 |
| 16138 | 0 | 143856 | DYWERETQKAKGNEQN<br>YRVSLRN        | 3.06 | 0.01 | 2.19 | 4.93 | 0.22 | 1.75 |
| 16139 | 0 | 149670 | DYYKNLINNAKT                       | 2.47 | 0.01 | 3.53 | 0.44 | 0.22 | 0.28 |
| 16140 | 0 | 273576 | AAAAPKNGTATTGDS                    | 2.68 | 0.01 | 1.61 | 0.44 | 0.85 | 1.28 |
| 16141 | 0 | 10983  | AAAAPVVESKWAL                      | 2.62 | 0.01 | 1.96 | 0.44 | 0.85 | 0.28 |
| 16142 | 0 | 10984  | AAAASAIQGNVTSIHSL<br>LDEGKQS       | 3.11 | 0.01 | 3.53 | 2.61 | 0.22 | 0.28 |
| 16143 | 0 | 10984  | AAAASAIQGNVTSIHSL<br>LDEGKQS       | 3.11 | 0.01 | 3.53 | 3.16 | 0.85 | 0.28 |
| 16144 | 0 | 141535 | AAAAYIKGRLSPIVKTER<br>IKV FVK      | 3.11 | 0.01 | 3.45 | 1.12 | 0.22 | 0.85 |
| 16145 | 0 | 141535 | AAAAYIKGRLSPIVKTER<br>IKV FVK      | 3.11 | 0.01 | 3.45 | 1.12 | 0.22 | 0.85 |
| 16146 | 0 | 141535 | AAAAYIKGRLSPIVKTER<br>IKV FVK      | 3.11 | 0.01 | 3.45 | 0.44 | 0.85 | 0.85 |
| 16147 | 0 | 192914 | EAAEAFLGFSYAPPTDSF                 | 2.86 | 3.63 | 0.78 | 1.15 | 1.41 | 0.28 |
| 16148 | 0 | 192914 | EAAEAFLGFSYAPPTDSF                 | 2.86 | 3.63 | 0.78 | 1.15 | 1.41 | 0.85 |
| 16149 | 0 | 225947 | EAAFNDAIKASTGGAYE<br>SYKFIPALEAAVK | 3.34 | 0.01 | 2.53 | 1.20 | 0.22 | 0.28 |

|       |   |        |                                    |      |      |      |      |      |      |
|-------|---|--------|------------------------------------|------|------|------|------|------|------|
| 16150 | 0 | 225947 | EAAFNDAIKASTGGAYE<br>SYKFIPALEAAVK | 3.34 | 0.01 | 2.53 | 1.20 | 0.22 | 0.28 |
| 16151 | 0 | 225947 | EAAFNDAIKASTGGAYE<br>SYKFIPALEAAVK | 3.34 | 0.01 | 2.53 | 1.20 | 0.22 | 0.28 |
| 16152 | 0 | 225947 | EAAFNDAIKASTGGAYE<br>SYKFIPALEAAVK | 3.34 | 0.01 | 2.53 | 1.20 | 0.22 | 0.28 |
| 16153 | 0 | 225947 | EAAFNDAIKASTGGAYE<br>SYKFIPALEAAVK | 3.34 | 0.01 | 2.53 | 1.20 | 0.22 | 0.28 |
| 16154 | 0 | 225947 | EAAFNDAIKASTGGAYE<br>SYKFIPALEAAVK | 3.34 | 0.01 | 2.53 | 1.20 | 0.22 | 0.28 |
| 16155 | 0 | 225947 | EAAFNDAIKASTGGAYE<br>SYKFIPALEAAVK | 3.34 | 0.01 | 2.53 | 1.20 | 0.22 | 0.28 |
| 16156 | 0 | 225947 | EAAFNDAIKASTGGAYE<br>SYKFIPALEAAVK | 3.34 | 0.01 | 2.53 | 1.20 | 0.22 | 1.66 |
| 16157 | 0 | 225947 | EAAFNDAIKASTGGAYE<br>SYKFIPALEAAVK | 3.34 | 0.01 | 2.53 | 0.44 | 1.23 | 2.35 |
| 16158 | 0 | 225947 | EAAFNDAIKASTGGAYE<br>SYKFIPALEAAVK | 3.34 | 0.01 | 2.53 | 1.20 | 0.22 | 0.28 |
| 16159 | 0 | 225947 | EAAFNDAIKASTGGAYE<br>SYKFIPALEAAVK | 3.34 | 0.01 | 2.53 | 1.20 | 0.22 | 0.28 |
| 16160 | 0 | 225947 | EAAFNDAIKASTGGAYE<br>SYKFIPALEAAVK | 3.34 | 0.01 | 2.53 | 1.20 | 0.22 | 0.28 |
| 16161 | 0 | 10987  | EAAGIGILTV                         | 2.32 | 0.01 | 0.78 | 0.44 | 1.41 | 0.28 |
| 16162 | 0 | 10987  | EAAGIGILTV                         | 2.32 | 0.01 | 0.78 | 0.44 | 1.41 | 2.12 |
| 16163 | 0 | 10990  | EAARKQGE                           | 2.04 | 0.01 | 0.90 | 0.44 | 1.23 | 0.28 |
| 16164 | 0 | 10990  | EAARKQGE                           | 2.04 | 0.01 | 0.90 | 0.44 | 1.23 | 1.27 |
| 16165 | 0 | 10991  | EAARYEAEDKDQVRQ                    | 2.72 | 0.01 | 2.30 | 0.44 | 0.85 | 0.28 |
| 16166 | 0 | 97968  | EAALKQYEAD                         | 2.34 | 0.01 | 2.39 | 2.42 | 0.22 | 0.28 |
| 16167 | 0 | 100810 | EAALSN                             | 1.89 | 0.01 | 3.18 | 1.12 | 0.22 | 0.28 |
| 16168 | 0 | 496407 | EAAPENAEPVHENA                     | 2.68 | 0.01 | 2.59 | 0.44 | 1.74 | 0.28 |
| 16169 | 0 | 10996  | EAARCIDGAFTPKNRTA<br>ADG           | 2.94 | 0.01 | 2.78 | 2.49 | 0.85 | 0.28 |
| 16170 | 0 | 514094 | EAASSDALEALADQT                    | 2.73 | 0.01 | 2.24 | 0.44 | 1.41 | 1.28 |
| 16171 | 0 | 140840 | EAAYSKNRRRAVL                      | 2.46 | 0.01 | 3.01 | 1.12 | 0.22 | 0.28 |
| 16172 | 0 | 11000  | EAAYSKNRRRAVLAY                    | 2.62 | 0.01 | 3.75 | 0.44 | 1.74 | 0.28 |
| 16173 | 0 | 11001  | EACGKVVDIMPCLHFV<br>KGEEKEPSKECCS  | 3.33 | 0.01 | 3.08 | 0.44 | 1.23 | 0.85 |
| 16174 | 0 | 106366 | EACKCIVRAT                         | 2.31 | 0.01 | 3.08 | 0.44 | 1.23 | 0.85 |
| 16175 | 0 | 273853 | EADADDDDPQRPNPE                    | 2.71 | 0.01 | 1.61 | 0.44 | 0.85 | 1.28 |
| 16176 | 0 | 273869 | EADDDDDDDDDDDGET                   | 2.73 | 0.01 | 1.61 | 0.44 | 0.85 | 1.28 |
| 16177 | 0 | 128484 | EADDDRNLNKVISELN                   | 2.67 | 0.01 | 0.78 | 0.44 | 1.13 | 0.85 |
| 16178 | 0 | 11006  | EADDRA                             | 1.90 | 0.01 | 3.51 | 0.44 | 0.85 | 0.28 |
| 16179 | 0 | 11011  | EADRKYDEVARKLAM                    | 2.71 | 0.01 | 3.15 | 0.44 | 1.23 | 0.85 |
| 16180 | 0 | 11011  | EADRKYDEVARKLAM                    | 2.71 | 0.01 | 2.36 | 0.44 | 1.23 | 1.28 |
| 16181 | 0 | 11011  | EADRKYDEVARKLAM                    | 2.71 | 0.01 | 2.36 | 0.44 | 1.23 | 1.27 |

|       |   |        |                                      |      |      |      |      |      |      |
|-------|---|--------|--------------------------------------|------|------|------|------|------|------|
| 16182 | 0 | 11011  | EADRKYDEVARKLAM                      | 2.71 | 0.01 | 2.36 | 0.44 | 1.23 | 1.28 |
| 16183 | 0 | 11012  | EADRQKGGRYER                         | 2.42 | 0.01 | 0.90 | 1.15 | 2.26 | 1.39 |
| 16184 | 0 | 11013  | EADRYFTYEEPN                         | 2.47 | 0.01 | 2.88 | 2.22 | 0.85 | 0.28 |
| 16185 | 0 | 11013  | EADRYFTYEEPN                         | 2.47 | 0.01 | 2.88 | 2.37 | 0.22 | 0.28 |
| 16186 | 0 | 11013  | EADRYFTYEEPN                         | 2.47 | 0.01 | 2.88 | 2.37 | 0.22 | 0.28 |
| 16187 | 0 | 11013  | EADRYFTYEEPN                         | 2.47 | 0.01 | 2.88 | 2.22 | 0.22 | 0.28 |
| 16188 | 0 | 105739 | EADVNTFV                             | 2.12 | 0.01 | 3.05 | 1.20 | 0.22 | 0.28 |
| 16189 | 0 | 118776 | EADYFEYHQEGGPDGEP<br>DVP             | 2.98 | 0.01 | 2.43 | 0.44 | 1.13 | 1.27 |
| 16190 | 0 | 118776 | EADYFEYHQEGGPDGEP<br>DVP             | 2.98 | 0.01 | 2.43 | 0.44 | 1.41 | 1.27 |
| 16191 | 0 | 118776 | EADYFEYHQEGGPDGEP<br>DVP             | 2.98 | 0.01 | 2.48 | 0.44 | 1.74 | 0.28 |
| 16192 | 0 | 118776 | EADYFEYHQEGGPDGEP<br>DVP             | 2.98 | 0.01 | 2.48 | 0.44 | 1.74 | 0.28 |
| 16193 | 0 | 97971  | EADYQAKLTA                           | 2.31 | 0.01 | 3.18 | 2.98 | 0.22 | 0.28 |
| 16194 | 0 | 104452 | EAEDLQVGQVELGGGP<br>GAGSLQPLALEGSLQ  | 3.43 | 0.01 | 0.78 | 4.45 | 0.22 | 1.57 |
| 16195 | 0 | 104452 | EAEDLQVGQVELGGGP<br>GAGSLQPLALEGSLQ  | 3.43 | 0.01 | 0.78 | 4.45 | 0.22 | 1.57 |
| 16196 | 0 | 104452 | EAEDLQVGQVELGGGP<br>GAGSLQPLALEGSLQ  | 3.43 | 0.01 | 0.78 | 3.06 | 0.22 | 1.27 |
| 16197 | 0 | 104452 | EAEDLQVGQVELGGGP<br>GAGSLQPLALEGSLQ  | 3.43 | 0.01 | 0.78 | 3.06 | 0.22 | 1.27 |
| 16198 | 0 | 130780 | EAEDYDDDLTDSE                        | 2.59 | 0.01 | 0.78 | 0.44 | 2.35 | 1.27 |
| 16199 | 0 | 130781 | EAEDYDDDLTDSEMD                      | 2.71 | 0.01 | 0.78 | 0.44 | 2.35 | 1.27 |
| 16200 | 0 | 273973 | EAEEDDEDDEEEEEE                      | 2.73 | 0.01 | 1.61 | 0.44 | 0.85 | 1.28 |
| 16201 | 0 | 113349 | EAEEWYKSKFADLSEAA<br>NRN             | 2.96 | 4.03 | 0.78 | 1.81 | 0.22 | 0.28 |
| 16202 | 0 | 113349 | EAEEWYKSKFADLSEAA<br>NRN             | 2.96 | 4.03 | 0.78 | 3.61 | 0.22 | 0.28 |
| 16203 | 0 | 113350 | EAEEWYKSKFADLSEAA<br>NRN             | 2.96 | 0.01 | 0.78 | 1.81 | 0.22 | 0.28 |
| 16204 | 0 | 113350 | EAEEWYKSKFADLSEAA<br>NRN             | 2.96 | 0.01 | 0.78 | 3.61 | 0.22 | 0.28 |
| 16205 | 0 | 11021  | EAEGGTWR                             | 2.14 | 0.01 | 2.04 | 0.44 | 0.85 | 0.28 |
| 16206 | 0 | 103128 | EAEHQAIVRDVLAAG<br>EAEKALQSAKTKQKASS | 2.68 | 0.01 | 2.04 | 0.44 | 0.85 | 1.28 |
| 16207 | 0 | 11025  | DLARSADKSAPLPENAG                    | 3.53 | 0.01 | 3.93 | 0.44 | 0.85 | 0.28 |
| 16208 | 0 | 274021 | EAEKQKAAEATKAAE                      | 2.75 | 0.01 | 1.61 | 0.44 | 0.85 | 1.28 |
| 16209 | 0 | 274022 | EAEKQKAAEATKAVE                      | 2.74 | 0.01 | 1.61 | 0.44 | 0.85 | 1.28 |
| 16210 | 0 | 195014 | EAEKQKAAEATKVA                       | 2.68 | 0.01 | 2.30 | 0.44 | 0.85 | 0.28 |
| 16211 | 0 | 274023 | EAEKQKAAEATKVAE                      | 2.74 | 0.01 | 1.61 | 0.44 | 0.85 | 1.28 |
| 16212 | 0 | 274024 | EAEKQRAAAATKAVE                      | 2.72 | 0.01 | 1.61 | 0.44 | 0.85 | 1.28 |
| 16213 | 0 | 274026 | EAEKQRAAEATKAVE                      | 2.73 | 0.01 | 1.61 | 0.44 | 0.85 | 1.28 |
| 16214 | 0 | 274027 | EAEKQRAAEATKDVE                      | 2.72 | 0.01 | 1.61 | 0.44 | 0.85 | 1.28 |

|       |   |        |                                |      |      |      |      |      |      |
|-------|---|--------|--------------------------------|------|------|------|------|------|------|
| 16215 | 0 | 274028 | EAEKQRAAEATKVAE                | 2.73 | 0.01 | 1.61 | 0.44 | 0.85 | 1.28 |
| 16216 | 0 | 274030 | EAEKRKAAEATKAAE                | 2.75 | 0.01 | 1.61 | 0.44 | 0.85 | 1.28 |
| 16217 | 0 | 274031 | EAEKRKAAEATKVAE                | 2.74 | 0.01 | 1.61 | 0.44 | 0.85 | 1.28 |
| 16218 | 0 | 121229 | EAELPCRISPGKNATGME             | 2.82 | 0.01 | 2.19 | 4.33 | 0.22 | 0.28 |
| 16219 | 0 | 11029  | EAELTGYG                       | 2.15 | 0.01 | 2.40 | 0.44 | 0.85 | 0.28 |
| 16220 | 0 | 125022 | EAERAGRGTG                     | 2.37 | 0.01 | 2.14 | 1.20 | 0.22 | 0.28 |
| 16221 | 0 | 190403 | EAESISSEEIVPNS                 | 2.72 | 0.01 | 1.60 | 0.44 | 1.23 | 0.28 |
| 16222 | 0 | 11033  | EAESISSEEIVPNSVE               | 2.85 | 0.01 | 1.60 | 0.44 | 1.23 | 0.28 |
| 16223 | 0 | 11033  | EAESISSEEIVPNSVE               | 2.85 | 0.01 | 1.60 | 1.12 | 0.22 | 1.27 |
| 16224 | 0 | 11035  | EAESISSEEIVPNSVEQKH            | 2.97 | 0.01 | 1.60 | 0.44 | 1.23 | 0.28 |
| 16225 | 0 | 11035  | EAESISSEEIVPNSVEQKH            | 2.97 | 0.01 | 1.60 | 0.44 | 2.98 | 0.28 |
| 16226 | 0 | 11035  | EAESISSEEIVPNSVEQKH            | 2.97 | 0.01 | 1.60 | 2.82 | 0.22 | 0.28 |
| 16227 | 0 | 11035  | EAESISSEEIVPNSVEQKH            | 2.97 | 0.01 | 1.60 | 0.44 | 1.23 | 1.28 |
| 16228 | 0 | 11038  | EAEVQIDRLITGRLQSL              | 2.80 | 0.01 | 2.48 | 0.44 | 0.85 | 0.28 |
| 16229 | 0 | 11038  | EAEVQIDRLITGRLQSL              | 2.80 | 0.01 | 2.48 | 0.68 | 0.22 | 0.28 |
| 16230 | 0 | 11043  | EAFIKTAAAEFLAW                 | 2.71 | 0.01 | 1.66 | 0.44 | 0.85 | 0.28 |
| 16231 | 0 | 107805 | EAFKQIKEQVDIPACEDVIYRLKHHEYDKG | 3.33 | 0.01 | 0.90 | 1.12 | 0.22 | 0.28 |
| 16232 | 0 | 125858 | EAFQQYVGPYEGYDST               | 2.73 | 0.01 | 0.78 | 1.20 | 0.22 | 0.28 |
| 16233 | 0 | 125858 | EAFQQYVGPYEGYDST               | 2.73 | 0.01 | 0.78 | 1.20 | 0.22 | 0.28 |
| 16234 | 0 | 11046  | EAFRRYQE                       | 2.14 | 0.01 | 2.40 | 2.43 | 0.22 | 0.28 |
| 16235 | 0 | 113351 | EAGAGGGA                       | 2.15 | 0.01 | 0.90 | 0.44 | 1.13 | 0.85 |
| 16236 | 0 | 11054  | EAGGTSGTTTSSGAASGKAGTG TAG     | 3.23 | 0.01 | 4.63 | 0.44 | 0.85 | 0.28 |
| 16237 | 0 | 112947 | EAGISKDRILIKLSS                | 2.68 | 0.01 | 0.78 | 0.44 | 1.13 | 0.85 |
| 16238 | 0 | 11055  | EAGKHSG                        | 2.02 | 0.01 | 0.90 | 0.44 | 1.23 | 1.27 |
| 16239 | 0 | 11055  | EAGKHSG                        | 2.02 | 0.01 | 0.90 | 0.44 | 1.23 | 0.28 |
| 16240 | 0 | 11057  | EAGPGVAG                       | 2.16 | 0.01 | 2.04 | 0.44 | 0.85 | 0.28 |
| 16241 | 0 | 274199 | EAGSDEEDQDEDEDE                | 2.74 | 0.01 | 1.61 | 0.44 | 0.85 | 1.28 |
| 16242 | 0 | 78367  | EAGVLNDGPRFTDAF                | 2.66 | 0.01 | 0.90 | 0.68 | 0.22 | 0.28 |
| 16243 | 0 | 78367  | EAGVLNDGPRFTDAF                | 2.66 | 0.01 | 0.90 | 0.68 | 0.22 | 0.28 |
| 16244 | 0 | 11064  | EAHNEKRADSSYVCKQGFTDRGWGNGC    | 3.20 | 0.01 | 3.78 | 2.82 | 0.22 | 0.28 |
| 16245 | 0 | 11064  | EAHNEKRADSSYVCKQGFTDRGWGNGC    | 3.20 | 0.01 | 3.78 | 2.82 | 0.22 | 1.34 |
| 16246 | 0 | 11064  | EAHNEKRADSSYVCKQGFTDRGWGNGC    | 3.20 | 0.01 | 3.78 | 1.15 | 0.22 | 0.85 |
| 16247 | 0 | 152483 | EAHREVINSS                     | 2.30 | 0.01 | 2.18 | 2.16 | 0.22 | 0.28 |

|       |   |       |                                                                                                                                                  |      |      |      |      |      |      |
|-------|---|-------|--------------------------------------------------------------------------------------------------------------------------------------------------|------|------|------|------|------|------|
| 16248 | 0 | 11067 | EAHREVINSSTEGLLNI<br>DKDIRKILSGYIVEIEDTE<br>GLKEVINDRYDMLNISSL<br>RQDGKTFIDFKKYNDKL<br>PLYISNPYKVNYYAVTK<br>ENTIINPSENGDTSTNGI<br>KKILIFSKKGYEIG | 4.77 | 0.01 | 2.18 | 2.74 | 0.22 | 0.28 |
| 16249 | 0 | 11067 | EAHREVINSSTEGLLNI<br>DKDIRKILSGYIVEIEDTE<br>GLKEVINDRYDMLNISSL<br>RQDGKTFIDFKKYNDKL<br>PLYISNPYKVNYYAVTK<br>ENTIINPSENGDTSTNGI<br>KKILIFSKKGYEIG | 4.77 | 0.01 | 2.18 | 2.74 | 0.22 | 1.34 |
| 16250 | 0 | 11067 | EAHREVINSSTEGLLNI<br>DKDIRKILSGYIVEIEDTE<br>GLKEVINDRYDMLNISSL<br>RQDGKTFIDFKKYNDKL<br>PLYISNPYKVNYYAVTK<br>ENTIINPSENGDTSTNGI<br>KKILIFSKKGYEIG | 4.77 | 0.01 | 2.18 | 2.74 | 0.22 | 1.66 |
| 16251 | 0 | 11067 | EAHREVINSSTEGLLNI<br>DKDIRKILSGYIVEIEDTE<br>GLKEVINDRYDMLNISSL<br>RQDGKTFIDFKKYNDKL<br>PLYISNPYKVNYYAVTK<br>ENTIINPSENGDTSTNGI<br>KKILIFSKKGYEIG | 4.77 | 0.01 | 2.18 | 2.74 | 0.22 | 1.66 |
| 16252 | 0 | 11067 | EAHREVINSSTEGLLNI<br>DKDIRKILSGYIVEIEDTE<br>GLKEVINDRYDMLNISSL<br>RQDGKTFIDFKKYNDKL<br>PLYISNPYKVNYYAVTK<br>ENTIINPSENGDTSTNGI<br>KKILIFSKKGYEIG | 4.77 | 0.01 | 2.18 | 2.74 | 0.22 | 1.66 |

|       |   |        |                                                                                |      |      |      |      |      |      |
|-------|---|--------|--------------------------------------------------------------------------------|------|------|------|------|------|------|
|       |   |        | EAHREVINSSTEGLLNI<br>DKDIRKILSGYIVEIEDTE<br>GLKEVINDRYDMLNISSL                 |      |      |      |      |      |      |
| 16253 | 0 | 11067  | RQDGKTFIDFKKYNDKL<br>PLYISNPYKVNYYAVTK<br>ENTIINPSENGDTSTNGI<br>KKILIFSKKGYEIG | 4.77 | 0.01 | 2.18 | 2.74 | 0.22 | 2.02 |
| 16254 | 0 | 11077  | EAIKGGRHLIFCHSKKKC<br>DELAAKLTGLGLNAV                                          | 3.43 | 0.01 | 1.72 | 0.44 | 1.59 | 1.39 |
| 16255 | 0 | 11081  | EAIPALTAVETGHTSQV                                                              | 2.80 | 0.01 | 3.21 | 1.12 | 0.22 | 0.28 |
| 16256 | 0 | 11081  | EAIPALTAVETGHTSQV                                                              | 2.80 | 0.01 | 3.21 | 1.12 | 0.22 | 0.28 |
| 16257 | 0 | 11081  | EAIPALTAVETGHTSQV                                                              | 2.80 | 0.01 | 3.21 | 1.12 | 0.22 | 0.28 |
| 16258 | 0 | 11081  | EAIPALTAVETGHTSQV                                                              | 2.80 | 0.01 | 4.63 | 1.12 | 0.22 | 0.85 |
| 16259 | 0 | 11081  | EAIPALTAVETGHTSQV                                                              | 2.80 | 0.01 | 4.63 | 1.12 | 0.22 | 0.85 |
| 16260 | 0 | 11081  | EAIPALTAVETGHTSQV                                                              | 2.80 | 0.01 | 3.21 | 0.44 | 1.13 | 0.28 |
| 16261 | 0 | 11081  | EAIPALTAVETGHTSQV                                                              | 2.80 | 0.01 | 3.21 | 0.44 | 1.41 | 0.28 |
| 16262 | 0 | 11081  | EAIPALTAVETGHTSQV                                                              | 2.80 | 0.01 | 4.03 | 1.12 | 0.22 | 1.27 |
| 16263 | 0 | 11081  | EAIPALTAVETGHTSQV                                                              | 2.80 | 0.01 | 4.03 | 1.12 | 0.22 | 1.27 |
| 16264 | 0 | 11081  | EAIPALTAVETGHTSQV                                                              | 2.80 | 0.01 | 4.03 | 1.12 | 0.22 | 0.28 |
| 16265 | 0 | 11081  | EAIPALTAVETGHTSQV                                                              | 2.80 | 0.01 | 4.03 | 1.12 | 0.22 | 0.85 |
| 16266 | 0 | 11081  | EAIPALTAVETGHTSQV                                                              | 2.80 | 0.01 | 4.03 | 1.12 | 0.22 | 0.85 |
| 16267 | 0 | 11081  | EAIPALTAVETGHTSQV                                                              | 2.80 | 0.01 | 4.03 | 1.12 | 0.22 | 0.85 |
| 16268 | 0 | 11081  | EAIPALTAVETGHTSQV                                                              | 2.80 | 0.01 | 4.03 | 1.12 | 0.22 | 0.85 |
| 16269 | 0 | 107107 | EAIQP                                                                          | 1.74 | 0.01 | 0.78 | 2.36 | 0.22 | 0.28 |
| 16270 | 0 | 107107 | EAIQP                                                                          | 1.74 | 0.01 | 0.78 | 2.36 | 0.22 | 1.48 |
| 16271 | 0 | 91222  | EAITDRIMLYQE                                                                   | 2.46 | 0.01 | 3.81 | 3.26 | 0.22 | 1.39 |
| 16272 | 0 | 91222  | EAITDRIMLYQE                                                                   | 2.46 | 0.01 | 3.50 | 3.26 | 0.22 | 0.28 |
| 16273 | 0 | 91222  | EAITDRIMLYQE                                                                   | 2.46 | 0.01 | 3.50 | 3.26 | 0.85 | 0.28 |
| 16274 | 0 | 11090  | EAKESPANNPGLSTV                                                                | 2.68 | 0.01 | 3.97 | 1.20 | 0.22 | 0.85 |
| 16275 | 0 | 170685 | EAKKKMQVDLEKELQ                                                                | 2.71 | 0.01 | 0.78 | 0.44 | 1.13 | 0.28 |
| 16276 | 0 | 11092  | EAKKQVEKALEE                                                                   | 2.51 | 0.01 | 4.45 | 0.68 | 0.22 | 0.28 |

|       |   |        |                                                   |      |      |      |      |      |      |
|-------|---|--------|---------------------------------------------------|------|------|------|------|------|------|
| 16277 | 0 | 11097  | EAKQPATLRKYCCKKNM<br>EGKVVL PENLEYTIV             | 3.40 | 0.01 | 0.90 | 2.65 | 0.22 | 0.28 |
| 16278 | 0 | 11097  | EAKQPATLRKYCCKKNM<br>EGKVVL PENLEYTIV             | 3.40 | 0.01 | 0.90 | 2.65 | 0.22 | 0.28 |
| 16279 | 0 | 11098  | EAKRLEIFKN<br>EAKVDTTAGRFTP KLGSL                 | 2.32 | 0.01 | 2.72 | 0.44 | 1.23 | 0.85 |
| 16280 | 0 | 11102  | EISTESSDFDQNPTRFT<br>PVGIG<br>EAKVDTTAGRFTP KLGSL | 3.66 | 0.01 | 3.72 | 0.68 | 0.22 | 0.28 |
| 16281 | 0 | 11102  | EISTESSDFDQNPTRFT<br>PVGIG<br>EAKVDTTAGRFTP KLGSL | 3.66 | 0.01 | 3.72 | 0.68 | 0.22 | 0.28 |
| 16282 | 0 | 11102  | EISTESSDFDQNPTRFT<br>PVGIG<br>EAKVDTTAGRFTP KLGSL | 3.66 | 0.01 | 3.72 | 0.68 | 0.22 | 0.28 |
| 16283 | 0 | 11102  | EISTESSDFDQNPTRFT<br>PVGIG                        | 3.66 | 0.01 | 3.72 | 0.68 | 0.22 | 0.28 |
| 16284 | 0 | 123106 | EALDAIRYL                                         | 2.23 | 0.01 | 2.28 | 2.00 | 0.22 | 0.28 |
| 16285 | 0 | 11109  | EALDKYELENHDLKTKNE<br>G                           | 2.93 | 0.01 | 4.45 | 0.68 | 0.22 | 0.28 |
| 16286 | 0 | 95332  | EALEKF                                            | 1.91 | 0.01 | 1.60 | 0.44 | 1.23 | 0.28 |
| 16287 | 0 | 98740  | EALEKFDKAL                                        | 2.36 | 0.01 | 1.60 | 0.44 | 1.23 | 0.85 |
| 16288 | 0 | 98740  | EALEKFDKAL                                        | 2.36 | 0.01 | 1.60 | 0.44 | 1.23 | 0.85 |
| 16289 | 0 | 98740  | EALEKFDKAL                                        | 2.36 | 0.01 | 1.60 | 0.44 | 2.98 | 0.85 |
| 16290 | 0 | 96205  | EALEKFDKALKALPM                                   | 2.72 | 0.01 | 1.60 | 0.44 | 1.23 | 0.28 |
| 16291 | 0 | 274383 | EALHEVLQYGR LIDD                                  | 2.65 | 0.01 | 1.61 | 0.44 | 0.85 | 1.28 |
| 16292 | 0 | 108885 | EALHNHYQKS                                        | 2.29 | 0.01 | 0.78 | 0.44 | 1.13 | 1.27 |
| 16293 | 0 | 119444 | EALKKIIEDQQESLNKWK<br>SK                          | 2.96 | 0.01 | 0.78 | 0.44 | 1.13 | 0.28 |
| 16294 | 0 | 119444 | EALKKIIEDQQESLNKWK<br>SK                          | 2.96 | 0.01 | 0.78 | 0.44 | 1.13 | 0.28 |
| 16295 | 0 | 97255  | EALMEWLKTRPILSPLTK                                | 2.86 | 0.01 | 2.36 | 1.12 | 0.22 | 0.85 |
| 16296 | 0 | 97255  | EALMEWLKTRPILSPLTK                                | 2.86 | 0.01 | 2.36 | 1.12 | 0.22 | 1.48 |
| 16297 | 0 | 123107 | EALPKIKAY                                         | 2.23 | 0.01 | 2.28 | 2.00 | 0.22 | 0.28 |
| 16298 | 0 | 182086 | EALRSCQADNSALID                                   | 2.68 | 0.01 | 0.78 | 0.44 | 1.13 | 0.85 |
| 16299 | 0 | 182087 | EALRSCQADNSALIDITS<br>LA                          | 2.96 | 0.01 | 0.78 | 0.44 | 1.13 | 0.28 |
| 16300 | 0 | 182087 | EALRSCQADNSALIDITS<br>LA                          | 2.96 | 0.01 | 0.78 | 0.44 | 1.41 | 0.28 |
| 16301 | 0 | 182087 | EALRSCQADNSALIDITS<br>LA                          | 2.96 | 0.01 | 0.78 | 0.44 | 1.13 | 1.27 |
| 16302 | 0 | 78368  | EALSEEEWPRYTSH P                                  | 2.67 | 0.01 | 0.90 | 0.68 | 0.22 | 0.28 |
| 16303 | 0 | 118313 | EALSTLV LNRLKV                                    | 2.56 | 0.01 | 0.78 | 0.44 | 1.74 | 0.85 |

|       |   |        |                                      |      |      |      |      |      |      |
|-------|---|--------|--------------------------------------|------|------|------|------|------|------|
| 16304 | 0 | 118313 | EALSTLVNLRLKV                        | 2.56 | 0.01 | 0.78 | 0.44 | 1.59 | 0.85 |
| 16305 | 0 | 118313 | EALSTLVNLRLKV                        | 2.56 | 0.01 | 0.78 | 0.44 | 1.74 | 0.85 |
| 16306 | 0 | 112491 | EALTGTEKLIETYFSKNYQ<br>DYE           | 3.04 | 0.01 | 1.60 | 2.04 | 0.22 | 0.28 |
| 16307 | 0 | 115215 | EALTGTEKLIETYFSKNYQ<br>DYEYL         | 3.13 | 0.01 | 2.19 | 1.12 | 0.22 | 1.27 |
| 16308 | 0 | 117809 | EALTKHFQD                            | 2.18 | 0.01 | 0.78 | 0.44 | 1.13 | 0.85 |
| 16309 | 0 | 496408 | EALTTLVVNKMRGVFN<br>VVAVKAPEFGDKRK   | 3.35 | 0.01 | 3.15 | 0.44 | 1.93 | 2.12 |
| 16310 | 0 | 135912 | EALVLDTNGLMS                         | 2.45 | 0.01 | 0.90 | 2.16 | 0.22 | 2.12 |
| 16311 | 0 | 11129  | EALYGMS                              | 1.99 | 0.01 | 0.90 | 0.68 | 0.22 | 1.39 |
| 16312 | 0 | 104759 | EALYLVCGERG                          | 2.42 | 0.01 | 1.75 | 0.68 | 0.22 | 1.57 |
| 16313 | 0 | 115216 | EAMAPKHKEMPFPKYP<br>VEPF             | 2.99 | 0.01 | 1.60 | 0.44 | 1.23 | 1.28 |
| 16314 | 0 | 11139  | EAMTRYSAAPPDPPQPE<br>YD              | 2.91 | 0.01 | 1.72 | 0.44 | 0.85 | 0.28 |
| 16315 | 0 | 189058 | EANKLAEKTRRQLRENA                    | 2.84 | 4.63 | 0.90 | 0.68 | 0.22 | 0.28 |
| 16316 | 0 | 11148  | EANNREGVEG                           | 2.35 | 0.01 | 3.67 | 0.68 | 0.22 | 0.28 |
| 16317 | 0 | 11148  | EANNREGVEG                           | 2.35 | 0.01 | 3.67 | 0.68 | 0.22 | 1.34 |
| 16318 | 0 | 11148  | EANNREGVEG                           | 2.35 | 0.01 | 3.48 | 0.68 | 0.22 | 2.02 |
| 16319 | 0 | 11148  | EANNREGVEG                           | 2.35 | 0.01 | 3.48 | 0.68 | 0.22 | 0.28 |
| 16320 | 0 | 11148  | EANNREGVEG                           | 2.35 | 0.01 | 3.48 | 0.68 | 0.22 | 1.34 |
| 16321 | 0 | 11148  | EANNREGVEG                           | 2.35 | 0.01 | 3.48 | 0.68 | 0.22 | 0.85 |
| 16322 | 0 | 11149  | EANQGQFEHF                           | 2.34 | 0.01 | 3.89 | 0.44 | 1.23 | 0.85 |
| 16323 | 0 | 164643 | EANQNSKTAKIEIKASIE<br>GLEVDVPGIDPNAC | 3.42 | 0.01 | 2.78 | 1.12 | 0.22 | 0.28 |
| 16324 | 0 | 164643 | EANQNSKTAKIEIKASIE<br>GLEVDVPGIDPNAC | 3.42 | 0.01 | 2.78 | 0.44 | 1.23 | 2.35 |
| 16325 | 0 | 164643 | EANQNSKTAKIEIKASIE<br>GLEVDVPGIDPNAC | 3.42 | 0.01 | 2.78 | 0.68 | 0.22 | 1.34 |
| 16326 | 0 | 164643 | EANQNSKTAKIEIKASIE<br>GLEVDVPGIDPNAC | 3.42 | 0.01 | 2.78 | 1.12 | 0.22 | 0.85 |
| 16327 | 0 | 11150  | EANSKLAALEKLNKELEE<br>SK             | 3.01 | 0.01 | 2.85 | 2.42 | 0.22 | 0.28 |
| 16328 | 0 | 11150  | EANSKLAALEKLNKELEE<br>SK             | 3.01 | 0.01 | 2.24 | 2.04 | 0.22 | 0.28 |
| 16329 | 0 | 11150  | EANSKLAALEKLNKELEE<br>SK             | 3.01 | 0.01 | 2.24 | 2.04 | 0.22 | 0.28 |
| 16330 | 0 | 125389 | EANSSWMDTVIRQNHV<br>VDVSVAVST        | 3.16 | 0.01 | 0.78 | 0.44 | 1.13 | 0.28 |
| 16331 | 0 | 125389 | EANSSWMDTVIRQNHV<br>VDVSVAVST        | 3.16 | 0.01 | 0.78 | 0.44 | 1.13 | 0.28 |
| 16332 | 0 | 98741  | EAPAPQPPAGRELSA                      | 2.71 | 0.01 | 2.14 | 0.68 | 0.22 | 0.28 |
| 16333 | 0 | 274538 | EAPIEATATKTTTAT                      | 2.74 | 0.01 | 1.61 | 0.44 | 0.85 | 1.28 |



|       |   |        |                                       |      |      |      |      |      |      |
|-------|---|--------|---------------------------------------|------|------|------|------|------|------|
| 16334 | 0 | 11155  | EAPKSHSISNNEQLINEL<br>ND              | 2.96 | 0.01 | 4.45 | 2.42 | 0.22 | 0.28 |
| 16335 | 0 | 11155  | EAPKSHSISNNEQLINEL<br>ND              | 2.96 | 0.01 | 4.45 | 2.42 | 0.22 | 1.34 |
| 16336 | 0 | 11155  | EAPKSHSISNNEQLINEL<br>ND              | 2.96 | 0.01 | 4.45 | 2.42 | 0.22 | 1.34 |
| 16337 | 0 | 142410 | EAPNSSRHHLRNGF                        | 2.59 | 0.01 | 2.59 | 0.44 | 0.85 | 0.85 |
| 16338 | 0 | 167493 | EAPNVPLHRS                            | 2.29 | 0.01 | 3.41 | 0.68 | 0.22 | 0.85 |
| 16339 | 0 | 167493 | EAPNVPLHRS                            | 2.29 | 0.01 | 3.41 | 0.68 | 0.22 | 0.85 |
| 16340 | 0 | 167493 | EAPNVPLHRS                            | 2.29 | 0.01 | 3.41 | 0.68 | 0.22 | 0.85 |
| 16341 | 0 | 11160  | EAPPAPKNTLTPLLEE                      | 2.72 | 0.01 | 1.66 | 1.15 | 0.22 | 0.28 |
| 16342 | 0 | 11160  | EAPPAPKNTLTPLLEE                      | 2.72 | 0.01 | 1.66 | 1.15 | 0.22 | 0.28 |
| 16343 | 0 | 133551 | EAPPPTLPPDMAQVTV<br>GPG               | 2.91 | 0.01 | 0.78 | 0.68 | 0.22 | 1.34 |
| 16344 | 0 | 133551 | EAPPPTLPPDMAQVTV<br>GPG               | 2.91 | 0.01 | 0.78 | 0.68 | 0.22 | 1.34 |
| 16345 | 0 | 133062 | EAPRRRSPSP                            | 2.35 | 0.01 | 0.78 | 0.44 | 1.13 | 0.28 |
| 16346 | 0 | 157177 | EAPSKQDKPVEN                          | 2.48 | 0.01 | 3.47 | 2.49 | 0.85 | 0.28 |
| 16347 | 0 | 142411 | EAQKACEKAKKAHA                        | 2.67 | 0.01 | 2.59 | 0.44 | 0.85 | 0.85 |
| 16348 | 0 | 11175  | EAQKAKTKLEEVRLDLD<br>DKTKLKNAKTAEQKAK | 3.51 | 0.01 | 2.94 | 0.68 | 0.22 | 0.28 |
| 16349 | 0 | 11175  | EAQKAKTKLEEVRLDLD<br>DKTKLKNAKTAEQKAK | 3.51 | 0.01 | 2.94 | 0.68 | 0.22 | 1.27 |
| 16350 | 0 | 11175  | EAQKAKTKLEEVRLDLD<br>DKTKLKNAKTAEQKAK | 3.51 | 0.01 | 2.94 | 0.44 | 0.85 | 1.27 |
| 16351 | 0 | 11175  | EAQKAKTKLEEVRLDLD<br>DKTKLKNAKTAEQKAK | 3.51 | 0.01 | 2.94 | 0.44 | 0.85 | 0.28 |
| 16352 | 0 | 11175  | EAQKAKTKLEEVRLDLD<br>DKTKLKNAKTAEQKAK | 3.51 | 0.01 | 2.94 | 0.44 | 0.85 | 0.28 |
| 16353 | 0 | 11175  | EAQKAKTKLEEVRLDLD<br>DKTKLKNAKTAEQKAK | 3.51 | 0.01 | 2.94 | 0.44 | 0.85 | 0.28 |
| 16354 | 0 | 11175  | EAQKAKTKLEEVRLDLD<br>DKTKLKNAKTAEQKAK | 3.51 | 0.01 | 2.94 | 0.44 | 0.85 | 0.28 |
| 16355 | 0 | 11176  | EAQLLAEHARDH                          | 2.51 | 0.01 | 2.69 | 1.20 | 0.22 | 0.28 |
| 16356 | 0 | 178125 | EAQSKRGILTLK                          | 2.45 | 3.50 | 0.78 | 0.44 | 1.13 | 0.28 |
| 16357 | 0 | 147609 | EARHVELCPDFKYPPFC<br>VP               | 2.94 | 0.01 | 0.90 | 1.20 | 0.22 | 0.28 |
| 16358 | 0 | 147609 | EARHVELCPDFKYPPFC<br>VP               | 2.94 | 0.01 | 0.90 | 1.20 | 0.22 | 0.28 |

|       |   |        |                                        |      |      |      |      |      |      |
|-------|---|--------|----------------------------------------|------|------|------|------|------|------|
| 16359 | 0 | 147609 | EARHVELCPDFKYPPFFC<br>VP               | 2.94 | 0.01 | 0.90 | 2.37 | 2.60 | 0.28 |
| 16360 | 0 | 192917 | EARKGADEAALARAEL                       | 2.80 | 0.01 | 1.75 | 3.72 | 0.22 | 0.28 |
| 16361 | 0 | 450503 | EARMHRA                                | 2.04 | 0.01 | 0.90 | 0.44 | 1.41 | 1.39 |
| 16362 | 0 | 11187  | EARQAI                                 | 1.90 | 0.01 | 1.96 | 0.44 | 0.85 | 0.28 |
| 16363 | 0 | 11188  | EASAARLEKERKNALDE<br>VAQLTADLDAE       | 3.31 | 0.01 | 3.78 | 1.81 | 0.22 | 0.85 |
| 16364 | 0 | 81394  | EASGPTHKEIPALT                         | 2.69 | 0.01 | 2.57 | 0.44 | 0.85 | 0.28 |
| 16365 | 0 | 11189  | EASLPYGANKEGIVWVA                      | 2.78 | 0.01 | 2.91 | 0.44 | 0.85 | 0.28 |
| 16366 | 0 | 157178 | EASNCF                                 | 1.88 | 0.01 | 0.78 | 0.44 | 1.93 | 1.28 |
| 16367 | 0 | 157178 | EASNCF                                 | 1.88 | 0.01 | 0.78 | 0.44 | 1.41 | 1.28 |
| 16368 | 0 | 157178 | EASNCF                                 | 1.88 | 0.01 | 0.78 | 0.44 | 1.41 | 1.28 |
| 16369 | 0 | 157179 | EASNCFAIRHFENKFAVE<br>TLICFNL          | 3.17 | 0.01 | 0.90 | 0.44 | 1.93 | 1.28 |
| 16370 | 0 | 157179 | EASNCFAIRHFENKFAVE<br>TLICFNL          | 3.17 | 0.01 | 0.90 | 0.44 | 1.41 | 1.28 |
| 16371 | 0 | 157180 | EASNCFAIRHFENKFAVE<br>TLICFNLFLNSQEKHY | 3.47 | 0.01 | 0.90 | 0.44 | 1.93 | 1.28 |
| 16372 | 0 | 157180 | EASNCFAIRHFENKFAVE<br>TLICFNLFLNSQEKHY | 3.47 | 0.01 | 0.90 | 0.44 | 1.41 | 1.28 |
| 16373 | 0 | 157180 | EASNCFAIRHFENKFAVE<br>TLICFNLFLNSQEKHY | 3.47 | 0.01 | 0.90 | 0.44 | 1.41 | 1.28 |
| 16374 | 0 | 157180 | EASNCFAIRHFENKFAVE<br>TLICFNLFLNSQEKHY | 3.47 | 0.01 | 0.90 | 3.70 | 0.22 | 1.28 |
| 16375 | 0 | 157181 | EASNCFAIRHFENKFAVE<br>TLICS            | 3.08 | 0.01 | 0.78 | 3.70 | 0.22 | 1.28 |
| 16376 | 0 | 157182 | EASNCFAIRHFENKFAVE<br>TLICSRTVKKNIIEEN | 3.48 | 0.01 | 0.90 | 0.44 | 1.93 | 1.28 |
| 16377 | 0 | 157182 | EASNCFAIRHFENKFAVE<br>TLICSRTVKKNIIEEN | 3.48 | 0.01 | 0.90 | 0.44 | 1.41 | 1.28 |
| 16378 | 0 | 157182 | EASNCFAIRHFENKFAVE<br>TLICSRTVKKNIIEEN | 3.48 | 0.01 | 0.90 | 0.44 | 1.41 | 1.28 |
| 16379 | 0 | 157182 | EASNCFAIRHFENKFAVE<br>TLICSRTVKKNIIEEN | 3.48 | 0.01 | 0.90 | 3.70 | 0.22 | 1.28 |
| 16380 | 0 | 157183 | EASNCFAIRHFENKFAVE<br>TLISSRTVKKNIIEEN | 3.47 | 0.01 | 0.90 | 0.44 | 1.93 | 1.28 |

|       |   |        |                                        |      |      |      |      |      |      |
|-------|---|--------|----------------------------------------|------|------|------|------|------|------|
| 16381 | 0 | 157183 | EASNCFAIRHFENKFAVE<br>TLISSRTVKKNIIEEN | 3.47 | 0.01 | 0.90 | 0.44 | 1.41 | 1.28 |
| 16382 | 0 | 157184 | EASNSFAIRHFENKFAVE<br>TLICSRTVKKNIIEEN | 3.48 | 0.01 | 0.90 | 0.44 | 1.41 | 1.28 |
| 16383 | 0 | 157184 | EASNSFAIRHFENKFAVE<br>TLICSRTVKKNIIEEN | 3.48 | 0.01 | 0.90 | 0.44 | 1.41 | 1.28 |
| 16384 | 0 | 134659 | EASPERPSPAFP                           | 2.53 | 0.01 | 0.90 | 1.20 | 0.22 | 0.28 |
| 16385 | 0 | 138841 | EASPQAWWDESQ                           | 2.51 | 0.01 | 2.19 | 1.15 | 2.26 | 0.85 |
| 16386 | 0 | 138841 | EASPQAWWDESQ                           | 2.51 | 0.01 | 2.19 | 1.15 | 2.26 | 0.85 |
| 16387 | 0 | 138841 | EASPQAWWDESQ                           | 2.51 | 0.01 | 2.19 | 1.15 | 2.26 | 0.85 |
| 16388 | 0 | 153821 | EASQAADESERMRK                         | 2.64 | 0.01 | 3.93 | 0.44 | 1.23 | 1.27 |
| 16389 | 0 | 11190  | EASQAADESERMRKV                        | 2.70 | 0.01 | 3.15 | 0.44 | 1.23 | 0.85 |
| 16390 | 0 | 11193  | EASRKGLRRDLASREA<br>K                  | 2.90 | 0.01 | 2.85 | 0.68 | 0.22 | 0.28 |
| 16391 | 0 | 11195  | EASSSDKP                               | 2.12 | 0.01 | 3.45 | 0.44 | 0.85 | 0.28 |
| 16392 | 0 | 11196  | EASSTNKP                               | 2.11 | 0.01 | 3.45 | 0.44 | 0.85 | 0.28 |
| 16393 | 0 | 229981 | EASVDSLTFSVVTGP                        | 2.67 | 0.01 | 0.78 | 0.44 | 1.93 | 1.27 |
| 16394 | 0 | 229981 | EASVDSLTFSVVTGP                        | 2.67 | 0.01 | 0.78 | 0.44 | 1.93 | 0.28 |
| 16395 | 0 | 229981 | EASVDSLTFSVVTGP                        | 2.67 | 0.01 | 0.78 | 0.44 | 2.39 | 0.28 |
| 16396 | 0 | 141873 | EATAESKSALTSVD                         | 2.65 | 0.01 | 2.73 | 0.44 | 0.85 | 0.28 |
| 16397 | 0 | 11199  | EATALDTS                               | 2.14 | 0.01 | 3.06 | 1.12 | 0.22 | 0.28 |
| 16398 | 0 | 274825 | EATAMKNTTATGDSD                        | 2.70 | 0.01 | 1.61 | 0.44 | 0.85 | 1.28 |
| 16399 | 0 | 274826 | EATAMKNTTATTGDS                        | 2.69 | 0.01 | 1.61 | 0.44 | 0.85 | 1.28 |
| 16400 | 0 | 274827 | EATAMKTTAATTGDS                        | 2.70 | 0.01 | 1.61 | 0.44 | 0.85 | 1.28 |
| 16401 | 0 | 274829 | EATAMKTTTATTGDS                        | 2.70 | 0.01 | 1.61 | 0.44 | 0.85 | 1.28 |
| 16402 | 0 | 274830 | EATAMKTTTTTTGDS                        | 2.68 | 0.01 | 1.61 | 0.44 | 0.85 | 1.28 |
| 16403 | 0 | 274835 | EATATKNTTATTGDS                        | 2.70 | 0.01 | 1.61 | 0.44 | 0.85 | 1.28 |
| 16404 | 0 | 274836 | EATATKTTTATTGDS                        | 2.71 | 0.01 | 1.61 | 0.44 | 0.85 | 1.28 |
| 16405 | 0 | 274837 | EATATKTTTATTGNS                        | 2.71 | 0.01 | 1.61 | 0.44 | 0.85 | 1.28 |
| 16406 | 0 | 274838 | EATAVKATTATTGDS                        | 2.70 | 0.01 | 1.61 | 0.44 | 0.85 | 1.28 |
| 16407 | 0 | 274839 | EATAVKATTATTGES                        | 2.73 | 0.01 | 1.61 | 0.44 | 0.85 | 1.28 |
| 16408 | 0 | 195015 | EATKVAEAEKQRAA                         | 2.65 | 0.01 | 2.30 | 0.44 | 0.85 | 0.28 |
| 16409 | 0 | 11203  | EATPAAEAPASEAPAAE<br>AAP               | 3.02 | 0.01 | 4.33 | 0.68 | 0.22 | 0.85 |
| 16410 | 0 | 11203  | EATPAAEAPASEAPAAE<br>AAP               | 3.02 | 0.01 | 4.33 | 0.68 | 0.22 | 0.85 |
| 16411 | 0 | 11203  | EATPAAEAPASEAPAAE<br>AAP               | 3.02 | 0.01 | 4.33 | 0.68 | 0.22 | 0.28 |
| 16412 | 0 | 11203  | EATPAAEAPASEAPAAE<br>AAP               | 3.02 | 0.01 | 4.33 | 0.68 | 0.22 | 0.85 |
| 16413 | 0 | 11204  | EATSGLVMLCIHGSPVN<br>SYTNTPYT          | 3.15 | 0.01 | 2.70 | 0.44 | 0.85 | 0.28 |
| 16414 | 0 | 11204  | EATSGLVMLCIHGSPVN<br>SYTNTPYT          | 3.15 | 0.01 | 2.70 | 0.44 | 0.85 | 0.28 |

|       |   |        |                        |      |      |      |      |      |      |
|-------|---|--------|------------------------|------|------|------|------|------|------|
| 16415 | 0 | 139487 | EAV                    | 1.37 | 0.01 | 0.78 | 0.44 | 1.41 | 0.28 |
| 16416 | 0 | 229146 | EAVAAANQTEVEMENK<br>VV | 2.87 | 0.01 | 2.25 | 0.68 | 0.22 | 0.85 |
| 16417 | 0 | 229146 | EAVAAANQTEVEMENK<br>VV | 2.87 | 0.01 | 2.25 | 0.68 | 0.22 | 1.48 |
| 16418 | 0 | 229146 | EAVAAANQTEVEMENK<br>VV | 2.87 | 0.01 | 2.25 | 0.68 | 0.22 | 1.27 |
| 16419 | 0 | 229146 | EAVAAANQTEVEMENK<br>VV | 2.87 | 0.01 | 2.25 | 0.68 | 0.22 | 0.28 |
| 16420 | 0 | 229146 | EAVAAANQTEVEMENK<br>VV | 2.87 | 0.01 | 2.25 | 0.68 | 0.22 | 1.66 |
| 16421 | 0 | 229146 | EAVAAANQTEVEMENK<br>VV | 2.87 | 0.01 | 2.25 | 0.68 | 0.22 | 1.66 |
| 16422 | 0 | 229146 | EAVAAANQTEVEMENK<br>VV | 2.87 | 0.01 | 2.25 | 0.68 | 0.22 | 1.66 |
| 16423 | 0 | 229146 | EAVAAANQTEVEMENK<br>VV | 2.87 | 0.01 | 2.25 | 0.68 | 0.22 | 1.66 |
| 16424 | 0 | 229146 | EAVAAANQTEVEMENK<br>VV | 2.87 | 0.01 | 2.25 | 0.68 | 0.22 | 1.66 |
| 16425 | 0 | 229146 | EAVAAANQTEVEMENK<br>VV | 2.87 | 0.01 | 2.25 | 0.68 | 0.22 | 1.66 |
| 16426 | 0 | 229146 | EAVAAANQTEVEMENK<br>VV | 2.87 | 0.01 | 2.25 | 0.68 | 0.22 | 3.13 |
| 16427 | 0 | 229146 | EAVAAANQTEVEMENK<br>VV | 2.87 | 0.01 | 2.25 | 0.68 | 0.22 | 3.13 |
| 16428 | 0 | 117467 | EAVAGRGRGRGRGRG        | 2.75 | 4.93 | 0.78 | 0.44 | 1.13 | 0.28 |
| 16429 | 0 | 274952 | EAVEAEKRKAAEATK        | 2.74 | 0.01 | 1.61 | 0.44 | 0.85 | 1.28 |
| 16430 | 0 | 11208  | EAVEAERAGRGTG          | 2.61 | 0.01 | 2.14 | 0.44 | 0.22 | 0.28 |
| 16431 | 0 | 11208  | EAVEAERAGRGTG          | 2.61 | 0.01 | 2.14 | 0.68 | 0.22 | 0.28 |
| 16432 | 0 | 11208  | EAVEAERAGRGTG          | 2.61 | 0.01 | 2.14 | 0.68 | 2.25 | 1.75 |
| 16433 | 0 | 11208  | EAVEAERAGRGTG          | 2.61 | 0.01 | 2.14 | 3.01 | 0.22 | 0.28 |
| 16434 | 0 | 11208  | EAVEAERAGRGTG          | 2.61 | 0.01 | 2.14 | 0.68 | 0.22 | 1.34 |
| 16435 | 0 | 11208  | EAVEAERAGRGTG          | 2.61 | 0.01 | 2.14 | 0.68 | 0.22 | 2.35 |
| 16436 | 0 | 434974 | EAVEKVKRTKDE           | 2.52 | 0.01 | 0.78 | 0.44 | 1.13 | 0.28 |
| 16437 | 0 | 434974 | EAVEKVKRTKDE           | 2.52 | 0.01 | 0.78 | 0.44 | 1.13 | 0.28 |
| 16438 | 0 | 117811 | EAVEKVKRTKDELE         | 2.65 | 0.01 | 0.78 | 0.44 | 1.13 | 0.28 |
| 16439 | 0 | 115718 | EAVESTVATL             | 2.36 | 0.01 | 1.60 | 0.44 | 1.23 | 0.85 |
| 16440 | 0 | 115718 | EAVESTVATL             | 2.36 | 0.01 | 1.60 | 0.44 | 1.23 | 0.85 |
| 16441 | 0 | 11210  | EAVESTVATLED           | 2.52 | 0.01 | 1.60 | 0.44 | 1.23 | 0.85 |
| 16442 | 0 | 274958 | EAVETEKRKAAEATK        | 2.74 | 0.01 | 1.61 | 0.44 | 0.85 | 1.28 |
| 16443 | 0 | 274997 | EAVRRHARAYN            | 2.43 | 0.01 | 3.93 | 3.42 | 1.59 | 1.34 |
| 16444 | 0 | 274997 | EAVRRHARAYN            | 2.43 | 0.01 | 3.93 | 3.42 | 1.59 | 1.34 |
| 16445 | 0 | 274997 | EAVRRHARAYN            | 2.43 | 0.01 | 3.93 | 3.42 | 1.59 | 1.34 |
| 16446 | 0 | 274997 | EAVRRHARAYN            | 2.43 | 0.01 | 3.93 | 3.42 | 1.59 | 1.48 |
| 16447 | 0 | 274997 | EAVRRHARAYN            | 2.43 | 0.01 | 3.93 | 3.42 | 1.59 | 1.48 |
| 16448 | 0 | 274997 | EAVRRHARAYN            | 2.43 | 0.01 | 3.93 | 3.42 | 1.59 | 1.48 |

|       |   |        |                     |      |      |      |      |      |      |
|-------|---|--------|---------------------|------|------|------|------|------|------|
| 16449 | 0 | 274997 | EAVRRHARAYN         | 2.43 | 0.01 | 3.93 | 0.68 | 0.22 | 2.35 |
| 16450 | 0 | 11216  | EAVRRHARAYNATVI     | 2.70 | 0.01 | 3.75 | 0.68 | 0.22 | 0.85 |
| 16451 | 0 | 11216  | EAVRRHARAYNATVI     | 2.70 | 0.01 | 3.75 | 0.68 | 0.22 | 0.85 |
| 16452 | 0 | 11216  | EAVRRHARAYNATVI     | 2.70 | 0.01 | 3.75 | 0.68 | 0.22 | 1.27 |
| 16453 | 0 | 11216  | EAVRRHARAYNATVI     | 2.70 | 0.01 | 3.75 | 1.20 | 0.22 | 0.85 |
| 16454 | 0 | 11216  | EAVRRHARAYNATVI     | 2.70 | 0.01 | 3.75 | 1.20 | 0.22 | 0.85 |
| 16455 | 0 | 11220  | EAWL DSTKAT         | 2.31 | 0.01 | 3.04 | 3.38 | 0.22 | 1.34 |
| 16456 | 0 | 111229 | EAYIFEMFNENQKAG     | 2.69 | 0.01 | 3.20 | 1.12 | 0.22 | 0.85 |
| 16457 | 0 | 178716 | EAYTLFAPLFDPIIE     | 2.70 | 0.01 | 2.36 | 0.44 | 1.23 | 1.28 |
| 16458 | 0 | 175787 | ECAVTCRYDKDADVN     | 2.68 | 0.01 | 2.63 | 1.15 | 0.22 | 0.85 |
|       |   |        | ECAVTCRYDKDADVNV    |      |      |      |      |      |      |
| 16459 | 0 | 11233  | VTQARNRPTTLTGCKKG   | 3.54 | 0.01 | 2.63 | 2.13 | 0.22 | 0.28 |
|       |   |        | KNFS                |      |      |      |      |      |      |
|       |   |        | ECAVTCRYDKDADVNV    |      |      |      |      |      |      |
| 16460 | 0 | 11233  | VTQARNRPTTLTGCKKG   | 3.54 | 0.01 | 2.63 | 2.13 | 0.22 | 0.85 |
|       |   |        | KNFS                |      |      |      |      |      |      |
| 16461 | 0 | 133552 | ECAYCLTI            | 2.12 | 0.01 | 1.60 | 0.68 | 0.22 | 0.28 |
| 16462 | 0 | 94493  | ECCHPACGKH          | 2.33 | 0.01 | 3.22 | 2.37 | 0.22 | 0.28 |
| 16463 | 0 | 94494  | ECCNPACGRH          | 2.31 | 0.01 | 3.22 | 1.20 | 0.22 | 0.28 |
| 16464 | 0 | 11234  | ECCQELQEVDRR        | 2.49 | 0.01 | 3.12 | 0.44 | 1.23 | 0.85 |
| 16465 | 0 | 181299 | ECEEGEIPRRPRPQHPE   | 3.35 | 0.01 | 2.72 | 0.44 | 1.23 | 1.27 |
|       |   |        | REPQQPGEKEE         |      |      |      |      |      |      |
| 16466 | 0 | 79192  | ECEHWGGQSQVQCR      | 2.63 | 0.01 | 0.90 | 0.68 | 0.22 | 1.39 |
| 16467 | 0 | 11240  | ECEVVPGAEDDFVCK     | 2.69 | 0.01 | 4.03 | 4.33 | 0.22 | 0.28 |
| 16468 | 0 | 79193  | ECEWTHNRYTHKCQ      | 2.62 | 0.01 | 0.90 | 0.68 | 0.22 | 1.39 |
| 16469 | 0 | 162096 | ECFDPLVRHCVACGLLR   | 2.79 | 0.01 | 0.90 | 0.44 | 1.41 | 2.49 |
| 16470 | 0 | 162096 | ECFDPLVRHCVACGLLR   | 2.79 | 0.01 | 0.90 | 0.44 | 1.41 | 1.66 |
| 16471 | 0 | 162096 | ECFDPLVRHCVACGLLR   | 2.79 | 0.01 | 0.90 | 0.44 | 1.41 | 1.66 |
| 16472 | 0 | 162096 | ECFDPLVRHCVACGLLR   | 2.79 | 0.01 | 0.90 | 0.44 | 1.41 | 1.34 |
| 16473 | 0 | 162096 | ECFDPLVRHCVACGLLR   | 2.79 | 0.01 | 0.90 | 0.44 | 1.41 | 1.34 |
| 16474 | 0 | 11241  | ECFPWDRKL           | 2.18 | 0.01 | 2.88 | 0.68 | 0.22 | 0.85 |
| 16475 | 0 | 11241  | ECFPWDRKL           | 2.18 | 0.01 | 2.88 | 0.68 | 0.22 | 0.28 |
| 16476 | 0 | 11241  | ECFPWDRKL           | 2.18 | 0.01 | 2.88 | 0.68 | 0.22 | 1.48 |
| 16477 | 0 | 11241  | ECFPWDRKL           | 2.18 | 0.01 | 2.88 | 0.68 | 0.22 | 1.48 |
| 16478 | 0 | 11241  | ECFPWDRKL           | 2.18 | 0.01 | 2.88 | 2.22 | 0.22 | 0.28 |
| 16479 | 0 | 11246  | ECGGTKISK TINKTKNFS | 3.20 | 0.01 | 3.36 | 0.68 | 0.22 | 0.28 |
|       |   |        | QCTKKEQ             |      |      |      |      |      |      |
| 16480 | 0 | 11246  | ECGGTKISK TINKTKNFS | 3.20 | 0.01 | 3.36 | 0.68 | 0.22 | 0.28 |
|       |   |        | QCTKKEQ             |      |      |      |      |      |      |
| 16481 | 0 | 11246  | ECGGTKISK TINKTKNFS | 3.20 | 0.01 | 3.36 | 0.68 | 0.22 | 0.28 |
|       |   |        | QCTKKEQ             |      |      |      |      |      |      |
| 16482 | 0 | 179975 | ECHQEEDFRVTC        | 2.47 | 0.01 | 0.78 | 0.68 | 0.22 | 0.28 |

|       |   |        |                                   |      |      |      |      |      |      |
|-------|---|--------|-----------------------------------|------|------|------|------|------|------|
| 16483 | 0 | 179975 | ECHQEEDFRVTC                      | 2.47 | 0.01 | 0.78 | 0.68 | 0.22 | 2.12 |
| 16484 | 0 | 122742 | ECHQEEDFRVTCKDIQRI<br>PS          | 2.93 | 0.01 | 0.78 | 3.01 | 0.22 | 1.27 |
| 16485 | 0 | 122742 | ECHQEEDFRVTCKDIQRI<br>PS          | 2.93 | 0.01 | 0.78 | 3.01 | 0.22 | 0.28 |
| 16486 | 0 | 122742 | ECHQEEDFRVTCKDIQRI<br>PS          | 2.93 | 0.01 | 0.78 | 3.01 | 0.22 | 1.27 |
| 16487 | 0 | 111230 | ECISMDYKQTQLCLI                   | 2.66 | 0.01 | 1.86 | 0.68 | 0.22 | 0.28 |
| 16488 | 0 | 118314 | ECISQVGKGGGSVCAV                  | 2.75 | 0.01 | 0.78 | 0.44 | 1.13 | 0.28 |
| 16489 | 0 | 118314 | ECISQVGKGGGSVCAV                  | 2.75 | 0.01 | 0.78 | 0.44 | 1.13 | 0.28 |
| 16490 | 0 | 130473 | ECIVYGKTALCT                      | 2.45 | 0.01 | 0.90 | 0.68 | 0.22 | 1.27 |
| 16491 | 0 | 130473 | ECIVYGKTALCT                      | 2.45 | 0.01 | 0.90 | 0.68 | 0.22 | 1.27 |
| 16492 | 0 | 130473 | ECIVYGKTALCT                      | 2.45 | 0.01 | 0.90 | 0.68 | 0.22 | 1.34 |
| 16493 | 0 | 11252  | ECKCLLNYKQEGDKC<br>VE<br>NPNPTCNE | 3.18 | 0.01 | 3.57 | 0.44 | 0.85 | 0.28 |
| 16494 | 0 | 114784 | ECKETVPMNC                        | 2.32 | 0.01 | 2.25 | 0.44 | 1.23 | 0.85 |
| 16495 | 0 | 11253  | ECKETVPMNCSSYA                    | 2.59 | 0.01 | 2.25 | 0.44 | 1.23 | 1.27 |
| 16496 | 0 | 11253  | ECKETVPMNCSSYA                    | 2.59 | 0.01 | 2.25 | 1.12 | 0.22 | 1.27 |
| 16497 | 0 | 230219 | ECKETVPMNCSSYANTT<br>SED          | 2.94 | 0.01 | 2.25 | 0.44 | 1.23 | 0.28 |
| 16498 | 0 | 114785 | ECLLCAHKVE                        | 2.33 | 0.01 | 2.25 | 0.44 | 1.23 | 0.85 |
| 16499 | 0 | 114785 | ECLLCAHKVE                        | 2.33 | 0.01 | 2.25 | 0.44 | 1.23 | 0.85 |
| 16500 | 0 | 130474 | ECLLLSKYCMPS                      | 2.47 | 0.01 | 0.90 | 0.68 | 0.22 | 0.28 |
| 16501 | 0 | 130474 | ECLLLSKYCMPS                      | 2.47 | 0.01 | 0.90 | 0.68 | 0.22 | 1.34 |
| 16502 | 0 | 130474 | ECLLLSKYCMPS                      | 2.47 | 0.01 | 0.90 | 0.68 | 0.22 | 1.27 |
| 16503 | 0 | 130474 | ECLLLSKYCMPS                      | 2.47 | 0.01 | 0.90 | 0.68 | 0.22 | 0.28 |
| 16504 | 0 | 130474 | ECLLLSKYCMPS                      | 2.47 | 0.01 | 0.90 | 0.68 | 0.22 | 0.28 |
| 16505 | 0 | 130474 | ECLLLSKYCMPS                      | 2.47 | 0.01 | 0.90 | 0.68 | 0.22 | 1.34 |
| 16506 | 0 | 170701 | ECLNRLSLDLEKEIE                   | 2.71 | 0.01 | 0.78 | 0.44 | 1.41 | 0.28 |
| 16507 | 0 | 135660 | ECPEGYILDDGFICTDIDE               | 2.93 | 0.01 | 0.78 | 2.84 | 1.41 | 1.27 |
| 16508 | 0 | 135660 | ECPEGYILDDGFICTDIDE               | 2.93 | 0.01 | 0.78 | 2.84 | 1.41 | 0.28 |
| 16509 | 0 | 135660 | ECPEGYILDDGFICTDIDE               | 2.93 | 0.01 | 0.78 | 2.84 | 1.41 | 0.28 |
| 16510 | 0 | 135660 | ECPEGYILDDGFICTDIDE               | 2.93 | 0.01 | 0.78 | 2.84 | 1.41 | 0.28 |
| 16511 | 0 | 135660 | ECPEGYILDDGFICTDIDE               | 2.93 | 0.01 | 0.78 | 2.84 | 1.41 | 0.28 |
| 16512 | 0 | 135660 | ECPEGYILDDGFICTDIDE               | 2.93 | 0.01 | 0.78 | 2.84 | 1.41 | 1.27 |
| 16513 | 0 | 135660 | ECPEGYILDDGFICTDIDE               | 2.93 | 0.01 | 0.78 | 2.84 | 1.41 | 1.27 |
| 16514 | 0 | 135660 | ECPEGYILDDGFICTDIDE               | 2.93 | 0.01 | 0.78 | 2.84 | 1.41 | 0.28 |

|       |   |        |                                |      |      |      |      |      |      |
|-------|---|--------|--------------------------------|------|------|------|------|------|------|
| 16515 | 0 | 135660 | ECPEGYILDDGFICTDIDE            | 2.93 | 0.01 | 0.78 | 2.84 | 1.41 | 0.28 |
| 16516 | 0 | 135660 | ECPEGYILDDGFICTDIDE            | 2.93 | 0.01 | 0.78 | 2.84 | 1.41 | 0.28 |
| 16517 | 0 | 135660 | ECPEGYILDDGFICTDIDE            | 2.93 | 0.01 | 0.78 | 2.84 | 1.41 | 0.28 |
| 16518 | 0 | 237691 | ECPLERRKTGVFTVAEFG             | 2.85 | 0.01 | 3.19 | 0.44 | 1.59 | 0.85 |
| 16519 | 0 | 237691 | ECPLERRKTGVFTVAEFG             | 2.85 | 0.01 | 3.19 | 0.44 | 0.85 | 0.85 |
| 16520 | 0 | 237691 | ECPLERRKTGVFTVAEFG             | 2.85 | 0.01 | 3.19 | 0.44 | 0.85 | 0.85 |
| 16521 | 0 | 237691 | ECPLERRKTGVFTVAEFG             | 2.85 | 0.01 | 3.19 | 0.44 | 0.22 | 0.85 |
| 16522 | 0 | 79194  | ECQSTSIGLFRCT                  | 2.59 | 0.01 | 0.90 | 0.68 | 0.22 | 1.39 |
| 16523 | 0 | 131295 | ECQEATLMVMVSKDLF<br>GTGK       | 2.94 | 0.01 | 0.78 | 3.78 | 0.22 | 0.28 |
| 16524 | 0 | 131295 | ECQEATLMVMVSKDLF<br>GTGK       | 2.94 | 0.01 | 0.78 | 3.78 | 0.22 | 0.28 |
| 16525 | 0 | 131295 | ECQEATLMVMVSKDLF<br>GTGK       | 2.94 | 0.01 | 0.78 | 3.78 | 0.22 | 3.16 |
| 16526 | 0 | 131295 | ECQEATLMVMVSKDLF<br>GTGK       | 2.94 | 0.01 | 0.78 | 3.78 | 0.22 | 1.48 |
| 16527 | 0 | 99172  | ECRNAM                         | 1.88 | 0.01 | 2.86 | 2.02 | 0.85 | 0.85 |
| 16528 | 0 | 11262  | ECRYSRNAVPNLRGDLQ<br>VLAQKVART | 3.18 | 0.01 | 3.63 | 0.68 | 0.22 | 1.34 |
| 16529 | 0 | 11262  | ECRYSRNAVPNLRGDLQ<br>VLAQKVART | 3.18 | 0.01 | 3.63 | 0.68 | 0.22 | 1.34 |
| 16530 | 0 | 11262  | ECRYSRNAVPNLRGDLQ<br>VLAQKVART | 3.18 | 0.01 | 3.63 | 2.37 | 0.22 | 1.34 |
| 16531 | 0 | 11262  | ECRYSRNAVPNLRGDLQ<br>VLAQKVART | 3.18 | 0.01 | 3.63 | 2.37 | 0.22 | 1.34 |
| 16532 | 0 | 11263  | ECSVRT                         | 1.88 | 0.01 | 2.40 | 0.44 | 0.85 | 0.28 |
| 16533 | 0 | 11264  | ECSQAAPYI                      | 2.20 | 0.01 | 2.59 | 0.44 | 0.85 | 0.28 |
| 16534 | 0 | 11265  | ECSQHLPYI                      | 2.18 | 0.01 | 2.41 | 0.44 | 0.85 | 0.28 |
| 16535 | 0 | 11269  | ECTGLAWEWWR                    | 2.41 | 0.01 | 3.55 | 0.68 | 0.22 | 0.28 |
| 16536 | 0 | 11269  | ECTGLAWEWWR                    | 2.41 | 0.01 | 3.55 | 0.68 | 0.22 | 0.28 |
| 16537 | 0 | 11270  | ECTGLAWEWWRT                   | 2.49 | 0.01 | 2.70 | 0.68 | 0.22 | 1.27 |
| 16538 | 0 | 11270  | ECTGLAWEWWRT                   | 2.49 | 0.01 | 2.70 | 0.68 | 0.22 | 0.85 |
| 16539 | 0 | 11270  | ECTGLAWEWWRT                   | 2.49 | 0.01 | 2.70 | 0.68 | 0.22 | 0.85 |
| 16540 | 0 | 11270  | ECTGLAWEWWRT                   | 2.49 | 0.01 | 2.70 | 0.68 | 0.22 | 0.85 |
| 16541 | 0 | 11270  | ECTGLAWEWWRT                   | 2.49 | 0.01 | 2.70 | 0.68 | 0.22 | 0.85 |
| 16542 | 0 | 11270  | ECTGLAWEWWRT                   | 2.49 | 0.01 | 2.70 | 0.68 | 0.22 | 1.34 |
| 16543 | 0 | 11270  | ECTGLAWEWWRT                   | 2.49 | 0.01 | 2.70 | 0.68 | 0.22 | 1.34 |
| 16544 | 0 | 11270  | ECTGLAWEWWRT                   | 2.49 | 0.01 | 2.70 | 0.68 | 0.22 | 1.34 |
| 16545 | 0 | 11273  | ECTLKKGSSGYCAWP                | 2.64 | 0.01 | 2.56 | 1.20 | 0.22 | 0.85 |
| 16546 | 0 | 11273  | ECTLKKGSSGYCAWP                | 2.64 | 0.01 | 2.56 | 1.20 | 0.22 | 0.85 |

|       |   |        |                                    |      |      |      |      |      |      |
|-------|---|--------|------------------------------------|------|------|------|------|------|------|
| 16547 | 0 | 11273  | ECTLKKGSSGYCAWP                    | 2.64 | 0.01 | 2.56 | 2.00 | 0.22 | 0.85 |
| 16548 | 0 | 11273  | ECTLKKGSSGYCAWP                    | 2.64 | 0.01 | 2.56 | 2.02 | 0.22 | 0.85 |
| 16549 | 0 | 11273  | ECTLKKGSSGYCAWP                    | 2.64 | 0.01 | 2.56 | 1.20 | 0.22 | 0.85 |
| 16550 | 0 | 118315 | ECVANSVVILQNNF                     | 2.67 | 0.01 | 3.78 | 0.44 | 1.13 | 0.85 |
| 16551 | 0 | 11275  | ECWKNAYFDK                         | 2.29 | 0.01 | 3.30 | 0.68 | 0.22 | 0.28 |
| 16552 | 0 | 192920 | EDAEGRLMEARKGADE                   | 2.79 | 0.01 | 1.75 | 3.72 | 0.22 | 0.28 |
| 16553 | 0 | 11283  | EDAEVAGTQWFTPSGK<br>SGC            | 2.88 | 0.01 | 0.90 | 2.63 | 0.22 | 1.48 |
| 16554 | 0 | 11285  | EDAILKGGHYDNQLQN<br>GIKRVKEFLESSPN | 3.32 | 0.01 | 3.21 | 3.14 | 0.22 | 0.28 |
| 16555 | 0 | 11285  | EDAILKGGHYDNQLQN<br>GIKRVKEFLESSPN | 3.32 | 0.01 | 3.21 | 3.14 | 0.22 | 0.28 |
| 16556 | 0 | 11285  | EDAILKGGHYDNQLQN<br>GIKRVKEFLESSPN | 3.32 | 0.01 | 3.21 | 3.14 | 0.22 | 0.28 |
| 16557 | 0 | 137143 | EDAKCERGKLFANCK                    | 2.75 | 0.01 | 3.19 | 0.44 | 1.23 | 0.28 |
| 16558 | 0 | 11286  | EDAKELLESSDQILR                    | 2.69 | 0.01 | 2.43 | 0.44 | 1.59 | 0.28 |
| 16559 | 0 | 135661 | EDAKPGQF                           | 2.10 | 0.01 | 0.78 | 0.44 | 2.35 | 0.28 |
| 16560 | 0 | 11288  | EDAMGQGQNSADPKV<br>YP              | 2.78 | 0.01 | 2.45 | 1.12 | 0.22 | 2.92 |
| 16561 | 0 | 132245 | EDAVSGPNTSG                        | 2.39 | 0.01 | 3.89 | 1.12 | 0.22 | 0.28 |
| 16562 | 0 | 275273 | EDDADGDEEDYDVVD                    | 2.73 | 0.01 | 1.61 | 0.44 | 0.85 | 1.28 |
| 16563 | 0 | 96207  | EDDAEDKDED                         | 2.38 | 0.01 | 0.90 | 0.44 | 1.93 | 0.85 |
| 16564 | 0 | 11292  | EDDDDDDDDEKNIFTPIKK<br>PG          | 2.95 | 0.01 | 2.76 | 0.44 | 1.59 | 0.28 |
| 16565 | 0 | 275282 | EDDDDDDDDEPEEGSK                   | 2.71 | 0.01 | 1.61 | 0.44 | 0.85 | 1.28 |
| 16566 | 0 | 275283 | EDDDDDDDNDNDADGE                   | 2.73 | 0.01 | 1.61 | 0.44 | 0.85 | 1.28 |
| 16567 | 0 | 79535  | EDDDDDDFGMGALF                     | 2.56 | 0.01 | 2.30 | 0.44 | 0.85 | 1.27 |
| 16568 | 0 | 79535  | EDDDDDDFGMGALF                     | 2.56 | 0.01 | 2.30 | 1.15 | 0.22 | 1.27 |
| 16569 | 0 | 79535  | EDDDDDDFGMGALF                     | 2.56 | 0.01 | 2.30 | 0.68 | 0.22 | 0.28 |
| 16570 | 0 | 79535  | EDDDDDDFGMGALF                     | 2.56 | 0.01 | 2.30 | 0.68 | 0.22 | 1.27 |
| 16571 | 0 | 275284 | EDDDDEEDDSDEAEA                    | 2.75 | 0.01 | 1.61 | 0.44 | 0.85 | 1.28 |
| 16572 | 0 | 275288 | EDDDEDEEENEEDAE                    | 2.75 | 0.01 | 1.61 | 0.44 | 0.85 | 1.28 |
| 16573 | 0 | 275289 | EDDDGDNDADDVCRF                    | 2.68 | 0.01 | 1.61 | 0.44 | 0.85 | 1.28 |
| 16574 | 0 | 119823 | EDDDMGFGLFD                        | 2.43 | 0.01 | 2.30 | 0.44 | 1.13 | 0.28 |
| 16575 | 0 | 119823 | EDDDMGFGLFD                        | 2.43 | 0.01 | 2.30 | 0.44 | 0.85 | 0.28 |
| 16576 | 0 | 119823 | EDDDMGFGLFD                        | 2.43 | 0.01 | 2.30 | 0.44 | 0.85 | 1.27 |
| 16577 | 0 | 119823 | EDDDMGFGLFD                        | 2.43 | 0.01 | 2.30 | 0.44 | 1.13 | 1.27 |
| 16578 | 0 | 275292 | EDDEEDKDDDVKDEE                    | 2.74 | 0.01 | 1.61 | 0.44 | 0.85 | 1.28 |
| 16579 | 0 | 275293 | EDDEEEEEEEEEKE                     | 2.75 | 0.01 | 1.61 | 0.44 | 0.85 | 1.28 |
| 16580 | 0 | 275294 | EDDEENDEEEDGSEE                    | 2.74 | 0.01 | 1.61 | 0.44 | 0.85 | 1.28 |
| 16581 | 0 | 150801 | EDDF                               | 1.59 | 0.01 | 2.19 | 0.44 | 1.13 | 1.34 |
| 16582 | 0 | 150801 | EDDF                               | 1.59 | 0.01 | 2.19 | 0.44 | 1.13 | 1.57 |



|       |   |        |                                     |      |      |      |      |      |      |
|-------|---|--------|-------------------------------------|------|------|------|------|------|------|
| 16583 | 0 | 170706 | EDDLFDRNLNTGILNK                    | 2.68 | 0.01 | 0.78 | 0.44 | 1.13 | 0.28 |
| 16584 | 0 | 167494 | EDDSDDDGSTPSDVIEF<br>RSDAESSDGEDFIV | 3.44 | 0.01 | 3.41 | 1.12 | 0.22 | 0.85 |
| 16585 | 0 | 167494 | EDDSDDDGSTPSDVIEF<br>RSDAESSDGEDFIV | 3.44 | 0.01 | 3.41 | 1.12 | 0.22 | 0.85 |
| 16586 | 0 | 11302  | EDDSKDDMEFKASPS                     | 2.71 | 0.01 | 1.66 | 1.15 | 0.22 | 0.28 |
| 16587 | 0 | 11302  | EDDSKDDMEFKASPS                     | 2.71 | 0.01 | 1.66 | 1.15 | 0.22 | 0.28 |
| 16588 | 0 | 275366 | EDEDDDDDDNDNDAD                     | 2.74 | 0.01 | 1.61 | 0.44 | 0.85 | 1.28 |
| 16589 | 0 | 275367 | EDEDEEEEEEEEE                       | 2.72 | 0.01 | 1.61 | 0.44 | 0.85 | 1.28 |
| 16590 | 0 | 99173  | EDEDEEEEGSNREVR                     | 2.72 | 0.01 | 2.16 | 0.44 | 1.23 | 1.48 |
| 16591 | 0 | 275371 | EDEDEEEMDDDEVQP                     | 2.73 | 0.01 | 1.61 | 0.44 | 0.85 | 1.28 |
| 16592 | 0 | 96208  | EDEEDEEDKE                          | 2.38 | 0.01 | 0.78 | 0.44 | 1.93 | 0.85 |
| 16593 | 0 | 275383 | EDEEEDDADGDEEDY                     | 2.74 | 0.01 | 1.61 | 0.44 | 0.85 | 1.28 |
| 16594 | 0 | 275385 | EDEEEDDEEEDYE                       | 2.75 | 0.01 | 1.61 | 0.44 | 0.85 | 1.28 |
| 16595 | 0 | 275388 | EDEEEEEDEEEDE                       | 2.74 | 0.01 | 1.61 | 0.44 | 0.85 | 1.28 |
| 16596 | 0 | 275389 | EDEEEEEDEEEGEE                      | 2.73 | 0.01 | 1.61 | 0.44 | 0.85 | 1.28 |
| 16597 | 0 | 275399 | EDEEEMDDDEVQPMK                     | 2.71 | 0.01 | 1.61 | 0.44 | 0.85 | 1.28 |
| 16598 | 0 | 423264 | EDEEGGEKGGDDPGR                     | 2.74 | 0.01 | 2.51 | 0.44 | 2.35 | 1.28 |
| 16599 | 0 | 514206 | EDEEGHAHEHRDKDD                     | 2.72 | 0.01 | 2.24 | 0.44 | 1.41 | 1.28 |
| 16600 | 0 | 110824 | EDEIDGPAGQAEPDRAH<br>YNI            | 2.97 | 0.01 | 1.86 | 0.68 | 0.22 | 0.85 |
| 16601 | 0 | 110824 | EDEIDGPAGQAEPDRAH<br>YNI            | 2.97 | 0.01 | 1.86 | 4.93 | 0.22 | 0.85 |
| 16602 | 0 | 110824 | EDEIDGPAGQAEPDRAH<br>YNI            | 2.97 | 0.01 | 1.86 | 1.81 | 0.22 | 0.28 |
| 16603 | 0 | 110824 | EDEIDGPAGQAEPDRAH<br>YNI            | 2.97 | 0.01 | 1.86 | 1.81 | 0.22 | 0.28 |
| 16604 | 0 | 110824 | EDEIDGPAGQAEPDRAH<br>YNI            | 2.97 | 0.01 | 1.86 | 1.81 | 0.22 | 0.28 |
| 16605 | 0 | 110824 | EDEIDGPAGQAEPDRAH<br>YNI            | 2.97 | 0.01 | 1.86 | 3.22 | 0.22 | 0.28 |
| 16606 | 0 | 110824 | EDEIDGPAGQAEPDRAH<br>YNI            | 2.97 | 0.01 | 1.86 | 3.38 | 0.22 | 0.28 |
| 16607 | 0 | 275432 | EDEKEDNDDDDDDPEP                    | 2.72 | 0.01 | 1.61 | 0.44 | 0.85 | 1.28 |
| 16608 | 0 | 103130 | EDEMKEGRYEVRAEL                     | 2.69 | 0.01 | 2.04 | 0.44 | 0.85 | 1.28 |
| 16609 | 0 | 11309  | EDENTLQHAYPID                       | 2.52 | 0.01 | 1.66 | 1.15 | 0.22 | 1.27 |
| 16610 | 0 | 11309  | EDENTLQHAYPID                       | 2.52 | 0.01 | 1.66 | 1.15 | 0.22 | 0.28 |
| 16611 | 0 | 11313  | EDERTLTK                            | 2.15 | 0.01 | 3.18 | 1.12 | 0.22 | 0.28 |
| 16612 | 0 | 240981 | EDEVSR                              | 1.91 | 0.01 | 3.35 | 1.20 | 0.22 | 0.85 |
| 16613 | 0 | 240982 | EDEVSR                              | 2.17 | 0.01 | 3.35 | 2.37 | 0.22 | 0.85 |
| 16614 | 0 | 11317  | EDEVVSSDFVG                         | 2.44 | 0.01 | 3.10 | 1.12 | 0.22 | 0.85 |
| 16615 | 0 | 11317  | EDEVVSSDFVG                         | 2.44 | 0.01 | 3.10 | 0.44 | 1.74 | 0.28 |
| 16616 | 0 | 99174  | EDEYEYDEEDRRRGR                     | 2.74 | 0.01 | 2.16 | 0.44 | 1.23 | 1.48 |
| 16617 | 0 | 99174  | EDEYEYDEEDRRRGR                     | 2.74 | 0.01 | 2.16 | 0.44 | 1.23 | 1.48 |
| 16618 | 0 | 423265 | EDFAHQCLQAACKRP                     | 2.64 | 0.01 | 2.51 | 0.44 | 2.35 | 1.28 |

|       |   |        |                               |      |      |      |      |      |      |
|-------|---|--------|-------------------------------|------|------|------|------|------|------|
| 16619 | 0 | 130787 | EDFDIYDEDE                    | 2.37 | 0.01 | 0.78 | 1.15 | 0.22 | 1.34 |
| 16620 | 0 | 130787 | EDFDIYDEDE                    | 2.37 | 0.01 | 0.78 | 1.15 | 0.22 | 0.28 |
| 16621 | 0 | 130787 | EDFDIYDEDE                    | 2.37 | 0.01 | 0.78 | 1.15 | 0.22 | 1.27 |
| 16622 | 0 | 130787 | EDFDIYDEDE                    | 2.37 | 0.01 | 0.78 | 1.15 | 0.22 | 1.39 |
| 16623 | 0 | 130787 | EDFDIYDEDE                    | 2.37 | 0.01 | 0.78 | 1.15 | 0.22 | 1.34 |
| 16624 | 0 | 130787 | EDFDIYDEDE                    | 2.37 | 0.01 | 0.78 | 1.15 | 0.22 | 1.34 |
| 16625 | 0 | 130787 | EDFDIYDEDE                    | 2.37 | 0.01 | 0.78 | 1.15 | 0.22 | 0.28 |
| 16626 | 0 | 132798 | EDFDIYDEDENQSP                | 2.64 | 0.01 | 0.78 | 0.68 | 0.22 | 1.39 |
| 16627 | 0 | 137393 | EDFESCDSITGMNLEA              | 2.72 | 0.01 | 0.78 | 1.20 | 0.22 | 0.28 |
| 16628 | 0 | 137393 | EDFESCDSITGMNLEA              | 2.72 | 0.01 | 0.78 | 1.20 | 0.22 | 0.28 |
| 16629 | 0 | 149033 | EDFRFESSLSINDHA               | 2.69 | 0.01 | 0.90 | 2.36 | 0.22 | 1.39 |
| 16630 | 0 | 11328  | EDGAGNQPGANGAGN<br>QPG        | 2.91 | 0.01 | 2.59 | 0.44 | 0.85 | 0.28 |
| 16631 | 0 | 11328  | EDGAGNQPGANGAGN<br>QPG        | 2.91 | 0.01 | 2.59 | 3.05 | 0.85 | 0.28 |
| 16632 | 0 | 275511 | EDGDNEDEEVEDEAK               | 2.73 | 0.01 | 1.61 | 0.44 | 0.85 | 1.28 |
| 16633 | 0 | 11330  | EDGEKRIPLD                    | 2.32 | 0.01 | 2.04 | 0.68 | 0.22 | 0.28 |
| 16634 | 0 | 11330  | EDGEKRIPLD                    | 2.32 | 0.01 | 2.04 | 0.68 | 0.22 | 0.28 |
| 16635 | 0 | 275544 | EDGIEQVEEEEEED                | 2.71 | 0.01 | 1.61 | 0.44 | 0.85 | 1.28 |
| 16636 | 0 | 229148 | EDGKAAQKKYE                   | 2.42 | 0.01 | 2.70 | 0.68 | 0.22 | 0.28 |
| 16637 | 0 | 229148 | EDGKAAQKKYE                   | 2.42 | 0.01 | 2.70 | 0.68 | 0.22 | 0.28 |
| 16638 | 0 | 11335  | EDGKERNVLIFDLGGGT<br>FDVT     | 3.00 | 0.01 | 2.30 | 0.44 | 0.85 | 0.28 |
| 16639 | 0 | 114786 | EDGKVMVLCN                    | 2.29 | 0.01 | 2.25 | 0.44 | 1.23 | 0.85 |
| 16640 | 0 | 114786 | EDGKVMVLCN                    | 2.29 | 0.01 | 2.25 | 0.44 | 1.23 | 0.85 |
| 16641 | 0 | 230220 | EDGKVMVLCNRAFNPV<br>CGTD      | 2.91 | 0.01 | 2.25 | 0.44 | 1.23 | 0.28 |
| 16642 | 0 | 11338  | EDGNHGHGTHCSGTIAG<br>KKFGVAK  | 3.08 | 0.01 | 3.28 | 0.44 | 1.23 | 0.85 |
| 16643 | 0 | 462316 | EDGTQ                         | 1.74 | 0.01 | 0.78 | 1.12 | 0.22 | 1.28 |
| 16644 | 0 | 275596 | EDGVDSREQDGEVTT               | 2.70 | 0.01 | 1.61 | 0.44 | 0.85 | 1.28 |
| 16645 | 0 | 11341  | EDGVNYATGNLPGCSFS<br>IFLLALLS | 3.14 | 0.01 | 1.72 | 0.44 | 0.85 | 0.28 |
| 16646 | 0 | 11341  | EDGVNYATGNLPGCSFS<br>IFLLALLS | 3.14 | 0.01 | 1.72 | 0.44 | 0.85 | 0.28 |
| 16647 | 0 | 106375 | EDHAGTYGLGDRK                 | 2.54 | 4.45 | 0.78 | 0.68 | 0.22 | 0.28 |
| 16648 | 0 | 106375 | EDHAGTYGLGDRK                 | 2.54 | 4.45 | 0.78 | 0.68 | 0.22 | 0.28 |
| 16649 | 0 | 106375 | EDHAGTYGLGDRK                 | 2.54 | 4.45 | 0.78 | 0.68 | 0.22 | 0.85 |
| 16650 | 0 | 106374 | EDHAGTYGLGDRK                 | 2.54 | 4.63 | 0.78 | 1.12 | 0.22 | 0.28 |
| 16651 | 0 | 106374 | EDHAGTYGLGDRK                 | 2.54 | 4.63 | 0.78 | 1.15 | 0.22 | 2.51 |
| 16652 | 0 | 275602 | EDHEKQHQSDETQVQ               | 2.72 | 0.01 | 1.61 | 0.44 | 0.85 | 1.28 |
| 16653 | 0 | 275603 | EDHEKQQQSDEAQFQ               | 2.71 | 0.01 | 1.61 | 0.44 | 0.85 | 1.28 |
| 16654 | 0 | 275604 | EDHEKQQQSDEAQVQ               | 2.71 | 0.01 | 1.61 | 0.44 | 0.85 | 1.28 |

|       |   |        |                                          |      |      |      |      |      |      |
|-------|---|--------|------------------------------------------|------|------|------|------|------|------|
| 16655 | 0 | 275605 | EDHEKQQQSDETQVQ                          | 2.71 | 0.01 | 1.61 | 0.44 | 0.85 | 1.28 |
| 16656 | 0 | 187314 | EDHKIMASENSSAMV                          | 2.68 | 0.01 | 2.97 | 0.44 | 1.59 | 0.28 |
| 16657 | 0 | 187314 | EDHKIMASENSSAMV                          | 2.68 | 0.01 | 2.97 | 0.44 | 0.85 | 0.28 |
| 16658 | 0 | 137394 | EDHRQVVE                                 | 2.14 | 0.01 | 0.78 | 2.04 | 0.22 | 1.57 |
| 16659 | 0 | 119563 | EDHRQVVEVTVGLQLI                         | 2.75 | 0.01 | 0.78 | 1.15 | 0.22 | 1.57 |
| 16660 | 0 | 119563 | EDHRQVVEVTVGLQLI                         | 2.75 | 0.01 | 0.78 | 0.44 | 1.13 | 1.57 |
| 16661 | 0 | 119563 | EDHRQVVEVTVGLQLI                         | 2.75 | 0.01 | 0.78 | 0.44 | 1.41 | 1.57 |
| 16662 | 0 | 11348  | EDIKQMEAES                               | 2.32 | 0.01 | 1.60 | 0.44 | 1.23 | 0.28 |
| 16663 | 0 | 11353  | EDINGIRRPK                               | 2.30 | 0.01 | 2.56 | 0.68 | 0.22 | 0.28 |
| 16664 | 0 | 11353  | EDINGIRRPK                               | 2.30 | 0.01 | 2.56 | 0.68 | 0.22 | 0.28 |
| 16665 | 0 | 11353  | EDINGIRRPK                               | 2.30 | 0.01 | 3.41 | 0.68 | 0.22 | 0.28 |
| 16666 | 0 | 11354  | EDINGIRRPKHLYV                           | 2.56 | 0.01 | 2.56 | 2.69 | 0.22 | 0.28 |
| 16667 | 0 | 11354  | EDINGIRRPKHLYV                           | 2.56 | 0.01 | 2.56 | 0.44 | 0.85 | 0.28 |
| 16668 | 0 | 11354  | EDINGIRRPKHLYV                           | 2.56 | 0.01 | 3.16 | 2.69 | 0.22 | 0.28 |
| 16669 | 0 | 11354  | EDINGIRRPKHLYV                           | 2.56 | 0.01 | 3.16 | 2.69 | 0.22 | 0.28 |
| 16670 | 0 | 11356  | EDIPHVNEFSAIDLFECN                       | 2.84 | 0.01 | 1.66 | 0.44 | 1.74 | 0.28 |
| 16671 | 0 | 149034 | EDIPQPPVSQFHIQGGQV<br>YCDTCRAGFITELSEFIP | 3.49 | 0.01 | 2.88 | 1.12 | 0.22 | 0.28 |
| 16672 | 0 | 149034 | EDIPQPPVSQFHIQGGQV<br>YCDTCRAGFITELSEFIP | 3.49 | 0.01 | 2.88 | 1.12 | 0.22 | 0.85 |
| 16673 | 0 | 149034 | EDIPQPPVSQFHIQGGQV<br>YCDTCRAGFITELSEFIP | 3.49 | 0.01 | 2.88 | 0.44 | 1.23 | 2.35 |
| 16674 | 0 | 131217 | EDISAYLL                                 | 2.09 | 0.01 | 0.78 | 0.68 | 0.22 | 1.66 |
| 16675 | 0 | 131217 | EDISAYLL                                 | 2.09 | 0.01 | 0.78 | 0.68 | 0.22 | 1.34 |
| 16676 | 0 | 131217 | EDISAYLL                                 | 2.09 | 0.01 | 0.78 | 0.68 | 0.22 | 1.27 |
| 16677 | 0 | 131217 | EDISAYLL                                 | 2.09 | 0.01 | 0.78 | 0.68 | 0.22 | 0.85 |
| 16678 | 0 | 131217 | EDISAYLL                                 | 2.09 | 0.01 | 0.78 | 0.68 | 0.22 | 1.27 |
| 16679 | 0 | 11362  | EDKAWL                                   | 1.88 | 0.01 | 2.40 | 0.44 | 0.85 | 0.28 |
| 16680 | 0 | 275651 | EDKDDDDVKDEEEEEE                         | 2.72 | 0.01 | 1.61 | 0.44 | 0.85 | 1.28 |
| 16681 | 0 | 96209  | EDKDEDEEDE                               | 2.38 | 0.01 | 0.78 | 0.44 | 1.93 | 0.85 |
| 16682 | 0 | 275657 | EDKEEDDADGDEEDY                          | 2.74 | 0.01 | 1.61 | 0.44 | 0.85 | 1.28 |
| 16683 | 0 | 96210  | EDKEEDEEED                               | 2.37 | 0.01 | 0.78 | 0.44 | 1.93 | 0.85 |
| 16684 | 0 | 275659 | EDKEEEEDDDDDDE                           | 2.74 | 0.01 | 1.61 | 0.44 | 0.85 | 1.28 |
| 16685 | 0 | 187789 | EDKGAIIVTKGGLSVI                         | 2.74 | 0.01 | 2.72 | 2.13 | 2.39 | 0.85 |
| 16686 | 0 | 167495 | EDKGPQDPQA                               | 2.33 | 0.01 | 0.78 | 0.44 | 1.13 | 0.85 |
| 16687 | 0 | 128494 | EDKINALIKAAGVNV                          | 2.69 | 0.01 | 0.78 | 0.44 | 1.13 | 0.85 |
| 16688 | 0 | 167235 | EDKKEDVGTVVGIDLT<br>TYS                  | 2.96 | 0.01 | 0.78 | 0.44 | 1.13 | 0.28 |

|       |   |        |                                 |      |      |      |      |      |      |
|-------|---|--------|---------------------------------|------|------|------|------|------|------|
| 16689 | 0 | 167236 | EDKKLKERIDTRNELESY<br>AYS       | 3.01 | 3.40 | 0.78 | 0.44 | 1.13 | 0.28 |
| 16690 | 0 | 96211  | EDKKRKEEEE                      | 2.35 | 0.01 | 0.78 | 0.44 | 1.93 | 0.85 |
| 16691 | 0 | 96211  | EDKKRKEEEE                      | 2.35 | 0.01 | 0.78 | 0.44 | 1.23 | 0.28 |
| 16692 | 0 | 96211  | EDKKRKEEEE                      | 2.35 | 0.01 | 0.78 | 0.44 | 1.41 | 0.28 |
| 16693 | 0 | 11370  | EDKLADYKRRMADA                  | 2.64 | 0.01 | 2.56 | 2.69 | 0.22 | 0.28 |
| 16694 | 0 | 11370  | EDKLADYKRRMADA                  | 2.64 | 0.01 | 3.16 | 2.69 | 0.22 | 0.28 |
| 16695 | 0 | 11370  | EDKLADYKRRMADA                  | 2.64 | 0.01 | 3.16 | 2.69 | 0.22 | 0.28 |
| 16696 | 0 | 514262 | EDKQISDASRQGLRR                 | 2.66 | 0.01 | 2.24 | 0.44 | 1.41 | 1.28 |
| 16697 | 0 | 11372  | EDKRDGNN                        | 2.11 | 0.01 | 3.29 | 1.20 | 0.22 | 0.28 |
| 16698 | 0 | 11374  | EDKSVTEEIAEEDKSVT               | 2.84 | 0.01 | 0.90 | 2.42 | 0.22 | 1.27 |
| 16699 | 0 | 11374  | EDKSVTEEIAEEDKSVT               | 2.84 | 0.01 | 0.90 | 2.42 | 0.22 | 1.27 |
| 16700 | 0 | 11375  | EDKVKQAERDLASREA<br>KKQLQDKVKQL | 3.33 | 0.01 | 0.90 | 2.42 | 0.22 | 0.28 |
| 16701 | 0 | 112090 | EDLAVYF                         | 1.99 | 0.01 | 0.78 | 0.44 | 1.13 | 0.28 |
| 16702 | 0 | 11377  | EDLDGA                          | 1.90 | 0.01 | 3.17 | 0.68 | 0.22 | 1.27 |
| 16703 | 0 | 11377  | EDLDGA                          | 1.90 | 0.01 | 3.17 | 0.68 | 0.22 | 0.28 |
| 16704 | 0 | 11377  | EDLDGA                          | 1.90 | 0.01 | 3.17 | 0.68 | 0.22 | 2.02 |
| 16705 | 0 | 140557 | EDLEGEWPMR                      | 2.32 | 0.01 | 0.90 | 0.68 | 0.22 | 0.28 |
| 16706 | 0 | 180418 | EDLERLLPHKVFEGNRPT<br>N         | 2.89 | 4.08 | 0.78 | 0.44 | 1.13 | 0.28 |
| 16707 | 0 | 180418 | EDLERLLPHKVFEGNRPT<br>N         | 2.89 | 4.08 | 0.78 | 0.44 | 1.13 | 0.28 |
| 16708 | 0 | 180418 | EDLERLLPHKVFEGNRPT<br>N         | 2.89 | 4.08 | 0.78 | 0.44 | 1.13 | 0.28 |
| 16709 | 0 | 180418 | EDLERLLPHKVFEGNRPT<br>N         | 2.89 | 4.08 | 0.78 | 0.44 | 1.41 | 0.28 |
| 16710 | 0 | 11378  | EDLERSEERLNTATT                 | 2.70 | 0.01 | 3.15 | 0.44 | 1.23 | 0.85 |
| 16711 | 0 | 141876 | EDLINLS                         | 2.02 | 0.01 | 3.14 | 0.68 | 0.22 | 0.28 |
| 16712 | 0 | 111231 | EDLLMGTLGIVCPICSQK<br>P         | 2.87 | 0.01 | 1.86 | 3.22 | 0.22 | 0.28 |
| 16713 | 0 | 111231 | EDLLMGTLGIVCPICSQK<br>P         | 2.87 | 0.01 | 1.86 | 2.69 | 0.22 | 0.28 |
| 16714 | 0 | 123108 | EDLPKIKAY                       | 2.21 | 0.01 | 2.28 | 2.00 | 0.22 | 0.28 |
| 16715 | 0 | 123109 | EDLPKIKEY                       | 2.24 | 0.01 | 2.28 | 2.00 | 0.22 | 0.28 |
| 16716 | 0 | 11394  | EDLTLDLETDVCTMDK<br>CAG         | 2.97 | 0.01 | 2.59 | 4.23 | 1.74 | 0.28 |
| 16717 | 0 | 133553 | EDMSYWHEWNP                     | 2.40 | 0.01 | 0.90 | 0.44 | 0.85 | 1.27 |
| 16718 | 0 | 275780 | EDNDDDDDEPEEEK                  | 2.72 | 0.01 | 1.61 | 0.44 | 0.85 | 1.28 |
| 16719 | 0 | 275781 | EDNDDDDLEAEER                   | 2.72 | 0.01 | 1.61 | 0.44 | 0.85 | 1.28 |
| 16720 | 0 | 275786 | EDNEKQQQSDEAQVQ                 | 2.71 | 0.01 | 1.61 | 0.44 | 0.85 | 1.28 |
| 16721 | 0 | 11406  | EDNNTGNNR                       | 2.14 | 0.01 | 2.99 | 0.44 | 0.85 | 0.28 |
| 16722 | 0 | 140454 | EDNRSQVETDDLILKPG<br>VVH        | 2.90 | 0.01 | 0.78 | 4.03 | 0.22 | 0.28 |

|       |   |        |                                    |      |      |      |      |      |      |
|-------|---|--------|------------------------------------|------|------|------|------|------|------|
| 16723 | 0 | 140454 | EDNRSQVETDDLILKPG<br>VVH           | 2.90 | 0.01 | 0.78 | 4.03 | 0.22 | 0.28 |
| 16724 | 0 | 140454 | EDNRSQVETDDLILKPG<br>VVH           | 2.90 | 0.01 | 0.78 | 4.03 | 0.22 | 0.28 |
| 16725 | 0 | 140454 | EDNRSQVETDDLILKPG<br>VVH           | 2.90 | 0.01 | 0.78 | 4.03 | 0.22 | 0.28 |
| 16726 | 0 | 11411  | EDPASR                             | 1.88 | 0.01 | 2.71 | 1.15 | 0.22 | 0.28 |
| 16727 | 0 | 11411  | EDPASR                             | 1.88 | 0.01 | 2.71 | 1.15 | 0.22 | 2.35 |
| 16728 | 0 | 107332 | EDPQVKF                            | 1.99 | 0.01 | 0.78 | 0.44 | 1.13 | 0.28 |
| 16729 | 0 | 11417  | EDPQYHEEWVTAAVER<br>TIPV           | 2.94 | 0.01 | 3.13 | 2.43 | 0.22 | 0.28 |
| 16730 | 0 | 119564 | EDPSVEEEEIAPPLPP                   | 2.75 | 0.01 | 3.33 | 0.44 | 0.85 | 0.28 |
| 16731 | 0 | 119564 | EDPSVEEEEIAPPLPP                   | 2.75 | 0.01 | 3.33 | 2.49 | 0.85 | 0.28 |
| 16732 | 0 | 11420  | EDPVLAKKVPETFPELKP<br>GE           | 2.98 | 0.01 | 2.82 | 0.44 | 0.85 | 0.28 |
| 16733 | 0 | 11420  | EDPVLAKKVPETFPELKP<br>GE           | 2.98 | 0.01 | 2.82 | 0.44 | 1.41 | 0.28 |
| 16734 | 0 | 115042 | EDQAMEDIKQMEAESIS<br>SSEEIVP       | 3.15 | 0.01 | 1.60 | 0.44 | 1.23 | 0.28 |
| 16735 | 0 | 115042 | EDQAMEDIKQMEAESIS<br>SSEEIVP       | 3.15 | 0.01 | 1.60 | 0.44 | 1.23 | 0.28 |
| 16736 | 0 | 108887 | EDQAMEDIKQMEAESIS<br>SSEEIVPNSVEQK | 3.37 | 0.01 | 1.60 | 0.44 | 1.23 | 0.85 |
| 16737 | 0 | 11423  | EDQKAREA                           | 2.15 | 0.01 | 2.40 | 2.43 | 0.22 | 0.28 |
| 16738 | 0 | 11428  | EDQRVGIN                           | 2.10 | 0.01 | 2.99 | 0.44 | 0.85 | 0.28 |
| 16739 | 0 | 149673 | EDQYLSSSEDFLL                      | 2.49 | 0.01 | 0.90 | 2.37 | 0.22 | 0.28 |
| 16740 | 0 | 114787 | EDRPLCGSDN                         | 2.29 | 0.01 | 2.25 | 0.44 | 1.23 | 0.85 |
| 16741 | 0 | 229151 | EDRRNYPTNTY                        | 2.42 | 0.01 | 2.70 | 0.68 | 0.22 | 0.28 |
| 16742 | 0 | 228067 | EDRYyre                            | 2.05 | 0.01 | 1.75 | 2.19 | 0.22 | 0.85 |
| 16743 | 0 | 228067 | EDRYyre                            | 2.05 | 0.01 | 1.75 | 2.19 | 0.22 | 2.02 |
| 16744 | 0 | 228067 | EDRYyre                            | 2.05 | 0.01 | 1.75 | 2.19 | 0.22 | 2.02 |
| 16745 | 0 | 11432  | EDRYRENm                           | 2.25 | 0.01 | 2.98 | 1.15 | 0.22 | 0.28 |
| 16746 | 0 | 119445 | EDSDEDEFQITE                       | 2.52 | 0.01 | 0.78 | 0.44 | 1.13 | 2.75 |
| 16747 | 0 | 419154 | EDSGLTVVRDSSSSESTV<br>TP           | 2.98 | 0.01 | 3.50 | 2.13 | 0.22 | 0.28 |
| 16748 | 0 | 11438  | EDSGSNGKKITCECTKPD<br>S            | 2.93 | 0.01 | 1.66 | 2.43 | 0.22 | 0.28 |
| 16749 | 0 | 11438  | EDSGSNGKKITCECTKPD<br>S            | 2.93 | 0.01 | 1.66 | 0.68 | 0.22 | 0.28 |
| 16750 | 0 | 11438  | EDSGSNGKKITCECTKPD<br>S            | 2.93 | 0.01 | 1.66 | 1.20 | 0.22 | 0.28 |
| 16751 | 0 | 101580 | EDSGSSRKK                          | 2.22 | 0.01 | 1.66 | 0.44 | 1.59 | 2.97 |
| 16752 | 0 | 11439  | EDSGSSRKKITCECTKPD<br>S            | 2.92 | 0.01 | 1.66 | 0.44 | 1.74 | 0.28 |
| 16753 | 0 | 164646 | EDSHP                              | 1.74 | 0.01 | 3.00 | 0.68 | 0.22 | 0.28 |
| 16754 | 0 | 164646 | EDSHP                              | 1.74 | 0.01 | 3.00 | 0.68 | 0.22 | 0.85 |
| 16755 | 0 | 164646 | EDSHP                              | 1.74 | 0.01 | 3.00 | 0.68 | 0.22 | 0.85 |

|       |   |        |                                      |      |      |      |      |      |      |
|-------|---|--------|--------------------------------------|------|------|------|------|------|------|
| 16756 | 0 | 164646 | EDSHP                                | 1.74 | 0.01 | 3.00 | 0.68 | 0.22 | 0.85 |
| 16757 | 0 | 164646 | EDSHP                                | 1.74 | 0.01 | 3.00 | 0.68 | 0.22 | 0.85 |
| 16758 | 0 | 164646 | EDSHP                                | 1.74 | 0.01 | 3.00 | 0.68 | 0.22 | 0.85 |
| 16759 | 0 | 164646 | EDSHP                                | 1.74 | 0.01 | 3.00 | 0.68 | 0.22 | 0.85 |
| 16760 | 0 | 164646 | EDSHP                                | 1.74 | 0.01 | 3.00 | 0.68 | 0.22 | 0.85 |
| 16761 | 0 | 164646 | EDSHP                                | 1.74 | 0.01 | 3.00 | 0.68 | 0.22 | 0.85 |
| 16762 | 0 | 164646 | EDSHP                                | 1.74 | 0.01 | 3.00 | 0.68 | 0.22 | 0.85 |
| 16763 | 0 | 164646 | EDSHP                                | 1.74 | 0.01 | 3.00 | 0.68 | 0.22 | 1.48 |
| 16764 | 0 | 164646 | EDSHP                                | 1.74 | 0.01 | 3.00 | 0.68 | 0.22 | 0.85 |
| 16765 | 0 | 164646 | EDSHP                                | 1.74 | 0.01 | 3.00 | 0.68 | 0.22 | 0.85 |
| 16766 | 0 | 120464 | EDSILAVRKYFQRI                       | 2.57 | 0.01 | 0.78 | 0.44 | 1.13 | 0.85 |
| 16767 | 0 | 11441  | EDSITIPYQSGSGKV                      | 2.66 | 0.01 | 2.43 | 3.34 | 0.22 | 0.28 |
| 16768 | 0 | 11441  | EDSITIPYQSGSGKV                      | 2.66 | 0.01 | 2.43 | 0.44 | 0.85 | 0.28 |
| 16769 | 0 | 115719 | EDSPEVIESP                           | 2.36 | 0.01 | 1.60 | 0.44 | 1.23 | 0.85 |
| 16770 | 0 | 115719 | EDSPEVIESP                           | 2.36 | 0.01 | 1.60 | 0.44 | 1.23 | 0.85 |
| 16771 | 0 | 137834 | EDSRVTENTNGL                         | 2.48 | 0.01 | 2.21 | 0.44 | 0.85 | 0.28 |
| 16772 | 0 | 275959 | EDSVASREKDGEDTT                      | 2.69 | 0.01 | 1.61 | 0.44 | 0.85 | 1.28 |
| 16773 | 0 | 275963 | EDSVDSREQDGEDAT                      | 2.71 | 0.01 | 1.61 | 0.44 | 0.85 | 1.28 |
| 16774 | 0 | 461763 | EDTGVYYCSRNYGS                       | 2.67 | 0.01 | 1.75 | 0.44 | 0.22 | 1.28 |
| 16775 | 0 | 461763 | EDTGVYYCSRNYGS                       | 2.67 | 0.01 | 1.75 | 0.44 | 1.41 | 1.28 |
| 16776 | 0 | 11447  | EDTKEPGVLMGGQSE                      | 2.66 | 0.01 | 2.24 | 1.15 | 0.22 | 0.85 |
| 16777 | 0 | 11447  | EDTKEPGVLMGGQSE                      | 2.66 | 0.01 | 2.24 | 1.15 | 0.22 | 0.85 |
| 16778 | 0 | 11448  | EDTKEPGVLMGGQSES                     | 2.73 | 0.01 | 2.24 | 1.15 | 0.22 | 0.28 |
| 16779 | 0 | 11448  | EDTKEPGVLMGGQSES                     | 2.73 | 0.01 | 2.24 | 0.68 | 0.22 | 0.28 |
| 16780 | 0 | 123110 | EDTKHLPEDENTPEKRA<br>EKIWGFFGKKDDDKL | 3.40 | 0.01 | 1.60 | 2.04 | 0.22 | 0.28 |
| 16781 | 0 | 99176  | EDTLEEKMYACRDIG                      | 2.64 | 0.01 | 2.86 | 2.02 | 0.85 | 0.85 |
| 16782 | 0 | 11451  | EDTLNKVD                             | 2.12 | 0.01 | 2.04 | 0.44 | 0.85 | 0.28 |
| 16783 | 0 | 11453  | EDTQAMPFRV                           | 2.26 | 0.01 | 2.25 | 0.44 | 1.23 | 0.85 |
| 16784 | 0 | 423266 | EDTSIYLSPPVPPV                       | 2.68 | 0.01 | 2.51 | 0.44 | 2.35 | 1.28 |
| 16785 | 0 | 11456  | EDTVTP                               | 1.90 | 0.01 | 1.96 | 0.44 | 0.85 | 0.28 |
| 16786 | 0 | 111232 | EDTYRFVTSQAIACQ                      | 2.64 | 0.01 | 1.86 | 0.68 | 0.22 | 0.28 |
| 16787 | 0 | 110825 | EDTYRFVTSQAIACQKH<br>TPPA            | 2.94 | 0.01 | 1.86 | 0.44 | 1.41 | 0.28 |
| 16788 | 0 | 110825 | EDTYRFVTSQAIACQKH<br>TPPA            | 2.94 | 0.01 | 1.86 | 0.44 | 0.85 | 0.28 |
| 16789 | 0 | 110825 | EDTYRFVTSQAIACQKH<br>TPPA            | 2.94 | 0.01 | 1.86 | 0.44 | 2.82 | 0.28 |
| 16790 | 0 | 110825 | EDTYRFVTSQAIACQKH<br>TPPA            | 2.94 | 0.01 | 1.86 | 0.44 | 0.85 | 0.28 |
| 16791 | 0 | 190733 | EDVAQAEGLNSEQTLQL<br>EDA             | 2.98 | 0.01 | 3.50 | 2.13 | 0.22 | 0.28 |
| 16792 | 0 | 276047 | EDVASREQDGEDTTS                      | 2.70 | 0.01 | 1.61 | 0.44 | 0.85 | 1.28 |
| 16793 | 0 | 187109 | EDVDEIHNQSHP                         | 2.48 | 0.01 | 0.90 | 0.44 | 1.41 | 1.39 |

|       |   |        |                                      |      |      |      |      |      |      |
|-------|---|--------|--------------------------------------|------|------|------|------|------|------|
| 16794 | 0 | 187109 | EDVDEIHNSHP                          | 2.48 | 0.01 | 0.90 | 0.44 | 1.41 | 0.28 |
| 16795 | 0 | 187109 | EDVDEIHNSHP                          | 2.48 | 0.01 | 0.90 | 0.44 | 1.41 | 1.34 |
| 16796 | 0 | 11457  | EDVEKDKPNRPVV                        | 2.58 | 0.01 | 3.17 | 0.44 | 0.85 | 0.85 |
| 16797 | 0 | 95008  | EDVFQNGFTAW                          | 2.36 | 0.01 | 2.14 | 0.68 | 0.22 | 0.28 |
| 16798 | 0 | 95008  | EDVFQNGFTAW                          | 2.36 | 0.01 | 2.14 | 0.68 | 0.22 | 0.85 |
| 16799 | 0 | 276060 | EDVGKKKDEEQEPNE                      | 2.70 | 0.01 | 1.61 | 0.44 | 0.85 | 1.28 |
| 16800 | 0 | 276061 | EDVGPRHVDPDHFRS                      | 2.70 | 0.01 | 1.61 | 0.44 | 0.85 | 1.28 |
| 16801 | 0 | 144622 | EDVGSNK                              | 1.99 | 0.01 | 0.78 | 0.68 | 0.22 | 0.28 |
| 16802 | 0 | 144622 | EDVGSNK                              | 1.99 | 0.01 | 0.78 | 0.68 | 0.22 | 1.48 |
| 16803 | 0 | 144622 | EDVGSNK                              | 1.99 | 0.01 | 0.78 | 0.68 | 0.22 | 1.48 |
| 16804 | 0 | 144622 | EDVGSNK                              | 1.99 | 0.01 | 0.78 | 0.68 | 0.22 | 0.28 |
| 16805 | 0 | 99971  | EDVGSNKGAI                           | 2.29 | 0.01 | 0.78 | 1.12 | 0.22 | 0.85 |
| 16806 | 0 | 105742 | EDVGSNKGAIIGLM                       | 2.58 | 0.01 | 0.78 | 0.44 | 1.41 | 0.28 |
| 16807 | 0 | 140995 | EDVHTNFKYNYSVIEGG<br>PIGDTLEKISNEIK  | 3.38 | 0.01 | 2.76 | 1.15 | 0.22 | 0.85 |
| 16808 | 0 | 11460  | EDVKFTDPYQVPFVQA<br>FDQAT            | 3.07 | 0.01 | 2.43 | 0.44 | 1.59 | 0.28 |
| 16809 | 0 | 11463  | EDVNGIRKPK                           | 2.29 | 0.01 | 3.75 | 0.68 | 0.22 | 1.27 |
| 16810 | 0 | 11463  | EDVNGIRKPK                           | 2.29 | 0.01 | 3.75 | 0.68 | 0.22 | 1.75 |
| 16811 | 0 | 11463  | EDVNGIRKPK                           | 2.29 | 0.01 | 3.75 | 0.68 | 0.22 | 1.48 |
| 16812 | 0 | 11463  | EDVNGIRKPK                           | 2.29 | 0.01 | 3.75 | 0.68 | 0.22 | 1.48 |
| 16813 | 0 | 11463  | EDVNGIRKPK                           | 2.29 | 0.01 | 3.75 | 0.68 | 0.22 | 1.48 |
| 16814 | 0 | 11463  | EDVNGIRKPK                           | 2.29 | 0.01 | 3.75 | 0.68 | 0.22 | 1.48 |
| 16815 | 0 | 11463  | EDVNGIRKPK                           | 2.29 | 0.01 | 3.75 | 0.68 | 0.22 | 0.85 |
| 16816 | 0 | 11463  | EDVNGIRKPK                           | 2.29 | 0.01 | 3.75 | 0.68 | 0.22 | 1.34 |
| 16817 | 0 | 11463  | EDVNGIRKPK                           | 2.29 | 0.01 | 3.75 | 0.68 | 0.22 | 0.85 |
| 16818 | 0 | 170713 | EDVNLLCGEELSYPN                      | 2.68 | 0.01 | 0.78 | 0.44 | 1.41 | 0.28 |
| 16819 | 0 | 130792 | EDVPLLED                             | 2.16 | 0.01 | 0.78 | 1.12 | 0.22 | 0.28 |
| 16820 | 0 | 130792 | EDVPLLED                             | 2.16 | 0.01 | 0.78 | 1.12 | 0.22 | 0.28 |
| 16821 | 0 | 95334  | EDVPQPPVSQFH                         | 2.48 | 0.01 | 2.88 | 0.44 | 1.23 | 0.85 |
| 16822 | 0 | 95335  | EDVPQPPVSQFHIQQG<br>VYCDTCRAG        | 3.13 | 0.01 | 2.88 | 1.12 | 0.22 | 0.28 |
| 16823 | 0 | 95335  | EDVPQPPVSQFHIQQG<br>VYCDTCRAG        | 3.13 | 0.01 | 2.88 | 0.44 | 1.23 | 3.40 |
| 16824 | 0 | 110826 | EDVQPHDLGKVGEVIVT<br>KDDAMLLKGKGDKAQ | 3.42 | 0.01 | 0.78 | 1.15 | 0.22 | 1.27 |
| 16825 | 0 | 110826 | EDVQPHDLGKVGEVIVT<br>KDDAMLLKGKGDKAQ | 3.42 | 0.01 | 0.78 | 1.15 | 0.22 | 1.27 |
| 16826 | 0 | 174084 | EDVRLTQETFAPLKA                      | 2.67 | 0.01 | 4.33 | 0.44 | 0.85 | 1.27 |
| 16827 | 0 | 174084 | EDVRLTQETFAPLKA                      | 2.67 | 0.01 | 4.33 | 0.68 | 0.22 | 1.27 |
| 16828 | 0 | 188124 | EDVSDIERRI                           | 2.35 | 0.01 | 2.92 | 0.68 | 0.22 | 0.85 |
| 16829 | 0 | 134039 | EDWDYAPLV LAPDDRSY<br>KSQ            | 2.94 | 0.01 | 0.78 | 0.44 | 2.35 | 0.28 |
| 16830 | 0 | 490820 | EDWFSASIRRVPTFA                      | 2.65 | 0.01 | 0.90 | 1.15 | 0.22 | 1.39 |
| 16831 | 0 | 11472  | EDWGEDGYIWIQRNT                      | 2.69 | 0.01 | 2.72 | 0.44 | 1.23 | 0.85 |

|       |   |        |                                        |      |      |      |      |      |      |
|-------|---|--------|----------------------------------------|------|------|------|------|------|------|
| 16832 | 0 | 11473  | EDWGTTP                                | 2.01 | 0.01 | 3.70 | 0.44 | 0.85 | 0.28 |
| 16833 | 0 | 99177  | EDWRQPREDWRRPSH                        | 2.71 | 0.01 | 2.16 | 0.44 | 1.23 | 1.48 |
| 16834 | 0 | 514347 | EDWRQPREDWRRPSH<br>QQPRKIRPE           | 3.16 | 0.01 | 2.16 | 0.44 | 1.23 | 1.39 |
| 16835 | 0 | 98746  | EDWRRPSHQQ                             | 2.28 | 0.01 | 2.16 | 0.44 | 1.23 | 0.85 |
| 16836 | 0 | 236165 | EDWWNANRQEIWKAL                        | 2.69 | 0.01 | 1.66 | 0.44 | 0.85 | 1.28 |
| 16837 | 0 | 91229  | EDYITLISDPYGFSPKINV<br>SGVPVTCVTKEFAKW | 3.46 | 0.01 | 3.81 | 3.26 | 0.22 | 0.85 |
| 16838 | 0 | 91229  | EDYITLISDPYGFSPKINV<br>SGVPVTCVTKEFAKW | 3.46 | 0.01 | 3.81 | 3.26 | 0.22 | 1.39 |
| 16839 | 0 | 91229  | EDYITLISDPYGFSPKINV<br>SGVPVTCVTKEFAKW | 3.46 | 0.01 | 3.81 | 3.26 | 0.22 | 1.27 |
| 16840 | 0 | 11481  | EDYPSP                                 | 1.90 | 0.01 | 2.59 | 0.44 | 0.85 | 0.28 |
| 16841 | 0 | 174085 | EDYRFQEGDWP NLKP                       | 2.65 | 0.01 | 3.36 | 0.44 | 1.23 | 1.27 |
| 16842 | 0 | 174085 | EDYRFQEGDWP NLKP                       | 2.65 | 0.01 | 3.36 | 0.68 | 0.22 | 1.27 |
| 16843 | 0 | 95336  | EDYVEGPSKRPRPSIQ                       | 2.74 | 0.01 | 2.43 | 0.44 | 1.59 | 0.28 |
| 16844 | 0 | 103871 | EDYWLRS                                | 1.99 | 0.01 | 0.90 | 0.44 | 1.13 | 1.39 |
| 16845 | 0 | 144880 | EE                                     | 1.04 | 0.01 | 2.85 | 0.68 | 0.22 | 0.85 |
| 16846 | 0 | 144880 | EE                                     | 1.04 | 0.01 | 2.85 | 0.68 | 0.22 | 0.85 |
| 16847 | 0 | 144880 | EE                                     | 1.04 | 0.01 | 2.85 | 0.68 | 0.22 | 1.75 |
| 16848 | 0 | 115602 | EEAAMELKVEDP                           | 2.48 | 0.01 | 0.78 | 0.44 | 1.41 | 0.28 |
| 16849 | 0 | 115602 | EEAAMELKVEDP                           | 2.48 | 0.01 | 0.78 | 0.44 | 1.13 | 0.28 |
| 16850 | 0 | 236080 | EEACGKVVQDIMPCLHF<br>VKGEEKEPSKECC     | 3.32 | 0.01 | 3.08 | 0.44 | 1.23 | 0.85 |
| 16851 | 0 | 11488  | EEACKLTPPHSAKSKFGY<br>G                | 2.88 | 0.01 | 1.72 | 0.44 | 0.85 | 0.28 |
| 16852 | 0 | 276159 | EEADDDDDDDDDDDGE                       | 2.74 | 0.01 | 1.61 | 0.44 | 0.85 | 1.28 |
| 16853 | 0 | 11489  | EEADDDMGFGLFD                          | 2.57 | 0.01 | 3.97 | 0.44 | 0.85 | 3.30 |
| 16854 | 0 | 11489  | EEADDDMGFGLFD                          | 2.57 | 0.01 | 3.97 | 1.15 | 0.22 | 3.30 |
| 16855 | 0 | 11491  | EEADV RNQAETLVYQTE<br>K FVKEQRETE      | 3.26 | 0.01 | 2.59 | 2.69 | 0.22 | 0.28 |
| 16856 | 0 | 276169 | EEAEDEDSDEEEETA                        | 2.73 | 0.01 | 1.61 | 0.44 | 0.85 | 1.28 |
| 16857 | 0 | 96212  | EEAEDKEDDA                             | 2.36 | 0.01 | 0.90 | 0.44 | 1.93 | 0.85 |
| 16858 | 0 | 144623 | EEAEGTTDAQIDANRKR<br>ESE               | 2.95 | 0.01 | 3.29 | 0.68 | 0.22 | 0.28 |
| 16859 | 0 | 144623 | EEAEGTTDAQIDANRKR<br>ESE               | 2.95 | 0.01 | 3.29 | 0.68 | 0.22 | 1.27 |
| 16860 | 0 | 144623 | EEAEGTTDAQIDANRKR<br>ESE               | 2.95 | 0.01 | 3.29 | 0.68 | 0.22 | 0.85 |
| 16861 | 0 | 144623 | EEAEGTTDAQIDANRKR<br>ESE               | 2.95 | 0.01 | 3.29 | 0.68 | 0.22 | 1.75 |



|       |   |        |                              |      |      |      |      |      |      |
|-------|---|--------|------------------------------|------|------|------|------|------|------|
| 16862 | 0 | 144623 | EEAEGTTDAQIDANRKR<br>ESE     | 2.95 | 0.01 | 3.29 | 0.68 | 0.22 | 0.28 |
| 16863 | 0 | 144623 | EEAEGTTDAQIDANRKR<br>ESE     | 2.95 | 0.01 | 3.29 | 0.68 | 0.22 | 1.75 |
| 16864 | 0 | 144623 | EEAEGTTDAQIDANRKR<br>ESE     | 2.95 | 0.01 | 3.29 | 0.68 | 0.22 | 0.85 |
| 16865 | 0 | 11493  | EEAFFSFCET                   | 2.35 | 0.01 | 0.78 | 0.44 | 1.74 | 0.28 |
| 16866 | 0 | 79536  | EEAFTYLCTAPGCATQTP<br>VPVR   | 3.04 | 0.01 | 2.85 | 0.44 | 1.59 | 0.28 |
| 16867 | 0 | 276202 | EEAGSDEEDQDEDED              | 2.74 | 0.01 | 1.61 | 0.44 | 0.85 | 1.28 |
| 16868 | 0 | 135913 | EEAIERAVVHVA                 | 2.52 | 0.01 | 3.21 | 0.44 | 0.85 | 0.28 |
| 16869 | 0 | 11497  | EEAILRPLRVQGKRAK             | 2.74 | 0.01 | 3.85 | 0.68 | 0.22 | 0.85 |
| 16870 | 0 | 11497  | EEAILRPLRVQGKRAK             | 2.74 | 0.01 | 3.85 | 0.68 | 0.22 | 0.28 |
| 16871 | 0 | 11497  | EEAILRPLRVQGKRAK             | 2.74 | 0.01 | 3.85 | 0.68 | 0.22 | 0.85 |
| 16872 | 0 | 11497  | EEAILRPLRVQGKRAK             | 2.74 | 0.01 | 3.85 | 0.68 | 0.22 | 0.28 |
| 16873 | 0 | 118779 | EEAKKFLAPK                   | 2.34 | 0.01 | 0.78 | 0.68 | 0.22 | 0.85 |
| 16874 | 0 | 118779 | EEAKKFLAPK                   | 2.34 | 0.01 | 0.78 | 0.68 | 0.22 | 0.85 |
| 16875 | 0 | 150977 | EEAKLNREEIDGVKL              | 2.67 | 0.01 | 2.87 | 0.44 | 0.85 | 0.28 |
| 16876 | 0 | 145158 | EEAPSLRPAPPPISGGGY<br>RARPAK | 3.14 | 4.93 | 0.78 | 0.44 | 1.13 | 1.28 |
| 16877 | 0 | 145157 | EEAPSLRPAPPPISGGGY<br>RARPAK | 3.14 | 4.93 | 0.78 | 0.44 | 1.13 | 1.28 |
| 16878 | 0 | 11512  | EEAQTLKILLKDLKE              | 2.76 | 0.01 | 3.67 | 0.44 | 1.23 | 1.27 |
| 16879 | 0 | 11512  | EEAQTLKILLKDLKE              | 2.76 | 0.01 | 3.67 | 0.44 | 1.23 | 1.27 |
| 16880 | 0 | 118780 | EEASGSSVTAEAAKKFLA<br>PK     | 2.96 | 0.01 | 0.78 | 0.68 | 0.22 | 0.85 |
| 16881 | 0 | 118780 | EEASGSSVTAEAAKKFLA<br>PK     | 2.96 | 0.01 | 0.78 | 0.68 | 0.22 | 0.85 |
| 16882 | 0 | 118780 | EEASGSSVTAEAAKKFLA<br>PK     | 2.96 | 0.01 | 0.78 | 0.44 | 1.13 | 0.85 |
| 16883 | 0 | 111233 | EEASVTVVEGQVDYY              | 2.68 | 0.01 | 1.86 | 0.44 | 0.85 | 0.28 |
| 16884 | 0 | 111233 | EEASVTVVEGQVDYY              | 2.68 | 0.01 | 1.86 | 0.44 | 0.85 | 0.28 |
| 16885 | 0 | 423267 | EEAVNLLDDTDDSGG              | 2.66 | 0.01 | 2.51 | 0.44 | 2.35 | 1.28 |
| 16886 | 0 | 11525  | EECDSELEIKRYKNRVAS<br>RKCR   | 3.04 | 0.01 | 2.43 | 0.44 | 1.59 | 0.28 |
| 16887 | 0 | 11525  | EECDSELEIKRYKNRVAS<br>RKCR   | 3.04 | 0.01 | 2.43 | 0.44 | 1.59 | 0.28 |
| 16888 | 0 | 11532  | EECQLPSLKIFIAGNSAY           | 2.81 | 0.01 | 2.76 | 1.15 | 2.26 | 0.85 |
| 16889 | 0 | 11532  | EECQLPSLKIFIAGNSAY           | 2.81 | 0.01 | 2.76 | 1.15 | 2.26 | 2.35 |
| 16890 | 0 | 11534  | EECSQAAPY                    | 2.21 | 0.01 | 2.59 | 0.44 | 0.85 | 0.28 |
| 16891 | 0 | 276352 | EEDDADGDEEDYDVV              | 2.72 | 0.01 | 1.61 | 0.44 | 0.85 | 1.28 |
| 16892 | 0 | 276354 | EEDDDDDDDDEPEEGS             | 2.72 | 0.01 | 1.61 | 0.44 | 0.85 | 1.28 |
| 16893 | 0 | 276355 | EEDDDDEEDDSDEAE              | 2.75 | 0.01 | 1.61 | 0.44 | 0.85 | 1.28 |
| 16894 | 0 | 276358 | EEDDEEDKDDDDVKDE             | 2.75 | 0.01 | 1.61 | 0.44 | 0.85 | 1.28 |
| 16895 | 0 | 11541  | EEDE                         | 1.59 | 0.01 | 4.63 | 0.68 | 0.22 | 0.28 |

|       |   |        |                                                            |      |      |      |      |      |      |
|-------|---|--------|------------------------------------------------------------|------|------|------|------|------|------|
| 16896 | 0 | 276372 | EEDEAFDEADDDDELA                                           | 2.73 | 0.01 | 1.61 | 0.44 | 0.85 | 1.28 |
| 16897 | 0 | 276374 | EEDEDDEEEEEEEEE                                            | 2.72 | 0.01 | 1.61 | 0.44 | 0.85 | 1.28 |
| 16898 | 0 | 276377 | EEDEDEEEMDDDEVQ                                            | 2.73 | 0.01 | 1.61 | 0.44 | 0.85 | 1.28 |
| 16899 | 0 | 96213  | EEDEEDKEED                                                 | 2.37 | 0.01 | 0.78 | 0.44 | 1.93 | 0.85 |
| 16900 | 0 | 276381 | EEDEEEDEEDYEEED                                            | 2.74 | 0.01 | 1.61 | 0.44 | 0.85 | 1.28 |
| 16901 | 0 | 276382 | EEDEEEDEEEDEEDY                                            | 2.74 | 0.01 | 1.61 | 0.44 | 0.85 | 1.28 |
| 16902 | 0 | 276385 | EEDEEEEEDEEEED                                             | 2.74 | 0.01 | 1.61 | 0.44 | 0.85 | 1.28 |
| 16903 | 0 | 276386 | EEDEEEEEDEEEEGE                                            | 2.75 | 0.01 | 1.61 | 0.44 | 0.85 | 1.28 |
| 16904 | 0 | 142136 | EEDEIDGPAGQA                                               | 2.51 | 0.01 | 1.86 | 0.44 | 1.41 | 0.28 |
| 16905 | 0 | 276399 | EEDEKEDNDDDDDDDE                                           | 2.73 | 0.01 | 1.61 | 0.44 | 0.85 | 1.28 |
| 16906 | 0 | 11543  | EEDEREISVPAEIL                                             | 2.63 | 0.01 | 2.41 | 0.44 | 0.85 | 0.28 |
| 16907 | 0 | 11543  | EEDEREISVPAEIL                                             | 2.63 | 0.01 | 2.41 | 0.44 | 0.85 | 0.28 |
| 16908 | 0 | 11543  | EEDEREISVPAEIL                                             | 2.63 | 0.01 | 1.96 | 0.44 | 0.85 | 0.28 |
| 16909 | 0 | 11543  | EEDEREISVPAEIL                                             | 2.63 | 0.01 | 1.96 | 0.44 | 0.85 | 0.28 |
| 16910 | 0 | 227910 | EEDESKKKSCGDEGEPK<br>VE                                    | 2.94 | 0.01 | 3.33 | 0.44 | 0.85 | 0.28 |
| 16911 | 0 | 227910 | EEDESKKKSCGDEGEPK<br>VE                                    | 2.94 | 0.01 | 3.33 | 0.44 | 0.85 | 0.28 |
| 16912 | 0 | 227910 | EEDESKKKSCGDEGEPK<br>VE                                    | 2.94 | 0.01 | 3.33 | 0.44 | 0.85 | 0.28 |
| 16913 | 0 | 227910 | EEDESKKKSCGDEGEPK<br>VE                                    | 2.94 | 0.01 | 3.33 | 2.49 | 0.22 | 0.28 |
| 16914 | 0 | 130477 | EEDFRV                                                     | 1.89 | 0.01 | 0.78 | 0.68 | 0.22 | 1.28 |
| 16915 | 0 | 130477 | EEDFRV                                                     | 1.89 | 0.01 | 0.78 | 0.68 | 0.22 | 1.27 |
| 16916 | 0 | 276416 | EEDGIEQVEEEEEEE                                            | 2.70 | 0.01 | 1.61 | 0.44 | 0.85 | 1.28 |
| 16917 | 0 | 276423 | EEDHEKQHQSDETQV                                            | 2.71 | 0.01 | 1.61 | 0.44 | 0.85 | 1.28 |
| 16918 | 0 | 276424 | EEDHEKQQQSDEAQF                                            | 2.70 | 0.01 | 1.61 | 0.44 | 0.85 | 1.28 |
| 16919 | 0 | 276425 | EEDHEKQQQSDEAQV                                            | 2.70 | 0.01 | 1.61 | 0.44 | 0.85 | 1.28 |
| 16920 | 0 | 276426 | EEDHEKQQQSDETQV                                            | 2.70 | 0.01 | 1.61 | 0.44 | 0.85 | 1.28 |
| 16921 | 0 | 276434 | EEDKDDDVKDEEEEE                                            | 2.72 | 0.01 | 1.61 | 0.44 | 0.85 | 1.28 |
| 16922 | 0 | 276438 | EEDKEEEEDDDDDDD                                            | 2.73 | 0.01 | 1.61 | 0.44 | 0.85 | 1.28 |
| 16923 | 0 | 135548 | EEDKENALSLLDKIYTSPL<br>C                                   | 2.94 | 0.01 | 3.08 | 1.12 | 0.22 | 0.28 |
| 16924 | 0 | 104761 | EEDKLRKAGELMLQFRR<br>VKCEYPSDTKITFHVEKG<br>SSPNYLALLVKYAAG | 3.82 | 0.01 | 3.10 | 0.44 | 1.23 | 0.85 |
| 16925 | 0 | 11552  | EEDKPKYEQG                                                 | 2.33 | 0.01 | 2.56 | 1.20 | 0.22 | 0.28 |
| 16926 | 0 | 101582 | EEDLRTR                                                    | 2.03 | 0.01 | 3.11 | 0.68 | 0.22 | 0.28 |
| 16927 | 0 | 101582 | EEDLRTR                                                    | 2.03 | 0.01 | 3.11 | 0.68 | 0.22 | 0.85 |
| 16928 | 0 | 276452 | EEDNDDDDLEEAEAE                                            | 2.72 | 0.01 | 1.61 | 0.44 | 0.85 | 1.28 |
| 16929 | 0 | 276453 | EEDNEKQQQSDEAQV                                            | 2.70 | 0.01 | 1.61 | 0.44 | 0.85 | 1.28 |
| 16930 | 0 | 11557  | EEDNNTGN                                                   | 2.15 | 0.01 | 2.99 | 0.44 | 0.85 | 0.28 |
| 16931 | 0 | 141628 | EEDNVISQIQRPVKELAF<br>PGSSREVDR                            | 3.23 | 0.01 | 3.65 | 0.44 | 1.23 | 1.27 |

|       |   |        |                  |      |      |      |      |      |      |
|-------|---|--------|------------------|------|------|------|------|------|------|
| 16932 | 0 | 11560  | EEDQKARE         | 2.14 | 0.01 | 2.40 | 2.43 | 0.22 | 0.28 |
| 16933 | 0 | 11561  | EEDQKAREA        | 2.25 | 0.01 | 2.40 | 0.68 | 0.22 | 0.85 |
| 16934 | 0 | 11561  | EEDQKAREA        | 2.25 | 0.01 | 2.40 | 0.68 | 0.22 | 0.85 |
| 16935 | 0 | 11561  | EEDQKAREA        | 2.25 | 0.01 | 2.40 | 2.43 | 0.22 | 0.28 |
| 16936 | 0 | 229153 | EEDRRNYPST       | 2.39 | 0.01 | 2.70 | 0.68 | 0.22 | 0.28 |
| 16937 | 0 | 101583 | EEDSGSSRK        | 2.23 | 0.01 | 1.66 | 0.44 | 1.59 | 2.97 |
| 16938 | 0 | 11564  | EEDTEEDKPK       | 2.36 | 0.01 | 2.56 | 1.20 | 0.22 | 0.28 |
| 16939 | 0 | 11565  | EEDTEKDKPK       | 2.36 | 0.01 | 2.56 | 1.20 | 0.22 | 0.28 |
| 16940 | 0 | 11565  | EEDTEKDKPK       | 2.36 | 0.01 | 2.56 | 1.20 | 0.22 | 0.28 |
| 16941 | 0 | 11567  | EEDTNKDKPS       | 2.32 | 0.01 | 2.56 | 1.20 | 0.22 | 0.28 |
| 16942 | 0 | 276486 | EEDVASREQDGEDTT  | 2.68 | 0.01 | 1.61 | 0.44 | 0.85 | 1.28 |
| 16943 | 0 | 276489 | EEDVGPRHVDPDHFR  | 2.71 | 0.01 | 1.61 | 0.44 | 0.85 | 1.28 |
| 16944 | 0 | 229154 | EEDYARRSEEEYNRL  | 2.70 | 0.01 | 2.70 | 0.68 | 0.22 | 0.28 |
| 16945 | 0 | 276522 | EEEAGSDEEDQDEDE  | 2.73 | 0.01 | 1.61 | 0.44 | 0.85 | 1.28 |
| 16946 | 0 | 276535 | EEEDDADGDEEDYDV  | 2.73 | 0.01 | 1.61 | 0.44 | 0.85 | 1.28 |
| 16947 | 0 | 11570  | EEEDDD           | 1.91 | 0.01 | 2.30 | 0.68 | 0.22 | 1.27 |
| 16948 | 0 | 11570  | EEEDDD           | 1.91 | 0.01 | 2.30 | 0.68 | 0.22 | 0.85 |
| 16949 | 0 | 11570  | EEEDDD           | 1.91 | 0.01 | 2.30 | 0.68 | 0.22 | 0.85 |
| 16950 | 0 | 11570  | EEEDDD           | 1.91 | 0.01 | 2.30 | 0.68 | 2.25 | 1.75 |
| 16951 | 0 | 11570  | EEEDDD           | 1.91 | 0.01 | 2.30 | 0.68 | 0.22 | 1.27 |
| 16952 | 0 | 276536 | EEEDDDDDDEPEEG   | 2.74 | 0.01 | 1.61 | 0.44 | 0.85 | 1.28 |
| 16953 | 0 | 168420 | EEEDDDDDDFGMGALF | 2.69 | 0.01 | 2.30 | 0.68 | 0.22 | 2.56 |
| 16954 | 0 | 168420 | EEEDDDDDDFGMGALF | 2.69 | 0.01 | 1.61 | 0.44 | 0.85 | 1.28 |
| 16955 | 0 | 276537 | EEEDDDDEEDDSDEA  | 2.75 | 0.01 | 1.61 | 0.44 | 0.85 | 1.28 |
| 16956 | 0 | 119825 | EEEDDDMG         | 2.16 | 0.01 | 2.30 | 0.44 | 0.85 | 1.27 |
| 16957 | 0 | 11571  | EEEDDDMGFGLFD    | 2.58 | 0.01 | 2.30 | 0.68 | 0.22 | 0.85 |
| 16958 | 0 | 11571  | EEEDDDMGFGLFD    | 2.58 | 0.01 | 2.30 | 0.68 | 0.22 | 0.85 |
| 16959 | 0 | 11571  | EEEDDDMGFGLFD    | 2.58 | 0.01 | 2.30 | 0.68 | 0.22 | 0.85 |
| 16960 | 0 | 11571  | EEEDDDMGFGLFD    | 2.58 | 0.01 | 2.30 | 0.68 | 0.22 | 2.98 |
| 16961 | 0 | 11571  | EEEDDDMGFGLFD    | 2.58 | 0.01 | 2.30 | 1.15 | 0.22 | 0.85 |
| 16962 | 0 | 11571  | EEEDDDMGFGLFD    | 2.58 | 0.01 | 2.30 | 0.68 | 0.22 | 1.66 |
| 16963 | 0 | 11571  | EEEDDDMGFGLFD    | 2.58 | 0.01 | 2.30 | 0.68 | 0.22 | 1.66 |
| 16964 | 0 | 11571  | EEEDDDMGFGLFD    | 2.58 | 0.01 | 2.30 | 0.68 | 0.22 | 1.66 |
| 16965 | 0 | 11571  | EEEDDDMGFGLFD    | 2.58 | 0.01 | 2.30 | 0.44 | 1.13 | 0.85 |
| 16966 | 0 | 11571  | EEEDDDMGFGLFD    | 2.58 | 0.01 | 2.30 | 0.68 | 0.22 | 0.28 |
| 16967 | 0 | 11571  | EEEDDDMGFGLFD    | 2.58 | 0.01 | 2.30 | 1.15 | 0.22 | 1.27 |
| 16968 | 0 | 11571  | EEEDDDMGFGLFD    | 2.58 | 0.01 | 2.30 | 0.44 | 0.85 | 1.27 |
| 16969 | 0 | 11571  | EEEDDDMGFGLFD    | 2.58 | 0.01 | 2.30 | 0.68 | 0.22 | 1.27 |
| 16970 | 0 | 11571  | EEEDDDMGFGLFD    | 2.58 | 0.01 | 2.30 | 0.44 | 0.85 | 0.28 |
| 16971 | 0 | 11571  | EEEDDDMGFGLFD    | 2.58 | 0.01 | 2.30 | 0.44 | 1.13 | 0.28 |
| 16972 | 0 | 11571  | EEEDDDMGFGLFD    | 2.58 | 0.01 | 2.30 | 1.15 | 0.22 | 0.28 |
| 16973 | 0 | 11571  | EEEDDDMGFGLFD    | 2.58 | 0.01 | 2.30 | 1.15 | 0.22 | 0.28 |
| 16974 | 0 | 11571  | EEEDDDMGFGLFD    | 2.58 | 0.01 | 2.30 | 0.68 | 0.22 | 0.28 |
| 16975 | 0 | 11571  | EEEDDDMGFGLFD    | 2.58 | 0.01 | 2.30 | 0.68 | 0.22 | 1.27 |
| 16976 | 0 | 11571  | EEEDDDMGFGLFD    | 2.58 | 0.01 | 2.30 | 0.68 | 0.22 | 0.28 |
| 16977 | 0 | 11571  | EEEDDDMGFGLFD    | 2.58 | 0.01 | 2.30 | 0.44 | 0.85 | 0.28 |
| 16978 | 0 | 11571  | EEEDDDMGFGLFD    | 2.58 | 0.01 | 2.30 | 0.44 | 1.13 | 0.28 |

|       |   |        |                 |      |      |      |      |      |      |
|-------|---|--------|-----------------|------|------|------|------|------|------|
| 16979 | 0 | 11571  | EEEDDDMGFGLFD   | 2.58 | 0.01 | 2.30 | 0.44 | 0.85 | 1.27 |
| 16980 | 0 | 11571  | EEEDDDMGFGLFD   | 2.58 | 0.01 | 2.30 | 0.44 | 1.13 | 1.27 |
| 16981 | 0 | 11571  | EEEDDDMGFGLFD   | 2.58 | 0.01 | 2.30 | 0.44 | 0.85 | 0.28 |
| 16982 | 0 | 11571  | EEEDDDMGFGLFD   | 2.58 | 0.01 | 2.30 | 0.44 | 0.85 | 0.28 |
| 16983 | 0 | 11571  | EEEDDDMGFGLFD   | 2.58 | 0.01 | 2.30 | 0.44 | 0.85 | 0.28 |
| 16984 | 0 | 11571  | EEEDDDMGFGLFD   | 2.58 | 0.01 | 2.30 | 0.44 | 0.85 | 0.28 |
| 16985 | 0 | 11571  | EEEDDDMGFGLFD   | 2.58 | 0.01 | 2.30 | 0.44 | 0.85 | 0.28 |
| 16986 | 0 | 11571  | EEEDDDMGFGLFD   | 2.58 | 0.01 | 2.30 | 0.44 | 0.85 | 0.28 |
| 16987 | 0 | 11571  | EEEDDDMGFGLFD   | 2.58 | 0.01 | 2.30 | 0.44 | 1.13 | 0.28 |
| 16988 | 0 | 11571  | EEEDDDMGFGLFD   | 2.58 | 0.01 | 2.30 | 0.44 | 1.13 | 0.28 |
| 16989 | 0 | 11571  | EEEDDDMGFGLFD   | 2.58 | 0.01 | 2.30 | 0.44 | 1.13 | 0.28 |
| 16990 | 0 | 11571  | EEEDDDMGFGLFD   | 2.58 | 0.01 | 2.30 | 0.44 | 1.13 | 0.28 |
| 16991 | 0 | 11571  | EEEDDDMGFGLFD   | 2.58 | 0.01 | 2.30 | 0.44 | 1.13 | 0.28 |
| 16992 | 0 | 11571  | EEEDDDMGFGLFD   | 2.58 | 0.01 | 2.30 | 0.44 | 1.13 | 0.28 |
| 16993 | 0 | 11571  | EEEDDDMGFGLFD   | 2.58 | 0.01 | 2.30 | 0.44 | 0.85 | 1.66 |
| 16994 | 0 | 11571  | EEEDDDMGFGLFD   | 2.58 | 0.01 | 2.30 | 0.44 | 1.13 | 1.27 |
| 16995 | 0 | 11571  | EEEDDDMGFGLFD   | 2.58 | 0.01 | 2.30 | 0.44 | 0.85 | 1.27 |
| 16996 | 0 | 11571  | EEEDDDMGFGLFD   | 2.58 | 0.01 | 2.30 | 0.44 | 0.85 | 1.27 |
| 16997 | 0 | 11571  | EEEDDDMGFGLFD   | 2.58 | 0.01 | 2.30 | 0.44 | 0.85 | 1.27 |
| 16998 | 0 | 11571  | EEEDDDMGFGLFD   | 2.58 | 0.01 | 2.30 | 0.44 | 0.85 | 1.27 |
| 16999 | 0 | 11571  | EEEDDDMGFGLFD   | 2.58 | 0.01 | 2.30 | 0.44 | 1.13 | 1.27 |
| 17000 | 0 | 11571  | EEEDDDMGFGLFD   | 2.58 | 0.01 | 2.30 | 0.44 | 1.13 | 1.27 |
| 17001 | 0 | 11571  | EEEDDDMGFGLFD   | 2.58 | 0.01 | 2.30 | 0.44 | 0.85 | 3.30 |
| 17002 | 0 | 11571  | EEEDDDMGFGLFD   | 2.58 | 0.01 | 2.30 | 1.15 | 0.22 | 3.30 |
| 17003 | 0 | 11571  | EEEDDDMGFGLFD   | 2.58 | 0.01 | 2.30 | 0.44 | 0.85 | 1.27 |
| 17004 | 0 | 11571  | EEEDDDMGFGLFD   | 2.58 | 0.01 | 2.30 | 0.44 | 0.85 | 1.27 |
| 17005 | 0 | 11571  | EEEDDDMGFGLFD   | 2.58 | 0.01 | 2.30 | 0.44 | 0.85 | 0.28 |
| 17006 | 0 | 11571  | EEEDDDMGFGLFD   | 2.58 | 0.01 | 2.30 | 0.44 | 0.85 | 0.85 |
| 17007 | 0 | 11571  | EEEDDDMGFGLFD   | 2.58 | 0.01 | 2.30 | 0.44 | 1.13 | 0.28 |
| 17008 | 0 | 11571  | EEEDDDMGFGLFD   | 2.58 | 0.01 | 2.30 | 0.44 | 1.13 | 0.28 |
| 17009 | 0 | 11571  | EEEDDDMGFGLFD   | 2.58 | 0.01 | 2.30 | 0.44 | 1.13 | 0.85 |
| 17010 | 0 | 11571  | EEEDDDMGFGLFD   | 2.58 | 0.01 | 2.30 | 0.68 | 0.22 | 2.49 |
| 17011 | 0 | 11571  | EEEDDDMGFGLFD   | 2.58 | 0.01 | 2.30 | 0.68 | 0.22 | 2.12 |
| 17012 | 0 | 11571  | EEEDDDMGFGLFD   | 2.58 | 0.01 | 2.30 | 0.68 | 0.22 | 1.27 |
| 17013 | 0 | 11571  | EEEDDDMGFGLFD   | 2.58 | 0.01 | 2.30 | 0.68 | 0.22 | 1.34 |
| 17014 | 0 | 11571  | EEEDDDMGFGLFD   | 2.58 | 0.01 | 2.30 | 0.68 | 0.22 | 2.56 |
| 17015 | 0 | 11571  | EEEDDDMGFGLFD   | 2.58 | 0.01 | 2.30 | 0.68 | 0.22 | 0.85 |
| 17016 | 0 | 11571  | EEEDDDMGFGLFD   | 2.58 | 0.01 | 2.30 | 0.68 | 0.22 | 0.85 |
| 17017 | 0 | 11571  | EEEDDDMGFGLFD   | 2.58 | 0.01 | 2.30 | 0.68 | 0.22 | 1.34 |
| 17018 | 0 | 11571  | EEEDDDMGFGLFD   | 2.58 | 0.01 | 2.30 | 0.68 | 0.22 | 1.34 |
| 17019 | 0 | 11571  | EEEDDDMGFGLFD   | 2.58 | 0.01 | 2.30 | 0.68 | 0.22 | 1.34 |
| 17020 | 0 | 276546 | EEEDEDEEEEEEEE  | 2.72 | 0.01 | 1.61 | 0.44 | 0.85 | 1.28 |
| 17021 | 0 | 276548 | EEEDEDEEEMDDDEV | 2.74 | 0.01 | 1.61 | 0.44 | 0.85 | 1.28 |
| 17022 | 0 | 117282 | EEEDEDMGFGLFD   | 2.59 | 0.01 | 4.33 | 0.44 | 1.13 | 0.28 |
| 17023 | 0 | 276551 | EEDEEEDEEDYEEE  | 2.73 | 0.01 | 1.61 | 0.44 | 0.85 | 1.28 |
| 17024 | 0 | 276552 | EEDEEEDEEEDEED  | 2.74 | 0.01 | 1.61 | 0.44 | 0.85 | 1.28 |
| 17025 | 0 | 276553 | EEDEEEEEDEEEEEE | 2.73 | 0.01 | 1.61 | 0.44 | 0.85 | 1.28 |

|       |   |        |                  |      |      |      |      |      |      |
|-------|---|--------|------------------|------|------|------|------|------|------|
| 17026 | 0 | 276554 | EEEEEEEEEEEEEG   | 2.74 | 0.01 | 1.61 | 0.44 | 0.85 | 1.28 |
| 17027 | 0 | 276564 | EEEDGIEQVEEEEE   | 2.70 | 0.01 | 1.61 | 0.44 | 0.85 | 1.28 |
| 17028 | 0 | 276567 | EEEDHEKQHQSDETQ  | 2.72 | 0.01 | 1.61 | 0.44 | 0.85 | 1.28 |
| 17029 | 0 | 276568 | EEEDHEKQQQSDEAQ  | 2.71 | 0.01 | 1.61 | 0.44 | 0.85 | 1.28 |
| 17030 | 0 | 276569 | EEEDHEKQQQSDETQ  | 2.71 | 0.01 | 1.61 | 0.44 | 0.85 | 1.28 |
| 17031 | 0 | 276573 | EEEDKEEEEDDDDDD  | 2.73 | 0.01 | 1.61 | 0.44 | 0.85 | 1.28 |
| 17032 | 0 | 96214  | EEEDKKRKEE       | 2.35 | 0.01 | 0.78 | 0.44 | 1.93 | 0.85 |
| 17033 | 0 | 276576 | EEEDNDDDDLEEAE   | 2.72 | 0.01 | 1.61 | 0.44 | 0.85 | 1.28 |
| 17034 | 0 | 276577 | EEEDNEKQQQSDEAQ  | 2.71 | 0.01 | 1.61 | 0.44 | 0.85 | 1.28 |
| 17035 | 0 | 276586 | EEEDVGPRHVDPDHF  | 2.70 | 0.01 | 1.61 | 0.44 | 0.85 | 1.28 |
| 17036 | 0 | 96215  | EEEEAEDKED       | 2.36 | 0.01 | 0.78 | 0.44 | 1.93 | 0.85 |
| 17037 | 0 | 96215  | EEEEAEDKED       | 2.36 | 0.01 | 0.78 | 0.44 | 1.23 | 0.28 |
| 17038 | 0 | 276597 | EEEEDDDDDDDEPEE  | 2.73 | 0.01 | 1.61 | 0.44 | 0.85 | 1.28 |
| 17039 | 0 | 276599 | EEEEDEDEEEEEEE   | 2.72 | 0.01 | 1.61 | 0.44 | 0.85 | 1.28 |
| 17040 | 0 | 98747  | EEEEDEDEEEGSR    | 2.71 | 0.01 | 2.16 | 0.44 | 1.23 | 1.48 |
| 17041 | 0 | 276600 | EEEEDEDEEEMDDDE  | 2.74 | 0.01 | 1.61 | 0.44 | 0.85 | 1.28 |
| 17042 | 0 | 276602 | EEEEDEDEEEDDEE   | 2.73 | 0.01 | 1.61 | 0.44 | 0.85 | 1.28 |
| 17043 | 0 | 276603 | EEEEDEDEEEDDEE   | 2.73 | 0.01 | 1.61 | 0.44 | 0.85 | 1.28 |
| 17044 | 0 | 141629 | EEEEEDGEM        | 2.17 | 0.01 | 0.78 | 0.44 | 1.13 | 0.28 |
| 17045 | 0 | 141629 | EEEEEDGEM        | 2.17 | 0.01 | 0.78 | 0.44 | 1.13 | 0.28 |
| 17046 | 0 | 141629 | EEEEEDGEM        | 2.17 | 0.01 | 0.78 | 0.44 | 1.41 | 0.28 |
| 17047 | 0 | 276609 | EEEEEDGIEQVEEEEE | 2.70 | 0.01 | 1.61 | 0.44 | 0.85 | 1.28 |
| 17048 | 0 | 276611 | EEEEEDHEKQHQSDET | 2.71 | 0.01 | 1.61 | 0.44 | 0.85 | 1.28 |
| 17049 | 0 | 276612 | EEEEEDHEKQQQSDEA | 2.70 | 0.01 | 1.61 | 0.44 | 0.85 | 1.28 |
| 17050 | 0 | 276613 | EEEEEDHEKQQQSDET | 2.70 | 0.01 | 1.61 | 0.44 | 0.85 | 1.28 |
| 17051 | 0 | 276616 | EEEEEDNEKQQQSDEA | 2.70 | 0.01 | 1.61 | 0.44 | 0.85 | 1.28 |
| 17052 | 0 | 276619 | EEEEEDVGPRHVDPDH | 2.71 | 0.01 | 1.61 | 0.44 | 0.85 | 1.28 |
| 17053 | 0 | 125869 | EEEE             | 1.75 | 4.45 | 2.18 | 0.68 | 0.22 | 2.51 |
| 17054 | 0 | 125869 | EEEE             | 1.75 | 4.45 | 2.18 | 0.68 | 0.22 | 2.51 |
| 17055 | 0 | 125869 | EEEE             | 1.75 | 4.45 | 2.18 | 0.68 | 0.22 | 2.51 |
| 17056 | 0 | 276625 | EEEEDEEEDDEE     | 2.74 | 0.01 | 1.61 | 0.44 | 0.85 | 1.28 |
| 17057 | 0 | 276626 | EEEEDEEEDDEE     | 2.73 | 0.01 | 1.61 | 0.44 | 0.85 | 1.28 |
| 17058 | 0 | 276627 | EEEEDEEEDGEEVE   | 2.75 | 0.01 | 1.61 | 0.44 | 0.85 | 1.28 |
| 17059 | 0 | 276629 | EEEEEDGIEQVEEEEE | 2.70 | 0.01 | 1.61 | 0.44 | 0.85 | 1.28 |
| 17060 | 0 | 276630 | EEEEEDHEKQHQSDE  | 2.72 | 0.01 | 1.61 | 0.44 | 0.85 | 1.28 |
| 17061 | 0 | 276631 | EEEEEDHEKQQQSDE  | 2.71 | 0.01 | 1.61 | 0.44 | 0.85 | 1.28 |
| 17062 | 0 | 276632 | EEEEEDNEKQQQSDE  | 2.71 | 0.01 | 1.61 | 0.44 | 0.85 | 1.28 |
| 17063 | 0 | 11575  | EEEEEDGFMGFGMFD  | 2.78 | 0.01 | 2.22 | 0.68 | 0.22 | 0.85 |
| 17064 | 0 | 11575  | EEEEEDGFMGFGMFD  | 2.78 | 0.01 | 2.22 | 0.68 | 0.22 | 0.85 |
| 17065 | 0 | 11575  | EEEEEDGFMGFGMFD  | 2.78 | 0.01 | 2.22 | 0.68 | 0.22 | 1.34 |
| 17066 | 0 | 11575  | EEEEEDGFMGFGMFD  | 2.78 | 0.01 | 2.22 | 1.15 | 2.25 | 1.75 |
| 17067 | 0 | 276636 | EEEEEDGIEQVEEE   | 2.70 | 0.01 | 1.61 | 0.44 | 0.85 | 1.28 |

|       |   |        |                                                   |      |      |      |      |      |      |
|-------|---|--------|---------------------------------------------------|------|------|------|------|------|------|
| 17068 | 0 | 276638 | EEEEEDHEKQQQSD                                    | 2.71 | 0.01 | 1.61 | 0.44 | 0.85 | 1.28 |
| 17069 | 0 | 276639 | EEEEEDNEKQQQSD                                    | 2.71 | 0.01 | 1.61 | 0.44 | 0.85 | 1.28 |
| 17070 | 0 | 276643 | EEEEEDHEKQQQS                                     | 2.71 | 0.01 | 1.61 | 0.44 | 0.85 | 1.28 |
| 17071 | 0 | 125870 | EEEEEEEE                                          | 2.27 | 4.15 | 2.18 | 0.68 | 0.22 | 0.28 |
| 17072 | 0 | 125870 | EEEEEEEE                                          | 2.27 | 4.15 | 2.18 | 0.68 | 0.22 | 1.27 |
| 17073 | 0 | 125870 | EEEEEEEE                                          | 2.27 | 4.15 | 2.18 | 0.68 | 0.22 | 1.48 |
| 17074 | 0 | 125870 | EEEEEEEE                                          | 2.27 | 4.15 | 2.18 | 0.68 | 0.22 | 1.34 |
| 17075 | 0 | 125870 | EEEEEEEE                                          | 2.27 | 4.15 | 2.18 | 3.50 | 0.22 | 0.28 |
| 17076 | 0 | 125870 | EEEEEEEE                                          | 2.27 | 4.15 | 2.18 | 4.93 | 0.22 | 0.28 |
| 17077 | 0 | 125871 | EEEEEEEE                                          | 2.37 | 4.45 | 2.18 | 1.20 | 0.22 | 0.28 |
| 17078 | 0 | 125871 | EEEEEEEE                                          | 2.37 | 4.45 | 2.18 | 2.75 | 0.22 | 0.28 |
| 17079 | 0 | 125871 | EEEEEEEE                                          | 2.37 | 4.45 | 2.18 | 2.75 | 0.22 | 1.34 |
| 17080 | 0 | 276675 | EEEEEEEGSDEEDQ                                    | 2.72 | 0.01 | 1.61 | 0.44 | 0.85 | 1.28 |
| 17081 | 0 | 11576  | EEEEEEGAGDGE                                      | 2.60 | 0.01 | 3.17 | 0.44 | 0.85 | 0.85 |
| 17082 | 0 | 276684 | EEEEEEGSDEEDQD                                    | 2.72 | 0.01 | 1.61 | 0.44 | 0.85 | 1.28 |
| 17083 | 0 | 276702 | EEEEEEGSDEEDQDE                                   | 2.73 | 0.01 | 1.61 | 0.44 | 0.85 | 1.28 |
| 17084 | 0 | 276717 | EEEEENERQQQSDE                                    | 2.71 | 0.01 | 1.61 | 0.44 | 0.85 | 1.28 |
| 17085 | 0 | 276731 | EEEEGSDEEDQDER                                    | 2.72 | 0.01 | 1.61 | 0.44 | 0.85 | 1.28 |
| 17086 | 0 | 276751 | EEEEENERQQQSDDET                                  | 2.70 | 0.01 | 1.61 | 0.44 | 0.85 | 1.28 |
| 17087 | 0 | 11579  | EEEEGAGDGEHLE                                     | 2.59 | 0.01 | 3.17 | 0.44 | 0.85 | 0.85 |
| 17088 | 0 | 276809 | EEEENERQQQSDDETQ                                  | 2.71 | 0.01 | 1.61 | 0.44 | 0.85 | 1.28 |
| 17089 | 0 | 99180  | EEEEYDEDEYDEE                                     | 2.72 | 0.01 | 2.16 | 0.44 | 1.23 | 1.48 |
| 17090 | 0 | 94496  | EEEEYMPMEDLYLDILPE<br>E                           | 2.93 | 0.01 | 4.15 | 1.12 | 0.22 | 2.02 |
| 17091 | 0 | 94496  | EEEEYMPMEDLYLDILPE<br>E                           | 2.93 | 0.01 | 4.15 | 1.12 | 0.22 | 1.27 |
| 17092 | 0 | 11582  | EEEGAIVTVRGGLRI                                   | 2.69 | 0.01 | 2.16 | 0.44 | 1.23 | 0.85 |
| 17093 | 0 | 276849 | EEEGEDHEKQQQSDE                                   | 2.71 | 0.01 | 1.61 | 0.44 | 0.85 | 1.28 |
| 17094 | 0 | 170726 | EEEGEGEEEEEGEE                                    | 2.72 | 0.01 | 0.78 | 0.44 | 1.41 | 0.28 |
| 17095 | 0 | 96216  | EEEGLLKKSADTLWNM<br>QK                            | 2.81 | 0.01 | 1.75 | 1.20 | 0.22 | 1.27 |
| 17096 | 0 | 96216  | EEEGLLKKSADTLWNM<br>QK                            | 2.81 | 0.01 | 1.75 | 1.20 | 0.22 | 1.27 |
| 17097 | 0 | 96216  | EEEGLLKKSADTLWNM<br>QK                            | 2.81 | 0.01 | 1.75 | 2.52 | 0.22 | 0.28 |
| 17098 | 0 | 96216  | EEEGLLKKSADTLWNM<br>QK                            | 2.81 | 0.01 | 1.75 | 2.52 | 0.22 | 0.28 |
| 17099 | 0 | 111235 | EEEGQQE                                           | 2.06 | 0.01 | 2.52 | 1.12 | 0.22 | 1.27 |
| 17100 | 0 | 98748  | EEEGSNREVRRTAR                                    | 2.69 | 0.01 | 2.16 | 0.44 | 1.23 | 0.85 |
| 17101 | 0 | 11583  | EEETIAQVA                                         | 2.14 | 0.01 | 2.99 | 0.44 | 0.85 | 0.28 |
| 17102 | 0 | 11589  | EEETITKGASAQGSS                                   | 2.67 | 0.01 | 1.66 | 0.44 | 0.85 | 0.28 |
| 17103 | 0 | 11590  | EEETITKGASAQSGT                                   | 2.70 | 0.01 | 3.26 | 0.44 | 0.85 | 0.28 |
| 17104 | 0 | 11591  | EEKKKEKKKEKKPDNEI<br>TNEVKEEQKYSSPSDINA<br>QNLISN | 3.69 | 0.01 | 2.22 | 0.44 | 0.85 | 0.28 |

|       |   |        |                                                     |      |      |      |      |      |      |
|-------|---|--------|-----------------------------------------------------|------|------|------|------|------|------|
| 17105 | 0 | 11591  | EEEEKKEEKKEEKKPDNEI<br>TNEVKEEQKYSSPSDINA<br>QNLISN | 3.69 | 0.01 | 2.22 | 0.44 | 0.85 | 0.28 |
| 17106 | 0 | 11591  | EEEEKKEEKKEEKKPDNEI<br>TNEVKEEQKYSSPSDINA<br>QNLISN | 3.69 | 0.01 | 2.22 | 0.44 | 0.85 | 1.34 |
| 17107 | 0 | 514398 | EEEKQISDASRQSLR                                     | 2.68 | 0.01 | 2.24 | 0.44 | 1.41 | 1.28 |
| 17108 | 0 | 168421 | EEENDEIDGVNHQHLP<br>RAEPQRHTMLCM                    | 3.32 | 0.01 | 3.11 | 0.68 | 0.22 | 0.28 |
| 17109 | 0 | 168421 | EEENDEIDGVNHQHLP<br>RAEPQRHTMLCM                    | 3.32 | 0.01 | 3.11 | 0.68 | 0.22 | 0.28 |
| 17110 | 0 | 168421 | EEENDEIDGVNHQHLP<br>RAEPQRHTMLCM                    | 3.32 | 0.01 | 3.11 | 0.68 | 0.22 | 0.28 |
| 17111 | 0 | 168421 | EEENDEIDGVNHQHLP<br>RAEPQRHTMLCM                    | 3.32 | 0.01 | 3.11 | 0.68 | 0.22 | 1.48 |
| 17112 | 0 | 168421 | EEENDEIDGVNHQHLP<br>RAEPQRHTMLCM                    | 3.32 | 0.01 | 3.11 | 0.68 | 0.22 | 1.48 |
| 17113 | 0 | 276975 | EEENERQQQSDQV                                       | 2.70 | 0.01 | 1.61 | 0.44 | 0.85 | 1.28 |
| 17114 | 0 | 105743 | EEERQQDRRRGRGSR                                     | 2.72 | 0.01 | 2.16 | 0.44 | 1.23 | 0.85 |
| 17115 | 0 | 11603  | EEERTFTLPYARYKAW<br>KS                              | 2.95 | 0.01 | 4.63 | 2.42 | 0.22 | 0.28 |
| 17116 | 0 | 11603  | EEERTFTLPYARYKAW<br>KS                              | 2.95 | 0.01 | 4.63 | 2.42 | 0.22 | 1.34 |
| 17117 | 0 | 477316 | EEESKKVLSQLNVQTQ<br>M                               | 2.85 | 0.01 | 3.12 | 0.68 | 0.22 | 0.28 |
| 17118 | 0 | 116698 | EEEVHNLQKRMQQLE                                     | 2.68 | 0.01 | 3.15 | 0.44 | 1.23 | 0.85 |
| 17119 | 0 | 116698 | EEEVHNLQKRMQQLE                                     | 2.68 | 0.01 | 2.36 | 0.44 | 1.23 | 1.28 |
| 17120 | 0 | 116698 | EEEVHNLQKRMQQLE                                     | 2.68 | 0.01 | 2.36 | 0.44 | 1.23 | 1.27 |
| 17121 | 0 | 116698 | EEEVHNLQKRMQQLE                                     | 2.68 | 0.01 | 2.36 | 0.44 | 1.23 | 1.28 |
| 17122 | 0 | 116698 | EEEVHNLQKRMQQLE                                     | 2.68 | 0.01 | 2.36 | 0.44 | 1.23 | 1.27 |
| 17123 | 0 | 11604  | EEEVKKILDEIVKDP                                     | 2.72 | 0.01 | 3.37 | 0.68 | 0.22 | 0.28 |
| 17124 | 0 | 122744 | EEFARQNLKDAGEYKEE<br>KTDQEAAMDE                     | 3.24 | 0.01 | 1.60 | 0.68 | 0.22 | 1.39 |
| 17125 | 0 | 122744 | EEFARQNLKDAGEYKEE<br>KTDQEAAMDE                     | 3.24 | 0.01 | 1.60 | 0.68 | 0.22 | 0.85 |
| 17126 | 0 | 11613  | EEFEYDENMEKAKQD                                     | 2.70 | 0.01 | 1.66 | 1.15 | 0.22 | 0.28 |
| 17127 | 0 | 11615  | EEFFFQGPWRKEKE                                      | 2.70 | 0.01 | 3.12 | 0.44 | 1.23 | 1.57 |
| 17128 | 0 | 161095 | EEFNTNIASVTVNKLISN<br>P                             | 2.90 | 0.01 | 2.08 | 0.44 | 1.93 | 1.57 |
| 17129 | 0 | 128497 | EEGAQVKWLKDGVELT<br>REETFKYRFKKDGQRH                | 3.40 | 0.01 | 0.78 | 2.04 | 0.22 | 0.28 |

|       |   |        |                                              |      |      |      |      |      |      |
|-------|---|--------|----------------------------------------------|------|------|------|------|------|------|
| 17130 | 0 | 277143 | EEGEDHEKQQQSDEA                              | 2.70 | 0.01 | 1.61 | 0.44 | 0.85 | 1.28 |
| 17131 | 0 | 277146 | EEGEEEDHEKQQQSD                              | 2.71 | 0.01 | 1.61 | 0.44 | 0.85 | 1.28 |
| 17132 | 0 | 277161 | EEGEIDDDSDVQNEI                              | 2.70 | 0.01 | 1.61 | 0.44 | 0.85 | 1.28 |
| 17133 | 0 | 277169 | EEGERMTEKEDGDNE                              | 2.71 | 0.01 | 1.61 | 0.44 | 0.85 | 1.28 |
| 17134 | 0 | 11647  | EEGKILRAQLEFNQIKAE                           | 2.87 | 0.01 | 0.78 | 2.82 | 0.22 | 0.28 |
| 17135 | 0 | 277227 | EEGNQDADEEDEGED                              | 2.74 | 0.01 | 1.61 | 0.44 | 0.85 | 1.28 |
| 17136 | 0 | 11652  | EEGPVDEEIVQEEGTV                             | 2.77 | 0.01 | 1.66 | 0.44 | 1.74 | 0.28 |
| 17137 | 0 | 11652  | EEGPVDEEIVQEEGTV                             | 2.77 | 0.01 | 1.66 | 1.20 | 0.22 | 0.28 |
| 17138 | 0 | 11652  | EEGPVDEEIVQEEGTV                             | 2.77 | 0.01 | 1.66 | 0.44 | 1.74 | 0.28 |
| 17139 | 0 | 11652  | EEGPVDEEIVQEEGTV                             | 2.77 | 0.01 | 1.66 | 0.44 | 1.74 | 0.28 |
| 17140 | 0 | 11652  | EEGPVDEEIVQEEGTV                             | 2.77 | 0.01 | 1.66 | 3.27 | 0.22 | 0.28 |
| 17141 | 0 | 11652  | EEGPVDEEIVQEEGTV                             | 2.77 | 0.01 | 1.66 | 2.42 | 0.22 | 0.28 |
| 17142 | 0 | 141631 | EEGQEEETTKQVQRYRA<br>RLSPGDVLVIPAGHPVAI<br>N | 3.50 | 0.01 | 3.65 | 0.44 | 1.23 | 1.27 |
| 17143 | 0 | 11656  | EEGQRMAEM                                    | 2.25 | 0.01 | 2.69 | 0.44 | 0.85 | 0.28 |
| 17144 | 0 | 277245 | EEGQYDAADVEAGDG                              | 2.73 | 0.01 | 1.61 | 0.44 | 0.85 | 1.28 |
| 17145 | 0 | 11661  | EEGSVAQEIVEEDAPA                             | 2.75 | 0.01 | 1.66 | 0.44 | 1.74 | 0.28 |
| 17146 | 0 | 11661  | EEGSVAQEIVEEDAPA                             | 2.75 | 0.01 | 1.66 | 1.20 | 0.22 | 0.28 |
| 17147 | 0 | 11661  | EEGSVAQEIVEEDAPA                             | 2.75 | 0.01 | 1.66 | 0.44 | 1.74 | 0.28 |
| 17148 | 0 | 11661  | EEGSVAQEIVEEDAPA                             | 2.75 | 0.01 | 1.66 | 0.44 | 1.74 | 0.28 |
| 17149 | 0 | 11661  | EEGSVAQEIVEEDAPA                             | 2.75 | 0.01 | 1.66 | 3.27 | 0.22 | 0.28 |
| 17150 | 0 | 11661  | EEGSVAQEIVEEDAPA                             | 2.75 | 0.01 | 1.66 | 2.42 | 0.22 | 0.28 |
| 17151 | 0 | 103874 | EEHSRPQ                                      | 2.01 | 0.01 | 0.90 | 1.15 | 0.22 | 1.39 |
| 17152 | 0 | 11672  | EEIAQVAT                                     | 2.13 | 0.01 | 2.99 | 0.44 | 0.85 | 0.28 |
| 17153 | 0 | 100813 | EEIAQVATIS                                   | 2.32 | 0.01 | 0.78 | 0.44 | 0.85 | 0.28 |
| 17154 | 0 | 135914 | EEIAQVATISAN                                 | 2.48 | 0.01 | 0.78 | 0.44 | 1.13 | 0.28 |
| 17155 | 0 | 135914 | EEIAQVATISAN                                 | 2.48 | 0.01 | 0.78 | 0.44 | 1.41 | 0.28 |
| 17156 | 0 | 102381 | EEIAQVATISANGDKDIG<br>NI                     | 2.95 | 0.01 | 1.75 | 3.33 | 1.13 | 0.28 |
| 17157 | 0 | 140996 | EEIDYDDTISVEMKK                              | 2.67 | 0.01 | 0.78 | 1.15 | 0.22 | 0.85 |
| 17158 | 0 | 143682 | EEIEKE                                       | 1.92 | 0.01 | 0.78 | 0.68 | 0.22 | 0.85 |
| 17159 | 0 | 143682 | EEIEKE                                       | 1.92 | 0.01 | 0.78 | 0.68 | 0.22 | 0.85 |
| 17160 | 0 | 143682 | EEIEKE                                       | 1.92 | 0.01 | 0.78 | 0.68 | 0.22 | 0.85 |
| 17161 | 0 | 143682 | EEIEKE                                       | 1.92 | 0.01 | 0.78 | 0.68 | 0.22 | 0.85 |
| 17162 | 0 | 11682  | EEIKEEIKEVKEEIKEVKEE<br>IKEVKEEIKEVKEEIKE    | 3.62 | 0.01 | 2.22 | 0.44 | 1.74 | 0.28 |



|       |   |        |                                               |      |      |      |      |      |      |
|-------|---|--------|-----------------------------------------------|------|------|------|------|------|------|
| 17163 | 0 | 11682  | EEIKEEIKEVKKEEIKEVKKEE<br>IKEVKKEEIKEVKKEEIKE | 3.62 | 0.01 | 2.22 | 1.15 | 0.22 | 1.48 |
| 17164 | 0 | 11682  | EEIKEEIKEVKKEEIKEVKKEE<br>IKEVKKEEIKEVKKEEIKE | 3.62 | 0.01 | 2.22 | 0.44 | 0.85 | 1.48 |
| 17165 | 0 | 11682  | EEIKEEIKEVKKEEIKEVKKEE<br>IKEVKKEEIKEVKKEEIKE | 3.62 | 0.01 | 2.22 | 1.15 | 0.22 | 0.28 |
| 17166 | 0 | 138765 | EEIKMDISKLNA                                  | 2.46 | 0.01 | 0.78 | 0.68 | 0.22 | 0.28 |
| 17167 | 0 | 138765 | EEIKMDISKLNA                                  | 2.46 | 0.01 | 0.78 | 0.68 | 0.22 | 0.28 |
| 17168 | 0 | 138765 | EEIKMDISKLNA                                  | 2.46 | 0.01 | 0.78 | 0.68 | 0.22 | 0.28 |
| 17169 | 0 | 138765 | EEIKMDISKLNA                                  | 2.46 | 0.01 | 0.78 | 0.68 | 0.22 | 1.48 |
| 17170 | 0 | 138765 | EEIKMDISKLNA                                  | 2.46 | 0.01 | 0.78 | 0.68 | 0.22 | 0.28 |
| 17171 | 0 | 138765 | EEIKMDISKLNA                                  | 2.46 | 0.01 | 0.78 | 0.68 | 0.22 | 0.28 |
| 17172 | 0 | 164647 | EEINGIRKPR                                    | 2.32 | 0.01 | 3.24 | 0.68 | 0.22 | 1.48 |
| 17173 | 0 | 164647 | EEINGIRKPR                                    | 2.32 | 0.01 | 3.24 | 0.68 | 0.22 | 1.48 |
| 17174 | 0 | 164647 | EEINGIRKPR                                    | 2.32 | 0.01 | 3.24 | 0.68 | 0.22 | 1.48 |
| 17175 | 0 | 164647 | EEINGIRKPR                                    | 2.32 | 0.01 | 3.24 | 0.68 | 0.22 | 1.48 |
| 17176 | 0 | 164647 | EEINGIRKPR                                    | 2.32 | 0.01 | 3.24 | 0.68 | 0.22 | 1.48 |
| 17177 | 0 | 164647 | EEINGIRKPR                                    | 2.32 | 0.01 | 3.24 | 0.68 | 0.22 | 1.48 |
| 17178 | 0 | 164647 | EEINGIRKPR                                    | 2.32 | 0.01 | 3.24 | 0.68 | 0.22 | 1.48 |
| 17179 | 0 | 164647 | EEINGIRKPR                                    | 2.32 | 0.01 | 3.24 | 0.68 | 0.22 | 1.48 |
| 17180 | 0 | 164647 | EEINGIRKPR                                    | 2.32 | 0.01 | 3.24 | 0.68 | 0.22 | 1.48 |
| 17181 | 0 | 164647 | EEINGIRKPR                                    | 2.32 | 0.01 | 3.24 | 0.68 | 0.22 | 1.48 |
| 17182 | 0 | 164647 | EEINGIRKPR                                    | 2.32 | 0.01 | 3.24 | 0.68 | 0.22 | 1.48 |
| 17183 | 0 | 164647 | EEINGIRKPR                                    | 2.32 | 0.01 | 3.24 | 0.68 | 0.22 | 1.48 |
| 17184 | 0 | 164647 | EEINGIRKPR                                    | 2.32 | 0.01 | 3.24 | 0.68 | 0.22 | 1.48 |
| 17185 | 0 | 164647 | EEINGIRKPR                                    | 2.32 | 0.01 | 3.24 | 0.68 | 0.22 | 1.48 |
| 17186 | 0 | 164647 | EEINGIRKPR                                    | 2.32 | 0.01 | 3.24 | 0.68 | 0.22 | 1.48 |
| 17187 | 0 | 11692  | EEINTLQN                                      | 2.13 | 0.01 | 2.40 | 2.43 | 0.22 | 0.28 |
| 17188 | 0 | 277361 | EEIRENDGDIWKTEA                               | 2.68 | 0.01 | 1.61 | 0.44 | 0.85 | 1.28 |
| 17189 | 0 | 98749  | EEIRNLALQTLP                                  | 2.46 | 0.01 | 1.86 | 0.44 | 1.93 | 1.27 |
| 17190 | 0 | 277367 | EEISDDDDGEDEEEE                               | 2.72 | 0.01 | 1.61 | 0.44 | 0.85 | 1.28 |
| 17191 | 0 | 11699  | EEITQVATISANSDH                               | 2.67 | 0.01 | 2.93 | 0.44 | 1.59 | 0.28 |
| 17192 | 0 | 11700  | EEITQVATISANSDHNIG<br>KL                      | 2.92 | 0.01 | 2.93 | 0.44 | 1.59 | 0.28 |
| 17193 | 0 | 11704  | EEIVPNSVEQ                                    | 2.33 | 0.01 | 1.60 | 0.44 | 1.23 | 0.28 |
| 17194 | 0 | 11704  | EEIVPNSVEQ                                    | 2.33 | 0.01 | 1.60 | 0.44 | 1.23 | 0.28 |
| 17195 | 0 | 11704  | EEIVPNSVEQ                                    | 2.33 | 0.01 | 1.60 | 0.44 | 1.23 | 0.85 |
| 17196 | 0 | 11711  | EEKANKAMININIFMRE<br>SSRSFL                   | 3.11 | 0.01 | 2.95 | 0.44 | 0.22 | 0.28 |
| 17197 | 0 | 11712  | EEKANQREEAYKEQI                               | 2.71 | 0.01 | 3.15 | 0.44 | 1.23 | 0.85 |
| 17198 | 0 | 277420 | EEKEEDEEEEEDEEE                               | 2.73 | 0.01 | 1.61 | 0.44 | 0.85 | 1.28 |
| 17199 | 0 | 99975  | EEKELLKRIQ                                    | 2.34 | 0.01 | 2.18 | 2.16 | 0.22 | 0.28 |
| 17200 | 0 | 99975  | EEKELLKRIQ                                    | 2.34 | 0.01 | 2.18 | 0.68 | 0.22 | 0.28 |
| 17201 | 0 | 99975  | EEKELLKRIQ                                    | 2.34 | 0.01 | 2.18 | 0.68 | 0.22 | 1.34 |

|       |   |        |                          |      |      |      |      |      |      |
|-------|---|--------|--------------------------|------|------|------|------|------|------|
| 17202 | 0 | 99975  | EEKELLKRIQ               | 2.34 | 0.01 | 2.18 | 0.68 | 0.22 | 1.27 |
| 17203 | 0 | 99975  | EEKELLKRIQ               | 2.34 | 0.01 | 2.18 | 2.16 | 0.22 | 0.28 |
| 17204 | 0 | 99976  | EEKELLNRIQ               | 2.32 | 0.01 | 2.18 | 2.16 | 0.22 | 0.28 |
| 17205 | 0 | 99976  | EEKELLNRIQ               | 2.32 | 0.01 | 2.18 | 2.16 | 0.22 | 0.28 |
| 17206 | 0 | 99976  | EEKELLNRIQ               | 2.32 | 0.01 | 2.18 | 2.16 | 0.22 | 0.28 |
| 17207 | 0 | 11715  | EEKIKEIAKT               | 2.36 | 0.01 | 3.18 | 2.74 | 0.22 | 0.28 |
| 17208 | 0 | 106376 | EEKKGNVYVTDH             | 2.44 | 0.01 | 0.90 | 2.16 | 0.22 | 2.49 |
| 17209 | 0 | 106376 | EEKKGNVYVTDH             | 2.44 | 0.01 | 0.90 | 2.16 | 0.22 | 2.49 |
| 17210 | 0 | 106376 | EEKKGNVYVTDH             | 2.44 | 0.01 | 0.90 | 2.16 | 0.22 | 0.28 |
| 17211 | 0 | 11723  | EEKKVPINLWLDGKQNT<br>VPL | 2.94 | 0.01 | 2.56 | 1.12 | 0.22 | 0.28 |
| 17212 | 0 | 11723  | EEKKVPINLWLDGKQNT<br>VPL | 2.94 | 0.01 | 2.56 | 1.12 | 0.22 | 0.28 |
| 17213 | 0 | 11723  | EEKKVPINLWLDGKQNT<br>VPL | 2.94 | 0.01 | 2.56 | 3.12 | 0.22 | 0.28 |
| 17214 | 0 | 11723  | EEKKVPINLWLDGKQNT<br>VPL | 2.94 | 0.01 | 2.56 | 3.12 | 0.22 | 1.34 |
| 17215 | 0 | 11724  | EEKLKKKSSF               | 2.34 | 4.23 | 2.56 | 0.44 | 0.85 | 0.28 |
| 17216 | 0 | 134909 | EEKLVF                   | 1.89 | 0.01 | 2.73 | 0.68 | 0.22 | 2.56 |
| 17217 | 0 | 134909 | EEKLVF                   | 1.89 | 0.01 | 2.73 | 0.68 | 0.22 | 2.56 |
| 17218 | 0 | 134909 | EEKLVF                   | 1.89 | 0.01 | 2.73 | 0.68 | 0.22 | 1.48 |
| 17219 | 0 | 134909 | EEKLVF                   | 1.89 | 0.01 | 2.73 | 0.68 | 0.22 | 1.48 |
| 17220 | 0 | 134909 | EEKLVF                   | 1.89 | 0.01 | 2.73 | 0.68 | 0.22 | 1.48 |
| 17221 | 0 | 134909 | EEKLVF                   | 1.89 | 0.01 | 2.73 | 0.68 | 0.22 | 1.48 |
| 17222 | 0 | 134909 | EEKLVF                   | 1.89 | 0.01 | 2.73 | 0.68 | 0.22 | 0.85 |
| 17223 | 0 | 141632 | EEKNENFPLCMGVEHI         | 2.71 | 0.01 | 2.86 | 2.55 | 0.22 | 0.28 |
| 17224 | 0 | 102383 | EEKNGNTSWNDTVTCP<br>NAEC | 2.94 | 0.01 | 3.44 | 0.68 | 0.22 | 0.28 |
| 17225 | 0 | 11729  | EEKNNINFNIDDLSSKLN<br>E  | 2.93 | 0.01 | 3.03 | 3.33 | 0.22 | 1.57 |
| 17226 | 0 | 11729  | EEKNNINFNIDDLSSKLN<br>E  | 2.93 | 0.01 | 2.08 | 2.02 | 0.22 | 1.57 |
| 17227 | 0 | 11731  | EEKPAVLGHDEAAYS          | 2.65 | 0.01 | 3.75 | 0.44 | 1.74 | 0.28 |
| 17228 | 0 | 122745 | EEKPTSAPS                | 2.24 | 0.01 | 0.78 | 1.20 | 0.22 | 0.85 |
| 17229 | 0 | 514449 | EEKQAANQTAINTIA          | 2.72 | 0.01 | 2.24 | 0.44 | 1.41 | 1.28 |
| 17230 | 0 | 514450 | EEKQISDASRQGLRR          | 2.65 | 0.01 | 2.24 | 0.44 | 1.41 | 1.28 |
| 17231 | 0 | 514451 | EEKQISDASRQSLRR          | 2.67 | 0.01 | 2.24 | 0.44 | 1.41 | 1.28 |
| 17232 | 0 | 11740  | EELDKYFKNHTSPDVDL        | 2.77 | 0.01 | 2.48 | 0.68 | 0.22 | 0.28 |
| 17233 | 0 | 11740  | EELDKYFKNHTSPDVDL        | 2.77 | 0.01 | 2.48 | 1.20 | 0.22 | 0.28 |
| 17234 | 0 | 11744  | EELFKEYK                 | 2.16 | 0.01 | 3.59 | 2.65 | 0.22 | 0.28 |
| 17235 | 0 | 11744  | EELFKEYK                 | 2.16 | 0.01 | 3.59 | 0.68 | 0.22 | 1.27 |
| 17236 | 0 | 11748  | EELGEEIRLKVFLG           | 2.70 | 0.01 | 2.08 | 0.44 | 0.85 | 0.28 |
| 17237 | 0 | 11748  | EELGEEIRLKVFLG           | 2.70 | 0.01 | 2.08 | 0.44 | 0.85 | 0.28 |
| 17238 | 0 | 11748  | EELGEEIRLKVFLG           | 2.70 | 0.01 | 2.08 | 0.44 | 0.85 | 0.28 |

|       |   |        |                                        |      |      |      |      |      |      |
|-------|---|--------|----------------------------------------|------|------|------|------|------|------|
| 17239 | 0 | 170736 | EELGMDDFTASNGWL                        | 2.64 | 0.01 | 0.78 | 0.44 | 1.41 | 0.28 |
| 17240 | 0 | 277652 | EELKDEEKEEDEEEE                        | 2.73 | 0.01 | 1.61 | 0.44 | 0.85 | 1.28 |
| 17241 | 0 | 170737 | EELKHLLSRINHFEKIQIIP<br>KNSWSDHEASGVSS | 3.43 | 0.01 | 4.63 | 2.13 | 0.22 | 0.28 |
| 17242 | 0 | 477415 | EELKKYLPFLNSIQKEYE                     | 2.86 | 0.01 | 3.12 | 0.68 | 0.22 | 0.28 |
| 17243 | 0 | 141633 | EELLETLQIVAEREAY                       | 2.76 | 0.01 | 1.66 | 2.55 | 0.22 | 0.28 |
| 17244 | 0 | 141633 | EELLETLQIVAEREAY                       | 2.76 | 0.01 | 1.66 | 1.20 | 0.22 | 0.28 |
| 17245 | 0 | 115219 | EELNVPGEIVESLSSEES<br>I                | 2.99 | 0.01 | 1.60 | 0.44 | 1.23 | 2.51 |
| 17246 | 0 | 141634 | EELQKREE                               | 2.13 | 0.01 | 0.78 | 0.44 | 1.13 | 0.28 |
| 17247 | 0 | 141634 | EELQKREE                               | 2.13 | 0.01 | 0.78 | 0.44 | 1.13 | 0.28 |
| 17248 | 0 | 141634 | EELQKREE                               | 2.13 | 0.01 | 0.78 | 0.44 | 1.41 | 0.28 |
| 17249 | 0 | 133067 | EELSELREE                              | 2.25 | 0.01 | 2.19 | 0.68 | 1.41 | 2.56 |
| 17250 | 0 | 133067 | EELSELREE                              | 2.25 | 0.01 | 2.19 | 0.68 | 1.41 | 0.28 |
| 17251 | 0 | 133067 | EELSELREE                              | 2.25 | 0.01 | 2.19 | 0.68 | 1.41 | 0.28 |
| 17252 | 0 | 133067 | EELSELREE                              | 2.25 | 0.01 | 2.19 | 0.68 | 1.41 | 2.56 |
| 17253 | 0 | 127956 | EELTAGSGLREDLLSLQE<br>PG               | 2.97 | 0.01 | 0.78 | 0.44 | 1.13 | 0.28 |
| 17254 | 0 | 11772  | EELTPGRFRT                             | 2.32 | 0.01 | 2.56 | 0.68 | 0.22 | 0.28 |
| 17255 | 0 | 11775  | EELVEEVI                               | 2.16 | 0.01 | 1.66 | 0.44 | 1.59 | 1.57 |
| 17256 | 0 | 11776  | EELVEEVIP                              | 2.26 | 0.01 | 1.66 | 0.44 | 1.59 | 1.57 |
| 17257 | 0 | 11777  | EELVEEVV                               | 2.14 | 0.01 | 1.66 | 0.44 | 1.59 | 1.57 |
| 17258 | 0 | 128503 | EEMALKLDNVLLDTYQD<br>ASS               | 2.92 | 0.01 | 0.78 | 3.01 | 0.22 | 0.28 |
| 17259 | 0 | 11781  | EEMFIPK                                | 2.01 | 0.01 | 4.93 | 0.68 | 0.22 | 3.13 |
| 17260 | 0 | 106377 | EEMRHVV                                | 2.00 | 0.01 | 0.90 | 1.81 | 0.22 | 0.28 |
| 17261 | 0 | 125880 | EEMTMQQAK                              | 2.23 | 0.01 | 0.78 | 0.44 | 1.13 | 0.85 |
| 17262 | 0 | 11792  | EENDKKKEQEKEQSNEN<br>NDQKKDMEAQNLISK   | 3.47 | 0.01 | 2.22 | 0.44 | 1.59 | 0.28 |
| 17263 | 0 | 11792  | EENDKKKEQEKEQSNEN<br>NDQKKDMEAQNLISK   | 3.47 | 0.01 | 2.22 | 0.44 | 1.59 | 1.48 |
| 17264 | 0 | 11792  | EENDKKKEQEKEQSNEN<br>NDQKKDMEAQNLISK   | 3.47 | 0.01 | 2.22 | 0.44 | 2.39 | 0.28 |
| 17265 | 0 | 11794  | EENEDSTLSTDVSP                         | 2.71 | 0.01 | 3.37 | 2.22 | 0.22 | 0.28 |
| 17266 | 0 | 99185  | EENEGGNIFSGFTPE                        | 2.71 | 0.01 | 2.16 | 0.44 | 1.23 | 1.48 |
| 17267 | 0 | 170745 | EENEKLLKEYGFCIM                        | 2.67 | 0.01 | 0.78 | 0.44 | 1.41 | 0.28 |
| 17268 | 0 | 277812 | EENERQQQSDQVQ                          | 2.70 | 0.01 | 1.61 | 0.44 | 0.85 | 1.28 |
| 17269 | 0 | 11799  | EENIGIYKELEDLIEKNEN<br>L               | 3.00 | 0.01 | 1.66 | 0.44 | 0.85 | 0.28 |

|       |   |        |                                        |      |      |      |      |      |      |
|-------|---|--------|----------------------------------------|------|------|------|------|------|------|
| 17270 | 0 | 11800  | EENISLDLIQQYYLTFNFD                    | 2.90 | 0.01 | 2.08 | 0.44 | 0.22 | 1.57 |
| 17271 | 0 | 11800  | EENISLDLIQQYYLTFNFD                    | 2.90 | 0.01 | 2.08 | 2.02 | 0.22 | 1.57 |
| 17272 | 0 | 11800  | EENISLDLIQQYYLTFNFD                    | 2.90 | 0.01 | 2.08 | 1.15 | 0.22 | 1.57 |
| 17273 | 0 | 11800  | EENISLDLIQQYYLTFNFD                    | 2.90 | 0.01 | 2.08 | 2.49 | 0.22 | 1.57 |
| 17274 | 0 | 11800  | EENISLDLIQQYYLTFNFD                    | 2.90 | 0.01 | 3.16 | 0.44 | 1.93 | 1.57 |
| 17275 | 0 | 122325 | EENKEKELSNQQQSEKK<br>SISKVDEDSYRILSVSY | 3.49 | 0.01 | 2.22 | 0.44 | 1.74 | 0.28 |
| 17276 | 0 | 122325 | EENKEKELSNQQQSEKK<br>SISKVDEDSYRILSVSY | 3.49 | 0.01 | 2.22 | 0.44 | 1.74 | 1.34 |
| 17277 | 0 | 122325 | EENKEKELSNQQQSEKK<br>SISKVDEDSYRILSVSY | 3.49 | 0.01 | 2.22 | 0.44 | 1.74 | 0.28 |
| 17278 | 0 | 11802  | EENKKPAE                               | 2.15 | 0.01 | 3.85 | 2.00 | 0.85 | 0.85 |
| 17279 | 0 | 11802  | EENKKPAE                               | 2.15 | 0.01 | 3.85 | 2.00 | 0.85 | 0.85 |
| 17280 | 0 | 11802  | EENKKPAE                               | 2.15 | 0.01 | 3.85 | 2.00 | 0.85 | 0.85 |
| 17281 | 0 | 11802  | EENKKPAE                               | 2.15 | 0.01 | 3.85 | 2.00 | 0.85 | 0.85 |
| 17282 | 0 | 79197  | EENLTYTEGCVSVFGA                       | 2.73 | 0.01 | 2.86 | 1.81 | 0.22 | 1.27 |
| 17283 | 0 | 96220  | EENV                                   | 1.59 | 0.01 | 4.08 | 0.44 | 2.39 | 1.57 |
| 17284 | 0 | 11813  | EENVEENV                               | 2.16 | 0.01 | 1.66 | 0.44 | 1.74 | 1.48 |
| 17285 | 0 | 11813  | EENVEENV                               | 2.16 | 0.01 | 1.66 | 0.44 | 1.74 | 1.34 |
| 17286 | 0 | 11813  | EENVEENV                               | 2.16 | 0.01 | 2.96 | 1.20 | 0.22 | 0.85 |
| 17287 | 0 | 11813  | EENVEENV                               | 2.16 | 0.01 | 2.96 | 1.20 | 0.22 | 1.48 |
| 17288 | 0 | 11813  | EENVEENV                               | 2.16 | 0.01 | 1.66 | 1.15 | 0.22 | 0.28 |
| 17289 | 0 | 11813  | EENVEENV                               | 2.16 | 0.01 | 1.66 | 1.81 | 0.22 | 0.28 |
| 17290 | 0 | 11813  | EENVEENV                               | 2.16 | 0.01 | 1.66 | 0.44 | 0.85 | 0.28 |
| 17291 | 0 | 11813  | EENVEENV                               | 2.16 | 0.01 | 1.66 | 0.44 | 1.74 | 0.28 |
| 17292 | 0 | 11813  | EENVEENV                               | 2.16 | 0.01 | 1.66 | 1.12 | 0.22 | 1.48 |
| 17293 | 0 | 11813  | EENVEENV                               | 2.16 | 0.01 | 1.66 | 1.12 | 0.22 | 1.34 |
| 17294 | 0 | 11813  | EENVEENV                               | 2.16 | 0.01 | 2.86 | 0.44 | 1.59 | 1.48 |
| 17295 | 0 | 11813  | EENVEENV                               | 2.16 | 0.01 | 1.66 | 0.44 | 0.85 | 0.28 |
| 17296 | 0 | 11813  | EENVEENV                               | 2.16 | 0.01 | 1.66 | 1.12 | 0.22 | 2.02 |
| 17297 | 0 | 11813  | EENVEENV                               | 2.16 | 0.01 | 1.66 | 1.12 | 0.22 | 1.48 |
| 17298 | 0 | 11814  | EENVEENVEENV                           | 2.54 | 0.01 | 1.66 | 1.20 | 0.22 | 0.28 |
| 17299 | 0 | 11814  | EENVEENVEENV                           | 2.54 | 0.01 | 1.66 | 1.20 | 0.22 | 1.48 |
| 17300 | 0 | 11814  | EENVEENVEENV                           | 2.54 | 0.01 | 1.66 | 1.20 | 0.22 | 1.34 |
| 17301 | 0 | 11815  | EENVEENVEENVEENV                       | 2.81 | 0.01 | 1.66 | 0.44 | 0.85 | 0.28 |
| 17302 | 0 | 11815  | EENVEENVEENVEENV                       | 2.81 | 0.01 | 1.66 | 2.74 | 0.22 | 0.28 |

|       |   |       |                  |      |      |      |      |      |      |
|-------|---|-------|------------------|------|------|------|------|------|------|
| 17303 | 0 | 11815 | EENVEENVEENVEENV | 2.81 | 0.01 | 1.66 | 0.44 | 0.85 | 0.28 |
| 17304 | 0 | 11815 | EENVEENVEENVEENV | 2.81 | 0.01 | 1.66 | 0.44 | 0.85 | 0.28 |
| 17305 | 0 | 11815 | EENVEENVEENVEENV | 2.81 | 0.01 | 1.66 | 0.44 | 0.85 | 0.28 |
| 17306 | 0 | 11815 | EENVEENVEENVEENV | 2.81 | 0.01 | 1.66 | 0.44 | 0.85 | 1.34 |
| 17307 | 0 | 11815 | EENVEENVEENVEENV | 2.81 | 0.01 | 1.66 | 0.44 | 0.85 | 0.85 |
| 17308 | 0 | 11815 | EENVEENVEENVEENV | 2.81 | 0.01 | 1.66 | 0.44 | 0.85 | 1.34 |
| 17309 | 0 | 11815 | EENVEENVEENVEENV | 2.81 | 0.01 | 1.66 | 0.44 | 0.85 | 1.34 |
| 17310 | 0 | 11815 | EENVEENVEENVEENV | 2.81 | 0.01 | 1.66 | 0.44 | 0.85 | 1.34 |
| 17311 | 0 | 11815 | EENVEENVEENVEENV | 2.81 | 0.01 | 1.66 | 0.44 | 0.85 | 0.28 |
| 17312 | 0 | 11815 | EENVEENVEENVEENV | 2.81 | 0.01 | 1.66 | 0.44 | 1.74 | 0.28 |
| 17313 | 0 | 11815 | EENVEENVEENVEENV | 2.81 | 0.01 | 1.66 | 1.12 | 0.22 | 1.48 |
| 17314 | 0 | 11815 | EENVEENVEENVEENV | 2.81 | 0.01 | 1.66 | 1.12 | 0.22 | 1.34 |
| 17315 | 0 | 11815 | EENVEENVEENVEENV | 2.81 | 0.01 | 1.66 | 0.44 | 0.85 | 0.28 |
| 17316 | 0 | 11815 | EENVEENVEENVEENV | 2.81 | 0.01 | 1.66 | 1.15 | 0.22 | 1.27 |
| 17317 | 0 | 11815 | EENVEENVEENVEENV | 2.81 | 0.01 | 1.66 | 1.15 | 0.22 | 1.48 |
| 17318 | 0 | 11815 | EENVEENVEENVEENV | 2.81 | 0.01 | 1.66 | 1.15 | 0.22 | 0.85 |
| 17319 | 0 | 11815 | EENVEENVEENVEENV | 2.81 | 0.01 | 1.66 | 1.15 | 0.22 | 1.48 |
| 17320 | 0 | 11815 | EENVEENVEENVEENV | 2.81 | 0.01 | 1.66 | 1.15 | 0.22 | 1.57 |
| 17321 | 0 | 11815 | EENVEENVEENVEENV | 2.81 | 0.01 | 1.66 | 0.44 | 0.85 | 0.28 |
| 17322 | 0 | 11815 | EENVEENVEENVEENV | 2.81 | 0.01 | 1.66 | 0.44 | 0.85 | 0.28 |
| 17323 | 0 | 11815 | EENVEENVEENVEENV | 2.81 | 0.01 | 1.66 | 0.44 | 1.74 | 0.28 |
| 17324 | 0 | 11815 | EENVEENVEENVEENV | 2.81 | 0.01 | 1.66 | 1.12 | 0.22 | 0.28 |
| 17325 | 0 | 11815 | EENVEENVEENVEENV | 2.81 | 0.01 | 1.66 | 1.12 | 0.22 | 0.28 |

|       |   |       |                                      |      |      |      |      |      |      |
|-------|---|-------|--------------------------------------|------|------|------|------|------|------|
| 17326 | 0 | 11815 | EENVEENVEENVEENV                     | 2.81 | 0.01 | 1.66 | 1.12 | 0.22 | 0.28 |
| 17327 | 0 | 11815 | EENVEENVEENVEENV                     | 2.81 | 0.01 | 1.66 | 1.12 | 0.22 | 0.28 |
| 17328 | 0 | 11815 | EENVEENVEENVEENV                     | 2.81 | 0.01 | 1.66 | 1.12 | 0.22 | 1.34 |
| 17329 | 0 | 11816 | EENVEENVEENVEENVE<br>ENVEENV         | 3.20 | 0.01 | 1.66 | 1.20 | 0.22 | 0.28 |
| 17330 | 0 | 11816 | EENVEENVEENVEENVE<br>ENVEENV         | 3.20 | 0.01 | 1.66 | 0.44 | 0.85 | 0.28 |
| 17331 | 0 | 11816 | EENVEENVEENVEENVE<br>ENVEENV         | 3.20 | 0.01 | 1.66 | 0.44 | 1.74 | 0.28 |
| 17332 | 0 | 11816 | EENVEENVEENVEENVE<br>ENVEENV         | 3.20 | 0.01 | 1.66 | 0.44 | 1.74 | 0.28 |
| 17333 | 0 | 11816 | EENVEENVEENVEENVE<br>ENVEENV         | 3.20 | 0.01 | 1.66 | 0.44 | 0.85 | 0.28 |
| 17334 | 0 | 11817 | EENVEENVEENVEENVE<br>ENVEENVEENVEENV | 3.48 | 0.01 | 1.66 | 1.15 | 0.22 | 0.28 |
| 17335 | 0 | 11817 | EENVEENVEENVEENVE<br>ENVEENVEENVEENV | 3.48 | 0.01 | 2.86 | 1.12 | 0.22 | 1.34 |
| 17336 | 0 | 11817 | EENVEENVEENVEENVE<br>ENVEENVEENVEENV | 3.48 | 0.01 | 0.90 | 3.70 | 0.22 | 0.28 |
| 17337 | 0 | 11817 | EENVEENVEENVEENVE<br>ENVEENVEENVEENV | 3.48 | 0.01 | 0.90 | 3.70 | 0.22 | 0.28 |
| 17338 | 0 | 11817 | EENVEENVEENVEENVE<br>ENVEENVEENVEENV | 3.48 | 0.01 | 1.66 | 3.70 | 0.22 | 0.28 |
| 17339 | 0 | 11817 | EENVEENVEENVEENVE<br>ENVEENVEENVEENV | 3.48 | 0.01 | 1.66 | 3.70 | 0.22 | 0.28 |
| 17340 | 0 | 11819 | EENVEHDA                             | 2.14 | 0.01 | 1.66 | 1.15 | 0.22 | 0.28 |
| 17341 | 0 | 11819 | EENVEHDA                             | 2.14 | 0.01 | 1.66 | 1.20 | 0.22 | 0.28 |
| 17342 | 0 | 11819 | EENVEHDA                             | 2.14 | 0.01 | 2.96 | 1.15 | 0.22 | 1.48 |
| 17343 | 0 | 11819 | EENVEHDA                             | 2.14 | 0.01 | 2.96 | 1.15 | 0.22 | 0.85 |
| 17344 | 0 | 11819 | EENVEHDA                             | 2.14 | 0.01 | 2.96 | 1.15 | 0.22 | 1.34 |
| 17345 | 0 | 11819 | EENVEHDA                             | 2.14 | 0.01 | 1.66 | 0.44 | 0.85 | 0.28 |
| 17346 | 0 | 11819 | EENVEHDA                             | 2.14 | 0.01 | 1.66 | 1.15 | 0.22 | 0.28 |
| 17347 | 0 | 11819 | EENVEHDA                             | 2.14 | 0.01 | 1.66 | 1.15 | 0.22 | 0.28 |
| 17348 | 0 | 11819 | EENVEHDA                             | 2.14 | 0.01 | 1.66 | 1.15 | 0.22 | 0.28 |
| 17349 | 0 | 11819 | EENVEHDA                             | 2.14 | 0.01 | 1.66 | 1.15 | 0.22 | 1.48 |
| 17350 | 0 | 11819 | EENVEHDA                             | 2.14 | 0.01 | 1.66 | 1.15 | 0.22 | 1.34 |
| 17351 | 0 | 11819 | EENVEHDA                             | 2.14 | 0.01 | 1.66 | 2.74 | 0.22 | 0.28 |
| 17352 | 0 | 11819 | EENVEHDA                             | 2.14 | 0.01 | 1.66 | 1.20 | 0.22 | 0.85 |

|       |   |       |                  |      |      |      |      |      |      |
|-------|---|-------|------------------|------|------|------|------|------|------|
| 17353 | 0 | 11819 | EENVEHDA         | 2.14 | 0.01 | 1.66 | 0.44 | 0.85 | 0.85 |
| 17354 | 0 | 11819 | EENVEHDA         | 2.14 | 0.01 | 1.66 | 0.44 | 0.85 | 0.85 |
| 17355 | 0 | 11819 | EENVEHDA         | 2.14 | 0.01 | 1.66 | 0.44 | 0.85 | 0.85 |
| 17356 | 0 | 11819 | EENVEHDA         | 2.14 | 0.01 | 1.66 | 0.44 | 0.85 | 1.34 |
| 17357 | 0 | 11819 | EENVEHDA         | 2.14 | 0.01 | 1.66 | 1.20 | 0.22 | 1.34 |
| 17358 | 0 | 11819 | EENVEHDA         | 2.14 | 0.01 | 1.66 | 1.81 | 0.22 | 0.28 |
| 17359 | 0 | 11819 | EENVEHDA         | 2.14 | 0.01 | 1.66 | 1.15 | 0.22 | 1.48 |
| 17360 | 0 | 11819 | EENVEHDA         | 2.14 | 0.01 | 1.66 | 1.15 | 0.22 | 0.85 |
| 17361 | 0 | 11819 | EENVEHDA         | 2.14 | 0.01 | 1.66 | 1.15 | 0.22 | 0.28 |
| 17362 | 0 | 11819 | EENVEHDA         | 2.14 | 0.01 | 1.66 | 0.44 | 0.85 | 0.28 |
| 17363 | 0 | 11819 | EENVEHDA         | 2.14 | 0.01 | 1.66 | 1.20 | 0.22 | 0.85 |
| 17364 | 0 | 11819 | EENVEHDA         | 2.14 | 0.01 | 1.66 | 1.20 | 0.22 | 1.34 |
| 17365 | 0 | 11819 | EENVEHDA         | 2.14 | 0.01 | 1.66 | 1.20 | 0.22 | 1.34 |
| 17366 | 0 | 11819 | EENVEHDA         | 2.14 | 0.01 | 1.66 | 1.12 | 0.22 | 1.34 |
| 17367 | 0 | 11819 | EENVEHDA         | 2.14 | 0.01 | 1.66 | 1.12 | 0.22 | 1.34 |
| 17368 | 0 | 11819 | EENVEHDA         | 2.14 | 0.01 | 1.66 | 1.12 | 0.22 | 1.48 |
| 17369 | 0 | 11819 | EENVEHDA         | 2.14 | 0.01 | 1.66 | 1.12 | 0.22 | 0.85 |
| 17370 | 0 | 11819 | EENVEHDA         | 2.14 | 0.01 | 2.86 | 0.44 | 1.59 | 1.48 |
| 17371 | 0 | 11819 | EENVEHDA         | 2.14 | 0.01 | 1.66 | 0.44 | 1.74 | 2.35 |
| 17372 | 0 | 11819 | EENVEHDA         | 2.14 | 0.01 | 1.66 | 0.44 | 0.85 | 0.28 |
| 17373 | 0 | 11819 | EENVEHDA         | 2.14 | 0.01 | 1.66 | 0.68 | 0.22 | 0.28 |
| 17374 | 0 | 11819 | EENVEHDA         | 2.14 | 0.01 | 1.66 | 1.20 | 0.22 | 0.28 |
| 17375 | 0 | 11819 | EENVEHDA         | 2.14 | 0.01 | 1.66 | 1.12 | 0.22 | 2.02 |
| 17376 | 0 | 11819 | EENVEHDA         | 2.14 | 0.01 | 1.66 | 1.12 | 0.22 | 2.02 |
| 17377 | 0 | 11819 | EENVEHDA         | 2.14 | 0.01 | 1.66 | 1.12 | 0.22 | 1.48 |
| 17378 | 0 | 11820 | EENVEHDAEENVEENV | 2.79 | 0.01 | 1.66 | 0.68 | 0.22 | 0.28 |
| 17379 | 0 | 11820 | EENVEHDAEENVEENV | 2.79 | 0.01 | 1.66 | 0.44 | 0.85 | 0.28 |
| 17380 | 0 | 11820 | EENVEHDAEENVEENV | 2.79 | 0.01 | 1.66 | 0.44 | 1.74 | 0.28 |
| 17381 | 0 | 11820 | EENVEHDAEENVEENV | 2.79 | 0.01 | 1.66 | 0.44 | 0.85 | 0.28 |
| 17382 | 0 | 11821 | EENVEHDAEENVEHDA | 2.80 | 0.01 | 1.66 | 0.44 | 0.85 | 0.28 |
| 17383 | 0 | 11821 | EENVEHDAEENVEHDA | 2.80 | 0.01 | 1.66 | 0.44 | 1.74 | 0.28 |
| 17384 | 0 | 11821 | EENVEHDAEENVEHDA | 2.80 | 0.01 | 1.66 | 1.15 | 0.22 | 0.28 |
| 17385 | 0 | 11821 | EENVEHDAEENVEHDA | 2.80 | 0.01 | 1.66 | 1.15 | 0.22 | 1.34 |
| 17386 | 0 | 11821 | EENVEHDAEENVEHDA | 2.80 | 0.01 | 1.66 | 0.44 | 1.74 | 0.28 |
| 17387 | 0 | 11821 | EENVEHDAEENVEHDA | 2.80 | 0.01 | 1.66 | 2.25 | 0.22 | 0.28 |
| 17388 | 0 | 11821 | EENVEHDAEENVEHDA | 2.80 | 0.01 | 1.66 | 2.25 | 0.22 | 0.28 |

|       |   |       |                              |      |      |      |      |      |      |
|-------|---|-------|------------------------------|------|------|------|------|------|------|
| 17389 | 0 | 11821 | EENVEHDAEENVEHDA             | 2.80 | 0.01 | 1.66 | 2.25 | 0.22 | 0.28 |
| 17390 | 0 | 11821 | EENVEHDAEENVEHDA             | 2.80 | 0.01 | 1.66 | 2.25 | 0.22 | 0.28 |
| 17391 | 0 | 11821 | EENVEHDAEENVEHDA             | 2.80 | 0.01 | 1.66 | 2.25 | 0.22 | 0.28 |
| 17392 | 0 | 11821 | EENVEHDAEENVEHDA             | 2.80 | 0.01 | 1.66 | 2.25 | 0.22 | 1.34 |
| 17393 | 0 | 11821 | EENVEHDAEENVEHDA             | 2.80 | 0.01 | 1.66 | 2.25 | 0.22 | 0.28 |
| 17394 | 0 | 11821 | EENVEHDAEENVEHDA             | 2.80 | 0.01 | 1.66 | 3.57 | 0.22 | 0.28 |
| 17395 | 0 | 11821 | EENVEHDAEENVEHDA             | 2.80 | 0.01 | 1.66 | 0.44 | 0.85 | 0.28 |
| 17396 | 0 | 11821 | EENVEHDAEENVEHDA             | 2.80 | 0.01 | 1.66 | 1.81 | 0.22 | 0.28 |
| 17397 | 0 | 11821 | EENVEHDAEENVEHDA             | 2.80 | 0.01 | 1.66 | 2.25 | 0.22 | 0.28 |
| 17398 | 0 | 11821 | EENVEHDAEENVEHDA             | 2.80 | 0.01 | 1.66 | 3.57 | 0.22 | 0.28 |
| 17399 | 0 | 11821 | EENVEHDAEENVEHDA             | 2.80 | 0.01 | 1.66 | 2.25 | 0.22 | 1.34 |
| 17400 | 0 | 11821 | EENVEHDAEENVEHDA             | 2.80 | 0.01 | 1.66 | 1.12 | 0.22 | 0.28 |
| 17401 | 0 | 11821 | EENVEHDAEENVEHDA             | 2.80 | 0.01 | 1.66 | 1.12 | 0.22 | 0.28 |
| 17402 | 0 | 11821 | EENVEHDAEENVEHDA             | 2.80 | 0.01 | 1.66 | 1.12 | 0.22 | 0.28 |
| 17403 | 0 | 11821 | EENVEHDAEENVEHDA             | 2.80 | 0.01 | 1.66 | 1.12 | 0.22 | 1.34 |
| 17404 | 0 | 11822 | EENVEHDAEENVEHDAE<br>ENVEENV | 3.19 | 0.01 | 1.66 | 0.44 | 1.74 | 0.28 |
| 17405 | 0 | 11822 | EENVEHDAEENVEHDAE<br>ENVEENV | 3.19 | 0.01 | 1.66 | 0.44 | 1.74 | 1.48 |
| 17406 | 0 | 11822 | EENVEHDAEENVEHDAE<br>ENVEENV | 3.19 | 0.01 | 1.66 | 0.44 | 0.85 | 0.28 |
| 17407 | 0 | 11822 | EENVEHDAEENVEHDAE<br>ENVEENV | 3.19 | 0.01 | 1.66 | 0.44 | 1.74 | 0.28 |
| 17408 | 0 | 11823 | EENVEHDAEENVEHDAE<br>ENVEHDA | 3.19 | 0.01 | 1.66 | 1.20 | 0.22 | 0.28 |
| 17409 | 0 | 11823 | EENVEHDAEENVEHDAE<br>ENVEHDA | 3.19 | 0.01 | 1.66 | 0.44 | 0.85 | 0.28 |
| 17410 | 0 | 11823 | EENVEHDAEENVEHDAE<br>ENVEHDA | 3.19 | 0.01 | 1.66 | 0.44 | 1.74 | 0.28 |
| 17411 | 0 | 11823 | EENVEHDAEENVEHDAE<br>ENVEHDA | 3.19 | 0.01 | 1.66 | 0.44 | 0.85 | 0.28 |



|       |   |       |                                      |      |      |      |      |      |      |
|-------|---|-------|--------------------------------------|------|------|------|------|------|------|
| 17412 | 0 | 11823 | EENVEHDAEENVEHDAE<br>ENVEHDA         | 3.19 | 0.01 | 1.66 | 0.44 | 0.85 | 0.85 |
| 17413 | 0 | 11824 | EENVEHDAEENVEHDAE<br>ENVEHDAEENVEHDA | 3.48 | 0.01 | 1.66 | 0.44 | 0.85 | 0.28 |
| 17414 | 0 | 11824 | EENVEHDAEENVEHDAE<br>ENVEHDAEENVEHDA | 3.48 | 0.01 | 1.66 | 0.44 | 0.85 | 2.97 |
| 17415 | 0 | 11824 | EENVEHDAEENVEHDAE<br>ENVEHDAEENVEHDA | 3.48 | 0.01 | 1.66 | 0.44 | 0.85 | 2.97 |
| 17416 | 0 | 11824 | EENVEHDAEENVEHDAE<br>ENVEHDAEENVEHDA | 3.48 | 0.01 | 1.66 | 0.44 | 0.85 | 2.97 |
| 17417 | 0 | 11824 | EENVEHDAEENVEHDAE<br>ENVEHDAEENVEHDA | 3.48 | 0.01 | 1.66 | 1.15 | 0.22 | 0.28 |
| 17418 | 0 | 11824 | EENVEHDAEENVEHDAE<br>ENVEHDAEENVEHDA | 3.48 | 0.01 | 1.66 | 0.44 | 0.85 | 0.28 |
| 17419 | 0 | 11824 | EENVEHDAEENVEHDAE<br>ENVEHDAEENVEHDA | 3.48 | 0.01 | 1.66 | 1.20 | 0.22 | 0.28 |
| 17420 | 0 | 11824 | EENVEHDAEENVEHDAE<br>ENVEHDAEENVEHDA | 3.48 | 0.01 | 1.66 | 1.20 | 0.22 | 0.85 |
| 17421 | 0 | 11824 | EENVEHDAEENVEHDAE<br>ENVEHDAEENVEHDA | 3.48 | 0.01 | 1.66 | 1.20 | 0.22 | 1.27 |
| 17422 | 0 | 11824 | EENVEHDAEENVEHDAE<br>ENVEHDAEENVEHDA | 3.48 | 0.01 | 1.66 | 1.20 | 0.22 | 1.27 |
| 17423 | 0 | 11824 | EENVEHDAEENVEHDAE<br>ENVEHDAEENVEHDA | 3.48 | 0.01 | 1.66 | 1.20 | 0.22 | 1.27 |
| 17424 | 0 | 11824 | EENVEHDAEENVEHDAE<br>ENVEHDAEENVEHDA | 3.48 | 0.01 | 1.66 | 1.20 | 2.25 | 1.75 |
| 17425 | 0 | 11824 | EENVEHDAEENVEHDAE<br>ENVEHDAEENVEHDA | 3.48 | 0.01 | 1.66 | 0.44 | 0.85 | 0.28 |
| 17426 | 0 | 11824 | EENVEHDAEENVEHDAE<br>ENVEHDAEENVEHDA | 3.48 | 0.01 | 1.66 | 0.44 | 0.85 | 0.28 |
| 17427 | 0 | 11824 | EENVEHDAEENVEHDAE<br>ENVEHDAEENVEHDA | 3.48 | 0.01 | 1.66 | 0.44 | 1.74 | 0.28 |

|       |   |        |                                      |      |      |      |      |      |      |
|-------|---|--------|--------------------------------------|------|------|------|------|------|------|
| 17428 | 0 | 11824  | EENVEHDAEENVEHDAE<br>ENVEHDAEENVEHDA | 3.48 | 0.01 | 2.86 | 1.12 | 0.22 | 1.34 |
| 17429 | 0 | 11824  | EENVEHDAEENVEHDAE<br>ENVEHDAEENVEHDA | 3.48 | 0.01 | 1.66 | 3.70 | 0.22 | 0.28 |
| 17430 | 0 | 11824  | EENVEHDAEENVEHDAE<br>ENVEHDAEENVEHDA | 3.48 | 0.01 | 1.66 | 3.70 | 0.22 | 0.28 |
| 17431 | 0 | 11824  | EENVEHDAEENVEHDAE<br>ENVEHDAEENVEHDA | 3.48 | 0.01 | 1.66 | 0.44 | 0.85 | 0.28 |
| 17432 | 0 | 11824  | EENVEHDAEENVEHDAE<br>ENVEHDAEENVEHDA | 3.48 | 0.01 | 1.66 | 0.44 | 0.85 | 0.28 |
| 17433 | 0 | 11824  | EENVEHDAEENVEHDAE<br>ENVEHDAEENVEHDA | 3.48 | 0.01 | 1.66 | 0.44 | 1.74 | 0.28 |
| 17434 | 0 | 159282 | EENW                                 | 1.59 | 0.01 | 0.78 | 1.20 | 0.22 | 0.85 |
| 17435 | 0 | 11825  | EEPEESEDDEDFGMGGLF                   | 2.82 | 0.01 | 4.23 | 0.44 | 0.85 | 1.27 |
| 17436 | 0 | 11825  | EEPEESEDDEDFGMGGLF                   | 2.82 | 0.01 | 4.23 | 0.44 | 0.85 | 1.27 |
| 17437 | 0 | 78136  | EEPKHETKETE                          | 2.45 | 0.01 | 2.60 | 0.44 | 1.23 | 0.85 |
| 17438 | 0 | 162129 | EEPLRW                               | 1.89 | 0.01 | 2.71 | 0.68 | 0.22 | 1.48 |
| 17439 | 0 | 162129 | EEPLRW                               | 1.89 | 0.01 | 2.71 | 0.68 | 0.22 | 0.85 |
| 17440 | 0 | 162129 | EEPLRW                               | 1.89 | 0.01 | 2.71 | 0.68 | 0.22 | 0.28 |
| 17441 | 0 | 162129 | EEPLRW                               | 1.89 | 0.01 | 2.71 | 0.68 | 0.22 | 0.85 |
| 17442 | 0 | 11831  | EEPNDGEERQSY                         | 2.46 | 0.01 | 2.88 | 2.37 | 0.22 | 0.28 |
| 17443 | 0 | 11833  | EEPSDKHIE                            | 2.23 | 0.01 | 3.37 | 1.12 | 0.22 | 0.28 |
| 17444 | 0 | 97982  | EEPTAAPA                             | 2.16 | 0.01 | 2.60 | 0.44 | 1.23 | 0.85 |
| 17445 | 0 | 78369  | EEPVTPGQCNMVVERL<br>GDYLIDQGL        | 3.14 | 0.01 | 2.76 | 0.44 | 1.23 | 1.39 |
| 17446 | 0 | 141243 | EEQEDEII                             | 2.14 | 0.01 | 0.78 | 0.44 | 1.41 | 0.85 |
| 17447 | 0 | 122746 | EEQEDEIIGFGQELKN                     | 2.75 | 0.01 | 0.78 | 1.20 | 0.22 | 0.28 |
| 17448 | 0 | 122746 | EEQEDEIIGFGQELKN                     | 2.75 | 0.01 | 0.78 | 1.20 | 0.22 | 2.12 |
| 17449 | 0 | 122746 | EEQEDEIIGFGQELKN                     | 2.75 | 0.01 | 0.78 | 1.20 | 0.22 | 1.27 |
| 17450 | 0 | 122746 | EEQEDEIIGFGQELKN                     | 2.75 | 0.01 | 0.78 | 0.44 | 1.13 | 0.28 |
| 17451 | 0 | 122746 | EEQEDEIIGFGQELKN                     | 2.75 | 0.01 | 0.78 | 0.44 | 1.13 | 0.28 |
| 17452 | 0 | 122746 | EEQEDEIIGFGQELKN                     | 2.75 | 0.01 | 0.78 | 1.20 | 0.22 | 0.28 |
| 17453 | 0 | 122746 | EEQEDEIIGFGQELKN                     | 2.75 | 0.01 | 2.19 | 1.12 | 0.22 | 0.28 |
| 17454 | 0 | 277953 | EEQEDVGPRHVDPDH                      | 2.71 | 0.01 | 1.61 | 0.44 | 0.85 | 1.28 |
| 17455 | 0 | 277955 | EEQEKKEEEEEEDGI                      | 2.71 | 0.01 | 1.61 | 0.44 | 0.85 | 1.28 |
| 17456 | 0 | 489518 | EEQPPYPDPAI                          | 2.49 | 0.01 | 2.69 | 3.05 | 0.85 | 1.28 |
| 17457 | 0 | 11850  | EEQTQQIRLQAEIFQAR                    | 2.84 | 0.01 | 1.75 | 0.68 | 0.22 | 0.28 |

|       |   |        |                         |      |      |      |      |      |      |
|-------|---|--------|-------------------------|------|------|------|------|------|------|
| 17458 | 0 | 123114 | EERARVSMI               | 2.22 | 0.01 | 2.28 | 2.00 | 0.22 | 0.28 |
| 17459 | 0 | 99188  | EERGQRRWSTRSEN          | 2.70 | 0.01 | 2.16 | 0.44 | 1.23 | 1.48 |
| 17460 | 0 | 11860  | EERLHSMKEG              | 2.31 | 0.01 | 1.60 | 0.44 | 1.23 | 0.28 |
| 17461 | 0 | 11861  | EERLNTATTKLAEAS         | 2.70 | 0.01 | 3.15 | 0.44 | 1.23 | 0.85 |
| 17462 | 0 | 99977  | EERNKTQEEH              | 2.32 | 0.01 | 2.18 | 2.16 | 0.22 | 0.28 |
| 17463 | 0 | 11862  | EERPPETT                | 2.14 | 0.01 | 2.40 | 2.43 | 0.22 | 0.28 |
| 17464 | 0 | 167734 | EERPPETTT               | 2.25 | 0.01 | 2.40 | 2.43 | 0.22 | 0.28 |
| 17465 | 0 | 180424 | EERRGEKGRA              | 2.37 | 0.01 | 0.78 | 0.68 | 0.22 | 0.28 |
| 17466 | 0 | 11870  | EERYKIQSYSEYLKDFWG<br>N | 2.87 | 0.01 | 2.08 | 0.44 | 1.93 | 1.57 |
| 17467 | 0 | 11870  | EERYKIQSYSEYLKDFWG<br>N | 2.87 | 0.01 | 2.08 | 2.43 | 0.22 | 1.57 |
| 17468 | 0 | 11870  | EERYKIQSYSEYLKDFWG<br>N | 2.87 | 0.01 | 3.45 | 0.44 | 0.22 | 1.57 |
| 17469 | 0 | 119826 | EESDDDMG                | 2.14 | 0.01 | 0.78 | 0.44 | 0.85 | 1.27 |
| 17470 | 0 | 11872  | EESDDDMGFGGLFD          | 2.57 | 0.01 | 0.78 | 1.15 | 0.22 | 0.28 |
| 17471 | 0 | 11872  | EESDDDMGFGGLFD          | 2.57 | 0.01 | 0.78 | 1.15 | 0.22 | 0.28 |
| 17472 | 0 | 11872  | EESDDDMGFGGLFD          | 2.57 | 0.01 | 0.78 | 0.68 | 0.22 | 0.28 |
| 17473 | 0 | 11872  | EESDDDMGFGGLFD          | 2.57 | 0.01 | 0.78 | 0.44 | 0.85 | 0.28 |
| 17474 | 0 | 11872  | EESDDDMGFGGLFD          | 2.57 | 0.01 | 0.78 | 0.44 | 1.13 | 0.28 |
| 17475 | 0 | 11872  | EESDDDMGFGGLFD          | 2.57 | 0.01 | 0.78 | 0.44 | 0.85 | 0.28 |
| 17476 | 0 | 11872  | EESDDDMGFGGLFD          | 2.57 | 0.01 | 0.78 | 0.44 | 1.13 | 0.28 |
| 17477 | 0 | 11872  | EESDDDMGFGGLFD          | 2.57 | 0.01 | 0.78 | 0.44 | 0.85 | 0.28 |
| 17478 | 0 | 11872  | EESDDDMGFGGLFD          | 2.57 | 0.01 | 0.78 | 0.44 | 0.85 | 0.28 |
| 17479 | 0 | 11872  | EESDDDMGFGGLFD          | 2.57 | 0.01 | 0.78 | 0.44 | 0.85 | 0.28 |
| 17480 | 0 | 11872  | EESDDDMGFGGLFD          | 2.57 | 0.01 | 0.78 | 0.44 | 0.85 | 0.28 |
| 17481 | 0 | 11872  | EESDDDMGFGGLFD          | 2.57 | 0.01 | 0.78 | 0.44 | 0.85 | 0.28 |
| 17482 | 0 | 11872  | EESDDDMGFGGLFD          | 2.57 | 0.01 | 0.78 | 0.44 | 0.85 | 0.28 |
| 17483 | 0 | 11872  | EESDDDMGFGGLFD          | 2.57 | 0.01 | 0.78 | 0.44 | 1.13 | 0.28 |
| 17484 | 0 | 11872  | EESDDDMGFGGLFD          | 2.57 | 0.01 | 0.78 | 0.44 | 1.13 | 0.28 |
| 17485 | 0 | 11872  | EESDDDMGFGGLFD          | 2.57 | 0.01 | 0.78 | 0.44 | 1.13 | 0.28 |
| 17486 | 0 | 11872  | EESDDDMGFGGLFD          | 2.57 | 0.01 | 0.78 | 0.44 | 1.13 | 0.28 |
| 17487 | 0 | 11872  | EESDDDMGFGGLFD          | 2.57 | 0.01 | 0.78 | 0.44 | 1.13 | 0.28 |
| 17488 | 0 | 11872  | EESDDDMGFGGLFD          | 2.57 | 0.01 | 0.78 | 0.44 | 1.13 | 0.28 |
| 17489 | 0 | 11872  | EESDDDMGFGGLFD          | 2.57 | 0.01 | 0.78 | 0.44 | 0.85 | 1.66 |
| 17490 | 0 | 11872  | EESDDDMGFGGLFD          | 2.57 | 0.01 | 0.78 | 0.44 | 0.85 | 3.30 |
| 17491 | 0 | 11872  | EESDDDMGFGGLFD          | 2.57 | 0.01 | 0.78 | 1.15 | 0.22 | 3.30 |
| 17492 | 0 | 11872  | EESDDDMGFGGLFD          | 2.57 | 0.01 | 0.78 | 0.44 | 0.85 | 1.27 |
| 17493 | 0 | 11872  | EESDDDMGFGGLFD          | 2.57 | 0.01 | 0.78 | 0.44 | 0.85 | 1.27 |
| 17494 | 0 | 11872  | EESDDDMGFGGLFD          | 2.57 | 0.01 | 0.78 | 0.44 | 1.13 | 1.27 |
| 17495 | 0 | 11872  | EESDDDMGFGGLFD          | 2.57 | 0.01 | 0.78 | 0.44 | 1.13 | 0.28 |
| 17496 | 0 | 11872  | EESDDDMGFGGLFD          | 2.57 | 0.01 | 0.78 | 0.44 | 1.13 | 0.28 |
| 17497 | 0 | 137395 | EESEDEKRRWGQRDN         | 2.69 | 0.01 | 3.12 | 0.68 | 0.22 | 0.85 |
| 17498 | 0 | 137395 | EESEDEKRRWGQRDN         | 2.69 | 0.01 | 3.12 | 0.44 | 1.23 | 2.35 |
| 17499 | 0 | 167497 | EESGPSRLNN              | 2.30 | 0.01 | 0.78 | 0.44 | 1.13 | 0.85 |

|       |   |        |                                                       |      |      |      |      |      |      |
|-------|---|--------|-------------------------------------------------------|------|------|------|------|------|------|
| 17500 | 0 | 11877  | EESIYQ                                                | 1.89 | 0.01 | 1.96 | 0.44 | 0.85 | 0.28 |
| 17501 | 0 | 161338 | EESLEVDNPLLGAGKFA<br>T                                | 2.88 | 0.01 | 2.08 | 2.02 | 0.22 | 1.57 |
| 17502 | 0 | 161338 | EESLEVDNPLLGAGKFA<br>T                                | 2.88 | 0.01 | 2.08 | 2.43 | 0.22 | 1.57 |
| 17503 | 0 | 514494 | EESNPFFTAAALAIM                                       | 2.65 | 0.01 | 2.24 | 0.44 | 1.41 | 1.28 |
| 17504 | 0 | 11882  | EESPLGFSPE                                            | 2.35 | 0.01 | 3.33 | 1.15 | 0.22 | 0.28 |
| 17505 | 0 | 156272 | EESQSSSQGRQQEQ                                        | 2.75 | 0.01 | 3.67 | 0.44 | 1.23 | 1.27 |
| 17506 | 0 | 127957 | EESRGRTSSKTAFYQALQ<br>NS                              | 2.94 | 0.01 | 0.78 | 0.44 | 1.13 | 0.28 |
| 17507 | 0 | 182092 | EESLLGDCVFADSN                                        | 2.66 | 0.01 | 0.78 | 0.44 | 1.13 | 0.85 |
| 17508 | 0 | 120467 | EESNAAEEWKYVAMVI<br>DHI                               | 2.93 | 0.01 | 2.26 | 0.68 | 0.22 | 0.28 |
| 17509 | 0 | 514501 | EETIADDANDLAPQA                                       | 2.69 | 0.01 | 2.24 | 0.44 | 1.41 | 1.28 |
| 17510 | 0 | 99189  | EETICTASAKKNIGR                                       | 2.66 | 0.01 | 2.16 | 0.44 | 1.23 | 1.48 |
| 17511 | 0 | 105746 | EETICTASFKKNIGR                                       | 2.64 | 0.01 | 2.16 | 0.44 | 1.23 | 0.85 |
| 17512 | 0 | 11893  | EETKNKELDKKNKELDSR<br>VT                              | 2.98 | 0.01 | 4.23 | 2.42 | 0.22 | 0.28 |
| 17513 | 0 | 11893  | EETKNKELDKKNKELDSR<br>VT                              | 2.98 | 0.01 | 4.23 | 2.42 | 0.22 | 1.34 |
| 17514 | 0 | 97983  | EETKTEEP                                              | 2.16 | 0.01 | 2.60 | 0.44 | 1.23 | 0.85 |
| 17515 | 0 | 78137  | EETKTEEPAAP                                           | 2.44 | 0.01 | 2.60 | 0.44 | 1.23 | 0.85 |
| 17516 | 0 | 11894  | EETLHSTSSEGN                                          | 2.50 | 0.01 | 4.03 | 0.44 | 0.85 | 0.28 |
| 17517 | 0 | 11894  | EETLHSTSSEGN                                          | 2.50 | 0.01 | 4.03 | 0.44 | 0.85 | 0.28 |
| 17518 | 0 | 278419 | EEVELYSFEDDEEDE                                       | 2.73 | 0.01 | 1.61 | 0.44 | 0.85 | 1.28 |
| 17519 | 0 | 11906  | EEVFQLLRKKLRMALRS<br>HLRGLIAEGE                       | 3.24 | 0.01 | 2.94 | 0.44 | 0.85 | 0.85 |
| 17520 | 0 | 135915 | EEVGSILYGLGG                                          | 2.48 | 0.01 | 0.90 | 2.16 | 0.22 | 1.27 |
| 17521 | 0 | 11910  | EEVIDTMKSMQRDED                                       | 2.68 | 0.01 | 2.75 | 0.44 | 0.85 | 0.28 |
| 17522 | 0 | 11910  | EEVIDTMKSMQRDED                                       | 2.68 | 0.01 | 2.75 | 0.44 | 1.59 | 2.51 |
| 17523 | 0 | 11910  | EEVIDTMKSMQRDED                                       | 2.68 | 0.01 | 2.75 | 0.44 | 0.85 | 2.51 |
| 17524 | 0 | 11910  | EEVIDTMKSMQRDED                                       | 2.68 | 0.01 | 2.75 | 0.44 | 0.85 | 2.51 |
| 17525 | 0 | 123117 | EEVKGDYLK                                             | 2.22 | 0.01 | 2.28 | 2.00 | 0.22 | 0.28 |
| 17526 | 0 | 78138  | EEVKITVDDKHYQKALN<br>EIN                              | 2.94 | 0.01 | 1.60 | 0.44 | 1.23 | 1.28 |
| 17527 | 0 | 78138  | EEVKITVDDKHYQKALN<br>EIN                              | 2.94 | 0.01 | 1.60 | 0.44 | 1.23 | 2.51 |
| 17528 | 0 | 106378 | EEVKTEQKR                                             | 2.34 | 0.01 | 3.08 | 0.44 | 1.23 | 0.85 |
| 17529 | 0 | 125881 | EEVRKLKARVDELERI                                      | 2.78 | 0.01 | 0.78 | 0.44 | 1.13 | 0.85 |
| 17530 | 0 | 125881 | EEVRKLKARVDELERI                                      | 2.78 | 0.01 | 0.78 | 0.44 | 1.13 | 0.85 |
| 17531 | 0 | 130479 | EEVRKLKARVDELERIR                                     | 2.84 | 0.01 | 0.78 | 0.44 | 1.13 | 0.85 |
| 17532 | 0 | 125882 | EEVRKLKARVDELERIRR<br>SILPYGDSMDRIEKDRLQ<br>GMAPAAGAD | 3.77 | 0.01 | 0.78 | 0.44 | 1.13 | 0.85 |

|       |   |        |                                                       |      |      |      |      |      |      |
|-------|---|--------|-------------------------------------------------------|------|------|------|------|------|------|
| 17533 | 0 | 125882 | EEVRKLKARVDELERIRR<br>SILPYGDSMDRIEKDRLQ<br>GMAPAAGAD | 3.77 | 0.01 | 0.78 | 0.44 | 1.13 | 0.85 |
| 17534 | 0 | 125882 | EEVRKLKARVDELERIRR<br>SILPYGDSMDRIEKDRLQ<br>GMAPAAGAD | 3.77 | 0.01 | 0.78 | 0.44 | 1.13 | 0.85 |
| 17535 | 0 | 123118 | EEVRKLKARVEELEKT                                      | 2.79 | 0.01 | 1.75 | 0.68 | 0.22 | 0.28 |
| 17536 | 0 | 118320 | EEVTCPICLDPFVEPV<br>SIECGHSF                          | 3.13 | 0.01 | 0.78 | 0.44 | 1.13 | 0.28 |
| 17537 | 0 | 118320 | EEVTCPICLDPFVEPV<br>SIECGHSF                          | 3.13 | 0.01 | 0.78 | 0.44 | 1.13 | 0.28 |
| 17538 | 0 | 118320 | EEVTCPICLDPFVEPV<br>SIECGHSF                          | 3.13 | 0.01 | 0.78 | 0.44 | 1.41 | 0.28 |
| 17539 | 0 | 122327 | EEVTTSGPCGEESVLLDR<br>KS                              | 2.94 | 0.01 | 0.78 | 0.44 | 1.13 | 0.28 |
| 17540 | 0 | 122327 | EEVTTSGPCGEESVLLDR<br>KS                              | 2.94 | 0.01 | 0.78 | 0.44 | 1.13 | 1.27 |
| 17541 | 0 | 11923  | EEVVEEVVPEEVVEEVV<br>P                                | 2.93 | 0.01 | 0.90 | 0.44 | 1.59 | 1.57 |
| 17542 | 0 | 11927  | EEVVGEEKLVSEEIVT                                      | 2.77 | 0.01 | 1.66 | 0.44 | 1.74 | 0.28 |
| 17543 | 0 | 11927  | EEVVGEEKLVSEEIVT                                      | 2.77 | 0.01 | 1.66 | 1.20 | 0.22 | 0.28 |
| 17544 | 0 | 11927  | EEVVGEEKLVSEEIVT                                      | 2.77 | 0.01 | 1.66 | 0.44 | 1.74 | 0.28 |
| 17545 | 0 | 11927  | EEVVGEEKLVSEEIVT                                      | 2.77 | 0.01 | 1.66 | 0.44 | 1.74 | 0.28 |
| 17546 | 0 | 11927  | EEVVGEEKLVSEEIVT                                      | 2.77 | 0.01 | 1.66 | 0.44 | 1.74 | 0.28 |
| 17547 | 0 | 11927  | EEVVGEEKLVSEEIVT                                      | 2.77 | 0.01 | 1.66 | 0.44 | 1.74 | 0.28 |
| 17548 | 0 | 11927  | EEVVGEEKLVSEEIVT                                      | 2.77 | 0.01 | 1.66 | 0.44 | 1.74 | 0.28 |
| 17549 | 0 | 11927  | EEVVGEEKLVSEEIVT                                      | 2.77 | 0.01 | 1.66 | 0.44 | 1.74 | 0.28 |
| 17550 | 0 | 11927  | EEVVGEEKLVSEEIVT                                      | 2.77 | 0.01 | 1.66 | 0.44 | 1.74 | 0.28 |
| 17551 | 0 | 11927  | EEVVGEEKLVSEEIVT                                      | 2.77 | 0.01 | 1.66 | 0.44 | 1.74 | 0.28 |
| 17552 | 0 | 11927  | EEVVGEEKLVSEEIVT                                      | 2.77 | 0.01 | 1.66 | 0.44 | 1.74 | 0.28 |
| 17553 | 0 | 11927  | EEVVGEEKLVSEEIVT                                      | 2.77 | 0.01 | 1.66 | 0.44 | 1.74 | 0.28 |
| 17554 | 0 | 11927  | EEVVGEEKLVSEEIVT                                      | 2.77 | 0.01 | 1.66 | 3.27 | 0.22 | 0.28 |
| 17555 | 0 | 11927  | EEVVGEEKLVSEEIVT                                      | 2.77 | 0.01 | 1.66 | 3.27 | 0.22 | 0.28 |
| 17556 | 0 | 105747 | EEVVRVPTTAASTPDA                                      | 2.77 | 0.01 | 0.78 | 1.12 | 0.22 | 2.35 |
| 17557 | 0 | 11930  | EEWSQCSVYCGSGVRV<br>RKRK                              | 2.97 | 0.01 | 3.33 | 0.68 | 0.22 | 0.28 |
| 17558 | 0 | 174088 | EEYDEDEYDEEDR                                         | 2.74 | 0.01 | 2.16 | 0.44 | 1.23 | 1.28 |
| 17559 | 0 | 174088 | EEYDEDEYDEEDR                                         | 2.74 | 0.01 | 2.16 | 0.44 | 1.23 | 1.27 |
| 17560 | 0 | 174088 | EEYDEDEYDEEDR                                         | 2.74 | 0.01 | 2.16 | 0.44 | 1.23 | 1.28 |
| 17561 | 0 | 123119 | EEYEEHLYG                                             | 2.26 | 0.01 | 2.28 | 2.00 | 0.22 | 0.28 |
| 17562 | 0 | 123119 | EEYEEHLYG                                             | 2.26 | 0.01 | 2.28 | 2.00 | 0.22 | 0.28 |
| 17563 | 0 | 123119 | EEYEEHLYG                                             | 2.26 | 0.01 | 2.28 | 2.00 | 0.22 | 0.28 |
| 17564 | 0 | 122328 | EEYHLYKDGHLPISEFALL<br>V                              | 2.92 | 0.01 | 0.78 | 0.44 | 1.13 | 0.28 |
| 17565 | 0 | 122328 | EEYHLYKDGHLPISEFALL<br>V                              | 2.92 | 0.01 | 0.78 | 0.44 | 1.13 | 1.27 |

|       |   |        |                                              |      |      |      |      |      |      |
|-------|---|--------|----------------------------------------------|------|------|------|------|------|------|
| 17566 | 0 | 11936  | EEYLILSARD                                   | 2.30 | 0.01 | 2.04 | 0.68 | 0.22 | 0.28 |
| 17567 | 0 | 11936  | EEYLILSARD                                   | 2.30 | 0.01 | 2.04 | 0.68 | 0.22 | 0.28 |
| 17568 | 0 | 11944  | EEYVEVTRVGDFHYVTG<br>M                       | 2.87 | 0.01 | 1.72 | 0.44 | 1.59 | 1.39 |
| 17569 | 0 | 91233  | EFAKWGCQPLGAYPDP<br>EIEYRNVSQEVVKEV          | 3.34 | 0.01 | 3.81 | 3.26 | 0.22 | 1.39 |
| 17570 | 0 | 91233  | EFAKWGCQPLGAYPDP<br>EIEYRNVSQEVVKEV          | 3.34 | 0.01 | 3.81 | 3.26 | 0.22 | 0.85 |
| 17571 | 0 | 138359 | EFALTAVAEVNAILKAL                            | 2.88 | 0.01 | 0.78 | 1.12 | 0.22 | 0.28 |
| 17572 | 0 | 138359 | EFALTAVAEVNAILKAL                            | 2.88 | 0.01 | 0.78 | 1.12 | 0.22 | 0.28 |
| 17573 | 0 | 138359 | EFALTAVAEVNAILKAL                            | 2.88 | 0.01 | 0.78 | 1.12 | 0.22 | 0.28 |
| 17574 | 0 | 450526 | EFARNSI                                      | 1.99 | 0.01 | 0.90 | 0.44 | 1.41 | 1.39 |
| 17575 | 0 | 141635 | EFCEKYTKYFEDMKSK                             | 2.77 | 0.01 | 2.86 | 0.44 | 1.74 | 0.28 |
| 17576 | 0 | 11960  | EFDAGDVLL                                    | 2.21 | 0.01 | 0.90 | 2.71 | 0.22 | 1.39 |
| 17577 | 0 | 11961  | EFDASIAQV                                    | 2.21 | 0.01 | 4.08 | 2.22 | 1.59 | 0.28 |
| 17578 | 0 | 11963  | EFDEMEACAPHPYIEQ<br>GMQ                      | 2.94 | 0.01 | 1.96 | 0.44 | 0.85 | 0.28 |
| 17579 | 0 | 11966  | EFDEMEECASHLPYIEQ<br>GMH                     | 2.91 | 0.01 | 2.41 | 0.44 | 0.85 | 0.28 |
| 17580 | 0 | 11967  | EFDEMEECASHLPYIEQ<br>GMQ                     | 2.91 | 0.01 | 2.41 | 0.44 | 0.85 | 0.28 |
| 17581 | 0 | 11968  | EFDEMEECASHLPYIEQ<br>GVQ                     | 2.89 | 0.01 | 1.96 | 0.44 | 0.85 | 0.28 |
| 17582 | 0 | 11969  | EFDEMEECASQLPYIEQ<br>GMQ                     | 2.93 | 0.01 | 2.41 | 0.44 | 0.85 | 0.28 |
| 17583 | 0 | 11970  | EFDEMEECGSHLPYIEQ<br>GMQ                     | 2.93 | 0.01 | 1.72 | 0.44 | 0.85 | 0.28 |
| 17584 | 0 | 11971  | EFDEMEECPSHLPYIEQG<br>MQ                     | 2.93 | 0.01 | 1.72 | 0.44 | 0.85 | 0.28 |
| 17585 | 0 | 11973  | EFDEMEECSQHLPYIEQ<br>G                       | 2.82 | 0.01 | 3.18 | 0.44 | 1.59 | 0.28 |
| 17586 | 0 | 11974  | EFDEMEECSQHLPYIEQ<br>GMM                     | 2.92 | 0.01 | 1.96 | 0.44 | 0.85 | 0.28 |
| 17587 | 0 | 11975  | EFDEMEECSQHLPYIEQ<br>GMMLAEQF                | 3.15 | 0.01 | 1.72 | 0.44 | 1.59 | 0.28 |
| 17588 | 0 | 103132 | EFDGQDACGSNSWTVV<br>DIDPPLRSNDPKSQNHP<br>GWL | 3.49 | 0.01 | 0.78 | 1.12 | 0.22 | 0.85 |
| 17589 | 0 | 11980  | EFDTQSKNILMQYIKAN<br>SKFIGITEL               | 3.20 | 0.01 | 2.95 | 0.44 | 0.22 | 0.28 |
| 17590 | 0 | 423268 | EFDYDEDATPCVFTD                              | 2.71 | 0.01 | 2.51 | 0.44 | 2.35 | 1.28 |
| 17591 | 0 | 278592 | EFDYEDEDYEGYKSF                              | 2.73 | 0.01 | 1.61 | 0.44 | 0.85 | 1.28 |

|       |   |        |                                              |      |      |      |      |      |      |
|-------|---|--------|----------------------------------------------|------|------|------|------|------|------|
| 17592 | 0 | 134912 | EFEDKFLKGELLEKV                              | 2.73 | 0.01 | 3.59 | 2.13 | 0.85 | 0.85 |
| 17593 | 0 | 11983  | EFEGAGDGEPPEDDDSA<br>TGL                     | 2.97 | 0.01 | 2.40 | 0.44 | 1.59 | 0.85 |
| 17594 | 0 | 11987  | EFEPVGSAPPSEGE                               | 2.66 | 0.01 | 2.69 | 0.44 | 0.85 | 0.28 |
| 17595 | 0 | 106380 | EFFRHNS                                      | 2.01 | 0.01 | 0.90 | 1.81 | 0.22 | 0.28 |
| 17596 | 0 | 189612 | EFGAMIKA                                     | 2.12 | 0.01 | 3.28 | 0.44 | 1.23 | 1.27 |
| 17597 | 0 | 237694 | EFGAPHAVKMDVYNLG<br>DQ                       | 2.80 | 0.01 | 3.19 | 0.44 | 0.22 | 0.85 |
| 17598 | 0 | 11999  | EFGLDGVTYEIDLTNKNA                           | 2.84 | 0.01 | 2.59 | 0.44 | 0.85 | 0.28 |
| 17599 | 0 | 236166 | EFGQKVHDEVHGEAK                              | 2.71 | 0.01 | 1.66 | 0.44 | 0.85 | 1.28 |
| 17600 | 0 | 158587 | EFGTFLW                                      | 2.02 | 0.01 | 0.90 | 0.44 | 1.13 | 1.39 |
| 17601 | 0 | 158587 | EFGTFLW                                      | 2.02 | 0.01 | 0.90 | 0.44 | 1.13 | 0.85 |
| 17602 | 0 | 12004  | EFGTNISK                                     | 2.10 | 0.01 | 2.25 | 0.44 | 1.23 | 0.85 |
| 17603 | 0 | 114788 | EFGTNISKEH                                   | 2.30 | 0.01 | 2.25 | 0.44 | 1.23 | 0.85 |
| 17604 | 0 | 114788 | EFGTNISKEH                                   | 2.30 | 0.01 | 2.25 | 0.44 | 1.23 | 0.85 |
| 17605 | 0 | 230221 | EFGTNISKEHDGECKETV<br>PM                     | 2.92 | 0.01 | 2.25 | 0.44 | 1.23 | 0.28 |
| 17606 | 0 | 230456 | EFHHSIMSQYKLKAS                              | 2.65 | 0.01 | 0.78 | 0.44 | 1.13 | 0.28 |
| 17607 | 0 | 119827 | EFHRWSSYMV                                   | 2.28 | 0.01 | 0.78 | 1.15 | 0.22 | 0.28 |
| 17608 | 0 | 119827 | EFHRWSSYMV                                   | 2.28 | 0.01 | 0.78 | 0.68 | 0.22 | 0.28 |
| 17609 | 0 | 12021  | EFIRKYDKGNKGKINLEE<br>LTAMLDVHRKTSRASM<br>SR | 3.54 | 0.01 | 2.94 | 0.68 | 0.22 | 1.39 |
| 17610 | 0 | 462318 | EFKDPS                                       | 1.88 | 0.01 | 0.78 | 1.12 | 0.22 | 1.28 |
| 17611 | 0 | 178726 | EFKEGFQLMDRDKDG                              | 2.71 | 0.01 | 2.36 | 0.44 | 1.23 | 1.28 |
| 17612 | 0 | 178726 | EFKEGFQLMDRDKDG                              | 2.71 | 0.01 | 2.36 | 0.44 | 1.23 | 1.27 |
| 17613 | 0 | 178726 | EFKEGFQLMDRDKDG                              | 2.71 | 0.01 | 2.36 | 0.44 | 1.23 | 1.28 |
| 17614 | 0 | 144624 | EFKKRFSDATSKAHQ                              | 2.68 | 0.01 | 0.78 | 0.44 | 1.13 | 1.27 |
| 17615 | 0 | 144624 | EFKKRFSDATSKAHQ                              | 2.68 | 0.01 | 0.78 | 1.81 | 0.22 | 1.27 |
| 17616 | 0 | 144624 | EFKKRFSDATSKAHQ                              | 2.68 | 0.01 | 0.78 | 1.81 | 0.22 | 1.27 |
| 17617 | 0 | 144624 | EFKKRFSDATSKAHQ                              | 2.68 | 0.01 | 0.78 | 1.81 | 0.22 | 1.27 |
| 17618 | 0 | 144624 | EFKKRFSDATSKAHQ                              | 2.68 | 0.01 | 0.78 | 1.81 | 0.22 | 1.48 |
| 17619 | 0 | 107811 | EFKNTFKNIKEPDACPN<br>ANEYLKKHCKCP            | 3.35 | 0.01 | 0.90 | 1.12 | 0.22 | 0.28 |
| 17620 | 0 | 451472 | EFKRRFKEAFSKAAQ                              | 2.72 | 0.01 | 0.78 | 1.81 | 0.22 | 1.27 |
| 17621 | 0 | 123123 | EFKSRIEAL                                    | 2.22 | 0.01 | 2.28 | 2.00 | 0.22 | 0.28 |
| 17622 | 0 | 123124 | EFKSRIEDL                                    | 2.22 | 0.01 | 2.28 | 2.00 | 0.22 | 0.28 |
| 17623 | 0 | 123124 | EFKSRIEDL                                    | 2.22 | 0.01 | 2.28 | 2.00 | 0.22 | 0.28 |
| 17624 | 0 | 164504 | EFKVRTNEQTNLPEPVP<br>ERANEPEEPPKIW           | 3.35 | 0.01 | 3.81 | 0.68 | 0.22 | 0.85 |
| 17625 | 0 | 164504 | EFKVRTNEQTNLPEPVP<br>ERANEPEEPPKIW           | 3.35 | 0.01 | 3.81 | 0.68 | 0.22 | 0.28 |
| 17626 | 0 | 164504 | EFKVRTNEQTNLPEPVP<br>ERANEPEEPPKIW           | 3.35 | 0.01 | 3.81 | 0.68 | 0.22 | 1.48 |

|       |   |        |                                   |      |      |      |      |      |      |
|-------|---|--------|-----------------------------------|------|------|------|------|------|------|
|       |   |        | EFLENFVRSSNLKFQDAY                |      |      |      |      |      |      |
| 17627 | 0 | 12036  | NAAGGHNAVFNLN<br>DAN<br>GTHSWEY   | 3.63 | 0.01 | 3.85 | 1.81 | 0.22 | 0.85 |
|       |   |        | EFLENFVRSSNLKFQDAY                |      |      |      |      |      |      |
| 17628 | 0 | 12036  | NAAGGHNAVFNLN<br>DAN<br>GTHSWEY   | 3.63 | 0.01 | 3.85 | 1.12 | 0.22 | 0.85 |
| 17629 | 0 | 12037  | EFLEQAFQVDDRQIV                   | 2.70 | 0.01 | 2.16 | 0.44 | 1.23 | 0.85 |
| 17630 | 0 | 99982  | EFLKKLKLDI                        | 2.35 | 0.01 | 2.18 | 2.16 | 0.22 | 0.28 |
| 17631 | 0 | 99982  | EFLKKLKLDI                        | 2.35 | 0.01 | 2.18 | 2.16 | 0.22 | 0.28 |
| 17632 | 0 | 120471 | EFLNLIKSLS                        | 2.33 | 0.01 | 2.18 | 2.16 | 0.22 | 0.28 |
| 17633 | 0 | 12048  | EFLVNT                            | 1.88 | 0.01 | 1.96 | 0.44 | 0.85 | 0.28 |
| 17634 | 0 | 12050  | EFMEKECPFIKPEV                    | 2.65 | 0.01 | 2.56 | 1.12 | 0.22 | 0.28 |
| 17635 | 0 | 78370  | EFMKEADKEAY                       | 2.43 | 0.01 | 3.45 | 0.44 | 0.85 | 0.28 |
| 17636 | 0 | 99192  | EFNEIRRVLEENAG                    | 2.68 | 0.01 | 2.16 | 0.44 | 1.23 | 1.48 |
| 17637 | 0 | 225266 | EFNNNSLSDKYKNKNID<br>L            | 2.87 | 0.01 | 2.61 | 0.68 | 0.22 | 0.28 |
| 17638 | 0 | 225266 | EFNNNSLSDKYKNKNID<br>L            | 2.87 | 0.01 | 2.61 | 0.68 | 0.22 | 0.28 |
| 17639 | 0 | 225266 | EFNNNSLSDKYKNKNID<br>L            | 2.87 | 0.01 | 2.61 | 0.68 | 0.22 | 0.28 |
| 17640 | 0 | 225267 | EFNSSPYETGYIKFIEGN                | 2.87 | 0.01 | 2.61 | 0.68 | 0.22 | 0.28 |
| 17641 | 0 | 225267 | EFNSSPYETGYIKFIEGN                | 2.87 | 0.01 | 2.61 | 0.68 | 0.22 | 0.28 |
| 17642 | 0 | 225267 | EFNSSPYETGYIKFIEGN                | 2.87 | 0.01 | 2.61 | 0.68 | 0.22 | 0.28 |
| 17643 | 0 | 12055  | EFPAAPAKAEAKEESEES<br>DEDMGFGLFD  | 3.32 | 0.01 | 1.75 | 1.15 | 0.22 | 0.28 |
| 17644 | 0 | 12055  | EFPAAPAKAEAKEESEES<br>DEDMGFGLFD  | 3.32 | 0.01 | 1.75 | 1.15 | 0.22 | 0.28 |
| 17645 | 0 | 12055  | EFPAAPAKAEAKEESEES<br>DEDMGFGLFD  | 3.32 | 0.01 | 1.75 | 1.15 | 0.22 | 0.28 |
| 17646 | 0 | 12055  | EFPAAPAKAEAKEESEES<br>DEDMGFGLFD  | 3.32 | 0.01 | 1.75 | 1.15 | 0.22 | 0.28 |
| 17647 | 0 | 120472 | EFPEKDNEIF                        | 2.34 | 0.01 | 2.18 | 2.16 | 0.22 | 0.28 |
| 17648 | 0 | 12056  | EFPIWMMFAS                        | 2.30 | 0.01 | 0.78 | 0.44 | 1.74 | 0.28 |
| 17649 | 0 | 123125 | EFPKLKEFK                         | 2.27 | 0.01 | 2.28 | 2.00 | 0.22 | 0.28 |
| 17650 | 0 | 105162 | EFPLD                             | 1.74 | 0.01 | 3.89 | 1.20 | 0.22 | 0.28 |
| 17651 | 0 | 12057  | EFPLDLTAGT                        | 2.31 | 0.01 | 3.42 | 3.28 | 0.22 | 0.28 |
| 17652 | 0 | 12059  | EFQEINEDDKSAHIQHEI<br>VEVEEILPEDD | 3.31 | 0.01 | 1.66 | 0.44 | 0.85 | 0.28 |
| 17653 | 0 | 12059  | EFQEINEDDKSAHIQHEI<br>VEVEEILPEDD | 3.31 | 0.01 | 1.66 | 0.44 | 0.85 | 1.48 |
| 17654 | 0 | 12059  | EFQEINEDDKSAHIQHEI<br>VEVEEILPEDD | 3.31 | 0.01 | 1.66 | 0.44 | 0.85 | 0.28 |
| 17655 | 0 | 12059  | EFQEINEDDKSAHIQHEI<br>VEVEEILPEDD | 3.31 | 0.01 | 1.66 | 0.44 | 0.85 | 1.34 |



|       |   |        |       |      |      |      |      |      |      |
|-------|---|--------|-------|------|------|------|------|------|------|
| 17656 | 0 | 192229 | EFR   | 1.37 | 3.45 | 0.78 | 0.68 | 0.22 | 0.85 |
| 17657 | 0 | 102384 | EFRH  | 1.57 | 0.01 | 0.78 | 3.16 | 1.93 | 0.28 |
| 17658 | 0 | 102384 | EFRH  | 1.57 | 0.01 | 0.78 | 3.16 | 1.93 | 1.75 |
| 17659 | 0 | 102384 | EFRH  | 1.57 | 0.01 | 0.78 | 0.68 | 0.22 | 0.28 |
| 17660 | 0 | 102384 | EFRH  | 1.57 | 0.01 | 0.78 | 2.37 | 0.22 | 0.28 |
| 17661 | 0 | 102384 | EFRH  | 1.57 | 0.01 | 0.78 | 2.37 | 0.22 | 2.56 |
| 17662 | 0 | 102384 | EFRH  | 1.57 | 0.01 | 0.78 | 2.37 | 0.22 | 2.56 |
| 17663 | 0 | 102384 | EFRH  | 1.57 | 0.01 | 0.78 | 2.37 | 0.22 | 1.34 |
| 17664 | 0 | 102384 | EFRH  | 1.57 | 0.01 | 0.78 | 0.68 | 0.22 | 0.28 |
| 17665 | 0 | 102384 | EFRH  | 1.57 | 0.01 | 0.78 | 1.15 | 0.22 | 2.56 |
| 17666 | 0 | 102384 | EFRH  | 1.57 | 0.01 | 0.78 | 3.16 | 2.25 | 1.75 |
| 17667 | 0 | 102384 | EFRH  | 1.57 | 0.01 | 0.78 | 1.15 | 0.22 | 0.28 |
| 17668 | 0 | 102384 | EFRH  | 1.57 | 0.01 | 0.78 | 3.00 | 0.22 | 0.28 |
| 17669 | 0 | 102384 | EFRH  | 1.57 | 0.01 | 0.78 | 1.15 | 0.22 | 1.27 |
| 17670 | 0 | 102384 | EFRH  | 1.57 | 0.01 | 0.78 | 2.37 | 0.22 | 0.28 |
| 17671 | 0 | 102384 | EFRH  | 1.57 | 0.01 | 0.78 | 3.00 | 0.22 | 1.34 |
| 17672 | 0 | 102384 | EFRH  | 1.57 | 0.01 | 0.78 | 3.00 | 1.93 | 1.75 |
| 17673 | 0 | 102384 | EFRH  | 1.57 | 0.01 | 0.78 | 3.00 | 0.22 | 0.28 |
| 17674 | 0 | 102384 | EFRH  | 1.57 | 0.01 | 0.78 | 1.15 | 0.22 | 1.34 |
| 17675 | 0 | 102384 | EFRH  | 1.57 | 0.01 | 0.78 | 1.15 | 0.22 | 2.56 |
| 17676 | 0 | 102384 | EFRH  | 1.57 | 0.01 | 0.78 | 1.15 | 0.22 | 2.56 |
| 17677 | 0 | 102384 | EFRH  | 1.57 | 0.01 | 0.78 | 1.15 | 0.22 | 2.56 |
| 17678 | 0 | 102384 | EFRH  | 1.57 | 0.01 | 0.78 | 1.15 | 0.22 | 2.56 |
| 17679 | 0 | 102384 | EFRH  | 1.57 | 0.01 | 0.78 | 1.15 | 0.22 | 2.56 |
| 17680 | 0 | 102384 | EFRH  | 1.57 | 0.01 | 0.78 | 1.15 | 0.22 | 2.56 |
| 17681 | 0 | 102384 | EFRH  | 1.57 | 0.01 | 0.78 | 1.15 | 0.22 | 1.66 |
| 17682 | 0 | 102384 | EFRH  | 1.57 | 0.01 | 0.78 | 1.15 | 0.22 | 1.66 |
| 17683 | 0 | 102384 | EFRH  | 1.57 | 0.01 | 0.78 | 1.15 | 0.22 | 1.66 |
| 17684 | 0 | 102384 | EFRH  | 1.57 | 0.01 | 0.78 | 1.15 | 0.22 | 1.34 |
| 17685 | 0 | 102384 | EFRH  | 1.57 | 0.01 | 0.78 | 1.15 | 0.22 | 2.02 |
| 17686 | 0 | 102384 | EFRH  | 1.57 | 0.01 | 0.78 | 1.15 | 0.22 | 2.02 |
| 17687 | 0 | 102384 | EFRH  | 1.57 | 0.01 | 0.78 | 1.15 | 0.22 | 2.02 |
| 17688 | 0 | 102384 | EFRH  | 1.57 | 0.01 | 0.78 | 1.15 | 0.22 | 2.02 |
| 17689 | 0 | 102384 | EFRH  | 1.57 | 0.01 | 0.78 | 1.15 | 0.22 | 2.02 |
| 17690 | 0 | 146879 | EFRHD | 1.74 | 4.63 | 0.78 | 0.44 | 1.93 | 0.28 |
| 17691 | 0 | 146879 | EFRHD | 1.74 | 4.63 | 0.78 | 0.44 | 1.41 | 0.28 |
| 17692 | 0 | 105163 | EFRHD | 1.74 | 0.01 | 0.78 | 1.15 | 0.22 | 0.28 |
| 17693 | 0 | 105163 | EFRHD | 1.74 | 0.01 | 0.78 | 1.15 | 0.22 | 0.28 |
| 17694 | 0 | 105163 | EFRHD | 1.74 | 0.01 | 0.78 | 1.15 | 0.22 | 1.34 |
| 17695 | 0 | 105163 | EFRHD | 1.74 | 0.01 | 0.78 | 1.15 | 0.22 | 1.34 |
| 17696 | 0 | 105163 | EFRHD | 1.74 | 0.01 | 0.78 | 1.15 | 0.22 | 1.75 |
| 17697 | 0 | 105163 | EFRHD | 1.74 | 0.01 | 0.78 | 1.15 | 0.22 | 1.75 |
| 17698 | 0 | 105163 | EFRHD | 1.74 | 0.01 | 0.78 | 1.15 | 0.22 | 1.75 |
| 17699 | 0 | 105163 | EFRHD | 1.74 | 0.01 | 0.78 | 1.15 | 0.22 | 1.66 |
| 17700 | 0 | 105163 | EFRHD | 1.74 | 0.01 | 0.78 | 1.15 | 0.22 | 0.85 |
| 17701 | 0 | 105163 | EFRHD | 1.74 | 0.01 | 0.78 | 1.15 | 0.22 | 1.66 |
| 17702 | 0 | 105163 | EFRHD | 1.74 | 0.01 | 0.78 | 1.15 | 0.22 | 0.85 |

|       |   |        |                           |      |      |      |      |      |      |
|-------|---|--------|---------------------------|------|------|------|------|------|------|
| 17703 | 0 | 105163 | EFRHD                     | 1.74 | 0.01 | 0.78 | 1.15 | 0.22 | 1.66 |
| 17704 | 0 | 105163 | EFRHD                     | 1.74 | 0.01 | 0.78 | 1.15 | 0.22 | 2.49 |
| 17705 | 0 | 105163 | EFRHD                     | 1.74 | 0.01 | 0.78 | 1.15 | 0.22 | 2.49 |
| 17706 | 0 | 105163 | EFRHD                     | 1.74 | 0.01 | 0.78 | 1.15 | 0.22 | 2.49 |
| 17707 | 0 | 107109 | EFRHDS                    | 1.88 | 3.45 | 0.78 | 1.81 | 0.22 | 0.28 |
| 17708 | 0 | 107109 | EFRHDS                    | 1.88 | 3.45 | 0.78 | 3.40 | 0.22 | 0.28 |
| 17709 | 0 | 104461 | EFRHDS                    | 1.88 | 0.01 | 0.78 | 1.15 | 0.22 | 0.85 |
| 17710 | 0 | 104461 | EFRHDS                    | 1.88 | 0.01 | 0.78 | 1.15 | 0.22 | 0.85 |
| 17711 | 0 | 104461 | EFRHDS                    | 1.88 | 0.01 | 0.78 | 0.68 | 0.22 | 2.49 |
| 17712 | 0 | 104461 | EFRHDS                    | 1.88 | 0.01 | 0.78 | 1.15 | 0.22 | 1.48 |
| 17713 | 0 | 104461 | EFRHDS                    | 1.88 | 0.01 | 0.78 | 1.15 | 0.22 | 1.48 |
| 17714 | 0 | 104461 | EFRHDS                    | 1.88 | 0.01 | 0.78 | 1.15 | 0.22 | 1.75 |
| 17715 | 0 | 104461 | EFRHDS                    | 1.88 | 0.01 | 0.78 | 1.15 | 2.26 | 0.28 |
| 17716 | 0 | 104461 | EFRHDS                    | 1.88 | 0.01 | 0.78 | 1.15 | 2.26 | 2.66 |
| 17717 | 0 | 104461 | EFRHDS                    | 1.88 | 0.01 | 0.78 | 1.15 | 0.22 | 0.85 |
| 17718 | 0 | 104461 | EFRHDS                    | 1.88 | 0.01 | 0.78 | 1.15 | 0.22 | 0.85 |
| 17719 | 0 | 104461 | EFRHDS                    | 1.88 | 0.01 | 0.78 | 1.15 | 0.22 | 0.85 |
| 17720 | 0 | 104461 | EFRHDS                    | 1.88 | 0.01 | 0.78 | 1.15 | 0.22 | 0.28 |
| 17721 | 0 | 104461 | EFRHDS                    | 1.88 | 0.01 | 0.78 | 1.15 | 0.22 | 1.48 |
| 17722 | 0 | 104461 | EFRHDS                    | 1.88 | 0.01 | 0.78 | 1.15 | 0.22 | 0.85 |
| 17723 | 0 | 104461 | EFRHDS                    | 1.88 | 0.01 | 0.78 | 1.15 | 0.22 | 1.48 |
| 17724 | 0 | 104461 | EFRHDS                    | 1.88 | 0.01 | 0.78 | 1.15 | 0.22 | 1.48 |
| 17725 | 0 | 105164 | EFRHDSG                   | 1.99 | 0.01 | 0.78 | 3.00 | 1.93 | 0.28 |
| 17726 | 0 | 105164 | EFRHDSG                   | 1.99 | 0.01 | 0.78 | 3.00 | 0.22 | 0.28 |
| 17727 | 0 | 105164 | EFRHDSG                   | 1.99 | 0.01 | 0.78 | 3.00 | 0.22 | 1.48 |
| 17728 | 0 | 105164 | EFRHDSG                   | 1.99 | 0.01 | 0.78 | 3.00 | 1.93 | 1.75 |
| 17729 | 0 | 105164 | EFRHDSG                   | 1.99 | 0.01 | 0.78 | 1.81 | 0.22 | 1.27 |
| 17730 | 0 | 105164 | EFRHDSG                   | 1.99 | 0.01 | 0.78 | 2.79 | 0.22 | 1.27 |
| 17731 | 0 | 105164 | EFRHDSG                   | 1.99 | 0.01 | 0.78 | 3.59 | 1.93 | 1.27 |
| 17732 | 0 | 157189 | EFRHDSGY                  | 2.10 | 0.01 | 0.78 | 0.68 | 0.22 | 0.28 |
| 17733 | 0 | 157189 | EFRHDSGY                  | 2.10 | 0.01 | 0.78 | 0.68 | 0.22 | 1.48 |
| 17734 | 0 | 157189 | EFRHDSGY                  | 2.10 | 0.01 | 0.78 | 0.68 | 0.22 | 0.85 |
| 17735 | 0 | 157189 | EFRHDSGY                  | 2.10 | 0.01 | 0.78 | 0.68 | 0.22 | 0.28 |
| 17736 | 0 | 157189 | EFRHDSGY                  | 2.10 | 0.01 | 0.78 | 0.68 | 0.22 | 1.66 |
| 17737 | 0 | 157189 | EFRHDSGY                  | 2.10 | 0.01 | 0.78 | 0.68 | 0.22 | 1.48 |
| 17738 | 0 | 157189 | EFRHDSGY                  | 2.10 | 0.01 | 0.78 | 0.68 | 0.22 | 1.34 |
| 17739 | 0 | 157189 | EFRHDSGY                  | 2.10 | 0.01 | 0.78 | 0.68 | 0.22 | 0.28 |
| 17740 | 0 | 157189 | EFRHDSGY                  | 2.10 | 0.01 | 0.78 | 0.68 | 0.22 | 1.66 |
| 17741 | 0 | 157189 | EFRHDSGY                  | 2.10 | 0.01 | 0.78 | 0.68 | 0.22 | 1.66 |
| 17742 | 0 | 157189 | EFRHDSGY                  | 2.10 | 0.01 | 0.78 | 0.68 | 0.22 | 1.66 |
| 17743 | 0 | 99985  | EFRHDSGYEV                | 2.30 | 0.01 | 0.78 | 1.12 | 0.22 | 0.85 |
| 17744 | 0 | 105748 | EFRHDSGYEVHHQK            | 2.59 | 0.01 | 0.78 | 1.15 | 0.22 | 1.27 |
| 17745 | 0 | 105748 | EFRHDSGYEVHHQK            | 2.59 | 0.01 | 0.78 | 1.15 | 0.22 | 1.48 |
|       |   |        | EFRHDSGYEVHHQKLVF         |      |      |      |      |      |      |
| 17746 | 0 | 174090 | FAEDVGSNKGAIIGLMV<br>GGVV | 3.55 | 3.45 | 0.78 | 3.16 | 0.22 | 0.85 |

|       |   |        |                             |      |      |      |      |      |      |
|-------|---|--------|-----------------------------|------|------|------|------|------|------|
|       |   |        | EFRHDSGYEVHHQKLVF           |      |      |      |      |      |      |
| 17747 | 0 | 174090 | FAEDVGSNKGAIIGLMV<br>GGVV   | 3.55 | 3.45 | 0.78 | 3.16 | 0.22 | 1.66 |
|       |   |        | EFRHDSGYEVHHQKLVF           |      |      |      |      |      |      |
| 17748 | 0 | 174090 | FAEDVGSNKGAIIGLMV<br>GGVV   | 3.55 | 3.45 | 0.78 | 3.16 | 0.22 | 1.75 |
|       |   |        | EFRHDSGYEVHHQKLVF           |      |      |      |      |      |      |
| 17749 | 0 | 174090 | FAEDVGSNKGAIIGLMV<br>GGVV   | 3.55 | 3.45 | 0.78 | 1.15 | 0.22 | 0.85 |
|       |   |        | EFRHDSGYEVHHQKLVF           |      |      |      |      |      |      |
| 17750 | 0 | 116699 | FAEDVGSNKGAIIGLMV<br>GGVVIA | 3.61 | 4.93 | 0.78 | 1.20 | 0.22 | 1.27 |
|       |   |        | EFRHDSGYEVHHQKLVF           |      |      |      |      |      |      |
| 17751 | 0 | 186994 | FAEDVGSNKGAIIGLMV<br>GGVVIA | 3.61 | 3.45 | 0.78 | 2.88 | 0.22 | 0.28 |
|       |   |        | EFRHDSGYEVHHQKLVF           |      |      |      |      |      |      |
| 17752 | 0 | 186994 | FAEDVGSNKGAIIGLMV<br>GGVVIA | 3.61 | 3.45 | 0.78 | 2.88 | 0.22 | 1.48 |
|       |   |        | EFRHDSGYEVHHQKLVF           |      |      |      |      |      |      |
| 17753 | 0 | 186994 | FAEDVGSNKGAIIGLMV<br>GGVVIA | 3.61 | 3.45 | 0.78 | 1.15 | 0.22 | 1.75 |
|       |   |        | EFRHDSGYEVHHQKLVF           |      |      |      |      |      |      |
| 17754 | 0 | 186994 | FAEDVGSNKGAIIGLMV<br>GGVVIA | 3.61 | 3.45 | 0.78 | 1.15 | 0.22 | 1.34 |
|       |   |        | EFRHDSGYEVHHQKLVF           |      |      |      |      |      |      |
| 17755 | 0 | 186994 | FAEDVGSNKGAIIGLMV<br>GGVVIA | 3.61 | 3.45 | 0.78 | 2.88 | 0.22 | 0.28 |
|       |   |        | EFRHDSGYEVHHQKLVF           |      |      |      |      |      |      |
| 17756 | 0 | 186994 | FAEDVGSNKGAIIGLMV<br>GGVVIA | 3.61 | 3.45 | 0.78 | 2.88 | 0.22 | 1.48 |
|       |   |        | EFRHDSGYEVHHQKLVF           |      |      |      |      |      |      |
| 17757 | 0 | 186994 | FAEDVGSNKGAIIGLMV<br>GGVVIA | 3.61 | 3.45 | 0.78 | 2.88 | 0.22 | 0.28 |
|       |   |        | EFRHDSGYEVHHQKLVF           |      |      |      |      |      |      |
| 17758 | 0 | 186994 | FAEDVGSNKGAIIGLMV<br>GGVVIA | 3.61 | 3.45 | 0.78 | 2.88 | 0.22 | 0.28 |
|       |   |        | EFRHDSGYEVHHQKLVF           |      |      |      |      |      |      |
| 17759 | 0 | 186994 | FAEDVGSNKGAIIGLMV<br>GGVVIA | 3.61 | 3.45 | 0.78 | 2.88 | 0.22 | 0.28 |
|       |   |        | EFRHDSGYEVHHQKLVF           |      |      |      |      |      |      |
| 17760 | 0 | 186994 | FAEDVGSNKGAIIGLMV<br>GGVVIA | 3.61 | 3.45 | 0.78 | 2.49 | 0.22 | 1.48 |
|       |   |        | EFRHDSGYEVHHQKLVF           |      |      |      |      |      |      |
| 17761 | 0 | 186994 | FAEDVGSNKGAIIGLMV<br>GGVVIA | 3.61 | 3.45 | 0.78 | 2.49 | 0.22 | 0.85 |

|       |   |        |                                 |      |      |      |      |      |      |
|-------|---|--------|---------------------------------|------|------|------|------|------|------|
|       |   |        | EFRHDSGYEVHHQKLVF               |      |      |      |      |      |      |
| 17762 | 0 | 186994 | FAEDVGSNKGAIIGLMV<br>GGVVIA     | 3.61 | 3.45 | 0.78 | 1.20 | 0.22 | 0.28 |
|       |   |        | EFRHDSGYEVHHQKLVF               |      |      |      |      |      |      |
| 17763 | 0 | 157191 | FAEDVGSNKGAIIGLMV<br>GGVVIA     | 3.61 | 0.01 | 0.78 | 0.44 | 1.93 | 1.28 |
|       |   |        | EFRHDSGYEVHHQKLVF               |      |      |      |      |      |      |
| 17764 | 0 | 157191 | FAEDVGSNKGAIIGLMV<br>GGVVIA     | 3.61 | 0.01 | 0.78 | 0.44 | 1.41 | 1.28 |
|       |   |        | EFRHDSGYEVHHQKLVF               |      |      |      |      |      |      |
| 17765 | 0 | 157191 | FAEDVGSNKGAIIGLMV<br>GGVVIA     | 3.61 | 0.01 | 0.78 | 0.44 | 1.93 | 1.28 |
|       |   |        | EFRHDSGYEVHHQKLVF               |      |      |      |      |      |      |
| 17766 | 0 | 157191 | FAEDVGSNKGAIIGLMV<br>GGVVIA     | 3.61 | 0.01 | 0.78 | 3.70 | 0.22 | 1.28 |
|       |   |        | EFRHEFRHEFRHEFRHEF              |      |      |      |      |      |      |
| 17767 | 0 | 105165 | RHEFRHEFRHEFRHEFR<br>HEFRH      | 3.71 | 0.01 | 0.90 | 4.93 | 1.93 | 1.75 |
|       |   |        | EFRLYYYNKFKDIASLTN<br>K         | 2.88 | 0.01 | 2.08 | 0.68 | 0.22 | 1.57 |
| 17768 | 0 | 161340 | EFRLYYYNKFKDIASLTN<br>K         | 2.88 | 0.01 | 2.08 | 2.25 | 0.22 | 1.57 |
| 17769 | 0 | 161340 | EFRLYYYNKFKDIASLTN<br>K         | 2.88 | 0.01 | 2.08 | 2.02 | 0.22 | 1.57 |
| 17770 | 0 | 161340 | EFRLYYYNKFKDIASLTN<br>K         | 2.88 | 0.01 | 2.08 | 2.43 | 0.22 | 1.57 |
| 17771 | 0 | 161340 | EFRLYYYNKFKDIASLTN<br>K         | 2.88 | 0.01 | 2.08 | 2.43 | 0.22 | 1.57 |
| 17772 | 0 | 12069  | EFSDCSKDYQYM                    | 2.46 | 0.01 | 3.61 | 1.20 | 0.22 | 0.85 |
| 17773 | 0 | 12071  | EFSEPKTSVTP                     | 2.49 | 0.01 | 0.90 | 0.68 | 0.22 | 0.28 |
| 17774 | 0 | 162142 | EFSLKGPLIQWRSG                  | 2.59 | 4.93 | 0.90 | 1.15 | 0.22 | 2.49 |
|       |   |        | EFSLPTHHTVRLIRVTAS<br>PSA       | 3.01 | 0.01 | 3.04 | 1.15 | 0.22 | 0.28 |
| 17775 | 0 | 12073  | EFSLPTHHTVRLIRVTAS<br>PSA       | 3.01 | 0.01 | 3.04 | 1.15 | 0.22 | 0.28 |
|       |   |        | EFSLGKEEMMAEMLQ                 | 3.37 | 0.01 | 3.78 | 1.12 | 0.22 | 0.85 |
| 17777 | 0 | 78956  | RGFEYNESDTKTQLI                 |      |      |      |      |      |      |
|       |   |        | EFSLGKEEMMAEMLQ                 | 3.64 | 0.01 | 3.78 | 3.23 | 0.22 | 0.28 |
| 17778 | 0 | 78957  | RGFEYNESDTKTQLIASF<br>KKQLRK    |      |      |      |      |      |      |
|       |   |        | EFSLGKEEMMAEMLQ                 | 3.71 | 0.01 | 3.78 | 1.12 | 0.22 | 0.85 |
| 17779 | 0 | 78958  | RGFEYNESDTKTQLIASF<br>KKQLRKSLK |      |      |      |      |      |      |
|       |   |        | EFSLGKEEMMAEMLQ                 | 3.71 | 0.01 | 3.78 | 3.23 | 0.22 | 0.28 |
| 17780 | 0 | 78958  | RGFEYNESDTKTQLIASF<br>KKQLRKSLK |      |      |      |      |      |      |
| 17781 | 0 | 12076  | EFSSSEFLENKSSVD                 | 2.71 | 0.01 | 1.66 | 1.15 | 0.22 | 0.28 |
| 17782 | 0 | 12076  | EFSSSEFLENKSSVD                 | 2.71 | 0.01 | 1.66 | 1.15 | 0.22 | 0.28 |
| 17783 | 0 | 12078  | EFSTNKAKQIRY                    | 2.43 | 0.01 | 4.63 | 1.12 | 0.22 | 0.85 |

|       |   |        |                              |      |      |      |      |      |      |
|-------|---|--------|------------------------------|------|------|------|------|------|------|
| 17784 | 0 | 12088  | EFTYHVKNREQAYEINKK<br>SG     | 2.91 | 0.01 | 3.47 | 0.44 | 0.22 | 0.85 |
| 17785 | 0 | 12089  | EFTYMINFGRGQNYWE<br>HPYQKS   | 3.00 | 0.01 | 1.66 | 1.20 | 0.22 | 0.28 |
| 17786 | 0 | 12089  | EFTYMINFGRGQNYWE<br>HPYQKS   | 3.00 | 0.01 | 1.66 | 2.43 | 0.22 | 0.28 |
| 17787 | 0 | 12089  | EFTYMINFGRGQNYWE<br>HPYQKS   | 3.00 | 0.01 | 1.66 | 1.20 | 0.22 | 0.28 |
| 17788 | 0 | 99194  | EFVDRLLSQIKSEGH              | 2.64 | 0.01 | 2.86 | 2.02 | 0.85 | 0.85 |
| 17789 | 0 | 188835 | EFVNLGANSIETDVS              | 2.67 | 0.01 | 3.36 | 2.02 | 0.22 | 0.28 |
| 17790 | 0 | 188835 | EFVNLGANSIETDVS              | 2.67 | 0.01 | 4.93 | 2.02 | 0.22 | 0.28 |
| 17791 | 0 | 138161 | EFVRFDSAENPRMEPR<br>ARWMEREG | 3.18 | 0.01 | 2.19 | 2.04 | 2.25 | 1.75 |
| 17792 | 0 | 12105  | EFVVEFDLPGIKA                | 2.53 | 0.01 | 2.59 | 0.44 | 0.85 | 0.28 |
| 17793 | 0 | 12105  | EFVVEFDLPGIKA                | 2.53 | 0.01 | 2.59 | 0.44 | 0.85 | 0.28 |
| 17794 | 0 | 12111  | EFYEKVTGTDLELIQLKD<br>H      | 2.95 | 0.01 | 2.75 | 0.44 | 0.85 | 0.85 |
| 17795 | 0 | 123127 | EGAAMDRLI                    | 2.20 | 0.01 | 2.28 | 2.00 | 0.22 | 0.28 |
| 17796 | 0 | 123127 | EGAAMDRLI                    | 2.20 | 0.01 | 2.28 | 2.00 | 0.22 | 0.28 |
| 17797 | 0 | 123128 | EGAAMDRLM                    | 2.22 | 0.01 | 2.28 | 2.00 | 0.22 | 0.28 |
| 17798 | 0 | 12115  | EGAARQP                      | 2.01 | 0.01 | 2.24 | 1.12 | 0.22 | 0.28 |
| 17799 | 0 | 12115  | EGAARQP                      | 2.01 | 0.01 | 2.24 | 0.68 | 0.22 | 0.28 |
| 17800 | 0 | 12118  | EGAGDGEHLEGGD                | 2.60 | 0.01 | 3.17 | 0.44 | 0.85 | 0.85 |
| 17801 | 0 | 12119  | EGAGDGEPPEDDDSAT<br>GLAF     | 2.97 | 0.01 | 2.40 | 0.44 | 1.59 | 0.85 |
| 17802 | 0 | 12122  | EGAGGKLGKQTDIAGT<br>GLT      | 2.97 | 0.01 | 2.21 | 1.20 | 0.22 | 0.28 |
| 17803 | 0 | 97256  | EGAKGENKRPNDKAGE<br>V        | 2.83 | 0.01 | 3.10 | 0.68 | 0.22 | 0.28 |
| 17804 | 0 | 97256  | EGAKGENKRPNDKAGE<br>V        | 2.83 | 0.01 | 3.10 | 0.68 | 0.22 | 2.56 |
| 17805 | 0 | 97256  | EGAKGENKRPNDKAGE<br>V        | 2.83 | 0.01 | 3.10 | 0.68 | 0.22 | 2.56 |
| 17806 | 0 | 97256  | EGAKGENKRPNDKAGE<br>V        | 2.83 | 0.01 | 3.10 | 0.68 | 0.22 | 2.56 |
| 17807 | 0 | 97256  | EGAKGENKRPNDKAGE<br>V        | 2.83 | 0.01 | 3.10 | 0.68 | 0.22 | 2.56 |
| 17808 | 0 | 97256  | EGAKGENKRPNDKAGE<br>V        | 2.83 | 0.01 | 3.10 | 0.68 | 0.22 | 2.56 |
| 17809 | 0 | 97256  | EGAKGENKRPNDKAGE<br>V        | 2.83 | 0.01 | 3.10 | 0.68 | 0.22 | 2.56 |
| 17810 | 0 | 97256  | EGAKGENKRPNDKAGE<br>V        | 2.83 | 0.01 | 3.10 | 0.68 | 0.22 | 2.56 |
| 17811 | 0 | 97256  | EGAKGENKRPNDKAGE<br>V        | 2.83 | 0.01 | 3.10 | 0.68 | 0.22 | 2.56 |
| 17812 | 0 | 97256  | EGAKGENKRPNDKAGE<br>V        | 2.83 | 0.01 | 3.10 | 0.68 | 0.22 | 0.85 |

|       |   |        |                                                  |      |      |      |      |      |      |
|-------|---|--------|--------------------------------------------------|------|------|------|------|------|------|
| 17813 | 0 | 97256  | EGAKGENKRPNDKAGE<br>V                            | 2.83 | 0.01 | 3.10 | 0.68 | 0.22 | 0.85 |
| 17814 | 0 | 12125  | EGAPPA                                           | 1.90 | 0.01 | 2.96 | 3.67 | 0.22 | 0.28 |
| 17815 | 0 | 108893 | EGAQGPRG                                         | 2.14 | 0.01 | 1.60 | 2.55 | 2.60 | 0.28 |
| 17816 | 0 | 12130  | EGASGATWVDLVLEGD<br>SCITI                        | 3.02 | 0.01 | 3.61 | 3.01 | 0.22 | 0.28 |
| 17817 | 0 | 12130  | EGASGATWVDLVLEGD<br>SCITI                        | 3.02 | 0.01 | 3.22 | 0.68 | 0.22 | 0.28 |
| 17818 | 0 | 12130  | EGASGATWVDLVLEGD<br>SCITI                        | 3.02 | 0.01 | 3.22 | 1.15 | 0.22 | 0.28 |
| 17819 | 0 | 147616 | EGATNFGDI                                        | 2.21 | 0.01 | 3.24 | 1.12 | 0.22 | 0.28 |
| 17820 | 0 | 137837 | EGAVALADRASS                                     | 2.47 | 0.01 | 2.21 | 0.44 | 0.85 | 0.28 |
| 17821 | 0 | 137837 | EGAVALADRASS                                     | 2.47 | 0.01 | 2.21 | 1.20 | 0.22 | 0.28 |
| 17822 | 0 | 12134  | EGCGWAGWLL                                       | 2.33 | 0.01 | 2.68 | 0.44 | 0.85 | 0.28 |
| 17823 | 0 | 12134  | EGCGWAGWLL                                       | 2.33 | 0.01 | 2.68 | 2.74 | 0.22 | 0.28 |
| 17824 | 0 | 12136  | EGCKFSCFIRPAGFC                                  | 2.68 | 0.01 | 2.56 | 2.02 | 0.22 | 0.85 |
| 17825 | 0 | 12137  | EGCKLSCFIRPSGYC                                  | 2.66 | 0.01 | 2.56 | 2.02 | 0.22 | 0.85 |
| 17826 | 0 | 190405 | EGCLPPFPADVFMIP                                  | 2.66 | 0.01 | 3.97 | 2.00 | 1.41 | 0.28 |
| 17827 | 0 | 12138  | EGCNGDGTSYKK                                     | 2.45 | 0.01 | 2.69 | 0.68 | 0.22 | 0.28 |
| 17828 | 0 | 12138  | EGCNGDGTSYKK                                     | 2.45 | 0.01 | 2.69 | 1.20 | 0.22 | 0.28 |
| 17829 | 0 | 180093 | EGCVICDPSVVLALKSLE<br>KDYLPGHLDKHHKAM<br>MERVENA | 3.65 | 0.01 | 0.78 | 0.44 | 1.93 | 0.28 |
| 17830 | 0 | 12142  | EGDDPAKAAFDLSLQA                                 | 2.68 | 0.01 | 3.89 | 0.68 | 0.22 | 0.85 |
| 17831 | 0 | 12143  | EGDEATGANIVKVALEA                                | 2.82 | 0.01 | 2.04 | 3.33 | 1.13 | 0.28 |
| 17832 | 0 | 99196  | EGDITNPINLREGEF                                  | 2.71 | 0.01 | 2.16 | 0.44 | 1.23 | 1.48 |
| 17833 | 0 | 278906 | EGDKPPFPQGAAAAGD                                 | 2.68 | 0.01 | 1.61 | 0.44 | 0.85 | 1.28 |
| 17834 | 0 | 98752  | EGDLEILLQK                                       | 2.33 | 0.01 | 1.60 | 0.44 | 1.23 | 0.85 |
| 17835 | 0 | 98752  | EGDLEILLQK                                       | 2.33 | 0.01 | 1.60 | 0.44 | 1.23 | 0.85 |
| 17836 | 0 | 187317 | EGDLLKLNNRYRN                                    | 2.64 | 0.01 | 2.59 | 0.44 | 1.74 | 0.28 |
| 17837 | 0 | 180094 | EGDMATGITYASYGYFC                                | 2.79 | 0.01 | 4.15 | 2.22 | 0.22 | 0.28 |
| 17838 | 0 | 462319 | EGDNLSPLAIPRAGPGL<br>SL                          | 2.98 | 0.01 | 1.96 | 2.90 | 0.22 | 0.28 |
| 17839 | 0 | 180324 | EGDSIKKYHDKHQGT                                  | 2.68 | 0.01 | 4.15 | 1.12 | 0.22 | 0.28 |
| 17840 | 0 | 180324 | EGDSIKKYHDKHQGT                                  | 2.68 | 0.01 | 4.15 | 3.06 | 0.22 | 0.28 |
| 17841 | 0 | 180324 | EGDSIKKYHDKHQGT                                  | 2.68 | 0.01 | 4.15 | 1.12 | 0.22 | 1.48 |
| 17842 | 0 | 180324 | EGDSIKKYHDKHQGT                                  | 2.68 | 0.01 | 4.15 | 3.06 | 0.22 | 1.48 |
| 17843 | 0 | 12150  | EGDTVIYSKY                                       | 2.29 | 0.01 | 2.04 | 0.68 | 0.22 | 0.28 |
| 17844 | 0 | 12150  | EGDTVIYSKY                                       | 2.29 | 0.01 | 2.04 | 0.68 | 0.22 | 0.28 |
| 17845 | 0 | 111238 | EGEAAQVEEVRIY                                    | 2.56 | 0.01 | 3.81 | 1.12 | 0.22 | 0.85 |
| 17846 | 0 | 111238 | EGEAAQVEEVRIY                                    | 2.56 | 0.01 | 3.81 | 1.12 | 0.22 | 0.85 |
| 17847 | 0 | 181598 | EGEAKCGSDKIRDYG                                  | 2.69 | 0.01 | 1.66 | 2.36 | 0.22 | 1.28 |
| 17848 | 0 | 278949 | EGEDEEGPSPPTPP                                   | 2.72 | 0.01 | 1.61 | 0.44 | 0.85 | 1.28 |

|       |   |        |                             |      |      |      |      |      |      |
|-------|---|--------|-----------------------------|------|------|------|------|------|------|
| 17849 | 0 | 278951 | EGEDHEKQQQSDEAQ             | 2.71 | 0.01 | 1.61 | 0.44 | 0.85 | 1.28 |
| 17850 | 0 | 278958 | EGEEEDHEKQQQSDE             | 2.71 | 0.01 | 1.61 | 0.44 | 0.85 | 1.28 |
| 17851 | 0 | 131406 | EGEGSGFIREDPIGAGA           | 2.83 | 0.01 | 0.78 | 1.12 | 0.22 | 0.28 |
| 17852 | 0 | 131406 | EGEGSGFIREDPIGAGA           | 2.83 | 0.01 | 0.78 | 1.12 | 0.22 | 2.02 |
| 17853 | 0 | 131406 | EGEGSGFIREDPIGAGA           | 2.83 | 0.01 | 0.78 | 1.12 | 0.22 | 1.27 |
| 17854 | 0 | 279007 | EGEIDDDSDVQNEIK             | 2.69 | 0.01 | 1.61 | 0.44 | 0.85 | 1.28 |
| 17855 | 0 | 120475 | EGEIGKIPLK                  | 2.36 | 0.01 | 2.18 | 2.16 | 0.22 | 0.28 |
| 17856 | 0 | 279010 | EGEIMTENEDDDEDE             | 2.73 | 0.01 | 1.61 | 0.44 | 0.85 | 1.28 |
| 17857 | 0 | 178730 | EGELKGTYYPLTGMS             | 2.70 | 0.01 | 2.36 | 0.44 | 1.23 | 1.28 |
| 17858 | 0 | 78959  | EGENVVGSETRVKVVK<br>KIAAPFK | 3.13 | 0.01 | 2.24 | 0.68 | 0.22 | 0.28 |
| 17859 | 0 | 78959  | EGENVVGSETRVKVVK<br>KIAAPFK | 3.13 | 0.01 | 2.24 | 0.68 | 0.22 | 1.34 |
| 17860 | 0 | 78959  | EGENVVGSETRVKVVK<br>KIAAPFK | 3.13 | 0.01 | 2.24 | 0.68 | 0.22 | 0.28 |
| 17861 | 0 | 98753  | EGEQEWGTPGSHVRE             | 2.69 | 0.01 | 2.16 | 0.44 | 1.23 | 0.85 |
| 17862 | 0 | 279059 | EGERMTEKEDGDNE              | 2.72 | 0.01 | 1.61 | 0.44 | 0.85 | 1.28 |
| 17863 | 0 | 279071 | EGESSFSYREVDVS              | 2.71 | 0.01 | 1.61 | 0.44 | 0.85 | 1.28 |
| 17864 | 0 | 116700 | EGEVAALNRRIQLE              | 2.68 | 0.01 | 2.36 | 0.44 | 1.23 | 1.28 |
| 17865 | 0 | 116700 | EGEVAALNRRIQLE              | 2.68 | 0.01 | 2.36 | 0.44 | 1.23 | 1.27 |
| 17866 | 0 | 116700 | EGEVAALNRRIQLE              | 2.68 | 0.01 | 2.36 | 0.44 | 1.23 | 1.28 |
| 17867 | 0 | 116700 | EGEVAALNRRIQLE              | 2.68 | 0.01 | 2.36 | 0.44 | 1.23 | 1.27 |
| 17868 | 0 | 157193 | EGEWQDGKMHGKGT              | 2.64 | 0.01 | 3.47 | 2.49 | 0.85 | 0.28 |
| 17869 | 0 | 189062 | EGFEYTWGNHPPKRVW            | 2.71 | 0.01 | 2.92 | 0.68 | 0.22 | 0.28 |
| 17870 | 0 | 105749 | EGFGSGGAI                   | 2.24 | 0.01 | 0.90 | 3.01 | 0.22 | 0.28 |
| 17871 | 0 | 12162  | EGFIEDELKFLIAFAAD<br>LR     | 3.03 | 0.01 | 3.81 | 0.44 | 1.23 | 1.27 |
| 17872 | 0 | 279121 | EGGDEGNDEAEGGND             | 2.75 | 0.01 | 1.61 | 0.44 | 0.85 | 1.28 |
| 17873 | 0 | 12169  | EGGDGTRDTLPQS               | 2.55 | 0.01 | 3.17 | 0.44 | 0.85 | 0.85 |
| 17874 | 0 | 12170  | EGGEGDDVYK                  | 2.35 | 0.01 | 1.66 | 1.15 | 0.22 | 0.85 |
| 17875 | 0 | 12171  | EGGEILLN                    | 2.15 | 0.01 | 2.40 | 2.43 | 0.22 | 0.28 |
| 17876 | 0 | 167737 | EGGEILLNQ                   | 2.25 | 0.01 | 2.40 | 2.43 | 0.22 | 0.28 |
| 17877 | 0 | 279133 | EGGERMTEKEDGDNE             | 2.72 | 0.01 | 1.61 | 0.44 | 0.85 | 1.28 |
| 17878 | 0 | 238327 | EGGRRVTQYCSHAC              | 2.63 | 0.01 | 2.56 | 2.02 | 0.22 | 0.85 |
| 17879 | 0 | 238327 | EGGRRVTQYCSHAC              | 2.63 | 0.01 | 2.56 | 1.20 | 0.22 | 0.85 |
| 17880 | 0 | 107813 | EGGVRGPRVV                  | 2.43 | 3.50 | 0.78 | 0.68 | 0.22 | 0.28 |
| 17881 | 0 | 178732 | EGGIYDISNKRRMGL             | 2.65 | 0.01 | 2.36 | 0.44 | 1.23 | 1.28 |
| 17882 | 0 | 178732 | EGGIYDISNKRRMGL             | 2.65 | 0.01 | 2.36 | 0.44 | 1.23 | 1.27 |
| 17883 | 0 | 178732 | EGGIYDISNKRRMGL             | 2.65 | 0.01 | 2.36 | 0.44 | 1.23 | 1.28 |
| 17884 | 0 | 99198  | EGGNIFSGFTPEFLE             | 2.70 | 0.01 | 2.16 | 0.44 | 1.23 | 1.48 |

|       |   |        |                                     |      |      |      |      |      |      |
|-------|---|--------|-------------------------------------|------|------|------|------|------|------|
| 17885 | 0 | 151161 | EGGPSQIGDALGFAVR                    | 2.71 | 0.01 | 0.78 | 0.68 | 0.22 | 0.28 |
| 17886 | 0 | 151161 | EGGPSQIGDALGFAVR                    | 2.71 | 0.01 | 0.78 | 0.68 | 0.22 | 2.66 |
| 17887 | 0 | 151161 | EGGPSQIGDALGFAVR                    | 2.71 | 0.01 | 0.78 | 0.68 | 0.22 | 0.28 |
| 17888 | 0 | 135663 | EGGRDSCQ                            | 2.11 | 0.01 | 0.78 | 0.44 | 2.35 | 0.28 |
| 17889 | 0 | 108331 | EGGRVNAVGYGESRPV<br>ADNATAEGRAINRRV | 3.40 | 0.01 | 4.15 | 3.57 | 0.22 | 0.28 |
| 17890 | 0 | 108331 | EGGRVNAVGYGESRPV<br>ADNATAEGRAINRRV | 3.40 | 0.01 | 4.15 | 3.57 | 0.22 | 2.12 |
| 17891 | 0 | 108331 | EGGRVNAVGYGESRPV<br>ADNATAEGRAINRRV | 3.40 | 0.01 | 4.15 | 3.57 | 0.22 | 1.34 |
| 17892 | 0 | 108331 | EGGRVNAVGYGESRPV<br>ADNATAEGRAINRRV | 3.40 | 0.01 | 4.15 | 3.57 | 0.22 | 1.75 |
| 17893 | 0 | 108331 | EGGRVNAVGYGESRPV<br>ADNATAEGRAINRRV | 3.40 | 0.01 | 4.15 | 3.70 | 0.22 | 0.28 |
| 17894 | 0 | 108331 | EGGRVNAVGYGESRPV<br>ADNATAEGRAINRRV | 3.40 | 0.01 | 4.15 | 3.70 | 0.22 | 0.28 |
| 17895 | 0 | 99988  | EGGRWGPAGPRERERE<br>EDWR            | 3.01 | 0.01 | 2.16 | 0.44 | 2.39 | 0.28 |
| 17896 | 0 | 12180  | EGGSRGAPGGGFVPSM<br>QGVPESPFARTGE   | 3.34 | 0.01 | 2.96 | 0.44 | 0.85 | 0.28 |
| 17897 | 0 | 12181  | EGGTKSEVEDVIEGWK<br>ADTSYSAK        | 3.18 | 0.01 | 3.22 | 0.44 | 1.23 | 1.57 |
| 17898 | 0 | 12181  | EGGTKSEVEDVIEGWK<br>ADTSYSAK        | 3.18 | 0.01 | 3.22 | 0.44 | 1.23 | 1.57 |
| 17899 | 0 | 12181  | EGGTKSEVEDVIEGWK<br>ADTSYSAK        | 3.18 | 0.01 | 3.22 | 0.44 | 1.23 | 1.27 |
| 17900 | 0 | 12181  | EGGTKSEVEDVIEGWK<br>ADTSYSAK        | 3.18 | 0.01 | 3.22 | 1.12 | 0.22 | 1.27 |
| 17901 | 0 | 12181  | EGGTKSEVEDVIEGWK<br>ADTSYSAK        | 3.18 | 0.01 | 3.22 | 0.44 | 1.23 | 1.27 |
| 17902 | 0 | 12181  | EGGTKSEVEDVIEGWK<br>ADTSYSAK        | 3.18 | 0.01 | 3.22 | 1.12 | 0.22 | 1.57 |
| 17903 | 0 | 12181  | EGGTKSEVEDVIEGWK<br>ADTSYSAK        | 3.18 | 0.01 | 3.22 | 1.12 | 0.22 | 1.57 |
| 17904 | 0 | 12181  | EGGTKSEVEDVIEGWK<br>ADTSYSAK        | 3.18 | 0.01 | 3.22 | 1.12 | 0.22 | 0.85 |
| 17905 | 0 | 12181  | EGGTKSEVEDVIEGWK<br>ADTSYSAK        | 3.18 | 0.01 | 3.22 | 0.44 | 1.23 | 2.35 |



|       |   |        |                                                     |      |      |      |      |      |      |
|-------|---|--------|-----------------------------------------------------|------|------|------|------|------|------|
| 17906 | 0 | 12182  | EGGTWRIG                                            | 2.14 | 0.01 | 2.04 | 0.44 | 0.85 | 0.28 |
| 17907 | 0 | 423269 | EGGWGGEEDDVLA                                       | 2.73 | 0.01 | 3.97 | 0.44 | 2.35 | 1.28 |
| 17908 | 0 | 110213 | EGHLIDLKRV                                          | 2.29 | 0.01 | 2.71 | 0.68 | 0.22 | 0.28 |
| 17909 | 0 | 110213 | EGHLIDLKRV                                          | 2.29 | 0.01 | 2.71 | 0.68 | 0.22 | 0.28 |
| 17910 | 0 | 110213 | EGHLIDLKRV                                          | 2.29 | 0.01 | 2.71 | 0.68 | 0.22 | 1.48 |
| 17911 | 0 | 12184  | EGHRMAWDMMMNWS                                      | 2.59 | 0.01 | 1.72 | 2.37 | 0.22 | 0.28 |
| 17912 | 0 | 12184  | EGHRMAWDMMMNWS                                      | 2.59 | 0.01 | 1.72 | 0.44 | 0.85 | 0.85 |
| 17913 | 0 | 12185  | EGHTDSVGTDAYNQK                                     | 2.64 | 0.01 | 2.58 | 2.43 | 0.22 | 0.28 |
| 17914 | 0 | 12187  | EGIHAQQKEP                                          | 2.31 | 0.01 | 1.60 | 0.44 | 1.23 | 0.28 |
| 17915 | 0 | 12187  | EGIHAQQKEP                                          | 2.31 | 0.01 | 1.60 | 0.44 | 1.23 | 0.28 |
| 17916 | 0 | 12187  | EGIHAQQKEP                                          | 2.31 | 0.01 | 1.60 | 0.44 | 1.23 | 0.28 |
| 17917 | 0 | 12187  | EGIHAQQKEP                                          | 2.31 | 0.01 | 1.60 | 0.44 | 1.23 | 0.28 |
| 17918 | 0 | 12196  | EGIRQWWKLKPGPPPKPAE                                 | 2.96 | 0.01 | 3.19 | 0.44 | 1.59 | 1.27 |
| 17919 | 0 | 12198  | EGIYKT                                              | 1.88 | 0.01 | 0.90 | 0.44 | 1.59 | 1.39 |
| 17920 | 0 | 12200  | EGKDEDKRDGNNEDNEKLRKPKHK                            | 3.17 | 0.01 | 1.66 | 0.44 | 1.74 | 0.28 |
| 17921 | 0 | 170767 | EGKDEPLEFKRVLDN                                     | 2.69 | 0.01 | 0.78 | 0.44 | 1.13 | 0.28 |
| 17922 | 0 | 92547  | EGKDTPGGY                                           | 2.22 | 0.01 | 3.47 | 0.44 | 0.85 | 0.28 |
| 17923 | 0 | 114790 | EGKDVLCNK                                           | 2.31 | 0.01 | 2.25 | 0.44 | 1.23 | 0.85 |
| 17924 | 0 | 136191 | EGKSVFDDNVQRGQILVVPQGFAVVVKAGRQGLEWVELKNNDNAITSPIAG | 3.88 | 0.01 | 4.33 | 0.44 | 1.23 | 0.28 |
| 17925 | 0 | 81506  | EGKTYYPVLV                                          | 2.30 | 0.01 | 3.06 | 0.44 | 0.85 | 0.28 |
| 17926 | 0 | 12208  | EGKVSTLPLDIQIIAATMSK                                | 2.91 | 0.01 | 2.93 | 1.81 | 0.22 | 0.28 |
| 17927 | 0 | 12208  | EGKVSTLPLDIQIIAATMSK                                | 2.91 | 0.01 | 2.93 | 2.69 | 0.22 | 0.28 |
| 17928 | 0 | 12208  | EGKVSTLPLDIQIIAATMSK                                | 2.91 | 0.01 | 2.93 | 0.68 | 0.22 | 0.28 |
| 17929 | 0 | 12209  | EGKVVL                                              | 1.89 | 0.01 | 2.40 | 0.44 | 0.85 | 0.28 |
| 17930 | 0 | 12210  | EGLDIR                                              | 1.88 | 0.01 | 2.96 | 0.44 | 0.85 | 0.28 |
| 17931 | 0 | 170770 | EGLEYTWGNHPP                                        | 2.46 | 0.01 | 2.92 | 1.15 | 0.22 | 0.28 |
| 17932 | 0 | 170770 | EGLEYTWGNHPP                                        | 2.46 | 0.01 | 2.92 | 1.15 | 0.22 | 1.48 |
| 17933 | 0 | 170770 | EGLEYTWGNHPP                                        | 2.46 | 0.01 | 2.92 | 1.15 | 0.22 | 0.28 |
| 17934 | 0 | 189063 | EGLEYTWGNHPPKRVW                                    | 2.71 | 0.01 | 2.92 | 0.68 | 0.22 | 0.28 |
| 17935 | 0 | 189063 | EGLEYTWGNHPPKRVW                                    | 2.71 | 0.01 | 2.92 | 0.68 | 0.22 | 0.28 |
| 17936 | 0 | 189063 | EGLEYTWGNHPPKRVW                                    | 2.71 | 0.01 | 2.92 | 0.68 | 0.22 | 0.28 |
| 17937 | 0 | 189063 | EGLEYTWGNHPPKRVW                                    | 2.71 | 0.01 | 2.92 | 0.68 | 0.22 | 1.48 |

|       |   |        |                                 |      |      |      |      |      |      |
|-------|---|--------|---------------------------------|------|------|------|------|------|------|
| 17938 | 0 | 12212  | EGLFAAAAPKPGPRRAR<br>RAAP       | 3.03 | 0.01 | 3.78 | 3.42 | 0.22 | 0.28 |
| 17939 | 0 | 12212  | EGLFAAAAPKPGPRRAR<br>RAAP       | 3.03 | 0.01 | 3.78 | 2.22 | 0.22 | 0.28 |
| 17940 | 0 | 107814 | EGLHNHY                         | 2.02 | 0.01 | 0.78 | 1.20 | 0.22 | 1.27 |
| 17941 | 0 | 107814 | EGLHNHY                         | 2.02 | 0.01 | 0.78 | 1.20 | 0.22 | 1.27 |
| 17942 | 0 | 107814 | EGLHNHY                         | 2.02 | 0.01 | 0.78 | 1.20 | 0.22 | 1.27 |
| 17943 | 0 | 107814 | EGLHNHY                         | 2.02 | 0.01 | 0.78 | 1.20 | 0.22 | 1.27 |
| 17944 | 0 | 107814 | EGLHNHY                         | 2.02 | 0.01 | 0.78 | 1.20 | 0.22 | 1.27 |
| 17945 | 0 | 107814 | EGLHNHY                         | 2.02 | 0.01 | 0.78 | 1.20 | 0.22 | 1.27 |
| 17946 | 0 | 107814 | EGLHNHY                         | 2.02 | 0.01 | 0.78 | 1.20 | 0.22 | 1.27 |
| 17947 | 0 | 107814 | EGLHNHY                         | 2.02 | 0.01 | 0.78 | 1.20 | 0.22 | 1.27 |
| 17948 | 0 | 107814 | EGLHNHY                         | 2.02 | 0.01 | 0.78 | 1.20 | 0.22 | 1.27 |
| 17949 | 0 | 107814 | EGLHNHY                         | 2.02 | 0.01 | 0.78 | 1.15 | 0.22 | 0.28 |
| 17950 | 0 | 107814 | EGLHNHY                         | 2.02 | 0.01 | 0.78 | 1.15 | 0.22 | 1.27 |
| 17951 | 0 | 107814 | EGLHNHY                         | 2.02 | 0.01 | 0.78 | 0.44 | 1.13 | 1.27 |
| 17952 | 0 | 107814 | EGLHNHY                         | 2.02 | 0.01 | 0.78 | 0.44 | 1.13 | 0.28 |
| 17953 | 0 | 107814 | EGLHNHY                         | 2.02 | 0.01 | 0.78 | 0.44 | 1.13 | 0.28 |
| 17954 | 0 | 152489 | EGLKEVINDR                      | 2.30 | 0.01 | 2.18 | 2.16 | 0.22 | 0.28 |
| 17955 | 0 | 12216  | EGLKEVINDRYDMLN                 | 2.67 | 0.01 | 2.18 | 0.68 | 0.22 | 0.28 |
| 17956 | 0 | 96228  | EGLKKLLDTLENMLK                 | 2.78 | 0.01 | 0.90 | 1.20 | 0.22 | 1.27 |
| 17957 | 0 | 96228  | EGLKKLLDTLENMLK                 | 2.78 | 0.01 | 0.90 | 2.52 | 0.22 | 0.28 |
| 17958 | 0 | 96228  | EGLKKLLDTLENMLK                 | 2.78 | 0.01 | 0.90 | 2.52 | 0.22 | 0.28 |
| 17959 | 0 | 96228  | EGLKKLLDTLENMLK                 | 2.78 | 0.01 | 0.90 | 1.20 | 0.22 | 1.27 |
| 17960 | 0 | 12218  | EGLLLDVPTLTGIETAG<br>G          | 2.97 | 0.01 | 2.78 | 0.44 | 0.85 | 0.28 |
| 17961 | 0 | 279407 | EGLLLPVDNDGDESS                 | 2.69 | 0.01 | 1.61 | 0.44 | 0.85 | 1.28 |
| 17962 | 0 | 12219  | EGLQND                          | 1.88 | 0.01 | 3.13 | 0.68 | 0.22 | 1.34 |
| 17963 | 0 | 12219  | EGLQND                          | 1.88 | 0.01 | 3.13 | 0.68 | 0.22 | 0.28 |
| 17964 | 0 | 12220  | EGLRMMMRMMQQK<br>EGLRMMMRMMQQKE | 2.57 | 0.01 | 4.08 | 0.44 | 1.23 | 1.28 |
| 17965 | 0 | 12221  | MQPRGEQMRRMMRL<br>AENIPSRCNL    | 3.59 | 0.01 | 4.08 | 0.44 | 1.23 | 1.28 |
| 17966 | 0 | 147619 | EGLRQAIEQQQSQGQ                 | 2.71 | 0.01 | 2.75 | 0.44 | 1.23 | 0.28 |
| 17967 | 0 | 147619 | EGLRQAIEQQQSQGQ                 | 2.71 | 0.01 | 2.75 | 0.44 | 1.23 | 1.34 |
| 17968 | 0 | 12225  | EGLTATTFEEDGVAA                 | 2.69 | 0.01 | 2.84 | 0.68 | 0.22 | 1.34 |
| 17969 | 0 | 12225  | EGLTATTFEEDGVAA                 | 2.69 | 0.01 | 2.84 | 0.68 | 0.22 | 0.28 |
| 17970 | 0 | 182094 | EGLWQLSPCQEKKGf                 | 2.68 | 0.01 | 0.78 | 0.44 | 1.13 | 0.85 |
| 17971 | 0 | 182094 | EGLWQLSPCQEKKGf                 | 2.68 | 0.01 | 0.78 | 0.44 | 1.41 | 0.85 |
| 17972 | 0 | 182095 | EGLWQLSPCQEKKGfIC<br>KMEADIHT   | 3.12 | 0.01 | 0.78 | 0.44 | 1.13 | 0.28 |
| 17973 | 0 | 182095 | EGLWQLSPCQEKKGfIC<br>KMEADIHT   | 3.12 | 0.01 | 0.78 | 0.44 | 1.41 | 0.28 |
| 17974 | 0 | 182095 | EGLWQLSPCQEKKGfIC<br>KMEADIHT   | 3.12 | 0.01 | 0.78 | 0.44 | 1.13 | 1.27 |
| 17975 | 0 | 133554 | EGLYSPWWPRSLPVL                 | 2.69 | 0.01 | 0.90 | 1.15 | 0.22 | 0.28 |
| 17976 | 0 | 133554 | EGLYSPWWPRSLPVL                 | 2.69 | 0.01 | 0.90 | 1.15 | 0.22 | 0.28 |

|       |   |        |                                |      |      |      |      |      |      |
|-------|---|--------|--------------------------------|------|------|------|------|------|------|
| 17977 | 0 | 133554 | EGLYSPWWPRSLPVL                | 2.69 | 0.01 | 0.90 | 1.15 | 0.22 | 2.12 |
| 17978 | 0 | 133554 | EGLYSPWWPRSLPVL                | 2.69 | 0.01 | 0.90 | 1.15 | 0.22 | 1.27 |
| 17979 | 0 | 133554 | EGLYSPWWPRSLPVL                | 2.69 | 0.01 | 0.90 | 1.15 | 0.22 | 1.66 |
| 17980 | 0 | 121241 | EGMKFDRGYISPYFI                | 2.66 | 0.01 | 2.19 | 2.97 | 0.22 | 0.28 |
| 17981 | 0 | 133070 | EGMRFDKGYISGYFV                | 2.66 | 0.01 | 2.04 | 2.97 | 0.22 | 0.28 |
| 17982 | 0 | 133070 | EGMRFDKGYISGYFV                | 2.66 | 0.01 | 4.45 | 2.79 | 1.13 | 1.28 |
| 17983 | 0 | 133070 | EGMRFDKGYISGYFV                | 2.66 | 0.01 | 4.45 | 1.81 | 1.41 | 1.28 |
| 17984 | 0 | 12229  | EGNARLAQAQEEALRD<br>VLN        | 2.94 | 0.01 | 4.63 | 2.42 | 0.22 | 0.28 |
| 17985 | 0 | 12229  | EGNARLAQAQEEALRD<br>VLN        | 2.94 | 0.01 | 4.63 | 2.42 | 0.22 | 1.34 |
| 17986 | 0 | 12235  | EGNIGL                         | 1.90 | 0.01 | 2.24 | 2.66 | 0.22 | 1.27 |
| 17987 | 0 | 95344  | EGNKDTINLQGMANNI<br>NNLSKEDKAV | 3.20 | 0.01 | 3.65 | 2.22 | 0.22 | 0.28 |
| 17988 | 0 | 279494 | EGNQDADEEDEGEDE                | 2.74 | 0.01 | 1.61 | 0.44 | 0.85 | 1.28 |
| 17989 | 0 | 120478 | EGNRPTNSIVFTKLT                | 2.64 | 0.01 | 0.78 | 2.46 | 0.22 | 0.28 |
| 17990 | 0 | 120478 | EGNRPTNSIVFTKLT                | 2.64 | 0.01 | 0.78 | 3.16 | 0.22 | 0.28 |
| 17991 | 0 | 120478 | EGNRPTNSIVFTKLT                | 2.64 | 0.01 | 0.78 | 3.16 | 0.22 | 0.28 |
| 17992 | 0 | 120478 | EGNRPTNSIVFTKLT                | 2.64 | 0.01 | 0.78 | 3.16 | 2.60 | 1.75 |
| 17993 | 0 | 140842 | EGNTDERGTPEYNIALG<br>QRR       | 2.94 | 0.01 | 3.01 | 1.12 | 0.22 | 0.28 |
| 17994 | 0 | 140842 | EGNTDERGTPEYNIALG<br>QRR       | 2.94 | 0.01 | 3.01 | 0.68 | 0.22 | 0.85 |
| 17995 | 0 | 108895 | EGNVFSC                        | 1.99 | 0.01 | 0.78 | 0.44 | 1.13 | 0.28 |
| 17996 | 0 | 159283 | EGP                            | 1.37 | 0.01 | 0.78 | 1.20 | 0.22 | 0.85 |
| 17997 | 0 | 159283 | EGP                            | 1.37 | 0.01 | 0.78 | 1.20 | 0.22 | 0.85 |
| 17998 | 0 | 12242  | EGPAKLLKERGFFGAIAG<br>FLEE     | 3.07 | 4.63 | 0.90 | 2.61 | 0.22 | 2.12 |
| 17999 | 0 | 12242  | EGPAKLLKERGFFGAIAG<br>FLEE     | 3.07 | 4.63 | 0.90 | 0.44 | 1.74 | 1.27 |
| 18000 | 0 | 133555 | EGPEYWDRET                     | 2.32 | 0.01 | 0.78 | 0.68 | 0.22 | 1.27 |
| 18001 | 0 | 133555 | EGPEYWDRET                     | 2.32 | 0.01 | 0.78 | 0.68 | 0.22 | 1.27 |
| 18002 | 0 | 133556 | EGPEYWDRNT                     | 2.30 | 0.01 | 0.78 | 0.68 | 0.22 | 1.27 |
| 18003 | 0 | 133556 | EGPEYWDRNT                     | 2.30 | 0.01 | 0.78 | 0.68 | 0.22 | 0.85 |
| 18004 | 0 | 128512 | EGPPPKDT                       | 2.12 | 0.01 | 0.78 | 0.44 | 1.13 | 0.28 |
| 18005 | 0 | 128512 | EGPPPKDT                       | 2.12 | 0.01 | 0.78 | 0.44 | 1.13 | 0.28 |
| 18006 | 0 | 128512 | EGPPPKDT                       | 2.12 | 0.01 | 0.78 | 0.44 | 1.41 | 0.28 |
| 18007 | 0 | 78139  | EGPRAG                         | 1.90 | 0.01 | 0.90 | 2.02 | 1.59 | 0.28 |
| 18008 | 0 | 230457 | EGPVFRPGSKTYVVT                | 2.67 | 0.01 | 0.78 | 0.44 | 1.13 | 0.28 |
| 18009 | 0 | 12247  | EGQDRGYSY                      | 2.23 | 0.01 | 3.97 | 0.44 | 0.85 | 0.28 |
| 18010 | 0 | 181599 | EGQKFECGNDKIIGN                | 2.70 | 0.01 | 2.86 | 2.37 | 0.22 | 1.28 |
| 18011 | 0 | 12248  | EGQKSAVTEY                     | 2.30 | 0.01 | 3.30 | 1.12 | 0.22 | 1.57 |
| 18012 | 0 | 12248  | EGQKSAVTEY                     | 2.30 | 0.01 | 3.30 | 1.12 | 0.22 | 1.57 |
| 18013 | 0 | 12248  | EGQKSAVTEY                     | 2.30 | 0.01 | 3.30 | 1.12 | 0.22 | 2.02 |
| 18014 | 0 | 12248  | EGQKSAVTEY                     | 2.30 | 0.01 | 3.59 | 1.12 | 0.22 | 0.28 |
| 18015 | 0 | 12248  | EGQKSAVTEY                     | 2.30 | 0.01 | 3.59 | 1.20 | 0.22 | 0.28 |
| 18016 | 0 | 96229  | EGQLGD                         | 1.90 | 0.01 | 3.03 | 1.20 | 0.22 | 0.28 |

|       |   |        |                                       |      |      |      |      |      |      |
|-------|---|--------|---------------------------------------|------|------|------|------|------|------|
| 18017 | 0 | 157195 | EGQLGDT                               | 2.02 | 0.01 | 2.40 | 1.20 | 0.22 | 0.28 |
|       |   |        | EGQLVIARQKVRDAEKQ                     |      |      |      |      |      |      |
| 18018 | 0 | 12250  | YEKDPDELNKRSLTDRE<br>GVAVSIQAKIDELKRQ | 3.87 | 0.01 | 4.45 | 1.15 | 0.22 | 1.39 |
| 18019 | 0 | 12253  | EGQRMAEML                             | 2.24 | 0.01 | 2.69 | 0.44 | 0.85 | 0.28 |
| 18020 | 0 | 279628 | EGQYDAADVEAGDGP                       | 2.72 | 0.01 | 1.61 | 0.44 | 0.85 | 1.28 |
| 18021 | 0 | 12258  | EGRFKSQD                              | 2.10 | 0.01 | 2.21 | 1.12 | 0.22 | 0.28 |
| 18022 | 0 | 12258  | EGRFKSQD                              | 2.10 | 0.01 | 2.21 | 0.44 | 0.85 | 0.28 |
| 18023 | 0 | 12259  | EGRFKSQDAD                            | 2.29 | 0.01 | 2.21 | 1.12 | 0.22 | 0.28 |
| 18024 | 0 | 12259  | EGRFKSQDAD                            | 2.29 | 0.01 | 2.21 | 1.12 | 0.22 | 0.28 |
| 18025 | 0 | 99989  | EGRGLLKKLQ                            | 2.34 | 0.01 | 2.18 | 2.16 | 0.22 | 0.28 |
| 18026 | 0 | 181600 | EGRKPCYERNEKRFS                       | 2.69 | 0.01 | 1.66 | 2.37 | 0.22 | 1.28 |
| 18027 | 0 | 181600 | EGRKPCYERNEKRFS                       | 2.69 | 0.01 | 1.66 | 2.36 | 0.22 | 1.28 |
| 18028 | 0 | 12264  | EGRSVFDDNVQR                          | 2.46 | 0.01 | 3.33 | 0.44 | 1.23 | 0.85 |
| 18029 | 0 | 12267  | EGRTWAQP                              | 2.10 | 0.01 | 1.72 | 0.44 | 0.85 | 0.28 |
| 18030 | 0 | 12272  | EGSFDEDDGYAKVGLDA<br>FSADELK          | 3.17 | 0.01 | 3.81 | 0.44 | 1.23 | 1.27 |
| 18031 | 0 | 12272  | EGSFDEDDGYAKVGLDA<br>FSADELK          | 3.17 | 0.01 | 3.81 | 0.44 | 1.23 | 3.40 |
| 18032 | 0 | 12273  | EGSFDEDDGYAKVGLDA<br>FSADELKK         | 3.20 | 0.01 | 3.81 | 0.44 | 1.23 | 1.27 |
| 18033 | 0 | 12273  | EGSFDEDDGYAKVGLDA<br>FSADELKK         | 3.20 | 0.01 | 3.81 | 0.44 | 1.23 | 3.40 |
| 18034 | 0 | 189615 | EGSFDHKAFFTKVGL                       | 2.65 | 0.01 | 3.28 | 0.44 | 1.23 | 0.28 |
| 18035 | 0 | 189615 | EGSFDHKAFFTKVGL                       | 2.65 | 0.01 | 3.28 | 0.44 | 1.41 | 0.28 |
| 18036 | 0 | 149035 | EGSGTTK                               | 2.03 | 0.01 | 0.90 | 2.13 | 1.59 | 1.39 |
| 18037 | 0 | 12280  | EGSNTNSV                              | 2.14 | 0.01 | 2.96 | 0.68 | 0.22 | 0.28 |
| 18038 | 0 | 12280  | EGSNTNSV                              | 2.14 | 0.01 | 2.96 | 0.68 | 0.22 | 0.28 |
| 18039 | 0 | 279751 | EGSQSTLAATDTANN                       | 2.68 | 0.01 | 1.61 | 0.44 | 0.85 | 1.28 |
| 18040 | 0 | 131856 | EGSTDVDEPLEVFISAPR<br>SE              | 2.95 | 0.01 | 0.78 | 0.44 | 1.13 | 0.28 |
| 18041 | 0 | 131856 | EGSTDVDEPLEVFISAPR<br>SE              | 2.95 | 0.01 | 0.78 | 0.44 | 1.13 | 1.39 |
| 18042 | 0 | 12284  | EGSYPKLKNSYENK                        | 2.65 | 0.01 | 4.93 | 1.15 | 0.22 | 1.34 |
| 18043 | 0 | 12285  | EGSYPKLKNSYVNK                        | 2.63 | 0.01 | 2.97 | 1.15 | 0.22 | 1.34 |
| 18044 | 0 | 279801 | EGTAMKTTTATTGDS                       | 2.70 | 0.01 | 1.61 | 0.44 | 0.85 | 1.28 |
| 18045 | 0 | 111240 | EGTEAVPGDPDVNRF                       | 2.69 | 0.01 | 3.81 | 4.33 | 0.85 | 0.85 |
| 18046 | 0 | 279818 | EGTGGDDVEDGDGED                       | 2.75 | 0.01 | 1.61 | 0.44 | 0.85 | 1.28 |
| 18047 | 0 | 238329 | EGTQGERCAVHGERLHL<br>F                | 2.86 | 0.01 | 0.78 | 0.44 | 1.13 | 0.28 |
| 18048 | 0 | 238329 | EGTQGERCAVHGERLHL<br>F                | 2.86 | 0.01 | 0.78 | 0.44 | 1.13 | 0.28 |
| 18049 | 0 | 12289  | EGTSGTAVTTSTPGS                       | 2.73 | 0.01 | 3.57 | 0.44 | 0.85 | 0.28 |
| 18050 | 0 | 451473 | EGVKNGEERVTEEN                        | 2.72 | 0.01 | 3.72 | 0.68 | 0.22 | 0.28 |

|       |   |        |                                     |      |      |      |      |      |      |
|-------|---|--------|-------------------------------------|------|------|------|------|------|------|
| 18051 | 0 | 451473 | EGVKNGEERVTEEN                      | 2.72 | 0.01 | 3.72 | 0.68 | 0.22 | 0.28 |
| 18052 | 0 | 451473 | EGVKNGEERVTEEN                      | 2.72 | 0.01 | 3.72 | 0.68 | 0.22 | 0.28 |
| 18053 | 0 | 451473 | EGVKNGEERVTEEN                      | 2.72 | 0.01 | 3.72 | 0.68 | 0.22 | 1.34 |
| 18054 | 0 | 451474 | EGVKNTTGEERV                        | 2.50 | 0.01 | 4.33 | 0.68 | 0.22 | 0.28 |
| 18055 | 0 | 451474 | EGVKNTTGEERV                        | 2.50 | 0.01 | 4.33 | 0.68 | 0.22 | 0.28 |
| 18056 | 0 | 451474 | EGVKNTTGEERV                        | 2.50 | 0.01 | 4.33 | 0.68 | 0.22 | 0.28 |
| 18057 | 0 | 451474 | EGVKNTTGEERV                        | 2.50 | 0.01 | 4.33 | 0.68 | 0.22 | 1.34 |
| 18058 | 0 | 119135 | EGVKYVLNETTNWLWA<br>FLAR            | 2.94 | 0.01 | 3.36 | 0.68 | 0.22 | 0.28 |
| 18059 | 0 | 119135 | EGVKYVLNETTNWLWA<br>FLAR            | 2.94 | 0.01 | 3.36 | 0.68 | 0.22 | 0.28 |
| 18060 | 0 | 119135 | EGVKYVLNETTNWLWA<br>FLAR            | 2.94 | 0.01 | 3.36 | 0.68 | 0.22 | 0.28 |
| 18061 | 0 | 119135 | EGVKYVLNETTNWLWA<br>FLAR            | 2.94 | 0.01 | 3.36 | 0.68 | 0.22 | 2.35 |
| 18062 | 0 | 119135 | EGVKYVLNETTNWLWA<br>FLAR            | 2.94 | 0.01 | 3.36 | 0.68 | 0.22 | 1.34 |
| 18063 | 0 | 12306  | EGVQQEGAQQ                          | 2.35 | 0.01 | 2.73 | 0.44 | 0.85 | 0.28 |
| 18064 | 0 | 12306  | EGVQQEGAQQ                          | 2.35 | 0.01 | 2.73 | 1.15 | 0.22 | 0.28 |
| 18065 | 0 | 12307  | EGVQQEGAQQPA                        | 2.52 | 0.01 | 2.97 | 1.15 | 0.22 | 1.27 |
| 18066 | 0 | 12307  | EGVQQEGAQQPA                        | 2.52 | 0.01 | 2.97 | 1.15 | 0.22 | 1.27 |
| 18067 | 0 | 12307  | EGVQQEGAQQPA                        | 2.52 | 0.01 | 2.97 | 1.15 | 0.22 | 1.27 |
| 18068 | 0 | 12307  | EGVQQEGAQQPA                        | 2.52 | 0.01 | 2.97 | 1.15 | 0.22 | 0.28 |
| 18069 | 0 | 12307  | EGVQQEGAQQPA                        | 2.52 | 0.01 | 2.97 | 0.44 | 0.85 | 0.85 |
| 18070 | 0 | 12307  | EGVQQEGAQQPA                        | 2.52 | 0.01 | 2.97 | 0.44 | 0.85 | 1.27 |
| 18071 | 0 | 138364 | EGVRDLKE                            | 2.13 | 0.01 | 3.33 | 0.44 | 1.23 | 0.28 |
| 18072 | 0 | 106384 | EGWGGHWRGA                          | 2.35 | 0.01 | 2.75 | 0.44 | 1.23 | 0.85 |
| 18073 | 0 | 103137 | EGWKGSPFGTTVDF<br>EGWQCSLCTYINNSELP | 2.67 | 0.01 | 2.04 | 0.44 | 0.85 | 1.28 |
| 18074 | 0 | 233362 | YCEMCETPQGSAVMQI<br>DSL             | 3.52 | 0.01 | 0.78 | 0.44 | 1.41 | 1.39 |
| 18075 | 0 | 162143 | EGWWPTLIGLAMNDS                     | 2.63 | 0.01 | 2.04 | 0.68 | 0.22 | 0.28 |
| 18076 | 0 | 136059 | EGY                                 | 1.37 | 0.01 | 0.78 | 2.04 | 0.22 | 0.28 |
| 18077 | 0 | 12315  | EGYPADSKGCKITCF                     | 2.64 | 0.01 | 2.56 | 1.20 | 0.22 | 0.85 |
| 18078 | 0 | 12315  | EGYPADSKGCKITCF                     | 2.64 | 0.01 | 2.56 | 0.68 | 0.22 | 0.85 |
| 18079 | 0 | 12315  | EGYPADSKGCKITCF                     | 2.64 | 0.01 | 2.56 | 1.20 | 0.22 | 0.85 |
| 18080 | 0 | 12315  | EGYPADSKGCKITCF                     | 2.64 | 0.01 | 2.56 | 2.00 | 0.22 | 0.85 |
| 18081 | 0 | 12315  | EGYPADSKGCKITCF                     | 2.64 | 0.01 | 2.56 | 1.20 | 0.22 | 0.85 |
| 18082 | 0 | 225625 | EGYQDYEP EA                         | 2.34 | 0.01 | 0.78 | 0.68 | 0.22 | 0.85 |
| 18083 | 0 | 225625 | EGYQDYEP EA                         | 2.34 | 0.01 | 0.78 | 0.68 | 0.22 | 0.28 |
| 18084 | 0 | 225625 | EGYQDYEP EA                         | 2.34 | 0.01 | 0.78 | 0.68 | 0.22 | 1.66 |
| 18085 | 0 | 225625 | EGYQDYEP EA                         | 2.34 | 0.01 | 0.78 | 0.68 | 0.22 | 1.48 |
| 18086 | 0 | 225625 | EGYQDYEP EA                         | 2.34 | 0.01 | 0.78 | 0.68 | 0.22 | 1.66 |
| 18087 | 0 | 12321  | EHAVGN                              | 1.88 | 0.01 | 2.40 | 0.44 | 0.85 | 0.28 |
| 18088 | 0 | 195016 | EHAYPNASHPWDEDV<br>MPDL             | 2.90 | 0.01 | 3.51 | 0.68 | 0.22 | 1.39 |

|       |   |        |                            |      |      |      |      |      |      |
|-------|---|--------|----------------------------|------|------|------|------|------|------|
| 18089 | 0 | 195016 | EHAYPNASHPWDEDV<br>MPDL    | 2.90 | 0.01 | 3.51 | 0.44 | 0.85 | 1.39 |
| 18090 | 0 | 195017 | EHAYPNASHPWDEDV<br>MPDLP   | 2.95 | 0.01 | 3.51 | 0.68 | 0.22 | 1.39 |
| 18091 | 0 | 195017 | EHAYPNASHPWDEDV<br>MPDLP   | 2.95 | 0.01 | 3.51 | 0.44 | 0.85 | 1.39 |
| 18092 | 0 | 195018 | EHAYPNASHPWDEDV<br>MPDLPY  | 3.00 | 0.01 | 3.51 | 0.68 | 0.22 | 1.39 |
| 18093 | 0 | 195018 | EHAYPNASHPWDEDV<br>MPDLPY  | 3.00 | 0.01 | 3.51 | 0.44 | 0.85 | 1.39 |
| 18094 | 0 | 195019 | EHAYPNATHPWDEDV<br>MPELPY  | 3.00 | 0.01 | 4.03 | 0.68 | 0.22 | 1.39 |
| 18095 | 0 | 195019 | EHAYPNATHPWDEDV<br>MPELPY  | 3.00 | 0.01 | 4.03 | 0.44 | 0.85 | 1.39 |
| 18096 | 0 | 195020 | EHAYPNATHPWDEDV<br>MPELPYE | 3.05 | 0.01 | 4.03 | 0.68 | 0.22 | 1.39 |
| 18097 | 0 | 195020 | EHAYPNATHPWDEDV<br>MPELPYE | 3.05 | 0.01 | 4.03 | 0.44 | 0.85 | 1.39 |
| 18098 | 0 | 114793 | EHDGECKETV                 | 2.32 | 0.01 | 2.25 | 0.44 | 1.23 | 0.85 |
| 18099 | 0 | 114793 | EHDGECKETV                 | 2.32 | 0.01 | 2.25 | 0.44 | 1.23 | 0.85 |
| 18100 | 0 | 120479 | EHEGEIGKIP                 | 2.36 | 0.01 | 2.18 | 2.16 | 0.22 | 0.28 |
| 18101 | 0 | 125394 | EHFLDAQGHFVKPEAFL<br>PFS   | 2.95 | 0.01 | 0.78 | 0.44 | 1.13 | 0.28 |
| 18102 | 0 | 12331  | EHFWEQRPR                  | 2.24 | 0.01 | 0.90 | 0.68 | 0.22 | 0.28 |
| 18103 | 0 | 12333  | EHGAMEI                    | 2.03 | 0.01 | 0.90 | 1.15 | 0.22 | 0.28 |
| 18104 | 0 | 12334  | EHGGIATDDDYPYRA            | 2.65 | 0.01 | 2.72 | 0.44 | 1.23 | 0.85 |
| 18105 | 0 | 227128 | EHGQPPPGPSLYEES            | 2.70 | 0.01 | 2.97 | 0.44 | 0.85 | 0.28 |
| 18106 | 0 | 280047 | EHGVDPGTGYQGDS             | 2.68 | 0.01 | 1.61 | 0.44 | 0.85 | 1.28 |
| 18107 | 0 | 119828 | EHHTHFVDITVGLQLI           | 2.75 | 0.01 | 2.26 | 1.15 | 0.22 | 1.57 |
| 18108 | 0 | 119828 | EHHTHFVDITVGLQLI           | 2.75 | 0.01 | 2.26 | 1.12 | 0.22 | 1.57 |
| 18109 | 0 | 119828 | EHHTHFVDITVGLQLI           | 2.75 | 0.01 | 2.26 | 2.43 | 0.22 | 1.57 |
| 18110 | 0 | 119828 | EHHTHFVDITVGLQLI           | 2.75 | 0.01 | 2.26 | 2.25 | 0.22 | 1.57 |
| 18111 | 0 | 119828 | EHHTHFVDITVGLQLI           | 2.75 | 0.01 | 2.26 | 3.65 | 0.22 | 1.57 |
| 18112 | 0 | 125027 | EHIEL                      | 1.77 | 0.01 | 0.78 | 0.44 | 1.13 | 0.28 |
| 18113 | 0 | 12339  | EHIFGMVLMN                 | 2.29 | 0.01 | 1.75 | 0.68 | 0.22 | 0.28 |
| 18114 | 0 | 12339  | EHIFGMVLMN                 | 2.29 | 0.01 | 1.75 | 0.68 | 0.22 | 0.28 |
| 18115 | 0 | 12345  | EHKYSWKS                   | 2.14 | 0.01 | 0.90 | 1.15 | 0.22 | 0.28 |
| 18116 | 0 | 12345  | EHKYSWKS                   | 2.14 | 0.01 | 0.90 | 1.15 | 0.22 | 0.28 |
| 18117 | 0 | 12345  | EHKYSWKS                   | 2.14 | 0.01 | 0.90 | 1.15 | 0.22 | 0.28 |
| 18118 | 0 | 12345  | EHKYSWKS                   | 2.14 | 0.01 | 0.90 | 1.15 | 0.22 | 2.35 |
| 18119 | 0 | 12345  | EHKYSWKS                   | 2.14 | 0.01 | 0.90 | 1.15 | 0.22 | 0.28 |
| 18120 | 0 | 12345  | EHKYSWKS                   | 2.14 | 0.01 | 0.90 | 1.15 | 0.22 | 0.28 |
| 18121 | 0 | 12345  | EHKYSWKS                   | 2.14 | 0.01 | 0.90 | 1.15 | 0.22 | 0.28 |
| 18122 | 0 | 12345  | EHKYSWKS                   | 2.14 | 0.01 | 0.90 | 0.44 | 0.85 | 0.28 |
| 18123 | 0 | 12345  | EHKYSWKS                   | 2.14 | 0.01 | 0.90 | 1.12 | 0.22 | 0.28 |
| 18124 | 0 | 12346  | EHLEGGDGTRDTL              | 2.59 | 0.01 | 3.17 | 0.44 | 0.85 | 0.85 |

|       |   |        |                          |      |      |      |      |      |      |
|-------|---|--------|--------------------------|------|------|------|------|------|------|
| 18125 | 0 | 125395 | EHLKELIARNTWTLKKLP<br>LS | 2.94 | 0.01 | 0.78 | 0.44 | 1.41 | 0.28 |
| 18126 | 0 | 125395 | EHLKELIARNTWTLKKLP<br>LS | 2.94 | 0.01 | 0.78 | 0.44 | 1.13 | 0.28 |
| 18127 | 0 | 120481 | EHLKLNGKVLAAMYQ          | 2.65 | 0.01 | 2.86 | 0.44 | 0.85 | 0.28 |
| 18128 | 0 | 123130 | EHLYGRDDR                | 2.22 | 0.01 | 2.28 | 2.00 | 0.22 | 0.28 |
| 18129 | 0 | 123130 | EHLYGRDDR                | 2.22 | 0.01 | 2.28 | 2.00 | 0.22 | 0.28 |
| 18130 | 0 | 123131 | EHLYGRNDR                | 2.21 | 0.01 | 2.28 | 2.00 | 0.22 | 0.28 |
| 18131 | 0 | 140458 | EHNDFPMYTWRP             | 2.43 | 0.01 | 0.90 | 0.68 | 0.22 | 0.28 |
| 18132 | 0 | 140458 | EHNDFPMYTWRP             | 2.43 | 0.01 | 0.90 | 0.68 | 0.22 | 1.34 |
| 18133 | 0 | 135664 | EHNIEETE                 | 2.17 | 0.01 | 0.78 | 0.44 | 2.35 | 0.28 |
| 18134 | 0 | 127958 | EHP                      | 1.37 | 3.45 | 0.78 | 0.68 | 0.22 | 1.27 |
| 18135 | 0 | 127958 | EHP                      | 1.37 | 3.45 | 0.78 | 1.20 | 0.22 | 1.27 |
| 18136 | 0 | 99992  | EHPTDFSVEF               | 2.32 | 0.01 | 2.18 | 2.16 | 0.22 | 0.28 |
| 18137 | 0 | 113365 | EHPVTGCGERTEGRCLH<br>YTV | 2.98 | 0.01 | 3.57 | 0.68 | 0.22 | 0.28 |
| 18138 | 0 | 113365 | EHPVTGCGERTEGRCLH<br>YTV | 2.98 | 0.01 | 3.57 | 3.37 | 0.22 | 0.28 |
| 18139 | 0 | 113365 | EHPVTGCGERTEGRCLH<br>YTV | 2.98 | 0.01 | 3.57 | 0.68 | 0.22 | 1.27 |
| 18140 | 0 | 113365 | EHPVTGCGERTEGRCLH<br>YTV | 2.98 | 0.01 | 3.57 | 3.37 | 0.22 | 1.27 |
| 18141 | 0 | 113365 | EHPVTGCGERTEGRCLH<br>YTV | 2.98 | 0.01 | 3.57 | 0.68 | 0.22 | 1.34 |
| 18142 | 0 | 113365 | EHPVTGCGERTEGRCLH<br>YTV | 2.98 | 0.01 | 3.57 | 3.37 | 0.22 | 1.34 |
| 18143 | 0 | 79537  | EHPWPLL                  | 2.00 | 0.01 | 0.90 | 1.12 | 0.22 | 1.39 |
| 18144 | 0 | 79538  | EHQLNRA                  | 1.99 | 0.01 | 0.90 | 1.12 | 0.22 | 1.39 |
| 18145 | 0 | 79539  | EHQTGTW                  | 2.02 | 0.01 | 0.90 | 1.12 | 0.22 | 1.39 |
| 18146 | 0 | 102390 | EHRAW                    | 1.74 | 0.01 | 3.04 | 0.68 | 0.22 | 0.28 |
| 18147 | 0 | 102390 | EHRAW                    | 1.74 | 0.01 | 3.04 | 0.68 | 0.22 | 0.28 |
| 18148 | 0 | 102390 | EHRAW                    | 1.74 | 0.01 | 3.04 | 2.13 | 0.22 | 0.85 |
| 18149 | 0 | 514675 | EHRDKDDHDHEHEDE          | 2.75 | 0.01 | 2.24 | 0.44 | 1.41 | 1.28 |
| 18150 | 0 | 79199  | EHRFKDIPDE               | 2.32 | 0.01 | 4.08 | 0.68 | 0.22 | 1.27 |
| 18151 | 0 | 122748 | EHRMTWDPAQPPR            | 2.52 | 0.01 | 0.78 | 0.44 | 1.13 | 0.85 |
| 18152 | 0 | 122748 | EHRMTWDPAQPPR            | 2.52 | 0.01 | 0.78 | 0.44 | 0.85 | 0.85 |
| 18153 | 0 | 122748 | EHRMTWDPAQPPR            | 2.52 | 0.01 | 0.78 | 0.44 | 1.13 | 0.28 |
| 18154 | 0 | 122748 | EHRMTWDPAQPPR            | 2.52 | 0.01 | 0.78 | 0.44 | 0.85 | 0.28 |
| 18155 | 0 | 122748 | EHRMTWDPAQPPR            | 2.52 | 0.01 | 0.78 | 0.44 | 1.13 | 0.85 |
| 18156 | 0 | 122748 | EHRMTWDPAQPPR            | 2.52 | 0.01 | 0.78 | 0.44 | 0.85 | 1.57 |
| 18157 | 0 | 130802 | EHRMTWDPAQPPRDLT<br>EAFL | 2.94 | 0.01 | 0.78 | 0.44 | 1.13 | 0.28 |
| 18158 | 0 | 130802 | EHRMTWDPAQPPRDLT<br>EAFL | 2.94 | 0.01 | 0.78 | 3.57 | 0.22 | 1.27 |
| 18159 | 0 | 280178 | EHSDFLTMGSKMIAA          | 2.62 | 0.01 | 1.61 | 0.44 | 0.85 | 1.28 |
| 18160 | 0 | 151842 | EHSGQAAWKQVV             | 2.44 | 0.01 | 2.80 | 2.78 | 0.22 | 0.28 |
| 18161 | 0 | 151842 | EHSGQAAWKQVV             | 2.44 | 0.01 | 2.80 | 2.78 | 0.22 | 1.34 |

|       |   |        |                             |      |      |      |      |      |      |
|-------|---|--------|-----------------------------|------|------|------|------|------|------|
| 18162 | 0 | 186663 | EHSPAFIADPLY                | 2.45 | 0.01 | 0.90 | 0.68 | 0.22 | 1.39 |
| 18163 | 0 | 121245 | EHSPFDGIVLVQCTEHL<br>KHMTQS | 3.09 | 0.01 | 0.78 | 1.20 | 0.22 | 0.28 |
| 18164 | 0 | 121245 | EHSPFDGIVLVQCTEHL<br>KHMTQS | 3.09 | 0.01 | 0.78 | 1.20 | 0.22 | 0.28 |
| 18165 | 0 | 108333 | EHSSSEVGEKVSKEE<br>STPEVKA  | 3.21 | 0.01 | 4.08 | 1.12 | 0.22 | 0.85 |
| 18166 | 0 | 164226 | EHTMAGWWHPSK                | 2.44 | 0.01 | 0.90 | 1.20 | 0.22 | 1.39 |
| 18167 | 0 | 141637 | EHWPQWGLALKR                | 2.45 | 0.01 | 0.90 | 0.68 | 0.22 | 1.39 |
| 18168 | 0 | 140459 | EHWSHDMFSPGD                | 2.48 | 0.01 | 0.90 | 0.68 | 0.22 | 0.28 |
| 18169 | 0 | 140459 | EHWSHDMFSPGD                | 2.48 | 0.01 | 0.90 | 0.68 | 0.22 | 1.27 |
| 18170 | 0 | 140459 | EHWSHDMFSPGD                | 2.48 | 0.01 | 0.90 | 0.68 | 0.22 | 1.34 |
| 18171 | 0 | 140459 | EHWSHDMFSPGD                | 2.48 | 0.01 | 0.90 | 0.68 | 0.22 | 0.28 |
| 18172 | 0 | 230565 | EHWSYCLRPG                  | 2.26 | 4.93 | 0.90 | 0.68 | 0.22 | 0.28 |
| 18173 | 0 | 419605 | EHWSYGLRPG                  | 2.29 | 3.45 | 1.75 | 0.68 | 0.22 | 0.28 |
| 18174 | 0 | 419605 | EHWSYGLRPG                  | 2.29 | 3.45 | 1.75 | 0.68 | 0.22 | 1.34 |
| 18175 | 0 | 12375  | EHWSYGLRPG                  | 2.29 | 0.01 | 1.75 | 0.68 | 0.22 | 0.28 |
| 18176 | 0 | 12375  | EHWSYGLRPG                  | 2.29 | 0.01 | 1.75 | 2.49 | 0.22 | 0.28 |
| 18177 | 0 | 12375  | EHWSYGLRPG                  | 2.29 | 0.01 | 1.75 | 2.87 | 0.22 | 0.28 |
| 18178 | 0 | 12375  | EHWSYGLRPG                  | 2.29 | 0.01 | 4.45 | 3.15 | 0.22 | 0.28 |
| 18179 | 0 | 12375  | EHWSYGLRPG                  | 2.29 | 0.01 | 1.75 | 0.68 | 2.25 | 3.16 |
| 18180 | 0 | 12375  | EHWSYGLRPG                  | 2.29 | 0.01 | 1.75 | 0.68 | 0.22 | 0.28 |
| 18181 | 0 | 12375  | EHWSYGLRPG                  | 2.29 | 0.01 | 1.75 | 3.15 | 0.22 | 1.27 |
| 18182 | 0 | 12375  | EHWSYGLRPG                  | 2.29 | 0.01 | 1.75 | 0.68 | 0.22 | 0.28 |
| 18183 | 0 | 12375  | EHWSYGLRPG                  | 2.29 | 0.01 | 1.75 | 0.68 | 0.22 | 0.28 |
| 18184 | 0 | 12375  | EHWSYGLRPG                  | 2.29 | 0.01 | 1.75 | 0.68 | 0.22 | 0.28 |
| 18185 | 0 | 12375  | EHWSYGLRPG                  | 2.29 | 0.01 | 1.75 | 0.68 | 0.22 | 0.28 |
| 18186 | 0 | 12375  | EHWSYGLRPG                  | 2.29 | 0.01 | 4.45 | 4.63 | 0.22 | 0.28 |
| 18187 | 0 | 12375  | EHWSYGLRPG                  | 2.29 | 0.01 | 4.45 | 4.63 | 0.22 | 1.34 |
| 18188 | 0 | 12376  | EHWSYGWLPG                  | 2.31 | 0.01 | 3.26 | 4.45 | 0.22 | 0.28 |
| 18189 | 0 | 99994  | EHYVYAKEGY                  | 2.34 | 0.01 | 2.18 | 2.16 | 0.22 | 0.28 |
| 18190 | 0 | 142413 | EIAAEVAKAKVAK               | 2.62 | 0.01 | 2.59 | 0.44 | 0.85 | 0.85 |
| 18191 | 0 | 12382  | EIAAILKDFD                  | 2.32 | 0.01 | 3.85 | 0.44 | 1.23 | 0.85 |
| 18192 | 0 | 12383  | EIAAKAIGKKIHQNNG            | 2.76 | 0.01 | 2.73 | 0.44 | 0.85 | 0.28 |
| 18193 | 0 | 12383  | EIAAKAIGKKIHQNNG            | 2.76 | 0.01 | 2.97 | 0.44 | 0.85 | 0.28 |
| 18194 | 0 | 242449 | EIAANIREEMRRLQR             | 2.70 | 0.01 | 3.32 | 1.20 | 0.22 | 0.85 |
| 18195 | 0 | 242449 | EIAANIREEMRRLQR             | 2.70 | 0.01 | 3.33 | 1.20 | 0.22 | 0.85 |
| 18196 | 0 | 170781 | EIAAPIIDSAIQGYN             | 2.68 | 0.01 | 0.78 | 0.44 | 1.41 | 0.28 |
| 18197 | 0 | 12388  | EIAKTTLLK                   | 2.23 | 0.01 | 2.61 | 0.44 | 0.85 | 0.28 |
| 18198 | 0 | 12393  | EIAQVATISA                  | 2.33 | 0.01 | 0.78 | 0.44 | 1.41 | 0.28 |
| 18199 | 0 | 12393  | EIAQVATISA                  | 2.33 | 0.01 | 0.78 | 1.20 | 0.22 | 0.28 |
| 18200 | 0 | 12393  | EIAQVATISA                  | 2.33 | 0.01 | 0.78 | 1.20 | 0.22 | 0.28 |
| 18201 | 0 | 12394  | EIAQVATV                    | 2.14 | 0.01 | 2.99 | 0.44 | 0.85 | 0.28 |
| 18202 | 0 | 462322 | EIAVDGVLL                   | 2.21 | 0.01 | 0.78 | 1.12 | 0.22 | 1.28 |
| 18203 | 0 | 12408  | EICPAVKRDVDLFLTG            | 2.69 | 0.01 | 3.08 | 0.44 | 1.23 | 1.57 |



|       |   |        |                                        |      |      |      |      |      |      |
|-------|---|--------|----------------------------------------|------|------|------|------|------|------|
| 18204 | 0 | 12408  | EICPAVKRDVDLFLTG                       | 2.69 | 0.01 | 3.08 | 0.44 | 1.74 | 1.57 |
| 18205 | 0 | 12408  | EICPAVKRDVDLFLTG                       | 2.69 | 0.01 | 3.08 | 0.68 | 0.22 | 1.57 |
| 18206 | 0 | 12408  | EICPAVKRDVDLFLTG                       | 2.69 | 0.01 | 3.08 | 0.68 | 0.22 | 1.27 |
| 18207 | 0 | 12408  | EICPAVKRDVDLFLTG                       | 2.69 | 0.01 | 3.08 | 0.68 | 0.22 | 1.57 |
| 18208 | 0 | 227130 | EICPAVKRDVDLFLTGTP<br>DEYVEQV          | 3.14 | 0.01 | 3.08 | 1.12 | 0.22 | 0.28 |
| 18209 | 0 | 227131 | EICPAVKRDVDLFLTGTP<br>DEYVEQVAQYK      | 3.30 | 0.01 | 3.08 | 0.44 | 1.23 | 0.28 |
| 18210 | 0 | 227131 | EICPAVKRDVDLFLTGTP<br>DEYVEQVAQYK      | 3.30 | 0.01 | 3.08 | 1.12 | 0.22 | 0.28 |
| 18211 | 0 | 153822 | EICPAVKRDVDLFLTGTP<br>DEYVEQVAQYKALPVV | 3.46 | 0.01 | 3.08 | 1.12 | 0.22 | 0.85 |
| 18212 | 0 | 280260 | EICRDEGGDEGNDEA                        | 2.72 | 0.01 | 1.61 | 0.44 | 0.85 | 1.28 |
| 18213 | 0 | 134662 | EICVKFTRGVDFNWWQ                       | 2.62 | 0.01 | 0.78 | 0.44 | 1.41 | 0.28 |
| 18214 | 0 | 134662 | EICVKFTRGVDFNWWQ                       | 2.62 | 0.01 | 0.78 | 0.44 | 1.13 | 0.28 |
| 18215 | 0 | 12412  | EIDAPRVFDARFSRHYSV<br>QL               | 2.93 | 0.01 | 0.90 | 3.93 | 0.22 | 0.28 |
| 18216 | 0 | 12412  | EIDAPRVFDARFSRHYSV<br>QL               | 2.93 | 0.01 | 0.90 | 0.44 | 1.74 | 0.28 |
| 18217 | 0 | 280264 | EIDDDSDVQNEIKVL                        | 2.69 | 0.01 | 1.61 | 0.44 | 0.85 | 1.28 |
| 18218 | 0 | 229162 | EIDEEINKAKQILNE                        | 2.72 | 0.01 | 2.70 | 0.68 | 0.22 | 0.28 |
| 18219 | 0 | 174093 | EIDGKQTHQSVAISR                        | 2.64 | 0.01 | 3.36 | 0.44 | 1.23 | 0.85 |
| 18220 | 0 | 174093 | EIDGKQTHQSVAISR                        | 2.64 | 0.01 | 3.36 | 0.44 | 1.23 | 0.85 |
| 18221 | 0 | 174094 | EIDGKQTHQSVAISRYLG<br>KQ               | 2.91 | 0.01 | 3.36 | 0.44 | 1.23 | 1.27 |
| 18222 | 0 | 108897 | EIDGPAGQAEP                            | 2.43 | 0.01 | 1.86 | 0.68 | 0.22 | 0.28 |
| 18223 | 0 | 108897 | EIDGPAGQAEP                            | 2.43 | 0.01 | 1.86 | 0.68 | 0.22 | 0.85 |
| 18224 | 0 | 108897 | EIDGPAGQAEP                            | 2.43 | 0.01 | 1.86 | 0.68 | 0.22 | 0.28 |
| 18225 | 0 | 108897 | EIDGPAGQAEP                            | 2.43 | 0.01 | 1.86 | 0.68 | 0.22 | 2.92 |
| 18226 | 0 | 108897 | EIDGPAGQAEP                            | 2.43 | 0.01 | 1.86 | 0.68 | 0.22 | 0.85 |
| 18227 | 0 | 142141 | EIDGPAGQAEPD                           | 2.52 | 0.01 | 1.86 | 0.44 | 1.41 | 0.28 |
| 18228 | 0 | 108898 | EIDGPAGQAEPDRAHYN                      | 2.80 | 0.01 | 1.86 | 0.68 | 0.22 | 0.28 |
| 18229 | 0 | 108898 | EIDGPAGQAEPDRAHYN                      | 2.80 | 0.01 | 1.86 | 0.68 | 0.22 | 0.85 |
| 18230 | 0 | 108898 | EIDGPAGQAEPDRAHYN                      | 2.80 | 0.01 | 1.86 | 0.68 | 0.22 | 0.28 |
| 18231 | 0 | 108898 | EIDGPAGQAEPDRAHYN                      | 2.80 | 0.01 | 1.86 | 0.68 | 0.22 | 2.92 |
| 18232 | 0 | 108898 | EIDGPAGQAEPDRAHYN                      | 2.80 | 0.01 | 1.86 | 0.68 | 0.22 | 0.85 |
| 18233 | 0 | 108898 | EIDGPAGQAEPDRAHYN                      | 2.80 | 0.01 | 1.86 | 0.68 | 0.22 | 0.28 |
| 18234 | 0 | 108898 | EIDGPAGQAEPDRAHYN                      | 2.80 | 0.01 | 1.86 | 0.68 | 0.22 | 0.28 |

|       |   |        |                                                   |      |      |      |      |      |      |
|-------|---|--------|---------------------------------------------------|------|------|------|------|------|------|
| 18235 | 0 | 108898 | EIDGPAGQAEPDRAHYN                                 | 2.80 | 0.01 | 1.86 | 0.68 | 0.22 | 0.28 |
| 18236 | 0 | 108898 | EIDGPAGQAEPDRAHYN                                 | 2.80 | 0.01 | 1.86 | 0.68 | 0.22 | 0.28 |
| 18237 | 0 | 108898 | EIDGPAGQAEPDRAHYN                                 | 2.80 | 0.01 | 1.86 | 0.68 | 0.22 | 1.48 |
| 18238 | 0 | 108898 | EIDGPAGQAEPDRAHYN                                 | 2.80 | 0.01 | 1.86 | 0.68 | 0.22 | 1.48 |
| 18239 | 0 | 110828 | EIDGPAGQAEPDRAHYN<br>                             | 2.86 | 0.01 | 1.86 | 3.57 | 0.22 | 0.28 |
| 18240 | 0 | 110828 | EIDGPAGQAEPDRAHYN<br>                             | 2.86 | 0.01 | 1.86 | 3.89 | 2.82 | 0.28 |
| 18241 | 0 | 110828 | EIDGPAGQAEPDRAHYN<br>                             | 2.86 | 0.01 | 1.86 | 0.44 | 2.82 | 0.28 |
| 18242 | 0 | 12415  | EIDGPAGQAEPDRAHYN<br>IVT                          | 2.94 | 0.01 | 1.86 | 3.89 | 0.22 | 0.28 |
| 18243 | 0 | 12415  | EIDGPAGQAEPDRAHYN<br>IVT                          | 2.94 | 0.01 | 1.86 | 1.81 | 0.22 | 0.28 |
| 18244 | 0 | 280272 | EIDGSLSSSAWVCAP                                   | 2.64 | 0.01 | 1.61 | 0.44 | 0.85 | 1.28 |
| 18245 | 0 | 280273 | EIDGSLSSSAWVCAS                                   | 2.67 | 0.01 | 1.61 | 0.44 | 0.85 | 1.28 |
| 18246 | 0 | 107815 | EIDGYNNQFKKSPLP                                   | 2.62 | 0.01 | 0.90 | 0.44 | 1.13 | 1.39 |
| 18247 | 0 | 12417  | EIDKGIYQTSNFRVVP                                  | 2.73 | 0.01 | 2.48 | 0.44 | 0.85 | 0.28 |
| 18248 | 0 | 12417  | EIDKGIYQTSNFRVVP                                  | 2.73 | 0.01 | 2.48 | 1.20 | 0.22 | 0.28 |
| 18249 | 0 | 153378 | EIDLKLEPGTRV                                      | 2.46 | 0.01 | 0.90 | 2.16 | 0.22 | 0.85 |
| 18250 | 0 | 153378 | EIDLKLEPGTRV                                      | 2.46 | 0.01 | 0.90 | 2.16 | 0.22 | 0.85 |
| 18251 | 0 | 12422  | EIDLTNKNAAKLRGD                                   | 2.67 | 0.01 | 2.59 | 0.44 | 0.85 | 0.28 |
| 18252 | 0 | 12423  | EIDMHMPDTPDRTLLS<br>QQS                           | 2.94 | 0.01 | 3.13 | 2.43 | 0.22 | 0.28 |
| 18253 | 0 | 139034 | EIDQLEQRADNLTTIAHE<br>LQ                          | 2.97 | 0.01 | 3.55 | 3.16 | 0.22 | 0.28 |
| 18254 | 0 | 12426  | EIDRLNEVAKNLNESLID<br>LQELGKYEQY                  | 3.29 | 4.23 | 2.45 | 0.44 | 0.85 | 0.28 |
| 18255 | 0 | 12433  | EIEAFGKRYFTDS                                     | 2.52 | 0.01 | 2.58 | 2.43 | 0.22 | 0.28 |
| 18256 | 0 | 12433  | EIEAFGKRYFTDS                                     | 2.52 | 0.01 | 2.58 | 2.43 | 0.22 | 1.34 |
| 18257 | 0 | 122331 | EIEDKPEQEIKNKSLEEK<br>QIDKNTDTSEKKGFNNS<br>EKDEKA | 3.68 | 0.01 | 2.22 | 0.44 | 1.74 | 1.34 |
| 18258 | 0 | 122331 | EIEDKPEQEIKNKSLEEK<br>QIDKNTDTSEKKGFNNS<br>EKDEKA | 3.68 | 0.01 | 2.22 | 0.44 | 1.74 | 0.28 |
| 18259 | 0 | 122331 | EIEDKPEQEIKNKSLEEK<br>QIDKNTDTSEKKGFNNS<br>EKDEKA | 3.68 | 0.01 | 2.22 | 0.44 | 1.74 | 0.28 |
| 18260 | 0 | 12435  | EIEDTEGLKEVIN                                     | 2.56 | 0.01 | 2.18 | 1.81 | 0.22 | 0.28 |

|       |   |        |                                    |      |      |      |      |      |      |
|-------|---|--------|------------------------------------|------|------|------|------|------|------|
| 18261 | 0 | 12436  | EIEKLNKQLTKCNKQIDE<br>LNEEVEKLN    | 3.28 | 0.01 | 2.22 | 0.44 | 1.74 | 0.28 |
| 18262 | 0 | 12436  | EIEKLNKQLTKCNKQIDE<br>LNEEVEKLN    | 3.28 | 0.01 | 2.22 | 0.44 | 1.74 | 0.28 |
| 18263 | 0 | 12436  | EIEKLNKQLTKCNKQIDE<br>LNEEVEKLN    | 3.28 | 0.01 | 2.22 | 0.44 | 1.74 | 0.28 |
| 18264 | 0 | 12440  | EIEMLRNKIYFMQ                      | 2.62 | 0.01 | 2.56 | 2.69 | 0.22 | 0.28 |
| 18265 | 0 | 125029 | EIERDTERDRFLSADEAV                 | 2.87 | 0.01 | 3.53 | 0.44 | 0.85 | 0.28 |
| 18266 | 0 | 125029 | EIERDTERDRFLSADEAV                 | 2.87 | 0.01 | 3.53 | 0.44 | 0.85 | 1.27 |
| 18267 | 0 | 192927 | EIEVHMPPDT                         | 2.31 | 0.01 | 3.26 | 0.68 | 0.22 | 0.28 |
| 18268 | 0 | 192927 | EIEVHMPPDT                         | 2.31 | 0.01 | 3.26 | 0.68 | 0.22 | 0.28 |
| 18269 | 0 | 192927 | EIEVHMPPDT                         | 2.31 | 0.01 | 3.26 | 0.68 | 0.22 | 1.48 |
| 18270 | 0 | 192927 | EIEVHMPPDT                         | 2.31 | 0.01 | 3.26 | 0.68 | 0.22 | 1.48 |
| 18271 | 0 | 190406 | EIEWELQKENS KRWN                   | 2.71 | 0.01 | 3.19 | 2.00 | 1.41 | 0.28 |
| 18272 | 0 | 12447  | EIFSFLISLI                         | 2.36 | 0.01 | 0.78 | 0.44 | 1.74 | 0.28 |
| 18273 | 0 | 194719 | EIGHQGITAASLR                      | 2.52 | 0.01 | 4.03 | 0.68 | 0.22 | 0.28 |
| 18274 | 0 | 194719 | EIGHQGITAASLR                      | 2.52 | 0.01 | 4.03 | 0.68 | 0.22 | 0.28 |
| 18275 | 0 | 194719 | EIGHQGITAASLR                      | 2.52 | 0.01 | 4.03 | 0.68 | 0.22 | 1.48 |
| 18276 | 0 | 194719 | EIGHQGITAASLR                      | 2.52 | 0.01 | 4.03 | 0.68 | 0.22 | 0.28 |
| 18277 | 0 | 194719 | EIGHQGITAASLR                      | 2.52 | 0.01 | 4.03 | 0.68 | 0.22 | 0.28 |
| 18278 | 0 | 120484 | EIGKIPLKLD                         | 2.33 | 0.01 | 2.18 | 2.16 | 0.22 | 0.28 |
| 18279 | 0 | 175582 | EIGLLGAEGTTTTW                     | 2.65 | 0.01 | 3.21 | 2.78 | 0.22 | 0.28 |
| 18280 | 0 | 175582 | EIGLLGAEGTTTTW                     | 2.65 | 0.01 | 3.21 | 2.78 | 0.22 | 0.28 |
| 18281 | 0 | 175582 | EIGLLGAEGTTTTW                     | 2.65 | 0.01 | 3.21 | 2.78 | 0.22 | 0.28 |
| 18282 | 0 | 175582 | EIGLLGAEGTTTTW                     | 2.65 | 0.01 | 3.21 | 2.78 | 0.22 | 1.34 |
| 18283 | 0 | 175582 | EIGLLGAEGTTTTW                     | 2.65 | 0.01 | 3.21 | 2.78 | 0.22 | 2.35 |
| 18284 | 0 | 175582 | EIGLLGAEGTTTTW                     | 2.65 | 0.01 | 3.21 | 2.78 | 0.22 | 0.28 |
| 18285 | 0 | 135916 | EIGNIISDAMKK                       | 2.44 | 0.01 | 0.78 | 0.44 | 1.41 | 0.28 |
| 18286 | 0 | 118323 | EIGNIISDAMKKV                      | 2.51 | 0.01 | 0.78 | 0.44 | 1.74 | 0.85 |
| 18287 | 0 | 496433 | EIGNIISDAMKKVGRKG<br>VITVKDGKTLNDE | 3.36 | 0.01 | 0.78 | 0.44 | 1.93 | 2.12 |
| 18288 | 0 | 178740 | EIGRIATDQELDEML                    | 2.69 | 0.01 | 2.36 | 0.44 | 1.23 | 1.28 |
| 18289 | 0 | 178740 | EIGRIATDQELDEML                    | 2.69 | 0.01 | 2.36 | 0.44 | 1.23 | 1.27 |
| 18290 | 0 | 178740 | EIGRIATDQELDEML                    | 2.69 | 0.01 | 2.36 | 0.44 | 1.23 | 1.28 |
| 18291 | 0 | 149679 | EIGVQPPTSSILED T                   | 2.67 | 0.01 | 3.67 | 1.12 | 0.22 | 0.28 |
| 18292 | 0 | 141638 | EIHSKTKS                           | 2.14 | 0.01 | 0.78 | 0.44 | 1.13 | 0.28 |
| 18293 | 0 | 141638 | EIHSKTKS                           | 2.14 | 0.01 | 0.78 | 0.44 | 1.13 | 0.28 |
| 18294 | 0 | 141638 | EIHSKTKS                           | 2.14 | 0.01 | 0.78 | 0.44 | 1.41 | 0.28 |
| 18295 | 0 | 240985 | EIIDIEVQ                           | 2.17 | 0.01 | 3.35 | 2.37 | 0.22 | 0.85 |
| 18296 | 0 | 189616 | EIIDQDKSDFVEEDE                    | 2.71 | 0.01 | 3.28 | 0.44 | 1.23 | 0.28 |
| 18297 | 0 | 189616 | EIIDQDKSDFVEEDE                    | 2.71 | 0.01 | 3.28 | 0.44 | 1.41 | 0.28 |
| 18298 | 0 | 12459  | EIEQLDVTT                          | 2.31 | 0.01 | 0.78 | 1.20 | 0.22 | 0.28 |
| 18299 | 0 | 12459  | EIEQLDVTT                          | 2.31 | 0.01 | 0.78 | 1.20 | 0.22 | 0.28 |
| 18300 | 0 | 188131 | EIIGDIRQA                          | 2.23 | 0.01 | 3.44 | 1.20 | 0.22 | 2.49 |
| 18301 | 0 | 122749 | EIIGFGQELKNPQEE                    | 2.68 | 0.01 | 0.78 | 1.20 | 0.22 | 1.27 |

|       |   |        |                                                                                                                                                                                |      |      |      |      |      |      |
|-------|---|--------|--------------------------------------------------------------------------------------------------------------------------------------------------------------------------------|------|------|------|------|------|------|
| 18302 | 0 | 122749 | EIIGFGQELKNPQEE                                                                                                                                                                | 2.68 | 0.01 | 0.78 | 1.20 | 0.22 | 2.12 |
| 18303 | 0 | 122749 | EIIGFGQELKNPQEE                                                                                                                                                                | 2.68 | 0.01 | 0.78 | 0.44 | 1.13 | 0.28 |
| 18304 | 0 | 122749 | EIIGFGQELKNPQEE                                                                                                                                                                | 2.68 | 0.01 | 0.78 | 1.20 | 0.22 | 1.27 |
| 18305 | 0 | 122749 | EIIGFGQELKNPQEE                                                                                                                                                                | 2.68 | 0.01 | 0.78 | 1.20 | 0.22 | 0.28 |
| 18306 | 0 | 122749 | EIIGFGQELKNPQEE                                                                                                                                                                | 2.68 | 0.01 | 0.78 | 1.20 | 0.22 | 0.28 |
| 18307 | 0 | 92556  | EIIGQNGERI                                                                                                                                                                     | 2.36 | 0.01 | 2.67 | 2.00 | 0.22 | 0.28 |
| 18308 | 0 | 92556  | EIIGQNGERI                                                                                                                                                                     | 2.36 | 0.01 | 2.67 | 2.00 | 0.22 | 0.28 |
| 18309 | 0 | 92556  | EIIGQNGERI                                                                                                                                                                     | 2.36 | 0.01 | 2.67 | 2.00 | 0.22 | 0.28 |
| 18310 | 0 | 118324 | EIIKRTLKIPAMT                                                                                                                                                                  | 2.55 | 0.01 | 0.78 | 0.44 | 1.74 | 0.85 |
| 18311 | 0 | 118324 | EIIKRTLKIPAMT                                                                                                                                                                  | 2.55 | 0.01 | 0.78 | 0.44 | 1.59 | 0.85 |
| 18312 | 0 | 118324 | EIIKRTLKIPAMT                                                                                                                                                                  | 2.55 | 0.01 | 0.78 | 0.44 | 1.74 | 0.85 |
| 18313 | 0 | 12464  | EIILPENVETEEIIDDPSP<br>KHSNHETF                                                                                                                                                | 3.29 | 0.01 | 1.66 | 0.44 | 0.85 | 0.28 |
| 18314 | 0 | 12464  | EIILPENVETEEIIDDPSP<br>KHSNHETF                                                                                                                                                | 3.29 | 0.01 | 1.66 | 0.44 | 0.85 | 1.34 |
| 18315 | 0 | 12465  | EIILPENVETEEIIDDPSP<br>KHSNHETFE                                                                                                                                               | 3.32 | 0.01 | 1.66 | 0.44 | 1.74 | 0.28 |
| 18316 | 0 | 12467  | EIINEIEKKIEDIEKNINITK<br>ENLKELENKITELQSSFSS<br>YENEMKHVVKKIEDLEK                                                                                                              | 4.01 | 0.01 | 2.22 | 0.44 | 1.74 | 0.28 |
| 18317 | 0 | 12467  | EIINEIEKKIEDIEKNINITK<br>ENLKELENKITELQSSFSS<br>YENEMKHVVKKIEDLEK                                                                                                              | 4.01 | 0.01 | 2.22 | 0.44 | 1.74 | 0.28 |
| 18318 | 0 | 144252 | EIINVGHSHFVNFEDND<br>NR                                                                                                                                                        | 2.92 | 0.01 | 0.78 | 0.44 | 2.35 | 2.66 |
| 18319 | 0 | 477691 | EIIVKKLEDYTKIDENLE                                                                                                                                                             | 2.88 | 0.01 | 3.12 | 0.68 | 0.22 | 0.28 |
| 18320 | 0 | 118783 | EIIVTHFPFDEQNCSMK                                                                                                                                                              | 2.73 | 0.01 | 0.78 | 2.04 | 0.22 | 0.28 |
| 18321 | 0 | 118783 | EIIVTHFPFDEQNCSMK                                                                                                                                                              | 2.73 | 0.01 | 0.78 | 2.04 | 0.22 | 2.02 |
| 18322 | 0 | 12474  | EIIWTLQDTQEIKQRVVF<br>KYSQMINISDYINRWIFV<br>TITNNRLNNSKIYINGRLI<br>DQKPISNLGNIHASNNI<br>MFKLDGCRDTHRYIWIK<br>YFNLFDKELNEKEIKDLY<br>DNQSNSGILKDFWGDY<br>LQYDKPYYMLNLYDPNK<br>YV | 4.93 | 0.01 | 2.08 | 2.02 | 0.22 | 0.85 |

|       |   |        |                                                                                        |      |      |      |      |      |      |
|-------|---|--------|----------------------------------------------------------------------------------------|------|------|------|------|------|------|
|       |   |        | EIIWTLQDTQEIKQRVVF<br>KYSQMINISDYINRWIFV<br>TITNNRLNNSKIYINGRLI<br>DQKPISNLGNIHASNNI   |      |      |      |      |      |      |
| 18323 | 0 | 12474  | MFKLDGCRDTHRYIWIK<br>YFNLFDKELNEKEIKDLY<br>DNQSNSGILKDFWGDY<br>LQYDKPYYMLNLYDPNK<br>YV | 4.93 | 0.01 | 2.08 | 3.23 | 0.22 | 0.28 |
|       |   |        | EIIWTLQDTQEIKQRVVF<br>KYSQMINISDYINRWIFV<br>TITNNRLNNSKIYINGRLI<br>DQKPISNLGNIHASNNI   |      |      |      |      |      |      |
| 18324 | 0 | 12474  | MFKLDGCRDTHRYIWIK<br>YFNLFDKELNEKEIKDLY<br>DNQSNSGILKDFWGDY<br>LQYDKPYYMLNLYDPNK<br>YV | 4.93 | 0.01 | 2.08 | 3.23 | 0.22 | 0.85 |
| 18325 | 0 | 514707 | EIKALTSQIVARNEK                                                                        | 2.67 | 0.01 | 2.24 | 0.44 | 1.41 | 1.28 |
| 18326 | 0 | 12479  | EIKASGGPEGGLAALTA<br>HQ                                                                | 2.95 | 0.01 | 0.90 | 0.44 | 0.22 | 0.28 |
| 18327 | 0 | 12486  | EIKITP                                                                                 | 1.90 | 0.01 | 2.40 | 0.44 | 0.85 | 0.28 |
| 18328 | 0 | 181601 | EIKKKNPYEQQKGT                                                                         | 2.67 | 0.01 | 3.26 | 2.37 | 0.22 | 1.28 |
| 18329 | 0 | 81550  | EIKVQMSAAY                                                                             | 2.28 | 0.01 | 3.06 | 0.44 | 0.85 | 0.28 |
| 18330 | 0 | 12498  | EIKYNGEAYL                                                                             | 2.33 | 0.01 | 2.04 | 0.68 | 0.22 | 0.28 |
| 18331 | 0 | 12498  | EIKYNGEAYL                                                                             | 2.33 | 0.01 | 2.04 | 0.68 | 0.22 | 0.28 |
| 18332 | 0 | 12507  | EILLNQLA                                                                               | 2.14 | 0.01 | 2.40 | 2.43 | 0.22 | 0.28 |
| 18333 | 0 | 95347  | EILLQK                                                                                 | 1.89 | 0.01 | 1.60 | 0.44 | 1.23 | 0.28 |
| 18334 | 0 | 115220 | EILLQKWENG                                                                             | 2.31 | 0.01 | 1.60 | 0.44 | 1.23 | 0.85 |
| 18335 | 0 | 115220 | EILLQKWENG                                                                             | 2.31 | 0.01 | 1.60 | 0.44 | 1.23 | 0.85 |
| 18336 | 0 | 12508  | EILRSRR                                                                                | 2.11 | 0.01 | 2.68 | 0.44 | 1.59 | 0.28 |
| 18337 | 0 | 161180 | EILRTQES                                                                               | 2.13 | 0.01 | 4.15 | 1.20 | 0.22 | 0.28 |
| 18338 | 0 | 161180 | EILRTQES                                                                               | 2.13 | 0.01 | 4.15 | 1.20 | 0.22 | 0.28 |
| 18339 | 0 | 128523 | EILSDVQLIKTGDKV                                                                        | 2.68 | 0.01 | 0.78 | 0.44 | 1.13 | 0.85 |
| 18340 | 0 | 178742 | EILTSKITQAGEVPMYGL<br>MPKGVK                                                           | 3.13 | 0.01 | 3.34 | 0.68 | 0.22 | 2.66 |
| 18341 | 0 | 178742 | EILTSKITQAGEVPMYGL<br>MPKGVK                                                           | 3.13 | 0.01 | 3.34 | 0.44 | 1.59 | 0.28 |
| 18342 | 0 | 12514  | EILVEFEAPHATKQS                                                                        | 2.64 | 0.01 | 3.22 | 1.81 | 0.22 | 0.28 |
| 18343 | 0 | 12514  | EILVEFEAPHATKQS                                                                        | 2.64 | 0.01 | 3.22 | 1.81 | 0.22 | 0.28 |
| 18344 | 0 | 12514  | EILVEFEAPHATKQS                                                                        | 2.64 | 0.01 | 3.22 | 1.81 | 0.22 | 0.28 |
| 18345 | 0 | 12514  | EILVEFEAPHATKQS                                                                        | 2.64 | 0.01 | 3.22 | 1.15 | 0.22 | 0.28 |
| 18346 | 0 | 12516  | EILYEAFFE                                                                              | 2.24 | 0.01 | 2.69 | 0.44 | 0.85 | 0.28 |
| 18347 | 0 | 78140  | EIMDLNDRHV                                                                             | 2.29 | 0.01 | 4.93 | 0.68 | 0.22 | 0.28 |
| 18348 | 0 | 280422 | EIMTENEDDEDEEE                                                                         | 2.72 | 0.01 | 1.61 | 0.44 | 0.85 | 1.28 |

|       |   |        |                                                |      |      |      |      |      |      |
|-------|---|--------|------------------------------------------------|------|------|------|------|------|------|
| 18349 | 0 | 118784 | EINCTRTQNTKCRCKPN<br>FFC                       | 2.97 | 0.01 | 0.78 | 1.15 | 0.22 | 1.27 |
| 18350 | 0 | 12531  | EINHVQDHALPKENI                                | 2.67 | 0.01 | 1.66 | 0.44 | 1.74 | 0.28 |
| 18351 | 0 | 12531  | EINHVQDHALPKENI                                | 2.67 | 0.01 | 1.66 | 0.44 | 0.85 | 0.28 |
| 18352 | 0 | 161341 | EINNMFNFTKLKNFTGLF<br>EF                       | 2.94 | 0.01 | 2.08 | 2.02 | 0.22 | 1.57 |
| 18353 | 0 | 240868 | EINPDHPIVETLRQKAEA<br>DKNDKAV                  | 3.17 | 3.67 | 0.78 | 0.44 | 1.13 | 0.28 |
| 18354 | 0 | 12535  | EINRVASCLR                                     | 2.29 | 0.01 | 1.96 | 0.44 | 0.85 | 1.34 |
| 18355 | 0 | 12536  | EINTEEEGTPDQISSLIEK                            | 2.90 | 0.01 | 3.37 | 3.23 | 0.22 | 0.28 |
| 18356 | 0 | 12536  | EINTEEEGTPDQISSLIEK                            | 2.90 | 0.01 | 3.37 | 3.23 | 0.22 | 1.34 |
| 18357 | 0 | 12536  | EINTEEEGTPDQISSLIEK                            | 2.90 | 0.01 | 3.37 | 3.23 | 0.22 | 0.28 |
| 18358 | 0 | 12537  | EINTLQNNQ                                      | 2.14 | 0.01 | 2.40 | 2.43 | 0.22 | 0.28 |
| 18359 | 0 | 167738 | EINTLQNNQG                                     | 2.23 | 0.01 | 2.40 | 2.43 | 0.22 | 0.28 |
| 18360 | 0 | 514720 | EINYDDKGKEVITKR                                | 2.68 | 0.01 | 2.24 | 0.44 | 1.41 | 1.28 |
| 18361 | 0 | 12539  | EIPALTAVE                                      | 2.24 | 0.01 | 3.51 | 1.15 | 0.22 | 0.28 |
| 18362 | 0 | 81565  | EIPALTAVETGATNP                                | 2.71 | 0.01 | 3.51 | 0.44 | 0.85 | 0.28 |
| 18363 | 0 | 12540  | EIPCTTYQQTTAETVEEI<br>DMHMPDTPDRTLLSQ<br>QSGNV | 3.57 | 0.01 | 3.13 | 1.15 | 0.22 | 0.85 |
| 18364 | 0 | 12540  | EIPCTTYQQTTAETVEEI<br>DMHMPDTPDRTLLSQ<br>QSGNV | 3.57 | 0.01 | 3.13 | 0.68 | 0.22 | 0.28 |
| 18365 | 0 | 12540  | EIPCTTYQQTTAETVEEI<br>DMHMPDTPDRTLLSQ<br>QSGNV | 3.57 | 0.01 | 3.13 | 1.15 | 0.22 | 0.85 |
| 18366 | 0 | 12542  | EIPDPVEAGEEV                                   | 2.51 | 0.01 | 0.78 | 0.68 | 0.22 | 0.28 |
| 18367 | 0 | 12542  | EIPDPVEAGEEV                                   | 2.51 | 0.01 | 0.78 | 0.68 | 0.22 | 1.27 |
| 18368 | 0 | 12542  | EIPDPVEAGEEV                                   | 2.51 | 0.01 | 0.78 | 0.68 | 0.22 | 0.28 |
| 18369 | 0 | 187636 | EIPFYGKAIPETIKG                                | 2.77 | 0.01 | 1.96 | 0.44 | 0.85 | 0.28 |
| 18370 | 0 | 187636 | EIPFYGKAIPETIKG                                | 2.77 | 0.01 | 1.96 | 0.44 | 0.85 | 0.28 |
| 18371 | 0 | 12550  | EIPQPQWT                                       | 2.14 | 0.01 | 2.40 | 2.43 | 0.22 | 0.28 |
| 18372 | 0 | 12551  | EIPQPQWTPPEEDQK                                | 2.64 | 0.01 | 2.40 | 1.12 | 0.22 | 0.28 |
| 18373 | 0 | 12551  | EIPQPQWTPPEEDQK                                | 2.64 | 0.01 | 2.40 | 1.12 | 0.22 | 0.28 |
| 18374 | 0 | 12554  | EIPSYRSLYLRWVNA                                | 2.66 | 0.01 | 3.50 | 2.22 | 0.22 | 0.28 |
| 18375 | 0 | 108900 | EIPVDLL                                        | 1.99 | 0.01 | 3.11 | 0.68 | 0.22 | 0.28 |
| 18376 | 0 | 108900 | EIPVDLL                                        | 1.99 | 0.01 | 3.11 | 0.68 | 0.22 | 1.48 |
| 18377 | 0 | 12555  | EIPVLPNRVGLPINQRFIL<br>VELSNHAELSV             | 3.36 | 0.01 | 2.75 | 0.44 | 2.82 | 0.28 |
| 18378 | 0 | 156276 | EIPYVKEVEAEDLRECNR<br>IVFGAS                   | 3.10 | 0.01 | 3.44 | 0.44 | 1.59 | 0.28 |
| 18379 | 0 | 156276 | EIPYVKEVEAEDLRECNR<br>IVFGAS                   | 3.10 | 0.01 | 3.44 | 0.44 | 0.85 | 0.28 |

|       |   |        |                                       |      |      |      |      |      |      |
|-------|---|--------|---------------------------------------|------|------|------|------|------|------|
| 18380 | 0 | 12562  | EIQYTSNYNKSVDFT<br>VDT                | 2.96 | 0.01 | 3.19 | 0.44 | 1.59 | 1.27 |
| 18381 | 0 | 280502 | EIRENDGDIWKTEAW                       | 2.69 | 0.01 | 1.61 | 0.44 | 0.85 | 1.28 |
| 18382 | 0 | 148581 | EIRNLALQTL                            | 2.31 | 0.01 | 1.86 | 2.74 | 0.22 | 0.85 |
| 18383 | 0 | 148581 | EIRNLALQTL                            | 2.31 | 0.01 | 1.86 | 2.74 | 0.22 | 0.85 |
| 18384 | 0 | 12570  | EIRPSA                                | 1.88 | 0.01 | 3.27 | 0.44 | 1.59 | 0.28 |
| 18385 | 0 | 12571  | EIRQVGDFHYVTGM                        | 2.57 | 0.01 | 2.41 | 0.44 | 0.85 | 0.28 |
| 18386 | 0 | 12571  | EIRQVGDFHYVTGM                        | 2.57 | 0.01 | 2.41 | 0.44 | 0.85 | 0.28 |
| 18387 | 0 | 12571  | EIRQVGDFHYVTGM                        | 2.57 | 0.01 | 2.41 | 0.44 | 1.41 | 0.28 |
| 18388 | 0 | 12571  | EIRQVGDFHYVTGM                        | 2.57 | 0.01 | 2.41 | 0.44 | 0.85 | 0.28 |
| 18389 | 0 | 135917 | EIRRGVMLAVDA                          | 2.46 | 0.01 | 0.78 | 0.44 | 1.41 | 0.28 |
| 18390 | 0 | 133073 | EIRVRLQSPSTRWTEL<br>DDVKRLLKGS        | 3.26 | 0.01 | 0.78 | 0.44 | 1.13 | 0.28 |
| 18391 | 0 | 280528 | EISDDDEGEDEEEG                        | 2.73 | 0.01 | 1.61 | 0.44 | 0.85 | 1.28 |
| 18392 | 0 | 99204  | EISKFL                                | 1.88 | 0.01 | 2.86 | 2.02 | 0.85 | 0.85 |
| 18393 | 0 | 12584  | EISTNIRQAGVQYSR                       | 2.66 | 0.01 | 2.04 | 0.68 | 0.22 | 0.28 |
| 18394 | 0 | 12584  | EISTNIRQAGVQYSR                       | 2.66 | 0.01 | 2.04 | 0.68 | 0.22 | 0.28 |
| 18395 | 0 | 12587  | EISVPAEIL                             | 2.24 | 0.01 | 2.41 | 0.44 | 0.85 | 0.28 |
| 18396 | 0 | 12587  | EISVPAEIL                             | 2.24 | 0.01 | 2.41 | 0.44 | 0.85 | 0.28 |
| 18397 | 0 | 142621 | EISVTTVYPP                            | 2.30 | 0.01 | 0.78 | 0.44 | 1.41 | 1.27 |
| 18398 | 0 | 125396 | EITDNPYMTSIPVNAFQ<br>GLC              | 2.88 | 0.01 | 0.78 | 0.44 | 1.13 | 0.28 |
| 18399 | 0 | 125396 | EITDNPYMTSIPVNAFQ<br>GLC              | 2.88 | 0.01 | 0.78 | 0.44 | 1.13 | 0.28 |
| 18400 | 0 | 125396 | EITDNPYMTSIPVNAFQ<br>GLC              | 2.88 | 0.01 | 0.78 | 1.20 | 0.22 | 0.28 |
| 18401 | 0 | 125396 | EITDNPYMTSIPVNAFQ<br>GLC              | 2.88 | 0.01 | 0.78 | 0.68 | 0.22 | 0.28 |
| 18402 | 0 | 125396 | EITDNPYMTSIPVNAFQ<br>GLC              | 2.88 | 0.01 | 0.78 | 1.20 | 0.22 | 0.28 |
| 18403 | 0 | 12601  | EITQNKTDPKPGQADPK<br>PN               | 2.92 | 0.01 | 3.97 | 1.20 | 0.22 | 0.85 |
| 18404 | 0 | 134043 | EITRTTLQSDQEEID<br>EITRTTLQSDQEEIDYDD | 2.70 | 0.01 | 0.78 | 1.20 | 0.22 | 1.57 |
| 18405 | 0 | 140019 | TISVEMKKEDFDIYDEDE<br>NQ              | 3.59 | 0.01 | 0.78 | 0.44 | 1.93 | 1.34 |
| 18406 | 0 | 158738 | EIVDLDPKLKQINLI                       | 2.70 | 0.01 | 4.45 | 3.01 | 0.22 | 2.02 |
| 18407 | 0 | 158738 | EIVDLDPKLKQINLI                       | 2.70 | 0.01 | 4.45 | 3.01 | 0.22 | 2.02 |
| 18408 | 0 | 158738 | EIVDLDPKLKQINLI                       | 2.70 | 0.01 | 4.45 | 3.01 | 0.22 | 0.28 |
| 18409 | 0 | 106386 | EIVLTQSPGTLSPGER<br>A                 | 2.91 | 0.01 | 0.78 | 1.12 | 0.22 | 0.28 |
| 18410 | 0 | 179781 | EIVYKSPVSGDTSRHL                      | 2.81 | 4.33 | 0.78 | 2.49 | 0.22 | 0.28 |
| 18411 | 0 | 179781 | EIVYKSPVSGDTSRHL                      | 2.81 | 4.33 | 0.78 | 2.49 | 0.22 | 1.66 |
| 18412 | 0 | 179781 | EIVYKSPVSGDTSRHL                      | 2.81 | 4.33 | 0.78 | 2.49 | 0.22 | 1.66 |

|       |   |        |                             |      |      |      |      |      |      |
|-------|---|--------|-----------------------------|------|------|------|------|------|------|
| 18413 | 0 | 179781 | EIVYKSPVVSGDTSRHL           | 2.81 | 4.33 | 0.78 | 2.49 | 0.22 | 1.66 |
| 18414 | 0 | 120486 | EIYFTDIDL                   | 2.31 | 0.01 | 2.18 | 2.16 | 0.22 | 0.28 |
| 18415 | 0 | 130482 | EIYPWYPMAERS                | 2.48 | 0.01 | 0.90 | 0.44 | 0.22 | 1.75 |
| 18416 | 0 | 130482 | EIYPWYPMAERS                | 2.48 | 0.01 | 0.90 | 3.57 | 0.22 | 0.28 |
| 18417 | 0 | 130482 | EIYPWYPMAERS                | 2.48 | 0.01 | 0.90 | 3.57 | 0.22 | 0.28 |
| 18418 | 0 | 130482 | EIYPWYPMAERS                | 2.48 | 0.01 | 0.90 | 0.44 | 0.22 | 0.28 |
| 18419 | 0 | 106387 | EIYRKYFGNR                  | 2.31 | 0.01 | 2.75 | 0.44 | 1.23 | 0.85 |
| 18420 | 0 | 12619  | EIYRKYFGNRP                 | 2.39 | 0.01 | 2.75 | 0.68 | 0.22 | 0.28 |
| 18421 | 0 | 280623 | EKAAVDADTAALAAL             | 2.72 | 0.01 | 1.61 | 0.44 | 0.85 | 1.28 |
| 18422 | 0 | 78141  | EKAEVEK                     | 2.18 | 0.01 | 2.60 | 0.44 | 1.23 | 0.85 |
| 18423 | 0 | 12625  | EKAFREL                     | 2.03 | 0.01 | 2.21 | 1.12 | 0.22 | 0.28 |
| 18424 | 0 | 12625  | EKAFREL                     | 2.03 | 0.01 | 2.21 | 0.44 | 0.85 | 0.28 |
| 18425 | 0 | 12625  | EKAFREL                     | 2.03 | 0.01 | 2.21 | 1.20 | 0.22 | 0.85 |
| 18426 | 0 | 12625  | EKAFREL                     | 2.03 | 0.01 | 2.21 | 1.12 | 0.22 | 0.28 |
| 18427 | 0 | 12625  | EKAFREL                     | 2.03 | 0.01 | 2.21 | 1.12 | 0.22 | 0.28 |
| 18428 | 0 | 12626  | EKAFRELADA                  | 2.34 | 0.01 | 2.21 | 1.12 | 0.22 | 0.28 |
| 18429 | 0 | 12626  | EKAFRELADA                  | 2.34 | 0.01 | 2.21 | 1.12 | 0.22 | 0.28 |
|       |   |        | EKAGAWYSYKGEKIGQG           |      |      |      |      |      |      |
| 18430 | 0 | 12627  | KANATAWLKDNPETAK<br>EIE     | 3.54 | 0.01 | 2.24 | 1.15 | 0.22 | 2.98 |
| 18431 | 0 | 514762 | EKAGQKTDDMLNSND             | 2.66 | 0.01 | 2.24 | 0.44 | 1.41 | 1.28 |
| 18432 | 0 | 170801 | EKAKEALGKAKDANN             | 2.72 | 0.01 | 0.78 | 0.44 | 1.41 | 0.28 |
| 18433 | 0 | 237699 | EKALSKLHEYFPE               | 2.56 | 0.01 | 0.78 | 0.44 | 1.13 | 1.28 |
| 18434 | 0 | 117474 | EKALSVETEKLLKYLEAV          | 2.90 | 0.01 | 0.78 | 0.44 | 1.13 | 0.28 |
| 18435 | 0 | 117474 | EKALSVETEKLLKYLEAV          | 2.90 | 0.01 | 0.78 | 0.44 | 1.13 | 0.28 |
| 18436 | 0 | 97267  | EKANPVNDLCYPGDFN<br>DYEELKH | 3.08 | 0.01 | 3.09 | 0.44 | 0.85 | 0.28 |
| 18437 | 0 | 97267  | EKANPVNDLCYPGDFN<br>DYEELKH | 3.08 | 0.01 | 3.09 | 0.44 | 0.85 | 0.28 |
| 18438 | 0 | 97267  | EKANPVNDLCYPGDFN<br>DYEELKH | 3.08 | 0.01 | 3.09 | 0.44 | 1.74 | 0.28 |
| 18439 | 0 | 12632  | EKASVPGGGDMGGMD<br>F        | 2.73 | 0.01 | 3.59 | 0.68 | 0.22 | 1.27 |
| 18440 | 0 | 12632  | EKASVPGGGDMGGMD<br>F        | 2.73 | 0.01 | 3.59 | 0.68 | 0.22 | 1.48 |
| 18441 | 0 | 12632  | EKASVPGGGDMGGMD<br>F        | 2.73 | 0.01 | 3.59 | 0.68 | 0.22 | 0.85 |
| 18442 | 0 | 12632  | EKASVPGGGDMGGMD<br>F        | 2.73 | 0.01 | 2.04 | 0.68 | 0.22 | 0.28 |
| 18443 | 0 | 12632  | EKASVPGGGDMGGMD<br>F        | 2.73 | 0.01 | 2.04 | 0.68 | 0.22 | 2.35 |
| 18444 | 0 | 12632  | EKASVPGGGDMGGMD<br>F        | 2.73 | 0.01 | 2.04 | 0.68 | 0.22 | 0.85 |



|       |   |        |                                   |      |      |      |      |      |      |
|-------|---|--------|-----------------------------------|------|------|------|------|------|------|
| 18445 | 0 | 12632  | EKASVPGGGDMGGMD<br>F              | 2.73 | 0.01 | 2.04 | 0.68 | 0.22 | 0.85 |
| 18446 | 0 | 12632  | EKASVPGGGDMGGMD<br>F              | 2.73 | 0.01 | 2.04 | 0.68 | 0.22 | 0.85 |
| 18447 | 0 | 12632  | EKASVPGGGDMGGMD<br>F              | 2.73 | 0.01 | 2.04 | 0.68 | 0.22 | 0.85 |
| 18448 | 0 | 12632  | EKASVPGGGDMGGMD<br>F              | 2.73 | 0.01 | 2.04 | 0.68 | 0.22 | 0.85 |
| 18449 | 0 | 12632  | EKASVPGGGDMGGMD<br>F              | 2.73 | 0.01 | 2.04 | 0.68 | 0.22 | 0.85 |
| 18450 | 0 | 12632  | EKASVPGGGDMGGMD<br>F              | 2.73 | 0.01 | 2.04 | 0.68 | 0.22 | 0.85 |
| 18451 | 0 | 12632  | EKASVPGGGDMGGMD<br>F              | 2.73 | 0.01 | 2.04 | 0.68 | 0.22 | 0.85 |
| 18452 | 0 | 12632  | EKASVPGGGDMGGMD<br>F              | 2.73 | 0.01 | 2.04 | 0.68 | 0.22 | 0.85 |
| 18453 | 0 | 12632  | EKASVPGGGDMGGMD<br>F              | 2.73 | 0.01 | 2.04 | 0.68 | 0.22 | 0.85 |
| 18454 | 0 | 12632  | EKASVPGGGDMGGMD<br>F              | 2.73 | 0.01 | 2.04 | 0.68 | 0.22 | 0.85 |
| 18455 | 0 | 534842 | EKCDGKINYTDKKVCKV<br>PPCQNACKSYDQ | 3.30 | 0.01 | 3.44 | 1.15 | 0.22 | 3.93 |
| 18456 | 0 | 534842 | EKCDGKINYTDKKVCKV<br>PPCQNACKSYDQ | 3.30 | 0.01 | 3.44 | 1.15 | 0.22 | 0.28 |
| 18457 | 0 | 534842 | EKCDGKINYTDKKVCKV<br>PPCQNACKSYDQ | 3.30 | 0.01 | 3.44 | 1.15 | 0.22 | 4.63 |
| 18458 | 0 | 280764 | EKDGEDTTSEDEKNV                   | 2.71 | 0.01 | 1.61 | 0.44 | 0.85 | 1.28 |
| 18459 | 0 | 131858 | EKDGLRNSTGLGSQN                   | 2.68 | 0.01 | 0.78 | 0.44 | 1.13 | 0.85 |
| 18460 | 0 | 12646  | EKDALSNAEGEVAA                    | 2.69 | 0.01 | 3.15 | 0.44 | 1.23 | 0.85 |
| 18461 | 0 | 96235  | EKDGLQTSQ                         | 2.31 | 0.01 | 0.78 | 0.44 | 1.93 | 0.85 |
| 18462 | 0 | 12647  | EKDKNRPVVPSP                      | 2.56 | 0.01 | 3.17 | 0.44 | 0.85 | 0.85 |
| 18463 | 0 | 121250 | EKDSYVVAFSDEMVP<br>CPVTTDM        | 3.04 | 0.01 | 0.78 | 0.44 | 1.13 | 0.28 |
| 18464 | 0 | 12659  | EKECPFIKPEVKPG                    | 2.65 | 0.01 | 2.56 | 1.12 | 0.22 | 0.28 |
| 18465 | 0 | 12660  | EKECPFIKPEVKPGT<br>PAQEIEMLRNKIYF | 3.33 | 0.01 | 2.56 | 2.69 | 0.22 | 1.48 |
| 18466 | 0 | 12660  | EKECPFIKPEVKPGT<br>PAQEIEMLRNKIYF | 3.33 | 0.01 | 2.56 | 0.68 | 0.22 | 1.48 |
| 18467 | 0 | 280819 | EKEDGDNEDEEVEDE                   | 2.74 | 0.01 | 1.61 | 0.44 | 0.85 | 1.28 |
| 18468 | 0 | 280824 | EKEDNDDDDDEPEE                    | 2.71 | 0.01 | 1.61 | 0.44 | 0.85 | 1.28 |
| 18469 | 0 | 280829 | EKEEDEEEEEDEEEE                   | 2.73 | 0.01 | 1.61 | 0.44 | 0.85 | 1.28 |
| 18470 | 0 | 514781 | EKEEKSEDKKKSEE                    | 2.73 | 0.01 | 2.24 | 0.44 | 1.41 | 1.28 |
| 18471 | 0 | 78142  | EKEPTAAPAE                        | 2.46 | 0.01 | 2.60 | 0.44 | 1.23 | 0.85 |
| 18472 | 0 | 100003 | EKEFLKLLKL                        | 2.38 | 0.01 | 2.18 | 2.16 | 0.22 | 0.28 |
| 18473 | 0 | 237700 | EKEFQVPMATTEG                     | 2.53 | 0.01 | 0.78 | 0.44 | 1.13 | 1.28 |
| 18474 | 0 | 118325 | EKEKLNRLAKLS                      | 2.60 | 0.01 | 0.78 | 0.44 | 1.74 | 0.85 |

|       |   |        |                                    |      |      |      |      |      |      |
|-------|---|--------|------------------------------------|------|------|------|------|------|------|
| 18475 | 0 | 153824 | EKEKYKSITDELDQTFSE                 | 2.87 | 0.01 | 3.93 | 0.44 | 1.23 | 1.27 |
| 18476 | 0 | 107110 | EKERRPSPIGTATLL                    | 2.66 | 0.01 | 0.90 | 0.44 | 1.23 | 0.28 |
| 18477 | 0 | 99205  | EKESPEKEDQEEENQ                    | 2.72 | 0.01 | 2.16 | 0.44 | 1.23 | 1.48 |
| 18478 | 0 | 281003 | EKEVEKIDSENSKLQ                    | 2.71 | 0.01 | 1.61 | 0.44 | 0.85 | 1.28 |
| 18479 | 0 | 101593 | EKFGKDLLAIRKIVKGEV<br>DAEKLEGNEIKY | 3.37 | 0.01 | 3.11 | 1.20 | 0.22 | 0.28 |
| 18480 | 0 | 123132 | EKFIKWPLN                          | 2.21 | 0.01 | 2.28 | 2.00 | 0.22 | 0.28 |
| 18481 | 0 | 123133 | EKFNMGLDL                          | 2.21 | 0.01 | 2.28 | 2.00 | 0.22 | 0.28 |
| 18482 | 0 | 12688  | EKFVKEQR                           | 2.15 | 0.01 | 2.04 | 0.44 | 0.85 | 0.28 |
| 18483 | 0 | 12688  | EKFVKEQR                           | 2.15 | 0.01 | 2.04 | 0.44 | 0.85 | 0.28 |
| 18484 | 0 | 12688  | EKFVKEQR                           | 2.15 | 0.01 | 2.04 | 0.44 | 0.85 | 0.28 |
| 18485 | 0 | 236513 | EKGGKVEVEGHLIDL                    | 2.72 | 0.01 | 3.70 | 2.13 | 0.22 | 1.28 |
| 18486 | 0 | 12693  | EKGGRK                             | 1.90 | 0.01 | 1.96 | 0.44 | 0.85 | 0.28 |
| 18487 | 0 | 12697  | EKGLKSLNEIKINYDSIIE<br>EQKNQLENLKM | 3.38 | 0.01 | 2.22 | 0.44 | 1.74 | 0.28 |
| 18488 | 0 | 12697  | EKGLKSLNEIKINYDSIIE<br>EQKNQLENLKM | 3.38 | 0.01 | 2.22 | 0.44 | 1.74 | 0.28 |
| 18489 | 0 | 12698  | EKGMRNVFDDVVPADF<br>KVGTTYKPE      | 3.16 | 0.01 | 3.22 | 0.44 | 1.23 | 1.27 |
| 18490 | 0 | 12698  | EKGMRNVFDDVVPADF<br>KVGTTYKPE      | 3.16 | 0.01 | 3.22 | 1.12 | 0.22 | 1.27 |
| 18491 | 0 | 12698  | EKGMRNVFDDVVPADF<br>KVGTTYKPE      | 3.16 | 0.01 | 3.22 | 1.12 | 0.22 | 1.27 |
| 18492 | 0 | 12698  | EKGMRNVFDDVVPADF<br>KVGTTYKPE      | 3.16 | 0.01 | 3.22 | 0.44 | 1.23 | 1.27 |
| 18493 | 0 | 12700  | EKGNPEMVDV                         | 2.32 | 0.01 | 2.21 | 1.12 | 0.22 | 0.28 |
| 18494 | 0 | 131859 | EKGTGESQSRDRRKI                    | 2.70 | 0.01 | 0.78 | 0.44 | 1.13 | 0.85 |
| 18495 | 0 | 136197 | EKGVPLYRHIADLAGNS<br>E             | 2.80 | 2.84 | 0.78 | 0.44 | 1.13 | 0.28 |
| 18496 | 0 | 136197 | EKGVPLYRHIADLAGNS<br>E             | 2.80 | 2.84 | 0.78 | 0.44 | 1.41 | 0.28 |
| 18497 | 0 | 136197 | EKGVPLYRHIADLAGNS<br>E             | 2.80 | 2.84 | 0.78 | 0.44 | 1.13 | 0.28 |
| 18498 | 0 | 281123 | EKIDSENSKLQQEMN                    | 2.70 | 0.01 | 1.61 | 0.44 | 0.85 | 1.28 |
| 18499 | 0 | 78143  | EKIEKTEEPAP                        | 2.44 | 0.01 | 2.60 | 0.44 | 1.23 | 0.85 |
| 18500 | 0 | 78635  | EKIERNNKLKQPPPPN<br>PN             | 2.93 | 0.01 | 3.01 | 0.68 | 0.22 | 0.28 |
| 18501 | 0 | 78635  | EKIERNNKLKQPPPPN<br>PN             | 2.93 | 0.01 | 3.01 | 0.68 | 0.22 | 1.48 |
| 18502 | 0 | 78635  | EKIERNNKLKQPPPPN<br>PN             | 2.93 | 0.01 | 3.01 | 0.68 | 0.22 | 1.48 |
| 18503 | 0 | 78635  | EKIERNNKLKQPPPPN<br>PN             | 2.93 | 0.01 | 3.01 | 0.68 | 0.22 | 1.34 |
| 18504 | 0 | 132260 | EKIERRQQEV                         | 2.34 | 0.01 | 0.78 | 0.44 | 1.13 | 0.28 |
| 18505 | 0 | 12715  | EKIGKESDEAPFMFS                    | 2.69 | 0.01 | 1.66 | 1.15 | 0.22 | 0.28 |
| 18506 | 0 | 12715  | EKIGKESDEAPFMFS                    | 2.69 | 0.01 | 1.66 | 1.15 | 0.22 | 0.28 |

|       |   |        |                                                               |      |      |      |      |      |      |
|-------|---|--------|---------------------------------------------------------------|------|------|------|------|------|------|
| 18507 | 0 | 12716  | EKIIKTIDNFLEKRYEKWI                                           | 2.91 | 0.01 | 2.95 | 3.38 | 0.22 | 0.28 |
| 18508 | 0 | 170815 | EKIKVRLPPPTILKP                                               | 2.70 | 0.01 | 0.78 | 0.44 | 1.13 | 0.28 |
| 18509 | 0 | 191273 | EKISNEIKIVAT                                                  | 2.50 | 0.01 | 2.76 | 1.20 | 0.22 | 0.28 |
| 18510 | 0 | 170817 | EKIYNKTQREKFAWA                                               | 2.67 | 0.01 | 0.78 | 0.44 | 1.13 | 0.28 |
| 18511 | 0 | 281150 | EKKDEEQEKKEEEEE                                               | 2.73 | 0.01 | 1.61 | 0.44 | 0.85 | 1.28 |
| 18512 | 0 | 118327 | EKKDRVTDALNAT                                                 | 2.55 | 0.01 | 0.78 | 0.44 | 1.74 | 0.85 |
| 18513 | 0 | 118327 | EKKDRVTDALNAT                                                 | 2.55 | 0.01 | 0.78 | 0.44 | 1.74 | 0.85 |
| 18514 | 0 | 281164 | EKKEEEEEDGIEQV                                                | 2.71 | 0.01 | 1.61 | 0.44 | 0.85 | 1.28 |
| 18515 | 0 | 128534 | EKKEESEESDDDMGF                                               | 2.71 | 0.01 | 0.78 | 0.44 | 1.13 | 0.85 |
| 18516 | 0 | 161098 | EKKFFMQSTDAIQAEEL<br>YT                                       | 2.87 | 0.01 | 2.08 | 0.44 | 1.93 | 1.57 |
| 18517 | 0 | 281176 | EKKGAAPAPKAAA                                                 | 2.72 | 0.01 | 1.61 | 0.44 | 0.85 | 1.28 |
| 18518 | 0 | 182099 | EKKGFICKMEADIHT                                               | 2.67 | 0.01 | 0.78 | 0.44 | 1.13 | 0.85 |
| 18519 | 0 | 12729  | EKKGREREHEEEEE                                                | 2.71 | 0.01 | 3.12 | 0.44 | 1.23 | 1.57 |
| 18520 | 0 | 78636  | EKKIAKMEKASSVFNVV<br>N                                        | 2.87 | 0.01 | 0.90 | 2.69 | 0.22 | 0.28 |
| 18521 | 0 | 281200 | EKKKNPEAASKKAPL                                               | 2.72 | 0.01 | 1.61 | 0.44 | 0.85 | 1.28 |
| 18522 | 0 | 12781  | EKKLDILKVNISNINNSLD<br>KLK                                    | 3.09 | 0.01 | 1.66 | 0.44 | 1.74 | 0.28 |
| 18523 | 0 | 12781  | EKKLDILKVNISNINNSLD<br>KLK                                    | 3.09 | 0.01 | 1.66 | 0.44 | 1.74 | 0.28 |
| 18524 | 0 | 12781  | EKKLDILKVNISNINNSLD<br>KLK                                    | 3.09 | 0.01 | 1.66 | 0.44 | 1.59 | 0.28 |
| 18525 | 0 | 12782  | EKKLDILKVNISNINNSLD<br>KLKKYEEALFQKVKEKA<br>EIQKENIEKIKQEINTL | 3.96 | 0.01 | 1.66 | 0.44 | 1.74 | 0.28 |
| 18526 | 0 | 12782  | EKKLDILKVNISNINNSLD<br>KLKKYEEALFQKVKEKA<br>EIQKENIEKIKQEINTL | 3.96 | 0.01 | 1.66 | 0.44 | 1.74 | 0.28 |
| 18527 | 0 | 170818 | EKKQFLDYLRPGLT                                                | 2.66 | 0.01 | 0.78 | 0.44 | 1.13 | 0.28 |
| 18528 | 0 | 138162 | EKKYSPCAWEVVRAE                                               | 2.67 | 0.01 | 0.78 | 0.68 | 0.22 | 1.57 |
| 18529 | 0 | 138162 | EKKYSPCAWEVVRAE                                               | 2.67 | 0.01 | 0.78 | 0.68 | 0.22 | 1.57 |
| 18530 | 0 | 138162 | EKKYSPCAWEVVRAE                                               | 2.67 | 0.01 | 0.78 | 0.68 | 0.22 | 1.27 |
| 18531 | 0 | 138162 | EKKYSPCAWEVVRAE                                               | 2.67 | 0.01 | 0.78 | 0.68 | 0.22 | 1.27 |
| 18532 | 0 | 138162 | EKKYSPCAWEVVRAE                                               | 2.67 | 0.01 | 0.78 | 0.68 | 0.22 | 1.57 |
| 18533 | 0 | 138162 | EKKYSPCAWEVVRAE                                               | 2.67 | 0.01 | 0.78 | 0.68 | 0.22 | 1.57 |
| 18534 | 0 | 138162 | EKKYSPCAWEVVRAE                                               | 2.67 | 0.01 | 0.78 | 0.68 | 0.22 | 1.34 |
| 18535 | 0 | 12790  | EKLALRNEERAIDELKKQ<br>AIEDKE                                  | 3.17 | 0.01 | 3.37 | 3.23 | 0.22 | 0.28 |
| 18536 | 0 | 12790  | EKLALRNEERAIDELKKQ<br>AIEDKE                                  | 3.17 | 0.01 | 3.37 | 3.23 | 0.22 | 1.34 |
| 18537 | 0 | 12790  | EKLALRNEERAIDELKKQ<br>AIEDKE                                  | 3.17 | 0.01 | 3.37 | 3.23 | 0.22 | 0.28 |

|       |   |        |                                   |      |      |      |      |      |      |
|-------|---|--------|-----------------------------------|------|------|------|------|------|------|
| 18538 | 0 | 12792  | EKLCVWNNKTPHAIA                   | 2.63 | 0.01 | 2.85 | 1.12 | 0.22 | 1.57 |
| 18539 | 0 | 12792  | EKLCVWNNKTPHAIA                   | 2.63 | 0.01 | 3.24 | 1.12 | 0.22 | 0.28 |
| 18540 | 0 | 12792  | EKLCVWNNKTPHAIA                   | 2.63 | 0.01 | 2.85 | 1.12 | 0.22 | 0.28 |
| 18541 | 0 | 12792  | EKLCVWNNKTPHAIA                   | 2.63 | 0.01 | 2.85 | 1.12 | 0.22 | 0.28 |
| 18542 | 0 | 12794  | EKLIEDDENSQC                      | 2.47 | 0.01 | 0.78 | 1.12 | 0.22 | 0.28 |
| 18543 | 0 | 12794  | EKLIEDDENSQC                      | 2.47 | 0.01 | 0.78 | 1.20 | 0.22 | 0.28 |
| 18544 | 0 | 12794  | EKLIEDDENSQC                      | 2.47 | 0.01 | 0.78 | 4.15 | 0.22 | 0.28 |
| 18545 | 0 | 12794  | EKLIEDDENSQC                      | 2.47 | 0.01 | 0.78 | 4.15 | 0.22 | 3.16 |
| 18546 | 0 | 140460 | EKLKHSM                           | 2.02 | 0.01 | 0.90 | 0.68 | 0.22 | 0.28 |
| 18547 | 0 | 140460 | EKLKHSM                           | 2.02 | 0.01 | 0.90 | 0.68 | 0.22 | 1.27 |
| 18548 | 0 | 140460 | EKLKHSM                           | 2.02 | 0.01 | 0.90 | 0.68 | 0.22 | 1.34 |
| 18549 | 0 | 140460 | EKLKHSM                           | 2.02 | 0.01 | 0.90 | 0.68 | 0.22 | 0.28 |
| 18550 | 0 | 12797  | EKLKKYNNEISSLKKELDI<br>LNEKMGKCT  | 3.29 | 0.01 | 2.22 | 0.44 | 1.74 | 0.28 |
| 18551 | 0 | 12797  | EKLKKYNNEISSLKKELDI<br>LNEKMGKCT  | 3.29 | 0.01 | 2.22 | 0.44 | 1.74 | 0.28 |
| 18552 | 0 | 12797  | EKLKKYNNEISSLKKELDI<br>LNEKMGKCT  | 3.29 | 0.01 | 2.22 | 0.44 | 1.74 | 0.28 |
| 18553 | 0 | 12797  | EKLKKYNNEISSLKKELDI<br>LNEKMGKCT  | 3.29 | 0.01 | 2.22 | 0.44 | 0.85 | 1.34 |
| 18554 | 0 | 12797  | EKLKKYNNEISSLKKELDI<br>LNEKMGKCT  | 3.29 | 0.01 | 2.22 | 0.44 | 0.85 | 1.48 |
| 18555 | 0 | 514811 | EKLKNQARSAYKNE                    | 2.70 | 0.01 | 2.24 | 0.44 | 1.41 | 1.28 |
| 18556 | 0 | 12798  | EKLNDMQKKLNDVNEK<br>YKNIVECLNNYKT | 3.33 | 0.01 | 2.22 | 0.44 | 1.74 | 0.28 |
| 18557 | 0 | 12798  | EKLNDMQKKLNDVNEK<br>YKNIVECLNNYKT | 3.33 | 0.01 | 2.22 | 0.44 | 1.74 | 0.28 |
| 18558 | 0 | 12799  | EKLNNLLEGNDSDNDLS<br>LEDF         | 3.05 | 0.01 | 2.67 | 1.15 | 0.22 | 0.28 |
| 18559 | 0 | 12799  | EKLNNLLEGNDSDNDLS<br>LEDF         | 3.05 | 0.01 | 2.67 | 0.44 | 0.85 | 0.28 |
| 18560 | 0 | 12799  | EKLNNLLEGNDSDNDLS<br>LEDF         | 3.05 | 0.01 | 2.67 | 0.44 | 0.85 | 0.28 |
| 18561 | 0 | 12799  | EKLNNLLEGNDSDNDLS<br>LEDF         | 3.05 | 0.01 | 2.67 | 1.12 | 0.22 | 0.28 |
| 18562 | 0 | 12799  | EKLNNLLEGNDSDNDLS<br>LEDF         | 3.05 | 0.01 | 2.67 | 1.12 | 0.22 | 0.28 |
| 18563 | 0 | 12799  | EKLNNLLEGNDSDNDLS<br>LEDF         | 3.05 | 0.01 | 2.67 | 1.12 | 0.22 | 2.02 |
| 18564 | 0 | 12800  | EKLQEQQSDLEQERLAK<br>EKLQEQQSDL   | 3.30 | 0.01 | 1.66 | 2.42 | 0.22 | 0.28 |
| 18565 | 0 | 12800  | EKLQEQQSDLEQERLAK<br>EKLQEQQSDL   | 3.30 | 0.01 | 1.66 | 0.68 | 0.22 | 0.28 |
| 18566 | 0 | 12800  | EKLQEQQSDLEQERLAK<br>EKLQEQQSDL   | 3.30 | 0.01 | 1.66 | 2.52 | 0.22 | 0.28 |
| 18567 | 0 | 12800  | EKLQEQQSDLEQERLAK<br>EKLQEQQSDL   | 3.30 | 0.01 | 1.66 | 1.81 | 0.22 | 0.28 |

|       |   |        |                                                             |      |      |      |      |      |      |
|-------|---|--------|-------------------------------------------------------------|------|------|------|------|------|------|
| 18568 | 0 | 12800  | EKLQEQQSDLEQERLAK<br>EKLQEQQSDL                             | 3.30 | 0.01 | 1.66 | 2.82 | 0.22 | 0.28 |
| 18569 | 0 | 12800  | EKLQEQQSDLEQERLAK<br>EKLQEQQSDL                             | 3.30 | 0.01 | 1.66 | 3.23 | 0.22 | 0.28 |
| 18570 | 0 | 12800  | EKLQEQQSDLEQERLAK<br>EKLQEQQSDL                             | 3.30 | 0.01 | 1.66 | 3.57 | 0.22 | 0.28 |
| 18571 | 0 | 12800  | EKLQEQQSDLEQERLAK<br>EKLQEQQSDL                             | 3.30 | 0.01 | 1.66 | 3.27 | 0.22 | 0.28 |
| 18572 | 0 | 12800  | EKLQEQQSDLEQERLAK<br>EKLQEQQSDL                             | 3.30 | 0.01 | 1.66 | 1.81 | 0.22 | 0.28 |
| 18573 | 0 | 12800  | EKLQEQQSDLEQERLAK<br>EKLQEQQSDL                             | 3.30 | 0.01 | 1.66 | 2.42 | 0.22 | 0.28 |
| 18574 | 0 | 12800  | EKLQEQQSDLEQERLAK<br>EKLQEQQSDL                             | 3.30 | 0.01 | 1.66 | 3.27 | 0.22 | 0.28 |
| 18575 | 0 | 12805  | EKLQKTYS                                                    | 2.12 | 0.01 | 1.66 | 0.44 | 1.74 | 0.28 |
| 18576 | 0 | 170822 | EKLQVALGELRRKQE<br>EKLQEQQSDL                               | 2.71 | 0.01 | 0.78 | 0.44 | 1.41 | 0.28 |
| 18577 | 0 | 12807  | ADDLAEAKSQLNDAHR<br>RIHEQEIEIKRLEN                          | 3.83 | 0.01 | 3.67 | 0.44 | 1.23 | 0.85 |
| 18578 | 0 | 190736 | EKLRLGYDVILQGDEEKA<br>DQIFLRLK                              | 3.22 | 0.01 | 4.15 | 0.44 | 1.74 | 0.28 |
| 18579 | 0 | 190736 | EKLRLGYDVILQGDEEKA<br>DQIFLRLK                              | 3.22 | 0.01 | 4.15 | 0.44 | 1.74 | 0.28 |
| 18580 | 0 | 12811  | EKLVKHLDVIDKLIENIYD<br>NINNLNEYINK                          | 3.40 | 0.01 | 1.66 | 0.44 | 1.74 | 0.28 |
| 18581 | 0 | 12811  | EKLVKHLDVIDKLIENIYD<br>NINNLNEYINK                          | 3.40 | 0.01 | 1.66 | 0.44 | 1.74 | 0.28 |
| 18582 | 0 | 12812  | EKLYILEKSINKLKKLLNDI<br>NNKYQTIKK                           | 3.34 | 0.01 | 2.22 | 0.44 | 1.74 | 0.28 |
| 18583 | 0 | 12812  | EKLYILEKSINKLKKLLNDI<br>NNKYQTIKK                           | 3.34 | 0.01 | 2.22 | 0.44 | 1.74 | 0.28 |
| 18584 | 0 | 12813  | EKMACLSTLDVCMENP                                            | 2.72 | 0.01 | 0.90 | 0.44 | 1.41 | 0.28 |
| 18585 | 0 | 12814  | EKMALY                                                      | 1.88 | 0.01 | 1.96 | 0.44 | 0.85 | 0.28 |
| 18586 | 0 | 12817  | EKMITEFE                                                    | 2.15 | 0.01 | 2.99 | 0.44 | 0.85 | 0.28 |
| 18587 | 0 | 170825 | EKMKELATTYKQMEN<br>EKMLTDNEGGNSLNHE                         | 2.70 | 0.01 | 0.78 | 0.44 | 1.41 | 0.28 |
| 18588 | 0 | 12820  | EVKEHTSNSDNVQQSG<br>GIVNMNVEKELKD                           | 3.77 | 0.01 | 3.18 | 1.12 | 0.22 | 0.28 |
| 18589 | 0 | 12820  | EKMLTDNEGGNSLNHE<br>EVKEHTSNSDNVQQSG<br>GIVNMNVEKELKD       | 3.77 | 0.01 | 3.18 | 0.68 | 0.22 | 0.28 |
| 18590 | 0 | 12821  | EKMNMKMEQMDMK<br>MEKIDVNMDQMDVK<br>MEQMDVKMEQMDVK<br>MKRMNK | 3.85 | 0.01 | 2.22 | 0.44 | 1.74 | 0.28 |

|       |   |        |                                                             |      |      |      |      |      |      |
|-------|---|--------|-------------------------------------------------------------|------|------|------|------|------|------|
| 18591 | 0 | 12821  | EKMNMKMEQMDMK<br>MEKIDVNMDQMDVK<br>MEQMDVKMEQMDVK<br>MKRMNK | 3.85 | 0.01 | 2.22 | 0.44 | 1.74 | 0.28 |
| 18592 | 0 | 12821  | EKMNMKMEQMDMK<br>MEKIDVNMDQMDVK<br>MEQMDVKMEQMDVK<br>MKRMNK | 3.85 | 0.01 | 2.22 | 0.44 | 1.74 | 0.28 |
| 18593 | 0 | 12821  | EKMNMKMEQMDMK<br>MEKIDVNMDQMDVK<br>MEQMDVKMEQMDVK<br>MKRMNK | 3.85 | 0.01 | 2.22 | 0.44 | 0.85 | 1.34 |
| 18594 | 0 | 12821  | EKMNMKMEQMDMK<br>MEKIDVNMDQMDVK<br>MEQMDVKMEQMDVK<br>MKRMNK | 3.85 | 0.01 | 2.22 | 0.44 | 0.85 | 1.48 |
| 18595 | 0 | 12821  | EKMNMKMEQMDMK<br>MEKIDVNMDQMDVK<br>MEQMDVKMEQMDVK<br>MKRMNK | 3.85 | 0.01 | 2.22 | 1.15 | 0.22 | 1.48 |
| 18596 | 0 | 12821  | EKMNMKMEQMDMK<br>MEKIDVNMDQMDVK<br>MEQMDVKMEQMDVK<br>MKRMNK | 3.85 | 0.01 | 1.66 | 0.44 | 1.59 | 0.28 |
| 18597 | 0 | 99208  | EKMYAC                                                      | 1.88 | 0.01 | 2.86 | 2.02 | 0.85 | 0.85 |
| 18598 | 0 | 150180 | EKNEQELLELDKWASLW                                           | 2.83 | 0.01 | 2.54 | 0.44 | 0.85 | 2.49 |
| 18599 | 0 | 95351  | EKNRLNFLKK                                                  | 2.33 | 0.01 | 1.60 | 0.44 | 1.23 | 0.85 |
| 18600 | 0 | 115226 | EKNRLNFLKKISQRYQKF<br>AL                                    | 2.96 | 0.01 | 1.60 | 0.44 | 1.23 | 1.28 |
| 18601 | 0 | 78144  | EKNRLNFLKKISQRYQKF<br>ALPQYLKT                              | 3.21 | 0.01 | 1.60 | 0.44 | 1.23 | 1.28 |
| 18602 | 0 | 150978 | EKNVTVTHSVNLLED                                             | 2.70 | 0.01 | 2.87 | 0.44 | 0.85 | 0.28 |
| 18603 | 0 | 150978 | EKNVTVTHSVNLLED                                             | 2.70 | 0.01 | 2.87 | 0.68 | 0.22 | 0.28 |
| 18604 | 0 | 150978 | EKNVTVTHSVNLLED                                             | 2.70 | 0.01 | 2.87 | 0.68 | 0.22 | 0.28 |
| 18605 | 0 | 150978 | EKNVTVTHSVNLLED                                             | 2.70 | 0.01 | 2.87 | 0.68 | 0.22 | 0.85 |
| 18606 | 0 | 150978 | EKNVTVTHSVNLLED                                             | 2.70 | 0.01 | 2.87 | 0.68 | 0.22 | 0.85 |
| 18607 | 0 | 150978 | EKNVTVTHSVNLLED                                             | 2.70 | 0.01 | 2.87 | 0.68 | 0.22 | 0.85 |
| 18608 | 0 | 150978 | EKNVTVTHSVNLLED                                             | 2.70 | 0.01 | 2.87 | 0.68 | 0.22 | 0.85 |
| 18609 | 0 | 192930 | EKNWPTGSYYKSTFKPG<br>ATN                                    | 2.95 | 0.01 | 3.47 | 2.00 | 0.22 | 0.28 |
| 18610 | 0 | 78145  | EKPAEEEEKP                                                  | 2.27 | 0.01 | 2.60 | 0.44 | 1.23 | 0.85 |
| 18611 | 0 | 79806  | EKPAKTYDDAAS                                                | 2.47 | 0.01 | 3.45 | 1.15 | 0.22 | 0.28 |
| 18612 | 0 | 79806  | EKPAKTYDDAAS                                                | 2.47 | 0.01 | 3.45 | 1.15 | 0.22 | 2.35 |
| 18613 | 0 | 79806  | EKPAKTYDDAAS                                                | 2.47 | 0.01 | 3.45 | 1.15 | 0.22 | 1.48 |

|       |   |        |                                                                        |      |      |      |      |      |      |
|-------|---|--------|------------------------------------------------------------------------|------|------|------|------|------|------|
| 18614 | 0 | 79807  | EKPAKTYDDAASESSDD<br>DDIDALIEELQSNHGVD<br>DESDNDGPVAAAGEAR<br>PVPEEYLQ | 4.00 | 0.01 | 3.45 | 1.12 | 0.22 | 0.85 |
| 18615 | 0 | 140843 | EKPAVLGHDEAA                                                           | 2.46 | 0.01 | 3.01 | 1.12 | 0.22 | 0.28 |
| 18616 | 0 | 140844 | EKPAVLGHDEAAYSKNR<br>RAV                                               | 2.92 | 0.01 | 3.01 | 1.12 | 0.22 | 0.28 |
| 18617 | 0 | 140844 | EKPAVLGHDEAAYSKNR<br>RAV                                               | 2.92 | 0.01 | 3.01 | 0.68 | 0.22 | 0.85 |
| 18618 | 0 | 122333 | EKPFRFHPEHFLDAQGH<br>FVK                                               | 2.95 | 0.01 | 0.78 | 0.44 | 1.13 | 0.85 |
| 18619 | 0 | 122333 | EKPFRFHPEHFLDAQGH<br>FVK                                               | 2.95 | 0.01 | 0.78 | 0.44 | 1.13 | 0.85 |
| 18620 | 0 | 12836  | EKPHFP                                                                 | 1.90 | 0.01 | 3.89 | 0.68 | 0.22 | 0.28 |
| 18621 | 0 | 12836  | EKPHFP                                                                 | 1.90 | 0.01 | 3.89 | 0.68 | 0.22 | 0.28 |
| 18622 | 0 | 136060 | EKPKLRKDMYKKMIEVD<br>PL                                                | 2.92 | 0.01 | 2.25 | 0.68 | 0.22 | 0.85 |
| 18623 | 0 | 136060 | EKPKLRKDMYKKMIEVD<br>PL                                                | 2.92 | 0.01 | 2.25 | 0.68 | 0.22 | 0.85 |
| 18624 | 0 | 12843  | EKPNLSSKRSE                                                            | 2.43 | 0.01 | 2.43 | 1.20 | 0.22 | 0.28 |
| 18625 | 0 | 12843  | EKPNLSSKRSE                                                            | 2.43 | 0.01 | 2.43 | 1.20 | 0.22 | 0.28 |
| 18626 | 0 | 12843  | EKPNLSSKRSE                                                            | 2.43 | 0.01 | 2.43 | 1.20 | 0.22 | 0.28 |
| 18627 | 0 | 12843  | EKPNLSSKRSE                                                            | 2.43 | 0.01 | 2.43 | 1.20 | 0.22 | 0.28 |
| 18628 | 0 | 12843  | EKPNLSSKRSE                                                            | 2.43 | 0.01 | 2.43 | 1.20 | 0.22 | 0.28 |
| 18629 | 0 | 12843  | EKPNLSSKRSE                                                            | 2.43 | 0.01 | 2.43 | 1.20 | 0.22 | 0.85 |
| 18630 | 0 | 12844  | EKPPINIDEIK                                                            | 2.44 | 0.01 | 3.89 | 1.20 | 0.22 | 2.75 |
| 18631 | 0 | 12847  | EKPTINITKPNI                                                           | 2.52 | 0.01 | 4.03 | 0.44 | 0.85 | 0.28 |
| 18632 | 0 | 12848  | EKPTINTTRTNI                                                           | 2.51 | 0.01 | 3.75 | 0.44 | 0.85 | 0.28 |
| 18633 | 0 | 514820 | EKQAAANTIAINTIAA                                                       | 2.71 | 0.01 | 2.24 | 0.44 | 1.41 | 1.28 |
| 18634 | 0 | 12851  | EKQDWYTPPEWMMEEG<br>WTVW                                               | 2.90 | 0.01 | 0.90 | 0.68 | 0.22 | 1.39 |
| 18635 | 0 | 281530 | EKQHQSDQVQQHQ                                                          | 2.72 | 0.01 | 1.61 | 0.44 | 0.85 | 1.28 |
| 18636 | 0 | 12852  | EKQISDASRQ                                                             | 2.31 | 0.01 | 3.13 | 1.15 | 0.22 | 0.28 |
| 18637 | 0 | 94501  | EKQISDASRQGLRRD                                                        | 2.67 | 0.01 | 4.33 | 0.68 | 0.22 | 1.27 |
| 18638 | 0 | 94501  | EKQISDASRQGLRRD                                                        | 2.67 | 0.01 | 4.33 | 0.68 | 0.22 | 0.85 |
| 18639 | 0 | 94501  | EKQISDASRQGLRRD                                                        | 2.67 | 0.01 | 2.24 | 0.44 | 1.41 | 1.28 |
| 18640 | 0 | 514821 | EKQISDASRQSLRRD                                                        | 2.69 | 0.01 | 2.24 | 0.44 | 1.41 | 1.28 |
| 18641 | 0 | 281534 | EKQKAAEATKAAEAE                                                        | 2.75 | 0.01 | 1.61 | 0.44 | 0.85 | 1.28 |
| 18642 | 0 | 281535 | EKQKAAEATKAVEAE                                                        | 2.74 | 0.01 | 1.61 | 0.44 | 0.85 | 1.28 |
| 18643 | 0 | 281536 | EKQKAAEATKAVETE                                                        | 2.74 | 0.01 | 1.61 | 0.44 | 0.85 | 1.28 |
| 18644 | 0 | 281537 | EKQKAAEATKVAEAE                                                        | 2.74 | 0.01 | 1.61 | 0.44 | 0.85 | 1.28 |
| 18645 | 0 | 96240  | EKQMKDKQDE                                                             | 2.37 | 0.01 | 0.78 | 0.44 | 1.93 | 0.85 |
| 18646 | 0 | 281574 | EKQQQSDEAQFQQHQ                                                        | 2.71 | 0.01 | 1.61 | 0.44 | 0.85 | 1.28 |
| 18647 | 0 | 281575 | EKQQQSDEAQVQQHQ                                                        | 2.71 | 0.01 | 1.61 | 0.44 | 0.85 | 1.28 |

|       |   |        |                                  |      |      |      |      |      |      |
|-------|---|--------|----------------------------------|------|------|------|------|------|------|
| 18648 | 0 | 281576 | EKQQQSDETQVQQHQ                  | 2.71 | 0.01 | 1.61 | 0.44 | 0.85 | 1.28 |
| 18649 | 0 | 281579 | EKQRAAAATKAVETE                  | 2.72 | 0.01 | 1.61 | 0.44 | 0.85 | 1.28 |
| 18650 | 0 | 281581 | EKQRAAEATKAVETE                  | 2.73 | 0.01 | 1.61 | 0.44 | 0.85 | 1.28 |
| 18651 | 0 | 281583 | EKQRAAEATKVAEAE                  | 2.73 | 0.01 | 1.61 | 0.44 | 0.85 | 1.28 |
| 18652 | 0 | 12856  | EKQT                             | 1.57 | 0.01 | 3.78 | 0.68 | 0.22 | 0.28 |
| 18653 | 0 | 12856  | EKQT                             | 1.57 | 0.01 | 3.78 | 0.68 | 0.22 | 1.27 |
| 18654 | 0 | 240869 | EKQTDDSLPSLTSQDI                 | 2.76 | 0.01 | 4.93 | 0.44 | 1.41 | 0.28 |
| 18655 | 0 | 12862  | EKRFAACKPLCNTPA                  | 2.61 | 0.01 | 0.90 | 0.44 | 0.85 | 1.39 |
| 18656 | 0 | 12862  | EKRFAACKPLCNTPA                  | 2.61 | 0.01 | 0.90 | 0.44 | 0.85 | 0.28 |
| 18657 | 0 | 150979 | EKRIENLNKKVDDGF                  | 2.67 | 0.01 | 2.87 | 0.44 | 0.85 | 0.28 |
| 18658 | 0 | 12865  | EKRIPLDVAE                       | 2.30 | 0.01 | 2.04 | 0.68 | 0.22 | 0.28 |
| 18659 | 0 | 12865  | EKRIPLDVAE                       | 2.30 | 0.01 | 2.04 | 0.68 | 0.22 | 0.28 |
| 18660 | 0 | 281620 | EKRKAAEATKAAEAE                  | 2.75 | 0.01 | 1.61 | 0.44 | 0.85 | 1.28 |
| 18661 | 0 | 281621 | EKRKAAEATKIAEAE                  | 2.74 | 0.01 | 1.61 | 0.44 | 0.85 | 1.28 |
| 18662 | 0 | 281622 | EKRKAAEATKVAEAE                  | 2.74 | 0.01 | 1.61 | 0.44 | 0.85 | 1.28 |
| 18663 | 0 | 123136 | EKRKPKSQ                         | 2.14 | 0.01 | 0.78 | 1.20 | 0.22 | 0.28 |
| 18664 | 0 | 134365 | EKSADQQAEEEDYARRSE<br>EEYNRLTQQQ | 3.24 | 0.01 | 2.70 | 2.69 | 0.22 | 0.85 |
| 18665 | 0 | 134365 | EKSADQQAEEEDYARRSE<br>EEYNRLTQQQ | 3.24 | 0.01 | 2.70 | 2.69 | 0.22 | 2.12 |
| 18666 | 0 | 134365 | EKSADQQAEEEDYARRSE<br>EEYNRLTQQQ | 3.24 | 0.01 | 2.70 | 2.69 | 2.25 | 1.75 |
| 18667 | 0 | 134365 | EKSADQQAEEEDYARRSE<br>EEYNRLTQQQ | 3.24 | 0.01 | 2.70 | 2.69 | 0.22 | 0.28 |
| 18668 | 0 | 134365 | EKSADQQAEEEDYARRSE<br>EEYNRLTQQQ | 3.24 | 0.01 | 2.70 | 2.69 | 0.22 | 1.75 |
| 18669 | 0 | 134365 | EKSADQQAEEEDYARRSE<br>EEYNRLTQQQ | 3.24 | 0.01 | 2.70 | 1.15 | 0.22 | 0.85 |
| 18670 | 0 | 134365 | EKSADQQAEEEDYARRSE<br>EEYNRLTQQQ | 3.24 | 0.01 | 2.70 | 1.15 | 0.22 | 2.12 |
| 18671 | 0 | 12871  | EKSEEEVHNLQKRMQ                  | 2.67 | 0.01 | 3.15 | 0.44 | 1.23 | 0.85 |
| 18672 | 0 | 12871  | EKSEEEVHNLQKRMQ                  | 2.67 | 0.01 | 2.36 | 0.44 | 1.23 | 1.28 |
| 18673 | 0 | 12871  | EKSEEEVHNLQKRMQ                  | 2.67 | 0.01 | 2.36 | 0.44 | 1.23 | 1.27 |
| 18674 | 0 | 12871  | EKSEEEVHNLQKRMQ                  | 2.67 | 0.01 | 2.36 | 0.44 | 1.23 | 1.28 |
| 18675 | 0 | 12871  | EKSEEEVHNLQKRMQ                  | 2.67 | 0.01 | 2.36 | 0.44 | 1.23 | 1.27 |
| 18676 | 0 | 122751 | EKSKFQDTHNNAHY                   | 2.58 | 0.01 | 0.78 | 3.01 | 0.22 | 0.28 |
| 18677 | 0 | 122751 | EKSKFQDTHNNAHY                   | 2.58 | 0.01 | 0.78 | 3.01 | 0.22 | 1.27 |
| 18678 | 0 | 141879 | EKSKKEIEDQKNTK                   | 2.65 | 0.01 | 2.73 | 0.44 | 0.85 | 0.28 |
| 18679 | 0 | 78637  | EKSLTSLSE                        | 2.27 | 0.01 | 3.27 | 1.12 | 0.22 | 0.28 |
| 18680 | 0 | 78637  | EKSLTSLSE                        | 2.27 | 0.01 | 3.27 | 1.12 | 0.22 | 0.28 |
| 18681 | 0 | 78637  | EKSLTSLSE                        | 2.27 | 0.01 | 3.27 | 1.12 | 0.22 | 0.28 |
| 18682 | 0 | 78638  | EKSLTSLSEVVLQNRRL<br>D           | 2.90 | 0.01 | 3.27 | 1.12 | 0.22 | 0.28 |
| 18683 | 0 | 78638  | EKSLTSLSEVVLQNRRL<br>D           | 2.90 | 0.01 | 3.27 | 1.12 | 0.22 | 0.28 |



|       |   |        |                       |      |      |      |      |      |      |
|-------|---|--------|-----------------------|------|------|------|------|------|------|
| 18684 | 0 | 78638  | EKSLTSLSEVVLQNRRLD    | 2.90 | 0.01 | 3.27 | 1.12 | 0.22 | 0.28 |
| 18685 | 0 | 78638  | EKSLTSLSEVVLQNRRLD    | 2.90 | 0.01 | 3.27 | 1.12 | 0.22 | 1.34 |
| 18686 | 0 | 181302 | EKSPHSITLRVYMRI       | 2.64 | 0.01 | 2.82 | 1.15 | 0.22 | 0.28 |
| 18687 | 0 | 147623 | EKSQLAPRK             | 2.21 | 0.01 | 3.24 | 1.12 | 0.22 | 0.28 |
| 18688 | 0 | 429038 | EKTCMYGGVTEHDGNQ      | 2.71 | 0.01 | 2.61 | 0.68 | 0.22 | 0.28 |
| 18689 | 0 | 429038 | EKTCMYGGVTEHDGNQ      | 2.71 | 0.01 | 2.61 | 0.68 | 0.22 | 0.28 |
| 18690 | 0 | 225271 | EKTCMYGGVTEHDGNQID    | 2.82 | 0.01 | 2.61 | 0.68 | 0.22 | 0.28 |
| 18691 | 0 | 281757 | EKTDEAEEDDEDDE        | 2.74 | 0.01 | 1.61 | 0.44 | 0.85 | 1.28 |
| 18692 | 0 | 97993  | EKTEEPAP              | 2.16 | 0.01 | 2.60 | 0.44 | 1.23 | 0.85 |
| 18693 | 0 | 146883 | EKTGGPVEYKKIPVQKPGPDE | 3.03 | 0.01 | 3.45 | 0.44 | 1.23 | 0.28 |
| 18694 | 0 | 110571 | EKTGILTVTYHSETQRTK    | 2.84 | 0.01 | 3.11 | 0.44 | 0.85 | 0.28 |
| 18695 | 0 | 110571 | EKTGILTVTYHSETQRTK    | 2.84 | 0.01 | 3.11 | 0.44 | 0.85 | 0.28 |
| 18696 | 0 | 110571 | EKTGILTVTYHSETQRTK    | 2.84 | 0.01 | 3.11 | 0.44 | 0.85 | 0.28 |
| 18697 | 0 | 110571 | EKTGILTVTYHSETQRTK    | 2.84 | 0.01 | 3.11 | 0.44 | 0.85 | 0.28 |
| 18698 | 0 | 110571 | EKTGILTVTYHSETQRTK    | 2.84 | 0.01 | 3.11 | 0.44 | 0.85 | 0.28 |
| 18699 | 0 | 107341 | EKTISKA               | 2.02 | 0.01 | 0.78 | 1.15 | 0.22 | 0.28 |
| 18700 | 0 | 107341 | EKTISKA               | 2.02 | 0.01 | 0.78 | 0.44 | 1.13 | 0.28 |
| 18701 | 0 | 128539 | EKTPVKKKARKSAGAA      | 2.74 | 0.01 | 0.78 | 1.12 | 0.22 | 0.28 |
| 18702 | 0 | 128539 | EKTPVKKKARKSAGAA      | 2.74 | 0.01 | 0.78 | 0.44 | 1.13 | 0.28 |
| 18703 | 0 | 128539 | EKTPVKKKARKSAGAA      | 2.74 | 0.01 | 0.78 | 0.44 | 1.13 | 0.28 |
| 18704 | 0 | 128539 | EKTPVKKKARKSAGAA      | 2.74 | 0.01 | 0.78 | 0.44 | 1.13 | 0.28 |
| 18705 | 0 | 128540 | EKTSFFQALGITTKI       | 2.66 | 0.01 | 0.78 | 0.44 | 1.13 | 0.85 |
| 18706 | 0 | 182101 | EKTWHEALRSCQADN       | 2.63 | 0.01 | 0.78 | 0.44 | 1.13 | 0.85 |
| 18707 | 0 | 103141 | EKVAKEAADEAKAKL       | 2.74 | 0.01 | 2.04 | 0.44 | 0.85 | 1.28 |
| 18708 | 0 | 12888  | EKVDNLGRSGGDIK        | 2.66 | 0.01 | 1.66 | 0.44 | 1.59 | 0.28 |
| 18709 | 0 | 12888  | EKVDNLGRSGGDIK        | 2.66 | 0.01 | 1.66 | 0.44 | 0.85 | 0.28 |
| 18710 | 0 | 117829 | EKVKRTKDELEVIH        | 2.64 | 0.01 | 0.78 | 0.44 | 1.13 | 0.28 |
| 18711 | 0 | 12896  | EKVNELSKDI            | 2.32 | 0.01 | 1.60 | 0.44 | 1.23 | 0.28 |
| 18712 | 0 | 120496 | EKVPFASRFV            | 2.31 | 0.01 | 2.18 | 2.16 | 0.22 | 0.28 |
| 18713 | 0 | 127960 | EKVPKGKKGKADAGK       | 2.73 | 0.01 | 2.73 | 1.12 | 0.22 | 0.28 |
| 18714 | 0 | 127960 | EKVPKGKKGKADAGK       | 2.73 | 0.01 | 2.73 | 0.44 | 1.13 | 0.28 |

|       |   |        |                          |      |      |      |      |      |      |
|-------|---|--------|--------------------------|------|------|------|------|------|------|
| 18715 | 0 | 12900  | EKVSRRSNFEF              | 2.43 | 0.01 | 2.24 | 1.12 | 0.22 | 0.28 |
| 18716 | 0 | 12900  | EKVSRRSNFEF              | 2.43 | 0.01 | 2.24 | 1.12 | 0.22 | 0.85 |
| 18717 | 0 | 12901  | EKVTGTDLELIQILKDHY<br>NI | 2.95 | 0.01 | 2.75 | 0.44 | 0.85 | 0.85 |
| 18718 | 0 | 92565  | EKVTIQNWFR               | 2.26 | 0.01 | 2.67 | 2.00 | 0.22 | 0.28 |
| 18719 | 0 | 92565  | EKVTIQNWFR               | 2.26 | 0.01 | 2.67 | 2.00 | 0.22 | 0.28 |
| 18720 | 0 | 92565  | EKVTIQNWFR               | 2.26 | 0.01 | 2.67 | 2.00 | 0.22 | 0.28 |
| 18721 | 0 | 133558 | EKVTSTWTDWQY             | 2.48 | 0.01 | 0.90 | 0.44 | 0.85 | 1.39 |
| 18722 | 0 | 123138 | EKWFSKKFE                | 2.27 | 0.01 | 2.28 | 2.00 | 0.22 | 0.28 |
| 18723 | 0 | 12913  | EKYKSITDELDQTFS          | 2.69 | 0.01 | 3.15 | 0.44 | 1.23 | 0.85 |
| 18724 | 0 | 12913  | EKYKSITDELDQTFS          | 2.69 | 0.01 | 3.15 | 0.44 | 1.23 | 0.85 |
| 18725 | 0 | 12913  | EKYKSITDELDQTFS          | 2.69 | 0.01 | 2.36 | 0.44 | 1.23 | 1.28 |
| 18726 | 0 | 12913  | EKYKSITDELDQTFS          | 2.69 | 0.01 | 2.36 | 0.44 | 1.23 | 1.27 |
| 18727 | 0 | 12913  | EKYKSITDELDQTFS          | 2.69 | 0.01 | 2.36 | 0.44 | 1.23 | 1.28 |
| 18728 | 0 | 12918  | EKYRGRDAPTIEAI           | 2.62 | 0.01 | 2.40 | 2.43 | 0.22 | 0.28 |
| 18729 | 0 | 12918  | EKYRGRDAPTIEAI           | 2.62 | 0.01 | 2.40 | 2.43 | 0.22 | 0.28 |
| 18730 | 0 | 12918  | EKYRGRDAPTIEAI           | 2.62 | 0.01 | 2.40 | 2.43 | 0.22 | 0.28 |
| 18731 | 0 | 12921  | ELAAALRGMGINAV           | 2.62 | 0.01 | 2.69 | 0.44 | 0.85 | 0.28 |
| 18732 | 0 | 12921  | ELAAALRGMGINAV           | 2.62 | 0.01 | 2.69 | 0.44 | 1.41 | 0.28 |
| 18733 | 0 | 12925  | ELAAKLSGLGLNAV           | 2.64 | 0.01 | 1.96 | 0.44 | 0.85 | 0.28 |
| 18734 | 0 | 12927  | ELAAKLVALGINAV           | 2.64 | 0.01 | 2.41 | 0.44 | 0.85 | 0.28 |
| 18735 | 0 | 78372  | ELAASAIVG                | 2.23 | 0.01 | 2.76 | 0.44 | 1.23 | 1.39 |
| 18736 | 0 | 230222 | ELAAVSVDCEYPKPDCT<br>AE  | 2.96 | 0.01 | 2.25 | 0.44 | 1.23 | 0.28 |
| 18737 | 0 | 12931  | ELADALLE                 | 2.17 | 0.01 | 2.21 | 1.12 | 0.22 | 0.28 |
| 18738 | 0 | 12931  | ELADALLE                 | 2.17 | 0.01 | 2.21 | 0.44 | 0.85 | 0.28 |
| 18739 | 0 | 12932  | ELADALLEKG               | 2.35 | 0.01 | 2.21 | 1.12 | 0.22 | 0.28 |
| 18740 | 0 | 149681 | ELAEAKVLANRE             | 2.52 | 0.01 | 3.53 | 0.68 | 0.22 | 0.28 |
| 18741 | 0 | 238332 | ELAEKLEVEIAIKRADWK       | 2.89 | 0.01 | 0.78 | 0.44 | 1.13 | 0.28 |
| 18742 | 0 | 238332 | ELAEKLEVEIAIKRADWK       | 2.89 | 0.01 | 0.78 | 0.44 | 1.13 | 0.28 |
| 18743 | 0 | 12941  | ELAGIGILTV               | 2.33 | 0.01 | 0.90 | 0.44 | 1.41 | 0.28 |
| 18744 | 0 | 12941  | ELAGIGILTV               | 2.33 | 0.01 | 0.90 | 0.44 | 1.41 | 2.12 |
| 18745 | 0 | 180431 | ELAGLGFAELQ              | 2.45 | 0.01 | 0.78 | 0.68 | 0.22 | 0.28 |
| 18746 | 0 | 12944  | ELAKLRAGKASDSQTPD<br>T   | 2.85 | 0.01 | 2.85 | 2.42 | 0.22 | 0.28 |
| 18747 | 0 | 12944  | ELAKLRAGKASDSQTPD<br>T   | 2.85 | 0.01 | 2.85 | 0.44 | 0.85 | 0.28 |
| 18748 | 0 | 124060 | ELALKATLV                | 2.25 | 0.01 | 0.78 | 0.44 | 1.41 | 0.28 |
| 18749 | 0 | 12951  | ELAPEDPEDS               | 2.36 | 0.01 | 3.36 | 1.20 | 0.22 | 0.28 |
| 18750 | 0 | 12951  | ELAPEDPEDS               | 2.36 | 0.01 | 3.36 | 1.20 | 0.22 | 0.28 |
| 18751 | 0 | 12951  | ELAPEDPEDS               | 2.36 | 0.01 | 3.36 | 1.20 | 0.22 | 1.34 |
| 18752 | 0 | 12951  | ELAPEDPEDS               | 2.36 | 0.01 | 3.36 | 0.44 | 0.85 | 0.28 |
| 18753 | 0 | 12951  | ELAPEDPEDS               | 2.36 | 0.01 | 2.40 | 1.20 | 0.22 | 1.34 |
| 18754 | 0 | 12951  | ELAPEDPEDS               | 2.36 | 0.01 | 2.40 | 1.20 | 0.22 | 1.34 |
| 18755 | 0 | 12952  | ELAPEDPEDSA              | 2.45 | 0.01 | 2.40 | 1.12 | 0.22 | 0.85 |

|       |   |        |                                     |      |      |      |      |      |      |
|-------|---|--------|-------------------------------------|------|------|------|------|------|------|
| 18756 | 0 | 12953  | ELAPEDPEDSALLED                     | 2.74 | 0.01 | 2.40 | 0.68 | 0.22 | 0.28 |
| 18757 | 0 | 170844 | ELAQGYRNFEDFLHE                     | 2.67 | 0.01 | 0.78 | 0.44 | 1.41 | 0.28 |
| 18758 | 0 | 170844 | ELAQGYRNFEDFLHE                     | 2.67 | 0.01 | 0.78 | 0.44 | 1.13 | 0.28 |
| 18759 | 0 | 106391 | ELARHAKAHI                          | 2.33 | 0.01 | 2.75 | 0.44 | 1.23 | 0.85 |
| 18760 | 0 | 97995  | ELARVQKANA                          | 2.31 | 0.01 | 3.18 | 2.98 | 0.22 | 0.28 |
| 18761 | 0 | 12955  | ELATKTFGSSGSSAVDSG<br>TA            | 2.97 | 0.01 | 1.72 | 0.44 | 0.85 | 0.28 |
| 18762 | 0 | 12958  | ELAWGIASDGGALKHGF<br>KTT            | 2.93 | 0.01 | 2.21 | 1.20 | 0.22 | 0.28 |
| 18763 | 0 | 12959  | ELAWGIASDRGALKHGF<br>KTT            | 2.92 | 0.01 | 2.21 | 1.20 | 0.22 | 0.28 |
| 18764 | 0 | 12960  | ELAWGIASEDGSAGNLK<br>HGFKTT         | 3.07 | 0.01 | 3.48 | 1.20 | 0.22 | 0.28 |
| 18765 | 0 | 12961  | ELAYFYPELF                          | 2.36 | 0.01 | 1.60 | 0.44 | 1.23 | 0.28 |
| 18766 | 0 | 12961  | ELAYFYPELF                          | 2.36 | 0.01 | 1.60 | 0.44 | 1.23 | 0.28 |
| 18767 | 0 | 12961  | ELAYFYPELF                          | 2.36 | 0.01 | 1.60 | 0.44 | 1.23 | 1.27 |
| 18768 | 0 | 12961  | ELAYFYPELF                          | 2.36 | 0.01 | 1.60 | 0.44 | 1.23 | 0.28 |
| 18769 | 0 | 12961  | ELAYFYPELF                          | 2.36 | 0.01 | 1.60 | 0.44 | 1.23 | 0.28 |
| 18770 | 0 | 514850 | ELDDELAKDIDEDVD                     | 2.73 | 0.01 | 2.24 | 0.44 | 1.41 | 1.28 |
| 18771 | 0 | 178750 | ELDEMLADAPAPINF                     | 2.71 | 0.01 | 2.36 | 0.44 | 1.23 | 1.28 |
| 18772 | 0 | 178750 | ELDEMLADAPAPINF                     | 2.71 | 0.01 | 2.36 | 0.44 | 1.23 | 1.27 |
| 18773 | 0 | 178750 | ELDEMLADAPAPINF                     | 2.71 | 0.01 | 2.36 | 0.44 | 1.23 | 1.28 |
| 18774 | 0 | 12981  | ELDGDQMI                            | 2.12 | 0.01 | 2.83 | 1.12 | 0.22 | 0.28 |
| 18775 | 0 | 170846 | ELDGQEYVVEFDLFG                     | 2.71 | 0.01 | 0.78 | 0.44 | 1.41 | 0.28 |
| 18776 | 0 | 170846 | ELDGQEYVVEFDLFG                     | 2.71 | 0.01 | 0.78 | 0.44 | 1.13 | 0.28 |
| 18777 | 0 | 117830 | ELDGQEYVVEFDLFGKD<br>SIR            | 2.94 | 0.01 | 0.78 | 0.44 | 1.13 | 1.27 |
| 18778 | 0 | 12982  | ELDGSKNEWGWWSKSK                    | 2.72 | 0.01 | 2.22 | 0.68 | 0.22 | 1.27 |
| 18779 | 0 | 12982  | ELDGSKNEWGWWSKSK                    | 2.72 | 0.01 | 2.22 | 0.68 | 0.22 | 0.28 |
| 18780 | 0 | 12982  | ELDGSKNEWGWWSKSK                    | 2.72 | 0.01 | 2.22 | 0.68 | 0.22 | 1.48 |
| 18781 | 0 | 12983  | ELDGVRLHR                           | 2.23 | 0.01 | 1.96 | 0.44 | 0.85 | 1.34 |
| 18782 | 0 | 149295 | ELDHWAS                             | 1.99 | 0.01 | 2.54 | 0.44 | 0.85 | 2.49 |
| 18783 | 0 | 12986  | ELDKDKSGKISCAELKSA<br>LQSCSAEPLDDDH | 3.40 | 0.01 | 2.94 | 1.20 | 0.22 | 0.85 |
| 18784 | 0 | 12988  | ELDKWA                              | 1.88 | 0.01 | 2.54 | 0.44 | 2.26 | 0.85 |
| 18785 | 0 | 149296 | ELDKWAG                             | 1.99 | 0.01 | 2.54 | 0.44 | 0.85 | 2.49 |
| 18786 | 0 | 149297 | ELDKWAN                             | 1.99 | 0.01 | 2.54 | 0.44 | 0.85 | 2.49 |
| 18787 | 0 | 149298 | ELDKWAS                             | 1.99 | 0.01 | 3.50 | 0.44 | 0.85 | 2.49 |
| 18788 | 0 | 149298 | ELDKWAS                             | 1.99 | 0.01 | 3.50 | 0.44 | 0.85 | 2.49 |
| 18789 | 0 | 149298 | ELDKWAS                             | 1.99 | 0.01 | 3.50 | 0.44 | 0.85 | 2.49 |
| 18790 | 0 | 149298 | ELDKWAS                             | 1.99 | 0.01 | 3.50 | 0.44 | 0.85 | 2.49 |
| 18791 | 0 | 149298 | ELDKWAS                             | 1.99 | 0.01 | 3.50 | 0.44 | 0.85 | 2.49 |
| 18792 | 0 | 149298 | ELDKWAS                             | 1.99 | 0.01 | 3.50 | 0.44 | 0.85 | 2.49 |
| 18793 | 0 | 149298 | ELDKWAS                             | 1.99 | 0.01 | 3.50 | 0.44 | 0.85 | 2.49 |

|       |   |        |                              |      |      |      |      |      |      |
|-------|---|--------|------------------------------|------|------|------|------|------|------|
| 18794 | 0 | 149298 | ELDKWAS                      | 1.99 | 0.01 | 3.50 | 0.44 | 0.85 | 2.49 |
| 18795 | 0 | 149298 | ELDKWAS                      | 1.99 | 0.01 | 3.50 | 0.44 | 0.85 | 2.49 |
| 18796 | 0 | 149298 | ELDKWAS                      | 1.99 | 0.01 | 3.50 | 0.44 | 0.85 | 2.49 |
| 18797 | 0 | 149298 | ELDKWAS                      | 1.99 | 0.01 | 3.50 | 0.44 | 0.85 | 2.49 |
| 18798 | 0 | 149298 | ELDKWAS                      | 1.99 | 0.01 | 3.50 | 0.44 | 0.85 | 2.49 |
| 18799 | 0 | 149298 | ELDKWAS                      | 1.99 | 0.01 | 2.54 | 0.44 | 0.85 | 2.49 |
| 18800 | 0 | 149298 | ELDKWAS                      | 1.99 | 0.01 | 2.54 | 0.44 | 0.85 | 2.12 |
| 18801 | 0 | 149298 | ELDKWAS                      | 1.99 | 0.01 | 2.54 | 0.44 | 0.85 | 1.34 |
| 18802 | 0 | 236081 | ELDKWASLWNWFNITN<br>VLWLIKK  | 3.08 | 4.63 | 0.90 | 0.44 | 0.85 | 2.49 |
| 18803 | 0 | 236081 | ELDKWASLWNWFNITN<br>VLWLIKK  | 3.08 | 4.63 | 0.90 | 0.44 | 0.85 | 0.28 |
| 18804 | 0 | 236082 | ELDKWASLWNWFNITN<br>WLWYIK   | 3.05 | 0.01 | 2.54 | 0.44 | 0.85 | 2.56 |
| 18805 | 0 | 149299 | ELDKWKSL                     | 2.14 | 0.01 | 2.54 | 0.44 | 0.85 | 2.49 |
| 18806 | 0 | 149300 | ELDKWNSL                     | 2.12 | 0.01 | 2.54 | 0.44 | 0.85 | 2.49 |
| 18807 | 0 | 12992  | ELDLQARR                     | 2.11 | 0.01 | 2.56 | 0.68 | 0.22 | 0.28 |
| 18808 | 0 | 12992  | ELDLQARR                     | 2.11 | 0.01 | 2.56 | 0.68 | 0.22 | 1.34 |
| 18809 | 0 | 12992  | ELDLQARR                     | 2.11 | 0.01 | 2.56 | 0.68 | 0.22 | 1.75 |
| 18810 | 0 | 12992  | ELDLQARR                     | 2.11 | 0.01 | 2.56 | 0.68 | 0.22 | 0.28 |
| 18811 | 0 | 12994  | ELDQENEALENGIKNE<br>ENT      | 2.97 | 0.01 | 0.78 | 0.44 | 0.85 | 0.28 |
| 18812 | 0 | 12994  | ELDQENEALENGIKNE<br>ENT      | 2.97 | 0.01 | 0.78 | 0.44 | 1.13 | 0.28 |
| 18813 | 0 | 12994  | ELDQENEALENGIKNE<br>ENT      | 2.97 | 0.01 | 0.78 | 0.44 | 1.93 | 0.28 |
| 18814 | 0 | 12994  | ELDQENEALENGIKNE<br>ENT      | 2.97 | 0.01 | 0.78 | 0.44 | 1.93 | 0.28 |
| 18815 | 0 | 12995  | ELDQTFSEL                    | 2.24 | 0.01 | 3.15 | 0.44 | 1.23 | 0.85 |
| 18816 | 0 | 170848 | ELEDKFDLLVDANDV              | 2.71 | 0.01 | 0.78 | 0.44 | 1.13 | 0.28 |
| 18817 | 0 | 238335 | ELEKDEREQLRILGEKEA           | 2.89 | 0.01 | 0.78 | 0.44 | 1.13 | 0.28 |
| 18818 | 0 | 238335 | ELEKDEREQLRILGEKEA           | 2.89 | 0.01 | 0.78 | 0.44 | 1.13 | 0.28 |
| 18819 | 0 | 149301 | ELEKWAS                      | 2.03 | 0.01 | 2.54 | 0.44 | 0.85 | 2.49 |
| 18820 | 0 | 13033  | ELENLCTPIMTNMYQG<br>MAGAG    | 3.00 | 0.01 | 2.30 | 0.44 | 0.85 | 0.28 |
| 18821 | 0 | 13033  | ELENLCTPIMTNMYQG<br>MAGAG    | 3.00 | 0.01 | 2.30 | 0.44 | 1.41 | 0.28 |
| 18822 | 0 | 124061 | ELERIRRSILPYGD               | 2.63 | 0.01 | 0.78 | 0.44 | 1.13 | 0.85 |
| 18823 | 0 | 124061 | ELERIRRSILPYGD               | 2.63 | 0.01 | 0.78 | 0.44 | 1.13 | 0.85 |
| 18824 | 0 | 124061 | ELERIRRSILPYGD               | 2.63 | 0.01 | 0.78 | 0.44 | 1.13 | 0.85 |
| 18825 | 0 | 128543 | ELERIRRSILPYGDSM             | 2.75 | 0.01 | 0.78 | 0.44 | 1.13 | 0.85 |
| 18826 | 0 | 13045  | ELETILNNSPFSEEQTMK           | 2.84 | 0.01 | 2.22 | 0.68 | 0.22 | 1.39 |
| 18827 | 0 | 119835 | ELEVIHLIEEHLVREHLL<br>TNHLKS | 3.20 | 0.01 | 0.78 | 2.25 | 0.22 | 0.28 |

|       |   |        |                                                         |      |      |      |      |      |      |
|-------|---|--------|---------------------------------------------------------|------|------|------|------|------|------|
| 18828 | 0 | 119835 | ELEVIHLIEEHRLVREHLL<br>TNHLKS                           | 3.20 | 0.01 | 0.78 | 3.72 | 0.22 | 0.28 |
| 18829 | 0 | 137145 | ELFAREYEGVCKSGK                                         | 2.67 | 0.01 | 3.19 | 0.44 | 1.23 | 0.28 |
| 18830 | 0 | 115227 | ELFRQFYQLDAYPSGAW<br>YYV                                | 2.92 | 0.01 | 1.60 | 0.44 | 1.23 | 2.51 |
| 18831 | 0 | 13058  | ELFSEIQEIR                                              | 2.34 | 0.01 | 3.70 | 1.81 | 0.22 | 0.85 |
| 18832 | 0 | 13058  | ELFSEIQEIR                                              | 2.34 | 0.01 | 3.75 | 1.81 | 0.22 | 0.85 |
| 18833 | 0 | 13058  | ELFSEIQEIR                                              | 2.34 | 0.01 | 3.70 | 1.81 | 0.22 | 0.85 |
| 18834 | 0 | 13058  | ELFSEIQEIR                                              | 2.34 | 0.01 | 3.75 | 1.81 | 0.22 | 0.85 |
| 18835 | 0 | 13058  | ELFSEIQEIR                                              | 2.34 | 0.01 | 3.70 | 1.81 | 0.22 | 0.85 |
| 18836 | 0 | 13058  | ELFSEIQEIR                                              | 2.34 | 0.01 | 3.75 | 1.81 | 0.22 | 0.85 |
| 18837 | 0 | 99209  | ELFTNR                                                  | 1.88 | 0.01 | 2.24 | 1.20 | 0.22 | 0.28 |
| 18838 | 0 | 99210  | ELFTNRWNLQSLL                                           | 2.53 | 0.01 | 2.24 | 1.20 | 0.22 | 1.27 |
| 18839 | 0 | 99210  | ELFTNRWNLQSLL                                           | 2.53 | 0.01 | 2.24 | 1.20 | 0.22 | 1.34 |
| 18840 | 0 | 99210  | ELFTNRWNLQSLL                                           | 2.53 | 0.01 | 2.24 | 1.20 | 0.22 | 1.75 |
| 18841 | 0 | 181303 | ELFTYMRFDAEFTFV                                         | 2.69 | 0.01 | 2.82 | 1.15 | 0.22 | 0.28 |
| 18842 | 0 | 238337 | ELGADHAVAVAGGR                                          | 2.64 | 0.01 | 2.14 | 2.65 | 0.22 | 0.85 |
| 18843 | 0 | 13063  | ELGAFFSILQ                                              | 2.30 | 0.01 | 2.56 | 0.68 | 0.22 | 0.28 |
| 18844 | 0 | 13064  | ELGAFFSILQDMR                                           | 2.50 | 0.01 | 3.00 | 0.44 | 0.85 | 0.28 |
| 18845 | 0 | 13064  | ELGAFFSILQDMR                                           | 2.50 | 0.01 | 3.00 | 1.15 | 2.39 | 0.28 |
| 18846 | 0 | 13065  | ELGAFFSILQDMRN                                          | 2.56 | 0.01 | 2.56 | 2.69 | 0.22 | 0.28 |
| 18847 | 0 | 13075  | ELGGTNVPAEFLENFVH<br>GSNLKFQD                           | 3.15 | 0.01 | 2.59 | 0.44 | 0.85 | 0.28 |
| 18848 | 0 | 13075  | ELGGTNVPAEFLENFVH<br>GSNLKFQD                           | 3.15 | 0.01 | 2.59 | 0.44 | 0.85 | 0.28 |
| 18849 | 0 | 123139 | ELGLDLPNL                                               | 2.25 | 0.01 | 2.28 | 2.00 | 0.22 | 0.28 |
| 18850 | 0 | 13080  | ELGLISIEAASDI                                           | 2.59 | 0.01 | 3.00 | 0.44 | 0.85 | 0.28 |
| 18851 | 0 | 13080  | ELGLISIEAASDI                                           | 2.59 | 0.01 | 3.00 | 1.15 | 2.39 | 0.28 |
| 18852 | 0 | 450544 | ELGTTQT                                                 | 2.04 | 0.01 | 0.90 | 0.44 | 1.41 | 1.39 |
| 18853 | 0 | 13084  | ELGVRE                                                  | 1.91 | 0.01 | 1.86 | 0.44 | 1.23 | 0.28 |
| 18854 | 0 | 140845 | ELHEKVSSHPIFKQ                                          | 2.61 | 0.01 | 3.02 | 2.22 | 0.22 | 0.28 |
| 18855 | 0 | 140845 | ELHEKVSSHPIFKQ                                          | 2.61 | 0.01 | 3.02 | 2.22 | 0.22 | 0.28 |
| 18856 | 0 | 140845 | ELHEKVSSHPIFKQ                                          | 2.61 | 0.01 | 3.02 | 2.37 | 0.22 | 0.28 |
| 18857 | 0 | 98758  | ELHLLGFGIN                                              | 2.32 | 0.01 | 2.16 | 0.44 | 1.23 | 0.85 |
| 18858 | 0 | 78146  | ELIEKEQEATIGENGVLH<br>GSEIRSKSSSGVIPGV PQ<br>SRPQLASSPA | 3.79 | 0.01 | 3.89 | 1.15 | 0.22 | 2.02 |
| 18859 | 0 | 13095  | ELIHVLHGLYGMQVSS                                        | 2.73 | 0.01 | 2.95 | 0.44 | 0.22 | 1.27 |
| 18860 | 0 | 13095  | ELIHVLHGLYGMQVSS                                        | 2.73 | 0.01 | 2.95 | 1.12 | 0.22 | 0.28 |
| 18861 | 0 | 13095  | ELIHVLHGLYGMQVSS                                        | 2.73 | 0.01 | 2.95 | 1.12 | 0.22 | 0.28 |
| 18862 | 0 | 13095  | ELIHVLHGLYGMQVSS                                        | 2.73 | 0.01 | 2.95 | 1.12 | 0.22 | 0.28 |
| 18863 | 0 | 119837 | ELIPSTSSAVPLIGK                                         | 2.67 | 0.01 | 0.78 | 0.44 | 1.41 | 1.57 |
| 18864 | 0 | 119837 | ELIPSTSSAVPLIGK                                         | 2.67 | 0.01 | 0.78 | 0.44 | 1.13 | 1.57 |
| 18865 | 0 | 119837 | ELIPSTSSAVPLIGK                                         | 2.67 | 0.01 | 2.26 | 2.43 | 0.22 | 1.57 |
| 18866 | 0 | 13100  | ELIRGTG                                                 | 2.02 | 0.01 | 2.72 | 1.15 | 0.22 | 1.27 |
| 18867 | 0 | 13103  | ELISSCLVWSARGCLFGG<br>GI                                | 2.94 | 0.01 | 0.90 | 1.15 | 0.22 | 0.28 |

|       |   |        |                                                    |      |      |      |      |      |      |
|-------|---|--------|----------------------------------------------------|------|------|------|------|------|------|
| 18868 | 0 | 13103  | ELISSCLVWSARGCLFGG<br>GI                           | 2.94 | 0.01 | 0.90 | 1.15 | 0.22 | 0.28 |
| 18869 | 0 | 13103  | ELISSCLVWSARGCLFGG<br>GI                           | 2.94 | 0.01 | 0.90 | 0.44 | 0.85 | 0.28 |
| 18870 | 0 | 13105  | ELITSCSS                                           | 2.11 | 0.01 | 1.72 | 0.68 | 0.22 | 0.28 |
| 18871 | 0 | 282229 | ELKDEEKEEDEEEEEE                                   | 2.73 | 0.01 | 1.61 | 0.44 | 0.85 | 1.28 |
| 18872 | 0 | 115228 | ELKDLKGYGG                                         | 2.33 | 0.01 | 1.60 | 0.44 | 1.23 | 0.85 |
| 18873 | 0 | 100010 | ELKDQRMLAR                                         | 2.31 | 0.01 | 2.18 | 2.16 | 0.22 | 0.28 |
| 18874 | 0 | 118330 | ELKIKRLRKKFAQKMLRK<br>ARRKL                        | 3.12 | 0.01 | 0.78 | 0.44 | 1.13 | 0.85 |
| 18875 | 0 | 13126  | ELKLAALCHGEDSIT                                    | 2.66 | 0.01 | 2.43 | 0.68 | 0.22 | 0.28 |
| 18876 | 0 | 13126  | ELKLAALCHGEDSIT                                    | 2.66 | 0.01 | 2.43 | 0.44 | 0.85 | 0.28 |
| 18877 | 0 | 98760  | ELKPTPEGDL                                         | 2.34 | 0.01 | 1.60 | 0.44 | 1.23 | 0.85 |
| 18878 | 0 | 13139  | ELKSALQSCSAEPLDDD<br>HVKAFLDKLDSNKGEL<br>SLDELMALF | 3.71 | 0.01 | 2.94 | 3.04 | 0.22 | 0.85 |
| 18879 | 0 | 13139  | ELKSALQSCSAEPLDDD<br>HVKAFLDKLDSNKGEL<br>SLDELMALF | 3.71 | 0.01 | 2.94 | 0.44 | 0.85 | 0.85 |
| 18880 | 0 | 13139  | ELKSALQSCSAEPLDDD<br>HVKAFLDKLDSNKGEL<br>SLDELMALF | 3.71 | 0.01 | 2.94 | 1.20 | 0.22 | 0.85 |
| 18881 | 0 | 13139  | ELKSALQSCSAEPLDDD<br>HVKAFLDKLDSNKGEL<br>SLDELMALF | 3.71 | 0.01 | 2.94 | 0.68 | 0.22 | 0.85 |
| 18882 | 0 | 115603 | ELKVEDPFYWVS                                       | 2.46 | 0.01 | 0.78 | 0.44 | 1.41 | 0.28 |
| 18883 | 0 | 115603 | ELKVEDPFYWVS                                       | 2.46 | 0.01 | 0.78 | 0.44 | 1.13 | 0.28 |
| 18884 | 0 | 13147  | ELKYFSSNIKGQ                                       | 2.44 | 0.01 | 0.90 | 0.68 | 0.22 | 1.39 |
| 18885 | 0 | 127961 | ELLADVQFALGLPFYPAY<br>EG                           | 2.98 | 0.01 | 0.78 | 0.44 | 1.13 | 0.28 |
| 18886 | 0 | 135665 | ELLEKTVKDKIAKEQENK<br>E                            | 2.92 | 0.01 | 2.24 | 0.44 | 1.13 | 0.28 |
| 18887 | 0 | 104472 | ELLEKTVKDKIAKEQENK<br>ET                           | 2.97 | 0.01 | 2.24 | 2.04 | 0.22 | 0.28 |
| 18888 | 0 | 104472 | ELLEKTVKDKIAKEQENK<br>ET                           | 2.97 | 0.01 | 2.24 | 2.04 | 0.22 | 0.28 |
| 18889 | 0 | 114318 | ELLHQRFFKNVESTP                                    | 2.63 | 0.01 | 4.93 | 0.44 | 1.41 | 1.57 |
| 18890 | 0 | 191274 | ELLHRSISDI                                         | 2.32 | 0.01 | 3.61 | 0.68 | 0.22 | 0.28 |
| 18891 | 0 | 13158  | ELLHSAPK                                           | 2.11 | 0.01 | 2.83 | 2.61 | 0.22 | 0.28 |
| 18892 | 0 | 125400 | ELLKLLIEA                                          | 2.27 | 0.01 | 3.93 | 1.15 | 0.22 | 0.28 |
| 18893 | 0 | 125400 | ELLKLLIEA                                          | 2.27 | 0.01 | 3.93 | 1.15 | 0.22 | 1.48 |
| 18894 | 0 | 151844 | ELLMSIPSGYDN                                       | 2.44 | 0.01 | 2.80 | 2.78 | 0.22 | 0.28 |
| 18895 | 0 | 125401 | ELLTEHRMTWDPAQPP<br>RDLT                           | 2.96 | 0.01 | 0.78 | 0.44 | 1.13 | 0.28 |
| 18896 | 0 | 125401 | ELLTEHRMTWDPAQPP<br>RDLT                           | 2.96 | 0.01 | 0.78 | 0.44 | 0.85 | 0.28 |
| 18897 | 0 | 124068 | ELMALHTGQSLEQIER                                   | 2.74 | 0.01 | 2.24 | 1.12 | 0.22 | 0.28 |

|       |   |        |                                                                                              |      |      |      |      |      |      |
|-------|---|--------|----------------------------------------------------------------------------------------------|------|------|------|------|------|------|
| 18898 | 0 | 124068 | ELMALHTGQSLEQIER                                                                             | 2.74 | 0.01 | 2.24 | 0.44 | 1.13 | 0.28 |
| 18899 | 0 | 124068 | ELMALHTGQSLEQIER                                                                             | 2.74 | 0.01 | 2.24 | 0.44 | 1.41 | 0.28 |
| 18900 | 0 | 120498 | ELMFEEQKDRHGLKRV<br>NKMT                                                                     | 2.93 | 0.01 | 2.26 | 2.04 | 0.22 | 1.57 |
| 18901 | 0 | 120498 | ELMFEEQKDRHGLKRV<br>NKMT                                                                     | 2.93 | 0.01 | 2.26 | 2.04 | 0.22 | 1.57 |
| 18902 | 0 | 120498 | ELMFEEQKDRHGLKRV<br>NKMT                                                                     | 2.93 | 0.01 | 2.26 | 2.04 | 0.22 | 1.48 |
| 18903 | 0 | 120498 | ELMFEEQKDRHGLKRV<br>NKMT                                                                     | 2.93 | 0.01 | 2.26 | 2.04 | 0.22 | 2.02 |
| 18904 | 0 | 120498 | ELMFEEQKDRHGLKRV<br>NKMT                                                                     | 2.93 | 0.01 | 2.26 | 2.04 | 0.22 | 2.02 |
| 18905 | 0 | 282376 | ELMLRESDGECAPFT                                                                              | 2.65 | 0.01 | 1.61 | 0.44 | 0.85 | 1.28 |
| 18906 | 0 | 13184  | ELNDTDSSAATKKTAAW<br>NSGT                                                                    | 3.01 | 0.01 | 2.73 | 0.68 | 0.22 | 0.85 |
| 18907 | 0 | 13184  | ELNDTDSSAATKKTAAW<br>NSGT                                                                    | 3.01 | 0.01 | 2.73 | 0.68 | 0.22 | 0.85 |
| 18908 | 0 | 13186  | ELNEFENNQRCEMCEA                                                                             | 2.70 | 0.01 | 2.16 | 0.44 | 1.23 | 1.48 |
| 18909 | 0 | 13188  | ELNEKEIKDLYDNQSNS<br>GILKDFWGDYLQYDKPY<br>YMLNLYDPNKYVDVNN<br>VGIRGYMYLKGPRGSV               | 4.94 | 0.01 | 2.08 | 2.02 | 0.22 | 0.85 |
|       |   |        | MTTNIYLNSSLYRGTKFII<br>KKYASGNKDNIVRNND<br>RVYINVVVKKEYRLAT<br>NASQAGVEKILSALEIPD<br>VGNLSQV |      |      |      |      |      |      |
| 18910 | 0 | 13188  | ELNEKEIKDLYDNQSNS<br>GILKDFWGDYLQYDKPY<br>YMLNLYDPNKYVDVNN<br>VGIRGYMYLKGPRGSV               | 4.94 | 0.01 | 2.08 | 3.23 | 0.22 | 0.28 |
|       |   |        | MTTNIYLNSSLYRGTKFII<br>KKYASGNKDNIVRNND<br>RVYINVVVKKEYRLAT<br>NASQAGVEKILSALEIPD<br>VGNLSQV |      |      |      |      |      |      |
| 18911 | 0 | 128548 | ELNGKNIEDVIAQGI                                                                              | 2.69 | 0.01 | 0.78 | 0.44 | 1.13 | 0.85 |
| 18912 | 0 | 181602 | ELNIESPGPSDSCSL                                                                              | 2.71 | 0.01 | 1.66 | 2.36 | 0.22 | 1.28 |
| 18913 | 0 | 130805 | ELNPEPDTEVFPMTF                                                                              | 2.71 | 0.01 | 0.90 | 0.44 | 1.13 | 0.28 |
| 18914 | 0 | 130805 | ELNPEPDTEVFPMTF                                                                              | 2.71 | 0.01 | 0.90 | 0.44 | 1.13 | 1.66 |
| 18915 | 0 | 130805 | ELNPEPDTEVFPMTF                                                                              | 2.71 | 0.01 | 0.90 | 0.44 | 1.13 | 1.66 |
| 18916 | 0 | 130805 | ELNPEPDTEVFPMTF                                                                              | 2.71 | 0.01 | 0.90 | 0.44 | 1.13 | 1.66 |
| 18917 | 0 | 130805 | ELNPEPDTEVFPMTF                                                                              | 2.71 | 0.01 | 0.90 | 0.44 | 1.13 | 1.27 |
| 18918 | 0 | 99212  | ELNTFFRWTTGG                                                                                 | 2.45 | 0.01 | 0.90 | 1.12 | 0.22 | 1.39 |
| 18919 | 0 | 115725 | ELNVPGEIVE                                                                                   | 2.34 | 0.01 | 1.60 | 0.44 | 1.23 | 0.85 |

|       |   |        |                                  |      |      |      |      |      |      |
|-------|---|--------|----------------------------------|------|------|------|------|------|------|
| 18920 | 0 | 115725 | ELNVPGEIVE                       | 2.34 | 0.01 | 1.60 | 0.44 | 1.23 | 0.85 |
| 18921 | 0 | 132262 | ELNVTVVTFPCRPHN                  | 2.66 | 0.01 | 0.78 | 0.44 | 1.41 | 0.28 |
| 18922 | 0 | 132262 | ELNVTVVTFPCRPHN                  | 2.66 | 0.01 | 0.78 | 0.44 | 1.13 | 0.28 |
| 18923 | 0 | 114319 | ELPCRISPGKNATGMEV<br>GWY         | 2.88 | 0.01 | 0.78 | 3.72 | 0.22 | 0.28 |
| 18924 | 0 | 423273 | ELPHTASLRALAGCM                  | 2.66 | 0.01 | 2.51 | 0.44 | 2.35 | 1.28 |
| 18925 | 0 | 105753 | ELPNIEAD                         | 2.13 | 0.01 | 3.05 | 1.20 | 0.22 | 0.28 |
| 18926 | 0 | 13216  | ELPRL                            | 1.75 | 0.01 | 2.43 | 0.68 | 0.22 | 0.28 |
| 18927 | 0 | 131862 | ELPSSNTGAWRVSTM                  | 2.64 | 0.01 | 0.78 | 0.44 | 1.13 | 0.85 |
| 18928 | 0 | 13220  | ELPYPQPQ<br>ELQDKIHPFAQQSLVY     | 2.16 | 0.01 | 1.86 | 0.44 | 1.93 | 0.28 |
| 18929 | 0 | 227136 | PFTGPIPNSLPQNILPLT<br>QTPVVVPPFL | 3.74 | 0.01 | 3.97 | 0.44 | 1.23 | 1.27 |
| 18930 | 0 | 170870 | ELQENTICSLVESQK                  | 2.69 | 0.01 | 0.78 | 0.44 | 1.41 | 0.28 |
| 18931 | 0 | 167500 | ELQETNAALQ                       | 2.35 | 4.63 | 0.78 | 1.15 | 0.22 | 0.28 |
| 18932 | 0 | 167500 | ELQETNAALQ                       | 2.35 | 4.63 | 0.78 | 1.15 | 0.22 | 0.28 |
| 18933 | 0 | 167501 | ELQETNAALQ                       | 2.35 | 0.01 | 0.78 | 1.15 | 0.22 | 0.28 |
| 18934 | 0 | 115047 | ELQFPFLQD                        | 2.25 | 0.01 | 0.78 | 0.68 | 0.22 | 1.27 |
| 18935 | 0 | 115047 | ELQFPFLQD                        | 2.25 | 0.01 | 0.78 | 0.68 | 0.22 | 0.28 |
| 18936 | 0 | 13233  | ELQGDRRCQSQLERA                  | 2.70 | 0.01 | 2.16 | 0.44 | 1.23 | 0.85 |
| 18937 | 0 | 13233  | ELQGDRRCQSQLERA                  | 2.70 | 0.01 | 2.16 | 2.90 | 0.22 | 0.85 |
| 18938 | 0 | 124069 | ELQIAKDERYGS                     | 2.44 | 0.01 | 2.73 | 3.65 | 0.22 | 0.28 |
| 18939 | 0 | 124069 | ELQIAKDERYGS                     | 2.44 | 0.01 | 2.73 | 3.65 | 0.22 | 0.28 |
| 18940 | 0 | 124069 | ELQIAKDERYGS                     | 2.44 | 0.01 | 2.73 | 3.65 | 0.22 | 1.34 |
| 18941 | 0 | 124069 | ELQIAKDERYGS                     | 2.44 | 0.01 | 2.73 | 3.65 | 0.22 | 1.48 |
| 18942 | 0 | 13239  | ELQLLMQSTPPTNNR                  | 2.67 | 0.01 | 2.67 | 0.68 | 0.22 | 0.28 |
| 18943 | 0 | 127638 | ELQMTPDSLIYS                     | 2.45 | 0.01 | 3.16 | 3.16 | 0.22 | 0.28 |
| 18944 | 0 | 514921 | ELQQDYDLAKESTSW                  | 2.68 | 0.01 | 2.24 | 0.44 | 1.41 | 1.28 |
| 18945 | 0 | 13243  | ELQVIDKVDAAFKVAAT<br>AAN         | 2.95 | 0.01 | 3.00 | 1.15 | 0.22 | 0.28 |
| 18946 | 0 | 13243  | ELQVIDKVDAAFKVAAT<br>AAN         | 2.95 | 0.01 | 3.00 | 3.27 | 0.22 | 0.28 |
| 18947 | 0 | 13243  | ELQVIDKVDAAFKVAAT<br>AAN         | 2.95 | 0.01 | 3.00 | 3.27 | 0.22 | 0.28 |
| 18948 | 0 | 180966 | ELRDKKQKVHALFYKLDI<br>V          | 2.89 | 0.01 | 2.54 | 0.44 | 0.22 | 2.49 |
| 18949 | 0 | 180966 | ELRDKKQKVHALFYKLDI<br>V          | 2.89 | 0.01 | 2.54 | 0.44 | 0.22 | 2.49 |
| 18950 | 0 | 180966 | ELRDKKQKVHALFYKLDI<br>V          | 2.89 | 0.01 | 2.54 | 0.44 | 0.22 | 0.28 |
| 18951 | 0 | 180966 | ELRDKKQKVHALFYKLDI<br>V          | 2.89 | 0.01 | 2.54 | 0.44 | 0.22 | 0.28 |
| 18952 | 0 | 180966 | ELRDKKQKVHALFYKLDI<br>V          | 2.89 | 0.01 | 2.54 | 0.44 | 0.22 | 0.28 |
| 18953 | 0 | 180966 | ELRDKKQKVHALFYKLDI<br>V          | 2.89 | 0.01 | 2.54 | 0.44 | 0.22 | 2.12 |



|       |   |        |                               |      |      |      |      |      |      |
|-------|---|--------|-------------------------------|------|------|------|------|------|------|
| 18954 | 0 | 180966 | ELRDKKQKVHALFYKLDI<br>V       | 2.89 | 0.01 | 2.54 | 0.44 | 0.22 | 0.28 |
| 18955 | 0 | 180966 | ELRDKKQKVHALFYKLDI<br>V       | 2.89 | 0.01 | 2.54 | 0.44 | 0.22 | 0.28 |
| 18956 | 0 | 180966 | ELRDKKQKVHALFYKLDI<br>V       | 2.89 | 0.01 | 2.54 | 0.44 | 0.22 | 1.34 |
| 18957 | 0 | 180966 | ELRDKKQKVHALFYKLDI<br>V       | 2.89 | 0.01 | 2.54 | 0.44 | 0.22 | 1.66 |
| 18958 | 0 | 180966 | ELRDKKQKVHALFYKLDI<br>V       | 2.89 | 0.01 | 2.54 | 0.44 | 0.22 | 1.66 |
| 18959 | 0 | 180966 | ELRDKKQKVHALFYKLDI<br>V       | 2.89 | 0.01 | 2.54 | 0.44 | 0.22 | 1.66 |
| 18960 | 0 | 180966 | ELRDKKQKVHALFYKLDI<br>V       | 2.89 | 0.01 | 2.54 | 0.44 | 0.22 | 1.66 |
| 18961 | 0 | 180966 | ELRDKKQKVHALFYKLDI<br>V       | 2.89 | 0.01 | 2.54 | 0.44 | 0.22 | 1.66 |
| 18962 | 0 | 180966 | ELRDKKQKVHALFYKLDI<br>V       | 2.89 | 0.01 | 2.54 | 0.44 | 0.22 | 1.66 |
| 18963 | 0 | 180966 | ELRDKKQKVHALFYKLDI<br>V       | 2.89 | 0.01 | 2.54 | 0.44 | 0.22 | 1.34 |
| 18964 | 0 | 180966 | ELRDKKQKVHALFYKLDI<br>V       | 2.89 | 0.01 | 2.54 | 0.44 | 0.22 | 2.35 |
| 18965 | 0 | 180966 | ELRDKKQKVHALFYKLDI<br>V       | 2.89 | 0.01 | 2.54 | 0.44 | 0.22 | 1.34 |
| 18966 | 0 | 180966 | ELRDKKQKVHALFYKLDI<br>V       | 2.89 | 0.01 | 2.54 | 0.44 | 0.22 | 1.34 |
| 18967 | 0 | 13247  | ELRGLAQALIDQKV                | 2.61 | 0.01 | 2.56 | 2.69 | 0.22 | 0.28 |
| 18968 | 0 | 13248  | ELRGLAQALIDQVK                | 2.68 | 4.93 | 2.56 | 0.44 | 0.85 | 0.28 |
| 18969 | 0 | 450546 | ELRNENT                       | 2.05 | 0.01 | 0.90 | 0.44 | 1.23 | 1.39 |
| 18970 | 0 | 13252  | ELRNLPQQCGLRAPQ               | 2.70 | 0.01 | 2.16 | 0.44 | 1.23 | 0.85 |
| 18971 | 0 | 514924 | ELRNLPQQCGLRAPQRC<br>DLEVESG  | 3.14 | 0.01 | 2.16 | 0.44 | 1.23 | 1.39 |
| 18972 | 0 | 514924 | ELRNLPQQCGLRAPQRC<br>DLEVESG  | 3.14 | 0.01 | 2.16 | 0.44 | 1.23 | 0.85 |
| 18973 | 0 | 112958 | ELRPELSWLGHE                  | 2.50 | 0.01 | 0.78 | 1.15 | 0.22 | 1.27 |
| 18974 | 0 | 112958 | ELRPELSWLGHE                  | 2.50 | 0.01 | 0.78 | 1.15 | 0.22 | 2.02 |
| 18975 | 0 | 178752 | ELRPGLQLATYYYYLK              | 2.72 | 0.01 | 3.34 | 0.68 | 0.22 | 2.66 |
| 18976 | 0 | 178752 | ELRPGLQLATYYYYLK              | 2.72 | 0.01 | 3.34 | 0.44 | 1.59 | 0.28 |
| 18977 | 0 | 178752 | ELRPGLQLATYYYYLK              | 2.72 | 0.01 | 3.34 | 0.44 | 0.85 | 0.28 |
| 18978 | 0 | 13253  | ELRQLAQSLIDTKVKEIS<br>NQEPLKL | 3.17 | 0.01 | 3.00 | 0.44 | 0.85 | 0.28 |
| 18979 | 0 | 238339 | ELRRKQELAEKLEVEIAI            | 2.89 | 0.01 | 0.78 | 0.44 | 1.13 | 0.28 |
| 18980 | 0 | 238339 | ELRRKQELAEKLEVEIAI            | 2.89 | 0.01 | 0.78 | 0.44 | 1.13 | 0.28 |
| 18981 | 0 | 170874 | ELRRSVSEKTAQIIN               | 2.65 | 0.01 | 0.78 | 0.44 | 1.13 | 0.28 |
| 18982 | 0 | 116703 | ELRVVGNNLKSLEVS               | 2.71 | 0.01 | 2.36 | 0.44 | 1.23 | 1.28 |

|       |   |        |                                    |      |      |      |      |      |      |
|-------|---|--------|------------------------------------|------|------|------|------|------|------|
| 18983 | 0 | 116703 | ELRVVGNNLKSLEVS                    | 2.71 | 0.01 | 2.36 | 0.44 | 1.23 | 1.27 |
| 18984 | 0 | 116703 | ELRVVGNNLKSLEVS                    | 2.71 | 0.01 | 2.36 | 0.44 | 1.23 | 1.28 |
| 18985 | 0 | 13266  | ELRWDLTDIYNL                       | 2.48 | 0.01 | 0.90 | 1.15 | 2.26 | 0.28 |
| 18986 | 0 | 13267  | ELRYSWKTWGKAKMLS<br>TELH           | 2.95 | 0.01 | 2.87 | 0.68 | 0.22 | 0.28 |
| 18987 | 0 | 13267  | ELRYSWKTWGKAKMLS<br>TELH           | 2.95 | 0.01 | 2.87 | 1.15 | 0.22 | 0.28 |
| 18988 | 0 | 13267  | ELRYSWKTWGKAKMLS<br>TELH           | 2.95 | 0.01 | 2.87 | 1.15 | 0.22 | 0.28 |
| 18989 | 0 | 13267  | ELRYSWKTWGKAKMLS<br>TELH           | 2.95 | 0.01 | 2.87 | 1.15 | 0.22 | 0.28 |
| 18990 | 0 | 13267  | ELRYSWKTWGKAKMLS<br>TELH           | 2.95 | 0.01 | 2.87 | 1.15 | 0.22 | 0.28 |
| 18991 | 0 | 13267  | ELRYSWKTWGKAKMLS<br>TELH           | 2.95 | 0.01 | 2.87 | 1.15 | 0.22 | 0.28 |
| 18992 | 0 | 13267  | ELRYSWKTWGKAKMLS<br>TELH           | 2.95 | 0.01 | 2.87 | 0.44 | 0.85 | 0.28 |
| 18993 | 0 | 95354  | ELSEFIPGASLR                       | 2.48 | 0.01 | 2.88 | 1.12 | 0.22 | 0.85 |
| 18994 | 0 | 95354  | ELSEFIPGASLR                       | 2.48 | 0.01 | 2.88 | 0.44 | 1.23 | 0.85 |
| 18995 | 0 | 282627 | ELSFDFLLMTREV                      | 2.69 | 0.01 | 1.61 | 0.44 | 0.85 | 1.28 |
| 18996 | 0 | 97997  | ELSGGQMRRVAIAGV                    | 2.67 | 0.01 | 3.97 | 0.44 | 0.85 | 1.39 |
| 18997 | 0 | 13272  | ELSKDIGSES                         | 2.34 | 0.01 | 1.60 | 0.44 | 1.23 | 0.85 |
| 18998 | 0 | 13272  | ELSKDIGSES                         | 2.34 | 0.01 | 1.60 | 0.44 | 1.23 | 0.28 |
| 18999 | 0 | 13272  | ELSKDIGSES                         | 2.34 | 0.01 | 1.60 | 0.44 | 1.23 | 0.28 |
| 19000 | 0 | 13274  | ELSNHAELSVTLALDVTN<br>AYVVGYRAGNSA | 3.37 | 0.01 | 2.75 | 0.44 | 2.82 | 0.28 |
| 19001 | 0 | 77864  | ELSPTNLRRSFV                       | 2.46 | 0.01 | 0.90 | 1.15 | 0.22 | 0.85 |
| 19002 | 0 | 167502 | ELTEEQQRGDEPL                      | 2.57 | 0.01 | 3.10 | 0.44 | 0.85 | 1.28 |
| 19003 | 0 | 167502 | ELTEEQQRGDEPL                      | 2.57 | 0.01 | 3.10 | 0.44 | 0.85 | 1.28 |
| 19004 | 0 | 167502 | ELTEEQQRGDEPL                      | 2.57 | 0.01 | 3.10 | 0.44 | 1.59 | 1.28 |
| 19005 | 0 | 167503 | ELTEQQQTGDEPL                      | 2.58 | 0.01 | 3.44 | 0.44 | 0.85 | 1.28 |
| 19006 | 0 | 167503 | ELTEQQQTGDEPL                      | 2.58 | 0.01 | 3.44 | 0.44 | 1.59 | 1.28 |
| 19007 | 0 | 13290  | ELTIPIFATNSDCELIVKA                | 2.88 | 0.01 | 4.63 | 3.12 | 0.22 | 1.27 |
| 19008 | 0 | 13290  | ELTIPIFATNSDCELIVKA                | 2.88 | 0.01 | 4.63 | 3.12 | 0.22 | 1.34 |
| 19009 | 0 | 13293  | ELTPAETSVR                         | 2.32 | 0.01 | 1.96 | 0.44 | 0.85 | 1.34 |
| 19010 | 0 | 514938 | ELTTEKAGQKTDDML                    | 2.69 | 0.01 | 2.24 | 0.44 | 1.41 | 1.28 |
| 19011 | 0 | 13316  | ELVNEKEYKSITDE                     | 2.69 | 0.01 | 3.15 | 0.44 | 1.23 | 0.85 |
| 19012 | 0 | 13316  | ELVNEKEYKSITDE                     | 2.69 | 0.01 | 3.15 | 0.44 | 1.23 | 0.85 |
| 19013 | 0 | 13316  | ELVNEKEYKSITDE                     | 2.69 | 0.01 | 2.36 | 0.44 | 1.23 | 1.28 |
| 19014 | 0 | 13316  | ELVNEKEYKSITDE                     | 2.69 | 0.01 | 2.36 | 0.44 | 1.23 | 1.27 |
| 19015 | 0 | 13316  | ELVNEKEYKSITDE                     | 2.69 | 0.01 | 2.36 | 0.44 | 1.23 | 1.28 |
| 19016 | 0 | 225275 | ELVRAERTEHEYVYDVD<br>QR            | 2.93 | 0.01 | 3.26 | 0.68 | 0.22 | 0.28 |
| 19017 | 0 | 225275 | ELVRAERTEHEYVYDVD<br>QR            | 2.93 | 0.01 | 3.26 | 0.68 | 0.22 | 0.85 |

|       |   |        |                                                  |      |      |      |      |      |      |
|-------|---|--------|--------------------------------------------------|------|------|------|------|------|------|
| 19018 | 0 | 225275 | ELVRAERTEHEYVYDVD<br>QR                          | 2.93 | 0.01 | 3.26 | 0.68 | 0.22 | 2.12 |
| 19019 | 0 | 225275 | ELVRAERTEHEYVYDVD<br>QR                          | 2.93 | 0.01 | 3.26 | 0.68 | 0.22 | 1.48 |
| 19020 | 0 | 225275 | ELVRAERTEHEYVYDVD<br>QR                          | 2.93 | 0.01 | 3.26 | 0.68 | 0.22 | 0.85 |
| 19021 | 0 | 107824 | ELWDKRYGGRSNI                                    | 2.50 | 0.01 | 1.66 | 0.44 | 0.85 | 0.28 |
| 19022 | 0 | 187112 | ELWPPNPHAGPP                                     | 2.47 | 0.01 | 0.90 | 0.44 | 1.41 | 1.39 |
| 19023 | 0 | 187112 | ELWPPNPHAGPP                                     | 2.47 | 0.01 | 0.90 | 0.44 | 1.41 | 0.28 |
| 19024 | 0 | 187112 | ELWPPNPHAGPP                                     | 2.47 | 0.01 | 0.90 | 0.44 | 1.41 | 1.34 |
| 19025 | 0 | 13326  | ELYDTLKKVKKT                                     | 2.58 | 0.01 | 3.00 | 0.44 | 0.85 | 0.28 |
| 19026 | 0 | 117283 | ELYKEKALSVETEKLLKYL<br>EAV                       | 3.10 | 0.01 | 0.78 | 0.44 | 1.13 | 0.28 |
| 19027 | 0 | 117283 | ELYKEKALSVETEKLLKYL<br>EAV                       | 3.10 | 0.01 | 0.78 | 0.44 | 1.13 | 0.28 |
| 19028 | 0 | 117283 | ELYKEKALSVETEKLLKYL<br>EAV                       | 3.10 | 0.01 | 0.78 | 0.44 | 1.13 | 0.28 |
| 19029 | 0 | 132801 | ELYRQKVEPLRAELQE<br>EMAIDEEPEQFEHRADQ            | 2.77 | 0.01 | 0.78 | 0.68 | 0.22 | 0.85 |
| 19030 | 0 | 107825 | EQDGEPQSSIIQYAWAE<br>GNRSDD                      | 3.63 | 0.01 | 4.08 | 0.68 | 0.22 | 0.28 |
| 19031 | 0 | 107825 | EQDGEPQSSIIQYAWAE<br>GNRSDD<br>EMAIDEEPEQFEHRADQ | 3.63 | 0.01 | 4.08 | 0.68 | 0.22 | 0.85 |
| 19032 | 0 | 107825 | EQDGEPQSSIIQYAWAE<br>GNRSDD                      | 3.63 | 0.01 | 4.08 | 0.68 | 0.22 | 1.48 |
| 19033 | 0 | 78373  | EMDDDETEYE                                       | 2.36 | 0.01 | 4.23 | 1.15 | 0.22 | 1.27 |
| 19034 | 0 | 78373  | EMDDDETEYE                                       | 2.36 | 0.01 | 4.23 | 1.15 | 0.22 | 0.85 |
| 19035 | 0 | 170878 | EMDFIDEVEKQKELL                                  | 2.69 | 0.01 | 0.78 | 0.44 | 1.41 | 0.28 |
| 19036 | 0 | 170878 | EMDFIDEVEKQKELL                                  | 2.69 | 0.01 | 0.78 | 0.44 | 1.13 | 0.28 |
| 19037 | 0 | 423654 | EMDIIDL PYNLL                                    | 2.46 | 0.01 | 0.90 | 0.68 | 0.22 | 0.28 |
| 19038 | 0 | 13354  | EMDKID                                           | 1.90 | 0.01 | 4.63 | 1.20 | 0.22 | 0.28 |
| 19039 | 0 | 117833 | EMDLSSPQT                                        | 2.20 | 0.01 | 0.78 | 0.44 | 1.41 | 0.85 |
| 19040 | 0 | 117833 | EMDLSSPQT                                        | 2.20 | 0.01 | 0.78 | 0.44 | 1.13 | 0.85 |
| 19041 | 0 | 130806 | EMDVVRFD                                         | 2.22 | 0.01 | 0.78 | 0.44 | 2.35 | 1.27 |
| 19042 | 0 | 13356  | EMEAVASKFR                                       | 2.32 | 0.01 | 3.33 | 1.15 | 0.22 | 0.28 |
| 19043 | 0 | 13366  | EMEPPFGDSYIVVGRGD<br>KQINHWHKA                   | 3.18 | 0.01 | 3.78 | 3.57 | 0.22 | 0.28 |
| 19044 | 0 | 13366  | EMEPPFGDSYIVVGRGD<br>KQINHWHKA                   | 3.18 | 0.01 | 3.78 | 3.57 | 0.22 | 0.28 |
| 19045 | 0 | 13366  | EMEPPFGDSYIVVGRGD<br>KQINHWHKA                   | 3.18 | 0.01 | 3.78 | 3.57 | 0.22 | 0.28 |
| 19046 | 0 | 13366  | EMEPPFGDSYIVVGRGD<br>KQINHWHKA                   | 3.18 | 0.01 | 3.78 | 3.57 | 2.25 | 1.75 |
| 19047 | 0 | 13366  | EMEPPFGDSYIVVGRGD<br>KQINHWHKA                   | 3.18 | 0.01 | 3.78 | 3.57 | 0.22 | 1.34 |

|       |   |        |                                 |      |      |      |      |      |      |
|-------|---|--------|---------------------------------|------|------|------|------|------|------|
| 19048 | 0 | 13366  | EMEPPFGDSYIVVGRGD<br>KQINHHWHKA | 3.18 | 0.01 | 3.53 | 3.47 | 0.22 | 1.34 |
| 19049 | 0 | 13366  | EMEPPFGDSYIVVGRGD<br>KQINHHWHKA | 3.18 | 0.01 | 3.53 | 3.47 | 0.22 | 0.28 |
| 19050 | 0 | 13366  | EMEPPFGDSYIVVGRGD<br>KQINHHWHKA | 3.18 | 0.01 | 3.53 | 3.47 | 0.22 | 0.28 |
| 19051 | 0 | 13366  | EMEPPFGDSYIVVGRGD<br>KQINHHWHKA | 3.18 | 0.01 | 4.63 | 0.68 | 0.22 | 2.12 |
| 19052 | 0 | 13366  | EMEPPFGDSYIVVGRGD<br>KQINHHWHKA | 3.18 | 0.01 | 4.63 | 0.68 | 0.22 | 0.28 |
| 19053 | 0 | 170880 | EMERDCLIGYGASML                 | 2.67 | 0.01 | 0.78 | 0.44 | 1.41 | 0.28 |
| 19054 | 0 | 170880 | EMERDCLIGYGASML                 | 2.67 | 0.01 | 0.78 | 0.44 | 1.13 | 0.28 |
| 19055 | 0 | 156278 | EMESHSVTQAGVQWP<br>DLGSLEV      | 3.04 | 0.01 | 0.78 | 1.20 | 0.22 | 1.48 |
| 19056 | 0 | 240870 | EMGPDGHQMEYEEQG                 | 2.71 | 0.01 | 2.84 | 1.20 | 0.22 | 0.85 |
| 19057 | 0 | 240870 | EMGPDGHQMEYEEQG                 | 2.71 | 0.01 | 2.84 | 1.20 | 0.22 | 0.28 |
| 19058 | 0 | 240870 | EMGPDGHQMEYEEQG                 | 2.71 | 0.01 | 2.84 | 1.20 | 0.22 | 0.28 |
| 19059 | 0 | 103143 | EMIEAVGYRSWPRYF                 | 2.65 | 0.01 | 2.04 | 0.44 | 0.85 | 1.28 |
| 19060 | 0 | 13391  | EMLAAERPRGVFNRL<br>VLGE         | 2.96 | 0.01 | 2.59 | 0.68 | 0.22 | 0.28 |
| 19061 | 0 | 13391  | EMLAAERPRGVFNRL<br>VLGE         | 2.96 | 0.01 | 2.59 | 2.42 | 0.22 | 0.28 |
| 19062 | 0 | 13391  | EMLAAERPRGVFNRL<br>VLGE         | 2.96 | 0.01 | 2.59 | 2.42 | 0.22 | 0.28 |
| 19063 | 0 | 13391  | EMLAAERPRGVFNRL<br>VLGE         | 2.96 | 0.01 | 2.59 | 2.42 | 0.22 | 0.28 |
| 19064 | 0 | 178756 | EMLADAPAPINFTML                 | 2.68 | 0.01 | 2.36 | 0.44 | 1.23 | 1.28 |
| 19065 | 0 | 178756 | EMLADAPAPINFTML                 | 2.68 | 0.01 | 2.36 | 0.44 | 1.23 | 1.27 |
| 19066 | 0 | 178756 | EMLADAPAPINFTML                 | 2.68 | 0.01 | 2.36 | 0.44 | 1.23 | 1.28 |
| 19067 | 0 | 13396  | EMLKRNIYF                       | 2.29 | 0.01 | 2.56 | 0.68 | 0.22 | 0.28 |
| 19068 | 0 | 105755 | EMLQGAGAM                       | 2.25 | 0.01 | 0.90 | 3.01 | 0.22 | 0.28 |
| 19069 | 0 | 434605 | EMLQREEAENTLQSFRQ               | 2.81 | 4.08 | 0.78 | 0.44 | 1.13 | 0.28 |
| 19070 | 0 | 99214  | EMNAFLDVVPGQAGQ                 | 2.65 | 0.01 | 2.86 | 2.02 | 0.85 | 0.85 |
| 19071 | 0 | 189065 | EMNKLFEKTRRQLRENA               | 2.81 | 0.01 | 3.78 | 0.68 | 0.22 | 0.28 |
| 19072 | 0 | 189065 | EMNKLFEKTRRQLRENA               | 2.81 | 0.01 | 3.78 | 0.68 | 0.22 | 0.28 |
| 19073 | 0 | 189065 | EMNKLFEKTRRQLRENA               | 2.81 | 0.01 | 3.78 | 0.68 | 0.22 | 1.75 |
| 19074 | 0 | 190738 | EMNVIDDVQQLEKDKQ<br>QLKD        | 2.98 | 0.01 | 3.50 | 2.13 | 0.22 | 0.28 |
| 19075 | 0 | 103144 | EMPENYAKTRIINRKK                | 2.73 | 0.01 | 3.50 | 2.37 | 0.22 | 1.27 |

|       |   |        |                          |      |      |      |      |      |      |
|-------|---|--------|--------------------------|------|------|------|------|------|------|
| 19076 | 0 | 103144 | EMPENYAKTRIINRKK         | 2.73 | 0.01 | 3.50 | 2.37 | 0.22 | 1.27 |
| 19077 | 0 | 229632 | EMPPFKYPVEPFTESQSL<br>TL | 2.97 | 0.01 | 1.60 | 0.44 | 1.23 | 1.28 |
| 19078 | 0 | 514956 | EMPLESAEEKKKSE           | 2.73 | 0.01 | 2.24 | 0.44 | 1.41 | 1.28 |
| 19079 | 0 | 195258 | EMPSEEGYQDYEP EA         | 2.70 | 0.01 | 0.78 | 3.40 | 0.22 | 0.28 |
| 19080 | 0 | 195258 | EMPSEEGYQDYEP EA         | 2.70 | 0.01 | 0.78 | 3.40 | 0.22 | 0.28 |
| 19081 | 0 | 195258 | EMPSEEGYQDYEP EA         | 2.70 | 0.01 | 0.78 | 3.40 | 0.22 | 2.02 |
| 19082 | 0 | 195258 | EMPSEEGYQDYEP EA         | 2.70 | 0.01 | 0.78 | 3.40 | 0.22 | 0.28 |
| 19083 | 0 | 195258 | EMPSEEGYQDYEP EA         | 2.70 | 0.01 | 0.78 | 3.40 | 0.22 | 1.48 |
| 19084 | 0 | 164652 | EMPWSTNSFTDD             | 2.45 | 0.01 | 0.90 | 1.15 | 0.22 | 1.39 |
| 19085 | 0 | 170883 | EMQLIHEISNLK NLV         | 2.69 | 0.01 | 0.78 | 0.44 | 1.41 | 0.28 |
| 19086 | 0 | 139725 | EMRTRIRYNRRS             | 2.48 | 0.01 | 2.75 | 0.68 | 0.22 | 0.28 |
| 19087 | 0 | 139725 | EMRTRIRYNRRS             | 2.48 | 0.01 | 2.75 | 0.68 | 0.22 | 0.28 |
| 19088 | 0 | 139725 | EMRTRIRYNRRS             | 2.48 | 0.01 | 2.75 | 0.68 | 0.22 | 1.34 |
| 19089 | 0 | 139725 | EMRTRIRYNRRS             | 2.48 | 0.01 | 2.75 | 0.68 | 0.22 | 1.75 |
| 19090 | 0 | 139725 | EMRTRIRYNRRS             | 2.48 | 0.01 | 2.75 | 0.68 | 0.22 | 1.34 |
| 19091 | 0 | 139725 | EMRTRIRYNRRS             | 2.48 | 0.01 | 2.75 | 0.68 | 0.22 | 1.66 |
| 19092 | 0 | 139725 | EMRTRIRYNRRS             | 2.48 | 0.01 | 2.75 | 0.68 | 0.22 | 1.66 |
| 19093 | 0 | 139725 | EMRTRIRYNRRS             | 2.48 | 0.01 | 2.75 | 2.61 | 0.22 | 2.35 |
| 19094 | 0 | 139725 | EMRTRIRYNRRS             | 2.48 | 0.01 | 2.75 | 0.44 | 0.22 | 2.35 |
| 19095 | 0 | 139725 | EMRTRIRYNRRS             | 2.48 | 0.01 | 2.75 | 0.68 | 0.22 | 0.28 |
| 19096 | 0 | 139725 | EMRTRIRYNRRS             | 2.48 | 0.01 | 2.75 | 0.68 | 0.22 | 1.34 |
| 19097 | 0 | 139725 | EMRTRIRYNRRS             | 2.48 | 0.01 | 2.75 | 0.68 | 0.22 | 1.75 |
| 19098 | 0 | 139725 | EMRTRIRYNRRS             | 2.48 | 0.01 | 2.75 | 0.68 | 0.22 | 0.28 |
| 19099 | 0 | 170886 | EMTQFLEEWLNTRFD          | 2.68 | 0.01 | 0.78 | 0.44 | 1.41 | 0.28 |
| 19100 | 0 | 13421  | EMVDVVTG                 | 2.13 | 0.01 | 2.21 | 1.12 | 0.22 | 0.28 |
| 19101 | 0 | 13421  | EMVDVVTG                 | 2.13 | 0.01 | 2.21 | 0.44 | 0.85 | 0.28 |
| 19102 | 0 | 13425  | EMVIITFKSG               | 2.28 | 0.01 | 2.66 | 0.68 | 0.22 | 0.28 |
| 19103 | 0 | 13425  | EMVIITFKSG               | 2.28 | 0.01 | 2.66 | 0.68 | 0.22 | 0.28 |
| 19104 | 0 | 13425  | EMVIITFKSG               | 2.28 | 0.01 | 2.66 | 0.68 | 0.22 | 0.28 |
| 19105 | 0 | 13425  | EMVIITFKSG               | 2.28 | 0.01 | 2.66 | 2.52 | 0.22 | 0.28 |
| 19106 | 0 | 13425  | EMVIITFKSG               | 2.28 | 0.01 | 2.66 | 0.68 | 0.22 | 0.28 |
| 19107 | 0 | 13425  | EMVIITFKSG               | 2.28 | 0.01 | 2.66 | 0.68 | 0.22 | 0.28 |
| 19108 | 0 | 13425  | EMVIITFKSG               | 2.28 | 0.01 | 2.66 | 0.68 | 0.22 | 0.28 |
| 19109 | 0 | 13425  | EMVIITFKSG               | 2.28 | 0.01 | 2.66 | 0.68 | 0.22 | 0.28 |
| 19110 | 0 | 13426  | EMVLLQ                   | 1.89 | 0.01 | 2.40 | 0.44 | 0.85 | 0.28 |
| 19111 | 0 | 100012 | EMYKAIGGKI               | 2.32 | 0.01 | 2.18 | 2.16 | 0.22 | 0.28 |
| 19112 | 0 | 13438  | ENANANNAV                | 2.26 | 0.01 | 1.66 | 0.44 | 1.74 | 0.28 |
| 19113 | 0 | 13438  | ENANANNAV                | 2.26 | 0.01 | 3.37 | 0.68 | 0.22 | 0.28 |
| 19114 | 0 | 13438  | ENANANNAV                | 2.26 | 0.01 | 3.37 | 0.68 | 0.22 | 1.48 |
| 19115 | 0 | 13438  | ENANANNAV                | 2.26 | 0.01 | 3.37 | 1.12 | 0.22 | 0.28 |
| 19116 | 0 | 13442  | ENAPQAEVTPPVP            | 2.59 | 0.01 | 2.67 | 2.22 | 0.22 | 0.85 |
| 19117 | 0 | 13443  | ENAPQAQNA PQVE           | 2.61 | 0.01 | 2.67 | 2.22 | 0.22 | 0.85 |
| 19118 | 0 | 81704  | ENATKVEDIK               | 2.32 | 0.01 | 3.06 | 0.44 | 0.85 | 0.28 |
| 19119 | 0 | 13447  | ENAVRSSLKVATSGDCF<br>VHG | 2.91 | 0.01 | 3.13 | 2.43 | 0.22 | 0.28 |
| 19120 | 0 | 232631 | ENAYEYLKHNGLETE          | 2.71 | 0.01 | 2.28 | 0.68 | 0.22 | 0.28 |

|       |   |        |                                  |      |      |      |      |      |      |
|-------|---|--------|----------------------------------|------|------|------|------|------|------|
| 19121 | 0 | 232631 | ENAYEYLKHNGLETE                  | 2.71 | 0.01 | 2.28 | 0.68 | 0.22 | 0.28 |
| 19122 | 0 | 232631 | ENAYEYLKHNGLETE                  | 2.71 | 0.01 | 2.28 | 0.68 | 0.22 | 0.28 |
| 19123 | 0 | 225722 | ENAYVSVVSSHYSRKFTP<br>E          | 2.89 | 0.01 | 3.72 | 1.15 | 0.22 | 1.28 |
| 19124 | 0 | 225722 | ENAYVSVVSSHYSRKFTP<br>E          | 2.89 | 0.01 | 3.72 | 1.15 | 0.22 | 1.28 |
| 19125 | 0 | 225722 | ENAYVSVVSSHYSRKFTP<br>E          | 2.89 | 0.01 | 3.72 | 1.12 | 0.22 | 1.28 |
| 19126 | 0 | 13449  | ENCGAATS                         | 2.11 | 0.01 | 3.42 | 0.68 | 0.22 | 0.28 |
| 19127 | 0 | 111253 | ENDEIDGVNHQHLPA                  | 2.67 | 0.01 | 3.11 | 3.70 | 0.22 | 0.28 |
| 19128 | 0 | 108906 | ENDEWTQDRAKPVQTQI                | 2.72 | 0.01 | 0.78 | 0.44 | 1.41 | 0.28 |
| 19129 | 0 | 13458  | ENDIRV                           | 1.88 | 0.01 | 1.96 | 0.44 | 0.85 | 0.28 |
| 19130 | 0 | 13460  | ENDVLNQETEEEMEK                  | 2.69 | 0.01 | 1.66 | 0.44 | 0.85 | 0.28 |
| 19131 | 0 | 13460  | ENDVLNQETEEEMEK                  | 2.69 | 0.01 | 1.66 | 1.12 | 0.22 | 0.28 |
| 19132 | 0 | 13460  | ENDVLNQETEEEMEK                  | 2.69 | 0.01 | 1.66 | 1.12 | 0.22 | 0.85 |
| 19133 | 0 | 13460  | ENDVLNQETEEEMEK                  | 2.69 | 0.01 | 1.66 | 1.12 | 0.22 | 1.34 |
| 19134 | 0 | 81710  | ENDYSANGGTIHPTILCV<br>YGKLQKNGAD | 3.24 | 0.01 | 3.06 | 2.37 | 0.22 | 0.28 |
| 19135 | 0 | 283193 | ENEDDDEDEEENEED                  | 2.74 | 0.01 | 1.61 | 0.44 | 0.85 | 1.28 |
| 19136 | 0 | 13463  | ENEKALNELLEKTVKDKI               | 2.88 | 0.01 | 2.85 | 0.68 | 0.22 | 0.28 |
| 19137 | 0 | 177045 | ENELV                            | 1.77 | 0.01 | 0.78 | 0.68 | 0.22 | 0.28 |
| 19138 | 0 | 177045 | ENELV                            | 1.77 | 0.01 | 0.78 | 0.68 | 0.22 | 1.48 |
| 19139 | 0 | 177045 | ENELV                            | 1.77 | 0.01 | 0.78 | 0.68 | 0.22 | 1.34 |
| 19140 | 0 | 177045 | ENELV                            | 1.77 | 0.01 | 0.78 | 0.68 | 0.22 | 0.85 |
| 19141 | 0 | 130808 | ENEPPVWTTESKLQS                  | 2.67 | 0.01 | 0.90 | 0.44 | 1.13 | 0.28 |
| 19142 | 0 | 130808 | ENEPPVWTTESKLQS                  | 2.67 | 0.01 | 0.90 | 0.44 | 1.13 | 1.66 |
| 19143 | 0 | 130808 | ENEPPVWTTESKLQS                  | 2.67 | 0.01 | 0.90 | 0.44 | 1.13 | 1.66 |
| 19144 | 0 | 130808 | ENEPPVWTTESKLQS                  | 2.67 | 0.01 | 0.90 | 0.44 | 1.13 | 1.66 |
| 19145 | 0 | 130808 | ENEPPVWTTESKLQS                  | 2.67 | 0.01 | 0.90 | 0.44 | 1.13 | 1.27 |
| 19146 | 0 | 283273 | ENERQQQSDETQVQQ                  | 2.69 | 0.01 | 1.61 | 0.44 | 0.85 | 1.28 |
| 19147 | 0 | 193185 | ENESDKYYFNPETKKA                 | 2.74 | 0.01 | 3.04 | 1.12 | 0.22 | 0.28 |
| 19148 | 0 | 161099 | ENETIDIGIQNHFA<br>SREG F         | 2.90 | 0.01 | 2.08 | 0.44 | 1.93 | 1.57 |
| 19149 | 0 | 13471  | ENFSTSFWIRIPKYFNSIS              | 2.91 | 0.01 | 3.03 | 0.68 | 0.22 | 1.57 |
| 19150 | 0 | 13471  | ENFSTSFWIRIPKYFNSIS              | 2.91 | 0.01 | 3.03 | 3.33 | 0.22 | 1.57 |
| 19151 | 0 | 13471  | ENFSTSFWIRIPKYFNSIS              | 2.91 | 0.01 | 2.08 | 0.44 | 0.22 | 1.57 |
| 19152 | 0 | 13471  | ENFSTSFWIRIPKYFNSIS              | 2.91 | 0.01 | 2.08 | 2.02 | 0.22 | 1.57 |
| 19153 | 0 | 13471  | ENFSTSFWIRIPKYFNSIS              | 2.91 | 0.01 | 2.08 | 1.15 | 0.22 | 1.57 |

|       |   |        |                           |      |      |      |      |      |      |
|-------|---|--------|---------------------------|------|------|------|------|------|------|
| 19154 | 0 | 13471  | ENFSTSWIRIPKYFNSIS        | 2.91 | 0.01 | 2.08 | 2.49 | 0.22 | 1.57 |
| 19155 | 0 | 13471  | ENFSTSWIRIPKYFNSIS        | 2.91 | 0.01 | 2.08 | 2.25 | 0.22 | 1.57 |
| 19156 | 0 | 13471  | ENFSTSWIRIPKYFNSIS        | 2.91 | 0.01 | 2.08 | 0.68 | 0.22 | 1.57 |
| 19157 | 0 | 13471  | ENFSTSWIRIPKYFNSIS        | 2.91 | 0.01 | 2.08 | 0.68 | 0.22 | 1.57 |
| 19158 | 0 | 13471  | ENFSTSWIRIPKYFNSIS        | 2.91 | 0.01 | 3.16 | 0.44 | 1.93 | 1.57 |
| 19159 | 0 | 13471  | ENFSTSWIRIPKYFNSIS        | 2.91 | 0.01 | 2.08 | 0.44 | 0.22 | 1.57 |
| 19160 | 0 | 13471  | ENFSTSWIRIPKYFNSIS        | 2.91 | 0.01 | 2.08 | 1.15 | 0.22 | 1.57 |
| 19161 | 0 | 13471  | ENFSTSWIRIPKYFNSIS        | 2.91 | 0.01 | 2.08 | 2.02 | 0.22 | 1.57 |
| 19162 | 0 | 13471  | ENFSTSWIRIPKYFNSIS        | 2.91 | 0.01 | 2.08 | 2.25 | 0.22 | 1.57 |
| 19163 | 0 | 13471  | ENFSTSWIRIPKYFNSIS        | 2.91 | 0.01 | 2.08 | 0.68 | 0.22 | 1.57 |
| 19164 | 0 | 13471  | ENFSTSWIRIPKYFNSIS        | 2.91 | 0.01 | 2.08 | 2.25 | 0.22 | 1.57 |
| 19165 | 0 | 13471  | ENFSTSWIRIPKYFNSIS        | 2.91 | 0.01 | 2.08 | 0.68 | 0.22 | 1.57 |
| 19166 | 0 | 13471  | ENFSTSWIRIPKYFNSIS        | 2.91 | 0.01 | 2.08 | 0.68 | 0.22 | 1.57 |
| 19167 | 0 | 13471  | ENFSTSWIRIPKYFNSIS        | 2.91 | 0.01 | 2.08 | 2.25 | 0.22 | 1.57 |
| 19168 | 0 | 13474  | ENGDKVKFDLIPKENTERS<br>HK | 2.92 | 0.01 | 4.63 | 1.15 | 0.22 | 0.28 |
| 19169 | 0 | 95356  | ENGDTVTFTEVGY             | 2.50 | 0.01 | 2.88 | 0.44 | 1.23 | 0.85 |
| 19170 | 0 | 119838 | ENGWAIIDFCPGVIR           | 2.65 | 0.01 | 0.78 | 2.04 | 0.22 | 0.28 |
| 19171 | 0 | 141881 | ENGSKIEAKKCIKT            | 2.63 | 0.01 | 2.73 | 0.44 | 0.85 | 0.28 |
| 19172 | 0 | 158742 | ENGVDLSVVVEKQEGM          | 2.74 | 0.01 | 3.05 | 2.49 | 0.22 | 0.28 |
| 19173 | 0 | 158742 | ENGVDLSVVVEKQEGM          | 2.74 | 0.01 | 3.05 | 2.43 | 0.22 | 0.28 |
| 19174 | 0 | 158742 | ENGVDLSVVVEKQEGM          | 2.74 | 0.01 | 3.04 | 0.68 | 0.22 | 0.85 |
| 19175 | 0 | 177488 | ENGVVWVSFRGADYSL<br>RAVR  | 2.94 | 3.37 | 0.78 | 0.44 | 2.26 | 0.28 |
| 19176 | 0 | 177488 | ENGVVWVSFRGADYSL<br>RAVR  | 2.94 | 3.37 | 0.78 | 0.44 | 1.13 | 0.28 |
| 19177 | 0 | 132268 | ENGYLMEAAP                | 2.31 | 0.01 | 0.78 | 0.44 | 1.13 | 0.28 |
| 19178 | 0 | 105168 | ENHA                      | 1.57 | 0.01 | 3.45 | 1.20 | 0.22 | 0.28 |
| 19179 | 0 | 13481  | ENHSPVNIAHKL              | 2.45 | 0.01 | 0.90 | 1.15 | 2.26 | 0.28 |
| 19180 | 0 | 13481  | ENHSPVNIAHKL              | 2.45 | 0.01 | 0.90 | 1.15 | 0.22 | 1.27 |

|       |   |        |                                       |      |      |      |      |      |      |
|-------|---|--------|---------------------------------------|------|------|------|------|------|------|
| 19181 | 0 | 13481  | ENHSPVNIAHKL                          | 2.45 | 0.01 | 0.90 | 1.15 | 0.22 | 0.28 |
| 19182 | 0 | 13481  | ENHSPVNIAHKL                          | 2.45 | 0.01 | 0.90 | 0.44 | 0.85 | 0.28 |
| 19183 | 0 | 13482  | ENHTKFTS                              | 2.12 | 0.01 | 3.57 | 0.68 | 0.22 | 0.28 |
| 19184 | 0 | 13482  | ENHTKFTS                              | 2.12 | 0.01 | 3.57 | 0.68 | 0.22 | 1.34 |
| 19185 | 0 | 13482  | ENHTKFTS                              | 2.12 | 0.01 | 3.57 | 0.68 | 0.22 | 0.28 |
| 19186 | 0 | 450550 | ENHVHVR                               | 2.04 | 0.01 | 0.90 | 0.44 | 1.23 | 1.39 |
| 19187 | 0 | 450550 | ENHVHVR                               | 2.04 | 0.01 | 0.90 | 0.44 | 1.41 | 1.39 |
| 19188 | 0 | 191277 | ENIEGNGGPGTI                          | 2.53 | 0.01 | 2.76 | 1.20 | 0.22 | 0.28 |
| 19189 | 0 | 13491  | ENINNMDEKINNVD EQ<br>NNNMDEKINNVD EKK | 3.42 | 0.01 | 2.22 | 0.44 | 1.74 | 0.28 |
| 19190 | 0 | 13491  | ENINNMDEKINNVD EQ<br>NNNMDEKINNVD EKK | 3.42 | 0.01 | 2.22 | 0.44 | 1.74 | 0.28 |
| 19191 | 0 | 13491  | ENINNMDEKINNVD EQ<br>NNNMDEKINNVD EKK | 3.42 | 0.01 | 2.22 | 0.44 | 1.74 | 0.28 |
| 19192 | 0 | 170889 | ENIQQKSKDIVNKMT                       | 2.67 | 0.01 | 0.78 | 0.44 | 1.13 | 0.28 |
| 19193 | 0 | 175789 | ENITQWNLSDN GTNG                      | 2.68 | 0.01 | 2.63 | 1.15 | 0.22 | 0.85 |
| 19194 | 0 | 175789 | ENITQWNLSDN GTNG                      | 2.68 | 0.01 | 2.63 | 1.15 | 0.22 | 0.85 |
| 19195 | 0 | 175789 | ENITQWNLSDN GTNG                      | 2.68 | 0.01 | 2.63 | 1.15 | 0.22 | 0.85 |
| 19196 | 0 | 13498  | ENKFLENQVKERNVA                       | 2.71 | 0.01 | 1.66 | 1.15 | 0.22 | 0.28 |
| 19197 | 0 | 13499  | ENKGTGQH                              | 2.12 | 0.01 | 3.42 | 0.68 | 0.22 | 0.28 |
| 19198 | 0 | 13501  | ENKGTRIRFK                            | 2.31 | 4.23 | 2.56 | 0.44 | 0.85 | 0.28 |
| 19199 | 0 | 13503  | ENKGTRIRFKDDTS                        | 2.60 | 0.01 | 2.56 | 2.69 | 0.22 | 0.28 |
| 19200 | 0 | 13503  | ENKGTRIRFKDDTS                        | 2.60 | 0.01 | 3.16 | 2.69 | 0.22 | 0.28 |
| 19201 | 0 | 13503  | ENKGTRIRFKDDTS                        | 2.60 | 0.01 | 3.16 | 2.69 | 0.22 | 0.28 |
| 19202 | 0 | 120503 | ENKIFADDIDIS                          | 2.49 | 0.01 | 2.26 | 2.36 | 0.22 | 0.28 |
| 19203 | 0 | 120503 | ENKIFADDIDIS                          | 2.49 | 0.01 | 2.26 | 1.12 | 0.22 | 0.28 |
| 19204 | 0 | 283441 | ENKPATGEAPSQPGA                       | 2.71 | 0.01 | 1.61 | 0.44 | 0.85 | 1.28 |
| 19205 | 0 | 95357  | ENKVLV                                | 1.90 | 0.01 | 1.60 | 0.44 | 1.23 | 0.28 |
| 19206 | 0 | 98763  | ENKVLVLDTD                            | 2.33 | 0.01 | 1.60 | 0.44 | 1.23 | 0.85 |
| 19207 | 0 | 13509  | ENLCSTFCKE                            | 2.32 | 0.01 | 1.60 | 0.44 | 1.23 | 0.85 |
| 19208 | 0 | 13509  | ENLCSTFCKE                            | 2.32 | 0.01 | 1.60 | 0.44 | 1.23 | 0.85 |
| 19209 | 0 | 283468 | ENLDGDEEEGDVSQD                       | 2.70 | 0.01 | 1.61 | 0.44 | 0.85 | 1.28 |
| 19210 | 0 | 115726 | ENLHLPLPLL                            | 2.34 | 0.01 | 1.60 | 0.44 | 1.23 | 0.85 |
| 19211 | 0 | 135455 | ENLIEEDKSQ                            | 2.31 | 0.01 | 4.63 | 0.68 | 0.22 | 1.27 |
| 19212 | 0 | 135455 | ENLIEEDKSQ                            | 2.31 | 0.01 | 4.63 | 0.68 | 0.22 | 1.27 |
| 19213 | 0 | 13513  | ENLLASSPRLAKYLSNRP<br>ATPF            | 3.06 | 0.01 | 2.86 | 0.44 | 0.85 | 0.28 |
| 19214 | 0 | 13513  | ENLLASSPRLAKYLSNRP<br>ATPF            | 3.06 | 0.01 | 2.86 | 0.44 | 0.85 | 0.28 |
| 19215 | 0 | 13513  | ENLLASSPRLAKYLSNRP<br>ATPF            | 3.06 | 0.01 | 3.10 | 2.69 | 0.22 | 0.28 |



|       |   |        |                               |      |      |      |      |      |      |
|-------|---|--------|-------------------------------|------|------|------|------|------|------|
| 19216 | 0 | 13513  | ENLLASSPRLAKYLSNRP<br>ATPF    | 3.06 | 0.01 | 3.10 | 1.12 | 0.22 | 0.28 |
| 19217 | 0 | 13513  | ENLLASSPRLAKYLSNRP<br>ATPF    | 3.06 | 0.01 | 3.10 | 1.12 | 0.22 | 0.28 |
| 19218 | 0 | 13513  | ENLLASSPRLAKYLSNRP<br>ATPF    | 3.06 | 0.01 | 3.10 | 0.68 | 0.22 | 0.28 |
| 19219 | 0 | 13513  | ENLLASSPRLAKYLSNRP<br>ATPF    | 3.06 | 0.01 | 2.86 | 3.06 | 0.22 | 1.27 |
| 19220 | 0 | 13513  | ENLLASSPRLAKYLSNRP<br>ATPF    | 3.06 | 0.01 | 2.86 | 3.63 | 0.22 | 0.28 |
| 19221 | 0 | 13513  | ENLLASSPRLAKYLSNRP<br>ATPF    | 3.06 | 0.01 | 2.86 | 3.63 | 0.22 | 1.34 |
| 19222 | 0 | 13513  | ENLLASSPRLAKYLSNRP<br>ATPF    | 3.06 | 0.01 | 2.86 | 3.06 | 0.22 | 1.34 |
| 19223 | 0 | 13513  | ENLLASSPRLAKYLSNRP<br>ATPF    | 3.06 | 0.01 | 2.86 | 3.63 | 0.22 | 1.34 |
| 19224 | 0 | 13513  | ENLLASSPRLAKYLSNRP<br>ATPF    | 3.06 | 0.01 | 2.86 | 0.68 | 0.22 | 1.75 |
| 19225 | 0 | 13513  | ENLLASSPRLAKYLSNRP<br>ATPF    | 3.06 | 0.01 | 2.86 | 0.44 | 0.85 | 0.28 |
| 19226 | 0 | 13514  | ENLLKEAIRAIFPSR               | 2.68 | 0.01 | 0.78 | 4.63 | 0.22 | 0.28 |
| 19227 | 0 | 13523  | ENMNRYPNQVYY                  | 2.47 | 0.01 | 2.98 | 2.19 | 0.22 | 0.28 |
| 19228 | 0 | 13524  | ENMTPQD                       | 1.99 | 0.01 | 2.24 | 1.15 | 0.22 | 0.28 |
| 19229 | 0 | 13524  | ENMTPQD                       | 1.99 | 0.01 | 2.24 | 1.15 | 0.22 | 1.27 |
| 19230 | 0 | 13525  | ENMYRYPNQVYY                  | 2.47 | 0.01 | 1.75 | 2.19 | 0.22 | 0.28 |
| 19231 | 0 | 13525  | ENMYRYPNQVYY                  | 2.47 | 0.01 | 1.75 | 2.19 | 0.22 | 0.28 |
| 19232 | 0 | 13525  | ENMYRYPNQVYY                  | 2.47 | 0.01 | 1.75 | 2.19 | 0.22 | 0.28 |
| 19233 | 0 | 13525  | ENMYRYPNQVYY                  | 2.47 | 0.01 | 1.75 | 2.19 | 0.22 | 0.28 |
| 19234 | 0 | 13525  | ENMYRYPNQVYY                  | 2.47 | 0.01 | 1.75 | 2.19 | 0.22 | 2.02 |
| 19235 | 0 | 13527  | ENMYRYPNQVYYRPVD<br>QYSN      | 2.97 | 0.01 | 1.75 | 1.81 | 0.22 | 0.28 |
| 19236 | 0 | 13527  | ENMYRYPNQVYYRPVD<br>QYSN      | 2.97 | 0.01 | 1.75 | 3.40 | 0.22 | 0.28 |
| 19237 | 0 | 13528  | ENNGGCDAD                     | 2.23 | 0.01 | 3.18 | 2.74 | 0.22 | 0.28 |
| 19238 | 0 | 13530  | ENNNYYFNENGEMQFG<br>YINIEDKMF | 3.20 | 0.01 | 3.04 | 2.75 | 0.22 | 0.28 |
| 19239 | 0 | 13530  | ENNNYYFNENGEMQFG<br>YINIEDKMF | 3.20 | 0.01 | 3.04 | 2.75 | 0.22 | 0.28 |
| 19240 | 0 | 443485 | ENNSSRCWVALTPTLAA<br>RNA      | 2.95 | 0.01 | 1.96 | 0.68 | 0.22 | 1.34 |
| 19241 | 0 | 443485 | ENNSSRCWVALTPTLAA<br>RNA      | 2.95 | 0.01 | 1.96 | 0.68 | 0.22 | 1.34 |
| 19242 | 0 | 443485 | ENNSSRCWVALTPTLAA<br>RNA      | 2.95 | 0.01 | 1.96 | 0.68 | 0.22 | 0.28 |
| 19243 | 0 | 119566 | ENNYKTP                       | 2.12 | 0.01 | 0.78 | 0.44 | 1.93 | 0.28 |
| 19244 | 0 | 13532  | ENP                           | 1.37 | 0.01 | 3.70 | 0.68 | 0.22 | 0.85 |
| 19245 | 0 | 13532  | ENP                           | 1.37 | 0.01 | 3.75 | 0.68 | 0.22 | 0.85 |

|       |   |        |                             |      |      |      |      |      |      |
|-------|---|--------|-----------------------------|------|------|------|------|------|------|
| 19246 | 0 | 13532  | ENP                         | 1.37 | 0.01 | 3.70 | 0.68 | 0.22 | 0.85 |
| 19247 | 0 | 13532  | ENP                         | 1.37 | 0.01 | 3.75 | 0.68 | 0.22 | 0.85 |
| 19248 | 0 | 13532  | ENP                         | 1.37 | 0.01 | 3.70 | 0.68 | 0.22 | 0.85 |
| 19249 | 0 | 13532  | ENP                         | 1.37 | 0.01 | 3.75 | 0.68 | 0.22 | 0.85 |
| 19250 | 0 | 237702 | ENPAKTREYCLHAKLSDT          | 2.82 | 0.01 | 3.19 | 0.44 | 1.74 | 0.85 |
| 19251 | 0 | 237702 | ENPAKTREYCLHAKLSDT          | 2.82 | 0.01 | 3.19 | 0.44 | 0.85 | 0.85 |
| 19252 | 0 | 237702 | ENPAKTREYCLHAKLSDT          | 2.82 | 0.01 | 3.19 | 0.44 | 0.85 | 0.85 |
| 19253 | 0 | 237702 | ENPAKTREYCLHAKLSDT          | 2.82 | 0.01 | 3.19 | 0.44 | 0.85 | 0.85 |
| 19254 | 0 | 237702 | ENPAKTREYCLHAKLSDT          | 2.82 | 0.01 | 3.19 | 0.44 | 0.22 | 0.85 |
| 19255 | 0 | 13535  | ENPEWAPLKDNRIPSYG<br>VLSVDL | 3.07 | 0.01 | 2.72 | 1.12 | 0.22 | 0.28 |
| 19256 | 0 | 13535  | ENPEWAPLKDNRIPSYG<br>VLSVDL | 3.07 | 0.01 | 2.72 | 1.12 | 0.22 | 0.28 |
| 19257 | 0 | 108345 | ENPKKYIPGTK                 | 2.41 | 0.01 | 3.45 | 0.44 | 1.23 | 0.28 |
| 19258 | 0 | 108345 | ENPKKYIPGTK                 | 2.41 | 0.01 | 3.45 | 0.44 | 1.23 | 1.27 |
| 19259 | 0 | 108345 | ENPKKYIPGTK                 | 2.41 | 0.01 | 3.45 | 0.44 | 1.23 | 3.40 |
| 19260 | 0 | 92586  | ENPSQFYERL                  | 2.30 | 0.01 | 4.63 | 1.12 | 0.22 | 0.85 |
| 19261 | 0 | 92586  | ENPSQFYERL                  | 2.30 | 0.01 | 4.63 | 1.12 | 0.22 | 1.27 |
| 19262 | 0 | 123144 | ENPTMAGYR                   | 2.18 | 0.01 | 3.93 | 0.44 | 0.85 | 0.28 |
| 19263 | 0 | 123144 | ENPTMAGYR                   | 2.18 | 0.01 | 3.93 | 0.44 | 1.59 | 0.85 |
| 19264 | 0 | 115230 | ENPVVHF                     | 2.01 | 0.01 | 0.78 | 1.12 | 0.22 | 1.27 |
| 19265 | 0 | 115230 | ENPVVHF                     | 2.01 | 0.01 | 0.78 | 1.12 | 0.22 | 1.27 |
| 19266 | 0 | 13568  | ENPVVHFFANIVTPRTP           | 2.80 | 0.01 | 0.90 | 2.25 | 0.22 | 0.28 |
| 19267 | 0 | 114203 | ENPVVHFFFNIVTPRTP           | 2.81 | 0.01 | 0.90 | 2.25 | 0.22 | 0.28 |
| 19268 | 0 | 114806 | ENPVVHFFKNIVTP              | 2.62 | 0.01 | 0.78 | 0.44 | 1.13 | 0.28 |
| 19269 | 0 | 114806 | ENPVVHFFKNIVTP              | 2.62 | 0.01 | 0.78 | 0.44 | 1.41 | 0.28 |
| 19270 | 0 | 114806 | ENPVVHFFKNIVTP              | 2.62 | 0.01 | 0.78 | 0.44 | 1.13 | 1.27 |
| 19271 | 0 | 114806 | ENPVVHFFKNIVTP              | 2.62 | 0.01 | 0.78 | 0.44 | 0.85 | 0.28 |
| 19272 | 0 | 114806 | ENPVVHFFKNIVTP              | 2.62 | 0.01 | 0.78 | 0.44 | 0.85 | 0.28 |
| 19273 | 0 | 114806 | ENPVVHFFKNIVTP              | 2.62 | 0.01 | 0.78 | 0.44 | 1.74 | 0.28 |
| 19274 | 0 | 13572  | ENPVVHFFKNIVTPR             | 2.67 | 0.01 | 0.78 | 0.44 | 1.13 | 1.57 |
| 19275 | 0 | 13572  | ENPVVHFFKNIVTPR             | 2.67 | 0.01 | 0.78 | 2.46 | 0.22 | 0.28 |
| 19276 | 0 | 13572  | ENPVVHFFKNIVTPR             | 2.67 | 0.01 | 0.78 | 3.00 | 0.22 | 1.27 |
| 19277 | 0 | 13572  | ENPVVHFFKNIVTPR             | 2.67 | 0.01 | 0.78 | 3.00 | 0.22 | 1.27 |
| 19278 | 0 | 13572  | ENPVVHFFKNIVTPR             | 2.67 | 0.01 | 0.78 | 3.41 | 0.22 | 2.75 |
| 19279 | 0 | 134926 | ENPVVHFFKNIVTPRTP           | 2.80 | 4.33 | 0.78 | 0.44 | 1.13 | 0.28 |
| 19280 | 0 | 134926 | ENPVVHFFKNIVTPRTP           | 2.80 | 4.33 | 0.78 | 0.44 | 1.13 | 1.27 |

|       |   |        |                          |      |      |      |      |      |      |
|-------|---|--------|--------------------------|------|------|------|------|------|------|
| 19281 | 0 | 13573  | ENPVVHFFKNIVTPRTP        | 2.80 | 0.01 | 1.60 | 2.25 | 0.22 | 0.28 |
| 19282 | 0 | 13573  | ENPVVHFFKNIVTPRTP        | 2.80 | 0.01 | 1.60 | 2.25 | 0.22 | 0.28 |
| 19283 | 0 | 13573  | ENPVVHFFKNIVTPRTP        | 2.80 | 0.01 | 0.78 | 0.44 | 1.13 | 3.25 |
| 19284 | 0 | 13573  | ENPVVHFFKNIVTPRTP        | 2.80 | 0.01 | 0.78 | 0.44 | 1.13 | 2.66 |
| 19285 | 0 | 114810 | ENPVVHFFRNIVTARTP        | 2.80 | 0.01 | 0.90 | 2.25 | 0.22 | 0.28 |
| 19286 | 0 | 78148  | ENQANPTTAET              | 2.45 | 0.01 | 2.72 | 3.75 | 0.22 | 1.57 |
| 19287 | 0 | 99217  | ENQGGKGPLLSILKA          | 2.68 | 0.01 | 2.16 | 0.44 | 1.23 | 1.48 |
| 19288 | 0 | 111255 | ENQKAGGIEQNFGLF          | 2.70 | 0.01 | 3.20 | 1.12 | 0.22 | 0.85 |
| 19289 | 0 | 13576  | ENQLKEARFLAEEAD          | 2.70 | 0.01 | 3.15 | 0.44 | 1.23 | 0.85 |
| 19290 | 0 | 13576  | ENQLKEARFLAEEAD          | 2.70 | 0.01 | 2.36 | 0.44 | 1.23 | 1.28 |
| 19291 | 0 | 13576  | ENQLKEARFLAEEAD          | 2.70 | 0.01 | 2.36 | 0.44 | 1.23 | 1.27 |
| 19292 | 0 | 13576  | ENQLKEARFLAEEAD          | 2.70 | 0.01 | 2.36 | 0.44 | 1.23 | 1.28 |
| 19293 | 0 | 153825 | ENQLKEARFLAEEADRK<br>YDE | 2.98 | 0.01 | 3.93 | 0.44 | 1.23 | 1.27 |
| 19294 | 0 | 152503 | ENQLSQILAP               | 2.31 | 0.01 | 2.18 | 2.16 | 0.22 | 0.28 |
| 19295 | 0 | 13581  | ENRLVSWHRKPSTYV          | 2.64 | 0.01 | 0.90 | 0.68 | 0.22 | 1.39 |
| 19296 | 0 | 153826 | ENRSLDEERMD              | 2.51 | 0.01 | 3.93 | 0.44 | 1.23 | 1.27 |
| 19297 | 0 | 134045 | ENRSWYLTENIQRFLPN<br>PAG | 2.92 | 0.01 | 0.78 | 0.44 | 2.35 | 0.28 |
| 19298 | 0 | 196427 | ENSANPPPPDRSLPTP         | 2.75 | 0.01 | 1.61 | 1.81 | 0.22 | 0.28 |
| 19299 | 0 | 196427 | ENSANPPPPDRSLPTP         | 2.75 | 0.01 | 1.61 | 1.81 | 0.22 | 0.28 |
| 19300 | 0 | 196427 | ENSANPPPPDRSLPTP         | 2.75 | 0.01 | 1.61 | 1.81 | 0.22 | 0.28 |
| 19301 | 0 | 196427 | ENSANPPPPDRSLPTP         | 2.75 | 0.01 | 1.61 | 0.44 | 0.85 | 0.28 |
| 19302 | 0 | 196427 | ENSANPPPPDRSLPTP         | 2.75 | 0.01 | 1.61 | 0.44 | 0.85 | 0.28 |
| 19303 | 0 | 13587  | ENSEKTTMPL               | 2.31 | 0.01 | 1.60 | 0.44 | 1.23 | 0.28 |
| 19304 | 0 | 13587  | ENSEKTTMPL               | 2.31 | 0.01 | 1.60 | 0.44 | 1.23 | 0.28 |
| 19305 | 0 | 13589  | ENSGCFRH                 | 2.10 | 0.01 | 1.66 | 1.15 | 0.22 | 0.28 |
| 19306 | 0 | 164654 | ENSHPP                   | 1.86 | 0.01 | 3.81 | 0.68 | 0.22 | 1.48 |
| 19307 | 0 | 164654 | ENSHPP                   | 1.86 | 0.01 | 3.81 | 0.68 | 0.22 | 0.85 |
| 19308 | 0 | 164654 | ENSHPP                   | 1.86 | 0.01 | 3.81 | 0.68 | 0.22 | 0.85 |
| 19309 | 0 | 164654 | ENSHPP                   | 1.86 | 0.01 | 3.81 | 0.68 | 0.22 | 0.85 |
| 19310 | 0 | 164654 | ENSHPP                   | 1.86 | 0.01 | 3.81 | 0.68 | 0.22 | 0.85 |
| 19311 | 0 | 164654 | ENSHPP                   | 1.86 | 0.01 | 3.81 | 0.68 | 0.22 | 0.85 |
| 19312 | 0 | 164654 | ENSHPP                   | 1.86 | 0.01 | 3.81 | 0.68 | 0.22 | 0.85 |
| 19313 | 0 | 164654 | ENSHPP                   | 1.86 | 0.01 | 3.81 | 0.68 | 0.22 | 0.85 |
| 19314 | 0 | 164654 | ENSHPP                   | 1.86 | 0.01 | 3.78 | 0.68 | 0.22 | 1.48 |
| 19315 | 0 | 164654 | ENSHPP                   | 1.86 | 0.01 | 3.78 | 0.68 | 0.22 | 0.85 |

|       |   |        |                                    |      |      |      |      |      |      |
|-------|---|--------|------------------------------------|------|------|------|------|------|------|
| 19316 | 0 | 164654 | ENSHPP                             | 1.86 | 0.01 | 3.78 | 0.68 | 0.22 | 0.85 |
| 19317 | 0 | 164654 | ENSHPP                             | 1.86 | 0.01 | 3.78 | 0.68 | 0.22 | 0.85 |
| 19318 | 0 | 164654 | ENSHPP                             | 1.86 | 0.01 | 3.78 | 0.68 | 0.22 | 0.85 |
| 19319 | 0 | 164654 | ENSHPP                             | 1.86 | 0.01 | 3.78 | 0.68 | 0.22 | 0.85 |
| 19320 | 0 | 164654 | ENSHPP                             | 1.86 | 0.01 | 3.78 | 0.68 | 0.22 | 0.85 |
| 19321 | 0 | 164654 | ENSHPP                             | 1.86 | 0.01 | 3.78 | 0.68 | 0.22 | 0.85 |
| 19322 | 0 | 164654 | ENSHPP                             | 1.86 | 0.01 | 3.78 | 0.68 | 0.22 | 0.85 |
| 19323 | 0 | 164654 | ENSHPP                             | 1.86 | 0.01 | 3.81 | 0.68 | 0.22 | 0.85 |
| 19324 | 0 | 164654 | ENSHPP                             | 1.86 | 0.01 | 3.78 | 0.68 | 0.22 | 0.85 |
| 19325 | 0 | 164654 | ENSHPP                             | 1.86 | 0.01 | 3.81 | 0.68 | 0.22 | 0.85 |
| 19326 | 0 | 164654 | ENSHPP                             | 1.86 | 0.01 | 3.81 | 0.68 | 0.22 | 0.85 |
| 19327 | 0 | 164654 | ENSHPP                             | 1.86 | 0.01 | 3.78 | 0.68 | 0.22 | 0.85 |
| 19328 | 0 | 164654 | ENSHPP                             | 1.86 | 0.01 | 3.78 | 0.68 | 0.22 | 0.85 |
| 19329 | 0 | 164654 | ENSHPP                             | 1.86 | 0.01 | 3.81 | 0.68 | 0.22 | 0.28 |
| 19330 | 0 | 164654 | ENSHPP                             | 1.86 | 0.01 | 3.81 | 0.68 | 0.22 | 0.85 |
| 19331 | 0 | 164654 | ENSHPP                             | 1.86 | 0.01 | 3.78 | 0.68 | 0.22 | 0.28 |
| 19332 | 0 | 227141 | ENSSAMVQVHSQGRE                    | 2.69 | 0.01 | 2.97 | 0.44 | 1.59 | 0.28 |
| 19333 | 0 | 227141 | ENSSAMVQVHSQGRE                    | 2.69 | 0.01 | 2.97 | 0.44 | 0.85 | 0.28 |
| 19334 | 0 | 13593  | ENSSLKKHYWNFRNG                    | 2.64 | 0.01 | 3.03 | 1.12 | 0.22 | 0.28 |
| 19335 | 0 | 13593  | ENSSLKKHYWNFRNG                    | 2.64 | 0.01 | 3.03 | 1.12 | 0.22 | 0.28 |
| 19336 | 0 | 107827 | ENSTSGTVNKKLQKCTQ<br>CEDNKGPLDLMNK | 3.36 | 0.01 | 0.90 | 1.12 | 0.22 | 0.28 |
| 19337 | 0 | 13594  | ENSYEKSMSVV                        | 2.41 | 0.01 | 2.86 | 1.81 | 0.22 | 0.28 |
| 19338 | 0 | 13594  | ENSYEKSMSVV                        | 2.41 | 0.01 | 2.86 | 1.81 | 0.22 | 0.28 |
| 19339 | 0 | 152505 | ENTIINPSEN                         | 2.35 | 0.01 | 2.18 | 2.16 | 0.22 | 0.28 |
| 19340 | 0 | 140020 | ENTNIT                             | 1.91 | 0.01 | 0.78 | 0.44 | 2.35 | 1.27 |
| 19341 | 0 | 149304 | ENTTTTLKGDSFYYGK                   | 2.65 | 0.01 | 3.67 | 3.16 | 0.22 | 0.28 |
| 19342 | 0 | 181603 | ENVKKECRDEPNNKY                    | 2.69 | 0.01 | 1.66 | 2.36 | 0.22 | 1.28 |
| 19343 | 0 | 100824 | ENYGGE                             | 1.92 | 0.01 | 3.02 | 1.12 | 0.22 | 0.28 |
| 19344 | 0 | 13609  | ENYGNIKEFNATHAAFE<br>YSK           | 2.96 | 0.01 | 3.10 | 1.12 | 0.22 | 0.28 |
| 19345 | 0 | 103145 | ENYIAQTRDKFLSAA                    | 2.60 | 0.01 | 2.04 | 0.44 | 0.85 | 1.28 |
| 19346 | 0 | 127962 | ENYKEFSELLPNRQGLKK<br>AD           | 2.92 | 0.01 | 0.78 | 0.44 | 1.13 | 0.28 |
| 19347 | 0 | 108911 | ENYKTP                             | 2.01 | 0.01 | 0.78 | 0.44 | 1.13 | 0.28 |
| 19348 | 0 | 13612  | EP                                 | 1.10 | 0.01 | 4.15 | 1.15 | 0.22 | 0.85 |
| 19349 | 0 | 98001  | EPAAPPAS                           | 2.16 | 0.01 | 2.60 | 0.68 | 0.22 | 0.85 |
| 19350 | 0 | 283854 | EPAEPKSAEPKPAEP                    | 2.75 | 0.01 | 1.61 | 0.44 | 0.85 | 1.28 |
| 19351 | 0 | 149684 | EPAGSNR                            | 1.99 | 0.01 | 0.78 | 0.68 | 0.22 | 1.27 |
| 19352 | 0 | 149684 | EPAGSNR                            | 1.99 | 0.01 | 0.78 | 0.68 | 0.22 | 1.27 |
| 19353 | 0 | 149684 | EPAGSNR                            | 1.99 | 0.01 | 0.78 | 0.68 | 0.22 | 0.28 |
| 19354 | 0 | 149684 | EPAGSNR                            | 1.99 | 0.01 | 0.78 | 0.68 | 0.22 | 1.27 |
| 19355 | 0 | 149684 | EPAGSNR                            | 1.99 | 0.01 | 0.78 | 0.68 | 0.22 | 0.28 |
| 19356 | 0 | 149684 | EPAGSNR                            | 1.99 | 0.01 | 0.78 | 0.68 | 0.22 | 0.28 |

|       |   |        |                              |      |      |      |      |      |      |
|-------|---|--------|------------------------------|------|------|------|------|------|------|
| 19357 | 0 | 149684 | EPAGSNR                      | 1.99 | 0.01 | 0.78 | 0.68 | 0.22 | 1.48 |
| 19358 | 0 | 450555 | EPAIATP                      | 2.04 | 0.01 | 0.90 | 0.44 | 1.41 | 1.39 |
| 19359 | 0 | 116085 | EPANPSEK                     | 2.15 | 0.01 | 0.78 | 1.15 | 2.26 | 2.49 |
| 19360 | 0 | 116085 | EPANPSEK                     | 2.15 | 0.01 | 0.78 | 1.15 | 2.26 | 1.34 |
| 19361 | 0 | 116085 | EPANPSEK                     | 2.15 | 0.01 | 0.78 | 1.15 | 2.26 | 1.34 |
| 19362 | 0 | 116085 | EPANPSEK                     | 2.15 | 0.01 | 0.78 | 1.15 | 2.26 | 1.66 |
| 19363 | 0 | 105757 | EPAQQGRRHQSQRPP              | 2.69 | 0.01 | 2.16 | 0.44 | 1.23 | 0.85 |
| 19364 | 0 | 98004  | EPARKGKVH                    | 2.21 | 0.01 | 3.13 | 0.68 | 0.22 | 0.28 |
| 19365 | 0 | 113371 | EPARSRSR                     | 2.16 | 0.01 | 0.90 | 0.44 | 1.13 | 0.85 |
| 19366 | 0 | 13618  | EPAVGQQLVF                   | 2.29 | 4.93 | 2.70 | 0.44 | 0.85 | 0.28 |
| 19367 | 0 | 167739 | EPAVPVIKT                    | 2.23 | 0.01 | 2.40 | 2.43 | 0.22 | 0.28 |
| 19368 | 0 | 117285 | EPAVYFKEQFLDGDGW<br>TSRWIESK | 3.08 | 0.01 | 0.78 | 0.44 | 1.13 | 0.28 |
| 19369 | 0 | 117285 | EPAVYFKEQFLDGDGW<br>TSRWIESK | 3.08 | 0.01 | 0.78 | 0.44 | 1.13 | 0.28 |
| 19370 | 0 | 117285 | EPAVYFKEQFLDGDGW<br>TSRWIESK | 3.08 | 0.01 | 0.78 | 0.44 | 1.13 | 0.28 |
| 19371 | 0 | 117285 | EPAVYFKEQFLDGDGW<br>TSRWIESK | 3.08 | 0.01 | 0.78 | 0.44 | 1.13 | 0.28 |
| 19372 | 0 | 117285 | EPAVYFKEQFLDGDGW<br>TSRWIESK | 3.08 | 0.01 | 0.78 | 0.44 | 1.41 | 0.28 |
| 19373 | 0 | 13620  | EPCTVGHRRYFTFGGGY<br>V       | 2.85 | 0.01 | 2.40 | 0.68 | 0.22 | 0.28 |
| 19374 | 0 | 98765  | EPDDLKQKACESRCT              | 2.66 | 0.01 | 2.16 | 0.44 | 1.23 | 0.85 |
| 19375 | 0 | 98765  | EPDDLKQKACESRCT              | 2.66 | 0.01 | 2.16 | 0.44 | 1.23 | 1.48 |
| 19376 | 0 | 108912 | EPDEVAMEVRMG                 | 2.50 | 0.01 | 0.90 | 1.15 | 0.22 | 1.39 |
| 19377 | 0 | 13623  | EPDKMTT                      | 1.99 | 0.01 | 0.90 | 0.44 | 1.23 | 0.28 |
| 19378 | 0 | 13623  | EPDKMTT                      | 1.99 | 0.01 | 0.90 | 0.44 | 1.23 | 1.27 |
| 19379 | 0 | 13624  | EPDKSII                      | 1.99 | 0.01 | 0.90 | 0.44 | 1.23 | 0.28 |
| 19380 | 0 | 13624  | EPDKSII                      | 1.99 | 0.01 | 0.90 | 0.44 | 1.23 | 1.27 |
| 19381 | 0 | 13624  | EPDKSII                      | 1.99 | 0.01 | 0.90 | 0.44 | 1.23 | 1.27 |
| 19382 | 0 | 119567 | EPDLEEIVSILKNDKEGIS<br>E     | 2.98 | 0.01 | 3.33 | 0.44 | 0.85 | 0.28 |
| 19383 | 0 | 141004 | EPDP                         | 1.57 | 0.01 | 0.78 | 0.68 | 0.22 | 0.28 |
| 19384 | 0 | 141004 | EPDP                         | 1.57 | 0.01 | 0.78 | 0.68 | 0.22 | 2.12 |
| 19385 | 0 | 141004 | EPDP                         | 1.57 | 0.01 | 0.78 | 0.68 | 0.22 | 0.28 |
| 19386 | 0 | 168490 | EPDRAHYN                     | 2.10 | 0.01 | 1.86 | 0.68 | 0.22 | 0.28 |
| 19387 | 0 | 168490 | EPDRAHYN                     | 2.10 | 0.01 | 1.86 | 0.68 | 0.22 | 0.28 |
| 19388 | 0 | 168490 | EPDRAHYN                     | 2.10 | 0.01 | 1.86 | 0.68 | 0.22 | 1.48 |
| 19389 | 0 | 283911 | EPEEEDDDDDFGMGGA             | 2.70 | 0.01 | 1.61 | 0.44 | 0.85 | 1.28 |
| 19390 | 0 | 13634  | EPEGIHYHDKFE                 | 2.48 | 0.01 | 3.53 | 0.68 | 0.22 | 0.85 |
| 19391 | 0 | 13634  | EPEGIHYHDKFE                 | 2.48 | 0.01 | 3.53 | 0.68 | 0.22 | 0.85 |
| 19392 | 0 | 283931 | EPEPAEPKSAEPKPA              | 2.75 | 0.01 | 1.61 | 0.44 | 0.85 | 1.28 |
| 19393 | 0 | 13638  | EPEPDVAVL                    | 2.26 | 0.01 | 1.96 | 0.68 | 0.22 | 2.12 |
| 19394 | 0 | 13638  | EPEPDVAVL                    | 2.26 | 0.01 | 1.96 | 0.68 | 0.22 | 2.12 |

|       |   |        |                                     |      |      |      |      |      |      |
|-------|---|--------|-------------------------------------|------|------|------|------|------|------|
| 19395 | 0 | 13638  | EPEPDVAVL                           | 2.26 | 0.01 | 1.96 | 0.68 | 0.22 | 2.12 |
| 19396 | 0 | 13638  | EPEPDVAVL                           | 2.26 | 0.01 | 1.96 | 0.68 | 0.22 | 2.12 |
| 19397 | 0 | 283935 | EPEPTEPKSAEPKPA                     | 2.75 | 0.01 | 1.61 | 0.44 | 0.85 | 1.28 |
| 19398 | 0 | 13641  | EPEQVELQPPPQGG                      | 2.65 | 0.01 | 2.69 | 0.44 | 0.85 | 0.28 |
| 19399 | 0 | 13641  | EPEQVELQPPPQGG                      | 2.65 | 0.01 | 2.69 | 0.44 | 1.41 | 0.28 |
| 19400 | 0 | 13641  | EPEQVELQPPPQGG                      | 2.65 | 0.01 | 2.69 | 0.44 | 0.85 | 0.28 |
| 19401 | 0 | 13644  | EPERTAMKKIQDCY                      | 2.56 | 0.01 | 3.08 | 0.44 | 1.23 | 1.57 |
| 19402 | 0 | 13644  | EPERTAMKKIQDCY                      | 2.56 | 0.01 | 3.08 | 0.44 | 1.74 | 1.57 |
| 19403 | 0 | 13644  | EPERTAMKKIQDCY                      | 2.56 | 0.01 | 3.08 | 0.68 | 0.22 | 1.27 |
| 19404 | 0 | 13644  | EPERTAMKKIQDCY                      | 2.56 | 0.01 | 3.08 | 0.68 | 0.22 | 1.57 |
| 19405 | 0 | 13644  | EPERTAMKKIQDCY                      | 2.56 | 0.01 | 3.08 | 0.68 | 0.22 | 1.57 |
| 19406 | 0 | 115728 | EPFTESQSLT                          | 2.34 | 0.01 | 1.60 | 0.44 | 1.23 | 0.85 |
| 19407 | 0 | 115728 | EPFTESQSLT                          | 2.34 | 0.01 | 1.60 | 0.44 | 1.23 | 0.85 |
| 19408 | 0 | 13650  | EPG                                 | 1.37 | 0.01 | 3.65 | 1.15 | 0.22 | 1.34 |
| 19409 | 0 | 13651  | EPGAVIRGKKGAGGITIK<br>KTGQALVVGIYDE | 3.38 | 0.01 | 2.53 | 0.68 | 0.22 | 0.28 |
| 19410 | 0 | 225724 | EPGDTIIFEANGNLIAPR<br>Y             | 2.89 | 0.01 | 3.72 | 1.12 | 0.22 | 1.28 |
| 19411 | 0 | 108346 | EPGIAGFKGEQGPKGEP<br>G              | 2.90 | 0.01 | 1.60 | 2.46 | 0.22 | 0.28 |
| 19412 | 0 | 78375  | EPGITTNYDT                          | 2.31 | 0.01 | 2.14 | 1.15 | 0.22 | 0.28 |
| 19413 | 0 | 78375  | EPGITTNYDT                          | 2.31 | 0.01 | 2.14 | 1.15 | 0.22 | 0.28 |
| 19414 | 0 | 233178 | EPGKSFWCR                           | 2.18 | 0.01 | 3.45 | 0.68 | 0.22 | 1.48 |
| 19415 | 0 | 233178 | EPGKSFWCR                           | 2.18 | 0.01 | 3.45 | 0.68 | 0.22 | 1.48 |
| 19416 | 0 | 233178 | EPGKSFWCR                           | 2.18 | 0.01 | 3.45 | 0.68 | 0.22 | 1.48 |
| 19417 | 0 | 233178 | EPGKSFWCR                           | 2.18 | 0.01 | 3.45 | 0.68 | 0.22 | 1.48 |
| 19418 | 0 | 233178 | EPGKSFWCR                           | 2.18 | 0.01 | 3.45 | 0.68 | 0.22 | 1.48 |
| 19419 | 0 | 233178 | EPGKSFWCR                           | 2.18 | 0.01 | 3.45 | 0.68 | 0.22 | 1.48 |
| 19420 | 0 | 233178 | EPGKSFWCR                           | 2.18 | 0.01 | 3.45 | 0.68 | 0.22 | 0.85 |
| 19421 | 0 | 108916 | EPGLIDDDERNT                        | 2.46 | 0.01 | 0.90 | 1.15 | 0.22 | 1.39 |
| 19422 | 0 | 120506 | EPGLTWQSCSCRANG                     | 2.64 | 0.01 | 3.59 | 0.44 | 1.59 | 0.28 |
| 19423 | 0 | 108917 | EPGPAGVQ                            | 2.14 | 0.01 | 1.60 | 2.55 | 2.60 | 0.28 |
| 19424 | 0 | 144885 | EPGQLKLNWFKKGSS                     | 2.65 | 0.01 | 3.65 | 1.81 | 0.22 | 0.28 |
| 19425 | 0 | 144885 | EPGQLKLNWFKKGSS                     | 2.65 | 0.01 | 3.65 | 0.44 | 0.85 | 0.28 |
| 19426 | 0 | 13656  | EPGVLMGGQSESVEF                     | 2.70 | 0.01 | 2.24 | 1.15 | 0.22 | 0.85 |
| 19427 | 0 | 13657  | EPGVLMGGQSESVEFT                    | 2.75 | 0.01 | 2.24 | 0.68 | 0.22 | 0.28 |
| 19428 | 0 | 13659  | EPHSNPADLLPR                        | 2.46 | 0.01 | 0.90 | 0.68 | 0.22 | 0.28 |
| 19429 | 0 | 13661  | EPIAPYHFDLSGH                       | 2.51 | 0.01 | 2.53 | 0.44 | 1.23 | 0.85 |
| 19430 | 0 | 13670  | EPIRDALNAMTQNIR                     | 2.66 | 0.01 | 2.43 | 0.44 | 1.59 | 0.28 |
| 19431 | 0 | 13675  | EPIVGAETF                           | 2.22 | 0.01 | 2.54 | 0.68 | 0.22 | 2.12 |
| 19432 | 0 | 13675  | EPIVGAETF                           | 2.22 | 0.01 | 2.54 | 0.68 | 0.22 | 2.12 |
| 19433 | 0 | 13675  | EPIVGAETF                           | 2.22 | 0.01 | 2.54 | 0.68 | 0.22 | 2.12 |
| 19434 | 0 | 13675  | EPIVGAETF                           | 2.22 | 0.01 | 2.54 | 0.68 | 0.22 | 2.12 |
| 19435 | 0 | 13678  | EPKIGLPGPPSAPVP                     | 2.70 | 0.01 | 3.37 | 2.22 | 0.22 | 0.28 |
| 19436 | 0 | 13680  | EPKKDKKKKTDEAQPL                    | 2.76 | 0.01 | 2.91 | 0.44 | 0.85 | 0.28 |

|       |   |        |                                |      |      |      |      |      |      |
|-------|---|--------|--------------------------------|------|------|------|------|------|------|
| 19437 | 0 | 13680  | EPKKDKKKKTDEAQPL               | 2.76 | 0.01 | 2.91 | 0.68 | 0.22 | 0.28 |
| 19438 | 0 | 168492 | EPKLLAFSAPSPGDTVTA<br>VKRSS    | 3.07 | 0.01 | 3.78 | 2.02 | 1.59 | 0.85 |
| 19439 | 0 | 168492 | EPKLLAFSAPSPGDTVTA<br>VKRSS    | 3.07 | 0.01 | 3.78 | 2.02 | 1.59 | 0.85 |
| 19440 | 0 | 284039 | EPKPAEPKSAEPEPA                | 2.75 | 0.01 | 1.61 | 0.44 | 0.85 | 1.28 |
| 19441 | 0 | 284040 | EPKPAEPKSAEPEPT                | 2.75 | 0.01 | 1.61 | 0.44 | 0.85 | 1.28 |
| 19442 | 0 | 284041 | EPKPAEPKSAEPKPA                | 2.75 | 0.01 | 1.61 | 0.44 | 0.85 | 1.28 |
| 19443 | 0 | 284042 | EPKPAEPKSAGPKPA                | 2.75 | 0.01 | 1.61 | 0.44 | 0.85 | 1.28 |
| 19444 | 0 | 284046 | EPKPAESKSAEPKPA                | 2.75 | 0.01 | 1.61 | 0.44 | 0.85 | 1.28 |
| 19445 | 0 | 284047 | EPKPAESKSAGPKPA                | 2.75 | 0.01 | 1.61 | 0.44 | 0.85 | 1.28 |
| 19446 | 0 | 127963 | EPKPKKAPAKKGEKV                | 2.74 | 0.01 | 2.73 | 1.12 | 0.22 | 0.28 |
| 19447 | 0 | 127963 | EPKPKKAPAKKGEKV                | 2.74 | 0.01 | 2.73 | 0.44 | 1.13 | 0.28 |
| 19448 | 0 | 108919 | EPKRAVAREESGKPGAH<br>VTVK      | 3.02 | 0.01 | 1.75 | 1.81 | 0.22 | 0.28 |
| 19449 | 0 | 284056 | EPKSAEPKPAEPKSA                | 2.75 | 0.01 | 1.61 | 0.44 | 0.85 | 1.28 |
| 19450 | 0 | 284057 | EPKSAEPKPAEPNAA                | 2.73 | 0.01 | 1.61 | 0.44 | 0.85 | 1.28 |
| 19451 | 0 | 284058 | EPKSAEPKPAEPNSA                | 2.75 | 0.01 | 1.61 | 0.44 | 0.85 | 1.28 |
| 19452 | 0 | 284060 | EPKSAEPKPAESKSA                | 2.75 | 0.01 | 1.61 | 0.44 | 0.85 | 1.28 |
| 19453 | 0 | 515092 | EPKTDISEAPTSANRPVP<br>NESAS    | 3.11 | 0.01 | 2.24 | 0.44 | 1.41 | 1.28 |
| 19454 | 0 | 170900 | EPLFKRVLNIAV                   | 2.67 | 0.01 | 0.78 | 0.44 | 1.13 | 0.28 |
| 19455 | 0 | 13688  | EPLFPPTQIHKDYK                 | 2.67 | 0.01 | 1.66 | 0.44 | 0.85 | 0.28 |
| 19456 | 0 | 13688  | EPLFPPTQIHKDYK                 | 2.67 | 0.01 | 1.66 | 0.44 | 0.85 | 1.34 |
| 19457 | 0 | 13688  | EPLFPPTQIHKDYK                 | 2.67 | 0.01 | 1.66 | 0.44 | 0.85 | 0.28 |
| 19458 | 0 | 13689  | EPLFPPTQIHKDYKE                | 2.74 | 0.01 | 1.66 | 0.44 | 1.74 | 0.28 |
| 19459 | 0 | 131865 | EPLVFISA                       | 2.22 | 0.01 | 0.78 | 0.44 | 1.13 | 0.28 |
| 19460 | 0 | 131866 | EPLVFISAPRS                    | 2.48 | 0.01 | 0.78 | 0.44 | 1.13 | 0.28 |
| 19461 | 0 | 136203 | EPLGLQCTFINDDTYHIR<br>H        | 2.90 | 0.01 | 0.78 | 0.44 | 1.13 | 0.28 |
| 19462 | 0 | 136203 | EPLGLQCTFINDDTYHIR<br>H        | 2.90 | 0.01 | 0.78 | 0.44 | 1.41 | 0.28 |
| 19463 | 0 | 136203 | EPLGLQCTFINDDTYHIR<br>H        | 2.90 | 0.01 | 0.78 | 0.44 | 1.13 | 0.28 |
| 19464 | 0 | 114321 | EPLMEPEGESYEDSPQE<br>EYQEYEPEA | 3.24 | 0.01 | 1.75 | 2.04 | 0.22 | 0.28 |
| 19465 | 0 | 13710  | EPLRTSVDKPGSKKTQG<br>EKF       | 2.95 | 0.01 | 2.82 | 0.44 | 0.85 | 0.28 |
| 19466 | 0 | 135667 | EPLVLNSY                       | 2.12 | 0.01 | 0.78 | 0.44 | 2.35 | 0.28 |
| 19467 | 0 | 112769 | EPLYGPY                        | 2.04 | 0.01 | 0.90 | 0.44 | 1.13 | 0.28 |
| 19468 | 0 | 13714  | EPMIGVNQEL                     | 2.30 | 0.01 | 1.60 | 0.44 | 1.23 | 0.28 |
| 19469 | 0 | 115233 | EPMIGVNQELAYFPELF<br>RQ        | 2.94 | 0.01 | 1.60 | 0.44 | 1.23 | 1.28 |
| 19470 | 0 | 113372 | EPMTPHQWITLYRSY                | 2.64 | 0.01 | 0.90 | 0.44 | 1.13 | 0.28 |
| 19471 | 0 | 96260  | EPNANLSLTTDGKFLKAS<br>A        | 2.90 | 0.01 | 2.39 | 0.44 | 1.59 | 0.28 |

|                                                                                                          |   |        |                                                                                                                       |      |      |      |      |      |      |
|----------------------------------------------------------------------------------------------------------|---|--------|-----------------------------------------------------------------------------------------------------------------------|------|------|------|------|------|------|
| 19472                                                                                                    | 0 | 13719  | EPNDGEERQSYW                                                                                                          | 2.45 | 0.01 | 2.88 | 2.37 | 0.22 | 0.28 |
| 19473                                                                                                    | 0 | 13719  | EPNDGEERQSYW                                                                                                          | 2.45 | 0.01 | 2.88 | 2.22 | 0.22 | 0.28 |
| 19474                                                                                                    | 0 | 102402 | EPNNDTYSY                                                                                                             | 2.22 | 0.01 | 4.03 | 0.68 | 0.22 | 0.28 |
| 19475                                                                                                    | 0 | 102402 | EPNNDTYSY                                                                                                             | 2.22 | 0.01 | 4.03 | 0.68 | 0.22 | 0.28 |
| 19476                                                                                                    | 0 | 156864 | EPNPTRL                                                                                                               | 2.02 | 0.01 | 0.90 | 2.74 | 0.22 | 0.85 |
| 19477                                                                                                    | 0 | 284136 | EPNSAEPKPAEPKSA                                                                                                       | 2.75 | 0.01 | 1.61 | 0.44 | 0.85 | 1.28 |
| EPNTNILKDFWGNLYLLY<br>DKEYYLLNVLPNNFIDR<br>RKDSTLSINNIRSTILLAN<br>RLYSGIKVKIQRVNNSST<br>NDNLVRKNDQVYINFV |   |        |                                                                                                                       |      |      |      |      |      |      |
| 19478                                                                                                    | 0 | 13720  | ASKTHLFPLYADTATTNK<br>EKTIKISSSGNRFNQVVV<br>MNSVGNCTMNFKNNN<br>GNNIGLLGFKADTVVAS<br>TWYYTHMRDHTNSNG<br>CFWNFISEEHWQEK | 5.19 | 0.01 | 4.03 | 1.20 | 0.22 | 0.28 |
| 19479                                                                                                    | 0 | 145172 | EPPDDDDDS                                                                                                             | 2.16 | 0.01 | 2.40 | 3.41 | 0.22 | 0.28 |
| 19480                                                                                                    | 0 | 145172 | EPPDDDDDS                                                                                                             | 2.16 | 0.01 | 2.40 | 3.41 | 0.22 | 0.28 |
| 19481                                                                                                    | 0 | 145172 | EPPDDDDDS                                                                                                             | 2.16 | 0.01 | 2.40 | 1.15 | 0.22 | 0.28 |
| 19482                                                                                                    | 0 | 145172 | EPPDDDDDS                                                                                                             | 2.16 | 0.01 | 2.40 | 1.15 | 0.22 | 0.28 |
| 19483                                                                                                    | 0 | 145172 | EPPDDDDDS                                                                                                             | 2.16 | 0.01 | 2.40 | 1.15 | 0.22 | 0.28 |
| 19484                                                                                                    | 0 | 145172 | EPPDDDDDS                                                                                                             | 2.16 | 0.01 | 2.40 | 1.15 | 0.22 | 0.85 |
| 19485                                                                                                    | 0 | 145172 | EPPDDDDDS                                                                                                             | 2.16 | 0.01 | 2.40 | 1.15 | 0.22 | 0.85 |
| 19486                                                                                                    | 0 | 145172 | EPPDDDDDS                                                                                                             | 2.16 | 0.01 | 2.40 | 1.15 | 0.22 | 1.34 |
| 19487                                                                                                    | 0 | 145172 | EPPDDDDDS                                                                                                             | 2.16 | 0.01 | 2.40 | 1.15 | 0.22 | 1.75 |
| 19488                                                                                                    | 0 | 145172 | EPPDDDDDS                                                                                                             | 2.16 | 0.01 | 2.40 | 1.15 | 0.22 | 1.75 |
| 19489                                                                                                    | 0 | 515106 | EPPEDDDSATGLAFRTP<br>NPN                                                                                              | 2.95 | 4.33 | 2.40 | 0.44 | 1.59 | 1.28 |
| 19490                                                                                                    | 0 | 515107 | EPPEDDDSATGLAFRTP<br>NPN                                                                                              | 2.95 | 4.23 | 2.40 | 0.44 | 1.59 | 1.28 |
| 19491                                                                                                    | 0 | 515108 | EPPEDDDSATGLAFRTP<br>NPN                                                                                              | 2.95 | 0.01 | 2.40 | 0.44 | 1.59 | 1.28 |
| 19492                                                                                                    | 0 | 13728  | EPPVVHGC                                                                                                              | 2.12 | 0.01 | 2.68 | 0.44 | 1.59 | 0.28 |
| 19493                                                                                                    | 0 | 284197 | EPQARKQQGRDAPQA                                                                                                       | 2.71 | 0.01 | 1.61 | 0.44 | 0.85 | 1.28 |
| 19494                                                                                                    | 0 | 284198 | EPQARRQQGRNEPQA                                                                                                       | 2.73 | 0.01 | 1.61 | 0.44 | 0.85 | 1.28 |
| 19495                                                                                                    | 0 | 96262  | EPQISPGGLEPPSEKHFR<br>ETEV                                                                                            | 3.02 | 0.01 | 2.04 | 0.68 | 0.22 | 1.48 |
| 19496                                                                                                    | 0 | 96262  | EPQISPGGLEPPSEKHFR<br>ETEV                                                                                            | 3.02 | 0.01 | 2.04 | 0.68 | 0.22 | 0.85 |
| 19497                                                                                                    | 0 | 96262  | EPQISPGGLEPPSEKHFR<br>ETEV                                                                                            | 3.02 | 0.01 | 2.04 | 0.68 | 0.22 | 2.35 |



|       |   |        |                             |      |      |      |      |      |      |
|-------|---|--------|-----------------------------|------|------|------|------|------|------|
| 19498 | 0 | 96262  | EPQISPGGLEPPSEKHFR<br>ETEV  | 3.02 | 0.01 | 2.04 | 0.44 | 1.59 | 2.35 |
| 19499 | 0 | 96262  | EPQISPGGLEPPSEKHFR<br>ETEV  | 3.02 | 0.01 | 2.04 | 0.68 | 0.22 | 0.85 |
| 19500 | 0 | 284237 | EPQTTIKQPGGIKTP             | 2.72 | 0.01 | 1.61 | 0.44 | 0.85 | 1.28 |
| 19501 | 0 | 115729 | EPQVVTLPSPR                 | 2.39 | 0.01 | 0.78 | 0.44 | 0.85 | 1.48 |
| 19502 | 0 | 108921 | EPQVYTL                     | 1.99 | 0.01 | 0.78 | 0.44 | 1.13 | 0.28 |
| 19503 | 0 | 13735  | EPQVYTLPPSR                 | 2.38 | 0.01 | 0.78 | 0.44 | 0.85 | 2.66 |
| 19504 | 0 | 13735  | EPQVYTLPPSR                 | 2.38 | 0.01 | 0.78 | 0.68 | 0.22 | 0.28 |
| 19505 | 0 | 13743  | EPRCPYVGADHFDCP             | 2.66 | 0.01 | 2.69 | 1.12 | 0.22 | 1.27 |
| 19506 | 0 | 13743  | EPRCPYVGADHFDCP             | 2.66 | 0.01 | 2.69 | 1.12 | 0.22 | 0.28 |
| 19507 | 0 | 13743  | EPRCPYVGADHFDCP             | 2.66 | 0.01 | 2.69 | 1.12 | 0.22 | 0.28 |
| 19508 | 0 | 13746  | EPRGFGHIGVTVDDV             | 2.67 | 0.01 | 3.97 | 1.20 | 0.22 | 0.85 |
| 19509 | 0 | 13747  | EPRSGIDTNAYYVMTVG<br>TKT    | 2.90 | 0.01 | 2.85 | 2.02 | 0.22 | 0.28 |
| 19510 | 0 | 168493 | EPSALVFSTPTPGDKVKV<br>TQRST | 3.08 | 0.01 | 3.93 | 2.02 | 1.59 | 0.85 |
| 19511 | 0 | 168493 | EPSALVFSTPTPGDKVKV<br>TQRST | 3.08 | 0.01 | 3.93 | 2.02 | 1.59 | 0.85 |
| 19512 | 0 | 13763  | EPSGQTADWY                  | 2.26 | 0.01 | 2.56 | 0.68 | 0.22 | 0.28 |
| 19513 | 0 | 13766  | EPSLNE                      | 1.91 | 0.01 | 2.40 | 0.44 | 0.85 | 0.28 |
| 19514 | 0 | 13767  | EPSLNEEQDKRFLCKHS<br>MVDR   | 2.96 | 0.01 | 2.30 | 1.15 | 0.22 | 0.28 |
| 19515 | 0 | 13767  | EPSLNEEQDKRFLCKHS<br>MVDR   | 2.96 | 0.01 | 2.30 | 2.65 | 0.22 | 0.28 |
| 19516 | 0 | 13767  | EPSLNEEQDKRFLCKHS<br>MVDR   | 2.96 | 0.01 | 2.30 | 2.65 | 0.22 | 0.28 |
| 19517 | 0 | 131867 | EPSPESIRRKMEIDD             | 2.70 | 0.01 | 0.78 | 0.44 | 1.13 | 0.85 |
| 19518 | 0 | 95361  | EPSYEAETPPTPTPDQP<br>EP     | 3.00 | 0.01 | 2.39 | 2.25 | 0.22 | 0.28 |
| 19519 | 0 | 13770  | EPTAAAIAYGLDKVEDG<br>KER    | 2.94 | 0.01 | 2.30 | 0.44 | 0.85 | 0.28 |
| 19520 | 0 | 13770  | EPTAAAIAYGLDKVEDG<br>KER    | 2.94 | 0.01 | 2.30 | 0.44 | 1.41 | 0.28 |
| 19521 | 0 | 144255 | EPTDTPVSHDDTIVVTA<br>AEQNLQ | 3.08 | 0.01 | 3.63 | 0.68 | 0.22 | 0.85 |
| 19522 | 0 | 144255 | EPTDTPVSHDDTIVVTA<br>AEQNLQ | 3.08 | 0.01 | 3.63 | 0.68 | 0.22 | 0.85 |
| 19523 | 0 | 119143 | EPTITFGTAI                  | 2.33 | 0.01 | 0.78 | 0.44 | 1.13 | 1.66 |
| 19524 | 0 | 119143 | EPTITFGTAI                  | 2.33 | 0.01 | 0.78 | 1.20 | 0.22 | 1.27 |
| 19525 | 0 | 119143 | EPTITFGTAI                  | 2.33 | 0.01 | 0.78 | 1.20 | 0.22 | 0.28 |
| 19526 | 0 | 119143 | EPTITFGTAI                  | 2.33 | 0.01 | 0.78 | 1.20 | 0.22 | 1.34 |
| 19527 | 0 | 13775  | EPTPNAYYEGVFCSSSS           | 2.76 | 0.01 | 3.00 | 3.27 | 0.22 | 0.28 |
| 19528 | 0 | 13775  | EPTPNAYYEGVFCSSSS           | 2.76 | 0.01 | 3.00 | 0.68 | 0.22 | 0.28 |

|       |   |        |                                         |      |      |      |      |      |      |
|-------|---|--------|-----------------------------------------|------|------|------|------|------|------|
| 19529 | 0 | 13775  | EPTPNAYYEGVFCSSSS                       | 2.76 | 0.01 | 3.00 | 2.52 | 0.22 | 0.28 |
| 19530 | 0 | 13775  | EPTPNAYYEGVFCSSSS                       | 2.76 | 0.01 | 3.33 | 1.15 | 0.22 | 0.28 |
| 19531 | 0 | 13775  | EPTPNAYYEGVFCSSSS                       | 2.76 | 0.01 | 3.33 | 1.15 | 0.22 | 0.28 |
| 19532 | 0 | 13776  | EPTPPTRTPDQAEPNKP<br>TP                 | 2.94 | 0.01 | 2.39 | 0.68 | 0.22 | 0.28 |
| 19533 | 0 | 13776  | EPTPPTRTPDQAEPNKP<br>TP                 | 2.94 | 0.01 | 2.39 | 0.68 | 0.22 | 0.28 |
| 19534 | 0 | 13776  | EPTPPTRTPDQAEPNKP<br>TP                 | 2.94 | 0.01 | 2.39 | 0.68 | 0.22 | 0.28 |
| 19535 | 0 | 13776  | EPTPPTRTPDQAEPNKP<br>TP                 | 2.94 | 0.01 | 2.39 | 0.68 | 0.22 | 0.28 |
| 19536 | 0 | 133076 | EPTPSPTTPEPTSEP                         | 2.76 | 0.01 | 0.78 | 0.44 | 1.13 | 0.28 |
| 19537 | 0 | 115730 | EPTSTPTTEA                              | 2.36 | 0.01 | 1.60 | 0.44 | 1.23 | 0.85 |
| 19538 | 0 | 138372 | EPTVTISPSRTEALN                         | 2.69 | 0.01 | 0.78 | 1.20 | 0.22 | 0.28 |
| 19539 | 0 | 132269 | EPVDGVVLVDPE                            | 2.53 | 0.01 | 1.60 | 0.68 | 0.22 | 0.28 |
| 19540 | 0 | 132269 | EPVDGVVLVDPE                            | 2.53 | 0.01 | 1.60 | 0.68 | 0.22 | 0.28 |
| 19541 | 0 | 132269 | EPVDGVVLVDPE                            | 2.53 | 0.01 | 1.60 | 0.68 | 0.22 | 0.85 |
| 19542 | 0 | 115731 | EPVLGPVRGP                              | 2.35 | 0.01 | 1.60 | 0.44 | 1.23 | 0.85 |
| 19543 | 0 | 115731 | EPVLGPVRGP                              | 2.35 | 0.01 | 1.60 | 0.44 | 1.23 | 0.85 |
| 19544 | 0 | 13781  | EPVNATEDPSSGYYS                         | 2.68 | 0.01 | 2.97 | 0.44 | 1.59 | 0.28 |
| 19545 | 0 | 240871 | EPVPDDLPAQSQT                           | 2.63 | 0.01 | 4.93 | 0.44 | 1.41 | 0.28 |
| 19546 | 0 | 164506 | EPVPERANEPEEPPKIW<br>APPTREELEELLRASPEL | 3.52 | 0.01 | 3.81 | 0.68 | 0.22 | 0.85 |
| 19547 | 0 | 164506 | EPVPERANEPEEPPKIW<br>APPTREELEELLRASPEL | 3.52 | 0.01 | 3.81 | 0.68 | 0.22 | 0.28 |
| 19548 | 0 | 164506 | EPVPERANEPEEPPKIW<br>APPTREELEELLRASPEL | 3.52 | 0.01 | 3.81 | 0.68 | 0.22 | 1.48 |
| 19549 | 0 | 119568 | EPVQVDIPNNPVREGR<br>NVMTLLHLA           | 3.15 | 0.01 | 3.33 | 0.44 | 0.85 | 0.28 |
| 19550 | 0 | 119568 | EPVQVDIPNNPVREGR<br>NVMTLLHLA           | 3.15 | 0.01 | 3.33 | 2.49 | 0.85 | 0.28 |
| 19551 | 0 | 118333 | EPVSIECGHSFCQECI                        | 2.75 | 0.01 | 0.78 | 0.44 | 1.13 | 0.28 |
| 19552 | 0 | 118333 | EPVSIECGHSFCQECI                        | 2.75 | 0.01 | 0.78 | 0.44 | 1.41 | 0.28 |
| 19553 | 0 | 238348 | EPVSIECGHSFCQECISQ                      | 2.87 | 0.01 | 0.78 | 0.44 | 1.13 | 0.28 |
| 19554 | 0 | 13784  | EPVVVHITDDNNEPIAPY<br>HFDLSGHAFGAMA     | 3.35 | 0.01 | 2.53 | 0.68 | 0.22 | 0.28 |
| 19555 | 0 | 13784  | EPVVVHITDDNNEPIAPY<br>HFDLSGHAFGAMA     | 3.35 | 0.01 | 2.53 | 1.12 | 0.22 | 0.28 |
| 19556 | 0 | 13784  | EPVVVHITDDNNEPIAPY<br>HFDLSGHAFGAMA     | 3.35 | 0.01 | 2.53 | 0.68 | 0.22 | 0.85 |

|       |   |        |                                                      |      |      |      |      |      |      |
|-------|---|--------|------------------------------------------------------|------|------|------|------|------|------|
| 19557 | 0 | 13784  | EPVVVHITDDNNEEPIAPY<br>HFDLSGHAFGAMA                 | 3.35 | 0.01 | 2.53 | 0.68 | 0.22 | 0.85 |
| 19558 | 0 | 13784  | EPVVVHITDDNNEEPIAPY<br>HFDLSGHAFGAMA                 | 3.35 | 0.01 | 2.53 | 0.68 | 0.22 | 0.85 |
| 19559 | 0 | 13784  | EPVVVHITDDNNEEPIAPY<br>HFDLSGHAFGAMA                 | 3.35 | 0.01 | 2.53 | 0.68 | 0.22 | 0.85 |
| 19560 | 0 | 13784  | EPVVVHITDDNNEEPIAPY<br>HFDLSGHAFGAMA                 | 3.35 | 0.01 | 2.53 | 1.12 | 0.22 | 2.35 |
| 19561 | 0 | 13785  | EPWFLHGLGLARTYWR<br>DTNTG                            | 2.98 | 0.01 | 2.40 | 1.15 | 0.22 | 0.28 |
| 19562 | 0 | 13785  | EPWFLHGLGLARTYWR<br>DTNTG                            | 2.98 | 0.01 | 2.40 | 1.15 | 0.22 | 2.02 |
| 19563 | 0 | 13785  | EPWFLHGLGLARTYWR<br>DTNTG                            | 2.98 | 0.01 | 2.40 | 1.15 | 0.22 | 0.85 |
| 19564 | 0 | 130810 | EPWWSMH                                              | 2.01 | 0.01 | 0.90 | 0.44 | 1.93 | 0.85 |
| 19565 | 0 | 13788  | EPYPMSEANYVRPMP                                      | 2.71 | 0.01 | 0.90 | 1.15 | 0.22 | 0.28 |
| 19566 | 0 | 284409 | EPYSAEPKPAEPKSA                                      | 2.75 | 0.01 | 1.61 | 0.44 | 0.85 | 1.28 |
| 19567 | 0 | 423657 | EQAGGAFITGAR                                         | 2.49 | 0.01 | 0.90 | 2.46 | 0.22 | 1.39 |
| 19568 | 0 | 423657 | EQAGGAFITGAR                                         | 2.49 | 0.01 | 0.90 | 0.44 | 1.13 | 0.28 |
| 19569 | 0 | 13797  | EQAGRQAGGKLAPNNL<br>ACSQWGWCGSTDEYCS<br>PDHNCQSNACKD | 3.70 | 0.01 | 0.90 | 0.68 | 0.22 | 1.27 |
| 19570 | 0 | 13798  | EQAGRQAGGKLCPNNL<br>CCSQWGWCGSTDEYCS<br>PDHNCQSNCKD  | 3.70 | 0.01 | 0.90 | 0.44 | 1.23 | 1.27 |
| 19571 | 0 | 13798  | EQAGRQAGGKLCPNNL<br>CCSQWGWCGSTDEYCS<br>PDHNCQSNCKD  | 3.70 | 0.01 | 0.90 | 0.68 | 0.22 | 1.27 |
| 19572 | 0 | 13798  | EQAGRQAGGKLCPNNL<br>CCSQWGWCGSTDEYCS<br>PDHNCQSNCKD  | 3.70 | 0.01 | 0.90 | 0.44 | 1.23 | 3.40 |
| 19573 | 0 | 13799  | EQAISALPDYASQPGKP<br>PREDLK                          | 3.09 | 0.01 | 2.58 | 0.44 | 0.85 | 0.85 |
| 19574 | 0 | 13799  | EQAISALPDYASQPGKP<br>PREDLK                          | 3.09 | 0.01 | 2.58 | 0.44 | 0.85 | 0.85 |
| 19575 | 0 | 13799  | EQAISALPDYASQPGKP<br>PREDLK                          | 3.09 | 0.01 | 2.58 | 0.44 | 0.85 | 1.34 |
| 19576 | 0 | 13799  | EQAISALPDYASQPGKP<br>PREDLK                          | 3.09 | 0.01 | 2.58 | 0.44 | 0.85 | 1.75 |
| 19577 | 0 | 13799  | EQAISALPDYASQPGKP<br>PREDLK                          | 3.09 | 0.01 | 2.58 | 0.44 | 0.85 | 1.75 |
| 19578 | 0 | 115048 | EQAPEYRGRTELLKESIG<br>EG                             | 2.94 | 0.01 | 2.19 | 2.04 | 0.22 | 0.28 |
| 19579 | 0 | 115048 | EQAPEYRGRTELLKESIG<br>EG                             | 2.94 | 0.01 | 2.19 | 2.04 | 0.22 | 0.28 |

|       |   |        |                                                     |      |      |      |      |      |      |
|-------|---|--------|-----------------------------------------------------|------|------|------|------|------|------|
| 19580 | 0 | 225276 | EQAPEYRGRTELLKETISE<br>GKVT                         | 3.08 | 0.01 | 1.75 | 1.81 | 0.22 | 0.28 |
| 19581 | 0 | 108348 | EQAQSQTLP                                           | 2.23 | 0.01 | 0.90 | 0.44 | 1.13 | 1.39 |
| 19582 | 0 | 114322 | EQASHLGGAVFSGAGNI<br>AAATGLVK                       | 3.15 | 0.01 | 1.75 | 2.04 | 0.22 | 0.28 |
| 19583 | 0 | 170905 | EQASKAWFGELAE                                       | 2.56 | 0.01 | 3.38 | 0.44 | 0.85 | 2.51 |
| 19584 | 0 | 156865 | EQATCDHTNEWCAKM<br>M                                | 2.72 | 0.01 | 0.90 | 2.74 | 0.22 | 0.85 |
| 19585 | 0 | 156865 | EQATCDHTNEWCAKM<br>M                                | 2.72 | 0.01 | 0.90 | 0.68 | 0.22 | 0.28 |
| 19586 | 0 | 13808  | EQCGRQAGGKLCPNL<br>CCSQWGWCGSTDEYCS<br>PDHNCQSNCKD  | 3.70 | 0.01 | 2.60 | 0.44 | 1.23 | 1.27 |
| 19587 | 0 | 13808  | EQCGRQAGGKLCPNL<br>CCSQWGWCGSTDEYCS<br>PDHNCQSNCKD  | 3.70 | 0.01 | 2.60 | 0.68 | 0.22 | 1.27 |
| 19588 | 0 | 13808  | EQCGRQAGGKLCPNL<br>CCSQWGWCGSTDEYCS<br>PDHNCQSNCKD  | 3.70 | 0.01 | 2.60 | 0.44 | 1.23 | 3.40 |
| 19589 | 0 | 13808  | EQCGRQAGGKLCPNL<br>CCSQWGWCGSTDEYCS<br>PDHNCQSNCKD  | 3.70 | 0.01 | 2.60 | 0.44 | 1.23 | 1.57 |
| 19590 | 0 | 13808  | EQCGRQAGGKLCPNL<br>CCSQWGWCGSTDEYCS<br>PDHNCQSNCKD  | 3.70 | 0.01 | 2.60 | 0.44 | 1.23 | 1.27 |
| 19591 | 0 | 13808  | EQCGRQAGGKLCPNL<br>CCSQWGWCGSTDEYCS<br>PDHNCQSNCKD  | 3.70 | 0.01 | 2.60 | 0.44 | 1.23 | 1.27 |
| 19592 | 0 | 13808  | EQCGRQAGGKLCPNL<br>CCSQWGWCGSTDEYCS<br>PDHNCQSNCKD  | 3.70 | 0.01 | 2.60 | 0.44 | 1.23 | 0.28 |
| 19593 | 0 | 13808  | EQCGRQAGGKLCPNL<br>CCSQWGWCGSTDEYCS<br>PDHNCQSNCKD  | 3.70 | 0.01 | 2.60 | 1.12 | 0.22 | 0.85 |
| 19594 | 0 | 13809  | EQCGRQAGGKLCPSGM<br>CCSQFGYCGKGPKYCGR               | 3.45 | 0.01 | 0.90 | 0.44 | 1.23 | 0.28 |
| 19595 | 0 | 13810  | EQCGRQAGGKLCPSGM<br>CCSQFGYCGKGPKYCSP<br>DHNCQSNCKD | 3.70 | 0.01 | 0.90 | 0.44 | 1.23 | 1.27 |
| 19596 | 0 | 284450 | EQDGEDTTSEGEKNV                                     | 2.70 | 0.01 | 1.61 | 0.44 | 0.85 | 1.28 |
| 19597 | 0 | 145175 | EQDRKPRN                                            | 2.12 | 0.01 | 2.40 | 3.41 | 0.22 | 0.28 |
| 19598 | 0 | 145175 | EQDRKPRN                                            | 2.12 | 0.01 | 2.40 | 3.41 | 0.22 | 0.28 |
| 19599 | 0 | 145175 | EQDRKPRN                                            | 2.12 | 0.01 | 2.40 | 1.15 | 0.22 | 0.28 |
| 19600 | 0 | 145175 | EQDRKPRN                                            | 2.12 | 0.01 | 2.40 | 1.15 | 0.22 | 0.28 |
| 19601 | 0 | 145175 | EQDRKPRN                                            | 2.12 | 0.01 | 2.40 | 1.15 | 0.22 | 0.28 |
| 19602 | 0 | 145175 | EQDRKPRN                                            | 2.12 | 0.01 | 2.40 | 1.15 | 0.22 | 0.85 |

|       |   |        |                                    |      |      |      |      |      |      |
|-------|---|--------|------------------------------------|------|------|------|------|------|------|
| 19603 | 0 | 145175 | EQDRKPRN                           | 2.12 | 0.01 | 2.40 | 1.15 | 0.22 | 0.85 |
| 19604 | 0 | 145175 | EQDRKPRN                           | 2.12 | 0.01 | 2.40 | 1.15 | 0.22 | 1.34 |
| 19605 | 0 | 145175 | EQDRKPRN                           | 2.12 | 0.01 | 2.40 | 1.15 | 0.22 | 1.75 |
| 19606 | 0 | 145175 | EQDRKPRN                           | 2.12 | 0.01 | 2.40 | 1.15 | 0.22 | 1.75 |
| 19607 | 0 | 117835 | EQEAKQKLEEDAEMK                    | 2.73 | 0.01 | 0.78 | 3.05 | 1.13 | 0.28 |
| 19608 | 0 | 284463 | EQEDVGPRHVDPDHF                    | 2.71 | 0.01 | 1.61 | 0.44 | 0.85 | 1.28 |
| 19609 | 0 | 284466 | EQEEISDDDDGEDE                     | 2.73 | 0.01 | 1.61 | 0.44 | 0.85 | 1.28 |
| 19610 | 0 | 98767  | EQEERGQRRW                         | 2.36 | 0.01 | 2.16 | 0.44 | 1.23 | 0.85 |
| 19611 | 0 | 108349 | EQEETNPEVLIK                       | 2.48 | 0.01 | 3.27 | 2.49 | 0.85 | 0.28 |
| 19612 | 0 | 108349 | EQEETNPEVLIK                       | 2.48 | 0.01 | 3.27 | 0.44 | 0.85 | 0.28 |
| 19613 | 0 | 108350 | EQEETNPEVLIKDLQD                   | 2.75 | 0.01 | 3.27 | 2.49 | 0.85 | 0.28 |
| 19614 | 0 | 108350 | EQEETNPEVLIKDLQD                   | 2.75 | 0.01 | 3.27 | 0.44 | 0.85 | 0.28 |
| 19615 | 0 | 13815  | EQEFLKYQQQQGGS                     | 2.69 | 0.01 | 2.72 | 0.44 | 1.23 | 0.85 |
| 19616 | 0 | 153379 | EQEFTNITDRV                        | 2.48 | 0.01 | 0.90 | 1.15 | 0.22 | 0.28 |
| 19617 | 0 | 153379 | EQEFTNITDRV                        | 2.48 | 0.01 | 0.90 | 0.68 | 0.22 | 0.28 |
| 19618 | 0 | 153379 | EQEFTNITDRV                        | 2.48 | 0.01 | 0.90 | 0.68 | 0.22 | 0.28 |
| 19619 | 0 | 153379 | EQEFTNITDRV                        | 2.48 | 0.01 | 0.90 | 0.68 | 0.22 | 0.28 |
| 19620 | 0 | 153379 | EQEFTNITDRV                        | 2.48 | 0.01 | 0.90 | 0.68 | 0.22 | 0.28 |
| 19621 | 0 | 153379 | EQEFTNITDRV                        | 2.48 | 0.01 | 0.90 | 0.68 | 0.22 | 0.28 |
| 19622 | 0 | 153379 | EQEFTNITDRV                        | 2.48 | 0.01 | 0.90 | 0.68 | 0.22 | 0.28 |
| 19623 | 0 | 153379 | EQEFTNITDRV                        | 2.48 | 0.01 | 0.90 | 0.68 | 0.22 | 0.28 |
| 19624 | 0 | 153379 | EQEFTNITDRV                        | 2.48 | 0.01 | 0.90 | 0.68 | 0.22 | 0.28 |
| 19625 | 0 | 153379 | EQEFTNITDRV                        | 2.48 | 0.01 | 0.90 | 0.68 | 0.22 | 0.28 |
| 19626 | 0 | 153379 | EQEFTNITDRV                        | 2.48 | 0.01 | 0.90 | 0.68 | 0.22 | 0.28 |
| 19627 | 0 | 153379 | EQEFTNITDRV                        | 2.48 | 0.01 | 0.90 | 0.68 | 0.22 | 0.28 |
| 19628 | 0 | 153379 | EQEFTNITDRV                        | 2.48 | 0.01 | 0.90 | 0.68 | 0.22 | 0.28 |
| 19629 | 0 | 153379 | EQEFTNITDRV                        | 2.48 | 0.01 | 0.90 | 0.68 | 0.22 | 0.28 |
| 19630 | 0 | 153379 | EQEFTNITDRV                        | 2.48 | 0.01 | 0.90 | 0.68 | 0.22 | 0.28 |
| 19631 | 0 | 153379 | EQEFTNITDRV                        | 2.48 | 0.01 | 0.90 | 0.68 | 0.22 | 0.28 |
| 19632 | 0 | 153379 | EQEFTNITDRV                        | 2.48 | 0.01 | 0.90 | 0.68 | 0.22 | 0.28 |
| 19633 | 0 | 153379 | EQEFTNITDRV                        | 2.48 | 0.01 | 0.90 | 0.68 | 0.22 | 0.28 |
| 19634 | 0 | 153379 | EQEFTNITDRV                        | 2.48 | 0.01 | 0.90 | 0.68 | 0.22 | 0.28 |
| 19635 | 0 | 153379 | EQEFTNITDRV                        | 2.48 | 0.01 | 0.90 | 0.68 | 0.22 | 1.48 |
| 19636 | 0 | 153379 | EQEFTNITDRV                        | 2.48 | 0.01 | 0.90 | 0.68 | 0.22 | 1.48 |
| 19637 | 0 | 153379 | EQEFTNITDRV                        | 2.48 | 0.01 | 0.90 | 0.68 | 0.22 | 1.48 |
| 19638 | 0 | 153379 | EQEFTNITDRV                        | 2.48 | 0.01 | 0.90 | 0.68 | 0.22 | 1.48 |
| 19639 | 0 | 284479 | EQEKKEEEEEEDGIE                    | 2.72 | 0.01 | 1.61 | 0.44 | 0.85 | 1.28 |
| 19640 | 0 | 226168 | EQELLELDKWASLW                     | 2.65 | 0.01 | 2.54 | 0.44 | 0.85 | 0.28 |
| 19641 | 0 | 226168 | EQELLELDKWASLW                     | 2.65 | 0.01 | 2.54 | 0.44 | 0.85 | 0.28 |
| 19642 | 0 | 226168 | EQELLELDKWASLW                     | 2.65 | 0.01 | 2.54 | 0.44 | 0.85 | 1.34 |
| 19643 | 0 | 13819  | EQELNFPHEVLDDAA                    | 2.66 | 0.01 | 4.15 | 1.15 | 0.22 | 0.85 |
| 19644 | 0 | 13819  | EQELNFPHEVLDDAA                    | 2.66 | 0.01 | 4.15 | 1.12 | 0.22 | 1.48 |
| 19645 | 0 | 13822  | EQFAKTCPMQAVKGG<br>WASTLCRSVYSGNVR | 3.31 | 0.01 | 0.90 | 1.15 | 0.22 | 1.27 |

|       |   |        |                                   |      |      |      |      |      |      |
|-------|---|--------|-----------------------------------|------|------|------|------|------|------|
| 19646 | 0 | 113373 | EQFNWVSRLANLTQGE<br>DQYY          | 2.90 | 3.70 | 0.78 | 1.81 | 0.22 | 0.28 |
| 19647 | 0 | 113373 | EQFNWVSRLANLTQGE<br>DQYY          | 2.90 | 3.70 | 0.78 | 3.61 | 0.22 | 0.28 |
| 19648 | 0 | 110833 | EQFNWVSRLANLTQGE<br>DQYY          | 2.90 | 0.01 | 0.78 | 1.81 | 1.41 | 2.51 |
| 19649 | 0 | 110833 | EQFNWVSRLANLTQGE<br>DQYY          | 2.90 | 0.01 | 0.78 | 1.81 | 1.41 | 1.27 |
| 19650 | 0 | 148584 | EQFPQQQFP                         | 2.35 | 0.01 | 1.86 | 0.44 | 1.23 | 0.85 |
| 19651 | 0 | 134048 | EQFRMRRAEDP                       | 2.49 | 0.01 | 0.78 | 0.68 | 0.22 | 0.28 |
| 19652 | 0 | 13830  | EQGGLCKALQ                        | 2.32 | 0.01 | 2.04 | 0.44 | 0.85 | 0.28 |
| 19653 | 0 | 227143 | EQGKEVLEKARGSTY                   | 2.67 | 0.01 | 2.48 | 0.44 | 1.59 | 0.28 |
| 19654 | 0 | 78643  | EQGMQLAEQFKQKALG<br>L             | 2.84 | 0.01 | 1.72 | 0.44 | 1.59 | 0.28 |
| 19655 | 0 | 78643  | EQGMQLAEQFKQKALG<br>L             | 2.84 | 0.01 | 1.72 | 0.44 | 0.85 | 0.28 |
| 19656 | 0 | 108923 | EQGPKGEP                          | 2.17 | 0.01 | 1.60 | 2.61 | 0.22 | 0.28 |
| 19657 | 0 | 13834  | EQGSENEEIFVEEVSA                  | 2.76 | 0.01 | 1.66 | 0.44 | 1.74 | 0.28 |
| 19658 | 0 | 13834  | EQGSENEEIFVEEVSA                  | 2.76 | 0.01 | 1.66 | 1.20 | 0.22 | 0.28 |
| 19659 | 0 | 13834  | EQGSENEEIFVEEVSA                  | 2.76 | 0.01 | 1.66 | 0.44 | 1.74 | 0.28 |
| 19660 | 0 | 13834  | EQGSENEEIFVEEVSA                  | 2.76 | 0.01 | 1.66 | 0.44 | 1.74 | 0.28 |
| 19661 | 0 | 13834  | EQGSENEEIFVEEVSA                  | 2.76 | 0.01 | 1.66 | 0.44 | 1.74 | 0.28 |
| 19662 | 0 | 13834  | EQGSENEEIFVEEVSA                  | 2.76 | 0.01 | 1.66 | 0.44 | 1.74 | 0.28 |
| 19663 | 0 | 13834  | EQGSENEEIFVEEVSA                  | 2.76 | 0.01 | 1.66 | 3.27 | 0.22 | 0.28 |
| 19664 | 0 | 13837  | EQHHRRTDN                         | 2.21 | 0.01 | 3.28 | 0.68 | 0.22 | 2.75 |
| 19665 | 0 | 13837  | EQHHRRTDN                         | 2.21 | 0.01 | 3.28 | 0.68 | 0.22 | 2.98 |
| 19666 | 0 | 13838  | EQHLMQKIQRDEDSY                   | 2.67 | 0.01 | 2.16 | 0.44 | 1.23 | 1.48 |
| 19667 | 0 | 119448 | EQHLPDDDKTMPSERLD<br>D            | 2.83 | 0.01 | 0.78 | 0.44 | 1.13 | 2.75 |
| 19668 | 0 | 103886 | EQHNPINAGTELSAT                   | 2.67 | 0.01 | 3.00 | 1.20 | 0.22 | 1.34 |
| 19669 | 0 | 103886 | EQHNPINAGTELSAT                   | 2.67 | 0.01 | 3.00 | 1.20 | 0.22 | 0.85 |
| 19670 | 0 | 122338 | EQHSKEDVKKGCALELV<br>PLSLSDIEQIAN | 3.31 | 0.01 | 2.22 | 0.44 | 1.74 | 1.34 |
| 19671 | 0 | 122338 | EQHSKEDVKKGCALELV<br>PLSLSDIEQIAN | 3.31 | 0.01 | 2.22 | 0.44 | 1.74 | 0.28 |
| 19672 | 0 | 122338 | EQHSKEDVKKGCALELV<br>PLSLSDIEQIAN | 3.31 | 0.01 | 2.22 | 0.44 | 1.74 | 0.28 |
| 19673 | 0 | 13844  | EQIKTLTNKLKAAEA                   | 2.72 | 0.01 | 3.15 | 0.44 | 1.23 | 0.85 |
| 19674 | 0 | 13844  | EQIKTLTNKLKAAEA                   | 2.72 | 0.01 | 3.15 | 0.44 | 1.23 | 0.85 |
| 19675 | 0 | 181307 | EQIRALSKRAKSSSRKTIS<br>SEDKPFN    | 3.20 | 0.01 | 2.72 | 0.44 | 1.23 | 1.27 |
| 19676 | 0 | 140672 | EQIYRVDLRTLRL                     | 2.48 | 0.01 | 2.19 | 3.42 | 0.22 | 0.28 |
| 19677 | 0 | 140672 | EQIYRVDLRTLRL                     | 2.48 | 0.01 | 2.19 | 3.42 | 0.22 | 0.28 |
| 19678 | 0 | 140672 | EQIYRVDLRTLRL                     | 2.48 | 0.01 | 2.19 | 3.42 | 2.35 | 0.28 |
| 19679 | 0 | 140672 | EQIYRVDLRTLRL                     | 2.48 | 0.01 | 2.19 | 3.42 | 2.35 | 0.28 |
| 19680 | 0 | 140672 | EQIYRVDLRTLRL                     | 2.48 | 0.01 | 2.19 | 3.42 | 0.22 | 0.28 |
| 19681 | 0 | 140672 | EQIYRVDLRTLRL                     | 2.48 | 0.01 | 2.19 | 3.42 | 0.22 | 0.28 |

|       |   |        |                         |      |      |      |      |      |      |
|-------|---|--------|-------------------------|------|------|------|------|------|------|
| 19682 | 0 | 142636 | EQIYRVDLRTLRYGY         | 2.66 | 0.01 | 2.19 | 3.42 | 0.22 | 1.34 |
| 19683 | 0 | 142636 | EQIYRVDLRTLRYGY         | 2.66 | 0.01 | 2.19 | 3.42 | 2.60 | 1.75 |
| 19684 | 0 | 142146 | EQKLISEEDL              | 2.33 | 0.01 | 0.78 | 0.68 | 0.22 | 1.48 |
| 19685 | 0 | 103147 | EQKLISEEDLN             | 2.41 | 0.01 | 0.90 | 0.68 | 0.22 | 2.49 |
| 19686 | 0 | 103147 | EQKLISEEDLN             | 2.41 | 0.01 | 0.90 | 0.68 | 0.22 | 3.13 |
| 19687 | 0 | 103147 | EQKLISEEDLN             | 2.41 | 0.01 | 0.90 | 0.68 | 0.22 | 3.13 |
| 19688 | 0 | 13856  | EQKLRSAGELELQFRRVK<br>C | 2.91 | 0.01 | 2.53 | 0.44 | 1.23 | 0.85 |
| 19689 | 0 | 13860  | EQKSKQ                  | 1.91 | 0.01 | 2.85 | 0.44 | 0.85 | 0.28 |
| 19690 | 0 | 13861  | EQKSKQN                 | 2.04 | 0.01 | 2.85 | 0.44 | 1.13 | 1.27 |
| 19691 | 0 | 284627 | EQKTAPFGQAAAGDK         | 2.68 | 0.01 | 1.61 | 0.44 | 0.85 | 1.28 |
| 19692 | 0 | 106398 | EQLAEVAVSAKR            | 2.50 | 0.01 | 2.25 | 1.12 | 0.22 | 1.27 |
| 19693 | 0 | 106398 | EQLAEVAVSAKR            | 2.50 | 0.01 | 2.25 | 1.12 | 0.22 | 0.85 |
| 19694 | 0 | 139730 | EQLAGNLRNIE             | 2.50 | 0.01 | 2.75 | 1.20 | 0.22 | 0.28 |
| 19695 | 0 | 139730 | EQLAGNLRNIE             | 2.50 | 0.01 | 2.75 | 0.68 | 0.22 | 0.28 |
| 19696 | 0 | 127964 | EQKIEKLIEDDE            | 2.52 | 0.01 | 0.78 | 1.20 | 0.22 | 0.28 |
| 19697 | 0 | 13871  | EQKIEKLIEDDKNSQ         | 2.71 | 0.01 | 4.33 | 1.12 | 0.22 | 0.28 |
| 19698 | 0 | 13871  | EQKIEKLIEDDKNSQ         | 2.71 | 0.01 | 4.33 | 4.15 | 0.22 | 0.28 |
| 19699 | 0 | 13871  | EQKIEKLIEDDKNSQ         | 2.71 | 0.01 | 4.33 | 4.15 | 0.22 | 3.16 |
| 19700 | 0 | 13871  | EQKIEKLIEDDKNSQ         | 2.71 | 0.01 | 4.33 | 4.15 | 0.22 | 0.85 |
| 19701 | 0 | 110834 | EQKKGQKSRLGDLYEE<br>EMR | 2.97 | 4.63 | 0.78 | 1.81 | 1.41 | 2.51 |
| 19702 | 0 | 110834 | EQKKGQKSRLGDLYEE<br>EMR | 2.97 | 4.63 | 0.78 | 1.81 | 1.41 | 1.27 |
| 19703 | 0 | 190408 | EQLRLKKYKVPQLE          | 2.72 | 0.01 | 1.60 | 0.44 | 1.23 | 0.28 |
| 19704 | 0 | 188137 | EQLNNSFTSAFLESQ         | 2.71 | 0.01 | 1.66 | 1.20 | 0.22 | 0.28 |
| 19705 | 0 | 188137 | EQLNNSFTSAFLESQ         | 2.71 | 0.01 | 1.66 | 0.68 | 0.22 | 0.28 |
| 19706 | 0 | 118335 | EQLRILGEKEAKLAQQS<br>QA | 2.94 | 0.01 | 0.78 | 0.44 | 1.13 | 0.28 |
| 19707 | 0 | 118335 | EQLRILGEKEAKLAQQS<br>QA | 2.94 | 0.01 | 0.78 | 0.44 | 1.41 | 0.28 |
| 19708 | 0 | 115234 | EQLTKCEVFR              | 2.30 | 0.01 | 1.60 | 0.44 | 1.23 | 0.85 |
| 19709 | 0 | 115234 | EQLTKCEVFR              | 2.30 | 0.01 | 1.60 | 0.44 | 1.23 | 0.85 |
| 19710 | 0 | 13888  | EQNKKFFADKPDESTL        | 2.72 | 0.01 | 2.30 | 0.44 | 0.85 | 0.28 |
| 19711 | 0 | 139731 | EQNPQHFIEDLEKVRVE       | 2.78 | 0.01 | 3.85 | 0.44 | 1.41 | 0.28 |
| 19712 | 0 | 139731 | EQNPQHFIEDLEKVRVE       | 2.78 | 0.01 | 3.85 | 0.44 | 1.41 | 0.28 |
| 19713 | 0 | 13893  | EQNQEQKRAAQRAAG         | 2.73 | 0.01 | 2.43 | 1.20 | 0.22 | 0.28 |
| 19714 | 0 | 13893  | EQNQEQKRAAQRAAG         | 2.73 | 0.01 | 2.43 | 1.20 | 0.22 | 0.28 |
| 19715 | 0 | 13893  | EQNQEQKRAAQRAAG         | 2.73 | 0.01 | 2.43 | 1.20 | 0.22 | 0.28 |
| 19716 | 0 | 13894  | EQNVPD                  | 1.88 | 0.01 | 3.17 | 2.37 | 0.22 | 0.28 |

|       |   |        |                                        |      |      |      |      |      |      |
|-------|---|--------|----------------------------------------|------|------|------|------|------|------|
| 19717 | 0 | 13897  | EQPFPSRLGPLVTLE                        | 2.69 | 0.01 | 3.37 | 2.22 | 0.22 | 0.28 |
| 19718 | 0 | 515247 | EQPKPESELTEKA                          | 2.70 | 0.01 | 2.24 | 0.44 | 1.41 | 1.28 |
| 19719 | 0 | 13898  | EQPTLTFGAGVNVPA<br>GAA                 | 2.96 | 0.01 | 2.76 | 0.44 | 1.59 | 0.28 |
| 19720 | 0 | 13899  | EQPTTRAQ                               | 2.13 | 0.01 | 3.61 | 2.37 | 0.22 | 0.28 |
| 19721 | 0 | 13899  | EQPTTRAQ                               | 2.13 | 0.01 | 3.61 | 1.12 | 0.22 | 0.28 |
| 19722 | 0 | 13899  | EQPTTRAQ                               | 2.13 | 0.01 | 3.61 | 1.12 | 0.22 | 1.34 |
| 19723 | 0 | 13900  | EQPTTRAQKLFAMWRI                       | 2.70 | 0.01 | 3.61 | 2.37 | 0.22 | 0.28 |
| 19724 | 0 | 13900  | EQPTTRAQKLFAMWRI                       | 2.70 | 0.01 | 3.61 | 1.12 | 0.22 | 0.28 |
| 19725 | 0 | 13900  | EQPTTRAQKLFAMWRI                       | 2.70 | 0.01 | 3.61 | 1.12 | 0.22 | 1.34 |
| 19726 | 0 | 13901  | EQPTTRVQ                               | 2.13 | 0.01 | 0.90 | 1.15 | 0.22 | 0.28 |
| 19727 | 0 | 13901  | EQPTTRVQ                               | 2.13 | 0.01 | 0.90 | 1.15 | 0.22 | 0.28 |
| 19728 | 0 | 13901  | EQPTTRVQ                               | 2.13 | 0.01 | 0.90 | 1.12 | 0.22 | 0.28 |
| 19729 | 0 | 13901  | EQPTTRVQ                               | 2.13 | 0.01 | 0.90 | 3.16 | 0.22 | 0.28 |
| 19730 | 0 | 13902  | EQPYIEN                                | 2.03 | 0.01 | 0.90 | 1.12 | 0.22 | 1.39 |
| 19731 | 0 | 13903  | EQPYLHV                                | 1.99 | 0.01 | 0.90 | 1.12 | 0.22 | 1.39 |
| 19732 | 0 | 13904  | EQPYRSM                                | 1.99 | 0.01 | 0.90 | 1.12 | 0.22 | 1.39 |
| 19733 | 0 | 170910 | EQQETIDKLRGIVSE                        | 2.66 | 0.01 | 0.78 | 0.44 | 1.13 | 0.28 |
| 19734 | 0 | 13908  | EQQKEQCVKECEKYY                        | 2.73 | 0.01 | 3.12 | 0.44 | 1.23 | 1.57 |
| 19735 | 0 | 181606 | EQQLKGTLSRAQFVD                        | 2.64 | 0.01 | 3.26 | 2.37 | 0.22 | 1.28 |
| 19736 | 0 | 190740 | EQQQFPQQQF                             | 2.36 | 0.01 | 1.86 | 0.44 | 1.23 | 0.28 |
| 19737 | 0 | 115732 | EQQQTEDELQ                             | 2.37 | 0.01 | 1.60 | 0.44 | 1.23 | 0.85 |
| 19738 | 0 | 115732 | EQQQTEDELQ                             | 2.37 | 0.01 | 1.60 | 0.44 | 1.23 | 0.85 |
| 19739 | 0 | 115235 | EQQQTEDELQDKIHPFA<br>QTQ               | 2.96 | 0.01 | 1.60 | 0.44 | 1.23 | 2.51 |
| 19740 | 0 | 13911  | EQQRFRNCQRYV                           | 2.49 | 0.01 | 3.12 | 0.44 | 1.23 | 0.85 |
| 19741 | 0 | 237704 | EQQRGKGSFPAM                           | 2.44 | 0.01 | 0.78 | 0.44 | 1.13 | 1.27 |
| 19742 | 0 | 237704 | EQQRGKGSFPAM                           | 2.44 | 0.01 | 0.78 | 0.44 | 1.13 | 1.27 |
| 19743 | 0 | 237704 | EQQRGKGSFPAM                           | 2.44 | 0.01 | 0.78 | 0.44 | 1.13 | 1.27 |
| 19744 | 0 | 237704 | EQQRGKGSFPAM                           | 2.44 | 0.01 | 0.78 | 0.44 | 1.13 | 0.85 |
| 19745 | 0 | 237704 | EQQRGKGSFPAM                           | 2.44 | 0.01 | 0.78 | 0.44 | 1.13 | 1.27 |
| 19746 | 0 | 13912  | EQQRYLNNFRFIELV                        | 2.69 | 0.01 | 4.23 | 3.27 | 0.22 | 0.28 |
| 19747 | 0 | 13912  | EQQRYLNNFRFIELV                        | 2.69 | 0.01 | 4.23 | 3.27 | 0.22 | 1.34 |
| 19748 | 0 | 127965 | EQQSAVDADDSHFVSIE<br>LE                | 2.91 | 0.01 | 2.36 | 0.68 | 0.22 | 0.28 |
| 19749 | 0 | 13913  | EQQSDLEQERLAKEKLQ                      | 2.84 | 0.01 | 1.66 | 0.44 | 0.85 | 0.28 |
| 19750 | 0 | 13913  | EQQSDLEQERLAKEKLQ                      | 2.84 | 0.01 | 1.66 | 0.68 | 0.22 | 0.28 |
| 19751 | 0 | 13913  | EQQSDLEQERLAKEKLQ                      | 2.84 | 0.01 | 1.66 | 1.20 | 0.22 | 0.28 |
| 19752 | 0 | 13914  | EQQSDLEQERLAKEKLQ<br>EQQSDLEQERRAKEKLQ | 3.52 | 0.01 | 1.66 | 0.44 | 0.85 | 0.28 |



|       |   |        |                             |      |      |      |      |      |      |
|-------|---|--------|-----------------------------|------|------|------|------|------|------|
| 19753 | 0 | 13917  | EQQWNFAGIEAAA               | 2.54 | 0.01 | 2.04 | 3.55 | 0.22 | 0.28 |
| 19754 | 0 | 13917  | EQQWNFAGIEAAA               | 2.54 | 0.01 | 2.04 | 3.55 | 0.22 | 0.28 |
| 19755 | 0 | 153827 | EQQYNKPLCDL                 | 2.38 | 0.01 | 1.86 | 2.37 | 0.22 | 2.02 |
| 19756 | 0 | 153827 | EQQYNKPLCDL                 | 2.38 | 0.01 | 1.86 | 1.12 | 0.22 | 0.28 |
| 19757 | 0 | 157219 | EQRCCNELNR                  | 2.35 | 0.01 | 2.16 | 0.44 | 1.23 | 0.85 |
| 19758 | 0 | 170911 | EQRCESLNTRTVYFS             | 2.67 | 0.01 | 0.78 | 0.44 | 1.13 | 0.28 |
| 19759 | 0 | 96263  | EQRLKEEEED                  | 2.34 | 0.01 | 0.78 | 0.44 | 1.93 | 0.85 |
| 19760 | 0 | 96263  | EQRLKEEEED                  | 2.34 | 0.01 | 0.78 | 0.44 | 1.23 | 0.28 |
| 19761 | 0 | 140673 | EQRLRERDEELES LRKST<br>TRTI | 3.09 | 0.01 | 2.93 | 1.81 | 0.22 | 0.28 |
| 19762 | 0 | 170912 | EQRQLQELEKDEREQ             | 2.75 | 0.01 | 0.78 | 1.12 | 0.22 | 1.28 |
| 19763 | 0 | 107345 | EQRRAA                      | 1.88 | 0.01 | 0.78 | 0.44 | 1.13 | 0.28 |
| 19764 | 0 | 107345 | EQRRAA                      | 1.88 | 0.01 | 0.78 | 0.44 | 1.13 | 0.28 |
| 19765 | 0 | 107345 | EQRRAA                      | 1.88 | 0.01 | 0.78 | 0.44 | 1.13 | 1.34 |
| 19766 | 0 | 139493 | EQSADSSRHSGSGH              | 2.64 | 3.70 | 0.78 | 0.44 | 1.13 | 1.27 |
| 19767 | 0 | 125035 | EQSLITVEGDKASM              | 2.58 | 0.01 | 2.24 | 0.44 | 1.74 | 1.27 |
| 19768 | 0 | 477855 | EQSQLNAQKEELKKYLPF          | 2.86 | 0.01 | 3.12 | 0.68 | 0.22 | 0.28 |
| 19769 | 0 | 149305 | EQSRCQAIHN                  | 2.29 | 0.01 | 1.86 | 2.74 | 0.22 | 0.85 |
| 19770 | 0 | 149305 | EQSRCQAIHN                  | 2.29 | 0.01 | 1.86 | 2.74 | 0.22 | 0.85 |
| 19771 | 0 | 450562 | EQSRDGSRHPRSHD              | 2.65 | 0.01 | 0.78 | 2.79 | 1.13 | 1.28 |
| 19772 | 0 | 450562 | EQSRDGSRHPRSHD              | 2.65 | 0.01 | 0.78 | 1.81 | 1.41 | 1.28 |
| 19773 | 0 | 78376  | EQSYPCWLSGTPSTP             | 2.68 | 0.01 | 0.90 | 0.68 | 0.22 | 0.28 |
| 19774 | 0 | 79542  | EQTINQW                     | 2.02 | 0.01 | 0.90 | 1.12 | 0.22 | 1.39 |
| 19775 | 0 | 164229 | EQTLSGQ                     | 2.02 | 0.01 | 0.90 | 1.20 | 0.22 | 1.39 |
| 19776 | 0 | 236169 | EQTSLGAIDVYATK              | 2.57 | 0.01 | 2.30 | 0.44 | 0.85 | 2.66 |
| 19777 | 0 | 81782  | EQVEYPLKPI                  | 2.32 | 0.01 | 3.53 | 1.12 | 0.22 | 0.28 |
| 19778 | 0 | 81782  | EQVEYPLKPI                  | 2.32 | 0.01 | 3.53 | 1.12 | 0.22 | 0.28 |
| 19779 | 0 | 81782  | EQVEYPLKPI                  | 2.32 | 0.01 | 3.53 | 1.12 | 0.22 | 0.28 |
| 19780 | 0 | 81782  | EQVEYPLKPI                  | 2.32 | 0.01 | 3.53 | 1.12 | 0.22 | 0.28 |
| 19781 | 0 | 81782  | EQVEYPLKPI                  | 2.32 | 0.01 | 3.53 | 1.12 | 0.22 | 0.28 |
| 19782 | 0 | 81782  | EQVEYPLKPI                  | 2.32 | 0.01 | 3.53 | 1.12 | 0.22 | 0.28 |
| 19783 | 0 | 81782  | EQVEYPLKPI                  | 2.32 | 0.01 | 3.53 | 1.12 | 0.22 | 0.28 |
| 19784 | 0 | 81782  | EQVEYPLKPI                  | 2.32 | 0.01 | 3.53 | 1.12 | 0.22 | 0.28 |
| 19785 | 0 | 81782  | EQVEYPLKPI                  | 2.32 | 0.01 | 3.53 | 1.12 | 0.22 | 0.28 |
| 19786 | 0 | 81782  | EQVEYPLKPI                  | 2.32 | 0.01 | 3.53 | 1.12 | 0.22 | 0.28 |
| 19787 | 0 | 81782  | EQVEYPLKPI                  | 2.32 | 0.01 | 3.53 | 1.12 | 0.22 | 0.28 |
| 19788 | 0 | 81782  | EQVEYPLKPI                  | 2.32 | 0.01 | 3.53 | 1.12 | 0.22 | 0.28 |
| 19789 | 0 | 176804 | EQVKASKEMGETLLRAV<br>ESYLLA | 3.09 | 0.01 | 2.76 | 0.44 | 1.23 | 0.28 |
| 19790 | 0 | 176804 | EQVKASKEMGETLLRAV<br>ESYLLA | 3.09 | 0.01 | 2.76 | 0.44 | 1.23 | 0.85 |
| 19791 | 0 | 176804 | EQVKASKEMGETLLRAV<br>ESYLLA | 3.09 | 0.01 | 2.76 | 0.44 | 1.23 | 1.28 |
| 19792 | 0 | 176804 | EQVKASKEMGETLLRAV<br>ESYLLA | 3.09 | 0.01 | 2.76 | 0.44 | 1.23 | 1.28 |

|       |   |        |                                                         |      |      |      |      |      |      |
|-------|---|--------|---------------------------------------------------------|------|------|------|------|------|------|
| 19793 | 0 | 13941  | EQVLGTSARPAVMPMD<br>AWRE                                | 2.94 | 0.01 | 2.59 | 0.68 | 0.22 | 0.28 |
| 19794 | 0 | 13941  | EQVLGTSARPAVMPMD<br>AWRE                                | 2.94 | 0.01 | 2.59 | 2.42 | 0.22 | 0.28 |
| 19795 | 0 | 13941  | EQVLGTSARPAVMPMD<br>AWRE                                | 2.94 | 0.01 | 2.59 | 2.42 | 0.22 | 0.28 |
| 19796 | 0 | 13941  | EQVLGTSARPAVMPMD<br>AWRE                                | 2.94 | 0.01 | 2.59 | 2.42 | 0.22 | 0.28 |
| 19797 | 0 | 130812 | EQVPLVQQ                                                | 2.13 | 0.01 | 1.86 | 1.12 | 0.22 | 0.28 |
| 19798 | 0 | 130812 | EQVPLVQQ                                                | 2.13 | 0.01 | 1.86 | 1.12 | 0.22 | 0.28 |
| 19799 | 0 | 13944  | EQVPLVQQQQFPGQQ<br>QQFPPQQ                              | 3.07 | 0.01 | 1.86 | 1.15 | 0.22 | 1.27 |
| 19800 | 0 | 229189 | EQVTNVGGAVVTGVTA<br>VAQKTEGAGSIAAATG<br>FVKKDQLGKNEEGAP | 3.83 | 0.01 | 0.78 | 0.44 | 1.41 | 0.85 |
| 19801 | 0 | 229189 | EQVTNVGGAVVTGVTA<br>VAQKTEGAGSIAAATG<br>FVKKDQLGKNEEGAP | 3.83 | 0.01 | 0.78 | 0.44 | 1.93 | 0.85 |
| 19802 | 0 | 13950  | EQWPWSLLPIHY                                            | 2.46 | 0.01 | 0.90 | 1.12 | 2.26 | 1.39 |
| 19803 | 0 | 103887 | EQWSLPW                                                 | 2.02 | 0.01 | 0.90 | 1.15 | 0.22 | 1.39 |
| 19804 | 0 | 134667 | ERADEATLGSYYTAAAK<br>KRFQFKVVPNYAITT                    | 3.37 | 0.01 | 2.72 | 1.15 | 0.22 | 0.85 |
| 19805 | 0 | 118336 | ERADLIAYLKKATNE                                         | 2.68 | 4.23 | 1.75 | 3.89 | 0.22 | 0.28 |
| 19806 | 0 | 118336 | ERADLIAYLKKATNE                                         | 2.68 | 4.23 | 1.75 | 3.89 | 0.22 | 0.28 |
| 19807 | 0 | 118336 | ERADLIAYLKKATNE                                         | 2.68 | 4.23 | 1.75 | 3.89 | 0.22 | 0.28 |
| 19808 | 0 | 118336 | ERADLIAYLKKATNE                                         | 2.68 | 4.23 | 1.75 | 3.89 | 0.22 | 1.27 |
| 19809 | 0 | 118336 | ERADLIAYLKKATNE                                         | 2.68 | 4.23 | 1.75 | 3.89 | 0.22 | 1.27 |
| 19810 | 0 | 118337 | ERADLIAYLKKATNE                                         | 2.68 | 0.01 | 1.75 | 3.89 | 0.22 | 0.28 |
| 19811 | 0 | 153828 | ERAEEAETGESKI                                           | 2.65 | 0.01 | 3.93 | 0.44 | 1.23 | 1.27 |
| 19812 | 0 | 13961  | ERAGAMERAN                                              | 2.36 | 0.01 | 0.90 | 0.44 | 1.23 | 0.28 |
| 19813 | 0 | 13961  | ERAGAMERAN                                              | 2.36 | 0.01 | 0.90 | 0.44 | 1.23 | 1.27 |
| 19814 | 0 | 13964  | ERANLRPCEQHLMQK<br>ERAQQQAIALAKEVSCP                    | 2.67 | 0.01 | 2.16 | 2.90 | 0.22 | 0.85 |
| 19815 | 0 | 127642 | MSSSQEVVSLRQKPAN<br>VLN<br>ERAQQQAIALAKEVSCP            | 3.56 | 0.01 | 0.78 | 1.12 | 0.22 | 0.85 |
| 19816 | 0 | 127642 | MSSSQEVVSLRQKPAN<br>VLN                                 | 3.56 | 0.01 | 0.78 | 1.12 | 0.22 | 0.85 |
| 19817 | 0 | 123146 | ERARISMIE                                               | 2.26 | 0.01 | 2.28 | 2.00 | 0.22 | 0.28 |
| 19818 | 0 | 123146 | ERARISMIE                                               | 2.26 | 0.01 | 2.28 | 2.00 | 0.22 | 0.28 |
| 19819 | 0 | 123146 | ERARISMIE                                               | 2.26 | 0.01 | 2.28 | 2.00 | 0.22 | 0.28 |
| 19820 | 0 | 515263 | ERCCNELNEFENNQRC<br>MCEALQQI                            | 3.15 | 0.01 | 2.16 | 1.12 | 0.22 | 1.39 |
| 19821 | 0 | 515263 | ERCCNELNEFENNQRC<br>MCEALQQI                            | 3.15 | 0.01 | 2.16 | 0.44 | 1.23 | 1.39 |

|       |   |        |                         |      |      |      |      |      |      |
|-------|---|--------|-------------------------|------|------|------|------|------|------|
| 19822 | 0 | 13969  | ERCKMMPGMTGSAAL<br>VCPM | 2.88 | 0.01 | 0.90 | 2.69 | 2.26 | 0.85 |
| 19823 | 0 | 132272 | ERDKERERRR              | 2.35 | 0.01 | 0.78 | 0.44 | 1.13 | 0.28 |
| 19824 | 0 | 13972  | ERDPANIPWDKD            | 2.48 | 0.01 | 2.86 | 1.81 | 0.22 | 0.28 |
| 19825 | 0 | 13972  | ERDPANIPWDKD            | 2.48 | 0.01 | 2.86 | 1.81 | 0.22 | 1.75 |
| 19826 | 0 | 99224  | ERDPYSPSQDPYSPS         | 2.73 | 0.01 | 2.16 | 0.44 | 1.23 | 1.48 |
| 19827 | 0 | 170917 | ERDQLKENTKEIVAK         | 2.67 | 0.01 | 0.78 | 0.44 | 1.13 | 0.28 |
| 19828 | 0 | 123147 | ERDRKREK                | 2.18 | 0.01 | 2.96 | 1.20 | 0.22 | 0.28 |
| 19829 | 0 | 123147 | ERDRKREK                | 2.18 | 0.01 | 2.96 | 1.20 | 0.22 | 0.28 |
| 19830 | 0 | 117495 | ERDRKREKRKPKS           | 2.61 | 0.01 | 0.78 | 0.68 | 0.22 | 0.28 |
| 19831 | 0 | 117495 | ERDRKREKRKPKS           | 2.61 | 0.01 | 0.78 | 0.68 | 0.22 | 1.27 |
| 19832 | 0 | 117495 | ERDRKREKRKPKS           | 2.61 | 0.01 | 0.78 | 0.68 | 0.22 | 1.66 |
| 19833 | 0 | 117495 | ERDRKREKRKPKS           | 2.61 | 0.01 | 0.78 | 0.68 | 0.22 | 0.85 |
| 19834 | 0 | 117495 | ERDRKREKRKPKS           | 2.61 | 0.01 | 0.78 | 0.44 | 1.13 | 1.27 |
| 19835 | 0 | 117495 | ERDRKREKRKPKS           | 2.61 | 0.01 | 2.96 | 1.20 | 0.22 | 0.28 |
| 19836 | 0 | 117495 | ERDRKREKRKPKS           | 2.61 | 0.01 | 2.96 | 1.20 | 0.22 | 0.28 |
| 19837 | 0 | 117495 | ERDRKREKRKPKS           | 2.61 | 0.01 | 2.96 | 1.20 | 0.22 | 2.02 |
| 19838 | 0 | 117495 | ERDRKREKRKPKS           | 2.61 | 0.01 | 2.96 | 1.20 | 0.22 | 1.34 |
| 19839 | 0 | 167244 | EREAQLHSHHK             | 2.49 | 0.01 | 0.90 | 2.37 | 0.22 | 1.39 |
| 19840 | 0 | 285122 | EREDDEENDEEEDGS         | 2.73 | 0.01 | 1.61 | 0.44 | 0.85 | 1.28 |
| 19841 | 0 | 13974  | EREDRTL                 | 2.17 | 0.01 | 3.18 | 1.12 | 0.22 | 0.28 |
| 19842 | 0 | 13975  | EREDERTLTKEYEDIVLK      | 2.89 | 0.01 | 1.66 | 0.68 | 0.22 | 0.28 |
| 19843 | 0 | 13975  | EREDERTLTKEYEDIVLK      | 2.89 | 0.01 | 1.66 | 1.20 | 0.22 | 0.28 |
| 19844 | 0 | 13976  | ERECKCL                 | 2.16 | 0.01 | 1.66 | 1.15 | 0.22 | 0.28 |
| 19845 | 0 | 423277 | EREEDTLREMALKAF         | 2.70 | 0.01 | 2.51 | 0.44 | 2.35 | 1.28 |
| 19846 | 0 | 99225  | EREEDWRQPREDWRR         | 2.73 | 0.01 | 2.16 | 0.44 | 1.23 | 1.48 |
| 19847 | 0 | 114325 | ERERQRRQGGRGRDV         | 2.74 | 0.01 | 3.48 | 0.44 | 1.23 | 0.85 |
| 19848 | 0 | 13984  | ERESQAY                 | 2.03 | 0.01 | 0.78 | 0.68 | 0.22 | 2.92 |
| 19849 | 0 | 13984  | ERESQAY                 | 2.03 | 0.01 | 0.78 | 0.68 | 0.22 | 0.28 |
| 19850 | 0 | 13984  | ERESQAY                 | 2.03 | 0.01 | 0.78 | 0.68 | 0.22 | 0.85 |
| 19851 | 0 | 139732 | ERETQKAKG               | 2.24 | 0.01 | 1.75 | 0.68 | 0.22 | 1.57 |
| 19852 | 0 | 139732 | ERETQKAKG               | 2.24 | 0.01 | 1.75 | 0.68 | 0.22 | 2.02 |
| 19853 | 0 | 139732 | ERETQKAKG               | 2.24 | 0.01 | 1.75 | 0.68 | 0.22 | 1.57 |
| 19854 | 0 | 139732 | ERETQKAKG               | 2.24 | 0.01 | 1.75 | 0.68 | 0.22 | 1.57 |
| 19855 | 0 | 139732 | ERETQKAKG               | 2.24 | 0.01 | 1.75 | 3.37 | 0.22 | 1.57 |
| 19856 | 0 | 285203 | EREVDGHDFIREHIQ         | 2.71 | 0.01 | 1.61 | 0.44 | 0.85 | 1.28 |
| 19857 | 0 | 13986  | EREVSVA                 | 2.15 | 0.01 | 2.68 | 0.44 | 1.59 | 0.28 |
| 19858 | 0 | 115733 | ERFFSDKIAK              | 2.30 | 0.01 | 1.60 | 0.44 | 1.23 | 0.85 |
| 19859 | 0 | 115733 | ERFFSDKIAK              | 2.30 | 0.01 | 1.60 | 0.44 | 1.23 | 0.85 |
| 19860 | 0 | 123148 | ERFIKWPLH               | 2.18 | 0.01 | 2.28 | 2.00 | 0.22 | 0.28 |
| 19861 | 0 | 13992  | ERFSFPR                 | 2.04 | 0.01 | 3.65 | 1.15 | 2.26 | 0.28 |
| 19862 | 0 | 238353 | ERGANVTVQRSAIV          | 2.61 | 0.01 | 2.14 | 2.65 | 0.22 | 0.85 |
| 19863 | 0 | 462601 | ERGETGPPGTS             | 2.44 | 4.03 | 0.78 | 1.12 | 0.22 | 0.28 |

|       |   |        |                 |      |      |      |      |      |      |
|-------|---|--------|-----------------|------|------|------|------|------|------|
| 19864 | 0 | 462601 | ERGETGPPGTS     | 2.44 | 4.03 | 0.78 | 1.12 | 0.22 | 1.27 |
| 19865 | 0 | 462601 | ERGETGPPGTS     | 2.44 | 4.03 | 0.78 | 1.12 | 0.22 | 1.27 |
| 19866 | 0 | 462602 | ERGETGPPGTS     | 2.44 | 0.01 | 0.78 | 1.12 | 0.22 | 1.27 |
| 19867 | 0 | 81790  | ERGGRKQRKE      | 2.36 | 0.01 | 4.15 | 1.12 | 0.22 | 0.85 |
| 19868 | 0 | 107828 | ERGLKGHRGFT     | 2.41 | 0.01 | 0.78 | 0.44 | 1.13 | 0.28 |
| 19869 | 0 | 107828 | ERGLKGHRGFT     | 2.41 | 0.01 | 0.78 | 0.44 | 1.93 | 0.28 |
| 19870 | 0 | 131412 | ERGLRYL         | 2.04 | 0.01 | 0.78 | 0.44 | 1.41 | 0.28 |
| 19871 | 0 | 131412 | ERGLRYL         | 2.04 | 0.01 | 0.78 | 0.44 | 1.13 | 0.28 |
| 19872 | 0 | 131412 | ERGLRYL         | 2.04 | 0.01 | 0.78 | 1.15 | 0.22 | 0.28 |
| 19873 | 0 | 131412 | ERGLRYL         | 2.04 | 0.01 | 0.78 | 1.15 | 0.22 | 0.28 |
| 19874 | 0 | 108928 | ERGRTGPA        | 2.14 | 0.01 | 1.60 | 2.55 | 2.60 | 0.28 |
| 19875 | 0 | 139494 | ERGSAGHWTSESSVS | 2.70 | 3.67 | 0.78 | 0.44 | 1.13 | 0.28 |
| 19876 | 0 | 162152 | ERGTKPPLEELS    | 2.48 | 4.08 | 1.75 | 2.82 | 0.22 | 2.49 |
| 19877 | 0 | 162152 | ERGTKPPLEELS    | 2.48 | 4.08 | 1.75 | 2.82 | 0.22 | 1.66 |
| 19878 | 0 | 162152 | ERGTKPPLEELS    | 2.48 | 4.08 | 1.75 | 2.82 | 0.22 | 1.66 |
| 19879 | 0 | 162152 | ERGTKPPLEELS    | 2.48 | 4.08 | 1.75 | 2.82 | 0.22 | 1.66 |
| 19880 | 0 | 14000  | ERHLTFT         | 2.02 | 0.01 | 0.90 | 0.44 | 1.23 | 0.28 |
| 19881 | 0 | 14000  | ERHLTFT         | 2.02 | 0.01 | 0.90 | 0.44 | 1.23 | 1.27 |
| 19882 | 0 | 153254 | ERHTKFPSV       | 2.18 | 0.01 | 0.90 | 1.15 | 0.22 | 1.27 |
| 19883 | 0 | 285302 | ERIEEADDDDDDDDD | 2.72 | 0.01 | 1.61 | 0.44 | 0.85 | 1.28 |
| 19884 | 0 | 14003  | ERILEVSD        | 2.13 | 0.01 | 4.63 | 1.15 | 0.22 | 0.85 |
| 19885 | 0 | 131413 | ERILTIS         | 2.02 | 0.01 | 0.78 | 0.44 | 1.41 | 0.28 |
| 19886 | 0 | 131413 | ERILTIS         | 2.02 | 0.01 | 0.78 | 0.44 | 1.13 | 0.28 |
| 19887 | 0 | 131413 | ERILTIS         | 2.02 | 0.01 | 0.78 | 1.15 | 0.22 | 0.28 |
| 19888 | 0 | 131413 | ERILTIS         | 2.02 | 0.01 | 0.78 | 1.15 | 0.22 | 0.28 |
| 19889 | 0 | 116704 | ERIQWVGDPHRK    | 2.43 | 0.01 | 1.60 | 0.68 | 0.22 | 2.92 |
| 19890 | 0 | 116704 | ERIQWVGDPHRK    | 2.43 | 0.01 | 1.60 | 0.68 | 0.22 | 2.92 |
| 19891 | 0 | 116704 | ERIQWVGDPHRK    | 2.43 | 0.01 | 1.60 | 0.68 | 0.22 | 0.85 |
| 19892 | 0 | 116704 | ERIQWVGDPHRK    | 2.43 | 0.01 | 1.60 | 0.68 | 0.22 | 0.85 |
| 19893 | 0 | 116704 | ERIQWVGDPHRK    | 2.43 | 0.01 | 1.60 | 0.68 | 0.22 | 0.85 |
| 19894 | 0 | 116704 | ERIQWVGDPHRK    | 2.43 | 0.01 | 1.60 | 0.68 | 0.22 | 0.85 |
| 19895 | 0 | 116704 | ERIQWVGDPHRK    | 2.43 | 0.01 | 1.60 | 0.68 | 0.22 | 2.92 |
| 19896 | 0 | 116704 | ERIQWVGDPHRK    | 2.43 | 0.01 | 1.60 | 0.68 | 0.22 | 2.92 |
| 19897 | 0 | 239628 | ERIRLDDSLAMPYIY | 2.74 | 0.01 | 2.70 | 0.68 | 0.22 | 0.28 |
| 19898 | 0 | 239628 | ERIRLDDSLAMPYIY | 2.74 | 0.01 | 2.70 | 0.68 | 0.22 | 0.28 |
| 19899 | 0 | 239628 | ERIRLDDSLAMPYIY | 2.74 | 0.01 | 2.70 | 0.68 | 0.22 | 0.28 |
| 19900 | 0 | 239628 | ERIRLDDSLAMPYIY | 2.74 | 0.01 | 2.70 | 0.68 | 0.22 | 1.48 |
| 19901 | 0 | 239628 | ERIRLDDSLAMPYIY | 2.74 | 0.01 | 2.70 | 0.68 | 0.22 | 1.48 |
| 19902 | 0 | 239628 | ERIRLDDSLAMPYIY | 2.74 | 0.01 | 2.70 | 0.68 | 0.22 | 1.48 |
| 19903 | 0 | 239628 | ERIRLDDSLAMPYIY | 2.74 | 0.01 | 2.70 | 0.68 | 0.22 | 1.48 |
| 19904 | 0 | 239628 | ERIRLDDSLAMPYIY | 2.74 | 0.01 | 2.70 | 0.68 | 0.22 | 1.48 |
| 19905 | 0 | 239628 | ERIRLDDSLAMPYIY | 2.74 | 0.01 | 2.70 | 0.68 | 0.22 | 1.48 |
| 19906 | 0 | 239628 | ERIRLDDSLAMPYIY | 2.74 | 0.01 | 2.70 | 0.68 | 0.22 | 1.48 |
| 19907 | 0 | 239628 | ERIRLDDSLAMPYIY | 2.74 | 0.01 | 2.70 | 0.68 | 0.22 | 1.48 |
| 19908 | 0 | 239628 | ERIRLDDSLAMPYIY | 2.74 | 0.01 | 2.70 | 0.68 | 0.22 | 1.48 |
| 19909 | 0 | 239628 | ERIRLDDSLAMPYIY | 2.74 | 0.01 | 2.70 | 0.68 | 0.22 | 1.48 |
| 19910 | 0 | 239628 | ERIRLDDSLAMPYIY | 2.74 | 0.01 | 2.70 | 0.68 | 0.22 | 1.48 |

|       |   |        |                                    |      |      |      |      |      |      |
|-------|---|--------|------------------------------------|------|------|------|------|------|------|
| 19911 | 0 | 239628 | ERIRLDDSLAMPYIY                    | 2.74 | 0.01 | 2.70 | 0.68 | 0.22 | 1.48 |
| 19912 | 0 | 239628 | ERIRLDDSLAMPYIY                    | 2.74 | 0.01 | 2.70 | 0.68 | 0.22 | 1.48 |
| 19913 | 0 | 239628 | ERIRLDDSLAMPYIY                    | 2.74 | 0.01 | 2.70 | 0.68 | 0.22 | 1.48 |
| 19914 | 0 | 239628 | ERIRLDDSLAMPYIY                    | 2.74 | 0.01 | 2.70 | 0.68 | 0.22 | 1.48 |
| 19915 | 0 | 239628 | ERIRLDDSLAMPYIY                    | 2.74 | 0.01 | 2.70 | 0.68 | 0.22 | 1.48 |
| 19916 | 0 | 239628 | ERIRLDDSLAMPYIY                    | 2.74 | 0.01 | 2.70 | 0.68 | 0.22 | 1.48 |
| 19917 | 0 | 239628 | ERIRLDDSLAMPYIY                    | 2.74 | 0.01 | 2.70 | 0.68 | 0.22 | 1.48 |
| 19918 | 0 | 239628 | ERIRLDDSLAMPYIY                    | 2.74 | 0.01 | 2.70 | 0.68 | 0.22 | 1.48 |
| 19919 | 0 | 239628 | ERIRLDDSLAMPYIY                    | 2.74 | 0.01 | 2.70 | 0.68 | 0.22 | 1.48 |
| 19920 | 0 | 239628 | ERIRLDDSLAMPYIY                    | 2.74 | 0.01 | 2.70 | 0.68 | 0.22 | 1.48 |
| 19921 | 0 | 239628 | ERIRLDDSLAMPYIY                    | 2.74 | 0.01 | 2.70 | 0.68 | 0.22 | 1.48 |
| 19922 | 0 | 128576 | ERIRRSILPYGDSMDR                   | 2.75 | 0.01 | 0.78 | 0.44 | 1.13 | 0.85 |
| 19923 | 0 | 132276 | ERIYHFV                            | 1.99 | 0.01 | 0.78 | 0.68 | 0.22 | 1.39 |
| 19924 | 0 | 132276 | ERIYHFV                            | 1.99 | 0.01 | 0.78 | 0.68 | 0.22 | 1.27 |
| 19925 | 0 | 132276 | ERIYHFV                            | 1.99 | 0.01 | 0.78 | 0.68 | 0.22 | 1.39 |
| 19926 | 0 | 132276 | ERIYHFV                            | 1.99 | 0.01 | 0.78 | 0.68 | 0.22 | 1.48 |
| 19927 | 0 | 14006  | ERKDRVED                           | 2.17 | 0.01 | 2.99 | 0.44 | 0.85 | 0.28 |
| 19928 | 0 | 14009  | ERKIKV                             | 1.90 | 0.01 | 2.25 | 0.68 | 0.22 | 0.85 |
| 19929 | 0 | 14013  | ERKRR                              | 1.72 | 0.01 | 0.78 | 0.44 | 1.13 | 0.28 |
| 19930 | 0 | 14013  | ERKRR                              | 1.72 | 0.01 | 0.78 | 0.44 | 1.13 | 0.85 |
| 19931 | 0 | 14013  | ERKRR                              | 1.72 | 0.01 | 0.78 | 0.44 | 1.13 | 0.28 |
| 19932 | 0 | 14016  | ERLAQHMTDFDVTHHR                   | 2.72 | 0.01 | 3.40 | 0.44 | 1.74 | 0.28 |
| 19933 | 0 | 14016  | ERLAQHMTDFDVTHHR                   | 2.72 | 0.01 | 3.40 | 0.44 | 0.85 | 0.28 |
| 19934 | 0 | 188138 | ERLEEETNDE                         | 2.35 | 0.01 | 2.92 | 0.68 | 0.22 | 0.85 |
| 19935 | 0 | 188138 | ERLEEETNDE                         | 2.35 | 0.01 | 2.92 | 1.81 | 0.22 | 0.85 |
| 19936 | 0 | 188138 | ERLEEETNDE                         | 2.35 | 0.01 | 2.92 | 3.37 | 0.22 | 0.85 |
| 19937 | 0 | 14019  | ERLGDY                             | 1.88 | 0.01 | 3.34 | 0.68 | 0.22 | 0.85 |
| 19938 | 0 | 14019  | ERLGDY                             | 1.88 | 0.01 | 3.34 | 0.68 | 0.22 | 0.85 |
| 19939 | 0 | 14019  | ERLGDY                             | 1.88 | 0.01 | 3.34 | 0.68 | 0.22 | 0.85 |
| 19940 | 0 | 14019  | ERLGDY                             | 1.88 | 0.01 | 3.34 | 0.68 | 0.22 | 0.85 |
| 19941 | 0 | 14019  | ERLGDY                             | 1.88 | 0.01 | 3.34 | 0.68 | 0.22 | 0.85 |
| 19942 | 0 | 178128 | ERLGPLVEQGR                        | 2.43 | 3.81 | 0.78 | 0.44 | 1.13 | 0.28 |
| 19943 | 0 | 178128 | ERLGPLVEQGR                        | 2.43 | 3.81 | 0.78 | 0.44 | 1.13 | 0.28 |
| 19944 | 0 | 178128 | ERLGPLVEQGR                        | 2.43 | 3.81 | 0.78 | 0.44 | 1.13 | 0.28 |
| 19945 | 0 | 238355 | ERLHLFCEKDGKALCWV<br>C             | 2.84 | 0.01 | 0.78 | 0.44 | 1.13 | 0.28 |
| 19946 | 0 | 115236 | ERLHSMKEGIHAQQKEP<br>MIG           | 2.94 | 0.01 | 1.60 | 0.44 | 1.23 | 1.28 |
| 19947 | 0 | 115236 | ERLHSMKEGIHAQQKEP<br>MIG           | 2.94 | 0.01 | 1.60 | 0.44 | 1.41 | 0.28 |
| 19948 | 0 | 115236 | ERLHSMKEGIHAQQKEP<br>MIG           | 2.94 | 0.01 | 1.60 | 0.44 | 1.93 | 0.28 |
| 19949 | 0 | 107829 | ERLKKVYGEAKTKVCAM<br>KYSFADIGSIIKG | 3.33 | 0.01 | 0.90 | 1.12 | 0.22 | 0.28 |
| 19950 | 0 | 14028  | ERLKYLDFVR                         | 2.31 | 0.01 | 2.60 | 0.44 | 1.23 | 0.85 |

|       |   |        |                          |      |      |      |      |      |      |
|-------|---|--------|--------------------------|------|------|------|------|------|------|
| 19951 | 0 | 81798  | ERLRDLRRKEKSE            | 2.60 | 0.01 | 4.15 | 1.12 | 0.22 | 0.28 |
| 19952 | 0 | 167062 | ERLRISPDRVYINYYDMN       | 2.84 | 0.01 | 0.78 | 0.44 | 1.41 | 0.28 |
| 19953 | 0 | 167062 | ERLRISPDRVYINYYDMN       | 2.84 | 0.01 | 0.78 | 0.44 | 1.41 | 1.34 |
| 19954 | 0 | 167062 | ERLRISPDRVYINYYDMN       | 2.84 | 0.01 | 0.78 | 0.44 | 1.41 | 1.66 |
| 19955 | 0 | 167062 | ERLRISPDRVYINYYDMN       | 2.84 | 0.01 | 0.78 | 0.44 | 1.41 | 1.66 |
| 19956 | 0 | 167062 | ERLRISPDRVYINYYDMN       | 2.84 | 0.01 | 0.78 | 0.44 | 1.41 | 1.66 |
| 19957 | 0 | 167062 | ERLRISPDRVYINYYDMN       | 2.84 | 0.01 | 0.78 | 0.44 | 1.41 | 1.66 |
| 19958 | 0 | 167062 | ERLRISPDRVYINYYDMN       | 2.84 | 0.01 | 0.78 | 0.44 | 1.41 | 1.66 |
| 19959 | 0 | 167062 | ERLRISPDRVYINYYDMN       | 2.84 | 0.01 | 0.78 | 0.44 | 1.41 | 1.66 |
| 19960 | 0 | 167062 | ERLRISPDRVYINYYDMN       | 2.84 | 0.01 | 0.78 | 0.44 | 1.41 | 1.66 |
| 19961 | 0 | 167062 | ERLRISPDRVYINYYDMN       | 2.84 | 0.01 | 0.78 | 0.44 | 1.41 | 1.66 |
| 19962 | 0 | 167062 | ERLRISPDRVYINYYDMN       | 2.84 | 0.01 | 0.78 | 0.44 | 1.41 | 1.66 |
| 19963 | 0 | 167062 | ERLRISPDRVYINYYDMN       | 2.84 | 0.01 | 0.78 | 0.44 | 1.41 | 1.66 |
| 19964 | 0 | 167062 | ERLRISPDRVYINYYDMN       | 2.84 | 0.01 | 0.78 | 0.44 | 1.41 | 1.66 |
| 19965 | 0 | 167062 | ERLRISPDRVYINYYDMN       | 2.84 | 0.01 | 0.78 | 0.44 | 1.41 | 1.66 |
| 19966 | 0 | 167062 | ERLRISPDRVYINYYDMN       | 2.84 | 0.01 | 0.78 | 0.44 | 1.41 | 1.75 |
| 19967 | 0 | 167062 | ERLRISPDRVYINYYDMN       | 2.84 | 0.01 | 0.78 | 0.44 | 1.41 | 1.75 |
| 19968 | 0 | 167062 | ERLRISPDRVYINYYDMN       | 2.84 | 0.01 | 0.78 | 0.44 | 1.41 | 1.75 |
| 19969 | 0 | 14035  | ERLYIG                   | 1.88 | 0.01 | 1.96 | 0.44 | 0.85 | 0.28 |
| 19970 | 0 | 443536 | ERMASCRPID               | 2.29 | 0.01 | 1.96 | 0.68 | 0.22 | 1.34 |
| 19971 | 0 | 443536 | ERMASCRPID               | 2.29 | 0.01 | 1.96 | 0.68 | 0.22 | 1.34 |
| 19972 | 0 | 443536 | ERMASCRPID               | 2.29 | 0.01 | 1.96 | 0.68 | 0.22 | 0.28 |
| 19973 | 0 | 443536 | ERMASCRPID               | 2.29 | 0.01 | 1.96 | 0.68 | 0.22 | 1.34 |
| 19974 | 0 | 443536 | ERMASCRPID               | 2.29 | 0.01 | 1.96 | 0.68 | 0.22 | 1.34 |
| 19975 | 0 | 443536 | ERMASCRPID               | 2.29 | 0.01 | 1.96 | 0.68 | 0.22 | 1.34 |
| 19976 | 0 | 443537 | ERMASCRPIDKFAQGW<br>GPIT | 2.90 | 0.01 | 1.96 | 0.68 | 0.22 | 1.34 |
| 19977 | 0 | 443537 | ERMASCRPIDKFAQGW<br>GPIT | 2.90 | 0.01 | 1.96 | 0.68 | 0.22 | 1.34 |

|       |   |        |                               |      |      |      |      |      |      |
|-------|---|--------|-------------------------------|------|------|------|------|------|------|
| 19978 | 0 | 443537 | ERMASCRPIDKFAQGW<br>GPIT      | 2.90 | 0.01 | 1.96 | 0.68 | 0.22 | 0.28 |
| 19979 | 0 | 14039  | ERMDALENQLKEARF               | 2.69 | 0.01 | 3.15 | 0.44 | 1.23 | 0.85 |
| 19980 | 0 | 14039  | ERMDALENQLKEARF               | 2.69 | 0.01 | 2.36 | 0.44 | 1.23 | 1.28 |
| 19981 | 0 | 14039  | ERMDALENQLKEARF               | 2.69 | 0.01 | 2.36 | 0.44 | 1.23 | 1.27 |
| 19982 | 0 | 14039  | ERMDALENQLKEARF               | 2.69 | 0.01 | 2.36 | 0.44 | 1.23 | 1.28 |
| 19983 | 0 | 121267 | ERMERKRREK                    | 2.37 | 0.01 | 0.78 | 0.44 | 1.13 | 0.28 |
| 19984 | 0 | 121267 | ERMERKRREK                    | 2.37 | 0.01 | 0.78 | 0.44 | 1.13 | 0.28 |
| 19985 | 0 | 107346 | ERMFRK                        | 1.90 | 0.01 | 0.78 | 2.36 | 0.22 | 0.28 |
| 19986 | 0 | 107346 | ERMFRK                        | 1.90 | 0.01 | 0.78 | 2.36 | 0.22 | 0.85 |
| 19987 | 0 | 14042  | ERMKDTLRIT                    | 2.31 | 0.01 | 2.66 | 0.68 | 0.22 | 0.28 |
| 19988 | 0 | 14042  | ERMKDTLRIT                    | 2.31 | 0.01 | 2.66 | 0.68 | 0.22 | 0.28 |
| 19989 | 0 | 170924 | ERMNQEIVNLSKEAQ               | 2.67 | 0.01 | 0.78 | 0.44 | 1.13 | 0.28 |
| 19990 | 0 | 116705 | ERMRKVLENRSLDE                | 2.71 | 0.01 | 2.36 | 0.44 | 1.23 | 1.28 |
| 19991 | 0 | 116705 | ERMRKVLENRSLDE                | 2.71 | 0.01 | 2.36 | 0.44 | 1.23 | 1.27 |
| 19992 | 0 | 116705 | ERMRKVLENRSLDE                | 2.71 | 0.01 | 2.36 | 0.44 | 1.23 | 1.28 |
| 19993 | 0 | 285453 | ERMTEKEDGDNEDEE               | 2.70 | 0.01 | 1.61 | 0.44 | 0.85 | 1.28 |
| 19994 | 0 | 225278 | ERNLSFDIPTNKKNITA             | 2.83 | 0.01 | 2.61 | 0.68 | 0.22 | 0.28 |
| 19995 | 0 | 225278 | ERNLSFDIPTNKKNITA             | 2.83 | 0.01 | 2.61 | 0.68 | 0.22 | 0.28 |
| 19996 | 0 | 225278 | ERNLSFDIPTNKKNITA             | 2.83 | 0.01 | 2.61 | 0.68 | 0.22 | 0.28 |
| 19997 | 0 | 489151 | ERPGGNEITRGGSTSYG<br>TGS      | 2.99 | 3.37 | 0.78 | 0.44 | 1.13 | 0.28 |
| 19998 | 0 | 132277 | ERPGPSPLPH                    | 2.33 | 0.01 | 0.78 | 0.44 | 1.13 | 0.28 |
| 19999 | 0 | 144635 | ERPKSMSTEG                    | 2.32 | 0.01 | 0.78 | 0.44 | 1.13 | 0.28 |
| 20000 | 0 | 127643 | ERPLELRVRVLDI                 | 2.60 | 0.01 | 0.78 | 0.44 | 1.13 | 2.02 |
| 20001 | 0 | 127643 | ERPLELRVRVLDI                 | 2.60 | 0.01 | 0.78 | 0.44 | 1.13 | 1.48 |
| 20002 | 0 | 127643 | ERPLELRVRVLDI                 | 2.60 | 0.01 | 0.78 | 0.44 | 1.13 | 0.28 |
| 20003 | 0 | 127643 | ERPLELRVRVLDI                 | 2.60 | 0.01 | 0.78 | 0.44 | 1.13 | 2.35 |
| 20004 | 0 | 127643 | ERPLELRVRVLDI                 | 2.60 | 0.01 | 0.78 | 0.44 | 1.13 | 0.28 |
| 20005 | 0 | 133822 | ERPLKQIAFNGGLEP               | 2.66 | 0.01 | 2.51 | 0.44 | 1.13 | 0.28 |
| 20006 | 0 | 133822 | ERPLKQIAFNGGLEP               | 2.66 | 0.01 | 2.51 | 0.44 | 1.93 | 0.28 |
| 20007 | 0 | 133822 | ERPLKQIAFNGGLEP               | 2.66 | 0.01 | 2.51 | 0.44 | 1.41 | 0.28 |
| 20008 | 0 | 134370 | ERPNTHTV                      | 1.99 | 4.63 | 0.90 | 0.44 | 1.13 | 1.27 |
| 20009 | 0 | 14053  | ERPPETTT                      | 2.14 | 0.01 | 2.40 | 2.43 | 0.22 | 0.28 |
| 20010 | 0 | 98013  | ERPPLENRVLGTWGL               | 2.70 | 0.01 | 2.04 | 0.44 | 2.98 | 0.28 |
| 20011 | 0 | 190742 | ERPTGNPDLLKIA                 | 2.50 | 0.01 | 3.50 | 2.13 | 0.22 | 0.28 |
| 20012 | 0 | 177423 | ERPTITK                       | 2.02 | 0.01 | 0.90 | 2.13 | 0.22 | 0.28 |
| 20013 | 0 | 285538 | ERPVEATATKNTTAT               | 2.72 | 0.01 | 1.61 | 0.44 | 0.85 | 1.28 |
| 20014 | 0 | 99226  | ERQLKSA                       | 1.99 | 0.01 | 4.93 | 3.97 | 0.22 | 0.28 |
| 20015 | 0 | 99227  | ERQMEPAFDQFRQTY               | 2.69 | 0.01 | 2.86 | 2.02 | 0.85 | 0.85 |
| 20016 | 0 | 285586 | ERQQQSDETQVQQQE               | 2.71 | 0.01 | 1.61 | 0.44 | 0.85 | 1.28 |
| 20017 | 0 | 14061  | ERQQVEETFNLIGCIERT<br>HVFCHTG | 3.17 | 0.01 | 2.86 | 2.02 | 1.59 | 0.28 |

|       |   |        |                                       |      |      |      |      |      |      |
|-------|---|--------|---------------------------------------|------|------|------|------|------|------|
| 20018 | 0 | 14061  | ERQQVEETFNIGCIERT<br>HVFCHTG          | 3.17 | 0.01 | 2.86 | 0.68 | 0.22 | 0.28 |
| 20019 | 0 | 14061  | ERQQVEETFNIGCIERT<br>HVFCHTG          | 3.17 | 0.01 | 2.86 | 2.02 | 1.59 | 0.28 |
| 20020 | 0 | 14062  | ERQV                                  | 1.57 | 0.01 | 3.78 | 1.81 | 0.22 | 0.85 |
| 20021 | 0 | 14064  | ERRAKEKLQEQQRDLEQ<br>RKADTKK          | 3.17 | 0.01 | 1.66 | 0.44 | 1.74 | 0.28 |
| 20022 | 0 | 139735 | ERRAKEKLQEQQRDLEQ<br>RKADTKKKPIVQYDNF | 3.44 | 0.01 | 0.90 | 2.71 | 0.22 | 0.28 |
| 20023 | 0 | 14065  | ERRAKEKLQEQQSDLEQ<br>RKADTKK          | 3.16 | 4.93 | 1.66 | 2.74 | 0.22 | 0.28 |
| 20024 | 0 | 99228  | ERRAQSVV                              | 2.10 | 0.01 | 2.24 | 0.68 | 0.22 | 0.28 |
| 20025 | 0 | 152514 | ERRIAAVNPS                            | 2.29 | 0.01 | 2.18 | 2.16 | 0.22 | 0.28 |
| 20026 | 0 | 423279 | ERRIREGKIPMTFVD                       | 2.67 | 0.01 | 2.51 | 0.44 | 2.35 | 1.28 |
| 20027 | 0 | 14069  | ERRKTGVFTVAEFGVGL<br>RTKVFLD          | 3.16 | 0.01 | 3.72 | 0.68 | 0.22 | 0.28 |
| 20028 | 0 | 192935 | ERRPHFPQFSYSASGTA                     | 2.79 | 3.63 | 4.63 | 1.15 | 1.41 | 0.28 |
| 20029 | 0 | 192935 | ERRPHFPQFSYSASGTA                     | 2.79 | 3.63 | 4.63 | 1.15 | 1.41 | 0.85 |
| 20030 | 0 | 188140 | ERRQEDSATH                            | 2.31 | 0.01 | 2.92 | 0.68 | 0.22 | 0.85 |
| 20031 | 0 | 188140 | ERRQEDSATH                            | 2.31 | 0.01 | 2.92 | 1.81 | 0.22 | 0.85 |
| 20032 | 0 | 188140 | ERRQEDSATH                            | 2.31 | 0.01 | 2.92 | 3.37 | 0.22 | 0.85 |
| 20033 | 0 | 157220 | ERRQSRRGGRDD                          | 2.50 | 0.01 | 3.65 | 0.44 | 1.23 | 0.85 |
| 20034 | 0 | 14074  | ERSDLEPSIPSEYM                        | 2.64 | 0.01 | 2.69 | 0.44 | 0.85 | 0.28 |
| 20035 | 0 | 130814 | ERSDSM                                | 1.90 | 0.01 | 0.90 | 0.44 | 1.93 | 0.85 |
| 20036 | 0 | 143872 | ERSGHSRWCDKSVEDD<br>W                 | 2.81 | 0.01 | 0.78 | 0.44 | 1.41 | 0.28 |
| 20037 | 0 | 124079 | ERSKESDDNYDKTEDVD<br>IEE              | 2.96 | 0.01 | 0.78 | 0.44 | 1.13 | 0.28 |
| 20038 | 0 | 110837 | ERSLSLLNCEEIKSQF                      | 2.74 | 0.01 | 0.78 | 2.46 | 0.22 | 1.28 |
| 20039 | 0 | 103891 | ERSQPRGRRQPIPKARR<br>PEG              | 2.98 | 0.01 | 1.72 | 0.44 | 0.85 | 0.28 |
| 20040 | 0 | 132283 | ERSRERDKER                            | 2.37 | 0.01 | 0.78 | 0.44 | 1.13 | 0.28 |
| 20041 | 0 | 153829 | ERSVQKLQKEVDRLEDE                     | 2.84 | 0.01 | 3.93 | 0.44 | 1.23 | 1.27 |
| 20042 | 0 | 14084  | ERTLPGQKACDDVN                        | 2.53 | 0.01 | 2.88 | 2.22 | 0.22 | 0.28 |
| 20043 | 0 | 14084  | ERTLPGQKACDDVN                        | 2.53 | 0.01 | 2.88 | 2.22 | 0.22 | 0.28 |
| 20044 | 0 | 14084  | ERTLPGQKACDDVN                        | 2.53 | 0.01 | 2.88 | 2.22 | 0.22 | 0.28 |
| 20045 | 0 | 14084  | ERTLPGQKACDDVN                        | 2.53 | 0.01 | 2.96 | 2.22 | 0.22 | 0.28 |
| 20046 | 0 | 285750 | ERTLQVAGIKTTTAT                       | 2.67 | 0.01 | 1.61 | 0.44 | 0.85 | 1.28 |
| 20047 | 0 | 14085  | ERTLTKEY                              | 2.15 | 0.01 | 3.18 | 1.12 | 0.22 | 0.28 |
| 20048 | 0 | 134929 | ERVGETPL                              | 2.13 | 0.01 | 0.78 | 1.12 | 0.22 | 1.27 |
| 20049 | 0 | 134929 | ERVGETPL                              | 2.13 | 0.01 | 0.78 | 1.12 | 0.22 | 1.27 |
| 20050 | 0 | 195021 | ERVPLADVPLDDDS                        | 2.63 | 0.01 | 2.30 | 0.44 | 0.85 | 0.28 |
| 20051 | 0 | 122340 | ERVTRLEWPKNDPRI                       | 2.67 | 0.01 | 0.90 | 1.15 | 0.22 | 0.28 |



|       |   |        |                                   |      |      |      |      |      |      |
|-------|---|--------|-----------------------------------|------|------|------|------|------|------|
| 20052 | 0 | 100831 | ERYELRS                           | 2.05 | 0.01 | 0.90 | 0.44 | 1.13 | 1.39 |
| 20053 | 0 | 14099  | ERYLGYLEQL                        | 2.36 | 0.01 | 1.60 | 0.44 | 1.23 | 0.28 |
| 20054 | 0 | 14099  | ERYLGYLEQL                        | 2.36 | 0.01 | 1.60 | 0.44 | 1.23 | 0.28 |
| 20055 | 0 | 14100  | ERYLGYLEQLRLK                     | 2.67 | 0.01 | 1.60 | 0.44 | 1.23 | 0.85 |
| 20056 | 0 | 103892 | ERYWLRS                           | 2.02 | 0.01 | 0.90 | 0.44 | 1.13 | 1.39 |
| 20057 | 0 | 100832 | ESADPV                            | 1.88 | 0.01 | 3.02 | 1.12 | 0.22 | 0.28 |
| 20058 | 0 | 515309 | ESAEKEEKSEDKKK                    | 2.73 | 0.01 | 2.24 | 0.44 | 1.41 | 1.28 |
| 20059 | 0 | 14109  | ESAFNKALNECT                      | 2.48 | 0.01 | 3.22 | 0.44 | 1.23 | 0.85 |
| 20060 | 0 | 14110  | ESAGTQEDAAALRAFTE<br>AMT          | 2.96 | 0.01 | 1.72 | 0.44 | 0.85 | 0.28 |
| 20061 | 0 | 118790 | ESAHHHHWKNFR                      | 2.44 | 0.01 | 0.90 | 1.15 | 0.22 | 1.39 |
| 20062 | 0 | 121268 | ESAQRPFGC                         | 2.18 | 0.01 | 0.90 | 2.46 | 0.22 | 1.27 |
| 20063 | 0 | 121268 | ESAQRPFGC                         | 2.18 | 0.01 | 0.90 | 2.46 | 0.22 | 0.28 |
| 20064 | 0 | 14128  | ESDEAPFMFSENKFL                   | 2.69 | 0.01 | 1.66 | 1.15 | 0.22 | 0.28 |
| 20065 | 0 | 14128  | ESDEAPFMFSENKFL                   | 2.69 | 0.01 | 1.66 | 1.15 | 0.22 | 0.28 |
| 20066 | 0 | 14130  | ESDEEEAIVAYTLAT                   | 2.69 | 0.01 | 2.51 | 0.44 | 2.35 | 1.28 |
| 20067 | 0 | 14132  | ESDKQILEDEIGDLHEKN<br>KQ          | 2.98 | 0.01 | 3.78 | 1.81 | 0.22 | 0.85 |
| 20068 | 0 | 130815 | ESDPPVASYQWRLIN                   | 2.61 | 0.01 | 0.90 | 0.44 | 1.13 | 0.28 |
| 20069 | 0 | 130815 | ESDPPVASYQWRLIN                   | 2.61 | 0.01 | 0.90 | 0.44 | 1.13 | 1.66 |
| 20070 | 0 | 130815 | ESDPPVASYQWRLIN                   | 2.61 | 0.01 | 0.90 | 0.44 | 1.13 | 1.66 |
| 20071 | 0 | 130815 | ESDPPVASYQWRLIN                   | 2.61 | 0.01 | 0.90 | 0.44 | 1.13 | 1.66 |
| 20072 | 0 | 130815 | ESDPPVASYQWRLIN                   | 2.61 | 0.01 | 0.90 | 0.44 | 1.13 | 1.27 |
| 20073 | 0 | 119845 | ESDQPDLNFMESGEW                   | 2.74 | 0.01 | 0.78 | 2.04 | 0.22 | 0.28 |
| 20074 | 0 | 119845 | ESDQPDLNFMESGEW                   | 2.74 | 0.01 | 0.78 | 1.12 | 0.22 | 0.28 |
| 20075 | 0 | 119845 | ESDQPDLNFMESGEW                   | 2.74 | 0.01 | 0.78 | 1.81 | 0.22 | 0.28 |
| 20076 | 0 | 120509 | ESDRP                             | 1.74 | 0.01 | 2.26 | 2.36 | 0.22 | 0.28 |
| 20077 | 0 | 121269 | ESDRPD                            | 1.90 | 0.01 | 2.26 | 1.20 | 0.22 | 0.28 |
| 20078 | 0 | 229190 | ESDSEDYV                          | 2.17 | 0.01 | 2.70 | 0.68 | 0.22 | 0.28 |
| 20079 | 0 | 229191 | ESDSEDYVK                         | 2.26 | 0.01 | 2.70 | 0.68 | 0.22 | 0.28 |
| 20080 | 0 | 118338 | ESEESDDDMGFLFD                    | 2.72 | 0.01 | 0.78 | 0.44 | 1.13 | 0.85 |
| 20081 | 0 | 118338 | ESEESDDDMGFLFD                    | 2.72 | 0.01 | 0.78 | 0.44 | 0.85 | 0.85 |
| 20082 | 0 | 118338 | ESEESDDDMGFLFD                    | 2.72 | 0.01 | 0.78 | 0.44 | 1.13 | 0.85 |
| 20083 | 0 | 128580 | ESESEDEDMGFLFD                    | 2.73 | 0.01 | 0.78 | 0.44 | 1.13 | 0.85 |
| 20084 | 0 | 14141  | ESEGCYNGWHYQSFE                   | 2.69 | 0.01 | 2.72 | 0.44 | 1.23 | 0.85 |
| 20085 | 0 | 106400 | ESEIYRKYFG                        | 2.32 | 0.01 | 2.75 | 0.44 | 1.23 | 0.85 |
| 20086 | 0 | 123149 | ESEKFIKWP                         | 2.24 | 0.01 | 2.28 | 2.00 | 0.22 | 0.28 |
| 20087 | 0 | 14151  | ESFVPPWVTVPPPR<br>ESGEWVMKDYRGWKH | 2.70 | 0.01 | 0.90 | 0.68 | 0.22 | 1.39 |
| 20088 | 0 | 95012  | WVYYTCCPDTPYLDITY<br>HF           | 3.44 | 0.01 | 2.26 | 2.36 | 0.22 | 2.02 |
| 20089 | 0 | 122341 | ESGFLREVLNAVPLLL                  | 2.74 | 0.01 | 0.78 | 0.44 | 1.13 | 0.85 |
| 20090 | 0 | 113379 | ESGQGQQPGQWQQP                    | 2.66 | 0.01 | 1.86 | 0.44 | 1.23 | 0.85 |

|       |   |        |                          |      |      |      |      |      |      |
|-------|---|--------|--------------------------|------|------|------|------|------|------|
| 20091 | 0 | 103153 | ESGTTDNFQRYLQAA          | 2.61 | 0.01 | 2.04 | 0.44 | 0.85 | 1.28 |
| 20092 | 0 | 112099 | ESGVPDR                  | 1.99 | 0.01 | 0.78 | 0.44 | 1.13 | 0.28 |
| 20093 | 0 | 167245 | ESHQDADIEDFKAKKKEL<br>EE | 2.95 | 0.01 | 0.78 | 0.44 | 1.13 | 0.28 |
| 20094 | 0 | 14163  | ESHVPSGGILTS             | 2.46 | 0.01 | 2.48 | 1.20 | 0.22 | 0.28 |
| 20095 | 0 | 144257 | ESISVSSEQLAQFR           | 2.63 | 0.01 | 0.78 | 0.44 | 2.35 | 2.66 |
| 20096 | 0 | 115734 | ESITRINKKI               | 2.32 | 0.01 | 1.60 | 0.44 | 1.23 | 0.85 |
| 20097 | 0 | 115734 | ESITRINKKI               | 2.32 | 0.01 | 1.60 | 0.44 | 1.23 | 0.85 |
| 20098 | 0 | 14173  | ESIQYC                   | 1.88 | 0.01 | 1.96 | 0.44 | 0.85 | 0.28 |
| 20099 | 0 | 130816 | ESKAISDAQITASSYFTN<br>M  | 2.88 | 0.01 | 0.78 | 1.15 | 0.22 | 1.34 |
| 20100 | 0 | 130816 | ESKAISDAQITASSYFTN<br>M  | 2.88 | 0.01 | 0.78 | 0.44 | 1.93 | 1.34 |
| 20101 | 0 | 131415 | ESKAISDAQITASSYFTN<br>MF | 2.94 | 0.01 | 0.78 | 0.44 | 2.35 | 0.28 |
| 20102 | 0 | 104480 | ESKENEKALNELLEKTVK<br>DK | 2.99 | 0.01 | 2.24 | 2.04 | 0.22 | 0.28 |
| 20103 | 0 | 104480 | ESKENEKALNELLEKTVK<br>DK | 2.99 | 0.01 | 2.24 | 2.04 | 0.22 | 0.28 |
| 20104 | 0 | 104480 | ESKENEKALNELLEKTVK<br>DK | 2.99 | 0.01 | 2.24 | 2.04 | 0.22 | 0.28 |
| 20105 | 0 | 147641 | ESKGEREGSSSQQR           | 2.71 | 0.01 | 2.75 | 0.44 | 1.23 | 0.28 |
| 20106 | 0 | 147641 | ESKGEREGSSSQQR           | 2.71 | 0.01 | 2.75 | 0.44 | 1.23 | 1.34 |
| 20107 | 0 | 14181  | ESKHSCQIWCDNML           | 2.57 | 0.01 | 0.90 | 1.15 | 0.22 | 1.27 |
| 20108 | 0 | 14182  | ESKIVELEEEL              | 2.43 | 0.01 | 3.15 | 0.44 | 1.23 | 0.85 |
| 20109 | 0 | 14183  | ESKIVELEEELRVVG          | 2.70 | 0.01 | 3.15 | 0.44 | 1.23 | 0.85 |
| 20110 | 0 | 14183  | ESKIVELEEELRVVG          | 2.70 | 0.01 | 3.15 | 0.44 | 1.23 | 0.85 |
| 20111 | 0 | 14190  | ESKLTPPPLNPIRVV          | 2.65 | 0.01 | 0.90 | 0.44 | 0.85 | 1.39 |
| 20112 | 0 | 14190  | ESKLTPPPLNPIRVV          | 2.65 | 0.01 | 0.90 | 0.44 | 0.85 | 0.28 |
| 20113 | 0 | 123150 | ESKRFIKWP                | 2.21 | 0.01 | 2.28 | 2.00 | 0.22 | 0.28 |
| 20114 | 0 | 286273 | ESKSAEPKPAEPKSA          | 2.75 | 0.01 | 1.61 | 0.44 | 0.85 | 1.28 |
| 20115 | 0 | 14191  | ESKVQDIIDLIDH            | 2.55 | 0.01 | 3.00 | 1.15 | 0.22 | 0.85 |
| 20116 | 0 | 14191  | ESKVQDIIDLIDH            | 2.55 | 0.01 | 3.00 | 1.15 | 0.22 | 1.48 |
| 20117 | 0 | 14191  | ESKVQDIIDLIDH            | 2.55 | 0.01 | 3.00 | 1.15 | 0.22 | 0.85 |
| 20118 | 0 | 450569 | ESKWMPL                  | 1.99 | 0.01 | 0.90 | 0.44 | 1.41 | 1.39 |
| 20119 | 0 | 14192  | ESKYSNTF                 | 2.12 | 0.01 | 2.96 | 0.68 | 0.22 | 0.28 |
| 20120 | 0 | 14192  | ESKYSNTF                 | 2.12 | 0.01 | 2.96 | 0.68 | 0.22 | 0.28 |
| 20121 | 0 | 141884 | ESLIA                    | 1.74 | 0.01 | 0.78 | 1.12 | 0.22 | 0.28 |
| 20122 | 0 | 141884 | ESLIA                    | 1.74 | 0.01 | 0.78 | 1.12 | 0.22 | 0.28 |
| 20123 | 0 | 141884 | ESLIA                    | 1.74 | 0.01 | 0.78 | 1.12 | 0.22 | 0.28 |
| 20124 | 0 | 141884 | ESLIA                    | 1.74 | 0.01 | 0.78 | 1.12 | 0.22 | 0.28 |
| 20125 | 0 | 141884 | ESLIA                    | 1.74 | 0.01 | 0.78 | 1.12 | 0.22 | 0.28 |
| 20126 | 0 | 182109 | ESLKKCIQAGKSVLT          | 2.66 | 0.01 | 0.78 | 0.44 | 1.13 | 0.85 |
| 20127 | 0 | 240986 | ESLMNLYQQ                | 2.21 | 0.01 | 3.35 | 2.37 | 0.22 | 0.85 |
| 20128 | 0 | 240986 | ESLMNLYQQ                | 2.21 | 0.01 | 3.35 | 1.20 | 0.22 | 0.85 |
| 20129 | 0 | 14202  | ESLNTGWLGLF              | 2.48 | 0.01 | 2.45 | 2.36 | 0.22 | 1.34 |
| 20130 | 0 | 14204  | ESLNTGWLGLP              | 2.48 | 0.01 | 2.45 | 2.36 | 0.22 | 1.34 |

|       |   |        |                                  |      |      |      |      |      |      |
|-------|---|--------|----------------------------------|------|------|------|------|------|------|
| 20131 | 0 | 170937 | ESLNTRTVYFSEQWV                  | 2.67 | 0.01 | 0.78 | 0.44 | 1.41 | 0.28 |
| 20132 | 0 | 170937 | ESLNTRTVYFSEQWV                  | 2.67 | 0.01 | 0.78 | 0.44 | 1.13 | 0.28 |
| 20133 | 0 | 14205  | ESLPTFA                          | 1.99 | 0.01 | 0.90 | 0.44 | 0.85 | 1.39 |
| 20134 | 0 | 196436 | ESLQRPL                          | 2.02 | 0.01 | 0.90 | 0.44 | 1.23 | 1.39 |
| 20135 | 0 | 14208  | ESLTTTSTALGKLQDVV                | 2.78 | 0.01 | 2.48 | 0.44 | 0.85 | 0.28 |
| 20136 | 0 | 14208  | ESLTTTSTALGKLQDVV                | 2.78 | 0.01 | 2.48 | 0.68 | 0.22 | 0.28 |
| 20137 | 0 | 14210  | ESMAGKREMV                       | 2.32 | 0.01 | 2.66 | 0.68 | 0.22 | 0.28 |
| 20138 | 0 | 14210  | ESMAGKREMV                       | 2.32 | 0.01 | 2.66 | 0.68 | 0.22 | 0.28 |
| 20139 | 0 | 14210  | ESMAGKREMV                       | 2.32 | 0.01 | 2.66 | 0.68 | 0.22 | 0.28 |
| 20140 | 0 | 14210  | ESMAGKREMV                       | 2.32 | 0.01 | 2.66 | 0.68 | 0.22 | 0.28 |
| 20141 | 0 | 127644 | ESMPALS                          | 2.02 | 0.01 | 0.90 | 0.44 | 1.13 | 1.39 |
| 20142 | 0 | 119569 | ESNGQPEN                         | 2.15 | 0.01 | 0.78 | 0.44 | 1.93 | 0.28 |
| 20143 | 0 | 114814 | ESNGTLTSLH                       | 2.33 | 0.01 | 2.25 | 0.44 | 1.23 | 0.85 |
| 20144 | 0 | 114814 | ESNGTLTSLH                       | 2.33 | 0.01 | 2.25 | 0.44 | 1.23 | 0.85 |
| 20145 | 0 | 515342 | ESNKQNTASTETTTT                  | 2.70 | 0.01 | 2.24 | 0.44 | 1.41 | 1.28 |
| 20146 | 0 | 97282  | ESNNL                            | 1.75 | 0.01 | 3.34 | 1.12 | 0.22 | 1.34 |
| 20147 | 0 | 97282  | ESNNL                            | 1.75 | 0.01 | 3.34 | 1.12 | 0.22 | 2.02 |
| 20148 | 0 | 97282  | ESNNL                            | 1.75 | 0.01 | 3.34 | 1.12 | 0.22 | 1.34 |
| 20149 | 0 | 14223  | ESNPVDGAHLSL                     | 2.45 | 0.01 | 0.90 | 0.68 | 0.22 | 0.28 |
| 20150 | 0 | 14223  | ESNPVDGAHLSL                     | 2.45 | 0.01 | 0.90 | 0.68 | 0.22 | 1.27 |
| 20151 | 0 | 14223  | ESNPVDGAHLSL                     | 2.45 | 0.01 | 0.90 | 0.44 | 1.59 | 0.28 |
| 20152 | 0 | 133084 | ESNTFGLQLELTEGM                  | 2.71 | 0.01 | 2.04 | 2.97 | 0.22 | 0.28 |
| 20153 | 0 | 14227  | ESPANNPGLSTVRDE                  | 2.66 | 0.01 | 3.97 | 1.20 | 0.22 | 0.85 |
| 20154 | 0 | 14230  | ESPEHCSPHHTA                     | 2.51 | 0.01 | 2.08 | 0.68 | 2.26 | 0.85 |
| 20155 | 0 | 14230  | ESPEHCSPHHTA                     | 2.51 | 0.01 | 2.08 | 0.44 | 1.59 | 0.85 |
| 20156 | 0 | 14231  | ESPFAR                           | 1.88 | 0.01 | 2.96 | 0.44 | 0.85 | 0.28 |
| 20157 | 0 | 229894 | ESPLQPTEDGSEEPGSE<br>TSDAKSTPTAE | 3.36 | 0.01 | 0.78 | 0.44 | 1.41 | 0.28 |
| 20158 | 0 | 122090 | ESPQEISKHQALG                    | 2.54 | 0.01 | 2.72 | 1.20 | 0.22 | 0.28 |
| 20159 | 0 | 122090 | ESPQEISKHQALG                    | 2.54 | 0.01 | 2.72 | 1.20 | 0.22 | 2.02 |
| 20160 | 0 | 122090 | ESPQEISKHQALG                    | 2.54 | 0.01 | 2.72 | 1.20 | 0.22 | 2.02 |
| 20161 | 0 | 14239  | ESPVPATIPLSSVIV                  | 2.71 | 0.01 | 2.51 | 0.44 | 2.35 | 1.28 |
| 20162 | 0 | 14241  | ESQAYYDGRSS                      | 2.45 | 0.01 | 1.75 | 2.19 | 0.22 | 0.28 |
| 20163 | 0 | 229984 | ESQAYYQR                         | 2.13 | 0.01 | 2.52 | 3.15 | 0.22 | 0.85 |
| 20164 | 0 | 229984 | ESQAYYQR                         | 2.13 | 0.01 | 2.52 | 3.15 | 0.22 | 0.85 |
| 20165 | 0 | 14242  | ESQAYYQRGASVILFSSP<br>PVI        | 2.98 | 0.01 | 2.52 | 1.15 | 0.22 | 0.28 |
| 20166 | 0 | 14242  | ESQAYYQRGASVILFSSP<br>PVI        | 2.98 | 0.01 | 2.52 | 2.90 | 0.22 | 0.85 |
| 20167 | 0 | 14242  | ESQAYYQRGASVILFSSP<br>PVI        | 2.98 | 0.01 | 2.52 | 2.90 | 0.22 | 0.28 |
| 20168 | 0 | 242460 | ESQIREQYDQVLSTK                  | 2.67 | 0.01 | 3.32 | 1.20 | 0.22 | 0.85 |
| 20169 | 0 | 242460 | ESQIREQYDQVLSTK                  | 2.67 | 0.01 | 3.32 | 1.20 | 0.22 | 0.85 |
| 20170 | 0 | 140674 | ESQPDPKDELHKS                    | 2.65 | 0.01 | 2.56 | 0.68 | 0.22 | 0.28 |
| 20171 | 0 | 140674 | ESQPDPKDELHKS                    | 2.65 | 0.01 | 2.56 | 0.68 | 0.22 | 1.66 |

|       |   |        |                                                          |      |      |      |      |      |      |
|-------|---|--------|----------------------------------------------------------|------|------|------|------|------|------|
| 20172 | 0 | 140674 | ESQPDPKPDELHKS                                           | 2.65 | 0.01 | 2.56 | 0.68 | 0.22 | 1.66 |
| 20173 | 0 | 140674 | ESQPDPKPDELHKS                                           | 2.65 | 0.01 | 2.56 | 0.68 | 0.22 | 1.66 |
| 20174 | 0 | 140674 | ESQPDPKPDELHKS                                           | 2.65 | 0.01 | 2.56 | 0.68 | 0.22 | 1.66 |
| 20175 | 0 | 140674 | ESQPDPKPDELHKS                                           | 2.65 | 0.01 | 2.56 | 0.68 | 0.22 | 1.66 |
| 20176 | 0 | 140674 | ESQPDPKPDELHKS                                           | 2.65 | 0.01 | 2.56 | 0.68 | 0.22 | 1.66 |
| 20177 | 0 | 140674 | ESQPDPKPDELHKS                                           | 2.65 | 0.01 | 2.56 | 0.68 | 0.22 | 0.85 |
| 20178 | 0 | 14247  | ESQRNGIAPQSDS                                            | 2.54 | 0.01 | 3.75 | 0.68 | 0.22 | 0.28 |
| 20179 | 0 | 78151  | ESQSLTLTDVENLHLPLP<br>LL                                 | 2.97 | 0.01 | 1.60 | 0.44 | 1.23 | 1.28 |
| 20180 | 0 | 131872 | ESQSRDRRKIDQHTL                                          | 2.67 | 0.01 | 0.78 | 0.44 | 1.13 | 0.85 |
| 20181 | 0 | 178775 | ESQYKEMEAKVSSTL                                          | 2.68 | 0.01 | 2.36 | 0.44 | 1.23 | 1.28 |
| 20182 | 0 | 420594 | ESRGDQDQ                                                 | 2.14 | 0.01 | 3.61 | 0.68 | 0.22 | 1.48 |
| 20183 | 0 | 420594 | ESRGDQDQ                                                 | 2.14 | 0.01 | 3.61 | 0.68 | 0.22 | 0.28 |
| 20184 | 0 | 420594 | ESRGDQDQ                                                 | 2.14 | 0.01 | 3.61 | 0.68 | 0.22 | 0.85 |
| 20185 | 0 | 420594 | ESRGDQDQ                                                 | 2.14 | 0.01 | 3.61 | 0.68 | 0.22 | 0.85 |
| 20186 | 0 | 420594 | ESRGDQDQ                                                 | 2.14 | 0.01 | 3.61 | 2.22 | 0.22 | 0.28 |
| 20187 | 0 | 151848 | ESRPNVVKPSVL                                             | 2.49 | 0.01 | 2.80 | 2.78 | 0.22 | 0.28 |
| 20188 | 0 | 14260  | ESRPRGVYPTEQ                                             | 2.48 | 0.01 | 0.90 | 1.15 | 2.26 | 0.85 |
| 20189 | 0 | 14260  | ESRPRGVYPTEQ                                             | 2.48 | 0.01 | 0.90 | 0.68 | 0.22 | 0.28 |
| 20190 | 0 | 14260  | ESRPRGVYPTEQ                                             | 2.48 | 0.01 | 0.90 | 1.15 | 2.26 | 1.39 |
| 20191 | 0 | 14261  | ESRRAL                                                   | 1.89 | 0.01 | 3.81 | 0.44 | 1.13 | 0.28 |
| 20192 | 0 | 14261  | ESRRAL                                                   | 1.89 | 0.01 | 3.81 | 0.44 | 1.13 | 0.28 |
| 20193 | 0 | 14261  | ESRRAL                                                   | 1.89 | 0.01 | 3.81 | 0.44 | 1.13 | 0.28 |
| 20194 | 0 | 14261  | ESRRAL                                                   | 1.89 | 0.01 | 3.81 | 0.44 | 1.13 | 1.34 |
| 20195 | 0 | 180967 | ESRTEYR                                                  | 2.05 | 0.01 | 0.90 | 0.68 | 0.22 | 1.39 |
| 20196 | 0 | 450572 | ESRVMSR                                                  | 2.04 | 0.01 | 0.90 | 0.44 | 1.41 | 1.39 |
| 20197 | 0 | 14263  | ESSCTFMPEGTVCSQ                                          | 2.69 | 0.01 | 2.43 | 0.44 | 1.59 | 0.28 |
| 20198 | 0 | 515353 | ESSELTTEKAGQKTD                                          | 2.69 | 0.01 | 2.24 | 0.44 | 1.41 | 1.28 |
| 20199 | 0 | 14271  | ESSNNAESSNISQESKLI<br>NT                                 | 2.99 | 0.01 | 4.63 | 2.42 | 0.22 | 0.28 |
| 20200 | 0 | 14271  | ESSNNAESSNISQESKLI<br>NT                                 | 2.99 | 0.01 | 4.63 | 2.42 | 0.22 | 1.34 |
| 20201 | 0 | 14273  | ESSPNTQWELRAFMA                                          | 2.64 | 0.01 | 2.80 | 1.15 | 0.22 | 1.27 |
| 20202 | 0 | 14273  | ESSPNTQWELRAFMA                                          | 2.64 | 0.01 | 2.80 | 1.15 | 0.22 | 0.28 |
| 20203 | 0 | 139496 | ESSRDGSRHPRSHD                                           | 2.66 | 3.70 | 0.78 | 0.44 | 1.13 | 1.27 |
| 20204 | 0 | 286656 | ESSSFYSREVDVSQC                                          | 2.69 | 0.01 | 1.61 | 0.44 | 0.85 | 1.28 |
| 20205 | 0 | 145179 | ESSSHHPGIAEFPSRGK                                        | 2.80 | 3.85 | 0.78 | 0.44 | 1.13 | 1.28 |
| 20206 | 0 | 14278  | ESSSSDKP                                                 | 2.14 | 0.01 | 3.45 | 0.44 | 0.85 | 0.28 |
| 20207 | 0 | 237708 | ESSSSGNAPNKTDGKGE<br>ESE                                 | 2.98 | 0.01 | 2.96 | 0.44 | 1.74 | 0.28 |
| 20208 | 0 | 142414 | ESSSSGNAPNKTDGKGE<br>ESEKQNELNESTEEGPK<br>APQEPQTAENENPA | 3.85 | 0.01 | 2.96 | 0.44 | 1.74 | 0.28 |

|       |   |        |                                                          |      |      |      |      |      |      |
|-------|---|--------|----------------------------------------------------------|------|------|------|------|------|------|
| 20209 | 0 | 142414 | ESSSSGNAPNKTDGKGE<br>ESEKQNELNESTEEGPK<br>APQEPQTAENENPA | 3.85 | 0.01 | 2.96 | 0.44 | 1.74 | 0.28 |
| 20210 | 0 | 14279  | ESSTVKAESSTVKAESSTI<br>S                                 | 3.01 | 0.01 | 4.63 | 2.42 | 0.22 | 0.28 |
| 20211 | 0 | 14279  | ESSTVKAESSTVKAESSTI<br>S                                 | 3.01 | 0.01 | 4.63 | 2.42 | 0.22 | 1.34 |
| 20212 | 0 | 14280  | ESSVDRRPMETVSKDS                                         | 2.76 | 0.01 | 3.37 | 3.23 | 0.22 | 0.28 |
| 20213 | 0 | 14280  | ESSVDRRPMETVSKDS                                         | 2.76 | 0.01 | 3.37 | 3.23 | 0.22 | 1.34 |
| 20214 | 0 | 14280  | ESSVDRRPMETVSKDS                                         | 2.76 | 0.01 | 3.37 | 3.23 | 0.22 | 0.28 |
| 20215 | 0 | 419166 | ESSVTLGCGIRGARF                                          | 2.65 | 0.01 | 0.90 | 2.97 | 2.60 | 1.75 |
| 20216 | 0 | 419166 | ESSVTLGCGIRGARF                                          | 2.65 | 0.01 | 0.90 | 2.97 | 0.22 | 0.28 |
| 20217 | 0 | 419166 | ESSVTLGCGIRGARF                                          | 2.65 | 0.01 | 0.90 | 0.44 | 1.13 | 0.28 |
| 20218 | 0 | 419167 | ESSVTLGCGIRRARF                                          | 2.65 | 0.01 | 0.90 | 2.97 | 2.60 | 1.75 |
| 20219 | 0 | 141886 | ESSVVLRRRVPP                                             | 2.49 | 0.01 | 0.78 | 0.44 | 2.35 | 0.28 |
| 20220 | 0 | 286679 | ESTAMKTTTATTGDS                                          | 2.70 | 0.01 | 1.61 | 0.44 | 0.85 | 1.28 |
| 20221 | 0 | 14287  | ESTCTWLUNA                                               | 2.29 | 4.23 | 2.70 | 0.44 | 0.85 | 0.28 |
| 20222 | 0 | 132802 | ESTLHLVLRRLR                                             | 2.43 | 0.01 | 0.78 | 0.68 | 0.22 | 1.57 |
| 20223 | 0 | 132802 | ESTLHLVLRRLR                                             | 2.43 | 0.01 | 0.78 | 0.68 | 0.22 | 1.48 |
| 20224 | 0 | 132802 | ESTLHLVLRRLR                                             | 2.43 | 0.01 | 0.78 | 0.68 | 0.22 | 1.57 |
| 20225 | 0 | 14294  | ESTLYTRTWS                                               | 2.33 | 4.23 | 2.70 | 0.44 | 0.85 | 0.28 |
| 20226 | 0 | 286740 | ESTVIKTTTATTGDS                                          | 2.68 | 0.01 | 1.61 | 0.44 | 0.85 | 1.28 |
| 20227 | 0 | 286741 | ESTVMKTTTATTGDS                                          | 2.68 | 0.01 | 1.61 | 0.44 | 0.85 | 1.28 |
| 20228 | 0 | 133561 | ESTWYMWQSRSE                                             | 2.50 | 0.01 | 0.90 | 0.44 | 0.85 | 1.39 |
| 20229 | 0 | 14300  | ESVLQAQMAAQLPVI<br>GGIA                                  | 2.96 | 0.01 | 3.37 | 3.23 | 0.22 | 1.34 |
| 20230 | 0 | 14300  | ESVLQAQMAAQLPVI<br>GGIA                                  | 2.96 | 0.01 | 3.37 | 3.23 | 0.22 | 0.28 |
| 20231 | 0 | 130817 | ESVMQSYPPHLQIPG                                          | 2.66 | 0.01 | 0.90 | 0.44 | 1.13 | 0.28 |
| 20232 | 0 | 130817 | ESVMQSYPPHLQIPG                                          | 2.66 | 0.01 | 0.90 | 0.44 | 1.13 | 1.66 |
| 20233 | 0 | 130817 | ESVMQSYPPHLQIPG                                          | 2.66 | 0.01 | 0.90 | 0.44 | 1.13 | 1.66 |
| 20234 | 0 | 130817 | ESVMQSYPPHLQIPG                                          | 2.66 | 0.01 | 0.90 | 0.44 | 1.13 | 1.66 |
| 20235 | 0 | 130817 | ESVMQSYPPHLQIPG                                          | 2.66 | 0.01 | 0.90 | 0.44 | 1.13 | 1.27 |
| 20236 | 0 | 14305  | ESVTEEIA                                                 | 2.14 | 0.01 | 1.66 | 0.44 | 1.59 | 1.57 |
| 20237 | 0 | 174896 | ESVVKEAHREVI                                             | 2.50 | 0.01 | 2.18 | 2.71 | 0.22 | 0.28 |
| 20238 | 0 | 225726 | ESWSYIVEKPNPENGTC<br>YP                                  | 2.90 | 0.01 | 3.72 | 1.12 | 0.22 | 1.28 |
| 20239 | 0 | 174472 | ESWTNSWAHYFG                                             | 2.45 | 0.01 | 0.90 | 1.15 | 1.41 | 1.39 |
| 20240 | 0 | 174473 | ESWTNSWAMYFG                                             | 2.45 | 0.01 | 0.90 | 1.15 | 1.41 | 1.39 |
| 20241 | 0 | 14315  | ESYIGSINNITKQSA                                          | 2.67 | 0.01 | 3.00 | 0.68 | 0.22 | 0.28 |
| 20242 | 0 | 14317  | ESYKNSKDKELLIYLNNG<br>ELKKKNS                            | 3.20 | 0.01 | 1.66 | 1.12 | 0.22 | 0.28 |

|       |   |        |                                       |      |      |      |      |      |      |
|-------|---|--------|---------------------------------------|------|------|------|------|------|------|
| 20243 | 0 | 14317  | ESYKNSKDKELLIYLNNG<br>ELKKKNS         | 3.20 | 0.01 | 1.66 | 0.44 | 1.59 | 1.57 |
| 20244 | 0 | 14317  | ESYKNSKDKELLIYLNNG<br>ELKKKNS         | 3.20 | 0.01 | 1.66 | 3.33 | 0.22 | 1.57 |
| 20245 | 0 | 236171 | ETAFTVKSMQTESKY                       | 2.69 | 0.01 | 1.66 | 0.44 | 0.85 | 1.28 |
| 20246 | 0 | 14331  | ETAGGVMTALIKRNTTIP<br>TK              | 2.94 | 0.01 | 2.78 | 0.44 | 0.85 | 0.28 |
| 20247 | 0 | 450573 | ETALIAA                               | 2.00 | 0.01 | 0.90 | 0.44 | 1.41 | 1.39 |
| 20248 | 0 | 117843 | ETARRLKKCVDKIRNQY<br>RED              | 2.93 | 0.01 | 0.78 | 0.44 | 1.13 | 0.28 |
| 20249 | 0 | 94506  | ETCFQQACKGKIQUALCE<br>NPEWA           | 3.03 | 0.01 | 2.43 | 0.68 | 0.22 | 2.12 |
| 20250 | 0 | 94506  | ETCFQQACKGKIQUALCE<br>NPEWA           | 3.03 | 0.01 | 2.43 | 0.68 | 0.22 | 1.34 |
| 20251 | 0 | 94506  | ETCFQQACKGKIQUALCE<br>NPEWA           | 3.03 | 0.01 | 2.43 | 0.68 | 0.22 | 0.28 |
| 20252 | 0 | 94506  | ETCFQQACKGKIQUALCE<br>NPEWA           | 3.03 | 0.01 | 2.43 | 0.68 | 0.22 | 1.34 |
| 20253 | 0 | 94506  | ETCFQQACKGKIQUALCE<br>NPEWA           | 3.03 | 0.01 | 2.43 | 0.68 | 0.22 | 1.34 |
| 20254 | 0 | 94506  | ETCFQQACKGKIQUALCE<br>NPEWA           | 3.03 | 0.01 | 2.43 | 0.68 | 0.22 | 1.34 |
| 20255 | 0 | 94506  | ETCFQQACKGKIQUALCE<br>NPEWA           | 3.03 | 0.01 | 2.43 | 0.68 | 0.22 | 1.34 |
| 20256 | 0 | 118791 | ETCFQQACKGKIQUALCE<br>NPEWAPLKDNRIPSY | 3.38 | 0.01 | 3.85 | 1.15 | 0.22 | 1.34 |
| 20257 | 0 | 118791 | ETCFQQACKGKIQUALCE<br>NPEWAPLKDNRIPSY | 3.38 | 0.01 | 3.85 | 1.15 | 0.22 | 1.34 |
| 20258 | 0 | 118791 | ETCFQQACKGKIQUALCE<br>NPEWAPLKDNRIPSY | 3.38 | 0.01 | 3.85 | 1.15 | 0.22 | 1.34 |
| 20259 | 0 | 118791 | ETCFQQACKGKIQUALCE<br>NPEWAPLKDNRIPSY | 3.38 | 0.01 | 3.85 | 1.15 | 0.22 | 1.34 |
| 20260 | 0 | 118791 | ETCFQQACKGKIQUALCE<br>NPEWAPLKDNRIPSY | 3.38 | 0.01 | 3.85 | 1.15 | 0.22 | 1.34 |
| 20261 | 0 | 118791 | ETCFQQACKGKIQUALCE<br>NPEWAPLKDNRIPSY | 3.38 | 0.01 | 3.85 | 1.15 | 0.22 | 1.34 |
| 20262 | 0 | 118791 | ETCFQQACKGKIQUALCE<br>NPEWAPLKDNRIPSY | 3.38 | 0.01 | 3.85 | 1.15 | 0.22 | 1.34 |

|       |   |        |                                       |      |      |      |      |      |      |
|-------|---|--------|---------------------------------------|------|------|------|------|------|------|
| 20263 | 0 | 118791 | ETCFQQACKGKIQALCE<br>NPEWAPLKDNRIPSY  | 3.38 | 0.01 | 3.85 | 1.15 | 0.22 | 1.34 |
| 20264 | 0 | 118791 | ETCFQQACKGKIQALCE<br>NPEWAPLKDNRIPSY  | 3.38 | 0.01 | 3.85 | 1.15 | 0.22 | 1.34 |
| 20265 | 0 | 118791 | ETCFQQACKGKIQALCE<br>NPEWAPLKDNRIPSY  | 3.38 | 0.01 | 3.85 | 1.15 | 0.22 | 1.34 |
| 20266 | 0 | 118791 | ETCFQQACKGKIQALCE<br>NPEWAPLKDNRIPSY  | 3.38 | 0.01 | 3.85 | 1.15 | 0.22 | 1.48 |
| 20267 | 0 | 118791 | ETCFQQACKGKIQALCE<br>NPEWAPLKDNRIPSY  | 3.38 | 0.01 | 3.85 | 1.15 | 0.22 | 1.48 |
| 20268 | 0 | 79204  | ETDEEYYSVEKLIGQAED<br>VEHEYHK         | 3.16 | 0.01 | 2.86 | 0.44 | 0.85 | 0.28 |
| 20269 | 0 | 79204  | ETDEEYYSVEKLIGQAED<br>VEHEYHK         | 3.16 | 0.01 | 2.86 | 0.44 | 0.85 | 0.28 |
| 20270 | 0 | 79204  | ETDEEYYSVEKLIGQAED<br>VEHEYHK         | 3.16 | 0.01 | 2.86 | 0.44 | 0.85 | 0.28 |
| 20271 | 0 | 170948 | ETDFKATADDNKKPQEY<br>QENREKWEADKKLIVA | 3.43 | 0.01 | 4.63 | 0.44 | 0.85 | 0.28 |
| 20272 | 0 | 14345  | ETDIKIMERV                            | 2.32 | 0.01 | 2.98 | 1.12 | 0.22 | 0.28 |
| 20273 | 0 | 14346  | ETDIKMMKRV                            | 2.30 | 0.01 | 1.60 | 3.85 | 0.22 | 0.28 |
| 20274 | 0 | 170950 | ETDNMKPLHLRQ                          | 2.43 | 0.01 | 0.90 | 0.44 | 0.85 | 1.39 |
| 20275 | 0 | 170950 | ETDNMKPLHLRQ                          | 2.43 | 0.01 | 0.90 | 0.44 | 0.85 | 0.28 |
| 20276 | 0 | 14350  | ETDVKMMERV                            | 2.33 | 0.01 | 1.75 | 1.12 | 0.22 | 0.28 |
| 20277 | 0 | 14350  | ETDVKMMERV                            | 2.33 | 0.01 | 1.75 | 1.12 | 0.22 | 0.28 |
| 20278 | 0 | 14353  | ETEDTKEPGVLMMGGQ                      | 2.68 | 0.01 | 2.24 | 1.15 | 0.22 | 0.85 |
| 20279 | 0 | 141887 | ETEEWTVPQSSR                          | 2.48 | 0.01 | 0.78 | 0.44 | 2.35 | 0.28 |
| 20280 | 0 | 14358  | ETEFKLY                               | 2.13 | 0.01 | 1.66 | 1.15 | 0.22 | 0.28 |
| 20281 | 0 | 108352 | ETEKESGITESHQKEDEIV<br>SQ             | 3.03 | 0.01 | 3.27 | 2.49 | 0.85 | 0.28 |
| 20282 | 0 | 108352 | ETEKESGITESHQKEDEIV<br>SQ             | 3.03 | 0.01 | 3.27 | 0.44 | 0.85 | 0.28 |
| 20283 | 0 | 100833 | ETEKPLEPAP                            | 2.36 | 0.01 | 3.18 | 3.75 | 0.22 | 0.28 |
| 20284 | 0 | 194914 | ETEKPLEPAPVEPSYAE<br>PT               | 2.99 | 0.01 | 2.39 | 0.44 | 1.59 | 0.28 |
| 20285 | 0 | 102408 | ETEKPLKPAPVAPNYEKE<br>PT              | 2.99 | 0.01 | 2.39 | 0.68 | 0.22 | 0.28 |
| 20286 | 0 | 287052 | ETEKQKAAEATKVAE                       | 2.74 | 0.01 | 1.61 | 0.44 | 0.85 | 1.28 |
| 20287 | 0 | 287055 | ETEKQRAAEATKVAE                       | 2.73 | 0.01 | 1.61 | 0.44 | 0.85 | 1.28 |
| 20288 | 0 | 287057 | ETEKRKAAEATKAAE                       | 2.75 | 0.01 | 1.61 | 0.44 | 0.85 | 1.28 |
| 20289 | 0 | 287058 | ETEKRKAAEATKIAE                       | 2.74 | 0.01 | 1.61 | 0.44 | 0.85 | 1.28 |
| 20290 | 0 | 287059 | ETEKRKAAEATKVAE                       | 2.74 | 0.01 | 1.61 | 0.44 | 0.85 | 1.28 |

|       |   |        |                                  |      |      |      |      |      |      |
|-------|---|--------|----------------------------------|------|------|------|------|------|------|
| 20291 | 0 | 153380 | ETELTIAALKYV                     | 2.49 | 0.01 | 0.90 | 0.68 | 0.22 | 1.66 |
| 20292 | 0 | 153380 | ETELTIAALKYV                     | 2.49 | 0.01 | 0.90 | 0.68 | 0.22 | 0.28 |
| 20293 | 0 | 153380 | ETELTIAALKYV                     | 2.49 | 0.01 | 0.90 | 0.68 | 0.22 | 0.28 |
| 20294 | 0 | 191279 | ETETTSVIPAAR                     | 2.48 | 0.01 | 2.76 | 1.20 | 0.22 | 0.28 |
| 20295 | 0 | 287109 | ETEVSRDPTDEHSDF                  | 2.71 | 0.01 | 1.61 | 0.44 | 0.85 | 1.28 |
| 20296 | 0 | 14371  | ETFLRGFLG                        | 2.25 | 0.01 | 2.61 | 0.44 | 0.85 | 0.28 |
| 20297 | 0 | 14379  | ETFTCISAPWTCVTWL                 | 2.73 | 0.01 | 0.90 | 0.44 | 1.41 | 0.28 |
| 20298 | 0 | 95077  | ETFTETWNRFITHTTE                 | 2.72 | 0.01 | 2.48 | 0.44 | 1.74 | 0.28 |
| 20299 | 0 | 95077  | ETFTETWNRFITHTTE                 | 2.72 | 0.01 | 2.48 | 0.44 | 1.74 | 0.28 |
| 20300 | 0 | 95077  | ETFTETWNRFITHTTE                 | 2.72 | 0.01 | 2.48 | 0.44 | 1.74 | 0.28 |
| 20301 | 0 | 14380  | ETFTNKLKEKHTD                    | 2.58 | 0.01 | 2.73 | 0.44 | 0.85 | 0.85 |
| 20302 | 0 | 14380  | ETFTNKLKEKHTD                    | 2.58 | 0.01 | 2.73 | 1.15 | 0.22 | 0.85 |
| 20303 | 0 | 100021 | ETGATNPLAPSDTV                   | 2.61 | 0.01 | 2.96 | 1.12 | 0.22 | 0.28 |
| 20304 | 0 | 14386  | ETGERSVLTVPSTDIEKEI<br>L         | 2.97 | 0.01 | 0.90 | 1.12 | 0.22 | 0.28 |
| 20305 | 0 | 14386  | ETGERSVLTVPSTDIEKEI<br>L         | 2.97 | 0.01 | 0.90 | 1.12 | 0.22 | 0.28 |
| 20306 | 0 | 119570 | ETGETVEEGLYAVPLPKD               | 2.87 | 0.01 | 3.33 | 0.44 | 0.85 | 0.28 |
| 20307 | 0 | 119571 | ETGETVEEGLYAVPLPKD<br>QRPTPTQVLE | 3.30 | 0.01 | 3.33 | 0.44 | 0.85 | 0.28 |
| 20308 | 0 | 119571 | ETGETVEEGLYAVPLPKD<br>QRPTPTQVLE | 3.30 | 0.01 | 3.33 | 2.49 | 0.85 | 0.28 |
| 20309 | 0 | 14388  | ETGIDSQSQGSFQAPQS<br>SQS         | 2.97 | 0.01 | 3.36 | 3.89 | 1.59 | 0.28 |
| 20310 | 0 | 102409 | ETGKGV                           | 1.90 | 0.01 | 3.04 | 0.68 | 0.22 | 0.28 |
| 20311 | 0 | 146901 | ETHGGEDVAVFAR                    | 2.55 | 0.01 | 1.60 | 0.44 | 0.85 | 0.85 |
| 20312 | 0 | 14397  | ETHPLYQ                          | 1.99 | 0.01 | 2.40 | 0.68 | 0.22 | 0.85 |
| 20313 | 0 | 14397  | ETHPLYQ                          | 1.99 | 0.01 | 2.40 | 0.68 | 0.22 | 0.85 |
| 20314 | 0 | 14398  | ETHPLYQS                         | 2.10 | 0.01 | 2.40 | 2.43 | 0.22 | 0.28 |
| 20315 | 0 | 14399  | ETHSVGGSAHTTSRFT<br>SLFSPGPQQN   | 3.23 | 0.01 | 1.72 | 0.44 | 0.85 | 0.28 |
| 20316 | 0 | 14399  | ETHSVGGSAHTTSRFT<br>SLFSPGPQQN   | 3.23 | 0.01 | 1.72 | 0.44 | 0.85 | 0.28 |
| 20317 | 0 | 14399  | ETHSVGGSAHTTSRFT<br>SLFSPGPQQN   | 3.23 | 0.01 | 1.72 | 0.68 | 0.22 | 0.28 |
| 20318 | 0 | 14399  | ETHSVGGSAHTTSRFT<br>SLFSPGPQQN   | 3.23 | 0.01 | 1.72 | 0.68 | 0.22 | 0.28 |
| 20319 | 0 | 14399  | ETHSVGGSAHTTSRFT<br>SLFSPGPQQN   | 3.23 | 0.01 | 1.72 | 0.44 | 0.85 | 0.28 |
| 20320 | 0 | 14399  | ETHSVGGSAHTTSRFT<br>SLFSPGPQQN   | 3.23 | 0.01 | 1.72 | 1.12 | 0.22 | 0.28 |
| 20321 | 0 | 14399  | ETHSVGGSAHTTSRFT<br>SLFSPGPQQN   | 3.23 | 0.01 | 1.72 | 1.12 | 0.22 | 0.28 |
| 20322 | 0 | 226019 | ETHTLW                           | 1.90 | 0.01 | 3.04 | 0.68 | 0.22 | 0.85 |
| 20323 | 0 | 226019 | ETHTLW                           | 1.90 | 0.01 | 3.04 | 0.68 | 0.22 | 0.85 |



|       |   |        |                                  |      |      |      |      |      |      |
|-------|---|--------|----------------------------------|------|------|------|------|------|------|
| 20324 | 0 | 226019 | ETHTLW                           | 1.90 | 0.01 | 3.04 | 0.68 | 0.22 | 0.28 |
| 20325 | 0 | 226019 | ETHTLW                           | 1.90 | 0.01 | 3.04 | 1.12 | 0.22 | 0.28 |
| 20326 | 0 | 226019 | ETHTLW                           | 1.90 | 0.01 | 3.04 | 1.12 | 0.22 | 0.28 |
| 20327 | 0 | 226019 | ETHTLW                           | 1.90 | 0.01 | 3.04 | 0.68 | 0.22 | 0.85 |
| 20328 | 0 | 14400  | ETHTSGGSVARAAFGLT<br>SIFSPGAKQN  | 3.22 | 0.01 | 1.72 | 0.44 | 0.85 | 0.28 |
| 20329 | 0 | 14400  | ETHTSGGSVARAAFGLT<br>SIFSPGAKQN  | 3.22 | 0.01 | 1.72 | 0.44 | 0.85 | 0.28 |
| 20330 | 0 | 14400  | ETHTSGGSVARAAFGLT<br>SIFSPGAKQN  | 3.22 | 0.01 | 1.72 | 0.68 | 0.22 | 0.28 |
| 20331 | 0 | 14400  | ETHTSGGSVARAAFGLT<br>SIFSPGAKQN  | 3.22 | 0.01 | 1.72 | 0.68 | 0.22 | 0.28 |
| 20332 | 0 | 14400  | ETHTSGGSVARAAFGLT<br>SIFSPGAKQN  | 3.22 | 0.01 | 1.72 | 0.44 | 0.85 | 0.28 |
| 20333 | 0 | 14400  | ETHTSGGSVARAAFGLT<br>SIFSPGAKQN  | 3.22 | 0.01 | 1.72 | 1.12 | 0.22 | 0.28 |
| 20334 | 0 | 14400  | ETHTSGGSVARAAFGLT<br>SIFSPGAKQN  | 3.22 | 0.01 | 1.72 | 1.12 | 0.22 | 0.28 |
| 20335 | 0 | 14401  | ETHTSGGSVARAAFGLT<br>SIFSPGKSQN  | 3.21 | 0.01 | 0.90 | 0.44 | 0.85 | 0.28 |
| 20336 | 0 | 14402  | ETHTTGGEAARTTLGIA<br>LFTSGANQK   | 3.24 | 0.01 | 1.72 | 0.44 | 0.85 | 0.28 |
| 20337 | 0 | 14402  | ETHTTGGEAARTTLGIA<br>LFTSGANQK   | 3.24 | 0.01 | 1.72 | 0.44 | 0.85 | 0.28 |
| 20338 | 0 | 14402  | ETHTTGGEAARTTLGIA<br>LFTSGANQK   | 3.24 | 0.01 | 1.72 | 0.68 | 0.22 | 0.28 |
| 20339 | 0 | 14402  | ETHTTGGEAARTTLGIA<br>LFTSGANQK   | 3.24 | 0.01 | 1.72 | 0.68 | 0.22 | 0.28 |
| 20340 | 0 | 14402  | ETHTTGGEAARTTLGIA<br>LFTSGANQK   | 3.24 | 0.01 | 1.72 | 1.12 | 0.22 | 0.28 |
| 20341 | 0 | 14402  | ETHTTGGEAARTTLGIA<br>LFTSGANQK   | 3.24 | 0.01 | 1.72 | 1.12 | 0.22 | 0.28 |
| 20342 | 0 | 14403  | ETHTTGGSAAARATFGIA<br>NFFTPGAKQN | 3.23 | 0.01 | 1.72 | 0.68 | 0.22 | 0.28 |
| 20343 | 0 | 14403  | ETHTTGGSAAARATFGIA<br>NFFTPGAKQN | 3.23 | 0.01 | 1.72 | 1.12 | 0.22 | 0.28 |
| 20344 | 0 | 14403  | ETHTTGGSAAARATFGIA<br>NFFTPGAKQN | 3.23 | 0.01 | 1.72 | 1.12 | 0.22 | 0.28 |
| 20345 | 0 | 14403  | ETHTTGGSAAARATFGIA<br>NFFTPGAKQN | 3.23 | 0.01 | 1.72 | 1.12 | 0.22 | 0.28 |
| 20346 | 0 | 14403  | ETHTTGGSAAARATFGIA<br>NFFTPGAKQN | 3.23 | 0.01 | 1.72 | 1.12 | 0.22 | 0.28 |
| 20347 | 0 | 14404  | ETHVSGGSAGHTVSGIA<br>GLFTSGARQN  | 3.25 | 0.01 | 1.72 | 0.44 | 0.85 | 2.02 |
| 20348 | 0 | 14405  | ETHVTGG                          | 2.00 | 0.01 | 1.72 | 0.44 | 0.85 | 0.28 |
| 20349 | 0 | 14407  | ETHVTGGNAGRRTAGL<br>VG           | 2.87 | 0.01 | 1.72 | 1.12 | 0.22 | 0.28 |

|       |   |       |                                  |      |      |      |      |      |      |
|-------|---|-------|----------------------------------|------|------|------|------|------|------|
| 20350 | 0 | 14408 | ETHVTGGNAGRRTTAGL<br>VGLLTPGAKQN | 3.25 | 0.01 | 2.68 | 0.44 | 0.85 | 0.28 |
| 20351 | 0 | 14408 | ETHVTGGNAGRRTTAGL<br>VGLLTPGAKQN | 3.25 | 0.01 | 2.68 | 0.44 | 0.85 | 0.28 |
| 20352 | 0 | 14408 | ETHVTGGNAGRRTTAGL<br>VGLLTPGAKQN | 3.25 | 0.01 | 2.68 | 0.68 | 0.22 | 0.28 |
| 20353 | 0 | 14408 | ETHVTGGNAGRRTTAGL<br>VGLLTPGAKQN | 3.25 | 0.01 | 2.68 | 0.68 | 0.22 | 0.28 |
| 20354 | 0 | 14408 | ETHVTGGNAGRRTTAGL<br>VGLLTPGAKQN | 3.25 | 0.01 | 1.72 | 0.44 | 0.85 | 0.28 |
| 20355 | 0 | 14408 | ETHVTGGNAGRRTTAGL<br>VGLLTPGAKQN | 3.25 | 0.01 | 2.45 | 1.12 | 0.22 | 0.28 |
| 20356 | 0 | 14408 | ETHVTGGNAGRRTTAGL<br>VGLLTPGAKQN | 3.25 | 0.01 | 2.45 | 1.12 | 0.22 | 0.28 |
| 20357 | 0 | 14408 | ETHVTGGNAGRRTTAGL<br>VGLLTPGAKQN | 3.25 | 0.01 | 2.68 | 0.68 | 0.22 | 2.02 |
| 20358 | 0 | 14408 | ETHVTGGNAGRRTTAGL<br>VGLLTPGAKQN | 3.25 | 0.01 | 2.68 | 0.68 | 0.22 | 0.28 |
| 20359 | 0 | 14408 | ETHVTGGNAGRRTTAGL<br>VGLLTPGAKQN | 3.25 | 0.01 | 2.68 | 0.68 | 0.22 | 0.28 |
| 20360 | 0 | 14408 | ETHVTGGNAGRRTTAGL<br>VGLLTPGAKQN | 3.25 | 0.01 | 2.68 | 0.68 | 0.22 | 1.66 |
| 20361 | 0 | 14408 | ETHVTGGNAGRRTTAGL<br>VGLLTPGAKQN | 3.25 | 0.01 | 2.68 | 0.68 | 0.22 | 1.34 |
| 20362 | 0 | 14408 | ETHVTGGNAGRRTTAGL<br>VGLLTPGAKQN | 3.25 | 0.01 | 2.68 | 0.68 | 0.22 | 0.28 |
| 20363 | 0 | 14409 | ETHVTGGS                         | 2.13 | 0.01 | 2.45 | 1.15 | 0.22 | 0.28 |
| 20364 | 0 | 14409 | ETHVTGGS                         | 2.13 | 0.01 | 2.45 | 2.36 | 0.22 | 0.28 |
| 20365 | 0 | 14410 | ETHVTGGSAASTTSTLTK<br>LFMPGASQN  | 3.23 | 0.01 | 1.72 | 0.44 | 0.85 | 0.28 |
| 20366 | 0 | 14410 | ETHVTGGSAASTTSTLTK<br>LFMPGASQN  | 3.23 | 0.01 | 1.72 | 0.44 | 0.85 | 0.28 |
| 20367 | 0 | 14410 | ETHVTGGSAASTTSTLTK<br>LFMPGASQN  | 3.23 | 0.01 | 1.72 | 0.68 | 0.22 | 0.28 |
| 20368 | 0 | 14410 | ETHVTGGSAASTTSTLTK<br>LFMPGASQN  | 3.23 | 0.01 | 1.72 | 0.68 | 0.22 | 0.28 |
| 20369 | 0 | 14410 | ETHVTGGSAASTTSTLTK<br>LFMPGASQN  | 3.23 | 0.01 | 1.72 | 0.44 | 0.85 | 0.28 |
| 20370 | 0 | 14410 | ETHVTGGSAASTTSTLTK<br>LFMPGASQN  | 3.23 | 0.01 | 1.72 | 1.12 | 0.22 | 0.28 |
| 20371 | 0 | 14410 | ETHVTGGSAASTTSTLTK<br>LFMPGASQN  | 3.23 | 0.01 | 1.72 | 1.12 | 0.22 | 0.28 |
| 20372 | 0 | 14411 | ETHVTGGSAGHTAAGIA<br>SFFAPGPKQN  | 3.24 | 0.01 | 1.72 | 0.44 | 0.85 | 0.28 |
| 20373 | 0 | 14411 | ETHVTGGSAGHTAAGIA<br>SFFAPGPKQN  | 3.24 | 0.01 | 1.72 | 0.44 | 0.85 | 0.28 |

|       |   |        |                                 |      |      |      |      |      |      |
|-------|---|--------|---------------------------------|------|------|------|------|------|------|
| 20374 | 0 | 14411  | ETHVTGGSAGHTAAGIA<br>SFFAPGPKQN | 3.24 | 0.01 | 1.72 | 0.68 | 0.22 | 0.28 |
| 20375 | 0 | 14411  | ETHVTGGSAGHTAAGIA<br>SFFAPGPKQN | 3.24 | 0.01 | 1.72 | 0.68 | 0.22 | 0.28 |
| 20376 | 0 | 14411  | ETHVTGGSAGHTAAGIA<br>SFFAPGPKQN | 3.24 | 0.01 | 2.45 | 1.12 | 0.22 | 0.28 |
| 20377 | 0 | 14411  | ETHVTGGSAGHTAAGIA<br>SFFAPGPKQN | 3.24 | 0.01 | 2.45 | 1.12 | 0.22 | 0.28 |
| 20378 | 0 | 135919 | ETHVTGGSAGHTVSGFV<br>SLLAPGAKQN | 3.24 | 0.01 | 2.41 | 0.44 | 0.22 | 0.28 |
| 20379 | 0 | 14413  | ETHVTGGSAGRSVLGIA<br>SFLTRGPKQN | 3.22 | 0.01 | 1.72 | 0.44 | 0.85 | 0.28 |
| 20380 | 0 | 14413  | ETHVTGGSAGRSVLGIA<br>SFLTRGPKQN | 3.22 | 0.01 | 1.72 | 0.44 | 0.85 | 0.28 |
| 20381 | 0 | 14413  | ETHVTGGSAGRSVLGIA<br>SFLTRGPKQN | 3.22 | 0.01 | 1.72 | 0.68 | 0.22 | 0.28 |
| 20382 | 0 | 14413  | ETHVTGGSAGRSVLGIA<br>SFLTRGPKQN | 3.22 | 0.01 | 1.72 | 1.12 | 0.22 | 0.28 |
| 20383 | 0 | 14413  | ETHVTGGSAGRSVLGIA<br>SFLTRGPKQN | 3.22 | 0.01 | 1.72 | 1.12 | 0.22 | 0.28 |
| 20384 | 0 | 14414  | ETHVTGGSAGRT                    | 2.49 | 0.01 | 2.45 | 2.36 | 0.22 | 1.34 |
| 20385 | 0 | 14414  | ETHVTGGSAGRT                    | 2.49 | 0.01 | 2.45 | 2.36 | 0.22 | 2.12 |
| 20386 | 0 | 161218 | ETHVTGGSAGRTTAGLV<br>GLL        | 2.97 | 0.01 | 1.72 | 0.68 | 0.22 | 0.28 |
| 20387 | 0 | 14415  | ETHVTGGSAGRTTAGLV<br>GLLTPGAKQN | 3.24 | 0.01 | 1.72 | 0.44 | 0.85 | 0.28 |
| 20388 | 0 | 14415  | ETHVTGGSAGRTTAGLV<br>GLLTPGAKQN | 3.24 | 0.01 | 1.72 | 0.44 | 0.85 | 0.28 |
| 20389 | 0 | 14415  | ETHVTGGSAGRTTAGLV<br>GLLTPGAKQN | 3.24 | 0.01 | 1.72 | 0.68 | 0.22 | 0.28 |
| 20390 | 0 | 14415  | ETHVTGGSAGRTTAGLV<br>GLLTPGAKQN | 3.24 | 0.01 | 1.72 | 0.68 | 0.22 | 0.28 |
| 20391 | 0 | 14415  | ETHVTGGSAGRTTAGLV<br>GLLTPGAKQN | 3.24 | 0.01 | 2.41 | 1.15 | 0.22 | 0.28 |
| 20392 | 0 | 14415  | ETHVTGGSAGRTTAGLV<br>GLLTPGAKQN | 3.24 | 0.01 | 2.45 | 0.68 | 0.22 | 0.28 |
| 20393 | 0 | 14415  | ETHVTGGSAGRTTAGLV<br>GLLTPGAKQN | 3.24 | 0.01 | 2.45 | 0.68 | 0.22 | 2.12 |
| 20394 | 0 | 14415  | ETHVTGGSAGRTTAGLV<br>GLLTPGAKQN | 3.24 | 0.01 | 2.45 | 0.68 | 0.22 | 1.34 |
| 20395 | 0 | 14415  | ETHVTGGSAGRTTAGLV<br>GLLTPGAKQN | 3.24 | 0.01 | 1.72 | 1.12 | 0.22 | 0.28 |
| 20396 | 0 | 14415  | ETHVTGGSAGRTTAGLV<br>GLLTPGAKQN | 3.24 | 0.01 | 1.72 | 1.12 | 0.22 | 0.28 |
| 20397 | 0 | 515381 | ETIADDANDLAPQAP                 | 2.70 | 0.01 | 2.24 | 0.44 | 1.41 | 1.28 |
| 20398 | 0 | 96268  | ETIFDV                          | 1.88 | 0.01 | 3.03 | 1.20 | 0.22 | 0.28 |
| 20399 | 0 | 96268  | ETIFDV                          | 1.88 | 0.01 | 2.40 | 3.42 | 0.22 | 0.28 |

|       |   |        |                               |      |      |      |      |      |      |
|-------|---|--------|-------------------------------|------|------|------|------|------|------|
| 20400 | 0 | 96268  | ETIFDV                        | 1.88 | 0.01 | 2.40 | 3.42 | 0.22 | 0.28 |
| 20401 | 0 | 96268  | ETIFDV                        | 1.88 | 0.01 | 2.40 | 2.52 | 0.22 | 0.28 |
| 20402 | 0 | 96268  | ETIFDV                        | 1.88 | 0.01 | 2.40 | 2.52 | 0.22 | 0.28 |
| 20403 | 0 | 14426  | ETIGTLKKILDETVK               | 2.72 | 0.01 | 2.24 | 0.44 | 1.13 | 0.28 |
| 20404 | 0 | 14426  | ETIGTLKKILDETVK               | 2.72 | 0.01 | 2.24 | 0.44 | 1.41 | 0.28 |
| 20405 | 0 | 78647  | ETIIQIIIEYGKKFNSSAGD          | 2.87 | 0.01 | 3.11 | 1.15 | 0.22 | 0.28 |
| 20406 | 0 | 97283  | ETINFADAE                     | 2.24 | 0.01 | 3.13 | 1.12 | 0.22 | 0.28 |
| 20407 | 0 | 14435  | ETIYNTTLKY                    | 2.32 | 0.01 | 2.51 | 0.44 | 0.85 | 0.85 |
| 20408 | 0 | 14435  | ETIYNTTLKY                    | 2.32 | 0.01 | 2.51 | 0.44 | 0.85 | 0.28 |
| 20409 | 0 | 14435  | ETIYNTTLKY                    | 2.32 | 0.01 | 2.51 | 0.44 | 0.85 | 2.02 |
| 20410 | 0 | 14435  | ETIYNTTLKY                    | 2.32 | 0.01 | 2.51 | 0.44 | 0.85 | 1.34 |
| 20411 | 0 | 14435  | ETIYNTTLKY                    | 2.32 | 0.01 | 2.76 | 0.44 | 1.59 | 0.28 |
| 20412 | 0 | 14435  | ETIYNTTLKY                    | 2.32 | 0.01 | 2.76 | 0.44 | 1.59 | 2.02 |
| 20413 | 0 | 14435  | ETIYNTTLKY                    | 2.32 | 0.01 | 2.76 | 0.44 | 1.59 | 0.28 |
| 20414 | 0 | 14435  | ETIYNTTLKY                    | 2.32 | 0.01 | 2.76 | 0.44 | 1.59 | 2.12 |
| 20415 | 0 | 14435  | ETIYNTTLKY                    | 2.32 | 0.01 | 2.76 | 0.44 | 1.59 | 1.34 |
| 20416 | 0 | 14435  | ETIYNTTLKY                    | 2.32 | 0.01 | 2.76 | 0.44 | 1.59 | 2.49 |
| 20417 | 0 | 14435  | ETIYNTTLKY                    | 2.32 | 0.01 | 2.76 | 0.44 | 1.59 | 2.12 |
| 20418 | 0 | 14435  | ETIYNTTLKY                    | 2.32 | 0.01 | 2.76 | 0.44 | 1.59 | 1.66 |
| 20419 | 0 | 14435  | ETIYNTTLKY                    | 2.32 | 0.01 | 2.76 | 0.44 | 1.59 | 1.66 |
| 20420 | 0 | 14435  | ETIYNTTLKY                    | 2.32 | 0.01 | 2.76 | 0.44 | 1.59 | 1.66 |
| 20421 | 0 | 14435  | ETIYNTTLKY                    | 2.32 | 0.01 | 2.76 | 0.44 | 1.59 | 3.13 |
| 20422 | 0 | 14435  | ETIYNTTLKY                    | 2.32 | 0.01 | 2.51 | 0.68 | 0.22 | 0.28 |
| 20423 | 0 | 158746 | ETKAFLKAGDADGDG               | 2.72 | 0.01 | 3.26 | 0.44 | 1.23 | 0.28 |
| 20424 | 0 | 158746 | ETKAFLKAGDADGDG               | 2.72 | 0.01 | 3.26 | 0.44 | 1.41 | 0.28 |
| 20425 | 0 | 14436  | ETKAVYPY                      | 2.12 | 0.01 | 3.27 | 2.02 | 0.22 | 0.28 |
| 20426 | 0 | 14436  | ETKAVYPY                      | 2.12 | 0.01 | 3.27 | 2.82 | 0.22 | 0.28 |
| 20427 | 0 | 167248 | ETKAWWL                       | 2.01 | 0.01 | 0.90 | 0.44 | 0.85 | 1.39 |
| 20428 | 0 | 515393 | ETKLKELQQDYDLAK               | 2.71 | 0.01 | 2.24 | 0.44 | 1.41 | 1.28 |
| 20429 | 0 | 14447  | ETKRKDGD                      | 2.14 | 0.01 | 3.27 | 2.02 | 0.22 | 0.28 |
| 20430 | 0 | 14447  | ETKRKDGD                      | 2.14 | 0.01 | 3.27 | 2.82 | 0.22 | 0.28 |
| 20431 | 0 | 98024  | ETKTEEPA                      | 2.16 | 0.01 | 2.60 | 0.44 | 1.23 | 0.85 |
| 20432 | 0 | 133087 | ETKTYFWKVQ                    | 2.31 | 0.01 | 0.78 | 1.15 | 0.22 | 0.28 |
| 20433 | 0 | 133087 | ETKTYFWKVQ                    | 2.31 | 0.01 | 0.78 | 1.15 | 0.22 | 2.02 |
| 20434 | 0 | 189622 | ETKVFLKAGDSGDG                | 2.68 | 0.01 | 3.28 | 0.44 | 1.23 | 0.28 |
| 20435 | 0 | 106403 | ETLEGHLFTRTHDHR               | 2.72 | 0.01 | 3.47 | 0.68 | 0.22 | 0.28 |
| 20436 | 0 | 106403 | ETLEGHLFTRTHDHR               | 2.72 | 0.01 | 3.47 | 0.68 | 0.22 | 0.28 |
| 20437 | 0 | 14457  | ETLGALASAIKETFEEGTC           | 2.92 | 0.01 | 3.72 | 0.68 | 0.22 | 0.28 |
| 20438 | 0 | 14457  | ETLGALASAIKETFEEGTC           | 2.92 | 0.01 | 3.72 | 0.68 | 0.22 | 1.57 |
| 20439 | 0 | 14457  | ETLGALASAIKETFEEGTC           | 2.92 | 0.01 | 3.72 | 0.68 | 2.25 | 1.75 |
| 20440 | 0 | 120511 | ETLHERIKVTERRLLVAA<br>VAALATH | 3.21 | 0.01 | 2.86 | 0.44 | 0.85 | 0.28 |
| 20441 | 0 | 122756 | ETLQAFDSHYDYTI                | 2.59 | 0.01 | 0.78 | 3.01 | 0.22 | 1.27 |

|       |   |        |                                                  |      |      |      |      |      |      |
|-------|---|--------|--------------------------------------------------|------|------|------|------|------|------|
| 20442 | 0 | 122756 | ETLQAFDSHYDYTI                                   | 2.59 | 0.01 | 0.78 | 3.01 | 0.22 | 0.28 |
| 20443 | 0 | 122756 | ETLQAFDSHYDYTI                                   | 2.59 | 0.01 | 0.78 | 3.01 | 0.22 | 1.27 |
| 20444 | 0 | 117198 | ETLSIRGNNIRYFIL                                  | 2.67 | 0.01 | 1.75 | 2.42 | 0.22 | 0.85 |
| 20445 | 0 | 117198 | ETLSIRGNNIRYFIL                                  | 2.67 | 0.01 | 1.75 | 2.42 | 0.22 | 0.85 |
| 20446 | 0 | 14475  | ETLVTF                                           | 1.90 | 0.01 | 2.40 | 0.44 | 0.85 | 0.28 |
| 20447 | 0 | 14476  | ETLVTFKN                                         | 2.12 | 0.01 | 2.40 | 0.44 | 0.85 | 0.28 |
| 20448 | 0 | 14476  | ETLVTFKN                                         | 2.12 | 0.01 | 2.40 | 0.44 | 0.85 | 0.28 |
| 20449 | 0 | 14476  | ETLVTFKN                                         | 2.12 | 0.01 | 2.40 | 0.44 | 0.85 | 0.28 |
| 20450 | 0 | 132803 | ETMGREPQVAWTVIV                                  | 2.67 | 0.01 | 3.16 | 3.16 | 0.22 | 0.28 |
| 20451 | 0 | 14487  | ETMTPSGLVIPENAK                                  | 2.65 | 0.01 | 2.59 | 0.44 | 0.85 | 0.28 |
| 20452 | 0 | 14487  | ETMTPSGLVIPENAK                                  | 2.65 | 0.01 | 2.59 | 0.44 | 0.85 | 0.28 |
| 20453 | 0 | 14487  | ETMTPSGLVIPENAK                                  | 2.65 | 0.01 | 2.59 | 3.50 | 0.22 | 0.28 |
| 20454 | 0 | 14492  | ETNGLEYIVG                                       | 2.32 | 0.01 | 0.78 | 0.44 | 1.74 | 0.28 |
| 20455 | 0 | 108353 | ETNPEVLIKDLQDVAS                                 | 2.72 | 0.01 | 3.27 | 2.49 | 0.85 | 0.28 |
| 20456 | 0 | 108353 | ETNPEVLIKDLQDVAS                                 | 2.72 | 0.01 | 3.27 | 0.44 | 0.85 | 0.28 |
| 20457 | 0 | 97284  | ETNQGEVAV                                        | 2.24 | 0.01 | 3.13 | 1.12 | 0.22 | 0.28 |
| 20458 | 0 | 240987 | ETP                                              | 1.37 | 0.01 | 3.35 | 1.20 | 0.22 | 0.85 |
| 20459 | 0 | 137398 | ETPADLST                                         | 2.12 | 0.01 | 0.78 | 1.20 | 0.22 | 0.85 |
| 20460 | 0 | 287413 | ETPAESTVIKTTTAT                                  | 2.71 | 0.01 | 1.61 | 0.44 | 0.85 | 1.28 |
| 20461 | 0 | 123153 | ETPATKKA                                         | 2.15 | 0.01 | 0.78 | 1.20 | 0.22 | 0.28 |
| 20462 | 0 | 119449 | ETPGQKYKETDLLILFKD<br>DY                         | 2.96 | 0.01 | 0.78 | 0.44 | 1.13 | 0.28 |
| 20463 | 0 | 119449 | ETPGQKYKETDLLILFKD<br>DY                         | 2.96 | 0.01 | 0.78 | 0.44 | 1.13 | 0.28 |
| 20464 | 0 | 14504  | ETPIRNEWGCR                                      | 2.40 | 0.01 | 3.67 | 1.12 | 0.22 | 0.28 |
| 20465 | 0 | 14504  | ETPIRNEWGCR                                      | 2.40 | 0.01 | 3.67 | 1.12 | 0.22 | 0.28 |
| 20466 | 0 | 14504  | ETPIRNEWGCR                                      | 2.40 | 0.01 | 3.67 | 1.12 | 0.22 | 0.28 |
| 20467 | 0 | 287457 | ETPLEATATKNTTAT                                  | 2.73 | 0.01 | 1.61 | 0.44 | 0.85 | 1.28 |
| 20468 | 0 | 143362 | ETPLMKE                                          | 2.03 | 0.01 | 0.78 | 0.68 | 0.22 | 0.28 |
| 20469 | 0 | 143362 | ETPLMKE                                          | 2.03 | 0.01 | 0.78 | 1.15 | 0.22 | 0.28 |
| 20470 | 0 | 143362 | ETPLMKE                                          | 2.03 | 0.01 | 0.78 | 0.68 | 0.22 | 0.28 |
| 20471 | 0 | 143362 | ETPLMKE                                          | 2.03 | 0.01 | 0.78 | 0.68 | 0.22 | 1.34 |
| 20472 | 0 | 134372 | ETPLMKEDSILAVRKYFQ<br>RITLYLKE                   | 3.18 | 0.01 | 0.78 | 0.68 | 0.22 | 1.27 |
| 20473 | 0 | 134372 | ETPLMKEDSILAVRKYFQ<br>RITLYLKE                   | 3.18 | 0.01 | 0.78 | 0.68 | 0.22 | 1.27 |
| 20474 | 0 | 134372 | ETPLMKEDSILAVRKYFQ<br>RITLYLKE                   | 3.18 | 0.01 | 0.78 | 0.68 | 0.22 | 1.34 |
| 20475 | 0 | 134372 | ETPLMKEDSILAVRKYFQ<br>RITLYLKE                   | 3.18 | 0.01 | 0.78 | 0.68 | 0.22 | 1.34 |
| 20476 | 0 | 134373 | ETPLMKEDSILAVRKYFQ<br>RITLYLKEKKYSPCAWEV<br>VRAE | 3.61 | 0.01 | 0.78 | 0.68 | 0.22 | 1.27 |
| 20477 | 0 | 134373 | ETPLMKEDSILAVRKYFQ<br>RITLYLKEKKYSPCAWEV<br>VRAE | 3.61 | 0.01 | 0.78 | 0.68 | 0.22 | 1.27 |

|       |   |        |                            |      |      |      |      |      |      |
|-------|---|--------|----------------------------|------|------|------|------|------|------|
|       |   |        | ETPLMKEDSILAVRKYFQ         |      |      |      |      |      |      |
| 20478 | 0 | 134373 | RITLYLKEKKYSPCAWEV<br>VRAE | 3.61 | 0.01 | 0.78 | 0.68 | 0.22 | 1.34 |
|       |   |        | ETPLMKEDSILAVRKYFQ         |      |      |      |      |      |      |
| 20479 | 0 | 134373 | RITLYLKEKKYSPCAWEV<br>VRAE | 3.61 | 0.01 | 0.78 | 0.68 | 0.22 | 1.34 |
| 20480 | 0 | 134930 | ETPLMNED                   | 2.13 | 0.01 | 0.78 | 1.12 | 0.22 | 0.28 |
| 20481 | 0 | 97286  | ETPLTEPAFKRH               | 2.48 | 0.01 | 0.90 | 0.68 | 0.22 | 1.39 |
| 20482 | 0 | 97287  | ETPLTETALKWH               | 2.50 | 0.01 | 0.90 | 0.68 | 0.22 | 0.28 |
| 20483 | 0 | 97287  | ETPLTETALKWH               | 2.50 | 0.01 | 0.90 | 0.68 | 0.22 | 2.12 |
| 20484 | 0 | 97287  | ETPLTETALKWH               | 2.50 | 0.01 | 0.90 | 0.68 | 0.22 | 1.27 |
| 20485 | 0 | 97287  | ETPLTETALKWH               | 2.50 | 0.01 | 0.90 | 0.68 | 0.22 | 1.39 |
| 20486 | 0 | 153381 | ETPLTIAGLKLK               | 2.49 | 0.01 | 0.90 | 0.68 | 0.22 | 1.66 |
| 20487 | 0 | 153381 | ETPLTIAGLKLK               | 2.49 | 0.01 | 0.90 | 0.68 | 0.22 | 0.28 |
| 20488 | 0 | 153381 | ETPLTIAGLKLK               | 2.49 | 0.01 | 0.90 | 0.68 | 0.22 | 0.28 |
| 20489 | 0 | 150980 | ETPSSDNGTCYPGDF            | 2.67 | 0.01 | 2.87 | 0.44 | 0.85 | 0.28 |
| 20490 | 0 | 287487 | ETPSTTTTRAPSRLR            | 2.71 | 0.01 | 1.61 | 0.44 | 0.85 | 1.28 |
| 20491 | 0 | 287510 | ETPVAATVIKTTTAA            | 2.70 | 0.01 | 1.61 | 0.44 | 0.85 | 1.28 |
| 20492 | 0 | 287517 | ETPVEATAMKNTTAT            | 2.72 | 0.01 | 1.61 | 0.44 | 0.85 | 1.28 |
| 20493 | 0 | 287518 | ETPVEATAMKTTTAT            | 2.73 | 0.01 | 1.61 | 0.44 | 0.85 | 1.28 |
| 20494 | 0 | 287520 | ETPVEATATKNTTAT            | 2.73 | 0.01 | 1.61 | 0.44 | 0.85 | 1.28 |
| 20495 | 0 | 287521 | ETPVEATATKTTTAT            | 2.74 | 0.01 | 1.61 | 0.44 | 0.85 | 1.28 |
| 20496 | 0 | 287522 | ETPVEATAVKATTAT            | 2.74 | 0.01 | 1.61 | 0.44 | 0.85 | 1.28 |
| 20497 | 0 | 287525 | ETPVEGTAMKTTTAT            | 2.71 | 0.01 | 1.61 | 0.44 | 0.85 | 1.28 |
| 20498 | 0 | 287526 | ETPVESTAMKTTTAT            | 2.71 | 0.01 | 1.61 | 0.44 | 0.85 | 1.28 |
| 20499 | 0 | 287528 | ETPVESTVMKTTTAT            | 2.71 | 0.01 | 1.61 | 0.44 | 0.85 | 1.28 |
| 20500 | 0 | 287529 | ETPVETTTMKNTTAT            | 2.71 | 0.01 | 1.61 | 0.44 | 0.85 | 1.28 |
| 20501 | 0 | 287537 | ETPVTAAMKTTTAT             | 2.71 | 0.01 | 1.61 | 0.44 | 0.85 | 1.28 |
| 20502 | 0 | 136061 | ETQAE                      | 1.77 | 0.01 | 0.78 | 3.61 | 0.22 | 1.27 |
| 20503 | 0 | 136061 | ETQAE                      | 1.77 | 0.01 | 0.78 | 3.61 | 0.22 | 0.28 |
| 20504 | 0 | 99230  | ETQICKAKAQTDREDLR<br>TLLR  | 3.02 | 0.01 | 0.78 | 0.68 | 0.22 | 0.28 |
| 20505 | 0 | 99230  | ETQICKAKAQTDREDLR<br>TLLR  | 3.02 | 0.01 | 0.78 | 0.68 | 0.22 | 0.85 |
| 20506 | 0 | 99230  | ETQICKAKAQTDREDLR<br>TLLR  | 3.02 | 0.01 | 0.78 | 0.68 | 0.22 | 0.85 |
| 20507 | 0 | 99230  | ETQICKAKAQTDREDLR<br>TLLR  | 3.02 | 0.01 | 0.78 | 0.68 | 0.22 | 0.28 |
| 20508 | 0 | 99230  | ETQICKAKAQTDREDLR<br>TLLR  | 3.02 | 0.01 | 0.78 | 0.68 | 0.22 | 0.28 |
| 20509 | 0 | 99230  | ETQICKAKAQTDREDLR<br>TLLR  | 3.02 | 0.01 | 0.78 | 0.68 | 0.22 | 0.28 |
| 20510 | 0 | 99230  | ETQICKAKAQTDREDLR<br>TLLR  | 3.02 | 0.01 | 0.78 | 0.68 | 0.22 | 0.28 |
| 20511 | 0 | 99230  | ETQICKAKAQTDREDLR<br>TLLR  | 3.02 | 0.01 | 0.78 | 0.68 | 0.22 | 0.28 |

|       |   |        |                                                  |      |      |      |      |      |      |
|-------|---|--------|--------------------------------------------------|------|------|------|------|------|------|
| 20512 | 0 | 99230  | ETQICKAKAQTDREDLR<br>TLLR                        | 3.02 | 0.01 | 0.78 | 0.68 | 0.22 | 0.28 |
| 20513 | 0 | 99230  | ETQICKAKAQTDREDLR<br>TLLR                        | 3.02 | 0.01 | 0.78 | 0.68 | 0.22 | 0.28 |
| 20514 | 0 | 99230  | ETQICKAKAQTDREDLR<br>TLLR                        | 3.02 | 0.01 | 0.78 | 0.68 | 0.22 | 0.28 |
| 20515 | 0 | 99230  | ETQICKAKAQTDREDLR<br>TLLR                        | 3.02 | 0.01 | 0.78 | 0.68 | 0.22 | 1.27 |
| 20516 | 0 | 99230  | ETQICKAKAQTDREDLR<br>TLLR                        | 3.02 | 0.01 | 0.78 | 0.68 | 0.22 | 0.28 |
| 20517 | 0 | 99230  | ETQICKAKAQTDREDLR<br>TLLR                        | 3.02 | 0.01 | 0.78 | 0.68 | 0.22 | 0.28 |
| 20518 | 0 | 138843 | ETQICKAKAQTDREDLR<br>TLLRY                       | 3.06 | 0.01 | 0.78 | 1.12 | 0.22 | 0.28 |
| 20519 | 0 | 138843 | ETQICKAKAQTDREDLR<br>TLLRY                       | 3.06 | 0.01 | 0.78 | 1.12 | 0.22 | 1.34 |
| 20520 | 0 | 138843 | ETQICKAKAQTDREDLR<br>TLLRY                       | 3.06 | 0.01 | 0.78 | 1.12 | 0.22 | 1.34 |
| 20521 | 0 | 138843 | ETQICKAKAQTDREDLR<br>TLLRY                       | 3.06 | 0.01 | 0.78 | 0.68 | 0.22 | 0.28 |
| 20522 | 0 | 138843 | ETQICKAKAQTDREDLR<br>TLLRY                       | 3.06 | 0.01 | 0.78 | 0.68 | 0.22 | 0.85 |
| 20523 | 0 | 138843 | ETQICKAKAQTDREDLR<br>TLLRY                       | 3.06 | 0.01 | 0.78 | 0.68 | 0.22 | 0.28 |
| 20524 | 0 | 138843 | ETQICKAKAQTDREDLR<br>TLLRY                       | 3.06 | 0.01 | 0.78 | 0.68 | 0.22 | 1.27 |
| 20525 | 0 | 138843 | ETQICKAKAQTDREDLR<br>TLLRY                       | 3.06 | 0.01 | 0.78 | 0.68 | 0.22 | 1.27 |
| 20526 | 0 | 138843 | ETQICKAKAQTDREDLR<br>TLLRY                       | 3.06 | 0.01 | 0.78 | 0.68 | 0.22 | 0.28 |
| 20527 | 0 | 14517  | ETQIQRRQHTDVSFIMD<br>RFVVPNLRGDLQVLAQK<br>VARTLP | 3.62 | 0.01 | 0.90 | 3.57 | 0.22 | 1.75 |
| 20528 | 0 | 14517  | ETQIQRRQHTDVSFIMD<br>RFVVPNLRGDLQVLAQK<br>VARTLP | 3.62 | 0.01 | 0.90 | 3.57 | 0.22 | 1.34 |
| 20529 | 0 | 97288  | ETQLTTAGLRLL                                     | 2.48 | 0.01 | 0.90 | 0.68 | 0.22 | 1.39 |
| 20530 | 0 | 97288  | ETQLTTAGLRLL                                     | 2.48 | 0.01 | 0.90 | 0.68 | 0.22 | 0.28 |
| 20531 | 0 | 97288  | ETQLTTAGLRLL                                     | 2.48 | 0.01 | 0.90 | 0.68 | 0.22 | 2.12 |
| 20532 | 0 | 97288  | ETQLTTAGLRLL                                     | 2.48 | 0.01 | 0.90 | 0.68 | 0.22 | 1.27 |
| 20533 | 0 | 97288  | ETQLTTAGLRLL                                     | 2.48 | 0.01 | 0.90 | 0.68 | 0.22 | 1.27 |
| 20534 | 0 | 97288  | ETQLTTAGLRLL                                     | 2.48 | 0.01 | 0.90 | 0.68 | 0.22 | 0.28 |
| 20535 | 0 | 14523  | ETQTQRRHHTDVAFVLD<br>RFVAGARRGDLAHLAA<br>AHARHLP | 3.65 | 0.01 | 0.90 | 3.57 | 0.22 | 1.34 |

|       |   |        |                                                   |      |      |      |      |      |      |
|-------|---|--------|---------------------------------------------------|------|------|------|------|------|------|
| 20536 | 0 | 14523  | ETQTQRRHHTDVAFVLD<br>RFVAGARRGDLAHLAA<br>AHARHLP  | 3.65 | 0.01 | 0.90 | 3.57 | 0.22 | 1.75 |
| 20537 | 0 | 14524  | ETQTQRRHHTDVAFVLD<br>RFVAGARRGDLAHLAA<br>AHARHLPC | 3.67 | 0.01 | 0.90 | 3.67 | 0.22 | 1.75 |
| 20538 | 0 | 14525  | ETQTQRRHHTDVAFVLD<br>RFVAGVRRGDLAHLAA<br>AHARHLP  | 3.65 | 0.01 | 0.90 | 3.57 | 0.22 | 1.34 |
| 20539 | 0 | 14525  | ETQTQRRHHTDVAFVLD<br>RFVAGVRRGDLAHLAA<br>AHARHLP  | 3.65 | 0.01 | 0.90 | 3.57 | 0.22 | 1.75 |
| 20540 | 0 | 423282 | ETRGDLFSGDESDS                                    | 2.72 | 0.01 | 2.51 | 0.44 | 2.35 | 1.28 |
| 20541 | 0 | 170961 | ETRGVLKVFLENVIR                                   | 2.69 | 0.01 | 0.78 | 0.44 | 1.13 | 0.28 |
| 20542 | 0 | 14536  | ETRTTNQFLAVSKGN                                   | 2.63 | 0.01 | 2.43 | 0.44 | 0.85 | 0.28 |
| 20543 | 0 | 14537  | ETRVGTGAAGHTAFGFA<br>SFLAPGAKQK                   | 3.24 | 0.01 | 3.97 | 0.44 | 0.85 | 0.28 |
| 20544 | 0 | 14537  | ETRVGTGAAGHTAFGFA<br>SFLAPGAKQK                   | 3.24 | 0.01 | 3.97 | 1.12 | 0.22 | 0.28 |
| 20545 | 0 | 14537  | ETRVGTGAAGHTAFGFA<br>SFLAPGAKQK                   | 3.24 | 0.01 | 3.97 | 1.12 | 0.22 | 0.28 |
| 20546 | 0 | 14537  | ETRVGTGAAGHTAFGFA<br>SFLAPGAKQK                   | 3.24 | 0.01 | 3.97 | 1.12 | 0.22 | 0.28 |
| 20547 | 0 | 208014 | ETSEAAATVDLFAFTLDG<br>GK                          | 2.96 | 0.01 | 4.08 | 0.44 | 0.85 | 1.48 |
| 20548 | 0 | 208014 | ETSEAAATVDLFAFTLDG<br>GK                          | 2.96 | 0.01 | 4.08 | 0.44 | 0.85 | 1.48 |
| 20549 | 0 | 208014 | ETSEAAATVDLFAFTLDG<br>GK                          | 2.96 | 0.01 | 4.08 | 0.44 | 0.85 | 1.48 |
| 20550 | 0 | 14540  | ETSEVSTTDKIADITIIP                                | 2.93 | 0.01 | 3.03 | 3.33 | 0.22 | 1.57 |
| 20551 | 0 | 14540  | ETSEVSTTDKIADITIIP                                | 2.93 | 0.01 | 2.08 | 2.02 | 0.22 | 1.57 |
| 20552 | 0 | 14542  | ETSGKVTFFGKV                                      | 2.56 | 0.01 | 3.10 | 1.12 | 0.22 | 0.85 |
| 20553 | 0 | 14543  | ETSGVAEEEEATSGLVML<br>CIHGSPVNSYNT                | 3.34 | 0.01 | 2.70 | 0.44 | 0.85 | 0.28 |
| 20554 | 0 | 135920 | ETSLSAAGNSII                                      | 2.46 | 0.01 | 3.21 | 0.44 | 1.13 | 0.28 |
| 20555 | 0 | 81856  | ETSRSVFHQNGQ                                      | 2.45 | 0.01 | 2.87 | 0.44 | 0.22 | 0.28 |
| 20556 | 0 | 81856  | ETSRSVFHQNGQ                                      | 2.45 | 0.01 | 2.90 | 0.68 | 0.22 | 0.28 |
| 20557 | 0 | 14551  | ETSWGQQST                                         | 2.24 | 0.01 | 3.55 | 0.68 | 0.22 | 0.28 |



|       |   |       |                      |      |      |      |      |      |      |
|-------|---|-------|----------------------|------|------|------|------|------|------|
|       |   |       | ETTARIIFNGKDLNLVER   |      |      |      |      |      |      |
|       |   |       | RIAAVNPSDPLETTKPD    |      |      |      |      |      |      |
|       |   |       | MTLKEALKIAFGFNEPN    |      |      |      |      |      |      |
|       |   |       | GNLQYQGKDITEFDNF     |      |      |      |      |      |      |
|       |   |       | DQQTSQNIKNQLAELN     |      |      |      |      |      |      |
|       |   |       | ATNIYTVLDKIKLNAKM    |      |      |      |      |      |      |
|       |   |       | NILIRDKRFHYDRNNIAV   |      |      |      |      |      |      |
| 20558 | 0 | 14556 | GADESVVKEAHREVINS    | 5.50 | 0.01 | 2.18 | 0.44 | 1.41 | 0.28 |
|       |   |       | STEGLLLNIIDKDIRKILSG |      |      |      |      |      |      |
|       |   |       | YIVEIEDTEGLKEVINDRY  |      |      |      |      |      |      |
|       |   |       | DMLNISSLRQDGKTFIDF   |      |      |      |      |      |      |
|       |   |       | KKYNDKLPYISNPYKV     |      |      |      |      |      |      |
|       |   |       | NVYAVTKENTIINPSENG   |      |      |      |      |      |      |
|       |   |       | DTSTNGIKKILIFSKKGYEI |      |      |      |      |      |      |
|       |   |       | G                    |      |      |      |      |      |      |

|       |   |       |                      |      |      |      |      |      |      |
|-------|---|-------|----------------------|------|------|------|------|------|------|
|       |   |       | ETTARIIFNGKDLNLVER   |      |      |      |      |      |      |
|       |   |       | RIAAVNPSDPLETTKPD    |      |      |      |      |      |      |
|       |   |       | MTLKEALKIAFGFNEPN    |      |      |      |      |      |      |
|       |   |       | GNLQYQGKDITEFDNF     |      |      |      |      |      |      |
|       |   |       | DQQTSQNIKNQLAELN     |      |      |      |      |      |      |
|       |   |       | ATNIYTVLDKIKLNAKM    |      |      |      |      |      |      |
|       |   |       | NILIRDKRFHYDRNNIAV   |      |      |      |      |      |      |
| 20559 | 0 | 14556 | GADESVVKEAHREVINS    | 5.50 | 0.01 | 2.18 | 0.44 | 1.41 | 1.66 |
|       |   |       | STEGLLLNIIDKDIRKILSG |      |      |      |      |      |      |
|       |   |       | YIVEIEDTEGLKEVINDRY  |      |      |      |      |      |      |
|       |   |       | DMLNISSLRQDGKTFIDF   |      |      |      |      |      |      |
|       |   |       | KKYNDKLPYISNPYKV     |      |      |      |      |      |      |
|       |   |       | NVYAVTKENTIINPSENG   |      |      |      |      |      |      |
|       |   |       | DTSTNGIKKILIFSKKGYEI |      |      |      |      |      |      |
|       |   |       | G                    |      |      |      |      |      |      |

|       |   |        |                                                                                                                                                                |      |      |      |      |      |      |
|-------|---|--------|----------------------------------------------------------------------------------------------------------------------------------------------------------------|------|------|------|------|------|------|
|       |   |        | ETTARIIFNGKDLNLVER<br>RIAAVNPSDPLETTKPD<br>MTLKEALKIAFGFNEPN<br>GNLQYQGKDITEFDNF<br>DQQTSQNIKNQLAELN<br>ATNIYTVLDKIKLNAKM<br>NILIRDKRFHYDRNNIAV                |      |      |      |      |      |      |
| 20560 | 0 | 14556  | GADESVVKEAHREVINS<br>STEGLLLNIIDKDIRKILSG<br>YIVEIEDTEGLKEVINDRY<br>DMLNISSLRQDGKTFIDF<br>KKYNDKLPLYISNPYKV<br>NVYAVTKENTIINPSENG<br>DTSTNGIKKILIFSCKGYEI<br>G | 5.50 | 0.01 | 2.18 | 0.44 | 1.41 | 1.66 |
|       |   |        | ETTARIIFNGKDLNLVER<br>RIAAVNPSDPLETTKPD<br>MTLKEALKIAFGFNEPN<br>GNLQYQGKDITEFDNF<br>DQQTSQNIKNQLAELN<br>ATNIYTVLDKIKLNAKM<br>NILIRDKRFHYDRNNIAV                |      |      |      |      |      |      |
| 20561 | 0 | 14556  | GADESVVKEAHREVINS<br>STEGLLLNIIDKDIRKILSG<br>YIVEIEDTEGLKEVINDRY<br>DMLNISSLRQDGKTFIDF<br>KKYNDKLPLYISNPYKV<br>NVYAVTKENTIINPSENG<br>DTSTNGIKKILIFSCKGYEI<br>G | 5.50 | 0.01 | 2.18 | 0.44 | 1.41 | 1.34 |
| 20562 | 0 | 208019 | ETTEAAATVDLFAFTLDG<br>GK                                                                                                                                       | 2.98 | 4.45 | 0.90 | 0.44 | 0.85 | 1.48 |
| 20563 | 0 | 208019 | ETTEAAATVDLFAFTLDG<br>GK                                                                                                                                       | 2.98 | 4.45 | 0.90 | 0.44 | 0.85 | 1.48 |
| 20564 | 0 | 208020 | ETTEAAATVDLFAFTLDG<br>GK                                                                                                                                       | 2.98 | 0.01 | 0.90 | 0.44 | 0.85 | 1.48 |
| 20565 | 0 | 208020 | ETTEAAATVDLFAFTLDG<br>GK                                                                                                                                       | 2.98 | 0.01 | 0.90 | 0.44 | 0.85 | 1.48 |
| 20566 | 0 | 208020 | ETTEAAATVDLFAFTLDG<br>GK                                                                                                                                       | 2.98 | 0.01 | 0.90 | 0.44 | 0.85 | 1.48 |
| 20567 | 0 | 451476 | ETTEERQNEDGENDEKA                                                                                                                                              | 2.82 | 0.01 | 3.67 | 0.68 | 0.22 | 0.28 |
| 20568 | 0 | 451476 | ETTEERQNEDGENDEKA                                                                                                                                              | 2.82 | 0.01 | 3.67 | 0.68 | 0.22 | 0.28 |

|       |   |        |                                  |      |      |      |      |      |      |
|-------|---|--------|----------------------------------|------|------|------|------|------|------|
| 20569 | 0 | 451476 | ETTEERQNEDGENDEKA                | 2.82 | 0.01 | 3.67 | 0.68 | 0.22 | 0.28 |
| 20570 | 0 | 451476 | ETTEERQNEDGENDEKA                | 2.82 | 0.01 | 3.67 | 0.68 | 0.22 | 0.28 |
| 20571 | 0 | 451476 | ETTEERQNEDGENDEKA                | 2.82 | 0.01 | 3.67 | 0.68 | 0.22 | 0.28 |
| 20572 | 0 | 451476 | ETTEERQNEDGENDEKA                | 2.82 | 0.01 | 3.67 | 0.68 | 0.22 | 1.34 |
| 20573 | 0 | 136210 | ETTEESLRNYYEQ                    | 2.56 | 0.01 | 0.78 | 0.44 | 1.13 | 0.28 |
| 20574 | 0 | 136210 | ETTEESLRNYYEQ                    | 2.56 | 0.01 | 0.78 | 2.79 | 1.13 | 1.28 |
| 20575 | 0 | 136210 | ETTEESLRNYYEQ                    | 2.56 | 0.01 | 0.78 | 2.79 | 1.13 | 1.28 |
| 20576 | 0 | 136210 | ETTEESLRNYYEQ                    | 2.56 | 0.01 | 0.78 | 1.81 | 1.41 | 1.28 |
| 20577 | 0 | 136210 | ETTEESLRNYYEQ                    | 2.56 | 0.01 | 0.78 | 1.81 | 1.41 | 1.28 |
| 20578 | 0 | 14561  | ETTET                            | 1.78 | 0.01 | 4.63 | 3.97 | 0.22 | 0.85 |
| 20579 | 0 | 14561  | ETTET                            | 1.78 | 0.01 | 4.63 | 3.97 | 0.22 | 0.28 |
| 20580 | 0 | 443593 | ETGGTRGSSDQFQ                    | 2.64 | 0.01 | 4.63 | 0.44 | 1.23 | 0.28 |
| 20581 | 0 | 125403 | ETTKLQRFQAML                     | 2.46 | 0.01 | 0.90 | 0.68 | 0.22 | 0.28 |
| 20582 | 0 | 125403 | ETTKLQRFQAML                     | 2.46 | 0.01 | 0.90 | 0.68 | 0.22 | 1.27 |
| 20583 | 0 | 125403 | ETTKLQRFQAML                     | 2.46 | 0.01 | 0.90 | 2.13 | 0.22 | 0.28 |
| 20584 | 0 | 141640 | ETTKQVQRYRARLSP                  | 2.65 | 0.01 | 3.65 | 0.44 | 1.23 | 1.28 |
| 20585 | 0 | 14563  | ETTLLEDRLTTRNG                   | 2.71 | 0.01 | 2.96 | 1.15 | 0.22 | 0.28 |
| 20586 | 0 | 14563  | ETTLLEDRLTTRNG                   | 2.71 | 0.01 | 2.96 | 1.15 | 0.22 | 0.28 |
| 20587 | 0 | 174100 | ETTPAASPGNTSDGN                  | 2.70 | 0.01 | 2.30 | 2.89 | 0.22 | 0.28 |
| 20588 | 0 | 174100 | ETTPAASPGNTSDGN                  | 2.70 | 0.01 | 2.30 | 2.89 | 0.22 | 0.28 |
| 20589 | 0 | 110839 | ETTSQMIVKDIK                     | 2.46 | 0.01 | 3.15 | 3.53 | 0.22 | 0.28 |
| 20590 | 0 | 110839 | ETTSQMIVKDIK                     | 2.46 | 0.01 | 3.15 | 0.44 | 1.59 | 0.28 |
| 20591 | 0 | 110839 | ETTSQMIVKDIK                     | 2.46 | 0.01 | 3.15 | 1.12 | 0.22 | 1.27 |
| 20592 | 0 | 14574  | ETTTASGLVIPDTAK                  | 2.65 | 0.01 | 2.04 | 0.44 | 1.74 | 0.28 |
| 20593 | 0 | 14574  | ETTTASGLVIPDTAK                  | 2.65 | 0.01 | 2.04 | 0.44 | 0.85 | 0.28 |
| 20594 | 0 | 14574  | ETTTASGLVIPDTAK                  | 2.65 | 0.01 | 2.04 | 0.44 | 0.85 | 0.28 |
| 20595 | 0 | 98026  | ETTTASGLVIPDTAKEKP<br>QEGTVVAV   | 3.21 | 0.01 | 3.59 | 1.12 | 0.22 | 0.85 |
| 20596 | 0 | 14576  | ETTTIPPS                         | 2.14 | 0.01 | 2.40 | 2.43 | 0.22 | 0.28 |
| 20597 | 0 | 287756 | ETTTMKNNTTATTGDS                 | 2.68 | 0.01 | 1.61 | 0.44 | 0.85 | 1.28 |
| 20598 | 0 | 515434 | ETTTTNEQPKPESE                   | 2.71 | 0.01 | 2.24 | 0.44 | 1.41 | 1.28 |
| 20599 | 0 | 14580  | ETTVVRRRGRSP                     | 2.49 | 0.01 | 2.08 | 0.44 | 1.59 | 0.85 |
| 20600 | 0 | 14580  | ETTVVRRRGRSP                     | 2.49 | 0.01 | 2.08 | 0.68 | 0.22 | 0.85 |
| 20601 | 0 | 14583  | ETVARMFPDFR<br>ETVARMFPDFRSEVSEK | 2.39 | 0.01 | 3.53 | 3.08 | 0.22 | 1.39 |
| 20602 | 0 | 14584  | FGIDLAVSEESDELVKK<br>TMVSSFS     | 3.69 | 0.01 | 3.53 | 3.08 | 0.22 | 1.27 |
| 20603 | 0 | 170964 | ETVKLGCVVEACS                    | 2.54 | 0.01 | 3.38 | 0.44 | 0.85 | 2.51 |
| 20604 | 0 | 14592  | ETVKTNKKNVTVQELDL<br>QAR         | 2.97 | 0.01 | 2.56 | 1.12 | 0.22 | 0.28 |
| 20605 | 0 | 14592  | ETVKTNKKNVTVQELDL<br>QAR         | 2.97 | 0.01 | 2.56 | 1.12 | 0.22 | 0.28 |

|       |   |        |                                      |      |      |      |      |      |      |
|-------|---|--------|--------------------------------------|------|------|------|------|------|------|
| 20606 | 0 | 14592  | ETVKTNKKNVTVQELDL<br>QAR             | 2.97 | 0.01 | 2.56 | 3.12 | 0.22 | 0.28 |
| 20607 | 0 | 14592  | ETVKTNKKNVTVQELDL<br>QAR             | 2.97 | 0.01 | 2.56 | 3.12 | 0.22 | 1.34 |
| 20608 | 0 | 230225 | ETVPMNCSSYANTTSED<br>GKV             | 2.92 | 0.01 | 2.25 | 0.44 | 1.23 | 0.28 |
| 20609 | 0 | 137842 | ETVPRSGEVYTSQVE                      | 2.71 | 0.01 | 0.78 | 1.15 | 0.22 | 1.57 |
| 20610 | 0 | 137842 | ETVPRSGEVYTSQVE                      | 2.71 | 0.01 | 0.78 | 0.44 | 2.26 | 1.57 |
| 20611 | 0 | 14599  | ETWKKPDY                             | 2.11 | 0.01 | 2.68 | 0.44 | 1.59 | 0.28 |
| 20612 | 0 | 14600  | ETWKLVKTSQVTPLPIS<br>EANTGLIR        | 3.21 | 0.01 | 2.86 | 2.02 | 1.59 | 0.28 |
| 20613 | 0 | 14600  | ETWKLVKTSQVTPLPIS<br>EANTGLIR        | 3.21 | 0.01 | 2.86 | 2.02 | 0.22 | 0.28 |
| 20614 | 0 | 14601  | ETWKLVKTSQVTPLPIS<br>EANTGLIRHKR     | 3.31 | 0.01 | 2.86 | 2.02 | 1.59 | 0.28 |
| 20615 | 0 | 14603  | ETYATGGTIARYTFRIAS<br>I FNPQPAQKIQLI | 3.38 | 0.01 | 1.72 | 0.44 | 0.85 | 0.28 |
| 20616 | 0 | 14603  | ETYATGGTIARYTFRIAS<br>I FNPQPAQKIQLI | 3.38 | 0.01 | 1.72 | 2.74 | 0.22 | 0.28 |
| 20617 | 0 | 14603  | ETYATGGTIARYTFRIAS<br>I FNPQPAQKIQLI | 3.38 | 0.01 | 1.72 | 3.27 | 0.22 | 0.28 |
| 20618 | 0 | 14603  | ETYATGGTIARYTFRIAS<br>I FNPQPAQKIQLI | 3.38 | 0.01 | 1.72 | 2.74 | 0.22 | 0.28 |
| 20619 | 0 | 14607  | ETYIIGAATGRRTAGLTSL<br>FSSGSQQN      | 3.24 | 0.01 | 1.72 | 0.44 | 0.85 | 0.28 |
| 20620 | 0 | 14607  | ETYIIGAATGRRTAGLTSL<br>FSSGSQQN      | 3.24 | 0.01 | 1.72 | 0.44 | 0.85 | 0.28 |
| 20621 | 0 | 14607  | ETYIIGAATGRRTAGLTSL<br>FSSGSQQN      | 3.24 | 0.01 | 1.72 | 0.68 | 0.22 | 0.28 |
| 20622 | 0 | 14607  | ETYIIGAATGRRTAGLTSL<br>FSSGSQQN      | 3.24 | 0.01 | 1.72 | 0.68 | 0.22 | 0.28 |
| 20623 | 0 | 14607  | ETYIIGAATGRRTAGLTSL<br>FSSGSQQN      | 3.24 | 0.01 | 1.72 | 0.44 | 0.85 | 0.28 |
| 20624 | 0 | 14607  | ETYIIGAATGRRTAGLTSL<br>FSSGSQQN      | 3.24 | 0.01 | 1.72 | 1.12 | 0.22 | 0.28 |
| 20625 | 0 | 14607  | ETYIIGAATGRRTAGLTSL<br>FSSGSQQN      | 3.24 | 0.01 | 1.72 | 1.12 | 0.22 | 0.28 |
| 20626 | 0 | 14609  | ETYKFIPSLEAA                         | 2.44 | 0.01 | 3.22 | 0.44 | 1.23 | 0.85 |
| 20627 | 0 | 14612  | ETYTSGGNAGHTMTGIV<br>RFFAPGPKQN      | 3.20 | 0.01 | 3.78 | 0.44 | 0.85 | 0.28 |
| 20628 | 0 | 14612  | ETYTSGGNAGHTMTGIV<br>RFFAPGPKQN      | 3.20 | 0.01 | 3.78 | 0.44 | 0.85 | 0.28 |
| 20629 | 0 | 14612  | ETYTSGGNAGHTMTGIV<br>RFFAPGPKQN      | 3.20 | 0.01 | 3.78 | 0.68 | 0.22 | 0.28 |
| 20630 | 0 | 14612  | ETYTSGGNAGHTMTGIV<br>RFFAPGPKQN      | 3.20 | 0.01 | 3.78 | 1.12 | 0.22 | 0.28 |

|       |   |        |                                   |      |      |      |      |      |      |
|-------|---|--------|-----------------------------------|------|------|------|------|------|------|
| 20631 | 0 | 14612  | ETYTSGGNAGHTMTGIV<br>RFFAPGPKQN   | 3.20 | 0.01 | 3.78 | 1.12 | 0.22 | 0.28 |
| 20632 | 0 | 14612  | ETYTSGGNAGHTMTGIV<br>RFFAPGPKQN   | 3.20 | 0.01 | 3.78 | 1.12 | 0.22 | 0.28 |
| 20633 | 0 | 14613  | ETYTSGGSAAHTTSGFVS<br>FFSPGAKQN   | 3.23 | 0.01 | 1.72 | 0.44 | 0.85 | 0.28 |
| 20634 | 0 | 14613  | ETYTSGGSAAHTTSGFVS<br>FFSPGAKQN   | 3.23 | 0.01 | 1.72 | 0.44 | 0.85 | 0.28 |
| 20635 | 0 | 14613  | ETYTSGGSAAHTTSGFVS<br>FFSPGAKQN   | 3.23 | 0.01 | 1.72 | 0.68 | 0.22 | 0.28 |
| 20636 | 0 | 14613  | ETYTSGGSAAHTTSGFVS<br>FFSPGAKQN   | 3.23 | 0.01 | 1.72 | 1.12 | 0.22 | 0.28 |
| 20637 | 0 | 14613  | ETYTSGGSAAHTTSGFVS<br>FFSPGAKQN   | 3.23 | 0.01 | 1.72 | 1.12 | 0.22 | 0.28 |
| 20638 | 0 | 14614  | ETYTTGGAAARTTSGLTS<br>LFSPGPSQN   | 3.24 | 0.01 | 0.90 | 0.44 | 1.59 | 0.28 |
| 20639 | 0 | 97289  | ETYVLSIIPSGPLKAEIAQ<br>KLEDVFAGKN | 3.30 | 0.01 | 3.09 | 0.44 | 0.85 | 0.28 |
| 20640 | 0 | 97289  | ETYVLSIIPSGPLKAEIAQ<br>KLEDVFAGKN | 3.30 | 0.01 | 3.09 | 0.44 | 0.85 | 0.28 |
| 20641 | 0 | 97289  | ETYVLSIIPSGPLKAEIAQ<br>KLEDVFAGKN | 3.30 | 0.01 | 3.09 | 0.44 | 1.74 | 0.28 |
| 20642 | 0 | 14616  | ETYVSGGSAARNAYGLT<br>SLFTVGPAQK   | 3.23 | 0.01 | 0.90 | 4.63 | 0.22 | 0.28 |
| 20643 | 0 | 14616  | ETYVSGGSAARNAYGLT<br>SLFTVGPAQK   | 3.23 | 0.01 | 0.90 | 4.63 | 0.22 | 0.28 |
| 20644 | 0 | 14616  | ETYVSGGSAARNAYGLT<br>SLFTVGPAQK   | 3.23 | 0.01 | 0.90 | 0.44 | 0.85 | 0.28 |
| 20645 | 0 | 14617  | ETYVTGGMAGRTTLGFT<br>SLSTPGPSQK   | 3.23 | 0.01 | 0.90 | 0.44 | 0.85 | 0.28 |
| 20646 | 0 | 14618  | ETYVTGGVAGRTTLGFT<br>SLFTPGPSQN   | 3.24 | 0.01 | 0.90 | 0.44 | 0.85 | 0.28 |
| 20647 | 0 | 227916 | EVAEAPPAEAAAPA                    | 2.62 | 0.01 | 3.33 | 0.44 | 0.85 | 0.28 |
| 20648 | 0 | 227916 | EVAEAPPAEAAAPA                    | 2.62 | 0.01 | 3.33 | 0.44 | 0.85 | 0.28 |
| 20649 | 0 | 227916 | EVAEAPPAEAAAPA                    | 2.62 | 0.01 | 3.33 | 0.44 | 0.85 | 0.28 |
| 20650 | 0 | 227916 | EVAEAPPAEAAAPA                    | 2.62 | 0.01 | 3.33 | 2.49 | 0.22 | 0.28 |
| 20651 | 0 | 108934 | EVAESDDEAEVY                      | 2.52 | 0.01 | 0.90 | 1.15 | 0.22 | 1.39 |
| 20652 | 0 | 108355 | EVAHPSVPL                         | 2.23 | 0.01 | 0.90 | 0.44 | 1.13 | 1.39 |
| 20653 | 0 | 142415 | EVAKAEVLNAEVK                     | 2.61 | 0.01 | 2.59 | 0.44 | 0.85 | 0.85 |
| 20654 | 0 | 229196 | EVAKEYDKAV                        | 2.45 | 0.01 | 2.70 | 0.68 | 0.22 | 0.28 |
| 20655 | 0 | 14626  | EVAKNLNESLIDLQELG                 | 2.80 | 0.01 | 2.48 | 0.44 | 0.85 | 0.28 |
| 20656 | 0 | 229197 | EVAPQAKI                          | 2.12 | 0.01 | 2.70 | 0.68 | 0.22 | 0.28 |
| 20657 | 0 | 114329 | EVAQEAAEEPLIE                     | 2.59 | 0.01 | 1.75 | 2.04 | 0.22 | 0.28 |
| 20658 | 0 | 114329 | EVAQEAAEEPLIE                     | 2.59 | 0.01 | 1.75 | 2.04 | 0.22 | 0.28 |
| 20659 | 0 | 114330 | EVAQEAAEEPLIEPLMEP<br>EGESYED     | 3.17 | 0.01 | 1.75 | 2.04 | 0.22 | 0.28 |

|       |   |        |                                        |      |      |      |      |      |      |
|-------|---|--------|----------------------------------------|------|------|------|------|------|------|
| 20660 | 0 | 114330 | EVAQEAAEEPLIEPLMEPEGESYED              | 3.17 | 0.01 | 1.75 | 2.04 | 0.22 | 0.28 |
| 20661 | 0 | 14636  | EVCVRQLKAIANK                          | 2.54 | 0.01 | 3.10 | 2.69 | 0.22 | 0.28 |
| 20662 | 0 | 14636  | EVCVRQLKAIANK                          | 2.54 | 0.01 | 3.10 | 2.69 | 0.22 | 0.28 |
| 20663 | 0 | 14636  | EVCVRQLKAIANK                          | 2.54 | 0.01 | 3.10 | 1.12 | 0.22 | 0.28 |
| 20664 | 0 | 14636  | EVCVRQLKAIANK                          | 2.54 | 0.01 | 3.10 | 0.68 | 0.22 | 0.28 |
| 20665 | 0 | 14636  | EVCVRQLKAIANK                          | 2.54 | 0.01 | 2.86 | 0.68 | 0.22 | 0.28 |
| 20666 | 0 | 95369  | EVDDEA                                 | 1.92 | 0.01 | 1.60 | 0.44 | 1.23 | 0.28 |
| 20667 | 0 | 14638  | EVDDEALEKF                             | 2.33 | 0.01 | 1.60 | 0.44 | 1.23 | 0.85 |
| 20668 | 0 | 14638  | EVDDEALEKF                             | 2.33 | 0.01 | 1.60 | 0.44 | 1.23 | 0.85 |
| 20669 | 0 | 14638  | EVDDEALEKF                             | 2.33 | 0.01 | 1.60 | 0.44 | 1.23 | 0.85 |
| 20670 | 0 | 14638  | EVDDEALEKF                             | 2.33 | 0.01 | 1.60 | 0.44 | 1.23 | 0.85 |
| 20671 | 0 | 14639  | EVDDEALEKFDKAL                         | 2.67 | 0.01 | 1.60 | 0.44 | 1.23 | 0.85 |
| 20672 | 0 | 115238 | EVDDEALEKFDKALKALPMH                   | 2.98 | 0.01 | 1.60 | 0.44 | 1.23 | 1.28 |
| 20673 | 0 | 287928 | EVDDTMADELRSAFF                        | 2.67 | 0.01 | 1.61 | 0.44 | 0.85 | 1.28 |
| 20674 | 0 | 287932 | EVDEDEDDDDDDNDN                        | 2.74 | 0.01 | 1.61 | 0.44 | 0.85 | 1.28 |
| 20675 | 0 | 14641  | EVDGDVKLSSNLVIL                        | 2.69 | 0.01 | 2.43 | 3.34 | 0.22 | 0.28 |
| 20676 | 0 | 14641  | EVDGDVKLSSNLVIL                        | 2.69 | 0.01 | 2.43 | 0.44 | 0.85 | 0.28 |
| 20677 | 0 | 287942 | EVDGHDFFIREHIQIR                       | 2.71 | 0.01 | 1.61 | 0.44 | 0.85 | 1.28 |
| 20678 | 0 | 174101 | EVDGQQLAQSQAICRYLAKT                   | 2.91 | 0.01 | 4.33 | 0.44 | 0.85 | 1.27 |
| 20679 | 0 | 174101 | EVDGQQLAQSQAICRYLAKT                   | 2.91 | 0.01 | 4.33 | 0.68 | 0.22 | 1.27 |
| 20680 | 0 | 146906 | EVDHTNFKYNYSVIEG                       | 2.72 | 0.01 | 2.76 | 0.68 | 0.22 | 0.28 |
| 20681 | 0 | 146906 | EVDHTNFKYNYSVIEG                       | 2.72 | 0.01 | 2.76 | 0.44 | 1.23 | 2.35 |
| 20682 | 0 | 146906 | EVDHTNFKYNYSVIEG                       | 2.72 | 0.01 | 2.76 | 0.68 | 0.22 | 0.28 |
| 20683 | 0 | 146906 | EVDHTNFKYNYSVIEG                       | 2.72 | 0.01 | 2.76 | 0.68 | 0.22 | 0.28 |
| 20684 | 0 | 146906 | EVDHTNFKYNYSVIEG                       | 2.72 | 0.01 | 2.76 | 0.68 | 0.22 | 0.28 |
| 20685 | 0 | 146907 | EVDHTNFKYNYSVIEGGPIGDTLEKISNEIK        | 3.38 | 0.01 | 2.76 | 1.12 | 0.22 | 1.34 |
| 20686 | 0 | 146907 | EVDHTNFKYNYSVIEGGPIGDTLEKISNEIK        | 3.38 | 0.01 | 2.76 | 0.68 | 0.22 | 0.85 |
| 20687 | 0 | 233181 | EVDKA                                  | 1.74 | 0.01 | 3.61 | 1.20 | 0.22 | 0.85 |
| 20688 | 0 | 14645  | EVDKDISQLTQAIVKNHKNLLKIAQYAAQNRRGLDLLF | 3.56 | 0.01 | 2.04 | 0.44 | 1.59 | 0.28 |
| 20689 | 0 | 14645  | EVDKDISQLTQAIVKNHKNLLKIAQYAAQNRRGLDLLF | 3.56 | 0.01 | 2.04 | 0.44 | 1.59 | 0.28 |
| 20690 | 0 | 14645  | EVDKDISQLTQAIVKNHKNLLKIAQYAAQNRRGLDLLF | 3.56 | 0.01 | 2.04 | 0.44 | 2.82 | 0.28 |
| 20691 | 0 | 14645  | EVDKDISQLTQAIVKNHKNLLKIAQYAAQNRRGLDLLF | 3.56 | 0.01 | 2.04 | 0.44 | 0.85 | 0.28 |

|       |   |        |                                                    |      |      |      |      |      |      |
|-------|---|--------|----------------------------------------------------|------|------|------|------|------|------|
| 20692 | 0 | 127967 | EVDLLIGSSQDDGLINRA<br>KA                           | 2.93 | 0.01 | 0.78 | 0.44 | 1.13 | 0.28 |
| 20693 | 0 | 14670  | EVDNEQPTTRAQKLFA                                   | 2.71 | 0.01 | 3.61 | 1.12 | 0.22 | 0.28 |
| 20694 | 0 | 14670  | EVDNEQPTTRAQKLFA                                   | 2.71 | 0.01 | 3.61 | 2.37 | 0.22 | 0.28 |
| 20695 | 0 | 14670  | EVDNEQPTTRAQKLFA                                   | 2.71 | 0.01 | 3.61 | 0.68 | 0.22 | 0.28 |
| 20696 | 0 | 14670  | EVDNEQPTTRAQKLFA                                   | 2.71 | 0.01 | 3.61 | 1.15 | 0.22 | 1.34 |
| 20697 | 0 | 14670  | EVDNEQPTTRAQKLFA                                   | 2.71 | 0.01 | 3.61 | 1.15 | 0.22 | 0.28 |
| 20698 | 0 | 14670  | EVDNEQPTTRAQKLFA                                   | 2.71 | 0.01 | 3.61 | 1.15 | 0.22 | 0.28 |
| 20699 | 0 | 14670  | EVDNEQPTTRAQKLFA                                   | 2.71 | 0.01 | 3.61 | 1.15 | 0.22 | 0.28 |
| 20700 | 0 | 14670  | EVDNEQPTTRAQKLFA                                   | 2.71 | 0.01 | 3.61 | 1.15 | 0.22 | 0.28 |
| 20701 | 0 | 14670  | EVDNEQPTTRAQKLFA                                   | 2.71 | 0.01 | 3.61 | 1.15 | 0.22 | 0.28 |
| 20702 | 0 | 14670  | EVDNEQPTTRAQKLFA                                   | 2.71 | 0.01 | 3.61 | 1.15 | 0.22 | 0.28 |
| 20703 | 0 | 14670  | EVDNEQPTTRAQKLFA                                   | 2.71 | 0.01 | 3.61 | 1.15 | 0.22 | 0.28 |
| 20704 | 0 | 127645 | EVDNGNFVHCEESGKLV<br>LVY                           | 2.94 | 0.01 | 1.75 | 1.81 | 0.22 | 0.28 |
| 20705 | 0 | 233182 | EVDRA                                              | 1.74 | 0.01 | 3.61 | 2.00 | 0.85 | 0.85 |
| 20706 | 0 | 14677  | EVDVFNPLATKSD                                      | 2.58 | 0.01 | 3.10 | 0.68 | 0.22 | 1.48 |
| 20707 | 0 | 164658 | EVDVPGIDPNACHYMK<br>CPLVKGQQYDIKYTWIV<br>PKIAPKSEN | 3.66 | 0.01 | 2.78 | 0.44 | 1.23 | 0.85 |
| 20708 | 0 | 164658 | EVDVPGIDPNACHYMK<br>CPLVKGQQYDIKYTWIV<br>PKIAPKSEN | 3.66 | 0.01 | 2.78 | 1.12 | 0.22 | 0.28 |
| 20709 | 0 | 164658 | EVDVPGIDPNACHYMK<br>CPLVKGQQYDIKYTWIV<br>PKIAPKSEN | 3.66 | 0.01 | 2.78 | 0.44 | 1.23 | 2.35 |
| 20710 | 0 | 164658 | EVDVPGIDPNACHYMK<br>CPLVKGQQYDIKYTWIV<br>PKIAPKSEN | 3.66 | 0.01 | 2.78 | 0.68 | 0.22 | 1.34 |
| 20711 | 0 | 164658 | EVDVPGIDPNACHYMK<br>CPLVKGQQYDIKYTWIV<br>PKIAPKSEN | 3.66 | 0.01 | 2.78 | 1.12 | 0.22 | 0.85 |
| 20712 | 0 | 287976 | EVEEDEKEDNDDDD                                     | 2.72 | 0.01 | 1.61 | 0.44 | 0.85 | 1.28 |
| 20713 | 0 | 14678  | EVEEIVRDGLVRSHFH                                   | 2.75 | 0.01 | 3.41 | 0.68 | 0.22 | 0.85 |
| 20714 | 0 | 288015 | EVEKIDSENSKLQQE                                    | 2.70 | 0.01 | 1.61 | 0.44 | 0.85 | 1.28 |
| 20715 | 0 | 97290  | EVELKLNLA                                          | 2.26 | 0.01 | 3.13 | 1.12 | 0.22 | 0.28 |

|       |   |        |                                      |      |      |      |      |      |      |
|-------|---|--------|--------------------------------------|------|------|------|------|------|------|
| 20716 | 0 | 288028 | EVELYSFEDDEEDEN                      | 2.72 | 0.01 | 1.61 | 0.44 | 0.85 | 1.28 |
| 20717 | 0 | 98771  | EVENQANPTTAETLDAT<br>RRVDDA          | 3.11 | 0.01 | 2.72 | 1.12 | 0.22 | 0.28 |
| 20718 | 0 | 14686  | EVETPIRN                             | 2.13 | 0.01 | 2.97 | 0.68 | 2.25 | 1.75 |
| 20719 | 0 | 14686  | EVETPIRN                             | 2.13 | 0.01 | 2.97 | 1.15 | 0.22 | 0.28 |
| 20720 | 0 | 14686  | EVETPIRN                             | 2.13 | 0.01 | 2.97 | 0.68 | 0.22 | 2.12 |
| 20721 | 0 | 14686  | EVETPIRN                             | 2.13 | 0.01 | 2.97 | 0.68 | 0.22 | 0.28 |
| 20722 | 0 | 14686  | EVETPIRN                             | 2.13 | 0.01 | 2.36 | 0.68 | 0.22 | 0.28 |
| 20723 | 0 | 161342 | EVETPIRNEW                           | 2.32 | 0.01 | 2.36 | 2.75 | 0.22 | 0.28 |
| 20724 | 0 | 161342 | EVETPIRNEW                           | 2.32 | 0.01 | 2.36 | 2.75 | 0.22 | 0.28 |
| 20725 | 0 | 161342 | EVETPIRNEW                           | 2.32 | 0.01 | 2.36 | 2.75 | 0.22 | 0.28 |
| 20726 | 0 | 161342 | EVETPIRNEW                           | 2.32 | 0.01 | 2.36 | 2.75 | 0.22 | 0.28 |
| 20727 | 0 | 161342 | EVETPIRNEW                           | 2.32 | 0.01 | 2.36 | 2.75 | 0.22 | 0.28 |
| 20728 | 0 | 161342 | EVETPIRNEW                           | 2.32 | 0.01 | 2.36 | 2.75 | 0.22 | 0.28 |
| 20729 | 0 | 161342 | EVETPIRNEW                           | 2.32 | 0.01 | 2.36 | 2.75 | 0.22 | 0.28 |
| 20730 | 0 | 161342 | EVETPIRNEW                           | 2.32 | 0.01 | 2.36 | 2.75 | 0.22 | 0.28 |
| 20731 | 0 | 161342 | EVETPIRNEW                           | 2.32 | 0.01 | 2.36 | 2.75 | 0.22 | 0.28 |
| 20732 | 0 | 161342 | EVETPIRNEW                           | 2.32 | 0.01 | 2.36 | 2.75 | 0.22 | 0.28 |
| 20733 | 0 | 161342 | EVETPIRNEW                           | 2.32 | 0.01 | 2.36 | 2.75 | 0.22 | 0.28 |
| 20734 | 0 | 161342 | EVETPIRNEW                           | 2.32 | 0.01 | 2.36 | 2.75 | 0.22 | 0.28 |
| 20735 | 0 | 161342 | EVETPIRNEW                           | 2.32 | 0.01 | 2.36 | 2.75 | 0.22 | 0.28 |
| 20736 | 0 | 161342 | EVETPIRNEW                           | 2.32 | 0.01 | 2.36 | 2.75 | 0.22 | 1.66 |
| 20737 | 0 | 161342 | EVETPIRNEW                           | 2.32 | 0.01 | 2.36 | 2.75 | 0.22 | 1.66 |
| 20738 | 0 | 14690  | EVFCVQ                               | 1.90 | 0.01 | 1.96 | 0.44 | 0.85 | 0.28 |
| 20739 | 0 | 131874 | EVFISAPR                             | 2.10 | 0.01 | 0.78 | 1.12 | 0.22 | 0.85 |
| 20740 | 0 | 131874 | EVFISAPR                             | 2.10 | 0.01 | 0.78 | 0.44 | 1.13 | 1.27 |
| 20741 | 0 | 131874 | EVFISAPR                             | 2.10 | 0.01 | 0.78 | 0.44 | 1.13 | 0.85 |
| 20742 | 0 | 131874 | EVFISAPR                             | 2.10 | 0.01 | 0.78 | 0.44 | 1.13 | 0.85 |
| 20743 | 0 | 14695  | EVFLISEDLKTPINITNSN<br>S             | 2.97 | 0.01 | 3.59 | 1.12 | 0.22 | 0.28 |
| 20744 | 0 | 14695  | EVFLISEDLKTPINITNSN<br>S             | 2.97 | 0.01 | 3.59 | 3.12 | 0.22 | 0.28 |
| 20745 | 0 | 115239 | EVFRELKDLK                           | 2.34 | 0.01 | 1.60 | 0.44 | 1.23 | 0.85 |
| 20746 | 0 | 115239 | EVFRELKDLK                           | 2.34 | 0.01 | 1.60 | 0.44 | 1.23 | 0.85 |
| 20747 | 0 | 115239 | EVFRELKDLK                           | 2.34 | 0.01 | 1.60 | 0.44 | 2.98 | 0.85 |
| 20748 | 0 | 14697  | EVFTKKTCLT                           | 2.35 | 0.01 | 1.60 | 0.44 | 1.23 | 0.85 |
| 20749 | 0 | 14697  | EVFTKKTCLT                           | 2.35 | 0.01 | 1.60 | 0.44 | 1.23 | 0.85 |
| 20750 | 0 | 182113 | EVGCDTIWEKDLNSH                      | 2.63 | 0.01 | 0.78 | 0.44 | 1.13 | 0.85 |
| 20751 | 0 | 14700  | EVGGDLVTIKHVVLEGV<br>KAQPLTRTSAEQWEA | 3.40 | 0.01 | 3.93 | 1.15 | 0.22 | 0.85 |
| 20752 | 0 | 14700  | EVGGDLVTIKHVVLEGV<br>KAQPLTRTSAEQWEA | 3.40 | 0.01 | 3.93 | 1.15 | 0.22 | 0.85 |
| 20753 | 0 | 14700  | EVGGDLVTIKHVVLEGV<br>KAQPLTRTSAEQWEA | 3.40 | 0.01 | 3.93 | 1.15 | 0.22 | 0.85 |



|       |   |        |                                      |      |      |      |      |      |      |
|-------|---|--------|--------------------------------------|------|------|------|------|------|------|
| 20754 | 0 | 14700  | EVGGDLVTIKHVVLEGV<br>KAQPLTRTSAEQWEA | 3.40 | 0.01 | 3.93 | 2.13 | 1.59 | 0.85 |
| 20755 | 0 | 238360 | EVGKRIELAGGRQV                       | 2.63 | 0.01 | 2.14 | 2.65 | 0.22 | 0.85 |
| 20756 | 0 | 14702  | EVGKVA                               | 1.90 | 0.01 | 3.70 | 0.44 | 0.85 | 0.28 |
| 20757 | 0 | 237711 | EVGLEKLMKGLTYTMC<br>D                | 2.87 | 0.01 | 3.19 | 0.44 | 0.22 | 0.85 |
| 20758 | 0 | 131296 | EVGLHECGNSMQVTDD<br>AL               | 2.81 | 0.01 | 0.78 | 3.78 | 0.22 | 0.28 |
| 20759 | 0 | 131296 | EVGLHECGNSMQVTDD<br>AL               | 2.81 | 0.01 | 0.78 | 3.78 | 0.22 | 0.28 |
| 20760 | 0 | 131296 | EVGLHECGNSMQVTDD<br>AL               | 2.81 | 0.01 | 0.78 | 3.78 | 0.22 | 3.16 |
| 20761 | 0 | 14703  | EVGREQPLHSLFLWGP                     | 2.74 | 0.01 | 2.74 | 2.13 | 0.22 | 0.28 |
| 20762 | 0 | 14704  | EVGSHQVEPLRTSVDKP<br>GSK             | 2.95 | 0.01 | 2.82 | 0.44 | 0.85 | 0.28 |
| 20763 | 0 | 135921 | EVGWYRSPF                            | 2.18 | 0.01 | 1.75 | 1.12 | 0.22 | 0.28 |
| 20764 | 0 | 135921 | EVGWYRSPF                            | 2.18 | 0.01 | 1.75 | 1.81 | 0.22 | 1.75 |
| 20765 | 0 | 95370  | EVGYTRAEGLYS                         | 2.48 | 0.01 | 2.88 | 0.44 | 1.23 | 0.85 |
| 20766 | 0 | 95370  | EVGYTRAEGLYS                         | 2.48 | 0.01 | 2.88 | 1.12 | 0.22 | 0.85 |
| 20767 | 0 | 152523 | EVHASFFDIG                           | 2.28 | 0.01 | 2.18 | 2.16 | 0.22 | 0.28 |
| 20768 | 0 | 423283 | EVHDALLFHYEHGLG                      | 2.70 | 0.01 | 2.51 | 0.44 | 2.35 | 1.28 |
| 20769 | 0 | 14714  | EVHGNAEVHASFFDIGG<br>SVSAGFS         | 3.16 | 0.01 | 2.18 | 0.68 | 0.22 | 0.28 |
| 20770 | 0 | 14714  | EVHGNAEVHASFFDIGG<br>SVSAGFS         | 3.16 | 0.01 | 2.18 | 2.37 | 0.22 | 0.28 |
| 20771 | 0 | 14714  | EVHGNAEVHASFFDIGG<br>SVSAGFS         | 3.16 | 0.01 | 2.18 | 2.37 | 0.22 | 0.28 |
| 20772 | 0 | 14714  | EVHGNAEVHASFFDIGG<br>SVSAGFS         | 3.16 | 0.01 | 2.18 | 2.37 | 0.22 | 1.34 |
| 20773 | 0 | 14714  | EVHGNAEVHASFFDIGG<br>SVSAGFS         | 3.16 | 0.01 | 2.18 | 2.37 | 0.22 | 1.75 |
| 20774 | 0 | 14714  | EVHGNAEVHASFFDIGG<br>SVSAGFS         | 3.16 | 0.01 | 2.18 | 0.68 | 0.22 | 0.28 |
| 20775 | 0 | 14714  | EVHGNAEVHASFFDIGG<br>SVSAGFS         | 3.16 | 0.01 | 2.18 | 0.68 | 0.22 | 1.34 |
| 20776 | 0 | 14714  | EVHGNAEVHASFFDIGG<br>SVSAGFS         | 3.16 | 0.01 | 2.18 | 0.68 | 0.22 | 1.75 |
| 20777 | 0 | 105763 | EVHHQK                               | 1.89 | 0.01 | 0.78 | 0.68 | 0.22 | 2.02 |
| 20778 | 0 | 105763 | EVHHQK                               | 1.89 | 0.01 | 0.78 | 0.68 | 0.22 | 0.28 |
| 20779 | 0 | 105763 | EVHHQK                               | 1.89 | 0.01 | 0.78 | 0.68 | 0.22 | 1.48 |
| 20780 | 0 | 99232  | EVHHQKLVFFAEDVG                      | 2.67 | 0.01 | 0.78 | 2.49 | 0.22 | 1.27 |
| 20781 | 0 | 99232  | EVHHQKLVFFAEDVG                      | 2.67 | 0.01 | 0.78 | 3.15 | 0.22 | 0.28 |
| 20782 | 0 | 99232  | EVHHQKLVFFAEDVG                      | 2.67 | 0.01 | 0.78 | 2.71 | 0.22 | 0.28 |
| 20783 | 0 | 99232  | EVHHQKLVFFAEDVG                      | 2.67 | 0.01 | 0.78 | 2.71 | 0.22 | 1.66 |
| 20784 | 0 | 99232  | EVHHQKLVFFAEDVG                      | 2.67 | 0.01 | 0.78 | 2.71 | 0.22 | 1.66 |

|       |   |        |                                      |      |      |      |      |      |      |
|-------|---|--------|--------------------------------------|------|------|------|------|------|------|
| 20785 | 0 | 99232  | EVHHQKLVFFAEDVG                      | 2.67 | 0.01 | 0.78 | 2.71 | 0.22 | 1.66 |
| 20786 | 0 | 99232  | EVHHQKLVFFAEDVG                      | 2.67 | 0.01 | 0.78 | 2.71 | 0.22 | 2.66 |
| 20787 | 0 | 116709 | EVHHQKLVFFAEDVGSN<br>K               | 2.82 | 0.01 | 0.78 | 1.81 | 0.22 | 0.28 |
| 20788 | 0 | 157223 | EVHHQKLVFFAEDVGSN<br>KGAIIGLMVGGVV   | 3.32 | 0.01 | 0.78 | 0.44 | 1.93 | 1.28 |
| 20789 | 0 | 157223 | EVHHQKLVFFAEDVGSN<br>KGAIIGLMVGGVV   | 3.32 | 0.01 | 0.78 | 0.44 | 1.41 | 1.28 |
| 20790 | 0 | 139736 | EVHHQKLVFFAEDVGSN<br>KGAIIGLMVGGVVIA | 3.39 | 3.75 | 0.78 | 1.20 | 0.22 | 1.27 |
| 20791 | 0 | 139736 | EVHHQKLVFFAEDVGSN<br>KGAIIGLMVGGVVIA | 3.39 | 3.75 | 0.78 | 1.20 | 0.22 | 1.27 |
| 20792 | 0 | 139736 | EVHHQKLVFFAEDVGSN<br>KGAIIGLMVGGVVIA | 3.39 | 3.75 | 0.78 | 1.20 | 0.22 | 1.27 |
| 20793 | 0 | 139736 | EVHHQKLVFFAEDVGSN<br>KGAIIGLMVGGVVIA | 3.39 | 3.75 | 0.78 | 1.20 | 0.22 | 0.28 |
| 20794 | 0 | 139736 | EVHHQKLVFFAEDVGSN<br>KGAIIGLMVGGVVIA | 3.39 | 3.75 | 0.78 | 1.20 | 0.22 | 1.34 |
| 20795 | 0 | 139736 | EVHHQKLVFFAEDVGSN<br>KGAIIGLMVGGVVIA | 3.39 | 3.75 | 0.78 | 1.20 | 0.22 | 1.27 |
| 20796 | 0 | 139736 | EVHHQKLVFFAEDVGSN<br>KGAIIGLMVGGVVIA | 3.39 | 3.75 | 0.78 | 1.20 | 0.22 | 1.27 |
| 20797 | 0 | 139736 | EVHHQKLVFFAEDVGSN<br>KGAIIGLMVGGVVIA | 3.39 | 3.75 | 0.78 | 1.20 | 0.22 | 1.27 |
| 20798 | 0 | 139736 | EVHHQKLVFFAEDVGSN<br>KGAIIGLMVGGVVIA | 3.39 | 3.75 | 0.78 | 1.20 | 0.22 | 0.28 |
| 20799 | 0 | 139736 | EVHHQKLVFFAEDVGSN<br>KGAIIGLMVGGVVIA | 3.39 | 3.75 | 0.78 | 1.20 | 0.22 | 0.28 |
| 20800 | 0 | 139736 | EVHHQKLVFFAEDVGSN<br>KGAIIGLMVGGVVIA | 3.39 | 3.75 | 0.78 | 1.20 | 0.22 | 0.28 |
| 20801 | 0 | 139736 | EVHHQKLVFFAEDVGSN<br>KGAIIGLMVGGVVIA | 3.39 | 3.75 | 0.78 | 1.20 | 0.22 | 0.28 |
| 20802 | 0 | 139736 | EVHHQKLVFFAEDVGSN<br>KGAIIGLMVGGVVIA | 3.39 | 3.75 | 0.78 | 1.20 | 0.22 | 0.28 |

|       |   |        |                                      |      |      |      |      |      |      |
|-------|---|--------|--------------------------------------|------|------|------|------|------|------|
| 20803 | 0 | 139736 | EVHHQKLVFFAEDVGSN<br>KGAIIGLMVGGVVIA | 3.39 | 3.75 | 0.78 | 1.20 | 0.22 | 0.28 |
| 20804 | 0 | 139736 | EVHHQKLVFFAEDVGSN<br>KGAIIGLMVGGVVIA | 3.39 | 3.75 | 0.78 | 1.20 | 0.22 | 0.28 |
| 20805 | 0 | 157224 | EVHHQKLVFFAEDVGSN<br>KGAIIGLMVGGVVIA | 3.39 | 0.01 | 0.78 | 0.44 | 1.41 | 1.28 |
| 20806 | 0 | 157224 | EVHHQKLVFFAEDVGSN<br>KGAIIGLMVGGVVIA | 3.39 | 0.01 | 0.78 | 3.70 | 0.22 | 1.28 |
| 20807 | 0 | 14717  | EVHLPPLHRSAT                         | 2.46 | 0.01 | 0.90 | 0.68 | 0.22 | 1.39 |
| 20808 | 0 | 14721  | EVIAPAVQTNWQKL                       | 2.59 | 0.01 | 2.41 | 0.44 | 0.85 | 0.28 |
| 20809 | 0 | 190744 | EVIDTMKSMQRDEEIFF<br>RAL             | 2.92 | 0.01 | 3.50 | 2.13 | 0.22 | 0.28 |
| 20810 | 0 | 115736 | EVIESPPEIN                           | 2.35 | 0.01 | 1.60 | 0.44 | 1.23 | 0.85 |
| 20811 | 0 | 115736 | EVIESPPEIN                           | 2.35 | 0.01 | 1.60 | 0.44 | 1.23 | 0.85 |
| 20812 | 0 | 115241 | EVIESPPEINTVQVTSTA<br>V              | 2.94 | 0.01 | 1.60 | 0.44 | 1.23 | 1.28 |
| 20813 | 0 | 14730  | EVILKNAIVYNSMYENFS<br>T              | 2.90 | 0.01 | 3.03 | 0.68 | 0.22 | 1.57 |
| 20814 | 0 | 14730  | EVILKNAIVYNSMYENFS<br>T              | 2.90 | 0.01 | 3.03 | 3.33 | 0.22 | 1.57 |
| 20815 | 0 | 14730  | EVILKNAIVYNSMYENFS<br>T              | 2.90 | 0.01 | 2.08 | 0.44 | 0.22 | 1.57 |
| 20816 | 0 | 14730  | EVILKNAIVYNSMYENFS<br>T              | 2.90 | 0.01 | 2.08 | 2.49 | 0.22 | 1.57 |
| 20817 | 0 | 14730  | EVILKNAIVYNSMYENFS<br>T              | 2.90 | 0.01 | 2.08 | 2.25 | 0.22 | 1.57 |
| 20818 | 0 | 14730  | EVILKNAIVYNSMYENFS<br>T              | 2.90 | 0.01 | 3.16 | 0.44 | 1.93 | 1.57 |
| 20819 | 0 | 14730  | EVILKNAIVYNSMYENFS<br>T              | 2.90 | 0.01 | 2.08 | 0.44 | 0.22 | 1.57 |
| 20820 | 0 | 14730  | EVILKNAIVYNSMYENFS<br>T              | 2.90 | 0.01 | 2.08 | 2.25 | 0.22 | 1.57 |
| 20821 | 0 | 14730  | EVILKNAIVYNSMYENFS<br>T              | 2.90 | 0.01 | 2.08 | 0.68 | 0.22 | 1.57 |
| 20822 | 0 | 14730  | EVILKNAIVYNSMYENFS<br>T              | 2.90 | 0.01 | 2.08 | 0.68 | 0.22 | 1.57 |
| 20823 | 0 | 14730  | EVILKNAIVYNSMYENFS<br>T              | 2.90 | 0.01 | 2.08 | 2.25 | 0.22 | 1.57 |
| 20824 | 0 | 14730  | EVILKNAIVYNSMYENFS<br>T              | 2.90 | 0.01 | 2.08 | 0.68 | 0.22 | 1.57 |
| 20825 | 0 | 14730  | EVILKNAIVYNSMYENFS<br>T              | 2.90 | 0.01 | 2.08 | 2.25 | 0.22 | 1.57 |
| 20826 | 0 | 152525 | EVINDRYDML                           | 2.29 | 0.01 | 2.18 | 2.16 | 0.22 | 0.28 |

|       |   |        |                                                                                                                                                                                                |      |      |      |      |      |      |
|-------|---|--------|------------------------------------------------------------------------------------------------------------------------------------------------------------------------------------------------|------|------|------|------|------|------|
| 20827 | 0 | 81878  | EVKALTTTTLT                                                                                                                                                                                    | 2.36 | 0.01 | 3.06 | 0.44 | 0.85 | 0.28 |
| 20828 | 0 | 112965 | EVKATPAGEL                                                                                                                                                                                     | 2.32 | 0.01 | 3.00 | 2.79 | 0.22 | 0.28 |
| 20829 | 0 | 112965 | EVKATPAGEL                                                                                                                                                                                     | 2.32 | 0.01 | 3.00 | 2.79 | 0.22 | 0.28 |
| 20830 | 0 | 14741  | EVKDTNIYGVFL                                                                                                                                                                                   | 2.43 | 0.01 | 3.45 | 1.12 | 0.22 | 0.85 |
| 20831 | 0 | 288182 | EVKKAAPAAKTA                                                                                                                                                                                   | 2.73 | 0.01 | 1.61 | 0.44 | 0.85 | 1.28 |
| 20832 | 0 | 14749  | EVKKKSDS                                                                                                                                                                                       | 2.14 | 0.01 | 3.57 | 0.68 | 0.22 | 0.28 |
| 20833 | 0 | 14749  | EVKKKSDS                                                                                                                                                                                       | 2.14 | 0.01 | 3.57 | 0.68 | 0.22 | 1.34 |
| 20834 | 0 | 14749  | EVKKKSDS                                                                                                                                                                                       | 2.14 | 0.01 | 3.57 | 0.68 | 0.22 | 0.28 |
| 20835 | 0 | 100024 | EVKMDAEFRH                                                                                                                                                                                     | 2.30 | 0.01 | 0.78 | 0.44 | 1.93 | 0.28 |
| 20836 | 0 | 114331 | EVKPASFFKNPHNDM                                                                                                                                                                                | 2.65 | 0.01 | 3.17 | 0.44 | 1.41 | 1.57 |
| 20837 | 0 | 14751  | EVKPGTPAQEIEM                                                                                                                                                                                  | 2.60 | 0.01 | 2.56 | 1.12 | 0.22 | 0.28 |
| 20838 | 0 | 14751  | EVKPGTPAQEIEM                                                                                                                                                                                  | 2.60 | 0.01 | 2.56 | 0.44 | 0.85 | 0.28 |
| 20839 | 0 | 14751  | EVKPGTPAQEIEM                                                                                                                                                                                  | 2.60 | 0.01 | 3.16 | 2.69 | 0.22 | 0.28 |
| 20840 | 0 | 14752  | EVKQENRLLNESESSQ<br>GLLGYYFSDLNFQAPMV<br>VTSSTTGDLSIPSELENI<br>PSENQYFQSAIWSGFIK<br>VKKSDEYTFATSADNHV<br>TMWVDDQEVINKASNS<br>NKIRLEKGRLYQIKIQYQ<br>RENPTKGLDFKLYWTD<br>SQNKKEVISSDNLQLPEL<br>K | 5.03 | 0.01 | 2.18 | 0.68 | 0.22 | 1.34 |
| 20841 | 0 | 14752  | EVKQENRLLNESESSQ<br>GLLGYYFSDLNFQAPMV<br>VTSSTTGDLSIPSELENI<br>PSENQYFQSAIWSGFIK<br>VKKSDEYTFATSADNHV<br>TMWVDDQEVINKASNS<br>NKIRLEKGRLYQIKIQYQ<br>RENPTKGLDFKLYWTD<br>SQNKKEVISSDNLQLPEL<br>K | 5.03 | 0.01 | 2.18 | 0.68 | 0.22 | 1.75 |
| 20842 | 0 | 14752  | EVKQENRLLNESESSQ<br>GLLGYYFSDLNFQAPMV<br>VTSSTTGDLSIPSELENI<br>PSENQYFQSAIWSGFIK<br>VKKSDEYTFATSADNHV<br>TMWVDDQEVINKASNS<br>NKIRLEKGRLYQIKIQYQ<br>RENPTKGLDFKLYWTD<br>SQNKKEVISSDNLQLPEL<br>K | 5.03 | 0.01 | 2.18 | 0.68 | 0.22 | 0.28 |

|       |   |       |                    |      |      |      |      |      |      |
|-------|---|-------|--------------------|------|------|------|------|------|------|
|       |   |       | EVKQENRLLNESESSQ   |      |      |      |      |      |      |
|       |   |       | GLLGYYFSDLNFQAPMV  |      |      |      |      |      |      |
|       |   |       | VTSTTGDLSPSSELENI  |      |      |      |      |      |      |
|       |   |       | PSENQYFQSAIWSGFIK  |      |      |      |      |      |      |
|       |   |       | VKKSDEYTFATSADNHV  |      |      |      |      |      |      |
|       |   |       | TMWVDDQEVINKASNS   |      |      |      |      |      |      |
|       |   |       | NKIRLEKGRLYQIKIQYQ |      |      |      |      |      |      |
| 20843 | 0 | 14753 | RENPTKGLDFKLYWTD   | 5.53 | 0.01 | 3.89 | 2.16 | 0.22 | 0.28 |
|       |   |       | SQNKKEVISSDNLQLPEL |      |      |      |      |      |      |
|       |   |       | KQKSSNSRKKRSTSAGP  |      |      |      |      |      |      |
|       |   |       | TVPDRDNDGIPDSLEVE  |      |      |      |      |      |      |
|       |   |       | GYTVDVKNKRTFLSPWI  |      |      |      |      |      |      |
|       |   |       | SNIHEKKGLTKYKSPEK  |      |      |      |      |      |      |
|       |   |       | WSTASDPYSDFEKTGR   |      |      |      |      |      |      |
|       |   |       | IDKNVSPEARHPLVAA   |      |      |      |      |      |      |

|       |   |       |                    |      |      |      |      |      |      |
|-------|---|-------|--------------------|------|------|------|------|------|------|
|       |   |       | EVKQENRLLNESESSQ   |      |      |      |      |      |      |
|       |   |       | GLLGYYFSDLNFQAPMV  |      |      |      |      |      |      |
|       |   |       | VTSTTGDLSPSSELENI  |      |      |      |      |      |      |
|       |   |       | PSENQYFQSAIWSGFIK  |      |      |      |      |      |      |
|       |   |       | VKKSDEYTFATSADNHV  |      |      |      |      |      |      |
|       |   |       | TMWVDDQEVINKASNS   |      |      |      |      |      |      |
|       |   |       | NKIRLEKGRLYQIKIQYQ |      |      |      |      |      |      |
| 20844 | 0 | 14753 | RENPTKGLDFKLYWTD   | 5.53 | 0.01 | 3.89 | 2.16 | 2.25 | 1.75 |
|       |   |       | SQNKKEVISSDNLQLPEL |      |      |      |      |      |      |
|       |   |       | KQKSSNSRKKRSTSAGP  |      |      |      |      |      |      |
|       |   |       | TVPDRDNDGIPDSLEVE  |      |      |      |      |      |      |
|       |   |       | GYTVDVKNKRTFLSPWI  |      |      |      |      |      |      |
|       |   |       | SNIHEKKGLTKYKSPEK  |      |      |      |      |      |      |
|       |   |       | WSTASDPYSDFEKTGR   |      |      |      |      |      |      |
|       |   |       | IDKNVSPEARHPLVAA   |      |      |      |      |      |      |

|       |   |        |                     |      |      |      |      |      |      |
|-------|---|--------|---------------------|------|------|------|------|------|------|
|       |   |        | EVKQENRLLNESESSQ    |      |      |      |      |      |      |
|       |   |        | GLLGYYFSDLNFQAPMV   |      |      |      |      |      |      |
|       |   |        | VTSTTGDLSSIPSELENI  |      |      |      |      |      |      |
|       |   |        | PSENQYFQSAIWSGFIK   |      |      |      |      |      |      |
|       |   |        | VKKSDEYTFATSADNHV   |      |      |      |      |      |      |
|       |   |        | TMWVDDQEVINKASNS    |      |      |      |      |      |      |
|       |   |        | NKIRLEKGRLYQIKIQYQ  |      |      |      |      |      |      |
| 20845 | 0 | 14753  | RENPTKGLDFKLYWTD    | 5.53 | 0.01 | 2.18 | 2.61 | 0.22 | 0.28 |
|       |   |        | SQNKKEVISSDNLQLPEL  |      |      |      |      |      |      |
|       |   |        | KQKSSNSRKKRSTSAGP   |      |      |      |      |      |      |
|       |   |        | TVPDRDNDGIPDSLEVE   |      |      |      |      |      |      |
|       |   |        | GYTVDVKNKRTFLSPWI   |      |      |      |      |      |      |
|       |   |        | SNIHEKKGLTKYKSSPEK  |      |      |      |      |      |      |
|       |   |        | WSTASDPYSDFEKVTGR   |      |      |      |      |      |      |
|       |   |        | IDKNVSPEARHPLVAA    |      |      |      |      |      |      |
| 20846 | 0 | 132804 | EVLGEMLAATNCTKD     | 2.66 | 0.01 | 3.16 | 3.16 | 0.22 | 0.28 |
| 20847 | 0 | 489533 | EVLPPPRKKKGLFSQ     | 2.65 | 0.01 | 3.17 | 0.44 | 0.85 | 2.75 |
| 20848 | 0 | 489533 | EVLPPPRKKKGLFSQ     | 2.65 | 0.01 | 3.17 | 0.44 | 0.85 | 0.85 |
| 20849 | 0 | 489533 | EVLPPPRKKKGLFSQ     | 2.65 | 0.01 | 3.17 | 0.44 | 0.85 | 0.85 |
| 20850 | 0 | 489533 | EVLPPPRKKKGLFSQ     | 2.65 | 0.01 | 3.17 | 0.44 | 0.85 | 0.28 |
| 20851 | 0 | 288261 | EVLQYGRLLDDFIVV     | 2.65 | 0.01 | 1.61 | 0.44 | 0.85 | 1.28 |
| 20852 | 0 | 105764 | EVLSHAGAH           | 2.23 | 0.01 | 0.90 | 3.01 | 0.22 | 0.28 |
| 20853 | 0 | 97293  | EVL TGNLQTLKIRVHEGY | 3.43 | 0.01 | 3.09 | 0.44 | 0.85 | 0.28 |
|       |   |        | EEFTMVGRRATAILR     |      |      |      |      |      |      |
| 20854 | 0 | 107831 | EVL TNRPIDKTKAIS    | 2.64 | 0.01 | 0.90 | 0.44 | 1.13 | 1.39 |
| 20855 | 0 | 14772  | EVL TRRQSQDPKYVTQR  | 2.89 | 0.01 | 2.24 | 2.42 | 0.22 | 0.28 |
|       |   |        | IS                  |      |      |      |      |      |      |
| 20856 | 0 | 14772  | EVL TRRQSQDPKYVTQR  | 2.89 | 0.01 | 2.24 | 2.42 | 0.22 | 1.34 |
|       |   |        | IS                  |      |      |      |      |      |      |
| 20857 | 0 | 14774  | EVLYEAFDEMEECASKA   | 2.94 | 0.01 | 1.96 | 0.44 | 0.85 | 0.28 |
|       |   |        | ALI                 |      |      |      |      |      |      |
| 20858 | 0 | 14777  | EVLYHKPLAGVYRALKK   | 2.96 | 0.01 | 0.90 | 2.63 | 0.22 | 1.48 |
|       |   |        | QLE                 |      |      |      |      |      |      |
| 20859 | 0 | 14778  | EVLYHMPLAGVYRALKK   | 2.94 | 0.01 | 0.90 | 2.63 | 0.22 | 1.48 |
|       |   |        | QLE                 |      |      |      |      |      |      |
| 20860 | 0 | 177050 | EVLYHVPLAGVYRSLKK   | 2.94 | 0.01 | 0.90 | 2.74 | 0.22 | 1.48 |
|       |   |        | QLE                 |      |      |      |      |      |      |
| 20861 | 0 | 177050 | EVLYHVPLAGVYRSLKK   | 2.94 | 0.01 | 0.90 | 2.74 | 0.22 | 0.85 |
|       |   |        | QLE                 |      |      |      |      |      |      |
| 20862 | 0 | 177050 | EVLYHVPLAGVYRSLKK   | 2.94 | 0.01 | 0.90 | 2.74 | 0.22 | 1.75 |
|       |   |        | QLE                 |      |      |      |      |      |      |
| 20863 | 0 | 177050 | EVLYHVPLAGVYRSLKK   | 2.94 | 0.01 | 0.90 | 2.63 | 0.22 | 1.48 |
|       |   |        | QLE                 |      |      |      |      |      |      |

|       |   |        |                          |      |      |      |      |      |      |
|-------|---|--------|--------------------------|------|------|------|------|------|------|
| 20864 | 0 | 14808  | EVLYLKPLAGVYRSLKKQ<br>LE | 2.96 | 4.45 | 1.66 | 0.68 | 0.22 | 0.85 |
| 20865 | 0 | 14809  | EVLYLKPLAGVYRSLKKQ<br>LE | 2.96 | 4.45 | 1.66 | 0.68 | 0.22 | 0.85 |
| 20866 | 0 | 14808  | EVLYLKPLAGVYRSLKKQ<br>LE | 2.96 | 4.45 | 1.66 | 0.68 | 0.22 | 1.34 |
| 20867 | 0 | 14809  | EVLYLKPLAGVYRSLKKQ<br>LE | 2.96 | 4.45 | 1.66 | 0.68 | 0.22 | 1.34 |
| 20868 | 0 | 14808  | EVLYLKPLAGVYRSLKKQ<br>LE | 2.96 | 4.45 | 1.66 | 0.68 | 0.22 | 1.27 |
| 20869 | 0 | 14809  | EVLYLKPLAGVYRSLKKQ<br>LE | 2.96 | 4.45 | 1.66 | 0.68 | 0.22 | 1.27 |
| 20870 | 0 | 14810  | EVLYLKPLAGVYRSLKKQ<br>LE | 2.96 | 0.01 | 1.66 | 0.68 | 0.22 | 1.27 |
| 20871 | 0 | 14819  | EVLYLLDLAGVYRSLKKQ<br>LE | 2.96 | 0.01 | 0.90 | 2.63 | 0.22 | 1.48 |
| 20872 | 0 | 14819  | EVLYLLDLAGVYRSLKKQ<br>LE | 2.96 | 0.01 | 0.90 | 2.63 | 2.25 | 1.75 |
| 20873 | 0 | 14822  | EVLYREFDE                | 2.24 | 0.01 | 2.41 | 0.44 | 0.85 | 0.28 |
| 20874 | 0 | 450575 | EVMGRLA                  | 1.99 | 0.01 | 0.90 | 0.44 | 1.23 | 1.39 |
| 20875 | 0 | 14826  | EVMKLT                   | 1.88 | 0.01 | 1.86 | 0.44 | 1.23 | 0.28 |
| 20876 | 0 | 79815  | EVMLRAVFMQQR             | 2.48 | 0.01 | 2.14 | 3.26 | 0.22 | 0.28 |
| 20877 | 0 | 174482 | EVMNNWTLASIM             | 2.44 | 0.01 | 0.90 | 1.15 | 1.41 | 1.39 |
| 20878 | 0 | 97294  | EVNDVRKFF                | 2.21 | 0.01 | 3.13 | 1.12 | 0.22 | 0.28 |
| 20879 | 0 | 119851 | EVNQIVETNVRLRQQW         | 2.76 | 0.01 | 2.26 | 1.81 | 0.22 | 1.57 |
| 20880 | 0 | 119851 | EVNQIVETNVRLRQQW         | 2.76 | 0.01 | 2.26 | 1.81 | 0.22 | 1.57 |
| 20881 | 0 | 119851 | EVNQIVETNVRLRQQW         | 2.76 | 0.01 | 2.26 | 1.15 | 0.22 | 1.57 |
| 20882 | 0 | 119851 | EVNQIVETNVRLRQQW         | 2.76 | 0.01 | 2.26 | 1.12 | 0.22 | 1.57 |
| 20883 | 0 | 119851 | EVNQIVETNVRLRQQW         | 2.76 | 0.01 | 2.26 | 2.43 | 0.22 | 1.57 |
| 20884 | 0 | 119851 | EVNQIVETNVRLRQQW         | 2.76 | 0.01 | 2.26 | 2.43 | 0.22 | 1.57 |
| 20885 | 0 | 119851 | EVNQIVETNVRLRQQW         | 2.76 | 0.01 | 2.26 | 2.43 | 0.22 | 1.57 |
| 20886 | 0 | 119851 | EVNQIVETNVRLRQQW         | 2.76 | 0.01 | 2.26 | 2.43 | 0.22 | 1.57 |
| 20887 | 0 | 119851 | EVNQIVETNVRLRQQW         | 2.76 | 0.01 | 2.26 | 2.43 | 0.22 | 1.57 |
| 20888 | 0 | 119852 | EVNQIVTTNVRLKQQW         | 2.73 | 0.01 | 0.78 | 1.15 | 0.22 | 1.57 |
| 20889 | 0 | 119852 | EVNQIVTTNVRLKQQW         | 2.73 | 0.01 | 0.78 | 0.44 | 1.13 | 1.57 |
| 20890 | 0 | 14836  | EVP                      | 1.37 | 0.01 | 3.24 | 1.12 | 0.22 | 0.28 |

|       |   |        |                     |      |      |      |      |      |      |
|-------|---|--------|---------------------|------|------|------|------|------|------|
|       |   |        | EVPDDGQLPSLEGIPKV   |      |      |      |      |      |      |
| 20891 | 0 | 131875 | VFLIDSFVKIKVRQAWR   | 3.71 | 0.01 | 0.78 | 0.44 | 1.13 | 0.85 |
|       |   |        | EAQAEGST            |      |      |      |      |      |      |
| 20892 | 0 | 122760 | EVPPRLMHPQPEDPDT    | 2.92 | 0.01 | 1.60 | 2.04 | 0.22 | 1.75 |
|       |   |        | AKES                |      |      |      |      |      |      |
| 20893 | 0 | 14841  | EVPGSQ              | 1.88 | 0.01 | 3.24 | 1.12 | 0.22 | 0.28 |
| 20894 | 0 | 170978 | EVPKCFKEHSSLAFW     | 2.66 | 0.01 | 0.78 | 0.44 | 1.13 | 0.28 |
| 20895 | 0 | 106407 | EVPKHCGIVD          | 2.29 | 0.01 | 3.08 | 0.44 | 1.23 | 0.85 |
| 20896 | 0 | 106408 | EVPPKKCDIKTTL       | 2.46 | 0.01 | 3.08 | 0.44 | 1.23 | 0.85 |
| 20897 | 0 | 14844  | EVPLGVAADANK        | 2.47 | 0.01 | 3.61 | 1.20 | 0.22 | 0.28 |
| 20898 | 0 | 14844  | EVPLGVAADANK        | 2.47 | 0.01 | 3.61 | 1.20 | 0.22 | 1.27 |
| 20899 | 0 | 242466 | EVPPKLSSEEIAANI     | 2.67 | 0.01 | 3.32 | 1.20 | 0.22 | 0.85 |
| 20900 | 0 | 242466 | EVPPKLSSEEIAANI     | 2.67 | 0.01 | 3.32 | 1.20 | 0.22 | 0.85 |
| 20901 | 0 | 242466 | EVPPKLSSEEIAANI     | 2.67 | 0.01 | 3.33 | 1.20 | 0.22 | 0.85 |
| 20902 | 0 | 14849  | EVPTTKPTEPTINT      | 2.73 | 0.01 | 2.67 | 1.12 | 0.22 | 0.28 |
| 20903 | 0 | 14849  | EVPTTKPTEPTINT      | 2.73 | 0.01 | 2.67 | 1.12 | 0.22 | 0.28 |
| 20904 | 0 | 14849  | EVPTTKPTEPTINT      | 2.73 | 0.01 | 2.67 | 1.12 | 0.22 | 0.28 |
| 20905 | 0 | 14849  | EVPTTKPTEPTINT      | 2.73 | 0.01 | 2.67 | 1.12 | 0.22 | 0.28 |
| 20906 | 0 | 14849  | EVPTTKPTEPTINT      | 2.73 | 0.01 | 2.67 | 1.12 | 0.22 | 0.28 |
| 20907 | 0 | 14849  | EVPTTKPTEPTINT      | 2.73 | 0.01 | 2.67 | 1.12 | 0.22 | 0.28 |
| 20908 | 0 | 118341 | EVPTVSPISRFTYHM     | 2.66 | 0.01 | 3.78 | 0.44 | 1.13 | 0.85 |
| 20909 | 0 | 118342 | EVPTVSPNSRFTYHM     | 2.66 | 0.01 | 3.78 | 0.44 | 1.13 | 0.85 |
| 20910 | 0 | 229201 | EVQNAYVKYQRVQR      | 2.65 | 0.01 | 2.70 | 0.68 | 0.22 | 0.28 |
| 20911 | 0 | 14853  | EVQTAVRIVLPAELAKHA  | 2.95 | 0.01 | 3.78 | 2.49 | 0.85 | 0.28 |
|       |   |        | MA                  |      |      |      |      |      |      |
| 20912 | 0 | 123157 | EVRLVPGR            | 2.14 | 0.01 | 0.78 | 0.44 | 1.13 | 0.28 |
| 20913 | 0 | 14865  | EVRRVGDFHYITGA      | 2.58 | 0.01 | 2.59 | 0.44 | 0.85 | 0.28 |
| 20914 | 0 | 14865  | EVRRVGDFHYITGA      | 2.58 | 0.01 | 2.59 | 0.44 | 0.85 | 0.28 |
| 20915 | 0 | 14869  | EVSEKII             | 2.02 | 0.01 | 2.97 | 1.20 | 0.22 | 0.28 |
| 20916 | 0 | 14869  | EVSEKII             | 2.02 | 0.01 | 2.97 | 1.12 | 0.22 | 1.48 |
|       |   |        | EVSFEELRTFGGHDAKFI  |      |      |      |      |      |      |
|       |   |        | DSLQENEFRLYYNKFKD   |      |      |      |      |      |      |
|       |   |        | IASTLNKAKSIVGTTASL  |      |      |      |      |      |      |
|       |   |        | QYMKNVFKEKYLLSED    |      |      |      |      |      |      |
|       |   |        | SGKFSVDKLFKDKLYKM   |      |      |      |      |      |      |
| 20917 | 0 | 14870  | LTEIYTEDNFVKFFKVLN  | 5.32 | 0.01 | 2.08 | 3.23 | 0.22 | 0.28 |
|       |   |        | RKTYLNFDKAVFKINIVP  |      |      |      |      |      |      |
|       |   |        | KVNYTIYDGFNLRNTNL   |      |      |      |      |      |      |
|       |   |        | AANFNGQNTNINNMNF    |      |      |      |      |      |      |
|       |   |        | TKLKNFTGLFEFYKLLCV  |      |      |      |      |      |      |
|       |   |        | RGIITSKTKSLDKGYNKAL |      |      |      |      |      |      |
|       |   |        | NDLCIKVNNWDLFFS     |      |      |      |      |      |      |



|       |   |        |                                                                                                                                                                                                                                                               |      |      |      |      |      |      |
|-------|---|--------|---------------------------------------------------------------------------------------------------------------------------------------------------------------------------------------------------------------------------------------------------------------|------|------|------|------|------|------|
| 20918 | 0 | 14870  | EVSFEELRTFGGHDAKFI<br>DSLQENEFRLYYYNKFKD<br>IASTLNKAKSIVGTTASL<br>QYMKNVFKEKYLLSED<br>SGKFSVDKLFKDKLYKM<br>LTEIYTEDNFVKFFKVLN<br>RKTYLNFDKAVFKINIVP<br>KVNYTIYDGFNLRNTNL<br>AANFNGQNTTEINNMNF<br>TKLKNFTGLFEFYKLLCV<br>RGIITSKTKSLDKGYNKAL<br>NDLCIKVNNWDLFFS | 5.32 | 0.01 | 2.08 | 3.23 | 0.22 | 0.85 |
| 20919 | 0 | 14870  | EVSFEELRTFGGHDAKFI<br>DSLQENEFRLYYYNKFKD<br>IASTLNKAKSIVGTTASL<br>QYMKNVFKEKYLLSED<br>SGKFSVDKLFKDKLYKM<br>LTEIYTEDNFVKFFKVLN<br>RKTYLNFDKAVFKINIVP<br>KVNYTIYDGFNLRNTNL<br>AANFNGQNTTEINNMNF<br>TKLKNFTGLFEFYKLLCV<br>RGIITSKTKSLDKGYNKAL<br>NDLCIKVNNWDLFFS | 5.32 | 0.01 | 2.08 | 2.02 | 0.22 | 0.85 |
| 20920 | 0 | 124086 | EVSIRDHRTDPSL                                                                                                                                                                                                                                                 | 2.54 | 0.01 | 2.73 | 3.65 | 0.22 | 0.28 |
| 20921 | 0 | 124086 | EVSIRDHRTDPSL                                                                                                                                                                                                                                                 | 2.54 | 0.01 | 2.73 | 3.65 | 0.22 | 0.28 |
| 20922 | 0 | 170981 | EVSLETRAQAMEKDQ                                                                                                                                                                                                                                               | 2.67 | 0.01 | 0.78 | 0.44 | 1.13 | 0.28 |
| 20923 | 0 | 140461 | EVSLHDMNLATH                                                                                                                                                                                                                                                  | 2.45 | 0.01 | 0.90 | 0.68 | 0.22 | 0.28 |
| 20924 | 0 | 140461 | EVSLHDMNLATH                                                                                                                                                                                                                                                  | 2.45 | 0.01 | 0.90 | 0.68 | 0.22 | 1.34 |
| 20925 | 0 | 288498 | EVS RDPTDEHSDFLT                                                                                                                                                                                                                                              | 2.69 | 0.01 | 1.61 | 0.44 | 0.85 | 1.28 |
| 20926 | 0 | 14876  | EVSVA AEILR                                                                                                                                                                                                                                                   | 2.33 | 0.01 | 1.96 | 0.44 | 0.85 | 1.34 |
| 20927 | 0 | 170984 | EVTCPICLDPFVEPV                                                                                                                                                                                                                                               | 2.71 | 0.01 | 0.78 | 0.44 | 1.41 | 0.28 |
| 20928 | 0 | 170984 | EVTCPICLDPFVEPV                                                                                                                                                                                                                                               | 2.71 | 0.01 | 0.78 | 0.44 | 1.13 | 0.28 |
| 20929 | 0 | 170984 | EVTCPICLDPFVEPV                                                                                                                                                                                                                                               | 2.71 | 0.01 | 0.78 | 2.79 | 1.13 | 1.28 |
| 20930 | 0 | 170984 | EVTCPICLDPFVEPV                                                                                                                                                                                                                                               | 2.71 | 0.01 | 0.78 | 1.81 | 1.41 | 1.28 |
| 20931 | 0 | 238361 | EVTCPICLDPFVEPVSIE                                                                                                                                                                                                                                            | 2.87 | 0.01 | 0.78 | 0.44 | 1.13 | 0.28 |
| 20932 | 0 | 238361 | EVTCPICLDPFVEPVSIE                                                                                                                                                                                                                                            | 2.87 | 0.01 | 0.78 | 0.44 | 1.13 | 0.28 |
| 20933 | 0 | 110840 | EVTIGDIEEPPILEVVPET<br>H                                                                                                                                                                                                                                      | 2.98 | 0.01 | 3.55 | 2.22 | 2.25 | 1.75 |
| 20934 | 0 | 110840 | EVTIGDIEEPPILEVVPET<br>H                                                                                                                                                                                                                                      | 2.98 | 0.01 | 3.55 | 2.22 | 0.22 | 0.28 |

|       |   |        |                               |      |      |      |      |      |      |
|-------|---|--------|-------------------------------|------|------|------|------|------|------|
| 20935 | 0 | 110840 | EVTIGDIEEPPILEVVPET<br>H      | 2.98 | 0.01 | 3.55 | 2.22 | 0.22 | 0.28 |
| 20936 | 0 | 110840 | EVTIGDIEEPPILEVVPET<br>H      | 2.98 | 0.01 | 3.55 | 2.22 | 0.22 | 0.28 |
| 20937 | 0 | 110841 | EVTPAIKSEVSL                  | 2.48 | 0.01 | 3.15 | 3.53 | 0.22 | 0.28 |
| 20938 | 0 | 14887  | EVTQHGSFSYVTGL                | 2.61 | 0.01 | 2.69 | 0.44 | 0.85 | 0.28 |
| 20939 | 0 | 14887  | EVTQHGSFSYVTGL                | 2.61 | 0.01 | 2.69 | 0.44 | 0.85 | 0.28 |
| 20940 | 0 | 14888  | EVTQHGSYHYITGL                | 2.61 | 0.01 | 2.69 | 0.44 | 0.85 | 0.28 |
| 20941 | 0 | 14888  | EVTQHGSYHYITGL                | 2.61 | 0.01 | 2.69 | 0.44 | 0.85 | 0.28 |
| 20942 | 0 | 14888  | EVTQHGSYHYITGL                | 2.61 | 0.01 | 2.69 | 0.44 | 0.85 | 0.28 |
| 20943 | 0 | 14889  | EVTRVGDFHYVTGM                | 2.61 | 0.01 | 1.96 | 0.44 | 1.41 | 0.28 |
| 20944 | 0 | 14889  | EVTRVGDFHYVTGM                | 2.61 | 0.01 | 1.96 | 0.44 | 0.85 | 0.28 |
| 20945 | 0 | 14889  | EVTRVGDFHYVTGM                | 2.61 | 0.01 | 1.96 | 0.44 | 0.85 | 0.28 |
| 20946 | 0 | 14889  | EVTRVGDFHYVTGM                | 2.61 | 0.01 | 1.96 | 0.44 | 0.85 | 0.28 |
| 20947 | 0 | 138844 | EVVETDGKKKECSS                | 2.61 | 0.01 | 3.33 | 0.44 | 1.74 | 0.28 |
| 20948 | 0 | 138844 | EVVETDGKKKECSS                | 2.61 | 0.01 | 3.33 | 0.44 | 0.85 | 0.28 |
| 20949 | 0 | 168514 | EVVKANGGYLAAGKL               | 2.70 | 0.01 | 3.36 | 0.44 | 1.23 | 0.85 |
| 20950 | 0 | 168514 | EVVKANGGYLAAGKL               | 2.70 | 0.01 | 3.36 | 0.44 | 1.23 | 0.85 |
| 20951 | 0 | 168514 | EVVKANGGYLAAGKL               | 2.70 | 0.01 | 3.36 | 0.44 | 1.23 | 0.85 |
| 20952 | 0 | 14899  | EVVLQNRRLDLL                  | 2.54 | 0.01 | 4.15 | 1.20 | 0.22 | 0.85 |
| 20953 | 0 | 14899  | EVVLQNRRLDLL                  | 2.54 | 0.01 | 4.15 | 1.20 | 0.22 | 0.85 |
| 20954 | 0 | 14899  | EVVLQNRRLDLL                  | 2.54 | 0.01 | 4.15 | 1.20 | 0.22 | 0.85 |
| 20955 | 0 | 14899  | EVVLQNRRLDLL                  | 2.54 | 0.01 | 4.15 | 1.20 | 0.22 | 0.85 |
| 20956 | 0 | 14899  | EVVLQNRRLDLL                  | 2.54 | 0.01 | 4.15 | 1.20 | 0.22 | 0.85 |
| 20957 | 0 | 14899  | EVVLQNRRLDLL                  | 2.54 | 0.01 | 4.15 | 1.20 | 0.22 | 0.85 |
| 20958 | 0 | 14899  | EVVLQNRRLDLL                  | 2.54 | 0.01 | 3.97 | 1.20 | 0.22 | 0.85 |
| 20959 | 0 | 14899  | EVVLQNRRLDLL                  | 2.54 | 0.01 | 3.97 | 1.20 | 0.22 | 0.85 |
| 20960 | 0 | 14899  | EVVLQNRRLDLL                  | 2.54 | 0.01 | 3.97 | 1.20 | 0.22 | 0.85 |
| 20961 | 0 | 14899  | EVVLQNRRLDLL                  | 2.54 | 0.01 | 3.97 | 1.20 | 0.22 | 0.85 |
| 20962 | 0 | 14899  | EVVLQNRRLDLL                  | 2.54 | 0.01 | 3.97 | 1.20 | 0.22 | 0.85 |
| 20963 | 0 | 14899  | EVVLQNRRLDLL                  | 2.54 | 0.01 | 3.97 | 1.20 | 0.22 | 0.85 |
| 20964 | 0 | 14899  | EVVLQNRRLDLL                  | 2.54 | 0.01 | 3.97 | 1.20 | 0.22 | 0.85 |
| 20965 | 0 | 14899  | EVVLQNRRLDLL                  | 2.54 | 0.01 | 3.97 | 1.20 | 0.22 | 0.85 |
| 20966 | 0 | 14899  | EVVLQNRRLDLL                  | 2.54 | 0.01 | 3.97 | 1.20 | 0.22 | 0.85 |
| 20967 | 0 | 108357 | EVVPHKKMHKDFLEKIG<br>GL       | 2.90 | 0.01 | 4.93 | 2.16 | 0.22 | 2.49 |
| 20968 | 0 | 136832 | EVVRAEIMRS                    | 2.33 | 0.01 | 0.78 | 1.12 | 0.22 | 0.28 |
| 20969 | 0 | 136832 | EVVRAEIMRS                    | 2.33 | 0.01 | 0.78 | 1.12 | 0.22 | 0.28 |
| 20970 | 0 | 136832 | EVVRAEIMRS                    | 2.33 | 0.01 | 0.78 | 1.12 | 0.22 | 0.28 |
| 20971 | 0 | 130485 | EVVTGSPRGDSQSS                | 2.60 | 0.01 | 0.78 | 0.68 | 0.22 | 0.28 |
| 20972 | 0 | 14903  | EVVTSTWVLVGGVLAAL<br>AAYCLSTG | 3.19 | 0.01 | 1.72 | 0.44 | 1.59 | 0.28 |
| 20973 | 0 | 14905  | EVWREEAYHAADIKD               | 2.67 | 0.01 | 0.90 | 1.12 | 0.22 | 1.57 |
| 20974 | 0 | 14905  | EVWREEAYHAADIKD               | 2.67 | 0.01 | 0.90 | 3.04 | 0.22 | 1.57 |
| 20975 | 0 | 14905  | EVWREEAYHAADIKD               | 2.67 | 0.01 | 0.90 | 0.44 | 1.23 | 1.57 |
| 20976 | 0 | 14906  | EVWREEAYHACDIKD               | 2.66 | 0.01 | 3.41 | 0.44 | 1.23 | 1.57 |
| 20977 | 0 | 14906  | EVWREEAYHACDIKD               | 2.66 | 0.01 | 3.41 | 1.15 | 0.22 | 1.57 |

|       |   |        |                         |      |      |      |      |      |      |
|-------|---|--------|-------------------------|------|------|------|------|------|------|
| 20978 | 0 | 14906  | EVWREEAYHACDIKD         | 2.66 | 0.01 | 3.41 | 1.15 | 0.22 | 1.57 |
| 20979 | 0 | 14907  | EVWVTPVI                | 2.14 | 0.01 | 2.85 | 0.44 | 0.22 | 0.28 |
| 20980 | 0 | 167576 | EVYGPIKRIH              | 2.29 | 0.01 | 0.78 | 0.44 | 1.13 | 0.85 |
| 20981 | 0 | 170985 | EVYQILEKGAAKRTT         | 2.64 | 0.01 | 0.78 | 0.44 | 1.41 | 0.28 |
| 20982 | 0 | 14917  | EVYSYLRYTGTPIDNPN<br>DK | 2.93 | 0.01 | 3.47 | 0.44 | 0.22 | 0.85 |
| 20983 | 0 | 236172 | EWAEDFCTKRKHKLQ         | 2.65 | 0.01 | 1.66 | 0.44 | 0.85 | 1.28 |
| 20984 | 0 | 232784 | EWDGYRFKVKYFVPL         | 2.66 | 0.01 | 2.89 | 1.12 | 0.22 | 1.28 |
| 20985 | 0 | 232784 | EWDGYRFKVKYFVPL         | 2.66 | 0.01 | 2.89 | 1.12 | 0.22 | 1.28 |
| 20986 | 0 | 232784 | EWDGYRFKVKYFVPL         | 2.66 | 0.01 | 2.89 | 1.12 | 0.22 | 1.28 |
| 20987 | 0 | 232784 | EWDGYRFKVKYFVPL         | 2.66 | 0.01 | 2.89 | 1.12 | 0.22 | 1.28 |
| 20988 | 0 | 232784 | EWDGYRFKVKYFVPL         | 2.66 | 0.01 | 2.89 | 1.12 | 0.22 | 1.28 |
| 20989 | 0 | 14928  | EWDLFVERSK              | 2.30 | 0.01 | 3.93 | 1.15 | 0.22 | 2.66 |
| 20990 | 0 | 119573 | EWEDTYGIVL              | 2.30 | 0.01 | 0.78 | 0.44 | 1.13 | 1.27 |
| 20991 | 0 | 119573 | EWEDTYGIVL              | 2.30 | 0.01 | 0.78 | 0.44 | 1.13 | 0.85 |
| 20992 | 0 | 190411 | EWELQKENSkrwnPE         | 2.71 | 0.01 | 3.61 | 2.00 | 1.41 | 0.28 |
| 20993 | 0 | 119574 | EWESNGQP                | 2.13 | 0.01 | 0.78 | 0.44 | 1.93 | 0.28 |
| 20994 | 0 | 119575 | EWESTYSILG              | 2.32 | 0.01 | 2.56 | 0.44 | 1.13 | 1.27 |
| 20995 | 0 | 108937 | EWGSNDG                 | 2.02 | 0.01 | 0.78 | 0.44 | 1.13 | 0.28 |
| 20996 | 0 | 99234  | EWGTPGSHVREETSR         | 2.70 | 0.01 | 2.16 | 0.44 | 1.23 | 1.48 |
| 20997 | 0 | 120516 | EWGWS                   | 1.75 | 0.01 | 1.66 | 1.15 | 0.22 | 0.28 |
| 20998 | 0 | 120516 | EWGWS                   | 1.75 | 0.01 | 1.66 | 1.12 | 0.22 | 0.28 |
| 20999 | 0 | 120516 | EWGWS                   | 1.75 | 0.01 | 1.66 | 2.89 | 0.22 | 0.85 |
| 21000 | 0 | 120516 | EWGWS                   | 1.75 | 0.01 | 1.66 | 2.89 | 0.22 | 0.28 |
| 21001 | 0 | 120516 | EWGWS                   | 1.75 | 0.01 | 1.66 | 2.89 | 0.22 | 0.28 |
| 21002 | 0 | 120516 | EWGWS                   | 1.75 | 0.01 | 1.66 | 2.89 | 0.22 | 1.75 |
| 21003 | 0 | 107354 | EWKGQVNVNPFDY           | 2.51 | 0.01 | 0.78 | 1.12 | 0.22 | 0.85 |
| 21004 | 0 | 107354 | EWKGQVNVNPFDY           | 2.51 | 0.01 | 0.78 | 1.12 | 0.22 | 0.85 |
| 21005 | 0 | 112102 | EWLAHIW                 | 2.02 | 0.01 | 0.78 | 0.44 | 1.13 | 0.28 |
| 21006 | 0 | 151853 | EWLRLPFSSWLVL           | 2.48 | 0.01 | 2.80 | 2.78 | 0.22 | 0.28 |
| 21007 | 0 | 190221 | EWMSHGPRPNN             | 2.36 | 0.01 | 0.90 | 1.15 | 2.25 | 1.75 |
| 21008 | 0 | 190221 | EWMSHGPRPNN             | 2.36 | 0.01 | 0.90 | 1.15 | 0.22 | 0.28 |
| 21009 | 0 | 190221 | EWMSHGPRPNN             | 2.36 | 0.01 | 0.90 | 1.15 | 0.22 | 0.28 |
| 21010 | 0 | 434735 | EWQVAAENSDDTKFK         | 2.65 | 0.01 | 3.89 | 0.68 | 0.22 | 0.28 |
| 21011 | 0 | 434735 | EWQVAAENSDDTKFK         | 2.65 | 0.01 | 3.89 | 0.68 | 0.22 | 1.34 |
| 21012 | 0 | 434735 | EWQVAAENSDDTKFK         | 2.65 | 0.01 | 3.89 | 0.68 | 0.22 | 1.34 |
| 21013 | 0 | 434735 | EWQVAAENSDDTKFK         | 2.65 | 0.01 | 3.89 | 0.68 | 0.22 | 1.34 |
| 21014 | 0 | 434735 | EWQVAAENSDDTKFK         | 2.65 | 0.01 | 3.89 | 0.68 | 0.22 | 1.34 |
| 21015 | 0 | 14949  | EWRRYMSDIHGY            | 2.44 | 0.01 | 0.90 | 0.44 | 1.59 | 0.28 |
| 21016 | 0 | 14949  | EWRRYMSDIHGY            | 2.44 | 0.01 | 0.90 | 0.44 | 1.59 | 0.28 |
| 21017 | 0 | 14949  | EWRRYMSDIHGY            | 2.44 | 0.01 | 0.90 | 0.44 | 1.59 | 0.28 |

|       |   |        |                                    |      |      |      |      |      |      |
|-------|---|--------|------------------------------------|------|------|------|------|------|------|
| 21018 | 0 | 14949  | EWRRYMSDIHGY                       | 2.44 | 0.01 | 0.90 | 0.44 | 1.59 | 0.28 |
| 21019 | 0 | 187057 | EWSGHDVTEIPNKRMF                   | 2.65 | 0.01 | 4.63 | 0.68 | 0.22 | 0.28 |
| 21020 | 0 | 187058 | EWSGHDVTEIPNRRMF                   | 2.66 | 0.01 | 3.81 | 0.68 | 0.22 | 0.85 |
| 21021 | 0 | 187058 | EWSGHDVTEIPNRRMF                   | 2.66 | 0.01 | 3.81 | 0.68 | 0.22 | 0.85 |
| 21022 | 0 | 187058 | EWSGHDVTEIPNRRMF                   | 2.66 | 0.01 | 3.81 | 0.68 | 0.22 | 1.48 |
| 21023 | 0 | 187058 | EWSGHDVTEIPNRRMF                   | 2.66 | 0.01 | 3.81 | 0.68 | 0.22 | 0.28 |
| 21024 | 0 | 187058 | EWSGHDVTEIPNRRMF                   | 2.66 | 0.01 | 3.81 | 0.68 | 0.22 | 0.28 |
| 21025 | 0 | 187058 | EWSGHDVTEIPNRRMF                   | 2.66 | 0.01 | 3.81 | 0.68 | 0.22 | 0.28 |
| 21026 | 0 | 187059 | EWSGHDVTEIPSRRMF                   | 2.69 | 0.01 | 4.63 | 0.68 | 0.22 | 0.28 |
| 21027 | 0 | 182384 | EWSLQYHMGLYH                       | 2.48 | 0.01 | 0.90 | 0.68 | 0.22 | 0.28 |
| 21028 | 0 | 14951  | EWSPCSVTCGK                        | 2.39 | 0.01 | 1.66 | 0.68 | 0.22 | 0.28 |
| 21029 | 0 | 14952  | EWSPCSVTCGKGTRSRK<br>R             | 2.87 | 0.01 | 1.66 | 1.20 | 0.22 | 0.28 |
| 21030 | 0 | 14952  | EWSPCSVTCGKGTRSRK<br>R             | 2.87 | 0.01 | 1.66 | 1.20 | 0.22 | 0.28 |
| 21031 | 0 | 14952  | EWSPCSVTCGKGTRSRK<br>R             | 2.87 | 0.01 | 1.66 | 1.20 | 0.22 | 0.28 |
| 21032 | 0 | 14952  | EWSPCSVTCGKGTRSRK<br>R             | 2.87 | 0.01 | 1.66 | 1.20 | 0.22 | 1.48 |
| 21033 | 0 | 14952  | EWSPCSVTCGKGTRSRK<br>R             | 2.87 | 0.01 | 1.66 | 1.20 | 0.22 | 1.34 |
| 21034 | 0 | 14953  | EWSPCSVTCGNGIQVRI<br>K             | 2.82 | 0.01 | 1.66 | 1.81 | 0.22 | 0.28 |
| 21035 | 0 | 14953  | EWSPCSVTCGNGIQVRI<br>K             | 2.82 | 0.01 | 1.66 | 1.81 | 0.22 | 0.28 |
| 21036 | 0 | 14953  | EWSPCSVTCGNGIQVRI<br>K             | 2.82 | 0.01 | 3.29 | 0.68 | 0.22 | 0.28 |
| 21037 | 0 | 77868  | EWSPTKLLWFHS                       | 2.46 | 0.01 | 0.90 | 1.15 | 0.22 | 1.39 |
| 21038 | 0 | 165595 | EWSRGIF                            | 1.99 | 0.01 | 0.90 | 0.44 | 1.23 | 1.39 |
| 21039 | 0 | 107833 | EWSRKRSIQWEAISCYK<br>KYKGMDEFKNTFK | 3.32 | 0.01 | 0.90 | 1.12 | 0.22 | 0.28 |
| 21040 | 0 | 14958  | EWTPCSVTCGVGVRVR<br>SRVNAAN        | 3.10 | 0.01 | 3.81 | 2.89 | 0.22 | 0.28 |
| 21041 | 0 | 14958  | EWTPCSVTCGVGVRVR<br>SRVNAAN        | 3.10 | 0.01 | 3.81 | 1.15 | 0.22 | 0.28 |
| 21042 | 0 | 14958  | EWTPCSVTCGVGVRVR<br>SRVNAAN        | 3.10 | 0.01 | 3.81 | 1.15 | 0.22 | 1.48 |
| 21043 | 0 | 14958  | EWTPCSVTCGVGVRVR<br>SRVNAAN        | 3.10 | 0.01 | 3.81 | 1.15 | 0.22 | 0.28 |

|       |   |        |                                               |      |      |      |      |      |      |
|-------|---|--------|-----------------------------------------------|------|------|------|------|------|------|
| 21044 | 0 | 14958  | EWTPCSVTCGVGVRVR<br>SRVNAAN                   | 3.10 | 0.01 | 3.81 | 1.81 | 0.22 | 0.28 |
| 21045 | 0 | 14958  | EWTPCSVTCGVGVRVR<br>SRVNAAN                   | 3.10 | 0.01 | 3.81 | 0.68 | 0.22 | 0.28 |
| 21046 | 0 | 14958  | EWTPCSVTCGVGVRVR<br>SRVNAAN                   | 3.10 | 0.01 | 3.81 | 3.06 | 0.22 | 0.28 |
| 21047 | 0 | 136215 | EWVELKNNDNAITSPIA<br>GRTSVLRAIPVEVLANSY<br>DI | 3.56 | 0.01 | 4.33 | 0.44 | 1.23 | 0.28 |
| 21048 | 0 | 132805 | EWVKFAKPCREGEDNS<br>KRNPIAKITSDYQA            | 3.31 | 0.01 | 0.78 | 0.44 | 1.13 | 0.28 |
| 21049 | 0 | 132805 | EWVKFAKPCREGEDNS<br>KRNPIAKITSDYQA            | 3.31 | 0.01 | 0.78 | 0.44 | 1.13 | 0.28 |
| 21050 | 0 | 132805 | EWVKFAKPCREGEDNS<br>KRNPIAKITSDYQA            | 3.31 | 0.01 | 0.78 | 0.44 | 1.41 | 0.28 |
| 21051 | 0 | 132805 | EWVKFAKPCREGEDNS<br>KRNPIAKITSDYQA            | 3.31 | 0.01 | 0.78 | 0.44 | 1.13 | 1.34 |
| 21052 | 0 | 14961  | EWVTGTLQQGIKITIPDE<br>H                       | 2.89 | 0.01 | 4.63 | 3.63 | 0.22 | 0.28 |
| 21053 | 0 | 14974  | EYANFRLTASLV                                  | 2.45 | 0.01 | 0.90 | 0.68 | 0.22 | 0.28 |
| 21054 | 0 | 14979  | EYAV                                          | 1.57 | 0.01 | 1.60 | 0.44 | 1.23 | 1.27 |
| 21055 | 0 | 95371  | EYCSPDHNCQ                                    | 2.29 | 0.01 | 2.60 | 0.44 | 1.23 | 0.85 |
| 21056 | 0 | 95371  | EYCSPDHNCQ                                    | 2.29 | 0.01 | 2.60 | 0.44 | 1.23 | 0.85 |
| 21057 | 0 | 123159 | EYDDPRFLRLDLAQEGL<br>KEESG                    | 3.08 | 0.01 | 0.78 | 0.44 | 1.13 | 0.28 |
| 21058 | 0 | 123159 | EYDDPRFLRLDLAQEGL<br>KEESG                    | 3.08 | 0.01 | 0.78 | 0.44 | 0.85 | 0.28 |
| 21059 | 0 | 14982  | EYDDQYSIP                                     | 2.30 | 0.01 | 3.30 | 1.12 | 0.22 | 0.28 |
| 21060 | 0 | 99235  | EYDEDEYEYDEEDRR                               | 2.73 | 0.01 | 2.16 | 0.44 | 1.23 | 1.48 |
| 21061 | 0 | 99235  | EYDEDEYEYDEEDRR                               | 2.73 | 0.01 | 2.16 | 0.44 | 1.23 | 1.48 |
| 21062 | 0 | 14983  | EYDEQPTYSCQLLFKKDE<br>E                       | 2.88 | 0.01 | 2.08 | 2.02 | 0.22 | 1.57 |
| 21063 | 0 | 81910  | EYDQVVVGAEYD                                  | 2.50 | 0.01 | 2.87 | 0.44 | 0.85 | 0.28 |
| 21064 | 0 | 14991  | EYEDIVLK                                      | 2.13 | 0.01 | 3.18 | 1.12 | 0.22 | 0.28 |
| 21065 | 0 | 14992  | EYEDLLKA                                      | 2.14 | 0.01 | 2.59 | 1.15 | 0.22 | 0.85 |
| 21066 | 0 | 14992  | EYEDLLKA                                      | 2.14 | 0.01 | 2.59 | 1.15 | 0.22 | 0.28 |
| 21067 | 0 | 122761 | EYEENLGDSIVGYKEKSK<br>FQD                     | 3.00 | 0.01 | 0.78 | 1.20 | 0.22 | 2.12 |
| 21068 | 0 | 122761 | EYEENLGDSIVGYKEKSK<br>FQD                     | 3.00 | 0.01 | 0.78 | 1.20 | 0.22 | 1.27 |
| 21069 | 0 | 122761 | EYEENLGDSIVGYKEKSK<br>FQD                     | 3.00 | 0.01 | 0.78 | 0.44 | 1.13 | 0.28 |
| 21070 | 0 | 122761 | EYEENLGDSIVGYKEKSK<br>FQD                     | 3.00 | 0.01 | 0.78 | 1.20 | 0.22 | 0.28 |
| 21071 | 0 | 122761 | EYEENLGDSIVGYKEKSK<br>FQD                     | 3.00 | 0.01 | 0.78 | 1.20 | 0.22 | 1.27 |

|       |   |        |                                                                          |      |      |      |      |      |      |
|-------|---|--------|--------------------------------------------------------------------------|------|------|------|------|------|------|
| 21072 | 0 | 122761 | EYEENLGDSIVGYKEKSK<br>FQD                                                | 3.00 | 0.01 | 0.78 | 1.20 | 0.22 | 1.27 |
| 21073 | 0 | 14994  | EYEKWVKDPYQPTRAVS<br>LD                                                  | 2.88 | 0.01 | 3.85 | 0.68 | 0.22 | 0.85 |
| 21074 | 0 | 14994  | EYEKWVKDPYQPTRAVS<br>LD                                                  | 2.88 | 0.01 | 3.85 | 0.68 | 0.22 | 1.48 |
| 21075 | 0 | 188156 | EYERTTEWLF                                                               | 2.33 | 0.01 | 2.92 | 1.81 | 0.22 | 0.85 |
| 21076 | 0 | 137844 | EYETDPSVTKMV                                                             | 2.48 | 0.01 | 2.21 | 0.44 | 0.85 | 0.28 |
| 21077 | 0 | 121287 | EYFIRK                                                                   | 1.88 | 0.01 | 2.26 | 0.44 | 1.13 | 2.35 |
| 21078 | 0 | 121287 | EYFIRK                                                                   | 1.88 | 0.01 | 2.26 | 2.36 | 0.22 | 2.02 |
| 21079 | 0 | 190412 | EYFPSQMLRTGNNFT                                                          | 2.63 | 0.01 | 3.19 | 2.00 | 1.41 | 0.28 |
| 21080 | 0 | 107355 | EYGFDTSDYYYYY                                                            | 2.55 | 0.01 | 0.78 | 1.12 | 0.22 | 0.85 |
| 21081 | 0 | 115245 | EYGLFQINNK                                                               | 2.28 | 0.01 | 1.60 | 0.44 | 1.23 | 0.85 |
| 21082 | 0 | 121288 | EYILKKPRS                                                                | 2.20 | 0.01 | 2.26 | 2.04 | 0.22 | 0.28 |
| 21083 | 0 | 121288 | EYILKKPRS                                                                | 2.20 | 0.01 | 2.26 | 2.04 | 0.22 | 2.02 |
| 21084 | 0 | 119576 | EYKCKVSN                                                                 | 2.12 | 0.01 | 0.78 | 0.44 | 1.93 | 0.28 |
| 21085 | 0 | 15032  | EYKILEKMPQTTIQVDGS<br>EKKI                                               | 3.02 | 0.01 | 2.80 | 1.15 | 0.22 | 1.27 |
| 21086 | 0 | 95373  | EYLDMLVNETLRL                                                            | 2.56 | 0.01 | 2.19 | 0.44 | 1.23 | 0.85 |
| 21087 | 0 | 123161 | EYLGEYEE                                                                 | 2.26 | 0.01 | 2.28 | 2.00 | 0.22 | 0.28 |
| 21088 | 0 | 15048  | EYLILSARDV                                                               | 2.29 | 0.01 | 2.04 | 0.68 | 0.22 | 0.28 |
| 21089 | 0 | 15048  | EYLILSARDV                                                               | 2.29 | 0.01 | 2.04 | 0.68 | 0.22 | 0.28 |
| 21090 | 0 | 15056  | EYLNKIQNSLSTEWSPCS<br>VT                                                 | 2.94 | 0.01 | 1.66 | 0.68 | 0.22 | 0.28 |
| 21091 | 0 | 15056  | EYLNKIQNSLSTEWSPCS<br>VT                                                 | 2.94 | 0.01 | 1.66 | 0.68 | 0.22 | 0.28 |
| 21092 | 0 | 419169 | EYLNKIQNSLSTEWSPCS<br>VTSGNGIQVRIKPGSAN<br>KPKDELDYENDIEKKICK<br>MEKCSSV | 4.04 | 0.01 | 0.90 | 3.32 | 0.22 | 0.28 |
| 21093 | 0 | 419169 | EYLNKIQNSLSTEWSPCS<br>VTSGNGIQVRIKPGSAN<br>KPKDELDYENDIEKKICK<br>MEKCSSV | 4.04 | 0.01 | 0.90 | 3.32 | 0.22 | 0.28 |
| 21094 | 0 | 110845 | EYMLD                                                                    | 1.74 | 0.01 | 1.86 | 0.68 | 0.22 | 0.85 |
| 21095 | 0 | 110845 | EYMLD                                                                    | 1.74 | 0.01 | 1.86 | 1.81 | 0.22 | 0.28 |
| 21096 | 0 | 110845 | EYMLD                                                                    | 1.74 | 0.01 | 1.86 | 0.68 | 0.22 | 0.85 |
| 21097 | 0 | 110845 | EYMLD                                                                    | 1.74 | 0.01 | 1.86 | 0.68 | 0.22 | 0.28 |
| 21098 | 0 | 111264 | EYMLDLQPETTDLYCYE<br>QLN                                                 | 2.97 | 0.01 | 1.86 | 3.22 | 0.22 | 0.28 |
| 21099 | 0 | 111264 | EYMLDLQPETTDLYCYE<br>QLN                                                 | 2.97 | 0.01 | 1.86 | 2.69 | 0.22 | 0.28 |
| 21100 | 0 | 111264 | EYMLDLQPETTDLYCYE<br>QLN                                                 | 2.97 | 0.01 | 1.86 | 3.38 | 0.22 | 0.28 |
| 21101 | 0 | 226339 | EYMPME                                                                   | 1.92 | 0.01 | 0.90 | 1.81 | 0.22 | 1.66 |
| 21102 | 0 | 226339 | EYMPME                                                                   | 1.92 | 0.01 | 0.90 | 1.81 | 0.22 | 3.25 |
| 21103 | 0 | 226339 | EYMPME                                                                   | 1.92 | 0.01 | 0.90 | 1.81 | 0.22 | 1.66 |

|       |   |        |                    |      |      |      |      |      |      |
|-------|---|--------|--------------------|------|------|------|------|------|------|
| 21104 | 0 | 127646 | EYNIMFGPDI         | 2.29 | 0.01 | 0.78 | 0.44 | 1.93 | 0.28 |
| 21105 | 0 | 127646 | EYNIMFGPDI         | 2.29 | 0.01 | 0.78 | 0.44 | 1.13 | 0.28 |
| 21106 | 0 | 146910 | EYPDDASVNGVRK      | 2.50 | 0.01 | 1.60 | 0.44 | 0.85 | 0.85 |
| 21107 | 0 | 170992 | EYPNTISFSCNTGFY    | 2.68 | 0.01 | 0.78 | 0.44 | 1.41 | 0.28 |
| 21108 | 0 | 170992 | EYPNTISFSCNTGFY    | 2.68 | 0.01 | 0.78 | 0.44 | 1.13 | 0.28 |
|       |   |        | EYPRKEFASSTRGRSQT  |      |      |      |      |      |      |
| 21109 | 0 | 130821 | RESEIRVRLQSASPSTRW | 3.64 | 0.01 | 0.78 | 0.44 | 1.13 | 0.85 |
|       |   |        | TELDD              |      |      |      |      |      |      |
|       |   |        | EYPRKEFASSTRGRSQT  |      |      |      |      |      |      |
| 21110 | 0 | 130821 | RESEIRVRLQSASPSTRW | 3.64 | 0.01 | 0.78 | 0.44 | 1.41 | 0.85 |
|       |   |        | TELDD              |      |      |      |      |      |      |
|       |   |        | EYPRKEFASSTRGRSQT  |      |      |      |      |      |      |
| 21111 | 0 | 130821 | RESEIRVRLQSASPSTRW | 3.64 | 0.01 | 0.78 | 0.44 | 1.13 | 0.85 |
|       |   |        | TELDD              |      |      |      |      |      |      |
| 21112 | 0 | 141006 | EYPSLRDIF          | 2.18 | 0.01 | 4.03 | 2.00 | 0.22 | 0.28 |
| 21113 | 0 | 434608 | EYQDLLNVKMALDIEIA  | 2.80 | 0.01 | 0.78 | 0.44 | 1.13 | 0.28 |
| 21114 | 0 | 101616 | EYREKFDALKEAIEIE   | 2.77 | 0.01 | 3.11 | 1.20 | 0.22 | 0.28 |
| 21115 | 0 | 128601 | EYRKKMDI           | 2.11 | 0.01 | 0.78 | 0.44 | 1.13 | 0.28 |
| 21116 | 0 | 146228 | EYSDSGIEV          | 2.24 | 0.01 | 0.90 | 1.20 | 0.22 | 1.39 |
|       |   |        | EYSIESSMKKHLSIGSG  |      |      |      |      |      |      |
| 21117 | 0 | 15087  | WSVSL              | 3.10 | 0.01 | 2.95 | 0.44 | 0.22 | 0.28 |
| 21118 | 0 | 230459 | EYTGKTSTGTVYVRV    | 2.72 | 0.01 | 0.78 | 0.44 | 1.13 | 0.28 |
| 21119 | 0 | 15099  | EYTIVI             | 1.90 | 0.01 | 2.40 | 0.44 | 0.85 | 0.28 |
| 21120 | 0 | 99236  | EYTKYN             | 1.90 | 0.01 | 2.24 | 1.20 | 0.22 | 0.28 |
| 21121 | 0 | 15110  | EYVLLLFL           | 2.24 | 0.01 | 1.72 | 0.44 | 0.85 | 2.51 |
| 21122 | 0 | 139044 | EYWYCGMNRTGC       | 2.48 | 0.01 | 0.90 | 1.15 | 0.22 | 1.27 |
| 21123 | 0 | 139044 | EYWYCGMNRTGC       | 2.48 | 0.01 | 0.90 | 0.44 | 1.41 | 1.27 |
| 21124 | 0 | 15122  | EYYLN              | 1.75 | 0.01 | 3.30 | 0.68 | 0.22 | 0.28 |
| 21125 | 0 | 15122  | EYYLN              | 1.75 | 0.01 | 3.30 | 0.68 | 0.22 | 0.28 |
| 21126 | 0 | 15122  | EYYLN              | 1.75 | 0.01 | 3.30 | 0.68 | 0.22 | 0.85 |
| 21127 | 0 | 15122  | EYYLN              | 1.75 | 0.01 | 3.30 | 0.68 | 0.22 | 0.85 |
| 21128 | 0 | 104771 | FA                 | 1.10 | 0.01 | 0.78 | 1.15 | 0.22 | 1.66 |
| 21129 | 0 | 104771 | FA                 | 1.10 | 0.01 | 0.78 | 1.15 | 0.22 | 0.28 |
|       |   |        | FAAYEDGFEQCDAGWL   |      |      |      |      |      |      |
| 21130 | 0 | 137149 | ADQTVRYPI          | 3.14 | 0.01 | 0.78 | 0.68 | 0.22 | 0.28 |
|       |   |        | FAAYEDGFEQCDAGWL   |      |      |      |      |      |      |
| 21131 | 0 | 137149 | ADQTVRYPI          | 3.14 | 0.01 | 0.78 | 0.68 | 0.22 | 0.28 |
|       |   |        | FAAYEDGFEQCDAGWL   |      |      |      |      |      |      |
| 21132 | 0 | 137150 | SDQTVRYPI          | 3.12 | 0.01 | 1.75 | 0.68 | 0.22 | 0.28 |
|       |   |        | FAAYEDGFEQCDAGWL   |      |      |      |      |      |      |
| 21133 | 0 | 137150 | SDQTVRYPI          | 3.12 | 0.01 | 1.75 | 0.68 | 0.22 | 0.28 |
| 21134 | 0 | 97295  | FADAEVELK          | 2.23 | 0.01 | 3.13 | 1.12 | 0.22 | 0.28 |
| 21135 | 0 | 15146  | FADFLQIA           | 2.15 | 0.01 | 3.06 | 1.12 | 0.22 | 0.28 |
|       |   |        | FADGNGDSSTYQYIYNL  |      |      |      |      |      |      |
| 21136 | 0 | 15147  | TICELNG            | 3.12 | 0.01 | 2.80 | 2.13 | 0.22 | 1.27 |

|       |   |        |                                     |      |      |      |      |      |      |
|-------|---|--------|-------------------------------------|------|------|------|------|------|------|
| 21137 | 0 | 15147  | FADGNNGDSSTYQYIYNL<br>TICELNG       | 3.12 | 0.01 | 2.80 | 2.13 | 0.22 | 0.28 |
| 21138 | 0 | 15147  | FADGNNGDSSTYQYIYNL<br>TICELNG       | 3.12 | 0.01 | 2.80 | 2.13 | 0.22 | 1.27 |
| 21139 | 0 | 15147  | FADGNNGDSSTYQYIYNL<br>TICELNG       | 3.12 | 0.01 | 2.80 | 1.15 | 0.22 | 1.27 |
| 21140 | 0 | 15147  | FADGNNGDSSTYQYIYNL<br>TICELNG       | 3.12 | 0.01 | 2.80 | 2.13 | 0.22 | 0.28 |
| 21141 | 0 | 15148  | FADGNNGDSSTYQYIYNL<br>TICELNGTDWLSS | 3.33 | 0.01 | 2.80 | 2.13 | 0.22 | 1.27 |
| 21142 | 0 | 15148  | FADGNNGDSSTYQYIYNL<br>TICELNGTDWLSS | 3.33 | 0.01 | 2.80 | 2.13 | 0.22 | 0.28 |
| 21143 | 0 | 137846 | FADGQPKLVSDQ                        | 2.45 | 0.01 | 2.21 | 1.20 | 0.22 | 0.28 |
| 21144 | 0 | 181611 | FADIGDIVRGRDMFK                     | 2.71 | 0.01 | 1.66 | 2.37 | 0.22 | 1.28 |
| 21145 | 0 | 15152  | FADKPDESTLSPEMKEH<br>YDK            | 2.95 | 0.01 | 4.15 | 0.44 | 0.85 | 0.28 |
| 21146 | 0 | 15152  | FADKPDESTLSPEMKEH<br>YDK            | 2.95 | 0.01 | 4.15 | 0.44 | 0.85 | 0.28 |
| 21147 | 0 | 15153  | FADKPDESTLSPEMKEH<br>YEK            | 2.95 | 0.01 | 2.78 | 0.44 | 0.85 | 0.28 |
| 21148 | 0 | 182116 | FADSNGRWHSTACES                     | 2.64 | 0.01 | 0.78 | 0.44 | 1.13 | 0.85 |
| 21149 | 0 | 96277  | FAEAPFSNKG                          | 2.32 | 0.01 | 0.90 | 0.44 | 1.93 | 0.85 |
| 21150 | 0 | 100027 | FAEDVGSNKG                          | 2.29 | 0.01 | 0.78 | 1.12 | 0.22 | 0.85 |
| 21151 | 0 | 105768 | FAEDVGSNKGGA                        | 2.39 | 0.01 | 0.78 | 1.15 | 0.22 | 0.28 |
| 21152 | 0 | 105768 | FAEDVGSNKGGA                        | 2.39 | 0.01 | 0.78 | 1.15 | 0.22 | 0.28 |
| 21153 | 0 | 158749 | FAEDVGSNKGAIIGLM                    | 2.70 | 0.01 | 0.78 | 1.20 | 0.22 | 0.28 |
| 21154 | 0 | 105769 | FAEDVGSNKGAIIGLMV<br>GGVVIA         | 3.08 | 0.01 | 0.78 | 1.15 | 0.22 | 0.85 |
| 21155 | 0 | 105769 | FAEDVGSNKGAIIGLMV<br>GGVVIA         | 3.08 | 0.01 | 0.78 | 1.12 | 0.22 | 0.85 |
| 21156 | 0 | 105769 | FAEDVGSNKGAIIGLMV<br>GGVVIA         | 3.08 | 0.01 | 0.78 | 1.12 | 0.22 | 0.28 |
| 21157 | 0 | 105769 | FAEDVGSNKGAIIGLMV<br>GGVVIA         | 3.08 | 0.01 | 0.78 | 1.15 | 0.22 | 1.66 |
| 21158 | 0 | 105769 | FAEDVGSNKGAIIGLMV<br>GGVVIA         | 3.08 | 0.01 | 0.78 | 1.15 | 0.22 | 1.66 |
| 21159 | 0 | 105769 | FAEDVGSNKGAIIGLMV<br>GGVVIA         | 3.08 | 0.01 | 0.78 | 1.15 | 0.22 | 1.66 |
| 21160 | 0 | 105769 | FAEDVGSNKGAIIGLMV<br>GGVVIA         | 3.08 | 0.01 | 0.78 | 1.15 | 0.22 | 2.02 |
| 21161 | 0 | 105769 | FAEDVGSNKGAIIGLMV<br>GGVVIA         | 3.08 | 0.01 | 0.78 | 1.15 | 0.22 | 2.02 |
| 21162 | 0 | 105769 | FAEDVGSNKGAIIGLMV<br>GGVVIA         | 3.08 | 0.01 | 0.78 | 1.15 | 0.22 | 1.34 |
| 21163 | 0 | 105769 | FAEDVGSNKGAIIGLMV<br>GGVVIA         | 3.08 | 0.01 | 0.78 | 1.15 | 0.22 | 1.27 |



|       |   |        |                                    |      |      |      |      |      |      |
|-------|---|--------|------------------------------------|------|------|------|------|------|------|
| 21164 | 0 | 105769 | FAEDVGSNKGAIIGLMV<br>GGVVIA        | 3.08 | 0.01 | 0.78 | 3.00 | 0.22 | 0.28 |
| 21165 | 0 | 105769 | FAEDVGSNKGAIIGLMV<br>GGVVIA        | 3.08 | 0.01 | 0.78 | 3.00 | 0.22 | 0.28 |
| 21166 | 0 | 105769 | FAEDVGSNKGAIIGLMV<br>GGVVIA        | 3.08 | 0.01 | 0.78 | 3.00 | 1.93 | 1.75 |
| 21167 | 0 | 105769 | FAEDVGSNKGAIIGLMV<br>GGVVIA        | 3.08 | 0.01 | 0.78 | 3.00 | 0.22 | 0.28 |
| 21168 | 0 | 105769 | FAEDVGSNKGAIIGLMV<br>GGVVIA        | 3.08 | 0.01 | 0.78 | 1.15 | 0.22 | 1.75 |
| 21169 | 0 | 167252 | FAEEDKKLKERIDTRNEL<br>ES           | 2.96 | 3.24 | 0.78 | 0.44 | 1.13 | 0.28 |
| 21170 | 0 | 153382 | FAENKKDHFSPGGGGS                   | 2.72 | 0.01 | 0.90 | 0.68 | 0.22 | 0.28 |
| 21171 | 0 | 153382 | FAENKKDHFSPGGGGS                   | 2.72 | 0.01 | 0.90 | 0.44 | 0.85 | 2.35 |
| 21172 | 0 | 119855 | FAESRIRRETIAAED                    | 2.70 | 0.01 | 3.81 | 0.44 | 1.13 | 0.28 |
| 21173 | 0 | 119855 | FAESRIRRETIAAED                    | 2.70 | 0.01 | 3.81 | 0.44 | 1.41 | 0.28 |
| 21174 | 0 | 119855 | FAESRIRRETIAAED                    | 2.70 | 0.01 | 4.93 | 0.44 | 1.13 | 0.28 |
| 21175 | 0 | 178786 | FAEVKEIDDAYNKLT                    | 2.65 | 0.01 | 2.36 | 0.44 | 1.23 | 1.28 |
| 21176 | 0 | 167902 | FAGAAGSAKSAAGTASH<br>VS            | 2.95 | 0.01 | 2.75 | 0.44 | 0.85 | 2.51 |
| 21177 | 0 | 167902 | FAGAAGSAKSAAGTASH<br>VS            | 2.95 | 0.01 | 2.75 | 0.44 | 0.85 | 2.51 |
| 21178 | 0 | 15176  | FAGDSOSSSADDAAGK<br>ATV            | 2.98 | 0.01 | 2.78 | 2.49 | 0.85 | 0.28 |
| 21179 | 0 | 232632 | FAGHGKAYLHGSFDK                    | 2.71 | 0.01 | 2.28 | 0.68 | 0.22 | 0.28 |
| 21180 | 0 | 15179  | FAGKDLESIKGTAPFEIH<br>AN           | 2.94 | 0.01 | 3.05 | 1.20 | 0.22 | 0.28 |
| 21181 | 0 | 15183  | FAGLKFDY                           | 2.24 | 0.01 | 3.53 | 4.33 | 0.22 | 0.28 |
| 21182 | 0 | 226020 | FAGLKYADVGSFDYGRN<br>YGV           | 2.97 | 0.01 | 2.24 | 3.70 | 0.22 | 0.28 |
| 21183 | 0 | 15184  | FAGNHVSPHYVPESDA<br>AAR            | 2.91 | 0.01 | 1.72 | 0.44 | 0.85 | 0.28 |
| 21184 | 0 | 120519 | FAGRLIELSQEG                       | 2.48 | 0.01 | 4.23 | 1.20 | 0.22 | 0.85 |
| 21185 | 0 | 161625 | FAHSQDLDRMLNPLVD<br>QYLWNF         | 3.02 | 0.01 | 3.81 | 3.55 | 0.22 | 0.85 |
| 21186 | 0 | 15196  | FAIPYIHPTNPFAPDVTA                 | 2.87 | 0.01 | 2.53 | 0.44 | 0.85 | 0.28 |
| 21187 | 0 | 15197  | FAIPYIHPTNPFAPDVTA<br>AAGAGPRVRQPA | 3.35 | 0.01 | 2.53 | 0.44 | 0.85 | 0.28 |
| 21188 | 0 | 15197  | FAIPYIHPTNPFAPDVTA<br>AAGAGPRVRQPA | 3.35 | 0.01 | 2.53 | 0.44 | 0.85 | 0.28 |
| 21189 | 0 | 97296  | FAITNVTTN                          | 2.24 | 0.01 | 3.13 | 1.12 | 0.22 | 0.28 |
| 21190 | 0 | 119856 | FAIVHMTKLLLDYTGK                   | 2.69 | 0.01 | 2.26 | 1.15 | 0.22 | 1.57 |
| 21191 | 0 | 119856 | FAIVHMTKLLLDYTGK                   | 2.69 | 0.01 | 2.26 | 1.12 | 0.22 | 1.57 |
| 21192 | 0 | 119856 | FAIVHMTKLLLDYTGK                   | 2.69 | 0.01 | 2.26 | 2.43 | 0.22 | 1.57 |

|       |   |        |                            |      |      |      |      |      |      |
|-------|---|--------|----------------------------|------|------|------|------|------|------|
| 21193 | 0 | 119856 | FAIVHMTKLLLDYTGK           | 2.69 | 0.01 | 2.26 | 3.65 | 0.22 | 1.57 |
| 21194 | 0 | 119578 | FAIVKFTKVLLQYTGH           | 2.73 | 0.01 | 0.78 | 1.15 | 0.22 | 1.57 |
| 21195 | 0 | 119578 | FAIVKFTKVLLQYTGH           | 2.73 | 0.01 | 0.78 | 0.44 | 1.13 | 1.57 |
| 21196 | 0 | 119578 | FAIVKFTKVLLQYTGH           | 2.73 | 0.01 | 0.78 | 0.44 | 1.41 | 1.57 |
| 21197 | 0 | 131876 | FAKANKQVCTDI               | 2.45 | 0.01 | 3.28 | 0.68 | 0.22 | 1.27 |
| 21198 | 0 | 131876 | FAKANKQVCTDI               | 2.45 | 0.01 | 3.28 | 0.68 | 0.22 | 0.85 |
| 21199 | 0 | 230460 | FAKPCREGEDNSKRN            | 2.66 | 0.01 | 0.78 | 0.44 | 1.13 | 0.28 |
| 21200 | 0 | 15205  | FAKY                       | 1.57 | 0.01 | 3.27 | 0.68 | 0.22 | 0.28 |
| 21201 | 0 | 15205  | FAKY                       | 1.57 | 0.01 | 3.27 | 0.68 | 0.22 | 1.48 |
| 21202 | 0 | 15205  | FAKY                       | 1.57 | 0.01 | 3.27 | 0.68 | 0.22 | 1.34 |
| 21203 | 0 | 15206  | FAKYIVGA                   | 2.12 | 0.01 | 3.27 | 2.02 | 0.22 | 0.28 |
| 21204 | 0 | 15206  | FAKYIVGA                   | 2.12 | 0.01 | 3.27 | 2.82 | 0.22 | 0.28 |
| 21205 | 0 | 120522 | FALAPSLTEI                 | 2.31 | 0.01 | 2.18 | 2.16 | 0.22 | 0.28 |
| 21206 | 0 | 106411 | FALEAYAFDI                 | 2.34 | 0.01 | 2.75 | 0.44 | 1.23 | 0.85 |
| 21207 | 0 | 138386 | FALTAVAEVNA                | 2.50 | 0.01 | 0.78 | 1.12 | 0.22 | 0.85 |
| 21208 | 0 | 138386 | FALTAVAEVNA                | 2.50 | 0.01 | 0.78 | 1.12 | 0.22 | 0.85 |
| 21209 | 0 | 138386 | FALTAVAEVNA                | 2.50 | 0.01 | 0.78 | 1.12 | 0.22 | 0.85 |
| 21210 | 0 | 100029 | FAMWRITYKDTVQL             | 2.55 | 0.01 | 2.96 | 0.44 | 0.22 | 0.28 |
| 21211 | 0 | 161100 | FANLIIFGPGPVLNENETI        | 2.93 | 0.01 | 2.08 | 0.44 | 1.93 | 1.57 |
| 21212 | 0 | 289147 | FANTLLYSDELFLS             | 2.69 | 0.01 | 1.61 | 0.44 | 0.85 | 1.28 |
| 21213 | 0 | 15246  | FAPALPVW                   | 2.14 | 0.01 | 2.68 | 0.44 | 1.59 | 0.28 |
| 21214 | 0 | 79544  | FAPWDLEATGACICEIPT<br>DV   | 2.95 | 0.01 | 2.85 | 0.44 | 1.59 | 0.28 |
| 21215 | 0 | 15262  | FAPWHVKRMLHH               | 2.43 | 0.01 | 0.90 | 0.68 | 0.22 | 0.28 |
| 21216 | 0 | 144639 | FAQAYARGIS                 | 2.31 | 0.01 | 0.78 | 0.44 | 1.41 | 0.28 |
| 21217 | 0 | 144639 | FAQAYARGIS                 | 2.31 | 0.01 | 0.78 | 0.44 | 1.13 | 0.28 |
| 21218 | 0 | 144639 | FAQAYARGIS                 | 2.31 | 0.01 | 0.78 | 0.44 | 1.13 | 0.28 |
| 21219 | 0 | 144639 | FAQAYARGIS                 | 2.31 | 0.01 | 0.78 | 0.44 | 2.35 | 0.28 |
| 21220 | 0 | 148591 | FAQPQQLFPE                 | 2.35 | 0.01 | 1.86 | 0.44 | 1.23 | 0.85 |
| 21221 | 0 | 115246 | FAQTQSLVYPFGPIPNS<br>LP    | 2.95 | 0.01 | 1.60 | 0.44 | 1.23 | 1.28 |
| 21222 | 0 | 78152  | FAQTQSLVYPFGPIPNS<br>LPQNI | 3.10 | 0.01 | 1.60 | 0.44 | 1.23 | 1.28 |
| 21223 | 0 | 105177 | FARANRGL                   | 2.14 | 0.01 | 2.76 | 0.44 | 1.23 | 0.85 |
| 21224 | 0 | 232633 | FASFDVPSKQPTIDIDLC<br>DI   | 2.95 | 0.01 | 2.28 | 0.68 | 0.22 | 0.28 |
| 21225 | 0 | 232633 | FASFDVPSKQPTIDIDLC<br>DI   | 2.95 | 0.01 | 2.28 | 0.68 | 0.22 | 0.28 |
| 21226 | 0 | 232633 | FASFDVPSKQPTIDIDLC<br>DI   | 2.95 | 0.01 | 2.28 | 0.68 | 0.22 | 0.28 |
| 21227 | 0 | 232634 | FASFDVPSKQPTIDIDLT<br>DI   | 2.97 | 0.01 | 0.90 | 0.68 | 0.22 | 0.28 |
| 21228 | 0 | 232634 | FASFDVPSKQPTIDIDLT<br>DI   | 2.97 | 0.01 | 0.90 | 0.68 | 0.22 | 0.28 |
| 21229 | 0 | 232634 | FASFDVPSKQPTIDIDLT<br>DI   | 2.97 | 0.01 | 0.90 | 0.68 | 0.22 | 0.28 |

|       |   |        |                         |      |      |      |      |      |      |
|-------|---|--------|-------------------------|------|------|------|------|------|------|
| 21230 | 0 | 15281  | FASRGTSMDDEA            | 2.46 | 0.01 | 2.88 | 2.22 | 0.85 | 0.28 |
| 21231 | 0 | 15281  | FASRGTSMDDEA            | 2.46 | 0.01 | 2.88 | 2.22 | 0.22 | 0.28 |
| 21232 | 0 | 15281  | FASRGTSMDDEA            | 2.46 | 0.01 | 2.88 | 2.37 | 0.22 | 0.28 |
| 21233 | 0 | 15281  | FASRGTSMDDEA            | 2.46 | 0.01 | 2.88 | 2.37 | 0.22 | 0.28 |
| 21234 | 0 | 15281  | FASRGTSMDDEA            | 2.46 | 0.01 | 2.88 | 2.22 | 0.22 | 0.28 |
| 21235 | 0 | 450579 | FASRSDT                 | 2.02 | 0.01 | 0.90 | 0.44 | 1.23 | 1.39 |
| 21236 | 0 | 121292 | FATFVYAK                | 2.15 | 0.01 | 3.85 | 0.68 | 0.22 | 0.28 |
| 21237 | 0 | 121292 | FATFVYAK                | 2.15 | 0.01 | 3.85 | 0.68 | 0.22 | 0.28 |
| 21238 | 0 | 121292 | FATFVYAK                | 2.15 | 0.01 | 3.85 | 0.68 | 0.22 | 1.34 |
| 21239 | 0 | 121292 | FATFVYAK                | 2.15 | 0.01 | 3.85 | 0.68 | 0.22 | 0.28 |
| 21240 | 0 | 121292 | FATFVYAK                | 2.15 | 0.01 | 3.85 | 0.68 | 0.22 | 0.85 |
| 21241 | 0 | 121292 | FATFVYAK                | 2.15 | 0.01 | 3.85 | 0.68 | 0.22 | 0.85 |
| 21242 | 0 | 121292 | FATFVYAK                | 2.15 | 0.01 | 3.85 | 0.68 | 0.22 | 0.85 |
| 21243 | 0 | 15289  | FATNREKM                | 2.10 | 0.01 | 2.99 | 0.44 | 0.85 | 0.28 |
| 21244 | 0 | 15291  | FATTLPKKQIKHKKVR        | 2.71 | 0.01 | 2.74 | 2.13 | 0.22 | 0.28 |
| 21245 | 0 | 15293  | FATTPVCQFDGN            | 2.45 | 0.01 | 2.56 | 2.69 | 2.26 | 0.85 |
| 21246 | 0 | 15295  | FAVANGNELLLDLS          | 2.62 | 0.01 | 3.08 | 0.44 | 1.23 | 1.57 |
| 21247 | 0 | 15295  | FAVANGNELLLDLS          | 2.62 | 0.01 | 3.08 | 0.44 | 1.23 | 1.27 |
| 21248 | 0 | 15295  | FAVANGNELLLDLS          | 2.62 | 0.01 | 3.08 | 0.44 | 1.23 | 1.27 |
| 21249 | 0 | 15295  | FAVANGNELLLDLS          | 2.62 | 0.01 | 3.08 | 0.44 | 1.23 | 1.57 |
| 21250 | 0 | 112507 | FAVLKLMGRGTK            | 2.48 | 0.01 | 1.60 | 2.04 | 0.22 | 0.28 |
| 21251 | 0 | 116971 | FAVLKLMGRGTKF           | 2.56 | 0.01 | 1.60 | 2.04 | 0.22 | 0.28 |
| 21252 | 0 | 116971 | FAVLKLMGRGTKF           | 2.56 | 0.01 | 1.60 | 2.04 | 0.22 | 0.85 |
| 21253 | 0 | 116971 | FAVLKLMGRGTKF           | 2.56 | 0.01 | 1.60 | 2.04 | 0.22 | 0.28 |
| 21254 | 0 | 116971 | FAVLKLMGRGTKF           | 2.56 | 0.01 | 1.60 | 2.04 | 0.22 | 0.85 |
| 21255 | 0 | 116971 | FAVLKLMGRGTKF           | 2.56 | 0.01 | 1.60 | 1.20 | 0.22 | 1.27 |
| 21256 | 0 | 116971 | FAVLKLMGRGTKF           | 2.56 | 0.01 | 1.60 | 1.20 | 0.22 | 1.27 |
| 21257 | 0 | 116971 | FAVLKLMGRGTKF           | 2.56 | 0.01 | 1.60 | 1.20 | 0.22 | 1.27 |
| 21258 | 0 | 116971 | FAVLKLMGRGTKF           | 2.56 | 0.01 | 1.60 | 1.20 | 0.22 | 1.27 |
| 21259 | 0 | 116971 | FAVLKLMGRGTKF           | 2.56 | 0.01 | 1.60 | 1.20 | 0.22 | 1.27 |
| 21260 | 0 | 116971 | FAVLKLMGRGTKF           | 2.56 | 0.01 | 1.60 | 1.20 | 0.22 | 1.27 |
| 21261 | 0 | 196449 | FAVQEAS                 | 2.02 | 0.01 | 0.90 | 0.44 | 1.23 | 1.39 |
| 21262 | 0 | 15301  | FAVSKDLADKLSSAEAS       | 2.84 | 0.01 | 3.59 | 2.02 | 0.22 | 0.28 |
| 21263 | 0 | 157228 | FAVVKRARDEGF            | 2.49 | 0.01 | 3.65 | 0.44 | 1.23 | 0.85 |
| 21264 | 0 | 196450 | FAVWKFLDALDNKDA         | 2.72 | 0.01 | 3.72 | 1.12 | 0.22 | 0.28 |
| 21265 | 0 | 136216 | FAWKWQYIYD              | 2.31 | 0.01 | 0.90 | 0.44 | 1.93 | 2.56 |
| 21266 | 0 | 181312 | FAWQTATNPSVFKM          | 2.67 | 0.01 | 2.82 | 1.15 | 0.22 | 0.28 |
| 21267 | 0 | 136217 | FAYRTFYKYD              | 2.34 | 0.01 | 0.90 | 0.44 | 1.93 | 0.85 |
| 21268 | 0 | 112103 | FAYWGQG                 | 2.02 | 0.01 | 0.78 | 0.44 | 1.13 | 0.28 |
| 21269 | 0 | 135671 | FCAGFHEG                | 2.15 | 0.01 | 0.78 | 0.44 | 2.35 | 0.28 |
| 21270 | 0 | 15315  | FCAKSPRYTLDVNGYP<br>KIY | 2.90 | 0.01 | 2.69 | 1.12 | 0.22 | 0.28 |
| 21271 | 0 | 79819  | FCDAKNQTEYRRELESY<br>AA | 2.85 | 0.01 | 4.03 | 1.12 | 0.22 | 0.85 |

|       |   |        |                              |      |      |      |      |      |      |
|-------|---|--------|------------------------------|------|------|------|------|------|------|
| 21272 | 0 | 79819  | FCDAKNQTEYRRELESY<br>AA      | 2.85 | 0.01 | 4.03 | 1.12 | 0.22 | 0.85 |
| 21273 | 0 | 15323  | FCETNGLEYI                   | 2.29 | 0.01 | 0.78 | 0.44 | 1.74 | 0.28 |
| 21274 | 0 | 15323  | FCETNGLEYI                   | 2.29 | 0.01 | 0.78 | 1.15 | 0.22 | 0.28 |
| 21275 | 0 | 135672 | FCGGSIVN                     | 2.11 | 0.01 | 0.78 | 0.44 | 2.35 | 0.28 |
| 21276 | 0 | 171000 | FCGLPQPETVGQLGT              | 2.70 | 0.01 | 0.78 | 0.44 | 1.13 | 2.66 |
| 21277 | 0 | 137399 | FCGLPRLE                     | 2.12 | 0.01 | 0.78 | 1.20 | 0.22 | 0.85 |
| 21278 | 0 | 137399 | FCGLPRLE                     | 2.12 | 0.01 | 0.78 | 0.44 | 1.13 | 0.85 |
| 21279 | 0 | 137399 | FCGLPRLE                     | 2.12 | 0.01 | 0.78 | 0.44 | 1.13 | 0.85 |
| 21280 | 0 | 103162 | FCGRIHTRYSSAYEL              | 2.63 | 0.01 | 2.04 | 0.44 | 0.85 | 1.28 |
| 21281 | 0 | 112104 | FCHQYLS                      | 1.99 | 0.01 | 0.78 | 0.44 | 1.13 | 0.28 |
| 21282 | 0 | 15328  | FCIDPTKGGKKPAR               | 2.59 | 0.01 | 2.69 | 0.44 | 0.85 | 0.28 |
| 21283 | 0 | 15328  | FCIDPTKGGKKPAR               | 2.59 | 0.01 | 2.69 | 0.44 | 0.85 | 0.28 |
| 21284 | 0 | 15328  | FCIDPTKGGKKPAR               | 2.59 | 0.01 | 2.69 | 0.44 | 0.85 | 0.28 |
| 21285 | 0 | 187334 | FCKDIRWSLGDF                 | 2.46 | 0.01 | 2.59 | 0.44 | 1.74 | 0.28 |
| 21286 | 0 | 15334  | FCLFFAFSVAAP                 | 2.51 | 0.01 | 2.69 | 0.68 | 0.22 | 0.28 |
| 21287 | 0 | 15334  | FCLFFAFSVAAP                 | 2.51 | 0.01 | 2.69 | 1.20 | 0.22 | 0.28 |
| 21288 | 0 | 79210  | FCLPTRESTGRACP               | 2.61 | 0.01 | 0.90 | 0.68 | 0.22 | 1.39 |
| 21289 | 0 | 15335  | FCLRMARDTNLHLQSG<br>AIAQ     | 2.91 | 0.01 | 3.27 | 1.12 | 0.22 | 0.28 |
| 21290 | 0 | 15335  | FCLRMARDTNLHLQSG<br>AIAQ     | 2.91 | 0.01 | 3.27 | 1.12 | 0.22 | 0.28 |
| 21291 | 0 | 15335  | FCLRMARDTNLHLQSG<br>AIAQ     | 2.91 | 0.01 | 3.27 | 1.12 | 0.22 | 0.28 |
| 21292 | 0 | 98031  | FCMDVVLQQHNIAHGR<br>SQVLQ    | 2.96 | 0.01 | 1.86 | 0.44 | 1.93 | 0.28 |
| 21293 | 0 | 98031  | FCMDVVLQQHNIAHGR<br>SQVLQ    | 2.96 | 0.01 | 1.86 | 0.44 | 1.93 | 0.28 |
| 21294 | 0 | 95378  | FCMENS                       | 1.88 | 0.01 | 1.60 | 0.44 | 1.23 | 0.28 |
| 21295 | 0 | 98772  | FCMENSAEPE                   | 2.31 | 0.01 | 1.60 | 0.44 | 1.23 | 0.85 |
| 21296 | 0 | 232512 | FCMSTCSGLKCQ                 | 2.48 | 0.01 | 0.90 | 2.22 | 0.85 | 0.28 |
| 21297 | 0 | 232512 | FCMSTCSGLKCQ                 | 2.48 | 0.01 | 0.90 | 2.22 | 0.85 | 1.27 |
| 21298 | 0 | 114818 | FCNAVVESNG                   | 2.30 | 0.01 | 2.25 | 0.44 | 1.23 | 0.85 |
| 21299 | 0 | 114818 | FCNAVVESNG                   | 2.30 | 0.01 | 2.25 | 0.44 | 1.23 | 0.85 |
| 21300 | 0 | 450580 | FCPDCKP                      | 2.04 | 0.01 | 0.90 | 0.44 | 1.41 | 1.39 |
| 21301 | 0 | 144640 | FCPDVEFKRRFKEAFSKA<br>AQQTKG | 3.11 | 0.01 | 0.78 | 0.44 | 1.13 | 1.27 |
| 21302 | 0 | 144640 | FCPDVEFKRRFKEAFSKA<br>AQQTKG | 3.11 | 0.01 | 0.78 | 0.44 | 1.13 | 0.28 |
| 21303 | 0 | 144640 | FCPDVEFKRRFKEAFSKA<br>AQQTKG | 3.11 | 0.01 | 0.78 | 0.44 | 1.13 | 0.28 |
| 21304 | 0 | 144640 | FCPDVEFKRRFKEAFSKA<br>AQQTKG | 3.11 | 0.01 | 0.78 | 0.44 | 1.13 | 1.27 |
| 21305 | 0 | 144640 | FCPDVEFKRRFKEAFSKA<br>AQQTKG | 3.11 | 0.01 | 0.78 | 0.44 | 1.13 | 0.28 |
| 21306 | 0 | 144640 | FCPDVEFKRRFKEAFSKA<br>AQQTKG | 3.11 | 0.01 | 0.78 | 1.81 | 0.22 | 1.27 |

|       |   |        |                                                      |      |      |      |      |      |      |
|-------|---|--------|------------------------------------------------------|------|------|------|------|------|------|
| 21307 | 0 | 15341  | FCPECRPLGLQGCAFAQS<br>TVAELQRLKMKVG                  | 3.35 | 0.01 | 2.53 | 0.44 | 0.85 | 0.28 |
| 21308 | 0 | 15341  | FCPECRPLGLQGCAFAQS<br>TVAELQRLKMKVG                  | 3.35 | 0.01 | 2.53 | 0.44 | 0.85 | 0.28 |
| 21309 | 0 | 79211  | FCPGVGGRYPVRQCY                                      | 2.65 | 0.01 | 0.90 | 0.68 | 0.22 | 1.39 |
| 21310 | 0 | 113387 | FCPPILPYSAWCPVP                                      | 2.68 | 0.01 | 0.90 | 0.44 | 1.13 | 0.28 |
| 21311 | 0 | 130487 | FCQPHLSCYILP                                         | 2.48 | 0.01 | 0.90 | 0.68 | 0.22 | 0.28 |
| 21312 | 0 | 130487 | FCQPHLSCYILP                                         | 2.48 | 0.01 | 0.90 | 0.68 | 0.22 | 1.34 |
| 21313 | 0 | 130487 | FCQPHLSCYILP                                         | 2.48 | 0.01 | 0.90 | 0.68 | 0.22 | 0.28 |
| 21314 | 0 | 130487 | FCQPHLSCYILP                                         | 2.48 | 0.01 | 0.90 | 0.68 | 0.22 | 0.28 |
| 21315 | 0 | 130487 | FCQPHLSCYILP                                         | 2.48 | 0.01 | 0.90 | 0.68 | 0.22 | 1.34 |
| 21316 | 0 | 15343  | FCRCAREESKRVPPTFG<br>SAPRLTEDD                       | 3.23 | 0.01 | 2.40 | 0.68 | 0.22 | 1.48 |
| 21317 | 0 | 138387 | FCRPHNI                                              | 1.99 | 0.01 | 0.78 | 0.44 | 1.13 | 0.28 |
| 21318 | 0 | 15348  | FCSLTSLATSCGAAVFI<br>PFR                             | 2.96 | 0.01 | 0.90 | 0.44 | 1.74 | 0.28 |
| 21319 | 0 | 15348  | FCSLTSLATSCGAAVFI<br>PFR                             | 2.96 | 0.01 | 0.90 | 3.93 | 0.22 | 0.28 |
| 21320 | 0 | 15352  | FCVDPTKGGKKAAR                                       | 2.58 | 0.01 | 2.69 | 0.44 | 0.85 | 0.28 |
| 21321 | 0 | 15352  | FCVDPTKGGKKAAR                                       | 2.58 | 0.01 | 2.69 | 0.44 | 0.85 | 0.28 |
| 21322 | 0 | 15352  | FCVDPTKGGKKAAR                                       | 2.58 | 0.01 | 2.69 | 0.44 | 0.85 | 0.28 |
| 21323 | 0 | 15354  | FCVLLMSFNLLSARLFG<br>ELEFWFSI                        | 3.20 | 0.01 | 3.40 | 0.44 | 0.85 | 0.28 |
| 21324 | 0 | 15354  | FCVLLMSFNLLSARLFG<br>ELEFWFSI                        | 3.20 | 0.01 | 3.40 | 0.44 | 1.74 | 0.28 |
| 21325 | 0 | 15355  | FCVQPE                                               | 1.88 | 0.01 | 1.96 | 0.44 | 0.85 | 0.28 |
| 21326 | 0 | 15356  | FCVQPEKGGRKPAR                                       | 2.60 | 0.01 | 2.41 | 0.44 | 0.85 | 0.28 |
| 21327 | 0 | 15356  | FCVQPEKGGRKPAR                                       | 2.60 | 0.01 | 2.41 | 0.44 | 0.85 | 0.28 |
| 21328 | 0 | 15356  | FCVQPEKGGRKPAR                                       | 2.60 | 0.01 | 2.41 | 0.44 | 0.85 | 0.28 |
| 21329 | 0 | 15356  | FCVQPEKGGRKPAR                                       | 2.60 | 0.01 | 2.41 | 0.44 | 0.85 | 0.28 |
| 21330 | 0 | 15356  | FCVQPEKGGRKPAR                                       | 2.60 | 0.01 | 1.96 | 0.44 | 0.85 | 0.28 |
| 21331 | 0 | 15356  | FCVQPEKGGRKPAR                                       | 2.60 | 0.01 | 1.96 | 0.44 | 0.85 | 0.28 |
| 21332 | 0 | 15356  | FCVQPEKGGRKPAR                                       | 2.60 | 0.01 | 1.96 | 0.44 | 0.85 | 0.28 |
| 21333 | 0 | 15356  | FCVQPEKGGRKPAR                                       | 2.60 | 0.01 | 1.96 | 0.44 | 0.85 | 0.28 |
| 21334 | 0 | 15358  | FDAASFVMRD                                           | 2.33 | 3.72 | 2.70 | 0.44 | 0.85 | 0.28 |
| 21335 | 0 | 157229 | FDADTIR                                              | 2.02 | 0.01 | 3.03 | 1.20 | 0.22 | 0.28 |
| 21336 | 0 | 15360  | FDANNAHVYPGALVLA<br>NKDLAKGSPTSIGIARAP<br>QTVSVDLPGL | 3.73 | 0.01 | 3.97 | 0.68 | 0.22 | 0.85 |
| 21337 | 0 | 15360  | FDANNAHVYPGALVLA<br>NKDLAKGSPTSIGIARAP<br>QTVSVDLPGL | 3.73 | 0.01 | 3.97 | 0.68 | 0.22 | 0.85 |
| 21338 | 0 | 15360  | FDANNAHVYPGALVLA<br>NKDLAKGSPTSIGIARAP<br>QTVSVDLPGL | 3.73 | 0.01 | 3.97 | 0.68 | 0.22 | 0.85 |
| 21339 | 0 | 15361  | FDARTMQY                                             | 2.10 | 0.01 | 2.99 | 0.44 | 0.85 | 0.28 |

|       |   |        |                                    |      |      |      |      |      |      |
|-------|---|--------|------------------------------------|------|------|------|------|------|------|
| 21340 | 0 | 91288  | FDATGHILPDSSSLKTD                  | 2.78 | 0.01 | 3.12 | 1.12 | 0.22 | 0.28 |
| 21341 | 0 | 464515 | FDDCGKNEEFLNDRCDI<br>CPVYEESDEDDQK | 3.32 | 0.01 | 1.66 | 0.44 | 0.85 | 1.28 |
| 21342 | 0 | 464515 | FDDCGKNEEFLNDRCDI<br>CPVYEESDEDDQK | 3.32 | 0.01 | 1.66 | 0.44 | 0.85 | 1.28 |
| 21343 | 0 | 149311 | FDDDNPSFIQIR                       | 2.56 | 0.01 | 0.78 | 0.44 | 1.93 | 2.66 |
| 21344 | 0 | 289399 | FDDEKEVEKIDSENS                    | 2.71 | 0.01 | 1.61 | 0.44 | 0.85 | 1.28 |
| 21345 | 0 | 423285 | FDDYGNTKSYLGAYT                    | 2.67 | 0.01 | 2.51 | 0.44 | 2.35 | 1.28 |
| 21346 | 0 | 233183 | FDEAKK                             | 1.86 | 0.01 | 3.61 | 1.20 | 0.22 | 0.85 |
| 21347 | 0 | 233184 | FDEAKR                             | 1.88 | 0.01 | 3.61 | 2.00 | 0.85 | 0.85 |
| 21348 | 0 | 120525 | FDEQNCSMKLG                        | 2.34 | 0.01 | 0.78 | 2.04 | 0.22 | 2.02 |
| 21349 | 0 | 119858 | FDEQNCSMKLGTWTYD                   | 2.67 | 0.01 | 0.78 | 2.04 | 0.22 | 0.28 |
| 21350 | 0 | 15381  | FDERRNKYLEEHPSAGK<br>DPKKTGGPI     | 3.15 | 0.01 | 3.65 | 0.68 | 0.22 | 0.28 |
| 21351 | 0 | 15381  | FDERRNKYLEEHPSAGK<br>DPKKTGGPI     | 3.15 | 0.01 | 3.65 | 0.68 | 0.22 | 0.85 |
| 21352 | 0 | 15381  | FDERRNKYLEEHPSAGK<br>DPKKTGGPI     | 3.15 | 0.01 | 3.65 | 0.68 | 0.22 | 0.85 |
| 21353 | 0 | 15381  | FDERRNKYLEEHPSAGK<br>DPKKTGGPI     | 3.15 | 0.01 | 3.65 | 0.68 | 0.22 | 0.85 |
| 21354 | 0 | 15381  | FDERRNKYLEEHPSAGK<br>DPKKTGGPI     | 3.15 | 0.01 | 3.65 | 0.68 | 0.22 | 0.85 |
| 21355 | 0 | 15381  | FDERRNKYLEEHPSAGK<br>DPKKTGGPI     | 3.15 | 0.01 | 3.65 | 0.68 | 0.22 | 0.85 |
| 21356 | 0 | 15381  | FDERRNKYLEEHPSAGK<br>DPKKTGGPI     | 3.15 | 0.01 | 3.65 | 0.68 | 0.22 | 0.85 |
| 21357 | 0 | 15381  | FDERRNKYLEEHPSAGK<br>DPKKTGGPI     | 3.15 | 0.01 | 3.65 | 0.68 | 0.22 | 0.85 |
| 21358 | 0 | 15381  | FDERRNKYLEEHPSAGK<br>DPKKTGGPI     | 3.15 | 0.01 | 3.65 | 0.68 | 0.22 | 0.85 |
| 21359 | 0 | 15381  | FDERRNKYLEEHPSAGK<br>DPKKTGGPI     | 3.15 | 0.01 | 3.65 | 0.68 | 0.22 | 0.85 |
| 21360 | 0 | 15381  | FDERRNKYLEEHPSAGK<br>DPKKTGGPI     | 3.15 | 0.01 | 3.65 | 0.68 | 0.22 | 0.85 |
| 21361 | 0 | 15381  | FDERRNKYLEEHPSAGK<br>DPKKTGGPI     | 3.15 | 0.01 | 3.65 | 0.68 | 0.22 | 0.85 |
| 21362 | 0 | 15381  | FDERRNKYLEEHPSAGK<br>DPKKTGGPI     | 3.15 | 0.01 | 3.65 | 0.68 | 0.22 | 0.85 |
| 21363 | 0 | 15381  | FDERRNKYLEEHPSAGK<br>DPKKTGGPI     | 3.15 | 0.01 | 3.65 | 0.68 | 0.22 | 0.85 |
| 21364 | 0 | 15381  | FDERRNKYLEEHPSAGK<br>DPKKTGGPI     | 3.15 | 0.01 | 3.65 | 0.68 | 0.22 | 0.85 |
| 21365 | 0 | 15381  | FDERRNKYLEEHPSAGK<br>DPKKTGGPI     | 3.15 | 0.01 | 3.65 | 0.68 | 0.22 | 1.48 |

|       |   |        |                                |      |      |      |      |      |      |
|-------|---|--------|--------------------------------|------|------|------|------|------|------|
| 21366 | 0 | 15381  | FDERRNKYLEEHPSAGK<br>DPKKTGGPI | 3.15 | 0.01 | 3.65 | 0.68 | 0.22 | 1.48 |
| 21367 | 0 | 15381  | FDERRNKYLEEHPSAGK<br>DPKKTGGPI | 3.15 | 0.01 | 3.65 | 0.68 | 0.22 | 1.48 |
| 21368 | 0 | 15382  | FDETTLNNFM                     | 2.32 | 0.01 | 1.75 | 0.68 | 0.22 | 0.28 |
| 21369 | 0 | 15382  | FDETTLNNFM                     | 2.32 | 0.01 | 1.75 | 0.68 | 0.22 | 0.28 |
| 21370 | 0 | 181613 | FDEWAEEFCRIRKIK                | 2.70 | 0.01 | 1.66 | 2.36 | 0.22 | 1.28 |
| 21371 | 0 | 15383  | FDFASGLD                       | 2.15 | 0.01 | 3.78 | 0.68 | 0.22 | 0.85 |
| 21372 | 0 | 226021 | FDFGLRPSIAYTKSKAKD<br>VE       | 2.92 | 0.01 | 2.24 | 3.06 | 0.22 | 0.28 |
| 21373 | 0 | 226021 | FDFGLRPSIAYTKSKAKD<br>VE       | 2.92 | 0.01 | 2.24 | 3.06 | 0.22 | 0.28 |
| 21374 | 0 | 152532 | FDFNFDQQT5                     | 2.35 | 0.01 | 2.18 | 2.16 | 0.22 | 0.28 |
| 21375 | 0 | 15384  | FDFQVFPTKYHSGRLLFC<br>FV       | 2.91 | 0.01 | 2.82 | 0.44 | 0.85 | 0.28 |
| 21376 | 0 | 15385  | FDFSGVVEG                      | 2.25 | 0.01 | 4.08 | 0.68 | 0.22 | 1.48 |
| 21377 | 0 | 81967  | FDFYEVT5RTPVRAREA              | 2.82 | 0.01 | 3.05 | 1.12 | 0.22 | 0.28 |
| 21378 | 0 | 81967  | FDFYEVT5RTPVRAREA              | 2.82 | 0.01 | 3.05 | 1.12 | 0.22 | 0.28 |
| 21379 | 0 | 81967  | FDFYEVT5RTPVRAREA              | 2.82 | 0.01 | 3.05 | 1.12 | 0.22 | 0.28 |
| 21380 | 0 | 81967  | FDFYEVT5RTPVRAREA              | 2.82 | 0.01 | 3.05 | 1.12 | 0.22 | 0.28 |
| 21381 | 0 | 81967  | FDFYEVT5RTPVRAREA              | 2.82 | 0.01 | 3.05 | 1.12 | 0.22 | 0.28 |
| 21382 | 0 | 81967  | FDFYEVT5RTPVRAREA              | 2.82 | 0.01 | 3.05 | 1.12 | 0.22 | 0.28 |
| 21383 | 0 | 81967  | FDFYEVT5RTPVRAREA              | 2.82 | 0.01 | 3.05 | 1.12 | 0.22 | 0.28 |
| 21384 | 0 | 15389  | FDGGKMOVQ                      | 2.11 | 0.01 | 2.21 | 1.12 | 0.22 | 0.28 |
| 21385 | 0 | 15389  | FDGGKMOVQ                      | 2.11 | 0.01 | 2.21 | 0.44 | 0.85 | 0.28 |
| 21386 | 0 | 135456 | FDGNQFQKAPASVLHE<br>LIQQIFNL   | 3.15 | 0.01 | 0.78 | 0.68 | 0.22 | 0.28 |
| 21387 | 0 | 229638 | FDGREAADAFSPEIV                | 2.69 | 0.01 | 3.85 | 0.68 | 0.22 | 0.28 |
| 21388 | 0 | 229638 | FDGREAADAFSPEIV                | 2.69 | 0.01 | 3.85 | 0.68 | 0.22 | 0.28 |
| 21389 | 0 | 229638 | FDGREAADAFSPEIV                | 2.69 | 0.01 | 3.85 | 0.68 | 0.22 | 0.28 |
| 21390 | 0 | 229638 | FDGREAADAFSPEIV                | 2.69 | 0.01 | 3.85 | 0.68 | 0.22 | 0.28 |
| 21391 | 0 | 15395  | FDGTNP                         | 1.88 | 0.01 | 3.37 | 0.68 | 0.22 | 0.28 |
| 21392 | 0 | 15395  | FDGTNP                         | 1.88 | 0.01 | 3.37 | 0.68 | 0.22 | 0.28 |
| 21393 | 0 | 423286 | FDGTNPST                       | 2.12 | 0.01 | 4.15 | 0.68 | 0.22 | 0.28 |
| 21394 | 0 | 423286 | FDGTNPST                       | 2.12 | 0.01 | 4.15 | 0.68 | 0.22 | 1.48 |
| 21395 | 0 | 423286 | FDGTNPST                       | 2.12 | 0.01 | 4.15 | 0.68 | 0.22 | 1.48 |
| 21396 | 0 | 423286 | FDGTNPST                       | 2.12 | 0.01 | 4.15 | 0.68 | 0.22 | 0.85 |
| 21397 | 0 | 423286 | FDGTNPST                       | 2.12 | 0.01 | 4.15 | 0.68 | 0.22 | 0.85 |
| 21398 | 0 | 15396  | FDGTNPSTEEMGDDFG<br>FGLCPFDT   | 3.15 | 0.01 | 3.37 | 2.13 | 0.22 | 1.34 |

|       |   |        |                                        |      |      |      |      |      |      |
|-------|---|--------|----------------------------------------|------|------|------|------|------|------|
| 21399 | 0 | 15396  | FDGTNPSTEEMGDDFG<br>FGLCPFDT           | 3.15 | 0.01 | 3.37 | 2.13 | 2.25 | 1.75 |
| 21400 | 0 | 131420 | FDGYWGYS                               | 2.14 | 0.01 | 0.78 | 0.44 | 1.93 | 0.85 |
| 21401 | 0 | 131420 | FDGYWGYS                               | 2.14 | 0.01 | 0.78 | 0.44 | 1.93 | 1.27 |
| 21402 | 0 | 131420 | FDGYWGYS                               | 2.14 | 0.01 | 0.78 | 0.44 | 1.93 | 1.27 |
| 21403 | 0 | 189626 | FDHKAFFTKVGLAAK                        | 2.69 | 0.01 | 3.28 | 0.44 | 1.23 | 0.28 |
| 21404 | 0 | 189626 | FDHKAFFTKVGLAAK                        | 2.69 | 0.01 | 3.28 | 0.44 | 1.41 | 0.28 |
| 21405 | 0 | 15402  | FDIAFKFASNTDWEGKD<br>SKG               | 2.97 | 0.01 | 2.21 | 1.20 | 0.22 | 0.28 |
| 21406 | 0 | 15404  | FDIAHSSSSARTGA                         | 2.67 | 0.01 | 2.08 | 1.12 | 0.22 | 1.48 |
| 21407 | 0 | 152533 | FDIGGSVSAG                             | 2.33 | 0.01 | 2.18 | 2.16 | 0.22 | 0.28 |
| 21408 | 0 | 15407  | FDIAGAHWGILAGLA                        | 2.78 | 0.01 | 2.59 | 0.44 | 0.85 | 0.28 |
| 21409 | 0 | 15407  | FDIAGAHWGILAGLA                        | 2.78 | 0.01 | 2.59 | 0.44 | 0.85 | 0.28 |
| 21410 | 0 | 146230 | FDIPEEIK                               | 2.13 | 0.01 | 0.78 | 1.12 | 0.22 | 0.28 |
| 21411 | 0 | 225284 | FDIPTNKKNITAQEIDYK                     | 2.85 | 0.01 | 2.61 | 0.68 | 0.22 | 0.28 |
| 21412 | 0 | 225284 | FDIPTNKKNITAQEIDYK                     | 2.85 | 0.01 | 2.61 | 0.68 | 0.22 | 0.28 |
| 21413 | 0 | 225284 | FDIPTNKKNITAQEIDYK                     | 2.85 | 0.01 | 2.61 | 0.68 | 0.22 | 0.28 |
| 21414 | 0 | 130488 | FDIYDEDE                               | 2.16 | 0.01 | 0.78 | 0.68 | 0.22 | 1.27 |
| 21415 | 0 | 130488 | FDIYDEDE                               | 2.16 | 0.01 | 0.78 | 1.20 | 0.22 | 1.27 |
| 21416 | 0 | 130488 | FDIYDEDE                               | 2.16 | 0.01 | 0.78 | 0.68 | 0.22 | 0.28 |
| 21417 | 0 | 96285  | FDKALKALPMHIRLS                        | 2.66 | 0.01 | 1.60 | 0.44 | 1.23 | 0.28 |
| 21418 | 0 | 96285  | FDKALKALPMHIRLS                        | 2.66 | 0.01 | 1.60 | 0.44 | 1.23 | 0.28 |
| 21419 | 0 | 15417  | FDKVK                                  | 1.75 | 0.01 | 4.15 | 0.68 | 0.22 | 1.27 |
| 21420 | 0 | 15417  | FDKVK                                  | 1.75 | 0.01 | 4.15 | 0.68 | 0.22 | 0.28 |
| 21421 | 0 | 15417  | FDKVK                                  | 1.75 | 0.01 | 4.15 | 0.68 | 0.22 | 0.28 |
| 21422 | 0 | 15417  | FDKVK                                  | 1.75 | 0.01 | 3.05 | 0.68 | 0.22 | 0.28 |
| 21423 | 0 | 15417  | FDKVK                                  | 1.75 | 0.01 | 3.05 | 0.68 | 0.22 | 0.28 |
| 21424 | 0 | 105773 | FDKVKGDP                               | 2.14 | 0.01 | 3.05 | 1.20 | 0.22 | 0.28 |
| 21425 | 0 | 15422  | FDLHTTSMAQKSFTQVE<br>FEAQT             | 3.60 | 0.01 | 3.00 | 0.44 | 0.85 | 0.28 |
| 21426 | 0 | 227163 | FDLPLIQPISQGAPV<br>FDLVARIKNNLNKNSPDLY | 2.68 | 0.01 | 2.48 | 0.44 | 1.59 | 0.28 |
| 21427 | 0 | 15428  | SHHFQSHGQLSDHPHA<br>LSSSSSH            | 3.65 | 0.01 | 2.75 | 0.44 | 0.85 | 0.85 |
| 21428 | 0 | 15430  | FDMATNP                                | 1.99 | 0.01 | 0.90 | 0.44 | 1.23 | 1.27 |
| 21429 | 0 | 15430  | FDMATNP                                | 1.99 | 0.01 | 0.90 | 0.44 | 1.23 | 0.28 |
| 21430 | 0 | 423288 | FDMDMMEMPATMHP<br>T                    | 2.71 | 0.01 | 2.51 | 0.44 | 1.59 | 1.28 |
| 21431 | 0 | 15434  | FDNEDQRV                               | 2.12 | 0.01 | 2.99 | 0.44 | 0.85 | 0.28 |
| 21432 | 0 | 127971 | FDPENFDPTRWLSKDKN<br>ITYFRNLGFG        | 3.24 | 0.01 | 0.78 | 1.12 | 0.22 | 0.85 |
| 21433 | 0 | 127971 | FDPENFDPTRWLSKDKN<br>ITYFRNLGFG        | 3.24 | 0.01 | 0.78 | 0.44 | 1.13 | 0.85 |



|       |   |        |                              |      |      |      |      |      |      |
|-------|---|--------|------------------------------|------|------|------|------|------|------|
| 21434 | 0 | 510433 | FDPFGWS                      | 2.03 | 0.01 | 0.90 | 0.44 | 1.13 | 0.28 |
| 21435 | 0 | 510433 | FDPFGWS                      | 2.03 | 0.01 | 0.90 | 0.44 | 1.41 | 0.28 |
| 21436 | 0 | 178798 | FDPIIEDYHVGFKQT              | 2.64 | 0.01 | 2.36 | 0.44 | 1.23 | 1.28 |
| 21437 | 0 | 230461 | FDPKEKDLNETLLRSLLG<br>GHYD   | 3.01 | 4.45 | 0.78 | 0.44 | 1.13 | 0.28 |
| 21438 | 0 | 230461 | FDPKEKDLNETLLRSLLG<br>GHYD   | 3.01 | 4.45 | 0.78 | 0.44 | 1.41 | 0.28 |
| 21439 | 0 | 230461 | FDPKEKDLNETLLRSLLG<br>GHYD   | 3.01 | 4.45 | 0.78 | 0.44 | 1.93 | 0.28 |
| 21440 | 0 | 15437  | FDPLRAEEDEREVS               | 2.63 | 0.01 | 1.96 | 0.44 | 0.85 | 0.28 |
| 21441 | 0 | 15437  | FDPLRAEEDEREVS               | 2.63 | 0.01 | 1.96 | 0.44 | 0.85 | 0.28 |
| 21442 | 0 | 15437  | FDPLRAEEDEREVS               | 2.63 | 0.01 | 1.96 | 0.44 | 0.85 | 0.28 |
| 21443 | 0 | 15438  | FDPLVAEE                     | 2.09 | 0.01 | 2.68 | 0.44 | 1.59 | 0.28 |
| 21444 | 0 | 15439  | FDPLVAEEDEREIS               | 2.61 | 0.01 | 2.41 | 0.44 | 0.85 | 0.28 |
| 21445 | 0 | 15439  | FDPLVAEEDEREIS               | 2.61 | 0.01 | 2.41 | 0.44 | 0.85 | 0.28 |
| 21446 | 0 | 15439  | FDPLVAEEDEREIS               | 2.61 | 0.01 | 2.41 | 0.44 | 0.85 | 0.28 |
| 21447 | 0 | 78153  | FDPQIQAISSPCHNS              | 2.73 | 0.01 | 2.04 | 0.44 | 1.59 | 0.28 |
| 21448 | 0 | 78153  | FDPQIQAISSPCHNS              | 2.73 | 0.01 | 2.04 | 0.44 | 2.82 | 0.28 |
| 21449 | 0 | 78153  | FDPQIQAISSPCHNS              | 2.73 | 0.01 | 2.04 | 0.44 | 0.85 | 0.28 |
| 21450 | 0 | 15445  | FDPVFSEFWRARST               | 2.67 | 0.01 | 0.90 | 1.15 | 0.22 | 0.85 |
| 21451 | 0 | 137152 | FDQCDYGWLSASVRH<br>PVTVARAQC | 3.14 | 0.01 | 0.78 | 0.68 | 0.22 | 0.28 |
| 21452 | 0 | 15446  | FDQGWGPISY                   | 2.29 | 0.01 | 1.72 | 2.74 | 0.22 | 0.28 |
| 21453 | 0 | 121293 | FDQQNC                       | 1.89 | 0.01 | 2.26 | 1.20 | 0.22 | 0.28 |
| 21454 | 0 | 121293 | FDQQNC                       | 1.89 | 0.01 | 2.26 | 1.20 | 0.22 | 0.28 |
| 21455 | 0 | 152534 | FDQQT SQNIK                  | 2.31 | 0.01 | 2.18 | 2.16 | 0.22 | 0.28 |
| 21456 | 0 | 99239  | FDQRSRQFQNLQNRH              | 2.72 | 0.01 | 2.16 | 0.44 | 1.23 | 1.48 |
| 21457 | 0 | 15456  | FDRGYISQ                     | 2.10 | 0.01 | 2.99 | 0.44 | 0.85 | 0.28 |
| 21458 | 0 | 15457  | FDRILLFKP                    | 2.32 | 0.01 | 0.78 | 0.44 | 1.74 | 0.28 |
| 21459 | 0 | 171006 | FDRVFHGNETTKNVY              | 2.66 | 0.01 | 0.78 | 0.44 | 1.13 | 0.28 |
| 21460 | 0 | 130823 | FDSH                         | 1.57 | 0.01 | 0.78 | 1.15 | 0.22 | 2.12 |
| 21461 | 0 | 128612 | FDSHY                        | 1.74 | 0.01 | 0.78 | 0.68 | 0.22 | 2.12 |
| 21462 | 0 | 15461  | FDSSGSFLGHI                  | 2.43 | 0.01 | 3.35 | 2.02 | 0.85 | 0.28 |
| 21463 | 0 | 15461  | FDSSGSFLGHI                  | 2.43 | 0.01 | 3.35 | 2.02 | 0.85 | 0.28 |
| 21464 | 0 | 15462  | FDSSKQSF                     | 2.17 | 0.01 | 3.78 | 1.12 | 0.22 | 0.28 |
| 21465 | 0 | 15462  | FDSSKQSF                     | 2.17 | 0.01 | 3.78 | 1.12 | 0.22 | 0.28 |
| 21466 | 0 | 225285 | FDSSYKRGQPATFPL              | 2.64 | 0.01 | 4.63 | 1.81 | 0.22 | 0.28 |
| 21467 | 0 | 171008 | FDSYPMVLGAQHFHS              | 2.65 | 0.01 | 0.78 | 0.44 | 1.41 | 0.28 |
| 21468 | 0 | 238367 | FDSYPMVLGAQHFHSG<br>KH       | 2.82 | 0.01 | 0.78 | 0.44 | 1.13 | 0.28 |
| 21469 | 0 | 145775 | FDTGAFPDWPA                  | 2.52 | 3.72 | 0.90 | 0.68 | 0.22 | 1.27 |
| 21470 | 0 | 145775 | FDTGAFPDWPA                  | 2.52 | 3.72 | 0.90 | 0.68 | 0.22 | 0.28 |
| 21471 | 0 | 145775 | FDTGAFPDWPA                  | 2.52 | 3.72 | 0.90 | 0.68 | 0.22 | 3.30 |
| 21472 | 0 | 145775 | FDTGAFPDWPA                  | 2.52 | 3.72 | 0.90 | 0.68 | 0.22 | 3.30 |
| 21473 | 0 | 145775 | FDTGAFPDWPA                  | 2.52 | 3.72 | 0.90 | 0.68 | 0.22 | 3.30 |
| 21474 | 0 | 15468  | FDTGAFPDWPA                  | 2.52 | 0.01 | 0.90 | 0.68 | 0.22 | 1.39 |

|       |   |        |                          |      |      |      |      |      |      |
|-------|---|--------|--------------------------|------|------|------|------|------|------|
| 21475 | 0 | 15468  | FDTGAFDPDWPA             | 2.52 | 0.01 | 0.90 | 0.68 | 0.22 | 1.27 |
| 21476 | 0 | 15468  | FDTGAFDPDWPA             | 2.52 | 0.01 | 0.90 | 0.68 | 0.22 | 0.28 |
| 21477 | 0 | 15468  | FDTGAFDPDWPA             | 2.52 | 0.01 | 0.90 | 1.15 | 0.22 | 0.28 |
| 21478 | 0 | 15468  | FDTGAFDPDWPA             | 2.52 | 0.01 | 0.90 | 1.15 | 0.22 | 0.28 |
| 21479 | 0 | 15468  | FDTGAFDPDWPA             | 2.52 | 0.01 | 0.90 | 0.68 | 0.22 | 1.27 |
| 21480 | 0 | 15468  | FDTGAFDPDWPA             | 2.52 | 0.01 | 0.90 | 2.71 | 0.22 | 0.28 |
| 21481 | 0 | 15468  | FDTGAFDPDWPA             | 2.52 | 0.01 | 0.90 | 2.71 | 0.22 | 0.28 |
| 21482 | 0 | 15468  | FDTGAFDPDWPA             | 2.52 | 0.01 | 0.90 | 2.71 | 0.22 | 0.28 |
| 21483 | 0 | 145776 | FDTGAFDPDWPY             | 2.50 | 3.72 | 0.90 | 0.68 | 0.22 | 1.27 |
| 21484 | 0 | 145776 | FDTGAFDPDWPY             | 2.50 | 3.72 | 0.90 | 0.68 | 0.22 | 0.28 |
| 21485 | 0 | 145776 | FDTGAFDPDWPY             | 2.50 | 3.72 | 0.90 | 0.68 | 0.22 | 3.30 |
| 21486 | 0 | 145776 | FDTGAFDPDWPY             | 2.50 | 3.72 | 0.90 | 0.68 | 0.22 | 3.30 |
| 21487 | 0 | 145777 | FDTGAFDPDWPYD            | 2.58 | 3.72 | 0.90 | 0.68 | 0.22 | 1.27 |
| 21488 | 0 | 145777 | FDTGAFDPDWPYD            | 2.58 | 3.72 | 0.90 | 0.68 | 0.22 | 0.28 |
| 21489 | 0 | 145777 | FDTGAFDPDWPYD            | 2.58 | 3.72 | 0.90 | 0.68 | 0.22 | 3.30 |
| 21490 | 0 | 145777 | FDTGAFDPDWPYD            | 2.58 | 3.72 | 0.90 | 0.68 | 0.22 | 3.30 |
| 21491 | 0 | 237716 | FDTLQKADTDPNADIVI<br>GVP | 2.95 | 0.01 | 2.74 | 1.20 | 0.22 | 1.34 |
| 21492 | 0 | 237716 | FDTLQKADTDPNADIVI<br>GVP | 2.95 | 0.01 | 2.74 | 1.20 | 0.22 | 0.28 |
| 21493 | 0 | 237716 | FDTLQKADTDPNADIVI<br>GVP | 2.95 | 0.01 | 2.74 | 1.20 | 0.22 | 0.28 |
| 21494 | 0 | 237716 | FDTLQKADTDPNADIVI<br>GVP | 2.95 | 0.01 | 2.74 | 1.20 | 0.22 | 0.28 |
| 21495 | 0 | 237716 | FDTLQKADTDPNADIVI<br>GVP | 2.95 | 0.01 | 2.74 | 1.20 | 0.22 | 0.28 |
| 21496 | 0 | 237716 | FDTLQKADTDPNADIVI<br>GVP | 2.95 | 0.01 | 2.74 | 1.20 | 0.22 | 0.28 |
| 21497 | 0 | 237716 | FDTLQKADTDPNADIVI<br>GVP | 2.95 | 0.01 | 2.74 | 1.20 | 0.22 | 0.28 |
| 21498 | 0 | 81983  | FDTTTL                   | 1.91 | 0.01 | 2.40 | 2.52 | 0.22 | 0.28 |
| 21499 | 0 | 289539 | FDVATEKKKNPEAAS          | 2.65 | 0.01 | 1.61 | 0.44 | 0.85 | 1.28 |
| 21500 | 0 | 127972 | FDVSFEVKVGGLKQYYR<br>LP  | 2.88 | 0.01 | 2.40 | 2.75 | 0.22 | 0.28 |
| 21501 | 0 | 127972 | FDVSFEVKVGGLKQYYR<br>LP  | 2.88 | 0.01 | 2.40 | 2.75 | 0.22 | 0.85 |
| 21502 | 0 | 105180 | FDVTT                    | 1.72 | 0.01 | 3.03 | 1.20 | 0.22 | 0.28 |
| 21503 | 0 | 96286  | FDVTTL                   | 1.89 | 0.01 | 3.03 | 1.20 | 0.22 | 0.28 |
| 21504 | 0 | 96286  | FDVTTL                   | 1.89 | 0.01 | 2.40 | 3.42 | 0.22 | 0.28 |
| 21505 | 0 | 96286  | FDVTTL                   | 1.89 | 0.01 | 2.40 | 3.42 | 0.22 | 0.28 |
| 21506 | 0 | 96286  | FDVTTL                   | 1.89 | 0.01 | 2.40 | 2.52 | 0.22 | 0.28 |
| 21507 | 0 | 96286  | FDVTTL                   | 1.89 | 0.01 | 2.40 | 2.52 | 0.22 | 0.28 |
| 21508 | 0 | 15473  | FDVTTLNPTIAGAGDVK        | 2.79 | 0.01 | 3.03 | 1.15 | 0.22 | 0.85 |
| 21509 | 0 | 15473  | FDVTTLNPTIAGAGDVK        | 2.79 | 0.01 | 3.03 | 1.15 | 0.22 | 1.39 |

|       |   |        |                                  |      |      |      |      |      |      |
|-------|---|--------|----------------------------------|------|------|------|------|------|------|
| 21510 | 0 | 15473  | FDVTTLNPTIAGAGDVK                | 2.79 | 0.01 | 3.03 | 1.15 | 0.22 | 0.85 |
| 21511 | 0 | 15473  | FDVTTLNPTIAGAGDVK                | 2.79 | 0.01 | 3.03 | 1.15 | 0.22 | 1.34 |
| 21512 | 0 | 79212  | FDWLWLWDT                        | 2.26 | 0.01 | 0.90 | 0.68 | 0.22 | 0.28 |
| 21513 | 0 | 121295 | FDWQNC                           | 1.88 | 0.01 | 2.26 | 1.20 | 0.22 | 0.28 |
| 21514 | 0 | 118793 | FDYSKHV                          | 1.99 | 0.01 | 0.90 | 1.15 | 0.22 | 1.39 |
| 21515 | 0 | 15476  | FEAAAL                           | 1.91 | 0.01 | 2.24 | 0.68 | 0.22 | 0.28 |
| 21516 | 0 | 15477  | FEAAFNDAIKASTGGAY<br>QSY         | 2.94 | 0.01 | 3.00 | 3.27 | 0.22 | 0.28 |
| 21517 | 0 | 289575 | FEATAMKTTTTTTGD                  | 2.68 | 0.01 | 1.61 | 0.44 | 0.85 | 1.28 |
| 21518 | 0 | 137849 | FEAVEGAVALAD                     | 2.51 | 0.01 | 2.21 | 1.20 | 0.22 | 0.28 |
| 21519 | 0 | 99240  | FECAGVALSRLVLR                   | 2.68 | 0.01 | 2.16 | 0.44 | 1.23 | 1.48 |
| 21520 | 0 | 99240  | FECAGVALSRLVLR                   | 2.68 | 0.01 | 2.16 | 0.44 | 1.23 | 0.85 |
| 21521 | 0 | 181614 | FECGNDKIIGNSDKY                  | 2.67 | 0.01 | 2.86 | 2.37 | 0.22 | 1.28 |
| 21522 | 0 | 128615 | FECTTHQPRSPLRDLKG<br>ALESLEEETGQ | 3.28 | 0.01 | 0.78 | 1.20 | 0.22 | 1.27 |
| 21523 | 0 | 128615 | FECTTHQPRSPLRDLKG<br>ALESLEEETGQ | 3.28 | 0.01 | 0.78 | 1.20 | 0.22 | 1.27 |
| 21524 | 0 | 128615 | FECTTHQPRSPLRDLKG<br>ALESLEEETGQ | 3.28 | 0.01 | 0.78 | 1.20 | 0.22 | 1.27 |
| 21525 | 0 | 128615 | FECTTHQPRSPLRDLKG<br>ALESLEEETGQ | 3.28 | 0.01 | 0.78 | 1.20 | 0.22 | 1.27 |
| 21526 | 0 | 128615 | FECTTHQPRSPLRDLKG<br>ALESLEEETGQ | 3.28 | 0.01 | 0.78 | 1.20 | 0.22 | 1.57 |
| 21527 | 0 | 229207 | FEDEL                            | 1.75 | 0.01 | 3.65 | 0.68 | 0.22 | 0.28 |
| 21528 | 0 | 229207 | FEDEL                            | 1.75 | 0.01 | 3.65 | 0.68 | 0.22 | 3.93 |
| 21529 | 0 | 229207 | FEDEL                            | 1.75 | 0.01 | 3.65 | 0.68 | 0.22 | 0.28 |
| 21530 | 0 | 229207 | FEDEL                            | 1.75 | 0.01 | 3.65 | 0.68 | 0.22 | 0.28 |
| 21531 | 0 | 78154  | FEDETW                           | 1.90 | 0.01 | 0.90 | 2.02 | 1.59 | 0.28 |
| 21532 | 0 | 99241  | FEDFFPASSRDQSSY                  | 2.69 | 0.01 | 2.16 | 0.44 | 1.23 | 1.48 |
| 21533 | 0 | 171010 | FEDFLHESLVEYLDV                  | 2.72 | 0.01 | 0.78 | 0.44 | 1.41 | 0.28 |
| 21534 | 0 | 171010 | FEDFLHESLVEYLDV                  | 2.72 | 0.01 | 0.78 | 0.44 | 1.13 | 0.28 |
| 21535 | 0 | 150982 | FEDINGIRRP                       | 2.30 | 0.01 | 3.16 | 0.68 | 0.22 | 0.85 |
| 21536 | 0 | 141891 | FEDLNFKYLYNSDKNSQ<br>HDKDF       | 3.08 | 0.01 | 3.13 | 0.68 | 0.22 | 0.28 |
| 21537 | 0 | 108360 | FEDMAKSDKARYDRE                  | 2.70 | 0.01 | 0.78 | 0.44 | 1.13 | 1.27 |
| 21538 | 0 | 15509  | FEDVKGTGGESRDLP<br>SG<br>QG      | 2.89 | 0.01 | 3.36 | 3.89 | 1.59 | 0.28 |
| 21539 | 0 | 15509  | FEDVKGTGGESRDLP<br>SG<br>QG      | 2.89 | 0.01 | 3.36 | 0.68 | 0.22 | 0.28 |
| 21540 | 0 | 15509  | FEDVKGTGGESRDLP<br>SG<br>QG      | 2.89 | 0.01 | 3.36 | 0.68 | 0.22 | 0.28 |
| 21541 | 0 | 15509  | FEDVKGTGGESRDLP<br>SG<br>QG      | 2.89 | 0.01 | 3.36 | 1.81 | 0.22 | 2.12 |
| 21542 | 0 | 15510  | FEDVNGIRKP                       | 2.26 | 0.01 | 3.75 | 0.68 | 0.22 | 0.85 |
| 21543 | 0 | 15511  | FEDVNGIRRP                       | 2.28 | 0.01 | 4.93 | 0.68 | 0.22 | 0.85 |

|       |   |        |                                |      |      |      |      |      |      |
|-------|---|--------|--------------------------------|------|------|------|------|------|------|
| 21544 | 0 | 137401 | FEDVW                          | 1.74 | 0.01 | 0.78 | 0.68 | 0.22 | 0.28 |
| 21545 | 0 | 137401 | FEDVW                          | 1.74 | 0.01 | 0.78 | 0.68 | 0.22 | 0.28 |
| 21546 | 0 | 137401 | FEDVW                          | 1.74 | 0.01 | 0.78 | 0.68 | 0.22 | 2.12 |
| 21547 | 0 | 137401 | FEDVW                          | 1.74 | 0.01 | 0.78 | 0.68 | 0.22 | 1.34 |
| 21548 | 0 | 137401 | FEDVW                          | 1.74 | 0.01 | 0.78 | 0.68 | 0.22 | 2.12 |
| 21549 | 0 | 137401 | FEDVW                          | 1.74 | 0.01 | 0.78 | 0.68 | 0.22 | 2.12 |
| 21550 | 0 | 137401 | FEDVW                          | 1.74 | 0.01 | 0.78 | 0.68 | 0.22 | 2.02 |
| 21551 | 0 | 141892 | FEEDKKMLELFVQKL                | 2.72 | 0.01 | 3.13 | 0.68 | 0.22 | 0.28 |
| 21552 | 0 | 141893 | FEEETESSASSES                  | 2.61 | 0.01 | 3.13 | 0.68 | 0.22 | 0.28 |
| 21553 | 0 | 15517  | FEEINGIRKP                     | 2.30 | 0.01 | 4.93 | 0.68 | 0.22 | 0.85 |
| 21554 | 0 | 15518  | FEEINGIRRP                     | 2.31 | 0.01 | 4.93 | 0.68 | 0.22 | 0.85 |
| 21555 | 0 | 149312 | FEEIRNLALQ                     | 2.30 | 0.01 | 1.86 | 0.44 | 1.93 | 0.85 |
| 21556 | 0 | 149312 | FEEIRNLALQ                     | 2.30 | 0.01 | 1.86 | 2.74 | 0.22 | 0.85 |
| 21557 | 0 | 149312 | FEEIRNLALQ                     | 2.30 | 0.01 | 1.86 | 2.74 | 0.22 | 0.85 |
| 21558 | 0 | 15519  | FEELCGELFRGTLQPV               | 2.75 | 0.01 | 2.30 | 0.44 | 1.41 | 0.28 |
| 21559 | 0 | 15520  | FEEMYRHILRSQGPFDA<br>VLYYHMMKD | 3.15 | 0.01 | 3.21 | 0.68 | 0.22 | 0.85 |
| 21560 | 0 | 191287 | FEEPGHLAPTGL                   | 2.48 | 0.01 | 2.76 | 1.20 | 0.22 | 0.28 |
| 21561 | 0 | 125045 | FEEQEDEIIGFGQELK               | 2.78 | 0.01 | 0.78 | 1.12 | 0.22 | 0.85 |
| 21562 | 0 | 103165 | FEETFEVTAAAPVAV                | 2.74 | 0.01 | 2.04 | 0.44 | 0.85 | 1.28 |
| 21563 | 0 | 15523  | FEEVNGIRKP                     | 2.28 | 0.01 | 4.93 | 0.68 | 0.22 | 0.85 |
| 21564 | 0 | 15524  | FEEVNGIRRP                     | 2.29 | 0.01 | 4.93 | 0.68 | 0.22 | 0.85 |
| 21565 | 0 | 136219 | FEYGGKIDTIEIT                  | 2.64 | 0.01 | 0.78 | 4.63 | 0.22 | 0.28 |
| 21566 | 0 | 136219 | FEYGGKIDTIEIT                  | 2.64 | 0.01 | 0.78 | 0.44 | 1.13 | 0.28 |
| 21567 | 0 | 136219 | FEYGGKIDTIEIT                  | 2.64 | 0.01 | 0.78 | 0.44 | 1.93 | 0.28 |
| 21568 | 0 | 15529  | FEFPPPTDE                      | 2.35 | 0.01 | 3.55 | 1.12 | 0.22 | 1.48 |
| 21569 | 0 | 15529  | FEFPPPTDE                      | 2.35 | 0.01 | 3.55 | 1.12 | 0.22 | 0.85 |
| 21570 | 0 | 180452 | FEFWDWVGGRYSLWS<br>AIGL        | 2.89 | 3.37 | 0.78 | 0.44 | 1.13 | 0.28 |
| 21571 | 0 | 180452 | FEFWDWVGGRYSLWS<br>AIGL        | 2.89 | 3.37 | 0.78 | 0.44 | 1.13 | 0.28 |
| 21572 | 0 | 180452 | FEFWDWVGGRYSLWS<br>AIGL        | 2.89 | 3.37 | 0.78 | 0.44 | 1.41 | 0.28 |
| 21573 | 0 | 15536  | FEGERAMTKDCHLLGT               | 2.70 | 0.01 | 2.30 | 0.44 | 0.85 | 0.28 |
| 21574 | 0 | 15536  | FEGERAMTKDCHLLGT               | 2.70 | 0.01 | 2.30 | 0.44 | 1.41 | 0.28 |
| 21575 | 0 | 79821  | FEGKPALELIRM                   | 2.45 | 0.01 | 2.14 | 3.26 | 0.22 | 0.28 |
| 21576 | 0 | 79821  | FEGKPALELIRM                   | 2.45 | 0.01 | 2.14 | 1.12 | 0.22 | 0.28 |
| 21577 | 0 | 141267 | FEGWFN                         | 1.91 | 0.01 | 4.33 | 2.37 | 0.22 | 0.85 |
| 21578 | 0 | 141267 | FEGWFN                         | 1.91 | 0.01 | 4.33 | 2.37 | 0.22 | 1.27 |
| 21579 | 0 | 15547  | FEHFRECCNE                     | 2.35 | 0.01 | 3.89 | 0.44 | 1.23 | 0.85 |
| 21580 | 0 | 92667  | FEKVKHNLVI                     | 2.31 | 0.01 | 2.67 | 2.00 | 0.22 | 0.28 |
| 21581 | 0 | 92667  | FEKVKHNLVI                     | 2.31 | 0.01 | 2.67 | 2.00 | 0.22 | 0.28 |
| 21582 | 0 | 92667  | FEKVKHNLVI                     | 2.31 | 0.01 | 2.67 | 2.00 | 0.22 | 0.28 |
| 21583 | 0 | 180968 | FEKVTGRIDK                     | 2.29 | 0.01 | 2.18 | 2.16 | 0.22 | 0.28 |

|       |   |        |                                                  |      |      |      |      |      |      |
|-------|---|--------|--------------------------------------------------|------|------|------|------|------|------|
| 21584 | 0 | 15582  | FELCDNPFFAVSKPMGT<br>QTHT                        | 2.93 | 0.01 | 3.30 | 3.27 | 0.22 | 2.12 |
| 21585 | 0 | 15582  | FELCDNPFFAVSKPMGT<br>QTHT                        | 2.93 | 0.01 | 3.30 | 3.27 | 0.22 | 2.12 |
| 21586 | 0 | 15582  | FELCDNPFFAVSKPMGT<br>QTHT                        | 2.93 | 0.01 | 3.30 | 3.27 | 0.22 | 1.34 |
| 21587 | 0 | 15582  | FELCDNPFFAVSKPMGT<br>QTHT                        | 2.93 | 0.01 | 3.30 | 3.27 | 0.22 | 2.02 |
| 21588 | 0 | 15582  | FELCDNPFFAVSKPMGT<br>QTHT                        | 2.93 | 0.01 | 3.30 | 3.27 | 0.22 | 1.75 |
| 21589 | 0 | 15582  | FELCDNPFFAVSKPMGT<br>QTHT                        | 2.93 | 0.01 | 3.30 | 3.27 | 0.22 | 1.66 |
| 21590 | 0 | 15588  | FELPSVPFPAPGSDEILFV<br>VRDTTFNTNAPV              | 3.39 | 0.01 | 4.63 | 1.15 | 0.22 | 1.27 |
| 21591 | 0 | 193200 | FENNNYYFNENGEMQF<br>GYINI                        | 3.04 | 0.01 | 3.04 | 1.12 | 0.22 | 0.28 |
| 21592 | 0 | 240990 | FENREII                                          | 2.00 | 0.01 | 3.35 | 1.20 | 0.22 | 0.85 |
| 21593 | 0 | 240991 | FENREIID                                         | 2.13 | 0.01 | 3.35 | 2.37 | 0.22 | 0.85 |
| 21594 | 0 | 127650 | FEPFSNKG                                         | 2.13 | 0.01 | 0.78 | 0.44 | 1.23 | 0.28 |
| 21595 | 0 | 15615  | FEPLRAETDDVEPS                                   | 2.60 | 0.01 | 2.59 | 0.44 | 0.85 | 0.28 |
| 21596 | 0 | 100032 | FEPNTVKAHAAY                                     | 2.44 | 0.01 | 2.88 | 1.20 | 0.22 | 0.85 |
| 21597 | 0 | 78379  | FEPSKISGVSHYLL                                   | 2.64 | 0.01 | 0.90 | 0.68 | 0.22 | 0.28 |
| 21598 | 0 | 123164 | FEPTGFQNMLSGLYNPI<br>VFSASGANLTDAHLFCLL<br>ACDRD | 3.61 | 0.01 | 0.78 | 3.06 | 0.22 | 0.28 |
| 21599 | 0 | 123164 | FEPTGFQNMLSGLYNPI<br>VFSASGANLTDAHLFCLL<br>ACDRD | 3.61 | 0.01 | 0.78 | 3.06 | 0.22 | 0.28 |
| 21600 | 0 | 141894 | FEQEPSSEEPKDSKL                                  | 2.70 | 0.01 | 3.13 | 0.68 | 0.22 | 0.28 |
| 21601 | 0 | 123165 | FEQLKEGYL                                        | 2.23 | 0.01 | 2.28 | 2.00 | 0.22 | 0.28 |
| 21602 | 0 | 15624  | FEQPTLTFGAGVNVP                                  | 2.69 | 0.01 | 2.76 | 0.44 | 1.59 | 0.28 |
| 21603 | 0 | 289706 | FEREVDGHDFFIREHI                                 | 2.72 | 0.01 | 1.61 | 0.44 | 0.85 | 1.28 |
| 21604 | 0 | 78380  | FERIDTTLCETHRINWT<br>AD                          | 2.94 | 0.01 | 2.69 | 0.68 | 0.22 | 0.28 |
| 21605 | 0 | 505210 | FERVPEGV                                         | 2.14 | 0.01 | 0.90 | 0.44 | 0.85 | 0.28 |
| 21606 | 0 | 505210 | FERVPEGV                                         | 2.14 | 0.01 | 0.90 | 0.44 | 0.85 | 0.28 |
| 21607 | 0 | 158588 | FERVPGEVT                                        | 2.23 | 0.01 | 0.90 | 0.44 | 0.85 | 1.27 |
| 21608 | 0 | 158588 | FERVPGEVT                                        | 2.23 | 0.01 | 0.90 | 0.44 | 0.85 | 1.27 |
| 21609 | 0 | 15657  | FESSAAK                                          | 2.02 | 0.01 | 0.78 | 2.37 | 0.22 | 0.28 |
| 21610 | 0 | 15687  | FESTGNLI                                         | 2.10 | 0.01 | 2.36 | 4.03 | 0.22 | 0.28 |
| 21611 | 0 | 15751  | FETTMR                                           | 1.89 | 0.01 | 2.40 | 0.44 | 0.85 | 0.28 |
| 21612 | 0 | 15753  | FEVFNFPVPCSIC                                    | 2.50 | 0.01 | 2.38 | 0.68 | 0.22 | 0.28 |
| 21613 | 0 | 15753  | FEVFNFPVPCSIC                                    | 2.50 | 0.01 | 2.38 | 0.68 | 0.22 | 0.28 |
| 21614 | 0 | 226022 | FEVGATYYFNKNMSTYV<br>DYI                         | 2.93 | 0.01 | 2.24 | 1.81 | 0.22 | 0.28 |
| 21615 | 0 | 226022 | FEVGATYYFNKNMSTYV<br>DYI                         | 2.93 | 0.01 | 2.24 | 1.81 | 0.22 | 0.28 |

|       |   |        |                                  |      |      |      |      |      |      |
|-------|---|--------|----------------------------------|------|------|------|------|------|------|
| 21616 | 0 | 99242  | FEVKPDKKNPQLQDL                  | 2.69 | 0.01 | 2.16 | 0.44 | 1.23 | 1.48 |
| 21617 | 0 | 15770  | FEWYYQSGLSVVMPV                  | 2.65 | 0.01 | 2.59 | 0.44 | 0.85 | 0.28 |
| 21618 | 0 | 118346 | FEYFPSHFFVPELEVTIIC              | 2.90 | 0.01 | 0.90 | 0.68 | 0.22 | 1.27 |
| 21619 | 0 | 118346 | FEYFPSHFFVPELEVTIIC              | 2.90 | 0.01 | 0.90 | 0.68 | 0.22 | 1.27 |
| 21620 | 0 | 118346 | FEYFPSHFFVPELEVTIIC              | 2.90 | 0.01 | 0.90 | 0.68 | 0.22 | 1.27 |
| 21621 | 0 | 118346 | FEYFPSHFFVPELEVTIIC              | 2.90 | 0.01 | 0.90 | 0.68 | 0.22 | 0.28 |
| 21622 | 0 | 118346 | FEYFPSHFFVPELEVTIIC              | 2.90 | 0.01 | 0.90 | 0.68 | 0.22 | 1.27 |
| 21623 | 0 | 118346 | FEYFPSHFFVPELEVTIIC              | 2.90 | 0.01 | 0.90 | 0.44 | 1.13 | 0.28 |
| 21624 | 0 | 118346 | FEYFPSHFFVPELEVTIIC              | 2.90 | 0.01 | 0.90 | 0.44 | 1.13 | 0.28 |
| 21625 | 0 | 120527 | FEYMNKLEKG                       | 2.31 | 0.01 | 2.18 | 2.16 | 0.22 | 0.28 |
| 21626 | 0 | 102423 | FEYQD                            | 1.74 | 0.01 | 0.78 | 0.68 | 0.22 | 0.85 |
| 21627 | 0 | 102423 | FEYQD                            | 1.74 | 0.01 | 0.78 | 0.68 | 0.22 | 1.66 |
| 21628 | 0 | 102423 | FEYQD                            | 1.74 | 0.01 | 0.78 | 0.68 | 0.22 | 0.85 |
| 21629 | 0 | 102423 | FEYQD                            | 1.74 | 0.01 | 0.78 | 0.68 | 0.22 | 1.48 |
| 21630 | 0 | 102423 | FEYQD                            | 1.74 | 0.01 | 0.78 | 0.68 | 0.22 | 2.35 |
| 21631 | 0 | 461776 | FEYSNGGPFLTPI                    | 2.53 | 0.01 | 3.00 | 0.68 | 0.22 | 1.48 |
| 21632 | 0 | 461776 | FEYSNGGPFLTPI                    | 2.53 | 0.01 | 3.00 | 0.68 | 0.22 | 0.85 |
| 21633 | 0 | 461776 | FEYSNGGPFLTPI                    | 2.53 | 0.01 | 3.00 | 0.68 | 0.22 | 0.85 |
| 21634 | 0 | 461776 | FEYSNGGPFLTPI                    | 2.53 | 0.01 | 3.00 | 0.68 | 0.22 | 0.28 |
| 21635 | 0 | 461776 | FEYSNGGPFLTPI                    | 2.53 | 0.01 | 3.00 | 0.68 | 0.22 | 0.85 |
| 21636 | 0 | 15775  | FEYVDTYGDNAG                     | 2.48 | 0.01 | 2.14 | 2.90 | 0.22 | 0.28 |
| 21637 | 0 | 15775  | FEYVDTYGDNAG                     | 2.48 | 0.01 | 2.14 | 2.90 | 0.22 | 0.28 |
| 21638 | 0 | 100034 | FFAEDVGSNK                       | 2.28 | 0.01 | 0.78 | 1.12 | 0.22 | 0.85 |
| 21639 | 0 | 15783  | FFAVSKPMGTQTHTMIF                | 2.77 | 0.01 | 2.48 | 0.44 | 0.85 | 0.28 |
| 21640 | 0 | 101625 | FFDEIHSQRSQNG                    | 2.57 | 0.01 | 0.90 | 0.68 | 0.22 | 2.51 |
| 21641 | 0 | 130824 | FFEE                             | 1.56 | 0.01 | 0.78 | 0.68 | 0.22 | 2.12 |
| 21642 | 0 | 144641 | FFENKD                           | 1.89 | 0.01 | 3.85 | 0.68 | 0.22 | 1.48 |
| 21643 | 0 | 144641 | FFENKD                           | 1.89 | 0.01 | 3.85 | 0.68 | 0.22 | 1.48 |
| 21644 | 0 | 144641 | FFENKD                           | 1.89 | 0.01 | 3.85 | 0.68 | 0.22 | 0.85 |
| 21645 | 0 | 15805  | FFEVAH                           | 1.89 | 0.01 | 0.90 | 2.02 | 0.22 | 0.28 |
| 21646 | 0 | 15807  | FFFDIDLLL                        | 2.24 | 0.01 | 2.51 | 0.68 | 0.22 | 0.28 |
| 21647 | 0 | 15807  | FFFDIDLLL                        | 2.24 | 0.01 | 2.51 | 0.68 | 0.22 | 2.02 |
| 21648 | 0 | 106413 | FFGHGAEDSLADQAAN<br>E            | 2.79 | 0.01 | 0.78 | 1.12 | 0.22 | 0.28 |
| 21649 | 0 | 123166 | FFGKKDDDKLTEKEFIEG<br>TLANKEILRL | 3.29 | 0.01 | 1.60 | 2.04 | 0.22 | 0.28 |
| 21650 | 0 | 15814  | FFGMSRIGMEVTPSGT<br>W            | 2.79 | 0.01 | 2.91 | 0.44 | 0.85 | 0.28 |

|       |   |        |                                                        |      |      |      |      |      |      |
|-------|---|--------|--------------------------------------------------------|------|------|------|------|------|------|
| 21651 | 0 | 134939 | FFGSDRGAPKRGSGKD<br>GHHAARTTHYGSLPQKA<br>QGHRPQDENPVVH | 3.76 | 0.01 | 1.60 | 1.20 | 0.22 | 1.27 |
| 21652 | 0 | 134939 | FFGSDRGAPKRGSGKD<br>GHHAARTTHYGSLPQKA<br>QGHRPQDENPVVH | 3.76 | 0.01 | 1.60 | 1.20 | 0.22 | 2.02 |
| 21653 | 0 | 134939 | FFGSDRGAPKRGSGKD<br>GHHAARTTHYGSLPQKA<br>QGHRPQDENPVVH | 3.76 | 0.01 | 1.60 | 1.20 | 0.22 | 2.92 |
| 21654 | 0 | 15820  | FFHNGRFSDALRFTL                                        | 2.68 | 0.01 | 0.90 | 0.68 | 0.22 | 1.66 |
| 21655 | 0 | 15820  | FFHNGRFSDALRFTL                                        | 2.68 | 0.01 | 0.90 | 0.68 | 0.22 | 1.66 |
| 21656 | 0 | 15820  | FFHNGRFSDALRFTL                                        | 2.68 | 0.01 | 0.90 | 0.68 | 0.22 | 1.66 |
| 21657 | 0 | 139047 | FFHTVLLPTEWEEVTAW<br>SGIC                              | 2.96 | 0.01 | 3.55 | 3.16 | 0.22 | 0.28 |
| 21658 | 0 | 117852 | FFIQACQGDNYQ                                           | 2.46 | 0.01 | 0.78 | 0.44 | 1.13 | 0.85 |
| 21659 | 0 | 15828  | FFIQDTYTQK                                             | 2.32 | 0.01 | 0.78 | 0.44 | 1.74 | 0.28 |
| 21660 | 0 | 15837  | FFKKHLFDWTPNLAFGH<br>CYYLELPSEHKGVYGS                  | 3.42 | 0.01 | 3.89 | 2.37 | 0.22 | 0.85 |
| 21661 | 0 | 112508 | FFKNIVTPRTPPPSQK                                       | 2.78 | 4.63 | 0.78 | 0.68 | 0.22 | 0.28 |
| 21662 | 0 | 112508 | FFKNIVTPRTPPPSQK                                       | 2.78 | 4.63 | 0.78 | 0.68 | 0.22 | 1.27 |
| 21663 | 0 | 181316 | FFLSSTEAQQSYLQGFSR<br>NILE                             | 3.04 | 0.01 | 2.72 | 0.44 | 1.23 | 1.27 |
| 21664 | 0 | 232789 | FFLVRMFGHSPRTAL                                        | 2.66 | 0.01 | 2.89 | 1.12 | 0.22 | 1.28 |
| 21665 | 0 | 232789 | FFLVRMFGHSPRTAL                                        | 2.66 | 0.01 | 2.89 | 1.12 | 0.22 | 1.28 |
| 21666 | 0 | 232789 | FFLVRMFGHSPRTAL                                        | 2.66 | 0.01 | 2.89 | 1.12 | 0.22 | 1.28 |
| 21667 | 0 | 108944 | FFLYSKL                                                | 2.03 | 0.01 | 0.78 | 0.44 | 1.13 | 0.28 |
| 21668 | 0 | 15856  | FFNIAY                                                 | 1.89 | 0.01 | 0.90 | 0.68 | 0.22 | 1.39 |
| 21669 | 0 | 99243  | FFPASSRDQSSYLQG                                        | 2.66 | 0.01 | 2.16 | 0.44 | 1.23 | 1.48 |
| 21670 | 0 | 15868  | FFPDHQLDPAFRANT                                        | 2.68 | 0.01 | 2.08 | 0.68 | 0.22 | 0.28 |
| 21671 | 0 | 15868  | FFPDHQLDPAFRANT                                        | 2.68 | 0.01 | 2.08 | 0.68 | 0.22 | 0.28 |
| 21672 | 0 | 15868  | FFPDHQLDPAFRANT                                        | 2.68 | 0.01 | 2.08 | 0.68 | 0.22 | 0.28 |
| 21673 | 0 | 128620 | FFQALGITTISRGT                                         | 2.67 | 0.01 | 0.78 | 0.44 | 1.13 | 0.85 |
| 21674 | 0 | 146918 | FFQP                                                   | 1.59 | 0.01 | 1.86 | 0.44 | 1.93 | 0.85 |
| 21675 | 0 | 196456 | FFQPQPQPQPQPQQ<br>F                                    | 2.86 | 0.01 | 1.61 | 1.81 | 0.22 | 0.28 |
| 21676 | 0 | 196456 | FFQPQPQPQPQPQQ<br>F                                    | 2.86 | 0.01 | 1.61 | 1.81 | 0.22 | 0.28 |
| 21677 | 0 | 196456 | FFQPQPQPQPQPQPQQ<br>F                                  | 2.86 | 0.01 | 1.61 | 1.81 | 0.22 | 0.28 |
| 21678 | 0 | 196456 | FFQPQPQPQPQPQPQQ<br>F                                  | 2.86 | 0.01 | 1.61 | 0.44 | 0.85 | 0.28 |

|       |   |        |                                    |      |      |      |      |      |      |
|-------|---|--------|------------------------------------|------|------|------|------|------|------|
| 21679 | 0 | 196456 | FFQPQPQPQPQPQQ<br>F                | 2.86 | 0.01 | 1.61 | 0.44 | 0.85 | 0.28 |
| 21680 | 0 | 15887  | FFRDEKEL                           | 2.13 | 0.01 | 3.89 | 1.15 | 0.22 | 0.28 |
| 21681 | 0 | 15887  | FFRDEKEL                           | 2.13 | 0.01 | 3.89 | 1.15 | 0.22 | 0.85 |
| 21682 | 0 | 15887  | FFRDEKEL                           | 2.13 | 0.01 | 3.89 | 1.15 | 0.22 | 0.85 |
| 21683 | 0 | 15887  | FFRDEKEL                           | 2.13 | 0.01 | 3.89 | 1.15 | 0.22 | 0.85 |
| 21684 | 0 | 135922 | FFRMVISNPAAT                       | 2.43 | 0.01 | 0.78 | 0.44 | 1.13 | 0.28 |
| 21685 | 0 | 113395 | FFRMVISNPAATHQDID<br>FLIEEIERLGQDL | 3.31 | 0.01 | 0.78 | 0.44 | 1.13 | 2.02 |
| 21686 | 0 | 101626 | FFRMVISNPAATQSDID<br>FLIE          | 2.95 | 0.01 | 0.78 | 1.12 | 0.22 | 0.85 |
| 21687 | 0 | 101626 | FFRMVISNPAATQSDID<br>FLIE          | 2.95 | 0.01 | 0.78 | 1.12 | 0.22 | 1.27 |
| 21688 | 0 | 101626 | FFRMVISNPAATQSDID<br>FLIE          | 2.95 | 0.01 | 0.78 | 1.12 | 0.22 | 1.34 |
| 21689 | 0 | 101626 | FFRMVISNPAATQSDID<br>FLIE          | 2.95 | 0.01 | 0.78 | 1.12 | 0.22 | 0.85 |
| 21690 | 0 | 15891  | FFRSTPEDLERA EK                    | 2.60 | 0.01 | 2.88 | 2.22 | 0.22 | 0.28 |
| 21691 | 0 | 15891  | FFRSTPEDLERA EK                    | 2.60 | 0.01 | 2.88 | 2.22 | 0.22 | 0.28 |
| 21692 | 0 | 15891  | FFRSTPEDLERA EK                    | 2.60 | 0.01 | 2.88 | 2.22 | 0.22 | 0.28 |
| 21693 | 0 | 15891  | FFRSTPEDLERA EK                    | 2.60 | 0.01 | 2.96 | 2.22 | 0.22 | 0.28 |
| 21694 | 0 | 110847 | FFSARGHRPLDKKREEA<br>P             | 2.83 | 3.89 | 0.78 | 0.44 | 1.13 | 0.28 |
| 21695 | 0 | 110852 | FFSARGHRPLDKKREEA<br>P             | 2.83 | 3.70 | 0.78 | 0.44 | 1.13 | 0.28 |
| 21696 | 0 | 110853 | FFSARGHRPLDKKREEA<br>P             | 2.83 | 4.45 | 0.78 | 0.44 | 1.13 | 0.28 |
| 21697 | 0 | 110851 | FFSARGHRPLDKKREEA<br>P             | 2.83 | 4.93 | 0.78 | 0.44 | 1.13 | 0.28 |
| 21698 | 0 | 110850 | FFSARGHRPLDKKREEA<br>P             | 2.83 | 4.93 | 0.78 | 0.44 | 1.13 | 0.28 |
| 21699 | 0 | 110849 | FFSARGHRPLDKKREEA<br>P             | 2.83 | 4.23 | 0.78 | 0.44 | 1.13 | 0.28 |
| 21700 | 0 | 110848 | FFSARGHRPLDKKREEA<br>P             | 2.83 | 3.93 | 0.78 | 0.44 | 1.13 | 0.28 |
| 21701 | 0 | 110854 | FFSARGHRPLDKKREEA<br>P             | 2.83 | 0.01 | 0.78 | 0.44 | 1.13 | 0.28 |
| 21702 | 0 | 15893  | FFSDKIAKYI                         | 2.32 | 0.01 | 1.60 | 0.44 | 1.23 | 0.85 |
| 21703 | 0 | 15893  | FFSDKIAKYI                         | 2.32 | 0.01 | 1.60 | 0.44 | 1.23 | 0.85 |
| 21704 | 0 | 15893  | FFSDKIAKYI                         | 2.32 | 0.01 | 1.60 | 0.44 | 1.23 | 0.85 |
| 21705 | 0 | 15893  | FFSDKIAKYI                         | 2.32 | 0.01 | 1.60 | 0.44 | 1.23 | 0.85 |
| 21706 | 0 | 238369 | FFSPGFNDGGKNTAPLT<br>L             | 2.86 | 0.01 | 0.78 | 0.44 | 1.13 | 0.28 |
| 21707 | 0 | 238369 | FFSPGFNDGGKNTAPLT<br>L             | 2.86 | 0.01 | 0.78 | 0.44 | 1.13 | 0.28 |



|       |   |        |                                                                  |      |      |      |      |      |      |
|-------|---|--------|------------------------------------------------------------------|------|------|------|------|------|------|
| 21708 | 0 | 15899  | FFSPQIITDNTFVSGNC<br>DVVIGIINNTVYDPLQPE<br>LDSF                  | 3.63 | 0.01 | 2.45 | 0.68 | 0.22 | 0.85 |
| 21709 | 0 | 15899  | FFSPQIITDNTFVSGNC<br>DVVIGIINNTVYDPLQPE<br>LDSF                  | 3.63 | 0.01 | 2.45 | 0.68 | 0.22 | 1.34 |
| 21710 | 0 | 15900  | FFSPSEDNFTNDLNKGE<br>EI                                          | 2.90 | 0.01 | 2.08 | 2.02 | 0.22 | 1.57 |
| 21711 | 0 | 116315 | FFSSDRGAPKRGSGKDH<br>AARTTHYGSLPQKSGHR<br>PQDENPVVHFFKNIVTP<br>R | 3.89 | 0.01 | 2.96 | 2.55 | 2.60 | 0.85 |
| 21712 | 0 | 171019 | FFSSLRCMVDLGPCW                                                  | 2.64 | 0.01 | 0.78 | 0.44 | 1.13 | 0.28 |
| 21713 | 0 | 15903  | FFSTFKCYGVSATKLND                                                | 2.77 | 0.01 | 2.48 | 0.44 | 0.85 | 0.28 |
| 21714 | 0 | 15911  | FFTEEFKRKNKGKNLASS<br>HR                                         | 2.94 | 0.01 | 2.78 | 2.49 | 0.85 | 0.28 |
| 21715 | 0 | 15911  | FFTEEFKRKNKGKNLASS<br>HR                                         | 2.94 | 0.01 | 2.78 | 2.49 | 0.85 | 0.85 |
| 21716 | 0 | 15911  | FFTEEFKRKNKGKNLASS<br>HR                                         | 2.94 | 0.01 | 2.78 | 0.44 | 0.85 | 0.28 |
| 21717 | 0 | 15912  | FFTEEFKRKNKGKNLASS<br>HRALARLRTACERAKRTL<br>SSATQATIEIDALF       | 3.86 | 0.01 | 2.78 | 0.44 | 0.85 | 0.28 |
| 21718 | 0 | 15913  | FFTELDGVRLHRFA                                                   | 2.61 | 0.01 | 2.41 | 0.44 | 0.85 | 0.28 |
| 21719 | 0 | 15918  | FFTEVDGVRLHRYA                                                   | 2.58 | 0.01 | 1.96 | 0.44 | 0.85 | 0.28 |
| 21720 | 0 | 15925  | FFTPKESEQLKVIKTFEGI<br>L                                         | 2.96 | 0.01 | 3.00 | 0.44 | 0.85 | 0.28 |
| 21721 | 0 | 15925  | FFTPKESEQLKVIKTFEGI<br>L                                         | 2.96 | 0.01 | 3.00 | 1.15 | 2.39 | 0.28 |
| 21722 | 0 | 15930  | FFVAPFPEVF                                                       | 2.36 | 0.01 | 1.60 | 0.44 | 1.23 | 0.28 |
| 21723 | 0 | 15930  | FFVAPFPEVF                                                       | 2.36 | 0.01 | 1.60 | 0.44 | 1.23 | 0.28 |
| 21724 | 0 | 15931  | FFVAPFPEVFGKEK                                                   | 2.66 | 0.01 | 1.60 | 0.44 | 1.23 | 0.85 |
| 21725 | 0 | 82034  | FFVQYGGAYKRH                                                     | 2.45 | 0.01 | 2.87 | 0.44 | 0.22 | 0.28 |
| 21726 | 0 | 82034  | FFVQYGGAYKRH                                                     | 2.45 | 0.01 | 2.90 | 0.68 | 0.22 | 0.28 |
| 21727 | 0 | 15938  | FFVRSIGSKGGKLAAGKY<br>TDAVTV                                     | 3.13 | 0.01 | 2.80 | 1.15 | 0.22 | 1.27 |
| 21728 | 0 | 15938  | FFVRSIGSKGGKLAAGKY<br>TDAVTV                                     | 3.13 | 0.01 | 2.80 | 1.15 | 0.22 | 1.27 |
| 21729 | 0 | 15938  | FFVRSIGSKGGKLAAGKY<br>TDAVTV                                     | 3.13 | 0.01 | 2.80 | 1.15 | 0.22 | 0.28 |
| 21730 | 0 | 15938  | FFVRSIGSKGGKLAAGKY<br>TDAVTV                                     | 3.13 | 0.01 | 2.80 | 1.15 | 0.22 | 0.28 |
| 21731 | 0 | 15938  | FFVRSIGSKGGKLAAGKY<br>TDAVTV                                     | 3.13 | 0.01 | 2.80 | 1.12 | 0.22 | 1.27 |

|       |   |        |                                |      |      |      |      |      |      |
|-------|---|--------|--------------------------------|------|------|------|------|------|------|
| 21732 | 0 | 15938  | FFVRSIGSKGGKLAAGKY<br>TDAVTV   | 3.13 | 0.01 | 2.80 | 1.12 | 0.22 | 0.28 |
| 21733 | 0 | 15938  | FFVRSIGSKGGKLAAGKY<br>TDAVTV   | 3.13 | 0.01 | 2.80 | 1.15 | 0.22 | 1.27 |
| 21734 | 0 | 15938  | FFVRSIGSKGGKLAAGKY<br>TDAVTV   | 3.13 | 0.01 | 3.59 | 3.04 | 0.22 | 0.28 |
| 21735 | 0 | 15938  | FFVRSIGSKGGKLAAGKY<br>TDAVTV   | 3.13 | 0.01 | 3.59 | 3.04 | 0.22 | 0.28 |
| 21736 | 0 | 15938  | FFVRSIGSKGGKLAAGKY<br>TDAVTV   | 3.13 | 0.01 | 3.59 | 3.04 | 0.22 | 0.28 |
| 21737 | 0 | 15938  | FFVRSIGSKGGKLAAGKY<br>TDAVTV   | 3.13 | 0.01 | 3.59 | 3.04 | 0.22 | 0.28 |
| 21738 | 0 | 15938  | FFVRSIGSKGGKLAAGKY<br>TDAVTV   | 3.13 | 0.01 | 3.59 | 0.68 | 2.25 | 1.75 |
| 21739 | 0 | 15938  | FFVRSIGSKGGKLAAGKY<br>TDAVTV   | 3.13 | 0.01 | 2.80 | 3.57 | 0.22 | 0.28 |
| 21740 | 0 | 15938  | FFVRSIGSKGGKLAAGKY<br>TDAVTV   | 3.13 | 0.01 | 2.80 | 1.81 | 0.22 | 0.28 |
| 21741 | 0 | 15938  | FFVRSIGSKGGKLAAGKY<br>TDAVTV   | 3.13 | 0.01 | 2.80 | 0.68 | 0.22 | 0.28 |
| 21742 | 0 | 15938  | FFVRSIGSKGGKLAAGKY<br>TDAVTV   | 3.13 | 0.01 | 2.80 | 3.04 | 0.22 | 0.28 |
| 21743 | 0 | 15938  | FFVRSIGSKGGKLAAGKY<br>TDAVTV   | 3.13 | 0.01 | 2.80 | 3.04 | 0.22 | 0.28 |
| 21744 | 0 | 97301  | FFWTILKP                       | 2.11 | 0.01 | 3.78 | 0.68 | 0.22 | 0.85 |
| 21745 | 0 | 97301  | FFWTILKP                       | 2.11 | 0.01 | 3.78 | 0.68 | 0.22 | 1.48 |
| 21746 | 0 | 97301  | FFWTILKP                       | 2.11 | 0.01 | 3.78 | 0.68 | 0.22 | 1.48 |
| 21747 | 0 | 97301  | FFWTILKP                       | 2.11 | 0.01 | 3.78 | 0.68 | 0.22 | 1.48 |
| 21748 | 0 | 97301  | FFWTILKP                       | 2.11 | 0.01 | 3.78 | 0.68 | 0.22 | 1.48 |
| 21749 | 0 | 149694 | FGAADFKTLNASKSD                | 2.70 | 0.01 | 3.67 | 1.12 | 0.22 | 0.28 |
| 21750 | 0 | 149695 | FGAANFKEINASKSD                | 2.70 | 0.01 | 3.67 | 1.12 | 0.22 | 0.28 |
| 21751 | 0 | 112971 | FGAEILKKIPGRVST                | 2.63 | 0.01 | 0.78 | 1.20 | 0.22 | 0.85 |
| 21752 | 0 | 112971 | FGAEILKKIPGRVST                | 2.63 | 0.01 | 0.78 | 0.44 | 1.13 | 0.85 |
| 21753 | 0 | 123167 | FGAGDAPPS                      | 2.24 | 0.01 | 2.28 | 2.00 | 0.22 | 0.28 |
| 21754 | 0 | 15952  | FGAIYG                         | 1.90 | 0.01 | 2.40 | 0.44 | 0.85 | 0.28 |
| 21755 | 0 | 111272 | FGAMDFTTLQANKSE                | 2.64 | 0.01 | 1.86 | 0.68 | 0.22 | 0.28 |
| 21756 | 0 | 111272 | FGAMDFTTLQANKSE                | 2.64 | 0.01 | 1.86 | 1.15 | 0.22 | 0.28 |
| 21757 | 0 | 111272 | FGAMDFTTLQANKSE                | 2.64 | 0.01 | 1.86 | 1.15 | 0.22 | 0.85 |
| 21758 | 0 | 78971  | FGANST                         | 1.88 | 0.01 | 2.08 | 0.68 | 0.22 | 0.28 |
| 21759 | 0 | 130825 | FGATIVVWGRWEYGSF<br>FCELWTSVDV | 3.19 | 0.01 | 0.78 | 1.12 | 0.22 | 0.28 |
| 21760 | 0 | 130825 | FGATIVVWGRWEYGSF<br>FCELWTSVDV | 3.19 | 0.01 | 0.78 | 1.12 | 0.22 | 1.34 |
| 21761 | 0 | 130825 | FGATIVVWGRWEYGSF<br>FCELWTSVDV | 3.19 | 0.01 | 0.78 | 1.12 | 0.22 | 1.34 |
| 21762 | 0 | 130825 | FGATIVVWGRWEYGSF<br>FCELWTSVDV | 3.19 | 0.01 | 0.78 | 1.12 | 0.22 | 2.56 |

|       |   |        |                                   |      |      |      |      |      |      |
|-------|---|--------|-----------------------------------|------|------|------|------|------|------|
| 21763 | 0 | 130825 | FGATIVVWGRWEYGSF<br>FCELWTSVDV    | 3.19 | 0.01 | 0.78 | 1.12 | 0.22 | 2.02 |
| 21764 | 0 | 187637 | FGAYMSKAHGTDPNIR                  | 2.67 | 0.01 | 1.96 | 0.68 | 0.22 | 1.48 |
| 21765 | 0 | 187637 | FGAYMSKAHGTDPNIR                  | 2.67 | 0.01 | 1.96 | 0.68 | 0.22 | 0.28 |
| 21766 | 0 | 187637 | FGAYMSKAHGTDPNIR                  | 2.67 | 0.01 | 1.96 | 0.68 | 0.22 | 0.28 |
| 21767 | 0 | 15959  | FGCTWMNSTGFTKVCG<br>APPC          | 2.94 | 0.01 | 2.83 | 0.44 | 0.85 | 0.28 |
| 21768 | 0 | 117288 | FGDFNLPRDKFLKEQIKL<br>DE          | 2.97 | 0.01 | 1.75 | 2.16 | 0.22 | 0.28 |
| 21769 | 0 | 117288 | FGDFNLPRDKFLKEQIKL<br>DE          | 2.97 | 0.01 | 1.75 | 2.16 | 0.22 | 0.28 |
| 21770 | 0 | 117288 | FGDFNLPRDKFLKEQIKL<br>DE          | 2.97 | 0.01 | 1.75 | 3.37 | 0.22 | 0.28 |
| 21771 | 0 | 117288 | FGDFNLPRDKFLKEQIKL<br>DE          | 2.97 | 0.01 | 1.75 | 2.16 | 0.22 | 0.28 |
| 21772 | 0 | 82038  | FGDGFYAQGYLETRFVT<br>KASENGSDNFGD | 3.31 | 0.01 | 3.04 | 1.12 | 0.22 | 0.28 |
| 21773 | 0 | 82038  | FGDGFYAQGYLETRFVT<br>KASENGSDNFGD | 3.31 | 0.01 | 3.04 | 1.12 | 0.22 | 0.85 |
| 21774 | 0 | 82038  | FGDGFYAQGYLETRFVT<br>KASENGSDNFGD | 3.31 | 0.01 | 3.04 | 1.81 | 0.22 | 0.28 |
| 21775 | 0 | 82038  | FGDGFYAQGYLETRFVT<br>KASENGSDNFGD | 3.31 | 0.01 | 3.04 | 2.37 | 0.22 | 0.28 |
| 21776 | 0 | 82038  | FGDGFYAQGYLETRFVT<br>KASENGSDNFGD | 3.31 | 0.01 | 3.04 | 1.12 | 0.22 | 0.28 |
| 21777 | 0 | 82039  | FGDITSKYAYVTLGNKAF<br>GEVKLGRAKT  | 3.28 | 0.01 | 3.04 | 1.12 | 0.22 | 0.28 |
| 21778 | 0 | 82039  | FGDITSKYAYVTLGNKAF<br>GEVKLGRAKT  | 3.28 | 0.01 | 3.04 | 1.12 | 0.22 | 0.85 |
| 21779 | 0 | 82039  | FGDITSKYAYVTLGNKAF<br>GEVKLGRAKT  | 3.28 | 0.01 | 3.04 | 1.81 | 0.22 | 0.28 |
| 21780 | 0 | 82039  | FGDITSKYAYVTLGNKAF<br>GEVKLGRAKT  | 3.28 | 0.01 | 3.04 | 0.44 | 0.85 | 0.28 |
| 21781 | 0 | 15961  | FGDKLIIPDIEKYQS                   | 2.66 | 0.01 | 3.47 | 0.68 | 0.22 | 1.34 |
| 21782 | 0 | 15961  | FGDKLIIPDIEKYQS                   | 2.66 | 0.01 | 3.47 | 0.68 | 0.22 | 0.28 |
| 21783 | 0 | 15961  | FGDKLIIPDIEKYQS                   | 2.66 | 0.01 | 3.47 | 0.68 | 0.22 | 0.28 |
| 21784 | 0 | 15961  | FGDKLIIPDIEKYQS                   | 2.66 | 0.01 | 3.47 | 0.68 | 0.22 | 0.28 |
| 21785 | 0 | 138391 | FGDSGGP                           | 2.03 | 0.01 | 0.78 | 0.44 | 1.13 | 0.28 |
| 21786 | 0 | 15968  | FGDSYI                            | 1.88 | 0.01 | 2.40 | 0.44 | 0.85 | 0.28 |
| 21787 | 0 | 103170 | FGDVDAHGAMIRAQA                   | 2.68 | 0.01 | 2.04 | 0.44 | 0.85 | 1.28 |
| 21788 | 0 | 139499 | FGEFSFYDCSSWGC                    | 2.70 | 0.01 | 0.90 | 0.68 | 0.22 | 0.28 |
| 21789 | 0 | 139499 | FGEFSFYDCSSWGC                    | 2.70 | 0.01 | 0.90 | 0.44 | 1.59 | 1.27 |
| 21790 | 0 | 194845 | FGEHKQEKDL                        | 2.31 | 0.01 | 2.60 | 0.68 | 0.22 | 1.34 |

|                   |   |        |                                        |      |      |      |      |      |      |
|-------------------|---|--------|----------------------------------------|------|------|------|------|------|------|
| 21791             | 0 | 194845 | FGEHKQEKDL                             | 2.31 | 0.01 | 2.60 | 0.68 | 0.22 | 1.34 |
| 21792             | 0 | 194845 | FGEHKQEKDL                             | 2.31 | 0.01 | 2.60 | 0.68 | 0.22 | 0.28 |
| 21793             | 0 | 194845 | FGEHKQEKDL                             | 2.31 | 0.01 | 2.60 | 0.68 | 0.22 | 1.75 |
| 21794             | 0 | 194845 | FGEHKQEKDL                             | 2.31 | 0.01 | 2.60 | 0.68 | 0.22 | 0.28 |
| 21795             | 0 | 194845 | FGEHKQEKDL                             | 2.31 | 0.01 | 2.60 | 0.68 | 0.22 | 0.28 |
| 21796             | 0 | 194845 | FGEHKQEKDL                             | 2.31 | 0.01 | 2.60 | 0.68 | 0.22 | 1.66 |
| 21797             | 0 | 194845 | FGEHKQEKDL                             | 2.31 | 0.01 | 2.60 | 0.68 | 0.22 | 1.66 |
| 21798             | 0 | 194845 | FGEHKQEKDL                             | 2.31 | 0.01 | 2.60 | 0.68 | 0.22 | 1.66 |
| 21799             | 0 | 194845 | FGEHKQEKDL                             | 2.31 | 0.01 | 2.60 | 0.68 | 0.22 | 1.34 |
| 21800             | 0 | 194845 | FGEHKQEKDL                             | 2.31 | 0.01 | 2.60 | 0.68 | 0.22 | 1.27 |
| 21801             | 0 | 194845 | FGEHKQEKDL                             | 2.31 | 0.01 | 2.60 | 0.68 | 0.22 | 0.28 |
| 21802             | 0 | 150200 | FGEHKQEKDLEYGAC                        | 2.66 | 0.01 | 3.45 | 0.68 | 0.22 | 1.27 |
| 21803             | 0 | 150200 | FGEHKQEKDLEYGAC                        | 2.66 | 0.01 | 3.45 | 0.68 | 0.22 | 1.34 |
| 21804             | 0 | 150200 | FGEHKQEKDLEYGAC                        | 2.66 | 0.01 | 3.45 | 0.68 | 0.22 | 1.34 |
| 21805             | 0 | 150200 | FGEHKQEKDLEYGAC                        | 2.66 | 0.01 | 3.45 | 0.68 | 0.22 | 1.27 |
| 21806             | 0 | 181317 | FGEHLQANDLDYGQC                        | 2.66 | 0.01 | 2.82 | 1.15 | 0.22 | 1.27 |
| 21807             | 0 | 181317 | FGEHLQANDLDYGQC                        | 2.66 | 0.01 | 2.82 | 0.68 | 0.22 | 0.28 |
| 21808             | 0 | 181317 | FGEHLQANDLDYGQC                        | 2.66 | 0.01 | 2.82 | 0.68 | 0.22 | 1.48 |
| 21809             | 0 | 181317 | FGEHLQANDLDYGQC                        | 2.66 | 0.01 | 2.82 | 0.68 | 0.22 | 0.85 |
| 21810             | 0 | 181317 | FGEHLQANDLDYGQC                        | 2.66 | 0.01 | 2.82 | 0.68 | 0.22 | 1.34 |
| 21811             | 0 | 181317 | FGEHLQANDLDYGQC                        | 2.66 | 0.01 | 2.82 | 0.68 | 0.22 | 1.34 |
| 21812             | 0 | 107358 | FGEL                                   | 1.57 | 0.01 | 0.78 | 2.36 | 0.22 | 0.28 |
| 21813             | 0 | 107358 | FGEL                                   | 1.57 | 0.01 | 0.78 | 2.36 | 0.22 | 0.85 |
| 21814             | 0 | 132813 | FGENNNM                                | 2.02 | 0.01 | 0.90 | 0.44 | 1.41 | 1.39 |
| 21815             | 0 | 132814 | FGENRPA                                | 1.99 | 0.01 | 0.90 | 0.44 | 1.41 | 1.39 |
| 21816             | 0 | 132815 | FGENTGY                                | 2.02 | 0.01 | 0.90 | 0.44 | 1.41 | 0.28 |
| 21817             | 0 | 15972  | FGEVFNAT                               | 2.13 | 0.01 | 2.45 | 0.44 | 0.85 | 1.34 |
| 21818             | 0 | 15972  | FGEVFNAT                               | 2.13 | 0.01 | 2.45 | 0.44 | 0.85 | 1.34 |
| FGEVVFKAYDSFLQLEQ |   |        |                                        |      |      |      |      |      |      |
| 21819             | 0 | 118347 | QINDLKVRAERNKFAAA<br>KLAAARRKLYKREVAAG | 3.88 | 0.01 | 2.40 | 0.44 | 2.39 | 0.85 |
|                   |   |        |                                        |      |      |      |      |      |      |
| 21820             | 0 | 135457 | FGF                                    | 1.37 | 0.01 | 0.78 | 0.68 | 0.22 | 0.28 |
| 21821             | 0 | 132293 | FGFPEHLLVDFLQSL                        | 2.75 | 0.01 | 0.78 | 1.20 | 0.22 | 0.28 |
| 21822             | 0 | 132293 | FGFPEHLLVDFLQSL                        | 2.75 | 0.01 | 0.78 | 0.68 | 0.22 | 0.28 |
| 21823             | 0 | 134669 | FGFPQE                                 | 1.91 | 0.01 | 0.78 | 0.68 | 0.22 | 1.27 |
| 21824             | 0 | 134669 | FGFPQE                                 | 1.91 | 0.01 | 0.78 | 0.68 | 0.22 | 1.27 |
| 21825             | 0 | 134669 | FGFPQE                                 | 1.91 | 0.01 | 0.78 | 0.68 | 0.22 | 1.34 |
| 21826             | 0 | 134669 | FGFPQE                                 | 1.91 | 0.01 | 0.78 | 0.68 | 0.22 | 1.34 |
| 21827             | 0 | 79545  | FGGDADR                                | 2.03 | 0.01 | 0.90 | 1.12 | 0.22 | 1.39 |
| FGGDRGAPKRGSGKDS  |   |        |                                        |      |      |      |      |      |      |
| 21828             | 0 | 115738 | HHPARTAHYGSLPQKSG<br>HRTQDENPVVHF      | 3.75 | 0.01 | 0.78 | 1.20 | 0.22 | 1.57 |
| FGGDRGAPKRGSGKDS  |   |        |                                        |      |      |      |      |      |      |
| 21829             | 0 | 115738 | HHPARTAHYGSLPQKSG<br>HRTQDENPVVHF      | 3.75 | 0.01 | 0.78 | 1.20 | 0.22 | 1.57 |

|       |   |        |                   |      |      |      |      |      |      |
|-------|---|--------|-------------------|------|------|------|------|------|------|
|       |   |        | FGGDRGAPKRGSGKDS  |      |      |      |      |      |      |
| 21830 | 0 | 115738 | HHPARTAHYGSLPQKSG | 3.75 | 0.01 | 0.78 | 1.20 | 0.22 | 1.57 |
|       |   |        | HRTQDENPVVHF      |      |      |      |      |      |      |
|       |   |        | FGGDRGAPKRGSGKDS  |      |      |      |      |      |      |
| 21831 | 0 | 115738 | HHPARTAHYGSLPQKSG | 3.75 | 0.01 | 0.78 | 2.00 | 0.22 | 1.57 |
|       |   |        | HRTQDENPVVHF      |      |      |      |      |      |      |
|       |   |        | FGGDRGAPKRGSGKDS  |      |      |      |      |      |      |
| 21832 | 0 | 115738 | HHPARTAHYGSLPQKSG | 3.75 | 0.01 | 0.78 | 1.20 | 0.22 | 1.57 |
|       |   |        | HRTQDENPVVHF      |      |      |      |      |      |      |
|       |   |        | FGGDRGAPKRGSGKDS  |      |      |      |      |      |      |
| 21833 | 0 | 115738 | HHPARTAHYGSLPQKSG | 3.75 | 0.01 | 0.78 | 2.00 | 0.22 | 1.57 |
|       |   |        | HRTQDENPVVHF      |      |      |      |      |      |      |
|       |   |        | FGGDRGAPKRGSGKDS  |      |      |      |      |      |      |
| 21834 | 0 | 115738 | HHPARTAHYGSLPQKSG | 3.75 | 0.01 | 0.78 | 1.20 | 0.22 | 1.57 |
|       |   |        | HRTQDENPVVHF      |      |      |      |      |      |      |
|       |   |        | FGGDRGAPKRGSGKDS  |      |      |      |      |      |      |
| 21835 | 0 | 115738 | HHPARTAHYGSLPQKSG | 3.75 | 0.01 | 0.78 | 1.20 | 0.22 | 1.57 |
|       |   |        | HRTQDENPVVHF      |      |      |      |      |      |      |
|       |   |        | FGGDRGAPKRGSGKDS  |      |      |      |      |      |      |
| 21836 | 0 | 115738 | HHPARTAHYGSLPQKSG | 3.75 | 0.01 | 0.78 | 1.20 | 0.22 | 1.57 |
|       |   |        | HRTQDENPVVHF      |      |      |      |      |      |      |
|       |   |        | FGGDRGAPKRGSGKDS  |      |      |      |      |      |      |
| 21837 | 0 | 115738 | HHPARTAHYGSLPQKSG | 3.75 | 0.01 | 0.78 | 2.00 | 0.22 | 1.57 |
|       |   |        | HRTQDENPVVHF      |      |      |      |      |      |      |
|       |   |        | FGGDRGAPKRGSGKDS  |      |      |      |      |      |      |
| 21838 | 0 | 115738 | HHPARTAHYGSLPQKSG | 3.75 | 0.01 | 0.78 | 1.20 | 0.22 | 1.57 |
|       |   |        | HRTQDENPVVHF      |      |      |      |      |      |      |
|       |   |        | FGGDRGAPKRGSGKDS  |      |      |      |      |      |      |
| 21839 | 0 | 115738 | HHPARTAHYGSLPQKSG | 3.75 | 0.01 | 0.78 | 2.00 | 0.22 | 1.57 |
|       |   |        | HRTQDENPVVHF      |      |      |      |      |      |      |
|       |   |        | FGGDRGAPKRGSGKDS  |      |      |      |      |      |      |
| 21840 | 0 | 115738 | HHPARTAHYGSLPQKSG | 3.75 | 0.01 | 0.78 | 1.20 | 0.22 | 1.57 |
|       |   |        | HRTQDENPVVHF      |      |      |      |      |      |      |
|       |   |        | FGGDRGAPKRGSGKDS  |      |      |      |      |      |      |
| 21841 | 0 | 115738 | HHPARTAHYGSLPQKSG | 3.75 | 0.01 | 0.78 | 2.00 | 0.22 | 1.57 |
|       |   |        | HRTQDENPVVHF      |      |      |      |      |      |      |
|       |   |        | FGGDRGAPKRGSGKDS  |      |      |      |      |      |      |
| 21842 | 0 | 115738 | HHPARTAHYGSLPQKSG | 3.75 | 0.01 | 0.78 | 1.20 | 0.22 | 1.57 |
|       |   |        | HRTQDENPVVHF      |      |      |      |      |      |      |
|       |   |        | FGGDRGAPKRGSGKDS  |      |      |      |      |      |      |
| 21843 | 0 | 115738 | HHPARTAHYGSLPQKSG | 3.75 | 0.01 | 0.78 | 2.00 | 0.22 | 1.57 |
|       |   |        | HRTQDENPVVHF      |      |      |      |      |      |      |
|       |   |        | FGGDRGAPKRGSGKDS  |      |      |      |      |      |      |
| 21844 | 0 | 115738 | HHPARTAHYGSLPQKSG | 3.75 | 0.01 | 0.78 | 1.20 | 0.22 | 1.57 |
|       |   |        | HRTQDENPVVHF      |      |      |      |      |      |      |

|       |   |        |                                   |      |      |      |      |      |      |
|-------|---|--------|-----------------------------------|------|------|------|------|------|------|
|       |   |        | FGGDRGAPKRGSGKDS                  |      |      |      |      |      |      |
| 21845 | 0 | 115738 | HHPARTAHYGSLPQKSG<br>HRTQDENPVVHF | 3.75 | 0.01 | 0.78 | 2.00 | 0.22 | 1.57 |
|       |   |        | FGGDRGAPKRGSGKDS                  |      |      |      |      |      |      |
| 21846 | 0 | 115738 | HHPARTAHYGSLPQKSG<br>HRTQDENPVVHF | 3.75 | 0.01 | 0.78 | 2.00 | 0.22 | 1.57 |
|       |   |        | FGGDRGAPKRGSGKDS                  |      |      |      |      |      |      |
| 21847 | 0 | 115738 | HHPARTAHYGSLPQKSG<br>HRTQDENPVVHF | 3.75 | 0.01 | 0.78 | 1.20 | 0.22 | 1.57 |
|       |   |        | FGGDRGAPKRGSGKDS                  |      |      |      |      |      |      |
| 21848 | 0 | 115738 | HHPARTAHYGSLPQKSG<br>HRTQDENPVVHF | 3.75 | 0.01 | 0.78 | 1.20 | 0.22 | 1.57 |
|       |   |        | FGGDRGAPKRGSGKDS                  |      |      |      |      |      |      |
| 21849 | 0 | 115738 | HHPARTAHYGSLPQKSG<br>HRTQDENPVVHF | 3.75 | 0.01 | 0.78 | 2.00 | 0.22 | 1.57 |
|       |   |        | FGGDRGAPKRGSGKDS                  |      |      |      |      |      |      |
| 21850 | 0 | 115738 | HHPARTAHYGSLPQKSG<br>HRTQDENPVVHF | 3.75 | 0.01 | 0.78 | 1.20 | 0.22 | 1.57 |
|       |   |        | FGGDRGAPKRGSGKDS                  |      |      |      |      |      |      |
| 21851 | 0 | 116088 | HHPARTAHYGSLPQKSH<br>GRTQDENPVVHF | 3.75 | 0.01 | 0.78 | 1.12 | 0.22 | 1.27 |
|       |   |        | FGGDRGAPKRGSGKDS                  |      |      |      |      |      |      |
| 21852 | 0 | 116088 | HHPARTAHYGSLPQKSH<br>GRTQDENPVVHF | 3.75 | 0.01 | 0.78 | 0.44 | 1.13 | 1.27 |
|       |   |        | FGGDRGAPKRGSGKDS                  |      |      |      |      |      |      |
| 21853 | 0 | 116317 | HHPARTAHYGSLPQKSH<br>GRTQDQDPVVHF | 3.77 | 0.01 | 0.78 | 1.12 | 0.22 | 1.27 |
|       |   |        | FGGDRGAPKRGSGKDS                  |      |      |      |      |      |      |
| 21854 | 0 | 116317 | HHPARTAHYGSLPQKSH<br>GRTQDQDPVVHF | 3.77 | 0.01 | 0.78 | 1.20 | 0.22 | 1.27 |
|       |   |        | FGGDRGAPKRGSGKDS                  |      |      |      |      |      |      |
| 21855 | 0 | 116317 | HHPARTAHYGSLPQKSH<br>GRTQDQDPVVHF | 3.77 | 0.01 | 0.78 | 2.00 | 0.22 | 1.27 |
|       |   |        | FGGDRGAPKRGSGKDS                  |      |      |      |      |      |      |
| 21856 | 0 | 78972  | FGGDTA                            | 1.89 | 0.01 | 2.24 | 0.68 | 0.22 | 2.02 |
| 21857 | 0 | 15981  | FGGETFTPDWMMEV                    | 2.62 | 0.01 | 0.90 | 0.68 | 0.22 | 1.27 |
| 21858 | 0 | 15981  | FGGETFTPDWMMEV                    | 2.62 | 0.01 | 0.90 | 0.68 | 0.22 | 0.28 |
| 21859 | 0 | 15981  | FGGETFTPDWMMEV                    | 2.62 | 0.01 | 0.90 | 0.68 | 0.22 | 0.28 |
| 21860 | 0 | 15981  | FGGETFTPDWMMEV                    | 2.62 | 0.01 | 0.90 | 0.68 | 0.22 | 1.66 |
| 21861 | 0 | 15981  | FGGETFTPDWMMEV                    | 2.62 | 0.01 | 0.90 | 0.68 | 0.22 | 1.66 |
| 21862 | 0 | 15981  | FGGETFTPDWMMEV                    | 2.62 | 0.01 | 0.90 | 0.68 | 0.22 | 1.66 |
| 21863 | 0 | 15981  | FGGETFTPDWMMEV                    | 2.62 | 0.01 | 0.90 | 0.68 | 0.22 | 0.28 |
| 21864 | 0 | 15981  | FGGETFTPDWMMEV                    | 2.62 | 0.01 | 0.90 | 0.68 | 0.22 | 0.28 |
| 21865 | 0 | 15982  | FGGETFTPDWMMEVAI<br>DNE           | 2.88 | 0.01 | 0.90 | 0.68 | 0.22 | 1.27 |

|       |   |        |                                                                  |      |      |      |      |      |      |
|-------|---|--------|------------------------------------------------------------------|------|------|------|------|------|------|
| 21866 | 0 | 15982  | FGGETFTPDWMMEVAI<br>DNE                                          | 2.88 | 0.01 | 0.90 | 0.68 | 0.22 | 1.39 |
| 21867 | 0 | 15982  | FGGETFTPDWMMEVAI<br>DNE                                          | 2.88 | 0.01 | 0.90 | 0.68 | 0.22 | 0.28 |
| 21868 | 0 | 15982  | FGGETFTPDWMMEVAI<br>DNE                                          | 2.88 | 0.01 | 0.90 | 0.68 | 0.22 | 0.28 |
| 21869 | 0 | 15982  | FGGETFTPDWMMEVAI<br>DNE                                          | 2.88 | 0.01 | 0.90 | 0.68 | 0.22 | 1.66 |
| 21870 | 0 | 15982  | FGGETFTPDWMMEVAI<br>DNE                                          | 2.88 | 0.01 | 0.90 | 0.68 | 0.22 | 0.28 |
| 21871 | 0 | 15982  | FGGETFTPDWMMEVAI<br>DNE                                          | 2.88 | 0.01 | 0.90 | 0.68 | 0.22 | 1.27 |
| 21872 | 0 | 15982  | FGGETFTPDWMMEVAI<br>DNE                                          | 2.88 | 0.01 | 0.90 | 0.68 | 0.22 | 0.28 |
| 21873 | 0 | 15982  | FGGETFTPDWMMEVAI<br>DNE                                          | 2.88 | 0.01 | 0.90 | 0.68 | 0.22 | 0.28 |
| 21874 | 0 | 15982  | FGGETFTPDWMMEVAI<br>DNE                                          | 2.88 | 0.01 | 0.90 | 0.68 | 0.22 | 1.66 |
| 21875 | 0 | 15982  | FGGETFTPDWMMEVAI<br>DNE                                          | 2.88 | 0.01 | 0.90 | 0.68 | 0.22 | 1.66 |
| 21876 | 0 | 15982  | FGGETFTPDWMMEVAI<br>DNE                                          | 2.88 | 0.01 | 0.90 | 0.68 | 0.22 | 0.28 |
| 21877 | 0 | 15982  | FGGETFTPDWMMEVAI<br>DNE                                          | 2.88 | 0.01 | 0.90 | 0.68 | 0.22 | 0.28 |
| 21878 | 0 | 15982  | FGGETFTPDWMMEVAI<br>DNE                                          | 2.88 | 0.01 | 0.90 | 0.68 | 0.22 | 1.27 |
| 21879 | 0 | 123168 | FGGGDAAPA                                                        | 2.26 | 0.01 | 2.28 | 2.00 | 0.22 | 0.28 |
| 21880 | 0 | 123169 | FGGGDAPPA                                                        | 2.25 | 0.01 | 2.28 | 2.00 | 0.22 | 0.28 |
| 21881 | 0 | 15984  | FGGHNSVDFE                                                       | 2.31 | 0.01 | 2.56 | 1.20 | 0.22 | 0.28 |
| 21882 | 0 | 15988  | FGGRAEWGTNTADND<br>DTDGNNGHGTHTASTAA<br>GSKFGVAKKASVVAVKV<br>LGA | 3.89 | 0.01 | 3.28 | 0.44 | 1.23 | 1.39 |
| 21883 | 0 | 167063 | FGGSSEPCALCSLHSIGKI                                              | 2.90 | 0.01 | 0.78 | 0.44 | 1.41 | 0.28 |
| 21884 | 0 | 167063 | FGGSSEPCALCSLHSIGKI                                              | 2.90 | 0.01 | 0.78 | 0.44 | 1.41 | 1.66 |
| 21885 | 0 | 167063 | FGGSSEPCALCSLHSIGKI                                              | 2.90 | 0.01 | 0.78 | 0.44 | 1.41 | 1.34 |
| 21886 | 0 | 167063 | FGGSSEPCALCSLHSIGKI                                              | 2.90 | 0.01 | 0.78 | 0.44 | 1.41 | 1.66 |
| 21887 | 0 | 167063 | FGGSSEPCALCSLHSIGKI                                              | 2.90 | 0.01 | 0.78 | 0.44 | 1.41 | 1.66 |
| 21888 | 0 | 167063 | FGGSSEPCALCSLHSIGKI                                              | 2.90 | 0.01 | 0.78 | 0.44 | 1.41 | 1.66 |
| 21889 | 0 | 167063 | FGGSSEPCALCSLHSIGKI                                              | 2.90 | 0.01 | 0.78 | 0.44 | 1.41 | 1.66 |

|       |   |        |                                       |      |      |      |      |      |      |
|-------|---|--------|---------------------------------------|------|------|------|------|------|------|
| 21890 | 0 | 167063 | FGGSSEPCALCSLHSIGKI                   | 2.90 | 0.01 | 0.78 | 0.44 | 1.41 | 1.66 |
| 21891 | 0 | 167063 | FGGSSEPCALCSLHSIGKI                   | 2.90 | 0.01 | 0.78 | 0.44 | 1.41 | 1.75 |
| 21892 | 0 | 167063 | FGGSSEPCALCSLHSIGKI                   | 2.90 | 0.01 | 0.78 | 0.44 | 1.41 | 1.75 |
| 21893 | 0 | 15990  | FGGVSDDEDVPSFHKPP<br>SSR              | 2.96 | 0.01 | 0.90 | 3.93 | 0.22 | 0.28 |
| 21894 | 0 | 15990  | FGGVSDDEDVPSFHKPP<br>SSR              | 2.96 | 0.01 | 0.90 | 0.44 | 1.74 | 0.28 |
| 21895 | 0 | 15990  | FGGVSDDEDVPSFHKPP<br>SSR              | 2.96 | 0.01 | 0.90 | 1.20 | 0.22 | 1.34 |
| 21896 | 0 | 146920 | FGGYTLRGTSIFG                         | 2.58 | 0.01 | 1.60 | 0.44 | 0.85 | 0.85 |
| 21897 | 0 | 144642 | FGHISGGHINPAVTVM<br>VCTRKISIA         | 3.19 | 0.01 | 0.78 | 0.44 | 1.13 | 1.27 |
| 21898 | 0 | 144642 | FGHISGGHINPAVTVM<br>VCTRKISIA         | 3.19 | 0.01 | 0.78 | 0.44 | 1.13 | 0.28 |
| 21899 | 0 | 144642 | FGHISGGHINPAVTVM<br>VCTRKISIA         | 3.19 | 0.01 | 0.78 | 0.44 | 1.13 | 0.28 |
| 21900 | 0 | 15991  | FGHQVGDG                              | 2.14 | 0.01 | 2.04 | 0.44 | 0.85 | 0.28 |
| 21901 | 0 | 15991  | FGHQVGDG                              | 2.14 | 0.01 | 2.04 | 0.44 | 0.85 | 0.28 |
| 21902 | 0 | 15991  | FGHQVGDG                              | 2.14 | 0.01 | 2.04 | 0.44 | 0.85 | 0.28 |
| 21903 | 0 | 77870  | FGINCSPTYLRC                          | 2.43 | 0.01 | 0.90 | 1.15 | 0.22 | 0.85 |
| 21904 | 0 | 136062 | FGISETQAEAILE                         | 2.56 | 0.01 | 3.53 | 3.61 | 0.22 | 0.28 |
| 21905 | 0 | 136062 | FGISETQAEAILE                         | 2.56 | 0.01 | 3.53 | 3.61 | 2.60 | 1.75 |
| 21906 | 0 | 136062 | FGISETQAEAILE                         | 2.56 | 0.01 | 3.53 | 3.61 | 0.22 | 1.34 |
| 21907 | 0 | 15995  | FGISNYCQIYPPNANKIR<br>EALAQPQRYCR     | 3.31 | 0.01 | 2.78 | 1.81 | 2.25 | 1.75 |
| 21908 | 0 | 15995  | FGISNYCQIYPPNANKIR<br>EALAQPQRYCR     | 3.31 | 0.01 | 2.78 | 1.81 | 0.22 | 0.28 |
| 21909 | 0 | 15995  | FGISNYCQIYPPNANKIR<br>EALAQPQRYCR     | 3.31 | 0.01 | 2.78 | 1.81 | 0.22 | 1.75 |
| 21910 | 0 | 15995  | FGISNYCQIYPPNANKIR<br>EALAQPQRYCR     | 3.31 | 0.01 | 2.78 | 1.81 | 0.22 | 0.28 |
| 21911 | 0 | 15995  | FGISNYCQIYPPNANKIR<br>EALAQPQRYCR     | 3.31 | 0.01 | 2.78 | 1.12 | 0.22 | 1.57 |
| 21912 | 0 | 226023 | FGIVGAYGAADRTNLQE<br>AQP              | 2.91 | 0.01 | 2.24 | 3.57 | 0.22 | 0.28 |
| 21913 | 0 | 226023 | FGIVGAYGAADRTNLQE<br>AQP              | 2.91 | 0.01 | 2.24 | 4.03 | 0.22 | 0.28 |
| 21914 | 0 | 108948 | FGKEKVNELSKDIGSEST<br>EDQAMEDIKQMEAES | 3.45 | 0.01 | 1.60 | 0.44 | 1.23 | 1.34 |
| 21915 | 0 | 108948 | FGKEKVNELSKDIGSEST<br>EDQAMEDIKQMEAES | 3.45 | 0.01 | 1.60 | 0.44 | 1.23 | 0.85 |



|       |   |        |                                                  |      |      |      |      |      |      |
|-------|---|--------|--------------------------------------------------|------|------|------|------|------|------|
| 21916 | 0 | 108948 | FGKEKVNELSKDIGSEST<br>EDQAMEDIKQMEAES            | 3.45 | 0.01 | 1.60 | 0.44 | 1.23 | 1.34 |
| 21917 | 0 | 15998  | FGKGGI                                           | 1.90 | 0.01 | 2.40 | 0.44 | 0.85 | 0.28 |
| 21918 | 0 | 82048  | FGKLRVGR LNSV                                    | 2.49 | 0.01 | 2.87 | 0.44 | 0.85 | 0.28 |
| 21919 | 0 | 82048  | FGKLRVGR LNSV                                    | 2.49 | 0.01 | 2.90 | 0.68 | 0.22 | 0.28 |
| 21920 | 0 | 78973  | FGLGGIGVLT PDNYLITP<br>AL                        | 2.96 | 0.01 | 2.84 | 0.44 | 0.85 | 0.28 |
| 21921 | 0 | 16006  | FGLQLELTEGMRFDK                                  | 2.69 | 0.01 | 2.04 | 0.44 | 0.85 | 1.28 |
| 21922 | 0 | 423290 | FGLRNCQFLAVGPDD                                  | 2.65 | 0.01 | 2.51 | 0.44 | 2.35 | 1.28 |
| 21923 | 0 | 226024 | FGLVDGLNFAVQYLGKN<br>ERD                         | 2.95 | 0.01 | 2.24 | 3.06 | 0.22 | 0.28 |
| 21924 | 0 | 226024 | FGLVDGLNFAVQYLGKN<br>ERD                         | 2.95 | 0.01 | 2.24 | 4.03 | 0.22 | 0.28 |
| 21925 | 0 | 16009  | FGMIFPGCPSTYQEP                                  | 2.67 | 0.01 | 2.72 | 0.44 | 1.23 | 0.85 |
| 21926 | 0 | 79213  | FGMLPVPQQPMGPQ                                   | 2.66 | 0.01 | 3.85 | 1.12 | 0.22 | 0.85 |
| 21927 | 0 | 79213  | FGMLPVPQQPMGPQ                                   | 2.66 | 0.01 | 3.85 | 1.12 | 0.22 | 0.85 |
| 21928 | 0 | 79213  | FGMLPVPQQPMGPQ                                   | 2.66 | 0.01 | 3.85 | 1.12 | 0.22 | 0.85 |
| 21929 | 0 | 79213  | FGMLPVPQQPMGPQ                                   | 2.66 | 0.01 | 3.85 | 1.12 | 0.22 | 0.85 |
| 21930 | 0 | 133093 | FGMQNNLAPSLTTL SHG<br>TTTTSTAYGVKKNMPQS<br>PAAVN | 3.60 | 0.01 | 0.78 | 0.44 | 1.13 | 1.27 |
| 21931 | 0 | 230462 | FGND DRTNTEPNTKI                                 | 2.67 | 0.01 | 0.78 | 0.44 | 1.13 | 0.28 |
| 21932 | 0 | 171025 | FGNDTITCTTHGNWT                                  | 2.70 | 0.01 | 0.78 | 0.44 | 1.41 | 0.28 |
| 21933 | 0 | 171025 | FGNDTITCTTHGNWT                                  | 2.70 | 0.01 | 0.78 | 0.44 | 1.13 | 0.28 |
| 21934 | 0 | 228132 | FGNDWEDRYREN                                     | 2.56 | 0.01 | 2.98 | 2.19 | 0.22 | 0.85 |
| 21935 | 0 | 16017  | FGNDWEDRYRENMY                                   | 2.70 | 0.01 | 1.75 | 2.19 | 0.22 | 0.28 |
| 21936 | 0 | 16018  | FGNDYEDRYR                                       | 2.42 | 0.01 | 2.52 | 2.19 | 0.22 | 2.02 |
| 21937 | 0 | 16018  | FGNDYEDRYR                                       | 2.42 | 0.01 | 2.52 | 2.19 | 0.22 | 0.28 |
| 21938 | 0 | 16018  | FGNDYEDRYR                                       | 2.42 | 0.01 | 2.52 | 1.15 | 0.22 | 1.48 |
| 21939 | 0 | 16018  | FGNDYEDRYR                                       | 2.42 | 0.01 | 2.52 | 3.15 | 0.22 | 0.85 |
| 21940 | 0 | 16018  | FGNDYEDRYR                                       | 2.42 | 0.01 | 2.52 | 3.15 | 0.22 | 0.85 |
| 21941 | 0 | 16018  | FGNDYEDRYR                                       | 2.42 | 0.01 | 2.52 | 3.15 | 0.22 | 0.85 |
| 21942 | 0 | 16018  | FGNDYEDRYR                                       | 2.42 | 0.01 | 2.52 | 3.15 | 0.22 | 0.85 |
| 21943 | 0 | 16018  | FGNDYEDRYR                                       | 2.42 | 0.01 | 2.52 | 3.15 | 0.22 | 1.48 |
| 21944 | 0 | 16018  | FGNDYEDRYR                                       | 2.42 | 0.01 | 2.52 | 3.15 | 0.22 | 0.85 |
| 21945 | 0 | 16018  | FGNDYEDRYR                                       | 2.42 | 0.01 | 2.52 | 3.15 | 0.22 | 0.85 |
| 21946 | 0 | 16018  | FGNDYEDRYR                                       | 2.42 | 0.01 | 2.52 | 3.15 | 0.22 | 0.85 |
| 21947 | 0 | 16019  | FGNDYEDRYRE                                      | 2.50 | 0.01 | 2.52 | 2.19 | 0.22 | 2.02 |
| 21948 | 0 | 16019  | FGNDYEDRYRE                                      | 2.50 | 0.01 | 2.52 | 2.19 | 0.22 | 0.28 |
| 21949 | 0 | 462337 | FGPEAD                                           | 1.88 | 0.01 | 0.78 | 1.12 | 0.22 | 1.28 |
| 21950 | 0 | 140558 | FGPHYFLNNP                                       | 2.33 | 0.01 | 3.72 | 2.37 | 0.22 | 0.28 |
| 21951 | 0 | 140558 | FGPHYFLNNP                                       | 2.33 | 0.01 | 3.72 | 2.37 | 0.22 | 0.28 |
| 21952 | 0 | 98035  | FGPKNF                                           | 1.91 | 0.01 | 3.97 | 0.44 | 0.85 | 0.28 |
| 21953 | 0 | 16031  | FGPLWILQASLLKV                                   | 2.58 | 0.01 | 2.41 | 0.44 | 1.41 | 0.28 |
| 21954 | 0 | 179783 | FGPRTK                                           | 1.88 | 0.01 | 3.44 | 0.68 | 0.22 | 0.28 |

|       |   |        |                               |      |      |      |      |      |      |
|-------|---|--------|-------------------------------|------|------|------|------|------|------|
| 21955 | 0 | 179783 | FGPRTK                        | 1.88 | 0.01 | 3.44 | 0.68 | 0.22 | 0.28 |
| 21956 | 0 | 179783 | FGPRTK                        | 1.88 | 0.01 | 3.44 | 0.68 | 0.22 | 0.85 |
| 21957 | 0 | 179783 | FGPRTK                        | 1.88 | 0.01 | 3.44 | 0.68 | 0.22 | 0.85 |
| 21958 | 0 | 179783 | FGPRTK                        | 1.88 | 0.01 | 3.44 | 0.68 | 0.22 | 0.85 |
| 21959 | 0 | 179783 | FGPRTK                        | 1.88 | 0.01 | 3.44 | 0.68 | 0.22 | 0.85 |
| 21960 | 0 | 179783 | FGPRTK                        | 1.88 | 0.01 | 3.44 | 0.68 | 0.22 | 0.85 |
| 21961 | 0 | 179783 | FGPRTK                        | 1.88 | 0.01 | 3.44 | 0.68 | 0.22 | 0.85 |
| 21962 | 0 | 179783 | FGPRTK                        | 1.88 | 0.01 | 3.44 | 0.68 | 0.22 | 0.85 |
| 21963 | 0 | 179783 | FGPRTK                        | 1.88 | 0.01 | 3.44 | 0.68 | 0.22 | 0.85 |
| 21964 | 0 | 290260 | FGQAAAADKPSLFGQ               | 2.68 | 0.01 | 1.61 | 0.44 | 0.85 | 1.28 |
| 21965 | 0 | 16039  | FGQAAAGDK                     | 2.23 | 0.01 | 2.30 | 0.44 | 0.85 | 0.28 |
| 21966 | 0 | 161220 | FGQAAAGDKLSL                  | 2.47 | 0.01 | 2.30 | 0.44 | 0.85 | 0.28 |
| 21967 | 0 | 290261 | FGQAAAGDKLSLFGQ               | 2.70 | 0.01 | 1.61 | 0.44 | 0.85 | 1.28 |
| 21968 | 0 | 161221 | FGQAAAGDKPAP                  | 2.50 | 0.01 | 2.30 | 0.44 | 0.85 | 0.28 |
| 21969 | 0 | 290262 | FGQAAAGDKPAPFGQ               | 2.73 | 0.01 | 1.61 | 0.44 | 0.85 | 1.28 |
| 21970 | 0 | 161222 | FGQAAAGDKPPP                  | 2.47 | 0.01 | 2.30 | 0.44 | 0.85 | 0.28 |
| 21971 | 0 | 290263 | FGQAAAGDKPPPFQ                | 2.71 | 0.01 | 1.61 | 0.44 | 0.85 | 1.28 |
| 21972 | 0 | 161223 | FGQAAAGDKPSL                  | 2.45 | 0.01 | 2.30 | 0.44 | 0.85 | 0.28 |
| 21973 | 0 | 290264 | FGQAAAGDKPSLFGQ               | 2.69 | 0.01 | 1.61 | 0.44 | 0.85 | 1.28 |
| 21974 | 0 | 16042  | FGQAAAGDKPSP                  | 2.47 | 0.01 | 2.30 | 1.20 | 0.22 | 0.85 |
| 21975 | 0 | 290265 | FGQAAAGDKPSPFGQ               | 2.70 | 0.01 | 1.61 | 0.44 | 0.85 | 1.28 |
| 21976 | 0 | 161224 | FGQAAAGGKPSL                  | 2.47 | 0.01 | 2.30 | 0.44 | 0.85 | 0.28 |
| 21977 | 0 | 290266 | FGQAAAGGKPSPFQ                | 2.72 | 0.01 | 1.61 | 0.44 | 0.85 | 1.28 |
| 21978 | 0 | 290267 | FGQAAEGDKPPPFQ                | 2.70 | 0.01 | 1.61 | 0.44 | 0.85 | 1.28 |
| 21979 | 0 | 16043  | FGQIFRPDNFVFGQS               | 2.69 | 0.01 | 2.73 | 1.15 | 0.22 | 0.85 |
| 21980 | 0 | 16043  | FGQIFRPDNFVFGQS               | 2.69 | 0.01 | 2.73 | 1.15 | 0.22 | 0.85 |
| 21981 | 0 | 16043  | FGQIFRPDNFVFGQS               | 2.69 | 0.01 | 2.73 | 1.15 | 0.22 | 1.48 |
| 21982 | 0 | 16043  | FGQIFRPDNFVFGQS               | 2.69 | 0.01 | 2.73 | 1.15 | 0.22 | 1.48 |
| 21983 | 0 | 16043  | FGQIFRPDNFVFGQS               | 2.69 | 0.01 | 2.73 | 1.15 | 0.22 | 1.48 |
| 21984 | 0 | 189219 | FGQMRVRKPPAQPTQA              | 2.75 | 0.01 | 4.23 | 2.02 | 1.59 | 0.85 |
| 21985 | 0 | 132816 | FGQNAPR                       | 1.99 | 0.01 | 0.90 | 0.44 | 1.41 | 1.39 |
| 21986 | 0 | 156291 | FGQNKEWQLNQLEAR               | 2.68 | 0.01 | 3.67 | 0.44 | 1.23 | 1.27 |
| 21987 | 0 | 132817 | FGQNRANPQLPP                  | 2.47 | 0.01 | 0.90 | 0.44 | 1.41 | 1.39 |
| 21988 | 0 | 132818 | FGQNXYL                       | 1.99 | 0.01 | 0.90 | 0.44 | 1.41 | 1.39 |
| 21989 | 0 | 105185 | FGRANRGL                      | 2.14 | 0.01 | 2.76 | 0.44 | 1.23 | 0.85 |
| 21990 | 0 | 123171 | FGRVCYNPK                     | 2.18 | 0.01 | 2.28 | 2.00 | 0.22 | 0.28 |
| 21991 | 0 | 112106 | FGSDRAAPKRGSGKDSH<br>HAARTTHY | 3.18 | 0.01 | 2.95 | 2.04 | 0.22 | 1.27 |

|       |   |        |                                                        |      |      |      |      |      |      |
|-------|---|--------|--------------------------------------------------------|------|------|------|------|------|------|
| 21992 | 0 | 113396 | FGSDRGAPKRGSGKDG<br>HHAARTTHYGSLPQKA<br>QGHRPQDENPVVHF | 3.77 | 0.01 | 1.60 | 1.20 | 0.22 | 1.27 |
| 21993 | 0 | 113396 | FGSDRGAPKRGSGKDG<br>HHAARTTHYGSLPQKA<br>QGHRPQDENPVVHF | 3.77 | 0.01 | 1.60 | 1.20 | 0.22 | 1.27 |
| 21994 | 0 | 113396 | FGSDRGAPKRGSGKDG<br>HHAARTTHYGSLPQKA<br>QGHRPQDENPVVHF | 3.77 | 0.01 | 1.60 | 1.20 | 0.22 | 1.57 |
| 21995 | 0 | 113396 | FGSDRGAPKRGSGKDG<br>HHAARTTHYGSLPQKA<br>QGHRPQDENPVVHF | 3.77 | 0.01 | 1.60 | 1.20 | 0.22 | 1.57 |
| 21996 | 0 | 113396 | FGSDRGAPKRGSGKDG<br>HHAARTTHYGSLPQKA<br>QGHRPQDENPVVHF | 3.77 | 0.01 | 1.60 | 1.20 | 0.22 | 1.57 |
| 21997 | 0 | 135458 | FGSDYEDRYR                                             | 2.42 | 0.01 | 0.78 | 2.19 | 0.22 | 1.34 |
| 21998 | 0 | 135458 | FGSDYEDRYR                                             | 2.42 | 0.01 | 0.78 | 2.19 | 0.22 | 1.34 |
| 21999 | 0 | 16053  | FGSDYEDRYREN                                           | 2.56 | 0.01 | 0.78 | 0.68 | 0.22 | 0.28 |
| 22000 | 0 | 16053  | FGSDYEDRYREN                                           | 2.56 | 0.01 | 0.78 | 0.68 | 0.22 | 0.28 |
| 22001 | 0 | 16053  | FGSDYEDRYREN                                           | 2.56 | 0.01 | 0.78 | 0.68 | 0.22 | 0.28 |
| 22002 | 0 | 16057  | FGSKLELVKK                                             | 2.31 | 0.01 | 3.16 | 0.68 | 0.22 | 0.28 |
| 22003 | 0 | 16057  | FGSKLELVKK                                             | 2.31 | 0.01 | 3.16 | 0.68 | 0.22 | 0.28 |
| 22004 | 0 | 16058  | FGSKSPFFRKYF                                           | 2.52 | 0.01 | 2.69 | 0.68 | 0.22 | 0.28 |
| 22005 | 0 | 16058  | FGSKSPFFRKYF                                           | 2.52 | 0.01 | 2.69 | 1.20 | 0.22 | 0.28 |
| 22006 | 0 | 16060  | FGSLGG                                                 | 1.88 | 0.01 | 2.40 | 0.44 | 0.85 | 0.28 |
| 22007 | 0 | 16062  | FGSMLELSWK                                             | 2.31 | 0.01 | 1.75 | 0.68 | 0.22 | 0.28 |
| 22008 | 0 | 16062  | FGSMLELSWK                                             | 2.31 | 0.01 | 1.75 | 0.68 | 0.22 | 0.28 |
| 22009 | 0 | 132820 | FGSNDPY                                                | 1.99 | 0.01 | 0.90 | 0.44 | 1.41 | 1.39 |
| 22010 | 0 | 132821 | FGSNQSQ                                                | 2.04 | 0.01 | 0.90 | 0.44 | 1.41 | 1.39 |
| 22011 | 0 | 132822 | FGSNVHF                                                | 2.03 | 0.01 | 0.90 | 0.44 | 1.41 | 1.39 |
| 22012 | 0 | 156866 | FGSSAG                                                 | 2.04 | 0.01 | 0.90 | 2.74 | 0.22 | 0.85 |
| 22013 | 0 | 16065  | FGSYVAFVPEKNL                                          | 2.52 | 0.01 | 3.34 | 1.12 | 0.22 | 0.85 |
| 22014 | 0 | 196457 | FGTIGGVMATSRFKI                                        | 2.68 | 0.01 | 3.72 | 1.12 | 0.22 | 0.28 |
| 22015 | 0 | 227170 | FGTNETEYLFVDNL                                         | 2.71 | 0.01 | 2.97 | 0.44 | 0.85 | 0.28 |
| 22016 | 0 | 225287 | FGTNNYYYQCYFSADNM<br>EL                                | 2.81 | 0.01 | 2.61 | 0.68 | 0.22 | 0.28 |
| 22017 | 0 | 225287 | FGTNNYYYQCYFSADNM<br>EL                                | 2.81 | 0.01 | 2.61 | 0.68 | 0.22 | 0.28 |
| 22018 | 0 | 225287 | FGTNNYYYQCYFSADNM<br>EL                                | 2.81 | 0.01 | 2.61 | 0.68 | 0.22 | 0.28 |
| 22019 | 0 | 77872  | FGTSPTGLKLAP                                           | 2.49 | 0.01 | 0.90 | 1.15 | 0.22 | 1.39 |
| 22020 | 0 | 423291 | FGTTPGEPLKDALGR                                        | 2.67 | 0.01 | 2.51 | 0.44 | 1.59 | 1.28 |

|       |   |        |                                              |      |      |      |      |      |      |
|-------|---|--------|----------------------------------------------|------|------|------|------|------|------|
| 22021 | 0 | 158589 | FGTYLW                                       | 1.88 | 0.01 | 0.90 | 0.44 | 1.13 | 0.85 |
| 22022 | 0 | 16087  | FGYRKPLDNIKDNVGK<br>MEDY                     | 2.93 | 0.01 | 1.66 | 2.63 | 0.22 | 0.28 |
| 22023 | 0 | 190415 | FGYSTPWGYFDFNRF                              | 2.69 | 0.01 | 3.19 | 2.00 | 1.41 | 0.28 |
| 22024 | 0 | 16090  | FGYYMGGNMLYRNILYF<br>PNH                     | 2.97 | 0.01 | 2.22 | 0.44 | 1.74 | 0.28 |
| 22025 | 0 | 112972 | FHAIDEYKPQDATTN                              | 2.63 | 0.01 | 0.78 | 0.44 | 1.13 | 0.85 |
| 22026 | 0 | 103172 | FHDHKTANQ                                    | 2.21 | 0.01 | 0.90 | 2.71 | 0.22 | 0.28 |
| 22027 | 0 | 141642 | FHDTSLLSHHLA                                 | 2.50 | 0.01 | 0.90 | 0.68 | 0.22 | 0.28 |
| 22028 | 0 | 138166 | FHEFWPT                                      | 2.03 | 0.01 | 0.90 | 0.44 | 1.41 | 1.34 |
| 22029 | 0 | 138166 | FHEFWPT                                      | 2.03 | 0.01 | 0.90 | 1.15 | 2.26 | 2.35 |
| 22030 | 0 | 138166 | FHEFWPT                                      | 2.03 | 0.01 | 0.90 | 1.15 | 2.26 | 0.28 |
| 22031 | 0 | 16101  | FHENWPS                                      | 1.99 | 0.01 | 0.90 | 1.15 | 0.22 | 0.85 |
| 22032 | 0 | 16101  | FHENWPS                                      | 1.99 | 0.01 | 0.90 | 3.55 | 0.22 | 0.28 |
| 22033 | 0 | 16101  | FHENWPS                                      | 1.99 | 0.01 | 0.90 | 1.15 | 0.22 | 1.48 |
| 22034 | 0 | 16101  | FHENWPS                                      | 1.99 | 0.01 | 0.90 | 1.15 | 0.22 | 1.27 |
| 22035 | 0 | 16101  | FHENWPS                                      | 1.99 | 0.01 | 0.90 | 1.15 | 0.22 | 1.48 |
| 22036 | 0 | 16101  | FHENWPS                                      | 1.99 | 0.01 | 0.90 | 1.15 | 0.22 | 0.28 |
| 22037 | 0 | 16101  | FHENWPS                                      | 1.99 | 0.01 | 0.90 | 1.15 | 0.22 | 1.27 |
| 22038 | 0 | 16101  | FHENWPS                                      | 1.99 | 0.01 | 0.90 | 0.44 | 0.85 | 1.39 |
| 22039 | 0 | 16101  | FHENWPS                                      | 1.99 | 0.01 | 0.90 | 1.15 | 2.26 | 0.28 |
| 22040 | 0 | 16101  | FHENWPS                                      | 1.99 | 0.01 | 0.90 | 1.15 | 2.26 | 2.35 |
| 22041 | 0 | 16101  | FHENWPS                                      | 1.99 | 0.01 | 0.90 | 0.44 | 1.41 | 1.34 |
| 22042 | 0 | 16103  | FHFEVFN FVPCS                                | 2.50 | 0.01 | 2.38 | 0.68 | 0.22 | 0.28 |
| 22043 | 0 | 16103  | FHFEVFN FVPCS                                | 2.50 | 0.01 | 2.38 | 0.68 | 0.22 | 0.28 |
| 22044 | 0 | 16103  | FHFEVFN FVPCS                                | 2.50 | 0.01 | 2.38 | 0.44 | 1.59 | 0.28 |
| 22045 | 0 | 16103  | FHFEVFN FVPCS                                | 2.50 | 0.01 | 2.38 | 0.44 | 1.74 | 0.28 |
| 22046 | 0 | 16103  | FHFEVFN FVPCS                                | 2.50 | 0.01 | 2.38 | 0.44 | 1.74 | 0.28 |
| 22047 | 0 | 171029 | FHGADSDIEWLQKDF                              | 2.65 | 0.01 | 0.78 | 0.44 | 1.41 | 0.28 |
| 22048 | 0 | 171029 | FHGADSDIEWLQKDF                              | 2.65 | 0.01 | 0.78 | 0.44 | 1.13 | 0.28 |
| 22049 | 0 | 137527 | FHGCLASRQEWQQQD                              | 2.62 | 0.01 | 3.12 | 0.44 | 1.23 | 0.85 |
| 22050 | 0 | 156867 | FHGIDNEDAVQGIANW<br>DVVQGIANWDTVHSFA<br>DGVA | 3.55 | 0.01 | 0.78 | 0.44 | 2.82 | 1.39 |
| 22051 | 0 | 16114  | FHISCLTFGRET                                 | 2.46 | 0.01 | 2.08 | 0.68 | 2.26 | 0.85 |
| 22052 | 0 | 16114  | FHISCLTFGRET                                 | 2.46 | 0.01 | 2.08 | 0.44 | 1.59 | 0.85 |
| 22053 | 0 | 79546  | FHISCLTFGRET VIEYLV<br>FG                    | 3.00 | 0.01 | 2.71 | 0.44 | 0.85 | 0.28 |
| 22054 | 0 | 16120  | FHLGDDMDPELRGL                               | 2.63 | 0.01 | 2.56 | 2.69 | 0.22 | 0.28 |
| 22055 | 0 | 16120  | FHLGDDMDPELRGL                               | 2.63 | 0.01 | 2.56 | 1.12 | 0.22 | 0.28 |
| 22056 | 0 | 16123  | FHLPYNHNWFAL                                 | 2.50 | 0.01 | 0.90 | 0.68 | 0.22 | 0.28 |
| 22057 | 0 | 16123  | FHLPYNHNWFAL                                 | 2.50 | 0.01 | 0.90 | 0.68 | 0.22 | 0.28 |
| 22058 | 0 | 16123  | FHLPYNHNWFAL                                 | 2.50 | 0.01 | 0.90 | 0.68 | 2.25 | 1.75 |
| 22059 | 0 | 16123  | FHLPYNHNWFAL                                 | 2.50 | 0.01 | 0.90 | 0.68 | 0.22 | 0.28 |
| 22060 | 0 | 16123  | FHLPYNHNWFAL                                 | 2.50 | 0.01 | 0.90 | 0.68 | 0.22 | 0.28 |
| 22061 | 0 | 16123  | FHLPYNHNWFAL                                 | 2.50 | 0.01 | 0.90 | 0.68 | 0.22 | 1.27 |

|       |   |        |                                 |      |      |      |      |      |      |
|-------|---|--------|---------------------------------|------|------|------|------|------|------|
| 22062 | 0 | 16123  | FHLPYNHNWFAL                    | 2.50 | 0.01 | 0.90 | 0.68 | 0.22 | 1.27 |
| 22063 | 0 | 16123  | FHLPYNHNWFAL                    | 2.50 | 0.01 | 0.90 | 0.44 | 0.85 | 1.27 |
| 22064 | 0 | 111274 | FHLSTAS                         | 2.02 | 0.01 | 0.90 | 0.44 | 0.85 | 1.39 |
| 22065 | 0 | 186754 | FHLTTRNGEPHMIVSR                | 2.68 | 0.01 | 2.30 | 1.20 | 0.22 | 0.28 |
| 22066 | 0 | 94513  | FHPDK                           | 1.74 | 0.01 | 3.36 | 0.68 | 0.22 | 1.27 |
| 22067 | 0 | 94513  | FHPDK                           | 1.74 | 0.01 | 3.36 | 0.68 | 0.22 | 1.27 |
| 22068 | 0 | 94513  | FHPDK                           | 1.74 | 0.01 | 3.36 | 0.68 | 0.22 | 0.28 |
| 22069 | 0 | 94513  | FHPDK                           | 1.74 | 0.01 | 3.36 | 0.68 | 0.22 | 1.34 |
| 22070 | 0 | 16132  | FHPPSSNQCESTPPIAM<br>DAW        | 2.90 | 0.01 | 3.01 | 0.44 | 0.85 | 0.28 |
| 22071 | 0 | 176805 | FHPTPCIHIPGEVRN                 | 2.66 | 0.01 | 2.60 | 0.68 | 0.22 | 1.34 |
| 22072 | 0 | 176805 | FHPTPCIHIPGEVRN                 | 2.66 | 0.01 | 2.60 | 0.68 | 0.22 | 0.28 |
| 22073 | 0 | 196458 | FHPTRYP                         | 2.02 | 0.01 | 0.90 | 0.44 | 1.23 | 1.39 |
| 22074 | 0 | 101632 | FHPYYNPIGLLH                    | 2.47 | 0.01 | 0.90 | 0.44 | 0.85 | 1.39 |
| 22075 | 0 | 16134  | FHQALLDPRVRGLYFPA<br>GGSSSGTVNP | 3.22 | 0.01 | 2.08 | 1.20 | 0.22 | 2.98 |
| 22076 | 0 | 16135  | FHQILSEGENAQAALTRL<br>SRTFDAFLG | 3.25 | 0.01 | 4.33 | 0.68 | 0.22 | 0.28 |
| 22077 | 0 | 16135  | FHQILSEGENAQAALTRL<br>SRTFDAFLG | 3.25 | 0.01 | 4.33 | 0.68 | 0.22 | 0.28 |
| 22078 | 0 | 16135  | FHQILSEGENAQAALTRL<br>SRTFDAFLG | 3.25 | 0.01 | 4.33 | 0.68 | 0.22 | 0.28 |
| 22079 | 0 | 79547  | FHQMPDA                         | 1.99 | 0.01 | 0.90 | 1.12 | 0.22 | 1.39 |
| 22080 | 0 | 82078  | FHQNGQVTEVTT                    | 2.47 | 0.01 | 2.90 | 0.44 | 0.22 | 0.28 |
| 22081 | 0 | 82078  | FHQNGQVTEVTT                    | 2.47 | 0.01 | 2.90 | 0.44 | 0.22 | 1.27 |
| 22082 | 0 | 82078  | FHQNGQVTEVTT                    | 2.47 | 0.01 | 2.90 | 0.68 | 0.22 | 0.28 |
| 22083 | 0 | 145188 | FHQPTYDYTVSR                    | 2.45 | 0.01 | 0.90 | 0.44 | 1.13 | 0.28 |
| 22084 | 0 | 148593 | FHQQQLPQQQ                      | 2.34 | 0.01 | 1.86 | 0.44 | 1.23 | 0.85 |
| 22085 | 0 | 187341 | FHRDITFRKLYLKRKL                | 2.77 | 0.01 | 2.59 | 0.44 | 1.74 | 0.28 |
| 22086 | 0 | 187341 | FHRDITFRKLYLKRKL                | 2.77 | 0.01 | 2.59 | 1.12 | 0.22 | 1.34 |
| 22087 | 0 | 156868 | FHRHPLE                         | 2.02 | 0.01 | 0.90 | 2.74 | 0.22 | 0.85 |
| 22088 | 0 | 16139  | FHRSPSIRVVHH                    | 2.48 | 0.01 | 0.90 | 0.68 | 0.22 | 0.28 |
| 22089 | 0 | 119861 | FHRWSSYMVH                      | 2.30 | 0.01 | 0.78 | 0.68 | 0.22 | 0.28 |
| 22090 | 0 | 171031 | FHSGKHYWEVDVTGK                 | 2.66 | 0.01 | 0.78 | 0.44 | 1.41 | 0.28 |
| 22091 | 0 | 118348 | FHSGKHYWEVDVTGKE                | 2.73 | 0.01 | 0.78 | 0.44 | 1.13 | 0.28 |
| 22092 | 0 | 118348 | FHSGKHYWEVDVTGKE                | 2.73 | 0.01 | 0.78 | 0.44 | 1.13 | 0.28 |
| 22093 | 0 | 118348 | FHSGKHYWEVDVTGKE                | 2.73 | 0.01 | 0.78 | 0.44 | 1.41 | 0.28 |
| 22094 | 0 | 177425 | FHSPISH                         | 2.04 | 0.01 | 0.90 | 2.13 | 0.22 | 0.28 |
| 22095 | 0 | 16143  | FHSTSSEGN                       | 2.22 | 0.01 | 2.67 | 0.44 | 0.85 | 0.28 |
| 22096 | 0 | 16144  | FHSTSSESN                       | 2.25 | 0.01 | 3.00 | 0.44 | 0.85 | 0.28 |
| 22097 | 0 | 150204 | FHSVVHTLLEWLMEKEL<br>MV         | 2.92 | 0.01 | 0.90 | 0.68 | 0.22 | 0.28 |

|       |   |        |                                                                                                                                                                                                    |      |      |      |      |      |      |
|-------|---|--------|----------------------------------------------------------------------------------------------------------------------------------------------------------------------------------------------------|------|------|------|------|------|------|
| 22098 | 0 | 150204 | FHSVVHTLLEWLMEKEL<br>MV                                                                                                                                                                            | 2.92 | 0.01 | 0.90 | 0.68 | 0.22 | 0.85 |
| 22099 | 0 | 150204 | FHSVVHTLLEWLMEKEL<br>MV                                                                                                                                                                            | 2.92 | 0.01 | 0.90 | 0.68 | 0.22 | 1.48 |
| 22100 | 0 | 150204 | FHSVVHTLLEWLMEKEL<br>MV                                                                                                                                                                            | 2.92 | 0.01 | 0.90 | 0.68 | 0.22 | 1.48 |
| 22101 | 0 | 150204 | FHSVVHTLLEWLMEKEL<br>MV                                                                                                                                                                            | 2.92 | 0.01 | 0.90 | 0.68 | 0.22 | 1.48 |
| 22102 | 0 | 150204 | FHSVVHTLLEWLMEKEL<br>MV                                                                                                                                                                            | 2.92 | 0.01 | 0.90 | 0.68 | 0.22 | 3.16 |
| 22103 | 0 | 150204 | FHSVVHTLLEWLMEKEL<br>MV                                                                                                                                                                            | 2.92 | 0.01 | 0.90 | 0.68 | 0.22 | 1.34 |
| 22104 | 0 | 165596 | FHTARPW                                                                                                                                                                                            | 1.99 | 0.01 | 0.90 | 0.44 | 1.23 | 1.39 |
| 22105 | 0 | 165596 | FHTARPW                                                                                                                                                                                            | 1.99 | 0.01 | 0.90 | 0.44 | 1.23 | 1.39 |
| 22106 | 0 | 139500 | FHTHISV                                                                                                                                                                                            | 2.02 | 0.01 | 0.90 | 0.44 | 0.85 | 0.28 |
| 22107 | 0 | 139500 | FHTHISV                                                                                                                                                                                            | 2.02 | 0.01 | 0.90 | 1.20 | 0.22 | 0.28 |
| 22108 | 0 | 139500 | FHTHISV                                                                                                                                                                                            | 2.02 | 0.01 | 0.90 | 1.20 | 0.22 | 2.35 |
| 22109 | 0 | 141643 | FHTLDNNIRNVN                                                                                                                                                                                       | 2.47 | 0.01 | 0.90 | 0.68 | 0.22 | 0.28 |
| 22110 | 0 | 16146  | FHTNSNVRYSHL                                                                                                                                                                                       | 2.48 | 0.01 | 0.90 | 0.68 | 0.22 | 0.28 |
| 22111 | 0 | 226424 | FHWSWSMQSAAT                                                                                                                                                                                       | 2.48 | 0.01 | 0.90 | 0.68 | 0.22 | 0.28 |
| 22112 | 0 | 226424 | FHWSWSMQSAAT                                                                                                                                                                                       | 2.48 | 0.01 | 0.90 | 0.68 | 0.22 | 1.66 |
| 22113 | 0 | 226424 | FHWSWSMQSAAT                                                                                                                                                                                       | 2.48 | 0.01 | 0.90 | 0.68 | 0.22 | 1.66 |
| 22114 | 0 | 226424 | FHWSWSMQSAAT                                                                                                                                                                                       | 2.48 | 0.01 | 0.90 | 0.68 | 0.22 | 1.66 |
| 22115 | 0 | 226424 | FHWSWSMQSAAT                                                                                                                                                                                       | 2.48 | 0.01 | 0.90 | 0.68 | 0.22 | 3.25 |
| 22116 | 0 | 226424 | FHWSWSMQSAAT                                                                                                                                                                                       | 2.48 | 0.01 | 0.90 | 0.68 | 0.22 | 3.25 |
| 22117 | 0 | 226424 | FHWSWSMQSAAT                                                                                                                                                                                       | 2.48 | 0.01 | 0.90 | 3.67 | 1.41 | 1.66 |
| 22118 | 0 | 226424 | FHWSWSMQSAAT                                                                                                                                                                                       | 2.48 | 0.01 | 0.90 | 3.67 | 1.41 | 1.66 |
| 22119 | 0 | 226424 | FHWSWSMQSAAT                                                                                                                                                                                       | 2.48 | 0.01 | 0.90 | 3.67 | 1.41 | 1.66 |
| 22120 | 0 | 226424 | FHWSWSMQSAAT                                                                                                                                                                                       | 2.48 | 0.01 | 0.90 | 3.67 | 1.41 | 3.25 |
| 22121 | 0 | 226424 | FHWSWSMQSAAT                                                                                                                                                                                       | 2.48 | 0.01 | 0.90 | 3.67 | 1.41 | 3.25 |
| 22122 | 0 | 226424 | FHWSWSMQSAAT                                                                                                                                                                                       | 2.48 | 0.01 | 0.90 | 0.68 | 0.22 | 1.39 |
| 22123 | 0 | 226424 | FHWSWSMQSAAT                                                                                                                                                                                       | 2.48 | 0.01 | 0.90 | 3.67 | 1.41 | 1.39 |
| 22124 | 0 | 152540 | FHYDRNNIAV                                                                                                                                                                                         | 2.28 | 0.01 | 2.18 | 2.16 | 0.22 | 0.28 |
| 22125 | 0 | 118794 | FHYDRNNIAVGA                                                                                                                                                                                       | 2.44 | 0.01 | 2.18 | 0.44 | 0.22 | 0.28 |
| 22126 | 0 | 16149  | FHYDRNNIAVGADES<br>V<br>KEAHREVINSSTEG<br>LLNI<br>DKDIRKILSGYIVE<br>IEDTE<br>GLKEVINDRYDMLN<br>ISSL<br>RQDGKTFIDFKKY<br>NDKL<br>PLYISNPNYKVN<br>VYAVTK<br>ENTIINPSENGDT<br>STNGI<br>KKILIFSKKGYEIG | 4.91 | 0.01 | 2.18 | 2.75 | 0.22 | 0.28 |

|       |   |       |                                                                                                                                                                         |      |      |      |      |      |      |
|-------|---|-------|-------------------------------------------------------------------------------------------------------------------------------------------------------------------------|------|------|------|------|------|------|
| 22127 | 0 | 16149 | FHYDRNNIAVGADESVV<br>KEAHREVINSSTEGLLLNI<br>DKDIRKILSGYIVEIEDTE<br>GLKEVINDRYDMLNISSL<br>RQDGKTFIDFKKYNDKL<br>PLYISNPYKVNYYAVTK<br>ENTIINPSENGDTSTNGI<br>KKILIFSKKGYEIG | 4.91 | 0.01 | 3.89 | 2.16 | 2.25 | 1.75 |
| 22128 | 0 | 16149 | FHYDRNNIAVGADESVV<br>KEAHREVINSSTEGLLLNI<br>DKDIRKILSGYIVEIEDTE<br>GLKEVINDRYDMLNISSL<br>RQDGKTFIDFKKYNDKL<br>PLYISNPYKVNYYAVTK<br>ENTIINPSENGDTSTNGI<br>KKILIFSKKGYEIG | 4.91 | 0.01 | 3.89 | 2.16 | 0.22 | 0.28 |
| 22129 | 0 | 16149 | FHYDRNNIAVGADESVV<br>KEAHREVINSSTEGLLLNI<br>DKDIRKILSGYIVEIEDTE<br>GLKEVINDRYDMLNISSL<br>RQDGKTFIDFKKYNDKL<br>PLYISNPYKVNYYAVTK<br>ENTIINPSENGDTSTNGI<br>KKILIFSKKGYEIG | 4.91 | 0.01 | 3.89 | 2.16 | 0.22 | 0.28 |
| 22130 | 0 | 16149 | FHYDRNNIAVGADESVV<br>KEAHREVINSSTEGLLLNI<br>DKDIRKILSGYIVEIEDTE<br>GLKEVINDRYDMLNISSL<br>RQDGKTFIDFKKYNDKL<br>PLYISNPYKVNYYAVTK<br>ENTIINPSENGDTSTNGI<br>KKILIFSKKGYEIG | 4.91 | 0.01 | 3.89 | 2.16 | 2.25 | 1.75 |
| 22131 | 0 | 16149 | FHYDRNNIAVGADESVV<br>KEAHREVINSSTEGLLLNI<br>DKDIRKILSGYIVEIEDTE<br>GLKEVINDRYDMLNISSL<br>RQDGKTFIDFKKYNDKL<br>PLYISNPYKVNYYAVTK<br>ENTIINPSENGDTSTNGI<br>KKILIFSKKGYEIG | 4.91 | 0.01 | 2.18 | 2.61 | 0.22 | 0.28 |
| 22132 | 0 | 16155 | FIAEKNSFSEEPFQDEIVS<br>YNTK                                                                                                                                             | 3.08 | 0.01 | 2.95 | 0.44 | 0.22 | 0.28 |

|       |   |        |                        |      |      |      |      |      |      |
|-------|---|--------|------------------------|------|------|------|------|------|------|
| 22133 | 0 | 423292 | FICRDNCTLSDQFTL        | 2.69 | 0.01 | 2.51 | 0.44 | 1.59 | 1.28 |
| 22134 | 0 | 134670 | FIDEPRRRPI             | 2.33 | 0.01 | 0.78 | 0.44 | 1.13 | 0.85 |
| 22135 | 0 | 134670 | FIDEPRRRPI             | 2.33 | 0.01 | 0.78 | 3.05 | 1.13 | 0.85 |
| 22136 | 0 | 92684  | FIDGGKGNDL             | 2.33 | 0.01 | 2.67 | 2.00 | 0.22 | 0.28 |
| 22137 | 0 | 92684  | FIDGGKGNDL             | 2.33 | 0.01 | 2.67 | 2.00 | 0.22 | 0.28 |
| 22138 | 0 | 137402 | FIDSYICQV              | 2.21 | 0.01 | 0.78 | 0.44 | 2.39 | 0.28 |
| 22139 | 0 | 137402 | FIDSYICQV              | 2.21 | 0.01 | 0.78 | 0.44 | 2.39 | 0.28 |
| 22140 | 0 | 137402 | FIDSYICQV              | 2.21 | 0.01 | 0.78 | 0.44 | 2.39 | 0.28 |
| 22141 | 0 | 128628 | FIDWQSR                | 1.99 | 0.01 | 0.90 | 0.44 | 1.13 | 0.28 |
| 22142 | 0 | 16183  | FIEDLLFNKVTLADAGF      | 2.80 | 0.01 | 2.48 | 0.44 | 0.85 | 0.28 |
| 22143 | 0 | 16183  | FIEDLLFNKVTLADAGF      | 2.80 | 0.01 | 2.48 | 0.68 | 0.22 | 0.28 |
| 22144 | 0 | 177664 | FIEGGWTGMVDGWYG<br>YHH | 2.83 | 0.01 | 2.87 | 0.44 | 0.22 | 0.28 |
| 22145 | 0 | 177664 | FIEGGWTGMVDGWYG<br>YHH | 2.83 | 0.01 | 2.87 | 0.44 | 0.22 | 0.28 |
| 22146 | 0 | 177664 | FIEGGWTGMVDGWYG<br>YHH | 2.83 | 0.01 | 2.87 | 0.44 | 0.22 | 0.28 |
| 22147 | 0 | 177664 | FIEGGWTGMVDGWYG<br>YHH | 2.83 | 0.01 | 2.87 | 0.44 | 0.22 | 0.28 |
| 22148 | 0 | 177664 | FIEGGWTGMVDGWYG<br>YHH | 2.83 | 0.01 | 2.87 | 0.44 | 0.22 | 1.34 |
| 22149 | 0 | 177664 | FIEGGWTGMVDGWYG<br>YHH | 2.83 | 0.01 | 2.87 | 0.44 | 0.22 | 1.34 |
| 22150 | 0 | 177664 | FIEGGWTGMVDGWYG<br>YHH | 2.83 | 0.01 | 2.87 | 0.44 | 0.22 | 1.34 |
| 22151 | 0 | 177664 | FIEGGWTGMVDGWYG<br>YHH | 2.83 | 0.01 | 2.87 | 0.44 | 0.22 | 1.34 |
| 22152 | 0 | 177664 | FIEGGWTGMVDGWYG<br>YHH | 2.83 | 0.01 | 2.87 | 0.44 | 0.22 | 1.34 |
| 22153 | 0 | 158753 | FIEVEELKLFLQNFC        | 2.70 | 0.01 | 3.26 | 0.44 | 1.23 | 0.28 |
| 22154 | 0 | 158753 | FIEVEELKLFLQNFC        | 2.70 | 0.01 | 3.26 | 0.44 | 1.41 | 0.28 |
| 22155 | 0 | 128630 | FIEVPWK                | 1.99 | 0.01 | 0.90 | 0.44 | 1.13 | 0.28 |
| 22156 | 0 | 120528 | FIEWLKVKILPEVKEK       | 2.78 | 0.01 | 3.34 | 1.20 | 0.22 | 0.28 |
| 22157 | 0 | 120528 | FIEWLKVKILPEVKEK       | 2.78 | 0.01 | 3.34 | 1.20 | 0.22 | 0.28 |
| 22158 | 0 | 120528 | FIEWLKVKILPEVKEK       | 2.78 | 0.01 | 3.34 | 1.20 | 0.22 | 0.85 |
| 22159 | 0 | 225731 | FIFPPKPKDVLMITR        | 2.69 | 0.01 | 3.28 | 0.44 | 0.22 | 0.85 |
| 22160 | 0 | 106418 | FIFPPSDEQLKSGTASVV     | 2.80 | 0.01 | 0.78 | 1.12 | 0.22 | 1.48 |
| 22161 | 0 | 16229  | FIKPEVKPGT             | 2.31 | 3.72 | 2.56 | 0.44 | 0.85 | 0.28 |
| 22162 | 0 | 171038 | FIKPIFTDESYLELY        | 2.69 | 0.01 | 0.78 | 0.44 | 1.41 | 0.28 |
| 22163 | 0 | 171038 | FIKPIFTDESYLELY        | 2.69 | 0.01 | 0.78 | 0.44 | 1.13 | 0.28 |
| 22164 | 0 | 123172 | FIKWPLHSW              | 2.21 | 0.01 | 2.28 | 2.00 | 0.22 | 0.28 |
| 22165 | 0 | 123173 | FIKWPLNGW              | 2.21 | 0.01 | 2.28 | 2.00 | 0.22 | 0.28 |
| 22166 | 0 | 123174 | FIKWPLNSW              | 2.21 | 0.01 | 2.28 | 2.00 | 0.22 | 0.28 |
| 22167 | 0 | 95383  | FILNTVNGTTRT           | 2.49 | 0.01 | 2.88 | 0.44 | 1.23 | 0.85 |



|       |   |        |                                |      |      |      |      |      |      |
|-------|---|--------|--------------------------------|------|------|------|------|------|------|
| 22168 | 0 | 95383  | FILNTVNGTTRT                   | 2.49 | 0.01 | 2.88 | 1.12 | 0.22 | 0.85 |
| 22169 | 0 | 16262  | FINNAYNM                       | 2.14 | 0.01 | 2.96 | 0.68 | 0.22 | 0.28 |
| 22170 | 0 | 16262  | FINNAYNM                       | 2.14 | 0.01 | 2.96 | 0.68 | 0.22 | 0.28 |
| 22171 | 0 | 177054 | FINNAYNMSIRRS                  | 2.56 | 0.01 | 2.22 | 2.69 | 0.22 | 0.28 |
| 22172 | 0 | 177054 | FINNAYNMSIRRS                  | 2.56 | 0.01 | 2.22 | 2.69 | 0.22 | 0.85 |
| 22173 | 0 | 177054 | FINNAYNMSIRRS                  | 2.56 | 0.01 | 2.22 | 2.69 | 0.22 | 0.85 |
|       |   |        | FINRLDRCLKAVRKERSK             |      |      |      |      |      |      |
| 22174 | 0 | 124108 | ESDDNYDKTEDVDIEEM<br>ALKL      | 3.61 | 0.01 | 0.78 | 0.44 | 1.13 | 0.85 |
| 22175 | 0 | 16265  | FINTSKGQKC                     | 2.29 | 0.01 | 0.78 | 0.44 | 1.41 | 0.28 |
| 22176 | 0 | 240873 | FIPEDPRIID                     | 2.34 | 0.01 | 2.90 | 0.68 | 0.22 | 0.85 |
| 22177 | 0 | 240873 | FIPEDPRIID                     | 2.34 | 0.01 | 2.90 | 0.68 | 0.22 | 0.85 |
| 22178 | 0 | 240873 | FIPEDPRIID                     | 2.34 | 0.01 | 2.90 | 0.68 | 0.22 | 0.28 |
| 22179 | 0 | 16272  | FIPLVFYTLKARTEGIIGKE           | 2.94 | 0.01 | 2.22 | 0.44 | 1.74 | 0.28 |
| 22180 | 0 | 16280  | FIQQGRGYFGLIFPG                | 2.71 | 0.01 | 2.16 | 0.44 | 1.23 | 1.48 |
| 22181 | 0 | 136063 | FIRFDKRIEAE                    | 2.50 | 0.01 | 0.78 | 0.44 | 2.82 | 0.85 |
| 22182 | 0 | 99245  | FIRGLGVPREPRQMEP               | 2.68 | 0.01 | 2.86 | 2.02 | 0.85 | 0.85 |
| 22183 | 0 | 181204 | FISCNNSGKDGNTSA                | 2.68 | 0.01 | 2.97 | 0.44 | 0.85 | 0.28 |
| 22184 | 0 | 16296  | FISEAIIHVLHSR                  | 2.55 | 0.01 | 4.93 | 2.25 | 0.22 | 0.28 |
| 22185 | 0 | 16298  | FISEPSIPSR                     | 2.35 | 3.72 | 2.70 | 0.44 | 0.85 | 0.28 |
| 22186 | 0 | 16305  | FISP                           | 1.57 | 0.01 | 3.70 | 0.44 | 0.85 | 0.28 |
| 22187 | 0 | 127652 | FISPRPGQNVLR                   | 2.45 | 0.01 | 3.16 | 3.16 | 0.22 | 0.28 |
| 22188 | 0 | 16311  | FITDD                          | 1.72 | 0.01 | 2.69 | 0.44 | 0.85 | 0.28 |
| 22189 | 0 | 180097 | FITDTSTTPVPSVPSTSL<br>G        | 2.99 | 0.01 | 1.86 | 1.12 | 0.22 | 1.75 |
| 22190 | 0 | 180097 | FITDTSTTPVPSVPSTSL<br>G        | 2.99 | 0.01 | 1.86 | 1.12 | 0.22 | 0.28 |
| 22191 | 0 | 16317  | FITSEPTQPPPTSPPLVH<br>DSDLEHVL | 3.22 | 0.01 | 3.01 | 0.68 | 0.22 | 0.85 |
| 22192 | 0 | 16317  | FITSEPTQPPPTSPPLVH<br>DSDLEHVL | 3.22 | 0.01 | 3.01 | 0.68 | 0.22 | 2.12 |
| 22193 | 0 | 191290 | FIVFLQTHI                      | 2.24 | 0.01 | 4.93 | 0.68 | 0.22 | 2.12 |
| 22194 | 0 | 180098 | FIVTGLKRMAVTVGEQA              | 2.78 | 0.01 | 4.15 | 2.22 | 0.22 | 0.28 |
| 22195 | 0 | 16336  | FIYETFSKLI                     | 2.32 | 0.01 | 0.78 | 0.44 | 1.74 | 0.28 |
| 22196 | 0 | 16340  | FIYRDD                         | 1.86 | 0.01 | 0.90 | 0.44 | 1.59 | 1.39 |
| 22197 | 0 | 101634 | FKADEKKFWGKYLEIAR              | 2.85 | 0.01 | 1.60 | 0.44 | 1.13 | 2.75 |
| 22198 | 0 | 101634 | FKADEKKFWGKYLEIAR              | 2.85 | 0.01 | 1.60 | 3.06 | 0.22 | 0.85 |
| 22199 | 0 | 103173 | FKADEKKFWGKYLEIAR<br>R         | 2.90 | 0.01 | 1.60 | 1.12 | 0.22 | 1.27 |
| 22200 | 0 | 103173 | FKADEKKFWGKYLEIAR<br>R         | 2.90 | 0.01 | 1.60 | 1.12 | 0.22 | 1.27 |
| 22201 | 0 | 105784 | FKADPSIM                       | 2.10 | 0.01 | 3.05 | 1.20 | 0.22 | 0.28 |
| 22202 | 0 | 171042 | FKAFAGNSKSKVSSQ                | 2.71 | 0.01 | 0.78 | 0.44 | 1.13 | 0.28 |

|       |   |        |                                                                                                                                                            |      |      |      |      |      |      |
|-------|---|--------|------------------------------------------------------------------------------------------------------------------------------------------------------------|------|------|------|------|------|------|
| 22203 | 0 | 128634 | FKAFDKHM                                                                                                                                                   | 2.15 | 0.01 | 0.78 | 0.44 | 1.13 | 0.28 |
| 22204 | 0 | 134945 | FKAPRP                                                                                                                                                     | 1.90 | 0.01 | 2.73 | 0.68 | 0.22 | 2.56 |
| 22205 | 0 | 134945 | FKAPRP                                                                                                                                                     | 1.90 | 0.01 | 2.73 | 0.68 | 0.22 | 2.56 |
| 22206 | 0 | 134945 | FKAPRP                                                                                                                                                     | 1.90 | 0.01 | 2.73 | 0.68 | 0.22 | 1.48 |
| 22207 | 0 | 134945 | FKAPRP                                                                                                                                                     | 1.90 | 0.01 | 2.73 | 0.68 | 0.22 | 1.48 |
| 22208 | 0 | 134945 | FKAPRP                                                                                                                                                     | 1.90 | 0.01 | 2.73 | 0.68 | 0.22 | 2.56 |
| 22209 | 0 | 134945 | FKAPRP                                                                                                                                                     | 1.90 | 0.01 | 2.73 | 0.68 | 0.22 | 2.56 |
| 22210 | 0 | 78381  | FKDGRGCGSCFEIKCTKP                                                                                                                                         | 2.86 | 0.01 | 3.22 | 0.44 | 1.23 | 1.27 |
| 22211 | 0 | 16354  | FKDKVLGLLQRASQQEA<br>EIR                                                                                                                                   | 2.93 | 0.01 | 1.96 | 0.44 | 0.85 | 0.28 |
| 22212 | 0 | 120532 | FKDSINNLVK                                                                                                                                                 | 2.30 | 0.01 | 2.18 | 2.16 | 0.22 | 0.28 |
| 22213 | 0 | 119579 | FKDYSSVVRPVEDHRQ                                                                                                                                           | 2.72 | 0.01 | 0.78 | 1.15 | 0.22 | 1.57 |
| 22214 | 0 | 119579 | FKDYSSVVRPVEDHRQ                                                                                                                                           | 2.72 | 0.01 | 0.78 | 0.44 | 1.13 | 1.57 |
| 22215 | 0 | 119579 | FKDYSSVVRPVEDHRQ                                                                                                                                           | 2.72 | 0.01 | 0.78 | 0.44 | 1.41 | 1.57 |
| 22216 | 0 | 16356  | FKEAQQAAAGGFITTTAN<br>YTSQAHANLYGLNLNYS<br>F                                                                                                               | 3.51 | 0.01 | 2.98 | 1.15 | 0.22 | 1.27 |
| 22217 | 0 | 16356  | FKEAQQAAAGGFITTTAN<br>YTSQAHANLYGLNLNYS<br>F                                                                                                               | 3.51 | 0.01 | 2.98 | 1.15 | 0.22 | 0.28 |
| 22218 | 0 | 16356  | FKEAQQAAAGGFITTTAN<br>YTSQAHANLYGLNLNYS<br>F                                                                                                               | 3.51 | 0.01 | 2.98 | 1.15 | 0.22 | 0.85 |
| 22219 | 0 | 16356  | FKEAQQAAAGGFITTTAN<br>YTSQAHANLYGLNLNYS<br>F                                                                                                               | 3.51 | 0.01 | 4.45 | 1.12 | 0.22 | 0.28 |
| 22220 | 0 | 16359  | FKEKILGLLQRATQQQA<br>VIE                                                                                                                                   | 2.94 | 0.01 | 1.96 | 0.44 | 0.85 | 0.28 |
| 22221 | 0 | 16360  | FKEKVLGFISTTGQKAET<br>LK                                                                                                                                   | 2.96 | 0.01 | 1.96 | 0.44 | 0.85 | 0.28 |
| 22222 | 0 | 16362  | FKEKVLGLLQRATQ                                                                                                                                             | 2.60 | 0.01 | 2.59 | 0.44 | 0.85 | 0.28 |
| 22223 | 0 | 16362  | FKEKVLGLLQRATQ                                                                                                                                             | 2.60 | 0.01 | 2.59 | 0.44 | 0.85 | 0.28 |
| 22224 | 0 | 16363  | FKEKVLGLLQRATQQQA<br>VIE                                                                                                                                   | 2.94 | 0.01 | 1.96 | 0.44 | 0.85 | 0.28 |
| 22225 | 0 | 16365  | FKENISSINIINDTNFGVQ<br>SMTGLSNRSKGQDGIYR<br>AATTAFSFKSKELYPEG<br>RYRMRFVIQSYEPFTCNF<br>KLFNNLIYSSSFDKGYD<br>EFFYFYNGSKSFFNISC<br>DIINSINRLSGVFLIEDKL<br>II | 4.83 | 0.01 | 3.97 | 1.12 | 0.22 | 0.85 |

|       |   |        |                                                                                                                                                                                                                                                                                                                            |      |      |      |      |      |      |
|-------|---|--------|----------------------------------------------------------------------------------------------------------------------------------------------------------------------------------------------------------------------------------------------------------------------------------------------------------------------------|------|------|------|------|------|------|
| 22226 | 0 | 16365  | FKENISSINIINDTNFGVQ<br>SMTGLSNRSGQDGIYR<br>AATTAFSFKSKELKYPEG<br>RYRMRFVIQSYEPFTCNF<br>KLFNNLIYSSSFDKGYD<br>EFFYFYNGSKSFFNISC<br>DIINSINRLSGVFLIELDKL<br>II<br>FKENISSINIINDTNFGVQ<br>SMTGLSNRSGQDGIYR<br>AATTAFSFKSKELKYPEG<br>RYRMRFVIQSYEPFTCNF<br>KLFNNLIYSSSFDKGYD<br>EFFYFYNGSKSFFNISC<br>DIINSINRLSGVFLIELDKL<br>II | 4.83 | 0.01 | 3.97 | 1.12 | 0.22 | 1.34 |
| 22227 | 0 | 16365  | FKENISSINIINDTNFGVQ<br>SMTGLSNRSGQDGIYR<br>AATTAFSFKSKELKYPEG<br>RYRMRFVIQSYEPFTCNF<br>KLFNNLIYSSSFDKGYD<br>EFFYFYNGSKSFFNISC<br>DIINSINRLSGVFLIELDKL<br>II                                                                                                                                                                | 4.83 | 0.01 | 3.97 | 1.12 | 0.22 | 0.85 |
| 22228 | 0 | 116974 | FKEQFLDGDGW                                                                                                                                                                                                                                                                                                                | 2.42 | 0.01 | 0.78 | 1.12 | 0.22 | 0.85 |
| 22229 | 0 | 130492 | FKEQFLDGDGWTSR                                                                                                                                                                                                                                                                                                             | 2.60 | 0.01 | 0.78 | 1.20 | 0.22 | 1.27 |
| 22230 | 0 | 130492 | FKEQFLDGDGWTSR                                                                                                                                                                                                                                                                                                             | 2.60 | 0.01 | 0.78 | 0.44 | 1.13 | 0.28 |
| 22231 | 0 | 130492 | FKEQFLDGDGWTSR                                                                                                                                                                                                                                                                                                             | 2.60 | 0.01 | 0.78 | 1.20 | 0.22 | 0.28 |
| 22232 | 0 | 16366  | FKEVKTIGDKRTLTLNTT<br>ANYTSQAHANLYGLNLN<br>YSF                                                                                                                                                                                                                                                                             | 3.58 | 0.01 | 2.98 | 1.15 | 0.22 | 1.27 |
| 22233 | 0 | 16366  | FKEVKTIGDKRTLTLNTT<br>ANYTSQAHANLYGLNLN<br>YSF                                                                                                                                                                                                                                                                             | 3.58 | 0.01 | 2.98 | 1.15 | 0.22 | 0.28 |
| 22234 | 0 | 16366  | FKEVKTIGDKRTLTLNTT<br>ANYTSQAHANLYGLNLN<br>YSF                                                                                                                                                                                                                                                                             | 3.58 | 0.01 | 2.98 | 1.15 | 0.22 | 0.85 |
| 22235 | 0 | 16366  | FKEVKTIGDKRTLTLNTT<br>ANYTSQAHANLYGLNLN<br>YSF                                                                                                                                                                                                                                                                             | 3.58 | 0.01 | 2.98 | 2.16 | 0.22 | 0.28 |
| 22236 | 0 | 16366  | FKEVKTIGDKRTLTLNTT<br>ANYTSQAHANLYGLNLN<br>YSF                                                                                                                                                                                                                                                                             | 3.58 | 0.01 | 2.98 | 1.12 | 0.22 | 0.28 |
| 22237 | 0 | 16366  | FKEVKTIGDKRTLTLNTT<br>ANYTSQAHANLYGLNLN<br>YSF                                                                                                                                                                                                                                                                             | 3.58 | 0.01 | 2.98 | 0.44 | 0.85 | 0.28 |
| 22238 | 0 | 16366  | FKEVKTIGDKRTLTLNTT<br>ANYTSQAHANLYGLNLN<br>YSF                                                                                                                                                                                                                                                                             | 3.58 | 0.01 | 2.98 | 1.12 | 0.22 | 0.28 |
| 22239 | 0 | 16366  | FKEVKTIGDKRTLTLNTT<br>ANYTSQAHANLYGLNLN<br>YSF                                                                                                                                                                                                                                                                             | 3.58 | 0.01 | 2.98 | 1.12 | 0.22 | 0.85 |
| 22240 | 0 | 16366  | FKEVKTIGDKRTLTLNTT<br>ANYTSQAHANLYGLNLN<br>YSF                                                                                                                                                                                                                                                                             | 3.58 | 0.01 | 2.98 | 1.12 | 0.22 | 0.85 |

|       |   |        |                          |      |      |      |      |      |      |
|-------|---|--------|--------------------------|------|------|------|------|------|------|
| 22241 | 0 | 226025 | FKGETQINSDLTGYGQW<br>EYN | 2.93 | 0.01 | 2.24 | 0.68 | 0.22 | 0.28 |
| 22242 | 0 | 91303  | FKGFSAVSVDLAA            | 2.54 | 0.01 | 4.03 | 2.02 | 0.22 | 0.28 |
| 22243 | 0 | 91304  | FKGFESISVDLAA            | 2.52 | 0.01 | 4.03 | 2.02 | 0.22 | 0.28 |
| 22244 | 0 | 189073 | FKGKLHVPFVPV             | 2.52 | 0.01 | 2.92 | 0.68 | 0.22 | 0.85 |
| 22245 | 0 | 189073 | FKGKLHVPFVPV             | 2.52 | 0.01 | 2.92 | 0.68 | 0.22 | 0.28 |
| 22246 | 0 | 189073 | FKGKLHVPFVPV             | 2.52 | 0.01 | 2.92 | 0.68 | 0.22 | 0.28 |
| 22247 | 0 | 189073 | FKGKLHVPFVPV             | 2.52 | 0.01 | 2.92 | 0.68 | 0.22 | 1.48 |
| 22248 | 0 | 16371  | FKGLTHSAN                | 2.18 | 0.01 | 3.18 | 2.74 | 0.22 | 0.28 |
| 22249 | 0 | 82146  | FKGLVDDADIGN             | 2.47 | 0.01 | 2.87 | 0.44 | 0.22 | 0.28 |
| 22250 | 0 | 94819  | FKGQEDLGNGLK             | 2.49 | 0.01 | 2.87 | 0.44 | 0.85 | 0.28 |
| 22251 | 0 | 16375  | FKHKFAELLEQQKAAQY<br>PSK | 2.96 | 0.01 | 4.15 | 0.44 | 0.85 | 0.28 |
| 22252 | 0 | 16375  | FKHKFAELLEQQKAAQY<br>PSK | 2.96 | 0.01 | 4.15 | 0.44 | 0.85 | 0.28 |
| 22253 | 0 | 16376  | FKHLREFVFNKDGFLY         | 2.80 | 0.01 | 2.48 | 0.44 | 0.85 | 0.28 |
| 22254 | 0 | 16376  | FKHLREFVFNKDGFLY         | 2.80 | 0.01 | 2.48 | 1.20 | 0.22 | 0.28 |
| 22255 | 0 | 146244 | FKIDALNENKV              | 2.39 | 0.01 | 1.60 | 1.20 | 0.22 | 1.27 |
| 22256 | 0 | 132295 | FKIGRGYAXVR              | 2.45 | 0.01 | 0.90 | 1.15 | 0.22 | 1.39 |
| 22257 | 0 | 97304  | FKIISDGTQ                | 2.20 | 0.01 | 3.13 | 1.12 | 0.22 | 0.28 |
| 22258 | 0 | 16385  | FKIVFPIVAKKDFKYRGE<br>GN | 2.95 | 0.01 | 2.21 | 1.20 | 0.22 | 0.28 |
| 22259 | 0 | 16385  | FKIVFPIVAKKDFKYRGE<br>GN | 2.95 | 0.01 | 2.21 | 1.20 | 0.22 | 0.28 |
| 22260 | 0 | 16387  | FKKDEIDMSFETNKK          | 2.68 | 0.01 | 3.85 | 0.68 | 0.22 | 0.85 |
| 22261 | 0 | 16387  | FKKDEIDMSFETNKK          | 2.68 | 0.01 | 3.85 | 0.68 | 0.22 | 1.48 |
| 22262 | 0 | 238377 | FKKWKKGEKVSRCGA          | 2.68 | 0.01 | 2.56 | 2.02 | 0.22 | 0.85 |
| 22263 | 0 | 238377 | FKKWKKGEKVSRCGA          | 2.68 | 0.01 | 2.56 | 1.20 | 0.22 | 0.85 |
| 22264 | 0 | 152542 | FKKYNDKLPL               | 2.33 | 0.01 | 2.18 | 2.16 | 0.22 | 0.28 |
| 22265 | 0 | 16394  | FKKYNDKLPLYISNPYK<br>VN  | 2.97 | 0.01 | 2.18 | 0.68 | 0.22 | 0.28 |
| 22266 | 0 | 16394  | FKKYNDKLPLYISNPYK<br>VN  | 2.97 | 0.01 | 2.18 | 1.81 | 0.22 | 0.28 |
| 22267 | 0 | 16396  | FKLEKEVAE                | 2.25 | 0.01 | 4.33 | 1.15 | 0.22 | 0.28 |
| 22268 | 0 | 16396  | FKLEKEVAE                | 2.25 | 0.01 | 4.33 | 1.15 | 0.22 | 0.28 |
| 22269 | 0 | 16396  | FKLEKEVAE                | 2.25 | 0.01 | 4.33 | 1.15 | 0.22 | 1.34 |
| 22270 | 0 | 113400 | FKLGGRDSR                | 2.22 | 0.01 | 0.78 | 1.12 | 0.22 | 0.28 |
| 22271 | 0 | 113400 | FKLGGRDSR                | 2.22 | 0.01 | 0.78 | 0.44 | 0.85 | 0.28 |
| 22272 | 0 | 113400 | FKLGGRDSR                | 2.22 | 0.01 | 0.78 | 0.44 | 1.41 | 0.28 |
| 22273 | 0 | 16397  | FKLKAIE                  | 2.02 | 0.01 | 0.90 | 0.44 | 1.23 | 0.28 |
| 22274 | 0 | 16397  | FKLKAIE                  | 2.02 | 0.01 | 0.90 | 0.44 | 1.23 | 1.27 |
| 22275 | 0 | 113401 | FKLPGLNSR                | 2.21 | 0.01 | 2.04 | 1.12 | 0.22 | 0.28 |
| 22276 | 0 | 113401 | FKLPGLNSR                | 2.21 | 0.01 | 2.04 | 1.12 | 0.22 | 0.28 |
| 22277 | 0 | 113401 | FKLPGLNSR                | 2.21 | 0.01 | 2.04 | 1.12 | 0.22 | 0.28 |
| 22278 | 0 | 113401 | FKLPGLNSR                | 2.21 | 0.01 | 2.04 | 0.44 | 1.41 | 0.28 |

|       |   |        |                                 |      |      |      |      |      |      |
|-------|---|--------|---------------------------------|------|------|------|------|------|------|
| 22279 | 0 | 132296 | FKLYERGMAFTX                    | 2.44 | 0.01 | 0.90 | 1.15 | 0.22 | 1.39 |
| 22280 | 0 | 16411  | FKNDDKENS                       | 2.35 | 0.01 | 2.22 | 1.20 | 0.22 | 0.85 |
| 22281 | 0 | 114206 | FKNIVTPRTPPPSQGKG<br>RGLSLSRFSW | 3.24 | 0.01 | 0.78 | 3.45 | 0.22 | 1.57 |
| 22282 | 0 | 114206 | FKNIVTPRTPPPSQGKG<br>RGLSLSRFSW | 3.24 | 0.01 | 0.78 | 3.45 | 0.22 | 1.57 |
| 22283 | 0 | 114206 | FKNIVTPRTPPPSQGKG<br>RGLSLSRFSW | 3.24 | 0.01 | 0.78 | 3.45 | 0.22 | 1.57 |
| 22284 | 0 | 114206 | FKNIVTPRTPPPSQGKG<br>RGLSLSRFSW | 3.24 | 0.01 | 0.78 | 3.45 | 0.22 | 1.57 |
| 22285 | 0 | 114206 | FKNIVTPRTPPPSQGKG<br>RGLSLSRFSW | 3.24 | 0.01 | 0.78 | 3.45 | 0.22 | 1.57 |
| 22286 | 0 | 114206 | FKNIVTPRTPPPSQGKG<br>RGLSLSRFSW | 3.24 | 0.01 | 0.78 | 3.45 | 0.22 | 1.57 |
| 22287 | 0 | 114206 | FKNIVTPRTPPPSQGKG<br>RGLSLSRFSW | 3.24 | 0.01 | 1.60 | 1.20 | 0.22 | 1.27 |
| 22288 | 0 | 114206 | FKNIVTPRTPPPSQGKG<br>RGLSLSRFSW | 3.24 | 0.01 | 1.60 | 1.20 | 0.22 | 1.27 |
| 22289 | 0 | 16417  | FKNKDGLYVYKGYP                  | 2.80 | 0.01 | 2.48 | 0.44 | 0.85 | 0.28 |
| 22290 | 0 | 16421  | FKNPHA                          | 1.88 | 0.01 | 2.40 | 0.44 | 0.85 | 0.28 |
| 22291 | 0 | 136836 | FKNPHAKKQDVV                    | 2.44 | 0.01 | 3.81 | 0.68 | 0.22 | 0.28 |
| 22292 | 0 | 16422  | FKNPHAKKQDVVVLGS<br>QEGAMHT     | 3.02 | 0.01 | 2.30 | 0.68 | 0.22 | 0.28 |
| 22293 | 0 | 16422  | FKNPHAKKQDVVVLGS<br>QEGAMHT     | 3.02 | 0.01 | 2.30 | 0.68 | 0.22 | 0.28 |
| 22294 | 0 | 112978 | FKNTEISFKLGQEFETT<br>ADNRKTK    | 3.16 | 0.01 | 1.60 | 2.04 | 0.22 | 0.28 |
| 22295 | 0 | 192946 | FKPGATNSNANAVATDL<br>TKL        | 2.96 | 0.01 | 3.47 | 2.00 | 0.22 | 0.28 |
| 22296 | 0 | 226838 | FKPKHVKAYVRP                    | 2.49 | 0.01 | 3.61 | 0.44 | 1.13 | 0.28 |
| 22297 | 0 | 226838 | FKPKHVKAYVRP                    | 2.49 | 0.01 | 3.61 | 0.44 | 1.13 | 0.28 |
| 22298 | 0 | 226838 | FKPKHVKAYVRP                    | 2.49 | 0.01 | 3.61 | 0.44 | 1.13 | 1.27 |
| 22299 | 0 | 226838 | FKPKHVKAYVRP                    | 2.49 | 0.01 | 3.61 | 0.44 | 1.13 | 1.27 |
| 22300 | 0 | 226838 | FKPKHVKAYVRP                    | 2.49 | 0.01 | 3.61 | 0.44 | 1.13 | 0.85 |
| 22301 | 0 | 226838 | FKPKHVKAYVRP                    | 2.49 | 0.01 | 3.61 | 0.44 | 1.13 | 2.02 |
| 22302 | 0 | 226838 | FKPKHVKAYVRP                    | 2.49 | 0.01 | 3.61 | 0.44 | 1.13 | 2.02 |
| 22303 | 0 | 226838 | FKPKHVKAYVRP                    | 2.49 | 0.01 | 3.61 | 0.44 | 1.13 | 2.02 |
| 22304 | 0 | 226838 | FKPKHVKAYVRP                    | 2.49 | 0.01 | 3.61 | 0.44 | 1.13 | 0.28 |
| 22305 | 0 | 226838 | FKPKHVKAYVRP                    | 2.49 | 0.01 | 3.61 | 0.44 | 1.13 | 1.34 |
| 22306 | 0 | 141644 | FKPSSPPSITLW                    | 2.48 | 0.01 | 0.90 | 3.41 | 0.22 | 0.28 |
| 22307 | 0 | 229210 | FKQFKKDTLPT                     | 2.43 | 0.01 | 2.70 | 0.68 | 0.22 | 0.28 |
| 22308 | 0 | 16437  | FKQKALGLLQTASR                  | 2.62 | 0.01 | 2.41 | 0.44 | 0.85 | 0.28 |
| 22309 | 0 | 16437  | FKQKALGLLQTASR                  | 2.62 | 0.01 | 2.41 | 0.44 | 0.85 | 0.28 |
| 22310 | 0 | 16437  | FKQKALGLLQTASR                  | 2.62 | 0.01 | 2.41 | 0.44 | 0.85 | 0.28 |
| 22311 | 0 | 16443  | FKQKALGLLQTATK                  | 2.65 | 0.01 | 1.96 | 0.44 | 0.85 | 0.28 |
| 22312 | 0 | 16443  | FKQKALGLLQTATK                  | 2.65 | 0.01 | 1.96 | 0.44 | 0.85 | 0.28 |

|       |   |        |                                  |      |      |      |      |      |      |
|-------|---|--------|----------------------------------|------|------|------|------|------|------|
| 22313 | 0 | 16443  | FKQKALGLLQTATK                   | 2.65 | 0.01 | 1.96 | 0.44 | 1.41 | 0.28 |
| 22314 | 0 | 16443  | FKQKALGLLQTATK                   | 2.65 | 0.01 | 1.96 | 0.44 | 0.85 | 0.28 |
| 22315 | 0 | 16448  | FKQKALGLLQTSTKQAE<br>AAA         | 2.96 | 0.01 | 1.96 | 0.44 | 0.85 | 0.28 |
| 22316 | 0 | 16449  | FKQKARGLLQTATKQAE<br>AAA         | 2.96 | 0.01 | 1.96 | 0.44 | 0.85 | 0.28 |
| 22317 | 0 | 16452  | FKQNVNRPSPRAD                    | 2.45 | 0.01 | 3.33 | 0.44 | 1.23 | 0.85 |
| 22318 | 0 | 122763 | FKQRQTRQFKSKPPKKG<br>VQGFGDIPGME | 3.31 | 0.01 | 1.60 | 2.04 | 0.22 | 0.28 |
| 22319 | 0 | 515829 | FKRELRNLPQQCGLRAP<br>QRCDLEV     | 3.12 | 0.01 | 2.16 | 0.44 | 1.23 | 1.39 |
| 22320 | 0 | 515829 | FKRELRNLPQQCGLRAP<br>QRCDLEV     | 3.12 | 0.01 | 2.16 | 0.44 | 1.23 | 0.85 |
| 22321 | 0 | 225626 | FKRGIQEETGIKPPWA                 | 2.71 | 0.01 | 2.51 | 2.00 | 0.85 | 0.28 |
| 22322 | 0 | 225626 | FKRGIQEETGIKPPWA                 | 2.71 | 0.01 | 2.51 | 2.00 | 0.22 | 0.28 |
| 22323 | 0 | 132297 | FKRPTLR                          | 2.02 | 0.01 | 0.78 | 0.68 | 0.22 | 0.85 |
| 22324 | 0 | 132297 | FKRPTLR                          | 2.02 | 0.01 | 0.78 | 0.68 | 0.22 | 0.85 |
| 22325 | 0 | 103174 | FKRSYEEHIPYTHM                   | 2.58 | 0.01 | 0.78 | 1.12 | 0.22 | 2.35 |
| 22326 | 0 | 103174 | FKRSYEEHIPYTHM                   | 2.58 | 0.01 | 0.78 | 1.12 | 0.22 | 0.85 |
| 22327 | 0 | 156293 | FKSDPKKSDVKTYF                   | 2.65 | 0.01 | 2.73 | 0.44 | 0.85 | 1.28 |
| 22328 | 0 | 156293 | FKSDPKKSDVKTYF                   | 2.65 | 0.01 | 2.73 | 0.44 | 0.85 | 1.28 |
| 22329 | 0 | 16457  | FKSGATFQVE                       | 2.30 | 0.01 | 2.66 | 0.68 | 0.22 | 0.28 |
| 22330 | 0 | 16457  | FKSGATFQVE                       | 2.30 | 0.01 | 2.66 | 0.68 | 0.22 | 0.28 |
| 22331 | 0 | 16457  | FKSGATFQVE                       | 2.30 | 0.01 | 2.66 | 0.68 | 0.22 | 0.28 |
| 22332 | 0 | 16457  | FKSGATFQVE                       | 2.30 | 0.01 | 2.66 | 0.68 | 0.22 | 0.28 |
| 22333 | 0 | 16457  | FKSGATFQVE                       | 2.30 | 0.01 | 2.66 | 0.68 | 0.22 | 0.28 |
| 22334 | 0 | 16457  | FKSGATFQVE                       | 2.30 | 0.01 | 2.66 | 0.68 | 0.22 | 0.28 |
| 22335 | 0 | 16458  | FKSQDADY                         | 2.12 | 0.01 | 2.21 | 1.12 | 0.22 | 0.28 |
| 22336 | 0 | 16458  | FKSQDADY                         | 2.12 | 0.01 | 2.21 | 0.44 | 0.85 | 0.28 |
| 22337 | 0 | 186846 | FKTNDRAMTSPLAGRTS<br>VLGGM       | 3.02 | 0.01 | 3.12 | 2.37 | 0.22 | 2.66 |
| 22338 | 0 | 16468  | FKTTKKDHKPQT                     | 2.51 | 0.01 | 2.38 | 0.44 | 1.74 | 0.28 |
| 22339 | 0 | 16468  | FKTTKKDHKPQT                     | 2.51 | 0.01 | 2.38 | 0.44 | 1.74 | 0.28 |
| 22340 | 0 | 16469  | FKTVDSGRSMHN                     | 2.43 | 0.01 | 0.90 | 0.68 | 0.22 | 1.39 |
| 22341 | 0 | 16477  | FKVLT                            | 1.74 | 0.01 | 0.90 | 0.44 | 1.13 | 0.85 |
| 22342 | 0 | 16480  | FKVSNSSARG                       | 2.30 | 0.01 | 0.78 | 0.44 | 1.74 | 0.28 |
| 22343 | 0 | 531712 | FKYFSKQYGITPGYIWEI<br>NTEKQG     | 3.14 | 0.01 | 2.56 | 0.68 | 0.22 | 1.75 |
| 22344 | 0 | 531712 | FKYFSKQYGITPGYIWEI<br>NTEKQG     | 3.14 | 0.01 | 2.56 | 0.68 | 0.22 | 1.34 |
| 22345 | 0 | 531712 | FKYFSKQYGITPGYIWEI<br>NTEKQG     | 3.14 | 0.01 | 2.56 | 0.68 | 0.22 | 0.28 |
| 22346 | 0 | 531712 | FKYFSKQYGITPGYIWEI<br>NTEKQG     | 3.14 | 0.01 | 2.56 | 0.68 | 0.22 | 0.28 |
| 22347 | 0 | 531712 | FKYFSKQYGITPGYIWEI<br>NTEKQG     | 3.14 | 0.01 | 2.56 | 0.68 | 0.22 | 0.28 |

|       |   |        |                                     |      |      |      |      |      |      |
|-------|---|--------|-------------------------------------|------|------|------|------|------|------|
| 22348 | 0 | 531712 | FKYFSKQYGITPGYIWEI<br>NTEKQG        | 3.14 | 0.01 | 2.56 | 0.68 | 0.22 | 0.28 |
| 22349 | 0 | 141895 | FKYPEIEKYEVDG                       | 2.56 | 0.01 | 3.13 | 0.68 | 0.22 | 0.28 |
| 22350 | 0 | 16487  | FKYSNYVCLLWRTPS                     | 2.63 | 0.01 | 2.93 | 0.44 | 0.85 | 0.28 |
| 22351 | 0 | 290815 | FLAAAMDKVFTTGFA                     | 2.69 | 0.01 | 1.61 | 0.44 | 0.85 | 1.28 |
| 22352 | 0 | 16496  | FLAEEADRK                           | 2.22 | 0.01 | 4.15 | 0.44 | 1.23 | 0.85 |
| 22353 | 0 | 16496  | FLAEEADRK                           | 2.22 | 0.01 | 4.15 | 0.44 | 1.23 | 0.85 |
| 22354 | 0 | 16496  | FLAEEADRK                           | 2.22 | 0.01 | 4.15 | 0.44 | 1.23 | 1.27 |
| 22355 | 0 | 108363 | FLAEGGGVRGPRVVERH                   | 2.81 | 2.84 | 0.78 | 0.44 | 1.13 | 0.28 |
| 22356 | 0 | 108363 | FLAEGGGVRGPRVVERH                   | 2.81 | 2.84 | 0.78 | 0.44 | 1.13 | 0.28 |
| 22357 | 0 | 108363 | FLAEGGGVRGPRVVERH                   | 2.81 | 2.84 | 0.78 | 0.44 | 1.41 | 0.28 |
| 22358 | 0 | 108363 | FLAEGGGVRGPRVVERH                   | 2.81 | 2.84 | 0.78 | 0.44 | 1.13 | 0.28 |
| 22359 | 0 | 108363 | FLAEGGGVRGPRVVERH                   | 2.81 | 2.84 | 0.78 | 0.44 | 1.13 | 0.28 |
| 22360 | 0 | 108363 | FLAEGGGVRGPRVVERH                   | 2.81 | 2.84 | 0.78 | 0.44 | 1.13 | 0.28 |
| 22361 | 0 | 450589 | FLAEGGGVRGPRVVERH                   | 2.81 | 0.01 | 0.78 | 2.79 | 1.13 | 1.28 |
| 22362 | 0 | 450589 | FLAEGGGVRGPRVVERH                   | 2.81 | 0.01 | 0.78 | 1.81 | 1.41 | 1.28 |
| 22363 | 0 | 450589 | FLAEGGGVRGPRVVERH                   | 2.81 | 0.01 | 0.78 | 1.81 | 1.41 | 1.28 |
| 22364 | 0 | 450589 | FLAEGGGVRGPRVVERH                   | 2.81 | 0.01 | 0.78 | 1.81 | 1.41 | 1.28 |
| 22365 | 0 | 122094 | FLALDVPTIGLC                        | 2.45 | 0.01 | 2.73 | 0.68 | 0.22 | 0.28 |
| 22366 | 0 | 122094 | FLALDVPTIGLC                        | 2.45 | 0.01 | 2.73 | 0.68 | 0.22 | 1.34 |
| 22367 | 0 | 122094 | FLALDVPTIGLC                        | 2.45 | 0.01 | 2.73 | 0.68 | 0.22 | 1.48 |
| 22368 | 0 | 122094 | FLALDVPTIGLC                        | 2.45 | 0.01 | 2.73 | 0.68 | 0.22 | 0.85 |
| 22369 | 0 | 16535  | FLCKHSMVDRGWGNG<br>CGLFGKGGIVTCAMFT | 3.35 | 0.01 | 2.30 | 1.15 | 0.22 | 0.28 |
| 22370 | 0 | 16551  | FLDLMRAVA                           | 2.23 | 0.01 | 3.59 | 2.49 | 0.22 | 0.28 |
| 22371 | 0 | 16551  | FLDLMRAVA                           | 2.23 | 0.01 | 3.59 | 1.15 | 0.22 | 1.48 |
| 22372 | 0 | 16551  | FLDLMRAVA                           | 2.23 | 0.01 | 3.59 | 1.15 | 0.22 | 0.85 |
| 22373 | 0 | 16551  | FLDLMRAVA                           | 2.23 | 0.01 | 3.59 | 2.49 | 0.22 | 0.28 |
| 22374 | 0 | 16552  | FLDLPL                              | 1.91 | 0.01 | 2.40 | 0.44 | 0.85 | 0.28 |
| 22375 | 0 | 171056 | FLDYLKRPGLTYLQK                     | 2.68 | 0.01 | 0.78 | 0.44 | 1.13 | 0.28 |
| 22376 | 0 | 130831 | FLEDVPWLEDVDFLEDV<br>PLLED          | 3.10 | 0.01 | 0.78 | 0.44 | 1.41 | 0.28 |
| 22377 | 0 | 130831 | FLEDVPWLEDVDFLEDV<br>PLLED          | 3.10 | 0.01 | 0.78 | 0.44 | 1.41 | 0.28 |
| 22378 | 0 | 130831 | FLEDVPWLEDVDFLEDV<br>PLLED          | 3.10 | 0.01 | 0.78 | 0.44 | 1.41 | 0.28 |

|       |   |        |                             |      |      |      |      |      |      |
|-------|---|--------|-----------------------------|------|------|------|------|------|------|
| 22379 | 0 | 130831 | FLEDVPWLEDVDFLEDV<br>PILLED | 3.10 | 0.01 | 0.78 | 1.12 | 0.22 | 0.28 |
| 22380 | 0 | 130831 | FLEDVPWLEDVDFLEDV<br>PILLED | 3.10 | 0.01 | 0.78 | 1.12 | 0.22 | 0.28 |
| 22381 | 0 | 130831 | FLEDVPWLEDVDFLEDV<br>PILLED | 3.10 | 0.01 | 0.78 | 1.12 | 0.22 | 0.28 |
| 22382 | 0 | 130831 | FLEDVPWLEDVDFLEDV<br>PILLED | 3.10 | 0.01 | 0.78 | 1.12 | 0.22 | 0.28 |
| 22383 | 0 | 130831 | FLEDVPWLEDVDFLEDV<br>PILLED | 3.10 | 0.01 | 0.78 | 1.12 | 0.22 | 0.28 |
| 22384 | 0 | 130831 | FLEDVPWLEDVDFLEDV<br>PILLED | 3.10 | 0.01 | 0.78 | 1.12 | 0.22 | 0.28 |
| 22385 | 0 | 130831 | FLEDVPWLEDVDFLEDV<br>PILLED | 3.10 | 0.01 | 0.78 | 1.12 | 0.22 | 0.28 |
| 22386 | 0 | 130831 | FLEDVPWLEDVDFLEDV<br>PILLED | 3.10 | 0.01 | 0.78 | 1.12 | 0.22 | 0.28 |
| 22387 | 0 | 130831 | FLEDVPWLEDVDFLEDV<br>PILLED | 3.10 | 0.01 | 0.78 | 1.12 | 0.22 | 1.27 |
| 22388 | 0 | 130831 | FLEDVPWLEDVDFLEDV<br>PILLED | 3.10 | 0.01 | 0.78 | 1.12 | 0.22 | 1.27 |
| 22389 | 0 | 130831 | FLEDVPWLEDVDFLEDV<br>PILLED | 3.10 | 0.01 | 0.78 | 1.12 | 0.22 | 1.27 |
| 22390 | 0 | 130831 | FLEDVPWLEDVDFLEDV<br>PILLED | 3.10 | 0.01 | 0.78 | 1.12 | 0.22 | 1.27 |
| 22391 | 0 | 130831 | FLEDVPWLEDVDFLEDV<br>PILLED | 3.10 | 0.01 | 0.78 | 1.12 | 0.22 | 0.85 |
| 22392 | 0 | 130831 | FLEDVPWLEDVDFLEDV<br>PILLED | 3.10 | 0.01 | 0.78 | 1.12 | 0.22 | 1.27 |
| 22393 | 0 | 130831 | FLEDVPWLEDVDFLEDV<br>PILLED | 3.10 | 0.01 | 0.78 | 1.12 | 0.22 | 1.27 |
| 22394 | 0 | 130831 | FLEDVPWLEDVDFLEDV<br>PILLED | 3.10 | 0.01 | 0.78 | 1.12 | 0.22 | 1.27 |
| 22395 | 0 | 130831 | FLEDVPWLEDVDFLEDV<br>PILLED | 3.10 | 0.01 | 0.78 | 1.12 | 0.22 | 1.27 |
| 22396 | 0 | 130831 | FLEDVPWLEDVDFLEDV<br>PILLED | 3.10 | 0.01 | 0.78 | 1.12 | 0.22 | 1.27 |
| 22397 | 0 | 130831 | FLEDVPWLEDVDFLEDV<br>PILLED | 3.10 | 0.01 | 0.78 | 1.12 | 0.22 | 1.27 |
| 22398 | 0 | 130831 | FLEDVPWLEDVDFLEDV<br>PILLED | 3.10 | 0.01 | 0.78 | 1.12 | 0.22 | 1.27 |
| 22399 | 0 | 130831 | FLEDVPWLEDVDFLEDV<br>PILLED | 3.10 | 0.01 | 0.78 | 1.12 | 0.22 | 1.27 |
| 22400 | 0 | 171057 | FLEEWLNTRFDIEKL             | 2.69 | 0.01 | 0.78 | 0.44 | 1.13 | 0.28 |
| 22401 | 0 | 16569  | FLEGAAR                     | 2.01 | 0.01 | 2.24 | 0.68 | 0.22 | 0.28 |
| 22402 | 0 | 16569  | FLEGAAR                     | 2.01 | 0.01 | 2.24 | 0.68 | 0.22 | 0.85 |
| 22403 | 0 | 196467 | FLEKTKKDFGL                 | 2.43 | 0.01 | 2.30 | 0.68 | 0.22 | 0.28 |
| 22404 | 0 | 196467 | FLEKTKKDFGL                 | 2.43 | 0.01 | 2.30 | 0.68 | 0.22 | 1.48 |



|       |   |        |                                   |      |      |      |      |      |      |
|-------|---|--------|-----------------------------------|------|------|------|------|------|------|
| 22405 | 0 | 196467 | FLEKTKKDFGL                       | 2.43 | 0.01 | 2.30 | 0.68 | 0.22 | 1.48 |
| 22406 | 0 | 196467 | FLEKTKKDFGL                       | 2.43 | 0.01 | 2.30 | 0.68 | 0.22 | 0.85 |
| 22407 | 0 | 196467 | FLEKTKKDFGL                       | 2.43 | 0.01 | 2.30 | 0.68 | 0.22 | 1.28 |
| 22408 | 0 | 196467 | FLEKTKKDFGL                       | 2.43 | 0.01 | 2.30 | 0.68 | 0.22 | 3.13 |
| 22409 | 0 | 16577  | FLENAHEHHGVYNQGR<br>GIDS          | 2.90 | 0.01 | 3.27 | 3.16 | 0.22 | 0.28 |
| 22410 | 0 | 123180 | FLEYLGEKY                         | 2.25 | 0.01 | 0.90 | 2.00 | 0.22 | 0.28 |
| 22411 | 0 | 146248 | FLFCGSMMATGKIL                    | 2.61 | 0.01 | 2.96 | 0.44 | 0.22 | 0.28 |
| 22412 | 0 | 16586  | FLFDGSPTYV                        | 2.30 | 0.01 | 0.78 | 0.44 | 2.39 | 0.28 |
| 22413 | 0 | 16586  | FLFDGSPTYV                        | 2.30 | 0.01 | 0.78 | 0.44 | 2.39 | 0.28 |
| 22414 | 0 | 16586  | FLFDGSPTYV                        | 2.30 | 0.01 | 0.78 | 0.44 | 2.39 | 0.28 |
| 22415 | 0 | 107363 | FLFPPKP                           | 2.07 | 0.01 | 0.78 | 0.44 | 1.13 | 0.28 |
| 22416 | 0 | 107363 | FLFPPKP                           | 2.07 | 0.01 | 0.78 | 0.44 | 1.13 | 0.28 |
| 22417 | 0 | 423293 | FLGARSPSLEFDDDA                   | 2.69 | 0.01 | 2.51 | 0.44 | 2.35 | 1.28 |
| 22418 | 0 | 123181 | FLGDRHYLT                         | 2.21 | 0.01 | 2.28 | 2.00 | 0.22 | 0.28 |
| 22419 | 0 | 123181 | FLGDRHYLT                         | 2.21 | 0.01 | 2.28 | 2.00 | 0.22 | 0.28 |
| 22420 | 0 | 123182 | FLGDRQYLI                         | 2.21 | 0.01 | 2.28 | 2.00 | 0.22 | 0.28 |
| 22421 | 0 | 114207 | FLGELTSSEVATEV                    | 2.64 | 0.01 | 0.78 | 0.44 | 1.13 | 0.28 |
| 22422 | 0 | 114207 | FLGELTSSEVATEV                    | 2.64 | 0.01 | 0.78 | 0.44 | 1.41 | 0.28 |
| 22423 | 0 | 103176 | FLGGFAGLPSLGFGN                   | 2.73 | 0.01 | 2.04 | 0.44 | 0.85 | 1.28 |
| 22424 | 0 | 16615  | FLGGTKYMVI                        | 2.28 | 0.01 | 3.85 | 0.44 | 1.23 | 0.85 |
| 22425 | 0 | 79828  | FLGPKQLTFEGK                      | 2.50 | 0.01 | 2.14 | 3.26 | 0.22 | 0.28 |
| 22426 | 0 | 79829  | FLGPKQLTFEGKPALELIR<br>MVECSG     | 3.14 | 0.01 | 2.14 | 3.26 | 0.22 | 0.28 |
| 22427 | 0 | 79829  | FLGPKQLTFEGKPALELIR<br>MVECSG     | 3.14 | 0.01 | 2.14 | 3.17 | 0.22 | 0.28 |
| 22428 | 0 | 16634  | FLGTPADTGHGTVVLEL<br>QYT          | 2.94 | 0.01 | 2.85 | 2.02 | 0.22 | 0.28 |
| 22429 | 0 | 16635  | FLGWVEQLVYDFTDETS<br>EV           | 2.91 | 0.01 | 2.08 | 0.44 | 0.22 | 1.57 |
| 22430 | 0 | 16636  | FLHAPHSPRVWL                      | 2.48 | 0.01 | 0.90 | 0.68 | 0.22 | 1.39 |
| 22431 | 0 | 149039 | FLHTRLFVSDGINS                    | 2.67 | 0.01 | 0.90 | 2.36 | 0.22 | 1.39 |
| 22432 | 0 | 149040 | FLHTRLFVSDWYHTP                   | 2.67 | 0.01 | 0.90 | 2.36 | 0.22 | 1.27 |
| 22433 | 0 | 149041 | FLHTRLFVSDWYNT                    | 2.65 | 0.01 | 0.90 | 2.36 | 0.22 | 1.39 |
| 22434 | 0 | 149042 | FLHTRLLFRIVSYSG                   | 2.68 | 0.01 | 0.90 | 2.36 | 0.22 | 1.39 |
| 22435 | 0 | 149043 | FLHTRLLFRNGILR                    | 2.71 | 0.01 | 0.90 | 2.36 | 0.22 | 1.39 |
| 22436 | 0 | 16649  | FLIDGPDSECPNERRA                  | 2.75 | 0.01 | 3.61 | 0.44 | 0.85 | 0.28 |
| 22437 | 0 | 16672  | FLISLIFIYE                        | 2.36 | 0.01 | 0.78 | 0.44 | 1.74 | 0.28 |
| 22438 | 0 | 443906 | FLIYITELLKKLQSTTMN<br>PYMKLAPGELT | 3.33 | 0.01 | 0.78 | 0.44 | 1.93 | 0.28 |
| 22439 | 0 | 443906 | FLIYITELLKKLQSTTMN<br>PYMKLAPGELT | 3.33 | 0.01 | 0.78 | 0.44 | 1.41 | 0.28 |
| 22440 | 0 | 186756 | FLKGLRGGNCNKNDH                   | 2.69 | 0.01 | 0.90 | 1.20 | 0.22 | 0.85 |
| 22441 | 0 | 95387  | FLKKISQRYQ                        | 2.30 | 0.01 | 1.60 | 0.44 | 1.23 | 0.85 |
| 22442 | 0 | 16703  | FLKVLKGDKSAGGKVLK<br>SGK          | 3.00 | 0.01 | 2.86 | 2.89 | 0.22 | 1.27 |

|       |   |        |                               |      |      |      |      |      |      |
|-------|---|--------|-------------------------------|------|------|------|------|------|------|
| 22443 | 0 | 99247  | FLLAHASARQQWEL                | 2.69 | 0.01 | 2.16 | 0.44 | 1.23 | 1.48 |
| 22444 | 0 | 290997 | FLLKDKKKVATAKVA               | 2.71 | 0.01 | 1.61 | 0.44 | 0.85 | 1.28 |
| 22445 | 0 | 291008 | FLLMTREVDDTMAD                | 2.68 | 0.01 | 1.61 | 0.44 | 0.85 | 1.28 |
| 22446 | 0 | 171062 | FLLRVSYMEIYNETI               | 2.65 | 0.01 | 0.78 | 0.44 | 1.13 | 0.28 |
| 22447 | 0 | 171063 | FLLSSKSGFWTIWLW               | 2.72 | 0.01 | 0.78 | 0.44 | 1.13 | 0.28 |
| 22448 | 0 | 16755  | FLLTRILTI                     | 2.27 | 0.01 | 2.08 | 0.68 | 0.22 | 2.12 |
| 22449 | 0 | 16755  | FLLTRILTI                     | 2.27 | 0.01 | 2.08 | 0.68 | 0.22 | 2.12 |
| 22450 | 0 | 16755  | FLLTRILTI                     | 2.27 | 0.01 | 2.08 | 0.68 | 0.22 | 1.48 |
| 22451 | 0 | 16755  | FLLTRILTI                     | 2.27 | 0.01 | 2.08 | 0.68 | 0.22 | 2.12 |
| 22452 | 0 | 16755  | FLLTRILTI                     | 2.27 | 0.01 | 2.08 | 0.68 | 0.22 | 2.12 |
| 22453 | 0 | 16755  | FLLTRILTI                     | 2.27 | 0.01 | 2.08 | 0.68 | 0.22 | 1.48 |
| 22454 | 0 | 16755  | FLLTRILTI                     | 2.27 | 0.01 | 2.08 | 0.68 | 0.22 | 1.66 |
| 22455 | 0 | 16760  | FLLVLLDYQGMLPV                | 2.63 | 0.01 | 2.58 | 2.25 | 0.22 | 0.28 |
| 22456 | 0 | 115251 | FLLYQEPVLGPVRGPFPII<br>V      | 2.97 | 0.01 | 1.60 | 0.44 | 1.23 | 2.51 |
| 22457 | 0 | 16769  | FLMHAPAFETAGTYL               | 2.69 | 4.15 | 2.40 | 0.68 | 0.22 | 0.28 |
| 22458 | 0 | 16769  | FLMHAPAFETAGTYL               | 2.69 | 4.15 | 2.40 | 3.81 | 0.22 | 0.28 |
| 22459 | 0 | 131878 | FLMLVGGSTL                    | 2.32 | 0.01 | 0.78 | 0.44 | 1.13 | 1.27 |
| 22460 | 0 | 131878 | FLMLVGGSTL                    | 2.32 | 0.01 | 0.78 | 0.44 | 2.35 | 1.27 |
| 22461 | 0 | 131878 | FLMLVGGSTL                    | 2.32 | 0.01 | 0.78 | 0.44 | 1.93 | 1.27 |
| 22462 | 0 | 131878 | FLMLVGGSTL                    | 2.32 | 0.01 | 0.78 | 0.44 | 1.41 | 0.28 |
| 22463 | 0 | 140197 | FLNNYDAE                      | 2.11 | 0.01 | 0.78 | 0.44 | 1.13 | 0.28 |
| 22464 | 0 | 16790  | FLNTEPSQLPPTAPPLLP<br>HSNLDHI | 3.17 | 0.01 | 2.04 | 0.44 | 0.85 | 0.28 |
| 22465 | 0 | 16790  | FLNTEPSQLPPTAPPLLP<br>HSNLDHI | 3.17 | 0.01 | 2.04 | 0.44 | 0.85 | 0.28 |
| 22466 | 0 | 16790  | FLNTEPSQLPPTAPPLLP<br>HSNLDHI | 3.17 | 0.01 | 2.04 | 0.44 | 0.85 | 0.28 |
| 22467 | 0 | 16790  | FLNTEPSQLPPTAPPLLP<br>HSNLDHI | 3.17 | 0.01 | 2.04 | 0.44 | 0.85 | 0.28 |
| 22468 | 0 | 16790  | FLNTEPSQLPPTAPPLLP<br>HSNLDHI | 3.17 | 0.01 | 3.19 | 0.44 | 0.85 | 0.28 |
| 22469 | 0 | 16790  | FLNTEPSQLPPTAPPLLP<br>HSNLDHI | 3.17 | 0.01 | 3.19 | 0.44 | 2.82 | 0.28 |
| 22470 | 0 | 16790  | FLNTEPSQLPPTAPPLLP<br>HSNLDHI | 3.17 | 0.01 | 3.19 | 0.44 | 0.85 | 0.28 |
| 22471 | 0 | 16790  | FLNTEPSQLPPTAPPLLP<br>HSNLDHI | 3.17 | 0.01 | 2.04 | 0.44 | 0.85 | 0.28 |
| 22472 | 0 | 16790  | FLNTEPSQLPPTAPPLLP<br>HSNLDHI | 3.17 | 0.01 | 3.19 | 1.15 | 0.22 | 0.28 |
| 22473 | 0 | 16790  | FLNTEPSQLPPTAPPLLP<br>HSNLDHI | 3.17 | 0.01 | 2.04 | 2.04 | 0.22 | 2.12 |
| 22474 | 0 | 16790  | FLNTEPSQLPPTAPPLLP<br>HSNLDHI | 3.17 | 0.01 | 2.04 | 2.04 | 0.22 | 1.48 |
| 22475 | 0 | 16790  | FLNTEPSQLPPTAPPLLP<br>HSNLDHI | 3.17 | 0.01 | 2.04 | 2.04 | 0.22 | 2.35 |

|       |   |       |                                                      |      |      |      |      |      |      |
|-------|---|-------|------------------------------------------------------|------|------|------|------|------|------|
| 22476 | 0 | 16790 | FLNTEPSQLPPTAPPLLP<br>HSNLDHI                        | 3.17 | 0.01 | 2.04 | 2.04 | 0.22 | 0.28 |
| 22477 | 0 | 16790 | FLNTEPSQLPPTAPPLLP<br>HSNLDHI                        | 3.17 | 0.01 | 2.04 | 0.68 | 0.22 | 1.48 |
| 22478 | 0 | 16790 | FLNTEPSQLPPTAPPLLP<br>HSNLDHI                        | 3.17 | 0.01 | 2.04 | 0.68 | 0.22 | 2.35 |
| 22479 | 0 | 16790 | FLNTEPSQLPPTAPPLLP<br>HSNLDHI                        | 3.17 | 0.01 | 2.04 | 0.68 | 0.22 | 2.35 |
| 22480 | 0 | 16790 | FLNTEPSQLPPTAPPLLP<br>HSNLDHI                        | 3.17 | 0.01 | 2.04 | 0.44 | 0.85 | 1.27 |
| 22481 | 0 | 16790 | FLNTEPSQLPPTAPPLLP<br>HSNLDHI                        | 3.17 | 0.01 | 2.04 | 0.44 | 1.59 | 0.28 |
| 22482 | 0 | 16790 | FLNTEPSQLPPTAPPLLP<br>HSNLDHI                        | 3.17 | 0.01 | 2.04 | 0.44 | 1.41 | 1.27 |
| 22483 | 0 | 16790 | FLNTEPSQLPPTAPPLLP<br>HSNLDHI                        | 3.17 | 0.01 | 2.04 | 0.44 | 0.85 | 0.28 |
| 22484 | 0 | 16790 | FLNTEPSQLPPTAPPLLP<br>HSNLDHI                        | 3.17 | 0.01 | 2.04 | 0.44 | 0.85 | 0.28 |
| 22485 | 0 | 16790 | FLNTEPSQLPPTAPPLLP<br>HSNLDHI                        | 3.17 | 0.01 | 2.04 | 0.44 | 2.82 | 0.28 |
| 22486 | 0 | 16790 | FLNTEPSQLPPTAPPLLP<br>HSNLDHI                        | 3.17 | 0.01 | 2.04 | 0.44 | 0.85 | 0.28 |
| 22487 | 0 | 16790 | FLNTEPSQLPPTAPPLLP<br>HSNLDHI                        | 3.17 | 0.01 | 2.04 | 0.44 | 0.85 | 1.27 |
| 22488 | 0 | 16790 | FLNTEPSQLPPTAPPLLP<br>HSNLDHI                        | 3.17 | 0.01 | 2.04 | 0.44 | 0.85 | 1.34 |
| 22489 | 0 | 16790 | FLNTEPSQLPPTAPPLLP<br>HSNLDHI                        | 3.17 | 0.01 | 2.04 | 0.44 | 0.85 | 0.28 |
| 22490 | 0 | 16790 | FLNTEPSQLPPTAPPLLP<br>HSNLDHI                        | 3.17 | 0.01 | 2.04 | 0.44 | 0.85 | 0.28 |
| 22491 | 0 | 16790 | FLNTEPSQLPPTAPPLLP<br>HSNLDHI                        | 3.17 | 0.01 | 2.04 | 0.44 | 2.82 | 0.28 |
| 22492 | 0 | 16791 | FLNTEPSQLPPTAPPLLP<br>HSNLDHILEPSIPWWSKL<br>LTLVQLTL | 3.73 | 0.01 | 2.04 | 3.33 | 0.22 | 0.28 |
| 22493 | 0 | 16791 | FLNTEPSQLPPTAPPLLP<br>HSNLDHILEPSIPWWSKL<br>LTLVQLTL | 3.73 | 0.01 | 2.04 | 3.33 | 0.22 | 1.48 |
| 22494 | 0 | 16791 | FLNTEPSQLPPTAPPLLP<br>HSNLDHILEPSIPWWSKL<br>LTLVQLTL | 3.73 | 0.01 | 2.04 | 3.33 | 2.25 | 1.75 |
| 22495 | 0 | 16791 | FLNTEPSQLPPTAPPLLP<br>HSNLDHILEPSIPWWSKL<br>LTLVQLTL | 3.73 | 0.01 | 2.04 | 1.20 | 0.22 | 1.27 |
| 22496 | 0 | 16791 | FLNTEPSQLPPTAPPLLP<br>HSNLDHILEPSIPWWSKL<br>LTLVQLTL | 3.73 | 0.01 | 2.04 | 2.43 | 0.22 | 1.27 |

|       |   |        |                          |      |      |      |      |      |      |
|-------|---|--------|--------------------------|------|------|------|------|------|------|
|       |   |        | FLNTEPSQLPPTAPPLLP       |      |      |      |      |      |      |
| 22497 | 0 | 16791  | HSNLDHILEPSIPWWSKL       | 3.73 | 0.01 | 2.04 | 2.43 | 0.22 | 1.27 |
|       |   |        | LTLVQLTL                 |      |      |      |      |      |      |
|       |   |        | FLNTEPSQLPPTAPPLLP       |      |      |      |      |      |      |
| 22498 | 0 | 16791  | HSNLDHILEPSIPWWSKL       | 3.73 | 0.01 | 2.04 | 2.43 | 0.22 | 0.28 |
|       |   |        | LTLVQLTL                 |      |      |      |      |      |      |
|       |   |        | FLNTEPSQLPPTAPPLLP       |      |      |      |      |      |      |
| 22499 | 0 | 16791  | HSNLDHILEPSIPWWSKL       | 3.73 | 0.01 | 2.04 | 1.20 | 0.22 | 0.28 |
|       |   |        | LTLVQLTL                 |      |      |      |      |      |      |
|       |   |        | FLNTEPSQLPPTAPPLLP       |      |      |      |      |      |      |
| 22500 | 0 | 16791  | HSNLDHILEPSIPWWSKL       | 3.73 | 0.01 | 2.04 | 1.20 | 0.22 | 1.34 |
|       |   |        | LTLVQLTL                 |      |      |      |      |      |      |
|       |   |        | FLNTEPSQLPPTAPPLLP       |      |      |      |      |      |      |
| 22501 | 0 | 16791  | HSNLDHILEPSIPWWSKL       | 3.73 | 0.01 | 2.04 | 2.43 | 0.22 | 1.34 |
|       |   |        | LTLVQLTL                 |      |      |      |      |      |      |
|       |   |        | FLNTEPSQLPPTAPPLLP       |      |      |      |      |      |      |
| 22502 | 0 | 16792  | HSNLDHILEPSIPWWSKL       | 3.78 | 0.01 | 2.04 | 1.20 | 0.22 | 0.28 |
|       |   |        | LTLVQLTLQS               |      |      |      |      |      |      |
| 22503 | 0 | 125408 | FLPFSAGRRACLGEPLAR<br>ME | 2.98 | 0.01 | 0.78 | 0.44 | 0.85 | 0.28 |
| 22504 | 0 | 133570 | FLPKYALS                 | 2.12 | 0.01 | 1.60 | 0.68 | 0.22 | 0.28 |
| 22505 | 0 | 149315 | FLPQQPYQP                | 2.36 | 0.01 | 1.86 | 0.44 | 1.93 | 0.85 |
| 22506 | 0 | 149315 | FLPQQPYQP                | 2.36 | 0.01 | 1.86 | 2.74 | 0.22 | 0.85 |
| 22507 | 0 | 149315 | FLPQQPYQP                | 2.36 | 0.01 | 1.86 | 2.74 | 0.22 | 0.85 |
| 22508 | 0 | 423294 | FLPQSPGLPPTEEEE          | 2.67 | 0.01 | 2.51 | 0.44 | 2.35 | 1.28 |
| 22509 | 0 | 16832  | FLPSDFFPSI               | 2.35 | 0.01 | 2.08 | 4.63 | 0.22 | 0.28 |
| 22510 | 0 | 16832  | FLPSDFFPSI               | 2.35 | 0.01 | 4.08 | 0.68 | 0.22 | 2.12 |
| 22511 | 0 | 16833  | FLPSDFFPSV               | 2.35 | 0.01 | 4.33 | 0.68 | 0.22 | 2.12 |
| 22512 | 0 | 16833  | FLPSDFFPSV               | 2.35 | 0.01 | 4.33 | 0.68 | 0.22 | 1.48 |
| 22513 | 0 | 16833  | FLPSDFFPSV               | 2.35 | 0.01 | 4.33 | 0.68 | 0.22 | 1.66 |
| 22514 | 0 | 16833  | FLPSDFFPSV               | 2.35 | 0.01 | 4.33 | 0.68 | 0.22 | 2.12 |
| 22515 | 0 | 144888 | FLPTLEENKGFA             | 2.47 | 0.01 | 0.90 | 0.68 | 0.22 | 1.39 |
| 22516 | 0 | 77874  | FLPTSPTGLRIE             | 2.48 | 0.01 | 0.90 | 1.15 | 0.22 | 1.39 |
| 22517 | 0 | 16863  | FLPYPPYAKP               | 2.34 | 0.01 | 1.60 | 0.44 | 1.23 | 0.85 |
| 22518 | 0 | 16863  | FLPYPPYAKP               | 2.34 | 0.01 | 1.60 | 0.44 | 1.23 | 0.85 |
| 22519 | 0 | 16863  | FLPYPPYAKP               | 2.34 | 0.01 | 1.60 | 0.44 | 1.23 | 0.85 |
| 22520 | 0 | 115252 | FLPYPPYAKPAAVRSPA<br>QIL | 2.95 | 0.01 | 1.60 | 0.44 | 1.23 | 2.51 |
| 22521 | 0 | 182127 | FLQGAICHVPPETRQ          | 2.61 | 0.01 | 0.78 | 0.44 | 1.13 | 0.85 |
| 22522 | 0 | 114822 | FLQHRLRGKLRRAVE          | 2.68 | 0.01 | 1.75 | 1.81 | 0.22 | 0.28 |
| 22523 | 0 | 189628 | FLQNFSAGARALSDA          | 2.71 | 0.01 | 3.28 | 0.44 | 1.23 | 0.28 |
| 22524 | 0 | 16874  | FLRFLTIPPT               | 2.35 | 0.01 | 3.65 | 1.15 | 0.22 | 0.28 |
| 22525 | 0 | 16875  | FLRGFLGRM                | 2.27 | 0.01 | 2.61 | 0.44 | 0.85 | 0.28 |
| 22526 | 0 | 16878  | FLRGRAYGL                | 2.25 | 0.01 | 2.43 | 0.44 | 0.22 | 0.28 |
| 22527 | 0 | 181621 | FLRWFEWAEEFCRI           | 2.70 | 0.01 | 1.66 | 2.36 | 0.22 | 1.28 |
| 22528 | 0 | 16887  | FLSAETIKKTIHQYSEFINF     | 2.94 | 0.01 | 2.78 | 2.49 | 0.85 | 0.28 |

|       |   |        |                                  |      |      |      |      |      |      |
|-------|---|--------|----------------------------------|------|------|------|------|------|------|
| 22529 | 0 | 16897  | FLSMQFKYSNYVCLLWR<br>TPSS        | 2.95 | 0.01 | 2.93 | 1.81 | 0.22 | 0.28 |
| 22530 | 0 | 16907  | FLTAAGYCNTCTLK                   | 2.67 | 0.01 | 2.56 | 1.20 | 0.22 | 0.85 |
| 22531 | 0 | 16907  | FLTAAGYCNTCTLK                   | 2.67 | 0.01 | 2.56 | 1.20 | 0.22 | 0.85 |
| 22532 | 0 | 16907  | FLTAAGYCNTCTLK                   | 2.67 | 0.01 | 2.56 | 2.02 | 0.22 | 0.85 |
| 22533 | 0 | 16907  | FLTAAGYCNTCTLK                   | 2.67 | 0.01 | 2.56 | 1.20 | 0.22 | 0.85 |
| 22534 | 0 | 99248  | FLTDTL                           | 1.91 | 0.01 | 2.86 | 2.02 | 0.85 | 0.85 |
| 22535 | 0 | 16912  | FLTEEPFQRGDPFDKNY<br>VGNSGKSRGGG | 3.25 | 0.01 | 2.76 | 0.44 | 1.59 | 0.28 |
| 22536 | 0 | 16912  | FLTEEPFQRGDPFDKNY<br>VGNSGKSRGGG | 3.25 | 0.01 | 2.76 | 0.44 | 1.59 | 0.28 |
| 22537 | 0 | 171068 | FLTGAYLLTLKDFFF                  | 2.70 | 0.01 | 0.78 | 0.44 | 1.41 | 0.28 |
| 22538 | 0 | 171068 | FLTGAYLLTLKDFFF                  | 2.70 | 0.01 | 0.78 | 0.44 | 1.13 | 0.28 |
| 22539 | 0 | 139501 | FLTLEEQCDWAFNQYW<br>HLNR         | 2.93 | 0.01 | 4.63 | 0.44 | 0.85 | 0.28 |
| 22540 | 0 | 123184 | FLTNLPEE                         | 2.11 | 0.01 | 0.78 | 1.20 | 0.22 | 0.28 |
| 22541 | 0 | 131879 | FLVAHTRARAPSAGERA<br>RRS         | 2.95 | 0.01 | 1.75 | 3.97 | 0.22 | 0.28 |
| 22542 | 0 | 131879 | FLVAHTRARAPSAGERA<br>RRS         | 2.95 | 0.01 | 1.75 | 3.97 | 0.22 | 0.28 |
| 22543 | 0 | 131879 | FLVAHTRARAPSAGERA<br>RRS         | 2.95 | 0.01 | 1.75 | 3.97 | 0.22 | 0.28 |
| 22544 | 0 | 131879 | FLVAHTRARAPSAGERA<br>RRS         | 2.95 | 0.01 | 1.75 | 3.97 | 0.22 | 0.28 |
| 22545 | 0 | 131879 | FLVAHTRARAPSAGERA<br>RRS         | 2.95 | 0.01 | 1.75 | 3.97 | 2.60 | 1.75 |
| 22546 | 0 | 131879 | FLVAHTRARAPSAGERA<br>RRS         | 2.95 | 0.01 | 1.75 | 3.97 | 0.22 | 1.75 |
| 22547 | 0 | 131879 | FLVAHTRARAPSAGERA<br>RRS         | 2.95 | 0.01 | 1.75 | 3.97 | 0.22 | 1.34 |
| 22548 | 0 | 171070 | FLVHLFEDAYLLTLH                  | 2.70 | 0.01 | 0.78 | 0.44 | 1.41 | 0.28 |
| 22549 | 0 | 171070 | FLVHLFEDAYLLTLH                  | 2.70 | 0.01 | 0.78 | 0.44 | 1.13 | 0.28 |
| 22550 | 0 | 16949  | FLVHREWFMDLNLNLPWS<br>SAGS       | 2.91 | 0.01 | 2.85 | 2.02 | 0.22 | 0.28 |
| 22551 | 0 | 16955  | FLVLLLFSL                        | 2.35 | 0.01 | 2.72 | 0.44 | 1.23 | 0.85 |
| 22552 | 0 | 16955  | FLVLLLFSL                        | 2.35 | 0.01 | 2.72 | 0.44 | 1.23 | 0.85 |
| 22553 | 0 | 16956  | FLVNAWKSKK                       | 2.29 | 0.01 | 1.96 | 0.44 | 0.85 | 1.34 |
| 22554 | 0 | 16957  | FLVNAWKSKKCP                     | 2.44 | 0.01 | 1.96 | 0.44 | 0.85 | 0.28 |
| 22555 | 0 | 16958  | FLVNAWKSKKNP                     | 2.46 | 0.01 | 1.96 | 0.44 | 0.85 | 0.28 |
| 22556 | 0 | 16960  | FLVNTW                           | 1.88 | 0.01 | 1.96 | 0.44 | 0.85 | 0.28 |
| 22557 | 0 | 16961  | FLVNTWKSCKCP                     | 2.44 | 0.01 | 4.03 | 0.44 | 0.85 | 0.28 |
| 22558 | 0 | 16962  | FLVNTWKSCKNP                     | 2.46 | 0.01 | 1.96 | 0.44 | 0.85 | 0.28 |
| 22559 | 0 | 16963  | FLVQAWKSCKTP                     | 2.44 | 0.01 | 2.41 | 0.44 | 0.85 | 0.28 |
| 22560 | 0 | 108966 | FLYSKLT                          | 2.02 | 0.01 | 0.78 | 0.44 | 1.13 | 0.28 |
| 22561 | 0 | 115741 | FMAIPPKKNQ                       | 2.29 | 0.01 | 1.60 | 0.44 | 1.23 | 0.85 |
| 22562 | 0 | 115741 | FMAIPPKKNQ                       | 2.29 | 0.01 | 1.60 | 0.44 | 1.23 | 0.85 |
| 22563 | 0 | 17018  | FMAVLLTLQPTGQI                   | 2.68 | 0.01 | 2.43 | 0.44 | 1.59 | 0.28 |

|       |   |        |                             |      |      |      |      |      |      |
|-------|---|--------|-----------------------------|------|------|------|------|------|------|
| 22564 | 0 | 149316 | FMAYTDETFK                  | 2.32 | 0.01 | 0.78 | 0.44 | 1.93 | 2.66 |
| 22565 | 0 | 119580 | FMESGEWVIKESRGWK<br>H       | 2.79 | 0.01 | 0.78 | 1.15 | 0.22 | 1.57 |
| 22566 | 0 | 119580 | FMESGEWVIKESRGWK<br>H       | 2.79 | 0.01 | 0.78 | 0.44 | 1.41 | 1.57 |
| 22567 | 0 | 119580 | FMESGEWVIKESRGWK<br>H       | 2.79 | 0.01 | 0.78 | 0.44 | 1.13 | 1.57 |
| 22568 | 0 | 119867 | FMESGEWVMKDYRGW<br>KH       | 2.78 | 0.01 | 2.26 | 1.81 | 0.22 | 1.57 |
| 22569 | 0 | 119867 | FMESGEWVMKDYRGW<br>KH       | 2.78 | 0.01 | 2.26 | 1.81 | 0.22 | 1.57 |
| 22570 | 0 | 119867 | FMESGEWVMKDYRGW<br>KH       | 2.78 | 0.01 | 2.26 | 1.81 | 0.22 | 1.57 |
| 22571 | 0 | 119867 | FMESGEWVMKDYRGW<br>KH       | 2.78 | 0.01 | 2.26 | 1.81 | 0.22 | 1.57 |
| 22572 | 0 | 119867 | FMESGEWVMKDYRGW<br>KH       | 2.78 | 0.01 | 2.26 | 1.15 | 0.22 | 1.57 |
| 22573 | 0 | 119867 | FMESGEWVMKDYRGW<br>KH       | 2.78 | 0.01 | 2.26 | 1.12 | 0.22 | 1.57 |
| 22574 | 0 | 119867 | FMESGEWVMKDYRGW<br>KH       | 2.78 | 0.01 | 2.26 | 3.65 | 0.22 | 1.57 |
| 22575 | 0 | 119867 | FMESGEWVMKDYRGW<br>KH       | 2.78 | 0.01 | 2.26 | 2.43 | 0.22 | 1.57 |
| 22576 | 0 | 119867 | FMESGEWVMKDYRGW<br>KH       | 2.78 | 0.01 | 2.26 | 2.43 | 0.22 | 1.57 |
| 22577 | 0 | 244201 | FMFGWRILFCFKCCRRT<br>RG     | 2.92 | 0.01 | 3.61 | 0.44 | 0.85 | 0.28 |
| 22578 | 0 | 108969 | FMGFSLPVWLDP                | 2.48 | 0.01 | 0.90 | 1.15 | 0.22 | 1.39 |
| 22579 | 0 | 108969 | FMGFSLPVWLDP                | 2.48 | 0.01 | 0.90 | 1.15 | 0.22 | 0.85 |
| 22580 | 0 | 181909 | FMGPQESTLQRL                | 2.45 | 0.01 | 0.90 | 3.15 | 0.22 | 1.39 |
| 22581 | 0 | 132304 | FMIHQLMGNGVWHFG<br>ET       | 2.78 | 0.01 | 0.78 | 0.44 | 1.13 | 1.39 |
| 22582 | 0 | 17052  | FMLEWGKEMVDHFH              | 2.62 | 0.01 | 2.56 | 2.69 | 0.22 | 0.28 |
| 22583 | 0 | 17073  | FMPGPLVNSVSTKEGDS<br>SNTGAG | 3.07 | 0.01 | 2.75 | 0.44 | 1.59 | 0.28 |
| 22584 | 0 | 17073  | FMPGPLVNSVSTKEGDS<br>SNTGAG | 3.07 | 0.01 | 2.75 | 0.44 | 1.59 | 2.02 |
| 22585 | 0 | 79830  | FMQQRPLRMFLGPKQL<br>T       | 2.83 | 0.01 | 2.14 | 3.17 | 0.22 | 0.28 |
| 22586 | 0 | 133575 | FMRF                        | 1.60 | 0.01 | 4.15 | 1.12 | 0.22 | 1.27 |
| 22587 | 0 | 133575 | FMRF                        | 1.60 | 0.01 | 4.15 | 1.12 | 0.22 | 1.27 |
| 22588 | 0 | 133575 | FMRF                        | 1.60 | 0.01 | 4.15 | 1.12 | 0.22 | 1.27 |
| 22589 | 0 | 133575 | FMRF                        | 1.60 | 0.01 | 4.15 | 1.12 | 0.22 | 1.27 |
| 22590 | 0 | 133575 | FMRF                        | 1.60 | 0.01 | 4.15 | 1.12 | 0.22 | 1.27 |
| 22591 | 0 | 133575 | FMRF                        | 1.60 | 0.01 | 4.15 | 1.12 | 0.22 | 1.27 |
| 22592 | 0 | 102434 | FMRWLSDLRETCFSYYQ<br>KYI    | 2.91 | 0.01 | 3.44 | 0.68 | 0.22 | 0.28 |

|       |   |        |                               |      |      |      |      |      |      |
|-------|---|--------|-------------------------------|------|------|------|------|------|------|
| 22593 | 0 | 123185 | FMSRIEALP                     | 2.18 | 0.01 | 2.28 | 2.00 | 0.22 | 0.28 |
| 22594 | 0 | 137855 | FMVDSEYKITN                   | 2.42 | 0.01 | 2.21 | 1.20 | 0.22 | 0.28 |
| 22595 | 0 | 17110  | FMVFLQTHI                     | 2.22 | 0.01 | 2.43 | 0.68 | 0.22 | 2.12 |
| 22596 | 0 | 17110  | FMVFLQTHI                     | 2.22 | 0.01 | 2.43 | 0.68 | 0.22 | 1.66 |
| 22597 | 0 | 17110  | FMVFLQTHI                     | 2.22 | 0.01 | 2.43 | 0.68 | 0.22 | 1.34 |
| 22598 | 0 | 17110  | FMVFLQTHI                     | 2.22 | 0.01 | 2.43 | 0.68 | 0.22 | 2.12 |
| 22599 | 0 | 17110  | FMVFLQTHI                     | 2.22 | 0.01 | 2.43 | 0.68 | 0.22 | 2.12 |
| 22600 | 0 | 17110  | FMVFLQTHI                     | 2.22 | 0.01 | 2.43 | 0.68 | 0.22 | 1.48 |
| 22601 | 0 | 123186 | FMVYEALDA                     | 2.21 | 0.01 | 2.28 | 2.00 | 0.22 | 0.28 |
| 22602 | 0 | 98775  | FNAEFNEIRR                    | 2.34 | 0.01 | 2.16 | 0.44 | 1.23 | 0.85 |
| 22603 | 0 | 99250  | FNAEFNEIRRVLEE                | 2.69 | 0.01 | 2.16 | 0.44 | 1.23 | 1.48 |
| 22604 | 0 | 125409 | FNAHIKGVETIANDVVSL<br>ATKAREG | 3.15 | 0.01 | 0.78 | 0.44 | 1.13 | 0.28 |
| 22605 | 0 | 17128  | FNASDSVGQQIKVIP               | 2.65 | 0.01 | 3.17 | 1.15 | 2.26 | 0.28 |
| 22606 | 0 | 17128  | FNASDSVGQQIKVIP               | 2.65 | 0.01 | 3.17 | 0.44 | 0.85 | 0.28 |
| 22607 | 0 | 17128  | FNASDSVGQQIKVIP               | 2.65 | 0.01 | 3.17 | 0.68 | 0.22 | 0.28 |
| 22608 | 0 | 17129  | FNASDSVGQQIKVIPVD<br>PYF      | 2.94 | 0.01 | 2.82 | 0.44 | 0.85 | 0.28 |
| 22609 | 0 | 17132  | FNATKFPSVYAWERKKI             | 2.75 | 0.01 | 2.48 | 1.20 | 0.22 | 0.28 |
| 22610 | 0 | 17135  | FNCLGMSNRDFLEGVS<br>GATW      | 2.92 | 0.01 | 2.85 | 2.02 | 0.22 | 1.34 |
| 22611 | 0 | 17135  | FNCLGMSNRDFLEGVS<br>GATW      | 2.92 | 0.01 | 2.85 | 2.02 | 0.22 | 1.75 |
| 22612 | 0 | 17135  | FNCLGMSNRDFLEGVS<br>GATW      | 2.92 | 0.01 | 2.85 | 2.02 | 0.22 | 1.48 |
| 22613 | 0 | 17135  | FNCLGMSNRDFLEGVS<br>GATW      | 2.92 | 0.01 | 2.85 | 2.02 | 0.22 | 1.48 |
| 22614 | 0 | 17135  | FNCLGMSNRDFLEGVS<br>GATW      | 2.92 | 0.01 | 2.85 | 2.02 | 0.22 | 1.48 |
| 22615 | 0 | 17135  | FNCLGMSNRDFLEGVS<br>GATW      | 2.92 | 0.01 | 2.85 | 2.02 | 0.22 | 0.28 |
| 22616 | 0 | 17135  | FNCLGMSNRDFLEGVS<br>GATW      | 2.92 | 0.01 | 2.85 | 2.02 | 0.22 | 0.28 |
| 22617 | 0 | 17135  | FNCLGMSNRDFLEGVS<br>GATW      | 2.92 | 0.01 | 2.85 | 2.02 | 0.22 | 0.28 |
| 22618 | 0 | 17135  | FNCLGMSNRDFLEGVS<br>GATW      | 2.92 | 0.01 | 2.85 | 2.02 | 0.22 | 0.28 |
| 22619 | 0 | 17136  | FNCLGMSSRDFIEGA               | 2.64 | 0.01 | 3.22 | 1.15 | 0.22 | 0.28 |
| 22620 | 0 | 17136  | FNCLGMSSRDFIEGA               | 2.64 | 0.01 | 3.22 | 0.68 | 0.22 | 0.28 |
| 22621 | 0 | 92714  | FNDAFNNGGDG                   | 2.37 | 0.01 | 2.67 | 2.00 | 0.22 | 0.28 |
| 22622 | 0 | 92714  | FNDAFNNGGDG                   | 2.37 | 0.01 | 2.67 | 2.00 | 0.22 | 0.28 |
| 22623 | 0 | 92714  | FNDAFNNGGDG                   | 2.37 | 0.01 | 2.67 | 2.00 | 0.22 | 0.28 |
| 22624 | 0 | 135674 | FNDFTRVV                      | 2.12 | 0.01 | 0.78 | 0.44 | 2.35 | 0.28 |
| 22625 | 0 | 132305 | FNDGGLFERLMG                  | 2.50 | 0.01 | 0.90 | 1.15 | 0.22 | 1.39 |
| 22626 | 0 | 17140  | FNDSQRQATKDAGTIAG<br>LEV      | 2.91 | 0.01 | 2.78 | 2.49 | 0.85 | 0.28 |

|       |   |        |                                          |      |      |      |      |      |      |
|-------|---|--------|------------------------------------------|------|------|------|------|------|------|
| 22627 | 0 | 17140  | FNDSQRQATKDAGTIAG<br>LEV                 | 2.91 | 0.01 | 2.78 | 0.44 | 0.85 | 0.28 |
| 22628 | 0 | 186667 | FNEHHRVHSVTR                             | 2.49 | 0.01 | 0.90 | 0.68 | 0.22 | 1.39 |
| 22629 | 0 | 94517  | FNENMAY                                  | 2.02 | 0.01 | 2.24 | 3.12 | 0.22 | 0.28 |
| 22630 | 0 | 94517  | FNENMAY                                  | 2.02 | 0.01 | 2.24 | 3.12 | 0.22 | 0.28 |
| 22631 | 0 | 152546 | FNFDQQTSQN                               | 2.36 | 0.01 | 2.18 | 2.16 | 0.22 | 0.28 |
| 22632 | 0 | 17146  | FNFEVEVV                                 | 2.15 | 0.01 | 2.99 | 0.44 | 0.85 | 0.28 |
| 22633 | 0 | 158775 | FNFKTFFHTIGFASK                          | 2.70 | 0.01 | 3.26 | 0.44 | 1.23 | 0.28 |
| 22634 | 0 | 158775 | FNFKTFFHTIGFASK                          | 2.70 | 0.01 | 3.26 | 0.44 | 1.41 | 0.28 |
| 22635 | 0 | 17147  | FNFRFVSEKGMNVF                           | 2.71 | 0.01 | 3.22 | 1.12 | 0.22 | 1.27 |
| 22636 | 0 | 120535 | FNGEKINYTEGRAVL                          | 2.64 | 0.01 | 0.78 | 2.46 | 0.22 | 0.28 |
| 22637 | 0 | 120535 | FNGEKINYTEGRAVL                          | 2.64 | 0.01 | 0.78 | 3.16 | 0.22 | 0.28 |
| 22638 | 0 | 120535 | FNGEKINYTEGRAVL                          | 2.64 | 0.01 | 0.78 | 3.16 | 0.22 | 0.28 |
| 22639 | 0 | 120535 | FNGEKINYTEGRAVL                          | 2.64 | 0.01 | 0.78 | 3.16 | 2.60 | 1.75 |
| 22640 | 0 | 227178 | FNIEKCFQCALLVEKENK<br>NDVCYKYLSEDIVSNFKE | 3.66 | 0.01 | 3.28 | 0.44 | 1.59 | 0.28 |
|       |   |        | IKAE                                     |      |      |      |      |      |      |
| 22641 | 0 | 227178 | FNIEKCFQCALLVEKENK<br>NDVCYKYLSEDIVSNFKE | 3.66 | 0.01 | 3.28 | 1.15 | 0.22 | 0.28 |
|       |   |        | IKAE                                     |      |      |      |      |      |      |
| 22642 | 0 | 227178 | FNIEKCFQCALLVEKENK<br>NDVCYKYLSEDIVSNFKE | 3.66 | 0.01 | 3.28 | 3.33 | 0.22 | 0.28 |
|       |   |        | IKAE                                     |      |      |      |      |      |      |
| 22643 | 0 | 227178 | FNIEKCFQCALLVEKENK<br>NDVCYKYLSEDIVSNFKE | 3.66 | 0.01 | 3.28 | 3.33 | 0.22 | 0.28 |
|       |   |        | IKAE                                     |      |      |      |      |      |      |
| 22644 | 0 | 119869 | FNISRSSELMFEKQS                          | 2.69 | 0.01 | 2.26 | 1.12 | 0.22 | 1.27 |
| 22645 | 0 | 119869 | FNISRSSELMFEKQS                          | 2.69 | 0.01 | 2.26 | 1.12 | 0.22 | 1.57 |
| 22646 | 0 | 181622 | FNIVSDFFCPSCKTE                          | 2.66 | 0.01 | 2.86 | 2.36 | 0.22 | 1.28 |
| 22647 | 0 | 227764 | FNKRSPQLENLRDYRI                         | 2.71 | 0.01 | 2.72 | 1.20 | 1.59 | 0.28 |
| 22648 | 0 | 103900 | FNKSWFP                                  | 2.03 | 0.01 | 0.90 | 0.44 | 1.74 | 1.39 |
| 22649 | 0 | 103901 | FNKSYYG                                  | 2.01 | 0.01 | 0.90 | 0.44 | 1.74 | 0.28 |
| 22650 | 0 | 17187  | FNKTLME                                  | 1.99 | 0.01 | 4.03 | 0.44 | 0.22 | 0.28 |
| 22651 | 0 | 17187  | FNKTLME                                  | 1.99 | 0.01 | 4.03 | 0.44 | 0.22 | 1.34 |
| 22652 | 0 | 177489 | FNLHDSSKLPDT                             | 2.46 | 0.01 | 0.90 | 1.20 | 0.22 | 1.27 |
| 22653 | 0 | 177489 | FNLHDSSKLPDT                             | 2.46 | 0.01 | 0.90 | 3.78 | 0.22 | 1.75 |
| 22654 | 0 | 177489 | FNLHDSSKLPDT                             | 2.46 | 0.01 | 0.90 | 3.78 | 0.22 | 0.28 |
| 22655 | 0 | 17197  | FNLVYT                                   | 1.88 | 0.01 | 0.90 | 0.68 | 0.22 | 1.39 |
| 22656 | 0 | 123187 | FNMGLDLPN                                | 2.23 | 0.01 | 2.28 | 2.00 | 0.22 | 0.28 |
| 22657 | 0 | 123187 | FNMGLDLPN                                | 2.23 | 0.01 | 2.28 | 2.00 | 0.22 | 0.28 |
| 22658 | 0 | 123187 | FNMGLDLPN                                | 2.23 | 0.01 | 2.28 | 2.00 | 0.22 | 0.28 |
| 22659 | 0 | 17202  | FNMVYL                                   | 1.88 | 0.01 | 0.90 | 0.68 | 0.22 | 1.39 |
| 22660 | 0 | 17207  | FNNFTVSFWLRVPKVSA<br>SHLE                | 2.98 | 0.01 | 2.95 | 1.15 | 0.22 | 1.27 |
| 22661 | 0 | 17207  | FNNFTVSFWLRVPKVSA<br>SHLE                | 2.98 | 0.01 | 2.95 | 0.68 | 0.22 | 1.75 |



|       |   |        |                           |      |      |      |      |      |      |
|-------|---|--------|---------------------------|------|------|------|------|------|------|
| 22662 | 0 | 17207  | FNNFTVSFWLRVPKVSA<br>SHLE | 2.98 | 0.01 | 2.95 | 0.68 | 0.22 | 0.28 |
| 22663 | 0 | 17207  | FNNFTVSFWLRVPKVSA<br>SHLE | 2.98 | 0.01 | 2.95 | 0.68 | 0.22 | 0.28 |
| 22664 | 0 | 17207  | FNNFTVSFWLRVPKVSA<br>SHLE | 2.98 | 0.01 | 2.95 | 0.68 | 0.22 | 0.28 |
| 22665 | 0 | 17210  | FNNIPSRYNLYDKMLPL<br>DD   | 2.89 | 0.01 | 0.90 | 2.63 | 0.22 | 1.48 |
| 22666 | 0 | 17210  | FNNIPSRYNLYDKMLPL<br>DD   | 2.89 | 0.01 | 0.90 | 2.63 | 2.25 | 1.75 |
| 22667 | 0 | 141272 | FNPCEDI                   | 1.99 | 0.01 | 0.78 | 0.44 | 1.41 | 0.85 |
| 22668 | 0 | 153257 | FNPKNKTWPDANKVG           | 2.68 | 0.01 | 2.08 | 0.68 | 0.22 | 0.28 |
| 22669 | 0 | 98777  | FNPTQLEEQC                | 2.30 | 0.01 | 1.60 | 0.44 | 1.23 | 0.85 |
| 22670 | 0 | 95389  | FNPTQLEEQCHI              | 2.44 | 0.01 | 1.60 | 0.44 | 1.23 | 1.27 |
| 22671 | 0 | 114823 | FNPVCGTDGV                | 2.31 | 0.01 | 2.25 | 0.44 | 1.23 | 0.85 |
| 22672 | 0 | 114823 | FNPVCGTDGV                | 2.31 | 0.01 | 2.25 | 0.44 | 1.23 | 0.85 |
| 22673 | 0 | 17219  | FNPVCGTDGVTYDN            | 2.63 | 0.01 | 2.25 | 0.44 | 1.23 | 0.28 |
| 22674 | 0 | 230226 | FNPVCGTDGVTYDNECL<br>LCA  | 2.94 | 0.01 | 2.25 | 0.44 | 1.23 | 0.28 |
| 22675 | 0 | 79215  | FNPVYP                    | 1.90 | 0.01 | 3.03 | 1.15 | 0.22 | 0.85 |
| 22676 | 0 | 79215  | FNPVYP                    | 1.90 | 0.01 | 3.03 | 1.15 | 0.22 | 0.85 |
| 22677 | 0 | 79215  | FNPVYP                    | 1.90 | 0.01 | 3.03 | 1.15 | 0.22 | 0.85 |
| 22678 | 0 | 17227  | FNQNP RS                  | 2.02 | 0.01 | 0.90 | 0.44 | 0.85 | 1.39 |
| 22679 | 0 | 110855 | FN RAGTVGENVPDDL I<br>KGS | 2.89 | 0.01 | 1.86 | 0.68 | 0.22 | 0.28 |
| 22680 | 0 | 110855 | FN RAGTVGENVPDDL I<br>KGS | 2.89 | 0.01 | 1.86 | 0.68 | 0.22 | 0.28 |
| 22681 | 0 | 110855 | FN RAGTVGENVPDDL I<br>KGS | 2.89 | 0.01 | 1.86 | 0.68 | 0.22 | 0.28 |
| 22682 | 0 | 110855 | FN RAGTVGENVPDDL I<br>KGS | 2.89 | 0.01 | 1.86 | 0.68 | 0.22 | 0.28 |
| 22683 | 0 | 110855 | FN RAGTVGENVPDDL I<br>KGS | 2.89 | 0.01 | 1.86 | 0.68 | 0.22 | 0.28 |
| 22684 | 0 | 110855 | FN RAGTVGENVPDDL I<br>KGS | 2.89 | 0.01 | 1.86 | 0.68 | 0.22 | 0.28 |
| 22685 | 0 | 110855 | FN RAGTVGENVPDDL I<br>KGS | 2.89 | 0.01 | 1.86 | 0.68 | 0.22 | 0.28 |
| 22686 | 0 | 110855 | FN RAGTVGENVPDDL I<br>KGS | 2.89 | 0.01 | 1.86 | 0.68 | 0.22 | 0.28 |
| 22687 | 0 | 110855 | FN RAGTVGENVPDDL I<br>KGS | 2.89 | 0.01 | 1.86 | 0.68 | 0.22 | 0.85 |
| 22688 | 0 | 110855 | FN RAGTVGENVPDDL I<br>KGS | 2.89 | 0.01 | 1.86 | 2.37 | 0.22 | 0.28 |
| 22689 | 0 | 110855 | FN RAGTVGENVPDDL I<br>KGS | 2.89 | 0.01 | 1.86 | 2.37 | 0.22 | 1.48 |

|       |   |        |                                    |      |      |      |      |      |      |
|-------|---|--------|------------------------------------|------|------|------|------|------|------|
| 22690 | 0 | 110855 | FN RAGTVGENVPDDL<br>YI KGS         | 2.89 | 0.01 | 1.86 | 2.37 | 0.22 | 1.48 |
| 22691 | 0 | 110855 | FN RAGTVGENVPDDL<br>YI KGS         | 2.89 | 0.01 | 1.86 | 2.37 | 0.22 | 0.28 |
| 22692 | 0 | 110855 | FN RAGTVGENVPDDL<br>YI KGS         | 2.89 | 0.01 | 1.86 | 2.37 | 0.22 | 0.28 |
| 22693 | 0 | 110855 | FN RAGTVGENVPDDL<br>YI KGS         | 2.89 | 0.01 | 1.86 | 1.12 | 0.22 | 0.28 |
| 22694 | 0 | 110855 | FN RAGTVGENVPDDL<br>YI KGS         | 2.89 | 0.01 | 1.86 | 0.68 | 0.22 | 0.28 |
| 22695 | 0 | 110855 | FN RAGTVGENVPDDL<br>YI KGS         | 2.89 | 0.01 | 1.86 | 0.68 | 0.22 | 1.27 |
| 22696 | 0 | 110855 | FN RAGTVGENVPDDL<br>YI KGS         | 2.89 | 0.01 | 1.86 | 0.68 | 0.22 | 1.66 |
| 22697 | 0 | 110855 | FN RAGTVGENVPDDL<br>YI KGS         | 2.89 | 0.01 | 1.86 | 0.68 | 0.22 | 0.28 |
| 22698 | 0 | 114339 | FN RQESTLVRSRPSR                   | 2.68 | 0.01 | 3.27 | 0.44 | 1.23 | 0.85 |
| 22699 | 0 | 489188 | FN RTWQDYKRGFGSLN<br>DEGE          | 2.94 | 3.37 | 0.78 | 0.44 | 1.13 | 0.28 |
| 22700 | 0 | 17234  | FN SISLNNEYTIINCMEN<br>N           | 2.90 | 0.01 | 3.03 | 0.68 | 0.22 | 1.57 |
| 22701 | 0 | 17234  | FN SISLNNEYTIINCMEN<br>N           | 2.90 | 0.01 | 3.03 | 3.33 | 0.22 | 1.57 |
| 22702 | 0 | 17234  | FN SISLNNEYTIINCMEN<br>N           | 2.90 | 0.01 | 2.08 | 2.25 | 0.22 | 1.57 |
| 22703 | 0 | 17234  | FN SISLNNEYTIINCMEN<br>N           | 2.90 | 0.01 | 3.16 | 0.44 | 1.93 | 1.57 |
| 22704 | 0 | 227765 | FN SKAIVILVINEGDA                  | 2.73 | 0.01 | 2.72 | 1.20 | 1.59 | 0.28 |
| 22705 | 0 | 227765 | FN SKAIVILVINEGDA                  | 2.73 | 0.01 | 2.72 | 1.20 | 1.59 | 0.28 |
| 22706 | 0 | 227765 | FN SKAIVILVINEGDA                  | 2.73 | 0.01 | 2.72 | 4.03 | 1.59 | 0.28 |
| 22707 | 0 | 227765 | FN SKAIVILVINEGDA                  | 2.73 | 0.01 | 2.72 | 4.03 | 1.59 | 0.28 |
| 22708 | 0 | 99252  | FN SKAMVIVVVNKG<br>T               | 2.66 | 0.01 | 2.16 | 0.44 | 1.23 | 1.48 |
| 22709 | 0 | 101642 | FN SLTLL                           | 2.00 | 0.01 | 0.90 | 0.44 | 0.85 | 1.39 |
| 22710 | 0 | 167580 | FN TGPLSVLT                        | 2.31 | 0.01 | 0.78 | 0.44 | 1.13 | 0.85 |
| 22711 | 0 | 140462 | FN TKHDMQGDTS                      | 2.45 | 0.01 | 0.90 | 0.68 | 0.22 | 0.28 |
| 22712 | 0 | 140462 | FN TKHDMQGDTS                      | 2.45 | 0.01 | 0.90 | 0.68 | 0.22 | 1.34 |
| 22713 | 0 | 422328 | FN TWTCQSIAPSKTSA<br>SIGSLCADARMYG | 3.34 | 0.01 | 1.75 | 1.81 | 0.22 | 0.28 |
| 22714 | 0 | 422328 | FN TWTCQSIAPSKTSA<br>SIGSLCADARMYG | 3.34 | 0.01 | 1.75 | 1.81 | 2.60 | 1.75 |
| 22715 | 0 | 422328 | FN TWTCQSIAPSKTSA<br>SIGSLCADARMYG | 3.34 | 0.01 | 1.75 | 1.81 | 0.22 | 2.92 |
| 22716 | 0 | 97310  | FN VKAEIQG                         | 2.18 | 0.01 | 3.13 | 1.12 | 0.22 | 0.28 |
| 22717 | 0 | 17243  | FN VPIKEAGEDCHAP                   | 2.64 | 0.01 | 2.43 | 3.34 | 0.22 | 0.28 |
| 22718 | 0 | 17243  | FN VPIKEAGEDCHAP                   | 2.64 | 0.01 | 2.43 | 3.34 | 0.22 | 0.28 |
| 22719 | 0 | 17243  | FN VPIKEAGEDCHAP                   | 2.64 | 0.01 | 2.43 | 0.44 | 0.85 | 0.28 |

|       |   |        |                                        |      |      |      |      |      |      |
|-------|---|--------|----------------------------------------|------|------|------|------|------|------|
| 22720 | 0 | 175798 | FNVSVEDILYGDHEC                        | 2.64 | 0.01 | 2.63 | 1.15 | 0.22 | 0.85 |
| 22721 | 0 | 149045 | FNVQTGP                                | 1.99 | 0.01 | 0.90 | 2.13 | 1.59 | 1.39 |
| 22722 | 0 | 17247  | FNWTHCFDPQI                            | 2.37 | 0.01 | 2.04 | 1.20 | 0.22 | 1.34 |
| 22723 | 0 | 17247  | FNWTHCFDPQI                            | 2.37 | 0.01 | 2.04 | 1.20 | 0.22 | 1.34 |
| 22724 | 0 | 17248  | FNWTHCFDPQIQAISS<br>PCHNSLILPPFSLSPVPT | 3.51 | 0.01 | 2.04 | 0.44 | 0.85 | 0.28 |
| 22725 | 0 | 17248  | FNWTHCFDPQIQAISS<br>PCHNSLILPPFSLSPVPT | 3.51 | 0.01 | 2.04 | 0.44 | 0.85 | 0.28 |
| 22726 | 0 | 17248  | FNWTHCFDPQIQAISS<br>PCHNSLILPPFSLSPVPT | 3.51 | 0.01 | 2.04 | 0.44 | 0.85 | 0.28 |
| 22727 | 0 | 107364 | FNWYVDG                                | 1.99 | 0.01 | 0.78 | 0.44 | 1.13 | 0.28 |
| 22728 | 0 | 78384  | FPAGVANDPSVAGPF                        | 2.72 | 0.01 | 0.90 | 0.68 | 0.22 | 0.28 |
| 22729 | 0 | 78384  | FPAGVANDPSVAGPF                        | 2.72 | 0.01 | 0.90 | 0.68 | 0.22 | 0.28 |
| 22730 | 0 | 167257 | FPAHPAWTIGSM                           | 2.45 | 0.01 | 0.90 | 2.37 | 0.22 | 1.39 |
| 22731 | 0 | 17256  | FPAHPLPRLPSL                           | 2.51 | 0.01 | 0.90 | 0.68 | 0.22 | 1.39 |
| 22732 | 0 | 509633 | FPAWFTKLYPRT                           | 2.48 | 0.01 | 0.90 | 1.12 | 0.22 | 1.27 |
| 22733 | 0 | 509633 | FPAWFTKLYPRT                           | 2.48 | 0.01 | 0.90 | 1.12 | 0.22 | 2.56 |
| 22734 | 0 | 17261  | FPAYGGMQQILA                           | 2.45 | 0.01 | 3.97 | 2.13 | 0.22 | 0.28 |
| 22735 | 0 | 17262  | FPCDRLSGYWERGIPSP<br>CVR               | 2.93 | 0.01 | 0.90 | 0.44 | 1.59 | 1.27 |
| 22736 | 0 | 17262  | FPCDRLSGYWERGIPSP<br>CVR               | 2.93 | 0.01 | 0.90 | 0.44 | 1.59 | 1.66 |
| 22737 | 0 | 17262  | FPCDRLSGYWERGIPSP<br>CVR               | 2.93 | 0.01 | 0.90 | 0.44 | 1.59 | 1.66 |
| 22738 | 0 | 17262  | FPCDRLSGYWERGIPSP<br>CVR               | 2.93 | 0.01 | 0.90 | 0.44 | 1.59 | 1.66 |
| 22739 | 0 | 17262  | FPCDRLSGYWERGIPSP<br>CVR               | 2.93 | 0.01 | 0.90 | 0.44 | 1.59 | 1.66 |
| 22740 | 0 | 17262  | FPCDRLSGYWERGIPSP<br>CVR               | 2.93 | 0.01 | 0.90 | 2.69 | 0.22 | 0.28 |
| 22741 | 0 | 17262  | FPCDRLSGYWERGIPSP<br>CVR               | 2.93 | 0.01 | 0.90 | 0.44 | 1.59 | 0.85 |
| 22742 | 0 | 171077 | FPDFFTRVALYVDWI                        | 2.66 | 0.01 | 0.78 | 0.44 | 1.13 | 0.28 |
| 22743 | 0 | 17271  | FPDLGV                                 | 1.88 | 0.01 | 1.96 | 0.44 | 0.85 | 0.28 |
| 22744 | 0 | 111286 | FPDTSFYNPDTQRLV                        | 2.67 | 0.01 | 1.86 | 0.68 | 0.22 | 0.28 |
| 22745 | 0 | 123189 | FPEADPKAYAQHVFERSF<br>DANNDGTLDFKE     | 3.28 | 0.01 | 1.60 | 2.04 | 0.22 | 0.28 |
| 22746 | 0 | 132826 | FPEDLGKNSWQAYVV                        | 2.58 | 0.01 | 3.16 | 3.16 | 0.22 | 0.28 |
| 22747 | 0 | 17278  | FPELKPGESRHTSDHMSI<br>YK               | 2.91 | 0.01 | 2.82 | 0.44 | 0.85 | 0.28 |

|       |   |        |                                    |      |      |      |      |      |      |
|-------|---|--------|------------------------------------|------|------|------|------|------|------|
| 22748 | 0 | 17278  | FPELKPGESRHTSDHMSI<br>YK           | 2.91 | 0.01 | 2.82 | 0.44 | 1.41 | 0.28 |
| 22749 | 0 | 17279  | FPELTCWTCLASS                      | 2.53 | 0.01 | 0.90 | 0.44 | 1.41 | 0.28 |
| 22750 | 0 | 115253 | FPEVFGKEKVNELSKDIG<br>SE           | 2.97 | 0.01 | 1.60 | 0.44 | 1.23 | 1.28 |
| 22751 | 0 | 115253 | FPEVFGKEKVNELSKDIG<br>SE           | 2.97 | 0.01 | 1.60 | 0.44 | 1.41 | 0.28 |
| 22752 | 0 | 115253 | FPEVFGKEKVNELSKDIG<br>SE           | 2.97 | 0.01 | 1.60 | 0.44 | 1.93 | 0.28 |
| 22753 | 0 | 78158  | FPEVFGKEKVNELSKDIG<br>SESTE        | 3.10 | 0.01 | 1.60 | 0.44 | 1.23 | 1.28 |
| 22754 | 0 | 17284  | FPFNASDSVGQQIKVIP                  | 2.79 | 0.01 | 3.17 | 1.15 | 2.26 | 0.28 |
| 22755 | 0 | 17284  | FPFNASDSVGQQIKVIP                  | 2.79 | 0.01 | 3.17 | 0.44 | 0.85 | 0.28 |
| 22756 | 0 | 17284  | FPFNASDSVGQQIKVIP                  | 2.79 | 0.01 | 3.17 | 0.68 | 0.22 | 0.28 |
| 22757 | 0 | 134051 | FPFSGETVFMSPMENPGL<br>WIL          | 2.95 | 0.01 | 0.78 | 0.44 | 2.35 | 0.28 |
| 22758 | 0 | 106424 | FPFTPHPEEYFL                       | 2.51 | 0.01 | 0.90 | 1.15 | 0.22 | 1.39 |
| 22759 | 0 | 149699 | FPGAAGSNRSPL                       | 2.48 | 0.01 | 0.90 | 2.37 | 0.22 | 0.28 |
| 22760 | 0 | 108976 | FPGARGPP                           | 2.13 | 0.01 | 1.60 | 2.55 | 2.60 | 0.28 |
| 22761 | 0 | 99253  | FPGCPRHYEEPHTQG                    | 2.67 | 0.01 | 2.16 | 0.44 | 1.23 | 1.48 |
| 22762 | 0 | 98778  | FPGCRRGD                           | 2.13 | 0.01 | 4.23 | 0.44 | 1.74 | 0.28 |
| 22763 | 0 | 17295  | FPGGGQIVGGVYLL                     | 2.61 | 0.01 | 1.72 | 1.15 | 2.26 | 0.28 |
| 22764 | 0 | 17295  | FPGGGQIVGGVYLL                     | 2.61 | 0.01 | 1.72 | 1.15 | 2.26 | 0.28 |
| 22765 | 0 | 17295  | FPGGGQIVGGVYLL                     | 2.61 | 0.01 | 1.72 | 1.15 | 2.26 | 1.66 |
| 22766 | 0 | 17296  | FPGGGQIVGGVYLLPRR<br>GPRLGVRATRKTS | 3.34 | 0.01 | 1.72 | 0.44 | 0.85 | 0.28 |
| 22767 | 0 | 136234 | FPGLITLTISLLDTSNLELP               | 2.97 | 0.01 | 0.78 | 0.44 | 1.13 | 0.28 |
| 22768 | 0 | 17300  | FPGSSTTSTGPCRTCMT<br>TAQGTSMPSC    | 3.30 | 0.01 | 2.08 | 1.12 | 0.22 | 1.57 |
| 22769 | 0 | 17300  | FPGSSTTSTGPCRTCMT<br>TAQGTSMPSC    | 3.30 | 0.01 | 2.08 | 1.12 | 0.22 | 1.27 |
| 22770 | 0 | 17300  | FPGSSTTSTGPCRTCMT<br>TAQGTSMPSC    | 3.30 | 0.01 | 2.08 | 2.74 | 0.22 | 1.57 |
| 22771 | 0 | 17300  | FPGSSTTSTGPCRTCMT<br>TAQGTSMPSC    | 3.30 | 0.01 | 2.08 | 1.12 | 0.22 | 2.02 |
| 22772 | 0 | 17300  | FPGSSTTSTGPCRTCMT<br>TAQGTSMPSC    | 3.30 | 0.01 | 2.08 | 2.74 | 0.22 | 1.57 |
| 22773 | 0 | 122097 | FPGWQPGMPTIPTAPP<br>TTPV           | 2.97 | 0.01 | 2.04 | 0.44 | 0.85 | 0.28 |
| 22774 | 0 | 103179 | FPHHPHTVPSEEV                      | 2.69 | 0.01 | 2.04 | 0.44 | 0.85 | 1.28 |
| 22775 | 0 | 17308  | FPIDSSCNATQY                       | 2.42 | 0.01 | 2.69 | 0.68 | 0.22 | 0.28 |
| 22776 | 0 | 17308  | FPIDSSCNATQY                       | 2.42 | 0.01 | 2.69 | 1.20 | 0.22 | 0.28 |
| 22777 | 0 | 106425 | FPIHSSCNAT                         | 2.28 | 0.01 | 2.75 | 0.44 | 1.23 | 0.85 |

|       |   |        |                             |      |      |      |      |      |      |
|-------|---|--------|-----------------------------|------|------|------|------|------|------|
| 22778 | 0 | 134053 | FPILPGEIFKYKWTVTVE<br>DG    | 2.95 | 0.01 | 0.78 | 0.44 | 2.35 | 0.28 |
| 22779 | 0 | 111288 | FPITTNAPIYGS                | 2.46 | 0.01 | 0.90 | 0.44 | 0.85 | 0.28 |
| 22780 | 0 | 226341 | FPKKPNA                     | 2.03 | 0.01 | 0.90 | 2.66 | 0.22 | 1.39 |
| 22781 | 0 | 102435 | FPKLTLYSW                   | 2.21 | 0.01 | 3.93 | 0.68 | 0.22 | 1.27 |
| 22782 | 0 | 102435 | FPKLTLYSW                   | 2.21 | 0.01 | 3.93 | 0.68 | 0.22 | 0.28 |
| 22783 | 0 | 102435 | FPKLTLYSW                   | 2.21 | 0.01 | 3.93 | 0.68 | 0.22 | 0.28 |
| 22784 | 0 | 102436 | FPKMSAYDY                   | 2.21 | 0.01 | 4.15 | 0.68 | 0.22 | 0.28 |
| 22785 | 0 | 102436 | FPKMSAYDY                   | 2.21 | 0.01 | 4.15 | 0.68 | 0.22 | 0.28 |
| 22786 | 0 | 127654 | FPKNSTV                     | 1.99 | 0.01 | 0.90 | 0.44 | 1.13 | 1.39 |
| 22787 | 0 | 191291 | FPKVAPQAISV                 | 2.48 | 0.01 | 2.76 | 1.20 | 0.22 | 0.28 |
| 22788 | 0 | 17324  | FPKYHPRFHKHA                | 2.52 | 0.01 | 0.90 | 0.68 | 0.22 | 1.39 |
| 22789 | 0 | 115742 | FPKYPVEPFT                  | 2.34 | 0.01 | 1.60 | 0.44 | 1.23 | 0.85 |
| 22790 | 0 | 115742 | FPKYPVEPFT                  | 2.34 | 0.01 | 1.60 | 0.44 | 1.23 | 0.85 |
| 22791 | 0 | 17326  | FPLDIT                      | 1.88 | 0.01 | 2.40 | 1.15 | 0.22 | 0.28 |
| 22792 | 0 | 17328  | FPLDLT                      | 1.90 | 0.01 | 2.40 | 1.15 | 0.22 | 0.28 |
| 22793 | 0 | 232795 | FPLFGLS                     | 2.05 | 0.01 | 0.90 | 2.49 | 0.85 | 1.39 |
| 22794 | 0 | 17329  | FPLHLGV                     | 2.02 | 0.01 | 0.90 | 0.44 | 0.85 | 1.39 |
| 22795 | 0 | 138398 | FPLITCCGYGGKYNFSVT<br>APC   | 2.98 | 0.01 | 2.60 | 0.44 | 1.23 | 0.85 |
| 22796 | 0 | 97311  | FPLPTDAG                    | 2.12 | 0.01 | 2.87 | 0.68 | 0.22 | 0.28 |
| 22797 | 0 | 97311  | FPLPTDAG                    | 2.12 | 0.01 | 2.87 | 1.81 | 0.22 | 0.28 |
| 22798 | 0 | 420471 | FPLQPQQP                    | 2.16 | 3.97 | 1.86 | 0.44 | 1.23 | 0.28 |
| 22799 | 0 | 420472 | FPLQPQQP                    | 2.16 | 0.01 | 1.86 | 0.44 | 1.23 | 0.28 |
| 22800 | 0 | 17333  | FPLQPQQPFP                  | 2.37 | 0.01 | 2.83 | 0.68 | 0.22 | 0.28 |
| 22801 | 0 | 17333  | FPLQPQQPFP                  | 2.37 | 0.01 | 2.83 | 0.68 | 0.22 | 0.85 |
| 22802 | 0 | 17333  | FPLQPQQPFP                  | 2.37 | 0.01 | 1.86 | 0.44 | 1.23 | 0.85 |
| 22803 | 0 | 182130 | FPNRSQLCVSAEQSE             | 2.66 | 0.01 | 0.78 | 0.44 | 1.13 | 0.85 |
| 22804 | 0 | 107366 | FPPKPKD                     | 2.05 | 0.01 | 0.78 | 0.44 | 1.13 | 0.28 |
| 22805 | 0 | 165597 | FPPKPKL                     | 2.05 | 0.01 | 0.90 | 0.44 | 1.23 | 1.39 |
| 22806 | 0 | 165597 | FPPKPKL                     | 2.05 | 0.01 | 0.90 | 0.44 | 1.23 | 1.39 |
| 22807 | 0 | 148598 | FPPQLPYPQP                  | 2.36 | 0.01 | 1.86 | 2.74 | 0.22 | 0.85 |
| 22808 | 0 | 148598 | FPPQLPYPQP                  | 2.36 | 0.01 | 1.86 | 2.74 | 0.22 | 0.85 |
| 22809 | 0 | 430030 | FPPQLPYPQPQSFPQQ<br>PYPQQQP | 3.19 | 0.01 | 1.86 | 0.44 | 1.23 | 0.85 |
| 22810 | 0 | 148599 | FPPQQPYPQP                  | 2.37 | 0.01 | 1.86 | 0.44 | 1.93 | 0.85 |
| 22811 | 0 | 148599 | FPPQQPYPQP                  | 2.37 | 0.01 | 1.86 | 2.74 | 0.22 | 0.85 |
| 22812 | 0 | 148599 | FPPQQPYPQP                  | 2.37 | 0.01 | 1.86 | 2.74 | 0.22 | 0.85 |
| 22813 | 0 | 98779  | FPPQQPYPQPQP                | 2.54 | 0.01 | 1.86 | 0.44 | 1.93 | 1.27 |
| 22814 | 0 | 115743 | FPPQSVLSLS                  | 2.34 | 0.01 | 1.60 | 0.44 | 1.23 | 0.85 |
| 22815 | 0 | 115743 | FPPQSVLSLS                  | 2.34 | 0.01 | 1.60 | 0.44 | 1.23 | 0.85 |
| 22816 | 0 | 17350  | FPPRP                       | 1.78 | 0.01 | 2.40 | 0.68 | 0.22 | 0.85 |
| 22817 | 0 | 17350  | FPPRP                       | 1.78 | 0.01 | 2.40 | 0.68 | 0.22 | 1.27 |
| 22818 | 0 | 17360  | FPQFKPEE                    | 2.14 | 0.01 | 3.34 | 0.68 | 0.22 | 0.85 |
| 22819 | 0 | 17360  | FPQFKPEE                    | 2.14 | 0.01 | 3.34 | 0.68 | 0.22 | 0.85 |
| 22820 | 0 | 17360  | FPQFKPEE                    | 2.14 | 0.01 | 3.34 | 0.68 | 0.22 | 0.85 |
| 22821 | 0 | 17360  | FPQFKPEE                    | 2.14 | 0.01 | 3.34 | 0.68 | 0.22 | 0.85 |

|       |   |        |                               |      |      |      |      |      |      |
|-------|---|--------|-------------------------------|------|------|------|------|------|------|
| 22822 | 0 | 17360  | FPQFKPEE                      | 2.14 | 0.01 | 3.34 | 0.68 | 0.22 | 0.85 |
| 22823 | 0 | 17360  | FPQFKPEE                      | 2.14 | 0.01 | 3.34 | 0.68 | 0.22 | 0.85 |
| 22824 | 0 | 17360  | FPQFKPEE                      | 2.14 | 0.01 | 3.34 | 0.68 | 0.22 | 0.85 |
| 22825 | 0 | 17360  | FPQFKPEE                      | 2.14 | 0.01 | 3.34 | 0.68 | 0.22 | 0.85 |
| 22826 | 0 | 17360  | FPQFKPEE                      | 2.14 | 0.01 | 3.34 | 0.68 | 0.22 | 0.85 |
| 22827 | 0 | 17360  | FPQFKPEE                      | 2.14 | 0.01 | 3.34 | 0.68 | 0.22 | 0.85 |
| 22828 | 0 | 17360  | FPQFKPEE                      | 2.14 | 0.01 | 3.34 | 0.68 | 0.22 | 0.85 |
| 22829 | 0 | 17360  | FPQFKPEE                      | 2.14 | 0.01 | 3.34 | 0.68 | 0.22 | 2.35 |
| 22830 | 0 | 191292 | FPQFKPQEITGI                  | 2.50 | 0.01 | 2.76 | 1.20 | 0.22 | 0.28 |
| 22831 | 0 | 17362  | FPQPELPY                      | 2.14 | 0.01 | 1.86 | 0.44 | 1.93 | 0.28 |
| 22832 | 0 | 98780  | FPQPQLPYSQPQ                  | 2.52 | 0.01 | 1.86 | 0.44 | 1.93 | 1.27 |
| 22833 | 0 | 17365  | FPQPQPFPPQ                    | 2.37 | 0.01 | 1.86 | 0.68 | 0.22 | 0.28 |
| 22834 | 0 | 17365  | FPQPQPFPPQ                    | 2.37 | 0.01 | 1.86 | 0.68 | 0.22 | 0.85 |
| 22835 | 0 | 17365  | FPQPQPFPPQ                    | 2.37 | 0.01 | 1.86 | 0.44 | 1.93 | 0.85 |
| 22836 | 0 | 17365  | FPQPQPFPPQ                    | 2.37 | 0.01 | 1.86 | 2.74 | 0.22 | 0.85 |
| 22837 | 0 | 17365  | FPQPQPFPPQ                    | 2.37 | 0.01 | 1.86 | 2.74 | 0.22 | 0.85 |
| 22838 | 0 | 17366  | FPQPQQPQQS                    | 2.36 | 0.01 | 1.86 | 0.68 | 0.22 | 0.28 |
| 22839 | 0 | 17366  | FPQPQQPQQS                    | 2.36 | 0.01 | 1.86 | 0.68 | 0.22 | 0.85 |
| 22840 | 0 | 17368  | FPQPQQTFPQ                    | 2.38 | 0.01 | 1.86 | 0.68 | 0.22 | 0.85 |
| 22841 | 0 | 17368  | FPQPQQTFPQ                    | 2.38 | 0.01 | 1.86 | 0.68 | 0.22 | 0.28 |
| 22842 | 0 | 148605 | FPQQPQQPFP                    | 2.37 | 0.01 | 1.86 | 0.44 | 1.23 | 0.85 |
| 22843 | 0 | 148605 | FPQQPQQPFP                    | 2.37 | 0.01 | 1.86 | 0.44 | 1.23 | 0.85 |
| 22844 | 0 | 148608 | FPQQPQQSFP                    | 2.37 | 0.01 | 1.86 | 0.68 | 0.22 | 0.28 |
| 22845 | 0 | 17376  | FPQQPQRPFA                    | 2.37 | 0.01 | 2.83 | 0.68 | 0.22 | 0.28 |
| 22846 | 0 | 17376  | FPQQPQRPFA                    | 2.37 | 0.01 | 2.83 | 0.68 | 0.22 | 0.85 |
| 22847 | 0 | 148610 | FPQQQFPQQQ                    | 2.35 | 0.01 | 1.86 | 0.44 | 1.23 | 0.85 |
| 22848 | 0 | 173928 | FPQQQFPQQQFPQ                 | 2.61 | 0.01 | 1.86 | 0.44 | 1.23 | 0.85 |
| 22849 | 0 | 173929 | FPQQQFPQQQQLP                 | 2.61 | 0.01 | 1.86 | 0.44 | 1.23 | 0.85 |
| 22850 | 0 | 173930 | FPQQQIAQQPQQL                 | 2.59 | 0.01 | 1.86 | 0.44 | 1.23 | 0.85 |
| 22851 | 0 | 226027 | FPQQQIP                       | 2.04 | 0.01 | 1.86 | 2.66 | 0.22 | 1.27 |
| 22852 | 0 | 190754 | FPQQQIPQQH                    | 2.35 | 0.01 | 1.86 | 0.44 | 1.23 | 0.28 |
| 22853 | 0 | 190755 | FPQQQFPQP                     | 2.37 | 0.01 | 1.86 | 0.44 | 1.23 | 0.28 |
| 22854 | 0 | 173931 | FPQQQFPQQQIA                  | 2.60 | 0.01 | 1.86 | 0.44 | 1.23 | 0.85 |
| 22855 | 0 | 190756 | FPQQQSPQQQ                    | 2.34 | 0.01 | 1.86 | 0.44 | 1.23 | 0.28 |
| 22856 | 0 | 510434 | FPRNVANSPVYN                  | 2.49 | 0.01 | 0.90 | 3.07 | 1.13 | 1.39 |
| 22857 | 0 | 17388  | FPRPGGGGNGDFEEIPE<br>EYL      | 2.96 | 0.01 | 0.90 | 0.44 | 0.22 | 0.28 |
| 22858 | 0 | 17396  | FPSCCCTKPSDGNCTCIP<br>IPSSWAF | 3.17 | 0.01 | 3.07 | 0.44 | 0.22 | 0.28 |
| 22859 | 0 | 17398  | FPSCCCTKPTDANCTCIP<br>IPSSWAF | 3.18 | 0.01 | 2.58 | 0.44 | 0.22 | 0.28 |
| 22860 | 0 | 17399  | FPSCCCTKPTDGNCTCIP<br>IPSSWAF | 3.17 | 0.01 | 2.58 | 0.44 | 0.22 | 0.28 |
| 22861 | 0 | 17400  | FPSCCCTKPTDKNCTCIPI<br>PSSWAF | 3.18 | 0.01 | 0.90 | 0.44 | 0.22 | 0.28 |
| 22862 | 0 | 17401  | FPSCCCTKPTDRNCTCIPI<br>PSSWAF | 3.17 | 0.01 | 2.58 | 0.44 | 0.22 | 0.28 |

|       |   |        |                                     |      |      |      |      |      |      |
|-------|---|--------|-------------------------------------|------|------|------|------|------|------|
| 22863 | 0 | 17402  | FPSDEF                              | 1.91 | 0.01 | 4.93 | 0.44 | 0.85 | 0.28 |
| 22864 | 0 | 103180 | FPSFAGLRPTFDTRL                     | 2.71 | 0.01 | 2.04 | 0.44 | 0.85 | 1.28 |
| 22865 | 0 | 116978 | FPSHYWLYPPPT                        | 2.47 | 0.01 | 0.90 | 1.15 | 0.22 | 0.28 |
| 22866 | 0 | 116978 | FPSHYWLYPPPT                        | 2.47 | 0.01 | 0.90 | 0.44 | 0.85 | 0.28 |
| 22867 | 0 | 116978 | FPSHYWLYPPPT                        | 2.47 | 0.01 | 0.90 | 0.44 | 0.85 | 0.28 |
| 22868 | 0 | 116978 | FPSHYWLYPPPT                        | 2.47 | 0.01 | 0.90 | 1.15 | 0.22 | 0.28 |
| 22869 | 0 | 116978 | FPSHYWLYPPPT                        | 2.47 | 0.01 | 0.90 | 0.44 | 0.85 | 1.39 |
| 22870 | 0 | 17408  | FSPYYSPAFTKGEKVDL                   | 2.83 | 0.01 | 2.56 | 1.12 | 0.22 | 0.28 |
| 22871 | 0 | 17408  | FSPYYSPAFTKGEKVDL                   | 2.83 | 0.01 | 2.56 | 1.12 | 0.22 | 0.28 |
| 22872 | 0 | 17408  | FSPYYSPAFTKGEKVDL                   | 2.83 | 0.01 | 2.56 | 1.12 | 0.22 | 0.85 |
| 22873 | 0 | 17408  | FSPYYSPAFTKGEKVDL                   | 2.83 | 0.01 | 2.56 | 1.12 | 0.22 | 0.85 |
| 22874 | 0 | 17408  | FSPYYSPAFTKGEKVDL                   | 2.83 | 0.01 | 2.56 | 0.68 | 0.22 | 0.28 |
| 22875 | 0 | 17408  | FSPYYSPAFTKGEKVDL                   | 2.83 | 0.01 | 2.56 | 0.68 | 0.22 | 1.34 |
| 22876 | 0 | 17410  | FPSQQPYLQL                          | 2.35 | 0.01 | 1.86 | 0.44 | 1.93 | 0.85 |
| 22877 | 0 | 17410  | FPSQQPYLQL                          | 2.35 | 0.01 | 1.86 | 2.74 | 0.22 | 0.85 |
| 22878 | 0 | 17410  | FPSQQPYLQL                          | 2.35 | 0.01 | 1.86 | 2.74 | 0.22 | 0.85 |
| 22879 | 0 | 17410  | FPSQQPYLQL                          | 2.35 | 0.01 | 1.86 | 0.68 | 0.22 | 0.28 |
| 22880 | 0 | 98781  | FPSQQPYLQLQP                        | 2.52 | 0.01 | 1.86 | 0.44 | 1.93 | 1.27 |
| 22881 | 0 | 79549  | FPSVRDLLDTASALYREA<br>LESPEHCSPHHTA | 3.38 | 0.01 | 2.71 | 0.44 | 0.85 | 0.28 |
| 22882 | 0 | 236103 | FPTDQLTPDQER                        | 2.49 | 0.01 | 0.78 | 0.44 | 1.41 | 0.28 |
| 22883 | 0 | 236103 | FPTDQLTPDQER                        | 2.49 | 0.01 | 0.78 | 0.44 | 1.13 | 0.28 |
| 22884 | 0 | 17418  | FPTFPDGHDY                          | 2.34 | 0.01 | 2.75 | 0.44 | 1.23 | 0.28 |
| 22885 | 0 | 17426  | FPTKYHSGRLLFCFVPGN<br>EL            | 2.91 | 0.01 | 2.82 | 0.44 | 0.85 | 0.28 |
| 22886 | 0 | 17427  | FPTLDHVL                            | 2.12 | 0.01 | 2.40 | 2.43 | 0.22 | 0.28 |
| 22887 | 0 | 148614 | FPTPQQQFPE                          | 2.36 | 0.01 | 1.86 | 0.44 | 1.23 | 0.85 |
| 22888 | 0 | 148614 | FPTPQQQFPE                          | 2.36 | 0.01 | 1.86 | 0.44 | 1.23 | 0.28 |
| 22889 | 0 | 148614 | FPTPQQQFPE                          | 2.36 | 0.01 | 1.86 | 0.68 | 0.22 | 0.28 |
| 22890 | 0 | 127980 | FPVIPGINIEQKNACS                    | 2.71 | 0.01 | 2.40 | 1.12 | 0.22 | 0.28 |
| 22891 | 0 | 127980 | FPVIPGINIEQKNACS                    | 2.71 | 0.01 | 2.40 | 2.75 | 0.22 | 0.28 |
| 22892 | 0 | 127980 | FPVIPGINIEQKNACS                    | 2.71 | 0.01 | 2.40 | 2.75 | 0.22 | 0.85 |
| 22893 | 0 | 120537 | FPVVTHDEVLRRLVGRRR<br>LWGRG         | 3.05 | 0.01 | 2.86 | 0.44 | 0.85 | 0.28 |
| 22894 | 0 | 140559 | FPYELLMQG                           | 2.20 | 0.01 | 0.90 | 0.68 | 0.22 | 1.39 |
| 22895 | 0 | 140559 | FPYELLMQG                           | 2.20 | 0.01 | 0.90 | 0.68 | 0.22 | 0.85 |
| 22896 | 0 | 17452  | FPYKRDAAGRVDKVVH<br>NFDWSAPEPKISFK  | 3.33 | 0.01 | 3.65 | 2.22 | 0.22 | 0.28 |
| 22897 | 0 | 17457  | FQAEVGPNNTRSIRKFN<br>TMQ            | 2.91 | 0.01 | 3.10 | 1.12 | 0.22 | 0.28 |
| 22898 | 0 | 171083 | FQAF CETQGDRLLQC                    | 2.68 | 0.01 | 0.78 | 0.44 | 1.41 | 0.28 |

|       |   |        |                                     |      |      |      |      |      |      |
|-------|---|--------|-------------------------------------|------|------|------|------|------|------|
| 22899 | 0 | 17464  | FQDHPLQK                            | 2.12 | 0.01 | 0.78 | 0.44 | 1.74 | 0.28 |
| 22900 | 0 | 17465  | FQDHPLQKTY                          | 2.29 | 0.01 | 0.78 | 0.44 | 1.74 | 0.28 |
| 22901 | 0 | 17466  | FQDLSNPCKVDL                        | 2.54 | 0.01 | 3.00 | 0.44 | 0.85 | 0.28 |
| 22902 | 0 | 17467  | FQDMLNIS                            | 2.10 | 0.01 | 1.66 | 1.15 | 0.22 | 0.28 |
| 22903 | 0 | 236104 | FQDNDR                              | 1.88 | 0.01 | 0.78 | 0.44 | 1.13 | 2.66 |
| 22904 | 0 | 130835 | FQDSSSSKAPPPSLPSPS<br>RLPGPSDTPILPQ | 3.38 | 0.01 | 0.78 | 2.61 | 0.22 | 1.57 |
| 22905 | 0 | 17470  | FQEPFWLEDG                          | 2.32 | 0.01 | 3.67 | 0.68 | 0.22 | 0.28 |
| 22906 | 0 | 17470  | FQEPFWLEDG                          | 2.32 | 0.01 | 3.67 | 0.68 | 0.22 | 1.34 |
| 22907 | 0 | 17470  | FQEPFWLEDG                          | 2.32 | 0.01 | 3.48 | 0.68 | 0.22 | 2.02 |
| 22908 | 0 | 17470  | FQEPFWLEDG                          | 2.32 | 0.01 | 3.48 | 0.68 | 0.22 | 0.28 |
| 22909 | 0 | 17470  | FQEPFWLEDG                          | 2.32 | 0.01 | 3.48 | 0.68 | 0.22 | 1.34 |
| 22910 | 0 | 17470  | FQEPFWLEDG                          | 2.32 | 0.01 | 3.48 | 0.68 | 0.22 | 1.34 |
| 22911 | 0 | 17470  | FQEPFWLEDG                          | 2.32 | 0.01 | 3.48 | 0.68 | 0.22 | 0.85 |
| 22912 | 0 | 17470  | FQEPFWLEDG                          | 2.32 | 0.01 | 3.48 | 0.68 | 0.22 | 0.85 |
| 22913 | 0 | 136236 | FQEQQNEGHEALLFE<br>GIKK             | 2.95 | 0.01 | 0.78 | 0.44 | 1.13 | 0.28 |
| 22914 | 0 | 151185 | FQFAQGQGVPIA                        | 2.52 | 0.01 | 3.35 | 1.81 | 0.22 | 0.85 |
| 22915 | 0 | 117141 | FQFFQRDAEELEKW                      | 2.63 | 0.01 | 0.78 | 0.44 | 1.13 | 0.28 |
| 22916 | 0 | 117141 | FQFFQRDAEELEKW                      | 2.63 | 0.01 | 0.78 | 0.44 | 1.41 | 0.28 |
| 22917 | 0 | 177056 | FQGINHYNQMER                        | 2.45 | 0.01 | 0.90 | 1.15 | 0.22 | 0.28 |
| 22918 | 0 | 177056 | FQGINHYNQMER                        | 2.45 | 0.01 | 0.90 | 1.15 | 0.22 | 0.28 |
| 22919 | 0 | 177056 | FQGINHYNQMER                        | 2.45 | 0.01 | 0.90 | 1.15 | 0.22 | 0.85 |
| 22920 | 0 | 177056 | FQGINHYNQMER                        | 2.45 | 0.01 | 0.90 | 1.15 | 0.22 | 1.27 |
| 22921 | 0 | 122766 | FQGLCNETLTLKLYN                     | 2.68 | 0.01 | 0.78 | 2.46 | 0.22 | 0.28 |
| 22922 | 0 | 122766 | FQGLCNETLTLKLYN                     | 2.68 | 0.01 | 0.78 | 2.46 | 0.22 | 0.28 |
| 22923 | 0 | 122766 | FQGLCNETLTLKLYN                     | 2.68 | 0.01 | 0.78 | 2.46 | 0.22 | 1.34 |
| 22924 | 0 | 122766 | FQGLCNETLTLKLYN                     | 2.68 | 0.01 | 0.78 | 2.46 | 0.22 | 1.27 |
| 22925 | 0 | 122766 | FQGLCNETLTLKLYN                     | 2.68 | 0.01 | 0.78 | 3.01 | 0.22 | 0.28 |
| 22926 | 0 | 122766 | FQGLCNETLTLKLYN                     | 2.68 | 0.01 | 0.78 | 3.01 | 0.22 | 1.27 |
| 22927 | 0 | 125411 | FQGLCNETLTLKLYNNG<br>FTS            | 2.96 | 0.01 | 0.78 | 0.44 | 1.13 | 0.28 |
| 22928 | 0 | 125411 | FQGLCNETLTLKLYNNG<br>FTS            | 2.96 | 0.01 | 0.78 | 0.44 | 1.41 | 0.28 |
| 22929 | 0 | 125411 | FQGLCNETLTLKLYNNG<br>FTS            | 2.96 | 0.01 | 0.78 | 0.44 | 1.13 | 0.28 |
| 22930 | 0 | 125411 | FQGLCNETLTLKLYNNG<br>FTS            | 2.96 | 0.01 | 0.78 | 1.20 | 0.22 | 0.28 |
| 22931 | 0 | 125411 | FQGLCNETLTLKLYNNG<br>FTS            | 2.96 | 0.01 | 0.78 | 0.44 | 1.41 | 0.28 |
| 22932 | 0 | 125411 | FQGLCNETLTLKLYNNG<br>FTS            | 2.96 | 0.01 | 0.78 | 0.44 | 1.13 | 1.34 |
| 22933 | 0 | 188170 | FQGQRDAADP                          | 2.32 | 0.01 | 2.92 | 0.68 | 0.22 | 0.85 |
| 22934 | 0 | 123193 | FQIHGPR                             | 1.99 | 0.01 | 1.75 | 2.36 | 0.22 | 0.85 |
| 22935 | 0 | 123193 | FQIHGPR                             | 1.99 | 0.01 | 1.75 | 2.36 | 0.22 | 0.85 |
| 22936 | 0 | 123193 | FQIHGPR                             | 1.99 | 0.01 | 1.75 | 3.15 | 0.22 | 0.28 |
| 22937 | 0 | 123193 | FQIHGPR                             | 1.99 | 0.01 | 1.75 | 3.15 | 0.22 | 0.28 |



|       |   |        |                               |      |      |      |      |      |      |
|-------|---|--------|-------------------------------|------|------|------|------|------|------|
| 22938 | 0 | 123193 | FQIHGPR                       | 1.99 | 0.01 | 1.75 | 3.15 | 0.22 | 0.28 |
| 22939 | 0 | 123193 | FQIHGPR                       | 1.99 | 0.01 | 1.75 | 3.15 | 0.22 | 1.27 |
| 22940 | 0 | 123193 | FQIHGPR                       | 1.99 | 0.01 | 1.75 | 0.68 | 0.22 | 0.28 |
| 22941 | 0 | 123193 | FQIHGPR                       | 1.99 | 0.01 | 1.75 | 0.68 | 0.22 | 0.28 |
| 22942 | 0 | 123193 | FQIHGPR                       | 1.99 | 0.01 | 1.75 | 0.68 | 0.22 | 3.16 |
| 22943 | 0 | 115255 | FQINNKIWCK                    | 2.32 | 0.01 | 1.60 | 0.44 | 1.23 | 0.85 |
| 22944 | 0 | 149046 | FQINPTQ                       | 2.02 | 0.01 | 0.90 | 2.13 | 1.59 | 1.39 |
| 22945 | 0 | 17492  | FQKVKEKAEIQKENIEKIK<br>QEINTL | 3.20 | 0.01 | 1.66 | 0.44 | 1.74 | 0.28 |
| 22946 | 0 | 17492  | FQKVKEKAEIQKENIEKIK<br>QEINTL | 3.20 | 0.01 | 1.66 | 0.44 | 1.74 | 0.28 |
| 22947 | 0 | 102439 | FQLKTADLPAGRDETTSF<br>VL      | 2.93 | 0.01 | 2.39 | 2.25 | 0.22 | 0.28 |
| 22948 | 0 | 102439 | FQLKTADLPAGRDETTSF<br>VL      | 2.93 | 0.01 | 2.39 | 0.68 | 0.22 | 0.28 |
| 22949 | 0 | 102439 | FQLKTADLPAGRDETTSF<br>VL      | 2.93 | 0.01 | 2.39 | 0.44 | 1.59 | 0.28 |
| 22950 | 0 | 17504  | FQNEKWDL                      | 2.10 | 0.01 | 3.04 | 3.65 | 0.22 | 0.28 |
| 22951 | 0 | 17504  | FQNEKWDL                      | 2.10 | 0.01 | 3.04 | 3.65 | 0.22 | 0.28 |
| 22952 | 0 | 156871 | FQNIASMPHLYV                  | 2.40 | 0.01 | 0.90 | 2.74 | 0.22 | 0.85 |
| 22953 | 0 | 156871 | FQNIASMPHLYV                  | 2.40 | 0.01 | 0.90 | 2.22 | 1.59 | 0.85 |
| 22954 | 0 | 156871 | FQNIASMPHLYV                  | 2.40 | 0.01 | 0.90 | 0.68 | 0.22 | 0.28 |
| 22955 | 0 | 149317 | FQPQQLPQFE                    | 2.37 | 0.01 | 1.86 | 0.44 | 1.93 | 0.85 |
| 22956 | 0 | 149317 | FQPQQLPQFE                    | 2.37 | 0.01 | 1.86 | 2.74 | 0.22 | 0.85 |
| 22957 | 0 | 17524  | FQQFGRDVSDFTDSVR<br>DPKT      | 2.97 | 0.01 | 2.45 | 0.44 | 0.85 | 0.28 |
| 22958 | 0 | 17524  | FQQFGRDVSDFTDSVR<br>DPKT      | 2.97 | 0.01 | 2.45 | 0.68 | 0.22 | 0.28 |
| 22959 | 0 | 17524  | FQQFGRDVSDFTDSVR<br>DPKT      | 2.97 | 0.01 | 4.33 | 0.68 | 0.22 | 0.28 |
| 22960 | 0 | 17524  | FQQFGRDVSDFTDSVR<br>DPKT      | 2.97 | 0.01 | 4.33 | 0.68 | 0.22 | 1.34 |
| 22961 | 0 | 17524  | FQQFGRDVSDFTDSVR<br>DPKT      | 2.97 | 0.01 | 4.33 | 0.68 | 0.22 | 1.48 |
| 22962 | 0 | 17524  | FQQFGRDVSDFTDSVR<br>DPKT      | 2.97 | 0.01 | 4.33 | 0.68 | 0.22 | 0.28 |
| 22963 | 0 | 123195 | FQQGKIPPTP                    | 2.32 | 0.01 | 0.78 | 0.44 | 1.13 | 0.28 |
| 22964 | 0 | 134054 | FQQGKIPPTPFSAPPPA<br>GAM      | 2.96 | 0.01 | 0.78 | 0.44 | 1.13 | 0.85 |
| 22965 | 0 | 98783  | FQQPLQQYPLGQ                  | 2.52 | 0.01 | 1.86 | 0.44 | 1.93 | 1.27 |
| 22966 | 0 | 111290 | FQRDDLRL                      | 2.03 | 0.01 | 0.90 | 0.44 | 0.85 | 1.39 |
| 22967 | 0 | 17531  | FQSFPSPGEPNSKLSGFF<br>QS      | 2.99 | 0.01 | 2.82 | 0.44 | 0.85 | 0.28 |
| 22968 | 0 | 17531  | FQSFPSPGEPNSKLSGFF<br>QS      | 2.99 | 0.01 | 2.82 | 0.44 | 1.41 | 0.28 |
| 22969 | 0 | 125051 | FQSKANCLNT                    | 2.29 | 0.01 | 0.78 | 0.68 | 0.22 | 0.28 |
| 22970 | 0 | 125051 | FQSKANCLNT                    | 2.29 | 0.01 | 0.78 | 0.68 | 0.22 | 1.34 |

|       |   |        |                                      |      |      |      |      |      |      |
|-------|---|--------|--------------------------------------|------|------|------|------|------|------|
| 22971 | 0 | 17535  | FQSMRKHTPYRNGCLEP<br>TLG             | 2.90 | 0.01 | 3.01 | 0.44 | 0.85 | 0.28 |
| 22972 | 0 | 157276 | FQSQPPPGVPQG                         | 2.52 | 0.01 | 3.47 | 2.49 | 0.85 | 0.28 |
| 22973 | 0 | 17536  | FQSRDEKERERF                         | 2.52 | 0.01 | 3.33 | 0.44 | 1.23 | 0.85 |
| 22974 | 0 | 17539  | FQTAAQR                              | 2.03 | 0.01 | 3.93 | 1.15 | 0.22 | 2.66 |
| 22975 | 0 | 17539  | FQTAAQR                              | 2.03 | 0.01 | 3.72 | 1.15 | 0.22 | 2.66 |
| 22976 | 0 | 116979 | FQTDMMSTRPRGA                        | 2.45 | 0.01 | 0.90 | 1.15 | 0.22 | 0.28 |
| 22977 | 0 | 116979 | FQTDMMSTRPRGA                        | 2.45 | 0.01 | 0.90 | 0.44 | 0.85 | 0.28 |
| 22978 | 0 | 17540  | FQTGGIGNLPVRNWTF<br>DFGTL            | 3.00 | 0.01 | 3.85 | 0.68 | 0.22 | 0.85 |
| 22979 | 0 | 17540  | FQTGGIGNLPVRNWTF<br>DFGTL            | 3.00 | 0.01 | 3.85 | 0.68 | 0.22 | 0.85 |
| 22980 | 0 | 17545  | FQVEVP                               | 1.90 | 0.01 | 3.24 | 1.12 | 0.22 | 0.28 |
| 22981 | 0 | 164231 | FQVLSRS                              | 2.02 | 0.01 | 0.90 | 1.20 | 0.22 | 1.39 |
| 22982 | 0 | 17553  | FQWSWYTPRPS                          | 2.49 | 0.01 | 0.90 | 1.12 | 2.26 | 1.39 |
| 22983 | 0 | 17553  | FQWSWYTPRPS                          | 2.49 | 0.01 | 0.90 | 1.12 | 2.26 | 0.28 |
| 22984 | 0 | 17554  | FQYIEGEMRTRIRYNRRS<br>APDPSVITLNS    | 3.32 | 0.01 | 2.75 | 0.44 | 2.82 | 0.28 |
| 22985 | 0 | 17557  | FQYSPG                               | 1.88 | 0.01 | 1.96 | 0.44 | 0.85 | 0.28 |
| 22986 | 0 | 121308 | FRAARHPQL                            | 2.22 | 0.01 | 0.90 | 2.46 | 0.22 | 0.28 |
| 22987 | 0 | 238387 | FRAGGGAYRAANGL                       | 2.64 | 0.01 | 2.14 | 2.65 | 0.22 | 0.85 |
| 22988 | 0 | 157277 | FRAISTPRTGTMP                        | 2.56 | 0.01 | 3.40 | 2.49 | 0.85 | 0.28 |
| 22989 | 0 | 17564  | FRSTDYPVFGF                          | 2.46 | 0.01 | 0.90 | 0.68 | 0.22 | 1.27 |
| 22990 | 0 | 108989 | FRCQVQFYGLSENDEW                     | 2.70 | 0.01 | 0.78 | 0.44 | 1.41 | 0.28 |
| 22991 | 0 | 17572  | FRDLTWCINPPERIK                      | 2.63 | 0.01 | 2.43 | 0.68 | 0.22 | 0.28 |
| 22992 | 0 | 17572  | FRDLTWCINPPERIK                      | 2.63 | 0.01 | 2.43 | 0.44 | 0.85 | 0.28 |
| 22993 | 0 | 187806 | FRDNKDTYDIKYWF                       | 2.64 | 0.01 | 3.65 | 2.02 | 0.22 | 0.85 |
| 22994 | 0 | 92743  | FREADFAKEVPNYKATK<br>DEKIEEIIQGNGERI | 3.41 | 0.01 | 2.67 | 0.68 | 0.22 | 0.85 |
| 22995 | 0 | 92743  | FREADFAKEVPNYKATK<br>DEKIEEIIQGNGERI | 3.41 | 0.01 | 2.67 | 0.68 | 0.22 | 1.34 |
| 22996 | 0 | 478198 | FREEE                                | 1.73 | 0.01 | 1.75 | 1.12 | 0.22 | 0.85 |
| 22997 | 0 | 17580  | FRELADAL                             | 2.14 | 0.01 | 2.21 | 1.12 | 0.22 | 0.28 |
| 22998 | 0 | 17580  | FRELADAL                             | 2.14 | 0.01 | 2.21 | 0.44 | 0.85 | 0.28 |
| 22999 | 0 | 17581  | FRELADALLE                           | 2.34 | 0.01 | 2.21 | 1.12 | 0.22 | 0.28 |
| 23000 | 0 | 17581  | FRELADALLE                           | 2.34 | 0.01 | 2.21 | 1.12 | 0.22 | 0.28 |
| 23001 | 0 | 115256 | FRELKDLKGY                           | 2.31 | 0.01 | 1.60 | 0.44 | 1.23 | 0.85 |
| 23002 | 0 | 115256 | FRELKDLKGY                           | 2.31 | 0.01 | 1.60 | 0.44 | 1.23 | 0.85 |
| 23003 | 0 | 115256 | FRELKDLKGY                           | 2.31 | 0.01 | 1.60 | 0.44 | 2.98 | 0.85 |
| 23004 | 0 | 102441 | FRERQSSKNLLSCENS<br>DR DA            | 2.95 | 0.01 | 0.78 | 0.44 | 1.13 | 1.27 |
| 23005 | 0 | 118361 | FRFLALKLYFSFTRP                      | 2.71 | 0.01 | 0.90 | 0.44 | 1.13 | 0.28 |
| 23006 | 0 | 118361 | FRFLALKLYFSFTRP                      | 2.71 | 0.01 | 0.90 | 0.44 | 1.13 | 0.28 |
| 23007 | 0 | 17589  | FRGETKTFNPPEEVSS                     | 2.66 | 0.01 | 2.30 | 0.44 | 0.85 | 0.28 |
| 23008 | 0 | 17589  | FRGETKTFNPPEEVSS                     | 2.66 | 0.01 | 2.30 | 0.44 | 1.41 | 0.28 |
| 23009 | 0 | 17590  | FRGKELKKSIPDEA                       | 2.63 | 0.01 | 2.30 | 0.44 | 0.85 | 0.28 |

|       |   |        |                          |      |      |      |      |      |      |
|-------|---|--------|--------------------------|------|------|------|------|------|------|
| 23010 | 0 | 17590  | FRGKELKKSQPDEA           | 2.63 | 0.01 | 2.30 | 0.44 | 1.41 | 0.28 |
| 23011 | 0 | 188171 | FRGNNGHNSSSLYN           | 2.69 | 0.01 | 1.66 | 1.20 | 0.22 | 0.28 |
| 23012 | 0 | 104779 | FRH                      | 1.37 | 0.01 | 0.78 | 1.15 | 0.22 | 1.66 |
| 23013 | 0 | 178853 | FRHALMTWGDKFSSQ          | 2.62 | 0.01 | 2.36 | 0.44 | 1.23 | 1.28 |
| 23014 | 0 | 178853 | FRHALMTWGDKFSSQ          | 2.62 | 0.01 | 2.36 | 0.44 | 1.23 | 1.27 |
| 23015 | 0 | 178853 | FRHALMTWGDKFSSQ          | 2.62 | 0.01 | 2.36 | 0.44 | 1.23 | 1.28 |
| 23016 | 0 | 186757 | FRHDSG                   | 1.88 | 0.01 | 0.78 | 0.68 | 0.22 | 1.48 |
| 23017 | 0 | 104780 | FRHDSGY                  | 1.99 | 0.01 | 0.78 | 3.16 | 0.22 | 0.28 |
| 23018 | 0 | 104780 | FRHDSGY                  | 1.99 | 0.01 | 0.78 | 1.15 | 0.22 | 0.28 |
| 23019 | 0 | 104780 | FRHDSGY                  | 1.99 | 0.01 | 0.78 | 1.15 | 0.22 | 0.28 |
| 23020 | 0 | 104780 | FRHDSGY                  | 1.99 | 0.01 | 0.78 | 1.15 | 0.22 | 0.28 |
| 23021 | 0 | 104780 | FRHDSGY                  | 1.99 | 0.01 | 0.78 | 1.15 | 0.22 | 0.28 |
| 23022 | 0 | 104780 | FRHDSGY                  | 1.99 | 0.01 | 0.78 | 2.87 | 0.22 | 0.28 |
| 23023 | 0 | 104780 | FRHDSGY                  | 1.99 | 0.01 | 0.78 | 1.20 | 0.22 | 0.28 |
| 23024 | 0 | 105791 | FRHDSGYE                 | 2.10 | 0.01 | 0.78 | 3.00 | 0.22 | 0.28 |
| 23025 | 0 | 105791 | FRHDSGYE                 | 2.10 | 0.01 | 0.78 | 1.15 | 0.22 | 0.28 |
| 23026 | 0 | 100046 | FRHDSGYEVH               | 2.29 | 0.01 | 0.78 | 0.44 | 1.93 | 0.28 |
| 23027 | 0 | 177674 | FRHDSGYEVHHQKL           | 2.56 | 0.01 | 0.78 | 3.40 | 0.22 | 0.28 |
| 23028 | 0 | 177674 | FRHDSGYEVHHQKL           | 2.56 | 0.01 | 0.78 | 3.40 | 0.22 | 0.28 |
| 23029 | 0 | 192262 | FRHDSGYEVHHQKLVF         | 2.71 | 0.01 | 0.78 | 0.68 | 0.22 | 0.85 |
| 23030 | 0 | 192262 | FRHDSGYEVHHQKLVF         | 2.71 | 0.01 | 0.78 | 0.68 | 0.22 | 0.28 |
| 23031 | 0 | 192262 | FRHDSGYEVHHQKLVF         | 2.71 | 0.01 | 0.78 | 0.68 | 0.22 | 1.34 |
| 23032 | 0 | 192262 | FRHDSGYEVHHQKLVF         | 2.71 | 0.01 | 0.78 | 0.68 | 0.22 | 1.48 |
| 23033 | 0 | 192262 | FRHDSGYEVHHQKLVF         | 2.71 | 0.01 | 0.78 | 0.68 | 0.22 | 1.48 |
| 23034 | 0 | 17594  | FRHLDERE                 | 2.14 | 0.01 | 1.66 | 1.15 | 0.22 | 0.28 |
| 23035 | 0 | 101647 | FRHLDEREE                | 2.22 | 0.01 | 1.66 | 0.44 | 1.59 | 2.97 |
| 23036 | 0 | 135923 | FRIPVTINAPLQ             | 2.45 | 0.01 | 3.21 | 0.44 | 1.41 | 0.28 |
| 23037 | 0 | 119450 | FRKADKFPM                | 2.24 | 0.01 | 0.90 | 0.44 | 1.13 | 0.28 |
| 23038 | 0 | 171090 | FRKLRDGDRLFWWENE         | 2.70 | 0.01 | 0.78 | 0.44 | 1.13 | 0.28 |
| 23039 | 0 | 141896 | FRKRKNSTSLQSHIPSDE<br>QL | 2.93 | 0.01 | 3.13 | 2.13 | 0.22 | 0.28 |
| 23040 | 0 | 119451 | FRKTSISGA                | 2.21 | 0.01 | 0.90 | 0.44 | 1.13 | 0.28 |
| 23041 | 0 | 119452 | FRKTSKGGS                | 2.24 | 0.01 | 0.90 | 0.44 | 1.13 | 0.28 |
| 23042 | 0 | 171091 | FRLAKSDEPKKSVAF          | 2.68 | 0.01 | 0.78 | 0.44 | 1.41 | 0.28 |
| 23043 | 0 | 131880 | FRLEESPFVPYDFMN          | 2.66 | 0.01 | 0.78 | 0.44 | 1.13 | 0.85 |
| 23044 | 0 | 103185 | FRMELLSLPQDEWAG          | 2.64 | 0.01 | 2.04 | 0.44 | 0.85 | 1.28 |
| 23045 | 0 | 151868 | FRPHGVSAAQEK             | 2.42 | 0.01 | 2.80 | 2.78 | 0.22 | 0.28 |
| 23046 | 0 | 17629  | FRPSQQN                  | 2.01 | 0.01 | 1.86 | 1.12 | 0.22 | 1.57 |

|       |   |        |                                         |      |      |      |      |      |      |
|-------|---|--------|-----------------------------------------|------|------|------|------|------|------|
| 23047 | 0 | 17629  | FRPSQQN                                 | 2.01 | 0.01 | 1.86 | 2.36 | 0.22 | 1.57 |
| 23048 | 0 | 17629  | FRPSQQN                                 | 2.01 | 0.01 | 1.86 | 1.12 | 0.22 | 1.27 |
| 23049 | 0 | 17629  | FRPSQQN                                 | 2.01 | 0.01 | 1.86 | 2.36 | 0.22 | 1.57 |
| 23050 | 0 | 144644 | FRQQHGKTVV                              | 2.28 | 0.01 | 0.78 | 0.44 | 1.41 | 0.28 |
| 23051 | 0 | 144644 | FRQQHGKTVV                              | 2.28 | 0.01 | 0.78 | 0.44 | 1.41 | 0.28 |
| 23052 | 0 | 144644 | FRQQHGKTVV                              | 2.28 | 0.01 | 0.78 | 0.44 | 1.13 | 0.28 |
| 23053 | 0 | 144644 | FRQQHGKTVV                              | 2.28 | 0.01 | 0.78 | 0.44 | 1.13 | 0.28 |
| 23054 | 0 | 144644 | FRQQHGKTVV                              | 2.28 | 0.01 | 0.78 | 0.44 | 2.35 | 0.28 |
| 23055 | 0 | 151869 | FRQWLISVHASI                            | 2.45 | 0.01 | 2.80 | 2.78 | 0.22 | 0.28 |
| 23056 | 0 | 127981 | FRRAVLMGGSALSPA<br>AVISH                | 2.94 | 0.01 | 0.78 | 0.44 | 1.13 | 0.28 |
| 23057 | 0 | 17636  | FRREKPFPHRMDCV<br>TTT VENED             | 3.03 | 0.01 | 3.37 | 2.13 | 0.22 | 1.34 |
| 23058 | 0 | 17636  | FRREKPFPHRMDCV<br>TTT VENED             | 3.03 | 0.01 | 3.37 | 2.13 | 2.25 | 1.75 |
| 23059 | 0 | 17636  | FRREKPFPHRMDCV<br>TTT VENED             | 3.03 | 0.01 | 3.21 | 1.12 | 0.22 | 0.85 |
| 23060 | 0 | 17636  | FRREKPFPHRMDCV<br>TTT VENED             | 3.03 | 0.01 | 3.21 | 2.13 | 0.22 | 1.34 |
| 23061 | 0 | 17636  | FRREKPFPHRMDCV<br>TTT VENED             | 3.03 | 0.01 | 3.21 | 2.13 | 0.22 | 1.75 |
| 23062 | 0 | 17639  | FRRLGAAL                                | 2.14 | 0.01 | 2.21 | 0.44 | 0.85 | 0.28 |
| 23063 | 0 | 17639  | FRRLGAAL                                | 2.14 | 0.01 | 2.21 | 1.12 | 0.22 | 0.28 |
| 23064 | 0 | 17640  | FRRLGAALLQ                              | 2.33 | 0.01 | 2.21 | 1.12 | 0.22 | 0.28 |
| 23065 | 0 | 17640  | FRRLGAALLQ                              | 2.33 | 0.01 | 2.21 | 1.12 | 0.22 | 0.28 |
| 23066 | 0 | 78388  | FRRVKCKYPDGT<br>KPTFH V                 | 2.85 | 0.01 | 3.22 | 1.20 | 0.22 | 0.28 |
| 23067 | 0 | 17642  | FRRYQEER                                | 2.15 | 0.01 | 2.40 | 2.43 | 0.22 | 0.28 |
| 23068 | 0 | 17642  | FRRYQEER                                | 2.15 | 0.01 | 2.40 | 0.68 | 0.22 | 1.34 |
| 23069 | 0 | 17642  | FRRYQEER                                | 2.15 | 0.01 | 2.40 | 0.68 | 0.22 | 0.85 |
| 23070 | 0 | 17642  | FRRYQEER                                | 2.15 | 0.01 | 2.40 | 0.68 | 0.22 | 0.28 |
| 23071 | 0 | 17644  | FRSDTLYLTQDL<br>FLPFY                   | 2.83 | 0.01 | 2.48 | 0.44 | 0.85 | 0.28 |
| 23072 | 0 | 17644  | FRSDTLYLTQDL<br>FLPFY                   | 2.83 | 0.01 | 2.48 | 1.20 | 0.22 | 0.28 |
| 23073 | 0 | 136237 | FRSGKYDLDFK<br>SPDDPS RY                | 2.94 | 4.63 | 0.78 | 0.44 | 1.13 | 0.28 |
| 23074 | 0 | 136237 | FRSGKYDLDFK<br>SPDDPS RY                | 2.94 | 4.63 | 0.78 | 0.44 | 1.13 | 0.28 |
| 23075 | 0 | 17648  | FRTAISGTPQFY                            | 2.46 | 0.01 | 0.90 | 1.12 | 0.22 | 1.39 |
| 23076 | 0 | 17650  | FRTKPDAQGDS                             | 2.45 | 0.01 | 0.90 | 0.68 | 0.22 | 1.39 |
| 23077 | 0 | 496496 | FRVCAVKAPGFG<br>DRRKA MLEDIA<br>ILTGGQL | 3.33 | 0.01 | 2.87 | 0.44 | 1.93 | 2.12 |
| 23078 | 0 | 496496 | FRVCAVKAPGFG<br>DRRKA MLEDIA<br>ILTGGQL | 3.33 | 0.01 | 2.87 | 0.44 | 1.93 | 2.12 |
| 23079 | 0 | 79216  | FRVGGTRWHRL<br>LRMPV RGLDGD<br>TAPLP    | 3.26 | 0.01 | 2.85 | 1.20 | 0.22 | 0.85 |
| 23080 | 0 | 79216  | FRVGGTRWHRL<br>LRMPV RGLDGD<br>TAPLP    | 3.26 | 0.01 | 2.85 | 1.12 | 0.22 | 0.85 |

|       |   |        |                          |      |      |      |      |      |      |
|-------|---|--------|--------------------------|------|------|------|------|------|------|
| 23081 | 0 | 143687 | FRVNLRTLRRYY             | 2.48 | 0.01 | 0.78 | 0.68 | 0.22 | 1.27 |
| 23082 | 0 | 143687 | FRVNLRTLRRYY             | 2.48 | 0.01 | 0.78 | 0.68 | 0.22 | 2.12 |
| 23083 | 0 | 125413 | FRVTCKDIQRIPSLPPST<br>QT | 2.94 | 0.01 | 0.78 | 0.44 | 1.41 | 0.28 |
| 23084 | 0 | 125413 | FRVTCKDIQRIPSLPPST<br>QT | 2.94 | 0.01 | 0.78 | 0.44 | 1.13 | 0.28 |
| 23085 | 0 | 125413 | FRVTCKDIQRIPSLPPST<br>QT | 2.94 | 0.01 | 0.78 | 0.68 | 0.22 | 0.28 |
| 23086 | 0 | 138171 | FRVVSVL                  | 2.04 | 0.01 | 0.90 | 0.44 | 1.13 | 0.28 |
| 23087 | 0 | 139752 | FRYPRPKHCHTQVA           | 2.59 | 0.01 | 3.51 | 2.49 | 0.22 | 1.27 |
| 23088 | 0 | 178856 | FSADAYANNQKIMRN          | 2.66 | 0.01 | 2.36 | 0.44 | 1.23 | 1.28 |
| 23089 | 0 | 178856 | FSADAYANNQKIMRN          | 2.66 | 0.01 | 2.36 | 0.44 | 1.23 | 1.27 |
| 23090 | 0 | 110856 | FSADLDQFPLGRKFL          | 2.69 | 0.01 | 1.86 | 0.68 | 0.22 | 0.85 |
| 23091 | 0 | 110856 | FSADLDQFPLGRKFL          | 2.69 | 0.01 | 1.86 | 0.68 | 0.22 | 0.28 |
| 23092 | 0 | 110856 | FSADLDQFPLGRKFL          | 2.69 | 0.01 | 1.86 | 0.68 | 0.22 | 0.85 |
| 23093 | 0 | 110856 | FSADLDQFPLGRKFL          | 2.69 | 0.01 | 1.86 | 0.68 | 0.22 | 0.85 |
| 23094 | 0 | 110856 | FSADLDQFPLGRKFL          | 2.69 | 0.01 | 1.86 | 0.68 | 0.22 | 0.85 |
| 23095 | 0 | 110856 | FSADLDQFPLGRKFL          | 2.69 | 0.01 | 1.86 | 0.68 | 0.22 | 0.85 |
| 23096 | 0 | 110856 | FSADLDQFPLGRKFL          | 2.69 | 0.01 | 1.86 | 0.68 | 0.22 | 0.85 |
| 23097 | 0 | 110856 | FSADLDQFPLGRKFL          | 2.69 | 0.01 | 1.86 | 0.68 | 0.22 | 0.85 |
| 23098 | 0 | 17665  | FSAEDEM                  | 2.12 | 0.01 | 2.83 | 1.12 | 0.22 | 0.28 |
| 23099 | 0 | 119581 | FSCSVMHE                 | 2.12 | 0.01 | 0.78 | 0.44 | 1.93 | 0.28 |
| 23100 | 0 | 138400 | FSDAAQASPSSH             | 2.50 | 0.01 | 0.78 | 1.12 | 0.22 | 0.85 |
| 23101 | 0 | 17683  | FSDALRF                  | 2.03 | 0.01 | 0.90 | 0.68 | 0.22 | 1.27 |
| 23102 | 0 | 140560 | FSDCYHSGCP               | 2.31 | 0.01 | 0.90 | 0.68 | 0.22 | 1.39 |
| 23103 | 0 | 292071 | FSDFLLMTREVDDT           | 2.68 | 0.01 | 1.61 | 0.44 | 0.85 | 1.28 |
| 23104 | 0 | 17689  | FSDIPNPIGS               | 2.33 | 0.01 | 1.60 | 0.44 | 1.23 | 0.28 |
| 23105 | 0 | 17689  | FSDIPNPIGS               | 2.33 | 0.01 | 1.60 | 0.44 | 1.23 | 0.28 |
| 23106 | 0 | 17690  | FSDIPNPIGSENSE           | 2.65 | 0.01 | 1.60 | 0.44 | 1.23 | 0.85 |
| 23107 | 0 | 229643 | FSDIPNPIGSENSGKTTM<br>PL | 2.94 | 0.01 | 1.60 | 0.44 | 1.23 | 1.28 |
| 23108 | 0 | 229643 | FSDIPNPIGSENSGKTTM<br>PL | 2.94 | 0.01 | 1.60 | 0.44 | 1.23 | 1.28 |
| 23109 | 0 | 78656  | FSDTQSTCLETVYKATGA<br>PS | 2.91 | 0.01 | 2.04 | 0.44 | 1.59 | 0.28 |
| 23110 | 0 | 238388 | FSECAFTGPLRPFFSPGF       | 2.87 | 0.01 | 0.78 | 0.44 | 1.13 | 0.28 |
| 23111 | 0 | 125414 | FSEEKLVFSLRLMEEN         | 2.76 | 0.01 | 2.73 | 1.20 | 0.22 | 0.28 |
| 23112 | 0 | 125414 | FSEEKLVFSLRLMEEN         | 2.76 | 0.01 | 2.73 | 1.20 | 0.22 | 0.28 |
| 23113 | 0 | 125414 | FSEEKLVFSLRLMEEN         | 2.76 | 0.01 | 2.73 | 1.20 | 0.22 | 1.48 |
| 23114 | 0 | 99255  | FSEVIF                   | 1.91 | 0.01 | 2.24 | 1.20 | 0.22 | 0.28 |
| 23115 | 0 | 171097 | FSEVVHKESRVQGLL          | 2.66 | 0.01 | 0.78 | 0.44 | 1.41 | 0.28 |
| 23116 | 0 | 17707  | FSFCETNGLE               | 2.32 | 0.01 | 0.78 | 0.44 | 1.74 | 0.28 |
| 23117 | 0 | 17707  | FSFCETNGLE               | 2.32 | 0.01 | 0.78 | 1.15 | 0.22 | 0.28 |
| 23118 | 0 | 17711  | FSFLISLIFI               | 2.38 | 0.01 | 0.78 | 0.44 | 1.74 | 0.28 |

|       |   |        |                           |      |      |      |      |      |      |
|-------|---|--------|---------------------------|------|------|------|------|------|------|
| 23119 | 0 | 157280 | FSGFDAEFLADA              | 2.52 | 0.01 | 3.65 | 0.44 | 1.23 | 0.85 |
| 23120 | 0 | 112114 | FSGFSLT                   | 2.05 | 0.01 | 0.78 | 0.44 | 1.13 | 0.28 |
| 23121 | 0 | 423301 | FSGNGVERSLNVSSM           | 2.69 | 0.01 | 2.51 | 0.44 | 2.35 | 1.28 |
| 23122 | 0 | 98043  | FSGSVQFVPI                | 2.34 | 0.01 | 3.08 | 0.68 | 0.22 | 0.28 |
| 23123 | 0 | 98043  | FSGSVQFVPI                | 2.34 | 0.01 | 3.08 | 1.20 | 0.22 | 0.28 |
| 23124 | 0 | 17726  | FSGVSW                    | 1.90 | 0.01 | 2.40 | 0.44 | 0.85 | 0.28 |
| 23125 | 0 | 17727  | FSGVSWTM                  | 2.12 | 0.01 | 2.40 | 1.12 | 0.22 | 0.28 |
| 23126 | 0 | 167260 | FSHELSDKPRKA              | 2.45 | 0.01 | 0.90 | 0.44 | 0.85 | 1.39 |
| 23127 | 0 | 127982 | FSHFIRSGNPNYPYFSR<br>KV   | 2.95 | 0.01 | 0.78 | 0.44 | 1.13 | 0.28 |
| 23128 | 0 | 419174 | FSHNPRH                   | 2.02 | 0.01 | 0.90 | 0.44 | 1.93 | 1.39 |
| 23129 | 0 | 444100 | FSHPLYC                   | 1.99 | 0.01 | 0.90 | 2.66 | 0.22 | 1.39 |
| 23130 | 0 | 17734  | FSIATGSGNSQGGSGSY<br>TPGK | 3.01 | 0.01 | 2.24 | 1.20 | 0.22 | 1.34 |
| 23131 | 0 | 17743  | FSILMAQDTLDQNL            | 2.61 | 0.01 | 2.69 | 0.44 | 0.85 | 0.28 |
| 23132 | 0 | 17743  | FSILMAQDTLDQNL            | 2.61 | 0.01 | 2.69 | 0.44 | 0.85 | 0.28 |
| 23133 | 0 | 82374  | FSKRTSALVSAG              | 2.48 | 0.01 | 2.87 | 0.44 | 0.22 | 0.28 |
| 23134 | 0 | 156872 | FSKSSSWESWLP              | 2.50 | 0.01 | 0.90 | 2.74 | 0.22 | 0.85 |
| 23135 | 0 | 156872 | FSKSSSWESWLP              | 2.50 | 0.01 | 0.90 | 2.22 | 1.59 | 0.85 |
| 23136 | 0 | 156872 | FSKSSSWESWLP              | 2.50 | 0.01 | 0.90 | 0.68 | 0.22 | 0.28 |
| 23137 | 0 | 145197 | FSKTEPLSPSWF              | 2.50 | 0.01 | 0.90 | 0.44 | 1.13 | 1.39 |
| 23138 | 0 | 141646 | FSKWRKNHMRQKSNK           | 2.70 | 0.01 | 3.33 | 1.15 | 0.22 | 0.28 |
| 23139 | 0 | 141646 | FSKWRKNHMRQKSNK           | 2.70 | 0.01 | 3.33 | 0.44 | 0.85 | 0.28 |
| 23140 | 0 | 141646 | FSKWRKNHMRQKSNK           | 2.70 | 0.01 | 3.33 | 0.44 | 0.85 | 0.28 |
| 23141 | 0 | 17769  | FSLGAKQ                   | 1.99 | 0.01 | 0.90 | 0.44 | 0.85 | 0.28 |
| 23142 | 0 | 17771  | FSLGPKQ                   | 1.99 | 0.01 | 0.90 | 0.44 | 0.85 | 0.28 |
| 23143 | 0 | 232797 | FSLLGSL                   | 2.05 | 0.01 | 0.90 | 2.49 | 0.85 | 1.39 |
| 23144 | 0 | 122353 | FSLQLMEENW                | 2.30 | 0.01 | 1.75 | 0.68 | 0.22 | 0.28 |
| 23145 | 0 | 125052 | FSLRLMEENW                | 2.30 | 0.01 | 1.75 | 3.15 | 0.22 | 1.48 |
| 23146 | 0 | 125052 | FSLRLMEENW                | 2.30 | 0.01 | 1.75 | 3.15 | 0.22 | 0.85 |
| 23147 | 0 | 125052 | FSLRLMEENW                | 2.30 | 0.01 | 1.75 | 3.15 | 0.22 | 1.27 |
| 23148 | 0 | 125052 | FSLRLMEENW                | 2.30 | 0.01 | 0.78 | 1.20 | 0.22 | 0.85 |
| 23149 | 0 | 159284 | FSLRLMEENWNAEKRS          | 2.75 | 0.01 | 0.78 | 1.20 | 0.22 | 0.28 |
| 23150 | 0 | 159284 | FSLRLMEENWNAEKRS          | 2.75 | 0.01 | 0.78 | 1.20 | 0.22 | 0.85 |
| 23151 | 0 | 159284 | FSLRLMEENWNAEKRS          | 2.75 | 0.01 | 0.78 | 1.20 | 0.22 | 1.48 |
| 23152 | 0 | 131297 | FSLRLMEENWNAEKRSP<br>TF   | 2.89 | 0.01 | 0.78 | 3.78 | 0.22 | 0.28 |
| 23153 | 0 | 131297 | FSLRLMEENWNAEKRSP<br>TF   | 2.89 | 0.01 | 0.78 | 3.78 | 0.22 | 0.28 |
| 23154 | 0 | 131297 | FSLRLMEENWNAEKRSP<br>TF   | 2.89 | 0.01 | 0.78 | 3.78 | 0.22 | 3.16 |

|       |   |        |                             |      |      |      |      |      |      |
|-------|---|--------|-----------------------------|------|------|------|------|------|------|
| 23155 | 0 | 131297 | FSLRLMEENWNAEKRSPTF         | 2.89 | 0.01 | 0.78 | 3.78 | 0.22 | 1.48 |
| 23156 | 0 | 112115 | FSLTTYG                     | 2.01 | 0.01 | 0.78 | 0.44 | 1.13 | 0.28 |
| 23157 | 0 | 139054 | FSLVNSAPEGLFFHTVLLPTEWEEVTA | 3.28 | 0.01 | 3.55 | 3.16 | 0.22 | 0.28 |
| 23158 | 0 | 97313  | FSMGAKPT                    | 2.10 | 0.01 | 2.87 | 0.68 | 0.22 | 0.28 |
| 23159 | 0 | 97313  | FSMGAKPT                    | 2.10 | 0.01 | 2.87 | 1.81 | 0.22 | 0.28 |
| 23160 | 0 | 133834 | FSNHGEIKWIDFVRG             | 2.65 | 0.01 | 0.78 | 0.44 | 1.13 | 0.28 |
| 23161 | 0 | 119453 | FSNHGEIKWIDFVRGAKEGI        | 2.94 | 0.01 | 0.78 | 0.44 | 1.13 | 0.28 |
| 23162 | 0 | 17795  | FSNVYLFAKDKGPLQPGV          | 2.90 | 0.01 | 2.60 | 0.44 | 1.23 | 0.28 |
| 23163 | 0 | 17795  | FSNVYLFAKDKGPLQPGV          | 2.90 | 0.01 | 2.60 | 1.20 | 0.22 | 0.28 |
| 23164 | 0 | 141539 | FSPAYLRDAALK                | 2.46 | 0.01 | 0.90 | 0.68 | 0.22 | 1.75 |
| 23165 | 0 | 141539 | FSPAYLRDAALK                | 2.46 | 0.01 | 0.90 | 0.68 | 0.22 | 0.28 |
| 23166 | 0 | 125415 | FSPDGKPCTPPALNCYW           | 2.75 | 0.01 | 2.45 | 1.15 | 0.22 | 0.28 |
| 23167 | 0 | 125415 | FSPDGKPCTPPALNCYW           | 2.75 | 0.01 | 2.45 | 1.15 | 0.22 | 1.27 |
| 23168 | 0 | 125415 | FSPDGKPCTPPALNCYW           | 2.75 | 0.01 | 2.45 | 1.15 | 0.22 | 2.35 |
| 23169 | 0 | 125415 | FSPDGKPCTPPALNCYW           | 2.75 | 0.01 | 2.45 | 1.15 | 0.22 | 1.27 |
| 23170 | 0 | 125415 | FSPDGKPCTPPALNCYW           | 2.75 | 0.01 | 2.45 | 1.15 | 0.22 | 1.66 |
| 23171 | 0 | 125415 | FSPDGKPCTPPALNCYW           | 2.75 | 0.01 | 2.45 | 1.15 | 0.22 | 1.34 |
| 23172 | 0 | 510435 | FSPFFAP                     | 2.05 | 0.01 | 0.90 | 0.44 | 1.13 | 0.28 |
| 23173 | 0 | 510435 | FSPFFAP                     | 2.05 | 0.01 | 0.90 | 0.44 | 1.41 | 0.28 |
| 23174 | 0 | 510436 | FSPFFWN                     | 2.04 | 0.01 | 0.90 | 0.44 | 1.13 | 0.28 |
| 23175 | 0 | 510436 | FSPFFWN                     | 2.04 | 0.01 | 0.90 | 0.44 | 1.41 | 0.28 |
| 23176 | 0 | 17801  | FSPGPSQKIQLVNT              | 2.59 | 0.01 | 1.96 | 0.44 | 0.85 | 0.28 |
| 23177 | 0 | 165599 | FSPIIAF                     | 2.04 | 0.01 | 0.90 | 0.44 | 1.23 | 1.39 |
| 23178 | 0 | 165599 | FSPIIAF                     | 2.04 | 0.01 | 0.90 | 0.44 | 1.23 | 1.39 |
| 23179 | 0 | 165600 | FSPIVLY                     | 1.99 | 0.01 | 0.90 | 0.44 | 1.23 | 1.39 |
| 23180 | 0 | 165600 | FSPIVLY                     | 1.99 | 0.01 | 0.90 | 0.44 | 1.23 | 1.39 |
| 23181 | 0 | 17806  | FSPNNTNG                    | 2.14 | 0.01 | 2.83 | 1.12 | 0.22 | 0.28 |
| 23182 | 0 | 17814  | FSPSLEHPIVVSGSWD            | 2.72 | 0.01 | 3.59 | 4.15 | 0.22 | 2.12 |
| 23183 | 0 | 17814  | FSPSLEHPIVVSGSWD            | 2.72 | 0.01 | 3.59 | 4.15 | 0.22 | 1.66 |
| 23184 | 0 | 17814  | FSPSLEHPIVVSGSWD            | 2.72 | 0.01 | 3.59 | 4.15 | 0.22 | 1.66 |
| 23185 | 0 | 17814  | FSPSLEHPIVVSGSWD            | 2.72 | 0.01 | 3.59 | 4.15 | 0.22 | 1.66 |
| 23186 | 0 | 17814  | FSPSLEHPIVVSGSWD            | 2.72 | 0.01 | 3.59 | 4.15 | 0.22 | 2.12 |
| 23187 | 0 | 17814  | FSPSLEHPIVVSGSWD            | 2.72 | 0.01 | 3.59 | 4.15 | 0.22 | 2.98 |
| 23188 | 0 | 419175 | FSPYLQPNMTAS                | 2.45 | 0.01 | 0.90 | 0.44 | 1.93 | 1.27 |
| 23189 | 0 | 132827 | FSQILPSFDDTMGR              | 2.64 | 0.01 | 3.16 | 3.16 | 0.22 | 0.28 |
| 23190 | 0 | 181623 | FSQLYYKKHTNNTKY             | 2.69 | 0.01 | 2.86 | 2.37 | 0.22 | 1.28 |

|       |   |        |                             |      |      |      |      |      |      |
|-------|---|--------|-----------------------------|------|------|------|------|------|------|
| 23191 | 0 | 132308 | FSQNPPVLKRHRQR              | 2.52 | 0.01 | 0.78 | 1.15 | 0.22 | 0.28 |
| 23192 | 0 | 132308 | FSQNPPVLKRHRQR              | 2.52 | 0.01 | 0.78 | 1.15 | 0.22 | 0.28 |
| 23193 | 0 | 195330 | FSRAYPTPLR                  | 2.31 | 0.01 | 0.78 | 1.15 | 0.22 | 2.35 |
| 23194 | 0 | 195330 | FSRAYPTPLR                  | 2.31 | 0.01 | 0.78 | 1.15 | 0.22 | 2.51 |
| 23195 | 0 | 181624 | FSRGTHWKAPDP                | 2.43 | 0.01 | 0.90 | 0.68 | 0.22 | 0.28 |
| 23196 | 0 | 171100 | FSRGVGHYTMVW                | 2.51 | 0.01 | 3.38 | 0.44 | 0.85 | 2.51 |
| 23197 | 0 | 171100 | FSRGVGHYTMVW                | 2.51 | 0.01 | 3.38 | 0.44 | 0.85 | 2.51 |
| 23198 | 0 | 171100 | FSRGVGHYTMVW                | 2.51 | 0.01 | 3.38 | 0.44 | 0.85 | 2.51 |
| 23199 | 0 | 171100 | FSRGVGHYTMVW                | 2.51 | 0.01 | 3.38 | 0.44 | 0.85 | 2.51 |
| 23200 | 0 | 113412 | FSRLGQRATM                  | 2.29 | 0.01 | 3.97 | 1.12 | 0.22 | 0.28 |
| 23201 | 0 | 17830  | FSRNGVYGINTLNNM             | 2.65 | 0.01 | 3.78 | 2.02 | 0.22 | 0.28 |
| 23202 | 0 | 17838  | FSRPGLPVEYLQVSPS<br>MGR     | 2.96 | 0.01 | 2.04 | 0.44 | 0.85 | 0.28 |
| 23203 | 0 | 17839  | FSRQFLIPYDPEHHYKVF<br>SP    | 2.93 | 0.01 | 2.75 | 0.44 | 1.59 | 0.28 |
| 23204 | 0 | 133099 | FSRVVHLYRNGKDQDG<br>DQAPEYR | 3.04 | 0.01 | 0.78 | 2.61 | 0.22 | 0.28 |
| 23205 | 0 | 107368 | FSSAP                       | 1.75 | 0.01 | 0.78 | 2.36 | 0.22 | 0.28 |
| 23206 | 0 | 107368 | FSSAP                       | 1.75 | 0.01 | 0.78 | 2.36 | 0.22 | 0.85 |
| 23207 | 0 | 177492 | FSSDSSKVHYPN                | 2.46 | 0.01 | 0.90 | 1.20 | 0.22 | 1.27 |
| 23208 | 0 | 177492 | FSSDSSKVHYPN                | 2.46 | 0.01 | 0.90 | 3.78 | 0.22 | 1.75 |
| 23209 | 0 | 177492 | FSSDSSKVHYPN                | 2.46 | 0.01 | 0.90 | 3.78 | 0.22 | 0.28 |
| 23210 | 0 | 17843  | FSSIPNGT                    | 2.11 | 0.01 | 2.21 | 0.44 | 0.85 | 0.28 |
| 23211 | 0 | 17843  | FSSIPNGT                    | 2.11 | 0.01 | 2.21 | 1.12 | 0.22 | 0.28 |
| 23212 | 0 | 17844  | FSSIPNGTYR                  | 2.28 | 0.01 | 2.21 | 1.12 | 0.22 | 0.28 |
| 23213 | 0 | 17844  | FSSIPNGTYR                  | 2.28 | 0.01 | 2.21 | 1.12 | 0.22 | 0.28 |
| 23214 | 0 | 178130 | FSLTVNVRGSGMRILV<br>RGN     | 2.97 | 0.01 | 3.51 | 1.12 | 0.22 | 1.27 |
| 23215 | 0 | 171102 | FSSRHGQKGVCGLIV             | 2.65 | 0.01 | 0.78 | 0.44 | 1.13 | 0.28 |
| 23216 | 0 | 17858  | FSTAHSSAKSRRVGQLG<br>VIP    | 2.92 | 0.01 | 3.75 | 3.97 | 0.22 | 0.28 |
| 23217 | 0 | 17858  | FSTAHSSAKSRRVGQLG<br>VIP    | 2.92 | 0.01 | 3.75 | 3.97 | 0.22 | 0.28 |
| 23218 | 0 | 17858  | FSTAHSSAKSRRVGQLG<br>VIP    | 2.92 | 0.01 | 3.75 | 3.97 | 0.22 | 0.28 |
| 23219 | 0 | 116981 | FSTDWSTRPRLV                | 2.48 | 0.01 | 0.90 | 1.15 | 0.22 | 0.28 |
| 23220 | 0 | 116981 | FSTDWSTRPRLV                | 2.48 | 0.01 | 0.90 | 0.44 | 0.85 | 0.28 |
| 23221 | 0 | 450600 | FSTNFGN                     | 2.05 | 0.01 | 0.90 | 0.44 | 1.41 | 1.39 |
| 23222 | 0 | 151630 | FSTNWMNQHRPS                | 2.45 | 0.01 | 0.90 | 1.15 | 0.22 | 0.28 |
| 23223 | 0 | 149048 | FSTQKSI                     | 2.02 | 0.01 | 0.90 | 2.13 | 1.59 | 1.39 |
| 23224 | 0 | 132828 | FSTTSFPGTVTCYDD             | 2.68 | 0.01 | 3.16 | 3.16 | 0.22 | 0.28 |
| 23225 | 0 | 17876  | FSVPWPTRPPHW                | 2.48 | 0.01 | 0.90 | 0.44 | 0.85 | 0.28 |
| 23226 | 0 | 232798 | FSVRSTGWGGYFVVG             | 2.71 | 0.01 | 2.89 | 1.12 | 0.22 | 1.28 |
| 23227 | 0 | 232798 | FSVRSTGWGGYFVVG             | 2.71 | 0.01 | 2.89 | 1.12 | 0.22 | 1.28 |
| 23228 | 0 | 232798 | FSVRSTGWGGYFVVG             | 2.71 | 0.01 | 2.89 | 1.12 | 0.22 | 1.28 |
| 23229 | 0 | 232798 | FSVRSTGWGGYFVVG             | 2.71 | 0.01 | 2.89 | 1.12 | 0.22 | 1.28 |
| 23230 | 0 | 232798 | FSVRSTGWGGYFVVG             | 2.71 | 0.01 | 2.89 | 1.12 | 0.22 | 1.28 |



|       |   |        |                                    |      |      |      |      |      |      |
|-------|---|--------|------------------------------------|------|------|------|------|------|------|
| 23231 | 0 | 17881  | FSWDWSGHNYINEIEAT<br>SS            | 2.88 | 0.01 | 3.38 | 1.12 | 0.22 | 0.85 |
| 23232 | 0 | 17881  | FSWDWSGHNYINEIEAT<br>SS            | 2.88 | 0.01 | 3.38 | 1.12 | 0.22 | 1.34 |
| 23233 | 0 | 113414 | FSWGAEGQK                          | 2.21 | 0.01 | 1.60 | 2.37 | 0.22 | 3.40 |
| 23234 | 0 | 116721 | FSWGGRDSRSGSPMAR<br>R              | 2.81 | 0.01 | 1.75 | 2.25 | 0.22 | 0.28 |
| 23235 | 0 | 17886  | FSYAHMKKPRPMSSF                    | 2.69 | 0.01 | 0.90 | 0.68 | 0.22 | 1.39 |
| 23236 | 0 | 17888  | FSYDTR                             | 1.88 | 0.01 | 1.96 | 0.44 | 0.85 | 0.28 |
| 23237 | 0 | 106427 | FSYLNHLITNMAQRT                    | 2.64 | 0.01 | 3.47 | 0.68 | 0.22 | 0.28 |
| 23238 | 0 | 106427 | FSYLNHLITNMAQRT                    | 2.64 | 0.01 | 3.47 | 0.68 | 0.22 | 0.28 |
| 23239 | 0 | 111291 | FSYQNLFDAIVDAVF                    | 2.69 | 0.01 | 3.20 | 1.12 | 0.22 | 0.85 |
| 23240 | 0 | 17901  | FSYTES                             | 1.90 | 0.01 | 3.24 | 1.12 | 0.22 | 0.28 |
| 23241 | 0 | 292416 | FTAKPPAESPFKSVF                    | 2.72 | 0.01 | 1.61 | 0.44 | 0.85 | 1.28 |
| 23242 | 0 | 17915  | FTCDRLSGYWERGIPLC<br>GL            | 2.93 | 0.01 | 0.90 | 2.69 | 0.22 | 0.28 |
| 23243 | 0 | 101652 | FTDEATLLSAAGDTINTT<br>GMAGNINSLTKD | 3.36 | 0.01 | 3.72 | 3.42 | 0.22 | 0.28 |
| 23244 | 0 | 17920  | FTDFVKPR                           | 2.13 | 0.01 | 3.65 | 0.44 | 0.85 | 0.28 |
| 23245 | 0 | 17920  | FTDFVKPR                           | 2.13 | 0.01 | 3.65 | 0.44 | 0.85 | 0.28 |
| 23246 | 0 | 17920  | FTDFVKPR                           | 2.13 | 0.01 | 3.65 | 0.44 | 0.85 | 0.28 |
| 23247 | 0 | 489544 | FTDLKNYIHWFHKTQ                    | 2.67 | 0.01 | 2.69 | 3.05 | 0.85 | 1.28 |
| 23248 | 0 | 190419 | FTDSEYQLPYVLGSA                    | 2.64 | 0.01 | 3.19 | 2.00 | 1.41 | 0.28 |
| 23249 | 0 | 17929  | FTDSVRDPKTSEILDIS                  | 2.79 | 0.01 | 2.48 | 0.44 | 0.85 | 0.28 |
| 23250 | 0 | 17929  | FTDSVRDPKTSEILDIS                  | 2.79 | 0.01 | 2.48 | 1.20 | 0.22 | 0.28 |
| 23251 | 0 | 110229 | FTEPSVLH                           | 2.10 | 0.01 | 3.81 | 0.68 | 0.22 | 0.28 |
| 23252 | 0 | 110229 | FTEPSVLH                           | 2.10 | 0.01 | 3.81 | 0.68 | 0.22 | 0.28 |
| 23253 | 0 | 110229 | FTEPSVLH                           | 2.10 | 0.01 | 3.81 | 0.68 | 0.22 | 0.28 |
| 23254 | 0 | 115745 | FTESQSLTLT                         | 2.35 | 0.01 | 1.60 | 0.44 | 1.23 | 0.85 |
| 23255 | 0 | 17943  | FTEVGYTRA EGL                      | 2.48 | 0.01 | 2.88 | 0.44 | 1.23 | 0.85 |
| 23256 | 0 | 17943  | FTEVGYTRA EGL                      | 2.48 | 0.01 | 2.88 | 1.12 | 0.22 | 0.85 |
| 23257 | 0 | 121312 | FTFIQFKKDLKESMK                    | 2.69 | 0.01 | 0.78 | 0.44 | 1.13 | 0.28 |
| 23258 | 0 | 17960  | FTFSPRRHWTTQGCNCS<br>IYP           | 2.92 | 0.01 | 2.83 | 0.44 | 0.85 | 0.28 |
| 23259 | 0 | 186758 | FTGASMNPARSFGPALA<br>TGDWTNHVV     | 3.20 | 0.01 | 4.45 | 0.44 | 1.13 | 0.28 |
| 23260 | 0 | 110857 | FTGEASYWSAK                        | 2.48 | 0.01 | 3.15 | 3.53 | 0.22 | 0.28 |
| 23261 | 0 | 17964  | FTGIQIICLA                         | 2.30 | 0.01 | 0.78 | 0.44 | 1.74 | 0.28 |
| 23262 | 0 | 17967  | FTGTT                              | 1.72 | 0.01 | 3.55 | 0.68 | 0.22 | 0.28 |
| 23263 | 0 | 178383 | FTHEAFG                            | 2.03 | 0.01 | 0.90 | 1.12 | 0.22 | 0.28 |
| 23264 | 0 | 122355 | FTHQGSDFGPI                        | 2.40 | 0.01 | 1.60 | 2.04 | 0.22 | 0.28 |
| 23265 | 0 | 17973  | FTIDYFQPNKNRNQL                    | 2.67 | 0.01 | 3.06 | 2.13 | 0.22 | 0.28 |
| 23266 | 0 | 444105 | FTIFKVRMYVGGVEHRL<br>NAA           | 2.89 | 0.01 | 1.96 | 0.68 | 0.22 | 1.34 |
| 23267 | 0 | 444105 | FTIFKVRMYVGGVEHRL<br>NAA           | 2.89 | 0.01 | 1.96 | 0.68 | 0.22 | 0.28 |
| 23268 | 0 | 17985  | FTILRY                             | 1.88 | 0.01 | 0.90 | 2.02 | 0.22 | 0.28 |

|       |   |        |                                    |      |      |      |      |      |      |
|-------|---|--------|------------------------------------|------|------|------|------|------|------|
| 23269 | 0 | 179790 | FTINLHSK                           | 2.10 | 0.01 | 3.89 | 0.44 | 0.85 | 0.85 |
| 23270 | 0 | 17993  | FTKDTQTGMSGQTP                     | 2.69 | 0.01 | 2.24 | 1.15 | 0.22 | 0.85 |
| 23271 | 0 | 95395  | FTKKTKLTEE                         | 2.34 | 0.01 | 1.60 | 0.44 | 1.23 | 0.85 |
| 23272 | 0 | 17997  | FTKVCGAPPCVIGGAGN<br>NTL           | 2.94 | 0.01 | 2.83 | 0.44 | 0.85 | 0.28 |
| 23273 | 0 | 189633 | FTKVGLAAKSSADIK                    | 2.67 | 0.01 | 3.28 | 0.44 | 1.23 | 0.28 |
| 23274 | 0 | 189633 | FTKVGLAAKSSADIK                    | 2.67 | 0.01 | 3.28 | 0.44 | 1.41 | 0.28 |
| 23275 | 0 | 17998  | FTKWTWETKGDL                       | 2.49 | 0.01 | 2.56 | 0.44 | 0.85 | 0.85 |
| 23276 | 0 | 18002  | FTLIELMIVVAIIGILAAIAI<br>PQYQNYVAR | 3.34 | 0.01 | 3.61 | 1.20 | 0.22 | 0.28 |
| 23277 | 0 | 18002  | FTLIELMIVVAIIGILAAIAI<br>PQYQNYVAR | 3.34 | 0.01 | 3.61 | 1.20 | 0.22 | 0.28 |
| 23278 | 0 | 18002  | FTLIELMIVVAIIGILAAIAI<br>PQYQNYVAR | 3.34 | 0.01 | 3.61 | 1.20 | 0.22 | 1.27 |
| 23279 | 0 | 18010  | FTLSPRRHETVQECNCSI<br>YP           | 2.90 | 0.01 | 2.83 | 1.12 | 0.22 | 0.28 |
| 23280 | 0 | 171104 | FTMEGERSPNEEYTW                    | 2.65 | 0.01 | 0.78 | 0.44 | 1.41 | 0.28 |
| 23281 | 0 | 18013  | FTMGGAGPK                          | 2.23 | 0.01 | 3.61 | 1.20 | 0.22 | 1.27 |
| 23282 | 0 | 120544 | FTNETLDKIQ                         | 2.29 | 0.01 | 2.18 | 2.16 | 0.22 | 0.28 |
| 23283 | 0 | 127983 | FTNFKFKIRKITNFDRVN                 | 2.90 | 0.01 | 2.87 | 2.75 | 0.22 | 0.28 |
| 23284 | 0 | 18025  | FTNKLKEKHTDLG                      | 2.56 | 0.01 | 2.73 | 0.44 | 0.85 | 0.85 |
| 23285 | 0 | 18025  | FTNKLKEKHTDLG                      | 2.56 | 0.01 | 2.73 | 1.15 | 0.22 | 0.85 |
| 23286 | 0 | 127984 | FTNLKFKVRKITSSHRGN                 | 2.85 | 0.01 | 2.40 | 1.12 | 0.22 | 0.28 |
| 23287 | 0 | 127984 | FTNLKFKVRKITSSHRGN                 | 2.85 | 0.01 | 2.40 | 0.44 | 0.85 | 0.28 |
| 23288 | 0 | 127984 | FTNLKFKVRKITSSHRGN                 | 2.85 | 0.01 | 2.40 | 2.75 | 0.22 | 0.28 |
| 23289 | 0 | 127984 | FTNLKFKVRKITSSHRGN                 | 2.85 | 0.01 | 2.40 | 2.75 | 0.22 | 0.28 |
| 23290 | 0 | 127984 | FTNLKFKVRKITSSHRGN                 | 2.85 | 0.01 | 2.40 | 2.75 | 0.22 | 0.85 |
| 23291 | 0 | 127984 | FTNLKFKVRKITSSHRGN                 | 2.85 | 0.01 | 2.40 | 2.75 | 0.22 | 1.34 |
| 23292 | 0 | 127984 | FTNLKFKVRKITSSHRGN                 | 2.85 | 0.01 | 2.40 | 2.75 | 0.22 | 0.28 |
| 23293 | 0 | 100047 | FTNQLKEHPT                         | 2.29 | 0.01 | 2.18 | 2.16 | 0.22 | 0.28 |
| 23294 | 0 | 157283 | FTNRRCDSNATNAR                     | 2.64 | 0.01 | 3.40 | 2.49 | 0.85 | 0.28 |
| 23295 | 0 | 157283 | FTNRRCDSNATNAR                     | 2.64 | 0.01 | 3.40 | 2.49 | 0.85 | 0.28 |
| 23296 | 0 | 157283 | FTNRRCDSNATNAR                     | 2.64 | 0.01 | 3.40 | 2.49 | 0.85 | 0.28 |
| 23297 | 0 | 186668 | FTNTDWLLFGP                        | 2.48 | 0.01 | 0.90 | 0.68 | 0.22 | 1.39 |
| 23298 | 0 | 18031  | FTPDYQVPF                          | 2.34 | 0.01 | 2.43 | 0.44 | 1.59 | 0.28 |
| 23299 | 0 | 146256 | FTPEGDHRP                          | 2.21 | 0.01 | 0.90 | 1.20 | 0.22 | 1.39 |
| 23300 | 0 | 18036  | FTPFIYQSSRTR                       | 2.50 | 0.01 | 4.03 | 0.68 | 0.22 | 0.85 |
| 23301 | 0 | 18036  | FTPFIYQSSRTR                       | 2.50 | 0.01 | 4.03 | 0.68 | 0.22 | 0.85 |
| 23302 | 0 | 18036  | FTPFIYQSSRTR                       | 2.50 | 0.01 | 4.03 | 0.68 | 0.22 | 1.48 |

|       |   |        |                                                 |      |      |      |      |      |      |
|-------|---|--------|-------------------------------------------------|------|------|------|------|------|------|
| 23303 | 0 | 18036  | FTPFIYQSSRTR                                    | 2.50 | 0.01 | 4.03 | 0.68 | 0.22 | 1.27 |
| 23304 | 0 | 18037  | FTPGAKQNIQLINT                                  | 2.61 | 0.01 | 2.41 | 0.44 | 0.85 | 0.28 |
| 23305 | 0 | 18037  | FTPGAKQNIQLINT                                  | 2.61 | 0.01 | 2.41 | 0.44 | 0.85 | 0.28 |
| 23306 | 0 | 18037  | FTPGAKQNIQLINT                                  | 2.61 | 0.01 | 2.41 | 0.44 | 0.85 | 0.28 |
| 23307 | 0 | 18039  | FTPGPSQ                                         | 2.02 | 0.01 | 1.72 | 0.44 | 0.85 | 0.28 |
| 23308 | 0 | 137858 | FTPGTEYT                                        | 2.14 | 0.01 | 2.21 | 1.20 | 0.22 | 0.28 |
| 23309 | 0 | 137858 | FTPGTEYT                                        | 2.14 | 0.01 | 2.21 | 0.44 | 0.85 | 0.28 |
| 23310 | 0 | 137858 | FTPGTEYT                                        | 2.14 | 0.01 | 2.21 | 0.44 | 0.85 | 0.28 |
| 23311 | 0 | 137858 | FTPGTEYT                                        | 2.14 | 0.01 | 2.21 | 1.20 | 0.22 | 0.28 |
| 23312 | 0 | 137858 | FTPGTEYT                                        | 2.14 | 0.01 | 2.21 | 1.20 | 0.22 | 0.28 |
| 23313 | 0 | 137858 | FTPGTEYT                                        | 2.14 | 0.01 | 2.21 | 1.20 | 0.22 | 0.28 |
| 23314 | 0 | 167905 | FTPKELDKTIDWFH                                  | 2.69 | 0.01 | 3.93 | 1.20 | 0.22 | 0.28 |
| 23315 | 0 | 189074 | FTPPVTL                                         | 2.03 | 0.01 | 0.90 | 2.13 | 0.22 | 0.28 |
| 23316 | 0 | 149049 | FTPQMVR                                         | 1.99 | 0.01 | 0.90 | 2.13 | 1.59 | 1.39 |
| 23317 | 0 | 141540 | FTPQSRRLRELPLAADAL<br>TF                        | 2.98 | 0.01 | 0.78 | 1.15 | 0.22 | 0.85 |
| 23318 | 0 | 18051  | FTPSPVVVGTTDRSGVP<br>TYR                        | 2.98 | 0.01 | 2.83 | 1.12 | 0.22 | 0.28 |
| 23319 | 0 | 18053  | FTQCSMNVVSKTLFRKS<br>PIY                        | 2.91 | 0.01 | 2.82 | 0.44 | 0.85 | 0.28 |
| 23320 | 0 | 18053  | FTQCSMNVVSKTLFRKS<br>PIY                        | 2.91 | 0.01 | 2.82 | 0.44 | 1.41 | 0.28 |
| 23321 | 0 | 18054  | FTQEVSRNLINLHFSK                                | 2.72 | 0.01 | 2.04 | 2.42 | 0.22 | 0.28 |
| 23322 | 0 | 18054  | FTQEVSRNLINLHFSK                                | 2.72 | 0.01 | 2.04 | 4.15 | 0.22 | 0.28 |
| 23323 | 0 | 105795 | FTQFAGKD                                        | 2.13 | 0.01 | 3.05 | 1.20 | 0.22 | 0.28 |
| 23324 | 0 | 118362 | FTQLNPTDGGSA                                    | 2.44 | 0.01 | 0.90 | 0.68 | 0.22 | 1.48 |
| 23325 | 0 | 118362 | FTQLNPTDGGSA                                    | 2.44 | 0.01 | 0.90 | 0.68 | 0.22 | 0.28 |
| 23326 | 0 | 118362 | FTQLNPTDGGSA                                    | 2.44 | 0.01 | 0.90 | 0.68 | 0.22 | 0.85 |
| 23327 | 0 | 118362 | FTQLNPTDGGSA                                    | 2.44 | 0.01 | 0.90 | 0.68 | 0.22 | 1.48 |
| 23328 | 0 | 450602 | FTQPLYK                                         | 1.99 | 0.01 | 0.90 | 0.44 | 1.41 | 1.39 |
| 23329 | 0 | 130837 | FTRHSQTTANPSCPE                                 | 2.65 | 0.01 | 2.19 | 2.97 | 0.22 | 0.28 |
| 23330 | 0 | 130837 | FTRHSQTTANPSCPE                                 | 2.65 | 0.01 | 2.19 | 2.97 | 0.22 | 0.28 |
| 23331 | 0 | 130837 | FTRHSQTTANPSCPE                                 | 2.65 | 0.01 | 2.19 | 2.97 | 0.22 | 1.27 |
| 23332 | 0 | 130837 | FTRHSQTTANPSCPE                                 | 2.65 | 0.01 | 2.19 | 2.97 | 2.60 | 1.75 |
| 23333 | 0 | 130837 | FTRHSQTTANPSCPE                                 | 2.65 | 0.01 | 2.19 | 2.97 | 2.60 | 1.75 |
| 23334 | 0 | 130837 | FTRHSQTTANPSCPE                                 | 2.65 | 0.01 | 2.19 | 2.97 | 0.22 | 0.85 |
| 23335 | 0 | 132310 | FTRVALYVDWIRSTL                                 | 2.66 | 0.01 | 0.78 | 0.44 | 1.41 | 0.28 |
| 23336 | 0 | 132310 | FTRVALYVDWIRSTL                                 | 2.66 | 0.01 | 0.78 | 0.44 | 1.13 | 0.28 |
| 23337 | 0 | 135677 | FTRVVGGE                                        | 2.12 | 0.01 | 0.78 | 0.44 | 2.35 | 0.28 |
| 23338 | 0 | 18067  | FTSEFIQASVEYFGITIG<br>G                         | 2.97 | 0.01 | 0.90 | 1.12 | 0.22 | 0.28 |
| 23339 | 0 | 18069  | FTSFGGLVAEAFGFKSDP<br>KKSDVKTYFTTVAAKLEK<br>TKT | 3.63 | 0.01 | 2.73 | 0.44 | 0.85 | 0.28 |
| 23340 | 0 | 18069  | FTSFGGLVAEAFGFKSDP<br>KKSDVKTYFTTVAAKLEK<br>TKT | 3.63 | 0.01 | 2.73 | 0.44 | 0.85 | 0.28 |

|       |   |        |                              |      |      |      |      |      |      |
|-------|---|--------|------------------------------|------|------|------|------|------|------|
| 23341 | 0 | 232799 | FTSFSPY                      | 2.05 | 0.01 | 0.90 | 2.49 | 0.85 | 1.39 |
| 23342 | 0 | 232799 | FTSFSPY                      | 2.05 | 0.01 | 0.90 | 0.68 | 0.22 | 0.28 |
| 23343 | 0 | 419178 | FTSPRLH                      | 1.99 | 0.01 | 0.90 | 0.44 | 1.93 | 1.39 |
| 23344 | 0 | 92761  | FTSSNDSRNV                   | 2.33 | 0.01 | 2.67 | 2.00 | 0.22 | 0.28 |
| 23345 | 0 | 92761  | FTSSNDSRNV                   | 2.33 | 0.01 | 2.67 | 2.00 | 0.22 | 0.28 |
| 23346 | 0 | 92761  | FTSSNDSRNV                   | 2.33 | 0.01 | 2.67 | 2.00 | 0.22 | 0.28 |
| 23347 | 0 | 510437 | FTTKTYNGVAER                 | 2.45 | 0.01 | 0.90 | 3.07 | 1.13 | 1.27 |
| 23348 | 0 | 18084  | FTTKVIGKDSRDFDISPK<br>V      | 2.92 | 0.01 | 2.80 | 1.15 | 0.22 | 0.28 |
| 23349 | 0 | 18084  | FTTKVIGKDSRDFDISPK<br>V      | 2.92 | 0.01 | 2.80 | 1.15 | 0.22 | 0.28 |
| 23350 | 0 | 18084  | FTTKVIGKDSRDFDISPK<br>V      | 2.92 | 0.01 | 2.80 | 1.12 | 0.22 | 0.28 |
| 23351 | 0 | 18084  | FTTKVIGKDSRDFDISPK<br>V      | 2.92 | 0.01 | 3.59 | 3.04 | 0.22 | 0.28 |
| 23352 | 0 | 18084  | FTTKVIGKDSRDFDISPK<br>V      | 2.92 | 0.01 | 3.59 | 3.04 | 0.22 | 0.28 |
| 23353 | 0 | 18084  | FTTKVIGKDSRDFDISPK<br>V      | 2.92 | 0.01 | 3.59 | 3.04 | 0.22 | 0.28 |
| 23354 | 0 | 18084  | FTTKVIGKDSRDFDISPK<br>V      | 2.92 | 0.01 | 3.59 | 3.04 | 0.22 | 0.28 |
| 23355 | 0 | 18084  | FTTKVIGKDSRDFDISPK<br>V      | 2.92 | 0.01 | 3.59 | 0.68 | 2.25 | 1.75 |
| 23356 | 0 | 18084  | FTTKVIGKDSRDFDISPK<br>V      | 2.92 | 0.01 | 2.80 | 0.68 | 0.22 | 0.28 |
| 23357 | 0 | 18084  | FTTKVIGKDSRDFDISPK<br>V      | 2.92 | 0.01 | 2.80 | 3.57 | 0.22 | 0.28 |
| 23358 | 0 | 18084  | FTTKVIGKDSRDFDISPK<br>V      | 2.92 | 0.01 | 2.80 | 1.81 | 0.22 | 0.28 |
| 23359 | 0 | 18084  | FTTKVIGKDSRDFDISPK<br>V      | 2.92 | 0.01 | 2.80 | 3.04 | 0.22 | 0.28 |
| 23360 | 0 | 18084  | FTTKVIGKDSRDFDISPK<br>V      | 2.92 | 0.01 | 2.80 | 3.04 | 0.22 | 0.28 |
| 23361 | 0 | 112982 | FTTVVADTGDFHAID              | 2.71 | 0.01 | 0.78 | 0.44 | 1.13 | 0.85 |
| 23362 | 0 | 141017 | FTTWSPWSQPLA                 | 2.48 | 0.01 | 0.78 | 0.68 | 0.22 | 0.28 |
| 23363 | 0 | 137161 | FTTYIIMNRWALGNLAC<br>DLW     | 2.91 | 0.01 | 0.78 | 0.44 | 1.13 | 0.28 |
| 23364 | 0 | 137161 | FTTYIIMNRWALGNLAC<br>DLW     | 2.91 | 0.01 | 0.78 | 0.44 | 1.41 | 0.28 |
| 23365 | 0 | 112983 | FTVFEEAFND                   | 2.33 | 0.01 | 3.00 | 2.79 | 0.22 | 0.28 |
| 23366 | 0 | 99259  | FTVKVGDKELF                  | 2.42 | 0.01 | 2.24 | 1.20 | 0.22 | 0.28 |
| 23367 | 0 | 224736 | FTVSPRNSPGEVLLNLE            | 2.81 | 0.01 | 4.03 | 1.12 | 0.22 | 2.66 |
| 23368 | 0 | 230376 | FTVTRDVTMSSTSFDDY<br>TMVLDLS | 3.17 | 0.01 | 3.40 | 2.49 | 0.85 | 0.28 |
| 23369 | 0 | 18100  | FTWGGLRDKS                   | 2.28 | 0.01 | 0.90 | 0.44 | 1.23 | 1.27 |

|       |   |        |                                                  |      |      |      |      |      |      |
|-------|---|--------|--------------------------------------------------|------|------|------|------|------|------|
| 23370 | 0 | 79217  | FTWSWESGKYTTETFAT<br>NS                          | 2.93 | 0.01 | 3.03 | 1.12 | 0.22 | 0.28 |
| 23371 | 0 | 79217  | FTWSWESGKYTTETFAT<br>NS                          | 2.93 | 0.01 | 3.03 | 1.12 | 0.22 | 1.34 |
| 23372 | 0 | 139753 | FTYDQIQRRYEAAPSYLS                               | 2.82 | 0.01 | 3.93 | 1.12 | 0.22 | 0.28 |
| 23373 | 0 | 18105  | FTYEENPDGEER                                     | 2.46 | 0.01 | 2.88 | 2.37 | 0.22 | 0.28 |
| 23374 | 0 | 18105  | FTYEENPDGEER                                     | 2.46 | 0.01 | 2.88 | 2.22 | 0.22 | 0.28 |
| 23375 | 0 | 18105  | FTYEENPDGEER                                     | 2.46 | 0.01 | 2.88 | 2.22 | 0.22 | 0.28 |
| 23376 | 0 | 18106  | FTYIENKLDILNNSKPNK<br>RW                         | 2.93 | 0.01 | 1.66 | 2.63 | 0.22 | 0.28 |
| 23377 | 0 | 18107  | FTYIENKLDILNNSKPNK<br>RWKSYGTPDNIDKNMS<br>LIHKHN | 3.63 | 0.01 | 1.66 | 2.63 | 0.22 | 0.28 |
| 23378 | 0 | 111295 | FVAHSPP                                          | 1.99 | 0.01 | 0.90 | 0.44 | 0.85 | 1.39 |
| 23379 | 0 | 18116  | FVAMWSDVGLCKKRPK<br>PGG                          | 2.86 | 0.01 | 2.52 | 1.15 | 0.22 | 0.28 |
| 23380 | 0 | 171107 | FVANSFYSLTPTEF                                   | 2.67 | 0.01 | 0.78 | 0.44 | 1.13 | 0.28 |
| 23381 | 0 | 134673 | FVAQNKIDSLNLD                                    | 2.54 | 0.01 | 0.78 | 0.44 | 1.13 | 0.28 |
| 23382 | 0 | 134673 | FVAQNKIDSLNLD                                    | 2.54 | 0.01 | 0.78 | 0.44 | 1.13 | 0.28 |
| 23383 | 0 | 225953 | FVATFGAASNKAFAEGL<br>SGEPKGAAESSSKAALTS<br>K     | 3.55 | 0.01 | 2.53 | 0.44 | 1.23 | 2.35 |
| 23384 | 0 | 225953 | FVATFGAASNKAFAEGL<br>SGEPKGAAESSSKAALTS<br>K     | 3.55 | 0.01 | 2.53 | 1.20 | 0.22 | 0.28 |
| 23385 | 0 | 225953 | FVATFGAASNKAFAEGL<br>SGEPKGAAESSSKAALTS<br>K     | 3.55 | 0.01 | 2.53 | 1.20 | 0.22 | 0.28 |
| 23386 | 0 | 225953 | FVATFGAASNKAFAEGL<br>SGEPKGAAESSSKAALTS<br>K     | 3.55 | 0.01 | 2.53 | 1.20 | 0.22 | 0.28 |
| 23387 | 0 | 225953 | FVATFGAASNKAFAEGL<br>SGEPKGAAESSSKAALTS<br>K     | 3.55 | 0.01 | 2.53 | 1.20 | 0.22 | 0.28 |
| 23388 | 0 | 225953 | FVATFGAASNKAFAEGL<br>SGEPKGAAESSSKAALTS<br>K     | 3.55 | 0.01 | 2.53 | 1.20 | 0.22 | 1.66 |
| 23389 | 0 | 225953 | FVATFGAASNKAFAEGL<br>SGEPKGAAESSSKAALTS<br>K     | 3.55 | 0.01 | 2.53 | 1.20 | 0.22 | 2.35 |
| 23390 | 0 | 225953 | FVATFGAASNKAFAEGL<br>SGEPKGAAESSSKAALTS<br>K     | 3.55 | 0.01 | 2.53 | 0.44 | 1.23 | 1.66 |
| 23391 | 0 | 225953 | FVATFGAASNKAFAEGL<br>SGEPKGAAESSSKAALTS<br>K     | 3.55 | 0.01 | 2.53 | 0.44 | 1.23 | 1.66 |

|       |   |        |                        |      |      |      |      |      |      |  |
|-------|---|--------|------------------------|------|------|------|------|------|------|--|
|       |   |        | FVATFGAASNKAFAEGL      |      |      |      |      |      |      |  |
| 23392 | 0 | 225953 | SGEPKGAAESSKAALTS<br>K | 3.55 | 0.01 | 2.53 | 0.44 | 1.23 | 1.66 |  |
|       |   |        | FVATFGAASNKAFAEGL      |      |      |      |      |      |      |  |
| 23393 | 0 | 225953 | SGEPKGAAESSKAALTS<br>K | 3.55 | 0.01 | 2.53 | 0.44 | 1.23 | 0.28 |  |
| 23394 | 0 | 108998 | FVCGDRGFYFNK           | 2.48 | 0.01 | 0.78 | 1.15 | 0.22 | 0.28 |  |
| 23395 | 0 | 108998 | FVCGDRGFYFNK           | 2.48 | 0.01 | 0.78 | 1.15 | 0.22 | 0.28 |  |
| 23396 | 0 | 108998 | FVCGDRGFYFNK           | 2.48 | 0.01 | 0.78 | 1.15 | 0.22 | 1.57 |  |
| 23397 | 0 | 108998 | FVCGDRGFYFNK           | 2.48 | 0.01 | 0.78 | 1.15 | 0.22 | 1.57 |  |
|       |   |        | FVCGTTFGAPIAATAGG      |      |      |      |      |      |      |  |
| 23398 | 0 | 18127  | NLFDMYVHVTYSGTETE      | 3.45 | 0.01 | 3.97 | 0.68 | 0.22 | 0.28 |  |
|       |   |        | FVCGTTFGAPIAATAGG      |      |      |      |      |      |      |  |
| 23399 | 0 | 18127  | NLFDMYVHVTYSGTETE      | 3.45 | 0.01 | 3.97 | 0.68 | 0.22 | 0.28 |  |
|       |   |        | FVCGTTFGAPIAATAGG      |      |      |      |      |      |      |  |
| 23400 | 0 | 18127  | NLFDMYVHVTYSGTETE      | 3.45 | 0.01 | 3.97 | 0.68 | 0.22 | 0.28 |  |
| 23401 | 0 | 181627 | FVDALSSRYGYVRNS        | 2.68 | 0.01 | 3.26 | 2.37 | 0.22 | 1.28 |  |
| 23402 | 0 | 104782 | FVDCGDSFNP             | 2.32 | 0.01 | 2.60 | 0.44 | 1.23 | 0.85 |  |
| 23403 | 0 | 462340 | FVDP                   | 1.57 | 0.01 | 0.78 | 1.12 | 0.22 | 1.28 |  |
| 23404 | 0 | 18139  | FVDSIGQSFQNTWEG        | 2.67 | 0.01 | 2.59 | 0.68 | 0.22 | 0.28 |  |
| 23405 | 0 | 18139  | FVDSIGQSFQNTWEG        | 2.67 | 0.01 | 2.59 | 1.12 | 0.22 | 0.28 |  |
| 23406 | 0 | 18139  | FVDSIGQSFQNTWEG        | 2.67 | 0.01 | 2.59 | 0.44 | 0.85 | 0.28 |  |
| 23407 | 0 | 127655 | FVEHTRW                | 1.99 | 0.01 | 0.90 | 0.44 | 1.13 | 0.28 |  |
| 23408 | 0 | 127655 | FVEHTRW                | 1.99 | 0.01 | 0.90 | 0.44 | 1.13 | 0.28 |  |
| 23409 | 0 | 106428 | FVEIYSP                | 1.99 | 0.01 | 0.90 | 0.44 | 1.13 | 1.39 |  |
| 23410 | 0 | 106428 | FVEIYSP                | 1.99 | 0.01 | 0.90 | 0.44 | 1.13 | 0.28 |  |
| 23411 | 0 | 106428 | FVEIYSP                | 1.99 | 0.01 | 0.90 | 0.44 | 1.13 | 0.28 |  |
| 23412 | 0 | 126068 | FVFEEF                 | 1.92 | 0.01 | 1.60 | 3.18 | 0.22 | 1.27 |  |
| 23413 | 0 | 126068 | FVFEEF                 | 1.92 | 0.01 | 1.60 | 3.18 | 0.22 | 0.85 |  |
| 23414 | 0 | 126068 | FVFEEF                 | 1.92 | 0.01 | 1.60 | 3.18 | 0.22 | 0.85 |  |
| 23415 | 0 | 126069 | FVFEEFARQNLK           | 2.47 | 0.01 | 1.60 | 0.68 | 0.22 | 0.85 |  |
| 23416 | 0 | 18161  | FVFNGTSWFITQRNFFS      | 2.81 | 0.01 | 2.48 | 0.44 | 0.85 | 0.28 |  |
|       |   |        | FVFNLKDMFSRANRKRK      |      |      |      |      |      |      |  |
| 23417 | 0 | 140026 | A                      | 2.87 | 0.01 | 0.90 | 1.20 | 0.22 | 0.28 |  |
|       |   |        | FVFNLKDMFSRANRKRK      |      |      |      |      |      |      |  |
| 23418 | 0 | 140026 | A                      | 2.87 | 0.01 | 0.90 | 1.20 | 0.22 | 0.28 |  |
| 23419 | 0 | 18172  | FVGAGIAGAAVGS          | 2.66 | 0.01 | 1.96 | 0.44 | 1.41 | 0.28 |  |
| 23420 | 0 | 18173  | FVGAGLAGAAIGSV         | 2.65 | 0.01 | 2.41 | 0.44 | 0.85 | 0.28 |  |
| 23421 | 0 | 18177  | FVGLFTP                | 2.03 | 0.01 | 1.72 | 0.44 | 0.85 | 0.28 |  |
| 23422 | 0 | 18177  | FVGLFTP                | 2.03 | 0.01 | 1.72 | 0.44 | 0.85 | 1.27 |  |
|       |   |        | FVGTWKLVD SKNFDDY      |      |      |      |      |      |      |  |
| 23423 | 0 | 131882 | MKSLGVGF               | 3.13 | 0.01 | 2.19 | 1.20 | 0.22 | 0.28 |  |

|       |   |        |                                |      |      |      |      |      |      |
|-------|---|--------|--------------------------------|------|------|------|------|------|------|
| 23424 | 0 | 131882 | FVGTWKLVD SKNFDDY<br>MKS LGVGF | 3.13 | 0.01 | 2.19 | 1.20 | 0.22 | 0.85 |
| 23425 | 0 | 127986 | FVG VGADYRHASCPIDYI<br>IA      | 2.94 | 0.01 | 2.40 | 1.12 | 0.22 | 0.28 |
| 23426 | 0 | 127986 | FVG VGADYRHASCPIDYI<br>IA      | 2.94 | 0.01 | 2.40 | 2.75 | 0.22 | 0.28 |
| 23427 | 0 | 127986 | FVG VGADYRHASCPIDYI<br>IA      | 2.94 | 0.01 | 2.40 | 2.75 | 0.22 | 0.28 |
| 23428 | 0 | 127986 | FVG VGADYRHASCPIDYI<br>IA      | 2.94 | 0.01 | 2.40 | 2.75 | 0.22 | 0.85 |
| 23429 | 0 | 127986 | FVG VGADYRHASCPIDYI<br>IA      | 2.94 | 0.01 | 2.40 | 2.75 | 0.22 | 1.34 |
| 23430 | 0 | 78657  | FVHAKKKEEGEDDTARQ<br>EI        | 2.87 | 0.01 | 3.11 | 1.15 | 0.22 | 0.28 |
| 23431 | 0 | 78657  | FVHAKKKEEGEDDTARQ<br>EI        | 2.87 | 0.01 | 3.11 | 1.15 | 0.22 | 0.28 |
| 23432 | 0 | 78657  | FVHAKKKEEGEDDTARQ<br>EI        | 2.87 | 0.01 | 3.11 | 1.12 | 0.22 | 0.28 |
| 23433 | 0 | 18182  | FVHDCVNITVKEHTVTT              | 2.79 | 0.01 | 1.60 | 1.12 | 0.22 | 0.28 |
| 23434 | 0 | 18182  | FVHDCVNITVKEHTVTT              | 2.79 | 0.01 | 1.60 | 1.12 | 0.22 | 0.28 |
| 23435 | 0 | 18182  | FVHDCVNITVKEHTVTT              | 2.79 | 0.01 | 1.60 | 1.12 | 0.22 | 0.28 |
| 23436 | 0 | 18200  | FVKDRPLELRTFGTL                | 2.69 | 0.01 | 0.90 | 0.44 | 0.85 | 1.39 |
| 23437 | 0 | 18208  | FVKIQNLNPIHVIDLMQ<br>THQHGL    | 3.08 | 0.01 | 3.32 | 0.68 | 0.22 | 0.28 |
| 23438 | 0 | 18208  | FVKIQNLNPIHVIDLMQ<br>THQHGL    | 3.08 | 0.01 | 3.32 | 1.12 | 0.22 | 0.28 |
| 23439 | 0 | 18208  | FVKIQNLNPIHVIDLMQ<br>THQHGL    | 3.08 | 0.01 | 3.32 | 2.37 | 0.22 | 0.28 |
| 23440 | 0 | 18208  | FVKIQNLNPIHVIDLMQ<br>THQHGL    | 3.08 | 0.01 | 3.32 | 1.12 | 0.22 | 0.28 |
| 23441 | 0 | 18208  | FVKIQNLNPIHVIDLMQ<br>THQHGL    | 3.08 | 0.01 | 3.32 | 1.12 | 0.22 | 1.34 |
| 23442 | 0 | 18213  | FVKLS                          | 1.74 | 0.01 | 0.90 | 0.44 | 1.13 | 0.85 |
| 23443 | 0 | 230464 | FVKNMNRDSTFIVNK                | 2.69 | 0.01 | 0.78 | 0.44 | 1.13 | 0.28 |
| 23444 | 0 | 131883 | FVKQFSNISFSRDSP                | 2.69 | 0.01 | 0.78 | 0.44 | 1.13 | 0.85 |
| 23445 | 0 | 131883 | FVKQFSNISFSRDSP                | 2.69 | 0.01 | 0.78 | 0.44 | 1.13 | 0.85 |
| 23446 | 0 | 18217  | FVKSGDFIKLYVSYNNNE<br>HIVGY    | 3.08 | 0.01 | 2.95 | 0.44 | 0.22 | 0.28 |
| 23447 | 0 | 147693 | FVKVAPNLT                      | 2.21 | 0.01 | 3.24 | 3.57 | 0.85 | 0.28 |
| 23448 | 0 | 188176 | FVLGPSVTDD                     | 2.29 | 0.01 | 2.92 | 1.81 | 0.22 | 0.85 |
| 23449 | 0 | 103188 | FVLPQDRKIAIQAVLEKI<br>QT       | 2.95 | 0.01 | 3.93 | 2.43 | 0.22 | 0.85 |
| 23450 | 0 | 103188 | FVLPQDRKIAIQAVLEKI<br>QT       | 2.95 | 0.01 | 3.93 | 0.44 | 1.59 | 0.28 |

|       |   |        |                                      |      |      |      |      |      |      |
|-------|---|--------|--------------------------------------|------|------|------|------|------|------|
| 23451 | 0 | 106429 | FVLPWRI                              | 1.99 | 0.01 | 0.90 | 0.44 | 1.13 | 1.39 |
| 23452 | 0 | 106429 | FVLPWRI                              | 1.99 | 0.01 | 0.90 | 0.44 | 1.13 | 0.28 |
| 23453 | 0 | 106429 | FVLPWRI                              | 1.99 | 0.01 | 0.90 | 0.44 | 1.13 | 1.34 |
| 23454 | 0 | 106429 | FVLPWRI                              | 1.99 | 0.01 | 0.90 | 0.44 | 1.13 | 0.28 |
| 23455 | 0 | 128668 | FVLVLFAGMSG                          | 2.52 | 0.01 | 0.90 | 0.44 | 1.13 | 0.28 |
| 23456 | 0 | 102446 | FVNAFQNNFMRPREL<br>FALA              | 2.98 | 0.01 | 0.90 | 1.20 | 0.22 | 0.28 |
| 23457 | 0 | 105201 | FVNQHLCY                             | 2.10 | 0.01 | 0.90 | 1.12 | 0.22 | 1.57 |
| 23458 | 0 | 105202 | FVNQHLYK                             | 2.10 | 0.01 | 0.90 | 2.37 | 0.22 | 1.57 |
| 23459 | 0 | 105202 | FVNQHLYK                             | 2.10 | 0.01 | 0.90 | 1.12 | 0.22 | 1.57 |
| 23460 | 0 | 105202 | FVNQHLYK                             | 2.10 | 0.01 | 0.90 | 2.37 | 0.22 | 1.48 |
| 23461 | 0 | 108999 | FVPAERYPWVDQ                         | 2.45 | 0.01 | 0.90 | 1.15 | 0.22 | 1.39 |
| 23462 | 0 | 108999 | FVPAERYPWVDQ                         | 2.45 | 0.01 | 0.90 | 1.15 | 0.22 | 0.85 |
| 23463 | 0 | 18255  | FVPCSICSNNPTCWAICK<br>RIP            | 2.99 | 0.01 | 2.67 | 2.61 | 0.22 | 0.28 |
| 23464 | 0 | 18255  | FVPCSICSNNPTCWAICK<br>RIP            | 2.99 | 0.01 | 2.67 | 3.16 | 0.22 | 0.28 |
| 23465 | 0 | 18255  | FVPCSICSNNPTCWAICK<br>RIP            | 2.99 | 0.01 | 2.67 | 0.68 | 0.22 | 0.28 |
| 23466 | 0 | 18255  | FVPCSICSNNPTCWAICK<br>RIP            | 2.99 | 0.01 | 2.67 | 0.68 | 2.25 | 1.75 |
| 23467 | 0 | 18255  | FVPCSICSNNPTCWAICK<br>RIP            | 2.99 | 0.01 | 2.67 | 0.44 | 1.59 | 0.85 |
| 23468 | 0 | 18255  | FVPCSICSNNPTCWAICK<br>RIP            | 2.99 | 0.01 | 2.67 | 1.15 | 0.22 | 0.85 |
| 23469 | 0 | 18255  | FVPCSICSNNPTCWAICK<br>RIP            | 2.99 | 0.01 | 2.67 | 1.15 | 0.22 | 0.85 |
| 23470 | 0 | 450603 | FVPHKWY                              | 1.99 | 0.01 | 0.90 | 0.44 | 1.41 | 1.39 |
| 23471 | 0 | 98048  | FVPIQNSKSA                           | 2.29 | 0.01 | 3.08 | 0.68 | 0.22 | 0.28 |
| 23472 | 0 | 98048  | FVPIQNSKSA                           | 2.29 | 0.01 | 3.08 | 1.20 | 0.22 | 0.28 |
| 23473 | 0 | 232639 | FVPLYSSKSATSVGTPTR<br>VS             | 2.96 | 0.01 | 2.28 | 0.68 | 0.22 | 0.28 |
| 23474 | 0 | 232639 | FVPLYSSKSATSVGTPTR<br>VS             | 2.96 | 0.01 | 2.28 | 0.68 | 0.22 | 0.28 |
| 23475 | 0 | 111296 | FVPQLNLHTPKN                         | 2.48 | 0.01 | 0.90 | 0.44 | 0.85 | 1.39 |
| 23476 | 0 | 98049  | FVPRAD                               | 1.88 | 0.01 | 3.13 | 0.68 | 0.22 | 0.28 |
| 23477 | 0 | 98049  | FVPRAD                               | 1.88 | 0.01 | 3.13 | 0.68 | 0.22 | 0.28 |
| 23478 | 0 | 98049  | FVPRAD                               | 1.88 | 0.01 | 3.13 | 0.68 | 0.22 | 1.75 |
| 23479 | 0 | 18262  | FVPSMQ                               | 1.88 | 0.01 | 2.96 | 0.44 | 0.85 | 0.28 |
| 23480 | 0 | 18271  | FVRDGQSVIGACASPYE<br>GRYRDLYDALRRLLY | 3.40 | 0.01 | 2.14 | 1.20 | 0.22 | 0.28 |
| 23481 | 0 | 18271  | FVRDGQSVIGACASPYE<br>GRYRDLYDALRRLLY | 3.40 | 0.01 | 2.14 | 1.20 | 0.22 | 0.28 |



|       |   |        |                                       |      |      |      |      |      |      |
|-------|---|--------|---------------------------------------|------|------|------|------|------|------|
| 23482 | 0 | 18271  | FVRDGQSVIGACASPYE<br>GRYRDLYDALRRLLY  | 3.40 | 0.01 | 2.14 | 1.20 | 0.22 | 1.34 |
| 23483 | 0 | 18271  | FVRDGQSVIGACASPYE<br>GRYRDLYDALRRLLY  | 3.40 | 0.01 | 2.14 | 1.20 | 0.22 | 0.28 |
| 23484 | 0 | 137651 | FVRFDSDAENPRMEPR<br>ARWMEREG          | 3.14 | 0.01 | 2.19 | 2.04 | 0.22 | 1.57 |
| 23485 | 0 | 137651 | FVRFDSDAENPRMEPR<br>ARWMEREG          | 3.14 | 0.01 | 2.19 | 2.04 | 0.22 | 1.57 |
| 23486 | 0 | 137651 | FVRFDSDAENPRMEPR<br>ARWMEREG          | 3.14 | 0.01 | 2.19 | 2.04 | 0.22 | 1.57 |
| 23487 | 0 | 137651 | FVRFDSDAENPRMEPR<br>ARWMEREG          | 3.14 | 0.01 | 2.19 | 2.04 | 2.35 | 1.57 |
| 23488 | 0 | 78389  | FVRFYNLETQLQQRYP                      | 2.70 | 0.01 | 0.90 | 0.68 | 0.22 | 0.28 |
| 23489 | 0 | 18275  | FVRSGQPVIGACTSPYD<br>GKYWSILYSRLRKMLY | 3.41 | 0.01 | 2.14 | 1.20 | 0.22 | 0.28 |
| 23490 | 0 | 18275  | FVRSGQPVIGACTSPYD<br>GKYWSILYSRLRKMLY | 3.41 | 0.01 | 2.14 | 1.20 | 0.22 | 0.28 |
| 23491 | 0 | 18275  | FVRSGQPVIGACTSPYD<br>GKYWSILYSRLRKMLY | 3.41 | 0.01 | 2.14 | 1.20 | 0.22 | 0.28 |
| 23492 | 0 | 115142 | FVSTIVSQWIVGNHAT<br>DLWQNCSTS         | 3.20 | 0.01 | 0.78 | 0.44 | 1.13 | 0.28 |
| 23493 | 0 | 115142 | FVSTIVSQWIVGNHAT<br>DLWQNCSTS         | 3.20 | 0.01 | 0.78 | 0.44 | 1.41 | 0.28 |
| 23494 | 0 | 188177 | FVTLHGAERL                            | 2.29 | 0.01 | 2.92 | 3.37 | 0.22 | 0.85 |
| 23495 | 0 | 188178 | FVTLHGAERLEEETNDE                     | 2.78 | 0.01 | 2.92 | 1.15 | 0.22 | 0.28 |
| 23496 | 0 | 133577 | FVVDMMERLRISQKWW<br>RVA               | 2.86 | 0.01 | 0.78 | 0.68 | 0.22 | 0.85 |
| 23497 | 0 | 133577 | FVVDMMERLRISQKWW<br>RVA               | 2.86 | 0.01 | 0.78 | 0.68 | 0.22 | 0.85 |
| 23498 | 0 | 133577 | FVVDMMERLRISQKWW<br>RVA               | 2.86 | 0.01 | 0.78 | 0.68 | 0.22 | 0.85 |
| 23499 | 0 | 18314  | FVVEYTKKW                             | 2.21 | 0.01 | 0.90 | 0.44 | 1.23 | 0.28 |
| 23500 | 0 | 18314  | FVVEYTKKW                             | 2.21 | 0.01 | 0.90 | 0.44 | 1.23 | 1.39 |
| 23501 | 0 | 18314  | FVVEYTKKW                             | 2.21 | 0.01 | 0.90 | 0.44 | 1.23 | 0.28 |
| 23502 | 0 | 237722 | FVVGNSLLDTSS                          | 2.54 | 0.01 | 0.78 | 0.44 | 1.13 | 1.28 |
| 23503 | 0 | 18320  | FVVSGLAGAAIGGI                        | 2.64 | 0.01 | 2.59 | 0.44 | 0.85 | 0.28 |
| 23504 | 0 | 125055 | FVYGGCQGNN                            | 2.31 | 0.01 | 0.78 | 0.68 | 0.22 | 0.28 |
| 23505 | 0 | 125055 | FVYGGCQGNN                            | 2.31 | 0.01 | 0.78 | 0.68 | 0.22 | 3.16 |
| 23506 | 0 | 125055 | FVYGGCQGNN                            | 2.31 | 0.01 | 0.78 | 0.68 | 0.22 | 0.85 |
| 23507 | 0 | 125055 | FVYGGCQGNN                            | 2.31 | 0.01 | 0.78 | 0.68 | 0.22 | 1.34 |
| 23508 | 0 | 18336  | FWAGDLLHRFWH                          | 2.49 | 0.01 | 2.69 | 0.68 | 0.22 | 0.28 |

|       |   |        |                                    |      |      |      |      |      |      |
|-------|---|--------|------------------------------------|------|------|------|------|------|------|
| 23509 | 0 | 18336  | FWAGDLLHRFWH                       | 2.49 | 0.01 | 2.69 | 1.20 | 0.22 | 0.28 |
| 23510 | 0 | 106430 | FWASDLMHRL                         | 2.29 | 0.01 | 2.75 | 0.44 | 1.23 | 0.85 |
| 23511 | 0 | 103910 | FWDDFW                             | 1.92 | 0.01 | 0.90 | 1.15 | 0.22 | 0.28 |
| 23512 | 0 | 103910 | FWDDFW                             | 1.92 | 0.01 | 0.90 | 1.15 | 0.22 | 0.28 |
| 23513 | 0 | 18343  | FWGDRVDSQPFAIPYIH<br>PTNPFAPDVTAAA | 3.32 | 0.01 | 2.53 | 0.44 | 0.85 | 0.28 |
| 23514 | 0 | 18343  | FWGDRVDSQPFAIPYIH<br>PTNPFAPDVTAAA | 3.32 | 0.01 | 2.53 | 0.44 | 0.85 | 0.28 |
| 23515 | 0 | 171112 | FWKPHRTHFWWG                       | 2.49 | 0.01 | 0.90 | 0.44 | 0.85 | 1.39 |
| 23516 | 0 | 79219  | FWLAVR                             | 1.88 | 0.01 | 0.90 | 0.68 | 0.22 | 1.39 |
| 23517 | 0 | 103912 | FWLDFW                             | 1.92 | 0.01 | 0.90 | 1.15 | 0.22 | 0.28 |
| 23518 | 0 | 103912 | FWLDFW                             | 1.92 | 0.01 | 0.90 | 1.15 | 0.22 | 0.28 |
| 23519 | 0 | 119165 | FWRFLWGSSQ                         | 2.33 | 0.01 | 3.38 | 2.04 | 2.60 | 1.75 |
| 23520 | 0 | 18363  | FWRGDLVDFQV                        | 2.50 | 0.01 | 3.17 | 0.44 | 0.85 | 1.66 |
| 23521 | 0 | 18363  | FWRGDLVDFQV                        | 2.50 | 0.01 | 3.17 | 0.44 | 0.85 | 1.66 |
| 23522 | 0 | 18363  | FWRGDLVDFQV                        | 2.50 | 0.01 | 3.17 | 0.44 | 0.85 | 0.28 |
| 23523 | 0 | 18363  | FWRGDLVDFQV                        | 2.50 | 0.01 | 3.17 | 0.44 | 0.85 | 0.28 |
| 23524 | 0 | 18363  | FWRGDLVDFQV                        | 2.50 | 0.01 | 3.17 | 0.44 | 0.85 | 0.28 |
| 23525 | 0 | 18363  | FWRGDLVDFQV                        | 2.50 | 0.01 | 3.17 | 0.44 | 0.85 | 0.28 |
| 23526 | 0 | 18363  | FWRGDLVDFQV                        | 2.50 | 0.01 | 3.17 | 0.44 | 0.85 | 1.27 |
| 23527 | 0 | 18363  | FWRGDLVDFQV                        | 2.50 | 0.01 | 2.82 | 0.44 | 0.85 | 1.27 |
| 23528 | 0 | 18363  | FWRGDLVDFQV                        | 2.50 | 0.01 | 2.82 | 2.89 | 0.22 | 1.34 |
| 23529 | 0 | 18363  | FWRGDLVDFQV                        | 2.50 | 0.01 | 2.82 | 2.89 | 0.22 | 0.28 |
| 23530 | 0 | 18363  | FWRGDLVDFQV                        | 2.50 | 0.01 | 2.82 | 2.89 | 0.22 | 1.34 |
| 23531 | 0 | 18363  | FWRGDLVDFQV                        | 2.50 | 0.01 | 2.82 | 2.89 | 0.22 | 0.28 |
| 23532 | 0 | 18363  | FWRGDLVDFQV                        | 2.50 | 0.01 | 2.82 | 2.89 | 0.22 | 0.28 |
| 23533 | 0 | 18363  | FWRGDLVDFQV                        | 2.50 | 0.01 | 2.82 | 2.89 | 0.22 | 0.28 |
| 23534 | 0 | 18363  | FWRGDLVDFQV                        | 2.50 | 0.01 | 2.82 | 2.89 | 0.22 | 0.28 |
| 23535 | 0 | 18363  | FWRGDLVDFQV                        | 2.50 | 0.01 | 2.82 | 2.89 | 0.22 | 1.34 |
| 23536 | 0 | 18364  | FWRGDLVDFQVFPTKY<br>HSG            | 2.92 | 0.01 | 2.82 | 0.44 | 0.85 | 0.28 |
| 23537 | 0 | 171113 | FWTIWLWNKQKYEAG                    | 2.64 | 0.01 | 0.78 | 0.44 | 1.41 | 0.28 |
| 23538 | 0 | 171113 | FWTIWLWNKQKYEAG                    | 2.64 | 0.01 | 0.78 | 0.44 | 1.13 | 0.28 |
| 23539 | 0 | 236105 | FWWENEGVFSMQQR                     | 2.60 | 0.01 | 0.78 | 0.44 | 1.13 | 2.66 |
| 23540 | 0 | 236105 | FWWENEGVFSMQQR                     | 2.60 | 0.01 | 0.78 | 0.44 | 1.41 | 2.66 |
| 23541 | 0 | 100856 | FWYIPPSLRTLEDNEER<br>MSRLSKVAP     | 3.16 | 0.01 | 0.78 | 0.44 | 1.13 | 2.02 |
| 23542 | 0 | 18385  | FYEPLVRRRC                         | 2.20 | 0.01 | 3.59 | 1.15 | 0.22 | 0.85 |
| 23543 | 0 | 18385  | FYEPLVRRRC                         | 2.20 | 0.01 | 3.59 | 1.15 | 0.22 | 0.28 |
| 23544 | 0 | 18385  | FYEPLVRRRC                         | 2.20 | 0.01 | 3.59 | 1.15 | 0.22 | 0.28 |
| 23545 | 0 | 132313 | FYERPMDEGLAT                       | 2.43 | 0.01 | 0.90 | 1.15 | 0.22 | 1.39 |
| 23546 | 0 | 99261  | FYFPSRRFSTRYGNQ                    | 2.70 | 0.01 | 2.16 | 0.44 | 1.23 | 1.48 |
| 23547 | 0 | 99261  | FYFPSRRFSTRYGNQ                    | 2.70 | 0.01 | 2.16 | 0.44 | 1.23 | 1.48 |

|       |   |        |                                  |      |      |      |      |      |      |
|-------|---|--------|----------------------------------|------|------|------|------|------|------|
| 23548 | 0 | 18399  | FYGLHASLFGMR                     | 2.48 | 0.01 | 0.90 | 0.68 | 0.22 | 1.39 |
| 23549 | 0 | 420596 | FYKPTGG                          | 1.99 | 0.01 | 3.61 | 0.68 | 0.22 | 1.48 |
| 23550 | 0 | 420596 | FYKPTGG                          | 1.99 | 0.01 | 3.61 | 0.68 | 0.22 | 0.28 |
| 23551 | 0 | 420596 | FYKPTGG                          | 1.99 | 0.01 | 3.61 | 0.68 | 0.22 | 0.85 |
| 23552 | 0 | 420596 | FYKPTGG                          | 1.99 | 0.01 | 3.61 | 0.68 | 0.22 | 0.85 |
| 23553 | 0 | 420596 | FYKPTGG                          | 1.99 | 0.01 | 3.61 | 0.68 | 0.22 | 0.85 |
| 23554 | 0 | 420596 | FYKPTGG                          | 1.99 | 0.01 | 3.61 | 0.68 | 0.22 | 0.85 |
| 23555 | 0 | 420596 | FYKPTGG                          | 1.99 | 0.01 | 3.61 | 2.22 | 0.22 | 0.28 |
| 23556 | 0 | 420596 | FYKPTGG                          | 1.99 | 0.01 | 3.61 | 0.68 | 0.22 | 1.34 |
| 23557 | 0 | 149709 | FYLNKNNKGDATLKIP                 | 2.65 | 0.01 | 3.67 | 1.12 | 0.22 | 0.28 |
| 23558 | 0 | 122768 | FYNLSKVTHIEIRNTR                 | 2.71 | 0.01 | 0.78 | 3.01 | 0.22 | 0.28 |
| 23559 | 0 | 125416 | FYNLSKVTHIEIRNTRNLTY             | 2.95 | 0.01 | 0.78 | 0.44 | 1.13 | 0.28 |
| 23560 | 0 | 18441  | FYNQKFKGKATL                     | 2.48 | 0.01 | 1.75 | 3.89 | 1.13 | 1.75 |
| 23561 | 0 | 18441  | FYNQKFKGKATL                     | 2.48 | 0.01 | 1.75 | 2.84 | 0.22 | 1.27 |
| 23562 | 0 | 18441  | FYNQKFKGKATL                     | 2.48 | 0.01 | 1.75 | 2.84 | 0.22 | 0.28 |
| 23563 | 0 | 18441  | FYNQKFKGKATL                     | 2.48 | 0.01 | 1.75 | 2.84 | 2.60 | 1.75 |
| 23564 | 0 | 18441  | FYNQKFKGKATL                     | 2.48 | 0.01 | 1.75 | 2.84 | 0.22 | 0.28 |
| 23565 | 0 | 112119 | FYNTVLK                          | 1.99 | 0.01 | 0.78 | 0.44 | 1.13 | 0.28 |
| 23566 | 0 | 18442  | FYPELFRQFY                       | 2.34 | 0.01 | 1.60 | 0.44 | 1.23 | 0.28 |
| 23567 | 0 | 18442  | FYPELFRQFY                       | 2.34 | 0.01 | 1.60 | 0.44 | 1.23 | 0.28 |
| 23568 | 0 | 115258 | FYPELFRQFYQLDAYPSGAW             | 2.95 | 0.01 | 1.60 | 0.44 | 1.23 | 2.51 |
| 23569 | 0 | 127987 | FYQALQNSLGGEDSDARVEA             | 2.94 | 0.01 | 0.78 | 0.44 | 1.13 | 0.28 |
| 23570 | 0 | 115259 | FYQKFPQYLQYLYQGPIVLN             | 2.98 | 0.01 | 1.60 | 0.44 | 1.23 | 1.28 |
| 23571 | 0 | 18452  | FYQLDAYPSG                       | 2.29 | 0.01 | 1.60 | 0.44 | 1.23 | 0.28 |
| 23572 | 0 | 109003 | FYQLDAYPSGAWYYVPLGTQYTDAPSFSDI   | 3.36 | 0.01 | 1.60 | 0.44 | 1.23 | 0.85 |
| 23573 | 0 | 99262  | FYSNAPQEIFIQQGR                  | 2.66 | 0.01 | 2.16 | 0.44 | 1.23 | 1.48 |
| 23574 | 0 | 293133 | FYSREVDVSQCNMQE                  | 2.66 | 0.01 | 1.61 | 0.44 | 0.85 | 1.28 |
| 23575 | 0 | 18471  | FYSTNPDTTVPIYGKTISTPSDYMCGEFSDDL | 3.39 | 0.01 | 3.02 | 0.68 | 0.22 | 0.85 |
| 23576 | 0 | 149318 | FYYGKGLINVQAAAQ                  | 2.65 | 0.01 | 3.67 | 3.16 | 0.22 | 0.28 |
| 23577 | 0 | 105801 | GAA                              | 1.32 | 0.01 | 0.78 | 3.01 | 0.22 | 0.28 |
| 23578 | 0 | 105801 | GAA                              | 1.32 | 0.01 | 0.78 | 3.01 | 0.22 | 0.28 |
| 23579 | 0 | 18494  | GAAAAGAVVGGLG                    | 2.61 | 0.01 | 2.52 | 1.20 | 0.22 | 0.28 |
| 23580 | 0 | 293157 | GAAAAPAAAAEPEEE                  | 2.72 | 0.01 | 1.61 | 0.44 | 0.85 | 1.28 |
| 23581 | 0 | 18500  | GAAALRAHVSGRRA                   | 2.65 | 0.01 | 2.40 | 1.20 | 0.22 | 0.28 |
| 23582 | 0 | 18500  | GAAALRAHVSGRRA                   | 2.65 | 0.01 | 2.40 | 1.20 | 0.22 | 0.85 |
| 23583 | 0 | 18502  | GAAARTT                          | 2.02 | 0.01 | 1.72 | 0.44 | 0.85 | 0.28 |
| 23584 | 0 | 293186 | GAADTDSAKGKATGG                  | 2.73 | 0.01 | 1.61 | 0.44 | 0.85 | 1.28 |
| 23585 | 0 | 293187 | GAADTDSAKGKATGS                  | 2.74 | 0.01 | 1.61 | 0.44 | 0.85 | 1.28 |
| 23586 | 0 | 18508  | GAAILTPVPNPSTA                   | 2.70 | 0.01 | 2.76 | 0.44 | 1.59 | 0.28 |

|       |   |        |                                    |      |      |      |      |      |      |
|-------|---|--------|------------------------------------|------|------|------|------|------|------|
| 23587 | 0 | 18509  | GAAILVAGLSGCSSNKST<br>TG           | 2.97 | 0.01 | 2.04 | 2.52 | 0.22 | 0.28 |
| 23588 | 0 | 18509  | GAAILVAGLSGCSSNKST<br>TG           | 2.97 | 0.01 | 2.04 | 2.52 | 0.22 | 0.85 |
| 23589 | 0 | 18509  | GAAILVAGLSGCSSNKST<br>TG           | 2.97 | 0.01 | 2.04 | 2.52 | 0.22 | 0.85 |
| 23590 | 0 | 293247 | GAAKAPAPKAAAPAP                    | 2.74 | 0.01 | 1.61 | 0.44 | 0.85 | 1.28 |
| 23591 | 0 | 18511  | GAALLQSA                           | 2.15 | 0.01 | 2.21 | 1.12 | 0.22 | 0.28 |
| 23592 | 0 | 18511  | GAALLQSA                           | 2.15 | 0.01 | 2.21 | 0.44 | 0.85 | 0.28 |
| 23593 | 0 | 18512  | GAALLQSARR                         | 2.32 | 0.01 | 2.21 | 1.12 | 0.22 | 0.28 |
| 23594 | 0 | 18515  | GAALQIPFAMQMAYRF<br>N              | 2.79 | 0.01 | 2.48 | 0.44 | 0.85 | 0.28 |
| 23595 | 0 | 18517  | GAANPSDDSSDSDAK                    | 2.73 | 0.01 | 3.97 | 0.44 | 0.85 | 0.28 |
| 23596 | 0 | 18518  | GAAPLTAVAPAHDTTPV<br>PDVDSRGAILRRQ | 3.36 | 0.01 | 2.53 | 0.44 | 0.85 | 0.28 |
| 23597 | 0 | 18518  | GAAPLTAVAPAHDTTPV<br>PDVDSRGAILRRQ | 3.36 | 0.01 | 2.53 | 0.44 | 0.85 | 0.28 |
| 23598 | 0 | 18519  | GAAPTTSDVAGLEKDPV<br>ANVA          | 3.01 | 0.01 | 3.36 | 2.52 | 0.22 | 0.28 |
| 23599 | 0 | 18519  | GAAPTTSDVAGLEKDPV<br>ANVA          | 3.01 | 0.01 | 3.36 | 2.52 | 0.22 | 0.28 |
| 23600 | 0 | 18519  | GAAPTTSDVAGLEKDPV<br>ANVA          | 3.01 | 0.01 | 3.36 | 0.68 | 0.22 | 0.28 |
| 23601 | 0 | 18519  | GAAPTTSDVAGLEKDPV<br>ANVA          | 3.01 | 0.01 | 3.36 | 2.25 | 0.22 | 0.28 |
| 23602 | 0 | 18519  | GAAPTTSDVAGLEKDPV<br>ANVA          | 3.01 | 0.01 | 3.36 | 2.25 | 0.22 | 0.28 |
| 23603 | 0 | 18519  | GAAPTTSDVAGLEKDPV<br>ANVA          | 3.01 | 0.01 | 3.36 | 3.42 | 0.22 | 0.28 |
| 23604 | 0 | 18519  | GAAPTTSDVAGLEKDPV<br>ANVA          | 3.01 | 0.01 | 3.36 | 2.42 | 0.22 | 0.28 |
| 23605 | 0 | 18519  | GAAPTTSDVAGLEKDPV<br>ANVA          | 3.01 | 0.01 | 3.36 | 4.33 | 0.22 | 0.28 |
| 23606 | 0 | 18519  | GAAPTTSDVAGLEKDPV<br>ANVA          | 3.01 | 0.01 | 3.36 | 4.33 | 0.22 | 0.28 |
| 23607 | 0 | 18519  | GAAPTTSDVAGLEKDPV<br>ANVA          | 3.01 | 0.01 | 3.36 | 4.33 | 0.22 | 0.28 |
| 23608 | 0 | 18519  | GAAPTTSDVAGLEKDPV<br>ANVA          | 3.01 | 0.01 | 3.36 | 4.33 | 0.22 | 0.28 |
| 23609 | 0 | 18519  | GAAPTTSDVAGLEKDPV<br>ANVA          | 3.01 | 0.01 | 3.36 | 4.33 | 0.22 | 0.28 |
| 23610 | 0 | 232518 | GAARHCQPASPATMM                    | 2.66 | 0.01 | 0.90 | 2.22 | 0.85 | 0.28 |
| 23611 | 0 | 232518 | GAARHCQPASPATMM                    | 2.66 | 0.01 | 0.90 | 2.22 | 0.85 | 1.27 |
| 23612 | 0 | 18524  | GAARQPD                            | 2.01 | 0.01 | 2.24 | 1.12 | 0.22 | 0.28 |

|       |   |        |                                    |      |      |      |      |      |      |
|-------|---|--------|------------------------------------|------|------|------|------|------|------|
| 23613 | 0 | 18524  | GAARQPD                            | 2.01 | 0.01 | 2.24 | 0.68 | 0.22 | 0.28 |
| 23614 | 0 | 175802 | GAARVTSWLGRQLRI                    | 2.68 | 0.01 | 2.63 | 1.15 | 0.22 | 0.85 |
| 23615 | 0 | 175802 | GAARVTSWLGRQLRI                    | 2.68 | 0.01 | 2.63 | 1.15 | 0.22 | 0.85 |
| 23616 | 0 | 175802 | GAARVTSWLGRQLRI                    | 2.68 | 0.01 | 2.63 | 1.15 | 0.22 | 0.85 |
| 23617 | 0 | 18527  | GAASSYFEYVDTYG                     | 2.62 | 0.01 | 2.14 | 0.44 | 0.22 | 0.28 |
| 23618 | 0 | 18527  | GAASSYFEYVDTYG                     | 2.62 | 0.01 | 2.14 | 0.68 | 2.25 | 1.75 |
| 23619 | 0 | 18527  | GAASSYFEYVDTYG                     | 2.62 | 0.01 | 2.14 | 3.01 | 0.22 | 0.28 |
| 23620 | 0 | 18529  | GAATAAAGGYKA                       | 2.54 | 0.01 | 3.22 | 0.44 | 1.23 | 0.28 |
| 23621 | 0 | 18529  | GAATAAAGGYKA                       | 2.54 | 0.01 | 3.22 | 0.44 | 1.23 | 0.28 |
| 23622 | 0 | 18529  | GAATAAAGGYKA                       | 2.54 | 0.01 | 3.22 | 0.44 | 1.23 | 0.85 |
| 23623 | 0 | 18529  | GAATAAAGGYKA                       | 2.54 | 0.01 | 3.22 | 0.44 | 1.23 | 0.85 |
| 23624 | 0 | 18529  | GAATAAAGGYKA                       | 2.54 | 0.01 | 3.22 | 0.44 | 1.23 | 0.85 |
| 23625 | 0 | 18529  | GAATAAAGGYKA                       | 2.54 | 0.01 | 3.22 | 0.44 | 1.23 | 0.85 |
| 23626 | 0 | 18529  | GAATAAAGGYKA                       | 2.54 | 0.01 | 3.22 | 0.44 | 1.23 | 0.85 |
| 23627 | 0 | 82527  | GAATPYAGEPARPPETL<br>GEE           | 2.98 | 0.01 | 0.90 | 2.74 | 0.22 | 1.48 |
| 23628 | 0 | 82528  | GAATPYSGEDSPFDMTL<br>GEE           | 2.94 | 0.01 | 0.90 | 2.74 | 0.22 | 1.48 |
| 23629 | 0 | 82529  | GAATPYSGEPSPFDEVL<br>GEE           | 2.94 | 0.01 | 0.90 | 2.74 | 0.22 | 1.48 |
| 23630 | 0 | 82529  | GAATPYSGEPSPFDEVL<br>GEE           | 2.94 | 0.01 | 0.90 | 2.63 | 0.22 | 1.48 |
| 23631 | 0 | 82529  | GAATPYSGEPSPFDEVL<br>GEE           | 2.94 | 0.01 | 0.90 | 2.63 | 0.22 | 0.85 |
| 23632 | 0 | 123206 | GAAVDLRQG                          | 2.23 | 0.01 | 2.28 | 2.00 | 0.22 | 0.28 |
| 23633 | 0 | 18536  | GACAPYRRHLHCD                      | 2.55 | 0.01 | 1.66 | 2.36 | 0.22 | 0.28 |
| 23634 | 0 | 18536  | GACAPYRRHLHCD                      | 2.55 | 0.01 | 1.66 | 0.44 | 1.74 | 0.28 |
| 23635 | 0 | 135459 | GACLGKAC                           | 2.17 | 0.01 | 0.78 | 1.20 | 0.22 | 0.28 |
| 23636 | 0 | 226840 | GACPNPWGLLCGAAGA<br>EK             | 2.88 | 0.01 | 0.90 | 0.44 | 1.41 | 1.66 |
| 23637 | 0 | 226840 | GACPNPWGLLCGAAGA<br>EK             | 2.88 | 0.01 | 0.90 | 0.44 | 1.41 | 0.28 |
| 23638 | 0 | 226841 | GACRNPWGLTCGAAGA<br>EK             | 2.85 | 0.01 | 0.90 | 0.44 | 1.41 | 1.66 |
| 23639 | 0 | 226841 | GACRNPWGLTCGAAGA<br>EK             | 2.85 | 0.01 | 0.90 | 0.44 | 1.41 | 0.28 |
| 23640 | 0 | 18547  | GACSFSSI                           | 2.13 | 0.01 | 2.21 | 1.12 | 0.22 | 0.28 |
| 23641 | 0 | 18548  | GACSFSSIPN                         | 2.30 | 0.01 | 2.21 | 1.12 | 0.22 | 0.28 |
| 23642 | 0 | 18548  | GACSFSSIPN                         | 2.30 | 0.01 | 2.21 | 1.12 | 0.22 | 0.28 |
| 23643 | 0 | 105802 | GAD                                | 1.37 | 0.01 | 0.78 | 3.01 | 0.22 | 0.28 |
| 23644 | 0 | 105802 | GAD                                | 1.37 | 0.01 | 0.78 | 3.01 | 0.22 | 0.28 |
| 23645 | 0 | 152559 | GADESVVKEA                         | 2.32 | 0.01 | 2.18 | 2.16 | 0.22 | 0.28 |
| 23646 | 0 | 110232 | GADGIPGA                           | 2.17 | 0.01 | 1.60 | 2.61 | 0.22 | 0.28 |
| 23647 | 0 | 110232 | GADGIPGA                           | 2.17 | 0.01 | 1.60 | 2.61 | 0.22 | 0.28 |
| 23648 | 0 | 18553  | GADGTAELTTTAATRFM<br>KDLYFTSTNGVGE | 3.34 | 0.01 | 2.70 | 1.15 | 0.22 | 0.28 |
| 23649 | 0 | 135926 | GADIKKTMGPV                        | 2.45 | 0.01 | 0.78 | 0.44 | 1.13 | 0.28 |

|       |   |        |                                            |      |      |      |      |      |      |
|-------|---|--------|--------------------------------------------|------|------|------|------|------|------|
| 23650 | 0 | 82531  | GADLAAAQAA                                 | 2.34 | 0.01 | 3.06 | 0.44 | 0.85 | 0.28 |
| 23651 | 0 | 82532  | GADLAGADLA                                 | 2.38 | 0.01 | 3.06 | 0.44 | 0.85 | 0.28 |
| 23652 | 0 | 105803 | GAE                                        | 1.37 | 0.01 | 0.78 | 3.01 | 0.22 | 0.28 |
| 23653 | 0 | 105803 | GAE                                        | 1.37 | 0.01 | 0.78 | 3.01 | 0.22 | 0.28 |
| 23654 | 0 | 105803 | GAE                                        | 1.37 | 0.01 | 0.78 | 3.01 | 0.22 | 0.28 |
| 23655 | 0 | 105803 | GAE                                        | 1.37 | 0.01 | 0.78 | 3.01 | 0.22 | 0.85 |
| 23656 | 0 | 105803 | GAE                                        | 1.37 | 0.01 | 0.78 | 3.01 | 0.22 | 0.28 |
| 23657 | 0 | 18564  | GAEASTSLFHFRI PRSYFL<br>R                  | 2.95 | 0.01 | 0.90 | 3.93 | 0.22 | 0.28 |
| 23658 | 0 | 18564  | GAEASTSLFHFRI PRSYFL<br>R                  | 2.95 | 0.01 | 0.90 | 0.44 | 1.74 | 0.28 |
| 23659 | 0 | 18565  | GAEGEPKPGSPDADRP<br>EGWPSLEAITHPPAPA<br>TP | 3.54 | 0.01 | 4.93 | 0.68 | 0.22 | 2.02 |
| 23660 | 0 | 167581 | GAEGHWRRLP                                 | 2.31 | 0.01 | 0.78 | 0.44 | 1.13 | 0.85 |
| 23661 | 0 | 167581 | GAEGHWRRLP                                 | 2.31 | 0.01 | 0.78 | 2.79 | 1.13 | 1.28 |
| 23662 | 0 | 167581 | GAEGHWRRLP                                 | 2.31 | 0.01 | 0.78 | 1.81 | 1.41 | 1.28 |
| 23663 | 0 | 115260 | GAEGQRPFGYGG                               | 2.56 | 0.01 | 0.78 | 1.15 | 0.22 | 2.75 |
| 23664 | 0 | 104785 | GAEIVYKSPVVSGD                             | 2.61 | 4.33 | 1.75 | 0.68 | 0.22 | 0.28 |
| 23665 | 0 | 104785 | GAEIVYKSPVVSGD                             | 2.61 | 4.33 | 1.75 | 1.15 | 0.22 | 0.28 |
| 23666 | 0 | 104786 | GAEIVYKSPVVSGD                             | 2.61 | 0.01 | 1.75 | 1.15 | 0.22 | 0.28 |
| 23667 | 0 | 134967 | GAEIVYKSPVVSGDTS PR<br>HLSNV               | 3.05 | 4.93 | 0.78 | 1.15 | 0.22 | 0.85 |
| 23668 | 0 | 188179 | GAERLEEETN                                 | 2.31 | 0.01 | 2.92 | 0.68 | 0.22 | 0.85 |
| 23669 | 0 | 188179 | GAERLEEETN                                 | 2.31 | 0.01 | 2.92 | 1.81 | 0.22 | 0.85 |
| 23670 | 0 | 188179 | GAERLEEETN                                 | 2.31 | 0.01 | 2.92 | 3.37 | 0.22 | 0.85 |
| 23671 | 0 | 18569  | GAETHLFT                                   | 2.12 | 0.01 | 3.55 | 0.68 | 0.22 | 0.28 |
| 23672 | 0 | 178232 | GAEYKQKQINGNFYVTS<br>DLITKNYD              | 3.16 | 0.01 | 3.93 | 0.68 | 0.22 | 0.85 |
| 23673 | 0 | 18572  | GAFDLKTTFCIMTTRNT<br>GQPA                  | 2.96 | 0.01 | 2.14 | 1.20 | 0.22 | 0.28 |
| 23674 | 0 | 18572  | GAFDLKTTFCIMTTRNT<br>GQPA                  | 2.96 | 0.01 | 2.14 | 1.20 | 0.22 | 1.34 |
| 23675 | 0 | 18572  | GAFDLKTTFCIMTTRNT<br>GQPA                  | 2.96 | 0.01 | 2.14 | 0.44 | 0.22 | 0.28 |
| 23676 | 0 | 18572  | GAFDLKTTFCIMTTRNT<br>GQPA                  | 2.96 | 0.01 | 2.14 | 1.20 | 0.22 | 0.28 |
| 23677 | 0 | 18572  | GAFDLKTTFCIMTTRNT<br>GQPA                  | 2.96 | 0.01 | 2.14 | 1.20 | 0.22 | 0.28 |
| 23678 | 0 | 420475 | GAFLDAFHQILSEGENA<br>QAALTRLSRTFDAFLG      | 3.46 | 0.01 | 4.33 | 0.68 | 0.22 | 0.28 |
| 23679 | 0 | 79834  | GAGAADCEFEESYTVY<br>QSYLDQLPV              | 3.19 | 0.01 | 3.93 | 0.68 | 0.22 | 2.02 |
| 23680 | 0 | 79834  | GAGAADCEFEESYTVY<br>QSYLDQLPV              | 3.19 | 0.01 | 3.93 | 0.68 | 0.22 | 0.85 |

|       |   |        |                                |      |      |      |      |      |      |
|-------|---|--------|--------------------------------|------|------|------|------|------|------|
| 23681 | 0 | 79834  | GAGAADCFEETISYTVY<br>QSYLDQLPV | 3.19 | 0.01 | 3.93 | 0.68 | 0.22 | 1.34 |
| 23682 | 0 | 79834  | GAGAADCFEETISYTVY<br>QSYLDQLPV | 3.19 | 0.01 | 3.93 | 0.68 | 0.22 | 2.02 |
| 23683 | 0 | 79834  | GAGAADCFEETISYTVY<br>QSYLDQLPV | 3.19 | 0.01 | 3.93 | 0.68 | 0.22 | 0.85 |
| 23684 | 0 | 18578  | GAGAAITPTPVNPS                 | 2.70 | 0.01 | 2.76 | 0.44 | 1.59 | 0.28 |
| 23685 | 0 | 138854 | GAGAGAGA                       | 2.16 | 0.01 | 2.43 | 0.68 | 0.22 | 0.28 |
| 23686 | 0 | 18579  | GAGAGAVDSILGGVATY<br>GAAC      | 3.02 | 0.01 | 0.90 | 0.44 | 1.74 | 1.57 |
| 23687 | 0 | 227188 | GAGAGGGAGGAGAGG                | 2.73 | 0.01 | 2.48 | 0.44 | 1.59 | 0.28 |
| 23688 | 0 | 503983 | GAGAGGGGRGRGGSG<br>GRGRG       | 3.02 | 2.84 | 2.48 | 0.44 | 1.74 | 0.28 |
| 23689 | 0 | 503980 | GAGAGGGGRGRGGSG<br>GRGRG       | 3.02 | 3.24 | 2.48 | 0.44 | 1.74 | 0.28 |
| 23690 | 0 | 503981 | GAGAGGGGRGRGGSG<br>GRGRG       | 3.02 | 4.23 | 2.48 | 0.44 | 1.74 | 0.28 |
| 23691 | 0 | 503982 | GAGAGGGGRGRGGSG<br>GRGRG       | 3.02 | 4.03 | 2.48 | 0.44 | 1.74 | 0.28 |
| 23692 | 0 | 120548 | GAGAPVYLAADVLEYLTA<br>E        | 2.90 | 0.01 | 1.60 | 0.44 | 1.13 | 0.28 |
| 23693 | 0 | 79220  | GAGAYVEVKFSQYGDN<br>LHKVWQAA   | 3.10 | 0.01 | 2.86 | 1.81 | 0.22 | 1.27 |
| 23694 | 0 | 18583  | GAGDVK                         | 1.91 | 0.01 | 2.40 | 2.52 | 0.22 | 0.28 |
| 23695 | 0 | 18584  | GAGDVKA                        | 2.05 | 0.01 | 2.40 | 1.81 | 0.22 | 0.28 |
| 23696 | 0 | 118798 | GAGFGHSGYGVGHGK                | 2.79 | 0.01 | 0.90 | 0.68 | 0.22 | 0.28 |
| 23697 | 0 | 118798 | GAGFGHSGYGVGHGK                | 2.79 | 0.01 | 0.90 | 0.68 | 0.22 | 0.28 |
| 23698 | 0 | 118798 | GAGFGHSGYGVGHGK                | 2.79 | 0.01 | 0.90 | 0.68 | 0.22 | 0.28 |
| 23699 | 0 | 118798 | GAGFGHSGYGVGHGK                | 2.79 | 0.01 | 0.90 | 0.68 | 0.22 | 0.28 |
| 23700 | 0 | 118798 | GAGFGHSGYGVGHGK                | 2.79 | 0.01 | 0.90 | 0.68 | 0.22 | 1.27 |
| 23701 | 0 | 118798 | GAGFGHSGYGVGHGK                | 2.79 | 0.01 | 0.90 | 0.68 | 0.22 | 0.28 |
| 23702 | 0 | 18586  | GAGGAG                         | 1.92 | 0.01 | 4.03 | 3.97 | 0.22 | 0.28 |
| 23703 | 0 | 227189 | GAGGAGAGGGAGGAG                | 2.75 | 0.01 | 2.48 | 0.44 | 1.59 | 0.28 |
| 23704 | 0 | 18587  | GAGGGAGAGGAGAGG<br>GGRGR       | 3.02 | 0.01 | 2.43 | 0.44 | 2.82 | 0.28 |
| 23705 | 0 | 18587  | GAGGGAGAGGAGAGG<br>GGRGR       | 3.02 | 0.01 | 2.43 | 0.44 | 1.59 | 0.28 |
| 23706 | 0 | 18587  | GAGGGAGAGGAGAGG<br>GGRGR       | 3.02 | 0.01 | 2.43 | 0.44 | 2.82 | 0.28 |

|       |   |        |                                    |      |      |      |      |      |      |
|-------|---|--------|------------------------------------|------|------|------|------|------|------|
| 23707 | 0 | 18587  | GAGGGAGAGGAGAGG<br>GGRGR           | 3.02 | 0.01 | 2.43 | 0.44 | 1.59 | 0.28 |
| 23708 | 0 | 18588  | GAGGGAGGAGAGGGA<br>GGAGA           | 3.02 | 0.01 | 2.43 | 0.44 | 1.74 | 0.28 |
| 23709 | 0 | 18588  | GAGGGAGGAGAGGGA<br>GGAGA           | 3.02 | 0.01 | 2.43 | 0.44 | 0.85 | 0.28 |
| 23710 | 0 | 18588  | GAGGGAGGAGAGGGA<br>GGAGA           | 3.02 | 0.01 | 2.43 | 0.44 | 1.74 | 0.85 |
| 23711 | 0 | 516212 | GAGGSGTPVDELDRCCK<br>V             | 2.83 | 0.01 | 2.56 | 2.02 | 0.22 | 0.85 |
| 23712 | 0 | 18591  | GAGGTAGGSAGGSAGG<br>SAGG           | 3.02 | 0.01 | 1.66 | 0.44 | 0.85 | 0.28 |
| 23713 | 0 | 18591  | GAGGTAGGSAGGSAGG<br>SAGG           | 3.02 | 0.01 | 1.66 | 0.44 | 1.41 | 0.28 |
| 23714 | 0 | 18594  | GAGICASY                           | 2.15 | 0.01 | 2.45 | 0.44 | 0.85 | 1.34 |
| 23715 | 0 | 18594  | GAGICASY                           | 2.15 | 0.01 | 2.45 | 0.44 | 0.85 | 1.34 |
| 23716 | 0 | 18594  | GAGICASY                           | 2.15 | 0.01 | 2.45 | 0.44 | 0.85 | 1.34 |
| 23717 | 0 | 18594  | GAGICASY                           | 2.15 | 0.01 | 2.45 | 0.44 | 0.85 | 1.34 |
| 23718 | 0 | 18594  | GAGICASY                           | 2.15 | 0.01 | 2.45 | 0.44 | 0.85 | 1.34 |
| 23719 | 0 | 18594  | GAGICASY                           | 2.15 | 0.01 | 2.45 | 0.44 | 0.85 | 1.34 |
| 23720 | 0 | 105805 | GAGIGWGID                          | 2.27 | 0.01 | 0.90 | 3.01 | 0.22 | 0.28 |
| 23721 | 0 | 18595  | GAGKALTGLSTGTSQNT<br>RIS           | 2.98 | 0.01 | 2.75 | 0.44 | 0.85 | 0.85 |
| 23722 | 0 | 114346 | GAGNIAAATGLVKKEEF<br>PTDLKPEE      | 3.16 | 0.01 | 1.75 | 2.04 | 0.22 | 0.28 |
| 23723 | 0 | 18603  | GAGPRVRQPARPLGSA<br>WR             | 2.89 | 0.01 | 2.53 | 0.44 | 0.85 | 0.28 |
| 23724 | 0 | 18604  | GAGPRVRQPARPLGSA<br>WRDQAQRPAVASRR | 3.38 | 0.01 | 2.53 | 0.44 | 0.85 | 0.28 |
| 23725 | 0 | 18604  | GAGPRVRQPARPLGSA<br>WRDQAQRPAVASRR | 3.38 | 0.01 | 2.53 | 0.44 | 0.85 | 0.28 |
| 23726 | 0 | 18607  | GAGRRVGL                           | 2.16 | 0.01 | 2.40 | 2.43 | 0.22 | 0.28 |
| 23727 | 0 | 18609  | GAGT                               | 1.60 | 0.01 | 3.38 | 1.15 | 0.22 | 1.34 |
| 23728 | 0 | 18609  | GAGT                               | 1.60 | 0.01 | 3.38 | 1.15 | 0.22 | 0.85 |
| 23729 | 0 | 18615  | GAHETSLSASGNSIIHYT<br>NI           | 2.98 | 0.01 | 3.61 | 0.44 | 2.39 | 1.27 |
| 23730 | 0 | 18615  | GAHETSLSASGNSIIHYT<br>NI           | 2.98 | 0.01 | 3.61 | 0.44 | 2.39 | 0.28 |
| 23731 | 0 | 100858 | GAHGDTTPEYQDL                      | 2.53 | 0.01 | 0.78 | 0.44 | 1.13 | 2.02 |
| 23732 | 0 | 140206 | GAHNVRTQ                           | 2.10 | 0.01 | 0.78 | 0.44 | 1.13 | 0.28 |
| 23733 | 0 | 150986 | GAIAGFIEGGWTGMV                    | 2.70 | 0.01 | 2.87 | 0.44 | 0.85 | 0.28 |
| 23734 | 0 | 18621  | GAIFQQVMSRS                        | 2.45 | 0.01 | 2.40 | 0.44 | 1.59 | 0.28 |
| 23735 | 0 | 18621  | GAIFQQVMSRS                        | 2.45 | 0.01 | 2.40 | 1.20 | 0.22 | 0.28 |
| 23736 | 0 | 18621  | GAIFQQVMSRS                        | 2.45 | 0.01 | 2.40 | 0.44 | 1.59 | 0.28 |
| 23737 | 0 | 18621  | GAIFQQVMSRS                        | 2.45 | 0.01 | 2.40 | 0.44 | 1.59 | 0.28 |



|       |   |        |                                |      |      |      |      |      |      |
|-------|---|--------|--------------------------------|------|------|------|------|------|------|
| 23738 | 0 | 157292 | GAIIGLM                        | 2.04 | 0.01 | 0.78 | 0.44 | 1.93 | 1.28 |
| 23739 | 0 | 157292 | GAIIGLM                        | 2.04 | 0.01 | 0.78 | 0.44 | 1.41 | 1.28 |
| 23740 | 0 | 105206 | GAIIGLMVGGVV                   | 2.50 | 0.01 | 0.78 | 0.44 | 1.41 | 0.28 |
| 23741 | 0 | 105206 | GAIIGLMVGGVV                   | 2.50 | 0.01 | 0.78 | 0.44 | 1.41 | 1.66 |
| 23742 | 0 | 105206 | GAIIGLMVGGVV                   | 2.50 | 0.01 | 0.78 | 0.44 | 1.41 | 1.66 |
| 23743 | 0 | 105206 | GAIIGLMVGGVV                   | 2.50 | 0.01 | 0.78 | 0.44 | 1.41 | 1.66 |
| 23744 | 0 | 105206 | GAIIGLMVGGVV                   | 2.50 | 0.01 | 0.78 | 0.68 | 0.22 | 0.28 |
| 23745 | 0 | 105206 | GAIIGLMVGGVV                   | 2.50 | 0.01 | 0.78 | 0.68 | 0.22 | 0.28 |
| 23746 | 0 | 105206 | GAIIGLMVGGVV                   | 2.50 | 0.01 | 0.78 | 1.15 | 0.22 | 2.66 |
| 23747 | 0 | 105206 | GAIIGLMVGGVV                   | 2.50 | 0.01 | 0.78 | 1.15 | 0.22 | 2.66 |
| 23748 | 0 | 105207 | GAIIGLMVGGVVIA                 | 2.66 | 0.01 | 0.78 | 3.59 | 0.22 | 0.28 |
| 23749 | 0 | 105207 | GAIIGLMVGGVVIA                 | 2.66 | 0.01 | 0.78 | 0.68 | 1.41 | 0.28 |
| 23750 | 0 | 105207 | GAIIGLMVGGVVIA                 | 2.66 | 0.01 | 0.78 | 0.68 | 1.41 | 0.28 |
| 23751 | 0 | 105207 | GAIIGLMVGGVVIA                 | 2.66 | 0.01 | 0.78 | 0.68 | 0.22 | 1.34 |
| 23752 | 0 | 105207 | GAIIGLMVGGVVIA                 | 2.66 | 0.01 | 0.78 | 0.68 | 0.22 | 0.28 |
| 23753 | 0 | 105207 | GAIIGLMVGGVVIA                 | 2.66 | 0.01 | 0.78 | 0.68 | 0.22 | 0.28 |
| 23754 | 0 | 105207 | GAIIGLMVGGVVIA                 | 2.66 | 0.01 | 0.78 | 0.68 | 1.41 | 1.34 |
| 23755 | 0 | 105207 | GAIIGLMVGGVVIA                 | 2.66 | 0.01 | 0.78 | 0.68 | 1.41 | 1.48 |
| 23756 | 0 | 105207 | GAIIGLMVGGVVIA                 | 2.66 | 0.01 | 0.78 | 0.68 | 1.41 | 1.34 |
| 23757 | 0 | 142422 | GAILVDFWAEWC                   | 2.45 | 0.01 | 0.90 | 0.68 | 0.22 | 0.85 |
| 23758 | 0 | 18633  | GAIVTVKGGLSVI                  | 2.57 | 0.01 | 2.72 | 0.44 | 1.23 | 0.85 |
| 23759 | 0 | 18634  | GAITYGA                        | 1.92 | 0.01 | 2.40 | 0.44 | 0.85 | 0.28 |
| 23760 | 0 | 99264  | GAKEPY                         | 1.88 | 0.01 | 2.86 | 2.02 | 0.85 | 0.85 |
| 23761 | 0 | 109011 | GAKGEAGPTGARGPE                | 2.73 | 0.01 | 1.75 | 2.98 | 0.22 | 0.28 |
| 23762 | 0 | 98784  | GAKGKAALLRELSDVVP<br>NLN       | 2.95 | 0.01 | 2.04 | 0.44 | 0.85 | 0.28 |
| 23763 | 0 | 98784  | GAKGKAALLRELSDVVP<br>NLN       | 2.95 | 0.01 | 2.04 | 0.44 | 2.98 | 0.28 |
| 23764 | 0 | 110581 | GAKGSAGAPGIAGAP                | 2.75 | 0.01 | 1.75 | 2.98 | 0.22 | 0.28 |
| 23765 | 0 | 142423 | GAKKAAGEAKKASI                 | 2.67 | 0.01 | 2.59 | 0.44 | 0.85 | 0.85 |
| 23766 | 0 | 135927 | GAKLVQDVANNT                   | 2.46 | 0.01 | 0.78 | 0.44 | 1.41 | 0.28 |
| 23767 | 0 | 230288 | GAKRHRKVLRDNIQGIT<br>KPAI      | 2.99 | 4.63 | 0.78 | 0.44 | 1.13 | 1.27 |
| 23768 | 0 | 230288 | GAKRHRKVLRDNIQGIT<br>KPAI      | 2.99 | 4.63 | 0.78 | 0.44 | 1.13 | 0.28 |
| 23769 | 0 | 18648  | GAKSLEPCACISSD                 | 2.60 | 0.01 | 2.59 | 0.44 | 1.41 | 0.28 |
| 23770 | 0 | 18649  | GAKYMLVQGEPGAV                 | 2.62 | 0.01 | 3.34 | 1.12 | 0.22 | 0.85 |
| 23771 | 0 | 82545  | GALASSAPSTAV                   | 2.51 | 0.01 | 2.48 | 0.44 | 1.59 | 0.28 |
| 23772 | 0 | 78159  | GALATYQSEYLAHRRIPP             | 2.81 | 0.01 | 2.14 | 1.12 | 0.22 | 1.34 |
| 23773 | 0 | 78159  | GALATYQSEYLAHRRIPP             | 2.81 | 0.01 | 2.14 | 1.12 | 0.22 | 0.28 |
| 23774 | 0 | 78159  | GALATYQSEYLAHRRIPP             | 2.81 | 0.01 | 2.14 | 1.12 | 0.22 | 0.85 |
| 23775 | 0 | 226345 | GALEENK                        | 2.01 | 0.01 | 0.90 | 2.66 | 0.22 | 1.39 |
| 23776 | 0 | 18663  | GALGNLKNSSYNKDN<br>NELSHFATTCS | 3.28 | 0.01 | 3.21 | 3.14 | 0.22 | 0.28 |

|       |   |        |                                  |      |      |      |      |      |      |
|-------|---|--------|----------------------------------|------|------|------|------|------|------|
| 23777 | 0 | 18663  | GALGNLKNSYSYNKDN<br>NELSHFATTCS  | 3.28 | 0.01 | 3.21 | 3.14 | 0.22 | 0.28 |
| 23778 | 0 | 18663  | GALGNLKNSYSYNKDN<br>NELSHFATTCS  | 3.28 | 0.01 | 3.21 | 3.14 | 0.22 | 0.28 |
| 23779 | 0 | 136301 | GALHQEPSSNLF                     | 2.44 | 0.01 | 0.90 | 2.74 | 0.22 | 0.85 |
| 23780 | 0 | 136301 | GALHQEPSSNLF                     | 2.44 | 0.01 | 0.90 | 0.68 | 0.22 | 0.28 |
| 23781 | 0 | 180974 | GALHVPNMYHVV                     | 2.45 | 0.01 | 0.90 | 0.68 | 0.22 | 1.39 |
| 23782 | 0 | 136302 | GALIYTPEKYTI                     | 2.48 | 0.01 | 0.90 | 2.74 | 0.22 | 0.28 |
| 23783 | 0 | 136302 | GALIYTPEKYTI                     | 2.48 | 0.01 | 0.90 | 2.74 | 0.22 | 0.85 |
| 23784 | 0 | 18668  | GALKQELAKKDEANKIS<br>D           | 2.87 | 0.01 | 2.85 | 0.68 | 0.22 | 0.28 |
| 23785 | 0 | 100052 | GALMLPHFNSKAMVIV<br>VVNK         | 2.93 | 0.01 | 2.16 | 0.44 | 2.39 | 0.28 |
| 23786 | 0 | 18671  | GALNTPKDHIGTRNPNN<br>NA          | 2.90 | 0.01 | 2.91 | 0.44 | 0.85 | 0.28 |
| 23787 | 0 | 18672  | GALNTPKDHIGTRNPNN<br>NAATVL      | 3.08 | 0.01 | 2.45 | 1.20 | 0.22 | 0.85 |
| 23788 | 0 | 18672  | GALNTPKDHIGTRNPNN<br>NAATVL      | 3.08 | 0.01 | 2.45 | 1.20 | 0.22 | 0.28 |
| 23789 | 0 | 92778  | GALRNYIGESSPA                    | 2.53 | 0.01 | 3.81 | 1.12 | 0.22 | 0.28 |
| 23790 | 0 | 92778  | GALRNYIGESSPA                    | 2.53 | 0.01 | 3.81 | 1.12 | 0.22 | 0.28 |
| 23791 | 0 | 92778  | GALRNYIGESSPA                    | 2.53 | 0.01 | 3.81 | 1.12 | 0.22 | 0.28 |
| 23792 | 0 | 92778  | GALRNYIGESSPA                    | 2.53 | 0.01 | 3.81 | 1.12 | 0.22 | 0.28 |
| 23793 | 0 | 18684  | GAMEKSQRQQ                       | 2.29 | 0.01 | 2.80 | 2.13 | 0.22 | 1.27 |
| 23794 | 0 | 18687  | GAMIKSQRQQPGGQAK<br>KKKPEKPHFPL  | 3.23 | 0.01 | 2.80 | 1.15 | 0.22 | 0.28 |
| 23795 | 0 | 18687  | GAMIKSQRQQPGGQAK<br>KKKPEKPHFPL  | 3.23 | 0.01 | 2.80 | 1.15 | 0.22 | 0.28 |
| 23796 | 0 | 18687  | GAMIKSQRQQPGGQAK<br>KKKPEKPHFPL  | 3.23 | 0.01 | 2.80 | 1.15 | 0.22 | 0.28 |
| 23797 | 0 | 18687  | GAMIKSQRQQPGGQAK<br>KKKPEKPHFPL  | 3.23 | 0.01 | 2.80 | 1.15 | 0.22 | 0.28 |
| 23798 | 0 | 18687  | GAMIKSQRQQPGGQAK<br>KKKPEKPHFPL  | 3.23 | 0.01 | 2.80 | 1.15 | 0.22 | 0.28 |
| 23799 | 0 | 18687  | GAMIKSQRQQPGGQAK<br>KKKPEKPHFPL  | 3.23 | 0.01 | 2.80 | 1.15 | 0.22 | 0.28 |
| 23800 | 0 | 18687  | GAMIKSQRQQPGGQAK<br>KKKPEKPHFPL  | 3.23 | 0.01 | 2.80 | 2.13 | 1.59 | 0.28 |
| 23801 | 0 | 18687  | GAMIKSQRQQPGGQAK<br>KKKPEKPHFPL  | 3.23 | 0.01 | 2.80 | 2.13 | 0.22 | 1.27 |
| 23802 | 0 | 18688  | GAMIKSQRQQPRGGQA<br>KKKKPEKPHFPL | 3.27 | 0.01 | 2.71 | 1.15 | 0.22 | 0.28 |
| 23803 | 0 | 18688  | GAMIKSQRQQPRGGQA<br>KKKKPEKPHFPL | 3.27 | 0.01 | 2.71 | 1.15 | 0.22 | 0.28 |
| 23804 | 0 | 18688  | GAMIKSQRQQPRGGQA<br>KKKKPEKPHFPL | 3.27 | 0.01 | 2.71 | 2.13 | 1.59 | 0.28 |
| 23805 | 0 | 123207 | GAMPPQQL                         | 2.12 | 0.01 | 0.78 | 1.20 | 0.22 | 0.28 |

|       |   |        |                                    |      |      |      |      |      |      |
|-------|---|--------|------------------------------------|------|------|------|------|------|------|
| 23806 | 0 | 123207 | GAMPPQQL                           | 2.12 | 0.01 | 0.78 | 0.44 | 1.13 | 0.28 |
| 23807 | 0 | 18693  | GANAPNAD                           | 2.16 | 0.01 | 2.96 | 0.68 | 0.22 | 0.28 |
| 23808 | 0 | 18693  | GANAPNAD                           | 2.16 | 0.01 | 2.96 | 0.68 | 0.22 | 0.28 |
| 23809 | 0 | 18694  | GANAPNEKSVKEYLDKV<br>RAT           | 2.93 | 0.01 | 2.59 | 3.05 | 0.85 | 0.28 |
| 23810 | 0 | 18694  | GANAPNEKSVKEYLDKV<br>RAT           | 2.93 | 0.01 | 2.59 | 0.44 | 0.85 | 0.28 |
| 23811 | 0 | 18694  | GANAPNEKSVKEYLDKV<br>RAT           | 2.93 | 0.01 | 4.08 | 2.42 | 0.22 | 0.28 |
| 23812 | 0 | 110582 | GANGDPGRPGEPGLP                    | 2.72 | 0.01 | 1.75 | 2.46 | 0.22 | 0.28 |
| 23813 | 0 | 230810 | GANGIPGPIGPPGPRGR<br>SGETGPAGPPGNP | 3.40 | 0.01 | 0.78 | 3.93 | 0.22 | 0.28 |
| 23814 | 0 | 230810 | GANGIPGPIGPPGPRGR<br>SGETGPAGPPGNP | 3.40 | 0.01 | 0.78 | 3.16 | 0.22 | 0.28 |
| 23815 | 0 | 18700  | GANIPAEFLENFVRSSNL<br>KF           | 2.94 | 0.01 | 2.04 | 0.44 | 0.85 | 0.28 |
| 23816 | 0 | 133103 | GANPLGLKRGIEKAV                    | 2.69 | 0.01 | 2.04 | 2.97 | 0.22 | 0.28 |
| 23817 | 0 | 186759 | GANSIETDVSFDDNA                    | 2.67 | 0.01 | 3.36 | 1.20 | 0.22 | 0.85 |
| 23818 | 0 | 18705  | GANSNNPDW                          | 2.22 | 0.01 | 2.58 | 1.15 | 0.22 | 0.28 |
| 23819 | 0 | 18706  | GANSNNPDWDFNP                      | 2.57 | 0.01 | 3.07 | 0.68 | 0.22 | 0.28 |
| 23820 | 0 | 18706  | GANSNNPDWDFNP                      | 2.57 | 0.01 | 3.07 | 0.68 | 0.22 | 0.85 |
| 23821 | 0 | 18706  | GANSNNPDWDFNP                      | 2.57 | 0.01 | 3.07 | 0.68 | 0.22 | 2.02 |
| 23822 | 0 | 18707  | GANTE                              | 1.74 | 0.01 | 4.23 | 0.68 | 0.22 | 1.34 |
| 23823 | 0 | 18707  | GANTE                              | 1.74 | 0.01 | 4.23 | 0.68 | 0.22 | 0.28 |
| 23824 | 0 | 77881  | GANYKSPTGFLRG                      | 2.52 | 0.01 | 0.90 | 1.15 | 0.22 | 1.39 |
| 23825 | 0 | 18711  | GANYLL                             | 1.86 | 0.01 | 3.10 | 0.68 | 0.22 | 0.28 |
| 23826 | 0 | 82550  | GANYLLAQKREGAKGE<br>NKRPNDKAGEV    | 3.26 | 0.01 | 3.04 | 1.12 | 0.22 | 0.28 |
| 23827 | 0 | 82550  | GANYLLAQKREGAKGE<br>NKRPNDKAGEV    | 3.26 | 0.01 | 3.04 | 1.12 | 0.22 | 0.85 |
| 23828 | 0 | 82550  | GANYLLAQKREGAKGE<br>NKRPNDKAGEV    | 3.26 | 0.01 | 3.04 | 1.12 | 0.22 | 0.28 |
| 23829 | 0 | 82550  | GANYLLAQKREGAKGE<br>NKRPNDKAGEV    | 3.26 | 0.01 | 3.10 | 0.68 | 0.22 | 0.28 |
| 23830 | 0 | 82550  | GANYLLAQKREGAKGE<br>NKRPNDKAGEV    | 3.26 | 0.01 | 3.10 | 0.68 | 0.22 | 2.56 |
| 23831 | 0 | 82550  | GANYLLAQKREGAKGE<br>NKRPNDKAGEV    | 3.26 | 0.01 | 3.10 | 0.68 | 0.22 | 2.56 |
| 23832 | 0 | 82550  | GANYLLAQKREGAKGE<br>NKRPNDKAGEV    | 3.26 | 0.01 | 3.10 | 0.68 | 0.22 | 2.56 |
| 23833 | 0 | 82550  | GANYLLAQKREGAKGE<br>NKRPNDKAGEV    | 3.26 | 0.01 | 3.10 | 0.68 | 0.22 | 2.56 |
| 23834 | 0 | 82550  | GANYLLAQKREGAKGE<br>NKRPNDKAGEV    | 3.26 | 0.01 | 3.10 | 0.68 | 0.22 | 2.56 |
| 23835 | 0 | 82550  | GANYLLAQKREGAKGE<br>NKRPNDKAGEV    | 3.26 | 0.01 | 3.10 | 0.68 | 0.22 | 2.56 |

|       |   |        |                                   |      |      |      |      |      |      |
|-------|---|--------|-----------------------------------|------|------|------|------|------|------|
| 23836 | 0 | 82550  | GANYLLAQKREGAKGE<br>NKRPN DKAGEV  | 3.26 | 0.01 | 3.10 | 0.68 | 0.22 | 2.56 |
| 23837 | 0 | 82550  | GANYLLAQKREGAKGE<br>NKRPN DKAGEV  | 3.26 | 0.01 | 3.10 | 0.68 | 0.22 | 0.85 |
| 23838 | 0 | 82550  | GANYLLAQKREGAKGE<br>NKRPN DKAGEV  | 3.26 | 0.01 | 3.10 | 0.68 | 0.22 | 0.85 |
| 23839 | 0 | 82551  | GANYLLAQKREGAKMA<br>NKL PN NKAGEV | 3.26 | 0.01 | 4.45 | 1.12 | 0.22 | 0.28 |
| 23840 | 0 | 82551  | GANYLLAQKREGAKMA<br>NKL PN NKAGEV | 3.26 | 0.01 | 4.45 | 1.12 | 0.22 | 0.28 |
| 23841 | 0 | 489546 | GAPGASAP EEQPPPY                  | 2.71 | 0.01 | 2.69 | 3.05 | 0.85 | 1.28 |
| 23842 | 0 | 110583 | GAPGERGPSGLAGPK                   | 2.72 | 0.01 | 1.75 | 2.98 | 0.22 | 0.28 |
| 23843 | 0 | 109021 | GAPGFPGA                          | 2.18 | 0.01 | 1.60 | 2.55 | 2.60 | 0.28 |
| 23844 | 0 | 110584 | GAPGFPGPRGPPGPQ                   | 2.74 | 0.01 | 1.75 | 2.98 | 0.22 | 0.28 |
| 23845 | 0 | 110585 | GAPGIAGAPGFPGPR                   | 2.75 | 0.01 | 1.75 | 2.46 | 0.22 | 0.28 |
| 23846 | 0 | 107124 | GAPGLRGGAG                        | 2.37 | 3.85 | 0.78 | 4.23 | 0.22 | 1.27 |
| 23847 | 0 | 107124 | GAPGLRGGAG                        | 2.37 | 3.85 | 0.78 | 4.23 | 0.22 | 1.27 |
| 23848 | 0 | 107124 | GAPGLRGGAG                        | 2.37 | 3.85 | 0.78 | 4.23 | 0.22 | 1.27 |
| 23849 | 0 | 107124 | GAPGLRGGAG                        | 2.37 | 3.85 | 0.78 | 4.23 | 0.22 | 1.27 |
| 23850 | 0 | 107124 | GAPGLRGGAG                        | 2.37 | 3.85 | 0.78 | 4.23 | 0.22 | 2.92 |
| 23851 | 0 | 110586 | GAPGNRGFP GQDGLA                  | 2.71 | 0.01 | 1.75 | 2.98 | 0.22 | 0.28 |
| 23852 | 0 | 109026 | GAPGPAGA                          | 2.18 | 0.01 | 1.60 | 2.55 | 2.60 | 0.28 |
| 23853 | 0 | 109027 | GAPGPAGE                          | 2.18 | 0.01 | 1.60 | 2.55 | 2.60 | 0.28 |
| 23854 | 0 | 138174 | GAPGTPAAPGAPAA                    | 2.67 | 0.01 | 2.51 | 1.20 | 0.22 | 0.28 |
| 23855 | 0 | 138174 | GAPGTPAAPGAPAA                    | 2.67 | 0.01 | 2.51 | 1.20 | 0.22 | 0.28 |
| 23856 | 0 | 107126 | GAPGTPGPQG                        | 2.37 | 0.01 | 1.60 | 0.68 | 0.22 | 2.56 |
| 23857 | 0 | 18722  | GAPLGGAARA<br>GAPLG GVARALAHGVR   | 2.37 | 0.01 | 2.68 | 2.74 | 0.22 | 0.28 |
| 23858 | 0 | 462341 | VLEDGVNYATGNLPGCS<br>FS           | 3.50 | 0.01 | 1.96 | 2.90 | 0.22 | 0.28 |
| 23859 | 0 | 516241 | GAPNATYAARVTTYRLT<br>RAC          | 2.97 | 0.01 | 2.40 | 0.44 | 1.59 | 1.28 |
| 23860 | 0 | 138175 | GAPPNGAPPPVDP                     | 2.67 | 0.01 | 2.51 | 1.20 | 0.22 | 0.28 |
| 23861 | 0 | 138175 | GAPPNGAPPPVDP                     | 2.67 | 0.01 | 2.51 | 1.20 | 0.22 | 0.28 |
| 23862 | 0 | 138176 | GAPPNGAPPPVDPNA<br>PPPPPADPNA     | 3.26 | 0.01 | 2.51 | 2.22 | 0.85 | 0.28 |
| 23863 | 0 | 142159 | GAPTYSWGANDTDV                    | 2.62 | 0.01 | 1.72 | 2.37 | 0.22 | 1.48 |
| 23864 | 0 | 193450 | GAPYPGPGQ                         | 2.27 | 0.01 | 2.51 | 0.44 | 2.39 | 0.28 |
| 23865 | 0 | 193450 | GAPYPGPGQ                         | 2.27 | 0.01 | 2.51 | 0.44 | 2.39 | 0.28 |
| 23866 | 0 | 18736  | GAQAVARSLDWTKVTL<br>DGR           | 2.91 | 0.01 | 2.70 | 0.44 | 0.85 | 0.28 |
| 23867 | 0 | 230814 | GAQGPPGLQGMPGER<br>GAAGIAGPK      | 3.16 | 0.01 | 0.78 | 3.93 | 0.22 | 0.28 |
| 23868 | 0 | 109030 | GAQGPRGE                          | 2.15 | 0.01 | 1.60 | 2.61 | 0.22 | 0.28 |
| 23869 | 0 | 109030 | GAQGPRGE                          | 2.15 | 0.01 | 1.60 | 2.55 | 2.60 | 0.28 |

|       |   |        |                                              |      |      |      |      |      |      |
|-------|---|--------|----------------------------------------------|------|------|------|------|------|------|
| 23870 | 0 | 171126 | GAQHFHSGKHYWEVD                              | 2.65 | 0.01 | 0.78 | 0.44 | 1.41 | 0.28 |
| 23871 | 0 | 171126 | GAQHFHSGKHYWEVD                              | 2.65 | 0.01 | 0.78 | 0.44 | 1.13 | 0.28 |
| 23872 | 0 | 18741  | GAQILQTTLCARLLTARC<br>GCVNLTADRMKRSFTLT<br>C | 3.53 | 0.01 | 1.66 | 0.44 | 1.59 | 1.57 |
| 23873 | 0 | 18741  | GAQILQTTLCARLLTARC<br>GCVNLTADRMKRSFTLT<br>C | 3.53 | 0.01 | 1.66 | 0.44 | 1.59 | 1.57 |
| 23874 | 0 | 18741  | GAQILQTTLCARLLTARC<br>GCVNLTADRMKRSFTLT<br>C | 3.53 | 0.01 | 1.66 | 1.12 | 0.22 | 0.28 |
| 23875 | 0 | 18741  | GAQILQTTLCARLLTARC<br>GCVNLTADRMKRSFTLT<br>C | 3.53 | 0.01 | 1.66 | 3.33 | 0.22 | 1.57 |
| 23876 | 0 | 18742  | GAQITGHVKNGSMRIV<br>GPKT                     | 2.94 | 0.01 | 1.72 | 0.44 | 0.85 | 0.28 |
| 23877 | 0 | 294063 | GAQKGNVRKLQPQPQ                              | 2.71 | 0.01 | 1.61 | 0.44 | 0.85 | 1.28 |
| 23878 | 0 | 18743  | GAQLNAMKPDQLQNTL                             | 2.68 | 0.01 | 2.59 | 0.44 | 0.85 | 0.28 |
| 23879 | 0 | 294081 | GAQSEADADDDDPQR                              | 2.69 | 0.01 | 1.61 | 0.44 | 0.85 | 1.28 |
| 23880 | 0 | 294082 | GAQSEADADVDDPQR                              | 2.69 | 0.01 | 1.61 | 0.44 | 0.85 | 1.28 |
| 23881 | 0 | 18746  | GAQSHTLRGV                                   | 2.30 | 0.01 | 1.72 | 3.61 | 0.22 | 1.66 |
| 23882 | 0 | 18746  | GAQSHTLRGV                                   | 2.30 | 0.01 | 1.72 | 3.61 | 0.22 | 1.27 |
| 23883 | 0 | 18746  | GAQSHTLRGV                                   | 2.30 | 0.01 | 1.72 | 3.61 | 0.22 | 1.66 |
| 23884 | 0 | 18746  | GAQSHTLRGV                                   | 2.30 | 0.01 | 1.72 | 3.61 | 0.22 | 1.66 |
| 23885 | 0 | 109032 | GAQVSRQNVGTHSTQN<br>MVSNGSSL                 | 3.15 | 0.01 | 3.67 | 1.20 | 0.22 | 1.34 |
| 23886 | 0 | 109032 | GAQVSRQNVGTHSTQN<br>MVSNGSSL                 | 3.15 | 0.01 | 3.67 | 1.20 | 0.22 | 1.34 |
| 23887 | 0 | 109034 | GAQVSTQKSGSHENQN                             | 2.75 | 0.01 | 3.67 | 1.20 | 0.22 | 0.28 |
| 23888 | 0 | 109035 | GAQVSTQKSGSHENQN<br>ILTNGSNQTFTVINY          | 3.38 | 0.01 | 3.67 | 1.20 | 0.22 | 1.34 |
| 23889 | 0 | 109035 | GAQVSTQKSGSHENQN<br>ILTNGSNQTFTVINY          | 3.38 | 0.01 | 3.67 | 1.20 | 0.22 | 1.34 |
| 23890 | 0 | 109035 | GAQVSTQKSGSHENQN<br>ILTNGSNQTFTVINY          | 3.38 | 0.01 | 3.67 | 1.20 | 0.22 | 1.34 |

|       |   |        |                                     |      |      |      |      |      |      |
|-------|---|--------|-------------------------------------|------|------|------|------|------|------|
| 23891 | 0 | 109035 | GAQVSTQKSGSHENQN<br>ILTNGSNQTFTVINY | 3.38 | 0.01 | 3.67 | 1.20 | 0.22 | 0.28 |
| 23892 | 0 | 109035 | GAQVSTQKSGSHENQN<br>ILTNGSNQTFTVINY | 3.38 | 0.01 | 3.67 | 1.20 | 0.22 | 0.28 |
| 23893 | 0 | 109035 | GAQVSTQKSGSHENQN<br>ILTNGSNQTFTVINY | 3.38 | 0.01 | 3.67 | 1.15 | 0.22 | 1.34 |
| 23894 | 0 | 109035 | GAQVSTQKSGSHENQN<br>ILTNGSNQTFTVINY | 3.38 | 0.01 | 3.67 | 1.15 | 0.22 | 0.28 |
| 23895 | 0 | 146952 | GAQYVWNRTALLQ                       | 2.52 | 0.01 | 1.60 | 0.44 | 0.85 | 0.85 |
| 23896 | 0 | 489547 | GARAMVTYDCEPRCP                     | 2.66 | 0.01 | 2.69 | 3.05 | 0.85 | 1.28 |
| 23897 | 0 | 18750  | GARAMVTYDCEPRCPY<br>VGAD            | 2.97 | 0.01 | 2.69 | 1.12 | 0.22 | 0.28 |
| 23898 | 0 | 18750  | GARAMVTYDCEPRCPY<br>VGAD            | 2.97 | 0.01 | 2.69 | 1.12 | 0.22 | 0.28 |
| 23899 | 0 | 18750  | GARAMVTYDCEPRCPY<br>VGAD            | 2.97 | 0.01 | 2.69 | 1.12 | 0.22 | 0.28 |
| 23900 | 0 | 136303 | GARGLTGRPGDA                        | 2.52 | 3.97 | 0.78 | 2.46 | 0.22 | 0.28 |
| 23901 | 0 | 136303 | GARGLTGRPGDA                        | 2.52 | 3.97 | 0.78 | 0.44 | 1.13 | 0.28 |
| 23902 | 0 | 136303 | GARGLTGRPGDA                        | 2.52 | 3.97 | 0.78 | 0.44 | 1.93 | 0.28 |
| 23903 | 0 | 136303 | GARGLTGRPGDA                        | 2.52 | 3.97 | 0.78 | 0.44 | 1.13 | 0.28 |
| 23904 | 0 | 136303 | GARGLTGRPGDA                        | 2.52 | 3.97 | 0.78 | 0.44 | 1.13 | 0.28 |
| 23905 | 0 | 136304 | GARGLTGRPGDA                        | 2.52 | 3.65 | 0.78 | 0.44 | 1.13 | 0.28 |
| 23906 | 0 | 136304 | GARGLTGRPGDA                        | 2.52 | 3.65 | 0.78 | 0.44 | 1.93 | 0.28 |
| 23907 | 0 | 136304 | GARGLTGRPGDA                        | 2.52 | 3.65 | 0.78 | 0.44 | 1.13 | 0.28 |
| 23908 | 0 | 136304 | GARGLTGRPGDA                        | 2.52 | 3.65 | 0.78 | 0.44 | 1.13 | 0.28 |
| 23909 | 0 | 136303 | GARGLTGRPGDA                        | 2.52 | 3.97 | 0.78 | 2.46 | 0.22 | 2.49 |
| 23910 | 0 | 136304 | GARGLTGRPGDA                        | 2.52 | 3.65 | 0.78 | 0.44 | 1.13 | 0.28 |
| 23911 | 0 | 136303 | GARGLTGRPGDA                        | 2.52 | 3.97 | 0.78 | 0.44 | 1.13 | 0.28 |
| 23912 | 0 | 136304 | GARGLTGRPGDA                        | 2.52 | 3.65 | 0.78 | 0.44 | 1.13 | 1.28 |
| 23913 | 0 | 136304 | GARGLTGRPGDA                        | 2.52 | 3.65 | 0.78 | 0.44 | 1.13 | 0.28 |
| 23914 | 0 | 136304 | GARGLTGRPGDA                        | 2.52 | 3.65 | 0.78 | 0.44 | 1.13 | 0.28 |
| 23915 | 0 | 136304 | GARGLTGRPGDA                        | 2.52 | 3.65 | 0.78 | 0.44 | 1.41 | 0.28 |
| 23916 | 0 | 136304 | GARGLTGRPGDA                        | 2.52 | 3.65 | 0.78 | 0.44 | 1.13 | 0.28 |
| 23917 | 0 | 136304 | GARGLTGRPGDA                        | 2.52 | 3.65 | 0.78 | 0.44 | 1.13 | 0.28 |
| 23918 | 0 | 136303 | GARGLTGRPGDA                        | 2.52 | 3.97 | 0.78 | 3.16 | 0.22 | 0.28 |
| 23919 | 0 | 136303 | GARGLTGRPGDA                        | 2.52 | 3.97 | 0.78 | 3.16 | 0.22 | 0.28 |
| 23920 | 0 | 162290 | GARGLTGRPGDA                        | 2.52 | 0.01 | 0.78 | 2.46 | 0.22 | 0.28 |
| 23921 | 0 | 162290 | GARGLTGRPGDA                        | 2.52 | 0.01 | 2.19 | 4.08 | 0.22 | 0.28 |
| 23922 | 0 | 162290 | GARGLTGRPGDA                        | 2.52 | 0.01 | 0.78 | 3.57 | 0.22 | 0.28 |
| 23923 | 0 | 162290 | GARGLTGRPGDA                        | 2.52 | 0.01 | 0.78 | 2.61 | 0.22 | 0.28 |
| 23924 | 0 | 162290 | GARGLTGRPGDA                        | 2.52 | 0.01 | 0.78 | 0.44 | 1.13 | 0.28 |
| 23925 | 0 | 162290 | GARGLTGRPGDA                        | 2.52 | 0.01 | 0.78 | 0.44 | 1.41 | 0.28 |
| 23926 | 0 | 162290 | GARGLTGRPGDA                        | 2.52 | 0.01 | 0.78 | 1.81 | 1.41 | 1.28 |

|       |   |        |                                   |      |      |      |      |      |      |
|-------|---|--------|-----------------------------------|------|------|------|------|------|------|
| 23927 | 0 | 162290 | GARGLTGRPGDA                      | 2.52 | 0.01 | 0.78 | 1.81 | 1.41 | 1.28 |
| 23928 | 0 | 424827 | GARGLTGRPGDAGPPG<br>pp            | 2.90 | 3.65 | 0.78 | 0.44 | 1.13 | 0.28 |
| 23929 | 0 | 424827 | GARGLTGRPGDAGPPG<br>pp            | 2.90 | 3.65 | 0.78 | 0.44 | 1.13 | 0.28 |
| 23930 | 0 | 424827 | GARGLTGRPGDAGPPG<br>pp            | 2.90 | 3.65 | 0.78 | 0.44 | 1.13 | 0.28 |
| 23931 | 0 | 424827 | GARGLTGRPGDAGPPG<br>pp            | 2.90 | 3.65 | 0.78 | 0.44 | 1.13 | 1.27 |
| 23932 | 0 | 424827 | GARGLTGRPGDAGPPG<br>pp            | 2.90 | 3.65 | 0.78 | 0.44 | 1.13 | 1.27 |
| 23933 | 0 | 424827 | GARGLTGRPGDAGPPG<br>pp            | 2.90 | 3.65 | 0.78 | 0.44 | 1.13 | 1.27 |
| 23934 | 0 | 424827 | GARGLTGRPGDAGPPG<br>pp            | 2.90 | 3.65 | 0.78 | 0.44 | 1.13 | 1.27 |
| 23935 | 0 | 110587 | GARGLTGRPGDAGPQ                   | 2.72 | 0.01 | 1.75 | 2.98 | 0.22 | 0.28 |
| 23936 | 0 | 108375 | GARGPEGAQGPRGESG<br>TPGSPGPAGAPGN | 3.37 | 4.93 | 2.25 | 2.46 | 0.22 | 0.28 |
| 23937 | 0 | 110588 | GARGPEGAQGSRGEP                   | 2.73 | 0.01 | 1.75 | 2.98 | 0.22 | 0.28 |
| 23938 | 0 | 109043 | GARGPPGP                          | 2.18 | 0.01 | 1.60 | 2.55 | 2.60 | 0.28 |
| 23939 | 0 | 18753  | GARSLTPCTCGSSD                    | 2.63 | 0.01 | 1.96 | 0.44 | 0.85 | 0.28 |
| 23940 | 0 | 238418 | GARVTVSGGSLSAP                    | 2.64 | 0.01 | 2.14 | 2.65 | 0.22 | 0.85 |
| 23941 | 0 | 18758  | GASAQSSGSPSGTPS                   | 2.74 | 0.01 | 1.66 | 0.44 | 0.85 | 0.28 |
| 23942 | 0 | 18759  | GASAQSGASAQSGAS                   | 2.76 | 0.01 | 1.66 | 0.44 | 0.85 | 0.28 |
| 23943 | 0 | 18761  | GASAQSGTSGTSGTS                   | 2.75 | 0.01 | 3.26 | 0.44 | 1.74 | 0.28 |
| 23944 | 0 | 18761  | GASAQSGTSGTSGTS                   | 2.75 | 0.01 | 3.26 | 0.44 | 0.85 | 0.28 |
| 23945 | 0 | 18761  | GASAQSGTSGTSGTS                   | 2.75 | 0.01 | 3.26 | 2.71 | 0.22 | 0.28 |
| 23946 | 0 | 18763  | GASDAYLSEGDMAAHK<br>GLMN          | 2.96 | 0.01 | 2.04 | 2.52 | 0.22 | 0.28 |
| 23947 | 0 | 18764  | GASDLRSS                          | 2.11 | 0.01 | 2.04 | 0.44 | 0.85 | 0.28 |
| 23948 | 0 | 91352  | GASDYVNTLFKNKNV                   | 2.66 | 0.01 | 3.12 | 1.12 | 0.22 | 0.28 |
| 23949 | 0 | 18766  | GASEDVRKQP                        | 2.26 | 0.01 | 3.36 | 1.20 | 0.22 | 0.28 |
| 23950 | 0 | 18766  | GASEDVRKQP                        | 2.26 | 0.01 | 3.36 | 1.20 | 0.22 | 0.28 |
| 23951 | 0 | 18766  | GASEDVRKQP                        | 2.26 | 0.01 | 3.36 | 1.20 | 0.22 | 1.48 |
| 23952 | 0 | 98786  | GASEL                             | 1.74 | 0.01 | 2.14 | 0.44 | 0.85 | 0.28 |
| 23953 | 0 | 450607 | GASESYL                           | 2.02 | 0.01 | 0.90 | 0.44 | 1.23 | 1.39 |
| 23954 | 0 | 108376 | GASGDIAKQ                         | 2.24 | 0.01 | 0.90 | 0.44 | 1.13 | 1.39 |
| 23955 | 0 | 109045 | GASGPLGP                          | 2.17 | 0.01 | 1.60 | 2.55 | 2.60 | 0.28 |
| 23956 | 0 | 18769  | GASGQVKVTKVTKAKSR<br>I            | 2.89 | 0.01 | 2.90 | 0.44 | 0.22 | 1.27 |
| 23957 | 0 | 79223  | GASHTV                            | 1.88 | 0.01 | 0.90 | 0.68 | 0.22 | 1.39 |
| 23958 | 0 | 161101 | GASIFNRRGYFSDPALIL<br>M           | 2.89 | 0.01 | 2.08 | 0.44 | 1.93 | 1.57 |
| 23959 | 0 | 97322  | GASIGWKAA                         | 2.24 | 0.01 | 3.13 | 1.12 | 0.22 | 0.28 |

|       |   |        |                                       |      |      |      |      |      |      |
|-------|---|--------|---------------------------------------|------|------|------|------|------|------|
| 23960 | 0 | 149050 | GASLRLQCKDKENG DVT<br>FTEVGYTRA EGLYS | 3.37 | 0.01 | 2.88 | 1.12 | 0.22 | 0.28 |
| 23961 | 0 | 149050 | GASLRLQCKDKENG DVT<br>FTEVGYTRA EGLYS | 3.37 | 0.01 | 2.88 | 1.12 | 0.22 | 0.85 |
| 23962 | 0 | 149050 | GASLRLQCKDKENG DVT<br>FTEVGYTRA EGLYS | 3.37 | 0.01 | 2.88 | 0.44 | 1.23 | 2.35 |
| 23963 | 0 | 134676 | GASSHQHSRRRQ GWL                      | 2.70 | 0.01 | 0.78 | 3.05 | 1.13 | 0.85 |
| 23964 | 0 | 294224 | GASSDDAQTVGTEG                        | 2.70 | 0.01 | 1.61 | 0.44 | 0.85 | 1.28 |
| 23965 | 0 | 478326 | GASVDKDLITAKD GMEY<br>Y               | 2.82 | 0.01 | 3.12 | 0.68 | 0.22 | 0.28 |
| 23966 | 0 | 131437 | GASVKVT                               | 2.02 | 0.01 | 0.78 | 0.44 | 1.41 | 0.28 |
| 23967 | 0 | 131437 | GASVKVT                               | 2.02 | 0.01 | 0.78 | 0.44 | 1.13 | 0.28 |
| 23968 | 0 | 131437 | GASVKVT                               | 2.02 | 0.01 | 0.78 | 1.15 | 0.22 | 0.28 |
| 23969 | 0 | 131437 | GASVKVT                               | 2.02 | 0.01 | 0.78 | 1.15 | 0.22 | 0.28 |
| 23970 | 0 | 103195 | GASVTVTGQGN SLKV                      | 2.71 | 0.01 | 2.04 | 0.44 | 0.85 | 1.28 |
| 23971 | 0 | 18784  | GATEIQ                                | 1.88 | 0.01 | 2.40 | 0.44 | 0.85 | 0.28 |
| 23972 | 0 | 18786  | GATFQVEVPG                            | 2.32 | 0.01 | 2.66 | 0.68 | 0.22 | 0.28 |
| 23973 | 0 | 18786  | GATFQVEVPG                            | 2.32 | 0.01 | 2.66 | 0.68 | 0.22 | 0.28 |
| 23974 | 0 | 18786  | GATFQVEVPG                            | 2.32 | 0.01 | 2.66 | 0.68 | 0.22 | 0.28 |
| 23975 | 0 | 18786  | GATFQVEVPG                            | 2.32 | 0.01 | 2.66 | 0.68 | 0.22 | 0.28 |
| 23976 | 0 | 18787  | GATFQVEVPGSQHIDSQ<br>KKA              | 2.93 | 0.01 | 2.24 | 1.15 | 0.22 | 0.28 |
| 23977 | 0 | 18787  | GATFQVEVPGSQHIDSQ<br>KKA              | 2.93 | 0.01 | 2.85 | 1.12 | 0.22 | 0.28 |
| 23978 | 0 | 18787  | GATFQVEVPGSQHIDSQ<br>KKA              | 2.93 | 0.01 | 2.85 | 1.12 | 0.22 | 0.28 |
| 23979 | 0 | 18787  | GATFQVEVPGSQHIDSQ<br>KKA              | 2.93 | 0.01 | 2.85 | 1.12 | 0.22 | 0.28 |
| 23980 | 0 | 167582 | GATGPVKRAR                            | 2.34 | 0.01 | 0.78 | 0.44 | 1.13 | 0.85 |
| 23981 | 0 | 171130 | GATGPVKRAREETDK                       | 2.70 | 0.01 | 0.78 | 0.44 | 1.41 | 0.28 |
| 23982 | 0 | 18792  | GATLGYPYP                             | 2.24 | 0.01 | 0.90 | 0.68 | 0.22 | 0.28 |
| 23983 | 0 | 147702 | GATNFGDIG                             | 2.24 | 0.01 | 3.24 | 1.12 | 0.22 | 0.28 |
| 23984 | 0 | 162291 | GATPEDLNQKL AGN                       | 2.62 | 0.01 | 0.90 | 1.15 | 0.22 | 2.49 |
| 23985 | 0 | 18795  | GATPERPR                              | 2.14 | 0.01 | 2.85 | 0.44 | 0.22 | 0.28 |
| 23986 | 0 | 162292 | GATPQDLN TL                           | 2.31 | 4.63 | 0.90 | 1.15 | 0.22 | 2.49 |
| 23987 | 0 | 123209 | GATPVVGA                              | 2.16 | 0.01 | 0.78 | 1.20 | 0.22 | 0.28 |
| 23988 | 0 | 18801  | GATVELLSFLP                           | 2.38 | 0.01 | 2.08 | 1.15 | 0.22 | 1.27 |
| 23989 | 0 | 18801  | GATVELLSFLP                           | 2.38 | 0.01 | 2.08 | 1.15 | 0.22 | 1.27 |
| 23990 | 0 | 18803  | GATVSSQS                              | 2.14 | 0.01 | 2.21 | 1.12 | 0.22 | 0.28 |
| 23991 | 0 | 18804  | GATVSSQSFR                            | 2.31 | 0.01 | 2.21 | 1.12 | 0.22 | 0.28 |
| 23992 | 0 | 128685 | GAVAVSAAPGSAAPA                       | 2.75 | 0.01 | 0.78 | 0.44 | 1.13 | 0.85 |
| 23993 | 0 | 18808  | GAVDSI                                | 1.88 | 0.01 | 0.90 | 0.44 | 1.74 | 1.57 |
| 23994 | 0 | 94823  | GAVDSILGGVATYGA                       | 2.70 | 0.01 | 0.90 | 2.61 | 0.22 | 1.57 |
| 23995 | 0 | 94823  | GAVDSILGGVATYGA                       | 2.70 | 0.01 | 0.90 | 2.61 | 0.22 | 1.57 |



|       |   |        |                               |      |      |      |      |      |      |
|-------|---|--------|-------------------------------|------|------|------|------|------|------|
| 23996 | 0 | 18809  | GAVDSILGGVATYGAAC             | 2.80 | 0.01 | 0.90 | 0.44 | 1.74 | 1.57 |
| 23997 | 0 | 132316 | GAVGCGIRLPNPDTDLY<br>WFTLYQF  | 3.10 | 0.01 | 0.78 | 0.44 | 1.13 | 1.39 |
| 23998 | 0 | 111304 | GAVGENVPDDLYIKG               | 2.66 | 0.01 | 1.86 | 0.68 | 0.22 | 0.28 |
| 23999 | 0 | 18814  | GAVIIRGHLRMAGHSLG<br>R        | 2.88 | 0.01 | 2.45 | 0.68 | 0.22 | 0.28 |
| 24000 | 0 | 18814  | GAVIIRGHLRMAGHSLG<br>R        | 2.88 | 0.01 | 2.45 | 0.44 | 0.85 | 0.28 |
| 24001 | 0 | 294368 | GAVPEGEEYPTEAEA               | 2.73 | 0.01 | 1.61 | 0.44 | 0.85 | 1.28 |
| 24002 | 0 | 294369 | GAVPEGEEYPTEAER               | 2.72 | 0.01 | 1.61 | 0.44 | 0.85 | 1.28 |
| 24003 | 0 | 18816  | GAVPPACCNGIRTIN               | 2.69 | 0.01 | 3.35 | 1.12 | 0.22 | 0.85 |
| 24004 | 0 | 123210 | GAVQGPVP                      | 2.17 | 0.01 | 0.78 | 1.20 | 0.22 | 0.28 |
| 24005 | 0 | 18818  | GAVQNEITLT                    | 2.29 | 0.01 | 3.18 | 0.44 | 0.85 | 0.28 |
| 24006 | 0 | 18818  | GAVQNEITLT                    | 2.29 | 0.01 | 3.18 | 0.44 | 1.41 | 0.28 |
| 24007 | 0 | 131438 | GAVTVAW                       | 2.04 | 0.01 | 0.78 | 0.44 | 1.41 | 0.28 |
| 24008 | 0 | 131438 | GAVTVAW                       | 2.04 | 0.01 | 0.78 | 0.44 | 1.13 | 0.28 |
| 24009 | 0 | 131438 | GAVTVAW                       | 2.04 | 0.01 | 0.78 | 0.44 | 1.13 | 1.27 |
| 24010 | 0 | 232803 | GAVVALSTTFA                   | 2.41 | 0.01 | 2.89 | 1.12 | 0.22 | 1.28 |
| 24011 | 0 | 18833  | GAVVGGLGGYML                  | 2.52 | 0.01 | 2.98 | 2.19 | 0.22 | 0.28 |
| 24012 | 0 | 18833  | GAVVGGLGGYML                  | 2.52 | 0.01 | 2.98 | 2.19 | 0.22 | 0.85 |
| 24013 | 0 | 18833  | GAVVGGLGGYML                  | 2.52 | 0.01 | 2.98 | 2.19 | 0.22 | 0.85 |
| 24014 | 0 | 18833  | GAVVGGLGGYML                  | 2.52 | 0.01 | 2.98 | 2.19 | 0.22 | 1.48 |
| 24015 | 0 | 18834  | GAVVGGLGGYMLGSA<br>MSRPMIHFGN | 3.16 | 0.01 | 1.75 | 2.19 | 0.22 | 0.28 |
| 24016 | 0 | 112120 | GAWFAYW                       | 2.04 | 0.01 | 0.78 | 0.44 | 1.13 | 0.28 |
| 24017 | 0 | 18838  | GAWPAGAG                      | 2.18 | 0.01 | 2.40 | 2.43 | 0.22 | 0.28 |
| 24018 | 0 | 167742 | GAWPAGAGR                     | 2.27 | 0.01 | 2.40 | 2.43 | 0.22 | 0.28 |
| 24019 | 0 | 161182 | GAWYIIPILMIYIVI               | 2.70 | 0.01 | 1.75 | 0.68 | 0.22 | 3.16 |
| 24020 | 0 | 161182 | GAWYIIPILMIYIVI               | 2.70 | 0.01 | 1.75 | 0.68 | 0.22 | 0.28 |
| 24021 | 0 | 161182 | GAWYIIPILMIYIVI               | 2.70 | 0.01 | 1.75 | 0.68 | 0.22 | 1.48 |
| 24022 | 0 | 190762 | GAYAAEGGDNQSSAVS<br>DRAS      | 2.97 | 0.01 | 3.50 | 2.13 | 0.22 | 0.28 |
| 24023 | 0 | 18843  | GAYGRCPNGTRALTVAE<br>LRGNAEL  | 3.15 | 0.01 | 2.14 | 1.20 | 0.22 | 0.28 |
| 24024 | 0 | 18843  | GAYGRCPNGTRALTVAE<br>LRGNAEL  | 3.15 | 0.01 | 2.14 | 1.20 | 0.22 | 0.28 |
| 24025 | 0 | 18843  | GAYGRCPNGTRALTVAE<br>LRGNAEL  | 3.15 | 0.01 | 2.14 | 1.20 | 0.22 | 1.34 |
| 24026 | 0 | 18843  | GAYGRCPNGTRALTVAE<br>LRGNAEL  | 3.15 | 0.01 | 2.14 | 1.20 | 0.22 | 0.28 |
| 24027 | 0 | 18843  | GAYGRCPNGTRALTVAE<br>LRGNAEL  | 3.15 | 0.01 | 2.14 | 1.20 | 0.22 | 0.85 |
| 24028 | 0 | 82573  | GAYKRHHQVQEG                  | 2.47 | 0.01 | 2.87 | 0.44 | 0.22 | 0.28 |
| 24029 | 0 | 82573  | GAYKRHHQVQEG                  | 2.47 | 0.01 | 2.90 | 0.68 | 0.22 | 0.28 |
| 24030 | 0 | 238425 | GAYRAANGLRVRDE                | 2.63 | 0.01 | 2.14 | 2.65 | 0.22 | 0.85 |
| 24031 | 0 | 79225  | GCAIPQNAIRPPCS                | 2.62 | 0.01 | 0.90 | 0.68 | 0.22 | 1.39 |

|       |   |        |                              |      |      |      |      |      |      |
|-------|---|--------|------------------------------|------|------|------|------|------|------|
| 24032 | 0 | 18853  | GCALLRCIPA                   | 2.32 | 0.01 | 0.78 | 0.44 | 1.41 | 0.28 |
| 24033 | 0 | 18853  | GCALLRCIPA                   | 2.32 | 0.01 | 0.78 | 0.44 | 1.13 | 0.28 |
| 24034 | 0 | 238426 | GCAVTCPKPKKDETI              | 2.67 | 0.01 | 2.56 | 2.02 | 0.22 | 0.85 |
| 24035 | 0 | 238426 | GCAVTCPKPKKDETI              | 2.67 | 0.01 | 2.56 | 1.20 | 0.22 | 0.85 |
| 24036 | 0 | 18859  | GCDADATCTEEDSGSSR<br>KK      | 2.91 | 0.01 | 1.66 | 0.44 | 1.74 | 0.28 |
| 24037 | 0 | 187812 | GCDPKKDRY                    | 2.22 | 0.01 | 3.65 | 2.02 | 0.22 | 0.85 |
| 24038 | 0 | 187812 | GCDPKKDRY                    | 2.22 | 0.01 | 3.65 | 2.02 | 0.22 | 0.85 |
| 24039 | 0 | 79226  | GCEMSCEIALVVCH               | 2.60 | 0.01 | 0.90 | 0.68 | 0.22 | 1.39 |
| 24040 | 0 | 18865  | GCFRHLDE                     | 2.10 | 0.01 | 1.66 | 1.15 | 0.22 | 0.28 |
| 24041 | 0 | 132317 | GCGIRLPNPDTDLYWFT<br>LYQFFLA | 3.11 | 0.01 | 0.78 | 0.44 | 1.13 | 1.39 |
| 24042 | 0 | 18866  | GCGLFG                       | 1.92 | 0.01 | 2.40 | 0.44 | 0.85 | 0.28 |
| 24043 | 0 | 18877  | GCHGSEPCIHRGK                | 2.63 | 4.15 | 2.78 | 0.44 | 1.23 | 1.57 |
| 24044 | 0 | 18879  | GCIGSYCV                     | 2.15 | 0.01 | 0.90 | 0.68 | 0.22 | 0.28 |
| 24045 | 0 | 118800 | GCKGTHGGTGAGAGAG<br>GAGA     | 3.02 | 0.01 | 2.43 | 0.44 | 1.13 | 1.27 |
| 24046 | 0 | 118800 | GCKGTHGGTGAGAGAG<br>GAGA     | 3.02 | 0.01 | 2.43 | 0.44 | 1.41 | 1.27 |
| 24047 | 0 | 118800 | GCKGTHGGTGAGAGAG<br>GAGA     | 3.02 | 0.01 | 2.48 | 0.44 | 1.74 | 0.28 |
| 24048 | 0 | 118800 | GCKGTHGGTGAGAGAG<br>GAGA     | 3.02 | 0.01 | 2.48 | 0.44 | 1.74 | 0.28 |
| 24049 | 0 | 18885  | GCKITCFLTAAGYCN              | 2.68 | 0.01 | 2.56 | 1.20 | 0.22 | 0.85 |
| 24050 | 0 | 18885  | GCKITCFLTAAGYCN              | 2.68 | 0.01 | 2.56 | 0.68 | 0.22 | 0.85 |
| 24051 | 0 | 18885  | GCKITCFLTAAGYCN              | 2.68 | 0.01 | 2.56 | 1.20 | 0.22 | 0.85 |
| 24052 | 0 | 18885  | GCKITCFLTAAGYCN              | 2.68 | 0.01 | 2.56 | 2.00 | 0.22 | 0.85 |
| 24053 | 0 | 18885  | GCKITCFLTAAGYCN              | 2.68 | 0.01 | 2.56 | 2.02 | 0.22 | 0.85 |
| 24054 | 0 | 18885  | GCKITCFLTAAGYCN              | 2.68 | 0.01 | 2.56 | 1.20 | 0.22 | 0.85 |
| 24055 | 0 | 79227  | GCKLAMTTTTLACH               | 2.62 | 0.01 | 0.90 | 0.68 | 0.22 | 1.39 |
| 24056 | 0 | 103196 | GCMGYDHRSGCV                 | 2.48 | 0.01 | 0.90 | 2.71 | 0.22 | 0.28 |
| 24057 | 0 | 18887  | GCNCSIYPGHITGHRMA<br>W       | 2.82 | 0.01 | 1.72 | 0.44 | 0.85 | 0.28 |
| 24058 | 0 | 18893  | GCPLPSTKAPPIPPRRK            | 2.84 | 0.01 | 1.72 | 0.44 | 0.85 | 0.28 |
| 24059 | 0 | 238428 | GCPQSSRGVKVDCCM              | 2.67 | 0.01 | 2.56 | 2.02 | 0.22 | 0.85 |
| 24060 | 0 | 238428 | GCPQSSRGVKVDCCM              | 2.67 | 0.01 | 2.56 | 1.20 | 0.22 | 0.85 |
| 24061 | 0 | 238428 | GCPQSSRGVKVDCCM              | 2.67 | 0.01 | 2.56 | 1.20 | 0.22 | 0.28 |
| 24062 | 0 | 238428 | GCPQSSRGVKVDCCM              | 2.67 | 0.01 | 2.56 | 2.02 | 0.22 | 0.85 |
| 24063 | 0 | 238428 | GCPQSSRGVKVDCCM              | 2.67 | 0.01 | 2.56 | 1.20 | 0.22 | 0.85 |
| 24064 | 0 | 516276 | GCPQSSRGVKVDCCMR<br>DKCNG    | 3.01 | 0.01 | 2.56 | 2.02 | 0.22 | 0.85 |

|       |   |        |                                    |      |      |      |      |      |      |
|-------|---|--------|------------------------------------|------|------|------|------|------|------|
| 24065 | 0 | 18895  | GCQSWTCPYTGAUSSPY<br>WKFQHDVN      | 3.14 | 0.01 | 2.04 | 0.44 | 0.85 | 0.28 |
| 24066 | 0 | 18898  | GCQTYKWETFLTSELPQ<br>WLS           | 2.95 | 0.01 | 2.04 | 0.44 | 0.85 | 0.28 |
| 24067 | 0 | 18906  | GCRKEV                             | 1.88 | 0.01 | 1.86 | 0.44 | 1.23 | 0.28 |
| 24068 | 0 | 135928 | GCSAVSAHGCLF                       | 2.50 | 0.01 | 0.78 | 0.44 | 1.41 | 0.28 |
| 24069 | 0 | 18911  | GCSGKLICT                          | 2.24 | 0.01 | 2.54 | 3.53 | 0.22 | 0.28 |
| 24070 | 0 | 18911  | GCSGKLICT                          | 2.24 | 0.01 | 2.54 | 0.44 | 1.59 | 0.28 |
| 24071 | 0 | 182137 | GCVAMRGRHPLGRWE                    | 2.67 | 0.01 | 0.78 | 0.44 | 1.13 | 0.85 |
| 24072 | 0 | 114828 | GCYGSLPQSHIIQKICEF<br>R            | 2.93 | 0.01 | 4.93 | 2.04 | 0.22 | 0.28 |
| 24073 | 0 | 294680 | GDAEVEDEDDDDDDD                    | 2.71 | 0.01 | 1.61 | 0.44 | 0.85 | 1.28 |
| 24074 | 0 | 117870 | GDAFKTLFVARVNYDTT<br>ESKLRRFEVYGP  | 3.34 | 0.01 | 0.78 | 0.44 | 1.13 | 0.28 |
| 24075 | 0 | 117870 | GDAFKTLFVARVNYDTT<br>ESKLRRFEVYGP  | 3.34 | 0.01 | 0.78 | 2.49 | 1.13 | 0.28 |
| 24076 | 0 | 107847 | GDAIGCKHKTKLDECEW<br>NDVDMRDPYNKYK | 3.31 | 0.01 | 0.90 | 1.12 | 0.22 | 0.28 |
| 24077 | 0 | 18933  | GDAKKKKDGKKAEPKN<br>PREN           | 2.99 | 0.01 | 2.59 | 0.44 | 0.85 | 0.28 |
| 24078 | 0 | 18933  | GDAKKKKDGKKAEPKN<br>PREN           | 2.99 | 0.01 | 2.59 | 3.67 | 0.22 | 1.27 |
| 24079 | 0 | 98787  | GDALAGGAVP                         | 2.35 | 0.01 | 2.14 | 0.68 | 0.22 | 0.28 |
| 24080 | 0 | 18934  | GDANTLKDGENVL                      | 2.56 | 0.01 | 2.24 | 1.20 | 0.22 | 0.28 |
| 24081 | 0 | 98788  | GDAPAGGAVP                         | 2.36 | 0.01 | 2.14 | 0.68 | 0.22 | 0.28 |
| 24082 | 0 | 178131 | GDAPFLDRLR                         | 2.33 | 0.01 | 3.51 | 0.68 | 0.22 | 0.85 |
| 24083 | 0 | 178131 | GDAPFLDRLR                         | 2.33 | 0.01 | 3.51 | 0.68 | 0.22 | 0.28 |
| 24084 | 0 | 178132 | GDAPFLDRLRRDQKSLR<br>GRG           | 2.98 | 0.01 | 3.51 | 1.12 | 0.22 | 1.27 |
| 24085 | 0 | 178132 | GDAPFLDRLRRDQKSLR<br>GRG           | 2.98 | 0.01 | 3.51 | 0.68 | 0.22 | 1.27 |
| 24086 | 0 | 489548 | GDAYIVPHGDHYHYIPK<br>NEL           | 2.95 | 0.01 | 2.70 | 0.44 | 0.85 | 0.85 |
| 24087 | 0 | 489548 | GDAYIVPHGDHYHYIPK<br>NEL           | 2.95 | 0.01 | 2.70 | 0.44 | 0.85 | 1.48 |
| 24088 | 0 | 489548 | GDAYIVPHGDHYHYIPK<br>NEL           | 2.95 | 0.01 | 2.70 | 0.44 | 0.85 | 2.12 |
| 24089 | 0 | 489548 | GDAYIVPHGDHYHYIPK<br>NEL           | 2.95 | 0.01 | 2.70 | 0.44 | 0.85 | 2.12 |
| 24090 | 0 | 489548 | GDAYIVPHGDHYHYIPK<br>NEL           | 2.95 | 0.01 | 2.70 | 0.44 | 0.85 | 2.12 |
| 24091 | 0 | 489548 | GDAYIVPHGDHYHYIPK<br>NEL           | 2.95 | 0.01 | 2.70 | 0.44 | 0.85 | 2.12 |

|       |   |        |                           |      |      |      |      |      |      |
|-------|---|--------|---------------------------|------|------|------|------|------|------|
| 24092 | 0 | 489548 | GDAYIVPHGDHYHYIPK<br>NEL  | 2.95 | 0.01 | 2.70 | 0.44 | 0.85 | 2.12 |
| 24093 | 0 | 489548 | GDAYIVPHGDHYHYIPK<br>NEL  | 2.95 | 0.01 | 2.70 | 0.44 | 0.85 | 2.12 |
| 24094 | 0 | 489548 | GDAYIVPHGDHYHYIPK<br>NEL  | 2.95 | 0.01 | 2.70 | 0.44 | 0.85 | 2.12 |
| 24095 | 0 | 489548 | GDAYIVPHGDHYHYIPK<br>NEL  | 2.95 | 0.01 | 2.70 | 0.44 | 0.85 | 1.48 |
| 24096 | 0 | 489548 | GDAYIVPHGDHYHYIPK<br>NEL  | 2.95 | 0.01 | 2.70 | 0.44 | 0.85 | 1.48 |
| 24097 | 0 | 133835 | GDCFFGFLNSPWRVC           | 2.67 | 0.01 | 0.90 | 1.15 | 0.22 | 1.27 |
| 24098 | 0 | 133835 | GDCFFGFLNSPWRVC           | 2.67 | 0.01 | 0.90 | 1.15 | 0.22 | 1.27 |
| 24099 | 0 | 104496 | GDD                       | 1.32 | 0.01 | 3.72 | 0.68 | 0.22 | 1.48 |
| 24100 | 0 | 104496 | GDD                       | 1.32 | 0.01 | 3.72 | 0.68 | 0.22 | 1.48 |
| 24101 | 0 | 104496 | GDD                       | 1.32 | 0.01 | 3.72 | 0.68 | 0.22 | 1.48 |
| 24102 | 0 | 104496 | GDD                       | 1.32 | 0.01 | 3.72 | 0.68 | 0.22 | 1.48 |
| 24103 | 0 | 104496 | GDD                       | 1.32 | 0.01 | 3.72 | 0.68 | 0.22 | 1.48 |
| 24104 | 0 | 104496 | GDD                       | 1.32 | 0.01 | 3.72 | 0.68 | 0.22 | 1.48 |
| 24105 | 0 | 104496 | GDD                       | 1.32 | 0.01 | 3.72 | 0.68 | 0.22 | 1.48 |
| 24106 | 0 | 104496 | GDD                       | 1.32 | 0.01 | 3.72 | 0.68 | 0.22 | 1.48 |
| 24107 | 0 | 294760 | GDDDPAADGAGTAEG           | 2.74 | 0.01 | 1.61 | 0.44 | 0.85 | 1.28 |
| 24108 | 0 | 294761 | GDDDPAADGAGTPEG           | 2.74 | 0.01 | 1.61 | 0.44 | 0.85 | 1.28 |
| 24109 | 0 | 294762 | GDDDPAADVAGTAEG           | 2.73 | 0.01 | 1.61 | 0.44 | 0.85 | 1.28 |
| 24110 | 0 | 103197 | GDDDRLHGMLTDRDI           | 2.71 | 0.01 | 2.04 | 0.44 | 0.85 | 1.28 |
| 24111 | 0 | 92780  | GDDFIDGGKG                | 2.38 | 0.01 | 2.67 | 2.00 | 0.22 | 0.28 |
| 24112 | 0 | 92780  | GDDFIDGGKG                | 2.38 | 0.01 | 2.67 | 2.00 | 0.22 | 0.28 |
| 24113 | 0 | 92780  | GDDFIDGGKG                | 2.38 | 0.01 | 2.67 | 2.00 | 0.22 | 0.28 |
| 24114 | 0 | 18946  | GDDGDDGDEGGDGDE           | 2.76 | 0.01 | 2.43 | 0.44 | 1.13 | 1.27 |
| 24115 | 0 | 503984 | GDDGDDGDEGGDGDE<br>GEEGQE | 3.08 | 0.01 | 2.48 | 0.44 | 1.74 | 0.28 |
| 24116 | 0 | 92781  | GDDIFVHRKG                | 2.31 | 0.01 | 2.67 | 2.00 | 0.22 | 0.28 |
| 24117 | 0 | 92781  | GDDIFVHRKG                | 2.31 | 0.01 | 2.67 | 2.00 | 0.22 | 0.28 |
| 24118 | 0 | 92781  | GDDIFVHRKG                | 2.31 | 0.01 | 2.67 | 2.00 | 0.22 | 0.28 |
| 24119 | 0 | 92782  | GDDILDGGNG                | 2.38 | 0.01 | 2.67 | 2.00 | 0.22 | 0.28 |
| 24120 | 0 | 92782  | GDDILDGGNG                | 2.38 | 0.01 | 2.67 | 2.00 | 0.22 | 0.28 |
| 24121 | 0 | 92782  | GDDILDGGNG                | 2.38 | 0.01 | 2.67 | 2.00 | 0.22 | 0.28 |
| 24122 | 0 | 188186 | GDDLAETISNELVSV           | 2.67 | 0.01 | 1.66 | 0.68 | 0.22 | 0.28 |
| 24123 | 0 | 18951  | GDDMDPELRGLAQA            | 2.63 | 0.01 | 2.56 | 2.69 | 0.22 | 0.28 |
| 24124 | 0 | 18951  | GDDMDPELRGLAQA            | 2.63 | 0.01 | 2.56 | 1.12 | 0.22 | 0.28 |
| 24125 | 0 | 107375 | GDDNLAPNTANVQMT           | 2.67 | 0.01 | 0.78 | 1.20 | 0.22 | 0.85 |
| 24126 | 0 | 107375 | GDDNLAPNTANVQMT           | 2.67 | 0.01 | 0.78 | 1.20 | 0.22 | 2.92 |

|       |   |        |                                                      |      |      |      |      |      |      |
|-------|---|--------|------------------------------------------------------|------|------|------|------|------|------|
| 24127 | 0 | 18952  | GDDPAKAAFDLQAS                                       | 2.69 | 0.01 | 3.89 | 0.68 | 0.22 | 0.85 |
| 24128 | 0 | 18953  | GDDPLLGN                                             | 2.15 | 0.01 | 2.40 | 2.43 | 0.22 | 0.28 |
| 24129 | 0 | 18954  | GDDPLLGNQ                                            | 2.25 | 0.01 | 2.40 | 2.43 | 0.22 | 0.28 |
| 24130 | 0 | 18954  | GDDPLLGNQ                                            | 2.25 | 0.01 | 2.40 | 2.43 | 0.22 | 0.28 |
| 24131 | 0 | 18955  | GDDPLLGNQSLL                                         | 2.49 | 0.01 | 2.40 | 0.68 | 0.22 | 0.85 |
| 24132 | 0 | 18955  | GDDPLLGNQSLL                                         | 2.49 | 0.01 | 2.40 | 0.68 | 0.22 | 0.85 |
| 24133 | 0 | 78161  | GDDRLF                                               | 1.89 | 0.01 | 0.90 | 2.02 | 1.59 | 1.39 |
| 24134 | 0 | 294806 | GDDVEDGDGEDEEEG                                      | 2.74 | 0.01 | 1.61 | 0.44 | 0.85 | 1.28 |
| 24135 | 0 | 18961  | GDESDSSDGYPPNRQ<br>DPRF                              | 2.97 | 0.01 | 2.76 | 0.44 | 1.59 | 0.28 |
| 24136 | 0 | 294826 | GDEEDYDVVDDDDDDV                                     | 2.72 | 0.01 | 1.61 | 0.44 | 0.85 | 1.28 |
| 24137 | 0 | 294827 | GDEEDYDVVDDLEEE                                      | 2.70 | 0.01 | 1.61 | 0.44 | 0.85 | 1.28 |
| 24138 | 0 | 18962  | GDEEVTEGLIIGKR                                       | 2.68 | 0.01 | 3.78 | 1.15 | 0.22 | 0.28 |
| 24139 | 0 | 142424 | GDEFDTYDDIKKVT                                       | 2.61 | 0.01 | 2.59 | 0.44 | 0.85 | 0.85 |
| 24140 | 0 | 95399  | GDEGGDGEDEEGQE                                       | 2.76 | 0.01 | 2.43 | 0.44 | 1.59 | 0.28 |
| 24141 | 0 | 294840 | GDEGNDEAEGGNAR                                       | 2.74 | 0.01 | 1.61 | 0.44 | 0.85 | 1.28 |
| 24142 | 0 | 188187 | GDEGRNNGVD                                           | 2.35 | 0.01 | 2.92 | 1.81 | 0.22 | 0.85 |
| 24143 | 0 | 18963  | GDEGRSVFDDNV                                         | 2.49 | 0.01 | 3.33 | 0.44 | 1.23 | 0.85 |
| 24144 | 0 | 18965  | GDELEAETQNVYAAPN<br>ANPTSFLQKKEKMVLPN<br>ANPPANKKNAG | 3.73 | 0.01 | 0.90 | 0.68 | 0.22 | 0.28 |
| 24145 | 0 | 101664 | GDELSKKVCGKGECSNG<br>TKKCGTTDSTATT                   | 3.36 | 0.01 | 3.72 | 3.42 | 0.22 | 0.28 |
| 24146 | 0 | 101665 | GDELSKKVCGKGTTSNG<br>QCGVNATSGSTNN                   | 3.36 | 0.01 | 3.72 | 3.42 | 0.22 | 0.28 |
| 24147 | 0 | 18967  | GDELSKKVCGKGTTSNG<br>TNQCGTTDSTAT                    | 3.33 | 0.01 | 3.65 | 2.22 | 0.22 | 0.28 |
| 24148 | 0 | 240875 | GDEMTSLSEYVSRMKET<br>QKSIYYIT                        | 3.16 | 0.01 | 0.78 | 0.44 | 1.13 | 0.28 |
| 24149 | 0 | 294877 | GDESSDKEDAEPTAA                                      | 2.69 | 0.01 | 1.61 | 0.44 | 0.85 | 1.28 |
| 24150 | 0 | 115605 | GDEVELPCRISP                                         | 2.45 | 0.01 | 0.78 | 0.44 | 1.41 | 0.28 |
| 24151 | 0 | 115605 | GDEVELPCRISP                                         | 2.45 | 0.01 | 0.78 | 0.44 | 1.13 | 0.28 |
| 24152 | 0 | 18970  | GDEVRLANDLKAFLDS<br>EYG                              | 2.95 | 0.01 | 2.93 | 1.81 | 0.22 | 0.28 |
| 24153 | 0 | 18970  | GDEVRLANDLKAFLDS<br>EYG                              | 2.95 | 0.01 | 2.93 | 2.69 | 0.22 | 0.28 |
| 24154 | 0 | 18971  | GDEYDDAADAAGDRAP                                     | 2.79 | 0.01 | 2.40 | 1.15 | 0.22 | 2.02 |
| 24155 | 0 | 171138 | GDEYDFYRSFPGFQA                                      | 2.69 | 0.01 | 0.78 | 0.44 | 1.41 | 0.28 |
| 24156 | 0 | 171138 | GDEYDFYRSFPGFQA                                      | 2.69 | 0.01 | 0.78 | 0.44 | 1.13 | 0.28 |
| 24157 | 0 | 18974  | GDFENSAAAAETG                                        | 2.55 | 0.01 | 3.63 | 1.20 | 0.22 | 0.28 |
| 24158 | 0 | 105809 | GDFGSLAPRVARQLPAS<br>FNY                             | 2.95 | 0.01 | 3.14 | 3.67 | 0.22 | 1.27 |

|       |   |        |                                                           |      |      |      |      |      |      |
|-------|---|--------|-----------------------------------------------------------|------|------|------|------|------|------|
| 24159 | 0 | 18977  | GDFGSLAPRVARQLPAS<br>FNYGAIK                              | 3.11 | 0.01 | 3.14 | 0.68 | 0.22 | 1.57 |
| 24160 | 0 | 18977  | GDFGSLAPRVARQLPAS<br>FNYGAIK                              | 3.11 | 0.01 | 3.14 | 0.68 | 0.22 | 1.57 |
| 24161 | 0 | 18977  | GDFGSLAPRVARQLPAS<br>FNYGAIK                              | 3.11 | 0.01 | 3.14 | 0.68 | 0.22 | 1.34 |
| 24162 | 0 | 106438 | GDFKRTT                                                   | 1.99 | 0.01 | 0.90 | 3.00 | 1.93 | 0.28 |
| 24163 | 0 | 18982  | GDGAAGQPAGDGAAG<br>QPA                                    | 2.93 | 0.01 | 2.59 | 0.44 | 0.85 | 0.28 |
| 24164 | 0 | 18983  | GDGANAGQ                                                  | 2.17 | 0.01 | 3.12 | 1.15 | 0.22 | 1.27 |
| 24165 | 0 | 294901 | GDGDPAADGAGTAEG                                           | 2.74 | 0.01 | 1.61 | 0.44 | 0.85 | 1.28 |
| 24166 | 0 | 18985  | GDGEHLEGGDGTR                                             | 2.59 | 0.01 | 3.17 | 0.44 | 0.85 | 0.85 |
| 24167 | 0 | 18986  | GDGEPPEDDDSATGLAF<br>RTP                                  | 2.96 | 0.01 | 2.40 | 0.44 | 1.59 | 0.28 |
| 24168 | 0 | 98789  | GDGETQFLDLMRAVAN<br>SMREAPNSAQSTTHPEP<br>PPTPGPSQDNDTDWGY | 3.83 | 0.01 | 4.33 | 0.68 | 0.22 | 0.85 |
| 24169 | 0 | 98789  | GDGETQFLDLMRAVAN<br>SMREAPNSAQSTTHPEP<br>PPTPGPSQDNDTDWGY | 3.83 | 0.01 | 4.33 | 0.68 | 0.22 | 0.85 |
| 24170 | 0 | 98789  | GDGETQFLDLMRAVAN<br>SMREAPNSAQSTTHPEP<br>PPTPGPSQDNDTDWGY | 3.83 | 0.01 | 4.33 | 0.68 | 0.22 | 0.85 |
| 24171 | 0 | 98789  | GDGETQFLDLMRAVAN<br>SMREAPNSAQSTTHPEP<br>PPTPGPSQDNDTDWGY | 3.83 | 0.01 | 4.33 | 0.68 | 0.22 | 0.28 |
| 24172 | 0 | 189639 | GDGKIGVDEFGAMIK                                           | 2.71 | 0.01 | 3.28 | 0.44 | 1.23 | 0.28 |
| 24173 | 0 | 158790 | GDGMIGIDEFAVLVK                                           | 2.69 | 0.01 | 3.26 | 0.44 | 1.23 | 0.28 |
| 24174 | 0 | 92786  | GDGNDIITDS                                                | 2.35 | 0.01 | 2.67 | 2.00 | 0.22 | 0.28 |
| 24175 | 0 | 92786  | GDGNDIITDS                                                | 2.35 | 0.01 | 2.67 | 2.00 | 0.22 | 0.28 |
| 24176 | 0 | 232804 | GDGPFSVRSTGWGGY                                           | 2.68 | 0.01 | 2.89 | 1.12 | 0.22 | 1.28 |
| 24177 | 0 | 232804 | GDGPFSVRSTGWGGY                                           | 2.68 | 0.01 | 2.89 | 1.12 | 0.22 | 1.28 |
| 24178 | 0 | 232804 | GDGPFSVRSTGWGGY                                           | 2.68 | 0.01 | 2.89 | 1.12 | 0.22 | 1.28 |
| 24179 | 0 | 232804 | GDGPFSVRSTGWGGY                                           | 2.68 | 0.01 | 2.89 | 1.12 | 0.22 | 1.28 |
| 24180 | 0 | 232804 | GDGPFSVRSTGWGGY                                           | 2.68 | 0.01 | 2.89 | 1.12 | 0.22 | 1.28 |
| 24181 | 0 | 78977  | GDGRFHFLRGFFDSD                                           | 2.73 | 0.01 | 0.90 | 2.16 | 0.22 | 1.39 |
| 24182 | 0 | 18994  | GDGRQTITNPAYDE                                            | 2.60 | 0.01 | 3.53 | 0.68 | 0.22 | 0.28 |

|       |   |        |                                |      |      |      |      |      |      |
|-------|---|--------|--------------------------------|------|------|------|------|------|------|
| 24183 | 0 | 18994  | GDGRQTITNPAYDE                 | 2.60 | 0.01 | 3.53 | 0.68 | 0.22 | 0.85 |
| 24184 | 0 | 130842 | GDGSLLSLDYAELSSRILS<br>YMSSSGI | 3.23 | 0.01 | 0.78 | 0.68 | 0.22 | 1.39 |
| 24185 | 0 | 130842 | GDGSLLSLDYAELSSRILS<br>YMSSSGI | 3.23 | 0.01 | 0.78 | 0.68 | 0.22 | 0.85 |
| 24186 | 0 | 130842 | GDGSLLSLDYAELSSRILS<br>YMSSSGI | 3.23 | 0.01 | 0.78 | 0.68 | 0.22 | 0.85 |
| 24187 | 0 | 18999  | GDHCEGLGVL                     | 2.34 | 0.01 | 3.16 | 0.68 | 0.22 | 0.28 |
| 24188 | 0 | 18999  | GDHCEGLGVL                     | 2.34 | 0.01 | 3.16 | 0.68 | 0.22 | 0.28 |
| 24189 | 0 | 182138 | GDICEYLHKDLHTIK                | 2.68 | 0.01 | 0.78 | 0.44 | 1.13 | 0.85 |
| 24190 | 0 | 110589 | GDICNTMHYTNWTHIYI<br>CEE       | 2.95 | 0.01 | 1.86 | 0.44 | 0.85 | 0.28 |
| 24191 | 0 | 110589 | GDICNTMHYTNWTHIYI<br>CEE       | 2.95 | 0.01 | 1.86 | 0.44 | 0.85 | 0.28 |
| 24192 | 0 | 114351 | GDIIAFPAGVAHWSY                | 2.66 | 0.01 | 3.27 | 0.44 | 1.23 | 0.85 |
| 24193 | 0 | 114352 | GDIIALPAGVAHWCY                | 2.66 | 0.01 | 3.48 | 0.44 | 1.23 | 0.85 |
| 24194 | 0 | 19004  | GDIIKKMQTLWDEIM                | 2.67 | 0.01 | 1.66 | 0.44 | 1.59 | 0.28 |
| 24195 | 0 | 19005  | GDINKVLEKLGYS                  | 2.54 | 0.01 | 2.72 | 2.69 | 0.22 | 0.28 |
| 24196 | 0 | 19005  | GDINKVLEKLGYS                  | 2.54 | 0.01 | 2.72 | 2.16 | 0.22 | 0.28 |
| 24197 | 0 | 19005  | GDINKVLEKLGYS                  | 2.54 | 0.01 | 2.72 | 3.34 | 0.22 | 0.28 |
| 24198 | 0 | 19005  | GDINKVLEKLGYS                  | 2.54 | 0.01 | 2.72 | 1.81 | 0.22 | 0.28 |
| 24199 | 0 | 19005  | GDINKVLEKLGYS                  | 2.54 | 0.01 | 2.72 | 2.69 | 0.22 | 0.28 |
| 24200 | 0 | 19005  | GDINKVLEKLGYS                  | 2.54 | 0.01 | 2.72 | 2.16 | 0.22 | 0.28 |
| 24201 | 0 | 19005  | GDINKVLEKLGYS                  | 2.54 | 0.01 | 2.72 | 3.34 | 0.22 | 0.28 |
| 24202 | 0 | 19005  | GDINKVLEKLGYS                  | 2.54 | 0.01 | 2.72 | 1.81 | 0.22 | 0.28 |
| 24203 | 0 | 19005  | GDINKVLEKLGYS                  | 2.54 | 0.01 | 2.72 | 2.69 | 0.22 | 0.28 |
| 24204 | 0 | 19005  | GDINKVLEKLGYS                  | 2.54 | 0.01 | 2.72 | 2.16 | 0.22 | 0.28 |
| 24205 | 0 | 19005  | GDINKVLEKLGYS                  | 2.54 | 0.01 | 2.72 | 3.34 | 0.22 | 0.28 |
| 24206 | 0 | 19005  | GDINKVLEKLGYS                  | 2.54 | 0.01 | 2.72 | 0.68 | 0.22 | 0.28 |
| 24207 | 0 | 19006  | GDINKVLEKLGYSGGDLL<br>G        | 2.92 | 0.01 | 2.72 | 2.69 | 0.22 | 0.28 |
| 24208 | 0 | 19006  | GDINKVLEKLGYSGGDLL<br>G        | 2.92 | 0.01 | 2.72 | 2.16 | 0.22 | 0.28 |
| 24209 | 0 | 19006  | GDINKVLEKLGYSGGDLL<br>G        | 2.92 | 0.01 | 2.72 | 3.34 | 0.22 | 0.28 |
| 24210 | 0 | 19006  | GDINKVLEKLGYSGGDLL<br>G        | 2.92 | 0.01 | 2.72 | 0.68 | 0.22 | 0.28 |
| 24211 | 0 | 19006  | GDINKVLEKLGYSGGDLL<br>G        | 2.92 | 0.01 | 2.72 | 2.69 | 0.22 | 0.28 |
| 24212 | 0 | 19006  | GDINKVLEKLGYSGGDLL<br>G        | 2.92 | 0.01 | 2.72 | 2.16 | 0.22 | 0.28 |
| 24213 | 0 | 19006  | GDINKVLEKLGYSGGDLL<br>G        | 2.92 | 0.01 | 2.72 | 3.34 | 0.22 | 0.28 |
| 24214 | 0 | 19006  | GDINKVLEKLGYSGGDLL<br>G        | 2.92 | 0.01 | 2.72 | 0.68 | 0.22 | 0.28 |
| 24215 | 0 | 233363 | GDIR                           | 1.57 | 0.01 | 3.85 | 0.44 | 0.85 | 2.49 |
| 24216 | 0 | 233363 | GDIR                           | 1.57 | 0.01 | 3.85 | 0.44 | 0.85 | 2.98 |

|       |   |        |                              |      |      |      |      |      |      |
|-------|---|--------|------------------------------|------|------|------|------|------|------|
| 24217 | 0 | 233363 | GDIR                         | 1.57 | 0.01 | 3.85 | 0.44 | 0.85 | 3.13 |
| 24218 | 0 | 233363 | GDIR                         | 1.57 | 0.01 | 3.85 | 0.44 | 0.85 | 1.34 |
| 24219 | 0 | 19007  | GDIVQQPSDETAAS               | 2.59 | 0.01 | 2.69 | 0.44 | 0.85 | 0.28 |
| 24220 | 0 | 19007  | GDIVQQPSDETAAS               | 2.59 | 0.01 | 2.69 | 0.44 | 0.85 | 0.28 |
| 24221 | 0 | 98790  | GDKDNVIDQIEKQAK              | 2.70 | 0.01 | 2.16 | 0.44 | 1.23 | 0.85 |
| 24222 | 0 | 295019 | GDKDPAADGAGTQEE              | 2.70 | 0.01 | 1.61 | 0.44 | 0.85 | 1.28 |
| 24223 | 0 | 135929 | GDKKEIGNIISDA                | 2.49 | 0.01 | 0.78 | 0.44 | 1.41 | 0.28 |
| 24224 | 0 | 99265  | GDKELF                       | 1.88 | 0.01 | 2.24 | 1.20 | 0.22 | 0.28 |
| 24225 | 0 | 227194 | GDKGEAGEPGERGLKG<br>HRGFTGLQ | 3.14 | 3.40 | 2.19 | 0.44 | 1.13 | 0.28 |
| 24226 | 0 | 227194 | GDKGEAGEPGERGLKG<br>HRGFTGLQ | 3.14 | 3.40 | 2.19 | 0.44 | 1.41 | 0.28 |
| 24227 | 0 | 227195 | GDKGEAGEPGERGLKG<br>HRGFTGLQ | 3.14 | 4.63 | 2.19 | 0.44 | 1.13 | 0.28 |
| 24228 | 0 | 227195 | GDKGEAGEPGERGLKG<br>HRGFTGLQ | 3.14 | 4.63 | 2.19 | 0.44 | 1.41 | 0.28 |
| 24229 | 0 | 227196 | GDKGEAGEPGERGLKG<br>HRGFTGLQ | 3.14 | 3.97 | 2.19 | 0.44 | 1.13 | 0.28 |
| 24230 | 0 | 227196 | GDKGEAGEPGERGLKG<br>HRGFTGLQ | 3.14 | 3.97 | 2.19 | 0.44 | 1.41 | 0.28 |
| 24231 | 0 | 227194 | GDKGEAGEPGERGLKG<br>HRGFTGLQ | 3.14 | 3.40 | 2.19 | 0.44 | 1.13 | 0.28 |
| 24232 | 0 | 227196 | GDKGEAGEPGERGLKG<br>HRGFTGLQ | 3.14 | 3.97 | 2.19 | 0.44 | 1.13 | 0.28 |
| 24233 | 0 | 227196 | GDKGEAGEPGERGLKG<br>HRGFTGLQ | 3.14 | 3.97 | 2.19 | 0.44 | 1.13 | 0.28 |
| 24234 | 0 | 227194 | GDKGEAGEPGERGLKG<br>HRGFTGLQ | 3.14 | 3.40 | 2.19 | 0.44 | 1.13 | 1.48 |
| 24235 | 0 | 227196 | GDKGEAGEPGERGLKG<br>HRGFTGLQ | 3.14 | 3.97 | 2.19 | 0.44 | 1.13 | 1.48 |
| 24236 | 0 | 227197 | GDKGEAGEPGERGLKG<br>HRGFTGLQ | 3.14 | 0.01 | 2.19 | 0.44 | 1.13 | 0.28 |
| 24237 | 0 | 227197 | GDKGEAGEPGERGLKG<br>HRGFTGLQ | 3.14 | 0.01 | 2.19 | 0.44 | 1.41 | 0.28 |
| 24238 | 0 | 227197 | GDKGEAGEPGERGLKG<br>HRGFTGLQ | 3.14 | 0.01 | 0.78 | 3.16 | 0.22 | 0.28 |
| 24239 | 0 | 295037 | GDKLSLFGQAAAGDK              | 2.70 | 0.01 | 1.61 | 0.44 | 0.85 | 1.28 |
| 24240 | 0 | 106440 | GDKLTLL                      | 2.00 | 0.01 | 0.90 | 0.68 | 0.22 | 1.39 |
| 24241 | 0 | 295041 | GDKPAPFGQAAAADK              | 2.71 | 0.01 | 1.61 | 0.44 | 0.85 | 1.28 |
| 24242 | 0 | 295042 | GDKPAPFGQAAAGDK              | 2.72 | 0.01 | 1.61 | 0.44 | 0.85 | 1.28 |
| 24243 | 0 | 295043 | GDKPPPFQAAAAGDK              | 2.71 | 0.01 | 1.61 | 0.44 | 0.85 | 1.28 |
| 24244 | 0 | 295044 | GDKPPPFQAAEGDK               | 2.70 | 0.01 | 1.61 | 0.44 | 0.85 | 1.28 |



|       |   |        |                          |      |      |      |      |      |      |
|-------|---|--------|--------------------------|------|------|------|------|------|------|
| 24245 | 0 | 295046 | GDKPSLFGQAAAGDK          | 2.69 | 0.01 | 1.61 | 0.44 | 0.85 | 1.28 |
| 24246 | 0 | 19014  | GDKPSLFGQAAAGDKPS<br>LF  | 2.93 | 0.01 | 2.30 | 0.44 | 0.85 | 0.28 |
| 24247 | 0 | 19015  | GDKPSPFGQAAA             | 2.47 | 0.01 | 2.30 | 1.20 | 0.22 | 0.85 |
| 24248 | 0 | 295047 | GDKPSPFGQAAAGDK          | 2.70 | 0.01 | 1.61 | 0.44 | 0.85 | 1.28 |
| 24249 | 0 | 295048 | GDKPSPFGQAAAGGK          | 2.70 | 0.01 | 1.61 | 0.44 | 0.85 | 1.28 |
| 24250 | 0 | 295049 | GDKPSPFGQGTAFDA          | 2.71 | 0.01 | 1.61 | 0.44 | 0.85 | 1.28 |
| 24251 | 0 | 19016  | GDKPVYEPGFEGAGGKL<br>GYK | 2.98 | 0.01 | 2.21 | 1.20 | 0.22 | 0.28 |
| 24252 | 0 | 19016  | GDKPVYEPGFEGAGGKL<br>GYK | 2.98 | 0.01 | 2.21 | 1.20 | 0.22 | 0.28 |
| 24253 | 0 | 134058 | GDKVSFF                  | 1.99 | 0.01 | 0.78 | 0.44 | 1.13 | 0.28 |
| 24254 | 0 | 134058 | GDKVSFF                  | 1.99 | 0.01 | 0.78 | 0.44 | 1.13 | 0.28 |
| 24255 | 0 | 135930 | GDKVSFFCKNKEKCC          | 2.68 | 0.01 | 0.78 | 0.44 | 1.13 | 1.27 |
| 24256 | 0 | 135930 | GDKVSFFCKNKEKCC          | 2.68 | 0.01 | 0.78 | 0.44 | 1.13 | 0.28 |
| 24257 | 0 | 135930 | GDKVSFFCKNKEKCC          | 2.68 | 0.01 | 0.78 | 0.44 | 1.13 | 1.27 |
| 24258 | 0 | 135930 | GDKVSFFCKNKEKCC          | 2.68 | 0.01 | 0.78 | 0.44 | 1.13 | 1.27 |
| 24259 | 0 | 135930 | GDKVSFFCKNKEKCC          | 2.68 | 0.01 | 0.78 | 0.44 | 1.13 | 0.28 |
| 24260 | 0 | 115261 | GDLEILLQKWENGECAQ<br>KKI | 2.95 | 0.01 | 1.60 | 0.44 | 1.23 | 2.51 |
| 24261 | 0 | 100868 | GDLGSI                   | 1.91 | 0.01 | 3.18 | 1.12 | 0.22 | 0.28 |
| 24262 | 0 | 19023  | GDLGSIA                  | 2.03 | 0.01 | 3.37 | 1.12 | 0.22 | 0.28 |
| 24263 | 0 | 19023  | GDLGSIA                  | 2.03 | 0.01 | 3.37 | 1.12 | 0.22 | 0.28 |
| 24264 | 0 | 19023  | GDLGSIA                  | 2.03 | 0.01 | 3.37 | 1.12 | 0.22 | 0.28 |
| 24265 | 0 | 19023  | GDLGSIA                  | 2.03 | 0.01 | 3.37 | 1.12 | 0.22 | 0.28 |
| 24266 | 0 | 19023  | GDLGSIA                  | 2.03 | 0.01 | 3.37 | 1.12 | 0.22 | 0.28 |
| 24267 | 0 | 19023  | GDLGSIA                  | 2.03 | 0.01 | 3.37 | 1.12 | 0.22 | 0.28 |
| 24268 | 0 | 19023  | GDLGSIA                  | 2.03 | 0.01 | 3.37 | 1.12 | 0.22 | 1.34 |
| 24269 | 0 | 19023  | GDLGSIA                  | 2.03 | 0.01 | 3.37 | 1.12 | 0.22 | 1.34 |
| 24270 | 0 | 19023  | GDLGSIA                  | 2.03 | 0.01 | 3.37 | 1.12 | 0.22 | 0.28 |
| 24271 | 0 | 99266  | GDLIAVPTGVAFWLY          | 2.67 | 0.01 | 2.16 | 0.44 | 1.23 | 1.48 |
| 24272 | 0 | 106441 | GDLKRTT                  | 1.99 | 0.01 | 0.90 | 3.00 | 1.93 | 0.28 |
| 24273 | 0 | 106442 | GDLKRTTGGGC              | 2.41 | 0.01 | 0.90 | 3.00 | 1.93 | 0.28 |
| 24274 | 0 | 106442 | GDLKRTTGGGC              | 2.41 | 0.01 | 0.90 | 1.81 | 0.22 | 0.28 |
| 24275 | 0 | 19029  | GDLKLLNNYRYNKD           | 2.72 | 0.01 | 2.59 | 0.44 | 0.85 | 0.28 |
| 24276 | 0 | 161343 | GDLNPPPEAKQVPVSY<br>DS   | 2.87 | 0.01 | 2.08 | 0.68 | 0.22 | 1.57 |
| 24277 | 0 | 161343 | GDLNPPPEAKQVPVSY<br>DS   | 2.87 | 0.01 | 2.08 | 2.49 | 0.22 | 1.57 |
| 24278 | 0 | 161343 | GDLNPPPEAKQVPVSY<br>DS   | 2.87 | 0.01 | 2.08 | 2.02 | 0.22 | 1.57 |
| 24279 | 0 | 103198 | GDLPTIGTAVSARNT          | 2.67 | 0.01 | 2.04 | 0.44 | 0.85 | 1.28 |
| 24280 | 0 | 100869 | GDLQVL                   | 1.90 | 0.01 | 3.02 | 1.12 | 0.22 | 0.28 |
| 24281 | 0 | 19033  | GDLQVLA                  | 2.02 | 0.01 | 3.51 | 1.12 | 0.22 | 0.28 |
| 24282 | 0 | 19033  | GDLQVLA                  | 2.02 | 0.01 | 3.51 | 1.12 | 0.22 | 0.28 |

|       |   |        |                                     |      |      |      |      |      |      |
|-------|---|--------|-------------------------------------|------|------|------|------|------|------|
| 24283 | 0 | 19033  | GDLQVLA                             | 2.02 | 0.01 | 3.51 | 1.12 | 0.22 | 0.28 |
| 24284 | 0 | 19033  | GDLQVLA                             | 2.02 | 0.01 | 3.51 | 1.12 | 0.22 | 0.28 |
| 24285 | 0 | 19033  | GDLQVLA                             | 2.02 | 0.01 | 3.51 | 1.12 | 0.22 | 0.28 |
| 24286 | 0 | 19033  | GDLQVLA                             | 2.02 | 0.01 | 3.51 | 1.12 | 0.22 | 0.28 |
| 24287 | 0 | 19033  | GDLQVLA                             | 2.02 | 0.01 | 3.51 | 1.12 | 0.22 | 0.28 |
| 24288 | 0 | 19033  | GDLQVLA                             | 2.02 | 0.01 | 3.51 | 1.12 | 0.22 | 0.28 |
| 24289 | 0 | 19033  | GDLQVLA                             | 2.02 | 0.01 | 3.26 | 1.12 | 0.22 | 1.57 |
| 24290 | 0 | 94521  | GDLQVLAQK                           | 2.23 | 0.01 | 3.26 | 1.12 | 0.22 | 0.28 |
| 24291 | 0 | 94521  | GDLQVLAQK                           | 2.23 | 0.01 | 3.26 | 1.12 | 0.22 | 0.28 |
| 24292 | 0 | 19034  | GDLQVLAQKV                          | 2.33 | 0.01 | 3.26 | 2.37 | 0.22 | 0.85 |
| 24293 | 0 | 19034  | GDLQVLAQKV                          | 2.33 | 0.01 | 3.26 | 2.59 | 0.22 | 0.85 |
| 24294 | 0 | 19035  | GDLRAVHHRPVPA                       | 2.56 | 0.01 | 2.85 | 0.68 | 0.22 | 1.34 |
| 24295 | 0 | 78392  | GDLRAYKMVYATNPQT<br>QLSN            | 2.91 | 0.01 | 2.14 | 3.70 | 0.22 | 0.28 |
| 24296 | 0 | 78392  | GDLRAYKMVYATNPQT<br>QLSN            | 2.91 | 0.01 | 2.14 | 3.70 | 0.22 | 0.28 |
| 24297 | 0 | 78392  | GDLRAYKMVYATNPQT<br>QLSN            | 2.91 | 0.01 | 2.14 | 3.70 | 0.22 | 0.28 |
| 24298 | 0 | 227198 | GDLTMVITQDCDTCH                     | 2.68 | 0.01 | 2.97 | 0.44 | 0.85 | 0.28 |
| 24299 | 0 | 103199 | GDLVGP GCAEYAAAN                    | 2.67 | 0.01 | 2.04 | 0.44 | 0.85 | 1.28 |
| 24300 | 0 | 19049  | GDLVGP GCAEYAAANP<br>TGPA           | 2.96 | 0.01 | 3.59 | 2.79 | 0.22 | 0.28 |
| 24301 | 0 | 19057  | GDN                                 | 1.37 | 0.01 | 3.70 | 0.44 | 0.85 | 0.28 |
| 24302 | 0 | 451479 | GDNAPNWKEPEVNGT                     | 2.69 | 0.01 | 3.72 | 0.68 | 0.22 | 0.28 |
| 24303 | 0 | 451479 | GDNAPNWKEPEVNGT                     | 2.69 | 0.01 | 3.72 | 0.68 | 0.22 | 0.28 |
| 24304 | 0 | 451479 | GDNAPNWKEPEVNGT                     | 2.69 | 0.01 | 3.72 | 0.68 | 0.22 | 0.28 |
| 24305 | 0 | 451479 | GDNAPNWKEPEVNGT                     | 2.69 | 0.01 | 3.72 | 0.68 | 0.22 | 1.34 |
| 24306 | 0 | 171140 | GDNEKMAALEAKICH                     | 2.66 | 0.01 | 0.78 | 0.44 | 1.41 | 0.28 |
| 24307 | 0 | 226467 | MSLDQSVVELYTQASLA<br>LSYRLNMFTPYIGV | 3.79 | 0.01 | 0.90 | 0.68 | 0.22 | 0.28 |
| 24308 | 0 | 226467 | MSLDQSVVELYTQASLA<br>LSYRLNMFTPYIGV | 3.79 | 0.01 | 0.90 | 0.68 | 0.22 | 0.28 |
| 24309 | 0 | 226467 | MSLDQSVVELYTQASLA<br>LSYRLNMFTPYIGV | 3.79 | 0.01 | 0.90 | 0.68 | 0.22 | 0.28 |

|       |   |        |                                                          |      |      |      |      |      |      |
|-------|---|--------|----------------------------------------------------------|------|------|------|------|------|------|
| 24310 | 0 | 226467 | GDNENQSTVKTNSVPN<br>MSLDQSVVELYTQASLA<br>LSYRLNMFTPYIGV  | 3.79 | 0.01 | 0.90 | 0.68 | 0.22 | 0.28 |
| 24311 | 0 | 226467 | GDNENQSTVKTNSVPN<br>MSLDQSVVELYTQASLA<br>LSYRLNMFTPYIGV  | 3.79 | 0.01 | 0.90 | 0.68 | 0.22 | 0.28 |
| 24312 | 0 | 226467 | GDNENQSTVKTNSVPN<br>MSLDQSVVELYTQASLA<br>LSYRLNMFTPYIGV  | 3.79 | 0.01 | 0.90 | 0.68 | 0.22 | 0.28 |
| 24313 | 0 | 142161 | GDNENQSTVKTNSVPN<br>MSLDQSVVELYTWQAS<br>LALSYRLNMFTPYIGV | 3.81 | 0.01 | 0.90 | 1.12 | 0.22 | 1.48 |
| 24314 | 0 | 142161 | GDNENQSTVKTNSVPN<br>MSLDQSVVELYTWQAS<br>LALSYRLNMFTPYIGV | 3.81 | 0.01 | 0.90 | 0.68 | 0.22 | 0.28 |
| 24315 | 0 | 142161 | GDNENQSTVKTNSVPN<br>MSLDQSVVELYTWQAS<br>LALSYRLNMFTPYIGV | 3.81 | 0.01 | 0.90 | 0.68 | 0.22 | 0.28 |
| 24316 | 0 | 144647 | GDNGKGGFFELPMKD                                          | 2.63 | 0.01 | 2.24 | 1.12 | 0.22 | 0.28 |
| 24317 | 0 | 144647 | GDNGKGGFFELPMKD                                          | 2.63 | 0.01 | 2.24 | 1.12 | 0.22 | 0.28 |
| 24318 | 0 | 144647 | GDNGKGGFFELPMKD                                          | 2.63 | 0.01 | 2.24 | 1.12 | 0.22 | 0.28 |
| 24319 | 0 | 435920 | GDNLDDFGNTVYGKLN<br>ADRR                                 | 2.95 | 0.01 | 3.10 | 2.87 | 0.22 | 1.75 |
| 24320 | 0 | 196944 | GDNLFPKVAPQAIS                                           | 2.57 | 0.01 | 2.76 | 0.44 | 1.23 | 0.28 |
| 24321 | 0 | 196944 | GDNLFPKVAPQAIS                                           | 2.57 | 0.01 | 2.76 | 0.44 | 1.23 | 0.28 |
| 24322 | 0 | 196944 | GDNLFPKVAPQAIS                                           | 2.57 | 0.01 | 2.76 | 0.44 | 1.23 | 0.28 |
| 24323 | 0 | 196944 | GDNLFPKVAPQAIS                                           | 2.57 | 0.01 | 2.76 | 0.44 | 1.23 | 1.27 |
| 24324 | 0 | 19064  | GDNNTYGGWFKDGQ<br>W                                      | 2.69 | 0.01 | 3.75 | 0.68 | 0.22 | 0.28 |
| 24325 | 0 | 19064  | GDNNTYGGWFKDGQ<br>W                                      | 2.69 | 0.01 | 3.75 | 0.68 | 0.22 | 0.28 |
| 24326 | 0 | 118366 | GDNRKNQLKDMAI                                            | 2.54 | 0.01 | 0.78 | 0.44 | 1.74 | 0.85 |
| 24327 | 0 | 295129 | GDPAADGAGTAEGKQ                                          | 2.72 | 0.01 | 1.61 | 0.44 | 0.85 | 1.28 |
| 24328 | 0 | 19067  | GDPEDL                                                   | 1.90 | 0.01 | 3.17 | 0.68 | 0.22 | 0.28 |
| 24329 | 0 | 19067  | GDPEDL                                                   | 1.90 | 0.01 | 3.17 | 0.68 | 0.22 | 1.27 |
| 24330 | 0 | 19067  | GDPEDL                                                   | 1.90 | 0.01 | 3.17 | 0.68 | 0.22 | 2.02 |
| 24331 | 0 | 196487 | GDPGDIMS                                                 | 2.15 | 0.01 | 3.41 | 0.68 | 0.22 | 0.28 |
| 24332 | 0 | 196487 | GDPGDIMS                                                 | 2.15 | 0.01 | 3.41 | 0.68 | 0.22 | 0.85 |
| 24333 | 0 | 196487 | GDPGDIMS                                                 | 2.15 | 0.01 | 3.41 | 0.68 | 0.22 | 1.48 |
| 24334 | 0 | 196487 | GDPGDIMS                                                 | 2.15 | 0.01 | 3.41 | 0.68 | 0.22 | 1.48 |

|       |   |        |                                |      |      |      |      |      |      |
|-------|---|--------|--------------------------------|------|------|------|------|------|------|
| 24335 | 0 | 196487 | GDPGDIMS                       | 2.15 | 0.01 | 3.41 | 0.68 | 0.22 | 1.48 |
| 24336 | 0 | 196487 | GDPGDIMS                       | 2.15 | 0.01 | 3.41 | 0.68 | 0.22 | 1.48 |
| 24337 | 0 | 196487 | GDPGDIMS                       | 2.15 | 0.01 | 3.41 | 0.68 | 0.22 | 1.48 |
| 24338 | 0 | 196487 | GDPGDIMS                       | 2.15 | 0.01 | 3.41 | 0.68 | 0.22 | 1.48 |
| 24339 | 0 | 130843 | GDPGKPGLTGPQGPQG<br>LPGTPGRPGI | 3.26 | 0.01 | 0.78 | 0.44 | 1.13 | 0.85 |
| 24340 | 0 | 110591 | GDPGRPGEPGLPGAR                | 2.73 | 0.01 | 1.75 | 2.46 | 0.22 | 0.28 |
| 24341 | 0 | 230825 | GDPGRPGEPGLPGARG<br>LTGRPGDA   | 3.19 | 0.01 | 0.78 | 3.93 | 0.22 | 0.28 |
| 24342 | 0 | 230825 | GDPGRPGEPGLPGARG<br>LTGRPGDA   | 3.19 | 0.01 | 0.78 | 3.16 | 0.22 | 0.28 |
| 24343 | 0 | 181321 | GDPIADMIDQTVNNQ                | 2.67 | 0.01 | 2.82 | 1.15 | 0.22 | 0.28 |
| 24344 | 0 | 181321 | GDPIADMIDQTVNNQ                | 2.67 | 0.01 | 3.78 | 0.44 | 0.85 | 1.27 |
| 24345 | 0 | 227199 | GDPRPSYISHLL                   | 2.45 | 0.01 | 0.90 | 2.16 | 0.22 | 2.49 |
| 24346 | 0 | 19081  | GDPTSPDNIDSPNA                 | 2.65 | 0.01 | 2.56 | 2.69 | 0.22 | 0.28 |
| 24347 | 0 | 465552 | GDQAWKDVNPNGI                  | 2.54 | 0.01 | 3.67 | 0.68 | 0.22 | 0.28 |
| 24348 | 0 | 465552 | GDQAWKDVNPNGI                  | 2.54 | 0.01 | 3.67 | 0.68 | 0.22 | 0.28 |
| 24349 | 0 | 465552 | GDQAWKDVNPNGI                  | 2.54 | 0.01 | 3.67 | 0.68 | 0.22 | 0.28 |
| 24350 | 0 | 465552 | GDQAWKDVNPNGI                  | 2.54 | 0.01 | 3.67 | 0.68 | 0.22 | 1.34 |
| 24351 | 0 | 230826 | GDQGVPGEGAPGLVG<br>PRGERGFP    | 3.17 | 0.01 | 0.78 | 3.93 | 0.22 | 0.28 |
| 24352 | 0 | 119173 | GDQHQVGNETQGVTA                | 2.71 | 0.01 | 3.45 | 0.44 | 1.59 | 0.28 |
| 24353 | 0 | 119173 | GDQHQVGNETQGVTA                | 2.71 | 0.01 | 3.45 | 0.44 | 1.59 | 0.28 |
| 24354 | 0 | 19085  | GDQILDLSVI                     | 2.33 | 0.01 | 1.75 | 0.68 | 0.22 | 0.28 |
| 24355 | 0 | 19085  | GDQILDLSVI                     | 2.33 | 0.01 | 1.75 | 0.68 | 0.22 | 0.28 |
| 24356 | 0 | 130844 | GDQSTDYGIFQINSR                | 2.69 | 0.01 | 1.75 | 0.68 | 0.22 | 0.28 |
| 24357 | 0 | 130844 | GDQSTDYGIFQINSR                | 2.69 | 0.01 | 1.75 | 0.68 | 0.22 | 1.27 |
| 24358 | 0 | 130844 | GDQSTDYGIFQINSR                | 2.69 | 0.01 | 1.75 | 0.68 | 0.22 | 0.28 |
| 24359 | 0 | 130844 | GDQSTDYGIFQINSR                | 2.69 | 0.01 | 1.75 | 0.68 | 0.22 | 1.66 |
| 24360 | 0 | 130844 | GDQSTDYGIFQINSR                | 2.69 | 0.01 | 1.75 | 0.68 | 0.22 | 1.66 |
| 24361 | 0 | 19091  | GDRAAGQAAGDRAAG<br>QAA         | 2.91 | 0.01 | 3.44 | 0.44 | 0.85 | 0.28 |
| 24362 | 0 | 19092  | GDRAAGQPA                      | 2.26 | 0.01 | 2.59 | 2.16 | 0.22 | 0.28 |
| 24363 | 0 | 19093  | GDRAAGQPAGDRAAG<br>QPA         | 2.92 | 0.01 | 3.78 | 2.89 | 0.22 | 0.28 |
| 24364 | 0 | 19093  | GDRAAGQPAGDRAAG<br>QPA         | 2.92 | 0.01 | 3.78 | 1.15 | 0.22 | 0.28 |
| 24365 | 0 | 19093  | GDRAAGQPAGDRAAG<br>QPA         | 2.92 | 0.01 | 3.78 | 1.15 | 0.22 | 1.48 |
| 24366 | 0 | 19093  | GDRAAGQPAGDRAAG<br>QPA         | 2.92 | 0.01 | 3.78 | 1.15 | 0.22 | 0.28 |
| 24367 | 0 | 19093  | GDRAAGQPAGDRAAG<br>QPA         | 2.92 | 0.01 | 3.78 | 1.81 | 0.22 | 0.28 |

|       |   |       |                                              |      |      |      |      |      |      |
|-------|---|-------|----------------------------------------------|------|------|------|------|------|------|
| 24368 | 0 | 19093 | GDRAAGQPAGDRAAG<br>QPA                       | 2.92 | 0.01 | 3.78 | 0.68 | 0.22 | 0.28 |
| 24369 | 0 | 19093 | GDRAAGQPAGDRAAG<br>QPA                       | 2.92 | 0.01 | 3.78 | 3.06 | 0.22 | 0.28 |
| 24370 | 0 | 19093 | GDRAAGQPAGDRAAG<br>QPA                       | 2.92 | 0.01 | 2.59 | 2.42 | 0.22 | 0.28 |
| 24371 | 0 | 19093 | GDRAAGQPAGDRAAG<br>QPA                       | 2.92 | 0.01 | 2.59 | 0.44 | 0.85 | 0.28 |
| 24372 | 0 | 19095 | GDRADGQAAGDRAAG<br>QAA                       | 2.91 | 0.01 | 0.90 | 0.44 | 0.85 | 0.28 |
| 24373 | 0 | 19096 | GDRADGQPA                                    | 2.26 | 0.01 | 2.59 | 4.23 | 0.22 | 0.28 |
| 24374 | 0 | 19096 | GDRADGQPA                                    | 2.26 | 0.01 | 2.59 | 0.44 | 0.85 | 0.28 |
| 24375 | 0 | 19096 | GDRADGQPA                                    | 2.26 | 0.01 | 2.59 | 4.23 | 0.22 | 1.48 |
| 24376 | 0 | 19096 | GDRADGQPA                                    | 2.26 | 0.01 | 2.59 | 0.44 | 0.85 | 0.28 |
| 24377 | 0 | 19096 | GDRADGQPA                                    | 2.26 | 0.01 | 2.59 | 0.68 | 0.22 | 0.28 |
| 24378 | 0 | 19096 | GDRADGQPA                                    | 2.26 | 0.01 | 2.59 | 0.68 | 0.22 | 0.28 |
| 24379 | 0 | 19096 | GDRADGQPA                                    | 2.26 | 0.01 | 2.59 | 2.16 | 0.22 | 0.28 |
| 24380 | 0 | 19097 | GDRADGQPAGDRAAG<br>QPA                       | 2.92 | 0.01 | 3.78 | 2.89 | 0.22 | 0.28 |
| 24381 | 0 | 19097 | GDRADGQPAGDRAAG<br>QPA                       | 2.92 | 0.01 | 3.78 | 1.15 | 0.22 | 0.28 |
| 24382 | 0 | 19097 | GDRADGQPAGDRAAG<br>QPA                       | 2.92 | 0.01 | 3.78 | 1.15 | 0.22 | 1.48 |
| 24383 | 0 | 19097 | GDRADGQPAGDRAAG<br>QPA                       | 2.92 | 0.01 | 3.78 | 1.15 | 0.22 | 0.28 |
| 24384 | 0 | 19097 | GDRADGQPAGDRAAG<br>QPA                       | 2.92 | 0.01 | 3.78 | 1.81 | 0.22 | 0.28 |
| 24385 | 0 | 19097 | GDRADGQPAGDRAAG<br>QPA                       | 2.92 | 0.01 | 3.78 | 0.68 | 0.22 | 0.28 |
| 24386 | 0 | 19097 | GDRADGQPAGDRAAG<br>QPA                       | 2.92 | 0.01 | 3.78 | 3.06 | 0.22 | 0.28 |
| 24387 | 0 | 19098 | GDRADGQPAGDRAAG<br>QPA                       | 2.92 | 0.01 | 2.59 | 1.81 | 0.22 | 0.28 |
| 24388 | 0 | 19098 | GDRADGQPAGDRAAG<br>QPA                       | 2.92 | 0.01 | 2.59 | 2.43 | 0.22 | 0.28 |
| 24389 | 0 | 19098 | GDRADGQPAGDRAAG<br>QPA                       | 2.92 | 0.01 | 2.59 | 0.44 | 0.85 | 0.28 |
| 24390 | 0 | 19098 | GDRADGQPAGDRAAG<br>QPA                       | 2.92 | 0.01 | 2.59 | 0.44 | 0.85 | 0.28 |
| 24391 | 0 | 19099 | GDRADGQPAGDRAAG<br>QPAGDRAAGQPAGDR<br>ADGQPA | 3.60 | 0.01 | 2.59 | 3.67 | 0.22 | 0.28 |
| 24392 | 0 | 19099 | GDRADGQPAGDRAAG<br>QPAGDRAAGQPAGDR<br>ADGQPA | 3.60 | 0.01 | 2.59 | 3.67 | 0.22 | 0.28 |

|       |   |        |                                   |      |      |      |      |      |      |
|-------|---|--------|-----------------------------------|------|------|------|------|------|------|
|       |   |        | GDRADGQPAGDRADG                   |      |      |      |      |      |      |
| 24393 | 0 | 19099  | QPAGDRADGQPAGDR<br>ADGQPA         | 3.60 | 0.01 | 2.59 | 3.67 | 0.22 | 0.28 |
| 24394 | 0 | 430298 | GDRAGQPA                          | 2.15 | 0.01 | 4.93 | 2.16 | 0.22 | 0.28 |
| 24395 | 0 | 19100  | GDRAGV                            | 1.91 | 0.01 | 1.86 | 0.44 | 1.23 | 0.28 |
| 24396 | 0 | 125063 | GDRAVYENELVA                      | 2.48 | 0.01 | 3.26 | 0.68 | 0.22 | 1.48 |
| 24397 | 0 | 125063 | GDRAVYENELVA                      | 2.48 | 0.01 | 3.26 | 0.68 | 0.22 | 1.48 |
| 24398 | 0 | 125063 | GDRAVYENELVA                      | 2.48 | 0.01 | 3.26 | 0.68 | 0.22 | 0.28 |
| 24399 | 0 | 19101  | GDREIGEK                          | 2.15 | 0.01 | 2.99 | 0.44 | 0.85 | 0.28 |
|       |   |        | GDRGILIHNTIFGEQVFL                |      |      |      |      |      |      |
| 24400 | 0 | 19103  | PLEHSQFSRYRWRGPTA<br>AFLSLVDQKRSL | 3.78 | 0.01 | 3.17 | 0.68 | 0.22 | 1.34 |
|       |   |        | GDRGILIHNTIFGEQVFL                |      |      |      |      |      |      |
| 24401 | 0 | 19103  | PLEHSQFSRYRWRGPTA<br>AFLSLVDQKRSL | 3.78 | 0.01 | 3.17 | 0.68 | 0.22 | 2.02 |
|       |   |        | GDRGILIHNTIFGEQVFL                |      |      |      |      |      |      |
| 24402 | 0 | 19103  | PLEHSQFSRYRWRGPTA<br>AFLSLVDQKRSL | 3.78 | 0.01 | 3.17 | 0.68 | 0.22 | 1.34 |
|       |   |        | GDRGILIHNTIFGEQVFL                |      |      |      |      |      |      |
| 24403 | 0 | 19103  | PLEHSQFSRYRWRGPTA<br>AFLSLVDQKRSL | 3.78 | 0.01 | 3.17 | 0.68 | 0.22 | 2.02 |
| 24404 | 0 | 123212 | GDRHYLTGS                         | 2.22 | 0.01 | 2.28 | 2.00 | 0.22 | 0.28 |
| 24405 | 0 | 123212 | GDRHYLTGS                         | 2.22 | 0.01 | 2.28 | 2.00 | 0.22 | 0.28 |
| 24406 | 0 | 19108  | GDRRKAMFEDIA                      | 2.46 | 0.01 | 2.40 | 1.20 | 0.22 | 0.28 |
| 24407 | 0 | 19108  | GDRRKAMFEDIA                      | 2.46 | 0.01 | 2.40 | 0.44 | 1.59 | 0.28 |
| 24408 | 0 | 19108  | GDRRKAMFEDIA                      | 2.46 | 0.01 | 2.40 | 0.44 | 1.59 | 0.28 |
| 24409 | 0 | 19108  | GDRRKAMFEDIA                      | 2.46 | 0.01 | 2.40 | 0.44 | 1.59 | 0.28 |
| 24410 | 0 | 105209 | GDRSGYSS                          | 2.14 | 0.01 | 1.60 | 0.68 | 0.22 | 2.56 |
| 24411 | 0 | 105209 | GDRSGYSS                          | 2.14 | 0.01 | 1.60 | 0.68 | 0.22 | 2.56 |
| 24412 | 0 | 107376 | GDRSGYSSPGSPG                     | 2.61 | 0.01 | 0.78 | 0.68 | 0.22 | 1.27 |
|       |   |        | GDRVADVIESSIGDSVSR                |      |      |      |      |      |      |
| 24413 | 0 | 230829 | ALTHALPAPTGQ                      | 3.36 | 0.01 | 2.60 | 1.20 | 0.22 | 0.85 |
|       |   |        | GDRVADVIESSIGDSVSR                |      |      |      |      |      |      |
| 24414 | 0 | 230829 | ALTHALPAPTGQ                      | 3.36 | 0.01 | 2.60 | 1.20 | 0.22 | 0.85 |
| 24415 | 0 | 182387 | GDSARVL                           | 1.99 | 0.01 | 2.51 | 0.44 | 1.13 | 0.28 |
| 24416 | 0 | 182387 | GDSARVL                           | 1.99 | 0.01 | 2.51 | 0.44 | 1.41 | 0.28 |
| 24417 | 0 | 182387 | GDSARVL                           | 1.99 | 0.01 | 2.51 | 0.44 | 1.13 | 0.28 |
| 24418 | 0 | 182387 | GDSARVL                           | 1.99 | 0.01 | 2.51 | 0.44 | 1.93 | 0.28 |
| 24419 | 0 | 182387 | GDSARVL                           | 1.99 | 0.01 | 2.51 | 0.44 | 1.41 | 0.28 |
| 24420 | 0 | 193454 | GDSASAGLI                         | 2.26 | 0.01 | 2.51 | 0.44 | 2.39 | 0.28 |
| 24421 | 0 | 193454 | GDSASAGLI                         | 2.26 | 0.01 | 2.51 | 0.44 | 2.39 | 0.28 |
| 24422 | 0 | 295269 | GDSDLQLERINVYFD                   | 2.64 | 0.01 | 1.61 | 0.44 | 0.85 | 1.28 |
|       |   |        | GDSEAASKAAGAVSAVS                 |      |      |      |      |      |      |
| 24423 | 0 | 19110  | GEQILSAIV                         | 3.24 | 0.01 | 2.73 | 0.44 | 0.85 | 0.28 |
| 24424 | 0 | 295305 | GDSGEGESSGPGASP                   | 2.74 | 0.01 | 1.61 | 0.44 | 0.85 | 1.28 |
| 24425 | 0 | 144648 | GDSKLLTITQSEPA                    | 2.58 | 0.01 | 2.24 | 1.12 | 0.22 | 1.27 |
| 24426 | 0 | 144648 | GDSKLLTITQSEPA                    | 2.58 | 0.01 | 2.24 | 1.12 | 0.22 | 0.28 |

|       |   |        |                                                  |      |      |      |      |      |      |
|-------|---|--------|--------------------------------------------------|------|------|------|------|------|------|
| 24427 | 0 | 144648 | GDSKLLTITQSEPA                                   | 2.58 | 0.01 | 2.24 | 1.12 | 0.22 | 1.27 |
| 24428 | 0 | 144648 | GDSKLLTITQSEPA                                   | 2.58 | 0.01 | 2.24 | 1.12 | 0.22 | 0.28 |
| 24429 | 0 | 128693 | GDSMDRIEKDRLQGMA                                 | 2.74 | 0.01 | 0.78 | 0.44 | 1.13 | 0.85 |
| 24430 | 0 | 97324  | GDSQATYNY                                        | 2.21 | 0.01 | 3.13 | 1.12 | 0.22 | 0.28 |
| 24431 | 0 | 19118  | GDSSNAGT                                         | 2.14 | 0.01 | 3.27 | 2.02 | 0.22 | 0.28 |
| 24432 | 0 | 19118  | GDSSNAGT                                         | 2.14 | 0.01 | 3.27 | 2.82 | 0.22 | 0.28 |
| 24433 | 0 | 19119  | GDSSNTGAGKALTGLST<br>GTS                         | 3.00 | 0.01 | 2.75 | 0.44 | 0.85 | 0.85 |
| 24434 | 0 | 19121  | GDSYII                                           | 1.86 | 0.01 | 2.40 | 0.44 | 0.85 | 0.28 |
| 24435 | 0 | 19122  | GDTAWD                                           | 1.90 | 0.01 | 2.40 | 0.44 | 0.85 | 0.28 |
| 24436 | 0 | 111308 | GDTGPR                                           | 1.91 | 0.01 | 2.52 | 1.12 | 0.22 | 1.27 |
| 24437 | 0 | 450610 | GDTHLGGEDFDQRVME<br>H                            | 2.79 | 0.01 | 0.78 | 2.79 | 1.13 | 1.28 |
| 24438 | 0 | 450610 | GDTHLGGEDFDQRVME<br>H                            | 2.79 | 0.01 | 0.78 | 2.79 | 1.13 | 1.28 |
| 24439 | 0 | 450610 | GDTHLGGEDFDQRVME<br>H                            | 2.79 | 0.01 | 0.78 | 1.81 | 1.41 | 1.28 |
| 24440 | 0 | 19128  | GDTMKTTVTVDVTAIR<br>NYKRL                        | 3.04 | 0.01 | 2.93 | 1.81 | 0.22 | 0.28 |
| 24441 | 0 | 19128  | GDTMKTTVTVDVTAIR<br>NYKRL                        | 3.04 | 0.01 | 2.93 | 0.68 | 0.22 | 0.28 |
| 24442 | 0 | 19128  | GDTMKTTVTVDVTAIR<br>NYKRL                        | 3.04 | 0.01 | 2.93 | 2.69 | 0.22 | 0.28 |
| 24443 | 0 | 19128  | GDTMKTTVTVDVTAIR<br>NYKRL                        | 3.04 | 0.01 | 2.93 | 1.81 | 0.22 | 0.28 |
| 24444 | 0 | 19128  | GDTMKTTVTVDVTAIR<br>NYKRL                        | 3.04 | 0.01 | 2.93 | 0.68 | 0.22 | 0.28 |
| 24445 | 0 | 111309 | GDTPTLHEYMLDLQ                                   | 2.61 | 0.01 | 1.86 | 0.68 | 0.22 | 1.27 |
| 24446 | 0 | 111309 | GDTPTLHEYMLDLQ                                   | 2.61 | 0.01 | 1.86 | 1.12 | 0.22 | 0.28 |
| 24447 | 0 | 111309 | GDTPTLHEYMLDLQ                                   | 2.61 | 0.01 | 1.86 | 0.68 | 0.22 | 2.02 |
| 24448 | 0 | 143896 | GDTQPRFLWQGKYKCH<br>FFNGTERVQFLERLFYN<br>QEEFVRF | 3.63 | 0.01 | 0.78 | 2.36 | 0.22 | 2.12 |
| 24449 | 0 | 137866 | GDTRPRFL                                         | 2.12 | 0.01 | 0.78 | 1.20 | 0.22 | 0.28 |
| 24450 | 0 | 137866 | GDTRPRFL                                         | 2.12 | 0.01 | 0.78 | 1.20 | 0.22 | 2.12 |
| 24451 | 0 | 137866 | GDTRPRFL                                         | 2.12 | 0.01 | 0.78 | 1.20 | 0.22 | 1.27 |
| 24452 | 0 | 143897 | GDTRPRFLEQVKHECHF<br>FNGTERVRFLDRYFYHQ<br>EEYVRF | 3.64 | 0.01 | 0.78 | 0.68 | 0.22 | 2.12 |
| 24453 | 0 | 143897 | GDTRPRFLEQVKHECHF<br>FNGTERVRFLDRYFYHQ<br>EEYVRF | 3.64 | 0.01 | 0.78 | 0.68 | 0.22 | 2.12 |
| 24454 | 0 | 137165 | GDTRPRFLWQPKREC                                  | 2.64 | 0.01 | 0.78 | 1.15 | 0.22 | 1.57 |
| 24455 | 0 | 137165 | GDTRPRFLWQPKREC                                  | 2.64 | 0.01 | 0.78 | 2.74 | 0.22 | 1.57 |
| 24456 | 0 | 137165 | GDTRPRFLWQPKREC                                  | 2.64 | 0.01 | 0.78 | 1.12 | 0.22 | 1.57 |
| 24457 | 0 | 137165 | GDTRPRFLWQPKREC                                  | 2.64 | 0.01 | 0.78 | 0.44 | 1.41 | 1.57 |

|       |   |        |                                    |      |      |      |      |      |      |
|-------|---|--------|------------------------------------|------|------|------|------|------|------|
| 24458 | 0 | 19133  | GDTVIYSKYG                         | 2.32 | 0.01 | 2.04 | 0.68 | 0.22 | 0.28 |
| 24459 | 0 | 19133  | GDTVIYSKYG                         | 2.32 | 0.01 | 2.04 | 0.68 | 0.22 | 0.28 |
| 24460 | 0 | 98792  | GDTWDDD                            | 2.01 | 0.01 | 2.14 | 0.68 | 0.22 | 0.28 |
| 24461 | 0 | 98792  | GDTWDDD                            | 2.01 | 0.01 | 2.14 | 0.68 | 0.22 | 0.28 |
| 24462 | 0 | 135931 | GDVEEAIERAVV                       | 2.49 | 0.01 | 3.21 | 0.44 | 0.85 | 0.28 |
| 24463 | 0 | 82594  | GDVKAS                             | 1.88 | 0.01 | 2.40 | 2.52 | 0.22 | 0.28 |
| 24464 | 0 | 141654 | GDVLVIPAGHPVAIN                    | 2.71 | 0.01 | 3.65 | 0.44 | 1.23 | 1.28 |
| 24465 | 0 | 229649 | GDVPEAVENAVARVA                    | 2.72 | 0.01 | 4.63 | 0.44 | 0.85 | 1.27 |
| 24466 | 0 | 229649 | GDVPEAVENAVARVA                    | 2.72 | 0.01 | 4.63 | 0.44 | 0.85 | 0.28 |
| 24467 | 0 | 120550 | GDVQPAEVVAAAR                      | 2.55 | 0.01 | 2.86 | 0.44 | 0.85 | 0.28 |
| 24468 | 0 | 109054 | GDVRF SRVWMRG                      | 2.50 | 0.01 | 0.90 | 1.15 | 0.22 | 1.39 |
| 24469 | 0 | 109054 | GDVRF SRVWMRG                      | 2.50 | 0.01 | 0.90 | 1.15 | 0.22 | 0.85 |
| 24470 | 0 | 95403  | GDVTFTEVGYTR                       | 2.50 | 0.01 | 2.88 | 0.44 | 1.23 | 0.85 |
| 24471 | 0 | 95403  | GDVTFTEVGYTR                       | 2.50 | 0.01 | 2.88 | 1.12 | 0.22 | 0.85 |
| 24472 | 0 | 19143  | GDVTSYAQIITNQIGMK<br>AIKDGSASQRNV  | 3.32 | 0.01 | 3.67 | 0.68 | 0.22 | 0.28 |
| 24473 | 0 | 19143  | GDVTSYAQIITNQIGMK<br>AIKDGSASQRNV  | 3.32 | 0.01 | 3.67 | 1.12 | 0.22 | 0.28 |
| 24474 | 0 | 19143  | GDVTSYAQIITNQIGMK<br>AIKDGSASQRNV  | 3.32 | 0.01 | 2.98 | 1.12 | 0.22 | 0.28 |
| 24475 | 0 | 19143  | GDVTSYAQIITNQIGMK<br>AIKDGSASQRNV  | 3.32 | 0.01 | 2.98 | 0.44 | 0.85 | 0.28 |
| 24476 | 0 | 19143  | GDVTSYAQIITNQIGMK<br>AIKDGSASQRNV  | 3.32 | 0.01 | 2.98 | 1.12 | 0.22 | 0.28 |
| 24477 | 0 | 19143  | GDVTSYAQIITNQIGMK<br>AIKDGSASQRNV  | 3.32 | 0.01 | 2.98 | 1.12 | 0.22 | 0.85 |
| 24478 | 0 | 19179  | GDWAAY                             | 1.89 | 0.01 | 1.86 | 0.44 | 1.23 | 0.28 |
| 24479 | 0 | 190429 | GDWHCDSTWMGDRV<br>V                | 2.67 | 0.01 | 3.97 | 2.00 | 1.41 | 0.28 |
| 24480 | 0 | 111310 | GDWIRRN VVAYWPSV                   | 2.65 | 0.01 | 3.20 | 1.12 | 0.22 | 0.85 |
| 24481 | 0 | 78393  | GDYLIDQGL                          | 2.26 | 0.01 | 2.76 | 0.44 | 1.23 | 1.39 |
| 24482 | 0 | 123214 | GDYKELPT                           | 2.21 | 0.01 | 2.28 | 2.00 | 0.22 | 0.28 |
| 24483 | 0 | 131884 | GDYNRTVGKGPGSRP                    | 2.69 | 0.01 | 0.78 | 0.44 | 1.13 | 0.85 |
| 24484 | 0 | 19192  | GDYSPSCCTLTIGVSSYH<br>SKP          | 2.99 | 0.01 | 2.04 | 0.44 | 0.85 | 0.28 |
| 24485 | 0 | 19192  | GDYSPSCCTLTIGVSSYH<br>SKP          | 2.99 | 0.01 | 2.04 | 0.44 | 0.85 | 0.28 |
| 24486 | 0 | 78162  | GDYSPSCCTLTIGVSSYH<br>SKPCNPAQPVCS | 3.33 | 0.01 | 3.19 | 0.44 | 1.59 | 0.28 |
| 24487 | 0 | 78162  | GDYSPSCCTLTIGVSSYH<br>SKPCNPAQPVCS | 3.33 | 0.01 | 3.19 | 0.44 | 2.82 | 0.28 |
| 24488 | 0 | 19193  | GDYSPSCCTLTIGVSSYH<br>SKPGNPAQPVCS | 3.33 | 0.01 | 0.90 | 0.44 | 0.85 | 0.28 |



|       |   |        |                                     |      |      |      |      |      |      |
|-------|---|--------|-------------------------------------|------|------|------|------|------|------|
| 24489 | 0 | 19193  | GDYSPSCCTLTIGVSSYH<br>SKPGNPAQPVCS  | 3.33 | 0.01 | 2.04 | 0.44 | 0.85 | 0.28 |
| 24490 | 0 | 19193  | GDYSPSCCTLTIGVSSYH<br>SKPGNPAQPVCS  | 3.33 | 0.01 | 2.04 | 0.44 | 0.85 | 0.28 |
| 24491 | 0 | 19193  | GDYSPSCCTLTIGVSSYH<br>SKPGNPAQPVCS  | 3.33 | 0.01 | 2.04 | 0.44 | 0.85 | 0.28 |
| 24492 | 0 | 189222 | GDYTTTCTDLKQCRA Y                   | 2.74 | 0.01 | 2.92 | 2.49 | 0.22 | 0.28 |
| 24493 | 0 | 189222 | GDYTTTCTDLKQCRA Y                   | 2.74 | 0.01 | 2.92 | 3.61 | 0.22 | 0.28 |
| 24494 | 0 | 420598 | GDYVFDRI GGGGGQAV<br>ANGGAI         | 3.05 | 0.01 | 0.90 | 1.81 | 0.22 | 0.28 |
| 24495 | 0 | 175803 | GDYVFDRIQAVANGGAI                   | 2.81 | 0.01 | 0.90 | 1.81 | 0.22 | 0.28 |
| 24496 | 0 | 111311 | GEADFN M                            | 1.99 | 0.01 | 0.90 | 0.44 | 0.85 | 1.39 |
| 24497 | 0 | 118801 | GEADYFEYHQEGGPDG<br>EPDVPPGAIEQGPAD | 3.41 | 0.01 | 2.43 | 0.44 | 1.13 | 0.28 |
| 24498 | 0 | 118801 | GEADYFEYHQEGGPDG<br>EPDVPPGAIEQGPAD | 3.41 | 0.01 | 2.43 | 0.44 | 1.41 | 0.28 |
| 24499 | 0 | 19202  | GEAGPGVA                            | 2.17 | 0.01 | 2.04 | 0.44 | 0.85 | 0.28 |
| 24500 | 0 | 109057 | GEAGPTGARGPEGAQ                     | 2.73 | 0.01 | 1.75 | 2.98 | 0.22 | 0.28 |
| 24501 | 0 | 496505 | GEALATLVVNRIRGGFR<br>VCAVKAPGFGDRR  | 3.33 | 0.01 | 2.87 | 0.44 | 1.93 | 2.12 |
| 24502 | 0 | 496505 | GEALATLVVNRIRGGFR<br>VCAVKAPGFGDRR  | 3.33 | 0.01 | 2.87 | 0.44 | 1.93 | 2.12 |
| 24503 | 0 | 78659  | GEAPLSACTSTSFP PPS<br>GP            | 2.98 | 0.01 | 2.04 | 0.44 | 1.59 | 0.28 |
| 24504 | 0 | 19209  | GEARIQEEEEGRNESSN<br>DMDC           | 2.99 | 0.01 | 1.75 | 1.12 | 0.22 | 2.12 |
| 24505 | 0 | 19209  | GEARIQEEEEGRNESSN<br>DMDC           | 2.99 | 0.01 | 1.75 | 1.12 | 2.25 | 1.75 |
| 24506 | 0 | 19210  | GEASGLCCRWSLRVV                     | 2.68 | 0.01 | 0.90 | 0.68 | 0.22 | 0.28 |
| 24507 | 0 | 19210  | GEASGLCCRWSLRVV                     | 2.68 | 0.01 | 0.90 | 0.68 | 0.22 | 0.28 |
| 24508 | 0 | 19211  | GEASGLCCRWSSLKGC                    | 2.76 | 0.01 | 0.90 | 0.68 | 0.22 | 0.28 |
| 24509 | 0 | 19211  | GEASGLCCRWSSLKGC                    | 2.76 | 0.01 | 0.90 | 0.44 | 1.59 | 0.28 |
| 24510 | 0 | 19211  | GEASGLCCRWSSLKGC                    | 2.76 | 0.01 | 0.90 | 0.68 | 0.22 | 0.28 |
| 24511 | 0 | 19212  | GEATALDT                            | 2.14 | 0.01 | 3.06 | 1.12 | 0.22 | 0.28 |
| 24512 | 0 | 78394  | GEAVTVTITDDNEEPIAP<br>Y             | 2.91 | 0.01 | 3.22 | 1.20 | 0.22 | 1.27 |
| 24513 | 0 | 161344 | GEDAEVAGTQYFHPSGK<br>VPVFG          | 3.04 | 0.01 | 0.90 | 2.74 | 0.22 | 1.75 |
| 24514 | 0 | 161344 | GEDAEVAGTQYFHPSGK<br>VPVFG          | 3.04 | 0.01 | 0.90 | 2.74 | 0.22 | 1.48 |

|       |   |        |                          |      |      |      |      |      |      |
|-------|---|--------|--------------------------|------|------|------|------|------|------|
| 24515 | 0 | 135678 | GEDAKPGQ                 | 2.13 | 0.01 | 0.78 | 0.44 | 2.35 | 0.28 |
| 24516 | 0 | 423305 | GEDDVLATIRNTLSA          | 2.65 | 0.01 | 3.97 | 0.44 | 2.35 | 1.28 |
| 24517 | 0 | 295659 | GEDHEKQQQSDEAQV          | 2.69 | 0.01 | 1.61 | 0.44 | 0.85 | 1.28 |
| 24518 | 0 | 79552  | GEDVGAFPPGKFVTAAL        | 2.80 | 0.01 | 2.85 | 0.44 | 1.59 | 0.28 |
| 24519 | 0 | 19236  | GEECDGSPENCQ             | 2.58 | 0.01 | 3.93 | 0.68 | 0.22 | 0.85 |
| 24520 | 0 | 19236  | GEECDGSPENCQ             | 2.58 | 0.01 | 3.93 | 0.68 | 0.22 | 0.85 |
| 24521 | 0 | 19236  | GEECDGSPENCQ             | 2.58 | 0.01 | 3.93 | 0.68 | 0.22 | 0.85 |
| 24522 | 0 | 295718 | GEEEDHEKQQQSDET          | 2.69 | 0.01 | 1.61 | 0.44 | 0.85 | 1.28 |
| 24523 | 0 | 19237  | GEEENQRGCEWESRQC<br>QMRH | 2.97 | 0.01 | 3.89 | 0.44 | 1.23 | 0.85 |
| 24524 | 0 | 118367 | GEEGLTLNLEDVQ            | 2.58 | 0.01 | 0.78 | 0.44 | 1.74 | 0.85 |
| 24525 | 0 | 106446 | GEEEPSKECCS              | 2.52 | 0.01 | 3.08 | 0.44 | 1.23 | 0.85 |
| 24526 | 0 | 113426 | GEEPISTPL                | 2.31 | 0.01 | 3.97 | 1.12 | 0.22 | 0.28 |
| 24527 | 0 | 192952 | GEEPNYQEEW               | 2.32 | 0.01 | 3.26 | 0.68 | 0.22 | 0.28 |
| 24528 | 0 | 192952 | GEEPNYQEEW               | 2.32 | 0.01 | 3.26 | 0.68 | 0.22 | 1.48 |
| 24529 | 0 | 19251  | GEERQSYWFENR             | 2.47 | 0.01 | 2.88 | 2.37 | 0.22 | 0.28 |
| 24530 | 0 | 19251  | GEERQSYWFENR             | 2.47 | 0.01 | 2.88 | 2.37 | 0.22 | 0.28 |
| 24531 | 0 | 19251  | GEERQSYWFENR             | 2.47 | 0.01 | 2.88 | 2.22 | 0.85 | 0.28 |
| 24532 | 0 | 19251  | GEERQSYWFENR             | 2.47 | 0.01 | 2.88 | 2.22 | 0.22 | 0.28 |
| 24533 | 0 | 19251  | GEERQSYWFENR             | 2.47 | 0.01 | 2.88 | 2.22 | 0.22 | 0.28 |
| 24534 | 0 | 110859 | GEESRISLPLPNFSSLNLR<br>E | 2.98 | 4.63 | 0.78 | 2.46 | 0.22 | 1.28 |
| 24535 | 0 | 110859 | GEESRISLPLPNFSSLNLR<br>E | 2.98 | 4.63 | 0.78 | 1.81 | 1.41 | 1.27 |
| 24536 | 0 | 19256  | GEEYLILSAR               | 2.30 | 0.01 | 2.04 | 0.68 | 0.22 | 0.28 |
| 24537 | 0 | 19256  | GEEYLILSAR               | 2.30 | 0.01 | 2.04 | 0.68 | 0.22 | 0.28 |
| 24538 | 0 | 19264  | GEFMFDGDEIF              | 2.61 | 0.01 | 0.78 | 3.65 | 0.22 | 0.85 |
| 24539 | 0 | 19266  | GEFPRHVKLKNEIENLLD<br>QV | 2.92 | 0.01 | 2.24 | 2.75 | 0.22 | 0.28 |
| 24540 | 0 | 19266  | GEFPRHVKLKNEIENLLD<br>QV | 2.92 | 0.01 | 2.24 | 2.75 | 0.22 | 1.34 |
| 24541 | 0 | 19266  | GEFPRHVKLKNEIENLLD<br>QV | 2.92 | 0.01 | 2.24 | 2.75 | 2.25 | 1.75 |
| 24542 | 0 | 95084  | GEFQRKLYKELLKNYNPL<br>ER | 2.97 | 0.01 | 2.25 | 2.04 | 0.22 | 1.57 |
| 24543 | 0 | 489194 | GEFVSETESRGSESGIFT<br>NT | 2.99 | 3.37 | 0.78 | 0.44 | 1.13 | 0.28 |
| 24544 | 0 | 19268  | GEGAPP                   | 1.89 | 0.01 | 2.96 | 3.67 | 0.22 | 0.28 |
| 24545 | 0 | 19269  | GEGAPPAKRARTDQME         | 2.75 | 0.01 | 2.96 | 1.20 | 0.22 | 0.28 |
| 24546 | 0 | 19269  | GEGAPPAKRARTDQME         | 2.75 | 0.01 | 2.96 | 1.20 | 0.22 | 2.02 |
| 24547 | 0 | 19269  | GEGAPPAKRARTDQME         | 2.75 | 0.01 | 2.96 | 0.44 | 0.85 | 0.28 |

|       |   |        |                                              |      |      |      |      |      |      |
|-------|---|--------|----------------------------------------------|------|------|------|------|------|------|
| 24548 | 0 | 19269  | GEGAPPAKRARTDQME                             | 2.75 | 0.01 | 2.96 | 2.74 | 0.22 | 0.28 |
| 24549 | 0 | 19269  | GEGAPPAKRARTDQME                             | 2.75 | 0.01 | 2.96 | 3.67 | 0.85 | 0.28 |
| 24550 | 0 | 19275  | GEGAVQWMNRLIAFAS<br>RGN                      | 2.88 | 0.01 | 1.96 | 0.44 | 0.85 | 0.28 |
| 24551 | 0 | 19275  | GEGAVQWMNRLIAFAS<br>RGN                      | 2.88 | 0.01 | 1.72 | 0.44 | 0.85 | 0.28 |
| 24552 | 0 | 19276  | GEGAVQWMNRLIAFAS<br>RGNH                     | 2.92 | 0.01 | 1.72 | 0.44 | 0.85 | 0.28 |
| 24553 | 0 | 19276  | GEGAVQWMNRLIAFAS<br>RGNH                     | 2.92 | 0.01 | 1.72 | 0.44 | 0.85 | 0.28 |
| 24554 | 0 | 177065 | GEGGYGSHD                                    | 2.26 | 0.01 | 0.90 | 2.13 | 0.22 | 0.28 |
| 24555 | 0 | 177065 | GEGGYGSHD                                    | 2.26 | 0.01 | 0.90 | 2.13 | 0.22 | 1.48 |
| 24556 | 0 | 177065 | GEGGYGSHD                                    | 2.26 | 0.01 | 0.90 | 2.13 | 0.22 | 1.48 |
| 24557 | 0 | 115606 | GEGKVTLRIRNV                                 | 2.48 | 0.01 | 0.78 | 0.44 | 1.41 | 0.28 |
| 24558 | 0 | 115606 | GEGKVTLRIRNV                                 | 2.48 | 0.01 | 0.78 | 0.44 | 1.13 | 0.28 |
| 24559 | 0 | 131885 | GEGMDEMEFTEASN<br>MNDLVSEYQQYQDATA<br>DEQGEF | 3.58 | 0.01 | 2.73 | 1.12 | 0.22 | 1.34 |
| 24560 | 0 | 189223 | GEGNPHGWPHEVVVYY                             | 2.75 | 0.01 | 2.92 | 2.49 | 0.22 | 0.28 |
| 24561 | 0 | 189223 | GEGNPHGWPHEVVVYY                             | 2.75 | 0.01 | 2.92 | 3.61 | 0.22 | 0.28 |
| 24562 | 0 | 19289  | GEGPVQWMNRLIAFAS<br>RGNH                     | 2.90 | 0.01 | 1.72 | 0.44 | 0.85 | 0.28 |
| 24563 | 0 | 97326  | GEGQFNDAE                                    | 2.24 | 0.01 | 3.13 | 1.12 | 0.22 | 0.28 |
| 24564 | 0 | 175170 | GEGTWRA                                      | 2.03 | 0.01 | 0.90 | 1.15 | 0.22 | 1.39 |
| 24565 | 0 | 195022 | GEHAYPNATHPWDEDV<br>MPELPYETWY               | 3.21 | 0.01 | 4.03 | 0.68 | 0.22 | 1.39 |
| 24566 | 0 | 195022 | GEHAYPNATHPWDEDV<br>MPELPYETWY               | 3.21 | 0.01 | 4.03 | 0.44 | 0.85 | 1.39 |
| 24567 | 0 | 195023 | GEHAYPNATHPWDEDV<br>MPELPYQT                 | 3.11 | 0.01 | 3.85 | 0.68 | 0.22 | 1.39 |
| 24568 | 0 | 195023 | GEHAYPNATHPWDEDV<br>MPELPYQT                 | 3.11 | 0.01 | 3.85 | 0.44 | 0.85 | 1.39 |
| 24569 | 0 | 97327  | GEHQLLYLQHQLDELN                             | 2.78 | 0.01 | 3.67 | 0.44 | 1.23 | 0.28 |
| 24570 | 0 | 189076 | GEHTTTCTDVKQCRA                              | 2.70 | 0.01 | 2.92 | 0.68 | 0.22 | 0.28 |
| 24571 | 0 | 189076 | GEHTTTCTDVKQCRA                              | 2.70 | 0.01 | 2.92 | 2.49 | 0.22 | 0.28 |
| 24572 | 0 | 189076 | GEHTTTCTDVKQCRA                              | 2.70 | 0.01 | 2.92 | 3.61 | 0.22 | 0.28 |
| 24573 | 0 | 295996 | GEICRDEGGDEGNDE                              | 2.73 | 0.01 | 1.61 | 0.44 | 0.85 | 1.28 |
| 24574 | 0 | 295998 | GEIDDDSDVQNEIKV                              | 2.69 | 0.01 | 1.61 | 0.44 | 0.85 | 1.28 |
| 24575 | 0 | 150234 | GEIDLPLEGTTNPNG                              | 2.71 | 0.01 | 2.60 | 0.68 | 0.22 | 0.28 |

|       |   |        |                         |      |      |      |      |      |      |
|-------|---|--------|-------------------------|------|------|------|------|------|------|
| 24576 | 0 | 489550 | GEIDLPLKGTTNPN          | 2.63 | 0.01 | 2.60 | 0.68 | 0.22 | 0.28 |
| 24577 | 0 | 489550 | GEIDLPLKGTTNPN          | 2.63 | 0.01 | 2.60 | 0.68 | 0.22 | 0.28 |
| 24578 | 0 | 489550 | GEIDLPLKGTTNPN          | 2.63 | 0.01 | 2.60 | 0.68 | 0.22 | 0.28 |
| 24579 | 0 | 489550 | GEIDLPLKGTTNPN          | 2.63 | 0.01 | 2.60 | 0.68 | 0.22 | 1.34 |
| 24580 | 0 | 451318 | GEIILT                  | 1.89 | 0.01 | 4.03 | 0.68 | 0.22 | 1.34 |
| 24581 | 0 | 451318 | GEIILT                  | 1.89 | 0.01 | 4.03 | 0.68 | 0.22 | 1.34 |
| 24582 | 0 | 451318 | GEIILT                  | 1.89 | 0.01 | 4.03 | 0.68 | 0.22 | 1.48 |
| 24583 | 0 | 451318 | GEIILT                  | 1.89 | 0.01 | 4.03 | 0.68 | 0.22 | 1.48 |
| 24584 | 0 | 451318 | GEIILT                  | 1.89 | 0.01 | 4.03 | 0.68 | 0.22 | 0.85 |
| 24585 | 0 | 451318 | GEIILT                  | 1.89 | 0.01 | 4.03 | 0.68 | 0.22 | 0.85 |
| 24586 | 0 | 451318 | GEIILT                  | 1.89 | 0.01 | 4.03 | 0.68 | 0.22 | 0.85 |
| 24587 | 0 | 451318 | GEIILT                  | 1.89 | 0.01 | 4.03 | 0.68 | 0.22 | 0.85 |
| 24588 | 0 | 19297  | GEIIWTLQDTQEIKQRV<br>VF | 2.88 | 0.01 | 3.03 | 0.68 | 0.22 | 1.57 |
| 24589 | 0 | 19297  | GEIIWTLQDTQEIKQRV<br>VF | 2.88 | 0.01 | 3.03 | 3.33 | 0.22 | 1.57 |
| 24590 | 0 | 19297  | GEIIWTLQDTQEIKQRV<br>VF | 2.88 | 0.01 | 2.08 | 0.44 | 0.22 | 1.57 |
| 24591 | 0 | 19297  | GEIIWTLQDTQEIKQRV<br>VF | 2.88 | 0.01 | 2.08 | 2.02 | 0.22 | 1.57 |
| 24592 | 0 | 19297  | GEIIWTLQDTQEIKQRV<br>VF | 2.88 | 0.01 | 2.08 | 2.49 | 0.22 | 1.57 |
| 24593 | 0 | 19297  | GEIIWTLQDTQEIKQRV<br>VF | 2.88 | 0.01 | 2.08 | 2.25 | 0.22 | 1.57 |
| 24594 | 0 | 19297  | GEIIWTLQDTQEIKQRV<br>VF | 2.88 | 0.01 | 2.08 | 2.25 | 0.22 | 1.57 |
| 24595 | 0 | 19297  | GEIIWTLQDTQEIKQRV<br>VF | 2.88 | 0.01 | 2.08 | 0.68 | 0.22 | 1.57 |
| 24596 | 0 | 19297  | GEIIWTLQDTQEIKQRV<br>VF | 2.88 | 0.01 | 2.08 | 0.68 | 0.22 | 1.57 |
| 24597 | 0 | 19297  | GEIIWTLQDTQEIKQRV<br>VF | 2.88 | 0.01 | 3.16 | 0.44 | 1.93 | 1.57 |
| 24598 | 0 | 19297  | GEIIWTLQDTQEIKQRV<br>VF | 2.88 | 0.01 | 2.08 | 2.02 | 0.22 | 1.57 |
| 24599 | 0 | 19297  | GEIIWTLQDTQEIKQRV<br>VF | 2.88 | 0.01 | 2.08 | 0.44 | 0.22 | 1.57 |
| 24600 | 0 | 19297  | GEIIWTLQDTQEIKQRV<br>VF | 2.88 | 0.01 | 2.08 | 2.25 | 0.22 | 1.57 |
| 24601 | 0 | 19297  | GEIIWTLQDTQEIKQRV<br>VF | 2.88 | 0.01 | 2.08 | 0.68 | 0.22 | 1.57 |
| 24602 | 0 | 19297  | GEIIWTLQDTQEIKQRV<br>VF | 2.88 | 0.01 | 2.08 | 2.25 | 0.22 | 1.57 |
| 24603 | 0 | 19297  | GEIIWTLQDTQEIKQRV<br>VF | 2.88 | 0.01 | 2.08 | 0.68 | 0.22 | 1.57 |
| 24604 | 0 | 19297  | GEIIWTLQDTQEIKQRV<br>VF | 2.88 | 0.01 | 2.08 | 0.68 | 0.22 | 1.57 |

|       |   |        |                         |      |      |      |      |      |      |
|-------|---|--------|-------------------------|------|------|------|------|------|------|
| 24605 | 0 | 19297  | GEIIWTLQDTQEIKQRV<br>VF | 2.88 | 0.01 | 2.08 | 2.25 | 0.22 | 1.57 |
| 24606 | 0 | 137867 | GEIKFEAVEGAV            | 2.52 | 0.01 | 2.21 | 0.44 | 0.85 | 0.28 |
| 24607 | 0 | 137867 | GEIKFEAVEGAV            | 2.52 | 0.01 | 2.21 | 1.20 | 0.22 | 0.28 |
| 24608 | 0 | 171154 | GEIKWIDFVRGAKEG         | 2.69 | 0.01 | 0.78 | 0.44 | 1.13 | 0.28 |
| 24609 | 0 | 19301  | GEILLNQL                | 2.14 | 0.01 | 2.40 | 2.43 | 0.22 | 0.28 |
| 24610 | 0 | 167743 | GEILLNQLA               | 2.23 | 0.01 | 2.40 | 2.43 | 0.22 | 0.28 |
| 24611 | 0 | 296009 | GEIMTENEDDDEDEE         | 2.70 | 0.01 | 1.61 | 0.44 | 0.85 | 1.28 |
| 24612 | 0 | 19306  | GEIPFYGKA IPL           | 2.48 | 0.01 | 1.72 | 0.68 | 0.22 | 0.28 |
| 24613 | 0 | 19306  | GEIPFYGKA IPL           | 2.48 | 0.01 | 1.72 | 0.68 | 0.22 | 0.28 |
| 24614 | 0 | 19306  | GEIPFYGKA IPL           | 2.48 | 0.01 | 1.72 | 0.68 | 0.22 | 0.28 |
| 24615 | 0 | 187655 | GEIPFYGKALPLAAIK        | 2.76 | 0.01 | 1.72 | 0.68 | 0.22 | 0.28 |
| 24616 | 0 | 19310  | GEIRPS                  | 1.88 | 0.01 | 3.27 | 0.44 | 1.59 | 0.28 |
| 24617 | 0 | 19310  | GEIRPS                  | 1.88 | 0.01 | 3.27 | 0.44 | 1.59 | 0.28 |
| 24618 | 0 | 19311  | GEIRPSAPLPPVA           | 2.62 | 0.01 | 3.27 | 0.44 | 0.85 | 0.28 |
| 24619 | 0 | 230466 | GEIRTMNNFLDREQY         | 2.63 | 0.01 | 0.78 | 0.44 | 1.13 | 0.28 |
| 24620 | 0 | 115263 | GEIVESLSSESITRINKK      | 2.95 | 0.01 | 1.60 | 0.44 | 1.23 | 2.51 |
| 24621 | 0 | 19318  | GEKFIIRRSNSQSINDDI      | 2.91 | 0.01 | 2.08 | 2.43 | 0.22 | 1.57 |
| 24622 | 0 | 19318  | GEKFIIRRSNSQSINDDI      | 2.91 | 0.01 | 3.45 | 0.44 | 0.22 | 1.57 |
| 24623 | 0 | 225294 | GEKFYPTKYLIIYNDNKT      | 2.84 | 0.01 | 2.61 | 0.68 | 0.22 | 0.28 |
| 24624 | 0 | 225294 | GEKFYPTKYLIIYNDNKT      | 2.84 | 0.01 | 2.61 | 0.68 | 0.22 | 0.28 |
| 24625 | 0 | 225294 | GEKFYPTKYLIIYNDNKT      | 2.84 | 0.01 | 2.61 | 0.68 | 0.22 | 0.28 |
| 24626 | 0 | 296053 | GEKKDEEQEKKEEEE         | 2.72 | 0.01 | 1.61 | 0.44 | 0.85 | 1.28 |
| 24627 | 0 | 192953 | GEKKGNVVTSH             | 2.46 | 3.78 | 0.90 | 1.15 | 1.41 | 2.49 |
| 24628 | 0 | 192953 | GEKKGNVVTSH             | 2.46 | 3.78 | 0.90 | 1.15 | 1.41 | 2.49 |
| 24629 | 0 | 192953 | GEKKGNVVTSH             | 2.46 | 3.78 | 0.90 | 1.15 | 1.41 | 1.66 |
| 24630 | 0 | 192953 | GEKKGNVVTSH             | 2.46 | 3.78 | 0.90 | 1.15 | 1.41 | 1.66 |
| 24631 | 0 | 192953 | GEKKGNVVTSH             | 2.46 | 3.78 | 0.90 | 1.15 | 1.41 | 1.66 |
| 24632 | 0 | 192953 | GEKKGNVVTSH             | 2.46 | 3.78 | 0.90 | 1.15 | 1.41 | 1.66 |
| 24633 | 0 | 192953 | GEKKGNVVTSH             | 2.46 | 3.78 | 0.90 | 1.15 | 1.41 | 1.66 |
| 24634 | 0 | 192953 | GEKKGNVVTSH             | 2.46 | 3.78 | 0.90 | 1.15 | 1.41 | 1.66 |
| 24635 | 0 | 192953 | GEKKGNVVTSH             | 2.46 | 3.78 | 0.90 | 1.15 | 1.41 | 1.66 |
| 24636 | 0 | 192953 | GEKKGNVVTSH             | 2.46 | 3.78 | 0.90 | 1.15 | 1.41 | 1.66 |
| 24637 | 0 | 192953 | GEKKGNVVTSH             | 2.46 | 3.78 | 0.90 | 1.15 | 1.41 | 1.66 |
| 24638 | 0 | 192953 | GEKKGNVVTSH             | 2.46 | 3.78 | 0.90 | 1.15 | 1.41 | 1.66 |
| 24639 | 0 | 192953 | GEKKGNVVTSH             | 2.46 | 3.78 | 0.90 | 1.15 | 1.41 | 1.66 |
| 24640 | 0 | 192953 | GEKKGNVVTSH             | 2.46 | 3.78 | 0.90 | 1.15 | 1.41 | 1.66 |
| 24641 | 0 | 192954 | GEKKGNVVTTH             | 2.48 | 3.85 | 0.90 | 1.15 | 1.41 | 2.49 |
| 24642 | 0 | 192954 | GEKKGNVVTTH             | 2.48 | 3.85 | 0.90 | 1.15 | 1.41 | 1.66 |
| 24643 | 0 | 192954 | GEKKGNVVTTH             | 2.48 | 3.85 | 0.90 | 1.15 | 1.41 | 1.66 |
| 24644 | 0 | 192954 | GEKKGNVVTTH             | 2.48 | 3.85 | 0.90 | 1.15 | 1.41 | 1.66 |

|       |   |        |                                   |      |      |      |      |      |      |
|-------|---|--------|-----------------------------------|------|------|------|------|------|------|
| 24645 | 0 | 192954 | GEKKGNYVVTTH                      | 2.48 | 3.85 | 0.90 | 1.15 | 1.41 | 1.66 |
| 24646 | 0 | 192954 | GEKKGNYVVTTH                      | 2.48 | 3.85 | 0.90 | 1.15 | 1.41 | 1.66 |
| 24647 | 0 | 192954 | GEKKGNYVVTTH                      | 2.48 | 3.85 | 0.90 | 1.15 | 1.41 | 1.66 |
| 24648 | 0 | 192954 | GEKKGNYVVTTH                      | 2.48 | 3.85 | 0.90 | 1.15 | 1.41 | 1.66 |
| 24649 | 0 | 192954 | GEKKGNYVVTTH                      | 2.48 | 3.85 | 0.90 | 1.15 | 1.41 | 1.66 |
| 24650 | 0 | 192954 | GEKKGNYVVTTH                      | 2.48 | 3.85 | 0.90 | 1.15 | 1.41 | 1.66 |
| 24651 | 0 | 192955 | GEKKGNYVVTYA                      | 2.48 | 4.08 | 0.90 | 1.15 | 1.41 | 2.49 |
| 24652 | 0 | 192955 | GEKKGNYVVTYA                      | 2.48 | 4.08 | 0.90 | 1.15 | 1.41 | 1.66 |
| 24653 | 0 | 192955 | GEKKGNYVVTYA                      | 2.48 | 4.08 | 0.90 | 1.15 | 1.41 | 1.66 |
| 24654 | 0 | 192955 | GEKKGNYVVTYA                      | 2.48 | 4.08 | 0.90 | 1.15 | 1.41 | 1.66 |
| 24655 | 0 | 192955 | GEKKGNYVVTYA                      | 2.48 | 4.08 | 0.90 | 1.15 | 1.41 | 1.66 |
| 24656 | 0 | 192955 | GEKKGNYVVTYA                      | 2.48 | 4.08 | 0.90 | 1.15 | 1.41 | 1.66 |
| 24657 | 0 | 192955 | GEKKGNYVVTYA                      | 2.48 | 4.08 | 0.90 | 1.15 | 1.41 | 1.66 |
| 24658 | 0 | 19326  | GEKPKEGADKEKKKEKG<br>KEKEEPPK     | 3.22 | 0.01 | 3.12 | 1.12 | 0.22 | 1.57 |
| 24659 | 0 | 19326  | GEKPKEGADKEKKKEKG<br>KEKEEPPK     | 3.22 | 0.01 | 3.12 | 1.12 | 0.22 | 0.85 |
| 24660 | 0 | 19328  | GEKRIPLDVA                        | 2.26 | 0.01 | 2.04 | 0.68 | 0.22 | 0.28 |
| 24661 | 0 | 19328  | GEKRIPLDVA                        | 2.26 | 0.01 | 2.04 | 0.68 | 0.22 | 0.28 |
| 24662 | 0 | 82603  | GEKTREQAVLFGVDHKL<br>HKQLL        | 3.04 | 0.01 | 3.04 | 1.12 | 0.22 | 0.28 |
| 24663 | 0 | 82603  | GEKTREQAVLFGVDHKL<br>HKQLL        | 3.04 | 0.01 | 3.04 | 1.12 | 0.22 | 0.28 |
| 24664 | 0 | 82603  | GEKTREQAVLFGVDHKL<br>HKQLL        | 3.04 | 0.01 | 3.04 | 1.12 | 0.22 | 0.28 |
| 24665 | 0 | 19329  | GEKTRNQMGV                        | 2.30 | 0.01 | 0.78 | 0.44 | 1.74 | 0.28 |
| 24666 | 0 | 101668 | GEKVSQKVCNGTGSS<br>GTQCGKNSGDTNGS | 3.39 | 0.01 | 3.72 | 3.42 | 0.22 | 0.28 |
| 24667 | 0 | 238435 | GEKVSRCVAVTCPKP                   | 2.69 | 0.01 | 2.56 | 2.02 | 0.22 | 0.85 |
| 24668 | 0 | 238435 | GEKVSRCVAVTCPKP                   | 2.69 | 0.01 | 2.56 | 1.20 | 0.22 | 0.85 |
| 24669 | 0 | 103203 | GELDNRSQFYLAMY                    | 2.65 | 0.01 | 2.04 | 0.44 | 0.85 | 1.28 |
| 24670 | 0 | 112990 | GELLQDNAKLVPVLS                   | 2.66 | 0.01 | 0.78 | 1.20 | 0.22 | 0.85 |
| 24671 | 0 | 112990 | GELLQDNAKLVPVLS                   | 2.66 | 0.01 | 0.78 | 0.44 | 1.13 | 0.85 |
| 24672 | 0 | 107378 | GELP                              | 1.57 | 0.01 | 0.78 | 2.36 | 0.22 | 0.28 |
| 24673 | 0 | 107378 | GELP                              | 1.57 | 0.01 | 0.78 | 2.36 | 0.22 | 0.85 |
| 24674 | 0 | 105813 | GELPNIEA                          | 2.12 | 0.01 | 3.05 | 1.20 | 0.22 | 0.28 |
| 24675 | 0 | 105814 | GELPNIEADVNTFVASH<br>KPR          | 2.90 | 0.01 | 3.05 | 1.20 | 0.22 | 0.28 |
| 24676 | 0 | 105814 | GELPNIEADVNTFVASH<br>KPR          | 2.90 | 0.01 | 3.05 | 0.44 | 1.23 | 0.28 |
| 24677 | 0 | 19355  | GELQIVDKIDAA                      | 2.45 | 0.01 | 3.22 | 0.44 | 1.23 | 0.85 |
| 24678 | 0 | 122771 | GELTSSEVATEVPFRLM<br>HPQ          | 2.92 | 0.01 | 1.60 | 2.04 | 0.22 | 1.75 |
| 24679 | 0 | 123221 | GENHAKSKAVPYSEMY<br>AN            | 2.85 | 0.01 | 0.90 | 3.12 | 0.22 | 0.28 |
| 24680 | 0 | 123221 | GENHAKSKAVPYSEMY<br>AN            | 2.85 | 0.01 | 0.90 | 3.12 | 0.22 | 0.28 |

|       |   |        |                              |      |      |      |      |      |      |
|-------|---|--------|------------------------------|------|------|------|------|------|------|
| 24681 | 0 | 123221 | GENHAKSKAVPYSEMY<br>AN       | 2.85 | 0.01 | 0.90 | 3.12 | 0.22 | 3.16 |
| 24682 | 0 | 123221 | GENHAKSKAVPYSEMY<br>AN       | 2.85 | 0.01 | 0.90 | 2.55 | 0.22 | 3.16 |
| 24683 | 0 | 123221 | GENHAKSKAVPYSEMY<br>AN       | 2.85 | 0.01 | 0.90 | 2.55 | 0.22 | 0.28 |
| 24684 | 0 | 123221 | GENHAKSKAVPYSEMY<br>AN       | 2.85 | 0.01 | 0.90 | 2.55 | 0.22 | 0.28 |
| 24685 | 0 | 19375  | GENK                         | 1.57 | 0.01 | 3.38 | 1.15 | 0.22 | 1.34 |
| 24686 | 0 | 19375  | GENK                         | 1.57 | 0.01 | 3.38 | 1.15 | 0.22 | 0.85 |
| 24687 | 0 | 82608  | GENK FVATAASV                | 2.46 | 0.01 | 2.87 | 0.44 | 0.22 | 0.28 |
| 24688 | 0 | 82608  | GENK FVATAASV                | 2.46 | 0.01 | 2.87 | 0.44 | 0.85 | 0.28 |
| 24689 | 0 | 19376  | GENKRPNDKA                   | 2.31 | 0.01 | 3.10 | 0.68 | 0.22 | 0.28 |
| 24690 | 0 | 19376  | GENKRPNDKA                   | 2.31 | 0.01 | 3.10 | 0.68 | 0.22 | 0.28 |
| 24691 | 0 | 19376  | GENKRPNDKA                   | 2.31 | 0.01 | 3.10 | 0.68 | 0.22 | 2.12 |
| 24692 | 0 | 92794  | GENKRPNDKAGEV                | 2.56 | 0.01 | 4.45 | 0.68 | 0.22 | 0.28 |
| 24693 | 0 | 92794  | GENKRPNDKAGEV                | 2.56 | 0.01 | 4.45 | 0.68 | 0.22 | 2.12 |
| 24694 | 0 | 296218 | GENLDGDEEEDVVSQ              | 2.70 | 0.01 | 1.61 | 0.44 | 0.85 | 1.28 |
| 24695 | 0 | 19383  | GEPAPGATAR                   | 2.36 | 4.15 | 2.70 | 0.44 | 0.85 | 0.28 |
| 24696 | 0 | 99267  | GEPDLSNNFGKLFV               | 2.68 | 0.01 | 2.16 | 0.44 | 1.23 | 1.48 |
| 24697 | 0 | 107849 | GEPGDDAPSC                   | 2.33 | 0.01 | 0.90 | 0.68 | 0.22 | 0.28 |
| 24698 | 0 | 107849 | GEPGDDAPSC                   | 2.33 | 0.01 | 0.90 | 0.68 | 0.22 | 1.66 |
| 24699 | 0 | 107849 | GEPGDDAPSC                   | 2.33 | 0.01 | 0.90 | 0.68 | 0.22 | 0.28 |
| 24700 | 0 | 107849 | GEPGDDAPSC                   | 2.33 | 0.01 | 0.90 | 0.68 | 0.22 | 0.28 |
| 24701 | 0 | 107849 | GEPGDDAPSC                   | 2.33 | 0.01 | 0.90 | 0.68 | 0.22 | 1.66 |
| 24702 | 0 | 107849 | GEPGDDAPSC                   | 2.33 | 0.01 | 0.90 | 0.68 | 0.22 | 1.66 |
| 24703 | 0 | 107849 | GEPGDDAPSC                   | 2.33 | 0.01 | 0.90 | 0.68 | 0.22 | 1.66 |
| 24704 | 0 | 107127 | GEPGDDAPSGAEGPPG<br>PQG      | 2.96 | 0.01 | 0.78 | 0.68 | 0.22 | 2.56 |
| 24705 | 0 | 171163 | GEPGDDGPS                    | 2.27 | 0.01 | 0.78 | 2.16 | 0.22 | 0.28 |
| 24706 | 0 | 171163 | GEPGDDGPS                    | 2.27 | 0.01 | 0.78 | 2.16 | 0.22 | 0.28 |
| 24707 | 0 | 171163 | GEPGDDGPS                    | 2.27 | 0.01 | 0.78 | 2.16 | 0.22 | 1.27 |
| 24708 | 0 | 171163 | GEPGDDGPS                    | 2.27 | 0.01 | 0.78 | 2.16 | 0.22 | 1.27 |
| 24709 | 0 | 171163 | GEPGDDGPS                    | 2.27 | 0.01 | 0.78 | 2.16 | 0.22 | 1.27 |
| 24710 | 0 | 107380 | GEPGIAGFKGDQGP               | 2.71 | 0.01 | 1.75 | 2.98 | 0.22 | 0.28 |
| 24711 | 0 | 107384 | GEPGIAGFKGEQGP               | 2.72 | 0.01 | 2.19 | 3.20 | 0.22 | 1.75 |
| 24712 | 0 | 230837 | GEPGIAGFKGEQGPGE<br>PGPAGPQ  | 3.19 | 0.01 | 0.78 | 3.16 | 0.22 | 0.28 |
| 24713 | 0 | 230838 | GEPGPAGPQGAPGPAG<br>EEGKRGR  | 3.19 | 0.01 | 0.78 | 3.93 | 0.22 | 0.28 |
| 24714 | 0 | 230838 | GEPGPAGPQGAPGPAG<br>EEGKRGR  | 3.19 | 0.01 | 0.78 | 3.16 | 0.22 | 0.28 |
| 24715 | 0 | 230839 | GEPGVSGPMGPRGPPG<br>PPGKPGDD | 3.16 | 0.01 | 0.78 | 3.16 | 0.22 | 0.28 |
| 24716 | 0 | 107852 | GEPQSSIIQY                   | 2.31 | 0.01 | 4.08 | 0.68 | 0.22 | 0.85 |
| 24717 | 0 | 107852 | GEPQSSIIQY                   | 2.31 | 0.01 | 4.08 | 0.68 | 0.22 | 1.48 |
| 24718 | 0 | 107852 | GEPQSSIIQY                   | 2.31 | 0.01 | 4.08 | 0.68 | 0.22 | 0.28 |

|       |   |        |                                             |      |      |      |      |      |      |
|-------|---|--------|---------------------------------------------|------|------|------|------|------|------|
| 24719 | 0 | 107852 | GEPQSSIIQY<br>GEPVVVHITDDNNEPIAP            | 2.31 | 0.01 | 4.08 | 0.44 | 0.85 | 0.28 |
| 24720 | 0 | 19398  | YHFDLSGHAFGAMAKK<br>G<br>GEPVVVHITDDNNEPIAP | 3.47 | 0.01 | 2.53 | 0.44 | 1.23 | 0.85 |
| 24721 | 0 | 19398  | YHFDLSGHAFGAMAKK<br>G                       | 3.47 | 0.01 | 2.53 | 0.44 | 1.23 | 0.85 |
| 24722 | 0 | 99269  | GEQEERGQRRWSTRS                             | 2.73 | 0.01 | 2.16 | 0.44 | 1.23 | 1.48 |
| 24723 | 0 | 99270  | GEQEWGTPGSHVREE                             | 2.67 | 0.01 | 2.16 | 0.44 | 1.23 | 1.48 |
| 24724 | 0 | 98793  | GEQFMQWFLQEIEEV<br>ALMA                     | 2.97 | 0.01 | 2.04 | 0.44 | 0.85 | 0.28 |
| 24725 | 0 | 109075 | GEQGPKGE                                    | 2.17 | 0.01 | 1.60 | 2.61 | 0.22 | 0.28 |
| 24726 | 0 | 82611  | GEQQEAIKSA                                  | 2.32 | 0.01 | 3.06 | 0.44 | 0.85 | 0.28 |
| 24727 | 0 | 19405  | GEQQEAIKSAENATKVE<br>DIK                    | 2.95 | 0.01 | 2.84 | 1.12 | 0.22 | 1.27 |
| 24728 | 0 | 104798 | GERAKRS                                     | 2.02 | 0.01 | 0.90 | 0.44 | 1.13 | 1.27 |
| 24729 | 0 | 104798 | GERAKRS                                     | 2.02 | 0.01 | 0.90 | 0.44 | 1.41 | 1.27 |
| 24730 | 0 | 19407  | GERCNLEDRDRSELSPLL<br>LS                    | 2.98 | 0.01 | 2.83 | 1.12 | 0.22 | 0.28 |
| 24731 | 0 | 112123 | GERGAAGIAGPK                                | 2.52 | 0.01 | 1.75 | 2.46 | 0.22 | 1.48 |
| 24732 | 0 | 112123 | GERGAAGIAGPK                                | 2.52 | 0.01 | 1.75 | 2.46 | 0.22 | 1.75 |
| 24733 | 0 | 112123 | GERGAAGIAGPK                                | 2.52 | 0.01 | 2.19 | 4.08 | 0.22 | 0.28 |
| 24734 | 0 | 110592 | GERGAPGNRGFPGQD                             | 2.71 | 0.01 | 1.75 | 2.98 | 0.22 | 0.28 |
| 24735 | 0 | 230840 | GERGEQGAPGPSGFQGLP                          | 2.89 | 0.01 | 0.78 | 3.93 | 0.22 | 0.28 |
| 24736 | 0 | 109080 | GERGPSGLAGPKGAN                             | 2.71 | 0.01 | 1.75 | 2.98 | 0.22 | 0.28 |
| 24737 | 0 | 109081 | GERGRTGP                                    | 2.17 | 0.01 | 1.60 | 2.55 | 2.60 | 0.28 |
| 24738 | 0 | 132324 | GERGSERGRD                                  | 2.37 | 0.01 | 0.78 | 0.44 | 1.13 | 0.28 |
| 24739 | 0 | 19410  | GERGYIRMARNRGNMC                            | 2.77 | 0.01 | 2.28 | 3.63 | 0.22 | 0.28 |
| 24740 | 0 | 92799  | GERITSKQVD                                  | 2.26 | 0.01 | 2.67 | 2.00 | 0.22 | 0.28 |
| 24741 | 0 | 78163  | GERLFT                                      | 1.88 | 0.01 | 0.90 | 2.02 | 1.59 | 1.39 |
| 24742 | 0 | 78164  | GERLIV                                      | 1.88 | 0.01 | 0.90 | 2.02 | 1.59 | 1.39 |
| 24743 | 0 | 296333 | GERMTEKEDGDNEDE                             | 2.72 | 0.01 | 1.61 | 0.44 | 0.85 | 1.28 |
| 24744 | 0 | 98794  | GERQH                                       | 1.74 | 0.01 | 2.14 | 0.68 | 0.22 | 0.28 |
| 24745 | 0 | 98794  | GERQH                                       | 1.74 | 0.01 | 2.14 | 0.68 | 0.22 | 0.28 |
| 24746 | 0 | 19424  | GERTRGRQPG                                  | 2.36 | 0.01 | 2.16 | 0.44 | 1.23 | 0.85 |
| 24747 | 0 | 19424  | GERTRGRQPG                                  | 2.36 | 0.01 | 2.16 | 0.44 | 1.23 | 0.85 |
| 24748 | 0 | 98795  | GERTRGRQPGDYDDD                             | 2.70 | 0.01 | 2.16 | 0.44 | 1.23 | 0.85 |
| 24749 | 0 | 175171 | GERTWAE                                     | 2.02 | 0.01 | 2.18 | 1.15 | 0.22 | 1.75 |
| 24750 | 0 | 175171 | GERTWAE                                     | 2.02 | 0.01 | 2.18 | 1.15 | 0.22 | 1.34 |
| 24751 | 0 | 78165  | GERVGY                                      | 1.91 | 0.01 | 0.90 | 2.02 | 1.59 | 1.39 |
| 24752 | 0 | 100872 | GESADP                                      | 1.88 | 0.01 | 3.02 | 1.12 | 0.22 | 0.28 |
| 24753 | 0 | 19426  | GESAPSDAKTVTDAVD                            | 2.77 | 0.01 | 3.59 | 0.44 | 0.85 | 0.28 |



|       |   |        |                              |      |      |      |      |      |      |
|-------|---|--------|------------------------------|------|------|------|------|------|------|
| 24754 | 0 | 19426  | GESAPSDAKTVTDAVD             | 2.77 | 0.01 | 3.59 | 0.44 | 0.85 | 0.28 |
|       |   |        | GESAPSDAKTVTDAVDG            |      |      |      |      |      |      |
| 24755 | 0 | 19427  | GGGTSGWAEVVVTPTH<br>VD       | 3.52 | 0.01 | 1.72 | 0.44 | 0.85 | 0.28 |
|       |   |        | GESAPSDAKTVTDAVDG            |      |      |      |      |      |      |
| 24756 | 0 | 19427  | GGGTSGWAEVVVTPTH<br>VD       | 3.52 | 0.01 | 1.72 | 0.44 | 0.85 | 0.28 |
| 24757 | 0 | 141655 | GESKEQVANS                   | 2.41 | 0.01 | 0.78 | 0.44 | 1.93 | 0.28 |
| 24758 | 0 | 296424 | GESSSFYSREVDVSQ              | 2.69 | 0.01 | 1.61 | 0.44 | 0.85 | 1.28 |
| 24759 | 0 | 509244 | GETGKEPHAGGPGDIEL<br>GPL     | 2.98 | 0.01 | 0.78 | 0.44 | 1.13 | 1.28 |
| 24760 | 0 | 238439 | GETICYKTFWNTHRG              | 2.65 | 0.01 | 2.56 | 1.20 | 0.22 | 0.85 |
| 24761 | 0 | 238439 | GETICYKTFWNTHRG              | 2.65 | 0.01 | 2.56 | 2.02 | 0.22 | 0.85 |
| 24762 | 0 | 167907 | GETLVNLPEGGQGCKR             | 2.73 | 0.01 | 2.75 | 0.44 | 1.59 | 2.51 |
| 24763 | 0 | 167907 | GETLVNLPEGGQGCKR             | 2.73 | 0.01 | 2.75 | 0.44 | 0.85 | 2.51 |
| 24764 | 0 | 153386 | GETQCVEIASID                 | 2.45 | 0.01 | 0.90 | 2.16 | 0.22 | 0.85 |
| 24765 | 0 | 153386 | GETQCVEIASID                 | 2.45 | 0.01 | 0.90 | 2.16 | 0.22 | 0.85 |
| 24766 | 0 | 141282 | GETRK                        | 1.74 | 0.01 | 0.78 | 0.44 | 1.41 | 2.35 |
| 24767 | 0 | 141282 | GETRK                        | 1.74 | 0.01 | 0.78 | 0.44 | 1.41 | 2.35 |
| 24768 | 0 | 141282 | GETRK                        | 1.74 | 0.01 | 0.78 | 0.44 | 1.41 | 2.35 |
| 24769 | 0 | 141282 | GETRK                        | 1.74 | 0.01 | 0.78 | 0.44 | 1.41 | 2.35 |
| 24770 | 0 | 141282 | GETRK                        | 1.74 | 0.01 | 0.78 | 1.15 | 0.22 | 2.12 |
| 24771 | 0 | 120551 | GEVIFQ                       | 1.88 | 0.01 | 2.26 | 2.04 | 0.22 | 0.28 |
| 24772 | 0 | 120552 | GEVIFQTP                     | 2.10 | 0.01 | 2.26 | 2.36 | 0.22 | 0.28 |
| 24773 | 0 | 451319 | GEVILT                       | 1.88 | 0.01 | 4.03 | 0.68 | 0.22 | 1.34 |
| 24774 | 0 | 451319 | GEVILT                       | 1.88 | 0.01 | 4.03 | 0.68 | 0.22 | 1.34 |
| 24775 | 0 | 451319 | GEVILT                       | 1.88 | 0.01 | 4.03 | 0.68 | 0.22 | 1.48 |
| 24776 | 0 | 451319 | GEVILT                       | 1.88 | 0.01 | 4.03 | 0.68 | 0.22 | 1.48 |
| 24777 | 0 | 451319 | GEVILT                       | 1.88 | 0.01 | 4.03 | 0.68 | 0.22 | 0.85 |
| 24778 | 0 | 451319 | GEVILT                       | 1.88 | 0.01 | 4.03 | 0.68 | 0.22 | 0.85 |
| 24779 | 0 | 451319 | GEVILT                       | 1.88 | 0.01 | 4.03 | 0.68 | 0.22 | 0.85 |
| 24780 | 0 | 451319 | GEVILT                       | 1.88 | 0.01 | 4.03 | 0.68 | 0.22 | 0.85 |
| 24781 | 0 | 19469  | GEVRQITFRDLDPKFNA<br>YLANKW  | 3.03 | 0.01 | 2.95 | 0.44 | 0.22 | 0.28 |
| 24782 | 0 | 19470  | GEVSTENGKLVNGKLIS<br>VHCERDP | 3.16 | 0.01 | 3.10 | 1.12 | 0.22 | 0.85 |
| 24783 | 0 | 19470  | GEVSTENGKLVNGKLIS<br>VHCERDP | 3.16 | 0.01 | 3.10 | 0.44 | 1.74 | 0.28 |
| 24784 | 0 | 19471  | GEVTELDISGCSGDT              | 2.71 | 0.01 | 4.23 | 1.12 | 0.22 | 0.85 |
| 24785 | 0 | 19472  | GEVTELDITGCSGDT              | 2.71 | 0.01 | 4.23 | 1.12 | 0.22 | 0.85 |
| 24786 | 0 | 19474  | GEVWVT                       | 1.90 | 0.01 | 2.85 | 0.44 | 0.22 | 0.28 |
| 24787 | 0 | 19475  | GEVWVTPV                     | 2.14 | 0.01 | 2.85 | 0.44 | 0.22 | 0.28 |
| 24788 | 0 | 79554  | GEVWVTPVIGSQARKC<br>GLHI     | 2.90 | 0.01 | 2.85 | 0.44 | 1.59 | 0.28 |

|       |   |        |                          |      |      |      |      |      |      |
|-------|---|--------|--------------------------|------|------|------|------|------|------|
| 24789 | 0 | 478550 | GEWAF                    | 1.74 | 0.01 | 3.28 | 3.16 | 0.22 | 0.28 |
| 24790 | 0 | 478550 | GEWAF                    | 1.74 | 0.01 | 3.28 | 3.16 | 0.22 | 0.28 |
| 24791 | 0 | 478550 | GEWAF                    | 1.74 | 0.01 | 3.28 | 3.16 | 0.22 | 0.28 |
| 24792 | 0 | 478550 | GEWAF                    | 1.74 | 0.01 | 3.28 | 3.16 | 0.22 | 0.28 |
| 24793 | 0 | 478550 | GEWAF                    | 1.74 | 0.01 | 3.28 | 3.16 | 0.22 | 1.27 |
| 24794 | 0 | 478550 | GEWAF                    | 1.74 | 0.01 | 3.28 | 3.16 | 0.22 | 1.75 |
| 24795 | 0 | 478550 | GEWAF                    | 1.74 | 0.01 | 3.28 | 3.16 | 0.22 | 2.35 |
| 24796 | 0 | 98059  | GEWAGKDKIE               | 2.34 | 0.01 | 3.57 | 0.44 | 0.85 | 0.28 |
| 24797 | 0 | 134678 | GEWNLPDNCRRGVS           | 2.59 | 0.01 | 2.72 | 1.15 | 0.22 | 0.85 |
| 24798 | 0 | 19481  | GEYGEVTVDCEPRSGID<br>TNA | 2.94 | 0.01 | 2.85 | 2.02 | 0.22 | 1.34 |
| 24799 | 0 | 19481  | GEYGEVTVDCEPRSGID<br>TNA | 2.94 | 0.01 | 2.85 | 2.02 | 0.22 | 1.48 |
| 24800 | 0 | 19481  | GEYGEVTVDCEPRSGID<br>TNA | 2.94 | 0.01 | 2.85 | 2.02 | 0.22 | 1.48 |
| 24801 | 0 | 19481  | GEYGEVTVDCEPRSGID<br>TNA | 2.94 | 0.01 | 2.85 | 2.02 | 0.22 | 1.48 |
| 24802 | 0 | 19481  | GEYGEVTVDCEPRSGID<br>TNA | 2.94 | 0.01 | 2.85 | 2.02 | 0.22 | 0.28 |
| 24803 | 0 | 19481  | GEYGEVTVDCEPRSGID<br>TNA | 2.94 | 0.01 | 2.85 | 2.02 | 0.22 | 0.28 |
| 24804 | 0 | 19481  | GEYGEVTVDCEPRSGID<br>TNA | 2.94 | 0.01 | 2.85 | 2.02 | 0.22 | 0.28 |
| 24805 | 0 | 19482  | GEYGGVIKDGTPGGA          | 2.68 | 0.01 | 2.14 | 1.12 | 0.22 | 0.28 |
| 24806 | 0 | 478551 | GEYIIKDPYKLLDLEQKK       | 2.86 | 0.01 | 3.12 | 0.68 | 0.22 | 0.28 |
| 24807 | 0 | 181989 | GEYQPPTGIRDPCVDTP<br>AYP | 2.95 | 0.01 | 3.85 | 2.13 | 1.74 | 0.28 |
| 24808 | 0 | 140853 | GEYVQILDAHAAYLNAT<br>PAA | 2.91 | 0.01 | 3.01 | 0.68 | 0.22 | 0.85 |
| 24809 | 0 | 140853 | GEYVQILDAHAAYLNAT<br>PAA | 2.91 | 0.01 | 3.01 | 0.68 | 0.22 | 1.34 |
| 24810 | 0 | 19491  | GFADLMGYIP               | 2.30 | 0.01 | 2.68 | 2.74 | 0.22 | 0.28 |
| 24811 | 0 | 19491  | GFADLMGYIP               | 2.30 | 0.01 | 2.68 | 0.44 | 0.85 | 0.28 |
| 24812 | 0 | 78661  | GFADLMGYIPLVGAPLG        | 2.82 | 0.01 | 1.72 | 3.63 | 0.22 | 0.28 |
| 24813 | 0 | 132325 | GFAE                     | 1.57 | 0.01 | 0.78 | 0.68 | 0.22 | 0.85 |
| 24814 | 0 | 132325 | GFAE                     | 1.57 | 0.01 | 0.78 | 0.68 | 0.22 | 0.85 |
| 24815 | 0 | 108378 | GFAGQAGPAGATGAPG<br>RP   | 2.91 | 0.01 | 2.25 | 2.46 | 0.22 | 2.35 |
| 24816 | 0 | 108378 | GFAGQAGPAGATGAPG<br>RP   | 2.91 | 0.01 | 2.25 | 2.46 | 0.22 | 0.28 |
| 24817 | 0 | 108378 | GFAGQAGPAGATGAPG<br>RP   | 2.91 | 0.01 | 2.25 | 2.46 | 0.22 | 1.48 |
| 24818 | 0 | 108378 | GFAGQAGPAGATGAPG<br>RP   | 2.91 | 0.01 | 2.25 | 2.46 | 0.22 | 0.28 |

|       |   |        |                                     |      |      |      |      |      |      |
|-------|---|--------|-------------------------------------|------|------|------|------|------|------|
| 24819 | 0 | 108378 | GFAGQAGPAGATGAPG<br>RP              | 2.91 | 0.01 | 2.25 | 2.46 | 0.22 | 0.28 |
| 24820 | 0 | 19499  | GFASKTPANQAIS                       | 2.54 | 0.01 | 2.04 | 2.42 | 0.22 | 0.28 |
| 24821 | 0 | 19503  | GFAVVLKAGNEG                        | 2.49 | 0.01 | 3.33 | 0.44 | 1.23 | 0.85 |
| 24822 | 0 | 107853 | GFBGADGIAGPKGPBGE<br>R              | 2.87 | 0.01 | 1.60 | 2.46 | 0.22 | 0.28 |
| 24823 | 0 | 19504  | GFCDGYCKTHLKASS                     | 2.65 | 0.01 | 2.56 | 2.52 | 0.22 | 0.85 |
| 24824 | 0 | 19509  | GFDARTMQ                            | 2.10 | 0.01 | 2.99 | 0.44 | 0.85 | 0.28 |
| 24825 | 0 | 19511  | GFDEMEECASHLPYIEQ<br>GMQ            | 2.91 | 0.01 | 1.72 | 0.44 | 0.85 | 0.28 |
| 24826 | 0 | 19512  | GFDHGLTPFDNY                        | 2.48 | 0.01 | 0.90 | 2.36 | 0.22 | 1.27 |
| 24827 | 0 | 140854 | GFDKYDITGEYVQILDAH<br>AA            | 2.92 | 0.01 | 3.01 | 1.12 | 0.22 | 0.28 |
| 24828 | 0 | 140854 | GFDKYDITGEYVQILDAH<br>AA            | 2.92 | 0.01 | 3.01 | 0.68 | 0.22 | 0.85 |
| 24829 | 0 | 516506 | GFEDQLVGAKAGDEV                     | 2.71 | 0.01 | 2.24 | 0.44 | 1.41 | 1.28 |
| 24830 | 0 | 19517  | GFEKISKGAN                          | 2.32 | 0.01 | 0.78 | 0.44 | 1.41 | 0.28 |
| 24831 | 0 | 125420 | GFESLEECYMAKILVAEG<br>TRDVPIG       | 3.12 | 0.01 | 0.78 | 0.44 | 1.13 | 0.28 |
| 24832 | 0 | 19520  | GFFGAIAGFIE                         | 2.46 | 0.01 | 3.61 | 1.12 | 0.22 | 1.57 |
| 24833 | 0 | 19520  | GFFGAIAGFIE                         | 2.46 | 0.01 | 3.61 | 2.37 | 0.22 | 1.57 |
| 24834 | 0 | 19520  | GFFGAIAGFIE                         | 2.46 | 0.01 | 3.61 | 0.44 | 0.85 | 1.57 |
| 24835 | 0 | 19520  | GFFGAIAGFIE                         | 2.46 | 0.01 | 3.61 | 1.15 | 0.22 | 1.57 |
| 24836 | 0 | 19520  | GFFGAIAGFIE                         | 2.46 | 0.01 | 3.61 | 1.12 | 0.22 | 1.57 |
| 24837 | 0 | 19520  | GFFGAIAGFIE                         | 2.46 | 0.01 | 3.61 | 1.12 | 0.22 | 1.57 |
| 24838 | 0 | 19520  | GFFGAIAGFIE                         | 2.46 | 0.01 | 3.61 | 1.12 | 0.22 | 1.57 |
| 24839 | 0 | 19520  | GFFGAIAGFIE                         | 2.46 | 0.01 | 3.61 | 1.15 | 0.22 | 1.57 |
| 24840 | 0 | 19520  | GFFGAIAGFIE                         | 2.46 | 0.01 | 3.61 | 1.12 | 0.22 | 1.57 |
| 24841 | 0 | 19527  | GFFSRLNWLTKS                        | 2.46 | 0.01 | 3.27 | 1.12 | 0.22 | 1.39 |
| 24842 | 0 | 109085 | GFGAMDF                             | 2.05 | 0.01 | 1.86 | 1.15 | 0.22 | 0.85 |
| 24843 | 0 | 109085 | GFGAMDF                             | 2.05 | 0.01 | 1.86 | 1.15 | 0.22 | 0.85 |
| 24844 | 0 | 109085 | GFGAMDF                             | 2.05 | 0.01 | 1.86 | 1.15 | 0.22 | 2.98 |
| 24845 | 0 | 19532  | GFGHIGVTVDVHKA                      | 2.70 | 0.01 | 3.97 | 1.20 | 0.22 | 0.85 |
| 24846 | 0 | 100056 | GFGKDITTGHSFTHKSN<br>NDP            | 2.97 | 0.01 | 0.90 | 2.00 | 0.22 | 0.28 |
| 24847 | 0 | 19533  | GFGCLKVWEVRREKEELK<br>RDK           | 2.98 | 0.01 | 2.93 | 1.81 | 0.22 | 0.28 |
| 24848 | 0 | 19533  | GFGCLKVWEVRREKEELK<br>RDK           | 2.98 | 0.01 | 2.93 | 2.69 | 0.22 | 0.28 |
| 24849 | 0 | 19533  | GFGCLKVWEVRREKEELK<br>RDK           | 2.98 | 0.01 | 2.93 | 0.68 | 0.22 | 0.28 |
| 24850 | 0 | 116096 | GFGYGGRASDYKSAHK                    | 2.76 | 0.01 | 0.78 | 3.18 | 2.60 | 1.75 |
| 24851 | 0 | 105211 | GFIAALFYAHRFNASGCP<br>ERNASCRPIDEFA | 3.38 | 0.01 | 1.72 | 0.68 | 0.22 | 0.28 |
| 24852 | 0 | 419189 | GFIFTR                              | 1.90 | 0.01 | 2.19 | 2.97 | 0.22 | 2.66 |
| 24853 | 0 | 95406  | GFITELSEFIPG                        | 2.50 | 0.01 | 2.88 | 1.12 | 0.22 | 0.85 |

|       |   |        |                     |      |      |      |      |      |      |
|-------|---|--------|---------------------|------|------|------|------|------|------|
| 24854 | 0 | 95406  | GFITELSEFIPG        | 2.50 | 0.01 | 2.88 | 0.44 | 1.23 | 0.85 |
| 24855 | 0 | 97330  | GFIVLEIQG           | 2.24 | 0.01 | 3.13 | 1.12 | 0.22 | 0.28 |
| 24856 | 0 | 19551  | GFKAAVAAAAANA       | 2.51 | 0.01 | 3.22 | 0.44 | 1.23 | 0.85 |
| 24857 | 0 | 77882  | GFKETSPTGLRW        | 2.46 | 0.01 | 0.90 | 1.15 | 0.22 | 1.39 |
|       |   |        | GFKNNKGVAEVLRDGD    |      |      |      |      |      |      |
| 24858 | 0 | 156663 | CPAVLIPSKPLARRCFPAI | 3.68 | 0.01 | 0.78 | 0.44 | 1.59 | 0.28 |
|       |   |        | HAYKGV              |      |      |      |      |      |      |
| 24859 | 0 | 19562  | GFKVRPSFSFFAVGPDG   | 2.92 | 0.01 | 2.86 | 0.44 | 0.85 | 0.28 |
|       |   |        | MP                  |      |      |      |      |      |      |
| 24860 | 0 | 19562  | GFKVRPSFSFFAVGPDG   | 2.92 | 0.01 | 2.86 | 0.44 | 0.85 | 0.28 |
|       |   |        | MP                  |      |      |      |      |      |      |
| 24861 | 0 | 193228 | GFKYFAPANTLDENLEG   | 2.91 | 0.01 | 3.04 | 1.12 | 0.22 | 0.28 |
|       |   |        | EA                  |      |      |      |      |      |      |
| 24862 | 0 | 193228 | GFKYFAPANTLDENLEG   | 2.91 | 0.01 | 3.04 | 1.12 | 0.22 | 0.28 |
|       |   |        | EA                  |      |      |      |      |      |      |
| 24863 | 0 | 175804 | GFLCPEFPGSFRKKC     | 2.70 | 0.01 | 3.75 | 0.68 | 0.22 | 0.28 |
| 24864 | 0 | 175804 | GFLCPEFPGSFRKKC     | 2.70 | 0.01 | 3.75 | 0.68 | 0.22 | 1.27 |
| 24865 | 0 | 97331  | GFLKLNIGD           | 2.24 | 0.01 | 3.13 | 1.12 | 0.22 | 0.28 |
| 24866 | 0 | 19577  | GFLMHAPAFETAGTY     | 2.69 | 4.45 | 2.40 | 0.68 | 0.22 | 0.28 |
| 24867 | 0 | 103208 | GFLMPPSDGSGVTPG     | 2.70 | 0.01 | 2.04 | 0.44 | 0.85 | 1.28 |
| 24868 | 0 | 167064 | GFLSELTQQLAQATGKP   | 2.86 | 0.01 | 0.78 | 0.44 | 1.41 | 0.28 |
|       |   |        | P                   |      |      |      |      |      |      |
| 24869 | 0 | 167064 | GFLSELTQQLAQATGKP   | 2.86 | 0.01 | 0.78 | 0.44 | 1.41 | 0.28 |
|       |   |        | P                   |      |      |      |      |      |      |
| 24870 | 0 | 133580 | GFLSSCNFRFCELVR     | 2.69 | 0.01 | 0.90 | 1.15 | 0.22 | 0.28 |
| 24871 | 0 | 133580 | GFLSSCNFRFCELVR     | 2.69 | 0.01 | 0.90 | 1.15 | 0.22 | 0.28 |
| 24872 | 0 | 133580 | GFLSSCNFRFCELVR     | 2.69 | 0.01 | 0.90 | 1.15 | 0.22 | 2.12 |
| 24873 | 0 | 133580 | GFLSSCNFRFCELVR     | 2.69 | 0.01 | 0.90 | 1.15 | 0.22 | 1.27 |
| 24874 | 0 | 133580 | GFLSSCNFRFCELVR     | 2.69 | 0.01 | 0.90 | 1.15 | 0.22 | 1.66 |
| 24875 | 0 | 19585  | GFMKQYGECLGDINAR    | 2.74 | 0.01 | 2.48 | 0.44 | 0.85 | 0.28 |
|       |   |        | D                   |      |      |      |      |      |      |
| 24876 | 0 | 19585  | GFMKQYGECLGDINAR    | 2.74 | 0.01 | 2.48 | 1.20 | 0.22 | 0.28 |
|       |   |        | D                   |      |      |      |      |      |      |
| 24877 | 0 | 423662 | GFMNTNQLFFDP        | 2.46 | 0.01 | 0.90 | 2.46 | 0.22 | 1.39 |
| 24878 | 0 | 423662 | GFMNTNQLFFDP        | 2.46 | 0.01 | 0.90 | 0.44 | 1.13 | 0.28 |
| 24879 | 0 | 118802 | GFNEPNGNLQYQ        | 2.50 | 0.01 | 2.18 | 0.68 | 0.22 | 0.28 |
| 24880 | 0 | 118802 | GFNEPNGNLQYQ        | 2.50 | 0.01 | 2.18 | 0.68 | 0.22 | 1.66 |
| 24881 | 0 | 118802 | GFNEPNGNLQYQ        | 2.50 | 0.01 | 2.18 | 0.68 | 0.22 | 1.66 |
| 24882 | 0 | 239709 | GFNGNVTGDDTGKIGG    | 3.02 | 0.01 | 2.56 | 1.20 | 0.22 | 1.34 |
|       |   |        | LIGAN               |      |      |      |      |      |      |
| 24883 | 0 | 239709 | GFNGNVTGDDTGKIGG    | 3.02 | 0.01 | 2.56 | 1.20 | 0.22 | 0.28 |
|       |   |        | LIGAN               |      |      |      |      |      |      |
| 24884 | 0 | 239709 | GFNGNVTGDDTGKIGG    | 3.02 | 0.01 | 2.56 | 1.20 | 0.22 | 0.28 |
|       |   |        | LIGAN               |      |      |      |      |      |      |
| 24885 | 0 | 239709 | GFNGNVTGDDTGKIGG    | 3.02 | 0.01 | 2.56 | 1.20 | 0.22 | 1.34 |
|       |   |        | LIGAN               |      |      |      |      |      |      |

|       |   |        |                                    |      |      |      |      |      |      |
|-------|---|--------|------------------------------------|------|------|------|------|------|------|
| 24886 | 0 | 239709 | GFNGNVTGDDTGKIGG<br>LIGAN          | 3.02 | 0.01 | 2.56 | 1.20 | 0.22 | 1.75 |
| 24887 | 0 | 239709 | GFNGNVTGDDTGKIGG<br>LIGAN          | 3.02 | 0.01 | 2.56 | 1.12 | 0.22 | 0.28 |
| 24888 | 0 | 239709 | GFNGNVTGDDTGKIGG<br>LIGAN          | 3.02 | 0.01 | 2.56 | 0.68 | 0.22 | 0.28 |
| 24889 | 0 | 19592  | GFNSSVITYPDAQLVPGI<br>NGKAI        | 3.06 | 0.01 | 2.95 | 0.44 | 0.22 | 0.28 |
| 24890 | 0 | 19596  | GFPCLSVASACYGIT                    | 2.67 | 0.01 | 0.90 | 0.44 | 1.41 | 0.28 |
| 24891 | 0 | 134975 | GFPEEEFDGHQFQ                      | 2.58 | 0.01 | 0.78 | 1.12 | 0.22 | 1.27 |
| 24892 | 0 | 134975 | GFPEEEFDGHQFQ                      | 2.58 | 0.01 | 0.78 | 1.12 | 0.22 | 1.27 |
| 24893 | 0 | 134975 | GFPEEEFDGHQFQ                      | 2.58 | 0.01 | 0.78 | 1.12 | 0.22 | 1.27 |
| 24894 | 0 | 109091 | GFPGARGP                           | 2.17 | 0.01 | 1.60 | 2.55 | 2.60 | 0.28 |
| 24895 | 0 | 110593 | GFPGPRGPPGPQGAT                    | 2.73 | 0.01 | 1.75 | 2.98 | 0.22 | 0.28 |
| 24896 | 0 | 230847 | GFPGTPGLPGVKGHRG<br>YPGLDGAK       | 3.14 | 0.01 | 0.78 | 3.93 | 0.22 | 0.28 |
| 24897 | 0 | 171176 | GFPSRMTVGKLIELL                    | 2.63 | 0.01 | 0.78 | 0.44 | 1.41 | 0.28 |
| 24898 | 0 | 171177 | GFPTDATLDDIKEWL                    | 2.65 | 0.01 | 0.78 | 0.44 | 1.41 | 0.28 |
| 24899 | 0 | 171177 | GFPTDATLDDIKEWL                    | 2.65 | 0.01 | 0.78 | 0.44 | 1.13 | 0.28 |
| 24900 | 0 | 150237 | GFPTELKPGTNQFLT                    | 2.71 | 0.01 | 2.60 | 0.68 | 0.22 | 1.34 |
| 24901 | 0 | 150237 | GFPTELKPGTNQFLT                    | 2.71 | 0.01 | 2.60 | 0.68 | 0.22 | 1.34 |
| 24902 | 0 | 150237 | GFPTELKPGTNQFLT                    | 2.71 | 0.01 | 2.60 | 0.68 | 0.22 | 0.28 |
| 24903 | 0 | 19607  | GFQYSP                             | 1.88 | 0.01 | 1.96 | 0.44 | 0.85 | 0.28 |
| 24904 | 0 | 19611  | GFRINTNVAALNAKANA<br>DLNSKSLDASLSR | 3.37 | 0.01 | 3.27 | 3.08 | 0.22 | 0.28 |
| 24905 | 0 | 19611  | GFRINTNVAALNAKANA<br>DLNSKSLDASLSR | 3.37 | 0.01 | 3.27 | 3.08 | 0.22 | 0.28 |
| 24906 | 0 | 19611  | GFRINTNVAALNAKANA<br>DLNSKSLDASLSR | 3.37 | 0.01 | 3.27 | 1.20 | 0.22 | 0.28 |
| 24907 | 0 | 19614  | GFRPKRLNFKLFNIQVKE<br>VT           | 2.95 | 0.01 | 3.19 | 0.44 | 1.59 | 1.27 |
| 24908 | 0 | 103209 | GFSEIMRSTLEKDNT                    | 2.64 | 0.01 | 2.04 | 0.44 | 0.85 | 1.28 |
| 24909 | 0 | 99273  | GFSEVI                             | 1.88 | 0.01 | 2.24 | 1.20 | 0.22 | 0.28 |
| 24910 | 0 | 19617  | GFSGNMVETEDTKEP                    | 2.67 | 0.01 | 2.24 | 1.15 | 0.22 | 0.85 |
| 24911 | 0 | 98061  | GFSGSVQFVP                         | 2.36 | 0.01 | 3.08 | 0.68 | 0.22 | 0.28 |
| 24912 | 0 | 98061  | GFSGSVQFVP                         | 2.36 | 0.01 | 3.08 | 1.20 | 0.22 | 0.28 |
| 24913 | 0 | 112125 | GFSLTTY                            | 2.01 | 0.01 | 0.78 | 0.44 | 1.13 | 0.28 |
| 24914 | 0 | 19620  | GFSPEEMEAVASKFR                    | 2.68 | 0.01 | 3.33 | 2.16 | 0.22 | 0.28 |
| 24915 | 0 | 19620  | GFSPEEMEAVASKFR                    | 2.68 | 0.01 | 3.33 | 1.15 | 2.25 | 1.75 |
| 24916 | 0 | 19620  | GFSPEEMEAVASKFR                    | 2.68 | 0.01 | 3.33 | 2.16 | 2.25 | 1.75 |
| 24917 | 0 | 19620  | GFSPEEMEAVASKFR                    | 2.68 | 0.01 | 3.33 | 2.16 | 0.22 | 0.28 |
| 24918 | 0 | 19620  | GFSPEEMEAVASKFR                    | 2.68 | 0.01 | 3.33 | 2.16 | 0.22 | 1.34 |
| 24919 | 0 | 19620  | GFSPEEMEAVASKFR                    | 2.68 | 0.01 | 3.33 | 2.16 | 0.22 | 1.34 |
| 24920 | 0 | 106450 | GFSYPFQLWTS                        | 2.48 | 0.01 | 0.90 | 1.15 | 0.22 | 1.39 |
| 24921 | 0 | 19621  | GFSYDT                             | 1.88 | 0.01 | 1.96 | 0.44 | 0.85 | 0.28 |
| 24922 | 0 | 19623  | GFSYYRPPWIL                        | 2.36 | 0.01 | 0.90 | 0.68 | 0.22 | 0.28 |
| 24923 | 0 | 19623  | GFSYYRPPWIL                        | 2.36 | 0.01 | 0.90 | 0.68 | 0.22 | 1.34 |

|       |   |        |                          |      |      |      |      |      |      |
|-------|---|--------|--------------------------|------|------|------|------|------|------|
| 24924 | 0 | 19623  | GFSYYRPPWIL              | 2.36 | 0.01 | 0.90 | 0.68 | 0.22 | 1.75 |
| 24925 | 0 | 19626  | GFTDRAFWVCPGVVC          | 2.68 | 0.01 | 0.90 | 1.15 | 0.22 | 0.85 |
| 24926 | 0 | 450621 | GFTFQPS                  | 2.02 | 0.01 | 0.90 | 0.44 | 1.23 | 1.39 |
| 24927 | 0 | 450622 | GFTIADPDDRGMLD           | 2.61 | 0.01 | 0.78 | 2.79 | 1.13 | 1.28 |
| 24928 | 0 | 450622 | GFTIADPDDRGMLD           | 2.61 | 0.01 | 0.78 | 2.79 | 1.13 | 1.28 |
| 24929 | 0 | 450622 | GFTIADPDDRGMLD           | 2.61 | 0.01 | 0.78 | 1.81 | 1.41 | 1.28 |
| 24930 | 0 | 19630  | GFTKTCGGPPCNIGGLG<br>NNT | 2.98 | 0.01 | 2.83 | 1.12 | 0.22 | 0.28 |
| 24931 | 0 | 19632  | GFTLEFLEHAFSV            | 2.56 | 0.01 | 2.72 | 0.44 | 1.23 | 0.85 |
| 24932 | 0 | 124186 | GFTPGGGGS                | 2.26 | 0.01 | 0.78 | 0.44 | 1.41 | 0.28 |
| 24933 | 0 | 19636  | GFTTNEERYNVFAE           | 2.62 | 0.01 | 2.86 | 1.12 | 0.22 | 0.85 |
| 24934 | 0 | 19636  | GFTTNEERYNVFAE           | 2.62 | 0.01 | 2.86 | 1.81 | 0.22 | 0.28 |
| 24935 | 0 | 19636  | GFTTNEERYNVFAE           | 2.62 | 0.01 | 2.86 | 1.81 | 0.22 | 0.28 |
| 24936 | 0 | 19636  | GFTTNEERYNVFAE           | 2.62 | 0.01 | 2.86 | 1.81 | 0.22 | 1.34 |
| 24937 | 0 | 19636  | GFTTNEERYNVFAE           | 2.62 | 0.01 | 2.86 | 1.81 | 2.25 | 1.75 |
| 24938 | 0 | 19636  | GFTTNEERYNVFAE           | 2.62 | 0.01 | 3.10 | 3.57 | 0.22 | 1.57 |
| 24939 | 0 | 19636  | GFTTNEERYNVFAE           | 2.62 | 0.01 | 3.10 | 1.15 | 0.22 | 1.57 |
| 24940 | 0 | 19636  | GFTTNEERYNVFAE           | 2.62 | 0.01 | 3.10 | 0.44 | 0.85 | 0.28 |
| 24941 | 0 | 19636  | GFTTNEERYNVFAE           | 2.62 | 0.01 | 3.10 | 1.81 | 2.25 | 1.75 |
| 24942 | 0 | 19636  | GFTTNEERYNVFAE           | 2.62 | 0.01 | 3.10 | 1.81 | 0.22 | 1.34 |
| 24943 | 0 | 19636  | GFTTNEERYNVFAE           | 2.62 | 0.01 | 3.10 | 1.81 | 0.22 | 0.28 |
| 24944 | 0 | 19636  | GFTTNEERYNVFAE           | 2.62 | 0.01 | 3.10 | 1.81 | 0.22 | 0.28 |
| 24945 | 0 | 19636  | GFTTNEERYNVFAE           | 2.62 | 0.01 | 3.10 | 1.81 | 0.22 | 0.28 |
| 24946 | 0 | 19637  | GFTTNEPRYNVFAE           | 2.60 | 0.01 | 3.10 | 1.81 | 2.25 | 1.75 |
| 24947 | 0 | 19637  | GFTTNEPRYNVFAE           | 2.60 | 0.01 | 3.10 | 1.81 | 0.22 | 0.28 |
| 24948 | 0 | 19637  | GFTTNEPRYNVFAE           | 2.60 | 0.01 | 3.10 | 3.57 | 0.22 | 1.57 |
| 24949 | 0 | 19637  | GFTTNEPRYNVFAE           | 2.60 | 0.01 | 3.10 | 1.15 | 0.22 | 1.57 |
| 24950 | 0 | 19637  | GFTTNEPRYNVFAE           | 2.60 | 0.01 | 3.10 | 1.81 | 0.22 | 0.28 |
| 24951 | 0 | 19637  | GFTTNEPRYNVFAE           | 2.60 | 0.01 | 3.10 | 1.81 | 0.22 | 0.28 |
| 24952 | 0 | 19637  | GFTTNEPRYNVFAE           | 2.60 | 0.01 | 3.10 | 0.44 | 0.85 | 0.28 |
| 24953 | 0 | 19639  | GFTWTGVTQNG              | 2.43 | 0.01 | 3.27 | 0.68 | 0.22 | 1.57 |
| 24954 | 0 | 19639  | GFTWTGVTQNG              | 2.43 | 0.01 | 3.27 | 0.68 | 0.22 | 1.57 |
| 24955 | 0 | 19639  | GFTWTGVTQNG              | 2.43 | 0.01 | 2.36 | 0.44 | 0.85 | 1.57 |
| 24956 | 0 | 19639  | GFTWTGVTQNG              | 2.43 | 0.01 | 2.36 | 1.15 | 0.22 | 1.57 |
| 24957 | 0 | 19639  | GFTWTGVTQNG              | 2.43 | 0.01 | 2.36 | 1.15 | 0.22 | 1.57 |
| 24958 | 0 | 19639  | GFTWTGVTQNG              | 2.43 | 0.01 | 2.36 | 1.15 | 0.22 | 1.57 |
| 24959 | 0 | 19641  | GFVDGLRDLTTTER           | 2.64 | 0.01 | 4.15 | 0.68 | 0.22 | 0.28 |
| 24960 | 0 | 19644  | GFVPSM                   | 1.88 | 0.01 | 2.96 | 0.44 | 0.85 | 0.28 |
| 24961 | 0 | 19647  | GFVSASIFGFQAEVGPN<br>NTR | 2.94 | 0.01 | 3.10 | 1.12 | 0.22 | 0.28 |
| 24962 | 0 | 19650  | GFYAEGSRGGSQASS          | 2.70 | 0.01 | 3.30 | 0.68 | 0.22 | 0.28 |
| 24963 | 0 | 109095 | GFYFNKPTGYGS             | 2.50 | 0.01 | 0.78 | 1.15 | 0.22 | 0.28 |
| 24964 | 0 | 109095 | GFYFNKPTGYGS             | 2.50 | 0.01 | 0.78 | 1.15 | 0.22 | 0.28 |
| 24965 | 0 | 109095 | GFYFNKPTGYGS             | 2.50 | 0.01 | 0.78 | 1.15 | 0.22 | 1.57 |
| 24966 | 0 | 109095 | GFYFNKPTGYGS             | 2.50 | 0.01 | 0.78 | 1.15 | 0.22 | 1.57 |
| 24967 | 0 | 137868 | GFYPGSIEVRWFLNG          | 2.65 | 0.01 | 0.78 | 2.74 | 0.22 | 1.57 |

|       |   |        |                                                   |      |      |      |      |      |      |
|-------|---|--------|---------------------------------------------------|------|------|------|------|------|------|
| 24968 | 0 | 137868 | GFYPGSIEVRWFLNG                                   | 2.65 | 0.01 | 0.78 | 1.15 | 0.22 | 1.57 |
| 24969 | 0 | 137868 | GFYPGSIEVRWFLNG                                   | 2.65 | 0.01 | 0.78 | 0.44 | 2.26 | 1.57 |
| 24970 | 0 | 115750 | GFYTTGAVRQIFGDY                                   | 2.68 | 0.01 | 1.75 | 1.81 | 0.22 | 0.28 |
| 24971 | 0 | 115750 | GFYTTGAVRQIFGDY                                   | 2.68 | 0.01 | 1.75 | 1.81 | 0.22 | 0.28 |
| 24972 | 0 | 19657  | GFYTTTGIGYQPVRVVV                                 | 2.79 | 0.01 | 2.48 | 0.44 | 0.85 | 0.28 |
| 24973 | 0 | 151198 | GGAAA                                             | 1.75 | 4.93 | 0.90 | 0.44 | 1.41 | 1.27 |
| 24974 | 0 | 19659  | GGAAART                                           | 2.04 | 0.01 | 1.72 | 0.44 | 0.85 | 0.28 |
| 24975 | 0 | 151200 | GGADVSPKP                                         | 2.31 | 0.01 | 3.35 | 1.81 | 0.22 | 0.85 |
| 24976 | 0 | 19672  | GGAGAGGAGAGGAGA<br>GGAGAG                         | 3.07 | 0.01 | 2.43 | 0.44 | 1.59 | 0.28 |
| 24977 | 0 | 127989 | GGAGAGGGAGAGG                                     | 2.59 | 0.01 | 2.43 | 0.44 | 1.41 | 0.28 |
| 24978 | 0 | 127990 | GGAGAGGGAGAGGGA<br>G                              | 2.80 | 0.01 | 2.43 | 0.44 | 1.41 | 0.28 |
| 24979 | 0 | 105824 | GGAGAGGGAGGAGAG<br>GGAGGAG                        | 3.11 | 0.01 | 2.43 | 0.44 | 1.59 | 0.28 |
| 24980 | 0 | 105824 | GGAGAGGGAGGAGAG<br>GGAGGAG                        | 3.11 | 0.01 | 2.43 | 0.44 | 1.74 | 0.28 |
| 24981 | 0 | 105824 | GGAGAGGGAGGAGAG<br>GGAGGAG                        | 3.11 | 0.01 | 2.43 | 0.44 | 1.74 | 1.27 |
| 24982 | 0 | 19674  | GGAGGAGGAGAGGGA<br>G                              | 2.80 | 0.01 | 2.43 | 0.44 | 1.59 | 0.28 |
| 24983 | 0 | 117506 | GGAHFSVSSLAEG                                     | 2.56 | 0.01 | 0.78 | 1.15 | 0.22 | 2.02 |
| 24984 | 0 | 117506 | GGAHFSVSSLAEG                                     | 2.56 | 0.01 | 0.78 | 1.15 | 0.22 | 2.02 |
| 24985 | 0 | 117506 | GGAHFSVSSLAEG                                     | 2.56 | 0.01 | 0.78 | 1.15 | 0.22 | 2.02 |
| 24986 | 0 | 117506 | GGAHFSVSSLAEG                                     | 2.56 | 0.01 | 0.78 | 1.15 | 0.22 | 1.27 |
| 24987 | 0 | 117506 | GGAHFSVSSLAEG                                     | 2.56 | 0.01 | 0.78 | 1.15 | 0.22 | 1.48 |
| 24988 | 0 | 117506 | GGAHFSVSSLAEG                                     | 2.56 | 0.01 | 0.78 | 1.15 | 0.22 | 2.12 |
| 24989 | 0 | 117506 | GGAHFSVSSLAEG                                     | 2.56 | 0.01 | 0.78 | 1.15 | 0.22 | 1.48 |
| 24990 | 0 | 113431 | GGAISNMYAMMIARFK<br>MFPEVKEKGMAALPRLI<br>AFTSEHSH | 3.65 | 0.01 | 0.78 | 0.44 | 1.13 | 2.02 |
| 24991 | 0 | 19678  | GGAKTPSDAVQNILQKI<br>EKIKNTEE                     | 3.15 | 0.01 | 2.76 | 0.44 | 0.85 | 0.85 |
| 24992 | 0 | 19679  | GGAKTPSDAVQNISQKI<br>EKIKNTEE                     | 3.16 | 0.01 | 2.76 | 0.44 | 0.85 | 0.85 |
| 24993 | 0 | 19679  | GGAKTPSDAVQNISQKI<br>EKIKNTEE                     | 3.16 | 0.01 | 2.76 | 0.44 | 1.59 | 0.85 |
| 24994 | 0 | 19679  | GGAKTPSDAVQNISQKI<br>EKIKNTEE                     | 3.16 | 0.01 | 2.76 | 0.44 | 1.59 | 0.85 |
| 24995 | 0 | 19679  | GGAKTPSDAVQNISQKI<br>EKIKNTEE                     | 3.16 | 0.01 | 2.76 | 0.44 | 1.59 | 0.85 |
| 24996 | 0 | 111339 | GGANVAVVVSESGWP                                   | 2.70 | 0.01 | 3.20 | 1.12 | 0.22 | 0.85 |
| 24997 | 0 | 296990 | GGAQKGNVRKLQPQP                                   | 2.70 | 0.01 | 1.61 | 0.44 | 0.85 | 1.28 |

|       |   |        |                                           |      |      |      |      |      |      |
|-------|---|--------|-------------------------------------------|------|------|------|------|------|------|
| 24998 | 0 | 296994 | GGAQSEADADDDDPQ                           | 2.70 | 0.01 | 1.61 | 0.44 | 0.85 | 1.28 |
| 24999 | 0 | 296995 | GGAQSEADADVDDPQ                           | 2.70 | 0.01 | 1.61 | 0.44 | 0.85 | 1.28 |
| 25000 | 0 | 195024 | GGATGSVGGGKGSVG<br>ISTGGWVGGSYFTDSYV<br>I | 3.49 | 0.01 | 3.85 | 0.68 | 0.22 | 1.39 |
| 25001 | 0 | 195024 | GGATGSVGGGKGSVG<br>ISTGGWVGGSYFTDSYV<br>I | 3.49 | 0.01 | 3.85 | 0.44 | 0.85 | 1.39 |
| 25002 | 0 | 123225 | GGATPVVG                                  | 2.15 | 0.01 | 0.78 | 1.20 | 0.22 | 0.28 |
| 25003 | 0 | 98796  | GGAVP                                     | 1.75 | 0.01 | 2.14 | 0.44 | 0.85 | 0.28 |
| 25004 | 0 | 19684  | GGAVPGGAVPGGAVP<br>GGFGPGGFGP             | 3.24 | 0.01 | 2.14 | 1.20 | 0.22 | 0.28 |
| 25005 | 0 | 19684  | GGAVPGGAVPGGAVP<br>GGFGPGGFGP             | 3.24 | 0.01 | 2.14 | 1.20 | 0.22 | 0.28 |
| 25006 | 0 | 19684  | GGAVPGGAVPGGAVP<br>GGFGPGGFGP             | 3.24 | 0.01 | 2.14 | 0.44 | 0.22 | 0.28 |
| 25007 | 0 | 19685  | GGAVPGGAVPGGFGPG<br>GFGPGGFGP             | 3.24 | 0.01 | 2.14 | 1.20 | 0.22 | 0.28 |
| 25008 | 0 | 19685  | GGAVPGGAVPGGFGPG<br>GFGPGGFGP             | 3.24 | 0.01 | 2.14 | 1.20 | 0.22 | 0.28 |
| 25009 | 0 | 19686  | GGAVPGGAVPGGFGPG<br>GFGPGGFGPGGFGP        | 3.41 | 0.01 | 2.14 | 1.20 | 0.22 | 0.28 |
| 25010 | 0 | 19686  | GGAVPGGAVPGGFGPG<br>GFGPGGFGPGGFGP        | 3.41 | 0.01 | 2.14 | 1.20 | 0.22 | 0.28 |
| 25011 | 0 | 114831 | GGCRKELAAV                                | 2.29 | 0.01 | 2.25 | 0.44 | 1.23 | 0.85 |
| 25012 | 0 | 114831 | GGCRKELAAV                                | 2.29 | 0.01 | 2.25 | 0.44 | 1.23 | 0.85 |
| 25013 | 0 | 19696  | GGDDPDHDPDHPDL                            | 2.74 | 0.01 | 2.40 | 1.15 | 2.26 | 0.28 |
| 25014 | 0 | 19696  | GGDDPDHDPDHPDL                            | 2.74 | 0.01 | 2.40 | 1.15 | 2.26 | 0.85 |
| 25015 | 0 | 297106 | GGDDVEDGDGEDEE                            | 2.73 | 0.01 | 1.61 | 0.44 | 0.85 | 1.28 |
| 25016 | 0 | 297110 | GGDEGNDEAEGGND                            | 2.74 | 0.01 | 1.61 | 0.44 | 0.85 | 1.28 |
| 25017 | 0 | 92807  | GGDGVDTIYG                                | 2.35 | 0.01 | 2.67 | 2.00 | 0.22 | 0.28 |
| 25018 | 0 | 92807  | GGDGVDTIYG                                | 2.35 | 0.01 | 2.67 | 2.00 | 0.22 | 0.28 |
| 25019 | 0 | 92807  | GGDGVDTIYG                                | 2.35 | 0.01 | 2.67 | 2.00 | 0.22 | 0.28 |
| 25020 | 0 | 19700  | GGDNHGRGRGRGRGR<br>GGGRPGAPG              | 3.18 | 4.23 | 2.43 | 0.44 | 1.74 | 0.28 |
| 25021 | 0 | 19701  | GGDNHGRGRGRGRGR<br>GGGRPGAPG              | 3.18 | 4.93 | 2.43 | 0.44 | 1.74 | 0.28 |
| 25022 | 0 | 19702  | GGDNHGRGRGRGRGR<br>GGGRPGAPG              | 3.18 | 3.85 | 2.43 | 0.44 | 1.74 | 0.28 |



|       |   |        |                              |      |      |      |      |      |      |
|-------|---|--------|------------------------------|------|------|------|------|------|------|
| 25023 | 0 | 19703  | GGDNHGRGRGRGRGR<br>GGGRPGAPG | 3.18 | 4.33 | 2.43 | 0.44 | 1.74 | 1.27 |
| 25024 | 0 | 19703  | GGDNHGRGRGRGRGR<br>GGGRPGAPG | 3.18 | 4.33 | 2.43 | 0.44 | 1.74 | 2.02 |
| 25025 | 0 | 19703  | GGDNHGRGRGRGRGR<br>GGGRPGAPG | 3.18 | 4.33 | 2.43 | 0.44 | 1.74 | 0.28 |
| 25026 | 0 | 19703  | GGDNHGRGRGRGRGR<br>GGGRPGAPG | 3.18 | 4.33 | 2.43 | 0.44 | 1.13 | 1.27 |
| 25027 | 0 | 19704  | GGDNHGRGRGRGRGR<br>GGGRPGAPG | 3.18 | 0.01 | 4.23 | 0.68 | 0.22 | 0.28 |
| 25028 | 0 | 19704  | GGDNHGRGRGRGRGR<br>GGGRPGAPG | 3.18 | 0.01 | 4.23 | 0.68 | 0.22 | 0.28 |
| 25029 | 0 | 19704  | GGDNHGRGRGRGRGR<br>GGGRPGAPG | 3.18 | 0.01 | 4.23 | 0.68 | 0.22 | 0.28 |
| 25030 | 0 | 19704  | GGDNHGRGRGRGRGR<br>GGGRPGAPG | 3.18 | 0.01 | 4.23 | 0.68 | 0.22 | 0.85 |
| 25031 | 0 | 19704  | GGDNHGRGRGRGRGR<br>GGGRPGAPG | 3.18 | 0.01 | 2.43 | 0.44 | 1.74 | 0.28 |
| 25032 | 0 | 19704  | GGDNHGRGRGRGRGR<br>GGGRPGAPG | 3.18 | 0.01 | 2.43 | 0.44 | 1.74 | 0.28 |
| 25033 | 0 | 19705  | GGDNYSDKPEPLGG               | 2.61 | 0.01 | 4.33 | 0.68 | 0.22 | 0.28 |
| 25034 | 0 | 119892 | GGDRGAPKRGSGKDSH<br>H        | 2.82 | 0.01 | 0.78 | 3.18 | 2.60 | 1.75 |
| 25035 | 0 | 112127 | GGDRGAPKRGSGKDSH<br>HPAR     | 2.99 | 0.01 | 0.78 | 0.44 | 0.22 | 0.28 |
| 25036 | 0 | 297157 | GGDSGGEGSSGPGAS              | 2.74 | 0.01 | 1.61 | 0.44 | 0.85 | 1.28 |
| 25037 | 0 | 423311 | GGDWADSASDFDADC              | 2.72 | 0.01 | 2.51 | 0.44 | 2.35 | 1.28 |
| 25038 | 0 | 135679 | GGEDAKPG                     | 2.14 | 0.01 | 0.78 | 0.44 | 2.35 | 0.28 |
| 25039 | 0 | 146963 | GGEDVAVFARGPQ                | 2.55 | 0.01 | 1.60 | 0.44 | 0.85 | 0.85 |
| 25040 | 0 | 19713  | GGEGEGGKGGRGAAC              | 2.74 | 0.01 | 4.63 | 1.20 | 0.22 | 0.85 |
| 25041 | 0 | 19715  | GGEILLNQ                     | 2.12 | 0.01 | 2.40 | 2.43 | 0.22 | 0.28 |
| 25042 | 0 | 19720  | GGEQPPSAPNGTATG              | 2.71 | 0.01 | 3.37 | 2.22 | 0.22 | 0.28 |
| 25043 | 0 | 19721  | GGEQVP                       | 1.89 | 0.01 | 4.03 | 3.97 | 0.22 | 0.28 |
| 25044 | 0 | 297257 | GGERMTEKEDGDNE               | 2.71 | 0.01 | 1.61 | 0.44 | 0.85 | 1.28 |
| 25045 | 0 | 19722  | GGERRRPPLGVREGRGR<br>T       | 2.89 | 0.01 | 2.19 | 1.12 | 0.22 | 0.85 |
| 25046 | 0 | 19722  | GGERRRPPLGVREGRGR<br>T       | 2.89 | 0.01 | 2.19 | 1.12 | 0.22 | 1.48 |
| 25047 | 0 | 19723  | GGESSEELSESSFFNLIT           | 2.87 | 0.01 | 2.75 | 0.44 | 0.85 | 0.28 |
| 25048 | 0 | 19723  | GGESSEELSESSFFNLIT           | 2.87 | 0.01 | 2.75 | 0.44 | 0.85 | 1.34 |
| 25049 | 0 | 108380 | GGETLLHMA                    | 2.21 | 0.01 | 0.90 | 0.44 | 1.13 | 1.39 |
| 25050 | 0 | 98797  | GGFGP                        | 1.78 | 0.01 | 2.14 | 0.68 | 0.22 | 0.28 |

|       |   |        |                                 |      |      |      |      |      |      |
|-------|---|--------|---------------------------------|------|------|------|------|------|------|
| 25051 | 0 | 98797  | GGFGP                           | 1.78 | 0.01 | 2.14 | 0.68 | 0.22 | 0.28 |
| 25052 | 0 | 98798  | GGFGPGGFGP                      | 2.37 | 0.01 | 2.14 | 0.68 | 0.22 | 0.28 |
| 25053 | 0 | 98798  | GGFGPGGFGP                      | 2.37 | 0.01 | 2.14 | 0.68 | 0.22 | 0.28 |
| 25054 | 0 | 98799  | GGFGPVLDGW                      | 2.33 | 0.01 | 2.14 | 0.68 | 0.22 | 0.28 |
| 25055 | 0 | 98799  | GGFGPVLDGW                      | 2.33 | 0.01 | 2.14 | 0.68 | 0.22 | 0.28 |
| 25056 | 0 | 238452 | GGFGPVLDGWYGVD                  | 2.64 | 0.01 | 2.14 | 2.65 | 0.22 | 0.85 |
| 25057 | 0 | 131446 | GGFKVENHTACHCSTCY<br>YHKS       | 2.98 | 0.01 | 0.78 | 1.12 | 0.22 | 0.28 |
| 25058 | 0 | 105825 | GGFRIFGIV                       | 2.27 | 0.01 | 0.90 | 3.01 | 0.22 | 0.28 |
| 25059 | 0 | 99274  | GGFSEV                          | 1.89 | 0.01 | 2.24 | 1.20 | 0.22 | 0.28 |
| 25060 | 0 | 19728  | GGFSSDPGFLLRPRG                 | 2.71 | 0.01 | 0.90 | 1.15 | 0.22 | 0.85 |
| 25061 | 0 | 19728  | GGFSSDPGFLLRPRG                 | 2.71 | 0.01 | 0.90 | 1.15 | 0.22 | 1.27 |
| 25062 | 0 | 19729  | GGFSSDPGFLLRPRV                 | 2.70 | 0.01 | 0.90 | 1.15 | 0.22 | 1.27 |
| 25063 | 0 | 19729  | GGFSSDPGFLLRPRV                 | 2.70 | 0.01 | 0.90 | 0.68 | 0.22 | 0.28 |
| 25064 | 0 | 19729  | GGFSSDPGFLLRPRV                 | 2.70 | 0.01 | 0.90 | 1.15 | 0.22 | 1.27 |
| 25065 | 0 | 19729  | GGFSSDPGFLLRPRV                 | 2.70 | 0.01 | 0.90 | 1.15 | 0.22 | 0.85 |
| 25066 | 0 | 19735  | GGFVQFVTSTRNA                   | 2.55 | 0.01 | 3.36 | 1.20 | 0.22 | 0.28 |
| 25067 | 0 | 19735  | GGFVQFVTSTRNA                   | 2.55 | 0.01 | 3.36 | 1.20 | 0.22 | 0.85 |
| 25068 | 0 | 19736  | GGFWGDRVDSQPFAIP<br>YIHPTNPFA   | 3.14 | 0.01 | 2.53 | 0.44 | 0.85 | 0.28 |
| 25069 | 0 | 19736  | GGFWGDRVDSQPFAIP<br>YIHPTNPFA   | 3.14 | 0.01 | 2.53 | 0.44 | 0.85 | 0.28 |
| 25070 | 0 | 19737  | GGGAGAGGAGAGGGG<br>R            | 2.80 | 0.01 | 2.48 | 1.20 | 0.22 | 0.28 |
| 25071 | 0 | 19737  | GGGAGAGGAGAGGGG<br>R            | 2.80 | 0.01 | 2.43 | 1.12 | 0.22 | 0.85 |
| 25072 | 0 | 19737  | GGGAGAGGAGAGGGG<br>R            | 2.80 | 0.01 | 2.43 | 0.44 | 1.59 | 0.28 |
| 25073 | 0 | 19737  | GGGAGAGGAGAGGGG<br>R            | 2.80 | 0.01 | 2.43 | 1.12 | 0.22 | 1.27 |
| 25074 | 0 | 19737  | GGGAGAGGAGAGGGG<br>R            | 2.80 | 0.01 | 2.43 | 0.44 | 1.59 | 0.28 |
| 25075 | 0 | 227204 | GGGAGGAGAGGGAGG                 | 2.72 | 0.01 | 2.48 | 0.44 | 1.59 | 0.28 |
| 25076 | 0 | 19738  | GGGAGGAGAGGGAGG<br>AG           | 2.86 | 0.01 | 2.48 | 1.12 | 0.22 | 0.28 |
| 25077 | 0 | 19738  | GGGAGGAGAGGGAGG<br>AG           | 2.86 | 0.01 | 2.48 | 0.44 | 1.74 | 1.27 |
| 25078 | 0 | 226347 | GGGAIEVALDNADIDL                | 2.76 | 0.01 | 2.92 | 2.87 | 0.22 | 0.28 |
| 25079 | 0 | 123226 | GGGATPVV                        | 2.12 | 0.01 | 0.78 | 1.20 | 0.22 | 0.28 |
| 25080 | 0 | 123227 | GGGDAPPSH                       | 2.23 | 0.01 | 2.28 | 2.00 | 0.22 | 0.28 |
| 25081 | 0 | 233568 | GGGEYVPVERSLTRVNP<br>GRFRGAHLAP | 3.24 | 0.01 | 3.67 | 2.61 | 0.85 | 1.28 |
| 25082 | 0 | 109099 | GGGGDIVPIWAR                    | 2.47 | 0.01 | 0.90 | 1.15 | 0.22 | 1.39 |
| 25083 | 0 | 109099 | GGGGDIVPIWAR                    | 2.47 | 0.01 | 0.90 | 1.15 | 0.22 | 0.85 |

|       |   |        |                                       |      |      |      |      |      |      |
|-------|---|--------|---------------------------------------|------|------|------|------|------|------|
| 25084 | 0 | 119893 | GGGGGGSGGGSGGG<br>GGGGSS              | 3.05 | 0.01 | 0.78 | 0.44 | 1.13 | 1.27 |
| 25085 | 0 | 423312 | GGGGGLDRNSGNYFN                       | 2.69 | 0.01 | 2.51 | 0.44 | 2.35 | 1.28 |
| 25086 | 0 | 19833  | GGGGWGQGGSHSQW<br>NK                  | 2.77 | 0.01 | 2.52 | 2.90 | 0.22 | 0.85 |
| 25087 | 0 | 19833  | GGGGWGQGGSHSQW<br>NK                  | 2.77 | 0.01 | 2.52 | 3.93 | 0.22 | 0.85 |
| 25088 | 0 | 19833  | GGGGWGQGGSHSQW<br>NK                  | 2.77 | 0.01 | 2.52 | 1.15 | 0.22 | 0.28 |
| 25089 | 0 | 19833  | GGGGWGQGGSHSQW<br>NK                  | 2.77 | 0.01 | 2.52 | 1.15 | 0.22 | 0.85 |
| 25090 | 0 | 19833  | GGGGWGQGGSHSQW<br>NK                  | 2.77 | 0.01 | 2.52 | 1.15 | 0.22 | 0.28 |
| 25091 | 0 | 19833  | GGGGWGQGGSHSQW<br>NK                  | 2.77 | 0.01 | 2.52 | 2.90 | 0.22 | 0.28 |
| 25092 | 0 | 19849  | GGGHTLIGGEQTRRTN<br>MFTSLFSAGASQKIQLV | 3.42 | 0.01 | 1.72 | 2.74 | 0.22 | 0.28 |
| 25093 | 0 | 19849  | GGGHTLIGGEQTRRTN<br>MFTSLFSAGASQKIQLV | 3.42 | 0.01 | 1.72 | 3.27 | 0.22 | 0.28 |
| 25094 | 0 | 19849  | GGGHTLIGGEQTRRTN<br>MFTSLFSAGASQKIQLV | 3.42 | 0.01 | 1.72 | 3.27 | 0.22 | 0.28 |
| 25095 | 0 | 132330 | GGGLGGTRRG                            | 2.37 | 0.01 | 0.78 | 0.44 | 1.13 | 0.28 |
| 25096 | 0 | 19858  | GGGQIVGGVYLLP                         | 2.57 | 0.01 | 1.72 | 0.44 | 0.85 | 0.85 |
| 25097 | 0 | 118371 | GGGRDRDRDRGGG                         | 2.59 | 0.01 | 0.90 | 3.44 | 1.13 | 1.27 |
| 25098 | 0 | 177494 | GGGRGGYGGGGPGYG<br>NQGGG              | 2.99 | 0.01 | 0.78 | 0.44 | 2.26 | 0.28 |
| 25099 | 0 | 136315 | GGGTGPADGTNATTI                       | 2.71 | 0.01 | 2.93 | 1.15 | 0.22 | 0.28 |
| 25100 | 0 | 136315 | GGGTGPADGTNATTI                       | 2.71 | 0.01 | 2.93 | 0.44 | 0.85 | 0.28 |
| 25101 | 0 | 136315 | GGGTGPADGTNATTI                       | 2.71 | 0.01 | 2.93 | 0.68 | 0.22 | 0.28 |
| 25102 | 0 | 136315 | GGGTGPADGTNATTI                       | 2.71 | 0.01 | 2.93 | 0.68 | 0.22 | 0.28 |
| 25103 | 0 | 136315 | GGGTGPADGTNATTI                       | 2.71 | 0.01 | 2.93 | 0.68 | 0.22 | 0.28 |
| 25104 | 0 | 136315 | GGGTGPADGTNATTI                       | 2.71 | 0.01 | 2.93 | 1.15 | 0.22 | 1.34 |
| 25105 | 0 | 136315 | GGGTGPADGTNATTI                       | 2.71 | 0.01 | 2.93 | 0.68 | 0.22 | 1.34 |
| 25106 | 0 | 136315 | GGGTGPADGTNATTI                       | 2.71 | 0.01 | 2.93 | 1.15 | 0.22 | 1.34 |
| 25107 | 0 | 136315 | GGGTGPADGTNATTI                       | 2.71 | 0.01 | 2.93 | 0.68 | 0.22 | 1.34 |
| 25108 | 0 | 19862  | GGGTHNQWNKPSKPKT<br>NLKH              | 2.96 | 0.01 | 1.75 | 3.40 | 0.22 | 0.28 |
| 25109 | 0 | 19862  | GGGTHNQWNKPSKPKT<br>NLKH              | 2.96 | 0.01 | 1.75 | 3.40 | 0.22 | 0.28 |
| 25110 | 0 | 19862  | GGGTHNQWNKPSKPKT<br>NLKH              | 2.96 | 0.01 | 1.75 | 3.40 | 0.22 | 2.02 |
| 25111 | 0 | 111341 | GGGTPRRPGKEIEAY                       | 2.68 | 0.01 | 3.20 | 1.12 | 0.22 | 0.85 |

|       |   |        |                                 |      |      |      |      |      |      |
|-------|---|--------|---------------------------------|------|------|------|------|------|------|
| 25112 | 0 | 19865  | GGGVTLQAAPALDKLK<br>LTGDEATGANI | 3.29 | 0.01 | 2.59 | 1.15 | 0.22 | 0.28 |
| 25113 | 0 | 19865  | GGGVTLQAAPALDKLK<br>LTGDEATGANI | 3.29 | 0.01 | 2.59 | 1.15 | 0.22 | 0.85 |
| 25114 | 0 | 19866  | GGGWGQGGGTHNQW<br>NK            | 2.77 | 0.01 | 1.75 | 3.85 | 0.22 | 0.85 |
| 25115 | 0 | 19866  | GGGWGQGGGTHNQW<br>NK            | 2.77 | 0.01 | 1.75 | 3.85 | 0.22 | 0.28 |
| 25116 | 0 | 187349 | GGGWGQGGGTHSQW<br>NKPS          | 2.86 | 0.01 | 0.78 | 1.15 | 0.22 | 0.28 |
| 25117 | 0 | 19868  | GGGWGQPHGGGWGQ<br>PH            | 2.80 | 0.01 | 2.52 | 1.15 | 0.22 | 0.28 |
| 25118 | 0 | 19868  | GGGWGQPHGGGWGQ<br>PH            | 2.80 | 0.01 | 2.52 | 3.93 | 0.22 | 0.85 |
| 25119 | 0 | 19868  | GGGWGQPHGGGWGQ<br>PH            | 2.80 | 0.01 | 2.52 | 2.90 | 0.22 | 0.85 |
| 25120 | 0 | 19868  | GGGWGQPHGGGWGQ<br>PH            | 2.80 | 0.01 | 2.52 | 2.90 | 0.22 | 0.28 |
| 25121 | 0 | 19868  | GGGWGQPHGGGWGQ<br>PH            | 2.80 | 0.01 | 0.78 | 2.19 | 0.22 | 0.85 |
| 25122 | 0 | 19868  | GGGWGQPHGGGWGQ<br>PH            | 2.80 | 0.01 | 0.78 | 2.19 | 0.22 | 0.85 |
| 25123 | 0 | 19868  | GGGWGQPHGGGWGQ<br>PH            | 2.80 | 0.01 | 0.78 | 2.19 | 0.22 | 0.85 |
| 25124 | 0 | 19868  | GGGWGQPHGGGWGQ<br>PH            | 2.80 | 0.01 | 0.78 | 2.19 | 0.22 | 0.85 |
| 25125 | 0 | 19868  | GGGWGQPHGGGWGQ<br>PH            | 2.80 | 0.01 | 0.78 | 2.19 | 0.22 | 0.85 |
| 25126 | 0 | 19868  | GGGWGQPHGGGWGQ<br>PH            | 2.80 | 0.01 | 0.78 | 2.19 | 0.22 | 0.85 |
| 25127 | 0 | 19868  | GGGWGQPHGGGWGQ<br>PH            | 2.80 | 0.01 | 0.78 | 2.19 | 0.22 | 0.85 |
| 25128 | 0 | 19868  | GGGWGQPHGGGWGQ<br>PH            | 2.80 | 0.01 | 0.78 | 2.19 | 0.22 | 0.85 |
| 25129 | 0 | 19868  | GGGWGQPHGGGWGQ<br>PH            | 2.80 | 0.01 | 0.78 | 2.19 | 0.22 | 0.85 |
| 25130 | 0 | 19869  | GGGWGQPHGGSW                    | 2.51 | 0.01 | 1.75 | 2.19 | 0.22 | 1.27 |
| 25131 | 0 | 161345 | GGHDAKFIDSLQENEF<br>R<br>LY     | 2.85 | 0.01 | 2.08 | 2.43 | 0.22 | 1.57 |
| 25132 | 0 | 100059 | GGHGDVGMHV                      | 2.36 | 0.01 | 2.18 | 2.16 | 0.22 | 0.28 |
| 25133 | 0 | 193457 | GGHGSKPSG                       | 2.27 | 0.01 | 2.51 | 0.44 | 2.39 | 0.28 |
| 25134 | 0 | 193457 | GGHGSKPSG                       | 2.27 | 0.01 | 2.51 | 0.44 | 2.39 | 0.28 |
| 25135 | 0 | 181990 | GGHGTFRKTNIGDPST<br>I<br>PC     | 2.93 | 0.01 | 3.89 | 2.13 | 1.74 | 0.28 |
| 25136 | 0 | 106451 | GGHWRGANAT                      | 2.33 | 0.01 | 2.75 | 0.44 | 1.23 | 0.85 |
| 25137 | 0 | 132830 | GGIITQTPKFLIQEGQ<br>K<br>LT     | 2.98 | 0.01 | 1.75 | 0.68 | 0.22 | 0.28 |

|       |   |        |                            |      |      |      |      |      |      |
|-------|---|--------|----------------------------|------|------|------|------|------|------|
| 25138 | 0 | 19887  | GGIKITHFTTWTSIPTLA<br>AQ   | 2.93 | 0.01 | 2.82 | 0.44 | 0.85 | 0.28 |
| 25139 | 0 | 119454 | GGIKKIRLPSDDVWLDP          | 2.79 | 0.01 | 2.26 | 1.12 | 0.22 | 1.57 |
| 25140 | 0 | 119454 | GGIKKIRLPSDDVWLDP          | 2.79 | 0.01 | 2.26 | 1.12 | 0.22 | 1.57 |
| 25141 | 0 | 119454 | GGIKKIRLPSDDVWLDP          | 2.79 | 0.01 | 2.26 | 1.12 | 2.25 | 1.75 |
| 25142 | 0 | 78166  | GGITGSMSLASGKSLLHE<br>VDK  | 2.99 | 0.01 | 2.04 | 0.44 | 1.59 | 0.28 |
| 25143 | 0 | 78166  | GGITGSMSLASGKSLLHE<br>VDK  | 2.99 | 0.01 | 2.04 | 0.44 | 2.82 | 0.28 |
| 25144 | 0 | 78166  | GGITGSMSLASGKSLLHE<br>VDK  | 2.99 | 0.01 | 2.04 | 0.44 | 0.85 | 0.28 |
| 25145 | 0 | 19891  | GGITGSMSLASGKSLLHE<br>VDKD | 3.04 | 0.01 | 2.04 | 0.44 | 0.85 | 0.28 |
| 25146 | 0 | 19891  | GGITGSMSLASGKSLLHE<br>VDKD | 3.04 | 0.01 | 2.04 | 0.44 | 0.85 | 0.28 |
| 25147 | 0 | 19891  | GGITGSMSLASGKSLLHE<br>VDKD | 3.04 | 0.01 | 2.04 | 0.44 | 0.85 | 0.28 |
| 25148 | 0 | 19891  | GGITGSMSLASGKSLLHE<br>VDKD | 3.04 | 0.01 | 2.04 | 0.44 | 0.85 | 0.28 |
| 25149 | 0 | 19891  | GGITGSMSLASGKSLLHE<br>VDKD | 3.04 | 0.01 | 2.04 | 0.44 | 0.85 | 0.28 |
| 25150 | 0 | 19891  | GGITGSMSLASGKSLLHE<br>VDKD | 3.04 | 0.01 | 2.04 | 0.44 | 0.85 | 0.28 |
| 25151 | 0 | 91363  | GGIVNGYVTLMGASD            | 2.66 | 0.01 | 3.12 | 1.12 | 0.22 | 0.28 |
| 25152 | 0 | 19893  | GGIVTC                     | 1.89 | 0.01 | 2.40 | 0.44 | 0.85 | 0.28 |
| 25153 | 0 | 130850 | GGIYQDLVS                  | 2.20 | 0.01 | 0.90 | 0.44 | 1.13 | 1.39 |
| 25154 | 0 | 130850 | GGIYQDLVS                  | 2.20 | 0.01 | 0.90 | 0.44 | 1.13 | 0.28 |
| 25155 | 0 | 19894  | GGIYYPYDIYYPYDIYYPY<br>D   | 3.02 | 0.01 | 0.90 | 1.15 | 0.22 | 1.27 |
| 25156 | 0 | 19894  | GGIYYPYDIYYPYDIYYPY<br>D   | 3.02 | 0.01 | 0.90 | 0.68 | 0.22 | 0.28 |
| 25157 | 0 | 19894  | GGIYYPYDIYYPYDIYYPY<br>D   | 3.02 | 0.01 | 0.90 | 0.68 | 0.22 | 0.28 |
| 25158 | 0 | 19894  | GGIYYPYDIYYPYDIYYPY<br>D   | 3.02 | 0.01 | 0.90 | 0.68 | 0.22 | 0.28 |
| 25159 | 0 | 19894  | GGIYYPYDIYYPYDIYYPY<br>D   | 3.02 | 0.01 | 0.90 | 0.68 | 0.22 | 0.28 |
| 25160 | 0 | 19894  | GGIYYPYDIYYPYDIYYPY<br>D   | 3.02 | 0.01 | 0.90 | 0.68 | 0.22 | 0.28 |
| 25161 | 0 | 19894  | GGIYYPYDIYYPYDIYYPY<br>D   | 3.02 | 0.01 | 0.90 | 1.15 | 0.22 | 1.27 |
| 25162 | 0 | 19895  | GGKFLEG                    | 2.04 | 0.01 | 2.24 | 0.68 | 0.22 | 0.28 |
| 25163 | 0 | 92808  | GGKGDDIFVH                 | 2.32 | 0.01 | 2.67 | 2.00 | 0.22 | 0.28 |
| 25164 | 0 | 92808  | GGKGDDIFVH                 | 2.32 | 0.01 | 2.67 | 2.00 | 0.22 | 0.28 |

|       |   |        |                         |      |      |      |      |      |      |
|-------|---|--------|-------------------------|------|------|------|------|------|------|
| 25165 | 0 | 92808  | GGKGDDIFVH              | 2.32 | 0.01 | 2.67 | 2.00 | 0.22 | 0.28 |
| 25166 | 0 | 92809  | GGKGDDILDG              | 2.37 | 0.01 | 2.67 | 2.00 | 0.22 | 0.28 |
| 25167 | 0 | 92809  | GGKGDDILDG              | 2.37 | 0.01 | 2.67 | 2.00 | 0.22 | 0.28 |
| 25168 | 0 | 92809  | GGKGDDILDG              | 2.37 | 0.01 | 2.67 | 2.00 | 0.22 | 0.28 |
| 25169 | 0 | 92810  | GGKGNDLLHG              | 2.34 | 0.01 | 2.67 | 2.00 | 0.22 | 0.28 |
| 25170 | 0 | 99276  | GGKGPLLSILKAFN          | 2.63 | 0.01 | 2.16 | 0.44 | 1.23 | 1.48 |
| 25171 | 0 | 19900  | GGKMQVV                 | 2.12 | 0.01 | 2.21 | 1.12 | 0.22 | 0.28 |
| 25172 | 0 | 19900  | GGKMQVV                 | 2.12 | 0.01 | 2.21 | 0.44 | 0.85 | 0.28 |
| 25173 | 0 | 19901  | GGKMQVVYD               | 2.31 | 0.01 | 2.21 | 1.12 | 0.22 | 0.28 |
| 25174 | 0 | 19901  | GGKMQVVYD               | 2.31 | 0.01 | 2.21 | 1.12 | 0.22 | 0.28 |
| 25175 | 0 | 19902  | GGKPALVPD               | 2.22 | 0.01 | 2.59 | 0.44 | 0.85 | 0.28 |
| 25176 | 0 | 297883 | GGKPSPFGQAAAGDK         | 2.70 | 0.01 | 1.61 | 0.44 | 0.85 | 1.28 |
| 25177 | 0 | 297884 | GGKPSPFGQAAAGGK         | 2.71 | 0.01 | 1.61 | 0.44 | 0.85 | 1.28 |
| 25178 | 0 | 478561 | GGKSPASITCEENNGG<br>C   | 2.83 | 0.01 | 0.90 | 0.68 | 0.22 | 0.28 |
| 25179 | 0 | 19906  | GGLEPINFQT              | 2.28 | 0.01 | 2.25 | 0.68 | 0.22 | 0.85 |
| 25180 | 0 | 110248 | GGLGIGTSGTGGRTGY<br>IPL | 3.00 | 0.01 | 1.86 | 0.68 | 0.22 | 0.28 |
| 25181 | 0 | 110248 | GGLGIGTSGTGGRTGY<br>IPL | 3.00 | 0.01 | 1.86 | 2.66 | 0.22 | 0.28 |
| 25182 | 0 | 110248 | GGLGIGTSGTGGRTGY<br>IPL | 3.00 | 0.01 | 1.86 | 2.66 | 0.22 | 0.28 |
| 25183 | 0 | 110248 | GGLGIGTSGTGGRTGY<br>IPL | 3.00 | 0.01 | 1.86 | 2.66 | 0.22 | 1.34 |
| 25184 | 0 | 110248 | GGLGIGTSGTGGRTGY<br>IPL | 3.00 | 0.01 | 1.86 | 1.12 | 0.22 | 0.28 |
| 25185 | 0 | 110248 | GGLGIGTSGTGGRTGY<br>IPL | 3.00 | 0.01 | 1.86 | 1.12 | 0.22 | 0.28 |
| 25186 | 0 | 110248 | GGLGIGTSGTGGRTGY<br>IPL | 3.00 | 0.01 | 1.86 | 1.12 | 0.22 | 0.28 |
| 25187 | 0 | 110248 | GGLGIGTSGTGGRTGY<br>IPL | 3.00 | 0.01 | 1.86 | 1.12 | 0.22 | 0.28 |
| 25188 | 0 | 110248 | GGLGIGTSGTGGRTGY<br>IPL | 3.00 | 0.01 | 1.86 | 1.12 | 0.22 | 1.34 |
| 25189 | 0 | 110248 | GGLGIGTSGTGGRTGY<br>IPL | 3.00 | 0.01 | 1.86 | 1.12 | 0.22 | 1.34 |
| 25190 | 0 | 110248 | GGLGIGTSGTGGRTGY<br>IPL | 3.00 | 0.01 | 1.86 | 1.12 | 0.22 | 1.34 |
| 25191 | 0 | 110248 | GGLGIGTSGTGGRTGY<br>IPL | 3.00 | 0.01 | 1.86 | 1.12 | 0.22 | 1.34 |
| 25192 | 0 | 110248 | GGLGIGTSGTGGRTGY<br>IPL | 3.00 | 0.01 | 1.86 | 2.66 | 0.22 | 1.34 |
| 25193 | 0 | 110248 | GGLGIGTSGTGGRTGY<br>IPL | 3.00 | 0.01 | 1.86 | 2.66 | 0.22 | 1.34 |

|       |   |        |                                    |      |      |      |      |      |      |
|-------|---|--------|------------------------------------|------|------|------|------|------|------|
| 25194 | 0 | 110248 | GGLGIGTSGTGGRRTGY<br>IPL           | 3.00 | 0.01 | 1.86 | 2.66 | 0.22 | 1.34 |
| 25195 | 0 | 110248 | GGLGIGTSGTGGRRTGY<br>IPL           | 3.00 | 0.01 | 1.86 | 2.66 | 0.22 | 1.34 |
| 25196 | 0 | 110248 | GGLGIGTSGTGGRRTGY<br>IPL           | 3.00 | 0.01 | 1.86 | 1.12 | 0.22 | 1.34 |
| 25197 | 0 | 110248 | GGLGIGTSGTGGRRTGY<br>IPL           | 3.00 | 0.01 | 1.86 | 1.12 | 0.22 | 1.34 |
| 25198 | 0 | 110248 | GGLGIGTSGTGGRRTGY<br>IPL           | 3.00 | 0.01 | 1.86 | 1.12 | 0.22 | 1.34 |
| 25199 | 0 | 110248 | GGLGIGTSGTGGRRTGY<br>IPL           | 3.00 | 0.01 | 1.86 | 1.12 | 0.22 | 0.85 |
| 25200 | 0 | 110248 | GGLGIGTSGTGGRRTGY<br>IPL           | 3.00 | 0.01 | 1.86 | 1.12 | 0.22 | 0.85 |
| 25201 | 0 | 110248 | GGLGIGTSGTGGRRTGY<br>IPL           | 3.00 | 0.01 | 1.86 | 1.12 | 0.22 | 0.85 |
| 25202 | 0 | 110248 | GGLGIGTSGTGGRRTGY<br>IPL           | 3.00 | 0.01 | 1.86 | 1.12 | 0.22 | 0.85 |
| 25203 | 0 | 189396 | GGLGIGTSGTGGRRTGY<br>IPLGTRPPT     | 3.25 | 0.01 | 1.86 | 1.81 | 0.22 | 0.85 |
| 25204 | 0 | 135460 | GGLGVG                             | 1.92 | 0.01 | 0.78 | 1.20 | 0.22 | 0.28 |
| 25205 | 0 | 135461 | GGLGVS                             | 1.92 | 0.01 | 0.78 | 1.20 | 0.22 | 0.28 |
| 25206 | 0 | 238470 | GGLHIGALQSLQPE                     | 2.63 | 0.01 | 2.14 | 2.65 | 0.22 | 0.85 |
| 25207 | 0 | 19911  | GGLKNSNHNLNNIEMK<br>YNTLNNNMNSINK  | 3.33 | 0.01 | 2.22 | 0.44 | 1.74 | 0.28 |
| 25208 | 0 | 19911  | GGLKNSNHNLNNIEMK<br>YNTLNNNMNSINK  | 3.33 | 0.01 | 2.22 | 0.44 | 1.74 | 0.28 |
| 25209 | 0 | 19911  | GGLKNSNHNLNNIEMK<br>YNTLNNNMNSINK  | 3.33 | 0.01 | 2.22 | 0.44 | 1.74 | 0.28 |
| 25210 | 0 | 19911  | GGLKNSNHNLNNIEMK<br>YNTLNNNMNSINK  | 3.33 | 0.01 | 2.22 | 0.44 | 0.85 | 1.34 |
| 25211 | 0 | 19911  | GGLKNSNHNLNNIEMK<br>YNTLNNNMNSINK  | 3.33 | 0.01 | 2.22 | 0.44 | 0.85 | 1.48 |
| 25212 | 0 | 19911  | GGLKNSNHNLNNIEMK<br>YNTLNNNMNSINK  | 3.33 | 0.01 | 2.22 | 1.15 | 0.22 | 0.28 |
| 25213 | 0 | 19912  | GGLLGEKTRN                         | 2.32 | 0.01 | 0.78 | 0.44 | 1.74 | 0.28 |
| 25214 | 0 | 19917  | GGLPTELISSAGGQLFYS<br>RPVVSANGEPTV | 3.34 | 0.01 | 2.70 | 1.15 | 0.22 | 0.28 |
| 25215 | 0 | 19917  | GGLPTELISSAGGQLFYS<br>RPVVSANGEPTV | 3.34 | 0.01 | 2.53 | 0.44 | 0.85 | 0.28 |

|       |   |        |                                    |      |      |      |      |      |      |
|-------|---|--------|------------------------------------|------|------|------|------|------|------|
| 25216 | 0 | 19917  | GGLPTELISSAGGQLFYS<br>RPVVSANGEPTV | 3.34 | 0.01 | 2.53 | 0.44 | 0.85 | 0.28 |
| 25217 | 0 | 99277  | GGLRILSPDRKRRAD                    | 2.68 | 0.01 | 2.16 | 0.44 | 1.23 | 1.48 |
| 25218 | 0 | 99277  | GGLRILSPDRKRRAD                    | 2.68 | 0.01 | 2.16 | 0.44 | 1.23 | 1.48 |
| 25219 | 0 | 105826 | GGLRILSPDRKRRQQ                    | 2.66 | 0.01 | 2.16 | 0.44 | 1.23 | 0.85 |
| 25220 | 0 | 19919  | GGLRVTAPAMRKPPQ                    | 2.65 | 0.01 | 2.72 | 0.44 | 1.23 | 0.85 |
| 25221 | 0 | 122773 | GGMGCSSPPCECHQEE                   | 2.75 | 0.01 | 0.78 | 3.01 | 0.22 | 1.27 |
| 25222 | 0 | 122773 | GGMGCSSPPCECHQEE                   | 2.75 | 0.01 | 0.78 | 3.01 | 0.22 | 0.28 |
| 25223 | 0 | 122773 | GGMGCSSPPCECHQEE                   | 2.75 | 0.01 | 0.78 | 3.01 | 0.22 | 1.27 |
| 25224 | 0 | 19927  | GGMPGGMPGGMPG                      | 2.62 | 0.01 | 1.66 | 1.12 | 0.22 | 0.28 |
| 25225 | 0 | 19927  | GGMPGGMPGGMPG                      | 2.62 | 0.01 | 1.66 | 1.12 | 0.22 | 0.28 |
| 25226 | 0 | 19928  | GGMPGGMPGGMPGG<br>MNFP             | 2.92 | 0.01 | 1.66 | 0.44 | 0.85 | 0.28 |
| 25227 | 0 | 19928  | GGMPGGMPGGMPGG<br>MNFP             | 2.92 | 0.01 | 1.66 | 0.68 | 0.22 | 0.28 |
| 25228 | 0 | 19928  | GGMPGGMPGGMPGG<br>MNFP             | 2.92 | 0.01 | 1.66 | 3.70 | 0.22 | 0.28 |
| 25229 | 0 | 19928  | GGMPGGMPGGMPGG<br>MNFP             | 2.92 | 0.01 | 1.66 | 2.16 | 0.22 | 0.28 |
| 25230 | 0 | 19928  | GGMPGGMPGGMPGG<br>MNFP             | 2.92 | 0.01 | 1.66 | 3.70 | 0.22 | 0.28 |
| 25231 | 0 | 19928  | GGMPGGMPGGMPGG<br>MNFP             | 2.92 | 0.01 | 1.66 | 3.01 | 0.22 | 0.28 |
| 25232 | 0 | 19928  | GGMPGGMPGGMPGG<br>MNFP             | 2.92 | 0.01 | 1.66 | 1.81 | 0.22 | 0.28 |
| 25233 | 0 | 19928  | GGMPGGMPGGMPGG<br>MNFP             | 2.92 | 0.01 | 1.66 | 3.42 | 0.22 | 0.28 |
| 25234 | 0 | 19928  | GGMPGGMPGGMPGG<br>MNFP             | 2.92 | 0.01 | 1.66 | 3.27 | 0.22 | 0.28 |
| 25235 | 0 | 19928  | GGMPGGMPGGMPGG<br>MNFP             | 2.92 | 0.01 | 1.66 | 4.08 | 0.22 | 0.28 |
| 25236 | 0 | 19928  | GGMPGGMPGGMPGG<br>MNFP             | 2.92 | 0.01 | 1.66 | 4.15 | 0.22 | 0.28 |
| 25237 | 0 | 188861 | GGMR                               | 1.59 | 0.01 | 0.78 | 0.44 | 1.13 | 0.28 |
| 25238 | 0 | 186761 | GGNCNKNDHLFACWL                    | 2.67 | 0.01 | 0.90 | 1.20 | 0.22 | 0.85 |
| 25239 | 0 | 177495 | GGNFGGSPGYGGGRG<br>GYGGG           | 2.99 | 0.01 | 0.78 | 0.44 | 2.26 | 0.28 |
| 25240 | 0 | 156873 | GGNFMRA                            | 2.01 | 0.01 | 0.90 | 2.74 | 0.22 | 0.85 |
| 25241 | 0 | 92811  | GGNGDDFIDG                         | 2.37 | 0.01 | 2.67 | 2.00 | 0.22 | 0.28 |
| 25242 | 0 | 92811  | GGNGDDFIDG                         | 2.37 | 0.01 | 2.67 | 2.00 | 0.22 | 0.28 |
| 25243 | 0 | 92811  | GGNGDDFIDG                         | 2.37 | 0.01 | 2.67 | 2.00 | 0.22 | 0.28 |



|       |   |        |                                   |      |      |      |      |      |      |
|-------|---|--------|-----------------------------------|------|------|------|------|------|------|
| 25244 | 0 | 118805 | GGNNGGIGGGMGGGV<br>GIG            | 2.91 | 0.01 | 0.90 | 0.68 | 0.22 | 0.28 |
| 25245 | 0 | 118805 | GGNNGGIGGGMGGGV<br>GIG            | 2.91 | 0.01 | 0.90 | 0.68 | 0.22 | 0.28 |
| 25246 | 0 | 118805 | GGNNGGIGGGMGGGV<br>GIG            | 2.91 | 0.01 | 0.90 | 0.68 | 0.22 | 0.28 |
| 25247 | 0 | 118805 | GGNNGGIGGGMGGGV<br>GIG            | 2.91 | 0.01 | 0.90 | 0.68 | 0.22 | 0.28 |
| 25248 | 0 | 118805 | GGNNGGIGGGMGGGV<br>GIG            | 2.91 | 0.01 | 0.90 | 0.68 | 0.22 | 1.27 |
| 25249 | 0 | 118805 | GGNNGGIGGGMGGGV<br>GIG            | 2.91 | 0.01 | 0.90 | 0.68 | 0.22 | 0.28 |
| 25250 | 0 | 19943  | GGNRYPPQGGGGW                     | 2.56 | 0.01 | 2.52 | 1.20 | 0.22 | 0.28 |
| 25251 | 0 | 19944  | GGNRYPPQGGTWGQP<br>HGGGWGQ        | 3.07 | 0.01 | 1.75 | 1.12 | 0.22 | 2.02 |
| 25252 | 0 | 19944  | GGNRYPPQGGTWGQP<br>HGGGWGQ        | 3.07 | 0.01 | 1.75 | 1.12 | 0.22 | 2.02 |
| 25253 | 0 | 128708 | GGNSSPSAKDIKKIL                   | 2.68 | 0.01 | 0.78 | 0.44 | 1.13 | 0.85 |
| 25254 | 0 | 118806 | GGPDGEPDVPPGAIEQ<br>GPAD          | 3.00 | 0.01 | 2.43 | 0.44 | 1.13 | 1.27 |
| 25255 | 0 | 118806 | GGPDGEPDVPPGAIEQ<br>GPAD          | 3.00 | 0.01 | 2.43 | 0.44 | 1.41 | 1.27 |
| 25256 | 0 | 118806 | GGPDGEPDVPPGAIEQ<br>GPAD          | 3.00 | 0.01 | 2.48 | 0.44 | 1.74 | 0.28 |
| 25257 | 0 | 118806 | GGPDGEPDVPPGAIEQ<br>GPAD          | 3.00 | 0.01 | 2.48 | 0.44 | 1.74 | 0.28 |
| 25258 | 0 | 118807 | GGPDGEPDVPPGAIEQ<br>GPADDPGEGPSTG | 3.35 | 0.01 | 2.43 | 0.44 | 1.13 | 0.28 |
| 25259 | 0 | 118807 | GGPDGEPDVPPGAIEQ<br>GPADDPGEGPSTG | 3.35 | 0.01 | 2.43 | 0.44 | 1.41 | 0.28 |
| 25260 | 0 | 19949  | GGPEEFEGAGDGEPED<br>DDS           | 2.99 | 0.01 | 2.40 | 0.44 | 1.59 | 0.85 |
| 25261 | 0 | 19950  | GGPGAANGPAGDGDA<br>GGRVTT         | 3.03 | 0.01 | 3.78 | 2.22 | 0.22 | 0.28 |
| 25262 | 0 | 123230 | GGPGIGRAA                         | 2.24 | 0.01 | 0.78 | 1.20 | 0.22 | 0.28 |
| 25263 | 0 | 191333 | GGPGTIKKISFP                      | 2.50 | 0.01 | 2.76 | 1.20 | 0.22 | 0.28 |
| 25264 | 0 | 146967 | GGPIGDTLEKISNEIK                  | 2.75 | 0.01 | 2.76 | 0.68 | 0.22 | 0.28 |
| 25265 | 0 | 146967 | GGPIGDTLEKISNEIK                  | 2.75 | 0.01 | 2.76 | 0.44 | 1.23 | 2.35 |
| 25266 | 0 | 146967 | GGPIGDTLEKISNEIK                  | 2.75 | 0.01 | 2.76 | 0.68 | 0.22 | 0.28 |
| 25267 | 0 | 146967 | GGPIGDTLEKISNEIK                  | 2.75 | 0.01 | 2.76 | 0.68 | 0.22 | 0.28 |
| 25268 | 0 | 146967 | GGPIGDTLEKISNEIK                  | 2.75 | 0.01 | 2.76 | 0.68 | 0.22 | 1.66 |
| 25269 | 0 | 146967 | GGPIGDTLEKISNEIK                  | 2.75 | 0.01 | 2.76 | 0.68 | 0.22 | 1.66 |
| 25270 | 0 | 146967 | GGPIGDTLEKISNEIK                  | 2.75 | 0.01 | 2.76 | 0.68 | 0.22 | 1.66 |
| 25271 | 0 | 146967 | GGPIGDTLEKISNEIK                  | 2.75 | 0.01 | 2.76 | 0.68 | 0.22 | 0.28 |
| 25272 | 0 | 19958  | GGPIPTIPRPTL                      | 2.52 | 0.01 | 0.90 | 1.12 | 2.26 | 1.39 |

|       |   |        |                     |      |      |      |      |      |      |  |
|-------|---|--------|---------------------|------|------|------|------|------|------|--|
|       |   |        | GGPKDHPLTCDDPRFQ    |      |      |      |      |      |      |  |
| 25273 | 0 | 130851 | DSSSSKAPPPSLPSPSRLP | 3.75 | 0.01 | 0.78 | 2.61 | 0.22 | 1.27 |  |
|       |   |        | GPSDTPILPQ          |      |      |      |      |      |      |  |
|       |   |        | GGPKDHPLTCDDPRFQ    |      |      |      |      |      |      |  |
| 25274 | 0 | 130851 | DSSSSKAPPPSLPSPSRLP | 3.75 | 0.01 | 0.78 | 1.12 | 0.22 | 1.57 |  |
|       |   |        | GPSDTPILPQ          |      |      |      |      |      |      |  |
|       |   |        | GGPKDHPLTCDDPRFQ    |      |      |      |      |      |      |  |
| 25275 | 0 | 130851 | DSSSSKAPPPSLPSPSRLP | 3.75 | 0.01 | 0.78 | 3.89 | 0.22 | 1.57 |  |
|       |   |        | GPSDTPILPQ          |      |      |      |      |      |      |  |
|       |   |        | GGPKDHPLTCDDPRFQ    |      |      |      |      |      |      |  |
| 25276 | 0 | 130851 | DSSSSKAPPPSLPSPSRLP | 3.75 | 0.01 | 0.78 | 2.61 | 0.22 | 1.27 |  |
|       |   |        | GPSDTPILPQ          |      |      |      |      |      |      |  |
|       |   |        | GGPKDHPLTCDDPRFQ    |      |      |      |      |      |      |  |
| 25277 | 0 | 130851 | DSSSSKAPPPSLPSPSRLP | 3.75 | 0.01 | 0.78 | 2.61 | 0.22 | 1.27 |  |
|       |   |        | GPSDTPILPQ          |      |      |      |      |      |      |  |
|       |   |        | GGPKDHPLTCDDPRFQ    |      |      |      |      |      |      |  |
| 25278 | 0 | 130851 | DSSSSKAPPPSLPSPSRLP | 3.75 | 0.01 | 0.78 | 2.61 | 0.22 | 1.34 |  |
|       |   |        | GPSDTPILPQ          |      |      |      |      |      |      |  |
| 25279 | 0 | 19965  | GGPLTN              | 1.89 | 0.01 | 1.96 | 0.44 | 0.85 | 0.28 |  |
|       |   |        | GGPPMMPMMGPPPP      |      |      |      |      |      |      |  |
| 25280 | 0 | 141286 | GMMPVGPAPGMRPP      | 3.37 | 0.01 | 0.78 | 0.44 | 1.13 | 0.28 |  |
|       |   |        | M                   |      |      |      |      |      |      |  |
|       |   |        | GGPPMMPMMGPPPP      |      |      |      |      |      |      |  |
| 25281 | 0 | 141286 | GMMPVGPAPGMRPP      | 3.37 | 0.01 | 0.78 | 0.44 | 1.13 | 2.02 |  |
|       |   |        | M                   |      |      |      |      |      |      |  |
|       |   |        | GGPPMMPMMGPPPP      |      |      |      |      |      |      |  |
| 25282 | 0 | 141286 | GMMPVGPAPGMRPP      | 3.37 | 0.01 | 0.78 | 0.44 | 1.13 | 0.28 |  |
|       |   |        | M                   |      |      |      |      |      |      |  |
|       |   |        | GGPPMMPMMGPPPP      |      |      |      |      |      |      |  |
| 25283 | 0 | 141286 | GMMPVGPAPGMRPP      | 3.37 | 0.01 | 0.78 | 0.44 | 1.13 | 0.85 |  |
|       |   |        | M                   |      |      |      |      |      |      |  |
|       |   |        | GGPPMMPMMGPPPP      |      |      |      |      |      |      |  |
| 25284 | 0 | 141286 | GMMPVGPAPGMRPP      | 3.37 | 0.01 | 0.78 | 0.44 | 1.13 | 1.48 |  |
|       |   |        | M                   |      |      |      |      |      |      |  |
|       |   |        | GGPPMMPMMGPPPP      |      |      |      |      |      |      |  |
| 25285 | 0 | 141286 | GMMPVGPAPGMRPP      | 3.37 | 0.01 | 0.78 | 0.44 | 1.13 | 0.85 |  |
|       |   |        | M                   |      |      |      |      |      |      |  |
| 25286 | 0 | 19970  | GGPQTP              | 1.90 | 0.01 | 3.17 | 1.12 | 0.22 | 0.28 |  |
| 25287 | 0 | 19971  | GGPRRSRPLSSSKDSK    | 2.84 | 0.01 | 2.04 | 1.12 | 0.22 | 1.48 |  |
| 25288 | 0 | 123232 | GGPSQQVMTPQGRGT     | 2.71 | 0.01 | 0.78 | 1.20 | 0.22 | 0.28 |  |
| 25289 | 0 | 225735 | GGPSVFIFPPKPKDV     | 2.70 | 0.01 | 3.28 | 0.44 | 0.22 | 0.85 |  |
| 25290 | 0 | 110862 | GGPTLVSLHELPAETP    | 2.76 | 0.01 | 3.37 | 1.20 | 0.22 | 0.28 |  |
| 25291 | 0 | 110862 | GGPTLVSLHELPAETP    | 2.76 | 0.01 | 3.37 | 1.20 | 0.22 | 0.28 |  |
| 25292 | 0 | 110862 | GGPTLVSLHELPAETP    | 2.76 | 0.01 | 3.37 | 1.20 | 0.22 | 0.85 |  |
| 25293 | 0 | 110862 | GGPTLVSLHELPAETP    | 2.76 | 0.01 | 3.37 | 1.20 | 0.22 | 0.85 |  |

|       |   |        |                                       |      |      |      |      |      |      |
|-------|---|--------|---------------------------------------|------|------|------|------|------|------|
| 25294 | 0 | 110862 | GGPTLVSLHELPAETP                      | 2.76 | 0.01 | 3.37 | 1.20 | 0.22 | 1.48 |
| 25295 | 0 | 110862 | GGPTLVSLHELPAETP                      | 2.76 | 0.01 | 3.37 | 1.20 | 0.22 | 1.48 |
| 25296 | 0 | 110862 | GGPTLVSLHELPAETP                      | 2.76 | 0.01 | 3.37 | 1.20 | 2.25 | 1.75 |
| 25297 | 0 | 111342 | GGPTLVSLHELPAETPYV<br>SSTNVT          | 3.14 | 0.01 | 3.37 | 0.68 | 0.22 | 0.28 |
| 25298 | 0 | 111342 | GGPTLVSLHELPAETPYV<br>SSTNVT          | 3.14 | 0.01 | 3.37 | 1.20 | 0.22 | 0.28 |
| 25299 | 0 | 111342 | GGPTLVSLHELPAETPYV<br>SSTNVT          | 3.14 | 0.01 | 3.37 | 1.20 | 0.22 | 0.28 |
| 25300 | 0 | 111342 | GGPTLVSLHELPAETPYV<br>SSTNVT          | 3.14 | 0.01 | 3.37 | 0.68 | 0.22 | 0.28 |
| 25301 | 0 | 111342 | GGPTLVSLHELPAETPYV<br>SSTNVT          | 3.14 | 0.01 | 3.37 | 1.20 | 0.22 | 0.28 |
| 25302 | 0 | 111342 | GGPTLVSLHELPAETPYV<br>SSTNVT          | 3.14 | 0.01 | 3.37 | 0.68 | 0.22 | 0.28 |
| 25303 | 0 | 111342 | GGPTLVSLHELPAETPYV<br>SSTNVT          | 3.14 | 0.01 | 3.37 | 1.20 | 0.22 | 0.28 |
| 25304 | 0 | 111342 | GGPTLVSLHELPAETPYV<br>SSTNVT          | 3.14 | 0.01 | 3.37 | 0.68 | 0.22 | 0.28 |
| 25305 | 0 | 111342 | GGPTLVSLHELPAETPYV<br>SSTNVT          | 3.14 | 0.01 | 3.37 | 1.20 | 0.22 | 0.28 |
| 25306 | 0 | 19974  | GGPTRTIGGS                            | 2.34 | 0.01 | 2.83 | 0.44 | 0.85 | 0.28 |
| 25307 | 0 | 19975  | GGPTRTIGGSQAQTASG<br>LVSMFSGGPSQK     | 3.32 | 0.01 | 2.83 | 0.44 | 0.85 | 0.28 |
| 25308 | 0 | 19975  | GGPTRTIGGSQAQTASG<br>LVSMFSGGPSQK     | 3.32 | 0.01 | 2.83 | 0.44 | 0.85 | 0.28 |
| 25309 | 0 | 19975  | GGPTRTIGGSQAQTASG<br>LVSMFSGGPSQK     | 3.32 | 0.01 | 2.83 | 1.12 | 0.22 | 0.28 |
| 25310 | 0 | 19975  | GGPTRTIGGSQAQTASG<br>LVSMFSGGPSQK     | 3.32 | 0.01 | 2.83 | 1.12 | 0.22 | 1.34 |
| 25311 | 0 | 119455 | GGQFNFDEGTP                           | 2.41 | 0.01 | 0.78 | 0.44 | 1.13 | 2.75 |
| 25312 | 0 | 119894 | GGQFNFDEGTPPTNFD<br>TFPAA             | 3.02 | 0.01 | 2.96 | 0.44 | 1.13 | 1.57 |
| 25313 | 0 | 94825  | GGQFNP                                | 1.89 | 0.01 | 3.72 | 0.68 | 0.22 | 0.85 |
| 25314 | 0 | 94825  | GGQFNP                                | 1.89 | 0.01 | 3.72 | 0.68 | 0.22 | 0.85 |
| 25315 | 0 | 107856 | GGQGSRHQQAR                           | 2.43 | 4.63 | 0.78 | 0.44 | 1.13 | 0.85 |
| 25316 | 0 | 107856 | GGQGSRHQQAR                           | 2.43 | 4.63 | 0.78 | 0.44 | 1.41 | 0.85 |
| 25317 | 0 | 19982  | GGQIVGGVYLLPRRGPR<br>LGVRATRKTSESRQPR | 3.45 | 0.01 | 1.72 | 0.44 | 0.85 | 0.28 |
| 25318 | 0 | 19982  | GGQIVGGVYLLPRRGPR<br>LGVRATRKTSESRQPR | 3.45 | 0.01 | 1.72 | 0.44 | 0.85 | 0.28 |
| 25319 | 0 | 19982  | GGQIVGGVYLLPRRGPR<br>LGVRATRKTSESRQPR | 3.45 | 0.01 | 1.72 | 0.44 | 0.85 | 0.28 |
| 25320 | 0 | 149051 | GGQMRQG                               | 2.05 | 0.01 | 0.90 | 2.13 | 1.59 | 1.39 |

|       |   |        |                            |      |      |      |      |      |      |
|-------|---|--------|----------------------------|------|------|------|------|------|------|
| 25321 | 0 | 147722 | GGQPAVRNE                  | 2.20 | 0.01 | 3.24 | 0.68 | 0.22 | 0.28 |
| 25322 | 0 | 19983  | GGQPAVRNER                 | 2.30 | 0.01 | 3.05 | 1.20 | 0.22 | 0.28 |
| 25323 | 0 | 19983  | GGQPAVRNER                 | 2.30 | 0.01 | 3.05 | 1.20 | 0.22 | 0.28 |
| 25324 | 0 | 19983  | GGQPAVRNER                 | 2.30 | 0.01 | 3.05 | 1.20 | 0.22 | 1.34 |
| 25325 | 0 | 19983  | GGQPAVRNER                 | 2.30 | 0.01 | 3.05 | 0.68 | 0.22 | 0.28 |
| 25326 | 0 | 19983  | GGQPAVRNER                 | 2.30 | 0.01 | 3.05 | 0.68 | 0.22 | 1.34 |
| 25327 | 0 | 19983  | GGQPAVRNER                 | 2.30 | 0.01 | 3.05 | 1.20 | 0.22 | 0.28 |
| 25328 | 0 | 193458 | GGQPPGGQP                  | 2.28 | 0.01 | 2.51 | 0.44 | 2.39 | 0.28 |
| 25329 | 0 | 193458 | GGQPPGGQP                  | 2.28 | 0.01 | 2.51 | 0.44 | 2.39 | 0.28 |
| 25330 | 0 | 19985  | GGQQQESSVSSQSDQA           | 2.78 | 0.01 | 3.41 | 1.12 | 0.22 | 0.85 |
| 25331 | 0 | 19990  | GGQTFTDRE                  | 2.22 | 0.01 | 0.90 | 0.68 | 0.22 | 0.28 |
| 25332 | 0 | 174122 | GGRAETPSSPSLETQ            | 2.69 | 0.01 | 2.30 | 2.89 | 0.22 | 0.28 |
| 25333 | 0 | 174122 | GGRAETPSSPSLETQ            | 2.69 | 0.01 | 2.30 | 2.89 | 0.22 | 0.28 |
| 25334 | 0 | 298253 | GGRDAPQARKQQGRN            | 2.70 | 0.01 | 1.61 | 0.44 | 0.85 | 1.28 |
| 25335 | 0 | 19998  | GGRGDSG                    | 2.05 | 0.01 | 4.45 | 0.68 | 0.22 | 1.27 |
| 25336 | 0 | 114359 | GGRGRDVNGFEETIC            | 2.67 | 0.01 | 3.48 | 0.44 | 1.23 | 0.85 |
| 25337 | 0 | 107144 | GGRHPSPMGTFTDTQT           | 2.68 | 0.01 | 0.90 | 0.44 | 1.23 | 0.28 |
| 25338 | 0 | 20001  | GGRKPA                     | 1.89 | 0.01 | 1.96 | 0.44 | 0.85 | 0.28 |
| 25339 | 0 | 118809 | GGRPGAPGGSGSGPRH<br>RDGV   | 3.00 | 0.01 | 2.43 | 0.44 | 1.13 | 1.27 |
| 25340 | 0 | 118809 | GGRPGAPGGSGSGPRH<br>RDGV   | 3.00 | 0.01 | 2.43 | 0.44 | 1.41 | 1.27 |
| 25341 | 0 | 118809 | GGRPGAPGGSGSGPRH<br>RDGV   | 3.00 | 0.01 | 2.48 | 0.44 | 1.74 | 0.28 |
| 25342 | 0 | 118809 | GGRPGAPGGSGSGPRH<br>RDGV   | 3.00 | 0.01 | 2.48 | 0.44 | 1.74 | 0.28 |
| 25343 | 0 | 503986 | GGRRGRGRERARGGSR<br>ERAR   | 3.02 | 3.97 | 2.48 | 0.44 | 1.74 | 0.28 |
| 25344 | 0 | 503987 | GGRRGRGRERARGGSR<br>ERAR   | 3.02 | 3.50 | 2.48 | 0.44 | 1.74 | 0.28 |
| 25345 | 0 | 114360 | GGRRLFFVKAHVRES            | 2.66 | 0.01 | 4.08 | 0.44 | 1.74 | 1.57 |
| 25346 | 0 | 20005  | GGRRRGRSNSGRGRG            | 2.74 | 0.01 | 2.59 | 0.44 | 0.85 | 0.28 |
| 25347 | 0 | 20011  | GGSGGRGRGGSGGRGR<br>GGSG   | 3.03 | 0.01 | 2.43 | 0.44 | 2.82 | 0.28 |
| 25348 | 0 | 136316 | GGSGGRRGRGRERARG<br>GSRERA | 3.11 | 0.01 | 2.43 | 0.44 | 1.74 | 0.28 |
| 25349 | 0 | 136316 | GGSGGRRGRGRERARG<br>GSRERA | 3.11 | 0.01 | 2.43 | 0.44 | 1.74 | 0.28 |
| 25350 | 0 | 20012  | GGSGGSVASGGSVAS            | 2.74 | 0.01 | 3.57 | 0.44 | 1.74 | 0.28 |
| 25351 | 0 | 20012  | GGSGGSVASGGSVAS            | 2.74 | 0.01 | 3.57 | 0.44 | 0.85 | 0.28 |
| 25352 | 0 | 20012  | GGSGGSVASGGSVAS            | 2.74 | 0.01 | 3.57 | 2.71 | 0.22 | 0.28 |
| 25353 | 0 | 20013  | GGSGGSVASVASGGS            | 2.74 | 0.01 | 1.66 | 0.44 | 0.85 | 0.28 |
| 25354 | 0 | 20014  | GGSGNSRRTNPSDNS            | 2.72 | 0.01 | 3.57 | 0.44 | 0.85 | 0.28 |
| 25355 | 0 | 134679 | GGSGPQRRGG                 | 2.34 | 0.01 | 2.43 | 0.44 | 1.13 | 0.85 |
| 25356 | 0 | 134679 | GGSGPQRRGG                 | 2.34 | 0.01 | 2.43 | 0.44 | 1.13 | 0.85 |

|       |   |        |                               |      |      |      |      |      |      |
|-------|---|--------|-------------------------------|------|------|------|------|------|------|
| 25357 | 0 | 134679 | GGSGPQRRGG                    | 2.34 | 0.01 | 2.43 | 0.44 | 1.13 | 0.85 |
| 25358 | 0 | 134679 | GGSGPQRRGG                    | 2.34 | 0.01 | 2.43 | 0.44 | 1.13 | 0.85 |
| 25359 | 0 | 134679 | GGSGPQRRGG                    | 2.34 | 0.01 | 2.43 | 0.44 | 1.13 | 0.85 |
| 25360 | 0 | 134679 | GGSGPQRRGG                    | 2.34 | 0.01 | 2.43 | 0.44 | 1.13 | 0.85 |
| 25361 | 0 | 134679 | GGSGPQRRGG                    | 2.34 | 0.01 | 2.43 | 0.44 | 1.13 | 0.85 |
| 25362 | 0 | 134679 | GGSGPQRRGG                    | 2.34 | 0.01 | 2.43 | 0.44 | 1.13 | 0.85 |
| 25363 | 0 | 134679 | GGSGPQRRGG                    | 2.34 | 0.01 | 2.43 | 0.44 | 1.13 | 0.85 |
| 25364 | 0 | 134679 | GGSGPQRRGG                    | 2.34 | 0.01 | 2.43 | 3.05 | 1.13 | 0.85 |
| 25365 | 0 | 20021  | GGSILSGFTLEFL                 | 2.59 | 0.01 | 2.72 | 0.44 | 1.23 | 0.85 |
| 25366 | 0 | 226033 | GGSISYEYEGFGIVGAYG<br>AA      | 2.99 | 0.01 | 2.24 | 3.70 | 0.22 | 0.28 |
| 25367 | 0 | 226033 | GGSISYEYEGFGIVGAYG<br>AA      | 2.99 | 0.01 | 2.24 | 3.70 | 0.22 | 0.28 |
| 25368 | 0 | 503988 | GGSKTSLYNLRRGTALAI<br>PQ      | 2.94 | 3.40 | 2.48 | 0.44 | 1.74 | 0.28 |
| 25369 | 0 | 20025  | GGSLPPEWGSMANLRE<br>LKIWELPL  | 3.13 | 0.01 | 2.78 | 1.12 | 0.22 | 0.28 |
| 25370 | 0 | 20025  | GGSLPPEWGSMANLRE<br>LKIWELPL  | 3.13 | 0.01 | 2.78 | 1.12 | 0.22 | 0.28 |
| 25371 | 0 | 20026  | GGSLSSLANAGGLHDD<br>G         | 2.84 | 0.01 | 2.51 | 0.44 | 1.59 | 0.28 |
| 25372 | 0 | 178903 | GGSNVFD MFTQRQVA              | 2.65 | 0.01 | 2.36 | 0.44 | 1.23 | 1.28 |
| 25373 | 0 | 178903 | GGSNVFD MFTQRQVA              | 2.65 | 0.01 | 2.36 | 0.44 | 1.23 | 1.27 |
| 25374 | 0 | 167908 | GGSPEKHHCTVKLEFAG<br>AA       | 2.87 | 0.01 | 2.75 | 0.44 | 0.85 | 2.51 |
| 25375 | 0 | 167908 | GGSPEKHHCTVKLEFAG<br>AA       | 2.87 | 0.01 | 2.75 | 0.44 | 0.85 | 2.51 |
| 25376 | 0 | 167908 | GGSPEKHHCTVKLEFAG<br>AA       | 2.87 | 0.01 | 2.75 | 0.44 | 0.85 | 2.51 |
| 25377 | 0 | 20029  | GGSPQGSGASQPGSSE<br>PSNPVSSGH | 3.23 | 0.01 | 3.93 | 0.68 | 0.22 | 0.28 |
| 25378 | 0 | 20029  | GGSPQGSGASQPGSSE<br>PSNPVSSGH | 3.23 | 0.01 | 3.93 | 0.68 | 0.22 | 0.85 |
| 25379 | 0 | 20029  | GGSPQGSGASQPGSSE<br>PSNPVSSGH | 3.23 | 0.01 | 3.93 | 0.68 | 0.22 | 1.48 |
| 25380 | 0 | 298511 | GGSTSSTPPSGTENK               | 2.72 | 0.01 | 1.61 | 0.44 | 0.85 | 1.28 |
| 25381 | 0 | 20039  | GGSVASVASGGSGGS               | 2.74 | 0.01 | 1.66 | 0.44 | 0.85 | 0.28 |
| 25382 | 0 | 20042  | GGSVTSGGSGASVAS               | 2.75 | 0.01 | 1.66 | 0.44 | 0.85 | 0.28 |
| 25383 | 0 | 20043  | GGSWGQPHGGGW                  | 2.51 | 0.01 | 1.75 | 2.19 | 0.22 | 1.27 |
| 25384 | 0 | 20044  | GGSWGQPHGGSW                  | 2.52 | 0.01 | 1.75 | 2.19 | 0.22 | 1.27 |
| 25385 | 0 | 115053 | GGSYFMISR                     | 2.22 | 0.01 | 2.08 | 4.63 | 0.22 | 0.28 |
| 25386 | 0 | 20046  | GGTEESVVTASRS                 | 2.56 | 0.01 | 3.00 | 0.44 | 0.85 | 0.28 |
| 25387 | 0 | 20046  | GGTEESVVTASRS                 | 2.56 | 0.01 | 3.00 | 0.44 | 0.85 | 0.28 |
| 25388 | 0 | 20046  | GGTEESVVTASRS                 | 2.56 | 0.01 | 3.00 | 0.44 | 0.85 | 0.28 |
| 25389 | 0 | 20046  | GGTEESVVTASRS                 | 2.56 | 0.01 | 3.00 | 0.44 | 0.85 | 0.28 |

|       |   |        |                          |      |      |      |      |      |      |
|-------|---|--------|--------------------------|------|------|------|------|------|------|
| 25390 | 0 | 20046  | GGTEESVVTASRS            | 2.56 | 0.01 | 3.00 | 0.44 | 0.85 | 0.28 |
| 25391 | 0 | 20046  | GGTEESVVTASRS            | 2.56 | 0.01 | 3.00 | 0.44 | 0.85 | 0.28 |
| 25392 | 0 | 20046  | GGTEESVVTASRS            | 2.56 | 0.01 | 3.00 | 0.44 | 2.39 | 0.28 |
| 25393 | 0 | 20046  | GGTEESVVTASRS            | 2.56 | 0.01 | 3.00 | 0.44 | 2.39 | 0.28 |
| 25394 | 0 | 20046  | GGTEESVVTASRS            | 2.56 | 0.01 | 3.00 | 2.22 | 0.22 | 0.28 |
| 25395 | 0 | 20046  | GGTEESVVTASRS            | 2.56 | 0.01 | 3.00 | 2.22 | 0.22 | 0.28 |
| 25396 | 0 | 20046  | GGTEESVVTASRS            | 2.56 | 0.01 | 3.00 | 2.22 | 0.22 | 0.28 |
| 25397 | 0 | 20046  | GGTEESVVTASRS            | 2.56 | 0.01 | 3.00 | 2.22 | 0.22 | 0.28 |
| 25398 | 0 | 20046  | GGTEESVVTASRS            | 2.56 | 0.01 | 3.00 | 3.57 | 0.22 | 0.28 |
| 25399 | 0 | 20047  | GGTEIKYNGE               | 2.33 | 0.01 | 2.04 | 0.68 | 0.22 | 0.28 |
| 25400 | 0 | 20047  | GGTEIKYNGE               | 2.33 | 0.01 | 2.04 | 0.68 | 0.22 | 0.28 |
| 25401 | 0 | 164542 | GGTHNQWNKPSKPKTN<br>LK   | 2.86 | 0.01 | 1.75 | 1.12 | 0.22 | 1.48 |
| 25402 | 0 | 164542 | GGTHNQWNKPSKPKTN<br>LK   | 2.86 | 0.01 | 1.75 | 1.12 | 0.22 | 1.34 |
| 25403 | 0 | 20051  | GGTHSQWNKP               | 2.28 | 0.01 | 0.78 | 2.19 | 0.22 | 0.28 |
| 25404 | 0 | 20051  | GGTHSQWNKP               | 2.28 | 0.01 | 0.78 | 2.19 | 0.22 | 0.85 |
| 25405 | 0 | 20051  | GGTHSQWNKP               | 2.28 | 0.01 | 0.78 | 2.19 | 0.22 | 0.85 |
| 25406 | 0 | 20051  | GGTHSQWNKP               | 2.28 | 0.01 | 0.78 | 2.19 | 0.22 | 2.92 |
| 25407 | 0 | 20052  | GGTHSQWNKPSKP            | 2.55 | 0.01 | 0.78 | 2.19 | 0.22 | 0.28 |
| 25408 | 0 | 20052  | GGTHSQWNKPSKP            | 2.55 | 0.01 | 0.78 | 2.19 | 0.22 | 2.02 |
| 25409 | 0 | 20052  | GGTHSQWNKPSKP            | 2.55 | 0.01 | 0.78 | 2.19 | 0.22 | 2.02 |
| 25410 | 0 | 20052  | GGTHSQWNKPSKP            | 2.55 | 0.01 | 0.78 | 2.19 | 0.22 | 2.02 |
| 25411 | 0 | 20052  | GGTHSQWNKPSKP            | 2.55 | 0.01 | 0.78 | 2.19 | 0.22 | 2.02 |
| 25412 | 0 | 20052  | GGTHSQWNKPSKP            | 2.55 | 0.01 | 0.78 | 2.19 | 0.22 | 0.28 |
| 25413 | 0 | 156664 | GGTHSQWNKPSKPKTN<br>M    | 2.80 | 0.01 | 0.78 | 1.15 | 2.26 | 0.85 |
| 25414 | 0 | 112524 | GGTLEDTYRF               | 2.30 | 0.01 | 1.86 | 2.37 | 0.22 | 0.28 |
| 25415 | 0 | 113438 | GGTLEDTYRFVTQAIAC<br>QKH | 2.89 | 0.01 | 1.86 | 2.37 | 0.22 | 0.28 |
| 25416 | 0 | 113438 | GGTLEDTYRFVTQAIAC<br>QKH | 2.89 | 0.01 | 1.86 | 2.37 | 0.22 | 0.28 |
| 25417 | 0 | 113438 | GGTLEDTYRFVTQAIAC<br>QKH | 2.89 | 0.01 | 1.86 | 1.12 | 0.22 | 0.28 |
| 25418 | 0 | 167909 | GGTNPLP                  | 2.03 | 0.01 | 3.93 | 1.20 | 0.22 | 0.28 |
| 25419 | 0 | 180906 | GGTPACPG                 | 2.16 | 0.01 | 2.08 | 0.44 | 0.85 | 2.75 |
| 25420 | 0 | 167910 | GGTRTSTAPAEAGKTE         | 2.78 | 0.01 | 2.75 | 0.44 | 1.59 | 2.51 |
| 25421 | 0 | 167910 | GGTRTSTAPAEAGKTE         | 2.78 | 0.01 | 2.75 | 0.44 | 0.85 | 2.51 |
| 25422 | 0 | 167910 | GGTRTSTAPAEAGKTE         | 2.78 | 0.01 | 2.75 | 0.44 | 0.85 | 2.51 |
| 25423 | 0 | 167910 | GGTRTSTAPAEAGKTE         | 2.78 | 0.01 | 2.75 | 0.44 | 0.85 | 2.51 |
| 25424 | 0 | 119456 | GGTTTPRTT                | 2.25 | 0.01 | 0.90 | 0.44 | 1.13 | 0.28 |
| 25425 | 0 | 20059  | GGTWGQPHGGGW             | 2.51 | 0.01 | 1.75 | 2.19 | 0.22 | 1.27 |
| 25426 | 0 | 20060  | GGTWRIGY                 | 2.14 | 0.01 | 2.04 | 0.44 | 0.85 | 0.28 |

|       |   |        |                              |      |      |      |      |      |      |
|-------|---|--------|------------------------------|------|------|------|------|------|------|
| 25427 | 0 | 20062  | GGTYVTGGTMAKNTLGI<br>TSLFSPG | 3.12 | 0.01 | 4.23 | 0.44 | 0.85 | 0.28 |
| 25428 | 0 | 20063  | GGVAGLFKMGSQQKL              | 2.69 | 0.01 | 1.72 | 0.68 | 0.22 | 0.28 |
| 25429 | 0 | 98062  | GGVAGMKAHK                   | 2.35 | 0.01 | 3.57 | 0.44 | 0.85 | 0.28 |
| 25430 | 0 | 20064  | GGVATY                       | 1.89 | 0.01 | 2.39 | 0.44 | 1.59 | 0.28 |
| 25431 | 0 | 20064  | GGVATY                       | 1.89 | 0.01 | 2.39 | 3.53 | 0.22 | 0.28 |
| 25432 | 0 | 20064  | GGVATY                       | 1.89 | 0.01 | 2.39 | 3.53 | 0.22 | 1.27 |
| 25433 | 0 | 20064  | GGVATY                       | 1.89 | 0.01 | 2.39 | 3.53 | 0.22 | 1.27 |
| 25434 | 0 | 20064  | GGVATY                       | 1.89 | 0.01 | 2.39 | 0.44 | 1.74 | 1.57 |
| 25435 | 0 | 20064  | GGVATY                       | 1.89 | 0.01 | 2.39 | 2.61 | 0.22 | 1.57 |
| 25436 | 0 | 20065  | GGVAVIKAGA                   | 2.36 | 0.01 | 3.20 | 0.44 | 1.13 | 0.28 |
| 25437 | 0 | 444243 | GGVEHRLNAACNWTRG<br>ERCD     | 2.94 | 0.01 | 1.96 | 0.68 | 0.22 | 1.34 |
| 25438 | 0 | 444243 | GGVEHRLNAACNWTRG<br>ERCD     | 2.94 | 0.01 | 1.96 | 0.68 | 0.22 | 1.34 |
| 25439 | 0 | 444243 | GGVEHRLNAACNWTRG<br>ERCD     | 2.94 | 0.01 | 1.96 | 0.68 | 0.22 | 1.34 |
| 25440 | 0 | 444243 | GGVEHRLNAACNWTRG<br>ERCD     | 2.94 | 0.01 | 1.96 | 0.68 | 0.22 | 0.28 |
| 25441 | 0 | 20069  | GGVFTS                       | 1.89 | 0.01 | 2.40 | 0.44 | 0.85 | 0.28 |
| 25442 | 0 | 119895 | GGVKKIHIPSEKIWRP             | 2.74 | 0.01 | 0.78 | 2.04 | 0.22 | 0.28 |
| 25443 | 0 | 119895 | GGVKKIHIPSEKIWRP             | 2.74 | 0.01 | 0.78 | 1.12 | 0.22 | 0.28 |
| 25444 | 0 | 20071  | GGVLGWS                      | 2.04 | 0.01 | 2.08 | 0.68 | 0.22 | 2.02 |
| 25445 | 0 | 20071  | GGVLGWS                      | 2.04 | 0.01 | 2.08 | 0.68 | 0.22 | 2.02 |
| 25446 | 0 | 196492 | GGVMATSRFKIIRAY              | 2.64 | 0.01 | 3.72 | 1.12 | 0.22 | 0.28 |
| 25447 | 0 | 135462 | GGVPGV                       | 1.92 | 0.01 | 0.78 | 1.20 | 0.22 | 0.28 |
| 25448 | 0 | 109102 | GGVSAESLDHAW                 | 2.46 | 0.01 | 0.90 | 1.15 | 0.22 | 1.39 |
| 25449 | 0 | 20077  | GGVSAVPFMDYFPSW              | 2.67 | 0.01 | 0.90 | 1.15 | 0.22 | 0.28 |
| 25450 | 0 | 137869 | GGVSTGLIQDDWTFQ              | 2.67 | 0.01 | 0.78 | 2.74 | 0.22 | 1.57 |
| 25451 | 0 | 137869 | GGVSTGLIQDDWTFQ              | 2.67 | 0.01 | 0.78 | 1.15 | 0.22 | 1.57 |
| 25452 | 0 | 137869 | GGVSTGLIQDDWTFQ              | 2.67 | 0.01 | 0.78 | 0.44 | 2.26 | 1.57 |
| 25453 | 0 | 225297 | GGVTEHDGNQIDKNNS<br>TD       | 2.84 | 0.01 | 2.61 | 0.68 | 0.22 | 0.28 |
| 25454 | 0 | 225297 | GGVTEHDGNQIDKNNS<br>TD       | 2.84 | 0.01 | 2.61 | 0.68 | 2.25 | 1.75 |
| 25455 | 0 | 225297 | GGVTEHDGNQIDKNNS<br>TD       | 2.84 | 0.01 | 2.61 | 0.68 | 0.22 | 0.28 |
| 25456 | 0 | 225297 | GGVTEHDGNQIDKNNS<br>TD       | 2.84 | 0.01 | 2.61 | 0.68 | 0.22 | 0.28 |
| 25457 | 0 | 225297 | GGVTEHDGNQIDKNNS<br>TD       | 2.84 | 0.01 | 2.61 | 0.68 | 0.22 | 0.28 |
| 25458 | 0 | 225297 | GGVTEHDGNQIDKNNS<br>TD       | 2.84 | 0.01 | 2.61 | 0.68 | 0.22 | 1.34 |
| 25459 | 0 | 108382 | GGVVIA                       | 1.91 | 0.01 | 0.78 | 0.68 | 0.22 | 1.27 |
| 25460 | 0 | 108382 | GGVVIA                       | 1.91 | 0.01 | 0.78 | 0.68 | 0.22 | 1.66 |

|       |   |        |                                |      |      |      |      |      |      |
|-------|---|--------|--------------------------------|------|------|------|------|------|------|
| 25461 | 0 | 108382 | GGVVIA                         | 1.91 | 0.01 | 0.78 | 0.68 | 0.22 | 1.66 |
| 25462 | 0 | 108382 | GGVVIA                         | 1.91 | 0.01 | 0.78 | 0.68 | 0.22 | 1.66 |
| 25463 | 0 | 108382 | GGVVIA                         | 1.91 | 0.01 | 0.78 | 0.68 | 0.22 | 1.66 |
| 25464 | 0 | 108382 | GGVVIA                         | 1.91 | 0.01 | 0.78 | 0.68 | 0.22 | 1.66 |
| 25465 | 0 | 108382 | GGVVIA                         | 1.91 | 0.01 | 0.78 | 0.68 | 0.22 | 1.48 |
| 25466 | 0 | 108382 | GGVVIA                         | 1.91 | 0.01 | 0.78 | 1.15 | 0.22 | 0.28 |
| 25467 | 0 | 108382 | GGVVIA                         | 1.91 | 0.01 | 0.78 | 1.15 | 0.22 | 0.85 |
| 25468 | 0 | 108382 | GGVVIA                         | 1.91 | 0.01 | 0.78 | 1.15 | 0.22 | 1.48 |
| 25469 | 0 | 108382 | GGVVIA                         | 1.91 | 0.01 | 0.78 | 1.15 | 0.22 | 1.27 |
| 25470 | 0 | 108382 | GGVVIA                         | 1.91 | 0.01 | 0.78 | 1.12 | 0.22 | 1.48 |
| 25471 | 0 | 108382 | GGVVIA                         | 1.91 | 0.01 | 1.75 | 1.81 | 0.22 | 0.28 |
| 25472 | 0 | 108382 | GGVVIA                         | 1.91 | 0.01 | 1.75 | 1.81 | 0.22 | 1.48 |
| 25473 | 0 | 108382 | GGVVIA                         | 1.91 | 0.01 | 1.75 | 1.81 | 0.22 | 0.28 |
| 25474 | 0 | 108382 | GGVVIA                         | 1.91 | 0.01 | 0.78 | 3.40 | 0.22 | 0.28 |
| 25475 | 0 | 20082  | GGVYLLPR                       | 2.12 | 0.01 | 1.72 | 0.44 | 0.85 | 0.28 |
| 25476 | 0 | 20084  | GGVYLLPRRGPR LGV               | 2.74 | 0.01 | 1.72 | 0.44 | 0.85 | 0.28 |
| 25477 | 0 | 20084  | GGVYLLPRRGPR LGV               | 2.74 | 0.01 | 1.72 | 0.44 | 0.85 | 0.28 |
| 25478 | 0 | 141656 | GGVYQARFEQFKQEMK<br>KQFAQYDKVH | 3.21 | 0.01 | 3.33 | 1.15 | 0.22 | 0.28 |
| 25479 | 0 | 141656 | GGVYQARFEQFKQEMK<br>KQFAQYDKVH | 3.21 | 0.01 | 3.33 | 0.44 | 0.85 | 0.28 |
| 25480 | 0 | 141656 | GGVYQARFEQFKQEMK<br>KQFAQYDKVH | 3.21 | 0.01 | 3.33 | 0.44 | 0.85 | 0.28 |
| 25481 | 0 | 228203 | GGWGQPHGGGWGQG                 | 2.60 | 0.01 | 2.98 | 2.19 | 0.22 | 0.85 |
| 25482 | 0 | 20088  | GGWGQPHGGGWGQG                 | 2.67 | 0.01 | 0.90 | 2.19 | 0.22 | 0.28 |
| 25483 | 0 | 20088  | GGWGQPHGGGWGQG                 | 2.67 | 0.01 | 0.90 | 2.19 | 0.22 | 0.28 |
| 25484 | 0 | 20088  | GGWGQPHGGGWGQG                 | 2.67 | 0.01 | 0.78 | 2.19 | 0.22 | 0.28 |
| 25485 | 0 | 20088  | GGWGQPHGGGWGQG                 | 2.67 | 0.01 | 0.78 | 2.19 | 0.22 | 0.28 |
| 25486 | 0 | 20088  | GGWGQPHGGGWGQG                 | 2.67 | 0.01 | 0.78 | 2.19 | 0.22 | 0.28 |
| 25487 | 0 | 20088  | GGWGQPHGGGWGQG                 | 2.67 | 0.01 | 0.78 | 2.19 | 0.22 | 0.28 |
| 25488 | 0 | 176806 | GGWHKHISRSDP                   | 2.46 | 0.01 | 0.90 | 0.68 | 0.22 | 1.27 |
| 25489 | 0 | 20089  | GGWNTGGSR                      | 2.25 | 0.01 | 2.98 | 2.19 | 0.22 | 0.28 |
| 25490 | 0 | 20089  | GGWNTGGSR                      | 2.25 | 0.01 | 2.98 | 2.19 | 0.22 | 2.12 |
| 25491 | 0 | 20089  | GGWNTGGSR                      | 2.25 | 0.01 | 2.98 | 2.19 | 0.22 | 1.48 |
| 25492 | 0 | 20095  | GGWYSFDSPYLSITEM<br>RLR        | 2.92 | 0.01 | 0.90 | 1.15 | 0.22 | 0.28 |
| 25493 | 0 | 20095  | GGWYSFDSPYLSITEM<br>RLR        | 2.92 | 0.01 | 0.90 | 0.44 | 0.85 | 0.28 |
| 25494 | 0 | 20095  | GGWYSFDSPYLSITEM<br>RLR        | 2.92 | 0.01 | 0.90 | 1.15 | 0.22 | 0.28 |



|       |   |        |                                                |      |      |      |      |      |      |
|-------|---|--------|------------------------------------------------|------|------|------|------|------|------|
| 25495 | 0 | 20095  | GGWYSFDSPYLMSITEM<br>RLR                       | 2.92 | 0.01 | 0.90 | 0.44 | 0.85 | 0.28 |
| 25496 | 0 | 462344 | GGYDRYS                                        | 2.03 | 0.01 | 0.78 | 1.12 | 0.22 | 1.28 |
| 25497 | 0 | 82657  | GGYEFLLANDVDNSNPV<br>VQ                        | 2.87 | 0.01 | 2.39 | 2.87 | 0.22 | 0.28 |
| 25498 | 0 | 82657  | GGYEFLLANDVDNSNPV<br>VQ                        | 2.87 | 0.01 | 2.39 | 2.87 | 0.22 | 0.28 |
| 25499 | 0 | 82657  | GGYEFLLANDVDNSNPV<br>VQ                        | 2.87 | 0.01 | 2.39 | 2.87 | 0.22 | 0.28 |
| 25500 | 0 | 82657  | GGYEFLLANDVDNSNPV<br>VQ                        | 2.87 | 0.01 | 2.39 | 2.87 | 0.22 | 0.28 |
| 25501 | 0 | 82657  | GGYEFLLANDVDNSNPV<br>VQ                        | 2.87 | 0.01 | 2.39 | 2.87 | 0.22 | 1.75 |
| 25502 | 0 | 82657  | GGYEFLLANDVDNSNPV<br>VQ                        | 2.87 | 0.01 | 2.39 | 2.87 | 0.22 | 1.34 |
| 25503 | 0 | 20097  | GGYGDGGAHGGGYGG                                | 2.73 | 0.01 | 3.93 | 0.44 | 1.13 | 1.27 |
| 25504 | 0 | 20097  | GGYGDGGAHGGGYGG                                | 2.73 | 0.01 | 3.93 | 0.44 | 1.23 | 1.27 |
| 25505 | 0 | 20097  | GGYGDGGAHGGGYGG                                | 2.73 | 0.01 | 3.93 | 0.44 | 1.13 | 0.28 |
| 25506 | 0 | 20097  | GGYGDGGAHGGGYGG                                | 2.73 | 0.01 | 3.93 | 0.44 | 1.13 | 0.28 |
| 25507 | 0 | 20097  | GGYGDGGAHGGGYGG                                | 2.73 | 0.01 | 3.93 | 0.44 | 1.13 | 0.28 |
| 25508 | 0 | 20097  | GGYGDGGAHGGGYGG                                | 2.73 | 0.01 | 3.93 | 0.44 | 1.13 | 0.28 |
| 25509 | 0 | 20097  | GGYGDGGAHGGGYGG                                | 2.73 | 0.01 | 3.93 | 0.68 | 0.22 | 0.28 |
| 25510 | 0 | 20097  | GGYGDGGAHGGGYGG                                | 2.73 | 0.01 | 3.93 | 0.68 | 0.22 | 0.28 |
| 25511 | 0 | 20097  | GGYGDGGAHGGGYGG                                | 2.73 | 0.01 | 3.93 | 0.68 | 0.22 | 0.28 |
| 25512 | 0 | 20097  | GGYGDGGAHGGGYGG                                | 2.73 | 0.01 | 3.93 | 0.68 | 0.22 | 0.28 |
| 25513 | 0 | 20103  | GGYMLGSAMSRPIIHFG<br>SDYEDRYRENMHRYP<br>NQVYYR | 3.59 | 0.01 | 0.78 | 2.19 | 0.22 | 0.28 |
| 25514 | 0 | 20103  | GGYMLGSAMSRPIIHFG<br>SDYEDRYRENMHRYP<br>NQVYYR | 3.59 | 0.01 | 0.78 | 2.19 | 0.22 | 0.28 |
| 25515 | 0 | 20104  | GGYMLGSAMSRPLIH                                | 2.68 | 0.01 | 2.52 | 1.20 | 0.22 | 0.28 |
| 25516 | 0 | 20105  | GGYPQQMVRHFA                                   | 2.43 | 0.01 | 0.90 | 2.13 | 0.22 | 1.39 |
| 25517 | 0 | 234113 | GGYSLK                                         | 1.89 | 0.01 | 0.90 | 0.68 | 0.22 | 0.28 |
| 25518 | 0 | 136317 | GGYVAGFLPDPT                                   | 2.47 | 0.01 | 3.48 | 3.70 | 0.85 | 1.34 |
| 25519 | 0 | 127663 | GGYVKLFPNS                                     | 2.28 | 0.01 | 0.78 | 0.44 | 1.13 | 0.28 |
| 25520 | 0 | 20108  | GGYYSASYSDPCSLK                                | 2.69 | 0.01 | 2.04 | 0.44 | 0.85 | 1.57 |

|       |   |        |                          |      |      |      |      |      |      |
|-------|---|--------|--------------------------|------|------|------|------|------|------|
| 25521 | 0 | 20109  | GHADFGGRA                | 2.25 | 0.01 | 3.28 | 0.44 | 1.23 | 0.85 |
| 25522 | 0 | 107858 | GHAksRPVRG               | 2.32 | 4.45 | 0.78 | 0.44 | 1.13 | 0.28 |
| 25523 | 0 | 107858 | GHAksRPVRG               | 2.32 | 4.45 | 0.78 | 0.44 | 1.13 | 0.28 |
| 25524 | 0 | 107858 | GHAksRPVRG               | 2.32 | 4.45 | 0.78 | 0.44 | 1.13 | 0.28 |
| 25525 | 0 | 126111 | GHCQGDGYRVGFGQC          | 2.71 | 0.01 | 1.75 | 0.68 | 0.22 | 0.28 |
| 25526 | 0 | 140855 | GHDEAAYSKNRR             | 2.42 | 0.01 | 3.01 | 1.12 | 0.22 | 0.28 |
| 25527 | 0 | 138412 | GHEAQPH                  | 2.02 | 0.01 | 0.78 | 0.44 | 1.13 | 0.28 |
| 25528 | 0 | 132336 | GHEAQPHSRPYMASL          | 2.66 | 0.01 | 0.78 | 0.44 | 1.41 | 0.28 |
| 25529 | 0 | 132336 | GHEAQPHSRPYMASL          | 2.66 | 0.01 | 0.78 | 1.12 | 0.22 | 0.28 |
| 25530 | 0 | 132336 | GHEAQPHSRPYMASL          | 2.66 | 0.01 | 0.78 | 0.44 | 1.13 | 0.28 |
| 25531 | 0 | 178235 | GHEDT                    | 1.74 | 0.01 | 1.75 | 2.16 | 0.22 | 1.66 |
| 25532 | 0 | 178235 | GHEDT                    | 1.74 | 0.01 | 1.75 | 2.16 | 0.22 | 0.28 |
| 25533 | 0 | 178235 | GHEDT                    | 1.74 | 0.01 | 1.75 | 2.16 | 0.22 | 0.28 |
| 25534 | 0 | 178235 | GHEDT                    | 1.74 | 0.01 | 1.75 | 2.16 | 0.22 | 1.27 |
| 25535 | 0 | 178235 | GHEDT                    | 1.74 | 0.01 | 1.75 | 2.16 | 0.22 | 1.48 |
| 25536 | 0 | 178235 | GHEDT                    | 1.74 | 0.01 | 1.75 | 2.16 | 0.22 | 1.75 |
| 25537 | 0 | 20129  | GHETQI                   | 1.88 | 0.01 | 3.53 | 0.68 | 0.22 | 0.85 |
| 25538 | 0 | 20129  | GHETQI                   | 1.88 | 0.01 | 3.53 | 0.68 | 0.22 | 1.27 |
| 25539 | 0 | 20129  | GHETQI                   | 1.88 | 0.01 | 3.53 | 0.68 | 0.22 | 1.27 |
| 25540 | 0 | 161346 | GHEVLNLTRNGYGSTQY<br>IR  | 2.90 | 0.01 | 2.08 | 2.25 | 0.22 | 1.57 |
| 25541 | 0 | 161346 | GHEVLNLTRNGYGSTQY<br>IR  | 2.90 | 0.01 | 2.08 | 2.02 | 0.22 | 1.57 |
| 25542 | 0 | 156874 | GHFPPTPIKTLA             | 2.47 | 0.01 | 0.90 | 2.74 | 0.22 | 0.85 |
| 25543 | 0 | 130852 | GHFVKPEAFLPFSAGRR<br>ACL | 2.94 | 0.01 | 0.78 | 0.44 | 1.13 | 0.28 |
| 25544 | 0 | 188204 | GHFVTLHGAE               | 2.32 | 0.01 | 2.92 | 1.81 | 0.22 | 0.85 |
| 25545 | 0 | 188204 | GHFVTLHGAE               | 2.32 | 0.01 | 2.92 | 3.37 | 0.22 | 0.85 |
| 25546 | 0 | 118810 | GHGKGVGFGEVGSgK          | 2.80 | 0.01 | 0.90 | 0.68 | 0.22 | 0.28 |
| 25547 | 0 | 118810 | GHGKGVGFGEVGSgK          | 2.80 | 0.01 | 0.90 | 0.68 | 0.22 | 0.28 |
| 25548 | 0 | 118810 | GHGKGVGFGEVGSgK          | 2.80 | 0.01 | 0.90 | 0.68 | 0.22 | 0.28 |
| 25549 | 0 | 118810 | GHGKGVGFGEVGSgK          | 2.80 | 0.01 | 0.90 | 0.68 | 0.22 | 0.28 |
| 25550 | 0 | 118810 | GHGKGVGFGEVGSgK          | 2.80 | 0.01 | 0.90 | 0.68 | 0.22 | 1.27 |
| 25551 | 0 | 118810 | GHGKGVGFGEVGSgK          | 2.80 | 0.01 | 0.90 | 0.68 | 0.22 | 0.28 |
| 25552 | 0 | 227208 | GHGQDQVSQFPHLQS          | 2.71 | 0.01 | 2.48 | 0.44 | 1.59 | 0.28 |
| 25553 | 0 | 20137  | GHGSETAWGT               | 2.34 | 0.01 | 2.84 | 0.68 | 0.22 | 0.28 |
| 25554 | 0 | 175177 | GHGTfRA                  | 2.03 | 0.01 | 0.90 | 1.15 | 0.22 | 1.39 |
| 25555 | 0 | 20141  | GHIELEGKpALVPDKEVL<br>YQ | 2.95 | 0.01 | 1.96 | 0.44 | 0.85 | 0.28 |

|       |   |        |                                                    |      |      |      |      |      |      |
|-------|---|--------|----------------------------------------------------|------|------|------|------|------|------|
| 25556 | 0 | 20143  | GHIELGGKPAIVPDKEVL<br>YQ                           | 2.94 | 0.01 | 1.96 | 0.44 | 0.85 | 0.28 |
| 25557 | 0 | 20144  | GHIELGGKPALVPDKEVL<br>YQ                           | 2.94 | 0.01 | 1.96 | 0.44 | 0.85 | 0.28 |
| 25558 | 0 | 20145  | GHIELGGKPALVPDRQV<br>LYQ                           | 2.93 | 0.01 | 1.96 | 0.44 | 0.85 | 0.28 |
| 25559 | 0 | 20148  | GHITGHRMAWDMMM<br>NWSPTT                           | 2.92 | 0.01 | 2.83 | 0.44 | 0.85 | 0.28 |
| 25560 | 0 | 20148  | GHITGHRMAWDMMM<br>NWSPTT                           | 2.92 | 0.01 | 2.83 | 0.44 | 0.85 | 0.28 |
| 25561 | 0 | 20148  | GHITGHRMAWDMMM<br>NWSPTT                           | 2.92 | 0.01 | 2.83 | 0.44 | 0.85 | 0.28 |
| 25562 | 0 | 141021 | GHKEVTVVT                                          | 2.24 | 0.01 | 4.03 | 2.00 | 0.22 | 0.28 |
| 25563 | 0 | 20152  | GHLAPL                                             | 1.90 | 0.01 | 3.27 | 0.44 | 1.59 | 0.28 |
| 25564 | 0 | 419190 | GHLNWAF                                            | 1.99 | 0.01 | 0.90 | 0.44 | 1.93 | 1.39 |
| 25565 | 0 | 20157  | GHLTSVYAWLAFLS                                     | 2.61 | 0.01 | 2.71 | 2.13 | 0.22 | 0.85 |
| 25566 | 0 | 20158  | GHHMHGSRN                                          | 2.15 | 0.01 | 3.42 | 0.68 | 0.22 | 0.28 |
| 25567 | 0 | 183374 | GHNAVFN                                            | 2.02 | 0.01 | 2.86 | 0.44 | 1.74 | 0.28 |
| 25568 | 0 | 183375 | GHNAVFNC                                           | 2.12 | 0.01 | 2.86 | 0.44 | 1.74 | 0.28 |
| 25569 | 0 | 98063  | GHNGSGKSTLAKTIN                                    | 2.71 | 0.01 | 4.93 | 1.20 | 0.22 | 0.85 |
| 25570 | 0 | 20166  | GHNMPNDPNRNV<br>DEN<br>ANANNAVKNNNNNEEPS<br>DKHIEQ | 3.55 | 0.01 | 3.37 | 0.44 | 1.74 | 0.28 |
| 25571 | 0 | 20166  | GHNMPNDPNRNV<br>DEN<br>ANANNAVKNNNNNEEPS<br>DKHIEQ | 3.55 | 0.01 | 3.37 | 3.33 | 0.22 | 0.28 |
| 25572 | 0 | 20167  | GHNSVDFEED                                         | 2.30 | 0.01 | 2.56 | 1.20 | 0.22 | 0.28 |
| 25573 | 0 | 20168  | GHNYINEIATSSYTFSYI<br>AQE                          | 3.06 | 0.01 | 3.38 | 1.12 | 0.22 | 0.85 |
| 25574 | 0 | 20168  | GHNYINEIATSSYTFSYI<br>AQE                          | 3.06 | 0.01 | 3.38 | 1.12 | 0.22 | 1.34 |
| 25575 | 0 | 124189 | GHPLAPPQA                                          | 2.24 | 0.01 | 0.90 | 0.44 | 1.13 | 0.28 |
| 25576 | 0 | 124189 | GHPLAPPQA                                          | 2.24 | 0.01 | 0.90 | 1.20 | 0.22 | 0.28 |
| 25577 | 0 | 124189 | GHPLAPPQA                                          | 2.24 | 0.01 | 0.90 | 1.20 | 0.22 | 0.28 |
| 25578 | 0 | 99279  | GHPQEI                                             | 1.88 | 0.01 | 2.86 | 2.02 | 0.85 | 0.85 |
| 25579 | 0 | 168667 | GHPSKTSGHPLT                                       | 2.52 | 0.01 | 0.90 | 0.44 | 0.85 | 1.39 |
| 25580 | 0 | 20174  | GHQVGDGE                                           | 2.15 | 0.01 | 2.04 | 0.44 | 0.85 | 0.28 |
| 25581 | 0 | 20174  | GHQVGDGE                                           | 2.15 | 0.01 | 2.04 | 0.44 | 0.85 | 0.28 |
| 25582 | 0 | 20174  | GHQVGDGE                                           | 2.15 | 0.01 | 2.04 | 0.44 | 0.85 | 0.28 |
| 25583 | 0 | 79555  | GHQVSR                                             | 1.99 | 0.01 | 0.90 | 1.12 | 0.22 | 1.39 |
| 25584 | 0 | 20175  | GHREAFPPWVFXFL                                     | 2.65 | 0.01 | 0.90 | 0.68 | 0.22 | 0.28 |
| 25585 | 0 | 20175  | GHREAFPPWVFXFL                                     | 2.65 | 0.01 | 0.90 | 0.68 | 0.22 | 0.28 |
| 25586 | 0 | 20178  | GHRMAWDM                                           | 2.12 | 0.01 | 1.72 | 0.44 | 0.85 | 0.28 |
| 25587 | 0 | 20179  | GHRMAWDMM                                          | 2.21 | 0.01 | 1.72 | 0.44 | 0.85 | 0.28 |
| 25588 | 0 | 20179  | GHRMAWDMM                                          | 2.21 | 0.01 | 1.72 | 1.20 | 0.22 | 1.34 |
| 25589 | 0 | 20179  | GHRMAWDMM                                          | 2.21 | 0.01 | 1.72 | 0.44 | 0.85 | 0.85 |
| 25590 | 0 | 20179  | GHRMAWDMM                                          | 2.21 | 0.01 | 1.72 | 0.44 | 0.85 | 0.85 |

|       |   |        |                            |      |      |      |      |      |      |
|-------|---|--------|----------------------------|------|------|------|------|------|------|
| 25591 | 0 | 20179  | GHRMAWDMM                  | 2.21 | 0.01 | 1.72 | 0.44 | 0.85 | 0.85 |
| 25592 | 0 | 20179  | GHRMAWDMM                  | 2.21 | 0.01 | 1.72 | 0.68 | 0.22 | 0.28 |
| 25593 | 0 | 20179  | GHRMAWDMM                  | 2.21 | 0.01 | 1.72 | 0.68 | 0.22 | 0.28 |
| 25594 | 0 | 20179  | GHRMAWDMM                  | 2.21 | 0.01 | 1.72 | 0.68 | 0.22 | 0.28 |
| 25595 | 0 | 20179  | GHRMAWDMM                  | 2.21 | 0.01 | 1.72 | 0.44 | 0.85 | 0.28 |
| 25596 | 0 | 20179  | GHRMAWDMM                  | 2.21 | 0.01 | 1.72 | 0.44 | 0.85 | 0.28 |
| 25597 | 0 | 20179  | GHRMAWDMM                  | 2.21 | 0.01 | 1.72 | 0.44 | 0.85 | 1.34 |
| 25598 | 0 | 107859 | GHRPLDKKREEAPSLRP<br>A     | 2.85 | 4.45 | 0.78 | 0.44 | 1.13 | 0.28 |
| 25599 | 0 | 107859 | GHRPLDKKREEAPSLRP<br>A     | 2.85 | 4.45 | 0.78 | 0.44 | 1.13 | 0.28 |
| 25600 | 0 | 107859 | GHRPLDKKREEAPSLRP<br>A     | 2.85 | 4.45 | 0.78 | 0.44 | 1.13 | 0.28 |
| 25601 | 0 | 138182 | GHRYTSSVSLTEACP            | 2.64 | 0.01 | 0.90 | 0.44 | 1.13 | 1.39 |
| 25602 | 0 | 225298 | GHSFWYDMMMPESGEKF<br>YP    | 2.85 | 0.01 | 2.61 | 0.68 | 0.22 | 0.28 |
| 25603 | 0 | 225298 | GHSFWYDMMMPESGEKF<br>YP    | 2.85 | 0.01 | 2.61 | 0.68 | 0.22 | 0.28 |
| 25604 | 0 | 225298 | GHSFWYDMMMPESGEKF<br>YP    | 2.85 | 0.01 | 2.61 | 0.68 | 0.22 | 0.28 |
| 25605 | 0 | 196946 | GHSHTLGWTNG                | 2.50 | 0.01 | 0.90 | 0.44 | 1.41 | 1.39 |
| 25606 | 0 | 196946 | GHSHTLGWTNG                | 2.50 | 0.01 | 0.90 | 0.44 | 1.41 | 0.28 |
| 25607 | 0 | 196946 | GHSHTLGWTNG                | 2.50 | 0.01 | 0.90 | 0.44 | 1.41 | 1.48 |
| 25608 | 0 | 196946 | GHSHTLGWTNG                | 2.50 | 0.01 | 0.90 | 0.44 | 1.41 | 1.34 |
| 25609 | 0 | 196946 | GHSHTLGWTNG                | 2.50 | 0.01 | 0.90 | 0.44 | 1.41 | 1.34 |
| 25610 | 0 | 196946 | GHSHTLGWTNG                | 2.50 | 0.01 | 0.90 | 0.44 | 1.41 | 1.34 |
| 25611 | 0 | 107860 | GHSYYISPELKP               | 2.46 | 0.01 | 0.90 | 0.68 | 0.22 | 1.39 |
| 25612 | 0 | 238501 | GHTDSVHVGGYATY             | 2.64 | 0.01 | 2.14 | 2.65 | 0.22 | 0.85 |
| 25613 | 0 | 196494 | GHTHKAM                    | 2.02 | 0.01 | 0.90 | 0.44 | 1.23 | 1.39 |
| 25614 | 0 | 156875 | GHTSLR                     | 1.88 | 0.01 | 0.90 | 2.74 | 0.22 | 0.85 |
| 25615 | 0 | 99280  | GHVLVVPQNFVAGK             | 2.69 | 0.01 | 2.16 | 0.44 | 1.23 | 1.48 |
| 25616 | 0 | 97337  | GHVTLSLLSLR                | 2.50 | 0.01 | 0.90 | 0.68 | 0.22 | 1.39 |
| 25617 | 0 | 112998 | GHWGAWMPSSISAFEG<br>TCVSI  | 2.98 | 0.01 | 0.78 | 0.44 | 1.13 | 2.97 |
| 25618 | 0 | 20197  | GHWMDFNTKTA                | 2.54 | 0.01 | 3.00 | 0.44 | 0.85 | 0.28 |
| 25619 | 0 | 20198  | GHWRCPPR                   | 2.13 | 0.01 | 2.04 | 0.44 | 0.85 | 0.28 |
| 25620 | 0 | 20198  | GHWRCPPR                   | 2.13 | 0.01 | 2.04 | 0.44 | 0.85 | 0.28 |
| 25621 | 0 | 20198  | GHWRCPPR                   | 2.13 | 0.01 | 2.04 | 0.44 | 0.85 | 0.28 |
| 25622 | 0 | 106453 | GHWRGANATS                 | 2.32 | 0.01 | 2.75 | 0.44 | 1.23 | 0.85 |
| 25623 | 0 | 20199  | GHWSRDCTQPRPPGP<br>CPLCQDP | 3.10 | 0.01 | 2.04 | 0.44 | 0.85 | 0.28 |
| 25624 | 0 | 20199  | GHWSRDCTQPRPPGP<br>CPLCQDP | 3.10 | 0.01 | 3.01 | 0.44 | 0.85 | 0.28 |
| 25625 | 0 | 20199  | GHWSRDCTQPRPPGP<br>CPLCQDP | 3.10 | 0.01 | 2.04 | 0.44 | 2.98 | 0.28 |
| 25626 | 0 | 79556  | GHWTRFA                    | 1.99 | 0.01 | 0.90 | 1.12 | 0.22 | 1.39 |

|       |   |        |                                      |      |      |      |      |      |      |
|-------|---|--------|--------------------------------------|------|------|------|------|------|------|
| 25627 | 0 | 171212 | GHYGYIDLELPCFHV                      | 2.67 | 0.01 | 0.78 | 0.44 | 1.13 | 0.28 |
| 25628 | 0 | 299043 | GIAADGVGGGDGSAG                      | 2.74 | 0.01 | 1.61 | 0.44 | 0.85 | 1.28 |
| 25629 | 0 | 20204  | GIADLNDAS                            | 2.23 | 0.01 | 0.90 | 2.55 | 0.22 | 0.28 |
| 25630 | 0 | 423664 | GIAEFPSRGKSSSYS                      | 2.68 | 3.70 | 0.78 | 0.44 | 1.13 | 1.27 |
| 25631 | 0 | 232815 | GIAFGAVELFD                          | 2.42 | 0.01 | 2.89 | 1.12 | 0.22 | 1.28 |
| 25632 | 0 | 109104 | GIAGAPGF                             | 2.17 | 0.01 | 1.60 | 2.55 | 2.60 | 0.28 |
| 25633 | 0 | 110595 | GIAGAPGFPGPRGPP                      | 2.73 | 0.01 | 1.75 | 2.46 | 0.22 | 0.28 |
| 25634 | 0 | 230853 | GIAGAPGFPGPRGPPGP<br>QGATGPL         | 3.17 | 0.01 | 0.78 | 3.16 | 0.22 | 0.28 |
| 25635 | 0 | 110596 | GIAGFKGDQGPKG                        | 2.58 | 0.01 | 0.78 | 3.18 | 0.22 | 0.28 |
| 25636 | 0 | 110596 | GIAGFKGDQGPKG                        | 2.58 | 0.01 | 0.78 | 3.18 | 0.22 | 0.28 |
| 25637 | 0 | 110596 | GIAGFKGDQGPKG                        | 2.58 | 0.01 | 0.78 | 3.18 | 0.22 | 0.28 |
| 25638 | 0 | 110597 | GIAGFKGDQGPKGGET                     | 2.69 | 0.01 | 1.75 | 2.98 | 0.22 | 0.28 |
| 25639 | 0 | 107147 | GIAGFKGEQGPKEP                       | 2.50 | 0.01 | 2.19 | 2.46 | 0.22 | 0.28 |
| 25640 | 0 | 108384 | GIAGFKGEQGPKEP                       | 2.72 | 4.23 | 2.19 | 3.16 | 0.22 | 1.75 |
| 25641 | 0 | 108384 | GIAGFKGEQGPKEP                       | 2.72 | 4.23 | 2.19 | 3.16 | 0.22 | 1.75 |
| 25642 | 0 | 108384 | GIAGFKGEQGPKEP                       | 2.72 | 4.23 | 2.19 | 3.16 | 0.22 | 1.75 |
| 25643 | 0 | 108385 | GIAGFKGEQGPKEPG                      | 2.79 | 0.01 | 1.60 | 2.46 | 0.22 | 0.28 |
| 25644 | 0 | 107149 | GIAGFKGEQGPKEGET                     | 2.71 | 4.23 | 2.19 | 3.20 | 2.25 | 1.75 |
| 25645 | 0 | 107149 | GIAGFKGEQGPKEGET                     | 2.71 | 4.23 | 2.19 | 4.93 | 2.25 | 1.75 |
| 25646 | 0 | 238502 | GIAHRTLRGTRAE                        | 2.65 | 0.01 | 2.14 | 2.65 | 0.22 | 0.85 |
| 25647 | 0 | 20216  | GIAIPHDIDLGESRVVIQ<br>DY             | 2.93 | 0.01 | 2.70 | 0.44 | 0.85 | 0.28 |
| 25648 | 0 | 20216  | GIAIPHDIDLGESRVVIQ<br>DY             | 2.93 | 0.01 | 2.70 | 0.44 | 0.85 | 0.28 |
| 25649 | 0 | 141022 | GIAKAFRAPSIREVSPGF<br>GTLTQGGASIMYGN | 3.39 | 0.01 | 4.63 | 0.68 | 0.22 | 0.85 |
| 25650 | 0 | 141022 | GIAKAFRAPSIREVSPGF<br>GTLTQGGASIMYGN | 3.39 | 0.01 | 4.63 | 0.68 | 0.22 | 0.85 |
| 25651 | 0 | 20217  | GIAKGIKEIVEAA                        | 2.59 | 0.01 | 2.73 | 0.44 | 0.85 | 0.28 |
| 25652 | 0 | 118372 | GIARVPLA                             | 2.12 | 0.01 | 0.78 | 0.44 | 1.13 | 0.28 |
| 25653 | 0 | 100880 | GIASRITQIK                           | 2.31 | 0.01 | 2.84 | 0.44 | 0.85 | 0.28 |
| 25654 | 0 | 238504 | GICYKKITRGSSRPE                      | 2.67 | 0.01 | 2.56 | 2.02 | 0.22 | 0.85 |
| 25655 | 0 | 238504 | GICYKKITRGSSRPE                      | 2.67 | 0.01 | 2.56 | 1.20 | 0.22 | 0.85 |
| 25656 | 0 | 141658 | GIDDANKKACCAIRGS                     | 2.75 | 0.01 | 1.66 | 2.55 | 0.22 | 0.28 |
| 25657 | 0 | 141658 | GIDDANKKACCAIRGS                     | 2.75 | 0.01 | 1.66 | 1.20 | 0.22 | 0.28 |
| 25658 | 0 | 141658 | GIDDANKKACCAIRGS                     | 2.75 | 0.01 | 2.86 | 2.55 | 0.22 | 0.28 |
| 25659 | 0 | 141658 | GIDDANKKACCAIRGS                     | 2.75 | 0.01 | 2.86 | 0.44 | 1.74 | 0.28 |
| 25660 | 0 | 114361 | GIDFDKFFKNRIDTF                      | 2.71 | 0.01 | 4.93 | 0.44 | 1.74 | 1.57 |

|       |   |        |                                                 |      |      |      |      |      |      |
|-------|---|--------|-------------------------------------------------|------|------|------|------|------|------|
| 25661 | 0 | 102473 | GIDGLV                                          | 1.91 | 0.01 | 3.04 | 1.20 | 0.22 | 0.28 |
| 25662 | 0 | 20224  | GIDKKKKKKNI                                     | 2.43 | 0.01 | 1.66 | 1.12 | 0.22 | 0.28 |
| 25663 | 0 | 20224  | GIDKKKKKKNI                                     | 2.43 | 0.01 | 1.66 | 3.33 | 0.22 | 1.57 |
| 25664 | 0 | 20224  | GIDKKKKKKNI                                     | 2.43 | 0.01 | 1.66 | 0.44 | 1.59 | 1.57 |
| 25665 | 0 | 130853 | GIDLIHAIPSLIVRDSCLPY<br>VPCPHPYCNRG             | 3.40 | 0.01 | 0.90 | 0.44 | 1.93 | 0.85 |
| 25666 | 0 | 20237  | GIDTNACHFMKCPLVKG<br>QQYDAKY                    | 3.07 | 0.01 | 3.72 | 1.15 | 0.22 | 0.85 |
| 25667 | 0 | 444262 | GIDWLYC                                         | 1.99 | 0.01 | 0.90 | 2.66 | 0.22 | 1.39 |
| 25668 | 0 | 118373 | GIEADDDRLNKVISE                                 | 2.64 | 0.01 | 0.78 | 0.44 | 1.13 | 0.85 |
| 25669 | 0 | 516679 | GIEDIRPLGQLPNLK                                 | 2.69 | 0.01 | 2.24 | 0.44 | 1.41 | 1.28 |
| 25670 | 0 | 100065 | GIEDLISEVAQGAL                                  | 2.64 | 0.01 | 2.96 | 1.12 | 0.22 | 0.28 |
| 25671 | 0 | 122365 | GIEFSGGLYFNEKKSTEE<br>NKQKNVLESVN               | 3.33 | 0.01 | 2.22 | 0.44 | 1.74 | 0.28 |
| 25672 | 0 | 122365 | GIEFSGGLYFNEKKSTEE<br>NKQKNVLESVN               | 3.33 | 0.01 | 2.22 | 0.44 | 1.74 | 1.34 |
| 25673 | 0 | 122365 | GIEFSGGLYFNEKKSTEE<br>NKQKNVLESVN               | 3.33 | 0.01 | 2.22 | 0.44 | 1.74 | 0.28 |
| 25674 | 0 | 454085 | GIEPSEITPEKSFVDDLDI                             | 2.91 | 0.01 | 2.04 | 1.15 | 0.22 | 0.28 |
| 25675 | 0 | 111344 | GIEQNFGFLFYPNKQP                                | 2.69 | 0.01 | 3.20 | 1.12 | 0.22 | 0.85 |
| 25676 | 0 | 299124 | GIEQVEEEEEEEDEE                                 | 2.70 | 0.01 | 1.61 | 0.44 | 0.85 | 1.28 |
| 25677 | 0 | 97339  | GIFGAIAGFIEGGW                                  | 2.67 | 0.01 | 4.93 | 1.20 | 0.22 | 1.27 |
| 25678 | 0 | 97340  | GIFGAIAGFIENGW<br>GIFGAIAGFIENGWEGM             | 2.67 | 0.01 | 4.93 | 1.20 | 0.22 | 1.27 |
| 25679 | 0 | 141904 | VDGWYGFRRHQNSEGT<br>GQAADL<br>GIFGAIAGFIENGWEGM | 3.56 | 0.01 | 4.45 | 0.68 | 0.22 | 0.28 |
| 25680 | 0 | 141904 | VDGWYGFRRHQNSEGT<br>GQAADL<br>GIFGAIAGFIENGWEGM | 3.56 | 0.01 | 4.45 | 0.68 | 2.25 | 1.75 |
| 25681 | 0 | 141904 | VDGWYGFRRHQNSEGT<br>GQAADL<br>GIFIYNMNLREILKLMT | 3.56 | 0.01 | 4.45 | 0.68 | 2.25 | 1.75 |
| 25682 | 0 | 20255  | DNIDTLKDKINEIKCSYAF<br>LK<br>GIFIYNMNLREILKLMT  | 3.61 | 0.01 | 2.22 | 0.44 | 1.74 | 0.28 |
| 25683 | 0 | 20255  | DNIDTLKDKINEIKCSYAF<br>LK<br>GIFNTGLKMFPDLTKVYS | 3.61 | 0.01 | 2.22 | 0.44 | 1.74 | 0.28 |
| 25684 | 0 | 122775 | GIFNTGLKMFPDLTKVYS<br>T                         | 2.88 | 0.01 | 0.78 | 2.46 | 0.22 | 0.28 |
| 25685 | 0 | 122775 | GIFNTGLKMFPDLTKVYS<br>T                         | 2.88 | 0.01 | 0.78 | 2.46 | 0.22 | 0.28 |
| 25686 | 0 | 122775 | GIFNTGLKMFPDLTKVYS<br>T                         | 2.88 | 0.01 | 0.78 | 2.46 | 0.22 | 1.34 |
| 25687 | 0 | 122775 | GIFNTGLKMFPDLTKVYS<br>T                         | 2.88 | 0.01 | 0.78 | 2.46 | 0.22 | 1.27 |

|       |   |        |                                |      |      |      |      |      |      |
|-------|---|--------|--------------------------------|------|------|------|------|------|------|
| 25688 | 0 | 122775 | GIFNTGLKMFPDLTKVYS<br>T        | 2.88 | 0.01 | 0.78 | 3.01 | 0.22 | 0.28 |
| 25689 | 0 | 115143 | GIFQILAGLCVMSAAAIY<br>TVRHPEWH | 3.14 | 0.01 | 0.78 | 0.44 | 1.13 | 0.28 |
| 25690 | 0 | 20260  | GIFRAAVCTR                     | 2.30 | 0.01 | 1.96 | 0.44 | 0.85 | 1.34 |
| 25691 | 0 | 241003 | GIFVIQSESLKKC                  | 2.52 | 0.01 | 0.78 | 0.44 | 1.13 | 2.35 |
| 25692 | 0 | 144649 | GIGAIDSNLD                     | 2.34 | 0.01 | 0.78 | 0.44 | 1.13 | 0.28 |
| 25693 | 0 | 144649 | GIGAIDSNLD                     | 2.34 | 0.01 | 0.78 | 0.44 | 2.35 | 0.28 |
| 25694 | 0 | 20267  | GIGAVLKVLTTGLPALIS<br>W        | 2.92 | 0.01 | 3.57 | 0.68 | 0.22 | 0.28 |
| 25695 | 0 | 20268  | GIGAVLKVLTTGLPALIS<br>WI       | 2.97 | 0.01 | 3.57 | 0.68 | 0.22 | 0.28 |
| 25696 | 0 | 20269  | GIGAVLKVLTTGLPALIS<br>WIKR     | 3.06 | 0.01 | 3.57 | 0.68 | 0.22 | 0.28 |
| 25697 | 0 | 20270  | GIGAVLKVLTTGLPALIS<br>WIKRKR   | 3.15 | 0.01 | 3.57 | 0.68 | 0.22 | 0.28 |
| 25698 | 0 | 20271  | GIGAVLKVLTTGLPALIS<br>WIKRKRQQ | 3.21 | 0.01 | 3.57 | 0.68 | 0.22 | 0.28 |
| 25699 | 0 | 20271  | GIGAVLKVLTTGLPALIS<br>WIKRKRQQ | 3.21 | 0.01 | 3.57 | 0.68 | 0.22 | 1.27 |
| 25700 | 0 | 20271  | GIGAVLKVLTTGLPALIS<br>WIKRKRQQ | 3.21 | 0.01 | 3.57 | 0.68 | 0.22 | 1.27 |
| 25701 | 0 | 20271  | GIGAVLKVLTTGLPALIS<br>WIKRKRQQ | 3.21 | 0.01 | 3.57 | 0.68 | 0.22 | 0.28 |
| 25702 | 0 | 20271  | GIGAVLKVLTTGLPALIS<br>WIKRKRQQ | 3.21 | 0.01 | 3.57 | 0.68 | 0.22 | 3.40 |
| 25703 | 0 | 94522  | GIGFQTGLRF                     | 2.34 | 0.01 | 0.90 | 0.44 | 0.22 | 1.27 |
| 25704 | 0 | 233571 | GIGMLPRFIPENQRIVAV             | 2.84 | 0.01 | 3.67 | 2.61 | 1.74 | 1.28 |
| 25705 | 0 | 20281  | GIGNIGDRNLGI                   | 2.53 | 0.01 | 2.86 | 0.44 | 0.85 | 0.28 |
| 25706 | 0 | 20281  | GIGNIGDRNLGI                   | 2.53 | 0.01 | 2.86 | 0.44 | 0.85 | 0.28 |
| 25707 | 0 | 20281  | GIGNIGDRNLGI                   | 2.53 | 0.01 | 2.86 | 0.44 | 0.85 | 0.28 |
| 25708 | 0 | 20283  | GIGPEKAF                       | 2.13 | 0.01 | 2.21 | 0.44 | 0.85 | 0.28 |
| 25709 | 0 | 20284  | GIGPEKAFRE                     | 2.32 | 0.01 | 2.21 | 1.12 | 0.22 | 0.28 |
| 25710 | 0 | 20285  | GIGSAVVSFAIKWE                 | 2.63 | 0.01 | 1.96 | 0.44 | 0.85 | 0.28 |
| 25711 | 0 | 112129 | GIGVGWI                        | 2.06 | 0.01 | 0.78 | 0.44 | 1.13 | 0.28 |
| 25712 | 0 | 20288  | GIGVTQNVLYENQKQIA              | 2.80 | 0.01 | 2.48 | 0.44 | 0.85 | 0.28 |
| 25713 | 0 | 20288  | GIGVTQNVLYENQKQIA              | 2.80 | 0.01 | 2.48 | 0.68 | 0.22 | 0.28 |
| 25714 | 0 | 190431 | GIHAQQKEPMIGVNVQ               | 2.67 | 0.01 | 1.60 | 0.44 | 1.23 | 0.28 |
| 25715 | 0 | 190431 | GIHAQQKEPMIGVNVQ               | 2.67 | 0.01 | 1.60 | 0.44 | 1.23 | 0.28 |
| 25716 | 0 | 20292  | GIHVIPTLNGDDRHKIVN<br>VD       | 2.96 | 0.01 | 3.27 | 3.16 | 0.22 | 0.28 |

|       |   |        |                           |      |      |      |      |      |      |
|-------|---|--------|---------------------------|------|------|------|------|------|------|
| 25717 | 0 | 117875 | GIIDLIEKRKFNQNSNST<br>YCV | 2.94 | 0.01 | 0.78 | 0.44 | 1.13 | 0.28 |
| 25718 | 0 | 117875 | GIIDLIEKRKFNQNSNST<br>YCV | 2.94 | 0.01 | 0.78 | 1.12 | 0.22 | 2.35 |
| 25719 | 0 | 117875 | GIIDLIEKRKFNQNSNST<br>YCV | 2.94 | 0.01 | 0.78 | 1.12 | 0.22 | 0.85 |
| 25720 | 0 | 117875 | GIIDLIEKRKFNQNSNST<br>YCV | 2.94 | 0.01 | 0.78 | 0.44 | 1.13 | 0.85 |
| 25721 | 0 | 117875 | GIIDLIEKRKFNQNSNST<br>YCV | 2.94 | 0.01 | 0.78 | 0.44 | 1.13 | 0.85 |
| 25722 | 0 | 117875 | GIIDLIEKRKFNQNSNST<br>YCV | 2.94 | 0.01 | 0.78 | 0.44 | 1.13 | 1.34 |
| 25723 | 0 | 117875 | GIIDLIEKRKFNQNSNST<br>YCV | 2.94 | 0.01 | 0.78 | 0.68 | 0.22 | 0.85 |
| 25724 | 0 | 117875 | GIIDLIEKRKFNQNSNST<br>YCV | 2.94 | 0.01 | 0.78 | 0.68 | 0.22 | 1.27 |
| 25725 | 0 | 117875 | GIIDLIEKRKFNQNSNST<br>YCV | 2.94 | 0.01 | 0.78 | 0.68 | 0.22 | 1.27 |
| 25726 | 0 | 117875 | GIIDLIEKRKFNQNSNST<br>YCV | 2.94 | 0.01 | 0.78 | 0.68 | 0.22 | 1.75 |
| 25727 | 0 | 20298  | GIIIGKSGVDLP              | 2.48 | 0.01 | 4.23 | 1.15 | 0.22 | 0.85 |
| 25728 | 0 | 20298  | GIIIGKSGVDLP              | 2.48 | 0.01 | 4.23 | 1.15 | 0.22 | 0.85 |
| 25729 | 0 | 20298  | GIIIGKSGVDLP              | 2.48 | 0.01 | 4.23 | 1.15 | 0.22 | 0.85 |
| 25730 | 0 | 20310  | GIIWVAVILHPRLV            | 2.63 | 0.01 | 2.69 | 0.44 | 0.85 | 0.28 |
| 25731 | 0 | 20318  | GIKITHFTTWTSI             | 2.57 | 0.01 | 3.17 | 1.15 | 2.26 | 0.28 |
| 25732 | 0 | 299221 | GIKTTTATTGSDSGV           | 2.70 | 0.01 | 1.61 | 0.44 | 0.85 | 1.28 |
| 25733 | 0 | 98065  | GIKVNSAVGK                | 2.34 | 0.01 | 3.57 | 0.44 | 0.85 | 0.28 |
| 25734 | 0 | 114120 | GILDSIGRFFGGDRG           | 2.73 | 0.01 | 0.78 | 2.36 | 0.22 | 0.85 |
| 25735 | 0 | 114120 | GILDSIGRFFGGDRG           | 2.73 | 0.01 | 0.78 | 2.36 | 0.22 | 2.92 |
| 25736 | 0 | 225628 | GILEDMPVDPDNEAY           | 2.66 | 0.01 | 0.78 | 0.68 | 0.22 | 0.85 |
| 25737 | 0 | 225628 | GILEDMPVDPDNEAY           | 2.66 | 0.01 | 0.78 | 0.68 | 0.22 | 0.28 |
| 25738 | 0 | 225628 | GILEDMPVDPDNEAY           | 2.66 | 0.01 | 0.78 | 0.68 | 0.22 | 1.48 |
| 25739 | 0 | 225628 | GILEDMPVDPDNEAY           | 2.66 | 0.01 | 0.78 | 0.68 | 0.22 | 1.66 |
| 25740 | 0 | 20329  | GILESRIKARITHVDTES<br>Y   | 2.94 | 0.01 | 2.72 | 0.68 | 0.22 | 0.28 |
| 25741 | 0 | 20329  | GILESRIKARITHVDTES<br>Y   | 2.94 | 0.01 | 2.72 | 0.68 | 0.22 | 0.28 |
| 25742 | 0 | 20354  | GILGFVFTL                 | 2.26 | 0.01 | 2.36 | 0.44 | 2.39 | 0.28 |
| 25743 | 0 | 20354  | GILGFVFTL                 | 2.26 | 0.01 | 2.36 | 0.44 | 2.39 | 0.28 |
| 25744 | 0 | 20354  | GILGFVFTL                 | 2.26 | 0.01 | 2.36 | 0.44 | 2.39 | 0.28 |
| 25745 | 0 | 20354  | GILGFVFTL                 | 2.26 | 0.01 | 2.36 | 0.44 | 1.74 | 1.27 |
| 25746 | 0 | 20354  | GILGFVFTL                 | 2.26 | 0.01 | 2.36 | 0.44 | 1.74 | 1.34 |
| 25747 | 0 | 178133 | GILGFVFTLTVPSEGLQ<br>RR   | 2.95 | 0.01 | 3.51 | 1.12 | 0.22 | 1.27 |
| 25748 | 0 | 178133 | GILGFVFTLTVPSEGLQ<br>RR   | 2.95 | 0.01 | 3.51 | 0.68 | 0.22 | 1.27 |



|       |   |        |                          |      |      |      |      |      |      |
|-------|---|--------|--------------------------|------|------|------|------|------|------|
| 25749 | 0 | 178133 | GILGFVFTLTVPSEGLQ<br>RR  | 2.95 | 0.01 | 3.51 | 0.68 | 0.22 | 0.85 |
| 25750 | 0 | 178133 | GILGFVFTLTVPSEGLQ<br>RR  | 2.95 | 0.01 | 3.51 | 0.68 | 0.22 | 0.85 |
| 25751 | 0 | 20358  | GILGGKF                  | 2.04 | 0.01 | 2.24 | 1.12 | 0.22 | 0.28 |
| 25752 | 0 | 20358  | GILGGKF                  | 2.04 | 0.01 | 2.24 | 0.68 | 0.22 | 0.28 |
| 25753 | 0 | 98801  | GILLEN                   | 1.89 | 0.01 | 2.14 | 0.44 | 0.85 | 0.28 |
| 25754 | 0 | 99281  | GILVLASVSATHAKS          | 2.70 | 0.01 | 2.16 | 0.44 | 1.23 | 1.48 |
| 25755 | 0 | 117876 | GIMAPPPGMR               | 2.34 | 0.01 | 0.78 | 3.05 | 1.13 | 0.28 |
| 25756 | 0 | 119178 | GIMAPPPGMRPPM            | 2.59 | 0.01 | 0.78 | 0.44 | 1.13 | 0.85 |
| 25757 | 0 | 103925 | GINDECDPDCACLGLA<br>VRVD | 3.00 | 0.01 | 1.75 | 3.33 | 1.13 | 1.39 |
| 25758 | 0 | 78979  | GIPASWKTIDADGDGH<br>GWKP | 2.98 | 0.01 | 2.84 | 0.44 | 0.85 | 0.28 |
| 25759 | 0 | 20391  | GIPDGWP                  | 2.05 | 0.01 | 4.33 | 3.16 | 0.22 | 0.28 |
| 25760 | 0 | 110599 | GIPGAKGSAGAPGIA          | 2.75 | 0.01 | 1.75 | 2.98 | 0.22 | 0.28 |
| 25761 | 0 | 186762 | GIPGGCKKYENFNDF          | 2.67 | 0.01 | 0.90 | 1.20 | 0.22 | 0.85 |
| 25762 | 0 | 20412  | GIQIICLAVL               | 2.32 | 0.01 | 0.78 | 0.44 | 1.74 | 0.28 |
| 25763 | 0 | 20413  | GIQLFDRILL               | 2.31 | 0.01 | 0.78 | 0.44 | 1.74 | 0.28 |
| 25764 | 0 | 127665 | GIQPTWVPFHST             | 2.45 | 0.01 | 3.16 | 3.16 | 0.22 | 0.28 |
| 25765 | 0 | 127666 | GIQPTWVPFHSTLSREQ        | 2.76 | 0.01 | 3.16 | 3.16 | 0.22 | 0.28 |
| 25766 | 0 | 127666 | GIQPTWVPFHSTLSREQ        | 2.76 | 0.01 | 3.16 | 3.16 | 0.22 | 0.28 |
| 25767 | 0 | 20420  | GIREVWPAG                | 2.22 | 0.01 | 0.90 | 0.44 | 1.23 | 0.28 |
| 25768 | 0 | 20420  | GIREVWPAG                | 2.22 | 0.01 | 0.90 | 0.44 | 1.23 | 1.39 |
| 25769 | 0 | 20420  | GIREVWPAG                | 2.22 | 0.01 | 0.90 | 0.44 | 1.23 | 0.28 |
| 25770 | 0 | 113001 | GIRKFAADAVKLERM          | 2.66 | 0.01 | 0.78 | 0.44 | 1.13 | 0.85 |
| 25771 | 0 | 113001 | GIRKFAADAVKLERM          | 2.66 | 0.01 | 0.78 | 1.20 | 0.22 | 0.85 |
| 25772 | 0 | 98802  | GIRRFL                   | 1.89 | 0.01 | 2.14 | 0.44 | 0.85 | 0.28 |
| 25773 | 0 | 20427  | GIRTINGLARTTADR          | 2.71 | 0.01 | 3.35 | 0.44 | 1.23 | 0.85 |
| 25774 | 0 | 79231  | GISHTG                   | 1.91 | 0.01 | 0.90 | 0.68 | 0.22 | 1.39 |
| 25775 | 0 | 131888 | GISSPSPINAFLSVD          | 2.68 | 0.01 | 0.78 | 0.44 | 1.13 | 0.85 |
| 25776 | 0 | 20451  | GISYYEVLAKYKDDLE         | 2.80 | 0.01 | 1.66 | 2.43 | 0.22 | 0.28 |
| 25777 | 0 | 20451  | GISYYEVLAKYKDDLE         | 2.80 | 0.01 | 1.66 | 1.20 | 0.22 | 0.28 |
| 25778 | 0 | 20451  | GISYYEVLAKYKDDLE         | 2.80 | 0.01 | 1.66 | 2.16 | 0.22 | 0.28 |
| 25779 | 0 | 20453  | GITDVF                   | 1.88 | 0.01 | 2.25 | 0.68 | 0.22 | 0.85 |
| 25780 | 0 | 20455  | GITGETTTTEYSNARYV        | 2.79 | 0.01 | 2.14 | 0.44 | 0.22 | 0.28 |
| 25781 | 0 | 20455  | GITGETTTTEYSNARYV        | 2.79 | 0.01 | 2.14 | 0.44 | 0.22 | 0.28 |
| 25782 | 0 | 20455  | GITGETTTTEYSNARYV        | 2.79 | 0.01 | 2.14 | 3.00 | 0.22 | 0.28 |

|       |   |        |                                                 |      |      |      |      |      |      |
|-------|---|--------|-------------------------------------------------|------|------|------|------|------|------|
| 25783 | 0 | 20458  | GITGRTFIRMARPTEDV<br>GVL                        | 2.95 | 0.01 | 2.40 | 0.44 | 1.59 | 0.28 |
| 25784 | 0 | 117295 | GITKPAIRRLARRGG                                 | 2.69 | 0.01 | 1.60 | 0.68 | 0.22 | 0.28 |
| 25785 | 0 | 117295 | GITKPAIRRLARRGG                                 | 2.69 | 0.01 | 1.60 | 2.84 | 1.13 | 0.28 |
| 25786 | 0 | 20462  | GITLKQATTAPCAVMDI<br>TGV                        | 2.95 | 0.01 | 2.82 | 0.44 | 0.85 | 0.28 |
| 25787 | 0 | 20463  | GITNKCKMNLQDNNGN<br>DIGFIGFHQ                   | 3.18 | 0.01 | 2.08 | 0.68 | 0.22 | 0.28 |
| 25788 | 0 | 20463  | GITNKCKMNLQDNNGN<br>DIGFIGFHQ                   | 3.18 | 0.01 | 2.08 | 0.68 | 0.22 | 0.28 |
| 25789 | 0 | 20463  | GITNKCKMNLQDNNGN<br>DIGFIGFHQ                   | 3.18 | 0.01 | 2.08 | 0.68 | 0.22 | 0.28 |
| 25790 | 0 | 20463  | GITNKCKMNLQDNNGN<br>DIGFIGFHQ                   | 3.18 | 0.01 | 2.08 | 0.68 | 2.25 | 1.75 |
| 25791 | 0 | 20463  | GITNKCKMNLQDNNGN<br>DIGFIGFHQ                   | 3.18 | 0.01 | 2.08 | 0.68 | 0.22 | 1.66 |
| 25792 | 0 | 20463  | GITNKCKMNLQDNNGN<br>DIGFIGFHQ                   | 3.18 | 0.01 | 2.08 | 0.68 | 0.22 | 1.66 |
| 25793 | 0 | 20463  | GITNKCKMNLQDNNGN<br>DIGFIGFHQ                   | 3.18 | 0.01 | 2.08 | 0.68 | 0.22 | 1.66 |
| 25794 | 0 | 20463  | GITNKCKMNLQDNNGN<br>DIGFIGFHQ                   | 3.18 | 0.01 | 2.08 | 0.68 | 0.22 | 1.66 |
| 25795 | 0 | 20463  | GITNKCKMNLQDNNGN<br>DIGFIGFHQ                   | 3.18 | 0.01 | 2.08 | 0.68 | 0.22 | 1.66 |
| 25796 | 0 | 20463  | GITNKCKMNLQDNNGN<br>DIGFIGFHQ                   | 3.18 | 0.01 | 2.08 | 0.68 | 0.22 | 1.66 |
| 25797 | 0 | 20463  | GITNKCKMNLQDNNGN<br>DIGFIGFHQ                   | 3.18 | 0.01 | 2.08 | 0.68 | 0.22 | 1.66 |
| 25798 | 0 | 20463  | GITNKCKMNLQDNNGN<br>DIGFIGFHQ                   | 3.18 | 0.01 | 2.08 | 0.68 | 0.22 | 1.66 |
| 25799 | 0 | 20463  | GITNKCKMNLQDNNGN<br>DIGFIGFHQ                   | 3.18 | 0.01 | 2.08 | 0.68 | 0.22 | 1.66 |
| 25800 | 0 | 20464  | GITQGIVE                                        | 2.15 | 0.01 | 3.06 | 1.12 | 0.22 | 0.28 |
| 25801 | 0 | 20468  | GITVKKTNQA                                      | 2.30 | 0.01 | 3.85 | 0.44 | 1.23 | 0.85 |
| 25802 | 0 | 177699 | GITVSRNGSSVFTTSQDS<br>TLK                       | 3.00 | 3.55 | 0.78 | 0.44 | 1.13 | 2.56 |
| 25803 | 0 | 20469  | GIVAHQRGNQ                                      | 2.32 | 0.01 | 2.75 | 0.44 | 1.23 | 0.28 |
| 25804 | 0 | 106457 | GIVDSKLPPIDV                                    | 2.48 | 0.01 | 3.08 | 0.44 | 1.23 | 0.85 |
| 25805 | 0 | 20473  | GIVEFYTD                                        | 2.10 | 0.01 | 3.06 | 1.12 | 0.22 | 0.28 |
| 25806 | 0 | 20477  | GIVPAKSVCGPVYCFTPS<br>PVVVGTTDRSGAPTYS<br>WGAND | 3.60 | 0.01 | 1.72 | 1.12 | 2.26 | 0.85 |
| 25807 | 0 | 20477  | GIVPAKSVCGPVYCFTPS<br>PVVVGTTDRSGAPTYS<br>WGAND | 3.60 | 0.01 | 1.72 | 0.44 | 1.59 | 0.28 |

|       |   |        |                               |      |      |      |      |      |      |
|-------|---|--------|-------------------------------|------|------|------|------|------|------|
|       |   |        | GIVPAKSVCGPVYCFTPS            |      |      |      |      |      |      |
| 25808 | 0 | 20477  | PVVVGTTDRSGAPTYS<br>WGAND     | 3.60 | 0.01 | 1.72 | 0.44 | 0.85 | 0.28 |
| 25809 | 0 | 20478  | GIVQIGVFDTSDGYKYFA<br>PANTVND | 3.17 | 0.01 | 3.04 | 2.75 | 0.22 | 0.28 |
| 25810 | 0 | 20478  | GIVQIGVFDTSDGYKYFA<br>PANTVND | 3.17 | 0.01 | 3.04 | 2.75 | 0.22 | 0.28 |
| 25811 | 0 | 20478  | GIVQIGVFDTSDGYKYFA<br>PANTVND | 3.17 | 0.01 | 3.04 | 2.75 | 0.22 | 0.28 |
| 25812 | 0 | 20480  | GIVRTPLAELLDG                 | 2.53 | 0.01 | 3.57 | 0.68 | 0.22 | 0.85 |
| 25813 | 0 | 20484  | GIVTCA                        | 1.88 | 0.01 | 2.40 | 0.44 | 0.85 | 0.28 |
| 25814 | 0 | 139062 | GIWPEKIC                      | 2.12 | 0.01 | 2.63 | 0.68 | 0.22 | 0.85 |
| 25815 | 0 | 175805 | GIWPEKICKGVPTYL               | 2.67 | 0.01 | 2.63 | 1.15 | 0.22 | 0.85 |
| 25816 | 0 | 175805 | GIWPEKICKGVPTYL               | 2.67 | 0.01 | 2.63 | 1.15 | 0.22 | 0.85 |
| 25817 | 0 | 175805 | GIWPEKICKGVPTYL               | 2.67 | 0.01 | 2.63 | 1.15 | 0.22 | 0.85 |
| 25818 | 0 | 175805 | GIWPEKICKGVPTYL               | 2.67 | 0.01 | 2.63 | 1.15 | 0.22 | 0.85 |
| 25819 | 0 | 193459 | GIYGPGSYG                     | 2.27 | 0.01 | 2.51 | 0.44 | 2.39 | 0.28 |
| 25820 | 0 | 193459 | GIYGPGSYG                     | 2.27 | 0.01 | 2.51 | 0.44 | 2.39 | 0.28 |
| 25821 | 0 | 181634 | GIYNQEKEKVYPYEN               | 2.70 | 0.01 | 1.66 | 2.36 | 0.22 | 1.28 |
| 25822 | 0 | 181635 | GIYNQEKIKKNPYEQ               | 2.71 | 0.01 | 2.86 | 2.37 | 0.22 | 1.28 |
| 25823 | 0 | 20512  | GKAKTKAVSRSQRAGLQ<br>FPV      | 2.97 | 0.01 | 0.78 | 0.44 | 0.85 | 0.28 |
| 25824 | 0 | 20512  | GKAKTKAVSRSQRAGLQ<br>FPV      | 2.97 | 0.01 | 0.78 | 0.44 | 1.13 | 0.28 |
| 25825 | 0 | 20512  | GKAKTKAVSRSQRAGLQ<br>FPV      | 2.97 | 0.01 | 0.78 | 0.44 | 1.13 | 0.28 |
| 25826 | 0 | 118374 | GKALCWVCAQSRKHRD              | 2.71 | 0.01 | 0.78 | 0.44 | 1.13 | 0.28 |
| 25827 | 0 | 118374 | GKALCWVCAQSRKHRD              | 2.71 | 0.01 | 0.78 | 0.44 | 1.13 | 0.28 |
| 25828 | 0 | 118374 | GKALCWVCAQSRKHRD              | 2.71 | 0.01 | 0.78 | 0.44 | 1.41 | 0.28 |
| 25829 | 0 | 118374 | GKALCWVCAQSRKHRD              | 2.71 | 0.01 | 0.78 | 0.44 | 1.13 | 0.28 |
| 25830 | 0 | 118374 | GKALCWVCAQSRKHRD              | 2.71 | 0.01 | 0.78 | 0.44 | 1.13 | 0.28 |
| 25831 | 0 | 118374 | GKALCWVCAQSRKHRD              | 2.71 | 0.01 | 0.78 | 0.44 | 1.13 | 0.28 |
| 25832 | 0 | 118374 | GKALCWVCAQSRKHRD              | 2.71 | 0.01 | 0.78 | 0.44 | 1.13 | 0.28 |
| 25833 | 0 | 118374 | GKALCWVCAQSRKHRD              | 2.71 | 0.01 | 0.78 | 0.44 | 1.13 | 0.28 |
| 25834 | 0 | 118374 | GKALCWVCAQSRKHRD              | 2.71 | 0.01 | 0.78 | 0.44 | 1.13 | 0.28 |
| 25835 | 0 | 118374 | GKALCWVCAQSRKHRD              | 2.71 | 0.01 | 0.78 | 0.44 | 1.13 | 1.27 |

|       |   |        |                          |      |      |      |      |      |      |
|-------|---|--------|--------------------------|------|------|------|------|------|------|
| 25836 | 0 | 118374 | GKALCWVCAQSRKHRD         | 2.71 | 0.01 | 0.78 | 1.12 | 0.22 | 0.85 |
| 25837 | 0 | 118375 | GKALCWVCAQSRKHRD<br>HAMV | 2.93 | 0.01 | 0.78 | 0.44 | 1.13 | 0.28 |
| 25838 | 0 | 118375 | GKALCWVCAQSRKHRD<br>HAMV | 2.93 | 0.01 | 0.78 | 0.44 | 1.13 | 0.28 |
| 25839 | 0 | 118375 | GKALCWVCAQSRKHRD<br>HAMV | 2.93 | 0.01 | 0.78 | 0.44 | 1.41 | 0.28 |
| 25840 | 0 | 237732 | GKALYFLNDMAKTRKDI<br>G   | 2.84 | 0.01 | 3.19 | 0.44 | 1.59 | 0.85 |
| 25841 | 0 | 237732 | GKALYFLNDMAKTRKDI<br>G   | 2.84 | 0.01 | 3.19 | 0.44 | 0.85 | 0.85 |
| 25842 | 0 | 237732 | GKALYFLNDMAKTRKDI<br>G   | 2.84 | 0.01 | 3.19 | 0.44 | 0.22 | 0.85 |
| 25843 | 0 | 434481 | GKAMYAPPIRG              | 2.41 | 0.01 | 3.44 | 1.20 | 0.22 | 2.49 |
| 25844 | 0 | 434481 | GKAMYAPPIRG              | 2.41 | 0.01 | 3.44 | 1.20 | 0.22 | 1.34 |
| 25845 | 0 | 434481 | GKAMYAPPIRG              | 2.41 | 0.01 | 3.44 | 1.20 | 0.22 | 2.75 |
| 25846 | 0 | 434481 | GKAMYAPPIRG              | 2.41 | 0.01 | 3.44 | 1.20 | 0.22 | 2.75 |
| 25847 | 0 | 434481 | GKAMYAPPIRG              | 2.41 | 0.01 | 3.44 | 1.20 | 0.22 | 2.75 |
| 25848 | 0 | 434481 | GKAMYAPPIRG              | 2.41 | 0.01 | 3.44 | 1.20 | 0.22 | 2.75 |
| 25849 | 0 | 434481 | GKAMYAPPIRG              | 2.41 | 0.01 | 3.44 | 1.20 | 0.22 | 2.75 |
| 25850 | 0 | 434481 | GKAMYAPPIRG              | 2.41 | 0.01 | 3.44 | 1.20 | 0.22 | 2.75 |
| 25851 | 0 | 434481 | GKAMYAPPIRG              | 2.41 | 0.01 | 3.44 | 1.20 | 0.22 | 2.75 |
| 25852 | 0 | 434481 | GKAMYAPPIRG              | 2.41 | 0.01 | 3.44 | 1.20 | 0.22 | 2.75 |
| 25853 | 0 | 434481 | GKAMYAPPIRG              | 2.41 | 0.01 | 3.44 | 1.20 | 0.22 | 2.75 |
| 25854 | 0 | 434481 | GKAMYAPPIRG              | 2.41 | 0.01 | 3.44 | 1.20 | 0.22 | 2.75 |
| 25855 | 0 | 434481 | GKAMYAPPIRG              | 2.41 | 0.01 | 3.44 | 1.20 | 0.22 | 2.75 |
| 25856 | 0 | 434481 | GKAMYAPPIRG              | 2.41 | 0.01 | 3.44 | 1.20 | 0.22 | 2.75 |
| 25857 | 0 | 434481 | GKAMYAPPIRG              | 2.41 | 0.01 | 3.44 | 1.20 | 0.22 | 2.75 |
| 25858 | 0 | 434481 | GKAMYAPPIRG              | 2.41 | 0.01 | 3.44 | 1.20 | 0.22 | 2.75 |
| 25859 | 0 | 434481 | GKAMYAPPIRG              | 2.41 | 0.01 | 3.44 | 1.20 | 0.22 | 2.75 |
| 25860 | 0 | 434481 | GKAMYAPPIRG              | 2.41 | 0.01 | 3.44 | 1.20 | 0.22 | 0.85 |
| 25861 | 0 | 434481 | GKAMYAPPIRG              | 2.41 | 0.01 | 3.44 | 1.20 | 0.22 | 0.85 |
| 25862 | 0 | 434481 | GKAMYAPPIRG              | 2.41 | 0.01 | 3.44 | 1.20 | 0.22 | 0.85 |
| 25863 | 0 | 434481 | GKAMYAPPIRG              | 2.41 | 0.01 | 3.44 | 1.20 | 0.22 | 0.85 |
| 25864 | 0 | 434481 | GKAMYAPPIRG              | 2.41 | 0.01 | 3.44 | 1.20 | 0.22 | 0.85 |
| 25865 | 0 | 299539 | GKATGGSAGEDGESS          | 2.72 | 0.01 | 1.61 | 0.44 | 0.85 | 1.28 |
| 25866 | 0 | 299540 | GKATGGSAGEDSDSS          | 2.72 | 0.01 | 1.61 | 0.44 | 0.85 | 1.28 |
| 25867 | 0 | 299541 | GKATGSSAGEDGESS          | 2.72 | 0.01 | 1.61 | 0.44 | 0.85 | 1.28 |
| 25868 | 0 | 20519  | GKATVLLGMVLSLMALV<br>VVW | 2.98 | 0.01 | 2.78 | 2.49 | 0.85 | 0.28 |
| 25869 | 0 | 20521  | GKAVTKEQL                | 2.21 | 0.01 | 3.63 | 1.15 | 0.22 | 1.34 |
| 25870 | 0 | 20521  | GKAVTKEQL                | 2.21 | 0.01 | 3.63 | 1.15 | 0.22 | 1.34 |
| 25871 | 0 | 20521  | GKAVTKEQL                | 2.21 | 0.01 | 3.63 | 1.15 | 0.22 | 1.34 |
| 25872 | 0 | 20521  | GKAVTKEQL                | 2.21 | 0.01 | 3.63 | 1.15 | 0.22 | 1.34 |
| 25873 | 0 | 128723 | GKAVVLMGKNTMMRK          | 2.69 | 0.01 | 0.78 | 0.44 | 1.13 | 0.85 |

|       |   |        |                               |      |      |      |      |      |      |
|-------|---|--------|-------------------------------|------|------|------|------|------|------|
| 25874 | 0 | 20523  | GKCGVSIPYK                    | 2.32 | 0.01 | 3.33 | 0.44 | 1.23 | 0.85 |
| 25875 | 0 | 133584 | GKCNTDYSD                     | 2.21 | 0.01 | 1.60 | 0.68 | 0.22 | 0.28 |
| 25876 | 0 | 150987 | GKCPKYVKSTKLRLA               | 2.66 | 0.01 | 2.87 | 0.44 | 0.85 | 0.28 |
| 25877 | 0 | 150987 | GKCPKYVKSTKLRLA               | 2.66 | 0.01 | 2.87 | 0.68 | 0.22 | 0.28 |
| 25878 | 0 | 150987 | GKCPKYVKSTKLRLA               | 2.66 | 0.01 | 2.87 | 0.68 | 0.22 | 0.28 |
| 25879 | 0 | 150987 | GKCPKYVKSTKLRLA               | 2.66 | 0.01 | 2.87 | 0.68 | 0.22 | 0.85 |
| 25880 | 0 | 150987 | GKCPKYVKSTKLRLA               | 2.66 | 0.01 | 2.87 | 0.68 | 0.22 | 0.85 |
| 25881 | 0 | 150987 | GKCPKYVKSTKLRLA               | 2.66 | 0.01 | 2.87 | 0.68 | 0.22 | 0.85 |
| 25882 | 0 | 150987 | GKCPKYVKSTKLRLA               | 2.66 | 0.01 | 2.87 | 0.68 | 0.22 | 0.85 |
| 25883 | 0 | 150987 | GKCPKYVKSTKLRLA               | 2.66 | 0.01 | 2.87 | 0.68 | 0.22 | 0.85 |
| 25884 | 0 | 20526  | GKDDHYLLEF                    | 2.29 | 0.01 | 2.75 | 0.44 | 1.23 | 0.28 |
| 25885 | 0 | 135463 | GKDFVQPPTKICVGCPR<br>DIPTNSPE | 3.15 | 0.01 | 0.78 | 0.44 | 1.13 | 0.28 |
| 25886 | 0 | 115265 | GKDITADNK                     | 2.23 | 0.01 | 3.93 | 1.20 | 0.22 | 1.34 |
| 25887 | 0 | 115265 | GKDITADNK                     | 2.23 | 0.01 | 3.93 | 1.20 | 0.22 | 0.28 |
| 25888 | 0 | 152584 | GKDITEFDN                     | 2.31 | 0.01 | 2.18 | 2.16 | 0.22 | 0.28 |
| 25889 | 0 | 105828 | GKDLESIK                      | 2.12 | 0.01 | 3.05 | 1.20 | 0.22 | 0.28 |
| 25890 | 0 | 79839  | GKDLKRPGSSPM                  | 2.49 | 0.01 | 2.14 | 3.26 | 0.22 | 0.28 |
| 25891 | 0 | 79839  | GKDLKRPGSSPM                  | 2.49 | 0.01 | 2.14 | 3.17 | 0.22 | 0.28 |
| 25892 | 0 | 79840  | GKDLKRPGSSPME                 | 2.55 | 0.01 | 2.14 | 3.17 | 0.22 | 0.28 |
| 25893 | 0 | 79840  | GKDLKRPGSSPME                 | 2.55 | 0.01 | 2.14 | 3.17 | 0.22 | 0.28 |
| 25894 | 0 | 106458 | GKDPNHFRPAGLPEKY              | 2.72 | 0.01 | 0.78 | 1.12 | 0.22 | 0.28 |
| 25895 | 0 | 134062 | GKDPVQCSRDVVICP               | 2.67 | 0.01 | 2.19 | 1.15 | 0.22 | 0.28 |
| 25896 | 0 | 20537  | GKDRSIQ                       | 1.99 | 0.01 | 0.90 | 0.44 | 1.23 | 0.28 |
| 25897 | 0 | 20537  | GKDRSIQ                       | 1.99 | 0.01 | 0.90 | 0.44 | 1.23 | 1.27 |
| 25898 | 0 | 20538  | GKDSADKMPLTQLA                | 2.66 | 0.01 | 1.66 | 0.44 | 0.85 | 0.28 |
| 25899 | 0 | 20541  | GKDVLCNKDLRPICGT<br>DGV       | 2.97 | 0.01 | 2.25 | 0.44 | 1.23 | 0.28 |
| 25900 | 0 | 141659 | GKDYSMIMAPTVIDYL              | 2.71 | 0.01 | 2.86 | 2.55 | 0.22 | 0.28 |
| 25901 | 0 | 118377 | GKEAWDLGVCRDSVRR<br>KG        | 2.85 | 0.01 | 0.78 | 0.44 | 1.41 | 0.28 |
| 25902 | 0 | 20545  | GKEELRFRGQGVPI<br>NSG         | 2.93 | 0.01 | 2.45 | 1.20 | 0.22 | 1.48 |
| 25903 | 0 | 106459 | GKEEPSKGC                     | 2.36 | 0.01 | 3.08 | 0.44 | 1.23 | 0.85 |
| 25904 | 0 | 20548  | GKEKVNELSK                    | 2.33 | 0.01 | 1.60 | 0.44 | 1.23 | 0.28 |
| 25905 | 0 | 20548  | GKEKVNELSK                    | 2.33 | 0.01 | 1.60 | 0.44 | 1.23 | 0.28 |
| 25906 | 0 | 20552  | GKENALLPNW                    | 2.30 | 0.01 | 1.75 | 0.68 | 0.22 | 0.28 |
| 25907 | 0 | 20552  | GKENALLPNW                    | 2.30 | 0.01 | 1.75 | 0.68 | 0.22 | 0.28 |
| 25908 | 0 | 115144 | GKETTIKRKLVNGKMVA<br>ECKMKGVC | 3.21 | 0.01 | 0.78 | 0.44 | 1.13 | 0.28 |
| 25909 | 0 | 115144 | GKETTIKRKLVNGKMVA<br>ECKMKGVC | 3.21 | 0.01 | 0.78 | 0.44 | 1.41 | 0.28 |
| 25910 | 0 | 299702 | GKEVKKAAPAAKTA                | 2.73 | 0.01 | 1.61 | 0.44 | 0.85 | 1.28 |
| 25911 | 0 | 20555  | GKEVLP                        | 1.88 | 0.01 | 1.86 | 0.44 | 1.23 | 0.28 |

|       |   |        |                          |      |      |      |      |      |      |
|-------|---|--------|--------------------------|------|------|------|------|------|------|
| 25912 | 0 | 161347 | GKFATDPAVTLAHELIHA<br>G  | 2.90 | 0.01 | 2.08 | 2.49 | 0.22 | 1.57 |
| 25913 | 0 | 161347 | GKFATDPAVTLAHELIHA<br>G  | 2.90 | 0.01 | 2.08 | 2.43 | 0.22 | 1.57 |
| 25914 | 0 | 227769 | GKFFEITPEKNPQLRD         | 2.70 | 0.01 | 2.72 | 4.03 | 1.59 | 0.28 |
| 25915 | 0 | 153388 | GKFKKIVKGTHHWMLLT<br>F   | 2.86 | 0.01 | 2.45 | 1.12 | 0.22 | 2.92 |
| 25916 | 0 | 20562  | GKFLEGA                  | 2.03 | 0.01 | 2.24 | 1.12 | 0.22 | 0.28 |
| 25917 | 0 | 20562  | GKFLEGA                  | 2.03 | 0.01 | 2.24 | 0.68 | 0.22 | 0.28 |
| 25918 | 0 | 20563  | GKFPGSKPS                | 2.27 | 0.01 | 0.90 | 0.44 | 1.59 | 0.28 |
| 25919 | 0 | 20563  | GKFPGSKPS                | 2.27 | 0.01 | 0.90 | 3.57 | 0.22 | 0.28 |
| 25920 | 0 | 20563  | GKFPGSKPS                | 2.27 | 0.01 | 0.90 | 0.44 | 0.85 | 1.39 |
| 25921 | 0 | 20564  | GKFPTLDH                 | 2.10 | 0.01 | 2.40 | 2.43 | 0.22 | 0.28 |
| 25922 | 0 | 127668 | GKFVLSSGKF               | 2.35 | 0.01 | 0.78 | 0.44 | 1.13 | 0.28 |
| 25923 | 0 | 130856 | GKGAAQREFH               | 2.31 | 0.01 | 0.78 | 0.44 | 1.93 | 0.85 |
| 25924 | 0 | 122101 | GKGAGDL                  | 2.05 | 0.01 | 0.90 | 0.44 | 1.13 | 1.27 |
| 25925 | 0 | 20567  | GKGDGTGWSS               | 2.34 | 0.01 | 2.24 | 0.68 | 0.22 | 0.85 |
| 25926 | 0 | 20569  | GKGGIV                   | 1.92 | 0.01 | 2.40 | 0.44 | 0.85 | 0.28 |
| 25927 | 0 | 112130 | GKGLEWL                  | 2.05 | 0.01 | 0.78 | 0.44 | 1.13 | 0.28 |
| 25928 | 0 | 113002 | GKGRGLSLSR               | 2.37 | 0.01 | 2.52 | 1.15 | 1.41 | 3.25 |
| 25929 | 0 | 113002 | GKGRGLSLSR               | 2.37 | 0.01 | 2.52 | 1.15 | 1.41 | 3.25 |
| 25930 | 0 | 181097 | GKGRGLSLSRFSWGAE         | 2.77 | 0.01 | 0.78 | 0.44 | 1.13 | 0.28 |
| 25931 | 0 | 181097 | GKGRGLSLSRFSWGAE         | 2.77 | 0.01 | 0.78 | 0.44 | 1.13 | 0.28 |
| 25932 | 0 | 181097 | GKGRGLSLSRFSWGAE         | 2.77 | 0.01 | 0.78 | 0.44 | 1.41 | 0.28 |
| 25933 | 0 | 181097 | GKGRGLSLSRFSWGAE         | 2.77 | 0.01 | 0.78 | 0.44 | 1.13 | 0.85 |
| 25934 | 0 | 181097 | GKGRGLSLSRFSWGAE         | 2.77 | 0.01 | 0.78 | 0.44 | 1.13 | 1.34 |
| 25935 | 0 | 181097 | GKGRGLSLSRFSWGAE         | 2.77 | 0.01 | 0.78 | 0.44 | 1.13 | 1.27 |
| 25936 | 0 | 181097 | GKGRGLSLSRFSWGAE         | 2.77 | 0.01 | 0.78 | 0.44 | 1.13 | 1.27 |
| 25937 | 0 | 181097 | GKGRGLSLSRFSWGAE         | 2.77 | 0.01 | 0.78 | 0.44 | 1.13 | 2.02 |
| 25938 | 0 | 116729 | GKGRGLSLSRFSWGGR<br>DSRS | 3.00 | 0.01 | 1.75 | 2.25 | 0.22 | 0.28 |
| 25939 | 0 | 20575  | GKGTEEKEK                | 2.28 | 0.01 | 3.97 | 0.44 | 0.85 | 0.28 |
| 25940 | 0 | 78169  | GKHGKEIKIT               | 2.36 | 0.01 | 2.30 | 0.68 | 0.22 | 0.28 |
| 25941 | 0 | 78169  | GKHGKEIKIT               | 2.36 | 0.01 | 2.30 | 0.68 | 0.22 | 0.28 |
| 25942 | 0 | 78170  | GKHGKEVKIT               | 2.34 | 0.01 | 2.30 | 0.68 | 0.22 | 0.28 |
| 25943 | 0 | 20583  | GKICNNPHRILDGIDCTLI<br>D | 2.96 | 0.01 | 3.27 | 2.69 | 0.22 | 0.28 |
| 25944 | 0 | 20583  | GKICNNPHRILDGIDCTLI<br>D | 2.96 | 0.01 | 3.27 | 2.69 | 0.22 | 0.28 |

|       |   |        |                         |      |      |      |      |      |      |
|-------|---|--------|-------------------------|------|------|------|------|------|------|
| 25945 | 0 | 239720 | GKIGGLIGANVSIGHTLK      | 2.87 | 0.01 | 2.56 | 1.20 | 0.22 | 0.28 |
| 25946 | 0 | 239720 | GKIGGLIGANVSIGHTLK      | 2.87 | 0.01 | 2.56 | 1.20 | 0.22 | 0.28 |
| 25947 | 0 | 20586  | GKIGMYP                 | 2.03 | 0.01 | 0.90 | 0.44 | 1.23 | 0.28 |
| 25948 | 0 | 20586  | GKIGMYP                 | 2.03 | 0.01 | 0.90 | 0.44 | 1.23 | 1.27 |
| 25949 | 0 | 20586  | GKIGMYP                 | 2.03 | 0.01 | 0.90 | 0.44 | 1.23 | 1.27 |
| 25950 | 0 | 20586  | GKIGMYP                 | 2.03 | 0.01 | 0.90 | 0.44 | 1.23 | 1.27 |
| 25951 | 0 | 225737 | GKIPSARVSILHEVRPVT<br>S | 2.89 | 0.01 | 4.63 | 1.15 | 0.22 | 1.28 |
| 25952 | 0 | 225737 | GKIPSARVSILHEVRPVT<br>S | 2.89 | 0.01 | 4.63 | 1.15 | 0.22 | 1.28 |
| 25953 | 0 | 82705  | GKIRAV                  | 1.88 | 0.01 | 3.59 | 0.44 | 0.85 | 0.28 |
| 25954 | 0 | 82705  | GKIRAV                  | 1.88 | 0.01 | 3.59 | 0.44 | 0.85 | 0.28 |
| 25955 | 0 | 20591  | GKISSDEAKNPFIG          | 2.61 | 0.01 | 2.85 | 1.12 | 0.22 | 0.28 |
| 25956 | 0 | 20591  | GKISSDEAKNPFIG          | 2.61 | 0.01 | 2.85 | 1.12 | 0.22 | 0.28 |
| 25957 | 0 | 20592  | GKIVFSGE                | 2.13 | 0.01 | 3.75 | 1.15 | 0.22 | 0.28 |
| 25958 | 0 | 299817 | GKKEEDNDDDDLEE          | 2.70 | 0.01 | 1.61 | 0.44 | 0.85 | 1.28 |
| 25959 | 0 | 299836 | GKKKDEEQEPNEEEE         | 2.69 | 0.01 | 1.61 | 0.44 | 0.85 | 1.28 |
| 25960 | 0 | 240877 | GKKKDEPNQPSTPE          | 2.61 | 0.01 | 2.84 | 1.20 | 0.22 | 0.85 |
| 25961 | 0 | 240877 | GKKKDEPNQPSTPE          | 2.61 | 0.01 | 2.84 | 1.20 | 0.22 | 0.28 |
| 25962 | 0 | 240877 | GKKKDEPNQPSTPE          | 2.61 | 0.01 | 2.84 | 1.20 | 0.22 | 0.28 |
| 25963 | 0 | 20604  | GKKNKKKNP               | 2.27 | 0.01 | 3.04 | 2.13 | 0.22 | 1.27 |
| 25964 | 0 | 20604  | GKKNKKKNP               | 2.27 | 0.01 | 3.04 | 2.13 | 0.22 | 1.27 |
| 25965 | 0 | 20604  | GKKNKKKNP               | 2.27 | 0.01 | 3.04 | 2.13 | 0.22 | 1.27 |
| 25966 | 0 | 96320  | GKKPNIWYSL              | 2.28 | 0.01 | 2.39 | 0.44 | 0.85 | 0.28 |
| 25967 | 0 | 133836 | GKKRKRSRKE              | 2.36 | 0.01 | 1.60 | 3.05 | 0.22 | 0.28 |
| 25968 | 0 | 133836 | GKKRKRSRKE              | 2.36 | 0.01 | 1.60 | 3.05 | 0.22 | 0.28 |
| 25969 | 0 | 133836 | GKKRKRSRKE              | 2.36 | 0.01 | 1.60 | 3.05 | 0.22 | 0.28 |
| 25970 | 0 | 299863 | GKKSAAAAAPAKAAA         | 2.72 | 0.01 | 1.61 | 0.44 | 0.85 | 1.28 |
| 25971 | 0 | 299864 | GKKSAAATAPAKAA          | 2.72 | 0.01 | 1.61 | 0.44 | 0.85 | 1.28 |
| 25972 | 0 | 20606  | GKKTTHKPTKKP            | 2.53 | 0.01 | 2.38 | 0.68 | 0.22 | 0.28 |
| 25973 | 0 | 20606  | GKKTTHKPTKKP            | 2.53 | 0.01 | 2.38 | 0.68 | 0.22 | 0.28 |
| 25974 | 0 | 20606  | GKKTTHKPTKKP            | 2.53 | 0.01 | 2.38 | 0.44 | 1.74 | 0.28 |
| 25975 | 0 | 109122 | GKLAPTWTRQSA            | 2.45 | 0.01 | 0.90 | 1.15 | 0.22 | 1.39 |
| 25976 | 0 | 109122 | GKLAPTWTRQSA            | 2.45 | 0.01 | 0.90 | 1.15 | 0.22 | 0.85 |
| 25977 | 0 | 95411  | GKLCPNLCC               | 2.32 | 0.01 | 2.60 | 0.44 | 1.23 | 0.85 |
| 25978 | 0 | 138855 | GKLEYSYCAPEAGWQC<br>A   | 2.80 | 0.01 | 3.33 | 0.68 | 0.22 | 0.28 |
| 25979 | 0 | 138855 | GKLEYSYCAPEAGWQC<br>A   | 2.80 | 0.01 | 3.33 | 1.15 | 0.22 | 0.28 |
| 25980 | 0 | 99283  | GKLFEVKPDKKNPQL         | 2.67 | 0.01 | 2.16 | 0.44 | 1.23 | 1.48 |
| 25981 | 0 | 162327 | GKLGLITNTIAGVAGLI       | 2.84 | 0.01 | 3.28 | 0.68 | 0.22 | 2.49 |
| 25982 | 0 | 162327 | GKLGLITNTIAGVAGLI       | 2.84 | 0.01 | 3.28 | 0.68 | 0.22 | 0.28 |
| 25983 | 0 | 162327 | GKLGLITNTIAGVAGLI       | 2.84 | 0.01 | 3.28 | 0.68 | 0.22 | 0.28 |
| 25984 | 0 | 162327 | GKLGLITNTIAGVAGLI       | 2.84 | 0.01 | 3.28 | 0.68 | 0.22 | 0.28 |

|       |   |        |                                                        |      |      |      |      |      |      |
|-------|---|--------|--------------------------------------------------------|------|------|------|------|------|------|
| 25985 | 0 | 162327 | GKLGLITNTIAGVAGLI                                      | 2.84 | 0.01 | 3.28 | 0.68 | 0.22 | 1.66 |
| 25986 | 0 | 162327 | GKLGLITNTIAGVAGLI                                      | 2.84 | 0.01 | 3.28 | 0.68 | 0.22 | 1.34 |
| 25987 | 0 | 162327 | GKLGLITNTIAGVAGLI                                      | 2.84 | 0.01 | 3.28 | 0.68 | 0.22 | 0.28 |
| 25988 | 0 | 162327 | GKLGLITNTIAGVAGLI                                      | 2.84 | 0.01 | 3.28 | 0.68 | 0.22 | 2.02 |
| 25989 | 0 | 162327 | GKLGLITNTIAGVAGLI                                      | 2.84 | 0.01 | 3.28 | 0.68 | 0.22 | 0.85 |
| 25990 | 0 | 162327 | GKLGLITNTIAGVAGLI                                      | 2.84 | 0.01 | 3.28 | 0.68 | 0.22 | 1.75 |
| 25991 | 0 | 140857 | GKLGTVSYGEEK                                           | 2.49 | 0.01 | 3.01 | 1.12 | 0.22 | 0.28 |
| 25992 | 0 | 20616  | GKLIIDENIYYFDDNYRG<br>AVE                              | 2.99 | 0.01 | 3.04 | 2.75 | 0.22 | 0.28 |
| 25993 | 0 | 20616  | GKLIIDENIYYFDDNYRG<br>AVE                              | 2.99 | 0.01 | 3.04 | 2.75 | 0.22 | 0.28 |
| 25994 | 0 | 499195 | GKLITEW                                                | 1.99 | 0.01 | 2.30 | 0.68 | 0.22 | 1.27 |
| 25995 | 0 | 499195 | GKLITEW                                                | 1.99 | 0.01 | 2.30 | 0.68 | 0.22 | 0.28 |
| 25996 | 0 | 499195 | GKLITEW                                                | 1.99 | 0.01 | 2.30 | 0.68 | 0.22 | 0.28 |
| 25997 | 0 | 499195 | GKLITEW                                                | 1.99 | 0.01 | 2.30 | 0.68 | 0.22 | 1.34 |
| 25998 | 0 | 103928 | GKLPIAM                                                | 1.99 | 0.01 | 0.90 | 0.44 | 1.74 | 1.39 |
| 25999 | 0 | 103929 | GKLPIPY                                                | 2.02 | 0.01 | 0.90 | 0.44 | 1.74 | 1.39 |
| 26000 | 0 | 103930 | GKLPKES                                                | 2.02 | 0.01 | 0.90 | 0.44 | 1.74 | 0.28 |
| 26001 | 0 | 103931 | GKLPKMT                                                | 2.02 | 0.01 | 0.90 | 0.44 | 1.74 | 1.39 |
| 26002 | 0 | 103932 | GKLPPPI                                                | 2.02 | 0.01 | 0.90 | 0.44 | 1.74 | 1.39 |
| 26003 | 0 | 103933 | GKLPPWK                                                | 2.04 | 0.01 | 0.90 | 0.44 | 1.74 | 1.39 |
| 26004 | 0 | 20626  | GKLSFWEAGTTKAGYPY<br>NYNTTASDQLLVE                     | 3.32 | 0.01 | 2.70 | 1.15 | 0.22 | 0.28 |
| 26005 | 0 | 20626  | GKLSFWEAGTTKAGYPY<br>NYNTTASDQLLVE                     | 3.32 | 0.01 | 2.53 | 0.44 | 0.85 | 0.28 |
| 26006 | 0 | 117508 | GKMTANS DVEPGNSEV<br>SLVC                              | 2.94 | 0.01 | 0.78 | 0.44 | 1.13 | 0.28 |
| 26007 | 0 | 20635  | GKMTFKDCGHGEVTE<br>GKMTFKDCGHGEVTEL                    | 2.69 | 0.01 | 4.23 | 1.12 | 0.22 | 0.85 |
| 26008 | 0 | 20636  | DITGCSGDTTCVIHRGEK<br>MTLEAKFAANQDT                    | 3.77 | 0.01 | 4.23 | 0.44 | 1.23 | 0.85 |
| 26009 | 0 | 20638  | GKMOVQVVY                                              | 2.13 | 0.01 | 2.21 | 1.12 | 0.22 | 0.28 |
| 26010 | 0 | 20638  | GKMOVQVVY                                              | 2.13 | 0.01 | 2.21 | 0.44 | 0.85 | 0.28 |
| 26011 | 0 | 20639  | GKMOVQVVYDY                                            | 2.32 | 0.01 | 2.21 | 1.12 | 0.22 | 0.28 |
| 26012 | 0 | 20639  | GKMOVQVVYDY                                            | 2.32 | 0.01 | 2.21 | 1.12 | 0.22 | 0.28 |
| 26013 | 0 | 135681 | GKNCELDV                                               | 2.10 | 0.01 | 0.78 | 0.44 | 2.35 | 0.28 |
| 26014 | 0 | 20641  | GKN DKEE                                               | 2.00 | 0.01 | 2.43 | 1.12 | 0.22 | 0.85 |
| 26015 | 0 | 122371 | GKNPLGDDEASTTVSKT<br>ETSQVAPA                          | 3.17 | 0.01 | 1.60 | 2.04 | 0.22 | 0.28 |
| 26016 | 0 | 20650  | GKNRAINMLKRGLPR                                        | 2.71 | 0.01 | 3.04 | 0.44 | 0.22 | 0.28 |
| 26017 | 0 | 20650  | GKNRAINMLKRGLPR                                        | 2.71 | 0.01 | 3.04 | 0.44 | 1.59 | 0.28 |
| 26018 | 0 | 20650  | GKNRAINMLKRGLPR                                        | 2.71 | 0.01 | 3.04 | 0.44 | 0.85 | 0.28 |
| 26019 | 0 | 101679 | GKNSGDTNGSSTTQHKI<br>SAVFTDEATLLSA<br>GKNSSNDRSVPNKNYR | 3.34 | 0.01 | 3.72 | 3.42 | 0.22 | 0.28 |
| 26020 | 0 | 134680 | NVKDFGGMSFKKNNLI<br>DDD                                | 3.49 | 0.01 | 2.72 | 1.15 | 0.22 | 0.85 |



|       |   |        |                                |      |      |      |      |      |      |
|-------|---|--------|--------------------------------|------|------|------|------|------|------|
| 26021 | 0 | 20653  | GKPAIIPDR                      | 2.22 | 0.01 | 2.41 | 0.44 | 0.85 | 0.28 |
| 26022 | 0 | 20654  | GKPAIIPDRE                     | 2.30 | 0.01 | 2.41 | 0.44 | 0.85 | 0.28 |
| 26023 | 0 | 20654  | GKPAIIPDRE                     | 2.30 | 0.01 | 2.41 | 0.44 | 0.85 | 0.28 |
| 26024 | 0 | 20654  | GKPAIIPDRE                     | 2.30 | 0.01 | 2.41 | 0.44 | 1.41 | 0.28 |
| 26025 | 0 | 79841  | GKPALELIRMVE                   | 2.45 | 0.01 | 2.14 | 3.26 | 0.22 | 0.28 |
| 26026 | 0 | 79841  | GKPALELIRMVE                   | 2.45 | 0.01 | 2.14 | 3.55 | 0.22 | 0.28 |
| 26027 | 0 | 20656  | GKPALVPDK                      | 2.23 | 0.01 | 2.59 | 0.44 | 0.85 | 0.28 |
| 26028 | 0 | 20657  | GKPALVPDKE                     | 2.31 | 0.01 | 2.59 | 0.44 | 0.85 | 0.28 |
| 26029 | 0 | 20657  | GKPALVPDKE                     | 2.31 | 0.01 | 2.59 | 0.44 | 1.41 | 0.28 |
| 26030 | 0 | 20657  | GKPALVPDKE                     | 2.31 | 0.01 | 2.59 | 0.44 | 0.85 | 0.28 |
| 26031 | 0 | 98066  | GKPGSDVYYA                     | 2.31 | 0.01 | 3.08 | 1.20 | 0.22 | 0.28 |
| 26032 | 0 | 100068 | GKPGWLLDNVAL                   | 2.48 | 0.01 | 0.90 | 2.00 | 0.22 | 0.28 |
| 26033 | 0 | 118380 | GKPIPNPLLGLDST                 | 2.63 | 0.01 | 4.63 | 1.15 | 2.26 | 0.28 |
| 26034 | 0 | 118380 | GKPIPNPLLGLDST                 | 2.63 | 0.01 | 4.63 | 0.68 | 0.22 | 0.28 |
| 26035 | 0 | 20660  | GKPNTNKSEKAERKSHD<br>TQTTQEICE | 3.19 | 0.01 | 4.63 | 0.44 | 0.85 | 0.28 |
| 26036 | 0 | 450631 | GKPRGYAFIEYEHERDM              | 2.78 | 0.01 | 0.78 | 2.79 | 1.13 | 1.28 |
| 26037 | 0 | 450631 | GKPRGYAFIEYEHERDM              | 2.78 | 0.01 | 0.78 | 2.79 | 1.13 | 1.28 |
| 26038 | 0 | 450631 | GKPRGYAFIEYEHERDM              | 2.78 | 0.01 | 0.78 | 1.81 | 1.41 | 1.28 |
| 26039 | 0 | 450631 | GKPRGYAFIEYEHERDM              | 2.78 | 0.01 | 0.78 | 1.81 | 1.41 | 1.28 |
| 26040 | 0 | 299989 | GKPSPFGQAAAAGDKP               | 2.70 | 0.01 | 1.61 | 0.44 | 0.85 | 1.28 |
| 26041 | 0 | 299990 | GKPSPFGQAAAAGGKP               | 2.71 | 0.01 | 1.61 | 0.44 | 0.85 | 1.28 |
| 26042 | 0 | 20662  | GKPTEKHIQIRSTN                 | 2.59 | 0.01 | 2.04 | 0.44 | 0.85 | 0.28 |
| 26043 | 0 | 20663  | GKPVVQTLA                      | 2.28 | 0.01 | 2.84 | 0.44 | 0.85 | 0.28 |
| 26044 | 0 | 20667  | GKQPASD                        | 1.99 | 0.01 | 0.90 | 0.44 | 1.23 | 0.28 |
| 26045 | 0 | 20667  | GKQPASD                        | 1.99 | 0.01 | 0.90 | 0.44 | 1.23 | 1.27 |
| 26046 | 0 | 20670  | GKQSLTKLAAAWGGSG<br>SEAYQGVQ   | 3.14 | 0.01 | 3.53 | 2.61 | 0.22 | 0.28 |
| 26047 | 0 | 20670  | GKQSLTKLAAAWGGSG<br>SEAYQGVQ   | 3.14 | 0.01 | 3.53 | 3.16 | 0.85 | 0.28 |
| 26048 | 0 | 137876 | GKQVTGE                        | 2.03 | 0.01 | 2.26 | 2.36 | 0.22 | 0.28 |
| 26049 | 0 | 137876 | GKQVTGE                        | 2.03 | 0.01 | 2.26 | 2.36 | 0.22 | 2.98 |
| 26050 | 0 | 171233 | GKQYCGKGEDLCAND                | 2.69 | 0.01 | 0.78 | 0.44 | 1.41 | 0.28 |
| 26051 | 0 | 20673  | GKREMA                         | 1.88 | 0.01 | 3.24 | 1.12 | 0.22 | 0.28 |
| 26052 | 0 | 20674  | GKREMVIITF                     | 2.28 | 0.01 | 2.66 | 0.68 | 0.22 | 0.28 |
| 26053 | 0 | 20674  | GKREMVIITF                     | 2.28 | 0.01 | 2.66 | 0.68 | 0.22 | 0.28 |
| 26054 | 0 | 20674  | GKREMVIITF                     | 2.28 | 0.01 | 2.66 | 2.52 | 0.22 | 0.28 |
| 26055 | 0 | 20674  | GKREMVIITF                     | 2.28 | 0.01 | 2.66 | 0.68 | 0.22 | 0.28 |
| 26056 | 0 | 20674  | GKREMVIITF                     | 2.28 | 0.01 | 2.66 | 0.68 | 0.22 | 0.28 |
| 26057 | 0 | 20674  | GKREMVIITF                     | 2.28 | 0.01 | 2.66 | 0.68 | 0.22 | 0.28 |
| 26058 | 0 | 20674  | GKREMVIITF                     | 2.28 | 0.01 | 2.66 | 0.68 | 0.22 | 0.28 |

|       |   |        |                                     |      |      |      |      |      |      |
|-------|---|--------|-------------------------------------|------|------|------|------|------|------|
| 26059 | 0 | 300052 | GKRIYDREFDYEDD                      | 2.72 | 0.01 | 1.61 | 0.44 | 0.85 | 1.28 |
| 26060 | 0 | 20678  | GKRPE                               | 1.74 | 0.01 | 4.93 | 1.15 | 0.22 | 0.85 |
| 26061 | 0 | 20679  | GKRPEGENASYHLAYDK<br>DRY            | 2.95 | 0.01 | 3.47 | 0.44 | 0.22 | 0.85 |
| 26062 | 0 | 107154 | GKRPSCTGCSYELAQ                     | 2.65 | 0.01 | 0.90 | 0.44 | 1.23 | 0.28 |
| 26063 | 0 | 137171 | GKSCDDQFCPEDAKC                     | 2.68 | 0.01 | 3.19 | 0.44 | 1.23 | 0.28 |
| 26064 | 0 | 105830 | GKSGDRSGYSSPGSPGT<br>PG             | 2.95 | 0.01 | 1.60 | 0.68 | 0.22 | 1.57 |
| 26065 | 0 | 105830 | GKSGDRSGYSSPGSPGT<br>PG             | 2.95 | 0.01 | 1.60 | 0.68 | 0.22 | 1.57 |
| 26066 | 0 | 105830 | GKSGDRSGYSSPGSPGT<br>PG             | 2.95 | 0.01 | 1.60 | 1.12 | 0.22 | 0.85 |
| 26067 | 0 | 20680  | GKSKRDAKNNAAKLAV<br>DKLL            | 2.97 | 0.01 | 3.10 | 0.68 | 0.22 | 0.85 |
| 26068 | 0 | 20680  | GKSKRDAKNNAAKLAV<br>DKLL            | 2.97 | 0.01 | 3.10 | 0.68 | 0.22 | 1.48 |
| 26069 | 0 | 20680  | GKSKRDAKNNAAKLAV<br>DKLL            | 2.97 | 0.01 | 3.10 | 0.68 | 0.22 | 1.48 |
| 26070 | 0 | 20680  | GKSKRDAKNNAAKLAV<br>DKLL            | 2.97 | 0.01 | 3.10 | 0.68 | 0.22 | 0.85 |
| 26071 | 0 | 20680  | GKSKRDAKNNAAKLAV<br>DKLL            | 2.97 | 0.01 | 3.10 | 0.68 | 0.22 | 0.85 |
| 26072 | 0 | 20680  | GKSKRDAKNNAAKLAV<br>DKLL            | 2.97 | 0.01 | 3.10 | 0.68 | 0.22 | 0.85 |
| 26073 | 0 | 20680  | GKSKRDAKNNAAKLAV<br>DKLL            | 2.97 | 0.01 | 3.10 | 0.68 | 0.22 | 0.85 |
| 26074 | 0 | 20680  | GKSKRDAKNNAAKLAV<br>DKLL            | 2.97 | 0.01 | 3.10 | 0.68 | 0.22 | 0.85 |
| 26075 | 0 | 20680  | GKSKRDAKNNAAKLAV<br>DKLL            | 2.97 | 0.01 | 3.10 | 0.68 | 0.22 | 0.85 |
| 26076 | 0 | 20683  | GKSMANTWPYFGYYM<br>GGNML            | 2.94 | 0.01 | 2.22 | 0.44 | 1.74 | 0.28 |
| 26077 | 0 | 465588 | GKSNSRNDDEMLDPEASF<br>WGEEKRASHTTPV | 3.31 | 0.01 | 1.66 | 0.44 | 0.85 | 1.28 |
| 26078 | 0 | 465588 | GKSNSRNDDEMLDPEASF<br>WGEEKRASHTTPV | 3.31 | 0.01 | 1.66 | 0.44 | 0.85 | 1.28 |
| 26079 | 0 | 434611 | GKSRLGDLYEEEMREL                    | 2.82 | 4.93 | 0.78 | 0.44 | 1.13 | 0.28 |
| 26080 | 0 | 300114 | GKSSEEGEIDDDSDV                     | 2.73 | 0.01 | 1.61 | 0.44 | 0.85 | 1.28 |
| 26081 | 0 | 300123 | GKSVGLTAALSPRQR                     | 2.68 | 0.01 | 1.61 | 0.44 | 0.85 | 1.28 |
| 26082 | 0 | 20690  | GKTAKSNIVSQVYLN                     | 2.66 | 0.01 | 3.38 | 1.12 | 0.22 | 0.28 |
| 26083 | 0 | 20690  | GKTAKSNIVSQVYLN                     | 2.66 | 0.01 | 3.38 | 1.12 | 0.22 | 0.28 |
| 26084 | 0 | 118381 | GKTCPKKEIPKGSKNT                    | 2.71 | 0.01 | 3.97 | 0.44 | 1.13 | 0.85 |
| 26085 | 0 | 118381 | GKTCPKKEIPKGSKNT                    | 2.71 | 0.01 | 3.97 | 0.44 | 1.13 | 0.28 |
| 26086 | 0 | 118381 | GKTCPKKEIPKGSKNT                    | 2.71 | 0.01 | 3.97 | 0.44 | 1.41 | 0.28 |
| 26087 | 0 | 118381 | GKTCPKKEIPKGSKNT                    | 2.71 | 0.01 | 3.97 | 0.44 | 1.13 | 0.28 |
| 26088 | 0 | 118381 | GKTCPKKEIPKGSKNT                    | 2.71 | 0.01 | 3.97 | 0.44 | 1.13 | 0.28 |

|       |   |        |                                   |      |      |      |      |      |      |
|-------|---|--------|-----------------------------------|------|------|------|------|------|------|
| 26089 | 0 | 118381 | GKTCPKEIPKGSKNT                   | 2.71 | 0.01 | 3.97 | 0.44 | 1.13 | 0.28 |
| 26090 | 0 | 118381 | GKTCPKEIPKGSKNT                   | 2.71 | 0.01 | 3.97 | 0.44 | 1.13 | 0.28 |
| 26091 | 0 | 152590 | GKTFIDFKKY                        | 2.32 | 0.01 | 2.18 | 2.16 | 0.22 | 0.28 |
| 26092 | 0 | 131889 | GKTFTNGWKSTEEED                   | 2.69 | 0.01 | 0.78 | 0.44 | 1.13 | 0.85 |
| 26093 | 0 | 119900 | GKTINKIDIDTEAYT                   | 2.70 | 0.01 | 0.78 | 3.81 | 0.22 | 0.28 |
| 26094 | 0 | 119900 | GKTINKIDIDTEAYT                   | 2.70 | 0.01 | 0.78 | 2.04 | 0.22 | 0.28 |
| 26095 | 0 | 119900 | GKTINKIDIDTEAYT                   | 2.70 | 0.01 | 0.78 | 2.04 | 0.22 | 0.28 |
| 26096 | 0 | 119900 | GKTINKIDIDTEAYT                   | 2.70 | 0.01 | 0.78 | 2.04 | 0.22 | 0.28 |
| 26097 | 0 | 119900 | GKTINKIDIDTEAYT                   | 2.70 | 0.01 | 0.78 | 2.04 | 0.22 | 0.28 |
| 26098 | 0 | 119900 | GKTINKIDIDTEAYT                   | 2.70 | 0.01 | 0.78 | 2.04 | 0.22 | 0.28 |
| 26099 | 0 | 82718  | GKTLAEVKAL                        | 2.33 | 0.01 | 3.06 | 0.44 | 0.85 | 0.28 |
| 26100 | 0 | 20693  | GKTLAEVKALTTeltaen<br>QE          | 2.99 | 0.01 | 2.84 | 1.12 | 0.22 | 1.34 |
| 26101 | 0 | 20693  | GKTLAEVKALTTeltaen<br>QE          | 2.99 | 0.01 | 2.84 | 0.68 | 1.41 | 2.97 |
| 26102 | 0 | 123236 | GKTNQKLEWAFSLYDV<br>DGNGTISKNEVLE | 3.30 | 0.01 | 1.60 | 2.04 | 0.22 | 0.28 |
| 26103 | 0 | 111345 | GKTTAAS                           | 2.02 | 0.01 | 0.90 | 0.44 | 0.85 | 1.39 |
| 26104 | 0 | 144651 | GKTVVGQITV                        | 2.36 | 0.01 | 0.78 | 0.44 | 1.41 | 0.28 |
| 26105 | 0 | 144651 | GKTVVGQITV                        | 2.36 | 0.01 | 0.78 | 0.44 | 1.41 | 0.28 |
| 26106 | 0 | 135682 | GKVDAFCG                          | 2.13 | 0.01 | 0.78 | 0.44 | 2.35 | 0.28 |
| 26107 | 0 | 236534 | GKVEVEGHLIDLKRV                   | 2.71 | 0.01 | 3.70 | 2.13 | 0.22 | 1.28 |
| 26108 | 0 | 110251 | GKVEVEGHLIDLKRVVL                 | 2.82 | 0.01 | 2.71 | 2.13 | 0.22 | 0.85 |
| 26109 | 0 | 110251 | GKVEVEGHLIDLKRVVL                 | 2.82 | 0.01 | 2.71 | 2.13 | 0.22 | 0.85 |
| 26110 | 0 | 20710  | GKVEYTKYNDDDTFTVK<br>VGD          | 2.98 | 0.01 | 3.70 | 1.12 | 0.22 | 1.34 |
| 26111 | 0 | 20710  | GKVEYTKYNDDDTFTVK<br>VGD          | 2.98 | 0.01 | 3.70 | 1.12 | 0.22 | 1.27 |
| 26112 | 0 | 20710  | GKVEYTKYNDDDTFTVK<br>VGD          | 2.98 | 0.01 | 3.70 | 1.81 | 2.25 | 1.75 |
| 26113 | 0 | 20710  | GKVEYTKYNDDDTFTVK<br>VGD          | 2.98 | 0.01 | 3.70 | 1.12 | 0.22 | 1.27 |
| 26114 | 0 | 534843 | GKVLLGEEEELEDDS                   | 2.71 | 0.01 | 0.78 | 1.15 | 0.22 | 2.02 |
| 26115 | 0 | 534843 | GKVLLGEEEELEDDS                   | 2.71 | 0.01 | 0.78 | 1.15 | 0.22 | 0.85 |
| 26116 | 0 | 534843 | GKVLLGEEEELEDDS                   | 2.71 | 0.01 | 0.78 | 1.15 | 0.22 | 1.48 |
| 26117 | 0 | 125423 | GKVLRFQKAFLTQLDELL<br>TE          | 2.95 | 0.01 | 0.78 | 0.44 | 0.85 | 0.28 |
| 26118 | 0 | 114837 | GKVMVLCNRA                        | 2.29 | 0.01 | 2.25 | 0.44 | 1.23 | 0.85 |
| 26119 | 0 | 114837 | GKVMVLCNRA                        | 2.29 | 0.01 | 2.25 | 0.44 | 1.23 | 0.85 |
| 26120 | 0 | 103934 | GKVQAQS                           | 2.02 | 0.01 | 0.90 | 0.44 | 1.13 | 1.39 |
| 26121 | 0 | 20719  | GKVSLEEFGRGFLKVV<br>EVR           | 2.98 | 0.01 | 2.93 | 1.81 | 0.22 | 0.28 |
| 26122 | 0 | 20719  | GKVSLEEFGRGFLKVV<br>EVR           | 2.98 | 0.01 | 2.93 | 2.69 | 0.22 | 0.28 |

|       |   |        |                                 |      |      |      |      |      |      |
|-------|---|--------|---------------------------------|------|------|------|------|------|------|
| 26123 | 0 | 20719  | GKVSLEEF CRGFGLKVW<br>EVR       | 2.98 | 0.01 | 2.93 | 0.68 | 0.22 | 0.28 |
| 26124 | 0 | 20722  | GKVTNGS                         | 2.03 | 0.01 | 2.14 | 0.44 | 0.85 | 0.28 |
| 26125 | 0 | 20723  | GKVTVSTKRSQQTIIPNV<br>GSRPWVRGL | 3.25 | 0.01 | 3.04 | 1.12 | 0.22 | 2.02 |
| 26126 | 0 | 20723  | GKVTVSTKRSQQTIIPNV<br>GSRPWVRGL | 3.25 | 0.01 | 3.04 | 1.12 | 0.22 | 0.28 |
| 26127 | 0 | 20723  | GKVTVSTKRSQQTIIPNV<br>GSRPWVRGL | 3.25 | 0.01 | 3.04 | 1.12 | 0.22 | 0.28 |
| 26128 | 0 | 20723  | GKVTVSTKRSQQTIIPNV<br>GSRPWVRGL | 3.25 | 0.01 | 3.04 | 1.12 | 0.22 | 0.28 |
| 26129 | 0 | 20723  | GKVTVSTKRSQQTIIPNV<br>GSRPWVRGL | 3.25 | 0.01 | 3.04 | 1.12 | 0.22 | 2.02 |
| 26130 | 0 | 20724  | GKVVL P                         | 1.89 | 0.01 | 2.40 | 0.44 | 0.85 | 0.28 |
| 26131 | 0 | 20725  | GKVVL PEN                       | 2.11 | 0.01 | 2.40 | 0.68 | 0.22 | 0.28 |
| 26132 | 0 | 20726  | GKVYLVGGPELGGWK                 | 2.71 | 0.01 | 3.41 | 0.44 | 1.23 | 1.57 |
| 26133 | 0 | 20726  | GKVYLVGGPELGGWK                 | 2.71 | 0.01 | 3.41 | 1.15 | 0.22 | 1.57 |
| 26134 | 0 | 20726  | GKVYLVGGPELGGWK                 | 2.71 | 0.01 | 3.41 | 1.15 | 0.22 | 1.57 |
| 26135 | 0 | 20726  | GKVYLVGGPELGGWK                 | 2.71 | 0.01 | 3.41 | 0.44 | 1.23 | 1.57 |
| 26136 | 0 | 20726  | GKVYLVGGPELGGWK                 | 2.71 | 0.01 | 3.41 | 1.12 | 0.22 | 1.57 |
| 26137 | 0 | 20726  | GKVYLVGGPELGGWK                 | 2.71 | 0.01 | 3.41 | 3.04 | 0.22 | 1.57 |
| 26138 | 0 | 107155 | GKWLGH PDK                      | 2.24 | 0.01 | 1.60 | 1.20 | 0.22 | 0.28 |
| 26139 | 0 | 107155 | GKWLGH PDK                      | 2.24 | 0.01 | 1.60 | 1.20 | 0.22 | 0.28 |
| 26140 | 0 | 20735  | GKYREDFQMDEGDPS                 | 2.67 | 0.01 | 4.03 | 0.68 | 0.22 | 0.85 |
| 26141 | 0 | 20735  | GKYREDFQMDEGDPS                 | 2.67 | 0.01 | 4.03 | 0.68 | 0.22 | 1.48 |
| 26142 | 0 | 225740 | GKYRTTEAQKSDSGS                 | 2.68 | 0.01 | 3.28 | 0.44 | 0.22 | 0.85 |
| 26143 | 0 | 20737  | GKYTTETFATNSYTF SYIA<br>QE      | 3.01 | 0.01 | 3.03 | 1.12 | 0.22 | 1.34 |
| 26144 | 0 | 20737  | GKYTTETFATNSYTF SYIA<br>QE      | 3.01 | 0.01 | 3.03 | 1.12 | 0.22 | 0.28 |
| 26145 | 0 | 20737  | GKYTTETFATNSYTF SYIA<br>QE      | 3.01 | 0.01 | 3.03 | 1.12 | 0.22 | 0.28 |
| 26146 | 0 | 20737  | GKYTTETFATNSYTF SYIA<br>QE      | 3.01 | 0.01 | 3.03 | 1.12 | 0.22 | 1.34 |
| 26147 | 0 | 20737  | GKYTTETFATNSYTF SYIA<br>QE      | 3.01 | 0.01 | 3.03 | 1.12 | 0.22 | 1.34 |
| 26148 | 0 | 516836 | GLAFRTPNPNKPPPARP<br>GPI        | 2.97 | 3.97 | 2.40 | 0.44 | 1.59 | 1.28 |
| 26149 | 0 | 516837 | GLAFRTPNPNKPPPARP<br>GPI        | 2.97 | 0.01 | 2.40 | 0.44 | 1.59 | 1.28 |
| 26150 | 0 | 107156 | GLAGAPGLR                       | 2.27 | 4.63 | 0.78 | 1.15 | 0.22 | 1.34 |
| 26151 | 0 | 107156 | GLAGAPGLR                       | 2.27 | 4.63 | 0.78 | 1.15 | 0.22 | 0.28 |
| 26152 | 0 | 167584 | GLAGPVRGVG                      | 2.36 | 0.01 | 0.78 | 0.44 | 1.13 | 0.85 |
| 26153 | 0 | 165601 | GLAGYPP                         | 2.02 | 0.01 | 0.90 | 0.44 | 1.23 | 1.39 |
| 26154 | 0 | 165601 | GLAGYPP                         | 2.02 | 0.01 | 0.90 | 0.44 | 1.23 | 1.39 |
| 26155 | 0 | 165602 | GLALLSEAVLRGQALLV<br>NSS        | 2.97 | 0.01 | 0.78 | 0.44 | 0.85 | 0.28 |

|       |   |        |                               |      |      |      |      |      |      |
|-------|---|--------|-------------------------------|------|------|------|------|------|------|
| 26156 | 0 | 78396  | GLANDV                        | 1.88 | 0.01 | 0.90 | 0.68 | 0.22 | 0.28 |
| 26157 | 0 | 123237 | GLAPGQIP                      | 2.15 | 0.01 | 0.78 | 1.20 | 0.22 | 0.28 |
| 26158 | 0 | 135464 | GLAPGV                        | 1.91 | 0.01 | 0.78 | 1.20 | 0.22 | 0.28 |
| 26159 | 0 | 146979 | GLAPSKALDSKSY                 | 2.57 | 0.01 | 1.60 | 0.44 | 0.85 | 0.85 |
| 26160 | 0 | 20769  | GLAQALIDQKVKEI                | 2.63 | 0.01 | 2.56 | 2.69 | 0.22 | 0.28 |
| 26161 | 0 | 20770  | GLARTTADRQTACNC               | 2.70 | 0.01 | 3.35 | 0.44 | 1.23 | 0.85 |
| 26162 | 0 | 20778  | GLAWTRQQNQWKEPD               | 2.64 | 0.01 | 2.51 | 0.44 | 2.35 | 1.28 |
| 26163 | 0 | 421053 | GLCCPTKEEELFA                 | 2.53 | 0.01 | 3.19 | 0.44 | 1.23 | 1.28 |
| 26164 | 0 | 20788  | GLCTLVAML                     | 2.23 | 0.01 | 2.43 | 0.44 | 2.39 | 0.28 |
| 26165 | 0 | 20788  | GLCTLVAML                     | 2.23 | 0.01 | 2.43 | 0.44 | 2.39 | 0.28 |
| 26166 | 0 | 20788  | GLCTLVAML                     | 2.23 | 0.01 | 2.43 | 0.44 | 2.39 | 0.28 |
| 26167 | 0 | 164763 | GLDATHAERAIPVSREEK<br>PTSAPSS | 3.15 | 0.01 | 0.78 | 0.44 | 1.13 | 0.28 |
| 26168 | 0 | 164763 | GLDATHAERAIPVSREEK<br>PTSAPSS | 3.15 | 0.01 | 0.78 | 0.44 | 1.13 | 0.28 |
| 26169 | 0 | 164763 | GLDATHAERAIPVSREEK<br>PTSAPSS | 3.15 | 0.01 | 0.78 | 0.44 | 1.41 | 0.28 |
| 26170 | 0 | 20793  | GLDFNE                        | 1.88 | 0.01 | 2.40 | 0.44 | 0.85 | 0.28 |
| 26171 | 0 | 20796  | GLDGTVWAQSAKFP                | 2.58 | 0.01 | 3.34 | 1.12 | 0.22 | 0.85 |
| 26172 | 0 | 20797  | GLDHILSLADIEEEQMIQ<br>SV      | 2.95 | 0.01 | 2.82 | 0.44 | 0.85 | 0.28 |
| 26173 | 0 | 20801  | GLDIQK                        | 1.88 | 0.01 | 1.60 | 0.44 | 1.23 | 1.27 |
| 26174 | 0 | 98803  | GLDIQKVAGT                    | 2.30 | 0.01 | 1.60 | 0.44 | 1.23 | 0.85 |
| 26175 | 0 | 95414  | GLDLDVNVFR                    | 2.33 | 0.01 | 2.60 | 1.12 | 0.22 | 0.85 |
| 26176 | 0 | 94530  | GLDLLFWEQGGGLCKALQ<br>EQCRFPN | 3.12 | 0.01 | 2.04 | 0.44 | 0.85 | 0.28 |
| 26177 | 0 | 94530  | GLDLLFWEQGGGLCKALQ<br>EQCRFPN | 3.12 | 0.01 | 2.04 | 0.44 | 1.59 | 0.28 |
| 26178 | 0 | 20803  | GLDLLPWEQGGGLCKAIQ<br>EQCCFLN | 3.11 | 0.01 | 3.01 | 0.44 | 1.59 | 0.28 |
| 26179 | 0 | 20803  | GLDLLPWEQGGGLCKAIQ<br>EQCCFLN | 3.11 | 0.01 | 3.01 | 0.44 | 0.85 | 0.28 |
| 26180 | 0 | 123240 | GLDLPNLPY                     | 2.25 | 0.01 | 2.28 | 2.00 | 0.22 | 0.28 |
| 26181 | 0 | 423317 | GLDRNSGNYFNDAKE               | 2.67 | 0.01 | 2.51 | 0.44 | 2.35 | 1.28 |
| 26182 | 0 | 177499 | GLDSSKWPNWSL                  | 2.49 | 0.01 | 0.90 | 1.20 | 0.22 | 1.27 |
| 26183 | 0 | 177499 | GLDSSKWPNWSL                  | 2.49 | 0.01 | 0.90 | 3.78 | 0.22 | 1.75 |
| 26184 | 0 | 177499 | GLDSSKWPNWSL                  | 2.49 | 0.01 | 0.90 | 3.78 | 0.22 | 0.28 |
| 26185 | 0 | 108390 | GLDWCNAGWLSGGSV<br>QYPITKPREP | 3.11 | 0.01 | 1.60 | 0.68 | 0.22 | 0.28 |
| 26186 | 0 | 107861 | GLEGGQDTKTITFDVS              | 2.67 | 0.01 | 0.90 | 0.44 | 1.13 | 1.39 |
| 26187 | 0 | 105224 | GLEKD                         | 1.74 | 0.01 | 3.21 | 1.20 | 0.22 | 0.28 |
| 26188 | 0 | 119457 | GLELPE                        | 1.91 | 0.01 | 0.78 | 0.44 | 0.85 | 0.28 |
| 26189 | 0 | 119457 | GLELPE                        | 1.91 | 0.01 | 0.78 | 0.44 | 0.85 | 0.28 |
| 26190 | 0 | 119457 | GLELPE                        | 1.91 | 0.01 | 0.78 | 0.44 | 1.13 | 0.28 |

|       |   |        |                     |      |      |      |      |      |      |
|-------|---|--------|---------------------|------|------|------|------|------|------|
|       |   |        | GLENLSGPAAVTARIKEL  |      |      |      |      |      |      |
| 26191 | 0 | 20819  | ATNGVVTNVKGS PNKL   | 3.66 | 0.01 | 2.75 | 1.20 | 0.22 | 0.85 |
|       |   |        | AYNGNA              |      |      |      |      |      |      |
|       |   |        | GLENLSGPAAVTARIKEL  |      |      |      |      |      |      |
| 26192 | 0 | 20819  | ATNGVVTNVKGS PNKL   | 3.66 | 0.01 | 2.75 | 0.44 | 1.23 | 0.85 |
|       |   |        | AYNGNA              |      |      |      |      |      |      |
| 26193 | 0 | 20823  | GLEPRRRKVKT TVV     | 2.60 | 0.01 | 2.40 | 2.43 | 0.22 | 0.28 |
| 26194 | 0 | 20825  | GLEQLESIIN          | 2.32 | 0.01 | 2.25 | 0.44 | 1.23 | 0.85 |
| 26195 | 0 | 112131 | GLEWLAH             | 2.02 | 0.01 | 0.78 | 0.44 | 1.13 | 0.28 |
| 26196 | 0 | 161348 | GLFEFYKLLCVRGIITSKT | 2.88 | 0.01 | 2.08 | 2.49 | 0.22 | 1.57 |
| 26197 | 0 | 161348 | GLFEFYKLLCVRGIITSKT | 2.88 | 0.01 | 2.08 | 2.02 | 0.22 | 1.57 |
| 26198 | 0 | 111347 | GLFFPDKRPKYNLNF     | 2.70 | 0.01 | 2.60 | 0.44 | 1.23 | 0.85 |
| 26199 | 0 | 20836  | GLFGAIAGF           | 2.27 | 0.01 | 3.78 | 0.68 | 0.22 | 1.75 |
| 26200 | 0 | 20836  | GLFGAIAGF           | 2.27 | 0.01 | 3.78 | 0.68 | 0.22 | 1.75 |
| 26201 | 0 | 20836  | GLFGAIAGF           | 2.27 | 0.01 | 3.78 | 0.68 | 0.22 | 1.34 |
| 26202 | 0 | 20836  | GLFGAIAGF           | 2.27 | 0.01 | 3.78 | 0.68 | 0.22 | 0.85 |
| 26203 | 0 | 20836  | GLFGAIAGF           | 2.27 | 0.01 | 3.78 | 0.68 | 0.22 | 1.34 |
| 26204 | 0 | 20838  | GLFGAIAGFIE         | 2.45 | 0.01 | 3.89 | 1.12 | 0.22 | 1.57 |
| 26205 | 0 | 20838  | GLFGAIAGFIE         | 2.45 | 0.01 | 3.89 | 1.12 | 0.22 | 1.57 |
| 26206 | 0 | 20838  | GLFGAIAGFIE         | 2.45 | 0.01 | 3.89 | 2.37 | 0.22 | 1.57 |
| 26207 | 0 | 20838  | GLFGAIAGFIE         | 2.45 | 0.01 | 3.89 | 2.37 | 0.22 | 1.57 |
| 26208 | 0 | 20838  | GLFGAIAGFIE         | 2.45 | 0.01 | 3.89 | 0.44 | 0.85 | 1.57 |
| 26209 | 0 | 20838  | GLFGAIAGFIE         | 2.45 | 0.01 | 3.89 | 1.15 | 0.22 | 1.57 |
| 26210 | 0 | 20838  | GLFGAIAGFIE         | 2.45 | 0.01 | 3.89 | 1.12 | 0.22 | 1.57 |
| 26211 | 0 | 20838  | GLFGAIAGFIE         | 2.45 | 0.01 | 3.89 | 1.12 | 0.22 | 1.57 |
| 26212 | 0 | 20838  | GLFGAIAGFIE         | 2.45 | 0.01 | 3.89 | 1.12 | 0.22 | 1.57 |
| 26213 | 0 | 20838  | GLFGAIAGFIE         | 2.45 | 0.01 | 3.89 | 1.15 | 0.22 | 1.57 |
| 26214 | 0 | 20838  | GLFGAIAGFIE         | 2.45 | 0.01 | 3.89 | 1.12 | 0.22 | 1.57 |
| 26215 | 0 | 20838  | GLFGAIAGFIE         | 2.45 | 0.01 | 2.36 | 0.44 | 0.85 | 1.57 |
| 26216 | 0 | 20838  | GLFGAIAGFIE         | 2.45 | 0.01 | 2.36 | 1.15 | 0.22 | 1.57 |
| 26217 | 0 | 20838  | GLFGAIAGFIE         | 2.45 | 0.01 | 2.36 | 1.15 | 0.22 | 1.57 |
| 26218 | 0 | 20838  | GLFGAIAGFIE         | 2.45 | 0.01 | 2.36 | 1.15 | 0.22 | 1.57 |
| 26219 | 0 | 97348  | GLFGAIAGFIEGGW      | 2.66 | 0.01 | 3.48 | 1.20 | 0.22 | 0.28 |
| 26220 | 0 | 97348  | GLFGAIAGFIEGGW      | 2.66 | 0.01 | 3.48 | 1.20 | 0.22 | 1.27 |
| 26221 | 0 | 97348  | GLFGAIAGFIEGGW      | 2.66 | 0.01 | 3.48 | 1.20 | 0.22 | 1.27 |
| 26222 | 0 | 97348  | GLFGAIAGFIEGGW      | 2.66 | 0.01 | 3.48 | 1.20 | 0.22 | 1.27 |
| 26223 | 0 | 97348  | GLFGAIAGFIEGGW      | 2.66 | 0.01 | 3.48 | 1.20 | 0.22 | 0.85 |
| 26224 | 0 | 97348  | GLFGAIAGFIEGGW      | 2.66 | 0.01 | 3.48 | 1.20 | 0.22 | 0.85 |
| 26225 | 0 | 97348  | GLFGAIAGFIEGGW      | 2.66 | 0.01 | 3.48 | 1.20 | 0.22 | 0.85 |
| 26226 | 0 | 97348  | GLFGAIAGFIEGGW      | 2.66 | 0.01 | 3.48 | 1.20 | 0.22 | 0.85 |
| 26227 | 0 | 97348  | GLFGAIAGFIEGGW      | 2.66 | 0.01 | 3.48 | 1.20 | 0.22 | 0.85 |
| 26228 | 0 | 97348  | GLFGAIAGFIEGGW      | 2.66 | 0.01 | 3.48 | 1.20 | 0.22 | 0.85 |
| 26229 | 0 | 97348  | GLFGAIAGFIEGGW      | 2.66 | 0.01 | 3.48 | 1.20 | 0.22 | 0.85 |
| 26230 | 0 | 97348  | GLFGAIAGFIEGGW      | 2.66 | 0.01 | 3.48 | 1.20 | 0.22 | 0.85 |
| 26231 | 0 | 97348  | GLFGAIAGFIEGGW      | 2.66 | 0.01 | 3.48 | 1.20 | 0.22 | 0.85 |

|       |   |        |                                |      |      |      |      |      |      |
|-------|---|--------|--------------------------------|------|------|------|------|------|------|
| 26232 | 0 | 97348  | GLFGAIAGFIEGGW                 | 2.66 | 0.01 | 3.48 | 1.20 | 0.22 | 0.85 |
| 26233 | 0 | 97348  | GLFGAIAGFIEGGW                 | 2.66 | 0.01 | 3.48 | 1.20 | 0.22 | 0.85 |
| 26234 | 0 | 97348  | GLFGAIAGFIEGGW                 | 2.66 | 0.01 | 3.48 | 1.20 | 0.22 | 0.85 |
| 26235 | 0 | 97348  | GLFGAIAGFIEGGW                 | 2.66 | 0.01 | 3.48 | 1.20 | 0.22 | 0.85 |
| 26236 | 0 | 97348  | GLFGAIAGFIEGGW                 | 2.66 | 0.01 | 3.48 | 1.20 | 0.22 | 2.02 |
| 26237 | 0 | 97348  | GLFGAIAGFIEGGW                 | 2.66 | 0.01 | 3.48 | 1.20 | 0.22 | 1.34 |
| 26238 | 0 | 97348  | GLFGAIAGFIEGGW                 | 2.66 | 0.01 | 3.48 | 1.20 | 0.22 | 1.34 |
| 26239 | 0 | 97348  | GLFGAIAGFIEGGW                 | 2.66 | 0.01 | 3.48 | 1.20 | 0.22 | 1.34 |
| 26240 | 0 | 97348  | GLFGAIAGFIEGGW                 | 2.66 | 0.01 | 3.48 | 1.20 | 0.22 | 1.34 |
| 26241 | 0 | 97348  | GLFGAIAGFIEGGW                 | 2.66 | 0.01 | 3.48 | 1.20 | 0.22 | 2.02 |
| 26242 | 0 | 97348  | GLFGAIAGFIEGGW                 | 2.66 | 0.01 | 3.48 | 1.20 | 0.22 | 2.02 |
| 26243 | 0 | 97348  | GLFGAIAGFIEGGW                 | 2.66 | 0.01 | 3.48 | 1.20 | 0.22 | 2.02 |
| 26244 | 0 | 97349  | GLFGAIAGFIENGW                 | 2.65 | 0.01 | 4.93 | 1.20 | 0.22 | 1.27 |
| 26245 | 0 | 20850  | GLFGKG                         | 1.92 | 0.01 | 2.40 | 0.44 | 0.85 | 0.28 |
| 26246 | 0 | 20851  | GLFGKGGIVTCAMFT                | 2.68 | 0.01 | 2.30 | 2.65 | 0.22 | 0.28 |
| 26247 | 0 | 20851  | GLFGKGGIVTCAMFT                | 2.68 | 0.01 | 2.30 | 2.65 | 0.22 | 0.28 |
| 26248 | 0 | 20851  | GLFGKGGIVTCAMFT                | 2.68 | 0.01 | 2.30 | 2.65 | 0.22 | 0.28 |
| 26249 | 0 | 20852  | GLFGKGGIVTCAMFTC               | 2.75 | 0.01 | 2.30 | 2.65 | 0.22 | 0.28 |
| 26250 | 0 | 20852  | GLFGKGGIVTCAMFTC               | 2.75 | 0.01 | 2.30 | 2.65 | 0.22 | 0.28 |
| 26251 | 0 | 20852  | GLFGKGGIVTCAMFTC               | 2.75 | 0.01 | 2.30 | 2.65 | 0.22 | 0.28 |
| 26252 | 0 | 20852  | GLFGKGGIVTCAMFTC               | 2.75 | 0.01 | 2.30 | 2.65 | 0.22 | 0.28 |
| 26253 | 0 | 20852  | GLFGKGGIVTCAMFTC               | 2.75 | 0.01 | 2.30 | 2.65 | 0.22 | 0.28 |
| 26254 | 0 | 20852  | GLFGKGGIVTCAMFTC               | 2.75 | 0.01 | 2.30 | 2.65 | 0.22 | 0.28 |
| 26255 | 0 | 20852  | GLFGKGGIVTCAMFTC               | 2.75 | 0.01 | 2.30 | 2.65 | 0.22 | 0.28 |
| 26256 | 0 | 94832  | GLFGNNENQTKV                   | 2.48 | 0.01 | 3.03 | 3.28 | 0.22 | 0.28 |
| 26257 | 0 | 94832  | GLFGNNENQTKV                   | 2.48 | 0.01 | 3.03 | 3.28 | 0.22 | 2.98 |
| 26258 | 0 | 94832  | GLFGNNENQTKV                   | 2.48 | 0.01 | 3.03 | 3.28 | 0.22 | 0.85 |
| 26259 | 0 | 108392 | GLFGRKTGSVA                    | 2.40 | 0.01 | 3.45 | 0.44 | 1.23 | 1.27 |
| 26260 | 0 | 97350  | GLFGVKGT                       | 2.15 | 0.01 | 2.87 | 0.68 | 0.22 | 0.28 |
| 26261 | 0 | 97351  | GLFGVKGTTVNANELPN<br>VLSNGVVEL | 3.26 | 0.01 | 2.87 | 0.68 | 0.22 | 0.28 |
| 26262 | 0 | 97351  | GLFGVKGTTVNANELPN<br>VLSNGVVEL | 3.26 | 0.01 | 2.87 | 0.68 | 0.22 | 0.85 |
| 26263 | 0 | 97351  | GLFGVKGTTVNANELPN<br>VLSNGVVEL | 3.26 | 0.01 | 2.87 | 1.81 | 0.22 | 0.28 |
| 26264 | 0 | 97351  | GLFGVKGTTVNANELPN<br>VLSNGVVEL | 3.26 | 0.01 | 2.87 | 1.81 | 0.22 | 0.85 |
| 26265 | 0 | 20854  | GLFHKEKMILNEEEITTK<br>GA       | 2.94 | 0.01 | 1.66 | 0.68 | 0.22 | 0.28 |

|       |   |        |                                  |      |      |      |      |      |      |
|-------|---|--------|----------------------------------|------|------|------|------|------|------|
| 26266 | 0 | 20854  | GLFHKEKMILNEEEITTK<br>GA         | 2.94 | 0.01 | 1.66 | 0.68 | 0.22 | 0.28 |
| 26267 | 0 | 20854  | GLFHKEKMILNEEEITTK<br>GA         | 2.94 | 0.01 | 1.66 | 0.68 | 0.22 | 0.85 |
| 26268 | 0 | 20854  | GLFHKEKMILNEEEITTK<br>GA         | 2.94 | 0.01 | 1.66 | 0.68 | 0.22 | 0.85 |
| 26269 | 0 | 20854  | GLFHKEKMILNEEEITTK<br>GA         | 2.94 | 0.01 | 1.66 | 0.68 | 0.22 | 0.85 |
| 26270 | 0 | 115266 | GLFQINNKIW                       | 2.30 | 0.01 | 1.60 | 0.44 | 1.23 | 0.85 |
| 26271 | 0 | 115266 | GLFQINNKIW                       | 2.30 | 0.01 | 1.60 | 0.44 | 1.23 | 0.85 |
| 26272 | 0 | 121335 | GLFSSYRLPGHTQDTLV<br>AQKSS       | 3.00 | 0.01 | 2.73 | 0.68 | 0.22 | 0.28 |
| 26273 | 0 | 121335 | GLFSSYRLPGHTQDTLV<br>AQKSS       | 3.00 | 0.01 | 2.73 | 0.68 | 0.22 | 0.28 |
| 26274 | 0 | 121335 | GLFSSYRLPGHTQDTLV<br>AQKSS       | 3.00 | 0.01 | 2.73 | 0.68 | 0.22 | 1.48 |
| 26275 | 0 | 121335 | GLFSSYRLPGHTQDTLV<br>AQKSS       | 3.00 | 0.01 | 2.73 | 0.68 | 0.22 | 1.48 |
| 26276 | 0 | 136322 | GLFTPDKSPAKT                     | 2.48 | 0.01 | 0.90 | 2.74 | 0.22 | 0.85 |
| 26277 | 0 | 136322 | GLFTPDKSPAKT                     | 2.48 | 0.01 | 0.90 | 0.68 | 0.22 | 0.28 |
| 26278 | 0 | 20869  | GLFVPPFWGTTSGDL                  | 2.69 | 0.01 | 0.90 | 0.68 | 0.22 | 1.39 |
| 26279 | 0 | 111348 | GLFYPNKQP                        | 2.21 | 0.01 | 3.20 | 0.44 | 1.23 | 0.85 |
| 26280 | 0 | 105832 | GLGDRKDQGGYTMH                   | 2.61 | 0.01 | 0.78 | 1.12 | 0.22 | 1.57 |
| 26281 | 0 | 116731 | GLGESRK                          | 2.03 | 0.01 | 1.60 | 0.68 | 0.22 | 2.92 |
| 26282 | 0 | 116731 | GLGESRK                          | 2.03 | 0.01 | 1.60 | 0.68 | 0.22 | 2.92 |
| 26283 | 0 | 116731 | GLGESRK                          | 2.03 | 0.01 | 1.60 | 0.68 | 0.22 | 0.85 |
| 26284 | 0 | 116731 | GLGESRK                          | 2.03 | 0.01 | 1.60 | 0.68 | 0.22 | 0.85 |
| 26285 | 0 | 116731 | GLGESRK                          | 2.03 | 0.01 | 1.60 | 0.68 | 0.22 | 0.85 |
| 26286 | 0 | 116731 | GLGESRK                          | 2.03 | 0.01 | 1.60 | 0.68 | 0.22 | 0.85 |
| 26287 | 0 | 116731 | GLGESRK                          | 2.03 | 0.01 | 1.60 | 0.68 | 0.22 | 2.92 |
| 26288 | 0 | 116731 | GLGESRK                          | 2.03 | 0.01 | 1.60 | 0.68 | 0.22 | 2.92 |
| 26289 | 0 | 180484 | GLGFA                            | 1.77 | 0.01 | 0.78 | 0.68 | 0.22 | 0.28 |
| 26290 | 0 | 116732 | GLGFYG                           | 1.92 | 0.01 | 1.60 | 0.44 | 1.13 | 0.28 |
| 26291 | 0 | 139761 | GLGGTAQ                          | 2.04 | 0.01 | 0.90 | 2.00 | 0.22 | 0.28 |
| 26292 | 0 | 238513 | GLGMAAALGRGHS                    | 2.65 | 0.01 | 2.14 | 2.65 | 0.22 | 0.85 |
| 26293 | 0 | 128740 | GLGPEKTSFFQALGI                  | 2.66 | 0.01 | 0.78 | 0.44 | 1.13 | 0.85 |
| 26294 | 0 | 103936 | GLGSPNCHGPDWASPV<br>CQRHS        | 2.99 | 0.01 | 3.16 | 0.44 | 1.59 | 0.28 |
| 26295 | 0 | 103937 | GLGSPNCHGPDWASPV<br>CQRHSPDCSRLV | 3.29 | 0.01 | 3.16 | 0.44 | 1.59 | 0.28 |
| 26296 | 0 | 99285  | GLGVPRERQMEPAFD                  | 2.67 | 0.01 | 2.86 | 2.02 | 0.85 | 0.85 |
| 26297 | 0 | 156876 | GLHANLQ                          | 2.02 | 0.01 | 0.90 | 2.74 | 0.22 | 0.85 |
| 26298 | 0 | 181638 | GLHKAADLGVIPGPS                  | 2.68 | 0.01 | 2.86 | 2.37 | 0.22 | 1.28 |
| 26299 | 0 | 109133 | GLHNHYT                          | 2.02 | 0.01 | 0.78 | 0.44 | 1.13 | 0.28 |
| 26300 | 0 | 156877 | GLHSGIQ                          | 2.03 | 0.01 | 0.90 | 2.74 | 0.22 | 0.85 |
| 26301 | 0 | 145799 | GLIADSVKDNQITSALST<br>Q          | 2.91 | 0.01 | 2.98 | 1.12 | 0.22 | 0.28 |



|       |   |        |                          |      |      |      |      |      |      |
|-------|---|--------|--------------------------|------|------|------|------|------|------|
| 26302 | 0 | 20906  | GLIAGAVGGSLLAAL          | 2.73 | 0.01 | 2.40 | 0.44 | 1.59 | 0.28 |
| 26303 | 0 | 187829 | GLIETWNPNNKPFQCA         | 2.68 | 0.01 | 2.72 | 2.13 | 2.39 | 0.85 |
| 26304 | 0 | 127999 | GLIEVQSDYGIVWGLSL<br>QKV | 2.97 | 0.01 | 2.87 | 2.75 | 0.22 | 0.28 |
| 26305 | 0 | 99286  | GLIFPGCPRHYEEPH          | 2.68 | 0.01 | 2.16 | 0.44 | 1.23 | 1.48 |
| 26306 | 0 | 151887 | GLIGALLVCRE              | 2.41 | 0.01 | 0.78 | 0.44 | 1.93 | 0.28 |
| 26307 | 0 | 20916  | GLIGIPALICCCRGR          | 2.72 | 0.01 | 2.43 | 0.44 | 1.59 | 0.28 |
| 26308 | 0 | 193460 | GLIGKIIAA                | 2.24 | 0.01 | 2.51 | 0.44 | 2.39 | 0.28 |
| 26309 | 0 | 193460 | GLIGKIIAA                | 2.24 | 0.01 | 2.51 | 0.44 | 2.39 | 0.28 |
| 26310 | 0 | 167744 | GLIGSFAACV               | 2.31 | 0.01 | 2.75 | 0.44 | 0.85 | 0.85 |
| 26311 | 0 | 167744 | GLIGSFAACV               | 2.31 | 0.01 | 2.75 | 0.44 | 0.85 | 0.85 |
| 26312 | 0 | 167744 | GLIGSFAACV               | 2.31 | 0.01 | 2.75 | 0.44 | 0.85 | 0.85 |
| 26313 | 0 | 20919  | GLIGVKGS                 | 2.15 | 0.01 | 3.06 | 1.12 | 0.22 | 0.28 |
| 26314 | 0 | 122375 | GLINRAKAVKQFEESQG        | 2.77 | 0.01 | 1.75 | 2.42 | 0.22 | 1.27 |
| 26315 | 0 | 122375 | GLINRAKAVKQFEESQG        | 2.77 | 0.01 | 1.75 | 2.82 | 0.22 | 0.28 |
| 26316 | 0 | 122375 | GLINRAKAVKQFEESQG        | 2.77 | 0.01 | 1.75 | 2.25 | 0.22 | 1.48 |
| 26317 | 0 | 122375 | GLINRAKAVKQFEESQG        | 2.77 | 0.01 | 2.19 | 2.42 | 0.22 | 0.28 |
| 26318 | 0 | 122375 | GLINRAKAVKQFEESQG        | 2.77 | 0.01 | 2.19 | 2.42 | 0.22 | 0.28 |
| 26319 | 0 | 122375 | GLINRAKAVKQFEESQG        | 2.77 | 0.01 | 2.19 | 2.42 | 0.22 | 0.28 |
| 26320 | 0 | 122375 | GLINRAKAVKQFEESQG        | 2.77 | 0.01 | 2.19 | 2.42 | 0.22 | 0.28 |
| 26321 | 0 | 122375 | GLINRAKAVKQFEESQG        | 2.77 | 0.01 | 2.19 | 2.42 | 0.22 | 0.28 |
| 26322 | 0 | 122375 | GLINRAKAVKQFEESQG        | 2.77 | 0.01 | 2.19 | 2.42 | 0.22 | 0.28 |
| 26323 | 0 | 122375 | GLINRAKAVKQFEESQG        | 2.77 | 0.01 | 2.19 | 3.63 | 0.22 | 0.28 |
| 26324 | 0 | 122375 | GLINRAKAVKQFEESQG        | 2.77 | 0.01 | 2.19 | 3.63 | 0.22 | 0.28 |
| 26325 | 0 | 122375 | GLINRAKAVKQFEESQG        | 2.77 | 0.01 | 2.19 | 2.82 | 0.22 | 0.28 |
| 26326 | 0 | 122375 | GLINRAKAVKQFEESQG        | 2.77 | 0.01 | 2.19 | 2.82 | 0.22 | 0.28 |
| 26327 | 0 | 122375 | GLINRAKAVKQFEESQG        | 2.77 | 0.01 | 1.75 | 0.68 | 0.22 | 0.28 |
| 26328 | 0 | 122375 | GLINRAKAVKQFEESQG        | 2.77 | 0.01 | 1.75 | 0.68 | 0.22 | 0.28 |
| 26329 | 0 | 128001 | GLINRAKAVKQFEESRG<br>RTS | 2.93 | 0.01 | 0.78 | 0.44 | 1.13 | 0.28 |
| 26330 | 0 | 20934  | GLIRACMLVR               | 2.31 | 0.01 | 1.96 | 0.44 | 0.85 | 1.34 |

|       |   |        |                    |      |      |      |      |      |      |
|-------|---|--------|--------------------|------|------|------|------|------|------|
| 26331 | 0 | 20936  | GLISDSGFLIPSKRR    | 2.69 | 0.01 | 0.90 | 0.44 | 0.85 | 1.39 |
| 26332 | 0 | 20939  | GLIVDTRDVEERVHV    | 2.69 | 0.01 | 3.50 | 2.22 | 0.22 | 0.28 |
| 26333 | 0 | 171246 | GLIYEETRRVFKVFL    | 2.66 | 0.01 | 0.78 | 0.44 | 1.13 | 0.28 |
|       |   |        | GLIYNRMGAVTTEVAFG  |      |      |      |      |      |      |
| 26334 | 0 | 20947  | LVCATCEQIADSQHRSH  | 3.51 | 0.01 | 3.85 | 1.15 | 0.22 | 0.85 |
|       |   |        | RQ                 |      |      |      |      |      |      |
|       |   |        | GLIYNRMGAVTTEVAFG  |      |      |      |      |      |      |
| 26335 | 0 | 20947  | LVCATCEQIADSQHRSH  | 3.51 | 0.01 | 3.85 | 1.15 | 0.22 | 0.85 |
|       |   |        | RQ                 |      |      |      |      |      |      |
|       |   |        | GLIYNRMGAVTTEVAFG  |      |      |      |      |      |      |
| 26336 | 0 | 20947  | LVCATCEQIADSQHRSH  | 3.51 | 0.01 | 3.85 | 0.68 | 0.22 | 0.85 |
|       |   |        | RQ                 |      |      |      |      |      |      |
| 26337 | 0 | 110602 | GLKAKPKFTLGKRKATPT | 2.94 | 0.01 | 1.86 | 0.44 | 0.85 | 0.28 |
|       |   |        | T                  |      |      |      |      |      |      |
| 26338 | 0 | 110602 | GLKAKPKFTLGKRKATPT | 2.94 | 0.01 | 1.86 | 0.44 | 1.41 | 0.28 |
|       |   |        | T                  |      |      |      |      |      |      |
| 26339 | 0 | 110863 | GLKAKPKFTLGKRKATPT | 2.99 | 0.01 | 1.86 | 0.44 | 0.85 | 1.27 |
|       |   |        | TS                 |      |      |      |      |      |      |
| 26340 | 0 | 110863 | GLKAKPKFTLGKRKATPT | 2.99 | 0.01 | 1.86 | 0.44 | 0.85 | 0.28 |
|       |   |        | TS                 |      |      |      |      |      |      |
| 26341 | 0 | 110864 | GLKAKPKLKRAAPTSTRT | 2.98 | 0.01 | 3.81 | 0.44 | 0.85 | 1.27 |
|       |   |        | SS                 |      |      |      |      |      |      |
| 26342 | 0 | 105835 | GLKGEGGEPGA        | 2.43 | 0.01 | 0.78 | 2.46 | 2.25 | 1.75 |
| 26343 | 0 | 105835 | GLKGEGGEPGA        | 2.43 | 0.01 | 0.78 | 2.46 | 0.22 | 0.28 |
| 26344 | 0 | 105835 | GLKGEGGEPGA        | 2.43 | 0.01 | 0.78 | 2.46 | 0.22 | 0.28 |
| 26345 | 0 | 105835 | GLKGEGGEPGA        | 2.43 | 0.01 | 0.78 | 2.46 | 0.22 | 0.28 |
| 26346 | 0 | 105835 | GLKGEGGEPGA        | 2.43 | 0.01 | 0.78 | 2.46 | 0.22 | 0.28 |
| 26347 | 0 | 105835 | GLKGEGGEPGA        | 2.43 | 0.01 | 0.78 | 2.46 | 0.22 | 0.28 |
| 26348 | 0 | 105835 | GLKGEGGEPGA        | 2.43 | 0.01 | 0.78 | 2.46 | 0.22 | 0.28 |
| 26349 | 0 | 105835 | GLKGEGGEPGA        | 2.43 | 0.01 | 0.78 | 2.46 | 0.22 | 0.28 |
| 26350 | 0 | 105835 | GLKGEGGEPGA        | 2.43 | 0.01 | 0.78 | 2.46 | 0.22 | 0.28 |
| 26351 | 0 | 105835 | GLKGEGGEPGA        | 2.43 | 0.01 | 0.78 | 2.46 | 0.22 | 0.28 |
| 26352 | 0 | 105835 | GLKGEGGEPGA        | 2.43 | 0.01 | 0.78 | 2.46 | 0.22 | 0.28 |
| 26353 | 0 | 105835 | GLKGEGGEPGA        | 2.43 | 0.01 | 0.78 | 2.46 | 0.22 | 0.28 |
| 26354 | 0 | 171247 | GLKKKISDKCRKKNI    | 2.68 | 0.01 | 0.78 | 0.44 | 1.41 | 0.28 |
| 26355 | 0 | 126137 | GLKKMLRTCAVHITL    | 2.65 | 4.93 | 0.78 | 0.44 | 1.13 | 1.27 |
| 26356 | 0 | 171248 | GLKKMLRTCAVHITL    | 2.65 | 0.01 | 0.78 | 0.44 | 1.41 | 0.28 |
| 26357 | 0 | 118383 | GLKKMLRTCAVHITLD   | 2.70 | 0.01 | 0.78 | 0.44 | 1.13 | 0.28 |
| 26358 | 0 | 118383 | GLKKMLRTCAVHITLD   | 2.70 | 0.01 | 0.78 | 0.44 | 1.13 | 0.28 |
| 26359 | 0 | 118383 | GLKKMLRTCAVHITLD   | 2.70 | 0.01 | 0.78 | 0.44 | 1.41 | 0.28 |
| 26360 | 0 | 118383 | GLKKMLRTCAVHITLD   | 2.70 | 0.01 | 0.78 | 0.44 | 1.13 | 0.28 |
| 26361 | 0 | 118383 | GLKKMLRTCAVHITLD   | 2.70 | 0.01 | 0.78 | 0.44 | 1.13 | 0.28 |
| 26362 | 0 | 118383 | GLKKMLRTCAVHITLD   | 2.70 | 0.01 | 0.78 | 0.44 | 1.13 | 0.28 |
| 26363 | 0 | 118383 | GLKKMLRTCAVHITLD   | 2.70 | 0.01 | 0.78 | 0.44 | 1.13 | 0.28 |
| 26364 | 0 | 118383 | GLKKMLRTCAVHITLD   | 2.70 | 0.01 | 0.78 | 0.44 | 1.13 | 0.28 |
| 26365 | 0 | 118383 | GLKKMLRTCAVHITLD   | 2.70 | 0.01 | 0.78 | 0.44 | 1.13 | 1.27 |
| 26366 | 0 | 118383 | GLKKMLRTCAVHITLD   | 2.70 | 0.01 | 0.78 | 1.12 | 0.22 | 0.85 |

|       |   |        |                         |      |      |      |      |      |      |
|-------|---|--------|-------------------------|------|------|------|------|------|------|
| 26367 | 0 | 238514 | GLKKMLRTCAVHITLDP<br>D  | 2.81 | 0.01 | 0.78 | 0.44 | 1.13 | 0.28 |
| 26368 | 0 | 238514 | GLKKMLRTCAVHITLDP<br>D  | 2.81 | 0.01 | 0.78 | 0.44 | 1.13 | 0.28 |
| 26369 | 0 | 122776 | GLKMFPDLTKVYST          | 2.59 | 0.01 | 0.78 | 3.01 | 0.22 | 0.28 |
| 26370 | 0 | 20961  | GLKNCTVQPWDATDVC<br>D   | 2.78 | 0.01 | 0.90 | 1.15 | 0.22 | 0.28 |
| 26371 | 0 | 20961  | GLKNCTVQPWDATDVC<br>D   | 2.78 | 0.01 | 0.90 | 0.44 | 1.74 | 0.28 |
| 26372 | 0 | 78397  | GLKNDSAVLVLVGS          | 2.65 | 0.01 | 0.90 | 0.68 | 0.22 | 0.28 |
| 26373 | 0 | 78398  | GLKNDSAVLVYLVGS         | 2.71 | 0.01 | 0.90 | 0.68 | 0.22 | 0.28 |
| 26374 | 0 | 20969  | GLKTENEGLKTENEGLKT<br>E | 2.97 | 0.01 | 2.85 | 0.68 | 0.22 | 0.28 |
| 26375 | 0 | 20970  | GLKVY                   | 1.74 | 0.01 | 0.90 | 0.44 | 1.13 | 0.85 |
| 26376 | 0 | 130859 | GLLAQQMDY               | 2.21 | 0.01 | 0.90 | 0.44 | 1.13 | 1.39 |
| 26377 | 0 | 130859 | GLLAQQMDY               | 2.21 | 0.01 | 0.90 | 0.44 | 1.13 | 0.28 |
| 26378 | 0 | 134065 | GLLECCARC               | 2.25 | 0.01 | 1.60 | 1.20 | 0.22 | 0.28 |
| 26379 | 0 | 134065 | GLLECCARC               | 2.25 | 0.01 | 1.60 | 1.20 | 0.22 | 0.28 |
| 26380 | 0 | 131891 | GLLETNFTA               | 2.22 | 0.01 | 0.78 | 0.44 | 1.13 | 0.28 |
| 26381 | 0 | 131891 | GLLETNFTA               | 2.22 | 0.01 | 0.78 | 0.44 | 1.93 | 0.28 |
| 26382 | 0 | 124198 | GLLFGLIALAEEVRKLKA<br>R | 2.93 | 0.01 | 0.78 | 1.12 | 0.22 | 0.85 |
| 26383 | 0 | 124198 | GLLFGLIALAEEVRKLKA<br>R | 2.93 | 0.01 | 0.78 | 0.44 | 1.13 | 0.85 |
| 26384 | 0 | 124198 | GLLFGLIALAEEVRKLKA<br>R | 2.93 | 0.01 | 0.78 | 0.44 | 1.13 | 0.85 |
| 26385 | 0 | 124198 | GLLFGLIALAEEVRKLKA<br>R | 2.93 | 0.01 | 0.78 | 0.44 | 1.13 | 0.85 |
| 26386 | 0 | 124198 | GLLFGLIALAEEVRKLKA<br>R | 2.93 | 0.01 | 0.78 | 0.44 | 1.13 | 0.85 |
| 26387 | 0 | 149323 | GLLGPY                  | 1.92 | 0.01 | 0.78 | 0.44 | 1.93 | 2.66 |
| 26388 | 0 | 186763 | GLLLLAANPAMAMGN         | 2.73 | 0.01 | 0.90 | 1.20 | 0.22 | 0.85 |
| 26389 | 0 | 152593 | GLLLNIDKDI              | 2.33 | 0.01 | 2.18 | 2.16 | 0.22 | 0.28 |
| 26390 | 0 | 300539 | GLLLPVDNDGDESSD         | 2.70 | 0.01 | 1.61 | 0.44 | 0.85 | 1.28 |
| 26391 | 0 | 78399  | GLLNDS                  | 1.89 | 0.01 | 0.90 | 0.68 | 0.22 | 0.28 |
| 26392 | 0 | 78400  | GLLNDY                  | 1.89 | 0.01 | 0.90 | 0.68 | 0.22 | 0.28 |
| 26393 | 0 | 21014  | GLLQQATRQ               | 2.25 | 0.01 | 2.69 | 0.44 | 0.85 | 0.28 |
| 26394 | 0 | 21015  | GLLQRATQQ               | 2.22 | 0.01 | 2.59 | 0.44 | 0.85 | 0.28 |
| 26395 | 0 | 21016  | GLLQRATQQQ              | 2.31 | 0.01 | 2.59 | 0.44 | 0.85 | 0.28 |
| 26396 | 0 | 21016  | GLLQRATQQQ              | 2.31 | 0.01 | 2.59 | 0.44 | 0.85 | 0.28 |
| 26397 | 0 | 21019  | GLLQTASRQAEVIAPAV<br>Q  | 2.84 | 0.01 | 3.18 | 0.44 | 1.59 | 0.28 |
| 26398 | 0 | 423319 | GLLRDPRLMNRQKER         | 2.68 | 0.01 | 2.51 | 0.44 | 2.35 | 1.28 |
| 26399 | 0 | 21026  | GLLRYHTYARFG            | 2.49 | 0.01 | 3.17 | 0.44 | 0.85 | 0.28 |
| 26400 | 0 | 21026  | GLLRYHTYARFG            | 2.49 | 0.01 | 3.17 | 0.44 | 0.85 | 0.28 |
| 26401 | 0 | 21026  | GLLRYHTYARFG            | 2.49 | 0.01 | 2.82 | 0.44 | 0.85 | 1.27 |

|       |   |        |                        |      |      |      |      |      |      |
|-------|---|--------|------------------------|------|------|------|------|------|------|
| 26402 | 0 | 21026  | GLLRYHTYARFG           | 2.49 | 0.01 | 2.82 | 2.89 | 0.22 | 1.34 |
| 26403 | 0 | 111350 | GLLTAYV                | 2.01 | 0.01 | 0.90 | 0.44 | 0.85 | 1.39 |
| 26404 | 0 | 21031  | GLLTPGAKQN             | 2.31 | 0.01 | 2.68 | 0.44 | 0.85 | 0.28 |
| 26405 | 0 | 237736 | GLLVISGLFPVSIPITAA     | 2.87 | 0.01 | 2.30 | 0.44 | 0.85 | 0.85 |
| 26406 | 0 | 237736 | GLLVISGLFPVSIPITAA     | 2.87 | 0.01 | 2.30 | 0.44 | 0.85 | 0.85 |
| 26407 | 0 | 237736 | GLLVISGLFPVSIPITAA     | 2.87 | 0.01 | 2.30 | 0.44 | 0.85 | 0.85 |
| 26408 | 0 | 237736 | GLLVISGLFPVSIPITAA     | 2.87 | 0.01 | 2.30 | 0.44 | 0.85 | 0.85 |
| 26409 | 0 | 225305 | GLMDNMRYLYDDKHVS<br>EI | 2.81 | 0.01 | 2.61 | 0.68 | 0.22 | 0.28 |
| 26410 | 0 | 225305 | GLMDNMRYLYDDKHVS<br>EI | 2.81 | 0.01 | 2.61 | 0.68 | 0.22 | 0.28 |
| 26411 | 0 | 225305 | GLMDNMRYLYDDKHVS<br>EI | 2.81 | 0.01 | 2.61 | 0.68 | 0.22 | 0.28 |
| 26412 | 0 | 21037  | GLMKAV                 | 1.88 | 0.01 | 2.24 | 2.66 | 0.22 | 1.27 |
| 26413 | 0 | 149721 | GLMPSVLQNWIEGVQ        | 2.67 | 0.01 | 3.67 | 1.12 | 0.22 | 0.28 |
| 26414 | 0 | 105228 | GLMVGGVV               | 2.14 | 0.01 | 0.78 | 0.68 | 0.22 | 0.28 |
| 26415 | 0 | 105228 | GLMVGGVV               | 2.14 | 0.01 | 0.78 | 1.15 | 0.22 | 0.28 |
| 26416 | 0 | 105228 | GLMVGGVV               | 2.14 | 0.01 | 0.78 | 0.68 | 0.22 | 0.28 |
| 26417 | 0 | 105228 | GLMVGGVV               | 2.14 | 0.01 | 1.60 | 0.68 | 0.22 | 1.48 |
| 26418 | 0 | 105228 | GLMVGGVV               | 2.14 | 0.01 | 0.78 | 1.12 | 0.22 | 1.48 |
| 26419 | 0 | 105228 | GLMVGGVV               | 2.14 | 0.01 | 0.78 | 1.15 | 0.22 | 1.57 |
| 26420 | 0 | 105228 | GLMVGGVV               | 2.14 | 0.01 | 0.78 | 1.15 | 0.22 | 0.28 |
| 26421 | 0 | 100070 | GLMVGGVVIA             | 2.34 | 0.01 | 0.78 | 1.12 | 0.22 | 0.28 |
| 26422 | 0 | 100070 | GLMVGGVVIA             | 2.34 | 0.01 | 0.78 | 1.12 | 0.22 | 1.27 |
| 26423 | 0 | 100070 | GLMVGGVVIA             | 2.34 | 0.01 | 0.78 | 1.12 | 0.22 | 2.56 |
| 26424 | 0 | 100070 | GLMVGGVVIA             | 2.34 | 0.01 | 0.78 | 1.20 | 0.22 | 2.56 |
| 26425 | 0 | 100070 | GLMVGGVVIA             | 2.34 | 0.01 | 0.78 | 1.20 | 0.22 | 2.56 |
| 26426 | 0 | 100070 | GLMVGGVVIA             | 2.34 | 0.01 | 0.78 | 1.20 | 0.22 | 1.48 |
| 26427 | 0 | 100070 | GLMVGGVVIA             | 2.34 | 0.01 | 0.78 | 1.20 | 0.22 | 0.28 |
| 26428 | 0 | 100070 | GLMVGGVVIA             | 2.34 | 0.01 | 0.78 | 1.20 | 0.22 | 2.56 |
| 26429 | 0 | 100070 | GLMVGGVVIA             | 2.34 | 0.01 | 0.78 | 1.20 | 0.22 | 2.56 |
| 26430 | 0 | 100070 | GLMVGGVVIA             | 2.34 | 0.01 | 0.78 | 1.20 | 0.22 | 2.56 |
| 26431 | 0 | 100070 | GLMVGGVVIA             | 2.34 | 0.01 | 0.78 | 1.20 | 0.22 | 2.56 |
| 26432 | 0 | 100070 | GLMVGGVVIA             | 2.34 | 0.01 | 0.78 | 1.20 | 0.22 | 2.56 |
| 26433 | 0 | 100070 | GLMVGGVVIA             | 2.34 | 0.01 | 1.75 | 1.81 | 0.22 | 0.28 |
| 26434 | 0 | 100070 | GLMVGGVVIA             | 2.34 | 0.01 | 0.78 | 3.70 | 0.22 | 1.28 |
| 26435 | 0 | 100070 | GLMVGGVVIA             | 2.34 | 0.01 | 0.78 | 1.15 | 0.22 | 0.28 |
| 26436 | 0 | 100070 | GLMVGGVVIA             | 2.34 | 0.01 | 0.78 | 2.71 | 0.22 | 2.66 |
| 26437 | 0 | 100070 | GLMVGGVVIA             | 2.34 | 0.01 | 0.78 | 2.71 | 0.22 | 2.66 |
| 26438 | 0 | 100070 | GLMVGGVVIA             | 2.34 | 0.01 | 0.78 | 2.71 | 0.22 | 1.66 |
| 26439 | 0 | 100070 | GLMVGGVVIA             | 2.34 | 0.01 | 0.78 | 2.71 | 0.22 | 1.66 |
| 26440 | 0 | 100070 | GLMVGGVVIA             | 2.34 | 0.01 | 0.78 | 2.71 | 0.22 | 1.66 |

|       |   |        |                          |      |      |      |      |      |      |
|-------|---|--------|--------------------------|------|------|------|------|------|------|
| 26441 | 0 | 100070 | GLMVGGVVIA               | 2.34 | 0.01 | 0.78 | 2.71 | 0.22 | 1.66 |
| 26442 | 0 | 100070 | GLMVGGVVIA               | 2.34 | 0.01 | 0.78 | 2.71 | 0.22 | 1.66 |
| 26443 | 0 | 100070 | GLMVGGVVIA               | 2.34 | 0.01 | 0.78 | 2.71 | 0.22 | 1.66 |
| 26444 | 0 | 100070 | GLMVGGVVIA               | 2.34 | 0.01 | 0.78 | 2.71 | 0.22 | 1.66 |
| 26445 | 0 | 100070 | GLMVGGVVIA               | 2.34 | 0.01 | 0.78 | 2.71 | 0.22 | 1.66 |
| 26446 | 0 | 100070 | GLMVGGVVIA               | 2.34 | 0.01 | 0.78 | 2.71 | 0.22 | 1.66 |
| 26447 | 0 | 100070 | GLMVGGVVIA               | 2.34 | 0.01 | 0.78 | 2.71 | 0.22 | 2.75 |
| 26448 | 0 | 82762  | GLMVWCIENGTSPPNVN<br>GV  | 2.84 | 0.01 | 3.05 | 1.12 | 0.22 | 0.28 |
| 26449 | 0 | 82762  | GLMVWCIENGTSPPNVN<br>GV  | 2.84 | 0.01 | 3.05 | 1.12 | 0.22 | 0.28 |
| 26450 | 0 | 82762  | GLMVWCIENGTSPPNVN<br>GV  | 2.84 | 0.01 | 3.05 | 1.12 | 0.22 | 0.28 |
| 26451 | 0 | 82762  | GLMVWCIENGTSPPNVN<br>GV  | 2.84 | 0.01 | 3.05 | 1.12 | 0.22 | 0.28 |
| 26452 | 0 | 82762  | GLMVWCIENGTSPPNVN<br>GV  | 2.84 | 0.01 | 3.05 | 1.12 | 0.22 | 0.28 |
| 26453 | 0 | 82762  | GLMVWCIENGTSPPNVN<br>GV  | 2.84 | 0.01 | 3.05 | 1.12 | 0.22 | 0.28 |
| 26454 | 0 | 82762  | GLMVWCIENGTSPPNVN<br>GV  | 2.84 | 0.01 | 3.05 | 1.12 | 0.22 | 0.28 |
| 26455 | 0 | 82762  | GLMVWCIENGTSPPNVN<br>GV  | 2.84 | 0.01 | 3.05 | 1.12 | 0.22 | 0.28 |
| 26456 | 0 | 82762  | GLMVWCIENGTSPPNVN<br>GV  | 2.84 | 0.01 | 3.05 | 1.12 | 0.22 | 0.28 |
| 26457 | 0 | 82762  | GLMVWCIENGTSPPNVN<br>GV  | 2.84 | 0.01 | 3.05 | 1.12 | 0.22 | 0.28 |
| 26458 | 0 | 82762  | GLMVWCIENGTSPPNVN<br>GV  | 2.84 | 0.01 | 3.05 | 1.12 | 0.22 | 0.28 |
| 26459 | 0 | 82762  | GLMVWCIENGTSPPNVN<br>GV  | 2.84 | 0.01 | 3.05 | 1.12 | 0.22 | 0.28 |
| 26460 | 0 | 182141 | GLNFSAPQPLSLYE           | 2.68 | 0.01 | 0.78 | 0.44 | 1.13 | 0.85 |
| 26461 | 0 | 21045  | GLNGPDIYKGVYQFKSV<br>EFD | 2.94 | 0.01 | 3.70 | 1.81 | 0.22 | 0.28 |
| 26462 | 0 | 237737 | GLNTFTNMEAQLRQM<br>EG    | 2.86 | 0.01 | 3.45 | 0.44 | 0.85 | 0.85 |
| 26463 | 0 | 237737 | GLNTFTNMEAQLRQM<br>EG    | 2.86 | 0.01 | 3.45 | 0.44 | 0.85 | 0.85 |
| 26464 | 0 | 237737 | GLNTFTNMEAQLRQM<br>EG    | 2.86 | 0.01 | 3.45 | 0.44 | 0.22 | 0.85 |
| 26465 | 0 | 115760 | GLNYYQQKPV               | 2.29 | 0.01 | 1.60 | 0.44 | 1.23 | 0.85 |
| 26466 | 0 | 115760 | GLNYYQQKPV               | 2.29 | 0.01 | 1.60 | 0.44 | 1.23 | 0.85 |
| 26467 | 0 | 21055  | GLPAA                    | 1.72 | 0.01 | 0.78 | 0.44 | 2.39 | 0.28 |
| 26468 | 0 | 21057  | GLPDSEPTKTNGKCK          | 2.69 | 0.01 | 2.56 | 2.02 | 0.22 | 0.85 |
| 26469 | 0 | 21059  | GLPDSVKIWTSETNK          | 2.64 | 0.01 | 2.56 | 3.17 | 0.22 | 1.75 |
| 26470 | 0 | 21059  | GLPDSVKIWTSETNK          | 2.64 | 0.01 | 2.56 | 3.17 | 0.22 | 0.85 |

|       |   |        |                                    |      |      |      |      |      |      |
|-------|---|--------|------------------------------------|------|------|------|------|------|------|
| 26471 | 0 | 21061  | GLPEGTPKDPILRSLAYS<br>NANKECQKLLQA | 3.33 | 0.01 | 2.04 | 0.44 | 0.85 | 0.28 |
| 26472 | 0 | 21061  | GLPEGTPKDPILRSLAYS<br>NANKECQKLLQA | 3.33 | 0.01 | 2.04 | 0.44 | 0.85 | 0.28 |
| 26473 | 0 | 21061  | GLPEGTPKDPILRSLAYS<br>NANKECQKLLQA | 3.33 | 0.01 | 2.04 | 0.44 | 0.85 | 0.28 |
| 26474 | 0 | 21061  | GLPEGTPKDPILRSLAYS<br>NANKECQKLLQA | 3.33 | 0.01 | 2.04 | 0.44 | 1.59 | 0.28 |
| 26475 | 0 | 21061  | GLPEGTPKDPILRSLAYS<br>NANKECQKLLQA | 3.33 | 0.01 | 2.04 | 0.44 | 2.82 | 0.28 |
| 26476 | 0 | 130860 | GLPGARGLTGRP                       | 2.53 | 0.01 | 1.60 | 2.46 | 0.22 | 0.28 |
| 26477 | 0 | 130860 | GLPGARGLTGRP                       | 2.53 | 0.01 | 1.60 | 2.46 | 0.22 | 0.28 |
| 26478 | 0 | 130860 | GLPGARGLTGRP                       | 2.53 | 0.01 | 1.60 | 2.46 | 0.22 | 0.28 |
| 26479 | 0 | 110603 | GLPGARGLTGRPGDA                    | 2.73 | 0.01 | 1.75 | 2.98 | 0.22 | 0.28 |
| 26480 | 0 | 109138 | GLPGERGR                           | 2.17 | 0.01 | 1.60 | 2.55 | 2.60 | 0.28 |
| 26481 | 0 | 230880 | GLPGPPGPPGEGGKPG<br>DQGVPEGA       | 3.17 | 0.01 | 0.78 | 3.93 | 0.22 | 0.28 |
| 26482 | 0 | 78171  | GLPLK                              | 1.75 | 0.01 | 0.90 | 2.02 | 1.59 | 0.28 |
| 26483 | 0 | 78401  | GLPNDWPCRQASGTR                    | 2.65 | 0.01 | 0.90 | 0.68 | 0.22 | 0.28 |
| 26484 | 0 | 78402  | GLPNDWSGRQASGTR                    | 2.67 | 0.01 | 0.90 | 0.68 | 0.22 | 0.28 |
| 26485 | 0 | 21065  | GLPNNTASWFTALTQH<br>GK             | 2.83 | 0.01 | 2.91 | 0.44 | 0.85 | 0.28 |
| 26486 | 0 | 128745 | GLPPARGT                           | 2.14 | 0.01 | 0.78 | 0.44 | 1.13 | 0.28 |
| 26487 | 0 | 147736 | GLPPFLNSL                          | 2.24 | 0.01 | 3.24 | 0.68 | 0.22 | 0.28 |
| 26488 | 0 | 115267 | GLPQEVLNENLLRFFVA<br>PFP           | 2.97 | 0.01 | 1.60 | 0.44 | 1.23 | 1.28 |
| 26489 | 0 | 122377 | GLPRLETPADLSTAIASRS                | 2.92 | 0.01 | 0.78 | 1.20 | 0.22 | 2.12 |
| 26490 | 0 | 122377 | GLPRLETPADLSTAIASRS                | 2.92 | 0.01 | 0.78 | 4.63 | 0.22 | 2.35 |
| 26491 | 0 | 122377 | GLPRLETPADLSTAIASRS                | 2.92 | 0.01 | 0.78 | 1.20 | 0.22 | 0.28 |
| 26492 | 0 | 122377 | GLPRLETPADLSTAIASRS                | 2.92 | 0.01 | 0.78 | 1.20 | 0.22 | 1.27 |
| 26493 | 0 | 122377 | GLPRLETPADLSTAIASRS                | 2.92 | 0.01 | 0.78 | 0.68 | 0.22 | 2.35 |
| 26494 | 0 | 122377 | GLPRLETPADLSTAIASRS                | 2.92 | 0.01 | 0.78 | 0.44 | 1.13 | 2.35 |
| 26495 | 0 | 122377 | GLPRLETPADLSTAIASRS                | 2.92 | 0.01 | 0.78 | 0.44 | 1.13 | 2.35 |
| 26496 | 0 | 122377 | GLPRLETPADLSTAIASRS                | 2.92 | 0.01 | 0.78 | 1.20 | 0.22 | 0.28 |
| 26497 | 0 | 122377 | GLPRLETPADLSTAIASRS                | 2.92 | 0.01 | 0.78 | 1.20 | 0.22 | 0.28 |

|       |   |        |                          |      |      |      |      |      |      |
|-------|---|--------|--------------------------|------|------|------|------|------|------|
| 26498 | 0 | 122377 | GLPRLETPADLSTAIASRS      | 2.92 | 0.01 | 0.78 | 0.44 | 1.13 | 2.35 |
| 26499 | 0 | 122377 | GLPRLETPADLSTAIASRS      | 2.92 | 0.01 | 0.78 | 0.68 | 0.22 | 2.35 |
| 26500 | 0 | 122377 | GLPRLETPADLSTAIASRS      | 2.92 | 0.01 | 0.78 | 0.68 | 0.22 | 0.28 |
| 26501 | 0 | 122377 | GLPRLETPADLSTAIASRS      | 2.92 | 0.01 | 0.78 | 0.44 | 1.13 | 2.35 |
| 26502 | 0 | 122377 | GLPRLETPADLSTAIASRS      | 2.92 | 0.01 | 0.78 | 0.44 | 1.13 | 2.35 |
| 26503 | 0 | 122377 | GLPRLETPADLSTAIASRS      | 2.92 | 0.01 | 0.78 | 0.44 | 1.13 | 2.35 |
| 26504 | 0 | 122377 | GLPRLETPADLSTAIASRS      | 2.92 | 0.01 | 0.78 | 0.44 | 1.41 | 2.35 |
| 26505 | 0 | 122377 | GLPRLETPADLSTAIASRS      | 2.92 | 0.01 | 0.78 | 1.12 | 0.22 | 0.28 |
| 26506 | 0 | 122377 | GLPRLETPADLSTAIASRS      | 2.92 | 0.01 | 0.78 | 1.20 | 0.22 | 0.28 |
| 26507 | 0 | 122377 | GLPRLETPADLSTAIASRS      | 2.92 | 0.01 | 0.78 | 1.20 | 0.22 | 0.28 |
| 26508 | 0 | 122377 | GLPRLETPADLSTAIASRS      | 2.92 | 0.01 | 0.78 | 1.20 | 0.22 | 1.27 |
| 26509 | 0 | 122377 | GLPRLETPADLSTAIASRS      | 2.92 | 0.01 | 0.78 | 1.20 | 0.22 | 0.28 |
| 26510 | 0 | 122377 | GLPRLETPADLSTAIASRS      | 2.92 | 0.01 | 0.78 | 0.44 | 1.13 | 2.35 |
| 26511 | 0 | 122377 | GLPRLETPADLSTAIASRS      | 2.92 | 0.01 | 0.78 | 0.68 | 0.22 | 2.35 |
| 26512 | 0 | 119582 | GLQLIQLINVDEVNQI         | 2.78 | 0.01 | 0.78 | 1.15 | 0.22 | 1.57 |
| 26513 | 0 | 119582 | GLQLIQLINVDEVNQI         | 2.78 | 0.01 | 0.78 | 0.44 | 1.13 | 1.57 |
| 26514 | 0 | 119904 | GLQLIQLISVDEVNQI         | 2.77 | 0.01 | 2.26 | 1.15 | 0.22 | 1.57 |
| 26515 | 0 | 119904 | GLQLIQLISVDEVNQI         | 2.77 | 0.01 | 2.26 | 1.12 | 0.22 | 1.57 |
| 26516 | 0 | 119904 | GLQLIQLISVDEVNQI         | 2.77 | 0.01 | 2.26 | 2.43 | 0.22 | 1.57 |
| 26517 | 0 | 119904 | GLQLIQLISVDEVNQI         | 2.77 | 0.01 | 2.26 | 2.43 | 0.22 | 1.57 |
| 26518 | 0 | 119904 | GLQLIQLISVDEVNQI         | 2.77 | 0.01 | 2.26 | 2.25 | 0.22 | 1.57 |
| 26519 | 0 | 119904 | GLQLIQLISVDEVNQI         | 2.77 | 0.01 | 2.26 | 3.65 | 0.22 | 1.57 |
| 26520 | 0 | 419193 | GLQLRQQSQYDYSYPGT<br>TST | 2.99 | 0.01 | 3.50 | 2.13 | 0.22 | 0.28 |
| 26521 | 0 | 181100 | GLQLYFS                  | 2.02 | 0.01 | 0.78 | 0.44 | 1.13 | 1.27 |
| 26522 | 0 | 181100 | GLQLYFS                  | 2.02 | 0.01 | 0.78 | 0.44 | 1.13 | 2.02 |
| 26523 | 0 | 181100 | GLQLYFS                  | 2.02 | 0.01 | 0.78 | 0.44 | 1.13 | 1.27 |
| 26524 | 0 | 21084  | GLQN                     | 1.57 | 0.01 | 3.47 | 0.68 | 0.22 | 0.85 |
| 26525 | 0 | 21084  | GLQN                     | 1.57 | 0.01 | 3.47 | 0.68 | 0.22 | 0.28 |
| 26526 | 0 | 21084  | GLQN                     | 1.57 | 0.01 | 3.47 | 0.68 | 0.22 | 1.34 |
| 26527 | 0 | 78403  | GLQNDF                   | 1.88 | 0.01 | 0.90 | 0.68 | 0.22 | 0.28 |
| 26528 | 0 | 95416  | GLQNDP                   | 1.88 | 0.01 | 2.40 | 2.52 | 0.22 | 0.28 |
| 26529 | 0 | 95416  | GLQNDP                   | 1.88 | 0.01 | 2.40 | 2.52 | 0.22 | 0.28 |

|       |   |        |                          |      |      |      |      |      |      |
|-------|---|--------|--------------------------|------|------|------|------|------|------|
| 26530 | 0 | 111351 | GLQPPPGGTLEDTYR          | 2.68 | 0.01 | 1.86 | 0.68 | 0.22 | 0.28 |
| 26531 | 0 | 21085  | GLQPRADMAAPPTLPQ         | 2.75 | 0.01 | 3.16 | 0.44 | 1.59 | 0.28 |
| 26532 | 0 | 96328  | GLQTSQDARF               | 2.29 | 0.01 | 0.78 | 0.44 | 1.93 | 0.85 |
| 26533 | 0 | 96328  | GLQTSQDARF               | 2.29 | 0.01 | 0.78 | 0.44 | 1.23 | 0.28 |
| 26534 | 0 | 238515 | GLQTSQTCPAGQKIC          | 2.69 | 0.01 | 2.56 | 2.02 | 0.22 | 0.85 |
| 26535 | 0 | 238515 | GLQTSQTCPAGQKIC          | 2.69 | 0.01 | 2.56 | 1.20 | 0.22 | 0.85 |
| 26536 | 0 | 181639 | GLQVVFGKIYNSLPS          | 2.66 | 0.01 | 1.66 | 2.37 | 0.22 | 1.28 |
| 26537 | 0 | 115268 | GLQYTPSWLVG              | 2.40 | 0.01 | 0.90 | 0.68 | 0.22 | 0.28 |
| 26538 | 0 | 115268 | GLQYTPSWLVG              | 2.40 | 0.01 | 0.90 | 0.68 | 0.22 | 0.28 |
| 26539 | 0 | 115268 | GLQYTPSWLVG              | 2.40 | 0.01 | 0.90 | 0.68 | 0.22 | 0.28 |
| 26540 | 0 | 115268 | GLQYTPSWLVG              | 2.40 | 0.01 | 0.90 | 0.68 | 0.22 | 0.28 |
| 26541 | 0 | 115268 | GLQYTPSWLVG              | 2.40 | 0.01 | 0.90 | 0.68 | 0.22 | 0.28 |
| 26542 | 0 | 115268 | GLQYTPSWLVG              | 2.40 | 0.01 | 0.90 | 0.68 | 0.22 | 0.28 |
| 26543 | 0 | 115268 | GLQYTPSWLVG              | 2.40 | 0.01 | 0.90 | 0.68 | 0.22 | 1.27 |
| 26544 | 0 | 115268 | GLQYTPSWLVG              | 2.40 | 0.01 | 0.90 | 0.68 | 0.22 | 1.66 |
| 26545 | 0 | 115268 | GLQYTPSWLVG              | 2.40 | 0.01 | 0.90 | 2.84 | 0.22 | 1.39 |
| 26546 | 0 | 115268 | GLQYTPSWLVG              | 2.40 | 0.01 | 0.90 | 0.68 | 0.22 | 1.39 |
| 26547 | 0 | 115268 | GLQYTPSWLVG              | 2.40 | 0.01 | 0.90 | 2.84 | 0.22 | 1.39 |
| 26548 | 0 | 115268 | GLQYTPSWLVG              | 2.40 | 0.01 | 0.90 | 2.84 | 0.22 | 1.39 |
| 26549 | 0 | 21090  | GLQYTPSWMLVG             | 2.46 | 0.01 | 0.90 | 0.68 | 0.22 | 2.49 |
| 26550 | 0 | 119905 | GLRAQACAFW               | 2.31 | 0.01 | 0.78 | 0.68 | 0.22 | 0.28 |
| 26551 | 0 | 21093  | GLRAQDDFSGWDINTP<br>AFEW | 2.91 | 0.01 | 2.04 | 1.15 | 0.22 | 0.85 |
| 26552 | 0 | 21096  | GLRAQDDYNGWDINTP<br>AFEW | 2.91 | 0.01 | 2.04 | 0.44 | 0.85 | 0.28 |
| 26553 | 0 | 21101  | GLRFRER                  | 2.04 | 0.01 | 2.40 | 0.68 | 0.22 | 0.85 |
| 26554 | 0 | 21102  | GLRGEEMEEMVQS            | 2.57 | 0.01 | 3.27 | 0.44 | 1.23 | 0.85 |
| 26555 | 0 | 21109  | GLRNVAAGAN               | 2.36 | 0.01 | 3.20 | 0.44 | 1.41 | 0.28 |
| 26556 | 0 | 105836 | GLRPGEGAY                | 2.24 | 0.01 | 0.90 | 3.01 | 0.22 | 0.28 |
| 26557 | 0 | 516882 | GLRRDLASREAKKQ           | 2.69 | 0.01 | 2.24 | 0.44 | 1.41 | 1.28 |
| 26558 | 0 | 516882 | GLRRDLASREAKKQ           | 2.69 | 0.01 | 2.24 | 0.44 | 1.41 | 1.28 |
| 26559 | 0 | 142166 | GLRRDLASREAKKQLE<br>AEQ  | 2.98 | 0.01 | 2.24 | 0.44 | 0.85 | 0.28 |
| 26560 | 0 | 142166 | GLRRDLASREAKKQLE<br>AEQ  | 2.98 | 0.01 | 2.24 | 0.44 | 1.74 | 0.28 |
| 26561 | 0 | 142167 | GLRRDLASREAKKQVE<br>KAL  | 2.97 | 0.01 | 2.24 | 0.44 | 0.85 | 0.28 |
| 26562 | 0 | 142167 | GLRRDLASREAKKQVE<br>KAL  | 2.97 | 0.01 | 2.24 | 0.44 | 1.74 | 0.28 |
| 26563 | 0 | 142167 | GLRRDLASREAKKQVE<br>KAL  | 2.97 | 0.01 | 2.24 | 1.15 | 0.22 | 0.28 |
| 26564 | 0 | 21113  | GLRSEFPIWM               | 2.26 | 0.01 | 0.78 | 0.44 | 1.74 | 0.28 |
| 26565 | 0 | 21113  | GLRSEFPIWM               | 2.26 | 0.01 | 0.78 | 1.15 | 0.22 | 0.28 |
| 26566 | 0 | 134067 | GLRVAQCSQKPCEDSCR<br>PSA | 3.55 | 0.01 | 0.78 | 1.12 | 0.22 | 1.39 |



|       |   |        |                                                                |      |      |      |      |      |      |
|-------|---|--------|----------------------------------------------------------------|------|------|------|------|------|------|
| 26567 | 0 | 196500 | GLRWIAP                                                        | 1.99 | 0.01 | 0.90 | 0.44 | 1.23 | 1.39 |
| 26568 | 0 | 116338 | GLSATVTGGQK                                                    | 2.41 | 0.01 | 1.75 | 3.44 | 0.22 | 0.28 |
| 26569 | 0 | 99288  | GLSERRAQ                                                       | 2.11 | 0.01 | 4.45 | 0.68 | 0.22 | 0.28 |
| 26570 | 0 | 21127  | GLSLPPG                                                        | 2.05 | 0.01 | 0.90 | 1.15 | 0.22 | 1.39 |
| 26571 | 0 | 117208 | GLSLSRFSWGA                                                    | 2.43 | 0.01 | 0.78 | 0.44 | 1.93 | 0.28 |
| 26572 | 0 | 115056 | GLSLSRFSWGAEGQRP<br>FG                                         | 2.93 | 3.85 | 0.78 | 0.44 | 1.13 | 0.28 |
| 26573 | 0 | 115056 | GLSLSRFSWGAEGQRP<br>FG                                         | 2.93 | 3.85 | 0.78 | 0.44 | 1.41 | 0.28 |
| 26574 | 0 | 21131  | GLSNPTPQ                                                       | 2.12 | 0.01 | 2.40 | 2.43 | 0.22 | 0.28 |
| 26575 | 0 | 21141  | GLSRISSK                                                       | 2.22 | 0.01 | 3.28 | 0.44 | 1.23 | 0.85 |
| 26576 | 0 | 123243 | GLSRISYDP                                                      | 2.21 | 0.01 | 2.28 | 2.00 | 0.22 | 0.28 |
| 26577 | 0 | 300810 | GLTAALSPQRSLPR                                                 | 2.71 | 0.01 | 1.61 | 0.44 | 0.85 | 1.28 |
| 26578 | 0 | 230883 | GLTGPAEPGREGSPGA<br>DGPPGRD                                    | 3.17 | 0.01 | 0.78 | 3.16 | 0.22 | 0.28 |
| 26579 | 0 | 110604 | GLTGRPGDAGPQGV                                                 | 2.69 | 0.01 | 1.75 | 2.98 | 0.22 | 0.28 |
| 26580 | 0 | 230885 | GLTGRPGDAGPQGV<br>PSGAPGED                                     | 3.14 | 0.01 | 0.78 | 3.16 | 0.22 | 0.28 |
| 26581 | 0 | 103940 | GLTLPGYKYLPGNSLD                                               | 2.83 | 0.01 | 3.00 | 1.20 | 0.22 | 0.85 |
| 26582 | 0 | 21173  | GLTSLFT                                                        | 2.04 | 0.01 | 1.72 | 0.44 | 0.85 | 0.28 |
| 26583 | 0 | 164766 | GLTYFDVSAIVN                                                   | 2.43 | 0.01 | 3.78 | 0.44 | 1.23 | 0.85 |
| 26584 | 0 | 21184  | GLVDCYINL                                                      | 2.21 | 0.01 | 3.38 | 0.44 | 1.74 | 0.85 |
| 26585 | 0 | 21191  | GLVGLLTPGAKQN                                                  | 2.55 | 0.01 | 2.45 | 1.12 | 0.22 | 0.28 |
| 26586 | 0 | 21191  | GLVGLLTPGAKQN                                                  | 2.55 | 0.01 | 2.45 | 1.12 | 0.22 | 1.34 |
| 26587 | 0 | 112134 | GLVGPRGERGF                                                    | 2.43 | 0.01 | 1.75 | 3.16 | 0.22 | 1.48 |
| 26588 | 0 | 112134 | GLVGPRGERGF                                                    | 2.43 | 0.01 | 1.75 | 3.16 | 0.22 | 1.75 |
| 26589 | 0 | 112134 | GLVGPRGERGF                                                    | 2.43 | 0.01 | 2.19 | 4.08 | 0.22 | 0.28 |
| 26590 | 0 | 112134 | GLVGPRGERGF                                                    | 2.43 | 0.01 | 2.19 | 4.08 | 0.22 | 0.28 |
| 26591 | 0 | 112134 | GLVGPRGERGF                                                    | 2.43 | 0.01 | 2.19 | 4.08 | 0.22 | 0.28 |
| 26592 | 0 | 230886 | GLVGPRGERGFP                                                   | 2.52 | 0.01 | 0.78 | 3.57 | 0.22 | 0.28 |
| 26593 | 0 | 230886 | GLVGPRGERGFP                                                   | 2.52 | 0.01 | 0.78 | 2.61 | 0.22 | 0.28 |
| 26594 | 0 | 230886 | GLVGPRGERGFP                                                   | 2.52 | 0.01 | 0.78 | 0.44 | 1.13 | 0.28 |
| 26595 | 0 | 230886 | GLVGPRGERGFP                                                   | 2.52 | 0.01 | 0.78 | 0.44 | 1.41 | 0.28 |
| 26596 | 0 | 77781  | GLVGRPKSKL                                                     | 2.34 | 0.01 | 3.93 | 0.44 | 1.59 | 0.28 |
| 26597 | 0 | 21194  | GLVGTHNGQIGNDPNR<br>DILIASNWYFNHLKDKIL<br>GCDWYFVPTDEGWTN<br>D | 3.84 | 0.01 | 2.95 | 3.38 | 0.22 | 0.28 |
| 26598 | 0 | 21194  | GLVGTHNGQIGNDPNR<br>DILIASNWYFNHLKDKIL<br>GCDWYFVPTDEGWTN<br>D | 3.84 | 0.01 | 2.95 | 0.68 | 0.22 | 0.28 |
| 26599 | 0 | 21210  | GLVRKNLVQFGVGEKN<br>GCVR                                       | 2.98 | 0.01 | 2.82 | 0.44 | 0.85 | 0.28 |
| 26600 | 0 | 181325 | GLVSIITMPTTGTQN                                                | 2.68 | 0.01 | 2.82 | 1.15 | 0.22 | 0.28 |

|       |   |        |                               |      |      |      |      |      |      |
|-------|---|--------|-------------------------------|------|------|------|------|------|------|
| 26601 | 0 | 21214  | GLVSMFSVGP                    | 2.34 | 0.01 | 2.83 | 1.12 | 0.22 | 0.28 |
| 26602 | 0 | 21214  | GLVSMFSVGP                    | 2.34 | 0.01 | 2.83 | 0.44 | 0.85 | 0.28 |
| 26603 | 0 | 21214  | GLVSMFSVGP                    | 2.34 | 0.01 | 2.83 | 0.44 | 0.85 | 0.28 |
| 26604 | 0 | 193461 | GLVVLAVIA                     | 2.27 | 0.01 | 2.51 | 0.44 | 2.39 | 0.28 |
| 26605 | 0 | 193461 | GLVVLAVIA                     | 2.27 | 0.01 | 2.51 | 0.44 | 2.39 | 0.28 |
| 26606 | 0 | 98804  | GLVWTSGPAT                    | 2.32 | 0.01 | 2.72 | 0.68 | 0.22 | 0.28 |
| 26607 | 0 | 98804  | GLVWTSGPAT                    | 2.32 | 0.01 | 2.72 | 1.12 | 0.22 | 0.28 |
| 26608 | 0 | 98804  | GLVWTSGPAT                    | 2.32 | 0.01 | 2.72 | 0.68 | 0.22 | 0.28 |
| 26609 | 0 | 98804  | GLVWTSGPAT                    | 2.32 | 0.01 | 2.72 | 0.68 | 0.22 | 0.28 |
| 26610 | 0 | 178136 | GLWDSFRQSERGEETIE<br>ERF      | 2.96 | 0.01 | 3.51 | 1.12 | 0.22 | 1.27 |
| 26611 | 0 | 105838 | GLWWAEGVV                     | 2.23 | 0.01 | 0.90 | 3.01 | 0.22 | 0.28 |
| 26612 | 0 | 162333 | GLYEWGGARITNTD                | 2.59 | 0.01 | 0.90 | 1.15 | 0.22 | 2.49 |
| 26613 | 0 | 95417  | GLYSMLVERDHK                  | 2.43 | 0.01 | 2.88 | 0.44 | 1.23 | 0.85 |
| 26614 | 0 | 95417  | GLYSMLVERDHK                  | 2.43 | 0.01 | 2.88 | 1.12 | 0.22 | 0.85 |
| 26615 | 0 | 113453 | GLYSRTTQQV                    | 2.29 | 0.01 | 1.86 | 1.12 | 0.22 | 0.28 |
| 26616 | 0 | 300898 | GLYTLV                        | 2.02 | 0.01 | 2.40 | 1.20 | 0.22 | 0.28 |
| 26617 | 0 | 79233  | GLYVIWSRDW                    | 2.29 | 0.01 | 0.90 | 0.68 | 0.22 | 0.28 |
| 26618 | 0 | 21247  | GMAELGAFFSILQD                | 2.61 | 0.01 | 2.56 | 2.69 | 0.22 | 0.28 |
| 26619 | 0 | 21249  | GMAGQTPQVETEDTK               | 2.75 | 0.01 | 2.24 | 0.68 | 0.22 | 0.28 |
| 26620 | 0 | 132342 | GMALALAVTKYKQRNG<br>WSHKDLLRL | 3.14 | 0.01 | 0.78 | 3.72 | 0.22 | 0.28 |
| 26621 | 0 | 21253  | GMAVHTAVSASSQKKA              | 2.75 | 0.01 | 3.41 | 0.68 | 0.22 | 0.85 |
| 26622 | 0 | 239735 | GMCVKQNFERAMIAAT              | 2.68 | 0.01 | 2.70 | 0.68 | 0.22 | 0.28 |
| 26623 | 0 | 21254  | GMDGTQLDRW                    | 2.32 | 0.01 | 0.90 | 3.75 | 0.22 | 0.28 |
| 26624 | 0 | 21254  | GMDGTQLDRW                    | 2.32 | 0.01 | 0.90 | 3.75 | 0.22 | 0.28 |
| 26625 | 0 | 21254  | GMDGTQLDRW                    | 2.32 | 0.01 | 0.90 | 3.75 | 0.22 | 1.75 |
| 26626 | 0 | 21254  | GMDGTQLDRW                    | 2.32 | 0.01 | 0.90 | 0.68 | 2.60 | 1.75 |
| 26627 | 0 | 21254  | GMDGTQLDRW                    | 2.32 | 0.01 | 0.90 | 1.81 | 2.60 | 1.75 |
| 26628 | 0 | 21254  | GMDGTQLDRW                    | 2.32 | 0.01 | 0.90 | 0.68 | 2.60 | 1.75 |
| 26629 | 0 | 21254  | GMDGTQLDRW                    | 2.32 | 0.01 | 0.90 | 0.44 | 0.22 | 1.27 |
| 26630 | 0 | 21254  | GMDGTQLDRW                    | 2.32 | 0.01 | 0.90 | 0.44 | 0.22 | 1.27 |
| 26631 | 0 | 21254  | GMDGTQLDRW                    | 2.32 | 0.01 | 0.90 | 0.44 | 1.41 | 1.27 |
| 26632 | 0 | 21254  | GMDGTQLDRW                    | 2.32 | 0.01 | 0.90 | 0.68 | 0.22 | 0.28 |
| 26633 | 0 | 21254  | GMDGTQLDRW                    | 2.32 | 0.01 | 0.90 | 0.68 | 0.22 | 1.27 |
| 26634 | 0 | 21254  | GMDGTQLDRW                    | 2.32 | 0.01 | 0.90 | 0.68 | 0.22 | 0.28 |
| 26635 | 0 | 21254  | GMDGTQLDRW                    | 2.32 | 0.01 | 0.90 | 0.68 | 0.22 | 1.27 |
| 26636 | 0 | 21254  | GMDGTQLDRW                    | 2.32 | 0.01 | 0.90 | 0.68 | 0.22 | 0.28 |
| 26637 | 0 | 21254  | GMDGTQLDRW                    | 2.32 | 0.01 | 0.90 | 0.68 | 2.25 | 1.75 |
| 26638 | 0 | 141660 | GMEKAKEELLETQIV               | 2.74 | 0.01 | 1.66 | 2.55 | 0.22 | 0.28 |
| 26639 | 0 | 141660 | GMEKAKEELLETQIV               | 2.74 | 0.01 | 1.66 | 1.20 | 0.22 | 0.28 |
| 26640 | 0 | 77892  | GMEPPKTPEAAAHCIHA<br>EWD      | 2.93 | 0.01 | 3.14 | 0.68 | 0.22 | 0.28 |

|       |   |        |                             |      |      |      |      |      |      |
|-------|---|--------|-----------------------------|------|------|------|------|------|------|
| 26641 | 0 | 188869 | GMEVGWYRPPFSRVVH<br>LYRNGKD | 3.04 | 4.33 | 0.78 | 2.61 | 0.22 | 0.28 |
| 26642 | 0 | 188869 | GMEVGWYRPPFSRVVH<br>LYRNGKD | 3.04 | 4.33 | 0.78 | 2.61 | 0.22 | 0.28 |
| 26643 | 0 | 188869 | GMEVGWYRPPFSRVVH<br>LYRNGKD | 3.04 | 4.33 | 0.78 | 2.61 | 0.22 | 0.28 |
| 26644 | 0 | 188869 | GMEVGWYRPPFSRVVH<br>LYRNGKD | 3.04 | 4.33 | 0.78 | 2.61 | 0.22 | 0.28 |
| 26645 | 0 | 114368 | GMEVGWYRPPFSRVVH<br>LYRNGKD | 3.04 | 0.01 | 0.78 | 3.57 | 0.22 | 0.28 |
| 26646 | 0 | 114368 | GMEVGWYRPPFSRVVH<br>LYRNGKD | 3.04 | 0.01 | 0.78 | 3.57 | 0.22 | 0.28 |
| 26647 | 0 | 114368 | GMEVGWYRPPFSRVVH<br>LYRNGKD | 3.04 | 0.01 | 0.78 | 3.57 | 0.22 | 0.28 |
| 26648 | 0 | 114368 | GMEVGWYRPPFSRVVH<br>LYRNGKD | 3.04 | 0.01 | 0.78 | 3.57 | 0.22 | 0.28 |
| 26649 | 0 | 114368 | GMEVGWYRPPFSRVVH<br>LYRNGKD | 3.04 | 0.01 | 0.78 | 3.57 | 0.22 | 0.28 |
| 26650 | 0 | 114368 | GMEVGWYRPPFSRVVH<br>LYRNGKD | 3.04 | 0.01 | 0.78 | 3.57 | 0.22 | 0.28 |
| 26651 | 0 | 114368 | GMEVGWYRPPFSRVVH<br>LYRNGKD | 3.04 | 0.01 | 0.78 | 3.57 | 0.22 | 0.28 |
| 26652 | 0 | 114368 | GMEVGWYRPPFSRVVH<br>LYRNGKD | 3.04 | 0.01 | 0.78 | 3.57 | 0.22 | 0.28 |
| 26653 | 0 | 114368 | GMEVGWYRPPFSRVVH<br>LYRNGKD | 3.04 | 0.01 | 0.78 | 2.61 | 0.22 | 0.28 |
| 26654 | 0 | 114368 | GMEVGWYRPPFSRVVH<br>LYRNGKD | 3.04 | 0.01 | 0.78 | 2.61 | 0.22 | 0.28 |
| 26655 | 0 | 114368 | GMEVGWYRPPFSRVVH<br>LYRNGKD | 3.04 | 0.01 | 0.78 | 2.61 | 0.22 | 0.28 |
| 26656 | 0 | 114368 | GMEVGWYRPPFSRVVH<br>LYRNGKD | 3.04 | 0.01 | 0.78 | 3.57 | 0.22 | 0.28 |
| 26657 | 0 | 114368 | GMEVGWYRPPFSRVVH<br>LYRNGKD | 3.04 | 0.01 | 0.78 | 3.57 | 0.22 | 0.28 |
| 26658 | 0 | 114368 | GMEVGWYRPPFSRVVH<br>LYRNGKD | 3.04 | 0.01 | 0.78 | 3.57 | 0.22 | 0.28 |
| 26659 | 0 | 21269  | GMFTGLFNQGAQQL              | 2.70 | 0.01 | 1.72 | 0.68 | 0.22 | 0.28 |
| 26660 | 0 | 126151 | GMGCSSPPCECHQEE             | 2.69 | 0.01 | 0.78 | 1.15 | 0.22 | 0.85 |
| 26661 | 0 | 126151 | GMGCSSPPCECHQEE             | 2.69 | 0.01 | 0.78 | 1.15 | 0.22 | 0.28 |
| 26662 | 0 | 21277  | GMGVSCTVTREDGTNR<br>R       | 2.80 | 0.01 | 2.72 | 0.44 | 0.85 | 0.28 |
| 26663 | 0 | 21277  | GMGVSCTVTREDGTNR<br>R       | 2.80 | 0.01 | 2.72 | 1.12 | 0.22 | 0.28 |
| 26664 | 0 | 21277  | GMGVSCTVTREDGTNR<br>R       | 2.80 | 0.01 | 2.72 | 1.12 | 0.22 | 0.28 |

|       |   |        |                               |      |      |      |      |      |      |
|-------|---|--------|-------------------------------|------|------|------|------|------|------|
| 26665 | 0 | 21277  | GMGVSCTVTREDGTNR<br>R         | 2.80 | 0.01 | 2.72 | 1.12 | 0.22 | 0.28 |
| 26666 | 0 | 128004 | GMIEVQSNYGFVWDVS<br>LKKV      | 2.91 | 0.01 | 2.40 | 1.12 | 0.22 | 0.28 |
| 26667 | 0 | 128004 | GMIEVQSNYGFVWDVS<br>LKKV      | 2.91 | 0.01 | 2.40 | 0.44 | 0.85 | 0.28 |
| 26668 | 0 | 128004 | GMIEVQSNYGFVWDVS<br>LKKV      | 2.91 | 0.01 | 2.40 | 2.75 | 0.22 | 0.28 |
| 26669 | 0 | 128004 | GMIEVQSNYGFVWDVS<br>LKKV      | 2.91 | 0.01 | 2.40 | 2.75 | 0.22 | 0.28 |
| 26670 | 0 | 128004 | GMIEVQSNYGFVWDVS<br>LKKV      | 2.91 | 0.01 | 2.40 | 2.75 | 0.22 | 0.85 |
| 26671 | 0 | 128004 | GMIEVQSNYGFVWDVS<br>LKKV      | 2.91 | 0.01 | 2.40 | 2.75 | 0.22 | 1.34 |
| 26672 | 0 | 128004 | GMIEVQSNYGFVWDVS<br>LKKV      | 2.91 | 0.01 | 2.40 | 2.75 | 0.22 | 0.28 |
| 26673 | 0 | 123244 | GMIPPPGL                      | 2.15 | 0.01 | 0.78 | 1.20 | 0.22 | 0.28 |
| 26674 | 0 | 123244 | GMIPPPGL                      | 2.15 | 0.01 | 0.78 | 0.44 | 1.13 | 0.28 |
| 26675 | 0 | 118384 | GMKFDRGYISPYF                 | 2.54 | 0.01 | 0.78 | 0.44 | 1.59 | 0.85 |
| 26676 | 0 | 143907 | GMKLTSEQKAML                  | 2.48 | 0.01 | 0.90 | 0.68 | 0.22 | 1.39 |
| 26677 | 0 | 21293  | GMLATVAFNTFTDNVD<br>QR        | 2.85 | 0.01 | 4.08 | 0.68 | 0.22 | 1.27 |
| 26678 | 0 | 21293  | GMLATVAFNTFTDNVD<br>QR        | 2.85 | 0.01 | 4.08 | 0.68 | 0.22 | 0.28 |
| 26679 | 0 | 21293  | GMLATVAFNTFTDNVD<br>QR        | 2.85 | 0.01 | 4.08 | 0.68 | 0.22 | 0.28 |
| 26680 | 0 | 21293  | GMLATVAFNTFTDNVD<br>QR        | 2.85 | 0.01 | 4.08 | 0.68 | 0.22 | 0.28 |
| 26681 | 0 | 107162 | GMLDIFAPIRHV                  | 2.43 | 0.01 | 0.90 | 0.44 | 1.41 | 1.39 |
| 26682 | 0 | 107162 | GMLDIFAPIRHV                  | 2.43 | 0.01 | 0.90 | 0.44 | 1.41 | 1.39 |
| 26683 | 0 | 95086  | GMLEASEGLDGWIHQ               | 2.67 | 0.01 | 2.48 | 0.44 | 1.74 | 0.28 |
| 26684 | 0 | 95086  | GMLEASEGLDGWIHQ               | 2.67 | 0.01 | 2.48 | 0.44 | 1.74 | 0.28 |
| 26685 | 0 | 95086  | GMLEASEGLDGWIHQ               | 2.67 | 0.01 | 2.48 | 0.44 | 1.74 | 0.28 |
| 26686 | 0 | 164768 | GMLGEVQFGGWN                  | 2.47 | 0.01 | 3.78 | 0.44 | 1.23 | 0.85 |
| 26687 | 0 | 123245 | GMLGSTPEE                     | 2.22 | 0.01 | 2.28 | 2.00 | 0.22 | 0.28 |
| 26688 | 0 | 123245 | GMLGSTPEE                     | 2.22 | 0.01 | 2.28 | 2.00 | 0.22 | 0.28 |
| 26689 | 0 | 123246 | GMLGTTPEE                     | 2.23 | 0.01 | 2.28 | 2.00 | 0.22 | 0.28 |
| 26690 | 0 | 133589 | GMLPPQLFDRHH                  | 2.44 | 0.01 | 0.90 | 0.68 | 0.22 | 1.39 |
| 26691 | 0 | 164769 | GMLTFCGPKIQTGLDAT<br>HAERAIPV | 3.13 | 0.01 | 0.78 | 0.44 | 1.13 | 0.28 |
| 26692 | 0 | 164769 | GMLTFCGPKIQTGLDAT<br>HAERAIPV | 3.13 | 0.01 | 0.78 | 0.44 | 1.13 | 0.28 |
| 26693 | 0 | 164769 | GMLTFCGPKIQTGLDAT<br>HAERAIPV | 3.13 | 0.01 | 0.78 | 0.44 | 1.41 | 0.28 |
| 26694 | 0 | 164769 | GMLTFCGPKIQTGLDAT<br>HAERAIPV | 3.13 | 0.01 | 0.78 | 0.44 | 1.41 | 0.28 |

|       |   |        |                                                    |      |      |      |      |      |      |
|-------|---|--------|----------------------------------------------------|------|------|------|------|------|------|
| 26695 | 0 | 21313  | GMMLAEQFKQKALGLL<br>QTAS                           | 2.97 | 0.01 | 1.72 | 0.44 | 0.85 | 0.28 |
| 26696 | 0 | 118814 | GMMPAPHM                                           | 2.16 | 0.01 | 0.78 | 0.44 | 1.13 | 0.28 |
| 26697 | 0 | 118814 | GMMPAPHM                                           | 2.16 | 0.01 | 0.78 | 0.44 | 1.13 | 0.28 |
| 26698 | 0 | 118814 | GMMPAPHM                                           | 2.16 | 0.01 | 0.78 | 0.44 | 1.41 | 0.28 |
| 26699 | 0 | 450632 | GMMSSPP                                            | 2.02 | 0.01 | 0.90 | 0.44 | 1.23 | 1.39 |
| 26700 | 0 | 21318  | GMNNMNGDINNINGD<br>INNMNGDINNMNGDI<br>NNMNGDINNMMN | 3.72 | 0.01 | 2.22 | 0.44 | 1.74 | 0.28 |
| 26701 | 0 | 21318  | GMNNMNGDINNINGD<br>INNMNGDINNMNGDI<br>NNMNGDINNMMN | 3.72 | 0.01 | 2.22 | 0.44 | 1.74 | 0.28 |
| 26702 | 0 | 21318  | GMNNMNGDINNINGD<br>INNMNGDINNMNGDI<br>NNMNGDINNMMN | 3.72 | 0.01 | 2.22 | 0.44 | 1.74 | 0.28 |
| 26703 | 0 | 21318  | GMNNMNGDINNINGD<br>INNMNGDINNMNGDI<br>NNMNGDINNMMN | 3.72 | 0.01 | 2.22 | 0.44 | 0.85 | 1.48 |
| 26704 | 0 | 21318  | GMNNMNGDINNINGD<br>INNMNGDINNMNGDI<br>NNMNGDINNMMN | 3.72 | 0.01 | 2.22 | 1.15 | 0.22 | 1.48 |
| 26705 | 0 | 132343 | GMPFMIHQLMGNGV<br>W                                | 2.67 | 0.01 | 0.78 | 0.44 | 1.13 | 1.39 |
| 26706 | 0 | 230888 | GMPGERGAAGIAGPK                                    | 2.72 | 0.01 | 0.78 | 3.57 | 0.22 | 0.28 |
| 26707 | 0 | 230888 | GMPGERGAAGIAGPK                                    | 2.72 | 0.01 | 0.78 | 2.61 | 0.22 | 0.28 |
| 26708 | 0 | 230888 | GMPGERGAAGIAGPK                                    | 2.72 | 0.01 | 0.78 | 0.44 | 1.13 | 0.28 |
| 26709 | 0 | 230888 | GMPGERGAAGIAGPK                                    | 2.72 | 0.01 | 0.78 | 0.44 | 1.41 | 0.28 |
| 26710 | 0 | 21322  | GMPGGMPGGMPGGM<br>PG                               | 2.82 | 0.01 | 2.30 | 0.44 | 0.85 | 0.28 |
| 26711 | 0 | 21323  | GMPLLATGTS                                         | 2.33 | 0.01 | 3.67 | 0.68 | 0.22 | 0.28 |
| 26712 | 0 | 123247 | GMPPMTQA                                           | 2.13 | 0.01 | 0.78 | 1.20 | 0.22 | 0.28 |
| 26713 | 0 | 123247 | GMPPMTQA                                           | 2.13 | 0.01 | 0.78 | 0.44 | 1.13 | 0.28 |
| 26714 | 0 | 128751 | GMPPPGMR                                           | 2.16 | 0.01 | 0.78 | 0.44 | 1.13 | 0.28 |
| 26715 | 0 | 21325  | GMQAFFRPRCAKTLSCA                                  | 2.77 | 0.01 | 0.90 | 0.68 | 0.22 | 0.28 |
| 26716 | 0 | 121339 | GMQGPAGSGWEEGSG<br>SPPGVTPLFSP                     | 3.22 | 0.01 | 0.78 | 0.68 | 0.22 | 0.28 |

|       |   |        |                                                           |      |      |      |      |      |      |
|-------|---|--------|-----------------------------------------------------------|------|------|------|------|------|------|
| 26717 | 0 | 121339 | GMQGPAGSGWEEGSG<br>SPPGVTPLFSP                            | 3.22 | 0.01 | 0.78 | 0.68 | 0.22 | 0.28 |
| 26718 | 0 | 21330  | GMQLAEQFK                                                 | 2.21 | 0.01 | 1.96 | 0.44 | 0.85 | 1.34 |
| 26719 | 0 | 103941 | GMQLAEQFKQKALGLL<br>QTAT                                  | 2.99 | 0.01 | 1.72 | 0.44 | 0.85 | 0.28 |
| 26720 | 0 | 423320 | GMRAVSQFLVTHPLG                                           | 2.65 | 0.01 | 2.51 | 0.44 | 2.35 | 1.28 |
| 26721 | 0 | 21334  | GMRFDRGY                                                  | 2.15 | 0.01 | 2.99 | 0.44 | 0.85 | 0.28 |
| 26722 | 0 | 144652 | GMRGMKGLVY                                                | 2.34 | 0.01 | 0.78 | 0.44 | 1.13 | 0.28 |
| 26723 | 0 | 144652 | GMRGMKGLVY                                                | 2.34 | 0.01 | 0.78 | 0.44 | 1.41 | 0.28 |
| 26724 | 0 | 117885 | GMRPPMGPP                                                 | 2.37 | 0.01 | 0.78 | 3.05 | 1.13 | 0.28 |
| 26725 | 0 | 21341  | GMSGSG                                                    | 1.92 | 0.01 | 0.90 | 0.44 | 1.74 | 1.39 |
| 26726 | 0 | 178923 | GMSKEVQKLIIDHF                                            | 2.62 | 0.01 | 2.36 | 0.44 | 1.23 | 1.28 |
| 26727 | 0 | 178923 | GMSKEVQKLIIDHF                                            | 2.62 | 0.01 | 2.36 | 0.44 | 1.23 | 1.27 |
| 26728 | 0 | 178923 | GMSKEVQKLIIDHF                                            | 2.62 | 0.01 | 2.36 | 0.44 | 1.23 | 1.28 |
| 26729 | 0 | 167269 | GMSLLHGQRPHT                                              | 2.47 | 0.01 | 0.90 | 2.37 | 0.22 | 1.39 |
| 26730 | 0 | 423321 | GMSLNQSTRDISYMG                                           | 2.67 | 0.01 | 2.51 | 0.44 | 2.35 | 1.28 |
| 26731 | 0 | 21345  | GMSQDPVA                                                  | 2.10 | 0.01 | 3.20 | 2.22 | 0.85 | 0.28 |
| 26732 | 0 | 134069 | GMTALLKVSSCDKNTG<br>DYEE                                  | 2.91 | 0.01 | 0.78 | 0.44 | 2.35 | 0.28 |
| 26733 | 0 | 132832 | GMTALLKVSSCDKNTG<br>DYYEDSYEDISAYLLSKN<br>NAIEPRFSQNSRHPS | 3.83 | 0.01 | 0.78 | 0.68 | 0.22 | 1.39 |
| 26734 | 0 | 21352  | GMTFRAQEGA                                                | 2.32 | 0.01 | 2.97 | 0.44 | 0.85 | 0.28 |
| 26735 | 0 | 21353  | GMTFRAQEGAFLTG                                            | 2.64 | 0.01 | 2.97 | 0.44 | 0.85 | 0.28 |
| 26736 | 0 | 78404  | GMTGCGNTPIFKDGRG<br>CG                                    | 2.86 | 0.01 | 3.22 | 0.44 | 1.23 | 1.27 |
| 26737 | 0 | 122778 | GMTHMTSRDIEVQGFRI                                         | 2.78 | 0.01 | 0.78 | 0.44 | 1.13 | 0.28 |
| 26738 | 0 | 122778 | GMTHMTSRDIEVQGFRI                                         | 2.78 | 0.01 | 0.78 | 0.44 | 1.13 | 0.85 |
| 26739 | 0 | 118385 | GMTSNGFIADPDDRGM<br>L                                     | 2.77 | 0.01 | 0.78 | 1.12 | 0.22 | 0.28 |
| 26740 | 0 | 118385 | GMTSNGFIADPDDRGM<br>L                                     | 2.77 | 0.01 | 0.78 | 1.12 | 0.22 | 0.28 |
| 26741 | 0 | 133590 | GMVDGWYG                                                  | 2.15 | 0.01 | 2.36 | 1.15 | 0.22 | 0.28 |
| 26742 | 0 | 133590 | GMVDGWYG                                                  | 2.15 | 0.01 | 2.36 | 0.68 | 0.22 | 0.85 |
| 26743 | 0 | 133590 | GMVDGWYG                                                  | 2.15 | 0.01 | 2.36 | 0.68 | 0.22 | 0.85 |
| 26744 | 0 | 133590 | GMVDGWYG                                                  | 2.15 | 0.01 | 2.36 | 0.68 | 0.22 | 0.85 |
| 26745 | 0 | 133590 | GMVDGWYG                                                  | 2.15 | 0.01 | 2.36 | 0.68 | 0.22 | 0.28 |
| 26746 | 0 | 133590 | GMVDGWYG                                                  | 2.15 | 0.01 | 2.36 | 0.68 | 0.22 | 0.28 |
| 26747 | 0 | 21360  | GMVQTHVTTGPSIPT                                           | 2.70 | 0.01 | 2.40 | 1.12 | 0.22 | 0.28 |
| 26748 | 0 | 21365  | GMYGGTYLVEKP                                              | 2.47 | 0.01 | 2.72 | 1.12 | 0.22 | 0.28 |
| 26749 | 0 | 21365  | GMYGGTYLVEKP                                              | 2.47 | 0.01 | 2.72 | 1.12 | 0.22 | 0.28 |
| 26750 | 0 | 21365  | GMYGGTYLVEKP                                              | 2.47 | 0.01 | 2.72 | 1.12 | 0.22 | 0.28 |

|       |   |        |                                          |      |      |      |      |      |      |
|-------|---|--------|------------------------------------------|------|------|------|------|------|------|
| 26751 | 0 | 21369  | GNAAGNAAGNDAGNA<br>AGNAAGNAAGNAAGN<br>AA | 3.48 | 0.01 | 3.93 | 4.63 | 1.59 | 0.28 |
| 26752 | 0 | 21369  | GNAAGNAAGNDAGNA<br>AGNAAGNAAGNAAGN<br>AA | 3.48 | 0.01 | 3.93 | 4.08 | 1.59 | 0.28 |
| 26753 | 0 | 21369  | GNAAGNAAGNDAGNA<br>AGNAAGNAAGNAAGN<br>AA | 3.48 | 0.01 | 3.93 | 0.44 | 1.74 | 0.28 |
| 26754 | 0 | 21369  | GNAAGNAAGNDAGNA<br>AGNAAGNAAGNAAGN<br>AA | 3.48 | 0.01 | 3.93 | 4.08 | 1.59 | 1.27 |
| 26755 | 0 | 21373  | GNAEKYDKMDEPQHYG<br>KS                   | 2.84 | 0.01 | 1.66 | 1.20 | 0.22 | 0.28 |
| 26756 | 0 | 21373  | GNAEKYDKMDEPQHYG<br>KS                   | 2.84 | 0.01 | 1.66 | 2.43 | 0.22 | 0.28 |
| 26757 | 0 | 21373  | GNAEKYDKMDEPQHYG<br>KS                   | 2.84 | 0.01 | 1.66 | 0.44 | 1.74 | 0.28 |
| 26758 | 0 | 21373  | GNAEKYDKMDEPQHYG<br>KS                   | 2.84 | 0.01 | 1.66 | 0.68 | 0.22 | 0.28 |
| 26759 | 0 | 21373  | GNAEKYDKMDEPQHYG<br>KS                   | 2.84 | 0.01 | 1.66 | 1.20 | 0.22 | 0.28 |
| 26760 | 0 | 21374  | GNAELQTYLRQITPGWS<br>IYGLYDGTYL          | 3.28 | 0.01 | 2.14 | 1.20 | 0.22 | 0.28 |
| 26761 | 0 | 21374  | GNAELQTYLRQITPGWS<br>IYGLYDGTYL          | 3.28 | 0.01 | 2.14 | 1.20 | 0.22 | 0.28 |
| 26762 | 0 | 21374  | GNAELQTYLRQITPGWS<br>IYGLYDGTYL          | 3.28 | 0.01 | 2.14 | 1.20 | 0.22 | 1.34 |
| 26763 | 0 | 21374  | GNAELQTYLRQITPGWS<br>IYGLYDGTYL          | 3.28 | 0.01 | 2.14 | 1.20 | 0.22 | 0.28 |
| 26764 | 0 | 21374  | GNAELQTYLRQITPGWS<br>IYGLYDGTYL          | 3.28 | 0.01 | 2.14 | 1.20 | 0.22 | 0.85 |
| 26765 | 0 | 119187 | GNAEVHASFFDIGG                           | 2.59 | 0.01 | 2.18 | 1.81 | 0.22 | 0.28 |
| 26766 | 0 | 119187 | GNAEVHASFFDIGG                           | 2.59 | 0.01 | 2.18 | 1.81 | 0.22 | 1.34 |
| 26767 | 0 | 119187 | GNAEVHASFFDIGG                           | 2.59 | 0.01 | 2.18 | 1.20 | 0.22 | 0.28 |
| 26768 | 0 | 119187 | GNAEVHASFFDIGG                           | 2.59 | 0.01 | 2.18 | 1.20 | 0.22 | 0.28 |
| 26769 | 0 | 119187 | GNAEVHASFFDIGG                           | 2.59 | 0.01 | 2.18 | 1.20 | 0.22 | 1.34 |
| 26770 | 0 | 119187 | GNAEVHASFFDIGG                           | 2.59 | 0.01 | 2.18 | 1.20 | 0.22 | 2.56 |
| 26771 | 0 | 115058 | GNAEVHASFFDIGGS                          | 2.67 | 0.01 | 2.18 | 1.20 | 0.22 | 0.28 |
| 26772 | 0 | 115058 | GNAEVHASFFDIGGS                          | 2.67 | 0.01 | 2.18 | 1.20 | 0.22 | 0.28 |
| 26773 | 0 | 115058 | GNAEVHASFFDIGGS                          | 2.67 | 0.01 | 2.18 | 1.20 | 0.22 | 1.34 |
| 26774 | 0 | 115058 | GNAEVHASFFDIGGS                          | 2.67 | 0.01 | 2.18 | 1.20 | 0.22 | 1.27 |
| 26775 | 0 | 180326 | GNAEVHASFFDIGGSGG<br>GNAEVHASFFDIGGS     | 3.44 | 0.01 | 0.90 | 3.01 | 0.22 | 0.28 |

|       |   |        |                                      |      |      |      |      |      |      |
|-------|---|--------|--------------------------------------|------|------|------|------|------|------|
| 26776 | 0 | 180326 | GNAEVHASFFDIGGSGG<br>GNAEVHASFFDIGGS | 3.44 | 0.01 | 0.90 | 1.20 | 0.22 | 0.28 |
| 26777 | 0 | 180326 | GNAEVHASFFDIGGSGG<br>GNAEVHASFFDIGGS | 3.44 | 0.01 | 0.90 | 1.20 | 0.22 | 1.75 |
| 26778 | 0 | 180326 | GNAEVHASFFDIGGSGG<br>GNAEVHASFFDIGGS | 3.44 | 0.01 | 0.90 | 1.20 | 0.22 | 1.34 |
| 26779 | 0 | 180326 | GNAEVHASFFDIGGSGG<br>GNAEVHASFFDIGGS | 3.44 | 0.01 | 0.90 | 1.20 | 0.22 | 2.56 |
| 26780 | 0 | 180326 | GNAEVHASFFDIGGSGG<br>GNAEVHASFFDIGGS | 3.44 | 0.01 | 0.90 | 1.20 | 0.22 | 2.56 |
| 26781 | 0 | 21379  | GNALPSAV                             | 2.12 | 0.01 | 2.66 | 2.61 | 0.22 | 0.28 |
| 26782 | 0 | 421056 | GNANRFTTIKNCEQHCK<br>MPD             | 2.89 | 0.01 | 3.19 | 0.44 | 1.23 | 1.28 |
| 26783 | 0 | 421056 | GNANRFTTIKNCEQHCK<br>MPD             | 2.89 | 0.01 | 3.19 | 0.44 | 1.23 | 1.28 |
| 26784 | 0 | 92841  | GNDGNDRFLG                           | 2.36 | 0.01 | 2.67 | 2.00 | 0.22 | 0.28 |
| 26785 | 0 | 92841  | GNDGNDRFLG                           | 2.36 | 0.01 | 2.67 | 2.00 | 0.22 | 0.28 |
| 26786 | 0 | 92841  | GNDGNDRFLG                           | 2.36 | 0.01 | 2.67 | 2.00 | 0.22 | 0.28 |
| 26787 | 0 | 21399  | GNDLGKVQVA                           | 2.32 | 0.01 | 3.38 | 1.15 | 0.22 | 1.34 |
| 26788 | 0 | 21399  | GNDLGKVQVA                           | 2.32 | 0.01 | 3.38 | 1.15 | 0.22 | 0.85 |
| 26789 | 0 | 92843  | GNDRLFGGKG                           | 2.34 | 0.01 | 2.67 | 2.00 | 0.22 | 0.28 |
| 26790 | 0 | 131892 | GNDTSSVSGWGDPKP                      | 2.70 | 0.01 | 0.78 | 0.44 | 1.13 | 0.85 |
| 26791 | 0 | 21406  | GNDWEDRYRENMYRY<br>PNQV              | 2.96 | 0.01 | 1.75 | 3.40 | 0.22 | 0.28 |
| 26792 | 0 | 21407  | GNDYEDRYREN                          | 2.52 | 0.01 | 2.52 | 2.19 | 0.22 | 0.28 |
| 26793 | 0 | 21407  | GNDYEDRYREN                          | 2.52 | 0.01 | 2.52 | 2.19 | 0.22 | 2.12 |
| 26794 | 0 | 21408  | GNDYEDRYRENMYRY<br>PNQ               | 2.94 | 0.01 | 2.52 | 1.15 | 0.22 | 0.85 |
| 26795 | 0 | 21408  | GNDYEDRYRENMYRY<br>PNQ               | 2.94 | 0.01 | 2.52 | 1.15 | 0.22 | 2.12 |
| 26796 | 0 | 21408  | GNDYEDRYRENMYRY<br>PNQ               | 2.94 | 0.01 | 2.52 | 2.90 | 0.22 | 0.85 |
| 26797 | 0 | 21408  | GNDYEDRYRENMYRY<br>PNQ               | 2.94 | 0.01 | 2.52 | 3.93 | 0.22 | 0.85 |
| 26798 | 0 | 21408  | GNDYEDRYRENMYRY<br>PNQ               | 2.94 | 0.01 | 2.52 | 2.90 | 0.22 | 0.28 |
| 26799 | 0 | 21409  | GNDYEDRYRENMYRY<br>PNQV              | 2.97 | 0.01 | 2.52 | 1.15 | 0.22 | 0.28 |
| 26800 | 0 | 21409  | GNDYEDRYRENMYRY<br>PNQV              | 2.97 | 0.01 | 2.52 | 1.15 | 0.22 | 0.85 |



|       |   |        |                                   |      |      |      |      |      |      |
|-------|---|--------|-----------------------------------|------|------|------|------|------|------|
| 26801 | 0 | 21409  | GNDYEDRYRENMYRY<br>PNQV           | 2.97 | 0.01 | 2.52 | 1.15 | 0.22 | 0.28 |
| 26802 | 0 | 107865 | GNDYICNKYKNINVCKK<br>NNDTWTDLVKNS | 3.36 | 0.01 | 0.90 | 1.12 | 0.22 | 0.28 |
| 26803 | 0 | 167586 | GNEGRGYGGRGEG                     | 2.62 | 0.01 | 3.44 | 0.44 | 0.85 | 1.28 |
| 26804 | 0 | 167586 | GNEGRGYGGRGEG                     | 2.62 | 0.01 | 3.44 | 0.44 | 0.85 | 1.28 |
| 26805 | 0 | 167586 | GNEGRGYGGRGEG                     | 2.62 | 0.01 | 3.44 | 0.44 | 1.59 | 1.28 |
| 26806 | 0 | 107866 | GNEITRGGSTS                       | 2.43 | 3.50 | 0.78 | 0.68 | 0.22 | 0.28 |
| 26807 | 0 | 106466 | GNESEIYRKY                        | 2.31 | 0.01 | 2.75 | 0.44 | 1.23 | 0.85 |
| 26808 | 0 | 103942 | GNESGGGGGGGGG                     | 2.59 | 0.01 | 3.00 | 1.20 | 0.22 | 0.28 |
| 26809 | 0 | 450633 | GNEVMTY                           | 1.99 | 0.01 | 0.90 | 0.44 | 1.23 | 1.39 |
| 26810 | 0 | 21422  | GNFERISGDLKTQID                   | 2.65 | 0.01 | 2.04 | 0.44 | 0.85 | 0.28 |
| 26811 | 0 | 21424  | GNFGDQDLIRQGTDYK<br>HW            | 2.82 | 0.01 | 2.91 | 0.44 | 0.85 | 0.28 |
| 26812 | 0 | 21427  | GNGAGGQAAGNGAGG<br>QAA            | 2.91 | 0.01 | 2.59 | 0.44 | 0.85 | 0.28 |
| 26813 | 0 | 21429  | GNGAGGQPAGNGAGG<br>QPA            | 2.92 | 0.01 | 0.90 | 0.44 | 0.85 | 0.28 |
| 26814 | 0 | 131893 | GNGANSGBSRRGWGT                   | 2.73 | 0.01 | 0.78 | 0.44 | 1.13 | 0.85 |
| 26815 | 0 | 150989 | GNGCFEFYHKCDNTC                   | 2.69 | 0.01 | 2.87 | 0.44 | 0.85 | 0.28 |
| 26816 | 0 | 21431  | GNGCGL                            | 1.92 | 0.01 | 2.40 | 0.44 | 0.85 | 0.28 |
| 26817 | 0 | 21434  | GNGGMVTGCAETPGCV<br>AYIG          | 2.96 | 0.01 | 2.04 | 2.52 | 0.22 | 0.28 |
| 26818 | 0 | 92845  | GNGKITQDEL                        | 2.30 | 0.01 | 2.67 | 2.00 | 0.22 | 0.28 |
| 26819 | 0 | 92845  | GNGKITQDEL                        | 2.30 | 0.01 | 2.67 | 2.00 | 0.22 | 0.28 |
| 26820 | 0 | 118817 | GNGLGEKGDTSGPEGS<br>GGSG          | 2.99 | 0.01 | 2.43 | 0.44 | 1.13 | 1.27 |
| 26821 | 0 | 118817 | GNGLGEKGDTSGPEGS<br>GGSG          | 2.99 | 0.01 | 2.43 | 0.44 | 1.41 | 1.27 |
| 26822 | 0 | 118817 | GNGLGEKGDTSGPEGS<br>GGSG          | 2.99 | 0.01 | 2.48 | 0.44 | 1.74 | 0.28 |
| 26823 | 0 | 146986 | GNGPGYALGGSR                      | 2.56 | 0.01 | 1.60 | 0.44 | 0.85 | 0.85 |
| 26824 | 0 | 100072 | GNGQGHNMPNDPNR<br>NVDENA          | 2.97 | 0.01 | 1.66 | 2.63 | 0.22 | 1.48 |
| 26825 | 0 | 100073 | GNGQGLNMNPPNPNF<br>VDENA          | 2.96 | 0.01 | 0.90 | 2.63 | 0.22 | 1.48 |
| 26826 | 0 | 100073 | GNGQGLNMNPPNPNF<br>VDENA          | 2.96 | 0.01 | 0.90 | 2.74 | 0.22 | 0.85 |
| 26827 | 0 | 100073 | GNGQGLNMNPPNPNF<br>VDENA          | 2.96 | 0.01 | 0.90 | 2.74 | 0.22 | 1.48 |
| 26828 | 0 | 100073 | GNGQGLNMNPPNPNF<br>VDENA          | 2.96 | 0.01 | 0.90 | 2.63 | 0.22 | 1.48 |
| 26829 | 0 | 100073 | GNGQGLNMNPPNPNF<br>VDENA          | 2.96 | 0.01 | 0.90 | 2.63 | 0.22 | 0.85 |

|       |   |        |                               |      |      |      |      |      |      |
|-------|---|--------|-------------------------------|------|------|------|------|------|------|
| 26830 | 0 | 301345 | GNGRPGRVKRVKRKA               | 2.73 | 0.01 | 1.61 | 0.44 | 0.85 | 1.28 |
| 26831 | 0 | 132345 | GNGVW                         | 1.77 | 0.01 | 0.78 | 0.44 | 1.13 | 1.39 |
| 26832 | 0 | 132346 | GNGVWHFGETMCTLIT<br>AMDANSQF  | 3.08 | 0.01 | 0.78 | 0.44 | 1.13 | 1.39 |
| 26833 | 0 | 21441  | GNHEYCVEVKYTAGVSP<br>KVCKDVTV | 3.17 | 0.01 | 4.08 | 0.68 | 0.22 | 0.28 |
| 26834 | 0 | 21441  | GNHEYCVEVKYTAGVSP<br>KVCKDVTV | 3.17 | 0.01 | 4.08 | 0.68 | 0.22 | 0.28 |
| 26835 | 0 | 21441  | GNHEYCVEVKYTAGVSP<br>KVCKDVTV | 3.17 | 0.01 | 4.08 | 0.68 | 0.22 | 0.28 |
| 26836 | 0 | 21442  | GNHVSPTHYVPESD                | 2.61 | 0.01 | 1.72 | 0.44 | 1.59 | 0.28 |
| 26837 | 0 | 21443  | GNIFSGFTPEFLEQA               | 2.67 | 0.01 | 2.16 | 0.44 | 1.23 | 0.85 |
| 26838 | 0 | 119458 | GNIGIDVEDEDSDE                | 2.67 | 0.01 | 0.78 | 0.44 | 1.13 | 2.75 |
| 26839 | 0 | 119908 | GNIGIDVEDEDSDEDEF             | 2.84 | 0.01 | 0.78 | 0.44 | 1.13 | 1.57 |
| 26840 | 0 | 100074 | GNINYACQQGID                  | 2.50 | 0.01 | 2.88 | 1.20 | 0.22 | 0.85 |
| 26841 | 0 | 174123 | GNIVAVDIKP                    | 2.31 | 0.01 | 3.10 | 0.44 | 1.23 | 0.85 |
| 26842 | 0 | 21450  | GNIVDIDFDS                    | 2.33 | 0.01 | 2.56 | 1.20 | 0.22 | 0.28 |
| 26843 | 0 | 174126 | GNIVSVDIKS                    | 2.33 | 0.01 | 3.10 | 0.44 | 1.23 | 0.85 |
| 26844 | 0 | 174126 | GNIVSVDIKS                    | 2.33 | 0.01 | 3.10 | 0.44 | 1.23 | 0.85 |
| 26845 | 0 | 103227 | GNKASFLDQVHFQPL               | 2.64 | 0.01 | 2.04 | 0.44 | 0.85 | 1.28 |
| 26846 | 0 | 21459  | GNKTLAGPKGPVTQ                | 2.64 | 0.01 | 2.69 | 0.44 | 0.85 | 0.28 |
| 26847 | 0 | 21460  | GNKTLAGSRGPVTQ                | 2.60 | 0.01 | 2.69 | 0.44 | 0.85 | 0.28 |
| 26848 | 0 | 21462  | GNLADDTIN                     | 2.22 | 0.01 | 3.78 | 1.12 | 0.22 | 0.28 |
| 26849 | 0 | 226842 | GNLEHVS                       | 1.99 | 0.01 | 0.78 | 0.44 | 1.13 | 0.28 |
| 26850 | 0 | 226842 | GNLEHVS                       | 1.99 | 0.01 | 0.78 | 0.44 | 1.13 | 1.34 |
| 26851 | 0 | 99290  | GNLELVAVRKEQQQR               | 2.68 | 0.01 | 2.16 | 0.44 | 1.23 | 1.48 |
| 26852 | 0 | 189083 | GNLFGRD                       | 2.03 | 0.01 | 0.90 | 2.13 | 0.22 | 0.28 |
| 26853 | 0 | 128005 | GNLKLCFCGDYIFSEE              | 2.72 | 0.01 | 2.40 | 2.75 | 0.22 | 0.28 |
| 26854 | 0 | 128005 | GNLKLCFCGDYIFSEE              | 2.72 | 0.01 | 2.40 | 2.75 | 0.22 | 0.28 |
| 26855 | 0 | 128005 | GNLKLCFCGDYIFSEE              | 2.72 | 0.01 | 2.40 | 2.75 | 0.22 | 0.85 |
| 26856 | 0 | 21466  | GNLLFT                        | 1.89 | 0.01 | 2.40 | 0.44 | 0.85 | 0.28 |
| 26857 | 0 | 21467  | GNLLFTGH                      | 2.14 | 0.01 | 2.40 | 1.12 | 0.22 | 0.28 |
| 26858 | 0 | 21469  | GNLLLSCL                      | 2.15 | 0.01 | 3.42 | 0.44 | 0.85 | 0.28 |
| 26859 | 0 | 21469  | GNLLLSCL                      | 2.15 | 0.01 | 3.42 | 0.68 | 0.22 | 0.28 |
| 26860 | 0 | 21469  | GNLLLSCL                      | 2.15 | 0.01 | 3.85 | 0.68 | 0.22 | 0.28 |
| 26861 | 0 | 21469  | GNLLLSCL                      | 2.15 | 0.01 | 3.85 | 0.68 | 0.22 | 1.48 |
| 26862 | 0 | 21469  | GNLLLSCL                      | 2.15 | 0.01 | 3.85 | 0.68 | 0.22 | 1.48 |
| 26863 | 0 | 21469  | GNLLLSCL                      | 2.15 | 0.01 | 3.85 | 0.68 | 0.22 | 1.48 |
| 26864 | 0 | 21469  | GNLLLSCL                      | 2.15 | 0.01 | 0.90 | 2.13 | 0.22 | 0.28 |
| 26865 | 0 | 152599 | GNLQYQGKDI                    | 2.32 | 0.01 | 2.18 | 2.16 | 0.22 | 0.28 |
| 26866 | 0 | 144311 | GNLTAG                        | 1.91 | 0.01 | 2.19 | 0.44 | 1.13 | 2.02 |
| 26867 | 0 | 144311 | GNLTAG                        | 1.91 | 0.01 | 2.19 | 0.44 | 1.13 | 1.48 |
| 26868 | 0 | 147742 | GNMALDDIH                     | 2.20 | 0.01 | 3.24 | 3.57 | 0.85 | 0.28 |
| 26869 | 0 | 21475  | GNMVETEDTKEPGVL               | 2.69 | 0.01 | 2.24 | 1.15 | 0.22 | 0.85 |
| 26870 | 0 | 420612 | GNNADV KYIYM                  | 2.46 | 0.01 | 3.61 | 0.68 | 0.22 | 1.48 |

|       |   |        |                             |      |      |      |      |      |      |
|-------|---|--------|-----------------------------|------|------|------|------|------|------|
| 26871 | 0 | 420612 | GNNADVKYVIYM                | 2.46 | 0.01 | 3.61 | 0.68 | 0.22 | 0.28 |
| 26872 | 0 | 420612 | GNNADVKYVIYM                | 2.46 | 0.01 | 3.61 | 0.68 | 0.22 | 0.85 |
| 26873 | 0 | 420612 | GNNADVKYVIYM                | 2.46 | 0.01 | 3.61 | 0.68 | 0.22 | 0.85 |
| 26874 | 0 | 420612 | GNNADVKYVIYM                | 2.46 | 0.01 | 3.61 | 0.68 | 0.22 | 0.85 |
| 26875 | 0 | 420612 | GNNADVKYVIYM                | 2.46 | 0.01 | 3.61 | 0.68 | 0.22 | 0.85 |
| 26876 | 0 | 420612 | GNNADVKYVIYM                | 2.46 | 0.01 | 3.61 | 2.22 | 0.22 | 0.28 |
| 26877 | 0 | 420612 | GNNADVKYVIYM                | 2.46 | 0.01 | 3.61 | 0.68 | 0.22 | 1.34 |
| 26878 | 0 | 21477  | GNNDNVLDHLTGRSC             | 2.69 | 0.01 | 2.14 | 2.90 | 0.22 | 0.28 |
| 26879 | 0 | 21477  | GNNDNVLDHLTGRSC             | 2.69 | 0.01 | 2.14 | 2.90 | 0.22 | 0.28 |
| 26880 | 0 | 21477  | GNNDNVLDHLTGRSC             | 2.69 | 0.01 | 2.14 | 1.12 | 0.22 | 0.28 |
| 26881 | 0 | 21478  | GNNEDNEK                    | 2.16 | 0.01 | 3.29 | 1.20 | 0.22 | 0.28 |
| 26882 | 0 | 192960 | GNNEPYKYWP                  | 2.32 | 0.01 | 3.26 | 0.68 | 0.22 | 0.28 |
| 26883 | 0 | 192960 | GNNEPYKYWP                  | 2.32 | 0.01 | 3.26 | 0.68 | 0.22 | 1.48 |
| 26884 | 0 | 21479  | GNNGHQTINKTAHEIID<br>A      | 2.86 | 0.01 | 2.59 | 0.44 | 0.85 | 0.28 |
| 26885 | 0 | 21479  | GNNGHQTINKTAHEIID<br>A      | 2.86 | 0.01 | 2.59 | 0.44 | 0.85 | 0.28 |
| 26886 | 0 | 156317 | GNNIFSGFDTQLLAQ             | 2.67 | 0.01 | 3.67 | 0.44 | 1.23 | 1.27 |
| 26887 | 0 | 21480  | GNNLEDPASRDL                | 2.46 | 0.01 | 2.08 | 0.68 | 2.26 | 0.85 |
| 26888 | 0 | 101689 | GNNNDSTGSSDV                | 2.51 | 0.01 | 3.10 | 1.15 | 0.22 | 0.28 |
| 26889 | 0 | 101689 | GNNNDSTGSSDV                | 2.51 | 0.01 | 3.10 | 1.15 | 0.22 | 0.85 |
| 26890 | 0 | 171268 | GNNSLYRDTAVFECL             | 2.61 | 0.01 | 0.78 | 0.44 | 1.41 | 0.28 |
| 26891 | 0 | 171268 | GNNSLYRDTAVFECL             | 2.61 | 0.01 | 0.78 | 0.44 | 1.13 | 0.28 |
| 26892 | 0 | 21485  | GNNSVSKEKPPSLNWP            | 2.76 | 0.01 | 0.90 | 0.44 | 0.85 | 0.28 |
| 26893 | 0 | 21486  | GNNSVSKEKPPSLNWP<br>P       | 2.81 | 0.01 | 0.90 | 0.44 | 0.85 | 1.39 |
| 26894 | 0 | 141661 | GNPAPWKDWGSA                | 2.50 | 0.01 | 0.90 | 0.68 | 0.22 | 1.39 |
| 26895 | 0 | 110257 | GNPGADGI                    | 2.15 | 0.01 | 1.60 | 2.61 | 0.22 | 0.28 |
| 26896 | 0 | 110606 | GNPGTDGIPGAKG               | 2.58 | 0.01 | 0.78 | 3.18 | 0.22 | 0.28 |
| 26897 | 0 | 110606 | GNPGTDGIPGAKG               | 2.58 | 0.01 | 0.78 | 3.18 | 0.22 | 0.28 |
| 26898 | 0 | 110606 | GNPGTDGIPGAKG               | 2.58 | 0.01 | 0.78 | 3.18 | 0.22 | 0.28 |
| 26899 | 0 | 21497  | GNPNRPDGGILT                | 2.49 | 0.01 | 2.86 | 0.44 | 0.85 | 0.28 |
| 26900 | 0 | 21497  | GNPNRPDGGILT                | 2.49 | 0.01 | 2.86 | 0.44 | 0.85 | 0.28 |
| 26901 | 0 | 21497  | GNPNRPDGGILT                | 2.49 | 0.01 | 2.86 | 0.44 | 0.85 | 0.28 |
| 26902 | 0 | 21500  | GNPTYSWGENDTDVLLL<br>NNT    | 2.94 | 0.01 | 3.10 | 1.81 | 0.22 | 0.28 |
| 26903 | 0 | 301536 | GNQDADEEDEGEDEE             | 2.73 | 0.01 | 1.61 | 0.44 | 0.85 | 1.28 |
| 26904 | 0 | 77893  | GNQFNGGCLLVAMVPE<br>LCSI    | 2.92 | 0.01 | 3.14 | 0.68 | 0.22 | 0.28 |
| 26905 | 0 | 21501  | GNQHVD DRPS                 | 2.28 | 0.01 | 3.14 | 1.20 | 0.22 | 0.28 |
| 26906 | 0 | 21502  | GNQHVD DRPSPAPAPK<br>RALGTL | 3.03 | 0.01 | 3.14 | 2.49 | 0.22 | 0.28 |
| 26907 | 0 | 21502  | GNQHVD DRPSPAPAPK<br>RALGTL | 3.03 | 0.01 | 3.14 | 2.13 | 0.85 | 0.28 |
| 26908 | 0 | 21502  | GNQHVD DRPSPAPAPK<br>RALGTL | 3.03 | 0.01 | 3.14 | 0.44 | 0.85 | 0.28 |

|       |   |        |                                   |      |      |      |      |      |      |
|-------|---|--------|-----------------------------------|------|------|------|------|------|------|
| 26909 | 0 | 21502  | GNQHVD DRPSPAPAPK<br>RALGTL       | 3.03 | 0.01 | 3.14 | 2.49 | 0.22 | 0.28 |
| 26910 | 0 | 99292  | GNQNGRIRVLQRFDQ                   | 2.71 | 0.01 | 2.16 | 0.44 | 1.23 | 1.48 |
| 26911 | 0 | 516955 | GNQNGRIRVLQRFDQR<br>SKQFQNLQ      | 3.15 | 0.01 | 2.16 | 0.44 | 1.23 | 1.39 |
| 26912 | 0 | 21504  | GNQSLLET                          | 2.11 | 0.01 | 2.40 | 2.43 | 0.22 | 0.28 |
| 26913 | 0 | 167746 | GNQSLLETH                         | 2.20 | 0.01 | 2.40 | 2.43 | 0.22 | 0.28 |
| 26914 | 0 | 21506  | GNRAQKELIQGKLNEEA<br>ERWRRNNPPPPA | 3.32 | 0.01 | 4.63 | 2.00 | 2.39 | 0.28 |
| 26915 | 0 | 21506  | GNRAQKELIQGKLNEEA<br>ERWRRNNPPPPA | 3.32 | 0.01 | 4.63 | 2.37 | 2.39 | 0.28 |
| 26916 | 0 | 21507  | GNRAQKELIQGKLNEEA<br>ERWVRQNPPGPN | 3.33 | 0.01 | 4.63 | 2.00 | 2.39 | 0.28 |
| 26917 | 0 | 21507  | GNRAQKELIQGKLNEEA<br>ERWVRQNPPGPN | 3.33 | 0.01 | 4.63 | 2.37 | 2.39 | 0.28 |
| 26918 | 0 | 110607 | GNRGFPQDGLAGPK                    | 2.69 | 0.01 | 1.75 | 2.98 | 0.22 | 0.28 |
| 26919 | 0 | 21510  | GNRPVRPQVYFSASS                   | 2.66 | 0.01 | 0.90 | 0.68 | 0.22 | 0.28 |
| 26920 | 0 | 21510  | GNRPVRPQVYFSASS                   | 2.66 | 0.01 | 0.90 | 0.68 | 0.22 | 0.28 |
| 26921 | 0 | 82809  | GNRQSFGLKGG                       | 2.46 | 0.01 | 2.87 | 0.44 | 0.22 | 0.28 |
| 26922 | 0 | 21513  | GNRSGGGV                          | 2.15 | 0.01 | 2.99 | 0.44 | 0.85 | 0.28 |
| 26923 | 0 | 131895 | GNSDARYTPGSSWGE                   | 2.66 | 0.01 | 0.78 | 0.44 | 1.13 | 0.85 |
| 26924 | 0 | 21518  | GNSIIHYTNINYYKDAAS<br>NS          | 2.96 | 0.01 | 3.61 | 0.44 | 2.39 | 0.28 |
| 26925 | 0 | 150251 | GNSIKPTGASRTAIT                   | 2.71 | 0.01 | 3.45 | 1.12 | 0.22 | 0.28 |
| 26926 | 0 | 21519  | GNSITAWIRASKYLLET                 | 2.77 | 0.01 | 0.90 | 2.63 | 0.22 | 1.48 |
| 26927 | 0 | 21519  | GNSITAWIRASKYLLET                 | 2.77 | 0.01 | 0.90 | 2.63 | 2.25 | 1.75 |
| 26928 | 0 | 161349 | GNSITAWIRASKYLLETI                | 2.83 | 0.01 | 0.90 | 2.74 | 0.22 | 1.48 |
| 26929 | 0 | 161349 | GNSITAWIRASKYLLETI                | 2.83 | 0.01 | 0.90 | 2.74 | 0.22 | 1.75 |
| 26930 | 0 | 180976 | GNSLHNYPRGPT                      | 2.48 | 0.01 | 0.90 | 0.68 | 0.22 | 1.39 |
| 26931 | 0 | 191344 | GNSNCAKDHTCEWH<br>Q               | 2.69 | 0.01 | 0.90 | 2.84 | 1.13 | 1.39 |
| 26932 | 0 | 191344 | GNSNCAKDHTCEWH<br>Q               | 2.69 | 0.01 | 0.90 | 2.84 | 1.13 | 1.66 |
| 26933 | 0 | 191345 | GNSNCWIWGLHCTPRS                  | 2.74 | 0.01 | 0.90 | 2.84 | 1.13 | 1.39 |
| 26934 | 0 | 191345 | GNSNCWIWGLHCTPRS                  | 2.74 | 0.01 | 0.90 | 2.84 | 1.13 | 1.66 |
| 26935 | 0 | 78665  | GNSRNSTPGS                        | 2.36 | 0.01 | 4.45 | 0.68 | 0.22 | 0.85 |
| 26936 | 0 | 21527  | GNSRRGPRVPSAPPM<br>L              | 2.81 | 0.01 | 4.33 | 2.37 | 0.85 | 0.28 |
| 26937 | 0 | 167587 | GNSRRKITY                         | 2.20 | 0.01 | 3.18 | 0.44 | 0.85 | 1.28 |

|       |   |        |                                                           |      |      |      |      |      |      |
|-------|---|--------|-----------------------------------------------------------|------|------|------|------|------|------|
| 26938 | 0 | 167587 | GNSRRKITY                                                 | 2.20 | 0.01 | 3.18 | 0.44 | 0.85 | 1.28 |
| 26939 | 0 | 167587 | GNSRRKITY                                                 | 2.20 | 0.01 | 3.18 | 0.44 | 1.59 | 1.28 |
| 26940 | 0 | 130506 | GNSSYSYSYSFS                                              | 2.53 | 0.01 | 0.78 | 0.44 | 1.93 | 0.28 |
| 26941 | 0 | 79842  | GNTDERGT                                                  | 2.15 | 0.01 | 4.93 | 1.12 | 0.22 | 0.28 |
| 26942 | 0 | 182144 | GNTHGMPCMFPPQYN                                           | 2.69 | 0.01 | 0.78 | 0.44 | 1.13 | 0.85 |
| 26943 | 0 | 21530  | GNTLGRGTEITIELKPDA<br>EQ                                  | 2.95 | 0.01 | 2.78 | 2.49 | 0.85 | 0.28 |
| 26944 | 0 | 147744 | GNTLLDTLVPLT                                              | 2.51 | 0.01 | 0.90 | 0.44 | 1.41 | 1.39 |
| 26945 | 0 | 21532  | GNTNTRVSRYSSTARHR<br>LRRGADGTAELTT                        | 3.35 | 0.01 | 2.70 | 1.15 | 0.22 | 0.28 |
| 26946 | 0 | 21532  | GNTNTRVSRYSSTARHR<br>LRRGADGTAELTT                        | 3.35 | 0.01 | 2.53 | 0.44 | 0.85 | 0.28 |
| 26947 | 0 | 21532  | GNTNTRVSRYSSTARHR<br>LRRGADGTAELTT                        | 3.35 | 0.01 | 2.53 | 0.44 | 0.85 | 0.28 |
| 26948 | 0 | 21535  | GNTPIFKSGRGCSCFEI<br>KCTKPEACSGEPVVVHIT<br>DDNEEPIAPYHFDL | 3.85 | 0.01 | 2.53 | 0.44 | 1.23 | 0.85 |
| 26949 | 0 | 21535  | GNTPIFKSGRGCSCFEI<br>KCTKPEACSGEPVVVHIT<br>DDNEEPIAPYHFDL | 3.85 | 0.01 | 2.53 | 0.44 | 1.23 | 0.85 |
| 26950 | 0 | 127670 | GNVALSSRVNA                                               | 2.42 | 0.01 | 0.90 | 0.68 | 0.22 | 1.39 |
| 26951 | 0 | 125424 | GNVALVSSRVNA                                              | 2.50 | 0.01 | 0.90 | 0.68 | 0.22 | 1.39 |
| 26952 | 0 | 181910 | GNVDVRWIWGNF                                              | 2.50 | 0.01 | 0.90 | 3.15 | 0.22 | 1.39 |
| 26953 | 0 | 109160 | GNVFSCS                                                   | 2.02 | 0.01 | 0.78 | 0.44 | 1.13 | 0.28 |
| 26954 | 0 | 119583 | GNVFSCSV                                                  | 2.14 | 0.01 | 0.78 | 0.44 | 1.93 | 0.28 |
| 26955 | 0 | 238520 | GNVIETGGARRFAP                                            | 2.60 | 0.01 | 2.14 | 2.65 | 0.22 | 0.85 |
| 26956 | 0 | 148620 | GNVIKGDNNHQVVLS<br>QE                                     | 2.84 | 0.01 | 3.57 | 2.49 | 0.22 | 0.28 |
| 26957 | 0 | 226471 | GNVKITVNGQTVRYKCN<br>C                                    | 2.87 | 0.01 | 3.26 | 3.16 | 0.22 | 0.28 |
| 26958 | 0 | 21541  | GNVQAAKDGGNTAAG<br>R                                      | 2.76 | 0.01 | 3.59 | 2.69 | 0.22 | 0.28 |
| 26959 | 0 | 110867 | GNVSPGTRREYHTEKLV<br>T                                    | 2.83 | 2.84 | 0.78 | 0.44 | 1.13 | 0.28 |
| 26960 | 0 | 110866 | GNVSPGTRREYHTEKLV<br>T                                    | 2.83 | 4.93 | 0.78 | 0.44 | 1.13 | 0.28 |
| 26961 | 0 | 110868 | GNVSPGTRREYHTEKLV<br>T                                    | 2.83 | 0.01 | 0.78 | 0.44 | 1.13 | 0.28 |
| 26962 | 0 | 239739 | GNVTGDDTGKIGGLIG                                          | 2.78 | 0.01 | 2.56 | 1.20 | 0.22 | 0.28 |
| 26963 | 0 | 239739 | GNVTGDDTGKIGGLIG                                          | 2.78 | 0.01 | 2.56 | 1.20 | 0.22 | 1.34 |
| 26964 | 0 | 239739 | GNVTGDDTGKIGGLIG                                          | 2.78 | 0.01 | 2.56 | 1.20 | 0.22 | 1.75 |

|       |   |        |                                   |      |      |      |      |      |      |
|-------|---|--------|-----------------------------------|------|------|------|------|------|------|
| 26965 | 0 | 239739 | GNVTGDDTGKIGGLIG                  | 2.78 | 0.01 | 2.56 | 1.20 | 0.22 | 1.34 |
| 26966 | 0 | 82816  | GNVTPRVSYAHG                      | 2.46 | 0.01 | 2.87 | 0.44 | 0.22 | 0.28 |
| 26967 | 0 | 82816  | GNVTPRVSYAHG                      | 2.46 | 0.01 | 2.90 | 0.68 | 0.22 | 0.28 |
| 26968 | 0 | 190433 | GNWHCDSQWLGDRI                    | 2.65 | 0.01 | 3.97 | 2.00 | 1.41 | 0.28 |
| 26969 | 0 | 190434 | GNWHCDSTWMGDRI                    | 2.65 | 0.01 | 3.19 | 2.00 | 1.41 | 0.28 |
| 26970 | 0 | 21548  | GNYD                              | 1.57 | 0.01 | 2.61 | 0.44 | 0.85 | 0.28 |
| 26971 | 0 | 106468 | GNYDAAKRGPGGVWA<br>AEAISDARE      | 3.12 | 0.01 | 0.78 | 1.12 | 0.22 | 0.85 |
| 26972 | 0 | 21549  | GNYDFWYQS                         | 2.21 | 0.01 | 2.61 | 0.44 | 0.85 | 0.28 |
| 26973 | 0 | 139764 | GNYDRLEQLAGN                      | 2.48 | 0.01 | 2.75 | 1.20 | 0.22 | 0.28 |
| 26974 | 0 | 103944 | GNYNLRR                           | 2.00 | 0.01 | 0.90 | 0.44 | 1.13 | 1.39 |
| 26975 | 0 | 21553  | GNYNKYRYLRHGKLRP<br>FER           | 2.98 | 0.01 | 2.45 | 1.15 | 0.22 | 0.28 |
| 26976 | 0 | 21553  | GNYNKYRYLRHGKLRP<br>FER           | 2.98 | 0.01 | 2.45 | 2.37 | 0.22 | 0.28 |
| 26977 | 0 | 21553  | GNYNKYRYLRHGKLRP<br>FER           | 2.98 | 0.01 | 2.45 | 1.12 | 0.22 | 0.28 |
| 26978 | 0 | 21553  | GNYNKYRYLRHGKLRP<br>FER           | 2.98 | 0.01 | 2.45 | 2.37 | 0.22 | 1.34 |
| 26979 | 0 | 21554  | GNYRLPSNKP                        | 2.31 | 0.01 | 3.16 | 0.68 | 0.22 | 0.28 |
| 26980 | 0 | 21554  | GNYRLPSNKP                        | 2.31 | 0.01 | 3.16 | 0.68 | 0.22 | 0.28 |
| 26981 | 0 | 21557  | GNYTKTDDEANQLLS                   | 2.64 | 0.01 | 2.59 | 1.12 | 0.22 | 0.28 |
| 26982 | 0 | 21560  | GPAARTTIGGSQAQTAS<br>GLVSMFSGPSQK | 3.36 | 0.01 | 2.83 | 0.44 | 0.85 | 0.28 |
| 26983 | 0 | 21560  | GPAARTTIGGSQAQTAS<br>GLVSMFSGPSQK | 3.36 | 0.01 | 2.83 | 0.44 | 0.85 | 0.28 |
| 26984 | 0 | 21560  | GPAARTTIGGSQAQTAS<br>GLVSMFSGPSQK | 3.36 | 0.01 | 2.83 | 1.12 | 0.22 | 0.28 |
| 26985 | 0 | 516976 | GPADAPPGSPAPPPPEH<br>RGG          | 2.97 | 4.63 | 2.40 | 0.44 | 1.59 | 1.28 |
| 26986 | 0 | 21562  | GPADAPPGSPAPPPPEH<br>RGG          | 2.97 | 0.01 | 2.40 | 0.44 | 1.59 | 0.85 |
| 26987 | 0 | 21562  | GPADAPPGSPAPPPPEH<br>RGG          | 2.97 | 0.01 | 2.40 | 0.44 | 1.59 | 1.28 |
| 26988 | 0 | 21566  | GPAFHER                           | 1.99 | 0.01 | 2.04 | 2.52 | 0.22 | 0.28 |
| 26989 | 0 | 109167 | GPAGGPGF                          | 2.18 | 0.01 | 1.60 | 2.55 | 2.60 | 0.28 |
| 26990 | 0 | 110608 | GPAGGPGFPGAPGAK                   | 2.75 | 0.01 | 1.75 | 2.46 | 0.22 | 0.28 |
| 26991 | 0 | 240878 | GPAGPRGGGRGRGRGR<br>GRGHNDGG      | 3.18 | 4.93 | 2.43 | 0.44 | 1.13 | 1.27 |
| 26992 | 0 | 142168 | GPAGQAEPDRAH                      | 2.50 | 0.01 | 1.86 | 0.44 | 1.41 | 0.28 |
| 26993 | 0 | 111359 | GPAGQAEPDRAHYNIVT<br>FCC          | 2.88 | 0.01 | 1.86 | 3.38 | 0.22 | 0.28 |

|       |   |        |                                   |      |      |      |      |      |      |
|-------|---|--------|-----------------------------------|------|------|------|------|------|------|
| 26994 | 0 | 21568  | GPALKPRGCVGSTCFW<br>A             | 2.78 | 0.01 | 0.90 | 0.68 | 0.22 | 0.28 |
| 26995 | 0 | 118818 | GPAPGMRPP                         | 2.25 | 0.01 | 0.78 | 0.44 | 1.13 | 0.28 |
| 26996 | 0 | 123249 | GPAPGMRPPM                        | 2.36 | 0.01 | 0.78 | 0.44 | 1.13 | 0.28 |
| 26997 | 0 | 123249 | GPAPGMRPPM                        | 2.36 | 0.01 | 0.78 | 0.44 | 1.13 | 0.85 |
| 26998 | 0 | 123249 | GPAPGMRPPM                        | 2.36 | 0.01 | 0.78 | 0.44 | 1.13 | 0.85 |
| 26999 | 0 | 124202 | GPAQITCTPRGWDSP                   | 2.67 | 0.01 | 2.73 | 1.81 | 0.22 | 0.28 |
| 27000 | 0 | 124203 | GPAQITCTPRGWDSPPP<br>LCKDINECEDET | 3.29 | 0.01 | 2.73 | 1.81 | 0.22 | 0.28 |
| 27001 | 0 | 21571  | GPARRGAPY                         | 2.27 | 0.01 | 4.33 | 2.61 | 0.85 | 0.28 |
| 27002 | 0 | 21571  | GPARRGAPY                         | 2.27 | 0.01 | 4.33 | 2.61 | 0.85 | 0.85 |
| 27003 | 0 | 21571  | GPARRGAPY                         | 2.27 | 0.01 | 4.33 | 0.44 | 1.59 | 0.85 |
| 27004 | 0 | 21571  | GPARRGAPY                         | 2.27 | 0.01 | 4.33 | 1.20 | 0.22 | 0.85 |
| 27005 | 0 | 489211 | GPCATCT                           | 2.04 | 0.01 | 0.90 | 0.68 | 0.22 | 0.28 |
| 27006 | 0 | 21580  | GPCKTCT                           | 2.04 | 0.01 | 2.08 | 0.68 | 0.22 | 2.75 |
| 27007 | 0 | 21580  | GPCKTCT                           | 2.04 | 0.01 | 2.08 | 0.68 | 0.22 | 1.34 |
| 27008 | 0 | 21580  | GPCKTCT                           | 2.04 | 0.01 | 2.08 | 0.68 | 0.22 | 1.75 |
| 27009 | 0 | 21580  | GPCKTCT                           | 2.04 | 0.01 | 2.08 | 0.68 | 0.22 | 1.75 |
| 27010 | 0 | 21580  | GPCKTCT                           | 2.04 | 0.01 | 2.08 | 0.68 | 0.22 | 1.75 |
| 27011 | 0 | 21580  | GPCKTCT                           | 2.04 | 0.01 | 2.08 | 0.68 | 0.22 | 1.75 |
| 27012 | 0 | 21580  | GPCKTCT                           | 2.04 | 0.01 | 2.08 | 0.68 | 0.22 | 1.34 |
| 27013 | 0 | 21580  | GPCKTCT                           | 2.04 | 0.01 | 2.08 | 0.68 | 0.22 | 1.75 |
| 27014 | 0 | 21580  | GPCKTCT                           | 2.04 | 0.01 | 2.08 | 0.68 | 0.22 | 1.75 |
| 27015 | 0 | 21580  | GPCKTCT                           | 2.04 | 0.01 | 2.08 | 0.68 | 0.22 | 1.75 |
| 27016 | 0 | 21580  | GPCKTCT                           | 2.04 | 0.01 | 2.08 | 0.68 | 0.22 | 1.75 |
| 27017 | 0 | 21580  | GPCKTCT                           | 2.04 | 0.01 | 2.08 | 0.68 | 0.22 | 1.75 |
| 27018 | 0 | 21580  | GPCKTCT                           | 2.04 | 0.01 | 2.08 | 0.68 | 0.22 | 1.75 |
| 27019 | 0 | 21580  | GPCKTCT                           | 2.04 | 0.01 | 2.08 | 0.68 | 0.22 | 1.75 |
| 27020 | 0 | 21580  | GPCKTCT                           | 2.04 | 0.01 | 2.08 | 0.68 | 0.22 | 2.98 |
| 27021 | 0 | 489212 | GPCRTCT                           | 2.04 | 0.01 | 2.08 | 0.68 | 0.22 | 0.28 |
| 27022 | 0 | 489212 | GPCRTCT                           | 2.04 | 0.01 | 2.08 | 0.68 | 0.22 | 0.28 |
| 27023 | 0 | 489212 | GPCRTCT                           | 2.04 | 0.01 | 2.08 | 0.68 | 0.22 | 0.85 |
| 27024 | 0 | 489212 | GPCRTCT                           | 2.04 | 0.01 | 2.08 | 0.68 | 0.22 | 1.34 |
| 27025 | 0 | 489212 | GPCRTCT                           | 2.04 | 0.01 | 2.08 | 0.68 | 0.22 | 1.34 |
| 27026 | 0 | 489212 | GPCRTCT                           | 2.04 | 0.01 | 2.08 | 0.68 | 0.22 | 1.34 |
| 27027 | 0 | 489212 | GPCRTCT                           | 2.04 | 0.01 | 2.08 | 0.68 | 0.22 | 0.28 |
| 27028 | 0 | 489212 | GPCRTCT                           | 2.04 | 0.01 | 2.08 | 0.68 | 0.22 | 0.28 |
| 27029 | 0 | 489212 | GPCRTCT                           | 2.04 | 0.01 | 2.08 | 0.68 | 0.22 | 0.28 |
| 27030 | 0 | 489212 | GPCRTCT                           | 2.04 | 0.01 | 2.08 | 0.68 | 0.22 | 0.28 |
| 27031 | 0 | 489212 | GPCRTCT                           | 2.04 | 0.01 | 2.08 | 0.68 | 0.22 | 0.28 |
| 27032 | 0 | 489212 | GPCRTCT                           | 2.04 | 0.01 | 2.08 | 0.68 | 0.22 | 0.28 |
| 27033 | 0 | 489212 | GPCRTCT                           | 2.04 | 0.01 | 2.08 | 0.68 | 0.22 | 0.28 |
| 27034 | 0 | 489212 | GPCRTCT                           | 2.04 | 0.01 | 2.08 | 0.68 | 0.22 | 0.28 |
| 27035 | 0 | 489212 | GPCRTCT                           | 2.04 | 0.01 | 2.08 | 0.68 | 0.22 | 0.28 |
| 27036 | 0 | 153393 | GPDAPRIPLSKM                      | 2.45 | 0.01 | 0.90 | 1.15 | 0.22 | 0.28 |
| 27037 | 0 | 21599  | GPDKEQIADEINNKNK<br>LEEKAN        | 3.11 | 0.01 | 2.95 | 0.44 | 0.22 | 0.28 |

|       |   |        |                                  |      |      |      |      |      |      |
|-------|---|--------|----------------------------------|------|------|------|------|------|------|
| 27038 | 0 | 134986 | GPDLIKDSQIYKDIGI                 | 2.71 | 0.01 | 3.59 | 2.13 | 0.85 | 0.85 |
| 27039 | 0 | 127671 | GPDRSPRQPPVLPAA                  | 2.68 | 0.01 | 0.78 | 0.44 | 1.13 | 0.85 |
| 27040 | 0 | 21601  | GPEET                            | 1.75 | 4.63 | 4.15 | 1.15 | 0.22 | 1.48 |
| 27041 | 0 | 21601  | GPEET                            | 1.75 | 4.63 | 4.15 | 1.15 | 0.22 | 0.85 |
| 27042 | 0 | 21602  | GPEETGPEETGPEET                  | 2.75 | 0.01 | 4.15 | 1.12 | 0.22 | 0.85 |
| 27043 | 0 | 21602  | GPEETGPEETGPEET                  | 2.75 | 0.01 | 4.15 | 1.12 | 0.22 | 1.48 |
| 27044 | 0 | 21602  | GPEETGPEETGPEET                  | 2.75 | 0.01 | 4.15 | 1.15 | 0.22 | 1.48 |
| 27045 | 0 | 109175 | GPEGAQGP                         | 2.17 | 0.01 | 1.60 | 2.55 | 2.60 | 0.28 |
| 27046 | 0 | 144653 | GPEGHGGLVEGSGTHPS<br>ARRGAGWETGW | 3.30 | 0.01 | 0.90 | 0.68 | 0.22 | 0.28 |
| 27047 | 0 | 144653 | GPEGHGGLVEGSGTHPS<br>ARRGAGWETGW | 3.30 | 0.01 | 0.90 | 0.68 | 0.22 | 0.28 |
| 27048 | 0 | 144653 | GPEGHGGLVEGSGTHPS<br>ARRGAGWETGW | 3.30 | 0.01 | 0.90 | 0.68 | 0.22 | 1.48 |
| 27049 | 0 | 144653 | GPEGHGGLVEGSGTHPS<br>ARRGAGWETGW | 3.30 | 0.01 | 0.90 | 0.68 | 0.22 | 1.48 |
| 27050 | 0 | 144653 | GPEGHGGLVEGSGTHPS<br>ARRGAGWETGW | 3.30 | 0.01 | 0.90 | 0.68 | 0.22 | 1.27 |
| 27051 | 0 | 21606  | GPEKAFRE                         | 2.12 | 0.01 | 2.21 | 1.12 | 0.22 | 0.28 |
| 27052 | 0 | 21606  | GPEKAFRE                         | 2.12 | 0.01 | 2.21 | 0.44 | 0.85 | 0.28 |
| 27053 | 0 | 21607  | GPEKAFRELA                       | 2.31 | 0.01 | 2.21 | 1.12 | 0.22 | 0.28 |
| 27054 | 0 | 21607  | GPEKAFRELA                       | 2.31 | 0.01 | 2.21 | 1.12 | 0.22 | 0.28 |
| 27055 | 0 | 21610  | GPEQLLFLRPEP                     | 2.51 | 0.01 | 0.90 | 0.68 | 0.22 | 0.28 |
| 27056 | 0 | 21610  | GPEQLLFLRPEP                     | 2.51 | 0.01 | 0.90 | 1.81 | 0.22 | 0.28 |
| 27057 | 0 | 109177 | GPETLCGAELVD                     | 2.48 | 0.01 | 0.78 | 1.15 | 0.22 | 0.28 |
| 27058 | 0 | 109177 | GPETLCGAELVD                     | 2.48 | 0.01 | 0.78 | 1.15 | 0.22 | 1.57 |
| 27059 | 0 | 109177 | GPETLCGAELVD                     | 2.48 | 0.01 | 0.78 | 1.15 | 0.22 | 1.34 |
| 27060 | 0 | 109177 | GPETLCGAELVD                     | 2.48 | 0.01 | 0.78 | 1.15 | 0.22 | 1.57 |
| 27061 | 0 | 109178 | GPETLCGAELVDALQFV<br>CGDR        | 3.00 | 0.01 | 0.78 | 1.15 | 0.22 | 0.28 |
| 27062 | 0 | 109178 | GPETLCGAELVDALQFV<br>CGDR        | 3.00 | 0.01 | 0.78 | 1.15 | 0.22 | 1.57 |
| 27063 | 0 | 109178 | GPETLCGAELVDALQFV<br>CGDR        | 3.00 | 0.01 | 0.78 | 1.15 | 0.22 | 1.34 |
| 27064 | 0 | 109178 | GPETLCGAELVDALQFV<br>CGDR        | 3.00 | 0.01 | 0.78 | 1.15 | 0.22 | 1.57 |
| 27065 | 0 | 137407 | GPEYWDGETRKVKA                   | 2.60 | 0.01 | 0.78 | 1.20 | 0.22 | 1.57 |
| 27066 | 0 | 137407 | GPEYWDGETRKVKA                   | 2.60 | 0.01 | 0.78 | 1.20 | 0.22 | 0.85 |
| 27067 | 0 | 137407 | GPEYWDGETRKVKA                   | 2.60 | 0.01 | 0.78 | 1.20 | 0.22 | 0.85 |
| 27068 | 0 | 137407 | GPEYWDGETRKVKA                   | 2.60 | 0.01 | 0.78 | 1.20 | 0.22 | 0.85 |
| 27069 | 0 | 137407 | GPEYWDGETRKVKA                   | 2.60 | 0.01 | 0.78 | 1.20 | 0.22 | 0.85 |
| 27070 | 0 | 140681 | GPEYWEQQTRIAKEWE<br>Q            | 2.79 | 0.01 | 2.19 | 3.42 | 0.22 | 0.28 |
| 27071 | 0 | 140681 | GPEYWEQQTRIAKEWE<br>Q            | 2.79 | 0.01 | 2.19 | 3.42 | 0.22 | 0.28 |
| 27072 | 0 | 140681 | GPEYWEQQTRIAKEWE<br>Q            | 2.79 | 0.01 | 2.19 | 3.42 | 2.35 | 0.28 |



|       |   |        |                                    |      |      |      |      |      |      |
|-------|---|--------|------------------------------------|------|------|------|------|------|------|
| 27073 | 0 | 140681 | GPEYWEQQTRIAKEWE<br>Q              | 2.79 | 0.01 | 2.19 | 3.42 | 2.35 | 0.28 |
| 27074 | 0 | 140681 | GPEYWEQQTRIAKEWE<br>Q              | 2.79 | 0.01 | 2.19 | 3.42 | 0.22 | 0.28 |
| 27075 | 0 | 140681 | GPEYWEQQTRIAKEWE<br>Q              | 2.79 | 0.01 | 2.19 | 3.42 | 0.22 | 0.28 |
| 27076 | 0 | 21617  | GPFFLSPTS                          | 2.24 | 0.01 | 0.90 | 1.20 | 0.22 | 0.28 |
| 27077 | 0 | 21617  | GPFFLSPTS                          | 2.24 | 0.01 | 0.90 | 1.15 | 0.22 | 0.28 |
| 27078 | 0 | 21623  | GPFTVRYTTEGGTKTE                   | 2.76 | 0.01 | 2.53 | 0.44 | 1.23 | 0.85 |
| 27079 | 0 | 21625  | GPFYTSAPQ                          | 2.21 | 0.01 | 0.90 | 1.20 | 0.22 | 1.27 |
| 27080 | 0 | 21625  | GPFYTSAPQ                          | 2.21 | 0.01 | 0.90 | 1.20 | 0.22 | 1.27 |
| 27081 | 0 | 21625  | GPFYTSAPQ                          | 2.21 | 0.01 | 0.90 | 1.20 | 0.22 | 0.28 |
| 27082 | 0 | 21625  | GPFYTSAPQ                          | 2.21 | 0.01 | 0.90 | 1.15 | 0.22 | 0.28 |
| 27083 | 0 | 127672 | GPGAGDRRREGPDRS                    | 2.73 | 0.01 | 0.78 | 0.44 | 1.13 | 0.85 |
| 27084 | 0 | 21631  | GPGEVWVT                           | 2.15 | 0.01 | 2.85 | 0.44 | 0.22 | 0.28 |
| 27085 | 0 | 121346 | GPGHPIRALVGDEAELP<br>C             | 2.86 | 0.01 | 2.19 | 4.15 | 0.22 | 0.28 |
| 27086 | 0 | 121346 | GPGHPIRALVGDEAELP<br>C             | 2.86 | 0.01 | 2.19 | 4.15 | 0.22 | 0.28 |
| 27087 | 0 | 190235 | GPGHRYQGIK                         | 2.32 | 0.01 | 3.12 | 0.68 | 0.22 | 1.27 |
| 27088 | 0 | 190235 | GPGHRYQGIK                         | 2.32 | 0.01 | 3.12 | 0.68 | 0.22 | 0.28 |
| 27089 | 0 | 190235 | GPGHRYQGIK                         | 2.32 | 0.01 | 3.12 | 0.68 | 0.22 | 0.28 |
| 27090 | 0 | 190235 | GPGHRYQGIK                         | 2.32 | 0.01 | 3.12 | 0.68 | 0.22 | 1.34 |
| 27091 | 0 | 190235 | GPGHRYQGIK                         | 2.32 | 0.01 | 3.12 | 0.68 | 0.22 | 1.48 |
| 27092 | 0 | 190235 | GPGHRYQGIK                         | 2.32 | 0.01 | 3.12 | 0.68 | 0.22 | 0.28 |
| 27093 | 0 | 190235 | GPGHRYQGIK                         | 2.32 | 0.01 | 3.12 | 0.68 | 0.22 | 0.28 |
| 27094 | 0 | 190235 | GPGHRYQGIK                         | 2.32 | 0.01 | 3.12 | 0.68 | 0.22 | 0.28 |
| 27095 | 0 | 190236 | GPGHRYQGIKVKTDDA<br>NGWEKDANVDTANE | 3.33 | 0.01 | 3.12 | 0.68 | 0.22 | 1.27 |
| 27096 | 0 | 190237 | GPGHTFQGVK                         | 2.32 | 0.01 | 3.12 | 0.68 | 0.22 | 0.28 |
| 27097 | 0 | 190238 | GPGHTYQGIK                         | 2.32 | 0.01 | 3.12 | 0.68 | 0.22 | 0.28 |
| 27098 | 0 | 489557 | GPGALPDAQIFWVN                     | 2.67 | 0.01 | 2.69 | 3.05 | 0.85 | 1.28 |
| 27099 | 0 | 78405  | GPGMKNDLVPPPSLT                    | 2.67 | 0.01 | 0.90 | 0.68 | 0.22 | 0.28 |
| 27100 | 0 | 78405  | GPGMKNDLVPPPSLT                    | 2.67 | 0.01 | 0.90 | 0.68 | 0.22 | 0.28 |
| 27101 | 0 | 190239 | GPGNRYQGIK                         | 2.32 | 0.01 | 3.12 | 0.68 | 0.22 | 0.28 |
| 27102 | 0 | 21642  | GPGQCNTRNPCPRPM                    | 2.72 | 0.01 | 0.90 | 1.15 | 0.22 | 1.27 |
| 27103 | 0 | 103230 | GPGQEGLDQYGS IPL                   | 2.71 | 0.01 | 2.04 | 0.44 | 0.85 | 1.28 |
| 27104 | 0 | 97359  | GPGR                               | 1.60 | 0.01 | 2.54 | 1.15 | 0.22 | 1.39 |
| 27105 | 0 | 97359  | GPGR                               | 1.60 | 0.01 | 2.54 | 1.15 | 0.22 | 1.66 |
| 27106 | 0 | 97359  | GPGR                               | 1.60 | 0.01 | 2.54 | 1.15 | 0.22 | 0.28 |
| 27107 | 0 | 95421  | GPGRGPG                            | 2.06 | 0.01 | 4.93 | 0.68 | 0.22 | 0.28 |
| 27108 | 0 | 193465 | GPGSKLPWL                          | 2.26 | 0.01 | 2.51 | 0.44 | 2.39 | 0.28 |
| 27109 | 0 | 193465 | GPGSKLPWL                          | 2.26 | 0.01 | 2.51 | 0.44 | 2.39 | 0.28 |
| 27110 | 0 | 146990 | GPGTIKKISF                         | 2.33 | 0.01 | 2.76 | 0.68 | 0.22 | 0.28 |
| 27111 | 0 | 146990 | GPGTIKKISF                         | 2.33 | 0.01 | 2.76 | 0.68 | 0.22 | 0.28 |

|       |   |        |                                    |      |      |      |      |      |      |
|-------|---|--------|------------------------------------|------|------|------|------|------|------|
| 27112 | 0 | 146990 | GPGTIKKISF                         | 2.33 | 0.01 | 2.76 | 0.44 | 1.23 | 2.35 |
| 27113 | 0 | 146990 | GPGTIKKISF                         | 2.33 | 0.01 | 2.76 | 0.68 | 0.22 | 0.28 |
| 27114 | 0 | 146990 | GPGTIKKISF                         | 2.33 | 0.01 | 2.76 | 0.68 | 0.22 | 0.28 |
| 27115 | 0 | 146990 | GPGTIKKISF                         | 2.33 | 0.01 | 2.76 | 0.68 | 0.22 | 0.28 |
| 27116 | 0 | 146990 | GPGTIKKISF                         | 2.33 | 0.01 | 2.76 | 0.68 | 0.22 | 0.28 |
| 27117 | 0 | 146990 | GPGTIKKISF                         | 2.33 | 0.01 | 2.76 | 0.68 | 0.22 | 0.28 |
| 27118 | 0 | 146990 | GPGTIKKISF                         | 2.33 | 0.01 | 2.76 | 0.44 | 1.23 | 2.35 |
| 27119 | 0 | 146990 | GPGTIKKISF                         | 2.33 | 0.01 | 2.76 | 0.44 | 1.23 | 2.35 |
| 27120 | 0 | 146990 | GPGTIKKISF                         | 2.33 | 0.01 | 2.76 | 0.44 | 1.23 | 2.35 |
| 27121 | 0 | 146990 | GPGTIKKISF                         | 2.33 | 0.01 | 2.76 | 0.68 | 0.22 | 1.66 |
| 27122 | 0 | 146990 | GPGTIKKISF                         | 2.33 | 0.01 | 2.76 | 0.68 | 0.22 | 1.66 |
| 27123 | 0 | 146990 | GPGTIKKISF                         | 2.33 | 0.01 | 2.76 | 0.68 | 0.22 | 1.66 |
| 27124 | 0 | 21651  | GPGTIKKISFPEGFPFKYV<br>KDRVDEVDHTN | 3.35 | 0.01 | 2.76 | 1.12 | 0.22 | 2.35 |
| 27125 | 0 | 21651  | GPGTIKKISFPEGFPFKYV<br>KDRVDEVDHTN | 3.35 | 0.01 | 2.76 | 0.44 | 1.23 | 0.28 |
| 27126 | 0 | 21651  | GPGTIKKISFPEGFPFKYV<br>KDRVDEVDHTN | 3.35 | 0.01 | 2.76 | 0.44 | 1.23 | 0.28 |
| 27127 | 0 | 21651  | GPGTIKKISFPEGFPFKYV<br>KDRVDEVDHTN | 3.35 | 0.01 | 2.76 | 1.20 | 0.22 | 0.28 |
| 27128 | 0 | 21651  | GPGTIKKISFPEGFPFKYV<br>KDRVDEVDHTN | 3.35 | 0.01 | 2.76 | 1.20 | 0.22 | 0.28 |
| 27129 | 0 | 21651  | GPGTIKKISFPEGFPFKYV<br>KDRVDEVDHTN | 3.35 | 0.01 | 2.76 | 1.20 | 0.22 | 0.28 |
| 27130 | 0 | 21651  | GPGTIKKISFPEGFPFKYV<br>KDRVDEVDHTN | 3.35 | 0.01 | 2.76 | 0.68 | 0.22 | 0.28 |
| 27131 | 0 | 21651  | GPGTIKKISFPEGFPFKYV<br>KDRVDEVDHTN | 3.35 | 0.01 | 2.76 | 0.68 | 0.22 | 0.28 |
| 27132 | 0 | 175188 | GPGTWRA                            | 2.03 | 0.01 | 0.90 | 1.15 | 0.22 | 1.39 |
| 27133 | 0 | 175189 | GPGTWRT                            | 2.05 | 0.01 | 0.90 | 1.15 | 0.22 | 1.39 |
| 27134 | 0 | 175190 | GPGTYRA                            | 2.03 | 0.01 | 0.90 | 1.15 | 0.22 | 1.39 |
| 27135 | 0 | 21653  | GPGVAGSG                           | 2.17 | 0.01 | 2.04 | 0.44 | 0.85 | 0.28 |
| 27136 | 0 | 100075 | GPGVDYKNNLDPLS                     | 2.63 | 0.01 | 2.96 | 1.12 | 0.22 | 0.28 |
| 27137 | 0 | 193466 | GPGYANAMP                          | 2.26 | 0.01 | 2.51 | 0.44 | 2.39 | 0.28 |
| 27138 | 0 | 21657  | GPHPRSV                            | 2.02 | 0.01 | 0.90 | 0.44 | 0.85 | 1.39 |
| 27139 | 0 | 144654 | GPHPTLEVVP MGRGS                   | 2.68 | 0.01 | 0.90 | 0.68 | 0.22 | 0.28 |
| 27140 | 0 | 144654 | GPHPTLEVVP MGRGS                   | 2.68 | 0.01 | 0.90 | 0.68 | 0.22 | 1.48 |
| 27141 | 0 | 144654 | GPHPTLEVVP MGRGS                   | 2.68 | 0.01 | 0.90 | 0.68 | 0.22 | 1.27 |
| 27142 | 0 | 139510 | GPIDDAF                            | 2.01 | 0.01 | 0.90 | 1.20 | 0.22 | 1.39 |
| 27143 | 0 | 230898 | GPIGPPGERGAPGNRGF<br>PGQDGLA       | 3.15 | 0.01 | 0.78 | 3.93 | 0.22 | 0.28 |
| 27144 | 0 | 95087  | GPIKNKMSESPNKT                     | 2.63 | 0.01 | 3.42 | 1.20 | 0.22 | 0.28 |
| 27145 | 0 | 95087  | GPIKNKMSESPNKT                     | 2.63 | 0.01 | 3.42 | 1.20 | 0.22 | 0.28 |
| 27146 | 0 | 21664  | GPIRPTLPPGILGLAPN<br>TP            | 3.00 | 0.01 | 2.40 | 0.44 | 1.59 | 0.28 |
| 27147 | 0 | 187658 | GPIVVEAGELVSHAGG                   | 2.75 | 0.01 | 2.14 | 1.20 | 0.22 | 0.28 |

|       |   |        |                           |      |      |      |      |      |      |
|-------|---|--------|---------------------------|------|------|------|------|------|------|
| 27148 | 0 | 110609 | GPKGANGDPGRPGE            | 2.72 | 0.01 | 1.75 | 2.46 | 0.22 | 0.28 |
| 27149 | 0 | 110610 | GPKGAPGERGPSGLA           | 2.72 | 0.01 | 1.75 | 2.98 | 0.22 | 0.28 |
| 27150 | 0 | 110611 | GPKGQAGEPGIAGFK           | 2.72 | 0.01 | 1.75 | 2.98 | 0.22 | 0.28 |
| 27151 | 0 | 130864 | GPKGQAGEPGIAGFKG<br>DQ    | 2.89 | 0.01 | 1.60 | 2.46 | 0.22 | 0.28 |
| 27152 | 0 | 130864 | GPKGQAGEPGIAGFKG<br>DQ    | 2.89 | 0.01 | 1.60 | 2.46 | 0.22 | 0.28 |
| 27153 | 0 | 130864 | GPKGQAGEPGIAGFKG<br>DQ    | 2.89 | 0.01 | 1.60 | 2.46 | 0.22 | 0.28 |
| 27154 | 0 | 130864 | GPKGQAGEPGIAGFKG<br>DQ    | 2.89 | 0.01 | 1.60 | 2.46 | 0.22 | 0.28 |
| 27155 | 0 | 130864 | GPKGQAGEPGIAGFKG<br>DQ    | 2.89 | 0.01 | 1.60 | 2.46 | 0.22 | 0.28 |
| 27156 | 0 | 106470 | GPKGQTGEPGIAGFKGE<br>QGPK | 3.04 | 0.01 | 0.78 | 2.46 | 0.22 | 0.28 |
| 27157 | 0 | 106470 | GPKGQTGEPGIAGFKGE<br>QGPK | 3.04 | 0.01 | 0.78 | 2.46 | 0.22 | 0.28 |
| 27158 | 0 | 106470 | GPKGQTGEPGIAGFKGE<br>QGPK | 3.04 | 0.01 | 0.78 | 2.46 | 0.22 | 0.28 |
| 27159 | 0 | 106471 | GPKGQTGKPGIAGFKGE<br>QGPK | 3.04 | 0.01 | 0.78 | 2.46 | 0.22 | 1.34 |
| 27160 | 0 | 106471 | GPKGQTGKPGIAGFKGE<br>QGPK | 3.04 | 0.01 | 0.78 | 2.46 | 0.22 | 1.34 |
| 27161 | 0 | 21673  | GPKGRNVVLEKKWGAP          | 2.74 | 0.01 | 2.04 | 2.04 | 0.22 | 0.28 |
| 27162 | 0 | 118387 | GPKGRTVIIEQSW             | 2.51 | 0.01 | 0.78 | 0.44 | 1.74 | 0.85 |
| 27163 | 0 | 118387 | GPKGRTVIIEQSW             | 2.51 | 0.01 | 0.78 | 0.44 | 1.74 | 0.85 |
| 27164 | 0 | 21675  | GPKLSTDLIKNCVNFN<br>F     | 2.82 | 0.01 | 2.45 | 1.81 | 0.22 | 1.34 |
| 27165 | 0 | 302066 | GPKPAEPKSAEPKPA           | 2.74 | 0.01 | 1.61 | 0.44 | 0.85 | 1.28 |
| 27166 | 0 | 79843  | GPKQLTFEGKPA              | 2.48 | 0.01 | 2.14 | 3.26 | 0.22 | 0.28 |
| 27167 | 0 | 79843  | GPKQLTFEGKPA              | 2.48 | 0.01 | 2.14 | 3.17 | 0.22 | 0.28 |
| 27168 | 0 | 78667  | GPKRIRTGDR                | 2.34 | 0.01 | 4.15 | 1.12 | 0.22 | 0.28 |
| 27169 | 0 | 78667  | GPKRIRTGDR                | 2.34 | 0.01 | 4.15 | 1.12 | 0.22 | 0.28 |
| 27170 | 0 | 78667  | GPKRIRTGDR                | 2.34 | 0.01 | 4.15 | 1.12 | 0.22 | 0.28 |
| 27171 | 0 | 167588 | GPKRR                     | 1.72 | 0.01 | 0.78 | 0.44 | 1.13 | 0.85 |
| 27172 | 0 | 21683  | GPLDRAFSWRLNPRV           | 2.66 | 0.01 | 0.90 | 1.15 | 0.22 | 1.27 |
| 27173 | 0 | 21683  | GPLDRAFSWRLNPRV           | 2.66 | 0.01 | 0.90 | 1.15 | 0.22 | 0.85 |
| 27174 | 0 | 238530 | GPLDVALASQARWT            | 2.59 | 0.01 | 2.14 | 2.65 | 0.22 | 0.85 |
| 27175 | 0 | 109189 | GPLGPKGQ                  | 2.17 | 0.01 | 1.60 | 2.55 | 2.60 | 0.28 |
| 27176 | 0 | 21685  | GPLGSADAGRQDLPRR<br>VVRH  | 2.97 | 0.01 | 2.40 | 0.44 | 1.59 | 0.28 |
| 27177 | 0 | 450638 | GPLKTKWK                  | 2.02 | 0.01 | 0.90 | 0.44 | 1.41 | 1.39 |
| 27178 | 0 | 124205 | GPLQLGM                   | 2.05 | 0.01 | 0.90 | 0.44 | 1.13 | 0.28 |
| 27179 | 0 | 124205 | GPLQLGM                   | 2.05 | 0.01 | 0.90 | 0.44 | 1.13 | 1.34 |

|       |   |        |                                    |      |      |      |      |      |      |
|-------|---|--------|------------------------------------|------|------|------|------|------|------|
| 27180 | 0 | 141295 | GPLSSTPAFARYFRCARG<br>ALLNPSSRCQLW | 3.35 | 0.01 | 0.78 | 1.12 | 0.22 | 0.85 |
| 27181 | 0 | 128766 | GPLTLELQI                          | 2.23 | 0.01 | 0.78 | 1.20 | 0.22 | 0.28 |
| 27182 | 0 | 128766 | GPLTLELQI                          | 2.23 | 0.01 | 0.78 | 3.89 | 0.22 | 0.28 |
| 27183 | 0 | 21699  | GPLTNS                             | 1.88 | 0.01 | 1.96 | 0.44 | 0.85 | 0.28 |
| 27184 | 0 | 121347 | GPLTVAQKKAQNIME                    | 2.63 | 0.01 | 0.78 | 0.44 | 1.13 | 0.85 |
| 27185 | 0 | 121347 | GPLTVAQKKAQNIME                    | 2.63 | 0.01 | 0.78 | 0.44 | 1.41 | 0.85 |
| 27186 | 0 | 175191 | GPLTWRA                            | 1.99 | 0.01 | 0.90 | 1.15 | 0.22 | 1.39 |
| 27187 | 0 | 127673 | GPLVLSEAENGP                       | 2.50 | 0.01 | 3.16 | 3.16 | 0.22 | 0.28 |
| 27188 | 0 | 78983  | GPLWLHYAGAFLHP                     | 2.65 | 0.01 | 0.90 | 2.16 | 0.22 | 1.39 |
| 27189 | 0 | 21704  | GPLYHTP                            | 2.02 | 0.01 | 0.90 | 1.15 | 0.22 | 0.85 |
| 27190 | 0 | 133594 | GPLYQMNDALL                        | 2.44 | 0.01 | 0.90 | 0.44 | 0.85 | 0.28 |
| 27191 | 0 | 139511 | GPM                                | 1.37 | 0.01 | 0.78 | 0.44 | 1.41 | 0.28 |
| 27192 | 0 | 109192 | GPMEIDRSGDVD                       | 2.48 | 0.01 | 0.90 | 1.15 | 0.22 | 1.39 |
| 27193 | 0 | 230904 | GPMGPMGPRGPPGPA<br>GAPGPQGQFQ      | 3.19 | 0.01 | 0.78 | 3.16 | 0.22 | 0.28 |
| 27194 | 0 | 230905 | GPMGPRGLPGERGRTG<br>PAGAAGAR       | 3.18 | 0.01 | 0.78 | 3.93 | 0.22 | 0.28 |
| 27195 | 0 | 21713  | GPNHTKV                            | 1.99 | 0.01 | 2.14 | 0.44 | 0.85 | 0.28 |
| 27196 | 0 | 132350 | GPNICTTRGVSSC                      | 2.54 | 0.01 | 0.78 | 1.12 | 0.22 | 0.85 |
| 27197 | 0 | 132350 | GPNICTTRGVSSC                      | 2.54 | 0.01 | 0.78 | 3.12 | 0.22 | 0.85 |
| 27198 | 0 | 78668  | GNLVLDPDQK                         | 2.31 | 0.01 | 4.15 | 1.12 | 0.22 | 0.28 |
| 27199 | 0 | 78668  | GNLVLDPDQK                         | 2.31 | 0.01 | 4.15 | 1.12 | 0.22 | 0.28 |
| 27200 | 0 | 78668  | GNLVLDPDQK                         | 2.31 | 0.01 | 4.15 | 1.12 | 0.22 | 0.28 |
| 27201 | 0 | 21715  | GPNNSEAIPALTAAE                    | 2.68 | 0.01 | 3.78 | 2.02 | 0.22 | 0.28 |
| 27202 | 0 | 21715  | GPNNSEAIPALTAAE                    | 2.68 | 0.01 | 3.67 | 1.20 | 0.22 | 0.28 |
| 27203 | 0 | 21715  | GPNNSEAIPALTAAE                    | 2.68 | 0.01 | 3.67 | 1.20 | 0.22 | 0.28 |
| 27204 | 0 | 21715  | GPNNSEAIPALTAAE                    | 2.68 | 0.01 | 3.67 | 2.04 | 0.22 | 0.85 |
| 27205 | 0 | 21715  | GPNNSEAIPALTAAE                    | 2.68 | 0.01 | 3.67 | 2.04 | 0.22 | 0.28 |
| 27206 | 0 | 177074 | GNSSDADS                           | 2.25 | 0.01 | 0.90 | 2.13 | 0.22 | 0.28 |
| 27207 | 0 | 177074 | GNSSDADS                           | 2.25 | 0.01 | 0.90 | 2.13 | 0.22 | 1.48 |
| 27208 | 0 | 177074 | GNSSDADS                           | 2.25 | 0.01 | 0.90 | 2.13 | 0.22 | 1.48 |
| 27209 | 0 | 177074 | GNSSDADS                           | 2.25 | 0.01 | 0.90 | 2.13 | 0.22 | 1.48 |
| 27210 | 0 | 175192 | GPNTWRS                            | 1.99 | 0.01 | 0.90 | 1.15 | 0.22 | 1.39 |
| 27211 | 0 | 21719  | GPPAA                              | 1.73 | 0.01 | 2.43 | 0.44 | 2.39 | 0.28 |
| 27212 | 0 | 21719  | GPPAA                              | 1.73 | 0.01 | 0.78 | 0.44 | 2.39 | 0.28 |
| 27213 | 0 | 124206 | GPPAAAPGHPLAPGPH<br>PAAPSSWGPRPRRY | 3.38 | 0.01 | 0.78 | 1.20 | 0.22 | 0.28 |
| 27214 | 0 | 124206 | GPPAAAPGHPLAPGPH<br>PAAPSSWGPRPRRY | 3.38 | 0.01 | 0.78 | 1.20 | 0.22 | 0.28 |
| 27215 | 0 | 124206 | GPPAAAPGHPLAPGPH<br>PAAPSSWGPRPRRY | 3.38 | 0.01 | 0.78 | 1.20 | 0.22 | 0.28 |
| 27216 | 0 | 124206 | GPPAAAPGHPLAPGPH<br>PAAPSSWGPRPRRY | 3.38 | 0.01 | 0.78 | 1.20 | 0.22 | 0.28 |
| 27217 | 0 | 124206 | GPPAAAPGHPLAPGPH<br>PAAPSSWGPRPRRY | 3.38 | 0.01 | 0.78 | 1.20 | 0.22 | 0.28 |

|       |   |        |                                    |      |      |      |      |      |      |
|-------|---|--------|------------------------------------|------|------|------|------|------|------|
| 27218 | 0 | 124206 | GPPAAAPGHPLAPGPH<br>PAAPSSWGPRPRRY | 3.38 | 0.01 | 0.78 | 0.44 | 1.13 | 0.28 |
| 27219 | 0 | 21720  | GPPAAEY                            | 2.02 | 0.01 | 0.78 | 0.44 | 2.39 | 0.28 |
| 27220 | 0 | 21721  | GPPAAEYGPPAAEY                     | 2.68 | 0.01 | 0.90 | 1.20 | 0.22 | 0.28 |
| 27221 | 0 | 21722  | GPPAAEYWNSQ                        | 2.36 | 0.01 | 0.78 | 0.44 | 2.39 | 0.28 |
| 27222 | 0 | 21723  | GPPAAGPPAAGPPAA                    | 2.75 | 0.01 | 2.43 | 0.44 | 2.39 | 1.27 |
| 27223 | 0 | 21723  | GPPAAGPPAAGPPAA                    | 2.75 | 0.01 | 2.43 | 0.44 | 2.39 | 0.28 |
| 27224 | 0 | 21723  | GPPAAGPPAAGPPAA                    | 2.75 | 0.01 | 2.43 | 0.44 | 2.39 | 0.28 |
| 27225 | 0 | 21723  | GPPAAGPPAAGPPAA                    | 2.75 | 0.01 | 2.43 | 0.44 | 2.39 | 0.28 |
| 27226 | 0 | 21723  | GPPAAGPPAAGPPAA                    | 2.75 | 0.01 | 2.43 | 0.44 | 2.39 | 0.28 |
| 27227 | 0 | 134988 | GPPGARGLTGRPGDAG<br>pp             | 2.90 | 3.24 | 0.90 | 3.63 | 0.22 | 0.28 |
| 27228 | 0 | 134988 | GPPGARGLTGRPGDAG<br>pp             | 2.90 | 3.24 | 0.90 | 3.63 | 0.22 | 1.75 |
| 27229 | 0 | 134988 | GPPGARGLTGRPGDAG<br>pp             | 2.90 | 3.24 | 0.90 | 3.63 | 0.22 | 0.28 |
| 27230 | 0 | 134989 | GPPGARGLTGRPGDAG<br>pp             | 2.90 | 3.50 | 0.90 | 2.46 | 0.22 | 2.49 |
| 27231 | 0 | 134988 | GPPGARGLTGRPGDAG<br>pp             | 2.90 | 3.24 | 0.90 | 3.63 | 0.22 | 0.28 |
| 27232 | 0 | 134989 | GPPGARGLTGRPGDAG<br>pp             | 2.90 | 3.50 | 0.90 | 2.46 | 0.22 | 0.28 |
| 27233 | 0 | 134989 | GPPGARGLTGRPGDAG<br>pp             | 2.90 | 3.50 | 0.90 | 2.46 | 0.22 | 0.28 |
| 27234 | 0 | 134987 | GPPGARGLTGRPGDAG<br>pp             | 2.90 | 4.45 | 0.90 | 3.16 | 0.22 | 0.28 |
| 27235 | 0 | 134987 | GPPGARGLTGRPGDAG<br>pp             | 2.90 | 4.45 | 0.90 | 3.16 | 0.22 | 0.28 |
| 27236 | 0 | 109193 | GPPGERGA                           | 2.16 | 0.01 | 1.60 | 2.55 | 2.60 | 0.28 |
| 27237 | 0 | 110612 | GPPGERGAPGNRGFP                    | 2.73 | 0.01 | 1.75 | 2.98 | 0.22 | 0.28 |
| 27238 | 0 | 100076 | GPPGEVMGRAIARVAD<br>TIGS           | 2.96 | 0.01 | 4.45 | 2.13 | 0.22 | 0.28 |
| 27239 | 0 | 100076 | GPPGEVMGRAIARVAD<br>TIGS           | 2.96 | 0.01 | 4.45 | 2.13 | 0.22 | 0.28 |
| 27240 | 0 | 100076 | GPPGEVMGRAIARVAD<br>TIGS           | 2.96 | 0.01 | 4.45 | 2.13 | 0.22 | 0.28 |
| 27241 | 0 | 100077 | GPPGGVTEGIIARVADT<br>VGS           | 2.96 | 0.01 | 4.45 | 2.13 | 0.22 | 0.28 |
| 27242 | 0 | 100077 | GPPGGVTEGIIARVADT<br>VGS           | 2.96 | 0.01 | 4.45 | 2.13 | 0.22 | 0.28 |
| 27243 | 0 | 100077 | GPPGGVTEGIIARVADT<br>VGS           | 2.96 | 0.01 | 4.45 | 2.13 | 0.22 | 0.28 |

|       |   |        |                            |      |      |      |      |      |      |
|-------|---|--------|----------------------------|------|------|------|------|------|------|
|       |   |        | GPPGPPGPPGPPGPPG           |      |      |      |      |      |      |
| 27244 | 0 | 134990 | ARGLTGRPGDAGPPGP<br>PGACA  | 3.61 | 4.23 | 0.90 | 3.63 | 0.22 | 0.28 |
|       |   |        | GPPGPPGPPGPPGPPG           |      |      |      |      |      |      |
| 27245 | 0 | 134990 | ARGLTGRPGDAGPPGP<br>PGACA  | 3.61 | 4.23 | 0.90 | 3.16 | 0.22 | 0.28 |
|       |   |        | GPPGPPGPPGPPGPPG           |      |      |      |      |      |      |
| 27246 | 0 | 134990 | ARGLTGRPGDAGPPGP<br>PGACA  | 3.61 | 4.23 | 0.90 | 3.16 | 0.22 | 0.28 |
|       |   |        | GPPGPPGPPGPPGPPG           |      |      |      |      |      |      |
| 27247 | 0 | 134990 | ARGLTGRPGDAGPPGP<br>PGACA  | 3.61 | 4.23 | 0.90 | 2.46 | 0.22 | 0.28 |
|       |   |        | GPPGPPGPPGPPGPPG           |      |      |      |      |      |      |
| 27248 | 0 | 134990 | ARGLTGRPGDAGPPGP<br>PGACA  | 3.61 | 4.23 | 0.90 | 2.46 | 0.22 | 0.28 |
| 27249 | 0 | 108399 | GPPGPQG                    | 2.07 | 3.85 | 0.78 | 2.16 | 0.22 | 1.27 |
| 27250 | 0 | 108399 | GPPGPQG                    | 2.07 | 3.85 | 0.78 | 2.16 | 0.22 | 0.28 |
| 27251 | 0 | 108399 | GPPGPQG                    | 2.07 | 3.85 | 0.78 | 2.16 | 0.22 | 1.27 |
| 27252 | 0 | 108399 | GPPGPQG                    | 2.07 | 3.85 | 0.78 | 2.16 | 0.22 | 0.28 |
| 27253 | 0 | 108399 | GPPGPQG                    | 2.07 | 3.85 | 0.78 | 2.16 | 0.22 | 0.28 |
| 27254 | 0 | 108399 | GPPGPQG                    | 2.07 | 3.85 | 0.78 | 2.16 | 0.22 | 0.28 |
| 27255 | 0 | 108399 | GPPGPQG                    | 2.07 | 3.85 | 0.78 | 2.16 | 0.22 | 1.27 |
| 27256 | 0 | 107166 | GPPGPQG                    | 2.07 | 0.01 | 0.78 | 0.68 | 0.22 | 1.66 |
| 27257 | 0 | 107166 | GPPGPQG                    | 2.07 | 0.01 | 0.78 | 0.68 | 0.22 | 2.56 |
| 27258 | 0 | 107166 | GPPGPQG                    | 2.07 | 0.01 | 0.78 | 0.68 | 0.22 | 1.48 |
| 27259 | 0 | 107166 | GPPGPQG                    | 2.07 | 0.01 | 0.78 | 0.68 | 0.22 | 1.66 |
| 27260 | 0 | 107166 | GPPGPQG                    | 2.07 | 0.01 | 0.78 | 0.68 | 0.22 | 0.28 |
| 27261 | 0 | 110613 | GPPGPQGATGPLGPK            | 2.73 | 0.01 | 1.75 | 2.98 | 0.22 | 0.28 |
| 27262 | 0 | 21729  | GPPLGCLSLSCYDVA            | 2.70 | 0.01 | 0.90 | 0.44 | 1.41 | 0.28 |
| 27263 | 0 | 118820 | GPPMMRPPA                  | 2.26 | 0.01 | 0.78 | 0.44 | 1.13 | 0.28 |
| 27264 | 0 | 123253 | GPPPPGMMPVGPAPG<br>M       | 2.80 | 0.01 | 0.78 | 1.20 | 0.22 | 0.28 |
| 27265 | 0 | 134071 | GPPPPGMMPVGPAPG<br>MRPPMG  | 3.05 | 0.01 | 0.78 | 0.44 | 1.13 | 0.85 |
| 27266 | 0 | 134071 | GPPPPGMMPVGPAPG<br>MRPPMG  | 3.05 | 0.01 | 0.78 | 0.44 | 1.13 | 0.85 |
| 27267 | 0 | 128769 | GPPPPGMR                   | 2.17 | 0.01 | 0.78 | 0.44 | 1.13 | 0.28 |
| 27268 | 0 | 118822 | GPPRPGMMPA                 | 2.37 | 0.01 | 0.78 | 0.44 | 1.13 | 0.28 |
| 27269 | 0 | 123254 | GPPRPGMMPAPHMGG<br>PPMMPMM | 3.10 | 0.01 | 0.78 | 1.20 | 0.22 | 0.28 |
| 27270 | 0 | 108400 | GPPRRLIDT                  | 2.21 | 0.01 | 0.90 | 0.44 | 1.13 | 1.39 |
| 27271 | 0 | 21737  | GPPVAP TSA                 | 2.25 | 0.01 | 0.90 | 1.12 | 0.22 | 0.85 |
| 27272 | 0 | 21738  | GPPVDPTSG                  | 2.26 | 0.01 | 0.90 | 1.12 | 0.22 | 0.85 |
| 27273 | 0 | 21738  | GPPVDPTSG                  | 2.26 | 0.01 | 0.90 | 0.44 | 1.41 | 0.85 |
| 27274 | 0 | 167589 | GPPYRYEPEKFT               | 2.49 | 0.01 | 3.10 | 0.44 | 0.85 | 1.28 |
| 27275 | 0 | 167589 | GPPYRYEPEKFT               | 2.49 | 0.01 | 3.10 | 0.44 | 1.59 | 1.28 |
| 27276 | 0 | 109203 | GPQGARGP                   | 2.17 | 0.01 | 1.60 | 2.55 | 2.60 | 0.28 |

|       |   |        |                                             |      |      |      |      |      |      |
|-------|---|--------|---------------------------------------------|------|------|------|------|------|------|
| 27277 | 0 | 230912 | GPQGATGPLGPKGQTG<br>EPGIAGFK                | 3.17 | 0.01 | 0.78 | 3.16 | 0.22 | 0.28 |
| 27278 | 0 | 229665 | GPQGEAVERAIARVA                             | 2.72 | 0.01 | 4.93 | 0.44 | 0.85 | 1.27 |
| 27279 | 0 | 194925 | GPQPFPEQLFPDPFR                             | 2.72 | 0.01 | 0.90 | 0.44 | 1.93 | 0.28 |
| 27280 | 0 | 141296 | GPQQLE                                      | 1.89 | 0.01 | 4.33 | 2.37 | 0.22 | 0.85 |
| 27281 | 0 | 141296 | GPQQLE                                      | 1.89 | 0.01 | 4.33 | 2.37 | 0.22 | 1.27 |
| 27282 | 0 | 167590 | GPQRR                                       | 1.72 | 0.01 | 2.43 | 0.44 | 1.13 | 0.85 |
| 27283 | 0 | 226349 | GPQSENR                                     | 1.99 | 0.01 | 0.90 | 2.66 | 0.22 | 1.39 |
| 27284 | 0 | 21745  | GPQTPY                                      | 1.90 | 0.01 | 3.17 | 1.12 | 0.22 | 0.28 |
| 27285 | 0 | 517178 | GPQTTPPGPATPGPVG<br>ASAA                    | 3.00 | 4.23 | 2.40 | 0.44 | 1.59 | 1.28 |
| 27286 | 0 | 517177 | GPQTTPPGPATPGPVG<br>ASAA                    | 3.00 | 4.45 | 2.40 | 0.44 | 1.59 | 1.28 |
| 27287 | 0 | 517179 | GPQTTPPGPATPGPVG<br>ASAA                    | 3.00 | 0.01 | 2.40 | 0.44 | 1.59 | 1.28 |
| 27288 | 0 | 21750  | GPRFLAASV                                   | 2.20 | 0.01 | 0.90 | 1.20 | 0.22 | 0.28 |
| 27289 | 0 | 21750  | GPRFLAASV                                   | 2.20 | 0.01 | 0.90 | 1.20 | 0.22 | 1.27 |
| 27290 | 0 | 21750  | GPRFLAASV                                   | 2.20 | 0.01 | 0.90 | 1.15 | 0.22 | 0.28 |
| 27291 | 0 | 109208 | GPRGEPGT                                    | 2.17 | 0.01 | 1.60 | 2.55 | 2.60 | 0.28 |
| 27292 | 0 | 230914 | GPRGERGFPGERGSPGA<br>QGLQGPR                | 3.18 | 0.01 | 0.78 | 3.16 | 0.22 | 0.28 |
| 27293 | 0 | 109210 | GPRGLPGE                                    | 2.17 | 0.01 | 1.60 | 2.55 | 2.60 | 0.28 |
| 27294 | 0 | 110614 | GPRGLPGERGRTGPAG<br>AAG                     | 2.96 | 0.01 | 0.78 | 3.18 | 0.22 | 0.28 |
| 27295 | 0 | 110614 | GPRGLPGERGRTGPAG<br>AAG                     | 2.96 | 0.01 | 0.78 | 3.18 | 0.22 | 0.28 |
| 27296 | 0 | 110615 | GPRGPPGPQGATGPL                             | 2.73 | 0.01 | 1.75 | 2.98 | 0.22 | 0.28 |
| 27297 | 0 | 115607 | GPRHPIRALVGD                                | 2.48 | 0.01 | 0.78 | 0.44 | 1.41 | 0.28 |
| 27298 | 0 | 115607 | GPRHPIRALVGD                                | 2.48 | 0.01 | 0.78 | 0.44 | 1.13 | 0.28 |
| 27299 | 0 | 302235 | GPRHVDPDHFRSTTQ                             | 2.67 | 0.01 | 1.61 | 0.44 | 0.85 | 1.28 |
| 27300 | 0 | 21755  | GPRLGVRA                                    | 2.15 | 0.01 | 1.72 | 0.44 | 0.85 | 0.28 |
| 27301 | 0 | 21756  | GPRLGVRAIRKTSERSQP<br>RG                    | 2.95 | 0.01 | 3.10 | 0.44 | 0.85 | 0.28 |
| 27302 | 0 | 21758  | GPRLGVRATR                                  | 2.34 | 0.01 | 2.68 | 0.44 | 0.85 | 0.28 |
| 27303 | 0 | 78984  | GPRLGVRATRKTSESRQ<br>P                      | 2.86 | 0.01 | 3.81 | 0.44 | 0.85 | 0.28 |
| 27304 | 0 | 21760  | GPRLGVRATRKTSESRQ<br>PRG                    | 2.97 | 0.01 | 1.72 | 0.44 | 0.85 | 0.28 |
| 27305 | 0 | 21760  | GPRLGVRATRKTSESRQ<br>PRG                    | 2.97 | 0.01 | 2.59 | 0.44 | 0.85 | 0.28 |
| 27306 | 0 | 462348 | GPRLGVRATRKTSESRQ<br>PRGRRQPIPKARRPEGR<br>T | 3.53 | 0.01 | 1.96 | 2.90 | 0.22 | 0.28 |
| 27307 | 0 | 21761  | GPRLGVRATRKTSESRQ<br>RG                     | 2.98 | 0.01 | 2.68 | 0.44 | 0.85 | 0.85 |
| 27308 | 0 | 21763  | GPRLQPY                                     | 2.02 | 0.01 | 3.97 | 0.68 | 0.22 | 0.28 |
| 27309 | 0 | 21763  | GPRLQPY                                     | 2.02 | 0.01 | 3.97 | 0.68 | 0.22 | 1.34 |

|       |   |        |                           |      |      |      |      |      |      |
|-------|---|--------|---------------------------|------|------|------|------|------|------|
| 27310 | 0 | 21763  | GPRLQPY                   | 2.02 | 0.01 | 3.97 | 1.15 | 0.22 | 1.34 |
| 27311 | 0 | 21763  | GPRLQPY                   | 2.02 | 0.01 | 3.97 | 1.15 | 0.22 | 1.34 |
| 27312 | 0 | 21763  | GPRLQPY                   | 2.02 | 0.01 | 3.97 | 1.15 | 0.22 | 1.27 |
| 27313 | 0 | 21763  | GPRLQPY                   | 2.02 | 0.01 | 3.97 | 1.15 | 0.22 | 1.27 |
| 27314 | 0 | 21763  | GPRLQPY                   | 2.02 | 0.01 | 3.97 | 1.15 | 0.22 | 1.27 |
| 27315 | 0 | 21764  | GPRLTHSGDLHL              | 2.50 | 0.01 | 0.90 | 0.44 | 0.85 | 0.28 |
| 27316 | 0 | 21765  | GPRLYGEMTMQGTRKP<br>RPSGP | 3.02 | 0.01 | 2.04 | 0.44 | 0.85 | 0.28 |
| 27317 | 0 | 21765  | GPRLYGEMTMQGTRKP<br>RPSGP | 3.02 | 0.01 | 2.04 | 0.44 | 2.98 | 0.28 |
| 27318 | 0 | 167591 | GPRRR                     | 1.73 | 0.01 | 0.78 | 0.44 | 1.13 | 0.85 |
| 27319 | 0 | 139512 | GPRVVERHQSACKDS           | 2.63 | 3.97 | 0.78 | 0.44 | 1.13 | 0.28 |
| 27320 | 0 | 156675 | GPRVVERHQSACKDS           | 2.63 | 3.81 | 0.78 | 0.44 | 1.13 | 0.28 |
| 27321 | 0 | 139512 | GPRVVERHQSACKDS           | 2.63 | 3.97 | 0.78 | 0.44 | 1.13 | 0.28 |
| 27322 | 0 | 139512 | GPRVVERHQSACKDS           | 2.63 | 3.97 | 0.78 | 0.44 | 1.13 | 1.66 |
| 27323 | 0 | 139512 | GPRVVERHQSACKDS           | 2.63 | 3.97 | 0.78 | 0.44 | 1.13 | 0.28 |
| 27324 | 0 | 139512 | GPRVVERHQSACKDS           | 2.63 | 3.97 | 0.78 | 0.44 | 1.93 | 0.28 |
| 27325 | 0 | 139512 | GPRVVERHQSACKDS           | 2.63 | 3.97 | 0.78 | 0.44 | 1.13 | 0.28 |
| 27326 | 0 | 139512 | GPRVVERHQSACKDS           | 2.63 | 3.97 | 0.78 | 0.44 | 1.41 | 0.28 |
| 27327 | 0 | 139512 | GPRVVERHQSACKDS           | 2.63 | 3.97 | 0.78 | 0.44 | 1.13 | 1.27 |
| 27328 | 0 | 139512 | GPRVVERHQSACKDS           | 2.63 | 3.97 | 0.78 | 0.44 | 1.93 | 0.28 |
| 27329 | 0 | 240880 | GPRVVERHQSACKDS           | 2.63 | 3.65 | 0.78 | 0.44 | 1.13 | 1.27 |
| 27330 | 0 | 21776  | GPRWNLNAHSAL              | 2.48 | 0.01 | 3.33 | 0.44 | 1.23 | 0.85 |
| 27331 | 0 | 161350 | GPSADIIQFECKSFGHEV<br>L   | 2.85 | 0.01 | 2.08 | 2.25 | 0.22 | 1.57 |
| 27332 | 0 | 161350 | GPSADIIQFECKSFGHEV<br>L   | 2.85 | 0.01 | 2.08 | 2.49 | 0.22 | 1.57 |
| 27333 | 0 | 161350 | GPSADIIQFECKSFGHEV<br>L   | 2.85 | 0.01 | 2.08 | 2.43 | 0.22 | 1.57 |
| 27334 | 0 | 106472 | GPSDPAHKAR                | 2.31 | 0.01 | 3.08 | 0.44 | 1.23 | 0.85 |
| 27335 | 0 | 451482 | GPSDTPILPQ                | 2.31 | 0.01 | 0.90 | 1.81 | 0.22 | 0.28 |
| 27336 | 0 | 110616 | GPSGLAGPKGANGDP           | 2.72 | 0.01 | 1.75 | 2.98 | 0.22 | 0.28 |
| 27337 | 0 | 181644 | GPSHFSQLYKKHTN            | 2.64 | 0.01 | 2.86 | 2.37 | 0.22 | 1.28 |
| 27338 | 0 | 178137 | GPSIVHRKCF                | 2.26 | 3.33 | 0.78 | 0.44 | 1.13 | 0.28 |
| 27339 | 0 | 21791  | GPSNSEQIPALTAVE           | 2.66 | 0.01 | 3.34 | 2.04 | 0.22 | 0.85 |
| 27340 | 0 | 21791  | GPSNSEQIPALTAVE           | 2.66 | 0.01 | 3.34 | 2.04 | 0.22 | 0.28 |
| 27341 | 0 | 226940 | GPSPKEFESSGKNEG           | 2.73 | 0.01 | 0.90 | 1.12 | 0.22 | 0.85 |
| 27342 | 0 | 21792  | GPSQKIQ                   | 2.02 | 0.01 | 1.72 | 0.44 | 0.85 | 0.28 |
| 27343 | 0 | 167592 | GPSRR                     | 1.72 | 0.01 | 0.78 | 0.44 | 1.13 | 0.85 |
| 27344 | 0 | 133116 | GPSRRGPSLG                | 2.36 | 0.01 | 0.78 | 0.44 | 1.13 | 0.28 |
| 27345 | 0 | 117298 | GPSRRGPSLGASSH            | 2.65 | 0.01 | 0.78 | 0.44 | 1.13 | 0.28 |
| 27346 | 0 | 134682 | GPSRRGPSLGASSHQ           | 2.70 | 0.01 | 0.78 | 3.05 | 1.13 | 0.85 |
| 27347 | 0 | 134682 | GPSRRGPSLGASSHQ           | 2.70 | 0.01 | 0.78 | 0.44 | 1.13 | 0.28 |
| 27348 | 0 | 133117 | GPSRRGPSLGASSHQH          | 2.77 | 0.01 | 0.78 | 0.44 | 1.13 | 0.28 |



|       |   |        |                              |      |      |      |      |      |      |
|-------|---|--------|------------------------------|------|------|------|------|------|------|
| 27349 | 0 | 21797  | GPSSDPAWERNDPTQQ<br>IPKL     | 2.90 | 0.01 | 2.04 | 0.44 | 0.85 | 0.28 |
| 27350 | 0 | 21799  | GPSSFSSR                     | 2.15 | 0.01 | 3.72 | 0.44 | 0.85 | 1.34 |
| 27351 | 0 | 175193 | GPSTWRA                      | 1.99 | 0.01 | 0.90 | 1.15 | 0.22 | 1.39 |
| 27352 | 0 | 107421 | GPSVFLF                      | 2.02 | 0.01 | 0.78 | 0.44 | 1.13 | 0.28 |
| 27353 | 0 | 21804  | GPSYGFQYSPGQRVEFL<br>VNT     | 2.95 | 0.01 | 1.72 | 0.44 | 0.85 | 0.28 |
| 27354 | 0 | 21807  | GPTEESVERAMGRVA              | 2.70 | 0.01 | 3.34 | 1.20 | 0.22 | 1.27 |
| 27355 | 0 | 21807  | GPTEESVERAMGRVA              | 2.70 | 0.01 | 3.34 | 1.20 | 0.22 | 1.27 |
| 27356 | 0 | 21807  | GPTEESVERAMGRVA              | 2.70 | 0.01 | 3.34 | 2.04 | 0.22 | 0.28 |
| 27357 | 0 | 110617 | GPTGARGPEGAQGSR              | 2.72 | 0.01 | 1.75 | 2.98 | 0.22 | 0.28 |
| 27358 | 0 | 109217 | GPTGASGP                     | 2.17 | 0.01 | 1.60 | 2.55 | 2.60 | 0.28 |
| 27359 | 0 | 230920 | GPTGVTGPKGARGAQG<br>PPGATGFP | 3.17 | 0.01 | 0.78 | 3.16 | 0.22 | 0.28 |
| 27360 | 0 | 144656 | GPTHAMFDSSGP                 | 2.47 | 0.01 | 0.90 | 0.68 | 0.22 | 0.28 |
| 27361 | 0 | 144656 | GPTHAMFDSSGP                 | 2.47 | 0.01 | 0.90 | 0.68 | 0.22 | 0.28 |
| 27362 | 0 | 144656 | GPTHAMFDSSGP                 | 2.47 | 0.01 | 0.90 | 0.68 | 0.22 | 1.48 |
| 27363 | 0 | 144656 | GPTHAMFDSSGP                 | 2.47 | 0.01 | 0.90 | 0.68 | 0.22 | 1.48 |
| 27364 | 0 | 144656 | GPTHAMFDSSGP                 | 2.47 | 0.01 | 0.90 | 0.68 | 0.22 | 1.27 |
| 27365 | 0 | 82831  | GPTHSKEIPALTAVE              | 2.66 | 0.01 | 2.57 | 0.44 | 0.85 | 0.28 |
| 27366 | 0 | 419197 | GPTQPALHRTEs                 | 2.45 | 0.01 | 0.90 | 0.44 | 1.93 | 1.39 |
| 27367 | 0 | 21812  | GPTRTIGGSQ                   | 2.33 | 0.01 | 2.83 | 1.12 | 0.22 | 0.28 |
| 27368 | 0 | 21812  | GPTRTIGGSQ                   | 2.33 | 0.01 | 2.83 | 0.44 | 0.85 | 0.28 |
| 27369 | 0 | 21812  | GPTRTIGGSQ                   | 2.33 | 0.01 | 2.83 | 0.44 | 0.85 | 0.28 |
| 27370 | 0 | 152607 | GPTVPDRDND                   | 2.33 | 0.01 | 2.18 | 2.16 | 0.22 | 0.28 |
| 27371 | 0 | 21814  | GPVEDAITAAIGRV               | 2.63 | 0.01 | 3.78 | 0.68 | 0.22 | 0.28 |
| 27372 | 0 | 21815  | GPVEDAITAAIGRVA              | 2.70 | 0.01 | 3.67 | 1.20 | 0.22 | 1.27 |
| 27373 | 0 | 21815  | GPVEDAITAAIGRVA              | 2.70 | 0.01 | 3.67 | 2.04 | 0.22 | 0.85 |
| 27374 | 0 | 21815  | GPVEDAITAAIGRVA              | 2.70 | 0.01 | 3.67 | 2.04 | 0.22 | 0.28 |
| 27375 | 0 | 21816  | GPVEESVERAMVRVA              | 2.71 | 0.01 | 3.75 | 1.20 | 0.22 | 1.27 |
| 27376 | 0 | 21816  | GPVEESVERAMVRVA              | 2.71 | 0.01 | 3.75 | 1.20 | 0.22 | 1.27 |
| 27377 | 0 | 21816  | GPVEESVERAMVRVA              | 2.71 | 0.01 | 3.75 | 2.04 | 0.22 | 0.85 |
| 27378 | 0 | 21816  | GPVEESVERAMVRVA              | 2.71 | 0.01 | 3.75 | 2.04 | 0.22 | 0.28 |
| 27379 | 0 | 110618 | GPVGPGAGGPGFP                | 2.54 | 0.01 | 1.75 | 2.46 | 0.22 | 0.28 |
| 27380 | 0 | 110619 | GPVGPGAGGPGFPGAP             | 2.75 | 0.01 | 1.75 | 2.46 | 0.22 | 0.28 |
| 27381 | 0 | 145803 | GPVGPSDPSIVS                 | 2.53 | 0.01 | 1.86 | 0.68 | 0.22 | 0.28 |
| 27382 | 0 | 145803 | GPVGPSDPSIVS                 | 2.53 | 0.01 | 1.86 | 0.68 | 0.22 | 0.28 |
| 27383 | 0 | 145804 | GPVGPSDPSIVSLVEE             | 2.77 | 0.01 | 1.86 | 0.68 | 0.22 | 0.28 |
| 27384 | 0 | 145804 | GPVGPSDPSIVSLVEE             | 2.77 | 0.01 | 1.86 | 0.68 | 0.22 | 0.28 |
| 27385 | 0 | 110275 | GPVGPSDPSIVSLVEETS<br>FI     | 2.97 | 0.01 | 1.86 | 0.68 | 0.22 | 1.34 |

|       |   |        |                                  |      |      |      |      |      |      |
|-------|---|--------|----------------------------------|------|------|------|------|------|------|
| 27386 | 0 | 110275 | GPVGPSPDPSIVSLVEETS<br>FI        | 2.97 | 0.01 | 1.86 | 0.68 | 0.22 | 0.28 |
| 27387 | 0 | 21823  | GPVLRR                           | 1.86 | 0.01 | 0.90 | 1.15 | 0.22 | 2.35 |
| 27388 | 0 | 21823  | GPVLRR                           | 1.86 | 0.01 | 0.90 | 3.48 | 0.22 | 0.28 |
| 27389 | 0 | 158592 | GPVNMNL                          | 2.02 | 0.01 | 0.90 | 0.44 | 1.13 | 1.39 |
| 27390 | 0 | 123255 | GPVPGMPP                         | 2.15 | 0.01 | 0.78 | 1.20 | 0.22 | 0.28 |
| 27391 | 0 | 115763 | GPVRGPFPII                       | 2.34 | 0.01 | 1.60 | 0.44 | 1.23 | 0.85 |
| 27392 | 0 | 115763 | GPVRGPFPII                       | 2.34 | 0.01 | 1.60 | 0.44 | 1.23 | 0.85 |
| 27393 | 0 | 78406  | GPVSLSPFERSPFQPYQC<br>QL         | 2.96 | 0.01 | 2.69 | 1.81 | 0.22 | 0.28 |
| 27394 | 0 | 21827  | GPVSQHNNR                        | 2.20 | 0.01 | 2.87 | 0.44 | 0.85 | 0.28 |
| 27395 | 0 | 133118 | GPVTTITGETFDYSELAS<br>HVVSYLRTSG | 3.27 | 0.01 | 0.78 | 0.44 | 1.13 | 0.28 |
| 27396 | 0 | 21831  | GPVYCFTPSPVVVGTTD<br>R           | 2.85 | 0.01 | 2.68 | 0.44 | 0.85 | 0.28 |
| 27397 | 0 | 444424 | GPVYCFTPSPVVVGTTD<br>RFG         | 2.96 | 0.01 | 1.96 | 0.68 | 0.22 | 1.34 |
| 27398 | 0 | 444424 | GPVYCFTPSPVVVGTTD<br>RFG         | 2.96 | 0.01 | 1.96 | 0.68 | 0.22 | 1.34 |
| 27399 | 0 | 444424 | GPVYCFTPSPVVVGTTD<br>RFG         | 2.96 | 0.01 | 1.96 | 0.68 | 0.22 | 1.34 |
| 27400 | 0 | 444424 | GPVYCFTPSPVVVGTTD<br>RFG         | 2.96 | 0.01 | 1.96 | 0.68 | 0.22 | 0.28 |
| 27401 | 0 | 21834  | GPVYVSDSVTLNVNATG<br>AQAVARSL    | 3.18 | 0.01 | 2.53 | 0.44 | 0.85 | 0.28 |
| 27402 | 0 | 21834  | GPVYVSDSVTLNVNATG<br>AQAVARSL    | 3.18 | 0.01 | 2.53 | 0.44 | 0.85 | 0.28 |
| 27403 | 0 | 21838  | GPWSPIDIHHLS                     | 2.48 | 0.01 | 3.97 | 2.49 | 0.22 | 0.28 |
| 27404 | 0 | 21838  | GPWSPIDIHHLS                     | 2.48 | 0.01 | 3.97 | 1.15 | 0.22 | 0.28 |
| 27405 | 0 | 21838  | GPWSPIDIHHLS                     | 2.48 | 0.01 | 3.97 | 1.15 | 2.26 | 0.85 |
| 27406 | 0 | 21838  | GPWSPIDIHHLS                     | 2.48 | 0.01 | 3.97 | 1.15 | 0.22 | 0.28 |
| 27407 | 0 | 21840  | GPYAGPLERQKPLK                   | 2.64 | 0.01 | 2.88 | 2.22 | 0.22 | 0.28 |
| 27408 | 0 | 21840  | GPYAGPLERQKPLK                   | 2.64 | 0.01 | 2.88 | 2.22 | 0.22 | 0.28 |
| 27409 | 0 | 21840  | GPYAGPLERQKPLK                   | 2.64 | 0.01 | 2.88 | 2.22 | 0.22 | 0.28 |
| 27410 | 0 | 21840  | GPYAGPLERQKPLK                   | 2.64 | 0.01 | 2.88 | 2.22 | 0.22 | 0.28 |
| 27411 | 0 | 21840  | GPYAGPLERQKPLK                   | 2.64 | 0.01 | 2.88 | 2.22 | 0.22 | 0.28 |
| 27412 | 0 | 21840  | GPYAGPLERQKPLK                   | 2.64 | 0.01 | 2.96 | 2.22 | 0.22 | 0.28 |
| 27413 | 0 | 21840  | GPYAGPLERQKPLK                   | 2.64 | 0.01 | 2.96 | 2.22 | 0.22 | 0.28 |
| 27414 | 0 | 21840  | GPYAGPLERQKPLK                   | 2.64 | 0.01 | 2.96 | 2.22 | 0.22 | 0.28 |
| 27415 | 0 | 21840  | GPYAGPLERQKPLK                   | 2.64 | 0.01 | 2.96 | 2.22 | 0.22 | 0.28 |
| 27416 | 0 | 233191 | GPYAGPMER                        | 2.24 | 0.01 | 3.02 | 0.68 | 0.22 | 0.28 |
| 27417 | 0 | 233191 | GPYAGPMER                        | 2.24 | 0.01 | 3.02 | 0.68 | 0.22 | 0.28 |
| 27418 | 0 | 233191 | GPYAGPMER                        | 2.24 | 0.01 | 3.02 | 2.22 | 0.22 | 2.35 |
| 27419 | 0 | 233191 | GPYAGPMER                        | 2.24 | 0.01 | 3.02 | 2.13 | 0.22 | 2.35 |
| 27420 | 0 | 233191 | GPYAGPMER                        | 2.24 | 0.01 | 3.02 | 2.00 | 0.22 | 2.35 |
| 27421 | 0 | 21841  | GPYAGPMERQKPLK                   | 2.62 | 0.01 | 2.88 | 2.22 | 0.22 | 0.28 |
| 27422 | 0 | 21841  | GPYAGPMERQKPLK                   | 2.62 | 0.01 | 2.88 | 2.22 | 0.22 | 0.28 |

|       |   |        |                          |      |      |      |      |      |      |
|-------|---|--------|--------------------------|------|------|------|------|------|------|
| 27423 | 0 | 21841  | GPYAGPMERQKPLK           | 2.62 | 0.01 | 2.88 | 2.22 | 0.22 | 0.28 |
| 27424 | 0 | 21841  | GPYAGPMERQKPLK           | 2.62 | 0.01 | 2.88 | 2.22 | 0.22 | 0.28 |
| 27425 | 0 | 21841  | GPYAGPMERQKPLK           | 2.62 | 0.01 | 2.96 | 2.22 | 0.22 | 0.28 |
| 27426 | 0 | 21841  | GPYAGPMERQKPLK           | 2.62 | 0.01 | 3.02 | 0.68 | 0.22 | 0.28 |
| 27427 | 0 | 21841  | GPYAGPMERQKPLK           | 2.62 | 0.01 | 3.02 | 0.68 | 0.22 | 0.28 |
| 27428 | 0 | 136328 | GPYDTPMFSLNM             | 2.45 | 0.01 | 0.90 | 2.74 | 0.22 | 0.85 |
| 27429 | 0 | 126165 | GPYEGYDSTA               | 2.32 | 0.01 | 0.78 | 1.20 | 0.22 | 0.28 |
| 27430 | 0 | 126165 | GPYEGYDSTA               | 2.32 | 0.01 | 0.78 | 1.20 | 0.22 | 0.28 |
| 27431 | 0 | 233192 | GPYTGPLERQKPLK           | 2.64 | 0.01 | 3.02 | 0.68 | 0.22 | 0.28 |
| 27432 | 0 | 233192 | GPYTGPLERQKPLK           | 2.64 | 0.01 | 3.02 | 0.68 | 0.22 | 0.28 |
| 27433 | 0 | 175196 | GPYTWRS                  | 1.99 | 0.01 | 0.90 | 1.15 | 0.22 | 1.39 |
| 27434 | 0 | 106473 | GPYVPYPEDQFV             | 2.49 | 0.01 | 0.90 | 1.15 | 0.22 | 1.39 |
| 27435 | 0 | 302403 | GQAAAADKPSLFGQA          | 2.69 | 0.01 | 1.61 | 0.44 | 0.85 | 1.28 |
| 27436 | 0 | 302404 | GQAAAGDKLSLFGQA          | 2.71 | 0.01 | 1.61 | 0.44 | 0.85 | 1.28 |
| 27437 | 0 | 302405 | GQAAAGDKPAPFGQA          | 2.73 | 0.01 | 1.61 | 0.44 | 0.85 | 1.28 |
| 27438 | 0 | 302406 | GQAAAGDKPPFPGQA          | 2.71 | 0.01 | 1.61 | 0.44 | 0.85 | 1.28 |
| 27439 | 0 | 302407 | GQAAAGDKPSLFGQA          | 2.69 | 0.01 | 1.61 | 0.44 | 0.85 | 1.28 |
| 27440 | 0 | 302408 | GQAAAGDKPSPFGQA          | 2.71 | 0.01 | 1.61 | 0.44 | 0.85 | 1.28 |
| 27441 | 0 | 302409 | GQAAAGDKPSPFGQG          | 2.70 | 0.01 | 1.61 | 0.44 | 0.85 | 1.28 |
| 27442 | 0 | 302410 | GQAAAGGKPSFGQA           | 2.73 | 0.01 | 1.61 | 0.44 | 0.85 | 1.28 |
| 27443 | 0 | 302412 | GQAAEGDKPPFPGQA          | 2.70 | 0.01 | 1.61 | 0.44 | 0.85 | 1.28 |
| 27444 | 0 | 21845  | GQAAWKEARA               | 2.33 | 0.01 | 1.75 | 0.68 | 0.22 | 0.28 |
| 27445 | 0 | 21845  | GQAAWKEARA               | 2.33 | 0.01 | 1.75 | 0.68 | 0.22 | 0.28 |
| 27446 | 0 | 111365 | GQAEP                    | 1.74 | 0.01 | 1.86 | 2.69 | 0.22 | 0.28 |
| 27447 | 0 | 111365 | GQAEP                    | 1.74 | 0.01 | 1.86 | 2.69 | 0.22 | 0.28 |
| 27448 | 0 | 142170 | GQAEPDRAHYNI             | 2.43 | 0.01 | 1.86 | 0.44 | 1.41 | 0.28 |
| 27449 | 0 | 110869 | GQAEPDRAHYNIVTFCC<br>KCD | 2.87 | 0.01 | 1.86 | 1.81 | 0.22 | 0.28 |
| 27450 | 0 | 110869 | GQAEPDRAHYNIVTFCC<br>KCD | 2.87 | 0.01 | 1.86 | 3.57 | 0.22 | 0.28 |
| 27451 | 0 | 110869 | GQAEPDRAHYNIVTFCC<br>KCD | 2.87 | 0.01 | 1.86 | 3.57 | 0.22 | 0.28 |
| 27452 | 0 | 110869 | GQAEPDRAHYNIVTFCC<br>KCD | 2.87 | 0.01 | 1.86 | 3.89 | 2.82 | 0.28 |
| 27453 | 0 | 110869 | GQAEPDRAHYNIVTFCC<br>KCD | 2.87 | 0.01 | 1.86 | 0.44 | 0.85 | 0.28 |
| 27454 | 0 | 110620 | GQAGEPGIAGFKGDQ          | 2.71 | 0.01 | 1.75 | 2.98 | 0.22 | 0.28 |
| 27455 | 0 | 423665 | GQAGSPFGMIPI             | 2.50 | 0.01 | 0.90 | 2.46 | 0.22 | 1.39 |
| 27456 | 0 | 423665 | GQAGSPFGMIPI             | 2.50 | 0.01 | 0.90 | 0.44 | 1.13 | 0.28 |

|       |   |        |                                  |      |      |      |      |      |      |
|-------|---|--------|----------------------------------|------|------|------|------|------|------|
| 27457 | 0 | 21847  | GQAKKKKPEKPHFPLAA<br>EDDIRHHLTQT | 3.26 | 0.01 | 2.80 | 1.15 | 0.22 | 0.28 |
| 27458 | 0 | 21847  | GQAKKKKPEKPHFPLAA<br>EDDIRHHLTQT | 3.26 | 0.01 | 2.80 | 1.15 | 0.22 | 0.28 |
| 27459 | 0 | 21847  | GQAKKKKPEKPHFPLAA<br>EDDIRHHLTQT | 3.26 | 0.01 | 2.80 | 1.15 | 0.22 | 0.28 |
| 27460 | 0 | 21847  | GQAKKKKPEKPHFPLAA<br>EDDIRHHLTQT | 3.26 | 0.01 | 2.80 | 2.13 | 0.22 | 1.27 |
| 27461 | 0 | 21848  | GQAMIMGIYD                       | 2.34 | 0.01 | 3.34 | 0.68 | 0.22 | 0.85 |
| 27462 | 0 | 21848  | GQAMIMGIYD                       | 2.34 | 0.01 | 3.34 | 0.68 | 0.22 | 0.85 |
| 27463 | 0 | 450640 | GQAMNHT                          | 1.99 | 0.01 | 0.90 | 0.44 | 1.41 | 1.39 |
| 27464 | 0 | 190776 | GQCCDGVKNL                       | 2.31 | 0.01 | 1.86 | 0.44 | 1.23 | 0.28 |
| 27465 | 0 | 21851  | GQCKWVNGREICNDRD<br>RPTA         | 2.92 | 0.01 | 3.24 | 0.44 | 1.23 | 0.28 |
| 27466 | 0 | 21851  | GQCKWVNGREICNDRD<br>RPTA         | 2.92 | 0.01 | 3.24 | 4.45 | 1.23 | 0.28 |
| 27467 | 0 | 21851  | GQCKWVNGREICNDRD<br>RPTA         | 2.92 | 0.01 | 3.24 | 0.44 | 1.23 | 1.34 |
| 27468 | 0 | 21851  | GQCKWVNGREICNDRD<br>RPTA         | 2.92 | 0.01 | 3.24 | 4.45 | 1.23 | 3.40 |
| 27469 | 0 | 78407  | GQCNMVVERLGDYLID                 | 2.71 | 0.01 | 2.76 | 0.44 | 1.23 | 1.39 |
| 27470 | 0 | 181327 | GQCPNNMMGTFSIRT                  | 2.65 | 0.01 | 2.82 | 1.15 | 0.22 | 0.28 |
| 27471 | 0 | 21856  | GQDLTAH                          | 1.99 | 0.01 | 2.70 | 0.68 | 0.22 | 1.34 |
| 27472 | 0 | 21856  | GQDLTAH                          | 1.99 | 0.01 | 2.70 | 0.68 | 0.22 | 1.27 |
| 27473 | 0 | 21856  | GQDLTAH                          | 1.99 | 0.01 | 2.70 | 0.68 | 0.22 | 0.85 |
| 27474 | 0 | 21856  | GQDLTAH                          | 1.99 | 0.01 | 2.70 | 0.68 | 0.22 | 1.34 |
| 27475 | 0 | 21856  | GQDLTAH                          | 1.99 | 0.01 | 2.70 | 0.68 | 0.22 | 1.27 |
| 27476 | 0 | 111369 | GQEEDIPPV                        | 2.21 | 0.01 | 2.52 | 1.12 | 0.22 | 1.27 |
| 27477 | 0 | 99293  | GQEEENEGGNIFSGF                  | 2.73 | 0.01 | 2.16 | 0.44 | 1.23 | 1.48 |
| 27478 | 0 | 132352 | GQELKNPQ                         | 2.12 | 0.01 | 0.78 | 2.46 | 0.22 | 0.85 |
| 27479 | 0 | 132352 | GQELKNPQ                         | 2.12 | 0.01 | 0.78 | 2.46 | 0.22 | 0.28 |
| 27480 | 0 | 122780 | GQELKNPQEETLQAFDS<br>HYD         | 2.90 | 0.01 | 0.78 | 1.20 | 0.22 | 2.12 |
| 27481 | 0 | 122780 | GQELKNPQEETLQAFDS<br>HYD         | 2.90 | 0.01 | 0.78 | 1.20 | 0.22 | 1.27 |
| 27482 | 0 | 122780 | GQELKNPQEETLQAFDS<br>HYD         | 2.90 | 0.01 | 0.78 | 0.44 | 1.13 | 0.28 |
| 27483 | 0 | 122780 | GQELKNPQEETLQAFDS<br>HYD         | 2.90 | 0.01 | 0.78 | 0.44 | 1.13 | 0.28 |
| 27484 | 0 | 122780 | GQELKNPQEETLQAFDS<br>HYD         | 2.90 | 0.01 | 0.78 | 1.20 | 0.22 | 1.34 |
| 27485 | 0 | 122780 | GQELKNPQEETLQAFDS<br>HYD         | 2.90 | 0.01 | 0.78 | 0.68 | 0.22 | 0.28 |
| 27486 | 0 | 122780 | GQELKNPQEETLQAFDS<br>HYD         | 2.90 | 0.01 | 0.78 | 3.06 | 0.22 | 0.28 |

|       |   |        |                                |      |      |      |      |      |      |
|-------|---|--------|--------------------------------|------|------|------|------|------|------|
| 27487 | 0 | 122780 | GQELKNPQEETLQAFDS<br>HYD       | 2.90 | 0.01 | 0.78 | 3.59 | 0.22 | 0.28 |
| 27488 | 0 | 21860  | GQFEHFRECC                     | 2.31 | 0.01 | 3.89 | 0.44 | 1.23 | 0.85 |
| 27489 | 0 | 121348 | GQFRVIGPGHPIRALVG<br>D         | 2.86 | 0.01 | 2.19 | 4.33 | 0.22 | 0.28 |
| 27490 | 0 | 121348 | GQFRVIGPGHPIRALVG<br>D         | 2.86 | 0.01 | 2.19 | 4.15 | 0.22 | 0.28 |
| 27491 | 0 | 113458 | GQFRVIGPGHPIRALVG<br>DEAE      | 3.00 | 0.01 | 2.19 | 2.04 | 0.22 | 0.28 |
| 27492 | 0 | 113458 | GQFRVIGPGHPIRALVG<br>DEAE      | 3.00 | 0.01 | 2.19 | 2.04 | 0.22 | 0.28 |
| 27493 | 0 | 114841 | GQFRVIGPGHPIRALVG<br>DEAELP    | 3.10 | 0.01 | 2.19 | 3.81 | 0.22 | 0.28 |
| 27494 | 0 | 114841 | GQFRVIGPGHPIRALVG<br>DEAELP    | 3.10 | 0.01 | 2.19 | 3.81 | 0.22 | 1.75 |
| 27495 | 0 | 225309 | GQFRVIGPGYPICALVG<br>DEAELP    | 3.10 | 0.01 | 1.75 | 1.81 | 0.22 | 0.28 |
| 27496 | 0 | 112139 | GQFRVIGPRHPIRALVG<br>DEV       | 2.95 | 0.01 | 0.78 | 3.72 | 0.22 | 0.28 |
| 27497 | 0 | 112139 | GQFRVIGPRHPIRALVG<br>DEV       | 2.95 | 0.01 | 0.78 | 0.44 | 1.13 | 0.28 |
| 27498 | 0 | 112139 | GQFRVIGPRHPIRALVG<br>DEV       | 2.95 | 0.01 | 0.78 | 0.44 | 1.13 | 0.28 |
| 27499 | 0 | 112779 | GQFRVIGPRHPIRALVG<br>DEVELPCRI | 3.21 | 0.01 | 0.78 | 0.44 | 1.13 | 0.28 |
| 27500 | 0 | 112779 | GQFRVIGPRHPIRALVG<br>DEVELPCRI | 3.21 | 0.01 | 0.78 | 0.44 | 1.41 | 0.28 |
| 27501 | 0 | 112779 | GQFRVIGPRHPIRALVG<br>DEVELPCRI | 3.21 | 0.01 | 0.78 | 0.44 | 1.13 | 0.28 |
| 27502 | 0 | 112779 | GQFRVIGPRHPIRALVG<br>DEVELPCRI | 3.21 | 0.01 | 0.78 | 0.44 | 1.41 | 0.28 |
| 27503 | 0 | 112779 | GQFRVIGPRHPIRALVG<br>DEVELPCRI | 3.21 | 0.01 | 0.78 | 0.44 | 1.13 | 0.28 |
| 27504 | 0 | 112779 | GQFRVIGPRHPIRALVG<br>DEVELPCRI | 3.21 | 0.01 | 0.78 | 0.44 | 1.41 | 0.28 |
| 27505 | 0 | 112779 | GQFRVIGPRHPIRALVG<br>DEVELPCRI | 3.21 | 0.01 | 0.78 | 0.44 | 1.59 | 0.28 |
| 27506 | 0 | 21867  | GQGGGTHNQWNKP                  | 2.56 | 0.01 | 2.98 | 1.20 | 0.22 | 0.28 |
| 27507 | 0 | 21867  | GQGGGTHNQWNKP                  | 2.56 | 0.01 | 2.98 | 1.20 | 0.22 | 0.85 |
| 27508 | 0 | 21867  | GQGGGTHNQWNKP                  | 2.56 | 0.01 | 2.98 | 1.20 | 0.22 | 1.48 |
| 27509 | 0 | 78985  | GQGGGTHNQWNKPSK                | 2.69 | 0.01 | 2.98 | 1.20 | 0.22 | 0.28 |
| 27510 | 0 | 78985  | GQGGGTHNQWNKPSK                | 2.69 | 0.01 | 2.98 | 1.20 | 0.22 | 0.28 |
| 27511 | 0 | 21868  | GQGGSHSQWNKP                   | 2.49 | 0.01 | 2.52 | 1.12 | 0.22 | 0.85 |
| 27512 | 0 | 21868  | GQGGSHSQWNKP                   | 2.49 | 0.01 | 2.52 | 1.20 | 0.22 | 0.28 |
| 27513 | 0 | 21868  | GQGGSHSQWNKP                   | 2.49 | 0.01 | 2.52 | 1.20 | 0.22 | 0.28 |

|       |   |        |                               |      |      |      |      |      |      |
|-------|---|--------|-------------------------------|------|------|------|------|------|------|
| 27514 | 0 | 21868  | GQGGSHSQWNKP                  | 2.49 | 0.01 | 2.52 | 1.20 | 0.22 | 0.28 |
| 27515 | 0 | 21868  | GQGGSHSQWNKP                  | 2.49 | 0.01 | 2.52 | 1.20 | 0.22 | 0.28 |
| 27516 | 0 | 21868  | GQGGSHSQWNKP                  | 2.49 | 0.01 | 2.52 | 1.20 | 0.22 | 0.28 |
| 27517 | 0 | 21868  | GQGGSHSQWNKP                  | 2.49 | 0.01 | 2.52 | 1.20 | 0.22 | 0.28 |
| 27518 | 0 | 21868  | GQGGSHSQWNKP                  | 2.49 | 0.01 | 2.52 | 1.20 | 0.22 | 0.28 |
| 27519 | 0 | 21868  | GQGGSHSQWNKP                  | 2.49 | 0.01 | 2.52 | 1.20 | 0.22 | 0.28 |
| 27520 | 0 | 21868  | GQGGSHSQWNKP                  | 2.49 | 0.01 | 2.52 | 1.20 | 0.22 | 0.28 |
| 27521 | 0 | 21868  | GQGGSHSQWNKP                  | 2.49 | 0.01 | 2.52 | 1.20 | 0.22 | 0.28 |
| 27522 | 0 | 21869  | GQGGSHSQWNKPSKPK<br>TNMK      | 2.97 | 0.01 | 2.52 | 1.20 | 0.22 | 0.28 |
| 27523 | 0 | 21876  | GQGPQAPQGPQAPQG<br>PGAPQGPQAP | 3.25 | 0.01 | 3.33 | 1.81 | 0.22 | 0.28 |
| 27524 | 0 | 78986  | GQGPTKEDDYVFEAGKK<br>YHF      | 2.94 | 0.01 | 2.84 | 0.44 | 0.85 | 0.28 |
| 27525 | 0 | 113462 | GQGQQAQQPGQGQQ                | 2.68 | 0.01 | 1.86 | 0.44 | 1.23 | 0.85 |
| 27526 | 0 | 113463 | GQGQQGQQPGQGQQ                | 2.68 | 0.01 | 1.86 | 0.44 | 1.23 | 0.85 |
| 27527 | 0 | 113466 | GQGQQPGQGQQGQQ                | 2.68 | 0.01 | 1.86 | 0.44 | 1.23 | 0.85 |
| 27528 | 0 | 113467 | GQGQQPGQLQQPAQ                | 2.69 | 0.01 | 1.86 | 0.44 | 1.23 | 0.85 |
| 27529 | 0 | 113468 | GQGQQPGQWQQPGQ                | 2.69 | 0.01 | 1.86 | 0.44 | 1.23 | 0.85 |
| 27530 | 0 | 21879  | GQGVFKEVKA                    | 2.34 | 0.01 | 3.16 | 0.68 | 0.22 | 0.28 |
| 27531 | 0 | 21879  | GQGVFKEVKA                    | 2.34 | 0.01 | 3.16 | 0.68 | 0.22 | 0.28 |
| 27532 | 0 | 106474 | GQGWVDHFAD                    | 2.32 | 0.01 | 2.75 | 0.44 | 1.23 | 0.85 |
| 27533 | 0 | 21881  | GQHGHMHG                      | 2.18 | 0.01 | 1.66 | 0.44 | 0.85 | 0.28 |
| 27534 | 0 | 21881  | GQHGHMHG                      | 2.18 | 0.01 | 1.66 | 2.43 | 0.22 | 0.28 |
| 27535 | 0 | 21881  | GQHGHMHG                      | 2.18 | 0.01 | 1.66 | 1.20 | 0.22 | 0.28 |
| 27536 | 0 | 113469 | GQHGGQPGQGQQGQ                | 2.69 | 0.01 | 1.86 | 0.44 | 1.23 | 0.85 |
| 27537 | 0 | 21883  | GQHPAKSM                      | 2.10 | 0.01 | 2.40 | 2.43 | 0.22 | 0.28 |
| 27538 | 0 | 302592 | GQHRHDTDTEDSTKN               | 2.68 | 0.01 | 1.61 | 0.44 | 0.85 | 1.28 |
| 27539 | 0 | 238541 | GQHRLWVRN                     | 2.21 | 0.01 | 2.14 | 2.65 | 0.22 | 0.85 |
| 27540 | 0 | 99294  | GQHSRRERAGQEEEN               | 2.70 | 0.01 | 2.16 | 0.44 | 1.23 | 1.48 |
| 27541 | 0 | 21887  | GQICYGRDAYLCFL                | 2.69 | 0.01 | 0.90 | 0.44 | 1.41 | 0.28 |
| 27542 | 0 | 21888  | GQIFRSASPIPR                  | 2.57 | 0.01 | 2.04 | 0.44 | 0.85 | 1.57 |
| 27543 | 0 | 117888 | GQILDILVSRSLK                 | 2.56 | 0.01 | 0.78 | 0.44 | 1.13 | 0.28 |
| 27544 | 0 | 117888 | GQILDILVSRSLK                 | 2.56 | 0.01 | 0.78 | 0.44 | 1.13 | 0.28 |
| 27545 | 0 | 117888 | GQILDILVSRSLK                 | 2.56 | 0.01 | 0.78 | 0.44 | 1.41 | 0.28 |
| 27546 | 0 | 107422 | GQIPLRFNGEVKNPGSV<br>V        | 2.82 | 0.01 | 0.78 | 1.12 | 0.22 | 0.85 |
| 27547 | 0 | 117509 | GQIPPGAM                      | 2.14 | 0.01 | 0.78 | 0.68 | 0.22 | 0.28 |
| 27548 | 0 | 117509 | GQIPPGAM                      | 2.14 | 0.01 | 0.78 | 0.68 | 0.22 | 0.85 |
| 27549 | 0 | 117509 | GQIPPGAM                      | 2.14 | 0.01 | 0.78 | 0.68 | 0.22 | 0.28 |
| 27550 | 0 | 117509 | GQIPPGAM                      | 2.14 | 0.01 | 0.78 | 1.20 | 0.22 | 0.28 |

|       |   |        |                                |      |      |      |      |      |      |
|-------|---|--------|--------------------------------|------|------|------|------|------|------|
| 27551 | 0 | 117509 | GQIPPGAM                       | 2.14 | 0.01 | 0.78 | 0.44 | 1.13 | 0.28 |
| 27552 | 0 | 117509 | GQIPPGAM                       | 2.14 | 0.01 | 0.78 | 0.44 | 1.13 | 0.28 |
| 27553 | 0 | 117509 | GQIPPGAM                       | 2.14 | 0.01 | 0.78 | 0.44 | 1.41 | 0.28 |
| 27554 | 0 | 144657 | GQITVDMMYG                     | 2.31 | 0.01 | 0.78 | 0.44 | 1.13 | 0.28 |
| 27555 | 0 | 21893  | GQIVGGVY                       | 2.16 | 0.01 | 1.72 | 0.44 | 0.85 | 0.28 |
| 27556 | 0 | 78987  | GQIVGGVYLLPRRG                 | 2.70 | 0.01 | 3.81 | 0.44 | 0.85 | 0.28 |
| 27557 | 0 | 103946 | GQKAKSNPNRPLVPR<br>NPCR        | 2.96 | 0.01 | 3.72 | 0.44 | 0.85 | 0.28 |
| 27558 | 0 | 115271 | GQKGRGSRG                      | 2.27 | 0.01 | 2.19 | 1.12 | 0.22 | 1.27 |
| 27559 | 0 | 115271 | GQKGRGSRG                      | 2.27 | 0.01 | 2.19 | 1.12 | 0.22 | 1.27 |
| 27560 | 0 | 115271 | GQKGRGSRG                      | 2.27 | 0.01 | 2.19 | 1.12 | 0.22 | 0.85 |
| 27561 | 0 | 115271 | GQKGRGSRG                      | 2.27 | 0.01 | 2.19 | 1.12 | 0.22 | 1.48 |
| 27562 | 0 | 156878 | GQKKKCVRDCLPAT                 | 2.57 | 0.01 | 0.90 | 2.74 | 0.22 | 0.85 |
| 27563 | 0 | 21900  | GQKLVFTQAA                     | 2.29 | 4.63 | 2.70 | 0.44 | 0.85 | 0.28 |
| 27564 | 0 | 131896 | GQKPLSTWDNSPLR                 | 2.66 | 0.01 | 0.78 | 0.44 | 1.13 | 0.85 |
| 27565 | 0 | 517322 | GQKTDDMLNSNDMIK                | 2.68 | 0.01 | 2.24 | 0.44 | 1.41 | 1.28 |
| 27566 | 0 | 181991 | GQKTEKEPLSDSDEESVI<br>SS       | 2.94 | 0.01 | 3.89 | 2.13 | 1.74 | 0.28 |
| 27567 | 0 | 21902  | GQKVHPNGIRLGIVKPW<br>NSTW      | 2.99 | 0.01 | 3.63 | 0.68 | 0.22 | 2.35 |
| 27568 | 0 | 21902  | GQKVHPNGIRLGIVKPW<br>NSTW      | 2.99 | 0.01 | 3.63 | 0.68 | 0.22 | 0.28 |
| 27569 | 0 | 79558  | GQLEVQVPPDPGDLVEY<br>IMN       | 2.96 | 0.01 | 2.85 | 0.44 | 1.59 | 0.28 |
| 27570 | 0 | 161229 | GQLFTFSPRRHWTTQD<br>CNCS       | 2.91 | 0.01 | 2.45 | 0.68 | 0.22 | 0.28 |
| 27571 | 0 | 161229 | GQLFTFSPRRHWTTQD<br>CNCS       | 2.91 | 0.01 | 2.45 | 0.68 | 0.22 | 1.27 |
| 27572 | 0 | 227222 | GQLGEDNEILLGTHRME<br>T         | 2.85 | 0.01 | 4.63 | 1.12 | 0.22 | 0.85 |
| 27573 | 0 | 21911  | GQLQAVNPNAGNRGQ                | 2.72 | 0.01 | 2.24 | 1.12 | 0.22 | 0.85 |
| 27574 | 0 | 21912  | GQLSDHPHALSSSSSHA<br>EPR       | 2.95 | 0.01 | 2.75 | 0.44 | 0.85 | 0.85 |
| 27575 | 0 | 164242 | GQMLSGSNMQLP                   | 2.52 | 0.01 | 0.90 | 1.20 | 0.22 | 1.39 |
| 27576 | 0 | 131897 | GQMPNNQSINSKVSG                | 2.70 | 0.01 | 0.78 | 0.44 | 1.13 | 0.85 |
| 27577 | 0 | 21917  | GQMQPVKAFKIHNKIW<br>VIPERDTFTN | 3.17 | 0.01 | 2.08 | 0.68 | 0.22 | 0.28 |
| 27578 | 0 | 21917  | GQMQPVKAFKIHNKIW<br>VIPERDTFTN | 3.17 | 0.01 | 2.08 | 0.68 | 0.22 | 0.28 |
| 27579 | 0 | 21917  | GQMQPVKAFKIHNKIW<br>VIPERDTFTN | 3.17 | 0.01 | 2.08 | 0.68 | 0.22 | 1.34 |
| 27580 | 0 | 21918  | GQMRPDNSKP                     | 2.29 | 0.01 | 1.75 | 0.68 | 0.22 | 0.28 |
| 27581 | 0 | 21918  | GQMRPDNSKP                     | 2.29 | 0.01 | 1.75 | 0.68 | 0.22 | 0.28 |
| 27582 | 0 | 21919  | GQNCGY                         | 1.91 | 0.01 | 1.96 | 0.44 | 0.85 | 0.28 |

|       |   |        |                                                         |      |      |      |      |      |      |
|-------|---|--------|---------------------------------------------------------|------|------|------|------|------|------|
| 27583 | 0 | 92857  | GQNGERITSK<br>GQNLSTSNPLGFFPDHQ                         | 2.30 | 0.01 | 2.67 | 2.00 | 0.22 | 0.28 |
| 27584 | 0 | 153258 | LDPAFRANTANPDWDF<br>NPN<br>GQNLSTSNPLGFFPDHQ            | 3.55 | 0.01 | 2.08 | 0.68 | 0.22 | 2.02 |
| 27585 | 0 | 153258 | LDPAFRANTANPDWDF<br>NPN<br>GQNLSTSNPLGFFPDHQ            | 3.55 | 0.01 | 2.08 | 0.68 | 0.22 | 0.28 |
| 27586 | 0 | 153258 | LDPAFRANTANPDWDF<br>NPN<br>GQNLSTSNPLGFFPDHQ            | 3.55 | 0.01 | 2.08 | 0.68 | 0.22 | 1.34 |
| 27587 | 0 | 153258 | LDPAFRANTANPDWDF<br>NPN<br>GQNLSTSNPLGFFPDHQ            | 3.55 | 0.01 | 2.08 | 0.68 | 0.22 | 0.28 |
| 27588 | 0 | 153258 | LDPAFRANTANPDWDF<br>NPN<br>GQNLSTSNPLGFFPDHQ            | 3.55 | 0.01 | 2.08 | 0.68 | 0.22 | 0.28 |
| 27589 | 0 | 153258 | LDPAFRANTANPDWDF<br>NPN<br>GQNLSTSNPLGFFPDHQ            | 3.55 | 0.01 | 2.08 | 0.68 | 0.22 | 0.28 |
| 27590 | 0 | 21922  | LDPAFRANTANPDWDF<br>NPNKDTWP<br>GQNLSTSNPLGFFPDHQ       | 3.67 | 0.01 | 2.71 | 0.68 | 0.22 | 0.28 |
| 27591 | 0 | 153259 | LDPAFRANTANPDWDF<br>NPNKDTWPDANKVG<br>GQNLSTSNPLGFFPDHQ | 3.81 | 0.01 | 2.08 | 0.68 | 0.22 | 0.28 |
| 27592 | 0 | 153259 | LDPAFRANTANPDWDF<br>NPNKDTWPDANKVG<br>GQNLSTSNPLGFFPDHQ | 3.81 | 0.01 | 2.08 | 0.68 | 0.22 | 0.28 |
| 27593 | 0 | 153259 | LDPAFRANTANPDWDF<br>NPNKDTWPDANKVG<br>GQNLSTSNPLGFFPDHQ | 3.81 | 0.01 | 2.08 | 0.68 | 0.22 | 1.34 |
| 27594 | 0 | 153259 | LDPAFRANTANPDWDF<br>NPNKDTWPDANKVG<br>GQNLSTSNPLGFFPDHQ | 3.81 | 0.01 | 2.08 | 0.68 | 0.22 | 0.28 |
| 27595 | 0 | 153259 | LDPAFRANTANPDWDF<br>NPNKDTWPDANKVG<br>GQNLSTSNPLGFFPDHQ | 3.81 | 0.01 | 2.08 | 0.68 | 0.22 | 2.02 |
| 27596 | 0 | 153259 | LDPAFRANTANPDWDF<br>NPNKDTWPDANKVG<br>GQNLSTSNPLGFFPDHQ | 3.81 | 0.01 | 2.08 | 0.68 | 0.22 | 0.28 |
| 27597 | 0 | 137882 | GQNVLSAD                                                | 2.10 | 0.01 | 2.21 | 0.44 | 0.85 | 0.28 |



|       |   |        |                  |      |      |      |      |      |      |
|-------|---|--------|------------------|------|------|------|------|------|------|
| 27598 | 0 | 137882 | GQNVLSAD         | 2.10 | 0.01 | 2.21 | 0.44 | 0.85 | 0.28 |
| 27599 | 0 | 82843  | GQPAADHYYSKVT    | 2.49 | 0.01 | 2.14 | 3.44 | 0.22 | 0.85 |
| 27600 | 0 | 82843  | GQPAADHYYSKVT    | 2.49 | 0.01 | 2.14 | 3.44 | 0.22 | 0.28 |
| 27601 | 0 | 147752 | GQPAVRNER        | 2.21 | 0.01 | 3.24 | 0.68 | 0.22 | 0.28 |
| 27602 | 0 | 21927  | GQPAVRNERA       | 2.31 | 0.01 | 3.05 | 0.68 | 0.22 | 0.28 |
| 27603 | 0 | 21927  | GQPAVRNERA       | 2.31 | 0.01 | 3.05 | 0.68 | 0.22 | 0.28 |
| 27604 | 0 | 21928  | GQPAVRNERATGS    | 2.54 | 0.01 | 3.05 | 0.68 | 0.22 | 0.85 |
| 27605 | 0 | 21928  | GQPAVRNERATGS    | 2.54 | 0.01 | 3.05 | 0.68 | 0.22 | 0.85 |
| 27606 | 0 | 21928  | GQPAVRNERATGS    | 2.54 | 0.01 | 3.05 | 0.68 | 0.22 | 0.28 |
| 27607 | 0 | 21928  | GQPAVRNERATGS    | 2.54 | 0.01 | 3.05 | 0.68 | 0.22 | 1.34 |
| 27608 | 0 | 21928  | GQPAVRNERATGS    | 2.54 | 0.01 | 3.05 | 0.68 | 0.22 | 1.34 |
| 27609 | 0 | 21928  | GQPAVRNERATGS    | 2.54 | 0.01 | 3.05 | 1.12 | 0.22 | 0.28 |
| 27610 | 0 | 21928  | GQPAVRNERATGS    | 2.54 | 0.01 | 3.05 | 1.12 | 0.22 | 0.28 |
| 27611 | 0 | 91407  | GQPAVRNERATGSGN  | 2.69 | 0.01 | 3.05 | 1.20 | 0.22 | 0.28 |
| 27612 | 0 | 91407  | GQPAVRNERATGSGN  | 2.69 | 0.01 | 3.05 | 1.20 | 0.22 | 0.28 |
| 27613 | 0 | 119584 | GQPENNYK         | 2.11 | 0.01 | 0.78 | 0.44 | 1.93 | 0.28 |
| 27614 | 0 | 21930  | GQPGPSGAAQGQVISN | 2.78 | 0.01 | 3.85 | 0.68 | 0.22 | 0.85 |
| 27615 | 0 | 21930  | GQPGPSGAAQGQVISN | 2.78 | 0.01 | 3.85 | 0.68 | 0.22 | 0.28 |
| 27616 | 0 | 21930  | GQPGPSGAAQGQVISN | 2.78 | 0.01 | 3.85 | 0.68 | 0.22 | 0.85 |
| 27617 | 0 | 21930  | GQPGPSGAAQGQVISN | 2.78 | 0.01 | 3.85 | 0.68 | 0.22 | 0.28 |
| 27618 | 0 | 189227 | GQPHGGGW         | 2.15 | 0.01 | 1.75 | 2.19 | 0.22 | 1.66 |
| 27619 | 0 | 177075 | GQPHGGGWG        | 2.27 | 0.01 | 1.75 | 2.19 | 0.22 | 0.85 |
| 27620 | 0 | 228237 | GQPHGGSWG        | 2.26 | 0.01 | 1.75 | 2.19 | 0.22 | 0.85 |
| 27621 | 0 | 123259 | GQPPYMPP         | 2.13 | 0.01 | 0.78 | 1.20 | 0.22 | 0.28 |
| 27622 | 0 | 123259 | GQPPYMPP         | 2.13 | 0.01 | 0.78 | 0.44 | 1.13 | 0.28 |
| 27623 | 0 | 21933  | GQPQAQGDGANA     | 2.53 | 0.01 | 3.12 | 1.20 | 0.22 | 1.57 |
| 27624 | 0 | 21933  | GQPQAQGDGANA     | 2.53 | 0.01 | 3.12 | 1.20 | 0.22 | 1.48 |
| 27625 | 0 | 193467 | GQPQGGPYP        | 2.27 | 0.01 | 2.51 | 0.44 | 2.39 | 0.28 |
| 27626 | 0 | 193467 | GQPQGGPYP        | 2.27 | 0.01 | 2.51 | 0.44 | 2.39 | 0.28 |
| 27627 | 0 | 109227 | GQPREPQ          | 2.04 | 0.01 | 0.78 | 0.44 | 1.13 | 0.28 |
| 27628 | 0 | 119585 | GQPREPQV         | 2.14 | 0.01 | 0.78 | 0.44 | 1.93 | 0.28 |
| 27629 | 0 | 112141 | GQPYIDVGTEKERIQ  | 2.74 | 0.01 | 2.19 | 2.04 | 0.22 | 2.97 |
| 27630 | 0 | 112141 | GQPYIDVGTEKERIQ  | 2.74 | 0.01 | 2.19 | 2.04 | 0.22 | 2.97 |
| 27631 | 0 | 177076 | GQQGLNGDS        | 2.25 | 0.01 | 0.90 | 2.13 | 0.22 | 0.28 |
| 27632 | 0 | 177076 | GQQGLNGDS        | 2.25 | 0.01 | 0.90 | 2.13 | 0.22 | 1.48 |
| 27633 | 0 | 177076 | GQQGLNGDS        | 2.25 | 0.01 | 0.90 | 2.13 | 0.22 | 1.48 |
| 27634 | 0 | 113474 | GQQGQQPGQQQPG    | 2.69 | 0.01 | 1.86 | 0.44 | 1.23 | 0.85 |
| 27635 | 0 | 113475 | GQQGQQVGGQQQAQ   | 2.69 | 0.01 | 1.86 | 0.44 | 1.23 | 0.85 |
| 27636 | 0 | 21938  | GQQKQLLPRW       | 2.32 | 0.01 | 3.16 | 0.68 | 0.22 | 0.28 |

|       |   |        |                           |      |      |      |      |      |      |
|-------|---|--------|---------------------------|------|------|------|------|------|------|
| 27637 | 0 | 21938  | GQQKQLLPBW                | 2.32 | 0.01 | 3.16 | 0.68 | 0.22 | 0.28 |
| 27638 | 0 | 113479 | GQQPGQAQQGQQPG            | 2.69 | 0.01 | 1.86 | 0.44 | 1.23 | 0.85 |
| 27639 | 0 | 113480 | GQQPGQGQPGYYPT            | 2.68 | 0.01 | 1.86 | 0.44 | 1.23 | 0.85 |
| 27640 | 0 | 113481 | GQQPGQGQGGQQPG            | 2.69 | 0.01 | 1.86 | 0.44 | 1.23 | 0.85 |
| 27641 | 0 | 125426 | GQQQPFPPQ                 | 2.27 | 0.01 | 1.86 | 0.68 | 0.22 | 2.75 |
| 27642 | 0 | 125426 | GQQQPFPPQ                 | 2.27 | 0.01 | 1.86 | 0.68 | 0.22 | 2.98 |
| 27643 | 0 | 180107 | GQQQQQQQQQQG              | 2.55 | 0.01 | 0.90 | 0.68 | 0.22 | 2.49 |
| 27644 | 0 | 180107 | GQQQQQQQQQQG              | 2.55 | 0.01 | 0.90 | 0.68 | 0.22 | 2.49 |
| 27645 | 0 | 180107 | GQQQQQQQQQQG              | 2.55 | 0.01 | 0.90 | 0.68 | 0.22 | 1.66 |
| 27646 | 0 | 188216 | GQRDAADPDT                | 2.32 | 0.01 | 2.92 | 0.68 | 0.22 | 0.85 |
| 27647 | 0 | 188216 | GQRDAADPDT                | 2.32 | 0.01 | 2.92 | 3.37 | 0.22 | 0.85 |
| 27648 | 0 | 95423  | GQRHSDEHHDDSLPH<br>PQ     | 2.87 | 0.01 | 2.43 | 0.44 | 1.59 | 0.28 |
| 27649 | 0 | 181101 | GQRPFGYGGGRASY            | 2.70 | 0.01 | 0.78 | 0.44 | 1.13 | 0.28 |
| 27650 | 0 | 140859 | GQRRADAVKGYL              | 2.47 | 0.01 | 3.01 | 1.12 | 0.22 | 0.28 |
| 27651 | 0 | 157340 | GQRREFQQRHQ               | 2.51 | 0.01 | 3.65 | 0.44 | 1.23 | 0.85 |
| 27652 | 0 | 115059 | GQRRIVPGHPIRALVG<br>DEA   | 3.01 | 0.01 | 2.19 | 2.04 | 0.22 | 0.28 |
| 27653 | 0 | 115059 | GQRRIVPGHPIRALVG<br>DEA   | 3.01 | 0.01 | 2.19 | 2.04 | 0.22 | 0.28 |
| 27654 | 0 | 115059 | GQRRIVPGHPIRALVG<br>DEA   | 3.01 | 0.01 | 2.19 | 2.04 | 0.22 | 0.28 |
| 27655 | 0 | 115059 | GQRRIVPGHPIRALVG<br>DEA   | 3.01 | 0.01 | 2.19 | 2.04 | 0.22 | 0.28 |
| 27656 | 0 | 115059 | GQRRIVPGHPIRALVG<br>DEA   | 3.01 | 0.01 | 2.19 | 2.04 | 0.22 | 0.28 |
| 27657 | 0 | 21950  | GQRTKTNRTRKGPRKP<br>IKK   | 2.98 | 0.01 | 2.24 | 0.68 | 0.22 | 0.28 |
| 27658 | 0 | 21951  | GQRVEF                    | 1.88 | 0.01 | 1.96 | 0.44 | 0.85 | 0.28 |
| 27659 | 0 | 21953  | GQRVEFLVQAWKSK            | 2.59 | 0.01 | 2.41 | 0.44 | 0.85 | 0.28 |
| 27660 | 0 | 21953  | GQRVEFLVQAWKSK            | 2.59 | 0.01 | 2.41 | 0.44 | 0.85 | 0.28 |
| 27661 | 0 | 21953  | GQRVEFLVQAWKSK            | 2.59 | 0.01 | 2.41 | 0.44 | 1.41 | 0.28 |
| 27662 | 0 | 450644 | GQSEKHL                   | 1.99 | 0.01 | 0.90 | 0.44 | 1.41 | 1.39 |
| 27663 | 0 | 21956  | GQSFQNTWEGQAASA           | 2.70 | 0.01 | 2.59 | 0.68 | 0.22 | 0.28 |
| 27664 | 0 | 21956  | GQSFQNTWEGQAASA           | 2.70 | 0.01 | 2.59 | 1.12 | 0.22 | 0.28 |
| 27665 | 0 | 112142 | GQSPKLL                   | 1.99 | 0.01 | 0.78 | 0.44 | 1.13 | 0.28 |
| 27666 | 0 | 103947 | GQSQQITDSIQTGLH           | 2.72 | 0.01 | 3.00 | 1.20 | 0.22 | 0.85 |
| 27667 | 0 | 144898 | GQSRGQSRG                 | 2.28 | 4.23 | 2.43 | 0.44 | 1.13 | 1.27 |
| 27668 | 0 | 144899 | GQSRGQSRGRGRGRGR<br>GRGKG | 3.08 | 4.15 | 2.43 | 0.44 | 1.13 | 0.28 |
| 27669 | 0 | 144899 | GQSRGQSRGRGRGRGR<br>GRGKG | 3.08 | 4.15 | 2.43 | 0.44 | 1.13 | 0.28 |

|       |   |        |                           |      |      |      |      |      |      |
|-------|---|--------|---------------------------|------|------|------|------|------|------|
| 27670 | 0 | 144899 | GQSRGQSRGRGRGRGR<br>GRGKG | 3.08 | 4.15 | 2.43 | 0.44 | 1.13 | 0.28 |
| 27671 | 0 | 144899 | GQSRGQSRGRGRGRGR<br>GRGKG | 3.08 | 4.15 | 2.43 | 0.44 | 1.13 | 1.27 |
| 27672 | 0 | 144899 | GQSRGQSRGRGRGRGR<br>GRGKG | 3.08 | 4.15 | 2.43 | 0.44 | 1.13 | 2.02 |
| 27673 | 0 | 144899 | GQSRGQSRGRGRGRGR<br>GRGKG | 3.08 | 4.15 | 2.43 | 0.44 | 1.74 | 2.02 |
| 27674 | 0 | 130868 | GQSYPPRPDTSLHVT           | 2.66 | 0.01 | 0.90 | 0.44 | 1.13 | 0.28 |
| 27675 | 0 | 130868 | GQSYPPRPDTSLHVT           | 2.66 | 0.01 | 0.90 | 0.44 | 1.13 | 1.66 |
| 27676 | 0 | 130868 | GQSYPPRPDTSLHVT           | 2.66 | 0.01 | 0.90 | 0.44 | 1.13 | 1.66 |
| 27677 | 0 | 130868 | GQSYPPRPDTSLHVT           | 2.66 | 0.01 | 0.90 | 0.44 | 1.13 | 1.66 |
| 27678 | 0 | 130868 | GQSYPPRPDTSLHVT           | 2.66 | 0.01 | 0.90 | 0.44 | 1.13 | 1.27 |
| 27679 | 0 | 21963  | GQTITPADKSDKGFV           | 2.67 | 0.01 | 3.50 | 2.22 | 0.22 | 0.28 |
| 27680 | 0 | 225743 | GQTRVPQVYVLAPHP           | 2.68 | 0.01 | 3.28 | 0.44 | 0.22 | 0.85 |
| 27681 | 0 | 21965  | GQTPQVETEDTKEP            | 2.71 | 0.01 | 2.24 | 1.15 | 0.22 | 0.85 |
| 27682 | 0 | 422369 | GQVCTKHRRKG               | 2.41 | 0.01 | 0.78 | 2.37 | 0.22 | 0.28 |
| 27683 | 0 | 422369 | GQVCTKHRRKG               | 2.41 | 0.01 | 0.78 | 0.68 | 0.22 | 0.28 |
| 27684 | 0 | 157341 | GQVEGRTYDAAMVA            | 2.61 | 0.01 | 3.47 | 2.49 | 0.85 | 0.28 |
| 27685 | 0 | 103948 | GQVELGGGPGAGSLQP<br>L     | 2.84 | 0.01 | 0.78 | 0.44 | 1.13 | 0.28 |
| 27686 | 0 | 103948 | GQVELGGGPGAGSLQP<br>L     | 2.84 | 0.01 | 0.78 | 0.44 | 1.41 | 0.28 |
| 27687 | 0 | 103948 | GQVELGGGPGAGSLQP<br>L     | 2.84 | 0.01 | 0.78 | 0.44 | 1.13 | 1.27 |
| 27688 | 0 | 103948 | GQVELGGGPGAGSLQP<br>L     | 2.84 | 0.01 | 0.78 | 0.44 | 1.41 | 0.28 |
| 27689 | 0 | 103948 | GQVELGGGPGAGSLQP<br>L     | 2.84 | 0.01 | 0.78 | 0.44 | 1.13 | 0.28 |
| 27690 | 0 | 103948 | GQVELGGGPGAGSLQP<br>L     | 2.84 | 0.01 | 0.78 | 0.44 | 1.41 | 0.28 |
| 27691 | 0 | 103948 | GQVELGGGPGAGSLQP<br>L     | 2.84 | 0.01 | 0.78 | 0.44 | 1.74 | 0.28 |
| 27692 | 0 | 103948 | GQVELGGGPGAGSLQP<br>L     | 2.84 | 0.01 | 0.78 | 0.44 | 1.41 | 0.28 |
| 27693 | 0 | 91410  | GQVKRDNLAPMSDGA           | 2.65 | 0.01 | 3.05 | 1.20 | 0.22 | 0.28 |
| 27694 | 0 | 91410  | GQVKRDNLAPMSDGA           | 2.65 | 0.01 | 3.05 | 1.20 | 0.22 | 0.28 |
| 27695 | 0 | 122781 | GQVRRPEMGDQA              | 2.47 | 0.01 | 0.78 | 0.44 | 0.85 | 0.85 |
| 27696 | 0 | 122781 | GQVRRPEMGDQA              | 2.47 | 0.01 | 0.78 | 0.44 | 1.13 | 0.85 |
| 27697 | 0 | 21972  | GQVSGIDENSA               | 2.40 | 0.01 | 2.30 | 1.12 | 0.22 | 0.85 |
| 27698 | 0 | 21972  | GQVSGIDENSA               | 2.40 | 0.01 | 2.30 | 0.68 | 0.22 | 0.85 |
| 27699 | 0 | 21972  | GQVSGIDENSA               | 2.40 | 0.01 | 2.30 | 0.68 | 0.22 | 0.85 |
| 27700 | 0 | 21972  | GQVSGIDENSA               | 2.40 | 0.01 | 2.30 | 0.68 | 0.22 | 0.85 |
| 27701 | 0 | 21972  | GQVSGIDENSA               | 2.40 | 0.01 | 2.30 | 1.12 | 0.22 | 0.85 |

|       |   |        |                                   |      |      |      |      |      |      |
|-------|---|--------|-----------------------------------|------|------|------|------|------|------|
| 27702 | 0 | 302888 | GQYDAADVEAGDGPD                   | 2.72 | 0.01 | 1.61 | 0.44 | 0.85 | 1.28 |
| 27703 | 0 | 119910 | GQYFAKPRNQGG                      | 2.46 | 0.01 | 0.78 | 0.44 | 0.85 | 0.85 |
| 27704 | 0 | 119910 | GQYFAKPRNQGG                      | 2.46 | 0.01 | 0.78 | 1.12 | 0.22 | 0.85 |
| 27705 | 0 | 119910 | GQYFAKPRNQGG                      | 2.46 | 0.01 | 0.78 | 1.15 | 0.22 | 0.85 |
| 27706 | 0 | 119910 | GQYFAKPRNQGG                      | 2.46 | 0.01 | 0.78 | 1.15 | 0.22 | 0.85 |
| 27707 | 0 | 119910 | GQYFAKPRNQGG                      | 2.46 | 0.01 | 0.78 | 1.15 | 0.22 | 0.85 |
| 27708 | 0 | 119910 | GQYFAKPRNQGG                      | 2.46 | 0.01 | 0.78 | 1.15 | 0.22 | 0.85 |
| 27709 | 0 | 119910 | GQYFAKPRNQGG                      | 2.46 | 0.01 | 0.78 | 1.15 | 0.22 | 0.85 |
| 27710 | 0 | 119910 | GQYFAKPRNQGG                      | 2.46 | 0.01 | 0.78 | 1.15 | 0.22 | 0.85 |
| 27711 | 0 | 119910 | GQYFAKPRNQGG                      | 2.46 | 0.01 | 0.78 | 1.15 | 0.22 | 0.85 |
| 27712 | 0 | 119910 | GQYFAKPRNQGG                      | 2.46 | 0.01 | 0.78 | 1.15 | 0.22 | 0.85 |
| 27713 | 0 | 119910 | GQYFAKPRNQGG                      | 2.46 | 0.01 | 0.78 | 1.15 | 0.22 | 0.85 |
| 27714 | 0 | 119910 | GQYFAKPRNQGG                      | 2.46 | 0.01 | 0.78 | 1.12 | 0.22 | 0.85 |
| 27715 | 0 | 21990  | GRAIN                             | 1.74 | 0.01 | 2.58 | 1.15 | 0.22 | 0.28 |
| 27716 | 0 | 21990  | GRAIN                             | 1.74 | 0.01 | 2.58 | 1.15 | 2.25 | 1.75 |
| 27717 | 0 | 21991  | GRAINRRVE                         | 2.22 | 0.01 | 2.58 | 1.15 | 2.25 | 1.75 |
| 27718 | 0 | 21992  | GRAKLREAGKPKAKHTN<br>HG           | 2.93 | 0.01 | 3.61 | 3.63 | 0.22 | 1.66 |
| 27719 | 0 | 21992  | GRAKLREAGKPKAKHTN<br>HG           | 2.93 | 0.01 | 3.61 | 3.63 | 0.22 | 1.66 |
| 27720 | 0 | 21993  | GRAKTIADGITS AEDKEY<br>GVLNNSDYIP | 3.27 | 0.01 | 3.67 | 0.68 | 0.22 | 0.85 |
| 27721 | 0 | 21993  | GRAKTIADGITS AEDKEY<br>GVLNNSDYIP | 3.27 | 0.01 | 3.67 | 0.68 | 0.22 | 0.28 |
| 27722 | 0 | 21993  | GRAKTIADGITS AEDKEY<br>GVLNNSDYIP | 3.27 | 0.01 | 3.04 | 1.12 | 0.22 | 0.28 |
| 27723 | 0 | 21993  | GRAKTIADGITS AEDKEY<br>GVLNNSDYIP | 3.27 | 0.01 | 3.04 | 1.12 | 0.22 | 0.28 |
| 27724 | 0 | 21993  | GRAKTIADGITS AEDKEY<br>GVLNNSDYIP | 3.27 | 0.01 | 3.04 | 1.81 | 0.22 | 0.28 |
| 27725 | 0 | 21993  | GRAKTIADGITS AEDKEY<br>GVLNNSDYIP | 3.27 | 0.01 | 3.04 | 1.12 | 0.22 | 0.28 |
| 27726 | 0 | 115769 | GRASDYKSAH                        | 2.31 | 0.01 | 0.78 | 1.15 | 0.22 | 0.28 |
| 27727 | 0 | 115769 | GRASDYKSAH                        | 2.31 | 0.01 | 0.78 | 1.15 | 0.22 | 0.28 |
| 27728 | 0 | 115770 | GRASDYKSAHKGFGK                   | 2.71 | 0.01 | 0.78 | 0.44 | 1.13 | 0.28 |
| 27729 | 0 | 423325 | GRASVVFVHHVVKYS                   | 2.68 | 0.01 | 2.51 | 0.44 | 2.35 | 1.28 |
| 27730 | 0 | 21996  | GRCDIKDLPKEITVATSR                | 2.82 | 0.01 | 2.45 | 0.44 | 0.85 | 0.28 |
| 27731 | 0 | 302974 | GRDAPQARKQQGRDA                   | 2.73 | 0.01 | 1.61 | 0.44 | 0.85 | 1.28 |
| 27732 | 0 | 302975 | GRDAPQARKQQGRNA                   | 2.71 | 0.01 | 1.61 | 0.44 | 0.85 | 1.28 |
| 27733 | 0 | 302976 | GRDAPQARKQQGRNE                   | 2.70 | 0.01 | 1.61 | 0.44 | 0.85 | 1.28 |
| 27734 | 0 | 123261 | GRDDREKWL                         | 2.22 | 0.01 | 2.28 | 2.00 | 0.22 | 0.28 |
| 27735 | 0 | 123262 | GRDDREKWM                         | 2.22 | 0.01 | 2.28 | 2.00 | 0.22 | 0.28 |

|       |   |        |                                                         |      |      |      |      |      |      |
|-------|---|--------|---------------------------------------------------------|------|------|------|------|------|------|
| 27736 | 0 | 102487 | GRDETTSFVLVDPLPSGY<br>QF                                | 2.94 | 0.01 | 2.39 | 0.68 | 0.22 | 0.28 |
| 27737 | 0 | 79235  | GRDGYIV                                                 | 2.03 | 0.01 | 3.85 | 1.12 | 0.22 | 0.28 |
| 27738 | 0 | 79235  | GRDGYIV                                                 | 2.03 | 0.01 | 3.85 | 3.55 | 0.22 | 0.28 |
| 27739 | 0 | 116740 | GRDPYSPSQDPYSPS                                         | 2.73 | 0.01 | 2.16 | 0.44 | 1.23 | 0.85 |
| 27740 | 0 | 517356 | GRDPYSPSQDPYSPSQD<br>PDRRDY                             | 3.19 | 0.01 | 2.16 | 1.12 | 0.22 | 1.39 |
| 27741 | 0 | 517356 | GRDPYSPSQDPYSPSQD<br>PDRRDY                             | 3.19 | 0.01 | 2.16 | 1.12 | 0.22 | 1.39 |
| 27742 | 0 | 517356 | GRDPYSPSQDPYSPSQD<br>PDRRDY                             | 3.19 | 0.01 | 2.16 | 0.44 | 1.23 | 1.39 |
| 27743 | 0 | 504102 | GRDRIMAWTVVNSIC                                         | 2.63 | 0.01 | 3.89 | 0.44 | 1.74 | 1.28 |
| 27744 | 0 | 504102 | GRDRIMAWTVVNSIC                                         | 2.63 | 0.01 | 3.89 | 0.44 | 1.74 | 1.28 |
| 27745 | 0 | 130869 | GRDRQPRL                                                | 2.14 | 0.01 | 2.19 | 1.20 | 0.22 | 0.85 |
| 27746 | 0 | 130869 | GRDRQPRL                                                | 2.14 | 0.01 | 2.19 | 1.20 | 0.22 | 0.85 |
| 27747 | 0 | 115272 | GREAADAFSPE                                             | 2.41 | 0.01 | 3.93 | 1.20 | 0.22 | 1.34 |
| 27748 | 0 | 115272 | GREAADAFSPE                                             | 2.41 | 0.01 | 3.93 | 1.20 | 0.22 | 0.28 |
| 27749 | 0 | 79236  | GREDILEQWVSGRKKLE<br>ELERDLRKLKKIKKLEED<br>NP           | 3.59 | 0.01 | 2.96 | 0.44 | 1.59 | 0.28 |
| 27750 | 0 | 79237  | GREDILEQWVSGRKKLE<br>ELERDLRKLKKIKKLEED<br>NPWLGNIKIIGK | 3.85 | 0.01 | 2.96 | 0.44 | 1.59 | 1.57 |
| 27751 | 0 | 99296  | GREGEQEWGTPGSHV                                         | 2.69 | 0.01 | 2.16 | 0.44 | 1.23 | 1.48 |
| 27752 | 0 | 22014  | GREGKDED                                                | 2.17 | 0.01 | 3.29 | 1.20 | 0.22 | 0.28 |
| 27753 | 0 | 144659 | GREGYPADGGAAGYCN<br>TE                                  | 2.86 | 0.01 | 0.90 | 1.20 | 0.22 | 0.85 |
| 27754 | 0 | 144660 | GREGYPADGGASASASA<br>S                                  | 2.89 | 0.01 | 0.90 | 1.20 | 0.22 | 0.85 |
| 27755 | 0 | 144661 | GREGYPADGGCAWPAC<br>YC                                  | 2.88 | 0.01 | 0.90 | 1.20 | 0.22 | 0.85 |
| 27756 | 0 | 144662 | GREGYPADGGDSVKIW<br>TS                                  | 2.81 | 0.01 | 0.90 | 1.20 | 0.22 | 0.85 |
| 27757 | 0 | 144663 | GREGYPADGGGCKITCF<br>L                                  | 2.80 | 0.01 | 0.90 | 1.20 | 0.22 | 0.85 |
| 27758 | 0 | 144664 | GREGYPADGGGLPDSV<br>KI                                  | 2.82 | 0.01 | 0.90 | 1.20 | 0.22 | 0.28 |
| 27759 | 0 | 144664 | GREGYPADGGGLPDSV<br>KI                                  | 2.82 | 0.01 | 0.90 | 1.20 | 0.22 | 0.28 |
| 27760 | 0 | 144664 | GREGYPADGGGLPDSV<br>KI                                  | 2.82 | 0.01 | 0.90 | 0.68 | 0.22 | 0.28 |
| 27761 | 0 | 144664 | GREGYPADGGGLPDSV<br>KI                                  | 2.82 | 0.01 | 0.90 | 0.68 | 0.22 | 0.28 |
| 27762 | 0 | 144664 | GREGYPADGGGLPDSV<br>KI                                  | 2.82 | 0.01 | 0.90 | 0.68 | 0.22 | 1.75 |

|       |   |        |                                     |      |      |      |      |      |      |
|-------|---|--------|-------------------------------------|------|------|------|------|------|------|
| 27763 | 0 | 144665 | GREGYPADGGITCFLTA<br>A              | 2.82 | 0.01 | 0.90 | 1.20 | 0.22 | 0.85 |
| 27764 | 0 | 144666 | GREGYPADGGKGSSGY<br>CA              | 2.86 | 0.01 | 0.90 | 1.20 | 0.22 | 0.85 |
| 27765 | 0 | 144667 | GREGYPADGGKIWTSET<br>N              | 2.81 | 0.01 | 0.90 | 1.20 | 0.22 | 0.85 |
| 27766 | 0 | 144668 | GREGYPADGGPACYCY<br>GL              | 2.89 | 0.01 | 0.90 | 1.20 | 0.22 | 0.85 |
| 27767 | 0 | 144669 | GREGYPADGGTECTLKK<br>G              | 2.85 | 0.01 | 0.90 | 1.20 | 0.22 | 0.85 |
| 27768 | 0 | 144670 | GREGYPADGGTSETNKC<br>G              | 2.84 | 0.01 | 0.90 | 1.20 | 0.22 | 0.85 |
| 27769 | 0 | 144671 | GREGYPADGGYCNTECT<br>L              | 2.85 | 0.01 | 0.90 | 1.20 | 0.22 | 0.85 |
| 27770 | 0 | 144672 | GREGYPADGGYCYGLPD<br>S              | 2.87 | 0.01 | 0.90 | 1.20 | 0.22 | 0.85 |
| 27771 | 0 | 22015  | GREGYPADSKGCKIT                     | 2.65 | 0.01 | 2.56 | 0.68 | 0.22 | 0.85 |
| 27772 | 0 | 22015  | GREGYPADSKGCKIT                     | 2.65 | 0.01 | 2.56 | 2.00 | 0.22 | 0.85 |
| 27773 | 0 | 22015  | GREGYPADSKGCKIT                     | 2.65 | 0.01 | 2.56 | 3.17 | 0.22 | 1.75 |
| 27774 | 0 | 22015  | GREGYPADSKGCKIT                     | 2.65 | 0.01 | 2.56 | 3.17 | 0.22 | 0.85 |
| 27775 | 0 | 104816 | GREKFTIRPHYGKEI                     | 2.69 | 0.01 | 3.13 | 1.81 | 0.22 | 0.28 |
| 27776 | 0 | 104816 | GREKFTIRPHYGKEI                     | 2.69 | 0.01 | 3.13 | 0.68 | 0.22 | 0.28 |
| 27777 | 0 | 104816 | GREKFTIRPHYGKEI                     | 2.69 | 0.01 | 3.13 | 0.68 | 0.22 | 0.28 |
| 27778 | 0 | 104816 | GREKFTIRPHYGKEI                     | 2.69 | 0.01 | 3.13 | 1.81 | 0.22 | 0.28 |
| 27779 | 0 | 22020  | GREKFTIRPHYGKEIC                    | 2.74 | 0.01 | 0.90 | 0.68 | 0.22 | 0.28 |
| 27780 | 0 | 22021  | GREKFTIRPHYGKEIPFV<br>PRADEPARKGKVH | 3.40 | 0.01 | 0.90 | 0.68 | 0.22 | 0.28 |
| 27781 | 0 | 22021  | GREKFTIRPHYGKEIPFV<br>PRADEPARKGKVH | 3.40 | 0.01 | 0.90 | 0.68 | 0.22 | 0.28 |
| 27782 | 0 | 22021  | GREKFTIRPHYGKEIPFV<br>PRADEPARKGKVH | 3.40 | 0.01 | 0.90 | 0.68 | 0.22 | 1.75 |
| 27783 | 0 | 22021  | GREKFTIRPHYGKEIPFV<br>PRADEPARKGKVH | 3.40 | 0.01 | 0.90 | 0.68 | 0.22 | 1.75 |
| 27784 | 0 | 22021  | GREKFTIRPHYGKEIPFV<br>PRADEPARKGKVH | 3.40 | 0.01 | 0.90 | 2.88 | 0.22 | 0.28 |
| 27785 | 0 | 22022  | GRENSRAEVSYVHVNG<br>AKFI            | 2.95 | 0.01 | 3.24 | 0.44 | 1.23 | 0.28 |
| 27786 | 0 | 22022  | GRENSRAEVSYVHVNG<br>AKFI            | 2.95 | 0.01 | 3.24 | 1.15 | 0.22 | 0.28 |
| 27787 | 0 | 22027  | GREVKAETRLNP                        | 2.45 | 0.01 | 3.27 | 0.68 | 0.22 | 0.85 |
| 27788 | 0 | 22027  | GREVKAETRLNP                        | 2.45 | 0.01 | 3.27 | 0.68 | 0.22 | 0.85 |
| 27789 | 0 | 22027  | GREVKAETRLNP                        | 2.45 | 0.01 | 3.27 | 0.68 | 0.22 | 1.34 |
| 27790 | 0 | 22028  | GRFDEAMQDQIRQLE                     | 2.68 | 0.01 | 2.59 | 0.68 | 0.22 | 0.28 |
| 27791 | 0 | 22028  | GRFDEAMQDQIRQLE                     | 2.68 | 0.01 | 2.59 | 1.12 | 0.22 | 0.28 |
| 27792 | 0 | 22028  | GRFDEAMQDQIRQLE                     | 2.68 | 0.01 | 2.59 | 0.44 | 0.85 | 0.28 |
| 27793 | 0 | 22031  | GRFKSQDA                            | 2.10 | 0.01 | 2.21 | 1.12 | 0.22 | 0.28 |
| 27794 | 0 | 22031  | GRFKSQDA                            | 2.10 | 0.01 | 2.21 | 0.44 | 0.85 | 0.28 |

|       |   |        |                          |      |      |      |      |      |      |
|-------|---|--------|--------------------------|------|------|------|------|------|------|
| 27795 | 0 | 22032  | GRFKSQDADY               | 2.29 | 0.01 | 2.21 | 1.12 | 0.22 | 0.28 |
| 27796 | 0 | 22037  | GRFRTIVCGLFPTQ           | 2.62 | 0.01 | 2.56 | 2.69 | 0.22 | 0.28 |
| 27797 | 0 | 22039  | GRFSDALRFTL              | 2.41 | 0.01 | 0.90 | 0.68 | 0.22 | 1.66 |
| 27798 | 0 | 121349 | GRGCEVIQ                 | 2.13 | 0.01 | 0.78 | 1.12 | 0.22 | 0.28 |
| 27799 | 0 | 22042  | GRGDKQINHHWHKA           | 2.61 | 0.01 | 3.78 | 3.57 | 0.22 | 0.28 |
| 27800 | 0 | 22042  | GRGDKQINHHWHKA           | 2.61 | 0.01 | 3.78 | 3.57 | 0.22 | 0.28 |
| 27801 | 0 | 22042  | GRGDKQINHHWHKA           | 2.61 | 0.01 | 3.78 | 3.57 | 0.22 | 1.34 |
| 27802 | 0 | 107427 | GRGDSVAYGLR              | 2.42 | 0.01 | 4.45 | 1.15 | 0.22 | 1.66 |
| 27803 | 0 | 107427 | GRGDSVAYGLR              | 2.42 | 0.01 | 4.45 | 1.15 | 0.22 | 1.34 |
| 27804 | 0 | 107427 | GRGDSVAYGLR              | 2.42 | 0.01 | 4.45 | 1.15 | 0.22 | 1.34 |
| 27805 | 0 | 107428 | GRGDSVVYGLR              | 2.43 | 0.01 | 0.78 | 1.15 | 0.22 | 1.66 |
| 27806 | 0 | 107428 | GRGDSVVYGLR              | 2.43 | 0.01 | 0.78 | 1.15 | 0.22 | 1.34 |
| 27807 | 0 | 107428 | GRGDSVVYGLR              | 2.43 | 0.01 | 0.78 | 1.15 | 0.22 | 1.34 |
| 27808 | 0 | 107428 | GRGDSVVYGLR              | 2.43 | 0.01 | 0.78 | 1.15 | 0.22 | 1.75 |
| 27809 | 0 | 107428 | GRGDSVVYGLR              | 2.43 | 0.01 | 0.78 | 1.15 | 0.22 | 1.66 |
| 27810 | 0 | 167593 | GRGEGGAEDDRP             | 2.59 | 0.01 | 3.10 | 0.44 | 0.85 | 1.28 |
| 27811 | 0 | 167593 | GRGEGGAEDDRP             | 2.59 | 0.01 | 3.10 | 0.44 | 0.85 | 1.28 |
| 27812 | 0 | 167593 | GRGEGGAEDDRP             | 2.59 | 0.01 | 3.10 | 0.44 | 1.59 | 1.28 |
| 27813 | 0 | 167594 | GRGEGGEDDRRPL            | 2.59 | 0.01 | 3.18 | 0.44 | 0.85 | 1.28 |
| 27814 | 0 | 167594 | GRGEGGEDDRRPL            | 2.59 | 0.01 | 3.18 | 0.44 | 0.85 | 1.28 |
| 27815 | 0 | 167594 | GRGEGGEDDRRPL            | 2.59 | 0.01 | 3.18 | 0.44 | 1.59 | 1.28 |
| 27816 | 0 | 238551 | GRGFAQRQQLDNRA           | 2.64 | 0.01 | 2.14 | 2.65 | 0.22 | 0.85 |
| 27817 | 0 | 238551 | GRGFAQRQQLDNRA           | 2.64 | 0.01 | 2.14 | 2.65 | 0.22 | 0.85 |
| 27818 | 0 | 109232 | GRGGAIWDRPEF             | 2.47 | 0.01 | 0.90 | 1.15 | 0.22 | 1.39 |
| 27819 | 0 | 109232 | GRGGAIWDRPEF             | 2.47 | 0.01 | 0.90 | 1.15 | 0.22 | 0.85 |
| 27820 | 0 | 22044  | GRGGIYRFVTPGER           | 2.63 | 0.01 | 1.96 | 0.44 | 0.85 | 0.28 |
| 27821 | 0 | 112144 | GRGLSLSRFSWGAEGQ<br>RPGF | 2.98 | 0.01 | 0.78 | 0.44 | 0.22 | 0.28 |
| 27822 | 0 | 133841 | GRGNBDPGGGMEKDG          | 2.71 | 0.01 | 0.78 | 0.44 | 1.13 | 0.28 |
| 27823 | 0 | 133841 | GRGNBDPGGGMEKDG          | 2.71 | 0.01 | 0.78 | 0.44 | 1.41 | 0.28 |
| 27824 | 0 | 133841 | GRGNBDPGGGMEKDG          | 2.71 | 0.01 | 0.78 | 0.44 | 1.93 | 0.28 |
| 27825 | 0 | 227226 | GRGRERARGGSRERA          | 2.75 | 0.01 | 2.48 | 0.44 | 1.59 | 0.28 |
| 27826 | 0 | 22055  | GRGRGAIDREQSAA           | 2.63 | 0.01 | 2.59 | 0.44 | 0.85 | 0.28 |
| 27827 | 0 | 117510 | GRGRGMGRGNIFQKR          | 2.72 | 4.93 | 0.78 | 0.44 | 1.13 | 0.28 |
| 27828 | 0 | 503990 | GRGRGRGEKRPRSPSSQ<br>SSS | 2.99 | 3.67 | 2.48 | 0.44 | 1.74 | 0.28 |
| 27829 | 0 | 503991 | GRGRGRGEKRPRSPSSQ<br>SSS | 2.99 | 3.97 | 2.48 | 0.44 | 1.74 | 0.28 |
| 27830 | 0 | 503992 | GRGRGRGEKRPRSPSSQ<br>SSS | 2.99 | 3.50 | 2.48 | 0.44 | 1.74 | 0.28 |
| 27831 | 0 | 503990 | GRGRGRGEKRPRSPSSQ<br>SSS | 2.99 | 3.67 | 2.48 | 0.44 | 1.74 | 0.28 |

|       |   |        |                             |      |      |      |      |      |      |
|-------|---|--------|-----------------------------|------|------|------|------|------|------|
| 27832 | 0 | 503991 | GRGRGRGEKRPRSPSSQ<br>SSS    | 2.99 | 3.97 | 2.48 | 0.44 | 1.74 | 0.28 |
| 27833 | 0 | 503992 | GRGRGRGEKRPRSPSSQ<br>SSS    | 2.99 | 3.50 | 2.48 | 0.44 | 1.74 | 0.28 |
| 27834 | 0 | 138856 | GRGRGRGR                    | 2.16 | 0.01 | 2.43 | 0.68 | 0.22 | 0.28 |
| 27835 | 0 | 117512 | GRGRGRGRGGPRR               | 2.60 | 0.01 | 0.78 | 0.44 | 1.13 | 0.85 |
| 27836 | 0 | 144901 | GRGRGRGRGRGGGRG             | 2.74 | 4.93 | 2.43 | 0.44 | 1.13 | 1.27 |
| 27837 | 0 | 22058  | GRGRGRGRGRGGGRG<br>G        | 2.79 | 4.93 | 0.90 | 0.44 | 1.74 | 0.28 |
| 27838 | 0 | 117513 | GRGRGRGRGRGGPRR             | 2.73 | 4.93 | 0.78 | 0.44 | 1.13 | 0.28 |
| 27839 | 0 | 117514 | GRGRGRGRGRGGPRR             | 2.73 | 0.01 | 0.78 | 0.44 | 1.13 | 0.28 |
| 27840 | 0 | 117514 | GRGRGRGRGRGGPRR             | 2.73 | 0.01 | 0.78 | 3.01 | 0.22 | 0.28 |
| 27841 | 0 | 128009 | GRGRGRGRGRGGRG              | 2.68 | 0.01 | 2.43 | 0.44 | 1.13 | 0.28 |
| 27842 | 0 | 117515 | GRGRGRGRGRGRG               | 2.62 | 0.01 | 0.78 | 0.44 | 1.13 | 0.85 |
| 27843 | 0 | 117516 | GRGRGRGRGRGRGGP             | 2.75 | 4.93 | 0.78 | 0.44 | 1.13 | 0.28 |
| 27844 | 0 | 117299 | GRGRGRGRGRGRGRGR<br>GRGGPRR | 3.15 | 0.01 | 0.78 | 0.44 | 1.13 | 0.28 |
| 27845 | 0 | 117299 | GRGRGRGRGRGRGRGR<br>GRGGPRR | 3.15 | 0.01 | 0.78 | 1.12 | 0.22 | 0.28 |
| 27846 | 0 | 117299 | GRGRGRGRGRGRGRGR<br>GRGGPRR | 3.15 | 0.01 | 0.78 | 0.44 | 1.13 | 0.28 |
| 27847 | 0 | 117299 | GRGRGRGRGRGRGRGR<br>GRGGPRR | 3.15 | 0.01 | 0.78 | 0.44 | 1.13 | 0.28 |
| 27848 | 0 | 117299 | GRGRGRGRGRGRGRGR<br>GRGGPRR | 3.15 | 0.01 | 0.78 | 0.44 | 1.13 | 0.28 |
| 27849 | 0 | 117299 | GRGRGRGRGRGRGRGR<br>GRGGPRR | 3.15 | 0.01 | 0.78 | 0.44 | 1.13 | 0.28 |
| 27850 | 0 | 117299 | GRGRGRGRGRGRGRGR<br>GRGGPRR | 3.15 | 0.01 | 1.75 | 2.84 | 1.13 | 0.28 |
| 27851 | 0 | 117299 | GRGRGRGRGRGRGRGR<br>GRGGPRR | 3.15 | 0.01 | 0.78 | 3.05 | 1.41 | 0.28 |
| 27852 | 0 | 433979 | GRGRMR                      | 1.92 | 0.01 | 0.90 | 2.36 | 0.22 | 1.39 |
| 27853 | 0 | 117519 | GRGTVAAAAAAT                | 2.59 | 0.01 | 0.78 | 3.05 | 1.13 | 0.85 |
| 27854 | 0 | 117519 | GRGTVAAAAAAT                | 2.59 | 0.01 | 0.78 | 3.05 | 1.13 | 1.39 |
| 27855 | 0 | 22063  | GRGYNVSSIVTMTSQ             | 2.69 | 0.01 | 2.72 | 0.44 | 0.85 | 0.28 |
| 27856 | 0 | 82850  | GRHNSESYHAGF                | 2.48 | 0.01 | 2.87 | 0.44 | 0.22 | 0.28 |
| 27857 | 0 | 82850  | GRHNSESYHAGF                | 2.48 | 0.01 | 2.90 | 0.68 | 0.22 | 0.28 |
| 27858 | 0 | 104817 | GRHSAEYYNKQYLERTR<br>AELDTA | 3.08 | 0.01 | 1.75 | 3.33 | 1.13 | 0.28 |
| 27859 | 0 | 104817 | GRHSAEYYNKQYLERTR<br>AELDTA | 3.08 | 0.01 | 1.75 | 3.33 | 1.13 | 2.12 |
| 27860 | 0 | 303157 | GRHSHDTEDEDSTKN             | 2.70 | 0.01 | 1.61 | 0.44 | 0.85 | 1.28 |



|       |   |        |                          |      |      |      |      |      |      |
|-------|---|--------|--------------------------|------|------|------|------|------|------|
| 27861 | 0 | 437780 | GRIIASYDPDNKEER          | 2.64 | 0.01 | 0.78 | 1.15 | 0.22 | 0.85 |
| 27862 | 0 | 22074  | GRIILSGKPAIIPDREALY<br>Q | 2.94 | 0.01 | 2.41 | 0.44 | 0.85 | 0.28 |
| 27863 | 0 | 22074  | GRIILSGKPAIIPDREALY<br>Q | 2.94 | 0.01 | 1.72 | 0.44 | 0.85 | 0.28 |
| 27864 | 0 | 22075  | GRIILSGKPAIIPDREVL<br>Q  | 2.92 | 0.01 | 2.41 | 0.44 | 0.85 | 0.28 |
| 27865 | 0 | 22076  | GRIILSGKPATIPDREALY<br>R | 2.95 | 0.01 | 1.96 | 0.44 | 0.85 | 0.28 |
| 27866 | 0 | 22077  | GRIILSGKPATIPDREAVL<br>Y | 2.93 | 0.01 | 1.96 | 0.44 | 0.85 | 0.28 |
| 27867 | 0 | 22078  | GRIILSGKPATIPDREVL<br>R  | 2.93 | 0.01 | 1.96 | 0.44 | 0.85 | 0.28 |
| 27868 | 0 | 22079  | GRIILSGKPATVPDREVL<br>YQ | 2.91 | 0.01 | 2.41 | 0.44 | 0.85 | 0.28 |
| 27869 | 0 | 22080  | GRIILSGKPAVIPDRELLY<br>R | 2.94 | 0.01 | 1.72 | 0.44 | 0.85 | 0.28 |
| 27870 | 0 | 22081  | GRIILSGKPAVIPDREVL<br>Q  | 2.93 | 0.01 | 1.72 | 0.44 | 0.85 | 0.28 |
| 27871 | 0 | 22082  | GRIILSGKPAVIPDREVL<br>R  | 2.95 | 0.01 | 1.72 | 0.44 | 0.85 | 0.28 |
| 27872 | 0 | 22083  | GRIILSGKPAVVPDREVL<br>YQ | 2.92 | 0.01 | 2.41 | 0.44 | 0.85 | 0.28 |
| 27873 | 0 | 22084  | GRIILSGRPAIIPDREALY<br>Q | 2.96 | 0.01 | 1.72 | 0.44 | 0.85 | 0.28 |
| 27874 | 0 | 22086  | GRIILSGRPAIIPDREVL<br>Q  | 2.94 | 0.01 | 2.41 | 0.44 | 0.85 | 0.28 |
| 27875 | 0 | 22087  | GRIILSGRPAIIPDREVL<br>R  | 2.96 | 0.01 | 1.96 | 0.44 | 0.85 | 0.28 |
| 27876 | 0 | 22088  | GRIILSGRPAIVPDRELLY<br>Q | 2.94 | 0.01 | 1.72 | 0.44 | 0.85 | 0.28 |
| 27877 | 0 | 22089  | GRIILSGRPAVIPDREVL<br>Q  | 2.95 | 0.01 | 2.41 | 0.44 | 0.85 | 0.28 |
| 27878 | 0 | 22090  | GRIILSGRPAVIPDREVL<br>R  | 2.96 | 0.01 | 1.96 | 0.44 | 0.85 | 0.28 |
| 27879 | 0 | 22091  | GRIILSGRPAVVPDREVL<br>YQ | 2.94 | 0.01 | 1.96 | 0.44 | 0.85 | 0.28 |
| 27880 | 0 | 22092  | GRIILSGRPAVVPDREVL<br>YR | 2.96 | 0.01 | 1.96 | 0.44 | 0.85 | 0.28 |
| 27881 | 0 | 22093  | GRIILSGRPVIVPDREVL<br>R  | 2.98 | 0.01 | 1.72 | 0.44 | 0.85 | 0.28 |
| 27882 | 0 | 22094  | GRIILTGKPAVIPDREVL<br>Q  | 2.93 | 0.01 | 2.41 | 0.44 | 0.85 | 0.28 |
| 27883 | 0 | 113008 | GRILDWHVANTDKKS          | 2.61 | 0.01 | 0.78 | 0.44 | 1.13 | 0.85 |
| 27884 | 0 | 303169 | GRILPDLPGGRAGRI          | 2.73 | 0.01 | 1.61 | 0.44 | 0.85 | 1.28 |
| 27885 | 0 | 22101  | GRITLTGKPAVVPDREIL<br>YQ | 2.93 | 0.01 | 1.96 | 0.44 | 0.85 | 0.28 |

|       |   |        |                                   |      |      |      |      |      |      |
|-------|---|--------|-----------------------------------|------|------|------|------|------|------|
| 27886 | 0 | 22104  | GRIVLSGKPAIIPDREVL<br>R           | 2.94 | 0.01 | 1.96 | 0.44 | 0.85 | 0.28 |
| 27887 | 0 | 22105  | GRIVLSGRPAIIPDREVL<br>R           | 2.96 | 0.01 | 1.96 | 0.44 | 0.85 | 0.28 |
| 27888 | 0 | 22106  | GRIVLSGRPAVIPDREVL<br>YQ          | 2.95 | 0.01 | 1.72 | 0.44 | 0.85 | 0.28 |
| 27889 | 0 | 22107  | GRIVLSGSPAIVPDREVL<br>YQ          | 2.95 | 0.01 | 1.72 | 0.44 | 0.85 | 0.28 |
| 27890 | 0 | 123266 | GRKHKENVKD                        | 2.31 | 0.01 | 0.78 | 0.44 | 1.13 | 0.85 |
| 27891 | 0 | 79238  | GRKIRMRCRAIDGDVTF<br>CRPKSPVYVGN  | 3.26 | 0.01 | 3.42 | 0.68 | 0.22 | 0.85 |
| 27892 | 0 | 79238  | GRKIRMRCRAIDGDVTF<br>CRPKSPVYVGN  | 3.26 | 0.01 | 3.42 | 0.68 | 0.22 | 0.28 |
| 27893 | 0 | 22110  | GRKPAR                            | 1.90 | 0.01 | 1.96 | 0.44 | 0.85 | 0.28 |
| 27894 | 0 | 119459 | GRKSAVSPA                         | 2.23 | 0.01 | 0.90 | 0.44 | 1.13 | 0.28 |
| 27895 | 0 | 141542 | GRKSFHKLDGSF                      | 2.50 | 0.01 | 0.90 | 3.06 | 0.22 | 1.39 |
| 27896 | 0 | 237739 | GRKTASFTVSSEKTILTM                | 2.83 | 0.01 | 3.19 | 0.44 | 1.74 | 0.85 |
| 27897 | 0 | 22115  | GRKTEKYS DGWTSMH<br>AEVCTQWNMSYCM | 3.31 | 0.01 | 0.90 | 1.15 | 0.22 | 1.27 |
| 27898 | 0 | 22119  | GRLDA                             | 1.74 | 0.01 | 0.78 | 0.44 | 2.39 | 0.28 |
| 27899 | 0 | 122385 | GRLEPLRKWRDDHRL                   | 2.69 | 0.01 | 0.90 | 1.15 | 0.22 | 1.39 |
| 27900 | 0 | 122386 | GRLERPSEPRLPLLA                   | 2.72 | 0.01 | 0.90 | 1.15 | 0.22 | 0.28 |
| 27901 | 0 | 22121  | GRLGIYRYVSTGER                    | 2.64 | 0.01 | 2.69 | 0.44 | 1.41 | 0.28 |
| 27902 | 0 | 22121  | GRLGIYRYVSTGER                    | 2.64 | 0.01 | 2.69 | 0.44 | 0.85 | 0.28 |
| 27903 | 0 | 22122  | GRLGTYRYVASGER                    | 2.64 | 0.01 | 2.59 | 0.44 | 0.85 | 0.28 |
| 27904 | 0 | 22122  | GRLGTYRYVASGER                    | 2.64 | 0.01 | 2.59 | 0.44 | 0.85 | 0.28 |
| 27905 | 0 | 22123  | GRLGTYRYVSSGER                    | 2.64 | 0.01 | 2.69 | 0.44 | 0.85 | 0.28 |
| 27906 | 0 | 22123  | GRLGTYRYVSSGER                    | 2.64 | 0.01 | 2.69 | 0.44 | 0.85 | 0.28 |
| 27907 | 0 | 22123  | GRLGTYRYVSSGER                    | 2.64 | 0.01 | 2.69 | 0.44 | 0.85 | 0.28 |
| 27908 | 0 | 22123  | GRLGTYRYVSSGER                    | 2.64 | 0.01 | 2.69 | 0.44 | 1.41 | 0.28 |
| 27909 | 0 | 136333 | GRLHFMFDLGKGRTKVS<br>HP           | 2.90 | 0.01 | 1.75 | 2.84 | 1.13 | 0.28 |
| 27910 | 0 | 22124  | GRLHINQRTVVAPDKE<br>LYE           | 2.89 | 0.01 | 1.96 | 0.44 | 0.85 | 0.28 |
| 27911 | 0 | 22125  | GRLHLINQRAVVAPDKE<br>VLY          | 2.91 | 0.01 | 1.96 | 0.44 | 0.85 | 0.28 |
| 27912 | 0 | 22126  | GRLHLNDQVVVTPDKE<br>LYE           | 2.90 | 0.01 | 1.96 | 0.44 | 0.85 | 0.28 |
| 27913 | 0 | 22127  | GRLHLNDRV                         | 2.23 | 0.01 | 2.69 | 0.44 | 0.85 | 0.28 |
| 27914 | 0 | 22128  | GRLHLNDRVVVAPDKE<br>LYE           | 2.91 | 0.01 | 1.96 | 0.44 | 0.85 | 0.28 |
| 27915 | 0 | 22129  | GRLHVNERAVVAPDKE<br>VLYE          | 2.94 | 0.01 | 1.96 | 0.44 | 0.85 | 0.28 |
| 27916 | 0 | 22130  | GRLHVNQRAVVAPDKE<br>VLYE          | 2.93 | 0.01 | 1.96 | 0.44 | 0.85 | 0.28 |

|       |   |        |                             |      |      |      |      |      |      |
|-------|---|--------|-----------------------------|------|------|------|------|------|------|
| 27917 | 0 | 95014  | GRLIELSQEG                  | 2.34 | 0.01 | 2.26 | 2.36 | 0.22 | 0.85 |
| 27918 | 0 | 95014  | GRLIELSQEG                  | 2.34 | 0.01 | 2.26 | 2.36 | 0.22 | 1.48 |
| 27919 | 0 | 136334 | GRLILLCVGNNT                | 2.48 | 0.01 | 3.48 | 3.70 | 0.85 | 1.34 |
| 27920 | 0 | 136334 | GRLILLCVGNNT                | 2.48 | 0.01 | 3.48 | 0.68 | 0.22 | 1.34 |
| 27921 | 0 | 22132  | GRLITV                      | 1.88 | 0.01 | 2.40 | 0.44 | 0.85 | 0.28 |
| 27922 | 0 | 22133  | GRLITVNP                    | 2.10 | 0.01 | 2.40 | 0.68 | 0.22 | 0.28 |
| 27923 | 0 | 22134  | GRLITVNPIVT                 | 2.41 | 0.01 | 2.30 | 0.68 | 0.22 | 0.28 |
| 27924 | 0 | 22134  | GRLITVNPIVT                 | 2.41 | 0.01 | 2.30 | 0.68 | 0.22 | 0.28 |
| 27925 | 0 | 22134  | GRLITVNPIVT                 | 2.41 | 0.01 | 2.30 | 0.68 | 0.22 | 0.28 |
| 27926 | 0 | 22134  | GRLITVNPIVT                 | 2.41 | 0.01 | 2.30 | 0.68 | 0.22 | 0.28 |
| 27927 | 0 | 22134  | GRLITVNPIVT                 | 2.41 | 0.01 | 2.30 | 0.68 | 0.22 | 0.28 |
| 27928 | 0 | 22134  | GRLITVNPIVT                 | 2.41 | 0.01 | 2.30 | 0.68 | 0.22 | 0.85 |
| 27929 | 0 | 22134  | GRLITVNPIVT                 | 2.41 | 0.01 | 2.30 | 0.68 | 0.22 | 0.28 |
| 27930 | 0 | 22134  | GRLITVNPIVT                 | 2.41 | 0.01 | 2.30 | 0.68 | 0.22 | 0.28 |
| 27931 | 0 | 22135  | GRLKAESTV                   | 2.18 | 0.01 | 2.51 | 0.68 | 0.22 | 0.28 |
| 27932 | 0 | 22135  | GRLKAESTV                   | 2.18 | 0.01 | 2.51 | 0.68 | 0.22 | 2.02 |
| 27933 | 0 | 167102 | GRLTTVNPIVT                 | 2.41 | 0.01 | 2.30 | 0.68 | 0.22 | 1.34 |
| 27934 | 0 | 167102 | GRLTTVNPIVT                 | 2.41 | 0.01 | 2.30 | 0.68 | 0.22 | 1.34 |
| 27935 | 0 | 167102 | GRLTTVNPIVT                 | 2.41 | 0.01 | 2.30 | 0.68 | 0.22 | 1.34 |
| 27936 | 0 | 167102 | GRLTTVNPIVT                 | 2.41 | 0.01 | 2.30 | 0.68 | 0.22 | 0.28 |
| 27937 | 0 | 167102 | GRLTTVNPIVT                 | 2.41 | 0.01 | 2.30 | 0.68 | 0.22 | 0.28 |
| 27938 | 0 | 167102 | GRLTTVNPIVT                 | 2.41 | 0.01 | 2.30 | 0.68 | 0.22 | 0.28 |
| 27939 | 0 | 167102 | GRLTTVNPIVT                 | 2.41 | 0.01 | 2.30 | 0.68 | 0.22 | 0.28 |
| 27940 | 0 | 167102 | GRLTTVNPIVT                 | 2.41 | 0.01 | 2.30 | 0.68 | 0.22 | 0.28 |
| 27941 | 0 | 22145  | GRLVLSGKPAIIPDREVL<br>R     | 2.94 | 0.01 | 1.96 | 0.44 | 0.85 | 0.28 |
| 27942 | 0 | 22147  | GRMASCRSIDKFDQGW<br>GPIT    | 2.92 | 0.01 | 3.10 | 1.81 | 0.22 | 0.28 |
| 27943 | 0 | 22149  | GRMIPKGT                    | 2.13 | 0.01 | 2.40 | 2.43 | 0.22 | 0.28 |
| 27944 | 0 | 79239  | GRNAYCN                     | 2.02 | 0.01 | 3.33 | 1.12 | 0.22 | 0.85 |
| 27945 | 0 | 123267 | GRNDREKWL                   | 2.21 | 0.01 | 2.28 | 2.00 | 0.22 | 0.28 |
| 27946 | 0 | 303264 | GRNEPQARKQQGRDA             | 2.70 | 0.01 | 1.61 | 0.44 | 0.85 | 1.28 |
| 27947 | 0 | 303265 | GRNEPQARRQQGRNE             | 2.73 | 0.01 | 1.61 | 0.44 | 0.85 | 1.28 |
| 27948 | 0 | 22152  | GRNGARPKQRRPQGL             | 2.71 | 0.01 | 2.91 | 0.44 | 0.85 | 0.28 |
| 27949 | 0 | 109234 | GRNGKQTMWSGG                | 2.46 | 0.01 | 0.90 | 1.15 | 0.22 | 1.39 |
| 27950 | 0 | 109234 | GRNGKQTMWSGG                | 2.46 | 0.01 | 0.90 | 1.15 | 0.22 | 0.85 |
| 27951 | 0 | 187659 | GRPEGLKIGAHSATSVS<br>GSFDAL | 3.07 | 0.01 | 2.14 | 1.20 | 0.22 | 0.28 |
| 27952 | 0 | 22162  | GRPGAPGGSGSGPRHR<br>DGVR    | 3.00 | 0.01 | 2.43 | 0.44 | 2.82 | 0.28 |
| 27953 | 0 | 22162  | GRPGAPGGSGSGPRHR<br>DGVR    | 3.00 | 0.01 | 2.43 | 0.44 | 2.82 | 0.28 |
| 27954 | 0 | 22162  | GRPGAPGGSGSGPRHR<br>DGVR    | 3.00 | 0.01 | 2.43 | 0.44 | 1.59 | 0.28 |

|       |   |        |                          |      |      |      |      |      |      |
|-------|---|--------|--------------------------|------|------|------|------|------|------|
| 27955 | 0 | 110622 | GRPGDAGPQGKVGPS          | 2.71 | 0.01 | 1.75 | 2.98 | 0.22 | 0.28 |
| 27956 | 0 | 109237 | GRPGEAGL                 | 2.15 | 0.01 | 1.60 | 2.55 | 2.60 | 0.28 |
| 27957 | 0 | 176810 | GRPGRRGRPGLKG            | 2.62 | 0.01 | 0.78 | 0.44 | 1.13 | 1.28 |
| 27958 | 0 | 176810 | GRPGRRGRPGLKG            | 2.62 | 0.01 | 0.78 | 0.44 | 1.13 | 1.66 |
| 27959 | 0 | 176810 | GRPGRRGRPGLKG            | 2.62 | 0.01 | 0.78 | 0.44 | 1.13 | 1.66 |
| 27960 | 0 | 176810 | GRPGRRGRPGLKG            | 2.62 | 0.01 | 0.78 | 0.44 | 1.13 | 1.66 |
| 27961 | 0 | 176810 | GRPGRRGRPGLKG            | 2.62 | 0.01 | 0.78 | 0.44 | 1.13 | 1.66 |
| 27962 | 0 | 176810 | GRPGRRGRPGLKG            | 2.62 | 0.01 | 0.78 | 0.44 | 1.13 | 1.66 |
| 27963 | 0 | 176810 | GRPGRRGRPGLKG            | 2.62 | 0.01 | 0.78 | 0.44 | 1.13 | 1.66 |
| 27964 | 0 | 176810 | GRPGRRGRPGLKG            | 2.62 | 0.01 | 0.78 | 0.44 | 1.13 | 1.66 |
| 27965 | 0 | 176810 | GRPGRRGRPGLKG            | 2.62 | 0.01 | 0.78 | 0.44 | 1.13 | 1.66 |
| 27966 | 0 | 176810 | GRPGRRGRPGLKG            | 2.62 | 0.01 | 0.78 | 0.44 | 1.13 | 1.27 |
| 27967 | 0 | 176810 | GRPGRRGRPGLKG            | 2.62 | 0.01 | 0.78 | 0.44 | 1.41 | 0.28 |
| 27968 | 0 | 176810 | GRPGRRGRPGLKG            | 2.62 | 0.01 | 0.78 | 0.44 | 1.13 | 0.28 |
| 27969 | 0 | 303305 | GRPGRVKRVKRKA            | 2.74 | 0.01 | 1.61 | 0.44 | 0.85 | 1.28 |
| 27970 | 0 | 131898 | GRPLSVQQMMQSR            | 2.69 | 0.01 | 0.78 | 0.44 | 1.13 | 0.85 |
| 27971 | 0 | 22169  | GRPSA                    | 1.74 | 0.01 | 0.78 | 0.44 | 2.39 | 0.28 |
| 27972 | 0 | 22170  | GRPVA                    | 1.74 | 0.01 | 0.78 | 0.44 | 2.39 | 0.28 |
| 27973 | 0 | 174131 | GRQAHGSEESGSGQS          | 2.73 | 0.01 | 2.30 | 2.89 | 0.22 | 0.28 |
| 27974 | 0 | 174131 | GRQAHGSEESGSGQS          | 2.73 | 0.01 | 2.30 | 2.89 | 0.22 | 0.28 |
| 27975 | 0 | 158593 | GRQAQYY                  | 2.00 | 0.01 | 0.90 | 0.44 | 1.13 | 1.39 |
| 27976 | 0 | 103235 | GRQERN DIALKTNGDKA<br>SC | 2.88 | 0.01 | 0.78 | 1.12 | 0.22 | 0.85 |
| 27977 | 0 | 181648 | GRQGKRFDEGQKFEC          | 2.72 | 0.01 | 2.86 | 2.37 | 0.22 | 1.28 |
| 27978 | 0 | 175806 | GRQLRIAGKRLEGRS          | 2.71 | 0.01 | 2.63 | 1.15 | 0.22 | 0.85 |
| 27979 | 0 | 175806 | GRQLRIAGKRLEGRS          | 2.71 | 0.01 | 2.63 | 1.15 | 0.22 | 0.85 |
| 27980 | 0 | 175806 | GRQLRIAGKRLEGRS          | 2.71 | 0.01 | 2.63 | 1.15 | 0.22 | 0.85 |
| 27981 | 0 | 175806 | GRQLRIAGKRLEGRS          | 2.71 | 0.01 | 2.63 | 1.15 | 0.22 | 0.85 |
| 27982 | 0 | 175806 | GRQLRIAGKRLEGRS          | 2.71 | 0.01 | 2.63 | 1.15 | 0.22 | 0.85 |
| 27983 | 0 | 99298  | GRQPGDYDDRRQPR           | 2.73 | 0.01 | 2.16 | 0.44 | 1.23 | 1.48 |
| 27984 | 0 | 153261 | GRQPTPLSPPLRNTH          | 2.69 | 0.01 | 2.08 | 0.68 | 0.22 | 0.28 |
| 27985 | 0 | 153261 | GRQPTPLSPPLRNTH          | 2.69 | 0.01 | 2.08 | 0.68 | 0.22 | 0.28 |
| 27986 | 0 | 157343 | GRQQHKFGQCQL             | 2.50 | 0.01 | 3.65 | 0.44 | 1.23 | 0.85 |
| 27987 | 0 | 22178  | GRQTVKENKGTRIR           | 2.64 | 0.01 | 2.56 | 2.69 | 0.22 | 0.28 |
| 27988 | 0 | 22178  | GRQTVKENKGTRIR           | 2.64 | 0.01 | 3.16 | 2.69 | 0.22 | 0.28 |
| 27989 | 0 | 22178  | GRQTVKENKGTRIR           | 2.64 | 0.01 | 3.16 | 2.69 | 0.22 | 0.28 |
| 27990 | 0 | 238555 | GRRFTHADGWFLPQA<br>ELA   | 2.89 | 0.01 | 2.14 | 2.65 | 0.22 | 0.85 |
| 27991 | 0 | 22185  | GRRGQKAKSNPNRPL          | 2.70 | 0.01 | 3.72 | 0.44 | 0.85 | 0.28 |
| 27992 | 0 | 22185  | GRRGQKAKSNPNRPL          | 2.70 | 0.01 | 3.72 | 0.44 | 0.85 | 0.28 |
| 27993 | 0 | 22185  | GRRGQKAKSNPNRPL          | 2.70 | 0.01 | 3.72 | 0.44 | 0.85 | 0.28 |
| 27994 | 0 | 22185  | GRRGQKAKSNPNRPL          | 2.70 | 0.01 | 3.72 | 0.44 | 0.85 | 0.28 |
| 27995 | 0 | 22185  | GRRGQKAKSNPNRPL          | 2.70 | 0.01 | 3.72 | 0.44 | 0.85 | 0.28 |
| 27996 | 0 | 22185  | GRRGQKAKSNPNRPL          | 2.70 | 0.01 | 3.72 | 0.44 | 0.85 | 0.28 |

|       |   |        |                                    |      |      |      |      |      |      |
|-------|---|--------|------------------------------------|------|------|------|------|------|------|
| 27997 | 0 | 22185  | GRRGQKAKSNPNRPL                    | 2.70 | 0.01 | 3.72 | 0.44 | 0.85 | 0.28 |
| 27998 | 0 | 22185  | GRRGQKAKSNPNRPL                    | 2.70 | 0.01 | 3.72 | 0.44 | 0.85 | 0.28 |
| 27999 | 0 | 79240  | GRRGQKAKSNPNRPLP<br>VPRNPCRGPS     | 3.23 | 0.01 | 3.72 | 0.44 | 0.85 | 0.28 |
| 28000 | 0 | 79240  | GRRGQKAKSNPNRPLP<br>VPRNPCRGPS     | 3.23 | 0.01 | 3.72 | 0.44 | 0.85 | 0.28 |
| 28001 | 0 | 79240  | GRRGQKAKSNPNRPLP<br>VPRNPCRGPS     | 3.23 | 0.01 | 3.72 | 0.44 | 0.85 | 1.48 |
| 28002 | 0 | 22186  | GRRGQKAKSNPNRPLP<br>VPRNPCRGPSG    | 3.27 | 0.01 | 3.72 | 0.44 | 0.85 | 0.28 |
| 28003 | 0 | 22186  | GRRGQKAKSNPNRPLP<br>VPRNPCRGPSG    | 3.27 | 0.01 | 3.72 | 0.44 | 0.85 | 0.28 |
| 28004 | 0 | 96335  | GRRLPVVI                           | 2.12 | 0.01 | 0.90 | 0.68 | 0.22 | 0.28 |
| 28005 | 0 | 158594 | GRRPFFHPVGE                        | 2.42 | 0.01 | 2.43 | 0.44 | 1.74 | 0.28 |
| 28006 | 0 | 118824 | GRRPFFHPVGEADYFEY<br>HQE           | 2.96 | 0.01 | 2.43 | 0.44 | 1.13 | 1.27 |
| 28007 | 0 | 118824 | GRRPFFHPVGEADYFEY<br>HQE           | 2.96 | 0.01 | 2.43 | 0.44 | 1.41 | 1.27 |
| 28008 | 0 | 118824 | GRRPFFHPVGEADYFEY<br>HQE           | 2.96 | 0.01 | 2.48 | 0.44 | 1.74 | 0.28 |
| 28009 | 0 | 118824 | GRRPFFHPVGEADYFEY<br>HQE           | 2.96 | 0.01 | 2.48 | 0.44 | 1.74 | 0.28 |
| 28010 | 0 | 22194  | GRRQPIPKARRPEGRTW<br>AQPGYPWP      | 3.19 | 0.01 | 1.72 | 0.44 | 0.85 | 0.28 |
| 28011 | 0 | 22194  | GRRQPIPKARRPEGRTW<br>AQPGYPWP      | 3.19 | 0.01 | 1.72 | 0.44 | 0.85 | 0.28 |
| 28012 | 0 | 128786 | GRRRGIALPANT                       | 2.48 | 0.01 | 0.78 | 0.68 | 0.22 | 1.27 |
| 28013 | 0 | 22195  | GRRRYAHPSVRYVCLPP<br>ERD           | 2.93 | 0.01 | 2.40 | 0.44 | 1.59 | 0.28 |
| 28014 | 0 | 22196  | GRRSGGSGGGFWGDR<br>VDSQPFAIPYIHPTN | 3.32 | 0.01 | 2.53 | 0.44 | 0.85 | 0.28 |
| 28015 | 0 | 22196  | GRRSGGSGGGFWGDR<br>VDSQPFAIPYIHPTN | 3.32 | 0.01 | 2.53 | 0.44 | 0.85 | 0.28 |
| 28016 | 0 | 227227 | GRRTGNADRHRDRDG<br>GDDDDDE         | 3.12 | 0.01 | 4.63 | 1.12 | 0.22 | 0.85 |
| 28017 | 0 | 22199  | GRRVGLSN                           | 2.14 | 0.01 | 2.40 | 2.43 | 0.22 | 0.28 |
| 28018 | 0 | 137409 | GRRVLVYSCRHGYELQG<br>REQ           | 2.98 | 0.01 | 0.78 | 1.20 | 0.22 | 0.28 |
| 28019 | 0 | 137409 | GRRVLVYSCRHGYELQG<br>REQ           | 2.98 | 0.01 | 0.78 | 1.20 | 0.22 | 0.28 |
| 28020 | 0 | 238556 | GRRVTQYCSHACAIP                    | 2.63 | 0.01 | 2.56 | 2.02 | 0.22 | 0.85 |
| 28021 | 0 | 141663 | GRSLEGVYVPPRRQQL                   | 2.75 | 0.01 | 1.66 | 2.55 | 0.22 | 0.28 |
| 28022 | 0 | 141663 | GRSLEGVYVPPRRQQL                   | 2.75 | 0.01 | 1.66 | 1.20 | 0.22 | 0.28 |
| 28023 | 0 | 141663 | GRSLEGVYVPPRRQQL                   | 2.75 | 0.01 | 2.86 | 2.55 | 0.22 | 0.28 |

|       |   |        |                                                  |      |      |      |      |      |      |
|-------|---|--------|--------------------------------------------------|------|------|------|------|------|------|
| 28024 | 0 | 141663 | GRSLEGVYVPPRRQQL                                 | 2.75 | 0.01 | 2.86 | 0.44 | 1.74 | 0.28 |
| 28025 | 0 | 22204  | GRSNSGRGRGAIDREQS<br>A                           | 2.89 | 0.01 | 2.59 | 0.44 | 0.85 | 0.28 |
| 28026 | 0 | 79561  | GRSPRRRTSPRRRRSQ<br>SPRRRRSQSRESQC               | 3.41 | 0.01 | 2.71 | 0.44 | 0.85 | 0.28 |
| 28027 | 0 | 22206  | GRSRVRSASAAAILE                                  | 2.70 | 0.01 | 1.66 | 1.15 | 0.22 | 0.28 |
| 28028 | 0 | 190436 | GRSSFYCLEYFPSQM                                  | 2.66 | 0.01 | 3.19 | 2.00 | 1.41 | 0.28 |
| 28029 | 0 | 181649 | GRSTNEIELSARDVL                                  | 2.66 | 0.01 | 2.86 | 2.37 | 0.22 | 1.28 |
| 28030 | 0 | 181649 | GRSTNEIELSARDVL                                  | 2.66 | 0.01 | 2.86 | 2.36 | 0.22 | 1.28 |
| 28031 | 0 | 134073 | GRTCPKPDDL<br>GRTCPKPDDLFPSTVVPL                 | 2.40 | 0.01 | 0.78 | 0.44 | 1.13 | 0.28 |
| 28032 | 0 | 135853 | KTFYEPGEEITYSCKPGY<br>VSRG<br>GRTCPKPDDLFPSTVVPL | 3.64 | 0.01 | 0.78 | 0.44 | 1.13 | 1.27 |
| 28033 | 0 | 135853 | KTFYEPGEEITYSCKPGY<br>VSRG                       | 3.64 | 0.01 | 0.78 | 0.44 | 1.13 | 1.27 |
| 28034 | 0 | 145228 | GRTDRPSA                                         | 2.12 | 0.01 | 2.40 | 3.41 | 0.22 | 0.28 |
| 28035 | 0 | 145228 | GRTDRPSA                                         | 2.12 | 0.01 | 2.40 | 3.41 | 0.22 | 0.28 |
| 28036 | 0 | 145228 | GRTDRPSA                                         | 2.12 | 0.01 | 2.40 | 1.15 | 0.22 | 0.28 |
| 28037 | 0 | 145228 | GRTDRPSA                                         | 2.12 | 0.01 | 2.40 | 1.15 | 0.22 | 0.28 |
| 28038 | 0 | 145228 | GRTDRPSA                                         | 2.12 | 0.01 | 2.40 | 1.15 | 0.22 | 0.28 |
| 28039 | 0 | 145228 | GRTDRPSA                                         | 2.12 | 0.01 | 2.40 | 1.15 | 0.22 | 0.85 |
| 28040 | 0 | 145228 | GRTDRPSA                                         | 2.12 | 0.01 | 2.40 | 1.15 | 0.22 | 0.85 |
| 28041 | 0 | 145228 | GRTDRPSA                                         | 2.12 | 0.01 | 2.40 | 1.15 | 0.22 | 1.34 |
| 28042 | 0 | 145228 | GRTDRPSA                                         | 2.12 | 0.01 | 2.40 | 1.15 | 0.22 | 1.75 |
| 28043 | 0 | 145228 | GRTDRPSA                                         | 2.12 | 0.01 | 2.40 | 1.15 | 0.22 | 1.75 |
| 28044 | 0 | 115608 | GRTELLKDAIGE                                     | 2.47 | 0.01 | 0.78 | 0.44 | 1.41 | 0.28 |
| 28045 | 0 | 115608 | GRTELLKDAIGE                                     | 2.47 | 0.01 | 0.78 | 0.44 | 1.13 | 0.28 |
| 28046 | 0 | 115608 | GRTELLKDAIGE                                     | 2.47 | 0.01 | 0.78 | 0.44 | 1.13 | 0.28 |
| 28047 | 0 | 115608 | GRTELLKDAIGE                                     | 2.47 | 0.01 | 0.78 | 0.44 | 1.13 | 0.28 |
| 28048 | 0 | 115608 | GRTELLKDAIGE                                     | 2.47 | 0.01 | 0.78 | 0.44 | 1.41 | 0.28 |
| 28049 | 0 | 113490 | GRTELLKESIGEGKVALRI<br>QN                        | 3.00 | 0.01 | 2.19 | 2.04 | 0.22 | 0.28 |
| 28050 | 0 | 113490 | GRTELLKESIGEGKVALRI<br>QN                        | 3.00 | 0.01 | 2.19 | 2.04 | 0.22 | 0.85 |
| 28051 | 0 | 109241 | GRTGPAGA                                         | 2.17 | 0.01 | 1.60 | 2.55 | 2.60 | 0.28 |
| 28052 | 0 | 174132 | GRTIIQRDNGYQPNYHA<br>VNIVGYSNAQGVDYWI            | 3.45 | 0.01 | 2.78 | 1.12 | 0.22 | 0.85 |
| 28053 | 0 | 108407 | GRTPEDNTL                                        | 2.21 | 0.01 | 0.90 | 0.44 | 1.13 | 1.39 |
| 28054 | 0 | 22217  | GRTPFII                                          | 1.99 | 0.01 | 2.14 | 0.44 | 0.85 | 0.28 |
| 28055 | 0 | 22217  | GRTPFII                                          | 1.99 | 0.01 | 2.14 | 0.44 | 0.22 | 0.28 |
| 28056 | 0 | 122105 | GRTSRTV                                          | 2.04 | 0.01 | 0.90 | 0.44 | 1.13 | 1.27 |
| 28057 | 0 | 133121 | GRTVIIEQSWGSPKVT                                 | 2.73 | 0.01 | 2.19 | 2.97 | 0.22 | 0.28 |
| 28058 | 0 | 22220  | GRTWAQPG                                         | 2.13 | 0.01 | 1.72 | 0.44 | 0.85 | 0.28 |
| 28059 | 0 | 22222  | GRTWAQPGYP                                       | 2.32 | 0.01 | 2.68 | 2.74 | 0.22 | 0.28 |

|       |   |        |                               |      |      |      |      |      |      |
|-------|---|--------|-------------------------------|------|------|------|------|------|------|
| 28060 | 0 | 22223  | GRTWAQPGYPWP                  | 2.50 | 0.01 | 2.68 | 0.44 | 0.85 | 0.28 |
| 28061 | 0 | 22223  | GRTWAQPGYPWP                  | 2.50 | 0.01 | 1.72 | 0.44 | 0.85 | 2.97 |
| 28062 | 0 | 22229  | GRVASSTQSLVSWLSQG<br>PSQK     | 3.01 | 0.01 | 4.03 | 0.44 | 0.85 | 0.28 |
| 28063 | 0 | 22230  | GRVCLR                        | 1.90 | 0.01 | 0.90 | 1.15 | 0.22 | 2.35 |
| 28064 | 0 | 22230  | GRVCLR                        | 1.90 | 0.01 | 0.90 | 3.48 | 0.22 | 0.28 |
| 28065 | 0 | 22231  | GRVFFLVRP                     | 2.24 | 0.01 | 0.90 | 1.15 | 0.22 | 1.39 |
| 28066 | 0 | 22233  | GRVGMIEMDLASG                 | 2.54 | 0.01 | 3.34 | 1.12 | 0.22 | 0.85 |
| 28067 | 0 | 22236  | GRVILSGKPAIIPDREVL<br>R       | 2.94 | 0.01 | 1.96 | 0.44 | 0.85 | 0.28 |
| 28068 | 0 | 22237  | GRVILSGKPATIPDREVL<br>YQ      | 2.92 | 0.01 | 1.72 | 0.44 | 0.85 | 0.28 |
| 28069 | 0 | 22238  | GRVILSGRPAIVPDREVL<br>YR      | 2.97 | 0.01 | 1.96 | 0.44 | 0.85 | 0.28 |
| 28070 | 0 | 303513 | GRVKRVKRKAACKGA               | 2.75 | 0.01 | 1.61 | 0.44 | 0.85 | 1.28 |
| 28071 | 0 | 77782  | GRVSARGCTFVACWKG<br>VVG       | 2.92 | 0.01 | 4.63 | 0.44 | 1.59 | 0.28 |
| 28072 | 0 | 113010 | GRVSTEVDARLSFDK               | 2.66 | 0.01 | 0.78 | 1.20 | 0.22 | 0.85 |
| 28073 | 0 | 113010 | GRVSTEVDARLSFDK               | 2.66 | 0.01 | 0.78 | 0.44 | 1.13 | 0.85 |
| 28074 | 0 | 135686 | GRVSVSQT                      | 2.14 | 0.01 | 0.78 | 0.44 | 2.35 | 0.28 |
| 28075 | 0 | 22244  | GRVVLSGKPAIIPDREVL            | 2.85 | 0.01 | 3.18 | 0.44 | 1.59 | 0.28 |
| 28076 | 0 | 22246  | GRVVLSGKPAIIPDREVL<br>YREFDEM | 3.15 | 0.01 | 1.72 | 0.44 | 1.59 | 0.28 |
| 28077 | 0 | 22247  | GRVVLSGQPAVIPDREV<br>LYQ      | 2.95 | 0.01 | 1.96 | 0.44 | 0.85 | 0.28 |
| 28078 | 0 | 22252  | GRWDEEDGEKRIPLDVA             | 2.74 | 0.01 | 2.04 | 1.15 | 0.22 | 0.28 |
| 28079 | 0 | 128010 | GRWGSQRAVNVSGGF<br>QF         | 2.82 | 0.01 | 2.40 | 2.75 | 0.22 | 0.28 |
| 28080 | 0 | 128010 | GRWGSQRAVNVSGGF<br>QF         | 2.82 | 0.01 | 2.40 | 2.75 | 0.22 | 0.85 |
| 28081 | 0 | 182149 | GRWHSTACESFLQGA               | 2.65 | 0.01 | 0.78 | 0.44 | 1.13 | 0.85 |
| 28082 | 0 | 22253  | GRWNPQPGVYPHAA                | 2.66 | 0.01 | 2.75 | 0.44 | 0.85 | 0.28 |
| 28083 | 0 | 22256  | GRYAES                        | 1.88 | 0.01 | 0.90 | 0.44 | 1.59 | 1.39 |
| 28084 | 0 | 97363  | GSAAANYT                      | 2.12 | 0.01 | 2.87 | 0.68 | 0.22 | 0.28 |
| 28085 | 0 | 97363  | GSAAANYT                      | 2.12 | 0.01 | 2.87 | 0.68 | 0.22 | 0.28 |
| 28086 | 0 | 97363  | GSAAANYT                      | 2.12 | 0.01 | 2.87 | 1.81 | 0.22 | 0.28 |
| 28087 | 0 | 149327 | GSAALKA AVDKAVAS              | 2.73 | 0.01 | 3.67 | 3.16 | 0.22 | 0.28 |
| 28088 | 0 | 157344 | GSAASPPPSGTRT                 | 2.59 | 0.01 | 3.40 | 2.49 | 0.85 | 0.28 |
| 28089 | 0 | 236538 | GSAATPLTRVSAEQW               | 2.66 | 0.01 | 3.70 | 2.13 | 0.22 | 1.28 |
| 28090 | 0 | 144319 | GSADDVVDAEVVDD                | 2.65 | 0.01 | 2.51 | 2.22 | 0.22 | 0.28 |
| 28091 | 0 | 144319 | GSADDVVDAEVVDD                | 2.65 | 0.01 | 2.51 | 2.22 | 0.22 | 0.28 |
| 28092 | 0 | 165603 | GSAFSAF                       | 2.04 | 0.01 | 0.90 | 0.44 | 1.23 | 1.39 |
| 28093 | 0 | 109245 | GSAGAPGI                      | 2.17 | 0.01 | 1.60 | 2.55 | 2.60 | 0.28 |

|       |   |        |                           |      |      |      |      |      |      |
|-------|---|--------|---------------------------|------|------|------|------|------|------|
| 28094 | 0 | 109247 | GSAGAPGIAGAPGFP           | 2.75 | 0.01 | 1.75 | 2.98 | 0.22 | 0.28 |
| 28095 | 0 | 22269  | GSAGHTTAGLVGLLTPG<br>AKQN | 3.01 | 0.01 | 2.45 | 0.44 | 0.85 | 0.28 |
| 28096 | 0 | 22269  | GSAGHTTAGLVGLLTPG<br>AKQN | 3.01 | 0.01 | 2.45 | 2.74 | 0.22 | 0.28 |
| 28097 | 0 | 22269  | GSAGHTTAGLVGLLTPG<br>AKQN | 3.01 | 0.01 | 2.45 | 1.12 | 0.22 | 0.28 |
| 28098 | 0 | 22269  | GSAGHTTAGLVGLLTPG<br>AKQN | 3.01 | 0.01 | 2.45 | 1.12 | 0.22 | 1.34 |
| 28099 | 0 | 22269  | GSAGHTTAGLVGLLTPG<br>AKQN | 3.01 | 0.01 | 2.68 | 0.44 | 0.85 | 0.28 |
| 28100 | 0 | 22271  | GSAGHTVSGFVSLLAPG<br>AKQN | 3.00 | 0.01 | 4.93 | 0.44 | 0.85 | 0.28 |
| 28101 | 0 | 167272 | GSAGPPPTGEEDTAEH<br>HHH   | 2.95 | 0.01 | 0.78 | 0.44 | 1.13 | 0.28 |
| 28102 | 0 | 22275  | GSAGRRTAGLVGLLTPG<br>AKQN | 3.01 | 0.01 | 2.45 | 0.68 | 0.22 | 1.34 |
| 28103 | 0 | 22275  | GSAGRRTAGLVGLLTPG<br>AKQN | 3.01 | 0.01 | 2.45 | 0.68 | 0.22 | 2.12 |
| 28104 | 0 | 22275  | GSAGRRTAGLVGLLTPG<br>AKQN | 3.01 | 0.01 | 2.45 | 0.68 | 0.22 | 0.28 |
| 28105 | 0 | 22280  | GSAMSRPIIHFGSDYEDR<br>YY  | 2.93 | 0.01 | 0.78 | 2.19 | 0.22 | 0.28 |
| 28106 | 0 | 22280  | GSAMSRPIIHFGSDYEDR<br>YY  | 2.93 | 0.01 | 0.78 | 2.19 | 0.22 | 0.28 |
| 28107 | 0 | 22280  | GSAMSRPIIHFGSDYEDR<br>YY  | 2.93 | 0.01 | 0.78 | 2.19 | 0.22 | 2.12 |
| 28108 | 0 | 22280  | GSAMSRPIIHFGSDYEDR<br>YY  | 2.93 | 0.01 | 0.78 | 2.19 | 0.22 | 0.85 |
| 28109 | 0 | 22280  | GSAMSRPIIHFGSDYEDR<br>YY  | 2.93 | 0.01 | 0.78 | 2.19 | 0.22 | 0.28 |
| 28110 | 0 | 22280  | GSAMSRPIIHFGSDYEDR<br>YY  | 2.93 | 0.01 | 0.78 | 2.19 | 0.22 | 2.12 |
| 28111 | 0 | 22281  | GSAMSRPLIHFGN             | 2.52 | 0.01 | 2.52 | 1.20 | 0.22 | 0.28 |
| 28112 | 0 | 22282  | GSAMSRPMIHF               | 2.39 | 0.01 | 1.75 | 2.19 | 0.22 | 1.34 |
| 28113 | 0 | 22282  | GSAMSRPMIHF               | 2.39 | 0.01 | 1.75 | 2.19 | 0.22 | 0.28 |
| 28114 | 0 | 145230 | GSASPMELLS                | 2.32 | 0.01 | 0.78 | 0.44 | 1.13 | 0.28 |
| 28115 | 0 | 78410  | GSCFEIKCTKPESCSGEA<br>V   | 2.91 | 0.01 | 3.22 | 0.44 | 1.23 | 1.27 |
| 28116 | 0 | 131455 | GSCLEEFRASPFLECH          | 2.75 | 0.01 | 0.78 | 2.97 | 0.22 | 0.28 |
| 28117 | 0 | 125428 | GSDDYVWLSRLLDLAPN<br>YRQ  | 2.94 | 0.01 | 2.76 | 0.44 | 1.13 | 0.28 |
| 28118 | 0 | 125428 | GSDDYVWLSRLLDLAPN<br>YRQ  | 2.94 | 0.01 | 2.76 | 0.44 | 0.85 | 0.28 |
| 28119 | 0 | 303740 | GSDEEDQDEDEDEGI           | 2.74 | 0.01 | 1.61 | 0.44 | 0.85 | 1.28 |



|       |   |        |                              |      |      |      |      |      |      |
|-------|---|--------|------------------------------|------|------|------|------|------|------|
|       |   |        | GSDIPEKCDTLASNCFLS           |      |      |      |      |      |      |
| 28120 | 0 | 227228 | GNFNIEKCFQCALLVEKE<br>NKNDVC | 3.69 | 0.01 | 3.28 | 0.44 | 1.59 | 0.28 |
|       |   |        | GSDIPEKCDTLASNCFLS           |      |      |      |      |      |      |
| 28121 | 0 | 227228 | GNFNIEKCFQCALLVEKE<br>NKNDVC | 3.69 | 0.01 | 3.28 | 1.15 | 0.22 | 0.28 |
| 28122 | 0 | 423667 | GSDIPITSRTRT                 | 2.51 | 0.01 | 0.90 | 2.46 | 0.22 | 1.39 |
| 28123 | 0 | 423667 | GSDIPITSRTRT                 | 2.51 | 0.01 | 0.90 | 0.44 | 1.13 | 0.28 |
| 28124 | 0 | 114843 | GSDNKTYGNK                   | 2.34 | 0.01 | 2.25 | 0.44 | 1.23 | 0.85 |
| 28125 | 0 | 114843 | GSDNKTYGNK                   | 2.34 | 0.01 | 2.25 | 0.44 | 1.23 | 0.85 |
| 28126 | 0 | 114843 | GSDNKTYGNK                   | 2.34 | 0.01 | 2.25 | 0.44 | 2.98 | 0.85 |
| 28127 | 0 | 135559 | GSDPQHYEG                    | 2.22 | 4.63 | 0.78 | 1.12 | 0.22 | 0.28 |
| 28128 | 0 | 135559 | GSDPQHYEG                    | 2.22 | 4.63 | 0.78 | 1.12 | 0.22 | 0.28 |
| 28129 | 0 | 98078  | GSDVYYAGLN                   | 2.31 | 0.01 | 3.08 | 0.68 | 0.22 | 0.28 |
| 28130 | 0 | 98078  | GSDVYYAGLN                   | 2.31 | 0.01 | 3.08 | 1.20 | 0.22 | 0.28 |
| 28131 | 0 | 177500 | GSDYEDR                      | 2.02 | 0.01 | 1.60 | 2.19 | 0.22 | 0.85 |
| 28132 | 0 | 177500 | GSDYEDR                      | 2.02 | 0.01 | 1.60 | 2.19 | 0.22 | 0.85 |
| 28133 | 0 | 177500 | GSDYEDR                      | 2.02 | 0.01 | 1.60 | 2.19 | 0.22 | 0.85 |
| 28134 | 0 | 177500 | GSDYEDR                      | 2.02 | 0.01 | 1.60 | 2.19 | 0.22 | 0.85 |
| 28135 | 0 | 135465 | GSDYEDRYREN                  | 2.50 | 0.01 | 0.78 | 2.19 | 0.22 | 1.34 |
| 28136 | 0 | 22303  | GSDYEDRYREN                  | 2.56 | 0.01 | 1.60 | 3.00 | 0.22 | 0.28 |
| 28137 | 0 | 22303  | GSDYEDRYREN                  | 2.56 | 0.01 | 1.60 | 3.00 | 0.22 | 0.28 |
| 28138 | 0 | 22303  | GSDYEDRYREN                  | 2.56 | 0.01 | 1.60 | 3.00 | 0.22 | 0.28 |
| 28139 | 0 | 22303  | GSDYEDRYREN                  | 2.56 | 0.01 | 1.60 | 3.00 | 0.22 | 0.28 |
| 28140 | 0 | 22303  | GSDYEDRYREN                  | 2.56 | 0.01 | 1.60 | 3.00 | 0.22 | 0.28 |
| 28141 | 0 | 22303  | GSDYEDRYREN                  | 2.56 | 0.01 | 1.60 | 3.00 | 0.22 | 1.48 |
| 28142 | 0 | 22303  | GSDYEDRYREN                  | 2.56 | 0.01 | 1.60 | 3.00 | 0.22 | 0.28 |
| 28143 | 0 | 22303  | GSDYEDRYREN                  | 2.56 | 0.01 | 1.60 | 3.00 | 0.22 | 0.28 |
| 28144 | 0 | 22303  | GSDYEDRYREN                  | 2.56 | 0.01 | 1.60 | 3.00 | 0.22 | 1.48 |
| 28145 | 0 | 22303  | GSDYEDRYREN                  | 2.56 | 0.01 | 1.60 | 3.00 | 0.22 | 1.48 |
| 28146 | 0 | 22303  | GSDYEDRYREN                  | 2.56 | 0.01 | 1.60 | 3.00 | 0.22 | 1.48 |
| 28147 | 0 | 135466 | GSDYEDRYRENMHRY<br>PN        | 2.87 | 0.01 | 0.78 | 2.19 | 0.22 | 0.85 |
| 28148 | 0 | 135466 | GSDYEDRYRENMHRY<br>PN        | 2.87 | 0.01 | 0.78 | 2.19 | 0.22 | 0.85 |
| 28149 | 0 | 22305  | GSDYEDRYRENMHRY<br>PNQ       | 2.91 | 0.01 | 0.78 | 2.19 | 0.22 | 0.28 |
| 28150 | 0 | 22305  | GSDYEDRYRENMHRY<br>PNQ       | 2.91 | 0.01 | 0.78 | 2.19 | 0.22 | 0.28 |
| 28151 | 0 | 22305  | GSDYEDRYRENMHRY<br>PNQ       | 2.91 | 0.01 | 0.78 | 2.19 | 0.22 | 0.28 |
| 28152 | 0 | 22305  | GSDYEDRYRENMHRY<br>PNQ       | 2.91 | 0.01 | 0.78 | 2.19 | 0.22 | 0.28 |
| 28153 | 0 | 22305  | GSDYEDRYRENMHRY<br>PNQ       | 2.91 | 0.01 | 1.60 | 2.19 | 0.22 | 1.27 |
| 28154 | 0 | 22305  | GSDYEDRYRENMHRY<br>PNQ       | 2.91 | 0.01 | 1.60 | 2.19 | 0.22 | 1.27 |

|       |   |        |                                  |      |      |      |      |      |      |
|-------|---|--------|----------------------------------|------|------|------|------|------|------|
| 28155 | 0 | 22305  | GSDYEDRYYYRENMHRY<br>PNQ         | 2.91 | 0.01 | 0.78 | 1.15 | 0.22 | 1.48 |
| 28156 | 0 | 22305  | GSDYEDRYYYRENMHRY<br>PNQ         | 2.91 | 0.01 | 0.78 | 2.19 | 0.22 | 0.28 |
| 28157 | 0 | 22305  | GSDYEDRYYYRENMHRY<br>PNQ         | 2.91 | 0.01 | 0.78 | 2.19 | 0.22 | 1.48 |
| 28158 | 0 | 22305  | GSDYEDRYYYRENMHRY<br>PNQ         | 2.91 | 0.01 | 0.78 | 2.19 | 0.22 | 0.85 |
| 28159 | 0 | 167917 | GSEGSLSSEKMNIIVFKC               | 2.74 | 0.01 | 2.75 | 0.44 | 0.85 | 2.51 |
| 28160 | 0 | 167917 | GSEGSLSSEKMNIIVFKC               | 2.74 | 0.01 | 2.75 | 0.44 | 0.85 | 2.51 |
| 28161 | 0 | 167917 | GSEGSLSSEKMNIIVFKC               | 2.74 | 0.01 | 2.75 | 0.44 | 0.85 | 2.51 |
| 28162 | 0 | 149725 | GSEKEAPSKDFYLKN                  | 2.66 | 0.01 | 3.67 | 1.12 | 0.22 | 0.28 |
| 28163 | 0 | 149726 | GSEKEAPTTDFYLKN                  | 2.63 | 0.01 | 3.67 | 1.12 | 0.22 | 0.28 |
| 28164 | 0 | 22311  | GSEKKIVSIKDFLGSENK<br>RTGALGNLKN | 3.35 | 0.01 | 3.21 | 3.14 | 0.22 | 0.28 |
| 28165 | 0 | 22311  | GSEKKIVSIKDFLGSENK<br>RTGALGNLKN | 3.35 | 0.01 | 3.21 | 3.14 | 0.22 | 0.28 |
| 28166 | 0 | 22311  | GSEKKIVSIKDFLGSENK<br>RTGALGNLKN | 3.35 | 0.01 | 3.21 | 3.14 | 0.22 | 0.28 |
| 28167 | 0 | 144320 | GSEN                             | 1.57 | 0.01 | 2.19 | 0.44 | 1.13 | 2.02 |
| 28168 | 0 | 144320 | GSEN                             | 1.57 | 0.01 | 2.19 | 0.44 | 1.13 | 1.48 |
| 28169 | 0 | 22312  | GSENKRTGALGNLKN                  | 2.71 | 0.01 | 2.80 | 1.15 | 0.22 | 1.27 |
| 28170 | 0 | 22312  | GSENKRTGALGNLKN                  | 2.71 | 0.01 | 2.80 | 1.12 | 0.22 | 1.27 |
| 28171 | 0 | 22312  | GSENKRTGALGNLKN                  | 2.71 | 0.01 | 2.80 | 1.15 | 0.22 | 1.27 |
| 28172 | 0 | 22312  | GSENKRTGALGNLKN                  | 2.71 | 0.01 | 2.80 | 1.15 | 0.22 | 1.27 |
| 28173 | 0 | 22312  | GSENKRTGALGNLKN                  | 2.71 | 0.01 | 2.80 | 1.15 | 0.22 | 0.28 |
| 28174 | 0 | 22312  | GSENKRTGALGNLKN                  | 2.71 | 0.01 | 2.80 | 1.15 | 0.22 | 0.28 |
| 28175 | 0 | 22312  | GSENKRTGALGNLKN                  | 2.71 | 0.01 | 2.80 | 0.68 | 0.22 | 0.28 |
| 28176 | 0 | 22312  | GSENKRTGALGNLKN                  | 2.71 | 0.01 | 2.80 | 0.68 | 0.22 | 0.28 |
| 28177 | 0 | 22312  | GSENKRTGALGNLKN                  | 2.71 | 0.01 | 2.80 | 1.15 | 0.22 | 0.28 |
| 28178 | 0 | 22316  | GSENSEKTTMPLW                    | 2.52 | 0.01 | 1.60 | 0.44 | 1.23 | 1.28 |
| 28179 | 0 | 22316  | GSENSEKTTMPLW                    | 2.52 | 0.01 | 1.60 | 0.44 | 1.23 | 1.28 |
| 28180 | 0 | 489568 | GSENSGKTTMPLW                    | 2.53 | 0.01 | 1.60 | 0.44 | 1.23 | 1.28 |
| 28181 | 0 | 130871 | GSESGIFTNTK                      | 2.42 | 0.01 | 0.78 | 0.68 | 0.22 | 1.34 |
| 28182 | 0 | 22321  | GSFCTQLN                         | 2.10 | 0.01 | 2.45 | 0.44 | 0.85 | 1.34 |
| 28183 | 0 | 22321  | GSFCTQLN                         | 2.10 | 0.01 | 2.45 | 0.44 | 0.85 | 1.34 |
| 28184 | 0 | 22321  | GSFCTQLN                         | 2.10 | 0.01 | 2.45 | 0.44 | 0.85 | 1.34 |
| 28185 | 0 | 22321  | GSFCTQLN                         | 2.10 | 0.01 | 2.45 | 0.44 | 0.85 | 1.34 |
| 28186 | 0 | 109251 | GSFFLYS                          | 2.03 | 0.01 | 0.78 | 0.44 | 1.13 | 0.28 |
| 28187 | 0 | 130872 | GSFLTKGPSKLNDRA                  | 2.67 | 0.01 | 0.78 | 1.20 | 0.22 | 1.34 |
| 28188 | 0 | 130872 | GSFLTKGPSKLNDRA                  | 2.67 | 0.01 | 0.78 | 1.81 | 0.22 | 1.34 |
| 28189 | 0 | 130872 | GSFLTKGPSKLNDRA                  | 2.67 | 0.01 | 0.78 | 1.20 | 0.22 | 2.12 |
| 28190 | 0 | 130872 | GSFLTKGPSKLNDRA                  | 2.67 | 0.01 | 0.78 | 1.81 | 0.22 | 2.12 |
| 28191 | 0 | 149328 | GSFQPQQLPQ                       | 2.35 | 0.01 | 1.86 | 0.44 | 1.93 | 0.85 |
| 28192 | 0 | 149328 | GSFQPQQLPQ                       | 2.35 | 0.01 | 1.86 | 2.74 | 0.22 | 0.85 |
| 28193 | 0 | 98807  | GSFRPSQQNPQA                     | 2.49 | 0.01 | 1.86 | 0.44 | 1.93 | 1.27 |
| 28194 | 0 | 22329  | GSFSAEHFLDDFAIW                  | 2.67 | 0.01 | 0.90 | 1.15 | 0.22 | 0.28 |

|       |   |        |                          |      |      |      |      |      |      |
|-------|---|--------|--------------------------|------|------|------|------|------|------|
| 28195 | 0 | 117520 | GSFSDADLAD               | 2.35 | 0.01 | 0.78 | 1.15 | 0.22 | 1.27 |
| 28196 | 0 | 117520 | GSFSDADLAD               | 2.35 | 0.01 | 0.78 | 1.15 | 0.22 | 2.02 |
| 28197 | 0 | 117520 | GSFSDADLAD               | 2.35 | 0.01 | 0.78 | 1.15 | 0.22 | 2.02 |
| 28198 | 0 | 117520 | GSFSDADLAD               | 2.35 | 0.01 | 0.78 | 1.15 | 0.22 | 2.02 |
| 28199 | 0 | 117520 | GSFSDADLAD               | 2.35 | 0.01 | 0.78 | 1.15 | 0.22 | 1.48 |
| 28200 | 0 | 117520 | GSFSDADLAD               | 2.35 | 0.01 | 0.78 | 1.15 | 0.22 | 2.12 |
| 28201 | 0 | 117520 | GSFSDADLAD               | 2.35 | 0.01 | 0.78 | 1.15 | 0.22 | 1.48 |
| 28202 | 0 | 141664 | GSFTVRADHGEP             | 2.44 | 0.01 | 0.78 | 0.44 | 1.93 | 0.28 |
| 28203 | 0 | 190437 | GSGAPMADNNEGADG          | 2.71 | 0.01 | 3.19 | 2.00 | 1.41 | 0.28 |
| 28204 | 0 | 22332  | GSGASDLR                 | 2.15 | 0.01 | 2.04 | 0.44 | 0.85 | 0.28 |
| 28205 | 0 | 182150 | GSGCLGLNFSAPEQP          | 2.69 | 0.01 | 0.78 | 0.44 | 1.13 | 0.85 |
| 28206 | 0 | 304001 | GSGGAQSEADADDDD          | 2.71 | 0.01 | 1.61 | 0.44 | 0.85 | 1.28 |
| 28207 | 0 | 95428  | GSGGDDDDPHGVPVQLS<br>YYD | 2.92 | 0.01 | 2.43 | 0.44 | 1.59 | 0.28 |
| 28208 | 0 | 22337  | GSGGGFWGDRVDSQPF<br>AI   | 2.85 | 0.01 | 2.53 | 0.44 | 0.85 | 0.28 |
| 28209 | 0 | 503995 | GSGGRGRGGSGGRRGR<br>GRER | 3.03 | 3.93 | 2.48 | 0.44 | 1.74 | 0.28 |
| 28210 | 0 | 503996 | GSGGRGRGGSGGRRGR<br>GRER | 3.03 | 3.33 | 2.48 | 0.44 | 1.74 | 0.28 |
| 28211 | 0 | 115774 | GSGKDSHTRTTHYGS          | 2.71 | 0.01 | 1.75 | 1.81 | 0.22 | 0.28 |
| 28212 | 0 | 118826 | GSGKGAGIGLVGGGV<br>GA    | 2.90 | 0.01 | 0.90 | 0.68 | 0.22 | 0.28 |
| 28213 | 0 | 118826 | GSGKGAGIGLVGGGV<br>GA    | 2.90 | 0.01 | 0.90 | 0.68 | 0.22 | 0.28 |
| 28214 | 0 | 118826 | GSGKGAGIGLVGGGV<br>GA    | 2.90 | 0.01 | 0.90 | 0.68 | 0.22 | 0.28 |
| 28215 | 0 | 118826 | GSGKGAGIGLVGGGV<br>GA    | 2.90 | 0.01 | 0.90 | 0.68 | 0.22 | 0.28 |
| 28216 | 0 | 118826 | GSGKGAGIGLVGGGV<br>GA    | 2.90 | 0.01 | 0.90 | 0.68 | 0.22 | 1.27 |
| 28217 | 0 | 118826 | GSGKGAGIGLVGGGV<br>GA    | 2.90 | 0.01 | 0.90 | 0.68 | 0.22 | 0.28 |
| 28218 | 0 | 117521 | GSGKGKVQFQGKKTkf         | 2.80 | 4.15 | 0.78 | 0.44 | 1.13 | 0.28 |
| 28219 | 0 | 117521 | GSGKGKVQFQGKKTkf         | 2.80 | 4.15 | 0.78 | 0.44 | 1.13 | 0.28 |
| 28220 | 0 | 117521 | GSGKGKVQFQGKKTkf         | 2.80 | 4.15 | 0.78 | 0.44 | 1.13 | 1.27 |
| 28221 | 0 | 117300 | GSGKGKVQFQGKKTkf         | 2.80 | 0.01 | 0.78 | 0.44 | 1.13 | 1.27 |
| 28222 | 0 | 117300 | GSGKGKVQFQGKKTkf         | 2.80 | 0.01 | 0.78 | 0.44 | 1.13 | 0.28 |
| 28223 | 0 | 117300 | GSGKGKVQFQGKKTkf         | 2.80 | 0.01 | 0.78 | 0.44 | 0.22 | 1.27 |

|       |   |        |                          |      |      |      |      |      |      |
|-------|---|--------|--------------------------|------|------|------|------|------|------|
| 28224 | 0 | 117300 | GSGKGKVQFQGKKTKF         | 2.80 | 0.01 | 0.78 | 0.68 | 0.22 | 1.27 |
| 28225 | 0 | 117300 | GSGKGKVQFQGKKTKF         | 2.80 | 0.01 | 0.78 | 1.20 | 0.22 | 0.28 |
| 28226 | 0 | 117300 | GSGKGKVQFQGKKTKF         | 2.80 | 0.01 | 0.78 | 1.20 | 0.22 | 0.28 |
| 28227 | 0 | 117300 | GSGKGKVQFQGKKTKF         | 2.80 | 0.01 | 0.78 | 0.68 | 0.22 | 1.27 |
| 28228 | 0 | 117300 | GSGKGKVQFQGKKTKF         | 2.80 | 0.01 | 0.78 | 1.20 | 0.22 | 2.35 |
| 28229 | 0 | 117300 | GSGKGKVQFQGKKTKF         | 2.80 | 0.01 | 0.78 | 1.20 | 0.22 | 0.28 |
| 28230 | 0 | 117300 | GSGKGKVQFQGKKTKF         | 2.80 | 0.01 | 0.78 | 0.44 | 1.13 | 0.28 |
| 28231 | 0 | 117300 | GSGKGKVQFQGKKTKF         | 2.80 | 0.01 | 0.78 | 0.44 | 1.13 | 0.28 |
| 28232 | 0 | 117300 | GSGKGKVQFQGKKTKF         | 2.80 | 0.01 | 0.78 | 0.44 | 1.13 | 0.28 |
| 28233 | 0 | 117300 | GSGKGKVQFQGKKTKF         | 2.80 | 0.01 | 0.78 | 0.44 | 1.13 | 0.28 |
| 28234 | 0 | 117300 | GSGKGKVQFQGKKTKF         | 2.80 | 0.01 | 0.78 | 0.44 | 1.41 | 0.28 |
| 28235 | 0 | 117300 | GSGKGKVQFQGKKTKF         | 2.80 | 0.01 | 0.78 | 0.44 | 1.13 | 1.27 |
| 28236 | 0 | 117300 | GSGKGKVQFQGKKTKF         | 2.80 | 0.01 | 0.78 | 1.20 | 0.22 | 1.27 |
| 28237 | 0 | 117300 | GSGKGKVQFQGKKTKF         | 2.80 | 0.01 | 0.78 | 1.20 | 0.22 | 0.28 |
| 28238 | 0 | 117300 | GSGKGKVQFQGKKTKF         | 2.80 | 0.01 | 0.78 | 1.20 | 0.22 | 0.28 |
| 28239 | 0 | 117300 | GSGKGKVQFQGKKTKF         | 2.80 | 0.01 | 0.78 | 1.20 | 0.22 | 0.28 |
| 28240 | 0 | 117300 | GSGKGKVQFQGKKTKF         | 2.80 | 0.01 | 0.78 | 1.20 | 0.22 | 0.28 |
| 28241 | 0 | 117301 | GSGKGKVQFQGKKTKF<br>ASDD | 2.98 | 4.45 | 0.78 | 0.44 | 0.22 | 1.27 |
| 28242 | 0 | 117302 | GSGKGKVQFQGKKTKF<br>ASDD | 2.98 | 0.01 | 0.78 | 0.44 | 0.22 | 1.27 |
| 28243 | 0 | 111376 | GSGLPLYMLWLT             | 2.50 | 0.01 | 0.90 | 0.44 | 0.85 | 1.39 |
| 28244 | 0 | 181651 | GSGNYKLRDWWTA            | 2.63 | 0.01 | 2.86 | 2.36 | 0.22 | 1.28 |
| 28245 | 0 | 22349  | GSGPDQRPYC               | 2.32 | 0.01 | 1.72 | 2.74 | 0.22 | 0.28 |
| 28246 | 0 | 118827 | GSGPRHRDGVRRPQKR<br>PSCI | 2.96 | 0.01 | 2.43 | 0.44 | 1.13 | 1.27 |
| 28247 | 0 | 118827 | GSGPRHRDGVRRPQKR<br>PSCI | 2.96 | 0.01 | 2.43 | 0.44 | 1.41 | 1.27 |

|       |   |        |                                                |      |      |      |      |      |      |
|-------|---|--------|------------------------------------------------|------|------|------|------|------|------|
| 28248 | 0 | 118827 | GSGPRHRDGVRRPQKR<br>PSCI                       | 2.96 | 0.01 | 2.48 | 0.44 | 1.74 | 0.28 |
| 28249 | 0 | 118827 | GSGPRHRDGVRRPQKR<br>PSCI                       | 2.96 | 0.01 | 2.48 | 0.44 | 1.74 | 0.28 |
| 28250 | 0 | 118828 | GSGPRHRDGVRRPQKR<br>PSCIGCKGTHGGTG             | 3.37 | 0.01 | 2.43 | 0.44 | 1.13 | 0.28 |
| 28251 | 0 | 118828 | GSGPRHRDGVRRPQKR<br>PSCIGCKGTHGGTG             | 3.37 | 0.01 | 2.43 | 0.44 | 1.41 | 0.28 |
| 28252 | 0 | 95429  | GSGRRGDM<br>GSGRRGDMGSLAARVV                   | 2.16 | 0.01 | 3.48 | 2.22 | 0.22 | 0.28 |
| 28253 | 0 | 95430  | KQGSRRGDMGSLAAR<br>VVKQPCG                     | 3.63 | 0.01 | 0.90 | 2.59 | 0.22 | 1.75 |
| 28254 | 0 | 95430  | GSGRRGDMGSLAARVV<br>KQGSRRGDMGSLAAR<br>VVKQPCG | 3.63 | 0.01 | 0.90 | 2.59 | 0.22 | 0.28 |
| 28255 | 0 | 95430  | GSGRRGDMGSLAARVV<br>KQGSRRGDMGSLAAR<br>VVKQPCG | 3.63 | 0.01 | 0.90 | 2.59 | 0.22 | 0.28 |
| 28256 | 0 | 151221 | GSGRSAPASR                                     | 2.37 | 0.01 | 3.35 | 1.81 | 0.22 | 0.85 |
| 28257 | 0 | 112145 | GSGSGTD                                        | 2.06 | 0.01 | 0.78 | 0.44 | 1.13 | 0.28 |
| 28258 | 0 | 110872 | GSGSTANLASSNYFP                                | 2.70 | 0.01 | 1.86 | 0.44 | 0.85 | 0.28 |
| 28259 | 0 | 112146 | GSGTDFT                                        | 2.05 | 0.01 | 0.78 | 0.44 | 1.13 | 0.28 |
| 28260 | 0 | 110873 | GSGTGGRTGYIPL                                  | 2.58 | 0.01 | 1.86 | 0.68 | 0.22 | 0.28 |
| 28261 | 0 | 110873 | GSGTGGRTGYIPL                                  | 2.58 | 0.01 | 1.86 | 0.68 | 0.22 | 0.28 |
| 28262 | 0 | 238570 | GSGTPVDELDRCCKV                                | 2.66 | 0.01 | 2.56 | 1.20 | 0.22 | 0.85 |
| 28263 | 0 | 22357  | GSGVRGDFG                                      | 2.26 | 0.01 | 3.14 | 2.37 | 0.22 | 0.85 |
| 28264 | 0 | 22357  | GSGVRGDFG                                      | 2.26 | 0.01 | 3.14 | 2.37 | 0.22 | 0.85 |
| 28265 | 0 | 22357  | GSGVRGDFG                                      | 2.26 | 0.01 | 3.14 | 2.59 | 0.22 | 0.85 |
| 28266 | 0 | 22357  | GSGVRGDFG                                      | 2.26 | 0.01 | 3.14 | 2.59 | 0.22 | 0.85 |
| 28267 | 0 | 22357  | GSGVRGDFG                                      | 2.26 | 0.01 | 3.14 | 2.37 | 0.22 | 1.27 |
| 28268 | 0 | 22357  | GSGVRGDFG                                      | 2.26 | 0.01 | 3.14 | 2.37 | 0.22 | 1.27 |
| 28269 | 0 | 22359  | GSGVRGDFGSLAPRVAR<br>QL                        | 2.93 | 4.23 | 3.14 | 2.13 | 0.22 | 1.75 |
| 28270 | 0 | 22359  | GSGVRGDFGSLAPRVAR<br>QL                        | 2.93 | 4.23 | 3.14 | 2.13 | 0.22 | 0.28 |
| 28271 | 0 | 22359  | GSGVRGDFGSLAPRVAR<br>QL                        | 2.93 | 4.23 | 3.14 | 2.13 | 0.22 | 0.28 |
| 28272 | 0 | 22359  | GSGVRGDFGSLAPRVAR<br>QL                        | 2.93 | 4.23 | 3.14 | 2.13 | 0.22 | 0.28 |
| 28273 | 0 | 22359  | GSGVRGDFGSLAPRVAR<br>QL                        | 2.93 | 4.23 | 3.14 | 2.13 | 0.22 | 0.28 |
| 28274 | 0 | 22360  | GSGVRGDFGSLAPRVAR<br>QL                        | 2.93 | 0.01 | 3.14 | 0.68 | 0.22 | 0.28 |
| 28275 | 0 | 22360  | GSGVRGDFGSLAPRVAR<br>QL                        | 2.93 | 0.01 | 3.14 | 0.68 | 0.22 | 1.34 |

|       |   |        |                               |      |      |      |      |      |      |
|-------|---|--------|-------------------------------|------|------|------|------|------|------|
| 28276 | 0 | 22360  | GSGVRGDFGSLAPRVAR<br>QL       | 2.93 | 0.01 | 3.18 | 2.37 | 0.22 | 0.28 |
| 28277 | 0 | 22360  | GSGVRGDFGSLAPRVAR<br>QL       | 2.93 | 0.01 | 3.18 | 2.37 | 0.22 | 0.28 |
| 28278 | 0 | 22360  | GSGVRGDFGSLAPRVAR<br>QL       | 2.93 | 0.01 | 3.18 | 2.59 | 0.22 | 1.27 |
| 28279 | 0 | 22360  | GSGVRGDFGSLAPRVAR<br>QL       | 2.93 | 0.01 | 3.18 | 2.59 | 0.22 | 1.34 |
| 28280 | 0 | 22360  | GSGVRGDFGSLAPRVAR<br>QL       | 2.93 | 0.01 | 3.14 | 2.59 | 0.22 | 0.28 |
| 28281 | 0 | 22360  | GSGVRGDFGSLAPRVAR<br>QL       | 2.93 | 0.01 | 3.14 | 2.59 | 0.22 | 0.28 |
| 28282 | 0 | 22360  | GSGVRGDFGSLAPRVAR<br>QL       | 2.93 | 0.01 | 3.14 | 2.59 | 0.22 | 1.34 |
| 28283 | 0 | 22360  | GSGVRGDFGSLAPRVAR<br>QL       | 2.93 | 0.01 | 3.14 | 2.59 | 0.22 | 1.75 |
| 28284 | 0 | 22361  | GSGVRGDSGSLALRVAR<br>QL       | 2.95 | 0.01 | 3.18 | 2.37 | 0.22 | 0.28 |
| 28285 | 0 | 22361  | GSGVRGDSGSLALRVAR<br>QL       | 2.95 | 0.01 | 3.18 | 2.37 | 0.22 | 0.28 |
| 28286 | 0 | 22362  | GSGVRVRKRKNVKNQP<br>ENLT      | 2.97 | 0.01 | 3.00 | 0.68 | 0.22 | 0.28 |
| 28287 | 0 | 22367  | GSHLPYIEQGMQLAEQF<br>KQK      | 2.94 | 0.01 | 1.72 | 0.44 | 0.85 | 0.28 |
| 28288 | 0 | 142695 | GSHSLRYFYTAVSRP               | 2.66 | 0.01 | 2.19 | 3.42 | 0.22 | 1.34 |
| 28289 | 0 | 142695 | GSHSLRYFYTAVSRP               | 2.66 | 0.01 | 2.19 | 3.42 | 2.60 | 1.75 |
| 28290 | 0 | 142695 | GSHSLRYFYTAVSRP               | 2.66 | 0.01 | 2.19 | 3.42 | 0.22 | 1.75 |
| 28291 | 0 | 181911 | GSHSRIGSVSMY                  | 2.50 | 0.01 | 0.90 | 3.15 | 0.22 | 0.28 |
| 28292 | 0 | 131457 | GSHTRGD                       | 2.03 | 0.01 | 0.78 | 0.44 | 1.41 | 1.27 |
| 28293 | 0 | 131457 | GSHTRGD                       | 2.03 | 0.01 | 0.78 | 0.44 | 1.13 | 0.28 |
| 28294 | 0 | 131457 | GSHTRGD                       | 2.03 | 0.01 | 0.78 | 1.15 | 0.22 | 0.28 |
| 28295 | 0 | 22372  | GSIGAASMEF                    | 2.33 | 0.01 | 2.25 | 0.44 | 1.23 | 1.27 |
| 28296 | 0 | 22372  | GSIGAASMEF                    | 2.33 | 0.01 | 2.25 | 1.12 | 0.22 | 1.27 |
| 28297 | 0 | 22387  | GSINTGWFNNTGNANTG             | 2.79 | 0.01 | 2.86 | 0.44 | 0.85 | 0.28 |
| 28298 | 0 | 22387  | GSINTGWFNNTGNANTG             | 2.79 | 0.01 | 2.86 | 0.44 | 0.85 | 0.28 |
| 28299 | 0 | 132359 | GSISYINIIMPSVFGTIC            | 2.85 | 0.01 | 0.78 | 0.44 | 1.13 | 1.39 |
| 28300 | 0 | 124232 | GSITRDSIFRLR                  | 2.49 | 0.01 | 2.73 | 3.65 | 0.22 | 0.28 |
| 28301 | 0 | 124232 | GSITRDSIFRLR                  | 2.49 | 0.01 | 2.73 | 3.65 | 0.22 | 0.28 |
| 28302 | 0 | 124232 | GSITRDSIFRLR                  | 2.49 | 0.01 | 2.73 | 3.65 | 0.22 | 1.34 |
| 28303 | 0 | 124232 | GSITRDSIFRLR                  | 2.49 | 0.01 | 2.73 | 3.65 | 0.22 | 1.48 |
| 28304 | 0 | 22389  | GSITTATSLDFPALW               | 2.68 | 0.01 | 2.72 | 0.44 | 1.23 | 0.85 |
| 28305 | 0 | 115146 | GSIVIHNLDYSDNGTFTC<br>DVKNPPD | 3.15 | 0.01 | 0.78 | 0.44 | 1.13 | 0.28 |

|       |   |        |                               |      |      |      |      |      |      |
|-------|---|--------|-------------------------------|------|------|------|------|------|------|
| 28306 | 0 | 115146 | GSIVIHNLDYSDNGTFTC<br>DVKNPPD | 3.15 | 0.01 | 0.78 | 0.44 | 1.41 | 0.28 |
| 28307 | 0 | 118390 | GSYINPEVLDI                   | 2.36 | 0.01 | 0.78 | 0.44 | 1.13 | 0.28 |
| 28308 | 0 | 92864  | GSKFNDAFNG                    | 2.34 | 0.01 | 2.67 | 2.00 | 0.22 | 0.28 |
| 28309 | 0 | 225312 | GSKIDGSKILKTEFNNS             | 2.86 | 0.01 | 2.61 | 0.68 | 0.22 | 0.28 |
| 28310 | 0 | 225312 | GSKIDGSKILKTEFNNS             | 2.86 | 0.01 | 2.61 | 0.68 | 0.22 | 0.28 |
| 28311 | 0 | 225312 | GSKIDGSKILKTEFNNS             | 2.86 | 0.01 | 2.61 | 0.68 | 0.22 | 0.28 |
| 28312 | 0 | 192962 | GSKNWPTSTKTGGVPS<br>DTTN      | 2.98 | 0.01 | 3.47 | 2.00 | 0.22 | 0.28 |
| 28313 | 0 | 22395  | GSKPPSGSPETGAG                | 2.67 | 0.01 | 2.04 | 2.49 | 0.22 | 0.85 |
| 28314 | 0 | 22396  | GSKTLAGPKGPITQ                | 2.64 | 0.01 | 1.96 | 0.44 | 0.85 | 0.28 |
| 28315 | 0 | 22396  | GSKTLAGPKGPITQ                | 2.64 | 0.01 | 1.96 | 0.44 | 0.85 | 0.28 |
| 28316 | 0 | 22398  | GSKVPEDT                      | 2.10 | 0.01 | 2.04 | 0.44 | 0.85 | 0.28 |
| 28317 | 0 | 22401  | GSLAAR                        | 1.89 | 0.01 | 3.48 | 0.68 | 0.22 | 1.34 |
| 28318 | 0 | 22401  | GSLAAR                        | 1.89 | 0.01 | 3.48 | 0.68 | 0.22 | 0.28 |
| 28319 | 0 | 22401  | GSLAAR                        | 1.89 | 0.01 | 3.48 | 0.68 | 0.22 | 1.27 |
| 28320 | 0 | 22401  | GSLAAR                        | 1.89 | 0.01 | 3.48 | 0.68 | 0.22 | 1.27 |
| 28321 | 0 | 22401  | GSLAAR                        | 1.89 | 0.01 | 3.48 | 0.68 | 0.22 | 1.27 |
| 28322 | 0 | 22401  | GSLAAR                        | 1.89 | 0.01 | 3.48 | 0.68 | 0.22 | 1.27 |
| 28323 | 0 | 22401  | GSLAAR                        | 1.89 | 0.01 | 3.48 | 0.68 | 0.22 | 1.34 |
| 28324 | 0 | 22401  | GSLAAR                        | 1.89 | 0.01 | 3.48 | 0.68 | 0.22 | 1.34 |
| 28325 | 0 | 95431  | GSLAARVV                      | 2.10 | 0.01 | 3.48 | 2.22 | 0.22 | 0.28 |
| 28326 | 0 | 119913 | GSLDSLRRREIEQMRR              | 2.68 | 0.01 | 0.78 | 0.44 | 1.13 | 0.28 |
| 28327 | 0 | 22405  | GSLFESTCTW                    | 2.31 | 4.15 | 2.70 | 0.44 | 0.85 | 0.28 |
| 28328 | 0 | 128795 | GSLICNVGAGGPAPA               | 2.70 | 0.01 | 0.78 | 0.44 | 1.13 | 0.85 |
| 28329 | 0 | 120569 | GSLIFAAVLVMLIAVLAR<br>LMMRGWR | 3.20 | 0.01 | 2.86 | 0.44 | 0.85 | 0.28 |
| 28330 | 0 | 120569 | GSLIFAAVLVMLIAVLAR<br>LMMRGWR | 3.20 | 0.01 | 2.86 | 0.44 | 1.41 | 0.28 |
| 28331 | 0 | 238572 | GSLIYSFSECAFTGPLRP            | 2.84 | 0.01 | 0.78 | 0.44 | 1.13 | 0.28 |
| 28332 | 0 | 22410  | GSLLAALVICGIVYW               | 2.69 | 0.01 | 2.40 | 0.44 | 1.59 | 0.28 |
| 28333 | 0 | 175811 | GSLQLDTALYLVDGM               | 2.69 | 0.01 | 2.63 | 1.15 | 0.22 | 0.85 |
| 28334 | 0 | 175811 | GSLQLDTALYLVDGM               | 2.69 | 0.01 | 2.63 | 1.15 | 0.22 | 0.85 |
| 28335 | 0 | 175811 | GSLQLDTALYLVDGM               | 2.69 | 0.01 | 2.63 | 1.15 | 0.22 | 0.85 |
| 28336 | 0 | 115609 | GSLPQKAQGHRPQDE               | 2.67 | 0.01 | 1.60 | 1.12 | 0.22 | 2.56 |
| 28337 | 0 | 115609 | GSLPQKAQGHRPQDE               | 2.67 | 0.01 | 1.60 | 1.12 | 0.22 | 2.56 |
| 28338 | 0 | 115609 | GSLPQKAQGHRPQDE               | 2.67 | 0.01 | 1.60 | 2.61 | 0.22 | 2.56 |
| 28339 | 0 | 115609 | GSLPQKAQGHRPQDE               | 2.67 | 0.01 | 1.60 | 1.20 | 0.22 | 1.27 |

|       |   |        |                          |      |      |      |      |      |      |
|-------|---|--------|--------------------------|------|------|------|------|------|------|
| 28340 | 0 | 115610 | GSLPQKAQGHRPQDEN         | 2.72 | 0.01 | 1.60 | 1.12 | 0.22 | 2.56 |
| 28341 | 0 | 115610 | GSLPQKAQGHRPQDEN         | 2.72 | 0.01 | 1.60 | 1.12 | 0.22 | 2.56 |
| 28342 | 0 | 115610 | GSLPQKAQGHRPQDEN         | 2.72 | 0.01 | 1.60 | 2.61 | 0.22 | 2.56 |
| 28343 | 0 | 115610 | GSLPQKAQGHRPQDEN         | 2.72 | 0.01 | 1.60 | 1.20 | 0.22 | 1.27 |
| 28344 | 0 | 115610 | GSLPQKAQGHRPQDEN         | 2.72 | 0.01 | 1.60 | 2.04 | 0.22 | 1.27 |
| 28345 | 0 | 115611 | GSLPQKAQRPQDEN           | 2.59 | 0.01 | 0.90 | 1.12 | 0.22 | 2.56 |
| 28346 | 0 | 115611 | GSLPQKAQRPQDEN           | 2.59 | 0.01 | 0.90 | 1.12 | 0.22 | 2.56 |
| 28347 | 0 | 115611 | GSLPQKAQRPQDEN           | 2.59 | 0.01 | 0.90 | 2.61 | 0.22 | 2.56 |
| 28348 | 0 | 115612 | GSLPQKAQRPQDENG          | 2.67 | 0.01 | 0.90 | 3.38 | 0.22 | 1.57 |
| 28349 | 0 | 115612 | GSLPQKAQRPQDENG          | 2.67 | 0.01 | 0.90 | 3.38 | 0.22 | 1.57 |
| 28350 | 0 | 115612 | GSLPQKAQRPQDENG          | 2.67 | 0.01 | 0.90 | 2.04 | 0.22 | 1.57 |
| 28351 | 0 | 115612 | GSLPQKAQRPQDENG          | 2.67 | 0.01 | 0.90 | 2.04 | 0.22 | 1.27 |
| 28352 | 0 | 115612 | GSLPQKAQRPQDENG          | 2.67 | 0.01 | 0.90 | 2.04 | 0.22 | 2.56 |
| 28353 | 0 | 115612 | GSLPQKAQRPQDENG          | 2.67 | 0.01 | 0.90 | 2.04 | 0.22 | 2.56 |
| 28354 | 0 | 115612 | GSLPQKAQRPQDENG          | 2.67 | 0.01 | 0.90 | 2.04 | 0.22 | 2.56 |
| 28355 | 0 | 112783 | GSLPQKSHGRTQDEN          | 2.65 | 0.01 | 0.78 | 2.04 | 0.22 | 0.28 |
| 28356 | 0 | 112783 | GSLPQKSHGRTQDEN          | 2.65 | 0.01 | 0.78 | 2.04 | 0.22 | 0.28 |
| 28357 | 0 | 114211 | GSLPQKSHGRTQDENP<br>VVHF | 2.91 | 0.01 | 0.78 | 3.45 | 0.22 | 1.57 |
| 28358 | 0 | 114211 | GSLPQKSHGRTQDENP<br>VVHF | 2.91 | 0.01 | 0.78 | 3.45 | 0.22 | 1.57 |
| 28359 | 0 | 114211 | GSLPQKSHGRTQDENP<br>VVHF | 2.91 | 0.01 | 0.78 | 3.45 | 0.22 | 1.57 |
| 28360 | 0 | 114211 | GSLPQKSHGRTQDENP<br>VVHF | 2.91 | 0.01 | 0.78 | 3.45 | 0.22 | 1.57 |
| 28361 | 0 | 114211 | GSLPQKSHGRTQDENP<br>VVHF | 2.91 | 0.01 | 0.78 | 3.45 | 0.22 | 1.57 |
| 28362 | 0 | 114211 | GSLPQKSHGRTQDENP<br>VVHF | 2.91 | 0.01 | 0.78 | 3.45 | 0.22 | 1.57 |
| 28363 | 0 | 114211 | GSLPQKSHGRTQDENP<br>VVHF | 2.91 | 0.01 | 0.78 | 3.45 | 0.22 | 1.57 |
| 28364 | 0 | 134684 | GSLPQKSQRDEN             | 2.45 | 0.01 | 2.95 | 2.04 | 0.22 | 0.28 |
| 28365 | 0 | 134684 | GSLPQKSQRDEN             | 2.45 | 0.01 | 2.95 | 2.04 | 2.60 | 1.75 |
| 28366 | 0 | 113495 | GSLPQKSQRSQ              | 2.43 | 0.01 | 2.95 | 2.04 | 0.22 | 1.75 |
| 28367 | 0 | 113495 | GSLPQKSQRSQ              | 2.43 | 0.01 | 2.95 | 1.12 | 0.22 | 1.75 |



|       |   |        |                         |      |      |      |      |      |      |
|-------|---|--------|-------------------------|------|------|------|------|------|------|
| 28368 | 0 | 113013 | GSLPQKSQRSQDEN          | 2.61 | 0.01 | 2.95 | 2.04 | 0.22 | 1.57 |
| 28369 | 0 | 113013 | GSLPQKSQRSQDEN          | 2.61 | 0.01 | 2.95 | 2.04 | 0.22 | 0.28 |
| 28370 | 0 | 113013 | GSLPQKSQRSQDEN          | 2.61 | 0.01 | 2.95 | 2.04 | 0.22 | 0.28 |
| 28371 | 0 | 113013 | GSLPQKSQRSQDEN          | 2.61 | 0.01 | 2.95 | 2.04 | 0.22 | 0.28 |
| 28372 | 0 | 113013 | GSLPQKSQRSQDEN          | 2.61 | 0.01 | 2.95 | 2.04 | 2.60 | 1.75 |
| 28373 | 0 | 113013 | GSLPQKSQRSQDEN          | 2.61 | 0.01 | 2.95 | 2.04 | 0.22 | 1.27 |
| 28374 | 0 | 113014 | GSLPQKSQRSQDENG         | 2.69 | 0.01 | 0.90 | 3.38 | 0.22 | 1.57 |
| 28375 | 0 | 113014 | GSLPQKSQRSQDENG         | 2.69 | 0.01 | 0.90 | 3.38 | 0.22 | 1.57 |
| 28376 | 0 | 113014 | GSLPQKSQRSQDENG         | 2.69 | 0.01 | 0.90 | 3.38 | 0.22 | 1.57 |
| 28377 | 0 | 113014 | GSLPQKSQRSQDENG         | 2.69 | 0.01 | 0.90 | 4.45 | 0.22 | 1.57 |
| 28378 | 0 | 113014 | GSLPQKSQRSQDENG         | 2.69 | 0.01 | 0.90 | 3.38 | 0.22 | 1.27 |
| 28379 | 0 | 109252 | GSLPQKSQRSQDENPV        | 2.73 | 0.01 | 2.95 | 2.04 | 0.22 | 1.27 |
| 28380 | 0 | 109252 | GSLPQKSQRSQDENPV        | 2.73 | 0.01 | 2.95 | 2.04 | 0.22 | 1.57 |
| 28381 | 0 | 109253 | GSLPQKSQRSQDENPV<br>VHF | 2.87 | 0.01 | 2.95 | 2.04 | 0.22 | 1.27 |
| 28382 | 0 | 109253 | GSLPQKSQRSQDENPV<br>VHF | 2.87 | 0.01 | 2.95 | 2.04 | 0.22 | 1.57 |
| 28383 | 0 | 109253 | GSLPQKSQRSQDENPV<br>VHF | 2.87 | 0.01 | 2.95 | 2.04 | 0.22 | 1.57 |
| 28384 | 0 | 109253 | GSLPQKSQRSQDENPV<br>VHF | 2.87 | 0.01 | 2.95 | 2.04 | 0.22 | 1.57 |
| 28385 | 0 | 109253 | GSLPQKSQRSQDENPV<br>VHF | 2.87 | 0.01 | 2.95 | 2.04 | 0.22 | 1.57 |
| 28386 | 0 | 109253 | GSLPQKSQRSQDENPV<br>VHF | 2.87 | 0.01 | 2.95 | 2.04 | 0.22 | 0.28 |
| 28387 | 0 | 110875 | GSLPQKSQRTQDENPV<br>VHF | 2.85 | 0.01 | 2.19 | 2.04 | 0.22 | 1.57 |
| 28388 | 0 | 110875 | GSLPQKSQRTQDENPV<br>VHF | 2.85 | 0.01 | 2.19 | 2.04 | 0.22 | 1.57 |
| 28389 | 0 | 232839 | GSLSYIGFTNFDWGS         | 2.69 | 0.01 | 2.89 | 1.12 | 0.22 | 1.28 |
| 28390 | 0 | 232839 | GSLSYIGFTNFDWGS         | 2.69 | 0.01 | 2.89 | 1.12 | 0.22 | 1.28 |
| 28391 | 0 | 232839 | GSLSYIGFTNFDWGS         | 2.69 | 0.01 | 2.89 | 1.12 | 0.22 | 1.28 |
| 28392 | 0 | 232839 | GSLSYIGFTNFDWGS         | 2.69 | 0.01 | 2.89 | 1.12 | 0.22 | 1.28 |
| 28393 | 0 | 232839 | GSLSYIGFTNFDWGS         | 2.69 | 0.01 | 2.89 | 1.12 | 0.22 | 1.28 |
| 28394 | 0 | 450654 | GSLVDEFKELVYPPDYN       | 2.79 | 0.01 | 0.78 | 2.79 | 1.13 | 1.28 |
| 28395 | 0 | 450654 | GSLVDEFKELVYPPDYN       | 2.79 | 0.01 | 0.78 | 2.79 | 1.13 | 1.28 |
| 28396 | 0 | 450654 | GSLVDEFKELVYPPDYN       | 2.79 | 0.01 | 0.78 | 1.81 | 1.41 | 1.28 |
| 28397 | 0 | 450654 | GSLVDEFKELVYPPDYN       | 2.79 | 0.01 | 0.78 | 1.81 | 1.41 | 1.28 |
| 28398 | 0 | 430345 | GSLVQGGQIIQP            | 2.51 | 0.01 | 1.86 | 0.44 | 1.23 | 0.85 |
| 28399 | 0 | 234119 | GSMAPH                  | 1.88 | 0.01 | 0.90 | 0.68 | 0.22 | 0.28 |

|       |   |        |                             |      |      |      |      |      |      |
|-------|---|--------|-----------------------------|------|------|------|------|------|------|
| 28400 | 0 | 22418  | GSMFQQILPSNLSIYATT<br>AAN   | 2.98 | 0.01 | 2.86 | 1.81 | 0.22 | 0.85 |
| 28401 | 0 | 22418  | GSMFQQILPSNLSIYATT<br>AAN   | 2.98 | 0.01 | 2.86 | 1.81 | 0.22 | 0.85 |
| 28402 | 0 | 22418  | GSMFQQILPSNLSIYATT<br>AAN   | 2.98 | 0.01 | 2.86 | 1.81 | 0.22 | 0.85 |
| 28403 | 0 | 22418  | GSMFQQILPSNLSIYATT<br>AAN   | 2.98 | 0.01 | 2.86 | 1.81 | 0.22 | 0.85 |
| 28404 | 0 | 22418  | GSMFQQILPSNLSIYATT<br>AAN   | 2.98 | 0.01 | 2.86 | 1.81 | 0.22 | 0.85 |
| 28405 | 0 | 22418  | GSMFQQILPSNLSIYATT<br>AAN   | 2.98 | 0.01 | 2.86 | 2.89 | 0.22 | 0.85 |
| 28406 | 0 | 228249 | GSMGVFFGGLGIGTGS<br>GTGGRTG | 3.12 | 0.01 | 1.86 | 0.68 | 0.22 | 0.28 |
| 28407 | 0 | 228249 | GSMGVFFGGLGIGTGS<br>GTGGRTG | 3.12 | 0.01 | 1.86 | 0.68 | 0.22 | 1.75 |
| 28408 | 0 | 22423  | GSNDDLWHQWKRMYY<br>NKEYN    | 2.87 | 0.01 | 2.28 | 3.06 | 0.22 | 1.75 |
| 28409 | 0 | 22423  | GSNDDLWHQWKRMYY<br>NKEYN    | 2.87 | 0.01 | 2.28 | 3.06 | 0.22 | 0.28 |
| 28410 | 0 | 22423  | GSNDDLWHQWKRMYY<br>NKEYN    | 2.87 | 0.01 | 2.28 | 3.06 | 0.22 | 0.28 |
| 28411 | 0 | 22423  | GSNDDLWHQWKRMYY<br>NKEYN    | 2.87 | 0.01 | 2.28 | 3.06 | 0.22 | 0.28 |
| 28412 | 0 | 105232 | GSNKGAIIGLM                 | 2.41 | 0.01 | 0.78 | 0.68 | 0.22 | 0.28 |
| 28413 | 0 | 105232 | GSNKGAIIGLM                 | 2.41 | 0.01 | 0.78 | 0.68 | 0.22 | 1.48 |
| 28414 | 0 | 105232 | GSNKGAIIGLM                 | 2.41 | 0.01 | 0.78 | 1.12 | 0.22 | 1.48 |
| 28415 | 0 | 105232 | GSNKGAIIGLM                 | 2.41 | 0.01 | 0.78 | 1.81 | 0.22 | 0.28 |
| 28416 | 0 | 116745 | GSNKGAIIGLMVGGVVI<br>A      | 2.87 | 0.01 | 0.78 | 0.68 | 0.22 | 1.27 |
| 28417 | 0 | 116745 | GSNKGAIIGLMVGGVVI<br>A      | 2.87 | 0.01 | 0.78 | 0.68 | 0.22 | 0.28 |
| 28418 | 0 | 116745 | GSNKGAIIGLMVGGVVI<br>A      | 2.87 | 0.01 | 0.78 | 0.68 | 0.22 | 0.28 |
| 28419 | 0 | 116745 | GSNKGAIIGLMVGGVVI<br>A      | 2.87 | 0.01 | 0.78 | 0.68 | 0.22 | 0.28 |
| 28420 | 0 | 116745 | GSNKGAIIGLMVGGVVI<br>A      | 2.87 | 0.01 | 0.78 | 0.68 | 0.22 | 0.28 |
| 28421 | 0 | 116745 | GSNKGAIIGLMVGGVVI<br>A      | 2.87 | 0.01 | 0.78 | 0.68 | 0.22 | 0.28 |
| 28422 | 0 | 116745 | GSNKGAIIGLMVGGVVI<br>A      | 2.87 | 0.01 | 0.78 | 0.68 | 0.22 | 0.28 |
| 28423 | 0 | 116745 | GSNKGAIIGLMVGGVVI<br>A      | 2.87 | 0.01 | 0.78 | 0.68 | 0.22 | 0.28 |
| 28424 | 0 | 22434  | GSNWIQ                      | 1.88 | 0.01 | 2.40 | 0.44 | 0.85 | 0.28 |
| 28425 | 0 | 147760 | GSPFLDLLAPAA                | 2.48 | 0.01 | 0.90 | 0.44 | 1.41 | 1.39 |

|       |   |        |                                    |      |      |      |      |      |      |
|-------|---|--------|------------------------------------|------|------|------|------|------|------|
| 28426 | 0 | 175467 | GSPGTPGSRSRTPSLPTP<br>PTREPKKVAVVR | 3.38 | 0.01 | 0.78 | 1.15 | 0.22 | 2.66 |
| 28427 | 0 | 175467 | GSPGTPGSRSRTPSLPTP<br>PTREPKKVAVVR | 3.38 | 0.01 | 0.78 | 1.15 | 0.22 | 2.49 |
| 28428 | 0 | 22444  | GSPLRQRRS                          | 2.24 | 0.01 | 0.90 | 0.68 | 0.22 | 0.28 |
| 28429 | 0 | 22445  | GSPLRQRSL                          | 2.25 | 0.01 | 0.90 | 0.68 | 0.22 | 0.28 |
| 28430 | 0 | 82891  | GSPNCHGPDWASPVCQ<br>RHS            | 2.90 | 0.01 | 3.16 | 0.68 | 0.22 | 0.28 |
| 28431 | 0 | 82891  | GSPNCHGPDWASPVCQ<br>RHS            | 2.90 | 0.01 | 3.16 | 0.68 | 0.22 | 1.34 |
| 28432 | 0 | 82891  | GSPNCHGPDWASPVCQ<br>RHS            | 2.90 | 0.01 | 3.16 | 0.68 | 0.22 | 0.28 |
| 28433 | 0 | 82891  | GSPNCHGPDWASPVCQ<br>RHS            | 2.90 | 0.01 | 3.16 | 0.68 | 0.22 | 1.34 |
| 28434 | 0 | 82891  | GSPNCHGPDWASPVCQ<br>RHS            | 2.90 | 0.01 | 2.85 | 0.68 | 0.22 | 0.28 |
| 28435 | 0 | 82891  | GSPNCHGPDWASPVCQ<br>RHS            | 2.90 | 0.01 | 2.85 | 0.68 | 0.22 | 0.28 |
| 28436 | 0 | 149054 | GSPNFTQ                            | 1.99 | 0.01 | 0.90 | 2.13 | 1.59 | 1.39 |
| 28437 | 0 | 22447  | GSPRRRPPPGRRPFFHP<br>VGE           | 2.99 | 0.01 | 2.43 | 0.44 | 2.82 | 0.28 |
| 28438 | 0 | 22447  | GSPRRRPPPGRRPFFHP<br>VGE           | 2.99 | 0.01 | 2.43 | 0.44 | 1.59 | 0.28 |
| 28439 | 0 | 22447  | GSPRRRPPPGRRPFFHP<br>VGE           | 2.99 | 0.01 | 2.43 | 0.44 | 2.82 | 0.28 |
| 28440 | 0 | 139766 | GSPSATPPAADCGPASP<br>T             | 2.91 | 0.01 | 3.65 | 2.00 | 0.22 | 0.28 |
| 28441 | 0 | 139766 | GSPSATPPAADCGPASP<br>T             | 2.91 | 0.01 | 3.65 | 2.00 | 0.22 | 0.28 |
| 28442 | 0 | 151895 | GSPSQDGYWSFF                       | 2.48 | 0.01 | 2.80 | 2.78 | 0.22 | 0.28 |
| 28443 | 0 | 151895 | GSPSQDGYWSFF                       | 2.48 | 0.01 | 2.80 | 2.78 | 0.22 | 1.34 |
| 28444 | 0 | 22454  | GSPVNSYTNTPYTGALG<br>LLDFALELEFRNL | 3.36 | 0.01 | 2.70 | 0.44 | 0.85 | 0.28 |
| 28445 | 0 | 22454  | GSPVNSYTNTPYTGALG<br>LLDFALELEFRNL | 3.36 | 0.01 | 2.70 | 0.44 | 0.85 | 0.28 |
| 28446 | 0 | 22456  | GSQAIENQFYIKLTNGS                  | 2.78 | 0.01 | 3.32 | 2.49 | 0.22 | 0.28 |
| 28447 | 0 | 22456  | GSQAIENQFYIKLTNGS                  | 2.78 | 0.01 | 3.32 | 2.49 | 0.22 | 0.28 |
| 28448 | 0 | 22456  | GSQAIENQFYIKLTNGS                  | 2.78 | 0.01 | 3.32 | 2.49 | 0.22 | 0.28 |
| 28449 | 0 | 22456  | GSQAIENQFYIKLTNGS                  | 2.78 | 0.01 | 3.32 | 2.49 | 0.22 | 0.28 |
| 28450 | 0 | 22456  | GSQAIENQFYIKLTNGS                  | 2.78 | 0.01 | 3.32 | 2.49 | 0.22 | 1.75 |
| 28451 | 0 | 22460  | GSQGFP                             | 1.91 | 0.01 | 2.96 | 0.44 | 0.85 | 0.28 |
| 28452 | 0 | 22461  | GSQHID                             | 1.88 | 0.01 | 3.24 | 1.12 | 0.22 | 0.28 |

|       |   |        |                                             |      |      |      |      |      |      |
|-------|---|--------|---------------------------------------------|------|------|------|------|------|------|
| 28453 | 0 | 22461  | GSQHID                                      | 1.88 | 0.01 | 3.24 | 1.12 | 0.22 | 0.28 |
| 28454 | 0 | 22469  | GSQLPCEPEPDVAVLTS<br>ML                     | 2.89 | 0.01 | 1.72 | 0.44 | 0.85 | 0.28 |
| 28455 | 0 | 22469  | GSQLPCEPEPDVAVLTS<br>ML                     | 2.89 | 0.01 | 1.72 | 0.44 | 0.85 | 0.28 |
| 28456 | 0 | 304528 | GSQSTLAATDTANNE                             | 2.69 | 0.01 | 1.61 | 0.44 | 0.85 | 1.28 |
| 28457 | 0 | 22475  | GSQVPE                                      | 1.88 | 0.01 | 1.86 | 0.44 | 1.23 | 0.28 |
| 28458 | 0 | 175813 | GSRDCVIPVEQARSFVE<br>RLR                    | 2.93 | 0.01 | 2.04 | 0.44 | 0.85 | 0.28 |
| 28459 | 0 | 175813 | GSRDCVIPVEQARSFVE<br>RLR                    | 2.93 | 0.01 | 2.04 | 0.44 | 0.85 | 0.28 |
| 28460 | 0 | 22481  | GSRGGSQASSRSSR                              | 2.74 | 0.01 | 3.30 | 4.08 | 0.22 | 0.28 |
| 28461 | 0 | 191355 | GSRNCPTTKTHCRD TT                           | 2.73 | 0.01 | 0.90 | 2.84 | 1.13 | 1.39 |
| 28462 | 0 | 191355 | GSRNCPTTKTHCRD TT                           | 2.73 | 0.01 | 0.90 | 2.84 | 1.13 | 1.66 |
| 28463 | 0 | 22484  | GSRNNHPQ                                    | 2.11 | 0.01 | 3.42 | 0.68 | 0.22 | 0.28 |
| 28464 | 0 | 107170 | GSRPSPIGSKWALQP                             | 2.69 | 0.01 | 0.90 | 0.44 | 1.23 | 0.28 |
| 28465 | 0 | 22490  | GSRSRRA                                     | 2.04 | 0.01 | 2.04 | 0.44 | 0.85 | 0.28 |
| 28466 | 0 | 179800 | GSRSRTPSLPTP PTR                            | 2.73 | 4.15 | 0.78 | 2.49 | 0.22 | 0.28 |
| 28467 | 0 | 179800 | GSRSRTPSLPTP PTR                            | 2.73 | 4.15 | 0.78 | 2.49 | 0.22 | 1.66 |
| 28468 | 0 | 179800 | GSRSRTPSLPTP PTR                            | 2.73 | 4.15 | 0.78 | 2.49 | 0.22 | 1.66 |
| 28469 | 0 | 179800 | GSRSRTPSLPTP PTR                            | 2.73 | 4.15 | 0.78 | 2.49 | 0.22 | 1.66 |
| 28470 | 0 | 106480 | GSRSRTPSLPTP PTRE                           | 2.78 | 4.33 | 0.78 | 1.15 | 0.22 | 0.28 |
| 28471 | 0 | 106480 | GSRSRTPSLPTP PTRE                           | 2.78 | 4.33 | 0.78 | 1.15 | 0.22 | 0.28 |
| 28472 | 0 | 106481 | GSRSRTPSLPTP PTRE                           | 2.78 | 3.85 | 0.78 | 1.15 | 0.22 | 0.28 |
| 28473 | 0 | 106481 | GSRSRTPSLPTP PTRE                           | 2.78 | 3.85 | 0.78 | 1.15 | 0.22 | 0.28 |
| 28474 | 0 | 106482 | GSRSRTPSLPTP PTRE                           | 2.78 | 4.15 | 0.78 | 1.15 | 0.22 | 0.28 |
| 28475 | 0 | 106482 | GSRSRTPSLPTP PTRE                           | 2.78 | 4.15 | 0.78 | 1.15 | 0.22 | 0.28 |
| 28476 | 0 | 106483 | GSRSRTPSLPTP PTRE                           | 2.78 | 4.63 | 0.78 | 1.15 | 0.22 | 0.28 |
| 28477 | 0 | 106483 | GSRSRTPSLPTP PTRE                           | 2.78 | 4.63 | 0.78 | 1.15 | 0.22 | 0.28 |
| 28478 | 0 | 22491  | GSRTLAKHPALQ                                | 2.62 | 0.01 | 2.59 | 0.44 | 1.41 | 0.28 |
| 28479 | 0 | 22491  | GSRTLAKHPALQ                                | 2.62 | 0.01 | 2.59 | 0.44 | 0.85 | 0.28 |
| 28480 | 0 | 156879 | GSRTPLQ                                     | 1.99 | 0.01 | 0.90 | 2.74 | 0.22 | 0.85 |
| 28481 | 0 | 22493  | GSRVPTGERVWDRGNV<br>TLLCDCPNGPWV            | 3.30 | 0.01 | 3.59 | 0.44 | 0.85 | 0.28 |
| 28482 | 0 | 22494  | GSRYPGQGSPG                                 | 2.45 | 0.01 | 1.75 | 2.19 | 0.22 | 1.34 |
| 28483 | 0 | 22494  | GSRYPGQGSPG                                 | 2.45 | 0.01 | 1.75 | 2.19 | 0.22 | 0.28 |
| 28484 | 0 | 228253 | GSRYPGQGSPGGNRYP<br>PQG                     | 2.96 | 0.01 | 1.75 | 2.19 | 0.22 | 0.28 |
| 28485 | 0 | 228253 | GSRYPGQGSPGGNRYP<br>PQG                     | 2.96 | 0.01 | 1.75 | 2.19 | 0.22 | 0.28 |
| 28486 | 0 | 22495  | GSSAMILAVNHPDQFIY<br>AGSLSALLDPSQGMGPS<br>L | 3.51 | 0.01 | 4.08 | 1.15 | 2.26 | 0.85 |
| 28487 | 0 | 175591 | GSSAYYDPNYLTT                               | 2.52 | 0.01 | 4.45 | 1.12 | 0.22 | 0.85 |

|       |   |        |                                  |      |      |      |      |      |      |
|-------|---|--------|----------------------------------|------|------|------|------|------|------|
|       |   |        | GSSAYYDPNYLTSTDVCEY              |      |      |      |      |      |      |
| 28488 | 0 | 175592 | YDPDYLNTPVSYDYDSTY<br>LST        | 3.63 | 0.01 | 0.90 | 0.68 | 0.22 | 0.28 |
|       |   |        | GSSAYYDPNYLTSTDVCEY              |      |      |      |      |      |      |
| 28489 | 0 | 175592 | YDPDYLNTPVSYDYDSTY<br>LST        | 3.63 | 0.01 | 0.90 | 0.68 | 0.22 | 0.28 |
| 28490 | 0 | 22497  | GSSDLYLVTRHADVIPVR<br>RR         | 2.92 | 0.01 | 1.72 | 0.44 | 0.85 | 0.28 |
| 28491 | 0 | 141665 | GSSDTNDIDTKRARTD                 | 2.76 | 0.01 | 1.66 | 1.20 | 0.22 | 0.28 |
| 28492 | 0 | 141665 | GSSDTNDIDTKRARTD                 | 2.76 | 0.01 | 1.66 | 2.55 | 0.22 | 0.28 |
| 28493 | 0 | 131900 | GSSFLSPEHQ                       | 2.31 | 4.15 | 2.19 | 2.55 | 0.22 | 0.28 |
| 28494 | 0 | 131900 | GSSFLSPEHQ                       | 2.31 | 4.15 | 2.19 | 2.55 | 0.22 | 0.28 |
| 28495 | 0 | 131900 | GSSFLSPEHQ                       | 2.31 | 4.15 | 2.19 | 2.55 | 2.25 | 1.75 |
| 28496 | 0 | 131901 | GSSFLSPEHQKAQQRKE<br>SKKPPAKLQPR | 3.30 | 4.15 | 2.19 | 2.55 | 0.22 | 0.28 |
| 28497 | 0 | 131901 | GSSFLSPEHQKAQQRKE<br>SKKPPAKLQPR | 3.30 | 4.15 | 2.19 | 2.55 | 0.22 | 0.28 |
| 28498 | 0 | 131901 | GSSFLSPEHQKAQQRKE<br>SKKPPAKLQPR | 3.30 | 4.15 | 2.19 | 2.55 | 2.25 | 1.75 |
| 28499 | 0 | 22505  | GSSGSSAVDSGTATGPP<br>DQA         | 3.00 | 0.01 | 1.72 | 0.44 | 0.85 | 0.28 |
| 28500 | 0 | 22507  | GSSGYCAWPACYCYG                  | 2.73 | 0.01 | 2.56 | 1.20 | 0.22 | 0.85 |
| 28501 | 0 | 22507  | GSSGYCAWPACYCYG                  | 2.73 | 0.01 | 2.56 | 2.02 | 0.22 | 0.85 |
| 28502 | 0 | 137887 | GSSHHETHYGYA                     | 2.51 | 0.01 | 2.21 | 0.44 | 0.85 | 0.28 |
| 28503 | 0 | 178937 | GSSHHHHHHSSGLVPR                 | 2.77 | 0.01 | 0.90 | 0.68 | 0.22 | 2.66 |
| 28504 | 0 | 22508  | GSSIAADQ                         | 2.12 | 0.01 | 3.06 | 1.12 | 0.22 | 0.28 |
| 28505 | 0 | 22509  | GSSIAADQLP                       | 2.29 | 0.01 | 4.15 | 1.15 | 0.22 | 1.34 |
| 28506 | 0 | 22509  | GSSIAADQLP                       | 2.29 | 0.01 | 4.15 | 1.15 | 0.22 | 0.85 |
| 28507 | 0 | 94836  | GSSK                             | 1.59 | 4.45 | 3.85 | 1.12 | 0.22 | 1.27 |
| 28508 | 0 | 94836  | GSSK                             | 1.59 | 4.45 | 3.85 | 1.12 | 0.22 | 2.02 |
| 28509 | 0 | 94836  | GSSK                             | 1.59 | 4.45 | 3.85 | 1.12 | 0.22 | 1.48 |
| 28510 | 0 | 189085 | GSSLDDS                          | 2.05 | 0.01 | 0.90 | 2.13 | 0.22 | 0.28 |
| 28511 | 0 | 189085 | GSSLDDS                          | 2.05 | 0.01 | 0.90 | 3.41 | 0.22 | 0.28 |
| 28512 | 0 | 149055 | GSSLHDI                          | 2.01 | 0.01 | 0.90 | 2.13 | 1.59 | 1.39 |
| 28513 | 0 | 22516  | GSSNSAFVSTSSRR                   | 2.68 | 0.01 | 2.14 | 2.90 | 0.22 | 0.28 |
| 28514 | 0 | 175199 | GSSNTNDIDTKRARTD                 | 2.76 | 0.01 | 2.86 | 2.55 | 0.22 | 0.28 |
| 28515 | 0 | 22529  | GSSTETVN                         | 2.13 | 0.01 | 2.83 | 1.12 | 0.22 | 0.28 |
| 28516 | 0 | 22533  | GSSYGF                           | 1.92 | 0.01 | 1.96 | 0.44 | 0.85 | 0.28 |
| 28517 | 0 | 22536  | GSTAHNARTLTGMFSLG<br>ARQK        | 3.00 | 0.01 | 4.15 | 0.44 | 0.85 | 0.28 |
| 28518 | 0 | 95433  | GSTDEYCSPD                       | 2.31 | 0.01 | 2.60 | 0.44 | 1.23 | 0.85 |
| 28519 | 0 | 95433  | GSTDEYCSPD                       | 2.31 | 0.01 | 2.60 | 0.44 | 1.23 | 0.85 |

|       |   |        |                                    |      |      |      |      |      |      |
|-------|---|--------|------------------------------------|------|------|------|------|------|------|
| 28520 | 0 | 22538  | GSTDSTSHGNYSTQIGA<br>NQAVRFTI      | 3.17 | 0.01 | 3.61 | 1.81 | 0.22 | 0.28 |
| 28521 | 0 | 22538  | GSTDSTSHGNYSTQIGA<br>NQAVRFTI      | 3.17 | 0.01 | 3.61 | 3.01 | 0.22 | 0.28 |
| 28522 | 0 | 22538  | GSTDSTSHGNYSTQIGA<br>NQAVRFTI      | 3.17 | 0.01 | 3.61 | 0.68 | 0.22 | 0.28 |
| 28523 | 0 | 22542  | GSTKSCARTLVSGSF                    | 2.69 | 0.01 | 2.43 | 0.44 | 1.59 | 0.28 |
| 28524 | 0 | 22545  | GSTMMQTKTFSSSSSSK<br>KMG           | 2.98 | 0.01 | 0.78 | 0.44 | 0.85 | 0.28 |
| 28525 | 0 | 22545  | GSTMMQTKTFSSSSSSK<br>KMG           | 2.98 | 0.01 | 0.78 | 0.44 | 1.13 | 0.28 |
| 28526 | 0 | 22545  | GSTMMQTKTFSSSSSSK<br>KMG           | 2.98 | 0.01 | 0.78 | 0.44 | 1.13 | 0.28 |
| 28527 | 0 | 22545  | GSTMMQTKTFSSSSSSK<br>KMG           | 2.98 | 0.01 | 0.78 | 0.44 | 1.93 | 0.28 |
| 28528 | 0 | 123269 | GSTPEERAR                          | 2.22 | 0.01 | 2.28 | 2.00 | 0.22 | 0.28 |
| 28529 | 0 | 304876 | GSTSSTPPSGTENKP                    | 2.73 | 0.01 | 1.61 | 0.44 | 0.85 | 1.28 |
| 28530 | 0 | 22562  | GSVNSFFSR                          | 2.24 | 0.01 | 3.72 | 1.15 | 0.22 | 2.66 |
| 28531 | 0 | 22562  | GSVNSFFSR                          | 2.24 | 0.01 | 4.45 | 1.15 | 0.22 | 2.66 |
| 28532 | 0 | 22562  | GSVNSFFSR                          | 2.24 | 0.01 | 3.72 | 2.25 | 0.22 | 2.66 |
| 28533 | 0 | 22563  | GSVNSFFSRLNWL                      | 2.56 | 0.01 | 3.72 | 1.15 | 0.22 | 2.66 |
| 28534 | 0 | 22564  | GSVPLSRRKEVWAGEEE<br>SFGYWLNVWQEMM | 3.31 | 0.01 | 0.90 | 1.15 | 0.22 | 1.27 |
| 28535 | 0 | 98081  | GSVQFVPIQN                         | 2.31 | 0.01 | 3.08 | 0.68 | 0.22 | 0.28 |
| 28536 | 0 | 98081  | GSVQFVPIQN                         | 2.31 | 0.01 | 3.08 | 1.20 | 0.22 | 0.28 |
| 28537 | 0 | 180977 | GSVSAGFSNS                         | 2.36 | 0.01 | 2.18 | 2.16 | 0.22 | 0.28 |
| 28538 | 0 | 136338 | GSVTKKRKLESTES                     | 2.64 | 0.01 | 0.78 | 1.12 | 0.22 | 0.85 |
| 28539 | 0 | 119914 | GSVVAINPESDQPDLS                   | 2.72 | 0.01 | 0.78 | 2.04 | 0.22 | 0.28 |
| 28540 | 0 | 119914 | GSVVAINPESDQPDLS                   | 2.72 | 0.01 | 0.78 | 1.12 | 0.22 | 0.28 |
| 28541 | 0 | 119914 | GSVVAINPESDQPDLS                   | 2.72 | 0.01 | 0.78 | 1.81 | 0.22 | 0.28 |
| 28542 | 0 | 100085 | GSWCVPKPGVSD                       | 2.50 | 0.01 | 2.88 | 0.44 | 1.23 | 0.85 |
| 28543 | 0 | 22575  | GSWHINRT<br>GSWIIAAGTSEALTQYKC     | 2.10 | 0.01 | 1.72 | 0.44 | 0.85 | 0.28 |
| 28544 | 0 | 104513 | WIDRFSYDDALYSLYTDS<br>KGNNKTAIR    | 3.75 | 0.01 | 3.36 | 0.44 | 1.23 | 0.28 |
| 28545 | 0 | 164771 | GSWVGWNWYAYPT                      | 2.48 | 0.01 | 3.78 | 0.44 | 1.23 | 0.85 |
| 28546 | 0 | 22586  | GSYNRSSFESSGLV                     | 2.69 | 0.01 | 2.72 | 0.68 | 0.22 | 0.85 |
| 28547 | 0 | 22586  | GSYNRSSFESSGLV                     | 2.69 | 0.01 | 2.72 | 0.68 | 0.22 | 1.66 |
| 28548 | 0 | 22586  | GSYNRSSFESSGLV                     | 2.69 | 0.01 | 2.72 | 0.68 | 0.22 | 1.66 |
| 28549 | 0 | 22586  | GSYNRSSFESSGLV                     | 2.69 | 0.01 | 2.72 | 0.68 | 0.22 | 1.66 |
| 28550 | 0 | 305067 | GTAMKTTTATTGDSD                    | 2.72 | 0.01 | 1.61 | 0.44 | 0.85 | 1.28 |
| 28551 | 0 | 105850 | GTAPFEIH                           | 2.10 | 0.01 | 3.05 | 1.20 | 0.22 | 0.28 |

|       |   |        |                                                  |      |      |      |      |      |      |
|-------|---|--------|--------------------------------------------------|------|------|------|------|------|------|
| 28552 | 0 | 105851 | GTAPFEIHANRIVGFFSKI<br>I                         | 2.91 | 0.01 | 3.05 | 1.20 | 0.22 | 0.28 |
| 28553 | 0 | 105851 | GTAPFEIHANRIVGFFSKI<br>I                         | 2.91 | 0.01 | 3.05 | 0.44 | 1.23 | 0.28 |
| 28554 | 0 | 22601  | GTAPT                                            | 1.75 | 0.01 | 2.66 | 2.61 | 0.22 | 0.28 |
| 28555 | 0 | 190659 | GTASHVSIFAMVTGLIGS<br>IA                         | 2.98 | 0.01 | 2.75 | 2.13 | 0.22 | 0.28 |
| 28556 | 0 | 78675  | GTATGPPDQASDDGDK<br>GSDVE                        | 3.02 | 0.01 | 1.72 | 0.44 | 1.59 | 0.28 |
| 28557 | 0 | 94837  | GTCKELKKL                                        | 2.24 | 0.01 | 4.23 | 1.15 | 0.22 | 0.85 |
| 28558 | 0 | 94837  | GTCKELKKL                                        | 2.24 | 0.01 | 4.23 | 1.15 | 0.22 | 0.85 |
| 28559 | 0 | 305142 | GTDEGLLLPVDNDGD                                  | 2.70 | 0.01 | 1.61 | 0.44 | 0.85 | 1.28 |
| 28560 | 0 | 305148 | GTDGDESIDEEEEKE                                  | 2.72 | 0.01 | 1.61 | 0.44 | 0.85 | 1.28 |
| 28561 | 0 | 230936 | GTDGIPGAKGSAGAPGI<br>AGAPGFP                     | 3.18 | 0.01 | 0.78 | 3.16 | 0.22 | 0.28 |
| 28562 | 0 | 22619  | GTDGPCKVPISSVASLN<br>DLT                         | 2.95 | 0.01 | 2.85 | 2.02 | 0.22 | 0.28 |
| 28563 | 0 | 22620  | GTDGV                                            | 1.77 | 0.01 | 2.25 | 0.44 | 1.23 | 0.85 |
| 28564 | 0 | 114845 | GTDGVTYTND                                       | 2.36 | 0.01 | 2.25 | 0.44 | 1.23 | 0.85 |
| 28565 | 0 | 22621  | GTDGVTYTNDCLLC                                   | 2.64 | 0.01 | 2.25 | 0.44 | 1.23 | 1.27 |
| 28566 | 0 | 22621  | GTDGVTYTNDCLLC                                   | 2.64 | 0.01 | 2.25 | 1.12 | 0.22 | 1.27 |
| 28567 | 0 | 230227 | GTDGVTYTNDCLLCAYSI<br>EF                         | 2.93 | 0.01 | 2.25 | 0.44 | 1.23 | 0.28 |
| 28568 | 0 | 226599 | GTDKKTAAGEAPSPSG                                 | 2.78 | 0.01 | 2.30 | 0.44 | 0.85 | 0.28 |
| 28569 | 0 | 226599 | GTDKKTAAGEAPSPSG                                 | 2.78 | 0.01 | 2.30 | 0.44 | 0.85 | 0.28 |
| 28570 | 0 | 226599 | GTDKKTAAGEAPSPSG                                 | 2.78 | 0.01 | 2.30 | 0.44 | 0.85 | 0.28 |
| 28571 | 0 | 226599 | GTDKKTAAGEAPSPSG                                 | 2.78 | 0.01 | 2.30 | 0.44 | 0.85 | 0.28 |
| 28572 | 0 | 226600 | GTDKKTAAGGTPSPSG                                 | 2.78 | 0.01 | 2.30 | 0.44 | 0.85 | 0.28 |
| 28573 | 0 | 226600 | GTDKKTAAGGTPSPSG                                 | 2.78 | 0.01 | 2.30 | 0.44 | 0.85 | 0.28 |
| 28574 | 0 | 226601 | GTDKKTATGEAPSQPG                                 | 2.76 | 0.01 | 0.90 | 0.44 | 0.85 | 0.28 |
| 28575 | 0 | 226601 | GTDKKTATGEAPSQPG                                 | 2.76 | 0.01 | 0.90 | 0.44 | 0.85 | 0.28 |
| 28576 | 0 | 226601 | GTDKKTATGEAPSQPG                                 | 2.76 | 0.01 | 0.90 | 0.44 | 0.85 | 0.28 |
| 28577 | 0 | 22626  | GTDLELIQILKDHYNISLD<br>NPLENPSSLFDLVARIKN<br>NLK | 3.61 | 0.01 | 2.75 | 0.44 | 0.85 | 0.85 |
| 28578 | 0 | 82909  | GTDSGWGNRQSF                                     | 2.48 | 0.01 | 2.87 | 0.44 | 0.22 | 0.28 |
| 28579 | 0 | 82909  | GTDSGWGNRQSF                                     | 2.48 | 0.01 | 2.90 | 0.68 | 0.22 | 0.28 |

|       |   |        |                              |      |      |      |      |      |      |
|-------|---|--------|------------------------------|------|------|------|------|------|------|
| 28580 | 0 | 95434  | GTDTLISVEGNKDTINL<br>QGMANNI | 3.12 | 0.01 | 3.65 | 2.22 | 0.22 | 0.28 |
| 28581 | 0 | 22639  | GTEKF                        | 1.74 | 0.01 | 3.30 | 1.15 | 0.22 | 0.28 |
| 28582 | 0 | 226602 | GTEKKAAGEAPSPSG              | 2.78 | 0.01 | 2.30 | 0.44 | 0.85 | 0.28 |
| 28583 | 0 | 226602 | GTEKKAAGEAPSPSG              | 2.78 | 0.01 | 2.30 | 0.44 | 0.85 | 0.28 |
| 28584 | 0 | 226602 | GTEKKAAGEAPSPSG              | 2.78 | 0.01 | 2.30 | 0.44 | 0.85 | 0.28 |
| 28585 | 0 | 226602 | GTEKKAAGEAPSPSG              | 2.78 | 0.01 | 2.30 | 0.44 | 0.85 | 0.28 |
| 28586 | 0 | 226603 | GTENKPAAGEAPSQPG             | 2.77 | 0.01 | 2.30 | 0.44 | 0.85 | 0.28 |
| 28587 | 0 | 226603 | GTENKPAAGEAPSQPG             | 2.77 | 0.01 | 2.30 | 0.44 | 0.85 | 0.28 |
| 28588 | 0 | 226603 | GTENKPAAGEAPSQPG             | 2.77 | 0.01 | 2.30 | 0.44 | 0.85 | 0.28 |
| 28589 | 0 | 305226 | GTENKPATGEAPSQP              | 2.71 | 0.01 | 1.61 | 0.44 | 0.85 | 1.28 |
| 28590 | 0 | 226604 | GTENKPATGEAPSQPG             | 2.77 | 0.01 | 2.30 | 0.44 | 0.85 | 0.28 |
| 28591 | 0 | 226604 | GTENKPATGEAPSQPG             | 2.77 | 0.01 | 2.30 | 0.44 | 0.85 | 0.28 |
| 28592 | 0 | 226604 | GTENKPATGEAPSQPG             | 2.77 | 0.01 | 2.30 | 0.44 | 0.85 | 0.28 |
| 28593 | 0 | 226604 | GTENKPATGEAPSQPG             | 2.77 | 0.01 | 2.30 | 0.44 | 0.85 | 0.28 |
| 28594 | 0 | 226605 | GTENKPATGETPSPSG             | 2.79 | 0.01 | 0.90 | 0.44 | 0.85 | 0.28 |
| 28595 | 0 | 226605 | GTENKPATGETPSPSG             | 2.79 | 0.01 | 0.90 | 0.44 | 0.85 | 0.28 |
| 28596 | 0 | 226605 | GTENKPATGETPSPSG             | 2.79 | 0.01 | 0.90 | 0.44 | 0.85 | 0.28 |
| 28597 | 0 | 226605 | GTENKPATGETPSPSG             | 2.79 | 0.01 | 0.90 | 0.44 | 0.85 | 0.28 |
| 28598 | 0 | 22642  | GTERVRLLEFIYN                | 2.61 | 0.01 | 0.78 | 3.65 | 0.22 | 0.85 |
| 28599 | 0 | 418982 | GTEYTIKATPATTPVA<br>PLIPG    | 3.11 | 0.01 | 4.33 | 0.68 | 0.22 | 0.85 |
| 28600 | 0 | 137888 | GTEYTV EV                    | 2.16 | 0.01 | 2.21 | 1.20 | 0.22 | 0.28 |
| 28601 | 0 | 137888 | GTEYTV EV                    | 2.16 | 0.01 | 2.21 | 0.44 | 0.85 | 0.28 |
| 28602 | 0 | 137888 | GTEYTV EV                    | 2.16 | 0.01 | 2.21 | 0.44 | 0.85 | 0.28 |
| 28603 | 0 | 137888 | GTEYTV EV                    | 2.16 | 0.01 | 2.21 | 1.20 | 0.22 | 0.28 |
| 28604 | 0 | 137888 | GTEYTV EV                    | 2.16 | 0.01 | 2.21 | 1.20 | 0.22 | 0.28 |
| 28605 | 0 | 144673 | GTFCGGEECMRG                 | 2.51 | 0.01 | 0.90 | 0.68 | 0.22 | 0.28 |
| 28606 | 0 | 144673 | GTFCGGEECMRG                 | 2.51 | 0.01 | 0.90 | 0.68 | 0.22 | 1.48 |
| 28607 | 0 | 144673 | GTFCGGEECMRG                 | 2.51 | 0.01 | 0.90 | 0.68 | 0.22 | 1.27 |
| 28608 | 0 | 139515 | GTFEVSGNVSPGTR               | 2.70 | 3.85 | 0.78 | 0.44 | 1.13 | 0.28 |
| 28609 | 0 | 128812 | GTFKAFDK                     | 2.14 | 0.01 | 0.78 | 0.44 | 1.13 | 0.28 |



|       |   |        |                               |      |      |      |      |      |      |
|-------|---|--------|-------------------------------|------|------|------|------|------|------|
| 28610 | 0 | 128812 | GTFKAFDK                      | 2.14 | 0.01 | 0.78 | 0.44 | 1.13 | 0.28 |
| 28611 | 0 | 150267 | GTFSVRTVGTSKSKY               | 2.72 | 0.01 | 3.45 | 1.12 | 0.22 | 0.28 |
| 28612 | 0 | 125432 | GTFTISNLGMFGIKNFSA<br>IINPPQA | 3.17 | 0.01 | 0.78 | 0.44 | 1.13 | 0.28 |
| 28613 | 0 | 125432 | GTFTISNLGMFGIKNFSA<br>IINPPQA | 3.17 | 0.01 | 0.78 | 0.44 | 1.13 | 0.28 |
| 28614 | 0 | 22652  | GTGA                          | 1.60 | 0.01 | 3.38 | 1.15 | 0.22 | 0.85 |
| 28615 | 0 | 22652  | GTGA                          | 1.60 | 0.01 | 3.38 | 1.15 | 0.22 | 1.34 |
| 28616 | 0 | 82914  | GTGALASSAPST                  | 2.53 | 0.01 | 2.48 | 0.44 | 1.59 | 0.28 |
| 28617 | 0 | 82915  | GTGEGNHIE                     | 2.36 | 0.01 | 3.06 | 0.44 | 0.85 | 0.28 |
| 28618 | 0 | 305280 | GTGENLDGDEEEGDV               | 2.72 | 0.01 | 1.61 | 0.44 | 0.85 | 1.28 |
| 28619 | 0 | 22656  | GTGFSLSLDP                    | 2.34 | 0.01 | 3.16 | 0.68 | 0.22 | 0.28 |
| 28620 | 0 | 22656  | GTGFSLSLDP                    | 2.34 | 0.01 | 3.16 | 0.68 | 0.22 | 0.28 |
| 28621 | 0 | 305289 | GTGGDDVEDGDGEDE               | 2.75 | 0.01 | 1.61 | 0.44 | 0.85 | 1.28 |
| 28622 | 0 | 145810 | GTGGRTGY                      | 2.18 | 0.01 | 1.86 | 0.68 | 0.22 | 0.28 |
| 28623 | 0 | 145810 | GTGGRTGY                      | 2.18 | 0.01 | 1.86 | 0.68 | 0.22 | 0.28 |
| 28624 | 0 | 228255 | GTGGRTGYIPLGGRSNT<br>VVDV     | 3.00 | 0.01 | 3.11 | 0.68 | 0.22 | 0.28 |
| 28625 | 0 | 228255 | GTGGRTGYIPLGGRSNT<br>VVDV     | 3.00 | 0.01 | 3.11 | 0.68 | 0.22 | 0.28 |
| 28626 | 0 | 228255 | GTGGRTGYIPLGGRSNT<br>VVDV     | 3.00 | 0.01 | 3.11 | 0.68 | 0.22 | 1.75 |
| 28627 | 0 | 228255 | GTGGRTGYIPLGGRSNT<br>VVDV     | 3.00 | 0.01 | 3.11 | 0.68 | 0.22 | 1.34 |
| 28628 | 0 | 180109 | GTGGRTGYIPLGTRPPT             | 2.85 | 0.01 | 1.86 | 1.12 | 0.22 | 1.75 |
| 28629 | 0 | 180109 | GTGGRTGYIPLGTRPPT             | 2.85 | 0.01 | 1.86 | 1.12 | 0.22 | 0.28 |
| 28630 | 0 | 228256 | GTGGRTGYIPLGTRPPT<br>ATDT     | 3.03 | 0.01 | 1.86 | 0.68 | 0.22 | 0.28 |
| 28631 | 0 | 228256 | GTGGRTGYIPLGTRPPT<br>ATDT     | 3.03 | 0.01 | 1.86 | 0.68 | 0.22 | 1.75 |
| 28632 | 0 | 228256 | GTGGRTGYIPLGTRPPT<br>ATDT     | 3.03 | 0.01 | 1.86 | 0.68 | 0.22 | 0.28 |
| 28633 | 0 | 228256 | GTGGRTGYIPLGTRPPT<br>ATDT     | 3.03 | 0.01 | 1.86 | 0.68 | 0.22 | 1.75 |
| 28634 | 0 | 228256 | GTGGRTGYIPLGTRPPT<br>ATDT     | 3.03 | 0.01 | 1.86 | 0.68 | 0.22 | 1.34 |
| 28635 | 0 | 228256 | GTGGRTGYIPLGTRPPT<br>ATDT     | 3.03 | 0.01 | 1.86 | 0.68 | 0.22 | 1.34 |
| 28636 | 0 | 228256 | GTGGRTGYIPLGTRPPT<br>ATDT     | 3.03 | 0.01 | 1.86 | 0.68 | 0.22 | 1.34 |
| 28637 | 0 | 228256 | GTGGRTGYIPLGTRPPT<br>ATDT     | 3.03 | 0.01 | 1.86 | 0.68 | 0.22 | 1.34 |
| 28638 | 0 | 228257 | GTGGRTGYVPLGTRPPT<br>VVDV     | 3.04 | 0.01 | 1.86 | 0.68 | 0.22 | 0.28 |

|       |   |        |                           |      |      |      |      |      |      |
|-------|---|--------|---------------------------|------|------|------|------|------|------|
| 28639 | 0 | 228257 | GTGGRTGYVPLGTRPPT<br>VVDV | 3.04 | 0.01 | 1.86 | 0.68 | 0.22 | 0.28 |
| 28640 | 0 | 228257 | GTGGRTGYVPLGTRPPT<br>VVDV | 3.04 | 0.01 | 1.86 | 0.68 | 0.22 | 1.34 |
| 28641 | 0 | 228257 | GTGGRTGYVPLGTRPPT<br>VVDV | 3.04 | 0.01 | 1.86 | 0.68 | 0.22 | 1.34 |
| 28642 | 0 | 228257 | GTGGRTGYVPLGTRPPT<br>VVDV | 3.04 | 0.01 | 1.86 | 0.68 | 0.22 | 1.34 |
| 28643 | 0 | 228257 | GTGGRTGYVPLGTRPPT<br>VVDV | 3.04 | 0.01 | 1.86 | 0.68 | 0.22 | 1.34 |
| 28644 | 0 | 228257 | GTGGRTGYVPLGTRPPT<br>VVDV | 3.04 | 0.01 | 1.86 | 0.68 | 0.22 | 1.34 |
| 28645 | 0 | 22658  | GTGGTASMSYKFPPVPP<br>ENL  | 2.92 | 0.01 | 2.75 | 0.44 | 1.59 | 0.28 |
| 28646 | 0 | 462350 | GTGIKPFLE                 | 2.22 | 0.01 | 0.78 | 1.12 | 0.22 | 1.28 |
| 28647 | 0 | 22662  | GTGKRNQITITNDKGRLS<br>KD  | 2.98 | 0.01 | 2.78 | 0.44 | 0.85 | 0.28 |
| 28648 | 0 | 22666  | GTGLVPLFDPRYRFL           | 2.71 | 0.01 | 0.90 | 0.44 | 1.41 | 0.28 |
| 28649 | 0 | 98808  | GTGNLELVAV                | 2.34 | 0.01 | 2.16 | 0.44 | 1.23 | 0.85 |
| 28650 | 0 | 100086 | GTGNLELVAVRKEQQQ<br>RGRR  | 2.95 | 0.01 | 2.16 | 0.44 | 2.39 | 0.28 |
| 28651 | 0 | 22669  | GTGP                      | 1.60 | 0.01 | 3.70 | 0.44 | 0.85 | 0.28 |
| 28652 | 0 | 111380 | GTGSGTGGRTGYIPL           | 2.72 | 0.01 | 1.86 | 1.12 | 0.22 | 0.28 |
| 28653 | 0 | 111380 | GTGSGTGGRTGYIPL           | 2.72 | 0.01 | 1.86 | 1.12 | 0.22 | 0.28 |
| 28654 | 0 | 111380 | GTGSGTGGRTGYIPL           | 2.72 | 0.01 | 1.86 | 1.12 | 0.22 | 0.28 |
| 28655 | 0 | 111380 | GTGSGTGGRTGYIPL           | 2.72 | 0.01 | 1.86 | 1.12 | 0.22 | 0.28 |
| 28656 | 0 | 111380 | GTGSGTGGRTGYIPL           | 2.72 | 0.01 | 1.86 | 1.12 | 0.22 | 1.34 |
| 28657 | 0 | 111380 | GTGSGTGGRTGYIPL           | 2.72 | 0.01 | 1.86 | 1.12 | 0.22 | 1.34 |
| 28658 | 0 | 111380 | GTGSGTGGRTGYIPL           | 2.72 | 0.01 | 1.86 | 1.12 | 0.22 | 1.34 |
| 28659 | 0 | 111380 | GTGSGTGGRTGYIPL           | 2.72 | 0.01 | 1.86 | 1.12 | 0.22 | 1.34 |
| 28660 | 0 | 111380 | GTGSGTGGRTGYIPL           | 2.72 | 0.01 | 1.86 | 1.12 | 0.22 | 1.34 |
| 28661 | 0 | 111380 | GTGSGTGGRTGYIPL           | 2.72 | 0.01 | 1.86 | 0.68 | 0.22 | 0.28 |
| 28662 | 0 | 111380 | GTGSGTGGRTGYIPL           | 2.72 | 0.01 | 1.86 | 0.68 | 0.22 | 0.28 |
| 28663 | 0 | 111381 | GTGSGTGGRTGYVPL           | 2.72 | 0.01 | 3.89 | 1.12 | 0.22 | 0.28 |
| 28664 | 0 | 111381 | GTGSGTGGRTGYVPL           | 2.72 | 0.01 | 3.89 | 1.12 | 0.22 | 0.28 |
| 28665 | 0 | 111381 | GTGSGTGGRTGYVPL           | 2.72 | 0.01 | 3.89 | 1.12 | 0.22 | 0.28 |
| 28666 | 0 | 111381 | GTGSGTGGRTGYVPL           | 2.72 | 0.01 | 3.89 | 1.12 | 0.22 | 1.34 |
| 28667 | 0 | 111381 | GTGSGTGGRTGYVPL           | 2.72 | 0.01 | 3.89 | 1.12 | 0.22 | 1.34 |
| 28668 | 0 | 450657 | GTGSQAS                   | 2.05 | 0.01 | 0.90 | 0.44 | 1.23 | 1.39 |
| 28669 | 0 | 226731 | GTGTEDSHPPYKQ             | 2.53 | 0.01 | 2.60 | 0.68 | 0.22 | 0.28 |
| 28670 | 0 | 181331 | GTGVVPALQAAETGA           | 2.71 | 0.01 | 2.82 | 1.15 | 0.22 | 0.28 |
| 28671 | 0 | 137889 | GTGYHSRFGSDA              | 2.48 | 0.01 | 2.21 | 0.44 | 0.85 | 0.28 |
| 28672 | 0 | 144674 | GTHCRGBGCMTG              | 2.52 | 0.01 | 0.90 | 0.68 | 0.22 | 0.28 |
| 28673 | 0 | 144674 | GTHCRGBGCMTG              | 2.52 | 0.01 | 0.90 | 0.68 | 0.22 | 0.28 |
| 28674 | 0 | 144674 | GTHCRGBGCMTG              | 2.52 | 0.01 | 0.90 | 0.68 | 0.22 | 1.48 |
| 28675 | 0 | 144674 | GTHCRGBGCMTG              | 2.52 | 0.01 | 0.90 | 0.68 | 0.22 | 1.27 |
| 28676 | 0 | 91420  | GTHNENYIFGNCY             | 2.56 | 0.01 | 3.12 | 1.12 | 0.22 | 0.28 |

|       |   |        |                                 |      |      |      |      |      |      |
|-------|---|--------|---------------------------------|------|------|------|------|------|------|
| 28677 | 0 | 91420  | GTHNENYIFGNCY                   | 2.56 | 0.01 | 3.12 | 1.12 | 0.22 | 0.28 |
| 28678 | 0 | 22685  | GTHNGQIGNDPNRDI                 | 2.71 | 0.01 | 2.95 | 3.38 | 0.22 | 0.28 |
| 28679 | 0 | 22686  | GTHNQWNKPSKP                    | 2.48 | 0.01 | 2.98 | 2.19 | 0.22 | 0.28 |
| 28680 | 0 | 22687  | GTHNQWNKPSKPKTNL<br>K           | 2.81 | 0.01 | 1.75 | 2.19 | 0.22 | 0.28 |
| 28681 | 0 | 22687  | GTHNQWNKPSKPKTNL<br>K           | 2.81 | 0.01 | 1.75 | 2.19 | 0.22 | 0.28 |
| 28682 | 0 | 22687  | GTHNQWNKPSKPKTNL<br>K           | 2.81 | 0.01 | 1.75 | 2.19 | 0.22 | 1.34 |
| 28683 | 0 | 144675 | GTHPFLSQW                       | 2.18 | 0.01 | 0.90 | 0.68 | 0.22 | 0.28 |
| 28684 | 0 | 144675 | GTHPFLSQW                       | 2.18 | 0.01 | 0.90 | 0.68 | 0.22 | 1.48 |
| 28685 | 0 | 144675 | GTHPFLSQW                       | 2.18 | 0.01 | 0.90 | 0.68 | 0.22 | 1.27 |
| 28686 | 0 | 144676 | GTHPSLQFT                       | 2.21 | 0.01 | 0.90 | 0.68 | 0.22 | 0.28 |
| 28687 | 0 | 144676 | GTHPSLQFT                       | 2.21 | 0.01 | 0.90 | 0.68 | 0.22 | 1.48 |
| 28688 | 0 | 144676 | GTHPSLQFT                       | 2.21 | 0.01 | 0.90 | 0.68 | 0.22 | 1.27 |
| 28689 | 0 | 22691  | GTHPSSSAGLKNDLLEN               | 2.77 | 0.01 | 2.97 | 0.68 | 0.22 | 0.28 |
| 28690 | 0 | 22691  | GTHPSSSAGLKNDLLEN               | 2.77 | 0.01 | 2.97 | 0.68 | 0.22 | 0.28 |
| 28691 | 0 | 22691  | GTHPSSSAGLKNDLLEN               | 2.77 | 0.01 | 2.97 | 0.68 | 0.22 | 0.28 |
| 28692 | 0 | 22691  | GTHPSSSAGLKNDLLEN               | 2.77 | 0.01 | 2.97 | 0.68 | 0.22 | 0.28 |
| 28693 | 0 | 144677 | GTHPTLVVHSREL                   | 2.55 | 0.01 | 0.90 | 0.68 | 0.22 | 0.28 |
| 28694 | 0 | 144677 | GTHPTLVVHSREL                   | 2.55 | 0.01 | 0.90 | 0.68 | 0.22 | 1.48 |
| 28695 | 0 | 144677 | GTHPTLVVHSREL                   | 2.55 | 0.01 | 0.90 | 0.68 | 0.22 | 1.27 |
| 28696 | 0 | 22693  | GTHSWDHPHHSYC                   | 2.55 | 0.01 | 0.90 | 0.68 | 0.22 | 0.28 |
| 28697 | 0 | 22693  | GTHSWDHPHHSYC                   | 2.55 | 0.01 | 0.90 | 0.68 | 0.22 | 0.28 |
| 28698 | 0 | 22693  | GTHSWDHPHHSYC                   | 2.55 | 0.01 | 0.90 | 0.68 | 0.22 | 1.34 |
| 28699 | 0 | 22694  | GHTTIGGSQAQQANRF<br>VSMFSRGPSQK | 3.23 | 0.01 | 1.72 | 0.44 | 0.85 | 0.28 |
| 28700 | 0 | 22694  | GHTTIGGSQAQQANRF<br>VSMFSRGPSQK | 3.23 | 0.01 | 1.72 | 0.44 | 0.85 | 0.28 |
| 28701 | 0 | 22694  | GHTTIGGSQAQQANRF<br>VSMFSRGPSQK | 3.23 | 0.01 | 1.72 | 0.68 | 0.22 | 0.28 |
| 28702 | 0 | 22694  | GHTTIGGSQAQQANRF<br>VSMFSRGPSQK | 3.23 | 0.01 | 1.72 | 1.12 | 0.22 | 0.28 |
| 28703 | 0 | 22694  | GHTTIGGSQAQQANRF<br>VSMFSRGPSQK | 3.23 | 0.01 | 1.72 | 1.12 | 0.22 | 0.28 |
| 28704 | 0 | 22700  | GTHVTGGKVAYTTQGFT<br>SFFSRGPSQK | 3.25 | 0.01 | 1.72 | 0.44 | 0.85 | 0.28 |
| 28705 | 0 | 22700  | GTHVTGGKVAYTTQGFT<br>SFFSRGPSQK | 3.25 | 0.01 | 1.72 | 0.44 | 0.85 | 0.28 |
| 28706 | 0 | 22700  | GTHVTGGKVAYTTQGFT<br>SFFSRGPSQK | 3.25 | 0.01 | 1.72 | 1.12 | 0.22 | 0.28 |
| 28707 | 0 | 22700  | GTHVTGGKVAYTTQGFT<br>SFFSRGPSQK | 3.25 | 0.01 | 1.72 | 1.12 | 0.22 | 0.28 |

|                                                                                                                                                                                                                                                                                               |   |        |                                                                                                                                                                                                                                                                                                                                |      |      |      |      |      |      |
|-----------------------------------------------------------------------------------------------------------------------------------------------------------------------------------------------------------------------------------------------------------------------------------------------|---|--------|--------------------------------------------------------------------------------------------------------------------------------------------------------------------------------------------------------------------------------------------------------------------------------------------------------------------------------|------|------|------|------|------|------|
| 28708                                                                                                                                                                                                                                                                                         | 0 | 22700  | GTHVTGGKVAYTTQGFT<br>SFFSRGPSQK                                                                                                                                                                                                                                                                                                | 3.25 | 0.01 | 1.72 | 1.12 | 0.22 | 0.28 |
| 28709                                                                                                                                                                                                                                                                                         | 0 | 127676 | GTIFDNFLIT                                                                                                                                                                                                                                                                                                                     | 2.33 | 0.01 | 0.78 | 0.44 | 1.93 | 0.28 |
| 28710                                                                                                                                                                                                                                                                                         | 0 | 22708  | GTIINQDPDKILTYI                                                                                                                                                                                                                                                                                                                | 2.68 | 0.01 | 2.43 | 0.44 | 1.59 | 0.28 |
| 28711                                                                                                                                                                                                                                                                                         | 0 | 22716  | GTIVIR                                                                                                                                                                                                                                                                                                                         | 1.90 | 0.01 | 2.40 | 0.44 | 0.85 | 0.28 |
| 28712                                                                                                                                                                                                                                                                                         | 0 | 22717  | GTIVIRVQYEG                                                                                                                                                                                                                                                                                                                    | 2.42 | 0.01 | 2.40 | 0.44 | 0.85 | 0.28 |
| 28713                                                                                                                                                                                                                                                                                         | 0 | 22717  | GTIVIRVQYEG                                                                                                                                                                                                                                                                                                                    | 2.42 | 0.01 | 2.40 | 0.44 | 0.85 | 0.28 |
| 28714                                                                                                                                                                                                                                                                                         | 0 | 22717  | GTIVIRVQYEG                                                                                                                                                                                                                                                                                                                    | 2.42 | 0.01 | 2.40 | 0.44 | 0.85 | 0.28 |
| 28715                                                                                                                                                                                                                                                                                         | 0 | 22717  | GTIVIRVQYEG                                                                                                                                                                                                                                                                                                                    | 2.42 | 0.01 | 2.40 | 0.44 | 0.85 | 0.28 |
| 28716                                                                                                                                                                                                                                                                                         | 0 | 22718  | GTK                                                                                                                                                                                                                                                                                                                            | 1.37 | 0.01 | 3.38 | 2.22 | 0.85 | 0.85 |
| 28717                                                                                                                                                                                                                                                                                         | 0 | 22719  | GTKAIDVGQG                                                                                                                                                                                                                                                                                                                     | 2.32 | 0.01 | 1.75 | 0.68 | 0.22 | 0.28 |
| 28718                                                                                                                                                                                                                                                                                         | 0 | 22719  | GTKAIDVGQG                                                                                                                                                                                                                                                                                                                     | 2.32 | 0.01 | 1.75 | 0.68 | 0.22 | 0.28 |
| GTKAPPRLCIRVNNSELF<br>FVASESSYNENDINTPKE<br>IDDTTNLNNNYRNNLDE<br>VILDYNSQTIPQISNRTL<br>NTLVQDQNSYVPRYDSN<br>GTSEIEEYDVVDFNVFFY<br>LHAQKVPEGETNISLTSSI<br>DTALLEESKDIFFSEFID<br>TINKPVNAALFIDWISKV<br>IRDFTTEATQKSTVDKIA<br>DISLIVPYVGLALNIIIEAE<br>KGNFEEAFELLGVGILLE<br>FVPELTIPVILVFTIKSYID |   |        |                                                                                                                                                                                                                                                                                                                                |      |      |      |      |      |      |
| 28719                                                                                                                                                                                                                                                                                         | 0 | 22720  | SYENKNKAIKAINNSLIER<br>EAKWKEIYSWIVSNWLT<br>RINTQFNKRKEQMYQAL<br>QNQVDAIKTAIEYKYN<br>YTSDEKNRLESEYNINNI<br>EEELNKKVSLAMKNIERF<br>MTESSISYLMKLINEAKV<br>GKLKKYDNHVKSDLLNYI<br>LDHRSILGEQTNELSDLV<br>TSTLNSSIPFELSSYTNDK<br>ILIIYFNRLYKKIKDSSILD<br>MRYENNKFIDISGYGSNI<br>SINGNVYIYSTNRNQFGI<br>YNSRLSEVNIAQNNDIY<br>NCRVQNFESIC | 6.20 | 0.01 | 4.45 | 0.68 | 0.22 | 0.85 |
| 28720                                                                                                                                                                                                                                                                                         | 0 | 133843 | GTKAVTKYTSSK                                                                                                                                                                                                                                                                                                                   | 2.50 | 0.01 | 1.60 | 1.12 | 0.22 | 0.28 |
| 28721                                                                                                                                                                                                                                                                                         | 0 | 22721  | GTKCEDGKVC                                                                                                                                                                                                                                                                                                                     | 2.34 | 0.01 | 3.93 | 0.68 | 0.22 | 0.85 |
| 28722                                                                                                                                                                                                                                                                                         | 0 | 22721  | GTKCEDGKVC                                                                                                                                                                                                                                                                                                                     | 2.34 | 0.01 | 3.93 | 0.68 | 0.22 | 0.85 |
| 28723                                                                                                                                                                                                                                                                                         | 0 | 22722  | GTKFIIKKYASGNKDNIV<br>RNNDRVY                                                                                                                                                                                                                                                                                                  | 3.17 | 0.01 | 2.08 | 0.68 | 0.22 | 0.28 |
| 28724                                                                                                                                                                                                                                                                                         | 0 | 22722  | GTKFIIKKYASGNKDNIV<br>RNNDRVY                                                                                                                                                                                                                                                                                                  | 3.17 | 0.01 | 2.08 | 0.68 | 0.22 | 0.28 |

|       |   |        |                                       |      |      |      |      |      |      |
|-------|---|--------|---------------------------------------|------|------|------|------|------|------|
| 28725 | 0 | 22722  | GTKFIIKKYASGNKDNIV<br>RNNDRVY         | 3.17 | 0.01 | 2.08 | 0.68 | 0.22 | 0.28 |
| 28726 | 0 | 22722  | GTKFIIKKYASGNKDNIV<br>RNNDRVY         | 3.17 | 0.01 | 2.08 | 0.68 | 0.22 | 1.66 |
| 28727 | 0 | 22722  | GTKFIIKKYASGNKDNIV<br>RNNDRVY         | 3.17 | 0.01 | 2.08 | 0.68 | 0.22 | 1.66 |
| 28728 | 0 | 22722  | GTKFIIKKYASGNKDNIV<br>RNNDRVY         | 3.17 | 0.01 | 2.08 | 0.68 | 0.22 | 1.66 |
| 28729 | 0 | 22722  | GTKFIIKKYASGNKDNIV<br>RNNDRVY         | 3.17 | 0.01 | 2.08 | 0.68 | 0.22 | 1.66 |
| 28730 | 0 | 22722  | GTKFIIKKYASGNKDNIV<br>RNNDRVY         | 3.17 | 0.01 | 2.08 | 0.68 | 0.22 | 1.66 |
| 28731 | 0 | 22722  | GTKFIIKKYASGNKDNIV<br>RNNDRVY         | 3.17 | 0.01 | 2.08 | 0.68 | 0.22 | 1.66 |
| 28732 | 0 | 22722  | GTKFIIKKYASGNKDNIV<br>RNNDRVY         | 3.17 | 0.01 | 2.08 | 0.68 | 0.22 | 1.66 |
| 28733 | 0 | 22722  | GTKFIIKKYASGNKDNIV<br>RNNDRVY         | 3.17 | 0.01 | 2.08 | 0.68 | 0.22 | 1.66 |
| 28734 | 0 | 22722  | GTKFIIKKYASGNKDNIV<br>RNNDRVY         | 3.17 | 0.01 | 2.08 | 0.68 | 0.22 | 1.66 |
| 28735 | 0 | 22725  | GTKHFLVHREWFNDLLL<br>PWTSPAS          | 3.08 | 0.01 | 3.61 | 1.81 | 0.22 | 0.28 |
| 28736 | 0 | 22725  | GTKHFLVHREWFNDLLL<br>PWTSPAS          | 3.08 | 0.01 | 3.61 | 0.68 | 0.22 | 0.28 |
| 28737 | 0 | 78411  | GTKPTFHVEKGSNPNYL<br>A                | 2.82 | 0.01 | 3.22 | 1.20 | 0.22 | 0.28 |
| 28738 | 0 | 22732  | GTKSLEPCTCGAVD                        | 2.60 | 0.01 | 2.69 | 0.44 | 0.85 | 0.28 |
| 28739 | 0 | 22732  | GTKSLEPCTCGAVD                        | 2.60 | 0.01 | 2.69 | 0.44 | 1.41 | 0.28 |
| 28740 | 0 | 22733  | GTKTEAEDVIPEGWKAD<br>TSYESK           | 3.10 | 0.01 | 2.53 | 0.44 | 1.23 | 0.85 |
| 28741 | 0 | 192964 | GTKYEVYRALATNEQPY<br>T                | 2.84 | 3.70 | 2.84 | 0.44 | 1.74 | 0.28 |
| 28742 | 0 | 450658 | GTLASLN                               | 2.02 | 0.01 | 0.90 | 0.44 | 1.41 | 1.39 |
| 28743 | 0 | 111382 | GTLGIVCPICSQKP                        | 2.62 | 0.01 | 1.86 | 3.22 | 0.22 | 0.28 |
| 28744 | 0 | 134399 | GTLHVVQR                              | 2.11 | 0.01 | 0.78 | 0.44 | 1.13 | 0.28 |
| 28745 | 0 | 134399 | GTLHVVQR                              | 2.11 | 0.01 | 0.78 | 0.44 | 1.13 | 0.28 |
| 28746 | 0 | 149728 | GTLINNQ                               | 2.01 | 0.01 | 0.90 | 2.37 | 0.22 | 0.28 |
| 28747 | 0 | 22742  | GTLKV                                 | 1.74 | 0.01 | 0.90 | 0.44 | 1.13 | 0.85 |
| 28748 | 0 | 22742  | GTLKV                                 | 1.74 | 0.01 | 0.90 | 1.12 | 0.22 | 0.85 |
| 28749 | 0 | 22742  | GTLKV                                 | 1.74 | 0.01 | 0.90 | 0.44 | 1.13 | 0.85 |
| 28750 | 0 | 128816 | GTLT                                  | 1.57 | 0.01 | 4.93 | 1.15 | 0.22 | 0.85 |
| 28751 | 0 | 22751  | GTLTDIPSDTPNLLAWN<br>GGGSANYTKILADGGY | 3.46 | 0.01 | 3.28 | 0.44 | 1.23 | 0.85 |
| 28752 | 0 | 22752  | GTLTTRTIGGSQAQTAG<br>GLVSMFSVGPSPK    | 3.35 | 0.01 | 2.83 | 0.44 | 0.85 | 0.28 |

|       |   |        |                                                 |      |      |      |      |      |      |
|-------|---|--------|-------------------------------------------------|------|------|------|------|------|------|
| 28753 | 0 | 22752  | GTLTTRTIGGSQAQTAG<br>GLVSMFSGVGPSPK             | 3.35 | 0.01 | 2.83 | 0.44 | 0.85 | 0.28 |
| 28754 | 0 | 22752  | GTLTTRTIGGSQAQTAG<br>GLVSMFSGVGPSPK             | 3.35 | 0.01 | 2.83 | 1.12 | 0.22 | 0.28 |
| 28755 | 0 | 22753  | GTLTWSGK                                        | 2.15 | 0.01 | 2.40 | 2.43 | 0.22 | 0.28 |
| 28756 | 0 | 22755  | GTLVKTITDDQIEV                                  | 2.62 | 0.01 | 3.27 | 0.68 | 0.22 | 1.75 |
| 28757 | 0 | 22755  | GTLVKTITDDQIEV                                  | 2.62 | 0.01 | 2.36 | 0.44 | 0.85 | 1.57 |
| 28758 | 0 | 22755  | GTLVKTITDDQIEV                                  | 2.62 | 0.01 | 2.36 | 1.15 | 0.22 | 1.57 |
| 28759 | 0 | 22755  | GTLVKTITDDQIEV                                  | 2.62 | 0.01 | 2.36 | 1.15 | 0.22 | 1.57 |
| 28760 | 0 | 22755  | GTLVKTITDDQIEV                                  | 2.62 | 0.01 | 2.36 | 1.15 | 0.22 | 1.57 |
| 28761 | 0 | 22756  | GTLVRMAPVIG                                     | 2.40 | 0.01 | 2.14 | 0.44 | 0.22 | 0.28 |
| 28762 | 0 | 22756  | GTLVRMAPVIG                                     | 2.40 | 0.01 | 2.14 | 0.68 | 2.25 | 1.75 |
| 28763 | 0 | 22756  | GTLVRMAPVIG                                     | 2.40 | 0.01 | 2.14 | 0.68 | 0.22 | 0.28 |
| 28764 | 0 | 22756  | GTLVRMAPVIG                                     | 2.40 | 0.01 | 2.14 | 0.68 | 0.22 | 0.28 |
| 28765 | 0 | 22756  | GTLVRMAPVIG                                     | 2.40 | 0.01 | 2.14 | 0.68 | 0.22 | 1.34 |
| 28766 | 0 | 450659 | GTMHSMK                                         | 2.02 | 0.01 | 0.90 | 0.44 | 1.41 | 1.39 |
| 28767 | 0 | 114847 | GTNISKEHDG                                      | 2.30 | 0.01 | 2.25 | 0.44 | 1.23 | 0.85 |
| 28768 | 0 | 22771  | GTNISKEHDGECKE                                  | 2.62 | 0.01 | 2.25 | 0.44 | 1.23 | 1.27 |
| 28769 | 0 | 22771  | GTNISKEHDGECKE                                  | 2.62 | 0.01 | 2.25 | 1.12 | 0.22 | 1.27 |
| 28770 | 0 | 22773  | GTNLSVPNPLGFFPDHQ<br>LDPAFGANSNNPDWDF<br>NPVKDD | 3.61 | 0.01 | 2.58 | 0.68 | 0.22 | 1.27 |
| 28771 | 0 | 22773  | GTNLSVPNPLGFFPDHQ<br>LDPAFGANSNNPDWDF<br>NPVKDD | 3.61 | 0.01 | 2.58 | 0.68 | 0.22 | 0.85 |
| 28772 | 0 | 22773  | GTNLSVPNPLGFFPDHQ<br>LDPAFGANSNNPDWDF<br>NPVKDD | 3.61 | 0.01 | 2.58 | 0.68 | 0.22 | 0.28 |
| 28773 | 0 | 100087 | GTNPLPLPFQYYRIRKAK                              | 2.83 | 0.01 | 3.06 | 0.68 | 0.22 | 0.28 |
| 28774 | 0 | 100087 | GTNPLPLPFQYYRIRKAK                              | 2.83 | 0.01 | 3.06 | 0.68 | 0.22 | 0.28 |
| 28775 | 0 | 127677 | GTNTAQK                                         | 2.02 | 0.01 | 0.90 | 0.44 | 1.13 | 1.39 |
| 28776 | 0 | 82932  | GTNVELGGRLSI                                    | 2.47 | 0.01 | 3.04 | 1.12 | 0.22 | 0.28 |
| 28777 | 0 | 419207 | GTPGHPVQAIPQQPLRT<br>QAT                        | 2.98 | 0.01 | 3.50 | 2.13 | 0.22 | 0.28 |
| 28778 | 0 | 230939 | GTPGSPGPAGASGNPG<br>TDGIPGAK                    | 3.18 | 0.01 | 0.78 | 3.16 | 0.22 | 0.28 |
| 28779 | 0 | 22783  | GTPLDIDTASESS                                   | 2.53 | 0.01 | 2.43 | 0.68 | 0.22 | 0.28 |
| 28780 | 0 | 305582 | GTPNNDPAADGAETR                                 | 2.71 | 0.01 | 1.61 | 0.44 | 0.85 | 1.28 |
| 28781 | 0 | 22784  | GTPNPNPNPNPNPNPG<br>TT                          | 2.92 | 0.01 | 2.84 | 0.68 | 0.22 | 0.28 |
| 28782 | 0 | 22784  | GTPNPNPNPNPNPNPNPG<br>TT                        | 2.92 | 0.01 | 2.84 | 0.68 | 0.22 | 1.34 |
| 28783 | 0 | 79241  | GTPPLDEDGRWDPALM<br>YNPCGPEPPAHV                | 3.25 | 0.01 | 2.85 | 1.20 | 0.22 | 0.85 |

|       |   |        |                                                                 |      |      |      |      |      |      |
|-------|---|--------|-----------------------------------------------------------------|------|------|------|------|------|------|
| 28784 | 0 | 79241  | GTPPLDEDGRWDPALM<br>YNPCGPEPPAHV                                | 3.25 | 0.01 | 2.85 | 0.44 | 1.59 | 0.28 |
| 28785 | 0 | 22786  | GTPSMDALSALLSNTLSL<br>AS                                        | 2.99 | 0.01 | 3.01 | 0.44 | 0.85 | 0.28 |
| 28786 | 0 | 106486 | GTQEFRH                                                         | 1.99 | 0.01 | 0.90 | 1.81 | 0.22 | 0.28 |
| 28787 | 0 | 22792  | GTQETGDTTPSAYSMS                                                | 2.75 | 0.01 | 3.38 | 1.12 | 0.22 | 0.85 |
| 28788 | 0 | 22792  | GTQETGDTTPSAYSMS                                                | 2.75 | 0.01 | 3.38 | 1.12 | 0.22 | 1.34 |
| 28789 | 0 | 22793  | GTQFTFDSWNYSFEDNY<br>S                                          | 2.87 | 0.01 | 1.75 | 1.12 | 0.22 | 2.35 |
| 28790 | 0 | 22793  | GTQFTFDSWNYSFEDNY<br>S                                          | 2.87 | 0.01 | 1.75 | 1.12 | 2.25 | 1.75 |
| 28791 | 0 | 144678 | GTQPTLEVVPMPGRGS                                                | 2.68 | 0.01 | 0.90 | 0.68 | 0.22 | 0.28 |
| 28792 | 0 | 144678 | GTQPTLEVVPMPGRGS                                                | 2.68 | 0.01 | 0.90 | 0.68 | 0.22 | 1.48 |
| 28793 | 0 | 144678 | GTQPTLEVVPMPGRGS                                                | 2.68 | 0.01 | 0.90 | 0.68 | 0.22 | 1.27 |
| 28794 | 0 | 121357 | GTQVHGTI                                                        | 2.15 | 0.01 | 0.78 | 0.44 | 1.13 | 0.28 |
| 28795 | 0 | 121357 | GTQVHGTI                                                        | 2.15 | 0.01 | 0.78 | 0.44 | 1.13 | 0.28 |
| 28796 | 0 | 121357 | GTQVHGTI                                                        | 2.15 | 0.01 | 0.78 | 0.44 | 1.41 | 0.28 |
| 28797 | 0 | 132834 | GTRAKFEGGQAIYEN                                                 | 2.66 | 0.01 | 3.16 | 3.16 | 0.22 | 0.28 |
| 28798 | 0 | 125434 | GTRDVPIGAIIICITVGKPE<br>DIEAFK                                  | 3.18 | 0.01 | 0.78 | 0.44 | 1.13 | 0.28 |
| 28799 | 0 | 125434 | GTRDVPIGAIIICITVGKPE<br>DIEAFK                                  | 3.18 | 0.01 | 0.78 | 0.44 | 1.13 | 0.28 |
| 28800 | 0 | 22799  | GTRIRFKDDTSFED                                                  | 2.63 | 0.01 | 2.56 | 2.69 | 0.22 | 0.28 |
| 28801 | 0 | 22799  | GTRIRFKDDTSFED                                                  | 2.63 | 0.01 | 2.56 | 0.44 | 0.85 | 0.28 |
| 28802 | 0 | 22799  | GTRIRFKDDTSFED                                                  | 2.63 | 0.01 | 3.16 | 2.69 | 0.22 | 0.28 |
| 28803 | 0 | 22799  | GTRIRFKDDTSFED                                                  | 2.63 | 0.01 | 3.16 | 2.69 | 0.22 | 0.28 |
| 28804 | 0 | 22803  | GTRQTLQGASVTVTGQ<br>GNSLKVGNADVVC GG<br>VSTANATVYMIDSVLMPP<br>A | 3.86 | 0.01 | 3.20 | 1.15 | 2.26 | 0.28 |
| 28805 | 0 | 22806  | GTRTIASPKGPVIQ                                                  | 2.62 | 0.01 | 2.41 | 0.44 | 0.85 | 0.28 |
| 28806 | 0 | 22806  | GTRTIASPKGPVIQ                                                  | 2.62 | 0.01 | 2.41 | 0.44 | 1.41 | 0.28 |
| 28807 | 0 | 22806  | GTRTIASPKGPVIQ                                                  | 2.62 | 0.01 | 2.41 | 0.44 | 0.85 | 0.28 |
| 28808 | 0 | 22809  | GTSAPSGSGTSPSSR                                                 | 2.74 | 0.01 | 1.66 | 0.44 | 0.85 | 0.28 |
| 28809 | 0 | 230384 | GTSAVYERYLLLT                                                   | 2.59 | 0.01 | 3.47 | 2.49 | 0.85 | 0.28 |
| 28810 | 0 | 450661 | GTSDKLP                                                         | 1.99 | 0.01 | 0.90 | 0.44 | 1.41 | 1.39 |
| 28811 | 0 | 22812  | GTSEEGSRGGSSMPSGT<br>SEEGSRGGSSMPA                              | 3.39 | 0.01 | 0.90 | 0.44 | 0.85 | 0.28 |
| 28812 | 0 | 22813  | GTSESTETSEVSTYSMS                                               | 2.85 | 0.01 | 3.03 | 1.12 | 0.22 | 1.34 |
| 28813 | 0 | 22813  | GTSESTETSEVSTYSMS                                               | 2.85 | 0.01 | 3.03 | 1.12 | 0.22 | 0.28 |
| 28814 | 0 | 22813  | GTSESTETSEVSTYSMS                                               | 2.85 | 0.01 | 3.03 | 1.12 | 0.22 | 1.34 |
| 28815 | 0 | 22815  | GTSGPSGTGPSGTSP                                                 | 2.76 | 0.01 | 1.66 | 0.44 | 0.85 | 0.28 |

|       |   |        |                                                                 |      |      |      |      |      |      |
|-------|---|--------|-----------------------------------------------------------------|------|------|------|------|------|------|
| 28816 | 0 | 242563 | GTSGSSADSPTGLLSP                                                | 2.79 | 0.01 | 3.32 | 1.20 | 2.25 | 1.75 |
| 28817 | 0 | 242563 | GTSGSSADSPTGLLSP                                                | 2.79 | 0.01 | 3.32 | 1.20 | 0.22 | 0.85 |
| 28818 | 0 | 242563 | GTSGSSADSPTGLLSP                                                | 2.79 | 0.01 | 3.32 | 1.20 | 0.22 | 0.85 |
| 28819 | 0 | 242563 | GTSGSSADSPTGLLSP                                                | 2.79 | 0.01 | 3.32 | 1.20 | 0.22 | 0.85 |
| 28820 | 0 | 22828  | GTSGTSAQSGTSGTS                                                 | 2.75 | 0.01 | 3.26 | 0.44 | 0.85 | 0.28 |
| 28821 | 0 | 22828  | GTSGTSAQSGTSGTS                                                 | 2.75 | 0.01 | 3.26 | 2.71 | 0.22 | 0.28 |
| 28822 | 0 | 22831  | GTSGWAEVVVTPTHVD                                                | 2.74 | 0.01 | 3.59 | 0.44 | 0.85 | 0.28 |
| 28823 | 0 | 22831  | GTSGWAEVVVTPTHVD                                                | 2.74 | 0.01 | 3.59 | 0.44 | 0.85 | 0.28 |
| 28824 | 0 | 22832  | GTSGWAEVVVTPTHVD<br>GGGGESAPSDAKTVTD<br>AVD                     | 3.52 | 0.01 | 1.72 | 0.44 | 0.85 | 0.28 |
| 28825 | 0 | 22832  | GTSGWAEVVVTPTHVD<br>GGGGESAPSDAKTVTD<br>AVD                     | 3.52 | 0.01 | 1.72 | 0.44 | 0.85 | 0.28 |
| 28826 | 0 | 22835  | GTSMDDEADRYF                                                    | 2.45 | 0.01 | 2.88 | 2.22 | 0.85 | 0.28 |
| 28827 | 0 | 22835  | GTSMDDEADRYF                                                    | 2.45 | 0.01 | 2.88 | 2.22 | 0.22 | 0.28 |
| 28828 | 0 | 22835  | GTSMDDEADRYF                                                    | 2.45 | 0.01 | 2.88 | 2.37 | 0.22 | 0.28 |
| 28829 | 0 | 22835  | GTSMDDEADRYF                                                    | 2.45 | 0.01 | 2.88 | 2.22 | 0.22 | 0.28 |
| 28830 | 0 | 22837  | GTSNGSNPST                                                      | 2.37 | 0.01 | 3.97 | 4.63 | 0.22 | 0.28 |
| 28831 | 0 | 22838  | GTSNGTVINLTELDGTPF<br>HPFEGPAPIGFPDLGGC<br>DWHINMTQFGHSSQT<br>Q | 3.87 | 0.01 | 3.78 | 0.68 | 0.22 | 0.28 |
| 28832 | 0 | 22838  | GTSNGTVINLTELDGTPF<br>HPFEGPAPIGFPDLGGC<br>DWHINMTQFGHSSQT<br>Q | 3.87 | 0.01 | 3.78 | 0.68 | 0.22 | 0.28 |
| 28833 | 0 | 22838  | GTSNGTVINLTELDGTPF<br>HPFEGPAPIGFPDLGGC<br>DWHINMTQFGHSSQT<br>Q | 3.87 | 0.01 | 3.78 | 0.68 | 0.22 | 0.28 |
| 28834 | 0 | 22841  | GTSPSSRSNTLPRSN                                                 | 2.73 | 0.01 | 3.26 | 2.71 | 0.22 | 0.28 |
| 28835 | 0 | 196507 | GTSQFQL                                                         | 2.02 | 0.01 | 0.90 | 0.44 | 1.23 | 1.39 |
| 28836 | 0 | 225747 | GTSSACIRRSNNSFFSRL<br>N                                         | 2.91 | 0.01 | 3.97 | 1.15 | 0.22 | 1.28 |
| 28837 | 0 | 225747 | GTSSACIRRSNNSFFSRL<br>N                                         | 2.91 | 0.01 | 3.97 | 1.15 | 0.22 | 1.28 |
| 28838 | 0 | 225747 | GTSSACIRRSNNSFFSRL<br>N                                         | 2.91 | 0.01 | 3.97 | 1.12 | 0.22 | 1.28 |
| 28839 | 0 | 94838  | GTSSCRLVP                                                       | 2.20 | 0.01 | 3.08 | 1.12 | 0.22 | 0.85 |
| 28840 | 0 | 94838  | GTSSCRLVP                                                       | 2.20 | 0.01 | 3.08 | 0.44 | 1.23 | 1.27 |
| 28841 | 0 | 94838  | GTSSCRLVP                                                       | 2.20 | 0.01 | 3.08 | 1.12 | 0.22 | 0.85 |
| 28842 | 0 | 94838  | GTSSCRLVP                                                       | 2.20 | 0.01 | 3.08 | 1.12 | 0.22 | 2.02 |
| 28843 | 0 | 94838  | GTSSCRLVP                                                       | 2.20 | 0.01 | 3.08 | 0.44 | 1.23 | 1.27 |
| 28844 | 0 | 94838  | GTSSCRLVP                                                       | 2.20 | 0.01 | 3.08 | 0.44 | 1.23 | 2.35 |



|       |   |        |                                    |      |      |      |      |      |      |
|-------|---|--------|------------------------------------|------|------|------|------|------|------|
| 28845 | 0 | 107874 | GTSSPSAD                           | 2.14 | 0.01 | 0.90 | 3.18 | 0.22 | 2.49 |
| 28846 | 0 | 106487 | GTSTEVWLAPDP                       | 2.45 | 0.01 | 0.90 | 1.15 | 0.22 | 0.85 |
| 28847 | 0 | 106487 | GTSTEVWLAPDP                       | 2.45 | 0.01 | 0.90 | 1.15 | 0.22 | 0.85 |
| 28848 | 0 | 106487 | GTSTEVWLAPDP                       | 2.45 | 0.01 | 0.90 | 1.15 | 0.22 | 1.34 |
| 28849 | 0 | 106487 | GTSTEVWLAPDP                       | 2.45 | 0.01 | 0.90 | 1.15 | 2.25 | 1.75 |
| 28850 | 0 | 106487 | GTSTEVWLAPDP                       | 2.45 | 0.01 | 0.90 | 1.15 | 2.25 | 1.75 |
| 28851 | 0 | 106487 | GTSTEVWLAPDP                       | 2.45 | 0.01 | 0.90 | 1.15 | 0.22 | 1.39 |
| 28852 | 0 | 123273 | GTSVSHVDF                          | 2.23 | 0.01 | 2.28 | 2.00 | 0.22 | 0.28 |
| 28853 | 0 | 22849  | GTTCQGGVYARGAGGI<br>ASLFSVGANQK    | 3.23 | 0.01 | 1.72 | 0.44 | 0.85 | 0.28 |
| 28854 | 0 | 22849  | GTTCQGGVYARGAGGI<br>ASLFSVGANQK    | 3.23 | 0.01 | 1.72 | 0.44 | 0.85 | 0.28 |
| 28855 | 0 | 22849  | GTTCQGGVYARGAGGI<br>ASLFSVGANQK    | 3.23 | 0.01 | 1.72 | 0.68 | 0.22 | 0.28 |
| 28856 | 0 | 22849  | GTTCQGGVYARGAGGI<br>ASLFSVGANQK    | 3.23 | 0.01 | 1.72 | 0.68 | 0.22 | 0.28 |
| 28857 | 0 | 22849  | GTTCQGGVYARGAGGI<br>ASLFSVGANQK    | 3.23 | 0.01 | 1.72 | 1.12 | 0.22 | 0.28 |
| 28858 | 0 | 22849  | GTTCQGGVYARGAGGI<br>ASLFSVGANQK    | 3.23 | 0.01 | 1.72 | 1.12 | 0.22 | 0.28 |
| 28859 | 0 | 22849  | GTTCQGGVYARGAGGI<br>ASLFSVGANQK    | 3.23 | 0.01 | 1.72 | 1.12 | 0.22 | 0.28 |
| 28860 | 0 | 108412 | GTTDHVGVPTYDWGK                    | 2.70 | 0.01 | 1.72 | 2.37 | 0.22 | 1.34 |
| 28861 | 0 | 108412 | GTTDHVGVPTYDWGK                    | 2.70 | 0.01 | 1.72 | 0.44 | 0.85 | 0.28 |
| 28862 | 0 | 108412 | GTTDHVGVPTYDWGK                    | 2.70 | 0.01 | 1.72 | 2.37 | 0.22 | 0.28 |
| 28863 | 0 | 108412 | GTTDHVGVPTYDWGK                    | 2.70 | 0.01 | 1.72 | 2.37 | 0.22 | 0.85 |
| 28864 | 0 | 108412 | GTTDHVGVPTYDWGK                    | 2.70 | 0.01 | 1.72 | 0.44 | 0.85 | 0.28 |
| 28865 | 0 | 108412 | GTTDHVGVPTYDWGK                    | 2.70 | 0.01 | 1.72 | 0.44 | 0.85 | 0.28 |
| 28866 | 0 | 108412 | GTTDHVGVPTYDWGK                    | 2.70 | 0.01 | 1.72 | 0.44 | 0.85 | 1.34 |
| 28867 | 0 | 171322 | GTTEPRVLYQLDRIT                    | 2.66 | 0.01 | 0.78 | 0.44 | 1.41 | 0.28 |
| 28868 | 0 | 423330 | GTTGSYTPPDGSFP                     | 2.72 | 0.01 | 3.97 | 0.44 | 1.59 | 1.28 |
| 28869 | 0 | 22853  | GTTKAGYPYNYNTTASD<br>QLLVENAAGHRVA | 3.32 | 0.01 | 2.70 | 1.15 | 0.22 | 0.28 |
| 28870 | 0 | 22853  | GTTKAGYPYNYNTTASD<br>QLLVENAAGHRVA | 3.32 | 0.01 | 2.53 | 0.44 | 0.85 | 0.28 |
| 28871 | 0 | 22855  | GTTLPK                             | 1.89 | 0.01 | 2.45 | 0.44 | 0.85 | 1.34 |
| 28872 | 0 | 22855  | GTTLPK                             | 1.89 | 0.01 | 2.45 | 0.44 | 0.85 | 1.34 |
| 28873 | 0 | 136341 | GTTMPLHAAPHS                       | 2.47 | 0.01 | 0.90 | 0.44 | 1.41 | 0.28 |
| 28874 | 0 | 136341 | GTTMPLHAAPHS                       | 2.47 | 0.01 | 0.90 | 0.44 | 1.41 | 0.28 |
| 28875 | 0 | 136341 | GTTMPLHAAPHS                       | 2.47 | 0.01 | 0.90 | 0.44 | 1.41 | 1.34 |

|       |   |        |                    |      |      |      |      |      |      |
|-------|---|--------|--------------------|------|------|------|------|------|------|
| 28876 | 0 | 136341 | GTTMPLHAAPHS       | 2.47 | 0.01 | 0.90 | 0.44 | 1.41 | 1.34 |
| 28877 | 0 | 136341 | GTTMPLHAAPHS       | 2.47 | 0.01 | 0.90 | 0.44 | 1.41 | 0.28 |
| 28878 | 0 | 136341 | GTTMPLHAAPHS       | 2.47 | 0.01 | 0.90 | 0.44 | 1.41 | 0.28 |
| 28879 | 0 | 151898 | GTTPEVHSIFL        | 2.35 | 0.01 | 0.78 | 0.44 | 1.93 | 0.28 |
| 28880 | 0 | 149056 | GTTRTVNPLGFFKKEALP | 3.46 | 0.01 | 2.88 | 0.44 | 1.23 | 0.28 |
|       |   |        | KCAQVYNKLGMYPPN    |      |      |      |      |      |      |
|       |   |        | M                  |      |      |      |      |      |      |
| 28881 | 0 | 149056 | GTTRTVNPLGFFKKEALP | 3.46 | 0.01 | 2.88 | 0.44 | 1.23 | 0.85 |
|       |   |        | KCAQVYNKLGMYPPN    |      |      |      |      |      |      |
|       |   |        | M                  |      |      |      |      |      |      |
| 28882 | 0 | 22860  | GTTRVGGAAARTTSSFA  | 3.24 | 0.01 | 1.72 | 0.44 | 0.85 | 0.28 |
| 28883 | 0 | 22860  | SLLTHGPSQN         | 3.24 | 0.01 | 1.72 | 0.44 | 0.85 | 0.28 |
|       |   |        | GTTRVGGAAARTTSSFA  |      |      |      |      |      |      |
| 28884 | 0 | 22860  | SLLTHGPSQN         | 3.24 | 0.01 | 1.72 | 0.68 | 0.22 | 0.28 |
|       |   |        | GTTRVGGAAARTTSSFA  |      |      |      |      |      |      |
| 28885 | 0 | 22860  | SLLTHGPSQN         | 3.24 | 0.01 | 1.72 | 0.68 | 0.22 | 0.28 |
|       |   |        | GTTRVGGAAARTTSSFA  |      |      |      |      |      |      |
| 28886 | 0 | 22860  | SLLTHGPSQN         | 3.24 | 0.01 | 1.72 | 1.12 | 0.22 | 0.28 |
|       |   |        | GTTRVGGAAARTTSSFA  |      |      |      |      |      |      |
| 28887 | 0 | 22860  | SLLTHGPSQN         | 3.24 | 0.01 | 1.72 | 1.12 | 0.22 | 0.28 |
|       |   |        | GTTRVGGAAARTTSSFA  |      |      |      |      |      |      |
| 28888 | 0 | 22860  | SLLTHGPSQN         | 3.24 | 0.01 | 1.72 | 1.12 | 0.22 | 0.28 |
|       |   |        | GTTRVGGAAARTTSSFA  |      |      |      |      |      |      |
| 28889 | 0 | 22863  | GTTTVGSAVSSTTYRFA  | 3.25 | 0.01 | 1.72 | 0.44 | 0.85 | 0.28 |
|       |   |        | GMFSQGAQQN         |      |      |      |      |      |      |
| 28890 | 0 | 22863  | GTTTVGSAVSSTTYRFA  | 3.25 | 0.01 | 1.72 | 0.44 | 0.85 | 0.28 |
|       |   |        | GMFSQGAQQN         |      |      |      |      |      |      |
| 28891 | 0 | 22863  | GTTTVGSAVSSTTYRFA  | 3.25 | 0.01 | 1.72 | 0.68 | 0.22 | 0.28 |
|       |   |        | GMFSQGAQQN         |      |      |      |      |      |      |
| 28892 | 0 | 22863  | GTTTVGSAVSSTTYRFA  | 3.25 | 0.01 | 1.72 | 0.68 | 0.22 | 0.28 |
|       |   |        | GMFSQGAQQN         |      |      |      |      |      |      |
| 28893 | 0 | 22863  | GTTTVGSAVSSTTYRFA  | 3.25 | 0.01 | 1.72 | 0.44 | 0.85 | 0.28 |
|       |   |        | GMFSQGAQQN         |      |      |      |      |      |      |
| 28894 | 0 | 22863  | GTTTVGSAVSSTTYRFA  | 3.25 | 0.01 | 1.72 | 1.12 | 0.22 | 0.28 |
|       |   |        | GMFSQGAQQN         |      |      |      |      |      |      |
| 28895 | 0 | 22863  | GTTTVGSAVSSTTYRFA  | 3.25 | 0.01 | 1.72 | 1.12 | 0.22 | 0.28 |
|       |   |        | GMFSQGAQQN         |      |      |      |      |      |      |
| 28896 | 0 | 22865  | GTTTYTTSARRGDLAHL  | 3.27 | 0.01 | 4.63 | 1.15 | 0.22 | 0.85 |
|       |   |        | ATAHARHLPT         |      |      |      |      |      |      |
| 28897 | 0 | 22865  | GTTTYTTSARRGDLAHL  | 3.27 | 0.01 | 4.63 | 1.15 | 0.22 | 0.85 |
|       |   |        | ATAHARHLPT         |      |      |      |      |      |      |
| 28898 | 0 | 131902 | GTTWGAYGSNYSGDK    | 2.70 | 0.01 | 0.78 | 0.44 | 1.13 | 0.85 |
| 28899 | 0 | 97368  | GTTYIRAIAALEGLK    | 2.69 | 0.01 | 2.84 | 0.44 | 0.85 | 0.28 |
| 28900 | 0 | 227772 | GTTYLVNPHDHQNLK    | 2.71 | 0.01 | 2.72 | 1.20 | 1.59 | 0.28 |

|       |   |        |                                     |      |      |      |      |      |      |
|-------|---|--------|-------------------------------------|------|------|------|------|------|------|
| 28901 | 0 | 97369  | GTVALTAGA                           | 2.27 | 0.01 | 3.13 | 1.12 | 0.22 | 0.28 |
| 28902 | 0 | 22870  | GTVAPQIPPNWHIPSIQ<br>D              | 2.83 | 4.45 | 2.40 | 1.15 | 0.22 | 0.85 |
| 28903 | 0 | 22870  | GTVAPQIPPNWHIPSIQ<br>D              | 2.83 | 4.45 | 2.40 | 1.12 | 0.22 | 0.85 |
| 28904 | 0 | 22870  | GTVAPQIPPNWHIPSIQ<br>D              | 2.83 | 4.45 | 2.40 | 1.12 | 0.22 | 0.85 |
| 28905 | 0 | 22871  | GTVAPQIPPNWHIPSIQ<br>D              | 2.83 | 0.01 | 2.40 | 1.15 | 0.22 | 1.34 |
| 28906 | 0 | 22873  | GTVCKRDQSDRGWGN<br>HAGLFGKGSIVTCVKA | 3.36 | 0.01 | 0.90 | 0.68 | 0.22 | 0.28 |
| 28907 | 0 | 22873  | GTVCKRDQSDRGWGN<br>HAGLFGKGSIVTCVKA | 3.36 | 0.01 | 0.90 | 0.68 | 2.25 | 1.75 |
| 28908 | 0 | 418157 | GTVELLGGPLAHPFQPL                   | 2.80 | 0.01 | 2.86 | 0.44 | 1.13 | 0.28 |
| 28909 | 0 | 418157 | GTVELLGGPLAHPFQPL                   | 2.80 | 0.01 | 2.86 | 0.44 | 1.41 | 0.28 |
| 28910 | 0 | 418157 | GTVELLGGPLAHPFQPL                   | 2.80 | 0.01 | 2.86 | 0.44 | 1.13 | 1.27 |
| 28911 | 0 | 418157 | GTVELLGGPLAHPFQPL                   | 2.80 | 0.01 | 2.51 | 0.44 | 1.74 | 0.28 |
| 28912 | 0 | 418157 | GTVELLGGPLAHPFQPL                   | 2.80 | 0.01 | 2.51 | 0.44 | 1.74 | 0.28 |
| 28913 | 0 | 418157 | GTVELLGGPLAHPFQPL                   | 2.80 | 0.01 | 2.04 | 0.44 | 1.41 | 0.28 |
| 28914 | 0 | 418157 | GTVELLGGPLAHPFQPL                   | 2.80 | 0.01 | 2.51 | 0.44 | 1.74 | 0.28 |
| 28915 | 0 | 418157 | GTVELLGGPLAHPFQPL                   | 2.80 | 0.01 | 2.51 | 0.44 | 1.41 | 0.28 |
| 28916 | 0 | 110877 | GTVGENVPDDLYIKG                     | 2.66 | 0.01 | 1.86 | 0.68 | 0.22 | 0.85 |
| 28917 | 0 | 110877 | GTVGENVPDDLYIKG                     | 2.66 | 0.01 | 1.86 | 0.68 | 0.22 | 0.28 |
| 28918 | 0 | 110877 | GTVGENVPDDLYIKG                     | 2.66 | 0.01 | 1.86 | 0.68 | 0.22 | 0.85 |
| 28919 | 0 | 110877 | GTVGENVPDDLYIKG                     | 2.66 | 0.01 | 1.86 | 0.68 | 0.22 | 0.85 |
| 28920 | 0 | 110877 | GTVGENVPDDLYIKG                     | 2.66 | 0.01 | 1.86 | 0.68 | 0.22 | 0.85 |
| 28921 | 0 | 110877 | GTVGENVPDDLYIKG                     | 2.66 | 0.01 | 1.86 | 0.68 | 0.22 | 0.85 |
| 28922 | 0 | 175830 | GTVIEGPCNFNVSVE                     | 2.69 | 0.01 | 2.63 | 1.15 | 0.22 | 0.85 |
| 28923 | 0 | 175830 | GTVIEGPCNFNVSVE                     | 2.69 | 0.01 | 2.63 | 1.15 | 0.22 | 0.85 |
| 28924 | 0 | 100901 | GTVLPDLSRNPY                        | 2.45 | 0.01 | 0.90 | 0.68 | 0.22 | 1.39 |
| 28925 | 0 | 100901 | GTVLPDLSRNPY                        | 2.45 | 0.01 | 0.90 | 0.68 | 0.22 | 1.27 |
| 28926 | 0 | 97370  | GTVLVTRKAL                          | 2.33 | 0.01 | 3.13 | 1.15 | 0.22 | 0.28 |
| 28927 | 0 | 97370  | GTVLVTRKAL                          | 2.33 | 0.01 | 3.13 | 1.15 | 0.22 | 0.85 |
| 28928 | 0 | 97370  | GTVLVTRKAL                          | 2.33 | 0.01 | 3.13 | 1.15 | 0.22 | 2.98 |
| 28929 | 0 | 190439 | GTVNSQGALPGMVWQ                     | 2.67 | 0.01 | 3.61 | 2.00 | 1.41 | 0.28 |
| 28930 | 0 | 140861 | GTVSYGEEKPAV                        | 2.47 | 0.01 | 3.01 | 1.12 | 0.22 | 0.28 |

|       |   |        |                          |      |      |      |      |      |      |
|-------|---|--------|--------------------------|------|------|------|------|------|------|
| 28931 | 0 | 140862 | GTVSYGEEKPAVLGHDE<br>AAY | 2.94 | 0.01 | 3.01 | 1.12 | 0.22 | 0.28 |
| 28932 | 0 | 149729 | GTVTGHPTFNALLDA          | 2.68 | 0.01 | 3.67 | 1.12 | 0.22 | 0.28 |
| 28933 | 0 | 149729 | GTVTGHPTFNALLDA          | 2.68 | 0.01 | 3.67 | 1.12 | 0.22 | 0.28 |
| 28934 | 0 | 22879  | GTVTLGRFSRSLFG           | 2.73 | 0.01 | 0.90 | 0.44 | 0.85 | 1.39 |
| 28935 | 0 | 22881  | GTVVAVGPGR               | 2.36 | 0.01 | 2.04 | 0.68 | 0.22 | 0.28 |
| 28936 | 0 | 22881  | GTVVAVGPGR               | 2.36 | 0.01 | 2.04 | 0.68 | 0.22 | 0.28 |
| 28937 | 0 | 22882  | GTVVAVGPGRWDEDG          | 2.70 | 0.01 | 2.59 | 0.44 | 1.74 | 0.28 |
| 28938 | 0 | 22882  | GTVVAVGPGRWDEDG          | 2.70 | 0.01 | 2.59 | 0.44 | 0.85 | 0.28 |
| 28939 | 0 | 22882  | GTVVAVGPGRWDEDG          | 2.70 | 0.01 | 2.59 | 0.44 | 1.74 | 0.28 |
| 28940 | 0 | 22882  | GTVVAVGPGRWDEDG          | 2.70 | 0.01 | 2.59 | 0.44 | 0.85 | 0.28 |
| 28941 | 0 | 22882  | GTVVAVGPGRWDEDG          | 2.70 | 0.01 | 2.59 | 0.44 | 0.85 | 0.28 |
| 28942 | 0 | 22882  | GTVVAVGPGRWDEDG          | 2.70 | 0.01 | 2.59 | 0.44 | 0.85 | 0.28 |
| 28943 | 0 | 22882  | GTVVAVGPGRWDEDG          | 2.70 | 0.01 | 2.59 | 0.44 | 1.74 | 0.28 |
| 28944 | 0 | 22882  | GTVVAVGPGRWDEDG          | 2.70 | 0.01 | 2.04 | 0.44 | 0.85 | 0.28 |
| 28945 | 0 | 22882  | GTVVAVGPGRWDEDG          | 2.70 | 0.01 | 2.04 | 0.44 | 0.85 | 0.28 |
| 28946 | 0 | 22882  | GTVVAVGPGRWDEDG          | 2.70 | 0.01 | 2.04 | 0.44 | 1.74 | 0.28 |
| 28947 | 0 | 22884  | GTVVAVGPGRWDEDG<br>E     | 2.77 | 0.01 | 2.04 | 1.15 | 0.22 | 0.28 |
| 28948 | 0 | 22885  | GTVVLELQYTGTGPCK<br>VPI  | 2.95 | 0.01 | 2.85 | 2.02 | 0.22 | 0.28 |
| 28949 | 0 | 145235 | GTWICDFKSCSW             | 2.48 | 0.01 | 0.90 | 0.44 | 1.13 | 0.28 |
| 28950 | 0 | 177501 | GTWNPGSSERGSAGH<br>WTSES | 2.98 | 3.37 | 0.78 | 0.44 | 2.26 | 0.28 |
| 28951 | 0 | 177501 | GTWNPGSSERGSAGH<br>WTSES | 2.98 | 3.37 | 0.78 | 0.44 | 1.13 | 0.28 |
| 28952 | 0 | 503998 | GTWVAGVFVYGGSKTS<br>LYNL | 2.96 | 0.01 | 2.48 | 0.44 | 1.74 | 0.28 |
| 28953 | 0 | 503998 | GTWVAGVFVYGGSKTS<br>LYNL | 2.96 | 0.01 | 2.48 | 0.44 | 1.74 | 0.28 |
| 28954 | 0 | 115275 | GTWYSLAMAA               | 2.29 | 0.01 | 1.60 | 0.44 | 1.23 | 0.85 |
| 28955 | 0 | 22894  | GTYETGNK                 | 2.15 | 0.01 | 2.58 | 1.15 | 0.22 | 0.28 |
| 28956 | 0 | 22894  | GTYETGNK                 | 2.15 | 0.01 | 2.58 | 1.15 | 0.22 | 0.28 |
| 28957 | 0 | 103960 | GTYFLRS                  | 1.99 | 0.01 | 0.90 | 0.44 | 1.13 | 1.39 |
| 28958 | 0 | 107875 | GTKAGNQHNHVKYG           | 2.71 | 0.01 | 0.90 | 0.44 | 1.13 | 1.39 |

|       |   |        |                                  |      |      |      |      |      |      |
|-------|---|--------|----------------------------------|------|------|------|------|------|------|
| 28959 | 0 | 22897  | GYLGQAYGGIIKDAPP<br>GAGFIYRETFC  | 3.27 | 0.01 | 2.14 | 1.20 | 0.22 | 0.28 |
| 28960 | 0 | 22897  | GYLGQAYGGIIKDAPP<br>GAGFIYRETFC  | 3.27 | 0.01 | 2.14 | 1.20 | 0.22 | 0.28 |
| 28961 | 0 | 22897  | GYLGQAYGGIIKDAPP<br>GAGFIYRETFC  | 3.27 | 0.01 | 2.14 | 1.20 | 0.22 | 1.34 |
| 28962 | 0 | 22897  | GYLGQAYGGIIKDAPP<br>GAGFIYRETFC  | 3.27 | 0.01 | 2.14 | 1.20 | 0.22 | 0.28 |
| 28963 | 0 | 238589 | GTYPQTPLHLQVPPCQV<br>G           | 2.88 | 0.01 | 0.78 | 0.44 | 1.13 | 0.28 |
| 28964 | 0 | 305968 | GTYYQGDSDLQLERIN                 | 2.67 | 0.01 | 1.61 | 0.44 | 0.85 | 1.28 |
| 28965 | 0 | 22898  | GTYRATYQ                         | 2.14 | 0.01 | 2.21 | 0.44 | 0.85 | 0.28 |
| 28966 | 0 | 22898  | GTYRATYQ                         | 2.14 | 0.01 | 2.21 | 1.12 | 0.22 | 0.28 |
| 28967 | 0 | 22899  | GTYRATYQDF                       | 2.31 | 0.01 | 2.21 | 1.12 | 0.22 | 0.28 |
| 28968 | 0 | 22899  | GTYRATYQDF                       | 2.31 | 0.01 | 2.21 | 1.12 | 0.22 | 0.28 |
| 28969 | 0 | 22903  | GTYYTGGAQGRATQGL<br>ASLFSRGSARK  | 3.28 | 0.01 | 0.90 | 0.44 | 0.85 | 0.28 |
| 28970 | 0 | 444643 | GTYYVTGGAQAHTTRGF<br>ASLF        | 2.96 | 0.01 | 1.96 | 0.68 | 0.22 | 1.34 |
| 28971 | 0 | 444643 | GTYYVTGGAQAHTTRGF<br>ASLF        | 2.96 | 0.01 | 1.96 | 0.68 | 0.22 | 1.34 |
| 28972 | 0 | 444643 | GTYYVTGGAQAHTTRGF<br>ASLF        | 2.96 | 0.01 | 1.96 | 0.68 | 0.22 | 0.28 |
| 28973 | 0 | 22905  | GTYYVTGGATAHTASGFA<br>SLFTTGSKQN | 3.26 | 0.01 | 0.90 | 0.44 | 0.85 | 0.28 |
| 28974 | 0 | 97371  | GVAFPLPT                         | 2.12 | 0.01 | 2.87 | 0.68 | 0.22 | 0.28 |
| 28975 | 0 | 97371  | GVAFPLPT                         | 2.12 | 0.01 | 2.87 | 1.81 | 0.22 | 0.28 |
| 28976 | 0 | 22912  | GVAGSGAS                         | 2.18 | 0.01 | 2.04 | 0.44 | 0.85 | 0.28 |
| 28977 | 0 | 509678 | GVAMPGAEDDVV                     | 2.49 | 0.01 | 0.78 | 2.87 | 0.22 | 2.49 |
| 28978 | 0 | 509678 | GVAMPGAEDDVV                     | 2.49 | 0.01 | 0.78 | 2.87 | 0.22 | 2.02 |
| 28979 | 0 | 509678 | GVAMPGAEDDVV                     | 2.49 | 0.01 | 0.78 | 2.87 | 0.22 | 2.75 |
| 28980 | 0 | 509678 | GVAMPGAEDDVV                     | 2.49 | 0.01 | 0.78 | 2.87 | 0.22 | 2.12 |
| 28981 | 0 | 157357 | GVAPPGWYDPPVQ                    | 2.57 | 0.01 | 3.40 | 2.49 | 0.85 | 0.28 |
| 28982 | 0 | 193470 | GVAQDVPGA                        | 2.26 | 0.01 | 2.51 | 0.44 | 2.39 | 0.28 |
| 28983 | 0 | 193470 | GVAQDVPGA                        | 2.26 | 0.01 | 2.51 | 0.44 | 2.39 | 0.28 |
| 28984 | 0 | 97372  | GVATATGT                         | 2.18 | 0.01 | 2.87 | 1.81 | 0.22 | 0.28 |
| 28985 | 0 | 22921  | GVATKGLGVHAKSSDW<br>G            | 2.81 | 0.01 | 2.14 | 1.12 | 0.22 | 0.85 |
| 28986 | 0 | 22921  | GVATKGLGVHAKSSDW<br>G            | 2.81 | 0.01 | 2.14 | 1.12 | 0.22 | 0.85 |
| 28987 | 0 | 22921  | GVATKGLGVHAKSSDW<br>G            | 2.81 | 0.01 | 2.14 | 1.12 | 0.22 | 0.85 |
| 28988 | 0 | 22922  | GVATKGLNVHKGSSDW<br>G            | 2.79 | 0.01 | 2.18 | 1.12 | 0.22 | 0.85 |
| 28989 | 0 | 22922  | GVATKGLNVHKGSSDW<br>G            | 2.79 | 0.01 | 2.18 | 1.12 | 0.22 | 0.85 |

|       |   |        |                                    |      |      |      |      |      |      |
|-------|---|--------|------------------------------------|------|------|------|------|------|------|
| 28990 | 0 | 22922  | GVATKGLNVHKGSSDW<br>G              | 2.79 | 0.01 | 2.18 | 1.12 | 0.22 | 0.85 |
| 28991 | 0 | 171327 | GVCGLIVPQEDMPFC                    | 2.67 | 0.01 | 0.78 | 0.44 | 1.41 | 0.28 |
| 28992 | 0 | 22929  | GVCYGD                             | 1.91 | 0.01 | 1.86 | 0.44 | 1.23 | 0.28 |
| 28993 | 0 | 22932  | GVDAYVIDTGANVKHV<br>DFE            | 2.90 | 0.01 | 3.28 | 0.44 | 1.23 | 0.85 |
| 28994 | 0 | 109274 | GVDGLDLPLEQL                       | 2.52 | 0.01 | 0.90 | 1.15 | 0.22 | 1.39 |
| 28995 | 0 | 306143 | GVDPTGTYQGSDSQ                     | 2.71 | 0.01 | 1.61 | 0.44 | 0.85 | 1.28 |
| 28996 | 0 | 118391 | GVDQHDNGSRAR                       | 2.48 | 0.01 | 0.90 | 0.68 | 0.22 | 1.48 |
| 28997 | 0 | 118391 | GVDQHDNGSRAR                       | 2.48 | 0.01 | 0.90 | 0.68 | 0.22 | 0.28 |
| 28998 | 0 | 118391 | GVDQHDNGSRAR                       | 2.48 | 0.01 | 0.90 | 0.68 | 0.22 | 0.85 |
| 28999 | 0 | 118391 | GVDQHDNGSRAR                       | 2.48 | 0.01 | 0.90 | 0.68 | 0.22 | 1.48 |
| 29000 | 0 | 306148 | GVDSREQDGEVTTSE                    | 2.71 | 0.01 | 1.61 | 0.44 | 0.85 | 1.28 |
| 29001 | 0 | 164772 | GVDTGIDISHSDF                      | 2.58 | 0.01 | 3.75 | 0.44 | 1.23 | 0.85 |
| 29002 | 0 | 92873  | GVDTIYGNDG                         | 2.34 | 0.01 | 2.67 | 2.00 | 0.22 | 0.28 |
| 29003 | 0 | 117524 | GVDVSMNTHLKAVKM                    | 2.66 | 0.01 | 1.75 | 2.16 | 0.22 | 0.28 |
| 29004 | 0 | 509679 | GVEIWSNKDLINVQP                    | 2.64 | 0.01 | 4.08 | 1.20 | 0.22 | 0.28 |
| 29005 | 0 | 509679 | GVEIWSNKDLINVQP                    | 2.64 | 0.01 | 4.08 | 0.68 | 0.22 | 0.28 |
| 29006 | 0 | 22948  | GVELGKRANRGGSTTS<br>WHGSSLGDIQSYWT | 3.32 | 0.01 | 0.90 | 1.15 | 0.22 | 1.27 |
| 29007 | 0 | 22949  | GVELNDKNQFKLTSSAN<br>SK            | 2.89 | 0.01 | 2.08 | 0.44 | 1.93 | 1.57 |
| 29008 | 0 | 22949  | GVELNDKNQFKLTSSAN<br>SK            | 2.89 | 0.01 | 2.08 | 2.02 | 0.22 | 1.57 |
| 29009 | 0 | 22949  | GVELNDKNQFKLTSSAN<br>SK            | 2.89 | 0.01 | 3.45 | 0.44 | 0.22 | 1.57 |
| 29010 | 0 | 22950  | GVELQQPEYEPSVHSID<br>WQV           | 2.94 | 0.01 | 2.22 | 0.44 | 1.74 | 0.28 |
| 29011 | 0 | 135933 | GVELRQLTPEQL                       | 2.49 | 0.01 | 0.78 | 0.44 | 1.13 | 0.28 |
| 29012 | 0 | 232646 | GVENGVKYWLIANSWN<br>EGWG           | 2.97 | 0.01 | 2.28 | 0.68 | 0.22 | 0.28 |
| 29013 | 0 | 232646 | GVENGVKYWLIANSWN<br>EGWG           | 2.97 | 0.01 | 2.28 | 0.68 | 0.22 | 0.28 |
| 29014 | 0 | 232646 | GVENGVKYWLIANSWN<br>EGWG           | 2.97 | 0.01 | 2.28 | 0.68 | 0.22 | 0.28 |
| 29015 | 0 | 232646 | GVENGVKYWLIANSWN<br>EGWG           | 2.97 | 0.01 | 2.28 | 0.68 | 0.22 | 0.28 |
| 29016 | 0 | 232646 | GVENGVKYWLIANSWN<br>EGWG           | 2.97 | 0.01 | 2.28 | 0.68 | 2.25 | 1.75 |
| 29017 | 0 | 232646 | GVENGVKYWLIANSWN<br>EGWG           | 2.97 | 0.01 | 2.28 | 0.68 | 2.25 | 1.75 |
| 29018 | 0 | 167921 | GVEVTLAEKCEKEFGI                   | 2.75 | 0.01 | 2.75 | 0.44 | 1.59 | 2.51 |
| 29019 | 0 | 167921 | GVEVTLAEKCEKEFGI                   | 2.75 | 0.01 | 2.75 | 0.44 | 0.85 | 2.51 |
| 29020 | 0 | 167921 | GVEVTLAEKCEKEFGI                   | 2.75 | 0.01 | 2.75 | 0.44 | 0.85 | 2.51 |
| 29021 | 0 | 167921 | GVEVTLAEKCEKEFGI                   | 2.75 | 0.01 | 2.75 | 0.44 | 0.85 | 2.51 |
| 29022 | 0 | 450663 | GVFISYN                            | 1.99 | 0.01 | 0.90 | 0.44 | 1.23 | 1.39 |

|       |   |        |                                                               |      |      |      |      |      |      |
|-------|---|--------|---------------------------------------------------------------|------|------|------|------|------|------|
| 29023 | 0 | 22972  | GVFTSI                                                        | 1.88 | 0.01 | 2.40 | 0.44 | 0.85 | 0.28 |
| 29024 | 0 | 22973  | GVFTTIDKAQAHIKN                                               | 2.65 | 0.01 | 3.10 | 1.12 | 0.22 | 0.85 |
| 29025 | 0 | 122387 | GVGARLPEQPPFV                                                 | 2.62 | 0.01 | 0.90 | 1.15 | 0.22 | 1.39 |
| 29026 | 0 | 306280 | GVGGGDGSAGEDLLL                                               | 2.70 | 0.01 | 1.61 | 0.44 | 0.85 | 1.28 |
| 29027 | 0 | 135467 | GVGGLGG                                                       | 2.04 | 0.01 | 0.78 | 1.20 | 0.22 | 0.28 |
| 29028 | 0 | 118392 | GVGGPSQQ                                                      | 2.13 | 0.01 | 0.78 | 0.44 | 1.13 | 0.28 |
| 29029 | 0 | 119200 | GVGGPSQQVMTPQGR<br>GTVAAAA                                    | 3.06 | 0.01 | 0.78 | 0.44 | 1.13 | 0.85 |
| 29030 | 0 | 178951 | GVGIYAPDAEAYTLF                                               | 2.67 | 0.01 | 2.36 | 0.44 | 1.23 | 1.28 |
| 29031 | 0 | 22980  | GVGIYLLPNR                                                    | 2.31 | 0.01 | 1.96 | 0.44 | 0.85 | 1.34 |
| 29032 | 0 | 135468 | GVGLAP                                                        | 1.91 | 0.01 | 0.78 | 1.20 | 0.22 | 0.28 |
| 29033 | 0 | 118393 | GVGRAAGR                                                      | 2.17 | 0.01 | 0.78 | 0.44 | 1.13 | 0.28 |
| 29034 | 0 | 444646 | GVGSVVVSFAIKWE                                                | 2.63 | 0.01 | 1.96 | 0.68 | 0.22 | 0.28 |
| 29035 | 0 | 22986  | GVGSSAVILDDNFVT                                               | 2.67 | 0.01 | 3.06 | 2.13 | 0.22 | 0.28 |
| 29036 | 0 | 22986  | GVGSSAVILDDNFVT                                               | 2.67 | 0.01 | 3.06 | 2.13 | 0.85 | 0.28 |
| 29037 | 0 | 22986  | GVGSSAVILDDNFVT                                               | 2.67 | 0.01 | 3.06 | 2.13 | 1.74 | 0.28 |
| 29038 | 0 | 142705 | GVGSSAVILNDDNFVT                                              | 2.68 | 0.01 | 3.06 | 2.13 | 0.22 | 0.28 |
| 29039 | 0 | 161230 | GVGSSIASWAIKWEYV<br>LLF                                       | 2.95 | 0.01 | 2.45 | 0.68 | 0.22 | 0.28 |
| 29040 | 0 | 190440 | GVGSSSGNWHCDSTW                                               | 2.69 | 0.01 | 3.61 | 2.00 | 1.41 | 0.28 |
| 29041 | 0 | 122108 | GVGVELENSMGGLNF                                               | 2.71 | 0.01 | 2.72 | 1.20 | 0.22 | 0.28 |
| 29042 | 0 | 122108 | GVGVELENSMGGLNF                                               | 2.71 | 0.01 | 2.72 | 1.20 | 0.22 | 2.02 |
| 29043 | 0 | 122108 | GVGVELENSMGGLNF                                               | 2.71 | 0.01 | 2.72 | 1.20 | 0.22 | 2.02 |
| 29044 | 0 | 112149 | GVGWIRQ                                                       | 2.03 | 0.01 | 0.78 | 0.44 | 1.13 | 0.28 |
| 29045 | 0 | 121361 | GVHAAYSTYPFFRVK                                               | 2.64 | 0.01 | 0.90 | 0.68 | 0.22 | 1.39 |
| 29046 | 0 | 121361 | GVHAAYSTYPFFRVK                                               | 2.64 | 0.01 | 0.90 | 0.68 | 0.22 | 0.28 |
| 29047 | 0 | 121361 | GVHAAYSTYPFFRVK                                               | 2.64 | 0.01 | 0.90 | 0.68 | 0.22 | 0.28 |
| 29048 | 0 | 79242  | GVHANLHVAFHRSSEK<br>IHSNEISSDSIGVLGYQKT<br>VDHTKVNSKLSLFFEIKS | 3.94 | 0.01 | 3.42 | 0.68 | 0.22 | 0.85 |
| 29049 | 0 | 79242  | GVHANLHVAFHRSSEK<br>IHSNEISSDSIGVLGYQKT<br>VDHTKVNSKLSLFFEIKS | 3.94 | 0.01 | 3.42 | 0.68 | 0.22 | 0.28 |
| 29050 | 0 | 22993  | GVHHPSTNQEQTSLYV<br>QASGRVTV                                  | 3.12 | 4.63 | 3.27 | 1.20 | 0.22 | 1.57 |
| 29051 | 0 | 22997  | GVIFFFNPGEELLPEA                                              | 2.68 | 0.01 | 2.04 | 0.44 | 0.85 | 1.28 |
| 29052 | 0 | 22999  | GVIGFSFFVK                                                    | 2.35 | 0.01 | 3.41 | 0.68 | 0.22 | 0.28 |
| 29053 | 0 | 187837 | GVIICGEGT                                                     | 2.25 | 0.01 | 3.65 | 2.02 | 0.22 | 0.85 |
| 29054 | 0 | 187837 | GVIICGEGT                                                     | 2.25 | 0.01 | 3.65 | 2.02 | 0.22 | 0.85 |
| 29055 | 0 | 23004  | GVII TW                                                       | 1.89 | 0.01 | 2.40 | 0.44 | 0.85 | 0.28 |
| 29056 | 0 | 79851  | GVINE                                                         | 1.74 | 0.01 | 4.63 | 1.15 | 0.22 | 2.02 |
| 29057 | 0 | 79851  | GVINE                                                         | 1.74 | 0.01 | 4.63 | 1.15 | 0.22 | 2.02 |
| 29058 | 0 | 187660 | GVINGRNTDDED                                                  | 2.50 | 0.01 | 4.33 | 1.12 | 0.22 | 0.28 |
| 29059 | 0 | 181653 | GVIPGPSHFSQLYYK                                               | 2.66 | 0.01 | 2.86 | 2.37 | 0.22 | 1.28 |

|       |   |        |                                                     |      |      |      |      |      |      |
|-------|---|--------|-----------------------------------------------------|------|------|------|------|------|------|
| 29060 | 0 | 517668 | GVKFVIIDDIIEGKD                                     | 2.73 | 0.01 | 2.24 | 0.44 | 1.41 | 1.28 |
| 29061 | 0 | 23021  | GVKGSSIA                                            | 2.14 | 0.01 | 3.06 | 1.12 | 0.22 | 0.28 |
| 29062 | 0 | 178952 | GVKGVQRPFTPDDWA                                     | 2.60 | 0.01 | 3.34 | 0.44 | 1.59 | 0.28 |
| 29063 | 0 | 178952 | GVKGVQRPFTPDDWA                                     | 2.60 | 0.01 | 3.34 | 0.44 | 0.85 | 0.28 |
| 29064 | 0 | 23028  | GVKYA                                               | 1.74 | 4.93 | 0.90 | 0.44 | 1.13 | 0.85 |
| 29065 | 0 | 118829 | GVLAGQASQLNA                                        | 2.52 | 0.01 | 3.12 | 0.68 | 0.22 | 0.85 |
| 29066 | 0 | 118829 | GVLAGQASQLNA                                        | 2.52 | 0.01 | 3.12 | 0.68 | 0.22 | 0.28 |
| 29067 | 0 | 118829 | GVLAGQASQLNA                                        | 2.52 | 0.01 | 3.12 | 0.68 | 0.22 | 1.27 |
| 29068 | 0 | 23032  | GVLAKDVRFSQV                                        | 2.45 | 0.01 | 0.90 | 0.44 | 0.85 | 1.27 |
| 29069 | 0 | 23032  | GVLAKDVRFSQV                                        | 2.45 | 0.01 | 0.90 | 0.44 | 0.85 | 0.28 |
| 29070 | 0 | 23032  | GVLAKDVRFSQV                                        | 2.45 | 0.01 | 0.90 | 0.44 | 1.59 | 1.27 |
| 29071 | 0 | 82953  | GVLATLGYRFSDLGLLVS<br>LDSGYAKT                      | 3.23 | 0.01 | 3.04 | 1.12 | 0.22 | 0.28 |
| 29072 | 0 | 82953  | GVLATLGYRFSDLGLLVS<br>LDSGYAKT                      | 3.23 | 0.01 | 3.04 | 1.12 | 0.22 | 0.85 |
| 29073 | 0 | 82953  | GVLATLGYRFSDLGLLVS<br>LDSGYAKT                      | 3.23 | 0.01 | 3.04 | 0.68 | 0.22 | 0.28 |
| 29074 | 0 | 82953  | GVLATLGYRFSDLGLLVS<br>LDSGYAKT                      | 3.23 | 0.01 | 3.04 | 1.12 | 0.22 | 0.28 |
| 29075 | 0 | 82953  | GVLATLGYRFSDLGLLVS<br>LDSGYAKT                      | 3.23 | 0.01 | 3.04 | 0.44 | 0.85 | 0.28 |
| 29076 | 0 | 109276 | GVLIQVYEGERAMTKDN<br>NLLGRFELSGIPPAPGVP<br>QIEVTFDI | 3.69 | 0.01 | 0.78 | 1.15 | 0.22 | 0.85 |
| 29077 | 0 | 109276 | GVLIQVYEGERAMTKDN<br>NLLGRFELSGIPPAPGVP<br>QIEVTFDI | 3.69 | 0.01 | 0.78 | 1.15 | 0.22 | 0.85 |
| 29078 | 0 | 23041  | GVLMSGQSESVEFTK                                     | 2.68 | 0.01 | 2.24 | 1.15 | 0.22 | 0.85 |
| 29079 | 0 | 23041  | GVLMSGQSESVEFTK                                     | 2.68 | 0.01 | 2.24 | 1.15 | 0.22 | 0.85 |
| 29080 | 0 | 23047  | GVLQTGVFSTEDGFK                                     | 2.69 | 0.01 | 3.04 | 2.75 | 0.22 | 0.28 |
| 29081 | 0 | 23048  | GVLSVDLSLTVELKI                                     | 2.70 | 0.01 | 2.72 | 1.12 | 0.22 | 0.28 |
| 29082 | 0 | 23048  | GVLSVDLSLTVELKI                                     | 2.70 | 0.01 | 2.72 | 0.44 | 0.85 | 0.28 |
| 29083 | 0 | 23049  | GVLSVVAAGNE                                         | 2.42 | 0.01 | 2.75 | 1.20 | 0.22 | 0.85 |
| 29084 | 0 | 23051  | GVLTSSSRFQPFQQFG                                    | 2.80 | 0.01 | 2.48 | 0.44 | 0.85 | 0.28 |
| 29085 | 0 | 23051  | GVLTSSSRFQPFQQFG                                    | 2.80 | 0.01 | 2.48 | 0.68 | 0.22 | 0.28 |
| 29086 | 0 | 23051  | GVLTSSSRFQPFQQFG                                    | 2.80 | 0.01 | 2.48 | 1.20 | 0.22 | 0.28 |
| 29087 | 0 | 23051  | GVLTSSSRFQPFQQFG                                    | 2.80 | 0.01 | 3.30 | 0.68 | 0.22 | 0.28 |
| 29088 | 0 | 23051  | GVLTSSSRFQPFQQFG                                    | 2.80 | 0.01 | 3.30 | 0.68 | 0.22 | 0.28 |
| 29089 | 0 | 23053  | GVLTSSSRFQPFQQFG<br>RDVSDFTDSVRDPK                  | 3.41 | 0.01 | 2.48 | 0.44 | 0.85 | 0.28 |



|       |   |        |                                         |      |      |      |      |      |      |
|-------|---|--------|-----------------------------------------|------|------|------|------|------|------|
| 29090 | 0 | 114382 | GVLYVGSKTSGVVQGV<br>ASVAEKTKE           | 3.20 | 0.01 | 1.75 | 2.04 | 0.22 | 0.28 |
| 29091 | 0 | 131903 | GVMAARGQL                               | 2.23 | 0.01 | 0.78 | 0.44 | 1.13 | 0.28 |
| 29092 | 0 | 131903 | GVMAARGQL                               | 2.23 | 0.01 | 0.78 | 0.44 | 1.93 | 0.28 |
| 29093 | 0 | 23058  | GVMLAAQMFIVSPQ                          | 2.60 | 0.01 | 2.69 | 0.44 | 0.85 | 0.28 |
| 29094 | 0 | 23059  | GVMMLCPQYFPSCRSL                        | 2.66 | 0.01 | 0.90 | 0.68 | 0.22 | 1.39 |
| 29095 | 0 | 187064 | GVMRSNYDVRELR                           | 2.54 | 0.01 | 3.33 | 2.00 | 1.59 | 0.28 |
| 29096 | 0 | 109277 | GVNH                                    | 1.57 | 0.01 | 3.11 | 0.68 | 0.22 | 0.28 |
| 29097 | 0 | 109277 | GVNH                                    | 1.57 | 0.01 | 3.11 | 0.68 | 0.22 | 1.48 |
| 29098 | 0 | 109277 | GVNH                                    | 1.57 | 0.01 | 3.11 | 0.68 | 0.22 | 0.28 |
| 29099 | 0 | 489571 | GVNHVIPYELFAGDGML<br>TRL                | 2.90 | 0.01 | 2.70 | 0.44 | 0.85 | 0.28 |
| 29100 | 0 | 23068  | GVNLEDPASRDL                            | 2.45 | 0.01 | 2.08 | 0.44 | 0.85 | 0.28 |
| 29101 | 0 | 23068  | GVNLEDPASRDL                            | 2.45 | 0.01 | 2.08 | 0.44 | 0.85 | 1.27 |
| 29102 | 0 | 23068  | GVNLEDPASRDL                            | 2.45 | 0.01 | 2.08 | 0.68 | 0.22 | 0.28 |
| 29103 | 0 | 23068  | GVNLEDPASRDL                            | 2.45 | 0.01 | 2.08 | 0.68 | 0.22 | 0.28 |
| 29104 | 0 | 23069  | GVNLEDPASRDLVVS                         | 2.67 | 0.01 | 2.08 | 1.12 | 0.22 | 2.35 |
| 29105 | 0 | 23069  | GVNLEDPASRDLVVS                         | 2.67 | 0.01 | 2.08 | 1.12 | 0.22 | 0.28 |
| 29106 | 0 | 23069  | GVNLEDPASRDLVVS                         | 2.67 | 0.01 | 2.08 | 1.12 | 0.22 | 0.28 |
| 29107 | 0 | 23071  | GVNLTSH                                 | 1.99 | 0.01 | 4.93 | 0.68 | 0.22 | 1.27 |
| 29108 | 0 | 23077  | GVNPNNAAAGLPGKCG                        | 2.70 | 0.01 | 3.35 | 1.12 | 0.22 | 0.85 |
| 29109 | 0 | 23077  | GVNPNNAAAGLPGKCG                        | 2.70 | 0.01 | 3.35 | 0.44 | 1.23 | 0.85 |
| 29110 | 0 | 23078  | GVNQELAYFY                              | 2.29 | 0.01 | 1.60 | 0.44 | 1.23 | 0.28 |
| 29111 | 0 | 23078  | GVNQELAYFY                              | 2.29 | 0.01 | 1.60 | 0.44 | 1.23 | 0.28 |
| 29112 | 0 | 23080  | GVNVPAGAGAAILTP                         | 2.71 | 0.01 | 2.76 | 0.44 | 1.59 | 0.28 |
| 29113 | 0 | 462351 | GVNYATGNLPGCSFSILL<br>ALLSCLTTIPASAYEVR | 3.50 | 0.01 | 1.96 | 2.90 | 0.22 | 0.28 |
| 29114 | 0 | 237749 | GVPACYLKYAQDKAPKG<br>IKIAAENC           | 3.16 | 0.01 | 2.74 | 1.20 | 0.22 | 0.28 |
| 29115 | 0 | 237749 | GVPACYLKYAQDKAPKG<br>IKIAAENC           | 3.16 | 0.01 | 2.74 | 1.20 | 0.22 | 0.28 |
| 29116 | 0 | 237749 | GVPACYLKYAQDKAPKG<br>IKIAAENC           | 3.16 | 0.01 | 2.74 | 1.20 | 0.22 | 0.28 |
| 29117 | 0 | 118394 | GVPAGVPI                                | 2.17 | 0.01 | 0.78 | 0.44 | 1.13 | 0.28 |
| 29118 | 0 | 23090  | GVPDHIKVWDYATNK                         | 2.64 | 0.01 | 2.56 | 2.02 | 0.22 | 0.85 |
| 29119 | 0 | 23090  | GVPDHIKVWDYATNK                         | 2.64 | 0.01 | 2.56 | 0.68 | 0.22 | 0.85 |
| 29120 | 0 | 171337 | GVPDNHKPARTQ                            | 2.43 | 0.01 | 0.90 | 0.44 | 0.85 | 1.39 |
| 29121 | 0 | 112150 | GVPDRFT                                 | 1.99 | 0.01 | 0.78 | 0.44 | 1.13 | 0.28 |
| 29122 | 0 | 117525 | GVPIEKIYNKTQREKFA                       | 2.76 | 0.01 | 0.78 | 0.44 | 1.13 | 0.28 |
| 29123 | 0 | 23096  | GVPIELQVECFTWDQ                         | 2.64 | 0.01 | 2.72 | 0.44 | 0.85 | 0.28 |
| 29124 | 0 | 23102  | GVPPLRVWR                               | 2.24 | 0.01 | 1.96 | 0.44 | 0.85 | 1.34 |

|       |   |        |                               |      |      |      |      |      |      |
|-------|---|--------|-------------------------------|------|------|------|------|------|------|
| 29125 | 0 | 23103  | GVPQPAPVAAPARRTR<br>KPQQPE    | 3.08 | 0.01 | 2.43 | 0.44 | 1.59 | 0.28 |
| 29126 | 0 | 23103  | GVPQPAPVAAPARRTR<br>KPQQPE    | 3.08 | 0.01 | 2.43 | 0.44 | 1.59 | 0.28 |
| 29127 | 0 | 82959  | GVPRRQRAIDKRQRA               | 2.70 | 0.01 | 2.48 | 0.44 | 1.59 | 0.28 |
| 29128 | 0 | 186669 | GVPSFLDMWLLY                  | 2.44 | 0.01 | 0.90 | 0.68 | 0.22 | 1.39 |
| 29129 | 0 | 103244 | GVPSRLGYLLDLAPK               | 2.69 | 0.01 | 2.04 | 0.44 | 0.85 | 1.28 |
| 29130 | 0 | 175838 | GVPTYLATDTTELKEI              | 2.66 | 0.01 | 2.63 | 1.15 | 0.22 | 0.85 |
| 29131 | 0 | 187839 | GVPYWTYNTGDEPVVA              | 2.75 | 0.01 | 2.72 | 2.13 | 2.39 | 1.27 |
| 29132 | 0 | 23107  | GVQEGAKALY                    | 2.32 | 0.01 | 2.60 | 0.44 | 1.23 | 0.85 |
| 29133 | 0 | 119461 | GVQGGMV                       | 2.05 | 0.01 | 0.78 | 0.44 | 1.13 | 2.75 |
| 29134 | 0 | 23110  | GVQIASNENMDSIVSST<br>LELR     | 2.97 | 0.01 | 3.72 | 1.15 | 0.22 | 2.66 |
| 29135 | 0 | 23110  | GVQIASNENMDSIVSST<br>LELR     | 2.97 | 0.01 | 3.93 | 1.15 | 0.22 | 2.66 |
| 29136 | 0 | 107434 | GVQVHNA                       | 2.02 | 0.01 | 0.78 | 0.44 | 1.13 | 0.28 |
| 29137 | 0 | 103961 | GVRATRKTSESRQPRGR<br>RQP      | 2.97 | 0.01 | 1.72 | 0.44 | 0.85 | 0.28 |
| 29138 | 0 | 23119  | GVRATRKTSESRQPRGR<br>RQPIPK   | 3.10 | 0.01 | 1.72 | 0.68 | 0.22 | 0.28 |
| 29139 | 0 | 23119  | GVRATRKTSESRQPRGR<br>RQPIPK   | 3.10 | 0.01 | 1.72 | 0.68 | 0.22 | 0.28 |
| 29140 | 0 | 23119  | GVRATRKTSESRQPRGR<br>RQPIPK   | 3.10 | 0.01 | 1.72 | 0.68 | 0.22 | 1.48 |
| 29141 | 0 | 23121  | GVREGK                        | 1.91 | 0.01 | 1.86 | 0.44 | 1.23 | 0.28 |
| 29142 | 0 | 147005 | GVRKRKQNLVQAW                 | 2.56 | 0.01 | 1.60 | 0.44 | 0.85 | 0.85 |
| 29143 | 0 | 23125  | GVRLLSGVFSDPAFA               | 2.70 | 0.01 | 0.90 | 1.15 | 0.22 | 0.85 |
| 29144 | 0 | 23125  | GVRLLSGVFSDPAFA               | 2.70 | 0.01 | 0.90 | 1.15 | 0.22 | 1.27 |
| 29145 | 0 | 137179 | GVRTLYRFENQTGFPPP<br>DSRFDAYC | 3.13 | 0.01 | 0.78 | 0.68 | 0.22 | 0.28 |
| 29146 | 0 | 23128  | GVRVCE                        | 1.90 | 0.01 | 1.96 | 0.44 | 0.85 | 0.28 |
| 29147 | 0 | 137180 | GVSAAQEKISFG                  | 2.47 | 0.01 | 2.80 | 2.13 | 0.22 | 0.28 |
| 29148 | 0 | 137180 | GVSAAQEKISFG                  | 2.47 | 0.01 | 2.80 | 2.13 | 0.22 | 1.34 |
| 29149 | 0 | 137180 | GVSAAQEKISFG                  | 2.47 | 0.01 | 2.80 | 2.78 | 0.22 | 0.28 |
| 29150 | 0 | 23133  | GVSCFAGXASSRHRV               | 2.70 | 0.01 | 0.90 | 0.68 | 0.22 | 1.39 |
| 29151 | 0 | 23134  | GVSVTVTREDGTNRR               | 2.69 | 0.01 | 2.43 | 0.68 | 0.22 | 0.28 |
| 29152 | 0 | 23134  | GVSVTVTREDGTNRR               | 2.69 | 0.01 | 2.43 | 0.68 | 0.22 | 0.28 |
| 29153 | 0 | 23134  | GVSVTVTREDGTNRR               | 2.69 | 0.01 | 2.43 | 0.44 | 0.85 | 0.28 |
| 29154 | 0 | 100089 | GVSDDQLTGNIN                  | 2.47 | 0.01 | 2.88 | 1.20 | 0.22 | 0.85 |
| 29155 | 0 | 149731 | GVSDYHKNLINN                  | 2.43 | 0.01 | 3.53 | 0.68 | 0.22 | 0.28 |
| 29156 | 0 | 149731 | GVSDYHKNLINN                  | 2.43 | 0.01 | 3.53 | 0.68 | 0.22 | 0.28 |
| 29157 | 0 | 149732 | GVSDYYKNLINN                  | 2.44 | 0.01 | 3.53 | 0.68 | 0.22 | 0.28 |
| 29158 | 0 | 149732 | GVSDYYKNLINN                  | 2.44 | 0.01 | 3.53 | 0.68 | 0.22 | 0.28 |
| 29159 | 0 | 23136  | GVSELLISTA                    | 2.30 | 0.01 | 0.78 | 0.44 | 1.74 | 0.28 |
| 29160 | 0 | 23139  | GVSGGS                        | 1.92 | 0.01 | 2.40 | 0.44 | 0.85 | 0.28 |

|       |   |        |                               |      |      |      |      |      |      |
|-------|---|--------|-------------------------------|------|------|------|------|------|------|
| 29161 | 0 | 23142  | GVSGSSITTLSSGPHSLSP<br>A      | 2.98 | 0.01 | 3.36 | 0.44 | 2.82 | 0.28 |
| 29162 | 0 | 23149  | GVSPKVCKDVTVEGSNE<br>FAPVQNLT | 3.16 | 0.01 | 2.84 | 1.15 | 0.22 | 0.85 |
| 29163 | 0 | 23149  | GVSPKVCKDVTVEGSNE<br>FAPVQNLT | 3.16 | 0.01 | 2.84 | 0.68 | 0.22 | 0.85 |
| 29164 | 0 | 134685 | GVSSYMKVSICLPMDVE             | 2.77 | 0.01 | 2.73 | 1.20 | 0.22 | 0.28 |
| 29165 | 0 | 134685 | GVSSYMKVSICLPMDVE             | 2.77 | 0.01 | 2.73 | 1.20 | 0.22 | 1.34 |
| 29166 | 0 | 134685 | GVSSYMKVSICLPMDVE             | 2.77 | 0.01 | 2.73 | 1.20 | 0.22 | 1.57 |
| 29167 | 0 | 23156  | GVSTANATVYMIDSVL<br>MPPA      | 2.94 | 0.01 | 3.59 | 2.79 | 0.22 | 0.28 |
| 29168 | 0 | 144324 | GVSTITADEIR                   | 2.39 | 0.01 | 3.63 | 0.68 | 0.22 | 0.85 |
| 29169 | 0 | 144324 | GVSTITADEIR                   | 2.39 | 0.01 | 3.63 | 0.68 | 0.22 | 2.12 |
| 29170 | 0 | 23160  | GVSWTM                        | 1.88 | 0.01 | 2.40 | 0.44 | 0.85 | 0.28 |
| 29171 | 0 | 23162  | GVSYNIGSQEWYTTV               | 2.68 | 0.01 | 2.43 | 0.44 | 1.59 | 0.28 |
| 29172 | 0 | 150994 | GVTAACPHAGAKSFY               | 2.67 | 0.01 | 2.87 | 0.44 | 0.85 | 0.28 |
| 29173 | 0 | 105853 | GVTHDQLN                      | 2.10 | 0.01 | 3.05 | 1.20 | 0.22 | 0.28 |
| 29174 | 0 | 23169  | GVTHDQLNNFR                   | 2.35 | 0.01 | 3.05 | 0.44 | 1.23 | 1.57 |
| 29175 | 0 | 23169  | GVTHDQLNNFR                   | 2.35 | 0.01 | 3.05 | 1.12 | 0.22 | 1.57 |
| 29176 | 0 | 23169  | GVTHDQLNNFR                   | 2.35 | 0.01 | 3.05 | 0.68 | 0.22 | 1.57 |
| 29177 | 0 | 23169  | GVTHDQLNNFR                   | 2.35 | 0.01 | 3.05 | 0.68 | 0.22 | 1.57 |
| 29178 | 0 | 23169  | GVTHDQLNNFR                   | 2.35 | 0.01 | 3.05 | 0.44 | 1.23 | 1.57 |
| 29179 | 0 | 105854 | GVTHDQLNNFRAGFVS<br>YMKA      | 2.89 | 0.01 | 3.05 | 1.20 | 0.22 | 0.28 |
| 29180 | 0 | 105854 | GVTHDQLNNFRAGFVS<br>YMKA      | 2.89 | 0.01 | 3.05 | 0.44 | 1.23 | 0.28 |
| 29181 | 0 | 125435 | GVTHMTSRDIEVQGFRI<br>PKG      | 2.92 | 0.01 | 0.78 | 0.44 | 1.13 | 0.28 |
| 29182 | 0 | 23171  | GVTLQAAPT                     | 2.31 | 0.01 | 3.20 | 0.44 | 1.41 | 0.28 |
| 29183 | 0 | 23171  | GVTLQAAPT                     | 2.31 | 0.01 | 3.20 | 0.44 | 1.13 | 0.28 |
| 29184 | 0 | 193471 | GVTNFVPSM                     | 2.21 | 0.01 | 2.51 | 0.44 | 2.39 | 0.28 |
| 29185 | 0 | 193471 | GVTNFVPSM                     | 2.21 | 0.01 | 2.51 | 0.44 | 2.39 | 0.28 |
| 29186 | 0 | 23173  | GVTQNGGSSACKRGPD<br>SGFFSR    | 3.02 | 0.01 | 3.04 | 1.12 | 0.22 | 0.28 |
| 29187 | 0 | 23173  | GVTQNGGSSACKRGPD<br>SGFFSR    | 3.02 | 0.01 | 3.04 | 1.12 | 0.22 | 0.28 |
| 29188 | 0 | 23174  | GVTRPS                        | 1.88 | 0.01 | 2.53 | 0.44 | 1.59 | 0.28 |
| 29189 | 0 | 23176  | GVTRPSAPPLPHVV                | 2.61 | 0.01 | 2.53 | 0.44 | 0.85 | 0.28 |
| 29190 | 0 | 23179  | GVTSAPDTRPAPGSTA              | 2.79 | 4.45 | 0.78 | 1.15 | 0.22 | 1.34 |
| 29191 | 0 | 23178  | GVTSAPDTRPAPGSTA              | 2.79 | 4.45 | 0.78 | 1.15 | 0.22 | 1.34 |
| 29192 | 0 | 23179  | GVTSAPDTRPAPGSTA              | 2.79 | 4.45 | 0.78 | 1.15 | 0.22 | 1.34 |

|       |   |        |                       |      |      |      |      |      |      |
|-------|---|--------|-----------------------|------|------|------|------|------|------|
| 29193 | 0 | 23179  | GVTSPDTRPAPGSTA       | 2.79 | 4.45 | 0.78 | 1.15 | 0.22 | 2.12 |
| 29194 | 0 | 23178  | GVTSPDTRPAPGSTA       | 2.79 | 4.45 | 0.78 | 1.15 | 0.22 | 1.34 |
| 29195 | 0 | 23178  | GVTSPDTRPAPGSTA       | 2.79 | 4.45 | 0.78 | 1.15 | 0.22 | 2.12 |
| 29196 | 0 | 186670 | GVTSFDFRRHTE          | 2.46 | 0.01 | 0.90 | 0.68 | 0.22 | 1.39 |
| 29197 | 0 | 23184  | GVTTSLS               | 2.03 | 0.01 | 2.61 | 0.44 | 0.85 | 0.28 |
| 29198 | 0 | 23185  | GVTTSLSYF             | 2.22 | 0.01 | 2.61 | 0.44 | 0.85 | 0.28 |
| 29199 | 0 | 144325 | GVTTV                 | 1.75 | 0.01 | 2.19 | 0.44 | 1.13 | 2.02 |
| 29200 | 0 | 144325 | GVTTV                 | 1.75 | 0.01 | 2.19 | 0.44 | 1.13 | 1.48 |
|       |   |        | GVTVSVGGVDMRAGRII     |      |      |      |      |      |      |
| 29201 | 0 | 23188  | AWDGQAALQIHNPTQ<br>QN | 3.46 | 0.01 | 3.81 | 1.15 | 0.22 | 0.85 |
|       |   |        | GVTVSVGGVDMRAGRII     |      |      |      |      |      |      |
| 29202 | 0 | 23188  | AWDGQAALQIHNPTQ<br>QN | 3.46 | 0.01 | 3.81 | 1.15 | 0.22 | 0.85 |
|       |   |        | GVTVSVGGVDMRAGRII     |      |      |      |      |      |      |
| 29203 | 0 | 23188  | AWDGQAALQIHNPTQ<br>QN | 3.46 | 0.01 | 3.81 | 2.00 | 0.22 | 2.35 |
|       |   |        | GVTVSVGGVDMRAGRII     |      |      |      |      |      |      |
| 29204 | 0 | 23188  | AWDGQAALQIHNPTQ<br>QN | 3.46 | 0.01 | 3.81 | 2.00 | 0.22 | 2.35 |
|       |   |        | GVTVSVGGVDMRAGRII     |      |      |      |      |      |      |
| 29205 | 0 | 23188  | AWDGQAALQIHNPTQ<br>QN | 3.46 | 0.01 | 3.81 | 1.12 | 0.22 | 2.35 |
|       |   |        | GVTVSVGGVDMRAGRII     |      |      |      |      |      |      |
| 29206 | 0 | 23188  | AWDGQAALQIHNPTQ<br>QN | 3.46 | 0.01 | 3.81 | 1.12 | 0.22 | 2.35 |
|       |   |        | GVTVTPLLLGYTFQDSQ     |      |      |      |      |      |      |
| 29207 | 0 | 178244 | HNNGG                 | 3.02 | 0.01 | 3.93 | 0.68 | 0.22 | 0.85 |
| 29208 | 0 | 114848 | GVTYDNECLL            | 2.26 | 0.01 | 2.25 | 0.44 | 1.23 | 0.85 |
| 29209 | 0 | 23190  | GVTYEIDLTNKNA         | 2.51 | 0.01 | 2.59 | 0.44 | 0.85 | 0.28 |
| 29210 | 0 | 23190  | GVTYEIDLTNKNA         | 2.51 | 0.01 | 2.59 | 0.44 | 0.85 | 0.28 |
| 29211 | 0 | 23191  | GVTYEIDLTNKNA         | 2.57 | 0.01 | 2.59 | 0.44 | 0.85 | 0.28 |
| 29212 | 0 | 23191  | GVTYEIDLTNKNA         | 2.57 | 0.01 | 2.59 | 0.44 | 0.85 | 0.28 |
| 29213 | 0 | 23192  | GVTYEIDLTNKNA         | 2.65 | 0.01 | 2.59 | 0.44 | 0.85 | 0.28 |
| 29214 | 0 | 23193  | GVTYEIDLTNKNA         | 2.72 | 0.01 | 2.59 | 0.44 | 0.85 | 0.28 |
| 29215 | 0 | 23194  | GVTYEIDLTNKNA         | 2.77 | 0.01 | 2.59 | 0.44 | 0.85 | 0.28 |
|       |   |        | GVTYEIDLTNKNA         |      |      |      |      |      |      |
| 29216 | 0 | 23195  | KL                    | 2.83 | 0.01 | 2.59 | 0.44 | 0.85 | 0.28 |
|       |   |        | GVTYEIDLTNKNA         |      |      |      |      |      |      |
| 29217 | 0 | 23196  | GD                    | 2.89 | 0.01 | 2.59 | 0.44 | 0.85 | 0.28 |
|       |   |        | GVTYTNDCLLCAYSIEFG    |      |      |      |      |      |      |
| 29218 | 0 | 230228 | TN                    | 2.93 | 0.01 | 2.25 | 0.44 | 1.23 | 0.28 |
| 29219 | 0 | 105855 | GVV                   | 1.32 | 0.01 | 0.78 | 0.68 | 0.22 | 0.28 |

|       |   |        |                   |      |      |      |      |      |      |
|-------|---|--------|-------------------|------|------|------|------|------|------|
| 29220 | 0 | 105855 | GVV               | 1.32 | 0.01 | 0.78 | 0.68 | 0.22 | 0.28 |
| 29221 | 0 | 23199  | GVVCAAILR         | 2.21 | 0.01 | 1.96 | 0.44 | 0.85 | 1.34 |
| 29222 | 0 | 306897 | GVVEGESSFYREV     | 2.73 | 0.01 | 1.61 | 0.44 | 0.85 | 1.28 |
| 29223 | 0 | 517721 | GVVGTPAAADSTLTV   | 2.70 | 0.01 | 2.24 | 0.44 | 1.41 | 1.28 |
| 29224 | 0 | 107435 | GVVIA             | 1.75 | 0.01 | 0.78 | 1.12 | 0.22 | 1.48 |
| 29225 | 0 | 167922 | GVVNQGPVDVPFSGKP  | 2.77 | 0.01 | 2.75 | 0.44 | 1.59 | 2.51 |
| 29226 | 0 | 167922 | GVVNQGPVDVPFSGKP  | 2.77 | 0.01 | 2.75 | 0.44 | 0.85 | 2.51 |
| 29227 | 0 | 167922 | GVVNQGPVDVPFSGKP  | 2.77 | 0.01 | 2.75 | 0.44 | 0.85 | 2.51 |
| 29228 | 0 | 167922 | GVVNQGPVDVPFSGKP  | 2.77 | 0.01 | 2.75 | 0.44 | 0.85 | 2.51 |
| 29229 | 0 | 23207  | GVVTLY            | 1.89 | 0.01 | 2.40 | 0.44 | 0.85 | 0.28 |
| 29230 | 0 | 189229 | GVVWYLVAVAHGDLLE  | 3.58 | 0.01 | 0.78 | 0.44 | 1.13 | 0.28 |
|       |   |        | LDPPANHTPCVVQVHTL |      |      |      |      |      |      |
|       |   |        | TGAFL             |      |      |      |      |      |      |
| 29231 | 0 | 189229 | GVVWYLVAVAHGDLLE  | 3.58 | 0.01 | 0.78 | 0.44 | 1.13 | 1.27 |
|       |   |        | LDPPANHTPCVVQVHTL |      |      |      |      |      |      |
| 29232 | 0 | 146298 | TGAFL             | 2.77 | 4.93 | 0.78 | 0.44 | 1.13 | 0.28 |
|       |   |        | GVYATRSSAVRLRSSV  |      |      |      |      |      |      |
| 29233 | 0 | 421999 | GVYATRSSAVRLRSSV  | 2.77 | 3.50 | 0.78 | 0.44 | 1.13 | 0.28 |
| 29234 | 0 | 103245 | GVYKVCKGLEKIPLL   | 2.69 | 0.01 | 2.04 | 0.44 | 0.85 | 1.28 |
| 29235 | 0 | 23221  | GVYLLPRR          | 2.10 | 0.01 | 1.72 | 0.44 | 0.85 | 0.28 |
| 29236 | 0 | 23223  | GVYLLPRRGP        | 2.34 | 0.01 | 2.68 | 0.44 | 0.85 | 0.28 |
| 29237 | 0 | 23225  | GVYLLPRRGPRLGVRAT | 2.90 | 0.01 | 1.72 | 0.44 | 0.85 | 0.28 |
|       |   |        | R                 |      |      |      |      |      |      |
| 29238 | 0 | 23226  | GVYLLPRRGPRLGVRAT | 2.99 | 0.01 | 1.72 | 0.44 | 0.85 | 0.28 |
|       |   |        | RKT               |      |      |      |      |      |      |
| 29239 | 0 | 23226  | GVYLLPRRGPRLGVRAT | 2.99 | 0.01 | 1.72 | 0.44 | 0.85 | 1.27 |
|       |   |        | RKT               |      |      |      |      |      |      |
| 29240 | 0 | 23226  | GVYLLPRRGPRLGVRAT | 2.99 | 0.01 | 1.72 | 0.44 | 0.85 | 0.28 |
|       |   |        | RKT               |      |      |      |      |      |      |
| 29241 | 0 | 23226  | GVYLLPRRGPRLGVRAT | 2.99 | 0.01 | 1.72 | 0.44 | 0.85 | 1.27 |
|       |   |        | RKT               |      |      |      |      |      |      |
| 29242 | 0 | 23226  | GVYLLPRRGPRLGVRAT | 2.99 | 0.01 | 1.72 | 0.44 | 0.85 | 2.92 |
|       |   |        | RKT               |      |      |      |      |      |      |
| 29243 | 0 | 165605 | GVYSLSK           | 2.02 | 0.01 | 0.90 | 0.44 | 1.23 | 1.39 |
| 29244 | 0 | 23240  | GWAGYWRGSNHS      | 2.50 | 0.01 | 2.69 | 0.68 | 0.22 | 0.28 |
| 29245 | 0 | 23240  | GWAGYWRGSNHS      | 2.50 | 0.01 | 2.69 | 1.20 | 0.22 | 0.28 |
| 29246 | 0 | 104824 | GWCGSTDEYC        | 2.32 | 0.01 | 2.60 | 0.44 | 1.23 | 0.85 |
| 29247 | 0 | 98809  | GWCR              | 1.57 | 0.01 | 4.23 | 0.44 | 1.74 | 0.28 |
| 29248 | 0 | 118830 | GWEFGGG           | 2.03 | 0.01 | 3.34 | 0.68 | 0.22 | 0.28 |
| 29249 | 0 | 118830 | GWEFGGG           | 2.03 | 0.01 | 3.34 | 0.68 | 0.22 | 1.48 |
| 29250 | 0 | 450665 | GWETRME           | 2.02 | 0.01 | 0.90 | 0.44 | 1.41 | 1.39 |
| 29251 | 0 | 23243  | GWGCNPPDCPGV      | 2.52 | 0.01 | 2.56 | 2.69 | 2.26 | 0.85 |
| 29252 | 0 | 188228 | GWGGDSGERW        | 2.36 | 0.01 | 2.92 | 1.81 | 0.22 | 0.85 |

|       |   |        |                                           |      |      |      |      |      |      |
|-------|---|--------|-------------------------------------------|------|------|------|------|------|------|
| 29253 | 0 | 106490 | GWGGHWRGAN                                | 2.36 | 0.01 | 2.75 | 0.44 | 1.23 | 0.85 |
| 29254 | 0 | 23246  | GWGLHQPPQIFLKILP<br>QSG                   | 2.97 | 0.01 | 2.75 | 0.44 | 0.85 | 0.85 |
| 29255 | 0 | 23247  | GWGLNWDLGLSQWAR<br>EALQTGIT               | 3.10 | 0.01 | 2.04 | 0.44 | 0.85 | 0.28 |
| 29256 | 0 | 23247  | GWGLNWDLGLSQWAR<br>EALQTGIT               | 3.10 | 0.01 | 2.04 | 0.44 | 0.85 | 0.28 |
| 29257 | 0 | 23247  | GWGLNWDLGLSQWAR<br>EALQTGIT               | 3.10 | 0.01 | 2.04 | 0.44 | 1.59 | 0.28 |
| 29258 | 0 | 23247  | GWGLNWDLGLSQWAR<br>EALQTGIT               | 3.10 | 0.01 | 2.04 | 0.44 | 2.82 | 0.28 |
| 29259 | 0 | 23247  | GWGLNWDLGLSQWAR<br>EALQTGIT               | 3.10 | 0.01 | 2.04 | 0.44 | 0.85 | 0.28 |
| 29260 | 0 | 23249  | GWGNGC                                    | 1.92 | 0.01 | 2.40 | 0.44 | 0.85 | 0.28 |
| 29261 | 0 | 174534 | GWGNKTPSQDVH                              | 2.44 | 0.01 | 0.90 | 1.15 | 1.41 | 1.39 |
| 29262 | 0 | 175593 | GWGQ                                      | 1.60 | 0.01 | 1.60 | 2.19 | 0.22 | 0.28 |
| 29263 | 0 | 175593 | GWGQ                                      | 1.60 | 0.01 | 1.60 | 2.19 | 0.22 | 0.28 |
| 29264 | 0 | 175593 | GWGQ                                      | 1.60 | 0.01 | 1.60 | 2.19 | 0.22 | 0.85 |
| 29265 | 0 | 175593 | GWGQ                                      | 1.60 | 0.01 | 1.60 | 2.19 | 0.22 | 0.85 |
| 29266 | 0 | 175593 | GWGQ                                      | 1.60 | 0.01 | 1.60 | 2.19 | 0.22 | 0.85 |
| 29267 | 0 | 175593 | GWGQ                                      | 1.60 | 0.01 | 1.60 | 2.19 | 0.22 | 0.85 |
| 29268 | 0 | 175593 | GWGQ                                      | 1.60 | 0.01 | 1.60 | 2.19 | 0.22 | 0.85 |
| 29269 | 0 | 175593 | GWGQ                                      | 1.60 | 0.01 | 1.60 | 2.19 | 0.22 | 0.85 |
| 29270 | 0 | 175593 | GWGQ                                      | 1.60 | 0.01 | 1.60 | 2.19 | 0.22 | 0.85 |
| 29271 | 0 | 175593 | GWGQ                                      | 1.60 | 0.01 | 1.60 | 2.19 | 0.22 | 0.28 |
| 29272 | 0 | 175593 | GWGQ                                      | 1.60 | 0.01 | 1.60 | 2.19 | 0.22 | 0.85 |
| 29273 | 0 | 134075 | GWGQGGTHSQWN                              | 2.51 | 0.01 | 1.60 | 3.40 | 0.22 | 0.28 |
| 29274 | 0 | 134075 | GWGQGGTHSQWN                              | 2.51 | 0.01 | 1.60 | 3.40 | 0.22 | 0.85 |
| 29275 | 0 | 134075 | GWGQGGTHSQWN                              | 2.51 | 0.01 | 1.60 | 3.40 | 0.22 | 0.85 |
| 29276 | 0 | 134075 | GWGQGGTHSQWN                              | 2.51 | 0.01 | 1.60 | 3.40 | 0.22 | 0.85 |
| 29277 | 0 | 134075 | GWGQGGTHSQWN                              | 2.51 | 0.01 | 1.60 | 3.40 | 0.22 | 0.85 |
| 29278 | 0 | 134075 | GWGQGGTHSQWN                              | 2.51 | 0.01 | 1.60 | 3.40 | 0.22 | 0.85 |
| 29279 | 0 | 134075 | GWGQGGTHSQWN                              | 2.51 | 0.01 | 1.60 | 3.40 | 0.22 | 0.85 |
| 29280 | 0 | 134075 | GWGQGGTHSQWN                              | 2.51 | 0.01 | 1.60 | 3.40 | 0.22 | 0.85 |
| 29281 | 0 | 106491 | GWGQLFQ                                   | 2.05 | 0.01 | 0.90 | 0.44 | 1.13 | 1.39 |
| 29282 | 0 | 106491 | GWGQLFQ                                   | 2.05 | 0.01 | 0.90 | 0.44 | 1.13 | 0.28 |
| 29283 | 0 | 23252  | GWGQPHGGGGWGQP<br>H                       | 2.74 | 0.01 | 2.52 | 1.20 | 0.22 | 0.28 |
| 29284 | 0 | 23252  | GWGQPHGGGGWGQP<br>H                       | 2.74 | 0.01 | 2.52 | 1.20 | 0.22 | 0.28 |
| 29285 | 0 | 23254  | GWGQPHGGGGWGQPH<br>G                      | 2.75 | 0.01 | 2.98 | 2.19 | 0.22 | 0.28 |
| 29286 | 0 | 23254  | GWGQPHGGGGWGQPH<br>G                      | 2.75 | 0.01 | 2.98 | 2.19 | 0.22 | 2.12 |
| 29287 | 0 | 23255  | GWGQPHGGGGWGQPH<br>GGGWGQPHGGGGWGQ<br>PHG | 3.44 | 0.01 | 2.52 | 1.15 | 0.22 | 0.85 |

|       |   |        |                                   |      |      |      |      |      |      |
|-------|---|--------|-----------------------------------|------|------|------|------|------|------|
| 29288 | 0 | 135934 | GWGSPKVTKDGV                      | 2.50 | 0.01 | 0.78 | 0.44 | 1.41 | 0.28 |
| 29289 | 0 | 123276 | GWHAQFGGG                         | 2.23 | 0.01 | 2.28 | 2.00 | 0.22 | 0.28 |
| 29290 | 0 | 149733 | GWHSPMY                           | 1.99 | 0.01 | 0.90 | 2.37 | 0.22 | 0.28 |
| 29291 | 0 | 149057 | GWHTRIFVSDWYHTP                   | 2.64 | 0.01 | 0.90 | 2.36 | 0.22 | 1.39 |
| 29292 | 0 | 112151 | GWIRQRS                           | 2.02 | 0.01 | 0.78 | 0.44 | 1.13 | 0.28 |
| 29293 | 0 | 97375  | GWKAAADGQ                         | 2.25 | 0.01 | 3.13 | 1.12 | 0.22 | 0.28 |
| 29294 | 0 | 236083 | GWKEPVPPDERFCGITE<br>EAGQAVFSSV   | 3.21 | 0.01 | 0.78 | 0.44 | 1.13 | 0.28 |
| 29295 | 0 | 23266  | GWKHWV                            | 1.90 | 0.01 | 2.26 | 0.68 | 0.22 | 0.28 |
| 29296 | 0 | 23266  | GWKHWV                            | 1.90 | 0.01 | 2.26 | 0.68 | 0.22 | 0.28 |
| 29297 | 0 | 23269  | GWLAGLFYQHKF                      | 2.48 | 0.01 | 2.45 | 0.68 | 0.22 | 0.28 |
| 29298 | 0 | 23269  | GWLAGLFYQHKF                      | 2.48 | 0.01 | 2.45 | 0.68 | 0.22 | 1.34 |
| 29299 | 0 | 23269  | GWLAGLFYQHKF                      | 2.48 | 0.01 | 2.45 | 2.36 | 0.22 | 0.28 |
| 29300 | 0 | 23269  | GWLAGLFYQHKF                      | 2.48 | 0.01 | 2.45 | 2.36 | 0.22 | 1.34 |
| 29301 | 0 | 134076 | GWLGFNKERGHLQ                     | 2.54 | 0.01 | 0.78 | 0.44 | 1.59 | 1.27 |
| 29302 | 0 | 134687 | GWLKEIRKLQKSTHL                   | 2.66 | 0.01 | 0.78 | 3.05 | 1.13 | 0.85 |
| 29303 | 0 | 23277  | GW MDF                            | 1.74 | 0.01 | 1.75 | 0.68 | 0.22 | 0.28 |
| 29304 | 0 | 421087 | GWMMTILGKSCDDQFC<br>PEDA          | 2.89 | 0.01 | 3.19 | 0.44 | 1.23 | 1.28 |
| 29305 | 0 | 23281  | GWNTGGSRYPGQGSP<br>GGNRYPP        | 3.07 | 0.01 | 2.52 | 1.20 | 0.22 | 0.28 |
| 29306 | 0 | 111390 | GWPSAGGGAEASTSN                   | 2.70 | 0.01 | 3.20 | 1.12 | 0.22 | 0.85 |
| 29307 | 0 | 108413 | GWPVAPDPA                         | 2.25 | 0.01 | 0.90 | 0.44 | 1.13 | 1.39 |
| 29308 | 0 | 119920 | GWRTPEDRSDPDACTIS<br>KDHG         | 2.99 | 0.01 | 0.78 | 1.12 | 0.22 | 1.27 |
| 29309 | 0 | 119920 | GWRTPEDRSDPDACTIS<br>KDHG         | 2.99 | 0.01 | 0.78 | 1.12 | 0.22 | 1.27 |
| 29310 | 0 | 119920 | GWRTPEDRSDPDACTIS<br>KDHG         | 2.99 | 0.01 | 0.78 | 1.12 | 0.22 | 0.85 |
| 29311 | 0 | 123277 | GWSRYIPEGMQCSCGID<br>YYTPHEETNNES | 3.29 | 0.01 | 1.60 | 2.04 | 0.22 | 0.28 |
| 29312 | 0 | 104826 | GWTAFCGPVG                        | 2.32 | 0.01 | 2.60 | 0.44 | 1.23 | 0.85 |
| 29313 | 0 | 107878 | GWVAMHPQGDL                       | 2.37 | 0.01 | 0.90 | 0.44 | 1.13 | 0.28 |
| 29314 | 0 | 107878 | GWVAMHPQGDL                       | 2.37 | 0.01 | 0.90 | 0.44 | 1.13 | 1.27 |
| 29315 | 0 | 107878 | GWVAMHPQGDL                       | 2.37 | 0.01 | 0.90 | 0.44 | 1.13 | 0.28 |
| 29316 | 0 | 106492 | GWVDHFADGY                        | 2.32 | 0.01 | 2.75 | 0.44 | 1.23 | 0.85 |
| 29317 | 0 | 23295  | GWVDHFADGYDEVIA                   | 2.69 | 0.01 | 2.75 | 0.68 | 0.22 | 0.28 |
| 29318 | 0 | 23295  | GWVDHFADGYDEVIA                   | 2.69 | 0.01 | 2.75 | 0.68 | 0.22 | 0.28 |
| 29319 | 0 | 23296  | GWVFGSTMNNKSQSVI<br>I             | 2.77 | 0.01 | 2.48 | 0.44 | 0.85 | 0.28 |
| 29320 | 0 | 23298  | GWWEDHGQL                         | 2.23 | 0.01 | 0.90 | 4.23 | 0.22 | 0.28 |
| 29321 | 0 | 23298  | GWWEDHGQL                         | 2.23 | 0.01 | 0.90 | 4.23 | 0.22 | 0.28 |
| 29322 | 0 | 151650 | GWWPYAALRALS                      | 2.48 | 0.01 | 0.90 | 1.15 | 0.22 | 0.28 |
| 29323 | 0 | 103963 | GWWSALY                           | 2.01 | 0.01 | 0.90 | 1.15 | 0.22 | 1.39 |

|       |   |        |                             |      |      |      |      |      |      |
|-------|---|--------|-----------------------------|------|------|------|------|------|------|
| 29324 | 0 | 430401 | GWYEHNNYYQGV                | 2.48 | 0.01 | 0.90 | 2.22 | 0.85 | 0.28 |
| 29325 | 0 | 112785 | GWYRPPFSRVVHLYRN<br>GKDQDGD | 3.05 | 0.01 | 0.78 | 0.44 | 1.13 | 0.28 |
| 29326 | 0 | 112785 | GWYRPPFSRVVHLYRN<br>GKDQDGD | 3.05 | 0.01 | 0.78 | 0.44 | 1.41 | 0.28 |
| 29327 | 0 | 112785 | GWYRPPFSRVVHLYRN<br>GKDQDGD | 3.05 | 0.01 | 0.78 | 0.44 | 1.41 | 0.28 |
| 29328 | 0 | 112785 | GWYRPPFSRVVHLYRN<br>GKDQDGD | 3.05 | 0.01 | 0.78 | 0.44 | 1.13 | 0.28 |
| 29329 | 0 | 112785 | GWYRPPFSRVVHLYRN<br>GKDQDGD | 3.05 | 0.01 | 0.78 | 0.44 | 1.59 | 0.28 |
| 29330 | 0 | 112785 | GWYRPPFSRVVHLYRN<br>GKDQDGD | 3.05 | 0.01 | 0.78 | 0.44 | 1.13 | 0.28 |
| 29331 | 0 | 112785 | GWYRPPFSRVVHLYRN<br>GKDQDGD | 3.05 | 0.01 | 0.78 | 0.44 | 1.41 | 0.28 |
| 29332 | 0 | 139770 | GWYSFQH                     | 1.99 | 0.01 | 0.90 | 2.00 | 0.22 | 0.28 |
| 29333 | 0 | 131222 | GWYSPFQLGW PQ               | 2.50 | 0.01 | 0.90 | 0.44 | 1.13 | 1.39 |
| 29334 | 0 | 131222 | GWYSPFQLGW PQ               | 2.50 | 0.01 | 0.90 | 0.44 | 1.13 | 1.39 |
| 29335 | 0 | 150850 | GY                          | 1.10 | 0.01 | 3.03 | 0.68 | 0.22 | 0.28 |
| 29336 | 0 | 150850 | GY                          | 1.10 | 0.01 | 3.03 | 0.68 | 0.22 | 1.34 |
| 29337 | 0 | 150850 | GY                          | 1.10 | 0.01 | 3.03 | 0.68 | 0.22 | 0.28 |
| 29338 | 0 | 243956 | GYAHLNALTWNTDEIE<br>R       | 2.82 | 0.01 | 3.34 | 1.20 | 0.22 | 2.66 |
| 29339 | 0 | 23307  | GYAMDHEGCKFSCFI             | 2.65 | 0.01 | 2.56 | 2.02 | 0.22 | 0.85 |
| 29340 | 0 | 23308  | GYAMNWSDS                   | 2.21 | 0.01 | 0.90 | 2.55 | 0.22 | 0.28 |
| 29341 | 0 | 23309  | GYAQDQEPDARGRI RN<br>GALL   | 2.95 | 0.01 | 2.58 | 0.44 | 0.22 | 0.28 |
| 29342 | 0 | 181332 | GYAQLRRKCELF TYM            | 2.63 | 0.01 | 2.82 | 1.15 | 0.22 | 0.28 |
| 29343 | 0 | 23313  | GYCAWPACYCYGLPN             | 2.72 | 0.01 | 2.56 | 2.02 | 0.22 | 0.85 |
| 29344 | 0 | 23314  | GYCGRECGIKKGSSG             | 2.70 | 0.01 | 2.56 | 2.02 | 0.22 | 0.85 |
| 29345 | 0 | 23315  | GYCKTHLKASSGYCA             | 2.70 | 0.01 | 2.56 | 2.02 | 0.22 | 0.85 |
| 29346 | 0 | 23315  | GYCKTHLKASSGYCA             | 2.70 | 0.01 | 2.56 | 0.68 | 0.22 | 0.85 |
| 29347 | 0 | 144679 | GYCNTECTGGGLPDSVK<br>I      | 2.80 | 0.01 | 0.90 | 1.20 | 0.22 | 0.85 |
| 29348 | 0 | 174135 | GYDEDNQRQHFRQCC             | 2.66 | 0.01 | 3.27 | 0.44 | 2.98 | 1.28 |
| 29349 | 0 | 174135 | GYDEDNQRQHFRQCC             | 2.66 | 0.01 | 3.27 | 0.44 | 1.23 | 1.28 |
| 29350 | 0 | 151901 | GYDNLKLEGYYA                | 2.49 | 0.01 | 2.80 | 2.78 | 0.22 | 0.28 |
| 29351 | 0 | 23323  | GYDRNMYL                    | 2.12 | 0.01 | 3.78 | 0.68 | 0.22 | 0.85 |
| 29352 | 0 | 115277 | GYDTQAIVQN                  | 2.29 | 0.01 | 1.60 | 0.44 | 1.23 | 0.85 |
| 29353 | 0 | 106494 | GYENPTYKFFEQM QN            | 2.67 | 0.01 | 0.78 | 1.20 | 0.22 | 1.27 |
| 29354 | 0 | 106494 | GYENPTYKFFEQM QN            | 2.67 | 0.01 | 0.78 | 1.20 | 0.22 | 2.02 |
| 29355 | 0 | 106495 | GYEVHHQKLVF                 | 2.38 | 0.01 | 0.78 | 2.49 | 0.22 | 1.27 |
| 29356 | 0 | 106495 | GYEVHHQKLVF                 | 2.38 | 0.01 | 0.78 | 2.49 | 0.22 | 1.27 |
| 29357 | 0 | 106495 | GYEVHHQKLVF                 | 2.38 | 0.01 | 0.78 | 2.49 | 0.22 | 0.85 |
| 29358 | 0 | 106495 | GYEVHHQKLVF                 | 2.38 | 0.01 | 0.78 | 2.49 | 0.22 | 0.85 |



|       |   |        |                                                            |      |      |      |      |      |      |
|-------|---|--------|------------------------------------------------------------|------|------|------|------|------|------|
| 29359 | 0 | 23337  | GYFGHQVG                                                   | 2.15 | 0.01 | 2.04 | 0.44 | 0.85 | 0.28 |
| 29360 | 0 | 23337  | GYFGHQVG                                                   | 2.15 | 0.01 | 2.04 | 0.44 | 0.85 | 0.28 |
| 29361 | 0 | 23337  | GYFGHQVG                                                   | 2.15 | 0.01 | 2.04 | 0.44 | 0.85 | 0.28 |
| 29362 | 0 | 99306  | GYFGLIFPGCPRHYE                                            | 2.69 | 0.01 | 2.16 | 0.44 | 1.23 | 1.48 |
| 29363 | 0 | 149736 | GYFPLRLPLLSL                                               | 2.51 | 0.01 | 0.90 | 2.37 | 0.22 | 0.28 |
| 29364 | 0 | 23341  | GYGESRPVADN                                                | 2.37 | 0.01 | 2.58 | 2.43 | 0.22 | 0.28 |
| 29365 | 0 | 23341  | GYGESRPVADN                                                | 2.37 | 0.01 | 2.58 | 2.43 | 0.22 | 1.34 |
| 29366 | 0 | 182160 | GYGFVCEKMQDTSGH                                            | 2.63 | 0.01 | 0.78 | 0.44 | 1.13 | 0.85 |
| 29367 | 0 | 182160 | GYGFVCEKMQDTSGH                                            | 2.63 | 0.01 | 0.78 | 0.44 | 1.13 | 0.28 |
| 29368 | 0 | 182160 | GYGFVCEKMQDTSGH                                            | 2.63 | 0.01 | 0.78 | 0.44 | 1.41 | 0.28 |
| 29369 | 0 | 182160 | GYGFVCEKMQDTSGH                                            | 2.63 | 0.01 | 0.78 | 0.44 | 1.13 | 1.27 |
| 29370 | 0 | 115278 | GYGGVSLPEW                                                 | 2.31 | 0.01 | 1.60 | 0.44 | 1.23 | 0.85 |
| 29371 | 0 | 96356  | SGYDTQAIVQNNSTEY<br>GLFQINNKK                              | 3.65 | 4.93 | 1.60 | 0.44 | 1.23 | 0.28 |
| 29372 | 0 | 119587 | GYGKINKKRIALTDNALI<br>ARSLGKYGIICMEDLIHEI<br>YTVGKRFKEANNF | 3.85 | 0.01 | 0.78 | 0.44 | 1.13 | 0.85 |
| 29373 | 0 | 119587 | GYGKINKKRIALTDNALI<br>ARSLGKYGIICMEDLIHEI<br>YTVGKRFKEANNF | 3.85 | 0.01 | 0.78 | 0.44 | 1.13 | 0.85 |
| 29374 | 0 | 119587 | GYGKINKKRIALTDNALI<br>ARSLGKYGIICMEDLIHEI<br>YTVGKRFKEANNF | 3.85 | 0.01 | 0.78 | 0.44 | 1.13 | 0.85 |
| 29375 | 0 | 119587 | GYGKINKKRIALTDNALI<br>ARSLGKYGIICMEDLIHEI<br>YTVGKRFKEANNF | 3.85 | 0.01 | 0.78 | 0.44 | 1.13 | 0.85 |
| 29376 | 0 | 23345  | GYGQNKSNQAQRNLNE<br>LCYN                                   | 2.97 | 0.01 | 3.33 | 0.68 | 0.22 | 0.28 |
| 29377 | 0 | 177502 | GYGSGRGFGDGYNGYG<br>GGPG                                   | 3.00 | 0.01 | 0.78 | 0.44 | 2.26 | 0.28 |
| 29378 | 0 | 23349  | GYGTVT                                                     | 1.92 | 0.01 | 2.40 | 0.44 | 0.85 | 0.28 |
| 29379 | 0 | 23354  | GYHGSSLY                                                   | 2.16 | 0.01 | 1.75 | 0.68 | 0.22 | 0.28 |
| 29380 | 0 | 23354  | GYHGSSLY                                                   | 2.16 | 0.01 | 1.75 | 0.68 | 0.22 | 0.28 |
| 29381 | 0 | 97376  | GYHHSNEQSGSYAADK<br>ESTQKAIDGVTNK                          | 3.32 | 0.01 | 3.09 | 0.44 | 0.85 | 0.28 |
| 29382 | 0 | 102503 | GYHSSDPNAVCECDKW<br>KYEN                                   | 2.90 | 0.01 | 3.44 | 0.68 | 0.22 | 0.28 |

|       |   |        |                                                         |      |      |      |      |      |      |
|-------|---|--------|---------------------------------------------------------|------|------|------|------|------|------|
| 29383 | 0 | 113504 | GYIPANTTIPFGGAYNIP<br>LV                                | 2.97 | 0.01 | 1.86 | 2.37 | 0.22 | 1.48 |
| 29384 | 0 | 23362  | GYIPEITLPVIAALSIAESS<br>TQK                             | 3.08 | 0.01 | 2.95 | 0.44 | 0.22 | 0.28 |
| 29385 | 0 | 103246 | GYIPILGAPWLADLV                                         | 2.71 | 0.01 | 2.04 | 0.44 | 0.85 | 1.28 |
| 29386 | 0 | 171351 | GYIREIEATGLQTKE                                         | 2.69 | 0.01 | 0.78 | 0.44 | 1.13 | 0.28 |
| 29387 | 0 | 119923 | GYISKAQEYFN                                             | 2.36 | 0.01 | 2.26 | 1.12 | 0.22 | 1.27 |
| 29388 | 0 | 119923 | GYISKAQEYFN                                             | 2.36 | 0.01 | 2.26 | 1.12 | 0.22 | 1.57 |
| 29389 | 0 | 23367  | GYISQYFA                                                | 2.12 | 0.01 | 2.99 | 0.44 | 0.85 | 0.28 |
| 29390 | 0 | 99308  | GYIVDDV                                                 | 2.03 | 0.01 | 3.33 | 1.12 | 0.22 | 0.28 |
| 29391 | 0 | 79244  | GYIVDDVNC                                               | 2.22 | 0.01 | 3.85 | 3.55 | 0.22 | 0.28 |
| 29392 | 0 | 23372  | GYIWIQRNTG                                              | 2.32 | 0.01 | 2.72 | 0.44 | 1.23 | 0.85 |
| 29393 | 0 | 23372  | GYIWIQRNTG                                              | 2.32 | 0.01 | 2.72 | 0.44 | 1.23 | 0.85 |
| 29394 | 0 | 78412  | GYKDVDKAPFNGMTGC<br>G                                   | 2.78 | 0.01 | 3.22 | 0.44 | 1.23 | 1.27 |
| 29395 | 0 | 23379  | GYKDVDKPPFSGMTGC<br>GNTPIFKSGRGC                        | 3.27 | 0.01 | 2.53 | 0.68 | 0.22 | 0.28 |
| 29396 | 0 | 23379  | GYKDVDKPPFSGMTGC<br>GNTPIFKSGRGC                        | 3.27 | 0.01 | 2.53 | 1.12 | 0.22 | 0.28 |
| 29397 | 0 | 23379  | GYKDVDKPPFSGMTGC<br>GNTPIFKSGRGC                        | 3.27 | 0.01 | 2.53 | 0.68 | 0.22 | 0.85 |
| 29398 | 0 | 23379  | GYKDVDKPPFSGMTGC<br>GNTPIFKSGRGC                        | 3.27 | 0.01 | 2.53 | 0.68 | 0.22 | 0.85 |
| 29399 | 0 | 23379  | GYKDVDKPPFSGMTGC<br>GNTPIFKSGRGC                        | 3.27 | 0.01 | 2.53 | 0.68 | 0.22 | 0.85 |
| 29400 | 0 | 23379  | GYKDVDKPPFSGMTGC<br>GNTPIFKSGRGC                        | 3.27 | 0.01 | 2.53 | 0.68 | 0.22 | 0.85 |
| 29401 | 0 | 23379  | GYKDVDKPPFSGMTGC<br>GNTPIFKSGRGC                        | 3.27 | 0.01 | 2.53 | 1.12 | 0.22 | 2.35 |
| 29402 | 0 | 23380  | GYKDVDKPPFSGMTGC<br>GNTPIFKSGRGC<br>GSCFEI<br>KCTKPEACS | 3.71 | 0.01 | 2.53 | 0.44 | 1.23 | 0.85 |
| 29403 | 0 | 124258 | GYKEKSKFQD                                              | 2.31 | 0.01 | 0.78 | 0.68 | 0.22 | 0.85 |
| 29404 | 0 | 124258 | GYKEKSKFQD                                              | 2.31 | 0.01 | 0.78 | 0.68 | 0.22 | 2.12 |
| 29405 | 0 | 126201 | GYKEKSKFQDTHNNA                                         | 2.63 | 0.01 | 0.78 | 0.44 | 1.13 | 0.28 |
| 29406 | 0 | 126201 | GYKEKSKFQDTHNNA                                         | 2.63 | 0.01 | 0.78 | 1.20 | 0.22 | 0.28 |
| 29407 | 0 | 126201 | GYKEKSKFQDTHNNA                                         | 2.63 | 0.01 | 0.78 | 1.20 | 0.22 | 1.27 |
| 29408 | 0 | 126201 | GYKEKSKFQDTHNNA                                         | 2.63 | 0.01 | 0.78 | 1.20 | 0.22 | 1.27 |
| 29409 | 0 | 126201 | GYKEKSKFQDTHNNA                                         | 2.63 | 0.01 | 0.78 | 1.20 | 0.22 | 0.28 |
| 29410 | 0 | 126201 | GYKEKSKFQDTHNNA                                         | 2.63 | 0.01 | 0.78 | 1.20 | 0.22 | 0.28 |
| 29411 | 0 | 126201 | GYKEKSKFQDTHNNA                                         | 2.63 | 0.01 | 0.78 | 1.20 | 0.22 | 2.02 |
| 29412 | 0 | 126201 | GYKEKSKFQDTHNNA                                         | 2.63 | 0.01 | 0.78 | 1.20 | 0.22 | 1.34 |
| 29413 | 0 | 97377  | GYKGVAFP                                                | 2.13 | 0.01 | 2.87 | 0.68 | 0.22 | 0.28 |
| 29414 | 0 | 97377  | GYKGVAFP                                                | 2.13 | 0.01 | 2.87 | 1.81 | 0.22 | 0.28 |
| 29415 | 0 | 97378  | GYKGVAFPLPTDAGVAT<br>ATGTK                              | 3.08 | 0.01 | 2.87 | 0.68 | 0.22 | 0.28 |

|       |   |        |                                       |      |      |      |      |      |      |
|-------|---|--------|---------------------------------------|------|------|------|------|------|------|
| 29416 | 0 | 97378  | GYKGVAFLPTDAGVAT<br>ATGTK             | 3.08 | 0.01 | 2.87 | 0.68 | 0.22 | 0.85 |
| 29417 | 0 | 97378  | GYKGVAFLPTDAGVAT<br>ATGTK             | 3.08 | 0.01 | 2.87 | 1.81 | 0.22 | 0.28 |
| 29418 | 0 | 97378  | GYKGVAFLPTDAGVAT<br>ATGTK             | 3.08 | 0.01 | 2.87 | 1.81 | 0.22 | 0.85 |
| 29419 | 0 | 23390  | GYKVLVLNPSVAAT                        | 2.60 | 0.01 | 1.72 | 0.68 | 0.22 | 0.28 |
| 29420 | 0 | 23392  | GYKVLVLNPSVAATLGF<br>G                | 2.85 | 0.01 | 3.67 | 0.44 | 0.85 | 0.28 |
| 29421 | 0 | 103965 | GYKYLPGNSLDQGEPT                      | 2.80 | 0.01 | 3.00 | 1.20 | 0.22 | 0.85 |
| 29422 | 0 | 140864 | GYLAGKGVDAGK                          | 2.52 | 0.01 | 3.01 | 1.12 | 0.22 | 0.28 |
| 29423 | 0 | 140865 | GYLAGKGVDAGKLGTVS<br>YGE              | 2.98 | 0.01 | 3.01 | 1.12 | 0.22 | 0.28 |
| 29424 | 0 | 115060 | GYLEQL                                | 1.90 | 0.01 | 1.60 | 0.44 | 1.23 | 0.28 |
| 29425 | 0 | 115060 | GYLEQL                                | 1.90 | 0.01 | 1.60 | 0.44 | 1.23 | 0.28 |
| 29426 | 0 | 23397  | GYLEQLRLK                             | 2.33 | 0.01 | 1.60 | 0.44 | 1.23 | 0.28 |
| 29427 | 0 | 23397  | GYLEQLRLK                             | 2.33 | 0.01 | 1.60 | 0.44 | 1.23 | 0.28 |
| 29428 | 0 | 23398  | GYLEQLRLKKYKVPQ                       | 2.76 | 0.01 | 1.60 | 0.44 | 1.23 | 0.28 |
| 29429 | 0 | 123278 | GYLKDLPTT                             | 2.21 | 0.01 | 2.28 | 2.00 | 0.22 | 0.28 |
| 29430 | 0 | 23402  | GYLMDHEGCKLSCFI                       | 2.65 | 0.01 | 2.56 | 2.02 | 0.22 | 0.85 |
| 29431 | 0 | 23404  | GYLPISGEMEKVT                         | 2.52 | 0.01 | 3.00 | 0.44 | 0.85 | 0.28 |
| 29432 | 0 | 237751 | GYMPIPVGVAGPL                         | 2.58 | 0.01 | 0.78 | 0.44 | 1.13 | 1.28 |
| 29433 | 0 | 237752 | GYNAHAANIVTAI                         | 2.57 | 0.01 | 0.78 | 0.44 | 1.13 | 1.28 |
| 29434 | 0 | 181654 | GYNEGRKPCYGREQN                       | 2.71 | 0.01 | 3.26 | 2.37 | 0.22 | 1.28 |
| 29435 | 0 | 125436 | GYNEWREFCGLPRLETP<br>ADLSTAIASRSVADKI | 3.42 | 0.01 | 0.78 | 0.44 | 1.13 | 0.28 |
| 29436 | 0 | 23422  | GYNVSSIVTMTSQGM                       | 2.70 | 0.01 | 2.43 | 0.68 | 0.22 | 0.28 |
| 29437 | 0 | 23422  | GYNVSSIVTMTSQGM                       | 2.70 | 0.01 | 2.43 | 0.44 | 0.85 | 0.28 |
| 29438 | 0 | 144680 | GYPADSKGGGLPDSV<br>KI                 | 2.85 | 0.01 | 0.90 | 1.20 | 0.22 | 0.85 |
| 29439 | 0 | 489572 | GYPKIYWPPPQGRRR                       | 2.68 | 0.01 | 2.69 | 3.05 | 0.85 | 1.28 |
| 29440 | 0 | 157364 | GYPKNPEEAYAD                          | 2.48 | 0.01 | 3.40 | 2.49 | 0.85 | 0.28 |
| 29441 | 0 | 23430  | GYPNPRQDPRFTDTL                       | 2.68 | 0.01 | 2.76 | 0.44 | 1.59 | 0.28 |
| 29442 | 0 | 517766 | GYPTFGEHKQEKDLEYG                     | 2.80 | 0.01 | 2.60 | 0.68 | 0.22 | 2.98 |
| 29443 | 0 | 517766 | GYPTFGEHKQEKDLEYG                     | 2.80 | 0.01 | 2.60 | 0.68 | 0.22 | 0.28 |
| 29444 | 0 | 517766 | GYPTFGEHKQEKDLEYG                     | 2.80 | 0.01 | 2.60 | 0.68 | 0.22 | 0.28 |
| 29445 | 0 | 517766 | GYPTFGEHKQEKDLEYG                     | 2.80 | 0.01 | 2.60 | 0.68 | 0.22 | 1.34 |
| 29446 | 0 | 517766 | GYPTFGEHKQEKDLEYG                     | 2.80 | 0.01 | 2.60 | 0.68 | 0.22 | 2.75 |
| 29447 | 0 | 517766 | GYPTFGEHKQEKDLEYG                     | 2.80 | 0.01 | 2.60 | 0.68 | 0.22 | 1.39 |

|       |   |        |                               |      |      |      |      |      |      |
|-------|---|--------|-------------------------------|------|------|------|------|------|------|
| 29448 | 0 | 517766 | GYPTFGEHKQEKDLEYG             | 2.80 | 0.01 | 2.60 | 0.68 | 0.22 | 1.34 |
| 29449 | 0 | 517766 | GYPTFGEHKQEKDLEYG             | 2.80 | 0.01 | 2.60 | 0.68 | 0.22 | 1.34 |
| 29450 | 0 | 517766 | GYPTFGEHKQEKDLEYG             | 2.80 | 0.01 | 2.60 | 0.68 | 0.22 | 1.75 |
| 29451 | 0 | 103247 | GYPVHKPVTAGWNGY               | 2.69 | 0.01 | 2.04 | 0.44 | 0.85 | 1.28 |
| 29452 | 0 | 23432  | GYPWPLYGNEGCGWA<br>GWLLSPRGSR | 3.19 | 0.01 | 1.72 | 0.44 | 0.85 | 0.28 |
| 29453 | 0 | 23432  | GYPWPLYGNEGCGWA<br>GWLLSPRGSR | 3.19 | 0.01 | 1.72 | 0.44 | 0.85 | 0.28 |
| 29454 | 0 | 421092 | GYQCKMMAFMGLCCP<br>TK         | 2.79 | 0.01 | 3.19 | 0.44 | 1.23 | 1.28 |
| 29455 | 0 | 421092 | GYQCKMMAFMGLCCP<br>TK         | 2.79 | 0.01 | 3.19 | 0.44 | 1.23 | 1.28 |
| 29456 | 0 | 95092  | GYQKTVDHTKVNSK                | 2.61 | 0.01 | 3.42 | 1.20 | 0.22 | 0.28 |
| 29457 | 0 | 95092  | GYQKTVDHTKVNSK                | 2.61 | 0.01 | 3.42 | 1.20 | 0.22 | 0.28 |
| 29458 | 0 | 23437  | GYQPVRVVVLSFELLNA             | 2.75 | 0.01 | 2.48 | 0.44 | 0.85 | 0.28 |
| 29459 | 0 | 23438  | GYQPVRVVVLSFELLNA<br>PATV     | 2.96 | 0.01 | 3.30 | 3.27 | 0.22 | 2.12 |
| 29460 | 0 | 23438  | GYQPVRVVVLSFELLNA<br>PATV     | 2.96 | 0.01 | 3.30 | 3.27 | 0.22 | 2.12 |
| 29461 | 0 | 23438  | GYQPVRVVVLSFELLNA<br>PATV     | 2.96 | 0.01 | 3.30 | 3.27 | 0.22 | 1.34 |
| 29462 | 0 | 23438  | GYQPVRVVVLSFELLNA<br>PATV     | 2.96 | 0.01 | 3.30 | 3.27 | 0.22 | 2.02 |
| 29463 | 0 | 23438  | GYQPVRVVVLSFELLNA<br>PATV     | 2.96 | 0.01 | 3.30 | 3.27 | 0.22 | 1.75 |
| 29464 | 0 | 23438  | GYQPVRVVVLSFELLNA<br>PATV     | 2.96 | 0.01 | 3.30 | 3.27 | 0.22 | 1.66 |
| 29465 | 0 | 23440  | GYQSSS                        | 1.88 | 0.01 | 0.90 | 0.44 | 1.74 | 1.39 |
| 29466 | 0 | 156885 | GYRAR                         | 1.75 | 4.93 | 0.78 | 0.44 | 1.13 | 0.28 |
| 29467 | 0 | 23441  | GYRFTNFEP                     | 2.21 | 0.01 | 4.08 | 1.20 | 0.22 | 0.28 |
| 29468 | 0 | 110879 | GYRGRSSIRTGVKRPAVS<br>K       | 2.93 | 0.01 | 3.25 | 0.44 | 1.41 | 0.28 |
| 29469 | 0 | 110880 | GYRGRSSIRTGVKRPAVS<br>KA      | 2.98 | 0.01 | 3.85 | 0.44 | 0.85 | 0.28 |
| 29470 | 0 | 110880 | GYRGRSSIRTGVKRPAVS<br>KA      | 2.98 | 0.01 | 3.85 | 0.44 | 0.85 | 0.28 |
| 29471 | 0 | 171355 | GYRNFEDFLHESLVE               | 2.66 | 0.01 | 0.78 | 0.44 | 1.41 | 0.28 |
| 29472 | 0 | 171355 | GYRNFEDFLHESLVE               | 2.66 | 0.01 | 0.78 | 0.44 | 1.13 | 0.28 |
| 29473 | 0 | 423336 | GYSAVFLLLETEDAVT              | 2.67 | 0.01 | 2.51 | 0.44 | 2.35 | 1.28 |
| 29474 | 0 | 23455  | GYSDRVRSITLGNS                | 2.62 | 0.01 | 3.67 | 0.44 | 0.85 | 0.28 |
| 29475 | 0 | 139771 | GYSFSTS                       | 2.04 | 0.01 | 0.90 | 2.00 | 0.22 | 0.28 |

|       |   |        |                              |      |      |      |      |      |      |
|-------|---|--------|------------------------------|------|------|------|------|------|------|
| 29476 | 0 | 121366 | GYSKNGANRWYDKSLQ<br>FVVGRDAT | 3.11 | 0.01 | 0.78 | 1.20 | 0.22 | 0.28 |
| 29477 | 0 | 121366 | GYSKNGANRWYDKSLQ<br>FVVGRDAT | 3.11 | 0.01 | 0.78 | 1.20 | 0.22 | 0.28 |
| 29478 | 0 | 23459  | GYSLFQKEKDNLNEGTS<br>GTA     | 2.95 | 0.01 | 0.90 | 2.63 | 0.22 | 1.48 |
| 29479 | 0 | 23461  | GYSLFQKEKMVLNEGTS<br>GTA     | 2.94 | 0.01 | 1.66 | 0.68 | 0.22 | 1.34 |
| 29480 | 0 | 23462  | GYSLFQKEMETLNEGTS<br>GTA     | 2.95 | 0.01 | 0.90 | 2.63 | 0.22 | 1.48 |
| 29481 | 0 | 23463  | GYSLFQKEMKTDNEGTS<br>GTA     | 2.94 | 0.01 | 0.90 | 2.63 | 0.22 | 1.48 |
| 29482 | 0 | 23464  | GYSLFQKEMKTHNEGTS<br>GTA     | 2.94 | 0.01 | 0.90 | 2.63 | 0.22 | 1.48 |
| 29483 | 0 | 23465  | GYSLFQKEMKTLNEGTS<br>GTA     | 2.95 | 0.01 | 0.90 | 2.63 | 0.22 | 1.48 |
| 29484 | 0 | 23465  | GYSLFQKEMKTLNEGTS<br>GTA     | 2.95 | 0.01 | 0.90 | 2.63 | 2.25 | 1.75 |
| 29485 | 0 | 23465  | GYSLFQKEMKTLNEGTS<br>GTA     | 2.95 | 0.01 | 0.90 | 2.63 | 0.22 | 1.48 |
| 29486 | 0 | 23465  | GYSLFQKEMKTLNEGTS<br>GTA     | 2.95 | 0.01 | 0.90 | 2.63 | 2.25 | 1.75 |
| 29487 | 0 | 23465  | GYSLFQKEMKTLNEGTS<br>GTA     | 2.95 | 0.01 | 0.90 | 2.63 | 0.22 | 1.75 |
| 29488 | 0 | 23465  | GYSLFQKEMKTLNEGTS<br>GTA     | 2.95 | 0.01 | 0.90 | 2.63 | 0.22 | 1.48 |
| 29489 | 0 | 23465  | GYSLFQKEMKTLNEGTS<br>GTA     | 2.95 | 0.01 | 0.90 | 2.63 | 0.22 | 0.85 |
| 29490 | 0 | 23466  | GYSLFQMEMKTLNEGTS<br>GTA     | 2.95 | 0.01 | 0.90 | 2.63 | 0.22 | 1.48 |
| 29491 | 0 | 23469  | GYSNAQGVVDYWI                | 2.46 | 0.01 | 2.78 | 0.44 | 1.23 | 1.34 |
| 29492 | 0 | 113506 | GYTIPTCRKLDELGSKGL<br>WAD    | 2.97 | 0.01 | 0.78 | 2.61 | 0.22 | 0.28 |
| 29493 | 0 | 238593 | GYTIVCYKRHASDSQ              | 2.62 | 0.01 | 2.56 | 2.02 | 0.22 | 0.85 |
| 29494 | 0 | 238593 | GYTIVCYKRHASDSQ              | 2.62 | 0.01 | 2.56 | 1.20 | 0.22 | 0.85 |
| 29495 | 0 | 238594 | GYTLECKICNFKTCP              | 2.66 | 0.01 | 2.56 | 2.02 | 0.22 | 0.85 |
| 29496 | 0 | 238594 | GYTLECKICNFKTCP              | 2.66 | 0.01 | 2.56 | 1.20 | 0.22 | 0.85 |
| 29497 | 0 | 238595 | GYTLVCYTNVLEPPG              | 2.70 | 0.01 | 2.56 | 2.02 | 0.22 | 0.85 |
| 29498 | 0 | 95439  | GYTRAEGLYSML                 | 2.48 | 0.01 | 2.88 | 0.44 | 1.23 | 0.85 |
| 29499 | 0 | 238596 | GYTTKCLTKFSPGLQ              | 2.69 | 0.01 | 2.56 | 2.02 | 0.22 | 0.85 |
| 29500 | 0 | 238596 | GYTTKCLTKFSPGLQ              | 2.69 | 0.01 | 2.56 | 1.20 | 0.22 | 0.85 |
| 29501 | 0 | 23490  | GYVGKEFPLD                   | 2.30 | 0.01 | 3.42 | 3.28 | 0.22 | 0.28 |
| 29502 | 0 | 23494  | GYVRSGGAVPPACCN              | 2.68 | 0.01 | 3.35 | 1.12 | 0.22 | 0.85 |
| 29503 | 0 | 123279 | GYWKIRGLA                    | 2.22 | 0.01 | 0.90 | 2.00 | 0.22 | 0.28 |
| 29504 | 0 | 123280 | GYWKIRGLQ                    | 2.22 | 0.01 | 2.28 | 2.00 | 0.22 | 0.28 |
| 29505 | 0 | 123280 | GYWKIRGLQ                    | 2.22 | 0.01 | 2.28 | 2.00 | 0.22 | 0.28 |

|       |   |        |                                 |      |      |      |      |      |      |
|-------|---|--------|---------------------------------|------|------|------|------|------|------|
| 29506 | 0 | 123280 | GYWKIRGLQ                       | 2.22 | 0.01 | 2.28 | 2.00 | 0.22 | 0.28 |
| 29507 | 0 | 123281 | GYWKLRGLA                       | 2.24 | 0.01 | 2.28 | 2.00 | 0.22 | 0.28 |
| 29508 | 0 | 23501  | GYWRRQARYKPGKSG                 | 2.70 | 0.01 | 3.32 | 2.49 | 0.22 | 0.28 |
| 29509 | 0 | 23501  | GYWRRQARYKPGKSG                 | 2.70 | 0.01 | 3.32 | 2.49 | 0.22 | 0.28 |
| 29510 | 0 | 23501  | GYWRRQARYKPGKSG                 | 2.70 | 0.01 | 3.32 | 2.49 | 0.22 | 0.28 |
| 29511 | 0 | 23501  | GYWRRQARYKPGKSG                 | 2.70 | 0.01 | 3.32 | 2.49 | 0.22 | 0.28 |
| 29512 | 0 | 504000 | GYWVNYNIDWDMFKPG<br>AMAEVVKYADG | 3.22 | 0.01 | 3.72 | 0.44 | 1.41 | 0.28 |
| 29513 | 0 | 195025 | GYYAKTPSEARP                    | 2.46 | 0.01 | 0.90 | 0.68 | 0.22 | 0.28 |
| 29514 | 0 | 151903 | GYYAWLAFLSFS                    | 2.50 | 0.01 | 2.80 | 2.78 | 0.22 | 0.28 |
| 29515 | 0 | 117211 | GYYWSWIRQPPGKGEE<br>WIG         | 2.91 | 0.01 | 0.90 | 2.84 | 1.13 | 1.75 |
| 29516 | 0 | 117211 | GYYWSWIRQPPGKGEE<br>WIG         | 2.91 | 0.01 | 0.78 | 0.68 | 0.22 | 0.28 |
| 29517 | 0 | 117211 | GYYWSWIRQPPGKGEE<br>WIG         | 2.91 | 0.01 | 0.78 | 0.68 | 2.60 | 1.75 |
| 29518 | 0 | 117211 | GYYWSWIRQPPGKGEE<br>WIG         | 2.91 | 0.01 | 0.78 | 2.84 | 1.13 | 1.75 |
| 29519 | 0 | 134077 | GYYPSPDPNT                      | 2.31 | 0.01 | 3.42 | 4.33 | 2.25 | 1.75 |
| 29520 | 0 | 23510  | GYYPSPDPNTFFYAPPYS<br>A         | 2.92 | 0.01 | 0.90 | 2.13 | 0.22 | 0.28 |
| 29521 | 0 | 23510  | GYYPSPDPNTFFYAPPYS<br>A         | 2.92 | 0.01 | 0.90 | 2.13 | 0.22 | 1.34 |
| 29522 | 0 | 134078 | GYYPSPDPNTFYAPPYQ               | 2.79 | 0.01 | 3.42 | 1.20 | 0.22 | 1.48 |
| 29523 | 0 | 134078 | GYYPSPDPNTFYAPPYQ               | 2.79 | 0.01 | 3.42 | 4.33 | 2.25 | 1.75 |
| 29524 | 0 | 134078 | GYYPSPDPNTFYAPPYQ               | 2.79 | 0.01 | 3.42 | 1.20 | 0.22 | 1.48 |
| 29525 | 0 | 134078 | GYYPSPDPNTFYAPPYQ               | 2.79 | 0.01 | 3.42 | 1.20 | 0.22 | 1.48 |
| 29526 | 0 | 134078 | GYYPSPDPNTFYAPPYQ               | 2.79 | 0.01 | 3.42 | 1.20 | 0.22 | 1.48 |
| 29527 | 0 | 134078 | GYYPSPDPNTFYAPPYQ               | 2.79 | 0.01 | 3.42 | 1.20 | 0.22 | 1.48 |
| 29528 | 0 | 23511  | GYYPSPDPNTFYAPPYS               | 2.81 | 0.01 | 3.85 | 0.68 | 0.22 | 0.28 |
| 29529 | 0 | 23511  | GYYPSPDPNTFYAPPYS               | 2.81 | 0.01 | 3.85 | 0.68 | 0.22 | 0.28 |
| 29530 | 0 | 23511  | GYYPSPDPNTFYAPPYS               | 2.81 | 0.01 | 3.85 | 0.68 | 0.22 | 1.48 |
| 29531 | 0 | 23511  | GYYPSPDPNTFYAPPYS               | 2.81 | 0.01 | 3.85 | 0.68 | 0.22 | 1.48 |

|       |   |        |                                                    |      |      |      |      |      |      |
|-------|---|--------|----------------------------------------------------|------|------|------|------|------|------|
| 29532 | 0 | 23511  | GYYPSPDPNTFYAPPYS                                  | 2.81 | 0.01 | 3.42 | 1.15 | 0.22 | 0.28 |
| 29533 | 0 | 23511  | GYYPSPDPNTFYAPPYS                                  | 2.81 | 0.01 | 3.42 | 2.13 | 0.22 | 0.28 |
| 29534 | 0 | 23511  | GYYPSPDPNTFYAPPYS                                  | 2.81 | 0.01 | 3.42 | 0.44 | 0.85 | 0.28 |
| 29535 | 0 | 233593 | HAALFAGLYSFFEGLGD<br>VGRAVGK                       | 3.13 | 0.01 | 3.67 | 2.61 | 0.85 | 1.28 |
| 29536 | 0 | 177503 | HAATVDKIENMR                                       | 2.42 | 0.01 | 0.90 | 1.20 | 0.22 | 1.27 |
| 29537 | 0 | 177503 | HAATVDKIENMR                                       | 2.42 | 0.01 | 0.90 | 3.78 | 0.22 | 1.75 |
| 29538 | 0 | 177503 | HAATVDKIENMR                                       | 2.42 | 0.01 | 0.90 | 3.78 | 0.22 | 0.28 |
| 29539 | 0 | 226474 | HAAVTNHKKWQYNSPL<br>VPRNAELGDRKGKIHIPF<br>PLANVTCR | 3.65 | 0.01 | 3.26 | 3.16 | 0.22 | 0.28 |
| 29540 | 0 | 450666 | HAAWHFI                                            | 2.04 | 0.01 | 0.90 | 0.44 | 1.41 | 1.39 |
| 29541 | 0 | 238597 | HACAIPASYEFVHCC                                    | 2.67 | 0.01 | 2.56 | 2.02 | 0.22 | 0.85 |
| 29542 | 0 | 238597 | HACAIPASYEFVHCC                                    | 2.67 | 0.01 | 2.56 | 1.20 | 0.22 | 0.85 |
| 29543 | 0 | 123282 | HACQKKLLKFEALQQUEE<br>GEE                          | 2.96 | 0.01 | 2.25 | 3.12 | 0.22 | 0.28 |
| 29544 | 0 | 123282 | HACQKKLLKFEALQQUEE<br>GEE                          | 2.96 | 0.01 | 2.25 | 3.12 | 0.22 | 3.16 |
| 29545 | 0 | 123282 | HACQKKLLKFEALQQUEE<br>GEE                          | 2.96 | 0.01 | 2.25 | 2.55 | 0.22 | 3.16 |
| 29546 | 0 | 123282 | HACQKKLLKFEALQQUEE<br>GEE                          | 2.96 | 0.01 | 2.25 | 2.55 | 0.22 | 0.28 |
| 29547 | 0 | 123282 | HACQKKLLKFEALQQUEE<br>GEE                          | 2.96 | 0.01 | 2.25 | 2.55 | 0.22 | 0.28 |
| 29548 | 0 | 123282 | HACQKKLLKFEALQQUEE<br>GEE                          | 2.96 | 0.01 | 2.25 | 3.12 | 0.22 | 0.28 |
| 29549 | 0 | 123282 | HACQKKLLKFEALQQUEE<br>GEE                          | 2.96 | 0.01 | 2.25 | 0.68 | 0.22 | 0.28 |
| 29550 | 0 | 123282 | HACQKKLLKFEALQQUEE<br>GEE                          | 2.96 | 0.01 | 2.25 | 0.68 | 0.22 | 0.28 |
| 29551 | 0 | 123282 | HACQKKLLKFEALQQUEE<br>GEE                          | 2.96 | 0.01 | 2.25 | 3.12 | 0.22 | 0.28 |
| 29552 | 0 | 123282 | HACQKKLLKFEALQQUEE<br>GEE                          | 2.96 | 0.01 | 2.25 | 3.12 | 0.22 | 0.28 |
| 29553 | 0 | 123282 | HACQKKLLKFEALQQUEE<br>GEE                          | 2.96 | 0.01 | 2.25 | 3.12 | 0.22 | 1.27 |
| 29554 | 0 | 123282 | HACQKKLLKFEALQQUEE<br>GEE                          | 2.96 | 0.01 | 2.25 | 3.12 | 0.22 | 1.27 |
| 29555 | 0 | 123282 | HACQKKLLKFEALQQUEE<br>GEE                          | 2.96 | 0.01 | 2.25 | 3.12 | 0.22 | 3.16 |
| 29556 | 0 | 123282 | HACQKKLLKFEALQQUEE<br>GEE                          | 2.96 | 0.01 | 2.25 | 2.55 | 0.22 | 3.16 |
| 29557 | 0 | 123282 | HACQKKLLKFEALQQUEE<br>GEE                          | 2.96 | 0.01 | 2.25 | 2.55 | 0.22 | 0.28 |

|       |   |        |                                        |      |      |      |      |      |      |
|-------|---|--------|----------------------------------------|------|------|------|------|------|------|
| 29558 | 0 | 123282 | HACQKKLLKFEALQQEE<br>GEE               | 2.96 | 0.01 | 2.25 | 2.55 | 0.22 | 0.28 |
| 29559 | 0 | 227775 | HADADFLLFVLSGRAI<br>HADPAPASAENVKEIIEI | 2.75 | 0.01 | 2.72 | 1.20 | 1.59 | 0.28 |
| 29560 | 0 | 78174  | LKGLDLRLQTVEGKVDKI<br>LA               | 3.58 | 0.01 | 3.89 | 1.15 | 0.22 | 2.02 |
| 29561 | 0 | 188230 | HADQDARGWG                             | 2.33 | 0.01 | 2.92 | 1.81 | 0.22 | 0.85 |
| 29562 | 0 | 23520  | HADQLTPAWRIYSTGN<br>N                  | 2.72 | 0.01 | 2.48 | 0.44 | 0.85 | 0.28 |
| 29563 | 0 | 23520  | HADQLTPAWRIYSTGN<br>N                  | 2.72 | 0.01 | 2.48 | 0.68 | 0.22 | 0.28 |
| 29564 | 0 | 23520  | HADQLTPAWRIYSTGN<br>N                  | 2.72 | 0.01 | 2.48 | 1.20 | 0.22 | 0.28 |
| 29565 | 0 | 23521  | HADSSRR                                | 2.12 | 0.01 | 3.78 | 1.81 | 0.22 | 0.85 |
| 29566 | 0 | 23522  | HAEDWSHRSSFG                           | 2.47 | 0.01 | 0.90 | 0.68 | 0.22 | 1.39 |
| 29567 | 0 | 23526  | HAEL                                   | 1.57 | 0.01 | 2.75 | 0.68 | 0.22 | 0.28 |
| 29568 | 0 | 23526  | HAEL                                   | 1.57 | 0.01 | 2.75 | 0.68 | 0.22 | 0.28 |
| 29569 | 0 | 23526  | HAEL                                   | 1.57 | 0.01 | 2.75 | 0.68 | 0.22 | 1.34 |
| 29570 | 0 | 123283 | HAEQKKLLKFEALEQEK<br>GKE               | 3.00 | 0.01 | 0.90 | 3.12 | 0.22 | 0.28 |
| 29571 | 0 | 123283 | HAEQKKLLKFEALEQEK<br>GKE               | 3.00 | 0.01 | 0.90 | 3.12 | 0.22 | 1.27 |
| 29572 | 0 | 123283 | HAEQKKLLKFEALEQEK<br>GKE               | 3.00 | 0.01 | 0.90 | 2.55 | 0.22 | 0.28 |
| 29573 | 0 | 23530  | HAFCHEEG                               | 2.14 | 0.01 | 3.72 | 0.44 | 0.85 | 1.34 |
| 29574 | 0 | 23534  | HAFPHLH                                | 2.05 | 0.01 | 0.90 | 0.44 | 1.59 | 1.27 |
| 29575 | 0 | 167923 | HAFRENCSPGRCIDDA                       | 2.70 | 0.01 | 2.75 | 0.44 | 1.59 | 2.51 |
| 29576 | 0 | 167923 | HAFRENCSPGRCIDDA                       | 2.70 | 0.01 | 2.75 | 0.44 | 0.85 | 2.51 |
| 29577 | 0 | 122785 | HAFSNLPNISRIYVSIDVT                    | 2.88 | 0.01 | 0.78 | 3.01 | 0.22 | 1.27 |
| 29578 | 0 | 122785 | HAFSNLPNISRIYVSIDVT                    | 2.88 | 0.01 | 0.78 | 3.01 | 0.22 | 0.28 |
| 29579 | 0 | 122785 | HAFSNLPNISRIYVSIDVT                    | 2.88 | 0.01 | 0.78 | 3.01 | 0.22 | 1.27 |
| 29580 | 0 | 450668 | HAGFVPS                                | 1.99 | 0.01 | 0.90 | 0.44 | 1.23 | 1.39 |
| 29581 | 0 | 509250 | HAGGPGDIELGPLDA                        | 2.71 | 0.01 | 0.78 | 0.44 | 1.13 | 1.28 |
| 29582 | 0 | 153263 | HAGTFLQVA                              | 2.21 | 0.01 | 0.90 | 1.15 | 0.22 | 1.27 |
| 29583 | 0 | 189230 | HAGVIRIQTSAMFGLK                       | 2.69 | 0.01 | 2.92 | 3.61 | 0.22 | 0.28 |
| 29584 | 0 | 111392 | HAHSRMLSPMP                            | 2.43 | 0.01 | 0.90 | 0.44 | 0.85 | 1.39 |
| 29585 | 0 | 106498 | HAIYPRH                                | 2.03 | 0.01 | 0.90 | 1.81 | 0.22 | 0.28 |
| 29586 | 0 | 79564  | HAIYRPH                                | 2.03 | 0.01 | 0.90 | 1.12 | 0.22 | 1.39 |
| 29587 | 0 | 108416 | HAKKTPPAS                              | 2.23 | 0.01 | 0.90 | 0.44 | 1.13 | 1.39 |
| 29588 | 0 | 489573 | HALPAPTQNTQV                           | 2.56 | 0.01 | 2.60 | 0.68 | 0.22 | 0.28 |
| 29589 | 0 | 99312  | HALRIPSGFISYILN                        | 2.66 | 0.01 | 2.16 | 0.44 | 1.23 | 1.48 |



|       |   |        |                                   |      |      |      |      |      |      |
|-------|---|--------|-----------------------------------|------|------|------|------|------|------|
| 29590 | 0 | 307398 | HALSSFLLKDKKKVA                   | 2.68 | 0.01 | 1.61 | 0.44 | 0.85 | 1.28 |
| 29591 | 0 | 103966 | HALTPSR                           | 1.99 | 0.01 | 0.90 | 0.44 | 1.13 | 1.39 |
| 29592 | 0 | 99313  | HANLNGWLRTLS                      | 2.48 | 0.01 | 0.90 | 1.12 | 0.22 | 1.39 |
| 29593 | 0 | 164247 | HANPKQNNHTTS                      | 2.48 | 0.01 | 0.90 | 1.20 | 0.22 | 1.39 |
| 29594 | 0 | 164247 | HANPKQNNHTTS                      | 2.48 | 0.01 | 0.90 | 1.20 | 0.22 | 1.39 |
| 29595 | 0 | 165606 | HAPRGVF                           | 1.99 | 0.01 | 0.90 | 0.44 | 1.23 | 1.39 |
| 29596 | 0 | 165606 | HAPRGVF                           | 1.99 | 0.01 | 0.90 | 0.44 | 1.23 | 1.39 |
| 29597 | 0 | 137412 | HAPRWHL                           | 2.03 | 0.01 | 0.90 | 0.68 | 0.22 | 1.39 |
| 29598 | 0 | 137412 | HAPRWHL                           | 2.03 | 0.01 | 0.90 | 0.68 | 0.22 | 1.39 |
| 29599 | 0 | 137413 | HAPRWHW                           | 2.05 | 0.01 | 0.90 | 0.68 | 0.22 | 1.39 |
| 29600 | 0 | 137414 | HAPRYHTIYGWP                      | 2.48 | 0.01 | 0.90 | 0.68 | 0.22 | 1.39 |
| 29601 | 0 | 137415 | HAPRYHY                           | 2.05 | 0.01 | 0.90 | 0.68 | 0.22 | 1.39 |
| 29602 | 0 | 418834 | HAPTPSFLGLLAVVF                   | 2.68 | 0.01 | 2.75 | 0.68 | 0.22 | 0.28 |
| 29603 | 0 | 167275 | HAPWRHHQASPK                      | 2.49 | 0.01 | 0.90 | 2.37 | 0.22 | 1.39 |
| 29604 | 0 | 123284 | HAQFGGGDA                         | 2.23 | 0.01 | 2.28 | 2.00 | 0.22 | 0.28 |
| 29605 | 0 | 182161 | HAQHFCAEEGTLVA                    | 2.67 | 0.01 | 0.78 | 0.44 | 1.13 | 0.85 |
| 29606 | 0 | 182161 | HAQHFCAEEGTLVA                    | 2.67 | 0.01 | 0.78 | 0.44 | 1.13 | 0.28 |
| 29607 | 0 | 182161 | HAQHFCAEEGTLVA                    | 2.67 | 0.01 | 0.78 | 0.44 | 1.41 | 0.28 |
| 29608 | 0 | 182161 | HAQHFCAEEGTLVA                    | 2.67 | 0.01 | 0.78 | 0.44 | 1.13 | 1.27 |
| 29609 | 0 | 105859 | HARGNYDAAKR                       | 2.40 | 0.01 | 0.78 | 0.68 | 0.22 | 0.28 |
| 29610 | 0 | 105859 | HARGNYDAAKR                       | 2.40 | 0.01 | 0.78 | 0.68 | 0.22 | 0.28 |
| 29611 | 0 | 105859 | HARGNYDAAKR                       | 2.40 | 0.01 | 0.78 | 0.68 | 0.22 | 1.48 |
| 29612 | 0 | 105859 | HARGNYDAAKR                       | 2.40 | 0.01 | 0.78 | 0.68 | 0.22 | 1.48 |
| 29613 | 0 | 105859 | HARGNYDAAKR                       | 2.40 | 0.01 | 0.78 | 0.68 | 0.22 | 1.48 |
| 29614 | 0 | 105859 | HARGNYDAAKR                       | 2.40 | 0.01 | 0.78 | 0.68 | 0.22 | 1.48 |
| 29615 | 0 | 105859 | HARGNYDAAKR                       | 2.40 | 0.01 | 0.78 | 0.68 | 0.22 | 0.28 |
| 29616 | 0 | 105859 | HARGNYDAAKR                       | 2.40 | 0.01 | 0.78 | 0.68 | 0.22 | 0.28 |
| 29617 | 0 | 105859 | HARGNYDAAKR                       | 2.40 | 0.01 | 0.78 | 0.68 | 0.22 | 0.28 |
| 29618 | 0 | 113507 | HARHGFLPRHRDTGILD<br>SIG          | 2.97 | 0.01 | 1.75 | 2.25 | 0.22 | 0.28 |
| 29619 | 0 | 122392 | HARLRDSGRAY                       | 2.41 | 0.01 | 0.78 | 0.44 | 1.13 | 2.12 |
| 29620 | 0 | 122392 | HARLRDSGRAY                       | 2.41 | 0.01 | 0.78 | 0.44 | 1.13 | 0.28 |
| 29621 | 0 | 122392 | HARLRDSGRAY                       | 2.41 | 0.01 | 0.78 | 0.44 | 1.13 | 0.28 |
| 29622 | 0 | 137416 | HARLRDSGRAYLPFVPP<br>RAP          | 2.96 | 0.01 | 0.78 | 1.20 | 0.22 | 0.28 |
| 29623 | 0 | 137416 | HARLRDSGRAYLPFVPP<br>RAP          | 2.96 | 0.01 | 0.78 | 1.20 | 0.22 | 0.28 |
| 29624 | 0 | 23562  | HASARQQWEL                        | 2.30 | 0.01 | 2.16 | 0.44 | 1.23 | 0.85 |
| 29625 | 0 | 152627 | HASFFDIGGS                        | 2.31 | 0.01 | 2.18 | 2.16 | 0.22 | 0.28 |
| 29626 | 0 | 23564  | HASGHRMAWDMMM<br>NWSPTTA          | 2.94 | 0.01 | 3.10 | 0.44 | 0.85 | 0.28 |
| 29627 | 0 | 178384 | HASPGQG                           | 2.02 | 0.01 | 0.90 | 1.12 | 0.22 | 0.28 |
| 29628 | 0 | 78679  | HASVGNNQYREIRIESHL<br>GDGDDKVFLSA | 3.29 | 0.01 | 2.24 | 0.68 | 0.22 | 2.02 |
| 29629 | 0 | 78679  | HASVGNNQYREIRIESHL<br>GDGDDKVFLSA | 3.29 | 0.01 | 2.24 | 0.68 | 0.22 | 0.85 |
| 29630 | 0 | 229234 | HATENERTTQVPTSS                   | 2.66 | 0.01 | 2.70 | 0.68 | 0.22 | 0.28 |

|       |   |        |                                              |      |      |      |      |      |      |
|-------|---|--------|----------------------------------------------|------|------|------|------|------|------|
| 29631 | 0 | 182388 | HATVQID                                      | 1.99 | 0.01 | 2.51 | 0.44 | 1.13 | 0.28 |
| 29632 | 0 | 182388 | HATVQID                                      | 1.99 | 0.01 | 2.51 | 0.44 | 1.41 | 0.28 |
| 29633 | 0 | 182388 | HATVQID                                      | 1.99 | 0.01 | 2.51 | 0.44 | 1.13 | 0.28 |
| 29634 | 0 | 182388 | HATVQID                                      | 1.99 | 0.01 | 2.51 | 0.44 | 1.41 | 0.28 |
| 29635 | 0 | 182388 | HATVQID                                      | 1.99 | 0.01 | 2.51 | 0.44 | 1.13 | 0.28 |
| 29636 | 0 | 182388 | HATVQID                                      | 1.99 | 0.01 | 2.51 | 0.44 | 1.93 | 0.28 |
| 29637 | 0 | 182388 | HATVQID                                      | 1.99 | 0.01 | 2.51 | 0.44 | 1.41 | 0.28 |
| 29638 | 0 | 105237 | HATVSD                                       | 1.88 | 0.01 | 3.45 | 1.20 | 0.22 | 0.28 |
| 29639 | 0 | 238599 | HAVAVAGGRWHLGG                               | 2.65 | 0.01 | 2.14 | 2.65 | 0.22 | 0.85 |
| 29640 | 0 | 238599 | HAVAVAGGRWHLGG                               | 2.65 | 0.01 | 2.14 | 2.65 | 0.22 | 0.85 |
| 29641 | 0 | 23576  | HAVGPNQGGLSQGLS                              | 2.70 | 0.01 | 1.66 | 0.44 | 0.85 | 0.28 |
| 29642 | 0 | 237753 | HAVVPVNPVKSL                                 | 2.49 | 0.01 | 0.90 | 1.20 | 0.22 | 1.39 |
| 29643 | 0 | 136352 | HAWQSKTPDKTR                                 | 2.45 | 0.01 | 0.90 | 2.74 | 0.22 | 0.85 |
| 29644 | 0 | 136352 | HAWQSKTPDKTR                                 | 2.45 | 0.01 | 0.90 | 2.74 | 0.22 | 0.85 |
| 29645 | 0 | 195026 | HAYPNASHPWDEDVM<br>PDLPYKT                   | 3.02 | 0.01 | 3.51 | 0.68 | 0.22 | 1.39 |
| 29646 | 0 | 195026 | HAYPNASHPWDEDVM<br>PDLPYKT                   | 3.02 | 0.01 | 3.51 | 0.44 | 0.85 | 1.39 |
| 29647 | 0 | 23586  | HCAYSSNVRLRPITVNPE<br>NNGVT                  | 3.05 | 0.01 | 4.63 | 3.63 | 0.22 | 0.28 |
| 29648 | 0 | 23587  | HCDGFQNE                                     | 2.10 | 0.01 | 3.04 | 1.12 | 0.22 | 0.28 |
| 29649 | 0 | 23588  | HCDGFQNEKWDL                                 | 2.43 | 0.01 | 3.04 | 3.65 | 0.22 | 0.28 |
| 29650 | 0 | 23588  | HCDGFQNEKWDL                                 | 2.43 | 0.01 | 3.04 | 3.65 | 0.22 | 0.28 |
| 29651 | 0 | 23589  | HCDGFQNEKWDLFVE                              | 2.64 | 0.01 | 3.04 | 1.12 | 0.22 | 0.28 |
| 29652 | 0 | 23589  | HCDGFQNEKWDLFVE                              | 2.64 | 0.01 | 3.04 | 1.12 | 0.22 | 0.28 |
| 29653 | 0 | 23590  | HCDGFQNEKWDLFVER<br>SKAFSNCYPYDVPDYASL<br>RS | 3.51 | 0.01 | 3.81 | 3.65 | 0.22 | 0.28 |
| 29654 | 0 | 23590  | HCDGFQNEKWDLFVER<br>SKAFSNCYPYDVPDYASL<br>RS | 3.51 | 0.01 | 3.81 | 3.65 | 0.22 | 0.28 |
| 29655 | 0 | 23590  | HCDGFQNEKWDLFVER<br>SKAFSNCYPYDVPDYASL<br>RS | 3.51 | 0.01 | 3.81 | 3.65 | 0.22 | 2.02 |
| 29656 | 0 | 23590  | HCDGFQNEKWDLFVER<br>SKAFSNCYPYDVPDYASL<br>RS | 3.51 | 0.01 | 3.04 | 1.12 | 0.22 | 0.28 |
| 29657 | 0 | 23590  | HCDGFQNEKWDLFVER<br>SKAFSNCYPYDVPDYASL<br>RS | 3.51 | 0.01 | 3.04 | 1.12 | 0.22 | 0.28 |
| 29658 | 0 | 23590  | HCDGFQNEKWDLFVER<br>SKAFSNCYPYDVPDYASL<br>RS | 3.51 | 0.01 | 3.04 | 1.12 | 0.22 | 0.28 |
| 29659 | 0 | 79245  | HCDSFWIPPPVCK                                | 2.58 | 0.01 | 0.90 | 0.68 | 0.22 | 1.39 |

|       |   |        |                 |      |      |      |      |      |      |
|-------|---|--------|-----------------|------|------|------|------|------|------|
| 29660 | 0 | 106501 | HCGIVDSKLP      | 2.26 | 0.01 | 3.08 | 0.44 | 1.23 | 0.85 |
| 29661 | 0 | 79246  | HCGQNSHPMWRKCQ  | 2.60 | 0.01 | 0.90 | 0.68 | 0.22 | 1.39 |
| 29662 | 0 | 23593  | HCHCSASFCIMP    | 2.50 | 0.01 | 3.61 | 1.20 | 0.22 | 0.85 |
| 29663 | 0 | 23594  | HCHTHADGEVHC    | 2.50 | 0.01 | 2.69 | 0.68 | 0.22 | 0.28 |
| 29664 | 0 | 23594  | HCHTHADGEVHC    | 2.50 | 0.01 | 2.69 | 1.20 | 0.22 | 0.28 |
| 29665 | 0 | 115613 | HCLGKWLGHDPDKF  | 2.56 | 4.23 | 1.75 | 2.25 | 0.22 | 0.28 |
| 29666 | 0 | 115613 | HCLGKWLGHDPDKF  | 2.56 | 4.23 | 1.75 | 2.25 | 0.22 | 0.28 |
| 29667 | 0 | 115613 | HCLGKWLGHDPDKF  | 2.56 | 4.23 | 1.75 | 2.25 | 0.22 | 0.28 |
| 29668 | 0 | 115613 | HCLGKWLGHDPDKF  | 2.56 | 4.23 | 1.75 | 2.25 | 0.22 | 0.28 |
| 29669 | 0 | 115614 | HCLGKWLGHDPDKF  | 2.56 | 4.45 | 1.75 | 2.25 | 0.22 | 0.28 |
| 29670 | 0 | 115614 | HCLGKWLGHDPDKF  | 2.56 | 4.45 | 1.75 | 2.25 | 0.22 | 0.28 |
| 29671 | 0 | 115614 | HCLGKWLGHDPDKF  | 2.56 | 4.45 | 1.75 | 2.25 | 0.22 | 0.28 |
| 29672 | 0 | 115613 | HCLGKWLGHDPDKF  | 2.56 | 4.23 | 1.75 | 2.25 | 2.60 | 1.75 |
| 29673 | 0 | 23599  | HCLGKWLGHDPDKF  | 2.56 | 0.01 | 0.78 | 2.25 | 0.22 | 1.27 |
| 29674 | 0 | 23599  | HCLGKWLGHDPDKF  | 2.56 | 0.01 | 0.78 | 2.25 | 0.22 | 1.48 |
| 29675 | 0 | 23599  | HCLGKWLGHDPDKF  | 2.56 | 0.01 | 0.78 | 2.25 | 0.22 | 1.48 |
| 29676 | 0 | 23599  | HCLGKWLGHDPDKF  | 2.56 | 0.01 | 1.75 | 2.25 | 0.22 | 0.28 |
| 29677 | 0 | 23599  | HCLGKWLGHDPDKF  | 2.56 | 0.01 | 1.75 | 2.25 | 0.22 | 0.28 |
| 29678 | 0 | 23599  | HCLGKWLGHDPDKF  | 2.56 | 0.01 | 1.75 | 2.25 | 0.22 | 1.75 |
| 29679 | 0 | 23599  | HCLGKWLGHDPDKF  | 2.56 | 0.01 | 1.75 | 2.25 | 0.22 | 0.28 |
| 29680 | 0 | 23599  | HCLGKWLGHDPDKF  | 2.56 | 0.01 | 1.75 | 2.25 | 0.22 | 0.28 |
| 29681 | 0 | 23599  | HCLGKWLGHDPDKF  | 2.56 | 0.01 | 1.75 | 2.25 | 0.22 | 0.28 |
| 29682 | 0 | 23599  | HCLGKWLGHDPDKF  | 2.56 | 0.01 | 1.75 | 2.25 | 0.22 | 0.28 |
| 29683 | 0 | 23599  | HCLGKWLGHDPDKF  | 2.56 | 0.01 | 1.75 | 2.25 | 2.60 | 1.75 |
| 29684 | 0 | 23599  | HCLGKWLGHDPDKF  | 2.56 | 0.01 | 0.78 | 2.25 | 0.22 | 0.28 |
| 29685 | 0 | 23599  | HCLGKWLGHDPDKF  | 2.56 | 0.01 | 0.78 | 2.25 | 2.60 | 1.75 |
| 29686 | 0 | 23599  | HCLGKWLGHDPDKF  | 2.56 | 0.01 | 1.75 | 2.25 | 0.22 | 0.28 |
| 29687 | 0 | 23599  | HCLGKWLGHDPDKF  | 2.56 | 0.01 | 0.78 | 0.44 | 1.13 | 0.28 |
| 29688 | 0 | 23599  | HCLGKWLGHDPDKF  | 2.56 | 0.01 | 0.78 | 0.44 | 1.41 | 0.28 |
| 29689 | 0 | 23599  | HCLGKWLGHDPDKF  | 2.56 | 0.01 | 0.78 | 0.44 | 1.13 | 0.28 |
| 29690 | 0 | 79247  | HCPQDPRSYNAFCI  | 2.57 | 0.01 | 0.90 | 0.68 | 0.22 | 1.39 |
| 29691 | 0 | 126209 | HCQGDGYRVGFGQCA | 2.68 | 0.01 | 1.75 | 0.68 | 0.22 | 0.28 |
| 29692 | 0 | 131904 | HCQICHCDVVNLTCE | 2.68 | 0.01 | 0.78 | 0.44 | 1.13 | 1.27 |
| 29693 | 0 | 131904 | HCQICHCDVVNLTCE | 2.68 | 0.01 | 0.78 | 0.44 | 1.13 | 1.57 |
| 29694 | 0 | 79248  | HCRMYEKLHHTACL  | 2.61 | 0.01 | 0.90 | 0.68 | 0.22 | 1.39 |
| 29695 | 0 | 23605  | HDAAFRVVHSSEWSF | 2.69 | 0.01 | 0.90 | 1.15 | 0.22 | 0.85 |
| 29696 | 0 | 139518 | HDASASL         | 2.04 | 0.01 | 0.90 | 1.20 | 0.22 | 1.39 |
| 29697 | 0 | 181656 | HDCKRTYLKDNTIFI | 2.66 | 0.01 | 1.66 | 2.37 | 0.22 | 1.28 |
| 29698 | 0 | 104515 | HDCRPKKI        | 2.11 | 0.01 | 3.72 | 0.68 | 0.22 | 1.48 |
| 29699 | 0 | 104515 | HDCRPKKI        | 2.11 | 0.01 | 3.72 | 0.68 | 0.22 | 1.48 |
| 29700 | 0 | 104515 | HDCRPKKI        | 2.11 | 0.01 | 3.72 | 0.68 | 0.22 | 1.48 |
| 29701 | 0 | 104515 | HDCRPKKI        | 2.11 | 0.01 | 3.72 | 0.68 | 0.22 | 1.48 |
| 29702 | 0 | 104515 | HDCRPKKI        | 2.11 | 0.01 | 3.72 | 0.68 | 0.22 | 1.48 |
| 29703 | 0 | 104515 | HDCRPKKI        | 2.11 | 0.01 | 3.72 | 0.68 | 0.22 | 1.48 |
| 29704 | 0 | 104515 | HDCRPKKI        | 2.11 | 0.01 | 3.72 | 0.68 | 0.22 | 1.48 |

|       |   |        |                                                        |      |      |      |      |      |      |
|-------|---|--------|--------------------------------------------------------|------|------|------|------|------|------|
| 29705 | 0 | 104515 | HDCRPKKI<br>HDCVNITIKQHTVTTTTK                         | 2.11 | 0.01 | 3.72 | 0.68 | 0.22 | 1.48 |
| 29706 | 0 | 99314  | GENFTETDIKIMERVVE<br>QMCTTQYQKES<br>HDCVNITIKQHTVTTTTK | 3.76 | 0.01 | 2.98 | 2.19 | 0.22 | 0.85 |
| 29707 | 0 | 99314  | GENFTETDIKIMERVVE<br>QMCTTQYQKES<br>HDCVNITIKQHTVTTTTK | 3.76 | 0.01 | 2.98 | 2.19 | 0.22 | 0.85 |
| 29708 | 0 | 99314  | GENFTETDIKIMERVVE<br>QMCTTQYQKES                       | 3.76 | 0.01 | 2.98 | 2.19 | 0.22 | 0.85 |
| 29709 | 0 | 238600 | HDDCYGAAEKYHRCS                                        | 2.67 | 0.01 | 2.56 | 2.02 | 0.22 | 0.85 |
| 29710 | 0 | 238600 | HDDCYGAAEKYHRCS                                        | 2.67 | 0.01 | 2.56 | 1.20 | 0.22 | 0.85 |
| 29711 | 0 | 423337 | HDDGPGLDNDLMNEP                                        | 2.71 | 0.01 | 2.51 | 0.44 | 2.35 | 1.28 |
| 29712 | 0 | 121368 | HDDPQLGAEQAFTF                                         | 2.67 | 0.01 | 0.90 | 0.68 | 0.22 | 1.39 |
| 29713 | 0 | 121368 | HDDPQLGAEQAFTF                                         | 2.67 | 0.01 | 0.90 | 0.68 | 0.22 | 0.28 |
| 29714 | 0 | 121368 | HDDPQLGAEQAFTF                                         | 2.67 | 0.01 | 0.90 | 0.68 | 0.22 | 0.28 |
| 29715 | 0 | 121369 | HDDPQRFADAQVFPF                                        | 2.71 | 0.01 | 0.90 | 0.68 | 0.22 | 1.39 |
| 29716 | 0 | 121369 | HDDPQRFADAQVFPF                                        | 2.71 | 0.01 | 0.90 | 0.68 | 0.22 | 0.28 |
| 29717 | 0 | 121369 | HDDPQRFADAQVFPF                                        | 2.71 | 0.01 | 0.90 | 0.68 | 0.22 | 0.28 |
| 29718 | 0 | 23616  | HDEGRQIIQFEE                                           | 2.46 | 0.01 | 0.90 | 0.68 | 0.22 | 0.28 |
| 29719 | 0 | 23616  | HDEGRQIIQFEE                                           | 2.46 | 0.01 | 0.90 | 0.68 | 0.22 | 1.27 |
| 29720 | 0 | 23616  | HDEGRQIIQFEE                                           | 2.46 | 0.01 | 0.90 | 0.44 | 1.59 | 0.28 |
| 29721 | 0 | 236107 | HDELGFMV                                               | 2.10 | 0.01 | 2.71 | 2.13 | 0.22 | 0.28 |
| 29722 | 0 | 236107 | HDELGFMV                                               | 2.10 | 0.01 | 2.71 | 2.13 | 0.22 | 0.28 |
| 29723 | 0 | 236107 | HDELGFMV                                               | 2.10 | 0.01 | 2.71 | 2.13 | 0.22 | 1.48 |
| 29724 | 0 | 230955 | HDELGFMVPPGLSSE                                        | 2.66 | 0.01 | 2.71 | 2.13 | 0.22 | 1.28 |
| 29725 | 0 | 119462 | HDENGATGPVKRAREET<br>DKE                               | 2.96 | 0.01 | 0.78 | 0.44 | 1.13 | 0.28 |
| 29726 | 0 | 141666 | HDEYTKYIDSKLNEIF                                       | 2.73 | 0.01 | 1.66 | 1.20 | 0.22 | 0.28 |
| 29727 | 0 | 141666 | HDEYTKYIDSKLNEIF                                       | 2.73 | 0.01 | 1.66 | 2.55 | 0.22 | 0.28 |
| 29728 | 0 | 175208 | HDEYTKYIDSKLNKIF                                       | 2.73 | 0.01 | 2.86 | 2.55 | 0.22 | 0.28 |
| 29729 | 0 | 144903 | HDFHDPTLEEQK                                           | 2.47 | 0.01 | 0.90 | 0.68 | 0.22 | 1.39 |
| 29730 | 0 | 140033 | HDFR                                                   | 1.57 | 0.01 | 3.36 | 0.44 | 0.22 | 0.28 |
| 29731 | 0 | 140033 | HDFR                                                   | 1.57 | 0.01 | 3.36 | 0.44 | 0.22 | 0.28 |
| 29732 | 0 | 140033 | HDFR                                                   | 1.57 | 0.01 | 3.36 | 0.44 | 0.22 | 0.28 |
| 29733 | 0 | 140033 | HDFR                                                   | 1.57 | 0.01 | 3.36 | 0.44 | 0.22 | 1.34 |
| 29734 | 0 | 140033 | HDFR                                                   | 1.57 | 0.01 | 3.36 | 0.44 | 0.22 | 0.28 |
| 29735 | 0 | 435225 | HDFVADMYQLAQ                                           | 2.48 | 0.01 | 0.90 | 0.68 | 0.22 | 1.27 |
| 29736 | 0 | 114850 | HDGGCRKELA                                             | 2.28 | 0.01 | 2.25 | 0.44 | 1.23 | 0.85 |
| 29737 | 0 | 114850 | HDGGCRKELA                                             | 2.28 | 0.01 | 2.25 | 0.44 | 1.23 | 0.85 |
| 29738 | 0 | 23625  | HDGYVRLQTSSQYGLDS<br>SGDLKGRT                          | 3.18 | 0.01 | 3.36 | 0.68 | 0.22 | 0.28 |

|       |   |        |                               |      |      |      |      |      |      |
|-------|---|--------|-------------------------------|------|------|------|------|------|------|
| 29739 | 0 | 23625  | HDGYVRLQTSSQYGLDS<br>SGDLKGRT | 3.18 | 0.01 | 3.36 | 0.68 | 0.22 | 0.28 |
| 29740 | 0 | 23625  | HDGYVRLQTSSQYGLDS<br>SGDLKGRT | 3.18 | 0.01 | 3.36 | 0.68 | 0.22 | 0.28 |
| 29741 | 0 | 103249 | HDHKLEGTE                     | 2.24 | 0.01 | 0.90 | 2.71 | 0.22 | 0.28 |
| 29742 | 0 | 103250 | HDHKTQLDP                     | 2.24 | 0.01 | 0.90 | 2.71 | 0.22 | 0.28 |
| 29743 | 0 | 103251 | HDHRIWPLDVT                   | 2.46 | 0.01 | 0.90 | 2.71 | 0.22 | 0.28 |
| 29744 | 0 | 23630  | HDKNNSDI                      | 2.13 | 0.01 | 2.99 | 0.44 | 0.85 | 0.28 |
| 29745 | 0 | 107881 | HDKPPDLMSQRL                  | 2.46 | 0.01 | 0.90 | 0.68 | 0.22 | 1.39 |
| 29746 | 0 | 171363 | HDLDFTEPAARASF                | 2.68 | 0.01 | 0.78 | 0.44 | 1.13 | 0.28 |
| 29747 | 0 | 111394 | HDQTLPGGVRLH                  | 2.47 | 0.01 | 0.90 | 0.44 | 0.85 | 1.39 |
| 29748 | 0 | 164248 | HDQVLSGIKWPH                  | 2.44 | 0.01 | 0.90 | 1.20 | 0.22 | 1.39 |
| 29749 | 0 | 23641  | HDRHFLNNV                     | 2.23 | 0.01 | 2.61 | 0.44 | 0.85 | 0.28 |
| 29750 | 0 | 100097 | HDSGYEVHHQ                    | 2.31 | 0.01 | 0.78 | 0.44 | 1.93 | 0.28 |
| 29751 | 0 | 105239 | HDSGYEVHHQK                   | 2.38 | 0.01 | 0.78 | 1.20 | 0.22 | 0.28 |
| 29752 | 0 | 99315  | HDSGYEVHHQKLVFF               | 2.64 | 0.01 | 0.78 | 2.49 | 0.22 | 1.27 |
| 29753 | 0 | 99315  | HDSGYEVHHQKLVFF               | 2.64 | 0.01 | 0.78 | 3.15 | 0.22 | 0.28 |
| 29754 | 0 | 105861 | HDSGYEVHHQKLVFFAE<br>DVG      | 2.94 | 0.01 | 0.78 | 1.12 | 0.22 | 1.27 |
| 29755 | 0 | 164249 | HDSKFNIRTHTT                  | 2.46 | 0.01 | 0.90 | 1.20 | 0.22 | 0.28 |
| 29756 | 0 | 423338 | HDSLESRRREEEDD                | 2.71 | 0.01 | 2.51 | 0.44 | 2.35 | 1.28 |
| 29757 | 0 | 121370 | HDSPQFIAEASAFHF               | 2.71 | 0.01 | 0.90 | 0.68 | 0.22 | 1.39 |
| 29758 | 0 | 121370 | HDSPQFIAEASAFHF               | 2.71 | 0.01 | 0.90 | 0.68 | 0.22 | 0.28 |
| 29759 | 0 | 121370 | HDSPQFIAEASAFHF               | 2.71 | 0.01 | 0.90 | 0.68 | 0.22 | 0.28 |
| 29760 | 0 | 118833 | HDSPSVRK                      | 2.12 | 0.01 | 0.78 | 0.44 | 1.13 | 0.28 |
| 29761 | 0 | 123287 | HDSPSVRKTH                    | 2.32 | 0.01 | 0.78 | 1.12 | 0.22 | 0.85 |
| 29762 | 0 | 23645  | HDSPTHYVPESDAAARV<br>TQI      | 2.94 | 0.01 | 1.96 | 0.44 | 0.85 | 0.28 |
| 29763 | 0 | 77900  | HDSPTIRYVEAY                  | 2.43 | 0.01 | 0.90 | 1.15 | 0.22 | 1.39 |
| 29764 | 0 | 177504 | HDSSKFPYVPSY                  | 2.49 | 0.01 | 0.90 | 1.20 | 0.22 | 1.27 |
| 29765 | 0 | 177504 | HDSSKFPYVPSY                  | 2.49 | 0.01 | 0.90 | 3.78 | 0.22 | 1.75 |
| 29766 | 0 | 177504 | HDSSKFPYVPSY                  | 2.49 | 0.01 | 0.90 | 3.78 | 0.22 | 0.28 |
| 29767 | 0 | 149740 | HDTSETKGLTDT                  | 2.49 | 0.01 | 0.90 | 2.37 | 0.22 | 0.28 |
| 29768 | 0 | 144331 | HDTSLKPISVSYNPATAK            | 2.84 | 0.01 | 0.78 | 0.44 | 2.35 | 2.66 |
| 29769 | 0 | 23648  | HDTYWTEQIEPWFLHGL<br>GLAR     | 2.97 | 0.01 | 2.40 | 1.15 | 0.22 | 0.28 |
| 29770 | 0 | 23648  | HDTYWTEQIEPWFLHGL<br>GLAR     | 2.97 | 0.01 | 2.40 | 1.15 | 0.22 | 2.02 |
| 29771 | 0 | 23648  | HDTYWTEQIEPWFLHGL<br>GLAR     | 2.97 | 0.01 | 2.40 | 1.15 | 0.22 | 0.85 |
| 29772 | 0 | 23648  | HDTYWTEQIEPWFLHGL<br>GLAR     | 2.97 | 0.01 | 2.40 | 1.15 | 0.22 | 1.34 |
| 29773 | 0 | 23648  | HDTYWTEQIEPWFLHGL<br>GLAR     | 2.97 | 0.01 | 2.40 | 1.15 | 0.22 | 1.34 |
| 29774 | 0 | 23649  | HDVEVIFMTDAIDEYVV<br>SQL      | 2.92 | 0.01 | 2.78 | 2.49 | 0.85 | 0.28 |

|       |   |        |                          |      |      |      |      |      |      |
|-------|---|--------|--------------------------|------|------|------|------|------|------|
| 29775 | 0 | 242575 | HDWDPLHSPNGR             | 2.48 | 0.01 | 3.33 | 1.20 | 0.22 | 0.85 |
| 29776 | 0 | 242576 | HDWDPLHSPNGRASK          | 2.67 | 0.01 | 3.33 | 1.20 | 0.22 | 0.85 |
| 29777 | 0 | 242577 | HDWDPLHSPNGRSPK          | 2.69 | 0.01 | 3.32 | 1.20 | 0.22 | 0.85 |
| 29778 | 0 | 242577 | HDWDPLHSPNGRSPK          | 2.69 | 0.01 | 3.32 | 1.20 | 0.22 | 0.85 |
| 29779 | 0 | 225630 | HDYVPYDRGENFAF           | 2.59 | 0.01 | 2.51 | 2.00 | 0.85 | 0.28 |
| 29780 | 0 | 225630 | HDYVPYDRGENFAF           | 2.59 | 0.01 | 2.51 | 2.00 | 0.22 | 0.28 |
| 29781 | 0 | 133596 | HEAIKTNYC                | 2.18 | 0.01 | 1.60 | 0.68 | 0.22 | 0.28 |
| 29782 | 0 | 225751 | HEALHNNHVMQKNVSH         | 2.69 | 0.01 | 3.28 | 0.44 | 0.22 | 0.85 |
| 29783 | 0 | 92900  | HEALREPRKLERTISK         | 2.75 | 0.01 | 2.19 | 1.20 | 0.22 | 0.28 |
| 29784 | 0 | 92900  | HEALREPRKLERTISK         | 2.75 | 0.01 | 2.19 | 1.20 | 0.22 | 1.27 |
| 29785 | 0 | 92900  | HEALREPRKLERTISK         | 2.75 | 0.01 | 2.19 | 1.20 | 0.22 | 0.28 |
| 29786 | 0 | 127679 | HECGSELQMTPD             | 2.43 | 0.01 | 3.16 | 3.16 | 0.22 | 0.28 |
| 29787 | 0 | 175845 | HECGSLLQDTALYLV          | 2.64 | 0.01 | 2.63 | 1.15 | 0.22 | 0.85 |
| 29788 | 0 | 175845 | HECGSLLQDTALYLV          | 2.64 | 0.01 | 2.63 | 1.15 | 0.22 | 0.85 |
| 29789 | 0 | 100906 | HEDEKPINF                | 2.31 | 0.01 | 3.18 | 3.22 | 0.22 | 0.28 |
| 29790 | 0 | 164795 | HEDT                     | 1.57 | 0.01 | 1.75 | 2.16 | 0.22 | 1.27 |
| 29791 | 0 | 164795 | HEDT                     | 1.57 | 0.01 | 1.75 | 2.16 | 0.22 | 1.27 |
| 29792 | 0 | 164795 | HEDT                     | 1.57 | 0.01 | 1.75 | 2.16 | 0.22 | 1.27 |
| 29793 | 0 | 164795 | HEDT                     | 1.57 | 0.01 | 1.75 | 2.16 | 0.22 | 1.48 |
| 29794 | 0 | 164795 | HEDT                     | 1.57 | 0.01 | 1.75 | 2.16 | 0.22 | 1.48 |
| 29795 | 0 | 164795 | HEDT                     | 1.57 | 0.01 | 1.75 | 2.16 | 0.22 | 1.48 |
| 29796 | 0 | 23671  | HEEDNNTG                 | 2.12 | 0.01 | 2.99 | 0.44 | 0.85 | 0.28 |
| 29797 | 0 | 23685  | HEGKAYFPREGV             | 2.45 | 0.01 | 2.45 | 0.68 | 0.22 | 0.28 |
| 29798 | 0 | 23685  | HEGKAYFPREGV             | 2.45 | 0.01 | 2.45 | 0.68 | 0.22 | 2.97 |
| 29799 | 0 | 23685  | HEGKAYFPREGV             | 2.45 | 0.01 | 2.45 | 0.44 | 0.85 | 2.35 |
| 29800 | 0 | 23685  | HEGKAYFPREGV             | 2.45 | 0.01 | 2.45 | 0.68 | 0.22 | 0.28 |
| 29801 | 0 | 23685  | HEGKAYFPREGV             | 2.45 | 0.01 | 2.45 | 0.44 | 0.85 | 0.28 |
| 29802 | 0 | 109286 | HEGLHNNH                 | 2.05 | 0.01 | 0.78 | 0.44 | 1.13 | 0.28 |
| 29803 | 0 | 109286 | HEGLHNNH                 | 2.05 | 0.01 | 0.78 | 0.44 | 1.13 | 0.28 |
| 29804 | 0 | 23689  | HEHHGVYNQGG              | 2.33 | 0.01 | 3.27 | 0.44 | 0.85 | 0.28 |
| 29805 | 0 | 23690  | HEHHGVYNQGRGIDSG<br>ERLM | 2.93 | 0.01 | 3.27 | 2.89 | 0.22 | 0.28 |
| 29806 | 0 | 517841 | HEHRDKDDHDHEHED          | 2.75 | 0.01 | 2.24 | 0.44 | 1.41 | 1.28 |
| 29807 | 0 | 107882 | HEHTFGRQW                | 2.22 | 0.01 | 0.90 | 2.46 | 0.22 | 1.27 |
| 29808 | 0 | 107882 | HEHTFGRQW                | 2.22 | 0.01 | 0.90 | 2.46 | 0.22 | 0.28 |
| 29809 | 0 | 107882 | HEHTFGRQW                | 2.22 | 0.01 | 0.90 | 2.46 | 0.22 | 1.27 |
| 29810 | 0 | 23694  | HEIAWFTERSDKSYEHQ<br>T   | 2.82 | 0.01 | 3.30 | 0.68 | 0.22 | 0.28 |
| 29811 | 0 | 23694  | HEIAWFTERSDKSYEHQ<br>T   | 2.82 | 0.01 | 3.30 | 0.68 | 0.22 | 2.35 |
| 29812 | 0 | 23694  | HEIAWFTERSDKSYEHQ<br>T   | 2.82 | 0.01 | 3.30 | 0.68 | 0.22 | 0.28 |

|       |   |        |                                     |      |      |      |      |      |      |
|-------|---|--------|-------------------------------------|------|------|------|------|------|------|
| 29813 | 0 | 141667 | HEIGSLAGLAMR                        | 2.48 | 0.01 | 0.90 | 0.68 | 0.22 | 0.28 |
| 29814 | 0 | 23696  | HEIKKVLVPGCHGS                      | 2.61 | 4.63 | 2.78 | 0.44 | 1.23 | 1.57 |
| 29815 | 0 | 23697  | HEIKKVLVPGCHGS                      | 2.61 | 0.01 | 2.78 | 0.44 | 1.23 | 1.57 |
| 29816 | 0 | 466231 | HEIVEVEEILPEDEEVKEK<br>EEVKEK       | 3.22 | 0.01 | 0.90 | 0.44 | 0.85 | 1.28 |
| 29817 | 0 | 307935 | HEKQHQSDETQVQQH                     | 2.71 | 0.01 | 1.61 | 0.44 | 0.85 | 1.28 |
| 29818 | 0 | 307938 | HEKQQQSDEAQFQQH                     | 2.70 | 0.01 | 1.61 | 0.44 | 0.85 | 1.28 |
| 29819 | 0 | 307939 | HEKQQQSDEAQVQQH                     | 2.70 | 0.01 | 1.61 | 0.44 | 0.85 | 1.28 |
| 29820 | 0 | 307940 | HEKQQQSDETQVQQH                     | 2.70 | 0.01 | 1.61 | 0.44 | 0.85 | 1.28 |
| 29821 | 0 | 108420 | HELGDIAIA                           | 2.23 | 0.01 | 0.90 | 0.44 | 1.13 | 1.39 |
| 29822 | 0 | 139074 | HELQQYIDNLNKTLDL<br>DWL             | 2.94 | 0.01 | 3.55 | 3.16 | 0.22 | 0.28 |
| 29823 | 0 | 23717  | HELRSQIISTTS                        | 2.47 | 0.01 | 0.90 | 1.12 | 2.26 | 1.39 |
| 29824 | 0 | 77901  | HELSPTGLKTSW                        | 2.48 | 0.01 | 0.90 | 1.15 | 0.22 | 1.39 |
| 29825 | 0 | 164250 | HENPKQNPLTAR                        | 2.45 | 0.01 | 0.90 | 1.20 | 0.22 | 1.39 |
| 29826 | 0 | 164251 | HENPKWHHTPV                         | 2.47 | 0.01 | 0.90 | 1.20 | 0.22 | 0.28 |
| 29827 | 0 | 23722  | HEPQISPGGLEPPSEKHF<br>RE            | 2.95 | 0.01 | 2.04 | 0.44 | 0.85 | 0.28 |
| 29828 | 0 | 23722  | HEPQISPGGLEPPSEKHF<br>RE            | 2.95 | 0.01 | 2.04 | 0.44 | 2.82 | 0.28 |
| 29829 | 0 | 23722  | HEPQISPGGLEPPSEKHF<br>RE            | 2.95 | 0.01 | 2.04 | 0.44 | 0.85 | 0.28 |
| 29830 | 0 | 23722  | HEPQISPGGLEPPSEKHF<br>RE            | 2.95 | 0.01 | 2.04 | 0.44 | 1.59 | 0.28 |
| 29831 | 0 | 23722  | HEPQISPGGLEPPSEKHF<br>RE            | 2.95 | 0.01 | 2.04 | 0.44 | 0.85 | 0.28 |
| 29832 | 0 | 23722  | HEPQISPGGLEPPSEKHF<br>RE            | 2.95 | 0.01 | 2.04 | 0.44 | 1.59 | 0.28 |
| 29833 | 0 | 23722  | HEPQISPGGLEPPSEKHF<br>RE            | 2.95 | 0.01 | 2.04 | 0.44 | 0.85 | 0.28 |
| 29834 | 0 | 101706 | HEQPHWLLWQPP                        | 2.50 | 0.01 | 0.90 | 0.44 | 0.85 | 1.39 |
| 29835 | 0 | 23727  | HEQQLVTARQKLK                       | 2.55 | 0.01 | 3.00 | 0.44 | 0.85 | 0.28 |
| 29836 | 0 | 23727  | HEQQLVTARQKLK                       | 2.55 | 0.01 | 3.00 | 1.15 | 2.39 | 0.28 |
| 29837 | 0 | 23728  | HEQQLVVARQKLKDAE<br>RAVEVDPDDV      | 3.23 | 0.01 | 3.16 | 1.15 | 0.22 | 0.28 |
| 29838 | 0 | 23728  | HEQQLVVARQKLKDAE<br>RAVEVDPDDV      | 3.23 | 0.01 | 3.16 | 1.15 | 0.22 | 0.28 |
| 29839 | 0 | 181334 | HEQREEQEWPRKEEKR<br>GEKGSEEEDE      | 3.23 | 0.01 | 2.72 | 0.44 | 1.23 | 1.27 |
| 29840 | 0 | 122786 | HESNEMQPT                           | 2.21 | 0.01 | 2.58 | 2.87 | 0.22 | 0.28 |
| 29841 | 0 | 122393 | HESNVGSIQEVNQGSVS<br>EESHKIDPSKIDDR | 3.45 | 0.01 | 2.22 | 0.44 | 1.74 | 1.34 |

|       |   |        |                                     |      |      |      |      |      |      |
|-------|---|--------|-------------------------------------|------|------|------|------|------|------|
| 29842 | 0 | 122393 | HESNVGSIQEVNQGSVS<br>EESHKIDPSKIDDR | 3.45 | 0.01 | 2.22 | 0.44 | 1.74 | 0.28 |
| 29843 | 0 | 122393 | HESNVGSIQEVNQGSVS<br>EESHKIDPSKIDDR | 3.45 | 0.01 | 2.22 | 0.44 | 1.74 | 0.28 |
| 29844 | 0 | 164252 | HESPKPTVWQTK                        | 2.48 | 0.01 | 0.90 | 1.20 | 0.22 | 1.39 |
| 29845 | 0 | 137891 | HETHYGYATLSY                        | 2.50 | 0.01 | 2.21 | 0.44 | 0.85 | 0.28 |
| 29846 | 0 | 98092  | HEVDKDISQLTQAIVKN<br>H              | 2.84 | 0.01 | 2.04 | 0.44 | 2.98 | 0.28 |
| 29847 | 0 | 191412 | HEVKAQVQKASK                        | 2.51 | 0.01 | 2.76 | 1.20 | 0.22 | 0.28 |
| 29848 | 0 | 23747  | HEVRNASGVYHVTNDC<br>SNSS            | 2.94 | 0.01 | 3.10 | 1.81 | 0.22 | 0.28 |
| 29849 | 0 | 188878 | HEYHNWLRSPFSRYSAT<br>CPNVLH         | 3.07 | 0.01 | 2.51 | 2.61 | 0.22 | 0.28 |
| 29850 | 0 | 188878 | HEYHNWLRSPFSRYSAT<br>CPNVLH         | 3.07 | 0.01 | 2.51 | 2.61 | 0.22 | 0.28 |
| 29851 | 0 | 188878 | HEYHNWLRSPFSRYSAT<br>CPNVLH         | 3.07 | 0.01 | 2.51 | 2.61 | 0.22 | 0.28 |
| 29852 | 0 | 188878 | HEYHNWLRSPFSRYSAT<br>CPNVLH         | 3.07 | 0.01 | 2.51 | 2.61 | 0.22 | 0.28 |
| 29853 | 0 | 110884 | HEYMLDLQPETTDLYCY<br>E              | 2.86 | 0.01 | 1.86 | 3.57 | 0.22 | 0.28 |
| 29854 | 0 | 110884 | HEYMLDLQPETTDLYCY<br>E              | 2.86 | 0.01 | 1.86 | 3.89 | 1.41 | 0.28 |
| 29855 | 0 | 110884 | HEYMLDLQPETTDLYCY<br>E              | 2.86 | 0.01 | 1.86 | 0.44 | 0.85 | 0.28 |
| 29856 | 0 | 23759  | HFANMKFRHSPD                        | 2.46 | 0.01 | 0.90 | 0.68 | 0.22 | 0.28 |
| 29857 | 0 | 423671 | HFAWPVDLPLYQ                        | 2.45 | 0.01 | 0.90 | 0.68 | 0.22 | 1.39 |
| 29858 | 0 | 23770  | HFEVFNFVPCSI                        | 2.48 | 0.01 | 2.38 | 0.68 | 0.22 | 0.28 |
| 29859 | 0 | 23770  | HFEVFNFVPCSI                        | 2.48 | 0.01 | 2.38 | 0.68 | 0.22 | 0.28 |
| 29860 | 0 | 23770  | HFEVFNFVPCSI                        | 2.48 | 0.01 | 2.38 | 0.44 | 1.59 | 0.28 |
| 29861 | 0 | 23770  | HFEVFNFVPCSI                        | 2.48 | 0.01 | 2.38 | 0.44 | 1.74 | 0.28 |
| 29862 | 0 | 23770  | HFEVFNFVPCSI                        | 2.48 | 0.01 | 2.38 | 0.44 | 1.74 | 0.28 |
| 29863 | 0 | 94539  | HFEVFNFVPCSIC                       | 2.56 | 0.01 | 2.38 | 0.68 | 0.22 | 0.28 |
| 29864 | 0 | 114851 | HFFKNIVTPR                          | 2.28 | 0.01 | 0.78 | 3.18 | 0.22 | 0.28 |
| 29865 | 0 | 114851 | HFFKNIVTPR                          | 2.28 | 0.01 | 0.78 | 3.18 | 0.22 | 0.28 |
| 29866 | 0 | 114851 | HFFKNIVTPR                          | 2.28 | 0.01 | 0.78 | 3.18 | 0.22 | 0.28 |
| 29867 | 0 | 114851 | HFFKNIVTPR                          | 2.28 | 0.01 | 0.78 | 3.18 | 0.22 | 0.28 |
| 29868 | 0 | 114851 | HFFKNIVTPR                          | 2.28 | 0.01 | 0.78 | 3.18 | 0.22 | 0.28 |
| 29869 | 0 | 79852  | HFFKNIVTPRT                         | 2.38 | 0.01 | 2.95 | 3.18 | 0.22 | 1.27 |
| 29870 | 0 | 79852  | HFFKNIVTPRT                         | 2.38 | 0.01 | 2.95 | 3.18 | 0.22 | 0.28 |
| 29871 | 0 | 229994 | HFGNDYEDRYR                         | 2.48 | 0.01 | 2.52 | 3.15 | 0.22 | 0.85 |
| 29872 | 0 | 229994 | HFGNDYEDRYR                         | 2.48 | 0.01 | 2.52 | 3.15 | 0.22 | 0.85 |
| 29873 | 0 | 229994 | HFGNDYEDRYR                         | 2.48 | 0.01 | 2.52 | 3.15 | 0.22 | 0.85 |
| 29874 | 0 | 229994 | HFGNDYEDRYR                         | 2.48 | 0.01 | 2.52 | 3.15 | 0.22 | 0.85 |
| 29875 | 0 | 229994 | HFGNDYEDRYR                         | 2.48 | 0.01 | 2.52 | 3.15 | 0.22 | 0.85 |



|       |   |        |                                   |      |      |      |      |      |      |
|-------|---|--------|-----------------------------------|------|------|------|------|------|------|
| 29876 | 0 | 229994 | HFGNDYEDRYR                       | 2.48 | 0.01 | 2.52 | 3.15 | 0.22 | 1.48 |
| 29877 | 0 | 134690 | HFGVAAKDQDLKSRPES<br>VECIRYNFRGFR | 3.27 | 0.01 | 0.78 | 0.44 | 1.13 | 0.28 |
| 29878 | 0 | 134690 | HFGVAAKDQDLKSRPES<br>VECIRYNFRGFR | 3.27 | 0.01 | 0.78 | 0.44 | 1.13 | 0.28 |
| 29879 | 0 | 106507 | HFHHTIW                           | 2.04 | 0.01 | 0.90 | 3.00 | 1.93 | 0.28 |
| 29880 | 0 | 127680 | HFHRPPT                           | 2.04 | 0.01 | 0.90 | 0.44 | 1.13 | 1.39 |
| 29881 | 0 | 127681 | HFHRPTQ                           | 2.03 | 0.01 | 0.90 | 0.44 | 1.13 | 1.39 |
| 29882 | 0 | 127682 | HFHRPYH                           | 2.05 | 0.01 | 0.90 | 0.44 | 1.13 | 1.39 |
| 29883 | 0 | 127683 | HFHRPYS                           | 2.03 | 0.01 | 0.90 | 0.44 | 1.13 | 1.39 |
| 29884 | 0 | 23785  | HFHYFSP                           | 2.05 | 0.01 | 0.90 | 0.68 | 0.22 | 1.39 |
| 29885 | 0 | 182162 | HFKAMSLCKQPVENQ                   | 2.62 | 0.01 | 0.78 | 0.44 | 1.13 | 0.85 |
| 29886 | 0 | 23791  | HFKDPQYPVWELTIRV<br>WSEL          | 2.90 | 0.01 | 2.82 | 0.44 | 0.85 | 0.28 |
| 29887 | 0 | 23797  | HFLCTFTFNSNNKEYTFP<br>IT          | 2.94 | 0.01 | 2.82 | 0.44 | 0.85 | 0.28 |
| 29888 | 0 | 23797  | HFLCTFTFNSNNKEYTFP<br>IT          | 2.94 | 0.01 | 2.82 | 0.44 | 1.41 | 0.28 |
| 29889 | 0 | 23801  | HFLSQNFFG                         | 2.22 | 0.01 | 0.90 | 0.68 | 0.22 | 0.28 |
| 29890 | 0 | 119925 | HFPFDEQNGSMKLGW<br>T              | 2.74 | 0.01 | 2.26 | 1.15 | 0.22 | 1.57 |
| 29891 | 0 | 119925 | HFPFDEQNGSMKLGW<br>T              | 2.74 | 0.01 | 2.26 | 0.44 | 1.41 | 1.57 |
| 29892 | 0 | 119925 | HFPFDEQNGSMKLGW<br>T              | 2.74 | 0.01 | 2.26 | 0.44 | 1.13 | 1.57 |
| 29893 | 0 | 119926 | HFPFDQQNCTMKLGIW<br>T             | 2.73 | 0.01 | 2.26 | 1.81 | 0.22 | 1.57 |
| 29894 | 0 | 119926 | HFPFDQQNCTMKLGIW<br>T             | 2.73 | 0.01 | 2.26 | 1.81 | 0.22 | 1.57 |
| 29895 | 0 | 119926 | HFPFDQQNCTMKLGIW<br>T             | 2.73 | 0.01 | 2.26 | 1.81 | 0.22 | 1.57 |
| 29896 | 0 | 119926 | HFPFDQQNCTMKLGIW<br>T             | 2.73 | 0.01 | 2.26 | 1.81 | 0.22 | 1.57 |
| 29897 | 0 | 119926 | HFPFDQQNCTMKLGIW<br>T             | 2.73 | 0.01 | 2.26 | 1.15 | 0.22 | 1.57 |
| 29898 | 0 | 119926 | HFPFDQQNCTMKLGIW<br>T             | 2.73 | 0.01 | 2.26 | 1.12 | 0.22 | 1.57 |
| 29899 | 0 | 119926 | HFPFDQQNCTMKLGIW<br>T             | 2.73 | 0.01 | 2.26 | 3.65 | 0.22 | 1.57 |
| 29900 | 0 | 119926 | HFPFDQQNCTMKLGIW<br>T             | 2.73 | 0.01 | 2.26 | 2.25 | 0.22 | 1.57 |
| 29901 | 0 | 122394 | HFPFDQQNGTMKLGW<br>T              | 2.75 | 0.01 | 2.26 | 2.43 | 0.22 | 1.57 |
| 29902 | 0 | 23809  | HFPLA                             | 1.74 | 0.01 | 3.89 | 0.68 | 0.22 | 0.28 |
| 29903 | 0 | 23809  | HFPLA                             | 1.74 | 0.01 | 3.89 | 0.68 | 0.22 | 0.28 |
| 29904 | 0 | 79249  | HFQYRM                            | 1.88 | 0.01 | 0.90 | 0.68 | 0.22 | 1.39 |

|       |   |        |                               |      |      |      |      |      |      |
|-------|---|--------|-------------------------------|------|------|------|------|------|------|
| 29905 | 0 | 23863  | HFRECCNEIR                    | 2.32 | 0.01 | 3.89 | 0.44 | 1.23 | 0.85 |
| 29906 | 0 | 422392 | HFRGEIEE                      | 2.11 | 0.01 | 0.78 | 2.37 | 0.22 | 0.28 |
| 29907 | 0 | 422392 | HFRGEIEE                      | 2.11 | 0.01 | 0.78 | 0.68 | 0.22 | 0.28 |
| 29908 | 0 | 132835 | HFRWG                         | 1.74 | 0.01 | 2.19 | 1.12 | 0.22 | 1.27 |
| 29909 | 0 | 23871  | HFTGGVLNWFSD                  | 2.44 | 0.01 | 0.90 | 0.68 | 0.22 | 1.39 |
| 29910 | 0 | 79565  | HFTTRLL                       | 2.00 | 0.01 | 0.90 | 1.12 | 0.22 | 1.39 |
| 29911 | 0 | 23874  | HFVGCYMGQVRSLNAT<br>VIAACAPHE | 3.11 | 0.01 | 4.03 | 0.68 | 0.22 | 0.85 |
| 29912 | 0 | 23874  | HFVGCYMGQVRSLNAT<br>VIAACAPHE | 3.11 | 0.01 | 4.03 | 0.68 | 0.22 | 1.48 |
| 29913 | 0 | 23875  | HFVLLVGYSADGVD                | 2.69 | 0.01 | 2.72 | 0.44 | 1.23 | 0.85 |
| 29914 | 0 | 23876  | HFVQQTPKSQPTLV                | 2.63 | 0.01 | 4.23 | 1.15 | 2.26 | 0.28 |
| 29915 | 0 | 23876  | HFVQQTPKSQPTLV                | 2.63 | 0.01 | 4.23 | 1.15 | 2.26 | 1.66 |
| 29916 | 0 | 23876  | HFVQQTPKSQPTLV                | 2.63 | 0.01 | 4.23 | 1.15 | 2.26 | 2.51 |
| 29917 | 0 | 23876  | HFVQQTPKSQPTLV                | 2.63 | 0.01 | 4.23 | 1.15 | 2.26 | 2.51 |
| 29918 | 0 | 23876  | HFVQQTPKSQPTLV                | 2.63 | 0.01 | 4.23 | 1.15 | 2.26 | 2.49 |
| 29919 | 0 | 188233 | HFVTLHGAER                    | 2.30 | 0.01 | 2.92 | 3.37 | 0.22 | 0.85 |
| 29920 | 0 | 100101 | HFYDGFAKVPLKTD                | 2.59 | 0.01 | 2.96 | 1.12 | 0.22 | 0.28 |
| 29921 | 0 | 100101 | HFYDGFAKVPLKTD                | 2.59 | 0.01 | 2.96 | 0.44 | 0.22 | 0.28 |
| 29922 | 0 | 232527 | HFYQITWLPNTFPAR               | 2.64 | 0.01 | 0.90 | 2.22 | 0.85 | 1.27 |
| 29923 | 0 | 78413  | HFYSGTER                      | 2.10 | 0.01 | 3.97 | 0.68 | 0.22 | 0.28 |
| 29924 | 0 | 188234 | HGAERLEEET                    | 2.31 | 0.01 | 2.92 | 1.81 | 0.22 | 0.85 |
| 29925 | 0 | 188234 | HGAERLEEET                    | 2.31 | 0.01 | 2.92 | 3.37 | 0.22 | 0.85 |
| 29926 | 0 | 188235 | HGDEGRNNGV                    | 2.32 | 0.01 | 2.92 | 1.81 | 0.22 | 0.85 |
| 29927 | 0 | 153835 | HGDTPTLHEYMLDLQP              | 2.75 | 0.01 | 1.86 | 2.37 | 0.22 | 0.28 |
| 29928 | 0 | 153835 | HGDTPTLHEYMLDLQP              | 2.75 | 0.01 | 1.86 | 2.37 | 0.22 | 2.02 |
| 29929 | 0 | 496535 | HGDTTFEYQDLCRQHM<br>ATKS      | 2.89 | 0.01 | 0.78 | 0.44 | 1.13 | 1.27 |
| 29930 | 0 | 109289 | HGDTTFEYQDLCRQHM<br>ATKSL     | 2.95 | 0.01 | 0.78 | 0.44 | 1.13 | 1.27 |
| 29931 | 0 | 100102 | HGDVGMHVKE                    | 2.34 | 0.01 | 2.18 | 2.16 | 0.22 | 0.28 |
| 29932 | 0 | 98093  | HGFTEQNSG                     | 2.21 | 0.01 | 2.58 | 0.68 | 0.22 | 0.28 |
| 29933 | 0 | 98093  | HGFTEQNSG                     | 2.21 | 0.01 | 2.58 | 1.20 | 0.22 | 0.28 |
| 29934 | 0 | 98093  | HGFTEQNSG                     | 2.21 | 0.01 | 2.58 | 1.20 | 0.22 | 0.28 |
| 29935 | 0 | 98093  | HGFTEQNSG                     | 2.21 | 0.01 | 2.58 | 1.20 | 0.22 | 0.28 |
| 29936 | 0 | 98093  | HGFTEQNSG                     | 2.21 | 0.01 | 2.58 | 1.20 | 0.22 | 0.28 |
| 29937 | 0 | 98093  | HGFTEQNSG                     | 2.21 | 0.01 | 2.58 | 1.20 | 0.22 | 0.28 |
| 29938 | 0 | 98093  | HGFTEQNSG                     | 2.21 | 0.01 | 2.58 | 1.20 | 0.22 | 0.28 |
| 29939 | 0 | 98093  | HGFTEQNSG                     | 2.21 | 0.01 | 2.58 | 1.20 | 0.22 | 0.28 |
| 29940 | 0 | 98093  | HGFTEQNSG                     | 2.21 | 0.01 | 2.58 | 1.20 | 0.22 | 1.34 |
| 29941 | 0 | 98093  | HGFTEQNSG                     | 2.21 | 0.01 | 2.58 | 1.20 | 0.22 | 1.34 |
| 29942 | 0 | 98093  | HGFTEQNSG                     | 2.21 | 0.01 | 2.58 | 1.20 | 0.22 | 1.34 |
| 29943 | 0 | 98093  | HGFTEQNSG                     | 2.21 | 0.01 | 2.58 | 1.20 | 0.22 | 1.34 |
| 29944 | 0 | 23902  | HGGGWGQPHGGGGW                | 2.67 | 0.01 | 2.52 | 1.20 | 0.22 | 0.28 |

|       |   |        |                                        |      |      |      |      |      |      |
|-------|---|--------|----------------------------------------|------|------|------|------|------|------|
| 29945 | 0 | 228289 | HGGGWGQPHGGGW<br>HGGSWGQPHGGSWG        | 2.60 | 0.01 | 2.98 | 2.19 | 0.22 | 0.85 |
| 29946 | 0 | 23909  | QPHGGGWGQGGGTH<br>NQ<br>HGGSWGQPHGGSWG | 3.39 | 0.01 | 1.75 | 2.19 | 0.22 | 0.28 |
| 29947 | 0 | 23909  | QPHGGGWGQGGGTH<br>NQ                   | 3.39 | 0.01 | 1.75 | 3.78 | 0.22 | 0.28 |
| 29948 | 0 | 450675 | HGGVRLY                                | 2.01 | 0.01 | 0.90 | 0.44 | 1.23 | 1.39 |
| 29949 | 0 | 137892 | HGHGAFRQQFY                            | 2.52 | 0.01 | 2.21 | 0.44 | 0.85 | 0.28 |
| 29950 | 0 | 489575 | HGIFTLTWEIWGYDP                        | 2.66 | 0.01 | 2.69 | 3.05 | 0.85 | 1.28 |
| 29951 | 0 | 117526 | HGIIKECT                               | 2.11 | 0.01 | 0.78 | 0.44 | 1.13 | 0.85 |
| 29952 | 0 | 151908 | HGIKTQGARQK                            | 2.41 | 0.01 | 0.78 | 0.44 | 1.93 | 1.27 |
| 29953 | 0 | 23913  | HGISEMWYLPK                            | 2.40 | 0.01 | 0.90 | 0.68 | 0.22 | 0.85 |
| 29954 | 0 | 23917  | HGKEELRFPRGQGVPI                       | 2.72 | 0.01 | 2.91 | 0.44 | 0.85 | 0.28 |
| 29955 | 0 | 23919  | HGKSRIALTNSVNEALLN<br>P                | 2.87 | 0.01 | 3.03 | 0.68 | 0.22 | 1.57 |
| 29956 | 0 | 23919  | HGKSRIALTNSVNEALLN<br>P                | 2.87 | 0.01 | 3.03 | 3.33 | 0.22 | 1.57 |
| 29957 | 0 | 23919  | HGKSRIALTNSVNEALLN<br>P                | 2.87 | 0.01 | 2.08 | 0.44 | 0.22 | 1.57 |
| 29958 | 0 | 23919  | HGKSRIALTNSVNEALLN<br>P                | 2.87 | 0.01 | 2.08 | 2.02 | 0.22 | 1.57 |
| 29959 | 0 | 23919  | HGKSRIALTNSVNEALLN<br>P                | 2.87 | 0.01 | 2.08 | 1.15 | 0.22 | 1.57 |
| 29960 | 0 | 23919  | HGKSRIALTNSVNEALLN<br>P                | 2.87 | 0.01 | 2.08 | 2.49 | 0.22 | 1.57 |
| 29961 | 0 | 23919  | HGKSRIALTNSVNEALLN<br>P                | 2.87 | 0.01 | 2.08 | 2.25 | 0.22 | 1.57 |
| 29962 | 0 | 23920  | HGKVVDADVDRAKEAAK                      | 2.77 | 0.01 | 3.41 | 1.20 | 0.22 | 0.85 |
| 29963 | 0 | 23920  | HGKVVDADVDRAKEAAK                      | 2.77 | 0.01 | 3.41 | 0.68 | 0.22 | 0.85 |
| 29964 | 0 | 79566  | HGLHLPV                                | 2.05 | 0.01 | 0.90 | 1.12 | 0.22 | 1.39 |
| 29965 | 0 | 106509 | HGLTTE                                 | 1.89 | 0.01 | 0.78 | 0.68 | 0.22 | 1.27 |
| 29966 | 0 | 106509 | HGLTTE                                 | 1.89 | 0.01 | 0.78 | 0.68 | 0.22 | 2.35 |
| 29967 | 0 | 156886 | HGLYGS                                 | 1.90 | 0.01 | 0.90 | 2.74 | 0.22 | 0.85 |
| 29968 | 0 | 136353 | HGNAEVHASFFDIGGS                       | 2.74 | 0.01 | 2.18 | 1.20 | 0.22 | 0.28 |
| 29969 | 0 | 136353 | HGNAEVHASFFDIGGS                       | 2.74 | 0.01 | 2.18 | 1.20 | 0.22 | 1.34 |
| 29970 | 0 | 136353 | HGNAEVHASFFDIGGS                       | 2.74 | 0.01 | 2.18 | 1.20 | 0.22 | 1.75 |
| 29971 | 0 | 136353 | HGNAEVHASFFDIGGS                       | 2.74 | 0.01 | 2.18 | 1.20 | 0.22 | 0.28 |
| 29972 | 0 | 136353 | HGNAEVHASFFDIGGS                       | 2.74 | 0.01 | 2.18 | 1.20 | 0.22 | 0.28 |

|       |   |        |                                  |      |      |      |      |      |      |
|-------|---|--------|----------------------------------|------|------|------|------|------|------|
| 29973 | 0 | 136353 | HGNAEVHASFFDIGGS                 | 2.74 | 0.01 | 2.18 | 1.20 | 0.22 | 1.34 |
| 29974 | 0 | 136353 | HGNAEVHASFFDIGGS                 | 2.74 | 0.01 | 2.18 | 1.20 | 0.22 | 1.27 |
| 29975 | 0 | 136353 | HGNAEVHASFFDIGGS                 | 2.74 | 0.01 | 2.18 | 1.20 | 0.22 | 0.28 |
| 29976 | 0 | 136353 | HGNAEVHASFFDIGGS                 | 2.74 | 0.01 | 2.18 | 1.20 | 0.22 | 0.28 |
| 29977 | 0 | 136353 | HGNAEVHASFFDIGGS                 | 2.74 | 0.01 | 2.18 | 1.20 | 0.22 | 1.75 |
| 29978 | 0 | 136353 | HGNAEVHASFFDIGGS                 | 2.74 | 0.01 | 2.18 | 1.20 | 0.22 | 0.28 |
| 29979 | 0 | 136353 | HGNAEVHASFFDIGGS                 | 2.74 | 0.01 | 2.18 | 1.20 | 0.22 | 1.34 |
| 29980 | 0 | 136353 | HGNAEVHASFFDIGGS                 | 2.74 | 0.01 | 2.18 | 1.20 | 0.22 | 1.27 |
| 29981 | 0 | 23934  | HGPDWASP                         | 2.12 | 0.01 | 2.85 | 0.68 | 0.22 | 0.28 |
| 29982 | 0 | 23934  | HGPDWASP                         | 2.12 | 0.01 | 2.85 | 0.68 | 0.22 | 1.34 |
| 29983 | 0 | 23936  | HGPDWASPVCQRHSPD<br>CSRLVG       | 3.05 | 0.01 | 3.16 | 0.68 | 0.22 | 0.28 |
| 29984 | 0 | 23936  | HGPDWASPVCQRHSPD<br>CSRLVG       | 3.05 | 0.01 | 3.16 | 0.68 | 0.22 | 0.28 |
| 29985 | 0 | 23936  | HGPDWASPVCQRHSPD<br>CSRLVG       | 3.05 | 0.01 | 3.16 | 0.68 | 0.22 | 0.28 |
| 29986 | 0 | 23936  | HGPDWASPVCQRHSPD<br>CSRLVG       | 3.05 | 0.01 | 3.16 | 0.68 | 0.22 | 0.28 |
| 29987 | 0 | 23936  | HGPDWASPVCQRHSPD<br>CSRLVG       | 3.05 | 0.01 | 3.16 | 0.68 | 0.22 | 0.28 |
| 29988 | 0 | 153836 | HGPKATLQDIVLHLEP<br>HGQEWTPENMVS | 2.72 | 0.01 | 3.11 | 2.37 | 0.22 | 2.02 |
| 29989 | 0 | 226476 | PFKLKSRVLNEKIILEKNN<br>K         | 3.48 | 0.01 | 4.93 | 0.44 | 0.85 | 0.28 |
| 29990 | 0 | 118834 | HGQGLGFGAGDGGGN<br>G             | 2.77 | 0.01 | 0.90 | 0.68 | 0.22 | 0.28 |
| 29991 | 0 | 118834 | HGQGLGFGAGDGGGN<br>G             | 2.77 | 0.01 | 0.90 | 0.68 | 0.22 | 0.28 |
| 29992 | 0 | 118834 | HGQGLGFGAGDGGGN<br>G             | 2.77 | 0.01 | 0.90 | 0.68 | 0.22 | 0.28 |
| 29993 | 0 | 118834 | HGQGLGFGAGDGGGN<br>G             | 2.77 | 0.01 | 0.90 | 0.68 | 0.22 | 0.28 |
| 29994 | 0 | 118834 | HGQGLGFGAGDGGGN<br>G             | 2.77 | 0.01 | 0.90 | 0.68 | 0.22 | 1.27 |
| 29995 | 0 | 118834 | HGQGLGFGAGDGGGN<br>G             | 2.77 | 0.01 | 0.90 | 0.68 | 0.22 | 0.28 |
| 29996 | 0 | 177083 | HGQWNKPSKPKTN                    | 2.56 | 0.01 | 1.60 | 2.19 | 0.22 | 0.85 |
| 29997 | 0 | 153837 | HGRLVTLKDIVLDLQP                 | 2.73 | 0.01 | 3.03 | 2.37 | 0.22 | 2.02 |
| 29998 | 0 | 153837 | HGRLVTLKDIVLDLQP                 | 2.73 | 0.01 | 3.03 | 2.37 | 0.22 | 2.02 |

|       |   |        |                                                |      |      |      |      |      |      |
|-------|---|--------|------------------------------------------------|------|------|------|------|------|------|
| 29999 | 0 | 23947  | HGRVGIYFGMK                                    | 2.39 | 0.01 | 2.24 | 1.15 | 0.22 | 0.28 |
| 30000 | 0 | 23947  | HGRVGIYFGMK                                    | 2.39 | 0.01 | 2.24 | 1.15 | 0.22 | 0.28 |
| 30001 | 0 | 23947  | HGRVGIYFGMK                                    | 2.39 | 0.01 | 2.24 | 1.15 | 0.22 | 1.27 |
| 30002 | 0 | 23947  | HGRVGIYFGMK                                    | 2.39 | 0.01 | 2.24 | 1.15 | 0.22 | 1.27 |
| 30003 | 0 | 23947  | HGRVGIYFGMK                                    | 2.39 | 0.01 | 2.24 | 3.93 | 0.22 | 0.28 |
| 30004 | 0 | 23948  | HGRYFHVPGYPWGSA                                | 2.69 | 0.01 | 0.90 | 0.44 | 1.59 | 1.39 |
| 30005 | 0 | 98094  | HGSEP                                          | 1.74 | 0.01 | 2.78 | 0.44 | 1.23 | 1.57 |
| 30006 | 0 | 23950  | HGSEPCIHRGKP                                   | 2.55 | 0.01 | 2.78 | 0.68 | 0.22 | 0.28 |
| 30007 | 0 | 492140 | HGSLGLGWPGHTSVR                                | 2.71 | 0.01 | 0.90 | 1.15 | 0.22 | 1.39 |
| 30008 | 0 | 103255 | HGTCANQCPIVDAGD                                | 2.66 | 0.01 | 2.04 | 0.44 | 0.85 | 1.28 |
| 30009 | 0 | 117212 | HGTITGVDVSMNTHL                                | 2.69 | 0.01 | 1.75 | 2.42 | 0.22 | 0.85 |
| 30010 | 0 | 23961  | HGTIVI                                         | 1.90 | 0.01 | 2.40 | 0.44 | 0.85 | 0.28 |
| 30011 | 0 | 133135 | HGTQCLAMGWGRVGA<br>H                           | 2.74 | 0.01 | 0.78 | 0.44 | 1.13 | 0.85 |
| 30012 | 0 | 133135 | HGTQCLAMGWGRVGA<br>H                           | 2.74 | 0.01 | 0.78 | 0.44 | 1.13 | 1.27 |
| 30013 | 0 | 134691 | HGTVIESLESNNYFNSS<br>GIDVEEKSLFLDIWRNW<br>QKDG | 3.59 | 0.01 | 1.75 | 1.20 | 0.22 | 0.28 |
| 30014 | 0 | 134691 | HGTVIESLESNNYFNSS<br>GIDVEEKSLFLDIWRNW<br>QKDG | 3.59 | 0.01 | 1.75 | 1.20 | 0.22 | 1.34 |
| 30015 | 0 | 308416 | HGVDPTGTYQGSDSL                                | 2.68 | 0.01 | 1.61 | 0.44 | 0.85 | 1.28 |
| 30016 | 0 | 125438 | HGVFAFLVSPSPYELCAV<br>PR                       | 2.95 | 0.01 | 0.78 | 0.44 | 0.85 | 0.28 |
| 30017 | 0 | 23965  | HGVRGLTNLFS                                    | 2.39 | 0.01 | 1.72 | 0.44 | 0.85 | 2.02 |
| 30018 | 0 | 23966  | HGVRGLTSLFS                                    | 2.41 | 0.01 | 1.72 | 0.44 | 0.85 | 2.02 |
| 30019 | 0 | 23972  | HGVTKPKQVIKLDADPV<br>ESQ                       | 2.93 | 0.01 | 2.82 | 0.44 | 0.85 | 0.28 |
| 30020 | 0 | 175848 | HGWCNWYNIDPWIQL                                | 2.66 | 0.01 | 2.63 | 1.15 | 0.22 | 0.85 |
| 30021 | 0 | 175848 | HGWCNWYNIDPWIQL                                | 2.66 | 0.01 | 2.63 | 1.15 | 0.22 | 0.85 |
| 30022 | 0 | 175848 | HGWCNWYNIDPWIQL                                | 2.66 | 0.01 | 2.63 | 1.15 | 0.22 | 0.85 |
| 30023 | 0 | 23973  | HGYEKPEELWTAksrvh<br>PL                        | 2.87 | 0.01 | 2.75 | 0.44 | 1.59 | 0.28 |
| 30024 | 0 | 23973  | HGYEKPEELWTAksrvh<br>PL                        | 2.87 | 0.01 | 2.75 | 0.44 | 1.59 | 1.34 |
| 30025 | 0 | 23973  | HGYEKPEELWTAksrvh<br>PL                        | 2.87 | 0.01 | 2.75 | 0.44 | 1.59 | 2.02 |
| 30026 | 0 | 23974  | HGysahaasPNF                                   | 2.49 | 0.01 | 0.90 | 0.68 | 0.22 | 1.39 |
| 30027 | 0 | 23975  | HHAEMQNPVYLIPETVP<br>YIK                       | 2.92 | 0.01 | 2.48 | 0.68 | 0.22 | 0.28 |

|       |   |        |                                    |      |      |      |      |      |      |
|-------|---|--------|------------------------------------|------|------|------|------|------|------|
| 30028 | 0 | 23975  | HHAEMQNPVYLIPETVP<br>YIK           | 2.92 | 0.01 | 2.48 | 0.68 | 0.22 | 1.27 |
| 30029 | 0 | 23975  | HHAEMQNPVYLIPETVP<br>YIK           | 2.92 | 0.01 | 2.48 | 0.68 | 0.22 | 1.34 |
| 30030 | 0 | 23975  | HHAEMQNPVYLIPETVP<br>YIK           | 2.92 | 0.01 | 2.48 | 0.68 | 0.22 | 1.34 |
| 30031 | 0 | 23975  | HHAEMQNPVYLIPETVP<br>YIK           | 2.92 | 0.01 | 2.48 | 1.20 | 0.22 | 0.28 |
| 30032 | 0 | 23975  | HHAEMQNPVYLIPETVP<br>YIK           | 2.92 | 0.01 | 2.48 | 1.20 | 0.22 | 0.28 |
| 30033 | 0 | 23975  | HHAEMQNPVYLIPETVP<br>YIK           | 2.92 | 0.01 | 2.48 | 1.20 | 0.22 | 2.12 |
| 30034 | 0 | 23975  | HHAEMQNPVYLIPETVP<br>YIK           | 2.92 | 0.01 | 2.48 | 1.20 | 0.22 | 1.34 |
| 30035 | 0 | 23976  | HHAERNGSQSTTSQSN                   | 2.75 | 0.01 | 3.40 | 0.44 | 0.85 | 0.28 |
| 30036 | 0 | 23976  | HHAERNGSQSTTSQSN                   | 2.75 | 0.01 | 3.40 | 0.44 | 1.74 | 0.28 |
| 30037 | 0 | 23977  | HHAHHAAHHAHHAHHA<br>HHA            | 2.92 | 0.01 | 1.66 | 1.20 | 0.22 | 0.85 |
| 30038 | 0 | 23983  | HHDSLESRRLREEED                    | 2.72 | 0.01 | 2.76 | 1.15 | 0.22 | 0.85 |
| 30039 | 0 | 23983  | HHDSLESRRLREEED                    | 2.72 | 0.01 | 2.76 | 1.15 | 0.22 | 0.85 |
| 30040 | 0 | 419212 | HHEKLRPDIGTA                       | 2.42 | 0.01 | 0.90 | 0.44 | 1.93 | 1.39 |
| 30041 | 0 | 107883 | HHEYDKGNDYICNKCNI<br>NVNMKKNNDDTWT | 3.34 | 0.01 | 0.90 | 1.12 | 0.22 | 0.28 |
| 30042 | 0 | 23985  | HHFQSHGQLSDHPHAL<br>SSSS           | 2.96 | 0.01 | 2.75 | 0.44 | 0.85 | 0.85 |
| 30043 | 0 | 23986  | HHFSSDPRPDLH                       | 2.50 | 0.01 | 0.90 | 0.44 | 0.85 | 0.28 |
| 30044 | 0 | 23988  | HHHHHH                             | 1.91 | 0.01 | 4.08 | 1.15 | 0.22 | 0.28 |
| 30045 | 0 | 23988  | HHHHHH                             | 1.91 | 0.01 | 0.90 | 1.81 | 0.22 | 2.49 |
| 30046 | 0 | 23988  | HHHHHH                             | 1.91 | 0.01 | 0.90 | 1.81 | 0.22 | 0.85 |
| 30047 | 0 | 137418 | HHILPPKALLFG                       | 2.47 | 0.01 | 0.90 | 0.68 | 0.22 | 1.39 |
| 30048 | 0 | 137418 | HHILPPKALLFG                       | 2.47 | 0.01 | 0.90 | 0.68 | 0.22 | 1.27 |
| 30049 | 0 | 127684 | HHKYWHR                            | 2.04 | 0.01 | 0.90 | 0.44 | 1.13 | 1.39 |
| 30050 | 0 | 127684 | HHKYWHR                            | 2.04 | 0.01 | 0.90 | 0.44 | 1.13 | 1.39 |
| 30051 | 0 | 123291 | HHMPGQPP                           | 2.12 | 0.01 | 0.78 | 1.20 | 0.22 | 0.28 |
| 30052 | 0 | 171377 | HHMSWYSRWLPV                       | 2.46 | 0.01 | 0.90 | 0.44 | 0.85 | 1.39 |
| 30053 | 0 | 119589 | HHNEHDHDAHGRGAAS<br>SVAEGV         | 3.08 | 0.01 | 3.27 | 0.44 | 0.85 | 0.28 |
| 30054 | 0 | 137893 | HHNLLVGSVSGFYPG                    | 2.68 | 0.01 | 0.78 | 2.74 | 0.22 | 1.57 |
| 30055 | 0 | 137893 | HHNLLVGSVSGFYPG                    | 2.68 | 0.01 | 0.78 | 1.15 | 0.22 | 1.57 |
| 30056 | 0 | 137893 | HHNLLVGSVSGFYPG                    | 2.68 | 0.01 | 0.78 | 0.44 | 2.26 | 1.57 |
| 30057 | 0 | 186671 | HHNPQWIDSQAK                       | 2.44 | 0.01 | 0.90 | 0.68 | 0.22 | 1.39 |
| 30058 | 0 | 113514 | HHPARTAHYGSLPQK                    | 2.66 | 0.01 | 0.78 | 0.44 | 1.13 | 1.27 |
| 30059 | 0 | 113514 | HHPARTAHYGSLPQK                    | 2.66 | 0.01 | 0.78 | 0.44 | 1.13 | 1.27 |
| 30060 | 0 | 113514 | HHPARTAHYGSLPQK                    | 2.66 | 0.01 | 0.78 | 0.44 | 1.13 | 1.27 |

|       |   |        |                           |      |      |      |      |      |      |
|-------|---|--------|---------------------------|------|------|------|------|------|------|
| 30061 | 0 | 112152 | HHPARTAHYGSLPQKSH<br>GRT  | 2.96 | 0.01 | 0.78 | 0.44 | 0.22 | 0.28 |
| 30062 | 0 | 229903 | HHPGIAEFPSRGKSSSYS<br>KQF | 2.98 | 3.24 | 0.78 | 0.44 | 1.13 | 1.28 |
| 30063 | 0 | 229903 | HHPGIAEFPSRGKSSSYS<br>KQF | 2.98 | 3.24 | 0.78 | 0.44 | 1.13 | 0.28 |
| 30064 | 0 | 419722 | HHPGIAEFPSRGKSSSYS<br>KQF | 2.98 | 2.94 | 0.78 | 0.44 | 1.41 | 1.28 |
| 30065 | 0 | 419722 | HHPGIAEFPSRGKSSSYS<br>KQF | 2.98 | 2.94 | 0.78 | 0.44 | 1.13 | 1.28 |
| 30066 | 0 | 229903 | HHPGIAEFPSRGKSSSYS<br>KQF | 2.98 | 3.24 | 0.78 | 0.44 | 1.13 | 1.28 |
| 30067 | 0 | 229903 | HHPGIAEFPSRGKSSSYS<br>KQF | 2.98 | 3.24 | 0.78 | 0.44 | 1.13 | 1.27 |
| 30068 | 0 | 24006  | HHPITDSDQTRLY             | 2.52 | 0.01 | 3.67 | 1.12 | 0.22 | 1.34 |
| 30069 | 0 | 24006  | HHPITDSDQTRLY             | 2.52 | 0.01 | 3.67 | 1.12 | 0.22 | 0.28 |
| 30070 | 0 | 24006  | HHPITDSDQTRLY             | 2.52 | 0.01 | 3.67 | 1.12 | 0.22 | 0.85 |
| 30071 | 0 | 24009  | HHPSTDKEQTNLV             | 2.50 | 0.01 | 3.04 | 1.12 | 0.22 | 0.28 |
| 30072 | 0 | 24009  | HHPSTDKEQTNLV             | 2.50 | 0.01 | 3.04 | 1.12 | 0.22 | 0.28 |
| 30073 | 0 | 24009  | HHPSTDKEQTNLV             | 2.50 | 0.01 | 3.04 | 1.12 | 0.22 | 0.28 |
| 30074 | 0 | 24012  | HHPSTNQEQTSLYVQAS         | 2.79 | 0.01 | 3.27 | 0.68 | 0.22 | 1.75 |
| 30075 | 0 | 24012  | HHPSTNQEQTSLYVQAS         | 2.79 | 0.01 | 2.36 | 0.44 | 0.85 | 1.57 |
| 30076 | 0 | 24012  | HHPSTNQEQTSLYVQAS         | 2.79 | 0.01 | 2.36 | 1.15 | 0.22 | 1.57 |
| 30077 | 0 | 24012  | HHPSTNQEQTSLYVQAS         | 2.79 | 0.01 | 2.36 | 1.15 | 0.22 | 1.57 |
| 30078 | 0 | 24012  | HHPSTNQEQTSLYVQAS         | 2.79 | 0.01 | 2.36 | 1.15 | 0.22 | 1.57 |
| 30079 | 0 | 24013  | HHPVDLADWELIESPED         | 2.80 | 0.01 | 3.72 | 2.13 | 0.22 | 0.28 |
| 30080 | 0 | 149333 | HHQEQKQQLQ                | 2.36 | 0.01 | 1.86 | 2.74 | 0.22 | 0.85 |
| 30081 | 0 | 149333 | HHQEQKQQLQ                | 2.36 | 0.01 | 1.86 | 2.74 | 0.22 | 0.85 |
| 30082 | 0 | 145239 | HHQIDGGNWFHL              | 2.46 | 0.01 | 2.80 | 0.68 | 0.22 | 0.28 |
| 30083 | 0 | 145239 | HHQIDGGNWFHL              | 2.46 | 0.01 | 2.80 | 0.68 | 0.22 | 0.85 |
| 30084 | 0 | 145239 | HHQIDGGNWFHL              | 2.46 | 0.01 | 2.80 | 0.68 | 0.22 | 0.28 |
| 30085 | 0 | 145239 | HHQIDGGNWFHL              | 2.46 | 0.01 | 2.80 | 0.68 | 0.22 | 0.28 |
| 30086 | 0 | 145239 | HHQIDGGNWFHL              | 2.46 | 0.01 | 2.80 | 0.68 | 0.22 | 0.28 |
| 30087 | 0 | 100103 | HHQKLVFFAE                | 2.29 | 0.01 | 0.78 | 0.44 | 1.93 | 0.28 |
| 30088 | 0 | 105863 | HHQKLVFFAEDVGSN           | 2.62 | 0.01 | 0.78 | 3.00 | 1.93 | 0.28 |
| 30089 | 0 | 105863 | HHQKLVFFAEDVGSN           | 2.62 | 0.01 | 0.78 | 2.16 | 0.22 | 1.57 |
| 30090 | 0 | 102510 | HHQKLVFFAEDVGSNK          | 2.69 | 0.01 | 0.78 | 1.15 | 0.22 | 1.34 |
| 30091 | 0 | 102510 | HHQKLVFFAEDVGSNK          | 2.69 | 0.01 | 0.78 | 1.15 | 0.22 | 1.57 |

|       |   |        |                       |      |      |      |      |      |      |
|-------|---|--------|-----------------------|------|------|------|------|------|------|
| 30092 | 0 | 102510 | HHQKLVFFAEDVGSNK      | 2.69 | 0.01 | 0.78 | 1.15 | 0.22 | 1.48 |
| 30093 | 0 | 102510 | HHQKLVFFAEDVGSNK      | 2.69 | 0.01 | 0.78 | 1.15 | 0.22 | 1.75 |
| 30094 | 0 | 102510 | HHQKLVFFAEDVGSNK      | 2.69 | 0.01 | 0.78 | 1.15 | 0.22 | 1.75 |
| 30095 | 0 | 102510 | HHQKLVFFAEDVGSNK      | 2.69 | 0.01 | 0.78 | 1.15 | 0.22 | 1.34 |
| 30096 | 0 | 102510 | HHQKLVFFAEDVGSNK      | 2.69 | 0.01 | 0.78 | 0.68 | 0.22 | 1.27 |
| 30097 | 0 | 102510 | HHQKLVFFAEDVGSNK      | 2.69 | 0.01 | 0.78 | 0.68 | 0.22 | 0.28 |
| 30098 | 0 | 102510 | HHQKLVFFAEDVGSNK      | 2.69 | 0.01 | 0.78 | 0.68 | 0.22 | 0.28 |
| 30099 | 0 | 102510 | HHQKLVFFAEDVGSNK      | 2.69 | 0.01 | 0.78 | 0.68 | 0.22 | 0.28 |
| 30100 | 0 | 102510 | HHQKLVFFAEDVGSNK      | 2.69 | 0.01 | 0.78 | 0.68 | 0.22 | 0.28 |
| 30101 | 0 | 102510 | HHQKLVFFAEDVGSNK      | 2.69 | 0.01 | 0.78 | 0.68 | 0.22 | 0.28 |
| 30102 | 0 | 102510 | HHQKLVFFAEDVGSNK      | 2.69 | 0.01 | 0.78 | 0.68 | 0.22 | 0.28 |
| 30103 | 0 | 102510 | HHQKLVFFAEDVGSNK      | 2.69 | 0.01 | 0.78 | 2.87 | 0.22 | 0.28 |
| 30104 | 0 | 102510 | HHQKLVFFAEDVGSNK      | 2.69 | 0.01 | 0.78 | 1.20 | 0.22 | 0.28 |
| 30105 | 0 | 187372 | HHQKLVFFAEDVGSNK<br>G | 2.76 | 0.01 | 0.78 | 1.15 | 0.22 | 0.28 |
| 30106 | 0 | 24014  | HHQPQQTFPQ            | 2.36 | 0.01 | 1.86 | 0.68 | 0.22 | 0.85 |
| 30107 | 0 | 24014  | HHQPQQTFPQ            | 2.36 | 0.01 | 1.86 | 0.68 | 0.22 | 0.28 |
| 30108 | 0 | 24015  | HHRGAAPNS             | 2.21 | 0.01 | 0.90 | 2.02 | 0.22 | 0.28 |
| 30109 | 0 | 24017  | HHRPPSHTPTLF          | 2.51 | 0.01 | 0.90 | 0.44 | 0.85 | 0.28 |
| 30110 | 0 | 24019  | HHSLSILQSDWF          | 2.49 | 0.01 | 0.90 | 3.03 | 0.22 | 1.39 |
| 30111 | 0 | 24019  | HHSLSILQSDWF          | 2.49 | 0.01 | 0.90 | 3.03 | 0.22 | 1.27 |
| 30112 | 0 | 195027 | HHWH                  | 1.59 | 0.01 | 3.04 | 0.68 | 0.22 | 1.48 |
| 30113 | 0 | 195027 | HHWH                  | 1.59 | 0.01 | 3.04 | 0.68 | 0.22 | 0.28 |
| 30114 | 0 | 195027 | HHWH                  | 1.59 | 0.01 | 3.04 | 0.68 | 0.22 | 1.34 |
| 30115 | 0 | 195027 | HHWH                  | 1.59 | 0.01 | 3.04 | 0.68 | 0.22 | 1.75 |
| 30116 | 0 | 195027 | HHWH                  | 1.59 | 0.01 | 3.04 | 0.68 | 0.22 | 0.28 |
| 30117 | 0 | 195027 | HHWH                  | 1.59 | 0.01 | 3.04 | 0.68 | 0.22 | 0.28 |
| 30118 | 0 | 195027 | HHWH                  | 1.59 | 0.01 | 3.04 | 0.68 | 0.22 | 0.28 |
| 30119 | 0 | 195027 | HHWH                  | 1.59 | 0.01 | 3.04 | 0.68 | 0.22 | 0.28 |
| 30120 | 0 | 195027 | HHWH                  | 1.59 | 0.01 | 3.04 | 0.68 | 0.22 | 0.28 |
| 30121 | 0 | 195027 | HHWH                  | 1.59 | 0.01 | 3.04 | 0.68 | 0.22 | 0.28 |
| 30122 | 0 | 195027 | HHWH                  | 1.59 | 0.01 | 3.04 | 0.68 | 0.22 | 0.28 |
| 30123 | 0 | 195027 | HHWH                  | 1.59 | 0.01 | 3.04 | 0.68 | 0.22 | 0.28 |
| 30124 | 0 | 195027 | HHWH                  | 1.59 | 0.01 | 3.04 | 0.68 | 0.22 | 0.28 |



|       |   |        |                                   |      |      |      |      |      |      |
|-------|---|--------|-----------------------------------|------|------|------|------|------|------|
| 30125 | 0 | 195027 | HHWH                              | 1.59 | 0.01 | 3.04 | 0.68 | 0.22 | 0.28 |
| 30126 | 0 | 195027 | HHWH                              | 1.59 | 0.01 | 3.04 | 0.68 | 0.22 | 0.28 |
| 30127 | 0 | 167276 | HHWKFFFSHPGA                      | 2.48 | 0.01 | 0.90 | 1.15 | 0.22 | 1.39 |
| 30128 | 0 | 167277 | HHWKFFFSHPGE                      | 2.48 | 0.01 | 0.90 | 1.15 | 0.22 | 1.39 |
| 30129 | 0 | 24029  | HIATNAVLFFGR                      | 2.44 | 0.01 | 2.25 | 1.12 | 0.22 | 2.66 |
| 30130 | 0 | 114853 | HICKGFQCFKKPRTPPPK                | 2.85 | 0.01 | 3.81 | 2.04 | 0.22 | 0.28 |
| 30131 | 0 | 167601 | HIDAKDQDD                         | 2.22 | 0.01 | 3.18 | 0.44 | 1.59 | 1.28 |
| 30132 | 0 | 130880 | HIDGPSLLIEN                       | 2.38 | 0.01 | 0.78 | 3.75 | 0.22 | 1.27 |
| 30133 | 0 | 24034  | HIDLLVGSATLCSALYVG<br>DL          | 2.96 | 0.01 | 2.83 | 0.44 | 0.85 | 0.28 |
| 30134 | 0 | 24034  | HIDLLVGSATLCSALYVG<br>DL          | 2.96 | 0.01 | 2.83 | 0.44 | 0.85 | 0.28 |
| 30135 | 0 | 24035  | HIDSQK                            | 1.88 | 0.01 | 3.24 | 1.12 | 0.22 | 0.28 |
| 30136 | 0 | 130881 | HIDSQKKA                          | 2.11 | 0.01 | 2.85 | 1.12 | 0.22 | 3.30 |
| 30137 | 0 | 24037  | HIDSQKKAIERMK                     | 2.53 | 0.01 | 2.85 | 1.12 | 0.22 | 0.28 |
| 30138 | 0 | 24037  | HIDSQKKAIERMK                     | 2.53 | 0.01 | 2.85 | 1.12 | 0.22 | 1.27 |
| 30139 | 0 | 24037  | HIDSQKKAIERMK                     | 2.53 | 0.01 | 2.85 | 1.12 | 0.22 | 1.27 |
| 30140 | 0 | 24037  | HIDSQKKAIERMK                     | 2.53 | 0.01 | 2.85 | 1.12 | 0.22 | 0.28 |
| 30141 | 0 | 24037  | HIDSQKKAIERMK                     | 2.53 | 0.01 | 2.85 | 1.12 | 0.22 | 0.28 |
| 30142 | 0 | 24037  | HIDSQKKAIERMK                     | 2.53 | 0.01 | 2.85 | 0.68 | 0.22 | 0.28 |
| 30143 | 0 | 24037  | HIDSQKKAIERMK                     | 2.53 | 0.01 | 2.85 | 0.68 | 0.22 | 0.28 |
| 30144 | 0 | 24037  | HIDSQKKAIERMK                     | 2.53 | 0.01 | 2.85 | 0.68 | 0.22 | 0.28 |
| 30145 | 0 | 24037  | HIDSQKKAIERMK                     | 2.53 | 0.01 | 2.85 | 0.68 | 0.22 | 0.28 |
| 30146 | 0 | 24037  | HIDSQKKAIERMK                     | 2.53 | 0.01 | 2.85 | 1.12 | 0.22 | 0.28 |
| 30147 | 0 | 145240 | HIDVSRPWRVTG                      | 2.45 | 0.01 | 0.90 | 0.44 | 1.13 | 1.39 |
| 30148 | 0 | 122787 | HIEIRNTRNLTYID                    | 2.63 | 0.01 | 0.78 | 3.01 | 0.22 | 0.28 |
| 30149 | 0 | 122787 | HIEIRNTRNLTYID                    | 2.63 | 0.01 | 0.78 | 3.01 | 0.22 | 0.28 |
| 30150 | 0 | 122787 | HIEIRNTRNLTYID                    | 2.63 | 0.01 | 0.78 | 3.01 | 0.22 | 0.28 |
| 30151 | 0 | 125092 | HIEL                              | 1.57 | 0.01 | 1.72 | 0.44 | 1.13 | 0.28 |
| 30152 | 0 | 131467 | HIERRECAYCLTINTTICA<br>GYCMTRDING | 3.32 | 0.01 | 0.78 | 1.12 | 0.22 | 0.28 |
| 30153 | 0 | 131467 | HIERRECAYCLTINTTICA<br>GYCMTRDING | 3.32 | 0.01 | 0.78 | 1.12 | 0.22 | 0.28 |
| 30154 | 0 | 131467 | HIERRECAYCLTINTTICA<br>GYCMTRDING | 3.32 | 0.01 | 0.78 | 1.12 | 0.22 | 0.28 |
| 30155 | 0 | 131467 | HIERRECAYCLTINTTICA<br>GYCMTRDING | 3.32 | 0.01 | 0.78 | 1.12 | 0.22 | 0.28 |
| 30156 | 0 | 131467 | HIERRECAYCLTINTTICA<br>GYCMTRDING | 3.32 | 0.01 | 0.78 | 1.12 | 0.22 | 0.28 |
| 30157 | 0 | 168765 | HIFHNTHWWQRW                      | 2.50 | 0.01 | 0.90 | 0.44 | 0.85 | 1.39 |
| 30158 | 0 | 24046  | HIFYRRFLGKDGRDPK                  | 2.80 | 0.01 | 3.36 | 0.44 | 2.82 | 0.28 |
| 30159 | 0 | 150852 | HIGGLSILDPIFAVL                   | 2.67 | 0.01 | 2.78 | 0.44 | 1.23 | 1.27 |
| 30160 | 0 | 150853 | HIGGLSILDPIFGVL                   | 2.70 | 0.01 | 3.72 | 0.44 | 1.23 | 1.27 |
| 30161 | 0 | 425283 | HIGPGRAFY                         | 2.21 | 0.01 | 3.85 | 0.44 | 0.85 | 2.49 |
| 30162 | 0 | 425283 | HIGPGRAFY                         | 2.21 | 0.01 | 3.85 | 0.44 | 0.85 | 1.34 |

|       |   |        |                              |      |      |      |      |      |      |
|-------|---|--------|------------------------------|------|------|------|------|------|------|
| 30163 | 0 | 425283 | HIGPGRAFY                    | 2.21 | 0.01 | 3.85 | 0.44 | 0.85 | 0.28 |
| 30164 | 0 | 425283 | HIGPGRAFY                    | 2.21 | 0.01 | 3.85 | 0.44 | 0.85 | 0.28 |
| 30165 | 0 | 425283 | HIGPGRAFY                    | 2.21 | 0.01 | 3.85 | 0.44 | 0.85 | 0.28 |
| 30166 | 0 | 425283 | HIGPGRAFY                    | 2.21 | 0.01 | 3.85 | 0.44 | 0.85 | 0.28 |
| 30167 | 0 | 425283 | HIGPGRAFY                    | 2.21 | 0.01 | 3.85 | 0.44 | 0.85 | 0.28 |
| 30168 | 0 | 425283 | HIGPGRAFY                    | 2.21 | 0.01 | 3.85 | 0.44 | 0.85 | 0.28 |
| 30169 | 0 | 161500 | HIGPGRAFYT                   | 2.29 | 0.01 | 3.70 | 1.15 | 0.22 | 2.49 |
| 30170 | 0 | 24050  | HIGVTVDVHKACER               | 2.66 | 0.01 | 3.97 | 1.20 | 0.22 | 0.85 |
| 30171 | 0 | 24051  | HIHLLDFGWGLPLDLRD<br>DVF     | 2.97 | 0.01 | 0.90 | 3.55 | 0.22 | 1.27 |
| 30172 | 0 | 24051  | HIHLLDFGWGLPLDLRD<br>DVF     | 2.97 | 0.01 | 0.90 | 3.55 | 0.22 | 2.35 |
| 30173 | 0 | 24051  | HIHLLDFGWGLPLDLRD<br>DVF     | 2.97 | 0.01 | 0.90 | 3.55 | 0.22 | 2.35 |
| 30174 | 0 | 24052  | HIHSVW                       | 1.91 | 0.01 | 1.96 | 0.44 | 0.85 | 0.28 |
| 30175 | 0 | 98096  | HIKSIKKLGF                   | 2.32 | 0.01 | 3.57 | 0.44 | 0.85 | 0.28 |
| 30176 | 0 | 138189 | HILGSTA                      | 1.99 | 0.01 | 0.90 | 1.15 | 2.26 | 0.28 |
| 30177 | 0 | 138189 | HILGSTA                      | 1.99 | 0.01 | 0.90 | 1.15 | 2.26 | 2.35 |
| 30178 | 0 | 138189 | HILGSTA                      | 1.99 | 0.01 | 0.90 | 0.44 | 1.41 | 1.34 |
| 30179 | 0 | 106512 | HILRWGNESE                   | 2.29 | 0.01 | 2.75 | 0.44 | 1.23 | 0.85 |
| 30180 | 0 | 24073  | HINRTALN                     | 2.12 | 0.01 | 4.15 | 0.44 | 0.85 | 0.28 |
| 30181 | 0 | 237755 | HINTFFDTLQKADTDPN<br>A       | 2.84 | 0.01 | 2.74 | 1.20 | 0.22 | 0.28 |
| 30182 | 0 | 237755 | HINTFFDTLQKADTDPN<br>A       | 2.84 | 0.01 | 2.74 | 1.20 | 0.22 | 0.28 |
| 30183 | 0 | 237755 | HINTFFDTLQKADTDPN<br>A       | 2.84 | 0.01 | 2.74 | 1.20 | 0.22 | 0.28 |
| 30184 | 0 | 24080  | HIPAYATHV                    | 2.24 | 0.01 | 0.90 | 0.68 | 0.22 | 0.28 |
| 30185 | 0 | 24083  | HIPLNVGK                     | 2.10 | 0.01 | 3.53 | 2.61 | 0.22 | 0.28 |
| 30186 | 0 | 177505 | HIPRQKVALRQFKLPKFK<br>ISLGI  | 3.09 | 0.01 | 1.86 | 0.44 | 1.23 | 0.85 |
| 30187 | 0 | 24084  | HIPYKISASTNCATVK             | 2.73 | 0.01 | 3.33 | 1.12 | 0.22 | 0.85 |
| 30188 | 0 | 24084  | HIPYKISASTNCATVK             | 2.73 | 0.01 | 3.33 | 0.44 | 1.23 | 0.85 |
| 30189 | 0 | 24089  | HIRLQAIDPMPP                 | 2.45 | 0.01 | 0.90 | 2.74 | 0.22 | 1.27 |
| 30190 | 0 | 96362  | HIRLSFNPTQLEEQC              | 2.63 | 0.01 | 1.60 | 0.44 | 1.23 | 0.28 |
| 30191 | 0 | 96362  | HIRLSFNPTQLEEQC              | 2.63 | 0.01 | 1.60 | 0.44 | 1.23 | 0.28 |
| 30192 | 0 | 139520 | HIRLSPA                      | 1.99 | 0.01 | 0.90 | 1.20 | 0.22 | 1.39 |
| 30193 | 0 | 450676 | HISGRPL                      | 1.99 | 0.01 | 0.90 | 0.44 | 1.41 | 1.39 |
| 30194 | 0 | 24099  | HITDDNEEPIAPYHF              | 2.67 | 0.01 | 2.53 | 0.44 | 1.23 | 0.85 |
| 30195 | 0 | 24100  | HITDDNEEPIAPYHFDLS<br>GHA    | 2.98 | 0.01 | 2.53 | 0.44 | 1.23 | 0.85 |
| 30196 | 0 | 24100  | HITDDNEEPIAPYHFDLS<br>GHA    | 2.98 | 0.01 | 2.53 | 0.44 | 1.23 | 0.85 |
| 30197 | 0 | 24101  | HITDDNEEPIAPYHFDLS<br>GHAFGA | 3.12 | 0.01 | 2.53 | 0.44 | 1.23 | 0.85 |
| 30198 | 0 | 24101  | HITDDNEEPIAPYHFDLS<br>GHAFGA | 3.12 | 0.01 | 2.53 | 0.44 | 1.23 | 0.85 |

|       |   |        |                                    |      |      |      |      |      |      |
|-------|---|--------|------------------------------------|------|------|------|------|------|------|
| 30199 | 0 | 161232 | HITGHRMAWDMMMN<br>WSPTAA           | 2.92 | 0.01 | 2.45 | 0.68 | 0.22 | 0.28 |
| 30200 | 0 | 24104  | HITHSGMEGMGVSCT                    | 2.71 | 0.01 | 2.43 | 0.44 | 0.85 | 0.28 |
| 30201 | 0 | 24105  | HITHYFVVPVS                        | 2.50 | 0.01 | 0.90 | 0.44 | 1.59 | 0.28 |
| 30202 | 0 | 24108  | HITQQHRPVSDT                       | 2.47 | 0.01 | 0.90 | 0.44 | 0.85 | 1.27 |
| 30203 | 0 | 24108  | HITQQHRPVSDT                       | 2.47 | 0.01 | 0.90 | 0.44 | 1.59 | 1.27 |
| 30204 | 0 | 171383 | HITDMEDGPIVKLA                     | 2.63 | 0.01 | 0.78 | 0.44 | 1.41 | 0.28 |
| 30205 | 0 | 95444  | HITVNYQFVD                         | 2.29 | 0.01 | 2.60 | 0.44 | 1.23 | 0.85 |
| 30206 | 0 | 196517 | HITVPTR                            | 2.02 | 0.01 | 0.90 | 0.44 | 1.23 | 1.39 |
| 30207 | 0 | 24113  | HIVGYPKDGNFNNLDR<br>ILRVGY         | 3.07 | 0.01 | 2.95 | 0.44 | 0.22 | 0.28 |
| 30208 | 0 | 168768 | HIWNWSNWTQWT                       | 2.51 | 0.01 | 0.90 | 0.44 | 0.85 | 1.39 |
| 30209 | 0 | 196948 | HIWTGSIWRTWD                       | 2.49 | 0.01 | 0.90 | 0.44 | 1.41 | 1.39 |
| 30210 | 0 | 196948 | HIWTGSIWRTWD                       | 2.49 | 0.01 | 0.90 | 0.44 | 1.41 | 0.28 |
| 30211 | 0 | 196948 | HIWTGSIWRTWD                       | 2.49 | 0.01 | 0.90 | 0.44 | 1.41 | 1.48 |
| 30212 | 0 | 196948 | HIWTGSIWRTWD                       | 2.49 | 0.01 | 0.90 | 0.44 | 1.41 | 1.34 |
| 30213 | 0 | 196948 | HIWTGSIWRTWD                       | 2.49 | 0.01 | 0.90 | 0.44 | 1.41 | 1.34 |
| 30214 | 0 | 196948 | HIWTGSIWRTWD                       | 2.49 | 0.01 | 0.90 | 0.44 | 1.41 | 1.34 |
| 30215 | 0 | 112153 | HIWWNDN                            | 2.03 | 0.01 | 0.78 | 0.44 | 1.13 | 1.27 |
| 30216 | 0 | 189086 | HIYQTCKQAGTCPPD                    | 2.65 | 0.01 | 4.93 | 0.68 | 0.22 | 0.28 |
| 30217 | 0 | 24119  | HKA EVKKFL                         | 2.22 | 0.01 | 3.53 | 3.08 | 0.22 | 1.39 |
| 30218 | 0 | 117907 | HKA FKGS                           | 2.12 | 0.01 | 0.78 | 0.44 | 1.13 | 0.28 |
| 30219 | 0 | 117907 | HKA FKGS                           | 2.12 | 0.01 | 0.78 | 0.44 | 1.13 | 0.28 |
| 30220 | 0 | 117907 | HKA FKGS                           | 2.12 | 0.01 | 0.78 | 1.20 | 0.22 | 1.27 |
| 30221 | 0 | 117907 | HKA FKGS                           | 2.12 | 0.01 | 0.78 | 1.20 | 0.22 | 1.27 |
| 30222 | 0 | 117907 | HKA FKGS                           | 2.12 | 0.01 | 0.78 | 1.20 | 0.22 | 0.28 |
| 30223 | 0 | 117907 | HKA FKGS                           | 2.12 | 0.01 | 0.78 | 1.20 | 0.22 | 0.28 |
| 30224 | 0 | 117907 | HKA FKGS                           | 2.12 | 0.01 | 0.78 | 1.20 | 0.22 | 1.27 |
| 30225 | 0 | 117907 | HKA FKGS                           | 2.12 | 0.01 | 0.78 | 1.20 | 0.22 | 0.28 |
| 30226 | 0 | 117907 | HKA FKGS                           | 2.12 | 0.01 | 0.78 | 1.20 | 0.22 | 0.28 |
| 30227 | 0 | 117907 | HKA FKGS                           | 2.12 | 0.01 | 0.78 | 0.44 | 1.13 | 0.28 |
| 30228 | 0 | 117907 | HKA FKGS                           | 2.12 | 0.01 | 0.78 | 0.44 | 1.13 | 0.28 |
| 30229 | 0 | 117907 | HKA FKGS                           | 2.12 | 0.01 | 0.78 | 0.44 | 1.13 | 0.28 |
| 30230 | 0 | 117907 | HKA FKGS                           | 2.12 | 0.01 | 0.78 | 0.44 | 1.41 | 0.28 |
| 30231 | 0 | 117907 | HKA FKGS                           | 2.12 | 0.01 | 0.78 | 0.44 | 1.13 | 1.27 |
| 30232 | 0 | 186672 | HKANEWHMLPST                       | 2.44 | 0.01 | 0.90 | 0.68 | 0.22 | 1.39 |
| 30233 | 0 | 106513 | HKARLERPQI                         | 2.29 | 0.01 | 3.08 | 0.44 | 1.23 | 0.85 |
| 30234 | 0 | 24123  | HKEGRFS                            | 2.12 | 0.01 | 2.21 | 0.44 | 0.85 | 0.28 |
| 30235 | 0 | 229673 | HKEMPFKYPVEPFTER                   | 2.81 | 0.01 | 1.60 | 0.44 | 1.23 | 1.28 |
| 30236 | 0 | 229674 | HKEMPFKYPVEPFTES                   | 2.81 | 0.01 | 1.60 | 0.44 | 1.23 | 1.28 |
| 30237 | 0 | 115280 | HKEMPFKYPVEPFTES<br>QSL            | 2.95 | 0.01 | 1.60 | 0.44 | 1.23 | 1.28 |
| 30238 | 0 | 141303 | HKENVKDYQKWMEE<br>QAQSLIDKTTAAFQQG | 3.31 | 0.01 | 0.78 | 0.44 | 1.13 | 0.28 |

|       |   |        |                                    |      |      |      |      |      |      |
|-------|---|--------|------------------------------------|------|------|------|------|------|------|
| 30239 | 0 | 141303 | HKENVKDYQKWMEE<br>QAQSLIDKTTAAFQQG | 3.31 | 0.01 | 0.78 | 0.44 | 1.13 | 2.02 |
| 30240 | 0 | 141303 | HKENVKDYQKWMEE<br>QAQSLIDKTTAAFQQG | 3.31 | 0.01 | 0.78 | 0.44 | 1.41 | 0.28 |
| 30241 | 0 | 141303 | HKENVKDYQKWMEE<br>QAQSLIDKTTAAFQQG | 3.31 | 0.01 | 0.78 | 0.44 | 1.41 | 2.02 |
| 30242 | 0 | 171389 | HKESKIIKMQKELEV                    | 2.69 | 0.01 | 0.78 | 0.44 | 1.13 | 0.28 |
| 30243 | 0 | 122395 | HKFDRDNWYLGISDL                    | 2.64 | 0.01 | 0.90 | 1.15 | 0.22 | 1.39 |
| 30244 | 0 | 117909 | HKGFKGVD                           | 2.14 | 0.01 | 0.78 | 0.44 | 1.13 | 0.28 |
| 30245 | 0 | 117909 | HKGFKGVD                           | 2.14 | 0.01 | 0.78 | 1.20 | 0.22 | 1.27 |
| 30246 | 0 | 117909 | HKGFKGVD                           | 2.14 | 0.01 | 0.78 | 0.44 | 1.13 | 0.28 |
| 30247 | 0 | 117909 | HKGFKGVD                           | 2.14 | 0.01 | 0.78 | 1.20 | 0.22 | 1.27 |
| 30248 | 0 | 117909 | HKGFKGVD                           | 2.14 | 0.01 | 0.78 | 1.20 | 0.22 | 0.28 |
| 30249 | 0 | 117909 | HKGFKGVD                           | 2.14 | 0.01 | 0.78 | 1.20 | 0.22 | 0.28 |
| 30250 | 0 | 117909 | HKGFKGVD                           | 2.14 | 0.01 | 0.78 | 1.20 | 0.22 | 1.27 |
| 30251 | 0 | 117909 | HKGFKGVD                           | 2.14 | 0.01 | 0.78 | 1.20 | 0.22 | 0.28 |
| 30252 | 0 | 117909 | HKGFKGVD                           | 2.14 | 0.01 | 0.78 | 1.20 | 0.22 | 0.28 |
| 30253 | 0 | 110625 | HKHAIVTVTYDSEEQRQ<br>Q             | 2.82 | 0.01 | 3.25 | 0.44 | 0.85 | 0.28 |
| 30254 | 0 | 110625 | HKHAIVTVTYDSEEQRQ<br>Q             | 2.82 | 0.01 | 3.25 | 0.44 | 0.85 | 0.28 |
| 30255 | 0 | 101710 | HKHIDNPLALL                        | 2.47 | 0.01 | 0.90 | 0.44 | 0.85 | 1.39 |
| 30256 | 0 | 97383  | HKIFKMEKGKVKSVEL<br>DAPNYHY        | 3.09 | 0.01 | 3.09 | 0.44 | 0.85 | 0.28 |
| 30257 | 0 | 130509 | HKKDFARGPGWS                       | 2.44 | 0.01 | 0.90 | 3.57 | 0.22 | 0.28 |
| 30258 | 0 | 130509 | HKKDFARGPGWS                       | 2.44 | 0.01 | 0.90 | 3.57 | 0.22 | 0.28 |
| 30259 | 0 | 130509 | HKKDFARGPGWS                       | 2.44 | 0.01 | 0.90 | 0.68 | 0.22 | 1.75 |
| 30260 | 0 | 130509 | HKKDFARGPGWS                       | 2.44 | 0.01 | 0.90 | 0.68 | 0.22 | 1.39 |
| 30261 | 0 | 24137  | HKKLKQPGDGNP                       | 2.49 | 0.01 | 1.66 | 0.44 | 1.74 | 0.28 |
| 30262 | 0 | 119463 | HKKSLSSPS                          | 2.26 | 0.01 | 0.90 | 0.44 | 1.13 | 0.28 |
| 30263 | 0 | 108423 | HKKTYGGYHGRVFLKGG<br>SDNDASLV      | 3.16 | 0.01 | 1.60 | 0.68 | 0.22 | 0.28 |
| 30264 | 0 | 106514 | HKMTNFPDSSLT                       | 2.44 | 0.01 | 0.90 | 1.15 | 0.22 | 1.39 |
| 30265 | 0 | 24150  | HKPQTTKPKEVP                       | 2.50 | 0.01 | 2.38 | 0.44 | 1.74 | 0.28 |
| 30266 | 0 | 121378 | HKPSRKNWRSDDPSYE<br>DVTf           | 2.93 | 0.01 | 2.26 | 1.20 | 0.22 | 0.28 |
| 30267 | 0 | 95446  | HKQKIIAP                           | 2.13 | 0.01 | 3.48 | 2.22 | 0.22 | 0.28 |
| 30268 | 0 | 95447  | HKQKIVAP                           | 2.12 | 0.01 | 2.96 | 2.59 | 0.22 | 0.28 |
| 30269 | 0 | 24152  | HKRTLGL                            | 2.02 | 0.01 | 2.08 | 0.68 | 0.22 | 0.28 |
| 30270 | 0 | 24152  | HKRTLGL                            | 2.02 | 0.01 | 2.08 | 0.68 | 0.22 | 0.28 |
| 30271 | 0 | 110284 | HKSAIVTLTYDSEWQRD<br>Q             | 2.80 | 0.01 | 1.86 | 0.44 | 0.85 | 0.28 |
| 30272 | 0 | 110284 | HKSAIVTLTYDSEWQRD<br>Q             | 2.80 | 0.01 | 1.86 | 0.44 | 0.85 | 0.28 |

|       |   |        |                        |      |      |      |      |      |      |
|-------|---|--------|------------------------|------|------|------|------|------|------|
| 30273 | 0 | 110284 | HKSAIVTLTYDSEWQRD<br>Q | 2.80 | 0.01 | 1.86 | 0.44 | 0.85 | 0.28 |
| 30274 | 0 | 110284 | HKSAIVTLTYDSEWQRD<br>Q | 2.80 | 0.01 | 1.86 | 0.44 | 0.85 | 0.28 |
| 30275 | 0 | 110284 | HKSAIVTLTYDSEWQRD<br>Q | 2.80 | 0.01 | 1.86 | 0.44 | 0.85 | 0.85 |
| 30276 | 0 | 110284 | HKSAIVTLTYDSEWQRD<br>Q | 2.80 | 0.01 | 1.86 | 0.44 | 0.85 | 0.85 |
| 30277 | 0 | 110284 | HKSAIVTLTYDSEWQRD<br>Q | 2.80 | 0.01 | 1.86 | 1.15 | 0.22 | 0.85 |
| 30278 | 0 | 110284 | HKSAIVTLTYDSEWQRD<br>Q | 2.80 | 0.01 | 1.86 | 1.20 | 0.22 | 0.85 |
| 30279 | 0 | 110284 | HKSAIVTLTYDSEWQRD<br>Q | 2.80 | 0.01 | 1.86 | 0.44 | 0.85 | 0.28 |
| 30280 | 0 | 110284 | HKSAIVTLTYDSEWQRD<br>Q | 2.80 | 0.01 | 1.86 | 0.44 | 0.85 | 0.28 |
| 30281 | 0 | 110284 | HKSAIVTLTYDSEWQRD<br>Q | 2.80 | 0.01 | 1.86 | 0.44 | 0.85 | 0.28 |
| 30282 | 0 | 110284 | HKSAIVTLTYDSEWQRD<br>Q | 2.80 | 0.01 | 1.86 | 0.44 | 0.85 | 0.28 |
| 30283 | 0 | 110284 | HKSAIVTLTYDSEWQRD<br>Q | 2.80 | 0.01 | 1.86 | 0.44 | 0.85 | 0.28 |
| 30284 | 0 | 110284 | HKSAIVTLTYDSEWQRD<br>Q | 2.80 | 0.01 | 1.86 | 0.44 | 0.85 | 0.28 |
| 30285 | 0 | 110284 | HKSAIVTLTYDSEWQRD<br>Q | 2.80 | 0.01 | 1.86 | 0.44 | 0.85 | 0.28 |
| 30286 | 0 | 110284 | HKSAIVTLTYDSEWQRD<br>Q | 2.80 | 0.01 | 1.86 | 0.44 | 0.85 | 0.28 |
| 30287 | 0 | 110284 | HKSAIVTLTYDSEWQRD<br>Q | 2.80 | 0.01 | 1.86 | 0.44 | 1.74 | 0.28 |
| 30288 | 0 | 99316  | HKSFNSLNDFLR           | 2.49 | 0.01 | 0.90 | 1.12 | 0.22 | 1.39 |
| 30289 | 0 | 98098  | HKSGANAASS             | 2.32 | 0.01 | 3.57 | 0.44 | 0.85 | 0.28 |
| 30290 | 0 | 120584 | HKTEKNKTEK             | 2.36 | 0.01 | 2.18 | 2.16 | 0.22 | 0.28 |
| 30291 | 0 | 107887 | HKTTTSPDYTTAVGT        | 2.67 | 0.01 | 0.90 | 0.44 | 1.13 | 1.39 |
| 30292 | 0 | 114854 | HKVEQGASVD             | 2.29 | 0.01 | 2.25 | 0.44 | 1.23 | 0.85 |
| 30293 | 0 | 24163  | HKVNSQVEAGSKATWN       | 2.73 | 0.01 | 3.75 | 1.12 | 0.22 | 1.27 |
| 30294 | 0 | 24163  | HKVNSQVEAGSKATWN       | 2.73 | 0.01 | 3.75 | 1.12 | 0.22 | 0.28 |
| 30295 | 0 | 156887 | HKYLYCTGKCNTKA         | 2.63 | 0.01 | 0.90 | 2.74 | 0.22 | 0.85 |
| 30296 | 0 | 171393 | HKYRMLIAMVDVIFA        | 2.66 | 0.01 | 0.78 | 0.44 | 1.13 | 0.28 |
| 30297 | 0 | 24167  | HKYSSDLLLQQR           | 2.47 | 0.01 | 0.90 | 0.68 | 0.22 | 0.28 |
| 30298 | 0 | 24168  | HKYSWK                 | 1.90 | 0.01 | 2.82 | 1.15 | 0.22 | 0.85 |
| 30299 | 0 | 24168  | HKYSWK                 | 1.90 | 0.01 | 2.82 | 1.15 | 0.22 | 0.28 |
| 30300 | 0 | 24168  | HKYSWK                 | 1.90 | 0.01 | 2.82 | 1.15 | 0.22 | 1.27 |
| 30301 | 0 | 132365 | HKYSWKSWGKAKIIG        | 2.71 | 0.01 | 2.82 | 0.68 | 0.22 | 0.28 |
| 30302 | 0 | 132365 | HKYSWKSWGKAKIIG        | 2.71 | 0.01 | 2.82 | 0.68 | 0.22 | 0.28 |

|       |   |        |                    |      |      |      |      |      |      |
|-------|---|--------|--------------------|------|------|------|------|------|------|
| 30303 | 0 | 132365 | HKYSWKSWSGKAKIIG   | 2.71 | 0.01 | 2.82 | 0.68 | 0.22 | 0.28 |
| 30304 | 0 | 132365 | HKYSWKSWSGKAKIIG   | 2.71 | 0.01 | 2.82 | 0.68 | 0.22 | 0.28 |
| 30305 | 0 | 132365 | HKYSWKSWSGKAKIIG   | 2.71 | 0.01 | 2.82 | 0.68 | 0.22 | 1.27 |
| 30306 | 0 | 132365 | HKYSWKSWSGKAKIIG   | 2.71 | 0.01 | 2.82 | 0.68 | 0.22 | 1.48 |
| 30307 | 0 | 132365 | HKYSWKSWSGKAKIIG   | 2.71 | 0.01 | 2.82 | 0.68 | 0.22 | 1.48 |
| 30308 | 0 | 132365 | HKYSWKSWSGKAKIIG   | 2.71 | 0.01 | 2.82 | 0.68 | 0.22 | 1.48 |
| 30309 | 0 | 132365 | HKYSWKSWSGKAKIIG   | 2.71 | 0.01 | 2.82 | 0.68 | 0.22 | 1.48 |
| 30310 | 0 | 132365 | HKYSWKSWSGKAKIIG   | 2.71 | 0.01 | 2.82 | 0.68 | 0.22 | 0.28 |
| 30311 | 0 | 132365 | HKYSWKSWSGKAKIIG   | 2.71 | 0.01 | 2.82 | 0.68 | 0.22 | 0.28 |
| 30312 | 0 | 132365 | HKYSWKSWSGKAKIIG   | 2.71 | 0.01 | 2.82 | 0.68 | 0.22 | 0.28 |
| 30313 | 0 | 132365 | HKYSWKSWSGKAKIIG   | 2.71 | 0.01 | 2.82 | 0.68 | 0.22 | 0.28 |
| 30314 | 0 | 132365 | HKYSWKSWSGKAKIIG   | 2.71 | 0.01 | 2.82 | 0.68 | 0.22 | 1.48 |
| 30315 | 0 | 132365 | HKYSWKSWSGKAKIIG   | 2.71 | 0.01 | 2.82 | 0.68 | 0.22 | 1.48 |
| 30316 | 0 | 132365 | HKYSWKSWSGKAKIIG   | 2.71 | 0.01 | 2.82 | 0.68 | 0.22 | 1.48 |
| 30317 | 0 | 132365 | HKYSWKSWSGKAKIIG   | 2.71 | 0.01 | 2.82 | 0.68 | 0.22 | 1.48 |
| 30318 | 0 | 132365 | HKYSWKSWSGKAKIIG   | 2.71 | 0.01 | 2.82 | 0.68 | 0.22 | 0.28 |
| 30319 | 0 | 132365 | HKYSWKSWSGKAKIIG   | 2.71 | 0.01 | 2.82 | 0.68 | 0.22 | 0.28 |
| 30320 | 0 | 132365 | HKYSWKSWSGKAKIIG   | 2.71 | 0.01 | 2.82 | 0.68 | 0.22 | 0.28 |
| 30321 | 0 | 132365 | HKYSWKSWSGKAKIIG   | 2.71 | 0.01 | 2.82 | 0.68 | 0.22 | 0.28 |
| 30322 | 0 | 132365 | HKYSWKSWSGKAKIIG   | 2.71 | 0.01 | 2.82 | 0.68 | 0.22 | 1.48 |
| 30323 | 0 | 132365 | HKYSWKSWSGKAKIIG   | 2.71 | 0.01 | 2.82 | 0.68 | 0.22 | 1.48 |
| 30324 | 0 | 132365 | HKYSWKSWSGKAKIIG   | 2.71 | 0.01 | 2.82 | 0.68 | 0.22 | 1.48 |
| 30325 | 0 | 132365 | HKYSWKSWSGKAKIIG   | 2.71 | 0.01 | 2.82 | 0.68 | 0.22 | 1.48 |
| 30326 | 0 | 132365 | HKYSWKSWSGKAKIIG   | 2.71 | 0.01 | 2.82 | 0.68 | 0.22 | 0.28 |
| 30327 | 0 | 132365 | HKYSWKSWSGKAKIIG   | 2.71 | 0.01 | 2.82 | 0.68 | 0.22 | 0.28 |
| 30328 | 0 | 132365 | HKYSWKSWSGKAKIIG   | 2.71 | 0.01 | 2.82 | 0.68 | 0.22 | 0.28 |
| 30329 | 0 | 132365 | HKYSWKSWSGKAKIIG   | 2.71 | 0.01 | 2.82 | 0.68 | 0.22 | 0.28 |
| 30330 | 0 | 132365 | HKYSWKSWSGKAKIIG   | 2.71 | 0.01 | 2.82 | 0.68 | 0.22 | 1.27 |
| 30331 | 0 | 132365 | HKYSWKSWSGKAKIIG   | 2.71 | 0.01 | 2.82 | 0.68 | 0.22 | 1.27 |
| 30332 | 0 | 24176  | HLAPLG             | 1.90 | 0.01 | 3.27 | 0.44 | 1.59 | 0.28 |
| 30333 | 0 | 24178  | HLDEREEC           | 2.13 | 0.01 | 1.66 | 1.15 | 0.22 | 0.28 |
| 30334 | 0 | 479348 | HLEAVNAQIKEIEASVPG | 2.84 | 0.01 | 3.12 | 0.68 | 0.22 | 0.28 |
| 30335 | 0 | 24200  | HLFEAH             | 1.91 | 0.01 | 0.90 | 2.02 | 0.22 | 0.28 |
| 30336 | 0 | 24201  | HLFEAP             | 1.88 | 0.01 | 0.90 | 2.02 | 0.22 | 0.28 |
| 30337 | 0 | 24206  | HLFTGIQIIC         | 2.30 | 0.01 | 0.78 | 0.44 | 1.74 | 0.28 |
| 30338 | 0 | 24209  | HLGDDMDPEL         | 2.33 | 0.01 | 2.56 | 0.68 | 0.22 | 0.28 |
| 30339 | 0 | 24211  | HLGGEDFDNRLVAHF    | 2.68 | 0.01 | 2.30 | 0.44 | 0.85 | 0.28 |
| 30340 | 0 | 98813  | HLGGLAGY           | 2.16 | 0.01 | 2.14 | 0.44 | 0.85 | 0.28 |
| 30341 | 0 | 150995 | HLGKCNIAGWILGNP    | 2.68 | 0.01 | 2.87 | 0.44 | 0.85 | 0.28 |
| 30342 | 0 | 150995 | HLGKCNIAGWILGNP    | 2.68 | 0.01 | 2.87 | 0.68 | 0.22 | 0.28 |
| 30343 | 0 | 227244 | HLGLDDQEKKILMNF    | 2.64 | 0.01 | 2.97 | 0.44 | 0.85 | 0.28 |
| 30344 | 0 | 24215  | HLGLMAMDHLPW       | 2.50 | 0.01 | 0.90 | 2.74 | 0.22 | 1.27 |
| 30345 | 0 | 77784  | HLGLRRGMFR         | 2.35 | 0.01 | 3.93 | 0.44 | 1.59 | 0.28 |
| 30346 | 0 | 24224  | HLHRRFSS           | 2.13 | 0.01 | 2.24 | 0.68 | 0.22 | 3.25 |
| 30347 | 0 | 24224  | HLHRRFSS           | 2.13 | 0.01 | 2.24 | 0.68 | 0.22 | 1.27 |
| 30348 | 0 | 112537 | HLILAPSIRHAP       | 2.52 | 0.01 | 0.90 | 0.44 | 1.13 | 1.27 |

|       |   |        |                                |      |      |      |      |      |      |
|-------|---|--------|--------------------------------|------|------|------|------|------|------|
| 30349 | 0 | 140868 | HLINTNGSWHINSTA                | 2.71 | 0.01 | 1.72 | 2.74 | 0.22 | 0.28 |
| 30350 | 0 | 182389 | HLISTGD                        | 1.99 | 0.01 | 2.51 | 0.44 | 1.13 | 0.28 |
| 30351 | 0 | 182389 | HLISTGD                        | 1.99 | 0.01 | 2.51 | 0.44 | 1.41 | 0.28 |
| 30352 | 0 | 182389 | HLISTGD                        | 1.99 | 0.01 | 2.51 | 0.44 | 1.13 | 0.28 |
| 30353 | 0 | 182389 | HLISTGD                        | 1.99 | 0.01 | 2.51 | 0.44 | 1.93 | 0.28 |
| 30354 | 0 | 182389 | HLISTGD                        | 1.99 | 0.01 | 2.51 | 0.44 | 1.41 | 0.28 |
| 30355 | 0 | 240882 | HLKEDQTEYLEERRVKEV<br>VKKHSQF  | 3.16 | 3.67 | 0.78 | 0.44 | 1.13 | 0.28 |
| 30356 | 0 | 136357 | HLKKFAGNAGTP                   | 2.46 | 0.01 | 3.48 | 0.68 | 0.22 | 1.34 |
| 30357 | 0 | 132366 | HLKRYYGRIHLY                   | 2.52 | 0.01 | 0.78 | 0.44 | 1.13 | 0.28 |
| 30358 | 0 | 24243  | HLKYATYPYPYQ                   | 2.49 | 0.01 | 0.90 | 0.68 | 0.22 | 0.28 |
| 30359 | 0 | 24243  | HLKYATYPYPYQ                   | 2.49 | 0.01 | 0.90 | 0.68 | 0.22 | 1.34 |
| 30360 | 0 | 99317  | HLLHIPLDGWDL                   | 2.52 | 0.01 | 0.90 | 1.12 | 0.22 | 1.39 |
| 30361 | 0 | 171399 | HLLKLYCNVDSNKQY                | 2.68 | 0.01 | 0.78 | 0.44 | 1.13 | 0.28 |
| 30362 | 0 | 24249  | HLLRLSEI                       | 2.14 | 0.01 | 0.90 | 2.71 | 0.22 | 0.28 |
| 30363 | 0 | 24249  | HLLRLSEI                       | 2.14 | 0.01 | 0.90 | 1.81 | 0.22 | 0.28 |
| 30364 | 0 | 24249  | HLLRLSEI                       | 2.14 | 0.01 | 0.90 | 1.81 | 0.22 | 0.28 |
| 30365 | 0 | 24249  | HLLRLSEI                       | 2.14 | 0.01 | 0.90 | 1.81 | 0.22 | 1.34 |
| 30366 | 0 | 24249  | HLLRLSEI                       | 2.14 | 0.01 | 0.90 | 3.57 | 0.22 | 1.57 |
| 30367 | 0 | 128016 | HLLTARATNSQLFRR AVL<br>MG      | 2.94 | 0.01 | 0.78 | 0.44 | 1.13 | 0.28 |
| 30368 | 0 | 117910 | HLLTNHLKSKEVWKAL               | 2.75 | 0.01 | 0.78 | 0.44 | 1.13 | 0.28 |
| 30369 | 0 | 117910 | HLLTNHLKSKEVWKAL               | 2.75 | 0.01 | 0.78 | 0.44 | 1.41 | 0.28 |
| 30370 | 0 | 24261  | HLNDRVVVT                      | 2.21 | 0.01 | 2.69 | 0.44 | 0.85 | 0.28 |
| 30371 | 0 | 450678 | HLNQQNH                        | 2.05 | 0.01 | 0.90 | 0.44 | 1.23 | 1.39 |
| 30372 | 0 | 133598 | HLNSLYYDWTEP                   | 2.44 | 0.01 | 0.90 | 0.44 | 0.85 | 1.39 |
| 30373 | 0 | 78176  | HLP                            | 1.37 | 0.01 | 0.78 | 2.88 | 2.26 | 0.28 |
| 30374 | 0 | 78176  | HLP                            | 1.37 | 0.01 | 0.78 | 2.88 | 2.26 | 1.27 |
| 30375 | 0 | 149058 | HLPNATQ                        | 1.99 | 0.01 | 0.90 | 2.13 | 1.59 | 1.39 |
| 30376 | 0 | 106515 | HLPSFLRPDPPL                   | 2.50 | 0.01 | 0.90 | 1.15 | 0.22 | 0.85 |
| 30377 | 0 | 106515 | HLPSFLRPDPPL                   | 2.50 | 0.01 | 0.90 | 1.15 | 0.22 | 0.85 |
| 30378 | 0 | 106515 | HLPSFLRPDPPL                   | 2.50 | 0.01 | 0.90 | 1.15 | 0.22 | 1.34 |
| 30379 | 0 | 106515 | HLPSFLRPDPPL                   | 2.50 | 0.01 | 0.90 | 1.15 | 2.25 | 1.75 |
| 30380 | 0 | 106515 | HLPSFLRPDPPL                   | 2.50 | 0.01 | 0.90 | 1.15 | 2.25 | 1.75 |
| 30381 | 0 | 106515 | HLPSFLRPDPPL                   | 2.50 | 0.01 | 0.90 | 1.15 | 0.22 | 1.39 |
| 30382 | 0 | 24283  | HLPYIEQGM                      | 2.18 | 0.01 | 2.41 | 0.44 | 0.85 | 0.28 |
| 30383 | 0 | 24284  | HLPYIEQGMMMLAEQFK              | 2.70 | 0.01 | 3.18 | 0.44 | 1.59 | 0.28 |
| 30384 | 0 | 24285  | HLPYIEQGMMMLAEQFK<br>QKALGLLQT | 3.15 | 0.01 | 1.72 | 0.44 | 1.59 | 0.28 |
| 30385 | 0 | 24286  | HLPYIEQGMQLAEQ                 | 2.61 | 0.01 | 2.41 | 0.44 | 0.85 | 0.28 |
| 30386 | 0 | 24286  | HLPYIEQGMQLAEQ                 | 2.61 | 0.01 | 2.41 | 0.44 | 0.85 | 0.28 |
| 30387 | 0 | 24286  | HLPYIEQGMQLAEQ                 | 2.61 | 0.01 | 2.41 | 0.44 | 0.85 | 0.28 |
| 30388 | 0 | 24286  | HLPYIEQGMQLAEQ                 | 2.61 | 0.01 | 2.41 | 0.44 | 0.85 | 0.28 |
| 30389 | 0 | 24286  | HLPYIEQGMQLAEQ                 | 2.61 | 0.01 | 1.96 | 0.44 | 0.85 | 0.28 |

|       |   |        |                              |      |      |      |      |      |      |
|-------|---|--------|------------------------------|------|------|------|------|------|------|
| 30390 | 0 | 24286  | HLPYIEQGMQLAEQ               | 2.61 | 0.01 | 1.96 | 0.44 | 0.85 | 0.28 |
| 30391 | 0 | 24286  | HLPYIEQGMQLAEQ               | 2.61 | 0.01 | 1.96 | 0.44 | 0.85 | 0.28 |
| 30392 | 0 | 24286  | HLPYIEQGMQLAEQ               | 2.61 | 0.01 | 1.96 | 0.44 | 0.85 | 0.28 |
| 30393 | 0 | 181336 | HLQANDLDYGQCPNN              | 2.66 | 0.01 | 2.82 | 1.15 | 0.22 | 0.28 |
| 30394 | 0 | 97384  | HLQDGSPPSSPH                 | 2.51 | 0.01 | 0.90 | 0.68 | 0.22 | 1.39 |
| 30395 | 0 | 131468 | HLQGRSNAWRPQVNN<br>PKEWL     | 2.92 | 0.01 | 0.78 | 0.44 | 2.35 | 0.28 |
| 30396 | 0 | 178385 | HLQHYQV                      | 2.05 | 0.01 | 0.90 | 1.12 | 0.22 | 0.28 |
| 30397 | 0 | 423342 | HLQLRHALELQMMQD              | 2.71 | 0.01 | 2.51 | 0.44 | 2.35 | 1.28 |
| 30398 | 0 | 133599 | HLQSMSSRWIEW                 | 2.46 | 0.01 | 0.90 | 0.44 | 0.85 | 1.39 |
| 30399 | 0 | 180327 | HLRHEPGIQHLEKRLES<br>MFQNIQN | 3.13 | 0.01 | 3.32 | 1.12 | 0.22 | 0.28 |
| 30400 | 0 | 180327 | HLRHEPGIQHLEKRLES<br>MFQNIQN | 3.13 | 0.01 | 3.32 | 3.06 | 0.22 | 0.28 |
| 30401 | 0 | 180327 | HLRHEPGIQHLEKRLES<br>MFQNIQN | 3.13 | 0.01 | 3.32 | 1.12 | 0.22 | 1.48 |
| 30402 | 0 | 180327 | HLRHEPGIQHLEKRLES<br>MFQNIQN | 3.13 | 0.01 | 3.32 | 3.06 | 0.22 | 1.48 |
| 30403 | 0 | 108471 | HLRQGRNTA                    | 2.21 | 0.01 | 0.90 | 0.44 | 1.13 | 1.39 |
| 30404 | 0 | 161638 | HLSFMAIPPK                   | 2.28 | 0.01 | 1.60 | 0.44 | 1.23 | 0.85 |
| 30405 | 0 | 77905  | HLSPTMLRWEQF                 | 2.43 | 0.01 | 0.90 | 1.15 | 0.22 | 1.39 |
| 30406 | 0 | 191083 | HLTPLTEFNVSP                 | 2.48 | 0.01 | 0.90 | 3.18 | 1.41 | 1.27 |
| 30407 | 0 | 191083 | HLTPLTEFNVSP                 | 2.48 | 0.01 | 0.90 | 3.18 | 1.41 | 1.34 |
| 30408 | 0 | 191083 | HLTPLTEFNVSP                 | 2.48 | 0.01 | 0.90 | 3.18 | 1.41 | 1.34 |
| 30409 | 0 | 191083 | HLTPLTEFNVSP                 | 2.48 | 0.01 | 0.90 | 3.18 | 1.41 | 0.28 |
| 30410 | 0 | 111398 | HLVCRPS                      | 1.99 | 0.01 | 0.90 | 0.44 | 0.85 | 1.39 |
| 30411 | 0 | 100920 | HLVEALYLV                    | 2.25 | 0.01 | 0.78 | 0.44 | 2.39 | 0.28 |
| 30412 | 0 | 100920 | HLVEALYLV                    | 2.25 | 0.01 | 0.78 | 0.44 | 2.39 | 0.28 |
| 30413 | 0 | 100920 | HLVEALYLV                    | 2.25 | 0.01 | 0.78 | 0.44 | 2.39 | 0.28 |
| 30414 | 0 | 24315  | HLVEKGY                      | 1.99 | 0.01 | 0.90 | 0.44 | 1.23 | 0.28 |
| 30415 | 0 | 24315  | HLVEKGY                      | 1.99 | 0.01 | 0.90 | 0.44 | 1.23 | 1.27 |
| 30416 | 0 | 144682 | HLVGSALSDP                   | 2.31 | 0.01 | 0.78 | 0.44 | 1.41 | 0.28 |
| 30417 | 0 | 112538 | HLVMAPSVARGL                 | 2.48 | 0.01 | 0.90 | 0.44 | 1.13 | 0.28 |
| 30418 | 0 | 240883 | HLVRDDLPRLTSQEI              | 2.65 | 0.01 | 4.93 | 0.44 | 1.41 | 0.28 |
| 30419 | 0 | 113517 | HLYADGLTD                    | 2.23 | 0.01 | 3.67 | 0.68 | 0.22 | 0.85 |
| 30420 | 0 | 113517 | HLYADGLTD                    | 2.23 | 0.01 | 3.67 | 0.68 | 0.22 | 1.48 |
| 30421 | 0 | 113517 | HLYADGLTD                    | 2.23 | 0.01 | 3.67 | 0.68 | 0.22 | 0.85 |
| 30422 | 0 | 196949 | HLYHFSSWLYAR                 | 2.49 | 0.01 | 0.90 | 0.44 | 1.41 | 1.39 |
| 30423 | 0 | 196949 | HLYHFSSWLYAR                 | 2.49 | 0.01 | 0.90 | 0.44 | 1.41 | 0.28 |
| 30424 | 0 | 196949 | HLYHFSSWLYAR                 | 2.49 | 0.01 | 0.90 | 0.44 | 1.41 | 1.48 |
| 30425 | 0 | 196949 | HLYHFSSWLYAR                 | 2.49 | 0.01 | 0.90 | 0.44 | 1.41 | 1.34 |
| 30426 | 0 | 196949 | HLYHFSSWLYAR                 | 2.49 | 0.01 | 0.90 | 0.44 | 1.41 | 1.34 |
| 30427 | 0 | 196949 | HLYHFSSWLYAR                 | 2.49 | 0.01 | 0.90 | 0.44 | 1.41 | 1.34 |
| 30428 | 0 | 24320  | HLYHKNRNHIAY                 | 2.50 | 0.01 | 0.90 | 0.68 | 0.22 | 1.39 |
| 30429 | 0 | 149059 | HLYNPTQ                      | 1.99 | 0.01 | 0.90 | 2.13 | 1.59 | 1.39 |



|       |   |        |                                                     |      |      |      |      |      |      |
|-------|---|--------|-----------------------------------------------------|------|------|------|------|------|------|
| 30430 | 0 | 103256 | HLYPGEVCPGMDIRNNL<br>TRLHELENC SVIEGHL              | 3.44 | 0.01 | 0.78 | 1.12 | 0.22 | 0.85 |
| 30431 | 0 | 180980 | HLYPKTEEALLR                                        | 2.45 | 0.01 | 0.90 | 0.68 | 0.22 | 1.39 |
| 30432 | 0 | 24330  | HLYVSMPTAQ                                          | 2.26 | 4.93 | 2.56 | 0.44 | 0.85 | 0.28 |
| 30433 | 0 | 24334  | HMAGAAAA                                            | 2.13 | 0.01 | 0.78 | 3.48 | 0.22 | 2.02 |
| 30434 | 0 | 24334  | HMAGAAAA                                            | 2.13 | 0.01 | 0.78 | 3.48 | 0.22 | 0.28 |
| 30435 | 0 | 164253 | HMNPKDLVMNSP                                        | 2.48 | 0.01 | 0.90 | 1.20 | 0.22 | 0.28 |
| 30436 | 0 | 123294 | HMPGQPPY                                            | 2.13 | 0.01 | 0.78 | 1.20 | 0.22 | 0.28 |
| 30437 | 0 | 24348  | HMPRDANRHHQHPST                                     | 2.69 | 0.01 | 0.90 | 0.68 | 0.22 | 1.39 |
| 30438 | 0 | 24348  | HMPRDANRHHQHPST                                     | 2.69 | 0.01 | 0.90 | 0.68 | 0.22 | 1.27 |
| 30439 | 0 | 136358 | HMRKRTKIKKIR                                        | 2.52 | 0.01 | 0.90 | 0.68 | 0.22 | 1.27 |
| 30440 | 0 | 136358 | HMRKRTKIKKIR                                        | 2.52 | 0.01 | 0.90 | 0.68 | 0.22 | 1.48 |
| 30441 | 0 | 136358 | HMRKRTKIKKIR                                        | 2.52 | 0.01 | 0.90 | 0.68 | 0.22 | 1.27 |
| 30442 | 0 | 24351  | HMSLDTDLIGVLSYRD<br>RFPVFSVSDQIKITRQH<br>YRPQYQRKRP | 3.76 | 0.01 | 4.63 | 0.68 | 0.22 | 0.85 |
| 30443 | 0 | 24352  | HMTNYLEQPVSNLDS                                     | 2.64 | 0.01 | 2.72 | 0.44 | 0.85 | 0.28 |
| 30444 | 0 | 133600 | HMWKWRK                                             | 2.04 | 0.01 | 0.90 | 0.68 | 0.22 | 0.28 |
| 30445 | 0 | 138190 | HNAKTKL                                             | 2.02 | 0.01 | 0.90 | 0.44 | 1.13 | 0.28 |
| 30446 | 0 | 24360  | HNAKYVSAESWG                                        | 2.45 | 0.01 | 0.90 | 0.68 | 0.22 | 1.39 |
| 30447 | 0 | 24360  | HNAKYVSAESWG                                        | 2.45 | 0.01 | 0.90 | 0.68 | 0.22 | 1.27 |
| 30448 | 0 | 109298 | HNAQPMTSWPIN                                        | 2.45 | 0.01 | 0.90 | 0.44 | 0.85 | 1.39 |
| 30449 | 0 | 24362  | HNASGKEAKVCTISPIM<br>GYS                            | 2.91 | 0.01 | 2.75 | 0.44 | 0.85 | 0.85 |
| 30450 | 0 | 24363  | HNAVFNLDANGTHSWE<br>YWGAQLNAMKGD LQ                 | 3.33 | 0.01 | 3.85 | 1.12 | 0.22 | 0.85 |
| 30451 | 0 | 24369  | HNDKRADPAFVCRQGV<br>VDRG                            | 2.94 | 0.01 | 2.85 | 2.02 | 0.22 | 1.34 |
| 30452 | 0 | 24369  | HNDKRADPAFVCRQGV<br>VDRG                            | 2.94 | 0.01 | 2.85 | 2.02 | 0.22 | 1.48 |
| 30453 | 0 | 24369  | HNDKRADPAFVCRQGV<br>VDRG                            | 2.94 | 0.01 | 2.85 | 2.02 | 0.22 | 1.48 |
| 30454 | 0 | 24369  | HNDKRADPAFVCRQGV<br>VDRG                            | 2.94 | 0.01 | 2.85 | 2.02 | 0.22 | 1.48 |
| 30455 | 0 | 24369  | HNDKRADPAFVCRQGV<br>VDRG                            | 2.94 | 0.01 | 2.85 | 2.02 | 0.22 | 1.48 |
| 30456 | 0 | 24369  | HNDKRADPAFVCRQGV<br>VDRG                            | 2.94 | 0.01 | 2.85 | 2.02 | 0.22 | 0.28 |
| 30457 | 0 | 24369  | HNDKRADPAFVCRQGV<br>VDRG                            | 2.94 | 0.01 | 2.85 | 2.02 | 0.22 | 0.28 |
| 30458 | 0 | 24369  | HNDKRADPAFVCRQGV<br>VDRG                            | 2.94 | 0.01 | 2.85 | 2.02 | 0.22 | 0.28 |

|       |   |        |                                                     |      |      |      |      |      |      |
|-------|---|--------|-----------------------------------------------------|------|------|------|------|------|------|
| 30459 | 0 | 24369  | HNDKRADPAFVCRQGV<br>VDRG                            | 2.94 | 0.01 | 2.85 | 2.02 | 0.22 | 0.28 |
| 30460 | 0 | 101712 | HNDPLLL                                             | 2.00 | 0.01 | 0.90 | 0.44 | 0.85 | 1.39 |
| 30461 | 0 | 510438 | HNGGAMHIQKMK                                        | 2.49 | 0.01 | 0.90 | 3.07 | 1.13 | 1.39 |
| 30462 | 0 | 115062 | HNGQACKGKIQALCE                                     | 2.68 | 0.01 | 0.90 | 0.68 | 0.22 | 0.28 |
| 30463 | 0 | 24375  | HNGRFSDALRFT                                        | 2.45 | 0.01 | 0.90 | 1.15 | 0.22 | 0.28 |
| 30464 | 0 | 24375  | HNGRFSDALRFT                                        | 2.45 | 0.01 | 0.90 | 0.68 | 2.25 | 1.75 |
| 30465 | 0 | 174141 | HNGVVQESYYRYVARE<br>QSCRRPNAQRFGISN                 | 3.37 | 0.01 | 2.78 | 1.12 | 0.22 | 0.85 |
| 30466 | 0 | 141669 | HNHGSISALMHL                                        | 2.50 | 0.01 | 0.90 | 0.68 | 0.22 | 0.28 |
| 30467 | 0 | 98102  | HNIAHGRSQVLQQSTY<br>QL                              | 2.84 | 0.01 | 1.86 | 0.44 | 1.93 | 0.28 |
| 30468 | 0 | 98102  | HNIAHGRSQVLQQSTY<br>QL                              | 2.84 | 0.01 | 1.86 | 0.44 | 2.39 | 0.28 |
| 30469 | 0 | 149334 | HNIFNPPIAR<br>HNIHPLTIGECPKYVKS                     | 2.41 | 0.01 | 0.78 | 0.44 | 1.93 | 2.66 |
| 30470 | 0 | 97387  | RLVLATGLRNSPQRERR<br>RKKRGLFGA                      | 3.71 | 0.01 | 3.09 | 0.44 | 0.85 | 0.28 |
| 30471 | 0 | 121383 | HNIPNFLTPMNPYQT                                     | 2.68 | 0.01 | 0.90 | 2.04 | 0.22 | 1.27 |
| 30472 | 0 | 143932 | HNIWSAPRLIFN                                        | 2.45 | 0.01 | 0.90 | 0.44 | 1.13 | 1.39 |
| 30473 | 0 | 143932 | HNIWSAPRLIFN                                        | 2.45 | 0.01 | 0.90 | 0.44 | 1.13 | 0.28 |
| 30474 | 0 | 171405 | HNKDEVYQILEKGAA                                     | 2.62 | 0.01 | 0.78 | 0.44 | 1.41 | 0.28 |
| 30475 | 0 | 113518 | HNKIQAIELEDLLRYSKLY<br>R                            | 2.94 | 4.63 | 0.78 | 1.81 | 0.22 | 0.28 |
| 30476 | 0 | 113518 | HNKIQAIELEDLLRYSKLY<br>R                            | 2.94 | 4.63 | 0.78 | 3.61 | 0.22 | 0.28 |
| 30477 | 0 | 24384  | HNLGMNHDGNQCNCG<br>AAGCIMSAAISQYRS                  | 3.35 | 0.01 | 3.93 | 0.68 | 0.22 | 0.85 |
| 30478 | 0 | 479395 | HNLSEILLATMNILFTQY<br>KRLKSGPTTLGRPQRV<br>QEDKDSVLR | 3.71 | 0.01 | 4.93 | 3.85 | 0.22 | 2.66 |
| 30479 | 0 | 100105 | HNMPNDIFMSDENAN<br>ANSAVKN                          | 3.05 | 0.01 | 0.90 | 2.63 | 0.22 | 1.48 |
| 30480 | 0 | 100105 | HNMPNDIFMSDENAN<br>ANSAVKN                          | 3.05 | 0.01 | 0.90 | 2.63 | 0.22 | 0.28 |
| 30481 | 0 | 100105 | HNMPNDIFMSDENAN<br>ANSAVKN                          | 3.05 | 0.01 | 0.90 | 2.63 | 0.22 | 0.28 |
| 30482 | 0 | 100106 | HNMPNDPIFITDENANA<br>NSAVKN                         | 3.08 | 0.01 | 0.90 | 2.63 | 0.22 | 1.48 |
| 30483 | 0 | 100107 | HNMPNDPIFITDENANS<br>IGSVKN                         | 3.06 | 0.01 | 0.90 | 2.63 | 0.22 | 1.48 |
| 30484 | 0 | 100109 | HNMPNDPIFMSDENAN<br>GMSAVKN                         | 3.08 | 0.01 | 0.90 | 2.63 | 0.22 | 0.28 |
| 30485 | 0 | 100109 | HNMPNDPIFMSDENAN<br>GMSAVKN                         | 3.08 | 0.01 | 0.90 | 2.63 | 0.22 | 0.28 |

|       |   |        |                                               |      |      |      |      |      |      |
|-------|---|--------|-----------------------------------------------|------|------|------|------|------|------|
| 30486 | 0 | 100110 | HNMPNDPIFMSDENAN<br>SIGSVKN                   | 3.08 | 0.01 | 0.90 | 2.63 | 0.22 | 1.48 |
| 30487 | 0 | 100113 | HNMPNDPMMNVN DEN<br>ANANSVKN                  | 3.11 | 0.01 | 0.90 | 2.63 | 0.22 | 1.48 |
| 30488 | 0 | 24388  | HNMPNDPN                                      | 2.16 | 0.01 | 3.29 | 1.20 | 0.22 | 0.28 |
| 30489 | 0 | 419216 | HNMPNDPNRNVD                                  | 2.51 | 0.01 | 1.66 | 3.32 | 0.22 | 0.28 |
| 30490 | 0 | 419217 | HNMPNDPNRNVDENA<br>NAN                        | 2.88 | 0.01 | 1.66 | 3.32 | 0.22 | 0.28 |
| 30491 | 0 | 419217 | HNMPNDPNRNVDENA<br>NAN                        | 2.88 | 0.01 | 1.66 | 1.81 | 0.22 | 1.75 |
| 30492 | 0 | 419217 | HNMPNDPNRNVDENA<br>NAN                        | 2.88 | 0.01 | 1.66 | 3.32 | 0.22 | 0.28 |
| 30493 | 0 | 126227 | HNNAHYYVFFEEQED                               | 2.68 | 0.01 | 0.78 | 0.44 | 1.13 | 0.28 |
| 30494 | 0 | 126227 | HNNAHYYVFFEEQED                               | 2.68 | 0.01 | 0.78 | 1.20 | 0.22 | 1.27 |
| 30495 | 0 | 24391  | HNNQRLMLYGMH                                  | 2.49 | 0.01 | 0.90 | 0.68 | 0.22 | 1.39 |
| 30496 | 0 | 24391  | HNNQRLMLYGMH                                  | 2.49 | 0.01 | 0.90 | 0.68 | 0.22 | 0.28 |
| 30497 | 0 | 130882 | HNPFAIHRWECCTPALR<br>ALVGPDVQQLPVLTA VS<br>GR | 3.50 | 0.01 | 0.90 | 0.68 | 0.22 | 1.27 |
| 30498 | 0 | 130882 | HNPFAIHRWECCTPALR<br>ALVGPDVQQLPVLTA VS<br>GR | 3.50 | 0.01 | 0.90 | 0.68 | 0.22 | 1.34 |
| 30499 | 0 | 102519 | HNPGYPHNPGYPQNP G<br>YPHN                     | 3.02 | 0.01 | 2.25 | 1.12 | 0.22 | 0.85 |
| 30500 | 0 | 103972 | HNPINAGTELSATGN                               | 2.68 | 0.01 | 3.00 | 1.20 | 0.22 | 1.34 |
| 30501 | 0 | 103972 | HNPINAGTELSATGN                               | 2.68 | 0.01 | 3.00 | 1.20 | 0.22 | 0.85 |
| 30502 | 0 | 103972 | HNPINAGTELSATGN                               | 2.68 | 0.01 | 3.00 | 1.20 | 0.22 | 1.34 |
| 30503 | 0 | 100117 | HNPTKVTSKVRIYM                                | 2.59 | 0.01 | 2.96 | 0.44 | 0.22 | 0.28 |
| 30504 | 0 | 24401  | HNQWKNK                                       | 1.90 | 0.01 | 1.75 | 2.19 | 0.22 | 1.27 |
| 30505 | 0 | 24402  | HNQWKNKPSK                                    | 2.23 | 0.01 | 1.75 | 2.19 | 0.22 | 0.28 |
| 30506 | 0 | 24402  | HNQWKNKPSK                                    | 2.23 | 0.01 | 1.75 | 2.19 | 0.22 | 2.02 |
| 30507 | 0 | 24402  | HNQWKNKPSK                                    | 2.23 | 0.01 | 1.75 | 2.19 | 0.22 | 0.28 |
| 30508 | 0 | 24402  | HNQWKNKPSK                                    | 2.23 | 0.01 | 1.75 | 2.19 | 0.22 | 2.12 |
| 30509 | 0 | 24402  | HNQWKNKPSK                                    | 2.23 | 0.01 | 1.75 | 2.19 | 0.22 | 0.28 |
| 30510 | 0 | 24402  | HNQWKNKPSK                                    | 2.23 | 0.01 | 1.75 | 2.19 | 0.22 | 0.28 |
| 30511 | 0 | 24403  | HNQWKNKPSKP                                   | 2.33 | 0.01 | 2.98 | 2.19 | 0.22 | 2.12 |
| 30512 | 0 | 196950 | HNQWKNKPSKPK                                  | 2.43 | 0.01 | 2.98 | 2.19 | 0.22 | 0.85 |
| 30513 | 0 | 196950 | HNQWKNKPSKPK                                  | 2.43 | 0.01 | 2.98 | 2.19 | 0.22 | 1.48 |
| 30514 | 0 | 156889 | HNRKCDYYIAECNVMP                              | 2.68 | 0.01 | 0.90 | 2.74 | 0.22 | 0.85 |
| 30515 | 0 | 309175 | HNRSLRQLRECDDLE                               | 2.69 | 0.01 | 1.61 | 0.44 | 0.85 | 1.28 |
| 30516 | 0 | 106516 | HNSTRAPEKLMI                                  | 2.40 | 0.01 | 0.90 | 1.15 | 0.22 | 1.39 |
| 30517 | 0 | 227248 | HNTPVYKLDISEATQ                               | 2.60 | 0.01 | 2.97 | 0.44 | 1.59 | 0.28 |
| 30518 | 0 | 227248 | HNTPVYKLDISEATQ                               | 2.60 | 0.01 | 2.97 | 0.44 | 0.85 | 0.28 |
| 30519 | 0 | 233197 | HNTPVYKLDISEATQVE                             | 2.74 | 0.01 | 3.28 | 0.68 | 0.22 | 1.34 |

|       |   |        |                   |      |      |      |      |      |      |
|-------|---|--------|-------------------|------|------|------|------|------|------|
| 30520 | 0 | 233197 | HNTPVYKLDISEATQVE | 2.74 | 0.01 | 3.28 | 0.68 | 0.22 | 0.28 |
| 30521 | 0 | 233197 | HNTPVYKLDISEATQVE | 2.74 | 0.01 | 3.28 | 0.68 | 0.22 | 2.02 |
| 30522 | 0 | 233197 | HNTPVYKLDISEATQVE | 2.74 | 0.01 | 3.28 | 0.68 | 0.22 | 0.85 |
| 30523 | 0 | 233197 | HNTPVYKLDISEATQVE | 2.74 | 0.01 | 3.28 | 0.68 | 0.22 | 1.75 |
| 30524 | 0 | 233197 | HNTPVYKLDISEATQVE | 2.74 | 0.01 | 3.28 | 0.68 | 0.22 | 2.75 |
| 30525 | 0 | 233197 | HNTPVYKLDISEATQVE | 2.74 | 0.01 | 3.28 | 0.68 | 0.22 | 2.98 |
| 30526 | 0 | 24411  | HNTQIH            | 1.91 | 0.01 | 3.24 | 1.12 | 0.22 | 0.28 |
| 30527 | 0 | 423343 | HNVTVNVRKRAYL     | 2.68 | 0.01 | 2.51 | 0.44 | 1.59 | 1.28 |
| 30528 | 0 | 98814  | HNVVHAILHQQ       | 2.48 | 0.01 | 1.86 | 0.44 | 1.93 | 1.27 |
| 30529 | 0 | 24419  | HNYNKIQTAAH       | 2.48 | 0.01 | 0.90 | 0.68 | 0.22 | 0.28 |
| 30530 | 0 | 127685 | HPAFARAHGEAGAGR   | 2.73 | 0.01 | 0.78 | 0.44 | 1.13 | 0.85 |
| 30531 | 0 | 121384 | HPAIALRE          | 2.12 | 0.01 | 0.78 | 0.44 | 1.13 | 0.28 |
| 30532 | 0 | 24425  | HPAKSMDV          | 2.10 | 0.01 | 2.40 | 2.43 | 0.22 | 0.28 |
| 30533 | 0 | 309240 | HPASSEDEEEDDADG   | 2.71 | 0.01 | 1.61 | 0.44 | 0.85 | 1.28 |
| 30534 | 0 | 309241 | HPASSEDKEEDDADG   | 2.70 | 0.01 | 1.61 | 0.44 | 0.85 | 1.28 |
| 30535 | 0 | 181665 | HPCHGRQGKRFDEGQ   | 2.69 | 0.01 | 2.86 | 2.37 | 0.22 | 1.28 |
| 30536 | 0 | 186673 | HPDDYTLRFNRM      | 2.44 | 0.01 | 0.90 | 0.68 | 0.22 | 1.39 |
| 30537 | 0 | 24438  | HPDSIHPFLASP      | 2.50 | 0.01 | 0.90 | 0.68 | 0.22 | 1.39 |
| 30538 | 0 | 24438  | HPDSIHPFLASP      | 2.50 | 0.01 | 0.90 | 0.68 | 0.22 | 1.27 |
| 30539 | 0 | 24441  | HPDVPYVK          | 2.14 | 0.01 | 0.78 | 0.44 | 1.74 | 0.28 |
| 30540 | 0 | 309254 | HPEEDEAFDEADDDE   | 2.72 | 0.01 | 1.61 | 0.44 | 0.85 | 1.28 |
| 30541 | 0 | 24445  | HPEYAVSVLL        | 2.29 | 0.01 | 1.60 | 0.44 | 1.23 | 0.28 |
| 30542 | 0 | 24445  | HPEYAVSVLL        | 2.29 | 0.01 | 1.60 | 0.44 | 1.23 | 1.27 |
| 30543 | 0 | 24449  | HPFVALGLKQPKEIK   | 2.66 | 0.01 | 3.78 | 1.15 | 0.22 | 0.28 |
| 30544 | 0 | 227776 | HPGDAQRIPAGTTYL   | 2.71 | 0.01 | 2.72 | 1.20 | 1.59 | 0.28 |
| 30545 | 0 | 150854 | HPGGQQP           | 2.04 | 0.01 | 3.67 | 0.68 | 0.22 | 1.48 |
| 30546 | 0 | 150854 | HPGGQQP           | 2.04 | 0.01 | 3.67 | 0.68 | 0.22 | 0.85 |
| 30547 | 0 | 150854 | HPGGQQP           | 2.04 | 0.01 | 3.67 | 0.68 | 0.22 | 0.85 |
| 30548 | 0 | 150854 | HPGGQQP           | 2.04 | 0.01 | 3.67 | 0.68 | 0.22 | 0.85 |
| 30549 | 0 | 150854 | HPGGQQP           | 2.04 | 0.01 | 3.67 | 0.68 | 0.22 | 0.85 |
| 30550 | 0 | 150854 | HPGGQQP           | 2.04 | 0.01 | 3.67 | 0.68 | 0.22 | 0.85 |
| 30551 | 0 | 150854 | HPGGQQP           | 2.04 | 0.01 | 3.67 | 0.68 | 0.22 | 0.85 |
| 30552 | 0 | 150855 | HPGGSQP           | 2.03 | 0.01 | 2.51 | 0.68 | 0.22 | 0.85 |
| 30553 | 0 | 150855 | HPGGSQP           | 2.03 | 0.01 | 2.51 | 0.68 | 0.22 | 0.85 |
| 30554 | 0 | 150855 | HPGGSQP           | 2.03 | 0.01 | 2.51 | 0.68 | 0.22 | 0.85 |
| 30555 | 0 | 150855 | HPGGSQP           | 2.03 | 0.01 | 2.51 | 0.68 | 0.22 | 0.85 |
| 30556 | 0 | 150855 | HPGGSQP           | 2.03 | 0.01 | 2.51 | 0.68 | 0.22 | 0.85 |
| 30557 | 0 | 150855 | HPGGSQP           | 2.03 | 0.01 | 2.51 | 0.68 | 0.22 | 0.85 |
| 30558 | 0 | 150855 | HPGGSQP           | 2.03 | 0.01 | 2.51 | 0.68 | 0.22 | 1.48 |

|       |   |        |                                         |      |      |      |      |      |      |
|-------|---|--------|-----------------------------------------|------|------|------|------|------|------|
| 30559 | 0 | 150855 | HPGGSQP                                 | 2.03 | 0.01 | 2.51 | 0.68 | 0.22 | 0.85 |
| 30560 | 0 | 150855 | HPGGSQP                                 | 2.03 | 0.01 | 2.51 | 0.68 | 0.22 | 0.85 |
| 30561 | 0 | 177506 | HPGIAEFPSRGKSSSYSK<br>QF                | 2.94 | 3.37 | 0.78 | 0.44 | 2.26 | 0.28 |
| 30562 | 0 | 177506 | HPGIAEFPSRGKSSSYSK<br>QF                | 2.94 | 3.37 | 0.78 | 0.44 | 1.13 | 0.28 |
| 30563 | 0 | 24454  | HPHDLDDARRDGRAP                         | 2.73 | 0.01 | 2.40 | 1.15 | 2.26 | 0.28 |
| 30564 | 0 | 24454  | HPHDLDDARRDGRAP                         | 2.73 | 0.01 | 2.40 | 1.15 | 2.26 | 0.85 |
| 30565 | 0 | 122397 | HPHKFQSSRQDYRLT                         | 2.66 | 0.01 | 0.90 | 1.15 | 0.22 | 1.39 |
| 30566 | 0 | 115281 | HPHLSFMAIPPKKNQDK<br>TEI                | 2.90 | 0.01 | 1.60 | 0.44 | 1.23 | 2.51 |
| 30567 | 0 | 135840 | HPICEVSKVASHLEVNC<br>DKRNLTALPPDLPKDTTI | 3.50 | 0.01 | 0.78 | 0.68 | 0.22 | 2.12 |
| 30568 | 0 | 115282 | HPIKHQGLPQEVLENL<br>LRF                 | 2.94 | 0.01 | 1.60 | 0.44 | 1.23 | 2.51 |
| 30569 | 0 | 115282 | HPIKHQGLPQEVLENL<br>LRF                 | 2.94 | 0.01 | 1.60 | 0.44 | 1.41 | 0.28 |
| 30570 | 0 | 115282 | HPIKHQGLPQEVLENL<br>LRF                 | 2.94 | 0.01 | 1.60 | 0.44 | 1.93 | 0.28 |
| 30571 | 0 | 229677 | HPIKHQGLPQPPEVFG<br>KEK                 | 2.98 | 0.01 | 1.60 | 0.44 | 1.23 | 1.28 |
| 30572 | 0 | 176811 | HPKHPHTHTNDQ                            | 2.52 | 0.01 | 0.90 | 0.68 | 0.22 | 1.27 |
| 30573 | 0 | 94543  | HPKQRPQ                                 | 2.02 | 0.01 | 3.10 | 1.12 | 0.22 | 1.27 |
| 30574 | 0 | 24464  | HPKVGEIDFTSIVP                          | 2.66 | 0.01 | 0.90 | 0.44 | 1.41 | 0.28 |
| 30575 | 0 | 194736 | HPKYAGQGGGYTT                           | 2.54 | 0.01 | 4.03 | 0.68 | 0.22 | 0.28 |
| 30576 | 0 | 194736 | HPKYAGQGGGYTT                           | 2.54 | 0.01 | 4.03 | 0.68 | 0.22 | 0.28 |
| 30577 | 0 | 194736 | HPKYAGQGGGYTT                           | 2.54 | 0.01 | 4.03 | 0.68 | 0.22 | 1.48 |
| 30578 | 0 | 124274 | HPLAPAGTF                               | 2.23 | 0.01 | 0.90 | 0.44 | 1.13 | 1.39 |
| 30579 | 0 | 124275 | HPLAPLNF                                | 2.14 | 0.01 | 0.90 | 0.44 | 1.13 | 1.39 |
| 30580 | 0 | 124276 | HPLAPPHPS                               | 2.28 | 0.01 | 0.90 | 1.20 | 0.22 | 0.28 |
| 30581 | 0 | 124276 | HPLAPPHPS                               | 2.28 | 0.01 | 0.90 | 0.44 | 1.13 | 1.39 |
| 30582 | 0 | 124277 | HPLAPSPAV                               | 2.25 | 0.01 | 0.90 | 0.44 | 1.13 | 1.39 |
| 30583 | 0 | 124278 | HPLAPVPRQ                               | 2.23 | 0.01 | 0.90 | 0.44 | 1.13 | 1.39 |
| 30584 | 0 | 124279 | HPLASSLHA                               | 2.27 | 0.01 | 0.90 | 0.44 | 1.13 | 1.39 |
| 30585 | 0 | 24468  | HPLASSPLFAAP                            | 2.51 | 0.01 | 0.90 | 2.74 | 0.22 | 1.27 |
| 30586 | 0 | 124280 | HPLASSVSA                               | 2.25 | 0.01 | 0.90 | 0.44 | 1.13 | 1.39 |
| 30587 | 0 | 124281 | HPLATGPHL                               | 2.26 | 0.01 | 0.90 | 0.44 | 1.13 | 1.39 |
| 30588 | 0 | 131910 | HPLGSPGSASDLE                           | 2.57 | 0.01 | 0.78 | 2.66 | 0.22 | 0.28 |
| 30589 | 0 | 124283 | HPLLPGTAS                               | 2.22 | 0.01 | 0.90 | 0.44 | 1.13 | 1.39 |
| 30590 | 0 | 124284 | HPLPPAATF                               | 2.23 | 0.01 | 0.90 | 0.44 | 1.13 | 1.39 |
| 30591 | 0 | 24471  | HPLQKTYN                                | 2.10 | 0.01 | 0.78 | 0.44 | 1.74 | 0.28 |
| 30592 | 0 | 139772 | HPLRHRP                                 | 2.06 | 0.01 | 0.90 | 2.00 | 0.22 | 0.28 |
| 30593 | 0 | 227251 | HPLRLLRIGNQAFLQ                         | 2.68 | 0.01 | 2.97 | 0.44 | 1.59 | 0.28 |
| 30594 | 0 | 124285 | HPLSPHPY                                | 2.27 | 0.01 | 0.90 | 0.44 | 1.13 | 1.39 |

|       |   |        |                                   |      |      |      |      |      |      |
|-------|---|--------|-----------------------------------|------|------|------|------|------|------|
| 30595 | 0 | 124286 | HPLSPRPLQ                         | 2.25 | 0.01 | 0.90 | 0.44 | 1.13 | 1.39 |
| 30596 | 0 | 124287 | HPLSPSPYM                         | 2.25 | 0.01 | 0.90 | 0.44 | 1.13 | 1.39 |
| 30597 | 0 | 125441 | HPLTCDDPRFQ                       | 2.38 | 0.01 | 0.78 | 1.12 | 0.22 | 1.27 |
| 30598 | 0 | 125441 | HPLTCDDPRFQ                       | 2.38 | 0.01 | 0.78 | 1.12 | 0.22 | 0.28 |
| 30599 | 0 | 125441 | HPLTCDDPRFQ                       | 2.38 | 0.01 | 0.78 | 1.12 | 0.22 | 1.27 |
| 30600 | 0 | 125441 | HPLTCDDPRFQ                       | 2.38 | 0.01 | 0.78 | 1.12 | 0.22 | 1.34 |
| 30601 | 0 | 115283 | HPLVRYPWHTHY                      | 2.50 | 0.01 | 0.90 | 0.68 | 0.22 | 1.39 |
| 30602 | 0 | 167751 | HPLYQSEPA                         | 2.21 | 0.01 | 2.40 | 2.43 | 0.22 | 0.28 |
| 30603 | 0 | 167279 | HPMKQYRWPSI                       | 2.45 | 0.01 | 0.90 | 1.15 | 0.22 | 1.39 |
| 30604 | 0 | 119464 | HPMLPNYKNFKGTIQEL<br>GQN          | 2.93 | 0.01 | 0.78 | 0.44 | 1.13 | 0.28 |
| 30605 | 0 | 133601 | HPMYPTWYSWQP                      | 2.49 | 0.01 | 0.90 | 0.44 | 0.85 | 1.39 |
| 30606 | 0 | 97388  | HPNSSAGLRDNLLENLQ<br>AYQKRMGVQMQR | 3.31 | 0.01 | 3.09 | 0.44 | 0.85 | 0.28 |
| 30607 | 0 | 97388  | HPNSSAGLRDNLLENLQ<br>AYQKRMGVQMQR | 3.31 | 0.01 | 3.09 | 0.44 | 0.85 | 0.28 |
| 30608 | 0 | 97388  | HPNSSAGLRDNLLENLQ<br>AYQKRMGVQMQR | 3.31 | 0.01 | 3.09 | 0.44 | 1.74 | 0.28 |
| 30609 | 0 | 125442 | HPNVLKAPSSNT                      | 2.46 | 0.01 | 0.90 | 0.44 | 1.23 | 0.28 |
| 30610 | 0 | 24485  | HPPEHGVEQACQVYAH<br>DAQNRGAYV     | 3.18 | 0.01 | 3.36 | 0.68 | 0.22 | 0.28 |
| 30611 | 0 | 24485  | HPPEHGVEQACQVYAH<br>DAQNRGAYV     | 3.18 | 0.01 | 3.36 | 0.68 | 0.22 | 0.28 |
| 30612 | 0 | 24485  | HPPEHGVEQACQVYAH<br>DAQNRGAYV     | 3.18 | 0.01 | 3.36 | 0.68 | 0.22 | 0.28 |
| 30613 | 0 | 24487  | HPPGHRLTIPH                       | 2.52 | 0.01 | 0.90 | 1.12 | 2.26 | 1.39 |
| 30614 | 0 | 196521 | HPPLLAT                           | 2.02 | 0.01 | 0.90 | 0.44 | 1.23 | 1.39 |
| 30615 | 0 | 78680  | HPPSSRPCANTPPSEMD<br>TWN          | 2.93 | 0.01 | 2.04 | 0.44 | 1.59 | 0.28 |
| 30616 | 0 | 83200  | HPPSYVYSQFEKSYRHKR                | 2.87 | 0.01 | 3.47 | 0.68 | 0.22 | 1.34 |
| 30617 | 0 | 122399 | HPQPEDPD TAKE                     | 2.49 | 0.01 | 1.60 | 0.68 | 0.22 | 0.28 |
| 30618 | 0 | 122399 | HPQPEDPD TAKE                     | 2.49 | 0.01 | 1.60 | 0.68 | 0.22 | 1.27 |
| 30619 | 0 | 122399 | HPQPEDPD TAKE                     | 2.49 | 0.01 | 1.60 | 0.68 | 0.22 | 0.85 |
| 30620 | 0 | 24499  | HPSCNSATGIPH                      | 2.48 | 0.01 | 0.90 | 1.12 | 2.26 | 1.39 |
| 30621 | 0 | 24500  | HPSDGKC                           | 1.99 | 0.01 | 1.66 | 1.15 | 0.22 | 1.48 |
| 30622 | 0 | 24500  | HPSDGKC                           | 1.99 | 0.01 | 1.66 | 1.15 | 0.22 | 0.28 |
| 30623 | 0 | 186674 | HPSDYLLTYPFK                      | 2.46 | 0.01 | 0.90 | 0.68 | 0.22 | 1.39 |
| 30624 | 0 | 186675 | HPSDYTLPVHPR                      | 2.48 | 0.01 | 0.90 | 0.68 | 0.22 | 1.39 |
| 30625 | 0 | 161639 | HPSFIAIPPK                        | 2.32 | 0.01 | 0.78 | 0.44 | 1.23 | 0.85 |
| 30626 | 0 | 423344 | HPSPMIAAAPPAQPP                   | 2.70 | 0.01 | 2.51 | 0.44 | 2.35 | 1.28 |
| 30627 | 0 | 150996 | HPSTSADQQSLYQNA                   | 2.68 | 0.01 | 2.87 | 0.44 | 0.85 | 0.28 |
| 30628 | 0 | 24508  | HPSVRYVCLPPERD                    | 2.60 | 0.01 | 2.40 | 0.44 | 1.59 | 0.28 |
| 30629 | 0 | 186676 | HPTDYSLSYMYP                      | 2.49 | 0.01 | 0.90 | 2.13 | 0.85 | 0.28 |

|       |   |        |                                |      |      |      |      |      |      |
|-------|---|--------|--------------------------------|------|------|------|------|------|------|
|       |   |        | HPTDYSLSYMPGGGHP               |      |      |      |      |      |      |
| 30630 | 0 | 186677 | TDYSLSYMPGGGHPTD<br>YLSYMPGKKK | 3.80 | 0.01 | 0.90 | 3.47 | 0.22 | 0.28 |
| 30631 | 0 | 151917 | HPTHYSIRSTL                    | 2.42 | 0.01 | 0.78 | 0.44 | 1.93 | 0.28 |
| 30632 | 0 | 24518  | HPTNPFAPDVTAAAGA<br>GPRVRQPAR  | 3.18 | 0.01 | 2.53 | 0.44 | 0.85 | 0.28 |
| 30633 | 0 | 24518  | HPTNPFAPDVTAAAGA<br>GPRVRQPAR  | 3.18 | 0.01 | 2.53 | 0.44 | 0.85 | 0.28 |
| 30634 | 0 | 133139 | HPTQESTKEQTTFP                 | 2.69 | 0.01 | 0.78 | 0.44 | 1.13 | 0.28 |
| 30635 | 0 | 24522  | HPTTTYKAFDWDQAYR<br>KPIT       | 2.94 | 0.01 | 2.04 | 0.44 | 0.85 | 0.28 |
| 30636 | 0 | 138191 | HPTWSSL                        | 2.01 | 0.01 | 0.90 | 2.88 | 2.26 | 0.28 |
| 30637 | 0 | 138191 | HPTWSSL                        | 2.01 | 0.01 | 0.90 | 1.15 | 2.26 | 2.35 |
| 30638 | 0 | 138191 | HPTWSSL                        | 2.01 | 0.01 | 0.90 | 0.44 | 1.41 | 1.34 |
| 30639 | 0 | 518033 | HPVAINASSELHLLGFI<br>NAENNH    | 3.14 | 0.01 | 2.16 | 1.12 | 0.22 | 1.39 |
| 30640 | 0 | 518033 | HPVAINASSELHLLGFI<br>NAENNH    | 3.14 | 0.01 | 2.16 | 1.12 | 0.22 | 1.39 |
| 30641 | 0 | 518033 | HPVAINASSELHLLGFI<br>NAENNH    | 3.14 | 0.01 | 2.16 | 0.44 | 1.23 | 1.39 |
| 30642 | 0 | 78416  | HPWWTWVSDPNATQP                | 2.68 | 0.01 | 0.90 | 0.68 | 0.22 | 0.28 |
| 30643 | 0 | 24564  | HPYISKPQ                       | 2.12 | 0.01 | 0.90 | 0.68 | 0.22 | 0.28 |
| 30644 | 0 | 24564  | HPYISKPQ                       | 2.12 | 0.01 | 0.90 | 0.68 | 0.22 | 0.28 |
| 30645 | 0 | 24564  | HPYISKPQ                       | 2.12 | 0.01 | 0.90 | 0.68 | 0.22 | 1.34 |
| 30646 | 0 | 24564  | HPYISKPQ                       | 2.12 | 0.01 | 0.90 | 0.68 | 0.22 | 1.66 |
| 30647 | 0 | 115284 | HPYPGHHLSHS                    | 2.53 | 0.01 | 0.90 | 0.68 | 0.22 | 1.39 |
| 30648 | 0 | 137187 | HQCDAGWLADQTVRYP<br>IHTPREGC   | 3.10 | 0.01 | 0.78 | 0.68 | 0.22 | 0.28 |
| 30649 | 0 | 137187 | HQCDAGWLADQTVRYP<br>IHTPREGC   | 3.10 | 0.01 | 0.78 | 0.68 | 0.22 | 0.28 |
| 30650 | 0 | 137755 | HQCHQUESTGRSRGRCG<br>RSGS      | 3.01 | 3.37 | 1.75 | 3.00 | 0.22 | 0.28 |
| 30651 | 0 | 137756 | HQCHQUESTKGKSKGKC<br>GKSGS     | 3.05 | 4.08 | 1.75 | 3.00 | 0.22 | 0.28 |
| 30652 | 0 | 137756 | HQCHQUESTKGKSKGKC<br>GKSGS     | 3.05 | 4.08 | 1.75 | 3.00 | 0.22 | 0.28 |
| 30653 | 0 | 137756 | HQCHQUESTKGKSKGKC<br>GKSGS     | 3.05 | 4.08 | 1.75 | 3.00 | 0.22 | 0.28 |
| 30654 | 0 | 137756 | HQCHQUESTKGKSKGKC<br>GKSGS     | 3.05 | 4.08 | 1.75 | 3.00 | 0.22 | 0.28 |
| 30655 | 0 | 137756 | HQCHQUESTKGKSKGKC<br>GKSGS     | 3.05 | 4.08 | 1.75 | 3.00 | 0.22 | 0.28 |
| 30656 | 0 | 137756 | HQCHQUESTKGKSKGKC<br>GKSGS     | 3.05 | 4.08 | 1.75 | 0.44 | 1.13 | 0.28 |

|       |   |        |                             |      |      |      |      |      |      |
|-------|---|--------|-----------------------------|------|------|------|------|------|------|
| 30657 | 0 | 137756 | HQCHQUESTKGKSKGKC<br>GKSGS  | 3.05 | 4.08 | 1.75 | 0.44 | 1.93 | 0.28 |
| 30658 | 0 | 137757 | HQCHQUESTKGKSKGKC<br>GKSGS  | 3.05 | 0.01 | 1.75 | 3.00 | 0.22 | 0.28 |
| 30659 | 0 | 137757 | HQCHQUESTKGKSKGKC<br>GKSGS  | 3.05 | 0.01 | 1.75 | 3.00 | 0.22 | 0.28 |
| 30660 | 0 | 137757 | HQCHQUESTKGKSKGKC<br>GKSGS  | 3.05 | 0.01 | 1.75 | 3.00 | 0.22 | 0.28 |
| 30661 | 0 | 137757 | HQCHQUESTKGKSKGKC<br>GKSGS  | 3.05 | 0.01 | 1.75 | 3.00 | 0.22 | 0.28 |
| 30662 | 0 | 107889 | HQCHQUESTRGRSRGRC<br>GRSGS  | 3.05 | 2.84 | 0.90 | 0.44 | 1.13 | 0.28 |
| 30663 | 0 | 107889 | HQCHQUESTRGRSRGRC<br>GRSGS  | 3.05 | 2.84 | 0.90 | 0.44 | 1.13 | 0.28 |
| 30664 | 0 | 108474 | HQCHQUESTRGRSRGRC<br>GRSGS  | 3.05 | 4.63 | 0.90 | 2.88 | 1.13 | 0.28 |
| 30665 | 0 | 108474 | HQCHQUESTRGRSRGRC<br>GRSGS  | 3.05 | 4.63 | 0.90 | 2.88 | 1.41 | 0.28 |
| 30666 | 0 | 107889 | HQCHQUESTRGRSRGRC<br>GRSGS  | 3.05 | 2.84 | 0.90 | 0.44 | 1.13 | 0.28 |
| 30667 | 0 | 107889 | HQCHQUESTRGRSRGRC<br>GRSGS  | 3.05 | 2.84 | 0.90 | 0.44 | 1.13 | 0.28 |
| 30668 | 0 | 107889 | HQCHQUESTRGRSRGRC<br>GRSGS  | 3.05 | 2.84 | 0.90 | 0.44 | 1.13 | 0.28 |
| 30669 | 0 | 107889 | HQCHQUESTRGRSRGRC<br>GRSGS  | 3.05 | 2.84 | 0.90 | 3.16 | 0.22 | 0.28 |
| 30670 | 0 | 107889 | HQCHQUESTRGRSRGRC<br>GRSGS  | 3.05 | 2.84 | 0.90 | 3.16 | 0.22 | 1.75 |
| 30671 | 0 | 107889 | HQCHQUESTRGRSRGRC<br>GRSGS  | 3.05 | 2.84 | 0.90 | 3.16 | 0.22 | 0.28 |
| 30672 | 0 | 107889 | HQCHQUESTRGRSRGRC<br>GRSGS  | 3.05 | 2.84 | 0.78 | 0.44 | 1.13 | 0.28 |
| 30673 | 0 | 107889 | HQCHQUESTRGRSRGRC<br>GRSGS  | 3.05 | 2.84 | 0.90 | 0.44 | 1.13 | 0.28 |
| 30674 | 0 | 107889 | HQCHQUESTRGRSRGRC<br>GRSGS  | 3.05 | 2.84 | 0.78 | 0.44 | 1.13 | 0.28 |
| 30675 | 0 | 119590 | HQDWLNGK                    | 2.10 | 0.01 | 0.78 | 0.44 | 1.93 | 0.28 |
| 30676 | 0 | 122790 | HQEEDFRVTCKDIQR             | 2.65 | 0.01 | 0.78 | 0.44 | 1.13 | 0.28 |
| 30677 | 0 | 122790 | HQEEDFRVTCKDIQR             | 2.65 | 0.01 | 0.78 | 1.20 | 0.22 | 0.28 |
| 30678 | 0 | 122790 | HQEEDFRVTCKDIQR             | 2.65 | 0.01 | 0.78 | 1.20 | 0.22 | 1.27 |
| 30679 | 0 | 122790 | HQEEDFRVTCKDIQR             | 2.65 | 0.01 | 0.78 | 1.20 | 0.22 | 1.27 |
| 30680 | 0 | 122790 | HQEEDFRVTCKDIQR             | 2.65 | 0.01 | 0.78 | 1.20 | 0.22 | 0.28 |
| 30681 | 0 | 122790 | HQEEDFRVTCKDIQR             | 2.65 | 0.01 | 0.78 | 1.20 | 0.22 | 0.28 |
| 30682 | 0 | 122790 | HQEEDFRVTCKDIQR             | 2.65 | 0.01 | 0.78 | 1.20 | 0.22 | 2.02 |
| 30683 | 0 | 122790 | HQEEDFRVTCKDIQR             | 2.65 | 0.01 | 0.78 | 1.20 | 0.22 | 1.34 |
| 30684 | 0 | 126229 | HQEEDFRVTCKDIQRIPS<br>LPPST | 3.05 | 0.01 | 0.78 | 2.25 | 0.22 | 0.28 |



|       |   |        |                                                                        |      |      |      |      |      |      |
|-------|---|--------|------------------------------------------------------------------------|------|------|------|------|------|------|
| 30685 | 0 | 126229 | HQEEDFRVTCKDIQRIPS<br>LPPST                                            | 3.05 | 0.01 | 0.78 | 0.68 | 0.22 | 0.28 |
| 30686 | 0 | 122791 | HQEEDFRVTCKDIQRIPS<br>LPPSTQT                                          | 3.14 | 0.01 | 0.78 | 0.44 | 1.13 | 2.02 |
| 30687 | 0 | 489223 | HQESTRGRSRGR                                                           | 2.51 | 3.50 | 0.78 | 0.44 | 1.13 | 0.28 |
| 30688 | 0 | 24573  | HQEWIYFLQNGSSVVW<br>YAYTNMLGQKSDTSILFE<br>VRPIQASDQPWFLAHH<br>TGGDDCTT | 3.97 | 0.01 | 3.14 | 0.68 | 0.22 | 1.34 |
| 30689 | 0 | 24573  | HQEWIYFLQNGSSVVW<br>YAYTNMLGQKSDTSILFE<br>VRPIQASDQPWFLAHH<br>TGGDDCTT | 3.97 | 0.01 | 3.14 | 0.68 | 0.22 | 0.85 |
| 30690 | 0 | 24573  | HQEWIYFLQNGSSVVW<br>YAYTNMLGQKSDTSILFE<br>VRPIQASDQPWFLAHH<br>TGGDDCTT | 3.97 | 0.01 | 3.14 | 0.68 | 0.22 | 0.28 |
| 30691 | 0 | 24573  | HQEWIYFLQNGSSVVW<br>YAYTNMLGQKSDTSILFE<br>VRPIQASDQPWFLAHH<br>TGGDDCTT | 3.97 | 0.01 | 3.14 | 0.68 | 0.22 | 2.02 |
| 30692 | 0 | 146311 | HQGALGVFAIPEYC                                                         | 2.57 | 0.01 | 2.96 | 0.44 | 0.22 | 0.28 |
| 30693 | 0 | 190444 | HQGCLPPFPADVMI                                                         | 2.64 | 0.01 | 3.61 | 2.00 | 1.41 | 0.28 |
| 30694 | 0 | 103258 | HQGQGGAKSKGSQQE                                                        | 2.72 | 0.01 | 2.04 | 0.44 | 0.85 | 1.28 |
| 30695 | 0 | 110885 | HQHQUESTXGRSRGRGR<br>SGS                                               | 2.95 | 0.01 | 0.78 | 2.46 | 0.22 | 2.51 |
| 30696 | 0 | 110885 | HQHQUESTXGRSRGRGR<br>SGS                                               | 2.95 | 0.01 | 0.78 | 2.46 | 0.22 | 1.27 |
| 30697 | 0 | 130885 | HQIALRMEVLGCEAQD                                                       | 2.71 | 0.01 | 0.78 | 1.15 | 0.22 | 1.27 |
| 30698 | 0 | 130885 | HQIALRMEVLGCEAQD                                                       | 2.71 | 0.01 | 0.78 | 0.44 | 1.93 | 1.27 |
| 30699 | 0 | 136064 | HQIALRMEVLGCEAQDL<br>Y                                                 | 2.82 | 0.01 | 0.78 | 1.20 | 0.22 | 0.28 |
| 30700 | 0 | 136064 | HQIALRMEVLGCEAQDL<br>Y                                                 | 2.82 | 0.01 | 0.78 | 1.20 | 0.22 | 0.85 |
| 30701 | 0 | 136064 | HQIALRMEVLGCEAQDL<br>Y                                                 | 2.82 | 0.01 | 0.78 | 0.44 | 1.41 | 0.85 |
| 30702 | 0 | 136064 | HQIALRMEVLGCEAQDL<br>Y                                                 | 2.82 | 0.01 | 0.78 | 0.44 | 1.41 | 1.34 |
| 30703 | 0 | 173939 | HQISQQPQQLPQQ                                                          | 2.58 | 0.01 | 1.86 | 0.44 | 1.23 | 0.85 |
| 30704 | 0 | 104834 | HQKLVFFAE                                                              | 2.20 | 0.01 | 0.78 | 0.68 | 0.22 | 0.28 |
| 30705 | 0 | 104834 | HQKLVFFAE                                                              | 2.20 | 0.01 | 0.78 | 0.68 | 0.22 | 0.85 |
| 30706 | 0 | 104834 | HQKLVFFAE                                                              | 2.20 | 0.01 | 0.78 | 0.68 | 0.22 | 0.85 |
| 30707 | 0 | 104834 | HQKLVFFAE                                                              | 2.20 | 0.01 | 0.78 | 0.68 | 0.22 | 0.85 |
| 30708 | 0 | 100120 | HQKLVFFAED                                                             | 2.28 | 0.01 | 0.78 | 0.44 | 1.93 | 0.28 |

|       |   |        |                          |      |      |      |      |      |      |
|-------|---|--------|--------------------------|------|------|------|------|------|------|
| 30709 | 0 | 153838 | HQKRTAMFQDPQER           | 2.59 | 0.01 | 1.86 | 2.37 | 0.22 | 0.28 |
| 30710 | 0 | 153838 | HQKRTAMFQDPQER           | 2.59 | 0.01 | 1.86 | 1.12 | 0.22 | 2.02 |
| 30711 | 0 | 153838 | HQKRTAMFQDPQER           | 2.59 | 0.01 | 1.86 | 1.12 | 0.22 | 2.02 |
| 30712 | 0 | 153838 | HQKRTAMFQDPQER           | 2.59 | 0.01 | 1.86 | 1.12 | 0.22 | 2.02 |
| 30713 | 0 | 153839 | HQKRTAMFQDPQERPR<br>KLPQ | 2.95 | 0.01 | 1.86 | 2.37 | 0.22 | 0.28 |
| 30714 | 0 | 153839 | HQKRTAMFQDPQERPR<br>KLPQ | 2.95 | 0.01 | 1.86 | 2.37 | 0.22 | 2.02 |
| 30715 | 0 | 153839 | HQKRTAMFQDPQERPR<br>KLPQ | 2.95 | 0.01 | 1.86 | 2.37 | 0.22 | 2.02 |
| 30716 | 0 | 24587  | HQLADAARREVLKGETV<br>PA  | 2.88 | 0.01 | 4.63 | 2.42 | 0.22 | 0.28 |
| 30717 | 0 | 24587  | HQLADAARREVLKGETV<br>PA  | 2.88 | 0.01 | 4.63 | 2.42 | 0.22 | 1.34 |
| 30718 | 0 | 78994  | HQLDPA                   | 1.88 | 0.01 | 2.08 | 0.68 | 0.22 | 0.28 |
| 30719 | 0 | 24590  | HQLDPAFGAN               | 2.29 | 0.01 | 2.58 | 1.15 | 0.22 | 0.28 |
| 30720 | 0 | 24590  | HQLDPAFGAN               | 2.29 | 0.01 | 2.08 | 1.15 | 0.22 | 0.28 |
| 30721 | 0 | 24591  | HQLDPAFGANSTNPD          | 2.66 | 0.01 | 2.08 | 1.15 | 0.22 | 1.66 |
| 30722 | 0 | 24591  | HQLDPAFGANSTNPD          | 2.66 | 0.01 | 2.08 | 1.15 | 0.22 | 1.66 |
| 30723 | 0 | 24591  | HQLDPAFGANSTNPD          | 2.66 | 0.01 | 2.08 | 1.81 | 0.22 | 0.28 |
| 30724 | 0 | 24591  | HQLDPAFGANSTNPD          | 2.66 | 0.01 | 2.08 | 0.68 | 0.22 | 2.97 |
| 30725 | 0 | 24591  | HQLDPAFGANSTNPD          | 2.66 | 0.01 | 2.08 | 1.15 | 2.26 | 2.49 |
| 30726 | 0 | 24591  | HQLDPAFGANSTNPD          | 2.66 | 0.01 | 2.08 | 0.68 | 0.22 | 2.49 |
| 30727 | 0 | 24591  | HQLDPAFGANSTNPD          | 2.66 | 0.01 | 2.08 | 0.68 | 0.22 | 2.49 |
| 30728 | 0 | 24592  | HQLDPAFGANSTNPDW<br>DFNP | 2.95 | 0.01 | 2.08 | 1.20 | 0.22 | 0.28 |
| 30729 | 0 | 24592  | HQLDPAFGANSTNPDW<br>DFNP | 2.95 | 0.01 | 2.08 | 2.25 | 0.22 | 0.28 |
| 30730 | 0 | 24592  | HQLDPAFGANSTNPDW<br>DFNP | 2.95 | 0.01 | 2.08 | 3.67 | 0.22 | 0.28 |
| 30731 | 0 | 24592  | HQLDPAFGANSTNPDW<br>DFNP | 2.95 | 0.01 | 2.08 | 3.42 | 0.22 | 0.28 |
| 30732 | 0 | 24592  | HQLDPAFGANSTNPDW<br>DFNP | 2.95 | 0.01 | 2.08 | 2.82 | 0.22 | 0.28 |
| 30733 | 0 | 24592  | HQLDPAFGANSTNPDW<br>DFNP | 2.95 | 0.01 | 2.08 | 3.57 | 0.22 | 0.28 |
| 30734 | 0 | 24592  | HQLDPAFGANSTNPDW<br>DFNP | 2.95 | 0.01 | 2.08 | 4.23 | 0.22 | 0.28 |
| 30735 | 0 | 24592  | HQLDPAFGANSTNPDW<br>DFNP | 2.95 | 0.01 | 2.08 | 3.42 | 0.22 | 0.28 |

|       |   |        |                                |      |      |      |      |      |      |
|-------|---|--------|--------------------------------|------|------|------|------|------|------|
| 30736 | 0 | 174540 | HQLSNKDEQTPQ                   | 2.45 | 0.01 | 0.90 | 1.15 | 1.41 | 1.39 |
| 30737 | 0 | 242591 | HQMSPSPFVEVPPKL                | 2.67 | 0.01 | 3.33 | 1.20 | 0.22 | 0.85 |
| 30738 | 0 | 24595  | HQNILRVAQ                      | 2.21 | 0.01 | 3.01 | 0.44 | 0.85 | 0.28 |
| 30739 | 0 | 24596  | HQNITNINSDSQGRQ                | 2.70 | 0.01 | 2.58 | 2.43 | 0.22 | 0.28 |
| 30740 | 0 | 107441 | HQNWLDG                        | 1.99 | 0.01 | 0.78 | 0.44 | 1.13 | 0.28 |
| 30741 | 0 | 192289 | HQPFSQQPQQTFPQ                 | 2.67 | 0.01 | 1.86 | 0.44 | 1.23 | 0.28 |
| 30742 | 0 | 24600  | HQPQQQFPQT                     | 2.36 | 0.01 | 1.86 | 0.68 | 0.22 | 0.28 |
| 30743 | 0 | 24600  | HQPQQQFPQT                     | 2.36 | 0.01 | 1.86 | 0.68 | 0.22 | 0.85 |
| 30744 | 0 | 101716 | HQPTPAA                        | 2.00 | 0.01 | 3.10 | 1.15 | 0.22 | 0.28 |
| 30745 | 0 | 101716 | HQPTPAA                        | 2.00 | 0.01 | 3.10 | 1.15 | 0.22 | 1.48 |
| 30746 | 0 | 101716 | HQPTPAA                        | 2.00 | 0.01 | 3.10 | 1.15 | 0.22 | 0.85 |
| 30747 | 0 | 95093  | HQQGGWSTLIEDNIP                | 2.62 | 0.01 | 2.48 | 0.44 | 1.74 | 0.28 |
| 30748 | 0 | 95093  | HQQGGWSTLIEDNIP                | 2.62 | 0.01 | 2.48 | 0.44 | 1.74 | 0.28 |
| 30749 | 0 | 95093  | HQQGGWSTLIEDNIP                | 2.62 | 0.01 | 2.48 | 0.44 | 1.74 | 0.28 |
| 30750 | 0 | 24602  | HQQILLQKYQVIKV                 | 2.65 | 0.01 | 3.93 | 3.26 | 0.22 | 0.28 |
| 30751 | 0 | 101717 | HQQPTQGDTSQG                   | 2.51 | 0.01 | 3.10 | 1.15 | 0.22 | 0.28 |
| 30752 | 0 | 101717 | HQQPTQGDTSQG                   | 2.51 | 0.01 | 3.10 | 1.15 | 0.22 | 0.85 |
| 30753 | 0 | 190784 | HQQQLPQQQF                     | 2.35 | 0.01 | 1.86 | 0.44 | 1.23 | 0.28 |
| 30754 | 0 | 190785 | HQQQPIQQQP                     | 2.36 | 0.01 | 1.86 | 0.44 | 1.23 | 0.28 |
| 30755 | 0 | 309512 | HQSDETQVQQHQQHE                | 2.73 | 0.01 | 1.61 | 0.44 | 0.85 | 1.28 |
| 30756 | 0 | 132837 | HQTKPALNLDTLQVR                | 2.66 | 0.01 | 3.16 | 3.16 | 0.22 | 0.28 |
| 30757 | 0 | 24651  | HQTLQDPRVRG                    | 2.39 | 0.01 | 2.71 | 2.42 | 0.22 | 1.57 |
| 30758 | 0 | 24651  | HQTLQDPRVRG                    | 2.39 | 0.01 | 2.71 | 2.52 | 0.22 | 1.57 |
| 30759 | 0 | 24651  | HQTLQDPRVRG                    | 2.39 | 0.01 | 2.71 | 3.20 | 0.22 | 1.57 |
| 30760 | 0 | 24652  | HQTLQDPRVRGL                   | 2.48 | 0.01 | 2.58 | 1.20 | 0.22 | 0.28 |
| 30761 | 0 | 24652  | HQTLQDPRVRGL                   | 2.48 | 0.01 | 2.58 | 1.20 | 0.22 | 0.28 |
| 30762 | 0 | 24653  | HQTLQDPRVRGLYFPAG<br>GSSSGTVNP | 3.18 | 0.01 | 2.71 | 0.68 | 0.22 | 1.27 |
| 30763 | 0 | 24654  | HQTLQDPRVRGLYLPAG<br>G         | 2.84 | 0.01 | 3.45 | 0.68 | 0.22 | 1.57 |
| 30764 | 0 | 24654  | HQTLQDPRVRGLYLPAG<br>G         | 2.84 | 0.01 | 3.45 | 0.68 | 0.22 | 1.57 |
| 30765 | 0 | 24654  | HQTLQDPRVRGLYLPAG<br>G         | 2.84 | 0.01 | 3.45 | 0.68 | 0.22 | 1.27 |
| 30766 | 0 | 24655  | HQTLQDPRVRGLYLPAG<br>GSSSGTVNP | 3.19 | 0.01 | 2.58 | 0.68 | 0.22 | 1.27 |
| 30767 | 0 | 24655  | HQTLQDPRVRGLYLPAG<br>GSSSGTVNP | 3.19 | 0.01 | 2.58 | 1.12 | 0.22 | 1.27 |
| 30768 | 0 | 24655  | HQTLQDPRVRGLYLPAG<br>GSSSGTVNP | 3.19 | 0.01 | 2.58 | 1.20 | 0.22 | 0.28 |
| 30769 | 0 | 24655  | HQTLQDPRVRGLYLPAG<br>GSSSGTVNP | 3.19 | 0.01 | 2.58 | 1.20 | 0.22 | 0.28 |
| 30770 | 0 | 138192 | HQTPLST                        | 2.02 | 0.01 | 0.90 | 1.15 | 2.26 | 0.28 |
| 30771 | 0 | 138192 | HQTPLST                        | 2.02 | 0.01 | 0.90 | 1.15 | 2.26 | 2.35 |
| 30772 | 0 | 138192 | HQTPLST                        | 2.02 | 0.01 | 0.90 | 0.44 | 1.41 | 1.34 |
| 30773 | 0 | 24656  | HQVFGA                         | 1.88 | 0.01 | 2.40 | 0.44 | 0.85 | 0.28 |

|       |   |        |                             |      |      |      |      |      |      |
|-------|---|--------|-----------------------------|------|------|------|------|------|------|
| 30774 | 0 | 24657  | HQVFGAIYGAAFSGV             | 2.76 | 0.01 | 2.30 | 2.65 | 0.22 | 0.28 |
| 30775 | 0 | 24657  | HQVFGAIYGAAFSGV             | 2.76 | 0.01 | 2.30 | 2.65 | 0.22 | 0.28 |
| 30776 | 0 | 24657  | HQVFGAIYGAAFSGV             | 2.76 | 0.01 | 2.30 | 2.65 | 0.22 | 0.28 |
| 30777 | 0 | 24657  | HQVFGAIYGAAFSGV             | 2.76 | 0.01 | 2.30 | 2.65 | 0.22 | 0.28 |
| 30778 | 0 | 24657  | HQVFGAIYGAAFSGV             | 2.76 | 0.01 | 2.30 | 2.65 | 0.22 | 0.28 |
| 30779 | 0 | 24657  | HQVFGAIYGAAFSGV             | 2.76 | 0.01 | 2.30 | 2.65 | 0.22 | 0.28 |
| 30780 | 0 | 24658  | HQVGDGEA                    | 2.12 | 0.01 | 2.04 | 0.44 | 0.85 | 0.28 |
| 30781 | 0 | 24658  | HQVGDGEA                    | 2.12 | 0.01 | 2.04 | 0.44 | 0.85 | 0.28 |
| 30782 | 0 | 24658  | HQVGDGEA                    | 2.12 | 0.01 | 2.04 | 0.44 | 0.85 | 0.28 |
| 30783 | 0 | 83209  | HQVQEGLNIEKY                | 2.45 | 0.01 | 2.87 | 0.44 | 0.85 | 0.28 |
| 30784 | 0 | 182165 | HQWHHECTREGREDD             | 2.68 | 0.01 | 0.78 | 0.44 | 1.13 | 0.85 |
| 30785 | 0 | 112158 | HQYLSSF                     | 2.01 | 0.01 | 0.78 | 0.44 | 1.13 | 0.28 |
| 30786 | 0 | 127686 | HRALARGPPARLGGE             | 2.71 | 0.01 | 0.78 | 0.44 | 1.13 | 0.85 |
| 30787 | 0 | 423346 | HRANETIYNTTLKYG             | 2.65 | 0.01 | 2.51 | 0.44 | 2.35 | 1.28 |
| 30788 | 0 | 518061 | HRDKDDHDHEHEDEN             | 2.74 | 0.01 | 2.24 | 0.44 | 1.41 | 1.28 |
| 30789 | 0 | 103975 | HRDLLRF                     | 2.03 | 0.01 | 0.90 | 1.15 | 0.22 | 1.39 |
| 30790 | 0 | 24673  | HRFYESGIVFEEYKDYFCI<br>SKWY | 3.07 | 0.01 | 2.08 | 0.68 | 0.22 | 1.75 |
| 30791 | 0 | 108476 | HRGFT                       | 1.74 | 0.01 | 0.78 | 2.46 | 0.22 | 0.28 |
| 30792 | 0 | 108476 | HRGFT                       | 1.74 | 0.01 | 0.78 | 2.46 | 0.22 | 0.28 |
| 30793 | 0 | 24675  | HRGGPEEFEGAGDGEP<br>PEDD    | 2.98 | 0.01 | 2.40 | 0.44 | 1.59 | 0.85 |
| 30794 | 0 | 238611 | HRGLRIDRGCAATCP             | 2.67 | 0.01 | 2.56 | 2.02 | 0.22 | 0.85 |
| 30795 | 0 | 24676  | HRGRAA                      | 1.88 | 0.01 | 0.90 | 2.02 | 0.22 | 0.28 |
| 30796 | 0 | 24677  | HRGRAQ                      | 1.90 | 0.01 | 0.90 | 2.02 | 0.22 | 0.28 |
| 30797 | 0 | 309591 | HRHDTDTEDSTKNAA             | 2.69 | 0.01 | 1.61 | 0.44 | 0.85 | 1.28 |
| 30798 | 0 | 98815  | HRIFLAGDKD                  | 2.29 | 0.01 | 2.16 | 0.44 | 1.23 | 0.85 |
| 30799 | 0 | 98815  | HRIFLAGDKD                  | 2.29 | 0.01 | 2.16 | 0.44 | 1.23 | 0.85 |
| 30800 | 0 | 171414 | HRIMKKLKYVLSYVT             | 2.68 | 0.01 | 0.78 | 0.44 | 1.41 | 0.28 |
| 30801 | 0 | 174543 | HRISNYAMELHS                | 2.46 | 0.01 | 0.90 | 1.15 | 1.41 | 1.39 |
| 30802 | 0 | 92920  | HRKGDGNDII                  | 2.31 | 0.01 | 2.67 | 2.00 | 0.22 | 0.28 |
| 30803 | 0 | 92920  | HRKGDGNDII                  | 2.31 | 0.01 | 2.67 | 2.00 | 0.22 | 0.28 |
| 30804 | 0 | 92920  | HRKGDGNDII                  | 2.31 | 0.01 | 2.67 | 2.00 | 0.22 | 0.28 |
| 30805 | 0 | 119465 | HRKSTVAGS                   | 2.21 | 0.01 | 0.90 | 0.44 | 1.13 | 0.28 |
| 30806 | 0 | 240884 | HRKVPDLPALTPQER             | 2.66 | 0.01 | 4.93 | 0.44 | 1.41 | 0.28 |
| 30807 | 0 | 107890 | HLAFGQNT                    | 2.18 | 0.01 | 0.90 | 2.46 | 0.22 | 1.27 |
| 30808 | 0 | 107890 | HLAFGQNT                    | 2.18 | 0.01 | 0.90 | 2.46 | 0.22 | 0.28 |
| 30809 | 0 | 107890 | HLAFGQNT                    | 2.18 | 0.01 | 0.90 | 2.46 | 0.22 | 1.27 |
| 30810 | 0 | 107890 | HLAFGQNT                    | 2.18 | 0.01 | 0.90 | 2.46 | 0.22 | 0.28 |

|       |   |        |                        |      |      |      |      |      |      |
|-------|---|--------|------------------------|------|------|------|------|------|------|
| 30811 | 0 | 107891 | HRLAFGQYT              | 2.18 | 0.01 | 0.90 | 2.46 | 0.22 | 1.27 |
| 30812 | 0 | 107891 | HRLAFGQYT              | 2.18 | 0.01 | 0.90 | 2.46 | 0.22 | 0.28 |
| 30813 | 0 | 107891 | HRLAFGQYT              | 2.18 | 0.01 | 0.90 | 2.46 | 0.22 | 1.27 |
| 30814 | 0 | 181337 | HRLGTGVVPALQAAE        | 2.66 | 0.01 | 2.82 | 1.15 | 0.22 | 0.28 |
| 30815 | 0 | 174544 | HRLTNSEQAALP           | 2.44 | 0.01 | 0.90 | 1.15 | 1.41 | 1.39 |
| 30816 | 0 | 106517 | HRLYHVPAVG             | 2.32 | 0.01 | 2.75 | 0.44 | 1.23 | 0.85 |
| 30817 | 0 | 24693  | HRMAWDMM               | 2.11 | 0.01 | 1.72 | 0.44 | 0.85 | 0.28 |
| 30818 | 0 | 24694  | HRMAWDMMM              | 2.22 | 0.01 | 1.72 | 0.44 | 0.85 | 0.85 |
| 30819 | 0 | 24694  | HRMAWDMMM              | 2.22 | 0.01 | 1.72 | 0.44 | 0.85 | 0.85 |
| 30820 | 0 | 24694  | HRMAWDMMM              | 2.22 | 0.01 | 1.72 | 0.44 | 0.85 | 0.85 |
| 30821 | 0 | 24694  | HRMAWDMMM              | 2.22 | 0.01 | 3.18 | 0.44 | 0.85 | 0.28 |
| 30822 | 0 | 24694  | HRMAWDMMM              | 2.22 | 0.01 | 3.18 | 0.44 | 1.41 | 0.28 |
| 30823 | 0 | 24696  | HRMAWNMMMWNWSP<br>T    | 2.61 | 0.01 | 2.68 | 0.44 | 0.85 | 0.28 |
| 30824 | 0 | 24696  | HRMAWNMMMWNWSP<br>T    | 2.61 | 0.01 | 2.68 | 2.74 | 0.22 | 0.28 |
| 30825 | 0 | 24697  | HRMQEAVEAERAGRGT<br>GH | 2.89 | 0.01 | 2.14 | 1.15 | 0.22 | 0.85 |
| 30826 | 0 | 24697  | HRMQEAVEAERAGRGT<br>GH | 2.89 | 0.01 | 2.14 | 1.15 | 0.22 | 0.28 |
| 30827 | 0 | 174545 | HRMTNAMHHFMG           | 2.49 | 0.01 | 0.90 | 1.15 | 1.41 | 1.39 |
| 30828 | 0 | 174546 | HRMTNNAMDVFM           | 2.46 | 0.01 | 0.90 | 1.15 | 1.41 | 1.39 |
| 30829 | 0 | 140233 | HRPPSPAL               | 2.14 | 0.01 | 0.78 | 0.44 | 1.13 | 0.28 |
| 30830 | 0 | 24703  | HRQWFL                 | 1.88 | 0.01 | 2.40 | 0.44 | 0.85 | 0.28 |
| 30831 | 0 | 114396 | HRRQQRQQRPGEHG         | 2.73 | 0.01 | 3.27 | 0.44 | 1.23 | 0.85 |
| 30832 | 0 | 24706  | HRRTRKAPKRIRLPHIR      | 2.84 | 0.01 | 2.40 | 1.12 | 0.22 | 0.85 |
| 30833 | 0 | 24706  | HRRTRKAPKRIRLPHIR      | 2.84 | 0.01 | 2.40 | 1.12 | 0.22 | 0.85 |
| 30834 | 0 | 24706  | HRRTRKAPKRIRLPHIR      | 2.84 | 0.01 | 2.40 | 1.20 | 0.22 | 0.85 |
| 30835 | 0 | 24706  | HRRTRKAPKRIRLPHIR      | 2.84 | 0.01 | 2.40 | 0.68 | 0.22 | 0.85 |
| 30836 | 0 | 24706  | HRRTRKAPKRIRLPHIR      | 2.84 | 0.01 | 2.40 | 0.68 | 0.22 | 0.85 |
| 30837 | 0 | 24706  | HRRTRKAPKRIRLPHIR      | 2.84 | 0.01 | 2.40 | 0.68 | 0.22 | 0.85 |
| 30838 | 0 | 24706  | HRRTRKAPKRIRLPHIR      | 2.84 | 0.01 | 2.40 | 1.12 | 0.22 | 0.85 |
| 30839 | 0 | 24706  | HRRTRKAPKRIRLPHIR      | 2.84 | 0.01 | 2.40 | 1.12 | 0.22 | 0.85 |
| 30840 | 0 | 24706  | HRRTRKAPKRIRLPHIR      | 2.84 | 0.01 | 2.40 | 1.20 | 0.22 | 0.85 |
| 30841 | 0 | 24706  | HRRTRKAPKRIRLPHIR      | 2.84 | 0.01 | 2.40 | 1.20 | 0.22 | 0.85 |

|       |   |        |                               |      |      |      |      |      |      |
|-------|---|--------|-------------------------------|------|------|------|------|------|------|
| 30842 | 0 | 24706  | HRRTRKAPKRIRLPHIR             | 2.84 | 0.01 | 2.40 | 1.20 | 0.22 | 0.85 |
| 30843 | 0 | 103260 | HRSDGSGDTFLFTQY               | 2.68 | 0.01 | 2.04 | 0.44 | 0.85 | 1.28 |
| 30844 | 0 | 115784 | HRTFE                         | 1.74 | 0.01 | 0.78 | 0.44 | 1.13 | 1.57 |
| 30845 | 0 | 115784 | HRTFE                         | 1.74 | 0.01 | 0.78 | 0.44 | 1.41 | 1.57 |
| 30846 | 0 | 115784 | HRTFE                         | 1.74 | 0.01 | 0.78 | 0.44 | 1.13 | 1.57 |
| 30847 | 0 | 115784 | HRTFE                         | 1.74 | 0.01 | 0.78 | 0.44 | 1.41 | 1.57 |
| 30848 | 0 | 115784 | HRTFE                         | 1.74 | 0.01 | 0.78 | 0.44 | 1.13 | 1.57 |
| 30849 | 0 | 115784 | HRTFE                         | 1.74 | 0.01 | 0.78 | 0.44 | 1.41 | 1.57 |
|       |   |        | HRTLMSCPVGEAPSPYN             |      |      |      |      |      |      |
| 30850 | 0 | 97390  | SRFESVAWSASACHDGT<br>SW       | 3.51 | 0.01 | 3.09 | 0.44 | 0.85 | 0.28 |
| 30851 | 0 | 24712  | HRVMYASS                      | 2.09 | 0.01 | 2.21 | 1.12 | 0.22 | 0.28 |
| 30852 | 0 | 24712  | HRVMYASS                      | 2.09 | 0.01 | 2.21 | 0.44 | 0.85 | 0.28 |
| 30853 | 0 | 24713  | HRVMYASSGI                    | 2.28 | 0.01 | 2.21 | 1.12 | 0.22 | 0.28 |
| 30854 | 0 | 24713  | HRVMYASSGI                    | 2.28 | 0.01 | 2.21 | 1.12 | 0.22 | 0.28 |
| 30855 | 0 | 119930 | HRWSSYMVHW                    | 2.33 | 0.01 | 0.78 | 0.68 | 0.22 | 0.28 |
| 30856 | 0 | 122400 | HSAHRGPTYDPRVLH               | 2.67 | 0.01 | 0.90 | 1.15 | 0.22 | 1.39 |
| 30857 | 0 | 189231 | HSAKVKITVPSGAQVK              | 2.75 | 0.01 | 2.92 | 2.49 | 0.22 | 0.28 |
| 30858 | 0 | 24722  | HSAPLG                        | 1.88 | 0.01 | 2.53 | 0.44 | 1.59 | 0.28 |
| 30859 | 0 | 107892 | HSASQDGQDTIRGHPG<br>SS        | 2.86 | 4.63 | 0.78 | 0.44 | 1.13 | 0.85 |
| 30860 | 0 | 107892 | HSASQDGQDTIRGHPG<br>SS        | 2.86 | 4.63 | 0.78 | 0.44 | 1.41 | 0.85 |
| 30861 | 0 | 24726  | HSCSVPYEVKFNPVGRE<br>LYTHPPEH | 3.15 | 0.01 | 3.36 | 0.68 | 0.22 | 0.28 |
| 30862 | 0 | 24726  | HSCSVPYEVKFNPVGRE<br>LYTHPPEH | 3.15 | 0.01 | 3.36 | 0.68 | 0.22 | 0.28 |
| 30863 | 0 | 24726  | HSCSVPYEVKFNPVGRE<br>LYTHPPEH | 3.15 | 0.01 | 3.36 | 0.68 | 0.22 | 0.28 |
| 30864 | 0 | 24730  | HSDHAESSWVNRGESS<br>RKAY      | 2.94 | 0.01 | 3.27 | 2.89 | 0.22 | 0.28 |
| 30865 | 0 | 24730  | HSDHAESSWVNRGESS<br>RKAY      | 2.94 | 0.01 | 3.27 | 3.16 | 0.22 | 0.28 |
| 30866 | 0 | 24730  | HSDHAESSWVNRGESS<br>RKAY      | 2.94 | 0.01 | 3.27 | 0.44 | 0.85 | 0.28 |
| 30867 | 0 | 132838 | HSDLKIQE                      | 2.10 | 0.01 | 2.19 | 1.12 | 0.22 | 0.85 |
| 30868 | 0 | 132838 | HSDLKIQE                      | 2.10 | 0.01 | 2.19 | 1.12 | 0.22 | 0.85 |
| 30869 | 0 | 122401 | HSEAETGPP                     | 2.21 | 0.01 | 0.78 | 0.44 | 1.41 | 1.39 |
| 30870 | 0 | 123296 | HSEYYNHAIDWQTGPG<br>CNTA      | 2.91 | 0.01 | 0.78 | 1.12 | 0.22 | 0.85 |
| 30871 | 0 | 123296 | HSEYYNHAIDWQTGPG<br>CNTA      | 2.91 | 0.01 | 0.78 | 1.12 | 0.22 | 1.34 |
| 30872 | 0 | 153396 | HSFEPWSARDMLGGGS              | 2.69 | 0.01 | 0.90 | 0.68 | 0.22 | 0.28 |

|       |   |        |                                        |      |      |      |      |      |      |
|-------|---|--------|----------------------------------------|------|------|------|------|------|------|
| 30873 | 0 | 153396 | HSFEPWSARDMLGGGS                       | 2.69 | 0.01 | 0.90 | 0.44 | 0.85 | 2.35 |
| 30874 | 0 | 24741  | HSGAEF                                 | 1.88 | 0.01 | 0.90 | 0.44 | 1.74 | 1.39 |
| 30875 | 0 | 24741  | HSGAEF                                 | 1.88 | 0.01 | 0.90 | 0.68 | 0.22 | 0.28 |
| 30876 | 0 | 107893 | HSGIGHGQASSAVRDSG<br>HRGYS             | 3.08 | 4.63 | 0.78 | 0.44 | 1.13 | 0.85 |
| 30877 | 0 | 107893 | HSGIGHGQASSAVRDSG<br>HRGYS             | 3.08 | 4.63 | 0.78 | 0.44 | 1.41 | 0.85 |
| 30878 | 0 | 24746  | HSGPNVRVWVSS                           | 2.47 | 0.01 | 0.90 | 0.68 | 0.22 | 0.28 |
| 30879 | 0 | 24747  | HSGVVPNISKAMAKKK<br>GGKK               | 2.94 | 0.01 | 2.78 | 2.49 | 0.85 | 0.28 |
| 30880 | 0 | 309801 | HSHTDTEDSTKNAA                         | 2.70 | 0.01 | 1.61 | 0.44 | 0.85 | 1.28 |
| 30881 | 0 | 180981 | HSHTLTDPDPL                            | 2.52 | 0.01 | 0.90 | 0.68 | 0.22 | 1.27 |
| 30882 | 0 | 180981 | HSHTLTDPDPL                            | 2.52 | 0.01 | 0.90 | 0.68 | 0.22 | 1.27 |
| 30883 | 0 | 180981 | HSHTLTDPDPL                            | 2.52 | 0.01 | 0.90 | 0.68 | 0.22 | 1.27 |
| 30884 | 0 | 180981 | HSHTLTDPDPL                            | 2.52 | 0.01 | 0.90 | 0.68 | 0.22 | 1.27 |
| 30885 | 0 | 101719 | HSHQVFNLLSL                            | 2.50 | 0.01 | 0.90 | 0.44 | 0.85 | 1.39 |
| 30886 | 0 | 450683 | HSHTLTW                                | 2.05 | 0.01 | 0.90 | 0.44 | 1.41 | 1.39 |
| 30887 | 0 | 147019 | HSHVFSFGGYTLR                          | 2.55 | 0.01 | 1.60 | 0.44 | 0.85 | 0.85 |
| 30888 | 0 | 24749  | HSYHKKF                                | 2.05 | 0.01 | 0.90 | 0.68 | 0.22 | 1.39 |
| 30889 | 0 | 450684 | HSILSNL                                | 2.04 | 0.01 | 0.90 | 0.44 | 1.23 | 1.39 |
| 30890 | 0 | 24755  | HSIRSTRLHTTSL                          | 2.74 | 0.01 | 0.90 | 0.44 | 1.59 | 1.39 |
| 30891 | 0 | 132839 | HSISLGATPTLP                           | 2.49 | 0.01 | 0.90 | 0.44 | 1.41 | 1.39 |
| 30892 | 0 | 133602 | HSIYSEWQPMWP                           | 2.48 | 0.01 | 0.90 | 0.44 | 0.85 | 1.39 |
| 30893 | 0 | 24766  | HSKKVPNKDRRRRVPE<br>KFFCDSSKNYTKWNKDI  | 3.44 | 0.01 | 3.89 | 1.12 | 0.22 | 0.85 |
| 30894 | 0 | 24767  | HSKKVPNKDVQRRVPKE<br>KFFCDSSKTYTKWNKDI | 3.44 | 0.01 | 3.89 | 1.12 | 0.22 | 0.85 |
| 30895 | 0 | 24767  | HSKKVPNKDVQRRVPKE<br>KFFCDSSKTYTKWNKDI | 3.44 | 0.01 | 3.89 | 1.12 | 0.22 | 0.85 |
| 30896 | 0 | 92924  | HSKNVTNSLD                             | 2.31 | 0.01 | 2.67 | 2.00 | 0.22 | 0.28 |
| 30897 | 0 | 92924  | HSKNVTNSLD                             | 2.31 | 0.01 | 2.67 | 2.00 | 0.22 | 0.28 |
| 30898 | 0 | 434614 | HSKRTFLIKTVETRDGQ                      | 2.76 | 4.93 | 0.78 | 0.44 | 1.13 | 0.28 |
| 30899 | 0 | 110286 | HSLGKLLGRPDKF                          | 2.55 | 0.01 | 0.90 | 1.20 | 0.22 | 1.57 |
| 30900 | 0 | 24778  | HSLGKWAGHPDKF                          | 2.54 | 0.01 | 0.90 | 2.25 | 0.22 | 3.40 |
| 30901 | 0 | 24786  | HSLGKWLGHHPDKF                         | 2.56 | 0.01 | 0.90 | 2.25 | 0.22 | 0.28 |
| 30902 | 0 | 24786  | HSLGKWLGHHPDKF                         | 2.56 | 0.01 | 0.90 | 2.25 | 0.22 | 0.28 |
| 30903 | 0 | 24786  | HSLGKWLGHHPDKF                         | 2.56 | 0.01 | 1.75 | 2.25 | 0.22 | 0.28 |
| 30904 | 0 | 24786  | HSLGKWLGHHPDKF                         | 2.56 | 0.01 | 1.75 | 2.25 | 0.22 | 0.28 |
| 30905 | 0 | 24786  | HSLGKWLGHHPDKF                         | 2.56 | 0.01 | 1.75 | 2.25 | 0.22 | 0.28 |
| 30906 | 0 | 24786  | HSLGKWLGHHPDKF                         | 2.56 | 0.01 | 1.75 | 2.25 | 0.22 | 0.28 |
| 30907 | 0 | 24786  | HSLGKWLGHHPDKF                         | 2.56 | 0.01 | 1.75 | 2.25 | 2.60 | 3.40 |
| 30908 | 0 | 24786  | HSLGKWLGHHPDKF                         | 2.56 | 0.01 | 1.75 | 1.20 | 0.22 | 1.57 |

|       |   |        |                           |      |      |      |      |      |      |
|-------|---|--------|---------------------------|------|------|------|------|------|------|
| 30909 | 0 | 24786  | HSLGKWLGHHPDKF            | 2.56 | 0.01 | 1.75 | 3.40 | 0.22 | 1.75 |
| 30910 | 0 | 24786  | HSLGKWLGHHPDKF            | 2.56 | 0.01 | 0.90 | 2.25 | 0.22 | 0.28 |
| 30911 | 0 | 24786  | HSLGKWLGHHPDKF            | 2.56 | 0.01 | 0.90 | 2.25 | 0.22 | 0.85 |
| 30912 | 0 | 24786  | HSLGKWLGHHPDKF            | 2.56 | 0.01 | 0.90 | 2.25 | 0.22 | 0.85 |
| 30913 | 0 | 24786  | HSLGKWLGHHPDKF            | 2.56 | 0.01 | 0.90 | 2.25 | 0.22 | 0.85 |
| 30914 | 0 | 24786  | HSLGKWLGHHPDKF            | 2.56 | 0.01 | 0.90 | 2.25 | 2.60 | 1.75 |
| 30915 | 0 | 24786  | HSLGKWLGHHPDKF            | 2.56 | 0.01 | 1.75 | 2.25 | 2.60 | 1.75 |
| 30916 | 0 | 24786  | HSLGKWLGHHPDKF            | 2.56 | 0.01 | 1.75 | 2.25 | 0.22 | 0.85 |
| 30917 | 0 | 24786  | HSLGKWLGHHPDKF            | 2.56 | 0.01 | 1.75 | 2.25 | 0.22 | 0.85 |
| 30918 | 0 | 24786  | HSLGKWLGHHPDKF            | 2.56 | 0.01 | 1.75 | 2.25 | 0.22 | 0.85 |
| 30919 | 0 | 24786  | HSLGKWLGHHPDKF            | 2.56 | 0.01 | 1.75 | 2.25 | 0.22 | 0.85 |
| 30920 | 0 | 24786  | HSLGKWLGHHPDKF            | 2.56 | 0.01 | 1.75 | 2.25 | 0.22 | 0.85 |
| 30921 | 0 | 24786  | HSLGKWLGHHPDKF            | 2.56 | 0.01 | 1.75 | 2.25 | 0.22 | 0.85 |
| 30922 | 0 | 24786  | HSLGKWLGHHPDKF            | 2.56 | 0.01 | 1.75 | 2.25 | 0.22 | 0.85 |
| 30923 | 0 | 24786  | HSLGKWLGHHPDKF            | 2.56 | 0.01 | 1.75 | 2.25 | 0.22 | 0.85 |
| 30924 | 0 | 24786  | HSLGKWLGHHPDKF            | 2.56 | 0.01 | 1.75 | 2.25 | 0.22 | 0.85 |
| 30925 | 0 | 24786  | HSLGKWLGHHPDKF            | 2.56 | 0.01 | 1.75 | 2.25 | 0.22 | 0.85 |
| 30926 | 0 | 24786  | HSLGKWLGHHPDKF            | 2.56 | 0.01 | 1.75 | 2.25 | 0.22 | 0.85 |
| 30927 | 0 | 24786  | HSLGKWLGHHPDKF            | 2.56 | 0.01 | 1.75 | 2.25 | 0.22 | 0.85 |
| 30928 | 0 | 24786  | HSLGKWLGHHPDKF            | 2.56 | 0.01 | 1.75 | 2.25 | 0.22 | 0.85 |
| 30929 | 0 | 24786  | HSLGKWLGHHPDKF            | 2.56 | 0.01 | 1.75 | 2.25 | 0.22 | 0.85 |
| 30930 | 0 | 24786  | HSLGKWLGHHPDKF            | 2.56 | 0.01 | 1.75 | 2.25 | 0.22 | 0.85 |
| 30931 | 0 | 24786  | HSLGKWLGHHPDKF            | 2.56 | 0.01 | 1.75 | 2.25 | 2.60 | 1.75 |
| 30932 | 0 | 24786  | HSLGKWLGHHPDKF            | 2.56 | 0.01 | 0.90 | 2.25 | 0.22 | 0.85 |
| 30933 | 0 | 24786  | HSLGKWLGHHPDKF            | 2.56 | 0.01 | 0.90 | 2.25 | 0.22 | 0.85 |
| 30934 | 0 | 24786  | HSLGKWLGHHPDKF            | 2.56 | 0.01 | 0.90 | 2.25 | 0.22 | 0.85 |
| 30935 | 0 | 24786  | HSLGKWLGHHPDKF            | 2.56 | 0.01 | 0.90 | 2.25 | 0.22 | 0.85 |
| 30936 | 0 | 24786  | HSLGKWLGHHPDKF            | 2.56 | 0.01 | 0.90 | 2.25 | 0.22 | 0.85 |
| 30937 | 0 | 24786  | HSLGKWLGHHPDKF            | 2.56 | 0.01 | 0.90 | 2.25 | 0.22 | 0.85 |
| 30938 | 0 | 24786  | HSLGKWLGHHPDKF            | 2.56 | 0.01 | 0.90 | 2.25 | 0.22 | 0.85 |
| 30939 | 0 | 24786  | HSLGKWLGHHPDKF            | 2.56 | 0.01 | 0.90 | 2.25 | 0.22 | 0.85 |
| 30940 | 0 | 24786  | HSLGKWLGHHPDKF            | 2.56 | 0.01 | 0.90 | 2.25 | 0.22 | 0.85 |
| 30941 | 0 | 24786  | HSLGKWLGHHPDKF            | 2.56 | 0.01 | 0.90 | 2.25 | 2.60 | 1.75 |
| 30942 | 0 | 24786  | HSLGKWLGHHPDKF            | 2.56 | 0.01 | 0.90 | 2.25 | 2.60 | 1.75 |
| 30943 | 0 | 24786  | HSLGKWLGHHPDKF            | 2.56 | 0.01 | 1.75 | 2.25 | 0.22 | 0.28 |
| 30944 | 0 | 24786  | HSLGKWLGHHPDKF            | 2.56 | 0.01 | 0.90 | 2.25 | 0.22 | 0.28 |
| 30945 | 0 | 24786  | HSLGKWLGHHPDKF            | 2.56 | 0.01 | 0.90 | 2.25 | 0.22 | 0.28 |
| 30946 | 0 | 24786  | HSLGKWLGHHPDKF            | 2.56 | 0.01 | 0.90 | 2.25 | 0.22 | 0.28 |
| 30947 | 0 | 24786  | HSLGKWLGHHPDKF            | 2.56 | 0.01 | 0.90 | 2.25 | 0.22 | 0.28 |
| 30948 | 0 | 120587 | HSLWIGVFLFLGGMAA<br>GGCNS | 3.03 | 0.01 | 2.86 | 0.44 | 0.85 | 0.28 |
| 30949 | 0 | 120587 | HSLWIGVFLFLGGMAA<br>GGCNS | 3.03 | 0.01 | 2.86 | 0.44 | 1.41 | 0.28 |
| 30950 | 0 | 131911 | HSLNIGDYNRTVGKG           | 2.64 | 0.01 | 0.78 | 0.44 | 1.13 | 0.85 |
| 30951 | 0 | 141916 | HSLRYNLTVLSW              | 2.48 | 0.01 | 0.78 | 0.44 | 2.35 | 0.28 |
| 30952 | 0 | 133604 | HLSMYFDWVPH               | 2.46 | 0.01 | 0.90 | 0.44 | 0.85 | 1.39 |
| 30953 | 0 | 174547 | HLSNIQMATLA               | 2.48 | 0.01 | 0.90 | 1.15 | 1.41 | 1.39 |



|       |   |        |                                      |      |      |      |      |      |      |
|-------|---|--------|--------------------------------------|------|------|------|------|------|------|
| 30954 | 0 | 174548 | HSLTNTQMTQLS                         | 2.51 | 0.01 | 0.90 | 1.15 | 1.41 | 1.39 |
| 30955 | 0 | 24812  | HSMKEGIHAQ                           | 2.30 | 0.01 | 1.60 | 0.44 | 1.23 | 0.28 |
| 30956 | 0 | 190445 | HSMKEGIHAQQKEPM                      | 2.68 | 0.01 | 1.60 | 0.44 | 1.23 | 1.28 |
| 30957 | 0 | 24814  | HSMKEGIHAQQKEPMI<br>GVNQ             | 2.95 | 0.01 | 1.60 | 0.44 | 1.23 | 0.28 |
| 30958 | 0 | 24814  | HSMKEGIHAQQKEPMI<br>GVNQ             | 2.95 | 0.01 | 1.60 | 0.44 | 1.23 | 0.28 |
| 30959 | 0 | 24814  | HSMKEGIHAQQKEPMI<br>GVNQ             | 2.95 | 0.01 | 1.60 | 2.82 | 0.22 | 0.28 |
| 30960 | 0 | 24814  | HSMKEGIHAQQKEPMI<br>GVNQ             | 2.95 | 0.01 | 1.60 | 0.44 | 1.23 | 0.28 |
| 30961 | 0 | 24814  | HSMKEGIHAQQKEPMI<br>GVNQ             | 2.95 | 0.01 | 1.60 | 1.12 | 0.22 | 1.27 |
| 30962 | 0 | 24814  | HSMKEGIHAQQKEPMI<br>GVNQ             | 2.95 | 0.01 | 1.60 | 0.44 | 1.23 | 1.28 |
| 30963 | 0 | 196526 | HSMP TLH                             | 2.03 | 0.01 | 0.90 | 0.44 | 1.23 | 1.39 |
| 30964 | 0 | 24816  | HSMVDR                               | 1.88 | 0.01 | 2.40 | 0.44 | 0.85 | 0.28 |
| 30965 | 0 | 419218 | HSMYGNKTPYPYADGQ<br>QGSP             | 2.94 | 0.01 | 3.50 | 2.13 | 0.22 | 0.28 |
| 30966 | 0 | 96367  | HSNLDHI                              | 2.03 | 0.01 | 2.04 | 0.44 | 0.85 | 0.28 |
| 30967 | 0 | 96367  | HSNLDHI                              | 2.03 | 0.01 | 2.04 | 0.44 | 0.85 | 0.85 |
| 30968 | 0 | 96367  | HSNLDHI                              | 2.03 | 0.01 | 2.04 | 0.44 | 0.85 | 1.34 |
| 30969 | 0 | 96367  | HSNLDHI                              | 2.03 | 0.01 | 2.04 | 0.44 | 0.85 | 1.34 |
| 30970 | 0 | 96367  | HSNLDHI                              | 2.03 | 0.01 | 2.04 | 0.44 | 0.85 | 1.27 |
| 30971 | 0 | 180982 | HSNSSWISRQTY                         | 2.47 | 0.01 | 0.90 | 0.68 | 0.22 | 1.39 |
| 30972 | 0 | 187147 | HSNWDMPPIRLVAS                       | 2.56 | 0.01 | 0.90 | 0.44 | 1.41 | 1.39 |
| 30973 | 0 | 187147 | HSNWDMPPIRLVAS                       | 2.56 | 0.01 | 0.90 | 0.44 | 1.41 | 1.34 |
| 30974 | 0 | 187147 | HSNWDMPPIRLVAS                       | 2.56 | 0.01 | 0.90 | 0.44 | 1.41 | 0.28 |
| 30975 | 0 | 450685 | HSPNSIK                              | 2.02 | 0.01 | 0.90 | 0.44 | 1.41 | 1.39 |
| 30976 | 0 | 24834  | HSPQKHPTRNTRSRRSV<br>PVELRANRTITTTTS | 3.38 | 0.01 | 3.41 | 0.44 | 0.85 | 0.28 |
| 30977 | 0 | 24834  | HSPQKHPTRNTRSRRSV<br>PVELRANRTITTTTS | 3.38 | 0.01 | 3.41 | 0.44 | 0.85 | 0.28 |
| 30978 | 0 | 137419 | HSPRWHL                              | 2.03 | 0.01 | 0.90 | 0.68 | 0.22 | 1.39 |
| 30979 | 0 | 137420 | HSPRYHM                              | 2.03 | 0.01 | 0.90 | 0.68 | 0.22 | 1.39 |
| 30980 | 0 | 137421 | HSPRYHSEPQFG                         | 2.48 | 0.01 | 0.90 | 0.68 | 0.22 | 1.39 |
| 30981 | 0 | 24841  | HSQWNKPSKP                           | 2.33 | 0.01 | 0.78 | 2.19 | 0.22 | 0.28 |
| 30982 | 0 | 24841  | HSQWNKPSKP                           | 2.33 | 0.01 | 0.78 | 2.19 | 0.22 | 2.02 |
| 30983 | 0 | 24841  | HSQWNKPSKP                           | 2.33 | 0.01 | 0.78 | 2.19 | 0.22 | 2.02 |
| 30984 | 0 | 24841  | HSQWNKPSKP                           | 2.33 | 0.01 | 0.78 | 2.19 | 0.22 | 2.02 |
| 30985 | 0 | 24841  | HSQWNKPSKP                           | 2.33 | 0.01 | 0.78 | 2.19 | 0.22 | 0.28 |
| 30986 | 0 | 24842  | HSQWNKPSKPKTNMK                      | 2.70 | 0.01 | 2.52 | 2.90 | 0.22 | 0.85 |
| 30987 | 0 | 24842  | HSQWNKPSKPKTNMK                      | 2.70 | 0.01 | 2.52 | 3.93 | 0.22 | 0.85 |

|       |   |        |                                                |      |      |      |      |      |      |
|-------|---|--------|------------------------------------------------|------|------|------|------|------|------|
| 30988 | 0 | 24842  | HSQWNKPSKPKTNMK                                | 2.70 | 0.01 | 2.52 | 2.90 | 0.22 | 0.28 |
| 30989 | 0 | 140234 | HSRPYMAS                                       | 2.12 | 0.01 | 0.78 | 0.44 | 1.13 | 0.28 |
| 30990 | 0 | 171423 | HSRPYMASLQMRGNP                                | 2.66 | 0.01 | 0.78 | 0.44 | 1.41 | 0.28 |
| 30991 | 0 | 24844  | HSRRERAGQEEENEG                                | 2.70 | 0.01 | 2.16 | 0.44 | 1.23 | 0.85 |
| 30992 | 0 | 134692 | HSRRRQGWLKEIRKL                                | 2.67 | 0.01 | 0.78 | 3.05 | 1.13 | 0.85 |
| 30993 | 0 | 127687 | HSSHRLS                                        | 2.07 | 0.01 | 0.90 | 0.44 | 1.13 | 1.39 |
| 30994 | 0 | 196527 | HSSNAQV                                        | 2.01 | 0.01 | 0.90 | 0.44 | 1.23 | 1.39 |
| 30995 | 0 | 139521 | HSSPTLS                                        | 2.04 | 0.01 | 0.90 | 1.20 | 0.22 | 1.39 |
| 30996 | 0 | 24846  | HSSQISMD                                       | 2.14 | 0.01 | 2.83 | 2.61 | 0.22 | 0.28 |
| 30997 | 0 | 509708 | HSSRQVTPLSL                                    | 2.41 | 0.01 | 4.45 | 0.68 | 0.22 | 1.48 |
| 30998 | 0 | 509708 | HSSRQVTPLSL                                    | 2.41 | 0.01 | 4.45 | 0.68 | 0.22 | 0.28 |
| 30999 | 0 | 509708 | HSSRQVTPLSL                                    | 2.41 | 0.01 | 4.45 | 0.68 | 0.22 | 0.85 |
| 31000 | 0 | 24849  | HSSWYIQHFPL                                    | 2.46 | 0.01 | 0.90 | 0.68 | 0.22 | 1.39 |
| 31001 | 0 | 107895 | HSTKRGHAKSRPVRG                                | 2.71 | 4.45 | 0.78 | 0.44 | 1.13 | 0.28 |
| 31002 | 0 | 107895 | HSTKRGHAKSRPVRG                                | 2.71 | 4.45 | 0.78 | 0.44 | 1.13 | 0.28 |
| 31003 | 0 | 107895 | HSTKRGHAKSRPVRG                                | 2.71 | 4.45 | 0.78 | 0.44 | 1.13 | 0.28 |
| 31004 | 0 | 110886 | HSTKRGHAKSRPVRG                                | 2.71 | 3.24 | 0.78 | 0.44 | 1.13 | 0.28 |
| 31005 | 0 | 110889 | HSTKRGHAKSRPVRG                                | 2.71 | 3.93 | 0.78 | 0.44 | 1.13 | 0.28 |
| 31006 | 0 | 110890 | HSTKRGHAKSRPVRG                                | 2.71 | 2.94 | 0.78 | 0.44 | 1.13 | 0.28 |
| 31007 | 0 | 110891 | HSTKRGHAKSRPVRG                                | 2.71 | 4.08 | 0.78 | 0.44 | 1.13 | 0.28 |
| 31008 | 0 | 110891 | HSTKRGHAKSRPVRG                                | 2.71 | 4.08 | 0.78 | 0.44 | 1.13 | 0.28 |
| 31009 | 0 | 110891 | HSTKRGHAKSRPVRG                                | 2.71 | 4.08 | 0.78 | 0.44 | 1.13 | 0.28 |
| 31010 | 0 | 110891 | HSTKRGHAKSRPVRG                                | 2.71 | 4.08 | 0.78 | 0.44 | 1.13 | 0.28 |
| 31011 | 0 | 110891 | HSTKRGHAKSRPVRG                                | 2.71 | 4.08 | 0.78 | 0.44 | 1.13 | 1.27 |
| 31012 | 0 | 110891 | HSTKRGHAKSRPVRG                                | 2.71 | 4.08 | 0.78 | 0.44 | 1.13 | 1.27 |
| 31013 | 0 | 110893 | HSTKRGHAKSRPVRG                                | 2.71 | 0.01 | 0.78 | 0.44 | 1.13 | 0.28 |
| 31014 | 0 | 186855 | HSTKRGHAKSRPVRGH<br>QSHQESTRGRSRGRSGR<br>SGS   | 3.57 | 4.45 | 0.90 | 0.44 | 1.41 | 0.28 |
| 31015 | 0 | 186855 | HSTKRGHAKSRPVRGH<br>QSHQESTRGRSRGRSGR<br>SGS   | 3.57 | 4.45 | 0.90 | 0.44 | 1.13 | 0.28 |
| 31016 | 0 | 181339 | HSTQETAIGNFFSRA                                | 2.65 | 0.01 | 2.82 | 1.15 | 0.22 | 0.28 |
| 31017 | 0 | 450686 | HSTQLPY                                        | 1.99 | 0.01 | 0.90 | 0.44 | 1.41 | 1.39 |
| 31018 | 0 | 107896 | HSTSQEGQDTIHGHRGS                              | 2.83 | 4.63 | 0.78 | 0.44 | 1.13 | 0.85 |
| 31019 | 0 | 107896 | HSTSQEGQDTIHGHRGS                              | 2.83 | 4.63 | 0.78 | 0.44 | 1.41 | 0.85 |
| 31020 | 0 | 24861  | HSTTEWAVLPCSYSD                                | 2.63 | 0.01 | 2.69 | 0.44 | 1.41 | 0.28 |
| 31021 | 0 | 24870  | HSVRGFTSLFS                                    | 2.41 | 0.01 | 1.72 | 0.44 | 0.85 | 2.02 |
| 31022 | 0 | 24871  | HSVRGFTSLFSA                                   | 2.48 | 0.01 | 1.72 | 0.44 | 0.85 | 2.02 |
| 31023 | 0 | 24872  | HSVRGLTSLFS                                    | 2.41 | 0.01 | 1.72 | 0.44 | 0.85 | 2.02 |
| 31024 | 0 | 24874  | HSVSTVSVSQTSTSSEKQ<br>DTIQVKSALLKDYMGLK<br>VTG | 3.59 | 0.01 | 1.66 | 2.37 | 0.22 | 0.85 |

|       |   |        |                          |      |      |      |      |      |      |
|-------|---|--------|--------------------------|------|------|------|------|------|------|
|       |   |        | HSVSTVSVSQSTSTSSEKQ      |      |      |      |      |      |      |
| 31025 | 0 | 24874  | DTIQVKSALLKDYMGLK<br>VTG | 3.59 | 0.01 | 1.66 | 0.68 | 0.22 | 0.85 |
| 31026 | 0 | 157381 | HSVVYALRGRAE             | 2.46 | 0.01 | 3.65 | 0.44 | 1.23 | 0.85 |
| 31027 | 0 | 24875  | HSVWKD                   | 1.88 | 0.01 | 1.96 | 0.44 | 0.85 | 0.28 |
| 31028 | 0 | 77908  | HSWDKNSSIWWP             | 2.47 | 0.01 | 0.90 | 1.15 | 0.22 | 0.85 |
| 31029 | 0 | 189088 | HSWLPYL                  | 2.02 | 0.01 | 0.90 | 2.13 | 0.22 | 0.28 |
| 31030 | 0 | 174549 | HSWSNYWGHQHA             | 2.50 | 0.01 | 0.90 | 1.15 | 1.41 | 1.39 |
| 31031 | 0 | 174550 | HSWTNSWMATFL             | 2.48 | 0.01 | 0.90 | 1.15 | 1.41 | 0.28 |
| 31032 | 0 | 174550 | HSWTNSWMATFL             | 2.48 | 0.01 | 0.90 | 0.44 | 1.41 | 0.28 |
| 31033 | 0 | 174550 | HSWTNSWMATFL             | 2.48 | 0.01 | 0.90 | 0.44 | 1.41 | 0.28 |
| 31034 | 0 | 174550 | HSWTNSWMATFL             | 2.48 | 0.01 | 0.90 | 0.44 | 1.93 | 0.28 |
| 31035 | 0 | 174550 | HSWTNSWMATFL             | 2.48 | 0.01 | 0.90 | 0.44 | 1.93 | 0.28 |
| 31036 | 0 | 174550 | HSWTNSWMATFL             | 2.48 | 0.01 | 0.90 | 0.44 | 1.93 | 0.28 |
| 31037 | 0 | 24878  | HSWYNDLLVDFDSKDIV<br>DKY | 2.95 | 0.01 | 2.56 | 1.12 | 0.22 | 0.28 |
| 31038 | 0 | 24878  | HSWYNDLLVDFDSKDIV<br>DKY | 2.95 | 0.01 | 2.56 | 1.12 | 0.22 | 0.28 |
| 31039 | 0 | 24878  | HSWYNDLLVDFDSKDIV<br>DKY | 2.95 | 0.01 | 2.56 | 3.12 | 0.22 | 0.28 |
| 31040 | 0 | 115785 | HSYQE                    | 1.74 | 0.01 | 0.78 | 0.44 | 1.13 | 1.57 |
| 31041 | 0 | 115785 | HSYQE                    | 1.74 | 0.01 | 0.78 | 0.44 | 1.41 | 1.57 |
| 31042 | 0 | 115785 | HSYQE                    | 1.74 | 0.01 | 0.78 | 0.44 | 1.13 | 1.57 |
| 31043 | 0 | 115785 | HSYQE                    | 1.74 | 0.01 | 0.78 | 0.44 | 1.41 | 1.57 |
| 31044 | 0 | 115785 | HSYQE                    | 1.74 | 0.01 | 0.78 | 0.44 | 1.13 | 1.57 |
| 31045 | 0 | 115785 | HSYQE                    | 1.74 | 0.01 | 0.78 | 0.44 | 1.41 | 1.57 |
| 31046 | 0 | 115785 | HSYQE                    | 1.74 | 0.01 | 0.78 | 3.05 | 1.13 | 0.28 |
| 31047 | 0 | 115785 | HSYQE                    | 1.74 | 0.01 | 0.78 | 3.05 | 1.13 | 1.75 |
| 31048 | 0 | 121392 | HSYQEEAAVELKVEDPF<br>Y   | 2.82 | 0.01 | 2.19 | 4.15 | 0.22 | 0.28 |
| 31049 | 0 | 24881  | HSYSPGEINRVASC           | 2.57 | 0.01 | 1.96 | 0.44 | 1.41 | 0.28 |
| 31050 | 0 | 24881  | HSYSPGEINRVASC           | 2.57 | 0.01 | 1.96 | 0.44 | 0.85 | 0.28 |
| 31051 | 0 | 24881  | HSYSPGEINRVASC           | 2.57 | 0.01 | 1.96 | 0.44 | 0.85 | 0.28 |
| 31052 | 0 | 24881  | HSYSPGEINRVASC           | 2.57 | 0.01 | 1.96 | 0.44 | 0.85 | 0.28 |
| 31053 | 0 | 24882  | HSYSPGEINRVASCLRKL<br>G  | 2.86 | 0.01 | 1.72 | 0.44 | 0.85 | 0.28 |
| 31054 | 0 | 103977 | HSYSPGEINRVASCLRKL<br>GV | 2.91 | 0.01 | 1.72 | 0.44 | 0.85 | 0.28 |
| 31055 | 0 | 79567  | HSYTLMF                  | 1.99 | 0.01 | 0.90 | 1.12 | 0.22 | 1.39 |
| 31056 | 0 | 24883  | HTADKYVSELMG             | 2.40 | 0.01 | 0.90 | 0.68 | 0.22 | 1.39 |
| 31057 | 0 | 149744 | HTALAPS                  | 2.02 | 0.01 | 0.90 | 2.37 | 0.22 | 0.28 |
| 31058 | 0 | 119591 | HTCPPCPA                 | 2.16 | 0.01 | 0.78 | 0.44 | 1.93 | 0.28 |
| 31059 | 0 | 105867 | HTDFAGAE                 | 2.12 | 0.01 | 3.05 | 1.20 | 0.22 | 0.28 |
| 31060 | 0 | 100923 | HTDVAF                   | 1.88 | 0.01 | 3.02 | 1.12 | 0.22 | 0.28 |
| 31061 | 0 | 24909  | HTFDDFCPECRPLGLQG<br>C   | 2.84 | 0.01 | 2.53 | 0.44 | 0.85 | 0.28 |

|       |   |        |                                        |      |      |      |      |      |      |
|-------|---|--------|----------------------------------------|------|------|------|------|------|------|
| 31062 | 0 | 24910  | HTFDDFCPECRPLGLQG<br>CAFQSTVA          | 3.15 | 0.01 | 2.53 | 0.44 | 0.85 | 0.28 |
| 31063 | 0 | 24910  | HTFDDFCPECRPLGLQG<br>CAFQSTVA          | 3.15 | 0.01 | 2.53 | 0.44 | 0.85 | 0.28 |
| 31064 | 0 | 24911  | HTFDDFCPECRPLGLQG<br>CAFQSTVAELQRL     | 3.34 | 0.01 | 2.53 | 0.44 | 0.85 | 0.28 |
| 31065 | 0 | 24911  | HTFDDFCPECRPLGLQG<br>CAFQSTVAELQRL     | 3.34 | 0.01 | 2.53 | 0.44 | 0.85 | 0.28 |
| 31066 | 0 | 24913  | HTFKTNGDYAWSHADD<br>WQGVAPVVKV         | 3.19 | 0.01 | 3.72 | 2.13 | 0.22 | 0.28 |
| 31067 | 0 | 24913  | HTFKTNGDYAWSHADD<br>WQGVAPVVKV         | 3.19 | 0.01 | 3.72 | 2.13 | 0.22 | 0.28 |
| 31068 | 0 | 119592 | HTFPAVLQ                               | 2.10 | 0.01 | 0.78 | 0.44 | 1.93 | 0.28 |
| 31069 | 0 | 24917  | HTHADGEVH                              | 2.24 | 0.01 | 2.69 | 0.68 | 0.22 | 0.28 |
| 31070 | 0 | 24918  | HTHADGEVHC                             | 2.32 | 0.01 | 2.69 | 0.68 | 0.22 | 0.28 |
| 31071 | 0 | 24918  | HTHADGEVHC                             | 2.32 | 0.01 | 2.69 | 0.68 | 0.22 | 0.28 |
| 31072 | 0 | 24918  | HTHADGEVHC                             | 2.32 | 0.01 | 2.69 | 0.68 | 0.22 | 0.85 |
| 31073 | 0 | 106520 | HTHEGGQLHC                             | 2.33 | 0.01 | 2.75 | 0.44 | 1.23 | 0.85 |
| 31074 | 0 | 24919  | HTHVSGGAQAFTRGF<br>VGLFTTGPSQKQLV      | 3.39 | 0.01 | 1.72 | 0.44 | 0.85 | 0.28 |
| 31075 | 0 | 24919  | HTHVSGGAQAFTRGF<br>VGLFTTGPSQKQLV      | 3.39 | 0.01 | 1.72 | 2.74 | 0.22 | 0.28 |
| 31076 | 0 | 24919  | HTHVSGGAQAFTRGF<br>VGLFTTGPSQKQLV      | 3.39 | 0.01 | 1.72 | 3.27 | 0.22 | 0.28 |
| 31077 | 0 | 24919  | HTHVSGGAQAFTRGF<br>VGLFTTGPSQKQLV      | 3.39 | 0.01 | 1.72 | 3.27 | 0.22 | 0.28 |
| 31078 | 0 | 24923  | HTINHTFGNPVIPFKDG                      | 2.82 | 0.01 | 2.48 | 0.44 | 0.85 | 0.28 |
| 31079 | 0 | 153397 | HTKIHNHPRLPT                           | 2.50 | 0.01 | 0.90 | 1.15 | 0.22 | 0.28 |
| 31080 | 0 | 153397 | HTKIHNHPRLPT                           | 2.50 | 0.01 | 0.90 | 1.15 | 0.22 | 0.28 |
| 31081 | 0 | 24930  | HTLETVNISDVNDFQISK<br>Y                | 2.88 | 0.01 | 1.66 | 0.44 | 0.85 | 0.28 |
| 31082 | 0 | 24941  | HTLTTGGHAARLTSGFA<br>GLF               | 3.00 | 0.01 | 3.10 | 1.81 | 0.22 | 0.28 |
| 31083 | 0 | 196529 | HTNFTAP                                | 2.02 | 0.01 | 0.90 | 0.44 | 1.23 | 1.39 |
| 31084 | 0 | 24950  | HTNLPQALWGMQ                           | 2.45 | 0.01 | 0.90 | 0.68 | 0.22 | 1.39 |
| 31085 | 0 | 24950  | HTNLPQALWGMQ                           | 2.45 | 0.01 | 0.90 | 0.68 | 0.22 | 0.28 |
| 31086 | 0 | 181668 | HTNNTKYYKDDRHPC                        | 2.68 | 0.01 | 2.86 | 2.37 | 0.22 | 1.28 |
| 31087 | 0 | 450688 | HTNSAYI                                | 1.99 | 0.01 | 0.90 | 0.44 | 1.23 | 1.39 |
| 31088 | 0 | 98108  | HTNSPLGDMLRACQT                        | 2.62 | 0.01 | 2.04 | 0.44 | 2.98 | 0.28 |
| 31089 | 0 | 100928 | HTNVCFWYIPPSLRTLED<br>NEERMSRLSKVAPVIK | 3.42 | 0.01 | 0.78 | 0.44 | 1.13 | 0.85 |
| 31090 | 0 | 100928 | HTNVCFWYIPPSLRTLED<br>NEERMSRLSKVAPVIK | 3.42 | 0.01 | 0.78 | 0.44 | 1.13 | 0.85 |

|       |   |        |                                     |      |      |      |      |      |      |
|-------|---|--------|-------------------------------------|------|------|------|------|------|------|
| 31091 | 0 | 24954  | HTPGCVPCVREGNSSRC<br>WVA            | 2.94 | 0.01 | 3.10 | 0.44 | 0.85 | 0.28 |
| 31092 | 0 | 24955  | HTPGCVPCVREGNSSRC<br>WVALTPTLVA     | 3.24 | 0.01 | 1.72 | 0.44 | 0.85 | 0.28 |
| 31093 | 0 | 444933 | HTPGCVPCVRENNSSRC<br>WVA            | 2.93 | 0.01 | 1.96 | 0.68 | 0.22 | 1.34 |
| 31094 | 0 | 444933 | HTPGCVPCVRENNSSRC<br>WVA            | 2.93 | 0.01 | 1.96 | 0.68 | 0.22 | 0.28 |
| 31095 | 0 | 24957  | HTPGCVPCVREQNSSRC<br>WVALTPTVA      | 3.19 | 0.01 | 1.72 | 0.44 | 0.85 | 0.28 |
| 31096 | 0 | 24960  | HTPLFSFLTASPA                       | 2.59 | 0.01 | 3.17 | 0.44 | 0.85 | 0.85 |
| 31097 | 0 | 168789 | HTPPPQPYRTHI                        | 2.51 | 0.01 | 0.90 | 0.44 | 0.85 | 1.39 |
| 31098 | 0 | 227256 | HTQGPWDPRAPHLPP                     | 2.67 | 0.01 | 2.48 | 0.44 | 1.59 | 0.28 |
| 31099 | 0 | 136359 | HTQHSPMVSVEF                        | 2.48 | 0.01 | 0.90 | 2.74 | 0.22 | 0.85 |
| 31100 | 0 | 122793 | HTQNT                               | 1.75 | 0.01 | 0.78 | 0.44 | 1.13 | 1.27 |
| 31101 | 0 | 101722 | HTQPYAYEARDH                        | 2.48 | 0.01 | 0.90 | 0.44 | 0.85 | 1.39 |
| 31102 | 0 | 101722 | HTQPYAYEARDH                        | 2.48 | 0.01 | 0.90 | 0.44 | 1.13 | 1.39 |
| 31103 | 0 | 187065 | HTRALPTSVVF                         | 2.38 | 0.01 | 4.45 | 1.81 | 0.22 | 0.28 |
| 31104 | 0 | 187065 | HTRALPTSVVF                         | 2.38 | 0.01 | 4.45 | 1.81 | 0.22 | 0.28 |
| 31105 | 0 | 187065 | HTRALPTSVVF                         | 2.38 | 0.01 | 4.45 | 1.81 | 0.22 | 1.34 |
| 31106 | 0 | 243807 | HTRLVSLFNTTLTGLHEV<br>SA            | 2.96 | 0.01 | 0.78 | 0.44 | 1.41 | 0.28 |
| 31107 | 0 | 243807 | HTRLVSLFNTTLTGLHEV<br>SA            | 2.96 | 0.01 | 0.78 | 0.44 | 1.13 | 0.28 |
| 31108 | 0 | 24970  | HTRVTGGVQG                          | 2.35 | 0.01 | 1.72 | 1.81 | 0.22 | 1.27 |
| 31109 | 0 | 24970  | HTRVTGGVQG                          | 2.35 | 0.01 | 1.72 | 1.81 | 0.22 | 1.66 |
| 31110 | 0 | 24970  | HTRVTGGVQG                          | 2.35 | 0.01 | 1.72 | 1.81 | 0.22 | 1.66 |
| 31111 | 0 | 24970  | HTRVTGGVQG                          | 2.35 | 0.01 | 1.72 | 1.81 | 0.22 | 1.66 |
| 31112 | 0 | 24970  | HTRVTGGVQG                          | 2.35 | 0.01 | 1.72 | 1.81 | 0.22 | 1.34 |
| 31113 | 0 | 24971  | HTRVTGGVQGHVTSTLT<br>SLFRPGASQK     | 3.26 | 0.01 | 1.72 | 0.44 | 0.85 | 0.28 |
| 31114 | 0 | 24971  | HTRVTGGVQGHVTSTLT<br>SLFRPGASQK     | 3.26 | 0.01 | 1.72 | 0.44 | 0.85 | 0.28 |
| 31115 | 0 | 24971  | HTRVTGGVQGHVTSTLT<br>SLFRPGASQK     | 3.26 | 0.01 | 1.72 | 0.68 | 0.22 | 0.28 |
| 31116 | 0 | 24971  | HTRVTGGVQGHVTSTLT<br>SLFRPGASQK     | 3.26 | 0.01 | 1.72 | 0.68 | 0.22 | 0.28 |
| 31117 | 0 | 24971  | HTRVTGGVQGHVTSTLT<br>SLFRPGASQK     | 3.26 | 0.01 | 1.72 | 0.44 | 0.85 | 0.28 |
| 31118 | 0 | 24971  | HTRVTGGVQGHVTSTLT<br>SLFRPGASQK     | 3.26 | 0.01 | 1.72 | 1.12 | 0.22 | 0.28 |
| 31119 | 0 | 24971  | HTRVTGGVQGHVTSTLT<br>SLFRPGASQK     | 3.26 | 0.01 | 1.72 | 1.12 | 0.22 | 0.28 |
| 31120 | 0 | 24972  | HTRVTGGVQGHVTSTLT<br>SLFRPGASQKIQLV | 3.39 | 0.01 | 1.72 | 2.74 | 0.22 | 1.66 |

|       |   |        |                                     |      |      |      |      |      |      |
|-------|---|--------|-------------------------------------|------|------|------|------|------|------|
| 31121 | 0 | 24972  | HTRVTGGVQGHVTSTLT<br>SLFRPGASQKIQLV | 3.39 | 0.01 | 1.72 | 0.68 | 0.22 | 0.28 |
| 31122 | 0 | 24972  | HTRVTGGVQGHVTSTLT<br>SLFRPGASQKIQLV | 3.39 | 0.01 | 1.72 | 2.74 | 0.22 | 1.34 |
| 31123 | 0 | 24972  | HTRVTGGVQGHVTSTLT<br>SLFRPGASQKIQLV | 3.39 | 0.01 | 1.72 | 3.27 | 0.22 | 0.28 |
| 31124 | 0 | 24972  | HTRVTGGVQGHVTSTLT<br>SLFRPGASQKIQLV | 3.39 | 0.01 | 1.72 | 2.74 | 0.22 | 0.28 |
| 31125 | 0 | 24972  | HTRVTGGVQGHVTSTLT<br>SLFRPGASQKIQLV | 3.39 | 0.01 | 1.72 | 0.44 | 0.85 | 0.28 |
| 31126 | 0 | 24972  | HTRVTGGVQGHVTSTLT<br>SLFRPGASQKIQLV | 3.39 | 0.01 | 1.72 | 1.15 | 0.22 | 0.28 |
| 31127 | 0 | 24972  | HTRVTGGVQGHVTSTLT<br>SLFRPGASQKIQLV | 3.39 | 0.01 | 1.72 | 2.74 | 0.22 | 2.02 |
| 31128 | 0 | 310183 | HTSAPAAGGFGSAAH                     | 2.73 | 0.01 | 1.61 | 0.44 | 0.85 | 1.28 |
| 31129 | 0 | 310184 | HTSAPAAGGFGSATH                     | 2.73 | 0.01 | 1.61 | 0.44 | 0.85 | 1.28 |
| 31130 | 0 | 310185 | HTSAPAAGGFGSATT                     | 2.71 | 0.01 | 1.61 | 0.44 | 0.85 | 1.28 |
| 31131 | 0 | 310186 | HTSAPAVGGFGSATH                     | 2.72 | 0.01 | 1.61 | 0.44 | 0.85 | 1.28 |
| 31132 | 0 | 310187 | HTSAPAVGGFGSATT                     | 2.70 | 0.01 | 1.61 | 0.44 | 0.85 | 1.28 |
| 31133 | 0 | 24973  | HTSLGHEDT                           | 2.24 | 0.01 | 0.90 | 2.55 | 0.22 | 0.28 |
| 31134 | 0 | 77910  | HTSPTGLRFQVQ                        | 2.45 | 0.01 | 0.90 | 1.15 | 0.22 | 1.39 |
| 31135 | 0 | 83266  | HTSQVVPSTDMQTRH                     | 2.70 | 0.01 | 3.75 | 0.44 | 0.85 | 0.28 |
| 31136 | 0 | 24978  | HTSSMRGVYYPDEIFRS                   | 2.74 | 0.01 | 2.48 | 0.44 | 0.85 | 0.28 |
| 31137 | 0 | 24978  | HTSSMRGVYYPDEIFRS                   | 2.74 | 0.01 | 2.48 | 1.20 | 0.22 | 0.28 |
| 31138 | 0 | 310202 | HTSTPAAGGFGSAAH                     | 2.73 | 0.01 | 1.61 | 0.44 | 0.85 | 1.28 |
| 31139 | 0 | 310203 | HTSTPAAGGFGSATH                     | 2.73 | 0.01 | 1.61 | 0.44 | 0.85 | 1.28 |
| 31140 | 0 | 310204 | HTSTPAVGGFGSAAH                     | 2.71 | 0.01 | 1.61 | 0.44 | 0.85 | 1.28 |
| 31141 | 0 | 310205 | HTSTPAVGGFGSATH                     | 2.72 | 0.01 | 1.61 | 0.44 | 0.85 | 1.28 |
| 31142 | 0 | 310206 | HTSTPAVGGFGSATT                     | 2.70 | 0.01 | 1.61 | 0.44 | 0.85 | 1.28 |
| 31143 | 0 | 24982  | HTTEDVSPSMHTLLGVK<br>NM             | 2.89 | 0.01 | 3.89 | 1.12 | 0.22 | 0.28 |
| 31144 | 0 | 24982  | HTTEDVSPSMHTLLGVK<br>NM             | 2.89 | 0.01 | 3.89 | 1.12 | 0.22 | 0.28 |
| 31145 | 0 | 24982  | HTTEDVSPSMHTLLGVK<br>NM             | 2.89 | 0.01 | 3.89 | 1.12 | 0.22 | 0.28 |
| 31146 | 0 | 24982  | HTTEDVSPSMHTLLGVK<br>NM             | 2.89 | 0.01 | 3.89 | 1.12 | 0.22 | 0.28 |
| 31147 | 0 | 444935 | HTTRGFASLFTPGPSQKI<br>QL            | 2.94 | 0.01 | 1.96 | 0.68 | 0.22 | 0.28 |
| 31148 | 0 | 25002  | HTVTTTTK                            | 2.15 | 0.01 | 2.52 | 1.15 | 0.22 | 0.85 |
| 31149 | 0 | 25002  | HTVTTTTK                            | 2.15 | 0.01 | 0.78 | 2.19 | 0.22 | 0.85 |
| 31150 | 0 | 25002  | HTVTTTTK                            | 2.15 | 0.01 | 0.78 | 2.19 | 0.22 | 0.85 |
| 31151 | 0 | 25004  | HTYARFGIEIQVINPTP<br>FQ             | 2.93 | 0.01 | 2.82 | 0.44 | 0.85 | 0.28 |

|       |   |        |                                 |      |      |      |      |      |      |
|-------|---|--------|---------------------------------|------|------|------|------|------|------|
| 31152 | 0 | 25004  | HTYARFGIEIQVINPTP<br>FQ         | 2.93 | 0.01 | 2.82 | 0.44 | 1.41 | 0.28 |
| 31153 | 0 | 25009  | HTYSPHELRSVAAT                  | 2.61 | 0.01 | 2.69 | 0.44 | 1.41 | 0.28 |
| 31154 | 0 | 25009  | HTYSPHELRSVAAT                  | 2.61 | 0.01 | 2.69 | 0.44 | 0.85 | 0.28 |
| 31155 | 0 | 25009  | HTYSPHELRSVAAT                  | 2.61 | 0.01 | 2.69 | 0.44 | 0.85 | 0.28 |
| 31156 | 0 | 25009  | HTYSPHELRSVAAT                  | 2.61 | 0.01 | 2.69 | 0.44 | 0.85 | 0.28 |
| 31157 | 0 | 25010  | HTYTPHELTRVASA                  | 2.62 | 0.01 | 2.69 | 0.44 | 0.85 | 0.28 |
| 31158 | 0 | 25010  | HTYTPHELTRVASA                  | 2.62 | 0.01 | 2.69 | 0.44 | 0.85 | 0.28 |
| 31159 | 0 | 25010  | HTYTPHELTRVASA                  | 2.62 | 0.01 | 2.69 | 0.44 | 0.85 | 0.28 |
| 31160 | 0 | 25010  | HTYTPHELTRVASA                  | 2.62 | 0.01 | 2.69 | 0.44 | 1.41 | 0.28 |
| 31161 | 0 | 138193 | HTYTSHLRYVPPISL                 | 2.70 | 0.01 | 0.90 | 0.44 | 1.13 | 1.39 |
| 31162 | 0 | 25011  | HTYTTGGTASRHTQAFA<br>GLFDIGPQQK | 3.23 | 0.01 | 3.63 | 0.44 | 0.85 | 0.28 |
| 31163 | 0 | 25011  | HTYTTGGTASRHTQAFA<br>GLFDIGPQQK | 3.23 | 0.01 | 3.63 | 0.44 | 0.85 | 0.28 |
| 31164 | 0 | 25011  | HTYTTGGTASRHTQAFA<br>GLFDIGPQQK | 3.23 | 0.01 | 3.63 | 0.68 | 0.22 | 0.28 |
| 31165 | 0 | 25011  | HTYTTGGTASRHTQAFA<br>GLFDIGPQQK | 3.23 | 0.01 | 3.63 | 1.12 | 0.22 | 0.28 |
| 31166 | 0 | 25011  | HTYTTGGTASRHTQAFA<br>GLFDIGPQQK | 3.23 | 0.01 | 3.63 | 1.12 | 0.22 | 0.28 |
| 31167 | 0 | 25013  | HVADIDKLID                      | 2.33 | 0.01 | 3.41 | 0.68 | 0.22 | 0.28 |
| 31168 | 0 | 25015  | HVAGAAALILSKHPN                 | 2.67 | 0.01 | 3.67 | 3.16 | 0.22 | 0.28 |
| 31169 | 0 | 177507 | HVALSLITAGAGGATR<br>NQLAATL     | 3.09 | 0.01 | 1.86 | 0.44 | 1.23 | 0.85 |
| 31170 | 0 | 25021  | HVAPTHYVTESDASQ<br>RV TQL       | 2.95 | 0.01 | 1.72 | 0.44 | 0.85 | 0.28 |
| 31171 | 0 | 25022  | HVAPTHYVVESDASQ<br>RV TQV       | 2.96 | 0.01 | 1.72 | 0.44 | 0.85 | 0.28 |
| 31172 | 0 | 177737 | HVATAASQDSQVVR                  | 2.63 | 0.01 | 0.78 | 0.68 | 0.22 | 0.28 |
| 31173 | 0 | 177737 | HVATAASQDSQVVR                  | 2.63 | 0.01 | 0.78 | 0.68 | 0.22 | 0.28 |
| 31174 | 0 | 177737 | HVATAASQDSQVVR                  | 2.63 | 0.01 | 0.78 | 0.68 | 0.22 | 0.28 |
| 31175 | 0 | 177738 | HVATAASRDSQVVR                  | 2.63 | 0.01 | 0.78 | 0.68 | 0.22 | 0.28 |
| 31176 | 0 | 177738 | HVATAASRDSQVVR                  | 2.63 | 0.01 | 0.78 | 0.68 | 0.22 | 0.28 |
| 31177 | 0 | 177738 | HVATAASRDSQVVR                  | 2.63 | 0.01 | 0.78 | 0.68 | 0.22 | 0.28 |
| 31178 | 0 | 177739 | HVATAASWDSQVVR                  | 2.61 | 0.01 | 0.78 | 0.68 | 0.22 | 0.28 |
| 31179 | 0 | 177739 | HVATAASWDSQVVR                  | 2.61 | 0.01 | 0.78 | 0.68 | 0.22 | 0.28 |
| 31180 | 0 | 177739 | HVATAASWDSQVVR                  | 2.61 | 0.01 | 0.78 | 0.68 | 0.22 | 0.28 |
| 31181 | 0 | 123299 | HVDFMLYET                       | 2.18 | 0.01 | 2.28 | 2.00 | 0.22 | 0.28 |
| 31182 | 0 | 123300 | HVDFMVYEA                       | 2.21 | 0.01 | 2.28 | 2.00 | 0.22 | 0.28 |
| 31183 | 0 | 123300 | HVDFMVYEA                       | 2.21 | 0.01 | 2.28 | 2.00 | 0.22 | 0.28 |
| 31184 | 0 | 25030  | HVDTESYFIVLSIAY                 | 2.66 | 0.01 | 2.43 | 0.44 | 1.59 | 0.28 |
| 31185 | 0 | 25031  | HVDTSYECDIPIGAGIC               | 2.78 | 0.01 | 2.48 | 0.44 | 0.85 | 0.28 |
| 31186 | 0 | 25031  | HVDTSYECDIPIGAGIC               | 2.78 | 0.01 | 2.48 | 1.20 | 0.22 | 0.28 |

|       |   |        |                                                  |      |      |      |      |      |      |
|-------|---|--------|--------------------------------------------------|------|------|------|------|------|------|
| 31187 | 0 | 25033  | HVEKGSNPNYLALLVKY<br>VNGDGDVVAV                  | 3.25 | 0.01 | 2.53 | 0.68 | 0.22 | 0.28 |
| 31188 | 0 | 25033  | HVEKGSNPNYLALLVKY<br>VNGDGDVVAV                  | 3.25 | 0.01 | 2.53 | 1.12 | 0.22 | 0.28 |
| 31189 | 0 | 25033  | HVEKGSNPNYLALLVKY<br>VNGDGDVVAV                  | 3.25 | 0.01 | 2.53 | 0.68 | 0.22 | 0.85 |
| 31190 | 0 | 25033  | HVEKGSNPNYLALLVKY<br>VNGDGDVVAV                  | 3.25 | 0.01 | 2.53 | 0.68 | 0.22 | 0.85 |
| 31191 | 0 | 25033  | HVEKGSNPNYLALLVKY<br>VNGDGDVVAV                  | 3.25 | 0.01 | 2.53 | 0.68 | 0.22 | 0.85 |
| 31192 | 0 | 25033  | HVEKGSNPNYLALLVKY<br>VNGDGDVVAV                  | 3.25 | 0.01 | 2.53 | 0.68 | 0.22 | 0.85 |
| 31193 | 0 | 25033  | HVEKGSNPNYLALLVKY<br>VNGDGDVVAV                  | 3.25 | 0.01 | 2.53 | 1.12 | 0.22 | 2.35 |
| 31194 | 0 | 25033  | HVEKGSNPNYLALLVKY<br>VNGDGDVVAV                  | 3.25 | 0.01 | 2.53 | 0.44 | 1.23 | 0.85 |
| 31195 | 0 | 25035  | HVFDETTLNN                                       | 2.28 | 0.01 | 1.75 | 0.68 | 0.22 | 0.28 |
| 31196 | 0 | 25035  | HVFDETTLNN                                       | 2.28 | 0.01 | 1.75 | 0.68 | 0.22 | 0.28 |
| 31197 | 0 | 100125 | HVGLGTAF                                         | 2.12 | 0.01 | 3.06 | 0.68 | 0.22 | 0.28 |
| 31198 | 0 | 100125 | HVGLGTAF                                         | 2.12 | 0.01 | 3.06 | 0.68 | 0.22 | 0.28 |
| 31199 | 0 | 100126 | HVGLGTAFENSIYDQEY<br>N                           | 2.80 | 0.01 | 3.06 | 2.13 | 0.22 | 0.28 |
| 31200 | 0 | 25047  | HVGQSASRGRGLGENP<br>DDEEVRRRVNAANKKP<br>EDLTNLDL | 3.63 | 0.01 | 0.90 | 3.67 | 0.22 | 0.28 |
| 31201 | 0 | 144685 | HVGTHPMLQPSF                                     | 2.46 | 0.01 | 0.90 | 0.68 | 0.22 | 0.28 |
| 31202 | 0 | 144685 | HVGTHPMLQPSF                                     | 2.46 | 0.01 | 0.90 | 0.68 | 0.22 | 1.48 |
| 31203 | 0 | 144685 | HVGTHPMLQPSF                                     | 2.46 | 0.01 | 0.90 | 0.68 | 0.22 | 1.27 |
| 31204 | 0 | 103262 | HVIAGQASPSRIDGT                                  | 2.66 | 0.01 | 2.04 | 0.44 | 0.85 | 1.28 |
| 31205 | 0 | 240885 | HVIRDDIPSITSQEL                                  | 2.65 | 0.01 | 4.93 | 0.44 | 1.41 | 0.28 |
| 31206 | 0 | 25054  | HVIWDVGLQSS                                      | 2.36 | 0.01 | 3.34 | 0.44 | 0.85 | 0.28 |
| 31207 | 0 | 25055  | HVKAFLDKLDSNKDGEL<br>SLDELMALF                   | 3.22 | 0.01 | 2.94 | 1.20 | 0.22 | 0.85 |
| 31208 | 0 | 25060  | HVLDHVQT                                         | 2.15 | 0.01 | 2.40 | 2.43 | 0.22 | 0.28 |
| 31209 | 0 | 167752 | HVLDHVQTM                                        | 2.24 | 0.01 | 2.40 | 2.43 | 0.22 | 0.28 |
| 31210 | 0 | 25061  | HVLGRL                                           | 1.90 | 0.01 | 2.40 | 0.44 | 0.85 | 0.28 |
| 31211 | 0 | 182168 | HVLSDAESGCQEGWE                                  | 2.66 | 0.01 | 0.78 | 0.44 | 1.13 | 0.85 |
| 31212 | 0 | 162463 | HVLTNLP                                          | 2.02 | 0.01 | 2.71 | 0.68 | 0.22 | 1.48 |
| 31213 | 0 | 162463 | HVLTNLP                                          | 2.02 | 0.01 | 2.71 | 0.68 | 0.22 | 1.48 |
| 31214 | 0 | 162463 | HVLTNLP                                          | 2.02 | 0.01 | 2.71 | 0.68 | 0.22 | 0.85 |
| 31215 | 0 | 162463 | HVLTNLP                                          | 2.02 | 0.01 | 2.71 | 0.68 | 0.22 | 0.28 |
| 31216 | 0 | 162463 | HVLTNLP                                          | 2.02 | 0.01 | 2.71 | 0.68 | 0.22 | 0.85 |
| 31217 | 0 | 510439 | HVLYTIAGGLEP                                     | 2.44 | 0.01 | 0.90 | 3.07 | 1.13 | 1.39 |
| 31218 | 0 | 25073  | HVNGRTTALVGLLTPAK<br>N                           | 2.86 | 0.01 | 0.90 | 2.36 | 0.22 | 1.34 |
| 31219 | 0 | 25073  | HVNGRTTALVGLLTPAK<br>N                           | 2.86 | 0.01 | 0.90 | 0.44 | 0.85 | 1.34 |



|       |   |        |                           |      |      |      |      |      |      |
|-------|---|--------|---------------------------|------|------|------|------|------|------|
| 31220 | 0 | 79854  | HVPFCFGKDLKR              | 2.45 | 0.01 | 2.14 | 3.26 | 0.22 | 0.28 |
| 31221 | 0 | 196531 | HVPTVLS                   | 2.02 | 0.01 | 0.90 | 0.44 | 1.23 | 1.39 |
| 31222 | 0 | 112540 | HVQLAPPIALRH              | 2.49 | 0.01 | 0.90 | 0.44 | 1.13 | 0.28 |
| 31223 | 0 | 25080  | HVQTMEEI                  | 2.11 | 0.01 | 2.40 | 2.43 | 0.22 | 0.28 |
| 31224 | 0 | 167754 | HVQTMEEIN                 | 2.20 | 0.01 | 2.40 | 2.43 | 0.22 | 0.28 |
| 31225 | 0 | 186678 | HVRAYTAGILFE              | 2.43 | 0.01 | 0.90 | 0.68 | 0.22 | 1.39 |
| 31226 | 0 | 136361 | HVRIPPTMPEAW              | 2.45 | 0.01 | 0.90 | 2.74 | 0.22 | 0.85 |
| 31227 | 0 | 25084  | HVRVRPYKEKPIQNQAK<br>SVD  | 2.93 | 0.01 | 3.47 | 0.44 | 0.22 | 0.85 |
| 31228 | 0 | 25086  | HVSGHRMAW                 | 2.22 | 0.01 | 1.72 | 0.44 | 0.85 | 0.85 |
| 31229 | 0 | 25086  | HVSGHRMAW                 | 2.22 | 0.01 | 1.72 | 0.44 | 0.85 | 0.85 |
| 31230 | 0 | 444950 | HVSGHRMAWDMMM<br>NWSPTTA  | 2.93 | 0.01 | 1.96 | 0.68 | 0.22 | 1.34 |
| 31231 | 0 | 444950 | HVSGHRMAWDMMM<br>NWSPTTA  | 2.93 | 0.01 | 1.96 | 0.68 | 0.22 | 1.34 |
| 31232 | 0 | 444950 | HVSGHRMAWDMMM<br>NWSPTTA  | 2.93 | 0.01 | 1.96 | 0.68 | 0.22 | 1.34 |
| 31233 | 0 | 444950 | HVSGHRMAWDMMM<br>NWSPTTA  | 2.93 | 0.01 | 1.96 | 0.68 | 0.22 | 1.34 |
| 31234 | 0 | 444950 | HVSGHRMAWDMMM<br>NWSPTTA  | 2.93 | 0.01 | 1.96 | 0.68 | 0.22 | 0.28 |
| 31235 | 0 | 25092  | HVSPAHYVPESDAAARV<br>TAL  | 2.96 | 0.01 | 1.72 | 0.44 | 0.85 | 0.28 |
| 31236 | 0 | 25093  | HVSPRHYVPESEPAARV<br>TQI  | 2.96 | 0.01 | 1.96 | 0.44 | 0.85 | 0.28 |
| 31237 | 0 | 25094  | HVSPTHYVP                 | 2.26 | 0.01 | 1.72 | 0.44 | 1.59 | 0.28 |
| 31238 | 0 | 175892 | HVSPTHYVPES               | 2.43 | 0.01 | 1.96 | 0.44 | 0.85 | 2.97 |
| 31239 | 0 | 25095  | HVSPTHYVPESDAAAKV<br>TAL  | 2.96 | 0.01 | 1.72 | 0.44 | 0.85 | 0.28 |
| 31240 | 0 | 25096  | HVSPTHYVPESDAAARV<br>TQI  | 2.94 | 0.01 | 1.72 | 0.44 | 0.85 | 0.28 |
| 31241 | 0 | 25098  | HVSTAPTGSWFAPQP<br>APENAY | 3.03 | 0.01 | 2.43 | 0.44 | 1.59 | 0.28 |
| 31242 | 0 | 78177  | HVTDLDKEFL                | 2.31 | 0.01 | 3.89 | 0.68 | 0.22 | 0.28 |
| 31243 | 0 | 78177  | HVTDLDKEFL                | 2.31 | 0.01 | 3.89 | 0.68 | 0.22 | 0.28 |
| 31244 | 0 | 78177  | HVTDLDKEFL                | 2.31 | 0.01 | 3.89 | 0.68 | 0.22 | 0.28 |
| 31245 | 0 | 78177  | HVTDLDKEFL                | 2.31 | 0.01 | 3.89 | 0.68 | 0.22 | 0.28 |
| 31246 | 0 | 78177  | HVTDLDKEFL                | 2.31 | 0.01 | 3.89 | 0.68 | 0.22 | 1.34 |
| 31247 | 0 | 78177  | HVTDLDKEFL                | 2.31 | 0.01 | 3.89 | 0.68 | 0.22 | 1.34 |
| 31248 | 0 | 78177  | HVTDLDKEFL                | 2.31 | 0.01 | 3.89 | 0.68 | 0.22 | 1.34 |
| 31249 | 0 | 135841 | HVTDMMELYTLG              | 2.46 | 0.01 | 0.90 | 2.69 | 0.22 | 0.28 |
| 31250 | 0 | 135841 | HVTDMMELYTLG              | 2.46 | 0.01 | 0.90 | 2.69 | 0.22 | 1.27 |
| 31251 | 0 | 135841 | HVTDMMELYTLG              | 2.46 | 0.01 | 0.90 | 0.68 | 0.22 | 0.28 |
| 31252 | 0 | 25101  | HVTGGAA                   | 2.00 | 0.01 | 1.72 | 0.44 | 0.85 | 0.28 |
| 31253 | 0 | 162464 | HVTLYLGNGQMELPNK          | 2.71 | 0.01 | 2.04 | 0.68 | 0.22 | 0.28 |

|       |   |        |                             |      |      |      |      |      |      |
|-------|---|--------|-----------------------------|------|------|------|------|------|------|
| 31254 | 0 | 25105  | HVTNDCSNSSIVFEAAD<br>LIM    | 2.91 | 0.01 | 3.10 | 1.81 | 0.22 | 0.28 |
| 31255 | 0 | 444952 | HVTNDCSNSSIVYEAAD<br>MIM    | 2.93 | 0.01 | 1.96 | 0.68 | 0.22 | 1.34 |
| 31256 | 0 | 444952 | HVTNDCSNSSIVYEAAD<br>MIM    | 2.93 | 0.01 | 1.96 | 0.68 | 0.22 | 1.34 |
| 31257 | 0 | 444952 | HVTNDCSNSSIVYEAAD<br>MIM    | 2.93 | 0.01 | 1.96 | 0.68 | 0.22 | 0.28 |
| 31258 | 0 | 106522 | HVTPISKLMWFN                | 2.40 | 0.01 | 0.90 | 3.00 | 1.93 | 0.28 |
| 31259 | 0 | 25108  | HVTSTLTSLF                  | 2.35 | 0.01 | 1.72 | 3.27 | 0.22 | 1.66 |
| 31260 | 0 | 25108  | HVTSTLTSLF                  | 2.35 | 0.01 | 1.72 | 3.27 | 0.22 | 1.34 |
| 31261 | 0 | 25108  | HVTSTLTSLF                  | 2.35 | 0.01 | 1.72 | 3.27 | 0.22 | 1.27 |
| 31262 | 0 | 25108  | HVTSTLTSLF                  | 2.35 | 0.01 | 1.72 | 3.27 | 0.22 | 1.66 |
| 31263 | 0 | 25108  | HVTSTLTSLF                  | 2.35 | 0.01 | 1.72 | 3.27 | 0.22 | 1.66 |
| 31264 | 0 | 141670 | HVTTTTFAPPPR                | 2.48 | 0.01 | 0.90 | 3.41 | 0.22 | 0.28 |
| 31265 | 0 | 25113  | HVVDLP                      | 1.89 | 0.01 | 2.53 | 0.44 | 1.59 | 0.28 |
| 31266 | 0 | 510440 | HVVKQAMFHNMM                | 2.47 | 0.01 | 0.90 | 3.07 | 1.13 | 1.39 |
| 31267 | 0 | 510441 | HVVKQAMSNNML                | 2.45 | 0.01 | 0.90 | 3.07 | 1.13 | 1.39 |
| 31268 | 0 | 510442 | HVVKQAMSNNMM                | 2.45 | 0.01 | 0.90 | 3.07 | 1.13 | 1.39 |
| 31269 | 0 | 112541 | HVVLAPNVQSPL                | 2.49 | 0.01 | 0.90 | 0.44 | 1.13 | 1.27 |
| 31270 | 0 | 25118  | HVVVNNKVATH                 | 2.44 | 0.01 | 2.90 | 1.15 | 2.26 | 2.49 |
| 31271 | 0 | 25119  | HVWIPPLNARGGRDAII<br>LLMCAV | 3.05 | 0.01 | 1.72 | 0.44 | 0.85 | 0.28 |
| 31272 | 0 | 78417  | HVWSSPQALQRFLHDP<br>TLTW    | 2.94 | 0.01 | 2.69 | 0.68 | 0.22 | 0.28 |
| 31273 | 0 | 78417  | HVWSSPQALQRFLHDP<br>TLTW    | 2.94 | 0.01 | 2.69 | 1.81 | 0.22 | 0.28 |
| 31274 | 0 | 135002 | HWDPFSL SAYFP               | 2.48 | 4.63 | 0.90 | 0.44 | 1.13 | 0.28 |
| 31275 | 0 | 135003 | HWDPFSL SAYFP               | 2.48 | 0.01 | 0.90 | 0.44 | 1.13 | 0.28 |
| 31276 | 0 | 135004 | HWDPFSL SAYFPGGGS           | 2.73 | 4.63 | 0.90 | 0.44 | 1.13 | 0.28 |
| 31277 | 0 | 25126  | HWGNHKSHPQR                 | 2.48 | 0.01 | 0.90 | 0.68 | 0.22 | 1.39 |
| 31278 | 0 | 25126  | HWGNHKSHPQR                 | 2.48 | 0.01 | 0.90 | 1.15 | 0.22 | 0.28 |
| 31279 | 0 | 25127  | HWGNLSKIGVVIGIS             | 2.69 | 0.01 | 2.43 | 0.44 | 1.59 | 0.28 |
| 31280 | 0 | 106523 | HWHHTIL                     | 2.04 | 0.01 | 0.90 | 3.00 | 1.93 | 0.28 |
| 31281 | 0 | 127688 | HWHRPSE                     | 2.03 | 0.01 | 0.90 | 0.44 | 1.13 | 1.39 |
| 31282 | 0 | 127689 | HWHRPSTN                    | 2.03 | 0.01 | 0.90 | 0.44 | 1.13 | 1.39 |
| 31283 | 0 | 196533 | HWHTSSR                     | 2.04 | 0.01 | 0.90 | 0.44 | 1.23 | 1.39 |
| 31284 | 0 | 98109  | HWIKKPNRNGGGYSA<br>SYSD     | 2.92 | 0.01 | 2.04 | 0.44 | 2.98 | 0.28 |
| 31285 | 0 | 103264 | HWLRPITPTFRPSWP             | 2.70 | 0.01 | 2.04 | 0.44 | 0.85 | 1.28 |
| 31286 | 0 | 182390 | HWNVQEHLGKPS                | 2.44 | 0.01 | 0.90 | 0.68 | 0.22 | 0.28 |
| 31287 | 0 | 106524 | HWR                         | 1.37 | 0.01 | 2.75 | 0.44 | 1.23 | 0.85 |
| 31288 | 0 | 25138  | HWRCPPRR                    | 2.12 | 0.01 | 2.04 | 0.44 | 0.85 | 0.28 |
| 31289 | 0 | 25138  | HWRCPPRR                    | 2.12 | 0.01 | 2.04 | 0.44 | 0.85 | 0.28 |
| 31290 | 0 | 25138  | HWRCPPRR                    | 2.12 | 0.01 | 2.04 | 0.44 | 0.85 | 0.28 |
| 31291 | 0 | 145244 | HWRHWLADTAFP                | 2.48 | 0.01 | 0.90 | 0.44 | 1.13 | 1.39 |

|       |   |        |                                |      |      |      |      |      |      |
|-------|---|--------|--------------------------------|------|------|------|------|------|------|
| 31292 | 0 | 450691 | HWRLPLH                        | 2.05 | 0.01 | 0.90 | 0.44 | 1.23 | 1.39 |
| 31293 | 0 | 25139  | HWSISKPQ                       | 2.12 | 0.01 | 0.90 | 0.68 | 0.22 | 1.66 |
| 31294 | 0 | 25139  | HWSISKPQ                       | 2.12 | 0.01 | 0.90 | 0.68 | 0.22 | 0.28 |
| 31295 | 0 | 25139  | HWSISKPQ                       | 2.12 | 0.01 | 0.90 | 0.68 | 0.22 | 1.34 |
| 31296 | 0 | 25139  | HWSISKPQ                       | 2.12 | 0.01 | 0.90 | 0.68 | 0.22 | 1.27 |
| 31297 | 0 | 25139  | HWSISKPQ                       | 2.12 | 0.01 | 0.90 | 0.68 | 0.22 | 1.75 |
| 31298 | 0 | 79568  | HWSPPSL                        | 2.03 | 0.01 | 0.90 | 1.12 | 0.22 | 1.39 |
| 31299 | 0 | 25140  | HWSYGLRPG                      | 2.21 | 0.01 | 1.75 | 0.68 | 0.22 | 0.28 |
| 31300 | 0 | 25140  | HWSYGLRPG                      | 2.21 | 0.01 | 1.75 | 0.68 | 0.22 | 3.16 |
| 31301 | 0 | 25140  | HWSYGLRPG                      | 2.21 | 0.01 | 0.78 | 2.87 | 0.22 | 0.28 |
| 31302 | 0 | 25140  | HWSYGLRPG                      | 2.21 | 0.01 | 0.78 | 2.87 | 0.22 | 1.27 |
| 31303 | 0 | 25140  | HWSYGLRPG                      | 2.21 | 0.01 | 0.78 | 2.87 | 0.22 | 0.28 |
| 31304 | 0 | 25140  | HWSYGLRPG                      | 2.21 | 0.01 | 0.78 | 2.87 | 0.22 | 1.27 |
| 31305 | 0 | 25140  | HWSYGLRPG                      | 2.21 | 0.01 | 0.78 | 0.68 | 0.22 | 0.28 |
| 31306 | 0 | 25140  | HWSYGLRPG                      | 2.21 | 0.01 | 0.78 | 0.68 | 0.22 | 3.16 |
| 31307 | 0 | 25140  | HWSYGLRPG                      | 2.21 | 0.01 | 1.75 | 0.68 | 0.22 | 0.28 |
| 31308 | 0 | 25140  | HWSYGLRPG                      | 2.21 | 0.01 | 1.75 | 0.68 | 0.22 | 3.16 |
| 31309 | 0 | 195466 | HWVPTSRTTWSIHAK                | 2.68 | 0.01 | 2.30 | 0.44 | 1.41 | 0.28 |
| 31310 | 0 | 195466 | HWVPTSRTTWSIHAK                | 2.68 | 0.01 | 2.30 | 0.44 | 1.41 | 0.28 |
| 31311 | 0 | 195466 | HWVPTSRTTWSIHAK                | 2.68 | 0.01 | 2.30 | 0.44 | 1.41 | 0.28 |
| 31312 | 0 | 195466 | HWVPTSRTTWSIHAK                | 2.68 | 0.01 | 2.30 | 0.44 | 1.41 | 0.28 |
| 31313 | 0 | 195466 | HWVPTSRTTWSIHAK                | 2.68 | 0.01 | 2.30 | 0.44 | 1.41 | 1.27 |
| 31314 | 0 | 195466 | HWVPTSRTTWSIHAK                | 2.68 | 0.01 | 2.30 | 0.44 | 1.41 | 1.27 |
| 31315 | 0 | 133605 | HWWHKKP                        | 2.05 | 0.01 | 0.90 | 0.68 | 0.22 | 0.28 |
| 31316 | 0 | 118838 | HWWNTPWAWSHP                   | 2.52 | 0.01 | 0.90 | 1.15 | 0.22 | 1.39 |
| 31317 | 0 | 151652 | HWWRAESDEARRCYN<br>DPKC        | 2.88 | 0.01 | 0.78 | 0.68 | 0.22 | 0.28 |
| 31318 | 0 | 151652 | HWWRAESDEARRCYN<br>DPKC        | 2.88 | 0.01 | 0.78 | 0.68 | 0.22 | 0.28 |
| 31319 | 0 | 151652 | HWWRAESDEARRCYN<br>DPKC        | 2.88 | 0.01 | 0.78 | 0.68 | 0.22 | 1.34 |
| 31320 | 0 | 151652 | HWWRAESDEARRCYN<br>DPKC        | 2.88 | 0.01 | 0.78 | 0.68 | 0.22 | 0.28 |
| 31321 | 0 | 25144  | HWWRAESDEARRCYN<br>DPKCCDFVTNR | 3.16 | 0.01 | 0.78 | 0.44 | 0.85 | 0.28 |
| 31322 | 0 | 25144  | HWWRAESDEARRCYN<br>DPKCCDFVTNR | 3.16 | 0.01 | 0.78 | 0.44 | 0.85 | 1.27 |
| 31323 | 0 | 25144  | HWWRAESDEARRCYN<br>DPKCCDFVTNR | 3.16 | 0.01 | 0.78 | 0.68 | 0.22 | 1.66 |
| 31324 | 0 | 25144  | HWWRAESDEARRCYN<br>DPKCCDFVTNR | 3.16 | 0.01 | 0.78 | 0.44 | 0.85 | 1.27 |
| 31325 | 0 | 25144  | HWWRAESDEARRCYN<br>DPKCCDFVTNR | 3.16 | 0.01 | 0.78 | 0.44 | 1.13 | 0.28 |
| 31326 | 0 | 25144  | HWWRAESDEARRCYN<br>DPKCCDFVTNR | 3.16 | 0.01 | 0.78 | 0.44 | 1.41 | 0.28 |
| 31327 | 0 | 25144  | HWWRAESDEARRCYN<br>DPKCCDFVTNR | 3.16 | 0.01 | 0.78 | 1.12 | 0.22 | 1.27 |

|       |   |        |                                |      |      |      |      |      |      |
|-------|---|--------|--------------------------------|------|------|------|------|------|------|
| 31328 | 0 | 25144  | HWWRAESDEARRCYN<br>DPKCCDFVTNR | 3.16 | 0.01 | 0.78 | 1.12 | 0.22 | 0.85 |
| 31329 | 0 | 25144  | HWWRAESDEARRCYN<br>DPKCCDFVTNR | 3.16 | 0.01 | 0.78 | 0.44 | 1.13 | 1.27 |
| 31330 | 0 | 25144  | HWWRAESDEARRCYN<br>DPKCCDFVTNR | 3.16 | 0.01 | 0.78 | 0.44 | 1.13 | 1.27 |
| 31331 | 0 | 25144  | HWWRAESDEARRCYN<br>DPKCCDFVTNR | 3.16 | 0.01 | 0.78 | 0.44 | 1.13 | 1.48 |
| 31332 | 0 | 25144  | HWWRAESDEARRCYN<br>DPKCCDFVTNR | 3.16 | 0.01 | 0.78 | 1.12 | 0.22 | 1.48 |
| 31333 | 0 | 25144  | HWWRAESDEARRCYN<br>DPKCCDFVTNR | 3.16 | 0.01 | 0.78 | 0.44 | 1.13 | 1.48 |
| 31334 | 0 | 25144  | HWWRAESDEARRCYN<br>DPKCCDFVTNR | 3.16 | 0.01 | 0.78 | 1.12 | 0.22 | 0.85 |
| 31335 | 0 | 25144  | HWWRAESDEARRCYN<br>DPKCCDFVTNR | 3.16 | 0.01 | 0.78 | 1.12 | 0.22 | 2.02 |
| 31336 | 0 | 25144  | HWWRAESDEARRCYN<br>DPKCCDFVTNR | 3.16 | 0.01 | 0.78 | 1.12 | 0.22 | 2.02 |
| 31337 | 0 | 25144  | HWWRAESDEARRCYN<br>DPKCCDFVTNR | 3.16 | 0.01 | 0.78 | 1.12 | 0.22 | 1.34 |
| 31338 | 0 | 25144  | HWWRAESDEARRCYN<br>DPKCCDFVTNR | 3.16 | 0.01 | 0.78 | 1.12 | 0.22 | 1.34 |
| 31339 | 0 | 25144  | HWWRAESDEARRCYN<br>DPKCCDFVTNR | 3.16 | 0.01 | 0.78 | 1.12 | 0.22 | 2.56 |
| 31340 | 0 | 25144  | HWWRAESDEARRCYN<br>DPKCCDFVTNR | 3.16 | 0.01 | 0.78 | 1.12 | 0.22 | 0.28 |
| 31341 | 0 | 25145  | HWYDAEVL                       | 2.10 | 0.01 | 0.90 | 0.68 | 0.22 | 0.28 |
| 31342 | 0 | 25145  | HWYDAEVL                       | 2.10 | 0.01 | 0.90 | 0.68 | 0.22 | 0.28 |
| 31343 | 0 | 168797 | HWYDWLTRYSHL                   | 2.50 | 0.01 | 0.90 | 0.44 | 0.85 | 1.39 |
| 31344 | 0 | 25146  | HWYISKPQ                       | 2.10 | 0.01 | 0.90 | 0.68 | 0.22 | 0.28 |
| 31345 | 0 | 25146  | HWYISKPQ                       | 2.10 | 0.01 | 0.90 | 0.68 | 0.22 | 1.66 |
| 31346 | 0 | 25146  | HWYISKPQ                       | 2.10 | 0.01 | 0.90 | 0.68 | 0.22 | 0.28 |
| 31347 | 0 | 25146  | HWYISKPQ                       | 2.10 | 0.01 | 0.90 | 0.68 | 0.22 | 1.34 |
| 31348 | 0 | 25146  | HWYISKPQ                       | 2.10 | 0.01 | 0.90 | 0.68 | 0.22 | 1.27 |
| 31349 | 0 | 120590 | HWYRATHQEAINCYAN               | 2.74 | 0.01 | 0.78 | 0.44 | 1.13 | 1.27 |
| 31350 | 0 | 151653 | HWYRATHQEAINCYAN<br>ETC        | 2.91 | 0.01 | 0.78 | 0.68 | 0.22 | 0.28 |
| 31351 | 0 | 151653 | HWYRATHQEAINCYAN<br>ETC        | 2.91 | 0.01 | 0.78 | 0.68 | 0.22 | 0.28 |
| 31352 | 0 | 120591 | HWYRATHQEAINCYAN<br>ETCCDFFTQ  | 3.20 | 0.01 | 0.78 | 0.44 | 1.13 | 0.28 |
| 31353 | 0 | 120591 | HWYRATHQEAINCYAN<br>ETCCDFFTQ  | 3.20 | 0.01 | 0.78 | 0.44 | 1.13 | 2.02 |
| 31354 | 0 | 120591 | HWYRATHQEAINCYAN<br>ETCCDFFTQ  | 3.20 | 0.01 | 0.78 | 0.44 | 1.13 | 1.27 |
| 31355 | 0 | 25149  | HYAPRPCGI                      | 2.21 | 0.01 | 1.96 | 0.44 | 0.85 | 0.28 |

|       |   |        |                                     |      |      |      |      |      |      |
|-------|---|--------|-------------------------------------|------|------|------|------|------|------|
| 31356 | 0 | 25149  | HYAPRPCGI                           | 2.21 | 0.01 | 1.96 | 0.44 | 0.85 | 1.48 |
| 31357 | 0 | 25152  | HYDFSIKETSLQ                        | 2.43 | 0.01 | 0.90 | 0.68 | 0.22 | 1.39 |
| 31358 | 0 | 99324  | HYEEPHTQGRRSQSQ                     | 2.69 | 0.01 | 2.16 | 0.44 | 1.23 | 1.48 |
| 31359 | 0 | 177740 | HYENSQRGPVSSTSD                     | 2.64 | 0.01 | 0.78 | 0.44 | 1.13 | 0.85 |
| 31360 | 0 | 193243 | HYFSPETGKAFK                        | 2.45 | 0.01 | 3.04 | 1.12 | 0.22 | 0.28 |
| 31361 | 0 | 113527 | HYGSLPQK                            | 2.10 | 0.01 | 0.78 | 1.20 | 0.22 | 1.27 |
| 31362 | 0 | 113527 | HYGSLPQK                            | 2.10 | 0.01 | 0.78 | 1.20 | 0.22 | 1.27 |
| 31363 | 0 | 113527 | HYGSLPQK                            | 2.10 | 0.01 | 0.78 | 1.20 | 0.22 | 1.27 |
| 31364 | 0 | 113527 | HYGSLPQK                            | 2.10 | 0.01 | 0.78 | 1.20 | 0.22 | 1.27 |
| 31365 | 0 | 113527 | HYGSLPQK                            | 2.10 | 0.01 | 0.78 | 1.20 | 0.22 | 1.27 |
| 31366 | 0 | 113527 | HYGSLPQK                            | 2.10 | 0.01 | 0.78 | 1.20 | 0.22 | 1.27 |
| 31367 | 0 | 113527 | HYGSLPQK                            | 2.10 | 0.01 | 0.78 | 1.20 | 0.22 | 1.27 |
| 31368 | 0 | 113527 | HYGSLPQK                            | 2.10 | 0.01 | 0.78 | 1.20 | 0.22 | 1.27 |
| 31369 | 0 | 113527 | HYGSLPQK                            | 2.10 | 0.01 | 0.78 | 1.20 | 0.22 | 1.27 |
| 31370 | 0 | 113527 | HYGSLPQK                            | 2.10 | 0.01 | 0.78 | 1.20 | 0.22 | 1.27 |
| 31371 | 0 | 113527 | HYGSLPQK                            | 2.10 | 0.01 | 2.19 | 2.74 | 0.22 | 1.27 |
| 31372 | 0 | 116357 | HYGSLPQKSQHGRQTQD<br>QDPVVHF        | 3.08 | 0.01 | 0.78 | 2.00 | 0.22 | 1.27 |
| 31373 | 0 | 114125 | HYGSLPQKSQRSQDENP<br>V              | 2.82 | 0.01 | 2.95 | 2.04 | 2.25 | 1.75 |
| 31374 | 0 | 114125 | HYGSLPQKSQRSQDENP<br>V              | 2.82 | 0.01 | 2.95 | 2.04 | 0.22 | 0.28 |
| 31375 | 0 | 114126 | HYGSLPQKSQRSQDENP<br>VV             | 2.86 | 0.01 | 2.95 | 1.12 | 0.22 | 0.85 |
| 31376 | 0 | 114126 | HYGSLPQKSQRSQDENP<br>VV             | 2.86 | 0.01 | 2.95 | 1.12 | 0.22 | 2.92 |
| 31377 | 0 | 112161 | HYGSLPQKSQRSQDENP<br>VVHF           | 2.96 | 0.01 | 2.95 | 2.04 | 0.22 | 1.27 |
| 31378 | 0 | 25164  | HYHKF                               | 1.77 | 0.01 | 0.90 | 0.68 | 0.22 | 1.27 |
| 31379 | 0 | 127690 | HYHRPPE                             | 2.04 | 0.01 | 0.90 | 0.44 | 1.13 | 0.28 |
| 31380 | 0 | 450692 | HYIDFRW                             | 1.99 | 0.01 | 0.90 | 0.44 | 1.23 | 1.39 |
| 31381 | 0 | 450692 | HYIDFRW                             | 1.99 | 0.01 | 0.90 | 0.44 | 1.41 | 1.39 |
| 31382 | 0 | 100129 | HYKWLNDPLAAW                        | 2.46 | 0.01 | 0.90 | 2.00 | 0.22 | 0.28 |
| 31383 | 0 | 100129 | HYKWLNDPLAAW                        | 2.46 | 0.01 | 0.90 | 2.00 | 0.22 | 0.28 |
| 31384 | 0 | 100129 | HYKWLNDPLAAW                        | 2.46 | 0.01 | 0.90 | 2.00 | 0.22 | 0.85 |
| 31385 | 0 | 100129 | HYKWLNDPLAAW                        | 2.46 | 0.01 | 0.90 | 2.00 | 0.22 | 1.34 |
| 31386 | 0 | 174145 | HYLALLVKY                           | 2.24 | 0.01 | 3.10 | 0.44 | 1.23 | 0.85 |
| 31387 | 0 | 120592 | HYLFDTYDPGRRPVQEP<br>EDT            | 2.94 | 0.01 | 1.60 | 1.12 | 0.22 | 0.85 |
| 31388 | 0 | 106526 | HYLHRVTYRVTCTSTS                    | 2.72 | 0.01 | 3.47 | 0.68 | 0.22 | 0.28 |
| 31389 | 0 | 106526 | HYLHRVTYRVTCTSTS                    | 2.72 | 0.01 | 3.47 | 4.63 | 0.22 | 0.28 |
| 31390 | 0 | 106526 | HYLHRVTYRVTCTSTS                    | 2.72 | 0.01 | 3.47 | 0.68 | 0.22 | 0.28 |
| 31391 | 0 | 423347 | HYLMYSHTNNECVGE<br>HYLNNDGKMASVKCPP | 2.66 | 0.01 | 2.51 | 0.44 | 1.59 | 1.28 |
| 31392 | 0 | 25178  | KYGLTEDCNFCRQMTG<br>AS              | 3.42 | 0.01 | 3.85 | 1.15 | 0.22 | 2.02 |

|       |   |        |                                   |      |      |      |      |      |      |
|-------|---|--------|-----------------------------------|------|------|------|------|------|------|
|       |   |        | HYLNNDGKMASVKCPP                  |      |      |      |      |      |      |
| 31393 | 0 | 25178  | KYGLTEDCNFCRQMTG<br>AS            | 3.42 | 0.01 | 3.85 | 1.15 | 0.22 | 2.02 |
| 31394 | 0 | 143938 | HYLVNHPEVLVEASQ                   | 2.69 | 0.01 | 4.63 | 1.81 | 0.22 | 0.28 |
| 31395 | 0 | 25180  | HYLVQSPPW                         | 2.20 | 0.01 | 0.90 | 0.68 | 0.22 | 0.28 |
| 31396 | 0 | 25181  | HYMKCPLVKGQQYD                    | 2.58 | 4.63 | 2.78 | 0.44 | 1.23 | 1.57 |
| 31397 | 0 | 25182  | HYMKCPLVKGQQYD                    | 2.58 | 0.01 | 2.78 | 0.44 | 1.23 | 1.57 |
| 31398 | 0 | 510443 | HYMKCPLVKGQQYDIKY<br>TWNVPKIAPKSE | 3.25 | 0.01 | 2.78 | 0.68 | 0.22 | 1.75 |
| 31399 | 0 | 510443 | HYMKCPLVKGQQYDIKY<br>TWNVPKIAPKSE | 3.25 | 0.01 | 2.78 | 1.12 | 0.22 | 0.85 |
| 31400 | 0 | 109306 | HYNIVTFCCCKDSTLRLC<br>VQ          | 2.91 | 0.01 | 1.86 | 2.49 | 0.22 | 0.28 |
| 31401 | 0 | 145245 | HYNPWEQEPMMY                      | 2.48 | 0.01 | 0.90 | 0.44 | 1.13 | 1.39 |
| 31402 | 0 | 181917 | HYQFSDVRHAWK                      | 2.44 | 0.01 | 0.90 | 3.15 | 0.22 | 1.39 |
| 31403 | 0 | 126242 | HYQRLSESRLREA                     | 2.71 | 0.01 | 1.75 | 1.15 | 0.22 | 0.28 |
| 31404 | 0 | 126242 | HYQRLSESRLREA                     | 2.71 | 0.01 | 1.75 | 1.15 | 0.22 | 0.28 |
| 31405 | 0 | 150282 | HYRAHARDGVFDYYT                   | 2.70 | 0.01 | 2.60 | 0.68 | 0.22 | 0.28 |
| 31406 | 0 | 150282 | HYRAHARDGVFDYYT                   | 2.70 | 0.01 | 2.60 | 0.68 | 0.22 | 0.28 |
| 31407 | 0 | 150282 | HYRAHARDGVFDYYT                   | 2.70 | 0.01 | 2.60 | 0.68 | 0.22 | 0.28 |
| 31408 | 0 | 150282 | HYRAHARDGVFDYYT                   | 2.70 | 0.01 | 2.60 | 0.68 | 0.22 | 1.34 |
| 31409 | 0 | 150282 | HYRAHARDGVFDYYT                   | 2.70 | 0.01 | 2.60 | 0.68 | 0.22 | 1.75 |
| 31410 | 0 | 150282 | HYRAHARDGVFDYYT                   | 2.70 | 0.01 | 2.60 | 0.68 | 0.22 | 0.28 |
| 31411 | 0 | 150282 | HYRAHARDGVFDYYT                   | 2.70 | 0.01 | 2.60 | 0.68 | 0.22 | 0.28 |
| 31412 | 0 | 150282 | HYRAHARDGVFDYYT                   | 2.70 | 0.01 | 2.60 | 0.68 | 0.22 | 1.34 |
| 31413 | 0 | 150282 | HYRAHARDGVFDYYT                   | 2.70 | 0.01 | 2.60 | 0.68 | 0.22 | 1.34 |
| 31414 | 0 | 150282 | HYRAHARDGVFDYYT                   | 2.70 | 0.01 | 2.60 | 0.68 | 0.22 | 1.34 |
| 31415 | 0 | 150282 | HYRAHARDGVFDYYT                   | 2.70 | 0.01 | 2.60 | 0.68 | 0.22 | 1.34 |
| 31416 | 0 | 150282 | HYRAHARDGVFDYYT                   | 2.70 | 0.01 | 2.60 | 0.68 | 0.22 | 1.34 |
| 31417 | 0 | 150282 | HYRAHARDGVFDYYT                   | 2.70 | 0.01 | 2.60 | 0.68 | 0.22 | 1.34 |
| 31418 | 0 | 150282 | HYRAHARDGVFDYYT                   | 2.70 | 0.01 | 2.60 | 0.68 | 0.22 | 1.34 |
| 31419 | 0 | 150282 | HYRAHARDGVFDYYT                   | 2.70 | 0.01 | 2.60 | 0.68 | 0.22 | 1.34 |
| 31420 | 0 | 150282 | HYRAHARDGVFDYYT                   | 2.70 | 0.01 | 2.60 | 0.68 | 0.22 | 1.34 |
| 31421 | 0 | 77912  | HYSPTGLRWTTM                      | 2.44 | 0.01 | 0.90 | 1.15 | 0.22 | 1.39 |
| 31422 | 0 | 25199  | HYSRSSFDSPML                      | 2.47 | 0.01 | 0.90 | 0.68 | 0.22 | 1.39 |
| 31423 | 0 | 120593 | HYTESDIKRN                        | 2.26 | 0.01 | 2.18 | 2.16 | 0.22 | 0.28 |
| 31424 | 0 | 25200  | HYTNESKFKFILE                     | 2.54 | 0.01 | 3.00 | 0.44 | 0.85 | 0.28 |
| 31425 | 0 | 25200  | HYTNESKFKFILE                     | 2.54 | 0.01 | 3.00 | 1.15 | 2.39 | 0.28 |
| 31426 | 0 | 119593 | HYTQKSLS                          | 2.12 | 0.01 | 0.78 | 0.44 | 1.93 | 0.28 |
| 31427 | 0 | 94548  | HYTQMVWGKTKEIGCG<br>SIKY          | 2.93 | 0.01 | 3.65 | 0.68 | 0.22 | 0.28 |
| 31428 | 0 | 94548  | HYTQMVWGKTKEIGCG<br>SIKY          | 2.93 | 0.01 | 3.65 | 0.68 | 0.22 | 0.28 |
| 31429 | 0 | 186679 | HYTWMWDELSWY                      | 2.48 | 0.01 | 0.90 | 0.68 | 0.22 | 1.39 |
| 31430 | 0 | 489580 | HYYNGKVPYDAIISELL<br>MK           | 2.88 | 0.01 | 2.70 | 0.44 | 0.85 | 0.28 |
| 31431 | 0 | 25215  | IAAAIVLRGMAKDG                    | 2.63 | 0.01 | 2.97 | 2.82 | 0.22 | 0.28 |

|       |   |        |                                                     |      |      |      |      |      |      |
|-------|---|--------|-----------------------------------------------------|------|------|------|------|------|------|
| 31432 | 0 | 310702 | IAADGVGGGDGSAGE                                     | 2.72 | 0.01 | 1.61 | 0.44 | 0.85 | 1.28 |
| 31433 | 0 | 25217  | IAADQLPN                                            | 2.11 | 0.01 | 3.06 | 1.12 | 0.22 | 0.28 |
| 31434 | 0 | 25219  | IAAEQDRNTREVFAQVK                                   | 2.79 | 0.01 | 2.48 | 0.44 | 0.85 | 0.28 |
| 31435 | 0 | 25219  | IAAEQDRNTREVFAQVK                                   | 2.79 | 0.01 | 2.48 | 1.20 | 0.22 | 0.28 |
| 31436 | 0 | 25224  | IAAISM                                              | 1.92 | 0.01 | 3.24 | 1.12 | 0.22 | 0.28 |
| 31437 | 0 | 193472 | IAALKVAKS                                           | 2.25 | 0.01 | 2.51 | 0.44 | 2.39 | 0.28 |
| 31438 | 0 | 193472 | IAALKVAKS                                           | 2.25 | 0.01 | 2.51 | 0.44 | 2.39 | 0.28 |
| 31439 | 0 | 96370  | IAAQKPKV                                            | 2.13 | 0.01 | 0.90 | 0.68 | 0.22 | 0.28 |
| 31440 | 0 | 177084 | IAARPKVKDQHGRM                                      | 2.58 | 0.01 | 3.85 | 0.68 | 0.22 | 1.75 |
| 31441 | 0 | 177084 | IAARPKVKDQHGRM                                      | 2.58 | 0.01 | 3.85 | 0.68 | 0.22 | 1.75 |
| 31442 | 0 | 115786 | IAATLEHVDRDQRPGLVR<br>SKDQFEFALTAVAEENV<br>AILKALPQ | 3.68 | 0.01 | 0.78 | 0.44 | 1.13 | 2.35 |
| 31443 | 0 | 110898 | IACQKHTPPAPKEDPLKK<br>YTFWEVNLK                     | 3.20 | 0.01 | 1.86 | 0.44 | 0.85 | 0.28 |
| 31444 | 0 | 110898 | IACQKHTPPAPKEDPLKK<br>YTFWEVNLK                     | 3.20 | 0.01 | 1.86 | 0.44 | 0.85 | 0.28 |
| 31445 | 0 | 110898 | IACQKHTPPAPKEDPLKK<br>YTFWEVNLK                     | 3.20 | 0.01 | 1.86 | 0.44 | 0.85 | 0.28 |
| 31446 | 0 | 25239  | IADAMEKVGKDGVITV                                    | 2.77 | 0.01 | 2.93 | 0.44 | 1.59 | 0.28 |
| 31447 | 0 | 25240  | IADAMGFGSANKGVVL<br>GGYSSVSAYMSSAG                  | 3.36 | 0.01 | 3.27 | 3.08 | 0.22 | 0.28 |
| 31448 | 0 | 25240  | IADAMGFGSANKGVVL<br>GGYSSVSAYMSSAG                  | 3.36 | 0.01 | 3.27 | 3.08 | 0.22 | 0.28 |
| 31449 | 0 | 25240  | IADAMGFGSANKGVVL<br>GGYSSVSAYMSSAG                  | 3.36 | 0.01 | 3.27 | 3.08 | 0.22 | 0.28 |
| 31450 | 0 | 25240  | IADAMGFGSANKGVVL<br>GGYSSVSAYMSSAG                  | 3.36 | 0.01 | 3.27 | 3.08 | 0.22 | 0.28 |
| 31451 | 0 | 25240  | IADAMGFGSANKGVVL<br>GGYSSVSAYMSSAG                  | 3.36 | 0.01 | 3.27 | 3.08 | 0.22 | 0.28 |
| 31452 | 0 | 25240  | IADAMGFGSANKGVVL<br>GGYSSVSAYMSSAG                  | 3.36 | 0.01 | 3.27 | 3.08 | 0.22 | 0.28 |
| 31453 | 0 | 25240  | IADAMGFGSANKGVVL<br>GGYSSVSAYMSSAG                  | 3.36 | 0.01 | 3.27 | 3.08 | 0.22 | 0.28 |
| 31454 | 0 | 25240  | IADAMGFGSANKGVVL<br>GGYSSVSAYMSSAG                  | 3.36 | 0.01 | 3.27 | 3.08 | 0.22 | 0.28 |

|       |   |        |                               |      |      |      |      |      |      |
|-------|---|--------|-------------------------------|------|------|------|------|------|------|
| 31455 | 0 | 25242  | IADEDK                        | 1.90 | 0.01 | 3.81 | 0.44 | 1.23 | 1.27 |
| 31456 | 0 | 103266 | IADIEAYPQWISEYK               | 2.69 | 0.01 | 2.04 | 0.44 | 0.85 | 1.28 |
| 31457 | 0 | 123302 | IADKHGMIG                     | 2.24 | 0.01 | 2.28 | 2.00 | 0.22 | 0.28 |
| 31458 | 0 | 181340 | IADMIDQTVNNQVNR               | 2.70 | 0.01 | 2.82 | 1.15 | 0.22 | 0.28 |
| 31459 | 0 | 25250  | IADYNYKLPDDFMGCVL             | 2.75 | 0.01 | 2.48 | 0.44 | 0.85 | 0.28 |
| 31460 | 0 | 25250  | IADYNYKLPDDFMGCVL             | 2.75 | 0.01 | 2.48 | 1.20 | 0.22 | 0.28 |
| 31461 | 0 | 25252  | IAEAMRKVKK                    | 2.31 | 0.01 | 2.84 | 0.44 | 0.85 | 0.28 |
| 31462 | 0 | 97391  | IAEAMRKVKKEGVIT               | 2.70 | 0.01 | 2.84 | 0.44 | 0.85 | 0.28 |
| 31463 | 0 | 504002 | IAEGLRALLARSHVERTT<br>DE      | 2.95 | 0.01 | 2.48 | 0.44 | 1.74 | 0.28 |
| 31464 | 0 | 114857 | IAEGSVAVRIQEVKASDD<br>GEYRCFF | 3.15 | 0.01 | 1.60 | 0.44 | 1.13 | 0.28 |
| 31465 | 0 | 114857 | IAEGSVAVRIQEVKASDD<br>GEYRCFF | 3.15 | 0.01 | 1.60 | 0.44 | 1.41 | 0.28 |
| 31466 | 0 | 114857 | IAEGSVAVRIQEVKASDD<br>GEYRCFF | 3.15 | 0.01 | 1.60 | 0.44 | 1.59 | 0.28 |
| 31467 | 0 | 25254  | IAEHQFKEK                     | 2.23 | 0.01 | 2.59 | 0.44 | 0.85 | 0.28 |
| 31468 | 0 | 25259  | IAEQFRQKVLGLLQASA<br>KQA      | 2.95 | 0.01 | 1.96 | 0.44 | 0.85 | 0.28 |
| 31469 | 0 | 141671 | IAESKQLTVKQKTEQIK             | 2.83 | 0.01 | 3.33 | 1.15 | 0.22 | 0.28 |
| 31470 | 0 | 141671 | IAESKQLTVKQKTEQIK             | 2.83 | 0.01 | 3.33 | 0.44 | 0.85 | 0.28 |
| 31471 | 0 | 141671 | IAESKQLTVKQKTEQIK             | 2.83 | 0.01 | 3.33 | 0.44 | 0.85 | 0.28 |
| 31472 | 0 | 25262  | IAETQHGTI                     | 2.24 | 0.01 | 2.30 | 0.68 | 0.22 | 0.28 |
| 31473 | 0 | 25266  | IAFASRGNHVSPTHYV              | 2.71 | 0.01 | 1.72 | 1.15 | 0.22 | 0.28 |
| 31474 | 0 | 103267 | IAFLAGCSSTKPVSQ               | 2.64 | 0.01 | 2.04 | 0.44 | 0.85 | 1.28 |
| 31475 | 0 | 25276  | IAGAG                         | 1.75 | 0.01 | 2.40 | 1.15 | 0.22 | 0.28 |
| 31476 | 0 | 25277  | IAGAGD                        | 1.91 | 0.01 | 2.40 | 2.52 | 0.22 | 0.28 |
| 31477 | 0 | 25279  | IAGALEVHAVKPA                 | 2.56 | 0.01 | 3.22 | 0.44 | 1.23 | 0.85 |
| 31478 | 0 | 109310 | IAGAPGFP                      | 2.16 | 0.01 | 1.60 | 2.55 | 2.60 | 0.28 |
| 31479 | 0 | 25280  | IAGDVRCV                      | 2.12 | 0.01 | 3.72 | 2.37 | 0.22 | 0.85 |
| 31480 | 0 | 105869 | IAGFKGEQGPK                   | 2.41 | 0.01 | 2.25 | 2.46 | 2.25 | 1.75 |
| 31481 | 0 | 105869 | IAGFKGEQGPK                   | 2.41 | 0.01 | 2.25 | 2.46 | 0.22 | 0.28 |
| 31482 | 0 | 105869 | IAGFKGEQGPK                   | 2.41 | 0.01 | 2.25 | 2.46 | 0.22 | 0.28 |
| 31483 | 0 | 105869 | IAGFKGEQGPK                   | 2.41 | 0.01 | 2.25 | 2.46 | 0.22 | 0.28 |
| 31484 | 0 | 105869 | IAGFKGEQGPK                   | 2.41 | 0.01 | 2.25 | 2.46 | 0.22 | 0.28 |
| 31485 | 0 | 105869 | IAGFKGEQGPK                   | 2.41 | 0.01 | 2.25 | 2.46 | 0.22 | 0.28 |
| 31486 | 0 | 105869 | IAGFKGEQGPK                   | 2.41 | 0.01 | 2.25 | 2.46 | 0.22 | 0.28 |
| 31487 | 0 | 105869 | IAGFKGEQGPK                   | 2.41 | 0.01 | 2.25 | 2.46 | 0.22 | 0.28 |
| 31488 | 0 | 105869 | IAGFKGEQGPK                   | 2.41 | 0.01 | 2.25 | 2.46 | 0.22 | 0.28 |
| 31489 | 0 | 105869 | IAGFKGEQGPK                   | 2.41 | 0.01 | 2.25 | 2.46 | 0.22 | 0.28 |



|       |   |        |                                 |      |      |      |      |      |      |
|-------|---|--------|---------------------------------|------|------|------|------|------|------|
| 31490 | 0 | 109315 | IAGFKGEQGPKGEP                  | 2.65 | 0.01 | 0.78 | 3.18 | 0.22 | 0.28 |
| 31491 | 0 | 109315 | IAGFKGEQGPKGEP                  | 2.65 | 0.01 | 0.78 | 3.18 | 0.22 | 0.28 |
| 31492 | 0 | 25284  | IAGFVFSCIVVVL                   | 2.62 | 0.01 | 2.94 | 2.00 | 0.22 | 0.28 |
| 31493 | 0 | 25291  | IAGKTSVLRAIP                    | 2.46 | 0.01 | 3.33 | 0.44 | 1.23 | 0.85 |
| 31494 | 0 | 25293  | IAGLIAIVMVTILLCCM               | 2.83 | 0.01 | 2.48 | 0.44 | 0.85 | 0.28 |
| 31495 | 0 | 25296  | IAGMDWAVK                       | 2.21 | 0.01 | 3.28 | 0.44 | 1.23 | 0.85 |
| 31496 | 0 | 25299  | IAGNSAYEYVDYLFKRMI<br>DLSSISTVD | 3.22 | 0.01 | 2.51 | 1.15 | 0.22 | 1.48 |
| 31497 | 0 | 25300  | IAGPEWLLDRPSVNNSQ<br>LVV        | 2.90 | 4.23 | 3.47 | 0.44 | 0.22 | 0.85 |
| 31498 | 0 | 450693 | IAGPFKL                         | 1.99 | 0.01 | 0.90 | 0.44 | 1.41 | 1.39 |
| 31499 | 0 | 25308  | IAHQFKEKILGLLQRATQ<br>QQ        | 2.94 | 0.01 | 1.96 | 0.44 | 0.85 | 0.28 |
| 31500 | 0 | 25309  | IAHQFKEKVLGLLQRAT<br>QQQ        | 2.92 | 0.01 | 1.96 | 0.44 | 0.85 | 0.28 |
| 31501 | 0 | 25309  | IAHQFKEKVLGLLQRAT<br>QQQ        | 2.92 | 0.01 | 4.03 | 0.44 | 1.59 | 0.85 |
| 31502 | 0 | 161235 | IAIAKVIRHRIRKCL                 | 2.72 | 0.01 | 2.74 | 0.44 | 0.85 | 0.28 |
| 31503 | 0 | 161236 | IAIAKVIRQRIRKSL                 | 2.72 | 0.01 | 2.74 | 0.44 | 0.85 | 0.28 |
| 31504 | 0 | 25315  | IAIGGAATGIAAVLTDGN<br>PP        | 2.97 | 0.01 | 3.53 | 0.68 | 0.22 | 0.28 |
| 31505 | 0 | 25315  | IAIGGAATGIAAVLTDGN<br>PP        | 2.97 | 0.01 | 2.04 | 0.44 | 1.13 | 0.28 |
| 31506 | 0 | 25315  | IAIGGAATGIAAVLTDGN<br>PP        | 2.97 | 0.01 | 2.04 | 0.44 | 0.22 | 0.28 |
| 31507 | 0 | 177087 | IAIRPKVRDQEGRM                  | 2.60 | 0.01 | 4.93 | 0.68 | 0.22 | 0.28 |
| 31508 | 0 | 25320  | IAIVERRNNLLQAELEEL              | 2.88 | 0.01 | 0.78 | 0.44 | 1.41 | 0.28 |
| 31509 | 0 | 25320  | IAIVERRNNLLQAELEEL              | 2.88 | 0.01 | 0.78 | 0.44 | 1.41 | 0.28 |
| 31510 | 0 | 110899 | IAKDLLPSRDRQHLPLIK              | 2.87 | 3.24 | 0.78 | 0.44 | 1.13 | 0.28 |
| 31511 | 0 | 110901 | IAKDLLPSRDRQHLPLIK              | 2.87 | 4.93 | 0.78 | 0.44 | 1.13 | 0.28 |
| 31512 | 0 | 110900 | IAKDLLPSRDRQHLPLIK              | 2.87 | 2.84 | 0.78 | 0.44 | 1.13 | 0.28 |
| 31513 | 0 | 110902 | IAKDLLPSRDRQHLPLIK              | 2.87 | 0.01 | 0.78 | 0.44 | 1.13 | 0.28 |
| 31514 | 0 | 104520 | IAKEQENKETIGTLKKILD<br>E        | 2.97 | 0.01 | 2.24 | 2.04 | 0.22 | 0.28 |
| 31515 | 0 | 104520 | IAKEQENKETIGTLKKILD<br>E        | 2.97 | 0.01 | 2.24 | 2.04 | 0.22 | 0.28 |
| 31516 | 0 | 141672 | IAKEWE                          | 1.90 | 0.01 | 2.19 | 2.04 | 0.22 | 1.57 |
| 31517 | 0 | 189089 | IAKPGFW                         | 1.99 | 0.01 | 0.90 | 2.13 | 0.22 | 0.28 |
| 31518 | 0 | 518220 | IAKQDSIISNLTEQ                  | 2.67 | 0.01 | 2.24 | 0.44 | 1.41 | 1.28 |
| 31519 | 0 | 177088 | IAKRPKVRDQEGRI                  | 2.62 | 0.01 | 4.63 | 0.68 | 0.22 | 1.75 |
| 31520 | 0 | 177089 | IAKRPKVRGQAGRM                  | 2.63 | 0.01 | 4.93 | 0.68 | 0.22 | 0.28 |

|       |   |        |                                   |      |      |      |      |      |      |
|-------|---|--------|-----------------------------------|------|------|------|------|------|------|
| 31521 | 0 | 25328  | IAKTTLKI                          | 2.26 | 0.01 | 2.61 | 0.44 | 0.85 | 0.28 |
| 31522 | 0 | 78418  | IAKVPPGNITAEGDK                   | 2.80 | 0.01 | 3.22 | 1.20 | 0.22 | 0.28 |
| 31523 | 0 | 25330  | IAKVPPGNITATYGDE<br>WLDKSTWYG     | 3.24 | 0.01 | 3.67 | 0.44 | 1.23 | 0.85 |
| 31524 | 0 | 115287 | IAKYIPIQVLSRPSYGL<br>N            | 2.95 | 0.01 | 1.60 | 0.44 | 1.23 | 1.28 |
| 31525 | 0 | 25331  | IALAISAQQVNYNLPGVS<br>EHL         | 3.00 | 0.01 | 2.04 | 2.52 | 0.22 | 0.28 |
| 31526 | 0 | 25335  | IALDGKIKHEDTNLASSTI<br>I          | 2.94 | 0.01 | 1.60 | 1.15 | 0.22 | 0.85 |
| 31527 | 0 | 140869 | IALGQRRADAVK                      | 2.46 | 0.01 | 3.01 | 1.12 | 0.22 | 0.28 |
| 31528 | 0 | 121396 | IALREYRK                          | 2.12 | 0.01 | 0.78 | 0.44 | 1.13 | 0.28 |
| 31529 | 0 | 119933 | IALREYRKMDIPAKLIVC<br>GMTSNG      | 3.12 | 0.01 | 0.78 | 2.25 | 0.22 | 0.28 |
| 31530 | 0 | 25346  | IALSQMGDA                         | 2.21 | 0.01 | 3.70 | 0.44 | 0.85 | 0.28 |
| 31531 | 0 | 196535 | IAMFPMP                           | 2.04 | 0.01 | 0.90 | 0.44 | 1.23 | 1.39 |
| 31532 | 0 | 137896 | IANGYRDVVADV                      | 2.49 | 0.01 | 2.21 | 0.44 | 0.85 | 0.28 |
| 31533 | 0 | 137896 | IANGYRDVVADV                      | 2.49 | 0.01 | 2.21 | 1.20 | 0.22 | 0.28 |
| 31534 | 0 | 236108 | IANVFTNAFR                        | 2.33 | 0.01 | 0.78 | 0.44 | 1.13 | 2.66 |
| 31535 | 0 | 236108 | IANVFTNAFR                        | 2.33 | 0.01 | 0.78 | 3.41 | 0.22 | 2.66 |
| 31536 | 0 | 111412 | IANYYGG                           | 2.00 | 0.01 | 0.90 | 0.44 | 0.85 | 1.39 |
| 31537 | 0 | 149335 | IAPFGIFGTN                        | 2.34 | 0.01 | 1.86 | 0.44 | 1.93 | 0.85 |
| 31538 | 0 | 149335 | IAPFGIFGTN                        | 2.34 | 0.01 | 1.86 | 2.74 | 0.22 | 0.85 |
| 31539 | 0 | 149335 | IAPFGIFGTN                        | 2.34 | 0.01 | 1.86 | 2.74 | 0.22 | 0.85 |
| 31540 | 0 | 25378  | IAPGQTGVIADYNYKLP                 | 2.78 | 0.01 | 2.48 | 0.44 | 0.85 | 0.28 |
| 31541 | 0 | 25378  | IAPGQTGVIADYNYKLP                 | 2.78 | 0.01 | 2.48 | 1.20 | 0.22 | 0.28 |
| 31542 | 0 | 121398 | IAPKRHNSA                         | 2.21 | 0.01 | 0.90 | 2.46 | 0.22 | 1.27 |
| 31543 | 0 | 119594 | IAPPLPPRGDVAELQEA<br>VEEDPLYAV    | 3.22 | 0.01 | 3.33 | 0.44 | 0.85 | 0.28 |
| 31544 | 0 | 25395  | IAQPKLAA                          | 2.11 | 0.01 | 3.06 | 1.12 | 0.22 | 0.28 |
| 31545 | 0 | 25396  | IAQPKS                            | 1.88 | 0.01 | 2.40 | 2.52 | 0.22 | 0.28 |
| 31546 | 0 | 25396  | IAQPKS                            | 1.88 | 0.01 | 2.40 | 2.52 | 0.22 | 0.28 |
| 31547 | 0 | 25397  | IAQQFKDKVLGLLQRAS<br>QQE          | 2.93 | 0.01 | 1.96 | 0.44 | 0.85 | 0.28 |
| 31548 | 0 | 25399  | IAQQNQSRGKGP GKKN<br>KKKNPEKPHFPL | 3.27 | 0.01 | 3.04 | 1.15 | 0.22 | 0.28 |
| 31549 | 0 | 25399  | IAQQNQSRGKGP GKKN<br>KKKNPEKPHFPL | 3.27 | 0.01 | 3.04 | 1.15 | 0.22 | 0.28 |
| 31550 | 0 | 25399  | IAQQNQSRGKGP GKKN<br>KKKNPEKPHFPL | 3.27 | 0.01 | 3.04 | 1.15 | 0.22 | 0.28 |
| 31551 | 0 | 25399  | IAQQNQSRGKGP GKKN<br>KKKNPEKPHFPL | 3.27 | 0.01 | 3.04 | 2.13 | 0.22 | 0.28 |
| 31552 | 0 | 25399  | IAQQNQSRGKGP GKKN<br>KKKNPEKPHFPL | 3.27 | 0.01 | 3.04 | 2.13 | 0.22 | 0.28 |

|       |   |        |                                   |      |      |      |      |      |      |
|-------|---|--------|-----------------------------------|------|------|------|------|------|------|
| 31553 | 0 | 25399  | IAQQNQSRGKGP GKKN<br>KKKNPEKPHFPL | 3.27 | 0.01 | 3.04 | 2.13 | 0.22 | 0.28 |
| 31554 | 0 | 25399  | IAQQNQSRGKGP GKKN<br>KKKNPEKPHFPL | 3.27 | 0.01 | 3.04 | 2.13 | 0.22 | 0.28 |
| 31555 | 0 | 25399  | IAQQNQSRGKGP GKKN<br>KKKNPEKPHFPL | 3.27 | 0.01 | 3.04 | 2.13 | 0.22 | 0.28 |
| 31556 | 0 | 25399  | IAQQNQSRGKGP GKKN<br>KKKNPEKPHFPL | 3.27 | 0.01 | 3.04 | 2.13 | 0.22 | 0.28 |
| 31557 | 0 | 25399  | IAQQNQSRGKGP GKKN<br>KKKNPEKPHFPL | 3.27 | 0.01 | 3.04 | 2.13 | 0.22 | 0.28 |
| 31558 | 0 | 25399  | IAQQNQSRGKGP GKKN<br>KKKNPEKPHFPL | 3.27 | 0.01 | 3.04 | 2.13 | 1.59 | 0.28 |
| 31559 | 0 | 25399  | IAQQNQSRGKGP GKKN<br>KKKNPEKPHFPL | 3.27 | 0.01 | 3.04 | 2.13 | 0.22 | 1.27 |
| 31560 | 0 | 25404  | IAQVATVS                          | 2.14 | 0.01 | 2.99 | 0.44 | 0.85 | 0.28 |
| 31561 | 0 | 120598 | IARFKMFPEVKEKGMA                  | 2.75 | 0.01 | 0.78 | 1.20 | 0.22 | 0.28 |
| 31562 | 0 | 120598 | IARFKMFPEVKEKGMA                  | 2.75 | 0.01 | 0.78 | 1.20 | 0.22 | 0.28 |
| 31563 | 0 | 120598 | IARFKMFPEVKEKGMA                  | 2.75 | 0.01 | 0.78 | 1.20 | 0.22 | 0.28 |
| 31564 | 0 | 120598 | IARFKMFPEVKEKGMA                  | 2.75 | 0.01 | 0.78 | 1.20 | 0.22 | 1.48 |
| 31565 | 0 | 120598 | IARFKMFPEVKEKGMA                  | 2.75 | 0.01 | 0.78 | 1.20 | 0.22 | 1.48 |
| 31566 | 0 | 120598 | IARFKMFPEVKEKGMA                  | 2.75 | 0.01 | 0.78 | 1.20 | 0.22 | 1.48 |
| 31567 | 0 | 132372 | IARGGFERALDD                      | 2.46 | 0.01 | 0.90 | 1.15 | 0.22 | 1.39 |
| 31568 | 0 | 141918 | IARGVRRLQA                        | 2.32 | 0.01 | 3.14 | 0.68 | 0.22 | 0.28 |
| 31569 | 0 | 79253  | IARLIS                            | 1.91 | 0.01 | 0.90 | 0.68 | 0.22 | 1.39 |
| 31570 | 0 | 25414  | IARLTDKK                          | 2.09 | 0.01 | 3.53 | 1.15 | 0.22 | 0.28 |
| 31571 | 0 | 115787 | IASGEPTSTP                        | 2.33 | 0.01 | 1.60 | 0.44 | 1.23 | 0.85 |
| 31572 | 0 | 115787 | IASGEPTSTP                        | 2.33 | 0.01 | 1.60 | 0.44 | 1.23 | 0.85 |
| 31573 | 0 | 25421  | IASGLSQERNFVDSI                   | 2.65 | 0.01 | 2.59 | 0.68 | 0.22 | 0.28 |
| 31574 | 0 | 25421  | IASGLSQERNFVDSI                   | 2.65 | 0.01 | 2.59 | 1.12 | 0.22 | 0.28 |
| 31575 | 0 | 177090 | IASGSQRSTNSAS                     | 2.57 | 0.01 | 2.96 | 0.68 | 0.22 | 0.28 |
| 31576 | 0 | 177090 | IASGSQRSTNSAS                     | 2.57 | 0.01 | 2.96 | 0.68 | 0.22 | 0.85 |
| 31577 | 0 | 177090 | IASGSQRSTNSAS                     | 2.57 | 0.01 | 2.96 | 0.68 | 0.22 | 1.48 |
| 31578 | 0 | 137195 | IASPEQLFAAYEDGFEQC<br>DAGWL       | 3.08 | 0.01 | 1.75 | 0.68 | 0.22 | 0.28 |
| 31579 | 0 | 137195 | IASPEQLFAAYEDGFEQC<br>DAGWL       | 3.08 | 0.01 | 1.75 | 0.68 | 0.22 | 0.28 |
| 31580 | 0 | 25445  | IAT                               | 1.37 | 0.01 | 3.72 | 0.44 | 1.23 | 0.85 |
| 31581 | 0 | 96373  | IATHAKIRD                         | 2.24 | 0.01 | 3.72 | 0.44 | 1.23 | 1.27 |
| 31582 | 0 | 118402 | IATKPLSKHVVKKLQACE<br>HPIGEWC     | 3.14 | 0.01 | 4.03 | 0.68 | 0.22 | 0.28 |

|       |   |        |                               |      |      |      |      |      |      |
|-------|---|--------|-------------------------------|------|------|------|------|------|------|
| 31583 | 0 | 118402 | IATKPLSKHVVKKLQACE<br>HPIGEWC | 3.14 | 0.01 | 4.03 | 0.68 | 0.22 | 1.48 |
| 31584 | 0 | 118402 | IATKPLSKHVVKKLQACE<br>HPIGEWC | 3.14 | 0.01 | 4.03 | 0.68 | 0.22 | 1.48 |
| 31585 | 0 | 118402 | IATKPLSKHVVKKLQACE<br>HPIGEWC | 3.14 | 0.01 | 4.03 | 0.68 | 0.22 | 1.48 |
| 31586 | 0 | 132373 | IATKRERGM LGQ                 | 2.45 | 0.01 | 0.90 | 1.15 | 0.22 | 1.39 |
| 31587 | 0 | 137196 | IATPEQLQAAYEDGFHQ<br>CDAGWL   | 3.06 | 0.01 | 1.75 | 0.68 | 0.22 | 0.28 |
| 31588 | 0 | 137196 | IATPEQLQAAYEDGFHQ<br>CDAGWL   | 3.06 | 0.01 | 1.75 | 0.68 | 0.22 | 0.28 |
| 31589 | 0 | 137197 | IATPEQLQAAYEDGFHQ<br>CDAGWLA  | 3.11 | 0.01 | 0.78 | 0.68 | 0.22 | 0.28 |
| 31590 | 0 | 137197 | IATPEQLQAAYEDGFHQ<br>CDAGWLA  | 3.11 | 0.01 | 0.78 | 0.68 | 0.22 | 0.28 |
| 31591 | 0 | 25452  | IATQEQPAFD                    | 2.31 | 0.01 | 3.67 | 0.68 | 0.22 | 0.28 |
| 31592 | 0 | 177091 | IATRPKVNGQGGRM                | 2.58 | 0.01 | 4.93 | 0.68 | 0.22 | 0.28 |
| 31593 | 0 | 177092 | IATRPKVNGQSGRI                | 2.60 | 0.01 | 4.45 | 0.68 | 0.22 | 0.28 |
| 31594 | 0 | 177094 | IATRPKVNGQSGRV                | 2.59 | 0.01 | 4.93 | 0.68 | 0.22 | 0.28 |
| 31595 | 0 | 177095 | IATRSEVNGQSGRM                | 2.59 | 0.01 | 4.93 | 0.68 | 0.22 | 0.28 |
| 31596 | 0 | 177096 | IATRSKINGQSGRI                | 2.64 | 0.01 | 4.93 | 0.68 | 0.22 | 0.28 |
| 31597 | 0 | 177097 | IATRSKINGQSGRM                | 2.62 | 0.01 | 4.93 | 0.68 | 0.22 | 0.28 |
| 31598 | 0 | 177098 | IATRSKVNGQIGRM                | 2.60 | 0.01 | 4.93 | 0.68 | 0.22 | 0.28 |
| 31599 | 0 | 177101 | IATRSKVNGQSGRM                | 2.59 | 0.01 | 3.09 | 0.68 | 0.22 | 0.28 |
| 31600 | 0 | 177101 | IATRSKVNGQSGRM                | 2.59 | 0.01 | 3.09 | 0.68 | 0.22 | 1.34 |
| 31601 | 0 | 177101 | IATRSKVNGQSGRM                | 2.59 | 0.01 | 3.09 | 0.68 | 0.22 | 1.34 |
| 31602 | 0 | 177101 | IATRSKVNGQSGRM                | 2.59 | 0.01 | 3.09 | 0.68 | 0.22 | 1.34 |
| 31603 | 0 | 177101 | IATRSKVNGQSGRM                | 2.59 | 0.01 | 3.09 | 0.68 | 0.22 | 1.75 |
| 31604 | 0 | 177101 | IATRSKVNGQSGRM                | 2.59 | 0.01 | 3.09 | 0.68 | 0.22 | 1.75 |
| 31605 | 0 | 177102 | IATRSKVNGQSGRV                | 2.61 | 0.01 | 4.93 | 0.68 | 0.22 | 0.28 |
| 31606 | 0 | 177103 | IATRSKVNGRSGRM                | 2.61 | 0.01 | 4.93 | 0.68 | 0.22 | 0.28 |
| 31607 | 0 | 177104 | IATR TKVNGQSGRM               | 2.59 | 0.01 | 4.93 | 0.68 | 0.22 | 0.28 |
| 31608 | 0 | 25453  | IATSSTGQNV                    | 2.30 | 0.01 | 3.67 | 0.68 | 0.22 | 0.28 |
| 31609 | 0 | 175902 | IAVAGCSAGGHLSALAG<br>LTA      | 2.99 | 0.01 | 2.04 | 0.44 | 0.85 | 0.28 |
| 31610 | 0 | 175902 | IAVAGCSAGGHLSALAG<br>LTA      | 2.99 | 0.01 | 2.04 | 0.44 | 0.85 | 0.28 |
| 31611 | 0 | 25455  | IAVAGDLFQPER                  | 2.43 | 0.01 | 0.78 | 4.63 | 0.22 | 0.28 |
| 31612 | 0 | 99325  | IAVPTGVAFWLYNDH               | 2.62 | 0.01 | 2.16 | 0.44 | 1.23 | 1.48 |
| 31613 | 0 | 131476 | IAWHQQQ                       | 2.00 | 0.01 | 0.78 | 1.15 | 0.22 | 0.28 |
| 31614 | 0 | 25471  | IAYCADCGAGHSCHSPV<br>AIE      | 2.97 | 0.01 | 3.13 | 2.43 | 0.22 | 0.28 |
| 31615 | 0 | 25471  | IAYCADCGAGHSCHSPV<br>AIE      | 2.97 | 0.01 | 3.13 | 2.43 | 0.22 | 0.28 |
| 31616 | 0 | 25480  | IAYFSMVGNWAKVLVV<br>LLLFAGVDA | 3.15 | 0.01 | 1.72 | 0.44 | 0.85 | 0.28 |

|       |   |        |                               |      |      |      |      |      |      |
|-------|---|--------|-------------------------------|------|------|------|------|------|------|
| 31617 | 0 | 25480  | IAYFSMVGNWAKVLVV<br>LLLFAGVDA | 3.15 | 0.01 | 1.72 | 0.44 | 0.85 | 0.28 |
| 31618 | 0 | 25481  | IAYGLDKGDDGKERNVLI<br>FD      | 2.95 | 0.01 | 2.78 | 0.44 | 0.85 | 0.28 |
| 31619 | 0 | 25483  | IAYLKSJKGK                    | 2.23 | 0.01 | 3.53 | 4.33 | 0.22 | 0.28 |
| 31620 | 0 | 25490  | ICACLCACSYNSV                 | 2.64 | 0.01 | 0.90 | 1.15 | 0.22 | 1.39 |
| 31621 | 0 | 79254  | ICADDEEWYSAMCA                | 2.61 | 0.01 | 0.90 | 0.68 | 0.22 | 1.39 |
| 31622 | 0 | 241008 | ICARQDPAGNCS                  | 2.45 | 0.01 | 0.90 | 2.49 | 0.85 | 1.39 |
| 31623 | 0 | 241008 | ICARQDPAGNCS                  | 2.45 | 0.01 | 0.90 | 3.15 | 0.22 | 0.28 |
| 31624 | 0 | 241008 | ICARQDPAGNCS                  | 2.45 | 0.01 | 0.90 | 2.49 | 0.85 | 0.85 |
| 31625 | 0 | 241008 | ICARQDPAGNCS                  | 2.45 | 0.01 | 0.90 | 0.68 | 0.22 | 0.28 |
| 31626 | 0 | 241008 | ICARQDPAGNCS                  | 2.45 | 0.01 | 0.90 | 0.68 | 0.22 | 0.28 |
| 31627 | 0 | 241008 | ICARQDPAGNCS                  | 2.45 | 0.01 | 0.90 | 0.68 | 0.22 | 1.75 |
| 31628 | 0 | 94549  | ICCNPACGPK                    | 2.33 | 0.01 | 3.70 | 1.20 | 0.22 | 0.28 |
| 31629 | 0 | 25495  | ICDLARTFAREMGEAN              | 2.71 | 0.01 | 2.40 | 1.12 | 0.22 | 0.28 |
| 31630 | 0 | 106529 | ICDRSYTTRR                    | 2.30 | 0.01 | 2.75 | 0.44 | 1.23 | 0.85 |
| 31631 | 0 | 151923 | ICEPCLTSQAAK                  | 2.44 | 0.01 | 2.71 | 2.78 | 0.22 | 0.28 |
| 31632 | 0 | 25496  | ICESAGTQEDAASL                | 2.60 | 0.01 | 1.96 | 0.44 | 1.41 | 0.28 |
| 31633 | 0 | 25497  | ICESAGVQEDAASL                | 2.60 | 0.01 | 2.41 | 0.44 | 0.85 | 0.28 |
| 31634 | 0 | 25497  | ICESAGVQEDAASL                | 2.60 | 0.01 | 2.41 | 0.44 | 1.41 | 0.28 |
| 31635 | 0 | 114859 | ICGTDGVTYT                    | 2.33 | 0.01 | 2.25 | 0.44 | 1.23 | 0.85 |
| 31636 | 0 | 171441 | ICHQIEYYFGDFNLP               | 2.64 | 0.01 | 0.78 | 0.44 | 1.41 | 0.28 |
| 31637 | 0 | 171441 | ICHQIEYYFGDFNLP               | 2.64 | 0.01 | 0.78 | 0.44 | 1.13 | 0.28 |
| 31638 | 0 | 182169 | ICHVPPETRQSEHPE               | 2.68 | 0.01 | 0.78 | 0.44 | 1.13 | 0.85 |
| 31639 | 0 | 182169 | ICHVPPETRQSEHPE               | 2.68 | 0.01 | 0.78 | 0.44 | 1.41 | 0.85 |
| 31640 | 0 | 182170 | ICKMEADIHTAEALP               | 2.67 | 0.01 | 0.78 | 0.44 | 1.13 | 0.85 |
| 31641 | 0 | 182170 | ICKMEADIHTAEALP               | 2.67 | 0.01 | 0.78 | 0.44 | 1.41 | 0.85 |
| 31642 | 0 | 94550  | ICKRIPNKKPGK                  | 2.52 | 0.01 | 2.38 | 0.68 | 0.22 | 0.28 |
| 31643 | 0 | 94550  | ICKRIPNKKPGK                  | 2.52 | 0.01 | 2.38 | 0.44 | 1.74 | 0.28 |
| 31644 | 0 | 94550  | ICKRIPNKKPGK                  | 2.52 | 0.01 | 2.38 | 0.44 | 1.74 | 0.28 |
| 31645 | 0 | 112544 | ICKTAEFQMTF                   | 2.39 | 0.01 | 0.78 | 1.12 | 0.22 | 0.28 |
| 31646 | 0 | 422417 | ICLACRKRRCMRHA<br>MCCPGNYC    | 3.13 | 0.01 | 0.78 | 0.68 | 0.22 | 0.28 |
| 31647 | 0 | 422417 | ICLACRKRRCMRHA<br>MCCPGNYC    | 3.13 | 0.01 | 0.78 | 2.37 | 0.22 | 0.28 |
| 31648 | 0 | 25510  | ICLAVLWVVK                    | 2.32 | 0.01 | 0.78 | 0.44 | 1.74 | 0.28 |
| 31649 | 0 | 25512  | ICLTRDRGWFCF                  | 2.56 | 0.01 | 3.00 | 0.68 | 0.22 | 0.28 |
| 31650 | 0 | 25514  | ICMEAASIVRANKKRTL<br>GAR      | 2.92 | 0.01 | 3.78 | 2.49 | 0.85 | 0.28 |
| 31651 | 0 | 151925 | ICMPCSTSQAAR                  | 2.46 | 0.01 | 2.80 | 2.78 | 0.22 | 0.28 |
| 31652 | 0 | 119595 | ICNVNHKP                      | 2.12 | 0.01 | 0.78 | 0.44 | 1.93 | 0.28 |
| 31653 | 0 | 230470 | ICPRDPAWSYCN                  | 2.45 | 0.01 | 0.90 | 0.44 | 0.85 | 0.85 |
| 31654 | 0 | 230470 | ICPRDPAWSYCN                  | 2.45 | 0.01 | 0.90 | 2.89 | 0.22 | 0.85 |
| 31655 | 0 | 174554 | ICPSNSEAN                     | 2.23 | 0.01 | 3.97 | 0.68 | 0.22 | 0.28 |
| 31656 | 0 | 311163 | ICRDEGGDEGNDEAE               | 2.71 | 0.01 | 1.61 | 0.44 | 0.85 | 1.28 |
| 31657 | 0 | 25525  | ICSISPSQGCQF                  | 2.52 | 0.01 | 3.12 | 0.44 | 1.23 | 0.85 |

|       |   |        |                                                           |      |      |      |      |      |      |
|-------|---|--------|-----------------------------------------------------------|------|------|------|------|------|------|
| 31658 | 0 | 25526  | ICSLTTEVMELNNKKNEL<br>IEENNKLNLDQGGKKKL<br>KKDVEKQKKEIEKL | 3.85 | 0.01 | 2.22 | 0.44 | 1.74 | 0.28 |
| 31659 | 0 | 25526  | ICSLTTEVMELNNKKNEL<br>IEENNKLNLDQGGKKKL<br>KKDVEKQKKEIEKL | 3.85 | 0.01 | 2.22 | 0.44 | 1.74 | 0.28 |
| 31660 | 0 | 25526  | ICSLTTEVMELNNKKNEL<br>IEENNKLNLDQGGKKKL<br>KKDVEKQKKEIEKL | 3.85 | 0.01 | 2.22 | 0.44 | 1.74 | 0.28 |
| 31661 | 0 | 99326  | ICTASAKKNIGRNRS                                           | 2.70 | 0.01 | 2.16 | 0.44 | 1.23 | 1.48 |
| 31662 | 0 | 105872 | ICTASFKKNIGRNRS                                           | 2.68 | 0.01 | 2.16 | 0.44 | 1.23 | 0.85 |
| 31663 | 0 | 79255  | ICTSHQHILKPMCE                                            | 2.60 | 0.01 | 0.90 | 0.68 | 0.22 | 1.39 |
| 31664 | 0 | 25527  | ICWNYDNAYCDKLCK                                           | 2.70 | 0.01 | 2.56 | 2.02 | 0.22 | 0.85 |
| 31665 | 0 | 25527  | ICWNYDNAYCDKLCK                                           | 2.70 | 0.01 | 2.56 | 1.20 | 0.22 | 0.85 |
| 31666 | 0 | 25527  | ICWNYDNAYCDKLCK                                           | 2.70 | 0.01 | 2.56 | 0.68 | 0.22 | 0.85 |
| 31667 | 0 | 25527  | ICWNYDNAYCDKLCK                                           | 2.70 | 0.01 | 2.56 | 2.52 | 0.22 | 0.85 |
| 31668 | 0 | 238615 | ICYKTFWNTHRGLRI                                           | 2.65 | 0.01 | 2.56 | 1.20 | 0.22 | 0.85 |
| 31669 | 0 | 238615 | ICYKTFWNTHRGLRI                                           | 2.65 | 0.01 | 2.56 | 2.02 | 0.22 | 0.85 |
| 31670 | 0 | 238616 | IDAGGS                                                    | 1.89 | 0.01 | 3.89 | 1.15 | 0.22 | 0.85 |
| 31671 | 0 | 238616 | IDAGGS                                                    | 1.89 | 0.01 | 3.89 | 1.15 | 0.22 | 0.28 |
| 31672 | 0 | 238616 | IDAGGS                                                    | 1.89 | 0.01 | 3.89 | 1.15 | 0.22 | 0.28 |
| 31673 | 0 | 238616 | IDAGGS                                                    | 1.89 | 0.01 | 3.89 | 1.15 | 0.22 | 0.28 |
| 31674 | 0 | 238616 | IDAGGS                                                    | 1.89 | 0.01 | 3.89 | 1.15 | 0.22 | 0.28 |
| 31675 | 0 | 238616 | IDAGGS                                                    | 1.89 | 0.01 | 3.89 | 1.15 | 0.22 | 0.85 |
| 31676 | 0 | 238616 | IDAGGS                                                    | 1.89 | 0.01 | 3.89 | 1.15 | 0.22 | 0.85 |
| 31677 | 0 | 25534  | IDALFENVDFQATITRAR<br>FE                                  | 2.97 | 0.01 | 2.78 | 0.44 | 0.85 | 0.28 |
| 31678 | 0 | 79256  | IDALMTGALDKPTKEITE<br>FMNLIQ                              | 3.13 | 0.01 | 2.86 | 1.81 | 0.22 | 1.27 |
| 31679 | 0 | 25535  | IDALNENK                                                  | 2.12 | 0.01 | 1.60 | 0.44 | 1.23 | 0.28 |
| 31680 | 0 | 25538  | IDANDCLVTPSVK                                             | 2.51 | 0.01 | 3.00 | 0.44 | 0.85 | 0.28 |
| 31681 | 0 | 25541  | IDAVNKRGRKQNKRG                                           | 2.70 | 0.01 | 3.04 | 0.44 | 0.22 | 0.28 |
| 31682 | 0 | 25541  | IDAVNKRGRKQNKRG                                           | 2.70 | 0.01 | 3.04 | 0.44 | 0.85 | 0.28 |
| 31683 | 0 | 25541  | IDAVNKRGRKQNKRG                                           | 2.70 | 0.01 | 3.04 | 0.44 | 1.59 | 0.28 |
| 31684 | 0 | 25543  | IDCCEICCNPAFCGLN                                          | 2.81 | 0.01 | 2.85 | 0.68 | 0.22 | 1.27 |
| 31685 | 0 | 25543  | IDCCEICCNPAFCGLN                                          | 2.81 | 0.01 | 2.85 | 0.68 | 0.22 | 1.27 |
| 31686 | 0 | 25543  | IDCCEICCNPAFCGLN                                          | 2.81 | 0.01 | 2.85 | 0.68 | 0.22 | 1.27 |

|       |   |        |                                          |      |      |      |      |      |      |
|-------|---|--------|------------------------------------------|------|------|------|------|------|------|
| 31687 | 0 | 25543  | IDCCEICCNPACFGCLN                        | 2.81 | 0.01 | 2.85 | 0.68 | 0.22 | 1.27 |
| 31688 | 0 | 311218 | IDDDSDVQNEIKVLD                          | 2.69 | 0.01 | 1.61 | 0.44 | 0.85 | 1.28 |
| 31689 | 0 | 102524 | IDDL                                     | 1.78 | 0.01 | 4.03 | 0.68 | 0.22 | 0.28 |
| 31690 | 0 | 102524 | IDDL                                     | 1.78 | 0.01 | 4.03 | 0.68 | 0.22 | 0.28 |
| 31691 | 0 | 193245 | IDDNYFYIDDNG                             | 2.52 | 0.01 | 3.04 | 1.12 | 0.22 | 0.28 |
| 31692 | 0 | 466413 | IDDTKGLSVTNSGFDDG<br>SAFGGGLPFSGYS       | 3.34 | 0.01 | 1.66 | 0.44 | 0.85 | 1.28 |
| 31693 | 0 | 466413 | IDDTKGLSVTNSGFDDG<br>SAFGGGLPFSGYS       | 3.34 | 0.01 | 1.66 | 0.44 | 0.85 | 1.28 |
| 31694 | 0 | 167282 | IDDIVLVGGSTRIPKIQQL<br>V                 | 2.94 | 3.40 | 0.78 | 0.44 | 1.13 | 0.28 |
| 31695 | 0 | 141673 | IDEYCVQQLK                               | 2.28 | 0.01 | 0.78 | 0.44 | 1.93 | 0.28 |
| 31696 | 0 | 78681  | IDFADRTATSLEANVIKE<br>GKKGNLTFTLPDYLELSG | 3.53 | 0.01 | 2.98 | 2.16 | 0.22 | 0.28 |
| 31697 | 0 | 78681  | IDFADRTATSLEANVIKE<br>GKKGNLTFTLPDYLELSG | 3.53 | 0.01 | 2.98 | 2.37 | 0.22 | 0.28 |
| 31698 | 0 | 78681  | IDFADRTATSLEANVIKE<br>GKKGNLTFTLPDYLELSG | 3.53 | 0.01 | 2.98 | 1.12 | 0.22 | 0.28 |
| 31699 | 0 | 78681  | IDFADRTATSLEANVIKE<br>GKKGNLTFTLPDYLELSG | 3.53 | 0.01 | 2.98 | 0.44 | 0.85 | 0.28 |
| 31700 | 0 | 78681  | IDFADRTATSLEANVIKE<br>GKKGNLTFTLPDYLELSG | 3.53 | 0.01 | 2.98 | 1.12 | 0.22 | 0.28 |
| 31701 | 0 | 78681  | IDFADRTATSLEANVIKE<br>GKKGNLTFTLPDYLELSG | 3.53 | 0.01 | 2.98 | 1.12 | 0.22 | 0.85 |
| 31702 | 0 | 78681  | IDFADRTATSLEANVIKE<br>GKKGNLTFTLPDYLELSG | 3.53 | 0.01 | 2.98 | 1.12 | 0.22 | 0.85 |
| 31703 | 0 | 152645 | IDFKKYNDKL                               | 2.33 | 0.01 | 2.18 | 2.16 | 0.22 | 0.28 |
| 31704 | 0 | 193247 | IDFTGKLIID                               | 2.33 | 0.01 | 3.04 | 1.12 | 0.22 | 0.28 |
| 31705 | 0 | 311254 | IDGDAEVDDEDEDDDD                         | 2.71 | 0.01 | 1.61 | 0.44 | 0.85 | 1.28 |
| 31706 | 0 | 102526 | IDGLVL                                   | 1.90 | 0.01 | 3.04 | 1.20 | 0.22 | 0.28 |
| 31707 | 0 | 110903 | IDGP                                     | 1.57 | 0.01 | 1.86 | 0.68 | 0.22 | 0.85 |
| 31708 | 0 | 110903 | IDGP                                     | 1.57 | 0.01 | 1.86 | 0.68 | 0.22 | 0.28 |
| 31709 | 0 | 111413 | IDGPAGQAEPDRAHYNI<br>VTFCKC              | 3.08 | 0.01 | 1.86 | 1.81 | 0.22 | 0.28 |
| 31710 | 0 | 111413 | IDGPAGQAEPDRAHYNI<br>VTFCKC              | 3.08 | 0.01 | 1.86 | 1.15 | 0.22 | 0.85 |
| 31711 | 0 | 311278 | IDGSLSSAWVCAPL                           | 2.66 | 0.01 | 1.61 | 0.44 | 0.85 | 1.28 |
| 31712 | 0 | 311279 | IDGSLSSAWVCASL                           | 2.69 | 0.01 | 1.61 | 0.44 | 0.85 | 1.28 |
| 31713 | 0 | 109325 | IDGVNH                                   | 1.88 | 0.01 | 3.11 | 0.68 | 0.22 | 0.28 |

|       |   |        |                                               |      |      |      |      |      |      |
|-------|---|--------|-----------------------------------------------|------|------|------|------|------|------|
| 31714 | 0 | 109325 | IDGVNH                                        | 1.88 | 0.01 | 3.11 | 0.68 | 0.22 | 1.48 |
| 31715 | 0 | 109325 | IDGVNH                                        | 1.88 | 0.01 | 3.11 | 0.68 | 0.22 | 0.28 |
| 31716 | 0 | 25587  | IDIDLCDICTNTMDV                               | 2.72 | 0.01 | 2.28 | 0.68 | 0.22 | 0.28 |
| 31717 | 0 | 25587  | IDIDLCDICTNTMDV                               | 2.72 | 0.01 | 2.28 | 1.20 | 0.22 | 0.28 |
| 31718 | 0 | 25587  | IDIDLCDICTNTMDV                               | 2.72 | 0.01 | 2.28 | 1.20 | 0.22 | 0.28 |
| 31719 | 0 | 25587  | IDIDLCDICTNTMDV                               | 2.72 | 0.01 | 2.28 | 1.20 | 0.22 | 1.27 |
| 31720 | 0 | 25590  | IDIFASKNFHLQKNTIGT<br>G                       | 2.90 | 0.01 | 3.24 | 1.15 | 0.22 | 0.28 |
| 31721 | 0 | 143941 | IDIINPAQNRLR                                  | 2.49 | 0.01 | 0.90 | 1.20 | 0.22 | 1.39 |
| 31722 | 0 | 143941 | IDIINPAQNRLR                                  | 2.49 | 0.01 | 0.90 | 0.44 | 1.41 | 0.28 |
| 31723 | 0 | 143941 | IDIINPAQNRLR                                  | 2.49 | 0.01 | 0.90 | 0.44 | 0.85 | 0.28 |
| 31724 | 0 | 25592  | IDIISGAHWGVMFGLA                              | 2.73 | 0.01 | 2.69 | 0.44 | 0.85 | 0.28 |
| 31725 | 0 | 25592  | IDIISGAHWGVMFGLA                              | 2.73 | 0.01 | 2.69 | 0.44 | 0.85 | 0.28 |
| 31726 | 0 | 120601 | IDISDISGKQVTGEVIFQT                           | 2.93 | 0.01 | 2.26 | 2.04 | 0.22 | 1.57 |
| 31727 | 0 | 120601 | IDISDISGKQVTGEVIFQT                           | 2.93 | 0.01 | 2.26 | 0.68 | 0.22 | 0.28 |
| 31728 | 0 | 165609 | IDIVVGKAATFNLKASDL<br>SGP                     | 2.99 | 0.01 | 4.33 | 1.20 | 0.22 | 1.48 |
| 31729 | 0 | 165609 | IDIVVGKAATFNLKASDL<br>SGP                     | 2.99 | 0.01 | 4.33 | 1.20 | 0.22 | 0.28 |
| 31730 | 0 | 25595  | IDKDNNELIDKQELTKYC<br>QQ                      | 2.96 | 0.01 | 2.93 | 1.81 | 0.22 | 0.28 |
| 31731 | 0 | 25595  | IDKDNNELIDKQELTKYC<br>QQ                      | 2.96 | 0.01 | 2.93 | 2.69 | 0.22 | 0.28 |
| 31732 | 0 | 25595  | IDKDNNELIDKQELTKYC<br>QQ                      | 2.96 | 0.01 | 2.93 | 0.68 | 0.22 | 0.28 |
| 31733 | 0 | 25598  | IDKLCVWNNK                                    | 2.30 | 0.01 | 2.66 | 0.68 | 0.22 | 0.28 |
| 31734 | 0 | 25598  | IDKLCVWNNK                                    | 2.30 | 0.01 | 2.66 | 0.68 | 0.22 | 0.28 |
| 31735 | 0 | 25599  | IDKLNNEKGTLSKISEL<br>NVQIMDL                  | 3.18 | 0.01 | 2.22 | 0.44 | 1.74 | 0.28 |
| 31736 | 0 | 25599  | IDKLNNEKGTLSKISEL<br>NVQIMDL                  | 3.18 | 0.01 | 2.22 | 0.44 | 1.74 | 0.28 |
| 31737 | 0 | 25600  | IDKLTTREIEQVELLKRIY<br>DKLTVQTTGEIDMTKEI<br>N | 3.57 | 0.01 | 3.29 | 1.12 | 0.22 | 0.85 |
| 31738 | 0 | 25600  | IDKLTTREIEQVELLKRIY<br>DKLTVQTTGEIDMTKEI<br>N | 3.57 | 0.01 | 3.29 | 1.12 | 0.22 | 0.85 |
| 31739 | 0 | 25600  | IDKLTTREIEQVELLKRIY<br>DKLTVQTTGEIDMTKEI<br>N | 3.57 | 0.01 | 3.29 | 1.12 | 0.22 | 0.85 |
| 31740 | 0 | 25600  | IDKLTTREIEQVELLKRIY<br>DKLTVQTTGEIDMTKEI<br>N | 3.57 | 0.01 | 3.29 | 1.12 | 0.22 | 0.85 |



|       |   |        |                                   |      |      |      |      |      |      |
|-------|---|--------|-----------------------------------|------|------|------|------|------|------|
|       |   |        | IDKLTTREIEQVELLKRIY               |      |      |      |      |      |      |
| 31741 | 0 | 25600  | DKLTVQTTGEIDMTKEI<br>N            | 3.57 | 0.01 | 3.29 | 1.12 | 0.22 | 0.85 |
| 31742 | 0 | 25605  | IDLGESRVVIQDYDNQH<br>EQDRPTSPAPSR | 3.33 | 0.01 | 2.70 | 1.15 | 0.22 | 0.28 |
| 31743 | 0 | 25605  | IDLGESRVVIQDYDNQH<br>EQDRPTSPAPSR | 3.33 | 0.01 | 2.53 | 0.44 | 0.85 | 0.28 |
| 31744 | 0 | 25605  | IDLGESRVVIQDYDNQH<br>EQDRPTSPAPSR | 3.33 | 0.01 | 2.53 | 0.44 | 0.85 | 0.28 |
| 31745 | 0 | 25606  | IDLGPPISLERLDVG                   | 2.70 | 0.01 | 2.43 | 0.44 | 1.59 | 0.28 |
| 31746 | 0 | 25622  | IDLTKNAAK                         | 2.21 | 0.01 | 2.59 | 0.44 | 0.85 | 0.28 |
| 31747 | 0 | 25623  | IDLTKNAAK                         | 2.32 | 0.01 | 2.59 | 0.44 | 0.85 | 0.28 |
| 31748 | 0 | 25624  | IDLTKNAAKL                        | 2.42 | 0.01 | 2.59 | 0.44 | 0.85 | 0.28 |
| 31749 | 0 | 25624  | IDLTKNAAKL                        | 2.42 | 0.01 | 2.59 | 0.44 | 0.85 | 0.28 |
| 31750 | 0 | 25626  | IDLTKNAAKLRD                      | 2.56 | 0.01 | 0.90 | 0.44 | 0.85 | 0.28 |
| 31751 | 0 | 25627  | IDLTKNAAKLRGD                     | 2.62 | 0.01 | 2.59 | 0.44 | 0.85 | 0.28 |
| 31752 | 0 | 25627  | IDLTKNAAKLRGD                     | 2.62 | 0.01 | 2.59 | 0.44 | 0.85 | 0.28 |
| 31753 | 0 | 120602 | IDLVEHKELQ                        | 2.31 | 0.01 | 2.18 | 2.16 | 0.22 | 0.28 |
| 31754 | 0 | 25630  | IDMIAGAHWG                        | 2.34 | 0.01 | 1.72 | 0.44 | 0.85 | 0.28 |
| 31755 | 0 | 25631  | IDMPSWPPVQSTSSPGT<br>PSM          | 2.97 | 0.01 | 3.01 | 0.44 | 0.85 | 0.28 |
| 31756 | 0 | 107445 | IDMSAFAGLGPREGPD<br>PLQY          | 2.97 | 0.01 | 0.78 | 1.20 | 0.22 | 0.85 |
|       |   |        | IDNEDAVQGIAEDAIQGI                |      |      |      |      |      |      |
| 31757 | 0 | 156890 | TNWDVAVQGIANWDAV<br>QDI           | 3.58 | 0.01 | 0.78 | 0.44 | 2.82 | 1.39 |
| 31758 | 0 | 178990 | IDNNGFLDKNDFECL                   | 2.70 | 0.01 | 2.36 | 0.44 | 1.23 | 1.28 |
| 31759 | 0 | 236221 | IDNQQKEFEKQKKKY                   | 2.70 | 0.01 | 1.66 | 0.44 | 0.85 | 1.28 |
| 31760 | 0 | 450694 | IDNSHTH                           | 2.02 | 0.01 | 0.90 | 0.44 | 1.41 | 1.39 |
| 31761 | 0 | 121400 | IDNSNTPFLPKIFIK                   | 2.71 | 0.01 | 0.78 | 0.44 | 1.13 | 0.85 |
| 31762 | 0 | 121400 | IDNSNTPFLPKIFIK                   | 2.71 | 0.01 | 0.78 | 0.44 | 1.41 | 0.85 |
| 31763 | 0 | 136363 | IDPLMFKYWSNM                      | 2.43 | 0.01 | 0.90 | 2.74 | 0.22 | 0.85 |
| 31764 | 0 | 136363 | IDPLMFKYWSNM                      | 2.43 | 0.01 | 0.90 | 0.68 | 0.22 | 0.28 |
| 31765 | 0 | 136363 | IDPLMFKYWSNM                      | 2.43 | 0.01 | 0.90 | 0.68 | 0.22 | 0.28 |
| 31766 | 0 | 136363 | IDPLMFKYWSNM                      | 2.43 | 0.01 | 0.90 | 2.74 | 0.22 | 0.85 |
| 31767 | 0 | 136364 | IDPLMFKYWYNM                      | 2.45 | 0.01 | 0.90 | 2.74 | 0.22 | 0.28 |
| 31768 | 0 | 136364 | IDPLMFKYWYNM                      | 2.45 | 0.01 | 0.90 | 0.68 | 0.22 | 0.28 |
| 31769 | 0 | 136364 | IDPLMFKYWYNM                      | 2.45 | 0.01 | 0.90 | 0.68 | 0.22 | 0.28 |
| 31770 | 0 | 136364 | IDPLMFKYWYNM                      | 2.45 | 0.01 | 0.90 | 2.22 | 0.22 | 0.28 |
| 31771 | 0 | 136364 | IDPLMFKYWYNM                      | 2.45 | 0.01 | 0.90 | 2.74 | 0.22 | 0.85 |
| 31772 | 0 | 164257 | IDPNRPN                           | 2.04 | 0.01 | 0.90 | 1.20 | 0.22 | 1.39 |
| 31773 | 0 | 25646  | IDPSFRLGFVPVSRG                   | 2.70 | 0.01 | 0.90 | 1.15 | 0.22 | 0.85 |
| 31774 | 0 | 25647  | IDPSFYWAPCRFSHC                   | 2.66 | 0.01 | 0.90 | 1.15 | 0.22 | 1.27 |
| 31775 | 0 | 25647  | IDPSFYWAPCRFSHC                   | 2.66 | 0.01 | 0.90 | 1.15 | 0.22 | 0.85 |
| 31776 | 0 | 189091 | IDPWI                             | 1.77 | 0.01 | 3.70 | 0.68 | 0.22 | 0.28 |
| 31777 | 0 | 189091 | IDPWI                             | 1.77 | 0.01 | 3.70 | 0.68 | 0.22 | 0.28 |
| 31778 | 0 | 189091 | IDPWI                             | 1.77 | 0.01 | 3.70 | 0.68 | 0.22 | 1.48 |

|       |   |        |                            |      |      |      |      |      |      |
|-------|---|--------|----------------------------|------|------|------|------|------|------|
| 31779 | 0 | 189091 | IDPWI                      | 1.77 | 0.01 | 3.70 | 0.68 | 0.22 | 0.28 |
| 31780 | 0 | 189091 | IDPWI                      | 1.77 | 0.01 | 3.70 | 0.68 | 0.22 | 0.28 |
| 31781 | 0 | 189091 | IDPWI                      | 1.77 | 0.01 | 3.70 | 0.68 | 0.22 | 0.28 |
| 31782 | 0 | 189091 | IDPWI                      | 1.77 | 0.01 | 3.70 | 0.68 | 0.22 | 0.28 |
| 31783 | 0 | 189091 | IDPWI                      | 1.77 | 0.01 | 3.70 | 0.68 | 0.22 | 0.28 |
| 31784 | 0 | 189091 | IDPWI                      | 1.77 | 0.01 | 3.70 | 0.68 | 0.22 | 0.85 |
| 31785 | 0 | 189091 | IDPWI                      | 1.77 | 0.01 | 3.70 | 0.68 | 0.22 | 0.28 |
| 31786 | 0 | 189091 | IDPWI                      | 1.77 | 0.01 | 3.70 | 0.68 | 0.22 | 1.48 |
| 31787 | 0 | 189091 | IDPWI                      | 1.77 | 0.01 | 3.70 | 0.68 | 0.22 | 1.48 |
| 31788 | 0 | 189091 | IDPWI                      | 1.77 | 0.01 | 3.70 | 0.68 | 0.22 | 1.48 |
| 31789 | 0 | 25649  | IDPY                       | 1.57 | 0.01 | 2.08 | 1.15 | 0.22 | 0.85 |
| 31790 | 0 | 25649  | IDPY                       | 1.57 | 0.01 | 2.08 | 1.15 | 0.22 | 0.28 |
| 31791 | 0 | 25649  | IDPY                       | 1.57 | 0.01 | 2.08 | 1.15 | 0.22 | 0.28 |
| 31792 | 0 | 237763 | IDQGEEPVDVDCFCRNV<br>D     | 2.84 | 0.01 | 3.19 | 0.44 | 0.22 | 0.85 |
| 31793 | 0 | 98821  | IDQIEKQAKD                 | 2.36 | 0.01 | 2.16 | 0.44 | 1.23 | 0.85 |
| 31794 | 0 | 100132 | IDQIEKQAKDLAFPGSGE<br>QV   | 2.95 | 0.01 | 2.16 | 0.44 | 2.39 | 0.28 |
| 31795 | 0 | 25653  | IDQKVKEISNQEPL             | 2.62 | 0.01 | 2.56 | 2.69 | 0.22 | 0.28 |
| 31796 | 0 | 25653  | IDQKVKEISNQEPL             | 2.62 | 0.01 | 2.56 | 0.44 | 0.85 | 0.28 |
| 31797 | 0 | 25654  | IDQLTADKAKADAELAA          | 2.82 | 0.01 | 3.59 | 2.02 | 0.22 | 0.28 |
| 31798 | 0 | 25663  | IDRMVKDAEAHAEEEDRK<br>RREE | 3.02 | 0.01 | 2.59 | 1.81 | 0.22 | 0.28 |
| 31799 | 0 | 25664  | IDRSLPIVK                  | 2.31 | 0.01 | 2.60 | 0.44 | 1.23 | 0.85 |
| 31800 | 0 | 153398 | IDRTPTNFHTQR               | 2.48 | 0.01 | 0.90 | 1.12 | 0.22 | 0.28 |
| 31801 | 0 | 450696 | IDRTQFM                    | 1.99 | 0.01 | 0.90 | 0.44 | 1.41 | 1.39 |
| 31802 | 0 | 148632 | IDSEELINKKR                | 2.48 | 0.01 | 0.78 | 1.15 | 0.22 | 1.48 |
| 31803 | 0 | 148632 | IDSEELINKKR                | 2.48 | 0.01 | 0.78 | 1.15 | 0.22 | 0.28 |
| 31804 | 0 | 148632 | IDSEELINKKR                | 2.48 | 0.01 | 0.78 | 1.15 | 0.22 | 0.85 |
| 31805 | 0 | 148632 | IDSEELINKKR                | 2.48 | 0.01 | 0.78 | 1.15 | 0.22 | 0.28 |
| 31806 | 0 | 148632 | IDSEELINKKR                | 2.48 | 0.01 | 0.78 | 1.15 | 0.22 | 0.85 |
| 31807 | 0 | 138435 | IDSFVIW                    | 2.03 | 0.01 | 0.78 | 0.44 | 1.13 | 0.28 |
| 31808 | 0 | 25667  | IDSGIDSSHPDLKVA            | 2.68 | 0.01 | 3.67 | 3.16 | 0.22 | 0.28 |
| 31809 | 0 | 136365 | IDSNHVYKDFLT               | 2.43 | 0.01 | 0.90 | 2.74 | 0.22 | 0.85 |
| 31810 | 0 | 136365 | IDSNHVYKDFLT               | 2.43 | 0.01 | 0.90 | 0.68 | 0.22 | 0.28 |
| 31811 | 0 | 136365 | IDSNHVYKDFLT               | 2.43 | 0.01 | 0.90 | 0.68 | 0.22 | 0.28 |
| 31812 | 0 | 136365 | IDSNHVYKDFLT               | 2.43 | 0.01 | 0.90 | 2.74 | 0.22 | 0.85 |
| 31813 | 0 | 25671  | IDSQKK                     | 1.86 | 0.01 | 3.24 | 1.12 | 0.22 | 0.28 |
| 31814 | 0 | 181918 | IDTFYMSTMSHS               | 2.49 | 0.01 | 0.90 | 3.15 | 0.22 | 1.39 |
| 31815 | 0 | 25694  | IDTTIM                     | 1.92 | 0.01 | 1.96 | 0.44 | 0.85 | 0.28 |
| 31816 | 0 | 113534 | IDVDVSKPDLTAALRDV<br>RQQ   | 2.94 | 3.97 | 0.78 | 1.81 | 0.22 | 0.28 |
| 31817 | 0 | 113534 | IDVDVSKPDLTAALRDV<br>RQQ   | 2.94 | 3.97 | 0.78 | 3.61 | 0.22 | 0.28 |
| 31818 | 0 | 107181 | IDVEF                      | 1.74 | 0.01 | 0.78 | 2.36 | 0.22 | 0.28 |
| 31819 | 0 | 107181 | IDVEF                      | 1.74 | 0.01 | 0.78 | 2.36 | 0.22 | 1.48 |

|       |   |        |                           |      |      |      |      |      |      |
|-------|---|--------|---------------------------|------|------|------|------|------|------|
| 31820 | 0 | 25697  | IDVKMMMNMEAANLAE<br>VRSYC | 2.92 | 0.01 | 2.85 | 2.02 | 0.22 | 0.28 |
| 31821 | 0 | 167930 | IDWFH                     | 1.74 | 0.01 | 3.93 | 0.68 | 0.22 | 0.28 |
| 31822 | 0 | 167930 | IDWFH                     | 1.74 | 0.01 | 3.93 | 0.68 | 0.22 | 0.85 |
| 31823 | 0 | 167931 | IDWFHPN                   | 1.99 | 0.01 | 3.93 | 0.68 | 0.22 | 0.28 |
| 31824 | 0 | 167931 | IDWFHPN                   | 1.99 | 0.01 | 3.93 | 0.68 | 0.22 | 0.85 |
| 31825 | 0 | 25710  | IDYHEWQASL                | 2.26 | 0.01 | 3.42 | 3.28 | 0.22 | 0.28 |
| 31826 | 0 | 518384 | IEAASSDALEALADQ           | 2.72 | 0.01 | 2.24 | 0.44 | 1.41 | 1.28 |
| 31827 | 0 | 105874 | IEADVNTF                  | 2.10 | 0.01 | 3.05 | 1.20 | 0.22 | 0.28 |
| 31828 | 0 | 98822  | IEAGAIGFKIHEDWG           | 2.71 | 0.01 | 2.93 | 1.15 | 0.22 | 0.85 |
| 31829 | 0 | 98822  | IEAGAIGFKIHEDWG           | 2.71 | 0.01 | 2.93 | 1.15 | 0.22 | 0.85 |
| 31830 | 0 | 98822  | IEAGAIGFKIHEDWG           | 2.71 | 0.01 | 2.93 | 1.15 | 0.22 | 0.28 |
| 31831 | 0 | 98822  | IEAGAIGFKIHEDWG           | 2.71 | 0.01 | 2.93 | 0.68 | 0.22 | 0.85 |
| 31832 | 0 | 98822  | IEAGAIGFKIHEDWG           | 2.71 | 0.01 | 2.93 | 0.68 | 0.22 | 0.85 |
| 31833 | 0 | 98822  | IEAGAIGFKIHEDWG           | 2.71 | 0.01 | 2.93 | 1.15 | 0.22 | 1.34 |
| 31834 | 0 | 98822  | IEAGAIGFKIHEDWG           | 2.71 | 0.01 | 2.93 | 1.15 | 0.22 | 1.27 |
| 31835 | 0 | 98822  | IEAGAIGFKIHEDWG           | 2.71 | 0.01 | 2.93 | 0.44 | 1.59 | 0.28 |
| 31836 | 0 | 25725  | IEAIRQAGQEMILAV           | 2.71 | 0.01 | 2.43 | 0.44 | 1.59 | 0.28 |
| 31837 | 0 | 123307 | IEALPSIKA                 | 2.24 | 0.01 | 2.28 | 2.00 | 0.22 | 0.28 |
| 31838 | 0 | 311450 | IEATATKTTTATTGD           | 2.71 | 0.01 | 1.61 | 0.44 | 0.85 | 1.28 |
| 31839 | 0 | 25735  | IEATLHCYGAYLTIGKNP<br>DF  | 2.92 | 0.01 | 2.21 | 1.20 | 0.22 | 0.28 |
| 31840 | 0 | 25735  | IEATLHCYGAYLTIGKNP<br>DF  | 2.92 | 0.01 | 2.21 | 1.20 | 0.22 | 0.28 |
| 31841 | 0 | 119208 | IEDEEGSGIPEQEYSC          | 2.77 | 0.01 | 0.90 | 1.12 | 0.22 | 0.28 |
| 31842 | 0 | 119208 | IEDEEGSGIPEQEYSC          | 2.77 | 0.01 | 0.90 | 1.12 | 0.22 | 1.48 |
| 31843 | 0 | 25749  | IEDFWQTTQGMHEI            | 2.61 | 0.01 | 2.40 | 2.43 | 0.22 | 0.28 |
| 31844 | 0 | 25749  | IEDFWQTTQGMHEI            | 2.61 | 0.01 | 2.40 | 2.43 | 0.22 | 0.28 |
| 31845 | 0 | 25749  | IEDFWQTTQGMHEI            | 2.61 | 0.01 | 2.40 | 2.43 | 0.22 | 0.28 |
| 31846 | 0 | 149752 | IEDGDMMEIGFGAAN           | 2.70 | 0.01 | 3.67 | 1.12 | 0.22 | 0.28 |
| 31847 | 0 | 94552  | IEDNWYTHYLVCNYGPG<br>GND  | 2.92 | 0.01 | 3.65 | 0.68 | 2.25 | 1.75 |
| 31848 | 0 | 94552  | IEDNWYTHYLVCNYGPG<br>GND  | 2.92 | 0.01 | 3.65 | 0.68 | 0.22 | 0.28 |
| 31849 | 0 | 171457 | IEDPKQMKQTLFDAE           | 2.66 | 0.01 | 0.78 | 0.44 | 1.13 | 0.28 |
| 31850 | 0 | 152648 | IEDTEGLKEV                | 2.31 | 0.01 | 2.18 | 2.16 | 0.22 | 0.28 |
| 31851 | 0 | 118403 | IEDVIAQGIGKLASV           | 2.69 | 0.01 | 0.78 | 0.44 | 1.13 | 0.85 |
| 31852 | 0 | 311468 | IEEADDDDDDDDDG            | 2.73 | 0.01 | 1.61 | 0.44 | 0.85 | 1.28 |
| 31853 | 0 | 25766  | IEEADKKTITSAVEEAL<br>WL   | 2.97 | 0.01 | 2.30 | 0.44 | 0.85 | 0.28 |
| 31854 | 0 | 25766  | IEEADKKTITSAVEEAL<br>WL   | 2.97 | 0.01 | 2.30 | 0.44 | 1.41 | 0.28 |
| 31855 | 0 | 25768  | IEEEKSLNMLDKKT            | 2.60 | 0.01 | 1.66 | 0.44 | 0.85 | 0.28 |
| 31856 | 0 | 25770  | IEEGQRIAEML               | 2.41 | 0.01 | 2.69 | 0.44 | 0.85 | 0.28 |
| 31857 | 0 | 25770  | IEEGQRIAEML               | 2.41 | 0.01 | 2.69 | 0.44 | 1.41 | 0.28 |
| 31858 | 0 | 25771  | IEEGQRMAE                 | 2.23 | 0.01 | 2.69 | 0.44 | 0.85 | 0.28 |
| 31859 | 0 | 79858  | IEELQSNHGV                | 2.28 | 0.01 | 3.45 | 1.15 | 0.22 | 0.85 |

|       |   |        |                                     |      |      |      |      |      |      |
|-------|---|--------|-------------------------------------|------|------|------|------|------|------|
| 31860 | 0 | 79858  | IEELQSNHGV                          | 2.28 | 0.01 | 3.45 | 1.15 | 0.22 | 2.35 |
| 31861 | 0 | 79858  | IEELQSNHGV                          | 2.28 | 0.01 | 3.45 | 1.15 | 0.22 | 1.48 |
| 31862 | 0 | 79859  | IEELQSNHGVDDSDN                     | 4.02 | 0.01 | 3.45 | 1.12 | 0.22 | 0.85 |
|       |   |        | DGPVAAGEARPVPEEYL                   |      |      |      |      |      |      |
|       |   |        | QTDPGYLTSDEVLKRRK                   |      |      |      |      |      |      |
|       |   |        | KYGLNQM                             |      |      |      |      |      |      |
| 31863 | 0 | 25786  | IEESPGQTADWYTI                      | 2.59 | 0.01 | 2.56 | 2.69 | 0.22 | 0.28 |
| 31864 | 0 | 109326 | IEESDDRRYDLVGP                      | 2.59 | 0.01 | 0.90 | 1.81 | 0.22 | 2.49 |
| 31865 | 0 | 25788  | IEESKKTIDKNKNATKEEE                 | 3.21 | 0.01 | 3.34 | 1.12 | 0.22 | 2.02 |
|       |   |        | KKKLYQA                             |      |      |      |      |      |      |
| 31866 | 0 | 25788  | IEESKKTIDKNKNATKEEE                 | 3.21 | 0.01 | 3.34 | 1.12 | 0.22 | 0.28 |
|       |   |        | KKKLYQA                             |      |      |      |      |      |      |
| 31867 | 0 | 25788  | IEESKKTIDKNKNATKEEE                 | 3.21 | 0.01 | 3.34 | 1.15 | 0.22 | 1.48 |
|       |   |        | KKKLYQA                             |      |      |      |      |      |      |
| 31868 | 0 | 25791  | IEEVALGHEGEIPF                      | 2.63 | 0.01 | 2.69 | 0.44 | 0.85 | 0.28 |
| 31869 | 0 | 25791  | IEEVALGHEGEIPF                      | 2.63 | 0.01 | 2.69 | 0.44 | 0.85 | 0.28 |
| 31870 | 0 | 25792  | IEEVALGQEGEIPF                      | 2.63 | 0.01 | 2.69 | 0.44 | 0.85 | 0.28 |
| 31871 | 0 | 25794  | IEEVALSNTGEIPF                      | 2.59 | 0.01 | 1.96 | 0.44 | 0.85 | 0.28 |
| 31872 | 0 | 25794  | IEEVALSNTGEIPF                      | 2.59 | 0.01 | 1.96 | 0.44 | 0.85 | 0.28 |
| 31873 | 0 | 25795  | IEEVALSTTGEIPF                      | 2.61 | 0.01 | 2.41 | 0.44 | 0.85 | 0.28 |
| 31874 | 0 | 25795  | IEEVALSTTGEIPF                      | 2.61 | 0.01 | 2.41 | 0.44 | 0.85 | 0.28 |
| 31875 | 0 | 25795  | IEEVALSTTGEIPF                      | 2.61 | 0.01 | 2.41 | 0.44 | 1.41 | 0.28 |
| 31876 | 0 | 25806  | IEFQQKNNRLLREITRE                   | 2.75 | 0.01 | 2.38 | 2.37 | 0.22 | 1.34 |
| 31877 | 0 | 25806  | IEFQQKNNRLLREITRE                   | 2.75 | 0.01 | 2.38 | 2.37 | 0.22 | 1.34 |
| 31878 | 0 | 25806  | IEFQQKNNRLLREITRE                   | 2.75 | 0.01 | 3.00 | 2.25 | 0.22 | 0.28 |
| 31879 | 0 | 25807  | IEFQQKNNRLLREITREF                  | 2.81 | 0.01 | 2.67 | 0.68 | 0.22 | 1.34 |
| 31880 | 0 | 25807  | IEFQQKNNRLLREITREF                  | 2.81 | 0.01 | 2.67 | 0.68 | 0.22 | 0.28 |
| 31881 | 0 | 25807  | IEFQQKNNRLLREITREF                  | 2.81 | 0.01 | 2.67 | 0.68 | 0.22 | 1.27 |
| 31882 | 0 | 25807  | IEFQQKNNRLLREITREF                  | 2.81 | 0.01 | 2.67 | 2.22 | 0.22 | 1.27 |
| 31883 | 0 | 117530 | IEFRSDAESSDGEDFIV<br>EE             | 2.97 | 0.01 | 3.41 | 0.68 | 0.22 | 0.85 |
| 31884 | 0 | 117530 | IEFRSDAESSDGEDFIV<br>EE             | 2.97 | 0.01 | 3.41 | 0.68 | 0.22 | 0.85 |
| 31885 | 0 | 117530 | IEFRSDAESSDGEDFIV<br>EE             | 2.97 | 0.01 | 3.41 | 0.68 | 0.22 | 0.85 |
| 31886 | 0 | 117530 | IEFRSDAESSDGEDFIV<br>EE             | 2.97 | 0.01 | 3.41 | 0.68 | 0.22 | 1.48 |
| 31887 | 0 | 117530 | IEFRSDAESSDGEDFIV<br>EE             | 2.97 | 0.01 | 3.41 | 0.68 | 0.22 | 0.85 |
| 31888 | 0 | 106533 | IEFRHGLNRTNA                        | 2.45 | 0.01 | 0.90 | 3.00 | 1.93 | 0.28 |
| 31889 | 0 | 123308 | IEGAAVDLR                           | 2.20 | 0.01 | 2.28 | 2.00 | 0.22 | 0.28 |
| 31890 | 0 | 25816  | IEGGEILL                            | 2.14 | 0.01 | 2.40 | 2.43 | 0.22 | 0.28 |
| 31891 | 0 | 121403 | IEGIKYIA                            | 2.15 | 0.01 | 0.78 | 3.55 | 0.22 | 1.57 |
| 31892 | 0 | 121403 | IEGIKYIA                            | 2.15 | 0.01 | 0.78 | 3.55 | 0.22 | 1.57 |
| 31893 | 0 | 121403 | IEGIKYIA                            | 2.15 | 0.01 | 0.78 | 3.55 | 0.22 | 1.57 |
| 31894 | 0 | 496556 | IEGMKFDRGYISPYFINT<br>SKGQKCEFDQDAY | 3.33 | 0.01 | 0.78 | 0.44 | 1.93 | 2.12 |

|       |   |        |                         |      |      |      |      |      |      |
|-------|---|--------|-------------------------|------|------|------|------|------|------|
| 31895 | 0 | 175904 | IEGPCNFNVSVEDIL         | 2.67 | 0.01 | 2.63 | 1.15 | 0.22 | 0.85 |
| 31896 | 0 | 175904 | IEGPCNFNVSVEDIL         | 2.67 | 0.01 | 2.63 | 1.15 | 0.22 | 0.85 |
| 31897 | 0 | 25827  | IEGTGQHLSAAIL           | 2.63 | 0.01 | 3.34 | 1.12 | 0.22 | 0.85 |
| 31898 | 0 | 153622 | IEGVKYIAEHMKSDEESS      | 2.83 | 0.01 | 2.26 | 0.68 | 0.22 | 0.28 |
| 31899 | 0 | 153622 | IEGVKYIAEHMKSDEESS      | 2.83 | 0.01 | 2.26 | 0.68 | 0.22 | 0.28 |
| 31900 | 0 | 434018 | IEHGPVA                 | 1.99 | 0.01 | 0.90 | 2.36 | 0.22 | 1.39 |
| 31901 | 0 | 25831  | IEHYADTYEEVL            | 2.46 | 0.01 | 2.69 | 1.20 | 0.22 | 0.28 |
| 31902 | 0 | 311554 | IEIDFREERIKELEE         | 2.72 | 0.01 | 1.61 | 0.44 | 0.85 | 1.28 |
| 31903 | 0 | 122406 | IEIGLEGKGFEPTEALFG<br>K | 2.99 | 0.01 | 0.78 | 0.44 | 1.93 | 0.28 |
| 31904 | 0 | 122406 | IEIGLEGKGFEPTEALFG<br>K | 2.99 | 0.01 | 0.78 | 0.44 | 1.93 | 0.28 |
| 31905 | 0 | 122406 | IEIGLEGKGFEPTEALFG<br>K | 2.99 | 0.01 | 0.78 | 0.44 | 1.41 | 0.28 |
| 31906 | 0 | 122406 | IEIGLEGKGFEPTEALFG<br>K | 2.99 | 0.01 | 0.78 | 0.44 | 1.41 | 0.28 |
| 31907 | 0 | 122406 | IEIGLEGKGFEPTEALFG<br>K | 2.99 | 0.01 | 0.78 | 1.15 | 2.26 | 1.48 |
| 31908 | 0 | 122406 | IEIGLEGKGFEPTEALFG<br>K | 2.99 | 0.01 | 0.78 | 0.44 | 1.41 | 0.28 |
| 31909 | 0 | 122406 | IEIGLEGKGFEPTEALFG<br>K | 2.99 | 0.01 | 0.78 | 0.44 | 1.41 | 0.28 |
| 31910 | 0 | 122406 | IEIGLEGKGFEPTEALFG<br>K | 2.99 | 0.01 | 0.78 | 0.44 | 1.41 | 1.66 |
| 31911 | 0 | 122406 | IEIGLEGKGFEPTEALFG<br>K | 2.99 | 0.01 | 0.78 | 0.44 | 1.41 | 0.28 |
| 31912 | 0 | 122406 | IEIGLEGKGFEPTEALFG<br>K | 2.99 | 0.01 | 0.78 | 0.44 | 1.41 | 1.75 |
| 31913 | 0 | 122406 | IEIGLEGKGFEPTEALFG<br>K | 2.99 | 0.01 | 0.78 | 0.44 | 1.41 | 1.48 |
| 31914 | 0 | 122406 | IEIGLEGKGFEPTEALFG<br>K | 2.99 | 0.01 | 0.78 | 0.44 | 1.41 | 1.66 |
| 31915 | 0 | 122406 | IEIGLEGKGFEPTEALFG<br>K | 2.99 | 0.01 | 0.78 | 0.44 | 1.41 | 1.66 |
| 31916 | 0 | 122406 | IEIGLEGKGFEPTEALFG<br>K | 2.99 | 0.01 | 0.78 | 1.81 | 0.22 | 0.28 |
| 31917 | 0 | 122406 | IEIGLEGKGFEPTEALFG<br>K | 2.99 | 0.01 | 0.78 | 1.81 | 2.25 | 1.75 |
| 31918 | 0 | 122406 | IEIGLEGKGFEPTEALFG<br>K | 2.99 | 0.01 | 0.78 | 3.85 | 0.22 | 0.28 |
| 31919 | 0 | 122406 | IEIGLEGKGFEPTEALFG<br>K | 2.99 | 0.01 | 0.78 | 1.81 | 0.22 | 0.28 |
| 31920 | 0 | 122406 | IEIGLEGKGFEPTEALFG<br>K | 2.99 | 0.01 | 0.78 | 1.81 | 0.22 | 0.28 |

|       |   |        |                                                   |      |      |      |      |      |      |
|-------|---|--------|---------------------------------------------------|------|------|------|------|------|------|
| 31921 | 0 | 122406 | IEIGLEGKGFPTLEALFG<br>K                           | 2.99 | 0.01 | 0.78 | 1.81 | 0.22 | 0.28 |
| 31922 | 0 | 122406 | IEIGLEGKGFPTLEALFG<br>K                           | 2.99 | 0.01 | 0.78 | 1.81 | 0.22 | 0.28 |
| 31923 | 0 | 122406 | IEIGLEGKGFPTLEALFG<br>K                           | 2.99 | 0.01 | 0.78 | 1.81 | 0.22 | 0.28 |
| 31924 | 0 | 122406 | IEIGLEGKGFPTLEALFG<br>K                           | 2.99 | 0.01 | 0.78 | 1.81 | 0.22 | 0.28 |
| 31925 | 0 | 462359 | IEIGTVG                                           | 2.05 | 0.01 | 0.78 | 1.12 | 0.22 | 1.28 |
| 31926 | 0 | 25844  | IEINMLTNNLLREMMKI<br>KNKLQKLSNLLNALRSNI<br>EKILKN | 3.69 | 0.01 | 2.22 | 0.44 | 1.74 | 0.28 |
| 31927 | 0 | 25844  | IEINMLTNNLLREMMKI<br>KNKLQKLSNLLNALRSNI<br>EKILKN | 3.69 | 0.01 | 2.22 | 0.44 | 1.74 | 0.28 |
| 31928 | 0 | 181670 | IEIQRKQFDKQKRKY                                   | 2.72 | 0.01 | 1.66 | 2.37 | 0.22 | 1.28 |
| 31929 | 0 | 181670 | IEIQRKQFDKQKRKY                                   | 2.72 | 0.01 | 1.66 | 2.36 | 0.22 | 1.28 |
| 31930 | 0 | 25852  | IEKKIAKMEKASSVFNVV                                | 2.86 | 0.01 | 0.90 | 0.68 | 0.22 | 0.28 |
| 31931 | 0 | 25852  | IEKKIAKMEKASSVFNVV                                | 2.86 | 0.01 | 0.90 | 0.44 | 1.74 | 0.28 |
| 31932 | 0 | 25853  | IEKKIAKMEKASSVFNVV<br>NS                          | 2.98 | 0.01 | 0.90 | 0.44 | 1.74 | 0.28 |
| 31933 | 0 | 107446 | IEKTISK                                           | 2.05 | 0.01 | 0.78 | 0.44 | 1.13 | 0.28 |
| 31934 | 0 | 25863  | IEKTNEKFHQIEK                                     | 2.58 | 0.01 | 2.36 | 0.44 | 0.85 | 1.57 |
| 31935 | 0 | 25863  | IEKTNEKFHQIEK                                     | 2.58 | 0.01 | 2.36 | 1.15 | 0.22 | 1.57 |
| 31936 | 0 | 25863  | IEKTNEKFHQIEK                                     | 2.58 | 0.01 | 2.36 | 1.15 | 0.22 | 1.57 |
| 31937 | 0 | 25863  | IEKTNEKFHQIEK                                     | 2.58 | 0.01 | 2.36 | 1.15 | 0.22 | 1.57 |
| 31938 | 0 | 94847  | IELPKKAAPAKKAAP                                   | 2.73 | 4.63 | 2.86 | 0.44 | 0.85 | 0.28 |
| 31939 | 0 | 94847  | IELPKKAAPAKKAAP                                   | 2.73 | 4.63 | 2.86 | 0.44 | 0.22 | 0.28 |
| 31940 | 0 | 128018 | IELRFVLTCLRVI                                     | 2.58 | 0.01 | 0.78 | 0.68 | 0.22 | 3.16 |
| 31941 | 0 | 128018 | IELRFVLTCLRVI                                     | 2.58 | 0.01 | 1.75 | 1.81 | 0.22 | 0.28 |
| 31942 | 0 | 128018 | IELRFVLTCLRVI                                     | 2.58 | 0.01 | 1.75 | 1.81 | 2.25 | 3.16 |
| 31943 | 0 | 25897  | IEMPENYAKTRIIN                                    | 2.61 | 0.01 | 3.93 | 3.26 | 0.22 | 0.28 |
| 31944 | 0 | 25897  | IEMPENYAKTRIIN                                    | 2.61 | 0.01 | 3.93 | 3.26 | 0.22 | 0.28 |
| 31945 | 0 | 171464 | IEMTIENQEELRLLG                                   | 2.69 | 0.01 | 0.78 | 0.44 | 1.13 | 0.28 |
| 31946 | 0 | 25900  | IENAIRMISD                                        | 2.32 | 0.01 | 2.73 | 0.44 | 0.85 | 0.28 |
| 31947 | 0 | 175905 | IENARQGAARVTSWL                                   | 2.63 | 0.01 | 2.63 | 1.15 | 0.22 | 0.85 |
| 31948 | 0 | 175905 | IENARQGAARVTSWL                                   | 2.63 | 0.01 | 2.63 | 1.15 | 0.22 | 0.85 |
| 31949 | 0 | 175905 | IENARQGAARVTSWL                                   | 2.63 | 0.01 | 2.63 | 1.15 | 0.22 | 0.85 |
| 31950 | 0 | 175905 | IENARQGAARVTSWL                                   | 2.63 | 0.01 | 2.63 | 1.15 | 0.22 | 0.85 |
| 31951 | 0 | 25906  | IENEYEVLYLKPLAGVYR<br>SLK                         | 3.00 | 0.01 | 1.66 | 0.44 | 0.85 | 1.57 |
| 31952 | 0 | 25906  | IENEYEVLYLKPLAGVYR<br>SLK                         | 3.00 | 0.01 | 1.66 | 0.44 | 1.74 | 1.57 |
| 31953 | 0 | 141919 | IENLRQRNTYTHKDLEN                                 | 2.79 | 0.01 | 3.13 | 0.68 | 0.22 | 0.28 |

|       |   |        |                                      |      |      |      |      |      |      |
|-------|---|--------|--------------------------------------|------|------|------|------|------|------|
| 31954 | 0 | 141920 | IENMDDLQKG                           | 2.28 | 0.01 | 3.13 | 0.68 | 0.22 | 0.28 |
| 31955 | 0 | 171465 | IENQEELRLLGDELK                      | 2.69 | 0.01 | 0.78 | 0.44 | 1.13 | 0.28 |
| 31956 | 0 | 450699 | IENRIYR                              | 2.05 | 0.01 | 0.90 | 0.44 | 1.23 | 1.39 |
| 31957 | 0 | 179804 | IEPGQTLIVK                           | 2.30 | 0.01 | 3.89 | 0.44 | 0.85 | 0.85 |
| 31958 | 0 | 179805 | IEPGTLIVK                            | 2.22 | 0.01 | 3.89 | 0.44 | 0.85 | 0.85 |
| 31959 | 0 | 132376 | IEPRSFSQNPPVLKR                      | 2.65 | 0.01 | 0.78 | 1.15 | 0.22 | 0.28 |
| 31960 | 0 | 132376 | IEPRSFSQNPPVLKR                      | 2.65 | 0.01 | 0.78 | 1.15 | 0.22 | 0.28 |
| 31961 | 0 | 132376 | IEPRSFSQNPPVLKR                      | 2.65 | 0.01 | 0.78 | 1.15 | 0.22 | 0.28 |
| 31962 | 0 | 135560 | IEQAIGRVTPIF                         | 2.46 | 0.01 | 0.78 | 1.12 | 0.22 | 0.28 |
| 31963 | 0 | 135560 | IEQAIGRVTPIF                         | 2.46 | 0.01 | 0.78 | 1.12 | 0.22 | 0.28 |
| 31964 | 0 | 135560 | IEQAIGRVTPIF                         | 2.46 | 0.01 | 0.78 | 1.12 | 0.22 | 1.34 |
| 31965 | 0 | 135560 | IEQAIGRVTPIF                         | 2.46 | 0.01 | 0.78 | 1.12 | 0.22 | 0.28 |
| 31966 | 0 | 25933  | IEQAQVIAE                            | 2.27 | 0.01 | 2.59 | 0.44 | 0.85 | 0.28 |
| 31967 | 0 | 135935 | IEQGWGSPKVTK                         | 2.45 | 0.01 | 0.78 | 0.44 | 1.41 | 0.28 |
| 31968 | 0 | 311661 | IEQVEEEEEEEDEEE                      | 2.71 | 0.01 | 1.61 | 0.44 | 0.85 | 1.28 |
| 31969 | 0 | 25951  | IEQYLKKIKNSISTEWSPC<br>S             | 2.95 | 0.01 | 3.29 | 0.68 | 0.22 | 0.28 |
| 31970 | 0 | 25952  | IEQYLKKIKNSISTEWSPC<br>SVTCGKGTRSRKR | 3.40 | 0.01 | 0.90 | 0.68 | 2.25 | 1.75 |
| 31971 | 0 | 25952  | IEQYLKKIKNSISTEWSPC<br>SVTCGKGTRSRKR | 3.40 | 0.01 | 0.90 | 0.68 | 0.22 | 0.28 |
| 31972 | 0 | 25952  | IEQYLKKIKNSISTEWSPC<br>SVTCGKGTRSRKR | 3.40 | 0.01 | 0.90 | 3.57 | 0.22 | 0.28 |
| 31973 | 0 | 25952  | IEQYLKKIKNSISTEWSPC<br>SVTCGKGTRSRKR | 3.40 | 0.01 | 0.90 | 3.57 | 0.22 | 0.28 |
| 31974 | 0 | 25952  | IEQYLKKIKNSISTEWSPC<br>SVTCGKGTRSRKR | 3.40 | 0.01 | 0.90 | 1.81 | 0.22 | 0.28 |
| 31975 | 0 | 25952  | IEQYLKKIKNSISTEWSPC<br>SVTCGKGTRSRKR | 3.40 | 0.01 | 0.90 | 0.68 | 0.22 | 0.28 |
| 31976 | 0 | 25953  | IEQYLKKIKNSISTEWSPC<br>SVTCGNGIQVRIK | 3.40 | 0.01 | 1.66 | 1.81 | 0.22 | 0.28 |
| 31977 | 0 | 25953  | IEQYLKKIKNSISTEWSPC<br>SVTCGNGIQVRIK | 3.40 | 0.01 | 1.66 | 1.81 | 0.22 | 0.28 |
| 31978 | 0 | 25953  | IEQYLKKIKNSISTEWSPC<br>SVTCGNGIQVRIK | 3.40 | 0.01 | 1.66 | 1.81 | 0.22 | 0.28 |
| 31979 | 0 | 25953  | IEQYLKKIKNSISTEWSPC<br>SVTCGNGIQVRIK | 3.40 | 0.01 | 1.66 | 1.81 | 0.22 | 1.34 |
| 31980 | 0 | 135936 | IERAVVHVADTM                         | 2.47 | 0.01 | 3.21 | 0.44 | 0.85 | 0.28 |
| 31981 | 0 | 25964  | IERMKDTLRI                           | 2.32 | 0.01 | 2.66 | 0.68 | 0.22 | 0.28 |
| 31982 | 0 | 25964  | IERMKDTLRI                           | 2.32 | 0.01 | 2.66 | 0.68 | 0.22 | 0.28 |
| 31983 | 0 | 178138 | IERMVLSAFDERRNRYLE<br>EH             | 2.92 | 0.01 | 3.51 | 1.12 | 0.22 | 1.27 |
| 31984 | 0 | 132377 | IERRQQEVET                           | 2.33 | 0.01 | 0.78 | 0.44 | 1.13 | 0.28 |
| 31985 | 0 | 25968  | IESDLISRYIDRISSPA                    | 2.82 | 0.01 | 2.30 | 0.68 | 0.22 | 0.85 |
| 31986 | 0 | 25968  | IESDLISRYIDRISSPA                    | 2.82 | 0.01 | 2.30 | 0.68 | 0.22 | 0.85 |
| 31987 | 0 | 187845 | IESEGGLIETWNPNNK                     | 2.74 | 0.01 | 2.72 | 2.13 | 2.39 | 0.85 |
| 31988 | 0 | 454625 | IESENPDAVANVQ                        | 2.56 | 0.01 | 2.04 | 1.15 | 0.22 | 0.28 |

|       |   |        |                               |      |      |      |      |      |      |
|-------|---|--------|-------------------------------|------|------|------|------|------|------|
| 31989 | 0 | 102528 | IESLEATYHIIIVALTIMGV          | 2.96 | 0.01 | 3.44 | 0.68 | 0.22 | 0.28 |
| 31990 | 0 | 115788 | IESPPEINTV                    | 2.33 | 0.01 | 1.60 | 0.44 | 1.23 | 0.85 |
| 31991 | 0 | 115788 | IESPPEINTV                    | 2.33 | 0.01 | 1.60 | 0.44 | 1.23 | 0.85 |
| 31992 | 0 | 25975  | IESPPEINTVQVTS                | 2.64 | 0.01 | 1.60 | 0.44 | 1.23 | 0.85 |
| 31993 | 0 | 227263 | IESRDETVPQSVREA               | 2.68 | 0.01 | 2.97 | 0.44 | 1.59 | 0.28 |
| 31994 | 0 | 227263 | IESRDETVPQSVREA               | 2.68 | 0.01 | 2.97 | 0.44 | 0.85 | 0.28 |
| 31995 | 0 | 114404 | IESWDPNNQQFQCAG               | 2.63 | 0.01 | 3.27 | 0.44 | 1.23 | 0.85 |
| 31996 | 0 | 125443 | IETDKATIGFEVQEEGYL<br>AKILVPE | 3.17 | 0.01 | 0.78 | 0.44 | 1.13 | 0.28 |
| 31997 | 0 | 136066 | IETDKTSVQV                    | 2.31 | 0.01 | 1.60 | 2.04 | 0.22 | 0.85 |
| 31998 | 0 | 136066 | IETDKTSVQV                    | 2.31 | 0.01 | 1.60 | 1.12 | 0.22 | 0.28 |
| 31999 | 0 | 136066 | IETDKTSVQV                    | 2.31 | 0.01 | 1.60 | 2.04 | 0.22 | 0.28 |
| 32000 | 0 | 186765 | IETDVSFDDNANPEY               | 2.65 | 0.01 | 3.36 | 1.20 | 0.22 | 0.85 |
| 32001 | 0 | 186765 | IETDVSFDDNANPEY               | 2.65 | 0.01 | 3.36 | 1.20 | 0.22 | 1.27 |
| 32002 | 0 | 194931 | IETGKKPNIWYSLNGKIR<br>AV      | 2.91 | 0.01 | 2.39 | 0.44 | 1.59 | 0.28 |
| 32003 | 0 | 25988  | IETGWIYDMENESDKYY<br>FNPETKKA | 3.14 | 0.01 | 3.04 | 2.75 | 0.22 | 0.28 |
| 32004 | 0 | 25988  | IETGWIYDMENESDKYY<br>FNPETKKA | 3.14 | 0.01 | 3.04 | 2.75 | 0.22 | 0.28 |
| 32005 | 0 | 25988  | IETGWIYDMENESDKYY<br>FNPETKKA | 3.14 | 0.01 | 3.04 | 2.75 | 0.22 | 0.28 |
| 32006 | 0 | 25988  | IETGWIYDMENESDKYY<br>FNPETKKA | 3.14 | 0.01 | 3.04 | 2.75 | 0.22 | 0.85 |
| 32007 | 0 | 181343 | IETRCVLNHHSTQET               | 2.65 | 0.01 | 2.82 | 1.15 | 0.22 | 0.28 |
| 32008 | 0 | 25997  | IETWNPNNQEFECAG               | 2.65 | 0.01 | 2.16 | 0.44 | 1.23 | 0.85 |
| 32009 | 0 | 100135 | IEVDNEQPTTRAQK                | 2.58 | 0.01 | 2.96 | 1.12 | 0.22 | 0.28 |
| 32010 | 0 | 227264 | IEVPETLVHKLTKGK               | 2.68 | 0.01 | 2.97 | 0.44 | 0.85 | 0.28 |
| 32011 | 0 | 26024  | IEYKVQFATK                    | 2.29 | 0.01 | 3.81 | 1.15 | 0.22 | 1.34 |
| 32012 | 0 | 26024  | IEYKVQFATK                    | 2.29 | 0.01 | 3.81 | 1.15 | 0.22 | 0.28 |
| 32013 | 0 | 171468 | IEYYFGDFNLPRDKF               | 2.65 | 0.01 | 0.78 | 0.44 | 1.41 | 0.28 |
| 32014 | 0 | 171468 | IEYYFGDFNLPRDKF               | 2.65 | 0.01 | 0.78 | 0.44 | 1.13 | 0.28 |
| 32015 | 0 | 120609 | IFAD                          | 1.57 | 0.01 | 2.26 | 2.04 | 0.22 | 0.28 |
| 32016 | 0 | 120610 | IFADDID                       | 2.07 | 0.01 | 2.26 | 2.36 | 0.22 | 0.28 |
| 32017 | 0 | 132379 | IFAGIKKKGERADLIAYLK<br>KATNE  | 3.13 | 0.01 | 1.75 | 3.07 | 0.22 | 1.27 |
| 32018 | 0 | 164259 | IFASFRTSPDQS                  | 2.48 | 0.01 | 0.90 | 1.20 | 0.22 | 1.39 |
| 32019 | 0 | 171470 | IFAYGQTGTGKTFTM               | 2.70 | 0.01 | 0.78 | 0.44 | 1.13 | 0.28 |
| 32020 | 0 | 26040  | IFCHSKKKCDELAACLVA<br>LG      | 2.93 | 0.01 | 1.72 | 0.68 | 0.22 | 1.27 |
| 32021 | 0 | 94553  | IFD                           | 1.37 | 0.01 | 2.40 | 1.15 | 0.22 | 0.85 |
| 32022 | 0 | 94553  | IFD                           | 1.37 | 0.01 | 2.40 | 1.15 | 0.22 | 0.85 |
| 32023 | 0 | 94553  | IFD                           | 1.37 | 0.01 | 2.40 | 1.15 | 0.22 | 0.85 |
| 32024 | 0 | 94553  | IFD                           | 1.37 | 0.01 | 2.40 | 1.15 | 0.22 | 0.85 |
| 32025 | 0 | 94553  | IFD                           | 1.37 | 0.01 | 2.40 | 1.15 | 0.22 | 0.28 |



|       |   |        |                    |      |      |      |      |      |      |
|-------|---|--------|--------------------|------|------|------|------|------|------|
| 32026 | 0 | 94553  | IFD                | 1.37 | 0.01 | 2.40 | 1.15 | 0.22 | 0.28 |
| 32027 | 0 | 94553  | IFD                | 1.37 | 0.01 | 2.40 | 1.15 | 0.22 | 0.28 |
| 32028 | 0 | 94553  | IFD                | 1.37 | 0.01 | 2.40 | 1.15 | 0.22 | 0.28 |
| 32029 | 0 | 96385  | IFDNFLITND         | 2.36 | 0.01 | 0.78 | 0.44 | 1.93 | 0.85 |
| 32030 | 0 | 96385  | IFDNFLITND         | 2.36 | 0.01 | 0.78 | 0.44 | 1.93 | 0.28 |
| 32031 | 0 | 96385  | IFDNFLITND         | 2.36 | 0.01 | 0.78 | 0.44 | 1.13 | 0.28 |
| 32032 | 0 | 96385  | IFDNFLITND         | 2.36 | 0.01 | 0.78 | 0.44 | 1.23 | 0.28 |
| 32033 | 0 | 26046  | IFDT               | 1.57 | 0.01 | 2.40 | 1.15 | 0.22 | 0.28 |
| 32034 | 0 | 26046  | IFDT               | 1.57 | 0.01 | 2.40 | 1.15 | 0.22 | 0.85 |
| 32035 | 0 | 26046  | IFDT               | 1.57 | 0.01 | 3.42 | 1.15 | 0.22 | 0.85 |
| 32036 | 0 | 26046  | IFDT               | 1.57 | 0.01 | 3.42 | 1.15 | 0.22 | 0.85 |
| 32037 | 0 | 26046  | IFDT               | 1.57 | 0.01 | 3.42 | 1.15 | 0.22 | 0.85 |
| 32038 | 0 | 26046  | IFDT               | 1.57 | 0.01 | 3.42 | 1.15 | 0.22 | 0.85 |
| 32039 | 0 | 26046  | IFDT               | 1.57 | 0.01 | 3.42 | 1.15 | 0.22 | 0.28 |
| 32040 | 0 | 26046  | IFDT               | 1.57 | 0.01 | 3.42 | 1.15 | 0.22 | 0.28 |
| 32041 | 0 | 26046  | IFDT               | 1.57 | 0.01 | 3.42 | 1.15 | 0.22 | 0.28 |
| 32042 | 0 | 83412  | IFDTTT             | 1.88 | 0.01 | 2.40 | 2.52 | 0.22 | 0.28 |
| 32043 | 0 | 96386  | IFDVTT             | 1.86 | 0.01 | 3.03 | 1.20 | 0.22 | 0.28 |
| 32044 | 0 | 96386  | IFDVTT             | 1.86 | 0.01 | 2.40 | 3.42 | 0.22 | 0.28 |
| 32045 | 0 | 96386  | IFDVTT             | 1.86 | 0.01 | 2.40 | 3.42 | 0.22 | 0.28 |
| 32046 | 0 | 96386  | IFDVTT             | 1.86 | 0.01 | 2.40 | 2.52 | 0.22 | 0.28 |
| 32047 | 0 | 96386  | IFDVTT             | 1.86 | 0.01 | 2.40 | 2.52 | 0.22 | 0.28 |
| 32048 | 0 | 26047  | IFDVTTL            | 2.01 | 0.01 | 3.03 | 1.20 | 0.22 | 0.28 |
| 32049 | 0 | 111415 | IFEMFNENQKAGGIE    | 2.70 | 0.01 | 3.20 | 1.12 | 0.22 | 0.85 |
| 32050 | 0 | 226478 | IFFLTFLCCNNKERK    | 2.68 | 0.01 | 2.73 | 0.44 | 0.85 | 0.28 |
| 32051 | 0 | 26071  | IFFYDPITGGGS       | 2.48 | 0.01 | 3.75 | 1.15 | 0.22 | 0.28 |
| 32052 | 0 | 26071  | IFFYDPITGGGS       | 2.48 | 0.01 | 3.75 | 1.15 | 0.22 | 0.28 |
| 32053 | 0 | 26075  | IFGFNALVDR         | 2.29 | 0.01 | 2.93 | 1.12 | 0.22 | 0.28 |
| 32054 | 0 | 26075  | IFGFNALVDR         | 2.29 | 0.01 | 2.93 | 1.12 | 0.22 | 0.28 |
| 32055 | 0 | 26075  | IFGFNALVDR         | 2.29 | 0.01 | 2.93 | 0.68 | 0.22 | 3.25 |
| 32056 | 0 | 26075  | IFGFNALVDR         | 2.29 | 0.01 | 2.93 | 1.12 | 0.22 | 1.48 |
| 32057 | 0 | 232856 | IFGKSAAFFLVRMF     | 2.66 | 0.01 | 2.89 | 1.12 | 0.22 | 1.28 |
| 32058 | 0 | 232856 | IFGKSAAFFLVRMF     | 2.66 | 0.01 | 2.89 | 1.12 | 0.22 | 1.28 |
| 32059 | 0 | 232856 | IFGKSAAFFLVRMF     | 2.66 | 0.01 | 2.89 | 1.12 | 0.22 | 1.28 |
| 32060 | 0 | 26076  | IFGVDANTGNVL       | 2.48 | 0.01 | 1.75 | 1.15 | 0.22 | 2.12 |
| 32061 | 0 | 26076  | IFGVDANTGNVL       | 2.48 | 0.01 | 1.75 | 2.04 | 0.22 | 2.12 |
| 32062 | 0 | 225332 | IFICVKSCSLLFMLNGNP | 2.85 | 0.01 | 2.61 | 0.68 | 0.22 | 0.28 |
| 32063 | 0 | 225332 | IFICVKSCSLLFMLNGNP | 2.85 | 0.01 | 2.61 | 0.68 | 0.22 | 0.28 |
| 32064 | 0 | 225332 | IFICVKSCSLLFMLNGNP | 2.85 | 0.01 | 2.61 | 0.68 | 0.22 | 0.28 |
| 32065 | 0 | 181671 | IFIDLNCPRCENACS    | 2.67 | 0.01 | 1.66 | 2.36 | 0.22 | 1.28 |
| 32066 | 0 | 117919 | IFIEME             | 1.92 | 0.01 | 0.78 | 0.44 | 1.13 | 0.85 |
| 32067 | 0 | 117919 | IFIEME             | 1.92 | 0.01 | 0.78 | 0.44 | 1.41 | 0.85 |
| 32068 | 0 | 100936 | IFIKNEFTFY         | 2.34 | 0.01 | 3.18 | 3.22 | 0.22 | 0.28 |
| 32069 | 0 | 92973  | IFKGSKFNDA         | 2.31 | 0.01 | 2.67 | 2.00 | 0.22 | 0.28 |

|       |   |        |                               |      |      |      |      |      |      |
|-------|---|--------|-------------------------------|------|------|------|------|------|------|
| 32070 | 0 | 418987 | IFKKLYHVWTKVEVG               | 2.59 | 0.01 | 0.90 | 0.44 | 1.13 | 1.27 |
| 32071 | 0 | 26094  | IFKNNSNYIR                    | 2.34 | 0.01 | 2.72 | 0.44 | 1.23 | 0.85 |
| 32072 | 0 | 171473 | IFKTSLTVADKIEDQ               | 2.67 | 0.01 | 0.78 | 0.44 | 1.41 | 0.28 |
| 32073 | 0 | 434746 | IFLAGDKDNVIDQIEK              | 2.74 | 4.93 | 2.16 | 0.44 | 1.23 | 0.28 |
| 32074 | 0 | 434747 | IFLAGDKDNVIDQIEK              | 2.74 | 0.01 | 2.16 | 0.44 | 1.23 | 0.28 |
| 32075 | 0 | 100137 | IFLAGDKDNVIDQIEKQA<br>KD      | 2.97 | 0.01 | 2.16 | 0.44 | 2.39 | 0.28 |
| 32076 | 0 | 171474 | IFLDYEAGMVSFYNI               | 2.65 | 0.01 | 0.78 | 0.44 | 1.41 | 0.28 |
| 32077 | 0 | 171474 | IFLDYEAGMVSFYNI               | 2.65 | 0.01 | 0.78 | 0.44 | 1.13 | 0.28 |
| 32078 | 0 | 26111  | IFLLALLSCL                    | 2.35 | 0.01 | 1.96 | 0.44 | 0.85 | 0.28 |
| 32079 | 0 | 145252 | IFMSNSYPRD                    | 2.29 | 0.01 | 0.78 | 0.44 | 1.13 | 0.28 |
| 32080 | 0 | 171475 | IFMSNSYPRDFVNCS               | 2.66 | 0.01 | 0.78 | 0.44 | 1.41 | 0.28 |
| 32081 | 0 | 122407 | IFMYHNNRRYHTCGGIL<br>L        | 2.82 | 0.01 | 2.73 | 0.68 | 0.22 | 0.85 |
| 32082 | 0 | 226043 | IFNAYSEYQVSRYVMFG<br>FSV      | 2.95 | 0.01 | 3.55 | 3.16 | 0.22 | 0.28 |
| 32083 | 0 | 120612 | IFNLFSTKDSSAAW                | 2.59 | 0.01 | 0.78 | 0.44 | 1.13 | 0.85 |
| 32084 | 0 | 120612 | IFNLFSTKDSSAAW                | 2.59 | 0.01 | 0.78 | 0.44 | 1.41 | 0.85 |
| 32085 | 0 | 26132  | IFNSVFLDFSVSFWIRIPK           | 2.91 | 0.01 | 2.08 | 0.44 | 1.93 | 1.57 |
| 32086 | 0 | 26132  | IFNSVFLDFSVSFWIRIPK           | 2.91 | 0.01 | 3.45 | 0.44 | 0.22 | 1.57 |
| 32087 | 0 | 106535 | IFPSFLRPDPPL                  | 2.50 | 0.01 | 0.90 | 1.15 | 0.22 | 0.85 |
| 32088 | 0 | 106535 | IFPSFLRPDPPL                  | 2.50 | 0.01 | 0.90 | 1.15 | 0.22 | 0.85 |
| 32089 | 0 | 106535 | IFPSFLRPDPPL                  | 2.50 | 0.01 | 0.90 | 1.15 | 0.22 | 1.34 |
| 32090 | 0 | 106535 | IFPSFLRPDPPL                  | 2.50 | 0.01 | 0.90 | 1.15 | 2.25 | 1.75 |
| 32091 | 0 | 106535 | IFPSFLRPDPPL                  | 2.50 | 0.01 | 0.90 | 1.15 | 2.25 | 1.75 |
| 32092 | 0 | 106535 | IFPSFLRPDPPL                  | 2.50 | 0.01 | 0.90 | 1.15 | 0.22 | 1.39 |
| 32093 | 0 | 111416 | IFQLCKITLTADVMT               | 2.67 | 0.01 | 1.86 | 0.68 | 0.22 | 0.28 |
| 32094 | 0 | 125098 | IFRDGEEAGAYDGPRTA<br>DGIVSHLK | 3.14 | 0.01 | 0.78 | 0.44 | 1.13 | 0.28 |
| 32095 | 0 | 171477 | IFRKNFFKDWRKEMT               | 2.67 | 0.01 | 0.78 | 0.44 | 1.13 | 0.28 |
| 32096 | 0 | 26153  | IFRTILPMDQEFTYHVKN<br>RE      | 2.90 | 0.01 | 3.47 | 0.44 | 0.22 | 0.85 |
| 32097 | 0 | 174149 | IFSGFTPEFLEQAFQ               | 2.68 | 0.01 | 2.16 | 0.44 | 1.23 | 1.28 |
| 32098 | 0 | 174149 | IFSGFTPEFLEQAFQ               | 2.68 | 0.01 | 2.16 | 0.44 | 1.23 | 1.27 |
| 32099 | 0 | 174149 | IFSGFTPEFLEQAFQ               | 2.68 | 0.01 | 2.16 | 0.44 | 1.23 | 1.28 |
| 32100 | 0 | 236222 | IFSKNIRNGNTILFD               | 2.69 | 0.01 | 1.66 | 0.44 | 0.85 | 1.28 |
| 32101 | 0 | 123310 | IFSQFGQI                      | 2.17 | 0.01 | 0.78 | 1.20 | 0.22 | 0.28 |
| 32102 | 0 | 26167  | IFSQNMNIKLKMP                 | 2.56 | 0.01 | 3.42 | 0.44 | 1.23 | 0.85 |
| 32103 | 0 | 26167  | IFSQNMNIKLKMP                 | 2.56 | 0.01 | 3.42 | 1.15 | 0.22 | 0.85 |
| 32104 | 0 | 26167  | IFSQNMNIKLKMP                 | 2.56 | 0.01 | 3.42 | 0.44 | 1.23 | 0.85 |
| 32105 | 0 | 26167  | IFSQNMNIKLKMP                 | 2.56 | 0.01 | 3.42 | 1.15 | 0.22 | 0.85 |
| 32106 | 0 | 26169  | IFSTYADNQPGVHIQ               | 2.63 | 0.01 | 2.30 | 0.44 | 0.85 | 0.28 |
| 32107 | 0 | 26169  | IFSTYADNQPGVHIQ               | 2.63 | 0.01 | 2.30 | 0.44 | 1.41 | 0.28 |
| 32108 | 0 | 171479 | IFTDESYLELYRKQK               | 2.66 | 0.01 | 0.78 | 0.44 | 1.13 | 0.28 |
| 32109 | 0 | 423349 | IFTEHVLGFELVPPS               | 2.67 | 0.01 | 2.51 | 0.44 | 1.59 | 1.28 |

|       |   |        |                              |      |      |      |      |      |      |
|-------|---|--------|------------------------------|------|------|------|------|------|------|
| 32110 | 0 | 26174  | IFTITKILL                    | 2.25 | 0.01 | 1.72 | 0.44 | 0.85 | 2.51 |
| 32111 | 0 | 423350 | IFTPIKKPGTSGKGA              | 2.72 | 0.01 | 2.51 | 0.44 | 1.59 | 1.28 |
| 32112 | 0 | 181672 | IFVDQLRKELNIESP              | 2.65 | 0.01 | 1.66 | 2.37 | 0.22 | 1.28 |
| 32113 | 0 | 181672 | IFVDQLRKELNIESP              | 2.65 | 0.01 | 1.66 | 2.36 | 0.22 | 1.28 |
| 32114 | 0 | 26178  | IFVEEVSSASQEIVQNE            | 2.78 | 0.01 | 1.66 | 0.44 | 1.74 | 0.28 |
| 32115 | 0 | 26178  | IFVEEVSSASQEIVQNE            | 2.78 | 0.01 | 1.66 | 1.20 | 0.22 | 0.28 |
| 32116 | 0 | 26178  | IFVEEVSSASQEIVQNE            | 2.78 | 0.01 | 1.66 | 0.44 | 1.74 | 0.28 |
| 32117 | 0 | 26178  | IFVEEVSSASQEIVQNE            | 2.78 | 0.01 | 1.66 | 0.44 | 1.74 | 0.28 |
| 32118 | 0 | 26178  | IFVEEVSSASQEIVQNE            | 2.78 | 0.01 | 1.66 | 3.27 | 0.22 | 0.28 |
| 32119 | 0 | 132380 | IFVGIKKKEERADLIAYLK<br>KATNE | 3.11 | 0.01 | 0.78 | 3.07 | 0.22 | 1.27 |
| 32120 | 0 | 92979  | IFVHRKGDGN                   | 2.29 | 0.01 | 2.67 | 2.00 | 0.22 | 0.28 |
| 32121 | 0 | 26190  | IFYDVFFAVANGN                | 2.56 | 0.01 | 3.08 | 0.68 | 0.22 | 1.57 |
| 32122 | 0 | 100138 | IFYTYGAAPARISV               | 2.61 | 0.01 | 2.96 | 0.44 | 0.22 | 0.28 |
| 32123 | 0 | 78997  | IGCHFSPSCFGPVWPS             | 2.70 | 0.01 | 0.90 | 2.16 | 0.22 | 1.39 |
| 32124 | 0 | 26204  | IGDAAKNQVAMNPRN              | 2.66 | 0.01 | 2.30 | 0.44 | 0.85 | 0.28 |
| 32125 | 0 | 225759 | IGDQKALYHTENAYVSV<br>VS      | 2.85 | 0.01 | 3.72 | 1.12 | 0.22 | 1.28 |
| 32126 | 0 | 180112 | IGDSVSRA                     | 2.12 | 0.01 | 3.00 | 0.68 | 0.22 | 0.85 |
| 32127 | 0 | 180112 | IGDSVSRA                     | 2.12 | 0.01 | 3.00 | 0.68 | 0.22 | 0.85 |
| 32128 | 0 | 180112 | IGDSVSRA                     | 2.12 | 0.01 | 3.00 | 0.68 | 0.22 | 0.85 |
| 32129 | 0 | 180112 | IGDSVSRA                     | 2.12 | 0.01 | 3.00 | 0.68 | 0.22 | 0.85 |
| 32130 | 0 | 180112 | IGDSVSRA                     | 2.12 | 0.01 | 3.00 | 0.68 | 0.22 | 0.85 |
| 32131 | 0 | 180112 | IGDSVSRA                     | 2.12 | 0.01 | 3.00 | 0.68 | 0.22 | 0.85 |
| 32132 | 0 | 180112 | IGDSVSRA                     | 2.12 | 0.01 | 3.00 | 0.68 | 0.22 | 0.85 |
| 32133 | 0 | 180112 | IGDSVSRA                     | 2.12 | 0.01 | 3.00 | 0.68 | 0.22 | 0.85 |
| 32134 | 0 | 180112 | IGDSVSRA                     | 2.12 | 0.01 | 3.00 | 0.68 | 0.22 | 0.85 |
| 32135 | 0 | 180112 | IGDSVSRA                     | 2.12 | 0.01 | 3.00 | 0.68 | 0.22 | 0.85 |
| 32136 | 0 | 180112 | IGDSVSRA                     | 2.12 | 0.01 | 3.00 | 0.68 | 0.22 | 1.48 |
| 32137 | 0 | 180112 | IGDSVSRA                     | 2.12 | 0.01 | 3.00 | 0.68 | 0.22 | 1.48 |
| 32138 | 0 | 180112 | IGDSVSRA                     | 2.12 | 0.01 | 3.00 | 0.68 | 0.22 | 1.48 |
| 32139 | 0 | 180112 | IGDSVSRA                     | 2.12 | 0.01 | 3.00 | 0.68 | 0.22 | 1.48 |
| 32140 | 0 | 180112 | IGDSVSRA                     | 2.12 | 0.01 | 3.00 | 0.68 | 0.22 | 1.48 |
| 32141 | 0 | 180112 | IGDSVSRA                     | 2.12 | 0.01 | 3.00 | 0.68 | 0.22 | 1.48 |
| 32142 | 0 | 180112 | IGDSVSRA                     | 2.12 | 0.01 | 3.00 | 0.68 | 0.22 | 1.48 |
| 32143 | 0 | 180112 | IGDSVSRA                     | 2.12 | 0.01 | 3.00 | 0.68 | 0.22 | 1.48 |
| 32144 | 0 | 180112 | IGDSVSRA                     | 2.12 | 0.01 | 3.00 | 0.68 | 0.22 | 1.48 |
| 32145 | 0 | 180112 | IGDSVSRA                     | 2.12 | 0.01 | 3.00 | 0.68 | 0.22 | 1.48 |
| 32146 | 0 | 180112 | IGDSVSRA                     | 2.12 | 0.01 | 3.00 | 0.68 | 0.22 | 1.48 |
| 32147 | 0 | 112793 | IGEGKVTLRIRNVRFSD<br>GGFTCFF | 3.15 | 0.01 | 0.78 | 0.44 | 1.13 | 0.28 |
| 32148 | 0 | 112793 | IGEGKVTLRIRNVRFSD<br>GGFTCFF | 3.15 | 0.01 | 0.78 | 0.44 | 1.41 | 0.28 |
| 32149 | 0 | 112793 | IGEGKVTLRIRNVRFSD<br>GGFTCFF | 3.15 | 0.01 | 0.78 | 0.44 | 1.41 | 0.28 |

|       |   |        |                              |      |      |      |      |      |      |
|-------|---|--------|------------------------------|------|------|------|------|------|------|
| 32150 | 0 | 112793 | IGEGKVTLRIRNVRFSD<br>GGFTCFF | 3.15 | 0.01 | 0.78 | 0.44 | 1.13 | 0.28 |
| 32151 | 0 | 112793 | IGEGKVTLRIRNVRFSD<br>GGFTCFF | 3.15 | 0.01 | 0.78 | 0.44 | 1.59 | 0.28 |
| 32152 | 0 | 195482 | IGETLGEKWKSRLNA              | 2.66 | 0.01 | 2.30 | 0.44 | 1.41 | 0.28 |
| 32153 | 0 | 195482 | IGETLGEKWKSRLNA              | 2.66 | 0.01 | 2.30 | 0.44 | 1.41 | 0.28 |
| 32154 | 0 | 195482 | IGETLGEKWKSRLNA              | 2.66 | 0.01 | 2.30 | 0.44 | 1.41 | 0.28 |
| 32155 | 0 | 195482 | IGETLGEKWKSRLNA              | 2.66 | 0.01 | 2.30 | 0.44 | 1.41 | 0.28 |
| 32156 | 0 | 195482 | IGETLGEKWKSRLNA              | 2.66 | 0.01 | 2.30 | 0.44 | 1.41 | 1.27 |
| 32157 | 0 | 195482 | IGETLGEKWKSRLNA              | 2.66 | 0.01 | 2.30 | 0.44 | 1.41 | 1.27 |
| 32158 | 0 | 158834 | IGFASKSADDVKKAF              | 2.70 | 0.01 | 3.26 | 0.44 | 1.23 | 0.28 |
| 32159 | 0 | 158834 | IGFASKSADDVKKAF              | 2.70 | 0.01 | 3.26 | 0.44 | 1.41 | 0.28 |
| 32160 | 0 | 26220  | IGFIGFHQFNNIAKLVAS<br>N      | 2.91 | 0.01 | 3.03 | 0.68 | 0.22 | 1.57 |
| 32161 | 0 | 26220  | IGFIGFHQFNNIAKLVAS<br>N      | 2.91 | 0.01 | 2.08 | 0.44 | 0.22 | 1.57 |
| 32162 | 0 | 26220  | IGFIGFHQFNNIAKLVAS<br>N      | 2.91 | 0.01 | 2.08 | 2.02 | 0.22 | 1.57 |
| 32163 | 0 | 26220  | IGFIGFHQFNNIAKLVAS<br>N      | 2.91 | 0.01 | 2.08 | 2.49 | 0.22 | 1.57 |
| 32164 | 0 | 26220  | IGFIGFHQFNNIAKLVAS<br>N      | 2.91 | 0.01 | 2.08 | 0.44 | 0.22 | 1.57 |
| 32165 | 0 | 26220  | IGFIGFHQFNNIAKLVAS<br>N      | 2.91 | 0.01 | 2.08 | 2.02 | 0.22 | 1.57 |
| 32166 | 0 | 26222  | IGFK                         | 1.57 | 0.01 | 3.27 | 2.82 | 0.22 | 0.28 |
| 32167 | 0 | 26225  | IGFSFFVKDWSEIRI              | 2.61 | 0.01 | 2.56 | 2.69 | 0.22 | 0.28 |
| 32168 | 0 | 26227  | IGFTLPIILKALYM               | 2.61 | 0.01 | 2.56 | 2.69 | 0.22 | 0.28 |
| 32169 | 0 | 26227  | IGFTLPIILKALYM               | 2.61 | 0.01 | 3.16 | 2.69 | 0.22 | 0.28 |
| 32170 | 0 | 26227  | IGFTLPIILKALYM               | 2.61 | 0.01 | 3.16 | 2.69 | 0.22 | 0.28 |
| 32171 | 0 | 132381 | IGFTLYERSLWE                 | 2.45 | 0.01 | 0.90 | 1.15 | 0.22 | 1.39 |
| 32172 | 0 | 131913 | IGGGWGNSDARYTPG              | 2.65 | 0.01 | 0.78 | 0.44 | 1.13 | 0.85 |
| 32173 | 0 | 26234  | IGGPLT                       | 1.89 | 0.01 | 1.96 | 0.44 | 0.85 | 0.28 |
| 32174 | 0 | 114407 | IGGRVHFFRDISPIG              | 2.69 | 0.01 | 4.93 | 0.44 | 1.74 | 1.57 |
| 32175 | 0 | 26235  | IGGSQAQTAS                   | 2.34 | 0.01 | 2.83 | 1.12 | 0.22 | 0.28 |
| 32176 | 0 | 26235  | IGGSQAQTAS                   | 2.34 | 0.01 | 2.83 | 0.44 | 0.85 | 0.28 |
| 32177 | 0 | 180984 | IGGSVSAGFS                   | 2.35 | 0.01 | 2.18 | 2.16 | 0.22 | 0.28 |
| 32178 | 0 | 152652 | IGGSVSAGFSNSNSSTV<br>A       | 2.89 | 0.01 | 2.18 | 0.44 | 0.22 | 0.28 |
| 32179 | 0 | 26239  | IGHADFGGR                    | 2.22 | 0.01 | 3.28 | 0.44 | 1.23 | 0.85 |
| 32180 | 0 | 151930 | IGHDRCEERDHD                 | 2.50 | 0.01 | 2.80 | 2.78 | 0.22 | 0.28 |
| 32181 | 0 | 78419  | IGHGLLPWNNLVTHPVL<br>GKV     | 2.97 | 0.01 | 2.69 | 0.68 | 0.22 | 0.28 |
| 32182 | 0 | 78419  | IGHGLLPWNNLVTHPVL<br>GKV     | 2.97 | 0.01 | 2.69 | 1.81 | 0.22 | 0.28 |
| 32183 | 0 | 178386 | IGHGTWG                      | 2.04 | 0.01 | 0.90 | 1.12 | 0.22 | 0.28 |
| 32184 | 0 | 26240  | IGHPLPLRL                    | 2.25 | 0.01 | 2.58 | 0.44 | 0.22 | 0.28 |

|                    |   |        |                                   |      |      |      |      |      |      |
|--------------------|---|--------|-----------------------------------|------|------|------|------|------|------|
| 32185              | 0 | 117921 | IGIIDLIEKRKFNQ                    | 2.61 | 0.01 | 0.78 | 0.68 | 0.22 | 0.85 |
| 32186              | 0 | 117921 | IGIIDLIEKRKFNQ                    | 2.61 | 0.01 | 0.78 | 0.68 | 0.22 | 1.27 |
| 32187              | 0 | 117921 | IGIIDLIEKRKFNQ                    | 2.61 | 0.01 | 0.78 | 0.68 | 0.22 | 1.27 |
| 32188              | 0 | 117921 | IGIIDLIEKRKFNQ                    | 2.61 | 0.01 | 0.78 | 0.68 | 0.22 | 1.75 |
| 32189              | 0 | 181673 | IGIKIYNQEIKKKNP                   | 2.70 | 0.01 | 3.26 | 2.37 | 0.22 | 1.28 |
| 32190              | 0 | 26244  | IGILGGK                           | 2.05 | 0.01 | 2.24 | 0.68 | 0.22 | 0.28 |
| 32191              | 0 | 26244  | IGILGGK                           | 2.05 | 0.01 | 2.24 | 1.12 | 0.22 | 0.28 |
| 32192              | 0 | 26246  | IGISNR                            | 1.91 | 0.01 | 2.40 | 0.44 | 0.85 | 0.28 |
| 32193              | 0 | 26247  | IGISNRDFV                         | 2.22 | 0.01 | 2.40 | 0.44 | 0.85 | 0.28 |
| 32194              | 0 | 26247  | IGISNRDFV                         | 2.22 | 0.01 | 2.40 | 0.44 | 0.85 | 0.28 |
| 32195              | 0 | 26247  | IGISNRDFV                         | 2.22 | 0.01 | 2.40 | 0.44 | 0.85 | 0.28 |
| 32196              | 0 | 26247  | IGISNRDFV                         | 2.22 | 0.01 | 2.40 | 0.44 | 0.85 | 0.28 |
| 32197              | 0 | 99330  | IGKPKAQNIRQGAKE                   | 2.71 | 0.01 | 2.86 | 2.02 | 0.85 | 0.85 |
| 32198              | 0 | 26258  | IGKVSQKN                          | 2.12 | 0.01 | 2.83 | 2.61 | 0.22 | 0.28 |
| IGLAMGDAGGYKASDM   |   |        |                                   |      |      |      |      |      |      |
| 32199              | 0 | 26261  | WGPSSDPAWQRNDPSL<br>HIPELVANNTLWI | 3.75 | 0.01 | 3.85 | 1.12 | 0.22 | 0.85 |
| IGLDLPALNMQR       |   |        |                                   |      |      |      |      |      |      |
| 32200              | 0 | 236109 | IGLDLPALNMQR                      | 2.45 | 0.01 | 0.78 | 0.44 | 1.13 | 0.28 |
| 32201              | 0 | 236109 | IGLDLPALNMQR                      | 2.45 | 0.01 | 0.78 | 0.44 | 1.41 | 0.28 |
| 32202              | 0 | 236109 | IGLDLPALNMQR                      | 2.45 | 0.01 | 0.78 | 3.41 | 0.22 | 0.28 |
| 32203              | 0 | 227266 | IGLDPVAPGDLTMVI                   | 2.71 | 0.01 | 2.97 | 0.44 | 1.59 | 0.28 |
| 32204              | 0 | 227266 | IGLDPVAPGDLTMVI                   | 2.71 | 0.01 | 2.97 | 0.44 | 0.85 | 0.28 |
| 32205              | 0 | 26265  | IGLEEEEEEGAG                      | 2.58 | 0.01 | 3.17 | 0.44 | 0.85 | 0.85 |
| 32206              | 0 | 83458  | IGLKGGFGKLRV                      | 2.51 | 0.01 | 2.87 | 0.44 | 0.22 | 0.28 |
| 32207              | 0 | 119943 | IGLMVGGVV                         | 2.23 | 0.01 | 0.78 | 1.15 | 0.22 | 0.28 |
| 32208              | 0 | 119943 | IGLMVGGVV                         | 2.23 | 0.01 | 0.78 | 1.15 | 0.22 | 2.02 |
| 32209              | 0 | 119943 | IGLMVGGVV                         | 2.23 | 0.01 | 0.78 | 1.15 | 0.22 | 1.66 |
| 32210              | 0 | 119943 | IGLMVGGVV                         | 2.23 | 0.01 | 0.78 | 1.15 | 0.22 | 1.66 |
| 32211              | 0 | 119943 | IGLMVGGVV                         | 2.23 | 0.01 | 0.78 | 1.15 | 0.22 | 1.66 |
| 32212              | 0 | 119943 | IGLMVGGVV                         | 2.23 | 0.01 | 0.78 | 1.15 | 0.22 | 1.66 |
| IGLNNKTLDDKTSYKIDG |   |        |                                   |      |      |      |      |      |      |
| 32213              | 0 | 83464  | KGWQKDKSWGgy                      | 3.37 | 0.01 | 2.56 | 0.68 | 0.22 | 0.85 |
| IGLPPARG           |   |        |                                   |      |      |      |      |      |      |
| 32214              | 0 | 128920 | IGLPPARG                          | 2.13 | 0.01 | 0.78 | 0.44 | 1.13 | 0.28 |
| IGLSMAGSSAMILAA    |   |        |                                   |      |      |      |      |      |      |
| 32215              | 0 | 103272 | IGLSMAGSSAMILAA                   | 2.72 | 0.01 | 2.04 | 0.44 | 0.85 | 1.28 |
| IGLSQHE            |   |        |                                   |      |      |      |      |      |      |
| 32216              | 0 | 234123 | IGLSQHE                           | 1.99 | 0.01 | 0.90 | 0.68 | 0.22 | 0.28 |
| IGLVAIGGRLNGSGQSN  |   |        |                                   |      |      |      |      |      |      |
| 32217              | 0 | 26271  | AIEC                              | 3.01 | 0.01 | 2.86 | 2.02 | 0.22 | 0.28 |
| IGLVAIGGRLNGSGQSN  |   |        |                                   |      |      |      |      |      |      |
| 32218              | 0 | 26271  | AIEC                              | 3.01 | 0.01 | 2.86 | 2.02 | 1.59 | 0.28 |
| IGMAHYLTFDGLKYLP   |   |        |                                   |      |      |      |      |      |      |
| 32219              | 0 | 134409 | GECQYVLVQDYCGS                    | 3.34 | 0.01 | 0.78 | 0.68 | 0.22 | 1.39 |
| IGMAHYLTFDGLKYLP   |   |        |                                   |      |      |      |      |      |      |
| 32220              | 0 | 134409 | GECQYVLVQDYCGS                    | 3.34 | 0.01 | 0.78 | 0.68 | 0.22 | 0.85 |
| IGMSQSK            |   |        |                                   |      |      |      |      |      |      |
| 32221              | 0 | 234124 | IGMSQSK                           | 2.02 | 0.01 | 0.90 | 0.68 | 0.22 | 0.28 |
| IGPEKAFR           |   |        |                                   |      |      |      |      |      |      |
| 32222              | 0 | 26293  | IGPEKAFR                          | 2.10 | 0.01 | 2.21 | 1.12 | 0.22 | 0.28 |

|       |   |        |                    |      |      |      |      |      |      |
|-------|---|--------|--------------------|------|------|------|------|------|------|
| 32223 | 0 | 26293  | IGPEKAFR           | 2.10 | 0.01 | 2.21 | 0.44 | 0.85 | 0.28 |
| 32224 | 0 | 26294  | IGPEKAFREL         | 2.29 | 0.01 | 2.21 | 1.12 | 0.22 | 0.28 |
| 32225 | 0 | 164261 | IGPGDRQ            | 2.02 | 0.01 | 0.90 | 1.20 | 0.22 | 0.28 |
| 32226 | 0 | 164261 | IGPGDRQ            | 2.02 | 0.01 | 0.90 | 1.20 | 0.22 | 1.39 |
| 32227 | 0 | 177111 | IGPRPLVNLQGR       | 2.65 | 0.01 | 4.33 | 0.68 | 0.22 | 0.28 |
| 32228 | 0 | 423352 | IGPVDRSSLYEANPE    | 2.63 | 0.01 | 2.51 | 0.44 | 2.35 | 1.28 |
| 32229 | 0 | 26306  | IGQLVIEHYADT       | 2.44 | 0.01 | 2.69 | 0.68 | 0.22 | 0.28 |
| 32230 | 0 | 26307  | IGQMF              | 1.88 | 0.01 | 2.40 | 0.44 | 0.85 | 0.28 |
| 32231 | 0 | 26308  | IGQMFETTM          | 2.30 | 0.01 | 2.40 | 0.44 | 0.85 | 0.28 |
| 32232 | 0 | 26308  | IGQMFETTM          | 2.30 | 0.01 | 2.40 | 0.44 | 0.85 | 0.28 |
|       |   |        | IGQMFETTMRGAKRMA   |      |      |      |      |      |      |
| 32233 | 0 | 26309  | ILGDTAWDFGSLGGVFT  | 3.58 | 0.01 | 2.30 | 2.65 | 0.22 | 0.28 |
|       |   |        | SIGKA              |      |      |      |      |      |      |
|       |   |        | IGQMFETTMRGAKRMA   |      |      |      |      |      |      |
| 32234 | 0 | 26309  | ILGDTAWDFGSLGGVFT  | 3.58 | 0.01 | 2.30 | 2.65 | 0.22 | 0.28 |
|       |   |        | SIGKA              |      |      |      |      |      |      |
|       |   |        | IGQMFETTMRGAKRMA   |      |      |      |      |      |      |
| 32235 | 0 | 26309  | ILGDTAWDFGSLGGVFT  | 3.58 | 0.01 | 2.30 | 2.65 | 0.22 | 0.28 |
|       |   |        | SIGKA              |      |      |      |      |      |      |
| 32236 | 0 | 26314  | IGRFAQMHNNGPQ      | 2.63 | 0.01 | 3.50 | 2.22 | 0.22 | 0.28 |
| 32237 | 0 | 26317  | IGRGNFGEVFSG       | 2.49 | 0.01 | 0.78 | 1.15 | 0.22 | 2.56 |
| 32238 | 0 | 26317  | IGRGNFGEVFSG       | 2.49 | 0.01 | 0.78 | 1.15 | 0.22 | 2.56 |
| 32239 | 0 | 26317  | IGRGNFGEVFSG       | 2.49 | 0.01 | 0.78 | 1.15 | 0.22 | 0.28 |
| 32240 | 0 | 26318  | IGRLHLNDR          | 2.23 | 0.01 | 2.69 | 0.44 | 0.85 | 0.28 |
| 32241 | 0 | 462360 | IGRLKLLP           | 2.23 | 0.01 | 0.78 | 1.12 | 0.22 | 1.28 |
| 32242 | 0 | 99331  | IGRNRSPDIYNPQAG    | 2.69 | 0.01 | 2.16 | 0.44 | 1.23 | 0.85 |
| 32243 | 0 | 510444 | IGSPHLTAPLLT       | 2.48 | 0.01 | 0.90 | 3.07 | 1.13 | 1.39 |
| 32244 | 0 | 177112 | IGSRPRVRNQSGRI     | 2.65 | 0.01 | 4.93 | 0.68 | 0.22 | 0.28 |
| 32245 | 0 | 177113 | IGSRPWVRGQSGRV     | 2.65 | 0.01 | 4.93 | 0.68 | 0.22 | 0.28 |
| 32246 | 0 | 177114 | IGSRPWVRGVSSRI     | 2.66 | 0.01 | 4.93 | 0.68 | 0.22 | 0.28 |
| 32247 | 0 | 114409 | IGSRVHFFHDISPIT    | 2.68 | 0.01 | 4.93 | 0.44 | 1.74 | 1.57 |
| 32248 | 0 | 518586 | IGSSDNKAEANQVD     | 2.67 | 0.01 | 2.24 | 0.44 | 1.41 | 1.28 |
| 32249 | 0 | 193476 | IGSTPIGDS          | 2.26 | 0.01 | 2.51 | 0.44 | 2.39 | 0.28 |
| 32250 | 0 | 193476 | IGSTPIGDS          | 2.26 | 0.01 | 2.51 | 0.44 | 2.39 | 0.28 |
| 32251 | 0 | 123314 | IGTFKAFD           | 2.12 | 0.01 | 0.78 | 1.20 | 0.22 | 0.28 |
| 32252 | 0 | 123314 | IGTFKAFD           | 2.12 | 0.01 | 0.78 | 0.44 | 1.13 | 0.28 |
| 32253 | 0 | 134087 | IGTLCADAR          | 2.21 | 0.01 | 1.60 | 1.20 | 0.22 | 0.28 |
| 32254 | 0 | 134087 | IGTLCADAR          | 2.21 | 0.01 | 1.60 | 1.20 | 0.22 | 0.28 |
| 32255 | 0 | 104521 | IGTLKKILDETVKDIAKE | 2.98 | 0.01 | 2.24 | 2.04 | 0.22 | 0.28 |
|       |   |        | Q                  |      |      |      |      |      |      |
| 32256 | 0 | 104521 | IGTLKKILDETVKDIAKE | 2.98 | 0.01 | 2.24 | 2.04 | 0.22 | 0.28 |
|       |   |        | Q                  |      |      |      |      |      |      |
| 32257 | 0 | 104521 | IGTLKKILDETVKDIAKE | 2.98 | 0.01 | 2.24 | 2.04 | 0.22 | 0.28 |
|       |   |        | Q                  |      |      |      |      |      |      |
| 32258 | 0 | 26328  | IGTLKKILDETVKDLAK  | 2.89 | 0.01 | 2.85 | 0.68 | 0.22 | 0.28 |

|       |   |        |                          |      |      |      |      |      |      |
|-------|---|--------|--------------------------|------|------|------|------|------|------|
| 32259 | 0 | 26329  | IGTRNPNNNAATVLQL         | 2.72 | 0.01 | 2.91 | 0.44 | 0.85 | 0.28 |
| 32260 | 0 | 26329  | IGTRNPNNNAATVLQL         | 2.72 | 0.01 | 2.91 | 0.68 | 0.22 | 0.28 |
| 32261 | 0 | 26330  | IGTRYLTR                 | 2.14 | 0.01 | 3.19 | 0.68 | 0.22 | 0.85 |
| 32262 | 0 | 26330  | IGTRYLTR                 | 2.14 | 0.01 | 3.19 | 0.68 | 0.22 | 1.27 |
| 32263 | 0 | 99332  | IGTTKQ                   | 1.89 | 0.01 | 2.86 | 2.02 | 0.85 | 0.85 |
| 32264 | 0 | 120615 | IGTVSVFAGRLIELSQEG       | 2.86 | 0.01 | 2.26 | 3.55 | 0.22 | 1.27 |
| 32265 | 0 | 120615 | IGTVSVFAGRLIELSQEG       | 2.86 | 0.01 | 2.26 | 0.68 | 0.22 | 0.28 |
| 32266 | 0 | 112165 | IGVGWIR                  | 2.05 | 0.01 | 0.78 | 0.44 | 1.13 | 0.28 |
| 32267 | 0 | 26338  | IGVIIT                   | 1.92 | 0.01 | 2.40 | 0.44 | 0.85 | 0.28 |
| 32268 | 0 | 26339  | IGVKGSSI                 | 2.16 | 0.01 | 3.06 | 1.12 | 0.22 | 0.28 |
| 32269 | 0 | 190447 | IGVNQELAYFYPELF          | 2.66 | 0.01 | 1.60 | 0.44 | 1.23 | 0.28 |
| 32270 | 0 | 26341  | IGVNQELAYFYPELFRQF<br>YQ | 2.95 | 0.01 | 1.60 | 2.82 | 0.22 | 0.28 |
| 32271 | 0 | 26341  | IGVNQELAYFYPELFRQF<br>YQ | 2.95 | 0.01 | 1.60 | 2.82 | 0.22 | 0.28 |
| 32272 | 0 | 26341  | IGVNQELAYFYPELFRQF<br>YQ | 2.95 | 0.01 | 1.60 | 2.82 | 0.22 | 0.28 |
| 32273 | 0 | 26341  | IGVNQELAYFYPELFRQF<br>YQ | 2.95 | 0.01 | 1.60 | 0.44 | 1.23 | 0.28 |
| 32274 | 0 | 26341  | IGVNQELAYFYPELFRQF<br>YQ | 2.95 | 0.01 | 1.60 | 1.12 | 0.22 | 1.27 |
| 32275 | 0 | 26341  | IGVNQELAYFYPELFRQF<br>YQ | 2.95 | 0.01 | 1.60 | 0.44 | 1.23 | 1.28 |
| 32276 | 0 | 26348  | IGYFGHQV                 | 2.12 | 0.01 | 2.04 | 0.44 | 0.85 | 0.28 |
| 32277 | 0 | 26348  | IGYFGHQV                 | 2.12 | 0.01 | 2.04 | 0.44 | 0.85 | 0.28 |
| 32278 | 0 | 26348  | IGYFGHQV                 | 2.12 | 0.01 | 2.04 | 0.44 | 0.85 | 0.28 |
| 32279 | 0 | 130513 | IGYQPSMPLDMP             | 2.48 | 0.01 | 0.90 | 3.18 | 1.41 | 1.39 |
| 32280 | 0 | 130513 | IGYQPSMPLDMP             | 2.48 | 0.01 | 0.90 | 3.18 | 1.41 | 0.85 |
| 32281 | 0 | 130513 | IGYQPSMPLDMP             | 2.48 | 0.01 | 0.90 | 3.18 | 1.41 | 1.34 |
| 32282 | 0 | 130513 | IGYQPSMPLDMP             | 2.48 | 0.01 | 0.90 | 3.18 | 1.41 | 0.28 |
| 32283 | 0 | 79258  | IGYSGTGEGNHIENDPLK<br>IK | 2.95 | 0.01 | 2.84 | 3.06 | 0.22 | 0.28 |
| 32284 | 0 | 26360  | IH                       | 1.10 | 0.01 | 4.33 | 0.68 | 0.22 | 1.34 |
| 32285 | 0 | 79570  | IHAHTTSDPWHPGPLG<br>LKF  | 2.94 | 0.01 | 2.85 | 0.44 | 1.59 | 0.28 |
| 32286 | 0 | 135562 | IHAMDIPPPTG              | 2.40 | 0.01 | 0.78 | 1.12 | 0.22 | 0.28 |
| 32287 | 0 | 135562 | IHAMDIPPPTG              | 2.40 | 0.01 | 0.78 | 1.12 | 0.22 | 0.28 |
| 32288 | 0 | 135562 | IHAMDIPPPTG              | 2.40 | 0.01 | 0.78 | 1.12 | 0.22 | 1.34 |
| 32289 | 0 | 135562 | IHAMDIPPPTG              | 2.40 | 0.01 | 0.78 | 1.12 | 0.22 | 0.28 |
| 32290 | 0 | 26363  | IHAQQKEPMI               | 2.31 | 0.01 | 1.60 | 0.44 | 1.23 | 0.28 |
| 32291 | 0 | 26363  | IHAQQKEPMI               | 2.31 | 0.01 | 1.60 | 0.44 | 1.23 | 0.28 |
| 32292 | 0 | 229682 | IHCEKDERFFSDKIAKYI       | 2.85 | 0.01 | 1.60 | 0.44 | 1.23 | 1.28 |

|       |   |        |                          |      |      |      |      |      |      |
|-------|---|--------|--------------------------|------|------|------|------|------|------|
| 32293 | 0 | 147815 | IHDFIDNPLPNQDNDD         | 2.77 | 0.01 | 4.93 | 0.68 | 0.22 | 0.28 |
| 32294 | 0 | 122408 | IHDRKSGKKFSIEEALQS<br>GR | 2.94 | 0.01 | 0.78 | 0.44 | 1.13 | 1.27 |
| 32295 | 0 | 26372  | IHFG                     | 1.57 | 0.01 | 1.60 | 0.68 | 0.22 | 1.48 |
| 32296 | 0 | 26372  | IHFG                     | 1.57 | 0.01 | 1.60 | 0.68 | 0.22 | 0.28 |
| 32297 | 0 | 26372  | IHFG                     | 1.57 | 0.01 | 1.60 | 0.68 | 0.22 | 0.85 |
| 32298 | 0 | 26372  | IHFG                     | 1.57 | 0.01 | 1.60 | 0.68 | 0.22 | 1.48 |
| 32299 | 0 | 26374  | IHFGSD                   | 1.88 | 0.01 | 1.60 | 1.15 | 0.22 | 2.66 |
| 32300 | 0 | 26375  | IHFGSDYEDRY              | 2.45 | 0.01 | 0.78 | 0.68 | 0.22 | 2.92 |
| 32301 | 0 | 26375  | IHFGSDYEDRY              | 2.45 | 0.01 | 0.78 | 0.68 | 0.22 | 0.28 |
| 32302 | 0 | 134088 | IHGKTQGARQKFSS           | 2.67 | 0.01 | 0.78 | 0.44 | 1.41 | 1.34 |
| 32303 | 0 | 134088 | IHGKTQGARQKFSS           | 2.67 | 0.01 | 0.78 | 0.44 | 1.41 | 1.34 |
| 32304 | 0 | 134088 | IHGKTQGARQKFSS           | 2.67 | 0.01 | 0.78 | 1.12 | 0.22 | 0.28 |
| 32305 | 0 | 134088 | IHGKTQGARQKFSS           | 2.67 | 0.01 | 0.78 | 1.12 | 0.22 | 0.28 |
| 32306 | 0 | 26382  | IHIGPGRAFYT              | 2.46 | 0.01 | 2.54 | 0.68 | 0.22 | 0.28 |
| 32307 | 0 | 26382  | IHIGPGRAFYT              | 2.46 | 0.01 | 2.54 | 1.81 | 0.22 | 0.28 |
| 32308 | 0 | 26382  | IHIGPGRAFYT              | 2.46 | 0.01 | 2.54 | 3.01 | 0.22 | 0.28 |
| 32309 | 0 | 119596 | IHIPSEKIWRPDLVLY         | 2.72 | 0.01 | 0.78 | 1.15 | 0.22 | 1.57 |
| 32310 | 0 | 119596 | IHIPSEKIWRPDLVLY         | 2.72 | 0.01 | 0.78 | 0.44 | 1.13 | 1.57 |
| 32311 | 0 | 238623 | IHIQGSPPGGVRTA           | 2.59 | 0.01 | 2.14 | 2.65 | 0.22 | 0.85 |
| 32312 | 0 | 127694 | IHKNSSV                  | 2.01 | 0.01 | 0.90 | 0.44 | 1.13 | 1.39 |
| 32313 | 0 | 158836 | IHNDVEAWIDRYKYL          | 2.70 | 0.01 | 3.22 | 0.68 | 0.22 | 0.28 |
| 32314 | 0 | 158837 | IHNDVEAWIDRYKY           | 2.71 | 0.01 | 3.36 | 0.68 | 0.22 | 0.28 |
| 32315 | 0 | 158837 | IHNDVEAWIDRYKY           | 2.71 | 0.01 | 3.36 | 2.49 | 0.22 | 0.28 |
| 32316 | 0 | 158837 | IHNDVEAWIDRYKY           | 2.71 | 0.01 | 3.36 | 2.43 | 0.22 | 0.28 |
| 32317 | 0 | 158837 | IHNDVEAWIDRYKY           | 2.71 | 0.01 | 3.36 | 3.55 | 0.22 | 0.28 |
| 32318 | 0 | 158838 | IHNDVEAWMDRYKY           | 2.68 | 0.01 | 3.05 | 0.68 | 0.22 | 0.28 |
| 32319 | 0 | 158838 | IHNDVEAWMDRYKY           | 2.68 | 0.01 | 3.05 | 0.68 | 0.22 | 0.28 |
| 32320 | 0 | 158838 | IHNDVEAWMDRYKY           | 2.68 | 0.01 | 3.05 | 0.68 | 0.22 | 1.48 |
| 32321 | 0 | 158838 | IHNDVEAWMDRYKY           | 2.68 | 0.01 | 3.05 | 0.68 | 0.22 | 0.28 |
| 32322 | 0 | 158838 | IHNDVEAWMDRYKY           | 2.68 | 0.01 | 3.05 | 2.49 | 0.22 | 0.28 |
| 32323 | 0 | 158838 | IHNDVEAWMDRYKY           | 2.68 | 0.01 | 3.05 | 2.43 | 0.22 | 0.28 |
| 32324 | 0 | 158838 | IHNDVEAWMDRYKY           | 2.68 | 0.01 | 3.05 | 3.55 | 0.22 | 0.28 |



|       |   |        |                                                        |      |      |      |      |      |      |
|-------|---|--------|--------------------------------------------------------|------|------|------|------|------|------|
| 32325 | 0 | 158838 | IHNDVEAWMDRYKYYP                                       | 2.68 | 0.01 | 3.04 | 0.68 | 0.22 | 0.85 |
| 32326 | 0 | 158838 | IHNDVEAWMDRYKYYP                                       | 2.68 | 0.01 | 3.04 | 0.68 | 0.22 | 0.85 |
| 32327 | 0 | 26394  | IHNEYTIINCMKNNSGW<br>KI                                | 2.89 | 0.01 | 2.08 | 2.02 | 0.22 | 1.57 |
| 32328 | 0 | 115789 | IHPFAQTQSL                                             | 2.29 | 0.01 | 1.60 | 0.44 | 1.23 | 0.85 |
| 32329 | 0 | 115789 | IHPFAQTQSL                                             | 2.29 | 0.01 | 1.60 | 0.44 | 1.23 | 0.85 |
| 32330 | 0 | 26400  | IHPLGLRSEF                                             | 2.29 | 0.01 | 0.78 | 0.44 | 1.74 | 0.28 |
| 32331 | 0 | 421136 | IHPLGLRSEFPIWMMFA<br>SALP                              | 3.00 | 0.01 | 0.78 | 1.12 | 1.41 | 0.28 |
| 32332 | 0 | 132382 | IHPSFVLTAACHLRD                                        | 2.63 | 0.01 | 0.78 | 0.44 | 1.41 | 0.28 |
| 32333 | 0 | 132382 | IHPSFVLTAACHLRD                                        | 2.63 | 0.01 | 0.78 | 0.44 | 1.13 | 0.28 |
| 32334 | 0 | 26404  | IHRFYESGIVFEEYKDYFC                                    | 2.89 | 0.01 | 2.08 | 0.44 | 1.93 | 1.57 |
| 32335 | 0 | 26404  | IHRFYESGIVFEEYKDYFC                                    | 2.89 | 0.01 | 2.08 | 2.43 | 0.22 | 1.57 |
| 32336 | 0 | 26408  | IHSDEGPGTGPGNGLGE                                      | 2.81 | 0.01 | 2.43 | 0.44 | 1.59 | 0.28 |
| 32337 | 0 | 109332 | IHSMNSTIL                                              | 2.24 | 0.01 | 1.86 | 0.44 | 0.85 | 0.28 |
| 32338 | 0 | 26412  | IHSVWK                                                 | 1.88 | 0.01 | 1.96 | 0.44 | 0.85 | 0.28 |
| 32339 | 0 | 186681 | IHTPAFNVNVRT                                           | 2.48 | 0.01 | 0.90 | 0.68 | 0.22 | 1.39 |
| 32340 | 0 | 186681 | IHTPAFNVNVRT                                           | 2.48 | 0.01 | 0.90 | 0.68 | 0.22 | 0.28 |
| 32341 | 0 | 186681 | IHTPAFNVNVRT                                           | 2.48 | 0.01 | 0.90 | 2.13 | 0.85 | 0.28 |
| 32342 | 0 | 186682 | IHTPAFNVNVRTGGGIH<br>TPAFNVNVRTGGGIHTP<br>AFNVNVRTGKKK | 3.80 | 0.01 | 0.90 | 3.47 | 0.22 | 0.28 |
| 32343 | 0 | 186682 | IHTPAFNVNVRTGGGIH<br>TPAFNVNVRTGGGIHTP<br>AFNVNVRTGKKK | 3.80 | 0.01 | 0.90 | 3.47 | 0.22 | 0.28 |
| 32344 | 0 | 186682 | IHTPAFNVNVRTGGGIH<br>TPAFNVNVRTGGGIHTP<br>AFNVNVRTGKKK | 3.80 | 0.01 | 0.90 | 3.47 | 0.22 | 0.28 |
| 32345 | 0 | 186682 | IHTPAFNVNVRTGGGIH<br>TPAFNVNVRTGGGIHTP<br>AFNVNVRTGKKK | 3.80 | 0.01 | 0.90 | 3.47 | 0.22 | 0.28 |
| 32346 | 0 | 186682 | IHTPAFNVNVRTGGGIH<br>TPAFNVNVRTGGGIHTP<br>AFNVNVRTGKKK | 3.80 | 0.01 | 0.90 | 3.47 | 0.22 | 0.28 |

|       |   |        |                                   |      |      |      |      |      |      |
|-------|---|--------|-----------------------------------|------|------|------|------|------|------|
|       |   |        | IHTPAFNVNVRTGGGIH                 |      |      |      |      |      |      |
| 32347 | 0 | 186682 | TPAFNVNVRTGGGIHTP<br>AFNVNVRTGKKK | 3.80 | 0.01 | 0.90 | 3.47 | 0.22 | 0.28 |
| 32348 | 0 | 103986 | IHVLNSESAGQMVQ<br>D               | 2.78 | 0.01 | 3.00 | 1.20 | 0.22 | 0.85 |
| 32349 | 0 | 226044 | IIACVYGERYCAMD<br>LQC             | 2.92 | 0.01 | 3.93 | 3.16 | 0.22 | 0.28 |
| 32350 | 0 | 26429  | IIADVEKCNQTEVDY<br>CKAMTGEC       | 3.16 | 0.01 | 3.45 | 4.08 | 0.22 | 0.28 |
| 32351 | 0 | 95461  | IIAECT                            | 1.89 | 0.01 | 1.60 | 0.44 | 1.23 | 0.28 |
| 32352 | 0 | 98824  | IIAECTKIPA                        | 2.35 | 0.01 | 1.60 | 0.44 | 1.23 | 0.85 |
| 32353 | 0 | 98824  | IIAECTKIPA                        | 2.35 | 0.01 | 1.60 | 0.44 | 1.23 | 0.85 |
| 32354 | 0 | 98824  | IIAECTKIPA                        | 2.35 | 0.01 | 1.60 | 0.44 | 2.98 | 0.85 |
| 32355 | 0 | 96388  | IIAECTKIPAVFKID                   | 2.70 | 0.01 | 1.60 | 0.44 | 1.23 | 0.28 |
| 32356 | 0 | 96388  | IIAECTKIPAVFKID                   | 2.70 | 0.01 | 1.60 | 0.44 | 1.23 | 0.28 |
| 32357 | 0 | 117924 | IIAKMKGTF                         | 2.22 | 0.01 | 0.78 | 0.44 | 1.13 | 0.28 |
| 32358 | 0 | 95462  | IIAPAKQL                          | 2.13 | 0.01 | 3.48 | 2.22 | 0.22 | 0.28 |
| 32359 | 0 | 122113 | IIASTEKL                          | 2.20 | 0.01 | 2.96 | 0.68 | 0.22 | 0.85 |
| 32360 | 0 | 122113 | IIASTEKL                          | 2.20 | 0.01 | 2.96 | 0.68 | 0.22 | 1.34 |
| 32361 | 0 | 122113 | IIASTEKL                          | 2.20 | 0.01 | 2.96 | 0.68 | 0.22 | 0.85 |
| 32362 | 0 | 193477 | IIAVDTKPV                         | 2.22 | 0.01 | 2.51 | 0.44 | 2.39 | 0.28 |
| 32363 | 0 | 193477 | IIAVDTKPV                         | 2.22 | 0.01 | 2.51 | 0.44 | 2.39 | 0.28 |
| 32364 | 0 | 26444  | IICDLSFVTRRY                      | 2.43 | 0.01 | 2.69 | 0.68 | 0.22 | 0.28 |
| 32365 | 0 | 26444  | IICDLSFVTRRY                      | 2.43 | 0.01 | 2.69 | 1.20 | 0.22 | 0.28 |
| 32366 | 0 | 144355 | IICKESISVSSEQLAQF                 | 2.80 | 0.01 | 0.78 | 0.44 | 2.35 | 2.66 |
| 32367 | 0 | 241010 | IIDIEVQ                           | 2.04 | 0.01 | 3.35 | 1.20 | 0.22 | 0.85 |
| 32368 | 0 | 26453  | IIDIKKHLEKLKIEIKE<br>DLENL        | 3.22 | 0.01 | 2.22 | 0.44 | 1.74 | 0.28 |
| 32369 | 0 | 26453  | IIDIKKHLEKLKIEIKE<br>DLENL        | 3.22 | 0.01 | 2.22 | 0.44 | 1.74 | 0.28 |
| 32370 | 0 | 26453  | IIDIKKHLEKLKIEIKE<br>DLENL        | 3.22 | 0.01 | 1.66 | 0.44 | 1.59 | 0.28 |
| 32371 | 0 | 489584 | IIDSLSYANANKECQ                   | 2.65 | 0.01 | 2.69 | 3.05 | 0.85 | 1.28 |
| 32372 | 0 | 99333  | IIEAMSEGIKVMIGK                   | 2.71 | 0.01 | 2.86 | 2.02 | 0.85 | 0.85 |
| 32373 | 0 | 100142 | IIGLMVGGVV                        | 2.33 | 0.01 | 0.78 | 1.81 | 0.22 | 2.66 |
| 32374 | 0 | 100142 | IIGLMVGGVV                        | 2.33 | 0.01 | 0.78 | 1.81 | 0.22 | 2.66 |
| 32375 | 0 | 100142 | IIGLMVGGVV                        | 2.33 | 0.01 | 0.78 | 1.81 | 0.22 | 1.66 |
| 32376 | 0 | 100142 | IIGLMVGGVV                        | 2.33 | 0.01 | 0.78 | 1.81 | 0.22 | 1.66 |
| 32377 | 0 | 100142 | IIGLMVGGVV                        | 2.33 | 0.01 | 0.78 | 1.81 | 0.22 | 1.66 |
| 32378 | 0 | 100142 | IIGLMVGGVV                        | 2.33 | 0.01 | 0.78 | 1.81 | 0.22 | 1.66 |
| 32379 | 0 | 100142 | IIGLMVGGVV                        | 2.33 | 0.01 | 0.78 | 1.81 | 0.22 | 1.66 |
| 32380 | 0 | 100142 | IIGLMVGGVV                        | 2.33 | 0.01 | 0.78 | 1.81 | 0.22 | 1.66 |
| 32381 | 0 | 100142 | IIGLMVGGVV                        | 2.33 | 0.01 | 0.78 | 1.81 | 0.22 | 1.66 |
| 32382 | 0 | 100142 | IIGLMVGGVV                        | 2.33 | 0.01 | 0.78 | 1.81 | 0.22 | 1.66 |
| 32383 | 0 | 100142 | IIGLMVGGVV                        | 2.33 | 0.01 | 0.78 | 1.81 | 0.22 | 1.66 |
| 32384 | 0 | 100142 | IIGLMVGGVV                        | 2.33 | 0.01 | 0.78 | 1.81 | 0.22 | 2.75 |

|       |   |        |                                                    |      |      |      |      |      |      |
|-------|---|--------|----------------------------------------------------|------|------|------|------|------|------|
| 32385 | 0 | 26506  | IIGRLHLND                                          | 2.22 | 0.01 | 2.69 | 0.44 | 0.85 | 0.28 |
| 32386 | 0 | 26515  | IIHR                                               | 1.59 | 0.01 | 2.78 | 0.68 | 0.22 | 0.28 |
| 32387 | 0 | 26537  | IIIGVE                                             | 1.91 | 0.01 | 2.40 | 0.44 | 0.85 | 0.28 |
| 32388 | 0 | 423354 | IINSCTV                                            | 2.12 | 0.01 | 2.93 | 0.44 | 1.41 | 0.28 |
| 32389 | 0 | 147033 | IILHQQHH                                           | 2.13 | 0.01 | 1.86 | 0.44 | 1.93 | 0.85 |
| 32390 | 0 | 98827  | IILHQQKQKQQQ                                       | 2.50 | 0.01 | 1.86 | 0.44 | 1.93 | 1.27 |
| 32391 | 0 | 26575  | IILKALYMLSTRGR                                     | 2.60 | 0.01 | 2.56 | 2.69 | 0.22 | 0.28 |
| 32392 | 0 | 26575  | IILKALYMLSTRGR                                     | 2.60 | 0.01 | 3.16 | 2.69 | 0.22 | 0.28 |
| 32393 | 0 | 26575  | IILKALYMLSTRGR                                     | 2.60 | 0.01 | 3.16 | 2.69 | 0.22 | 0.28 |
| 32394 | 0 | 26600  | IIMYAPTLWARMIL                                     | 2.63 | 0.01 | 1.96 | 0.44 | 0.85 | 0.28 |
| 32395 | 0 | 26607  | IINHNTSAINASRNNGIN<br>AANLSKTQEKLSGYNIN            | 3.54 | 0.01 | 4.33 | 0.44 | 0.85 | 0.85 |
| 32396 | 0 | 26610  | IINNSTNVVIRACNFEL                                  | 2.78 | 0.01 | 2.48 | 0.44 | 0.85 | 0.28 |
| 32397 | 0 | 26610  | IINNSTNVVIRACNFEL                                  | 2.78 | 0.01 | 2.48 | 0.68 | 0.22 | 0.28 |
| 32398 | 0 | 108482 | IINPSENGDTSTNGIKK                                  | 2.81 | 0.01 | 2.18 | 0.68 | 0.22 | 0.28 |
| 32399 | 0 | 108482 | IINPSENGDTSTNGIKK                                  | 2.81 | 0.01 | 2.18 | 0.68 | 0.22 | 0.28 |
| 32400 | 0 | 108482 | IINPSENGDTSTNGIKK                                  | 2.81 | 0.01 | 2.18 | 0.68 | 0.22 | 0.85 |
| 32401 | 0 | 108482 | IINPSENGDTSTNGIKK                                  | 2.81 | 0.01 | 2.18 | 0.68 | 0.22 | 1.34 |
| 32402 | 0 | 108482 | IINPSENGDTSTNGIKK                                  | 2.81 | 0.01 | 2.18 | 0.68 | 0.22 | 1.75 |
| 32403 | 0 | 108482 | IINPSENGDTSTNGIKK                                  | 2.81 | 0.01 | 2.18 | 0.68 | 0.22 | 0.28 |
| 32404 | 0 | 141675 | IINTGSLLSLAH                                       | 2.48 | 0.01 | 0.90 | 0.68 | 0.22 | 0.28 |
| 32405 | 0 | 26619  | IIPDREVLY                                          | 2.20 | 0.01 | 2.41 | 0.44 | 0.85 | 0.28 |
| 32406 | 0 | 26620  | IIPDREVLYQEFDEMEEC<br>ASHLPYIEQGMQLAEQF<br>KQKALGL | 3.67 | 0.01 | 1.72 | 1.15 | 0.22 | 0.28 |
| 32407 | 0 | 26622  | IIPDREVLYREFDEMEEC                                 | 2.84 | 0.01 | 3.18 | 0.44 | 1.59 | 0.28 |
| 32408 | 0 | 26622  | IIPDREVLYREFDEMEEC                                 | 2.84 | 0.01 | 3.18 | 0.44 | 1.59 | 0.28 |
| 32409 | 0 | 26622  | IIPDREVLYREFDEMEEC                                 | 2.84 | 0.01 | 1.72 | 0.44 | 0.85 | 0.28 |
| 32410 | 0 | 26622  | IIPDREVLYREFDEMEEC                                 | 2.84 | 0.01 | 1.72 | 0.44 | 0.85 | 0.28 |
| 32411 | 0 | 26623  | IIPDREVLYREFDEMEEC<br>SQ                           | 2.91 | 0.01 | 1.72 | 0.44 | 0.85 | 0.28 |
| 32412 | 0 | 26624  | IIPDREVLYREFDEMEEC<br>SQHLPYI                      | 3.14 | 0.01 | 1.72 | 0.44 | 1.59 | 0.28 |
| 32413 | 0 | 135690 | IIPHHNYN                                           | 2.14 | 0.01 | 0.78 | 0.44 | 2.35 | 0.28 |

|       |   |        |                          |      |      |      |      |      |      |
|-------|---|--------|--------------------------|------|------|------|------|------|------|
| 32414 | 0 | 138194 | IIPKSSWS                 | 2.15 | 0.01 | 3.29 | 0.44 | 0.85 | 1.48 |
| 32415 | 0 | 138194 | IIPKSSWS                 | 2.15 | 0.01 | 3.29 | 0.44 | 0.85 | 0.85 |
| 32416 | 0 | 138194 | IIPKSSWS                 | 2.15 | 0.01 | 3.29 | 0.44 | 0.85 | 1.75 |
| 32417 | 0 | 138194 | IIPKSSWS                 | 2.15 | 0.01 | 3.29 | 0.44 | 0.85 | 1.34 |
| 32418 | 0 | 138194 | IIPKSSWS                 | 2.15 | 0.01 | 3.29 | 0.44 | 0.85 | 1.34 |
| 32419 | 0 | 138194 | IIPKSSWS                 | 2.15 | 0.01 | 3.29 | 0.44 | 0.85 | 1.34 |
| 32420 | 0 | 138194 | IIPKSSWS                 | 2.15 | 0.01 | 3.29 | 0.44 | 0.85 | 1.34 |
| 32421 | 0 | 138194 | IIPKSSWS                 | 2.15 | 0.01 | 3.29 | 0.44 | 0.85 | 1.34 |
| 32422 | 0 | 138194 | IIPKSSWS                 | 2.15 | 0.01 | 3.29 | 0.44 | 0.85 | 1.34 |
| 32423 | 0 | 138194 | IIPKSSWS                 | 2.15 | 0.01 | 3.29 | 0.44 | 0.85 | 1.48 |
| 32424 | 0 | 138194 | IIPKSSWS                 | 2.15 | 0.01 | 3.29 | 0.44 | 0.85 | 1.34 |
| 32425 | 0 | 138194 | IIPKSSWS                 | 2.15 | 0.01 | 3.29 | 0.44 | 0.85 | 1.34 |
| 32426 | 0 | 138194 | IIPKSSWS                 | 2.15 | 0.01 | 3.29 | 0.44 | 0.85 | 1.34 |
| 32427 | 0 | 138194 | IIPKSSWS                 | 2.15 | 0.01 | 3.29 | 0.44 | 0.85 | 1.34 |
| 32428 | 0 | 138194 | IIPKSSWS                 | 2.15 | 0.01 | 3.29 | 0.44 | 0.85 | 1.34 |
| 32429 | 0 | 138194 | IIPKSSWS                 | 2.15 | 0.01 | 3.29 | 0.44 | 0.85 | 1.34 |
| 32430 | 0 | 138194 | IIPKSSWS                 | 2.15 | 0.01 | 3.29 | 0.44 | 0.85 | 1.34 |
| 32431 | 0 | 138194 | IIPKSSWS                 | 2.15 | 0.01 | 3.29 | 0.44 | 0.85 | 1.34 |
| 32432 | 0 | 138194 | IIPKSSWS                 | 2.15 | 0.01 | 3.29 | 0.44 | 0.85 | 1.34 |
| 32433 | 0 | 138194 | IIPKSSWS                 | 2.15 | 0.01 | 3.29 | 0.44 | 0.85 | 1.34 |
| 32434 | 0 | 138194 | IIPKSSWS                 | 2.15 | 0.01 | 3.29 | 0.44 | 0.85 | 1.34 |
| 32435 | 0 | 138194 | IIPKSSWS                 | 2.15 | 0.01 | 3.29 | 0.44 | 0.85 | 1.34 |
| 32436 | 0 | 138194 | IIPKSSWS                 | 2.15 | 0.01 | 3.29 | 0.44 | 0.85 | 1.34 |
| 32437 | 0 | 138194 | IIPKSSWS                 | 2.15 | 0.01 | 3.29 | 0.44 | 0.85 | 1.34 |
| 32438 | 0 | 138194 | IIPKSSWS                 | 2.15 | 0.01 | 3.29 | 0.44 | 0.85 | 1.34 |
| 32439 | 0 | 138194 | IIPKSSWS                 | 2.15 | 0.01 | 3.29 | 0.44 | 0.85 | 1.34 |
| 32440 | 0 | 138194 | IIPKSSWS                 | 2.15 | 0.01 | 3.29 | 0.44 | 0.85 | 0.28 |
| 32441 | 0 | 138194 | IIPKSSWS                 | 2.15 | 0.01 | 3.29 | 0.44 | 0.85 | 0.28 |
| 32442 | 0 | 145827 | IIPKVEGK                 | 2.13 | 0.01 | 1.86 | 0.68 | 0.22 | 1.34 |
| 32443 | 0 | 145827 | IIPKVEGK                 | 2.13 | 0.01 | 1.86 | 0.68 | 0.22 | 0.28 |
| 32444 | 0 | 145827 | IIPKVEGK                 | 2.13 | 0.01 | 1.86 | 0.68 | 0.22 | 0.28 |
| 32445 | 0 | 180113 | IIPKVEGKTIADQILQYGS<br>M | 2.91 | 0.01 | 1.86 | 1.12 | 0.22 | 1.75 |
| 32446 | 0 | 180113 | IIPKVEGKTIADQILQYGS<br>M | 2.91 | 0.01 | 1.86 | 1.12 | 0.22 | 0.28 |
| 32447 | 0 | 113539 | IIPKVEGKTIAEQILQYGS<br>M | 2.93 | 0.01 | 1.86 | 2.37 | 0.22 | 1.48 |
| 32448 | 0 | 113539 | IIPKVEGKTIAEQILQYGS<br>M | 2.93 | 0.01 | 1.86 | 2.37 | 0.22 | 0.28 |
| 32449 | 0 | 113540 | IIPRHLQLAIRNDEELNKL<br>L | 2.94 | 0.01 | 0.78 | 1.81 | 0.22 | 0.28 |
| 32450 | 0 | 113540 | IIPRHLQLAIRNDEELNKL<br>L | 2.94 | 0.01 | 0.78 | 3.61 | 0.22 | 0.28 |
| 32451 | 0 | 105879 | IISCDEGVG                | 2.22 | 0.01 | 0.90 | 3.01 | 0.22 | 0.28 |
| 32452 | 0 | 127695 | IISGKDS                  | 2.03 | 0.01 | 0.90 | 0.44 | 1.13 | 1.39 |
| 32453 | 0 | 26700  | IITFKSGATF               | 2.32 | 0.01 | 2.66 | 0.68 | 0.22 | 0.28 |
| 32454 | 0 | 26700  | IITFKSGATF               | 2.32 | 0.01 | 2.66 | 0.68 | 0.22 | 0.28 |

|       |   |        |                                                |      |      |      |      |      |      |
|-------|---|--------|------------------------------------------------|------|------|------|------|------|------|
| 32455 | 0 | 26700  | IITFKSGATF                                     | 2.32 | 0.01 | 2.66 | 0.68 | 0.22 | 0.28 |
| 32456 | 0 | 26700  | IITFKSGATF                                     | 2.32 | 0.01 | 2.66 | 0.68 | 0.22 | 0.28 |
| 32457 | 0 | 26700  | IITFKSGATF                                     | 2.32 | 0.01 | 2.66 | 0.68 | 0.22 | 0.28 |
| 32458 | 0 | 26700  | IITFKSGATF                                     | 2.32 | 0.01 | 2.66 | 0.68 | 0.22 | 0.28 |
| 32459 | 0 | 126280 | IITGHCQGDGYRVGF                                | 2.65 | 0.01 | 1.75 | 0.68 | 0.22 | 0.28 |
| 32460 | 0 | 26714  | IITWIG                                         | 1.92 | 0.01 | 2.40 | 0.44 | 0.85 | 0.28 |
| 32461 | 0 | 134410 | IWRSTQG                                        | 2.11 | 0.01 | 0.78 | 0.44 | 1.13 | 0.28 |
| 32462 | 0 | 134410 | IWRSTQG                                        | 2.11 | 0.01 | 0.78 | 0.44 | 1.13 | 0.28 |
| 32463 | 0 | 518713 | IKALTSQIVARNEKL                                | 2.67 | 0.01 | 2.24 | 0.44 | 1.41 | 1.28 |
| 32464 | 0 | 229256 | IKANIAEANSDYDREKLQ<br>ERL                      | 3.02 | 0.01 | 3.65 | 0.68 | 0.22 | 0.28 |
| 32465 | 0 | 229256 | IKANIAEANSDYDREKLQ<br>ERL                      | 3.02 | 0.01 | 3.65 | 0.68 | 0.22 | 3.93 |
| 32466 | 0 | 149338 | IKAPALHSQGYTGSN                                | 2.64 | 0.01 | 3.67 | 3.16 | 0.22 | 0.28 |
| 32467 | 0 | 123316 | IKAYMESNR                                      | 2.18 | 0.01 | 2.28 | 2.00 | 0.22 | 0.28 |
| 32468 | 0 | 230473 | IKDGENE                                        | 2.02 | 0.01 | 3.97 | 0.68 | 0.22 | 0.28 |
| 32469 | 0 | 230473 | IKDGENE                                        | 2.02 | 0.01 | 3.97 | 0.68 | 0.22 | 0.28 |
| 32470 | 0 | 230473 | IKDGENE                                        | 2.02 | 0.01 | 3.97 | 0.68 | 0.22 | 0.85 |
| 32471 | 0 | 100144 | IKDIYGKDAL                                     | 2.34 | 0.01 | 2.18 | 2.16 | 0.22 | 0.28 |
| 32472 | 0 | 26766  | IKDTTSDY                                       | 2.13 | 0.01 | 2.99 | 0.44 | 0.85 | 0.28 |
| 32473 | 0 | 26775  | IKHETEKFNNKMHEHSE<br>HFKQKFAELLEQQKAAQ<br>YPSK | 3.58 | 0.01 | 3.51 | 0.44 | 0.85 | 0.28 |
| 32474 | 0 | 26775  | IKHETEKFNNKMHEHSE<br>HFKQKFAELLEQQKAAQ<br>YPSK | 3.58 | 0.01 | 3.51 | 0.44 | 0.85 | 0.28 |
| 32475 | 0 | 26775  | IKHETEKFNNKMHEHSE<br>HFKQKFAELLEQQKAAQ<br>YPSK | 3.58 | 0.01 | 3.51 | 0.44 | 0.85 | 0.28 |
| 32476 | 0 | 171510 | IKESLKMERDQFIAT                                | 2.65 | 0.01 | 0.78 | 0.44 | 1.41 | 0.28 |
| 32477 | 0 | 122115 | IKGANDLAKFHQMLMKI<br>IMK                       | 2.96 | 0.01 | 2.72 | 1.20 | 0.22 | 0.28 |
| 32478 | 0 | 122115 | IKGANDLAKFHQMLMKI<br>IMK                       | 2.96 | 0.01 | 2.72 | 1.20 | 0.22 | 2.02 |
| 32479 | 0 | 122115 | IKGANDLAKFHQMLMKI<br>IMK                       | 2.96 | 0.01 | 2.72 | 1.20 | 0.22 | 2.02 |
| 32480 | 0 | 191439 | IKGDCLGWQVQCMAA<br>V                           | 2.72 | 0.01 | 0.90 | 2.84 | 1.13 | 1.39 |
| 32481 | 0 | 191439 | IKGDCLGWQVQCMAA<br>V                           | 2.72 | 0.01 | 0.90 | 2.84 | 1.13 | 1.66 |
| 32482 | 0 | 26794  | IKGEEVRELYET                                   | 2.47 | 0.01 | 3.12 | 0.44 | 1.23 | 0.85 |
| 32483 | 0 | 95464  | IKGGKKSNETASVFLG<br>KELAYHTARGQV               | 3.31 | 0.01 | 3.65 | 2.22 | 0.22 | 0.28 |
| 32484 | 0 | 105880 | IKGTAPFE                                       | 2.10 | 0.01 | 3.05 | 1.20 | 0.22 | 0.28 |
| 32485 | 0 | 26801  | IKGVIVHRLEGVSYN                                | 2.67 | 0.01 | 2.43 | 0.44 | 1.59 | 0.28 |
| 32486 | 0 | 190448 | IKHQGLPQEVLENL                                 | 2.68 | 0.01 | 1.60 | 0.44 | 1.23 | 0.28 |
| 32487 | 0 | 136381 | IKHRKRRLRMIL                                   | 2.53 | 0.01 | 0.90 | 0.68 | 0.22 | 1.27 |

|       |   |        |                           |      |      |      |      |      |      |
|-------|---|--------|---------------------------|------|------|------|------|------|------|
| 32488 | 0 | 136381 | IKHRKRRRLRMIL             | 2.53 | 0.01 | 0.90 | 0.68 | 0.22 | 1.48 |
| 32489 | 0 | 136381 | IKHRKRRRLRMIL             | 2.53 | 0.01 | 0.90 | 0.68 | 0.22 | 1.27 |
| 32490 | 0 | 130896 | IKIFKSDGLR                | 2.32 | 0.01 | 0.78 | 0.44 | 1.93 | 0.85 |
| 32491 | 0 | 26806  | IKIFQDHP                  | 2.13 | 0.01 | 0.78 | 0.44 | 1.74 | 0.28 |
| 32492 | 0 | 191440 | IKIVATPDGGS               | 2.47 | 0.01 | 2.76 | 1.20 | 0.22 | 0.28 |
| 32493 | 0 | 111423 | IKIWTRKASLAM              | 2.48 | 0.01 | 0.90 | 0.44 | 0.85 | 1.39 |
| 32494 | 0 | 131914 | IKKEKPFNSKVECQA           | 2.73 | 0.01 | 0.78 | 0.44 | 1.13 | 0.28 |
| 32495 | 0 | 131914 | IKKEKPFNSKVECQA           | 2.73 | 0.01 | 0.78 | 0.44 | 1.13 | 1.39 |
| 32496 | 0 | 171515 | IKKFPDREFLLRSY            | 2.64 | 0.01 | 0.78 | 0.44 | 1.13 | 0.28 |
| 32497 | 0 | 26817  | IKKGKKYEKTKDNNF           | 2.69 | 0.01 | 1.66 | 0.44 | 0.85 | 0.28 |
| 32498 | 0 | 26818  | IKKGSSGYCAWPACY           | 2.68 | 0.01 | 2.56 | 2.02 | 0.22 | 0.85 |
| 32499 | 0 | 174920 | IKKILFSKKG                | 2.51 | 0.01 | 2.18 | 2.71 | 0.22 | 0.28 |
| 32500 | 0 | 116753 | IKKKMQAMKLEKDNA           | 2.69 | 0.01 | 3.15 | 0.44 | 1.23 | 0.85 |
| 32501 | 0 | 116753 | IKKKMQAMKLEKDNA           | 2.69 | 0.01 | 2.36 | 0.44 | 1.23 | 1.28 |
| 32502 | 0 | 116753 | IKKKMQAMKLEKDNA           | 2.69 | 0.01 | 2.36 | 0.44 | 1.23 | 1.27 |
| 32503 | 0 | 116753 | IKKKMQAMKLEKDNA           | 2.69 | 0.01 | 2.36 | 0.44 | 1.23 | 1.28 |
| 32504 | 0 | 116753 | IKKKMQAMKLEKDNA           | 2.69 | 0.01 | 2.36 | 0.44 | 1.23 | 1.27 |
| 32505 | 0 | 141676 | IKKLENGRSLEGVYVP          | 2.72 | 0.01 | 1.66 | 2.55 | 0.22 | 0.28 |
| 32506 | 0 | 141676 | IKKLENGRSLEGVYVP          | 2.72 | 0.01 | 1.66 | 1.20 | 0.22 | 0.28 |
| 32507 | 0 | 141676 | IKKLENGRSLEGVYVP          | 2.72 | 0.01 | 2.86 | 2.55 | 0.22 | 0.28 |
| 32508 | 0 | 171517 | IKKLSDGQVGGFINY           | 2.65 | 0.01 | 0.78 | 0.44 | 1.41 | 0.28 |
| 32509 | 0 | 171517 | IKKLSDGQVGGFINY           | 2.65 | 0.01 | 0.78 | 0.44 | 1.13 | 0.28 |
| 32510 | 0 | 26829  | IKKMLADQTVEEHIG           | 2.63 | 0.01 | 2.28 | 0.68 | 0.22 | 0.28 |
| 32511 | 0 | 26829  | IKKMLADQTVEEHIG           | 2.63 | 0.01 | 2.28 | 0.68 | 0.22 | 0.28 |
| 32512 | 0 | 26829  | IKKMLADQTVEEHIG           | 2.63 | 0.01 | 2.28 | 1.20 | 0.22 | 0.28 |
| 32513 | 0 | 26829  | IKKMLADQTVEEHIG           | 2.63 | 0.01 | 2.28 | 1.20 | 0.22 | 0.28 |
| 32514 | 0 | 26829  | IKKMLADQTVEEHIG           | 2.63 | 0.01 | 2.28 | 1.20 | 0.22 | 1.27 |
| 32515 | 0 | 227269 | IKKPDGSECLPAAPD           | 2.66 | 0.01 | 2.97 | 0.44 | 1.59 | 0.28 |
| 32516 | 0 | 26833  | IKKPNRQGLGYSPSYN<br>DPCSL | 3.04 | 0.01 | 3.01 | 0.44 | 1.59 | 0.28 |
| 32517 | 0 | 141924 | IKKQIPRCKDAFNKIES         | 2.78 | 0.01 | 3.13 | 2.13 | 0.22 | 0.28 |
| 32518 | 0 | 191441 | IKKTGQALVFGI              | 2.47 | 0.01 | 2.76 | 1.20 | 0.22 | 0.28 |
| 32519 | 0 | 128024 | IKKVATPKKASPKK            | 2.64 | 0.01 | 0.78 | 1.12 | 0.22 | 0.28 |
| 32520 | 0 | 128024 | IKKVATPKKASPKK            | 2.64 | 0.01 | 0.78 | 0.44 | 1.13 | 0.28 |
| 32521 | 0 | 518739 | IKLAPKEMPLES              | 2.72 | 0.01 | 2.24 | 0.44 | 1.41 | 1.28 |
| 32522 | 0 | 128945 | IKLGLKSLVSKGTLVQ          | 2.78 | 0.01 | 0.78 | 0.44 | 1.13 | 0.28 |
| 32523 | 0 | 128945 | IKLGLKSLVSKGTLVQ          | 2.78 | 0.01 | 0.78 | 0.44 | 1.13 | 0.28 |
| 32524 | 0 | 128945 | IKLGLKSLVSKGTLVQ          | 2.78 | 0.01 | 0.78 | 1.12 | 0.22 | 0.28 |
| 32525 | 0 | 128945 | IKLGLKSLVSKGTLVQ          | 2.78 | 0.01 | 0.78 | 0.44 | 1.13 | 0.28 |
| 32526 | 0 | 26839  | IKLKDCP                   | 2.02 | 0.01 | 2.14 | 0.44 | 0.85 | 0.28 |
| 32527 | 0 | 26840  | IKLMPNITLLNNCTR           | 2.69 | 0.01 | 2.43 | 0.44 | 1.59 | 0.28 |

|       |   |        |                                 |      |      |      |      |      |      |
|-------|---|--------|---------------------------------|------|------|------|------|------|------|
| 32528 | 0 | 26841  | IKLNAKMNILIRDKRFHY<br>DRN       | 3.02 | 0.01 | 2.18 | 0.68 | 0.22 | 2.12 |
| 32529 | 0 | 26841  | IKLNAKMNILIRDKRFHY<br>DRN       | 3.02 | 0.01 | 2.18 | 1.20 | 0.22 | 2.35 |
| 32530 | 0 | 26841  | IKLNAKMNILIRDKRFHY<br>DRN       | 3.02 | 0.01 | 2.18 | 0.68 | 0.22 | 0.85 |
| 32531 | 0 | 26841  | IKLNAKMNILIRDKRFHY<br>DRN       | 3.02 | 0.01 | 2.18 | 0.68 | 0.22 | 1.34 |
| 32532 | 0 | 26841  | IKLNAKMNILIRDKRFHY<br>DRN       | 3.02 | 0.01 | 2.18 | 0.44 | 0.22 | 2.35 |
| 32533 | 0 | 26842  | IKLNG                           | 1.74 | 0.01 | 2.45 | 0.44 | 0.85 | 1.34 |
| 32534 | 0 | 26844  | IKLPALF                         | 2.02 | 0.01 | 0.90 | 0.44 | 1.23 | 1.27 |
| 32535 | 0 | 26844  | IKLPALF                         | 2.02 | 0.01 | 0.90 | 0.44 | 1.23 | 1.27 |
| 32536 | 0 | 26844  | IKLPALF                         | 2.02 | 0.01 | 0.90 | 0.44 | 1.23 | 1.27 |
| 32537 | 0 | 26844  | IKLPALF                         | 2.02 | 0.01 | 0.90 | 0.44 | 1.23 | 0.28 |
| 32538 | 0 | 113028 | IKLSSTWEGIQAGKE                 | 2.68 | 0.01 | 0.78 | 0.44 | 1.13 | 0.85 |
| 32539 | 0 | 26847  | IKMMERVVEQMCITQY<br>QRESQAYYQRG | 3.24 | 0.01 | 1.60 | 1.12 | 0.22 | 0.28 |
| 32540 | 0 | 26847  | IKMMERVVEQMCITQY<br>QRESQAYYQRG | 3.24 | 0.01 | 1.60 | 1.12 | 0.22 | 0.28 |
| 32541 | 0 | 26847  | IKMMERVVEQMCITQY<br>QRESQAYYQRG | 3.24 | 0.01 | 1.60 | 1.12 | 0.22 | 0.28 |
| 32542 | 0 | 26849  | IKMVSSLKTKIT                    | 2.51 | 0.01 | 2.28 | 2.71 | 0.22 | 0.28 |
| 32543 | 0 | 26849  | IKMVSSLKTKIT                    | 2.51 | 0.01 | 2.28 | 1.20 | 0.22 | 0.28 |
| 32544 | 0 | 26849  | IKMVSSLKTKIT                    | 2.51 | 0.01 | 2.28 | 1.20 | 0.22 | 0.28 |
| 32545 | 0 | 26849  | IKMVSSLKTKIT                    | 2.51 | 0.01 | 2.28 | 2.71 | 0.22 | 1.75 |
| 32546 | 0 | 26849  | IKMVSSLKTKIT                    | 2.51 | 0.01 | 2.28 | 0.68 | 0.22 | 1.75 |
| 32547 | 0 | 26849  | IKMVSSLKTKIT                    | 2.51 | 0.01 | 2.28 | 1.20 | 0.22 | 1.34 |
| 32548 | 0 | 26850  | IKND                            | 1.57 | 0.01 | 2.86 | 1.15 | 0.22 | 1.39 |
| 32549 | 0 | 26858  | IKNQCVNFNFNGLTGTG<br>V          | 2.87 | 0.01 | 2.45 | 1.81 | 0.22 | 1.34 |
| 32550 | 0 | 152661 | IKNQLAELNA                      | 2.33 | 0.01 | 2.18 | 2.16 | 0.22 | 0.28 |
| 32551 | 0 | 226046 | IKNVTYCNSHINNIKCSQ<br>LT        | 2.96 | 0.01 | 3.93 | 3.16 | 0.22 | 0.28 |
| 32552 | 0 | 26865  | IKPGSADKPKDQLDYEN<br>DIE        | 2.95 | 0.01 | 1.66 | 0.44 | 0.85 | 0.28 |
| 32553 | 0 | 26870  | IKPGSANKPKDELDYEN<br>DIE        | 2.97 | 0.01 | 3.37 | 0.44 | 1.74 | 0.28 |
| 32554 | 0 | 26870  | IKPGSANKPKDELDYEN<br>DIE        | 2.97 | 0.01 | 3.37 | 0.44 | 0.22 | 0.28 |
| 32555 | 0 | 26870  | IKPGSANKPKDELDYEN<br>DIE        | 2.97 | 0.01 | 3.37 | 3.33 | 0.22 | 0.28 |
| 32556 | 0 | 26870  | IKPGSANKPKDELDYEN<br>DIE        | 2.97 | 0.01 | 3.29 | 2.42 | 0.22 | 0.28 |
| 32557 | 0 | 26877  | IKPLEDKILV                      | 2.34 | 0.01 | 2.04 | 0.68 | 0.22 | 0.28 |
| 32558 | 0 | 26877  | IKPLEDKILV                      | 2.34 | 0.01 | 2.04 | 0.68 | 0.22 | 0.28 |
| 32559 | 0 | 312732 | IKQPGGIKTPSSTTP                 | 2.71 | 0.01 | 1.61 | 0.44 | 0.85 | 1.28 |

|       |   |        |                                                       |      |      |      |      |      |      |
|-------|---|--------|-------------------------------------------------------|------|------|------|------|------|------|
| 32560 | 0 | 26889  | IKQRNENAKATYEAAALK<br>QY                              | 2.92 | 0.01 | 2.39 | 2.98 | 0.22 | 0.28 |
| 32561 | 0 | 181345 | IKRPFGVKYNPYTRSI                                      | 2.74 | 0.01 | 0.78 | 0.44 | 1.13 | 0.28 |
| 32562 | 0 | 181345 | IKRPFGVKYNPYTRSI                                      | 2.74 | 0.01 | 0.78 | 0.44 | 1.13 | 1.27 |
| 32563 | 0 | 181346 | IKRPFGVKYNPYTRSIQIL<br>KD                             | 2.97 | 0.01 | 0.78 | 0.44 | 1.13 | 0.28 |
| 32564 | 0 | 181346 | IKRPFGVKYNPYTRSIQIL<br>KD                             | 2.97 | 0.01 | 0.78 | 0.44 | 1.13 | 1.27 |
| 32565 | 0 | 139090 | IKRSNSTA                                              | 2.12 | 0.01 | 0.78 | 1.20 | 0.22 | 0.28 |
| 32566 | 0 | 26897  | IKRYKNRVASRKCRAFK<br>QLLQ                             | 3.04 | 0.01 | 2.43 | 0.44 | 1.59 | 0.28 |
| 32567 | 0 | 138440 | IKRYNSTA                                              | 2.10 | 0.01 | 0.78 | 1.20 | 0.22 | 0.28 |
| 32568 | 0 | 138441 | IKSEEVGEAHHQRAYLQ<br>GPC                              | 2.90 | 0.01 | 2.19 | 4.45 | 0.22 | 0.28 |
| 32569 | 0 | 99338  | IKSEGHPQEISKFLT                                       | 2.67 | 0.01 | 2.86 | 2.02 | 0.85 | 0.85 |
| 32570 | 0 | 120624 | IKSGVATKGL                                            | 2.31 | 0.01 | 2.18 | 2.16 | 0.22 | 0.28 |
| 32571 | 0 | 161106 | IKSKPLGEKLEMIINGIP                                    | 2.93 | 0.01 | 2.08 | 0.44 | 1.93 | 1.57 |
| 32572 | 0 | 26901  | IKSLANLYLDDLPIGGSLP<br>PEWG                           | 3.08 | 0.01 | 2.78 | 1.12 | 0.22 | 0.28 |
| 32573 | 0 | 26901  | IKSLANLYLDDLPIGGSLP<br>PEWG                           | 3.08 | 0.01 | 2.78 | 1.12 | 0.22 | 0.28 |
| 32574 | 0 | 26902  | IKSLTE                                                | 1.88 | 0.01 | 1.96 | 0.44 | 0.85 | 0.28 |
| 32575 | 0 | 26909  | IKSTIRIYFKPKHVK                                       | 2.69 | 0.01 | 3.78 | 2.02 | 0.22 | 0.28 |
| 32576 | 0 | 26909  | IKSTIRIYFKPKHVK                                       | 2.69 | 0.01 | 3.67 | 1.20 | 0.22 | 0.28 |
| 32577 | 0 | 26909  | IKSTIRIYFKPKHVK                                       | 2.69 | 0.01 | 3.67 | 1.20 | 0.22 | 0.28 |
| 32578 | 0 | 26909  | IKSTIRIYFKPKHVK                                       | 2.69 | 0.01 | 3.67 | 1.20 | 0.22 | 0.28 |
| 32579 | 0 | 26909  | IKSTIRIYFKPKHVK                                       | 2.69 | 0.01 | 3.67 | 1.20 | 0.22 | 0.28 |
| 32580 | 0 | 26909  | IKSTIRIYFKPKHVK                                       | 2.69 | 0.01 | 3.67 | 1.20 | 0.22 | 0.28 |
| 32581 | 0 | 26909  | IKSTIRIYFKPKHVK                                       | 2.69 | 0.01 | 3.67 | 2.04 | 0.22 | 0.28 |
| 32582 | 0 | 128950 | IKTGDKVGASEATLL                                       | 2.66 | 0.01 | 0.78 | 0.44 | 1.13 | 0.85 |
| 32583 | 0 | 26918  | IKTMNTQISTLKNDVHLL<br>NEQIDKLNNEKGTLNSKI<br>SELVQIMDL | 3.80 | 0.01 | 2.22 | 0.44 | 1.74 | 0.28 |
| 32584 | 0 | 26918  | IKTMNTQISTLKNDVHLL<br>NEQIDKLNNEKGTLNSKI<br>SELVQIMDL | 3.80 | 0.01 | 2.22 | 0.44 | 1.74 | 0.28 |
| 32585 | 0 | 26918  | IKTMNTQISTLKNDVHLL<br>NEQIDKLNNEKGTLNSKI<br>SELVQIMDL | 3.80 | 0.01 | 2.22 | 0.44 | 1.74 | 0.28 |
| 32586 | 0 | 26918  | IKTMNTQISTLKNDVHLL<br>NEQIDKLNNEKGTLNSKI<br>SELVQIMDL | 3.80 | 0.01 | 2.22 | 0.44 | 0.85 | 1.48 |
| 32587 | 0 | 167756 | IKTPPLKKK                                             | 2.23 | 0.01 | 2.40 | 2.43 | 0.22 | 0.28 |
| 32588 | 0 | 190795 | IKTSDGSYSEVGNVNME                                     | 2.79 | 0.01 | 3.50 | 2.13 | 0.22 | 0.28 |
| 32589 | 0 | 312784 | IKTTTAATGDSGDGST                                      | 2.71 | 0.01 | 1.61 | 0.44 | 0.85 | 1.28 |



|       |   |        |                          |      |      |      |      |      |      |
|-------|---|--------|--------------------------|------|------|------|------|------|------|
| 32590 | 0 | 312786 | IKTTTATTGDS DGST         | 2.72 | 0.01 | 1.61 | 0.44 | 0.85 | 1.28 |
| 32591 | 0 | 312787 | IKTTTATTGDS DGVK         | 2.70 | 0.01 | 1.61 | 0.44 | 0.85 | 1.28 |
| 32592 | 0 | 26922  | IKTTTSSH                 | 2.14 | 0.01 | 2.83 | 2.61 | 0.22 | 0.28 |
| 32593 | 0 | 26924  | IKVELTGNSTLSSDYAQA<br>RA | 2.90 | 0.01 | 2.21 | 1.20 | 0.22 | 0.28 |
| 32594 | 0 | 26924  | IKVELTGNSTLSSDYAQA<br>RA | 2.90 | 0.01 | 2.21 | 1.20 | 0.22 | 0.28 |
| 32595 | 0 | 225338 | IKVFENERNSLSFDIPTN       | 2.84 | 0.01 | 2.61 | 0.68 | 0.22 | 0.28 |
| 32596 | 0 | 225338 | IKVFENERNSLSFDIPTN       | 2.84 | 0.01 | 2.61 | 0.68 | 0.22 | 0.28 |
| 32597 | 0 | 225338 | IKVFENERNSLSFDIPTN       | 2.84 | 0.01 | 2.61 | 0.68 | 0.22 | 0.28 |
| 32598 | 0 | 26926  | IKVFG                    | 1.74 | 0.01 | 0.90 | 1.12 | 0.22 | 0.85 |
| 32599 | 0 | 26927  | IKVIPVDPYFFQMTNTN<br>PDQ | 2.96 | 0.01 | 2.82 | 0.44 | 0.85 | 0.28 |
| 32600 | 0 | 194934 | IKVKTTDDANGWEKDA         | 2.68 | 0.01 | 3.12 | 0.68 | 0.22 | 1.34 |
| 32601 | 0 | 194934 | IKVKTTDDANGWEKDA         | 2.68 | 0.01 | 3.12 | 0.68 | 0.22 | 1.34 |
| 32602 | 0 | 26932  | IKVYVGNYD                | 2.23 | 0.01 | 2.61 | 0.44 | 0.85 | 0.28 |
| 32603 | 0 | 123319 | IKWPLNGWH                | 2.21 | 0.01 | 2.28 | 2.00 | 0.22 | 0.28 |
| 32604 | 0 | 98115  | IKY                      | 1.37 | 0.01 | 2.78 | 0.44 | 1.23 | 1.57 |
| 32605 | 0 | 122799 | IKYIAEQLES               | 2.32 | 0.01 | 2.26 | 3.55 | 0.22 | 0.28 |
| 32606 | 0 | 120625 | IKYIAETM                 | 2.13 | 0.01 | 0.78 | 3.55 | 0.22 | 0.28 |
| 32607 | 0 | 120625 | IKYIAETM                 | 2.13 | 0.01 | 0.78 | 3.55 | 0.22 | 0.28 |
| 32608 | 0 | 98116  | IKYNGEEYL                | 2.22 | 0.01 | 3.59 | 1.12 | 0.22 | 0.85 |
| 32609 | 0 | 26942  | IKYNGEEYLI               | 2.33 | 0.01 | 2.04 | 0.68 | 0.22 | 0.28 |
| 32610 | 0 | 26942  | IKYNGEEYLI               | 2.33 | 0.01 | 2.04 | 0.68 | 0.22 | 0.28 |
| 32611 | 0 | 141926 | ILAAALSEAANKIEN          | 2.66 | 0.01 | 2.73 | 0.44 | 0.85 | 0.28 |
| 32612 | 0 | 226047 | ILACAFGERYCAMQDAV<br>STS | 2.90 | 0.01 | 3.55 | 3.16 | 0.22 | 0.28 |
| 32613 | 0 | 26961  | ILALLPQGVF               | 2.30 | 4.93 | 2.70 | 0.44 | 0.85 | 0.28 |
| 32614 | 0 | 232858 | ILALNYAHWHYSIVA          | 2.71 | 0.01 | 2.89 | 1.12 | 0.22 | 1.28 |
| 32615 | 0 | 232858 | ILALNYAHWHYSIVA          | 2.71 | 0.01 | 2.89 | 1.12 | 0.22 | 1.28 |
| 32616 | 0 | 232858 | ILALNYAHWHYSIVA          | 2.71 | 0.01 | 2.89 | 1.12 | 0.22 | 1.28 |
| 32617 | 0 | 232858 | ILALNYAHWHYSIVA          | 2.71 | 0.01 | 2.89 | 1.12 | 0.22 | 1.28 |
| 32618 | 0 | 232858 | ILALNYAHWHYSIVA          | 2.71 | 0.01 | 2.89 | 1.12 | 0.22 | 1.28 |
| 32619 | 0 | 26989  | ILCYCYGLPDSEPTK          | 2.66 | 0.01 | 2.56 | 2.02 | 0.22 | 0.85 |
| 32620 | 0 | 171524 | ILDEVIMGYNCTIFA          | 2.63 | 0.01 | 0.78 | 0.44 | 1.13 | 0.28 |
| 32621 | 0 | 26996  | ILDGDNLF PKVAPQAI        | 2.74 | 0.01 | 2.76 | 0.44 | 1.23 | 1.27 |
| 32622 | 0 | 26996  | ILDGDNLF PKVAPQAI        | 2.74 | 0.01 | 2.76 | 0.44 | 1.23 | 3.40 |
| 32623 | 0 | 26996  | ILDGDNLF PKVAPQAI        | 2.74 | 0.01 | 2.76 | 0.44 | 1.23 | 1.34 |
| 32624 | 0 | 92988  | ILDGGNGDDF               | 2.34 | 0.01 | 2.67 | 2.00 | 0.22 | 0.28 |
| 32625 | 0 | 92988  | ILDGGNGDDF               | 2.34 | 0.01 | 2.67 | 2.00 | 0.22 | 0.28 |
| 32626 | 0 | 92988  | ILDGGNGDDF               | 2.34 | 0.01 | 2.67 | 2.00 | 0.22 | 0.28 |
| 32627 | 0 | 115291 | ILDKVGINYW               | 2.30 | 0.01 | 1.60 | 0.44 | 1.23 | 0.85 |

|       |   |        |                                   |      |      |      |      |      |      |
|-------|---|--------|-----------------------------------|------|------|------|------|------|------|
| 32628 | 0 | 115291 | ILDKVGINYW                        | 2.30 | 0.01 | 1.60 | 0.44 | 2.98 | 0.85 |
| 32629 | 0 | 135691 | ILDNITQS                          | 2.13 | 0.01 | 0.78 | 0.44 | 2.35 | 0.28 |
| 32630 | 0 | 312861 | ILDRFLAAAMDKVFT                   | 2.66 | 0.01 | 1.61 | 0.44 | 0.85 | 1.28 |
| 32631 | 0 | 181108 | ILDSIGRFFGGDRGA                   | 2.71 | 0.01 | 0.78 | 0.44 | 1.13 | 0.28 |
| 32632 | 0 | 181108 | ILDSIGRFFGGDRGA                   | 2.71 | 0.01 | 0.78 | 0.44 | 1.13 | 0.28 |
| 32633 | 0 | 181108 | ILDSIGRFFGGDRGA                   | 2.71 | 0.01 | 0.78 | 0.44 | 1.13 | 1.34 |
| 32634 | 0 | 181108 | ILDSIGRFFGGDRGA                   | 2.71 | 0.01 | 0.78 | 0.44 | 1.13 | 0.28 |
| 32635 | 0 | 27014  | ILDTSNPVK                         | 2.18 | 0.01 | 3.33 | 1.15 | 0.22 | 0.28 |
| 32636 | 0 | 105246 | ILDVTT                            | 1.86 | 0.01 | 3.89 | 1.20 | 0.22 | 0.28 |
| 32637 | 0 | 241013 | ILEDQE                            | 1.90 | 0.01 | 3.35 | 1.20 | 0.22 | 0.85 |
| 32638 | 0 | 149757 | ILEDTRYRIESPATK                   | 2.67 | 0.01 | 3.67 | 1.12 | 0.22 | 0.28 |
| 32639 | 0 | 27016  | ILEENMEVEIWTRGEK<br>KKL           | 2.95 | 0.01 | 3.61 | 0.44 | 0.85 | 0.28 |
| 32640 | 0 | 177115 | ILEKKHNGKLC<br>ILELDQFKGQQGQKRFAQ | 2.41 | 0.01 | 3.09 | 0.68 | 0.22 | 0.28 |
| 32641 | 0 | 117928 | DMMGHGSDYSLSEVL<br>W              | 3.43 | 0.01 | 0.78 | 0.68 | 0.22 | 0.85 |
| 32642 | 0 | 171526 | ILENGAVRYTTFEYP                   | 2.63 | 0.01 | 0.78 | 0.44 | 1.13 | 0.28 |
| 32643 | 0 | 27025  | ILEPSIPWKSLLTLV                   | 2.77 | 0.01 | 2.04 | 1.20 | 0.22 | 1.34 |
| 32644 | 0 | 27025  | ILEPSIPWKSLLTLV                   | 2.77 | 0.01 | 2.04 | 1.20 | 0.22 | 1.34 |
| 32645 | 0 | 153265 | ILETLPANPPPASTN                   | 2.70 | 0.01 | 2.08 | 0.68 | 0.22 | 0.28 |
| 32646 | 0 | 27035  | ILFGWERTREDGVQEYIK<br>VE          | 2.94 | 0.01 | 2.21 | 1.20 | 0.22 | 0.28 |
| 32647 | 0 | 27035  | ILFGWERTREDGVQEYIK<br>VE          | 2.94 | 0.01 | 2.21 | 1.20 | 0.22 | 0.28 |
| 32648 | 0 | 518776 | ILFIISTTIHTAAFVCLVAL              | 2.99 | 4.63 | 2.40 | 0.44 | 1.59 | 1.28 |
| 32649 | 0 | 27040  | ILFLCDDLDDKC                      | 2.52 | 0.01 | 2.69 | 1.20 | 0.22 | 0.28 |
| 32650 | 0 | 27048  | ILFPAD                            | 1.88 | 0.01 | 2.96 | 3.67 | 0.22 | 0.28 |
| 32651 | 0 | 128955 | ILFSVFD                           | 2.02 | 0.01 | 0.78 | 2.88 | 2.35 | 1.27 |
| 32652 | 0 | 128955 | ILFSVFD                           | 2.02 | 0.01 | 0.78 | 2.88 | 2.35 | 1.34 |
| 32653 | 0 | 27067  | ILGGKFL                           | 2.03 | 0.01 | 2.24 | 1.12 | 0.22 | 0.28 |
| 32654 | 0 | 27067  | ILGGKFL                           | 2.03 | 0.01 | 2.24 | 0.68 | 0.22 | 0.28 |
| 32655 | 0 | 27068  | ILGGVATYGA                        | 2.33 | 0.01 | 2.39 | 0.44 | 1.74 | 1.57 |
| 32656 | 0 | 27072  | ILGHDGTVWAQSADFP<br>QFKPEEITGI    | 3.18 | 0.01 | 2.53 | 0.68 | 0.22 | 0.28 |
| 32657 | 0 | 27072  | ILGHDGTVWAQSADFP<br>QFKPEEITGI    | 3.18 | 0.01 | 2.53 | 0.68 | 0.22 | 0.28 |
| 32658 | 0 | 27073  | ILGHVGFANWQT                      | 2.43 | 0.01 | 0.90 | 0.68 | 0.22 | 1.39 |
| 32659 | 0 | 242669 | ILGMLRVLRLRLTLR                   | 2.73 | 0.01 | 0.78 | 0.44 | 1.59 | 0.28 |
| 32660 | 0 | 150998 | ILGNPECESLSTASS                   | 2.66 | 0.01 | 2.87 | 0.44 | 0.85 | 0.28 |
| 32661 | 0 | 27080  | ILGPRWNLNAHS                      | 2.45 | 0.01 | 3.33 | 0.44 | 1.23 | 0.85 |
| 32662 | 0 | 171528 | ILGVIRDHKKLVNTF                   | 2.66 | 0.01 | 0.78 | 0.44 | 1.41 | 0.28 |
| 32663 | 0 | 27084  | ILGWEFGGGAP                       | 2.39 | 0.01 | 1.66 | 0.44 | 0.85 | 0.28 |
| 32664 | 0 | 27085  | ILGWPLAERT                        | 2.29 | 0.01 | 2.58 | 0.44 | 0.22 | 0.28 |
| 32665 | 0 | 171529 | ILHENLEEMRSVTKE                   | 2.66 | 0.01 | 0.78 | 0.44 | 1.41 | 0.28 |

|       |   |        |                                                    |      |      |      |      |      |      |
|-------|---|--------|----------------------------------------------------|------|------|------|------|------|------|
| 32666 | 0 | 27100  | ILIEMFNKYNSEILNNIIL                                | 2.93 | 0.01 | 2.08 | 0.44 | 1.93 | 1.57 |
| 32667 | 0 | 27100  | ILIEMFNKYNSEILNNIIL                                | 2.93 | 0.01 | 2.08 | 2.43 | 0.22 | 1.57 |
| 32668 | 0 | 27100  | ILIEMFNKYNSEILNNIIL                                | 2.93 | 0.01 | 2.08 | 2.02 | 0.22 | 1.57 |
| 32669 | 0 | 152664 | ILIFSKKGYE                                         | 2.31 | 0.01 | 2.18 | 0.44 | 0.22 | 0.28 |
| 32670 | 0 | 227270 | ILIHAYKEHNGTNLIESKN<br>YALGSDIPEKCDTLASNC<br>FLSGN | 3.69 | 0.01 | 3.28 | 1.15 | 0.22 | 0.28 |
| 32671 | 0 | 227270 | ILIHAYKEHNGTNLIESKN<br>YALGSDIPEKCDTLASNC<br>FLSGN | 3.69 | 0.01 | 3.28 | 3.33 | 0.22 | 0.28 |
| 32672 | 0 | 227270 | ILIHAYKEHNGTNLIESKN<br>YALGSDIPEKCDTLASNC<br>FLSGN | 3.69 | 0.01 | 3.28 | 3.33 | 0.22 | 0.28 |
| 32673 | 0 | 27113  | ILIRGIHHVL                                         | 2.35 | 0.01 | 3.81 | 1.15 | 0.22 | 0.28 |
| 32674 | 0 | 27113  | ILIRGIHHVL                                         | 2.35 | 0.01 | 3.81 | 1.15 | 0.22 | 1.34 |
| 32675 | 0 | 78180  | ILISMDELARPTLSSTKRI<br>TRKPESKKDLTGIKLTLM<br>QL    | 3.63 | 0.01 | 3.89 | 1.15 | 0.22 | 0.85 |
| 32676 | 0 | 103274 | ILKDESYKVTGTAPI                                    | 2.65 | 0.01 | 2.04 | 0.44 | 0.85 | 1.28 |
| 32677 | 0 | 27125  | ILKEPVHGV                                          | 2.21 | 0.01 | 2.54 | 0.44 | 2.39 | 0.28 |
| 32678 | 0 | 27125  | ILKEPVHGV                                          | 2.21 | 0.01 | 2.54 | 0.44 | 2.39 | 0.28 |
| 32679 | 0 | 27125  | ILKEPVHGV                                          | 2.21 | 0.01 | 2.54 | 0.44 | 2.39 | 0.28 |
| 32680 | 0 | 151241 | ILKKTWADQTERGLN                                    | 2.70 | 0.01 | 3.35 | 1.81 | 0.22 | 0.28 |
| 32681 | 0 | 118846 | ILKKVLEALKDLI                                      | 2.59 | 0.01 | 0.78 | 1.12 | 0.22 | 0.28 |
| 32682 | 0 | 118846 | ILKKVLEALKDLI                                      | 2.59 | 0.01 | 0.78 | 1.12 | 0.22 | 2.02 |
| 32683 | 0 | 118847 | ILKKVLEALKDLINE                                    | 2.72 | 0.01 | 0.78 | 1.12 | 0.22 | 0.28 |
| 32684 | 0 | 118847 | ILKKVLEALKDLINE                                    | 2.72 | 0.01 | 0.78 | 1.12 | 0.22 | 0.28 |
| 32685 | 0 | 27137  | ILKNCVDAKMTEED                                     | 2.58 | 0.01 | 3.08 | 0.68 | 0.22 | 1.57 |
| 32686 | 0 | 122410 | ILLEHVKITSWDKEDIKE<br>NEDTKREVQE                   | 3.31 | 0.01 | 2.22 | 0.44 | 1.74 | 1.34 |
| 32687 | 0 | 122410 | ILLEHVKITSWDKEDIKE<br>NEDTKREVQE                   | 3.31 | 0.01 | 2.22 | 0.44 | 1.74 | 0.28 |
| 32688 | 0 | 122410 | ILLEHVKITSWDKEDIKE<br>NEDTKREVQE                   | 3.31 | 0.01 | 2.22 | 0.44 | 1.74 | 0.28 |
| 32689 | 0 | 122410 | ILLEHVKITSWDKEDIKE<br>NEDTKREVQE                   | 3.31 | 0.01 | 2.22 | 0.44 | 1.74 | 0.28 |
| 32690 | 0 | 122410 | ILLEHVKITSWDKEDIKE<br>NEDTKREVQE                   | 3.31 | 0.01 | 2.22 | 0.44 | 1.74 | 0.28 |
| 32691 | 0 | 122410 | ILLEHVKITSWDKEDIKE<br>NEDTKREVQE                   | 3.31 | 0.01 | 2.22 | 0.44 | 1.74 | 0.28 |
| 32692 | 0 | 27185  | ILLNQLAG                                           | 2.14 | 0.01 | 2.40 | 2.43 | 0.22 | 0.28 |
| 32693 | 0 | 167757 | ILLNQLAGR                                          | 2.23 | 0.01 | 2.40 | 2.43 | 0.22 | 0.28 |
| 32694 | 0 | 227782 | ILLPHHADADFLFVL                                    | 2.77 | 0.01 | 2.72 | 1.20 | 1.59 | 0.28 |

|       |   |        |                                                  |      |      |      |      |      |      |
|-------|---|--------|--------------------------------------------------|------|------|------|------|------|------|
| 32695 | 0 | 96402  | ILLQKWENGECQAQKK                                 | 2.65 | 0.01 | 1.60 | 0.44 | 1.23 | 0.28 |
| 32696 | 0 | 96402  | ILLQKWENGECQAQKK                                 | 2.65 | 0.01 | 1.60 | 0.44 | 1.23 | 0.28 |
| 32697 | 0 | 109337 | ILNANTARV                                        | 2.23 | 0.01 | 3.37 | 4.63 | 0.22 | 0.28 |
| 32698 | 0 | 123323 | ILNKPLITVSNSKIL                                  | 2.72 | 0.01 | 0.78 | 1.12 | 0.22 | 0.85 |
| 32699 | 0 | 123323 | ILNKPLITVSNSKIL                                  | 2.72 | 0.01 | 0.78 | 1.12 | 0.22 | 1.34 |
| 32700 | 0 | 445102 | ILPCSFTTLPALSTGLIHL<br>H                         | 2.98 | 0.01 | 1.96 | 0.68 | 0.22 | 1.34 |
| 32701 | 0 | 445102 | ILPCSFTTLPALSTGLIHL<br>H                         | 2.98 | 0.01 | 1.96 | 0.68 | 0.22 | 0.28 |
| 32702 | 0 | 121413 | ILPDSLPL                                         | 2.16 | 0.01 | 0.78 | 0.44 | 1.13 | 0.28 |
| 32703 | 0 | 466616 | ILPEDKNEKVEHEIVEVE<br>EILPEDKNEKGQ               | 3.38 | 0.01 | 1.66 | 0.44 | 0.85 | 1.28 |
| 32704 | 0 | 466616 | ILPEDKNEKVEHEIVEVE<br>EILPEDKNEKGQ               | 3.38 | 0.01 | 1.66 | 0.44 | 0.85 | 1.28 |
| 32705 | 0 | 27244  | ILPGGGTALIRC                                     | 2.48 | 0.01 | 2.40 | 1.20 | 0.22 | 0.28 |
| 32706 | 0 | 27244  | ILPGGGTALIRC                                     | 2.48 | 0.01 | 2.40 | 0.44 | 1.59 | 0.28 |
| 32707 | 0 | 27244  | ILPGGGTALIRC                                     | 2.48 | 0.01 | 2.40 | 0.44 | 1.59 | 0.28 |
| 32708 | 0 | 27244  | ILPGGGTALIRC                                     | 2.48 | 0.01 | 2.40 | 0.44 | 1.59 | 0.28 |
| 32709 | 0 | 27248  | ILPKLTENPWQ                                      | 2.39 | 0.01 | 2.75 | 0.68 | 0.22 | 0.28 |
| 32710 | 0 | 27248  | ILPKLTENPWQ                                      | 2.39 | 0.01 | 2.75 | 0.68 | 0.22 | 0.28 |
| 32711 | 0 | 120627 | ILPPPGY                                          | 2.02 | 0.01 | 2.24 | 3.75 | 1.13 | 0.85 |
| 32712 | 0 | 187387 | ILPWKWPWWPWRR                                    | 2.58 | 0.01 | 1.60 | 0.68 | 0.22 | 1.66 |
| 32713 | 0 | 187387 | ILPWKWPWWPWRR                                    | 2.58 | 0.01 | 1.60 | 0.68 | 0.22 | 0.28 |
| 32714 | 0 | 187387 | ILPWKWPWWPWRR                                    | 2.58 | 0.01 | 1.60 | 0.68 | 0.22 | 1.39 |
| 32715 | 0 | 187387 | ILPWKWPWWPWRR                                    | 2.58 | 0.01 | 1.60 | 0.68 | 0.22 | 1.39 |
| 32716 | 0 | 128959 | ILPYGDSMDRIEKDRL                                 | 2.74 | 0.01 | 0.78 | 0.44 | 1.13 | 0.85 |
| 32717 | 0 | 489587 | ILQADPTPADLEQLC                                  | 2.70 | 0.01 | 2.69 | 3.05 | 0.85 | 1.28 |
| 32718 | 0 | 489588 | ILQGRGLVAAPVGQK                                  | 2.69 | 0.01 | 2.69 | 3.05 | 0.85 | 1.28 |
| 32719 | 0 | 115791 | ILQWQVLSNT                                       | 2.31 | 0.01 | 1.60 | 0.44 | 1.23 | 0.85 |
| 32720 | 0 | 115292 | ILQWQVLSNTVPAKSCQ<br>AQP                         | 2.95 | 0.01 | 1.60 | 0.44 | 1.41 | 0.28 |
| 32721 | 0 | 115292 | ILQWQVLSNTVPAKSCQ<br>AQP                         | 2.95 | 0.01 | 1.60 | 0.44 | 1.93 | 0.28 |
| 32722 | 0 | 27290  | ILRKSRRF                                         | 2.13 | 0.01 | 2.68 | 0.44 | 1.59 | 0.28 |
| 32723 | 0 | 27291  | ILRKSRRFAQALPV<br>ILRRHVGPGEGAVQWM               | 2.60 | 0.01 | 2.41 | 0.44 | 0.85 | 0.28 |
| 32724 | 0 | 27305  | NRLIAFASRGNHVSPTH<br>YVPESDA<br>ILRRHVGPGEGAVQWM | 3.61 | 0.01 | 1.72 | 0.44 | 0.85 | 0.28 |
| 32725 | 0 | 27305  | NRLIAFASRGNHVSPTH<br>YVPESDA                     | 3.61 | 0.01 | 1.72 | 1.15 | 0.22 | 0.28 |
| 32726 | 0 | 27307  | ILRRHVGQGEAVQW<br>MNRLI                          | 2.95 | 0.01 | 1.72 | 0.44 | 0.85 | 0.28 |
| 32727 | 0 | 192368 | ILRTQESEC                                        | 2.21 | 0.01 | 2.36 | 1.20 | 0.22 | 1.34 |
| 32728 | 0 | 192368 | ILRTQESEC                                        | 2.21 | 0.01 | 2.36 | 1.20 | 0.22 | 1.34 |
| 32729 | 0 | 192368 | ILRTQESEC                                        | 2.21 | 0.01 | 2.36 | 1.20 | 0.22 | 1.34 |
| 32730 | 0 | 192368 | ILRTQESEC                                        | 2.21 | 0.01 | 2.36 | 1.20 | 0.22 | 1.34 |

|       |   |        |                                     |      |      |      |      |      |      |
|-------|---|--------|-------------------------------------|------|------|------|------|------|------|
| 32731 | 0 | 192368 | ILRTQESEC                           | 2.21 | 0.01 | 2.36 | 1.20 | 0.22 | 0.28 |
| 32732 | 0 | 192368 | ILRTQESEC                           | 2.21 | 0.01 | 2.36 | 1.20 | 0.22 | 0.28 |
| 32733 | 0 | 192368 | ILRTQESEC                           | 2.21 | 0.01 | 2.36 | 1.20 | 0.22 | 0.85 |
| 32734 | 0 | 192368 | ILRTQESEC                           | 2.21 | 0.01 | 2.36 | 1.20 | 0.22 | 0.85 |
| 32735 | 0 | 192368 | ILRTQESEC                           | 2.21 | 0.01 | 2.36 | 1.20 | 0.22 | 0.85 |
| 32736 | 0 | 192368 | ILRTQESEC                           | 2.21 | 0.01 | 2.36 | 1.20 | 0.22 | 0.85 |
| 32737 | 0 | 192368 | ILRTQESEC                           | 2.21 | 0.01 | 2.36 | 1.20 | 0.22 | 0.85 |
| 32738 | 0 | 192368 | ILRTQESEC                           | 2.21 | 0.01 | 2.36 | 1.20 | 0.22 | 0.85 |
| 32739 | 0 | 192368 | ILRTQESEC                           | 2.21 | 0.01 | 2.36 | 1.20 | 0.22 | 0.85 |
| 32740 | 0 | 192368 | ILRTQESEC                           | 2.21 | 0.01 | 2.36 | 1.20 | 0.22 | 0.85 |
| 32741 | 0 | 192368 | ILRTQESEC                           | 2.21 | 0.01 | 2.36 | 1.20 | 0.22 | 0.85 |
| 32742 | 0 | 192368 | ILRTQESEC                           | 2.21 | 0.01 | 2.36 | 1.20 | 0.22 | 0.85 |
| 32743 | 0 | 192368 | ILRTQESEC                           | 2.21 | 0.01 | 2.36 | 1.20 | 0.22 | 0.85 |
| 32744 | 0 | 192368 | ILRTQESEC                           | 2.21 | 0.01 | 2.36 | 1.20 | 0.22 | 0.85 |
| 32745 | 0 | 192368 | ILRTQESEC                           | 2.21 | 0.01 | 2.36 | 1.20 | 0.22 | 0.85 |
| 32746 | 0 | 106539 | ILRWGNESEI                          | 2.32 | 0.01 | 2.75 | 0.44 | 1.23 | 0.85 |
| 32747 | 0 | 123324 | ILRYIADKH                           | 2.22 | 0.01 | 2.28 | 2.00 | 0.22 | 0.28 |
| 32748 | 0 | 27308  | ILSALEIPDVGNLSQVVV<br>M             | 2.88 | 0.01 | 2.08 | 2.02 | 0.22 | 1.57 |
| 32749 | 0 | 27308  | ILSALEIPDVGNLSQVVV<br>M             | 2.88 | 0.01 | 3.16 | 0.44 | 1.93 | 1.57 |
| 32750 | 0 | 27308  | ILSALEIPDVGNLSQVVV<br>M             | 2.88 | 0.01 | 2.08 | 2.02 | 0.22 | 1.57 |
| 32751 | 0 | 27308  | ILSALEIPDVGNLSQVVV<br>M             | 2.88 | 0.01 | 2.08 | 2.25 | 0.22 | 1.57 |
| 32752 | 0 | 27308  | ILSALEIPDVGNLSQVVV<br>M             | 2.88 | 0.01 | 2.08 | 2.25 | 0.22 | 1.57 |
| 32753 | 0 | 187850 | ILSGFTLEFLEHAFSV                    | 2.75 | 0.01 | 2.72 | 2.13 | 2.39 | 0.85 |
| 32754 | 0 | 152666 | ILSGYIVEIE                          | 2.34 | 0.01 | 2.18 | 2.16 | 0.22 | 0.28 |
| 32755 | 0 | 152667 | ILSKNEDQST                          | 2.29 | 0.01 | 2.18 | 2.16 | 0.22 | 0.28 |
| 32756 | 0 | 27357  | ILSRDKVEAEVQIDRL                    | 2.82 | 0.01 | 2.48 | 0.44 | 0.85 | 0.28 |
| 32757 | 0 | 27357  | ILSRDKVEAEVQIDRL                    | 2.82 | 0.01 | 2.48 | 1.20 | 0.22 | 0.28 |
| 32758 | 0 | 27368  | ILSTWVGSDHATNTISGT<br>SMA           | 3.00 | 0.01 | 3.28 | 0.44 | 1.23 | 0.85 |
| 32759 | 0 | 99341  | ILSVDCTSEEMNAFL                     | 2.63 | 0.01 | 2.86 | 2.02 | 0.85 | 0.85 |
| 32760 | 0 | 27370  | ILSVYHPQQFIYAGSLSAL<br>MDPSQGMGPSLI | 3.39 | 0.01 | 3.85 | 0.68 | 0.22 | 0.85 |
| 32761 | 0 | 27370  | ILSVYHPQQFIYAGSLSAL<br>MDPSQGMGPSLI | 3.39 | 0.01 | 3.85 | 1.12 | 0.22 | 0.85 |
| 32762 | 0 | 27379  | ILTGGKSKQTEGLLLL                    | 2.75 | 0.01 | 2.30 | 0.44 | 0.85 | 0.28 |
| 32763 | 0 | 27379  | ILTGGKSKQTEGLLLL                    | 2.75 | 0.01 | 2.30 | 0.44 | 1.41 | 0.28 |
| 32764 | 0 | 171536 | ILTHVPVKEFNFRK                      | 2.64 | 0.01 | 0.78 | 0.44 | 1.13 | 0.28 |
| 32765 | 0 | 227783 | ILTLVNNDDRDSYNLH                    | 2.74 | 0.01 | 2.72 | 1.20 | 1.59 | 0.28 |
| 32766 | 0 | 27389  | ILTVSVAVSEGKPTTEKHI<br>QI           | 2.95 | 0.01 | 2.04 | 0.68 | 0.22 | 0.85 |
| 32767 | 0 | 27389  | ILTVSVAVSEGKPTTEKHI<br>QI           | 2.95 | 0.01 | 2.04 | 0.68 | 0.22 | 0.85 |

|       |   |        |                                                      |      |      |      |      |      |      |
|-------|---|--------|------------------------------------------------------|------|------|------|------|------|------|
| 32768 | 0 | 27391  | ILTYIAADHCPVVEV                                      | 2.66 | 0.01 | 2.43 | 0.44 | 1.59 | 0.28 |
| 32769 | 0 | 146333 | ILVAYAPPGAQPPT                                       | 2.62 | 0.01 | 2.96 | 0.44 | 0.22 | 0.28 |
| 32770 | 0 | 27395  | ILVEGSVTEEVVGEEK                                     | 2.76 | 0.01 | 1.66 | 0.44 | 1.74 | 0.28 |
| 32771 | 0 | 27395  | ILVEGSVTEEVVGEEK                                     | 2.76 | 0.01 | 1.66 | 1.20 | 0.22 | 0.28 |
| 32772 | 0 | 27395  | ILVEGSVTEEVVGEEK                                     | 2.76 | 0.01 | 1.66 | 0.44 | 1.74 | 0.28 |
| 32773 | 0 | 27395  | ILVEGSVTEEVVGEEK                                     | 2.76 | 0.01 | 1.66 | 0.44 | 1.74 | 0.28 |
| 32774 | 0 | 27395  | ILVEGSVTEEVVGEEK                                     | 2.76 | 0.01 | 1.66 | 3.27 | 0.22 | 0.28 |
| 32775 | 0 | 518820 | ILWDEINYDDKGKEV                                      | 2.68 | 0.01 | 2.24 | 0.44 | 1.41 | 1.28 |
| 32776 | 0 | 79573  | ILWEGFGGDPDCTT<br>WCDASMRM                           | 3.14 | 0.01 | 3.21 | 2.16 | 0.22 | 0.28 |
| 32777 | 0 | 79573  | ILWEGFGGDPDCTT<br>WCDASMRM                           | 3.14 | 0.01 | 3.21 | 2.16 | 0.22 | 0.28 |
| 32778 | 0 | 79573  | ILWEGFGGDPDCTT<br>WCDASMRM                           | 3.14 | 0.01 | 3.21 | 2.16 | 0.22 | 0.28 |
| 32779 | 0 | 27416  | ILYAVFK                                              | 1.99 | 0.01 | 4.15 | 0.68 | 0.22 | 0.28 |
| 32780 | 0 | 27416  | ILYAVFK                                              | 1.99 | 0.01 | 4.15 | 0.68 | 0.22 | 0.28 |
| 32781 | 0 | 27416  | ILYAVFK                                              | 1.99 | 0.01 | 4.15 | 0.68 | 0.22 | 0.28 |
| 32782 | 0 | 27416  | ILYAVFK                                              | 1.99 | 0.01 | 3.05 | 0.68 | 0.22 | 0.28 |
| 32783 | 0 | 27416  | ILYAVFK                                              | 1.99 | 0.01 | 3.05 | 0.68 | 0.22 | 0.28 |
| 32784 | 0 | 27416  | ILYAVFK                                              | 1.99 | 0.01 | 3.05 | 0.68 | 0.22 | 0.28 |
| 32785 | 0 | 27421  | ILYEAFDDEM                                           | 2.21 | 0.01 | 2.69 | 0.44 | 0.85 | 0.28 |
| 32786 | 0 | 27422  | ILYEAFDEMEECASKAAL<br>IE                             | 2.96 | 0.01 | 1.96 | 0.44 | 0.85 | 0.28 |
| 32787 | 0 | 147038 | ILYGNGPGYALGG<br>ILYPGGNKYQTIDNYQPY                  | 2.57 | 0.01 | 1.60 | 0.44 | 0.85 | 0.85 |
| 32788 | 0 | 422427 | PCAEEDECGTDEYCASP<br>TRGGDAGVQ<br>ILYPGGNKYQTIDNYQPY | 3.73 | 0.01 | 0.78 | 2.37 | 0.22 | 0.28 |
| 32789 | 0 | 422427 | PCAEEDECGTDEYCASP<br>TRGGDAGVQ                       | 3.73 | 0.01 | 0.78 | 0.68 | 0.22 | 0.28 |
| 32790 | 0 | 27431  | ILYQQFDEMEECRHIPI<br>LA                              | 2.90 | 0.01 | 1.96 | 0.44 | 0.85 | 0.28 |
| 32791 | 0 | 105884 | IMAKFTQF                                             | 2.12 | 0.01 | 3.05 | 1.20 | 0.22 | 0.28 |
| 32792 | 0 | 27445  | IMAKNE                                               | 1.88 | 0.01 | 1.96 | 0.44 | 0.85 | 0.28 |
| 32793 | 0 | 117931 | IMAPPPGMRP                                           | 2.34 | 0.01 | 0.78 | 3.05 | 1.13 | 0.28 |
| 32794 | 0 | 27448  | IMASENSSAMVQVHS                                      | 2.70 | 0.01 | 2.97 | 0.44 | 0.85 | 0.28 |
| 32795 | 0 | 27449  | IMASKTVGTA                                           | 2.31 | 4.23 | 2.56 | 0.44 | 0.85 | 0.28 |
| 32796 | 0 | 27451  | IMASKTVGTAEEL                                        | 2.60 | 0.01 | 2.56 | 0.44 | 0.85 | 0.28 |
| 32797 | 0 | 238627 | IMCLDLGYTLECKIC                                      | 2.69 | 0.01 | 2.56 | 2.02 | 0.22 | 0.85 |
| 32798 | 0 | 238628 | IMCLDLGYTLVCYTN                                      | 2.68 | 0.01 | 2.56 | 2.02 | 0.22 | 0.85 |
| 32799 | 0 | 115293 | IMCVKKILDK                                           | 2.34 | 0.01 | 1.60 | 0.44 | 1.23 | 0.85 |
| 32800 | 0 | 115293 | IMCVKKILDK                                           | 2.34 | 0.01 | 1.60 | 0.44 | 1.23 | 0.85 |
| 32801 | 0 | 115293 | IMCVKKILDK                                           | 2.34 | 0.01 | 1.60 | 0.44 | 2.98 | 0.85 |
| 32802 | 0 | 27462  | IMDINKRK                                             | 2.15 | 0.01 | 1.66 | 0.44 | 1.74 | 0.28 |
| 32803 | 0 | 27463  | IMDINKRKYDSLK                                        | 2.56 | 0.01 | 1.66 | 0.44 | 1.74 | 0.28 |
| 32804 | 0 | 27463  | IMDINKRKYDSLK                                        | 2.56 | 0.01 | 1.66 | 0.44 | 1.74 | 1.48 |

|       |   |        |                                                 |      |      |      |      |      |      |
|-------|---|--------|-------------------------------------------------|------|------|------|------|------|------|
| 32805 | 0 | 27463  | IMDINKRKYDSLK                                   | 2.56 | 0.01 | 1.66 | 0.44 | 1.74 | 1.34 |
| 32806 | 0 | 27463  | IMDINKRKYDSLK                                   | 2.56 | 0.01 | 1.66 | 0.44 | 1.59 | 0.28 |
| 32807 | 0 | 122800 | IMDLENDKQQLDERLKK<br>KDFELNAL                   | 3.17 | 0.01 | 0.78 | 2.04 | 0.22 | 0.28 |
| 32808 | 0 | 161240 | IMDMIAGAHWGVLAGI<br>AYFS                        | 2.95 | 0.01 | 2.45 | 0.68 | 0.22 | 0.28 |
| 32809 | 0 | 78181  | IMDPSTPTNVPVEEIRKS<br>LHNVPVVIAGPTSGGFT<br>AEQV | 3.59 | 0.01 | 3.89 | 1.15 | 0.22 | 0.85 |
| 32810 | 0 | 103991 | IMEQCFEIGCPATN                                  | 2.60 | 0.01 | 0.90 | 0.44 | 1.13 | 1.39 |
| 32811 | 0 | 27494  | IMGGECPTAEDMVN                                  | 2.58 | 0.01 | 2.59 | 0.44 | 0.85 | 0.28 |
| 32812 | 0 | 27494  | IMGGECPTAEDMVN                                  | 2.58 | 0.01 | 2.59 | 0.44 | 0.85 | 0.28 |
| 32813 | 0 | 27494  | IMGGECPTAEDMVN                                  | 2.58 | 0.01 | 2.59 | 0.44 | 0.85 | 0.28 |
| 32814 | 0 | 27494  | IMGGECPTAEDMVN                                  | 2.58 | 0.01 | 2.59 | 0.44 | 0.85 | 0.28 |
| 32815 | 0 | 27494  | IMGGECPTAEDMVN                                  | 2.58 | 0.01 | 2.59 | 0.44 | 1.41 | 0.28 |
| 32816 | 0 | 27498  | IMGYSTPWRYLDFNALN<br>LFF                        | 2.90 | 0.01 | 2.75 | 0.44 | 0.85 | 0.85 |
| 32817 | 0 | 123326 | IMHHMPGQ                                        | 2.13 | 0.01 | 0.78 | 1.20 | 0.22 | 0.28 |
| 32818 | 0 | 120629 | IMIKAEYILKKPRSELMF<br>E                         | 2.96 | 0.01 | 2.26 | 2.04 | 0.22 | 1.57 |
| 32819 | 0 | 120629 | IMIKAEYILKKPRSELMF<br>E                         | 2.96 | 0.01 | 2.26 | 2.04 | 0.22 | 1.48 |
| 32820 | 0 | 120629 | IMIKAEYILKKPRSELMF<br>E                         | 2.96 | 0.01 | 2.26 | 2.04 | 0.22 | 2.02 |
| 32821 | 0 | 120630 | IMIVSLGVTASSFLFING<br>VAFLIPR                   | 3.18 | 0.01 | 2.86 | 0.44 | 0.85 | 0.28 |
| 32822 | 0 | 120630 | IMIVSLGVTASSFLFING<br>VAFLIPR                   | 3.18 | 0.01 | 2.86 | 0.44 | 1.41 | 0.28 |
| 32823 | 0 | 27507  | IMKAQ                                           | 1.74 | 0.01 | 2.69 | 0.44 | 0.85 | 0.28 |
| 32824 | 0 | 189683 | IMKNHLRDMG                                      | 2.40 | 0.01 | 3.47 | 0.44 | 0.85 | 0.28 |
| 32825 | 0 | 196555 | IMKNPTV                                         | 1.99 | 0.01 | 2.30 | 0.68 | 0.22 | 0.28 |
| 32826 | 0 | 196555 | IMKNPTV                                         | 1.99 | 0.01 | 2.30 | 0.68 | 0.22 | 1.48 |
| 32827 | 0 | 196555 | IMKNPTV                                         | 1.99 | 0.01 | 2.30 | 0.68 | 0.22 | 0.85 |
| 32828 | 0 | 196555 | IMKNPTV                                         | 1.99 | 0.01 | 2.30 | 0.68 | 0.22 | 1.48 |
| 32829 | 0 | 196555 | IMKNPTV                                         | 1.99 | 0.01 | 2.30 | 0.68 | 0.22 | 1.48 |
| 32830 | 0 | 196555 | IMKNPTV                                         | 1.99 | 0.01 | 2.30 | 0.68 | 0.22 | 1.48 |
| 32831 | 0 | 196555 | IMKNPTV                                         | 1.99 | 0.01 | 2.30 | 0.68 | 0.22 | 1.48 |
| 32832 | 0 | 196555 | IMKNPTV                                         | 1.99 | 0.01 | 2.30 | 0.68 | 0.22 | 0.85 |
| 32833 | 0 | 196555 | IMKNPTV                                         | 1.99 | 0.01 | 2.30 | 0.68 | 0.22 | 0.85 |
| 32834 | 0 | 196555 | IMKNPTV                                         | 1.99 | 0.01 | 2.30 | 0.68 | 0.22 | 0.85 |
| 32835 | 0 | 196555 | IMKNPTV                                         | 1.99 | 0.01 | 2.30 | 0.68 | 0.22 | 0.85 |
| 32836 | 0 | 196555 | IMKNPTV                                         | 1.99 | 0.01 | 2.30 | 0.68 | 0.22 | 1.28 |
| 32837 | 0 | 196555 | IMKNPTV                                         | 1.99 | 0.01 | 2.30 | 0.68 | 0.22 | 3.13 |
| 32838 | 0 | 196555 | IMKNPTV                                         | 1.99 | 0.01 | 2.30 | 0.68 | 0.22 | 3.13 |
| 32839 | 0 | 27517  | IMLIILSGIVGFKVK                                 | 2.72 | 0.01 | 1.66 | 0.44 | 0.85 | 0.28 |
| 32840 | 0 | 450706 | IMNSFVTDIFERIASEASR<br>L                        | 2.95 | 0.01 | 0.78 | 2.79 | 1.13 | 1.28 |

|       |   |        |                          |      |      |      |      |      |      |
|-------|---|--------|--------------------------|------|------|------|------|------|------|
| 32841 | 0 | 79574  | IMNYTGNQQSRWGLGS<br>PNCH | 2.90 | 0.01 | 2.85 | 0.44 | 1.59 | 0.28 |
| 32842 | 0 | 95100  | IMPATSDSVPLIAQYFAS<br>TM | 2.95 | 0.01 | 2.25 | 2.04 | 0.22 | 1.57 |
| 32843 | 0 | 27553  | IMSALAMVYLGAK            | 2.56 | 0.01 | 2.25 | 1.12 | 0.22 | 2.02 |
| 32844 | 0 | 27553  | IMSALAMVYLGAK            | 2.56 | 0.01 | 2.25 | 0.44 | 1.23 | 1.27 |
| 32845 | 0 | 27554  | MSG EKPSMEDVVN           | 2.60 | 0.01 | 2.69 | 0.44 | 0.85 | 0.28 |
| 32846 | 0 | 27554  | MSG EKPSMEDVVN           | 2.60 | 0.01 | 2.69 | 0.44 | 0.85 | 0.28 |
| 32847 | 0 | 27554  | MSG EKPSMEDVVN           | 2.60 | 0.01 | 2.69 | 0.44 | 0.85 | 0.28 |
| 32848 | 0 | 27554  | MSG EKPSMEDVVN           | 2.60 | 0.01 | 2.69 | 0.44 | 1.41 | 0.28 |
| 32849 | 0 | 27554  | MSG EKPSMEDVVN           | 2.60 | 0.01 | 2.69 | 0.44 | 0.85 | 0.28 |
| 32850 | 0 | 27555  | MSG EKPTVEDVVN           | 2.58 | 0.01 | 2.69 | 0.44 | 0.85 | 0.28 |
| 32851 | 0 | 27555  | MSG EKPTVEDVVN           | 2.58 | 0.01 | 2.69 | 0.44 | 1.41 | 0.28 |
| 32852 | 0 | 27555  | MSG EKPTVEDVVN           | 2.58 | 0.01 | 2.69 | 0.44 | 0.85 | 0.28 |
| 32853 | 0 | 27555  | MSG EKPTVEDVVN           | 2.58 | 0.01 | 2.69 | 0.44 | 0.85 | 0.28 |
| 32854 | 0 | 27555  | MSG EKPTVEDVVN           | 2.58 | 0.01 | 2.69 | 0.44 | 0.85 | 0.28 |
| 32855 | 0 | 27557  | MSG EVPSTEDLVN           | 2.59 | 0.01 | 2.41 | 0.44 | 0.85 | 0.28 |
| 32856 | 0 | 27557  | MSG EVPSTEDLVN           | 2.59 | 0.01 | 2.41 | 0.44 | 0.85 | 0.28 |
| 32857 | 0 | 27557  | MSG EVPSTEDLVN           | 2.59 | 0.01 | 2.41 | 0.44 | 0.85 | 0.28 |
| 32858 | 0 | 27557  | MSG EVPSTEDLVN           | 2.59 | 0.01 | 2.41 | 0.44 | 1.41 | 0.28 |
| 32859 | 0 | 27557  | MSG EVPSTEDLVN           | 2.59 | 0.01 | 2.41 | 0.44 | 0.85 | 0.28 |
| 32860 | 0 | 313291 | IMTENEDDDEDEEEN          | 2.72 | 0.01 | 1.61 | 0.44 | 0.85 | 1.28 |
| 32861 | 0 | 27573  | IMTVTMTFKLGPRKATG<br>RWN | 2.93 | 0.01 | 2.75 | 0.44 | 0.85 | 0.85 |
| 32862 | 0 | 99344  | INASSELHLLGFGIN          | 2.69 | 0.01 | 2.16 | 0.44 | 1.23 | 1.48 |
| 32863 | 0 | 132384 | INAYEVPLGX YR            | 2.43 | 0.01 | 0.90 | 1.15 | 0.22 | 1.39 |
| 32864 | 0 | 27595  | INAYTTGPCTPSPA           | 2.63 | 0.01 | 1.96 | 0.44 | 0.85 | 0.28 |
| 32865 | 0 | 27598  | INCYTEGPCVPKPP           | 2.59 | 0.01 | 2.69 | 0.44 | 0.85 | 0.28 |
| 32866 | 0 | 27598  | INCYTEGPCVPKPP           | 2.59 | 0.01 | 2.69 | 0.44 | 1.41 | 0.28 |
| 32867 | 0 | 27598  | INCYTEGPCVPKPP           | 2.59 | 0.01 | 2.69 | 0.44 | 0.85 | 0.28 |
| 32868 | 0 | 27598  | INCYTEGPCVPKPP           | 2.59 | 0.01 | 2.69 | 0.44 | 0.85 | 0.28 |
| 32869 | 0 | 27599  | INCYTEGQCVPKPA           | 2.57 | 0.01 | 2.69 | 0.44 | 0.85 | 0.28 |
| 32870 | 0 | 27599  | INCYTEGQCVPKPA           | 2.57 | 0.01 | 2.69 | 0.44 | 1.41 | 0.28 |
| 32871 | 0 | 27599  | INCYTEGQCVPKPA           | 2.57 | 0.01 | 2.69 | 0.44 | 0.85 | 0.28 |
| 32872 | 0 | 27599  | INCYTEGQCVPKPA           | 2.57 | 0.01 | 2.69 | 0.44 | 0.85 | 0.28 |
| 32873 | 0 | 27608  | INDISHTQSVSSKQRTG<br>LD  | 2.94 | 0.01 | 1.60 | 2.66 | 0.22 | 0.28 |
| 32874 | 0 | 27608  | INDISHTQSVSSKQRTG<br>LD  | 2.94 | 0.01 | 1.60 | 2.66 | 0.22 | 0.85 |
| 32875 | 0 | 27608  | INDISHTQSVSSKQRTG<br>LD  | 2.94 | 0.01 | 1.60 | 2.66 | 0.22 | 0.85 |
| 32876 | 0 | 27608  | INDISHTQSVSSKQRTG<br>LD  | 2.94 | 0.01 | 1.60 | 2.66 | 0.22 | 0.85 |
| 32877 | 0 | 518840 | INDKIYSLNYNELEV          | 2.71 | 0.01 | 2.24 | 0.44 | 1.41 | 1.28 |
| 32878 | 0 | 96409  | INDMPITNDQKKL            | 2.55 | 0.01 | 2.38 | 1.12 | 0.22 | 0.85 |
| 32879 | 0 | 96409  | INDMPITNDQKKL            | 2.55 | 0.01 | 2.38 | 1.12 | 0.22 | 0.28 |
| 32880 | 0 | 100153 | INDQIKFIIN               | 2.35 | 0.01 | 2.18 | 3.23 | 0.22 | 0.28 |



|       |   |        |                               |      |      |      |      |      |      |
|-------|---|--------|-------------------------------|------|------|------|------|------|------|
| 32881 | 0 | 100153 | INDQIKFIIN                    | 2.35 | 0.01 | 2.18 | 3.23 | 0.22 | 1.34 |
| 32882 | 0 | 100153 | INDQIKFIIN                    | 2.35 | 0.01 | 2.18 | 3.23 | 0.22 | 1.27 |
| 32883 | 0 | 152668 | INDRYDMLNI                    | 2.34 | 0.01 | 2.18 | 2.16 | 0.22 | 0.28 |
| 32884 | 0 | 27614  | INDSTTVEPILD                  | 2.47 | 0.01 | 3.78 | 2.74 | 0.22 | 0.85 |
| 32885 | 0 | 27614  | INDSTTVEPILD                  | 2.47 | 0.01 | 3.78 | 2.74 | 0.22 | 1.34 |
| 32886 | 0 | 227784 | INEGALLPHFNSKAI               | 2.72 | 0.01 | 2.72 | 4.03 | 1.59 | 0.28 |
| 32887 | 0 | 125445 | INEGDLIAEVETDKATVG<br>FESLEEC | 3.16 | 0.01 | 0.78 | 0.44 | 1.13 | 0.28 |
| 32888 | 0 | 27620  | INEHREHPKEY                   | 2.41 | 0.01 | 1.66 | 0.44 | 1.74 | 0.28 |
| 32889 | 0 | 141927 | INELKKEHTDKIQIVSKL            | 2.85 | 0.01 | 3.13 | 0.68 | 0.22 | 0.28 |
| 32890 | 0 | 119597 | INEPVQVDIPNNPVREG<br>RNV      | 2.99 | 0.01 | 3.33 | 0.44 | 0.85 | 0.28 |
| 32891 | 0 | 119597 | INEPVQVDIPNNPVREG<br>RNV      | 2.99 | 0.01 | 3.33 | 2.49 | 0.85 | 0.28 |
| 32892 | 0 | 27627  | INEYTTGPSTPCPS                | 2.63 | 0.01 | 2.59 | 0.44 | 0.85 | 0.28 |
| 32893 | 0 | 27627  | INEYTTGPSTPCPS                | 2.63 | 0.01 | 2.59 | 0.44 | 0.85 | 0.28 |
| 32894 | 0 | 27632  | INFFDSSGSFL                   | 2.43 | 0.01 | 3.35 | 2.02 | 0.85 | 0.28 |
| 32895 | 0 | 27632  | INFFDSSGSFL                   | 2.43 | 0.01 | 3.35 | 2.02 | 0.85 | 0.28 |
| 32896 | 0 | 78423  | INFLRMDDFARHFNR               | 2.69 | 0.01 | 3.28 | 1.12 | 0.22 | 0.28 |
| 32897 | 0 | 27635  | INFNCEVWSNVSETISG<br>PRLY     | 2.97 | 0.01 | 2.04 | 0.44 | 0.85 | 0.28 |
| 32898 | 0 | 27635  | INFNCEVWSNVSETISG<br>PRLY     | 2.97 | 0.01 | 2.04 | 0.44 | 2.98 | 0.28 |
| 32899 | 0 | 179026 | INFTMLLMFAERQT                | 2.67 | 0.01 | 2.36 | 0.44 | 1.23 | 1.28 |
| 32900 | 0 | 179026 | INFTMLLMFAERQT                | 2.67 | 0.01 | 2.36 | 0.44 | 1.23 | 1.27 |
| 32901 | 0 | 179026 | INFTMLLMFAERQT                | 2.67 | 0.01 | 2.36 | 0.44 | 1.23 | 1.28 |
| 32902 | 0 | 181919 | INGHNAEVRKAL                  | 2.45 | 0.01 | 0.78 | 0.44 | 1.13 | 0.28 |
| 32903 | 0 | 161108 | INGIPYLGDRRVPLEEFN<br>T       | 2.88 | 0.01 | 2.08 | 0.44 | 1.93 | 1.57 |
| 32904 | 0 | 27640  | INGKTKSVFFEGNGRED             | 2.79 | 0.01 | 0.90 | 2.02 | 0.22 | 0.28 |
| 32905 | 0 | 27640  | INGKTKSVFFEGNGRED             | 2.79 | 0.01 | 0.90 | 0.68 | 0.22 | 1.75 |
| 32906 | 0 | 171545 | INGQFSLKYRNP                  | 2.43 | 0.01 | 0.90 | 0.44 | 0.85 | 0.28 |
| 32907 | 0 | 171545 | INGQFSLKYRNP                  | 2.43 | 0.01 | 0.90 | 0.44 | 0.85 | 1.39 |
| 32908 | 0 | 313374 | INGTGENLDGDEEEG               | 2.71 | 0.01 | 1.61 | 0.44 | 0.85 | 1.28 |
| 32909 | 0 | 27650  | INHFLVLLVGY                   | 2.30 | 0.01 | 2.72 | 0.44 | 1.23 | 0.85 |
| 32910 | 0 | 27650  | INHFLVLLVGY                   | 2.30 | 0.01 | 2.72 | 0.44 | 1.23 | 0.85 |
| 32911 | 0 | 27655  | INIDEIKTIEA                   | 2.43 | 0.01 | 3.89 | 1.20 | 0.22 | 2.75 |
| 32912 | 0 | 27656  | INIDSNPLHLL                   | 2.49 | 0.01 | 0.90 | 0.68 | 0.22 | 1.27 |
| 32913 | 0 | 27670  | INKDAREL                      | 2.10 | 0.01 | 2.83 | 1.12 | 0.22 | 0.28 |
| 32914 | 0 | 229258 | INKMIQLDKRK                   | 2.42 | 0.01 | 2.70 | 0.68 | 0.22 | 0.28 |
| 32915 | 0 | 27674  | INKRKYDS                      | 2.12 | 0.01 | 1.66 | 0.44 | 1.74 | 0.28 |
| 32916 | 0 | 27675  | INKRKYDSLKEKL                 | 2.56 | 0.01 | 1.66 | 0.44 | 1.74 | 0.28 |
| 32917 | 0 | 27675  | INKRKYDSLKEKL                 | 2.56 | 0.01 | 1.66 | 0.44 | 1.74 | 1.48 |
| 32918 | 0 | 27675  | INKRKYDSLKEKL                 | 2.56 | 0.01 | 1.66 | 0.44 | 1.74 | 1.34 |

|       |   |        |                                                       |      |      |      |      |      |      |
|-------|---|--------|-------------------------------------------------------|------|------|------|------|------|------|
| 32919 | 0 | 27678  | INKVVRFD                                              | 2.11 | 0.01 | 2.25 | 0.68 | 0.22 | 0.85 |
| 32920 | 0 | 100155 | INLDVRKQYK                                            | 2.29 | 0.01 | 2.18 | 2.16 | 0.22 | 0.28 |
| 32921 | 0 | 27681  | INLLDDSDF                                             | 2.25 | 0.01 | 3.53 | 4.33 | 0.22 | 0.28 |
| 32922 | 0 | 27684  | INLQGMANNINNLSKED<br>KAVVAGAFARAVE                    | 3.34 | 0.01 | 3.65 | 2.22 | 0.22 | 0.28 |
| 32923 | 0 | 125446 | INLQRGRDHGLPGYNE<br>WREFCGLPRLETPADLS<br>TAIASRSVADKI | 3.73 | 0.01 | 0.78 | 0.44 | 1.13 | 1.39 |
| 32924 | 0 | 27685  | INLRTNNSATIV                                          | 2.49 | 0.01 | 3.67 | 0.44 | 0.85 | 0.28 |
| 32925 | 0 | 100156 | INLSLEELKD                                            | 2.32 | 0.01 | 2.18 | 2.16 | 0.22 | 0.28 |
| 32926 | 0 | 102535 | INLVHWNKKKYSSYEAA<br>KKH                              | 2.93 | 0.01 | 3.44 | 0.68 | 0.22 | 0.28 |
| 32927 | 0 | 27690  | INNAYNMS                                              | 2.14 | 0.01 | 2.96 | 0.68 | 0.22 | 0.28 |
| 32928 | 0 | 27690  | INNAYNMS                                              | 2.14 | 0.01 | 2.96 | 0.68 | 0.22 | 0.28 |
| 32929 | 0 | 27693  | INNEWC                                                | 1.89 | 0.01 | 1.86 | 0.44 | 1.23 | 0.28 |
| 32930 | 0 | 93007  | INNGLPPIQNTRNI                                        | 2.64 | 0.01 | 3.72 | 0.68 | 0.22 | 0.28 |
| 32931 | 0 | 93007  | INNGLPPIQNTRNI                                        | 2.64 | 0.01 | 3.72 | 0.68 | 0.22 | 1.34 |
| 32932 | 0 | 93007  | INNGLPPIQNTRNI                                        | 2.64 | 0.01 | 3.72 | 0.68 | 0.22 | 1.34 |
| 32933 | 0 | 93007  | INNGLPPIQNTRNI                                        | 2.64 | 0.01 | 3.72 | 0.68 | 0.22 | 1.34 |
| 32934 | 0 | 93007  | INNGLPPIQNTRNI                                        | 2.64 | 0.01 | 3.72 | 0.68 | 0.22 | 1.34 |
| 32935 | 0 | 94851  | INNLLIVELIR                                           | 2.35 | 0.01 | 2.72 | 0.68 | 0.22 | 0.28 |
| 32936 | 0 | 94851  | INNLLIVELIR                                           | 2.35 | 0.01 | 2.72 | 0.68 | 0.22 | 0.28 |
| 32937 | 0 | 94851  | INNLLIVELIR                                           | 2.35 | 0.01 | 2.72 | 0.68 | 0.22 | 1.66 |
| 32938 | 0 | 94851  | INNLLIVELIR                                           | 2.35 | 0.01 | 2.72 | 0.68 | 0.22 | 1.66 |
| 32939 | 0 | 94851  | INNLLIVELIR                                           | 2.35 | 0.01 | 2.72 | 0.68 | 0.22 | 1.66 |
| 32940 | 0 | 94851  | INNLLIVELIR                                           | 2.35 | 0.01 | 2.72 | 0.68 | 0.22 | 1.66 |
| 32941 | 0 | 94851  | INNLLIVELIR                                           | 2.35 | 0.01 | 2.72 | 0.68 | 0.22 | 1.66 |
| 32942 | 0 | 94851  | INNLLIVELIR                                           | 2.35 | 0.01 | 2.72 | 0.68 | 0.22 | 1.66 |
| 32943 | 0 | 94851  | INNLLIVELIR                                           | 2.35 | 0.01 | 2.72 | 0.68 | 0.22 | 1.66 |
| 32944 | 0 | 94851  | INNLLIVELIR                                           | 2.35 | 0.01 | 2.72 | 0.68 | 0.22 | 1.66 |
| 32945 | 0 | 94851  | INNLLIVELIR                                           | 2.35 | 0.01 | 2.72 | 0.68 | 0.22 | 1.66 |
| 32946 | 0 | 94851  | INNLLIVELIR                                           | 2.35 | 0.01 | 2.72 | 0.68 | 0.22 | 1.66 |
| 32947 | 0 | 94851  | INNLLIVELIR                                           | 2.35 | 0.01 | 2.72 | 0.68 | 0.22 | 1.66 |
| 32948 | 0 | 94851  | INNLLIVELIR                                           | 2.35 | 0.01 | 2.72 | 0.68 | 0.22 | 1.66 |
| 32949 | 0 | 94851  | INNLLIVELIR                                           | 2.35 | 0.01 | 2.72 | 0.68 | 0.22 | 1.66 |
| 32950 | 0 | 94851  | INNLLIVELIR                                           | 2.35 | 0.01 | 2.72 | 0.68 | 0.22 | 1.66 |
| 32951 | 0 | 94851  | INNLLIVELIR                                           | 2.35 | 0.01 | 2.72 | 0.68 | 0.22 | 1.66 |
| 32952 | 0 | 94851  | INNLLIVELIR                                           | 2.35 | 0.01 | 2.72 | 0.68 | 0.22 | 1.66 |
| 32953 | 0 | 94851  | INNLLIVELIR                                           | 2.35 | 0.01 | 2.72 | 0.68 | 0.22 | 1.66 |
| 32954 | 0 | 94851  | INNLLIVELIR                                           | 2.35 | 0.01 | 2.72 | 0.68 | 0.22 | 1.66 |
| 32955 | 0 | 94851  | INNLLIVELIR                                           | 2.35 | 0.01 | 2.72 | 0.68 | 0.22 | 1.66 |
| 32956 | 0 | 94851  | INNLLIVELIR                                           | 2.35 | 0.01 | 2.72 | 0.68 | 0.22 | 1.66 |
| 32957 | 0 | 94851  | INNLLIVELIR                                           | 2.35 | 0.01 | 2.72 | 0.68 | 0.22 | 1.66 |
| 32958 | 0 | 94851  | INNLLIVELIR                                           | 2.35 | 0.01 | 2.72 | 0.68 | 0.22 | 1.66 |
| 32959 | 0 | 94851  | INNLLIVELIR                                           | 2.35 | 0.01 | 2.72 | 0.68 | 0.22 | 1.66 |
| 32960 | 0 | 94851  | INNLLIVELIR                                           | 2.35 | 0.01 | 2.72 | 0.68 | 0.22 | 1.66 |

|       |   |        |                               |      |      |      |      |      |      |
|-------|---|--------|-------------------------------|------|------|------|------|------|------|
| 32961 | 0 | 79867  | INNLIVELIRGT                  | 2.49 | 0.01 | 2.72 | 0.68 | 0.22 | 0.28 |
| 32962 | 0 | 79867  | INNLIVELIRGT                  | 2.49 | 0.01 | 2.72 | 0.68 | 0.22 | 1.66 |
| 32963 | 0 | 79867  | INNLIVELIRGT                  | 2.49 | 0.01 | 2.72 | 0.68 | 0.22 | 1.66 |
| 32964 | 0 | 79867  | INNLIVELIRGT                  | 2.49 | 0.01 | 2.72 | 0.68 | 0.22 | 1.66 |
| 32965 | 0 | 79867  | INNLIVELIRGT                  | 2.49 | 0.01 | 2.72 | 0.68 | 0.22 | 1.66 |
| 32966 | 0 | 79867  | INNLIVELIRGT                  | 2.49 | 0.01 | 2.72 | 0.68 | 0.22 | 1.66 |
| 32967 | 0 | 79867  | INNLIVELIRGT                  | 2.49 | 0.01 | 2.72 | 0.68 | 0.22 | 1.66 |
| 32968 | 0 | 79867  | INNLIVELIRGT                  | 2.49 | 0.01 | 2.72 | 0.68 | 0.22 | 1.66 |
| 32969 | 0 | 79867  | INNLIVELIRGT                  | 2.49 | 0.01 | 2.72 | 0.68 | 0.22 | 1.66 |
| 32970 | 0 | 79867  | INNLIVELIRGT                  | 2.49 | 0.01 | 2.72 | 0.68 | 0.22 | 1.66 |
| 32971 | 0 | 79867  | INNLIVELIRGT                  | 2.49 | 0.01 | 2.72 | 0.68 | 0.22 | 1.66 |
| 32972 | 0 | 79867  | INNLIVELIRGT                  | 2.49 | 0.01 | 2.72 | 0.68 | 0.22 | 1.66 |
| 32973 | 0 | 79867  | INNLIVELIRGT                  | 2.49 | 0.01 | 2.72 | 0.68 | 0.22 | 1.66 |
| 32974 | 0 | 79867  | INNLIVELIRGT                  | 2.49 | 0.01 | 2.72 | 0.68 | 0.22 | 1.66 |
| 32975 | 0 | 79867  | INNLIVELIRGT                  | 2.49 | 0.01 | 2.72 | 0.68 | 0.22 | 1.66 |
| 32976 | 0 | 79867  | INNLIVELIRGT                  | 2.49 | 0.01 | 2.72 | 0.68 | 0.22 | 1.66 |
| 32977 | 0 | 79867  | INNLIVELIRGT                  | 2.49 | 0.01 | 2.72 | 0.68 | 0.22 | 1.66 |
| 32978 | 0 | 79867  | INNLIVELIRGT                  | 2.49 | 0.01 | 2.72 | 0.68 | 0.22 | 1.66 |
| 32979 | 0 | 79867  | INNLIVELIRGT                  | 2.49 | 0.01 | 2.72 | 0.68 | 0.22 | 1.66 |
| 32980 | 0 | 79867  | INNLIVELIRGT                  | 2.49 | 0.01 | 2.72 | 0.68 | 0.22 | 1.27 |
| 32981 | 0 | 27698  | INNLKKNLEEKAN                 | 2.59 | 0.01 | 2.95 | 3.38 | 0.22 | 0.28 |
| 32982 | 0 | 27699  | INNLNEKLEETNKEYTNL<br>QNNYTNE | 3.22 | 0.01 | 2.22 | 0.44 | 1.74 | 0.28 |
| 32983 | 0 | 27699  | INNLNEKLEETNKEYTNL<br>QNNYTNE | 3.22 | 0.01 | 2.22 | 0.44 | 1.74 | 0.28 |
| 32984 | 0 | 115793 | INNQFLPYPY                    | 2.32 | 0.01 | 1.60 | 0.44 | 1.23 | 0.85 |
| 32985 | 0 | 27703  | INNVLNLYYVFSKIFGKSP<br>VF     | 2.97 | 0.01 | 2.82 | 0.44 | 0.85 | 0.28 |
| 32986 | 0 | 119598 | INPESDQPDLSNFMESG             | 2.79 | 0.01 | 0.78 | 1.15 | 0.22 | 1.57 |
| 32987 | 0 | 119598 | INPESDQPDLSNFMESG             | 2.79 | 0.01 | 0.78 | 0.44 | 1.41 | 1.57 |
| 32988 | 0 | 119598 | INPESDQPDLSNFMESG             | 2.79 | 0.01 | 0.78 | 0.44 | 1.13 | 1.57 |
| 32989 | 0 | 27716  | INPPNSDVVFPGGSPVA<br>QYC      | 2.93 | 0.01 | 2.40 | 0.44 | 1.59 | 0.28 |
| 32990 | 0 | 115295 | INPSKENLCSTFCKEVVR<br>NA      | 2.92 | 0.01 | 1.60 | 0.44 | 1.23 | 1.28 |
| 32991 | 0 | 27720  | INPSPFAQTR                    | 2.29 | 0.01 | 3.78 | 2.74 | 0.22 | 0.85 |
| 32992 | 0 | 27722  | INPTPFQQGGLICAMVP<br>GDQ      | 2.93 | 0.01 | 2.82 | 0.44 | 0.85 | 0.28 |
| 32993 | 0 | 149061 | INPTQTT                       | 2.00 | 0.01 | 0.90 | 2.13 | 1.59 | 1.39 |
| 32994 | 0 | 27723  | INPTS                         | 1.74 | 0.01 | 4.08 | 0.68 | 0.22 | 0.28 |
| 32995 | 0 | 83781  | INPWDSKSDYLG                  | 2.45 | 0.01 | 2.87 | 0.44 | 0.22 | 0.28 |
| 32996 | 0 | 83781  | INPWDSKSDYLG                  | 2.45 | 0.01 | 2.90 | 0.68 | 0.22 | 0.28 |
| 32997 | 0 | 27724  | INQAIDNINNFINCSVS<br>Y        | 2.91 | 0.01 | 2.08 | 0.44 | 1.93 | 1.57 |

|       |   |        |                          |      |      |      |      |      |      |
|-------|---|--------|--------------------------|------|------|------|------|------|------|
| 32998 | 0 | 27724  | INQAIDNINNFINCSVS<br>Y   | 2.91 | 0.01 | 3.45 | 0.44 | 0.22 | 1.57 |
| 32999 | 0 | 27725  | INQDPDKILTY              | 2.40 | 0.01 | 2.72 | 3.01 | 0.22 | 0.28 |
| 33000 | 0 | 27725  | INQDPDKILTY              | 2.40 | 0.01 | 2.72 | 2.16 | 0.22 | 0.28 |
| 33001 | 0 | 27725  | INQDPDKILTY              | 2.40 | 0.01 | 2.72 | 2.16 | 0.22 | 0.28 |
| 33002 | 0 | 27725  | INQDPDKILTY              | 2.40 | 0.01 | 2.72 | 2.69 | 0.22 | 0.28 |
| 33003 | 0 | 27725  | INQDPDKILTY              | 2.40 | 0.01 | 2.72 | 2.69 | 0.22 | 0.28 |
| 33004 | 0 | 27725  | INQDPDKILTY              | 2.40 | 0.01 | 2.72 | 2.69 | 0.22 | 0.28 |
| 33005 | 0 | 27725  | INQDPDKILTY              | 2.40 | 0.01 | 2.72 | 2.69 | 0.22 | 1.75 |
| 33006 | 0 | 27725  | INQDPDKILTY              | 2.40 | 0.01 | 2.72 | 0.68 | 0.22 | 0.28 |
| 33007 | 0 | 27725  | INQDPDKILTY              | 2.40 | 0.01 | 2.72 | 0.68 | 0.22 | 0.28 |
| 33008 | 0 | 27725  | INQDPDKILTY              | 2.40 | 0.01 | 2.72 | 0.68 | 0.22 | 1.75 |
| 33009 | 0 | 27725  | INQDPDKILTY              | 2.40 | 0.01 | 2.72 | 2.69 | 0.22 | 0.28 |
| 33010 | 0 | 27725  | INQDPDKILTY              | 2.40 | 0.01 | 2.72 | 1.81 | 0.22 | 1.75 |
| 33011 | 0 | 27725  | INQDPDKILTY              | 2.40 | 0.01 | 2.72 | 1.81 | 0.22 | 1.75 |
| 33012 | 0 | 27725  | INQDPDKILTY              | 2.40 | 0.01 | 2.72 | 1.81 | 0.22 | 0.28 |
| 33013 | 0 | 27725  | INQDPDKILTY              | 2.40 | 0.01 | 2.72 | 1.81 | 0.22 | 0.28 |
| 33014 | 0 | 27725  | INQDPDKILTY              | 2.40 | 0.01 | 2.72 | 1.81 | 0.22 | 0.28 |
| 33015 | 0 | 27725  | INQDPDKILTY              | 2.40 | 0.01 | 2.72 | 1.81 | 0.22 | 1.75 |
| 33016 | 0 | 27725  | INQDPDKILTY              | 2.40 | 0.01 | 2.72 | 2.69 | 0.22 | 0.28 |
| 33017 | 0 | 226049 | INQIDSDNKLGVGSDDT<br>VAV | 2.96 | 0.01 | 2.24 | 0.68 | 0.22 | 0.28 |
| 33018 | 0 | 226049 | INQIDSDNKLGVGSDDT<br>VAV | 2.96 | 0.01 | 2.24 | 0.68 | 0.22 | 0.28 |
| 33019 | 0 | 226049 | INQIDSDNKLGVGSDDT<br>VAV | 2.96 | 0.01 | 2.24 | 0.68 | 0.22 | 0.28 |
| 33020 | 0 | 27727  | INQQLNPK                 | 2.13 | 0.01 | 2.75 | 0.44 | 1.23 | 1.27 |
| 33021 | 0 | 27727  | INQQLNPK                 | 2.13 | 0.01 | 2.75 | 0.44 | 1.23 | 1.27 |
| 33022 | 0 | 27727  | INQQLNPK                 | 2.13 | 0.01 | 2.75 | 0.68 | 2.25 | 1.75 |
| 33023 | 0 | 27727  | INQQLNPK                 | 2.13 | 0.01 | 2.75 | 0.68 | 2.25 | 1.75 |
| 33024 | 0 | 27727  | INQQLNPK                 | 2.13 | 0.01 | 2.75 | 0.68 | 2.60 | 1.75 |
| 33025 | 0 | 27728  | INQQLNPKNKWEDK           | 2.67 | 0.01 | 2.75 | 0.44 | 1.23 | 1.27 |
| 33026 | 0 | 27728  | INQQLNPKNKWEDK           | 2.67 | 0.01 | 2.75 | 0.44 | 1.23 | 1.27 |
| 33027 | 0 | 27728  | INQQLNPKNKWEDK           | 2.67 | 0.01 | 2.75 | 0.68 | 2.25 | 1.75 |
| 33028 | 0 | 27728  | INQQLNPKNKWEDK           | 2.67 | 0.01 | 2.75 | 0.68 | 2.25 | 1.75 |
| 33029 | 0 | 27728  | INQQLNPKNKWEDK           | 2.67 | 0.01 | 2.75 | 0.68 | 2.60 | 1.75 |
| 33030 | 0 | 27730  | INQRTVVAPDKEVLYEA<br>FDE | 2.91 | 0.01 | 1.96 | 0.44 | 0.85 | 0.28 |
| 33031 | 0 | 27732  | INRIADQAQY               | 2.34 | 0.01 | 2.73 | 0.44 | 0.85 | 0.28 |
| 33032 | 0 | 27732  | INRIADQAQY               | 2.34 | 0.01 | 2.73 | 0.68 | 0.22 | 0.28 |

|       |   |        |                    |      |      |      |      |      |      |
|-------|---|--------|--------------------|------|------|------|------|------|------|
|       |   |        | INRIADQAQYNQMHML   |      |      |      |      |      |      |
| 33033 | 0 | 27733  | SNKSASQNVRTAEELG   | 3.56 | 0.01 | 2.73 | 0.44 | 0.85 | 0.28 |
|       |   |        | MQPAKI             |      |      |      |      |      |      |
|       |   |        | INSCSVRLVDIKKEKPFS |      |      |      |      |      |      |
| 33034 | 0 | 131918 | NSKVECQAQARTHNNQ   | 3.51 | 0.01 | 0.78 | 0.44 | 1.13 | 1.39 |
|       |   |        | AS                 |      |      |      |      |      |      |
| 33035 | 0 | 120633 | INSEQSKEVY         | 2.31 | 0.01 | 2.18 | 2.16 | 0.22 | 0.28 |
| 33036 | 0 | 152671 | INSSTEGLLL         | 2.29 | 0.01 | 2.18 | 2.16 | 0.22 | 0.28 |
| 33037 | 0 | 27745  | INTILNNIYVLYALR    | 2.71 | 0.01 | 3.50 | 2.22 | 0.22 | 0.28 |
| 33038 | 0 | 27748  | INTLQNQG           | 2.14 | 0.01 | 2.40 | 2.43 | 0.22 | 0.28 |
| 33039 | 0 | 27750  | INTNGSWHINST       | 2.52 | 0.01 | 2.68 | 2.74 | 0.22 | 0.28 |
| 33040 | 0 | 27757  | INTTGNPEH          | 2.22 | 0.01 | 3.00 | 0.44 | 0.85 | 0.28 |
| 33041 | 0 | 133608 | INTTVCAGY          | 2.20 | 0.01 | 1.60 | 0.68 | 0.22 | 0.28 |
| 33042 | 0 | 27758  | INTVDSNNLPIL       | 2.49 | 0.01 | 3.33 | 0.44 | 1.23 | 0.85 |
| 33043 | 0 | 27766  | INVNGDNNYGKTIIN    | 2.71 | 0.01 | 1.66 | 1.15 | 0.22 | 0.28 |
| 33044 | 0 | 27766  | INVNGDNNYGKTIIN    | 2.71 | 0.01 | 1.66 | 1.15 | 0.22 | 0.28 |
| 33045 | 0 | 230476 | INVREGIAFRPASKT    | 2.65 | 0.01 | 0.78 | 0.44 | 1.13 | 0.28 |
| 33046 | 0 | 100159 | INYACGQGIDCG       | 2.50 | 0.01 | 2.88 | 1.20 | 0.22 | 0.85 |
| 33047 | 0 | 518909 | INYDDKGKEVITKRR    | 2.66 | 0.01 | 2.24 | 0.44 | 1.41 | 1.28 |
| 33048 | 0 | 115297 | INYWLAHKAL         | 2.31 | 0.01 | 1.60 | 0.44 | 1.23 | 0.85 |
| 33049 | 0 | 115297 | INYWLAHKAL         | 2.31 | 0.01 | 1.60 | 0.44 | 1.23 | 0.85 |
| 33050 | 0 | 83789  | IPALTAETGHTSQV     | 2.65 | 0.01 | 3.75 | 0.44 | 0.85 | 0.28 |
| 33051 | 0 | 27795  | IPALTAVETGATNPL    | 2.70 | 0.01 | 2.57 | 0.68 | 0.22 | 0.85 |
| 33052 | 0 | 27795  | IPALTAVETGATNPL    | 2.70 | 0.01 | 2.57 | 0.68 | 0.22 | 2.02 |
| 33053 | 0 | 236110 | IPCFLAGDTR         | 2.26 | 0.01 | 0.78 | 0.44 | 1.13 | 2.66 |
| 33054 | 0 | 236110 | IPCFLAGDTR         | 2.26 | 0.01 | 0.78 | 3.41 | 0.22 | 2.66 |
|       |   |        | IPCTTYQQTTAETVEEID |      |      |      |      |      |      |
| 33055 | 0 | 27805  | MH                 | 2.93 | 0.01 | 3.13 | 2.43 | 0.22 | 0.28 |
|       |   |        | IPCTTYQQTTAETVEEID |      |      |      |      |      |      |
| 33056 | 0 | 27805  | MH                 | 2.93 | 0.01 | 3.13 | 2.43 | 0.22 | 0.28 |
|       |   |        | IPCTTYQQTTAETVEEID |      |      |      |      |      |      |
| 33057 | 0 | 95101  | MHMPPDTPDRTLLSQQ   | 3.59 | 0.01 | 3.13 | 0.68 | 0.22 | 0.85 |
|       |   |        | SGNVKI             |      |      |      |      |      |      |
| 33058 | 0 | 27812  | IPDREVLRY          | 2.21 | 0.01 | 2.41 | 0.44 | 0.85 | 0.28 |
| 33059 | 0 | 27813  | IPDREVLRYREFDEM    | 2.61 | 0.01 | 2.41 | 0.44 | 0.85 | 0.28 |
| 33060 | 0 | 27813  | IPDREVLRYREFDEM    | 2.61 | 0.01 | 2.41 | 0.44 | 0.85 | 0.28 |
| 33061 | 0 | 27813  | IPDREVLRYREFDEM    | 2.61 | 0.01 | 2.41 | 0.44 | 0.85 | 0.28 |
| 33062 | 0 | 27813  | IPDREVLRYREFDEM    | 2.61 | 0.01 | 2.41 | 0.44 | 0.85 | 0.28 |
| 33063 | 0 | 131487 | IPDRFSG            | 1.99 | 0.01 | 0.78 | 1.15 | 0.22 | 0.28 |
| 33064 | 0 | 122116 | IPDSRLK            | 1.99 | 0.01 | 0.90 | 0.44 | 1.13 | 1.27 |
|       |   |        | IPEAEDSWWTGDSASLD  |      |      |      |      |      |      |
| 33065 | 0 | 190670 | TAGIKLTVPIEKF      | 3.36 | 0.01 | 2.75 | 2.13 | 0.22 | 0.28 |
| 33066 | 0 | 146337 | IPEEIKQL           | 2.14 | 0.01 | 0.78 | 3.75 | 0.22 | 0.28 |
| 33067 | 0 | 146337 | IPEEIKQL           | 2.14 | 0.01 | 0.78 | 3.75 | 0.22 | 1.27 |
| 33068 | 0 | 146337 | IPEEIKQL           | 2.14 | 0.01 | 0.78 | 3.75 | 0.22 | 0.28 |
| 33069 | 0 | 146337 | IPEEIKQL           | 2.14 | 0.01 | 0.78 | 3.75 | 0.22 | 1.34 |
| 33070 | 0 | 146337 | IPEEIKQL           | 2.14 | 0.01 | 0.78 | 3.75 | 0.22 | 1.34 |

|       |   |        |                                                |      |      |      |      |      |      |
|-------|---|--------|------------------------------------------------|------|------|------|------|------|------|
| 33071 | 0 | 146338 | IP EEIKQLQQFQKEDAA                             | 2.81 | 0.01 | 0.78 | 3.75 | 0.22 | 0.28 |
| 33072 | 0 | 146338 | IP EEIKQLQQFQKEDAA                             | 2.81 | 0.01 | 0.78 | 1.12 | 0.22 | 0.28 |
| 33073 | 0 | 181109 | IP ELIHYTRNSTKRFYGL<br>MGKKRKRRLGFLLGIG<br>SAI | 3.58 | 0.01 | 4.33 | 0.68 | 0.22 | 0.28 |
| 33074 | 0 | 181109 | IP ELIHYTRNSTKRFYGL<br>MGKKRKRRLGFLLGIG<br>SAI | 3.58 | 0.01 | 4.08 | 3.63 | 0.22 | 0.28 |
| 33075 | 0 | 181109 | IP ELIHYTRNSTKRFYGL<br>MGKKRKRRLGFLLGIG<br>SAI | 3.58 | 0.01 | 4.08 | 3.63 | 0.22 | 1.75 |
| 33076 | 0 | 147041 | IP EQ                                          | 1.57 | 0.01 | 1.86 | 0.44 | 1.93 | 0.85 |
| 33077 | 0 | 434619 | IP FAAAAGTAVQDSRSH<br>VYAHQAQTRHP              | 3.27 | 0.01 | 2.86 | 4.03 | 0.22 | 0.28 |
| 33078 | 0 | 434619 | IP FAAAAGTAVQDSRSH<br>VYAHQAQTRHP              | 3.27 | 0.01 | 2.86 | 4.03 | 0.22 | 0.28 |
| 33079 | 0 | 27832  | IP FGVT                                        | 1.88 | 0.01 | 3.51 | 0.68 | 0.22 | 0.28 |
| 33080 | 0 | 153400 | IP FHKHPHHRGT                                  | 2.48 | 0.01 | 0.90 | 1.15 | 0.22 | 0.28 |
| 33081 | 0 | 130901 | IP FPTLFAP                                     | 2.25 | 0.01 | 0.90 | 0.44 | 1.13 | 1.39 |
| 33082 | 0 | 27847  | IP FYGKAI                                      | 2.13 | 0.01 | 1.96 | 0.68 | 0.22 | 1.27 |
| 33083 | 0 | 27847  | IP FYGKAI                                      | 2.13 | 0.01 | 1.96 | 0.68 | 0.22 | 1.48 |
| 33084 | 0 | 27847  | IP FYGKAI                                      | 2.13 | 0.01 | 1.96 | 0.68 | 0.22 | 0.28 |
| 33085 | 0 | 27847  | IP FYGKAI                                      | 2.13 | 0.01 | 1.96 | 0.68 | 0.22 | 1.48 |
| 33086 | 0 | 27847  | IP FYGKAI                                      | 2.13 | 0.01 | 1.96 | 0.68 | 0.22 | 0.28 |
| 33087 | 0 | 27850  | IP GEFGLP GP                                   | 2.35 | 0.01 | 1.60 | 0.44 | 1.23 | 1.27 |
| 33088 | 0 | 120634 | IP GK RNEKFYEC                                 | 2.45 | 0.01 | 2.19 | 1.12 | 0.22 | 0.28 |
| 33089 | 0 | 120634 | IP GK RNEKFYEC                                 | 2.45 | 0.01 | 2.19 | 1.12 | 0.22 | 0.28 |
| 33090 | 0 | 120634 | IP GK RNEKFYEC                                 | 2.45 | 0.01 | 2.19 | 1.12 | 0.22 | 0.28 |
| 33091 | 0 | 27855  | IP GSTTTSTGPCKTCTTP<br>AQGNSKFPSC              | 3.30 | 0.01 | 2.08 | 2.25 | 0.22 | 0.28 |
| 33092 | 0 | 27855  | IP GSTTTSTGPCKTCTTP<br>AQGNSKFPSC              | 3.30 | 0.01 | 2.08 | 2.25 | 0.22 | 0.28 |
| 33093 | 0 | 27856  | IP GSTTTSTGPCKTCTTP<br>AQGNSMFPSC              | 3.28 | 0.01 | 3.28 | 1.12 | 0.22 | 1.57 |
| 33094 | 0 | 27861  | IP HDIDLGESRVVIQDYD<br>NQHEQDR                 | 3.16 | 0.01 | 2.53 | 0.44 | 0.85 | 0.28 |
| 33095 | 0 | 79575  | IP KARRPEGRTWAQPGY                             | 2.79 | 0.01 | 3.18 | 0.44 | 0.85 | 0.28 |
| 33096 | 0 | 79576  | IP KDRRSTGKSWGKPGY                             | 2.80 | 0.01 | 4.15 | 0.44 | 0.85 | 0.28 |
| 33097 | 0 | 120635 | IP KDVLEIYS                                    | 2.30 | 0.01 | 2.18 | 2.16 | 0.22 | 0.28 |
| 33098 | 0 | 118420 | IP KESKNTEVLVWEE                               | 2.66 | 0.01 | 3.78 | 0.44 | 1.13 | 0.85 |
| 33099 | 0 | 27895  | IP KGKKGQAY                                    | 2.41 | 0.01 | 3.57 | 0.44 | 1.23 | 1.27 |
| 33100 | 0 | 27895  | IP KGKKGQAY                                    | 2.41 | 0.01 | 3.57 | 0.44 | 1.23 | 0.28 |
| 33101 | 0 | 27896  | IP GTLTW                                       | 2.12 | 0.01 | 2.40 | 2.43 | 0.22 | 0.28 |

|       |   |        |                                    |      |      |      |      |      |      |
|-------|---|--------|------------------------------------|------|------|------|------|------|------|
| 33102 | 0 | 167760 | IPKGTLTWS                          | 2.21 | 0.01 | 2.40 | 2.43 | 0.22 | 0.28 |
| 33103 | 0 | 27903  | IPKPFFRDEVSFVCV                    | 2.61 | 0.01 | 2.69 | 0.44 | 0.85 | 0.28 |
| 33104 | 0 | 27903  | IPKPFFRDEVSFVCV                    | 2.61 | 0.01 | 2.69 | 0.44 | 0.85 | 0.28 |
| 33105 | 0 | 27903  | IPKPFFRDEVSFVCV                    | 2.61 | 0.01 | 2.69 | 0.44 | 0.85 | 0.28 |
| 33106 | 0 | 110293 | IPKPSPWAPKKHRLSS<br>DQD            | 2.94 | 0.01 | 1.86 | 0.44 | 0.85 | 0.28 |
| 33107 | 0 | 110293 | IPKPSPWAPKKHRLSS<br>DQD            | 2.94 | 0.01 | 1.86 | 0.44 | 1.41 | 0.28 |
| 33108 | 0 | 136392 | IPKSRKRRIPQR                       | 2.53 | 0.01 | 0.90 | 0.68 | 0.22 | 1.27 |
| 33109 | 0 | 136392 | IPKSRKRRIPQR                       | 2.53 | 0.01 | 0.90 | 0.68 | 0.22 | 1.48 |
| 33110 | 0 | 136392 | IPKSRKRRIPQR                       | 2.53 | 0.01 | 0.90 | 0.68 | 0.22 | 1.27 |
| 33111 | 0 | 27909  | IPKVMQLVSDFFRGKEL<br>KKS           | 2.91 | 0.01 | 2.30 | 0.44 | 0.85 | 0.28 |
| 33112 | 0 | 27909  | IPKVMQLVSDFFRGKEL<br>KKS           | 2.91 | 0.01 | 2.30 | 0.44 | 1.41 | 0.28 |
| 33113 | 0 | 114414 | IPKVPPGPNITA                       | 2.50 | 4.45 | 2.53 | 0.44 | 1.23 | 0.28 |
| 33114 | 0 | 114414 | IPKVPPGPNITA                       | 2.50 | 4.45 | 2.53 | 0.44 | 1.23 | 0.28 |
| 33115 | 0 | 27910  | IPKVPPGPNITA                       | 2.50 | 0.01 | 2.53 | 0.44 | 1.23 | 0.28 |
| 33116 | 0 | 27910  | IPKVPPGPNITA                       | 2.50 | 0.01 | 2.53 | 0.44 | 1.23 | 0.28 |
| 33117 | 0 | 27910  | IPKVPPGPNITA                       | 2.50 | 0.01 | 2.53 | 0.44 | 1.23 | 1.27 |
| 33118 | 0 | 27911  | IPKVPPGPNITATYGDK<br>WLDKSTWYGKPTG | 3.39 | 0.01 | 2.53 | 0.68 | 0.22 | 0.28 |
| 33119 | 0 | 27911  | IPKVPPGPNITATYGDK<br>WLDKSTWYGKPTG | 3.39 | 0.01 | 2.53 | 1.12 | 0.22 | 0.28 |
| 33120 | 0 | 27911  | IPKVPPGPNITATYGDK<br>WLDKSTWYGKPTG | 3.39 | 0.01 | 2.53 | 0.68 | 0.22 | 0.85 |
| 33121 | 0 | 27911  | IPKVPPGPNITATYGDK<br>WLDKSTWYGKPTG | 3.39 | 0.01 | 2.53 | 0.68 | 0.22 | 0.85 |
| 33122 | 0 | 27911  | IPKVPPGPNITATYGDK<br>WLDKSTWYGKPTG | 3.39 | 0.01 | 2.53 | 0.68 | 0.22 | 0.85 |
| 33123 | 0 | 27911  | IPKVPPGPNITATYGDK<br>WLDKSTWYGKPTG | 3.39 | 0.01 | 2.53 | 0.68 | 0.22 | 0.85 |
| 33124 | 0 | 27911  | IPKVPPGPNITATYGDK<br>WLDKSTWYGKPTG | 3.39 | 0.01 | 2.53 | 1.12 | 0.22 | 2.35 |
| 33125 | 0 | 27918  | IPLGDLFKHQEERI                     | 2.59 | 0.01 | 2.40 | 2.43 | 0.22 | 0.28 |
| 33126 | 0 | 27918  | IPLGDLFKHQEERI                     | 2.59 | 0.01 | 2.40 | 2.43 | 0.22 | 0.28 |
| 33127 | 0 | 27918  | IPLGDLFKHQEERI                     | 2.59 | 0.01 | 2.40 | 2.43 | 0.22 | 0.28 |
| 33128 | 0 | 145831 | IPLGTRP                            | 2.02 | 0.01 | 1.86 | 0.68 | 0.22 | 1.34 |
| 33129 | 0 | 145831 | IPLGTRP                            | 2.02 | 0.01 | 1.86 | 0.68 | 0.22 | 0.28 |
| 33130 | 0 | 145831 | IPLGTRP                            | 2.02 | 0.01 | 1.86 | 0.68 | 0.22 | 0.28 |

|       |   |        |                          |      |      |      |      |      |      |
|-------|---|--------|--------------------------|------|------|------|------|------|------|
| 33131 | 0 | 145832 | IPLGTRPP                 | 2.11 | 0.01 | 1.86 | 0.68 | 0.22 | 0.28 |
| 33132 | 0 | 145832 | IPLGTRPP                 | 2.11 | 0.01 | 1.86 | 0.68 | 0.22 | 0.28 |
| 33133 | 0 | 27921  | IPLKAPYPFKHLKRR          | 2.68 | 0.01 | 0.90 | 0.68 | 0.22 | 1.39 |
| 33134 | 0 | 27932  | IPLLRTQ                  | 2.01 | 0.01 | 2.24 | 1.12 | 0.22 | 0.28 |
| 33135 | 0 | 27932  | IPLLRTQ                  | 2.01 | 0.01 | 2.24 | 0.68 | 0.22 | 0.28 |
|       |   |        | IPLNQKVLEISKKLNNM        |      |      |      |      |      |      |
| 33136 | 0 | 27934  | NNNINEYKNYLSNFIHM<br>LKE | 3.57 | 0.01 | 2.22 | 0.44 | 1.74 | 0.28 |
|       |   |        | IPLNQKVLEISKKLNNM        |      |      |      |      |      |      |
| 33137 | 0 | 27934  | NNNINEYKNYLSNFIHM<br>LKE | 3.57 | 0.01 | 2.22 | 0.44 | 1.74 | 0.28 |
|       |   |        |                          |      |      |      |      |      |      |
| 33138 | 0 | 27935  | IPLNVGK                  | 1.99 | 0.01 | 3.53 | 1.15 | 0.22 | 0.28 |
| 33139 | 0 | 189097 | IPLPQSP                  | 2.04 | 0.01 | 0.90 | 2.13 | 0.22 | 0.28 |
| 33140 | 0 | 27946  | IPLVGAPLGG               | 2.33 | 0.01 | 2.68 | 2.74 | 0.22 | 0.28 |
| 33141 | 0 | 313693 | IPMLNLLKSHSKTVG          | 2.65 | 0.01 | 1.61 | 0.44 | 0.85 | 1.28 |
| 33142 | 0 | 423359 | IPNDVSESFERYKEL          | 2.64 | 0.01 | 2.51 | 0.44 | 2.35 | 1.28 |
| 33143 | 0 | 450711 | IPNGHFT                  | 1.99 | 0.01 | 0.90 | 0.44 | 1.23 | 1.39 |
| 33144 | 0 | 27959  | IPNGTYRA                 | 2.10 | 0.01 | 2.21 | 1.12 | 0.22 | 0.28 |
| 33145 | 0 | 27959  | IPNGTYRA                 | 2.10 | 0.01 | 2.21 | 0.44 | 0.85 | 0.28 |
| 33146 | 0 | 27960  | IPNGTYRATY               | 2.31 | 0.01 | 2.21 | 1.12 | 0.22 | 0.28 |
| 33147 | 0 | 27960  | IPNGTYRATY               | 2.31 | 0.01 | 2.21 | 1.12 | 0.22 | 0.28 |
| 33148 | 0 | 27961  | IPNKKPGKTTT              | 2.49 | 0.01 | 2.38 | 0.68 | 0.22 | 0.28 |
| 33149 | 0 | 27961  | IPNKKPGKTTT              | 2.49 | 0.01 | 2.38 | 0.44 | 1.59 | 0.28 |
| 33150 | 0 | 27961  | IPNKKPGKTTT              | 2.49 | 0.01 | 2.38 | 0.44 | 1.74 | 0.28 |
| 33151 | 0 | 27961  | IPNKKPGKTTT              | 2.49 | 0.01 | 2.38 | 0.44 | 1.74 | 0.28 |
| 33152 | 0 | 27965  | IPNPLLGLD                | 2.25 | 0.01 | 4.45 | 1.15 | 0.22 | 1.57 |
| 33153 | 0 | 27965  | IPNPLLGLD                | 2.25 | 0.01 | 4.45 | 1.15 | 0.22 | 0.85 |
| 33154 | 0 | 27965  | IPNPLLGLD                | 2.25 | 0.01 | 4.45 | 1.15 | 0.22 | 1.27 |
| 33155 | 0 | 141677 | IPNPQERTLTLV             | 2.48 | 0.01 | 0.78 | 0.44 | 1.93 | 0.28 |
| 33156 | 0 | 423360 | IPNRIRYIPATQGDV          | 2.67 | 0.01 | 2.51 | 0.44 | 2.35 | 1.28 |
| 33157 | 0 | 127698 | IPNSTHT                  | 2.02 | 0.01 | 0.90 | 0.44 | 1.13 | 1.39 |
| 33158 | 0 | 134411 | IPP                      | 1.32 | 0.01 | 2.04 | 0.68 | 0.22 | 1.57 |
| 33159 | 0 | 134411 | IPP                      | 1.32 | 0.01 | 2.04 | 0.68 | 0.22 | 0.28 |
| 33160 | 0 | 134411 | IPP                      | 1.32 | 0.01 | 2.04 | 0.68 | 0.22 | 1.48 |
| 33161 | 0 | 77920  | IPPFYKNFWWP              | 2.48 | 0.01 | 0.90 | 1.15 | 0.22 | 0.85 |
| 33162 | 0 | 123329 | IPPGAMPP                 | 2.13 | 0.01 | 0.78 | 1.20 | 0.22 | 0.28 |
| 33163 | 0 | 123329 | IPPGAMPP                 | 2.13 | 0.01 | 0.78 | 0.44 | 1.13 | 0.28 |
|       |   |        | IPPGRGTPMGMPPPG          |      |      |      |      |      |      |
| 33164 | 0 | 117533 | MRPPPPGMRGLL             | 3.28 | 0.01 | 0.78 | 0.44 | 1.13 | 0.28 |
|       |   |        | IPPGRGTPMGMPPPG          |      |      |      |      |      |      |
| 33165 | 0 | 117533 | MRPPPPGMRGLL             | 3.28 | 0.01 | 0.78 | 0.44 | 1.13 | 0.28 |
|       |   |        | IPPGRGTPMGMPPPG          |      |      |      |      |      |      |
| 33166 | 0 | 117533 | MRPPPPGMRGLL             | 3.28 | 0.01 | 0.78 | 0.44 | 1.13 | 0.28 |
|       |   |        | IPPGRGTPMGMPPPG          |      |      |      |      |      |      |
| 33167 | 0 | 117533 | MRPPPPGMRGLL             | 3.28 | 0.01 | 0.78 | 0.44 | 1.13 | 0.28 |
|       |   |        | IPPGRGTPMGMPPPG          |      |      |      |      |      |      |
| 33168 | 0 | 117533 | MRPPPPGMRGLL             | 3.28 | 0.01 | 0.78 | 0.44 | 1.13 | 0.28 |



|       |   |        |                                     |      |      |      |      |      |      |
|-------|---|--------|-------------------------------------|------|------|------|------|------|------|
| 33169 | 0 | 149062 | IPPNPSQ                             | 2.04 | 0.01 | 0.90 | 2.13 | 1.59 | 1.39 |
| 33170 | 0 | 99823  | IPPNWHIPSIQ                         | 2.43 | 0.01 | 2.40 | 0.44 | 1.59 | 0.85 |
| 33171 | 0 | 99823  | IPPNWHIPSIQ                         | 2.43 | 0.01 | 2.40 | 0.44 | 1.59 | 0.85 |
| 33172 | 0 | 99823  | IPPNWHIPSIQ                         | 2.43 | 0.01 | 2.40 | 0.44 | 1.59 | 0.85 |
| 33173 | 0 | 123331 | IPPPGLAP                            | 2.15 | 0.01 | 0.78 | 1.20 | 0.22 | 0.28 |
| 33174 | 0 | 123331 | IPPPGLAP                            | 2.15 | 0.01 | 0.78 | 0.44 | 1.13 | 0.28 |
| 33175 | 0 | 27979  | IPPPPRGVPQIEVTF                     | 2.69 | 0.01 | 2.30 | 0.44 | 0.85 | 0.28 |
| 33176 | 0 | 27979  | IPPPPRGVPQIEVTF                     | 2.69 | 0.01 | 2.30 | 0.44 | 1.41 | 0.28 |
| 33177 | 0 | 27980  | IPPPRRKRTVVLTE                      | 2.62 | 0.01 | 1.96 | 0.44 | 0.85 | 0.28 |
| 33178 | 0 | 27980  | IPPPRRKRTVVLTE                      | 2.62 | 0.01 | 1.96 | 0.44 | 0.85 | 0.28 |
| 33179 | 0 | 27980  | IPPPRRKRTVVLTE                      | 2.62 | 0.01 | 1.96 | 0.44 | 0.85 | 0.28 |
| 33180 | 0 | 134412 | IPPPYV                              | 1.91 | 0.01 | 2.04 | 0.68 | 0.22 | 1.57 |
| 33181 | 0 | 134412 | IPPPYV                              | 1.91 | 0.01 | 2.04 | 0.68 | 0.22 | 0.28 |
| 33182 | 0 | 103993 | IPPSLRTLEDNEERMS                    | 2.73 | 0.01 | 0.78 | 0.44 | 1.13 | 0.85 |
| 33183 | 0 | 103993 | IPPSLRTLEDNEERMS                    | 2.73 | 0.01 | 0.78 | 0.44 | 1.13 | 0.85 |
| 33184 | 0 | 103993 | IPPSLRTLEDNEERMS                    | 2.73 | 0.01 | 0.78 | 0.44 | 1.13 | 1.27 |
| 33185 | 0 | 102537 | IPPSLRTLEDNEERMSRL<br>SK            | 2.95 | 0.01 | 0.78 | 1.81 | 0.22 | 0.28 |
| 33186 | 0 | 102537 | IPPSLRTLEDNEERMSRL<br>SK            | 2.95 | 0.01 | 0.78 | 1.81 | 0.22 | 0.28 |
| 33187 | 0 | 27985  | IPSSPPQ                             | 2.17 | 0.01 | 2.40 | 2.43 | 0.22 | 0.28 |
| 33188 | 0 | 27987  | IPPTTTPVPPGYLI                      | 2.65 | 0.01 | 2.40 | 2.43 | 0.22 | 0.28 |
| 33189 | 0 | 27987  | IPPTTTPVPPGYLI                      | 2.65 | 0.01 | 2.40 | 2.43 | 0.22 | 0.28 |
| 33190 | 0 | 27987  | IPPTTTPVPPGYLI                      | 2.65 | 0.01 | 2.40 | 2.43 | 0.22 | 0.28 |
| 33191 | 0 | 134100 | IPPWEAPKEHKYKA                      | 2.64 | 0.01 | 0.78 | 0.68 | 0.22 | 1.27 |
| 33192 | 0 | 134100 | IPPWEAPKEHKYKA                      | 2.64 | 0.01 | 0.78 | 0.68 | 0.22 | 1.27 |
| 33193 | 0 | 134101 | IPPWEAPKEHKYKAEEH<br>TVVLTVTGEP     | 3.28 | 0.01 | 0.78 | 0.68 | 0.22 | 1.27 |
| 33194 | 0 | 134102 | IPPWEAPKEHKYKAEEH<br>TVVLTVTGEPCHFP | 3.37 | 0.01 | 0.78 | 0.68 | 0.22 | 1.39 |
| 33195 | 0 | 98832  | IPPYCTIAPFGI                        | 2.50 | 0.01 | 1.86 | 0.44 | 1.93 | 1.27 |
| 33196 | 0 | 27997  | IPQPQWTP                            | 2.16 | 0.01 | 2.40 | 2.43 | 0.22 | 0.28 |
| 33197 | 0 | 27997  | IPQPQWTP                            | 2.16 | 0.01 | 2.40 | 1.15 | 0.22 | 1.34 |
| 33198 | 0 | 27997  | IPQPQWTP                            | 2.16 | 0.01 | 2.40 | 0.68 | 0.22 | 1.34 |
| 33199 | 0 | 27997  | IPQPQWTP                            | 2.16 | 0.01 | 2.40 | 0.68 | 0.22 | 0.85 |
| 33200 | 0 | 27997  | IPQPQWTP                            | 2.16 | 0.01 | 2.40 | 0.68 | 0.22 | 0.28 |
| 33201 | 0 | 419226 | IPQQPLRTQATATYYHP<br>AAAPP          | 3.05 | 0.01 | 3.50 | 2.13 | 0.22 | 0.28 |
| 33202 | 0 | 173940 | IPQQPQQFPQQQQ                       | 2.59 | 0.01 | 1.86 | 0.44 | 1.23 | 0.85 |
| 33203 | 0 | 27998  | IPQQPQQPFP                          | 2.36 | 0.01 | 2.83 | 0.68 | 0.22 | 0.85 |
| 33204 | 0 | 27998  | IPQQPQQPFP                          | 2.36 | 0.01 | 2.83 | 0.68 | 0.22 | 0.28 |
| 33205 | 0 | 27998  | IPQQPQQPFP                          | 2.36 | 0.01 | 1.86 | 0.44 | 1.23 | 0.85 |
| 33206 | 0 | 226050 | IPQQQLP                             | 2.04 | 0.01 | 0.90 | 2.66 | 0.22 | 1.27 |
| 33207 | 0 | 27999  | IPQQTQQPFP                          | 2.36 | 0.01 | 2.83 | 0.68 | 0.22 | 0.85 |
| 33208 | 0 | 27999  | IPQQTQQPFP                          | 2.36 | 0.01 | 2.83 | 0.68 | 0.22 | 0.28 |
| 33209 | 0 | 28023  | IPQSLDSWWTSL                        | 2.48 | 0.01 | 2.08 | 0.68 | 0.22 | 0.28 |
| 33210 | 0 | 509766 | IPQVWRDWFKLP                        | 2.45 | 0.01 | 0.90 | 1.12 | 0.22 | 1.27 |

|       |   |        |                          |      |      |      |      |      |      |
|-------|---|--------|--------------------------|------|------|------|------|------|------|
| 33211 | 0 | 509766 | IPQVWRDWFKLP             | 2.45 | 0.01 | 0.90 | 1.12 | 0.22 | 2.56 |
| 33212 | 0 | 105252 | IPRCRHGY                 | 2.12 | 0.01 | 4.33 | 0.44 | 1.23 | 0.85 |
| 33213 | 0 | 178253 | IPRFK                    | 1.74 | 0.01 | 3.89 | 0.68 | 0.22 | 1.34 |
| 33214 | 0 | 178253 | IPRFK                    | 1.74 | 0.01 | 3.89 | 0.68 | 0.22 | 2.35 |
| 33215 | 0 | 178253 | IPRFK                    | 1.74 | 0.01 | 3.89 | 0.68 | 0.22 | 1.34 |
| 33216 | 0 | 178253 | IPRFK                    | 1.74 | 0.01 | 3.89 | 0.68 | 0.22 | 1.34 |
| 33217 | 0 | 178253 | IPRFK                    | 1.74 | 0.01 | 3.89 | 0.68 | 0.22 | 1.34 |
| 33218 | 0 | 178253 | IPRFK                    | 1.74 | 0.01 | 3.89 | 0.68 | 0.22 | 1.34 |
| 33219 | 0 | 178253 | IPRFK                    | 1.74 | 0.01 | 3.89 | 0.68 | 0.22 | 2.02 |
| 33220 | 0 | 178253 | IPRFK                    | 1.74 | 0.01 | 3.89 | 0.68 | 0.22 | 1.34 |
| 33221 | 0 | 28041  | IPRFKVSPYLFNVPI          | 2.69 | 0.01 | 2.43 | 0.44 | 0.85 | 0.28 |
| 33222 | 0 | 181350 | IPRPLRNQPYLFKTN          | 2.68 | 0.01 | 2.82 | 1.15 | 0.22 | 0.28 |
| 33223 | 0 | 78424  | IPRSRQIDLQIG             | 2.50 | 0.01 | 3.81 | 0.68 | 0.22 | 1.34 |
| 33224 | 0 | 78424  | IPRSRQIDLQIG             | 2.50 | 0.01 | 3.81 | 0.68 | 0.22 | 1.27 |
| 33225 | 0 | 78424  | IPRSRQIDLQIG             | 2.50 | 0.01 | 3.81 | 0.68 | 0.22 | 2.35 |
| 33226 | 0 | 78424  | IPRSRQIDLQIG             | 2.50 | 0.01 | 3.81 | 0.68 | 0.22 | 1.34 |
| 33227 | 0 | 78424  | IPRSRQIDLQIG             | 2.50 | 0.01 | 3.81 | 0.68 | 0.22 | 0.28 |
| 33228 | 0 | 78424  | IPRSRQIDLQIG             | 2.50 | 0.01 | 3.81 | 0.68 | 0.22 | 0.85 |
| 33229 | 0 | 78424  | IPRSRQIDLQIG             | 2.50 | 0.01 | 3.81 | 0.68 | 0.22 | 1.34 |
| 33230 | 0 | 243810 | IPSFTMSARTGA             | 2.48 | 0.01 | 0.90 | 0.44 | 0.22 | 1.39 |
| 33231 | 0 | 127700 | IPSHAFSNLPNISRIYVSIA     | 2.97 | 0.01 | 0.78 | 0.44 | 1.13 | 0.28 |
| 33232 | 0 | 125447 | IPSHAFSNLPNISRIYVSI<br>D | 2.95 | 0.01 | 0.78 | 0.44 | 1.13 | 0.28 |
| 33233 | 0 | 150999 | IPSIQSRGLFGAIAAG         | 2.71 | 0.01 | 2.87 | 0.44 | 0.85 | 0.28 |
| 33234 | 0 | 136393 | IPSRKRRNRIQQ             | 2.50 | 0.01 | 0.90 | 0.68 | 0.22 | 1.27 |
| 33235 | 0 | 136393 | IPSRKRRNRIQQ             | 2.50 | 0.01 | 0.90 | 0.68 | 0.22 | 1.48 |
| 33236 | 0 | 136393 | IPSRKRRNRIQQ             | 2.50 | 0.01 | 0.90 | 0.68 | 0.22 | 1.27 |
| 33237 | 0 | 28074  | IPSTACTDIAWVRLPCHY<br>G  | 2.86 | 0.01 | 0.90 | 2.36 | 0.22 | 0.28 |
| 33238 | 0 | 28074  | IPSTACTDIAWVRLPCHY<br>G  | 2.86 | 0.01 | 0.90 | 0.44 | 1.74 | 0.28 |
| 33239 | 0 | 28075  | IPSTAFTDIAWVRLPNHY       | 2.80 | 0.01 | 0.90 | 0.44 | 1.74 | 1.34 |
| 33240 | 0 | 28075  | IPSTAFTDIAWVRLPNHY       | 2.80 | 0.01 | 0.90 | 1.20 | 0.22 | 1.34 |
| 33241 | 0 | 28075  | IPSTAFTDIAWVRLPNHY       | 2.80 | 0.01 | 0.90 | 0.44 | 1.74 | 0.28 |
| 33242 | 0 | 28075  | IPSTAFTDIAWVRLPNHY       | 2.80 | 0.01 | 0.90 | 0.44 | 1.74 | 1.27 |
| 33243 | 0 | 28075  | IPSTAFTDIAWVRLPNHY       | 2.80 | 0.01 | 0.90 | 1.20 | 0.22 | 0.28 |
| 33244 | 0 | 28075  | IPSTAFTDIAWVRLPNHY       | 2.80 | 0.01 | 0.90 | 1.20 | 0.22 | 0.28 |
| 33245 | 0 | 28075  | IPSTAFTDIAWVRLPNHY       | 2.80 | 0.01 | 0.90 | 3.93 | 0.22 | 0.28 |

|       |   |        |                           |      |      |      |      |      |      |
|-------|---|--------|---------------------------|------|------|------|------|------|------|
| 33246 | 0 | 28076  | IPSTAFTDIAWVRLPNHY<br>G   | 2.84 | 0.01 | 0.90 | 2.36 | 0.22 | 0.28 |
| 33247 | 0 | 28076  | IPSTAFTDIAWVRLPNHY<br>G   | 2.84 | 0.01 | 0.90 | 0.44 | 1.74 | 0.28 |
| 33248 | 0 | 107448 | IPSTVKA                   | 1.99 | 0.01 | 0.78 | 2.36 | 0.22 | 0.28 |
| 33249 | 0 | 107448 | IPSTVKA                   | 1.99 | 0.01 | 0.78 | 2.36 | 0.22 | 0.85 |
| 33250 | 0 | 105886 | IPSTVKAGELEKI             | 2.54 | 0.01 | 0.78 | 0.44 | 1.13 | 1.27 |
| 33251 | 0 | 28085  | IPTGGIQRGGRGPCQRQ<br>QRS  | 3.00 | 0.01 | 2.40 | 1.12 | 0.22 | 0.28 |
| 33252 | 0 | 28085  | IPTGGIQRGGRGPCQRQ<br>QRS  | 3.00 | 0.01 | 2.40 | 2.37 | 0.22 | 1.48 |
| 33253 | 0 | 28085  | IPTGGIQRGGRGPCQRQ<br>QRS  | 3.00 | 0.01 | 2.40 | 2.37 | 0.22 | 0.85 |
| 33254 | 0 | 115795 | IPTINTIASG                | 2.34 | 0.01 | 1.60 | 0.44 | 1.23 | 0.85 |
| 33255 | 0 | 99348  | IPTLNQHVRASG              | 2.40 | 0.01 | 0.90 | 1.12 | 0.22 | 1.39 |
| 33256 | 0 | 95472  | IPTPPTDPVYQDLPTPSI<br>P   | 2.99 | 0.01 | 2.39 | 2.25 | 0.22 | 0.28 |
| 33257 | 0 | 168896 | IPTSFCGYGDYLRKPESF<br>GKA | 2.97 | 0.01 | 3.89 | 2.02 | 1.59 | 0.28 |
| 33258 | 0 | 168896 | IPTSFCGYGDYLRKPESF<br>GKA | 2.97 | 0.01 | 3.89 | 2.02 | 1.59 | 0.85 |
| 33259 | 0 | 102538 | IPTSGN                    | 1.88 | 0.01 | 3.04 | 1.20 | 0.22 | 0.28 |
| 33260 | 0 | 168897 | IPTSycGYADYKKKPRLF<br>GHP | 2.95 | 0.01 | 3.78 | 2.36 | 0.22 | 0.28 |
| 33261 | 0 | 168897 | IPTSycGYADYKKKPRLF<br>GHP | 2.95 | 0.01 | 3.78 | 2.02 | 1.59 | 0.85 |
| 33262 | 0 | 168897 | IPTSycGYADYKKKPRLF<br>GHP | 2.95 | 0.01 | 3.78 | 2.02 | 1.59 | 0.85 |
| 33263 | 0 | 168897 | IPTSycGYADYKKKPRLF<br>GHP | 2.95 | 0.01 | 3.78 | 2.02 | 1.59 | 0.85 |
| 33264 | 0 | 109348 | IPVDL                     | 1.74 | 0.01 | 3.11 | 0.68 | 0.22 | 0.28 |
| 33265 | 0 | 109348 | IPVDL                     | 1.74 | 0.01 | 3.11 | 0.68 | 0.22 | 1.48 |
| 33266 | 0 | 109349 | IPVDLL                    | 1.86 | 0.01 | 3.11 | 0.68 | 0.22 | 0.28 |
| 33267 | 0 | 109349 | IPVDLL                    | 1.86 | 0.01 | 3.11 | 0.68 | 0.22 | 1.48 |
| 33268 | 0 | 135939 | IPVLDENGLFAP              | 2.45 | 0.01 | 0.90 | 2.16 | 0.22 | 1.27 |
| 33269 | 0 | 135939 | IPVLDENGLFAP              | 2.45 | 0.01 | 0.90 | 0.68 | 0.22 | 0.28 |
| 33270 | 0 | 135939 | IPVLDENGLFAP              | 2.45 | 0.01 | 0.90 | 0.68 | 0.22 | 0.28 |
| 33271 | 0 | 135939 | IPVLDENGLFAP              | 2.45 | 0.01 | 0.90 | 0.68 | 0.22 | 1.34 |
| 33272 | 0 | 28105  | IPVLGTFALVSYIANKVLT       | 2.90 | 0.01 | 3.03 | 0.68 | 0.22 | 1.57 |
| 33273 | 0 | 28105  | IPVLGTFALVSYIANKVLT       | 2.90 | 0.01 | 3.03 | 3.33 | 0.22 | 1.57 |
| 33274 | 0 | 28105  | IPVLGTFALVSYIANKVLT       | 2.90 | 0.01 | 2.08 | 0.44 | 0.22 | 1.57 |
| 33275 | 0 | 28105  | IPVLGTFALVSYIANKVLT       | 2.90 | 0.01 | 2.08 | 1.15 | 0.22 | 1.57 |

|       |   |        |                                               |      |      |      |      |      |      |
|-------|---|--------|-----------------------------------------------|------|------|------|------|------|------|
| 33276 | 0 | 28105  | IPVLGTFALVSYIANKVLT                           | 2.90 | 0.01 | 2.08 | 2.49 | 0.22 | 1.57 |
| 33277 | 0 | 28107  | IPVSDAQR                                      | 2.10 | 0.01 | 3.55 | 0.68 | 0.22 | 0.28 |
| 33278 | 0 | 28107  | IPVSDAQR                                      | 2.10 | 0.01 | 3.55 | 0.68 | 0.22 | 0.28 |
| 33279 | 0 | 120639 | IPVSVTKSVGFQLRGQ<br>SGPTTVK                   | 3.14 | 0.01 | 2.86 | 0.44 | 0.85 | 0.28 |
| 33280 | 0 | 230477 | IPYMEQSSYTIEIQE                               | 2.71 | 0.01 | 0.78 | 0.44 | 1.13 | 0.28 |
| 33281 | 0 | 136394 | IPYTHAHADHTL                                  | 2.49 | 0.01 | 0.90 | 2.74 | 0.22 | 0.85 |
| 33282 | 0 | 165610 | IPYTLDK                                       | 1.99 | 0.01 | 0.90 | 0.44 | 1.23 | 1.39 |
| 33283 | 0 | 115796 | IQAFLLYQEP                                    | 2.30 | 0.01 | 1.60 | 0.44 | 1.23 | 0.85 |
| 33284 | 0 | 115298 | IQAFLLYQEPVLGPVRGP<br>FP                      | 2.96 | 0.01 | 1.60 | 0.44 | 1.23 | 1.28 |
| 33285 | 0 | 28133  | IQAIVSSP                                      | 2.14 | 0.01 | 2.04 | 0.44 | 0.85 | 0.28 |
| 33286 | 0 | 78425  | IQAIVSSPCHNSLILPPFS<br>LSPV                   | 3.11 | 0.01 | 3.19 | 0.44 | 0.85 | 0.28 |
| 33287 | 0 | 230136 | IQAIYKTL PQSVKDELEK<br>GI                     | 2.94 | 0.01 | 3.19 | 0.44 | 1.23 | 1.28 |
| 33288 | 0 | 230136 | IQAIYKTL PQSVKDELEK<br>GI                     | 2.94 | 0.01 | 3.19 | 0.44 | 1.23 | 1.28 |
| 33289 | 0 | 28134  | IQALSALGGDINKV                                | 2.66 | 0.01 | 2.43 | 0.44 | 1.59 | 0.28 |
| 33290 | 0 | 111428 | IQDGDMMVHTGFGAMD                              | 2.68 | 0.01 | 1.86 | 0.68 | 0.22 | 0.28 |
| 33291 | 0 | 97401  | IQDTRNAVRACRIQYHH<br>DPQPVGREKF               | 3.20 | 0.01 | 3.13 | 0.68 | 2.25 | 1.75 |
| 33292 | 0 | 95102  | IQDTRNAVRACRIQYHH<br>DPQPVGREKFTIRPHYG<br>KEI | 3.55 | 0.01 | 3.13 | 1.20 | 0.22 | 0.85 |
| 33293 | 0 | 95102  | IQDTRNAVRACRIQYHH<br>DPQPVGREKFTIRPHYG<br>KEI | 3.55 | 0.01 | 3.13 | 0.68 | 0.22 | 0.85 |
| 33294 | 0 | 115797 | IQDTRNAVRASRIQY                               | 2.69 | 0.01 | 0.90 | 1.81 | 0.22 | 0.28 |
| 33295 | 0 | 115797 | IQDTRNAVRASRIQY                               | 2.69 | 0.01 | 0.90 | 1.81 | 0.22 | 0.28 |
| 33296 | 0 | 115797 | IQDTRNAVRASRIQY                               | 2.69 | 0.01 | 0.90 | 1.81 | 0.22 | 0.28 |
| 33297 | 0 | 115797 | IQDTRNAVRASRIQY                               | 2.69 | 0.01 | 0.90 | 1.81 | 0.22 | 0.28 |
| 33298 | 0 | 115797 | IQDTRNAVRASRIQY                               | 2.69 | 0.01 | 0.90 | 1.81 | 0.22 | 0.28 |
| 33299 | 0 | 115797 | IQDTRNAVRASRIQY                               | 2.69 | 0.01 | 0.90 | 1.81 | 0.22 | 0.28 |
| 33300 | 0 | 115797 | IQDTRNAVRASRIQY                               | 2.69 | 0.01 | 0.90 | 1.81 | 0.22 | 0.28 |
| 33301 | 0 | 140475 | IQDTRNAVRASRIQYHH<br>DP                       | 2.89 | 0.01 | 3.13 | 1.81 | 0.22 | 0.28 |
| 33302 | 0 | 28143  | IQDTYTQKLS                                    | 2.31 | 0.01 | 0.78 | 0.44 | 1.74 | 0.28 |
| 33303 | 0 | 421167 | IQDTYTQKLSVPDGFK                              | 2.71 | 0.01 | 0.78 | 1.12 | 1.41 | 0.28 |
| 33304 | 0 | 28144  | IQEDITRHEQQLIV                                | 2.63 | 0.01 | 2.56 | 2.69 | 0.22 | 0.28 |
| 33305 | 0 | 28144  | IQEDITRHEQQLIV                                | 2.63 | 0.01 | 3.16 | 2.69 | 0.22 | 0.28 |
| 33306 | 0 | 28144  | IQEDITRHEQQLIV                                | 2.63 | 0.01 | 3.16 | 2.69 | 0.22 | 0.28 |
| 33307 | 0 | 134103 | IQEVKEQRISGLLAVL                              | 2.81 | 0.01 | 0.78 | 0.44 | 1.41 | 1.27 |
| 33308 | 0 | 128973 | IQEVRSKS                                      | 2.12 | 0.01 | 0.78 | 0.44 | 1.13 | 0.28 |

|       |   |        |                                   |      |      |      |      |      |      |
|-------|---|--------|-----------------------------------|------|------|------|------|------|------|
| 33309 | 0 | 119952 | IQGTLSKIFKLGGDRSRS<br>GSPMARR     | 3.16 | 0.01 | 0.78 | 3.18 | 2.60 | 1.75 |
| 33310 | 0 | 175908 | IQHAMYLRGISRS LH                  | 2.69 | 0.01 | 2.63 | 1.15 | 0.22 | 0.85 |
| 33311 | 0 | 175908 | IQHAMYLRGISRS LH                  | 2.69 | 0.01 | 2.63 | 1.15 | 0.22 | 0.85 |
| 33312 | 0 | 175908 | IQHAMYLRGISRS LH                  | 2.69 | 0.01 | 2.63 | 1.15 | 0.22 | 0.85 |
| 33313 | 0 | 175908 | IQHAMYLRGISRS LH                  | 2.69 | 0.01 | 2.63 | 1.15 | 0.22 | 0.85 |
| 33314 | 0 | 28165  | IQIIAATMSKAKQYNICC<br>KF          | 2.95 | 0.01 | 2.93 | 1.81 | 0.22 | 0.28 |
| 33315 | 0 | 28165  | IQIIAATMSKAKQYNICC<br>KF          | 2.95 | 0.01 | 2.93 | 2.69 | 0.22 | 0.28 |
| 33316 | 0 | 230137 | IQKAQKIQAIYKTL PQSV<br>KD         | 2.97 | 0.01 | 3.19 | 0.44 | 1.23 | 1.28 |
| 33317 | 0 | 230137 | IQKAQKIQAIYKTL PQSV<br>KD         | 2.97 | 0.01 | 3.19 | 0.44 | 1.23 | 1.28 |
| 33318 | 0 | 28169  | IQKEDVP SER                       | 2.29 | 0.01 | 1.60 | 0.44 | 1.23 | 0.28 |
| 33319 | 0 | 131488 | IQLARRIRGERA                      | 2.52 | 0.01 | 0.78 | 1.12 | 0.22 | 0.28 |
| 33320 | 0 | 28181  | IQLINTDGSWHINRTAL<br>NCNASHNTGW   | 3.25 | 0.01 | 2.41 | 0.68 | 0.22 | 0.28 |
| 33321 | 0 | 175909 | IQLINTNGSWHINR                    | 2.62 | 0.01 | 2.45 | 0.68 | 0.22 | 2.49 |
| 33322 | 0 | 175910 | IQLMNRTQANLAEGP                   | 2.66 | 0.01 | 2.63 | 1.15 | 0.22 | 0.85 |
| 33323 | 0 | 175910 | IQLMNRTQANLAEGP                   | 2.66 | 0.01 | 2.63 | 1.15 | 0.22 | 0.85 |
| 33324 | 0 | 175910 | IQLMNRTQANLAEGP                   | 2.66 | 0.01 | 2.63 | 1.15 | 0.22 | 0.85 |
| 33325 | 0 | 149764 | IQLPDPNQFALPDRT                   | 2.68 | 0.01 | 3.67 | 1.12 | 0.22 | 0.28 |
| 33326 | 0 | 149764 | IQLPDPNQFALPDRT                   | 2.68 | 0.01 | 3.67 | 1.12 | 0.22 | 0.28 |
| 33327 | 0 | 225631 | IQLQVVQATDKLVMH                   | 2.68 | 0.01 | 3.85 | 0.68 | 0.22 | 0.28 |
| 33328 | 0 | 423689 | IQLQVVQATDKLVMHN<br>RGLVMSSAKVS   | 3.23 | 0.01 | 3.85 | 0.68 | 0.22 | 0.28 |
| 33329 | 0 | 423689 | IQLQVVQATDKLVMHN<br>RGLVMSSAKVS   | 3.23 | 0.01 | 3.85 | 0.68 | 0.22 | 0.28 |
| 33330 | 0 | 423689 | IQLQVVQATDKLVMHN<br>RGLVMSSAKVS   | 3.23 | 0.01 | 3.85 | 0.68 | 0.22 | 0.28 |
| 33331 | 0 | 423689 | IQLQVVQATDKLVMHN<br>RGLVMSSAKVS   | 3.23 | 0.01 | 3.85 | 0.68 | 0.22 | 1.48 |
| 33332 | 0 | 423689 | IQLQVVQATDKLVMHN<br>RGLVMSSAKVS   | 3.23 | 0.01 | 3.85 | 0.68 | 0.22 | 1.34 |
| 33333 | 0 | 28186  | IQLVNTNGSWHINRTAL<br>NCNDSLNTGF   | 3.23 | 0.01 | 1.96 | 0.68 | 0.22 | 0.28 |
| 33334 | 0 | 226480 | IQMRTQVELLDEHISIDC                | 2.83 | 0.01 | 3.26 | 3.16 | 0.22 | 0.28 |
| 33335 | 0 | 180910 | IQMSDPAYNINISLPSYY<br>PD          | 2.97 | 0.01 | 2.04 | 1.81 | 0.22 | 0.28 |
| 33336 | 0 | 28191  | IQMSSGNLLFTGHLKCR<br>LRMDKLQLKGMS | 3.31 | 0.01 | 2.40 | 0.68 | 0.22 | 0.28 |
| 33337 | 0 | 314011 | IQNDIPRLTSQELERRTQ<br>RYLRD       | 3.11 | 0.01 | 3.36 | 0.44 | 2.39 | 0.28 |

|       |   |        |                                                |      |      |      |      |      |      |
|-------|---|--------|------------------------------------------------|------|------|------|------|------|------|
| 33338 | 0 | 28197  | IQPELPEAVVSDKGEPEV<br>QPTLPEAVVTDKGETEV<br>QPE | 3.61 | 0.01 | 2.70 | 0.44 | 0.85 | 0.28 |
| 33339 | 0 | 28197  | IQPELPEAVVSDKGEPEV<br>QPTLPEAVVTDKGETEV<br>QPE | 3.61 | 0.01 | 2.70 | 0.44 | 1.74 | 0.28 |
| 33340 | 0 | 28197  | IQPELPEAVVSDKGEPEV<br>QPTLPEAVVTDKGETEV<br>QPE | 3.61 | 0.01 | 2.70 | 0.44 | 1.74 | 0.28 |
| 33341 | 0 | 28197  | IQPELPEAVVSDKGEPEV<br>QPTLPEAVVTDKGETEV<br>QPE | 3.61 | 0.01 | 2.70 | 0.44 | 1.74 | 0.85 |
| 33342 | 0 | 171564 | IQPFMFRLDNRYQPM                                | 2.68 | 0.01 | 0.78 | 0.44 | 1.41 | 0.28 |
| 33343 | 0 | 136396 | IQPMCANTGGG                                    | 2.44 | 0.01 | 3.48 | 3.70 | 0.85 | 1.34 |
| 33344 | 0 | 148641 | IQPQQPFPQQ                                     | 2.35 | 0.01 | 1.86 | 0.44 | 1.23 | 0.85 |
| 33345 | 0 | 148641 | IQPQQPFPQQ                                     | 2.35 | 0.01 | 1.86 | 0.44 | 1.23 | 0.85 |
| 33346 | 0 | 148641 | IQPQQPFPQQ                                     | 2.35 | 0.01 | 1.86 | 0.44 | 1.23 | 0.28 |
| 33347 | 0 | 28205  | IQPVERVLQDAKMDKRS<br>VHD                       | 2.93 | 0.01 | 2.78 | 0.44 | 0.85 | 0.28 |
| 33348 | 0 | 196560 | IQQLKPP                                        | 2.00 | 0.01 | 0.90 | 0.44 | 1.23 | 1.39 |
| 33349 | 0 | 28210  | IQQRASFGPHGF                                   | 2.46 | 0.01 | 0.90 | 0.68 | 0.22 | 1.39 |
| 33350 | 0 | 135854 | IQQSIERL                                       | 2.14 | 0.01 | 0.78 | 2.52 | 0.22 | 2.12 |
| 33351 | 0 | 128977 | IQQVFDNGSIYNPEV                                | 2.66 | 0.01 | 0.78 | 0.44 | 1.13 | 0.85 |
| 33352 | 0 | 134104 | IQRFLPNPAGVQLEDPE<br>FQA                       | 2.95 | 0.01 | 0.78 | 0.44 | 2.35 | 0.28 |
| 33353 | 0 | 122801 | IQRIPSLPPSTQTLKLIET                            | 2.94 | 0.01 | 0.78 | 3.01 | 0.22 | 1.27 |
| 33354 | 0 | 122801 | IQRIPSLPPSTQTLKLIET                            | 2.94 | 0.01 | 0.78 | 3.01 | 0.22 | 0.28 |
| 33355 | 0 | 122801 | IQRIPSLPPSTQTLKLIET                            | 2.94 | 0.01 | 0.78 | 3.01 | 0.22 | 1.27 |
| 33356 | 0 | 106542 | IQSTIFRGYY                                     | 2.30 | 0.01 | 3.08 | 0.44 | 1.23 | 0.85 |
| 33357 | 0 | 28228  | IQTAFNQGA                                      | 2.23 | 0.01 | 3.89 | 0.68 | 0.22 | 0.85 |
| 33358 | 0 | 28229  | IQTAIVTRPIITTAGPSD<br>MY                       | 2.94 | 0.01 | 3.27 | 1.12 | 0.22 | 0.28 |
| 33359 | 0 | 28229  | IQTAIVTRPIITTAGPSD<br>MY                       | 2.94 | 0.01 | 3.27 | 1.12 | 0.22 | 0.28 |
| 33360 | 0 | 120641 | IQTAVRLLLLPGELAKHAV<br>SE                      | 2.92 | 0.01 | 1.60 | 0.44 | 1.13 | 0.28 |
| 33361 | 0 | 120641 | IQTAVRLLLLPGELAKHAV<br>SE                      | 2.92 | 0.01 | 1.60 | 0.44 | 1.41 | 0.28 |
| 33362 | 0 | 120641 | IQTAVRLLLLPGELAKHAV<br>SE                      | 2.92 | 0.01 | 1.60 | 1.20 | 0.22 | 0.28 |
| 33363 | 0 | 98123  | IQTQAQIPSRPAPPPPS                              | 2.84 | 0.01 | 2.04 | 0.44 | 2.98 | 0.28 |
| 33364 | 0 | 474389 | IQTRTEP                                        | 2.02 | 0.01 | 3.51 | 0.68 | 0.22 | 0.28 |
| 33365 | 0 | 474389 | IQTRTEP                                        | 2.02 | 0.01 | 3.51 | 0.68 | 0.22 | 0.28 |

|       |   |        |                               |      |      |      |      |      |      |
|-------|---|--------|-------------------------------|------|------|------|------|------|------|
| 33366 | 0 | 474389 | IQTRTEP                       | 2.02 | 0.01 | 3.51 | 0.68 | 0.22 | 1.34 |
| 33367 | 0 | 474389 | IQTRTEP                       | 2.02 | 0.01 | 3.51 | 0.68 | 0.22 | 0.28 |
| 33368 | 0 | 474389 | IQTRTEP                       | 2.02 | 0.01 | 3.51 | 0.68 | 0.22 | 0.28 |
| 33369 | 0 | 474389 | IQTRTEP                       | 2.02 | 0.01 | 3.51 | 0.68 | 0.22 | 0.28 |
| 33370 | 0 | 474389 | IQTRTEP                       | 2.02 | 0.01 | 3.51 | 0.68 | 0.22 | 0.28 |
| 33371 | 0 | 474389 | IQTRTEP                       | 2.02 | 0.01 | 3.51 | 0.68 | 0.22 | 0.28 |
| 33372 | 0 | 474389 | IQTRTEP                       | 2.02 | 0.01 | 3.51 | 0.68 | 0.22 | 0.28 |
| 33373 | 0 | 474389 | IQTRTEP                       | 2.02 | 0.01 | 3.51 | 0.68 | 0.22 | 0.28 |
| 33374 | 0 | 474389 | IQTRTEP                       | 2.02 | 0.01 | 3.51 | 0.68 | 0.22 | 0.28 |
| 33375 | 0 | 474389 | IQTRTEP                       | 2.02 | 0.01 | 3.51 | 0.68 | 0.22 | 0.28 |
| 33376 | 0 | 474389 | IQTRTEP                       | 2.02 | 0.01 | 3.51 | 0.68 | 0.22 | 0.28 |
| 33377 | 0 | 136397 | IQVVGDDLTVTNPKRIA<br>KA       | 2.89 | 4.03 | 0.78 | 0.44 | 1.41 | 0.28 |
| 33378 | 0 | 136397 | IQVVGDDLTVTNPKRIA<br>KA       | 2.89 | 4.03 | 0.78 | 0.44 | 1.13 | 0.28 |
| 33379 | 0 | 157429 | IQVYRSDVPVN                   | 2.39 | 0.01 | 3.47 | 2.49 | 0.85 | 0.28 |
| 33380 | 0 | 28250  | IQWDGYARQ                     | 2.21 | 0.01 | 0.90 | 0.68 | 0.22 | 0.28 |
| 33381 | 0 | 123333 | IQYAKTDS                      | 2.10 | 0.01 | 0.78 | 1.20 | 0.22 | 0.28 |
| 33382 | 0 | 97402  | IQYHHDPQPVGREKFTIR<br>PHYGKEI | 3.17 | 0.01 | 3.13 | 0.68 | 2.25 | 1.75 |
| 33383 | 0 | 115619 | IRALVGDEVELP                  | 2.48 | 0.01 | 0.78 | 0.44 | 1.41 | 0.28 |
| 33384 | 0 | 115619 | IRALVGDEVELP                  | 2.48 | 0.01 | 0.78 | 0.44 | 1.13 | 0.28 |
| 33385 | 0 | 115619 | IRALVGDEVELP                  | 2.48 | 0.01 | 0.78 | 0.44 | 1.13 | 0.28 |
| 33386 | 0 | 115619 | IRALVGDEVELP                  | 2.48 | 0.01 | 0.78 | 0.44 | 1.13 | 0.28 |
| 33387 | 0 | 115619 | IRALVGDEVELP                  | 2.48 | 0.01 | 0.78 | 0.44 | 1.41 | 0.28 |
| 33388 | 0 | 28265  | IRAWVAWRAHCQNRD               | 2.68 | 0.01 | 1.75 | 0.68 | 0.22 | 1.75 |
| 33389 | 0 | 28265  | IRAWVAWRAHCQNRD               | 2.68 | 0.01 | 1.75 | 0.68 | 0.22 | 0.28 |
| 33390 | 0 | 115799 | IRCEKDERFF                    | 2.31 | 0.01 | 1.60 | 0.44 | 1.23 | 0.85 |
| 33391 | 0 | 115799 | IRCEKDERFF                    | 2.31 | 0.01 | 1.60 | 0.44 | 1.23 | 0.85 |
| 33392 | 0 | 229689 | IRCEKDERFFSDKIAKYI            | 2.87 | 0.01 | 1.60 | 0.44 | 1.23 | 1.28 |
| 33393 | 0 | 130905 | IRCFKRHGAEVIDTPVFE            | 2.82 | 0.01 | 1.75 | 4.33 | 0.22 | 0.28 |
| 33394 | 0 | 28268  | IRDFMEKESP                    | 2.29 | 0.01 | 3.41 | 0.68 | 0.22 | 0.28 |
| 33395 | 0 | 151936 | IRDFQITASGQ                   | 2.40 | 0.01 | 0.78 | 0.44 | 1.93 | 0.28 |
| 33396 | 0 | 113551 | IRDVWGIEGPIDAAFTRI<br>NC      | 2.93 | 4.63 | 0.78 | 1.81 | 0.22 | 0.28 |
| 33397 | 0 | 113551 | IRDVWGIEGPIDAAFTRI<br>NC      | 2.93 | 4.63 | 0.78 | 3.61 | 0.22 | 0.28 |
| 33398 | 0 | 28277  | IRECTGLAWEWWRVTV              | 2.67 | 0.01 | 2.70 | 0.68 | 0.22 | 1.27 |
| 33399 | 0 | 28277  | IRECTGLAWEWWRVTV              | 2.67 | 0.01 | 2.70 | 0.68 | 0.22 | 0.85 |
| 33400 | 0 | 28277  | IRECTGLAWEWWRVTV              | 2.67 | 0.01 | 2.70 | 0.68 | 0.22 | 1.34 |

|       |   |        |                                    |      |      |      |      |      |      |
|-------|---|--------|------------------------------------|------|------|------|------|------|------|
| 33401 | 0 | 28278  | IREDDQPSSHQPLFY                    | 2.64 | 0.01 | 2.40 | 0.68 | 0.22 | 0.28 |
| 33402 | 0 | 28278  | IREDDQPSSHQPLFY                    | 2.64 | 0.01 | 2.40 | 3.81 | 0.22 | 0.28 |
| 33403 | 0 | 124319 | IREKIEDAK                          | 2.26 | 0.01 | 0.78 | 0.44 | 1.41 | 0.28 |
| 33404 | 0 | 242696 | IREQYDQVLSTKLAE                    | 2.64 | 0.01 | 3.32 | 1.20 | 0.22 | 0.85 |
| 33405 | 0 | 242696 | IREQYDQVLSTKLAE                    | 2.64 | 0.01 | 3.32 | 1.20 | 0.22 | 0.85 |
| 33406 | 0 | 28288  | IRFDENGVLNNSFL                     | 2.67 | 0.01 | 3.38 | 1.12 | 0.22 | 0.28 |
| 33407 | 0 | 28288  | IRFDENGVLNNSFL                     | 2.67 | 0.01 | 3.38 | 1.12 | 0.22 | 0.28 |
| 33408 | 0 | 28290  | IRFKDDSSYEEN                       | 2.50 | 0.01 | 3.78 | 1.15 | 0.22 | 0.85 |
| 33409 | 0 | 28290  | IRFKDDSSYEEN                       | 2.50 | 0.01 | 3.78 | 1.15 | 0.22 | 0.28 |
| 33410 | 0 | 28290  | IRFKDDSSYEEN                       | 2.50 | 0.01 | 3.78 | 1.15 | 0.22 | 0.28 |
| 33411 | 0 | 28290  | IRFKDDSSYEEN                       | 2.50 | 0.01 | 3.78 | 1.15 | 0.22 | 0.85 |
| 33412 | 0 | 28291  | IRFKDDTSFEDING                     | 2.61 | 0.01 | 2.56 | 2.69 | 0.22 | 0.28 |
| 33413 | 0 | 28291  | IRFKDDTSFEDING                     | 2.61 | 0.01 | 2.56 | 0.44 | 0.85 | 0.28 |
| 33414 | 0 | 28299  | IRGDTFATR                          | 2.23 | 0.01 | 3.03 | 1.15 | 0.22 | 2.66 |
| 33415 | 0 | 28299  | IRGDTFATR                          | 2.23 | 0.01 | 3.03 | 1.15 | 0.22 | 0.28 |
| 33416 | 0 | 28299  | IRGDTFATR                          | 2.23 | 0.01 | 3.03 | 1.15 | 0.22 | 0.28 |
| 33417 | 0 | 28299  | IRGDTFATR                          | 2.23 | 0.01 | 3.03 | 1.15 | 0.22 | 0.28 |
| 33418 | 0 | 28299  | IRGDTFATR                          | 2.23 | 0.01 | 3.03 | 1.15 | 0.22 | 0.85 |
| 33419 | 0 | 28299  | IRGDTFATR                          | 2.23 | 0.01 | 3.03 | 1.15 | 0.22 | 1.34 |
| 33420 | 0 | 28299  | IRGDTFATR                          | 2.23 | 0.01 | 3.03 | 1.15 | 0.22 | 1.66 |
| 33421 | 0 | 28299  | IRGDTFATR                          | 2.23 | 0.01 | 3.03 | 1.15 | 0.22 | 1.66 |
| 33422 | 0 | 28299  | IRGDTFATR                          | 2.23 | 0.01 | 3.03 | 1.15 | 0.22 | 2.98 |
| 33423 | 0 | 119466 | IRGERA                             | 1.90 | 0.01 | 1.60 | 0.44 | 1.13 | 0.28 |
| 33424 | 0 | 119466 | IRGERA                             | 1.90 | 0.01 | 1.60 | 0.44 | 1.41 | 0.28 |
| 33425 | 0 | 119466 | IRGERA                             | 1.90 | 0.01 | 1.60 | 1.20 | 0.22 | 0.28 |
| 33426 | 0 | 119466 | IRGERA                             | 1.90 | 0.01 | 0.78 | 1.15 | 0.22 | 2.49 |
| 33427 | 0 | 119466 | IRGERA                             | 1.90 | 0.01 | 1.75 | 2.84 | 1.13 | 0.28 |
| 33428 | 0 | 128984 | IRGIDKGRVRAAVDKKE<br>AGKDGRGEERAVA | 3.40 | 0.01 | 0.78 | 0.44 | 1.13 | 0.85 |
| 33429 | 0 | 128984 | IRGIDKGRVRAAVDKKE<br>AGKDGRGEERAVA | 3.40 | 0.01 | 0.78 | 0.44 | 1.13 | 0.85 |
| 33430 | 0 | 128984 | IRGIDKGRVRAAVDKKE<br>AGKDGRGEERAVA | 3.40 | 0.01 | 0.78 | 0.44 | 1.41 | 0.85 |
| 33431 | 0 | 125448 | IRGILESMLCNESSMQSL<br>RQ           | 2.98 | 0.01 | 0.78 | 0.44 | 1.13 | 0.28 |
| 33432 | 0 | 125448 | IRGILESMLCNESSMQSL<br>RQ           | 2.98 | 0.01 | 0.78 | 0.44 | 1.13 | 0.28 |
| 33433 | 0 | 125448 | IRGILESMLCNESSMQSL<br>RQ           | 2.98 | 0.01 | 0.78 | 1.20 | 0.22 | 0.28 |
| 33434 | 0 | 125448 | IRGILESMLCNESSMQSL<br>RQ           | 2.98 | 0.01 | 0.78 | 1.20 | 0.22 | 1.34 |
| 33435 | 0 | 131490 | IRGNRIRYFILPDSLPLDTI               | 2.97 | 0.01 | 0.78 | 0.44 | 1.13 | 0.28 |
| 33436 | 0 | 130906 | IRGPGVLAGGRSAGAR                   | 2.78 | 0.01 | 0.90 | 0.44 | 1.93 | 0.85 |
| 33437 | 0 | 28303  | IRGSQG                             | 1.90 | 0.01 | 2.96 | 0.44 | 0.85 | 0.28 |
| 33438 | 0 | 103283 | IRGSVTPAVSQFNAR                    | 2.66 | 0.01 | 2.04 | 0.44 | 0.85 | 1.28 |



|       |   |        |                          |      |      |      |      |      |      |
|-------|---|--------|--------------------------|------|------|------|------|------|------|
| 33439 | 0 | 28313  | IRHQMVLLQL               | 2.33 | 0.01 | 3.81 | 1.15 | 0.22 | 0.28 |
| 33440 | 0 | 28313  | IRHQMVLLQL               | 2.33 | 0.01 | 3.81 | 1.15 | 0.22 | 1.34 |
| 33441 | 0 | 141928 | IRHQRSQTECG              | 2.39 | 0.01 | 3.13 | 2.13 | 0.22 | 0.28 |
| 33442 | 0 | 28315  | IRIAQPKL                 | 2.13 | 0.01 | 3.06 | 1.12 | 0.22 | 0.28 |
| 33443 | 0 | 28322  | IRIPKYKNDGIQNYIHNE<br>Y  | 2.91 | 0.01 | 2.08 | 0.44 | 1.93 | 1.57 |
| 33444 | 0 | 28322  | IRIPKYKNDGIQNYIHNE<br>Y  | 2.91 | 0.01 | 2.08 | 2.43 | 0.22 | 1.57 |
| 33445 | 0 | 28322  | IRIPKYKNDGIQNYIHNE<br>Y  | 2.91 | 0.01 | 2.08 | 2.02 | 0.22 | 1.57 |
| 33446 | 0 | 28322  | IRIPKYKNDGIQNYIHNE<br>Y  | 2.91 | 0.01 | 3.45 | 0.44 | 0.22 | 1.57 |
| 33447 | 0 | 122802 | IRKPAGDFVC               | 2.26 | 0.01 | 2.26 | 2.04 | 0.22 | 0.28 |
| 33448 | 0 | 423361 | IRKPPWLMEQPPPS           | 2.65 | 0.01 | 2.51 | 0.44 | 2.35 | 1.28 |
| 33449 | 0 | 161243 | IRKSLGEYLGLENE           | 2.70 | 0.01 | 2.74 | 0.44 | 0.85 | 0.28 |
| 33450 | 0 | 161243 | IRKSLGEYLGLENE           | 2.70 | 0.01 | 2.74 | 1.20 | 0.22 | 0.28 |
| 33451 | 0 | 103284 | IRLAKCGPWHRGGWD          | 2.65 | 0.01 | 2.04 | 0.44 | 0.85 | 1.28 |
| 33452 | 0 | 191445 | IRLDCAENHQKQLME          | 2.71 | 0.01 | 0.90 | 2.84 | 1.13 | 1.39 |
| 33453 | 0 | 191445 | IRLDCAENHQKQLME          | 2.71 | 0.01 | 0.90 | 2.84 | 1.13 | 1.66 |
| 33454 | 0 | 171570 | IRLLRLEVNAETVRY          | 2.70 | 0.01 | 0.78 | 0.44 | 1.41 | 0.28 |
| 33455 | 0 | 132389 | IRLPNPDTDLYWFTLY         | 2.75 | 0.01 | 0.78 | 0.44 | 1.13 | 1.39 |
| 33456 | 0 | 95016  | IRLPSDDVWLPDLVL          | 2.71 | 0.01 | 2.26 | 2.36 | 0.22 | 2.02 |
| 33457 | 0 | 119955 | IRLPSDDVWLPDLVLY         | 2.76 | 0.01 | 2.26 | 1.15 | 0.22 | 1.57 |
| 33458 | 0 | 119955 | IRLPSDDVWLPDLVLY         | 2.76 | 0.01 | 2.26 | 1.12 | 0.22 | 1.57 |
| 33459 | 0 | 133156 | IRLR                     | 1.57 | 4.33 | 2.24 | 1.20 | 0.22 | 1.48 |
| 33460 | 0 | 133156 | IRLR                     | 1.57 | 4.33 | 2.24 | 1.20 | 0.22 | 1.48 |
| 33461 | 0 | 133156 | IRLR                     | 1.57 | 4.33 | 2.24 | 1.20 | 0.22 | 1.48 |
| 33462 | 0 | 133156 | IRLR                     | 1.57 | 4.33 | 2.24 | 1.20 | 0.22 | 1.27 |
| 33463 | 0 | 133157 | IRLRHENKDLKARL           | 2.63 | 4.03 | 2.24 | 1.20 | 0.22 | 1.48 |
| 33464 | 0 | 133157 | IRLRHENKDLKARL           | 2.63 | 4.03 | 2.24 | 1.20 | 0.22 | 1.48 |
| 33465 | 0 | 133157 | IRLRHENKDLKARL           | 2.63 | 4.03 | 2.24 | 1.20 | 0.22 | 1.48 |
| 33466 | 0 | 133157 | IRLRHENKDLKARL           | 2.63 | 4.03 | 2.24 | 1.20 | 0.22 | 1.27 |
| 33467 | 0 | 28331  | IRLRHENKDLKARLENA<br>MEV | 2.96 | 0.01 | 2.24 | 2.75 | 0.22 | 0.28 |
| 33468 | 0 | 28331  | IRLRHENKDLKARLENA<br>MEV | 2.96 | 0.01 | 2.24 | 2.75 | 0.22 | 1.34 |
| 33469 | 0 | 28331  | IRLRHENKDLKARLENA<br>MEV | 2.96 | 0.01 | 2.24 | 2.75 | 2.25 | 1.75 |
| 33470 | 0 | 95475  | IRLSFN                   | 1.88 | 0.01 | 1.60 | 0.44 | 1.23 | 0.28 |
| 33471 | 0 | 98834  | IRLSFNPTQL               | 2.29 | 0.01 | 1.60 | 0.44 | 1.23 | 0.85 |
| 33472 | 0 | 98834  | IRLSFNPTQL               | 2.29 | 0.01 | 1.60 | 0.44 | 1.23 | 0.85 |
| 33473 | 0 | 98834  | IRLSFNPTQL               | 2.29 | 0.01 | 1.60 | 0.44 | 2.98 | 0.85 |
| 33474 | 0 | 28334  | IRLSWEVQHLSDLK           | 2.59 | 0.01 | 2.94 | 2.00 | 0.22 | 0.28 |
| 33475 | 0 | 28334  | IRLSWEVQHLSDLK           | 2.59 | 0.01 | 2.94 | 2.00 | 0.22 | 0.28 |

|       |   |        |                                    |      |      |      |      |      |      |
|-------|---|--------|------------------------------------|------|------|------|------|------|------|
| 33476 | 0 | 28337  | IRMARPT                            | 2.02 | 0.01 | 2.40 | 0.68 | 0.22 | 0.85 |
| 33477 | 0 | 28339  | IRMGTDK                            | 1.99 | 0.01 | 2.14 | 0.44 | 0.85 | 0.28 |
| 33478 | 0 | 28340  | IRMISDQRAN                         | 2.32 | 0.01 | 2.73 | 0.44 | 0.85 | 0.28 |
| 33479 | 0 | 117936 | IRNQYREDWKSKEMKV<br>RQRA           | 2.93 | 0.01 | 0.78 | 0.44 | 1.13 | 0.28 |
| 33480 | 0 | 28349  | IRNVNNLART                         | 2.32 | 0.01 | 3.33 | 0.44 | 1.23 | 0.85 |
| 33481 | 0 | 28350  | IRNVPHPFVALGLKQ                    | 2.64 | 0.01 | 3.78 | 1.15 | 0.22 | 0.28 |
| 33482 | 0 | 28351  | IRNW                               | 1.57 | 0.01 | 3.65 | 1.15 | 2.26 | 0.28 |
| 33483 | 0 | 28351  | IRNW                               | 1.57 | 0.01 | 3.65 | 1.15 | 2.26 | 0.28 |
| 33484 | 0 | 28351  | IRNW                               | 1.57 | 0.01 | 3.65 | 1.15 | 2.26 | 1.27 |
| 33485 | 0 | 28351  | IRNW                               | 1.57 | 0.01 | 3.65 | 1.15 | 2.26 | 0.28 |
| 33486 | 0 | 28353  | IRPAGFCDGYCKTHL                    | 2.62 | 0.01 | 2.56 | 2.02 | 0.22 | 0.85 |
| 33487 | 0 | 28353  | IRPAGFCDGYCKTHL                    | 2.62 | 0.01 | 2.56 | 0.68 | 0.22 | 0.85 |
| 33488 | 0 | 28353  | IRPAGFCDGYCKTHL                    | 2.62 | 0.01 | 2.56 | 2.52 | 0.22 | 0.85 |
| 33489 | 0 | 28359  | IRPSGYCGRECGIKK                    | 2.69 | 0.01 | 2.56 | 2.02 | 0.22 | 0.85 |
| 33490 | 0 | 28365  | IRQAGVQYSRADEEQ                    | 2.67 | 0.01 | 2.04 | 0.68 | 0.22 | 0.28 |
| 33491 | 0 | 28371  | IRQGTDYKHWPQIAQFA                  | 2.76 | 0.01 | 2.91 | 0.44 | 0.85 | 0.28 |
| 33492 | 0 | 28374  | IRQLDTSVERRALGEIQN<br>V            | 2.89 | 0.01 | 1.75 | 0.44 | 0.85 | 1.27 |
| 33493 | 0 | 28375  | IRQLESIVDKLNRSQ                    | 2.67 | 0.01 | 2.59 | 0.68 | 0.22 | 0.28 |
| 33494 | 0 | 28375  | IRQLESIVDKLNRSQ                    | 2.67 | 0.01 | 2.59 | 1.12 | 0.22 | 0.28 |
| 33495 | 0 | 28377  | IRQLLWFHISCL                       | 2.48 | 0.01 | 2.08 | 0.68 | 2.26 | 0.85 |
| 33496 | 0 | 28377  | IRQLLWFHISCL                       | 2.48 | 0.01 | 2.08 | 0.44 | 1.59 | 0.85 |
| 33497 | 0 | 112170 | IRQRSGK                            | 2.02 | 0.01 | 0.78 | 0.44 | 1.13 | 0.28 |
| 33498 | 0 | 28382  | IRRA                               | 1.59 | 0.01 | 2.93 | 2.82 | 0.22 | 0.28 |
| 33499 | 0 | 28382  | IRRA                               | 1.59 | 0.01 | 3.53 | 3.08 | 0.22 | 1.39 |
| 33500 | 0 | 28383  | IRRAVVKNIPSMKQENQ<br>MKVTPNIRNFLFF | 3.33 | 0.01 | 3.53 | 3.08 | 0.22 | 1.27 |
| 33501 | 0 | 121429 | IRRLSGGPP                          | 2.21 | 0.01 | 0.90 | 2.46 | 0.22 | 0.28 |
| 33502 | 0 | 111430 | IRRNVVAYWPSVSFR                    | 2.68 | 0.01 | 3.20 | 0.44 | 1.23 | 1.27 |
| 33503 | 0 | 28389  | IRRPKHLVVS                         | 2.28 | 0.01 | 3.41 | 0.68 | 0.22 | 0.28 |
| 33504 | 0 | 108486 | IRRSETPRA                          | 2.23 | 0.01 | 0.90 | 0.44 | 1.13 | 1.27 |
| 33505 | 0 | 128989 | IRRSILPYGDSMDRIE                   | 2.75 | 0.01 | 0.78 | 0.44 | 1.13 | 0.85 |
| 33506 | 0 | 28393  | IRRSMANE                           | 2.11 | 0.01 | 2.96 | 0.68 | 0.22 | 0.28 |
| 33507 | 0 | 28393  | IRRSMANE                           | 2.11 | 0.01 | 2.96 | 0.68 | 0.22 | 0.28 |
| 33508 | 0 | 78182  | IRRSTL                             | 1.89 | 0.01 | 0.90 | 2.02 | 1.59 | 0.28 |
| 33509 | 0 | 28396  | IRSAEVVSRMLVH                      | 2.55 | 0.01 | 3.00 | 0.44 | 0.85 | 0.28 |
| 33510 | 0 | 28398  | IRSEELSFTVVSNGA                    | 2.64 | 0.01 | 2.97 | 0.44 | 1.59 | 0.28 |
| 33511 | 0 | 28398  | IRSEELSFTVVSNGA                    | 2.64 | 0.01 | 2.97 | 0.44 | 0.85 | 0.28 |
| 33512 | 0 | 479965 | IRSLVLQTLPSMCNVYVP<br>PECS         | 3.02 | 0.01 | 1.86 | 0.44 | 1.93 | 0.28 |
| 33513 | 0 | 479965 | IRSLVLQTLPSMCNVYVP<br>PECS         | 3.02 | 0.01 | 1.86 | 0.44 | 1.93 | 0.28 |
| 33514 | 0 | 479965 | IRSLVLQTLPSMCNVYVP<br>PECS         | 3.02 | 0.01 | 1.86 | 1.12 | 0.22 | 0.28 |

|       |   |        |                                     |      |      |      |      |      |      |
|-------|---|--------|-------------------------------------|------|------|------|------|------|------|
| 33515 | 0 | 479965 | IRSLVLQTLPSMCNVYVP<br>PECS          | 3.02 | 0.01 | 1.86 | 1.12 | 0.22 | 0.28 |
| 33516 | 0 | 479965 | IRSLVLQTLPSMCNVYVP<br>PECS          | 3.02 | 0.01 | 1.86 | 1.20 | 0.22 | 0.28 |
| 33517 | 0 | 28401  | IRSM LVK                            | 1.99 | 0.01 | 3.65 | 1.15 | 2.26 | 0.28 |
| 33518 | 0 | 423362 | IRSSLILYATETLIY                     | 2.71 | 0.01 | 2.51 | 0.44 | 2.35 | 1.28 |
| 33519 | 0 | 134105 | IRSVAKKHPKTWVHYIA<br>AEE            | 2.93 | 0.01 | 0.78 | 0.44 | 2.35 | 0.28 |
| 33520 | 0 | 28405  | IRSWFGLP                            | 2.10 | 0.01 | 3.57 | 0.44 | 1.23 | 1.27 |
| 33521 | 0 | 117010 | IRTDESTKRLPP                        | 2.45 | 0.01 | 0.90 | 1.15 | 0.22 | 0.28 |
| 33522 | 0 | 117010 | IRTDESTKRLPP                        | 2.45 | 0.01 | 0.90 | 0.44 | 0.85 | 0.28 |
| 33523 | 0 | 141037 | IRTLKSGHK                           | 2.21 | 0.01 | 4.03 | 2.00 | 0.22 | 0.28 |
| 33524 | 0 | 79577  | IRTPPAYRPPNAPILSTLP<br>ETTV         | 3.10 | 0.01 | 2.71 | 0.44 | 0.85 | 0.28 |
| 33525 | 0 | 141929 | IRTQGIARGVRRLOAEH<br>AQQFWFKVWELFTN | 3.37 | 0.01 | 3.14 | 0.68 | 0.22 | 0.28 |
| 33526 | 0 | 181354 | IRTVGTEKSPHSITL                     | 2.67 | 0.01 | 2.82 | 1.15 | 0.22 | 0.28 |
| 33527 | 0 | 28413  | IRVEES                              | 1.89 | 0.01 | 1.96 | 0.44 | 0.85 | 0.28 |
| 33528 | 0 | 98835  | IRVLQRFQDQSRQFQ                     | 2.72 | 0.01 | 2.16 | 0.44 | 1.23 | 1.48 |
| 33529 | 0 | 98835  | IRVLQRFQDQSRQFQ                     | 2.72 | 0.01 | 2.16 | 0.44 | 1.23 | 1.48 |
| 33530 | 0 | 28415  | IRVQYE                              | 1.88 | 0.01 | 2.40 | 0.44 | 0.85 | 0.28 |
| 33531 | 0 | 78687  | IRVRKRKGSNKAEDTLE<br>D              | 2.88 | 0.01 | 3.01 | 0.68 | 0.22 | 0.28 |
| 33532 | 0 | 78687  | IRVRKRKGSNKAEDTLE<br>D              | 2.88 | 0.01 | 3.01 | 0.68 | 0.22 | 1.48 |
| 33533 | 0 | 78687  | IRVRKRKGSNKAEDTLE<br>D              | 2.88 | 0.01 | 3.01 | 0.68 | 0.22 | 1.48 |
| 33534 | 0 | 78687  | IRVRKRKGSNKAEDTLE<br>D              | 2.88 | 0.01 | 3.01 | 0.68 | 0.22 | 1.34 |
| 33535 | 0 | 118428 | IRYFILPDSLPLDTL                     | 2.71 | 4.45 | 1.75 | 3.89 | 0.22 | 0.28 |
| 33536 | 0 | 118428 | IRYFILPDSLPLDTL                     | 2.71 | 4.45 | 1.75 | 3.89 | 0.22 | 0.28 |
| 33537 | 0 | 118428 | IRYFILPDSLPLDTL                     | 2.71 | 4.45 | 1.75 | 3.89 | 0.22 | 0.28 |
| 33538 | 0 | 118429 | IRYFILPDSLPLDTL                     | 2.71 | 0.01 | 1.75 | 3.89 | 0.22 | 0.28 |
| 33539 | 0 | 108487 | IRYHTNWSS                           | 2.18 | 0.01 | 0.90 | 0.44 | 1.13 | 1.39 |
| 33540 | 0 | 423363 | IRYIPATQGDVYHGR                     | 2.67 | 0.01 | 2.51 | 0.44 | 2.35 | 1.28 |
| 33541 | 0 | 28424  | IRYRYSNDYDANDHIS                    | 2.79 | 0.01 | 0.90 | 2.63 | 0.22 | 1.48 |
| 33542 | 0 | 28425  | IRYRYSNNYEANDHIS                    | 2.77 | 0.01 | 0.90 | 2.63 | 0.22 | 1.48 |
| 33543 | 0 | 152678 | IRYVNTGTAP                          | 2.29 | 0.01 | 2.18 | 2.16 | 0.22 | 0.28 |
| 33544 | 0 | 180537 | ISADAMMQALL                         | 2.39 | 0.01 | 0.78 | 0.68 | 0.22 | 0.28 |
| 33545 | 0 | 28437  | ISASTNCATVK                         | 2.41 | 0.01 | 3.33 | 0.44 | 1.23 | 0.85 |
| 33546 | 0 | 119220 | ISCAKDGGIPEQEYSC                    | 2.73 | 0.01 | 0.90 | 1.12 | 0.22 | 1.48 |
| 33547 | 0 | 119220 | ISCAKDGGIPEQEYSC                    | 2.73 | 0.01 | 0.90 | 1.12 | 0.22 | 1.27 |
| 33548 | 0 | 119220 | ISCAKDGGIPEQEYSC                    | 2.73 | 0.01 | 0.90 | 1.12 | 0.22 | 1.27 |
| 33549 | 0 | 119220 | ISCAKDGGIPEQEYSC                    | 2.73 | 0.01 | 0.90 | 1.12 | 0.22 | 1.27 |
| 33550 | 0 | 119220 | ISCAKDGGIPEQEYSC                    | 2.73 | 0.01 | 0.90 | 1.12 | 0.22 | 1.27 |
| 33551 | 0 | 115300 | ISCDKFLDDD                          | 2.30 | 0.01 | 1.60 | 0.44 | 1.23 | 0.85 |

|       |   |        |                                    |      |      |      |      |      |      |
|-------|---|--------|------------------------------------|------|------|------|------|------|------|
| 33552 | 0 | 115300 | ISCDKFLDDD                         | 2.30 | 0.01 | 1.60 | 0.44 | 1.23 | 0.85 |
| 33553 | 0 | 118430 | ISDAMKKVGRKGV                      | 2.55 | 0.01 | 0.78 | 0.44 | 1.74 | 0.85 |
| 33554 | 0 | 118430 | ISDAMKKVGRKGV                      | 2.55 | 0.01 | 0.78 | 0.44 | 1.59 | 0.85 |
| 33555 | 0 | 118430 | ISDAMKKVGRKGV                      | 2.55 | 0.01 | 0.78 | 0.44 | 1.74 | 0.85 |
| 33556 | 0 | 118431 | ISDAMKKVGRKGVITVK<br>D             | 2.87 | 0.01 | 0.78 | 1.20 | 0.22 | 0.85 |
| 33557 | 0 | 118431 | ISDAMKKVGRKGVITVK<br>D             | 2.87 | 0.01 | 0.78 | 1.20 | 0.22 | 0.85 |
| 33558 | 0 | 118431 | ISDAMKKVGRKGVITVK<br>D             | 2.87 | 0.01 | 0.78 | 1.20 | 0.22 | 0.85 |
| 33559 | 0 | 118431 | ISDAMKKVGRKGVITVK<br>D             | 2.87 | 0.01 | 0.78 | 1.20 | 0.22 | 0.85 |
| 33560 | 0 | 118431 | ISDAMKKVGRKGVITVK<br>D             | 2.87 | 0.01 | 0.78 | 1.20 | 0.22 | 1.48 |
| 33561 | 0 | 314440 | ISDDDEGEDEEEGP                     | 2.72 | 0.01 | 1.61 | 0.44 | 0.85 | 1.28 |
| 33562 | 0 | 167604 | ISDGPSKVTL                         | 2.29 | 0.01 | 0.78 | 0.44 | 1.13 | 0.85 |
| 33563 | 0 | 28460  | ISDSDEFYNTIQIKEYDEQ                | 2.93 | 0.01 | 2.08 | 2.43 | 0.22 | 1.57 |
| 33564 | 0 | 496594 | ISEELGMKLENANLAML<br>GKAKKVIVSKEDT | 3.37 | 0.01 | 2.87 | 0.44 | 1.93 | 2.12 |
| 33565 | 0 | 107916 | ISEGYKKYKGMDEFCTFK<br>NIKEPDANEPNA | 3.35 | 0.01 | 0.90 | 1.12 | 0.22 | 0.28 |
| 33566 | 0 | 232650 | ISEIRDQSSTSSTWAVSS<br>AS           | 2.97 | 0.01 | 0.90 | 0.68 | 0.22 | 0.28 |
| 33567 | 0 | 232650 | ISEIRDQSSTSSTWAVSS<br>AS           | 2.97 | 0.01 | 0.90 | 0.68 | 0.22 | 0.28 |
| 33568 | 0 | 232650 | ISEIRDQSSTSSTWAVSS<br>AS           | 2.97 | 0.01 | 0.90 | 0.68 | 0.22 | 0.28 |
| 33569 | 0 | 232650 | ISEIRDQSSTSSTWAVSS<br>AS           | 2.97 | 0.01 | 0.90 | 0.68 | 0.22 | 0.28 |
| 33570 | 0 | 232650 | ISEIRDQSSTSSTWAVSS<br>AS           | 2.97 | 0.01 | 0.90 | 0.68 | 2.25 | 1.75 |
| 33571 | 0 | 232650 | ISEIRDQSSTSSTWAVSS<br>AS           | 2.97 | 0.01 | 0.90 | 0.68 | 2.25 | 1.75 |
| 33572 | 0 | 28475  | ISEKYYVLKKGEKPYDPF<br>DR           | 2.94 | 0.01 | 3.47 | 0.44 | 0.22 | 0.85 |
| 33573 | 0 | 238634 | ISELDRRCHSSALELLQE                 | 2.85 | 0.01 | 0.78 | 0.44 | 1.13 | 0.28 |
| 33574 | 0 | 28482  | ISESQGNEEDERNL                     | 2.63 | 0.01 | 2.69 | 0.44 | 0.85 | 0.28 |
| 33575 | 0 | 28482  | ISESQGNEEDERNL                     | 2.63 | 0.01 | 2.69 | 0.44 | 0.85 | 0.28 |
| 33576 | 0 | 28483  | ISESQGTEEDERNL                     | 2.61 | 0.01 | 2.69 | 0.44 | 0.85 | 0.28 |
| 33577 | 0 | 171578 | ISEYIEEVFLPDDCF                    | 2.67 | 0.01 | 0.78 | 0.44 | 1.41 | 0.28 |
| 33578 | 0 | 171578 | ISEYIEEVFLPDDCF                    | 2.67 | 0.01 | 0.78 | 0.44 | 1.13 | 0.28 |
| 33579 | 0 | 137207 | ISFGKSSQCREA                       | 2.44 | 0.01 | 2.80 | 2.78 | 0.22 | 0.28 |
| 33580 | 0 | 28492  | ISFHFQMEKQVIH                      | 2.56 | 0.01 | 3.00 | 0.44 | 0.85 | 0.28 |
| 33581 | 0 | 196954 | ISFPEGFPFKY                        | 2.41 | 0.01 | 2.76 | 0.44 | 1.23 | 0.28 |
| 33582 | 0 | 196954 | ISFPEGFPFKY                        | 2.41 | 0.01 | 2.76 | 0.44 | 1.23 | 0.28 |

|       |   |        |                                                    |      |      |      |      |      |      |
|-------|---|--------|----------------------------------------------------|------|------|------|------|------|------|
| 33583 | 0 | 196954 | ISFPEGFPFKY                                        | 2.41 | 0.01 | 2.76 | 0.44 | 1.23 | 1.27 |
| 33584 | 0 | 196954 | ISFPEGFPFKY                                        | 2.41 | 0.01 | 2.76 | 0.44 | 1.23 | 0.28 |
| 33585 | 0 | 196955 | ISFPEGFPFKYVKD                                     | 2.61 | 0.01 | 2.76 | 0.44 | 1.23 | 0.28 |
| 33586 | 0 | 196955 | ISFPEGFPFKYVKD                                     | 2.61 | 0.01 | 2.76 | 0.44 | 1.23 | 0.28 |
| 33587 | 0 | 196955 | ISFPEGFPFKYVKD                                     | 2.61 | 0.01 | 2.76 | 0.44 | 1.23 | 1.27 |
| 33588 | 0 | 232651 | ISFSEQQLVDTSGPW                                    | 2.63 | 0.01 | 0.90 | 0.68 | 0.22 | 0.28 |
| 33589 | 0 | 232651 | ISFSEQQLVDTSGPW                                    | 2.63 | 0.01 | 0.90 | 0.68 | 0.22 | 0.28 |
| 33590 | 0 | 232651 | ISFSEQQLVDTSGPW                                    | 2.63 | 0.01 | 0.90 | 0.68 | 0.22 | 0.28 |
| 33591 | 0 | 28505  | ISGDLKTQIDQVEST                                    | 2.69 | 0.01 | 2.04 | 0.44 | 0.85 | 0.28 |
| 33592 | 0 | 78689  | ISGGLCSARLHRHALLAT<br>CP                           | 2.96 | 0.01 | 2.04 | 0.44 | 1.59 | 0.28 |
| 33593 | 0 | 28509  | ISGHRMAWDMMMMN<br>WS                               | 2.66 | 0.01 | 1.72 | 0.44 | 0.85 | 0.28 |
| 33594 | 0 | 236087 | ISGIKNELVAEVPKKCD                                  | 2.77 | 0.01 | 3.08 | 0.44 | 1.23 | 0.85 |
| 33595 | 0 | 236088 | ISGIKNELVAEVPKKCDIK<br>TTLPPITADFDCSKIQSTI<br>FRGY | 3.68 | 0.01 | 3.08 | 0.44 | 1.23 | 0.85 |
| 33596 | 0 | 28512  | ISGINASVVNIQKEIDRL<br>NE                           | 2.94 | 0.01 | 2.45 | 0.68 | 0.22 | 0.85 |
| 33597 | 0 | 28512  | ISGINASVVNIQKEIDRL<br>NE                           | 2.94 | 0.01 | 2.45 | 0.68 | 0.22 | 1.34 |
| 33598 | 0 | 28513  | ISGINASVVNIQKEIDRL<br>NEVAKNLNESLIDLQELG<br>KYEQYI | 3.71 | 0.01 | 2.45 | 0.68 | 0.22 | 1.34 |
| 33599 | 0 | 28513  | ISGINASVVNIQKEIDRL<br>NEVAKNLNESLIDLQELG<br>KYEQYI | 3.71 | 0.01 | 2.45 | 0.68 | 0.22 | 0.85 |
| 33600 | 0 | 119467 | ISGKPGPPPMGFHSPLIK                                 | 2.88 | 0.01 | 0.78 | 1.12 | 0.22 | 1.57 |
| 33601 | 0 | 119467 | ISGKPGPPPMGFHSPLIK                                 | 2.88 | 0.01 | 0.78 | 1.12 | 2.25 | 1.75 |
| 33602 | 0 | 119467 | ISGKPGPPPMGFHSPLIK                                 | 2.88 | 0.01 | 0.78 | 1.12 | 0.22 | 1.57 |
| 33603 | 0 | 119467 | ISGKPGPPPMGFHSPLIK                                 | 2.88 | 0.01 | 0.78 | 1.12 | 0.22 | 1.57 |
| 33604 | 0 | 119467 | ISGKPGPPPMGFHSPLIK                                 | 2.88 | 0.01 | 0.78 | 1.12 | 0.22 | 1.57 |
| 33605 | 0 | 119467 | ISGKPGPPPMGFHSPLIK                                 | 2.88 | 0.01 | 0.78 | 1.12 | 0.22 | 1.48 |
| 33606 | 0 | 119467 | ISGKPGPPPMGFHSPLIK                                 | 2.88 | 0.01 | 0.78 | 1.12 | 0.22 | 1.57 |
| 33607 | 0 | 119467 | ISGKPGPPPMGFHSPLIK                                 | 2.88 | 0.01 | 0.78 | 1.12 | 0.22 | 1.48 |
| 33608 | 0 | 119468 | ISGQVTGEVIFQTPLIK                                  | 2.86 | 0.01 | 2.26 | 1.12 | 0.22 | 1.57 |

|       |   |        |                          |      |      |      |      |      |      |
|-------|---|--------|--------------------------|------|------|------|------|------|------|
| 33609 | 0 | 119468 | ISGKQVTGEVIFQTPLIK       | 2.86 | 0.01 | 2.26 | 1.12 | 0.22 | 1.57 |
| 33610 | 0 | 119468 | ISGKQVTGEVIFQTPLIK       | 2.86 | 0.01 | 2.26 | 1.12 | 2.25 | 1.75 |
| 33611 | 0 | 119468 | ISGKQVTGEVIFQTPLIK       | 2.86 | 0.01 | 2.26 | 1.12 | 0.22 | 1.57 |
| 33612 | 0 | 119468 | ISGKQVTGEVIFQTPLIK       | 2.86 | 0.01 | 2.26 | 1.12 | 0.22 | 1.57 |
| 33613 | 0 | 119468 | ISGKQVTGEVIFQTPLIK       | 2.86 | 0.01 | 2.26 | 1.12 | 0.22 | 1.48 |
| 33614 | 0 | 119468 | ISGKQVTGEVIFQTPLIK       | 2.86 | 0.01 | 2.26 | 1.12 | 0.22 | 1.57 |
| 33615 | 0 | 119468 | ISGKQVTGEVIFQTPLIK       | 2.86 | 0.01 | 2.26 | 1.15 | 0.22 | 0.85 |
| 33616 | 0 | 126328 | ISHG                     | 1.57 | 0.01 | 2.75 | 0.68 | 0.22 | 0.28 |
| 33617 | 0 | 126328 | ISHG                     | 1.57 | 0.01 | 2.75 | 0.68 | 0.22 | 0.28 |
| 33618 | 0 | 450717 | ISHTKAE                  | 1.99 | 0.01 | 0.90 | 0.44 | 1.41 | 1.39 |
| 33619 | 0 | 489594 | ISIDQILEAHNQSPF          | 2.67 | 0.01 | 2.69 | 3.05 | 0.85 | 1.28 |
| 33620 | 0 | 118432 | ISIGYHYPPICLGRA          | 2.68 | 0.01 | 3.97 | 0.44 | 1.13 | 0.85 |
| 33621 | 0 | 118433 | ISIGYRYPPICLGRA          | 2.70 | 0.01 | 3.78 | 0.44 | 1.13 | 0.85 |
| 33622 | 0 | 28537  | ISIKYDPRKDSEVFA          | 2.67 | 0.01 | 2.80 | 1.15 | 0.22 | 1.27 |
| 33623 | 0 | 28537  | ISIKYDPRKDSEVFA          | 2.67 | 0.01 | 2.80 | 1.12 | 0.22 | 1.27 |
| 33624 | 0 | 28537  | ISIKYDPRKDSEVFA          | 2.67 | 0.01 | 2.80 | 1.15 | 0.22 | 1.27 |
| 33625 | 0 | 28537  | ISIKYDPRKDSEVFA          | 2.67 | 0.01 | 2.80 | 1.15 | 0.22 | 1.27 |
| 33626 | 0 | 28537  | ISIKYDPRKDSEVFA          | 2.67 | 0.01 | 2.80 | 1.15 | 0.22 | 0.28 |
| 33627 | 0 | 28537  | ISIKYDPRKDSEVFA          | 2.67 | 0.01 | 2.80 | 1.15 | 0.22 | 0.28 |
| 33628 | 0 | 28537  | ISIKYDPRKDSEVFA          | 2.67 | 0.01 | 2.80 | 0.68 | 0.22 | 0.28 |
| 33629 | 0 | 28537  | ISIKYDPRKDSEVFA          | 2.67 | 0.01 | 2.80 | 0.68 | 0.22 | 0.28 |
| 33630 | 0 | 28537  | ISIKYDPRKDSEVFA          | 2.67 | 0.01 | 2.80 | 1.15 | 0.22 | 0.28 |
| 33631 | 0 | 28548  | ISITTEVMPVSMAKTSV        | 2.83 | 0.01 | 2.48 | 1.20 | 0.22 | 0.28 |
| 33632 | 0 | 28554  | ISKAMAKKKGGKKGKAT<br>PSA | 2.99 | 0.01 | 2.78 | 2.49 | 0.85 | 0.28 |
| 33633 | 0 | 118434 | ISKGANPVEIRRG            | 2.53 | 0.01 | 0.78 | 0.44 | 1.74 | 0.85 |
| 33634 | 0 | 118434 | ISKGANPVEIRRG            | 2.53 | 0.01 | 0.78 | 0.44 | 1.59 | 0.85 |
| 33635 | 0 | 118434 | ISKGANPVEIRRG            | 2.53 | 0.01 | 0.78 | 0.44 | 1.74 | 0.85 |
| 33636 | 0 | 118435 | ISKGANPVEIRRGVMLA<br>V   | 2.83 | 0.01 | 0.78 | 1.20 | 0.22 | 0.85 |
| 33637 | 0 | 118435 | ISKGANPVEIRRGVMLA<br>V   | 2.83 | 0.01 | 0.78 | 1.20 | 0.22 | 0.85 |
| 33638 | 0 | 118435 | ISKGANPVEIRRGVMLA<br>V   | 2.83 | 0.01 | 0.78 | 1.20 | 0.22 | 0.85 |
| 33639 | 0 | 118435 | ISKGANPVEIRRGVMLA<br>V   | 2.83 | 0.01 | 0.78 | 1.20 | 0.22 | 1.48 |
| 33640 | 0 | 171579 | ISKKPKDPEPPEKEF          | 2.72 | 0.01 | 0.78 | 0.44 | 1.41 | 0.28 |
| 33641 | 0 | 28564  | ISKQEYDAAVTAK            | 2.53 | 0.01 | 3.30 | 1.20 | 0.22 | 0.85 |
| 33642 | 0 | 28564  | ISKQEYDAAVTAK            | 2.53 | 0.01 | 3.30 | 1.20 | 0.22 | 0.85 |

|       |   |        |                               |      |      |      |      |      |      |
|-------|---|--------|-------------------------------|------|------|------|------|------|------|
| 33643 | 0 | 28564  | ISKQEYDAAVTAK                 | 2.53 | 0.01 | 3.30 | 1.20 | 0.22 | 1.34 |
| 33644 | 0 | 28575  | ISLFIYETF                     | 2.34 | 0.01 | 0.78 | 0.44 | 1.74 | 0.28 |
| 33645 | 0 | 98836  | ISLLDAQSAP                    | 2.32 | 0.01 | 1.60 | 0.44 | 1.23 | 0.85 |
| 33646 | 0 | 98836  | ISLLDAQSAP                    | 2.32 | 0.01 | 1.60 | 0.44 | 1.23 | 0.85 |
| 33647 | 0 | 28589  | ISLNFENYV                     | 2.21 | 0.01 | 0.90 | 2.55 | 0.22 | 1.27 |
| 33648 | 0 | 28589  | ISLNFENYV                     | 2.21 | 0.01 | 0.90 | 2.55 | 0.22 | 2.12 |
| 33649 | 0 | 117314 | ISLNIDCSRV                    | 2.32 | 0.01 | 1.86 | 0.44 | 1.23 | 0.28 |
| 33650 | 0 | 28590  | ISLNIENEA                     | 2.26 | 0.01 | 0.90 | 2.55 | 0.22 | 0.28 |
| 33651 | 0 | 126331 | ISLRPG                        | 1.88 | 0.01 | 2.75 | 0.68 | 0.22 | 0.28 |
| 33652 | 0 | 126331 | ISLRPG                        | 1.88 | 0.01 | 2.75 | 0.68 | 0.22 | 0.28 |
| 33653 | 0 | 28602  | ISLTDLEIWSNQ                  | 2.48 | 0.01 | 3.61 | 1.20 | 0.22 | 0.85 |
| 33654 | 0 | 28603  | ISLTEWSMWYRH                  | 2.45 | 0.01 | 0.90 | 1.15 | 0.22 | 1.66 |
| 33655 | 0 | 28603  | ISLTEWSMWYRH                  | 2.45 | 0.01 | 0.90 | 1.81 | 0.22 | 0.28 |
| 33656 | 0 | 28603  | ISLTEWSMWYRH                  | 2.45 | 0.01 | 0.90 | 1.81 | 0.22 | 0.28 |
| 33657 | 0 | 28603  | ISLTEWSMWYRH                  | 2.45 | 0.01 | 0.90 | 0.44 | 0.85 | 0.28 |
| 33658 | 0 | 418215 | ISLWKGFSFIMFT                 | 2.56 | 0.01 | 0.78 | 0.44 | 1.13 | 0.28 |
| 33659 | 0 | 28607  | ISMDVNKS                      | 2.12 | 0.01 | 2.83 | 2.61 | 0.22 | 0.28 |
| 33660 | 0 | 103286 | ISMIDGPAPDGYPII               | 2.70 | 0.01 | 2.04 | 0.44 | 0.85 | 1.28 |
| 33661 | 0 | 132390 | ISNELNHILLENDMK               | 2.70 | 0.01 | 2.82 | 0.68 | 0.22 | 1.27 |
| 33662 | 0 | 132390 | ISNELNHILLENDMK               | 2.70 | 0.01 | 2.82 | 0.68 | 0.22 | 1.48 |
| 33663 | 0 | 132390 | ISNELNHILLENDMK               | 2.70 | 0.01 | 2.82 | 0.68 | 0.22 | 0.28 |
| 33664 | 0 | 28624  | ISNFDESSCTFMPEG               | 2.65 | 0.01 | 2.43 | 0.44 | 1.59 | 0.28 |
| 33665 | 0 | 28630  | ISNIFKDIQNIKKQSQDII<br>TNMNDM | 3.21 | 0.01 | 1.66 | 0.44 | 1.74 | 0.28 |
| 33666 | 0 | 28630  | ISNIFKDIQNIKKQSQDII<br>TNMNDM | 3.21 | 0.01 | 1.66 | 0.44 | 1.74 | 0.28 |
| 33667 | 0 | 125449 | ISNIRRVIAQRLMQSKQT<br>IPHYYS  | 3.15 | 0.01 | 0.78 | 0.44 | 1.41 | 0.28 |
| 33668 | 0 | 125449 | ISNIRRVIAQRLMQSKQT<br>IPHYYS  | 3.15 | 0.01 | 0.78 | 0.44 | 1.41 | 0.28 |
| 33669 | 0 | 179041 | ISNKRRMGLTEFQAV               | 2.59 | 0.01 | 2.36 | 0.44 | 1.23 | 1.28 |
| 33670 | 0 | 179041 | ISNKRRMGLTEFQAV               | 2.59 | 0.01 | 2.36 | 0.44 | 1.23 | 1.27 |
| 33671 | 0 | 179041 | ISNKRRMGLTEFQAV               | 2.59 | 0.01 | 2.36 | 0.44 | 1.23 | 1.28 |
| 33672 | 0 | 236429 | ISNLF                         | 1.74 | 0.01 | 0.78 | 1.15 | 0.22 | 1.39 |
| 33673 | 0 | 236429 | ISNLF                         | 1.74 | 0.01 | 0.78 | 1.15 | 0.22 | 1.39 |
| 33674 | 0 | 236429 | ISNLF                         | 1.74 | 0.01 | 0.78 | 1.15 | 0.22 | 1.39 |
| 33675 | 0 | 28637  | ISNRDF                        | 1.88 | 0.01 | 2.40 | 0.44 | 0.85 | 0.28 |
| 33676 | 0 | 28643  | ISPCAFGGVSVITPGTN             | 2.81 | 0.01 | 2.48 | 0.44 | 0.85 | 0.28 |
| 33677 | 0 | 28643  | ISPCAFGGVSVITPGTN             | 2.81 | 0.01 | 2.48 | 1.20 | 0.22 | 0.28 |
| 33678 | 0 | 119962 | ISPESDRPDLSTFMESG             | 2.79 | 0.01 | 2.26 | 1.15 | 0.22 | 1.57 |
| 33679 | 0 | 119962 | ISPESDRPDLSTFMESG             | 2.79 | 0.01 | 2.26 | 1.12 | 0.22 | 1.57 |
| 33680 | 0 | 119962 | ISPESDRPDLSTFMESG             | 2.79 | 0.01 | 2.26 | 2.43 | 0.22 | 1.57 |

|       |   |        |                   |      |      |      |      |      |      |
|-------|---|--------|-------------------|------|------|------|------|------|------|
| 33681 | 0 | 119962 | ISPESDRPDLSTFMESG | 2.79 | 0.01 | 2.26 | 2.25 | 0.22 | 1.57 |
| 33682 | 0 | 119962 | ISPESDRPDLSTFMESG | 2.79 | 0.01 | 2.26 | 3.65 | 0.22 | 1.57 |
| 33683 | 0 | 134694 | ISPFCLK           | 2.12 | 0.01 | 0.78 | 4.03 | 2.26 | 0.85 |
| 33684 | 0 | 134694 | ISPFCLK           | 2.12 | 0.01 | 0.78 | 4.03 | 2.26 | 1.34 |
| 33685 | 0 | 450719 | ISPLSVP           | 2.04 | 0.01 | 0.90 | 0.44 | 1.23 | 1.39 |
| 33686 | 0 | 97404  | ISPNDNTFV         | 2.21 | 0.01 | 3.13 | 1.12 | 0.22 | 0.28 |
| 33687 | 0 | 131299 | ISPNTTYP SL       | 2.32 | 0.01 | 0.78 | 0.44 | 1.13 | 2.02 |
| 33688 | 0 | 186683 | ISQHPLY SILS      | 2.52 | 0.01 | 0.90 | 0.68 | 0.22 | 1.39 |
| 33689 | 0 | 489595 | ISPSDWLNLVQSAQR   | 2.66 | 0.01 | 2.69 | 3.05 | 0.85 | 1.28 |
| 33690 | 0 | 139783 | ISPTDNM           | 1.99 | 0.01 | 0.90 | 2.00 | 0.22 | 0.28 |
| 33691 | 0 | 77923  | ISPTQLYAQVRA      | 2.45 | 0.01 | 0.90 | 1.15 | 0.22 | 0.85 |
| 33692 | 0 | 28669  | ISQAVHAAHA        | 2.35 | 0.01 | 2.25 | 0.68 | 0.22 | 0.85 |
| 33693 | 0 | 28669  | ISQAVHAAHA        | 2.35 | 0.01 | 2.25 | 0.68 | 0.22 | 0.85 |
| 33694 | 0 | 28676  | ISQAVHAAHAEINEAGR | 2.81 | 0.01 | 2.25 | 1.12 | 0.22 | 2.02 |
| 33695 | 0 | 28676  | ISQAVHAAHAEINEAGR | 2.81 | 0.01 | 2.25 | 0.44 | 1.23 | 2.02 |
| 33696 | 0 | 28676  | ISQAVHAAHAEINEAGR | 2.81 | 0.01 | 2.25 | 1.12 | 0.22 | 1.27 |
| 33697 | 0 | 28676  | ISQAVHAAHAEINEAGR | 2.81 | 0.01 | 2.25 | 0.44 | 1.23 | 1.27 |
| 33698 | 0 | 28676  | ISQAVHAAHAEINEAGR | 2.81 | 0.01 | 2.25 | 0.68 | 0.22 | 0.28 |
| 33699 | 0 | 28676  | ISQAVHAAHAEINEAGR | 2.81 | 0.01 | 2.25 | 0.68 | 0.22 | 0.28 |
| 33700 | 0 | 28676  | ISQAVHAAHAEINEAGR | 2.81 | 0.01 | 2.25 | 0.68 | 0.22 | 1.27 |
| 33701 | 0 | 28676  | ISQAVHAAHAEINEAGR | 2.81 | 0.01 | 2.25 | 0.68 | 0.22 | 1.27 |
| 33702 | 0 | 28676  | ISQAVHAAHAEINEAGR | 2.81 | 0.01 | 2.25 | 2.04 | 0.22 | 1.75 |
| 33703 | 0 | 28676  | ISQAVHAAHAEINEAGR | 2.81 | 0.01 | 2.25 | 2.04 | 0.22 | 1.75 |
| 33704 | 0 | 28676  | ISQAVHAAHAEINEAGR | 2.81 | 0.01 | 2.25 | 2.04 | 0.22 | 1.75 |
| 33705 | 0 | 28676  | ISQAVHAAHAEINEAGR | 2.81 | 0.01 | 2.25 | 1.81 | 0.22 | 0.28 |
| 33706 | 0 | 28676  | ISQAVHAAHAEINEAGR | 2.81 | 0.01 | 2.25 | 1.15 | 0.22 | 0.28 |
| 33707 | 0 | 28676  | ISQAVHAAHAEINEAGR | 2.81 | 0.01 | 2.25 | 1.81 | 0.22 | 0.28 |
| 33708 | 0 | 28676  | ISQAVHAAHAEINEAGR | 2.81 | 0.01 | 2.25 | 1.81 | 0.22 | 0.28 |
| 33709 | 0 | 28676  | ISQAVHAAHAEINEAGR | 2.81 | 0.01 | 2.25 | 1.81 | 0.22 | 0.28 |



|       |   |        |                                      |      |      |      |      |      |      |
|-------|---|--------|--------------------------------------|------|------|------|------|------|------|
| 33710 | 0 | 28676  | ISQAVHAAHAEINEAGR                    | 2.81 | 0.01 | 2.25 | 1.81 | 0.22 | 0.28 |
| 33711 | 0 | 28676  | ISQAVHAAHAEINEAGR                    | 2.81 | 0.01 | 2.25 | 1.81 | 0.22 | 0.28 |
| 33712 | 0 | 28676  | ISQAVHAAHAEINEAGR                    | 2.81 | 0.01 | 2.25 | 1.81 | 0.22 | 0.28 |
| 33713 | 0 | 28676  | ISQAVHAAHAEINEAGR                    | 2.81 | 0.01 | 2.25 | 1.81 | 0.22 | 1.66 |
| 33714 | 0 | 28676  | ISQAVHAAHAEINEAGR                    | 2.81 | 0.01 | 2.25 | 1.81 | 0.22 | 1.34 |
| 33715 | 0 | 161501 | ISQAVHAAHAEINEAGR<br>ESGK            | 3.01 | 4.23 | 0.90 | 4.63 | 0.22 | 0.28 |
| 33716 | 0 | 161501 | ISQAVHAAHAEINEAGR<br>ESGK            | 3.01 | 4.23 | 0.90 | 4.63 | 0.22 | 0.28 |
| 33717 | 0 | 189236 | ISQAVHAAHAEINEAGR<br>KKSPITDTNLDTMDK | 3.39 | 0.01 | 0.90 | 0.68 | 0.22 | 0.28 |
| 33718 | 0 | 238639 | ISQEAREGTQGERCAVH<br>G               | 2.85 | 0.01 | 0.78 | 0.44 | 1.13 | 0.28 |
| 33719 | 0 | 135940 | ISQEMERIPRLR                         | 2.50 | 0.01 | 0.78 | 0.44 | 1.41 | 0.28 |
| 33720 | 0 | 28691  | ISQHQCVK                             | 2.12 | 0.01 | 1.66 | 1.15 | 0.22 | 0.28 |
| 33721 | 0 | 425663 | ISQPPRYA                             | 2.11 | 0.01 | 2.89 | 2.00 | 0.85 | 0.85 |
| 33722 | 0 | 28693  | ISQQPFPLQP                           | 2.35 | 0.01 | 2.83 | 0.68 | 0.22 | 0.28 |
| 33723 | 0 | 28693  | ISQQPFPLQP                           | 2.35 | 0.01 | 2.83 | 0.68 | 0.22 | 0.85 |
| 33724 | 0 | 28694  | ISQQPQQPFP                           | 2.36 | 0.01 | 2.83 | 0.68 | 0.22 | 0.85 |
| 33725 | 0 | 28694  | ISQQPQQPFP                           | 2.36 | 0.01 | 2.83 | 0.68 | 0.22 | 0.28 |
| 33726 | 0 | 95478  | ISQRYQKFAL                           | 2.29 | 0.01 | 1.60 | 0.44 | 1.23 | 0.85 |
| 33727 | 0 | 28695  | ISQSLMPLSPWR                         | 2.49 | 0.01 | 0.90 | 1.20 | 0.22 | 0.28 |
| 33728 | 0 | 28698  | ISQYFATN                             | 2.10 | 0.01 | 2.99 | 0.44 | 0.85 | 0.28 |
| 33729 | 0 | 105887 | ISRCQVCMKKRH                         | 2.46 | 0.01 | 0.78 | 0.44 | 1.13 | 1.27 |
| 33730 | 0 | 122804 | ISRIYVSIDVTLQLES                     | 2.81 | 0.01 | 0.78 | 3.01 | 0.22 | 0.28 |
| 33731 | 0 | 175923 | ISRSLHGIWPEKICK                      | 2.67 | 0.01 | 2.63 | 1.15 | 0.22 | 0.85 |
| 33732 | 0 | 175923 | ISRSLHGIWPEKICK                      | 2.67 | 0.01 | 2.63 | 1.15 | 0.22 | 0.85 |
| 33733 | 0 | 175923 | ISRSLHGIWPEKICK                      | 2.67 | 0.01 | 2.63 | 1.15 | 0.22 | 0.85 |
| 33734 | 0 | 28719  | ISSIFSR                              | 2.07 | 0.01 | 4.08 | 1.15 | 0.22 | 0.28 |
| 33735 | 0 | 28719  | ISSIFSR                              | 2.07 | 0.01 | 4.08 | 1.15 | 0.22 | 0.28 |
| 33736 | 0 | 28719  | ISSIFSR                              | 2.07 | 0.01 | 2.08 | 1.15 | 0.22 | 0.28 |
| 33737 | 0 | 28721  | ISSISART                             | 2.17 | 0.01 | 2.08 | 0.68 | 0.22 | 0.85 |
| 33738 | 0 | 28723  | ISSKKSGAT                            | 2.25 | 0.01 | 3.28 | 0.44 | 1.23 | 0.85 |
| 33739 | 0 | 150858 | ISSLYNLVKSS                          | 2.40 | 0.01 | 3.10 | 0.68 | 0.22 | 0.85 |
| 33740 | 0 | 150858 | ISSLYNLVKSS                          | 2.40 | 0.01 | 3.10 | 0.68 | 0.22 | 1.66 |
| 33741 | 0 | 150858 | ISSLYNLVKSS                          | 2.40 | 0.01 | 3.10 | 0.68 | 0.22 | 1.66 |
| 33742 | 0 | 150858 | ISSLYNLVKSS                          | 2.40 | 0.01 | 3.10 | 0.68 | 0.22 | 0.28 |
| 33743 | 0 | 150858 | ISSLYNLVKSS                          | 2.40 | 0.01 | 3.10 | 0.68 | 0.22 | 1.48 |
| 33744 | 0 | 150858 | ISSLYNLVKSS                          | 2.40 | 0.01 | 3.10 | 0.68 | 0.22 | 1.34 |
| 33745 | 0 | 150858 | ISSLYNLVKSS                          | 2.40 | 0.01 | 3.10 | 0.68 | 0.22 | 1.75 |
| 33746 | 0 | 150858 | ISSLYNLVKSS                          | 2.40 | 0.01 | 3.10 | 0.68 | 0.22 | 1.34 |

|       |   |        |                                          |      |      |      |      |      |      |
|-------|---|--------|------------------------------------------|------|------|------|------|------|------|
| 33747 | 0 | 101760 | ISSPDMLLRAQA                             | 2.45 | 0.01 | 0.90 | 0.44 | 0.85 | 1.39 |
| 33748 | 0 | 139524 | ISSQT                                    | 1.75 | 0.01 | 0.78 | 0.68 | 0.22 | 1.34 |
| 33749 | 0 | 139524 | ISSQT                                    | 1.75 | 0.01 | 0.78 | 0.68 | 0.22 | 0.85 |
| 33750 | 0 | 139524 | ISSQT                                    | 1.75 | 0.01 | 0.78 | 0.68 | 0.22 | 0.85 |
| 33751 | 0 | 139525 | ISSQTNDTHKRDTYAAT<br>PRA                 | 2.94 | 0.01 | 0.78 | 3.61 | 0.22 | 0.28 |
| 33752 | 0 | 139525 | ISSQTNDTHKRDTYAAT<br>PRA                 | 2.94 | 0.01 | 0.78 | 3.61 | 0.22 | 0.28 |
| 33753 | 0 | 139525 | ISSQTNDTHKRDTYAAT<br>PRA                 | 2.94 | 0.01 | 0.78 | 3.61 | 0.22 | 1.66 |
| 33754 | 0 | 139525 | ISSQTNDTHKRDTYAAT<br>PRA                 | 2.94 | 0.01 | 0.78 | 3.61 | 0.22 | 1.66 |
| 33755 | 0 | 139525 | ISSQTNDTHKRDTYAAT<br>PRA                 | 2.94 | 0.01 | 0.78 | 3.61 | 0.22 | 1.66 |
| 33756 | 0 | 139525 | ISSQTNDTHKRDTYAAT<br>PRA                 | 2.94 | 0.01 | 0.78 | 3.61 | 0.22 | 1.66 |
| 33757 | 0 | 139525 | ISSQTNDTHKRDTYAAT<br>PRA                 | 2.94 | 0.01 | 0.78 | 3.61 | 0.22 | 1.48 |
| 33758 | 0 | 28732  | ISSSEEIVPN                               | 2.34 | 0.01 | 1.60 | 0.44 | 1.23 | 0.28 |
| 33759 | 0 | 109358 | ISSSEEIVPNSVEQKHIQK<br>EDVPSERYLGYLEQLLR | 3.53 | 0.01 | 1.60 | 0.44 | 1.23 | 1.34 |
| 33760 | 0 | 109358 | ISSSEEIVPNSVEQKHIQK<br>EDVPSERYLGYLEQLLR | 3.53 | 0.01 | 1.60 | 0.44 | 1.23 | 0.85 |
| 33761 | 0 | 28733  | ISSTNEI                                  | 2.04 | 0.01 | 3.37 | 2.13 | 2.25 | 1.75 |
| 33762 | 0 | 93028  | ISSVSAFTSS                               | 2.33 | 0.01 | 2.67 | 2.00 | 0.22 | 0.28 |
| 33763 | 0 | 93028  | ISSVSAFTSS                               | 2.33 | 0.01 | 2.67 | 2.00 | 0.22 | 0.28 |
| 33764 | 0 | 93028  | ISSVSAFTSS                               | 2.33 | 0.01 | 2.67 | 2.00 | 0.22 | 0.28 |
| 33765 | 0 | 28742  | ISTEPFPNQKHKDLQ                          | 2.64 | 0.01 | 1.66 | 0.44 | 0.85 | 0.28 |
| 33766 | 0 | 128029 | ISTHGRLLGRSQAIVGVT<br>SW                 | 2.96 | 0.01 | 0.78 | 0.44 | 1.13 | 0.28 |
| 33767 | 0 | 28749  | ISTLIKQKLDGLKNE                          | 2.69 | 0.01 | 2.73 | 0.44 | 0.85 | 0.28 |
| 33768 | 0 | 28749  | ISTLIKQKLDGLKNE                          | 2.69 | 0.01 | 2.97 | 0.44 | 0.85 | 0.28 |
| 33769 | 0 | 179042 | ISTRVRCGRSLQGYP                          | 2.66 | 0.01 | 2.36 | 0.44 | 1.23 | 1.28 |
| 33770 | 0 | 179042 | ISTRVRCGRSLQGYP                          | 2.66 | 0.01 | 2.36 | 0.44 | 1.23 | 1.27 |
| 33771 | 0 | 179042 | ISTRVRCGRSLQGYP                          | 2.66 | 0.01 | 2.36 | 0.44 | 1.23 | 1.28 |
| 33772 | 0 | 139526 | ISVRTVYPPE                               | 2.30 | 0.01 | 0.78 | 0.68 | 0.22 | 0.28 |
| 33773 | 0 | 139526 | ISVRTVYPPE                               | 2.30 | 0.01 | 0.78 | 0.68 | 0.22 | 0.28 |
| 33774 | 0 | 139526 | ISVRTVYPPE                               | 2.30 | 0.01 | 0.78 | 0.68 | 0.22 | 1.66 |
| 33775 | 0 | 139526 | ISVRTVYPPE                               | 2.30 | 0.01 | 0.78 | 0.68 | 0.22 | 1.66 |
| 33776 | 0 | 139526 | ISVRTVYPPE                               | 2.30 | 0.01 | 0.78 | 0.68 | 0.22 | 1.66 |
| 33777 | 0 | 139526 | ISVRTVYPPE                               | 2.30 | 0.01 | 0.78 | 0.68 | 0.22 | 1.66 |
| 33778 | 0 | 28777  | ISVSIDAKDF                               | 2.34 | 0.01 | 2.72 | 0.44 | 1.23 | 0.85 |
| 33779 | 0 | 28786  | ISYANGSGLDERPY                           | 2.59 | 0.01 | 2.68 | 0.44 | 0.85 | 0.28 |
| 33780 | 0 | 123339 | ISYDPKFEQ                                | 2.18 | 0.01 | 2.28 | 2.00 | 0.22 | 0.28 |
| 33781 | 0 | 132392 | ISYINIIMPSVFGT                           | 2.61 | 0.01 | 0.78 | 0.44 | 1.13 | 1.39 |

|       |   |        |                            |      |      |      |      |      |      |
|-------|---|--------|----------------------------|------|------|------|------|------|------|
| 33782 | 0 | 450721 | ISYLSVT                    | 2.02 | 0.01 | 0.90 | 0.44 | 1.23 | 1.39 |
| 33783 | 0 | 196566 | ISYQWPS                    | 2.02 | 0.01 | 0.90 | 0.44 | 1.23 | 1.39 |
| 33784 | 0 | 28804  | ITADMYT                    | 2.02 | 0.01 | 0.90 | 0.44 | 1.23 | 1.27 |
| 33785 | 0 | 28804  | ITADMYT                    | 2.02 | 0.01 | 0.90 | 0.44 | 1.23 | 0.28 |
| 33786 | 0 | 28809  | ITAGIALHQSM LNSQ           | 2.69 | 0.01 | 2.43 | 0.44 | 1.59 | 0.28 |
| 33787 | 0 | 105256 | ITAGTE                     | 1.90 | 0.01 | 3.47 | 1.20 | 0.22 | 0.28 |
| 33788 | 0 | 179828 | ITANTREIQHIKEE             | 2.62 | 0.01 | 3.63 | 0.68 | 0.22 | 0.28 |
| 33789 | 0 | 179828 | ITANTREIQHIKEE             | 2.62 | 0.01 | 3.63 | 0.68 | 0.22 | 0.85 |
| 33790 | 0 | 179828 | ITANTREIQHIKEE             | 2.62 | 0.01 | 3.63 | 0.68 | 0.22 | 0.28 |
| 33791 | 0 | 179828 | ITANTREIQHIKEE             | 2.62 | 0.01 | 3.63 | 0.68 | 0.22 | 0.85 |
| 33792 | 0 | 179828 | ITANTREIQHIKEE             | 2.62 | 0.01 | 3.63 | 0.68 | 0.22 | 1.48 |
| 33793 | 0 | 179828 | ITANTREIQHIKEE             | 2.62 | 0.01 | 3.63 | 0.68 | 0.22 | 1.48 |
| 33794 | 0 | 179828 | ITANTREIQHIKEE             | 2.62 | 0.01 | 3.63 | 0.68 | 0.22 | 1.48 |
| 33795 | 0 | 137209 | ITANVTDESYLY               | 2.45 | 0.01 | 2.80 | 2.13 | 0.22 | 0.28 |
| 33796 | 0 | 167291 | ITAPHPH                    | 2.04 | 0.01 | 0.90 | 1.15 | 0.22 | 1.39 |
| 33797 | 0 | 180330 | ITCGATMNDIFS KNIR          | 2.72 | 0.01 | 3.32 | 1.12 | 0.22 | 0.28 |
| 33798 | 0 | 180330 | ITCGATMNDIFS KNIR          | 2.72 | 0.01 | 3.32 | 3.06 | 0.22 | 0.28 |
| 33799 | 0 | 181676 | ITCRAPNEANFFRNI            | 2.70 | 0.01 | 1.66 | 2.37 | 0.22 | 1.28 |
| 33800 | 0 | 181676 | ITCRAPNEANFFRNI            | 2.70 | 0.01 | 1.66 | 2.36 | 0.22 | 1.28 |
| 33801 | 0 | 28844  | ITCYVKALAACKAAGIVA<br>PTML | 3.06 | 0.01 | 4.23 | 0.68 | 0.22 | 0.85 |
| 33802 | 0 | 28844  | ITCYVKALAACKAAGIVA<br>PTML | 3.06 | 0.01 | 4.23 | 0.68 | 0.22 | 1.34 |
| 33803 | 0 | 28844  | ITCYVKALAACKAAGIVA<br>PTML | 3.06 | 0.01 | 4.23 | 0.68 | 0.22 | 1.34 |
| 33804 | 0 | 144364 | ITDAVITVPAYFND             | 2.64 | 0.01 | 2.51 | 0.68 | 0.22 | 0.28 |
| 33805 | 0 | 144364 | ITDAVITVPAYFND             | 2.64 | 0.01 | 2.51 | 0.68 | 0.22 | 0.28 |
| 33806 | 0 | 144364 | ITDAVITVPAYFND             | 2.64 | 0.01 | 2.51 | 0.68 | 0.22 | 0.28 |
| 33807 | 0 | 144364 | ITDAVITVPAYFND             | 2.64 | 0.01 | 2.51 | 0.68 | 0.22 | 0.28 |
| 33808 | 0 | 144364 | ITDAVITVPAYFND             | 2.64 | 0.01 | 2.51 | 3.26 | 0.22 | 0.28 |
| 33809 | 0 | 144364 | ITDAVITVPAYFND             | 2.64 | 0.01 | 2.51 | 3.26 | 0.22 | 0.28 |
| 33810 | 0 | 144364 | ITDAVITVPAYFND             | 2.64 | 0.01 | 2.51 | 0.68 | 0.22 | 2.12 |
| 33811 | 0 | 144364 | ITDAVITVPAYFND             | 2.64 | 0.01 | 2.51 | 0.68 | 0.22 | 2.12 |
| 33812 | 0 | 144364 | ITDAVITVPAYFND             | 2.64 | 0.01 | 2.51 | 0.68 | 0.22 | 0.28 |
| 33813 | 0 | 144364 | ITDAVITVPAYFND             | 2.64 | 0.01 | 2.51 | 2.22 | 0.22 | 0.28 |
| 33814 | 0 | 144364 | ITDAVITVPAYFND             | 2.64 | 0.01 | 2.51 | 2.22 | 0.22 | 0.28 |
| 33815 | 0 | 144364 | ITDAVITVPAYFND             | 2.64 | 0.01 | 2.51 | 2.22 | 0.22 | 0.28 |
| 33816 | 0 | 314918 | ITDDDDPAADAAGTR            | 2.71 | 0.01 | 1.61 | 0.44 | 0.85 | 1.28 |
| 33817 | 0 | 28850  | ITDELDQTFSEL SGY           | 2.68 | 0.01 | 3.15 | 0.44 | 1.23 | 0.85 |
| 33818 | 0 | 28853  | ITDHEEDN                   | 2.13 | 0.01 | 2.99 | 0.44 | 0.85 | 0.28 |
| 33819 | 0 | 78183  | ITDNHGHVKW                 | 2.29 | 0.01 | 3.89 | 0.68 | 0.22 | 0.28 |
| 33820 | 0 | 78183  | ITDNHGHVKW                 | 2.29 | 0.01 | 3.89 | 0.68 | 0.22 | 0.28 |
| 33821 | 0 | 78183  | ITDNHGHVKW                 | 2.29 | 0.01 | 3.89 | 0.68 | 0.22 | 0.28 |
| 33822 | 0 | 78183  | ITDNHGHVKW                 | 2.29 | 0.01 | 3.89 | 0.68 | 0.22 | 0.28 |
| 33823 | 0 | 122805 | ITDNPYMTSIPVNAFQG<br>LC    | 2.84 | 0.01 | 0.78 | 2.46 | 0.22 | 0.28 |

|       |   |        |                         |      |      |      |      |      |      |
|-------|---|--------|-------------------------|------|------|------|------|------|------|
| 33824 | 0 | 122805 | ITDNPYMTSIPVNAFQG<br>LC | 2.84 | 0.01 | 0.78 | 2.46 | 0.22 | 0.28 |
| 33825 | 0 | 93030  | ITDSDGNDKL              | 2.31 | 0.01 | 2.67 | 2.00 | 0.22 | 0.28 |
| 33826 | 0 | 120646 | ITEHEGEIGK              | 2.36 | 0.01 | 2.18 | 2.16 | 0.22 | 0.28 |
| 33827 | 0 | 95480  | ITELSEFIPGAS            | 2.48 | 0.01 | 2.88 | 1.12 | 0.22 | 0.85 |
| 33828 | 0 | 95480  | ITELSEFIPGAS            | 2.48 | 0.01 | 2.88 | 0.44 | 1.23 | 0.85 |
| 33829 | 0 | 28888  | ITFDGNKIIKTS            | 2.49 | 0.01 | 3.75 | 1.15 | 0.22 | 0.28 |
| 33830 | 0 | 28898  | ITFKSGATFQ              | 2.31 | 0.01 | 2.66 | 0.68 | 0.22 | 0.28 |
| 33831 | 0 | 28898  | ITFKSGATFQ              | 2.31 | 0.01 | 2.66 | 0.68 | 0.22 | 0.28 |
| 33832 | 0 | 28898  | ITFKSGATFQ              | 2.31 | 0.01 | 2.66 | 0.68 | 0.22 | 0.28 |
| 33833 | 0 | 28898  | ITFKSGATFQ              | 2.31 | 0.01 | 2.66 | 0.68 | 0.22 | 0.28 |
| 33834 | 0 | 28898  | ITFKSGATFQ              | 2.31 | 0.01 | 2.66 | 0.68 | 0.22 | 0.28 |
| 33835 | 0 | 28898  | ITFKSGATFQ              | 2.31 | 0.01 | 2.66 | 0.68 | 0.22 | 0.28 |
| 33836 | 0 | 28898  | ITFKSGATFQ              | 2.31 | 0.01 | 2.66 | 0.68 | 0.22 | 0.28 |
| 33837 | 0 | 489599 | ITFSLHKIPDPPQPD         | 2.69 | 0.01 | 2.69 | 3.05 | 0.85 | 1.28 |
| 33838 | 0 | 95104  | ITGAGPKYVKQNTLK         | 2.66 | 0.01 | 0.90 | 0.44 | 0.85 | 1.57 |
| 33839 | 0 | 95104  | ITGAGPKYVKQNTLK         | 2.66 | 0.01 | 0.90 | 1.15 | 0.22 | 1.57 |
| 33840 | 0 | 95104  | ITGAGPKYVKQNTLK         | 2.66 | 0.01 | 0.90 | 1.15 | 0.22 | 1.57 |
| 33841 | 0 | 95104  | ITGAGPKYVKQNTLK         | 2.66 | 0.01 | 0.90 | 1.15 | 0.22 | 1.57 |
| 33842 | 0 | 191449 | ITGDCTSEVWQCYGGV        | 2.72 | 0.01 | 0.90 | 2.84 | 1.13 | 1.27 |
| 33843 | 0 | 191449 | ITGDCTSEVWQCYGGV        | 2.72 | 0.01 | 0.90 | 2.84 | 1.13 | 1.66 |
| 33844 | 0 | 191449 | ITGDCTSEVWQCYGGV        | 2.72 | 0.01 | 0.90 | 0.68 | 0.22 | 0.28 |
| 33845 | 0 | 191449 | ITGDCTSEVWQCYGGV        | 2.72 | 0.01 | 0.90 | 0.68 | 0.22 | 0.28 |
| 33846 | 0 | 171589 | ITGEPLAIIYFGPV          | 2.69 | 0.01 | 0.78 | 0.44 | 1.41 | 0.28 |
| 33847 | 0 | 171589 | ITGEPLAIIYFGPV          | 2.69 | 0.01 | 0.78 | 0.44 | 1.13 | 0.28 |
| 33848 | 0 | 28907  | ITGEYVQILDAAAY          | 2.66 | 0.01 | 3.75 | 0.44 | 1.74 | 0.28 |
| 33849 | 0 | 126341 | ITGHCQGDGYRVGFG         | 2.66 | 0.01 | 1.75 | 0.68 | 0.22 | 0.28 |
| 33850 | 0 | 28909  | ITGHRMAWDM              | 2.29 | 0.01 | 2.68 | 0.44 | 0.85 | 0.28 |
| 33851 | 0 | 28909  | ITGHRMAWDM              | 2.29 | 0.01 | 2.68 | 2.74 | 0.22 | 0.28 |
| 33852 | 0 | 28910  | ITGHRMAWDMMLNWS         | 2.63 | 0.01 | 1.72 | 0.44 | 0.85 | 0.28 |
| 33853 | 0 | 28911  | ITGHRMAWDMMMNWS         | 2.64 | 0.01 | 3.85 | 0.44 | 0.85 | 2.51 |
| 33854 | 0 | 28911  | ITGHRMAWDMMMNWS         | 2.64 | 0.01 | 3.85 | 1.15 | 0.22 | 2.51 |
| 33855 | 0 | 28911  | ITGHRMAWDMMMNWS         | 2.64 | 0.01 | 3.85 | 0.44 | 0.85 | 1.34 |
| 33856 | 0 | 28911  | ITGHRMAWDMMMNWS         | 2.64 | 0.01 | 3.85 | 0.44 | 0.85 | 2.51 |
| 33857 | 0 | 28911  | ITGHRMAWDMMMNWS         | 2.64 | 0.01 | 3.85 | 1.15 | 0.22 | 2.51 |
| 33858 | 0 | 28911  | ITGHRMAWDMMMNWS         | 2.64 | 0.01 | 3.85 | 0.44 | 0.85 | 2.51 |

|       |   |        |                                                                                                                                                                                                                         |      |      |      |      |      |      |
|-------|---|--------|-------------------------------------------------------------------------------------------------------------------------------------------------------------------------------------------------------------------------|------|------|------|------|------|------|
| 33859 | 0 | 28911  | ITGHRMAWDMMM<br>WS                                                                                                                                                                                                      | 2.64 | 0.01 | 3.85 | 1.15 | 0.22 | 2.51 |
| 33860 | 0 | 28911  | ITGHRMAWDMMM<br>WS                                                                                                                                                                                                      | 2.64 | 0.01 | 3.85 | 0.44 | 0.85 | 1.34 |
| 33861 | 0 | 28911  | ITGHRMAWDMMM<br>WS                                                                                                                                                                                                      | 2.64 | 0.01 | 2.41 | 0.44 | 0.22 | 0.28 |
| 33862 | 0 | 28911  | ITGHRMAWDMMM<br>WS                                                                                                                                                                                                      | 2.64 | 0.01 | 1.72 | 0.44 | 0.85 | 0.28 |
| 33863 | 0 | 28911  | ITGHRMAWDMMM<br>WS                                                                                                                                                                                                      | 2.64 | 0.01 | 1.72 | 0.44 | 0.85 | 0.28 |
| 33864 | 0 | 28911  | ITGHRMAWDMMM<br>WS                                                                                                                                                                                                      | 2.64 | 0.01 | 1.72 | 0.44 | 0.85 | 0.28 |
| 33865 | 0 | 28911  | ITGHRMAWDMMM<br>WS                                                                                                                                                                                                      | 2.64 | 0.01 | 1.72 | 0.44 | 0.22 | 2.35 |
| 33866 | 0 | 28912  | ITGHRMAWDMMM<br>WSPTT                                                                                                                                                                                                   | 2.80 | 0.01 | 3.18 | 0.44 | 1.59 | 0.28 |
| 33867 | 0 | 28913  | ITGHRMAWDMMM<br>WSPTTAL                                                                                                                                                                                                 | 2.91 | 0.01 | 1.72 | 0.68 | 0.22 | 0.28 |
| 33868 | 0 | 28913  | ITGHRMAWDMMM<br>WSPTTAL                                                                                                                                                                                                 | 2.91 | 0.01 | 1.72 | 0.68 | 0.22 | 0.28 |
| 33869 | 0 | 28914  | ITGHRMAWDMMV<br>NS                                                                                                                                                                                                      | 2.63 | 0.01 | 1.72 | 0.44 | 0.85 | 0.28 |
| 33870 | 0 | 84003  | ITGPGTNNPE                                                                                                                                                                                                              | 2.34 | 0.01 | 3.06 | 0.44 | 0.85 | 0.28 |
| 33871 | 0 | 28922  | ITGQRMAWDMMM<br>WS                                                                                                                                                                                                      | 2.64 | 0.01 | 1.72 | 0.44 | 0.85 | 0.28 |
| 33872 | 0 | 139100 | ITGRLAALNAYV<br>SQTLTQY                                                                                                                                                                                                 | 2.91 | 0.01 | 3.55 | 3.16 | 0.22 | 0.28 |
| 33873 | 0 | 28928  | ITHTTGGTASRA<br>TQGFTSLFTAGASQK                                                                                                                                                                                         | 3.27 | 0.01 | 1.72 | 0.44 | 0.85 | 2.02 |
| 33874 | 0 | 28933  | ITIIIPYIGPALN<br>IGNMLYKDDFVGALIFSGAVILLEFI<br>PEIAIPVLGTFALVSYIAN<br>KVLTVQTIDNALSKRNEK<br>WDEVYKYIVTNWLAKV<br>NTQIDLIRKKMKEALEN<br>QAEATKAIINYQYNQYTE<br>EEKNNINFNIDDLSSKLN<br>ESINKAMININKFLNQCS<br>VSYLMNSMIPYGVKRL | 5.16 | 0.01 | 2.08 | 3.23 | 0.22 | 0.85 |

|       |   |        |                                                                                                                                                                                                                         |      |      |      |      |      |      |
|-------|---|--------|-------------------------------------------------------------------------------------------------------------------------------------------------------------------------------------------------------------------------|------|------|------|------|------|------|
| 33875 | 0 | 28933  | ITIIIPYIGPALNIGNMLYK<br>DDFVGALIFSGAVILLEFI<br>PEIAIPVLGTFALVSYIAN<br>KVLTVQTIDNALSKRNEK<br>WDEVYKYIVTNWLAKV<br>NTQIDLIRKKMKEALEN<br>QAEATKAIINYQYNQYTE<br>EEKNNINFNIDDLSSKLN<br>ESINKAMININKFLNQCS<br>VSYLMNSMIPYGVKRL | 5.16 | 0.01 | 2.08 | 3.23 | 0.22 | 0.28 |
| 33876 | 0 | 28933  | ITIIIPYIGPALNIGNMLYK<br>DDFVGALIFSGAVILLEFI<br>PEIAIPVLGTFALVSYIAN<br>KVLTVQTIDNALSKRNEK<br>WDEVYKYIVTNWLAKV<br>NTQIDLIRKKMKEALEN<br>QAEATKAIINYQYNQYTE<br>EEKNNINFNIDDLSSKLN<br>ESINKAMININKFLNQCS<br>VSYLMNSMIPYGVKRL | 5.16 | 0.01 | 2.08 | 2.02 | 0.22 | 0.85 |
| 33877 | 0 | 28936  | ITIKQHTVTTTTKGENFT<br>ET                                                                                                                                                                                                | 2.96 | 0.01 | 1.75 | 3.40 | 0.22 | 0.28 |
| 33878 | 0 | 28936  | ITIKQHTVTTTTKGENFT<br>ET                                                                                                                                                                                                | 2.96 | 0.01 | 1.75 | 3.40 | 0.22 | 0.28 |
| 33879 | 0 | 28937  | ITIMDNGNIDTELLVGTL<br>TLGGY                                                                                                                                                                                             | 3.11 | 0.01 | 3.59 | 3.04 | 0.22 | 0.28 |
| 33880 | 0 | 28937  | ITIMDNGNIDTELLVGTL<br>TLGGY                                                                                                                                                                                             | 3.11 | 0.01 | 3.59 | 3.04 | 0.22 | 0.28 |
| 33881 | 0 | 28937  | ITIMDNGNIDTELLVGTL<br>TLGGY                                                                                                                                                                                             | 3.11 | 0.01 | 3.59 | 3.04 | 0.22 | 0.28 |
| 33882 | 0 | 28937  | ITIMDNGNIDTELLVGTL<br>TLGGY                                                                                                                                                                                             | 3.11 | 0.01 | 3.59 | 3.04 | 0.22 | 0.28 |
| 33883 | 0 | 28937  | ITIMDNGNIDTELLVGTL<br>TLGGY                                                                                                                                                                                             | 3.11 | 0.01 | 2.80 | 3.04 | 0.22 | 0.28 |
| 33884 | 0 | 28937  | ITIMDNGNIDTELLVGTL<br>TLGGY                                                                                                                                                                                             | 3.11 | 0.01 | 2.80 | 3.04 | 0.22 | 0.28 |
| 33885 | 0 | 226202 | ITKEFGKELEEVDYDFM                                                                                                                                                                                                       | 2.72 | 0.01 | 3.28 | 0.68 | 0.22 | 0.85 |
| 33886 | 0 | 226202 | ITKEFGKELEEVDYDFM                                                                                                                                                                                                       | 2.72 | 0.01 | 3.28 | 0.68 | 0.22 | 0.85 |
| 33887 | 0 | 226202 | ITKEFGKELEEVDYDFM                                                                                                                                                                                                       | 2.72 | 0.01 | 3.28 | 0.68 | 0.22 | 1.48 |
| 33888 | 0 | 226202 | ITKEFGKELEEVDYDFM                                                                                                                                                                                                       | 2.72 | 0.01 | 3.28 | 0.68 | 0.22 | 1.48 |
| 33889 | 0 | 226202 | ITKEFGKELEEVDYDFM                                                                                                                                                                                                       | 2.72 | 0.01 | 3.28 | 0.68 | 0.22 | 1.48 |
| 33890 | 0 | 226202 | ITKEFGKELEEVDYDFM                                                                                                                                                                                                       | 2.72 | 0.01 | 3.28 | 0.68 | 0.22 | 0.28 |
| 33891 | 0 | 28953  | ITKGKSQKSLGD                                                                                                                                                                                                            | 2.49 | 0.01 | 2.73 | 0.44 | 0.85 | 0.28 |

|       |   |        |                                     |      |      |      |      |      |      |
|-------|---|--------|-------------------------------------|------|------|------|------|------|------|
| 33892 | 0 | 28953  | ITKGKSQKSLGD                        | 2.49 | 0.01 | 2.73 | 0.44 | 0.85 | 0.28 |
| 33893 | 0 | 141680 | ITKHNDDEQYA                         | 2.35 | 0.01 | 0.78 | 0.44 | 1.93 | 0.28 |
| 33894 | 0 | 141931 | ITKLTPEELENLAK                      | 2.64 | 0.01 | 2.73 | 0.44 | 0.85 | 0.28 |
| 33895 | 0 | 177121 | ITKRPKVRDQEGRI                      | 2.62 | 0.01 | 4.93 | 0.68 | 0.22 | 0.28 |
| 33896 | 0 | 171594 | ITLKKDVNETQKKVS                     | 2.67 | 0.01 | 0.78 | 0.44 | 1.13 | 0.28 |
| 33897 | 0 | 28976  | ITLNREDHT                           | 2.21 | 0.01 | 0.90 | 2.55 | 0.22 | 0.28 |
| 33898 | 0 | 28982  | ITLPQDAVSRTQRRGRT<br>GRG            | 2.96 | 0.01 | 1.72 | 0.44 | 0.85 | 0.28 |
| 33899 | 0 | 28982  | ITLPQDAVSRTQRRGRT<br>GRG            | 2.96 | 0.01 | 1.72 | 0.44 | 1.13 | 0.28 |
| 33900 | 0 | 238641 | ITLQAGAHA                           | 2.23 | 0.01 | 2.14 | 2.65 | 0.22 | 0.85 |
| 33901 | 0 | 181356 | ITLRVYMRIKHVRAW                     | 2.67 | 0.01 | 2.82 | 1.15 | 0.22 | 0.28 |
| 33902 | 0 | 28984  | ITLSSTSNPPHGL                       | 2.56 | 0.01 | 3.17 | 2.37 | 0.22 | 1.34 |
| 33903 | 0 | 112553 | ITLTADVMTYIHSMNSTI<br>LE            | 2.95 | 0.01 | 1.86 | 2.37 | 0.22 | 0.28 |
| 33904 | 0 | 134696 | ITLYLTEK                            | 2.14 | 0.01 | 0.78 | 4.03 | 2.26 | 0.85 |
| 33905 | 0 | 134696 | ITLYLTEK                            | 2.14 | 0.01 | 0.78 | 4.03 | 2.26 | 1.34 |
| 33906 | 0 | 103996 | ITMWDF                              | 1.88 | 0.01 | 0.90 | 1.15 | 0.22 | 0.28 |
| 33907 | 0 | 103996 | ITMWDF                              | 1.88 | 0.01 | 0.90 | 1.15 | 0.22 | 0.28 |
| 33908 | 0 | 29004  | ITNDGVSIKEIELEDPYE<br>KIGAEL        | 3.17 | 0.01 | 2.59 | 0.44 | 0.85 | 0.28 |
| 33909 | 0 | 29005  | ITNDQKKLMS                          | 2.28 | 0.01 | 4.08 | 2.22 | 1.59 | 0.28 |
| 33910 | 0 | 29018  | ITNPAYDEKRSF                        | 2.40 | 0.01 | 3.53 | 1.12 | 0.22 | 0.28 |
| 33911 | 0 | 29018  | ITNPAYDEKRSF                        | 2.40 | 0.01 | 3.53 | 1.12 | 0.22 | 0.28 |
| 33912 | 0 | 99358  | ITNPINLREGPDLS                      | 2.69 | 0.01 | 2.16 | 0.44 | 1.23 | 1.48 |
| 33913 | 0 | 196568 | ITPAALS                             | 2.01 | 0.01 | 0.90 | 0.44 | 1.23 | 1.39 |
| 33914 | 0 | 450723 | ITPAYDN                             | 1.99 | 0.01 | 0.90 | 0.44 | 1.41 | 1.39 |
| 33915 | 0 | 227787 | ITPEKNPQLRDLIFL                     | 2.74 | 0.01 | 2.72 | 4.33 | 1.59 | 0.28 |
| 33916 | 0 | 227787 | ITPEKNPQLRDLIFL                     | 2.74 | 0.01 | 2.72 | 4.33 | 1.59 | 0.28 |
| 33917 | 0 | 95481  | ITPTLNREQL                          | 2.31 | 0.01 | 1.60 | 0.44 | 1.23 | 0.85 |
| 33918 | 0 | 29053  | ITPTLQAQTKEEVPP                     | 2.67 | 0.01 | 3.37 | 2.22 | 0.22 | 0.28 |
| 33919 | 0 | 121433 | ITPVMVLGTIFIVMGNF<br>NHPPAKPFEGDPFD | 3.42 | 0.01 | 2.26 | 2.04 | 0.22 | 0.85 |
| 33920 | 0 | 132843 | ITPWPHWLERSS                        | 2.45 | 0.01 | 0.90 | 1.15 | 0.22 | 1.27 |
| 33921 | 0 | 132843 | ITPWPHWLERSS                        | 2.45 | 0.01 | 0.90 | 1.15 | 0.22 | 1.27 |
| 33922 | 0 | 132843 | ITPWPHWLERSS                        | 2.45 | 0.01 | 0.90 | 1.15 | 0.22 | 0.28 |
| 33923 | 0 | 132843 | ITPWPHWLERSS                        | 2.45 | 0.01 | 0.90 | 0.68 | 0.22 | 1.48 |
| 33924 | 0 | 182391 | ITQDHSERLTHR                        | 2.48 | 0.01 | 0.90 | 0.68 | 0.22 | 0.28 |
| 33925 | 0 | 182391 | ITQDHSERLTHR                        | 2.48 | 0.01 | 0.90 | 0.68 | 0.22 | 0.28 |
| 33926 | 0 | 151246 | ITQFQKGKEFQ                         | 2.43 | 0.01 | 3.35 | 1.81 | 0.22 | 0.85 |
| 33927 | 0 | 29059  | ITQGIVEF                            | 2.13 | 0.01 | 3.06 | 1.12 | 0.22 | 0.28 |
| 33928 | 0 | 99824  | ITQSTQSFN                           | 2.25 | 0.01 | 0.78 | 0.44 | 0.22 | 0.85 |
| 33929 | 0 | 99824  | ITQSTQSFN                           | 2.25 | 0.01 | 0.78 | 0.44 | 0.22 | 1.34 |
| 33930 | 0 | 130518 | ITQSTQSFNDFTRVV                     | 2.68 | 0.01 | 0.78 | 1.15 | 0.22 | 0.85 |
| 33931 | 0 | 130518 | ITQSTQSFNDFTRVV                     | 2.68 | 0.01 | 0.78 | 1.15 | 0.22 | 1.34 |
| 33932 | 0 | 130518 | ITQSTQSFNDFTRVV                     | 2.68 | 0.01 | 0.78 | 1.15 | 0.22 | 1.27 |

|       |   |        |                                 |      |      |      |      |      |      |
|-------|---|--------|---------------------------------|------|------|------|------|------|------|
| 33933 | 0 | 130518 | ITQSTQSFNDFTRVV                 | 2.68 | 0.01 | 0.78 | 1.15 | 2.35 | 0.28 |
| 33934 | 0 | 171596 | ITRDLEKQEELKIVH                 | 2.68 | 0.01 | 0.78 | 0.44 | 1.41 | 0.28 |
| 33935 | 0 | 122417 | ITREPEPRLRFSQNL                 | 2.68 | 0.01 | 0.90 | 1.15 | 0.22 | 1.39 |
| 33936 | 0 | 238643 | ITRGSSRPENMGCGCP                | 2.69 | 0.01 | 2.56 | 2.02 | 0.22 | 0.85 |
| 33937 | 0 | 29067  | ITRHEQQLIV                      | 2.31 | 4.23 | 2.56 | 0.44 | 0.85 | 0.28 |
| 33938 | 0 | 29068  | ITRHEQQLIV                      | 2.31 | 0.01 | 2.56 | 0.68 | 0.22 | 0.28 |
| 33939 | 0 | 115800 | ITRINKKIEK                      | 2.36 | 0.01 | 1.60 | 0.44 | 1.23 | 0.85 |
| 33940 | 0 | 115800 | ITRINKKIEK                      | 2.36 | 0.01 | 1.60 | 0.44 | 1.23 | 0.85 |
| 33941 | 0 | 181357 | ITRPFSVYFNPYTQSIEILK<br>D       | 2.97 | 0.01 | 0.78 | 0.44 | 1.13 | 0.28 |
| 33942 | 0 | 181357 | ITRPFSVYFNPYTQSIEILK<br>D       | 2.97 | 0.01 | 0.78 | 0.44 | 1.13 | 1.27 |
| 33943 | 0 | 130908 | ITRTTLQSDQEEIDY                 | 2.69 | 0.01 | 0.78 | 1.20 | 0.22 | 1.57 |
| 33944 | 0 | 130908 | ITRTTLQSDQEEIDY                 | 2.69 | 0.01 | 0.78 | 1.20 | 0.22 | 1.34 |
| 33945 | 0 | 29078  | ITRVTGGVQGHSLRSLTS<br>LFTPGPAQK | 3.25 | 0.01 | 0.90 | 0.44 | 0.85 | 0.28 |
| 33946 | 0 | 103291 | ITSAGRHPDSDIFLD                 | 2.67 | 0.01 | 2.04 | 0.44 | 0.85 | 1.28 |
| 33947 | 0 | 29081  | ITSEPTQPPPTSPPLVHD<br>SDLEHV    | 3.15 | 0.01 | 3.01 | 0.44 | 1.59 | 0.28 |
| 33948 | 0 | 29088  | ITSHTGYLQLRL                    | 2.48 | 0.01 | 0.90 | 3.41 | 2.25 | 1.75 |
| 33949 | 0 | 29088  | ITSHTGYLQLRL                    | 2.48 | 0.01 | 0.90 | 3.41 | 0.22 | 0.85 |
| 33950 | 0 | 29088  | ITSHTGYLQLRL                    | 2.48 | 0.01 | 0.90 | 3.41 | 0.22 | 1.34 |
| 33951 | 0 | 93039  | ITSKQVDDLI                      | 2.31 | 0.01 | 2.67 | 2.00 | 0.22 | 0.28 |
| 33952 | 0 | 93039  | ITSKQVDDLI                      | 2.31 | 0.01 | 2.67 | 2.00 | 0.22 | 0.28 |
| 33953 | 0 | 93039  | ITSKQVDDLI                      | 2.31 | 0.01 | 2.67 | 2.00 | 0.22 | 0.28 |
| 33954 | 0 | 161354 | ITSKTKSLDKGYNKALND<br>L         | 2.92 | 0.01 | 2.08 | 2.02 | 0.22 | 1.57 |
| 33955 | 0 | 177122 | ITSLFSPGS                       | 2.23 | 0.01 | 4.23 | 1.20 | 0.22 | 0.28 |
| 33956 | 0 | 177122 | ITSLFSPGS                       | 2.23 | 0.01 | 4.23 | 1.20 | 0.22 | 1.34 |
| 33957 | 0 | 29095  | ITSPQTNS                        | 2.14 | 0.01 | 3.53 | 2.61 | 0.22 | 0.28 |
| 33958 | 0 | 237777 | ITSPVVTQKKVPD                   | 2.56 | 0.01 | 0.78 | 0.44 | 1.13 | 1.28 |
| 33959 | 0 | 29103  | ITTATGY                         | 2.04 | 0.01 | 4.33 | 3.16 | 0.22 | 0.28 |
| 33960 | 0 | 29108  | ITTDNTFVSGNCDVVIG               | 2.82 | 0.01 | 2.48 | 0.68 | 0.22 | 0.28 |
| 33961 | 0 | 29112  | ITTFSKRHLWYKLN                  | 2.66 | 0.01 | 0.90 | 0.68 | 0.22 | 1.39 |
| 33962 | 0 | 29116  | ITTIEDPVLAKKVPETFPE<br>L        | 2.97 | 0.01 | 2.82 | 0.44 | 0.85 | 0.28 |
| 33963 | 0 | 29116  | ITTIEDPVLAKKVPETFPE<br>L        | 2.97 | 0.01 | 2.82 | 0.44 | 1.41 | 0.28 |
| 33964 | 0 | 230478 | ITTLNATSALLRAQE                 | 2.69 | 0.01 | 0.78 | 0.44 | 1.13 | 0.28 |
| 33965 | 0 | 135941 | ITTQECANVVVG                    | 2.44 | 0.01 | 3.34 | 0.44 | 1.41 | 0.28 |
| 33966 | 0 | 171601 | ITTVSKNNIFMSNSY                 | 2.69 | 0.01 | 0.78 | 0.44 | 1.13 | 0.28 |
| 33967 | 0 | 423366 | ITTYNEYEILNYFDN                 | 2.71 | 0.01 | 2.51 | 0.44 | 2.35 | 1.28 |
| 33968 | 0 | 29126  | ITTYV                           | 1.75 | 0.01 | 2.14 | 0.44 | 0.85 | 0.28 |
| 33969 | 0 | 29126  | ITTYV                           | 1.75 | 0.01 | 2.14 | 0.44 | 0.22 | 0.28 |
| 33970 | 0 | 29127  | ITVATSRT                        | 2.14 | 0.01 | 2.45 | 0.44 | 0.85 | 1.34 |
| 33971 | 0 | 29127  | ITVATSRT                        | 2.14 | 0.01 | 2.45 | 0.44 | 0.85 | 1.34 |



|       |   |        |                          |      |      |      |      |      |      |
|-------|---|--------|--------------------------|------|------|------|------|------|------|
| 33972 | 0 | 29127  | ITVATSRT                 | 2.14 | 0.01 | 2.45 | 0.44 | 0.85 | 1.34 |
| 33973 | 0 | 29127  | ITVATSRT                 | 2.14 | 0.01 | 2.45 | 0.44 | 0.85 | 1.34 |
| 33974 | 0 | 29127  | ITVATSRT                 | 2.14 | 0.01 | 2.45 | 0.44 | 0.85 | 1.34 |
| 33975 | 0 | 29127  | ITVATSRT                 | 2.14 | 0.01 | 2.45 | 0.44 | 0.85 | 1.34 |
| 33976 | 0 | 193480 | ITVDGTKAV                | 2.23 | 0.01 | 2.51 | 0.44 | 2.39 | 0.28 |
| 33977 | 0 | 193480 | ITVDGTKAV                | 2.23 | 0.01 | 2.51 | 0.44 | 2.39 | 0.28 |
| 33978 | 0 | 29128  | ITVEELKQ                 | 2.11 | 0.01 | 2.45 | 0.44 | 0.85 | 1.34 |
| 33979 | 0 | 29128  | ITVEELKQ                 | 2.11 | 0.01 | 2.45 | 0.44 | 0.85 | 1.34 |
| 33980 | 0 | 29128  | ITVEELKQ                 | 2.11 | 0.01 | 2.45 | 0.44 | 0.85 | 1.34 |
| 33981 | 0 | 29128  | ITVEELKQ                 | 2.11 | 0.01 | 2.45 | 0.44 | 0.85 | 1.34 |
| 33982 | 0 | 29128  | ITVEELKQ                 | 2.11 | 0.01 | 2.45 | 0.44 | 0.85 | 1.34 |
| 33983 | 0 | 29128  | ITVEELKQ                 | 2.11 | 0.01 | 2.45 | 0.44 | 0.85 | 1.34 |
| 33984 | 0 | 29129  | ITVEELKQLLEQWNLVI        | 2.83 | 0.01 | 2.45 | 0.44 | 0.85 | 0.28 |
| 33985 | 0 | 29129  | ITVEELKQLLEQWNLVI        | 2.83 | 0.01 | 2.45 | 0.68 | 0.22 | 0.28 |
| 33986 | 0 | 120649 | ITVGLQLIQLISVDEVNQI<br>V | 2.98 | 0.01 | 2.26 | 0.68 | 0.22 | 0.85 |
| 33987 | 0 | 120649 | ITVGLQLIQLISVDEVNQI<br>V | 2.98 | 0.01 | 2.26 | 0.68 | 0.22 | 0.28 |
| 33988 | 0 | 120649 | ITVGLQLIQLISVDEVNQI<br>V | 2.98 | 0.01 | 2.26 | 0.68 | 0.22 | 0.28 |
| 33989 | 0 | 120649 | ITVGLQLIQLISVDEVNQI<br>V | 2.98 | 0.01 | 2.26 | 0.68 | 0.22 | 0.28 |
| 33990 | 0 | 120649 | ITVGLQLIQLISVDEVNQI<br>V | 2.98 | 0.01 | 2.26 | 0.68 | 0.22 | 0.28 |
| 33991 | 0 | 29132  | ITVHTGDQHQVGNET          | 2.70 | 0.01 | 3.45 | 0.44 | 1.59 | 0.28 |
| 33992 | 0 | 29132  | ITVHTGDQHQVGNET          | 2.70 | 0.01 | 3.45 | 0.44 | 1.59 | 0.28 |
| 33993 | 0 | 122806 | ITVICPWEAFNHL            | 2.50 | 0.01 | 1.60 | 2.04 | 0.22 | 0.28 |
| 33994 | 0 | 29138  | ITVNPIVTEKDSPVNIE        | 2.83 | 0.01 | 2.30 | 0.68 | 0.22 | 0.28 |
| 33995 | 0 | 29138  | ITVNPIVTEKDSPVNIE        | 2.83 | 0.01 | 2.30 | 0.68 | 0.22 | 0.28 |
| 33996 | 0 | 29138  | ITVNPIVTEKDSPVNIE        | 2.83 | 0.01 | 2.30 | 2.65 | 0.22 | 0.28 |
| 33997 | 0 | 29138  | ITVNPIVTEKDSPVNIE        | 2.83 | 0.01 | 2.30 | 2.65 | 0.22 | 0.28 |
| 33998 | 0 | 29138  | ITVNPIVTEKDSPVNIE        | 2.83 | 0.01 | 2.30 | 2.65 | 0.22 | 0.28 |
| 33999 | 0 | 29138  | ITVNPIVTEKDSPVNIE        | 2.83 | 0.01 | 2.30 | 0.68 | 0.22 | 0.28 |
| 34000 | 0 | 29138  | ITVNPIVTEKDSPVNIE        | 2.83 | 0.01 | 2.30 | 0.68 | 0.22 | 0.28 |
| 34001 | 0 | 29138  | ITVNPIVTEKDSPVNIE        | 2.83 | 0.01 | 2.30 | 0.68 | 0.22 | 1.34 |
| 34002 | 0 | 29138  | ITVNPIVTEKDSPVNIE        | 2.83 | 0.01 | 2.30 | 0.68 | 0.22 | 1.34 |

|       |   |        |                          |      |      |      |      |      |      |
|-------|---|--------|--------------------------|------|------|------|------|------|------|
| 34003 | 0 | 29138  | ITVNPIVTEKDSPVNIE        | 2.83 | 0.01 | 2.30 | 2.65 | 0.22 | 0.28 |
| 34004 | 0 | 29138  | ITVNPIVTEKDSPVNIE        | 2.83 | 0.01 | 2.30 | 0.68 | 0.22 | 1.34 |
| 34005 | 0 | 29138  | ITVNPIVTEKDSPVNIE        | 2.83 | 0.01 | 2.30 | 0.68 | 0.22 | 0.28 |
| 34006 | 0 | 29138  | ITVNPIVTEKDSPVNIE        | 2.83 | 0.01 | 2.30 | 0.68 | 0.22 | 0.28 |
| 34007 | 0 | 29139  | ITVNSKTKDLV              | 2.49 | 0.01 | 2.73 | 0.44 | 0.85 | 0.28 |
| 34008 | 0 | 187664 | ITVTSRGGFDNEGKMES<br>NK  | 2.89 | 0.01 | 2.14 | 1.20 | 0.22 | 0.28 |
| 34009 | 0 | 120650 | ITVVVINTHHRSPSTHT<br>M   | 2.87 | 0.01 | 2.26 | 1.81 | 0.22 | 0.28 |
| 34010 | 0 | 29147  | ITWIGM                   | 1.91 | 0.01 | 2.40 | 0.44 | 0.85 | 0.28 |
| 34011 | 0 | 29159  | ITYGACPKYVKQNTLK         | 2.71 | 0.01 | 3.27 | 0.68 | 0.22 | 1.57 |
| 34012 | 0 | 29159  | ITYGACPKYVKQNTLK         | 2.71 | 0.01 | 3.27 | 0.68 | 0.22 | 1.57 |
| 34013 | 0 | 29160  | ITYGACPRYVK              | 2.36 | 0.01 | 3.93 | 1.15 | 0.22 | 2.66 |
| 34014 | 0 | 29160  | ITYGACPRYVK              | 2.36 | 0.01 | 3.72 | 1.15 | 0.22 | 2.66 |
| 34015 | 0 | 29160  | ITYGACPRYVK              | 2.36 | 0.01 | 4.45 | 1.15 | 0.22 | 2.66 |
| 34016 | 0 | 29165  | ITYKVMREVRALAYFVN<br>GTA | 2.93 | 0.01 | 3.32 | 2.49 | 0.22 | 0.28 |
| 34017 | 0 | 29165  | ITYKVMREVRALAYFVN<br>GTA | 2.93 | 0.01 | 3.32 | 2.49 | 0.22 | 0.28 |
| 34018 | 0 | 29165  | ITYKVMREVRALAYFVN<br>GTA | 2.93 | 0.01 | 3.32 | 2.49 | 0.22 | 0.28 |
| 34019 | 0 | 29165  | ITYKVMREVRALAYFVN<br>GTA | 2.93 | 0.01 | 3.32 | 2.49 | 0.22 | 1.75 |
| 34020 | 0 | 423012 | ITYNCPLLRQNEPEDI         | 2.73 | 0.01 | 2.30 | 1.20 | 0.22 | 0.28 |
| 34021 | 0 | 29171  | ITYNESHSSDQRPY           | 2.58 | 0.01 | 4.23 | 0.44 | 0.85 | 0.28 |
| 34022 | 0 | 29197  | IVAGGGVTLL               | 2.31 | 0.01 | 3.20 | 0.44 | 1.41 | 0.28 |
| 34023 | 0 | 29197  | IVAGGGVTLL               | 2.31 | 0.01 | 3.20 | 0.44 | 1.13 | 0.28 |
| 34024 | 0 | 95484  | IVAPVKQT                 | 2.12 | 0.01 | 2.96 | 2.22 | 0.22 | 0.28 |
| 34025 | 0 | 29201  | IVAPVKQTL                | 2.21 | 0.01 | 2.88 | 1.12 | 0.22 | 0.28 |
| 34026 | 0 | 29201  | IVAPVKQTL                | 2.21 | 0.01 | 2.88 | 1.12 | 0.22 | 0.28 |
| 34027 | 0 | 29205  | IVARQKLKDAERAV           | 2.63 | 0.01 | 2.56 | 2.69 | 0.22 | 0.28 |
| 34028 | 0 | 29205  | IVARQKLKDAERAV           | 2.63 | 0.01 | 3.16 | 2.69 | 0.22 | 0.28 |
| 34029 | 0 | 29205  | IVARQKLKDAERAV           | 2.63 | 0.01 | 3.16 | 2.69 | 0.22 | 0.28 |
| 34030 | 0 | 29206  | IVATNWQKL                | 2.18 | 0.01 | 2.59 | 0.44 | 0.85 | 0.28 |
| 34031 | 0 | 186684 | IVCDDDGRCPNV             | 2.47 | 0.01 | 0.90 | 0.68 | 0.22 | 1.39 |
| 34032 | 0 | 79578  | IVCHTTATIPSSAVTC         | 2.78 | 0.01 | 3.10 | 0.68 | 0.22 | 1.75 |
| 34033 | 0 | 29218  | IVCIDRASLST              | 2.40 | 0.01 | 2.04 | 1.20 | 0.22 | 1.34 |
| 34034 | 0 | 29218  | IVCIDRASLST              | 2.40 | 0.01 | 2.04 | 1.20 | 0.22 | 1.34 |
| 34035 | 0 | 238644 | IVCLDFGYTIVCYKR          | 2.67 | 0.01 | 2.56 | 2.02 | 0.22 | 0.85 |
| 34036 | 0 | 238644 | IVCLDFGYTIVCYKR          | 2.67 | 0.01 | 2.56 | 1.20 | 0.22 | 0.85 |
| 34037 | 0 | 238645 | IVCLDFGYTTKCLTK          | 2.68 | 0.01 | 2.56 | 2.02 | 0.22 | 0.85 |
| 34038 | 0 | 238645 | IVCLDFGYTTKCLTK          | 2.68 | 0.01 | 2.56 | 1.20 | 0.22 | 0.85 |
| 34039 | 0 | 238646 | IVCYKRHASDSQTTT          | 2.61 | 0.01 | 2.56 | 2.02 | 0.22 | 0.85 |

|       |   |        |                                                    |      |      |      |      |      |      |
|-------|---|--------|----------------------------------------------------|------|------|------|------|------|------|
| 34040 | 0 | 99359  | IVDDVNC                                            | 2.03 | 0.01 | 3.33 | 1.12 | 0.22 | 0.28 |
| 34041 | 0 | 29228  | IVDDVNCTYFCGRNAYC                                  | 2.79 | 0.01 | 3.33 | 0.68 | 0.22 | 0.28 |
| 34042 | 0 | 29228  | IVDDVNCTYFCGRNAYC                                  | 2.79 | 0.01 | 3.33 | 0.68 | 0.22 | 1.34 |
| 34043 | 0 | 29228  | IVDDVNCTYFCGRNAYC                                  | 2.79 | 0.01 | 3.33 | 0.68 | 0.22 | 0.28 |
| 34044 | 0 | 79874  | IVDELKKTLANTAVVIRD<br>GQLVEIPANEVVPGDIL<br>QLEDGT  | 3.67 | 0.01 | 3.45 | 1.12 | 0.22 | 0.85 |
| 34045 | 0 | 79874  | IVDELKKTLANTAVVIRD<br>GQLVEIPANEVVPGDIL<br>QLEDGT  | 3.67 | 0.01 | 3.45 | 1.15 | 0.22 | 0.85 |
| 34046 | 0 | 79874  | IVDELKKTLANTAVVIRD<br>GQLVEIPANEVVPGDIL<br>QLEDGT  | 3.67 | 0.01 | 3.45 | 1.15 | 0.22 | 2.35 |
| 34047 | 0 | 79874  | IVDELKKTLANTAVVIRD<br>GQLVEIPANEVVPGDIL<br>QLEDGT  | 3.67 | 0.01 | 3.45 | 1.15 | 0.22 | 1.48 |
| 34048 | 0 | 29229  | IVDIDFDSVP                                         | 2.36 | 0.01 | 2.56 | 1.20 | 0.22 | 0.28 |
| 34049 | 0 | 29229  | IVDIDFDSVP                                         | 2.36 | 0.01 | 2.56 | 1.20 | 0.22 | 0.28 |
| 34050 | 0 | 95485  | IVDQCSNGGL                                         | 2.28 | 0.01 | 2.60 | 0.44 | 1.23 | 0.85 |
| 34051 | 0 | 29248  | IVEEDAPATEEIDEIE                                   | 2.79 | 0.01 | 1.66 | 0.44 | 1.74 | 0.28 |
| 34052 | 0 | 29248  | IVEEDAPATEEIDEIE                                   | 2.79 | 0.01 | 1.66 | 1.20 | 0.22 | 0.28 |
| 34053 | 0 | 29248  | IVEEDAPATEEIDEIE                                   | 2.79 | 0.01 | 1.66 | 0.44 | 1.74 | 0.28 |
| 34054 | 0 | 29248  | IVEEDAPATEEIDEIE                                   | 2.79 | 0.01 | 1.66 | 0.44 | 1.74 | 0.28 |
| 34055 | 0 | 29248  | IVEEDAPATEEIDEIE                                   | 2.79 | 0.01 | 1.66 | 3.27 | 0.22 | 0.28 |
| 34056 | 0 | 29251  | IVEFYTDT                                           | 2.12 | 0.01 | 3.06 | 1.12 | 0.22 | 0.28 |
| 34057 | 0 | 104526 | IVEGCPAAANGHVIYVQ<br>LRLTWRRFHPKLGDK<br>MIQHYTLDQV | 3.67 | 0.01 | 3.36 | 0.44 | 1.23 | 0.28 |
| 34058 | 0 | 236552 | IVEKGGKVEVEGHLI                                    | 2.73 | 0.01 | 3.70 | 2.13 | 0.22 | 1.28 |
| 34059 | 0 | 116755 | IVELEELRVVGNNL                                     | 2.70 | 0.01 | 2.36 | 0.44 | 1.23 | 1.28 |
| 34060 | 0 | 116755 | IVELEELRVVGNNL                                     | 2.70 | 0.01 | 2.36 | 0.44 | 1.23 | 1.27 |
| 34061 | 0 | 116755 | IVELEELRVVGNNL                                     | 2.70 | 0.01 | 2.36 | 0.44 | 1.23 | 1.28 |
| 34062 | 0 | 94853  | IVELIRG                                            | 2.03 | 0.01 | 2.72 | 0.68 | 0.22 | 0.28 |
| 34063 | 0 | 94853  | IVELIRG                                            | 2.03 | 0.01 | 2.72 | 0.68 | 0.22 | 0.28 |
| 34064 | 0 | 114865 | IVERETRQSENPLWHA<br>LRR                            | 2.90 | 0.01 | 4.93 | 2.04 | 0.22 | 0.28 |
| 34065 | 0 | 171606 | IVERHLIDGDVVLFN                                    | 2.68 | 0.01 | 0.78 | 0.44 | 1.41 | 0.28 |
| 34066 | 0 | 466929 | IVEVEEI                                            | 2.05 | 0.01 | 1.66 | 0.44 | 0.85 | 1.28 |
| 34067 | 0 | 466930 | IVEVEEILPEDDKNE                                    | 2.71 | 0.01 | 1.66 | 0.44 | 0.85 | 1.28 |
| 34068 | 0 | 466931 | IVEVEEILPEDDKNEKVE<br>HEIVEVEEILPE                 | 3.39 | 0.01 | 1.66 | 0.44 | 0.85 | 1.28 |
| 34069 | 0 | 29265  | IVFKT                                              | 1.74 | 0.01 | 0.90 | 0.44 | 1.13 | 0.85 |
| 34070 | 0 | 29269  | IVFPDL                                             | 1.88 | 0.01 | 1.96 | 0.44 | 0.85 | 0.28 |
| 34071 | 0 | 29270  | IVFPDLGVR                                          | 2.21 | 0.01 | 1.96 | 0.44 | 0.85 | 1.34 |

|       |   |        |                                                      |      |      |      |      |      |      |
|-------|---|--------|------------------------------------------------------|------|------|------|------|------|------|
| 34072 | 0 | 29278  | IVGAGDSS                                             | 2.11 | 0.01 | 3.27 | 2.02 | 0.22 | 0.28 |
| 34073 | 0 | 29278  | IVGAGDSS                                             | 2.11 | 0.01 | 3.27 | 2.82 | 0.22 | 0.28 |
| 34074 | 0 | 171608 | IVGAMVQIITYRDYL                                      | 2.66 | 0.01 | 0.78 | 0.44 | 1.13 | 0.28 |
| 34075 | 0 | 29283  | IVGFFSEVIGLIGNPENR<br>PALKTLIDGLASSHKAR              | 3.49 | 0.01 | 3.05 | 0.44 | 1.23 | 1.57 |
| 34076 | 0 | 105889 | IVGFFSKI                                             | 2.14 | 0.01 | 3.05 | 1.20 | 0.22 | 0.28 |
| 34077 | 0 | 29285  | IVGGVYLL                                             | 2.12 | 0.01 | 1.72 | 0.44 | 0.85 | 0.28 |
| 34078 | 0 | 29287  | IVGGVYLLPR                                           | 2.31 | 0.01 | 1.96 | 0.44 | 0.85 | 1.48 |
| 34079 | 0 | 29290  | IVGPKASK                                             | 2.12 | 0.01 | 3.78 | 0.68 | 0.22 | 1.27 |
| 34080 | 0 | 29290  | IVGPKASK                                             | 2.12 | 0.01 | 3.78 | 0.68 | 0.22 | 0.85 |
| 34081 | 0 | 111434 | IVGTGPQPSSTV                                         | 2.50 | 0.01 | 0.90 | 0.44 | 0.85 | 1.39 |
| 34082 | 0 | 29294  | IVGYIMHGISTINTEMK                                    | 2.80 | 0.01 | 1.66 | 0.44 | 0.85 | 0.28 |
| 34083 | 0 | 121436 | IVIGRYSTQPWFRVG                                      | 2.67 | 0.01 | 0.90 | 0.68 | 0.22 | 1.39 |
| 34084 | 0 | 121436 | IVIGRYSTQPWFRVG                                      | 2.67 | 0.01 | 0.90 | 0.68 | 0.22 | 0.28 |
| 34085 | 0 | 121436 | IVIGRYSTQPWFRVG                                      | 2.67 | 0.01 | 0.90 | 0.68 | 0.22 | 0.28 |
| 34086 | 0 | 29315  | IVIRVQ                                               | 1.92 | 0.01 | 2.40 | 0.44 | 0.85 | 0.28 |
| 34087 | 0 | 29316  | IVITEKDGIKTTTVKDGTK<br>TTCDTN                        | 3.21 | 0.01 | 3.45 | 4.08 | 0.22 | 0.28 |
| 34088 | 0 | 29327  | IVKNHKNLLKIAQYAAQ<br>NRRGLDLLFWEQGGLC<br>KALQEQCRFPN | 3.71 | 0.01 | 3.19 | 0.44 | 0.85 | 0.85 |
| 34089 | 0 | 29327  | IVKNHKNLLKIAQYAAQ<br>NRRGLDLLFWEQGGLC<br>KALQEQCRFPN | 3.71 | 0.01 | 3.19 | 0.44 | 0.85 | 0.85 |
| 34090 | 0 | 29327  | IVKNHKNLLKIAQYAAQ<br>NRRGLDLLFWEQGGLC<br>KALQEQCRFPN | 3.71 | 0.01 | 3.19 | 0.44 | 0.85 | 0.85 |
| 34091 | 0 | 29327  | IVKNHKNLLKIAQYAAQ<br>NRRGLDLLFWEQGGLC<br>KALQEQCRFPN | 3.71 | 0.01 | 3.19 | 0.44 | 0.85 | 0.85 |
| 34092 | 0 | 29327  | IVKNHKNLLKIAQYAAQ<br>NRRGLDLLFWEQGGLC<br>KALQEQCRFPN | 3.71 | 0.01 | 3.19 | 0.44 | 0.85 | 0.85 |
| 34093 | 0 | 29327  | IVKNHKNLLKIAQYAAQ<br>NRRGLDLLFWEQGGLC<br>KALQEQCRFPN | 3.71 | 0.01 | 3.19 | 0.44 | 0.85 | 0.85 |
| 34094 | 0 | 29327  | IVKNHKNLLKIAQYAAQ<br>NRRGLDLLFWEQGGLC<br>KALQEQCRFPN | 3.71 | 0.01 | 3.19 | 4.15 | 0.85 | 0.85 |
| 34095 | 0 | 29327  | IVKNHKNLLKIAQYAAQ<br>NRRGLDLLFWEQGGLC<br>KALQEQCRFPN | 3.71 | 0.01 | 2.04 | 0.44 | 0.85 | 0.85 |
| 34096 | 0 | 29328  | IVKNHQNILRVAQYAAQ<br>NRRGLDLLFWEQGGLC<br>KAIQECCFLN  | 3.72 | 0.01 | 3.01 | 0.44 | 0.85 | 0.85 |

|       |   |        |                                    |      |      |      |      |      |      |
|-------|---|--------|------------------------------------|------|------|------|------|------|------|
|       |   |        | IVKNHQNILRVAQYAAQ                  |      |      |      |      |      |      |
| 34097 | 0 | 29328  | NRRGLDLLFWEQGGLC                   | 3.72 | 0.01 | 3.01 | 0.44 | 2.82 | 0.85 |
|       |   |        | KAIQEQQCCFLN                       |      |      |      |      |      |      |
| 34098 | 0 | 188271 | IVKTRDMEYERTTEWL                   | 2.72 | 0.01 | 2.92 | 1.15 | 0.22 | 0.28 |
| 34099 | 0 | 148647 | IVKVEDKSKLQDTKDKKR                 | 2.86 | 0.01 | 3.57 | 2.49 | 0.22 | 0.28 |
| 34100 | 0 | 114425 | IVKVEGRLQVVRPER                    | 2.69 | 0.01 | 3.48 | 0.44 | 1.23 | 0.85 |
| 34101 | 0 | 171610 | IVKVFGADSDIEWL                     | 2.65 | 0.01 | 0.78 | 0.44 | 1.13 | 0.28 |
| 34102 | 0 | 103998 | IVKWDRDM                           | 2.12 | 0.01 | 0.78 | 0.68 | 0.22 | 1.27 |
| 34103 | 0 | 103998 | IVKWDRDM                           | 2.12 | 0.01 | 0.78 | 0.68 | 0.22 | 1.27 |
| 34104 | 0 | 103998 | IVKWDRDM                           | 2.12 | 0.01 | 0.78 | 0.68 | 0.22 | 1.48 |
| 34105 | 0 | 103998 | IVKWDRDM                           | 2.12 | 0.01 | 0.78 | 0.68 | 0.22 | 0.85 |
| 34106 | 0 | 103998 | IVKWDRDM                           | 2.12 | 0.01 | 0.78 | 0.68 | 0.22 | 1.34 |
| 34107 | 0 | 103998 | IVKWDRDM                           | 2.12 | 0.01 | 0.78 | 0.68 | 0.22 | 0.28 |
| 34108 | 0 | 103998 | IVKWDRDM                           | 2.12 | 0.01 | 0.78 | 0.68 | 0.22 | 2.92 |
| 34109 | 0 | 118439 | IVLERSSEWNLKDLDI                   | 2.75 | 0.01 | 0.78 | 0.44 | 1.13 | 0.28 |
| 34110 | 0 | 29342  | IVLGGGCALL                         | 2.31 | 0.01 | 0.78 | 0.44 | 1.41 | 0.28 |
| 34111 | 0 | 29342  | IVLGGGCALL                         | 2.31 | 0.01 | 0.78 | 0.44 | 1.13 | 0.28 |
| 34112 | 0 | 29342  | IVLGGGCALL                         | 2.31 | 0.01 | 0.78 | 1.20 | 0.22 | 0.28 |
| 34113 | 0 | 29342  | IVLGGGCALL                         | 2.31 | 0.01 | 0.78 | 1.20 | 0.22 | 0.28 |
| 34114 | 0 | 118440 | IVLGGGCALLRCI                      | 2.57 | 0.01 | 0.78 | 0.44 | 1.74 | 0.85 |
| 34115 | 0 | 118440 | IVLGGGCALLRCI                      | 2.57 | 0.01 | 0.78 | 0.44 | 1.59 | 0.85 |
| 34116 | 0 | 118440 | IVLGGGCALLRCI                      | 2.57 | 0.01 | 0.78 | 0.44 | 1.74 | 0.85 |
| 34117 | 0 | 496600 | IVLGGGCALLRCIPALDS<br>LTPANEDQKIGI | 3.33 | 0.01 | 0.78 | 0.44 | 1.93 | 2.12 |
| 34118 | 0 | 168918 | IVLHLEPQNEIPVDLLCH<br>EQLSDSE      | 3.19 | 0.01 | 3.11 | 0.68 | 0.22 | 0.28 |
| 34119 | 0 | 168918 | IVLHLEPQNEIPVDLLCH<br>EQLSDSE      | 3.19 | 0.01 | 3.11 | 0.68 | 0.22 | 0.28 |
| 34120 | 0 | 168918 | IVLHLEPQNEIPVDLLCH<br>EQLSDSE      | 3.19 | 0.01 | 3.11 | 0.68 | 0.22 | 1.48 |
| 34121 | 0 | 168918 | IVLHLEPQNEIPVDLLCH<br>EQLSDSE      | 3.19 | 0.01 | 3.11 | 0.68 | 0.22 | 1.48 |
| 34122 | 0 | 103296 | IVMSTNNDDPAGACR                    | 2.62 | 0.01 | 2.04 | 0.44 | 0.85 | 1.28 |
| 34123 | 0 | 29375  | IVNRRTSFFNLGPSQR                   | 2.72 | 0.01 | 1.72 | 0.68 | 0.22 | 0.28 |
| 34124 | 0 | 29378  | IVNTLNEIYRYLYVR                    | 2.72 | 0.01 | 4.23 | 3.27 | 0.22 | 0.28 |
| 34125 | 0 | 29378  | IVNTLNEIYRYLYVR                    | 2.72 | 0.01 | 4.23 | 3.27 | 0.22 | 1.34 |
| 34126 | 0 | 29379  | IVNTLNGFYRSL                       | 2.45 | 0.01 | 3.61 | 1.20 | 0.22 | 0.85 |
| 34127 | 0 | 161246 | IVPAKSVCGPVYCFTPSP<br>VV           | 2.95 | 0.01 | 2.45 | 0.68 | 0.22 | 1.27 |
| 34128 | 0 | 161246 | IVPAKSVCGPVYCFTPSP<br>VV           | 2.95 | 0.01 | 2.45 | 0.68 | 0.22 | 1.34 |
| 34129 | 0 | 161246 | IVPAKSVCGPVYCFTPSP<br>VV           | 2.95 | 0.01 | 2.45 | 2.74 | 0.22 | 0.28 |
| 34130 | 0 | 161246 | IVPAKSVCGPVYCFTPSP<br>VV           | 2.95 | 0.01 | 2.45 | 0.44 | 0.85 | 0.28 |

|       |   |        |                                         |      |      |      |      |      |      |
|-------|---|--------|-----------------------------------------|------|------|------|------|------|------|
| 34131 | 0 | 161246 | IVPAKSVCGPVYCFTPSP<br>VV                | 2.95 | 0.01 | 2.45 | 2.74 | 0.22 | 0.28 |
| 34132 | 0 | 29402  | IVPNSAEERL                              | 2.28 | 0.01 | 1.60 | 0.44 | 1.23 | 0.28 |
| 34133 | 0 | 29402  | IVPNSAEERL                              | 2.28 | 0.01 | 1.60 | 0.44 | 1.23 | 0.28 |
| 34134 | 0 | 29403  | IVPNSVEQKH                              | 2.29 | 0.01 | 1.60 | 0.44 | 1.23 | 0.28 |
| 34135 | 0 | 29409  | IVQEEGTVTEEIIQGE                        | 2.80 | 0.01 | 1.66 | 0.44 | 1.74 | 0.28 |
| 34136 | 0 | 29409  | IVQEEGTVTEEIIQGE                        | 2.80 | 0.01 | 1.66 | 1.20 | 0.22 | 0.28 |
| 34137 | 0 | 29409  | IVQEEGTVTEEIIQGE                        | 2.80 | 0.01 | 1.66 | 0.44 | 1.74 | 0.28 |
| 34138 | 0 | 29409  | IVQEEGTVTEEIIQGE                        | 2.80 | 0.01 | 1.66 | 0.44 | 1.74 | 0.28 |
| 34139 | 0 | 29409  | IVQEEGTVTEEIIQGE                        | 2.80 | 0.01 | 1.66 | 3.27 | 0.22 | 0.28 |
| 34140 | 0 | 29409  | IVQEEGTVTEEIIQGE                        | 2.80 | 0.01 | 1.66 | 2.42 | 0.22 | 0.28 |
| 34141 | 0 | 227788 | IVQFQSKPNTILLPHH                        | 2.71 | 0.01 | 2.72 | 4.03 | 1.59 | 0.28 |
| 34142 | 0 | 111435 | IVQLTQW                                 | 2.02 | 0.01 | 0.90 | 0.44 | 0.85 | 1.39 |
| 34143 | 0 | 121437 | IVQQFGAPGGLGETLQQ<br>KLL                | 2.94 | 0.01 | 0.78 | 1.20 | 0.22 | 0.28 |
| 34144 | 0 | 121437 | IVQQFGAPGGLGETLQQ<br>KLL                | 2.94 | 0.01 | 0.78 | 0.68 | 0.22 | 0.28 |
| 34145 | 0 | 121437 | IVQQFGAPGGLGETLQQ<br>KLL                | 2.94 | 0.01 | 0.78 | 0.68 | 0.22 | 0.28 |
| 34146 | 0 | 121437 | IVQQFGAPGGLGETLQQ<br>KLL                | 2.94 | 0.01 | 0.78 | 1.20 | 0.22 | 0.28 |
| 34147 | 0 | 94559  | IVQQNQSRGKGP GKKN<br>KKKNPEK            | 3.11 | 0.01 | 2.71 | 0.68 | 0.22 | 2.02 |
| 34148 | 0 | 94559  | IVQQNQSRGKGP GKKN<br>KKKNPEK            | 3.11 | 0.01 | 2.71 | 0.68 | 0.22 | 2.02 |
| 34149 | 0 | 94559  | IVQQNQSRGKGP GKKN<br>KKKNPEK            | 3.11 | 0.01 | 2.71 | 0.68 | 0.22 | 2.02 |
| 34150 | 0 | 94559  | IVQQNQSRGKGP GKKN<br>KKKNPEK            | 3.11 | 0.01 | 2.71 | 0.68 | 0.22 | 2.02 |
| 34151 | 0 | 29440  | IVSFLSEVISLAGSDANIP<br>AIQNLAK          | 3.21 | 0.01 | 3.05 | 0.44 | 0.22 | 1.57 |
| 34152 | 0 | 29441  | IVSFLSEVISLAGSDANIP<br>AIQNLAKELATSHKPR | 3.49 | 0.01 | 3.05 | 0.44 | 1.23 | 1.57 |
| 34153 | 0 | 29441  | IVSFLSEVISLAGSDANIP<br>AIQNLAKELATSHKPR | 3.49 | 0.01 | 3.05 | 0.44 | 0.22 | 1.57 |
| 34154 | 0 | 145838 | IVSLVEETSFIDAGAP                        | 2.73 | 0.01 | 1.86 | 0.68 | 0.22 | 0.28 |
| 34155 | 0 | 145838 | IVSLVEETSFIDAGAP                        | 2.73 | 0.01 | 1.86 | 0.68 | 0.22 | 0.28 |
| 34156 | 0 | 145838 | IVSLVEETSFIDAGAP                        | 2.73 | 0.01 | 1.86 | 0.68 | 0.22 | 0.28 |
| 34157 | 0 | 225765 | IVSRQEKGKS                              | 2.31 | 0.01 | 2.30 | 1.15 | 0.22 | 0.28 |
| 34158 | 0 | 225765 | IVSRQEKGKS                              | 2.31 | 0.01 | 2.30 | 1.15 | 0.22 | 0.28 |
| 34159 | 0 | 225765 | IVSRQEKGKS                              | 2.31 | 0.01 | 2.30 | 1.15 | 0.22 | 0.28 |
| 34160 | 0 | 225765 | IVSRQEKGKS                              | 2.31 | 0.01 | 2.30 | 1.15 | 0.22 | 0.28 |
| 34161 | 0 | 225765 | IVSRQEKGKS                              | 2.31 | 0.01 | 2.30 | 0.44 | 0.85 | 0.28 |
| 34162 | 0 | 225765 | IVSRQEKGKS                              | 2.31 | 0.01 | 2.30 | 0.68 | 0.22 | 0.28 |
| 34163 | 0 | 225765 | IVSRQEKGKS                              | 2.31 | 0.01 | 2.30 | 0.68 | 0.22 | 1.34 |

|       |   |        |                               |      |      |      |      |      |      |
|-------|---|--------|-------------------------------|------|------|------|------|------|------|
| 34164 | 0 | 225765 | IVSRQEKGKS                    | 2.31 | 0.01 | 2.30 | 0.68 | 0.22 | 1.34 |
| 34165 | 0 | 225765 | IVSRQEKGKS                    | 2.31 | 0.01 | 2.30 | 0.68 | 0.22 | 1.34 |
| 34166 | 0 | 225765 | IVSRQEKGKS                    | 2.31 | 0.01 | 2.30 | 0.68 | 0.22 | 1.34 |
| 34167 | 0 | 225765 | IVSRQEKGKS                    | 2.31 | 0.01 | 2.30 | 0.68 | 0.22 | 1.34 |
| 34168 | 0 | 225765 | IVSRQEKGKS                    | 2.31 | 0.01 | 2.30 | 0.68 | 0.22 | 1.34 |
| 34169 | 0 | 225765 | IVSRQEKGKS                    | 2.31 | 0.01 | 2.30 | 0.68 | 0.22 | 1.34 |
| 34170 | 0 | 225765 | IVSRQEKGKS                    | 2.31 | 0.01 | 2.30 | 0.68 | 0.22 | 1.34 |
| 34171 | 0 | 423013 | IVSRQEKGKSLLFKTE              | 2.72 | 0.01 | 2.30 | 1.20 | 0.22 | 0.28 |
| 34172 | 0 | 133611 | IVSYLCDLAPEAPPPTLPP           | 2.88 | 0.01 | 0.78 | 0.68 | 0.22 | 1.34 |
| 34173 | 0 | 133611 | IVSYLCDLAPEAPPPTLPP           | 2.88 | 0.01 | 0.78 | 0.68 | 0.22 | 1.34 |
| 34174 | 0 | 115302 | IVTAGEERAVTT                  | 2.48 | 0.01 | 3.93 | 1.20 | 0.22 | 0.28 |
| 34175 | 0 | 115302 | IVTAGEERAVTT                  | 2.48 | 0.01 | 3.93 | 1.20 | 0.22 | 1.34 |
| 34176 | 0 | 153266 | IVTARARHDWNWVQRS<br>SRSL      | 2.94 | 0.01 | 0.90 | 1.15 | 2.26 | 1.34 |
| 34177 | 0 | 153266 | IVTARARHDWNWVQRS<br>SRSL      | 2.94 | 0.01 | 0.90 | 1.15 | 2.26 | 1.39 |
| 34178 | 0 | 29463  | IVTCAM                        | 1.88 | 0.01 | 2.40 | 0.44 | 0.85 | 0.28 |
| 34179 | 0 | 29464  | IVTCAMF                       | 1.99 | 0.01 | 2.40 | 0.44 | 0.85 | 0.28 |
| 34180 | 0 | 29464  | IVTCAMF                       | 1.99 | 0.01 | 2.40 | 0.44 | 0.85 | 0.28 |
| 34181 | 0 | 29464  | IVTCAMF                       | 1.99 | 0.01 | 2.40 | 0.44 | 0.85 | 0.28 |
| 34182 | 0 | 110909 | IVTFCCKCDSTLRLCVQS<br>T       | 2.91 | 0.01 | 1.86 | 3.89 | 2.82 | 0.28 |
| 34183 | 0 | 420619 | IVTKYITKGWKEVHELYK<br>EKALSVE | 3.18 | 0.01 | 0.78 | 0.44 | 2.35 | 0.28 |
| 34184 | 0 | 29482  | IVTPRTPPPSQGK                 | 2.54 | 0.01 | 0.78 | 0.44 | 2.39 | 0.28 |
| 34185 | 0 | 226622 | IVTQVVRGVA                    | 2.33 | 0.01 | 0.78 | 1.12 | 0.22 | 1.27 |
| 34186 | 0 | 226622 | IVTQVVRGVA                    | 2.33 | 0.01 | 0.78 | 1.12 | 0.22 | 2.92 |
| 34187 | 0 | 194937 | IVTTGEDNATTYT                 | 2.55 | 0.01 | 3.85 | 0.68 | 2.25 | 1.75 |
| 34188 | 0 | 113560 | IVTTSTNDWVVTCGYTIP<br>TCRKLD  | 3.10 | 0.01 | 0.78 | 2.61 | 0.22 | 0.28 |
| 34189 | 0 | 113039 | IVTTSTNDWVVTCSTYIP<br>TCRKMDE | 3.15 | 0.01 | 1.75 | 3.75 | 0.22 | 0.28 |
| 34190 | 0 | 113039 | IVTTSTNDWVVTCSTYIP<br>TCRKMDE | 3.15 | 0.01 | 1.75 | 2.25 | 0.22 | 0.28 |
| 34191 | 0 | 187855 | IVTVEGGLSVISPKWQ              | 2.73 | 0.01 | 2.72 | 2.13 | 2.39 | 1.27 |
| 34192 | 0 | 151941 | IVVEKLGKAEVD                  | 2.49 | 0.01 | 2.80 | 2.78 | 0.22 | 0.28 |
| 34193 | 0 | 29497  | IVVQGAGKNVVFDDG               | 2.62 | 0.01 | 2.24 | 1.20 | 0.22 | 0.28 |
| 34194 | 0 | 29497  | IVVQGAGKNVVFDDG               | 2.62 | 0.01 | 2.24 | 0.68 | 0.22 | 0.28 |
| 34195 | 0 | 115147 | IVVYTDREVGAVGSRV<br>TLHCSFWS  | 3.14 | 0.01 | 0.78 | 0.44 | 1.13 | 0.28 |
| 34196 | 0 | 29504  | IVWVATEGALNTPKDHI             | 2.76 | 0.01 | 2.91 | 0.44 | 0.85 | 0.28 |
| 34197 | 0 | 445297 | IVYEAADMIMHTPGCVP<br>CVR      | 2.93 | 0.01 | 1.96 | 0.68 | 0.22 | 0.28 |
| 34198 | 0 | 106548 | IVYTPHPEYLWP                  | 2.48 | 0.01 | 0.90 | 1.15 | 0.22 | 2.56 |

|       |   |        |                         |      |      |      |      |      |      |
|-------|---|--------|-------------------------|------|------|------|------|------|------|
| 34199 | 0 | 105890 | IVYVG DGVC              | 2.25 | 0.01 | 0.90 | 3.01 | 0.22 | 0.28 |
| 34200 | 0 | 129014 | IWAQKTNT                | 2.12 | 0.01 | 0.78 | 0.44 | 1.13 | 0.28 |
| 34201 | 0 | 96434  | IWCKDDQNP HSSNICNI      | 3.48 | 4.33 | 1.60 | 0.44 | 1.23 | 0.28 |
|       |   |        | SCDKFLDDDLTDDIMCV<br>K  |      |      |      |      |      |      |
| 34202 | 0 | 96434  | IWCKDDQNP HSSNICNI      | 3.48 | 4.33 | 1.60 | 0.44 | 1.23 | 1.27 |
|       |   |        | SCDKFLDDDLTDDIMCV<br>K  |      |      |      |      |      |      |
| 34203 | 0 | 96435  | IWCKDDQNP HSSNICNI      | 3.51 | 4.33 | 1.60 | 0.44 | 1.23 | 0.28 |
|       |   |        | SCDKFLDDDLTDDIMCV<br>KK |      |      |      |      |      |      |
| 34204 | 0 | 96435  | IWCKDDQNP HSSNICNI      | 3.51 | 4.33 | 1.60 | 0.44 | 1.23 | 1.27 |
|       |   |        | SCDKFLDDDLTDDIMCV<br>KK |      |      |      |      |      |      |
| 34205 | 0 | 153267 | IWENAGRMV               | 2.18 | 0.01 | 0.90 | 1.15 | 0.22 | 1.27 |
| 34206 | 0 | 171614 | IWGCATRLFPDFFTR         | 2.65 | 0.01 | 0.78 | 0.44 | 1.13 | 0.28 |
| 34207 | 0 | 178140 | IWHHTFYNELRVAPEE        | 2.66 | 3.24 | 0.78 | 0.44 | 1.13 | 0.28 |
| 34208 | 0 | 161109 | IWIIPERYTFGYKPEDFN      | 2.89 | 0.01 | 2.08 | 0.44 | 1.93 | 1.57 |
|       |   |        | K                       |      |      |      |      |      |      |
| 34209 | 0 | 103297 | IWKLIKDMLILPYLD         | 2.72 | 0.01 | 2.04 | 0.44 | 0.85 | 1.28 |
| 34210 | 0 | 500035 | IWKVNPTVD               | 2.21 | 0.01 | 3.89 | 0.44 | 0.85 | 2.98 |
| 34211 | 0 | 500035 | IWKVNPTVD               | 2.21 | 0.01 | 3.89 | 0.44 | 0.85 | 0.28 |
| 34212 | 0 | 500035 | IWKVNPTVD               | 2.21 | 0.01 | 3.89 | 0.44 | 0.85 | 1.34 |
| 34213 | 0 | 423371 | IWLGPDSHNICQHE          | 2.65 | 0.01 | 2.51 | 0.44 | 2.35 | 1.28 |
| 34214 | 0 | 118441 | IWLWNKQKYEAGTYPQ        | 2.78 | 0.01 | 0.78 | 0.44 | 1.13 | 0.28 |
|       |   |        | T                       |      |      |      |      |      |      |
| 34215 | 0 | 188274 | IWNYNSPDVSESEES         | 2.69 | 0.01 | 1.66 | 1.20 | 0.22 | 0.28 |
| 34216 | 0 | 188274 | IWNYNSPDVSESEES         | 2.69 | 0.01 | 1.66 | 0.68 | 0.22 | 0.28 |
| 34217 | 0 | 450727 | IWRLPTH                 | 1.99 | 0.01 | 0.90 | 0.44 | 1.23 | 1.39 |
| 34218 | 0 | 134415 | IWRSTQGV                | 2.10 | 0.01 | 0.78 | 0.44 | 1.13 | 0.28 |
| 34219 | 0 | 134415 | IWRSTQGV                | 2.10 | 0.01 | 0.78 | 0.44 | 1.13 | 0.28 |
| 34220 | 0 | 112174 | IWWNDNK                 | 2.03 | 0.01 | 0.78 | 0.44 | 1.13 | 0.28 |
| 34221 | 0 | 106550 | IWYINCFGCETHAML         | 2.63 | 0.01 | 0.78 | 2.46 | 0.22 | 0.28 |
| 34222 | 0 | 106550 | IWYINCFGCETHAML         | 2.63 | 0.01 | 0.78 | 2.46 | 0.22 | 0.28 |
| 34223 | 0 | 106550 | IWYINCFGCETHAML         | 2.63 | 0.01 | 0.78 | 2.46 | 0.22 | 0.28 |
| 34224 | 0 | 106550 | IWYINCFGCETHAML         | 2.63 | 0.01 | 0.78 | 2.46 | 0.22 | 0.28 |
| 34225 | 0 | 106550 | IWYINCFGCETHAML         | 2.63 | 0.01 | 0.78 | 2.46 | 0.22 | 0.28 |
| 34226 | 0 | 106550 | IWYINCFGCETHAML         | 2.63 | 0.01 | 0.78 | 2.46 | 0.22 | 0.28 |
| 34227 | 0 | 106550 | IWYINCFGCETHAML         | 2.63 | 0.01 | 0.78 | 3.16 | 0.22 | 0.28 |
| 34228 | 0 | 106550 | IWYINCFGCETHAML         | 2.63 | 0.01 | 0.78 | 3.16 | 0.22 | 0.28 |
| 34229 | 0 | 106550 | IWYINCFGCETHAML         | 2.63 | 0.01 | 0.78 | 3.16 | 0.22 | 0.28 |
| 34230 | 0 | 106550 | IWYINCFGCETHAML         | 2.63 | 0.01 | 0.78 | 3.16 | 0.22 | 0.28 |
| 34231 | 0 | 106550 | IWYINCFGCETHAML         | 2.63 | 0.01 | 0.78 | 3.16 | 2.60 | 1.75 |
| 34232 | 0 | 106551 | IWYINCYGCETHALL         | 2.65 | 0.01 | 1.75 | 3.16 | 2.60 | 1.75 |
| 34233 | 0 | 179054 | IYAPDAEAYTLFAPL         | 2.70 | 0.01 | 2.36 | 0.44 | 1.23 | 1.28 |



|       |   |        |                     |      |      |      |      |      |      |
|-------|---|--------|---------------------|------|------|------|------|------|------|
|       |   |        | IYCGNGTPSELGGANVP   |      |      |      |      |      |      |
| 34234 | 0 | 29561  | AEFLENFVRSSNLKFQD   | 3.56 | 0.01 | 3.85 | 1.12 | 0.22 | 0.85 |
|       |   |        | AYNA                |      |      |      |      |      |      |
|       |   |        | IYCGNGTPSELGGANVP   |      |      |      |      |      |      |
| 34235 | 0 | 29561  | AEFLENFVRSSNLKFQD   | 3.56 | 0.01 | 3.85 | 0.68 | 0.22 | 0.85 |
|       |   |        | AYNA                |      |      |      |      |      |      |
| 34236 | 0 | 179055 | IYDISNKRRMGLTEF     | 2.62 | 0.01 | 2.36 | 0.44 | 1.23 | 1.28 |
| 34237 | 0 | 179055 | IYDISNKRRMGLTEF     | 2.62 | 0.01 | 2.36 | 0.44 | 1.23 | 1.27 |
| 34238 | 0 | 179055 | IYDISNKRRMGLTEF     | 2.62 | 0.01 | 2.36 | 0.44 | 1.23 | 1.28 |
| 34239 | 0 | 29566  | IYDKKISVLK          | 2.34 | 0.01 | 2.84 | 0.44 | 0.85 | 0.28 |
| 34240 | 0 | 29567  | IYDKLTVQTTG         | 2.38 | 0.01 | 3.29 | 1.12 | 0.22 | 0.85 |
| 34241 | 0 | 29567  | IYDKLTVQTTG         | 2.38 | 0.01 | 3.29 | 1.12 | 0.22 | 1.34 |
| 34242 | 0 | 29567  | IYDKLTVQTTG         | 2.38 | 0.01 | 3.29 | 1.12 | 0.22 | 0.85 |
| 34243 | 0 | 315684 | IYDREFDYEDYEG       | 2.73 | 0.01 | 1.61 | 0.44 | 0.85 | 1.28 |
| 34244 | 0 | 29570  | IYEATQAASKVGGEASA   |      |      |      |      |      |      |
|       |   |        | PGGSNSTD            | 3.15 | 0.01 | 2.59 | 0.44 | 0.85 | 1.27 |
| 34245 | 0 | 78427  | IYEETVTPGQCNMVVER   |      |      |      |      |      |      |
|       |   |        | LG DY LIDQGL        | 3.23 | 0.01 | 2.76 | 0.44 | 1.23 | 1.39 |
| 34246 | 0 | 29578  | IYFMQRQDVL DKNH     | 2.57 | 0.01 | 2.56 | 2.69 | 0.22 | 0.28 |
| 34247 | 0 | 29578  | IYFMQRQDVL DKNH     | 2.57 | 0.01 | 3.16 | 2.69 | 0.22 | 0.28 |
| 34248 | 0 | 226482 | IYFYSFNTHIKPLD      | 2.60 | 0.01 | 2.97 | 0.44 | 0.85 | 0.28 |
| 34249 | 0 | 226483 | IYFYSFNTHIKPLDNVKIR |      |      |      |      |      |      |
|       |   |        | KALTLA              | 3.16 | 0.01 | 2.97 | 0.44 | 0.85 | 0.28 |
| 34250 | 0 | 29582  | IYGAAF              | 1.89 | 0.01 | 2.40 | 0.44 | 0.85 | 0.28 |
| 34251 | 0 | 29590  | IYGQAVEYSGLVRVGED   |      |      |      |      |      |      |
|       |   |        | VYYFGETY            | 3.16 | 0.01 | 3.04 | 2.75 | 0.22 | 0.28 |
| 34252 | 0 | 29590  | IYGQAVEYSGLVRVGED   |      |      |      |      |      |      |
|       |   |        | VYYFGETY            | 3.16 | 0.01 | 3.04 | 2.75 | 0.22 | 0.28 |
| 34253 | 0 | 480077 | IYKSKKESDVRSSGLLE   | 2.84 | 0.01 | 3.12 | 0.68 | 0.22 | 0.28 |
| 34254 | 0 | 226053 | IYLAANYGETRNATPITN  |      |      |      |      |      |      |
|       |   |        | KF                  | 2.95 | 0.01 | 2.24 | 0.68 | 0.22 | 0.28 |
| 34255 | 0 | 226053 | IYLAANYGETRNATPITN  |      |      |      |      |      |      |
|       |   |        | KF                  | 2.95 | 0.01 | 2.24 | 0.68 | 0.22 | 0.28 |
| 34256 | 0 | 191084 | IYLDCTIQRPTQ        | 2.48 | 0.01 | 0.90 | 3.18 | 1.41 | 1.27 |
| 34257 | 0 | 191084 | IYLDCTIQRPTQ        | 2.48 | 0.01 | 0.90 | 3.18 | 1.41 | 1.34 |
| 34258 | 0 | 191084 | IYLDCTIQRPTQ        | 2.48 | 0.01 | 0.90 | 3.18 | 1.41 | 1.34 |
| 34259 | 0 | 191084 | IYLDCTIQRPTQ        | 2.48 | 0.01 | 0.90 | 3.18 | 1.41 | 0.28 |
| 34260 | 0 | 150860 | IYLKNVLKPDEKIH      | 2.62 | 0.01 | 4.33 | 1.12 | 0.22 | 0.85 |
| 34261 | 0 | 150860 | IYLKNVLKPDEKIH      | 2.62 | 0.01 | 4.33 | 1.12 | 0.22 | 0.85 |
| 34262 | 0 | 150328 | IYMRMKHVRAWIPRP     | 2.69 | 0.01 | 3.45 | 1.12 | 0.22 | 0.28 |
| 34263 | 0 | 111437 | IYNALSSAGLQNQIK     | 2.70 | 0.01 | 3.20 | 1.12 | 0.22 | 0.85 |
| 34264 | 0 | 29633  | IYNHFSSADELIKYLEK   | 2.79 | 0.01 | 1.66 | 0.44 | 1.74 | 0.28 |
| 34265 | 0 | 181679 | IYNQEIKKKNPYEQQ     | 2.70 | 0.01 | 3.26 | 2.37 | 0.22 | 1.28 |
| 34266 | 0 | 181680 | IYNSLPSPAQKH YAH    | 2.68 | 0.01 | 1.66 | 2.37 | 0.22 | 1.28 |
| 34267 | 0 | 29654  | IYQCCD              | 1.89 | 0.01 | 1.96 | 0.44 | 0.85 | 0.28 |

|       |   |        |                 |      |      |      |      |      |      |
|-------|---|--------|-----------------|------|------|------|------|------|------|
| 34268 | 0 | 106552 | IYRKYFGNRP      | 2.31 | 0.01 | 2.75 | 0.44 | 1.23 | 0.85 |
| 34269 | 0 | 99363  | IYRLRGRAHVQVVD  | 2.65 | 0.01 | 2.16 | 0.44 | 1.23 | 1.48 |
| 34270 | 0 | 99363  | IYRLRGRAHVQVVD  | 2.65 | 0.01 | 2.16 | 0.44 | 1.23 | 1.48 |
| 34271 | 0 | 144697 | IYRNLYWEGS      | 2.29 | 0.01 | 0.78 | 0.44 | 1.13 | 0.28 |
| 34272 | 0 | 144697 | IYRNLYWEGS      | 2.29 | 0.01 | 0.78 | 0.44 | 1.41 | 0.28 |
| 34273 | 0 | 144697 | IYRNLYWEGS      | 2.29 | 0.01 | 0.78 | 0.44 | 2.35 | 0.28 |
| 34274 | 0 | 29683  | IYSKYGGTEI      | 2.33 | 0.01 | 2.04 | 0.68 | 0.22 | 0.28 |
| 34275 | 0 | 29683  | IYSKYGGTEI      | 2.33 | 0.01 | 2.04 | 0.68 | 0.22 | 0.28 |
| 34276 | 0 | 519442 | IYSLNYNELEVLA   | 2.70 | 0.01 | 2.24 | 0.44 | 1.41 | 1.28 |
| 34277 | 0 | 29690  | IYSTVASSL       | 2.22 | 0.01 | 2.97 | 0.68 | 0.22 | 2.12 |
| 34278 | 0 | 29690  | IYSTVASSL       | 2.22 | 0.01 | 2.97 | 0.68 | 0.22 | 0.28 |
| 34279 | 0 | 29690  | IYSTVASSL       | 2.22 | 0.01 | 2.97 | 0.68 | 0.22 | 0.28 |
| 34280 | 0 | 29696  | IYSYFPSVI       | 2.26 | 0.01 | 2.95 | 0.68 | 0.22 | 0.28 |
| 34281 | 0 | 171622 | IYTAVMVRVILAQ   | 2.68 | 0.01 | 0.78 | 0.44 | 1.41 | 0.28 |
| 34282 | 0 | 29703  | IYTINDKILS      | 2.32 | 0.01 | 2.66 | 0.68 | 0.22 | 0.28 |
| 34283 | 0 | 135698 | IYTKVSR         | 2.12 | 0.01 | 0.78 | 0.44 | 2.35 | 0.28 |
| 34284 | 0 | 77924  | IYTSPTFPPTAH    | 2.48 | 0.01 | 0.90 | 1.15 | 0.22 | 0.85 |
| 34285 | 0 | 152689 | IYTVLDKIKL      | 2.34 | 0.01 | 2.18 | 2.16 | 0.22 | 0.28 |
| 34286 | 0 | 156693 | IYVNVEPTFQRTLH  | 2.76 | 0.01 | 0.78 | 2.71 | 0.22 | 0.28 |
| 34287 | 0 | 156693 | IYVNVEPTFQRTLH  | 2.76 | 0.01 | 0.78 | 2.71 | 0.22 | 0.28 |
| 34288 | 0 | 489601 | IYWPPQGRRRFGAR  | 2.67 | 0.01 | 2.69 | 3.05 | 0.85 | 1.28 |
| 34289 | 0 | 29732  | IYYHGEPIPVTVAVT | 2.94 | 0.01 | 1.60 | 1.15 | 0.22 | 0.85 |
| 34290 | 0 | 136406 | IYYPGE          | 1.89 | 0.01 | 4.45 | 0.68 | 0.22 | 0.28 |
| 34291 | 0 | 136406 | IYYPGE          | 1.89 | 0.01 | 4.45 | 0.68 | 0.22 | 0.28 |
| 34292 | 0 | 136406 | IYYPGE          | 1.89 | 0.01 | 4.45 | 0.68 | 0.22 | 0.28 |
| 34293 | 0 | 315793 | KAAAAPAKAAAPAK  | 2.74 | 0.01 | 1.61 | 0.44 | 0.85 | 1.28 |
| 34294 | 0 | 315794 | KAAAAPAKAAAPAK  | 2.74 | 0.01 | 1.61 | 0.44 | 0.85 | 1.28 |
| 34295 | 0 | 315795 | KAAAAPAKAATAPAK | 2.75 | 0.01 | 1.61 | 0.44 | 0.85 | 1.28 |
| 34296 | 0 | 315848 | KAAAPAKAAAPAKA  | 2.74 | 0.01 | 1.61 | 0.44 | 0.85 | 1.28 |
| 34297 | 0 | 315849 | KAAAPAKAAAPAKA  | 2.74 | 0.01 | 1.61 | 0.44 | 0.85 | 1.28 |
| 34298 | 0 | 315851 | KAAAPKAAAPKKAA  | 2.74 | 0.01 | 1.61 | 0.44 | 0.85 | 1.28 |
| 34299 | 0 | 315852 | KAAAPKAAAPQKAA  | 2.74 | 0.01 | 1.61 | 0.44 | 0.85 | 1.28 |
| 34300 | 0 | 315853 | KAAAPKTAAPKKAA  | 2.74 | 0.01 | 1.61 | 0.44 | 0.85 | 1.28 |
| 34301 | 0 | 315855 | KAAAPPAKAAAPAK  | 2.75 | 0.01 | 1.61 | 0.44 | 0.85 | 1.28 |
| 34302 | 0 | 315856 | KAAAPPAKAAAPVG  | 2.74 | 0.01 | 1.61 | 0.44 | 0.85 | 1.28 |

|       |   |        |                              |      |      |      |      |      |      |
|-------|---|--------|------------------------------|------|------|------|------|------|------|
| 34303 | 0 | 315857 | KAAAPPAKAAAPPAK              | 2.75 | 0.01 | 1.61 | 0.44 | 0.85 | 1.28 |
| 34304 | 0 | 315858 | KAAAPPAKTAAAPAK              | 2.75 | 0.01 | 1.61 | 0.44 | 0.85 | 1.28 |
| 34305 | 0 | 315860 | KAAAPQKAAAPKKTAA             | 2.74 | 0.01 | 1.61 | 0.44 | 0.85 | 1.28 |
| 34306 | 0 | 315861 | KAAAPQKAAVAKKAV              | 2.74 | 0.01 | 1.61 | 0.44 | 0.85 | 1.28 |
| 34307 | 0 | 29744  | KAAASKVKANLLSV               | 2.66 | 0.01 | 2.41 | 0.44 | 0.85 | 0.28 |
| 34308 | 0 | 29744  | KAAASKVKANLLSV               | 2.66 | 0.01 | 2.41 | 0.44 | 1.41 | 0.28 |
| 34309 | 0 | 29744  | KAAASKVKANLLSV               | 2.66 | 0.01 | 2.41 | 0.44 | 0.85 | 0.28 |
| 34310 | 0 | 29744  | KAAASKVKANLLSV               | 2.66 | 0.01 | 2.41 | 0.44 | 0.85 | 0.28 |
| 34311 | 0 | 29747  | KAADQQ                       | 1.88 | 0.01 | 4.08 | 2.66 | 0.22 | 0.28 |
| 34312 | 0 | 315889 | KAAEAEKQKAAEATK              | 2.75 | 0.01 | 1.61 | 0.44 | 0.85 | 1.28 |
| 34313 | 0 | 315891 | KAAEAEKRKAAEATK              | 2.75 | 0.01 | 1.61 | 0.44 | 0.85 | 1.28 |
| 34314 | 0 | 315897 | KAAEATKIAEAEKRK              | 2.74 | 0.01 | 1.61 | 0.44 | 0.85 | 1.28 |
| 34315 | 0 | 315899 | KAAEATKVAEAEKQR              | 2.73 | 0.01 | 1.61 | 0.44 | 0.85 | 1.28 |
| 34316 | 0 | 121442 | KAAEQTAAREQAKEA              | 2.74 | 0.01 | 0.78 | 0.44 | 1.13 | 0.85 |
| 34317 | 0 | 140247 | KAAESEIEKLTTK                | 2.58 | 0.01 | 2.90 | 1.20 | 0.22 | 0.28 |
| 34318 | 0 | 140247 | KAAESEIEKLTTK                | 2.58 | 0.01 | 2.90 | 1.20 | 0.22 | 1.34 |
| 34319 | 0 | 129022 | KAAGVNVEPFWPGLF              | 2.67 | 0.01 | 0.78 | 0.44 | 1.13 | 0.85 |
| 34320 | 0 | 29750  | KAAIAPAKAAAAPAKAA<br>TAPA    | 3.06 | 0.01 | 0.90 | 0.44 | 0.85 | 0.28 |
| 34321 | 0 | 241015 | KAAIP                        | 1.75 | 0.01 | 3.35 | 1.20 | 0.22 | 0.85 |
| 34322 | 0 | 120653 | KAAIPEDKEYDVSGR              | 2.66 | 0.01 | 3.35 | 2.02 | 0.85 | 0.28 |
| 34323 | 0 | 241016 | KAAIPNGS                     | 2.11 | 0.01 | 3.35 | 2.37 | 0.22 | 0.85 |
| 34324 | 0 | 315936 | KAAKPAAKTAAKTAA              | 2.74 | 0.01 | 1.61 | 0.44 | 0.85 | 1.28 |
| 34325 | 0 | 29751  | KAALIEEGQ                    | 2.21 | 0.01 | 2.69 | 0.44 | 0.85 | 0.28 |
| 34326 | 0 | 29752  | KAALIEEGQRMAEM               | 2.63 | 0.01 | 2.69 | 0.44 | 0.85 | 0.28 |
| 34327 | 0 | 29752  | KAALIEEGQRMAEM               | 2.63 | 0.01 | 2.69 | 0.44 | 1.41 | 0.28 |
| 34328 | 0 | 29752  | KAALIEEGQRMAEM               | 2.63 | 0.01 | 2.69 | 0.44 | 0.85 | 0.28 |
| 34329 | 0 | 29753  | KAALISVATEGTLTDIPSD<br>TPNLL | 3.12 | 0.01 | 3.28 | 0.44 | 1.23 | 0.85 |
| 34330 | 0 | 29755  | KAANLSIIK                    | 2.25 | 0.01 | 3.89 | 2.88 | 2.26 | 0.85 |
| 34331 | 0 | 29756  | KAANYQYNYLRDGEQV<br>TA       | 2.83 | 0.01 | 3.78 | 1.15 | 0.22 | 0.28 |
| 34332 | 0 | 29756  | KAANYQYNYLRDGEQV<br>TA       | 2.83 | 0.01 | 3.78 | 0.68 | 0.22 | 0.28 |
| 34333 | 0 | 29757  | KAAPKRAAPKRAAPKKA<br>APK     | 3.03 | 0.01 | 3.97 | 0.44 | 0.85 | 0.28 |
| 34334 | 0 | 29757  | KAAPKRAAPKRAAPKKA<br>APK     | 3.03 | 0.01 | 3.97 | 0.44 | 0.85 | 0.28 |
| 34335 | 0 | 135470 | KAAQFG                       | 1.89 | 0.01 | 0.78 | 1.20 | 0.22 | 0.28 |
| 34336 | 0 | 29758  | KAAQIYSEP                    | 2.20 | 0.01 | 0.90 | 0.68 | 0.22 | 0.28 |
| 34337 | 0 | 29758  | KAAQIYSEP                    | 2.20 | 0.01 | 0.90 | 3.48 | 0.22 | 0.28 |

|       |   |        |                                     |      |      |      |      |      |      |
|-------|---|--------|-------------------------------------|------|------|------|------|------|------|
| 34338 | 0 | 136407 | KAASGSTGDQKVQISYY<br>GPK            | 2.95 | 0.01 | 0.78 | 0.44 | 1.13 | 0.28 |
| 34339 | 0 | 29759  | KAASKETPPALNKC                      | 2.63 | 0.01 | 2.97 | 0.44 | 0.85 | 0.28 |
| 34340 | 0 | 29760  | KAASNTFINNA                         | 2.42 | 0.01 | 0.90 | 0.44 | 1.74 | 0.28 |
| 34341 | 0 | 29761  | KAASREKGGAVQKC                      | 2.63 | 0.01 | 0.90 | 0.44 | 0.85 | 0.28 |
| 34342 | 0 | 315971 | KAATAPAKAAAAPAK                     | 2.75 | 0.01 | 1.61 | 0.44 | 0.85 | 1.28 |
| 34343 | 0 | 315983 | KAAVDADTAALAALL                     | 2.72 | 0.01 | 1.61 | 0.44 | 0.85 | 1.28 |
| 34344 | 0 | 142426 | KAAYGLLKTKNQYVL                     | 2.69 | 0.01 | 2.59 | 0.44 | 0.85 | 0.85 |
| 34345 | 0 | 77925  | KACSNNSTCFNP                        | 2.49 | 0.01 | 0.90 | 1.15 | 0.22 | 0.85 |
| 34346 | 0 | 130912 | KADILPEMNSMRADRM                    | 2.73 | 0.01 | 0.90 | 0.68 | 0.22 | 1.27 |
| 34347 | 0 | 130912 | KADILPEMNSMRADRM                    | 2.73 | 0.01 | 0.90 | 0.68 | 0.22 | 1.34 |
| 34348 | 0 | 519476 | KADKVSLEEKQAANQ                     | 2.69 | 0.01 | 2.24 | 0.44 | 1.41 | 1.28 |
| 34349 | 0 | 519478 | KADNAASDALEALAD                     | 2.73 | 0.01 | 2.24 | 0.44 | 1.41 | 1.28 |
| 34350 | 0 | 105891 | KADPSIMA                            | 2.12 | 0.01 | 3.05 | 1.20 | 0.22 | 0.28 |
| 34351 | 0 | 129024 | KADQLYK                             | 2.03 | 0.01 | 0.78 | 0.44 | 1.13 | 0.28 |
| 34352 | 0 | 119599 | KAEEYILKKPRSELMFEE                  | 2.83 | 0.01 | 2.26 | 0.68 | 0.22 | 1.27 |
| 34353 | 0 | 119599 | KAEEYILKKPRSELMFEE                  | 2.83 | 0.01 | 2.26 | 0.68 | 0.22 | 2.98 |
| 34354 | 0 | 119599 | KAEEYILKKPRSELMFEE                  | 2.83 | 0.01 | 2.26 | 0.68 | 0.22 | 0.28 |
| 34355 | 0 | 119979 | KAEFHRWSSY                          | 2.28 | 0.01 | 0.78 | 0.68 | 0.22 | 0.28 |
| 34356 | 0 | 142427 | KAEKDAEAAQ                          | 2.36 | 0.01 | 2.59 | 0.44 | 0.85 | 0.85 |
| 34357 | 0 | 229268 | KAEKDYDAAVK                         | 2.44 | 0.01 | 2.70 | 0.68 | 0.22 | 0.28 |
| 34358 | 0 | 29783  | KAEQVKASKEMGETLLR<br>AVESYLLAHSDAYN | 3.36 | 0.01 | 2.76 | 1.12 | 0.22 | 2.35 |
| 34359 | 0 | 29783  | KAEQVKASKEMGETLLR<br>AVESYLLAHSDAYN | 3.36 | 0.01 | 2.76 | 0.44 | 1.23 | 0.28 |
| 34360 | 0 | 29783  | KAEQVKASKEMGETLLR<br>AVESYLLAHSDAYN | 3.36 | 0.01 | 2.76 | 0.44 | 1.23 | 0.28 |
| 34361 | 0 | 29783  | KAEQVKASKEMGETLLR<br>AVESYLLAHSDAYN | 3.36 | 0.01 | 2.76 | 1.20 | 0.22 | 0.28 |
| 34362 | 0 | 29783  | KAEQVKASKEMGETLLR<br>AVESYLLAHSDAYN | 3.36 | 0.01 | 2.76 | 0.68 | 0.22 | 0.28 |
| 34363 | 0 | 135042 | KAETIPVL                            | 2.10 | 0.01 | 0.78 | 1.12 | 0.22 | 1.27 |
| 34364 | 0 | 135042 | KAETIPVL                            | 2.10 | 0.01 | 0.78 | 1.12 | 0.22 | 1.27 |
| 34365 | 0 | 120654 | KAETIPVLHEMIQQ                      | 2.57 | 0.01 | 0.78 | 0.44 | 1.13 | 0.85 |
| 34366 | 0 | 129025 | KAFDKHMN                            | 2.13 | 0.01 | 0.78 | 0.44 | 1.13 | 0.28 |
| 34367 | 0 | 230141 | KAFFEL                              | 1.89 | 0.01 | 3.19 | 0.44 | 1.23 | 1.28 |
| 34368 | 0 | 230141 | KAFFEL                              | 1.89 | 0.01 | 3.19 | 0.44 | 1.23 | 1.28 |
| 34369 | 0 | 189689 | KAFFTKVGLAAKSSA                     | 2.70 | 0.01 | 3.28 | 0.44 | 1.23 | 0.28 |
| 34370 | 0 | 189689 | KAFFTKVGLAAKSSA                     | 2.70 | 0.01 | 3.28 | 0.44 | 1.41 | 0.28 |
| 34371 | 0 | 158873 | KAFKVIDQDASGFIE                     | 2.69 | 0.01 | 3.26 | 0.44 | 1.23 | 0.28 |
| 34372 | 0 | 29802  | KAFRELAD                            | 2.12 | 0.01 | 2.21 | 1.12 | 0.22 | 0.28 |

|       |   |        |                             |      |      |      |      |      |      |
|-------|---|--------|-----------------------------|------|------|------|------|------|------|
| 34373 | 0 | 29802  | KAFRELAD                    | 2.12 | 0.01 | 2.21 | 0.44 | 0.85 | 0.28 |
| 34374 | 0 | 29803  | KAFRELADAL                  | 2.33 | 0.01 | 2.21 | 1.12 | 0.22 | 0.28 |
| 34375 | 0 | 29803  | KAFRELADAL                  | 2.33 | 0.01 | 2.21 | 1.12 | 0.22 | 0.28 |
| 34376 | 0 | 158874 | KAGDADGDGMIGIDE             | 2.73 | 0.01 | 3.26 | 0.44 | 1.23 | 0.28 |
| 34377 | 0 | 158874 | KAGDADGDGMIGIDE             | 2.73 | 0.01 | 3.26 | 0.44 | 1.41 | 0.28 |
| 34378 | 0 | 156894 | KAGDPRT                     | 1.99 | 0.01 | 0.90 | 1.20 | 0.22 | 0.28 |
| 34379 | 0 | 189690 | KAGDSGDGKIGVDE              | 2.72 | 0.01 | 3.28 | 0.44 | 1.23 | 0.28 |
| 34380 | 0 | 189690 | KAGDSGDGKIGVDE              | 2.72 | 0.01 | 3.28 | 0.44 | 1.41 | 0.28 |
| 34381 | 0 | 140248 | KAGETIYDIDEDGTITKK<br>D     | 2.95 | 0.01 | 2.90 | 1.20 | 0.22 | 0.28 |
| 34382 | 0 | 140248 | KAGETIYDIDEDGTITKK<br>D     | 2.95 | 0.01 | 2.90 | 1.20 | 0.22 | 1.34 |
| 34383 | 0 | 140248 | KAGETIYDIDEDGTITKK<br>D     | 2.95 | 0.01 | 2.90 | 1.20 | 0.22 | 1.34 |
| 34384 | 0 | 111439 | KAGGIEQNFGLFYPN             | 2.66 | 0.01 | 3.20 | 1.12 | 0.22 | 0.85 |
| 34385 | 0 | 97407  | KAGLLVSDGGPNLY              | 2.60 | 0.01 | 3.09 | 0.44 | 0.85 | 0.28 |
| 34386 | 0 | 29810  | KAGNEGLEWVEL                | 2.49 | 0.01 | 3.33 | 0.44 | 1.23 | 0.85 |
| 34387 | 0 | 519501 | KAGQKTDDMLNSNDM             | 2.69 | 0.01 | 2.24 | 0.44 | 1.41 | 1.28 |
| 34388 | 0 | 29812  | KAGSTVYAVTAVTSIFSV<br>G     | 2.94 | 0.01 | 3.10 | 0.44 | 0.85 | 1.27 |
| 34389 | 0 | 29812  | KAGSTVYAVTAVTSIFSV<br>G     | 2.94 | 0.01 | 3.10 | 0.44 | 0.85 | 0.28 |
| 34390 | 0 | 29812  | KAGSTVYAVTAVTSIFSV<br>G     | 2.94 | 0.01 | 3.10 | 0.44 | 0.85 | 1.27 |
| 34391 | 0 | 29812  | KAGSTVYAVTAVTSIFSV<br>G     | 2.94 | 0.01 | 3.10 | 0.44 | 0.85 | 0.28 |
| 34392 | 0 | 29815  | KAGYPYNYNTTASDQLL<br>V      | 2.82 | 0.01 | 2.53 | 0.44 | 0.85 | 0.28 |
| 34393 | 0 | 29816  | KAHDLSTASRPHVVT             | 2.67 | 0.01 | 0.90 | 1.15 | 0.22 | 1.39 |
| 34394 | 0 | 106553 | KAHILRWGNE                  | 2.26 | 0.01 | 2.75 | 0.44 | 1.23 | 0.85 |
| 34395 | 0 | 29817  | KAHPPLLLNSPRDVPL            | 2.73 | 0.01 | 0.90 | 0.44 | 0.85 | 0.28 |
| 34396 | 0 | 29818  | KAHPPLLLNSPRDVPL            | 2.68 | 0.01 | 0.90 | 0.44 | 0.85 | 1.39 |
| 34397 | 0 | 29819  | KAHTDFAGAEAAWGAT<br>LDAFFGM | 3.10 | 0.01 | 3.05 | 0.44 | 1.23 | 1.57 |
| 34398 | 0 | 29824  | KAIERM                      | 1.88 | 0.01 | 3.24 | 1.12 | 0.22 | 0.28 |
| 34399 | 0 | 29825  | KAIERMKDTL                  | 2.30 | 0.01 | 2.66 | 0.68 | 0.22 | 0.28 |
| 34400 | 0 | 29832  | KAISQIQESLTTTSTAL           | 2.83 | 0.01 | 2.48 | 0.44 | 0.85 | 0.28 |
| 34401 | 0 | 29832  | KAISQIQESLTTTSTAL           | 2.83 | 0.01 | 2.48 | 0.68 | 0.22 | 0.28 |
| 34402 | 0 | 79877  | KAKAQTD                     | 2.15 | 0.01 | 0.78 | 0.44 | 1.41 | 0.28 |
| 34403 | 0 | 131500 | KAKAQTDREDLRTLRL            | 2.78 | 0.01 | 0.78 | 1.12 | 0.22 | 0.28 |
| 34404 | 0 | 131500 | KAKAQTDREDLRTLRL            | 2.78 | 0.01 | 0.78 | 2.36 | 0.22 | 0.28 |
| 34405 | 0 | 131500 | KAKAQTDREDLRTLRL            | 2.78 | 0.01 | 0.78 | 2.36 | 0.22 | 1.48 |
| 34406 | 0 | 29835  | KAKASTVKAKLLSV              | 2.67 | 0.01 | 1.96 | 0.44 | 0.85 | 0.28 |
| 34407 | 0 | 29835  | KAKASTVKAKLLSV              | 2.67 | 0.01 | 1.96 | 0.44 | 0.85 | 0.28 |
| 34408 | 0 | 29835  | KAKASTVKAKLLSV              | 2.67 | 0.01 | 1.96 | 0.44 | 0.85 | 0.28 |
| 34409 | 0 | 157443 | KAKDAEKKKAKTD               | 2.61 | 0.01 | 3.47 | 2.49 | 0.85 | 0.28 |

|       |   |        |                             |      |      |      |      |      |      |
|-------|---|--------|-----------------------------|------|------|------|------|------|------|
| 34410 | 0 | 141681 | KAKEELLETLQIVAER            | 2.77 | 0.01 | 1.66 | 2.55 | 0.22 | 0.28 |
| 34411 | 0 | 141681 | KAKEELLETLQIVAER            | 2.77 | 0.01 | 1.66 | 1.20 | 0.22 | 0.28 |
| 34412 | 0 | 122423 | KAKGNPESSFNDENLRI<br>VVAD   | 2.97 | 0.01 | 0.78 | 0.44 | 1.13 | 0.85 |
| 34413 | 0 | 107455 | KAKGQPR                     | 2.03 | 0.01 | 0.78 | 1.15 | 0.22 | 0.28 |
| 34414 | 0 | 107455 | KAKGQPR                     | 2.03 | 0.01 | 0.78 | 0.68 | 0.22 | 0.28 |
| 34415 | 0 | 107455 | KAKGQPR                     | 2.03 | 0.01 | 0.78 | 0.68 | 0.22 | 0.85 |
| 34416 | 0 | 129026 | KAKKPAAAAGAKKAKS            | 2.81 | 0.01 | 0.78 | 0.44 | 1.13 | 0.28 |
| 34417 | 0 | 129026 | KAKKPAAAAGAKKAKS            | 2.81 | 0.01 | 0.78 | 0.44 | 1.13 | 0.28 |
| 34418 | 0 | 129026 | KAKKPAAAAGAKKAKS            | 2.81 | 0.01 | 0.78 | 1.12 | 0.22 | 0.28 |
| 34419 | 0 | 129026 | KAKKPAAAAGAKKAKS            | 2.81 | 0.01 | 0.78 | 0.44 | 1.13 | 0.28 |
| 34420 | 0 | 519514 | KAKLEEEKQISDASR             | 2.69 | 0.01 | 2.24 | 0.44 | 1.41 | 1.28 |
| 34421 | 0 | 29839  | KAKLMPQLPGIPFV              | 2.62 | 0.01 | 2.41 | 0.44 | 0.85 | 0.28 |
| 34422 | 0 | 29839  | KAKLMPQLPGIPFV              | 2.62 | 0.01 | 2.41 | 0.44 | 0.85 | 0.28 |
| 34423 | 0 | 141682 | KAKLPQEVIDYINDPRN<br>DITV   | 2.99 | 0.01 | 2.24 | 0.68 | 0.22 | 0.28 |
| 34424 | 0 | 141682 | KAKLPQEVIDYINDPRN<br>DITV   | 2.99 | 0.01 | 2.24 | 0.68 | 0.22 | 1.34 |
| 34425 | 0 | 141682 | KAKLPQEVIDYINDPRN<br>DITV   | 2.99 | 0.01 | 2.24 | 0.68 | 0.22 | 0.85 |
| 34426 | 0 | 141682 | KAKLPQEVIDYINDPRN<br>DITV   | 2.99 | 0.01 | 2.24 | 0.68 | 0.22 | 1.27 |
| 34427 | 0 | 141682 | KAKLPQEVIDYINDPRN<br>DITV   | 2.99 | 0.01 | 2.24 | 0.68 | 0.22 | 0.28 |
| 34428 | 0 | 141682 | KAKLPQEVIDYINDPRN<br>DITV   | 2.99 | 0.01 | 2.24 | 0.68 | 0.22 | 1.75 |
| 34429 | 0 | 141682 | KAKLPQEVIDYINDPRN<br>DITV   | 2.99 | 0.01 | 2.24 | 0.68 | 0.22 | 1.75 |
| 34430 | 0 | 110910 | KAKPKFTLGKRKATP             | 2.72 | 0.01 | 1.86 | 0.68 | 0.22 | 0.85 |
| 34431 | 0 | 110910 | KAKPKFTLGKRKATP             | 2.72 | 0.01 | 1.86 | 0.68 | 0.22 | 0.28 |
| 34432 | 0 | 132846 | KAKRLHLSPVRLAE              | 2.64 | 0.01 | 2.19 | 1.12 | 0.22 | 0.85 |
| 34433 | 0 | 131226 | KAKRLHLSPVRLAELHSD<br>LKIQE | 3.10 | 0.01 | 2.19 | 2.04 | 0.22 | 0.28 |
| 34434 | 0 | 131226 | KAKRLHLSPVRLAELHSD<br>LKIQE | 3.10 | 0.01 | 2.19 | 2.04 | 2.60 | 1.75 |
| 34435 | 0 | 131226 | KAKRLHLSPVRLAELHSD<br>LKIQE | 3.10 | 0.01 | 2.19 | 1.12 | 0.22 | 0.85 |
| 34436 | 0 | 131226 | KAKRLHLSPVRLAELHSD<br>LKIQE | 3.10 | 0.01 | 2.19 | 1.12 | 0.22 | 1.75 |
| 34437 | 0 | 131226 | KAKRLHLSPVRLAELHSD<br>LKIQE | 3.10 | 0.01 | 2.19 | 1.12 | 0.22 | 0.85 |
| 34438 | 0 | 121444 | KAKSETFRLLHAKNI             | 2.66 | 0.01 | 0.78 | 0.44 | 1.13 | 0.85 |
| 34439 | 0 | 121444 | KAKSETFRLLHAKNI             | 2.66 | 0.01 | 0.78 | 0.44 | 1.41 | 0.85 |

|       |   |        |                                       |      |      |      |      |      |      |
|-------|---|--------|---------------------------------------|------|------|------|------|------|------|
| 34440 | 0 | 519518 | KAKVDSLKKAIAAITAV                     | 2.84 | 0.01 | 2.24 | 0.44 | 1.41 | 1.28 |
| 34441 | 0 | 168942 | KALDYEQLQSVKLSIAVK<br>NKAEFHQSVISRYRV | 3.45 | 0.01 | 0.78 | 0.44 | 1.13 | 0.28 |
| 34442 | 0 | 168942 | KALDYEQLQSVKLSIAVK<br>NKAEFHQSVISRYRV | 3.45 | 0.01 | 0.78 | 0.44 | 1.13 | 1.48 |
| 34443 | 0 | 168942 | KALDYEQLQSVKLSIAVK<br>NKAEFHQSVISRYRV | 3.45 | 0.01 | 0.78 | 0.44 | 1.13 | 0.28 |
| 34444 | 0 | 29852  | KALENKKKQLSAGGKNL<br>S                | 2.89 | 0.01 | 2.96 | 1.20 | 0.22 | 0.28 |
| 34445 | 0 | 29852  | KALENKKKQLSAGGKNL<br>S                | 2.89 | 0.01 | 2.96 | 1.20 | 0.22 | 2.02 |
| 34446 | 0 | 29852  | KALENKKKQLSAGGKNL<br>S                | 2.89 | 0.01 | 2.96 | 0.44 | 0.85 | 0.28 |
| 34447 | 0 | 29852  | KALENKKKQLSAGGKNL<br>S                | 2.89 | 0.01 | 2.96 | 2.74 | 0.22 | 0.28 |
| 34448 | 0 | 29852  | KALENKKKQLSAGGKNL<br>S                | 2.89 | 0.01 | 2.96 | 3.67 | 0.85 | 0.28 |
| 34449 | 0 | 29852  | KALENKKKQLSAGGKNL<br>S                | 2.89 | 0.01 | 2.96 | 0.44 | 0.85 | 0.28 |
| 34450 | 0 | 29855  | KALGLLQTA                             | 2.24 | 0.01 | 2.41 | 0.44 | 0.85 | 0.28 |
| 34451 | 0 | 29861  | KALKALPMHI                            | 2.34 | 0.01 | 1.60 | 0.44 | 1.23 | 0.85 |
| 34452 | 0 | 29861  | KALKALPMHI                            | 2.34 | 0.01 | 1.60 | 0.44 | 1.23 | 0.85 |
| 34453 | 0 | 98839  | KALLYR                                | 1.89 | 0.01 | 2.14 | 0.44 | 0.85 | 0.28 |
| 34454 | 0 | 98840  | KALPMHIRLS                            | 2.29 | 0.01 | 1.60 | 0.44 | 1.23 | 0.85 |
| 34455 | 0 | 98840  | KALPMHIRLS                            | 2.29 | 0.01 | 1.60 | 0.44 | 1.23 | 0.85 |
| 34456 | 0 | 29868  | KALPMHIRLSFN                          | 2.43 | 0.01 | 1.60 | 0.44 | 1.23 | 0.85 |
| 34457 | 0 | 96438  | KALPMHIRLSFNPTQ                       | 2.62 | 0.01 | 1.60 | 0.44 | 1.23 | 0.28 |
| 34458 | 0 | 29871  | KALPVVLENARILKNCVD<br>AKMTEEDKE       | 3.25 | 0.01 | 3.08 | 0.44 | 1.23 | 0.28 |
| 34459 | 0 | 29871  | KALPVVLENARILKNCVD<br>AKMTEEDKE       | 3.25 | 0.01 | 3.08 | 0.44 | 1.23 | 0.28 |
| 34460 | 0 | 29871  | KALPVVLENARILKNCVD<br>AKMTEEDKE       | 3.25 | 0.01 | 3.08 | 2.79 | 0.22 | 0.28 |
| 34461 | 0 | 29871  | KALPVVLENARILKNCVD<br>AKMTEEDKE       | 3.25 | 0.01 | 3.08 | 2.79 | 2.60 | 1.75 |
| 34462 | 0 | 192973 | KALRAWFNAGRSELA<br>VS                 | 2.85 | 4.93 | 2.84 | 0.44 | 1.74 | 0.28 |
| 34463 | 0 | 126374 | KALRDGDWFWWENSH<br>VFTD               | 2.85 | 0.01 | 0.78 | 1.20 | 0.22 | 0.28 |
| 34464 | 0 | 126374 | KALRDGDWFWWENSH<br>VFTD               | 2.85 | 0.01 | 0.78 | 1.20 | 0.22 | 0.28 |
| 34465 | 0 | 29875  | KALREN                                | 1.99 | 0.01 | 3.70 | 0.68 | 0.22 | 0.85 |
| 34466 | 0 | 29875  | KALREN                                | 1.99 | 0.01 | 3.75 | 0.68 | 0.22 | 0.85 |

|       |   |        |                            |      |      |      |      |      |      |
|-------|---|--------|----------------------------|------|------|------|------|------|------|
| 34467 | 0 | 29875  | KALRENP                    | 1.99 | 0.01 | 3.70 | 1.81 | 0.22 | 0.85 |
| 34468 | 0 | 29875  | KALRENP                    | 1.99 | 0.01 | 3.75 | 1.81 | 0.22 | 0.85 |
| 34469 | 0 | 29875  | KALRENP                    | 1.99 | 0.01 | 3.70 | 1.81 | 0.22 | 0.85 |
| 34470 | 0 | 29875  | KALRENP                    | 1.99 | 0.01 | 3.75 | 1.81 | 0.22 | 0.85 |
| 34471 | 0 | 104000 | KALSSPY                    | 2.01 | 0.01 | 0.90 | 1.15 | 0.22 | 1.39 |
| 34472 | 0 | 117315 | KALSVETEKLLKYLEAV          | 2.84 | 0.01 | 0.78 | 0.44 | 1.13 | 1.27 |
| 34473 | 0 | 117315 | KALSVETEKLLKYLEAV          | 2.84 | 0.01 | 0.78 | 0.44 | 1.13 | 0.28 |
| 34474 | 0 | 117315 | KALSVETEKLLKYLEAV          | 2.84 | 0.01 | 0.78 | 0.44 | 1.13 | 0.28 |
| 34475 | 0 | 117315 | KALSVETEKLLKYLEAV          | 2.84 | 0.01 | 0.78 | 0.44 | 1.41 | 0.28 |
| 34476 | 0 | 117315 | KALSVETEKLLKYLEAV          | 2.84 | 0.01 | 0.78 | 0.44 | 1.13 | 1.57 |
| 34477 | 0 | 117315 | KALSVETEKLLKYLEAV          | 2.84 | 0.01 | 0.78 | 0.44 | 1.41 | 1.57 |
| 34478 | 0 | 117315 | KALSVETEKLLKYLEAV          | 2.84 | 0.01 | 0.78 | 0.44 | 1.13 | 0.28 |
| 34479 | 0 | 117537 | KALSVETEKLLKYLEAVEK<br>V   | 3.00 | 0.01 | 0.78 | 0.44 | 1.13 | 0.28 |
| 34480 | 0 | 117537 | KALSVETEKLLKYLEAVEK<br>V   | 3.00 | 0.01 | 0.78 | 0.44 | 1.13 | 0.28 |
| 34481 | 0 | 29879  | KALTGLSTGTSQNTRISL<br>RP   | 2.96 | 0.01 | 2.75 | 0.44 | 0.85 | 0.85 |
| 34482 | 0 | 519527 | KALTSQIVARNEKLK            | 2.67 | 0.01 | 2.24 | 0.44 | 1.41 | 1.28 |
| 34483 | 0 | 29883  | KALYMLSTRG                 | 2.29 | 3.85 | 2.56 | 0.44 | 0.85 | 0.28 |
| 34484 | 0 | 29891  | KAMDIEYNDFNNFTV<br>SFWLRVP | 3.02 | 0.01 | 2.95 | 0.44 | 0.22 | 0.28 |
| 34485 | 0 | 171643 | KAMLEVHKTFLGNLL            | 2.65 | 0.01 | 0.78 | 0.44 | 1.13 | 0.28 |
| 34486 | 0 | 103301 | KAMLFDGRSGEPFPY            | 2.64 | 0.01 | 2.04 | 0.44 | 0.85 | 1.28 |
| 34487 | 0 | 99364  | KAMVIVVVNKGTTGNL           | 2.69 | 0.01 | 2.16 | 0.44 | 1.23 | 1.48 |
| 34488 | 0 | 98841  | KAMVIVVVNKGTTGNLEL<br>VAV  | 2.97 | 0.01 | 2.16 | 0.44 | 2.39 | 0.85 |
| 34489 | 0 | 98841  | KAMVIVVVNKGTTGNLEL<br>VAV  | 2.97 | 0.01 | 2.16 | 0.44 | 2.39 | 0.85 |
| 34490 | 0 | 98841  | KAMVIVVVNKGTTGNLEL<br>VAV  | 2.97 | 0.01 | 2.16 | 0.44 | 2.39 | 0.28 |
| 34491 | 0 | 29897  | KANADAKAAYEAAVAA<br>NNA    | 2.96 | 0.01 | 2.39 | 0.44 | 1.74 | 0.28 |
| 34492 | 0 | 29897  | KANADAKAAYEAAVAA<br>NNA    | 2.96 | 0.01 | 2.39 | 2.98 | 0.22 | 0.28 |
| 34493 | 0 | 29899  | KANGNGSGDNGDTTW            | 2.71 | 0.01 | 3.03 | 1.12 | 0.22 | 0.28 |
| 34494 | 0 | 29899  | KANGNGSGDNGDTTW            | 2.71 | 0.01 | 3.03 | 1.12 | 0.22 | 0.28 |
| 34495 | 0 | 29899  | KANGNGSGDNGDTTW            | 2.71 | 0.01 | 3.03 | 1.12 | 0.22 | 1.34 |
| 34496 | 0 | 29899  | KANGNGSGDNGDTTW            | 2.71 | 0.01 | 3.03 | 0.44 | 0.85 | 0.28 |
| 34497 | 0 | 519530 | KANLVAQKEAAEKAA            | 2.72 | 0.01 | 2.24 | 0.44 | 1.41 | 1.28 |



|       |   |        |                            |      |      |      |      |      |      |
|-------|---|--------|----------------------------|------|------|------|------|------|------|
| 34498 | 0 | 29907  | KANSSYSGNYPYSILFQKF        | 2.91 | 0.01 | 3.59 | 1.12 | 0.22 | 0.28 |
| 34499 | 0 | 316381 | KAPAAPAAPAAAAEA            | 2.74 | 0.01 | 1.61 | 0.44 | 0.85 | 1.28 |
| 34500 | 0 | 165613 | KAPAFDL                    | 2.02 | 0.01 | 0.90 | 0.44 | 1.23 | 1.39 |
| 34501 | 0 | 165614 | KAPAFNL                    | 2.02 | 0.01 | 0.90 | 0.44 | 1.23 | 1.39 |
| 34502 | 0 | 316384 | KAPAPKAAAPAPKAA            | 2.73 | 0.01 | 1.61 | 0.44 | 0.85 | 1.28 |
| 34503 | 0 | 179061 | KAPDTGGKTEVPVSY            | 2.68 | 0.01 | 0.90 | 0.44 | 1.59 | 0.28 |
| 34504 | 0 | 179061 | KAPDTGGKTEVPVSY            | 2.68 | 0.01 | 0.90 | 0.44 | 0.85 | 0.28 |
| 34505 | 0 | 118443 | KAPGFGDNRKNQL              | 2.54 | 0.01 | 0.78 | 0.44 | 1.74 | 0.85 |
| 34506 | 0 | 118443 | KAPGFGDNRKNQL              | 2.54 | 0.01 | 0.78 | 0.44 | 1.59 | 0.85 |
| 34507 | 0 | 29910  | KAPGFGDRRKAMLQD<br>MAILTGA | 3.04 | 0.01 | 2.59 | 1.15 | 0.22 | 0.85 |
| 34508 | 0 | 29910  | KAPGFGDRRKAMLQD<br>MAILTGA | 3.04 | 0.01 | 2.59 | 1.15 | 0.22 | 0.28 |
| 34509 | 0 | 121449 | KAPQWPPY                   | 2.13 | 0.01 | 0.78 | 0.68 | 0.22 | 0.28 |
| 34510 | 0 | 29914  | KAPSGASGVKRSHRRW<br>RPGT   | 2.98 | 0.01 | 2.78 | 2.49 | 0.85 | 0.28 |
| 34511 | 0 | 29915  | KAPTEAAKPA                 | 2.37 | 3.85 | 3.55 | 1.12 | 0.22 | 0.85 |
| 34512 | 0 | 114866 | KAQHGRP                    | 1.99 | 0.01 | 2.73 | 1.15 | 0.22 | 0.28 |
| 34513 | 0 | 114866 | KAQHGRP                    | 1.99 | 0.01 | 2.73 | 1.15 | 0.22 | 0.28 |
| 34514 | 0 | 114866 | KAQHGRP                    | 1.99 | 0.01 | 2.73 | 1.15 | 0.22 | 0.28 |
| 34515 | 0 | 114866 | KAQHGRP                    | 1.99 | 0.01 | 2.73 | 1.15 | 0.22 | 0.28 |
| 34516 | 0 | 114866 | KAQHGRP                    | 1.99 | 0.01 | 2.73 | 1.15 | 0.22 | 0.28 |
| 34517 | 0 | 114866 | KAQHGRP                    | 1.99 | 0.01 | 2.73 | 1.15 | 0.22 | 0.28 |
| 34518 | 0 | 114866 | KAQHGRP                    | 1.99 | 0.01 | 2.73 | 1.15 | 0.22 | 0.28 |
| 34519 | 0 | 142428 | KAQKEATAAKLKA              | 2.61 | 0.01 | 2.59 | 0.44 | 0.85 | 0.85 |
| 34520 | 0 | 239838 | KAQRSALLRLFCFVCY           | 2.75 | 0.01 | 2.70 | 0.68 | 0.22 | 0.28 |
| 34521 | 0 | 239838 | KAQRSALLRLFCFVCY           | 2.75 | 0.01 | 2.70 | 0.68 | 0.22 | 0.28 |
| 34522 | 0 | 239838 | KAQRSALLRLFCFVCY           | 2.75 | 0.01 | 2.70 | 0.68 | 0.22 | 0.28 |
| 34523 | 0 | 239838 | KAQRSALLRLFCFVCY           | 2.75 | 0.01 | 2.70 | 0.68 | 0.22 | 1.48 |
| 34524 | 0 | 239838 | KAQRSALLRLFCFVCY           | 2.75 | 0.01 | 2.70 | 0.68 | 0.22 | 1.48 |
| 34525 | 0 | 239838 | KAQRSALLRLFCFVCY           | 2.75 | 0.01 | 2.70 | 0.68 | 0.22 | 1.48 |
| 34526 | 0 | 239838 | KAQRSALLRLFCFVCY           | 2.75 | 0.01 | 2.70 | 0.68 | 0.22 | 1.48 |
| 34527 | 0 | 239838 | KAQRSALLRLFCFVCY           | 2.75 | 0.01 | 2.70 | 0.68 | 0.22 | 1.48 |
| 34528 | 0 | 239838 | KAQRSALLRLFCFVCY           | 2.75 | 0.01 | 2.70 | 0.68 | 0.22 | 1.48 |
| 34529 | 0 | 239838 | KAQRSALLRLFCFVCY           | 2.75 | 0.01 | 2.70 | 0.68 | 0.22 | 1.48 |
| 34530 | 0 | 239838 | KAQRSALLRLFCFVCY           | 2.75 | 0.01 | 2.70 | 0.68 | 0.22 | 1.48 |
| 34531 | 0 | 239838 | KAQRSALLRLFCFVCY           | 2.75 | 0.01 | 2.70 | 0.68 | 0.22 | 1.48 |
| 34532 | 0 | 239838 | KAQRSALLRLFCFVCY           | 2.75 | 0.01 | 2.70 | 0.68 | 0.22 | 1.48 |
| 34533 | 0 | 239838 | KAQRSALLRLFCFVCY           | 2.75 | 0.01 | 2.70 | 0.68 | 0.22 | 1.48 |
| 34534 | 0 | 239838 | KAQRSALLRLFCFVCY           | 2.75 | 0.01 | 2.70 | 0.68 | 0.22 | 1.48 |
| 34535 | 0 | 239838 | KAQRSALLRLFCFVCY           | 2.75 | 0.01 | 2.70 | 0.68 | 0.22 | 1.48 |
| 34536 | 0 | 239838 | KAQRSALLRLFCFVCY           | 2.75 | 0.01 | 2.70 | 0.68 | 0.22 | 1.48 |
| 34537 | 0 | 239838 | KAQRSALLRLFCFVCY           | 2.75 | 0.01 | 2.70 | 0.68 | 0.22 | 1.48 |
| 34538 | 0 | 239838 | KAQRSALLRLFCFVCY           | 2.75 | 0.01 | 2.70 | 0.68 | 0.22 | 1.48 |

|       |   |        |                             |      |      |      |      |      |      |
|-------|---|--------|-----------------------------|------|------|------|------|------|------|
| 34539 | 0 | 239838 | KAQRSALLRLFCFVCY            | 2.75 | 0.01 | 2.70 | 0.68 | 0.22 | 1.48 |
| 34540 | 0 | 239838 | KAQRSALLRLFCFVCY            | 2.75 | 0.01 | 2.70 | 0.68 | 0.22 | 1.48 |
| 34541 | 0 | 239838 | KAQRSALLRLFCFVCY            | 2.75 | 0.01 | 2.70 | 0.68 | 0.22 | 1.48 |
| 34542 | 0 | 239838 | KAQRSALLRLFCFVCY            | 2.75 | 0.01 | 2.70 | 0.68 | 0.22 | 1.48 |
| 34543 | 0 | 239838 | KAQRSALLRLFCFVCY            | 2.75 | 0.01 | 2.70 | 0.68 | 0.22 | 1.48 |
| 34544 | 0 | 239838 | KAQRSALLRLFCFVCY            | 2.75 | 0.01 | 2.70 | 0.68 | 0.22 | 1.48 |
| 34545 | 0 | 239838 | KAQRSALLRLFCFVCY            | 2.75 | 0.01 | 2.70 | 0.68 | 0.22 | 1.48 |
| 34546 | 0 | 239838 | KAQRSALLRLFCFVCY            | 2.75 | 0.01 | 2.70 | 0.68 | 0.22 | 1.48 |
| 34547 | 0 | 118444 | KAQVAARGRGRGMGR<br>GNIFQKRR | 3.10 | 0.01 | 0.78 | 0.44 | 1.13 | 0.28 |
| 34548 | 0 | 29926  | KAREAFRR                    | 2.13 | 0.01 | 2.40 | 2.43 | 0.22 | 0.28 |
| 34549 | 0 | 117940 | KARIHPFHILIALETYKTG<br>H    | 2.95 | 0.01 | 0.78 | 2.25 | 0.22 | 0.85 |
| 34550 | 0 | 117940 | KARIHPFHILIALETYKTG<br>H    | 2.95 | 0.01 | 0.78 | 2.25 | 0.22 | 0.85 |
| 34551 | 0 | 117940 | KARIHPFHILIALETYKTG<br>H    | 2.95 | 0.01 | 0.78 | 2.25 | 0.22 | 0.85 |
| 34552 | 0 | 117940 | KARIHPFHILIALETYKTG<br>H    | 2.95 | 0.01 | 0.78 | 2.25 | 0.22 | 0.85 |
| 34553 | 0 | 117940 | KARIHPFHILIALETYKTG<br>H    | 2.95 | 0.01 | 0.78 | 2.25 | 0.22 | 0.85 |
| 34554 | 0 | 117940 | KARIHPFHILIALETYKTG<br>H    | 2.95 | 0.01 | 0.78 | 2.25 | 0.22 | 1.27 |
| 34555 | 0 | 117940 | KARIHPFHILIALETYKTG<br>H    | 2.95 | 0.01 | 0.78 | 2.25 | 0.22 | 0.85 |
| 34556 | 0 | 117940 | KARIHPFHILIALETYKTG<br>H    | 2.95 | 0.01 | 0.78 | 2.25 | 0.22 | 1.27 |
| 34557 | 0 | 117940 | KARIHPFHILIALETYKTG<br>H    | 2.95 | 0.01 | 0.78 | 2.25 | 0.22 | 1.48 |
| 34558 | 0 | 117940 | KARIHPFHILIALETYKTG<br>H    | 2.95 | 0.01 | 0.78 | 2.25 | 0.22 | 1.27 |
| 34559 | 0 | 117940 | KARIHPFHILIALETYKTG<br>H    | 2.95 | 0.01 | 0.78 | 2.25 | 0.22 | 1.27 |
| 34560 | 0 | 117940 | KARIHPFHILIALETYKTG<br>H    | 2.95 | 0.01 | 0.78 | 2.25 | 0.22 | 1.27 |
| 34561 | 0 | 137211 | KARIHPFHVLIALETYRA<br>GH    | 2.93 | 0.01 | 1.75 | 2.25 | 0.22 | 0.85 |
| 34562 | 0 | 137211 | KARIHPFHVLIALETYRA<br>GH    | 2.93 | 0.01 | 1.75 | 2.25 | 0.22 | 1.27 |
| 34563 | 0 | 137211 | KARIHPFHVLIALETYRA<br>GH    | 2.93 | 0.01 | 1.75 | 2.25 | 0.22 | 1.27 |
| 34564 | 0 | 137211 | KARIHPFHVLIALETYRA<br>GH    | 2.93 | 0.01 | 1.75 | 2.25 | 0.22 | 1.27 |
| 34565 | 0 | 137211 | KARIHPFHVLIALETYRA<br>GH    | 2.93 | 0.01 | 1.75 | 2.25 | 0.22 | 1.27 |
| 34566 | 0 | 137211 | KARIHPFHVLIALETYRA<br>GH    | 2.93 | 0.01 | 1.75 | 2.25 | 0.22 | 1.27 |

|       |   |        |                                    |      |      |      |      |      |      |
|-------|---|--------|------------------------------------|------|------|------|------|------|------|
| 34567 | 0 | 106555 | KARLERPQIRVP<br>KARLHLQGRSNAWRPQ   | 2.48 | 0.01 | 3.08 | 0.44 | 1.23 | 0.85 |
| 34568 | 0 | 130914 | VNNPKEWLQVDFQKT<br>MKVTGV          | 3.53 | 0.01 | 0.78 | 1.15 | 0.22 | 1.34 |
| 34569 | 0 | 29931  | KARQPEGRAWAQ                       | 2.49 | 0.01 | 1.96 | 0.44 | 0.85 | 0.28 |
| 34570 | 0 | 29931  | KARQPEGRAWAQ                       | 2.49 | 0.01 | 1.96 | 0.44 | 0.85 | 0.28 |
| 34571 | 0 | 29931  | KARQPEGRAWAQ                       | 2.49 | 0.01 | 1.96 | 0.44 | 0.85 | 0.28 |
| 34572 | 0 | 29936  | KARRPEGRTWAQ                       | 2.47 | 0.01 | 2.68 | 0.44 | 0.85 | 0.28 |
| 34573 | 0 | 29936  | KARRPEGRTWAQ                       | 2.47 | 0.01 | 2.68 | 2.74 | 0.22 | 0.28 |
| 34574 | 0 | 29936  | KARRPEGRTWAQ                       | 2.47 | 0.01 | 2.41 | 0.44 | 0.85 | 0.28 |
| 34575 | 0 | 29936  | KARRPEGRTWAQ                       | 2.47 | 0.01 | 2.41 | 0.44 | 0.85 | 0.28 |
| 34576 | 0 | 29936  | KARRPEGRTWAQ                       | 2.47 | 0.01 | 2.41 | 0.44 | 0.85 | 0.28 |
| 34577 | 0 | 29937  | KARRPEGRTWAQPGY                    | 2.68 | 0.01 | 2.41 | 0.44 | 1.59 | 0.28 |
| 34578 | 0 | 29938  | KARRSEGRSWAQ                       | 2.49 | 0.01 | 2.59 | 0.44 | 0.85 | 0.28 |
| 34579 | 0 | 29938  | KARRSEGRSWAQ                       | 2.49 | 0.01 | 2.59 | 0.44 | 0.85 | 0.28 |
| 34580 | 0 | 29938  | KARRSEGRSWAQ                       | 2.49 | 0.01 | 2.59 | 0.44 | 0.85 | 0.28 |
| 34581 | 0 | 29938  | KARRSEGRSWAQ                       | 2.49 | 0.01 | 2.59 | 0.44 | 1.41 | 0.28 |
| 34582 | 0 | 129036 | KARVDELERIRRSILP                   | 2.74 | 0.01 | 0.78 | 0.44 | 1.13 | 0.85 |
| 34583 | 0 | 29939  | KASAAC                             | 1.90 | 0.01 | 1.96 | 0.44 | 0.85 | 0.28 |
| 34584 | 0 | 84184  | KASAEG                             | 1.90 | 0.01 | 3.16 | 0.68 | 0.22 | 0.28 |
| 34585 | 0 | 84184  | KASAEG                             | 1.90 | 0.01 | 2.40 | 2.52 | 0.22 | 0.28 |
| 34586 | 0 | 29940  | KASAEYKILEKMPQTTIQ<br>VDGSEKKIVSIK | 3.34 | 0.01 | 3.21 | 3.14 | 0.22 | 0.28 |
| 34587 | 0 | 29940  | KASAEYKILEKMPQTTIQ<br>VDGSEKKIVSIK | 3.34 | 0.01 | 3.21 | 3.14 | 0.22 | 0.28 |
| 34588 | 0 | 29940  | KASAEYKILEKMPQTTIQ<br>VDGSEKKIVSIK | 3.34 | 0.01 | 3.21 | 3.14 | 0.22 | 0.28 |
| 34589 | 0 | 78694  | KASAMYSKGKPLNDLR<br>VKI            | 2.88 | 0.01 | 3.11 | 1.15 | 0.22 | 0.28 |
| 34590 | 0 | 78694  | KASAMYSKGKPLNDLR<br>VKI            | 2.88 | 0.01 | 3.11 | 1.12 | 0.22 | 0.28 |
| 34591 | 0 | 78694  | KASAMYSKGKPLNDLR<br>VKI            | 2.88 | 0.01 | 3.11 | 1.12 | 0.22 | 0.28 |
| 34592 | 0 | 114867 | KASDDGEYRCFFRQDEN<br>YEEAIVHL      | 3.10 | 0.01 | 1.60 | 0.44 | 1.13 | 0.28 |
| 34593 | 0 | 114867 | KASDDGEYRCFFRQDEN<br>YEEAIVHL      | 3.10 | 0.01 | 1.60 | 0.44 | 1.41 | 0.28 |
| 34594 | 0 | 114867 | KASDDGEYRCFFRQDEN<br>YEEAIVHL      | 3.10 | 0.01 | 1.60 | 0.44 | 1.59 | 0.28 |
| 34595 | 0 | 225352 | KASEFTGLMDNMRYLY<br>DD             | 2.80 | 0.01 | 2.61 | 0.68 | 0.22 | 0.28 |
| 34596 | 0 | 225352 | KASEFTGLMDNMRYLY<br>DD             | 2.80 | 0.01 | 2.61 | 0.68 | 2.25 | 1.75 |
| 34597 | 0 | 225352 | KASEFTGLMDNMRYLY<br>DD             | 2.80 | 0.01 | 2.61 | 0.68 | 0.22 | 0.28 |

|       |   |        |                          |      |      |      |      |      |      |
|-------|---|--------|--------------------------|------|------|------|------|------|------|
| 34598 | 0 | 225352 | KASEFTGLMDNMRYLY<br>DD   | 2.80 | 0.01 | 2.61 | 0.68 | 0.22 | 1.34 |
| 34599 | 0 | 29943  | KASFDVTGAFKAPRYKS        | 2.80 | 0.01 | 0.90 | 2.63 | 0.22 | 1.48 |
| 34600 | 0 | 29944  | KASFHVTGAFMSDRWK<br>S    | 2.78 | 0.01 | 0.90 | 2.63 | 0.22 | 1.48 |
| 34601 | 0 | 161355 | KASFHVTGAFMSDRWK<br>SH   | 2.84 | 0.01 | 0.90 | 2.74 | 0.22 | 1.48 |
| 34602 | 0 | 120656 | KASGLVPEHA               | 2.29 | 0.01 | 2.18 | 2.16 | 0.22 | 0.28 |
| 34603 | 0 | 120656 | KASGLVPEHA               | 2.29 | 0.01 | 2.18 | 2.16 | 0.22 | 0.28 |
| 34604 | 0 | 144699 | KASITEIKADKT             | 2.52 | 0.01 | 4.33 | 0.68 | 0.22 | 0.28 |
| 34605 | 0 | 144699 | KASITEIKADKT             | 2.52 | 0.01 | 4.33 | 0.68 | 0.22 | 0.28 |
| 34606 | 0 | 144699 | KASITEIKADKT             | 2.52 | 0.01 | 4.33 | 0.68 | 0.22 | 1.75 |
| 34607 | 0 | 29949  | KASPSVVKTSTPSGT          | 2.73 | 0.01 | 1.66 | 1.15 | 0.22 | 0.28 |
| 34608 | 0 | 136409 | KASTVTGFGRG              | 2.49 | 0.01 | 3.48 | 3.70 | 0.85 | 1.34 |
| 34609 | 0 | 29957  | KATAACRAAKLQDCTM<br>LVN  | 2.90 | 0.01 | 1.72 | 0.44 | 0.85 | 0.28 |
| 34610 | 0 | 142806 | KATALYDPYVNYSS           | 2.66 | 0.01 | 3.06 | 2.13 | 0.22 | 0.28 |
| 34611 | 0 | 97409  | KATALVSEG                | 2.21 | 0.01 | 3.13 | 1.12 | 0.22 | 0.28 |
| 34612 | 0 | 151659 | KATDLLDDSLVSLFGNR<br>RL  | 2.94 | 4.03 | 1.75 | 2.25 | 0.22 | 0.85 |
| 34613 | 0 | 316580 | KATGSSAGEDGESSG          | 2.72 | 0.01 | 1.61 | 0.44 | 0.85 | 1.28 |
| 34614 | 0 | 136067 | KATI                     | 1.57 | 0.01 | 0.78 | 1.12 | 0.22 | 0.28 |
| 34615 | 0 | 93058  | KATKDEKIEE               | 2.34 | 0.01 | 2.67 | 2.00 | 0.22 | 0.28 |
| 34616 | 0 | 93058  | KATKDEKIEE               | 2.34 | 0.01 | 2.67 | 2.00 | 0.22 | 0.28 |
| 34617 | 0 | 93058  | KATKDEKIEE               | 2.34 | 0.01 | 2.67 | 2.00 | 0.22 | 0.28 |
| 34618 | 0 | 131504 | KATLVCLISDFYPGAV         | 2.69 | 0.01 | 0.78 | 0.44 | 1.41 | 1.27 |
| 34619 | 0 | 131504 | KATLVCLISDFYPGAV         | 2.69 | 0.01 | 0.78 | 0.44 | 1.41 | 0.28 |
| 34620 | 0 | 131504 | KATLVCLISDFYPGAV         | 2.69 | 0.01 | 0.78 | 0.44 | 1.13 | 0.28 |
| 34621 | 0 | 131504 | KATLVCLISDFYPGAV         | 2.69 | 0.01 | 0.78 | 0.44 | 1.13 | 0.28 |
| 34622 | 0 | 136410 | KATPMLKMRTSFHGCIK        | 2.76 | 0.01 | 1.75 | 2.84 | 1.13 | 0.28 |
| 34623 | 0 | 110911 | KATPNDGY                 | 2.10 | 0.01 | 3.15 | 1.12 | 0.22 | 1.27 |
| 34624 | 0 | 29961  | KATPPAAPATKWKA<br>EYCGYY | 3.07 | 0.01 | 3.48 | 1.12 | 0.22 | 0.28 |
| 34625 | 0 | 29962  | KATPPAAPATKWSKEYC<br>GY  | 2.96 | 0.01 | 2.21 | 1.20 | 0.22 | 0.28 |
| 34626 | 0 | 29962  | KATPPAAPATKWSKEYC<br>GY  | 2.96 | 0.01 | 2.21 | 1.20 | 0.22 | 0.28 |
| 34627 | 0 | 29962  | KATPPAAPATKWSKEYC<br>GY  | 2.96 | 0.01 | 2.21 | 1.20 | 0.22 | 0.28 |
| 34628 | 0 | 316612 | KATTATTGSDSSTA           | 2.73 | 0.01 | 1.61 | 0.44 | 0.85 | 1.28 |
| 34629 | 0 | 316613 | KATTATTGESDGSTA          | 2.73 | 0.01 | 1.61 | 0.44 | 0.85 | 1.28 |
| 34630 | 0 | 109386 | KATTVR                   | 1.89 | 0.01 | 3.42 | 0.68 | 0.22 | 1.48 |
| 34631 | 0 | 109386 | KATTVR                   | 1.89 | 0.01 | 3.42 | 0.68 | 0.22 | 1.48 |
| 34632 | 0 | 109386 | KATTVR                   | 1.89 | 0.01 | 3.42 | 0.68 | 0.22 | 0.28 |
| 34633 | 0 | 136068 | KATV                     | 1.57 | 0.01 | 0.78 | 1.12 | 0.22 | 0.28 |

|       |   |        |                          |      |      |      |      |      |      |
|-------|---|--------|--------------------------|------|------|------|------|------|------|
| 34634 | 0 | 98149  | KATYEAAVAA               | 2.33 | 0.01 | 2.39 | 0.68 | 0.22 | 0.28 |
| 34635 | 0 | 98149  | KATYEAAVAA               | 2.33 | 0.01 | 2.39 | 0.68 | 0.22 | 0.28 |
| 34636 | 0 | 29965  | KATYEAAVAANNAKNA<br>ALT  | 2.94 | 0.01 | 2.39 | 0.44 | 1.74 | 0.28 |
| 34637 | 0 | 29965  | KATYEAAVAANNAKNA<br>ALT  | 2.94 | 0.01 | 2.39 | 0.44 | 1.74 | 0.28 |
| 34638 | 0 | 29965  | KATYEAAVAANNAKNA<br>ALT  | 2.94 | 0.01 | 2.39 | 0.44 | 1.74 | 0.28 |
| 34639 | 0 | 29965  | KATYEAAVAANNAKNA<br>ALT  | 2.94 | 0.01 | 2.39 | 2.98 | 0.22 | 0.28 |
| 34640 | 0 | 29965  | KATYEAAVAANNAKNA<br>ALT  | 2.94 | 0.01 | 2.39 | 2.98 | 0.22 | 0.28 |
| 34641 | 0 | 29965  | KATYEAAVAANNAKNA<br>ALT  | 2.94 | 0.01 | 2.39 | 2.98 | 0.22 | 0.28 |
| 34642 | 0 | 29965  | KATYEAAVAANNAKNA<br>ALT  | 2.94 | 0.01 | 2.39 | 0.44 | 1.59 | 0.28 |
| 34643 | 0 | 228366 | KAVAASKERSGVSLAA         | 2.77 | 2.84 | 0.78 | 0.44 | 1.13 | 1.27 |
| 34644 | 0 | 228366 | KAVAASKERSGVSLAA         | 2.77 | 2.84 | 0.78 | 0.44 | 1.13 | 1.27 |
| 34645 | 0 | 316645 | KAVEAEKRKAAEATK          | 2.74 | 0.01 | 1.61 | 0.44 | 0.85 | 1.28 |
| 34646 | 0 | 29972  | KAVEKVTETLLKGAK          | 2.73 | 0.01 | 2.04 | 2.97 | 0.22 | 0.28 |
| 34647 | 0 | 316660 | KAVETEKQKAAEATK          | 2.74 | 0.01 | 1.61 | 0.44 | 0.85 | 1.28 |
| 34648 | 0 | 316661 | KAVETEKQRAAEATK          | 2.73 | 0.01 | 1.61 | 0.44 | 0.85 | 1.28 |
| 34649 | 0 | 316662 | KAVETEKRKAAEATK          | 2.74 | 0.01 | 1.61 | 0.44 | 0.85 | 1.28 |
| 34650 | 0 | 423375 | KAVLGLNAACAVYDH          | 2.68 | 0.01 | 2.51 | 0.44 | 2.35 | 1.28 |
| 34651 | 0 | 29981  | KAVNHI                   | 1.88 | 0.01 | 1.96 | 0.44 | 0.85 | 0.28 |
| 34652 | 0 | 123342 | KAVQGGGA                 | 2.14 | 0.01 | 0.78 | 1.20 | 0.22 | 0.28 |
| 34653 | 0 | 193484 | KAVRADADV                | 2.26 | 0.01 | 2.51 | 0.44 | 2.39 | 0.28 |
| 34654 | 0 | 193484 | KAVRADADV                | 2.26 | 0.01 | 2.51 | 0.44 | 2.39 | 0.28 |
| 34655 | 0 | 124341 | KAVRKERSKESDDNYDK<br>TED | 2.98 | 0.01 | 0.78 | 0.44 | 1.13 | 0.28 |
| 34656 | 0 | 29985  | KAVSAAGVHFKAGGPI         | 2.76 | 0.01 | 3.32 | 2.49 | 0.22 | 0.28 |
| 34657 | 0 | 29985  | KAVSAAGVHFKAGGPI         | 2.76 | 0.01 | 3.32 | 2.49 | 0.22 | 0.28 |
| 34658 | 0 | 29985  | KAVSAAGVHFKAGGPI         | 2.76 | 0.01 | 3.32 | 2.49 | 0.22 | 0.28 |
| 34659 | 0 | 29985  | KAVSAAGVHFKAGGPI         | 2.76 | 0.01 | 3.32 | 2.49 | 0.22 | 0.28 |
| 34660 | 0 | 29985  | KAVSAAGVHFKAGGPI         | 2.76 | 0.01 | 3.32 | 2.49 | 0.22 | 1.75 |
| 34661 | 0 | 115148 | KAVSEKKAKGLGESRKD<br>KK  | 2.93 | 0.01 | 0.78 | 0.44 | 1.13 | 0.28 |
| 34662 | 0 | 115148 | KAVSEKKAKGLGESRKD<br>KK  | 2.93 | 0.01 | 0.78 | 0.44 | 1.41 | 0.28 |
| 34663 | 0 | 237782 | KAVVPVSSIMPF             | 2.48 | 0.01 | 0.90 | 1.20 | 0.22 | 1.39 |

|       |   |        |                                    |      |      |      |      |      |      |
|-------|---|--------|------------------------------------|------|------|------|------|------|------|
| 34664 | 0 | 30001  | KAVYNFATC                          | 2.21 | 0.01 | 3.70 | 1.81 | 0.22 | 1.34 |
| 34665 | 0 | 30001  | KAVYNFATC                          | 2.21 | 0.01 | 3.70 | 1.81 | 0.22 | 1.75 |
| 34666 | 0 | 30015  | KAVYNFATM                          | 2.21 | 0.01 | 3.70 | 1.81 | 0.22 | 2.12 |
| 34667 | 0 | 164266 | KAWGKSILFA                         | 2.32 | 0.01 | 4.03 | 0.68 | 0.22 | 0.85 |
| 34668 | 0 | 164266 | KAWGKSILFA                         | 2.32 | 0.01 | 4.03 | 0.68 | 0.22 | 2.12 |
| 34669 | 0 | 164266 | KAWGKSILFA                         | 2.32 | 0.01 | 4.03 | 0.68 | 0.22 | 0.85 |
| 34670 | 0 | 164266 | KAWGKSILFA                         | 2.32 | 0.01 | 4.03 | 0.68 | 0.22 | 1.75 |
| 34671 | 0 | 30024  | KAWIIPA                            | 2.03 | 0.01 | 0.90 | 0.44 | 0.85 | 1.39 |
| 34672 | 0 | 30025  | KAWLVH                             | 1.88 | 0.01 | 2.40 | 0.44 | 0.85 | 0.28 |
| 34673 | 0 | 423692 | KAWQIDTWDHLE                       | 2.45 | 0.01 | 0.90 | 0.68 | 0.22 | 1.39 |
| 34674 | 0 | 142429 | KAYAVEAHLAKTKN                     | 2.64 | 0.01 | 2.59 | 0.44 | 0.85 | 0.85 |
| 34675 | 0 | 123343 | KAYMESEKF                          | 2.24 | 0.01 | 2.28 | 2.00 | 0.22 | 0.28 |
| 34676 | 0 | 123344 | KAYMESKRF                          | 2.22 | 0.01 | 2.28 | 2.00 | 0.22 | 0.28 |
| 34677 | 0 | 30035  | KAYPDIMAKFPQFAGKD<br>LDSIKDSAAF    | 3.26 | 0.01 | 3.05 | 0.44 | 1.23 | 1.57 |
| 34678 | 0 | 30036  | KAYSNCYPYDVPDY                     | 2.63 | 0.01 | 3.67 | 1.12 | 0.22 | 0.28 |
| 34679 | 0 | 30036  | KAYSNCYPYDVPDY                     | 2.63 | 0.01 | 3.67 | 1.12 | 0.22 | 0.85 |
| 34680 | 0 | 30036  | KAYSNCYPYDVPDY                     | 2.63 | 0.01 | 3.67 | 1.12 | 0.22 | 1.34 |
| 34681 | 0 | 30036  | KAYSNCYPYDVPDY                     | 2.63 | 0.01 | 3.67 | 1.20 | 0.22 | 0.28 |
| 34682 | 0 | 30036  | KAYSNCYPYDVPDY                     | 2.63 | 0.01 | 3.67 | 1.20 | 0.22 | 0.85 |
| 34683 | 0 | 30036  | KAYSNCYPYDVPDY                     | 2.63 | 0.01 | 3.67 | 1.20 | 0.22 | 1.34 |
| 34684 | 0 | 122426 | KAYTVPSGPYVEPRL                    | 2.66 | 0.01 | 0.90 | 1.15 | 0.22 | 1.39 |
| 34685 | 0 | 30041  | KCAFATTPVCQF                       | 2.48 | 0.01 | 2.56 | 2.69 | 2.26 | 0.85 |
| 34686 | 0 | 124343 | KCCVFSCGKKCLD                      | 2.57 | 0.01 | 0.78 | 0.68 | 0.22 | 0.28 |
| 34687 | 0 | 196573 | KCCYVPL                            | 2.01 | 0.01 | 0.90 | 0.44 | 1.23 | 1.39 |
| 34688 | 0 | 111440 | KCDSTLRLCVQSTHVDIR<br>TL           | 2.96 | 0.01 | 1.86 | 3.22 | 0.22 | 0.28 |
| 34689 | 0 | 111440 | KCDSTLRLCVQSTHVDIR<br>TL           | 2.96 | 0.01 | 1.86 | 3.22 | 0.22 | 0.28 |
| 34690 | 0 | 111440 | KCDSTLRLCVQSTHVDIR<br>TL           | 2.96 | 0.01 | 1.86 | 2.69 | 0.22 | 0.28 |
| 34691 | 0 | 110640 | KCDSTLRLCVQSTHVDIR<br>TLE          | 3.00 | 0.01 | 1.86 | 0.44 | 0.85 | 0.28 |
| 34692 | 0 | 110640 | KCDSTLRLCVQSTHVDIR<br>TLE          | 3.00 | 0.01 | 1.86 | 0.44 | 0.85 | 0.28 |
| 34693 | 0 | 110640 | KCDSTLRLCVQSTHVDIR<br>TLE          | 3.00 | 0.01 | 1.86 | 0.44 | 0.85 | 0.28 |
| 34694 | 0 | 110640 | KCDSTLRLCVQSTHVDIR<br>TLE          | 3.00 | 0.01 | 1.86 | 0.44 | 0.85 | 0.28 |
| 34695 | 0 | 118445 | KCEFQDAYVLLSE                      | 2.50 | 0.01 | 0.78 | 0.44 | 1.74 | 0.85 |
| 34696 | 0 | 30051  | KCETEFK                            | 2.15 | 0.01 | 1.66 | 1.15 | 0.22 | 0.28 |
| 34697 | 0 | 115304 | KCEVFRELKD                         | 2.32 | 0.01 | 1.60 | 0.44 | 1.23 | 0.85 |
| 34698 | 0 | 115304 | KCEVFRELKD                         | 2.32 | 0.01 | 1.60 | 0.44 | 1.23 | 0.85 |
| 34699 | 0 | 30052  | KCEVFRELKDLKGY                     | 2.62 | 0.01 | 1.60 | 0.44 | 1.23 | 1.57 |
| 34700 | 0 | 122427 | KCFTELFVKEPPVLIVTPL<br>EDQQVFVGDRV | 3.35 | 0.01 | 0.78 | 2.04 | 2.60 | 1.75 |

|       |   |        |                                    |      |      |      |      |      |      |
|-------|---|--------|------------------------------------|------|------|------|------|------|------|
| 34701 | 0 | 122427 | KCFTELFVKEPPVLIVTPL<br>EDQQVFVGDRV | 3.35 | 0.01 | 0.78 | 2.04 | 0.22 | 0.28 |
| 34702 | 0 | 122427 | KCFTELFVKEPPVLIVTPL<br>EDQQVFVGDRV | 3.35 | 0.01 | 0.78 | 2.04 | 0.22 | 0.28 |
| 34703 | 0 | 122427 | KCFTELFVKEPPVLIVTPL<br>EDQQVFVGDRV | 3.35 | 0.01 | 0.78 | 2.04 | 0.22 | 0.28 |
| 34704 | 0 | 122427 | KCFTELFVKEPPVLIVTPL<br>EDQQVFVGDRV | 3.35 | 0.01 | 0.78 | 2.04 | 0.22 | 0.28 |
| 34705 | 0 | 181681 | KCGSDKIRDYGIKSA                    | 2.71 | 0.01 | 1.66 | 2.36 | 0.22 | 1.28 |
| 34706 | 0 | 30057  | KCGVNVYPYKISTSTN                   | 2.69 | 0.01 | 3.35 | 0.44 | 1.23 | 0.85 |
| 34707 | 0 | 30062  | KCKNDGWAGYWR                       | 2.48 | 0.01 | 2.69 | 0.68 | 0.22 | 0.28 |
| 34708 | 0 | 30062  | KCKNDGWAGYWR                       | 2.48 | 0.01 | 2.69 | 1.20 | 0.22 | 0.28 |
| 34709 | 0 | 30063  | KCKSDQDPQFIPKGCSK                  | 2.83 | 0.01 | 0.90 | 1.12 | 0.22 | 1.66 |
| 34710 | 0 | 30063  | KCKSDQDPQFIPKGCSK                  | 2.83 | 0.01 | 0.90 | 1.12 | 0.22 | 1.66 |
| 34711 | 0 | 30063  | KCKSDQDPQFIPKGCSK                  | 2.83 | 0.01 | 0.90 | 1.12 | 0.22 | 1.66 |
| 34712 | 0 | 30063  | KCKSDQDPQFIPKGCSK                  | 2.83 | 0.01 | 0.90 | 1.12 | 0.22 | 1.66 |
| 34713 | 0 | 30063  | KCKSDQDPQFIPKGCSK                  | 2.83 | 0.01 | 0.90 | 1.12 | 0.22 | 1.66 |
| 34714 | 0 | 30063  | KCKSDQDPQFIPKGCSK                  | 2.83 | 0.01 | 0.90 | 1.12 | 0.22 | 1.66 |
| 34715 | 0 | 30063  | KCKSDQDPQFIPKGCSK                  | 2.83 | 0.01 | 0.90 | 1.12 | 0.22 | 1.66 |
| 34716 | 0 | 30063  | KCKSDQDPQFIPKGCSK                  | 2.83 | 0.01 | 0.90 | 1.12 | 0.22 | 1.66 |
| 34717 | 0 | 30063  | KCKSDQDPQFIPKGCSK                  | 2.83 | 0.01 | 0.90 | 1.12 | 0.22 | 1.66 |
| 34718 | 0 | 30063  | KCKSDQDPQFIPKGCSK                  | 2.83 | 0.01 | 0.90 | 1.12 | 0.22 | 1.66 |
| 34719 | 0 | 30063  | KCKSDQDPQFIPKGCSK                  | 2.83 | 0.01 | 0.90 | 1.12 | 0.22 | 1.66 |
| 34720 | 0 | 30063  | KCKSDQDPQFIPKGCSK                  | 2.83 | 0.01 | 0.90 | 1.12 | 0.22 | 1.66 |
| 34721 | 0 | 30063  | KCKSDQDPQFIPKGCSK                  | 2.83 | 0.01 | 0.90 | 1.12 | 0.22 | 1.66 |
| 34722 | 0 | 30063  | KCKSDQDPQFIPKGCSK                  | 2.83 | 0.01 | 0.90 | 1.12 | 0.22 | 1.66 |
| 34723 | 0 | 30063  | KCKSDQDPQFIPKGCSK                  | 2.83 | 0.01 | 0.90 | 1.12 | 0.22 | 1.66 |
| 34724 | 0 | 30063  | KCKSDQDPQFIPKGCSK                  | 2.83 | 0.01 | 0.90 | 1.12 | 0.22 | 1.66 |
| 34725 | 0 | 30063  | KCKSDQDPQFIPKGCSK                  | 2.83 | 0.01 | 0.90 | 1.12 | 0.22 | 1.66 |

|       |   |        |                                       |      |      |      |      |      |      |
|-------|---|--------|---------------------------------------|------|------|------|------|------|------|
| 34726 | 0 | 30063  | KCKSDQDPQFIPKGCSK                     | 2.83 | 0.01 | 0.90 | 1.12 | 0.22 | 1.66 |
| 34727 | 0 | 30063  | KCKSDQDPQFIPKGCSK                     | 2.83 | 0.01 | 0.90 | 1.12 | 0.22 | 1.66 |
| 34728 | 0 | 30063  | KCKSDQDPQFIPKGCSK                     | 2.83 | 0.01 | 0.90 | 1.12 | 0.22 | 1.66 |
| 34729 | 0 | 153841 | KCLKFYISKISEYRHY                      | 2.69 | 0.01 | 1.86 | 2.37 | 0.22 | 0.28 |
| 34730 | 0 | 153841 | KCLKFYISKISEYRHY                      | 2.69 | 0.01 | 1.86 | 1.12 | 0.22 | 2.02 |
| 34731 | 0 | 153841 | KCLKFYISKISEYRHY                      | 2.69 | 0.01 | 1.86 | 1.12 | 0.22 | 2.02 |
| 34732 | 0 | 153841 | KCLKFYISKISEYRHY                      | 2.69 | 0.01 | 1.86 | 1.12 | 0.22 | 2.02 |
| 34733 | 0 | 79264  | KCMDAFVIYETNCQ                        | 2.55 | 0.01 | 0.90 | 0.68 | 0.22 | 1.39 |
| 34734 | 0 | 189691 | KCNEKHDEEFCDMLRL                      | 2.75 | 0.01 | 3.47 | 0.44 | 0.85 | 0.28 |
| 34735 | 0 | 79265  | KNSAVVPLGAQCR                         | 2.58 | 0.01 | 0.90 | 0.68 | 0.22 | 1.39 |
| 34736 | 0 | 105893 | KCNTATCATQR                           | 2.43 | 0.01 | 0.78 | 3.14 | 0.22 | 2.56 |
| 34737 | 0 | 105893 | KCNTATCATQR                           | 2.43 | 0.01 | 0.78 | 3.14 | 0.22 | 2.56 |
| 34738 | 0 | 105894 | KCNTATCATQRLANFL                      | 2.77 | 0.01 | 0.78 | 3.14 | 0.22 | 2.56 |
| 34739 | 0 | 241018 | KCPSIPGAVLCV                          | 2.48 | 0.01 | 0.90 | 2.49 | 0.85 | 1.39 |
| 34740 | 0 | 241018 | KCPSIPGAVLCV                          | 2.48 | 0.01 | 0.90 | 2.49 | 0.22 | 0.28 |
| 34741 | 0 | 241018 | KCPSIPGAVLCV                          | 2.48 | 0.01 | 0.90 | 3.15 | 0.22 | 0.28 |
| 34742 | 0 | 97413  | KCQTPMGAINSSMPFH                      | 3.69 | 0.01 | 3.09 | 0.44 | 0.85 | 0.28 |
|       |   |        | NIHPLTIGECKPYVKSNR                    |      |      |      |      |      |      |
|       |   |        | LVLATGLRN                             |      |      |      |      |      |      |
| 34743 | 0 | 97413  | KCQTPMGAINSSMPFH                      | 3.69 | 0.01 | 3.09 | 0.44 | 0.85 | 0.28 |
|       |   |        | NIHPLTIGECKPYVKSNR                    |      |      |      |      |      |      |
|       |   |        | LVLATGLRN                             |      |      |      |      |      |      |
| 34744 | 0 | 97413  | KCQTPMGAINSSMPFH                      | 3.69 | 0.01 | 3.09 | 0.44 | 1.74 | 0.28 |
|       |   |        | NIHPLTIGECKPYVKSNR                    |      |      |      |      |      |      |
|       |   |        | LVLATGLRN                             |      |      |      |      |      |      |
| 34745 | 0 | 118859 | KCRCKPNFFCNSTVCEH<br>CDP              | 2.94 | 0.01 | 0.78 | 1.15 | 0.22 | 1.27 |
| 34746 | 0 | 423376 | KCRITEPITMLGAYS                       | 2.62 | 0.01 | 2.51 | 0.44 | 2.35 | 1.28 |
| 34747 | 0 | 135566 | KCSRLYTACVY                           | 2.39 | 3.85 | 0.78 | 1.12 | 0.22 | 0.28 |
| 34748 | 0 | 135566 | KCSRLYTACVY                           | 2.39 | 3.85 | 0.78 | 1.12 | 0.22 | 0.28 |
| 34749 | 0 | 135566 | KCSRLYTACVY                           | 2.39 | 3.85 | 0.78 | 1.12 | 0.22 | 1.34 |
| 34750 | 0 | 135566 | KCSRLYTACVY                           | 2.39 | 3.85 | 0.78 | 1.12 | 0.22 | 0.28 |
| 34751 | 0 | 30091  | KCTKPEACSGEPVVVHIT<br>DDNEEPIAPYHFDLS | 3.41 | 0.01 | 2.53 | 0.44 | 1.23 | 0.85 |
| 34752 | 0 | 30091  | KCTKPEACSGEPVVVHIT<br>DDNEEPIAPYHFDLS | 3.41 | 0.01 | 2.53 | 0.44 | 1.23 | 0.85 |
| 34753 | 0 | 30092  | KCTNTDRPPFCQ                          | 2.46 | 0.01 | 0.90 | 0.68 | 0.22 | 0.28 |
| 34754 | 0 | 30093  | KCTSDQDEQFIPKGCSK                     | 2.80 | 0.01 | 2.58 | 4.03 | 0.22 | 1.34 |



|       |   |       |                   |      |      |      |      |      |      |
|-------|---|-------|-------------------|------|------|------|------|------|------|
| 34755 | 0 | 30093 | KCTSDQDEQFIPKGCSK | 2.80 | 0.01 | 2.58 | 4.03 | 0.22 | 0.85 |
| 34756 | 0 | 30093 | KCTSDQDEQFIPKGCSK | 2.80 | 0.01 | 2.58 | 4.03 | 0.22 | 0.85 |
| 34757 | 0 | 30093 | KCTSDQDEQFIPKGCSK | 2.80 | 0.01 | 2.58 | 0.68 | 0.22 | 1.27 |
| 34758 | 0 | 30093 | KCTSDQDEQFIPKGCSK | 2.80 | 0.01 | 2.58 | 4.03 | 0.22 | 1.34 |
| 34759 | 0 | 30093 | KCTSDQDEQFIPKGCSK | 2.80 | 0.01 | 2.58 | 0.68 | 0.22 | 1.34 |
| 34760 | 0 | 30093 | KCTSDQDEQFIPKGCSK | 2.80 | 0.01 | 2.58 | 0.68 | 0.22 | 1.34 |
| 34761 | 0 | 30093 | KCTSDQDEQFIPKGCSK | 2.80 | 0.01 | 2.58 | 1.12 | 0.22 | 1.66 |
| 34762 | 0 | 30093 | KCTSDQDEQFIPKGCSK | 2.80 | 0.01 | 2.58 | 1.12 | 0.22 | 1.66 |
| 34763 | 0 | 30093 | KCTSDQDEQFIPKGCSK | 2.80 | 0.01 | 2.58 | 1.12 | 0.22 | 1.66 |
| 34764 | 0 | 30093 | KCTSDQDEQFIPKGCSK | 2.80 | 0.01 | 2.58 | 1.12 | 0.22 | 1.66 |
| 34765 | 0 | 30093 | KCTSDQDEQFIPKGCSK | 2.80 | 0.01 | 2.58 | 1.12 | 0.22 | 1.66 |
| 34766 | 0 | 30093 | KCTSDQDEQFIPKGCSK | 2.80 | 0.01 | 2.58 | 1.12 | 0.22 | 1.66 |
| 34767 | 0 | 30093 | KCTSDQDEQFIPKGCSK | 2.80 | 0.01 | 2.58 | 1.12 | 0.22 | 1.66 |
| 34768 | 0 | 30093 | KCTSDQDEQFIPKGCSK | 2.80 | 0.01 | 2.58 | 1.12 | 0.22 | 1.66 |
| 34769 | 0 | 30093 | KCTSDQDEQFIPKGCSK | 2.80 | 0.01 | 2.58 | 1.12 | 0.22 | 1.66 |
| 34770 | 0 | 30093 | KCTSDQDEQFIPKGCSK | 2.80 | 0.01 | 2.58 | 1.12 | 0.22 | 1.66 |
| 34771 | 0 | 30093 | KCTSDQDEQFIPKGCSK | 2.80 | 0.01 | 2.58 | 1.12 | 0.22 | 1.66 |
| 34772 | 0 | 30093 | KCTSDQDEQFIPKGCSK | 2.80 | 0.01 | 2.58 | 1.12 | 0.22 | 1.66 |
| 34773 | 0 | 30093 | KCTSDQDEQFIPKGCSK | 2.80 | 0.01 | 2.58 | 1.12 | 0.22 | 1.66 |
| 34774 | 0 | 30093 | KCTSDQDEQFIPKGCSK | 2.80 | 0.01 | 2.58 | 1.12 | 0.22 | 1.66 |
| 34775 | 0 | 30093 | KCTSDQDEQFIPKGCSK | 2.80 | 0.01 | 2.58 | 1.12 | 0.22 | 1.66 |
| 34776 | 0 | 30093 | KCTSDQDEQFIPKGCSK | 2.80 | 0.01 | 2.58 | 1.12 | 0.22 | 1.66 |
| 34777 | 0 | 30093 | KCTSDQDEQFIPKGCSK | 2.80 | 0.01 | 2.58 | 1.12 | 0.22 | 1.66 |

|       |   |       |                   |      |      |      |      |      |      |
|-------|---|-------|-------------------|------|------|------|------|------|------|
| 34778 | 0 | 30093 | KCTSDQDEQFIPKGCSK | 2.80 | 0.01 | 2.58 | 1.12 | 0.22 | 1.66 |
| 34779 | 0 | 30093 | KCTSDQDEQFIPKGCSK | 2.80 | 0.01 | 2.58 | 1.12 | 0.22 | 1.66 |
| 34780 | 0 | 30093 | KCTSDQDEQFIPKGCSK | 2.80 | 0.01 | 2.58 | 1.12 | 0.22 | 1.66 |
| 34781 | 0 | 30093 | KCTSDQDEQFIPKGCSK | 2.80 | 0.01 | 2.58 | 1.12 | 0.22 | 1.66 |
| 34782 | 0 | 30093 | KCTSDQDEQFIPKGCSK | 2.80 | 0.01 | 2.58 | 1.12 | 0.22 | 1.66 |
| 34783 | 0 | 30093 | KCTSDQDEQFIPKGCSK | 2.80 | 0.01 | 2.58 | 1.12 | 0.22 | 1.66 |
| 34784 | 0 | 30093 | KCTSDQDEQFIPKGCSK | 2.80 | 0.01 | 2.58 | 1.12 | 0.22 | 1.66 |
| 34785 | 0 | 30093 | KCTSDQDEQFIPKGCSK | 2.80 | 0.01 | 2.58 | 1.12 | 0.22 | 1.66 |
| 34786 | 0 | 30093 | KCTSDQDEQFIPKGCSK | 2.80 | 0.01 | 2.58 | 1.12 | 0.22 | 1.66 |
| 34787 | 0 | 30093 | KCTSDQDEQFIPKGCSK | 2.80 | 0.01 | 2.58 | 1.12 | 0.22 | 1.66 |
| 34788 | 0 | 30093 | KCTSDQDEQFIPKGCSK | 2.80 | 0.01 | 2.58 | 1.12 | 0.22 | 1.66 |
| 34789 | 0 | 30093 | KCTSDQDEQFIPKGCSK | 2.80 | 0.01 | 3.61 | 4.93 | 0.22 | 0.28 |
| 34790 | 0 | 30093 | KCTSDQDEQFIPKGCSK | 2.80 | 0.01 | 3.61 | 1.20 | 0.22 | 0.28 |
| 34791 | 0 | 30093 | KCTSDQDEQFIPKGCSK | 2.80 | 0.01 | 3.61 | 0.68 | 0.22 | 0.28 |
| 34792 | 0 | 30093 | KCTSDQDEQFIPKGCSK | 2.80 | 0.01 | 3.61 | 0.68 | 0.22 | 1.27 |
| 34793 | 0 | 30093 | KCTSDQDEQFIPKGCSK | 2.80 | 0.01 | 2.58 | 0.68 | 0.22 | 2.56 |
| 34794 | 0 | 30093 | KCTSDQDEQFIPKGCSK | 2.80 | 0.01 | 2.58 | 0.68 | 0.22 | 2.56 |
| 34795 | 0 | 30093 | KCTSDQDEQFIPKGCSK | 2.80 | 0.01 | 2.58 | 0.68 | 0.22 | 2.56 |
| 34796 | 0 | 30093 | KCTSDQDEQFIPKGCSK | 2.80 | 0.01 | 3.61 | 1.15 | 0.22 | 3.30 |
| 34797 | 0 | 30093 | KCTSDQDEQFIPKGCSK | 2.80 | 0.01 | 3.61 | 1.15 | 0.22 | 3.30 |
| 34798 | 0 | 30093 | KCTSDQDEQFIPKGCSK | 2.80 | 0.01 | 3.61 | 1.15 | 0.22 | 3.30 |
| 34799 | 0 | 30093 | KCTSDQDEQFIPKGCSK | 2.80 | 0.01 | 3.61 | 1.15 | 0.22 | 3.30 |
| 34800 | 0 | 30093 | KCTSDQDEQFIPKGCSK | 2.80 | 0.01 | 3.61 | 0.68 | 0.22 | 0.28 |

|       |   |        |                                  |      |      |      |      |      |      |
|-------|---|--------|----------------------------------|------|------|------|------|------|------|
| 34801 | 0 | 30093  | KCTSDQDEQFIPKGCSK                | 2.80 | 0.01 | 3.61 | 0.68 | 0.22 | 0.28 |
| 34802 | 0 | 30095  | KCVENPNPTCNENNGG<br>CDADATCTE    | 3.19 | 0.01 | 3.78 | 0.44 | 0.85 | 0.28 |
| 34803 | 0 | 30102  | KCYTTGTIINQDPDK                  | 2.68 | 0.01 | 2.43 | 0.44 | 1.59 | 0.28 |
| 34804 | 0 | 176015 | KDADVNVVTQARNRP                  | 2.69 | 0.01 | 2.63 | 1.15 | 0.22 | 0.85 |
| 34805 | 0 | 176015 | KDADVNVVTQARNRP                  | 2.69 | 0.01 | 2.63 | 1.15 | 0.22 | 0.85 |
| 34806 | 0 | 176015 | KDADVNVVTQARNRP                  | 2.69 | 0.01 | 2.63 | 1.15 | 0.22 | 0.85 |
| 34807 | 0 | 176015 | KDADVNVVTQARNRP                  | 2.69 | 0.01 | 2.63 | 1.15 | 0.22 | 0.85 |
| 34808 | 0 | 176015 | KDADVNVVTQARNRP                  | 2.69 | 0.01 | 2.63 | 1.15 | 0.22 | 0.85 |
| 34809 | 0 | 30104  | KDAERAVEVD                       | 2.35 | 3.85 | 2.56 | 0.44 | 0.85 | 0.28 |
| 34810 | 0 | 30105  | KDAERAVEVD                       | 2.35 | 0.01 | 2.56 | 0.68 | 0.22 | 0.28 |
| 34811 | 0 | 30110  | KDAGTIAGLEVLRIINEPT<br>AA        | 2.98 | 0.01 | 2.30 | 0.44 | 0.85 | 0.28 |
| 34812 | 0 | 30110  | KDAGTIAGLEVLRIINEPT<br>AA        | 2.98 | 0.01 | 2.30 | 0.44 | 1.41 | 0.28 |
| 34813 | 0 | 100174 | KDALLHEHYV                       | 2.30 | 0.01 | 2.18 | 2.16 | 0.22 | 0.28 |
| 34814 | 0 | 30115  | KDASIQVVSA                       | 2.32 | 0.01 | 2.60 | 0.44 | 1.23 | 0.85 |
| 34815 | 0 | 236089 | KDATAADVEADDF                    | 2.58 | 0.01 | 2.90 | 2.71 | 0.22 | 0.85 |
| 34816 | 0 | 236089 | KDATAADVEADDF                    | 2.58 | 0.01 | 2.90 | 2.71 | 0.22 | 3.93 |
| 34817 | 0 | 236089 | KDATAADVEADDF                    | 2.58 | 0.01 | 2.90 | 2.71 | 0.22 | 1.66 |
| 34818 | 0 | 236089 | KDATAADVEADDF                    | 2.58 | 0.01 | 2.90 | 2.71 | 0.22 | 1.66 |
| 34819 | 0 | 236089 | KDATAADVEADDF                    | 2.58 | 0.01 | 2.90 | 2.71 | 0.22 | 1.66 |
| 34820 | 0 | 236089 | KDATAADVEADDF                    | 2.58 | 0.01 | 2.90 | 2.71 | 0.22 | 1.66 |
| 34821 | 0 | 236089 | KDATAADVEADDF                    | 2.58 | 0.01 | 2.90 | 2.71 | 0.22 | 1.34 |
| 34822 | 0 | 236089 | KDATAADVEADDF                    | 2.58 | 0.01 | 2.90 | 2.71 | 0.22 | 3.25 |
| 34823 | 0 | 30116  | KDATGIDNHREAKL                   | 2.60 | 0.01 | 3.67 | 1.12 | 0.22 | 0.28 |
| 34824 | 0 | 79266  | KDAVPN                           | 1.88 | 0.01 | 3.42 | 3.00 | 0.22 | 1.27 |
| 34825 | 0 | 79266  | KDAVPN                           | 1.88 | 0.01 | 3.42 | 3.00 | 0.22 | 0.28 |
| 34826 | 0 | 79266  | KDAVPN                           | 1.88 | 0.01 | 3.42 | 1.15 | 0.22 | 0.28 |
| 34827 | 0 | 130521 | KDC                              | 1.37 | 0.01 | 0.78 | 0.44 | 1.13 | 0.85 |
| 34828 | 0 | 30121  | KDCMGEAVQNTVED                   | 2.59 | 0.01 | 3.08 | 0.68 | 0.22 | 1.57 |
| 34829 | 0 | 151660 | KDCVGPEVENACANPA<br>AGTVILLENLRF | 3.26 | 4.33 | 1.75 | 2.25 | 0.22 | 0.85 |
| 34830 | 0 | 156339 | KDDPTNKFYQSUIQ                   | 2.59 | 0.01 | 2.73 | 0.44 | 0.85 | 1.28 |
| 34831 | 0 | 181683 | KDRHPCHGRQGKRF                   | 2.70 | 0.01 | 2.86 | 2.37 | 0.22 | 1.28 |
| 34832 | 0 | 30130  | KDDTSFEDINGIRR                   | 2.59 | 0.01 | 2.56 | 2.69 | 0.22 | 0.28 |
| 34833 | 0 | 229693 | KDDVPSERYLGYLEQLLR<br>LK         | 2.96 | 0.01 | 1.60 | 0.44 | 1.23 | 1.28 |

|       |   |        |                                    |      |      |      |      |      |      |
|-------|---|--------|------------------------------------|------|------|------|------|------|------|
|       |   |        | KDEANKISDASRKGLRR                  |      |      |      |      |      |      |
| 34834 | 0 | 30132  | DLDASREAKKQLEAEHQ<br>KLEEQNKIS     | 3.73 | 0.01 | 2.85 | 1.12 | 0.22 | 2.12 |
| 34835 | 0 | 316928 | KDEDDDDGDNDADDVC                   | 2.70 | 0.01 | 1.61 | 0.44 | 0.85 | 1.28 |
| 34836 | 0 | 96444  | KDEDEEDEED                         | 2.36 | 0.01 | 0.78 | 0.44 | 1.93 | 0.85 |
| 34837 | 0 | 316936 | KDEEKEEDEEEEEDE                    | 2.75 | 0.01 | 1.61 | 0.44 | 0.85 | 1.28 |
| 34838 | 0 | 316939 | KDEEQEPNEEEEEEE                    | 2.70 | 0.01 | 1.61 | 0.44 | 0.85 | 1.28 |
| 34839 | 0 | 100176 | KDEERNKTQE                         | 2.34 | 0.01 | 2.18 | 2.16 | 0.22 | 0.28 |
| 34840 | 0 | 119981 | KDEGSYFLVY                         | 2.29 | 0.01 | 0.78 | 0.68 | 0.22 | 0.28 |
| 34841 | 0 | 93073  | KDEKIEEIIG                         | 2.36 | 0.01 | 2.67 | 2.00 | 0.22 | 0.28 |
| 34842 | 0 | 93073  | KDEKIEEIIG                         | 2.36 | 0.01 | 2.67 | 2.00 | 0.22 | 0.28 |
| 34843 | 0 | 93073  | KDEKIEEIIG                         | 2.36 | 0.01 | 2.67 | 2.00 | 0.22 | 0.28 |
| 34844 | 0 | 30140  | KDEPNGRASDT                        | 2.36 | 0.01 | 3.35 | 2.02 | 0.85 | 0.28 |
| 34845 | 0 | 128032 | KDEPQRRSARLSAKP                    | 2.70 | 0.01 | 2.73 | 1.12 | 0.22 | 0.28 |
| 34846 | 0 | 128032 | KDEPQRRSARLSAKP                    | 2.70 | 0.01 | 2.73 | 0.44 | 1.13 | 0.28 |
| 34847 | 0 | 167608 | KDEPVELAAL                         | 2.32 | 0.01 | 3.18 | 0.44 | 0.85 | 1.28 |
| 34848 | 0 | 167608 | KDEPVELAAL                         | 2.32 | 0.01 | 3.18 | 0.44 | 0.85 | 1.28 |
| 34849 | 0 | 30141  | KDERFFSDKI                         | 2.33 | 0.01 | 1.60 | 0.44 | 1.23 | 0.85 |
| 34850 | 0 | 30141  | KDERFFSDKI                         | 2.33 | 0.01 | 1.60 | 0.44 | 1.23 | 0.85 |
| 34851 | 0 | 115305 | KDERFFSDKIAKYIPIQYV<br>L           | 2.93 | 0.01 | 1.60 | 0.44 | 1.23 | 2.51 |
| 34852 | 0 | 238652 | KDETIQCCTKNNCNR                    | 2.70 | 0.01 | 2.56 | 2.02 | 0.22 | 0.85 |
| 34853 | 0 | 238652 | KDETIQCCTKNNCNR                    | 2.70 | 0.01 | 2.56 | 1.20 | 0.22 | 0.85 |
| 34854 | 0 | 107926 | KDFIYSSAISEVERCKVYG<br>EAKTKVVHAMK | 3.33 | 0.01 | 0.90 | 1.12 | 0.22 | 0.28 |
| 34855 | 0 | 30144  | KDFKYRGEGNVYAEINV<br>KAL           | 2.95 | 0.01 | 2.21 | 1.20 | 0.22 | 0.28 |
| 34856 | 0 | 30145  | KDFLEVTF                           | 2.12 | 0.01 | 2.21 | 1.12 | 0.22 | 0.28 |
| 34857 | 0 | 149345 | KDFPILPGEIF                        | 2.41 | 0.01 | 0.78 | 0.44 | 1.93 | 2.66 |
| 34858 | 0 | 30150  | KDGDTTNR                           | 2.13 | 0.01 | 3.27 | 2.02 | 0.22 | 0.28 |
| 34859 | 0 | 30150  | KDGDTTNR                           | 2.13 | 0.01 | 3.27 | 2.82 | 0.22 | 0.28 |
| 34860 | 0 | 30151  | KDGEKA                             | 1.90 | 0.01 | 2.96 | 0.44 | 0.85 | 0.28 |
| 34861 | 0 | 30151  | KDGEKA                             | 1.90 | 0.01 | 2.96 | 3.67 | 0.22 | 0.28 |
| 34862 | 0 | 30152  | KDGEKAPPAKKL                       | 2.50 | 0.01 | 2.96 | 0.44 | 0.85 | 0.28 |
| 34863 | 0 | 30153  | KDGIQLGTDTDQPIYA<br>DK             | 2.93 | 0.01 | 4.15 | 1.12 | 0.22 | 0.28 |
| 34864 | 0 | 156341 | KDGKFAVKDGEKEK                     | 2.67 | 0.01 | 2.73 | 0.44 | 0.85 | 1.28 |
| 34865 | 0 | 156341 | KDGKFAVKDGEKEK                     | 2.67 | 0.01 | 2.73 | 0.44 | 0.85 | 1.28 |
| 34866 | 0 | 179064 | KDGVIGKTDLRGTFD                    | 2.71 | 0.01 | 2.36 | 0.44 | 1.23 | 1.28 |
| 34867 | 0 | 179064 | KDGVIGKTDLRGTFD                    | 2.71 | 0.01 | 2.36 | 0.44 | 1.23 | 1.27 |
| 34868 | 0 | 79267  | KDGYIV                             | 1.88 | 0.01 | 3.85 | 3.55 | 0.22 | 0.28 |
| 34869 | 0 | 79267  | KDGYIV                             | 1.88 | 0.01 | 3.85 | 1.12 | 0.22 | 0.28 |
| 34870 | 0 | 99367  | KDGYIVD                            | 2.02 | 0.01 | 3.33 | 1.12 | 0.22 | 0.28 |
| 34871 | 0 | 30163  | KDHKPQTTKPKE                       | 2.51 | 0.01 | 2.38 | 0.44 | 1.74 | 0.28 |
| 34872 | 0 | 110913 | KDIKANPENYFT                       | 2.46 | 0.01 | 3.15 | 3.53 | 0.22 | 0.28 |
| 34873 | 0 | 110913 | KDIKANPENYFT                       | 2.46 | 0.01 | 3.15 | 0.44 | 1.59 | 0.28 |

|       |   |        |                             |      |      |      |      |      |      |
|-------|---|--------|-----------------------------|------|------|------|------|------|------|
| 34874 | 0 | 230480 | KDIKKEIDNDKENIKTNN<br>AK    | 3.01 | 0.01 | 2.22 | 0.68 | 0.22 | 0.28 |
| 34875 | 0 | 230480 | KDIKKEIDNDKENIKTNN<br>AK    | 3.01 | 0.01 | 2.22 | 0.68 | 0.22 | 0.85 |
| 34876 | 0 | 230480 | KDIKKEIDNDKENIKTNN<br>AK    | 3.01 | 0.01 | 2.22 | 0.68 | 0.22 | 1.34 |
| 34877 | 0 | 230480 | KDIKKEIDNDKENIKTNN<br>AK    | 3.01 | 0.01 | 2.22 | 0.68 | 0.22 | 0.28 |
| 34878 | 0 | 230480 | KDIKKEIDNDKENIKTNN<br>AK    | 3.01 | 0.01 | 2.22 | 0.68 | 0.22 | 0.28 |
| 34879 | 0 | 118446 | KDIKKILDSVGIEAD             | 2.70 | 0.01 | 0.78 | 0.44 | 1.13 | 0.85 |
| 34880 | 0 | 118446 | KDIKKILDSVGIEAD             | 2.70 | 0.01 | 0.78 | 0.44 | 0.85 | 0.85 |
| 34881 | 0 | 30173  | KDILEDERAAVDTYC             | 2.65 | 0.01 | 0.78 | 1.20 | 0.22 | 1.27 |
| 34882 | 0 | 30173  | KDILEDERAAVDTYC             | 2.65 | 0.01 | 0.78 | 1.20 | 0.22 | 2.12 |
| 34883 | 0 | 30173  | KDILEDERAAVDTYC             | 2.65 | 0.01 | 0.78 | 1.20 | 0.22 | 2.12 |
| 34884 | 0 | 174931 | KDIRKILSGYIV                | 2.48 | 0.01 | 2.18 | 2.71 | 0.22 | 0.28 |
| 34885 | 0 | 30178  | KDISQLTQAIVKNHKNLL<br>KIAQY | 3.09 | 0.01 | 2.04 | 0.44 | 0.85 | 0.28 |
| 34886 | 0 | 30178  | KDISQLTQAIVKNHKNLL<br>KIAQY | 3.09 | 0.01 | 2.04 | 0.44 | 1.59 | 0.28 |
| 34887 | 0 | 174932 | KDITEFDNFNDQ                | 2.49 | 0.01 | 2.18 | 2.71 | 0.22 | 0.28 |
| 34888 | 0 | 134112 | KDKATF                      | 1.91 | 0.01 | 0.78 | 0.44 | 1.13 | 0.28 |
| 34889 | 0 | 134112 | KDKATF                      | 1.91 | 0.01 | 0.90 | 0.44 | 1.13 | 0.28 |
| 34890 | 0 | 134112 | KDKATF                      | 1.91 | 0.01 | 0.78 | 0.44 | 1.13 | 0.28 |
| 34891 | 0 | 134112 | KDKATF                      | 1.91 | 0.01 | 0.78 | 0.44 | 1.41 | 0.28 |
| 34892 | 0 | 134112 | KDKATF                      | 1.91 | 0.01 | 0.78 | 0.44 | 1.13 | 1.27 |
| 34893 | 0 | 134112 | KDKATF                      | 1.91 | 0.01 | 0.78 | 0.44 | 1.13 | 1.27 |
| 34894 | 0 | 135471 | KDKATFGCHDGC                | 2.50 | 0.01 | 0.90 | 0.44 | 1.13 | 1.27 |
| 34895 | 0 | 135471 | KDKATFGCHDGC                | 2.50 | 0.01 | 0.90 | 0.44 | 1.13 | 0.28 |
| 34896 | 0 | 135471 | KDKATFGCHDGC                | 2.50 | 0.01 | 0.90 | 0.44 | 1.13 | 1.34 |
| 34897 | 0 | 135471 | KDKATFGCHDGC                | 2.50 | 0.01 | 0.90 | 0.44 | 1.13 | 0.28 |
| 34898 | 0 | 135471 | KDKATFGCHDGC                | 2.50 | 0.01 | 0.90 | 0.44 | 1.13 | 1.75 |
| 34899 | 0 | 135471 | KDKATFGCHDGC                | 2.50 | 0.01 | 0.90 | 0.44 | 1.13 | 1.75 |
| 34900 | 0 | 30180  | KDKDKDNTDE                  | 2.37 | 0.01 | 1.66 | 1.15 | 0.22 | 0.28 |
| 34901 | 0 | 30180  | KDKDKDNTDE                  | 2.37 | 0.01 | 1.66 | 1.15 | 0.22 | 1.48 |
| 34902 | 0 | 121454 | KDKDRDRKRRSSRSR             | 2.76 | 0.01 | 0.78 | 0.44 | 1.13 | 0.28 |
| 34903 | 0 | 30181  | KDKIAKEQENKETIGTLK          | 2.87 | 0.01 | 2.85 | 0.68 | 0.22 | 0.28 |
| 34904 | 0 | 98152  | KDKIEKVSİY                  | 2.34 | 0.01 | 3.57 | 0.44 | 0.85 | 0.28 |
| 34905 | 0 | 30184  | KDKKADSGYCYWVHI             | 2.66 | 0.01 | 2.56 | 0.68 | 0.22 | 0.85 |
| 34906 | 0 | 141932 | KDKKDDKYTKILAA              | 2.64 | 0.01 | 2.73 | 0.44 | 0.85 | 0.28 |
| 34907 | 0 | 30186  | KDKKKKTDEAQPLPQRQ<br>KKQ    | 2.97 | 0.01 | 2.45 | 0.44 | 0.85 | 0.28 |
| 34908 | 0 | 30186  | KDKKKKTDEAQPLPQRQ<br>KKQ    | 2.97 | 0.01 | 2.45 | 0.44 | 0.85 | 0.28 |
| 34909 | 0 | 30186  | KDKKKKTDEAQPLPQRQ<br>KKQ    | 2.97 | 0.01 | 2.45 | 0.44 | 0.85 | 1.48 |

|       |   |        |                                     |      |      |      |      |      |      |
|-------|---|--------|-------------------------------------|------|------|------|------|------|------|
| 34910 | 0 | 133165 | KDKLAKEQKSKQNIGAL<br>KQEL           | 3.03 | 0.01 | 2.85 | 1.20 | 0.22 | 1.27 |
| 34911 | 0 | 171673 | KDKLFSEVVHKESRV                     | 2.70 | 0.01 | 0.78 | 0.44 | 1.41 | 0.28 |
| 34912 | 0 | 133166 | KDKYKNIGAKLVQDVAN<br>NTN            | 2.96 | 0.01 | 2.19 | 2.04 | 0.22 | 0.28 |
| 34913 | 0 | 98842  | KDLAFPGSGE                          | 2.29 | 0.01 | 2.16 | 0.44 | 1.23 | 0.85 |
| 34914 | 0 | 99368  | KDLAFPGSGEQVEKL                     | 2.67 | 0.01 | 2.16 | 0.44 | 1.23 | 1.48 |
| 34915 | 0 | 174159 | KDLDAFRHYDGRTHIQRD<br>NGYQPNYHAVNIV | 3.37 | 0.01 | 2.78 | 1.12 | 0.22 | 0.85 |
| 34916 | 0 | 30194  | KDLEDGSKYYFDEDTA                    | 2.75 | 0.01 | 3.04 | 2.75 | 0.22 | 0.28 |
| 34917 | 0 | 30194  | KDLEDGSKYYFDEDTA                    | 2.75 | 0.01 | 3.04 | 2.75 | 0.22 | 0.28 |
| 34918 | 0 | 105895 | KDLESIKG                            | 2.13 | 0.01 | 3.05 | 1.20 | 0.22 | 0.28 |
| 34919 | 0 | 30196  | KDLKETEKKVKDIQTQ                    | 2.79 | 0.01 | 3.67 | 0.44 | 1.23 | 0.28 |
| 34920 | 0 | 30198  | KDLKGYGGVS                          | 2.33 | 0.01 | 1.60 | 0.44 | 1.23 | 0.85 |
| 34921 | 0 | 30198  | KDLKGYGGVS                          | 2.33 | 0.01 | 1.60 | 0.44 | 1.23 | 0.85 |
| 34922 | 0 | 30198  | KDLKGYGGVS                          | 2.33 | 0.01 | 1.60 | 0.44 | 1.23 | 0.85 |
| 34923 | 0 | 30199  | KDLLED                              | 1.90 | 0.01 | 1.96 | 0.44 | 0.85 | 0.28 |
| 34924 | 0 | 30200  | KDLLEQKRAAVDTYC                     | 2.65 | 0.01 | 0.78 | 1.20 | 0.22 | 0.28 |
| 34925 | 0 | 30200  | KDLLEQKRAAVDTYC                     | 2.65 | 0.01 | 0.78 | 1.20 | 0.22 | 0.28 |
| 34926 | 0 | 30200  | KDLLEQKRAAVDTYC                     | 2.65 | 0.01 | 0.78 | 1.20 | 0.22 | 0.28 |
| 34927 | 0 | 30200  | KDLLEQKRAAVDTYC                     | 2.65 | 0.01 | 0.78 | 1.20 | 0.22 | 1.27 |
| 34928 | 0 | 30200  | KDLLEQKRAAVDTYC                     | 2.65 | 0.01 | 0.78 | 1.20 | 0.22 | 1.27 |
| 34929 | 0 | 30200  | KDLLEQKRAAVDTYC                     | 2.65 | 0.01 | 0.78 | 1.20 | 0.22 | 1.27 |
| 34930 | 0 | 30200  | KDLLEQKRAAVDTYC                     | 2.65 | 0.01 | 0.78 | 1.20 | 0.22 | 2.12 |
| 34931 | 0 | 145273 | KDLLPSRDRQHLPLI                     | 2.70 | 2.84 | 0.78 | 0.44 | 1.13 | 1.28 |
| 34932 | 0 | 145272 | KDLLPSRDRQHLPLI                     | 2.70 | 4.08 | 0.78 | 0.44 | 1.13 | 1.28 |
| 34933 | 0 | 152696 | KDLNLVERRI                          | 2.30 | 0.01 | 2.18 | 2.16 | 0.22 | 0.28 |
| 34934 | 0 | 30204  | KDLPVLDQLTDP PGV                    | 2.71 | 0.01 | 2.40 | 0.68 | 0.22 | 0.28 |
| 34935 | 0 | 30211  | KDLTT                               | 1.72 | 0.01 | 2.69 | 1.12 | 0.22 | 0.28 |
| 34936 | 0 | 30212  | KDLVFTKENTIT                        | 2.48 | 0.01 | 2.73 | 0.44 | 0.85 | 0.28 |
| 34937 | 0 | 30215  | KDMPSGPTPQHIPLF                     | 2.64 | 0.01 | 2.40 | 0.44 | 1.59 | 0.28 |
| 34938 | 0 | 114430 | KDMTKEFFKNKSETW                     | 2.70 | 0.01 | 4.93 | 0.44 | 1.74 | 1.57 |
| 34939 | 0 | 30219  | KDNPHPKGSR                          | 2.32 | 0.01 | 2.43 | 1.20 | 0.22 | 0.28 |
| 34940 | 0 | 30219  | KDNPHPKGSR                          | 2.32 | 0.01 | 2.43 | 1.20 | 0.22 | 0.28 |
| 34941 | 0 | 30219  | KDNPHPKGSR                          | 2.32 | 0.01 | 2.43 | 1.20 | 0.22 | 0.28 |
| 34942 | 0 | 167294 | KDNRAVQKLRRREVEKAK<br>RAL           | 2.99 | 3.24 | 0.78 | 0.44 | 1.13 | 0.28 |
| 34943 | 0 | 30220  | KDNRIPSYGVLSVDL                     | 2.66 | 0.01 | 2.43 | 0.44 | 0.85 | 0.28 |
| 34944 | 0 | 30222  | KDNTDEGDEGDDS                       | 2.58 | 0.01 | 1.66 | 0.44 | 0.85 | 0.28 |
| 34945 | 0 | 181684 | KDNTIFIDLNCPRCE                     | 2.66 | 0.01 | 1.66 | 2.37 | 0.22 | 1.28 |
| 34946 | 0 | 181684 | KDNTIFIDLNCPRCE                     | 2.66 | 0.01 | 1.66 | 2.36 | 0.22 | 1.28 |
| 34947 | 0 | 450731 | KDNTYVM                             | 1.99 | 0.01 | 0.90 | 0.44 | 1.41 | 1.39 |
| 34948 | 0 | 317165 | KDPAADGAGTQEEKQ                     | 2.71 | 0.01 | 1.61 | 0.44 | 0.85 | 1.28 |
| 34949 | 0 | 30227  | KDPKSPGE                            | 2.15 | 0.01 | 3.85 | 2.00 | 0.85 | 0.85 |

|       |   |        |                                     |      |      |      |      |      |      |
|-------|---|--------|-------------------------------------|------|------|------|------|------|------|
| 34950 | 0 | 30227  | KDPKSPGE                            | 2.15 | 0.01 | 3.85 | 2.00 | 0.85 | 0.85 |
| 34951 | 0 | 30227  | KDPKSPGE                            | 2.15 | 0.01 | 3.85 | 2.00 | 0.85 | 0.85 |
| 34952 | 0 | 30227  | KDPKSPGE                            | 2.15 | 0.01 | 3.85 | 2.00 | 0.85 | 0.85 |
| 34953 | 0 | 164267 | KDPNLKN                             | 2.05 | 0.01 | 0.90 | 1.20 | 0.22 | 1.39 |
| 34954 | 0 | 225355 | KDQDAEQAPEYRGRTEL<br>LKETIS         | 3.08 | 0.01 | 1.75 | 1.81 | 0.22 | 0.28 |
| 34955 | 0 | 111444 | KDQTNYP                             | 1.99 | 0.01 | 0.90 | 0.44 | 0.85 | 1.39 |
| 34956 | 0 | 135472 | KDRHDF                              | 1.90 | 0.01 | 0.78 | 1.12 | 0.22 | 0.28 |
| 34957 | 0 | 135472 | KDRHDF                              | 1.90 | 0.01 | 0.78 | 1.12 | 0.22 | 0.28 |
| 34958 | 0 | 134699 | KDRHDFGF                            | 2.14 | 0.01 | 0.78 | 0.68 | 0.22 | 1.57 |
| 34959 | 0 | 134699 | KDRHDFGF                            | 2.14 | 0.01 | 0.78 | 0.68 | 0.22 | 1.34 |
| 34960 | 0 | 134699 | KDRHDFGF                            | 2.14 | 0.01 | 0.78 | 0.68 | 0.22 | 1.27 |
| 34961 | 0 | 135473 | KDRHDFGFPQ                          | 2.31 | 0.01 | 0.78 | 1.15 | 0.22 | 0.28 |
| 34962 | 0 | 125453 | KDRLQGMAPAAGAD                      | 2.63 | 0.01 | 0.78 | 0.44 | 1.13 | 0.85 |
| 34963 | 0 | 125453 | KDRLQGMAPAAGAD                      | 2.63 | 0.01 | 0.78 | 0.44 | 1.13 | 0.85 |
| 34964 | 0 | 125453 | KDRLQGMAPAAGAD                      | 2.63 | 0.01 | 0.78 | 0.44 | 1.13 | 0.85 |
| 34965 | 0 | 125453 | KDRLQGMAPAAGAD                      | 2.63 | 0.01 | 0.78 | 0.44 | 1.13 | 0.85 |
| 34966 | 0 | 125453 | KDRLQGMAPAAGAD                      | 2.63 | 0.01 | 0.78 | 0.44 | 1.13 | 0.85 |
| 34967 | 0 | 125453 | KDRLQGMAPAAGAD                      | 2.63 | 0.01 | 0.78 | 0.44 | 1.13 | 0.85 |
| 34968 | 0 | 125453 | KDRLQGMAPAAGAD                      | 2.63 | 0.01 | 0.78 | 0.44 | 1.13 | 1.27 |
| 34969 | 0 | 129051 | KDRMVN                              | 1.88 | 0.01 | 0.78 | 0.44 | 1.13 | 0.28 |
| 34970 | 0 | 30235  | KDRRSTGKSWGK                        | 2.51 | 0.01 | 2.69 | 0.44 | 0.85 | 0.28 |
| 34971 | 0 | 30235  | KDRRSTGKSWGK                        | 2.51 | 0.01 | 2.69 | 0.44 | 1.41 | 0.28 |
| 34972 | 0 | 30235  | KDRRSTGKSWGK                        | 2.51 | 0.01 | 2.69 | 0.44 | 0.85 | 0.28 |
| 34973 | 0 | 30235  | KDRRSTGKSWGK                        | 2.51 | 0.01 | 2.69 | 0.44 | 0.85 | 0.28 |
| 34974 | 0 | 30235  | KDRRSTGKSWGK                        | 2.51 | 0.01 | 2.69 | 0.44 | 0.85 | 0.28 |
| 34975 | 0 | 30236  | KDRTLIEQK                           | 2.22 | 0.01 | 2.83 | 0.68 | 0.22 | 0.85 |
| 34976 | 0 | 30236  | KDRTLIEQK                           | 2.22 | 0.01 | 2.83 | 1.15 | 0.22 | 0.28 |
| 34977 | 0 | 30237  | KDRTQQRKTKRSTNRRR<br>SKNEKKKK       | 3.19 | 0.01 | 0.90 | 0.44 | 0.85 | 0.28 |
| 34978 | 0 | 30237  | KDRTQQRKTKRSTNRRR<br>SKNEKKKK       | 3.19 | 0.01 | 0.90 | 0.44 | 0.85 | 0.28 |
| 34979 | 0 | 30237  | KDRTQQRKTKRSTNRRR<br>SKNEKKKK       | 3.19 | 0.01 | 1.72 | 0.44 | 0.85 | 0.28 |
| 34980 | 0 | 30239  | KDRVEDAL                            | 2.12 | 0.01 | 2.99 | 0.44 | 0.85 | 0.28 |
| 34981 | 0 | 30243  | KDSKSRGAT                           | 2.24 | 0.01 | 3.28 | 0.44 | 1.23 | 0.85 |
| 34982 | 0 | 496607 | KDSLRLNRLAKLNKGVAV<br>IKVGAVSEVELKE | 3.38 | 0.01 | 3.15 | 0.44 | 1.93 | 2.12 |
| 34983 | 0 | 496607 | KDSLRLNRLAKLNKGVAV<br>IKVGAVSEVELKE | 3.38 | 0.01 | 3.15 | 0.44 | 1.93 | 2.12 |
| 34984 | 0 | 30246  | KDSPVGEILTRSKYNQNS<br>K             | 2.86 | 0.01 | 2.08 | 2.02 | 0.22 | 1.57 |
| 34985 | 0 | 30247  | KDSPVGEILTRSKYNQNS<br>KY            | 2.92 | 0.01 | 2.08 | 2.02 | 0.22 | 0.28 |
| 34986 | 0 | 30247  | KDSPVGEILTRSKYNQNS<br>KY            | 2.92 | 0.01 | 2.08 | 0.68 | 0.22 | 1.75 |

|       |   |        |                                  |      |      |      |      |      |      |
|-------|---|--------|----------------------------------|------|------|------|------|------|------|
| 34987 | 0 | 95488  | KDSPVGELLTRSKYNQN<br>SK          | 2.87 | 0.01 | 3.45 | 0.44 | 0.22 | 1.57 |
| 34988 | 0 | 30249  | KDSPVNIEAEPFPGDSYII<br>IGVEPGQLK | 3.26 | 0.01 | 2.30 | 0.68 | 0.22 | 0.28 |
| 34989 | 0 | 30249  | KDSPVNIEAEPFPGDSYII<br>IGVEPGQLK | 3.26 | 0.01 | 2.30 | 0.68 | 0.22 | 0.28 |
| 34990 | 0 | 30249  | KDSPVNIEAEPFPGDSYII<br>IGVEPGQLK | 3.26 | 0.01 | 2.30 | 2.65 | 0.22 | 0.28 |
| 34991 | 0 | 317281 | KDSVDSREQDGEGTT                  | 2.68 | 0.01 | 1.61 | 0.44 | 0.85 | 1.28 |
| 34992 | 0 | 30260  | KDTLRIAYLTEAKVEKL                | 2.82 | 0.01 | 2.85 | 1.12 | 0.22 | 1.57 |
| 34993 | 0 | 30260  | KDTLRIAYLTEAKVEKL                | 2.82 | 0.01 | 2.85 | 1.12 | 0.22 | 0.28 |
| 34994 | 0 | 30260  | KDTLRIAYLTEAKVEKL                | 2.82 | 0.01 | 2.85 | 1.12 | 0.22 | 0.28 |
| 34995 | 0 | 30261  | KDTLRITYLT                       | 2.33 | 0.01 | 2.66 | 0.68 | 0.22 | 0.28 |
| 34996 | 0 | 30262  | KDTNNN                           | 1.88 | 0.01 | 2.90 | 0.68 | 0.22 | 1.27 |
| 34997 | 0 | 30262  | KDTNNN                           | 1.88 | 0.01 | 2.90 | 0.68 | 0.22 | 0.28 |
| 34998 | 0 | 30262  | KDTNNN                           | 1.88 | 0.01 | 2.87 | 0.68 | 0.22 | 1.34 |
| 34999 | 0 | 30262  | KDTNNN                           | 1.88 | 0.01 | 2.87 | 0.68 | 0.22 | 1.75 |
| 35000 | 0 | 30262  | KDTNNN                           | 1.88 | 0.01 | 2.87 | 0.68 | 0.22 | 0.28 |
| 35001 | 0 | 30263  | KDTNNNL                          | 2.02 | 0.01 | 2.87 | 0.68 | 0.22 | 0.28 |
| 35002 | 0 | 30263  | KDTNNNL                          | 2.02 | 0.01 | 2.87 | 0.68 | 0.22 | 1.34 |
| 35003 | 0 | 30263  | KDTNNNL                          | 2.02 | 0.01 | 2.87 | 0.68 | 0.22 | 1.75 |
| 35004 | 0 | 98154  | KDTNNNLTLV                       | 2.33 | 0.01 | 2.87 | 0.68 | 0.22 | 0.28 |
| 35005 | 0 | 98154  | KDTNNNLTLV                       | 2.33 | 0.01 | 2.87 | 1.20 | 0.22 | 0.28 |
| 35006 | 0 | 78695  | KDTNNNLYNGK                      | 2.43 | 0.01 | 0.90 | 0.68 | 0.22 | 0.28 |
| 35007 | 0 | 78695  | KDTNNNLYNGK                      | 2.43 | 0.01 | 0.90 | 0.68 | 0.22 | 1.34 |
| 35008 | 0 | 78695  | KDTNNNLYNGK                      | 2.43 | 0.01 | 0.90 | 1.15 | 2.26 | 1.66 |
| 35009 | 0 | 78695  | KDTNNNLYNGK                      | 2.43 | 0.01 | 0.90 | 1.15 | 2.26 | 1.66 |
| 35010 | 0 | 121458 | KDTPQTSAAEAFLF                   | 2.68 | 0.01 | 0.90 | 0.68 | 0.22 | 1.39 |
| 35011 | 0 | 121458 | KDTPQTSAAEAFLF                   | 2.68 | 0.01 | 0.90 | 0.68 | 0.22 | 0.28 |
| 35012 | 0 | 121458 | KDTPQTSAAEAFLF                   | 2.68 | 0.01 | 0.90 | 0.68 | 0.22 | 0.28 |
| 35013 | 0 | 30265  | KDTSYDYE                         | 2.13 | 0.01 | 2.99 | 0.44 | 0.85 | 0.28 |
| 35014 | 0 | 181685 | KDVDGSGNYYKLRED                  | 2.68 | 0.01 | 2.86 | 2.36 | 0.22 | 1.28 |
| 35015 | 0 | 317317 | KDVETEKQKAAEATK                  | 2.73 | 0.01 | 1.61 | 0.44 | 0.85 | 1.28 |
| 35016 | 0 | 317318 | KDVETEKQRAAEATK                  | 2.72 | 0.01 | 1.61 | 0.44 | 0.85 | 1.28 |
| 35017 | 0 | 135942 | KDVKFGADARAL                     | 2.50 | 0.01 | 0.78 | 0.44 | 1.13 | 0.28 |
| 35018 | 0 | 135942 | KDVKFGADARAL                     | 2.50 | 0.01 | 0.78 | 0.44 | 1.41 | 0.28 |
| 35019 | 0 | 120660 | KDVLEIYSEL                       | 2.31 | 0.01 | 2.18 | 2.16 | 0.22 | 0.28 |
| 35020 | 0 | 114869 | KDVLVCNKDL                       | 2.36 | 0.01 | 2.25 | 0.44 | 1.23 | 0.85 |
| 35021 | 0 | 114869 | KDVLVCNKDL                       | 2.36 | 0.01 | 2.25 | 0.44 | 1.23 | 0.85 |
| 35022 | 0 | 157447 | KDVTKEEYAAFYKA                   | 2.64 | 0.01 | 3.51 | 2.49 | 0.85 | 0.28 |
| 35023 | 0 | 157447 | KDVTKEEYAAFYKA                   | 2.64 | 0.01 | 3.51 | 2.49 | 0.85 | 0.28 |
| 35024 | 0 | 157447 | KDVTKEEYAAFYKA                   | 2.64 | 0.01 | 3.51 | 2.49 | 0.85 | 0.28 |
| 35025 | 0 | 79001  | KDVTVEGSNEFAPVQNL<br>TGS         | 2.93 | 0.01 | 2.84 | 0.44 | 0.85 | 0.28 |
| 35026 | 0 | 141683 | KDWG                             | 1.57 | 0.01 | 0.78 | 0.68 | 0.22 | 0.28 |
| 35027 | 0 | 141683 | KDWG                             | 1.57 | 0.01 | 0.78 | 0.68 | 0.22 | 0.28 |
| 35028 | 0 | 141683 | KDWG                             | 1.57 | 0.01 | 0.78 | 0.68 | 0.22 | 1.27 |



|       |   |        |                                       |      |      |      |      |      |      |
|-------|---|--------|---------------------------------------|------|------|------|------|------|------|
| 35029 | 0 | 141683 | KDWG                                  | 1.57 | 0.01 | 0.78 | 0.68 | 0.22 | 0.85 |
| 35030 | 0 | 141683 | KDWG                                  | 1.57 | 0.01 | 0.78 | 0.68 | 0.22 | 0.85 |
| 35031 | 0 | 141683 | KDWG                                  | 1.57 | 0.01 | 0.78 | 0.68 | 0.22 | 0.85 |
| 35032 | 0 | 141683 | KDWG                                  | 1.57 | 0.01 | 0.78 | 0.68 | 0.22 | 0.85 |
| 35033 | 0 | 141683 | KDWG                                  | 1.57 | 0.01 | 0.78 | 0.68 | 0.22 | 1.48 |
| 35034 | 0 | 141683 | KDWG                                  | 1.57 | 0.01 | 0.78 | 0.68 | 0.22 | 1.34 |
| 35035 | 0 | 127704 | KDWNTNTYLHLNATNF<br>DIELQQNGKFVV      | 3.25 | 0.01 | 2.95 | 3.16 | 1.41 | 0.28 |
| 35036 | 0 | 127704 | KDWNTNTYLHLNATNF<br>DIELQQNGKFVV      | 3.25 | 0.01 | 2.95 | 3.16 | 0.22 | 0.28 |
| 35037 | 0 | 30274  | KDWYEGVVIDYRGKKV<br>NSKT              | 2.94 | 0.01 | 2.86 | 1.81 | 0.22 | 0.85 |
| 35038 | 0 | 30276  | KDYFCISKWYLKEVKRKP<br>Y               | 2.88 | 0.01 | 2.08 | 2.02 | 0.22 | 1.57 |
| 35039 | 0 | 125454 | KDYKTMVKFCN                           | 2.40 | 0.01 | 3.93 | 1.15 | 0.22 | 0.28 |
| 35040 | 0 | 125454 | KDYKTMVKFCN                           | 2.40 | 0.01 | 3.93 | 1.15 | 0.22 | 1.48 |
| 35041 | 0 | 125454 | KDYKTMVKFCN                           | 2.40 | 0.01 | 3.93 | 1.15 | 0.22 | 1.34 |
| 35042 | 0 | 147854 | KDYQRNRGPSKFTGLQP<br>SVL              | 2.94 | 0.01 | 0.90 | 2.37 | 2.60 | 0.28 |
| 35043 | 0 | 147854 | KDYQRNRGPSKFTGLQP<br>SVL              | 2.94 | 0.01 | 0.90 | 1.20 | 0.22 | 0.28 |
| 35044 | 0 | 147854 | KDYQRNRGPSKFTGLQP<br>SVL              | 2.94 | 0.01 | 0.90 | 1.20 | 0.22 | 0.28 |
| 35045 | 0 | 118860 | KDYYQKWM                              | 2.14 | 0.01 | 0.78 | 0.44 | 1.13 | 0.28 |
| 35046 | 0 | 123346 | KDYYQKWME                             | 2.31 | 0.01 | 0.78 | 0.44 | 1.13 | 0.85 |
| 35047 | 0 | 519665 | KEAAEKAAAEALAE                        | 2.75 | 0.01 | 2.24 | 0.44 | 1.41 | 1.28 |
| 35048 | 0 | 177794 | KEAAQKKATEQKIKV                       | 2.73 | 0.01 | 0.78 | 0.44 | 1.13 | 0.85 |
| 35049 | 0 | 136069 | KEADIS                                | 1.88 | 0.01 | 0.78 | 1.12 | 0.22 | 0.28 |
| 35050 | 0 | 30288  | KEAELDGD                              | 2.14 | 0.01 | 2.83 | 1.12 | 0.22 | 0.28 |
| 35051 | 0 | 30289  | KEAESVCAPIMSKIYQ                      | 2.74 | 0.01 | 1.66 | 0.44 | 1.74 | 0.28 |
| 35052 | 0 | 30290  | KEAFRLKNGRQE                          | 2.48 | 0.01 | 3.33 | 0.44 | 1.23 | 0.85 |
| 35053 | 0 | 30292  | KEAIPMAVEMAKSQ                        | 2.64 | 0.01 | 4.63 | 0.44 | 1.23 | 1.27 |
| 35054 | 0 | 30294  | KEAIVTK                               | 2.03 | 0.01 | 3.38 | 2.22 | 0.85 | 0.85 |
| 35055 | 0 | 30296  | KEAKPVAAATGAATAAA<br>GVAAGAATAAAGGYKV | 3.48 | 0.01 | 3.67 | 0.44 | 1.23 | 0.85 |
| 35056 | 0 | 30296  | KEAKPVAAATGAATAAA<br>GVAAGAATAAAGGYKV | 3.48 | 0.01 | 3.67 | 0.44 | 1.23 | 1.27 |
| 35057 | 0 | 30299  | KEALDKYELENHD                         | 2.58 | 0.01 | 2.85 | 1.20 | 0.22 | 1.34 |
| 35058 | 0 | 30299  | KEALDKYELENHD                         | 2.58 | 0.01 | 2.85 | 1.20 | 0.22 | 0.28 |
| 35059 | 0 | 30299  | KEALDKYELENHD                         | 2.58 | 0.01 | 2.85 | 1.20 | 0.22 | 0.28 |
| 35060 | 0 | 30299  | KEALDKYELENHD                         | 2.58 | 0.01 | 2.85 | 1.20 | 0.22 | 1.34 |
| 35061 | 0 | 30300  | KEALDKYELENHDLKTK<br>N                | 2.89 | 0.01 | 2.85 | 0.68 | 0.22 | 0.28 |
| 35062 | 0 | 30302  | KEALISLTRGKLTYTQQ                     | 2.83 | 0.01 | 0.78 | 0.44 | 1.13 | 0.85 |

|       |   |        |                                    |      |      |      |      |      |      |
|-------|---|--------|------------------------------------|------|------|------|------|------|------|
| 35063 | 0 | 30302  | KEALISLTRGKLYTQ                    | 2.83 | 0.01 | 0.78 | 0.44 | 1.13 | 1.27 |
| 35064 | 0 | 30302  | KEALISLTRGKLYTQ                    | 2.83 | 0.01 | 0.78 | 0.44 | 1.13 | 1.27 |
| 35065 | 0 | 30302  | KEALISLTRGKLYTQ                    | 2.83 | 0.01 | 0.78 | 0.44 | 1.13 | 1.27 |
| 35066 | 0 | 30302  | KEALISLTRGKLYTQ                    | 2.83 | 0.01 | 0.78 | 0.44 | 1.13 | 1.34 |
| 35067 | 0 | 152697 | KEALKIAGF                          | 2.34 | 0.01 | 2.18 | 2.16 | 0.22 | 0.28 |
| 35068 | 0 | 317429 | KEAPIEATATKTTTA                    | 2.73 | 0.01 | 1.61 | 0.44 | 0.85 | 1.28 |
| 35069 | 0 | 30304  | KEAPTTKPTKP                        | 2.54 | 0.01 | 4.23 | 0.44 | 0.85 | 0.28 |
| 35070 | 0 | 30307  | KEARDQEMN                          | 2.21 | 0.01 | 2.86 | 0.68 | 0.22 | 0.28 |
| 35071 | 0 | 30308  | KEARDQEMNLKEESKEE<br>KRRNDWWKIGMFL | 3.33 | 0.01 | 2.86 | 2.02 | 0.22 | 0.28 |
| 35072 | 0 | 30308  | KEARDQEMNLKEESKEE<br>KRRNDWWKIGMFL | 3.33 | 0.01 | 2.86 | 2.02 | 1.59 | 0.28 |
| 35073 | 0 | 140567 | KEAWLDSTKAT                        | 2.42 | 0.01 | 4.23 | 0.68 | 0.22 | 0.28 |
| 35074 | 0 | 140567 | KEAWLDSTKAT                        | 2.42 | 0.01 | 4.23 | 0.68 | 0.22 | 1.48 |
| 35075 | 0 | 140567 | KEAWLDSTKAT                        | 2.42 | 0.01 | 4.23 | 0.68 | 0.22 | 0.28 |
| 35076 | 0 | 140567 | KEAWLDSTKAT                        | 2.42 | 0.01 | 4.23 | 2.13 | 1.59 | 0.28 |
| 35077 | 0 | 30318  | KECEKYYKEKKGRER                    | 2.73 | 0.01 | 3.12 | 0.44 | 1.23 | 1.57 |
| 35078 | 0 | 158877 | KECPTQNRAWSLEVE                    | 2.69 | 0.01 | 3.05 | 2.49 | 0.22 | 0.28 |
| 35079 | 0 | 181686 | KECRDEPNNKYCSGD                    | 2.68 | 0.01 | 1.66 | 2.36 | 0.22 | 1.28 |
| 35080 | 0 | 130916 | KEDFDIYDEDE                        | 2.44 | 0.01 | 0.78 | 1.15 | 0.22 | 0.85 |
| 35081 | 0 | 130916 | KEDFDIYDEDE                        | 2.44 | 0.01 | 0.78 | 1.15 | 0.22 | 0.85 |
| 35082 | 0 | 130916 | KEDFDIYDEDE                        | 2.44 | 0.01 | 0.78 | 1.15 | 0.22 | 1.34 |
| 35083 | 0 | 130916 | KEDFDIYDEDE                        | 2.44 | 0.01 | 0.78 | 1.15 | 0.22 | 1.27 |
| 35084 | 0 | 130916 | KEDFDIYDEDE                        | 2.44 | 0.01 | 0.78 | 1.15 | 0.22 | 2.75 |
| 35085 | 0 | 130916 | KEDFDIYDEDE                        | 2.44 | 0.01 | 0.78 | 1.15 | 0.22 | 1.27 |
| 35086 | 0 | 145841 | KEDFRYAISSTNEIGLLGA                | 2.86 | 0.01 | 3.81 | 2.78 | 0.22 | 1.75 |
| 35087 | 0 | 145841 | KEDFRYAISSTNEIGLLGA                | 2.86 | 0.01 | 3.81 | 2.78 | 0.22 | 0.28 |
| 35088 | 0 | 145841 | KEDFRYAISSTNEIGLLGA                | 2.86 | 0.01 | 3.81 | 2.78 | 0.22 | 1.34 |
| 35089 | 0 | 145841 | KEDFRYAISSTNEIGLLGA                | 2.86 | 0.01 | 3.81 | 2.78 | 0.22 | 0.28 |
| 35090 | 0 | 145841 | KEDFRYAISSTNEIGLLGA                | 2.86 | 0.01 | 3.21 | 2.78 | 0.22 | 1.75 |
| 35091 | 0 | 145841 | KEDFRYAISSTNEIGLLGA                | 2.86 | 0.01 | 3.21 | 2.78 | 0.22 | 0.28 |
| 35092 | 0 | 145841 | KEDFRYAISSTNEIGLLGA                | 2.86 | 0.01 | 3.21 | 2.78 | 0.22 | 0.28 |

|       |   |        |                             |      |      |      |      |      |      |
|-------|---|--------|-----------------------------|------|------|------|------|------|------|
| 35093 | 0 | 145841 | KEDFRYAISSTNEIGLLGA         | 2.86 | 0.01 | 3.21 | 2.78 | 0.22 | 0.28 |
| 35094 | 0 | 145841 | KEDFRYAISSTNEIGLLGA         | 2.86 | 0.01 | 3.21 | 2.78 | 0.22 | 1.34 |
| 35095 | 0 | 145841 | KEDFRYAISSTNEIGLLGA         | 2.86 | 0.01 | 3.21 | 2.78 | 0.22 | 2.35 |
| 35096 | 0 | 145841 | KEDFRYAISSTNEIGLLGA         | 2.86 | 0.01 | 3.21 | 2.78 | 0.22 | 0.28 |
| 35097 | 0 | 317491 | KEDGDNEDEEVEDEA             | 2.73 | 0.01 | 1.61 | 0.44 | 0.85 | 1.28 |
| 35098 | 0 | 519673 | KEDKQISDASRQGLR             | 2.69 | 0.01 | 2.24 | 0.44 | 1.41 | 1.28 |
| 35099 | 0 | 317503 | KEDNDDDDDDDEPEEE            | 2.70 | 0.01 | 1.61 | 0.44 | 0.85 | 1.28 |
| 35100 | 0 | 99371  | KEDQEEENQGGKGPL             | 2.70 | 0.01 | 2.16 | 0.44 | 1.23 | 1.48 |
| 35101 | 0 | 519675 | KEDQEEENQGGKGPLLS<br>ILKAFN | 3.08 | 0.01 | 2.16 | 0.44 | 1.23 | 1.39 |
| 35102 | 0 | 30332  | KEDTSFGGNLGRAVFQA<br>KKR    | 2.92 | 0.01 | 3.19 | 0.44 | 1.59 | 1.27 |
| 35103 | 0 | 30333  | KEDVPSERYL                  | 2.29 | 0.01 | 1.60 | 0.44 | 1.23 | 0.28 |
| 35104 | 0 | 30333  | KEDVPSERYL                  | 2.29 | 0.01 | 1.60 | 0.44 | 1.23 | 0.28 |
| 35105 | 0 | 30334  | KEDVPSERYLGYLEQLLR<br>LK    | 2.96 | 0.01 | 1.60 | 0.44 | 1.23 | 0.28 |
| 35106 | 0 | 30334  | KEDVPSERYLGYLEQLLR<br>LK    | 2.96 | 0.01 | 1.60 | 0.44 | 1.23 | 1.28 |
| 35107 | 0 | 30337  | KEDYRY                      | 1.90 | 0.01 | 3.37 | 2.13 | 0.22 | 1.34 |
| 35108 | 0 | 30337  | KEDYRY                      | 1.90 | 0.01 | 3.37 | 2.13 | 2.25 | 1.75 |
| 35109 | 0 | 174160 | KEEDDADATEVTSAG             | 2.71 | 0.01 | 2.30 | 2.89 | 0.22 | 0.28 |
| 35110 | 0 | 174160 | KEEDDADATEVTSAG             | 2.71 | 0.01 | 2.30 | 2.89 | 0.22 | 0.28 |
| 35111 | 0 | 317548 | KEEDDADGDEEDYDV             | 2.72 | 0.01 | 1.61 | 0.44 | 0.85 | 1.28 |
| 35112 | 0 | 317553 | KEEDEEEEEDEEEEEE            | 2.73 | 0.01 | 1.61 | 0.44 | 0.85 | 1.28 |
| 35113 | 0 | 115806 | KEEDWICCACQKTRTSR<br>RAKPPQ | 3.07 | 0.01 | 0.78 | 4.15 | 0.22 | 0.28 |
| 35114 | 0 | 317563 | KEEEAGSDEEDQDED             | 2.72 | 0.01 | 1.61 | 0.44 | 0.85 | 1.28 |
| 35115 | 0 | 317566 | KEEEDNDDDDLEEAE             | 2.72 | 0.01 | 1.61 | 0.44 | 0.85 | 1.28 |
| 35116 | 0 | 317569 | KEEEDDDDDDDDEPE             | 2.74 | 0.01 | 1.61 | 0.44 | 0.85 | 1.28 |
| 35117 | 0 | 96447  | KEEEDDKRK                   | 2.37 | 0.01 | 0.78 | 0.44 | 1.93 | 0.85 |
| 35118 | 0 | 317570 | KEEEEEDEEED                 | 2.74 | 0.01 | 1.61 | 0.44 | 0.85 | 1.28 |
| 35119 | 0 | 317572 | KEEEEEEDGIEQVEE             | 2.69 | 0.01 | 1.61 | 0.44 | 0.85 | 1.28 |
| 35120 | 0 | 317573 | KEEEEEEDHEKQQQS             | 2.72 | 0.01 | 1.61 | 0.44 | 0.85 | 1.28 |
| 35121 | 0 | 171686 | KEEEQKWKWWEERY              | 2.72 | 0.01 | 0.78 | 0.44 | 1.13 | 0.28 |
| 35122 | 0 | 171686 | KEEEQKWKWWEERY              | 2.72 | 0.01 | 0.78 | 2.79 | 1.13 | 1.28 |
| 35123 | 0 | 171686 | KEEEQKWKWWEERY              | 2.72 | 0.01 | 0.78 | 2.79 | 1.13 | 1.28 |
| 35124 | 0 | 171686 | KEEEQKWKWWEERY              | 2.72 | 0.01 | 0.78 | 1.81 | 1.41 | 1.28 |
| 35125 | 0 | 171686 | KEEEQKWKWWEERY              | 2.72 | 0.01 | 0.78 | 1.81 | 1.41 | 1.28 |

|       |   |        |                                                  |      |      |      |      |      |      |
|-------|---|--------|--------------------------------------------------|------|------|------|------|------|------|
| 35126 | 0 | 78696  | KEEGEDDTARQEIRKAW<br>VK                          | 2.90 | 0.01 | 3.11 | 1.12 | 0.22 | 1.34 |
| 35127 | 0 | 117540 | KEEGSRSNLGWL                                     | 2.48 | 0.01 | 0.78 | 0.44 | 1.13 | 0.85 |
| 35128 | 0 | 117540 | KEEGSRSNLGWL                                     | 2.48 | 0.01 | 0.78 | 0.44 | 1.13 | 0.85 |
| 35129 | 0 | 117540 | KEEGSRSNLGWL                                     | 2.48 | 0.01 | 0.78 | 0.44 | 1.13 | 0.85 |
| 35130 | 0 | 117540 | KEEGSRSNLGWL                                     | 2.48 | 0.01 | 0.78 | 0.44 | 1.41 | 0.85 |
| 35131 | 0 | 107930 | KEEHKEYVKSNCNL<br>GAQESKNCSE                     | 3.36 | 0.01 | 0.90 | 1.12 | 0.22 | 0.28 |
| 35132 | 0 | 445358 | KEEINKATSPYYGR                                   | 2.64 | 0.01 | 4.63 | 0.44 | 1.23 | 0.28 |
| 35133 | 0 | 30349  | KEEKEEKEEKEKEKE                                  | 2.92 | 0.01 | 1.66 | 0.44 | 0.85 | 0.28 |
| 35134 | 0 | 30349  | KEEKEEKEEKEKEKE                                  | 2.92 | 0.01 | 1.66 | 1.12 | 0.22 | 0.28 |
| 35135 | 0 | 30349  | KEEKEEKEEKEKEKE                                  | 2.92 | 0.01 | 1.66 | 1.12 | 0.22 | 0.85 |
| 35136 | 0 | 30349  | KEEKEEKEEKEKEKE                                  | 2.92 | 0.01 | 1.66 | 1.12 | 0.22 | 1.34 |
| 35137 | 0 | 519680 | KEEKSEDKKSEED                                    | 2.74 | 0.01 | 2.24 | 0.44 | 1.41 | 1.28 |
| 35138 | 0 | 171688 | KEEKLKIENEKLL                                    | 2.74 | 0.01 | 0.78 | 0.44 | 1.41 | 0.28 |
| 35139 | 0 | 519681 | KEEKQISDASRQLR                                   | 2.68 | 0.01 | 2.24 | 0.44 | 1.41 | 1.28 |
| 35140 | 0 | 171689 | KEEMELKLKEKNDLD                                  | 2.74 | 0.01 | 0.78 | 0.44 | 1.13 | 0.28 |
| 35141 | 0 | 132397 | KEENLVKSLVSAGSG                                  | 2.71 | 0.01 | 2.82 | 0.68 | 0.22 | 1.27 |
| 35142 | 0 | 132397 | KEENLVKSLVSAGSG                                  | 2.71 | 0.01 | 2.82 | 0.68 | 0.22 | 1.48 |
| 35143 | 0 | 132397 | KEENLVKSLVSAGSG                                  | 2.71 | 0.01 | 2.82 | 0.68 | 0.22 | 0.28 |
| 35144 | 0 | 30361  | KEENVEHDAEENVEHD<br>A                            | 2.85 | 0.01 | 0.90 | 0.44 | 1.74 | 0.28 |
| 35145 | 0 | 98155  | KEEPTAAP                                         | 2.14 | 0.01 | 2.60 | 0.44 | 1.23 | 0.85 |
| 35146 | 0 | 98155  | KEEPTAAP                                         | 2.14 | 0.01 | 2.60 | 0.68 | 0.22 | 0.85 |
| 35147 | 0 | 132398 | KEERRSRER                                        | 2.37 | 0.01 | 0.78 | 0.44 | 1.13 | 0.28 |
| 35148 | 0 | 129058 | KEESESEDEDMGFGL                                  | 2.71 | 0.01 | 0.78 | 0.44 | 1.13 | 0.85 |
| 35149 | 0 | 30370  | KEFED                                            | 1.75 | 0.01 | 2.69 | 0.44 | 0.85 | 0.28 |
| 35150 | 0 | 78428  | KEFQMGAKPTTTTGNA<br>VAPSTLTARENPAYGRH<br>MQDAEMF | 3.61 | 0.01 | 3.03 | 0.68 | 0.22 | 0.28 |
| 35151 | 0 | 30386  | KEFSEVEGRIQDLEKYV                                | 2.78 | 0.01 | 3.27 | 0.68 | 0.22 | 1.57 |
| 35152 | 0 | 30386  | KEFSEVEGRIQDLEKYV                                | 2.78 | 0.01 | 3.27 | 0.68 | 0.22 | 1.57 |
| 35153 | 0 | 30386  | KEFSEVEGRIQDLEKYV                                | 2.78 | 0.01 | 2.36 | 0.44 | 0.85 | 1.57 |
| 35154 | 0 | 30386  | KEFSEVEGRIQDLEKYV                                | 2.78 | 0.01 | 2.36 | 1.15 | 0.22 | 1.57 |
| 35155 | 0 | 30386  | KEFSEVEGRIQDLEKYV                                | 2.78 | 0.01 | 2.36 | 1.15 | 0.22 | 1.57 |
| 35156 | 0 | 30386  | KEFSEVEGRIQDLEKYV                                | 2.78 | 0.01 | 2.36 | 1.15 | 0.22 | 1.57 |
| 35157 | 0 | 171691 | KEFTPYDYSQSDFKA                                  | 2.69 | 0.01 | 0.78 | 0.44 | 1.41 | 0.28 |

|       |   |        |                                               |      |      |      |      |      |      |
|-------|---|--------|-----------------------------------------------|------|------|------|------|------|------|
| 35158 | 0 | 99372  | KEGALMLPHFNSKAM                               | 2.67 | 0.01 | 2.16 | 0.44 | 1.23 | 1.48 |
| 35159 | 0 | 99372  | KEGALMLPHFNSKAM                               | 2.67 | 0.01 | 2.16 | 0.44 | 1.23 | 1.48 |
| 35160 | 0 | 98843  | KEGDVFIMPAAHPVA                               | 2.66 | 0.01 | 2.16 | 0.44 | 1.23 | 1.48 |
| 35161 | 0 | 30399  | KEGGLSVALKEECCFYVD<br>HSG                     | 2.98 | 0.01 | 4.23 | 1.15 | 0.22 | 1.27 |
| 35162 | 0 | 30399  | KEGGLSVALKEECCFYVD<br>HSG                     | 2.98 | 0.01 | 4.23 | 1.15 | 0.22 | 1.34 |
| 35163 | 0 | 489611 | KEGHWARDCPTKATG                               | 2.67 | 0.01 | 2.69 | 3.05 | 0.85 | 1.28 |
| 35164 | 0 | 115306 | KEGIHAQQKEPMIGVN<br>QELA                      | 2.95 | 0.01 | 1.60 | 0.44 | 1.23 | 1.28 |
| 35165 | 0 | 104850 | KEGILQYCQEVYPELQ                              | 2.75 | 0.01 | 0.78 | 0.68 | 0.22 | 0.28 |
| 35166 | 0 | 104850 | KEGILQYCQEVYPELQ                              | 2.75 | 0.01 | 0.78 | 0.68 | 0.22 | 1.27 |
| 35167 | 0 | 104850 | KEGILQYCQEVYPELQ                              | 2.75 | 0.01 | 0.78 | 0.68 | 0.22 | 0.85 |
| 35168 | 0 | 194939 | KEGLEIGKDITADNKPIY<br>ADK                     | 3.02 | 0.01 | 3.85 | 0.68 | 0.22 | 1.34 |
| 35169 | 0 | 194939 | KEGLEIGKDITADNKPIY<br>ADK                     | 3.02 | 0.01 | 3.85 | 0.68 | 2.25 | 1.75 |
| 35170 | 0 | 194939 | KEGLEIGKDITADNKPIY<br>ADK                     | 3.02 | 0.01 | 3.85 | 0.68 | 0.22 | 1.34 |
| 35171 | 0 | 194940 | KEGLQIGKDITTTEGEEK<br>PIYADK                  | 3.14 | 0.01 | 3.12 | 0.68 | 0.22 | 1.34 |
| 35172 | 0 | 194940 | KEGLQIGKDITTTEGEEK<br>PIYADK                  | 3.14 | 0.01 | 3.12 | 0.68 | 0.22 | 1.34 |
| 35173 | 0 | 30407  | KEGLRNITAGANPIEVKR<br>GM                      | 2.95 | 0.01 | 2.93 | 0.44 | 1.59 | 0.28 |
| 35174 | 0 | 125455 | KEGNLLIE                                      | 2.13 | 0.01 | 3.06 | 0.68 | 0.22 | 1.48 |
| 35175 | 0 | 125455 | KEGNLLIE                                      | 2.13 | 0.01 | 3.06 | 0.68 | 0.22 | 1.48 |
| 35176 | 0 | 125455 | KEGNLLIE                                      | 2.13 | 0.01 | 3.06 | 0.68 | 0.22 | 0.85 |
| 35177 | 0 | 125455 | KEGNLLIE                                      | 2.13 | 0.01 | 3.06 | 0.68 | 0.22 | 1.48 |
| 35178 | 0 | 125455 | KEGNLLIE                                      | 2.13 | 0.01 | 3.06 | 0.68 | 0.22 | 1.48 |
| 35179 | 0 | 125455 | KEGNLLIE                                      | 2.13 | 0.01 | 3.06 | 0.68 | 0.22 | 0.85 |
| 35180 | 0 | 125455 | KEGNLLIE                                      | 2.13 | 0.01 | 3.06 | 0.68 | 0.22 | 0.85 |
| 35181 | 0 | 125455 | KEGNLLIE                                      | 2.13 | 0.01 | 3.06 | 0.68 | 0.22 | 0.85 |
| 35182 | 0 | 125455 | KEGNLLIE                                      | 2.13 | 0.01 | 3.06 | 0.68 | 0.22 | 0.85 |
| 35183 | 0 | 30409  | KEGRFKSQ                                      | 2.13 | 0.01 | 2.21 | 1.12 | 0.22 | 0.28 |
| 35184 | 0 | 30409  | KEGRFKSQ                                      | 2.13 | 0.01 | 2.21 | 0.44 | 0.85 | 0.28 |
| 35185 | 0 | 30415  | KEGTVTLSKNIS                                  | 2.48 | 0.01 | 2.73 | 0.44 | 0.85 | 0.28 |
| 35186 | 0 | 30416  | KEGTVTLSKNISKSGEVS<br>VELNDTDSSAATKKTA        | 3.50 | 0.01 | 2.97 | 0.44 | 0.85 | 0.85 |
| 35187 | 0 | 30417  | KEGTVTLSKNISKSGEVS<br>VELNDTDSSAATKKTAA<br>WN | 3.57 | 0.01 | 2.97 | 0.68 | 0.22 | 0.85 |

|       |   |        |                                 |      |      |      |      |      |      |
|-------|---|--------|---------------------------------|------|------|------|------|------|------|
| 35188 | 0 | 158878 | KEGVCGLRSVSRLEHQ                | 2.75 | 0.01 | 3.05 | 2.49 | 0.22 | 0.28 |
| 35189 | 0 | 158878 | KEGVCGLRSVSRLEHQ                | 2.75 | 0.01 | 3.05 | 2.43 | 0.22 | 0.28 |
| 35190 | 0 | 158878 | KEGVCGLRSVSRLEHQ                | 2.75 | 0.01 | 3.04 | 0.68 | 0.22 | 0.85 |
| 35191 | 0 | 114431 | KEGVVAAAETKQGVTE<br>AAETKEG     | 3.22 | 0.01 | 1.75 | 2.04 | 0.22 | 0.28 |
| 35192 | 0 | 30419  | KEGYAMDHEGCKFSC                 | 2.67 | 0.01 | 2.56 | 2.02 | 0.22 | 0.28 |
| 35193 | 0 | 135943 | KEGYKVRDLNITLEFRT<br>TSK        | 2.98 | 0.01 | 1.75 | 0.44 | 1.41 | 0.28 |
| 35194 | 0 | 135943 | KEGYKVRDLNITLEFRT<br>TSK        | 2.98 | 0.01 | 1.75 | 0.44 | 1.13 | 0.28 |
| 35195 | 0 | 135943 | KEGYKVRDLNITLEFRT<br>TSK        | 2.98 | 0.01 | 1.75 | 0.44 | 1.13 | 0.28 |
| 35196 | 0 | 135943 | KEGYKVRDLNITLEFRT<br>TSK        | 2.98 | 0.01 | 1.75 | 0.44 | 1.13 | 0.28 |
| 35197 | 0 | 135943 | KEGYKVRDLNITLEFRT<br>TSK        | 2.98 | 0.01 | 1.75 | 2.84 | 1.13 | 0.28 |
| 35198 | 0 | 135943 | KEGYKVRDLNITLEFRT<br>TSK        | 2.98 | 0.01 | 1.75 | 3.05 | 2.60 | 1.75 |
| 35199 | 0 | 135943 | KEGYKVRDLNITLEFRT<br>TSK        | 2.98 | 0.01 | 1.75 | 3.05 | 1.13 | 1.75 |
| 35200 | 0 | 135943 | KEGYKVRDLNITLEFRT<br>TSK        | 2.98 | 0.01 | 1.75 | 2.84 | 1.13 | 0.28 |
| 35201 | 0 | 135943 | KEGYKVRDLNITLEFRT<br>TSK        | 2.98 | 0.01 | 1.75 | 2.84 | 1.13 | 1.27 |
| 35202 | 0 | 135943 | KEGYKVRDLNITLEFRT<br>TSK        | 2.98 | 0.01 | 1.75 | 0.44 | 1.13 | 0.28 |
| 35203 | 0 | 135943 | KEGYKVRDLNITLEFRT<br>TSK        | 2.98 | 0.01 | 1.75 | 3.05 | 1.13 | 0.28 |
| 35204 | 0 | 135943 | KEGYKVRDLNITLEFRT<br>TSK        | 2.98 | 0.01 | 1.75 | 0.44 | 1.13 | 0.28 |
| 35205 | 0 | 123347 | KEGYLKDLP                       | 2.24 | 0.01 | 2.28 | 2.00 | 0.22 | 0.28 |
| 35206 | 0 | 30420  | KEGYLMDHEGCKLSC                 | 2.69 | 0.01 | 2.56 | 2.02 | 0.22 | 0.28 |
| 35207 | 0 | 30421  | KEGYLVDKNT                      | 2.30 | 0.01 | 3.75 | 2.71 | 0.22 | 0.28 |
| 35208 | 0 | 30421  | KEGYLVDKNT                      | 2.30 | 0.01 | 3.75 | 2.71 | 0.22 | 0.28 |
| 35209 | 0 | 30422  | KEGYLVDKNTGCKY                  | 2.62 | 0.01 | 3.75 | 2.71 | 0.22 | 0.28 |
| 35210 | 0 | 30422  | KEGYLVDKNTGCKY                  | 2.62 | 0.01 | 3.75 | 2.71 | 0.22 | 0.28 |
| 35211 | 0 | 30423  | KEGYLVDKNTGCKYECL<br>KLGDNDYCLR | 3.27 | 0.01 | 3.75 | 2.71 | 0.22 | 0.28 |
| 35212 | 0 | 30423  | KEGYLVDKNTGCKYECL<br>KLGDNDYCLR | 3.27 | 0.01 | 3.75 | 2.71 | 0.22 | 0.28 |
| 35213 | 0 | 30423  | KEGYLVDKNTGCKYECL<br>KLGDNDYCLR | 3.27 | 0.01 | 3.75 | 2.71 | 0.22 | 1.34 |
| 35214 | 0 | 30424  | KEHDGECKETV                     | 2.42 | 0.01 | 2.25 | 0.44 | 1.23 | 0.85 |

|       |   |        |                                    |      |      |      |      |      |      |
|-------|---|--------|------------------------------------|------|------|------|------|------|------|
| 35215 | 0 | 30435  | KEIDRLNEVAKNLNESL                  | 2.82 | 0.01 | 2.48 | 0.68 | 0.22 | 0.28 |
| 35216 | 0 | 480296 | KEIEASVPGEQSQLNAQ<br>K             | 2.86 | 0.01 | 3.12 | 0.68 | 0.22 | 0.28 |
| 35217 | 0 | 111445 | KEIEAYIFEMFNENQ                    | 2.70 | 0.01 | 3.20 | 1.12 | 0.22 | 0.85 |
| 35218 | 0 | 30436  | KEIEKLYTSYLSITFLRDP<br>WGNP        | 3.07 | 0.01 | 2.95 | 0.44 | 0.22 | 0.28 |
| 35219 | 0 | 489612 | KEIENKAPGSQVWIIQ                   | 2.67 | 0.01 | 2.69 | 3.05 | 0.85 | 1.28 |
| 35220 | 0 | 129060 | KEIKKVATPKKASKPKK                  | 2.83 | 0.01 | 0.78 | 0.44 | 1.13 | 0.28 |
| 35221 | 0 | 129060 | KEIKKVATPKKASKPKK                  | 2.83 | 0.01 | 0.78 | 0.44 | 1.13 | 0.28 |
| 35222 | 0 | 129060 | KEIKKVATPKKASKPKK                  | 2.83 | 0.01 | 0.78 | 1.12 | 0.22 | 0.28 |
| 35223 | 0 | 129060 | KEIKKVATPKKASKPKK                  | 2.83 | 0.01 | 0.78 | 0.44 | 1.13 | 0.28 |
| 35224 | 0 | 30444  | KEILKKVKEKIDKSR                    | 2.72 | 0.01 | 4.08 | 2.66 | 0.22 | 0.85 |
| 35225 | 0 | 30445  | KEILYEAFD                          | 2.21 | 0.01 | 2.69 | 0.44 | 0.85 | 0.28 |
| 35226 | 0 | 176016 | KEIQGMMMDASEGTNY                   | 2.63 | 0.01 | 2.63 | 1.15 | 0.22 | 0.85 |
| 35227 | 0 | 30448  | KEIQMLKNQILSLEESIKS<br>LNEFINNLKN  | 3.36 | 0.01 | 2.22 | 0.44 | 1.74 | 0.28 |
| 35228 | 0 | 30448  | KEIQMLKNQILSLEESIKS<br>LNEFINNLKN  | 3.36 | 0.01 | 2.22 | 0.44 | 1.74 | 0.28 |
| 35229 | 0 | 30448  | KEIQMLKNQILSLEESIKS<br>LNEFINNLKN  | 3.36 | 0.01 | 2.22 | 0.44 | 1.74 | 0.28 |
| 35230 | 0 | 30448  | KEIQMLKNQILSLEESIKS<br>LNEFINNLKN  | 3.36 | 0.01 | 2.22 | 0.44 | 1.74 | 0.28 |
| 35231 | 0 | 30448  | KEIQMLKNQILSLEESIKS<br>LNEFINNLKN  | 3.36 | 0.01 | 2.22 | 0.44 | 1.74 | 0.28 |
| 35232 | 0 | 30448  | KEIQMLKNQILSLEESIKS<br>LNEFINNLKN  | 3.36 | 0.01 | 2.22 | 0.44 | 1.74 | 0.28 |
| 35233 | 0 | 134701 | KEIRKLQKSTHLLIR                    | 2.70 | 0.01 | 0.78 | 3.05 | 1.13 | 0.85 |
| 35234 | 0 | 134701 | KEIRKLQKSTHLLIR                    | 2.70 | 0.01 | 0.78 | 0.44 | 1.13 | 0.28 |
| 35235 | 0 | 118448 | KEISQEAREGTQGERCA<br>V             | 2.85 | 0.01 | 0.78 | 0.44 | 1.13 | 0.28 |
| 35236 | 0 | 118448 | KEISQEAREGTQGERCA<br>V             | 2.85 | 0.01 | 0.78 | 0.44 | 1.13 | 0.28 |
| 35237 | 0 | 107933 | KEKALEAMKNSFYDCYII<br>KGSDMLTNIQFK | 3.33 | 0.01 | 0.90 | 1.12 | 0.22 | 0.28 |
| 35238 | 0 | 106557 | KEKEPSKGCCSG                       | 2.52 | 0.01 | 3.08 | 0.44 | 1.23 | 0.85 |
| 35239 | 0 | 134702 | KEKKYS                             | 1.92 | 0.01 | 0.78 | 0.68 | 0.22 | 1.34 |
| 35240 | 0 | 134702 | KEKKYS                             | 1.92 | 0.01 | 0.78 | 0.68 | 0.22 | 1.34 |
| 35241 | 0 | 134702 | KEKKYS                             | 1.92 | 0.01 | 0.78 | 0.68 | 0.22 | 0.28 |
| 35242 | 0 | 134702 | KEKKYS                             | 1.92 | 0.01 | 0.78 | 0.68 | 0.22 | 0.28 |
| 35243 | 0 | 134702 | KEKKYS                             | 1.92 | 0.01 | 0.78 | 0.68 | 0.22 | 1.27 |
| 35244 | 0 | 134702 | KEKKYS                             | 1.92 | 0.01 | 0.78 | 0.68 | 0.22 | 1.27 |

|       |   |        |                              |      |      |      |      |      |      |
|-------|---|--------|------------------------------|------|------|------|------|------|------|
| 35245 | 0 | 134702 | KEKKYS                       | 1.92 | 0.01 | 0.78 | 2.00 | 0.22 | 1.27 |
| 35246 | 0 | 30472  | KEKLQERL                     | 2.17 | 0.01 | 2.99 | 0.44 | 0.85 | 0.28 |
| 35247 | 0 | 30473  | KEKLQKTY                     | 2.15 | 0.01 | 1.66 | 0.44 | 1.74 | 0.28 |
| 35248 | 0 | 30474  | KEKLQKTYSQ                   | 2.34 | 0.01 | 1.66 | 0.44 | 1.74 | 0.28 |
| 35249 | 0 | 30476  | KEKMILNEEEITTKG              | 2.70 | 0.01 | 3.26 | 0.44 | 0.85 | 0.28 |
| 35250 | 0 | 30477  | KEKMILLNEEEITTKG             | 2.69 | 0.01 | 1.66 | 0.44 | 0.85 | 0.28 |
| 35251 | 0 | 30478  | KEKMVLKDGANTQVV              | 2.65 | 0.01 | 3.97 | 0.44 | 0.85 | 0.28 |
| 35252 | 0 | 30479  | KEKMVLNEEEITTKG              | 2.68 | 0.01 | 1.66 | 0.44 | 0.85 | 0.28 |
| 35253 | 0 | 30480  | KEKMVLNEGTSGTAV              | 2.69 | 0.01 | 3.57 | 0.44 | 0.85 | 0.28 |
| 35254 | 0 | 108492 | KEKSKFEDMAKSDKA              | 2.73 | 0.01 | 0.78 | 0.44 | 1.13 | 1.27 |
| 35255 | 0 | 318002 | KEKTDEAEDEEDDD               | 2.72 | 0.01 | 1.61 | 0.44 | 0.85 | 1.28 |
| 35256 | 0 | 115068 | KEKVNELSKDIG                 | 2.48 | 0.01 | 1.60 | 0.44 | 1.23 | 1.27 |
| 35257 | 0 | 229694 | KEKVNELSKDIGSES              | 2.71 | 0.01 | 1.60 | 0.44 | 1.23 | 1.28 |
| 35258 | 0 | 423377 | KEYEQHKITSYLS                | 2.71 | 0.01 | 2.51 | 0.44 | 2.35 | 1.28 |
| 35259 | 0 | 114870 | KELAAVSVDC                   | 2.30 | 0.01 | 2.25 | 0.44 | 1.23 | 0.85 |
| 35260 | 0 | 30491  | KELAGSKL                     | 2.15 | 0.01 | 3.53 | 2.61 | 0.22 | 0.28 |
| 35261 | 0 | 229283 | KELEIEKLQYE                  | 2.45 | 0.01 | 2.70 | 0.68 | 0.22 | 0.28 |
| 35262 | 0 | 30497  | KELFLASHMKDS                 | 2.48 | 0.01 | 0.90 | 0.68 | 0.22 | 1.39 |
| 35263 | 0 | 99374  | KELFTN                       | 1.88 | 0.01 | 2.24 | 1.20 | 0.22 | 0.28 |
| 35264 | 0 | 30504  | KELLDKTSRTGDEV<br>RALA<br>ND | 2.96 | 0.01 | 2.93 | 1.81 | 0.22 | 0.28 |
| 35265 | 0 | 30504  | KELLDKTSRTGDEV<br>RALA<br>ND | 2.96 | 0.01 | 2.93 | 2.69 | 0.22 | 0.28 |
| 35266 | 0 | 141544 | KELLQEGYEEIVGETP<br>SF<br>KK | 2.93 | 0.01 | 3.45 | 1.12 | 0.22 | 0.85 |
| 35267 | 0 | 141544 | KELLQEGYEEIVGETP<br>SF<br>KK | 2.93 | 0.01 | 3.45 | 1.12 | 0.22 | 0.85 |
| 35268 | 0 | 141544 | KELLQEGYEEIVGETP<br>SF<br>KK | 2.93 | 0.01 | 3.45 | 0.44 | 0.85 | 0.85 |
| 35269 | 0 | 123348 | KELPKTLKM                    | 2.26 | 0.01 | 2.28 | 2.00 | 0.22 | 0.28 |
| 35270 | 0 | 123349 | KELPTTLKM                    | 2.25 | 0.01 | 2.28 | 2.00 | 0.22 | 0.28 |
| 35271 | 0 | 519717 | KELQQDYDLAKESTS              | 2.70 | 0.01 | 2.24 | 0.44 | 1.41 | 1.28 |
| 35272 | 0 | 30513  | KELRQRAFTS                   | 2.29 | 0.01 | 1.75 | 0.68 | 0.22 | 0.28 |
| 35273 | 0 | 30513  | KELRQRAFTS                   | 2.29 | 0.01 | 1.75 | 0.68 | 0.22 | 0.28 |
| 35274 | 0 | 30516  | KELSQCTL                     | 2.15 | 0.01 | 2.83 | 1.12 | 0.22 | 0.28 |
| 35275 | 0 | 115807 | KEMPFPKYPV                   | 2.34 | 0.01 | 1.60 | 0.44 | 1.23 | 0.85 |
| 35276 | 0 | 115807 | KEMPFPKYPV                   | 2.34 | 0.01 | 1.60 | 0.44 | 1.23 | 0.85 |
| 35277 | 0 | 30533  | KEMPFPKYPVEPFT               | 2.65 | 0.01 | 1.60 | 0.44 | 1.23 | 0.85 |
| 35278 | 0 | 519721 | KEMPLSAEKEEKKS               | 2.72 | 0.01 | 2.24 | 0.44 | 1.41 | 1.28 |
| 35279 | 0 | 179067 | KEMQDGILELIKIEK              | 2.72 | 0.01 | 2.36 | 0.44 | 1.23 | 1.28 |
| 35280 | 0 | 179067 | KEMQDGILELIKIEK              | 2.72 | 0.01 | 2.36 | 0.44 | 1.23 | 1.27 |
| 35281 | 0 | 179067 | KEMQDGILELIKIEK              | 2.72 | 0.01 | 2.36 | 0.44 | 1.23 | 1.28 |
| 35282 | 0 | 30537  | KENCGA                       | 1.88 | 0.01 | 2.22 | 1.15 | 0.22 | 0.28 |
| 35283 | 0 | 84241  | KENKTEPKESK                  | 2.52 | 0.01 | 4.15 | 1.12 | 0.22 | 0.28 |
| 35284 | 0 | 480382 | KENLKKFINNCQIEKKET           | 2.87 | 0.01 | 3.12 | 0.68 | 0.22 | 0.28 |



|       |   |        |                          |      |      |      |      |      |      |
|-------|---|--------|--------------------------|------|------|------|------|------|------|
| 35285 | 0 | 191085 | KENSKRW                  | 2.03 | 0.01 | 4.03 | 3.55 | 0.22 | 0.85 |
| 35286 | 0 | 191085 | KENSKRW                  | 2.03 | 0.01 | 4.03 | 3.55 | 0.22 | 0.85 |
| 35287 | 0 | 134115 | KENVKDYQKWMEEQ<br>AQS    | 2.84 | 0.01 | 0.78 | 0.44 | 1.13 | 0.85 |
| 35288 | 0 | 134115 | KENVKDYQKWMEEQ<br>AQS    | 2.84 | 0.01 | 0.78 | 1.12 | 0.22 | 0.85 |
| 35289 | 0 | 30553  | KENYIYGTCYYTASDRTA<br>FP | 2.90 | 0.01 | 3.42 | 1.12 | 0.22 | 0.28 |
| 35290 | 0 | 30553  | KENYIYGTCYYTASDRTA<br>FP | 2.90 | 0.01 | 3.42 | 1.12 | 0.22 | 0.28 |
| 35291 | 0 | 30553  | KENYIYGTCYYTASDRTA<br>FP | 2.90 | 0.01 | 3.42 | 1.12 | 0.22 | 0.28 |
| 35292 | 0 | 30553  | KENYIYGTCYYTASDRTA<br>FP | 2.90 | 0.01 | 3.42 | 1.12 | 0.22 | 0.28 |
| 35293 | 0 | 165615 | KEPAFML                  | 1.99 | 0.01 | 0.90 | 0.44 | 1.23 | 1.39 |
| 35294 | 0 | 240888 | KEPAPTTT                 | 2.12 | 3.85 | 0.78 | 1.15 | 0.22 | 0.85 |
| 35295 | 0 | 240888 | KEPAPTTT                 | 2.12 | 3.85 | 0.78 | 1.15 | 0.22 | 0.85 |
| 35296 | 0 | 240888 | KEPAPTTT                 | 2.12 | 3.85 | 0.78 | 1.15 | 0.22 | 0.85 |
| 35297 | 0 | 240888 | KEPAPTTT                 | 2.12 | 3.85 | 0.78 | 1.15 | 0.22 | 0.85 |
| 35298 | 0 | 240888 | KEPAPTTT                 | 2.12 | 3.85 | 0.78 | 1.15 | 0.22 | 0.85 |
| 35299 | 0 | 240888 | KEPAPTTT                 | 2.12 | 3.85 | 0.78 | 1.15 | 0.22 | 0.85 |
| 35300 | 0 | 240888 | KEPAPTTT                 | 2.12 | 3.85 | 0.78 | 1.15 | 0.22 | 0.85 |
| 35301 | 0 | 240888 | KEPAPTTT                 | 2.12 | 3.85 | 0.78 | 1.15 | 0.22 | 0.85 |
| 35302 | 0 | 240888 | KEPAPTTT                 | 2.12 | 3.85 | 0.78 | 1.15 | 0.22 | 0.85 |
| 35303 | 0 | 240888 | KEPAPTTT                 | 2.12 | 3.85 | 0.78 | 1.15 | 0.22 | 0.28 |
| 35304 | 0 | 240888 | KEPAPTTT                 | 2.12 | 3.85 | 0.78 | 1.15 | 0.22 | 2.02 |
| 35305 | 0 | 240888 | KEPAPTTT                 | 2.12 | 3.85 | 0.78 | 1.15 | 0.22 | 2.92 |
| 35306 | 0 | 30560  | KEPGGEVVDVEKRG           | 2.73 | 0.01 | 2.43 | 1.20 | 0.22 | 0.28 |
| 35307 | 0 | 30561  | KEPGVLMGGQSESVE          | 2.69 | 0.01 | 2.24 | 1.15 | 0.22 | 0.85 |
| 35308 | 0 | 30561  | KEPGVLMGGQSESVE          | 2.69 | 0.01 | 2.24 | 1.15 | 0.22 | 0.85 |
| 35309 | 0 | 509254 | KEPHAGGPGDIELGP          | 2.70 | 0.01 | 0.78 | 0.44 | 1.13 | 1.28 |
| 35310 | 0 | 131928 | KEPQSRLRKWTTVDS          | 2.66 | 0.01 | 0.78 | 0.44 | 1.13 | 0.85 |
| 35311 | 0 | 30567  | KEQAISALPDYASQPGK<br>PPR | 2.94 | 0.01 | 2.58 | 0.44 | 0.22 | 0.28 |
| 35312 | 0 | 138456 | KEQFEFALTAVAEV           | 2.71 | 0.01 | 0.78 | 1.12 | 0.22 | 1.27 |
| 35313 | 0 | 138456 | KEQFEFALTAVAEV           | 2.71 | 0.01 | 0.78 | 1.12 | 0.22 | 0.28 |
| 35314 | 0 | 138456 | KEQFEFALTAVAEV           | 2.71 | 0.01 | 0.78 | 1.12 | 0.22 | 0.28 |
| 35315 | 0 | 138456 | KEQFEFALTAVAEV           | 2.71 | 0.01 | 0.78 | 1.12 | 0.22 | 0.28 |
| 35316 | 0 | 138456 | KEQFEFALTAVAEV           | 2.71 | 0.01 | 0.78 | 1.12 | 0.22 | 0.28 |
| 35317 | 0 | 138456 | KEQFEFALTAVAEV           | 2.71 | 0.01 | 0.78 | 1.12 | 0.22 | 1.27 |
| 35318 | 0 | 138456 | KEQFEFALTAVAEV           | 2.71 | 0.01 | 0.78 | 1.12 | 0.22 | 1.27 |
| 35319 | 0 | 138456 | KEQFEFALTAVAEV           | 2.71 | 0.01 | 0.78 | 1.12 | 0.22 | 0.28 |
| 35320 | 0 | 138456 | KEQFEFALTAVAEV           | 2.71 | 0.01 | 0.78 | 1.12 | 0.22 | 0.85 |
| 35321 | 0 | 138456 | KEQFEFALTAVAEV           | 2.71 | 0.01 | 0.78 | 1.12 | 0.22 | 0.28 |
| 35322 | 0 | 138456 | KEQFEFALTAVAEV           | 2.71 | 0.01 | 0.78 | 1.12 | 0.22 | 0.28 |
| 35323 | 0 | 138456 | KEQFEFALTAVAEV           | 2.71 | 0.01 | 0.78 | 1.12 | 0.22 | 0.28 |
| 35324 | 0 | 138456 | KEQFEFALTAVAEV           | 2.71 | 0.01 | 0.78 | 1.12 | 0.22 | 0.28 |

|       |   |        |                                     |      |      |      |      |      |      |
|-------|---|--------|-------------------------------------|------|------|------|------|------|------|
| 35325 | 0 | 138456 | KEQFEFALTAVAEV                      | 2.71 | 0.01 | 0.78 | 1.12 | 0.22 | 0.28 |
| 35326 | 0 | 138456 | KEQFEFALTAVAEV                      | 2.71 | 0.01 | 0.78 | 1.12 | 0.22 | 0.28 |
| 35327 | 0 | 138456 | KEQFEFALTAVAEV                      | 2.71 | 0.01 | 0.78 | 3.33 | 0.22 | 0.28 |
| 35328 | 0 | 138456 | KEQFEFALTAVAEV                      | 2.71 | 0.01 | 0.78 | 0.44 | 0.85 | 0.28 |
| 35329 | 0 | 138456 | KEQFEFALTAVAEV                      | 2.71 | 0.01 | 0.78 | 1.12 | 0.22 | 0.85 |
| 35330 | 0 | 138456 | KEQFEFALTAVAEV                      | 2.71 | 0.01 | 0.78 | 1.12 | 0.22 | 0.85 |
| 35331 | 0 | 138456 | KEQFEFALTAVAEV                      | 2.71 | 0.01 | 0.78 | 1.12 | 0.22 | 0.85 |
| 35332 | 0 | 138456 | KEQFEFALTAVAEV                      | 2.71 | 0.01 | 0.78 | 1.12 | 0.22 | 0.85 |
| 35333 | 0 | 135944 | KEQFEFALTAVAEVC                     | 2.76 | 0.01 | 0.78 | 0.44 | 1.13 | 0.28 |
| 35334 | 0 | 135944 | KEQFEFALTAVAEVC                     | 2.76 | 0.01 | 0.78 | 0.44 | 1.41 | 0.28 |
| 35335 | 0 | 135944 | KEQFEFALTAVAEVC                     | 2.76 | 0.01 | 0.78 | 0.44 | 0.85 | 0.28 |
| 35336 | 0 | 418995 | KEQFFQLQHLSADYPK<br>QVQTVYEFLGWVADK | 3.40 | 0.01 | 3.10 | 0.68 | 0.22 | 0.28 |
| 35337 | 0 | 418995 | KEQFFQLQHLSADYPK<br>QVQTVYEFLGWVADK | 3.40 | 0.01 | 3.10 | 0.68 | 0.22 | 0.28 |
| 35338 | 0 | 418995 | KEQFFQLQHLSADYPK<br>QVQTVYEFLGWVADK | 3.40 | 0.01 | 3.10 | 0.68 | 0.22 | 1.75 |
| 35339 | 0 | 418995 | KEQFFQLQHLSADYPK<br>QVQTVYEFLGWVADK | 3.40 | 0.01 | 3.10 | 0.68 | 0.22 | 1.75 |
| 35340 | 0 | 117015 | KEQFLDGDGWTSRWIE<br>SK              | 2.84 | 0.01 | 0.78 | 0.44 | 1.13 | 0.28 |
| 35341 | 0 | 117015 | KEQFLDGDGWTSRWIE<br>SK              | 2.84 | 0.01 | 0.78 | 0.44 | 1.13 | 0.28 |
| 35342 | 0 | 117015 | KEQFLDGDGWTSRWIE<br>SK              | 2.84 | 0.01 | 0.78 | 0.44 | 1.41 | 0.28 |
| 35343 | 0 | 117015 | KEQFLDGDGWTSRWIE<br>SK              | 2.84 | 0.01 | 0.78 | 0.44 | 1.93 | 0.28 |
| 35344 | 0 | 117015 | KEQFLDGDGWTSRWIE<br>SK              | 2.84 | 0.01 | 0.78 | 0.44 | 1.13 | 0.28 |
| 35345 | 0 | 117015 | KEQFLDGDGWTSRWIE<br>SK              | 2.84 | 0.01 | 0.78 | 0.44 | 1.13 | 1.27 |
| 35346 | 0 | 117015 | KEQFLDGDGWTSRWIE<br>SK              | 2.84 | 0.01 | 0.78 | 0.44 | 1.13 | 0.28 |
| 35347 | 0 | 131508 | KEQIKLDEGWVPLEI                     | 2.69 | 0.01 | 0.78 | 0.44 | 1.41 | 0.28 |
| 35348 | 0 | 131508 | KEQIKLDEGWVPLEI                     | 2.69 | 0.01 | 0.78 | 0.44 | 1.13 | 0.28 |
| 35349 | 0 | 171702 | KEQKLGLENAEALIR                     | 2.71 | 0.01 | 0.78 | 0.44 | 1.13 | 0.28 |
| 35350 | 0 | 30575  | KEQKSKQNIGALKQELA<br>KKDEANKISDASR  | 3.38 | 0.01 | 2.85 | 1.20 | 0.22 | 0.28 |
| 35351 | 0 | 30575  | KEQKSKQNIGALKQELA<br>KKDEANKISDASR  | 3.38 | 0.01 | 2.85 | 1.20 | 0.22 | 0.28 |
| 35352 | 0 | 30575  | KEQKSKQNIGALKQELA<br>KKDEANKISDASR  | 3.38 | 0.01 | 2.85 | 1.20 | 0.22 | 0.28 |

|       |   |        |                                                           |      |      |      |      |      |      |
|-------|---|--------|-----------------------------------------------------------|------|------|------|------|------|------|
| 35353 | 0 | 30575  | KEQKSKQNIGALKQELA<br>KKDEANKISDASR                        | 3.38 | 0.01 | 2.85 | 0.68 | 2.25 | 1.75 |
| 35354 | 0 | 30575  | KEQKSKQNIGALKQELA<br>KKDEANKISDASR                        | 3.38 | 0.01 | 2.85 | 0.44 | 0.85 | 0.28 |
| 35355 | 0 | 78429  | KEQLPSTYPPERAGW                                           | 2.63 | 0.01 | 0.90 | 0.68 | 0.22 | 0.28 |
| 35356 | 0 | 107934 | KEQVDIPAELEDVICLKH<br>HEYDKGNDYICN                        | 3.34 | 0.01 | 0.90 | 1.12 | 0.22 | 0.28 |
| 35357 | 0 | 30585  | KERASRVKARMLTI                                            | 2.62 | 0.01 | 2.59 | 0.44 | 0.85 | 0.28 |
| 35358 | 0 | 30585  | KERASRVKARMLTI                                            | 2.62 | 0.01 | 2.59 | 0.44 | 0.85 | 0.28 |
| 35359 | 0 | 30585  | KERASRVKARMLTI                                            | 2.62 | 0.01 | 2.59 | 0.44 | 1.41 | 0.28 |
| 35360 | 0 | 30585  | KERASRVKARMLTI                                            | 2.62 | 0.01 | 2.59 | 0.44 | 0.85 | 0.28 |
| 35361 | 0 | 242753 | KERECQIREQYDQVLSTK<br>LAE                                 | 2.99 | 0.01 | 3.33 | 1.20 | 0.22 | 0.85 |
| 35362 | 0 | 242754 | KERECQIREQYDQVLSTK<br>LAEQYDTFVKFT                        | 3.35 | 0.01 | 3.33 | 1.20 | 0.22 | 0.85 |
| 35363 | 0 | 242755 | KERESQIREQYDQVL                                           | 2.68 | 0.01 | 3.32 | 1.20 | 0.22 | 0.85 |
| 35364 | 0 | 242755 | KERESQIREQYDQVL                                           | 2.68 | 0.01 | 3.32 | 1.20 | 0.22 | 0.85 |
| 35365 | 0 | 100972 | KERLAALGPEGAH                                             | 2.57 | 0.01 | 0.78 | 0.44 | 1.13 | 2.02 |
| 35366 | 0 | 186685 | KERLAALGPEGAHGDTT<br>FEYQDL                               | 3.07 | 0.01 | 0.78 | 0.44 | 1.13 | 1.57 |
| 35367 | 0 | 100973 | KERLAALGPEGAHGDTT<br>PEYQDL                               | 3.08 | 0.01 | 0.78 | 0.44 | 1.13 | 2.02 |
| 35368 | 0 | 100973 | KERLAALGPEGAHGDTT<br>PEYQDL                               | 3.08 | 0.01 | 0.78 | 0.44 | 1.41 | 2.02 |
| 35369 | 0 | 100973 | KERLAALGPEGAHGDTT<br>PEYQDL                               | 3.08 | 0.01 | 0.78 | 0.44 | 1.13 | 1.57 |
| 35370 | 0 | 30596  | KERSSLRYGN                                                | 2.30 | 0.01 | 2.56 | 0.68 | 0.22 | 0.28 |
| 35371 | 0 | 30597  | KERSSLRYGNVLDV                                            | 2.60 | 0.01 | 2.56 | 2.69 | 0.22 | 0.28 |
| 35372 | 0 | 30597  | KERSSLRYGNVLDV                                            | 2.60 | 0.01 | 2.56 | 0.44 | 0.85 | 0.28 |
| 35373 | 0 | 30597  | KERSSLRYGNVLDV                                            | 2.60 | 0.01 | 3.16 | 2.69 | 0.22 | 0.28 |
| 35374 | 0 | 30597  | KERSSLRYGNVLDV                                            | 2.60 | 0.01 | 3.16 | 2.69 | 0.22 | 0.28 |
| 35375 | 0 | 318307 | KERTLQVAGIKTTTA                                           | 2.67 | 0.01 | 1.61 | 0.44 | 0.85 | 1.28 |
| 35376 | 0 | 91560  | KESAAMTQLAEEQARRI<br>PEVWESLKDVFDWSG<br>WFSWLKYIPIIVVGLLG | 3.82 | 0.01 | 3.81 | 3.26 | 0.22 | 1.39 |
| 35377 | 0 | 30601  | KESCNGLYYQGSCYILHS<br>DYKSFEDAKANCA                       | 3.38 | 0.01 | 4.23 | 2.61 | 0.22 | 0.28 |
| 35378 | 0 | 30603  | KESHDQFLQHRILFKGFF<br>TD                                  | 2.94 | 0.01 | 2.56 | 1.12 | 0.22 | 0.28 |
| 35379 | 0 | 30603  | KESHDQFLQHRILFKGFF<br>TD                                  | 2.94 | 0.01 | 2.56 | 1.12 | 0.22 | 0.28 |
| 35380 | 0 | 30604  | KESHDQFLQHTILFKGFF<br>TD                                  | 2.96 | 0.01 | 2.56 | 3.12 | 0.22 | 0.28 |
| 35381 | 0 | 98844  | KESHFVSARP                                                | 2.29 | 0.01 | 2.16 | 0.44 | 1.23 | 0.85 |
| 35382 | 0 | 111447 | KESPTNHKTRLW                                              | 2.46 | 0.01 | 0.90 | 0.44 | 0.85 | 1.39 |
| 35383 | 0 | 30611  | KESQAYYDGRR                                               | 2.35 | 0.01 | 1.75 | 2.19 | 0.22 | 0.28 |

|       |   |        |                   |      |      |      |      |      |      |
|-------|---|--------|-------------------|------|------|------|------|------|------|
| 35384 | 0 | 30611  | KESQAYYDGRR       | 2.35 | 0.01 | 1.75 | 2.19 | 0.22 | 0.85 |
| 35385 | 0 | 30612  | KESQAYYDGRRS      | 2.45 | 0.01 | 2.98 | 2.19 | 0.22 | 2.12 |
| 35386 | 0 | 171710 | KESQEKEYQFLKMTA   | 2.69 | 0.01 | 0.78 | 0.44 | 1.13 | 0.28 |
| 35387 | 0 | 124355 | KESQRSGNV         | 2.21 | 0.01 | 0.78 | 0.44 | 1.41 | 0.28 |
| 35388 | 0 | 145274 | KESSSHHPGIAEFPSRG | 2.79 | 4.03 | 0.78 | 0.44 | 1.13 | 1.28 |
| 35389 | 0 | 162644 | KESTQKAIDGVTNKVNS | 2.80 | 0.01 | 2.77 | 0.44 | 1.59 | 0.28 |
| 35390 | 0 | 162644 | KESTQKAIDGVTNKVNS | 2.80 | 0.01 | 2.77 | 0.44 | 1.59 | 1.75 |
| 35391 | 0 | 162644 | KESTQKAIDGVTNKVNS | 2.80 | 0.01 | 2.77 | 0.44 | 1.59 | 1.75 |
| 35392 | 0 | 162644 | KESTQKAIDGVTNKVNS | 2.80 | 0.01 | 2.77 | 0.44 | 1.59 | 2.12 |
| 35393 | 0 | 162644 | KESTQKAIDGVTNKVNS | 2.80 | 0.01 | 2.77 | 0.44 | 1.59 | 0.28 |
| 35394 | 0 | 162644 | KESTQKAIDGVTNKVNS | 2.80 | 0.01 | 2.77 | 0.44 | 1.59 | 0.28 |
| 35395 | 0 | 162644 | KESTQKAIDGVTNKVNS | 2.80 | 0.01 | 2.77 | 0.44 | 1.59 | 0.28 |
| 35396 | 0 | 162644 | KESTQKAIDGVTNKVNS | 2.80 | 0.01 | 2.77 | 0.44 | 1.59 | 0.28 |
| 35397 | 0 | 162644 | KESTQKAIDGVTNKVNS | 2.80 | 0.01 | 2.77 | 0.44 | 1.59 | 0.28 |
| 35398 | 0 | 162644 | KESTQKAIDGVTNKVNS | 2.80 | 0.01 | 2.77 | 0.44 | 1.59 | 0.28 |
| 35399 | 0 | 162644 | KESTQKAIDGVTNKVNS | 2.80 | 0.01 | 2.77 | 0.44 | 1.59 | 0.28 |
| 35400 | 0 | 162644 | KESTQKAIDGVTNKVNS | 2.80 | 0.01 | 2.77 | 0.44 | 1.59 | 0.28 |
| 35401 | 0 | 162644 | KESTQKAIDGVTNKVNS | 2.80 | 0.01 | 2.77 | 0.44 | 1.59 | 0.28 |
| 35402 | 0 | 162644 | KESTQKAIDGVTNKVNS | 2.80 | 0.01 | 2.77 | 0.44 | 1.59 | 0.28 |
| 35403 | 0 | 162644 | KESTQKAIDGVTNKVNS | 2.80 | 0.01 | 2.77 | 0.44 | 1.59 | 0.28 |
| 35404 | 0 | 162644 | KESTQKAIDGVTNKVNS | 2.80 | 0.01 | 2.77 | 0.44 | 1.59 | 0.28 |
| 35405 | 0 | 162644 | KESTQKAIDGVTNKVNS | 2.80 | 0.01 | 2.77 | 0.44 | 1.59 | 0.28 |
| 35406 | 0 | 162644 | KESTQKAIDGVTNKVNS | 2.80 | 0.01 | 2.77 | 0.44 | 1.59 | 0.28 |
| 35407 | 0 | 162644 | KESTQKAIDGVTNKVNS | 2.80 | 0.01 | 2.77 | 0.44 | 1.59 | 0.28 |
| 35408 | 0 | 162644 | KESTQKAIDGVTNKVNS | 2.80 | 0.01 | 2.77 | 0.44 | 1.59 | 0.28 |

|       |   |        |                   |      |      |      |      |      |      |
|-------|---|--------|-------------------|------|------|------|------|------|------|
| 35409 | 0 | 162644 | KESTQKAIDGVTNKVNS | 2.80 | 0.01 | 2.77 | 0.44 | 1.59 | 2.12 |
| 35410 | 0 | 162644 | KESTQKAIDGVTNKVNS | 2.80 | 0.01 | 2.77 | 0.44 | 1.59 | 2.12 |
| 35411 | 0 | 162644 | KESTQKAIDGVTNKVNS | 2.80 | 0.01 | 2.77 | 0.44 | 1.59 | 2.12 |
| 35412 | 0 | 162644 | KESTQKAIDGVTNKVNS | 2.80 | 0.01 | 2.77 | 0.44 | 1.59 | 2.12 |
| 35413 | 0 | 162644 | KESTQKAIDGVTNKVNS | 2.80 | 0.01 | 2.77 | 0.44 | 1.59 | 2.12 |
| 35414 | 0 | 162644 | KESTQKAIDGVTNKVNS | 2.80 | 0.01 | 2.77 | 0.44 | 1.59 | 2.12 |
| 35415 | 0 | 162644 | KESTQKAIDGVTNKVNS | 2.80 | 0.01 | 2.77 | 0.44 | 1.59 | 2.12 |
| 35416 | 0 | 162644 | KESTQKAIDGVTNKVNS | 2.80 | 0.01 | 2.77 | 0.44 | 1.59 | 2.12 |
| 35417 | 0 | 162644 | KESTQKAIDGVTNKVNS | 2.80 | 0.01 | 2.77 | 0.44 | 1.59 | 1.34 |
| 35418 | 0 | 162644 | KESTQKAIDGVTNKVNS | 2.80 | 0.01 | 2.77 | 0.44 | 1.59 | 1.34 |
| 35419 | 0 | 162644 | KESTQKAIDGVTNKVNS | 2.80 | 0.01 | 2.77 | 0.44 | 1.59 | 1.34 |
| 35420 | 0 | 162644 | KESTQKAIDGVTNKVNS | 2.80 | 0.01 | 2.77 | 0.44 | 1.59 | 1.34 |
| 35421 | 0 | 162644 | KESTQKAIDGVTNKVNS | 2.80 | 0.01 | 2.77 | 0.44 | 1.59 | 1.34 |
| 35422 | 0 | 162644 | KESTQKAIDGVTNKVNS | 2.80 | 0.01 | 2.77 | 0.44 | 1.59 | 1.34 |
| 35423 | 0 | 162644 | KESTQKAIDGVTNKVNS | 2.80 | 0.01 | 2.77 | 0.44 | 1.59 | 1.34 |
| 35424 | 0 | 162644 | KESTQKAIDGVTNKVNS | 2.80 | 0.01 | 2.77 | 0.44 | 1.59 | 1.34 |
| 35425 | 0 | 162644 | KESTQKAIDGVTNKVNS | 2.80 | 0.01 | 2.77 | 0.44 | 1.59 | 1.34 |
| 35426 | 0 | 162644 | KESTQKAIDGVTNKVNS | 2.80 | 0.01 | 2.77 | 0.44 | 1.59 | 1.34 |
| 35427 | 0 | 162644 | KESTQKAIDGVTNKVNS | 2.80 | 0.01 | 2.77 | 0.44 | 1.59 | 1.34 |
| 35428 | 0 | 162644 | KESTQKAIDGVTNKVNS | 2.80 | 0.01 | 2.77 | 0.44 | 1.59 | 1.34 |
| 35429 | 0 | 162644 | KESTQKAIDGVTNKVNS | 2.80 | 0.01 | 2.77 | 0.44 | 1.59 | 1.34 |
| 35430 | 0 | 162644 | KESTQKAIDGVTNKVNS | 2.80 | 0.01 | 2.77 | 0.44 | 1.59 | 1.34 |
| 35431 | 0 | 162644 | KESTQKAIDGVTNKVNS | 2.80 | 0.01 | 2.77 | 0.44 | 1.59 | 1.34 |

|       |   |        |                                                    |      |      |      |      |      |      |
|-------|---|--------|----------------------------------------------------|------|------|------|------|------|------|
| 35432 | 0 | 162644 | KESTQKAIDGVTNKVNS                                  | 2.80 | 0.01 | 2.77 | 0.44 | 1.59 | 1.34 |
| 35433 | 0 | 162644 | KESTQKAIDGVTNKVNS                                  | 2.80 | 0.01 | 2.77 | 0.44 | 1.59 | 1.34 |
| 35434 | 0 | 162644 | KESTQKAIDGVTNKVNS                                  | 2.80 | 0.01 | 2.77 | 0.44 | 1.59 | 1.34 |
| 35435 | 0 | 162644 | KESTQKAIDGVTNKVNS                                  | 2.80 | 0.01 | 2.77 | 0.44 | 1.59 | 1.34 |
| 35436 | 0 | 162644 | KESTQKAIDGVTNKVNS                                  | 2.80 | 0.01 | 2.77 | 0.44 | 1.59 | 1.34 |
| 35437 | 0 | 162644 | KESTQKAIDGVTNKVNS                                  | 2.80 | 0.01 | 2.77 | 0.44 | 1.59 | 1.34 |
| 35438 | 0 | 162644 | KESTQKAIDGVTNKVNS                                  | 2.80 | 0.01 | 2.77 | 0.44 | 1.59 | 1.34 |
| 35439 | 0 | 162644 | KESTQKAIDGVTNKVNS                                  | 2.80 | 0.01 | 2.77 | 0.44 | 1.59 | 1.34 |
| 35440 | 0 | 162644 | KESTQKAIDGVTNKVNS                                  | 2.80 | 0.01 | 2.77 | 0.44 | 1.59 | 1.34 |
| 35441 | 0 | 162644 | KESTQKAIDGVTNKVNS                                  | 2.80 | 0.01 | 2.77 | 0.44 | 1.59 | 2.98 |
| 35442 | 0 | 162644 | KESTQKAIDGVTNKVNS                                  | 2.80 | 0.01 | 2.77 | 0.44 | 1.59 | 2.98 |
| 35443 | 0 | 107935 | KETELLYEYHDTGTAIISK<br>N                           | 2.94 | 0.01 | 1.66 | 0.44 | 0.85 | 0.28 |
| 35444 | 0 | 30629  | KETLHSTSPEGN                                       | 2.48 | 0.01 | 3.75 | 0.44 | 0.85 | 0.28 |
| 35445 | 0 | 30629  | KETLHSTSPEGN                                       | 2.48 | 0.01 | 3.75 | 0.44 | 0.85 | 0.28 |
| 35446 | 0 | 167297 | KETMEKAVEEKIEWLES<br>HQD                           | 2.93 | 0.01 | 0.78 | 0.44 | 1.13 | 0.28 |
| 35447 | 0 | 227294 | KETNNAISFESNSGSLEK<br>KKYVKLPSNGTTGEQGS<br>STGTVRG | 3.68 | 0.01 | 3.28 | 0.44 | 1.59 | 0.28 |
| 35448 | 0 | 227294 | KETNNAISFESNSGSLEK<br>KKYVKLPSNGTTGEQGS<br>STGTVRG | 3.68 | 0.01 | 3.28 | 1.15 | 0.22 | 0.28 |
| 35449 | 0 | 227294 | KETNNAISFESNSGSLEK<br>KKYVKLPSNGTTGEQGS<br>STGTVRG | 3.68 | 0.01 | 3.28 | 3.33 | 0.22 | 0.28 |
| 35450 | 0 | 227294 | KETNNAISFESNSGSLEK<br>KKYVKLPSNGTTGEQGS<br>STGTVRG | 3.68 | 0.01 | 3.28 | 3.33 | 0.22 | 0.28 |
| 35451 | 0 | 30636  | KETNNAISFMSNAGSLE<br>KK                            | 2.90 | 0.01 | 0.90 | 2.63 | 0.22 | 1.48 |
| 35452 | 0 | 30636  | KETNNAISFMSNAGSLE<br>KK                            | 2.90 | 0.01 | 0.90 | 2.63 | 2.25 | 1.75 |
| 35453 | 0 | 30637  | KETNNSISFMSNAGSLE<br>KK                            | 2.90 | 0.01 | 0.90 | 2.63 | 0.22 | 1.48 |

|       |   |        |                                    |      |      |      |      |      |      |
|-------|---|--------|------------------------------------|------|------|------|------|------|------|
| 35454 | 0 | 107936 | KETNNTEKVDDWWECK<br>KSIWNAMLCGYKKS | 3.32 | 0.01 | 0.90 | 1.12 | 0.22 | 0.28 |
| 35455 | 0 | 318434 | KETPAESTVIKTTTA                    | 2.70 | 0.01 | 1.61 | 0.44 | 0.85 | 1.28 |
| 35456 | 0 | 318443 | KETPLEATATKNNTTA                   | 2.73 | 0.01 | 1.61 | 0.44 | 0.85 | 1.28 |
| 35457 | 0 | 318448 | KETPVAATVIKTTTA                    | 2.72 | 0.01 | 1.61 | 0.44 | 0.85 | 1.28 |
| 35458 | 0 | 318452 | KETPVEATAMKNNTTA                   | 2.71 | 0.01 | 1.61 | 0.44 | 0.85 | 1.28 |
| 35459 | 0 | 318453 | KETPVEATAMKTTTA                    | 2.72 | 0.01 | 1.61 | 0.44 | 0.85 | 1.28 |
| 35460 | 0 | 318455 | KETPVEATATKTTTA                    | 2.73 | 0.01 | 1.61 | 0.44 | 0.85 | 1.28 |
| 35461 | 0 | 318459 | KETPVEGTAMKTTTA                    | 2.70 | 0.01 | 1.61 | 0.44 | 0.85 | 1.28 |
| 35462 | 0 | 318460 | KETPVESTAMKTTTA                    | 2.70 | 0.01 | 1.61 | 0.44 | 0.85 | 1.28 |
| 35463 | 0 | 318462 | KETPVESTVMKTTTA                    | 2.70 | 0.01 | 1.61 | 0.44 | 0.85 | 1.28 |
| 35464 | 0 | 318463 | KETPVETTTMKNTTA                    | 2.70 | 0.01 | 1.61 | 0.44 | 0.85 | 1.28 |
| 35465 | 0 | 318466 | KETPVTAAMKTTTA                     | 2.71 | 0.01 | 1.61 | 0.44 | 0.85 | 1.28 |
| 35466 | 0 | 114871 | KETVPMNCSS                         | 2.26 | 0.01 | 2.25 | 0.44 | 1.23 | 0.85 |
| 35467 | 0 | 30646  | KEVDRLIDE                          | 2.25 | 0.01 | 3.15 | 0.44 | 1.23 | 0.85 |
| 35468 | 0 | 115069 | KEVDRLMS                           | 2.10 | 0.01 | 3.78 | 0.68 | 0.22 | 0.28 |
| 35469 | 0 | 115069 | KEVDRLMS                           | 2.10 | 0.01 | 3.78 | 0.68 | 0.22 | 0.28 |
| 35470 | 0 | 115069 | KEVDRLMS                           | 2.10 | 0.01 | 3.78 | 0.68 | 0.22 | 0.28 |
| 35471 | 0 | 115069 | KEVDRLMS                           | 2.10 | 0.01 | 3.78 | 0.68 | 0.22 | 0.28 |
| 35472 | 0 | 115069 | KEVDRLMS                           | 2.10 | 0.01 | 3.78 | 0.68 | 0.22 | 1.27 |
| 35473 | 0 | 115069 | KEVDRLMS                           | 2.10 | 0.01 | 3.78 | 0.68 | 0.22 | 0.28 |
| 35474 | 0 | 318506 | KEVEKIDSENSKLQQ                    | 2.69 | 0.01 | 1.61 | 0.44 | 0.85 | 1.28 |
| 35475 | 0 | 109389 | KEVHSGVSTDPQPLKE                   | 2.74 | 0.01 | 0.78 | 0.44 | 1.41 | 0.28 |
| 35476 | 0 | 30651  | KEVISSDNLQLPELKQ                   | 2.75 | 0.01 | 2.18 | 0.68 | 0.22 | 0.28 |
| 35477 | 0 | 318516 | KEVKKAAPAAKTAA                     | 2.73 | 0.01 | 1.61 | 0.44 | 0.85 | 1.28 |
| 35478 | 0 | 151005 | KEVLVLWGIHPSTS                     | 2.65 | 0.01 | 2.87 | 0.44 | 0.85 | 0.28 |
| 35479 | 0 | 30661  | KEVPALTAVETGAT                     | 2.65 | 0.01 | 3.51 | 0.44 | 1.74 | 0.28 |
| 35480 | 0 | 30661  | KEVPALTAVETGAT                     | 2.65 | 0.01 | 2.96 | 1.12 | 0.22 | 0.28 |
| 35481 | 0 | 30661  | KEVPALTAVETGAT                     | 2.65 | 0.01 | 2.96 | 1.12 | 0.22 | 2.02 |
| 35482 | 0 | 30661  | KEVPALTAVETGAT                     | 2.65 | 0.01 | 2.96 | 1.12 | 0.22 | 1.27 |
| 35483 | 0 | 30661  | KEVPALTAVETGAT                     | 2.65 | 0.01 | 2.96 | 1.12 | 0.22 | 0.85 |
| 35484 | 0 | 30661  | KEVPALTAVETGAT                     | 2.65 | 0.01 | 2.96 | 1.12 | 0.22 | 0.85 |
| 35485 | 0 | 30661  | KEVPALTAVETGAT                     | 2.65 | 0.01 | 2.96 | 1.12 | 0.22 | 0.85 |
| 35486 | 0 | 30661  | KEVPALTAVETGAT                     | 2.65 | 0.01 | 2.96 | 1.12 | 0.22 | 0.85 |
| 35487 | 0 | 30661  | KEVPALTAVETGAT                     | 2.65 | 0.01 | 2.96 | 1.12 | 0.22 | 0.85 |
| 35488 | 0 | 30661  | KEVPALTAVETGAT                     | 2.65 | 0.01 | 2.96 | 0.44 | 1.13 | 0.28 |
| 35489 | 0 | 30661  | KEVPALTAVETGAT                     | 2.65 | 0.01 | 2.96 | 0.44 | 1.41 | 0.28 |
| 35490 | 0 | 30661  | KEVPALTAVETGAT                     | 2.65 | 0.01 | 2.96 | 0.44 | 0.85 | 0.28 |
| 35491 | 0 | 30661  | KEVPALTAVETGAT                     | 2.65 | 0.01 | 4.15 | 1.12 | 0.22 | 0.28 |
| 35492 | 0 | 30661  | KEVPALTAVETGAT                     | 2.65 | 0.01 | 4.15 | 0.44 | 0.85 | 0.28 |
| 35493 | 0 | 30661  | KEVPALTAVETGAT                     | 2.65 | 0.01 | 4.15 | 1.12 | 0.22 | 0.85 |
| 35494 | 0 | 30661  | KEVPALTAVETGAT                     | 2.65 | 0.01 | 4.15 | 1.12 | 0.22 | 0.85 |
| 35495 | 0 | 30661  | KEVPALTAVETGAT                     | 2.65 | 0.01 | 4.15 | 1.12 | 0.22 | 0.85 |
| 35496 | 0 | 30661  | KEVPALTAVETGAT                     | 2.65 | 0.01 | 2.96 | 0.44 | 0.22 | 0.28 |

|       |   |        |                          |      |      |      |      |      |      |
|-------|---|--------|--------------------------|------|------|------|------|------|------|
| 35497 | 0 | 138458 | KEVPALTAVETGATNPL<br>V   | 2.88 | 0.01 | 4.15 | 1.12 | 0.22 | 0.28 |
| 35498 | 0 | 179068 | KEVQQKLIDDHFLFK          | 2.69 | 0.01 | 2.36 | 0.44 | 1.23 | 1.28 |
| 35499 | 0 | 123353 | KEVSSATNALRSMQ           | 2.59 | 0.01 | 0.78 | 1.20 | 0.22 | 0.28 |
| 35500 | 0 | 30665  | KEVTQNDGTTTIANNLT<br>STV | 2.93 | 0.01 | 3.19 | 0.44 | 1.59 | 1.27 |
| 35501 | 0 | 141046 | KEVTVVTTS                | 2.25 | 0.01 | 4.03 | 2.00 | 0.22 | 0.28 |
| 35502 | 0 | 144700 | KEWAKRAALP               | 2.33 | 0.01 | 0.78 | 0.44 | 1.13 | 0.28 |
| 35503 | 0 | 144700 | KEWAKRAALP               | 2.33 | 0.01 | 0.78 | 0.44 | 1.13 | 0.28 |
| 35504 | 0 | 144700 | KEWAKRAALP               | 2.33 | 0.01 | 0.78 | 0.44 | 1.41 | 0.28 |
| 35505 | 0 | 144700 | KEWAKRAALP               | 2.33 | 0.01 | 0.78 | 0.44 | 1.41 | 0.28 |
| 35506 | 0 | 142810 | KEWEQIYR                 | 2.12 | 0.01 | 2.19 | 3.42 | 0.22 | 1.57 |
| 35507 | 0 | 142810 | KEWEQIYR                 | 2.12 | 0.01 | 2.19 | 3.42 | 0.22 | 1.34 |
| 35508 | 0 | 142810 | KEWEQIYR                 | 2.12 | 0.01 | 2.19 | 3.42 | 2.60 | 1.75 |
| 35509 | 0 | 142810 | KEWEQIYR                 | 2.12 | 0.01 | 2.19 | 3.42 | 0.22 | 1.75 |
| 35510 | 0 | 30669  | KEYEDIVL                 | 2.12 | 0.01 | 3.18 | 1.12 | 0.22 | 0.28 |
| 35511 | 0 | 30677  | KEYLDKVRATVGTEWTP<br>CSV | 2.92 | 0.01 | 2.59 | 3.05 | 0.85 | 0.28 |
| 35512 | 0 | 30677  | KEYLDKVRATVGTEWTP<br>CSV | 2.92 | 0.01 | 2.59 | 0.44 | 0.85 | 0.28 |
| 35513 | 0 | 30689  | KFACQTFLKDEIRPM          | 2.63 | 0.01 | 3.50 | 2.22 | 0.22 | 0.28 |
| 35514 | 0 | 30691  | KFADFLQI                 | 2.12 | 0.01 | 3.06 | 1.12 | 0.22 | 0.28 |
| 35515 | 0 | 30696  | KFAELLEQQKNAQFPGK        | 2.82 | 0.01 | 2.30 | 0.44 | 0.85 | 0.28 |
| 35516 | 0 | 30697  | KFAENVG                  | 1.99 | 0.01 | 2.75 | 0.44 | 0.85 | 0.85 |
| 35517 | 0 | 136415 | KFAGRNFRNPLAK            | 2.58 | 4.33 | 0.78 | 0.44 | 1.13 | 0.28 |
| 35518 | 0 | 136415 | KFAGRNFRNPLAK            | 2.58 | 4.33 | 0.78 | 0.44 | 1.41 | 0.28 |
| 35519 | 0 | 136415 | KFAGRNFRNPLAK            | 2.58 | 4.33 | 0.78 | 0.44 | 1.13 | 0.28 |
| 35520 | 0 | 171715 | KFALGSVVAVTKASG          | 2.72 | 0.01 | 0.78 | 0.44 | 1.13 | 0.28 |
| 35521 | 0 | 95491  | KFALPQYLKT               | 2.32 | 0.01 | 1.60 | 0.44 | 1.23 | 0.85 |
| 35522 | 0 | 445420 | KFAQGWGPITYAEPDSS<br>DQR | 2.90 | 0.01 | 1.96 | 0.68 | 0.22 | 1.34 |
| 35523 | 0 | 445420 | KFAQGWGPITYAEPDSS<br>DQR | 2.90 | 0.01 | 1.96 | 0.68 | 0.22 | 1.34 |
| 35524 | 0 | 114433 | KFAWAIDMADEDYEF          | 2.70 | 0.01 | 0.78 | 0.44 | 1.41 | 0.28 |
| 35525 | 0 | 114433 | KFAWAIDMADEDYEF          | 2.70 | 0.01 | 0.78 | 0.44 | 1.13 | 0.28 |
| 35526 | 0 | 30704  | KFDFDKSKVKENSY           | 2.65 | 0.01 | 2.58 | 2.43 | 0.22 | 0.28 |
| 35527 | 0 | 30704  | KFDFDKSKVKENSY           | 2.65 | 0.01 | 2.58 | 2.43 | 0.22 | 0.28 |
| 35528 | 0 | 30704  | KFDFDKSKVKENSY           | 2.65 | 0.01 | 2.58 | 2.43 | 0.22 | 1.34 |
| 35529 | 0 | 98845  | KFDKALKALP               | 2.36 | 0.01 | 1.60 | 0.44 | 1.23 | 0.85 |
| 35530 | 0 | 98845  | KFDKALKALP               | 2.36 | 0.01 | 1.60 | 0.44 | 1.23 | 0.85 |
| 35531 | 0 | 98845  | KFDKALKALP               | 2.36 | 0.01 | 1.60 | 0.44 | 2.98 | 0.85 |
| 35532 | 0 | 190809 | KFDKLYIWGVHHPGT          | 2.64 | 0.01 | 2.36 | 1.20 | 0.22 | 0.28 |
| 35533 | 0 | 190809 | KFDKLYIWGVHHPGT          | 2.64 | 0.01 | 2.36 | 1.20 | 0.22 | 0.28 |
| 35534 | 0 | 190809 | KFDKLYIWGVHHPGT          | 2.64 | 0.01 | 2.36 | 1.20 | 0.22 | 0.28 |
| 35535 | 0 | 161357 | KFDKLYKMLTEIYTEDNF<br>V  | 2.91 | 0.01 | 2.08 | 0.68 | 0.22 | 1.57 |



|       |   |        |                          |      |      |      |      |      |      |
|-------|---|--------|--------------------------|------|------|------|------|------|------|
| 35536 | 0 | 161357 | KFDKLYKMLTEIYTEDNF<br>V  | 2.91 | 0.01 | 2.08 | 2.25 | 0.22 | 1.57 |
| 35537 | 0 | 161357 | KFDKLYKMLTEIYTEDNF<br>V  | 2.91 | 0.01 | 2.08 | 2.02 | 0.22 | 1.57 |
| 35538 | 0 | 161357 | KFDKLYKMLTEIYTEDNF<br>V  | 2.91 | 0.01 | 2.08 | 2.43 | 0.22 | 1.57 |
| 35539 | 0 | 30709  | KFDQGWGPITYAEPTKD<br>PDQ | 2.95 | 0.01 | 3.10 | 1.81 | 0.22 | 0.28 |
| 35540 | 0 | 30710  | KFDRGYISPY               | 2.29 | 0.01 | 0.78 | 0.44 | 1.41 | 0.28 |
| 35541 | 0 | 30710  | KFDRGYISPY               | 2.29 | 0.01 | 0.78 | 1.20 | 0.22 | 0.28 |
| 35542 | 0 | 30715  | KFDTKGSAKTIEATLHCY<br>GA | 2.94 | 0.01 | 2.21 | 1.20 | 0.22 | 0.28 |
| 35543 | 0 | 30715  | KFDTKGSAKTIEATLHCY<br>GA | 2.94 | 0.01 | 2.21 | 1.20 | 0.22 | 0.28 |
| 35544 | 0 | 116757 | KFDVPCGGRDCSGGCQ<br>CY   | 2.84 | 0.01 | 0.78 | 1.12 | 0.22 | 0.28 |
| 35545 | 0 | 116757 | KFDVPCGGRDCSGGCQ<br>CY   | 2.84 | 0.01 | 0.78 | 0.44 | 1.13 | 0.28 |
| 35546 | 0 | 116757 | KFDVPCGGRDCSGGCQ<br>CY   | 2.84 | 0.01 | 0.78 | 0.44 | 0.85 | 1.27 |
| 35547 | 0 | 30716  | KFDWNTPD                 | 2.12 | 0.01 | 3.27 | 0.68 | 0.22 | 0.85 |
| 35548 | 0 | 30716  | KFDWNTPD                 | 2.12 | 0.01 | 3.27 | 0.68 | 0.22 | 1.48 |
| 35549 | 0 | 30716  | KFDWNTPD                 | 2.12 | 0.01 | 3.27 | 0.68 | 0.22 | 1.34 |
| 35550 | 0 | 30716  | KFDWNTPD                 | 2.12 | 0.01 | 3.27 | 0.68 | 0.22 | 0.28 |
| 35551 | 0 | 30716  | KFDWNTPD                 | 2.12 | 0.01 | 3.27 | 2.02 | 0.22 | 0.28 |
| 35552 | 0 | 30716  | KFDWNTPD                 | 2.12 | 0.01 | 3.27 | 2.82 | 0.22 | 0.28 |
| 35553 | 0 | 123355 | KFEELKGDY                | 2.23 | 0.01 | 2.28 | 2.00 | 0.22 | 0.28 |
| 35554 | 0 | 123356 | KFEEVKEEY                | 2.27 | 0.01 | 2.28 | 2.00 | 0.22 | 0.28 |
| 35555 | 0 | 123357 | KFEEVKGDY                | 2.23 | 0.01 | 2.28 | 2.00 | 0.22 | 0.28 |
| 35556 | 0 | 134704 | KFFNSNKKKRDDFEKL         | 2.77 | 0.01 | 0.78 | 1.12 | 0.22 | 1.57 |
| 35557 | 0 | 134704 | KFFNSNKKKRDDFEKL         | 2.77 | 0.01 | 0.78 | 1.12 | 0.22 | 1.57 |
| 35558 | 0 | 134704 | KFFNSNKKKRDDFEKL         | 2.77 | 0.01 | 0.78 | 1.12 | 0.22 | 1.34 |
| 35559 | 0 | 423379 | KFFVDRLCCETMIMG          | 2.62 | 0.01 | 2.51 | 0.44 | 2.35 | 1.28 |
| 35560 | 0 | 135945 | KFGADARALMLQ             | 2.48 | 0.01 | 0.78 | 0.44 | 1.13 | 0.28 |
| 35561 | 0 | 135945 | KFGADARALMLQ             | 2.48 | 0.01 | 0.78 | 0.44 | 1.41 | 0.28 |
| 35562 | 0 | 118449 | KFGADARALMLQG            | 2.56 | 0.01 | 0.78 | 0.44 | 1.74 | 0.85 |
| 35563 | 0 | 144701 | KFGNYNHTQLLGQLQA<br>V    | 2.79 | 0.01 | 2.24 | 1.12 | 0.22 | 1.27 |
| 35564 | 0 | 144701 | KFGNYNHTQLLGQLQA<br>V    | 2.79 | 0.01 | 2.24 | 1.12 | 0.22 | 0.28 |
| 35565 | 0 | 144701 | KFGNYNHTQLLGQLQA<br>V    | 2.79 | 0.01 | 2.24 | 1.12 | 0.22 | 1.27 |
| 35566 | 0 | 144701 | KFGNYNHTQLLGQLQA<br>V    | 2.79 | 0.01 | 2.24 | 1.12 | 0.22 | 0.28 |

|       |   |        |                                    |      |      |      |      |      |      |
|-------|---|--------|------------------------------------|------|------|------|------|------|------|
| 35567 | 0 | 158596 | KFGTALW                            | 1.99 | 0.01 | 0.90 | 0.44 | 1.13 | 1.39 |
| 35568 | 0 | 130524 | KFHPKDIPYQVW                       | 2.46 | 0.01 | 0.90 | 0.68 | 0.22 | 1.75 |
| 35569 | 0 | 130524 | KFHPKDIPYQVW                       | 2.46 | 0.01 | 0.90 | 0.68 | 0.22 | 0.28 |
| 35570 | 0 | 130524 | KFHPKDIPYQVW                       | 2.46 | 0.01 | 0.90 | 3.57 | 2.25 | 1.75 |
| 35571 | 0 | 130524 | KFHPKDIPYQVW                       | 2.46 | 0.01 | 0.90 | 3.57 | 0.22 | 0.28 |
| 35572 | 0 | 130524 | KFHPKDIPYQVW                       | 2.46 | 0.01 | 0.90 | 3.57 | 0.22 | 1.48 |
| 35573 | 0 | 130524 | KFHPKDIPYQVW                       | 2.46 | 0.01 | 0.90 | 0.68 | 0.22 | 1.27 |
| 35574 | 0 | 77929  | KFHRVIKDF                          | 2.24 | 0.01 | 0.78 | 0.44 | 1.23 | 0.28 |
| 35575 | 0 | 77929  | KFHRVIKDF                          | 2.24 | 0.01 | 0.78 | 0.44 | 1.23 | 0.28 |
| 35576 | 0 | 77929  | KFHRVIKDF                          | 2.24 | 0.01 | 0.78 | 0.44 | 1.41 | 0.28 |
| 35577 | 0 | 77929  | KFHRVIKDF                          | 2.24 | 0.01 | 0.78 | 0.44 | 1.41 | 0.28 |
| 35578 | 0 | 225357 | KFIEGNHGSFWYDMMP<br>ES             | 2.81 | 0.01 | 2.61 | 0.68 | 0.22 | 0.28 |
| 35579 | 0 | 225357 | KFIEGNHGSFWYDMMP<br>ES             | 2.81 | 0.01 | 2.61 | 0.68 | 0.22 | 0.28 |
| 35580 | 0 | 225357 | KFIEGNHGSFWYDMMP<br>ES             | 2.81 | 0.01 | 2.61 | 0.68 | 0.22 | 0.28 |
| 35581 | 0 | 30743  | KFIIKRYTPNNEIDSFVKS<br>G           | 2.92 | 0.01 | 2.95 | 3.38 | 0.22 | 0.28 |
| 35582 | 0 | 30748  | KFIPALEAAVKQSYAATV<br>AT           | 2.94 | 0.01 | 3.00 | 0.44 | 1.23 | 0.28 |
| 35583 | 0 | 96453  | KFKEAFLRSV                         | 2.32 | 0.01 | 2.39 | 0.44 | 0.85 | 0.28 |
| 35584 | 0 | 117947 | KFKGKATL                           | 2.15 | 0.01 | 1.75 | 2.84 | 0.22 | 0.28 |
| 35585 | 0 | 117543 | KFKGKATLTSDK                       | 2.50 | 0.01 | 1.75 | 3.89 | 1.13 | 1.75 |
| 35586 | 0 | 117543 | KFKGKATLTSDK                       | 2.50 | 0.01 | 1.75 | 3.89 | 0.22 | 0.28 |
| 35587 | 0 | 117543 | KFKGKATLTSDK                       | 2.50 | 0.01 | 1.75 | 3.89 | 1.13 | 0.28 |
| 35588 | 0 | 171717 | KFKNGMLHGDKVSFF                    | 2.67 | 0.01 | 0.78 | 0.44 | 1.13 | 0.28 |
| 35589 | 0 | 180558 | KFKRPTLRRVRI                       | 2.50 | 0.01 | 0.78 | 1.15 | 2.26 | 0.28 |
| 35590 | 0 | 129066 | KFKSV                              | 1.77 | 0.01 | 0.78 | 0.44 | 1.13 | 0.28 |
| 35591 | 0 | 93094  | KFKVQGEAVSNIQEN                    | 2.69 | 0.01 | 1.75 | 0.68 | 0.22 | 0.28 |
| 35592 | 0 | 115308 | KFLDDDLTDD                         | 2.34 | 0.01 | 1.60 | 0.44 | 1.23 | 0.85 |
| 35593 | 0 | 30767  | KFLEGAA                            | 1.99 | 0.01 | 2.24 | 1.12 | 0.22 | 0.28 |
| 35594 | 0 | 30767  | KFLEGAA                            | 1.99 | 0.01 | 2.24 | 0.68 | 0.22 | 0.28 |
| 35595 | 0 | 30769  | KFLENQVKERNVAGS                    | 2.67 | 0.01 | 1.66 | 1.15 | 0.22 | 0.28 |
| 35596 | 0 | 107937 | KFLGNYYNEDKDKECLE<br>AMKNSFYDYEYII | 3.35 | 0.01 | 0.90 | 1.12 | 0.22 | 0.28 |
| 35597 | 0 | 196956 | KFLLPNPQAGAP                       | 2.48 | 0.01 | 0.90 | 0.44 | 1.41 | 1.39 |
| 35598 | 0 | 196956 | KFLLPNPQAGAP                       | 2.48 | 0.01 | 0.90 | 0.44 | 1.41 | 0.28 |
| 35599 | 0 | 196956 | KFLLPNPQAGAP                       | 2.48 | 0.01 | 0.90 | 0.44 | 1.41 | 1.48 |
| 35600 | 0 | 196956 | KFLLPNPQAGAP                       | 2.48 | 0.01 | 0.90 | 0.44 | 1.41 | 1.34 |
| 35601 | 0 | 196956 | KFLLPNPQAGAP                       | 2.48 | 0.01 | 0.90 | 0.44 | 1.41 | 1.34 |
| 35602 | 0 | 196956 | KFLLPNPQAGAP                       | 2.48 | 0.01 | 0.90 | 0.44 | 1.41 | 1.34 |
| 35603 | 0 | 30774  | KFLNPDREYDFRDLT                    | 2.68 | 0.01 | 2.43 | 0.68 | 0.22 | 0.28 |
| 35604 | 0 | 30774  | KFLNPDREYDFRDLT                    | 2.68 | 0.01 | 2.43 | 0.44 | 0.85 | 0.28 |
| 35605 | 0 | 225358 | KFLQHDLLFKINGSKIDG                 | 2.87 | 0.01 | 2.61 | 0.68 | 0.22 | 0.28 |

|       |   |        |                          |      |      |      |      |      |      |
|-------|---|--------|--------------------------|------|------|------|------|------|------|
| 35606 | 0 | 225358 | KFLQHDLLFKINGSKIDG       | 2.87 | 0.01 | 2.61 | 0.68 | 0.22 | 0.28 |
| 35607 | 0 | 225358 | KFLQHDLLFKINGSKIDG       | 2.87 | 0.01 | 2.61 | 0.68 | 0.22 | 0.28 |
| 35608 | 0 | 30780  | KFLVNGRWID               | 2.26 | 0.01 | 0.90 | 0.44 | 1.23 | 0.28 |
| 35609 | 0 | 30780  | KFLVNGRWID               | 2.26 | 0.01 | 0.90 | 0.44 | 1.23 | 1.27 |
| 35610 | 0 | 100190 | KFNEQEINLS               | 2.31 | 0.01 | 2.18 | 2.16 | 0.22 | 0.28 |
| 35611 | 0 | 30794  | KFNKKMHEHSEHFKHKF<br>AEL | 2.99 | 0.01 | 4.15 | 0.44 | 0.85 | 0.28 |
| 35612 | 0 | 30794  | KFNKKMHEHSEHFKHKF<br>AEL | 2.99 | 0.01 | 4.15 | 0.44 | 0.85 | 0.28 |
| 35613 | 0 | 30799  | KFNPD LAPG               | 2.21 | 0.01 | 3.40 | 0.44 | 1.74 | 0.28 |
| 35614 | 0 | 30799  | KFNPD LAPG               | 2.21 | 0.01 | 3.40 | 0.44 | 0.85 | 0.28 |
| 35615 | 0 | 107479 | KFNWYVD                  | 1.99 | 0.01 | 0.78 | 0.44 | 1.13 | 1.27 |
| 35616 | 0 | 107479 | KFNWYVD                  | 1.99 | 0.01 | 0.78 | 1.20 | 0.22 | 0.28 |
| 35617 | 0 | 107479 | KFNWYVD                  | 1.99 | 0.01 | 0.78 | 1.15 | 0.22 | 1.27 |
| 35618 | 0 | 107479 | KFNWYVD                  | 1.99 | 0.01 | 0.78 | 1.15 | 0.22 | 1.27 |
| 35619 | 0 | 107479 | KFNWYVD                  | 1.99 | 0.01 | 0.78 | 1.15 | 0.22 | 1.27 |
| 35620 | 0 | 107479 | KFNWYVD                  | 1.99 | 0.01 | 0.78 | 1.15 | 0.22 | 0.28 |
| 35621 | 0 | 107479 | KFNWYVD                  | 1.99 | 0.01 | 0.78 | 1.15 | 0.22 | 1.27 |
| 35622 | 0 | 107479 | KFNWYVD                  | 1.99 | 0.01 | 0.78 | 1.15 | 0.22 | 1.27 |
| 35623 | 0 | 107479 | KFNWYVD                  | 1.99 | 0.01 | 0.78 | 1.15 | 0.22 | 0.28 |
| 35624 | 0 | 107479 | KFNWYVD                  | 1.99 | 0.01 | 0.78 | 1.15 | 0.22 | 0.28 |
| 35625 | 0 | 107479 | KFNWYVD                  | 1.99 | 0.01 | 0.78 | 1.15 | 0.22 | 0.28 |
| 35626 | 0 | 107479 | KFNWYVD                  | 1.99 | 0.01 | 0.78 | 1.15 | 0.22 | 0.28 |
| 35627 | 0 | 107479 | KFNWYVD                  | 1.99 | 0.01 | 0.78 | 1.20 | 0.22 | 0.28 |
| 35628 | 0 | 107479 | KFNWYVD                  | 1.99 | 0.01 | 0.78 | 1.20 | 0.22 | 1.27 |
| 35629 | 0 | 107479 | KFNWYVD                  | 1.99 | 0.01 | 0.78 | 0.44 | 1.13 | 0.28 |
| 35630 | 0 | 119600 | KFNWYVDG                 | 2.10 | 0.01 | 0.78 | 0.44 | 1.93 | 0.28 |
| 35631 | 0 | 137425 | KFP                      | 1.37 | 0.01 | 0.78 | 1.20 | 0.22 | 0.85 |
| 35632 | 0 | 138862 | KFPED                    | 1.74 | 0.01 | 0.78 | 0.68 | 0.22 | 1.66 |
| 35633 | 0 | 138862 | KFPED                    | 1.74 | 0.01 | 0.78 | 0.68 | 0.22 | 1.66 |
| 35634 | 0 | 138862 | KFPED                    | 1.74 | 0.01 | 0.78 | 0.68 | 0.22 | 1.66 |
| 35635 | 0 | 138862 | KFPED                    | 1.74 | 0.01 | 0.78 | 0.68 | 0.22 | 0.85 |
| 35636 | 0 | 138862 | KFPED                    | 1.74 | 0.01 | 0.78 | 0.68 | 0.22 | 2.35 |
| 35637 | 0 | 138862 | KFPED                    | 1.74 | 0.01 | 0.78 | 0.68 | 0.22 | 1.48 |
| 35638 | 0 | 130919 | KFPEDFES                 | 2.14 | 0.01 | 0.78 | 0.44 | 1.13 | 0.28 |
| 35639 | 0 | 123359 | KFPEDFESC                | 2.23 | 0.01 | 0.78 | 0.68 | 0.22 | 0.85 |
| 35640 | 0 | 123359 | KFPEDFESC                | 2.23 | 0.01 | 0.78 | 0.68 | 0.22 | 0.28 |
| 35641 | 0 | 123359 | KFPEDFESC                | 2.23 | 0.01 | 0.78 | 0.68 | 0.22 | 0.28 |
| 35642 | 0 | 30808  | KFPGGGQI                 | 2.12 | 0.01 | 1.72 | 0.44 | 0.85 | 0.28 |
| 35643 | 0 | 30811  | KFPGGGQIVGGVYLLPR<br>RG  | 2.90 | 0.01 | 1.72 | 0.44 | 0.85 | 0.28 |
| 35644 | 0 | 143959 | KFPHLAVGF                | 2.21 | 0.01 | 0.78 | 1.12 | 0.22 | 0.85 |
| 35645 | 0 | 143959 | KFPHLAVGF                | 2.21 | 0.01 | 0.78 | 1.12 | 0.22 | 0.85 |
| 35646 | 0 | 143959 | KFPHLAVGF                | 2.21 | 0.01 | 0.78 | 1.12 | 0.22 | 0.85 |
| 35647 | 0 | 143959 | KFPHLAVGF                | 2.21 | 0.01 | 0.78 | 1.12 | 0.22 | 0.85 |

|       |   |        |                                         |      |      |      |      |      |      |
|-------|---|--------|-----------------------------------------|------|------|------|------|------|------|
| 35648 | 0 | 143959 | KFPHLAVGF                               | 2.21 | 0.01 | 0.78 | 1.12 | 0.22 | 0.85 |
| 35649 | 0 | 143959 | KFPHLAVGF                               | 2.21 | 0.01 | 0.78 | 3.93 | 0.22 | 0.85 |
| 35650 | 0 | 143959 | KFPHLAVGF                               | 2.21 | 0.01 | 0.78 | 3.93 | 0.22 | 0.28 |
| 35651 | 0 | 143959 | KFPHLAVGF                               | 2.21 | 0.01 | 0.78 | 3.93 | 0.22 | 0.85 |
| 35652 | 0 | 115309 | KFPQYLQYLYQGPIVLNP<br>WD                | 2.95 | 0.01 | 1.60 | 0.44 | 1.23 | 1.28 |
| 35653 | 0 | 151944 | KFPSESRPNVVK                            | 2.49 | 0.01 | 2.80 | 2.78 | 0.22 | 0.28 |
| 35654 | 0 | 151944 | KFPSESRPNVVK                            | 2.49 | 0.01 | 2.80 | 2.78 | 0.22 | 1.34 |
| 35655 | 0 | 30821  | KFPTLDHV                                | 2.10 | 0.01 | 2.40 | 2.43 | 0.22 | 0.28 |
| 35656 | 0 | 167767 | KFPTLDHVL                               | 2.21 | 0.01 | 2.40 | 2.43 | 0.22 | 0.28 |
| 35657 | 0 | 30826  | KFQDAYNA                                | 2.12 | 0.01 | 4.08 | 1.81 | 0.22 | 0.28 |
| 35658 | 0 | 30826  | KFQDAYNA                                | 2.12 | 0.01 | 4.08 | 1.81 | 0.22 | 0.28 |
| 35659 | 0 | 30826  | KFQDAYNA                                | 2.12 | 0.01 | 4.08 | 1.81 | 0.22 | 0.28 |
| 35660 | 0 | 30827  | KFQDMLNI                                | 2.10 | 0.01 | 1.66 | 1.15 | 0.22 | 0.28 |
| 35661 | 0 | 156895 | KFQNGCAHPCHKKP                          | 2.63 | 0.01 | 0.90 | 2.74 | 0.22 | 0.85 |
| 35662 | 0 | 30831  | KFQPESPARLASAILNA                       | 2.79 | 0.01 | 3.61 | 0.44 | 0.85 | 0.28 |
| 35663 | 0 | 117544 | KFRFLALKLYFSFTRP                        | 2.77 | 0.01 | 0.90 | 0.68 | 0.22 | 1.27 |
| 35664 | 0 | 117544 | KFRFLALKLYFSFTRP                        | 2.77 | 0.01 | 0.90 | 1.20 | 0.22 | 2.35 |
| 35665 | 0 | 117544 | KFRFLALKLYFSFTRP                        | 2.77 | 0.01 | 0.90 | 1.20 | 0.22 | 0.28 |
| 35666 | 0 | 79583  | KFRQLLWFHISCLTFGRE<br>TVIEY             | 3.04 | 0.01 | 2.71 | 0.44 | 0.85 | 0.28 |
| 35667 | 0 | 30848  | KFSDGQLTIGELKP                          | 2.60 | 0.01 | 2.94 | 2.00 | 0.22 | 0.28 |
| 35668 | 0 | 30853  | KFSISIDQ                                | 2.14 | 0.01 | 2.69 | 1.12 | 0.22 | 0.28 |
| 35669 | 0 | 30853  | KFSISIDQ                                | 2.14 | 0.01 | 2.69 | 1.12 | 0.22 | 0.28 |
| 35670 | 0 | 151662 | KFSPLTANLMNLLAENG<br>RL                 | 2.89 | 4.23 | 1.75 | 2.25 | 0.22 | 0.85 |
| 35671 | 0 | 151945 | KFSSLYISQFI                             | 2.43 | 0.01 | 0.78 | 0.44 | 1.93 | 0.28 |
| 35672 | 0 | 30863  | KFTEPVKDIM                              | 2.30 | 0.01 | 3.17 | 0.68 | 0.22 | 0.28 |
| 35673 | 0 | 30863  | KFTEPVKDIM                              | 2.30 | 0.01 | 3.17 | 0.68 | 0.22 | 0.28 |
| 35674 | 0 | 30863  | KFTEPVKDIM                              | 2.30 | 0.01 | 3.17 | 0.68 | 0.22 | 0.85 |
| 35675 | 0 | 30863  | KFTEPVKDIM                              | 2.30 | 0.01 | 3.17 | 0.68 | 0.22 | 0.28 |
| 35676 | 0 | 146390 | KFTFLFCGSMMATG                          | 2.62 | 0.01 | 2.96 | 0.44 | 0.22 | 0.28 |
| 35677 | 0 | 196583 | KFTLHTP                                 | 2.02 | 0.01 | 0.90 | 0.44 | 1.23 | 1.39 |
| 35678 | 0 | 105896 | KFTQFAGK                                | 2.15 | 0.01 | 3.05 | 1.20 | 0.22 | 0.28 |
| 35679 | 0 | 30868  | KFTVFEGAFNKAIKESTG<br>GAYEAYKFIPSLETAVK | 3.52 | 0.01 | 3.67 | 0.44 | 1.23 | 1.27 |
| 35680 | 0 | 30868  | KFTVFEGAFNKAIKESTG<br>GAYEAYKFIPSLETAVK | 3.52 | 0.01 | 3.67 | 0.44 | 1.23 | 0.85 |
| 35681 | 0 | 30872  | KFVDSTVVASVTIIDRSLP                     | 2.90 | 0.01 | 2.60 | 0.44 | 1.23 | 0.28 |
| 35682 | 0 | 30872  | KFVDSTVVASVTIIDRSLP                     | 2.90 | 0.01 | 2.60 | 1.20 | 0.22 | 0.28 |
| 35683 | 0 | 117948 | KFVETPGQKYKETDL                         | 2.67 | 0.01 | 0.78 | 3.05 | 1.13 | 0.28 |
| 35684 | 0 | 117948 | KFVETPGQKYKETDL                         | 2.67 | 0.01 | 0.78 | 0.44 | 1.13 | 0.28 |

|       |   |        |                          |      |      |      |      |      |      |
|-------|---|--------|--------------------------|------|------|------|------|------|------|
| 35685 | 0 | 117948 | KFVETPGQKYKETDL          | 2.67 | 0.01 | 0.78 | 0.44 | 1.41 | 0.28 |
| 35686 | 0 | 30877  | KFVKEQRE                 | 2.15 | 0.01 | 2.04 | 0.44 | 0.85 | 0.28 |
| 35687 | 0 | 30882  | KFVVNGRWID               | 2.28 | 0.01 | 0.90 | 0.44 | 1.23 | 0.28 |
| 35688 | 0 | 123361 | KFYCDYCDTY               | 2.35 | 0.01 | 0.78 | 0.44 | 1.13 | 0.85 |
| 35689 | 0 | 30894  | KGA                      | 1.37 | 0.01 | 3.13 | 0.68 | 0.22 | 0.28 |
| 35690 | 0 | 318702 | KGAAKAPAPKAAAPA          | 2.75 | 0.01 | 1.61 | 0.44 | 0.85 | 1.28 |
| 35691 | 0 | 156343 | KGAGKLFGKAGAAA           | 2.66 | 0.01 | 2.73 | 0.44 | 0.85 | 1.28 |
| 35692 | 0 | 156343 | KGAGKLFGKAGAAA           | 2.66 | 0.01 | 2.73 | 0.44 | 0.85 | 1.28 |
| 35693 | 0 | 232654 | KGAGSSQDACIKFIQYEV<br>DG | 2.94 | 0.01 | 2.28 | 0.68 | 0.22 | 0.28 |
| 35694 | 0 | 232654 | KGAGSSQDACIKFIQYEV<br>DG | 2.94 | 0.01 | 2.28 | 0.68 | 0.22 | 0.28 |
| 35695 | 0 | 232654 | KGAGSSQDACIKFIQYEV<br>DG | 2.94 | 0.01 | 2.28 | 0.68 | 0.22 | 0.28 |
| 35696 | 0 | 232654 | KGAGSSQDACIKFIQYEV<br>DG | 2.94 | 0.01 | 2.28 | 0.68 | 2.25 | 1.75 |
| 35697 | 0 | 232654 | KGAGSSQDACIKFIQYEV<br>DG | 2.94 | 0.01 | 2.28 | 0.68 | 2.25 | 1.75 |
| 35698 | 0 | 232655 | KGAGSSQDATIKFIQYEV<br>DG | 2.94 | 0.01 | 0.90 | 0.68 | 0.22 | 0.28 |
| 35699 | 0 | 232655 | KGAGSSQDATIKFIQYEV<br>DG | 2.94 | 0.01 | 0.90 | 0.68 | 0.22 | 0.28 |
| 35700 | 0 | 232655 | KGAGSSQDATIKFIQYEV<br>DG | 2.94 | 0.01 | 0.90 | 0.68 | 0.22 | 0.28 |
| 35701 | 0 | 232655 | KGAGSSQDATIKFIQYEV<br>DG | 2.94 | 0.01 | 0.90 | 0.68 | 2.25 | 1.75 |
| 35702 | 0 | 232655 | KGAGSSQDATIKFIQYEV<br>DG | 2.94 | 0.01 | 0.90 | 0.68 | 2.25 | 1.75 |
| 35703 | 0 | 134418 | KGAIIGLMVGGVV            | 2.55 | 0.01 | 0.78 | 0.44 | 1.41 | 0.28 |
| 35704 | 0 | 134418 | KGAIIGLMVGGVV            | 2.55 | 0.01 | 1.75 | 0.44 | 1.41 | 1.34 |
| 35705 | 0 | 134418 | KGAIIGLMVGGVV            | 2.55 | 0.01 | 1.75 | 0.44 | 1.41 | 1.75 |
| 35706 | 0 | 134418 | KGAIIGLMVGGVV            | 2.55 | 0.01 | 1.75 | 0.44 | 1.41 | 0.28 |
| 35707 | 0 | 134418 | KGAIIGLMVGGVV            | 2.55 | 0.01 | 1.75 | 0.44 | 1.41 | 0.28 |
| 35708 | 0 | 134418 | KGAIIGLMVGGVV            | 2.55 | 0.01 | 0.78 | 0.44 | 1.41 | 0.28 |
| 35709 | 0 | 134418 | KGAIIGLMVGGVV            | 2.55 | 0.01 | 0.78 | 0.44 | 2.26 | 0.85 |
| 35710 | 0 | 134418 | KGAIIGLMVGGVV            | 2.55 | 0.01 | 0.78 | 0.44 | 2.26 | 1.66 |
| 35711 | 0 | 104851 | KGAIIGLMVGGVVI           | 2.64 | 0.01 | 0.78 | 0.68 | 0.22 | 0.28 |
| 35712 | 0 | 104851 | KGAIIGLMVGGVVI           | 2.64 | 0.01 | 0.78 | 0.68 | 0.22 | 0.28 |
| 35713 | 0 | 104851 | KGAIIGLMVGGVVI           | 2.64 | 0.01 | 0.78 | 0.68 | 0.22 | 0.28 |
| 35714 | 0 | 104851 | KGAIIGLMVGGVVI           | 2.64 | 0.01 | 0.78 | 0.68 | 0.22 | 1.48 |
| 35715 | 0 | 104851 | KGAIIGLMVGGVVI           | 2.64 | 0.01 | 0.78 | 0.68 | 0.22 | 0.85 |
| 35716 | 0 | 104851 | KGAIIGLMVGGVVI           | 2.64 | 0.01 | 0.78 | 0.68 | 0.22 | 1.48 |
| 35717 | 0 | 30896  | KGAIIRPGAANPSDD          | 2.67 | 0.01 | 3.97 | 0.44 | 1.74 | 0.28 |
| 35718 | 0 | 30902  | KGAV                     | 1.57 | 0.01 | 3.13 | 0.68 | 0.22 | 1.34 |
| 35719 | 0 | 30902  | KGAV                     | 1.57 | 0.01 | 3.13 | 0.68 | 0.22 | 0.28 |
| 35720 | 0 | 140568 | KGAWLDSTKAT              | 2.42 | 0.01 | 4.93 | 0.68 | 0.22 | 0.28 |

|       |   |        |                                   |      |      |      |      |      |      |
|-------|---|--------|-----------------------------------|------|------|------|------|------|------|
| 35721 | 0 | 144702 | KGCKITCFGGGLPDSVKI                | 2.84 | 0.01 | 0.90 | 1.20 | 0.22 | 0.85 |
| 35722 | 0 | 30905  | KGCNETWARVKRCPIDI<br>LYGIHPIRLCVQ | 3.27 | 0.01 | 2.86 | 2.02 | 0.22 | 0.28 |
| 35723 | 0 | 30905  | KGCNETWARVKRCPIDI<br>LYGIHPIRLCVQ | 3.27 | 0.01 | 2.86 | 2.02 | 1.59 | 0.28 |
| 35724 | 0 | 123362 | KGDCGTPSHSRRQPHVE<br>SQWSRSA      | 3.11 | 0.01 | 0.90 | 3.81 | 0.22 | 0.85 |
| 35725 | 0 | 123362 | KGDCGTPSHSRRQPHVE<br>SQWSRSA      | 3.11 | 0.01 | 0.90 | 1.20 | 0.22 | 0.28 |
| 35726 | 0 | 123362 | KGDCGTPSHSRRQPHVE<br>SQWSRSA      | 3.11 | 0.01 | 0.90 | 1.20 | 0.22 | 0.28 |
| 35727 | 0 | 122120 | KGDCGTPSHSRRQPHV<br>VSQWSRSA      | 3.11 | 0.01 | 3.26 | 3.81 | 0.22 | 0.28 |
| 35728 | 0 | 122120 | KGDCGTPSHSRRQPHV<br>VSQWSRSA      | 3.11 | 0.01 | 3.26 | 3.81 | 0.22 | 0.28 |
| 35729 | 0 | 122120 | KGDCGTPSHSRRQPHV<br>VSQWSRSA      | 3.11 | 0.01 | 3.26 | 0.68 | 0.22 | 0.28 |
| 35730 | 0 | 122120 | KGDCGTPSHSRRQPHV<br>VSQWSRSA      | 3.11 | 0.01 | 3.26 | 3.81 | 0.22 | 0.28 |
| 35731 | 0 | 30909  | KGDGWILGEPSVVSSQI<br>LNL          | 2.93 | 0.01 | 0.90 | 1.12 | 0.22 | 0.28 |
| 35732 | 0 | 30909  | KGDGWILGEPSVVSSQI<br>LNL          | 2.93 | 0.01 | 0.90 | 1.12 | 0.22 | 0.28 |
| 35733 | 0 | 118450 | KGDKAQIEKRIQE                     | 2.58 | 0.01 | 0.78 | 0.44 | 1.74 | 0.85 |
| 35734 | 0 | 118450 | KGDKAQIEKRIQE                     | 2.58 | 0.01 | 0.78 | 0.44 | 1.74 | 0.85 |
| 35735 | 0 | 79584  | KGDKAQIEKRIQEIIQLD<br>V           | 2.97 | 0.01 | 0.78 | 1.15 | 0.22 | 1.27 |
| 35736 | 0 | 79584  | KGDKAQIEKRIQEIIQLD<br>V           | 2.97 | 0.01 | 0.78 | 1.15 | 0.22 | 0.85 |
| 35737 | 0 | 79584  | KGDKAQIEKRIQEIIQLD<br>V           | 2.97 | 0.01 | 0.78 | 1.15 | 0.22 | 1.27 |
| 35738 | 0 | 79584  | KGDKAQIEKRIQEIIQLD<br>V           | 2.97 | 0.01 | 0.78 | 1.15 | 0.22 | 1.27 |
| 35739 | 0 | 193485 | KGDSVTIIA                         | 2.20 | 0.01 | 2.51 | 0.44 | 2.39 | 0.28 |
| 35740 | 0 | 193485 | KGDSVTIIA                         | 2.20 | 0.01 | 2.51 | 0.44 | 2.39 | 0.28 |
| 35741 | 0 | 134116 | KGDVTAQIALQ                       | 2.39 | 0.01 | 0.78 | 0.44 | 1.59 | 0.28 |
| 35742 | 0 | 30918  | KGEEITSDTNIEAAEENIS               | 2.92 | 0.01 | 2.08 | 2.02 | 0.22 | 1.57 |
| 35743 | 0 | 120671 | KGEKALKASG                        | 2.36 | 0.01 | 2.18 | 2.16 | 0.22 | 0.28 |
| 35744 | 0 | 30921  | KGEKVDLNTKRTKKSQH<br>TSEG         | 3.00 | 0.01 | 2.56 | 1.15 | 0.22 | 0.28 |
| 35745 | 0 | 30924  | KGENFTETDVKMMERV<br>VEQMCVTQYQK   | 3.25 | 0.01 | 1.75 | 1.81 | 0.22 | 0.28 |
| 35746 | 0 | 30924  | KGENFTETDVKMMERV<br>VEQMCVTQYQK   | 3.25 | 0.01 | 1.75 | 2.19 | 0.22 | 0.28 |
| 35747 | 0 | 107482 | KGEPGLPGRGFP                      | 2.73 | 0.01 | 0.78 | 0.68 | 0.22 | 1.27 |

|                   |   |        |                                      |      |      |      |      |      |      |
|-------------------|---|--------|--------------------------------------|------|------|------|------|------|------|
| 35748             | 0 | 107482 | KGEPGLPGRGFP                         | 2.73 | 0.01 | 0.78 | 0.68 | 0.22 | 0.85 |
| 35749             | 0 | 105898 | KGEQG                                | 1.75 | 0.01 | 0.78 | 2.46 | 0.22 | 0.28 |
| 35750             | 0 | 105898 | KGEQG                                | 1.75 | 0.01 | 0.78 | 0.68 | 0.22 | 0.28 |
| 35751             | 0 | 117214 | KGEQGEPGA                            | 2.25 | 0.01 | 0.78 | 0.44 | 1.13 | 0.28 |
| 35752             | 0 | 117214 | KGEQGEPGA                            | 2.25 | 0.01 | 0.78 | 0.44 | 1.13 | 0.28 |
| 35753             | 0 | 117214 | KGEQGEPGA                            | 2.25 | 0.01 | 0.78 | 0.68 | 0.22 | 0.28 |
| KGFGGTRTSTAPAEAGK |   |        |                                      |      |      |      |      |      |      |
| 35754             | 0 | 30927  | TELDDGYRPPPFNPRPS<br>PYAELLKDLERMRKE | 3.85 | 0.01 | 2.75 | 1.15 | 0.22 | 0.28 |
| KGFGGTRTSTAPAEAGK |   |        |                                      |      |      |      |      |      |      |
| 35755             | 0 | 30927  | TELDDGYRPPPFNPRPS<br>PYAELLKDLERMRKE | 3.85 | 0.01 | 2.75 | 1.15 | 0.22 | 0.85 |
| KGFGGTRTSTAPAEAGK |   |        |                                      |      |      |      |      |      |      |
| 35756             | 0 | 30927  | TELDDGYRPPPFNPRPS<br>PYAELLKDLERMRKE | 3.85 | 0.01 | 2.75 | 1.81 | 0.22 | 0.85 |
| KGFGGTRTSTAPAEAGK |   |        |                                      |      |      |      |      |      |      |
| 35757             | 0 | 30927  | TELDDGYRPPPFNPRPS<br>PYAELLKDLERMRKE | 3.85 | 0.01 | 2.75 | 0.44 | 0.85 | 0.28 |
| KGFGGTRTSTAPAEAGK |   |        |                                      |      |      |      |      |      |      |
| 35758             | 0 | 30927  | TELDDGYRPPPFNPRPS<br>PYAELLKDLERMRKE | 3.85 | 0.01 | 2.75 | 1.81 | 2.25 | 1.75 |
| KGFGGTRTSTAPAEAGK |   |        |                                      |      |      |      |      |      |      |
| 35759             | 0 | 30927  | TELDDGYRPPPFNPRPS<br>PYAELLKDLERMRKE | 3.85 | 0.01 | 2.75 | 1.81 | 0.22 | 0.28 |
| KGFGGTRTSTAPAEAGK |   |        |                                      |      |      |      |      |      |      |
| 35760             | 0 | 30927  | TELDDGYRPPPFNPRPS<br>PYAELLKDLERMRKE | 3.85 | 0.01 | 2.75 | 1.81 | 0.22 | 0.28 |
| 35761             | 0 | 233634 | KGFPKLALESNSDEPDTI<br>EYCNLGCRSSVC   | 3.32 | 0.01 | 1.86 | 0.44 | 1.23 | 0.85 |
| 35762             | 0 | 233634 | KGFPKLALESNSDEPDTI<br>EYCNLGCRSSVC   | 3.32 | 0.01 | 1.86 | 1.20 | 0.22 | 0.85 |
| 35763             | 0 | 129069 | KGGCAKGK                             | 2.18 | 0.01 | 0.78 | 0.44 | 1.13 | 0.28 |
| 35764             | 0 | 131929 | KGGGVWESGAANSQS                      | 2.68 | 0.01 | 0.78 | 0.44 | 1.13 | 0.85 |
| 35765             | 0 | 30937  | KGGIVT                               | 1.89 | 0.01 | 2.40 | 0.44 | 0.85 | 0.28 |
| 35766             | 0 | 30939  | KGGKGTEEK                            | 2.28 | 0.01 | 3.97 | 1.15 | 0.22 | 0.28 |
| 35767             | 0 | 30940  | KGGKKGKATPSA                         | 2.53 | 0.01 | 2.78 | 2.49 | 0.85 | 0.28 |
| 35768             | 0 | 30943  | KGGMKNVFDEVIPTAFT<br>VGKTYTPEYN      | 3.25 | 0.01 | 3.22 | 1.12 | 0.22 | 1.27 |

|       |   |        |                                 |      |      |      |      |      |      |
|-------|---|--------|---------------------------------|------|------|------|------|------|------|
| 35769 | 0 | 30943  | KGGMKNVFDEVIPTAFT<br>VGKTYTPEYN | 3.25 | 0.01 | 3.22 | 0.44 | 1.23 | 1.27 |
| 35770 | 0 | 30945  | KGGRKP                          | 1.92 | 0.01 | 1.96 | 0.44 | 0.85 | 0.28 |
| 35771 | 0 | 30951  | KGGWFGKHRGQGGG                  | 2.64 | 0.01 | 2.43 | 0.44 | 1.74 | 1.27 |
| 35772 | 0 | 504004 | KGGWFGKHRGQGGSN<br>PKFEN        | 2.96 | 2.84 | 2.48 | 0.44 | 1.74 | 0.28 |
| 35773 | 0 | 117949 | KGHFLSSKSGFWT                   | 2.64 | 0.01 | 0.78 | 0.68 | 0.22 | 0.85 |
| 35774 | 0 | 117949 | KGHFLSSKSGFWT                   | 2.64 | 0.01 | 0.78 | 0.68 | 0.22 | 1.27 |
| 35775 | 0 | 117949 | KGHFLSSKSGFWT                   | 2.64 | 0.01 | 0.78 | 0.68 | 0.22 | 1.27 |
| 35776 | 0 | 30953  | KGHVILRKRV                      | 2.34 | 0.01 | 3.81 | 1.15 | 0.22 | 0.28 |
| 35777 | 0 | 30953  | KGHVILRKRV                      | 2.34 | 0.01 | 3.81 | 1.15 | 0.22 | 1.34 |
| 35778 | 0 | 434485 | KGIAIPHDIDLGESRVVI<br>QDYDNQH   | 3.13 | 0.01 | 2.70 | 0.68 | 0.22 | 0.28 |
| 35779 | 0 | 434485 | KGIAIPHDIDLGESRVVI<br>QDYDNQH   | 3.13 | 0.01 | 2.70 | 0.68 | 0.22 | 0.85 |
| 35780 | 0 | 229287 | KGIAPYQN                        | 2.10 | 0.01 | 2.70 | 0.68 | 0.22 | 0.28 |
| 35781 | 0 | 118451 | KGIIDPTKVVRTA                   | 2.54 | 0.01 | 0.78 | 0.44 | 1.74 | 0.85 |
| 35782 | 0 | 118451 | KGIIDPTKVVRTA                   | 2.54 | 0.01 | 0.78 | 0.44 | 1.74 | 0.85 |
| 35783 | 0 | 118451 | KGIIDPTKVVRTA                   | 2.54 | 0.01 | 0.78 | 0.44 | 1.59 | 0.85 |
| 35784 | 0 | 118451 | KGIIDPTKVVRTA                   | 2.54 | 0.01 | 0.78 | 1.20 | 0.22 | 0.85 |
| 35785 | 0 | 118451 | KGIIDPTKVVRTA                   | 2.54 | 0.01 | 0.78 | 1.20 | 0.22 | 0.85 |
| 35786 | 0 | 118451 | KGIIDPTKVVRTA                   | 2.54 | 0.01 | 0.78 | 1.20 | 0.22 | 0.85 |
| 35787 | 0 | 118451 | KGIIDPTKVVRTA                   | 2.54 | 0.01 | 0.78 | 1.20 | 0.22 | 0.85 |
| 35788 | 0 | 118451 | KGIIDPTKVVRTA                   | 2.54 | 0.01 | 0.78 | 1.20 | 0.22 | 1.48 |
| 35789 | 0 | 30956  | KGIIKEFDEAGTLA                  | 2.63 | 0.01 | 3.34 | 1.12 | 0.22 | 0.85 |
| 35790 | 0 | 30974  | KGILSN                          | 1.88 | 0.01 | 3.81 | 0.44 | 1.23 | 1.27 |
| 35791 | 0 | 30978  | KGINLIDDIKYYFDEKGI<br>MRTGLIS   | 3.16 | 0.01 | 3.04 | 2.75 | 0.22 | 0.28 |
| 35792 | 0 | 30978  | KGINLIDDIKYYFDEKGI<br>MRTGLIS   | 3.16 | 0.01 | 3.04 | 2.75 | 0.22 | 0.28 |
| 35793 | 0 | 30978  | KGINLIDDIKYYFDEKGI<br>MRTGLIS   | 3.16 | 0.01 | 3.04 | 2.75 | 0.22 | 0.28 |
| 35794 | 0 | 30980  | KGIPNTKAP                       | 2.24 | 0.01 | 0.90 | 0.44 | 1.23 | 1.39 |
| 35795 | 0 | 30980  | KGIPNTKAP                       | 2.24 | 0.01 | 0.90 | 0.44 | 1.23 | 0.28 |
| 35796 | 0 | 30980  | KGIPNTKAP                       | 2.24 | 0.01 | 0.90 | 0.44 | 1.23 | 0.28 |
| 35797 | 0 | 30984  | KGITTKWMA                       | 2.23 | 0.01 | 0.90 | 0.44 | 1.23 | 1.39 |
| 35798 | 0 | 30984  | KGITTKWMA                       | 2.23 | 0.01 | 0.90 | 0.44 | 1.23 | 0.28 |
| 35799 | 0 | 30984  | KGITTKWMA                       | 2.23 | 0.01 | 0.90 | 0.44 | 1.23 | 0.28 |
| 35800 | 0 | 450740 | KGIYHQQV                        | 1.99 | 0.01 | 0.90 | 0.44 | 1.23 | 1.39 |
| 35801 | 0 | 450740 | KGIYHQQV                        | 1.99 | 0.01 | 0.90 | 0.44 | 1.23 | 1.39 |
| 35802 | 0 | 30986  | KGIYPLSYE                       | 2.21 | 0.01 | 0.90 | 0.68 | 0.22 | 0.28 |
| 35803 | 0 | 30987  | KGIYQTSN                        | 2.10 | 0.01 | 2.45 | 0.44 | 0.85 | 1.34 |
| 35804 | 0 | 30987  | KGIYQTSN                        | 2.10 | 0.01 | 2.45 | 0.44 | 0.85 | 1.34 |
| 35805 | 0 | 30988  | KGIYQTSNFRVVPBGDV<br>VRF        | 2.92 | 0.01 | 2.45 | 1.20 | 0.22 | 0.85 |
| 35806 | 0 | 30988  | KGIYQTSNFRVVPBGDV<br>VRF        | 2.92 | 0.01 | 2.45 | 0.44 | 0.85 | 0.28 |



|       |   |        |                                          |      |      |      |      |      |      |
|-------|---|--------|------------------------------------------|------|------|------|------|------|------|
| 35807 | 0 | 132400 | KGKAGKDGGAGQ                             | 2.54 | 0.01 | 0.90 | 1.15 | 0.22 | 1.39 |
| 35808 | 0 | 318904 | KGKATGGSAGEDGES                          | 2.73 | 0.01 | 1.61 | 0.44 | 0.85 | 1.28 |
| 35809 | 0 | 318905 | KGKATGGSAGEDSDS                          | 2.73 | 0.01 | 1.61 | 0.44 | 0.85 | 1.28 |
| 35810 | 0 | 318906 | KGKATGSSAGEDGES                          | 2.73 | 0.01 | 1.61 | 0.44 | 0.85 | 1.28 |
| 35811 | 0 | 119471 | KGKKALQSA                                | 2.25 | 0.01 | 0.90 | 0.44 | 1.13 | 0.28 |
| 35812 | 0 | 30992  | KGKKVDLYGAYYGUQC<br>AGGT                 | 2.94 | 0.01 | 2.56 | 1.12 | 0.22 | 0.28 |
| 35813 | 0 | 30992  | KGKKVDLYGAYYGUQC<br>AGGT                 | 2.94 | 0.01 | 2.56 | 1.12 | 0.22 | 0.28 |
| 35814 | 0 | 30993  | KGKKVDLYGAYYGQCA<br>GGT                  | 2.96 | 0.01 | 2.56 | 3.12 | 0.22 | 0.28 |
| 35815 | 0 | 96455  | KGKNVLINKD                               | 2.34 | 0.01 | 0.78 | 0.44 | 1.93 | 0.85 |
| 35816 | 0 | 96455  | KGKNVLINKD                               | 2.34 | 0.01 | 0.78 | 0.44 | 1.93 | 0.28 |
| 35817 | 0 | 96455  | KGKNVLINKD                               | 2.34 | 0.01 | 0.78 | 0.44 | 1.13 | 0.28 |
| 35818 | 0 | 96455  | KGKNVLINKD                               | 2.34 | 0.01 | 0.78 | 0.44 | 1.93 | 0.28 |
| 35819 | 0 | 96455  | KGKNVLINKD                               | 2.34 | 0.01 | 0.78 | 0.44 | 1.23 | 0.28 |
| 35820 | 0 | 96455  | KGKNVLINKD                               | 2.34 | 0.01 | 0.78 | 0.44 | 1.41 | 0.28 |
| 35821 | 0 | 180332 | KGKRGDSGSPATWTTR<br>GFVFT                | 3.01 | 0.01 | 0.78 | 0.68 | 0.22 | 0.85 |
| 35822 | 0 | 423017 | KGKSLLFKTENGVNMC                         | 2.73 | 0.01 | 2.30 | 1.20 | 0.22 | 1.27 |
| 35823 | 0 | 423017 | KGKSLLFKTENGVNMC                         | 2.73 | 0.01 | 2.30 | 0.68 | 2.60 | 1.75 |
| 35824 | 0 | 423017 | KGKSLLFKTENGVNMC                         | 2.73 | 0.01 | 2.30 | 1.15 | 0.22 | 0.28 |
| 35825 | 0 | 423017 | KGKSLLFKTENGVNMC                         | 2.73 | 0.01 | 2.30 | 1.15 | 0.22 | 0.28 |
| 35826 | 0 | 423017 | KGKSLLFKTENGVNMC                         | 2.73 | 0.01 | 2.30 | 1.15 | 0.22 | 0.28 |
| 35827 | 0 | 423017 | KGKSLLFKTENGVNMC                         | 2.73 | 0.01 | 2.30 | 1.15 | 0.22 | 0.28 |
| 35828 | 0 | 423017 | KGKSLLFKTENGVNMC                         | 2.73 | 0.01 | 2.30 | 0.44 | 0.85 | 0.28 |
| 35829 | 0 | 423017 | KGKSLLFKTENGVNMC                         | 2.73 | 0.01 | 2.30 | 0.68 | 0.22 | 1.34 |
| 35830 | 0 | 423017 | KGKSLLFKTENGVNMC                         | 2.73 | 0.01 | 2.30 | 0.68 | 0.22 | 1.34 |
| 35831 | 0 | 423017 | KGKSLLFKTENGVNMC                         | 2.73 | 0.01 | 2.30 | 0.68 | 0.22 | 1.34 |
| 35832 | 0 | 423017 | KGKSLLFKTENGVNMC                         | 2.73 | 0.01 | 2.30 | 0.68 | 0.22 | 1.34 |
| 35833 | 0 | 142430 | KGLDAAKTAIKKAKAAA<br>EEAKKEAAI           | 3.25 | 0.01 | 2.59 | 0.44 | 0.85 | 0.85 |
| 35834 | 0 | 84303  | KGLDIQKVAGTW                             | 2.46 | 0.01 | 1.60 | 1.15 | 0.22 | 0.28 |
| 35835 | 0 | 30997  | KGLEEANEKLQIVREKV<br>QSLKAKLSELISQYDHAIV | 3.54 | 0.01 | 2.22 | 0.44 | 1.74 | 0.28 |

|       |   |        |                                          |      |      |      |      |      |      |
|-------|---|--------|------------------------------------------|------|------|------|------|------|------|
| 35836 | 0 | 30997  | KGLEEANEKLQIVREKV<br>QSLKAKLSELISQYDHAIV | 3.54 | 0.01 | 2.22 | 0.44 | 1.74 | 0.28 |
| 35837 | 0 | 171727 | KGLEEITVHNKDEVY                          | 2.67 | 0.01 | 0.78 | 0.44 | 1.41 | 0.28 |
| 35838 | 0 | 112177 | KGLEWLA                                  | 2.02 | 0.01 | 0.78 | 0.44 | 1.13 | 0.28 |
| 35839 | 0 | 103304 | KGLMNIALAISAAQV                          | 2.67 | 0.01 | 2.04 | 0.44 | 0.85 | 1.28 |
| 35840 | 0 | 31002  | KGLNGLFDLGPKQKI                          | 2.71 | 0.01 | 1.72 | 0.68 | 0.22 | 1.66 |
| 35841 | 0 | 31002  | KGLNGLFDLGPKQKI                          | 2.71 | 0.01 | 1.72 | 0.68 | 0.22 | 0.28 |
| 35842 | 0 | 31002  | KGLNGLFDLGPKQKI                          | 2.71 | 0.01 | 1.72 | 0.68 | 0.22 | 1.27 |
| 35843 | 0 | 31002  | KGLNGLFDLGPKQKI                          | 2.71 | 0.01 | 1.72 | 0.68 | 0.22 | 1.66 |
| 35844 | 0 | 31002  | KGLNGLFDLGPKQKI                          | 2.71 | 0.01 | 1.72 | 0.68 | 0.22 | 1.66 |
| 35845 | 0 | 31002  | KGLNGLFDLGPKQKI                          | 2.71 | 0.01 | 1.72 | 0.68 | 0.22 | 1.66 |
| 35846 | 0 | 467193 | KGLPEPTVTNEEYVE                          | 2.70 | 0.01 | 1.66 | 0.44 | 0.85 | 1.28 |
| 35847 | 0 | 123363 | KGLPTTLKM                                | 2.25 | 0.01 | 2.28 | 2.00 | 0.22 | 0.28 |
| 35848 | 0 | 186767 | KGLRGNCNCNNDHLF                          | 2.70 | 0.01 | 0.90 | 1.20 | 0.22 | 0.85 |
| 35849 | 0 | 137906 | KGLRKSNAAEERRGPL                         | 2.69 | 0.01 | 0.78 | 0.68 | 0.22 | 0.28 |
| 35850 | 0 | 137906 | KGLRKSNAAEERRGPL                         | 2.69 | 0.01 | 0.78 | 0.68 | 0.22 | 0.28 |
| 35851 | 0 | 122430 | KGLRRDLASREAK                            | 2.65 | 0.01 | 2.85 | 0.68 | 0.22 | 0.85 |
| 35852 | 0 | 122430 | KGLRRDLASREAK                            | 2.65 | 0.01 | 2.85 | 0.68 | 0.22 | 0.28 |
| 35853 | 0 | 122430 | KGLRRDLASREAK                            | 2.65 | 0.01 | 2.85 | 0.68 | 0.22 | 1.27 |
| 35854 | 0 | 31005  | KGLRRDLASREAKKQ                          | 2.76 | 0.01 | 2.85 | 0.68 | 0.22 | 0.28 |
| 35855 | 0 | 31005  | KGLRRDLASREAKKQ                          | 2.76 | 0.01 | 2.85 | 0.44 | 0.85 | 0.28 |
| 35856 | 0 | 31005  | KGLRRDLASREAKKQ                          | 2.76 | 0.01 | 2.85 | 0.44 | 0.85 | 0.28 |
| 35857 | 0 | 31005  | KGLRRDLASREAKKQ                          | 2.76 | 0.01 | 2.85 | 0.44 | 0.85 | 0.28 |
| 35858 | 0 | 31005  | KGLRRDLASREAKKQ                          | 2.76 | 0.01 | 2.85 | 0.44 | 0.85 | 0.28 |
| 35859 | 0 | 142200 | KGLRRDLASREAKKQL<br>EAE                  | 2.98 | 0.01 | 2.24 | 0.44 | 0.85 | 0.28 |
| 35860 | 0 | 142200 | KGLRRDLASREAKKQL<br>EAE                  | 2.98 | 0.01 | 2.24 | 0.44 | 1.74 | 0.28 |
| 35861 | 0 | 142200 | KGLRRDLASREAKKQL<br>EAE                  | 2.98 | 0.01 | 2.24 | 1.15 | 0.22 | 0.28 |
| 35862 | 0 | 31006  | KGLRRDLASREAKKQL<br>EAEHQKLEEQ           | 3.28 | 0.01 | 2.85 | 1.20 | 0.22 | 0.28 |
| 35863 | 0 | 31006  | KGLRRDLASREAKKQL<br>EAEHQKLEEQ           | 3.28 | 0.01 | 2.85 | 1.20 | 0.22 | 0.28 |
| 35864 | 0 | 31006  | KGLRRDLASREAKKQL<br>EAEHQKLEEQ           | 3.28 | 0.01 | 2.85 | 0.44 | 0.85 | 0.28 |
| 35865 | 0 | 31006  | KGLRRDLASREAKKQL<br>EAEHQKLEEQ           | 3.28 | 0.01 | 2.85 | 0.68 | 2.25 | 1.75 |
| 35866 | 0 | 31006  | KGLRRDLASREAKKQL<br>EAEHQKLEEQ           | 3.28 | 0.01 | 2.85 | 1.20 | 0.22 | 0.28 |

|       |   |        |                                  |      |      |      |      |      |      |
|-------|---|--------|----------------------------------|------|------|------|------|------|------|
| 35867 | 0 | 142201 | KGLRRDLASREAKKQV<br>EKA          | 2.98 | 0.01 | 2.24 | 0.44 | 0.85 | 0.28 |
| 35868 | 0 | 142201 | KGLRRDLASREAKKQV<br>EKA          | 2.98 | 0.01 | 2.24 | 0.44 | 1.74 | 0.28 |
| 35869 | 0 | 142201 | KGLRRDLASREAKKQV<br>EKA          | 2.98 | 0.01 | 2.24 | 1.15 | 0.22 | 0.28 |
| 35870 | 0 | 31009  | KGLTNLFSLSQKQV                   | 2.70 | 0.01 | 1.72 | 0.68 | 0.22 | 0.28 |
| 35871 | 0 | 171730 | KGLVKQHIDSFNYFI                  | 2.65 | 0.01 | 0.78 | 0.44 | 1.13 | 0.28 |
| 35872 | 0 | 130922 | KGMLPDPKNV                       | 2.32 | 0.01 | 0.78 | 0.44 | 1.93 | 0.85 |
| 35873 | 0 | 31012  | KGMRFDRG                         | 2.14 | 0.01 | 2.99 | 0.44 | 0.85 | 0.28 |
| 35874 | 0 | 31015  | KGMSYSMCTGKFK                    | 2.58 | 0.01 | 2.40 | 0.68 | 0.22 | 0.28 |
| 35875 | 0 | 31018  | KGNCSGPTTIR                      | 2.38 | 0.01 | 2.43 | 1.20 | 0.22 | 0.28 |
| 35876 | 0 | 31018  | KGNCSGPTTIR                      | 2.38 | 0.01 | 2.43 | 1.20 | 0.22 | 0.28 |
| 35877 | 0 | 31018  | KGNCSGPTTIR                      | 2.38 | 0.01 | 2.43 | 1.20 | 0.22 | 1.34 |
| 35878 | 0 | 31018  | KGNCSGPTTIR                      | 2.38 | 0.01 | 2.43 | 1.20 | 0.22 | 0.28 |
| 35879 | 0 | 31018  | KGNCSGPTTIR                      | 2.38 | 0.01 | 2.43 | 1.20 | 0.22 | 0.28 |
| 35880 | 0 | 31018  | KGNCSGPTTIR                      | 2.38 | 0.01 | 2.43 | 1.20 | 0.22 | 1.48 |
| 35881 | 0 | 181364 | KGNDIKCTSTRDKI                   | 2.71 | 0.01 | 2.82 | 1.15 | 0.22 | 0.28 |
| 35882 | 0 | 151663 | KGNDISSGTVLSDYVGS<br>GPPSGTGLHRY | 3.28 | 4.33 | 1.75 | 2.25 | 0.22 | 0.85 |
| 35883 | 0 | 226055 | KGNGENSYGGNGDMT<br>YARLG         | 2.94 | 0.01 | 2.24 | 3.70 | 0.22 | 0.28 |
| 35884 | 0 | 119601 | KGNNVHGFQKQIIRSFY                | 2.78 | 0.01 | 0.90 | 2.04 | 0.22 | 1.34 |
| 35885 | 0 | 119601 | KGNNVHGFQKQIIRSFY                | 2.78 | 0.01 | 0.90 | 2.04 | 0.22 | 1.75 |
| 35886 | 0 | 119601 | KGNNVHGFQKQIIRSFY                | 2.78 | 0.01 | 0.90 | 2.04 | 0.22 | 2.35 |
| 35887 | 0 | 119601 | KGNNVHGFQKQIIRSFY                | 2.78 | 0.01 | 0.90 | 2.04 | 2.25 | 1.75 |
| 35888 | 0 | 119601 | KGNNVHGFQKQIIRSFY                | 2.78 | 0.01 | 0.90 | 2.04 | 2.25 | 0.28 |
| 35889 | 0 | 119601 | KGNNVHGFQKQIIRSFY                | 2.78 | 0.01 | 0.90 | 2.04 | 0.22 | 2.35 |
| 35890 | 0 | 31021  | KGNPEMVD                         | 2.10 | 0.01 | 2.21 | 1.12 | 0.22 | 0.28 |
| 35891 | 0 | 31023  | KGNQSFEDT                        | 2.28 | 0.01 | 2.56 | 1.20 | 0.22 | 0.28 |
| 35892 | 0 | 113564 | KGNQYWRFEDGVLDPD<br>YPRN         | 2.93 | 4.63 | 0.78 | 1.81 | 0.22 | 0.28 |
| 35893 | 0 | 113564 | KGNQYWRFEDGVLDPD<br>YPRN         | 2.93 | 4.63 | 0.78 | 3.61 | 0.22 | 0.28 |
| 35894 | 0 | 113565 | KGNQYWRFEDGVLDPD<br>YPRN         | 2.93 | 0.01 | 0.78 | 1.81 | 0.22 | 0.28 |
| 35895 | 0 | 113565 | KGNQYWRFEDGVLDPD<br>YPRN         | 2.93 | 0.01 | 0.78 | 3.61 | 0.22 | 0.28 |
| 35896 | 0 | 31024  | KGNRSDSEENEDST                   | 2.70 | 0.01 | 3.37 | 2.22 | 0.22 | 0.28 |
| 35897 | 0 | 319047 | KGNVRLQPQPQKQR                   | 2.72 | 0.01 | 1.61 | 0.44 | 0.85 | 1.28 |

|       |   |        |                                              |      |      |      |      |      |      |
|-------|---|--------|----------------------------------------------|------|------|------|------|------|------|
| 35898 | 0 | 192977 | KGNYVVDH                                     | 2.20 | 0.01 | 0.90 | 1.15 | 1.41 | 1.66 |
| 35899 | 0 | 192977 | KGNYVVDH                                     | 2.20 | 0.01 | 0.90 | 1.15 | 1.41 | 1.66 |
| 35900 | 0 | 192977 | KGNYVVDH                                     | 2.20 | 0.01 | 0.90 | 1.15 | 1.41 | 1.66 |
| 35901 | 0 | 192977 | KGNYVVDH                                     | 2.20 | 0.01 | 0.90 | 1.15 | 1.41 | 1.27 |
| 35902 | 0 | 467194 | KGPEIIIEVKKEIKQVE<br>DGIKENDTEGN             | 3.38 | 0.01 | 1.66 | 0.44 | 0.85 | 1.28 |
| 35903 | 0 | 467194 | KGPEIIIEVKKEIKQVE<br>DGIKENDTEGN             | 3.38 | 0.01 | 1.66 | 0.44 | 0.85 | 1.28 |
| 35904 | 0 | 422476 | KGQEGSVC                                     | 2.12 | 0.01 | 0.78 | 2.37 | 0.22 | 0.28 |
| 35905 | 0 | 422476 | KGQEGSVC                                     | 2.12 | 0.01 | 0.78 | 0.68 | 0.22 | 0.28 |
| 35906 | 0 | 116111 | KGQGQKAKMRCIPEKG<br>H                        | 2.80 | 0.01 | 1.75 | 4.23 | 2.25 | 1.75 |
| 35907 | 0 | 116111 | KGQGQKAKMRCIPEKG<br>H                        | 2.80 | 0.01 | 1.75 | 4.23 | 0.22 | 0.28 |
| 35908 | 0 | 79002  | KGQGVLDYLEWLENLLTY<br>LKSDYTQNNIHPNFVGD<br>K | 3.49 | 0.01 | 3.78 | 1.12 | 0.22 | 0.85 |
| 35909 | 0 | 79002  | KGQGVLDYLEWLENLLTY<br>LKSDYTQNNIHPNFVGD<br>K | 3.49 | 0.01 | 3.78 | 3.23 | 0.22 | 0.28 |
| 35910 | 0 | 31046  | KGQKPNLLDRLRHRKNG<br>YRH                     | 2.98 | 0.01 | 3.75 | 0.68 | 0.22 | 0.28 |
| 35911 | 0 | 31046  | KGQKPNLLDRLRHRKNG<br>YRH                     | 2.98 | 0.01 | 3.75 | 0.68 | 0.22 | 1.48 |
| 35912 | 0 | 31046  | KGQKPNLLDRLRHRKNG<br>YRH                     | 2.98 | 0.01 | 3.75 | 0.68 | 0.22 | 1.48 |
| 35913 | 0 | 31046  | KGQKPNLLDRLRHRKNG<br>YRH                     | 2.98 | 0.01 | 3.75 | 0.68 | 0.22 | 1.48 |
| 35914 | 0 | 31047  | KGQNCG                                       | 1.90 | 0.01 | 1.96 | 0.44 | 0.85 | 0.28 |
| 35915 | 0 | 119602 | KGQPREPQ                                     | 2.14 | 0.01 | 0.78 | 0.44 | 1.93 | 0.28 |
| 35916 | 0 | 31050  | KGQRFR                                       | 1.90 | 0.01 | 0.90 | 0.44 | 1.59 | 1.39 |
| 35917 | 0 | 140695 | KGRFTISRDNASTLYL                             | 2.78 | 0.01 | 1.75 | 4.45 | 0.22 | 0.28 |
| 35918 | 0 | 140695 | KGRFTISRDNASTLYL                             | 2.78 | 0.01 | 1.75 | 4.45 | 0.22 | 1.27 |
| 35919 | 0 | 140695 | KGRFTISRDNASTLYL                             | 2.78 | 0.01 | 1.75 | 4.45 | 0.22 | 0.28 |
| 35920 | 0 | 31054  | KGRNVVLEKKWGAPTIT<br>NDGVSIKE                | 3.19 | 0.01 | 2.59 | 0.44 | 0.85 | 0.28 |
| 35921 | 0 | 31056  | KGSDVESYSSMPPL<br>KGSITSVQAIYVPADDLT         | 2.59 | 0.01 | 1.96 | 0.44 | 0.85 | 0.28 |
| 35922 | 0 | 151664 | DPAPATTFHAHLDATTVL<br>SRA                    | 3.58 | 4.93 | 1.75 | 2.46 | 0.22 | 0.85 |
| 35923 | 0 | 111450 | KGSPCTNVAVNPGDCP<br>PLEL                     | 2.94 | 0.01 | 1.86 | 0.44 | 0.85 | 0.28 |
| 35924 | 0 | 111450 | KGSPCTNVAVNPGDCP<br>PLEL                     | 2.94 | 0.01 | 1.86 | 0.44 | 0.85 | 0.28 |

|       |   |        |                          |      |      |      |      |      |      |
|-------|---|--------|--------------------------|------|------|------|------|------|------|
| 35925 | 0 | 111450 | KGSPCTNVAVNPGDCP<br>PLEL | 2.94 | 0.01 | 1.86 | 0.44 | 0.85 | 0.28 |
| 35926 | 0 | 111450 | KGSPCTNVAVNPGDCP<br>PLEL | 2.94 | 0.01 | 1.86 | 0.44 | 1.41 | 0.28 |
| 35927 | 0 | 111450 | KGSPCTNVAVNPGDCP<br>PLEL | 2.94 | 0.01 | 1.86 | 0.44 | 0.85 | 0.28 |
| 35928 | 0 | 111450 | KGSPCTNVAVNPGDCP<br>PLEL | 2.94 | 0.01 | 1.86 | 0.44 | 1.41 | 0.28 |
| 35929 | 0 | 111450 | KGSPCTNVAVNPGDCP<br>PLEL | 2.94 | 0.01 | 1.86 | 0.44 | 0.85 | 0.28 |
| 35930 | 0 | 111450 | KGSPCTNVAVNPGDCP<br>PLEL | 2.94 | 0.01 | 1.86 | 0.44 | 1.41 | 0.28 |
| 35931 | 0 | 111450 | KGSPCTNVAVNPGDCP<br>PLEL | 2.94 | 0.01 | 1.86 | 2.37 | 0.22 | 0.28 |
| 35932 | 0 | 111450 | KGSPCTNVAVNPGDCP<br>PLEL | 2.94 | 0.01 | 1.86 | 2.37 | 0.22 | 1.48 |
| 35933 | 0 | 111450 | KGSPCTNVAVNPGDCP<br>PLEL | 2.94 | 0.01 | 1.86 | 2.37 | 0.22 | 0.28 |
| 35934 | 0 | 31062  | KGSQRRQKKVLRDNIRG<br>ITR | 2.96 | 0.01 | 3.78 | 2.49 | 0.85 | 0.28 |
| 35935 | 0 | 98163  | KGSRR                    | 1.72 | 0.01 | 4.03 | 2.00 | 0.22 | 0.28 |
| 35936 | 0 | 31063  | KGSSGYCAWPACYCY          | 2.71 | 0.01 | 2.56 | 2.02 | 0.22 | 0.85 |
| 35937 | 0 | 31064  | KGSSIAAD                 | 2.12 | 0.01 | 3.06 | 1.12 | 0.22 | 0.28 |
| 35938 | 0 | 105260 | KGSVVSAGTD               | 2.32 | 0.01 | 3.47 | 1.20 | 0.22 | 0.28 |
| 35939 | 0 | 105901 | KGTAPFEI                 | 2.10 | 0.01 | 3.05 | 1.20 | 0.22 | 0.28 |
| 35940 | 0 | 31067  | KGTAPFGVAFGNS            | 2.56 | 0.01 | 3.63 | 1.20 | 0.22 | 0.28 |
| 35941 | 0 | 31067  | KGTAPFGVAFGNS            | 2.56 | 0.01 | 3.63 | 1.20 | 0.22 | 0.85 |
| 35942 | 0 | 31067  | KGTAPFGVAFGNS            | 2.56 | 0.01 | 3.63 | 1.20 | 0.22 | 1.34 |
| 35943 | 0 | 31069  | KGTFDPLQEPRT             | 2.45 | 0.01 | 0.90 | 0.68 | 0.22 | 1.34 |
| 35944 | 0 | 31069  | KGTFDPLQEPRT             | 2.45 | 0.01 | 0.90 | 0.68 | 0.22 | 0.28 |
| 35945 | 0 | 31069  | KGTFDPLQEPRT             | 2.45 | 0.01 | 0.90 | 2.43 | 0.22 | 0.28 |
| 35946 | 0 | 99379  | KGTGNLELVAVRKEQ          | 2.69 | 0.01 | 2.16 | 0.44 | 1.23 | 1.48 |
| 35947 | 0 | 31070  | KGTGQHGH                 | 2.16 | 0.01 | 3.42 | 0.68 | 0.22 | 0.28 |
| 35948 | 0 | 31071  | KGTHGGTGAGAGAGG<br>AGAG  | 2.97 | 0.01 | 2.43 | 0.44 | 1.59 | 0.28 |
| 35949 | 0 | 144705 | KGTHSLYSQIAG             | 2.45 | 0.01 | 0.90 | 0.68 | 0.22 | 0.28 |
| 35950 | 0 | 144705 | KGTHSLYSQIAG             | 2.45 | 0.01 | 0.90 | 0.68 | 0.22 | 0.28 |
| 35951 | 0 | 144705 | KGTHSLYSQIAG             | 2.45 | 0.01 | 0.90 | 0.68 | 0.22 | 1.48 |
| 35952 | 0 | 144705 | KGTHSLYSQIAG             | 2.45 | 0.01 | 0.90 | 0.68 | 0.22 | 1.48 |
| 35953 | 0 | 144705 | KGTHSLYSQIAG             | 2.45 | 0.01 | 0.90 | 0.68 | 0.22 | 1.27 |
| 35954 | 0 | 31072  | KGTHSLYSQIAGC            | 2.51 | 0.01 | 0.90 | 0.68 | 0.22 | 0.85 |
| 35955 | 0 | 31072  | KGTHSLYSQIAGC            | 2.51 | 0.01 | 0.90 | 0.68 | 0.22 | 0.28 |
| 35956 | 0 | 114434 | KGTIYFFKNKEELF           | 2.69 | 0.01 | 4.63 | 0.44 | 1.41 | 1.57 |
| 35957 | 0 | 181688 | KGTLRAQFVDALSS           | 2.64 | 0.01 | 3.26 | 2.37 | 0.22 | 1.28 |
| 35958 | 0 | 31074  | KGTLTWSG                 | 2.14 | 0.01 | 2.40 | 2.43 | 0.22 | 0.28 |
| 35959 | 0 | 167768 | KGTLTWSGK                | 2.26 | 0.01 | 2.40 | 2.43 | 0.22 | 0.28 |
| 35960 | 0 | 31075  | KGTMDSGQTKR              | 2.42 | 0.01 | 3.85 | 1.15 | 0.22 | 2.02 |

|       |   |        |                                     |      |      |      |      |      |      |
|-------|---|--------|-------------------------------------|------|------|------|------|------|------|
| 35961 | 0 | 31075  | KGTMDSGQTKR                         | 2.42 | 0.01 | 3.85 | 1.15 | 0.22 | 2.02 |
| 35962 | 0 | 31075  | KGTMDSGQTKR                         | 2.42 | 0.01 | 4.33 | 1.15 | 0.22 | 1.34 |
| 35963 | 0 | 31075  | KGTMDSGQTKR                         | 2.42 | 0.01 | 4.33 | 1.15 | 0.22 | 1.34 |
| 35964 | 0 | 421214 | KGTPCTQEGG                          | 2.31 | 0.01 | 3.19 | 0.44 | 1.23 | 1.28 |
| 35965 | 0 | 179830 | KGTPFDIR                            | 2.10 | 0.01 | 3.89 | 0.44 | 0.85 | 0.85 |
| 35966 | 0 | 31076  | KGTPAENPEYLGLDVP<br>V               | 2.85 | 0.01 | 0.78 | 1.15 | 2.26 | 0.28 |
| 35967 | 0 | 31079  | KGTTGVRNT                           | 2.25 | 0.01 | 0.90 | 0.44 | 1.23 | 0.28 |
| 35968 | 0 | 31079  | KGTTGVRNT                           | 2.25 | 0.01 | 0.90 | 0.44 | 1.23 | 1.39 |
| 35969 | 0 | 31079  | KGTTGVRNT                           | 2.25 | 0.01 | 0.90 | 0.44 | 1.23 | 0.28 |
| 35970 | 0 | 96457  | KGTVNLTWSR                          | 2.29 | 0.01 | 0.78 | 0.68 | 0.22 | 0.28 |
| 35971 | 0 | 96457  | KGTVNLTWSR                          | 2.29 | 0.01 | 0.78 | 0.68 | 0.22 | 1.34 |
| 35972 | 0 | 96457  | KGTVNLTWSR                          | 2.29 | 0.01 | 0.78 | 0.68 | 0.22 | 2.35 |
| 35973 | 0 | 96457  | KGTVNLTWSR                          | 2.29 | 0.01 | 0.78 | 0.68 | 0.22 | 0.85 |
| 35974 | 0 | 97420  | KGVAFPLP                            | 2.12 | 0.01 | 2.87 | 0.68 | 0.22 | 0.28 |
| 35975 | 0 | 97420  | KGVAFPLP                            | 2.12 | 0.01 | 2.87 | 1.81 | 0.22 | 0.28 |
| 35976 | 0 | 140873 | KGVDAGKLGTVSYGEEK<br>PAV            | 2.96 | 0.01 | 3.01 | 1.12 | 0.22 | 0.28 |
| 35977 | 0 | 118452 | KGVITVKDGKTLN                       | 2.58 | 0.01 | 0.78 | 0.44 | 1.74 | 0.85 |
| 35978 | 0 | 118452 | KGVITVKDGKTLN                       | 2.58 | 0.01 | 0.78 | 0.44 | 1.74 | 0.85 |
| 35979 | 0 | 138461 | KGVKEIDIAATL                        | 2.47 | 0.01 | 0.78 | 1.12 | 0.22 | 0.85 |
| 35980 | 0 | 122810 | KGVQGFDDIPGMEGL<br>GTDITVICPWEAFNHL | 3.38 | 0.01 | 1.60 | 2.04 | 0.22 | 0.28 |
| 35981 | 0 | 162656 | KGVRIGPGQA                          | 2.31 | 0.01 | 4.03 | 0.44 | 0.85 | 2.49 |
| 35982 | 0 | 162656 | KGVRIGPGQA                          | 2.31 | 0.01 | 4.03 | 0.44 | 0.85 | 0.28 |
| 35983 | 0 | 162656 | KGVRIGPGQA                          | 2.31 | 0.01 | 4.03 | 0.44 | 0.85 | 0.28 |
| 35984 | 0 | 125459 | KGWMAYPVASSW                        | 2.46 | 0.01 | 0.90 | 0.44 | 1.23 | 0.28 |
| 35985 | 0 | 95494  | KGYERGHITV                          | 2.29 | 0.01 | 2.60 | 1.12 | 0.22 | 0.85 |
| 35986 | 0 | 140874 | KGYLAGKGV DAG                       | 2.52 | 0.01 | 3.01 | 1.12 | 0.22 | 0.28 |
| 35987 | 0 | 31093  | KGYLVDKNTGCKY                       | 2.56 | 0.01 | 0.90 | 2.71 | 0.22 | 0.28 |
| 35988 | 0 | 31093  | KGYLVDKNTGCKY                       | 2.56 | 0.01 | 0.90 | 2.71 | 0.22 | 0.28 |
| 35989 | 0 | 31098  | KHAQYVSAESFL                        | 2.45 | 0.01 | 0.90 | 0.68 | 0.22 | 1.39 |
| 35990 | 0 | 119229 | KHARKERNITGGH                       | 2.55 | 0.01 | 3.36 | 0.68 | 0.22 | 0.28 |
| 35991 | 0 | 119229 | KHARKERNITGGH                       | 2.55 | 0.01 | 3.36 | 0.68 | 0.22 | 0.28 |
| 35992 | 0 | 119229 | KHARKERNITGGH                       | 2.55 | 0.01 | 3.36 | 0.68 | 0.22 | 0.28 |
| 35993 | 0 | 119229 | KHARKERNITGGH                       | 2.55 | 0.01 | 3.36 | 0.68 | 0.22 | 0.28 |
| 35994 | 0 | 119229 | KHARKERNITGGH                       | 2.55 | 0.01 | 3.36 | 0.68 | 0.22 | 0.28 |
| 35995 | 0 | 119229 | KHARKERNITGGH                       | 2.55 | 0.01 | 3.36 | 0.68 | 0.22 | 0.85 |
| 35996 | 0 | 119229 | KHARKERNITGGH                       | 2.55 | 0.01 | 3.36 | 0.68 | 0.22 | 0.28 |
| 35997 | 0 | 111452 | KHARTSE                             | 1.99 | 0.01 | 0.90 | 0.44 | 0.85 | 1.39 |
| 35998 | 0 | 181920 | KHAYGNISHDDKKKLDIP<br>NNDNEH        | 3.12 | 0.01 | 0.90 | 0.44 | 1.74 | 0.28 |
| 35999 | 0 | 107941 | KHCSKPCGFNDMQCT<br>KYTNIGNEAFKQIK   | 3.33 | 0.01 | 0.90 | 1.12 | 0.22 | 0.28 |
| 36000 | 0 | 161248 | KHEKD                               | 1.77 | 0.01 | 2.60 | 0.68 | 0.22 | 0.85 |
| 36001 | 0 | 161248 | KHEKD                               | 1.77 | 0.01 | 2.60 | 0.68 | 0.22 | 0.85 |

|       |   |        |                                    |      |      |      |      |      |      |
|-------|---|--------|------------------------------------|------|------|------|------|------|------|
| 36002 | 0 | 31104  | KHFNLTVPVGSQGIR                    | 2.55 | 0.01 | 2.94 | 2.00 | 0.22 | 0.28 |
| 36003 | 0 | 31105  | KHFRETEV                           | 2.12 | 0.01 | 2.04 | 1.15 | 0.22 | 0.85 |
| 36004 | 0 | 31105  | KHFRETEV                           | 2.12 | 0.01 | 2.04 | 1.15 | 0.22 | 0.85 |
| 36005 | 0 | 31105  | KHFRETEV                           | 2.12 | 0.01 | 2.04 | 1.15 | 0.22 | 1.27 |
| 36006 | 0 | 31105  | KHFRETEV                           | 2.12 | 0.01 | 2.04 | 1.15 | 0.22 | 1.48 |
| 36007 | 0 | 31105  | KHFRETEV                           | 2.12 | 0.01 | 2.04 | 1.15 | 0.22 | 1.48 |
| 36008 | 0 | 31105  | KHFRETEV                           | 2.12 | 0.01 | 2.04 | 0.68 | 0.22 | 1.34 |
| 36009 | 0 | 140479 | KHGLLSM                            | 2.01 | 0.01 | 0.90 | 0.68 | 0.22 | 0.28 |
| 36010 | 0 | 140479 | KHGLLSM                            | 2.01 | 0.01 | 0.90 | 0.68 | 0.22 | 1.34 |
| 36011 | 0 | 100977 | KHHYLR                             | 2.01 | 0.01 | 0.90 | 0.44 | 1.13 | 1.39 |
| 36012 | 0 | 31116  | KHIDAYKTFPPTPKKDK<br>KK            | 2.96 | 0.01 | 2.45 | 0.44 | 0.85 | 1.48 |
| 36013 | 0 | 31116  | KHIDAYKTFPPTPKKDK<br>KK            | 2.96 | 0.01 | 3.30 | 0.68 | 0.22 | 0.28 |
| 36014 | 0 | 31116  | KHIDAYKTFPPTPKKDK<br>KK            | 2.96 | 0.01 | 3.30 | 4.08 | 0.22 | 0.28 |
| 36015 | 0 | 31118  | KHIHKDIGHC                         | 2.36 | 0.01 | 0.90 | 1.12 | 0.22 | 0.28 |
| 36016 | 0 | 31118  | KHIHKDIGHC                         | 2.36 | 0.01 | 0.90 | 1.12 | 0.22 | 0.28 |
| 36017 | 0 | 31118  | KHIHKDIGHC                         | 2.36 | 0.01 | 0.90 | 1.12 | 0.22 | 0.28 |
| 36018 | 0 | 115310 | KHIQKEDVPSERYLGYLE<br>QL           | 2.94 | 0.01 | 1.60 | 0.44 | 1.23 | 2.51 |
| 36019 | 0 | 115823 | KHKEMPFPKY                         | 2.34 | 0.01 | 1.60 | 0.44 | 1.23 | 0.85 |
| 36020 | 0 | 115823 | KHKEMPFPKY                         | 2.34 | 0.01 | 1.60 | 0.44 | 1.23 | 0.85 |
| 36021 | 0 | 134117 | KHKENVKDYYQKWMEE<br>QA             | 2.84 | 0.01 | 0.78 | 1.12 | 0.22 | 0.85 |
| 36022 | 0 | 31124  | KHKKVSTNLCTHSFRKK<br>QVR           | 2.96 | 0.01 | 2.45 | 0.44 | 0.85 | 1.48 |
| 36023 | 0 | 31124  | KHKKVSTNLCTHSFRKK<br>QVR           | 2.96 | 0.01 | 2.45 | 1.12 | 0.22 | 2.92 |
| 36024 | 0 | 225361 | KHKNLVEFNSSPYETGYI                 | 2.83 | 0.01 | 2.61 | 0.68 | 0.22 | 0.28 |
| 36025 | 0 | 225361 | KHKNLVEFNSSPYETGYI                 | 2.83 | 0.01 | 2.61 | 0.68 | 2.25 | 1.75 |
| 36026 | 0 | 225361 | KHKNLVEFNSSPYETGYI                 | 2.83 | 0.01 | 2.61 | 0.68 | 0.22 | 0.28 |
| 36027 | 0 | 225361 | KHKNLVEFNSSPYETGYI                 | 2.83 | 0.01 | 2.61 | 0.68 | 0.22 | 1.34 |
| 36028 | 0 | 107942 | KHKTKLDELDEWND<br>RDPYNKYKGVLI     | 3.31 | 0.01 | 0.90 | 1.12 | 0.22 | 0.28 |
| 36029 | 0 | 31125  | KHKVRNEVMVHWFDD                    | 2.67 | 0.01 | 3.21 | 0.68 | 0.22 | 0.28 |
| 36030 | 0 | 145845 | KHKVRNEVMVHWFDD                    | 2.67 | 0.01 | 3.81 | 2.78 | 0.22 | 0.28 |
| 36031 | 0 | 97421  | KHLLSRINHFKEIQIIPKSS<br>WSSHEASLGV | 3.32 | 0.01 | 3.09 | 0.44 | 0.85 | 0.28 |
| 36032 | 0 | 97421  | KHLLSRINHFKEIQIIPKSS<br>WSSHEASLGV | 3.32 | 0.01 | 3.09 | 0.44 | 0.85 | 0.28 |

|       |   |        |                               |      |      |      |      |      |      |
|-------|---|--------|-------------------------------|------|------|------|------|------|------|
| 36033 | 0 | 31131  | KHLTSFKRELGLID                | 2.67 | 0.01 | 3.04 | 0.44 | 0.22 | 0.28 |
| 36034 | 0 | 31133  | KHLYVSMPTAQSTM                | 2.59 | 0.01 | 2.56 | 0.44 | 0.85 | 0.28 |
| 36035 | 0 | 423699 | KHMHWGTTTHSVM                 | 2.48 | 0.01 | 0.90 | 2.46 | 0.22 | 1.39 |
| 36036 | 0 | 423699 | KHMHWGTTTHSVM                 | 2.48 | 0.01 | 0.90 | 0.44 | 1.13 | 0.28 |
| 36037 | 0 | 79585  | KHMQDAEMFTNAAYM<br>ALNIWDRFDV | 3.12 | 0.01 | 3.21 | 2.16 | 0.22 | 0.28 |
| 36038 | 0 | 79585  | KHMQDAEMFTNAAYM<br>ALNIWDRFDV | 3.12 | 0.01 | 3.21 | 2.16 | 0.22 | 0.28 |
| 36039 | 0 | 79585  | KHMQDAEMFTNAAYM<br>ALNIWDRFDV | 3.12 | 0.01 | 3.21 | 2.16 | 0.22 | 0.28 |
| 36040 | 0 | 79585  | KHMQDAEMFTNAAYM<br>ALNIWDRFDV | 3.12 | 0.01 | 3.21 | 2.16 | 0.22 | 0.28 |
| 36041 | 0 | 120677 | KHPEVKSIAIEGIKYI              | 2.69 | 0.01 | 0.78 | 2.04 | 0.22 | 1.27 |
| 36042 | 0 | 120677 | KHPEVKSIAIEGIKYI              | 2.69 | 0.01 | 0.78 | 2.04 | 0.22 | 0.85 |
| 36043 | 0 | 120677 | KHPEVKSIAIEGIKYI              | 2.69 | 0.01 | 0.78 | 2.04 | 0.22 | 0.85 |
| 36044 | 0 | 120677 | KHPEVKSIAIEGIKYI              | 2.69 | 0.01 | 0.78 | 2.04 | 0.22 | 0.85 |
| 36045 | 0 | 120677 | KHPEVKSIAIEGIKYI              | 2.69 | 0.01 | 0.78 | 2.04 | 0.22 | 0.85 |
| 36046 | 0 | 120677 | KHPEVKSIAIEGIKYI              | 2.69 | 0.01 | 0.78 | 2.04 | 0.22 | 1.27 |
| 36047 | 0 | 31141  | KHPIKHQGLP                    | 2.34 | 0.01 | 1.60 | 0.44 | 1.23 | 0.28 |
| 36048 | 0 | 31141  | KHPIKHQGLP                    | 2.34 | 0.01 | 1.60 | 0.44 | 1.23 | 0.28 |
| 36049 | 0 | 151946 | KHPLGMFWHMRV                  | 2.45 | 0.01 | 2.80 | 2.78 | 0.22 | 0.28 |
| 36050 | 0 | 226208 | KHQAHCESTRGRSRCRA<br>GRSGS    | 3.07 | 3.37 | 0.90 | 1.12 | 0.22 | 0.85 |
| 36051 | 0 | 226209 | KHQCHQESTRARSRGRC<br>GRSGS    | 3.07 | 3.37 | 0.90 | 1.12 | 0.22 | 0.85 |
| 36052 | 0 | 226210 | KHQCHQESTRGKSKGKC<br>GRSGS    | 3.09 | 3.37 | 0.90 | 1.12 | 0.22 | 0.85 |
| 36053 | 0 | 226211 | KHQCHQESTRGRSRGR<br>CGRSGS    | 3.09 | 3.37 | 0.90 | 1.12 | 0.22 | 0.85 |
| 36054 | 0 | 226211 | KHQCHQESTRGRSRGR<br>CGRSGS    | 3.09 | 3.37 | 0.90 | 0.44 | 2.26 | 0.28 |
| 36055 | 0 | 226212 | KHQCHWESTRARSRLV<br>CGRSGS    | 3.03 | 3.37 | 0.90 | 0.44 | 2.26 | 0.28 |
| 36056 | 0 | 226213 | KHQCHWESTRGRSRLIC<br>GRSGS    | 3.05 | 3.37 | 0.90 | 1.12 | 0.22 | 0.85 |
| 36057 | 0 | 226214 | KHQCHWESTRGRSRLV<br>CGRSGS    | 3.05 | 3.37 | 0.90 | 1.12 | 0.22 | 0.85 |
| 36058 | 0 | 226214 | KHQCHWESTRGRSRLV<br>CGRSGS    | 3.05 | 3.37 | 0.90 | 0.44 | 2.26 | 0.28 |
| 36059 | 0 | 147064 | KHQGAQYVWNRTA                 | 2.51 | 0.01 | 1.60 | 0.44 | 0.85 | 0.85 |
| 36060 | 0 | 115311 | KHQGLPQEVNLNENLLRF<br>FVA     | 2.93 | 0.01 | 1.60 | 0.44 | 1.23 | 2.51 |
| 36061 | 0 | 140045 | KHQPGGGKVQIVYKPV              | 2.77 | 0.01 | 0.78 | 1.15 | 0.22 | 0.85 |
| 36062 | 0 | 140045 | KHQPGGGKVQIVYKPV              | 2.77 | 0.01 | 0.78 | 1.15 | 0.22 | 0.85 |
| 36063 | 0 | 164269 | KHQVYLRSIDLPF                 | 2.43 | 0.01 | 0.90 | 1.20 | 0.22 | 1.39 |



|       |   |        |                                                                |      |      |      |      |      |      |
|-------|---|--------|----------------------------------------------------------------|------|------|------|------|------|------|
| 36064 | 0 | 132403 | KHRPHGYNSLVNTQV                                                | 2.64 | 0.01 | 0.90 | 2.46 | 0.22 | 0.28 |
| 36065 | 0 | 132403 | KHRPHGYNSLVNTQV                                                | 2.64 | 0.01 | 0.90 | 2.46 | 0.22 | 1.39 |
| 36066 | 0 | 110303 | KHRRLLSSDQDQSQTPET<br>PAT                                      | 2.95 | 0.01 | 1.86 | 0.44 | 0.85 | 0.28 |
| 36067 | 0 | 110303 | KHRRLLSSDQDQSQTPET<br>PAT                                      | 2.95 | 0.01 | 1.86 | 0.44 | 1.41 | 0.28 |
| 36068 | 0 | 31152  | KHSEWLNKARGIESW                                                | 2.67 | 0.01 | 0.90 | 0.44 | 1.59 | 0.28 |
| 36069 | 0 | 31154  | KHSMVDRGWGNGC                                                  | 2.51 | 0.01 | 2.30 | 2.65 | 0.22 | 0.28 |
| 36070 | 0 | 31154  | KHSMVDRGWGNGC                                                  | 2.51 | 0.01 | 2.30 | 2.65 | 0.22 | 0.28 |
| 36071 | 0 | 31154  | KHSMVDRGWGNGC                                                  | 2.51 | 0.01 | 2.30 | 2.65 | 0.22 | 0.28 |
| 36072 | 0 | 31154  | KHSMVDRGWGNGC                                                  | 2.51 | 0.01 | 2.30 | 2.65 | 0.22 | 0.28 |
| 36073 | 0 | 31154  | KHSMVDRGWGNGC                                                  | 2.51 | 0.01 | 2.30 | 2.65 | 0.22 | 0.28 |
| 36074 | 0 | 31154  | KHSMVDRGWGNGC                                                  | 2.51 | 0.01 | 2.30 | 2.65 | 0.22 | 0.28 |
| 36075 | 0 | 31154  | KHSMVDRGWGNGC                                                  | 2.51 | 0.01 | 2.30 | 2.65 | 0.22 | 0.28 |
| 36076 | 0 | 31154  | KHSMVDRGWGNGC                                                  | 2.51 | 0.01 | 2.30 | 2.65 | 0.22 | 0.28 |
| 36077 | 0 | 122122 | KHSVTYSCCPDTPYL                                                | 2.67 | 0.01 | 0.78 | 1.20 | 0.22 | 0.85 |
| 36078 | 0 | 156896 | KHTSLAS                                                        | 2.02 | 0.01 | 0.90 | 2.74 | 0.22 | 0.85 |
| 36079 | 0 | 31160  | KHVAGAAAAGAVVGGL<br>GGY                                        | 2.94 | 0.01 | 2.52 | 1.15 | 0.22 | 0.28 |
| 36080 | 0 | 31160  | KHVAGAAAAGAVVGGL<br>GGY                                        | 2.94 | 0.01 | 2.52 | 2.90 | 0.22 | 0.85 |
| 36081 | 0 | 31160  | KHVAGAAAAGAVVGGL<br>GGY                                        | 2.94 | 0.01 | 2.52 | 2.90 | 0.22 | 0.28 |
| 36082 | 0 | 181365 | KHVRAWIPRPLRNQP                                                | 2.66 | 0.01 | 2.82 | 1.15 | 0.22 | 0.28 |
| 36083 | 0 | 150336 | KHVRAWIPRPMRNQN                                                | 2.66 | 0.01 | 3.45 | 1.12 | 0.22 | 0.28 |
| 36084 | 0 | 225362 | KHVSEINIKAQEKFLQHD                                             | 2.84 | 0.01 | 2.61 | 0.68 | 0.22 | 0.28 |
| 36085 | 0 | 225362 | KHVSEINIKAQEKFLQHD                                             | 2.84 | 0.01 | 2.61 | 0.68 | 0.22 | 0.28 |
| 36086 | 0 | 225362 | KHVSEINIKAQEKFLQHD                                             | 2.84 | 0.01 | 2.61 | 0.68 | 0.22 | 0.28 |
| 36087 | 0 | 31165  | KHWIGRLMWWNQYT                                                 | 2.56 | 0.01 | 2.59 | 0.44 | 0.85 | 0.28 |
| 36088 | 0 | 130526 | KHWKEQRAAQKPDVLT<br>TGGGNPVGDKLNSLTV<br>GPRGP LLVQDVVFTDE<br>M | 3.82 | 0.01 | 1.60 | 2.66 | 0.22 | 0.85 |
| 36089 | 0 | 130526 | KHWKEQRAAQKPDVLT<br>TGGGNPVGDKLNSLTV<br>GPRGP LLVQDVVFTDE<br>M | 3.82 | 0.01 | 1.60 | 2.66 | 0.22 | 0.85 |
| 36090 | 0 | 130526 | KHWKEQRAAQKPDVLT<br>TGGGNPVGDKLNSLTV<br>GPRGP LLVQDVVFTDE<br>M | 3.82 | 0.01 | 1.60 | 2.55 | 0.22 | 0.85 |

|       |   |        |                                        |      |      |      |      |      |      |
|-------|---|--------|----------------------------------------|------|------|------|------|------|------|
| 36091 | 0 | 31166  | KHWPQIAQFAPSASAFF                      | 2.81 | 0.01 | 2.91 | 0.44 | 0.85 | 0.28 |
| 36092 | 0 | 31167  | KHWVYY                                 | 1.86 | 0.01 | 2.26 | 0.68 | 0.22 | 0.28 |
| 36093 | 0 | 31167  | KHWVYY                                 | 1.86 | 0.01 | 2.26 | 0.68 | 0.22 | 0.28 |
| 36094 | 0 | 106561 | KHYAAFPENLLI                           | 2.43 | 0.01 | 0.90 | 1.15 | 0.22 | 2.56 |
| 36095 | 0 | 106561 | KHYAAFPENLLI                           | 2.43 | 0.01 | 0.90 | 0.68 | 0.22 | 0.28 |
| 36096 | 0 | 106561 | KHYAAFPENLLI                           | 2.43 | 0.01 | 0.90 | 0.68 | 0.22 | 0.28 |
| 36097 | 0 | 193268 | KHYFDDSGVMK                            | 2.38 | 0.01 | 3.04 | 1.12 | 0.22 | 0.28 |
| 36098 | 0 | 193268 | KHYFDDSGVMK                            | 2.38 | 0.01 | 3.04 | 1.12 | 0.22 | 0.28 |
| 36099 | 0 | 131227 | KHYPEVGPNNGFI                          | 2.45 | 0.01 | 0.90 | 0.44 | 1.13 | 0.28 |
| 36100 | 0 | 131227 | KHYPEVGPNNGFI                          | 2.45 | 0.01 | 0.90 | 0.44 | 1.41 | 0.28 |
| 36101 | 0 | 131227 | KHYPEVGPNNGFI                          | 2.45 | 0.01 | 0.90 | 0.44 | 1.13 | 0.28 |
| 36102 | 0 | 131227 | KHYPEVGPNNGFI                          | 2.45 | 0.01 | 0.90 | 0.44 | 1.41 | 0.28 |
| 36103 | 0 | 115312 | KHYQKALNEINQFYQKF<br>PQY               | 2.97 | 0.01 | 1.60 | 0.44 | 1.23 | 2.51 |
| 36104 | 0 | 171739 | KHYWEVDVTGKEAWD                        | 2.69 | 0.01 | 0.78 | 0.44 | 1.41 | 0.28 |
| 36105 | 0 | 152706 | KIAFGFNEPN                             | 2.31 | 0.01 | 2.18 | 2.16 | 0.22 | 0.28 |
| 36106 | 0 | 94564  | KIAKEQ                                 | 1.91 | 0.01 | 4.33 | 0.68 | 0.22 | 1.27 |
| 36107 | 0 | 94564  | KIAKEQ                                 | 1.91 | 0.01 | 4.33 | 0.68 | 0.22 | 0.85 |
| 36108 | 0 | 519882 | KIAKQDSIISNLTE                         | 2.67 | 0.01 | 2.24 | 0.44 | 1.41 | 1.28 |
| 36109 | 0 | 115824 | KIAKYIPIQY                             | 2.36 | 0.01 | 1.60 | 0.44 | 1.23 | 0.85 |
| 36110 | 0 | 115824 | KIAKYIPIQY                             | 2.36 | 0.01 | 1.60 | 0.44 | 1.23 | 0.85 |
| 36111 | 0 | 186686 | KIALESYNLSSA                           | 2.48 | 0.01 | 0.90 | 0.68 | 0.22 | 1.39 |
| 36112 | 0 | 227789 | KIAPQDQDSFLDDQPGV<br>RPIPSFDDMPLHQ     | 3.34 | 0.01 | 3.47 | 0.68 | 0.22 | 0.28 |
| 36113 | 0 | 181689 | KIATGIYNQEKEKVY                        | 2.69 | 0.01 | 1.66 | 2.36 | 0.22 | 1.28 |
| 36114 | 0 | 238655 | KICFKKWKKGEKVS                         | 2.68 | 0.01 | 2.56 | 2.02 | 0.22 | 0.85 |
| 36115 | 0 | 238655 | KICFKKWKKGEKVS                         | 2.68 | 0.01 | 2.56 | 1.20 | 0.22 | 0.85 |
| 36116 | 0 | 192978 | KICKTKKGSSGSNDYGKY<br>AS               | 2.98 | 0.01 | 3.47 | 2.00 | 0.22 | 0.28 |
| 36117 | 0 | 238656 | KICNFKTCPTDELRH                        | 2.65 | 0.01 | 2.56 | 2.02 | 0.22 | 0.85 |
| 36118 | 0 | 519886 | KICNFKTCPTDELRHCAS                     | 2.80 | 0.01 | 2.56 | 2.02 | 0.22 | 0.85 |
| 36119 | 0 | 98847  | KIDALNENKV                             | 2.32 | 0.01 | 1.60 | 0.44 | 1.23 | 0.85 |
| 36120 | 0 | 98847  | KIDALNENKV                             | 2.32 | 0.01 | 1.60 | 0.44 | 1.23 | 0.85 |
| 36121 | 0 | 31189  | KIDDLVRDAKDALE                         | 2.65 | 0.01 | 2.40 | 2.43 | 0.22 | 0.28 |
| 36122 | 0 | 31189  | KIDDLVRDAKDALE                         | 2.65 | 0.01 | 2.40 | 2.43 | 0.22 | 0.28 |
| 36123 | 0 | 31189  | KIDDLVRDAKDALE                         | 2.65 | 0.01 | 2.40 | 2.43 | 0.22 | 0.28 |
| 36124 | 0 | 78700  | KIDELIKKQKSGGNVSSS<br>ELAKASIELINQLVDT | 3.49 | 0.01 | 2.24 | 0.68 | 0.22 | 2.02 |
| 36125 | 0 | 78700  | KIDELIKKQKSGGNVSSS<br>ELAKASIELINQLVDT | 3.49 | 0.01 | 2.24 | 0.68 | 0.22 | 0.85 |

|       |   |        |                                        |      |      |      |      |      |      |
|-------|---|--------|----------------------------------------|------|------|------|------|------|------|
| 36126 | 0 | 78700  | KIDELIKKQKSGGNVSSS<br>ELAKASIELINQLVDT | 3.49 | 0.01 | 2.24 | 0.68 | 0.22 | 1.34 |
| 36127 | 0 | 181921 | KIDESDICEYKKDPKL                       | 2.77 | 0.01 | 0.90 | 0.44 | 1.74 | 0.28 |
| 36128 | 0 | 119987 | KIDIDTEAYTENGEW                        | 2.68 | 0.01 | 0.78 | 3.81 | 0.22 | 0.28 |
| 36129 | 0 | 119987 | KIDIDTEAYTENGEW                        | 2.68 | 0.01 | 0.78 | 2.04 | 0.22 | 0.28 |
| 36130 | 0 | 31195  | KIDKLCVWNN                             | 2.30 | 0.01 | 2.66 | 0.68 | 0.22 | 0.28 |
| 36131 | 0 | 31205  | KIDSWEEEGWPAASGT<br>H                  | 2.77 | 0.01 | 4.15 | 1.12 | 0.22 | 1.48 |
| 36132 | 0 | 109404 | KIDTIEITDRQSGKKRGF<br>GFV              | 3.05 | 0.01 | 1.75 | 3.05 | 1.41 | 0.28 |
| 36133 | 0 | 31214  | KIEEHEKEIKEIAKT                        | 2.74 | 0.01 | 3.34 | 0.44 | 1.74 | 0.28 |
| 36134 | 0 | 93098  | KIEEIIGQNG                             | 2.33 | 0.01 | 2.67 | 2.00 | 0.22 | 0.28 |
| 36135 | 0 | 93098  | KIEEIIGQNG                             | 2.33 | 0.01 | 2.67 | 2.00 | 0.22 | 0.28 |
| 36136 | 0 | 93098  | KIEEIIGQNG                             | 2.33 | 0.01 | 2.67 | 2.00 | 0.22 | 0.28 |
| 36137 | 0 | 510445 | KIEIKASIDGLEVDVPGID<br>PNACH           | 3.13 | 0.01 | 2.78 | 0.68 | 0.22 | 1.75 |
| 36138 | 0 | 510445 | KIEIKASIDGLEVDVPGID<br>PNACH           | 3.13 | 0.01 | 2.78 | 1.12 | 0.22 | 0.85 |
| 36139 | 0 | 115825 | KIEKFQSEEQ                             | 2.35 | 0.01 | 1.60 | 0.44 | 1.23 | 0.85 |
| 36140 | 0 | 98167  | KIEKTEEP                               | 2.16 | 0.01 | 2.60 | 0.44 | 1.23 | 0.85 |
| 36141 | 0 | 141933 | KIENAAMAIHLCFNN                        | 2.66 | 0.01 | 2.73 | 0.44 | 0.85 | 0.28 |
| 36142 | 0 | 31224  | KIENEPLVHENLSIPNDPI<br>EQILNQ          | 3.19 | 0.01 | 1.66 | 0.44 | 0.85 | 0.28 |
| 36143 | 0 | 31225  | KIENEPLVHENLSIPNDPI<br>EQILNQP         | 3.23 | 0.01 | 1.66 | 0.44 | 1.74 | 0.28 |
| 36144 | 0 | 161361 | KIESKWANTFNINAYNM<br>SIR               | 2.95 | 0.01 | 0.90 | 2.74 | 0.22 | 1.48 |
| 36145 | 0 | 161362 | KIESKWANTFNINAYNM<br>SNR               | 2.95 | 0.01 | 0.90 | 2.74 | 0.22 | 1.48 |
| 36146 | 0 | 161362 | KIESKWANTFNINAYNM<br>SNR               | 2.95 | 0.01 | 0.90 | 2.74 | 0.22 | 1.75 |
| 36147 | 0 | 151665 | KIETELRDICNDVLSLLEK<br>F               | 2.94 | 3.33 | 1.75 | 2.25 | 0.22 | 0.85 |
| 36148 | 0 | 120679 | KIFADDID                               | 2.16 | 0.01 | 2.26 | 2.36 | 0.22 | 0.28 |
| 36149 | 0 | 180562 | KIFDLRGKFKRPTLRR                       | 2.75 | 0.01 | 0.78 | 0.68 | 0.22 | 0.28 |
| 36150 | 0 | 31253  | KIFQDHPL                               | 2.10 | 0.01 | 0.78 | 0.44 | 1.74 | 0.28 |
| 36151 | 0 | 31254  | KIFQDHPLQK                             | 2.32 | 0.01 | 0.78 | 0.44 | 1.74 | 0.28 |
| 36152 | 0 | 31254  | KIFQDHPLQK                             | 2.32 | 0.01 | 0.78 | 1.15 | 0.22 | 0.28 |
| 36153 | 0 | 121471 | KIFQDHPLQKTYNY                         | 2.60 | 0.01 | 0.78 | 1.15 | 0.22 | 1.48 |
| 36154 | 0 | 108497 | KIGPELHGL                              | 2.23 | 0.01 | 3.45 | 0.44 | 1.23 | 1.27 |
| 36155 | 0 | 189694 | KIGVDEFGAMIKA                          | 2.56 | 0.01 | 3.28 | 0.44 | 1.23 | 0.28 |
| 36156 | 0 | 108498 | KIHAREIFDSRGNPTV                       | 2.67 | 2.94 | 0.78 | 0.44 | 1.13 | 0.28 |
| 36157 | 0 | 108498 | KIHAREIFDSRGNPTV                       | 2.67 | 2.94 | 0.78 | 0.44 | 1.41 | 0.28 |
| 36158 | 0 | 108498 | KIHAREIFDSRGNPTV                       | 2.67 | 2.94 | 0.78 | 0.44 | 1.13 | 0.28 |
| 36159 | 0 | 108498 | KIHAREIFDSRGNPTV                       | 2.67 | 2.94 | 0.78 | 0.44 | 1.41 | 0.28 |
| 36160 | 0 | 108498 | KIHAREIFDSRGNPTV                       | 2.67 | 2.94 | 0.78 | 0.44 | 1.13 | 0.28 |

|       |   |        |                   |      |      |      |      |      |      |
|-------|---|--------|-------------------|------|------|------|------|------|------|
| 36161 | 0 | 167300 | KIHAREIFDSRGNPTV  | 2.67 | 2.94 | 0.78 | 0.44 | 1.13 | 0.28 |
| 36162 | 0 | 167300 | KIHAREIFDSRGNPTV  | 2.67 | 2.94 | 0.78 | 0.44 | 1.13 | 0.28 |
| 36163 | 0 | 136420 | KIHAREIFDSRGNPTVE | 2.74 | 3.93 | 0.78 | 0.44 | 1.13 | 0.28 |
| 36164 | 0 | 136420 | KIHAREIFDSRGNPTVE | 2.74 | 3.93 | 0.78 | 0.44 | 1.13 | 0.28 |
| 36165 | 0 | 136420 | KIHAREIFDSRGNPTVE | 2.74 | 3.93 | 0.78 | 0.44 | 1.41 | 0.28 |
| 36166 | 0 | 136418 | KIHAREIFDSRGNPTVE | 2.74 | 3.40 | 0.78 | 0.44 | 1.13 | 0.28 |
| 36167 | 0 | 136419 | KIHAREIFDSRGNPTVE | 2.74 | 3.50 | 0.78 | 0.44 | 1.13 | 0.28 |
| 36168 | 0 | 136420 | KIHAREIFDSRGNPTVE | 2.74 | 3.93 | 0.78 | 0.44 | 1.13 | 1.27 |
| 36169 | 0 | 136420 | KIHAREIFDSRGNPTVE | 2.74 | 3.93 | 0.78 | 1.12 | 0.22 | 0.28 |
| 36170 | 0 | 136420 | KIHAREIFDSRGNPTVE | 2.74 | 3.93 | 0.78 | 1.12 | 0.22 | 0.28 |
| 36171 | 0 | 136420 | KIHAREIFDSRGNPTVE | 2.74 | 3.93 | 0.78 | 1.12 | 0.22 | 0.28 |
| 36172 | 0 | 141934 | KIHAREIFDSRGNPTVE | 2.74 | 4.93 | 0.78 | 0.44 | 1.13 | 0.28 |
| 36173 | 0 | 156697 | KIHAREIFDSRGNPTVE | 2.74 | 2.94 | 0.78 | 0.44 | 1.13 | 0.28 |
| 36174 | 0 | 156697 | KIHAREIFDSRGNPTVE | 2.74 | 2.94 | 0.78 | 0.44 | 1.13 | 0.28 |
| 36175 | 0 | 156697 | KIHAREIFDSRGNPTVE | 2.74 | 2.94 | 0.78 | 0.44 | 1.41 | 0.28 |
| 36176 | 0 | 156697 | KIHAREIFDSRGNPTVE | 2.74 | 2.94 | 0.78 | 0.44 | 1.13 | 1.66 |
| 36177 | 0 | 156697 | KIHAREIFDSRGNPTVE | 2.74 | 2.94 | 0.78 | 0.44 | 1.13 | 1.66 |
| 36178 | 0 | 156697 | KIHAREIFDSRGNPTVE | 2.74 | 2.94 | 0.78 | 0.44 | 1.13 | 1.66 |
| 36179 | 0 | 156697 | KIHAREIFDSRGNPTVE | 2.74 | 2.94 | 0.78 | 0.44 | 1.13 | 1.66 |
| 36180 | 0 | 156697 | KIHAREIFDSRGNPTVE | 2.74 | 2.94 | 0.78 | 0.44 | 1.13 | 1.66 |
| 36181 | 0 | 156697 | KIHAREIFDSRGNPTVE | 2.74 | 2.94 | 0.78 | 0.44 | 1.13 | 1.66 |
| 36182 | 0 | 156697 | KIHAREIFDSRGNPTVE | 2.74 | 2.94 | 0.78 | 0.44 | 1.13 | 1.66 |
| 36183 | 0 | 156697 | KIHAREIFDSRGNPTVE | 2.74 | 2.94 | 0.78 | 0.44 | 1.13 | 1.66 |
| 36184 | 0 | 156697 | KIHAREIFDSRGNPTVE | 2.74 | 2.94 | 0.78 | 0.44 | 1.13 | 1.66 |

|       |   |        |                   |      |      |      |      |      |      |
|-------|---|--------|-------------------|------|------|------|------|------|------|
| 36185 | 0 | 156697 | KIHAREIFDSRGNPTVE | 2.74 | 2.94 | 0.78 | 0.44 | 1.13 | 1.66 |
| 36186 | 0 | 156697 | KIHAREIFDSRGNPTVE | 2.74 | 2.94 | 0.78 | 0.44 | 1.13 | 1.66 |
| 36187 | 0 | 156697 | KIHAREIFDSRGNPTVE | 2.74 | 2.94 | 0.78 | 0.44 | 1.13 | 1.66 |
| 36188 | 0 | 156697 | KIHAREIFDSRGNPTVE | 2.74 | 2.94 | 0.78 | 0.44 | 1.13 | 1.66 |
| 36189 | 0 | 156697 | KIHAREIFDSRGNPTVE | 2.74 | 2.94 | 0.78 | 0.44 | 1.13 | 1.66 |
| 36190 | 0 | 156697 | KIHAREIFDSRGNPTVE | 2.74 | 2.94 | 0.78 | 0.44 | 1.13 | 1.66 |
| 36191 | 0 | 156697 | KIHAREIFDSRGNPTVE | 2.74 | 2.94 | 0.78 | 0.44 | 1.13 | 1.66 |
| 36192 | 0 | 156697 | KIHAREIFDSRGNPTVE | 2.74 | 2.94 | 0.78 | 0.44 | 1.13 | 1.66 |
| 36193 | 0 | 156697 | KIHAREIFDSRGNPTVE | 2.74 | 2.94 | 0.78 | 0.44 | 1.13 | 1.66 |
| 36194 | 0 | 156697 | KIHAREIFDSRGNPTVE | 2.74 | 2.94 | 0.78 | 0.44 | 1.13 | 1.66 |
| 36195 | 0 | 156697 | KIHAREIFDSRGNPTVE | 2.74 | 2.94 | 0.78 | 0.44 | 1.13 | 1.66 |
| 36196 | 0 | 156697 | KIHAREIFDSRGNPTVE | 2.74 | 2.94 | 0.78 | 0.44 | 1.13 | 1.66 |
| 36197 | 0 | 156697 | KIHAREIFDSRGNPTVE | 2.74 | 2.94 | 0.78 | 0.44 | 1.13 | 1.66 |
| 36198 | 0 | 156697 | KIHAREIFDSRGNPTVE | 2.74 | 2.94 | 0.78 | 0.44 | 1.13 | 1.66 |
| 36199 | 0 | 156697 | KIHAREIFDSRGNPTVE | 2.74 | 2.94 | 0.78 | 0.44 | 1.13 | 1.66 |
| 36200 | 0 | 156697 | KIHAREIFDSRGNPTVE | 2.74 | 2.94 | 0.78 | 0.44 | 1.13 | 1.66 |
| 36201 | 0 | 156697 | KIHAREIFDSRGNPTVE | 2.74 | 2.94 | 0.78 | 0.44 | 1.13 | 1.66 |
| 36202 | 0 | 156697 | KIHAREIFDSRGNPTVE | 2.74 | 2.94 | 0.78 | 0.44 | 1.13 | 1.66 |
| 36203 | 0 | 156697 | KIHAREIFDSRGNPTVE | 2.74 | 2.94 | 0.78 | 0.44 | 1.13 | 1.66 |
| 36204 | 0 | 156697 | KIHAREIFDSRGNPTVE | 2.74 | 2.94 | 0.78 | 0.44 | 1.13 | 1.66 |
| 36205 | 0 | 156697 | KIHAREIFDSRGNPTVE | 2.74 | 2.94 | 0.78 | 0.44 | 1.13 | 1.66 |
| 36206 | 0 | 156697 | KIHAREIFDSRGNPTVE | 2.74 | 2.94 | 0.78 | 0.44 | 1.13 | 1.66 |
| 36207 | 0 | 156697 | KIHAREIFDSRGNPTVE | 2.74 | 2.94 | 0.78 | 0.44 | 1.13 | 1.66 |

|       |   |        |                   |      |      |      |      |      |      |
|-------|---|--------|-------------------|------|------|------|------|------|------|
| 36208 | 0 | 156697 | KIHAREIFDSRGNPTVE | 2.74 | 2.94 | 0.78 | 0.44 | 1.13 | 1.66 |
| 36209 | 0 | 156697 | KIHAREIFDSRGNPTVE | 2.74 | 2.94 | 0.78 | 0.44 | 1.13 | 1.66 |
| 36210 | 0 | 156697 | KIHAREIFDSRGNPTVE | 2.74 | 2.94 | 0.78 | 0.44 | 1.13 | 1.66 |
| 36211 | 0 | 156697 | KIHAREIFDSRGNPTVE | 2.74 | 2.94 | 0.78 | 0.44 | 1.13 | 1.66 |
| 36212 | 0 | 156697 | KIHAREIFDSRGNPTVE | 2.74 | 2.94 | 0.78 | 0.44 | 1.13 | 1.66 |
| 36213 | 0 | 156697 | KIHAREIFDSRGNPTVE | 2.74 | 2.94 | 0.78 | 0.44 | 1.13 | 1.66 |
| 36214 | 0 | 156697 | KIHAREIFDSRGNPTVE | 2.74 | 2.94 | 0.78 | 0.44 | 1.13 | 1.66 |
| 36215 | 0 | 156697 | KIHAREIFDSRGNPTVE | 2.74 | 2.94 | 0.78 | 0.44 | 1.13 | 1.66 |
| 36216 | 0 | 156697 | KIHAREIFDSRGNPTVE | 2.74 | 2.94 | 0.78 | 0.44 | 1.13 | 1.66 |
| 36217 | 0 | 156697 | KIHAREIFDSRGNPTVE | 2.74 | 2.94 | 0.78 | 0.44 | 1.13 | 1.66 |
| 36218 | 0 | 156697 | KIHAREIFDSRGNPTVE | 2.74 | 2.94 | 0.78 | 0.44 | 1.13 | 1.66 |
| 36219 | 0 | 156697 | KIHAREIFDSRGNPTVE | 2.74 | 2.94 | 0.78 | 0.44 | 1.13 | 1.66 |
| 36220 | 0 | 156697 | KIHAREIFDSRGNPTVE | 2.74 | 2.94 | 0.78 | 0.44 | 1.13 | 1.66 |
| 36221 | 0 | 156697 | KIHAREIFDSRGNPTVE | 2.74 | 2.94 | 0.78 | 0.44 | 1.13 | 1.66 |
| 36222 | 0 | 156697 | KIHAREIFDSRGNPTVE | 2.74 | 2.94 | 0.78 | 0.44 | 1.13 | 1.66 |
| 36223 | 0 | 156697 | KIHAREIFDSRGNPTVE | 2.74 | 2.94 | 0.78 | 0.44 | 1.13 | 1.66 |
| 36224 | 0 | 156697 | KIHAREIFDSRGNPTVE | 2.74 | 2.94 | 0.78 | 0.44 | 1.13 | 1.66 |
| 36225 | 0 | 156697 | KIHAREIFDSRGNPTVE | 2.74 | 2.94 | 0.78 | 0.44 | 1.13 | 1.66 |
| 36226 | 0 | 156697 | KIHAREIFDSRGNPTVE | 2.74 | 2.94 | 0.78 | 0.44 | 1.13 | 1.66 |
| 36227 | 0 | 156697 | KIHAREIFDSRGNPTVE | 2.74 | 2.94 | 0.78 | 0.44 | 1.13 | 1.66 |
| 36228 | 0 | 156697 | KIHAREIFDSRGNPTVE | 2.74 | 2.94 | 0.78 | 0.44 | 1.13 | 1.66 |
| 36229 | 0 | 156697 | KIHAREIFDSRGNPTVE | 2.74 | 2.94 | 0.78 | 0.44 | 1.13 | 1.66 |
| 36230 | 0 | 156697 | KIHAREIFDSRGNPTVE | 2.74 | 2.94 | 0.78 | 0.44 | 1.13 | 0.28 |

|       |   |        |                   |      |      |      |      |      |      |
|-------|---|--------|-------------------|------|------|------|------|------|------|
| 36231 | 0 | 156697 | KIHAREIFDSRGNPTVE | 2.74 | 2.94 | 0.78 | 0.44 | 1.13 | 0.28 |
| 36232 | 0 | 156697 | KIHAREIFDSRGNPTVE | 2.74 | 2.94 | 0.78 | 0.44 | 1.13 | 0.28 |
| 36233 | 0 | 156697 | KIHAREIFDSRGNPTVE | 2.74 | 2.94 | 0.78 | 0.44 | 1.13 | 0.28 |
| 36234 | 0 | 156697 | KIHAREIFDSRGNPTVE | 2.74 | 2.94 | 0.78 | 0.44 | 1.13 | 0.28 |
| 36235 | 0 | 156697 | KIHAREIFDSRGNPTVE | 2.74 | 2.94 | 0.78 | 0.44 | 1.13 | 0.28 |
| 36236 | 0 | 223141 | KIHAREIFDSRGNPTVE | 2.74 | 2.94 | 0.78 | 0.44 | 1.13 | 0.28 |
| 36237 | 0 | 156697 | KIHAREIFDSRGNPTVE | 2.74 | 2.94 | 0.78 | 0.44 | 1.13 | 0.28 |
| 36238 | 0 | 156697 | KIHAREIFDSRGNPTVE | 2.74 | 2.94 | 0.78 | 0.44 | 1.13 | 0.28 |
| 36239 | 0 | 156697 | KIHAREIFDSRGNPTVE | 2.74 | 2.94 | 0.78 | 0.44 | 1.13 | 0.28 |
| 36240 | 0 | 136420 | KIHAREIFDSRGNPTVE | 2.74 | 3.93 | 0.78 | 0.44 | 1.13 | 1.28 |
| 36241 | 0 | 156697 | KIHAREIFDSRGNPTVE | 2.74 | 2.94 | 0.78 | 0.44 | 1.13 | 0.28 |
| 36242 | 0 | 156697 | KIHAREIFDSRGNPTVE | 2.74 | 2.94 | 0.78 | 0.44 | 1.41 | 0.28 |
| 36243 | 0 | 156697 | KIHAREIFDSRGNPTVE | 2.74 | 2.94 | 0.78 | 0.44 | 1.13 | 0.28 |
| 36244 | 0 | 156697 | KIHAREIFDSRGNPTVE | 2.74 | 2.94 | 0.78 | 0.44 | 1.41 | 1.28 |
| 36245 | 0 | 156697 | KIHAREIFDSRGNPTVE | 2.74 | 2.94 | 0.78 | 0.44 | 1.13 | 1.28 |
| 36246 | 0 | 156697 | KIHAREIFDSRGNPTVE | 2.74 | 2.94 | 0.78 | 0.44 | 1.13 | 0.28 |
| 36247 | 0 | 156697 | KIHAREIFDSRGNPTVE | 2.74 | 2.94 | 0.78 | 0.44 | 1.13 | 0.28 |
| 36248 | 0 | 156697 | KIHAREIFDSRGNPTVE | 2.74 | 2.94 | 0.78 | 0.44 | 1.13 | 1.27 |
| 36249 | 0 | 156697 | KIHAREIFDSRGNPTVE | 2.74 | 2.94 | 0.78 | 0.44 | 1.13 | 0.28 |
| 36250 | 0 | 156697 | KIHAREIFDSRGNPTVE | 2.74 | 2.94 | 0.78 | 0.44 | 1.13 | 0.28 |
| 36251 | 0 | 156697 | KIHAREIFDSRGNPTVE | 2.74 | 2.94 | 0.78 | 0.44 | 1.13 | 0.28 |
| 36252 | 0 | 156697 | KIHAREIFDSRGNPTVE | 2.74 | 2.94 | 0.78 | 0.44 | 1.13 | 0.28 |
| 36253 | 0 | 156697 | KIHAREIFDSRGNPTVE | 2.74 | 2.94 | 0.78 | 0.44 | 1.13 | 0.28 |

|       |   |        |                                   |      |      |      |      |      |      |
|-------|---|--------|-----------------------------------|------|------|------|------|------|------|
| 36254 | 0 | 156697 | KIHAREIFDSRGNPTVE                 | 2.74 | 2.94 | 0.78 | 0.44 | 1.13 | 0.28 |
| 36255 | 0 | 156697 | KIHAREIFDSRGNPTVE                 | 2.74 | 2.94 | 0.78 | 0.44 | 1.13 | 0.85 |
| 36256 | 0 | 156697 | KIHAREIFDSRGNPTVE                 | 2.74 | 2.94 | 0.78 | 0.44 | 1.13 | 0.28 |
| 36257 | 0 | 136421 | KIHAREIFDSRGNPTVE                 | 2.74 | 0.01 | 0.78 | 0.44 | 1.13 | 0.28 |
| 36258 | 0 | 136421 | KIHAREIFDSRGNPTVE                 | 2.74 | 0.01 | 0.78 | 0.44 | 1.13 | 0.28 |
| 36259 | 0 | 136421 | KIHAREIFDSRGNPTVE                 | 2.74 | 0.01 | 0.78 | 0.44 | 1.41 | 0.28 |
| 36260 | 0 | 136421 | KIHAREIFDSRGNPTVE                 | 2.74 | 0.01 | 0.78 | 0.44 | 1.13 | 0.28 |
| 36261 | 0 | 136421 | KIHAREIFDSRGNPTVE                 | 2.74 | 0.01 | 0.78 | 0.44 | 1.13 | 0.28 |
| 36262 | 0 | 115313 | KIIAEKTKIPAVFKIDALN<br>E          | 2.96 | 0.01 | 1.60 | 0.44 | 1.23 | 2.51 |
| 36263 | 0 | 95497  | KIIAPAKQ                          | 2.16 | 0.01 | 3.48 | 2.22 | 0.22 | 0.28 |
| 36264 | 0 | 136422 | KIIGREILDSRGNPTVE                 | 2.77 | 3.93 | 4.03 | 0.44 | 1.13 | 0.28 |
| 36265 | 0 | 136422 | KIIGREILDSRGNPTVE                 | 2.77 | 3.93 | 4.03 | 0.44 | 1.13 | 0.28 |
| 36266 | 0 | 519897 | KIIGREILDSRGNPTVE                 | 2.77 | 2.94 | 4.03 | 0.44 | 1.13 | 0.28 |
| 36267 | 0 | 519897 | KIIGREILDSRGNPTVE                 | 2.77 | 2.94 | 4.03 | 0.44 | 1.13 | 0.28 |
| 36268 | 0 | 519897 | KIIGREILDSRGNPTVE                 | 2.77 | 2.94 | 4.03 | 0.44 | 1.13 | 0.85 |
| 36269 | 0 | 227790 | KIKLAIPVNPGRYD                    | 2.73 | 0.01 | 2.72 | 1.20 | 1.59 | 0.28 |
| 36270 | 0 | 123368 | KIKAYMESE                         | 2.24 | 0.01 | 2.28 | 2.00 | 0.22 | 0.28 |
| 36271 | 0 | 123369 | KIKAYMESK                         | 2.24 | 0.01 | 2.28 | 2.00 | 0.22 | 0.28 |
| 36272 | 0 | 96463  | KIKDPDASKP                        | 2.36 | 0.01 | 0.78 | 0.44 | 1.93 | 0.85 |
| 36273 | 0 | 96463  | KIKDPDASKP                        | 2.36 | 0.01 | 0.78 | 0.44 | 1.13 | 0.28 |
| 36274 | 0 | 96463  | KIKDPDASKP                        | 2.36 | 0.01 | 0.78 | 0.44 | 1.23 | 0.28 |
| 36275 | 0 | 445449 | KIKGVISIPRLQAEARSEIL<br>AHWSPAKLL | 3.32 | 0.01 | 0.78 | 0.44 | 1.93 | 0.28 |
| 36276 | 0 | 445449 | KIKGVISIPRLQAEARSEIL<br>AHWSPAKLL | 3.32 | 0.01 | 0.78 | 0.44 | 1.41 | 0.28 |
| 36277 | 0 | 117953 | KIKKDELKKSL                       | 2.44 | 0.01 | 0.78 | 0.44 | 1.13 | 0.28 |
| 36278 | 0 | 152708 | KIKLNAKMNI                        | 2.36 | 0.01 | 2.18 | 2.16 | 0.22 | 0.28 |
| 36279 | 0 | 31295  | KIKNGDLTKELNKTRQEL                | 2.87 | 0.01 | 2.85 | 0.68 | 0.22 | 0.28 |
| 36280 | 0 | 31308  | KIKVYL                            | 1.91 | 0.01 | 2.25 | 0.68 | 0.22 | 0.85 |
| 36281 | 0 | 241020 | KILEDQEE                          | 2.11 | 0.01 | 3.35 | 2.37 | 0.22 | 0.85 |
| 36282 | 0 | 31320  | KILGCDWYFVPTDEGW<br>TND           | 2.86 | 0.01 | 2.95 | 0.44 | 0.22 | 0.28 |
| 36283 | 0 | 125108 | KILGNQGSFLTGPSKL                  | 2.82 | 0.01 | 0.78 | 4.15 | 1.13 | 0.28 |
| 36284 | 0 | 31322  | KILIGV                            | 1.90 | 0.01 | 2.40 | 0.44 | 0.85 | 0.28 |
| 36285 | 0 | 31323  | KILIGVIITWIGM                     | 2.57 | 0.01 | 2.40 | 0.44 | 0.85 | 0.28 |
| 36286 | 0 | 31323  | KILIGVIITWIGM                     | 2.57 | 0.01 | 2.40 | 0.44 | 0.85 | 0.28 |



|       |   |        |                          |      |      |      |      |      |      |
|-------|---|--------|--------------------------|------|------|------|------|------|------|
| 36287 | 0 | 31323  | KILIGVIITWIGM            | 2.57 | 0.01 | 2.40 | 0.44 | 0.85 | 0.28 |
| 36288 | 0 | 31323  | KILIGVIITWIGM            | 2.57 | 0.01 | 2.40 | 0.44 | 0.85 | 0.28 |
| 36289 | 0 | 119473 | KILKVIRK                 | 2.17 | 0.01 | 0.78 | 0.44 | 0.85 | 0.28 |
| 36290 | 0 | 119473 | KILKVIRK                 | 2.17 | 0.01 | 0.78 | 0.44 | 0.85 | 0.28 |
| 36291 | 0 | 120681 | KILPEVKEKH               | 2.34 | 0.01 | 3.34 | 1.20 | 0.22 | 0.28 |
| 36292 | 0 | 31330  | KILPEVKEKHEF             | 2.50 | 0.01 | 3.61 | 1.12 | 0.22 | 0.28 |
| 36293 | 0 | 31330  | KILPEVKEKHEF             | 2.50 | 0.01 | 3.61 | 1.12 | 0.22 | 0.85 |
| 36294 | 0 | 31330  | KILPEVKEKHEF             | 2.50 | 0.01 | 3.61 | 1.12 | 0.22 | 0.28 |
| 36295 | 0 | 31330  | KILPEVKEKHEF             | 2.50 | 0.01 | 3.61 | 2.71 | 0.22 | 0.28 |
| 36296 | 0 | 31330  | KILPEVKEKHEF             | 2.50 | 0.01 | 3.61 | 0.44 | 1.13 | 0.28 |
| 36297 | 0 | 120682 | KILPEVKEKHEFLSRL         | 2.75 | 0.01 | 3.34 | 1.20 | 0.22 | 1.27 |
| 36298 | 0 | 120682 | KILPEVKEKHEFLSRL         | 2.75 | 0.01 | 3.34 | 1.20 | 0.22 | 0.28 |
| 36299 | 0 | 120682 | KILPEVKEKHEFLSRL         | 2.75 | 0.01 | 3.34 | 1.20 | 0.22 | 0.28 |
| 36300 | 0 | 120682 | KILPEVKEKHEFLSRL         | 2.75 | 0.01 | 3.34 | 0.44 | 0.85 | 0.28 |
| 36301 | 0 | 120682 | KILPEVKEKHEFLSRL         | 2.75 | 0.01 | 3.34 | 0.44 | 1.13 | 0.28 |
| 36302 | 0 | 120682 | KILPEVKEKHEFLSRL         | 2.75 | 0.01 | 3.34 | 0.44 | 1.41 | 0.28 |
| 36303 | 0 | 120682 | KILPEVKEKHEFLSRL         | 2.75 | 0.01 | 3.34 | 1.20 | 0.22 | 0.28 |
| 36304 | 0 | 161363 | KIMSKWANTFNINAYN<br>MSNR | 2.97 | 0.01 | 0.90 | 2.74 | 0.22 | 1.48 |
| 36305 | 0 | 161363 | KIMSKWANTFNINAYN<br>MSNR | 2.97 | 0.01 | 0.90 | 2.74 | 0.22 | 1.75 |
| 36306 | 0 | 31350  | KIMSKWGNTFNINAYN<br>MSNF | 2.97 | 0.01 | 0.90 | 2.63 | 0.22 | 1.48 |
| 36307 | 0 | 31351  | KIMSKWVNTFNINAYIM<br>SNF | 2.97 | 0.01 | 0.90 | 2.63 | 0.22 | 1.48 |
| 36308 | 0 | 31351  | KIMSKWVNTFNINAYIM<br>SNF | 2.97 | 0.01 | 0.90 | 2.74 | 0.22 | 1.48 |
| 36309 | 0 | 31352  | KIMSKWVNVFNINAYI<br>MSNF | 2.98 | 0.01 | 0.90 | 2.63 | 0.22 | 1.48 |
| 36310 | 0 | 31352  | KIMSKWVNVFNINAYI<br>MSNF | 2.98 | 0.01 | 0.90 | 2.74 | 0.22 | 1.48 |
| 36311 | 0 | 31353  | KIMSKYSNTFEVNAYNM<br>SDF | 2.95 | 0.01 | 0.90 | 2.63 | 0.22 | 1.48 |
| 36312 | 0 | 31357  | KINEESLDRARRLL           | 2.59 | 0.01 | 2.40 | 2.43 | 0.22 | 0.28 |
| 36313 | 0 | 31357  | KINEESLDRARRLL           | 2.59 | 0.01 | 2.40 | 2.43 | 0.22 | 0.28 |
| 36314 | 0 | 31357  | KINEESLDRARRLL           | 2.59 | 0.01 | 2.40 | 2.43 | 0.22 | 0.28 |
| 36315 | 0 | 31365  | KINIGSKVNFDPIDKNQI<br>Q  | 2.93 | 0.01 | 3.03 | 0.68 | 0.22 | 1.57 |
| 36316 | 0 | 31365  | KINIGSKVNFDPIDKNQI<br>Q  | 2.93 | 0.01 | 3.03 | 3.33 | 0.22 | 1.57 |
| 36317 | 0 | 31365  | KINIGSKVNFDPIDKNQI<br>Q  | 2.93 | 0.01 | 2.08 | 2.02 | 0.22 | 1.57 |
| 36318 | 0 | 31365  | KINIGSKVNFDPIDKNQI<br>Q  | 2.93 | 0.01 | 2.08 | 2.49 | 0.22 | 1.57 |
| 36319 | 0 | 31365  | KINIGSKVNFDPIDKNQI<br>Q  | 2.93 | 0.01 | 2.08 | 2.25 | 0.22 | 1.57 |

|       |   |        |                         |      |      |      |      |      |      |
|-------|---|--------|-------------------------|------|------|------|------|------|------|
| 36320 | 0 | 31365  | KINIGSKVNFDPIDKNQIQ     | 2.93 | 0.01 | 2.08 | 2.25 | 0.22 | 1.57 |
| 36321 | 0 | 31365  | KINIGSKVNFDPIDKNQIQ     | 2.93 | 0.01 | 3.16 | 0.44 | 1.93 | 1.57 |
| 36322 | 0 | 31365  | KINIGSKVNFDPIDKNQIQ     | 2.93 | 0.01 | 2.08 | 2.02 | 0.22 | 1.57 |
| 36323 | 0 | 31365  | KINIGSKVNFDPIDKNQIQ     | 2.93 | 0.01 | 2.08 | 2.25 | 0.22 | 1.57 |
| 36324 | 0 | 31365  | KINIGSKVNFDPIDKNQIQ     | 2.93 | 0.01 | 2.08 | 2.25 | 0.22 | 1.27 |
| 36325 | 0 | 31367  | KINLADRMLGLSGVQEIKEQ    | 2.94 | 0.01 | 2.82 | 0.44 | 0.85 | 0.28 |
| 36326 | 0 | 100196 | KINRGIFNEF              | 2.33 | 0.01 | 2.18 | 2.16 | 0.22 | 0.28 |
| 36327 | 0 | 31373  | KINSLS                  | 1.90 | 0.01 | 3.37 | 0.68 | 0.22 | 0.28 |
| 36328 | 0 | 31373  | KINSLS                  | 1.90 | 0.01 | 3.37 | 1.12 | 0.22 | 0.28 |
| 36329 | 0 | 95498  | KIPAVF                  | 1.88 | 0.01 | 1.60 | 0.44 | 1.23 | 0.28 |
| 36330 | 0 | 95498  | KIPAVF                  | 1.88 | 0.01 | 1.60 | 2.66 | 0.22 | 0.85 |
| 36331 | 0 | 445463 | KIPAVFC                 | 1.99 | 0.01 | 0.90 | 2.66 | 0.22 | 1.39 |
| 36332 | 0 | 98849  | KIPAVFKIDA              | 2.34 | 0.01 | 1.60 | 0.44 | 1.23 | 0.85 |
| 36333 | 0 | 98849  | KIPAVFKIDA              | 2.34 | 0.01 | 1.60 | 0.44 | 1.23 | 0.85 |
| 36334 | 0 | 98849  | KIPAVFKIDA              | 2.34 | 0.01 | 1.60 | 0.44 | 2.98 | 0.85 |
| 36335 | 0 | 31383  | KIPDPPQPDFPQLNSDWVPS    | 2.96 | 0.01 | 2.69 | 1.12 | 0.22 | 0.28 |
| 36336 | 0 | 31383  | KIPDPPQPDFPQLNSDWVPS    | 2.96 | 0.01 | 2.69 | 1.12 | 0.22 | 0.28 |
| 36337 | 0 | 31383  | KIPDPPQPDFPQLNSDWVPS    | 2.96 | 0.01 | 2.69 | 1.12 | 0.22 | 0.28 |
| 36338 | 0 | 31383  | KIPDPPQPDFPQLNSDWVPS    | 2.96 | 0.01 | 2.69 | 1.12 | 0.22 | 0.28 |
| 36339 | 0 | 31383  | KIPDPPQPDFPQLNSDWVPS    | 2.96 | 0.01 | 2.69 | 1.12 | 0.22 | 0.28 |
| 36340 | 0 | 31383  | KIPDPPQPDFPQLNSDWVPS    | 2.96 | 0.01 | 2.69 | 1.12 | 0.22 | 0.28 |
| 36341 | 0 | 31383  | KIPDPPQPDFPQLNSDWVPS    | 2.96 | 0.01 | 2.69 | 0.68 | 0.22 | 0.28 |
| 36342 | 0 | 31383  | KIPDPPQPDFPQLNSDWVPS    | 2.96 | 0.01 | 2.69 | 0.68 | 0.22 | 1.27 |
| 36343 | 0 | 31383  | KIPDPPQPDFPQLNSDWVPS    | 2.96 | 0.01 | 2.69 | 0.68 | 0.22 | 2.35 |
| 36344 | 0 | 31383  | KIPDPPQPDFPQLNSDWVPS    | 2.96 | 0.01 | 2.69 | 1.12 | 0.22 | 2.35 |
| 36345 | 0 | 79586  | KIPIALS                 | 2.02 | 0.01 | 0.90 | 1.12 | 0.22 | 1.39 |
| 36346 | 0 | 31388  | KIPKTITVST              | 2.36 | 0.01 | 1.86 | 0.68 | 0.22 | 1.66 |
| 36347 | 0 | 31388  | KIPKTITVST              | 2.36 | 0.01 | 1.86 | 0.68 | 0.22 | 1.66 |
| 36348 | 0 | 31388  | KIPKTITVST              | 2.36 | 0.01 | 1.86 | 0.68 | 0.22 | 1.66 |
| 36349 | 0 | 244229 | KIPLLGKMAIYICRMSNH<br>P | 2.87 | 0.01 | 3.61 | 0.44 | 0.85 | 0.28 |

|       |   |        |                                        |      |      |      |      |      |      |
|-------|---|--------|----------------------------------------|------|------|------|------|------|------|
|       |   |        | KIPLRCVLGWVALANSK                      |      |      |      |      |      |      |
| 36350 | 0 | 31389  | KFQLLVEADKLSKIMQD<br>DLNRYTSC          | 3.65 | 0.01 | 4.08 | 1.15 | 2.26 | 0.85 |
| 36351 | 0 | 118864 | KIPPTPFS                               | 2.14 | 0.01 | 0.78 | 0.44 | 1.13 | 0.28 |
| 36352 | 0 | 445464 | KIPRVFC                                | 1.99 | 0.01 | 0.90 | 2.66 | 0.22 | 1.39 |
| 36353 | 0 | 31395  | KIPYNLSFMVPP                           | 2.43 | 0.01 | 0.90 | 2.13 | 0.22 | 1.39 |
| 36354 | 0 | 31397  | KIQIEEIKKETNQINKDID<br>HIEMNIINLKKKIEF | 3.50 | 0.01 | 2.22 | 0.44 | 1.74 | 0.28 |
| 36355 | 0 | 31397  | KIQIEEIKKETNQINKDID<br>HIEMNIINLKKKIEF | 3.50 | 0.01 | 2.22 | 0.44 | 1.74 | 0.28 |
| 36356 | 0 | 31397  | KIQIEEIKKETNQINKDID<br>HIEMNIINLKKKIEF | 3.50 | 0.01 | 2.22 | 0.44 | 1.74 | 0.28 |
| 36357 | 0 | 31397  | KIQIEEIKKETNQINKDID<br>HIEMNIINLKKKIEF | 3.50 | 0.01 | 2.22 | 0.44 | 0.85 | 1.34 |
| 36358 | 0 | 31397  | KIQIEEIKKETNQINKDID<br>HIEMNIINLKKKIEF | 3.50 | 0.01 | 2.22 | 0.44 | 0.85 | 1.48 |
| 36359 | 0 | 109406 | KIQPSEPRDSAVYFCA                       | 2.69 | 0.01 | 0.78 | 0.44 | 1.41 | 0.28 |
| 36360 | 0 | 109406 | KIQPSEPRDSAVYFCA                       | 2.69 | 0.01 | 0.78 | 0.44 | 1.13 | 0.28 |
| 36361 | 0 | 109406 | KIQPSEPRDSAVYFCA                       | 2.69 | 0.01 | 0.78 | 0.44 | 1.13 | 0.28 |
| 36362 | 0 | 109406 | KIQPSEPRDSAVYFCA                       | 2.69 | 0.01 | 0.78 | 0.44 | 1.41 | 1.27 |
| 36363 | 0 | 109406 | KIQPSEPRDSAVYFCA                       | 2.69 | 0.01 | 0.78 | 1.12 | 0.22 | 0.28 |
| 36364 | 0 | 109406 | KIQPSEPRDSAVYFCA                       | 2.69 | 0.01 | 0.78 | 0.44 | 1.13 | 0.28 |
| 36365 | 0 | 109406 | KIQPSEPRDSAVYFCA                       | 2.69 | 0.01 | 0.78 | 0.44 | 1.13 | 0.28 |
| 36366 | 0 | 31404  | KIQRDEDSYE                             | 2.31 | 0.01 | 2.16 | 0.44 | 1.23 | 0.85 |
| 36367 | 0 | 99381  | KIQRDEDSYERDPYS                        | 2.70 | 0.01 | 2.16 | 0.44 | 1.23 | 1.48 |
| 36368 | 0 | 31406  | KIQRDEDSYGRDPYS                        | 2.68 | 0.01 | 2.16 | 0.44 | 1.23 | 0.85 |
| 36369 | 0 | 31406  | KIQRDEDSYGRDPYS                        | 2.68 | 0.01 | 2.16 | 2.90 | 0.22 | 0.85 |
| 36370 | 0 | 117545 | KIQRTOQEDSAVYLCA                       | 2.68 | 0.01 | 0.78 | 1.12 | 0.22 | 0.28 |
| 36371 | 0 | 117545 | KIQRTOQEDSAVYLCA                       | 2.68 | 0.01 | 0.78 | 0.44 | 1.41 | 0.28 |
| 36372 | 0 | 144382 | KIQTSFHCCGVKGPDDY<br>KG                | 2.86 | 0.01 | 2.93 | 0.44 | 1.41 | 1.27 |
| 36373 | 0 | 31414  | KIRPRGQRDSSY                           | 2.46 | 0.01 | 4.03 | 1.12 | 0.22 | 0.85 |
| 36374 | 0 | 31414  | KIRPRGQRDSSY                           | 2.46 | 0.01 | 4.03 | 1.12 | 0.22 | 2.02 |
| 36375 | 0 | 117546 | KIRRSPSKPLPEVT                         | 2.63 | 0.01 | 0.78 | 0.44 | 1.13 | 0.28 |
| 36376 | 0 | 111455 | KIRSEGGTIEVWDEE                        | 2.65 | 0.01 | 3.33 | 0.44 | 1.23 | 0.85 |
| 36377 | 0 | 119474 | KIRY                                   | 1.57 | 0.01 | 0.78 | 0.44 | 0.85 | 0.28 |
| 36378 | 0 | 119474 | KIRY                                   | 1.57 | 0.01 | 0.78 | 0.44 | 1.13 | 0.28 |
| 36379 | 0 | 142202 | KISEASRKGLRRDLASR<br>EA                | 2.99 | 0.01 | 2.24 | 0.44 | 0.85 | 0.28 |
| 36380 | 0 | 142202 | KISEASRKGLRRDLASR<br>EA                | 2.99 | 0.01 | 2.24 | 0.44 | 1.74 | 0.28 |
| 36381 | 0 | 142202 | KISEASRKGLRRDLASR<br>EA                | 2.99 | 0.01 | 2.24 | 1.15 | 0.22 | 0.28 |
| 36382 | 0 | 164166 | KISGQNTGNYKTN                          | 2.58 | 0.01 | 3.36 | 0.68 | 0.22 | 0.28 |
| 36383 | 0 | 164166 | KISGQNTGNYKTN                          | 2.58 | 0.01 | 3.36 | 0.68 | 0.22 | 1.48 |

|       |   |        |                                |      |      |      |      |      |      |
|-------|---|--------|--------------------------------|------|------|------|------|------|------|
| 36384 | 0 | 164166 | KISGQNTGNYKTN                  | 2.58 | 0.01 | 3.36 | 0.68 | 0.22 | 1.48 |
| 36385 | 0 | 164166 | KISGQNTGNYKTN                  | 2.58 | 0.01 | 4.08 | 1.20 | 0.22 | 0.85 |
| 36386 | 0 | 164166 | KISGQNTGNYKTN                  | 2.58 | 0.01 | 4.08 | 1.20 | 0.22 | 1.48 |
| 36387 | 0 | 31439  | KITCFLTAAGYCNT                 | 2.65 | 0.01 | 2.56 | 1.20 | 0.22 | 0.85 |
| 36388 | 0 | 31439  | KITCFLTAAGYCNT                 | 2.65 | 0.01 | 2.56 | 2.00 | 0.22 | 0.85 |
| 36389 | 0 | 31439  | KITCFLTAAGYCNT                 | 2.65 | 0.01 | 2.56 | 2.02 | 0.22 | 0.85 |
| 36390 | 0 | 31439  | KITCFLTAAGYCNT                 | 2.65 | 0.01 | 2.56 | 1.20 | 0.22 | 0.85 |
| 36391 | 0 | 144706 | KITCFLTAGGGLPDSVKI             | 2.82 | 0.01 | 0.90 | 1.20 | 0.22 | 0.85 |
| 36392 | 0 | 31442  | KITGPKTCLNLWQG                 | 2.62 | 0.01 | 2.69 | 0.44 | 1.41 | 0.28 |
| 36393 | 0 | 31445  | KITKRRMLRLMT                   | 2.53 | 0.01 | 0.90 | 1.20 | 0.22 | 1.39 |
| 36394 | 0 | 93104  | KITQDELSKV                     | 2.30 | 0.01 | 2.67 | 2.00 | 0.22 | 0.28 |
| 36395 | 0 | 93104  | KITQDELSKV                     | 2.30 | 0.01 | 2.67 | 2.00 | 0.22 | 0.28 |
| 36396 | 0 | 93104  | KITQDELSKV                     | 2.30 | 0.01 | 2.67 | 2.00 | 0.22 | 0.28 |
| 36397 | 0 | 123373 | KITQNNAMKI                     | 2.33 | 0.01 | 0.78 | 1.20 | 0.22 | 0.28 |
| 36398 | 0 | 31451  | KITQTQKDSKNTTVIVRE<br>IV       | 2.97 | 0.01 | 2.93 | 1.81 | 0.22 | 0.28 |
| 36399 | 0 | 31451  | KITQTQKDSKNTTVIVRE<br>IV       | 2.97 | 0.01 | 2.93 | 2.69 | 0.22 | 0.28 |
| 36400 | 0 | 31451  | KITQTQKDSKNTTVIVRE<br>IV       | 2.97 | 0.01 | 2.93 | 0.68 | 0.22 | 0.28 |
| 36401 | 0 | 31451  | KITQTQKDSKNTTVIVRE<br>IV       | 2.97 | 0.01 | 2.93 | 1.81 | 0.22 | 0.28 |
| 36402 | 0 | 31451  | KITQTQKDSKNTTVIVRE<br>IV       | 2.97 | 0.01 | 2.93 | 2.69 | 0.22 | 0.28 |
| 36403 | 0 | 31451  | KITQTQKDSKNTTVIVRE<br>IV       | 2.97 | 0.01 | 2.93 | 0.68 | 0.22 | 0.28 |
| 36404 | 0 | 115315 | KITVDDKHQYKALNEIN<br>QFY       | 2.93 | 0.01 | 1.60 | 0.44 | 1.23 | 2.51 |
| 36405 | 0 | 31454  | KITVGGKKVKYNCTCGT<br>GNVGTNSDM | 3.26 | 0.01 | 3.13 | 1.15 | 0.22 | 0.85 |
| 36406 | 0 | 31454  | KITVGGKKVKYNCTCGT<br>GNVGTNSDM | 3.26 | 0.01 | 3.13 | 1.15 | 0.22 | 0.85 |
| 36407 | 0 | 31454  | KITVGGKKVKYNCTCGT<br>GNVGTNSDM | 3.26 | 0.01 | 3.13 | 0.68 | 0.22 | 0.28 |
| 36408 | 0 | 100980 | KIVAPV                         | 1.90 | 0.01 | 3.02 | 1.12 | 0.22 | 0.28 |
| 36409 | 0 | 95499  | KIVAPVKQ                       | 2.15 | 0.01 | 2.96 | 2.22 | 0.22 | 0.28 |
| 36410 | 0 | 31456  | KIVAPVKQTL                     | 2.32 | 0.01 | 3.26 | 1.12 | 0.22 | 1.34 |
| 36411 | 0 | 31456  | KIVAPVKQTL                     | 2.32 | 0.01 | 3.26 | 1.12 | 0.22 | 0.28 |
| 36412 | 0 | 117018 | KIVMFWHEPVYA                   | 2.43 | 0.01 | 0.90 | 1.15 | 0.22 | 0.28 |
| 36413 | 0 | 117018 | KIVMFWHEPVYA                   | 2.43 | 0.01 | 0.90 | 0.44 | 0.85 | 0.28 |
| 36414 | 0 | 91575  | KIVYEKSQLAPRKLY                | 2.67 | 0.01 | 3.05 | 1.20 | 0.22 | 0.28 |
| 36415 | 0 | 91575  | KIVYEKSQLAPRKLY                | 2.67 | 0.01 | 3.05 | 1.20 | 0.22 | 0.28 |
| 36416 | 0 | 422022 | KIWAREILDSRGNPTV               | 2.67 | 3.93 | 0.78 | 0.44 | 1.13 | 0.28 |
| 36417 | 0 | 143962 | KIWKAPHVAKYFDDQ                | 2.66 | 0.01 | 0.78 | 3.93 | 0.22 | 0.28 |

|       |   |        |                          |      |      |      |      |      |      |
|-------|---|--------|--------------------------|------|------|------|------|------|------|
| 36418 | 0 | 143962 | KIWKAPHVAKYFDDQ          | 2.66 | 0.01 | 0.78 | 3.93 | 0.22 | 0.85 |
| 36419 | 0 | 519927 | KIYSLNYNELEVLA           | 2.71 | 0.01 | 2.24 | 0.44 | 1.41 | 1.28 |
| 36420 | 0 | 230394 | KIYWKQPVEGTKSWT<br>LSK   | 2.84 | 0.01 | 2.30 | 1.81 | 0.22 | 0.28 |
| 36421 | 0 | 230394 | KIYWKQPVEGTKSWT<br>LSK   | 2.84 | 0.01 | 2.30 | 1.81 | 0.22 | 1.75 |
| 36422 | 0 | 230394 | KIYWKQPVEGTKSWT<br>LSK   | 2.84 | 0.01 | 2.30 | 1.81 | 0.22 | 1.34 |
| 36423 | 0 | 31488  | KKAAAKKAAAKKAAP<br>KKAAP | 3.03 | 0.01 | 3.97 | 0.44 | 0.85 | 0.28 |
| 36424 | 0 | 319629 | KKAAAPKKAAAPQKA          | 2.75 | 0.01 | 1.61 | 0.44 | 0.85 | 1.28 |
| 36425 | 0 | 319630 | KKAAAPQKAAAPKKT          | 2.73 | 0.01 | 1.61 | 0.44 | 0.85 | 1.28 |
| 36426 | 0 | 319631 | KKAAAPQKAAVAKKA          | 2.74 | 0.01 | 1.61 | 0.44 | 0.85 | 1.28 |
| 36427 | 0 | 319639 | KKAAKPAAKTAAKTA          | 2.75 | 0.01 | 1.61 | 0.44 | 0.85 | 1.28 |
| 36428 | 0 | 141684 | KKACCAIRGSFYDLED         | 2.69 | 0.01 | 1.66 | 1.20 | 0.22 | 0.28 |
| 36429 | 0 | 230143 | KKADAE                   | 1.90 | 0.01 | 3.19 | 0.44 | 1.23 | 1.28 |
| 36430 | 0 | 230143 | KKADAE                   | 1.90 | 0.01 | 3.19 | 0.44 | 1.23 | 1.28 |
| 36431 | 0 | 230144 | KKADAELSKIA              | 2.43 | 0.01 | 3.19 | 0.44 | 1.23 | 1.28 |
| 36432 | 0 | 229292 | KKAEDAQKKYD              | 2.43 | 0.01 | 2.70 | 0.68 | 0.22 | 0.28 |
| 36433 | 0 | 229292 | KKAEDAQKKYD              | 2.43 | 0.01 | 2.70 | 0.68 | 0.22 | 0.28 |
| 36434 | 0 | 229293 | KKAEDAQKKYDEDQK          | 2.74 | 0.01 | 2.70 | 0.68 | 0.22 | 0.28 |
| 36435 | 0 | 229293 | KKAEDAQKKYDEDQK          | 2.74 | 0.01 | 2.70 | 0.68 | 0.22 | 0.28 |
| 36436 | 0 | 142431 | KKAEAAKKIVDKI            | 2.59 | 0.01 | 2.59 | 0.44 | 0.85 | 0.85 |
| 36437 | 0 | 430726 | KKAEPPKNPRENKLKQ         | 2.71 | 0.01 | 2.59 | 2.16 | 0.22 | 0.28 |
| 36438 | 0 | 164942 | KKAGIEDRDLQTGGIN         | 2.71 | 0.01 | 3.57 | 2.00 | 0.22 | 0.28 |
| 36439 | 0 | 31491  | KKAIER                   | 1.89 | 0.01 | 3.24 | 1.12 | 0.22 | 0.28 |
| 36440 | 0 | 31492  | KKAIERMKDT               | 2.31 | 0.01 | 2.66 | 0.68 | 0.22 | 0.28 |
| 36441 | 0 | 121473 | KKAKAKAK                 | 2.16 | 0.01 | 0.90 | 0.44 | 1.13 | 0.28 |
| 36442 | 0 | 121474 | KKAPAKKGEKVPKGK          | 2.74 | 0.01 | 0.78 | 0.44 | 1.13 | 1.27 |
| 36443 | 0 | 121474 | KKAPAKKGEKVPKGK          | 2.74 | 0.01 | 2.73 | 1.12 | 0.22 | 0.28 |
| 36444 | 0 | 121474 | KKAPAKKGEKVPKGK          | 2.74 | 0.01 | 2.73 | 0.44 | 1.13 | 0.28 |
| 36445 | 0 | 177801 | KKATEQKIKVPEQIK          | 2.71 | 0.01 | 0.78 | 0.44 | 1.13 | 0.85 |
| 36446 | 0 | 123374 | KKAVQGGG                 | 2.12 | 0.01 | 0.78 | 1.20 | 0.22 | 0.28 |
| 36447 | 0 | 133860 | KKAVTKAQKKD              | 2.43 | 0.01 | 1.60 | 1.12 | 0.22 | 0.28 |
| 36448 | 0 | 113570 | KKAVTKAQKKDGKSAA<br>HRKE | 2.95 | 0.01 | 0.78 | 1.81 | 0.22 | 0.28 |
| 36449 | 0 | 113570 | KKAVTKAQKKDGKSAA<br>HRKE | 2.95 | 0.01 | 0.78 | 3.61 | 0.22 | 0.28 |
| 36450 | 0 | 106562 | KKCDIKTTLP               | 2.32 | 0.01 | 3.08 | 0.44 | 1.23 | 0.85 |
| 36451 | 0 | 31500  | KKDAVPNMSF               | 2.28 | 0.01 | 3.42 | 3.28 | 0.22 | 0.28 |
| 36452 | 0 | 319713 | KKDEEQEKKEEEEE           | 2.73 | 0.01 | 1.61 | 0.44 | 0.85 | 1.28 |
| 36453 | 0 | 319714 | KKDEEQEPNEEEEE           | 2.70 | 0.01 | 1.61 | 0.44 | 0.85 | 1.28 |
| 36454 | 0 | 123375 | KKDELKKS                 | 2.26 | 0.01 | 0.78 | 1.20 | 0.22 | 0.28 |

|       |   |        |                               |      |      |      |      |      |      |
|-------|---|--------|-------------------------------|------|------|------|------|------|------|
| 36455 | 0 | 238657 | KKDETIQCCTKNNCN               | 2.71 | 0.01 | 2.56 | 2.02 | 0.22 | 0.85 |
| 36456 | 0 | 238657 | KKDETIQCCTKNNCN               | 2.71 | 0.01 | 2.56 | 1.20 | 0.22 | 0.85 |
| 36457 | 0 | 31502  | KKDGKKAEPKNPRENKL<br>DQP      | 2.97 | 0.01 | 2.59 | 3.05 | 1.41 | 0.28 |
| 36458 | 0 | 31502  | KKDGKKAEPKNPRENKL<br>DQP      | 2.97 | 0.01 | 2.59 | 3.05 | 0.85 | 0.28 |
| 36459 | 0 | 31502  | KKDGKKAEPKNPRENKL<br>DQP      | 2.97 | 0.01 | 2.59 | 0.44 | 0.85 | 0.28 |
| 36460 | 0 | 31504  | KKDGYPVEYDNCAYI               | 2.65 | 0.01 | 2.56 | 2.02 | 0.22 | 0.85 |
| 36461 | 0 | 31504  | KKDGYPVEYDNCAYI               | 2.65 | 0.01 | 2.56 | 1.20 | 0.22 | 0.85 |
| 36462 | 0 | 31505  | KKDHKPQTTPK                   | 2.52 | 0.01 | 2.38 | 0.44 | 1.74 | 0.28 |
| 36463 | 0 | 420620 | KKDLKESMKCGMWGR<br>A          | 2.73 | 0.01 | 0.78 | 0.44 | 2.35 | 0.28 |
| 36464 | 0 | 420620 | KKDLKESMKCGMWGR<br>A          | 2.73 | 0.01 | 0.78 | 0.44 | 1.13 | 0.28 |
| 36465 | 0 | 125109 | KKDNTCSMFV                    | 2.28 | 0.01 | 0.78 | 0.68 | 0.22 | 0.28 |
| 36466 | 0 | 125109 | KKDNTCSMFV                    | 2.28 | 0.01 | 0.78 | 0.68 | 0.22 | 1.34 |
| 36467 | 0 | 135060 | KKDVVNSQNKTDKTE               | 2.70 | 0.01 | 4.93 | 2.13 | 0.85 | 0.28 |
| 36468 | 0 | 135061 | KKDVVNSQNKTEKTE               | 2.70 | 0.01 | 4.93 | 2.13 | 0.85 | 0.28 |
| 36469 | 0 | 132847 | KKEDFDIYDEDENQSP              | 2.74 | 0.01 | 0.78 | 0.68 | 0.22 | 1.39 |
| 36470 | 0 | 132848 | KKEDFDIYDEDENQSPR             | 2.79 | 0.01 | 0.78 | 0.68 | 0.22 | 1.34 |
| 36471 | 0 | 132848 | KKEDFDIYDEDENQSPR             | 2.79 | 0.01 | 0.78 | 0.68 | 0.22 | 1.27 |
| 36472 | 0 | 132848 | KKEDFDIYDEDENQSPR             | 2.79 | 0.01 | 0.78 | 1.15 | 0.22 | 2.02 |
| 36473 | 0 | 132848 | KKEDFDIYDEDENQSPR             | 2.79 | 0.01 | 0.78 | 1.15 | 0.22 | 2.02 |
| 36474 | 0 | 319768 | KKEEEDNDDDDLEEA               | 2.71 | 0.01 | 1.61 | 0.44 | 0.85 | 1.28 |
| 36475 | 0 | 319769 | KKEEEEEEDGIEQVE               | 2.70 | 0.01 | 1.61 | 0.44 | 0.85 | 1.28 |
| 36476 | 0 | 114435 | KKEEFPTDLKPEEVAQEA<br>AEEPLIE | 3.18 | 0.01 | 1.75 | 2.04 | 0.22 | 0.28 |
| 36477 | 0 | 114435 | KKEEFPTDLKPEEVAQEA<br>AEEPLIE | 3.18 | 0.01 | 1.75 | 2.04 | 0.22 | 0.28 |
| 36478 | 0 | 31518  | KKEEKKEESEEDEDMG<br>FGLFD     | 3.08 | 0.01 | 4.33 | 0.44 | 1.13 | 0.28 |
| 36479 | 0 | 31518  | KKEEKKEESEEDEDMG<br>FGLFD     | 3.08 | 0.01 | 4.33 | 0.44 | 1.13 | 1.27 |
| 36480 | 0 | 31518  | KKEEKKEESEEDEDMG<br>FGLFD     | 3.08 | 0.01 | 4.33 | 0.44 | 1.41 | 1.27 |
| 36481 | 0 | 31518  | KKEEKKEESEEDEDMG<br>FGLFD     | 3.08 | 0.01 | 0.90 | 3.05 | 1.13 | 0.28 |
| 36482 | 0 | 31518  | KKEEKKEESEEDEDMG<br>FGLFD     | 3.08 | 0.01 | 0.90 | 3.05 | 1.41 | 0.28 |
| 36483 | 0 | 129092 | KKEESEESDDDMGFG               | 2.70 | 0.01 | 0.78 | 0.44 | 1.13 | 0.85 |
| 36484 | 0 | 31521  | KKEFLNSYEDEFSSSE              | 2.70 | 0.01 | 1.66 | 1.15 | 0.22 | 0.28 |
| 36485 | 0 | 31521  | KKEFLNSYEDEFSSSE              | 2.70 | 0.01 | 1.66 | 1.15 | 0.22 | 0.28 |

|       |   |        |                             |      |      |      |      |      |      |
|-------|---|--------|-----------------------------|------|------|------|------|------|------|
| 36486 | 0 | 182190 | KKEGSNLLTIKDEAE             | 2.67 | 0.01 | 0.78 | 0.44 | 1.13 | 0.85 |
| 36487 | 0 | 31522  | KKEHEAENDKLKQQRDT<br>L      | 2.86 | 0.01 | 2.85 | 0.68 | 0.22 | 0.28 |
| 36488 | 0 | 131932 | KKEKPFSNSKVEQ               | 2.63 | 0.01 | 0.78 | 0.44 | 1.13 | 0.28 |
| 36489 | 0 | 31525  | KKELSQKT                    | 2.14 | 0.01 | 2.83 | 2.61 | 0.22 | 0.28 |
| 36490 | 0 | 31526  | KKENAANVNGTVGADA<br>LLTLGYR | 3.10 | 0.01 | 3.48 | 1.12 | 0.22 | 0.28 |
| 36491 | 0 | 31526  | KKENAANVNGTVGADA<br>LLTLGYR | 3.10 | 0.01 | 3.48 | 1.20 | 0.22 | 0.28 |
| 36492 | 0 | 31531  | KKETTSISSQRDSQSSKA          | 2.87 | 0.01 | 4.45 | 0.68 | 0.22 | 1.27 |
| 36493 | 0 | 229295 | KKEYEDGKAAQKKYE             | 2.71 | 0.01 | 2.70 | 0.68 | 0.22 | 0.28 |
| 36494 | 0 | 100201 | KKFIDIFKEE                  | 2.34 | 0.01 | 2.18 | 2.16 | 0.22 | 0.28 |
| 36495 | 0 | 31539  | KKFKAIEIRDFKEMRIQY<br>AK    | 2.97 | 0.01 | 1.66 | 0.44 | 1.74 | 0.28 |
| 36496 | 0 | 213183 | KKFKPEIAIRPKVRD             | 2.70 | 0.01 | 2.87 | 0.44 | 0.85 | 0.28 |
| 36497 | 0 | 213183 | KKFKPEIAIRPKVRD             | 2.70 | 0.01 | 2.87 | 1.12 | 0.22 | 1.34 |
| 36498 | 0 | 213183 | KKFKPEIAIRPKVRD             | 2.70 | 0.01 | 2.87 | 1.12 | 0.22 | 0.28 |
| 36499 | 0 | 429068 | KKFKPEIAIRPKVRGD            | 2.75 | 0.01 | 0.90 | 1.12 | 0.22 | 1.34 |
| 36500 | 0 | 78701  | KKFNSSAGDKQGNISIEK<br>L     | 2.90 | 0.01 | 3.11 | 1.12 | 0.22 | 0.28 |
| 36501 | 0 | 78701  | KKFNSSAGDKQGNISIEK<br>L     | 2.90 | 0.01 | 3.11 | 1.15 | 0.22 | 0.28 |
| 36502 | 0 | 78701  | KKFNSSAGDKQGNISIEK<br>L     | 2.90 | 0.01 | 3.11 | 1.12 | 0.22 | 0.28 |
| 36503 | 0 | 78701  | KKFNSSAGDKQGNISIEK<br>L     | 2.90 | 0.01 | 3.11 | 1.12 | 0.22 | 0.28 |
| 36504 | 0 | 192979 | KKFSKFVEDVKIGEKNW<br>PTG    | 2.94 | 0.01 | 3.47 | 2.00 | 0.22 | 0.28 |
| 36505 | 0 | 319871 | KKGAAKAPAPKAAAP             | 2.74 | 0.01 | 1.61 | 0.44 | 0.85 | 1.28 |
| 36506 | 0 | 31546  | KKGEGNTC                    | 2.13 | 0.01 | 3.00 | 1.15 | 0.22 | 0.85 |
| 36507 | 0 | 121475 | KKGEKVPKGKKGKAD             | 2.73 | 0.01 | 0.78 | 0.44 | 1.13 | 1.27 |
| 36508 | 0 | 108499 | KKGKKKDP                    | 2.17 | 0.01 | 0.78 | 0.44 | 1.13 | 0.28 |
| 36509 | 0 | 176031 | KKGKNFSFAGTVIEG             | 2.68 | 0.01 | 2.63 | 1.15 | 0.22 | 0.85 |
| 36510 | 0 | 176031 | KKGKNFSFAGTVIEG             | 2.68 | 0.01 | 2.63 | 1.15 | 0.22 | 0.85 |
| 36511 | 0 | 84423  | KKGLQQLQEWEDWVG<br>WIGN     | 2.91 | 0.01 | 3.93 | 3.16 | 0.22 | 0.28 |
| 36512 | 0 | 84423  | KKGLQQLQEWEDWVG<br>WIGN     | 2.91 | 0.01 | 3.93 | 3.16 | 0.22 | 2.02 |
| 36513 | 0 | 84423  | KKGLQQLQEWEDWVG<br>WIGN     | 2.91 | 0.01 | 3.93 | 3.16 | 2.25 | 1.75 |
| 36514 | 0 | 98850  | KKGSEEGDITNPIN              | 2.67 | 0.01 | 2.16 | 0.44 | 1.23 | 1.48 |
| 36515 | 0 | 31553  | KKGSGGITVK                  | 2.34 | 0.01 | 3.85 | 0.44 | 1.23 | 0.85 |
| 36516 | 0 | 31554  | KKGSSGYCAWPACYC             | 2.70 | 0.01 | 2.56 | 1.20 | 0.22 | 0.85 |
| 36517 | 0 | 31554  | KKGSSGYCAWPACYC             | 2.70 | 0.01 | 2.56 | 2.00 | 0.22 | 0.85 |
| 36518 | 0 | 31554  | KKGSSGYCAWPACYC             | 2.70 | 0.01 | 2.56 | 2.02 | 0.22 | 0.85 |

|       |   |        |                          |      |      |      |      |      |      |
|-------|---|--------|--------------------------|------|------|------|------|------|------|
| 36519 | 0 | 144707 | KKGSSGYCGGGLPDSVK<br>I   | 2.85 | 0.01 | 0.90 | 1.20 | 0.22 | 0.85 |
| 36520 | 0 | 31555  | KKGSSGYS                 | 2.16 | 0.01 | 0.90 | 0.68 | 0.22 | 0.28 |
| 36521 | 0 | 31555  | KKGSSGYS                 | 2.16 | 0.01 | 0.90 | 0.68 | 0.22 | 1.34 |
| 36522 | 0 | 31555  | KKGSSGYS                 | 2.16 | 0.01 | 0.90 | 0.68 | 0.22 | 0.85 |
| 36523 | 0 | 31555  | KKGSSGYS                 | 2.16 | 0.01 | 0.90 | 0.68 | 0.22 | 1.34 |
| 36524 | 0 | 31557  | KKGSSIGKM                | 2.26 | 0.01 | 2.30 | 0.68 | 0.22 | 0.28 |
| 36525 | 0 | 31558  | KKGSSIGQM                | 2.23 | 0.01 | 2.87 | 0.68 | 0.22 | 0.28 |
| 36526 | 0 | 31558  | KKGSSIGQM                | 2.23 | 0.01 | 2.87 | 0.68 | 0.22 | 0.28 |
| 36527 | 0 | 31559  | KKGVITQVKY               | 2.33 | 0.01 | 2.72 | 0.44 | 1.23 | 0.85 |
| 36528 | 0 | 98168  | KKHEDAGADKAVHLR          | 2.70 | 0.01 | 2.71 | 2.78 | 0.22 | 0.28 |
| 36529 | 0 | 226484 | KKICEFIQNQWKKILNID<br>VE | 2.95 | 0.01 | 2.97 | 0.44 | 0.85 | 0.28 |
| 36530 | 0 | 226485 | KKICEFIQNQWKKNLNI<br>DVE | 2.95 | 0.01 | 2.73 | 0.44 | 0.85 | 0.28 |
| 36531 | 0 | 31566  | KKICKMEKCSSVFNV          | 2.69 | 0.01 | 1.66 | 0.68 | 0.22 | 0.28 |
| 36532 | 0 | 31566  | KKICKMEKCSSVFNV          | 2.69 | 0.01 | 1.66 | 1.20 | 0.22 | 0.28 |
| 36533 | 0 | 98851  | KKIIAEKTKI               | 2.37 | 0.01 | 1.60 | 0.44 | 1.23 | 0.85 |
| 36534 | 0 | 98851  | KKIIAEKTKI               | 2.37 | 0.01 | 1.60 | 0.44 | 1.23 | 0.85 |
| 36535 | 0 | 98851  | KKIIAEKTKI               | 2.37 | 0.01 | 1.60 | 0.44 | 2.98 | 0.85 |
| 36536 | 0 | 119475 | KKIK                     | 1.59 | 0.01 | 0.78 | 0.44 | 0.85 | 0.28 |
| 36537 | 0 | 119475 | KKIK                     | 1.59 | 0.01 | 0.78 | 0.44 | 0.85 | 0.28 |
| 36538 | 0 | 119475 | KKIK                     | 1.59 | 0.01 | 0.78 | 0.44 | 1.13 | 0.28 |
| 36539 | 0 | 119475 | KKIK                     | 1.59 | 0.01 | 0.78 | 0.44 | 0.85 | 0.28 |
| 36540 | 0 | 100202 | KKIKDIYGKD               | 2.36 | 0.01 | 2.18 | 2.16 | 0.22 | 0.28 |
| 36541 | 0 | 115317 | KKILDKVGIN               | 2.33 | 0.01 | 1.60 | 0.44 | 1.23 | 0.85 |
| 36542 | 0 | 115317 | KKILDKVGIN               | 2.33 | 0.01 | 1.60 | 0.44 | 1.23 | 0.85 |
| 36543 | 0 | 115317 | KKILDKVGIN               | 2.33 | 0.01 | 1.60 | 0.44 | 2.98 | 0.85 |
| 36544 | 0 | 120688 | KKIPKDVLEI               | 2.33 | 0.01 | 2.18 | 2.16 | 0.22 | 0.28 |
| 36545 | 0 | 31580  | KKIQDCYVENGLIS           | 2.56 | 0.01 | 3.08 | 0.44 | 1.23 | 1.57 |
| 36546 | 0 | 31580  | KKIQDCYVENGLIS           | 2.56 | 0.01 | 3.08 | 0.44 | 1.74 | 1.57 |
| 36547 | 0 | 31580  | KKIQDCYVENGLIS           | 2.56 | 0.01 | 3.08 | 0.68 | 0.22 | 1.27 |
| 36548 | 0 | 31580  | KKIQDCYVENGLIS           | 2.56 | 0.01 | 3.08 | 0.68 | 0.22 | 1.57 |
| 36549 | 0 | 31580  | KKIQDCYVENGLIS           | 2.56 | 0.01 | 3.08 | 0.68 | 0.22 | 1.57 |
| 36550 | 0 | 191485 | KKISFPEGFPFK             | 2.51 | 0.01 | 2.76 | 1.20 | 0.22 | 0.28 |
| 36551 | 0 | 100203 | KKISFSLGEKVIGNN          | 2.68 | 0.01 | 0.90 | 2.63 | 0.22 | 1.48 |
| 36552 | 0 | 31581  | KKISNCVADYSVLYNST        | 2.79 | 0.01 | 2.48 | 0.44 | 0.85 | 0.28 |
| 36553 | 0 | 31581  | KKISNCVADYSVLYNST        | 2.79 | 0.01 | 2.48 | 1.20 | 0.22 | 0.28 |
| 36554 | 0 | 95501  | KKISQRYQKF               | 2.33 | 0.01 | 1.60 | 0.44 | 1.23 | 0.85 |
| 36555 | 0 | 171780 | KKKAACKAGGTPRKA          | 2.73 | 0.01 | 0.78 | 0.44 | 1.13 | 0.28 |
| 36556 | 0 | 319983 | KKKDEEQEPNEEEEE          | 2.70 | 0.01 | 1.61 | 0.44 | 0.85 | 1.28 |
| 36557 | 0 | 78702  | KKKEEGEDDTARQEIRK<br>AW  | 2.91 | 0.01 | 3.11 | 1.12 | 0.22 | 0.28 |
| 36558 | 0 | 78702  | KKKEEGEDDTARQEIRK<br>AW  | 2.91 | 0.01 | 3.11 | 1.15 | 0.22 | 0.28 |



|       |   |        |                                           |      |      |      |      |      |      |
|-------|---|--------|-------------------------------------------|------|------|------|------|------|------|
| 36559 | 0 | 78702  | KKKEEGEDDTARQEIRK<br>AW                   | 2.91 | 0.01 | 3.11 | 1.12 | 0.22 | 0.28 |
| 36560 | 0 | 78702  | KKKEEGEDDTARQEIRK<br>AW                   | 2.91 | 0.01 | 3.11 | 1.12 | 0.22 | 0.28 |
| 36561 | 0 | 121478 | KKKK                                      | 1.56 | 0.01 | 0.90 | 0.44 | 1.13 | 0.28 |
| 36562 | 0 | 177803 | KKKKKDDKKKKEAAQ                           | 2.73 | 0.01 | 0.78 | 0.44 | 1.13 | 0.85 |
| 36563 | 0 | 137213 | KKKKKKKLDA TR                             | 2.50 | 0.01 | 0.90 | 2.37 | 0.22 | 3.40 |
| 36564 | 0 | 137214 | KKKKLDA TR                                | 2.23 | 0.01 | 0.90 | 2.37 | 0.22 | 3.40 |
| 36565 | 0 | 78703  | KKKKTDEAQP                                | 2.31 | 0.01 | 4.45 | 0.68 | 0.22 | 0.85 |
| 36566 | 0 | 119476 | KKKKYAEAV                                 | 2.25 | 0.01 | 0.90 | 0.44 | 1.13 | 0.28 |
| 36567 | 0 | 31602  | KKKMKIVVTDDAKKRYKI<br>RLQRFR              | 3.11 | 0.01 | 3.42 | 1.12 | 0.22 | 0.85 |
| 36568 | 0 | 31602  | KKKMKIVVTDDAKKRYKI<br>RLQRFR              | 3.11 | 0.01 | 3.42 | 1.12 | 0.22 | 0.85 |
| 36569 | 0 | 31602  | KKKMKIVVTDDAKKRYKI<br>RLQRFR              | 3.11 | 0.01 | 3.42 | 1.12 | 0.22 | 0.85 |
| 36570 | 0 | 31602  | KKKMKIVVTDDAKKRYKI<br>RLQRFR              | 3.11 | 0.01 | 3.42 | 1.12 | 0.22 | 0.85 |
| 36571 | 0 | 31602  | KKKMKIVVTDDAKKRYKI<br>RLQRFR              | 3.11 | 0.01 | 3.42 | 1.12 | 0.22 | 0.85 |
| 36572 | 0 | 320020 | KKKNPEAASKKAPLS                           | 2.71 | 0.01 | 1.61 | 0.44 | 0.85 | 1.28 |
| 36573 | 0 | 79274  | KKLEELERDLRKLKKKIKK<br>LEEDNPWLGNIKG IIGK | 3.56 | 0.01 | 2.96 | 0.44 | 1.59 | 0.28 |
| 36574 | 0 | 133618 | KKLLVRGLYRISFTTYK                         | 2.80 | 0.01 | 3.85 | 1.12 | 0.22 | 0.85 |
| 36575 | 0 | 133618 | KKLLVRGLYRISFTTYK                         | 2.80 | 0.01 | 3.85 | 1.12 | 0.22 | 0.85 |
| 36576 | 0 | 133618 | KKLLVRGLYRISFTTYK                         | 2.80 | 0.01 | 3.85 | 0.44 | 0.85 | 0.28 |
| 36577 | 0 | 31633  | KKMKVFCPRPTLFFP                           | 2.69 | 0.01 | 3.02 | 2.69 | 0.22 | 0.28 |
| 36578 | 0 | 31636  | KKMNMHMENTVIYIMK<br>NQNLFK                | 3.01 | 0.01 | 0.90 | 2.63 | 0.22 | 1.48 |
| 36579 | 0 | 31638  | KKMSQFIDKKFIPLVFYT<br>LK                  | 2.94 | 0.01 | 2.22 | 0.44 | 1.74 | 0.28 |
| 36580 | 0 | 31639  | KKND                                      | 1.59 | 0.01 | 3.00 | 1.15 | 0.22 | 1.39 |
| 36581 | 0 | 31641  | KKNGAQGTVGADALLTL<br>GYR                  | 2.95 | 0.01 | 2.21 | 1.20 | 0.22 | 0.28 |
| 36582 | 0 | 31641  | KKNGAQGTVGADALLTL<br>GYR                  | 2.95 | 0.01 | 2.21 | 1.20 | 0.22 | 0.28 |
| 36583 | 0 | 31641  | KKNGAQGTVGADALLTL<br>GYR                  | 2.95 | 0.01 | 2.21 | 1.20 | 0.22 | 0.28 |
| 36584 | 0 | 103309 | KKNGRILTLPRSNPS                           | 2.69 | 0.01 | 0.78 | 1.12 | 0.22 | 2.35 |
| 36585 | 0 | 103309 | KKNGRILTLPRSNPS                           | 2.69 | 0.01 | 0.78 | 1.12 | 0.22 | 0.85 |
| 36586 | 0 | 103309 | KKNGRILTLPRSNPS                           | 2.69 | 0.01 | 0.78 | 0.68 | 0.22 | 1.27 |
| 36587 | 0 | 103309 | KKNGRILTLPRSNPS                           | 2.69 | 0.01 | 0.78 | 0.68 | 0.22 | 2.02 |
| 36588 | 0 | 103309 | KKNGRILTLPRSNPS                           | 2.69 | 0.01 | 0.78 | 0.68 | 0.22 | 2.02 |
| 36589 | 0 | 31642  | KKNIGRNRSPDIYNP                           | 2.69 | 0.01 | 2.16 | 0.44 | 1.23 | 0.85 |
| 36590 | 0 | 225366 | KKNITAEIDYKVRNYLL                         | 2.82 | 0.01 | 2.61 | 0.68 | 0.22 | 0.28 |

|       |   |        |                                  |      |      |      |      |      |      |
|-------|---|--------|----------------------------------|------|------|------|------|------|------|
| 36591 | 0 | 225366 | KKNITAEIDYKVRNYLL                | 2.82 | 0.01 | 2.61 | 0.68 | 0.22 | 0.28 |
| 36592 | 0 | 225366 | KKNITAEIDYKVRNYLL                | 2.82 | 0.01 | 2.61 | 0.68 | 0.22 | 0.28 |
| 36593 | 0 | 31645  | KKNKKKNPEKPHFPLAT<br>EDDVRHHFTPS | 3.26 | 0.01 | 3.04 | 1.15 | 0.22 | 0.28 |
| 36594 | 0 | 31645  | KKNKKKNPEKPHFPLAT<br>EDDVRHHFTPS | 3.26 | 0.01 | 3.04 | 1.15 | 0.22 | 0.28 |
| 36595 | 0 | 31645  | KKNKKKNPEKPHFPLAT<br>EDDVRHHFTPS | 3.26 | 0.01 | 3.04 | 1.15 | 0.22 | 0.28 |
| 36596 | 0 | 31645  | KKNKKKNPEKPHFPLAT<br>EDDVRHHFTPS | 3.26 | 0.01 | 3.04 | 2.13 | 1.59 | 0.28 |
| 36597 | 0 | 31645  | KKNKKKNPEKPHFPLAT<br>EDDVRHHFTPS | 3.26 | 0.01 | 3.04 | 2.13 | 0.22 | 1.27 |
| 36598 | 0 | 31649  | KKNMEG                           | 1.89 | 0.01 | 2.40 | 0.44 | 0.85 | 0.28 |
| 36599 | 0 | 320154 | KKNPEAASKKAPLSV                  | 2.70 | 0.01 | 1.61 | 0.44 | 0.85 | 1.28 |
| 36600 | 0 | 31652  | KKNPMG                           | 1.89 | 0.01 | 1.96 | 0.44 | 0.85 | 0.28 |
| 36601 | 0 | 99383  | KKNPQLQDLDMMLTC                  | 2.68 | 0.01 | 2.16 | 0.44 | 1.23 | 1.48 |
| 36602 | 0 | 181692 | KKNPYEQQLKGTLSN                  | 2.67 | 0.01 | 2.86 | 2.37 | 0.22 | 1.28 |
| 36603 | 0 | 181692 | KKNPYEQQLKGTLSN                  | 2.67 | 0.01 | 2.86 | 2.36 | 0.22 | 1.28 |
| 36604 | 0 | 115827 | KKNQDKTEIP                       | 2.31 | 0.01 | 1.60 | 0.44 | 1.23 | 0.85 |
| 36605 | 0 | 115827 | KKNQDKTEIP                       | 2.31 | 0.01 | 1.60 | 0.44 | 1.23 | 0.85 |
| 36606 | 0 | 31653  | KKNQDKTEIPTINT                   | 2.64 | 0.01 | 1.60 | 0.44 | 1.23 | 0.85 |
| 36607 | 0 | 421228 | KKPAEDSNGEQLVCAG<br>MRED         | 2.90 | 0.01 | 3.19 | 0.44 | 1.23 | 1.28 |
| 36608 | 0 | 421228 | KKPAEDSNGEQLVCAG<br>MRED         | 2.90 | 0.01 | 3.19 | 0.44 | 1.23 | 1.28 |
| 36609 | 0 | 320174 | KKPAVKPTVKPAAKA                  | 2.75 | 0.01 | 1.61 | 0.44 | 0.85 | 1.28 |
| 36610 | 0 | 31657  | KKPDYEP                          | 2.12 | 0.01 | 2.68 | 0.44 | 1.59 | 0.28 |
| 36611 | 0 | 141935 | KKPGGPG                          | 2.05 | 0.01 | 3.04 | 0.68 | 0.22 | 0.85 |
| 36612 | 0 | 141935 | KKPGGPG                          | 2.05 | 0.01 | 3.04 | 0.68 | 0.22 | 1.48 |
| 36613 | 0 | 141935 | KKPGGPG                          | 2.05 | 0.01 | 3.04 | 0.68 | 0.22 | 1.39 |
| 36614 | 0 | 141935 | KKPGGPG                          | 2.05 | 0.01 | 3.04 | 0.68 | 0.22 | 0.85 |
| 36615 | 0 | 141935 | KKPGGPG                          | 2.05 | 0.01 | 3.04 | 2.02 | 2.39 | 0.85 |
| 36616 | 0 | 141935 | KKPGGPG                          | 2.05 | 0.01 | 3.04 | 2.02 | 2.39 | 0.85 |
| 36617 | 0 | 171791 | KKPKKEEQKWKWWE                   | 2.74 | 0.01 | 0.78 | 0.44 | 1.41 | 0.28 |
| 36618 | 0 | 31663  | KKPNRNGGG                        | 2.23 | 0.01 | 2.04 | 2.37 | 0.22 | 1.27 |
| 36619 | 0 | 31664  | KKPNRQGLGYSPSYND<br>p            | 2.86 | 0.01 | 3.01 | 0.44 | 0.85 | 0.28 |
| 36620 | 0 | 31664  | KKPNRQGLGYSPSYND<br>p            | 2.86 | 0.01 | 3.01 | 0.44 | 0.85 | 0.28 |
| 36621 | 0 | 31664  | KKPNRQGLGYSPSYND<br>p            | 2.86 | 0.01 | 3.01 | 0.44 | 0.85 | 0.28 |
| 36622 | 0 | 31664  | KKPNRQGLGYSPSYND<br>p            | 2.86 | 0.01 | 3.01 | 0.44 | 0.85 | 0.28 |

|       |   |        |                                     |      |      |      |      |      |      |
|-------|---|--------|-------------------------------------|------|------|------|------|------|------|
| 36623 | 0 | 181117 | KKPPKQPQRLRVKTPP<br>PVT             | 3.00 | 0.01 | 3.97 | 2.02 | 0.22 | 0.28 |
| 36624 | 0 | 181117 | KKPPKQPQRLRVKTPP<br>PVT             | 3.00 | 0.01 | 3.97 | 2.02 | 0.85 | 0.28 |
| 36625 | 0 | 181118 | KKPPTLPRVHVKTTPPIL<br>VPQVTPEAHTDFI | 3.38 | 0.01 | 3.75 | 2.02 | 0.22 | 0.28 |
| 36626 | 0 | 31667  | KKPTFK                              | 1.92 | 0.01 | 2.38 | 0.68 | 0.22 | 0.28 |
| 36627 | 0 | 31668  | KKPTFKTTKKDH                        | 2.51 | 0.01 | 2.38 | 0.68 | 0.22 | 0.28 |
| 36628 | 0 | 31668  | KKPTFKTTKKDH                        | 2.51 | 0.01 | 2.38 | 0.68 | 0.22 | 0.28 |
| 36629 | 0 | 95502  | KKPTPPTYETEKPLEPAP<br>VE            | 3.00 | 0.01 | 2.39 | 2.25 | 0.22 | 0.28 |
| 36630 | 0 | 107486 | KKPTPST                             | 2.04 | 0.01 | 0.78 | 2.36 | 0.22 | 0.28 |
| 36631 | 0 | 107486 | KKPTPST                             | 2.04 | 0.01 | 0.78 | 2.36 | 0.22 | 0.85 |
| 36632 | 0 | 107487 | KKPTPSTL                            | 2.15 | 0.01 | 0.78 | 2.36 | 0.22 | 0.28 |
| 36633 | 0 | 107487 | KKPTPSTL                            | 2.15 | 0.01 | 0.78 | 2.36 | 0.22 | 0.85 |
| 36634 | 0 | 31670  | KKQCPENS                            | 2.11 | 0.01 | 1.66 | 1.15 | 0.22 | 0.28 |
| 36635 | 0 | 181693 | KKQGEFNKQKKKY                       | 2.57 | 0.01 | 2.86 | 2.37 | 0.22 | 1.28 |
| 36636 | 0 | 181693 | KKQGEFNKQKKKY                       | 2.57 | 0.01 | 2.86 | 2.36 | 0.22 | 1.28 |
| 36637 | 0 | 480644 | KKQLENHVAAFNTNITD<br>M              | 2.80 | 0.01 | 3.12 | 0.68 | 0.22 | 0.28 |
| 36638 | 0 | 31679  | KKQPTVTLLPAADMDDF                   | 2.78 | 0.01 | 2.91 | 0.68 | 0.22 | 0.28 |
| 36639 | 0 | 31679  | KKQPTVTLLPAADMDDF                   | 2.78 | 0.01 | 2.91 | 0.44 | 0.85 | 0.28 |
| 36640 | 0 | 31679  | KKQPTVTLLPAADMDDF                   | 2.78 | 0.01 | 2.91 | 0.68 | 0.22 | 0.28 |
| 36641 | 0 | 31679  | KKQPTVTLLPAADMDDF                   | 2.78 | 0.01 | 2.91 | 0.68 | 0.22 | 0.28 |
| 36642 | 0 | 118458 | KKQSKPVTTPEEI                       | 2.55 | 0.01 | 0.78 | 0.44 | 1.74 | 0.85 |
| 36643 | 0 | 425803 | KKQSYNDAVRMSFTEF                    | 2.68 | 0.01 | 2.89 | 2.00 | 0.85 | 0.85 |
| 36644 | 0 | 31683  | KKRFGPRLRDKDLIK                     | 2.71 | 0.01 | 3.42 | 1.12 | 0.22 | 0.85 |
| 36645 | 0 | 31683  | KKRFGPRLRDKDLIK                     | 2.71 | 0.01 | 3.42 | 1.12 | 0.22 | 0.85 |
| 36646 | 0 | 31683  | KKRFGPRLRDKDLIK                     | 2.71 | 0.01 | 3.42 | 1.12 | 0.22 | 0.85 |
| 36647 | 0 | 31683  | KKRFGPRLRDKDLIK                     | 2.71 | 0.01 | 3.42 | 1.12 | 0.22 | 0.85 |
| 36648 | 0 | 31683  | KKRFGPRLRDKDLIK                     | 2.71 | 0.01 | 3.42 | 1.12 | 0.22 | 0.85 |
| 36649 | 0 | 31688  | KKRNVEEELHSLRKNYNI<br>INEEIEEIT     | 3.25 | 0.01 | 2.22 | 0.44 | 1.74 | 0.28 |
| 36650 | 0 | 31688  | KKRNVEEELHSLRKNYNI<br>INEEIEEIT     | 3.25 | 0.01 | 2.22 | 0.44 | 1.74 | 0.28 |
| 36651 | 0 | 31688  | KKRNVEEELHSLRKNYNI<br>INEEIEEIT     | 3.25 | 0.01 | 2.22 | 0.44 | 1.74 | 0.28 |
| 36652 | 0 | 31688  | KKRNVEEELHSLRKNYNI<br>INEEIEEIT     | 3.25 | 0.01 | 2.22 | 1.15 | 0.22 | 1.48 |
| 36653 | 0 | 102563 | KKRPKPG                             | 2.05 | 0.01 | 0.78 | 0.44 | 1.41 | 1.27 |
| 36654 | 0 | 102563 | KKRPKPG                             | 2.05 | 0.01 | 0.78 | 0.44 | 1.41 | 0.28 |
| 36655 | 0 | 102564 | KKRPKPGGGWNT                        | 2.49 | 0.01 | 1.60 | 0.68 | 0.22 | 1.27 |

|       |   |        |                                    |      |      |      |      |      |      |
|-------|---|--------|------------------------------------|------|------|------|------|------|------|
| 36656 | 0 | 102564 | KKRPKPGGGWNT                       | 2.49 | 0.01 | 1.60 | 0.68 | 0.22 | 1.48 |
| 36657 | 0 | 102564 | KKRPKPGGGWNT                       | 2.49 | 0.01 | 1.60 | 0.68 | 0.22 | 1.48 |
| 36658 | 0 | 102564 | KKRPKPGGGWNT                       | 2.49 | 0.01 | 1.60 | 0.44 | 1.41 | 1.27 |
| 36659 | 0 | 104532 | KKRPKPGGWNTGGSRY<br>PGQGSPGGNRYPP  | 3.33 | 0.01 | 1.75 | 3.78 | 0.22 | 0.28 |
| 36660 | 0 | 104532 | KKRPKPGGWNTGGSRY<br>PGQGSPGGNRYPP  | 3.33 | 0.01 | 1.75 | 1.81 | 0.22 | 0.28 |
| 36661 | 0 | 31690  | KKRPKPGGWNTGGSRY<br>PGQGSPGGNRYPPQ | 3.37 | 0.01 | 1.75 | 2.19 | 0.22 | 0.28 |
| 36662 | 0 | 31690  | KKRPKPGGWNTGGSRY<br>PGQGSPGGNRYPPQ | 3.37 | 0.01 | 1.75 | 2.19 | 0.22 | 0.28 |
| 36663 | 0 | 31690  | KKRPKPGGWNTGGSRY<br>PGQGSPGGNRYPPQ | 3.37 | 0.01 | 1.75 | 2.19 | 0.22 | 2.12 |
| 36664 | 0 | 31690  | KKRPKPGGWNTGGSRY<br>PGQGSPGGNRYPPQ | 3.37 | 0.01 | 1.75 | 2.19 | 0.22 | 0.28 |
| 36665 | 0 | 31690  | KKRPKPGGWNTGGSRY<br>PGQGSPGGNRYPPQ | 3.37 | 0.01 | 1.75 | 2.19 | 0.22 | 0.28 |
| 36666 | 0 | 31690  | KKRPKPGGWNTGGSRY<br>PGQGSPGGNRYPPQ | 3.37 | 0.01 | 1.75 | 1.81 | 0.22 | 0.28 |
| 36667 | 0 | 78431  | KKRW                               | 1.59 | 0.01 | 3.89 | 1.12 | 0.22 | 1.27 |
| 36668 | 0 | 31692  | KKSAAEASKPRQKRTA                   | 2.83 | 0.01 | 2.91 | 0.44 | 0.85 | 0.28 |
| 36669 | 0 | 31693  | KKSAAEASKPRQKRTA<br>TKQYNVTQ       | 3.19 | 0.01 | 2.45 | 0.44 | 0.85 | 1.28 |
| 36670 | 0 | 320269 | KKSAKAAAPAKAAAA                    | 2.72 | 0.01 | 1.61 | 0.44 | 0.85 | 1.28 |
| 36671 | 0 | 320270 | KKSAKAATAPAKAAA                    | 2.72 | 0.01 | 1.61 | 0.44 | 0.85 | 1.28 |
| 36672 | 0 | 31695  | KKSDFSSFEDSD                       | 2.53 | 0.01 | 2.69 | 0.68 | 0.22 | 0.28 |
| 36673 | 0 | 31695  | KKSDFSSFEDSD                       | 2.53 | 0.01 | 2.69 | 1.20 | 0.22 | 0.28 |
| 36674 | 0 | 171799 | KKSIKTPKKVKKPA                     | 2.72 | 0.01 | 0.78 | 0.44 | 1.41 | 0.28 |
| 36675 | 0 | 31701  | KKSSFYQSYL                         | 2.34 | 0.01 | 2.56 | 0.68 | 0.22 | 0.28 |
| 36676 | 0 | 320313 | KKTAAPKKAAPQKA                     | 2.75 | 0.01 | 1.61 | 0.44 | 0.85 | 1.28 |
| 36677 | 0 | 31707  | KKTDEAQPLPQRQKK                    | 2.68 | 0.01 | 2.91 | 0.44 | 0.85 | 0.28 |
| 36678 | 0 | 31707  | KKTDEAQPLPQRQKK                    | 2.68 | 0.01 | 2.91 | 0.68 | 0.22 | 0.28 |
| 36679 | 0 | 141685 | KKTEETTLLEDR                       | 2.51 | 0.01 | 3.02 | 0.68 | 0.22 | 1.48 |
| 36680 | 0 | 141685 | KKTEETTLLEDR                       | 2.51 | 0.01 | 3.02 | 0.68 | 0.22 | 1.48 |
| 36681 | 0 | 141685 | KKTEETTLLEDR                       | 2.51 | 0.01 | 3.02 | 0.68 | 0.22 | 0.85 |
| 36682 | 0 | 141685 | KKTEETTLLEDR                       | 2.51 | 0.01 | 3.02 | 0.68 | 0.22 | 0.85 |
| 36683 | 0 | 31718  | KKTKDTPVVKKEERQN<br>VN             | 2.92 | 0.01 | 3.37 | 3.23 | 0.22 | 0.28 |

|       |   |        |                     |      |      |      |      |      |      |
|-------|---|--------|---------------------|------|------|------|------|------|------|
| 36684 | 0 | 31718  | KKTKDTPVVKKEERQNVN  | 2.92 | 0.01 | 3.37 | 3.23 | 0.22 | 1.34 |
| 36685 | 0 | 31718  | KKTKDTPVVKKEERQNVN  | 2.92 | 0.01 | 3.37 | 3.23 | 0.22 | 0.28 |
| 36686 | 0 | 119477 | KKTKGLVTT           | 2.24 | 0.01 | 0.90 | 0.44 | 1.13 | 0.28 |
| 36687 | 0 | 95503  | KKTKLTEEEK          | 2.36 | 0.01 | 1.60 | 0.44 | 1.23 | 0.85 |
| 36688 | 0 | 161368 | KKTQNLSPDTADHATNIVG | 2.92 | 0.01 | 0.90 | 2.74 | 0.22 | 1.48 |
| 36689 | 0 | 94566  | KKTTTKPTK           | 2.28 | 0.01 | 2.38 | 0.68 | 0.22 | 1.75 |
| 36690 | 0 | 31722  | KKTTTKPTKKPT        | 2.53 | 0.01 | 2.38 | 0.68 | 0.22 | 0.28 |
| 36691 | 0 | 31723  | KKTTTKPTKKPTFKTTKK  | 2.90 | 0.01 | 2.38 | 1.20 | 0.22 | 0.28 |
| 36692 | 0 | 31723  | KKTTTKPTKKPTFKTTKK  | 2.90 | 0.01 | 2.38 | 1.20 | 0.22 | 0.85 |
| 36693 | 0 | 106565 | KKVAVVRTPPKSPSSAK   | 2.84 | 3.75 | 0.78 | 1.15 | 0.22 | 0.28 |
| 36694 | 0 | 106565 | KKVAVVRTPPKSPSSAK   | 2.84 | 3.75 | 0.78 | 1.15 | 0.22 | 0.28 |
| 36695 | 0 | 106564 | KKVAVVRTPPKSPSSAK   | 2.84 | 4.33 | 0.78 | 1.15 | 0.22 | 0.28 |
| 36696 | 0 | 106564 | KKVAVVRTPPKSPSSAK   | 2.84 | 4.33 | 0.78 | 1.15 | 0.22 | 0.28 |
| 36697 | 0 | 106565 | KKVAVVRTPPKSPSSAK   | 2.84 | 3.75 | 0.78 | 2.49 | 0.22 | 2.49 |
| 36698 | 0 | 106565 | KKVAVVRTPPKSPSSAK   | 2.84 | 3.75 | 0.78 | 2.49 | 0.22 | 0.28 |
| 36699 | 0 | 106565 | KKVAVVRTPPKSPSSAK   | 2.84 | 3.75 | 0.78 | 2.49 | 0.22 | 1.66 |
| 36700 | 0 | 106565 | KKVAVVRTPPKSPSSAK   | 2.84 | 3.75 | 0.78 | 2.49 | 0.22 | 1.66 |
| 36701 | 0 | 106565 | KKVAVVRTPPKSPSSAK   | 2.84 | 3.75 | 0.78 | 2.49 | 0.22 | 1.66 |
| 36702 | 0 | 106565 | KKVAVVRTPPKSPSSAK   | 2.84 | 3.75 | 0.78 | 2.49 | 0.22 | 1.66 |
| 36703 | 0 | 106565 | KKVAVVRTPPKSPSSAK   | 2.84 | 3.75 | 0.78 | 2.49 | 0.22 | 1.66 |
| 36704 | 0 | 106565 | KKVAVVRTPPKSPSSAK   | 2.84 | 3.75 | 0.78 | 2.49 | 0.22 | 1.66 |
| 36705 | 0 | 106565 | KKVAVVRTPPKSPSSAK   | 2.84 | 3.75 | 0.78 | 2.49 | 0.22 | 1.66 |
| 36706 | 0 | 106565 | KKVAVVRTPPKSPSSAK   | 2.84 | 3.75 | 0.78 | 2.49 | 0.22 | 1.66 |
| 36707 | 0 | 106565 | KKVAVVRTPPKSPSSAK   | 2.84 | 3.75 | 0.78 | 2.49 | 0.22 | 1.66 |
| 36708 | 0 | 106565 | KKVAVVRTPPKSPSSAK   | 2.84 | 3.75 | 0.78 | 2.49 | 0.22 | 1.48 |

|       |   |        |                              |      |      |      |      |      |      |
|-------|---|--------|------------------------------|------|------|------|------|------|------|
| 36709 | 0 | 106565 | KKVAVVRTPPKSPSSAK            | 2.84 | 3.75 | 0.78 | 2.49 | 0.22 | 0.85 |
| 36710 | 0 | 192980 | KKVCVTQKHGSTPSTFG<br>TYS     | 2.96 | 0.01 | 3.47 | 2.00 | 0.22 | 0.28 |
| 36711 | 0 | 118459 | KKVGRKGVITVKD                | 2.59 | 0.01 | 0.78 | 0.44 | 1.74 | 0.85 |
| 36712 | 0 | 118459 | KKVGRKGVITVKD                | 2.59 | 0.01 | 0.78 | 0.44 | 1.59 | 0.85 |
| 36713 | 0 | 118459 | KKVGRKGVITVKD                | 2.59 | 0.01 | 0.78 | 0.44 | 1.74 | 0.85 |
| 36714 | 0 | 532467 | KKVIAVSKDVKPIYLNGE<br>EGNKDK | 3.13 | 0.01 | 2.56 | 0.68 | 0.22 | 0.28 |
| 36715 | 0 | 532467 | KKVIAVSKDVKPIYLNGE<br>EGNKDK | 3.13 | 0.01 | 2.56 | 0.68 | 0.22 | 0.28 |
| 36716 | 0 | 532467 | KKVIAVSKDVKPIYLNGE<br>EGNKDK | 3.13 | 0.01 | 2.56 | 0.68 | 0.22 | 0.28 |
| 36717 | 0 | 532467 | KKVIAVSKDVKPIYLNGE<br>EGNKDK | 3.13 | 0.01 | 2.56 | 0.68 | 0.22 | 0.28 |
| 36718 | 0 | 532467 | KKVIAVSKDVKPIYLNGE<br>EGNKDK | 3.13 | 0.01 | 2.56 | 0.68 | 0.22 | 1.75 |
| 36719 | 0 | 532467 | KKVIAVSKDVKPIYLNGE<br>EGNKDK | 3.13 | 0.01 | 2.56 | 0.68 | 0.22 | 1.34 |
| 36720 | 0 | 132849 | KKVLGEKTENPKKFK              | 2.69 | 0.01 | 0.78 | 1.12 | 0.22 | 0.28 |
| 36721 | 0 | 132849 | KKVLGEKTENPKKFK              | 2.69 | 0.01 | 0.78 | 1.12 | 0.22 | 0.85 |
| 36722 | 0 | 132849 | KKVLGEKTENPKKFK              | 2.69 | 0.01 | 0.78 | 1.12 | 0.22 | 1.48 |
| 36723 | 0 | 161373 | KKVQNLTGDDNADLAT<br>NIVG     | 2.97 | 0.01 | 0.90 | 2.74 | 0.22 | 1.48 |
| 36724 | 0 | 161374 | KKVQNLTGDDNAPLAT<br>NIVG     | 2.95 | 0.01 | 0.90 | 2.74 | 0.22 | 1.48 |
| 36725 | 0 | 161375 | KKVQNLTGDDTADLAT<br>NIVG     | 2.97 | 0.01 | 0.90 | 2.74 | 0.22 | 1.48 |
| 36726 | 0 | 161375 | KKVQNLTGDDTADLAT<br>NIVG     | 2.97 | 0.01 | 0.90 | 2.74 | 0.22 | 1.75 |
| 36727 | 0 | 161376 | KKVQNLTGDDTAILATNI<br>VG     | 2.96 | 0.01 | 0.90 | 2.74 | 0.22 | 1.48 |
| 36728 | 0 | 78704  | KKVTFDRLQVLDDHYRD<br>VLKEMK  | 3.09 | 0.01 | 1.72 | 0.44 | 1.59 | 0.28 |
| 36729 | 0 | 100210 | KKVTNYLVDG                   | 2.30 | 0.01 | 2.18 | 2.16 | 0.22 | 0.28 |
| 36730 | 0 | 238659 | KKWEGGGRRVTQYCS              | 2.62 | 0.01 | 2.56 | 2.02 | 0.22 | 0.85 |
| 36731 | 0 | 238659 | KKWEGGGRRVTQYCS              | 2.62 | 0.01 | 2.56 | 1.20 | 0.22 | 0.85 |
| 36732 | 0 | 78185  | KKWLAA                       | 1.88 | 0.01 | 0.90 | 2.02 | 1.59 | 1.39 |
| 36733 | 0 | 189102 | KKWVYNSGRLPRGED              | 2.70 | 0.01 | 2.92 | 0.68 | 0.22 | 0.28 |
| 36734 | 0 | 189102 | KKWVYNSGRLPRGED              | 2.70 | 0.01 | 2.92 | 0.68 | 0.22 | 0.28 |
| 36735 | 0 | 189102 | KKWVYNSGRLPRGED              | 2.70 | 0.01 | 2.92 | 0.68 | 0.22 | 1.48 |

|       |   |        |                                        |      |      |      |      |      |      |
|-------|---|--------|----------------------------------------|------|------|------|------|------|------|
| 36736 | 0 | 189102 | KKWVYNSGRLPRGED                        | 2.70 | 0.01 | 2.92 | 2.49 | 0.22 | 0.28 |
| 36737 | 0 | 31736  | KKYASGNKDNIVRNND<br>RVY                | 2.91 | 0.01 | 2.08 | 0.44 | 0.22 | 1.57 |
| 36738 | 0 | 31736  | KKYASGNKDNIVRNND<br>RVY                | 2.91 | 0.01 | 2.08 | 0.44 | 0.22 | 1.57 |
| 36739 | 0 | 187068 | KKYENFNDFLKGLR                         | 2.63 | 0.01 | 3.36 | 1.20 | 0.22 | 0.28 |
| 36740 | 0 | 135474 | KKYFIDFVARETTCSKES<br>NEELTESCETKKLGQS | 3.44 | 0.01 | 0.78 | 0.44 | 1.13 | 0.28 |
| 36741 | 0 | 141686 | KKYIKKLENGRSLEGV                       | 2.74 | 0.01 | 1.66 | 1.20 | 0.22 | 0.28 |
| 36742 | 0 | 102565 | KKYKIWMHVDAA                           | 2.45 | 0.01 | 0.78 | 0.44 | 1.13 | 0.28 |
| 36743 | 0 | 115319 | KKYLLFCMENSAPQSL<br>AC                 | 2.94 | 0.01 | 1.60 | 0.44 | 1.23 | 2.51 |
| 36744 | 0 | 179079 | KKYLTKEVFDKLDK                         | 2.71 | 0.01 | 2.36 | 0.44 | 1.23 | 1.28 |
| 36745 | 0 | 171806 | KKYRLAADLASSTEQRCL<br>YSALAAKLEEK      | 3.33 | 0.01 | 4.63 | 0.44 | 0.85 | 0.28 |
| 36746 | 0 | 121479 | KKYRNMAGP                              | 2.20 | 0.01 | 0.90 | 2.46 | 0.22 | 0.28 |
| 36747 | 0 | 31740  | KKYRYLKLCKK                            | 2.57 | 0.01 | 4.45 | 2.89 | 0.22 | 0.28 |
| 36748 | 0 | 31740  | KKYRYLKLCKK                            | 2.57 | 0.01 | 4.45 | 2.89 | 0.22 | 0.28 |
| 36749 | 0 | 31740  | KKYRYLKLCKK                            | 2.57 | 0.01 | 4.45 | 2.89 | 0.22 | 1.75 |
| 36750 | 0 | 31743  | KLAAAVLN                               | 2.14 | 0.01 | 3.06 | 1.12 | 0.22 | 0.28 |
| 36751 | 0 | 31744  | KLAAKTAAEKLMEVNG                       | 2.83 | 0.01 | 3.59 | 2.02 | 0.22 | 0.28 |
| 36752 | 0 | 179080 | KLAANREKLEEVAGK                        | 2.71 | 0.01 | 2.36 | 0.44 | 1.23 | 1.28 |
| 36753 | 0 | 179080 | KLAANREKLEEVAGK                        | 2.71 | 0.01 | 2.36 | 0.44 | 1.23 | 1.27 |
| 36754 | 0 | 31757  | KLAKYQADLAKYQKDLA<br>DY                | 2.97 | 0.01 | 2.39 | 2.98 | 0.22 | 0.28 |
| 36755 | 0 | 31757  | KLAKYQADLAKYQKDLA<br>DY                | 2.97 | 0.01 | 2.39 | 2.98 | 0.22 | 0.28 |
| 36756 | 0 | 31757  | KLAKYQADLAKYQKDLA<br>DY                | 2.97 | 0.01 | 2.39 | 2.98 | 0.22 | 0.28 |
| 36757 | 0 | 111458 | KLALSNGAIAQP                           | 2.48 | 0.01 | 0.90 | 0.44 | 0.85 | 1.39 |
| 36758 | 0 | 31763  | KLAPDNIS                               | 2.10 | 0.01 | 3.53 | 2.61 | 0.22 | 0.28 |
| 36759 | 0 | 520004 | KLAPKEMPLESKE                          | 2.73 | 0.01 | 2.24 | 0.44 | 1.41 | 1.28 |
| 36760 | 0 | 126422 | KLASIPHTSPL                            | 2.49 | 0.01 | 0.90 | 2.16 | 0.22 | 2.49 |
| 36761 | 0 | 120691 | KLATNLIKSG                             | 2.32 | 0.01 | 2.18 | 2.16 | 0.22 | 0.28 |
| 36762 | 0 | 102566 | KLCALLYGDAEK                           | 2.49 | 0.01 | 0.78 | 0.44 | 1.13 | 0.28 |
| 36763 | 0 | 31772  | KLCGVL                                 | 1.90 | 0.01 | 3.36 | 0.44 | 0.22 | 1.34 |
| 36764 | 0 | 31772  | KLCGVL                                 | 1.90 | 0.01 | 3.36 | 0.44 | 0.22 | 1.66 |
| 36765 | 0 | 31772  | KLCGVL                                 | 1.90 | 0.01 | 3.36 | 0.44 | 0.22 | 1.34 |
| 36766 | 0 | 31772  | KLCGVL                                 | 1.90 | 0.01 | 3.36 | 0.44 | 0.22 | 1.75 |
| 36767 | 0 | 31772  | KLCGVL                                 | 1.90 | 0.01 | 3.36 | 0.44 | 0.22 | 0.28 |
| 36768 | 0 | 31772  | KLCGVL                                 | 1.90 | 0.01 | 3.36 | 0.44 | 0.22 | 1.34 |
| 36769 | 0 | 31773  | KLCKGTAPFGVAFGNS                       | 2.74 | 0.01 | 3.63 | 1.20 | 0.22 | 0.28 |

|       |   |        |                                                    |      |      |      |      |      |      |
|-------|---|--------|----------------------------------------------------|------|------|------|------|------|------|
| 36770 | 0 | 31773  | KLCKGTAPFGVAFGNS                                   | 2.74 | 0.01 | 3.63 | 1.20 | 0.22 | 0.85 |
| 36771 | 0 | 31773  | KLCKGTAPFGVAFGNS                                   | 2.74 | 0.01 | 3.63 | 1.20 | 0.22 | 1.34 |
| 36772 | 0 | 31779  | KLCVWNNKTP                                         | 2.31 | 0.01 | 2.66 | 0.68 | 0.22 | 0.28 |
| 36773 | 0 | 31779  | KLCVWNNKTP                                         | 2.31 | 0.01 | 2.66 | 0.68 | 0.22 | 0.28 |
| 36774 | 0 | 113049 | KLDAAYKLAY                                         | 2.37 | 0.01 | 3.00 | 2.79 | 0.22 | 0.28 |
| 36775 | 0 | 31780  | KLDDKDPQFKDNVILL                                   | 2.75 | 0.01 | 2.91 | 0.44 | 0.85 | 0.28 |
| 36776 | 0 | 110916 | KLDDTENASAYAANA                                    | 2.69 | 0.01 | 1.86 | 0.68 | 0.22 | 0.85 |
| 36777 | 0 | 110916 | KLDDTENASAYAANA                                    | 2.69 | 0.01 | 1.86 | 0.68 | 0.22 | 0.28 |
| 36778 | 0 | 110916 | KLDDTENASAYAANA                                    | 2.69 | 0.01 | 1.86 | 0.68 | 0.22 | 0.85 |
| 36779 | 0 | 110916 | KLDDTENASAYAANA                                    | 2.69 | 0.01 | 1.86 | 0.68 | 0.22 | 0.85 |
| 36780 | 0 | 110916 | KLDDTENASAYAANA                                    | 2.69 | 0.01 | 1.86 | 0.68 | 0.22 | 0.85 |
| 36781 | 0 | 110916 | KLDDTENASAYAANA                                    | 2.69 | 0.01 | 1.86 | 0.68 | 0.22 | 0.85 |
| 36782 | 0 | 110916 | KLDDTENASAYAANA                                    | 2.69 | 0.01 | 1.86 | 0.68 | 0.22 | 0.28 |
| 36783 | 0 | 157466 | KLDITGKPMV                                         | 2.30 | 0.01 | 3.47 | 2.49 | 0.85 | 0.28 |
| 36784 | 0 | 31787  | KLDLYGKVH                                          | 2.24 | 0.01 | 3.53 | 4.33 | 0.22 | 0.28 |
| 36785 | 0 | 132850 | KLDLYLSYPQPY                                       | 2.51 | 0.01 | 0.90 | 1.15 | 0.22 | 1.39 |
| 36786 | 0 | 132850 | KLDLYLSYPQPY                                       | 2.51 | 0.01 | 0.90 | 1.15 | 0.22 | 1.34 |
| 36787 | 0 | 31794  | KLDVVKLLYNEQFAVQG<br>LLR                           | 2.94 | 0.01 | 3.17 | 1.15 | 2.26 | 0.28 |
| 36788 | 0 | 31794  | KLDVVKLLYNEQFAVQG<br>LLR                           | 2.94 | 0.01 | 3.17 | 0.44 | 0.85 | 0.28 |
| 36789 | 0 | 31794  | KLDVVKLLYNEQFAVQG<br>LLR                           | 2.94 | 0.01 | 3.17 | 0.68 | 0.22 | 0.28 |
| 36790 | 0 | 31799  | KLEAFWHKH                                          | 2.24 | 0.01 | 2.59 | 0.44 | 0.85 | 0.28 |
| 36791 | 0 | 520013 | KLEEEKQISDASRQS                                    | 2.69 | 0.01 | 2.24 | 0.44 | 1.41 | 1.28 |
| 36792 | 0 | 31812  | KLEEMKQKNKELINNLN<br>DISDELKNCIEQVNSVSR<br>NMANVEK | 3.71 | 0.01 | 2.22 | 0.44 | 1.74 | 0.28 |
| 36793 | 0 | 31812  | KLEEMKQKNKELINNLN<br>DISDELKNCIEQVNSVSR<br>NMANVEK | 3.71 | 0.01 | 2.22 | 0.44 | 1.74 | 0.28 |
| 36794 | 0 | 31813  | KLEEQNKISEASRKGLRR                                 | 2.86 | 0.01 | 2.85 | 1.15 | 0.22 | 0.28 |
| 36795 | 0 | 31813  | KLEEQNKISEASRKGLRR                                 | 2.86 | 0.01 | 2.85 | 0.68 | 0.22 | 0.28 |
| 36796 | 0 | 142204 | KLEEQNKISEASRKGLRR<br>DL                           | 2.96 | 0.01 | 2.24 | 0.44 | 0.85 | 0.28 |
| 36797 | 0 | 142204 | KLEEQNKISEASRKGLRR<br>DL                           | 2.96 | 0.01 | 2.24 | 0.44 | 1.74 | 0.28 |
| 36798 | 0 | 142204 | KLEEQNKISEASRKGLRR<br>DL                           | 2.96 | 0.01 | 2.24 | 1.15 | 0.22 | 0.28 |
| 36799 | 0 | 84461  | KLEFFTYLRFDLELT                                    | 2.71 | 0.01 | 3.75 | 0.44 | 0.85 | 0.28 |
| 36800 | 0 | 31814  | KLEFFTYSRFDMELTFVV<br>TAN                          | 2.97 | 0.01 | 2.57 | 1.20 | 0.22 | 1.27 |



|       |   |        |                           |      |      |      |      |      |      |
|-------|---|--------|---------------------------|------|------|------|------|------|------|
| 36801 | 0 | 31814  | KLEFFTYSRFDMELTFVV<br>TAN | 2.97 | 0.01 | 2.57 | 1.20 | 0.22 | 0.85 |
| 36802 | 0 | 31814  | KLEFFTYSRFDMELTFVV<br>TAN | 2.97 | 0.01 | 2.57 | 2.04 | 0.22 | 1.27 |
| 36803 | 0 | 31814  | KLEFFTYSRFDMELTFVV<br>TAN | 2.97 | 0.01 | 2.57 | 2.04 | 0.22 | 0.85 |
| 36804 | 0 | 31816  | KLEGGGKDIREGGDGI<br>DRT   | 3.00 | 0.01 | 0.90 | 2.02 | 0.22 | 0.28 |
| 36805 | 0 | 31816  | KLEGGGKDIREGGDGI<br>DRT   | 3.00 | 0.01 | 0.90 | 0.68 | 0.22 | 1.75 |
| 36806 | 0 | 120692 | KLELNKSID                 | 2.33 | 0.01 | 2.18 | 2.16 | 0.22 | 0.28 |
| 36807 | 0 | 31827  | KLESHKFD                  | 2.13 | 0.01 | 3.27 | 2.02 | 0.22 | 0.28 |
| 36808 | 0 | 31827  | KLESHKFD                  | 2.13 | 0.01 | 3.27 | 2.82 | 0.22 | 0.28 |
| 36809 | 0 | 117547 | KLEVQATDREENKQIAL<br>GTS  | 2.93 | 0.01 | 0.78 | 0.44 | 1.13 | 0.28 |
| 36810 | 0 | 99385  | KLEYDPRCVYDPRGH           | 2.66 | 0.01 | 2.16 | 0.44 | 1.23 | 1.48 |
| 36811 | 0 | 99385  | KLEYDPRCVYDPRGH           | 2.66 | 0.01 | 2.16 | 0.44 | 1.23 | 1.48 |
| 36812 | 0 | 126424 | KLF                       | 1.37 | 0.01 | 1.60 | 1.15 | 0.22 | 1.57 |
| 36813 | 0 | 126424 | KLF                       | 1.37 | 0.01 | 1.60 | 1.15 | 0.22 | 1.34 |
| 36814 | 0 | 126424 | KLF                       | 1.37 | 0.01 | 1.60 | 1.15 | 0.22 | 1.34 |
| 36815 | 0 | 126424 | KLF                       | 1.37 | 0.01 | 1.60 | 1.15 | 0.22 | 1.57 |
| 36816 | 0 | 31834  | KLFAVWKITYKDT             | 2.54 | 0.01 | 2.57 | 1.15 | 0.22 | 0.85 |
| 36817 | 0 | 418847 | KLFDPLVQSHF               | 2.45 | 0.01 | 0.90 | 1.12 | 0.22 | 1.39 |
| 36818 | 0 | 31847  | KLFIRQEEVQQELYSP          | 2.72 | 0.01 | 2.45 | 0.44 | 0.85 | 1.48 |
| 36819 | 0 | 130924 | KLFPEEDEMRTETQR           | 2.68 | 0.01 | 0.90 | 0.44 | 1.13 | 0.28 |
| 36820 | 0 | 130924 | KLFPEEDEMRTETQR           | 2.68 | 0.01 | 0.90 | 0.44 | 1.13 | 1.66 |
| 36821 | 0 | 130924 | KLFPEEDEMRTETQR           | 2.68 | 0.01 | 0.90 | 0.44 | 1.13 | 1.66 |
| 36822 | 0 | 130924 | KLFPEEDEMRTETQR           | 2.68 | 0.01 | 0.90 | 0.44 | 1.13 | 1.66 |
| 36823 | 0 | 130924 | KLFPEEDEMRTETQR           | 2.68 | 0.01 | 0.90 | 0.44 | 1.13 | 1.27 |
| 36824 | 0 | 96476  | KLFPNSLDQT                | 2.29 | 0.01 | 0.78 | 0.44 | 1.93 | 0.85 |
| 36825 | 0 | 156899 | KLGDPLA                   | 2.02 | 0.01 | 0.90 | 1.20 | 0.22 | 0.28 |
| 36826 | 0 | 156900 | KLGDPRIATTLF              | 2.44 | 0.01 | 0.90 | 1.81 | 0.22 | 0.28 |
| 36827 | 0 | 156900 | KLGDPRIATTLF              | 2.44 | 0.01 | 0.90 | 1.81 | 2.25 | 1.75 |
| 36828 | 0 | 151948 | KLGAEDVGNLV               | 2.50 | 0.01 | 2.80 | 2.78 | 0.22 | 0.28 |
| 36829 | 0 | 31885  | KLKFGAARV                 | 2.33 | 0.01 | 0.90 | 0.44 | 1.23 | 0.28 |
| 36830 | 0 | 31885  | KLKFGAARV                 | 2.33 | 0.01 | 0.90 | 0.44 | 1.23 | 1.27 |
| 36831 | 0 | 31885  | KLKFGAARV                 | 2.33 | 0.01 | 0.90 | 0.68 | 0.22 | 0.85 |
| 36832 | 0 | 31885  | KLKFGAARV                 | 2.33 | 0.01 | 0.90 | 0.68 | 0.22 | 0.85 |
| 36833 | 0 | 31885  | KLKFGAARV                 | 2.33 | 0.01 | 0.90 | 0.68 | 0.22 | 0.85 |
| 36834 | 0 | 320581 | KLKSVGLTAALSPR            | 2.70 | 0.01 | 1.61 | 0.44 | 0.85 | 1.28 |
| 36835 | 0 | 31886  | KLGLKLLRYYTEILS           | 2.69 | 0.01 | 2.43 | 0.44 | 1.59 | 0.28 |
| 36836 | 0 | 31887  | KLGLNK                    | 1.92 | 0.01 | 3.53 | 1.15 | 0.22 | 0.28 |
| 36837 | 0 | 93108  | KLGLRQVTGVTRVTI           | 2.72 | 0.01 | 1.75 | 0.68 | 0.22 | 0.28 |
| 36838 | 0 | 119992 | KLGTWYDGSVVAINP           | 2.68 | 0.01 | 0.78 | 1.12 | 0.22 | 0.28 |
| 36839 | 0 | 119992 | KLGTWYDGSVVAINP           | 2.68 | 0.01 | 0.78 | 1.81 | 0.22 | 0.28 |

|       |   |        |                               |      |      |      |      |      |      |
|-------|---|--------|-------------------------------|------|------|------|------|------|------|
| 36840 | 0 | 31894  | KLGVWKSPTDMQSWV               | 2.67 | 0.01 | 2.43 | 0.68 | 0.22 | 0.28 |
| 36841 | 0 | 31894  | KLGVWKSPTDMQSWV               | 2.67 | 0.01 | 2.43 | 0.44 | 0.85 | 0.28 |
| 36842 | 0 | 123377 | KLGYWKIRG                     | 2.24 | 0.01 | 2.28 | 2.00 | 0.22 | 0.28 |
| 36843 | 0 | 123377 | KLGYWKIRG                     | 2.24 | 0.01 | 2.28 | 2.00 | 0.22 | 0.28 |
| 36844 | 0 | 123377 | KLGYWKIRG                     | 2.24 | 0.01 | 2.28 | 2.00 | 0.22 | 0.28 |
| 36845 | 0 | 123378 | KLGYWKLRG                     | 2.26 | 0.01 | 2.28 | 2.00 | 0.22 | 0.28 |
| 36846 | 0 | 78705  | KLHASFEDGKKAFDKEL<br>QYSNNSRV | 3.15 | 0.01 | 2.98 | 1.81 | 0.22 | 0.28 |
| 36847 | 0 | 78705  | KLHASFEDGKKAFDKEL<br>QYSNNSRV | 3.15 | 0.01 | 2.98 | 2.37 | 0.22 | 0.28 |
| 36848 | 0 | 78705  | KLHASFEDGKKAFDKEL<br>QYSNNSRV | 3.15 | 0.01 | 2.98 | 1.12 | 0.22 | 0.28 |
| 36849 | 0 | 78705  | KLHASFEDGKKAFDKEL<br>QYSNNSRV | 3.15 | 0.01 | 2.98 | 0.44 | 0.85 | 0.28 |
| 36850 | 0 | 78705  | KLHASFEDGKKAFDKEL<br>QYSNNSRV | 3.15 | 0.01 | 2.98 | 1.12 | 0.22 | 0.28 |
| 36851 | 0 | 78705  | KLHASFEDGKKAFDKEL<br>QYSNNSRV | 3.15 | 0.01 | 2.98 | 1.12 | 0.22 | 0.85 |
| 36852 | 0 | 78705  | KLHASFEDGKKAFDKEL<br>QYSNNSRV | 3.15 | 0.01 | 2.98 | 1.12 | 0.22 | 0.85 |
| 36853 | 0 | 156901 | KLHHNGS                       | 2.01 | 0.01 | 0.90 | 2.74 | 0.22 | 0.85 |
| 36854 | 0 | 186687 | KLHISKDHIYPT                  | 2.48 | 0.01 | 0.90 | 0.68 | 0.22 | 1.39 |
| 36855 | 0 | 165616 | KLIAFDL                       | 2.02 | 0.01 | 0.90 | 0.44 | 1.23 | 1.39 |
| 36856 | 0 | 31903  | KLIAQGGKAKICGL                | 2.67 | 0.01 | 2.59 | 0.44 | 0.85 | 0.28 |
| 36857 | 0 | 31903  | KLIAQGGKAKICGL                | 2.67 | 0.01 | 2.59 | 0.44 | 0.85 | 0.28 |
| 36858 | 0 | 31903  | KLIAQGGKAKICGL                | 2.67 | 0.01 | 2.59 | 0.44 | 1.41 | 0.28 |
| 36859 | 0 | 31903  | KLIAQGGKAKICGL                | 2.67 | 0.01 | 2.59 | 0.44 | 0.85 | 0.28 |
| 36860 | 0 | 150803 | KLIE                          | 1.57 | 0.01 | 2.19 | 0.44 | 1.13 | 1.34 |
| 36861 | 0 | 150803 | KLIE                          | 1.57 | 0.01 | 2.19 | 0.44 | 1.13 | 1.57 |
| 36862 | 0 | 31916  | KLILAYTPPGARGPQD              | 2.73 | 0.01 | 3.67 | 1.12 | 0.22 | 0.85 |
| 36863 | 0 | 31916  | KLILAYTPPGARGPQD              | 2.73 | 0.01 | 3.67 | 1.12 | 0.22 | 1.27 |
| 36864 | 0 | 31920  | KLIPNASLIENCTKAEL             | 2.82 | 0.01 | 3.89 | 3.15 | 0.22 | 1.27 |
| 36865 | 0 | 462373 | KLITSDV                       | 1.99 | 0.01 | 0.78 | 1.12 | 0.22 | 1.28 |
| 36866 | 0 | 117318 | KLIVCGMTSNGFTIADP<br>DDRGMLD  | 3.09 | 0.01 | 0.78 | 0.44 | 1.13 | 0.28 |
| 36867 | 0 | 117318 | KLIVCGMTSNGFTIADP<br>DDRGMLD  | 3.09 | 0.01 | 0.78 | 0.44 | 1.13 | 0.28 |
| 36868 | 0 | 117318 | KLIVCGMTSNGFTIADP<br>DDRGMLD  | 3.09 | 0.01 | 0.78 | 0.44 | 1.13 | 0.28 |
| 36869 | 0 | 117318 | KLIVCGMTSNGFTIADP<br>DDRGMLD  | 3.09 | 0.01 | 0.78 | 0.44 | 1.41 | 0.28 |
| 36870 | 0 | 124367 | KLKARVDELERIRRS               | 2.70 | 0.01 | 0.78 | 1.12 | 0.22 | 0.85 |
| 36871 | 0 | 124367 | KLKARVDELERIRRS               | 2.70 | 0.01 | 0.78 | 0.44 | 1.13 | 0.85 |
| 36872 | 0 | 124367 | KLKARVDELERIRRS               | 2.70 | 0.01 | 0.78 | 0.44 | 1.13 | 0.85 |
| 36873 | 0 | 124367 | KLKARVDELERIRRS               | 2.70 | 0.01 | 0.78 | 0.44 | 1.13 | 0.85 |

|       |   |        |                               |      |      |      |      |      |      |
|-------|---|--------|-------------------------------|------|------|------|------|------|------|
| 36874 | 0 | 31932  | KLKECPQ                       | 2.03 | 0.01 | 2.14 | 0.44 | 0.22 | 0.28 |
| 36875 | 0 | 31932  | KLKECPQ                       | 2.03 | 0.01 | 2.14 | 0.44 | 0.85 | 0.28 |
| 36876 | 0 | 31932  | KLKECPQ                       | 2.03 | 0.01 | 2.14 | 0.44 | 0.85 | 0.28 |
| 36877 | 0 | 520025 | KLKELQQDYDLAKES               | 2.71 | 0.01 | 2.24 | 0.44 | 1.41 | 1.28 |
| 36878 | 0 | 99386  | KLKGESG                       | 2.05 | 0.01 | 3.33 | 1.12 | 0.22 | 0.28 |
| 36879 | 0 | 133862 | KLKKIDDLDAKEN                 | 2.66 | 0.01 | 2.24 | 1.20 | 0.22 | 1.27 |
| 36880 | 0 | 226215 | KLKKVINALSGIDLSH              | 2.75 | 0.01 | 3.28 | 0.68 | 0.22 | 0.85 |
| 36881 | 0 | 226215 | KLKKVINALSGIDLSH              | 2.75 | 0.01 | 3.28 | 0.68 | 0.22 | 0.85 |
| 36882 | 0 | 226215 | KLKKVINALSGIDLSH              | 2.75 | 0.01 | 3.28 | 0.68 | 0.22 | 1.48 |
| 36883 | 0 | 226215 | KLKKVINALSGIDLSH              | 2.75 | 0.01 | 3.28 | 0.68 | 0.22 | 1.48 |
| 36884 | 0 | 226215 | KLKKVINALSGIDLSH              | 2.75 | 0.01 | 3.28 | 0.68 | 0.22 | 1.48 |
| 36885 | 0 | 226215 | KLKKVINALSGIDLSH              | 2.75 | 0.01 | 3.28 | 0.68 | 0.22 | 1.48 |
| 36886 | 0 | 226215 | KLKKVINALSGIDLSH              | 2.75 | 0.01 | 3.28 | 0.68 | 0.22 | 1.48 |
| 36887 | 0 | 226215 | KLKKVINALSGIDLSH              | 2.75 | 0.01 | 3.28 | 0.68 | 0.22 | 1.48 |
| 36888 | 0 | 226215 | KLKKVINALSGIDLSH              | 2.75 | 0.01 | 3.28 | 0.68 | 0.22 | 1.48 |
| 36889 | 0 | 226215 | KLKKVINALSGIDLSH              | 2.75 | 0.01 | 3.28 | 0.68 | 0.22 | 1.48 |
| 36890 | 0 | 226215 | KLKKVINALSGIDLSH              | 2.75 | 0.01 | 3.28 | 0.68 | 0.22 | 1.48 |
| 36891 | 0 | 226215 | KLKKVINALSGIDLSH              | 2.75 | 0.01 | 3.28 | 0.68 | 0.22 | 0.28 |
| 36892 | 0 | 151667 | KLKLYTGEACRTGDR               | 2.69 | 0.01 | 0.78 | 1.12 | 0.22 | 0.28 |
| 36893 | 0 | 151667 | KLKLYTGEACRTGDR               | 2.69 | 0.01 | 0.78 | 1.12 | 0.22 | 0.28 |
| 36894 | 0 | 151667 | KLKLYTGEACRTGDR               | 2.69 | 0.01 | 0.78 | 1.12 | 0.22 | 0.85 |
| 36895 | 0 | 151667 | KLKLYTGEACRTGDR               | 2.69 | 0.01 | 0.78 | 1.12 | 0.22 | 1.27 |
| 36896 | 0 | 151667 | KLKLYTGEACRTGDR               | 2.69 | 0.01 | 0.78 | 1.12 | 0.22 | 1.34 |
| 36897 | 0 | 480761 | KLKNSKLINEEESKKVLS            | 2.89 | 0.01 | 3.12 | 0.68 | 0.22 | 0.28 |
| 36898 | 0 | 419237 | KLKQPGDGNPDP                  | 2.52 | 0.01 | 1.66 | 3.32 | 0.22 | 0.28 |
| 36899 | 0 | 419237 | KLKQPGDGNPDP                  | 2.52 | 0.01 | 1.66 | 3.32 | 0.22 | 0.28 |
| 36900 | 0 | 419237 | KLKQPGDGNPDP                  | 2.52 | 0.01 | 1.66 | 1.81 | 0.22 | 1.75 |
| 36901 | 0 | 419237 | KLKQPGDGNPDP                  | 2.52 | 0.01 | 1.66 | 3.32 | 0.22 | 0.28 |
| 36902 | 0 | 419237 | KLKQPGDGNPDP                  | 2.52 | 0.01 | 1.66 | 3.32 | 0.22 | 1.48 |
| 36903 | 0 | 504007 | KLKTLALSLLAAGVLAGC<br>SSH     | 3.03 | 0.01 | 3.72 | 0.44 | 1.41 | 0.28 |
| 36904 | 0 | 167065 | KLLCGLLAERLRI                 | 2.57 | 0.01 | 0.78 | 0.44 | 1.41 | 0.28 |
| 36905 | 0 | 167065 | KLLCGLLAERLRI                 | 2.57 | 0.01 | 0.78 | 0.44 | 1.41 | 0.28 |
| 36906 | 0 | 480775 | KLLDLEQKKKLLGSYQYI            | 2.87 | 0.01 | 3.12 | 0.68 | 0.22 | 0.28 |
| 36907 | 0 | 31964  | KLLEDVNAGFKA                  | 2.47 | 0.01 | 3.22 | 0.44 | 1.23 | 0.85 |
| 36908 | 0 | 434621 | KLLEGESRISLPLPNF              | 2.80 | 2.84 | 0.78 | 0.44 | 1.13 | 0.28 |
| 36909 | 0 | 510446 | KLLFAIPEVEGF                  | 2.46 | 0.01 | 0.90 | 3.07 | 1.13 | 1.39 |
| 36910 | 0 | 230395 | KLLFPLPPPPLRLPEALQE<br>LSPECH | 3.18 | 0.01 | 3.47 | 2.49 | 0.85 | 0.28 |
| 36911 | 0 | 480787 | KLLGSYQYIGASVDKDLI            | 2.87 | 0.01 | 3.12 | 0.68 | 0.22 | 0.28 |
| 36912 | 0 | 112184 | KLLIYWA                       | 2.01 | 0.01 | 0.78 | 0.44 | 1.13 | 0.28 |
| 36913 | 0 | 120694 | KLLLDYTGKI                    | 2.32 | 0.01 | 2.26 | 2.04 | 0.22 | 1.57 |
| 36914 | 0 | 120694 | KLLLDYTGKI                    | 2.32 | 0.01 | 2.26 | 2.04 | 0.22 | 1.57 |
| 36915 | 0 | 120694 | KLLLDYTGKI                    | 2.32 | 0.01 | 2.26 | 2.04 | 0.22 | 1.57 |

|       |   |        |                                    |      |      |      |      |      |      |
|-------|---|--------|------------------------------------|------|------|------|------|------|------|
| 36916 | 0 | 120694 | KLLLDYTGKI                         | 2.32 | 0.01 | 2.26 | 2.04 | 0.22 | 2.02 |
| 36917 | 0 | 120694 | KLLLDYTGKI                         | 2.32 | 0.01 | 2.26 | 2.04 | 0.22 | 2.02 |
| 36918 | 0 | 120695 | KLLLDYTGKINPGGWNPA<br>DYGGIK       | 3.13 | 0.01 | 0.90 | 2.04 | 0.22 | 2.02 |
| 36919 | 0 | 120695 | KLLLDYTGKINPGGWNPA<br>DYGGIK       | 3.13 | 0.01 | 0.90 | 2.04 | 0.22 | 2.02 |
| 36920 | 0 | 120695 | KLLLDYTGKINPGGWNPA<br>DYGGIK       | 3.13 | 0.01 | 0.90 | 2.04 | 2.60 | 1.75 |
| 36921 | 0 | 120697 | KLLLDYTGKIWNPADYGA<br>GIK          | 2.94 | 0.01 | 0.90 | 2.04 | 0.22 | 2.02 |
| 36922 | 0 | 120697 | KLLLDYTGKIWNPADYGA<br>GIK          | 2.94 | 0.01 | 0.90 | 2.04 | 0.22 | 2.02 |
| 36923 | 0 | 120697 | KLLLDYTGKIWNPADYGA<br>GIK          | 2.94 | 0.01 | 0.90 | 2.04 | 0.22 | 2.02 |
| 36924 | 0 | 120698 | KLLLDYTGKIWNPADYGA<br>GIKLLLDYTGKI | 3.36 | 0.01 | 0.90 | 2.04 | 0.22 | 2.02 |
| 36925 | 0 | 120698 | KLLLDYTGKIWNPADYGA<br>GIKLLLDYTGKI | 3.36 | 0.01 | 0.90 | 2.04 | 0.22 | 2.02 |
| 36926 | 0 | 120698 | KLLLDYTGKIWNPADYGA<br>GIKLLLDYTGKI | 3.36 | 0.01 | 0.90 | 2.04 | 0.22 | 2.02 |
| 36927 | 0 | 120698 | KLLLDYTGKIWNPADYGA<br>GIKLLLDYTGKI | 3.36 | 0.01 | 0.90 | 2.04 | 0.22 | 2.02 |
| 36928 | 0 | 120698 | KLLLDYTGKIWNPADYGA<br>GIKLLLDYTGKI | 3.36 | 0.01 | 0.90 | 2.04 | 2.60 | 1.75 |
| 36929 | 0 | 510447 | KLLLPQVGPL                         | 2.50 | 0.01 | 0.90 | 3.07 | 1.13 | 1.39 |
| 36930 | 0 | 130925 | KLLPEDDESRTYHTV                    | 2.64 | 0.01 | 0.90 | 0.44 | 1.13 | 1.27 |
| 36931 | 0 | 130925 | KLLPEDDESRTYHTV                    | 2.64 | 0.01 | 0.90 | 0.44 | 1.13 | 0.28 |
| 36932 | 0 | 130925 | KLLPEDDESRTYHTV                    | 2.64 | 0.01 | 0.90 | 0.44 | 1.13 | 1.66 |
| 36933 | 0 | 130925 | KLLPEDDESRTYHTV                    | 2.64 | 0.01 | 0.90 | 0.44 | 1.13 | 1.66 |
| 36934 | 0 | 130925 | KLLPEDDESRTYHTV                    | 2.64 | 0.01 | 0.90 | 0.44 | 1.13 | 1.66 |
| 36935 | 0 | 131933 | KLLRDSHVL                          | 2.23 | 0.01 | 0.78 | 0.44 | 1.41 | 1.27 |
| 36936 | 0 | 510448 | KLLSPNLQAGVL                       | 2.47 | 0.01 | 0.90 | 3.07 | 1.13 | 1.39 |
| 36937 | 0 | 32006  | KLLSQGGRAATCGK                     | 2.62 | 0.01 | 1.96 | 0.44 | 0.85 | 0.28 |
| 36938 | 0 | 32010  | KLLSVEEACK                         | 2.32 | 0.01 | 1.96 | 0.44 | 0.85 | 1.34 |
| 36939 | 0 | 117960 | KLLTLVQLTLQS                       | 2.52 | 0.01 | 2.04 | 2.66 | 0.22 | 0.28 |
| 36940 | 0 | 117960 | KLLTLVQLTLQS                       | 2.52 | 0.01 | 2.04 | 0.44 | 2.82 | 0.28 |
| 36941 | 0 | 171817 | KLMEQYGTPNNIDIW                    | 2.61 | 0.01 | 0.78 | 0.44 | 1.13 | 0.28 |
| 36942 | 0 | 32031  | KLMSKYSNTFEVNAYN<br>MSIR           | 2.94 | 0.01 | 0.90 | 2.63 | 0.22 | 1.48 |
| 36943 | 0 | 32035  | KLMTHWP                            | 1.99 | 0.01 | 0.90 | 1.15 | 0.22 | 1.39 |
| 36944 | 0 | 152715 | KLNAKMNILI                         | 2.36 | 0.01 | 2.18 | 2.16 | 0.22 | 0.28 |
| 36945 | 0 | 32037  | KLNDLCFSNVYADSFVV                  | 2.79 | 0.01 | 2.48 | 0.44 | 0.85 | 0.28 |
| 36946 | 0 | 32037  | KLNDLCFSNVYADSFVV                  | 2.79 | 0.01 | 2.48 | 0.68 | 0.22 | 0.28 |
| 36947 | 0 | 32037  | KLNDLCFSNVYADSFVV                  | 2.79 | 0.01 | 2.48 | 1.20 | 0.22 | 0.28 |

|       |   |        |                          |      |      |      |      |      |      |
|-------|---|--------|--------------------------|------|------|------|------|------|------|
| 36948 | 0 | 32048  | KLNKEEESKKLTEKEKAE<br>L  | 3.01 | 0.01 | 2.85 | 3.27 | 0.22 | 0.28 |
| 36949 | 0 | 129107 | KLNKKAASGEAKPKAK         | 2.78 | 0.01 | 0.78 | 0.44 | 1.13 | 0.28 |
| 36950 | 0 | 129107 | KLNKKAASGEAKPKAK         | 2.78 | 0.01 | 0.78 | 0.44 | 1.13 | 0.28 |
| 36951 | 0 | 129107 | KLNKKAASGEAKPKAK         | 2.78 | 0.01 | 0.78 | 1.12 | 0.22 | 0.28 |
| 36952 | 0 | 129107 | KLNKKAASGEAKPKAK         | 2.78 | 0.01 | 0.78 | 0.44 | 1.13 | 0.28 |
| 36953 | 0 | 129107 | KLNKKAASGEAKPKAK         | 2.78 | 0.01 | 0.78 | 1.12 | 0.22 | 0.28 |
| 36954 | 0 | 32059  | KLNTDHAGSNDNIALLV<br>Q   | 2.83 | 0.01 | 2.45 | 0.44 | 0.85 | 1.48 |
| 36955 | 0 | 32062  | KLNWFKKGSSIGQ            | 2.54 | 0.01 | 2.30 | 2.65 | 0.22 | 0.28 |
| 36956 | 0 | 32062  | KLNWFKKGSSIGQ            | 2.54 | 0.01 | 2.30 | 2.65 | 0.22 | 0.28 |
| 36957 | 0 | 32062  | KLNWFKKGSSIGQ            | 2.54 | 0.01 | 2.30 | 2.65 | 0.22 | 0.28 |
| 36958 | 0 | 32062  | KLNWFKKGSSIGQ            | 2.54 | 0.01 | 2.30 | 2.65 | 0.22 | 0.28 |
| 36959 | 0 | 32062  | KLNWFKKGSSIGQ            | 2.54 | 0.01 | 2.30 | 2.65 | 0.22 | 0.28 |
| 36960 | 0 | 32062  | KLNWFKKGSSIGQ            | 2.54 | 0.01 | 2.30 | 2.65 | 0.22 | 0.28 |
| 36961 | 0 | 32062  | KLNWFKKGSSIGQ            | 2.54 | 0.01 | 2.30 | 0.68 | 0.22 | 0.28 |
| 36962 | 0 | 165617 | KLPAFML                  | 2.02 | 0.01 | 0.90 | 0.44 | 1.23 | 1.39 |
| 36963 | 0 | 165618 | KLPAFQL                  | 2.02 | 0.01 | 0.90 | 0.44 | 1.23 | 1.39 |
| 36964 | 0 | 32070  | KLPDDFMGCVLAWNTR<br>N    | 2.73 | 0.01 | 2.48 | 0.44 | 0.85 | 0.28 |
| 36965 | 0 | 32070  | KLPDDFMGCVLAWNTR<br>N    | 2.73 | 0.01 | 2.48 | 1.20 | 0.22 | 0.28 |
| 36966 | 0 | 32072  | KLPDHVRTKG               | 2.30 | 0.01 | 3.33 | 1.12 | 0.22 | 1.57 |
| 36967 | 0 | 32072  | KLPDHVRTKG               | 2.30 | 0.01 | 3.33 | 1.12 | 0.22 | 1.57 |
| 36968 | 0 | 106567 | KLPDYILSPTSS             | 2.47 | 0.01 | 0.90 | 1.15 | 0.22 | 1.39 |
| 36969 | 0 | 32074  | KLPENQTRVAFFYDR          | 2.61 | 0.01 | 3.02 | 2.69 | 0.22 | 0.28 |
| 36970 | 0 | 134707 | KLPFSRLAREICVKF          | 2.67 | 0.01 | 0.78 | 3.05 | 1.13 | 0.85 |
| 36971 | 0 | 123380 | KLPGKF                   | 1.91 | 0.01 | 3.93 | 0.44 | 0.85 | 0.28 |
| 36972 | 0 | 123380 | KLPGKF                   | 1.91 | 0.01 | 3.93 | 0.44 | 1.59 | 0.85 |
| 36973 | 0 | 179087 | KLPKLAANREKLEEV          | 2.70 | 0.01 | 2.36 | 0.44 | 1.23 | 1.28 |
| 36974 | 0 | 179087 | KLPKLAANREKLEEV          | 2.70 | 0.01 | 2.36 | 0.44 | 1.23 | 1.27 |
| 36975 | 0 | 125462 | KLPLSLSFLHLTRADLSYP<br>S | 2.96 | 0.01 | 0.78 | 0.44 | 1.13 | 0.28 |
| 36976 | 0 | 125462 | KLPLSLSFLHLTRADLSYP<br>S | 2.96 | 0.01 | 0.78 | 0.44 | 1.13 | 0.28 |
| 36977 | 0 | 125462 | KLPLSLSFLHLTRADLSYP<br>S | 2.96 | 0.01 | 0.78 | 0.68 | 0.22 | 0.28 |
| 36978 | 0 | 125462 | KLPLSLSFLHLTRADLSYP<br>S | 2.96 | 0.01 | 0.78 | 3.06 | 1.41 | 0.28 |
| 36979 | 0 | 32083  | KLPLTKG                  | 2.05 | 0.01 | 0.90 | 0.44 | 1.23 | 0.28 |
| 36980 | 0 | 32083  | KLPLTKG                  | 2.05 | 0.01 | 0.90 | 0.44 | 1.23 | 1.27 |
| 36981 | 0 | 152716 | KLPLYISNPN               | 2.33 | 0.01 | 2.18 | 2.16 | 0.22 | 0.28 |

|       |   |        |                                   |      |      |      |      |      |      |
|-------|---|--------|-----------------------------------|------|------|------|------|------|------|
| 36982 | 0 | 106568 | KLPPIDVNMDCK<br>KLPSNGTTGEQGSSTGT | 2.47 | 0.01 | 3.08 | 0.44 | 1.23 | 0.85 |
| 36983 | 0 | 227303 | VRGDTEPISDSSESHPAN<br>GPDSPV      | 3.69 | 0.01 | 3.28 | 1.15 | 0.22 | 0.28 |
| 36984 | 0 | 227303 | VRGDTEPISDSSESHPAN<br>GPDSPV      | 3.69 | 0.01 | 3.28 | 3.33 | 0.22 | 0.28 |
| 36985 | 0 | 227303 | VRGDTEPISDSSESHPAN<br>GPDSPV      | 3.69 | 0.01 | 3.28 | 3.33 | 0.22 | 0.28 |
| 36986 | 0 | 32089  | KLPTPIELPLK                       | 2.45 | 0.01 | 3.89 | 1.20 | 0.22 | 2.75 |
| 36987 | 0 | 423383 | KLPYSITVTDHRTS                    | 2.66 | 0.01 | 2.51 | 0.44 | 2.35 | 1.28 |
| 36988 | 0 | 32096  | KLQACEHPIGEWCM                    | 2.62 | 0.01 | 4.03 | 4.33 | 0.22 | 0.28 |
| 36989 | 0 | 32098  | KLQDCT                            | 1.88 | 0.01 | 1.96 | 0.44 | 0.85 | 0.28 |
| 36990 | 0 | 182392 | KLQEWLGTRYPE                      | 2.45 | 0.01 | 0.90 | 0.68 | 0.22 | 0.28 |
| 36991 | 0 | 182191 | KLQKEKTWHEALRS                    | 2.69 | 0.01 | 0.78 | 0.44 | 1.13 | 0.85 |
| 36992 | 0 | 141687 | KLQKETECEEEKGPL                   | 2.77 | 0.01 | 1.66 | 1.20 | 0.22 | 0.28 |
| 36993 | 0 | 141687 | KLQKETECEEEKGPL                   | 2.77 | 0.01 | 1.66 | 2.55 | 0.22 | 0.28 |
| 36994 | 0 | 141687 | KLQKETECEEEKGPL                   | 2.77 | 0.01 | 2.86 | 2.55 | 0.22 | 0.28 |
| 36995 | 0 | 84512  | KLQKNGADLA                        | 2.34 | 0.01 | 3.06 | 0.44 | 0.85 | 0.28 |
| 36996 | 0 | 32108  | KLQKTYSQ                          | 2.15 | 0.01 | 1.66 | 0.44 | 1.74 | 0.28 |
| 36997 | 0 | 32109  | KLQKTYSQYKVQYDM                   | 2.71 | 0.01 | 1.66 | 0.44 | 1.59 | 0.28 |
| 36998 | 0 | 32113  | KLQPAEITCMKTIT                    | 2.69 | 0.01 | 1.66 | 0.44 | 0.85 | 0.28 |
| 36999 | 0 | 32113  | KLQPAEITCMKTIT                    | 2.69 | 0.01 | 1.66 | 0.44 | 0.85 | 0.28 |
| 37000 | 0 | 32114  | KLQPAEITCMKTITT                   | 2.74 | 0.01 | 1.66 | 0.44 | 1.74 | 0.28 |
| 37001 | 0 | 32114  | KLQPAEITCMKTITT                   | 2.74 | 0.01 | 1.66 | 0.68 | 0.22 | 0.28 |
| 37002 | 0 | 32115  | KLQPGDDP                          | 2.13 | 0.01 | 2.40 | 2.43 | 0.22 | 0.28 |
| 37003 | 0 | 167770 | KLQPGDDPL                         | 2.24 | 0.01 | 2.40 | 2.43 | 0.22 | 0.28 |
| 37004 | 0 | 32116  | KLQPGDDPLL                        | 2.42 | 0.01 | 2.40 | 1.12 | 0.22 | 0.28 |
| 37005 | 0 | 180565 | KLQQWYREHRSNLRR<br>LF             | 2.89 | 4.93 | 0.78 | 0.44 | 1.13 | 0.28 |
| 37006 | 0 | 176040 | KLQRHEWKNKHGWCN<br>W              | 2.69 | 0.01 | 2.63 | 1.15 | 0.22 | 0.85 |
| 37007 | 0 | 176040 | KLQRHEWKNKHGWCN<br>W              | 2.69 | 0.01 | 2.63 | 1.15 | 0.22 | 0.85 |
| 37008 | 0 | 180334 | KLQTLTLHQVREYWWA<br>LNRKEVWKA     | 3.18 | 0.01 | 3.32 | 1.12 | 0.22 | 0.28 |
| 37009 | 0 | 180334 | KLQTLTLHQVREYWWA<br>LNRKEVWKA     | 3.18 | 0.01 | 3.32 | 3.06 | 0.22 | 0.28 |
| 37010 | 0 | 180334 | KLQTLTLHQVREYWWA<br>LNRKEVWKA     | 3.18 | 0.01 | 3.32 | 1.12 | 0.22 | 1.48 |
| 37011 | 0 | 180334 | KLQTLTLHQVREYWWA<br>LNRKEVWKA     | 3.18 | 0.01 | 3.32 | 3.06 | 0.22 | 1.48 |
| 37012 | 0 | 180334 | KLQTLTLHQVREYWWA<br>LNRKEVWKA     | 3.18 | 0.01 | 3.32 | 3.06 | 0.22 | 1.48 |

|       |   |        |                                |      |      |      |      |      |      |
|-------|---|--------|--------------------------------|------|------|------|------|------|------|
| 37013 | 0 | 180334 | KLQTLTLHQQVREYWWA<br>LNRKEVWKA | 3.18 | 0.01 | 3.32 | 3.06 | 0.22 | 1.48 |
| 37014 | 0 | 180334 | KLQTLTLHQQVREYWWA<br>LNRKEVWKA | 3.18 | 0.01 | 3.32 | 1.12 | 0.22 | 0.28 |
| 37015 | 0 | 180334 | KLQTLTLHQQVREYWWA<br>LNRKEVWKA | 3.18 | 0.01 | 3.32 | 3.06 | 0.22 | 0.28 |
| 37016 | 0 | 180334 | KLQTLTLHQQVREYWWA<br>LNRKEVWKA | 3.18 | 0.01 | 3.32 | 1.12 | 0.22 | 0.28 |
| 37017 | 0 | 180334 | KLQTLTLHQQVREYWWA<br>LNRKEVWKA | 3.18 | 0.01 | 3.32 | 1.12 | 0.22 | 0.28 |
| 37018 | 0 | 180334 | KLQTLTLHQQVREYWWA<br>LNRKEVWKA | 3.18 | 0.01 | 3.32 | 1.12 | 0.22 | 0.28 |
| 37019 | 0 | 180334 | KLQTLTLHQQVREYWWA<br>LNRKEVWKA | 3.18 | 0.01 | 3.32 | 1.12 | 0.22 | 0.28 |
| 37020 | 0 | 180334 | KLQTLTLHQQVREYWWA<br>LNRKEVWKA | 3.18 | 0.01 | 3.32 | 1.12 | 0.22 | 0.28 |
| 37021 | 0 | 180334 | KLQTLTLHQQVREYWWA<br>LNRKEVWKA | 3.18 | 0.01 | 3.32 | 1.12 | 0.22 | 0.28 |
| 37022 | 0 | 180334 | KLQTLTLHQQVREYWWA<br>LNRKEVWKA | 3.18 | 0.01 | 3.32 | 1.12 | 0.22 | 0.28 |
| 37023 | 0 | 180334 | KLQTLTLHQQVREYWWA<br>LNRKEVWKA | 3.18 | 0.01 | 3.32 | 1.12 | 0.22 | 0.28 |
| 37024 | 0 | 180334 | KLQTLTLHQQVREYWWA<br>LNRKEVWKA | 3.18 | 0.01 | 3.32 | 1.12 | 0.22 | 0.28 |
| 37025 | 0 | 180334 | KLQTLTLHQQVREYWWA<br>LNRKEVWKA | 3.18 | 0.01 | 3.32 | 1.12 | 0.22 | 0.28 |
| 37026 | 0 | 180334 | KLQTLTLHQQVREYWWA<br>LNRKEVWKA | 3.18 | 0.01 | 3.32 | 1.12 | 0.22 | 0.28 |
| 37027 | 0 | 180334 | KLQTLTLHQQVREYWWA<br>LNRKEVWKA | 3.18 | 0.01 | 3.32 | 1.12 | 0.22 | 0.28 |
| 37028 | 0 | 180334 | KLQTLTLHQQVREYWWA<br>LNRKEVWKA | 3.18 | 0.01 | 3.32 | 1.12 | 0.22 | 0.28 |
| 37029 | 0 | 180334 | KLQTLTLHQQVREYWWA<br>LNRKEVWKA | 3.18 | 0.01 | 3.32 | 1.12 | 0.22 | 0.28 |
| 37030 | 0 | 180334 | KLQTLTLHQQVREYWWA<br>LNRKEVWKA | 3.18 | 0.01 | 3.32 | 3.06 | 0.22 | 0.28 |
| 37031 | 0 | 180334 | KLQTLTLHQQVREYWWA<br>LNRKEVWKA | 3.18 | 0.01 | 3.32 | 3.06 | 0.22 | 0.28 |
| 37032 | 0 | 180334 | KLQTLTLHQQVREYWWA<br>LNRKEVWKA | 3.18 | 0.01 | 3.32 | 3.06 | 0.22 | 0.28 |
| 37033 | 0 | 180334 | KLQTLTLHQQVREYWWA<br>LNRKEVWKA | 3.18 | 0.01 | 3.32 | 3.06 | 0.22 | 0.28 |
| 37034 | 0 | 180334 | KLQTLTLHQQVREYWWA<br>LNRKEVWKA | 3.18 | 0.01 | 3.32 | 3.06 | 0.22 | 0.28 |
| 37035 | 0 | 180334 | KLQTLTLHQQVREYWWA<br>LNRKEVWKA | 3.18 | 0.01 | 3.32 | 3.06 | 0.22 | 0.28 |

|       |   |        |                                |      |      |      |      |      |      |
|-------|---|--------|--------------------------------|------|------|------|------|------|------|
| 37036 | 0 | 180334 | KLQTLTLHQVREYWWA<br>LNRKEVWKA  | 3.18 | 0.01 | 3.32 | 1.12 | 0.22 | 0.28 |
| 37037 | 0 | 180334 | KLQTLTLHQVREYWWA<br>LNRKEVWKA  | 3.18 | 0.01 | 3.32 | 1.12 | 0.22 | 0.28 |
| 37038 | 0 | 180334 | KLQTLTLHQVREYWWA<br>LNRKEVWKA  | 3.18 | 0.01 | 3.32 | 3.06 | 0.22 | 0.28 |
| 37039 | 0 | 180334 | KLQTLTLHQVREYWWA<br>LNRKEVWKA  | 3.18 | 0.01 | 3.32 | 3.06 | 0.22 | 0.28 |
| 37040 | 0 | 180334 | KLQTLTLHQVREYWWA<br>LNRKEVWKA  | 3.18 | 0.01 | 3.32 | 3.06 | 0.22 | 1.48 |
| 37041 | 0 | 78707  | KLRERLKQR                      | 2.27 | 0.01 | 3.27 | 1.12 | 0.22 | 0.28 |
| 37042 | 0 | 78707  | KLRERLKQR                      | 2.27 | 0.01 | 3.27 | 1.12 | 0.22 | 0.28 |
| 37043 | 0 | 78707  | KLRERLKQR                      | 2.27 | 0.01 | 3.27 | 1.12 | 0.22 | 0.28 |
| 37044 | 0 | 78707  | KLRERLKQR                      | 2.27 | 0.01 | 3.27 | 1.12 | 0.22 | 1.34 |
| 37045 | 0 | 121486 | KLRFPPHNLFTERML                | 2.67 | 0.01 | 0.90 | 2.04 | 0.22 | 1.27 |
| 37046 | 0 | 32128  | KLRGDLRQWVSAGRRV<br>GG         | 2.85 | 0.01 | 2.59 | 0.44 | 0.85 | 0.28 |
| 37047 | 0 | 151006 | KLRGVAPHLHGKC                  | 2.56 | 0.01 | 2.87 | 0.68 | 0.22 | 2.35 |
| 37048 | 0 | 32135  | KLRMETCFQQACKGKIQ<br>ALCENPEWA | 3.18 | 0.01 | 2.72 | 1.12 | 0.22 | 0.28 |
| 37049 | 0 | 32135  | KLRMETCFQQACKGKIQ<br>ALCENPEWA | 3.18 | 0.01 | 2.72 | 1.12 | 0.22 | 0.28 |
| 37050 | 0 | 32135  | KLRMETCFQQACKGKIQ<br>ALCENPEWA | 3.18 | 0.01 | 2.72 | 1.12 | 0.22 | 0.28 |
| 37051 | 0 | 32135  | KLRMETCFQQACKGKIQ<br>ALCENPEWA | 3.18 | 0.01 | 2.72 | 1.12 | 0.22 | 0.28 |
| 37052 | 0 | 32135  | KLRMETCFQQACKGKIQ<br>ALCENPEWA | 3.18 | 0.01 | 2.72 | 1.12 | 0.22 | 0.28 |
| 37053 | 0 | 32135  | KLRMETCFQQACKGKIQ<br>ALCENPEWA | 3.18 | 0.01 | 2.72 | 1.12 | 0.22 | 0.28 |
| 37054 | 0 | 94568  | KLRNTDGETNKG                   | 2.50 | 0.01 | 2.24 | 3.12 | 0.22 | 0.85 |
| 37055 | 0 | 94568  | KLRNTDGETNKG                   | 2.50 | 0.01 | 2.24 | 3.12 | 0.22 | 0.85 |
| 37056 | 0 | 94568  | KLRNTDGETNKG                   | 2.50 | 0.01 | 2.24 | 3.12 | 0.22 | 0.85 |
| 37057 | 0 | 32138  | KLRPFERDI                      | 2.21 | 0.01 | 2.91 | 0.68 | 0.22 | 0.28 |
| 37058 | 0 | 32138  | KLRPFERDI                      | 2.21 | 0.01 | 2.91 | 0.68 | 0.22 | 0.28 |
| 37059 | 0 | 148529 | KLRPFERDISNV                   | 2.43 | 0.01 | 2.91 | 2.49 | 0.22 | 0.85 |
| 37060 | 0 | 148529 | KLRPFERDISNV                   | 2.43 | 0.01 | 2.91 | 0.44 | 0.85 | 0.85 |
| 37061 | 0 | 167301 | KLRREVEKAKRALSSQH<br>QAR       | 2.98 | 3.24 | 0.78 | 0.44 | 1.13 | 0.28 |
| 37062 | 0 | 32145  | KLRRSTNWG                      | 2.20 | 0.01 | 0.90 | 1.81 | 0.22 | 0.28 |
| 37063 | 0 | 32145  | KLRRSTNWG                      | 2.20 | 0.01 | 0.90 | 0.44 | 1.59 | 0.28 |
| 37064 | 0 | 462374 | KLRVF                          | 1.74 | 0.01 | 0.78 | 1.12 | 0.22 | 1.28 |
| 37065 | 0 | 32151  | KLSATDPLAHYK                   | 2.48 | 0.01 | 0.90 | 2.74 | 0.22 | 1.27 |
| 37066 | 0 | 118464 | KLSDGVAVLKVGG                  | 2.58 | 0.01 | 0.78 | 0.44 | 1.74 | 0.85 |
| 37067 | 0 | 144708 | KLSDSALDTMWR                   | 2.48 | 0.01 | 0.90 | 0.68 | 0.22 | 0.28 |
| 37068 | 0 | 106569 | KLSEEVKTTEQK                   | 2.51 | 0.01 | 3.08 | 0.44 | 1.23 | 0.85 |
| 37069 | 0 | 32159  | KLSEGDLLAEIETDK                | 2.70 | 0.01 | 0.78 | 0.44 | 1.13 | 1.27 |



|       |   |        |                          |      |      |      |      |      |      |
|-------|---|--------|--------------------------|------|------|------|------|------|------|
| 37070 | 0 | 32159  | KLSEGDLLAEIETDK          | 2.70 | 0.01 | 0.78 | 0.44 | 1.13 | 0.28 |
| 37071 | 0 | 32159  | KLSEGDLLAEIETDK          | 2.70 | 0.01 | 0.78 | 0.44 | 1.13 | 0.28 |
| 37072 | 0 | 32159  | KLSEGDLLAEIETDK          | 2.70 | 0.01 | 0.78 | 0.44 | 1.13 | 0.28 |
| 37073 | 0 | 32159  | KLSEGDLLAEIETDK          | 2.70 | 0.01 | 0.78 | 0.44 | 1.13 | 0.28 |
| 37074 | 0 | 32159  | KLSEGDLLAEIETDK          | 2.70 | 0.01 | 0.78 | 0.44 | 1.41 | 0.28 |
| 37075 | 0 | 32159  | KLSEGDLLAEIETDK          | 2.70 | 0.01 | 0.78 | 0.44 | 1.13 | 0.28 |
| 37076 | 0 | 32159  | KLSEGDLLAEIETDK          | 2.70 | 0.01 | 0.78 | 0.44 | 1.41 | 0.28 |
| 37077 | 0 | 32159  | KLSEGDLLAEIETDK          | 2.70 | 0.01 | 0.78 | 0.44 | 1.13 | 1.27 |
| 37078 | 0 | 149780 | KLSLDLQFPLGRRF           | 2.69 | 0.01 | 3.67 | 1.12 | 0.22 | 0.28 |
| 37079 | 0 | 32168  | KLSLESNGGAKFDTKGS<br>AKT | 2.98 | 0.01 | 2.21 | 1.20 | 0.22 | 0.28 |
| 37080 | 0 | 32168  | KLSLESNGGAKFDTKGS<br>AKT | 2.98 | 0.01 | 2.21 | 1.20 | 0.22 | 0.28 |
| 37081 | 0 | 320876 | KLSLFGQAAAGDKPA          | 2.69 | 0.01 | 1.61 | 0.44 | 0.85 | 1.28 |
| 37082 | 0 | 320877 | KLSLFGQAAAGDKPS          | 2.69 | 0.01 | 1.61 | 0.44 | 0.85 | 1.28 |
| 37083 | 0 | 32171  | KLSNAEASRDKAFAVSK        | 2.82 | 0.01 | 3.59 | 2.02 | 0.22 | 0.28 |
| 37084 | 0 | 118867 | KLSQTSNVDKEEEAV          | 2.67 | 0.01 | 0.78 | 1.15 | 0.22 | 1.27 |
| 37085 | 0 | 118867 | KLSQTSNVDKEEEAV          | 2.67 | 0.01 | 0.78 | 1.15 | 0.22 | 1.48 |
| 37086 | 0 | 118867 | KLSQTSNVDKEEEAV          | 2.67 | 0.01 | 0.78 | 1.15 | 0.22 | 1.48 |
| 37087 | 0 | 118867 | KLSQTSNVDKEEEAV          | 2.67 | 0.01 | 0.78 | 1.15 | 0.22 | 1.48 |
| 37088 | 0 | 118867 | KLSQTSNVDKEEEAV          | 2.67 | 0.01 | 0.78 | 1.15 | 0.22 | 0.85 |
| 37089 | 0 | 118867 | KLSQTSNVDKEEEAV          | 2.67 | 0.01 | 0.78 | 1.15 | 0.22 | 0.28 |
| 37090 | 0 | 229303 | KLSRIKT                  | 2.03 | 0.01 | 2.70 | 0.68 | 0.22 | 0.28 |
| 37091 | 0 | 32190  | KLTEKEKAELQAKLEAEA<br>KA | 3.02 | 0.01 | 2.85 | 3.27 | 0.22 | 0.28 |
| 37092 | 0 | 32190  | KLTEKEKAELQAKLEAEA<br>KA | 3.02 | 0.01 | 2.85 | 3.27 | 0.22 | 0.28 |
| 37093 | 0 | 181992 | KLTLPKSPHDLDFG           | 2.64 | 0.01 | 3.85 | 2.13 | 1.74 | 0.28 |
| 37094 | 0 | 125463 | KLTPLPEARLLDLSSWFT<br>VG | 2.92 | 0.01 | 1.72 | 0.44 | 1.13 | 0.28 |
| 37095 | 0 | 125463 | KLTPLPEARLLDLSSWFT<br>VG | 2.92 | 0.01 | 1.72 | 0.44 | 0.85 | 0.28 |
| 37096 | 0 | 32202  | KLTPPHSAK                | 2.23 | 0.01 | 1.96 | 0.44 | 0.85 | 1.34 |
| 37097 | 0 | 135702 | KLTRAEAV                 | 2.12 | 0.01 | 0.78 | 0.44 | 2.35 | 0.28 |
| 37098 | 0 | 178141 | KLTSEARGRIPVAQK          | 2.65 | 4.08 | 0.78 | 0.44 | 1.13 | 0.28 |
| 37099 | 0 | 178141 | KLTSEARGRIPVAQK          | 2.65 | 4.08 | 0.78 | 0.44 | 1.13 | 0.28 |
| 37100 | 0 | 178141 | KLTSEARGRIPVAQK          | 2.65 | 4.08 | 0.78 | 0.44 | 1.13 | 0.28 |
| 37101 | 0 | 178141 | KLTSEARGRIPVAQK          | 2.65 | 4.08 | 0.78 | 0.44 | 1.13 | 0.28 |
| 37102 | 0 | 138196 | KLTSSLRCNCPLRF           | 2.68 | 0.01 | 0.90 | 0.44 | 1.13 | 1.39 |
| 37103 | 0 | 138197 | KLTSSLRYNSPPLCF          | 2.67 | 0.01 | 0.90 | 0.44 | 1.13 | 1.39 |
| 37104 | 0 | 78708  | KLVEYCDFLTTFVHAKKK<br>E  | 2.89 | 0.01 | 3.11 | 1.15 | 0.22 | 0.28 |
| 37105 | 0 | 78708  | KLVEYCDFLTTFVHAKKK<br>E  | 2.89 | 0.01 | 3.11 | 1.12 | 0.22 | 0.28 |
| 37106 | 0 | 177137 | KLVFFA                   | 1.89 | 0.01 | 0.78 | 4.33 | 1.41 | 0.85 |
| 37107 | 0 | 177137 | KLVFFA                   | 1.89 | 0.01 | 0.78 | 4.33 | 1.41 | 1.34 |

|       |   |        |                          |      |      |      |      |      |      |
|-------|---|--------|--------------------------|------|------|------|------|------|------|
| 37108 | 0 | 177137 | KLVFFA                   | 1.89 | 0.01 | 0.78 | 4.33 | 1.41 | 2.02 |
| 37109 | 0 | 177137 | KLVFFA                   | 1.89 | 0.01 | 0.78 | 4.33 | 1.41 | 3.30 |
| 37110 | 0 | 188898 | KLVFFAED                 | 2.11 | 0.01 | 0.78 | 1.15 | 0.22 | 0.28 |
| 37111 | 0 | 188898 | KLVFFAED                 | 2.11 | 0.01 | 0.78 | 1.15 | 0.22 | 0.28 |
| 37112 | 0 | 188898 | KLVFFAED                 | 2.11 | 0.01 | 0.78 | 1.15 | 0.22 | 0.28 |
| 37113 | 0 | 105904 | KLVFFAEDV                | 2.22 | 0.01 | 0.78 | 1.15 | 2.26 | 1.27 |
| 37114 | 0 | 100216 | KLVFFAEDVG               | 2.30 | 0.01 | 0.78 | 0.44 | 1.93 | 0.28 |
| 37115 | 0 | 118466 | KLVFFAEDVGS              | 2.38 | 0.01 | 0.78 | 1.15 | 2.26 | 2.66 |
| 37116 | 0 | 118466 | KLVFFAEDVGS              | 2.38 | 0.01 | 0.78 | 1.15 | 2.26 | 2.66 |
| 37117 | 0 | 105264 | KLVFFAEDVGSNK            | 2.53 | 0.01 | 0.78 | 1.20 | 0.22 | 0.28 |
| 37118 | 0 | 105265 | KLVFFAEDVGSNKGA          | 2.68 | 0.01 | 0.78 | 3.15 | 0.22 | 0.28 |
| 37119 | 0 | 151670 | KLVIESDLERAEEERA         | 2.75 | 3.24 | 1.75 | 2.46 | 0.22 | 0.85 |
| 37120 | 0 | 151671 | KLVINGKPITIFQERD         | 2.70 | 3.89 | 1.75 | 2.25 | 0.22 | 0.85 |
| 37121 | 0 | 32233  | KLVLSLCFLFSGCF           | 2.72 | 0.01 | 2.72 | 0.44 | 1.23 | 0.85 |
| 37122 | 0 | 106571 | KLVSEVPKHCGI             | 2.46 | 0.01 | 3.08 | 0.44 | 1.23 | 0.85 |
| 37123 | 0 | 510449 | KLWLPLNQAGVP             | 2.48 | 0.01 | 0.90 | 3.07 | 1.13 | 1.39 |
| 37124 | 0 | 196589 | KLWVIPV                  | 2.02 | 0.01 | 0.90 | 0.44 | 1.23 | 1.39 |
| 37125 | 0 | 122440 | KLYPDGDPRLSSYSL          | 2.71 | 0.01 | 0.90 | 1.15 | 0.22 | 1.39 |
| 37126 | 0 | 32267  | KLYQAQYDLSF              | 2.41 | 0.01 | 0.90 | 0.44 | 1.74 | 0.28 |
| 37127 | 0 | 151672 | KLYTLVLTPDAPSRK          | 2.75 | 3.85 | 1.75 | 2.25 | 0.22 | 0.85 |
| 37128 | 0 | 32273  | KLYTSVENAQQDKGIAIP<br>HD | 2.89 | 0.01 | 2.70 | 0.44 | 0.85 | 0.28 |
| 37129 | 0 | 78433  | KLYVCLNE                 | 2.12 | 0.01 | 3.97 | 0.68 | 0.22 | 0.28 |
| 37130 | 0 | 32280  | KMADPNRFRGKDLPV          | 2.67 | 4.45 | 2.40 | 0.68 | 0.22 | 0.28 |
| 37131 | 0 | 32280  | KMADPNRFRGKDLPV          | 2.67 | 4.45 | 2.40 | 3.81 | 0.22 | 0.28 |
| 37132 | 0 | 32280  | KMADPNRFRGKDLPV          | 2.67 | 4.45 | 2.40 | 3.81 | 0.22 | 1.34 |
| 37133 | 0 | 32287  | KMALYD                   | 1.88 | 0.01 | 1.96 | 0.44 | 0.85 | 0.28 |
| 37134 | 0 | 151950 | KMALYNLYPGV              | 2.39 | 0.01 | 0.78 | 0.44 | 1.93 | 1.27 |
| 37135 | 0 | 100217 | KMDAEFRHDS               | 2.29 | 0.01 | 0.78 | 0.44 | 1.93 | 0.28 |
| 37136 | 0 | 141689 | KMDKKYSAHKMKCTEV         | 2.73 | 0.01 | 1.66 | 1.20 | 0.22 | 0.28 |
| 37137 | 0 | 141689 | KMDKKYSAHKMKCTEV         | 2.73 | 0.01 | 1.66 | 2.55 | 0.22 | 0.28 |
| 37138 | 0 | 78186  | KMDKLELKG                | 2.26 | 0.01 | 3.45 | 0.68 | 0.22 | 0.28 |
| 37139 | 0 | 32296  | KMDTKPTDPTGIEP           | 2.65 | 0.01 | 2.56 | 1.12 | 0.22 | 0.28 |
| 37140 | 0 | 32296  | KMDTKPTDPTGIEP           | 2.65 | 0.01 | 2.56 | 0.44 | 0.85 | 0.28 |
| 37141 | 0 | 32306  | KMEKLQLKGTTYGVCSK<br>AFK | 2.93 | 0.01 | 2.85 | 2.02 | 0.22 | 0.28 |
| 37142 | 0 | 140570 | KMEMFTYIRCDMELT          | 2.66 | 0.01 | 3.34 | 3.22 | 0.22 | 0.28 |
| 37143 | 0 | 450754 | KMESGTA                  | 1.99 | 0.01 | 0.90 | 0.44 | 1.41 | 1.39 |
| 37144 | 0 | 32309  | KMFGEVKYFFERDP           | 2.61 | 0.01 | 2.94 | 1.15 | 0.22 | 1.27 |
| 37145 | 0 | 32309  | KMFGEVKYFFERDP           | 2.61 | 0.01 | 2.94 | 1.15 | 0.22 | 2.56 |
| 37146 | 0 | 32309  | KMFGEVKYFFERDP           | 2.61 | 0.01 | 2.94 | 1.15 | 0.22 | 2.56 |

|       |   |        |                                |      |      |      |      |      |      |
|-------|---|--------|--------------------------------|------|------|------|------|------|------|
| 37147 | 0 | 32310  | KMFGEVKYFFERDPLGQ<br>KVVDLLKEL | 3.21 | 0.01 | 2.94 | 0.44 | 0.85 | 1.27 |
| 37148 | 0 | 120699 | KMFPEVKEKGMAALPR<br>L          | 2.81 | 0.01 | 0.78 | 1.20 | 0.22 | 0.28 |
| 37149 | 0 | 120699 | KMFPEVKEKGMAALPR<br>L          | 2.81 | 0.01 | 0.78 | 1.20 | 0.22 | 0.28 |
| 37150 | 0 | 120699 | KMFPEVKEKGMAALPR<br>L          | 2.81 | 0.01 | 0.78 | 1.20 | 0.22 | 0.28 |
| 37151 | 0 | 120699 | KMFPEVKEKGMAALPR<br>L          | 2.81 | 0.01 | 0.78 | 0.44 | 1.13 | 0.28 |
| 37152 | 0 | 120699 | KMFPEVKEKGMAALPR<br>L          | 2.81 | 0.01 | 0.78 | 0.44 | 1.41 | 0.28 |
| 37153 | 0 | 120699 | KMFPEVKEKGMAALPR<br>L          | 2.81 | 0.01 | 0.78 | 1.20 | 0.22 | 0.28 |
| 37154 | 0 | 120699 | KMFPEVKEKGMAALPR<br>L          | 2.81 | 0.01 | 0.78 | 1.20 | 0.22 | 1.27 |
| 37155 | 0 | 32316  | KMGDYGEVTVECEPRS<br>GLN        | 2.86 | 0.01 | 3.61 | 3.01 | 0.22 | 0.28 |
| 37156 | 0 | 32316  | KMGDYGEVTVECEPRS<br>GLN        | 2.86 | 0.01 | 3.61 | 0.68 | 0.22 | 0.28 |
| 37157 | 0 | 32316  | KMGDYGEVTVECEPRS<br>GLN        | 2.86 | 0.01 | 3.22 | 1.15 | 0.22 | 0.28 |
| 37158 | 0 | 32316  | KMGDYGEVTVECEPRS<br>GLN        | 2.86 | 0.01 | 3.22 | 0.68 | 0.22 | 0.28 |
| 37159 | 0 | 32317  | KMGEEFTPDWMMESD<br>FQGW        | 2.90 | 0.01 | 0.90 | 0.68 | 0.22 | 1.39 |
| 37160 | 0 | 171837 | KMGMLKRRIMPEDII                | 2.68 | 0.01 | 0.78 | 0.44 | 1.41 | 0.28 |
| 37161 | 0 | 450755 | KMISATE                        | 1.99 | 0.01 | 0.90 | 0.44 | 1.41 | 1.39 |
| 37162 | 0 | 32331  | KMITEFEN                       | 2.12 | 0.01 | 2.99 | 0.44 | 0.85 | 0.28 |
| 37163 | 0 | 32337  | KMKEIAESYLGKQVK                | 2.67 | 0.01 | 2.30 | 0.44 | 0.85 | 0.28 |
| 37164 | 0 | 132411 | KMKGTFVE                       | 2.13 | 0.01 | 0.78 | 0.44 | 1.13 | 0.28 |
| 37165 | 0 | 32345  | KMKRTIKENAMYRDRKF<br>DSNDED    | 3.10 | 0.01 | 3.42 | 1.12 | 0.22 | 0.85 |
| 37166 | 0 | 32345  | KMKRTIKENAMYRDRKF<br>DSNDED    | 3.10 | 0.01 | 3.42 | 1.12 | 0.22 | 0.85 |
| 37167 | 0 | 32345  | KMKRTIKENAMYRDRKF<br>DSNDED    | 3.10 | 0.01 | 3.42 | 1.12 | 0.22 | 0.85 |
| 37168 | 0 | 32345  | KMKRTIKENAMYRDRKF<br>DSNDED    | 3.10 | 0.01 | 3.42 | 1.12 | 0.22 | 0.85 |
| 37169 | 0 | 32345  | KMKRTIKENAMYRDRKF<br>DSNDED    | 3.10 | 0.01 | 3.42 | 1.12 | 0.22 | 0.85 |
| 37170 | 0 | 79587  | KMKSRKSCGIAVGTTVV<br>DADKYAVT  | 3.18 | 0.01 | 3.21 | 2.16 | 0.22 | 0.28 |
| 37171 | 0 | 79587  | KMKSRKSCGIAVGTTVV<br>DADKYAVT  | 3.18 | 0.01 | 3.21 | 2.16 | 0.22 | 0.28 |
| 37172 | 0 | 79587  | KMKSRKSCGIAVGTTVV<br>DADKYAVT  | 3.18 | 0.01 | 3.21 | 2.16 | 0.22 | 0.28 |

|       |   |        |                                                 |      |      |      |      |      |      |
|-------|---|--------|-------------------------------------------------|------|------|------|------|------|------|
| 37173 | 0 | 79587  | KMKSRKSCGIAVGTTVV<br>DADKYAVT                   | 3.18 | 0.01 | 3.21 | 2.16 | 0.22 | 0.28 |
| 37174 | 0 | 79587  | KMKSRKSCGIAVGTTVV<br>DADKYAVT                   | 3.18 | 0.01 | 3.21 | 2.16 | 0.22 | 0.28 |
| 37175 | 0 | 79587  | KMKSRKSCGIAVGTTVV<br>DADKYAVT                   | 3.18 | 0.01 | 3.21 | 2.16 | 0.22 | 0.28 |
| 37176 | 0 | 79587  | KMKSRKSCGIAVGTTVV<br>DADKYAVT                   | 3.18 | 0.01 | 3.21 | 2.16 | 0.22 | 0.28 |
| 37177 | 0 | 79588  | KMKSRKSCGIAVGTTW<br>DADKYAVTPTTSDVAGL<br>EKDPVA | 3.60 | 0.01 | 0.90 | 2.16 | 0.22 | 0.28 |
| 37178 | 0 | 79588  | KMKSRKSCGIAVGTTW<br>DADKYAVTPTTSDVAGL<br>EKDPVA | 3.60 | 0.01 | 0.90 | 2.16 | 0.22 | 0.28 |
| 37179 | 0 | 79588  | KMKSRKSCGIAVGTTW<br>DADKYAVTPTTSDVAGL<br>EKDPVA | 3.60 | 0.01 | 0.90 | 2.16 | 0.22 | 0.28 |
| 37180 | 0 | 119604 | KMLKNREPVQLETLSIRG<br>NRIRY                     | 3.07 | 0.01 | 0.78 | 3.44 | 0.22 | 0.28 |
| 37181 | 0 | 119604 | KMLKNREPVQLETLSIRG<br>NRIRY                     | 3.07 | 0.01 | 0.78 | 3.44 | 0.22 | 0.28 |
| 37182 | 0 | 119604 | KMLKNREPVQLETLSIRG<br>NRIRY                     | 3.07 | 0.01 | 0.78 | 3.44 | 0.22 | 0.28 |
| 37183 | 0 | 119604 | KMLKNREPVQLETLSIRG<br>NRIRY                     | 3.07 | 0.01 | 0.78 | 3.44 | 0.22 | 0.28 |
| 37184 | 0 | 119604 | KMLKNREPVQLETLSIRG<br>NRIRY                     | 3.07 | 0.01 | 0.78 | 3.44 | 0.22 | 0.28 |
| 37185 | 0 | 119604 | KMLKNREPVQLETLSIRG<br>NRIRY                     | 3.07 | 0.01 | 0.78 | 3.44 | 0.22 | 0.28 |
| 37186 | 0 | 119604 | KMLKNREPVQLETLSIRG<br>NRIRY                     | 3.07 | 0.01 | 0.78 | 3.44 | 0.22 | 0.28 |
| 37187 | 0 | 119604 | KMLKNREPVQLETLSIRG<br>NRIRY                     | 3.07 | 0.01 | 0.78 | 3.44 | 0.22 | 0.28 |
| 37188 | 0 | 119604 | KMLKNREPVQLETLSIRG<br>NRIRY                     | 3.07 | 0.01 | 0.78 | 3.44 | 0.22 | 0.28 |
| 37189 | 0 | 175611 | KMLTEIYTEDNFVKFFKV<br>LNRKTYLNFDKAVFK           | 3.46 | 0.01 | 2.08 | 1.12 | 0.22 | 0.85 |
| 37190 | 0 | 152717 | KMNILIRDKR                                      | 2.34 | 0.01 | 2.18 | 2.16 | 0.22 | 0.28 |
| 37191 | 0 | 32370  | KMNMHLENVPWIMNK<br>QNLFK                        | 2.95 | 0.01 | 0.90 | 2.63 | 0.22 | 1.48 |
| 37192 | 0 | 32370  | KMNMHLENVPWIMNK<br>QNLFK                        | 2.95 | 0.01 | 0.90 | 2.63 | 2.25 | 1.75 |
| 37193 | 0 | 32371  | KMNMHMENVAWIMK<br>NQNLFK                        | 2.95 | 0.01 | 0.90 | 2.63 | 0.22 | 1.48 |
| 37194 | 0 | 32372  | KMNMHMENVPWIVKN<br>QNLFK                        | 2.95 | 0.01 | 0.90 | 2.63 | 0.22 | 1.48 |

|       |   |        |                             |      |      |      |      |      |      |
|-------|---|--------|-----------------------------|------|------|------|------|------|------|
| 37195 | 0 | 32376  | KMNMNLEHVPWIMKN<br>QNLFK    | 2.95 | 0.01 | 0.90 | 2.63 | 0.22 | 1.48 |
| 37196 | 0 | 108503 | KMPIEADPL                   | 2.21 | 0.01 | 0.90 | 0.44 | 1.13 | 1.39 |
| 37197 | 0 | 32382  | KMPMYIAGYKTFDGR             | 2.67 | 0.01 | 3.24 | 1.15 | 2.26 | 0.28 |
| 37198 | 0 | 32384  | KMQAMKLEKDNAMDR             | 2.71 | 0.01 | 3.15 | 0.44 | 1.23 | 0.85 |
| 37199 | 0 | 32384  | KMQAMKLEKDNAMDR             | 2.71 | 0.01 | 3.15 | 0.44 | 1.23 | 0.85 |
| 37200 | 0 | 32384  | KMQAMKLEKDNAMDR             | 2.71 | 0.01 | 2.36 | 0.44 | 1.23 | 1.28 |
| 37201 | 0 | 32384  | KMQAMKLEKDNAMDR             | 2.71 | 0.01 | 2.36 | 0.44 | 1.23 | 1.27 |
| 37202 | 0 | 32384  | KMQAMKLEKDNAMDR             | 2.71 | 0.01 | 2.36 | 0.44 | 1.23 | 1.28 |
| 37203 | 0 | 32384  | KMQAMKLEKDNAMDR             | 2.71 | 0.01 | 2.36 | 0.44 | 1.23 | 1.27 |
| 37204 | 0 | 32387  | KMQQGNRRGIRVVPS             | 2.73 | 0.01 | 3.50 | 2.37 | 0.85 | 0.28 |
| 37205 | 0 | 32388  | KMQQGNRRGIRVVPS<br>APPME    | 2.97 | 0.01 | 3.50 | 2.37 | 0.85 | 0.28 |
| 37206 | 0 | 175230 | KMQQNGYENPT                 | 2.38 | 0.01 | 0.78 | 0.68 | 0.22 | 0.28 |
| 37207 | 0 | 139528 | KMQQNGYENPTYKFFE<br>QMQN    | 2.97 | 0.01 | 0.78 | 1.12 | 0.22 | 0.85 |
| 37208 | 0 | 132851 | KMSESGAGVQFYLP              | 2.64 | 0.01 | 3.16 | 3.16 | 0.22 | 0.28 |
| 37209 | 0 | 171843 | KMTFHSQKFCADSDG             | 2.67 | 0.01 | 0.78 | 0.44 | 1.41 | 0.28 |
| 37210 | 0 | 117319 | KMTLKNREPQLETLSIR<br>GNRIRY | 3.11 | 0.01 | 0.78 | 0.44 | 1.13 | 0.28 |
| 37211 | 0 | 117319 | KMTLKNREPQLETLSIR<br>GNRIRY | 3.11 | 0.01 | 0.78 | 0.44 | 1.41 | 0.28 |
| 37212 | 0 | 117319 | KMTLKNREPQLETLSIR<br>GNRIRY | 3.11 | 0.01 | 0.78 | 0.44 | 1.13 | 0.28 |
| 37213 | 0 | 117319 | KMTLKNREPQLETLSIR<br>GNRIRY | 3.11 | 0.01 | 0.78 | 0.44 | 1.13 | 0.28 |
| 37214 | 0 | 117319 | KMTLKNREPQLETLSIR<br>GNRIRY | 3.11 | 0.01 | 0.78 | 0.44 | 1.13 | 0.28 |
| 37215 | 0 | 117319 | KMTLKNREPQLETLSIR<br>GNRIRY | 3.11 | 0.01 | 0.78 | 0.44 | 1.13 | 0.28 |
| 37216 | 0 | 117319 | KMTLKNREPQLETLSIR<br>GNRIRY | 3.11 | 0.01 | 0.78 | 0.44 | 1.13 | 0.28 |
| 37217 | 0 | 117319 | KMTLKNREPQLETLSIR<br>GNRIRY | 3.11 | 0.01 | 0.78 | 0.44 | 1.13 | 0.28 |
| 37218 | 0 | 117319 | KMTLKNREPQLETLSIR<br>GNRIRY | 3.11 | 0.01 | 0.78 | 0.44 | 1.13 | 0.28 |
| 37219 | 0 | 117319 | KMTLKNREPQLETLSIR<br>GNRIRY | 3.11 | 0.01 | 0.78 | 0.44 | 1.13 | 0.28 |
| 37220 | 0 | 117319 | KMTLKNREPQLETLSIR<br>GNRIRY | 3.11 | 0.01 | 0.78 | 0.44 | 1.13 | 0.28 |

|       |   |        |                                |      |      |      |      |      |      |
|-------|---|--------|--------------------------------|------|------|------|------|------|------|
| 37221 | 0 | 117319 | KMTLKNREPVQLETLSIR<br>GNRIRY   | 3.11 | 0.01 | 0.78 | 0.44 | 1.13 | 0.28 |
| 37222 | 0 | 117319 | KMTLKNREPVQLETLSIR<br>GNRIRY   | 3.11 | 0.01 | 0.78 | 0.44 | 1.13 | 0.28 |
| 37223 | 0 | 117319 | KMTLKNREPVQLETLSIR<br>GNRIRY   | 3.11 | 0.01 | 0.78 | 0.44 | 1.13 | 0.28 |
| 37224 | 0 | 117319 | KMTLKNREPVQLETLSIR<br>GNRIRY   | 3.11 | 0.01 | 0.78 | 0.44 | 1.13 | 0.28 |
| 37225 | 0 | 117319 | KMTLKNREPVQLETLSIR<br>GNRIRY   | 3.11 | 0.01 | 0.78 | 0.44 | 1.13 | 0.28 |
| 37226 | 0 | 117319 | KMTLKNREPVQLETLSIR<br>GNRIRY   | 3.11 | 0.01 | 0.78 | 0.44 | 1.13 | 0.28 |
| 37227 | 0 | 32408  | KMTVEAVKAKKTIL                 | 2.64 | 0.01 | 2.94 | 2.00 | 0.22 | 0.28 |
| 37228 | 0 | 98852  | KMVAPVLEEIATERATDL<br>TV       | 2.96 | 0.01 | 2.04 | 0.44 | 0.85 | 0.28 |
| 37229 | 0 | 190671 | KMVLHKTAQPSVDLTFG<br>GVKFTVVNN | 3.17 | 0.01 | 4.15 | 0.68 | 0.22 | 0.85 |
| 37230 | 0 | 190671 | KMVLHKTAQPSVDLTFG<br>GVKFTVVNN | 3.17 | 0.01 | 4.15 | 0.68 | 0.22 | 0.85 |
| 37231 | 0 | 190671 | KMVLHKTAQPSVDLTFG<br>GVKFTVVNN | 3.17 | 0.01 | 4.15 | 0.68 | 0.22 | 0.85 |
| 37232 | 0 | 190671 | KMVLHKTAQPSVDLTFG<br>GVKFTVVNN | 3.17 | 0.01 | 4.15 | 0.68 | 0.22 | 0.85 |
| 37233 | 0 | 190671 | KMVLHKTAQPSVDLTFG<br>GVKFTVVNN | 3.17 | 0.01 | 4.15 | 0.68 | 0.22 | 0.85 |
| 37234 | 0 | 190671 | KMVLHKTAQPSVDLTFG<br>GVKFTVVNN | 3.17 | 0.01 | 4.15 | 0.68 | 0.22 | 0.85 |
| 37235 | 0 | 32415  | KMVQVVYD                       | 2.13 | 0.01 | 2.21 | 1.12 | 0.22 | 0.28 |
| 37236 | 0 | 32415  | KMVQVVYD                       | 2.13 | 0.01 | 2.21 | 0.44 | 0.85 | 0.28 |
| 37237 | 0 | 32416  | KMVQVVYDYQ                     | 2.34 | 0.01 | 2.21 | 1.12 | 0.22 | 0.28 |
| 37238 | 0 | 32416  | KMVQVVYDYQ                     | 2.34 | 0.01 | 2.21 | 1.12 | 0.22 | 0.28 |
| 37239 | 0 | 32418  | KMVYATN                        | 1.99 | 0.01 | 2.14 | 0.44 | 0.85 | 0.28 |
| 37240 | 0 | 32418  | KMVYATN                        | 1.99 | 0.01 | 2.14 | 0.44 | 0.22 | 0.28 |
| 37241 | 0 | 134119 | KMVYEDTLTLFPFSGETV<br>FM       | 2.95 | 0.01 | 0.78 | 0.44 | 2.35 | 0.28 |
| 37242 | 0 | 123383 | KMWSDFLGK                      | 2.22 | 0.01 | 2.28 | 2.00 | 0.22 | 0.28 |
| 37243 | 0 | 99389  | KMYACR                         | 1.88 | 0.01 | 2.86 | 2.02 | 0.85 | 0.85 |
| 37244 | 0 | 32452  | KNAAKLRGDLRQWVSA<br>G          | 2.80 | 0.01 | 2.59 | 0.44 | 0.85 | 0.28 |
| 37245 | 0 | 107946 | KNAASERGSFTDLKS                | 2.66 | 0.01 | 0.90 | 0.44 | 1.13 | 1.39 |
| 37246 | 0 | 32454  | KNAETNPKGKGEVQ                 | 2.64 | 0.01 | 2.22 | 0.44 | 0.22 | 0.28 |
| 37247 | 0 | 32454  | KNAETNPKGKGEVQ                 | 2.64 | 0.01 | 2.22 | 3.23 | 0.22 | 0.28 |
| 37248 | 0 | 118471 | KNAGVEGSLIVEK                  | 2.56 | 0.01 | 0.78 | 0.44 | 1.74 | 0.85 |
| 37249 | 0 | 120700 | KNAIEGIK                       | 2.15 | 0.01 | 2.25 | 2.04 | 0.22 | 0.28 |
| 37250 | 0 | 120700 | KNAIEGIK                       | 2.15 | 0.01 | 2.25 | 2.04 | 0.22 | 0.28 |
| 37251 | 0 | 32457  | KNASLGLVGTHNGQIG<br>NPPNRDI    | 3.06 | 0.01 | 2.95 | 0.44 | 0.22 | 0.28 |

|       |   |        |                                                        |      |      |      |      |      |      |
|-------|---|--------|--------------------------------------------------------|------|------|------|------|------|------|
| 37252 | 0 | 135072 | KNATGMEVGWYRPPFS<br>RVVHL                              | 2.91 | 4.33 | 0.78 | 0.44 | 1.13 | 0.28 |
| 37253 | 0 | 135072 | KNATGMEVGWYRPPFS<br>RVVHL                              | 2.91 | 4.33 | 0.78 | 0.44 | 1.13 | 1.27 |
| 37254 | 0 | 225372 | KNATGMEVGWYRSPFS<br>RVVHLYR                            | 3.02 | 0.01 | 1.75 | 1.81 | 0.22 | 0.28 |
| 37255 | 0 | 177811 | KNNAVSDLSEKEAWP                                        | 2.68 | 0.01 | 0.78 | 0.44 | 1.13 | 0.85 |
| 37256 | 0 | 229305 | KNCHWPKSHTLWSNGV<br>LESEMIIPKNLAGPVSQH<br>NYRPGYHTQITG | 3.76 | 0.01 | 2.30 | 0.44 | 0.85 | 0.85 |
| 37257 | 0 | 229305 | KNCHWPKSHTLWSNGV<br>LESEMIIPKNLAGPVSQH<br>NYRPGYHTQITG | 3.76 | 0.01 | 2.30 | 0.44 | 0.85 | 0.85 |
| 37258 | 0 | 229305 | KNCHWPKSHTLWSNGV<br>LESEMIIPKNLAGPVSQH<br>NYRPGYHTQITG | 3.76 | 0.01 | 2.30 | 0.44 | 0.85 | 1.48 |
| 37259 | 0 | 229305 | KNCHWPKSHTLWSNGV<br>LESEMIIPKNLAGPVSQH<br>NYRPGYHTQITG | 3.76 | 0.01 | 2.30 | 0.44 | 0.85 | 1.48 |
| 37260 | 0 | 229305 | KNCHWPKSHTLWSNGV<br>LESEMIIPKNLAGPVSQH<br>NYRPGYHTQITG | 3.76 | 0.01 | 2.30 | 0.44 | 0.85 | 1.48 |
| 37261 | 0 | 32458  | KNCMACRYARTRFTNFI<br>VDDRGRHRWKSPIVVE<br>KLGKAE        | 3.59 | 0.01 | 3.93 | 1.15 | 0.22 | 0.85 |
| 37262 | 0 | 32458  | KNCMACRYARTRFTNFI<br>VDDRGRHRWKSPIVVE<br>KLGKAE        | 3.59 | 0.01 | 3.93 | 1.15 | 0.22 | 0.85 |
| 37263 | 0 | 32462  | KNDGTTVDLTVDAQWR<br>GKGE                               | 2.95 | 0.01 | 2.82 | 0.44 | 0.85 | 0.28 |
| 37264 | 0 | 32463  | KNDINVQLDDINVQLDD<br>INVQLDDINIQLDEINLN                | 3.55 | 0.01 | 2.22 | 0.44 | 1.74 | 0.28 |
| 37265 | 0 | 32463  | KNDINVQLDDINVQLDD<br>INVQLDDINIQLDEINLN                | 3.55 | 0.01 | 2.22 | 0.44 | 1.74 | 0.28 |
| 37266 | 0 | 32463  | KNDINVQLDDINVQLDD<br>INVQLDDINIQLDEINLN                | 3.55 | 0.01 | 2.22 | 0.44 | 1.74 | 0.28 |
| 37267 | 0 | 119478 | KNDK                                                   | 1.60 | 0.01 | 0.78 | 0.44 | 0.85 | 0.28 |
| 37268 | 0 | 119478 | KNDK                                                   | 1.60 | 0.01 | 0.78 | 0.44 | 0.85 | 0.28 |
| 37269 | 0 | 119478 | KNDK                                                   | 1.60 | 0.01 | 0.78 | 0.44 | 1.13 | 0.28 |

|       |   |        |                                                                      |      |      |      |      |      |      |
|-------|---|--------|----------------------------------------------------------------------|------|------|------|------|------|------|
| 37270 | 0 | 122816 | KNDLQLQVQAEQDNLA<br>DAEERCQDL                                        | 3.20 | 0.01 | 0.78 | 2.04 | 0.22 | 0.28 |
| 37271 | 0 | 143965 | KNDPELDQQLANLDLNS<br>EK                                              | 2.94 | 0.01 | 0.78 | 0.44 | 1.41 | 0.28 |
| 37272 | 0 | 143965 | KNDPELDQQLANLDLNS<br>EK                                              | 2.94 | 0.01 | 0.78 | 0.44 | 1.41 | 0.28 |
| 37273 | 0 | 143965 | KNDPELDQQLANLDLNS<br>EK                                              | 2.94 | 0.01 | 0.78 | 0.44 | 1.41 | 0.28 |
| 37274 | 0 | 143965 | KNDPELDQQLANLDLNS<br>EK                                              | 2.94 | 0.01 | 0.78 | 0.44 | 1.41 | 0.28 |
| 37275 | 0 | 143965 | KNDPELDQQLANLDLNS<br>EK                                              | 2.94 | 0.01 | 0.78 | 0.44 | 1.41 | 2.12 |
| 37276 | 0 | 143965 | KNDPELDQQLANLDLNS<br>EK                                              | 2.94 | 0.01 | 0.78 | 0.44 | 1.41 | 2.12 |
| 37277 | 0 | 32465  | KNDSDGRLVAAIN                                                        | 2.52 | 0.01 | 2.93 | 0.68 | 0.22 | 0.28 |
| 37278 | 0 | 142433 | KNDSLPHEEPNNLE                                                       | 2.64 | 0.01 | 2.59 | 0.44 | 0.85 | 0.85 |
| 37279 | 0 | 235149 | KNDSMTIYSIVNHSRE                                                     | 2.71 | 0.01 | 1.75 | 1.20 | 0.22 | 0.85 |
| 37280 | 0 | 32466  | KNDTVHSGASPR                                                         | 2.43 | 0.01 | 0.90 | 0.68 | 0.22 | 1.39 |
| 37281 | 0 | 135075 | KNDVVNSQDKTEKTE                                                      | 2.71 | 0.01 | 4.63 | 2.13 | 0.85 | 0.28 |
| 37282 | 0 | 135076 | KNDVVNSQNKTEKTE                                                      | 2.71 | 0.01 | 3.59 | 2.13 | 0.85 | 0.28 |
| 37283 | 0 | 32470  | KNEEEIAQ                                                             | 2.12 | 0.01 | 2.99 | 0.44 | 0.85 | 0.28 |
| 37284 | 0 | 119995 | KNEELRLYHHLFNNY                                                      | 2.69 | 0.01 | 0.78 | 3.81 | 0.22 | 0.28 |
| 37285 | 0 | 117548 | KNEERKQNKVEAKLRAK<br>QEQAQKQLEEDAE                                   | 3.43 | 0.01 | 0.78 | 0.44 | 1.13 | 1.27 |
| 37286 | 0 | 32471  | KNEGDLVAQKEEFY                                                       | 2.67 | 0.01 | 1.66 | 1.15 | 0.22 | 0.28 |
| 37287 | 0 | 32471  | KNEGDLVAQKEEFY                                                       | 2.67 | 0.01 | 1.66 | 1.15 | 0.22 | 0.28 |
| 37288 | 0 | 94569  | KNEILKRHNDFRQNVAK<br>GLE                                             | 2.94 | 0.01 | 3.65 | 0.68 | 0.22 | 0.28 |
| 37289 | 0 | 32472  | KNEKKCINSKSGQGDKI<br>QGACKRKCEK                                      | 3.27 | 0.01 | 2.86 | 0.44 | 0.85 | 0.85 |
| 37290 | 0 | 467355 | KNEKVEHEIVEVEEI                                                      | 2.74 | 0.01 | 1.66 | 0.44 | 0.85 | 1.28 |
| 37291 | 0 | 94864  | KNELTNKYDIKQIENELN<br>QKVSAMNNIDRFLTESS<br>ISYLMKIINEVKINKLREY<br>DE | 4.01 | 0.01 | 3.85 | 0.68 | 0.22 | 0.85 |
| 37292 | 0 | 32475  | KNEQAGQVQVLSSV                                                       | 2.62 | 0.01 | 2.69 | 0.44 | 0.85 | 0.28 |
| 37293 | 0 | 32475  | KNEQAGQVQVLSSV                                                       | 2.62 | 0.01 | 2.69 | 0.44 | 1.41 | 0.28 |
| 37294 | 0 | 32477  | KNESKYSN                                                             | 2.17 | 0.01 | 2.96 | 0.68 | 0.22 | 0.28 |
| 37295 | 0 | 32477  | KNESKYSN                                                             | 2.17 | 0.01 | 2.96 | 0.68 | 0.22 | 0.28 |
| 37296 | 0 | 32478  | KNESKYSNTFI                                                          | 2.42 | 0.01 | 2.22 | 1.15 | 0.22 | 0.28 |
| 37297 | 0 | 32479  | KNESKYSNTFINNAY                                                      | 2.70 | 0.01 | 1.66 | 1.15 | 0.22 | 0.85 |
| 37298 | 0 | 32480  | KNESKYSNTFINNAYNM<br>SIR                                             | 2.96 | 4.93 | 0.90 | 2.74 | 0.22 | 0.28 |
| 37299 | 0 | 32481  | KNESKYSNTFINNAYNM<br>SIR                                             | 2.96 | 4.63 | 0.90 | 2.74 | 0.22 | 0.28 |



|       |   |        |                          |      |      |      |      |      |      |
|-------|---|--------|--------------------------|------|------|------|------|------|------|
| 37300 | 0 | 32481  | KNESKYSNTFINNAYNM<br>SIR | 2.96 | 4.63 | 0.90 | 0.68 | 0.22 | 0.85 |
| 37301 | 0 | 189696 | KNESKYSNTFINNAYNM<br>SIR | 2.96 | 3.93 | 0.90 | 2.74 | 0.22 | 0.85 |
| 37302 | 0 | 189696 | KNESKYSNTFINNAYNM<br>SIR | 2.96 | 3.93 | 0.90 | 0.68 | 0.22 | 0.85 |
| 37303 | 0 | 189697 | KNESKYSNTFINNAYNM<br>SIR | 2.96 | 3.85 | 0.90 | 2.74 | 0.22 | 0.85 |
| 37304 | 0 | 189697 | KNESKYSNTFINNAYNM<br>SIR | 2.96 | 3.85 | 0.90 | 0.68 | 0.22 | 0.85 |
| 37305 | 0 | 189696 | KNESKYSNTFINNAYNM<br>SIR | 2.96 | 3.93 | 0.90 | 0.68 | 0.22 | 0.85 |
| 37306 | 0 | 189696 | KNESKYSNTFINNAYNM<br>SIR | 2.96 | 3.93 | 0.90 | 0.68 | 0.22 | 0.85 |
| 37307 | 0 | 189697 | KNESKYSNTFINNAYNM<br>SIR | 2.96 | 3.85 | 0.90 | 0.68 | 0.22 | 0.85 |
| 37308 | 0 | 189696 | KNESKYSNTFINNAYNM<br>SIR | 2.96 | 3.93 | 0.90 | 0.68 | 0.22 | 0.85 |
| 37309 | 0 | 189697 | KNESKYSNTFINNAYNM<br>SIR | 2.96 | 3.85 | 0.90 | 0.68 | 0.22 | 0.85 |
| 37310 | 0 | 189697 | KNESKYSNTFINNAYNM<br>SIR | 2.96 | 3.85 | 0.90 | 0.68 | 0.22 | 0.85 |
| 37311 | 0 | 189696 | KNESKYSNTFINNAYNM<br>SIR | 2.96 | 3.93 | 0.90 | 0.68 | 0.22 | 0.85 |
| 37312 | 0 | 189697 | KNESKYSNTFINNAYNM<br>SIR | 2.96 | 3.85 | 0.90 | 0.68 | 0.22 | 0.85 |
| 37313 | 0 | 189696 | KNESKYSNTFINNAYNM<br>SIR | 2.96 | 3.93 | 0.90 | 0.68 | 0.22 | 1.75 |
| 37314 | 0 | 189696 | KNESKYSNTFINNAYNM<br>SIR | 2.96 | 3.93 | 0.90 | 0.68 | 0.22 | 1.75 |
| 37315 | 0 | 189696 | KNESKYSNTFINNAYNM<br>SIR | 2.96 | 3.93 | 0.90 | 0.68 | 0.22 | 1.75 |
| 37316 | 0 | 189697 | KNESKYSNTFINNAYNM<br>SIR | 2.96 | 3.85 | 0.90 | 0.68 | 0.22 | 1.75 |
| 37317 | 0 | 189697 | KNESKYSNTFINNAYNM<br>SIR | 2.96 | 3.85 | 0.90 | 0.68 | 0.22 | 1.75 |
| 37318 | 0 | 189697 | KNESKYSNTFINNAYNM<br>SIR | 2.96 | 3.85 | 0.90 | 0.68 | 0.22 | 1.75 |
| 37319 | 0 | 189697 | KNESKYSNTFINNAYNM<br>SIR | 2.96 | 3.85 | 0.90 | 0.68 | 0.22 | 1.75 |
| 37320 | 0 | 189697 | KNESKYSNTFINNAYNM<br>SIR | 2.96 | 3.85 | 0.90 | 0.68 | 0.22 | 1.75 |
| 37321 | 0 | 189696 | KNESKYSNTFINNAYNM<br>SIR | 2.96 | 3.93 | 0.90 | 0.68 | 0.22 | 1.75 |
| 37322 | 0 | 32482  | KNESKYSNTFINNAYNM<br>SIR | 2.96 | 0.01 | 1.66 | 0.68 | 0.22 | 1.27 |

|       |   |        |                                    |      |      |      |      |      |      |
|-------|---|--------|------------------------------------|------|------|------|------|------|------|
| 37323 | 0 | 32482  | KNESKYSNTFINNAYNM<br>SIR           | 2.96 | 0.01 | 1.66 | 2.74 | 0.22 | 0.85 |
| 37324 | 0 | 32482  | KNESKYSNTFINNAYNM<br>SIR           | 2.96 | 0.01 | 1.66 | 0.68 | 0.22 | 0.85 |
| 37325 | 0 | 32482  | KNESKYSNTFINNAYNM<br>SIR           | 2.96 | 0.01 | 1.66 | 0.68 | 0.22 | 0.85 |
| 37326 | 0 | 32483  | KNESKYSNTFINNAYNM<br>SIRRS         | 3.10 | 0.01 | 1.66 | 1.81 | 0.22 | 0.28 |
| 37327 | 0 | 32483  | KNESKYSNTFINNAYNM<br>SIRRS         | 3.10 | 0.01 | 1.66 | 0.68 | 0.22 | 0.28 |
| 37328 | 0 | 32483  | KNESKYSNTFINNAYNM<br>SIRRS         | 3.10 | 0.01 | 1.66 | 1.20 | 0.22 | 0.28 |
| 37329 | 0 | 32484  | KNESKYSNTFQMNAYN<br>MSIR           | 2.95 | 0.01 | 0.90 | 2.63 | 0.22 | 1.48 |
| 37330 | 0 | 32484  | KNESKYSNTFQMNAYN<br>MSIR           | 2.95 | 0.01 | 0.90 | 2.74 | 0.22 | 1.48 |
| 37331 | 0 | 32485  | KNESKYSNTFQVNAYN<br>MSIR           | 2.94 | 0.01 | 0.90 | 2.63 | 0.22 | 1.48 |
| 37332 | 0 | 32485  | KNESKYSNTFQVNAYN<br>MSIR           | 2.94 | 0.01 | 0.90 | 2.74 | 0.22 | 1.48 |
| 37333 | 0 | 98174  | KNETPEVT                           | 2.14 | 0.01 | 2.60 | 0.44 | 1.23 | 0.85 |
| 37334 | 0 | 32486  | KNEVFC                             | 1.88 | 0.01 | 1.96 | 0.44 | 0.85 | 0.28 |
| 37335 | 0 | 32494  | KNFNFEVE                           | 2.16 | 0.01 | 2.99 | 0.44 | 0.85 | 0.28 |
| 37336 | 0 | 133178 | KNFVKPNETKTYFWK                    | 2.71 | 0.01 | 0.78 | 1.15 | 0.22 | 0.28 |
| 37337 | 0 | 133178 | KNFVKPNETKTYFWK                    | 2.71 | 0.01 | 0.78 | 1.15 | 0.22 | 2.02 |
| 37338 | 0 | 78434  | KNGDVEASAITTYVGFS<br>VVYP          | 2.97 | 0.01 | 2.14 | 3.70 | 0.22 | 0.28 |
| 37339 | 0 | 78434  | KNGDVEASAITTYVGFS<br>VVYP          | 2.97 | 0.01 | 2.14 | 3.70 | 0.22 | 0.28 |
| 37340 | 0 | 78434  | KNGDVEASAITTYVGFS<br>VVYP          | 2.97 | 0.01 | 2.14 | 3.70 | 0.22 | 0.28 |
| 37341 | 0 | 78434  | KNGDVEASAITTYVGFS<br>VVYP          | 2.97 | 0.01 | 2.14 | 3.70 | 0.22 | 0.28 |
| 37342 | 0 | 422487 | KNGICVSSDQN                        | 2.38 | 0.01 | 0.78 | 2.37 | 0.22 | 0.28 |
| 37343 | 0 | 422487 | KNGICVSSDQN                        | 2.38 | 0.01 | 0.78 | 0.68 | 0.22 | 0.28 |
| 37344 | 0 | 32501  | KNGLENYAFSMKNAVN<br>DPN            | 2.88 | 0.01 | 2.30 | 0.44 | 0.85 | 0.28 |
| 37345 | 0 | 32501  | KNGLENYAFSMKNAVN<br>DPN            | 2.88 | 0.01 | 2.30 | 0.44 | 1.41 | 0.28 |
| 37346 | 0 | 32502  | KNGLENYAYSMKNTLSD<br>SNV           | 2.95 | 0.01 | 2.78 | 2.49 | 0.85 | 0.28 |
| 37347 | 0 | 32502  | KNGLENYAYSMKNTLSD<br>SNV           | 2.95 | 0.01 | 2.78 | 0.44 | 0.85 | 0.28 |
| 37348 | 0 | 143709 | KNGLSEEIEKEVGQAEG                  | 2.81 | 0.01 | 0.78 | 1.12 | 0.22 | 0.85 |
| 37349 | 0 | 129118 | KNGQEIQMSGKYIFESI<br>GAKRTLTIQCSLA | 3.41 | 0.01 | 0.78 | 2.04 | 0.22 | 0.28 |

|       |   |        |                                  |      |      |      |      |      |      |
|-------|---|--------|----------------------------------|------|------|------|------|------|------|
| 37350 | 0 | 135703 | KNGRCEQF                         | 2.10 | 0.01 | 0.78 | 0.44 | 2.35 | 0.28 |
| 37351 | 0 | 321356 | KNGTATTGDSGSTA                   | 2.73 | 0.01 | 1.61 | 0.44 | 0.85 | 1.28 |
| 37352 | 0 | 32506  | KNHKNLLKIAQYAAQNR<br>RGLDLL      | 3.08 | 0.01 | 2.04 | 0.44 | 0.85 | 0.28 |
| 37353 | 0 | 32506  | KNHKNLLKIAQYAAQNR<br>RGLDLL      | 3.08 | 0.01 | 2.04 | 0.44 | 1.59 | 0.28 |
| 37354 | 0 | 32508  | KNHTSPDVLGDISGIN                 | 2.79 | 0.01 | 2.48 | 0.44 | 0.85 | 0.28 |
| 37355 | 0 | 32508  | KNHTSPDVLGDISGIN                 | 2.79 | 0.01 | 2.48 | 1.20 | 0.22 | 0.28 |
| 37356 | 0 | 129119 | KNIEDVIAQGIGKLA                  | 2.69 | 0.01 | 0.78 | 0.44 | 1.13 | 0.85 |
| 37357 | 0 | 120701 | KNIEEKSGMEGRK                    | 2.58 | 0.01 | 0.78 | 2.04 | 0.22 | 1.27 |
| 37358 | 0 | 118472 | KNIGAKLVQDVAN                    | 2.56 | 0.01 | 0.78 | 0.44 | 1.74 | 0.85 |
| 37359 | 0 | 118472 | KNIGAKLVQDVAN                    | 2.56 | 0.01 | 0.78 | 0.44 | 1.59 | 0.85 |
| 37360 | 0 | 118472 | KNIGAKLVQDVAN                    | 2.56 | 0.01 | 0.78 | 0.44 | 1.74 | 0.85 |
| 37361 | 0 | 181923 | KNIHDRMKKNNGNFVT<br>DNFVKNSWEISN | 3.27 | 0.01 | 0.90 | 0.44 | 1.74 | 0.28 |
| 37362 | 0 | 181923 | KNIHDRMKKNNGNFVT<br>DNFVKNSWEISN | 3.27 | 0.01 | 0.90 | 0.44 | 1.74 | 0.28 |
| 37363 | 0 | 181923 | KNIHDRMKKNNGNFVT<br>DNFVKNSWEISN | 3.27 | 0.01 | 0.90 | 0.44 | 1.74 | 0.28 |
| 37364 | 0 | 181923 | KNIHDRMKKNNGNFVT<br>DNFVKNSWEISN | 3.27 | 0.01 | 0.90 | 0.44 | 1.74 | 0.28 |

|       |   |       |                     |      |      |      |      |      |      |
|-------|---|-------|---------------------|------|------|------|------|------|------|
|       |   |       | KNIINTSILNLRYESNHLI |      |      |      |      |      |      |
|       |   |       | DLSRYASKINIGSKVNFD  |      |      |      |      |      |      |
|       |   |       | PIDKNQIQLFNLESSKIEV |      |      |      |      |      |      |
|       |   |       | ILKNAIVYNSMYENFSTS  |      |      |      |      |      |      |
|       |   |       | FWIRIPKYFNSISLNNEYT |      |      |      |      |      |      |
|       |   |       | IINCMENNSGWKVSLNY   |      |      |      |      |      |      |
|       |   |       | GEIIWTLQDTQEIKQRV   |      |      |      |      |      |      |
|       |   |       | VFKYSQMINISDYINRWI  |      |      |      |      |      |      |
|       |   |       | FVTITNNRLNNSKIYING  |      |      |      |      |      |      |
|       |   |       | RLIDQKPISNLGNIHASN  |      |      |      |      |      |      |
|       |   |       | NIMFKLDGCRDTHRYIW   |      |      |      |      |      |      |
|       |   |       | IKYFNLFDKELNEKEIKDL |      |      |      |      |      |      |
| 37365 | 0 | 32514 | YDNQSNSGILKDFWGD    | 6.04 | 0.01 | 3.16 | 1.20 | 0.22 | 1.34 |
|       |   |       | YLQYDKPYMMLNLYDPN   |      |      |      |      |      |      |
|       |   |       | KYVDVNNVGIRGYMYL    |      |      |      |      |      |      |
|       |   |       | KGPRGSVMTTNIYLNSS   |      |      |      |      |      |      |
|       |   |       | LYRGTKFIIKKYASGNKD  |      |      |      |      |      |      |
|       |   |       | NIVRNNDRVYINVVKN    |      |      |      |      |      |      |
|       |   |       | KEYRLATNASQAGVEKIL  |      |      |      |      |      |      |
|       |   |       | SALEIPDVGNLSQVVVM   |      |      |      |      |      |      |
|       |   |       | KSKNDQGITNKCKMNL    |      |      |      |      |      |      |
|       |   |       | QDNNGNDIGFIGFHQF    |      |      |      |      |      |      |
|       |   |       | NNIAKLVASNWWYNRQIE  |      |      |      |      |      |      |
|       |   |       | RSSRTLGCSEFIPVDD    |      |      |      |      |      |      |
|       |   |       | GWGERPL             |      |      |      |      |      |      |

|       |   |       |                     |      |      |      |      |      |      |
|-------|---|-------|---------------------|------|------|------|------|------|------|
|       |   |       | KNIINTSILNLRYESNHLI |      |      |      |      |      |      |
|       |   |       | DLSRYASKINIGSKVNFD  |      |      |      |      |      |      |
|       |   |       | PIDKNQIQLFNLESSKIEV |      |      |      |      |      |      |
|       |   |       | ILKNAIVYNSMYENFSTS  |      |      |      |      |      |      |
|       |   |       | FWIRIPKYFNSISLNNEYT |      |      |      |      |      |      |
|       |   |       | IINCMENNSGWKVSLNY   |      |      |      |      |      |      |
|       |   |       | GEIIWTLQDTQEIKQRV   |      |      |      |      |      |      |
|       |   |       | VFKYSQMINISDYINRWI  |      |      |      |      |      |      |
|       |   |       | FVTITNNRLNNSKIYING  |      |      |      |      |      |      |
|       |   |       | RLIDQKPISNLGNIHASN  |      |      |      |      |      |      |
|       |   |       | NIMFKLDGCRDTHRYIW   |      |      |      |      |      |      |
|       |   |       | IKYFNLFDKELNEKEIKDL |      |      |      |      |      |      |
| 37366 | 0 | 32514 | YDNQSNSGILKDFWGD    | 6.04 | 0.01 | 3.16 | 1.20 | 0.22 | 0.85 |
|       |   |       | YLQYDKPYMMLNLYDPN   |      |      |      |      |      |      |
|       |   |       | KYVDVNNVGIRGYMYL    |      |      |      |      |      |      |
|       |   |       | KGPRGSVMTTNIYLNSS   |      |      |      |      |      |      |
|       |   |       | LYRGTKFIIKKYASGNKD  |      |      |      |      |      |      |
|       |   |       | NIVRNNDRVYINVVKN    |      |      |      |      |      |      |
|       |   |       | KEYRLATNASQAGVEKIL  |      |      |      |      |      |      |
|       |   |       | SALEIPDVGNLSQVVVM   |      |      |      |      |      |      |
|       |   |       | KSKNDQGITNKCKMNL    |      |      |      |      |      |      |
|       |   |       | QDNNGNDIGFIGFHQF    |      |      |      |      |      |      |
|       |   |       | NNIAKLVASNWAYNRQIE  |      |      |      |      |      |      |
|       |   |       | RSSRTLGCSEFIPVDD    |      |      |      |      |      |      |
|       |   |       | GWGERPL             |      |      |      |      |      |      |

|       |   |       |                     |      |      |      |      |      |      |
|-------|---|-------|---------------------|------|------|------|------|------|------|
|       |   |       | KNIINTSILNLRYESNHLI |      |      |      |      |      |      |
|       |   |       | DLSRYASKINIGSKVNFD  |      |      |      |      |      |      |
|       |   |       | PIDKNQIQLFNLESSKIEV |      |      |      |      |      |      |
|       |   |       | ILKNAIVYNSMYENFSTS  |      |      |      |      |      |      |
|       |   |       | FWIRIPKYFNSISLNNEYT |      |      |      |      |      |      |
|       |   |       | IINCMENNSGWKVSLNY   |      |      |      |      |      |      |
|       |   |       | GEIIWTLQDTQEIKQRV   |      |      |      |      |      |      |
|       |   |       | VFKYSQMINISDYINRWI  |      |      |      |      |      |      |
|       |   |       | FVTITNNRLNNSKIYING  |      |      |      |      |      |      |
|       |   |       | RLIDQKPISNLGNIHASN  |      |      |      |      |      |      |
|       |   |       | NIMFKLDGCRDTHRYIW   |      |      |      |      |      |      |
|       |   |       | IKYFNLFDKELNEKEIKDL |      |      |      |      |      |      |
| 37367 | 0 | 32514 | YDNQSNSGILKDFWGD    | 6.04 | 0.01 | 3.16 | 1.20 | 0.22 | 0.85 |
|       |   |       | YLQYDKPYMMLNLYDPN   |      |      |      |      |      |      |
|       |   |       | KYVDVNNVGIRGYMYL    |      |      |      |      |      |      |
|       |   |       | KGPRGSVMTTNIYLNSS   |      |      |      |      |      |      |
|       |   |       | LYRGTKFIIKKYASGNKD  |      |      |      |      |      |      |
|       |   |       | NIVRNNDRVYINVVKN    |      |      |      |      |      |      |
|       |   |       | KEYRLATNASQAGVEKIL  |      |      |      |      |      |      |
|       |   |       | SALEIPDVGNLSQVVVM   |      |      |      |      |      |      |
|       |   |       | KSKNDQGITNKCKMNL    |      |      |      |      |      |      |
|       |   |       | QDNNGNDIGFIGFHQF    |      |      |      |      |      |      |
|       |   |       | NNIAKLVASNWWYNRQIE  |      |      |      |      |      |      |
|       |   |       | RSSRTLGCSEFIPVDD    |      |      |      |      |      |      |
|       |   |       | GWGERPL             |      |      |      |      |      |      |

|       |   |       |                     |      |      |      |      |      |      |
|-------|---|-------|---------------------|------|------|------|------|------|------|
|       |   |       | KNIINTSILNLRYESNHLI |      |      |      |      |      |      |
|       |   |       | DLSRYASKINIGSKVNFD  |      |      |      |      |      |      |
|       |   |       | PIDKNQIQLFNLESSKIEV |      |      |      |      |      |      |
|       |   |       | ILKNAIVYNSMYENFSTS  |      |      |      |      |      |      |
|       |   |       | FWIRIPKYFNSISLNNEYT |      |      |      |      |      |      |
|       |   |       | IINCMENNSGWKVSLNY   |      |      |      |      |      |      |
|       |   |       | GEIIWTLQDTQEIKQRV   |      |      |      |      |      |      |
|       |   |       | VFKYSQMINISDYINRWI  |      |      |      |      |      |      |
|       |   |       | FVTITNNRLNNSKIYING  |      |      |      |      |      |      |
|       |   |       | RLIDQKPISNLGNIHASN  |      |      |      |      |      |      |
|       |   |       | NIMFKLDGCRDTHRYIW   |      |      |      |      |      |      |
|       |   |       | IKYFNLFDKELNEKEIKDL |      |      |      |      |      |      |
| 37368 | 0 | 32514 | YDNQSNSGILKDFWGD    | 6.04 | 0.01 | 3.16 | 1.20 | 0.22 | 0.85 |
|       |   |       | YLQYDKPYMMLNLYDPN   |      |      |      |      |      |      |
|       |   |       | KYVDVNNVGIRGYMYL    |      |      |      |      |      |      |
|       |   |       | KGPRGSVMTTNIYLNSS   |      |      |      |      |      |      |
|       |   |       | LYRGTKFIIKKYASGNKD  |      |      |      |      |      |      |
|       |   |       | NIVRNNDRVYINVVKN    |      |      |      |      |      |      |
|       |   |       | KEYRLATNASQAGVEKIL  |      |      |      |      |      |      |
|       |   |       | SALEIPDVGNLSQVVVM   |      |      |      |      |      |      |
|       |   |       | KSKNDQGITNKCKMNL    |      |      |      |      |      |      |
|       |   |       | QDNNGNDIGFIGFHQF    |      |      |      |      |      |      |
|       |   |       | NNIAKLVASNWYNRQIE   |      |      |      |      |      |      |
|       |   |       | RSSRTLGCSEFIPVDD    |      |      |      |      |      |      |
|       |   |       | GWGERPL             |      |      |      |      |      |      |

|       |   |       |                     |      |      |      |      |      |      |
|-------|---|-------|---------------------|------|------|------|------|------|------|
|       |   |       | KNIINTSILNLRYESNHLI |      |      |      |      |      |      |
|       |   |       | DLSRYASKINIGSKVNFD  |      |      |      |      |      |      |
|       |   |       | PIDKNQIQLFNLESSKIEV |      |      |      |      |      |      |
|       |   |       | ILKNAIVYNSMYENFSTS  |      |      |      |      |      |      |
|       |   |       | FWIRIPKYFNSISLNNEYT |      |      |      |      |      |      |
|       |   |       | IINCMENNSGWKVSLNY   |      |      |      |      |      |      |
|       |   |       | GEIIWTLQDTQEIKQRV   |      |      |      |      |      |      |
|       |   |       | VFKYSQMINISDYINRWI  |      |      |      |      |      |      |
|       |   |       | FVTITNNRLNNSKIYING  |      |      |      |      |      |      |
|       |   |       | RLIDQKPISNLGNIHASN  |      |      |      |      |      |      |
|       |   |       | NIMFKLDGCRDTHRYIW   |      |      |      |      |      |      |
|       |   |       | IKYFNLFDKELNEKEIKDL |      |      |      |      |      |      |
| 37369 | 0 | 32514 | YDNQSNSGILKDFWGD    | 6.04 | 0.01 | 3.16 | 2.43 | 0.22 | 0.85 |
|       |   |       | YLQYDKPYMMLNLYDPN   |      |      |      |      |      |      |
|       |   |       | KYVDVNNVGIRGYMYL    |      |      |      |      |      |      |
|       |   |       | KGPRGSVMTTNIYLNSS   |      |      |      |      |      |      |
|       |   |       | LYRGTKFIIKKYASGNKD  |      |      |      |      |      |      |
|       |   |       | NIVRNNDRVYINVVKN    |      |      |      |      |      |      |
|       |   |       | KEYRLATNASQAGVEKIL  |      |      |      |      |      |      |
|       |   |       | SALEIPDVGNLSQVVVM   |      |      |      |      |      |      |
|       |   |       | KSKNDQGITNKCKMNL    |      |      |      |      |      |      |
|       |   |       | QDNNGNDIGFIGFHQF    |      |      |      |      |      |      |
|       |   |       | NNIAKLVASNWNRYRQIE  |      |      |      |      |      |      |
|       |   |       | RSSRTLGCSEFIPVDD    |      |      |      |      |      |      |
|       |   |       | GWGERPL             |      |      |      |      |      |      |



|       |   |       |                     |      |      |      |      |      |      |
|-------|---|-------|---------------------|------|------|------|------|------|------|
|       |   |       | KNIINTSILNLRYESNHLI |      |      |      |      |      |      |
|       |   |       | DLSRYASKINIGSKVNFD  |      |      |      |      |      |      |
|       |   |       | PIDKNQIQLFNLESSKIEV |      |      |      |      |      |      |
|       |   |       | ILKNAIVYNSMYENFSTS  |      |      |      |      |      |      |
|       |   |       | FWIRIPKYFNSISLNNEYT |      |      |      |      |      |      |
|       |   |       | IINCMENNSGWKVSLNY   |      |      |      |      |      |      |
|       |   |       | GEIIWTLQDTQEIKQRV   |      |      |      |      |      |      |
|       |   |       | VFKYSQMINISDYINRWI  |      |      |      |      |      |      |
|       |   |       | FVTITNNRLNNSKIYING  |      |      |      |      |      |      |
|       |   |       | RLIDQKPISNLGNIHASN  |      |      |      |      |      |      |
|       |   |       | NIMFKLDGCRDTHRYIW   |      |      |      |      |      |      |
|       |   |       | IKYFNLFDKELNEKEIKDL |      |      |      |      |      |      |
| 37370 | 0 | 32514 | YDNQSNSGILKDFWGD    | 6.04 | 0.01 | 3.16 | 2.43 | 0.22 | 0.85 |
|       |   |       | YLQYDKPYMMLNLYDPN   |      |      |      |      |      |      |
|       |   |       | KYVDVNNVGIRGYMYL    |      |      |      |      |      |      |
|       |   |       | KGPRGSVMTTNIYLNSS   |      |      |      |      |      |      |
|       |   |       | LYRGTKFIIKKYASGNKD  |      |      |      |      |      |      |
|       |   |       | NIVRNNDRVYINVVKN    |      |      |      |      |      |      |
|       |   |       | KEYRLATNASQAGVEKIL  |      |      |      |      |      |      |
|       |   |       | SALEIPDVGNLSQVVVM   |      |      |      |      |      |      |
|       |   |       | KSKNDQGITNKCKMNL    |      |      |      |      |      |      |
|       |   |       | QDNNGNDIGFIGFHQF    |      |      |      |      |      |      |
|       |   |       | NNIAKLVASNWAYNRQIE  |      |      |      |      |      |      |
|       |   |       | RSSRTLGCSEFIPVDD    |      |      |      |      |      |      |
|       |   |       | GWGERPL             |      |      |      |      |      |      |

|       |   |       |                     |      |      |      |      |      |      |
|-------|---|-------|---------------------|------|------|------|------|------|------|
|       |   |       | KNIINTSILNLRYESNHLI |      |      |      |      |      |      |
|       |   |       | DLSRYASKINIGSKVNFD  |      |      |      |      |      |      |
|       |   |       | PIDKNQIQLFNLESSKIEV |      |      |      |      |      |      |
|       |   |       | ILKNAIVYNSMYENFSTS  |      |      |      |      |      |      |
|       |   |       | FWIRIPKYFNSISLNNEYT |      |      |      |      |      |      |
|       |   |       | IINCMENNSGWKVSLNY   |      |      |      |      |      |      |
|       |   |       | GEIIWTLQDTQEIKQRV   |      |      |      |      |      |      |
|       |   |       | VFKYSQMINISDYINRWI  |      |      |      |      |      |      |
|       |   |       | FVTITNNRLNNSKIYING  |      |      |      |      |      |      |
|       |   |       | RLIDQKPISNLGNIHASN  |      |      |      |      |      |      |
|       |   |       | NIMFKLDGCRDTHRYIW   |      |      |      |      |      |      |
|       |   |       | IKYFNLFDKELNEKEIKDL |      |      |      |      |      |      |
| 37371 | 0 | 32514 | YDNQSNSGILKDFWGD    | 6.04 | 0.01 | 3.16 | 2.43 | 0.22 | 0.85 |
|       |   |       | YLQYDKPYMMLNLYDPN   |      |      |      |      |      |      |
|       |   |       | KYVDVNNVGIRGYMYL    |      |      |      |      |      |      |
|       |   |       | KGPRGSVMTTNIYLNSS   |      |      |      |      |      |      |
|       |   |       | LYRGTKFIIKKYASGNKD  |      |      |      |      |      |      |
|       |   |       | NIVRNNDRVYINVVKN    |      |      |      |      |      |      |
|       |   |       | KEYRLATNASQAGVEKIL  |      |      |      |      |      |      |
|       |   |       | SALEIPDVGNLSQVVVM   |      |      |      |      |      |      |
|       |   |       | KSKNDQGITNKCKMNL    |      |      |      |      |      |      |
|       |   |       | QDNNGNDIGFIGFHQF    |      |      |      |      |      |      |
|       |   |       | NNIAKLVASNWNRYRQIE  |      |      |      |      |      |      |
|       |   |       | RSSRTLGCSEFIPVDD    |      |      |      |      |      |      |
|       |   |       | GWGERPL             |      |      |      |      |      |      |

|       |   |        |                                                                                                                                                                                                                                                                       |      |      |      |      |      |      |
|-------|---|--------|-----------------------------------------------------------------------------------------------------------------------------------------------------------------------------------------------------------------------------------------------------------------------|------|------|------|------|------|------|
|       |   |        | KNIINTSILNLRYESNHLI<br>DLSRYASKINIGSKVNFD<br>PIDKNQIQLFNLESSKIEV<br>ILKNAIVYNSMYENFSTS<br>FWIRIPKYFNSISLNNEYT<br>IINCMENNSGWKVSLNY<br>GEIIWTLQDTQEIKQRV<br>VFKYSQMINISDYINRWI<br>FVTITNNRLNNSKIYING<br>RLIDQKPISNLGNIHASN<br>NIMFKLDGCRDTHRYIW<br>IKYFNLFDKELNEKEIKDL |      |      |      |      |      |      |
| 37372 | 0 | 32514  | YDNQSNSGILKDFWGD<br>YLQYDKPYMMLNLYDPN<br>KYVDVNNVGIRGYMYL<br>KGPRGSVMTTNIYLNSS<br>LYRGTKFIIKKYASGNKD<br>NIVRNNDRVYINVVVKN<br>KEYRLATNASQAGVEKIL<br>SALEIPDVGNLSQVVVM<br>KSKNDQGITNKCKMNL<br>QDNNGNDIGFIGFHQF<br>NNIAKLVASNWYNRQIE<br>RSSRTLGCSEFIPVDD<br>GWERPL       | 6.04 | 0.01 | 3.16 | 2.43 | 2.25 | 1.75 |
| 37373 | 0 | 181924 | KNINVNMKKNNDNIWT<br>DLLVKNSSDINK                                                                                                                                                                                                                                      | 3.31 | 0.01 | 0.90 | 0.44 | 1.74 | 0.28 |
| 37374 | 0 | 181924 | KNINVNMKKNNDNIWT<br>DLLVKNSSDINK                                                                                                                                                                                                                                      | 3.31 | 0.01 | 0.90 | 0.44 | 1.74 | 0.28 |
| 37375 | 0 | 181924 | KNINVNMKKNNDNIWT<br>DLLVKNSSDINK                                                                                                                                                                                                                                      | 3.31 | 0.01 | 0.90 | 0.44 | 1.74 | 0.28 |
| 37376 | 0 | 181924 | KNINVNMKKNNDNIWT<br>DLLVKNSSDINK                                                                                                                                                                                                                                      | 3.31 | 0.01 | 0.90 | 0.44 | 1.74 | 0.28 |
| 37377 | 0 | 32523  | KNITVTASV                                                                                                                                                                                                                                                             | 2.23 | 0.01 | 2.66 | 2.61 | 0.22 | 0.28 |
| 37378 | 0 | 116388 | KNIVTPRTPPPSQGKGR<br>GLSLSRF                                                                                                                                                                                                                                          | 3.13 | 0.01 | 0.78 | 0.44 | 1.13 | 0.28 |
| 37379 | 0 | 230481 | KNKAEFHQSVISRYR                                                                                                                                                                                                                                                       | 2.65 | 0.01 | 0.78 | 0.44 | 1.13 | 0.28 |
| 37380 | 0 | 32524  | KNKDLADK                                                                                                                                                                                                                                                              | 2.17 | 0.01 | 2.56 | 0.68 | 0.22 | 0.28 |
| 37381 | 0 | 32524  | KNKDLADK                                                                                                                                                                                                                                                              | 2.17 | 0.01 | 2.56 | 0.68 | 0.22 | 0.28 |
| 37382 | 0 | 32524  | KNKDLADK                                                                                                                                                                                                                                                              | 2.17 | 0.01 | 2.56 | 1.12 | 0.22 | 1.27 |
| 37383 | 0 | 32535  | KNKLEEKANKAMININ                                                                                                                                                                                                                                                      | 2.79 | 0.01 | 2.95 | 3.38 | 0.22 | 0.28 |
| 37384 | 0 | 32535  | KNKLEEKANKAMININ                                                                                                                                                                                                                                                      | 2.79 | 0.01 | 2.95 | 3.38 | 0.22 | 1.34 |

|       |   |        |                                                                     |      |      |      |      |      |      |
|-------|---|--------|---------------------------------------------------------------------|------|------|------|------|------|------|
| 37385 | 0 | 32536  | KNKLNKKWEQINDHIN<br>NLETNINDYNKKIKEGDS<br>QLNNIQLQCENIEQKINK<br>IKE | 3.97 | 0.01 | 2.22 | 0.44 | 1.74 | 0.28 |
| 37386 | 0 | 32536  | KNKLNKKWEQINDHIN<br>NLETNINDYNKKIKEGDS<br>QLNNIQLQCENIEQKINK<br>IKE | 3.97 | 0.01 | 2.22 | 0.44 | 1.74 | 0.28 |
| 37387 | 0 | 32536  | KNKLNKKWEQINDHIN<br>NLETNINDYNKKIKEGDS<br>QLNNIQLQCENIEQKINK<br>IKE | 3.97 | 0.01 | 2.22 | 0.44 | 1.74 | 0.28 |
| 37388 | 0 | 32536  | KNKLNKKWEQINDHIN<br>NLETNINDYNKKIKEGDS<br>QLNNIQLQCENIEQKINK<br>IKE | 3.97 | 0.01 | 2.22 | 0.44 | 0.85 | 1.48 |
| 37389 | 0 | 32536  | KNKLNKKWEQINDHIN<br>NLETNINDYNKKIKEGDS<br>QLNNIQLQCENIEQKINK<br>IKE | 3.97 | 0.01 | 2.22 | 1.15 | 0.22 | 1.48 |
| 37390 | 0 | 131934 | KNKQGWGDGQKSSQG                                                     | 2.73 | 0.01 | 0.78 | 0.44 | 1.13 | 0.85 |
| 37391 | 0 | 32540  | KNKRNTNRRPQDVKF                                                     | 2.70 | 0.01 | 1.72 | 0.44 | 1.59 | 0.28 |
| 37392 | 0 | 32541  | KNKRNTNRRPQDVKFP<br>GGGQIVGGVYLLPRRGP<br>RLGVRATRKTS                | 3.73 | 0.01 | 1.72 | 0.44 | 0.85 | 0.28 |
| 37393 | 0 | 32541  | KNKRNTNRRPQDVKFP<br>GGGQIVGGVYLLPRRGP<br>RLGVRATRKTS                | 3.73 | 0.01 | 1.72 | 1.15 | 0.22 | 0.28 |
| 37394 | 0 | 174946 | KNKRFTLSPWIS                                                        | 2.46 | 0.01 | 2.18 | 2.71 | 0.22 | 0.28 |
| 37395 | 0 | 32546  | KNLDCWVDNEEDIDVIL<br>KKSTIL                                         | 3.10 | 0.01 | 2.95 | 0.44 | 0.22 | 0.28 |
| 37396 | 0 | 158910 | KNLDIDPKLQEYLGK                                                     | 2.69 | 0.01 | 0.78 | 3.01 | 0.22 | 2.02 |
| 37397 | 0 | 158910 | KNLDIDPKLQEYLGK                                                     | 2.69 | 0.01 | 0.78 | 3.01 | 0.22 | 0.28 |
| 37398 | 0 | 32548  | KNLEEPK                                                             | 2.04 | 0.01 | 0.90 | 0.44 | 1.23 | 1.27 |
| 37399 | 0 | 32548  | KNLEEPK                                                             | 2.04 | 0.01 | 0.90 | 0.44 | 1.23 | 0.28 |
| 37400 | 0 | 32548  | KNLEEPK                                                             | 2.04 | 0.01 | 0.90 | 0.44 | 1.23 | 1.27 |
| 37401 | 0 | 156347 | KNLEFSDKINTLLSET                                                    | 2.76 | 0.01 | 2.83 | 4.15 | 0.22 | 0.28 |
| 37402 | 0 | 136433 | KNLEISRSTFDLLRNSYG<br>VRK                                           | 2.98 | 0.01 | 1.75 | 2.84 | 1.13 | 0.28 |
| 37403 | 0 | 422489 | KNLPPPLGGAAGHPGSA<br>VSAAPG                                         | 3.11 | 0.01 | 0.78 | 0.68 | 0.22 | 0.28 |
| 37404 | 0 | 422489 | KNLPPPLGGAAGHPGSA<br>VSAAPG                                         | 3.11 | 0.01 | 0.78 | 2.37 | 0.22 | 0.28 |
| 37405 | 0 | 171855 | KNLQLFMENKQPEDD                                                     | 2.69 | 0.01 | 0.78 | 0.44 | 1.41 | 0.28 |

|       |   |        |                                                              |      |      |      |      |      |      |
|-------|---|--------|--------------------------------------------------------------|------|------|------|------|------|------|
| 37406 | 0 | 238663 | KNLRPNRQLANMVNNL<br>KE                                       | 2.87 | 0.01 | 0.78 | 0.44 | 1.13 | 0.28 |
| 37407 | 0 | 189698 | KNLYDHAL                                                     | 2.12 | 0.01 | 3.47 | 0.44 | 0.85 | 0.28 |
| 37408 | 0 | 126455 | KNLYGYTDEEIFKASAEY<br>KILEKMPQTTIQ                           | 3.33 | 0.01 | 2.80 | 0.68 | 0.22 | 1.75 |
| 37409 | 0 | 126455 | KNLYGYTDEEIFKASAEY<br>KILEKMPQTTIQ                           | 3.33 | 0.01 | 2.80 | 0.68 | 0.22 | 1.66 |
| 37410 | 0 | 126455 | KNLYGYTDEEIFKASAEY<br>KILEKMPQTTIQ                           | 3.33 | 0.01 | 2.80 | 0.68 | 0.22 | 0.28 |
| 37411 | 0 | 126455 | KNLYGYTDEEIFKASAEY<br>KILEKMPQTTIQ                           | 3.33 | 0.01 | 2.80 | 0.68 | 0.22 | 0.28 |
| 37412 | 0 | 126455 | KNLYGYTDEEIFKASAEY<br>KILEKMPQTTIQ                           | 3.33 | 0.01 | 2.80 | 0.68 | 0.22 | 0.28 |
| 37413 | 0 | 126455 | KNLYGYTDEEIFKASAEY<br>KILEKMPQTTIQ                           | 3.33 | 0.01 | 2.80 | 0.68 | 0.22 | 0.28 |
| 37414 | 0 | 126455 | KNLYGYTDEEIFKASAEY<br>KILEKMPQTTIQ                           | 3.33 | 0.01 | 2.80 | 0.68 | 0.22 | 1.34 |
| 37415 | 0 | 126455 | KNLYGYTDEEIFKASAEY<br>KILEKMPQTTIQ                           | 3.33 | 0.01 | 2.80 | 0.68 | 0.22 | 1.75 |
| 37416 | 0 | 510450 | KNMAKAENNVYM                                                 | 2.51 | 0.01 | 0.90 | 3.07 | 1.13 | 1.39 |
| 37417 | 0 | 32554  | KNMDTVYKNIINMSNN<br>MTQMYNSMNNMSHNI<br>INASHDMMDASGNINS<br>H | 3.84 | 0.01 | 2.22 | 0.44 | 1.74 | 0.28 |
| 37418 | 0 | 32554  | KNMDTVYKNIINMSNN<br>MTQMYNSMNNMSHNI<br>INASHDMMDASGNINS<br>H | 3.84 | 0.01 | 2.22 | 0.44 | 1.74 | 0.28 |
| 37419 | 0 | 32558  | KNMSMYSNAFDINAYN<br>MANRR                                    | 3.01 | 0.01 | 0.90 | 2.63 | 0.22 | 1.48 |
| 37420 | 0 | 226056 | KNMSTYVDYIINQIDSD<br>NKL                                     | 2.96 | 0.01 | 2.24 | 0.68 | 0.22 | 0.28 |
| 37421 | 0 | 226056 | KNMSTYVDYIINQIDSD<br>NKL                                     | 2.96 | 0.01 | 2.24 | 3.57 | 0.22 | 0.28 |
| 37422 | 0 | 79276  | KNNAQRIVYDEE                                                 | 2.42 | 0.01 | 4.93 | 0.68 | 0.22 | 1.27 |
| 37423 | 0 | 321477 | KNNDKDEDDDDGDNDA                                             | 2.74 | 0.01 | 1.61 | 0.44 | 0.85 | 1.28 |
| 37424 | 0 | 129121 | KNNEEAEDYDDDLTDSE<br>MDVVRFDD                                | 3.13 | 0.01 | 0.78 | 0.44 | 2.35 | 0.85 |
| 37425 | 0 | 129121 | KNNEEAEDYDDDLTDSE<br>MDVVRFDD                                | 3.13 | 0.01 | 0.78 | 0.44 | 2.35 | 1.34 |
| 37426 | 0 | 129121 | KNNEEAEDYDDDLTDSE<br>MDVVRFDD                                | 3.13 | 0.01 | 0.78 | 0.68 | 0.22 | 1.39 |
| 37427 | 0 | 100220 | KNNLDPLSEKGLTT                                               | 2.61 | 0.01 | 2.96 | 1.12 | 0.22 | 0.28 |
| 37428 | 0 | 32568  | KNNNNEEPS                                                    | 2.25 | 0.01 | 3.37 | 1.12 | 0.22 | 0.28 |
| 37429 | 0 | 32571  | KNNNSTNSGI                                                   | 2.34 | 0.01 | 1.66 | 0.68 | 0.22 | 0.28 |
| 37430 | 0 | 32571  | KNNNSTNSGI                                                   | 2.34 | 0.01 | 1.66 | 1.20 | 0.22 | 0.28 |

|       |   |        |                                   |      |      |      |      |      |      |
|-------|---|--------|-----------------------------------|------|------|------|------|------|------|
| 37431 | 0 | 32571  | KNNNSTNSGI                        | 2.34 | 0.01 | 1.66 | 0.68 | 0.22 | 0.28 |
| 37432 | 0 | 32571  | KNNNSTNSGI                        | 2.34 | 0.01 | 1.66 | 0.68 | 0.22 | 0.85 |
| 37433 | 0 | 32571  | KNNNSTNSGI                        | 2.34 | 0.01 | 1.66 | 0.68 | 0.22 | 1.48 |
| 37434 | 0 | 32573  | KNNQGNQGQHNMPPN<br>DPNRNVDENANANN | 3.28 | 0.01 | 1.66 | 0.44 | 0.85 | 0.28 |
| 37435 | 0 | 225373 | KNNSTDNSHNILIKVFEN                | 2.85 | 0.01 | 2.61 | 0.68 | 0.22 | 0.28 |
| 37436 | 0 | 225373 | KNNSTDNSHNILIKVFEN                | 2.85 | 0.01 | 2.61 | 0.68 | 0.22 | 0.28 |
| 37437 | 0 | 225373 | KNNSTDNSHNILIKVFEN                | 2.85 | 0.01 | 2.61 | 0.68 | 0.22 | 0.28 |
| 37438 | 0 | 321517 | KNPEAASKKAPLSVV                   | 2.69 | 0.01 | 1.61 | 0.44 | 0.85 | 1.28 |
| 37439 | 0 | 32580  | KNPEKPHFPL                        | 2.34 | 0.01 | 3.04 | 1.15 | 0.22 | 1.27 |
| 37440 | 0 | 32580  | KNPEKPHFPL                        | 2.34 | 0.01 | 3.04 | 1.15 | 0.22 | 1.27 |
| 37441 | 0 | 32585  | KNPFLFGSNRFETLF                   | 2.68 | 0.01 | 2.72 | 2.13 | 0.22 | 0.85 |
| 37442 | 0 | 32587  | KNPHAK                            | 1.91 | 0.01 | 2.40 | 0.44 | 0.85 | 0.28 |
| 37443 | 0 | 32589  | KNPHNDMLNVNLAKTN<br>DAIK          | 2.97 | 0.01 | 2.82 | 0.44 | 0.85 | 0.28 |
| 37444 | 0 | 32591  | KNPMGF                            | 1.88 | 0.01 | 1.96 | 0.44 | 0.85 | 0.28 |
| 37445 | 0 | 115149 | KNPPDIVGKTSQVTLYVF<br>EKVPTRY     | 3.14 | 0.01 | 0.78 | 0.44 | 1.13 | 0.28 |
| 37446 | 0 | 144710 | KNPWPNVDAH                        | 2.31 | 0.01 | 0.78 | 0.44 | 2.35 | 0.28 |
| 37447 | 0 | 181694 | KNPYEQQLKGTLSRA                   | 2.64 | 0.01 | 3.26 | 2.37 | 0.22 | 1.28 |
| 37448 | 0 | 100984 | KNQATKEQYE                        | 2.34 | 0.01 | 3.18 | 2.98 | 0.22 | 0.28 |
| 37449 | 0 | 115324 | KNQDKTEIPTINTIASGE<br>PT          | 2.97 | 0.01 | 1.60 | 0.44 | 1.23 | 1.28 |
| 37450 | 0 | 120705 | KNQFDHYSRHESCAEL                  | 2.69 | 0.01 | 2.26 | 1.20 | 0.22 | 2.02 |
| 37451 | 0 | 120705 | KNQFDHYSRHESCAEL                  | 2.69 | 0.01 | 2.26 | 1.20 | 0.22 | 1.27 |
| 37452 | 0 | 32595  | KNQIQLFNLESSKIEVILK               | 2.94 | 0.01 | 3.03 | 0.68 | 0.22 | 1.57 |
| 37453 | 0 | 32595  | KNQIQLFNLESSKIEVILK               | 2.94 | 0.01 | 3.03 | 3.33 | 0.22 | 1.57 |
| 37454 | 0 | 32595  | KNQIQLFNLESSKIEVILK               | 2.94 | 0.01 | 2.08 | 0.44 | 0.22 | 1.57 |
| 37455 | 0 | 32595  | KNQIQLFNLESSKIEVILK               | 2.94 | 0.01 | 2.08 | 2.02 | 0.22 | 1.57 |
| 37456 | 0 | 32595  | KNQIQLFNLESSKIEVILK               | 2.94 | 0.01 | 2.08 | 2.49 | 0.22 | 1.57 |
| 37457 | 0 | 32595  | KNQIQLFNLESSKIEVILK               | 2.94 | 0.01 | 2.08 | 2.25 | 0.22 | 1.57 |
| 37458 | 0 | 32595  | KNQIQLFNLESSKIEVILK               | 2.94 | 0.01 | 3.16 | 0.44 | 1.93 | 1.57 |
| 37459 | 0 | 32595  | KNQIQLFNLESSKIEVILK               | 2.94 | 0.01 | 2.08 | 2.02 | 0.22 | 1.57 |

|       |   |        |                                               |      |      |      |      |      |      |
|-------|---|--------|-----------------------------------------------|------|------|------|------|------|------|
| 37460 | 0 | 32595  | KNQIQLFNLESSKIEVILK                           | 2.94 | 0.01 | 2.08 | 0.44 | 0.22 | 1.57 |
| 37461 | 0 | 32595  | KNQIQLFNLESSKIEVILK                           | 2.94 | 0.01 | 2.08 | 2.25 | 0.22 | 1.57 |
| 37462 | 0 | 32595  | KNQIQLFNLESSKIEVILK                           | 2.94 | 0.01 | 2.08 | 2.25 | 0.22 | 1.57 |
| 37463 | 0 | 125464 | KNQKKIRGILESLMCNES                            | 2.85 | 0.01 | 0.78 | 0.44 | 1.13 | 1.34 |
| 37464 | 0 | 32596  | KNQLAGKDEYEAKQKEA<br>E                        | 2.89 | 0.01 | 1.66 | 0.44 | 1.74 | 0.28 |
| 37465 | 0 | 32596  | KNQLAGKDEYEAKQKEA<br>E                        | 2.89 | 0.01 | 2.22 | 0.44 | 0.85 | 0.28 |
| 37466 | 0 | 32596  | KNQLAGKDEYEAKQKEA<br>E                        | 2.89 | 0.01 | 2.22 | 0.44 | 0.85 | 0.28 |
| 37467 | 0 | 32596  | KNQLAGKDEYEAKQKEA<br>E                        | 2.89 | 0.01 | 1.66 | 0.44 | 1.74 | 0.28 |
| 37468 | 0 | 32597  | KNQVAMNPRNTVFDA                               | 2.66 | 0.01 | 2.30 | 0.44 | 0.85 | 0.28 |
| 37469 | 0 | 32597  | KNQVAMNPRNTVFDA                               | 2.66 | 0.01 | 2.30 | 0.44 | 1.41 | 0.28 |
| 37470 | 0 | 32599  | KNQVEGEVQIVSTATQT<br>FLA                      | 2.95 | 0.01 | 1.72 | 0.44 | 0.85 | 0.28 |
| 37471 | 0 | 32600  | KNQVEGEVQVVSTA                                | 2.62 | 0.01 | 1.96 | 0.44 | 1.41 | 0.28 |
| 37472 | 0 | 109425 | KNQVSLT                                       | 1.99 | 0.01 | 0.78 | 0.44 | 1.13 | 0.28 |
| 37473 | 0 | 109425 | KNQVSLT                                       | 1.99 | 0.01 | 0.78 | 0.44 | 1.13 | 0.28 |
| 37474 | 0 | 32601  | KNRFLMSAEAFEHLKTQ<br>FDLNAETNACSINGNAP<br>AEI | 3.54 | 0.01 | 2.78 | 0.44 | 1.23 | 1.57 |
| 37475 | 0 | 32601  | KNRFLMSAEAFEHLKTQ<br>FDLNAETNACSINGNAP<br>AEI | 3.54 | 0.01 | 2.78 | 0.44 | 1.23 | 1.57 |
| 37476 | 0 | 156903 | KNRGIKTFSN                                    | 2.41 | 0.01 | 2.67 | 0.68 | 0.22 | 1.66 |
| 37477 | 0 | 156903 | KNRGIKTFSN                                    | 2.41 | 0.01 | 2.67 | 0.68 | 0.22 | 1.66 |
| 37478 | 0 | 156903 | KNRGIKTFSN                                    | 2.41 | 0.01 | 2.67 | 0.68 | 0.22 | 1.66 |
| 37479 | 0 | 156903 | KNRGIKTFSN                                    | 2.41 | 0.01 | 2.67 | 0.68 | 0.22 | 1.66 |
| 37480 | 0 | 156903 | KNRGIKTFSN                                    | 2.41 | 0.01 | 2.67 | 0.68 | 0.22 | 1.34 |
| 37481 | 0 | 156903 | KNRGIKTFSN                                    | 2.41 | 0.01 | 2.67 | 0.68 | 0.22 | 2.49 |
| 37482 | 0 | 156903 | KNRGIKTFSN                                    | 2.41 | 0.01 | 2.67 | 0.68 | 0.22 | 2.49 |
| 37483 | 0 | 156903 | KNRGIKTFSN                                    | 2.41 | 0.01 | 2.67 | 0.68 | 0.22 | 1.34 |
| 37484 | 0 | 156903 | KNRGIKTFSN                                    | 2.41 | 0.01 | 2.67 | 0.68 | 0.22 | 0.28 |
| 37485 | 0 | 100222 | KNSFSLGENPNANP                                | 2.63 | 0.01 | 0.90 | 2.63 | 0.22 | 1.48 |
| 37486 | 0 | 100222 | KNSFSLGENPNANP                                | 2.63 | 0.01 | 0.90 | 2.74 | 0.22 | 1.48 |
| 37487 | 0 | 100222 | KNSFSLGENPNANP                                | 2.63 | 0.01 | 0.90 | 2.74 | 0.22 | 0.85 |
| 37488 | 0 | 100222 | KNSFSLGENPNANP                                | 2.63 | 0.01 | 0.90 | 2.63 | 0.22 | 0.85 |
| 37489 | 0 | 151261 | KNSGGADGPTKD                                  | 2.50 | 0.01 | 3.35 | 1.81 | 0.22 | 0.85 |
| 37490 | 0 | 120706 | KNSMNSRGEK                                    | 2.34 | 0.01 | 2.18 | 2.16 | 0.22 | 0.28 |
| 37491 | 0 | 130927 | KNSRQSYPEPAPVYH                               | 2.66 | 0.01 | 0.90 | 0.44 | 1.13 | 0.28 |

|       |   |        |                                                    |      |      |      |      |      |      |
|-------|---|--------|----------------------------------------------------|------|------|------|------|------|------|
| 37492 | 0 | 130927 | KNSRQSYPEPAPVYH                                    | 2.66 | 0.01 | 0.90 | 0.44 | 1.13 | 1.66 |
| 37493 | 0 | 130927 | KNSRQSYPEPAPVYH                                    | 2.66 | 0.01 | 0.90 | 0.44 | 1.13 | 1.66 |
| 37494 | 0 | 130927 | KNSRQSYPEPAPVYH                                    | 2.66 | 0.01 | 0.90 | 0.44 | 1.13 | 1.66 |
| 37495 | 0 | 130927 | KNSRQSYPEPAPVYH                                    | 2.66 | 0.01 | 0.90 | 0.44 | 1.13 | 1.27 |
| 37496 | 0 | 181925 | KNSSDKIGKILGDTDGQ<br>NEKRKK                        | 3.09 | 0.01 | 2.86 | 0.44 | 1.74 | 0.28 |
| 37497 | 0 | 181925 | KNSSDKIGKILGDTDGQ<br>NEKRKK                        | 3.09 | 0.01 | 2.86 | 0.44 | 1.74 | 0.28 |
| 37498 | 0 | 141937 | KNTKESKNIEVKDT                                     | 2.65 | 0.01 | 2.73 | 0.44 | 0.85 | 0.28 |
| 37499 | 0 | 32616  | KNTLQARQQT                                         | 2.32 | 3.85 | 2.56 | 0.44 | 0.85 | 0.28 |
| 37500 | 0 | 32617  | KNTLQARQQT                                         | 2.32 | 0.01 | 2.56 | 0.68 | 0.22 | 0.28 |
| 37501 | 0 | 95029  | KNTLRIAYLTEAKVEKL                                  | 2.82 | 0.01 | 3.24 | 1.12 | 0.22 | 0.28 |
| 37502 | 0 | 32619  | KNTLTPLEELYPT                                      | 2.58 | 0.01 | 1.66 | 0.44 | 0.85 | 0.28 |
| 37503 | 0 | 78187  | KNTMEHVSSEESIISQ<br>E TY                           | 2.94 | 0.01 | 1.60 | 0.44 | 1.23 | 1.28 |
| 37504 | 0 | 98176  | KNTNNNLTLV                                         | 2.35 | 0.01 | 3.45 | 0.68 | 0.22 | 0.28 |
| 37505 | 0 | 98176  | KNTNNNLTLV                                         | 2.35 | 0.01 | 3.45 | 1.20 | 0.22 | 0.28 |
| 37506 | 0 | 434623 | KNTRTNEKVELQELNDR                                  | 2.83 | 4.93 | 0.78 | 0.44 | 1.13 | 0.28 |
| 37507 | 0 | 321632 | KNTTATGDSGDSTAV                                    | 2.71 | 0.01 | 1.61 | 0.44 | 0.85 | 1.28 |
| 37508 | 0 | 321633 | KNTTATTGDSGDSTA                                    | 2.73 | 0.01 | 1.61 | 0.44 | 0.85 | 1.28 |
| 37509 | 0 | 321634 | KNTTATTGDSDSSTA                                    | 2.72 | 0.01 | 1.61 | 0.44 | 0.85 | 1.28 |
| 37510 | 0 | 32621  | KNTTPTWLTQNPQLG                                    | 2.71 | 0.01 | 2.67 | 1.12 | 0.22 | 0.28 |
| 37511 | 0 | 32621  | KNTTPTWLTQNPQLG                                    | 2.71 | 0.01 | 2.67 | 1.12 | 0.22 | 0.28 |
| 37512 | 0 | 32621  | KNTTPTWLTQNPQLG                                    | 2.71 | 0.01 | 2.67 | 1.12 | 0.22 | 0.28 |
| 37513 | 0 | 32621  | KNTTPTWLTQNPQLG                                    | 2.71 | 0.01 | 2.67 | 1.12 | 0.22 | 0.28 |
| 37514 | 0 | 32621  | KNTTPTWLTQNPQLG                                    | 2.71 | 0.01 | 2.67 | 1.12 | 0.22 | 0.28 |
| 37515 | 0 | 32621  | KNTTPTWLTQNPQLG                                    | 2.71 | 0.01 | 2.67 | 1.12 | 0.22 | 0.28 |
| 37516 | 0 | 32622  | KNTTTTQTQPSK                                       | 2.52 | 0.01 | 2.38 | 0.44 | 1.74 | 0.28 |
| 37517 | 0 | 32623  | KNTTTTQTQPSKPTT                                    | 2.72 | 0.01 | 2.67 | 1.12 | 0.22 | 0.28 |
| 37518 | 0 | 32623  | KNTTTTQTQPSKPTT                                    | 2.72 | 0.01 | 2.67 | 1.12 | 0.22 | 0.28 |
| 37519 | 0 | 32623  | KNTTTTQTQPSKPTT                                    | 2.72 | 0.01 | 2.67 | 1.12 | 0.22 | 0.28 |
| 37520 | 0 | 32623  | KNTTTTQTQPSKPTT                                    | 2.72 | 0.01 | 2.67 | 1.12 | 0.22 | 0.28 |
| 37521 | 0 | 32623  | KNTTTTQTQPSKPTT                                    | 2.72 | 0.01 | 2.67 | 1.12 | 0.22 | 0.28 |
| 37522 | 0 | 32623  | KNTTTTQTQPSKPTT                                    | 2.72 | 0.01 | 2.67 | 1.12 | 0.22 | 0.28 |
| 37523 | 0 | 32626  | KNVIELKEYLEDLKKRMF<br>DMQKRLNDIIITK                | 3.38 | 0.01 | 2.22 | 0.44 | 1.74 | 0.28 |
| 37524 | 0 | 32626  | KNVIELKEYLEDLKKRMF<br>DMQKRLNDIIITK                | 3.38 | 0.01 | 2.22 | 0.44 | 1.74 | 0.28 |
| 37525 | 0 | 32628  | KNVIKCTGESQTGNTGG<br>GQAGNTVGDQAGSTG<br>GSPQGSTGAS | 3.70 | 0.01 | 1.66 | 2.37 | 0.22 | 0.85 |
| 37526 | 0 | 32628  | KNVIKCTGESQTGNTGG<br>GQAGNTVGDQAGSTG<br>GSPQGSTGAS | 3.70 | 0.01 | 1.66 | 0.44 | 0.85 | 0.85 |
| 37527 | 0 | 127710 | KNVLINKDIR                                         | 2.34 | 0.01 | 0.78 | 0.44 | 1.13 | 0.28 |
| 37528 | 0 | 195029 | KNVLVKLV                                           | 2.18 | 0.01 | 2.24 | 1.15 | 0.22 | 0.85 |



|       |   |        |                          |      |      |      |      |      |      |
|-------|---|--------|--------------------------|------|------|------|------|------|------|
| 37529 | 0 | 195029 | KNVLVKLV                 | 2.18 | 0.01 | 2.24 | 1.15 | 0.22 | 0.85 |
| 37530 | 0 | 32633  | KNVNFQPSGVTTTRQ          | 2.66 | 0.01 | 3.78 | 2.02 | 0.22 | 0.28 |
| 37531 | 0 | 95109  | KNVRFPDGLIWKPDILLY<br>NS | 2.93 | 0.01 | 2.25 | 2.04 | 0.22 | 1.57 |
| 37532 | 0 | 91588  | KNVSINVELYFDAT           | 2.57 | 0.01 | 3.12 | 1.12 | 0.22 | 0.28 |
| 37533 | 0 | 174947 | KNVSPEARHPLV             | 2.45 | 0.01 | 2.18 | 2.71 | 0.22 | 0.28 |
| 37534 | 0 | 32635  | KNVVTGEVQVLYTA           | 2.61 | 0.01 | 2.59 | 0.44 | 0.85 | 0.28 |
| 37535 | 0 | 32635  | KNVVTGEVQVLYTA           | 2.61 | 0.01 | 2.59 | 0.44 | 1.41 | 0.28 |
| 37536 | 0 | 32635  | KNVVTGEVQVLYTA           | 2.61 | 0.01 | 2.59 | 0.44 | 0.85 | 0.28 |
| 37537 | 0 | 32635  | KNVVTGEVQVLYTA           | 2.61 | 0.01 | 2.59 | 0.44 | 0.85 | 0.28 |
| 37538 | 0 | 32635  | KNVVTGEVQVLYTA           | 2.61 | 0.01 | 2.59 | 0.44 | 0.85 | 0.28 |
| 37539 | 0 | 165620 | KNVYHQT                  | 1.99 | 0.01 | 0.90 | 0.44 | 1.23 | 1.39 |
| 37540 | 0 | 165620 | KNVYHQT                  | 1.99 | 0.01 | 0.90 | 0.44 | 1.23 | 1.39 |
| 37541 | 0 | 127711 | KNWDTPP                  | 1.99 | 0.01 | 0.90 | 0.44 | 1.13 | 0.28 |
| 37542 | 0 | 134710 | KNWKEESDRKIMQS           | 2.61 | 0.01 | 0.78 | 1.12 | 0.22 | 1.57 |
| 37543 | 0 | 134710 | KNWKEESDRKIMQS           | 2.61 | 0.01 | 0.78 | 1.12 | 0.22 | 1.57 |
| 37544 | 0 | 127712 | KNWSTPF                  | 1.99 | 0.01 | 0.90 | 0.44 | 1.13 | 1.39 |
| 37545 | 0 | 127713 | KNWTTPL                  | 2.01 | 0.01 | 0.90 | 0.44 | 1.13 | 1.39 |
| 37546 | 0 | 95512  | KNYIGYSGTGEG             | 2.49 | 0.01 | 2.84 | 2.55 | 0.22 | 0.28 |
| 37547 | 0 | 112186 | KNYLAWY                  | 2.02 | 0.01 | 0.78 | 0.44 | 1.13 | 0.28 |
| 37548 | 0 | 321697 | KPAAKAPAPKA              | 2.75 | 0.01 | 1.61 | 0.44 | 0.85 | 1.28 |
| 37549 | 0 | 321698 | KPAAKPAAPKA              | 2.76 | 0.01 | 1.61 | 0.44 | 0.85 | 1.28 |
| 37550 | 0 | 321699 | KPAAKPAAPKA              | 2.76 | 0.01 | 1.61 | 0.44 | 0.85 | 1.28 |
| 37551 | 0 | 321700 | KPAAKPAAPKA              | 2.76 | 0.01 | 1.61 | 0.44 | 0.85 | 1.28 |
| 37552 | 0 | 321701 | KPAAKPAAPKA              | 2.76 | 0.01 | 1.61 | 0.44 | 0.85 | 1.28 |
| 37553 | 0 | 321702 | KPAAKPAAPKA              | 2.76 | 0.01 | 1.61 | 0.44 | 0.85 | 1.28 |
| 37554 | 0 | 321703 | KPAAKPAAPKA              | 2.75 | 0.01 | 1.61 | 0.44 | 0.85 | 1.28 |
| 37555 | 0 | 321704 | KPAAKPAAPKA              | 2.76 | 0.01 | 1.61 | 0.44 | 0.85 | 1.28 |
| 37556 | 0 | 115828 | KPAAVRSPAQ               | 2.33 | 0.01 | 1.60 | 0.44 | 1.23 | 0.85 |
| 37557 | 0 | 115828 | KPAAVRSPAQ               | 2.33 | 0.01 | 1.60 | 0.44 | 1.23 | 0.85 |
| 37558 | 0 | 321717 | KPAEPKSAEPKPAEP          | 2.75 | 0.01 | 1.61 | 0.44 | 0.85 | 1.28 |
| 37559 | 0 | 321718 | KPAEPKSAEPKPAEP          | 2.75 | 0.01 | 1.61 | 0.44 | 0.85 | 1.28 |
| 37560 | 0 | 321721 | KPAEPNSAEPKPAEP          | 2.75 | 0.01 | 1.61 | 0.44 | 0.85 | 1.28 |
| 37561 | 0 | 321723 | KPAEPYSAEPKPAEP          | 2.75 | 0.01 | 1.61 | 0.44 | 0.85 | 1.28 |
| 37562 | 0 | 321724 | KPAESKSAEPKPAEP          | 2.75 | 0.01 | 1.61 | 0.44 | 0.85 | 1.28 |
| 37563 | 0 | 171864 | KPAGPSVSELIVQAA          | 2.66 | 0.01 | 0.78 | 0.44 | 1.41 | 0.28 |
| 37564 | 0 | 32648  | KPAIIPDRE                | 2.22 | 0.01 | 2.41 | 0.44 | 0.85 | 0.28 |
| 37565 | 0 | 176042 | KPAIIPDREVLYQEF          | 2.63 | 0.01 | 1.72 | 0.44 | 0.85 | 2.97 |
| 37566 | 0 | 32649  | KPAIIPDREVLYREFDEM       | 2.83 | 0.01 | 1.72 | 0.44 | 0.85 | 0.28 |
| 37567 | 0 | 32650  | KPAIIPDREVLYREFDEM<br>EE | 2.92 | 0.01 | 1.72 | 0.44 | 0.85 | 0.28 |
| 37568 | 0 | 230305 | KPAIRRLARRGGVKRISG<br>LI | 2.99 | 4.63 | 0.78 | 0.44 | 1.13 | 1.27 |

|       |   |        |                      |      |      |      |      |      |      |
|-------|---|--------|----------------------|------|------|------|------|------|------|
| 37569 | 0 | 230305 | KPAIRRLARRGGVKRISGLI | 2.99 | 4.63 | 0.78 | 0.44 | 1.13 | 0.28 |
| 37570 | 0 | 321732 | KPAKKPAVKPTVKPA      | 2.75 | 0.01 | 1.61 | 0.44 | 0.85 | 1.28 |
| 37571 | 0 | 32653  | KPALVPDKE            | 2.24 | 0.01 | 2.59 | 0.44 | 0.85 | 0.28 |
| 37572 | 0 | 321736 | KPAPFGQAAAADKPS      | 2.70 | 0.01 | 1.61 | 0.44 | 0.85 | 1.28 |
| 37573 | 0 | 321737 | KPAPFGQAAAGDKLS      | 2.69 | 0.01 | 1.61 | 0.44 | 0.85 | 1.28 |
| 37574 | 0 | 321738 | KPAPFGQAAAGDKPA      | 2.73 | 0.01 | 1.61 | 0.44 | 0.85 | 1.28 |
| 37575 | 0 | 321739 | KPAPFGQAAAGDKPS      | 2.70 | 0.01 | 1.61 | 0.44 | 0.85 | 1.28 |
| 37576 | 0 | 32657  | KPAPKPTPPKPAPKPAP    | 2.88 | 0.01 | 3.72 | 3.70 | 0.22 | 0.85 |
| 37577 | 0 | 32657  | KPAPKPTPPKPAPKPAP    | 2.88 | 0.01 | 3.72 | 3.70 | 0.22 | 0.85 |
| 37578 | 0 | 32657  | KPAPKPTPPKPAPKPAP    | 2.88 | 0.01 | 3.72 | 3.70 | 0.22 | 1.48 |
| 37579 | 0 | 32657  | KPAPKPTPPKPAPKPAP    | 2.88 | 0.01 | 3.72 | 3.70 | 0.22 | 1.48 |
| 37580 | 0 | 32657  | KPAPKPTPPKPAPKPAP    | 2.88 | 0.01 | 3.72 | 3.70 | 0.22 | 1.48 |
| 37581 | 0 | 32658  | KPARLI               | 1.88 | 0.01 | 1.96 | 0.44 | 0.85 | 0.28 |
| 37582 | 0 | 321748 | KPASKPAAKPAKAP       | 2.76 | 0.01 | 1.61 | 0.44 | 0.85 | 1.28 |
| 37583 | 0 | 32662  | KPATGEAPSQ           | 2.31 | 0.01 | 2.30 | 0.44 | 0.85 | 0.85 |
| 37584 | 0 | 32662  | KPATGEAPSQ           | 2.31 | 0.01 | 2.30 | 0.68 | 0.22 | 0.85 |
| 37585 | 0 | 32662  | KPATGEAPSQ           | 2.31 | 0.01 | 2.30 | 1.12 | 0.22 | 0.85 |
| 37586 | 0 | 321752 | KPATGEAPSQPGASS      | 2.70 | 0.01 | 1.61 | 0.44 | 0.85 | 1.28 |
| 37587 | 0 | 321755 | KPAVKPTVKPAAKAA      | 2.74 | 0.01 | 1.61 | 0.44 | 0.85 | 1.28 |
| 37588 | 0 | 140876 | KPAVLGHDEAAY         | 2.44 | 0.01 | 3.01 | 1.12 | 0.22 | 0.28 |
| 37589 | 0 | 243811 | KPCEQHIMQRI          | 2.39 | 0.01 | 2.16 | 0.44 | 1.23 | 1.28 |
| 37590 | 0 | 114873 | KPDCTAEDRP           | 2.31 | 0.01 | 2.25 | 0.44 | 1.23 | 0.85 |
| 37591 | 0 | 114873 | KPDCTAEDRP           | 2.31 | 0.01 | 2.25 | 0.44 | 1.23 | 0.85 |
| 37592 | 0 | 182393 | KPDIQEHLGMGP         | 2.45 | 0.01 | 0.90 | 0.68 | 0.22 | 0.28 |
| 37593 | 0 | 99392  | KPDKKNPQLQDLMM       | 2.71 | 0.01 | 2.16 | 0.44 | 1.23 | 1.48 |
| 37594 | 0 | 32677  | KPDLTGTSKSYVRSL      | 2.69 | 0.01 | 2.43 | 0.44 | 1.59 | 0.28 |
| 37595 | 0 | 32680  | KPDSMP               | 1.90 | 0.01 | 0.90 | 2.02 | 0.22 | 0.28 |
| 37596 | 0 | 32683  | KPDYEPPV             | 2.13 | 0.01 | 2.68 | 0.44 | 1.59 | 0.28 |
| 37597 | 0 | 32684  | KPDYEPPVVHGCPLPPP    | 2.78 | 0.01 | 2.41 | 0.44 | 0.85 | 0.28 |
| 37598 | 0 | 32684  | KPDYEPPVVHGCPLPPP    | 2.78 | 0.01 | 2.41 | 0.44 | 0.85 | 0.28 |
| 37599 | 0 | 32684  | KPDYEPPVVHGCPLPPP    | 2.78 | 0.01 | 2.41 | 0.44 | 1.41 | 0.28 |
| 37600 | 0 | 32684  | KPDYEPPVVHGCPLPPP    | 2.78 | 0.01 | 2.41 | 0.44 | 0.85 | 0.28 |

|       |   |        |                    |      |      |      |      |      |      |
|-------|---|--------|--------------------|------|------|------|------|------|------|
| 37601 | 0 | 32684  | KPDYEPPVVHGCPLPPP  | 2.78 | 0.01 | 2.41 | 0.44 | 0.85 | 0.28 |
| 37602 | 0 | 133181 | KPEAPRRRSP         | 2.33 | 0.01 | 0.78 | 0.44 | 1.13 | 0.85 |
| 37603 | 0 | 133181 | KPEAPRRRSP         | 2.33 | 0.01 | 0.78 | 0.44 | 1.13 | 0.85 |
| 37604 | 0 | 133181 | KPEAPRRRSP         | 2.33 | 0.01 | 0.78 | 0.44 | 1.13 | 0.28 |
| 37605 | 0 | 133181 | KPEAPRRRSP         | 2.33 | 0.01 | 0.78 | 3.05 | 1.13 | 0.85 |
| 37606 | 0 | 32686  | KPEASSSD           | 2.12 | 0.01 | 3.45 | 0.44 | 0.85 | 0.28 |
| 37607 | 0 | 32687  | KPEASSTN           | 2.11 | 0.01 | 3.45 | 0.44 | 0.85 | 0.28 |
| 37608 | 0 | 32691  | KPEENK             | 1.92 | 0.01 | 3.38 | 2.22 | 0.85 | 0.85 |
| 37609 | 0 | 32691  | KPEENK             | 1.92 | 0.01 | 3.38 | 1.15 | 0.22 | 1.34 |
| 37610 | 0 | 32691  | KPEENK             | 1.92 | 0.01 | 3.38 | 1.15 | 0.22 | 0.85 |
| 37611 | 0 | 151008 | KPEIAIRPKVRDQEG    | 2.69 | 0.01 | 2.87 | 0.44 | 0.85 | 0.28 |
| 37612 | 0 | 32692  | KPEKEKASVPGGGDM    | 2.69 | 0.01 | 2.04 | 2.97 | 0.22 | 0.28 |
| 37613 | 0 | 32694  | KPEKPHFPLAAEDDIRH  | 3.72 | 0.01 | 2.80 | 1.15 | 0.22 | 0.28 |
|       |   |        | HLTQTERSLCLQSIQTAF |      |      |      |      |      |      |
| 37614 | 0 | 32694  | NQGAGTASL          | 3.72 | 0.01 | 2.80 | 1.15 | 0.22 | 0.28 |
|       |   |        | KPEKPHFPLAAEDDIRH  |      |      |      |      |      |      |
| 37615 | 0 | 32694  | HLTQTERSLCLQSIQTAF | 3.72 | 0.01 | 2.80 | 1.15 | 0.22 | 0.28 |
|       |   |        | NQGAGTASL          |      |      |      |      |      |      |
| 37616 | 0 | 32694  | KPEKPHFPLAAEDDIRH  | 3.72 | 0.01 | 2.80 | 1.15 | 0.22 | 0.28 |
|       |   |        | HLTQTERSLCLQSIQTAF |      |      |      |      |      |      |
| 37617 | 0 | 32694  | NQGAGTASL          | 3.72 | 0.01 | 2.80 | 2.13 | 0.22 | 1.27 |
|       |   |        | KPEKPHFPLAAEDDIRH  |      |      |      |      |      |      |
| 37618 | 0 | 225374 | HLTQTERSLCLQSIQTAF | 2.82 | 0.01 | 2.61 | 0.68 | 0.22 | 0.28 |
| 37619 | 0 | 225374 | NQGAGTASL          | 2.82 | 0.01 | 2.61 | 0.68 | 0.22 | 0.28 |
|       |   |        | KPEQLNKASEFTGLMDN  |      |      |      |      |      |      |
| 37620 | 0 | 225374 | M                  | 2.82 | 0.01 | 2.61 | 0.68 | 0.22 | 0.28 |
|       |   |        | KPEQLNKASEFTGLMDN  |      |      |      |      |      |      |
| 37621 | 0 | 137909 | M                  | 2.42 | 0.01 | 1.60 | 0.44 | 1.41 | 1.27 |
| 37622 | 0 | 137910 | KPESELTAEK         | 2.41 | 0.01 | 0.78 | 0.44 | 1.41 | 1.27 |
| 37623 | 0 | 520141 | KPESELTAEK         | 2.69 | 0.01 | 2.24 | 0.44 | 1.41 | 1.28 |
| 37624 | 0 | 32708  | KPFQCAGVALSRCTL    | 2.64 | 0.01 | 2.72 | 0.44 | 1.23 | 0.85 |
| 37625 | 0 | 131935 | KPFQNSKV           | 2.15 | 0.01 | 0.78 | 0.44 | 1.13 | 0.28 |
| 37626 | 0 | 156904 | KPGDPRH            | 2.02 | 0.01 | 0.90 | 1.20 | 0.22 | 0.28 |
| 37627 | 0 | 156904 | KPGDPRH            | 2.02 | 0.01 | 0.90 | 1.81 | 0.22 | 0.28 |
| 37628 | 0 | 156904 | KPGDPRH            | 2.02 | 0.01 | 0.90 | 1.81 | 2.25 | 1.75 |
| 37629 | 0 | 156905 | KPGDPRQ            | 2.02 | 0.01 | 0.90 | 1.81 | 0.22 | 0.28 |
| 37630 | 0 | 156905 | KPGDPRQ            | 2.02 | 0.01 | 0.90 | 1.81 | 0.22 | 1.34 |
| 37631 | 0 | 156905 | KPGDPRQ            | 2.02 | 0.01 | 0.90 | 1.81 | 2.25 | 1.75 |

|       |   |        |                        |      |      |      |      |      |      |
|-------|---|--------|------------------------|------|------|------|------|------|------|
| 37632 | 0 | 133622 | KPGDPSALHVVRWCWIC      | 2.68 | 0.01 | 0.90 | 1.15 | 0.22 | 0.28 |
| 37633 | 0 | 133622 | KPGDPSALHVVRWCWIC      | 2.68 | 0.01 | 0.90 | 1.15 | 0.22 | 0.28 |
| 37634 | 0 | 133622 | KPGDPSALHVVRWCWIC      | 2.68 | 0.01 | 0.90 | 1.15 | 0.22 | 2.12 |
| 37635 | 0 | 133622 | KPGDPSALHVVRWCWIC      | 2.68 | 0.01 | 0.90 | 1.15 | 0.22 | 1.27 |
| 37636 | 0 | 133622 | KPGDPSALHVVRWCWIC      | 2.68 | 0.01 | 0.90 | 1.15 | 0.22 | 1.66 |
| 37637 | 0 | 133623 | KPGEMR                 | 1.88 | 0.01 | 0.90 | 1.15 | 0.22 | 0.28 |
| 37638 | 0 | 133623 | KPGEMR                 | 1.88 | 0.01 | 0.90 | 1.15 | 0.22 | 0.28 |
| 37639 | 0 | 133623 | KPGEMR                 | 1.88 | 0.01 | 0.90 | 1.15 | 0.22 | 2.12 |
| 37640 | 0 | 133623 | KPGEMR                 | 1.88 | 0.01 | 0.90 | 1.15 | 0.22 | 1.27 |
| 37641 | 0 | 133623 | KPGEMR                 | 1.88 | 0.01 | 0.90 | 1.15 | 0.22 | 1.66 |
| 37642 | 0 | 133624 | KPGEMRGAA              | 2.21 | 0.01 | 0.90 | 1.15 | 0.22 | 0.28 |
| 37643 | 0 | 133624 | KPGEMRGAA              | 2.21 | 0.01 | 0.90 | 1.15 | 0.22 | 0.28 |
| 37644 | 0 | 133624 | KPGEMRGAA              | 2.21 | 0.01 | 0.90 | 1.15 | 0.22 | 2.12 |
| 37645 | 0 | 133624 | KPGEMRGAA              | 2.21 | 0.01 | 0.90 | 1.15 | 0.22 | 1.27 |
| 37646 | 0 | 133624 | KPGEMRGAA              | 2.21 | 0.01 | 0.90 | 1.15 | 0.22 | 1.66 |
| 37647 | 0 | 32716  | KPGGGWNTGGSRYPG<br>QGS | 2.86 | 0.01 | 2.52 | 1.15 | 0.22 | 0.85 |
| 37648 | 0 | 32716  | KPGGGWNTGGSRYPG<br>QGS | 2.86 | 0.01 | 2.52 | 1.15 | 0.22 | 0.28 |
| 37649 | 0 | 32716  | KPGGGWNTGGSRYPG<br>QGS | 2.86 | 0.01 | 2.52 | 3.93 | 0.22 | 0.85 |
| 37650 | 0 | 32716  | KPGGGWNTGGSRYPG<br>QGS | 2.86 | 0.01 | 2.52 | 2.90 | 0.22 | 0.28 |
| 37651 | 0 | 32719  | KPGKIS                 | 1.91 | 0.01 | 2.76 | 0.44 | 1.59 | 0.28 |
| 37652 | 0 | 32719  | KPGKIS                 | 1.91 | 0.01 | 2.76 | 0.44 | 1.59 | 0.28 |
| 37653 | 0 | 32719  | KPGKIS                 | 1.91 | 0.01 | 2.76 | 0.44 | 1.59 | 1.48 |
| 37654 | 0 | 32723  | KPGKKTITTKPTK          | 2.54 | 0.01 | 2.38 | 0.68 | 0.22 | 0.28 |
| 37655 | 0 | 32723  | KPGKKTITTKPTK          | 2.54 | 0.01 | 2.38 | 0.68 | 0.22 | 0.28 |
| 37656 | 0 | 32723  | KPGKKTITTKPTK          | 2.54 | 0.01 | 2.38 | 0.44 | 1.74 | 0.28 |
| 37657 | 0 | 227307 | KPGPDNSTHNTPVYK        | 2.69 | 0.01 | 2.97 | 0.44 | 1.59 | 0.28 |
| 37658 | 0 | 227307 | KPGPDNSTHNTPVYK        | 2.69 | 0.01 | 2.97 | 0.44 | 0.85 | 0.28 |
| 37659 | 0 | 98177  | KPGSDVYYAG             | 2.30 | 0.01 | 3.08 | 0.68 | 0.22 | 0.28 |
| 37660 | 0 | 98177  | KPGSDVYYAG             | 2.30 | 0.01 | 3.08 | 1.20 | 0.22 | 0.28 |
| 37661 | 0 | 238667 | KPGVNIICCKTDNCN        | 2.69 | 0.01 | 2.56 | 2.02 | 0.22 | 0.85 |
| 37662 | 0 | 238667 | KPGVNIICCKTDNCN        | 2.69 | 0.01 | 2.56 | 1.20 | 0.22 | 0.85 |
| 37663 | 0 | 100223 | KPGVSDDQLTGN           | 2.44 | 0.01 | 2.88 | 1.20 | 0.22 | 0.85 |
| 37664 | 0 | 94570  | KPHFLLATEDDVRHHFT<br>p | 2.83 | 0.01 | 2.71 | 0.68 | 0.22 | 2.02 |
| 37665 | 0 | 94570  | KPHFLLATEDDVRHHFT<br>p | 2.83 | 0.01 | 2.71 | 0.68 | 0.22 | 2.02 |
| 37666 | 0 | 94570  | KPHFLLATEDDVRHHFT<br>p | 2.83 | 0.01 | 2.71 | 0.68 | 0.22 | 2.02 |

|       |   |        |                              |      |      |      |      |      |      |
|-------|---|--------|------------------------------|------|------|------|------|------|------|
| 37667 | 0 | 94570  | KPHFLLATEDDVRHHFT<br>p       | 2.83 | 0.01 | 2.71 | 0.68 | 0.22 | 2.02 |
| 37668 | 0 | 32731  | KPHFPLA                      | 2.02 | 0.01 | 3.89 | 0.68 | 0.22 | 0.28 |
| 37669 | 0 | 32731  | KPHFPLA                      | 2.02 | 0.01 | 3.89 | 0.68 | 0.22 | 0.28 |
| 37670 | 0 | 171869 | KPHRTFRFNECVCTP              | 2.68 | 0.01 | 0.78 | 0.44 | 1.41 | 0.28 |
| 37671 | 0 | 226488 | KPHSIPLLDLTR                 | 2.47 | 0.01 | 0.90 | 0.68 | 0.22 | 1.27 |
| 37672 | 0 | 226488 | KPHSIPLLDLTR                 | 2.47 | 0.01 | 0.90 | 0.68 | 0.22 | 0.85 |
| 37673 | 0 | 226488 | KPHSIPLLDLTR                 | 2.47 | 0.01 | 0.90 | 0.68 | 0.22 | 0.28 |
| 37674 | 0 | 226488 | KPHSIPLLDLTR                 | 2.47 | 0.01 | 0.90 | 0.68 | 0.22 | 1.34 |
| 37675 | 0 | 32734  | KPIISVIMYETNQ                | 2.51 | 0.01 | 2.86 | 2.02 | 1.59 | 0.28 |
| 37676 | 0 | 109427 | KPISGHNSLF                   | 2.29 | 0.01 | 0.78 | 0.44 | 1.41 | 0.28 |
| 37677 | 0 | 109427 | KPISGHNSLF                   | 2.29 | 0.01 | 0.78 | 0.44 | 1.41 | 0.28 |
| 37678 | 0 | 109427 | KPISGHNSLF                   | 2.29 | 0.01 | 0.78 | 0.44 | 1.41 | 0.28 |
| 37679 | 0 | 109427 | KPISGHNSLF                   | 2.29 | 0.01 | 0.78 | 0.44 | 1.41 | 0.28 |
| 37680 | 0 | 109427 | KPISGHNSLF                   | 2.29 | 0.01 | 0.78 | 0.44 | 1.13 | 0.28 |
| 37681 | 0 | 109427 | KPISGHNSLF                   | 2.29 | 0.01 | 0.78 | 0.44 | 1.13 | 0.28 |
| 37682 | 0 | 109427 | KPISGHNSLF                   | 2.29 | 0.01 | 0.78 | 0.44 | 1.13 | 0.28 |
| 37683 | 0 | 32738  | KPIVQYDNF                    | 2.18 | 0.01 | 1.66 | 1.20 | 0.22 | 0.28 |
| 37684 | 0 | 32738  | KPIVQYDNF                    | 2.18 | 0.01 | 1.66 | 2.43 | 0.22 | 0.28 |
| 37685 | 0 | 171870 | KPIWRHEILDADGIC              | 2.64 | 0.01 | 0.78 | 0.44 | 1.41 | 0.28 |
| 37686 | 0 | 117320 | KPKAAKPKKAAAKKK              | 2.73 | 0.01 | 0.78 | 3.44 | 2.26 | 0.28 |
| 37687 | 0 | 117320 | KPKAAKPKKAAAKKK              | 2.73 | 0.01 | 0.78 | 0.44 | 1.13 | 0.28 |
| 37688 | 0 | 117320 | KPKAAKPKKAAAKKK              | 2.73 | 0.01 | 0.78 | 0.44 | 1.13 | 0.28 |
| 37689 | 0 | 117320 | KPKAAKPKKAAAKKK              | 2.73 | 0.01 | 0.78 | 0.44 | 1.13 | 0.28 |
| 37690 | 0 | 117320 | KPKAAKPKKAAAKKK              | 2.73 | 0.01 | 0.78 | 0.44 | 1.13 | 0.28 |
| 37691 | 0 | 117320 | KPKAAKPKKAAAKKK              | 2.73 | 0.01 | 0.78 | 0.44 | 1.13 | 0.28 |
| 37692 | 0 | 117320 | KPKAAKPKKAAAKKK              | 2.73 | 0.01 | 0.78 | 0.44 | 1.13 | 0.28 |
| 37693 | 0 | 117320 | KPKAAKPKKAAAKKK              | 2.73 | 0.01 | 0.78 | 1.12 | 0.22 | 0.28 |
| 37694 | 0 | 117320 | KPKAAKPKKAAAKKK              | 2.73 | 0.01 | 0.78 | 0.44 | 1.13 | 0.28 |
| 37695 | 0 | 117320 | KPKAAKPKKAAAKKK              | 2.73 | 0.01 | 0.78 | 1.12 | 0.22 | 0.28 |
| 37696 | 0 | 117320 | KPKAAKPKKAAAKKK              | 2.73 | 0.01 | 0.78 | 1.12 | 0.22 | 0.28 |
| 37697 | 0 | 117320 | KPKAAKPKKAAAKKK              | 2.73 | 0.01 | 0.78 | 1.12 | 0.22 | 0.28 |
| 37698 | 0 | 117320 | KPKAAKPKKAAAKKK              | 2.73 | 0.01 | 0.78 | 0.44 | 1.13 | 0.28 |
| 37699 | 0 | 117320 | KPKAAKPKKAAAKKK              | 2.73 | 0.01 | 0.78 | 0.44 | 1.13 | 0.28 |
| 37700 | 0 | 117320 | KPKAAKPKKAAAKKK              | 2.73 | 0.01 | 0.78 | 2.79 | 1.13 | 1.28 |
| 37701 | 0 | 117320 | KPKAAKPKKAAAKKK              | 2.73 | 0.01 | 0.78 | 1.81 | 1.41 | 1.28 |
| 37702 | 0 | 117320 | KPKAAKPKKAAAKKK              | 2.73 | 0.01 | 0.78 | 1.81 | 1.41 | 1.28 |
| 37703 | 0 | 32741  | KPKDEL DY                    | 2.15 | 0.01 | 3.29 | 1.20 | 0.22 | 0.28 |
| 37704 | 0 | 32749  | KPKDEL DYENDIEKKICK<br>MEKCS | 3.11 | 0.01 | 3.29 | 0.68 | 0.22 | 0.28 |
| 37705 | 0 | 32749  | KPKDEL DYENDIEKKICK<br>MEKCS | 3.11 | 0.01 | 1.66 | 1.20 | 0.22 | 0.28 |
| 37706 | 0 | 32749  | KPKDEL DYENDIEKKICK<br>MEKCS | 3.11 | 0.01 | 1.66 | 2.43 | 0.22 | 0.28 |
| 37707 | 0 | 32761  | KPKDQLDYENDIEKKICK<br>MEKCS  | 3.09 | 0.01 | 1.66 | 0.44 | 0.85 | 0.28 |
| 37708 | 0 | 225780 | KPKDVLMITRTPEVT              | 2.69 | 0.01 | 3.28 | 0.44 | 0.22 | 0.85 |

|       |   |        |                                     |      |      |      |      |      |      |
|-------|---|--------|-------------------------------------|------|------|------|------|------|------|
| 37709 | 0 | 32769  | KPKHKKLKQPGDGNP                     | 2.72 | 0.01 | 1.66 | 2.43 | 0.22 | 0.28 |
| 37710 | 0 | 32769  | KPKHKKLKQPGDGNP                     | 2.72 | 0.01 | 1.66 | 0.44 | 1.74 | 0.28 |
| 37711 | 0 | 32769  | KPKHKKLKQPGDGNP                     | 2.72 | 0.01 | 1.66 | 1.81 | 0.22 | 0.28 |
| 37712 | 0 | 32769  | KPKHKKLKQPGDGNP                     | 2.72 | 0.01 | 1.66 | 1.81 | 0.22 | 1.27 |
| 37713 | 0 | 32770  | KPKHKKLKQPGDGNPD                    | 2.78 | 0.01 | 1.66 | 0.44 | 0.85 | 0.28 |
| 37714 | 0 | 139792 | KPKHKKLKQPGDGNPE<br>NANANNAV        | 3.15 | 0.01 | 0.90 | 0.68 | 0.22 | 0.28 |
| 37715 | 0 | 171879 | KPKKAASKAPTKKPK                     | 2.75 | 0.01 | 0.78 | 0.44 | 1.41 | 0.28 |
| 37716 | 0 | 123386 | KPKSQETP                            | 2.15 | 0.01 | 0.78 | 1.20 | 0.22 | 0.28 |
| 37717 | 0 | 123386 | KPKSQETP                            | 2.15 | 0.01 | 0.78 | 0.44 | 1.13 | 0.28 |
| 37718 | 0 | 123386 | KPKSQETP                            | 2.15 | 0.01 | 0.78 | 0.44 | 1.13 | 0.28 |
| 37719 | 0 | 123386 | KPKSQETP                            | 2.15 | 0.01 | 0.78 | 0.44 | 1.41 | 0.28 |
| 37720 | 0 | 32776  | KPKTNMKHMA                          | 2.34 | 0.01 | 2.98 | 1.15 | 2.26 | 2.49 |
| 37721 | 0 | 32780  | KPLAMDPLHVST                        | 2.45 | 0.01 | 0.90 | 2.74 | 0.22 | 1.27 |
| 37722 | 0 | 32781  | KPLASDPLGAMP                        | 2.49 | 0.01 | 0.90 | 2.74 | 0.22 | 1.27 |
| 37723 | 0 | 32782  | KPLDERA                             | 1.99 | 0.01 | 2.75 | 0.44 | 0.85 | 0.85 |
| 37724 | 0 | 32783  | KPLDKFGNIYDYHYEH                    | 2.74 | 0.01 | 1.66 | 1.15 | 0.22 | 0.28 |
| 37725 | 0 | 32783  | KPLDKFGNIYDYHYEH                    | 2.74 | 0.01 | 1.66 | 0.68 | 0.22 | 0.28 |
| 37726 | 0 | 32783  | KPLDKFGNIYDYHYEH                    | 2.74 | 0.01 | 1.66 | 0.68 | 0.22 | 0.28 |
| 37727 | 0 | 32783  | KPLDKFGNIYDYHYEH                    | 2.74 | 0.01 | 1.66 | 0.68 | 0.22 | 0.28 |
| 37728 | 0 | 32783  | KPLDKFGNIYDYHYEH                    | 2.74 | 0.01 | 1.66 | 0.68 | 0.22 | 0.28 |
| 37729 | 0 | 32783  | KPLDKFGNIYDYHYEH                    | 2.74 | 0.01 | 1.66 | 1.15 | 0.22 | 0.85 |
| 37730 | 0 | 32783  | KPLDKFGNIYDYHYEH                    | 2.74 | 0.01 | 1.66 | 1.20 | 0.22 | 0.28 |
| 37731 | 0 | 32783  | KPLDKFGNIYDYHYEH                    | 2.74 | 0.01 | 1.66 | 2.43 | 0.22 | 0.28 |
| 37732 | 0 | 32784  | KPLDKFGNIYDYHYEHET<br>HA            | 2.94 | 0.01 | 1.66 | 0.68 | 0.22 | 0.28 |
| 37733 | 0 | 32784  | KPLDKFGNIYDYHYEHET<br>HA            | 2.94 | 0.01 | 1.66 | 0.68 | 0.22 | 0.28 |
| 37734 | 0 | 32786  | KPLDNIKDDIGKLETFITK<br>NKETISNINKLI | 3.41 | 0.01 | 4.08 | 0.68 | 0.22 | 1.48 |
| 37735 | 0 | 32787  | KPLEDKILVQ                          | 2.32 | 0.01 | 2.04 | 0.68 | 0.22 | 0.28 |
| 37736 | 0 | 32787  | KPLEDKILVQ                          | 2.32 | 0.01 | 2.04 | 0.68 | 0.22 | 0.28 |
| 37737 | 0 | 144385 | KPLEEVLNL                           | 2.24 | 4.45 | 0.78 | 1.15 | 0.22 | 2.49 |
| 37738 | 0 | 144385 | KPLEEVLNL                           | 2.24 | 4.45 | 0.78 | 1.15 | 0.22 | 0.28 |
| 37739 | 0 | 144385 | KPLEEVLNL                           | 2.24 | 4.45 | 0.78 | 1.15 | 0.22 | 0.28 |
| 37740 | 0 | 32790  | KPLHCGDTFCSLNQ                      | 2.57 | 0.01 | 0.90 | 0.44 | 1.41 | 0.28 |
| 37741 | 0 | 32800  | KPMKTLQFFPGL                        | 2.49 | 0.01 | 0.90 | 0.68 | 0.22 | 0.28 |
| 37742 | 0 | 122442 | KPMSNFRFGENHA                       | 2.51 | 0.01 | 1.60 | 2.04 | 0.22 | 0.28 |
| 37743 | 0 | 224827 | KPNDAINF                            | 2.12 | 0.01 | 2.77 | 1.15 | 0.22 | 1.66 |
| 37744 | 0 | 224827 | KPNDAINF                            | 2.12 | 0.01 | 2.77 | 1.15 | 0.22 | 1.66 |
| 37745 | 0 | 224827 | KPNDAINF                            | 2.12 | 0.01 | 2.77 | 1.15 | 0.22 | 1.66 |
| 37746 | 0 | 224827 | KPNDAINF                            | 2.12 | 0.01 | 2.77 | 1.15 | 0.22 | 1.34 |
| 37747 | 0 | 224827 | KPNDAINF                            | 2.12 | 0.01 | 2.77 | 1.15 | 0.22 | 1.34 |
| 37748 | 0 | 224827 | KPNDAINF                            | 2.12 | 0.01 | 2.77 | 1.15 | 0.22 | 1.34 |
| 37749 | 0 | 224827 | KPNDAINF                            | 2.12 | 0.01 | 2.77 | 1.15 | 0.22 | 1.34 |
| 37750 | 0 | 224827 | KPNDAINF                            | 2.12 | 0.01 | 2.77 | 1.15 | 0.22 | 1.34 |

|       |   |        |                          |      |      |      |      |      |      |
|-------|---|--------|--------------------------|------|------|------|------|------|------|
| 37751 | 0 | 224827 | KPNDAINF                 | 2.12 | 0.01 | 2.77 | 1.15 | 0.22 | 1.34 |
| 37752 | 0 | 224827 | KPNDAINF                 | 2.12 | 0.01 | 2.77 | 1.15 | 0.22 | 1.34 |
| 37753 | 0 | 224827 | KPNDAINF                 | 2.12 | 0.01 | 2.77 | 1.15 | 0.22 | 1.34 |
| 37754 | 0 | 224827 | KPNDAINF                 | 2.12 | 0.01 | 2.77 | 1.15 | 0.22 | 1.34 |
| 37755 | 0 | 224827 | KPNDAINF                 | 2.12 | 0.01 | 2.77 | 1.15 | 0.22 | 1.34 |
| 37756 | 0 | 224827 | KPNDAINF                 | 2.12 | 0.01 | 2.77 | 1.15 | 0.22 | 1.34 |
| 37757 | 0 | 224827 | KPNDAINF                 | 2.12 | 0.01 | 2.77 | 1.15 | 0.22 | 0.28 |
| 37758 | 0 | 224827 | KPNDAINF                 | 2.12 | 0.01 | 2.77 | 1.15 | 0.22 | 0.28 |
| 37759 | 0 | 224827 | KPNDAINF                 | 2.12 | 0.01 | 2.77 | 1.15 | 0.22 | 1.48 |
| 37760 | 0 | 32802  | KPNDKSLY                 | 2.13 | 0.01 | 1.66 | 2.43 | 0.22 | 0.28 |
| 37761 | 0 | 32807  | KPNLSSKRSELSQLS          | 2.72 | 0.01 | 2.72 | 0.68 | 0.22 | 0.28 |
| 37762 | 0 | 32807  | KPNLSSKRSELSQLS          | 2.72 | 0.01 | 2.43 | 1.15 | 0.22 | 2.12 |
| 37763 | 0 | 32808  | KPNLSSKRSELSQLSMYR<br>VF | 2.95 | 0.01 | 2.43 | 0.68 | 0.22 | 1.27 |
| 37764 | 0 | 32808  | KPNLSSKRSELSQLSMYR<br>VF | 2.95 | 0.01 | 2.43 | 0.68 | 0.22 | 1.34 |
| 37765 | 0 | 32808  | KPNLSSKRSELSQLSMYR<br>VF | 2.95 | 0.01 | 2.43 | 0.68 | 0.22 | 1.66 |
| 37766 | 0 | 32808  | KPNLSSKRSELSQLSMYR<br>VF | 2.95 | 0.01 | 2.43 | 0.68 | 0.22 | 1.27 |
| 37767 | 0 | 32808  | KPNLSSKRSELSQLSMYR<br>VF | 2.95 | 0.01 | 2.43 | 0.68 | 0.22 | 0.85 |
| 37768 | 0 | 32809  | KPNNDFHFEVFN             | 2.49 | 0.01 | 2.38 | 0.68 | 0.22 | 0.28 |
| 37769 | 0 | 32809  | KPNNDFHFEVFN             | 2.49 | 0.01 | 2.38 | 0.68 | 0.22 | 0.28 |
| 37770 | 0 | 32809  | KPNNDFHFEVFN             | 2.49 | 0.01 | 2.38 | 0.68 | 0.22 | 0.28 |
| 37771 | 0 | 32809  | KPNNDFHFEVFN             | 2.49 | 0.01 | 2.38 | 0.44 | 1.59 | 0.28 |
| 37772 | 0 | 32809  | KPNNDFHFEVFN             | 2.49 | 0.01 | 2.38 | 0.44 | 1.74 | 0.28 |
| 37773 | 0 | 32809  | KPNNDFHFEVFN             | 2.49 | 0.01 | 2.38 | 0.44 | 1.74 | 0.28 |
| 37774 | 0 | 32811  | KPNRNGGGYYSASYS          | 2.70 | 0.01 | 2.04 | 0.44 | 0.85 | 0.28 |
| 37775 | 0 | 32812  | KPNRPVVPSPDPN            | 2.58 | 0.01 | 3.17 | 0.44 | 0.85 | 0.85 |
| 37776 | 0 | 99393  | KPNTLVLPKHADADN          | 2.71 | 0.01 | 2.16 | 0.44 | 1.23 | 1.48 |
| 37777 | 0 | 32817  | KPNYAPANCPKS             | 2.52 | 0.01 | 2.58 | 0.68 | 0.22 | 0.28 |
| 37778 | 0 | 32817  | KPNYAPANCPKS             | 2.52 | 0.01 | 2.58 | 0.68 | 0.22 | 0.85 |
| 37779 | 0 | 321984 | KPPAESPFRSVFGAP          | 2.70 | 0.01 | 1.61 | 0.44 | 0.85 | 1.28 |
| 37780 | 0 | 189240 | KPPAQP                   | 1.92 | 0.01 | 4.23 | 0.68 | 0.22 | 0.28 |
| 37781 | 0 | 189240 | KPPAQP                   | 1.92 | 0.01 | 4.23 | 0.68 | 0.22 | 1.48 |
| 37782 | 0 | 189240 | KPPAQP                   | 1.92 | 0.01 | 4.23 | 0.68 | 0.22 | 0.28 |
| 37783 | 0 | 189240 | KPPAQP                   | 1.92 | 0.01 | 4.23 | 0.68 | 0.22 | 0.85 |
| 37784 | 0 | 32818  | KPPFSGMTGCGNT            | 2.55 | 0.01 | 2.53 | 0.44 | 1.23 | 0.85 |
| 37785 | 0 | 32825  | KPPKYHPD                 | 2.17 | 0.01 | 0.78 | 0.44 | 1.74 | 0.28 |
| 37786 | 0 | 32826  | KPPKYHPDVP               | 2.36 | 0.01 | 0.78 | 0.44 | 1.74 | 0.28 |
| 37787 | 0 | 32827  | KPPNKPNNDFHF             | 2.52 | 0.01 | 2.38 | 0.68 | 0.22 | 0.28 |
| 37788 | 0 | 32827  | KPPNKPNNDFHF             | 2.52 | 0.01 | 2.38 | 0.68 | 0.22 | 0.28 |
| 37789 | 0 | 32827  | KPPNKPNNDFHF             | 2.52 | 0.01 | 2.38 | 0.68 | 0.22 | 0.28 |
| 37790 | 0 | 32827  | KPPNKPNNDFHF             | 2.52 | 0.01 | 2.38 | 0.44 | 1.59 | 0.28 |
| 37791 | 0 | 32827  | KPPNKPNNDFHF             | 2.52 | 0.01 | 2.38 | 0.44 | 1.74 | 0.28 |

|       |   |        |                                                  |      |      |      |      |      |      |
|-------|---|--------|--------------------------------------------------|------|------|------|------|------|------|
| 37792 | 0 | 520185 | KPPPARPGPIRPTLPPGIL<br>G                         | 2.99 | 4.23 | 2.40 | 0.44 | 1.59 | 1.28 |
| 37793 | 0 | 520186 | KPPPARPGPIRPTLPPGIL<br>G                         | 2.99 | 0.01 | 2.40 | 0.44 | 1.59 | 1.28 |
| 37794 | 0 | 321998 | KPPPFQQAAGDKLS                                   | 2.67 | 0.01 | 1.61 | 0.44 | 0.85 | 1.28 |
| 37795 | 0 | 32832  | KPPPFQQAAGDKPA                                   | 2.72 | 0.01 | 1.61 | 0.44 | 0.85 | 1.28 |
| 37796 | 0 | 32833  | KPPPFQQAAGDKPP                                   | 2.70 | 0.01 | 1.61 | 0.44 | 0.85 | 1.28 |
| 37797 | 0 | 32834  | KPPPFQQAAGDKPS                                   | 2.70 | 0.01 | 1.61 | 0.44 | 0.85 | 1.28 |
| 37798 | 0 | 32835  | KPPPFQQAAGDKPP                                   | 2.69 | 0.01 | 1.61 | 0.44 | 0.85 | 1.28 |
| 37799 | 0 | 226489 | KPPQMPLYNLSA                                     | 2.47 | 0.01 | 0.90 | 0.68 | 0.22 | 1.27 |
| 37800 | 0 | 226489 | KPPQMPLYNLSA                                     | 2.47 | 0.01 | 0.90 | 0.68 | 0.22 | 0.85 |
| 37801 | 0 | 226489 | KPPQMPLYNLSA                                     | 2.47 | 0.01 | 0.90 | 0.68 | 0.22 | 0.28 |
| 37802 | 0 | 226489 | KPPQMPLYNLSA                                     | 2.47 | 0.01 | 0.90 | 0.68 | 0.22 | 1.34 |
| 37803 | 0 | 227308 | KPPRNLCNICETGKNFK<br>LVVYIKENTLIKWVYG<br>ETKDTTE | 3.67 | 0.01 | 3.28 | 0.44 | 1.59 | 0.28 |
| 37804 | 0 | 227308 | KPPRNLCNICETGKNFK<br>LVVYIKENTLIKWVYG<br>ETKDTTE | 3.67 | 0.01 | 3.28 | 3.33 | 0.22 | 0.28 |
| 37805 | 0 | 32841  | KPPTPPPEPET                                      | 2.46 | 0.01 | 3.36 | 0.68 | 0.22 | 1.27 |
| 37806 | 0 | 32841  | KPPTPPPEPET                                      | 2.46 | 0.01 | 3.36 | 0.68 | 0.22 | 1.48 |
| 37807 | 0 | 32841  | KPPTPPPEPET                                      | 2.46 | 0.01 | 3.36 | 0.68 | 0.22 | 1.27 |
| 37808 | 0 | 32841  | KPPTPPPEPET                                      | 2.46 | 0.01 | 3.36 | 0.68 | 0.22 | 1.27 |
| 37809 | 0 | 32841  | KPPTPPPEPET                                      | 2.46 | 0.01 | 3.36 | 0.68 | 0.22 | 0.28 |
| 37810 | 0 | 32841  | KPPTPPPEPET                                      | 2.46 | 0.01 | 3.36 | 0.68 | 0.22 | 1.48 |
| 37811 | 0 | 104014 | KPQ                                              | 1.37 | 0.01 | 0.78 | 0.44 | 1.13 | 2.02 |
| 37812 | 0 | 32844  | KPQEEKEKITKEILNGK                                | 2.83 | 0.01 | 3.10 | 2.69 | 0.22 | 0.28 |
| 37813 | 0 | 32844  | KPQEEKEKITKEILNGK                                | 2.83 | 0.01 | 3.10 | 2.69 | 0.22 | 0.28 |
| 37814 | 0 | 32844  | KPQEEKEKITKEILNGK                                | 2.83 | 0.01 | 3.10 | 1.12 | 0.22 | 0.28 |
| 37815 | 0 | 32844  | KPQEEKEKITKEILNGK                                | 2.83 | 0.01 | 3.10 | 1.12 | 0.22 | 0.28 |
| 37816 | 0 | 32844  | KPQEEKEKITKEILNGK                                | 2.83 | 0.01 | 3.10 | 0.68 | 0.22 | 0.28 |
| 37817 | 0 | 32844  | KPQEEKEKITKEILNGK                                | 2.83 | 0.01 | 2.86 | 1.12 | 0.22 | 0.85 |
| 37818 | 0 | 32844  | KPQEEKEKITKEILNGK                                | 2.83 | 0.01 | 2.86 | 0.68 | 0.22 | 0.28 |
| 37819 | 0 | 32844  | KPQEEKEKITKEILNGK                                | 2.83 | 0.01 | 2.86 | 0.68 | 0.22 | 0.28 |
| 37820 | 0 | 32844  | KPQEEKEKITKEILNGK                                | 2.83 | 0.01 | 2.86 | 3.38 | 0.22 | 0.28 |
| 37821 | 0 | 32844  | KPQEEKEKITKEILNGK                                | 2.83 | 0.01 | 2.86 | 3.38 | 0.22 | 0.28 |
| 37822 | 0 | 32844  | KPQEEKEKITKEILNGK                                | 2.83 | 0.01 | 2.86 | 3.38 | 0.22 | 0.28 |
| 37823 | 0 | 32844  | KPQEEKEKITKEILNGK                                | 2.83 | 0.01 | 2.86 | 2.69 | 0.22 | 0.28 |
| 37824 | 0 | 32844  | KPQEEKEKITKEILNGK                                | 2.83 | 0.01 | 2.86 | 0.44 | 0.85 | 0.28 |
| 37825 | 0 | 32844  | KPQEEKEKITKEILNGK                                | 2.83 | 0.01 | 2.86 | 0.44 | 0.85 | 0.28 |
| 37826 | 0 | 32844  | KPQEEKEKITKEILNGK                                | 2.83 | 0.01 | 2.86 | 0.44 | 0.85 | 0.28 |
| 37827 | 0 | 32844  | KPQEEKEKITKEILNGK                                | 2.83 | 0.01 | 2.86 | 0.44 | 0.85 | 0.28 |
| 37828 | 0 | 32844  | KPQEEKEKITKEILNGK                                | 2.83 | 0.01 | 2.86 | 3.63 | 0.22 | 0.85 |
| 37829 | 0 | 32844  | KPQEEKEKITKEILNGK                                | 2.83 | 0.01 | 2.86 | 0.68 | 0.22 | 1.57 |
| 37830 | 0 | 32847  | KPQGPLPNTA                                       | 2.31 | 0.01 | 0.78 | 0.44 | 1.74 | 0.28 |



|       |   |        |                               |      |      |      |      |      |      |
|-------|---|--------|-------------------------------|------|------|------|------|------|------|
| 37831 | 0 | 32848  | KPQGSPPASQKEAIRD              | 2.75 | 0.01 | 4.63 | 1.12 | 0.22 | 0.85 |
| 37832 | 0 | 32848  | KPQGSPPASQKEAIRD              | 2.75 | 0.01 | 4.63 | 1.12 | 0.22 | 1.48 |
| 37833 | 0 | 32853  | KPQQPESLEECDSELEIK<br>RYKN    | 3.04 | 0.01 | 2.43 | 0.44 | 1.59 | 0.28 |
| 37834 | 0 | 113580 | KPQQQSPQQQFPQQQI<br>PQQQ      | 2.99 | 0.01 | 0.90 | 0.44 | 1.23 | 2.75 |
| 37835 | 0 | 113580 | KPQQQSPQQQFPQQQI<br>PQQQ      | 2.99 | 0.01 | 0.90 | 0.44 | 1.23 | 2.75 |
| 37836 | 0 | 113580 | KPQQQSPQQQFPQQQI<br>PQQQ      | 2.99 | 0.01 | 0.90 | 0.44 | 1.23 | 1.27 |
| 37837 | 0 | 32856  | KPQRKTKRNTNRRPQ               | 2.74 | 0.01 | 1.72 | 0.44 | 0.85 | 0.28 |
| 37838 | 0 | 32862  | KPRDTLPPPLNRPPP               | 2.70 | 0.01 | 0.90 | 0.44 | 0.85 | 1.39 |
| 37839 | 0 | 32862  | KPRDTLPPPLNRPPP               | 2.70 | 0.01 | 0.90 | 0.44 | 0.85 | 0.28 |
| 37840 | 0 | 131524 | KPREE                         | 1.72 | 0.01 | 0.78 | 1.15 | 0.22 | 0.28 |
| 37841 | 0 | 131524 | KPREE                         | 1.72 | 0.01 | 0.78 | 1.15 | 0.22 | 0.85 |
| 37842 | 0 | 108504 | KPREPCGGQNTVPGVR<br>NYGFWDKDK | 3.15 | 0.01 | 1.60 | 0.68 | 0.22 | 0.28 |
| 37843 | 0 | 107489 | KPREQQY                       | 2.01 | 0.01 | 0.78 | 0.44 | 1.13 | 0.28 |
| 37844 | 0 | 105905 | KPRGVTHD                      | 2.10 | 0.01 | 3.05 | 1.20 | 0.22 | 0.28 |
| 37845 | 0 | 32865  | KPRPQPTP                      | 2.16 | 0.01 | 3.72 | 3.70 | 0.22 | 0.85 |
| 37846 | 0 | 32865  | KPRPQPTP                      | 2.16 | 0.01 | 3.72 | 3.70 | 0.22 | 0.85 |
| 37847 | 0 | 32865  | KPRPQPTP                      | 2.16 | 0.01 | 3.72 | 3.70 | 0.22 | 1.48 |
| 37848 | 0 | 32865  | KPRPQPTP                      | 2.16 | 0.01 | 3.72 | 3.70 | 0.22 | 1.48 |
| 37849 | 0 | 32865  | KPRPQPTP                      | 2.16 | 0.01 | 3.72 | 3.70 | 0.22 | 1.48 |
| 37850 | 0 | 124373 | KPSARFSGL                     | 2.21 | 0.01 | 0.90 | 0.44 | 1.13 | 1.39 |
| 37851 | 0 | 32872  | KPSDFPP                       | 2.00 | 0.01 | 0.90 | 1.12 | 0.22 | 1.39 |
| 37852 | 0 | 32877  | KPSKPKTNLKHVAGAA              | 2.74 | 0.01 | 1.75 | 1.12 | 0.22 | 0.28 |
| 37853 | 0 | 32877  | KPSKPKTNLKHVAGAA              | 2.74 | 0.01 | 1.75 | 1.12 | 0.22 | 0.28 |
| 37854 | 0 | 32878  | KPSKPKTNMKHMAGAA              | 2.71 | 0.01 | 2.98 | 1.15 | 0.22 | 1.27 |
| 37855 | 0 | 32879  | KPSKPKTNMKHMAGAA              | 2.75 | 0.01 | 2.98 | 1.12 | 0.22 | 0.28 |
| 37856 | 0 | 32879  | KPSKPKTNMKHMAGAA              | 2.75 | 0.01 | 2.98 | 1.12 | 0.22 | 0.28 |
| 37857 | 0 | 135568 | KPSKPKTNMKHMAGAA<br>AAG       | 2.92 | 0.01 | 0.78 | 1.81 | 0.22 | 2.56 |
| 37858 | 0 | 322093 | KPSLFGQAAAGDKPP               | 2.67 | 0.01 | 1.61 | 0.44 | 0.85 | 1.28 |
| 37859 | 0 | 322094 | KPSLFGQAAAGDKPS               | 2.69 | 0.01 | 1.61 | 0.44 | 0.85 | 1.28 |
| 37860 | 0 | 32884  | KPSPFGQAAAGDKPP               | 2.69 | 0.01 | 1.61 | 0.44 | 0.85 | 1.28 |
| 37861 | 0 | 322098 | KPSPFGQAAAGDKPS               | 2.70 | 0.01 | 1.61 | 0.44 | 0.85 | 1.28 |
| 37862 | 0 | 322099 | KPSPFGQAAAGGKPS               | 2.71 | 0.01 | 1.61 | 0.44 | 0.85 | 1.28 |
| 37863 | 0 | 322100 | KPSPFGQGTAFDASR               | 2.68 | 0.01 | 1.61 | 0.44 | 0.85 | 1.28 |

|       |   |        |                                |      |      |      |      |      |      |
|-------|---|--------|--------------------------------|------|------|------|------|------|------|
| 37864 | 0 | 98854  | KPSPQVTVRFPDSDFKV<br>YRYNA     | 3.05 | 0.01 | 2.72 | 1.12 | 0.22 | 0.28 |
| 37865 | 0 | 110920 | KPSPWAPKKHRRLS                 | 2.64 | 0.01 | 1.86 | 1.15 | 0.22 | 0.85 |
| 37866 | 0 | 110920 | KPSPWAPKKHRRLS                 | 2.64 | 0.01 | 1.86 | 1.15 | 0.22 | 0.28 |
| 37867 | 0 | 110920 | KPSPWAPKKHRRLS                 | 2.64 | 0.01 | 1.86 | 1.15 | 0.22 | 1.48 |
| 37868 | 0 | 110920 | KPSPWAPKKHRRLS                 | 2.64 | 0.01 | 1.86 | 0.44 | 0.85 | 0.28 |
| 37869 | 0 | 110920 | KPSPWAPKKHRRLS                 | 2.64 | 0.01 | 1.86 | 0.44 | 0.85 | 0.28 |
| 37870 | 0 | 32886  | KPSTGAG                        | 2.02 | 0.01 | 2.22 | 3.23 | 0.22 | 0.28 |
| 37871 | 0 | 32886  | KPSTGAG                        | 2.02 | 0.01 | 2.22 | 0.44 | 0.22 | 0.28 |
| 37872 | 0 | 32887  | KPSTLYKMTVEAVK                 | 2.62 | 0.01 | 2.94 | 2.00 | 0.22 | 0.28 |
| 37873 | 0 | 32887  | KPSTLYKMTVEAVK                 | 2.62 | 0.01 | 2.94 | 2.00 | 0.22 | 0.28 |
| 37874 | 0 | 32888  | KPSYQFGGHNSVDFEED<br>TLPK      | 2.95 | 0.01 | 2.56 | 1.20 | 0.22 | 0.28 |
| 37875 | 0 | 32888  | KPSYQFGGHNSVDFEED<br>TLPK      | 2.95 | 0.01 | 2.56 | 1.20 | 0.22 | 1.34 |
| 37876 | 0 | 156348 | KPTCLINDKNFIATTALS<br>HPQEVdle | 3.18 | 0.01 | 3.44 | 0.44 | 0.85 | 0.28 |
| 37877 | 0 | 156348 | KPTCLINDKNFIATTALS<br>HPQEVdle | 3.18 | 0.01 | 3.44 | 0.44 | 1.59 | 0.28 |
| 37878 | 0 | 32889  | KPTDG                          | 1.74 | 0.01 | 2.08 | 1.12 | 0.22 | 0.28 |
| 37879 | 0 | 32890  | KPTDGN                         | 1.88 | 0.01 | 2.08 | 1.15 | 2.26 | 1.27 |
| 37880 | 0 | 32890  | KPTDGN                         | 1.88 | 0.01 | 2.08 | 4.33 | 0.22 | 1.57 |
| 37881 | 0 | 32891  | KPTEKPTINITK                   | 2.53 | 0.01 | 4.03 | 0.44 | 0.85 | 0.28 |
| 37882 | 0 | 32895  | KPTFKTTKKDHK                   | 2.52 | 0.01 | 2.38 | 0.68 | 0.22 | 0.28 |
| 37883 | 0 | 32895  | KPTFKTTKKDHK                   | 2.52 | 0.01 | 2.38 | 0.44 | 1.74 | 0.28 |
| 37884 | 0 | 97428  | KPTGSAAA                       | 2.10 | 0.01 | 2.87 | 0.68 | 0.22 | 0.28 |
| 37885 | 0 | 32901  | KPTKKPTFKTTK                   | 2.54 | 0.01 | 2.38 | 0.68 | 0.22 | 0.28 |
| 37886 | 0 | 32901  | KPTKKPTFKTTK                   | 2.54 | 0.01 | 2.38 | 0.44 | 1.74 | 0.28 |
| 37887 | 0 | 32902  | KPTKKPTFKTTKKDLKPQ             | 2.90 | 0.01 | 2.38 | 1.20 | 0.22 | 0.85 |
| 37888 | 0 | 32902  | KPTKKPTFKTTKKDLKPQ             | 2.90 | 0.01 | 2.38 | 1.20 | 0.22 | 0.28 |
| 37889 | 0 | 32904  | KPTLGGKAVVGRPPSVP<br>VSG       | 2.99 | 0.01 | 2.76 | 0.44 | 1.59 | 0.28 |
| 37890 | 0 | 171891 | KPTLYYKDkatFGCH                | 2.66 | 0.01 | 0.78 | 0.44 | 1.13 | 0.28 |
| 37891 | 0 | 32907  | KPTPEGdleI                     | 2.31 | 0.01 | 1.60 | 0.44 | 1.23 | 0.85 |
| 37892 | 0 | 32907  | KPTPEGdleI                     | 2.31 | 0.01 | 1.60 | 0.44 | 1.23 | 0.85 |
| 37893 | 0 | 32907  | KPTPEGdleI                     | 2.31 | 0.01 | 1.60 | 0.44 | 1.23 | 0.85 |
| 37894 | 0 | 32907  | KPTPEGdleI                     | 2.31 | 0.01 | 1.60 | 0.44 | 1.23 | 0.85 |
| 37895 | 0 | 32908  | KPTPEGdleILLQK                 | 2.63 | 0.01 | 1.60 | 0.44 | 1.23 | 0.85 |
| 37896 | 0 | 138198 | KPTSTLT                        | 2.04 | 0.01 | 0.90 | 1.15 | 2.26 | 0.28 |
| 37897 | 0 | 138198 | KPTSTLT                        | 2.04 | 0.01 | 0.90 | 1.15 | 2.26 | 2.35 |
| 37898 | 0 | 138198 | KPTSTLT                        | 2.04 | 0.01 | 0.90 | 0.44 | 1.41 | 1.34 |
| 37899 | 0 | 430734 | KPTTEGGVETE                    | 2.43 | 0.01 | 4.23 | 0.68 | 0.22 | 0.28 |
| 37900 | 0 | 430734 | KPTTEGGVETE                    | 2.43 | 0.01 | 4.23 | 0.68 | 0.22 | 0.28 |
| 37901 | 0 | 430734 | KPTTEGGVETE                    | 2.43 | 0.01 | 4.23 | 0.68 | 0.22 | 1.34 |
| 37902 | 0 | 430734 | KPTTEGGVETE                    | 2.43 | 0.01 | 4.23 | 0.68 | 0.22 | 1.75 |

|       |   |        |                                   |      |      |      |      |      |      |
|-------|---|--------|-----------------------------------|------|------|------|------|------|------|
| 37903 | 0 | 430734 | KPTTEGGVETE                       | 2.43 | 0.01 | 4.23 | 0.68 | 0.22 | 0.28 |
| 37904 | 0 | 32912  | KPTTFMLKYDENGITD                  | 2.78 | 0.01 | 2.48 | 0.44 | 0.85 | 0.28 |
| 37905 | 0 | 32913  | KPTTKQRQNKPP                      | 2.50 | 0.01 | 2.38 | 0.68 | 0.22 | 0.28 |
| 37906 | 0 | 32913  | KPTTKQRQNKPP                      | 2.50 | 0.01 | 2.38 | 0.44 | 1.74 | 0.28 |
| 37907 | 0 | 32914  | KPTTKQRQNKPPNKP                   | 2.80 | 0.01 | 2.38 | 1.20 | 0.22 | 0.85 |
| 37908 | 0 | 32914  | KPTTKQRQNKPPNKP                   | 2.80 | 0.01 | 2.38 | 1.20 | 0.22 | 0.28 |
| 37909 | 0 | 106573 | KPTYSPYPFSMP                      | 2.51 | 0.01 | 0.90 | 1.15 | 0.22 | 2.56 |
| 37910 | 0 | 115325 | KPVALINNQLPYPPYAK<br>PA           | 2.97 | 0.01 | 1.60 | 0.44 | 1.23 | 1.28 |
| 37911 | 0 | 171892 | KPVKPKAKSSAKRAG                   | 2.73 | 0.01 | 0.78 | 0.44 | 1.13 | 0.28 |
| 37912 | 0 | 131936 | KPVSSPDWNKQQDIV                   | 2.69 | 0.01 | 0.78 | 0.44 | 1.13 | 0.85 |
| 37913 | 0 | 193488 | KPVSVFIGS                         | 2.23 | 0.01 | 2.51 | 0.44 | 2.39 | 0.28 |
| 37914 | 0 | 193488 | KPVSVFIGS                         | 2.23 | 0.01 | 2.51 | 0.44 | 2.39 | 0.28 |
| 37915 | 0 | 136436 | KPVVGMPIVEVW                      | 2.49 | 0.01 | 0.90 | 2.74 | 0.22 | 0.85 |
| 37916 | 0 | 95514  | KPWIQPKTKV                        | 2.34 | 0.01 | 1.60 | 0.44 | 1.23 | 0.85 |
| 37917 | 0 | 127714 | KPWKHLK                           | 2.05 | 0.01 | 0.90 | 0.44 | 1.13 | 1.39 |
| 37918 | 0 | 79888  | KPYEVTPTTMLV                      | 2.48 | 0.01 | 2.14 | 3.26 | 0.22 | 0.28 |
| 37919 | 0 | 79888  | KPYEVTPTTMLV                      | 2.48 | 0.01 | 2.14 | 1.12 | 0.22 | 0.28 |
| 37920 | 0 | 95515  | KPYSWRSKYG                        | 2.34 | 0.01 | 2.60 | 0.44 | 1.23 | 0.85 |
| 37921 | 0 | 520241 | KQAANQTAINTIAAN                   | 2.73 | 0.01 | 2.24 | 0.44 | 1.41 | 1.28 |
| 37922 | 0 | 32951  | KQAEDKVKASREAKKQV<br>EKALEQLEDKVK | 3.36 | 0.01 | 2.24 | 2.42 | 0.22 | 0.28 |
| 37923 | 0 | 32951  | KQAEDKVKASREAKKQV<br>EKALEQLEDKVK | 3.36 | 0.01 | 2.24 | 2.42 | 0.22 | 1.34 |
| 37924 | 0 | 32951  | KQAEDKVKASREAKKQV<br>EKALEQLEDKVK | 3.36 | 0.01 | 0.90 | 3.23 | 0.22 | 0.28 |
| 37925 | 0 | 32951  | KQAEDKVKASREAKKQV<br>EKALEQLEDKVK | 3.36 | 0.01 | 0.90 | 3.23 | 0.22 | 0.28 |
| 37926 | 0 | 32951  | KQAEDKVKASREAKKQV<br>EKALEQLEDKVK | 3.36 | 0.01 | 0.90 | 3.23 | 0.22 | 1.75 |
| 37927 | 0 | 32951  | KQAEDKVKASREAKKQV<br>EKALEQLEDKVK | 3.36 | 0.01 | 0.90 | 3.23 | 0.22 | 1.34 |
| 37928 | 0 | 32951  | KQAEDKVKASREAKKQV<br>EKALEQLEDKVK | 3.36 | 0.01 | 0.90 | 0.68 | 0.22 | 0.28 |
| 37929 | 0 | 32951  | KQAEDKVKASREAKKQV<br>EKALEQLEDKVK | 3.36 | 0.01 | 0.90 | 0.68 | 0.22 | 1.48 |
| 37930 | 0 | 32951  | KQAEDKVKASREAKKQV<br>EKALEQLEDKVK | 3.36 | 0.01 | 0.90 | 0.68 | 0.22 | 0.28 |
| 37931 | 0 | 32951  | KQAEDKVKASREAKKQV<br>EKALEQLEDKVK | 3.36 | 0.01 | 0.90 | 1.20 | 0.22 | 0.28 |
| 37932 | 0 | 32951  | KQAEDKVKASREAKKQV<br>EKALEQLEDKVK | 3.36 | 0.01 | 0.90 | 1.20 | 0.22 | 1.34 |

|       |   |        |                                   |      |      |      |      |      |      |
|-------|---|--------|-----------------------------------|------|------|------|------|------|------|
| 37933 | 0 | 32951  | KQAEDKVKASREAKKQV<br>EKALEQLEDKVK | 3.36 | 0.01 | 0.90 | 2.43 | 0.22 | 1.75 |
| 37934 | 0 | 32951  | KQAEDKVKASREAKKQV<br>EKALEQLEDKVK | 3.36 | 0.01 | 0.90 | 0.68 | 0.22 | 0.28 |
| 37935 | 0 | 32951  | KQAEDKVKASREAKKQV<br>EKALEQLEDKVK | 3.36 | 0.01 | 0.90 | 2.42 | 0.22 | 0.28 |
| 37936 | 0 | 32951  | KQAEDKVKASREAKKQV<br>EKALEQLEDKVK | 3.36 | 0.01 | 0.90 | 2.42 | 0.22 | 1.48 |
| 37937 | 0 | 32951  | KQAEDKVKASREAKKQV<br>EKALEQLEDKVK | 3.36 | 0.01 | 0.90 | 2.42 | 0.22 | 2.12 |
| 37938 | 0 | 32951  | KQAEDKVKASREAKKQV<br>EKALEQLEDKVK | 3.36 | 0.01 | 0.90 | 2.42 | 0.22 | 0.28 |
| 37939 | 0 | 32951  | KQAEDKVKASREAKKQV<br>EKALEQLEDKVK | 3.36 | 0.01 | 0.90 | 2.42 | 0.22 | 0.28 |
| 37940 | 0 | 32951  | KQAEDKVKASREAKKQV<br>EKALEQLEDKVK | 3.36 | 0.01 | 0.90 | 2.42 | 0.22 | 1.48 |
| 37941 | 0 | 32951  | KQAEDKVKASREAKKQV<br>EKALEQLEDKVK | 3.36 | 0.01 | 0.90 | 2.42 | 0.22 | 2.12 |
| 37942 | 0 | 32951  | KQAEDKVKASREAKKQV<br>EKALEQLEDKVK | 3.36 | 0.01 | 0.90 | 2.42 | 0.22 | 0.28 |
| 37943 | 0 | 32951  | KQAEDKVKASREAKKQV<br>EKALEQLEDKVK | 3.36 | 0.01 | 0.90 | 2.42 | 0.22 | 0.28 |
| 37944 | 0 | 32952  | KQAEDKVKASREAKKQV<br>EKAVKQLEDKV  | 3.33 | 0.01 | 0.90 | 2.42 | 0.22 | 0.28 |
| 37945 | 0 | 32952  | KQAEDKVKASREAKKQV<br>EKAVKQLEDKV  | 3.33 | 0.01 | 0.90 | 0.68 | 0.22 | 0.28 |
| 37946 | 0 | 32956  | KQAGDNFPYLVAYQA                   | 2.66 | 0.01 | 1.96 | 0.44 | 0.85 | 0.28 |
| 37947 | 0 | 32956  | KQAGDNFPYLVAYQA                   | 2.66 | 0.01 | 1.96 | 0.44 | 0.85 | 0.28 |
| 37948 | 0 | 181926 | KQAGGDTKTNENCRFP<br>DTDGVP        | 3.03 | 0.01 | 0.90 | 0.44 | 1.74 | 0.28 |
| 37949 | 0 | 181926 | KQAGGDTKTNENCRFP<br>DTDGVP        | 3.03 | 0.01 | 0.90 | 0.44 | 1.74 | 0.28 |
| 37950 | 0 | 99394  | KQAKDLAFPGSGEQV                   | 2.67 | 0.01 | 2.16 | 0.44 | 1.23 | 1.48 |
| 37951 | 0 | 99394  | KQAKDLAFPGSGEQV                   | 2.67 | 0.01 | 2.16 | 0.44 | 1.23 | 1.28 |
| 37952 | 0 | 99394  | KQAKDLAFPGSGEQV                   | 2.67 | 0.01 | 2.16 | 0.44 | 1.23 | 1.27 |
| 37953 | 0 | 99394  | KQAKDLAFPGSGEQV                   | 2.67 | 0.01 | 2.16 | 0.44 | 1.23 | 1.28 |
| 37954 | 0 | 101806 | KQAVILNVAGTLESAP                  | 2.71 | 0.01 | 3.11 | 1.20 | 0.22 | 0.28 |
| 37955 | 0 | 96490  | KQDEEQRLKE                        | 2.36 | 0.01 | 0.78 | 0.44 | 1.93 | 0.85 |
| 37956 | 0 | 32964  | KQDPEGWGKSPGFGTT<br>VDFP          | 2.96 | 0.01 | 2.04 | 2.52 | 0.22 | 0.28 |
| 37957 | 0 | 32964  | KQDPEGWGKSPGFGTT<br>VDFP          | 2.96 | 0.01 | 2.04 | 2.52 | 0.22 | 0.28 |
| 37958 | 0 | 32964  | KQDPEGWGKSPGFGTT<br>VDFP          | 2.96 | 0.01 | 2.04 | 2.52 | 0.22 | 0.28 |

|       |   |        |                           |      |      |      |      |      |      |
|-------|---|--------|---------------------------|------|------|------|------|------|------|
| 37959 | 0 | 32964  | KQDPEGWGKSPGFGTT<br>VDFP  | 2.96 | 0.01 | 2.04 | 2.52 | 0.22 | 0.28 |
| 37960 | 0 | 127715 | KQDPPSL                   | 2.01 | 0.01 | 0.90 | 0.44 | 1.13 | 1.39 |
| 37961 | 0 | 520252 | KQDSISNLTTEQKA            | 2.67 | 0.01 | 2.24 | 0.44 | 1.41 | 1.28 |
| 37962 | 0 | 450761 | KQEAMTL                   | 1.99 | 0.01 | 0.90 | 0.44 | 1.41 | 1.39 |
| 37963 | 0 | 32970  | KQEGDKCVENPNPTCN<br>ENN   | 2.91 | 0.01 | 1.66 | 0.44 | 1.74 | 0.28 |
| 37964 | 0 | 161250 | KQEKD                     | 1.77 | 0.01 | 3.00 | 0.68 | 0.22 | 0.85 |
| 37965 | 0 | 161250 | KQEKD                     | 1.77 | 0.01 | 3.00 | 0.68 | 0.22 | 0.85 |
| 37966 | 0 | 161250 | KQEKD                     | 1.77 | 0.01 | 3.00 | 0.68 | 0.22 | 1.48 |
| 37967 | 0 | 161250 | KQEKD                     | 1.77 | 0.01 | 3.00 | 0.68 | 0.22 | 1.48 |
| 37968 | 0 | 161250 | KQEKD                     | 1.77 | 0.01 | 3.00 | 0.68 | 0.22 | 1.48 |
| 37969 | 0 | 161250 | KQEKD                     | 1.77 | 0.01 | 3.00 | 0.68 | 0.22 | 1.48 |
| 37970 | 0 | 161250 | KQEKD                     | 1.77 | 0.01 | 3.00 | 0.68 | 0.22 | 1.48 |
| 37971 | 0 | 161250 | KQEKD                     | 1.77 | 0.01 | 3.00 | 0.68 | 0.22 | 1.48 |
| 37972 | 0 | 161250 | KQEKD                     | 1.77 | 0.01 | 3.00 | 0.68 | 0.22 | 1.48 |
| 37973 | 0 | 161250 | KQEKD                     | 1.77 | 0.01 | 3.00 | 0.68 | 0.22 | 1.48 |
| 37974 | 0 | 161250 | KQEKD                     | 1.77 | 0.01 | 3.00 | 0.68 | 0.22 | 1.48 |
| 37975 | 0 | 161250 | KQEKD                     | 1.77 | 0.01 | 3.00 | 0.68 | 0.22 | 1.48 |
| 37976 | 0 | 161250 | KQEKD                     | 1.77 | 0.01 | 3.00 | 0.68 | 0.22 | 1.75 |
| 37977 | 0 | 161250 | KQEKD                     | 1.77 | 0.01 | 3.00 | 0.68 | 0.22 | 1.48 |
| 37978 | 0 | 161250 | KQEKD                     | 1.77 | 0.01 | 3.00 | 0.68 | 0.22 | 0.85 |
| 37979 | 0 | 161250 | KQEKD                     | 1.77 | 0.01 | 3.00 | 0.68 | 0.22 | 0.85 |
| 37980 | 0 | 161250 | KQEKD                     | 1.77 | 0.01 | 3.00 | 0.68 | 0.22 | 1.48 |
| 37981 | 0 | 161250 | KQEKD                     | 1.77 | 0.01 | 3.00 | 0.68 | 0.22 | 1.48 |
| 37982 | 0 | 161250 | KQEKD                     | 1.77 | 0.01 | 3.00 | 0.68 | 0.22 | 1.48 |
| 37983 | 0 | 161250 | KQEKD                     | 1.77 | 0.01 | 3.00 | 0.68 | 0.22 | 1.48 |
| 37984 | 0 | 161250 | KQEKD                     | 1.77 | 0.01 | 3.00 | 0.68 | 0.22 | 1.48 |
| 37985 | 0 | 161250 | KQEKD                     | 1.77 | 0.01 | 3.00 | 0.68 | 0.22 | 1.48 |
| 37986 | 0 | 161250 | KQEKD                     | 1.77 | 0.01 | 3.00 | 0.68 | 0.22 | 1.48 |
| 37987 | 0 | 161250 | KQEKD                     | 1.77 | 0.01 | 3.00 | 0.68 | 0.22 | 1.48 |
| 37988 | 0 | 161250 | KQEKD                     | 1.77 | 0.01 | 3.00 | 0.68 | 0.22 | 1.48 |
| 37989 | 0 | 161250 | KQEKD                     | 1.77 | 0.01 | 3.00 | 0.68 | 0.22 | 1.48 |
| 37990 | 0 | 161250 | KQEKD                     | 1.77 | 0.01 | 3.00 | 0.68 | 0.22 | 1.48 |
| 37991 | 0 | 161250 | KQEKD                     | 1.77 | 0.01 | 2.60 | 0.68 | 0.22 | 0.85 |
| 37992 | 0 | 32971  | KQELDEISTNIRQAG           | 2.64 | 0.01 | 2.04 | 0.68 | 0.22 | 0.28 |
| 37993 | 0 | 32971  | KQELDEISTNIRQAG           | 2.64 | 0.01 | 2.04 | 0.44 | 0.85 | 0.28 |
| 37994 | 0 | 32972  | KQELTKYCQQNQMDM<br>KQIDP  | 2.95 | 0.01 | 2.93 | 2.69 | 0.22 | 0.28 |
| 37995 | 0 | 32975  | KQEVQRGGRYNQ              | 2.48 | 0.01 | 3.12 | 0.44 | 1.23 | 0.85 |
| 37996 | 0 | 145283 | KQFTSSTSYNRGDSTFES        | 2.85 | 3.24 | 0.78 | 0.44 | 1.13 | 1.28 |
| 37997 | 0 | 145284 | KQFTSSTSYNRGDSTFES<br>KSY | 3.01 | 3.24 | 0.78 | 0.44 | 1.13 | 1.28 |
| 37998 | 0 | 32984  | KQGGENFAYLTAYQA           | 2.67 | 0.01 | 2.69 | 0.44 | 1.41 | 0.28 |
| 37999 | 0 | 32984  | KQGGENFAYLTAYQA           | 2.67 | 0.01 | 2.69 | 0.44 | 0.85 | 0.28 |
| 38000 | 0 | 32984  | KQGGENFAYLTAYQA           | 2.67 | 0.01 | 2.69 | 0.44 | 0.85 | 0.28 |

|       |   |        |                                               |      |      |      |      |      |      |
|-------|---|--------|-----------------------------------------------|------|------|------|------|------|------|
| 38001 | 0 | 322314 | KQHQSDETQVQQHQQ                               | 2.70 | 0.01 | 1.61 | 0.44 | 0.85 | 1.28 |
| 38002 | 0 | 32990  | KQHTVTTTTKGE                                  | 2.49 | 0.01 | 2.52 | 2.19 | 0.22 | 2.49 |
| 38003 | 0 | 32990  | KQHTVTTTTKGE                                  | 2.49 | 0.01 | 2.52 | 2.19 | 0.22 | 2.49 |
| 38004 | 0 | 32990  | KQHTVTTTTKGE                                  | 2.49 | 0.01 | 2.52 | 2.19 | 0.22 | 2.49 |
| 38005 | 0 | 32990  | KQHTVTTTTKGE                                  | 2.49 | 0.01 | 2.52 | 2.19 | 0.22 | 0.28 |
| 38006 | 0 | 32990  | KQHTVTTTTKGE                                  | 2.49 | 0.01 | 2.52 | 2.19 | 0.22 | 0.28 |
| 38007 | 0 | 32990  | KQHTVTTTTKGE                                  | 2.49 | 0.01 | 2.52 | 2.19 | 0.22 | 0.28 |
| 38008 | 0 | 32990  | KQHTVTTTTKGE                                  | 2.49 | 0.01 | 2.52 | 2.19 | 0.22 | 0.28 |
| 38009 | 0 | 99396  | KQILLDAIDKIADDW                               | 2.72 | 0.01 | 2.86 | 2.02 | 0.85 | 0.85 |
| 38010 | 0 | 227309 | KQILRQLLTGGVKKG                               | 2.70 | 0.01 | 2.48 | 0.44 | 1.59 | 0.28 |
| 38011 | 0 | 134421 | KQIPECENVKTTQCVF                              | 2.75 | 0.01 | 0.78 | 1.15 | 0.22 | 1.27 |
| 38012 | 0 | 134421 | KQIPECENVKTTQCVF                              | 2.75 | 0.01 | 0.78 | 1.15 | 0.22 | 0.28 |
| 38013 | 0 | 33003  | KQIRDSITEEWS                                  | 2.46 | 0.01 | 3.01 | 2.16 | 0.22 | 1.48 |
| 38014 | 0 | 33003  | KQIRDSITEEWS                                  | 2.46 | 0.01 | 3.01 | 1.15 | 2.25 | 1.75 |
| 38015 | 0 | 520256 | KQISDASRQGLRRDL                               | 2.69 | 0.01 | 2.24 | 0.44 | 1.41 | 1.28 |
| 38016 | 0 | 520257 | KQISDASRQSLRRDL                               | 2.71 | 0.01 | 2.24 | 0.44 | 1.41 | 1.28 |
| 38017 | 0 | 100224 | KQISSQLTEEWS                                  | 2.48 | 0.01 | 3.00 | 3.70 | 0.22 | 0.28 |
| 38018 | 0 | 100224 | KQISSQLTEEWS                                  | 2.48 | 0.01 | 3.00 | 0.68 | 0.22 | 0.28 |
| 38019 | 0 | 100224 | KQISSQLTEEWS                                  | 2.48 | 0.01 | 3.00 | 3.70 | 0.22 | 0.28 |
| 38020 | 0 | 100224 | KQISSQLTEEWS                                  | 2.48 | 0.01 | 3.00 | 0.68 | 0.22 | 0.28 |
| 38021 | 0 | 100225 | KQISSQLTEEWSQGPGA<br>PQGPAPQGPAPSYV<br>PSAEQI | 3.63 | 0.01 | 0.90 | 1.15 | 0.22 | 0.85 |
| 38022 | 0 | 100225 | KQISSQLTEEWSQGPGA<br>PQGPAPQGPAPSYV<br>PSAEQI | 3.63 | 0.01 | 0.90 | 1.15 | 0.22 | 0.85 |
| 38023 | 0 | 100225 | KQISSQLTEEWSQGPGA<br>PQGPAPQGPAPSYV<br>PSAEQI | 3.63 | 0.01 | 0.90 | 1.15 | 0.22 | 0.28 |
| 38024 | 0 | 100225 | KQISSQLTEEWSQGPGA<br>PQGPAPQGPAPSYV<br>PSAEQI | 3.63 | 0.01 | 0.90 | 1.15 | 0.22 | 0.28 |
| 38025 | 0 | 100225 | KQISSQLTEEWSQGPGA<br>PQGPAPQGPAPSYV<br>PSAEQI | 3.63 | 0.01 | 0.90 | 1.15 | 0.22 | 0.28 |
| 38026 | 0 | 100225 | KQISSQLTEEWSQGPGA<br>PQGPAPQGPAPSYV<br>PSAEQI | 3.63 | 0.01 | 0.90 | 3.70 | 0.22 | 0.28 |
| 38027 | 0 | 100225 | KQISSQLTEEWSQGPGA<br>PQGPAPQGPAPSYV<br>PSAEQI | 3.63 | 0.01 | 0.90 | 3.70 | 0.22 | 0.28 |
| 38028 | 0 | 100225 | KQISSQLTEEWSQGPGA<br>PQGPAPQGPAPSYV<br>PSAEQI | 3.63 | 0.01 | 0.90 | 3.70 | 0.22 | 0.28 |

|       |   |        |                                               |      |      |      |      |      |      |
|-------|---|--------|-----------------------------------------------|------|------|------|------|------|------|
| 38029 | 0 | 100225 | KQISSQLTEEWSQGPGA<br>PQGPAPQGPAPSYV<br>PSAEQI | 3.63 | 0.01 | 0.90 | 0.68 | 0.22 | 0.28 |
| 38030 | 0 | 100225 | KQISSQLTEEWSQGPGA<br>PQGPAPQGPAPSYV<br>PSAEQI | 3.63 | 0.01 | 0.90 | 0.68 | 0.22 | 0.28 |
| 38031 | 0 | 100225 | KQISSQLTEEWSQGPGA<br>PQGPAPQGPAPSYV<br>PSAEQI | 3.63 | 0.01 | 0.90 | 0.68 | 0.22 | 0.28 |
| 38032 | 0 | 100225 | KQISSQLTEEWSQGPGA<br>PQGPAPQGPAPSYV<br>PSAEQI | 3.63 | 0.01 | 0.90 | 3.70 | 0.22 | 0.28 |
| 38033 | 0 | 100225 | KQISSQLTEEWSQGPGA<br>PQGPAPQGPAPSYV<br>PSAEQI | 3.63 | 0.01 | 0.90 | 3.70 | 0.22 | 0.28 |
| 38034 | 0 | 100225 | KQISSQLTEEWSQGPGA<br>PQGPAPQGPAPSYV<br>PSAEQI | 3.63 | 0.01 | 0.90 | 0.68 | 0.22 | 0.28 |
| 38035 | 0 | 100225 | KQISSQLTEEWSQGPGA<br>PQGPAPQGPAPSYV<br>PSAEQI | 3.63 | 0.01 | 0.90 | 0.68 | 0.22 | 0.28 |
| 38036 | 0 | 100225 | KQISSQLTEEWSQGPGA<br>PQGPAPQGPAPSYV<br>PSAEQI | 3.63 | 0.01 | 0.90 | 3.70 | 0.22 | 1.75 |
| 38037 | 0 | 100225 | KQISSQLTEEWSQGPGA<br>PQGPAPQGPAPSYV<br>PSAEQI | 3.63 | 0.01 | 0.90 | 0.68 | 0.22 | 1.75 |
| 38038 | 0 | 509258 | KQIVERILEEE                                   | 2.39 | 0.01 | 2.94 | 0.68 | 0.22 | 1.48 |
| 38039 | 0 | 509258 | KQIVERILEEE                                   | 2.39 | 0.01 | 2.94 | 0.68 | 0.22 | 1.28 |
| 38040 | 0 | 322332 | KQKAAAKKAAAPSGK                               | 2.73 | 0.01 | 1.61 | 0.44 | 0.85 | 1.28 |
| 38041 | 0 | 195030 | KQKAAEATK                                     | 2.28 | 0.01 | 2.30 | 0.44 | 0.85 | 0.28 |
| 38042 | 0 | 322333 | KQKAAEATKAAEAEK                               | 2.75 | 0.01 | 1.61 | 0.44 | 0.85 | 1.28 |
| 38043 | 0 | 322334 | KQKAAEATKAVEAEK                               | 2.74 | 0.01 | 1.61 | 0.44 | 0.85 | 1.28 |
| 38044 | 0 | 322335 | KQKAAEATKAVETEK                               | 2.74 | 0.01 | 1.61 | 0.44 | 0.85 | 1.28 |
| 38045 | 0 | 322336 | KQKAAEATKVAEAEK                               | 2.74 | 0.01 | 1.61 | 0.44 | 0.85 | 1.28 |
| 38046 | 0 | 322337 | KQKAAEATKVAEAER                               | 2.73 | 0.01 | 1.61 | 0.44 | 0.85 | 1.28 |
| 38047 | 0 | 130928 | KQKFVLKTPKGTRDYS<br>P                         | 2.84 | 0.01 | 1.75 | 4.33 | 0.22 | 0.28 |
| 38048 | 0 | 95517  | KQKIIAPA                                      | 2.16 | 0.01 | 3.48 | 2.22 | 0.22 | 0.28 |
| 38049 | 0 | 129133 | KQKIIR                                        | 1.92 | 0.01 | 0.78 | 0.44 | 1.13 | 0.28 |
| 38050 | 0 | 95518  | KQKIVAPV                                      | 2.15 | 0.01 | 2.96 | 2.22 | 0.22 | 0.28 |
| 38051 | 0 | 121499 | KQKKHLNTQQLTAFQ                               | 2.71 | 0.01 | 0.78 | 0.44 | 1.13 | 0.85 |
| 38052 | 0 | 121499 | KQKKHLNTQQLTAFQ                               | 2.71 | 0.01 | 0.78 | 0.44 | 1.41 | 0.85 |
| 38053 | 0 | 33018  | KQKTNEPYEDFAARLLE<br>AIDAE                    | 3.03 | 0.01 | 3.50 | 3.26 | 0.22 | 0.28 |

|       |   |        |                                 |      |      |      |      |      |      |
|-------|---|--------|---------------------------------|------|------|------|------|------|------|
| 38054 | 0 | 33018  | KQKTNEPYEDFAARLLE<br>AIDAE      | 3.03 | 0.01 | 3.50 | 3.26 | 0.22 | 0.85 |
| 38055 | 0 | 238670 | KQKYEAGTYPQTPHLQ<br>V           | 2.86 | 0.01 | 0.78 | 0.44 | 1.13 | 0.28 |
| 38056 | 0 | 120711 | KQLATKAARKSAPAT                 | 2.72 | 0.01 | 1.60 | 0.44 | 1.13 | 0.28 |
| 38057 | 0 | 120711 | KQLATKAARKSAPAT                 | 2.72 | 0.01 | 1.60 | 0.44 | 1.41 | 0.28 |
| 38058 | 0 | 181927 | KQLHPIYVQNGT                    | 2.43 | 0.01 | 0.90 | 3.15 | 0.22 | 0.28 |
| 38059 | 0 | 33025  | KQLIAKDPKNKETYEN                | 2.80 | 0.01 | 3.37 | 3.23 | 0.22 | 0.28 |
| 38060 | 0 | 33025  | KQLIAKDPKNKETYEN                | 2.80 | 0.01 | 3.37 | 3.23 | 0.22 | 1.34 |
| 38061 | 0 | 33025  | KQLIAKDPKNKETYEN                | 2.80 | 0.01 | 3.37 | 3.23 | 0.22 | 0.28 |
| 38062 | 0 | 177815 | KQLLKRQGHFPVIAA                 | 2.64 | 0.01 | 0.78 | 0.44 | 1.13 | 0.85 |
| 38063 | 0 | 84644  | KQLLYIEGAYARTTT                 | 2.79 | 0.01 | 3.04 | 1.12 | 0.22 | 0.28 |
| 38064 | 0 | 84644  | KQLLYIEGAYARTTT                 | 2.79 | 0.01 | 3.04 | 1.12 | 0.22 | 0.28 |
| 38065 | 0 | 84644  | KQLLYIEGAYARTTT                 | 2.79 | 0.01 | 3.04 | 1.12 | 0.22 | 0.28 |
| 38066 | 0 | 33028  | KQLMAP                          | 1.88 | 0.01 | 0.90 | 1.15 | 0.22 | 0.28 |
| 38067 | 0 | 33032  | KQLSSNFGAISSVLNDI               | 2.78 | 0.01 | 2.48 | 0.68 | 0.22 | 0.28 |
| 38068 | 0 | 79889  | KQLTFEGKPALE                    | 2.48 | 0.01 | 2.14 | 3.26 | 0.22 | 0.28 |
| 38069 | 0 | 79889  | KQLTFEGKPALE                    | 2.48 | 0.01 | 2.14 | 3.55 | 0.22 | 0.28 |
| 38070 | 0 | 110922 | KQMDIKSINDLQ                    | 2.50 | 0.01 | 3.15 | 3.53 | 0.22 | 0.28 |
| 38071 | 0 | 110922 | KQMDIKSINDLQ                    | 2.50 | 0.01 | 3.15 | 0.44 | 1.59 | 0.28 |
| 38072 | 0 | 115072 | KQMEAESISSSEIVP                 | 2.74 | 0.01 | 1.60 | 0.44 | 1.23 | 1.27 |
| 38073 | 0 | 96494  | KQMGQTGGSY                      | 2.32 | 0.01 | 2.39 | 0.44 | 0.85 | 0.28 |
| 38074 | 0 | 96494  | KQMGQTGGSY                      | 2.32 | 0.01 | 3.18 | 2.98 | 0.22 | 0.28 |
| 38075 | 0 | 136439 | KQNCLSSRASFRGCVRN<br>LRLSR      | 3.06 | 0.01 | 1.75 | 2.84 | 1.13 | 0.28 |
| 38076 | 0 | 237801 | KQNELNESTEEGPKAPQ<br>EPQ        | 2.98 | 0.01 | 2.96 | 0.44 | 1.74 | 0.28 |
| 38077 | 0 | 186769 | KQNEPEDI                        | 2.12 | 0.01 | 4.45 | 0.68 | 0.22 | 0.28 |
| 38078 | 0 | 186769 | KQNEPEDI                        | 2.12 | 0.01 | 4.45 | 0.68 | 0.22 | 0.28 |
| 38079 | 0 | 186769 | KQNEPEDI                        | 2.12 | 0.01 | 4.45 | 0.44 | 0.85 | 0.28 |
| 38080 | 0 | 78435  | KQNERAMIAATDAEEP<br>AKAYKLVELAK | 3.26 | 0.01 | 3.28 | 1.12 | 0.22 | 0.28 |
| 38081 | 0 | 78435  | KQNERAMIAATDAEEP<br>AKAYKLVELAK | 3.26 | 0.01 | 3.28 | 1.12 | 0.22 | 0.28 |
| 38082 | 0 | 33043  | KQNIQLINTNGSWH                  | 2.61 | 0.01 | 2.41 | 0.44 | 1.41 | 0.28 |
| 38083 | 0 | 33043  | KQNIQLINTNGSWH                  | 2.61 | 0.01 | 2.41 | 0.44 | 0.85 | 0.28 |
| 38084 | 0 | 33043  | KQNIQLINTNGSWH                  | 2.61 | 0.01 | 2.41 | 0.44 | 0.85 | 0.28 |
| 38085 | 0 | 33043  | KQNIQLINTNGSWH                  | 2.61 | 0.01 | 2.41 | 0.44 | 0.85 | 0.28 |
| 38086 | 0 | 161251 | KQNIQLINTNGSWHINS<br>TAL        | 2.96 | 0.01 | 2.45 | 0.68 | 0.22 | 0.28 |
| 38087 | 0 | 33045  | KQNSQIPSLDLKEPT                 | 2.69 | 0.01 | 1.66 | 0.44 | 1.74 | 0.28 |
| 38088 | 0 | 520273 | KQNTASTETTTTNEQ                 | 2.71 | 0.01 | 2.24 | 0.44 | 1.41 | 1.28 |
| 38089 | 0 | 165621 | KQPAFNL                         | 1.99 | 0.01 | 0.90 | 0.44 | 1.23 | 1.39 |



|       |   |        |                                       |      |      |      |      |      |      |
|-------|---|--------|---------------------------------------|------|------|------|------|------|------|
| 38090 | 0 | 33049  | KQPGDGNP                              | 2.14 | 0.01 | 3.29 | 1.20 | 0.22 | 0.28 |
| 38091 | 0 | 322461 | KQPGGIKTPSSTTPP                       | 2.70 | 0.01 | 1.61 | 0.44 | 0.85 | 1.28 |
| 38092 | 0 | 33051  | KQPQRLRVKTPPPVTV<br>P                 | 2.90 | 0.01 | 3.97 | 2.02 | 0.22 | 0.28 |
| 38093 | 0 | 33053  | KQPYNLTIAWFRMGG                       | 2.58 | 4.93 | 2.40 | 0.68 | 0.22 | 0.28 |
| 38094 | 0 | 33054  | KQQESK                                | 1.92 | 0.01 | 2.85 | 0.44 | 0.85 | 0.28 |
| 38095 | 0 | 33055  | KQQGLNFSYLAAYQA                       | 2.69 | 0.01 | 2.59 | 0.44 | 0.85 | 0.28 |
| 38096 | 0 | 33055  | KQQGLNFSYLAAYQA                       | 2.69 | 0.01 | 2.59 | 0.44 | 0.85 | 0.28 |
| 38097 | 0 | 322490 | KQQGRDAPQARKQQG                       | 2.73 | 0.01 | 1.61 | 0.44 | 0.85 | 1.28 |
| 38098 | 0 | 322491 | KQQGRNEPQARRQQG                       | 2.70 | 0.01 | 1.61 | 0.44 | 0.85 | 1.28 |
| 38099 | 0 | 33056  | KQQGYKGAGGY                           | 2.44 | 0.01 | 3.75 | 2.71 | 0.22 | 0.28 |
| 38100 | 0 | 33056  | KQQGYKGAGGY                           | 2.44 | 0.01 | 3.75 | 2.71 | 0.22 | 0.28 |
| 38101 | 0 | 233212 | KQQKKKKGNGQPVNQL<br>CQMLGKIIAQQ       | 3.24 | 0.01 | 3.45 | 0.68 | 0.22 | 1.48 |
| 38102 | 0 | 233212 | KQQKKKKGNGQPVNQL<br>CQMLGKIIAQQ       | 3.24 | 0.01 | 3.45 | 0.68 | 0.22 | 1.48 |
| 38103 | 0 | 233212 | KQQKKKKGNGQPVNQL<br>CQMLGKIIAQQ       | 3.24 | 0.01 | 3.45 | 0.68 | 0.22 | 1.48 |
| 38104 | 0 | 233212 | KQQKKKKGNGQPVNQL<br>CQMLGKIIAQQ       | 3.24 | 0.01 | 3.45 | 0.68 | 0.22 | 1.48 |
| 38105 | 0 | 233212 | KQQKKKKGNGQPVNQL<br>CQMLGKIIAQQ       | 3.24 | 0.01 | 3.45 | 0.68 | 0.22 | 0.85 |
| 38106 | 0 | 233212 | KQQKKKKGNGQPVNQL<br>CQMLGKIIAQQ       | 3.24 | 0.01 | 3.45 | 0.68 | 0.22 | 1.48 |
| 38107 | 0 | 119480 | KQKKTENGAGDQ                          | 2.50 | 0.01 | 0.78 | 0.44 | 1.13 | 0.28 |
| 38108 | 0 | 322513 | KQQQSDEAQFQQHQQ                       | 2.69 | 0.01 | 1.61 | 0.44 | 0.85 | 1.28 |
| 38109 | 0 | 322514 | KQQQSDEAQVQQHQQ                       | 2.69 | 0.01 | 1.61 | 0.44 | 0.85 | 1.28 |
| 38110 | 0 | 322515 | KQQQSDEAQVQQHQR                       | 2.69 | 0.01 | 1.61 | 0.44 | 0.85 | 1.28 |
| 38111 | 0 | 322516 | KQQQSDETQVQQHQQ                       | 2.69 | 0.01 | 1.61 | 0.44 | 0.85 | 1.28 |
| 38112 | 0 | 322517 | KQQQSDETQVQQHQR                       | 2.69 | 0.01 | 1.61 | 0.44 | 0.85 | 1.28 |
| 38113 | 0 | 33058  | KQQRDTLSTQKETLERE<br>VQNTQYNNETLKIKNG | 3.46 | 0.01 | 2.85 | 0.44 | 1.13 | 1.27 |
| 38114 | 0 | 33058  | KQQRDTLSTQKETLERE<br>VQNTQYNNETLKIKNG | 3.46 | 0.01 | 2.85 | 1.20 | 0.22 | 1.27 |
| 38115 | 0 | 33058  | KQQRDTLSTQKETLERE<br>VQNTQYNNETLKIKNG | 3.46 | 0.01 | 2.85 | 1.20 | 0.22 | 1.27 |

|       |   |        |                            |      |      |      |      |      |      |
|-------|---|--------|----------------------------|------|------|------|------|------|------|
| 38116 | 0 | 119998 | KQQWVDYNLKWNPDD<br>Y       | 2.75 | 0.01 | 0.78 | 2.04 | 0.22 | 0.28 |
| 38117 | 0 | 119998 | KQQWVDYNLKWNPDD<br>Y       | 2.75 | 0.01 | 0.78 | 1.12 | 0.22 | 0.28 |
| 38118 | 0 | 119998 | KQQWVDYNLKWNPDD<br>Y       | 2.75 | 0.01 | 0.78 | 1.81 | 0.22 | 0.28 |
| 38119 | 0 | 322529 | KQRAAAATKAVETEK            | 2.72 | 0.01 | 1.61 | 0.44 | 0.85 | 1.28 |
| 38120 | 0 | 195031 | KQRAAEATK                  | 2.26 | 0.01 | 2.30 | 0.44 | 0.85 | 0.28 |
| 38121 | 0 | 322533 | KQRAAEATKVAEAEK            | 2.73 | 0.01 | 1.61 | 0.44 | 0.85 | 1.28 |
| 38122 | 0 | 153847 | KQRHLDKKQRFHNIRGR<br>WTGR  | 3.00 | 0.01 | 1.86 | 2.37 | 0.22 | 0.28 |
| 38123 | 0 | 171908 | KQRLRSGSASPMELL            | 2.66 | 0.01 | 0.78 | 0.44 | 1.41 | 0.28 |
| 38124 | 0 | 171908 | KQRLRSGSASPMELL            | 2.66 | 0.01 | 0.78 | 0.44 | 1.13 | 0.28 |
| 38125 | 0 | 33063  | KQRQNKPPNKP                | 2.54 | 0.01 | 2.38 | 0.68 | 0.22 | 0.28 |
| 38126 | 0 | 33063  | KQRQNKPPNKP                | 2.54 | 0.01 | 2.38 | 0.68 | 0.22 | 0.28 |
| 38127 | 0 | 33063  | KQRQNKPPNKP                | 2.54 | 0.01 | 2.38 | 0.44 | 1.74 | 0.28 |
| 38128 | 0 | 322571 | KQSEREDDEENDEEE            | 2.70 | 0.01 | 1.61 | 0.44 | 0.85 | 1.28 |
| 38129 | 0 | 33065  | KQSGENFAYLTAYQA            | 2.66 | 0.01 | 2.69 | 0.44 | 0.85 | 0.28 |
| 38130 | 0 | 33065  | KQSGENFAYLTAYQA            | 2.66 | 0.01 | 2.69 | 0.44 | 0.85 | 0.28 |
| 38131 | 0 | 33066  | KQSGENLPYLVAYQA            | 2.66 | 0.01 | 2.41 | 0.44 | 0.85 | 0.28 |
| 38132 | 0 | 33066  | KQSGENLPYLVAYQA            | 2.66 | 0.01 | 2.41 | 0.44 | 0.85 | 0.28 |
| 38133 | 0 | 79005  | KQSPYL                     | 1.88 | 0.01 | 0.90 | 0.68 | 0.22 | 1.39 |
| 38134 | 0 | 33074  | KQSRRG                     | 1.89 | 0.01 | 0.90 | 2.02 | 0.22 | 0.28 |
| 38135 | 0 | 33077  | KQSYAATVATAPAVKYT<br>VFE   | 2.98 | 0.01 | 3.00 | 0.44 | 1.23 | 0.28 |
| 38136 | 0 | 33077  | KQSYAATVATAPAVKYT<br>VFE   | 2.98 | 0.01 | 3.00 | 3.27 | 0.22 | 0.28 |
| 38137 | 0 | 33077  | KQSYAATVATAPAVKYT<br>VFE   | 2.98 | 0.01 | 3.00 | 3.27 | 0.22 | 0.28 |
| 38138 | 0 | 149782 | KQTGLDAKQQQILL             | 2.68 | 0.01 | 3.67 | 1.12 | 0.22 | 0.28 |
| 38139 | 0 | 149782 | KQTGLDAKQQQILL             | 2.68 | 0.01 | 3.67 | 1.12 | 0.22 | 0.28 |
| 38140 | 0 | 95521  | KQTLPPSV                   | 2.11 | 0.01 | 0.90 | 2.22 | 0.22 | 0.28 |
| 38141 | 0 | 241023 | KQTRP                      | 1.74 | 0.01 | 3.35 | 1.20 | 0.22 | 0.85 |
| 38142 | 0 | 33086  | KQVEKDLANLTAELDKV<br>KEEKQ | 3.08 | 0.01 | 4.03 | 1.12 | 0.22 | 0.28 |
| 38143 | 0 | 33086  | KQVEKDLANLTAELDKV<br>KEEKQ | 3.08 | 0.01 | 4.03 | 1.12 | 0.22 | 0.28 |
| 38144 | 0 | 141691 | KQVQRYRRLSPGDV             | 2.66 | 0.01 | 3.65 | 0.44 | 1.23 | 1.28 |
| 38145 | 0 | 33090  | KQVTIRIGCKTSSS             | 2.61 | 0.01 | 3.24 | 1.12 | 0.22 | 0.85 |
| 38146 | 0 | 94572  | KQWEDEVTEFNYKVGL<br>QNSN   | 2.94 | 0.01 | 3.65 | 0.68 | 0.22 | 0.28 |
| 38147 | 0 | 78711  | KQYDPDRP                   | 2.14 | 0.01 | 3.27 | 1.12 | 0.22 | 0.28 |
| 38148 | 0 | 78711  | KQYDPDRP                   | 2.14 | 0.01 | 3.27 | 1.12 | 0.22 | 0.28 |
| 38149 | 0 | 78711  | KQYDPDRP                   | 2.14 | 0.01 | 3.27 | 1.12 | 0.22 | 0.28 |
| 38150 | 0 | 78711  | KQYDPDRP                   | 2.14 | 0.01 | 3.27 | 1.12 | 0.22 | 1.34 |
| 38151 | 0 | 98180  | KQYEADLAAV                 | 2.30 | 0.01 | 2.39 | 0.68 | 0.22 | 0.28 |
| 38152 | 0 | 138199 | KQYLERTRAEVDTV             | 2.61 | 0.01 | 1.75 | 3.78 | 0.22 | 1.57 |

|       |   |        |                                      |      |      |      |      |      |      |
|-------|---|--------|--------------------------------------|------|------|------|------|------|------|
| 38153 | 0 | 138199 | KQYLERTRAEVDTV                       | 2.61 | 0.01 | 1.75 | 3.78 | 0.22 | 2.12 |
| 38154 | 0 | 138199 | KQYLERTRAEVDTV                       | 2.61 | 0.01 | 1.75 | 3.78 | 0.22 | 1.57 |
| 38155 | 0 | 122445 | KQYSIEAALRCRRISKEEY<br>H             | 2.94 | 0.01 | 0.78 | 0.44 | 1.13 | 0.28 |
| 38156 | 0 | 122445 | KQYSIEAALRCRRISKEEY<br>H             | 2.94 | 0.01 | 0.78 | 0.44 | 1.13 | 1.27 |
| 38157 | 0 | 135706 | KQYVDGDQ                             | 2.14 | 0.01 | 0.78 | 0.44 | 2.35 | 0.28 |
| 38158 | 0 | 33107  | KRAASKVSARLLTV                       | 2.66 | 0.01 | 2.69 | 0.44 | 0.85 | 0.28 |
| 38159 | 0 | 33107  | KRAASKVSARLLTV                       | 2.66 | 0.01 | 2.69 | 0.44 | 1.41 | 0.28 |
| 38160 | 0 | 33107  | KRAASKVSARLLTV                       | 2.66 | 0.01 | 2.69 | 0.44 | 0.85 | 0.28 |
| 38161 | 0 | 238671 | KRADWKKTVETQKSRIH<br>A               | 2.84 | 0.01 | 0.78 | 0.44 | 1.13 | 0.28 |
| 38162 | 0 | 238671 | KRADWKKTVETQKSRIH<br>A               | 2.84 | 0.01 | 0.78 | 0.44 | 1.13 | 0.28 |
| 38163 | 0 | 33108  | KRAETYCPRLLAIHPTE<br>ARHKQKIVAPVKQTL | 3.46 | 0.01 | 3.26 | 3.75 | 0.22 | 1.34 |
| 38164 | 0 | 322650 | KRALPQEEEEVDGPR                      | 2.65 | 0.01 | 1.61 | 0.44 | 0.85 | 1.28 |
| 38165 | 0 | 177819 | KRATANNQPPQQQQQ                      | 2.69 | 0.01 | 0.78 | 0.44 | 1.13 | 0.85 |
| 38166 | 0 | 33111  | KRAVHDVVLVGGSTRIP<br>KVM             | 2.92 | 0.01 | 2.30 | 0.44 | 0.85 | 0.28 |
| 38167 | 0 | 33111  | KRAVHDVVLVGGSTRIP<br>KVM             | 2.92 | 0.01 | 2.30 | 0.44 | 1.41 | 0.28 |
| 38168 | 0 | 33112  | KRAVQKWAP                            | 2.24 | 0.01 | 0.90 | 0.68 | 0.22 | 0.28 |
| 38169 | 0 | 423387 | KRCLVPEVFCTRDLA                      | 2.66 | 0.01 | 2.51 | 0.44 | 2.35 | 1.28 |
| 38170 | 0 | 79277  | KRDGYIV                              | 1.99 | 0.01 | 3.85 | 3.55 | 0.22 | 0.28 |
| 38171 | 0 | 79277  | KRDGYIV                              | 1.99 | 0.01 | 3.85 | 1.12 | 0.22 | 0.28 |
| 38172 | 0 | 33119  | KRDVDLFLTGTDPDEYVE<br>QVAQYKALPV     | 3.25 | 0.01 | 3.08 | 0.44 | 1.23 | 0.28 |
| 38173 | 0 | 106574 | KREACKCIVR                           | 2.34 | 0.01 | 3.08 | 0.44 | 1.23 | 0.85 |
| 38174 | 0 | 532562 | KREAIVKADE                           | 2.34 | 0.01 | 3.10 | 0.68 | 0.22 | 2.49 |
| 38175 | 0 | 532562 | KREAIVKADE                           | 2.34 | 0.01 | 3.10 | 0.68 | 0.22 | 0.28 |
| 38176 | 0 | 532562 | KREAIVKADE                           | 2.34 | 0.01 | 3.10 | 0.68 | 0.22 | 1.34 |
| 38177 | 0 | 532562 | KREAIVKADE                           | 2.34 | 0.01 | 3.10 | 0.68 | 0.22 | 1.75 |
| 38178 | 0 | 532562 | KREAIVKADE                           | 2.34 | 0.01 | 3.10 | 0.68 | 0.22 | 0.28 |
| 38179 | 0 | 102576 | KREAIVKADEDDNEETLK<br>QR             | 2.95 | 0.01 | 3.44 | 0.68 | 0.22 | 0.28 |
| 38180 | 0 | 117550 | KREAVAGRGRGRGRG                      | 2.74 | 4.93 | 0.78 | 0.44 | 1.13 | 0.28 |
| 38181 | 0 | 117551 | KREAVAGRGRGRGRG                      | 2.74 | 0.01 | 0.78 | 3.01 | 0.22 | 0.28 |
| 38182 | 0 | 117552 | KREAVAGRGRGRGRGR<br>GRGR             | 3.02 | 0.01 | 1.75 | 2.16 | 0.22 | 0.28 |
| 38183 | 0 | 145287 | KREEAPSLRPAPPPISGG<br>GYRARPA        | 3.18 | 4.93 | 0.78 | 0.44 | 1.13 | 1.28 |
| 38184 | 0 | 123389 | KREKRKPK                             | 2.18 | 0.01 | 2.96 | 1.20 | 0.22 | 0.28 |

|       |   |        |                               |      |      |      |      |      |      |
|-------|---|--------|-------------------------------|------|------|------|------|------|------|
| 38185 | 0 | 123389 | KREKRKPK                      | 2.18 | 0.01 | 2.96 | 1.20 | 0.22 | 0.28 |
| 38186 | 0 | 130529 | KREKTNFDPA                    | 2.30 | 0.01 | 0.78 | 0.44 | 1.41 | 0.28 |
| 38187 | 0 | 243812 | KRELMNLPQQ                    | 2.29 | 0.01 | 2.16 | 0.44 | 1.23 | 1.28 |
| 38188 | 0 | 96497  | KRELRNLPQ                     | 2.23 | 0.01 | 2.16 | 2.82 | 0.22 | 1.57 |
| 38189 | 0 | 33122  | KRELRNLPQQ                    | 2.31 | 0.01 | 2.16 | 0.44 | 1.23 | 0.85 |
| 38190 | 0 | 33122  | KRELRNLPQQ                    | 2.31 | 0.01 | 2.16 | 0.44 | 1.23 | 1.28 |
| 38191 | 0 | 33123  | KRELRNLPQQCGLRA               | 2.67 | 0.01 | 2.16 | 0.44 | 1.23 | 1.48 |
| 38192 | 0 | 33123  | KRELRNLPQQCGLRA               | 2.67 | 0.01 | 2.16 | 0.44 | 1.23 | 1.48 |
| 38193 | 0 | 33125  | KREMAI                        | 1.88 | 0.01 | 3.24 | 1.12 | 0.22 | 0.28 |
| 38194 | 0 | 33126  | KREMVITFK                     | 2.31 | 0.01 | 2.66 | 0.68 | 0.22 | 0.28 |
| 38195 | 0 | 33126  | KREMVITFK                     | 2.31 | 0.01 | 2.66 | 0.68 | 0.22 | 0.28 |
| 38196 | 0 | 33126  | KREMVITFK                     | 2.31 | 0.01 | 2.66 | 2.52 | 0.22 | 0.28 |
| 38197 | 0 | 33126  | KREMVITFK                     | 2.31 | 0.01 | 2.66 | 0.68 | 0.22 | 0.28 |
| 38198 | 0 | 33126  | KREMVITFK                     | 2.31 | 0.01 | 2.66 | 0.68 | 0.22 | 0.28 |
| 38199 | 0 | 33126  | KREMVITFK                     | 2.31 | 0.01 | 2.66 | 0.68 | 0.22 | 0.28 |
| 38200 | 0 | 33126  | KREMVITFK                     | 2.31 | 0.01 | 2.66 | 0.68 | 0.22 | 0.28 |
| 38201 | 0 | 123390 | KREWVKFAKPCREGED<br>NSKRN     | 2.99 | 0.01 | 0.78 | 1.20 | 0.22 | 0.85 |
| 38202 | 0 | 123390 | KREWVKFAKPCREGED<br>NSKRN     | 2.99 | 0.01 | 0.78 | 1.20 | 0.22 | 1.27 |
| 38203 | 0 | 123390 | KREWVKFAKPCREGED<br>NSKRN     | 2.99 | 0.01 | 0.78 | 1.20 | 0.22 | 2.02 |
| 38204 | 0 | 123390 | KREWVKFAKPCREGED<br>NSKRN     | 2.99 | 0.01 | 0.78 | 1.12 | 0.22 | 0.28 |
| 38205 | 0 | 123390 | KREWVKFAKPCREGED<br>NSKRN     | 2.99 | 0.01 | 0.78 | 1.12 | 0.22 | 0.85 |
| 38206 | 0 | 33128  | KRFAGVVLAGAALGV               | 2.72 | 0.01 | 2.43 | 0.44 | 1.59 | 0.28 |
| 38207 | 0 | 181696 | KRFDEGQKFECGNDK               | 2.71 | 0.01 | 2.86 | 2.37 | 0.22 | 1.28 |
| 38208 | 0 | 181696 | KRFDEGQKFECGNDK               | 2.71 | 0.01 | 2.86 | 2.36 | 0.22 | 1.28 |
| 38209 | 0 | 152727 | KRFHYDRNNI                    | 2.30 | 0.01 | 2.18 | 2.16 | 0.22 | 0.28 |
| 38210 | 0 | 123391 | KRFIKWPLN                     | 2.22 | 0.01 | 2.28 | 2.00 | 0.22 | 0.28 |
| 38211 | 0 | 132413 | KRGERGSE                      | 2.36 | 0.01 | 0.78 | 0.44 | 1.13 | 0.28 |
| 38212 | 0 | 109438 | KRGFGVTFDDHDPVD<br>KIVLQ      | 3.00 | 0.01 | 1.75 | 4.23 | 0.22 | 0.85 |
| 38213 | 0 | 33137  | KRGIEKAVDKVTETLLKD<br>AKEVETK | 3.20 | 0.01 | 2.59 | 0.44 | 0.85 | 0.28 |
| 38214 | 0 | 33142  | KRGPD                         | 2.02 | 0.01 | 3.04 | 0.68 | 0.22 | 1.57 |
| 38215 | 0 | 33142  | KRGPD                         | 2.02 | 0.01 | 3.04 | 0.68 | 0.22 | 1.57 |
| 38216 | 0 | 33142  | KRGPD                         | 2.02 | 0.01 | 3.04 | 0.68 | 0.22 | 1.57 |
| 38217 | 0 | 33143  | KRGPG                         | 2.04 | 0.01 | 3.27 | 0.68 | 0.22 | 0.28 |
| 38218 | 0 | 33143  | KRGPG                         | 2.04 | 0.01 | 3.67 | 0.68 | 0.22 | 1.57 |
| 38219 | 0 | 33143  | KRGPG                         | 2.04 | 0.01 | 3.67 | 0.68 | 0.22 | 1.57 |
| 38220 | 0 | 33143  | KRGPG                         | 2.04 | 0.01 | 3.67 | 0.68 | 0.22 | 1.57 |
| 38221 | 0 | 33146  | KRGRKQNKRGGNEGS               | 2.73 | 0.01 | 3.04 | 0.44 | 0.22 | 0.28 |
| 38222 | 0 | 115829 | KRGSGKDSHHPARTAHY             | 2.81 | 0.01 | 0.78 | 1.20 | 0.22 | 1.57 |

|       |   |        |                                   |      |      |      |      |      |      |
|-------|---|--------|-----------------------------------|------|------|------|------|------|------|
| 38223 | 0 | 115829 | KRGSGKDSHHPARTAHY                 | 2.81 | 0.01 | 0.78 | 2.00 | 0.22 | 1.57 |
| 38224 | 0 | 115829 | KRGSGKDSHHPARTAHY                 | 2.81 | 0.01 | 0.78 | 1.20 | 0.22 | 1.57 |
| 38225 | 0 | 115829 | KRGSGKDSHHPARTAHY                 | 2.81 | 0.01 | 0.78 | 1.20 | 0.22 | 1.57 |
| 38226 | 0 | 115829 | KRGSGKDSHHPARTAHY                 | 2.81 | 0.01 | 0.78 | 2.00 | 0.22 | 1.57 |
| 38227 | 0 | 115829 | KRGSGKDSHHPARTAHY                 | 2.81 | 0.01 | 0.78 | 1.20 | 0.22 | 1.57 |
| 38228 | 0 | 115829 | KRGSGKDSHHPARTAHY                 | 2.81 | 0.01 | 0.78 | 2.00 | 0.22 | 1.57 |
| 38229 | 0 | 115829 | KRGSGKDSHHPARTAHY                 | 2.81 | 0.01 | 0.78 | 1.20 | 0.22 | 1.57 |
| 38230 | 0 | 115829 | KRGSGKDSHHPARTAHY                 | 2.81 | 0.01 | 0.78 | 2.00 | 0.22 | 1.57 |
| 38231 | 0 | 115829 | KRGSGKDSHHPARTAHY                 | 2.81 | 0.01 | 0.78 | 2.00 | 0.22 | 1.57 |
| 38232 | 0 | 116392 | KRGSGKDSHHPARTAHY<br>GSLPQKSHGRTQ | 3.33 | 0.01 | 0.78 | 0.44 | 1.13 | 0.28 |
| 38233 | 0 | 113583 | KRGSGKDSHTRTTTHYGS<br>LPQ         | 2.96 | 0.01 | 1.75 | 2.25 | 0.22 | 0.28 |
| 38234 | 0 | 33148  | KRHDGGCRKE                        | 2.33 | 0.01 | 2.25 | 0.44 | 1.23 | 0.85 |
| 38235 | 0 | 33148  | KRHDGGCRKE                        | 2.33 | 0.01 | 2.25 | 0.44 | 1.23 | 0.85 |
| 38236 | 0 | 33148  | KRHDGGCRKE                        | 2.33 | 0.01 | 2.25 | 0.44 | 1.23 | 0.85 |
| 38237 | 0 | 33149  | KRHDGGCRKELAAV                    | 2.60 | 0.01 | 2.25 | 0.44 | 1.23 | 1.27 |
| 38238 | 0 | 230233 | KRHDGGCRKELAAVSVD<br>CSE          | 2.95 | 0.01 | 2.25 | 0.44 | 1.23 | 0.28 |
| 38239 | 0 | 33151  | KRHFLSQRQ                         | 2.23 | 0.01 | 0.90 | 1.15 | 0.22 | 1.27 |
| 38240 | 0 | 33151  | KRHFLSQRQ                         | 2.23 | 0.01 | 0.90 | 0.68 | 0.22 | 0.28 |
| 38241 | 0 | 33153  | KRHRKVLRDNIQGITKPA<br>IRRLAR      | 3.12 | 0.01 | 1.75 | 3.89 | 1.13 | 1.75 |
| 38242 | 0 | 33155  | KRHVLG                            | 1.88 | 0.01 | 2.40 | 0.44 | 0.85 | 0.28 |
| 38243 | 0 | 225781 | KRIEVLPKPTTPAP                    | 2.70 | 0.01 | 3.28 | 0.44 | 0.22 | 0.85 |
| 38244 | 0 | 162761 | KRIHIGPGRA                        | 2.33 | 0.01 | 3.70 | 4.33 | 0.22 | 2.49 |
| 38245 | 0 | 149350 | KRIHIGPGRAFYTT                    | 2.59 | 0.01 | 3.70 | 0.44 | 0.85 | 2.49 |
| 38246 | 0 | 149350 | KRIHIGPGRAFYTT                    | 2.59 | 0.01 | 3.70 | 4.33 | 0.22 | 2.49 |
| 38247 | 0 | 149350 | KRIHIGPGRAFYTT                    | 2.59 | 0.01 | 3.70 | 0.44 | 0.85 | 3.13 |

|       |   |       |                     |      |      |      |      |      |      |
|-------|---|-------|---------------------|------|------|------|------|------|------|
|       |   |       | KRIKSSSVLNMRYKNDK   |      |      |      |      |      |      |
|       |   |       | YVDTSGYDSNININGDV   |      |      |      |      |      |      |
|       |   |       | YKYPTNKNQFGIYNDKL   |      |      |      |      |      |      |
|       |   |       | SEVNISQNDYIIYDNKYK  |      |      |      |      |      |      |
|       |   |       | NFSISFWVRIPNYDNKIV  |      |      |      |      |      |      |
|       |   |       | NVNNEYTIINCMRDNNS   |      |      |      |      |      |      |
|       |   |       | GWKVSLNHNEIITWFED   |      |      |      |      |      |      |
|       |   |       | NRGINQKLAFNYGNAN    |      |      |      |      |      |      |
|       |   |       | GISDYINKWIFVTITNDR  |      |      |      |      |      |      |
|       |   |       | LGDSKLYINGNLIDQKSIL |      |      |      |      |      |      |
|       |   |       | NLGNIHVSDNILFKIVNC  |      |      |      |      |      |      |
| 38248 | 0 | 33159 | SYTRYIGIRYFNIFDKELD | 5.99 | 0.01 | 4.03 | 1.20 | 0.22 | 1.34 |
|       |   |       | ETEIQTLYSNEPNTNILK  |      |      |      |      |      |      |
|       |   |       | DFWGNLYLLYDKEYLLN   |      |      |      |      |      |      |
|       |   |       | VLKPNNFIDRRKDSTLSI  |      |      |      |      |      |      |
|       |   |       | NNIRSTILLANRLYSGIKV |      |      |      |      |      |      |
|       |   |       | KIQRVNNSSTNDNLVRK   |      |      |      |      |      |      |
|       |   |       | NDQVYINFVASKTHLFPL  |      |      |      |      |      |      |
|       |   |       | YADTATTNKEKTIKISSSG |      |      |      |      |      |      |
|       |   |       | NRFNQVVVMNSVGNC     |      |      |      |      |      |      |
|       |   |       | TMNFKNNNGNIGLLG     |      |      |      |      |      |      |
|       |   |       | FKADTVVASTWYYTHM    |      |      |      |      |      |      |
|       |   |       | RDHTNSNGCFWNFISEE   |      |      |      |      |      |      |
|       |   |       | HGWQEK              |      |      |      |      |      |      |

|       |   |       |                     |      |      |      |      |      |      |
|-------|---|-------|---------------------|------|------|------|------|------|------|
|       |   |       | KRIKSSSVLNMRYKNDK   |      |      |      |      |      |      |
|       |   |       | YVDTSGYDSNININGDV   |      |      |      |      |      |      |
|       |   |       | YKYPTNKNQFGIYNDKL   |      |      |      |      |      |      |
|       |   |       | SEVNISQNDYIIYDNKYK  |      |      |      |      |      |      |
|       |   |       | NFSISFWVRIPNYDNKIV  |      |      |      |      |      |      |
|       |   |       | NVNNEYTIINCMRDNNS   |      |      |      |      |      |      |
|       |   |       | GWKVSLNHNEIITWTFED  |      |      |      |      |      |      |
|       |   |       | NRGINQKLAFNYGNAN    |      |      |      |      |      |      |
|       |   |       | GISDYINKWIFVTITNDR  |      |      |      |      |      |      |
|       |   |       | LGDSKLYINGNLIDQKSIL |      |      |      |      |      |      |
|       |   |       | NLGNIHVSDNILFKIVNC  |      |      |      |      |      |      |
| 38249 | 0 | 33159 | SYTRYIGIRYFNIFDKELD | 5.99 | 0.01 | 4.03 | 1.20 | 0.22 | 1.34 |
|       |   |       | ETEIQTLYSNEPNTNILK  |      |      |      |      |      |      |
|       |   |       | DFWGNLYLLYDKEYYLLN  |      |      |      |      |      |      |
|       |   |       | VLKPNNFIDRRKDSTLSI  |      |      |      |      |      |      |
|       |   |       | NNIRSTILLANRLYSGIKV |      |      |      |      |      |      |
|       |   |       | KIQRVNNSSTNDNLVRK   |      |      |      |      |      |      |
|       |   |       | NDQVYINFVASKTHLFPL  |      |      |      |      |      |      |
|       |   |       | YADTATTNKEKTIKISSSG |      |      |      |      |      |      |
|       |   |       | NRFNQVVVMNSVGNC     |      |      |      |      |      |      |
|       |   |       | TMNFKNNNGNIGLLG     |      |      |      |      |      |      |
|       |   |       | FKADTVVASTWYYTHM    |      |      |      |      |      |      |
|       |   |       | RDHTNSNGCFWNFISEE   |      |      |      |      |      |      |
|       |   |       | HGWQEK              |      |      |      |      |      |      |

|       |   |       |                     |      |      |      |      |      |      |
|-------|---|-------|---------------------|------|------|------|------|------|------|
|       |   |       | KRIKSSSVLNMRYKNDK   |      |      |      |      |      |      |
|       |   |       | YVDTSGYDSNININGDV   |      |      |      |      |      |      |
|       |   |       | YKYPTNKNQFGIYNDKL   |      |      |      |      |      |      |
|       |   |       | SEVNISQNDYIIYDNKYK  |      |      |      |      |      |      |
|       |   |       | NFSISFWVRIPNYDNKIV  |      |      |      |      |      |      |
|       |   |       | NVNNEYTIINCMRDNNS   |      |      |      |      |      |      |
|       |   |       | GWKVSLNHNEIITWTFED  |      |      |      |      |      |      |
|       |   |       | NRGINQKLAFNYGNAN    |      |      |      |      |      |      |
|       |   |       | GISDYINKWIFVTITNDR  |      |      |      |      |      |      |
|       |   |       | LGDSKLYINGNLIDQKSIL |      |      |      |      |      |      |
|       |   |       | NLGNIHVSDNILFKIVNC  |      |      |      |      |      |      |
| 38250 | 0 | 33159 | SYTRYIGIRYFNIFDKELD | 5.99 | 0.01 | 4.03 | 1.20 | 0.22 | 0.85 |
|       |   |       | ETEIQTLYSNEPNTNILK  |      |      |      |      |      |      |
|       |   |       | DFWGNLYLLYDKEYLLN   |      |      |      |      |      |      |
|       |   |       | VLKPNNFIDRRKDSTLSI  |      |      |      |      |      |      |
|       |   |       | NNIRSTILLANRLYSGIKV |      |      |      |      |      |      |
|       |   |       | KIQRVNNSSTNDNLVRK   |      |      |      |      |      |      |
|       |   |       | NDQVYINFVASKTHLFPL  |      |      |      |      |      |      |
|       |   |       | YADTATTNKEKTIKISSSG |      |      |      |      |      |      |
|       |   |       | NRFNQVVVMNSVGNC     |      |      |      |      |      |      |
|       |   |       | TMNFKNNNGNIGLLG     |      |      |      |      |      |      |
|       |   |       | FKADTVVASTWYYTHM    |      |      |      |      |      |      |
|       |   |       | RDHTNSNGCFWNFISEE   |      |      |      |      |      |      |
|       |   |       | HGWQEK              |      |      |      |      |      |      |



|       |   |       |                     |      |      |      |      |      |      |
|-------|---|-------|---------------------|------|------|------|------|------|------|
|       |   |       | KRIKSSSVLNMRYKNDK   |      |      |      |      |      |      |
|       |   |       | YVDTSGYDSNININGDV   |      |      |      |      |      |      |
|       |   |       | YKYPTNKNQFGIYNDKL   |      |      |      |      |      |      |
|       |   |       | SEVNISQNDYIIYDNKYK  |      |      |      |      |      |      |
|       |   |       | NFSISFWVRIPNYDNKIV  |      |      |      |      |      |      |
|       |   |       | NVNNEYTIINCMRDNNS   |      |      |      |      |      |      |
|       |   |       | GWKVSLNHNEIIWTFED   |      |      |      |      |      |      |
|       |   |       | NRGINQKLAFNYGNAN    |      |      |      |      |      |      |
|       |   |       | GISDYINKWIFVTITNDR  |      |      |      |      |      |      |
|       |   |       | LGDSKLYINGNLIDQKSIL |      |      |      |      |      |      |
|       |   |       | NLGNIHVSDNILFKIVNC  |      |      |      |      |      |      |
| 38251 | 0 | 33159 | SYTRYIGIRYFNIFDKELD | 5.99 | 0.01 | 4.03 | 1.20 | 0.22 | 0.28 |
|       |   |       | ETEIQTLYSNEPNTNILK  |      |      |      |      |      |      |
|       |   |       | DFWGNLYLLYDKEYYLLN  |      |      |      |      |      |      |
|       |   |       | VLKPNNFIDRRKDSTLSI  |      |      |      |      |      |      |
|       |   |       | NNIRSTILLANRLYSGIKV |      |      |      |      |      |      |
|       |   |       | KIQRVNNSSTNDNLVRK   |      |      |      |      |      |      |
|       |   |       | NDQVYINFVASKTHLFPL  |      |      |      |      |      |      |
|       |   |       | YADTATTNKEKTIKISSSG |      |      |      |      |      |      |
|       |   |       | NRFNQVVVMNSVGNC     |      |      |      |      |      |      |
|       |   |       | TMNFKNNNGNIGLLG     |      |      |      |      |      |      |
|       |   |       | FKADTVVASTWYYTHM    |      |      |      |      |      |      |
|       |   |       | RDHTNSNGCFWNFISEE   |      |      |      |      |      |      |
|       |   |       | HGWQEK              |      |      |      |      |      |      |

|       |   |       |                     |      |      |      |      |      |      |
|-------|---|-------|---------------------|------|------|------|------|------|------|
|       |   |       | KRIKSSSVLNMRYKNDK   |      |      |      |      |      |      |
|       |   |       | YVDTSGYDSNININGDV   |      |      |      |      |      |      |
|       |   |       | YKYPTNKNQFGIYNDKL   |      |      |      |      |      |      |
|       |   |       | SEVNISQNDYIIYDNKYK  |      |      |      |      |      |      |
|       |   |       | NFSISFWVRIPNYDNKIV  |      |      |      |      |      |      |
|       |   |       | NVNNEYTIINCMRDNNS   |      |      |      |      |      |      |
|       |   |       | GWKVSLNHNEIITWTFED  |      |      |      |      |      |      |
|       |   |       | NRGINQKLAFNYGNAN    |      |      |      |      |      |      |
|       |   |       | GISDYINKWIFVTITNDR  |      |      |      |      |      |      |
|       |   |       | LGDSKLYINGNLIDQKSIL |      |      |      |      |      |      |
|       |   |       | NLGNIHVSDNILFKIVNC  |      |      |      |      |      |      |
| 38252 | 0 | 33159 | SYTRYIGIRYFNIFDKELD | 5.99 | 0.01 | 4.03 | 2.43 | 0.22 | 0.85 |
|       |   |       | ETEIQTLYSNEPNTNILK  |      |      |      |      |      |      |
|       |   |       | DFWGNLYLLYDKEYYLLN  |      |      |      |      |      |      |
|       |   |       | VLKPNNFIDRRKDSTLSI  |      |      |      |      |      |      |
|       |   |       | NNIRSTILLANRLYSGIKV |      |      |      |      |      |      |
|       |   |       | KIQRVNNSSTNDNLVRK   |      |      |      |      |      |      |
|       |   |       | NDQVYINFVASKTHLFPL  |      |      |      |      |      |      |
|       |   |       | YADTATTNKEKTIKISSSG |      |      |      |      |      |      |
|       |   |       | NRFNQVVVMNSVGNC     |      |      |      |      |      |      |
|       |   |       | TMNFKNNNGNIGLLG     |      |      |      |      |      |      |
|       |   |       | FKADTVVASTWYYTHM    |      |      |      |      |      |      |
|       |   |       | RDHTNSNGCFWNFISEE   |      |      |      |      |      |      |
|       |   |       | HGWQEK              |      |      |      |      |      |      |

|       |   |       |                     |      |      |      |      |      |      |
|-------|---|-------|---------------------|------|------|------|------|------|------|
|       |   |       | KRIKSSSVLNMRYKNDK   |      |      |      |      |      |      |
|       |   |       | YVDTSGYDSNININGDV   |      |      |      |      |      |      |
|       |   |       | YKYPTNKNQFGIYNDKL   |      |      |      |      |      |      |
|       |   |       | SEVNISQNDYIIYDNKYK  |      |      |      |      |      |      |
|       |   |       | NFSISFWVRIPNYDNKIV  |      |      |      |      |      |      |
|       |   |       | NVNNEYTIINCMRDNNS   |      |      |      |      |      |      |
|       |   |       | GWKVSLNHNEIIWTFED   |      |      |      |      |      |      |
|       |   |       | NRGINQKLAFNYGNAN    |      |      |      |      |      |      |
|       |   |       | GISDYINKWIFVTITNDR  |      |      |      |      |      |      |
|       |   |       | LGDSKLYINGNLIDQKSIL |      |      |      |      |      |      |
|       |   |       | NLGNIHVSDNILFKIVNC  |      |      |      |      |      |      |
| 38253 | 0 | 33159 | SYTRYIGIRYFNIFDKELD | 5.99 | 0.01 | 4.03 | 2.43 | 0.22 | 0.85 |
|       |   |       | ETEIQTLYSNEPNTNILK  |      |      |      |      |      |      |
|       |   |       | DFWGNLYLLYDKEYYLLN  |      |      |      |      |      |      |
|       |   |       | VLKPNNFIDRRKDSTLSI  |      |      |      |      |      |      |
|       |   |       | NNIRSTILLANRLYSGIKV |      |      |      |      |      |      |
|       |   |       | KIQRVNNSSTNDNLVRK   |      |      |      |      |      |      |
|       |   |       | NDQVYINFVASKTHLFPL  |      |      |      |      |      |      |
|       |   |       | YADTATTNKEKTIKISSSG |      |      |      |      |      |      |
|       |   |       | NRFNQVVVMNSVGNC     |      |      |      |      |      |      |
|       |   |       | TMNFKNNNGNIGLLG     |      |      |      |      |      |      |
|       |   |       | FKADTVVASTWYYTHM    |      |      |      |      |      |      |
|       |   |       | RDHTNSNGCFWNFISEE   |      |      |      |      |      |      |
|       |   |       | HGWQEK              |      |      |      |      |      |      |

|       |   |        |                     |      |      |      |      |      |      |
|-------|---|--------|---------------------|------|------|------|------|------|------|
|       |   |        | KRIKSSSVLNMRYKNDK   |      |      |      |      |      |      |
|       |   |        | YVDTSGYDSNININGDV   |      |      |      |      |      |      |
|       |   |        | YKYPTNKNQFGIYNDKL   |      |      |      |      |      |      |
|       |   |        | SEVNISQNDYIIYDNKYK  |      |      |      |      |      |      |
|       |   |        | NFSISFWVRIPNYDNKIV  |      |      |      |      |      |      |
|       |   |        | NVNNEYTIINCMRDNNS   |      |      |      |      |      |      |
|       |   |        | GWKVSLSNHNEIWT FED  |      |      |      |      |      |      |
|       |   |        | NRGINQKLAFNYGNAN    |      |      |      |      |      |      |
|       |   |        | GISDYINKWIFVTITNDR  |      |      |      |      |      |      |
|       |   |        | LGDSKLYINGNLIDQKSIL |      |      |      |      |      |      |
|       |   |        | NLGNIHVSDNILFKIVNC  |      |      |      |      |      |      |
| 38254 | 0 | 33159  | SYTRYIGIRYFNIFDKELD | 5.99 | 0.01 | 4.03 | 2.43 | 2.25 | 1.75 |
|       |   |        | ETEIQTLYSNEPNTNILK  |      |      |      |      |      |      |
|       |   |        | DFWGNLYLLYDKEYYLLN  |      |      |      |      |      |      |
|       |   |        | VLKPNNFIDRRKDSTLSI  |      |      |      |      |      |      |
|       |   |        | NNIRSTILLANRLYSGIKV |      |      |      |      |      |      |
|       |   |        | KIQRVNNSSTNDNLVRK   |      |      |      |      |      |      |
|       |   |        | NDQVYINFVASKTHLFPL  |      |      |      |      |      |      |
|       |   |        | YADTATTNKEKTIKISSSG |      |      |      |      |      |      |
|       |   |        | NRFNQVVVMNSVGNC     |      |      |      |      |      |      |
|       |   |        | TMNFKNNNGNIGLLG     |      |      |      |      |      |      |
|       |   |        | FKADTVVASTWYYTHM    |      |      |      |      |      |      |
|       |   |        | RDHTNSNGCFWNFISEE   |      |      |      |      |      |      |
|       |   |        | HGWQEK              |      |      |      |      |      |      |
| 38255 | 0 | 33161  | KRIPLDVAEG          | 2.26 | 0.01 | 2.04 | 0.68 | 0.22 | 0.28 |
| 38256 | 0 | 33161  | KRIPLDVAEG          | 2.26 | 0.01 | 2.04 | 0.68 | 0.22 | 0.28 |
| 38257 | 0 | 94573  | KRIPNKKPGKKT        | 2.51 | 0.01 | 2.38 | 0.68 | 0.22 | 0.28 |
| 38258 | 0 | 94573  | KRIPNKKPGKKT        | 2.51 | 0.01 | 2.38 | 0.44 | 1.74 | 0.28 |
| 38259 | 0 | 94573  | KRIPNKKPGKKT        | 2.51 | 0.01 | 2.38 | 0.44 | 1.74 | 0.28 |
| 38260 | 0 | 33163  | KRIPNKKPGKKT TT     | 2.64 | 0.01 | 2.38 | 1.20 | 0.22 | 0.28 |
| 38261 | 0 | 33163  | KRIPNKKPGKKT TT     | 2.64 | 0.01 | 2.38 | 1.20 | 0.22 | 0.85 |
| 38262 | 0 | 33163  | KRIPNKKPGKKT TT     | 2.64 | 0.01 | 2.38 | 1.20 | 0.22 | 1.34 |
| 38263 | 0 | 33166  | KRIRLPHIREDDQPS     | 2.67 | 0.01 | 2.40 | 0.68 | 0.22 | 0.28 |
| 38264 | 0 | 33166  | KRIRLPHIREDDQPS     | 2.67 | 0.01 | 2.40 | 3.81 | 0.22 | 0.28 |
| 38265 | 0 | 33167  | KRIRNQSFNQYNC SINN  | 3.16 | 0.01 | 2.86 | 2.02 | 0.22 | 0.28 |
|       |   |        | KTELETWK            |      |      |      |      |      |      |
| 38266 | 0 | 33167  | KRIRNQSFNQYNC SINN  | 3.16 | 0.01 | 2.86 | 2.02 | 1.59 | 0.28 |
|       |   |        | KTELETWK            |      |      |      |      |      |      |
| 38267 | 0 | 240891 | KRISDDLPA L TSIYV   | 2.65 | 0.01 | 4.93 | 0.44 | 1.41 | 0.28 |
| 38268 | 0 | 322805 | KRIYDREFDY EDEDY    | 2.73 | 0.01 | 1.61 | 0.44 | 0.85 | 1.28 |
| 38269 | 0 | 322808 | KRKAAEATKIAEAEK     | 2.74 | 0.01 | 1.61 | 0.44 | 0.85 | 1.28 |
| 38270 | 0 | 322809 | KRKAAEATKVAEAEK     | 2.74 | 0.01 | 1.61 | 0.44 | 0.85 | 1.28 |
| 38271 | 0 | 100229 | KRKDEERNKT          | 2.35 | 0.01 | 2.18 | 2.16 | 0.22 | 0.28 |
| 38272 | 0 | 100229 | KRKDEERNKT          | 2.35 | 0.01 | 2.18 | 2.16 | 0.22 | 0.28 |

|       |   |        |                                |      |      |      |      |      |      |
|-------|---|--------|--------------------------------|------|------|------|------|------|------|
| 38273 | 0 | 122822 | KRKLEGLDLKLTQESIMDL<br>ENDKQQL | 3.18 | 0.01 | 0.78 | 2.04 | 0.22 | 0.28 |
| 38274 | 0 | 123392 | KRKPKSQE                       | 2.15 | 0.01 | 0.78 | 1.20 | 0.22 | 0.28 |
| 38275 | 0 | 33173  | KRKPYNLKLGCNWQFIP<br>KDEGWTE   | 3.10 | 0.01 | 2.08 | 0.44 | 1.93 | 1.57 |
| 38276 | 0 | 33173  | KRKPYNLKLGCNWQFIP<br>KDEGWTE   | 3.10 | 0.01 | 2.08 | 2.43 | 0.22 | 1.57 |
| 38277 | 0 | 33173  | KRKPYNLKLGCNWQFIP<br>KDEGWTE   | 3.10 | 0.01 | 3.45 | 0.44 | 0.22 | 1.57 |
| 38278 | 0 | 147074 | KRKQNLVQAWQAK                  | 2.58 | 0.01 | 1.60 | 0.44 | 0.85 | 0.85 |
| 38279 | 0 | 162762 | KRKRIHIGPGRAFYTTK              | 2.81 | 0.01 | 3.70 | 0.44 | 0.85 | 2.49 |
| 38280 | 0 | 162762 | KRKRIHIGPGRAFYTTK              | 2.81 | 0.01 | 3.70 | 0.44 | 0.85 | 2.49 |
| 38281 | 0 | 162762 | KRKRIHIGPGRAFYTTK              | 2.81 | 0.01 | 3.70 | 0.44 | 0.85 | 2.49 |
| 38282 | 0 | 162763 | KRKRIHIGPGRAFYTTKN             | 2.85 | 0.01 | 3.70 | 0.44 | 0.85 | 2.49 |
| 38283 | 0 | 162763 | KRKRIHIGPGRAFYTTKN             | 2.85 | 0.01 | 3.70 | 0.44 | 0.85 | 0.28 |
| 38284 | 0 | 162763 | KRKRIHIGPGRAFYTTKN             | 2.85 | 0.01 | 3.70 | 0.44 | 0.85 | 0.28 |
| 38285 | 0 | 134422 | KRKRSQMLFRGRRASQ               | 2.76 | 0.01 | 0.78 | 0.68 | 0.22 | 0.28 |
| 38286 | 0 | 134422 | KRKRSQMLFRGRRASQ               | 2.76 | 0.01 | 0.78 | 0.68 | 0.22 | 0.28 |
| 38287 | 0 | 134422 | KRKRSQMLFRGRRASQ               | 2.76 | 0.01 | 0.78 | 0.68 | 0.22 | 0.28 |
| 38288 | 0 | 134422 | KRKRSQMLFRGRRASQ               | 2.76 | 0.01 | 0.78 | 0.68 | 0.22 | 1.27 |
| 38289 | 0 | 134422 | KRKRSQMLFRGRRASQ               | 2.76 | 0.01 | 0.78 | 0.68 | 0.22 | 0.28 |
| 38290 | 0 | 33177  | KRKYDSLK                       | 2.15 | 0.01 | 1.66 | 0.44 | 1.74 | 0.28 |
| 38291 | 0 | 229309 | KRKYDYATLKVALAK                | 2.72 | 0.01 | 2.70 | 0.68 | 0.22 | 0.28 |
| 38292 | 0 | 176043 | KRLEGRSKTW                     | 2.32 | 0.01 | 2.63 | 1.15 | 0.22 | 0.85 |
| 38293 | 0 | 176043 | KRLEGRSKTW                     | 2.32 | 0.01 | 2.63 | 1.15 | 0.22 | 1.48 |
| 38294 | 0 | 176043 | KRLEGRSKTW                     | 2.32 | 0.01 | 2.63 | 1.15 | 0.22 | 1.48 |
| 38295 | 0 | 176043 | KRLEGRSKTW                     | 2.32 | 0.01 | 2.63 | 1.15 | 0.22 | 0.85 |
| 38296 | 0 | 176044 | KRLEGRSKTWFGAYA                | 2.67 | 0.01 | 2.63 | 1.15 | 0.22 | 0.85 |
| 38297 | 0 | 176044 | KRLEGRSKTWFGAYA                | 2.67 | 0.01 | 2.63 | 1.15 | 0.22 | 0.85 |
| 38298 | 0 | 122449 | KRLGRALVIGEVTSGGC<br>QPPQTY    | 3.05 | 0.01 | 1.60 | 2.04 | 0.22 | 0.28 |
| 38299 | 0 | 33182  | KRLHQWINED                     | 2.26 | 0.01 | 1.96 | 0.44 | 0.85 | 0.28 |
| 38300 | 0 | 33182  | KRLHQWINED                     | 2.26 | 0.01 | 1.96 | 0.44 | 0.85 | 0.28 |
| 38301 | 0 | 33183  | KRLHQWINEDCSTP                 | 2.52 | 0.01 | 1.96 | 0.44 | 0.85 | 0.28 |
| 38302 | 0 | 33183  | KRLHQWINEDCSTP                 | 2.52 | 0.01 | 1.96 | 0.44 | 0.85 | 0.28 |
| 38303 | 0 | 33183  | KRLHQWINEDCSTP                 | 2.52 | 0.01 | 1.96 | 0.44 | 1.41 | 0.28 |

|       |   |        |                                     |      |      |      |      |      |      |
|-------|---|--------|-------------------------------------|------|------|------|------|------|------|
| 38304 | 0 | 33183  | KRLHQQWINECSTP                      | 2.52 | 0.01 | 1.96 | 0.44 | 0.85 | 0.28 |
| 38305 | 0 | 33183  | KRLHQQWINECSTP                      | 2.52 | 0.01 | 1.96 | 0.44 | 0.85 | 0.28 |
| 38306 | 0 | 121503 | KRLKISKKPKDPEPP                     | 2.70 | 0.01 | 0.78 | 0.44 | 1.13 | 0.85 |
| 38307 | 0 | 121503 | KRLKISKKPKDPEPP                     | 2.70 | 0.01 | 0.78 | 0.44 | 1.41 | 0.85 |
| 38308 | 0 | 121503 | KRLKISKKPKDPEPP                     | 2.70 | 0.01 | 0.78 | 0.44 | 1.41 | 0.28 |
| 38309 | 0 | 97430  | KRLRLALAS                           | 2.26 | 0.01 | 3.13 | 1.12 | 0.22 | 0.28 |
| 38310 | 0 | 164510 | KRMEVGQQAVEV                        | 2.48 | 0.01 | 0.78 | 1.12 | 0.22 | 0.28 |
| 38311 | 0 | 164510 | KRMEVGQQAVEV                        | 2.48 | 0.01 | 0.78 | 1.12 | 0.22 | 0.28 |
| 38312 | 0 | 164510 | KRMEVGQQAVEV                        | 2.48 | 0.01 | 0.78 | 1.12 | 0.22 | 1.27 |
| 38313 | 0 | 33198  | KRNEKWDEVYKYIVTN<br>WLA             | 2.90 | 0.01 | 3.03 | 3.33 | 0.22 | 1.57 |
| 38314 | 0 | 33198  | KRNEKWDEVYKYIVTN<br>WLA             | 2.90 | 0.01 | 2.08 | 0.44 | 0.22 | 1.57 |
| 38315 | 0 | 33198  | KRNEKWDEVYKYIVTN<br>WLA             | 2.90 | 0.01 | 2.08 | 2.02 | 0.22 | 1.57 |
| 38316 | 0 | 33198  | KRNEKWDEVYKYIVTN<br>WLA             | 2.90 | 0.01 | 2.08 | 1.15 | 0.22 | 1.57 |
| 38317 | 0 | 33198  | KRNEKWDEVYKYIVTN<br>WLA             | 2.90 | 0.01 | 2.08 | 2.49 | 0.22 | 1.57 |
| 38318 | 0 | 33198  | KRNEKWDEVYKYIVTN<br>WLA             | 2.90 | 0.01 | 3.16 | 0.44 | 1.93 | 1.57 |
| 38319 | 0 | 33198  | KRNEKWDEVYKYIVTN<br>WLA             | 2.90 | 0.01 | 2.08 | 0.68 | 0.22 | 1.57 |
| 38320 | 0 | 33198  | KRNEKWDEVYKYIVTN<br>WLA             | 2.90 | 0.01 | 2.08 | 2.25 | 0.22 | 1.57 |
| 38321 | 0 | 78712  | KRNGVDVDPNKGKWK<br>EHIKEVTEKLKKAQTE | 3.37 | 0.01 | 3.11 | 1.12 | 0.22 | 0.28 |
| 38322 | 0 | 33199  | KRNQIVLTNDKGRLS                     | 2.67 | 0.01 | 2.30 | 0.44 | 0.85 | 0.28 |
| 38323 | 0 | 33199  | KRNQIVLTNDKGRLS                     | 2.67 | 0.01 | 2.30 | 0.44 | 1.41 | 0.28 |
| 38324 | 0 | 33202  | KRNTNRR                             | 2.02 | 0.01 | 1.72 | 0.44 | 0.85 | 0.28 |
| 38325 | 0 | 33204  | KRNTNRRPQDVKFPGG<br>GQIVGGVY        | 3.12 | 0.01 | 1.72 | 0.44 | 0.85 | 0.28 |
| 38326 | 0 | 33204  | KRNTNRRPQDVKFPGG<br>GQIVGGVY        | 3.12 | 0.01 | 1.72 | 0.68 | 0.22 | 0.28 |
| 38327 | 0 | 135707 | KRNVIRII                            | 2.13 | 0.01 | 0.78 | 0.44 | 2.35 | 0.28 |
| 38328 | 0 | 492884 | KRPAAP                              | 1.90 | 0.01 | 3.65 | 0.68 | 0.22 | 0.28 |
| 38329 | 0 | 492884 | KRPAAP                              | 1.90 | 0.01 | 3.65 | 0.68 | 0.22 | 0.28 |
| 38330 | 0 | 492884 | KRPAAP                              | 1.90 | 0.01 | 3.65 | 0.68 | 0.22 | 0.85 |
| 38331 | 0 | 79890  | KRPGSSPMEVML                        | 2.46 | 0.01 | 2.14 | 3.26 | 0.22 | 0.28 |
| 38332 | 0 | 79890  | KRPGSSPMEVML                        | 2.46 | 0.01 | 2.14 | 3.55 | 0.22 | 0.28 |
| 38333 | 0 | 135475 | KRPKPGGW                            | 2.16 | 0.01 | 0.78 | 2.19 | 0.22 | 1.34 |
| 38334 | 0 | 33206  | KRPNDKAG                            | 2.13 | 0.01 | 3.10 | 0.68 | 0.22 | 0.28 |
| 38335 | 0 | 33206  | KRPNDKAG                            | 2.13 | 0.01 | 3.10 | 0.68 | 0.22 | 2.12 |
| 38336 | 0 | 33206  | KRPNDKAG                            | 2.13 | 0.01 | 3.10 | 0.68 | 0.22 | 0.28 |
| 38337 | 0 | 33210  | KRPRP                               | 1.75 | 0.01 | 3.03 | 0.68 | 0.22 | 2.02 |
| 38338 | 0 | 227311 | KRPRSPSSQSSSSGS                     | 2.73 | 0.01 | 2.48 | 0.44 | 1.59 | 0.28 |

|       |   |        |                                   |      |      |      |      |      |      |
|-------|---|--------|-----------------------------------|------|------|------|------|------|------|
| 38339 | 0 | 95524  | KRQIYTDIEMNRLGK                   | 2.65 | 0.01 | 3.89 | 1.12 | 0.22 | 2.02 |
| 38340 | 0 | 95524  | KRQIYTDIEMNRLGK                   | 2.65 | 0.01 | 3.89 | 1.12 | 0.22 | 1.27 |
| 38341 | 0 | 95524  | KRQIYTDIEMNRLGK                   | 2.65 | 0.01 | 3.89 | 1.12 | 0.22 | 1.34 |
| 38342 | 0 | 136441 | KRQKRF                            | 1.92 | 0.01 | 3.59 | 2.74 | 0.22 | 0.28 |
| 38343 | 0 | 103324 | KRQPDGPLGPLYASSNP<br>EYLSASDVFPCS | 3.30 | 0.01 | 0.78 | 1.12 | 0.22 | 0.85 |
| 38344 | 0 | 103324 | KRQPDGPLGPLYASSNP<br>EYLSASDVFPCS | 3.30 | 0.01 | 0.78 | 1.12 | 0.22 | 2.02 |
| 38345 | 0 | 119481 | KRRASAGGP                         | 2.23 | 0.01 | 0.90 | 0.44 | 1.13 | 0.28 |
| 38346 | 0 | 33215  | KRRLRPSRVRIE                      | 2.49 | 0.01 | 0.90 | 3.41 | 0.22 | 0.28 |
| 38347 | 0 | 33215  | KRRLRPSRVRIE                      | 2.49 | 0.01 | 0.90 | 3.41 | 2.25 | 1.75 |
| 38348 | 0 | 33215  | KRRLRPSRVRIE                      | 2.49 | 0.01 | 0.90 | 2.36 | 1.41 | 0.28 |
| 38349 | 0 | 179096 | KRRMGLTEFQAVKEM                   | 2.66 | 0.01 | 2.36 | 0.44 | 1.23 | 1.28 |
| 38350 | 0 | 179096 | KRRMGLTEFQAVKEM                   | 2.66 | 0.01 | 2.36 | 0.44 | 1.23 | 1.27 |
| 38351 | 0 | 179096 | KRRMGLTEFQAVKEM                   | 2.66 | 0.01 | 2.36 | 0.44 | 1.23 | 1.28 |
| 38352 | 0 | 127716 | KRRWATRGPAHPAFA                   | 2.70 | 0.01 | 0.78 | 0.44 | 1.13 | 0.85 |
| 38353 | 0 | 33218  | KRSGYGQPIA                        | 2.29 | 0.01 | 3.67 | 1.15 | 0.22 | 0.85 |
| 38354 | 0 | 124384 | KRSRHF                            | 1.90 | 0.01 | 4.15 | 1.12 | 0.22 | 2.02 |
| 38355 | 0 | 124384 | KRSRHF                            | 1.90 | 0.01 | 4.15 | 1.12 | 0.22 | 1.27 |
| 38356 | 0 | 122127 | KRSRLDV                           | 2.02 | 0.01 | 0.90 | 0.44 | 1.13 | 1.27 |
| 38357 | 0 | 122127 | KRSRLDV                           | 2.02 | 0.01 | 0.90 | 0.44 | 1.93 | 1.27 |
| 38358 | 0 | 152729 | KRSTSAGPTV                        | 2.31 | 0.01 | 2.18 | 2.16 | 0.22 | 0.28 |
| 38359 | 0 | 33220  | KRTATKQYNVTQAFGRR                 | 2.80 | 0.01 | 2.91 | 0.44 | 0.85 | 0.28 |
| 38360 | 0 | 242819 | KRTHDWDPLHSPNGR                   | 2.66 | 0.01 | 3.32 | 1.20 | 0.22 | 0.85 |
| 38361 | 0 | 242819 | KRTHDWDPLHSPNGR                   | 2.66 | 0.01 | 3.32 | 1.20 | 0.22 | 0.85 |
| 38362 | 0 | 242819 | KRTHDWDPLHSPNGR                   | 2.66 | 0.01 | 3.33 | 1.20 | 0.22 | 0.85 |
| 38363 | 0 | 33222  | KRTISIWGT                         | 2.23 | 0.01 | 2.70 | 0.68 | 0.22 | 1.27 |
| 38364 | 0 | 33222  | KRTISIWGT                         | 2.23 | 0.01 | 2.70 | 0.68 | 0.22 | 0.85 |
| 38365 | 0 | 33223  | KRTITSKSKKAPSGASG<br>VK           | 2.99 | 0.01 | 2.78 | 2.49 | 0.85 | 0.28 |
| 38366 | 0 | 117553 | KRTKDELEVIHLEEHLV<br>R            | 2.99 | 0.01 | 0.78 | 0.44 | 1.13 | 0.28 |
| 38367 | 0 | 131937 | KRTVPPGECFIQFLSEPTI<br>TFGTAI     | 3.15 | 0.01 | 0.78 | 1.20 | 0.22 | 0.28 |
| 38368 | 0 | 131937 | KRTVPPGECFIQFLSEPTI<br>TFGTAI     | 3.15 | 0.01 | 0.78 | 1.20 | 0.22 | 1.34 |
| 38369 | 0 | 131937 | KRTVPPGECFIQFLSEPTI<br>TFGTAI     | 3.15 | 0.01 | 0.78 | 0.44 | 1.13 | 0.28 |

|       |   |        |                                    |      |      |      |      |      |      |
|-------|---|--------|------------------------------------|------|------|------|------|------|------|
| 38370 | 0 | 131937 | KRTVPPGECFIQFLSEPTI<br>TFGTAI      | 3.15 | 0.01 | 0.78 | 0.44 | 1.41 | 0.28 |
| 38371 | 0 | 33232  | KRVKTwRM                           | 2.15 | 0.01 | 0.78 | 0.44 | 1.74 | 0.28 |
| 38372 | 0 | 33233  | KRVKTwRMHL                         | 2.32 | 0.01 | 0.78 | 0.44 | 1.74 | 0.28 |
| 38373 | 0 | 33234  | KRVLEPLGL                          | 2.23 | 0.01 | 3.19 | 0.68 | 0.22 | 1.27 |
| 38374 | 0 | 33234  | KRVLEPLGL                          | 2.23 | 0.01 | 3.19 | 0.68 | 0.22 | 0.85 |
| 38375 | 0 | 171922 | KRVSiSEGDDKIEYR                    | 2.70 | 0.01 | 0.78 | 0.44 | 1.41 | 0.28 |
| 38376 | 0 | 33244  | KRVVIN                             | 1.89 | 0.01 | 3.53 | 1.15 | 0.22 | 0.85 |
| 38377 | 0 | 33259  | KRYISWCLWWLQYF                     | 2.60 | 0.01 | 2.41 | 0.44 | 1.41 | 0.28 |
| 38378 | 0 | 33259  | KRYISWCLWWLQYF                     | 2.60 | 0.01 | 2.41 | 0.44 | 0.85 | 0.28 |
| 38379 | 0 | 33263  | KRYTPNNEIDSFVKSG                   | 2.69 | 0.01 | 2.95 | 3.38 | 0.22 | 0.28 |
| 38380 | 0 | 184137 | KS                                 | 1.10 | 3.85 | 0.78 | 1.12 | 0.22 | 1.28 |
| 38381 | 0 | 184137 | KS                                 | 1.10 | 3.85 | 0.78 | 1.12 | 0.22 | 1.27 |
| 38382 | 0 | 323102 | KSAAKPAAKPAAKPA                    | 2.76 | 0.01 | 1.61 | 0.44 | 0.85 | 1.28 |
| 38383 | 0 | 79891  | KSADVesDV                          | 2.25 | 0.01 | 3.81 | 0.68 | 0.22 | 0.85 |
| 38384 | 0 | 79891  | KSADVesDV                          | 2.25 | 0.01 | 3.81 | 0.68 | 0.22 | 2.02 |
| 38385 | 0 | 323112 | KSAEPKPAEPKSAEP                    | 2.75 | 0.01 | 1.61 | 0.44 | 0.85 | 1.28 |
| 38386 | 0 | 323117 | KSAEPKPAEPKSAEP                    | 2.75 | 0.01 | 1.61 | 0.44 | 0.85 | 1.28 |
| 38387 | 0 | 323118 | KSAEPKPAEPKSAGP                    | 2.75 | 0.01 | 1.61 | 0.44 | 0.85 | 1.28 |
| 38388 | 0 | 323122 | KSAEPKPAESKSAEP                    | 2.75 | 0.01 | 1.61 | 0.44 | 0.85 | 1.28 |
| 38389 | 0 | 323123 | KSAEPKPAESKSAGP                    | 2.75 | 0.01 | 1.61 | 0.44 | 0.85 | 1.28 |
| 38390 | 0 | 33267  | KSAETI                             | 1.88 | 0.01 | 3.03 | 1.20 | 0.22 | 0.28 |
| 38391 | 0 | 33267  | KSAETI                             | 1.88 | 0.01 | 2.40 | 3.42 | 0.22 | 0.28 |
| 38392 | 0 | 33267  | KSAETI                             | 1.88 | 0.01 | 2.40 | 2.52 | 0.22 | 0.28 |
| 38393 | 0 | 323128 | KSAGPKPAEPKSAEP                    | 2.75 | 0.01 | 1.61 | 0.44 | 0.85 | 1.28 |
| 38394 | 0 | 120716 | KSAIEGVK                           | 2.13 | 0.01 | 2.26 | 2.04 | 0.22 | 0.28 |
| 38395 | 0 | 120716 | KSAIEGVK                           | 2.13 | 0.01 | 2.26 | 2.04 | 0.22 | 0.28 |
| 38396 | 0 | 120716 | KSAIEGVK                           | 2.13 | 0.01 | 2.26 | 0.44 | 1.13 | 2.35 |
| 38397 | 0 | 120716 | KSAIEGVK                           | 2.13 | 0.01 | 2.26 | 2.36 | 0.22 | 2.02 |
| 38398 | 0 | 120716 | KSAIEGVK                           | 2.13 | 0.01 | 2.26 | 2.04 | 0.22 | 0.28 |
| 38399 | 0 | 106576 | KSAITPT                            | 2.02 | 0.01 | 0.90 | 0.68 | 0.22 | 1.39 |
| 38400 | 0 | 323134 | KSAAAAAPAKAAAAAP                   | 2.74 | 0.01 | 1.61 | 0.44 | 0.85 | 1.28 |
| 38401 | 0 | 323135 | KSAAATAPAKAAAAA                    | 2.72 | 0.01 | 1.61 | 0.44 | 0.85 | 1.28 |
| 38402 | 0 | 171924 | KSakKVKTPQPKKAA                    | 2.71 | 0.01 | 0.78 | 0.44 | 1.13 | 0.28 |
| 38403 | 0 | 323146 | KSANKPASKPAAKPA                    | 2.75 | 0.01 | 1.61 | 0.44 | 0.85 | 1.28 |
| 38404 | 0 | 79278  | KSavgY                             | 1.88 | 0.01 | 0.90 | 1.15 | 0.22 | 0.28 |
| 38405 | 0 | 79278  | KSavgY                             | 1.88 | 0.01 | 0.90 | 1.15 | 0.22 | 1.27 |
| 38406 | 0 | 79278  | KSavgY                             | 1.88 | 0.01 | 0.90 | 1.15 | 0.22 | 0.28 |
| 38407 | 0 | 98183  | KSAYTPAYYT                         | 2.34 | 0.01 | 3.08 | 0.68 | 0.22 | 0.28 |
| 38408 | 0 | 98183  | KSAYTPAYYT                         | 2.34 | 0.01 | 3.08 | 1.20 | 0.22 | 0.28 |
| 38409 | 0 | 132854 | KSCAERVHGTYRVNL                    | 2.62 | 0.01 | 3.16 | 3.16 | 0.22 | 0.28 |
| 38410 | 0 | 233645 | KSCCRSTLGRNCYNLCR<br>ARGAQKLCAGVCR | 3.37 | 0.01 | 1.86 | 0.44 | 1.23 | 0.85 |
| 38411 | 0 | 233645 | KSCCRSTLGRNCYNLCR<br>ARGAQKLCAGVCR | 3.37 | 0.01 | 1.86 | 1.20 | 0.22 | 0.85 |



|       |   |        |                                    |      |      |      |      |      |      |
|-------|---|--------|------------------------------------|------|------|------|------|------|------|
| 38412 | 0 | 33282  | KSCDPLDL                           | 2.14 | 0.01 | 3.18 | 2.74 | 0.22 | 0.28 |
| 38413 | 0 | 158923 | KSCTWPETHTLWGDAV                   | 2.69 | 0.01 | 3.22 | 0.68 | 0.22 | 0.28 |
| 38414 | 0 | 158924 | KSCTWPETHTLWGDGI                   | 2.71 | 0.01 | 3.05 | 0.68 | 0.22 | 0.28 |
| 38415 | 0 | 158924 | KSCTWPETHTLWGDGI                   | 2.71 | 0.01 | 3.04 | 0.68 | 0.22 | 0.85 |
| 38416 | 0 | 158924 | KSCTWPETHTLWGDGI                   | 2.71 | 0.01 | 3.04 | 0.68 | 0.22 | 0.85 |
| 38417 | 0 | 158925 | KSCTWPETHTLWGDGV                   | 2.71 | 0.01 | 3.36 | 0.68 | 0.22 | 0.28 |
| 38418 | 0 | 121507 | KSDEES                             | 1.90 | 0.01 | 2.26 | 1.20 | 0.22 | 0.28 |
| 38419 | 0 | 121507 | KSDEES                             | 1.90 | 0.01 | 2.26 | 1.20 | 0.22 | 0.28 |
| 38420 | 0 | 121507 | KSDEES                             | 1.90 | 0.01 | 2.26 | 1.20 | 0.22 | 0.28 |
| 38421 | 0 | 121507 | KSDEES                             | 1.90 | 0.01 | 2.26 | 1.20 | 0.22 | 0.28 |
| 38422 | 0 | 121507 | KSDEES                             | 1.90 | 0.01 | 2.26 | 1.20 | 0.22 | 0.28 |
| 38423 | 0 | 121507 | KSDEES                             | 1.90 | 0.01 | 2.26 | 1.20 | 0.22 | 0.28 |
| 38424 | 0 | 108507 | KSDKARYDREMKNYV                    | 2.69 | 0.01 | 0.78 | 0.44 | 1.13 | 1.27 |
| 38425 | 0 | 33294  | KSDNNVT                            | 2.01 | 0.01 | 0.90 | 0.44 | 1.23 | 0.28 |
| 38426 | 0 | 33294  | KSDNNVT                            | 2.01 | 0.01 | 0.90 | 0.44 | 1.23 | 1.27 |
| 38427 | 0 | 77932  | KSDNQIKAVPASQAL                    | 2.69 | 0.01 | 2.86 | 3.06 | 0.22 | 0.28 |
| 38428 | 0 | 77932  | KSDNQIKAVPASQAL                    | 2.69 | 0.01 | 2.86 | 3.06 | 0.22 | 0.28 |
| 38429 | 0 | 77932  | KSDNQIKAVPASQAL                    | 2.69 | 0.01 | 2.86 | 3.06 | 0.22 | 0.28 |
| 38430 | 0 | 77934  | KSDYDSPTQTFAL                      | 2.54 | 0.01 | 0.90 | 1.15 | 0.22 | 1.39 |
| 38431 | 0 | 84698  | KSDYLGVNKIAE                       | 2.44 | 0.01 | 2.87 | 0.44 | 0.85 | 0.28 |
| 38432 | 0 | 181993 | KSEQDIKKEAHS AEISREY<br>TRDPKSK    | 3.22 | 0.01 | 3.89 | 2.13 | 1.74 | 0.28 |
| 38433 | 0 | 123393 | KSERFIKWP                          | 2.22 | 0.01 | 2.28 | 2.00 | 0.22 | 0.28 |
| 38434 | 0 | 33305  | KSFEIDKGIYQTSNFRVV                 | 2.81 | 0.01 | 2.45 | 1.81 | 0.22 | 1.34 |
| 38435 | 0 | 190672 | KSFKDILPKLSENPWQG<br>NASSDNGATLTIN | 3.34 | 0.01 | 2.75 | 2.13 | 0.22 | 0.28 |
| 38436 | 0 | 79592  | KSFNSPH                            | 2.02 | 0.01 | 0.90 | 1.12 | 0.22 | 1.39 |
| 38437 | 0 | 33319  | KSGATFQVEV                         | 2.29 | 0.01 | 2.66 | 0.68 | 0.22 | 0.28 |
| 38438 | 0 | 33319  | KSGATFQVEV                         | 2.29 | 0.01 | 2.66 | 0.68 | 0.22 | 0.28 |
| 38439 | 0 | 33319  | KSGATFQVEV                         | 2.29 | 0.01 | 2.66 | 0.68 | 0.22 | 0.28 |
| 38440 | 0 | 33319  | KSGATFQVEV                         | 2.29 | 0.01 | 2.66 | 0.68 | 0.22 | 0.28 |
| 38441 | 0 | 33319  | KSGATFQVEV                         | 2.29 | 0.01 | 2.66 | 0.68 | 0.22 | 0.28 |
| 38442 | 0 | 179097 | KSGGGSNVFDMFTQR                    | 2.64 | 0.01 | 2.36 | 0.44 | 1.23 | 1.28 |
| 38443 | 0 | 179097 | KSGGGSNVFDMFTQR                    | 2.64 | 0.01 | 2.36 | 0.44 | 1.23 | 1.27 |
| 38444 | 0 | 179097 | KSGGGSNVFDMFTQR                    | 2.64 | 0.01 | 2.36 | 0.44 | 1.23 | 1.28 |
| 38445 | 0 | 115831 | KSGHRTQDENP                        | 2.34 | 0.01 | 0.78 | 2.00 | 0.22 | 1.57 |
| 38446 | 0 | 115831 | KSGHRTQDENP                        | 2.34 | 0.01 | 0.78 | 1.20 | 0.22 | 1.57 |
| 38447 | 0 | 115831 | KSGHRTQDENP                        | 2.34 | 0.01 | 0.78 | 2.00 | 0.22 | 1.57 |

|       |   |        |                                                |      |      |      |      |      |      |
|-------|---|--------|------------------------------------------------|------|------|------|------|------|------|
| 38448 | 0 | 115831 | KSGHRTQDENP                                    | 2.34 | 0.01 | 0.78 | 2.00 | 0.22 | 1.57 |
| 38449 | 0 | 115831 | KSGHRTQDENP                                    | 2.34 | 0.01 | 0.78 | 1.20 | 0.22 | 1.57 |
| 38450 | 0 | 115831 | KSGHRTQDENP                                    | 2.34 | 0.01 | 0.78 | 2.00 | 0.22 | 1.57 |
| 38451 | 0 | 115831 | KSGHRTQDENP                                    | 2.34 | 0.01 | 0.78 | 2.00 | 0.22 | 1.57 |
| 38452 | 0 | 115831 | KSGHRTQDENP                                    | 2.34 | 0.01 | 0.78 | 1.20 | 0.22 | 1.57 |
| 38453 | 0 | 115831 | KSGHRTQDENP                                    | 2.34 | 0.01 | 0.78 | 2.00 | 0.22 | 1.57 |
| 38454 | 0 | 115831 | KSGHRTQDENP                                    | 2.34 | 0.01 | 0.78 | 1.20 | 0.22 | 1.57 |
| 38455 | 0 | 115831 | KSGHRTQDENP                                    | 2.34 | 0.01 | 0.78 | 2.00 | 0.22 | 1.57 |
| 38456 | 0 | 227312 | KSGKKGNSADLTSPE                                | 2.68 | 0.01 | 2.97 | 0.44 | 1.59 | 0.28 |
| 38457 | 0 | 227312 | KSGKKGNSADLTSPE                                | 2.68 | 0.01 | 2.97 | 0.44 | 0.85 | 0.28 |
| 38458 | 0 | 33326  | KSGNFKHLREFVFKNKD<br>GFLYVYKGYQPIDV            | 3.37 | 0.01 | 2.45 | 1.15 | 0.22 | 0.28 |
| 38459 | 0 | 33326  | KSGNFKHLREFVFKNKD<br>GFLYVYKGYQPIDV            | 3.37 | 0.01 | 2.45 | 2.37 | 0.22 | 0.28 |
| 38460 | 0 | 33326  | KSGNFKHLREFVFKNKD<br>GFLYVYKGYQPIDV            | 3.37 | 0.01 | 2.45 | 1.12 | 0.22 | 0.28 |
| 38461 | 0 | 108508 | KSGPIDIIG                                      | 2.24 | 0.01 | 0.90 | 0.44 | 1.13 | 1.39 |
| 38462 | 0 | 33328  | KSGRC                                          | 1.74 | 0.01 | 3.72 | 1.15 | 0.22 | 0.28 |
| 38463 | 0 | 33331  | KSGSSSDN                                       | 2.14 | 0.01 | 3.45 | 0.44 | 0.85 | 0.28 |
| 38464 | 0 | 33332  | KSGTGPQPGSAGMGGA<br>KTPSDAVQNILQKIEKIK<br>NTEE | 3.58 | 0.01 | 2.76 | 0.44 | 0.85 | 0.85 |
| 38465 | 0 | 33332  | KSGTGPQPGSAGMGGA<br>KTPSDAVQNILQKIEKIK<br>NTEE | 3.58 | 0.01 | 2.76 | 0.44 | 1.59 | 0.85 |
| 38466 | 0 | 33332  | KSGTGPQPGSAGMGGA<br>KTPSDAVQNILQKIEKIK<br>NTEE | 3.58 | 0.01 | 2.76 | 0.44 | 1.59 | 0.28 |
| 38467 | 0 | 33332  | KSGTGPQPGSAGMGGA<br>KTPSDAVQNILQKIEKIK<br>NTEE | 3.58 | 0.01 | 2.76 | 0.44 | 1.59 | 0.28 |
| 38468 | 0 | 33333  | KSGTGPQPGSAGMGGA<br>KTPSDAVQNISQKIEKIK<br>NTEE | 3.59 | 0.01 | 2.76 | 0.44 | 1.59 | 0.85 |
| 38469 | 0 | 33333  | KSGTGPQPGSAGMGGA<br>KTPSDAVQNISQKIEKIK<br>NTEE | 3.59 | 0.01 | 2.76 | 0.44 | 0.85 | 0.85 |
| 38470 | 0 | 96503  | KSGTIFDNFL                                     | 2.29 | 0.01 | 0.78 | 0.44 | 1.93 | 0.85 |
| 38471 | 0 | 96503  | KSGTIFDNFL                                     | 2.29 | 0.01 | 0.78 | 0.44 | 1.93 | 0.28 |
| 38472 | 0 | 96503  | KSGTIFDNFL                                     | 2.29 | 0.01 | 0.78 | 0.44 | 1.13 | 0.28 |
| 38473 | 0 | 96503  | KSGTIFDNFL                                     | 2.29 | 0.01 | 0.78 | 0.44 | 1.93 | 0.28 |
| 38474 | 0 | 96503  | KSGTIFDNFL                                     | 2.29 | 0.01 | 0.78 | 0.44 | 1.23 | 0.28 |
| 38475 | 0 | 33337  | KSHDYSEKPS                                     | 2.34 | 0.01 | 4.63 | 0.68 | 0.22 | 0.85 |
| 38476 | 0 | 33337  | KSHDYSEKPS                                     | 2.34 | 0.01 | 4.63 | 0.68 | 0.22 | 0.85 |
| 38477 | 0 | 171929 | KSHGKDKENRGINTL                                | 2.67 | 0.01 | 0.78 | 0.44 | 1.13 | 0.28 |
| 38478 | 0 | 114132 | KSHGRTQDENPVVHF                                | 2.61 | 0.01 | 0.78 | 0.68 | 0.22 | 0.85 |
| 38479 | 0 | 114132 | KSHGRTQDENPVVHF                                | 2.61 | 0.01 | 0.78 | 0.68 | 0.22 | 0.85 |

|       |   |        |                                                                                                                                                                                                                                                                                                                                   |      |      |      |      |      |      |
|-------|---|--------|-----------------------------------------------------------------------------------------------------------------------------------------------------------------------------------------------------------------------------------------------------------------------------------------------------------------------------------|------|------|------|------|------|------|
| 38480 | 0 | 114132 | KSHGRTQDENPVVHF                                                                                                                                                                                                                                                                                                                   | 2.61 | 0.01 | 0.78 | 0.68 | 0.22 | 1.48 |
| 38481 | 0 | 113586 | KSHGRTQDENPVVHFFK<br>NIVT                                                                                                                                                                                                                                                                                                         | 2.96 | 0.01 | 0.78 | 0.44 | 1.13 | 1.57 |
| 38482 | 0 | 115075 | KSHGRTQDENPVVHFFK<br>NIVTPRT                                                                                                                                                                                                                                                                                                      | 3.10 | 0.01 | 0.78 | 0.44 | 1.13 | 0.28 |
| 38483 | 0 | 115075 | KSHGRTQDENPVVHFFK<br>NIVTPRT                                                                                                                                                                                                                                                                                                      | 3.10 | 0.01 | 0.78 | 0.44 | 1.41 | 0.28 |
| 38484 | 0 | 158926 | KSHHNKRTGYHTQTKG                                                                                                                                                                                                                                                                                                                  | 2.77 | 0.01 | 3.93 | 0.68 | 0.22 | 0.28 |
|       |   |        | KSICIEINNNGELFFVASEN<br>SYNDDNINTPKEIDDTV<br>SNNNYENDLDQVILNFN<br>SESAPGLSDEKLNLTIQN<br>DAYIPKYDSNGTSDIEQH<br>DVNELNVFFYLDAQKVP<br>EGENNVNLTSSIDTALLE<br>QPKIYFFSSEFINNVNK<br>PVQAALFVSWIQQVLV<br>DFTTEANQKSTVDKIADI<br>SIVVPYIGLALNIGNEAQ<br>KGNFKDALELLGAGILLE<br>FEPELLIPTILVFTIKSFLGS                                         |      |      |      |      |      |      |
| 38485 | 0 | 33341  | SDNKNKVIKAINNALKE<br>DEKWKEVYSFIVSNWM<br>TKINTQFNKRKEQMYQ<br>ALQNQVNAIKTIIESKYN<br>SYTLEEKNELTNKYDIKQI<br>ENELNQKVSIAMNNIDR<br>FLTESSISYLMKIINEVKIN<br>KLREYDENVKTYLLNYIIQ<br>HGSILGESQQELNSMVT<br>DTLNNSIPFKLSSYTDDKI<br>LISYFNKFFKRIKSSSVLN<br>MRYKNDKYVDTSGYDS<br>NININGDVYKYPTNKNQ<br>FGIYNDKLSEVNISQNDY<br>HYNKXKXNFCISFMAVR | 6.20 | 0.01 | 3.81 | 0.68 | 0.22 | 0.85 |

|       |   |       |                       |      |      |      |      |      |      |
|-------|---|-------|-----------------------|------|------|------|------|------|------|
|       |   |       | KSICIEINNGELFFVASEN   |      |      |      |      |      |      |
|       |   |       | SYNDDNINTPKEIDDTVT    |      |      |      |      |      |      |
|       |   |       | SNNNYENDLDQVILNFN     |      |      |      |      |      |      |
|       |   |       | SESAPGLSDEKLNLTIQN    |      |      |      |      |      |      |
|       |   |       | DAYIPKYDSNGTSDIEQH    |      |      |      |      |      |      |
|       |   |       | DVNELNVFFYLDAQKVP     |      |      |      |      |      |      |
|       |   |       | EGENNVNLTSSIDTALLE    |      |      |      |      |      |      |
|       |   |       | QPKIYFFSSEFINNVNK     |      |      |      |      |      |      |
|       |   |       | PVQAALFVSWIQQVLV      |      |      |      |      |      |      |
|       |   |       | DFTTEANQKSTVDKIADI    |      |      |      |      |      |      |
|       |   |       | SIVVPYIGLALNIGNEAQ    |      |      |      |      |      |      |
|       |   |       | KGNFKDALELLGAGILLE    |      |      |      |      |      |      |
|       |   |       | FEPELLIPTILVFTIKSFLGS |      |      |      |      |      |      |
| 38486 | 0 | 33341 | SDNKNKVIKAINNALKER    | 6.20 | 0.01 | 3.81 | 0.68 | 0.22 | 1.34 |
|       |   |       | DEKWKEVYSFIVSNWM      |      |      |      |      |      |      |
|       |   |       | TKINTQFNKRKEQMYQ      |      |      |      |      |      |      |
|       |   |       | ALQNQVNAIKTIIESKYN    |      |      |      |      |      |      |
|       |   |       | SYTLEEKNELTNKYDIKQI   |      |      |      |      |      |      |
|       |   |       | ENELNQKVSIAMNNIDR     |      |      |      |      |      |      |
|       |   |       | FLTESSISYLMKIINEVKIN  |      |      |      |      |      |      |
|       |   |       | KLREYDENVKTYLLNYIIQ   |      |      |      |      |      |      |
|       |   |       | HGSILGESQQELNSMVT     |      |      |      |      |      |      |
|       |   |       | DTLNNSIPFKLSSYTDDKI   |      |      |      |      |      |      |
|       |   |       | LISYFNKFFKRIKSSSVLN   |      |      |      |      |      |      |
|       |   |       | MRYKNDKYVDTSGYDS      |      |      |      |      |      |      |
|       |   |       | NININGDVYKYPTNKNQ     |      |      |      |      |      |      |
|       |   |       | FGIYNDKLSEVNISQNDY    |      |      |      |      |      |      |
|       |   |       | UNDAKQKNEGICELAND     |      |      |      |      |      |      |

|       |   |       |                       |      |      |      |      |      |      |
|-------|---|-------|-----------------------|------|------|------|------|------|------|
|       |   |       | KSICIEINNGELFFVASEN   |      |      |      |      |      |      |
|       |   |       | SYNDDNINTPKEIDDTVT    |      |      |      |      |      |      |
|       |   |       | SNNNYENDLDQVILNFN     |      |      |      |      |      |      |
|       |   |       | SESAPGLSDEKLNLTIQN    |      |      |      |      |      |      |
|       |   |       | DAYIPKYDSNGTSDIEQH    |      |      |      |      |      |      |
|       |   |       | DVNELNVFFYLDAQKVP     |      |      |      |      |      |      |
|       |   |       | EGENNVNLTSSIDTALLE    |      |      |      |      |      |      |
|       |   |       | QPKIYFFSSEFINNVNK     |      |      |      |      |      |      |
|       |   |       | PVQAALFVSWIQQVLV      |      |      |      |      |      |      |
|       |   |       | DFTTEANQKSTVDKIADI    |      |      |      |      |      |      |
|       |   |       | SIVVPYIGLALNIGNEAQ    |      |      |      |      |      |      |
|       |   |       | KGNFKDALELLGAGILLE    |      |      |      |      |      |      |
|       |   |       | FEPELLIPTILVFTIKSFLGS |      |      |      |      |      |      |
| 38487 | 0 | 33341 | SDNKNKVIKAINNALKER    | 6.20 | 0.01 | 3.81 | 0.68 | 0.22 | 0.28 |
|       |   |       | DEKWKEVYSFIVSNWM      |      |      |      |      |      |      |
|       |   |       | TKINTQFNKRKEQMYQ      |      |      |      |      |      |      |
|       |   |       | ALQNQVNAIKTIIESKYN    |      |      |      |      |      |      |
|       |   |       | SYTLEEKNELTNKYDIKQI   |      |      |      |      |      |      |
|       |   |       | ENELNQKVSIAMNNIDR     |      |      |      |      |      |      |
|       |   |       | FLTESSISYLMKIINEVKIN  |      |      |      |      |      |      |
|       |   |       | KLREYDENVKTYLLNYIIQ   |      |      |      |      |      |      |
|       |   |       | HGSILGESQQELNSMVT     |      |      |      |      |      |      |
|       |   |       | DTLNNSIPFKLSSYTDDKI   |      |      |      |      |      |      |
|       |   |       | LISYFNKFFKRIKSSSVLN   |      |      |      |      |      |      |
|       |   |       | MRYKNDKYVDTSGYDS      |      |      |      |      |      |      |
|       |   |       | NININGDVYKYPTNKNQ     |      |      |      |      |      |      |
|       |   |       | FGIYNDKLSEVNISQNDY    |      |      |      |      |      |      |
|       |   |       | UNDAKQKNEGICELAND     |      |      |      |      |      |      |

|       |   |       |                       |      |      |      |      |      |      |
|-------|---|-------|-----------------------|------|------|------|------|------|------|
|       |   |       | KSICIEINNGELFFVASEN   |      |      |      |      |      |      |
|       |   |       | SYNDDNINTPKEIDDTVT    |      |      |      |      |      |      |
|       |   |       | SNNNYENDLDQVILNFN     |      |      |      |      |      |      |
|       |   |       | SESAPGLSDEKLNLTIQN    |      |      |      |      |      |      |
|       |   |       | DAYIPKYDSNGTSDIEQH    |      |      |      |      |      |      |
|       |   |       | DVNELNVFFYLDAQKVP     |      |      |      |      |      |      |
|       |   |       | EGENNVNLTSSIDTALLE    |      |      |      |      |      |      |
|       |   |       | QPKIYFFSSEFINNVNK     |      |      |      |      |      |      |
|       |   |       | PVQAALFVSWIQQVLV      |      |      |      |      |      |      |
|       |   |       | DFTTEANQKSTVDKIADI    |      |      |      |      |      |      |
|       |   |       | SIVVPYIGLALNIGNEAQ    |      |      |      |      |      |      |
|       |   |       | KGNFKDALELLGAGILLE    |      |      |      |      |      |      |
|       |   |       | FEPELLIPTILVFTIKSFLGS |      |      |      |      |      |      |
| 38488 | 0 | 33341 | SDNKNKVIKAINNALKER    | 6.20 | 0.01 | 3.81 | 0.68 | 0.22 | 0.28 |
|       |   |       | DEKWKEVYSFIVSNWM      |      |      |      |      |      |      |
|       |   |       | TKINTQFNKRKEQMYQ      |      |      |      |      |      |      |
|       |   |       | ALQNQVNAIKTIIESKYN    |      |      |      |      |      |      |
|       |   |       | SYTLEEKNELTNKYDIKQI   |      |      |      |      |      |      |
|       |   |       | ENELNQKVSIAMNNIDR     |      |      |      |      |      |      |
|       |   |       | FLTESSISYLMKIINEVKIN  |      |      |      |      |      |      |
|       |   |       | KLREYDENVKTYLLNYIIQ   |      |      |      |      |      |      |
|       |   |       | HGSILGESQQELNSMVT     |      |      |      |      |      |      |
|       |   |       | DTLNNSIPFKLSSYTDDKI   |      |      |      |      |      |      |
|       |   |       | LISYFNKFFKRIKSSSVLN   |      |      |      |      |      |      |
|       |   |       | MRYKNDKYVDTSGYDS      |      |      |      |      |      |      |
|       |   |       | NININGDVYKYPTNKNQ     |      |      |      |      |      |      |
|       |   |       | FGIYNDKLSEVNISQNDY    |      |      |      |      |      |      |
|       |   |       | UNDAKQKNEGICELAND     |      |      |      |      |      |      |

|       |   |        |                       |      |      |      |      |      |      |
|-------|---|--------|-----------------------|------|------|------|------|------|------|
|       |   |        | KSICIEINNGELFFVASEN   |      |      |      |      |      |      |
|       |   |        | SYNDDNINTPKEIDDTVT    |      |      |      |      |      |      |
|       |   |        | SNNNYENDLDQVILNFN     |      |      |      |      |      |      |
|       |   |        | SESAPGLSDEKLNLTIQN    |      |      |      |      |      |      |
|       |   |        | DAYIPKYDSNGTSDIEQH    |      |      |      |      |      |      |
|       |   |        | DVNELNVFFYLDAQKVP     |      |      |      |      |      |      |
|       |   |        | EGENNVNLTSSIDTALLE    |      |      |      |      |      |      |
|       |   |        | QPKIYFFSSEFINNVNK     |      |      |      |      |      |      |
|       |   |        | PVQAALFVSWIQQVLV      |      |      |      |      |      |      |
|       |   |        | DFTTEANQKSTVDKIADI    |      |      |      |      |      |      |
|       |   |        | SIVVPYIGLALNIGNEAQ    |      |      |      |      |      |      |
|       |   |        | KGNFKDALELLGAGILLE    |      |      |      |      |      |      |
|       |   |        | FEPELLIPTILVFTIKSFLGS |      |      |      |      |      |      |
| 38489 | 0 | 101815 | SDNKNKVIKAINNALKER    | 6.71 | 0.01 | 3.85 | 0.68 | 0.22 | 0.28 |
|       |   |        | DEKWKEVYSFIVSNWM      |      |      |      |      |      |      |
|       |   |        | TKINTQFNKRKEQMYQ      |      |      |      |      |      |      |
|       |   |        | ALQNQVNAIKTIIESKYN    |      |      |      |      |      |      |
|       |   |        | SYTLEEKNELTNKYDIKQI   |      |      |      |      |      |      |
|       |   |        | ENELNQKVSAMNNIDR      |      |      |      |      |      |      |
|       |   |        | FLTESSISYLMKIINEVKIN  |      |      |      |      |      |      |
|       |   |        | KLREYDENVKTYLLNYIIQ   |      |      |      |      |      |      |
|       |   |        | HGSILGESQQELNSMVT     |      |      |      |      |      |      |
|       |   |        | DTLNNSIPFKLSSYTDDKI   |      |      |      |      |      |      |
|       |   |        | LISYFNKFFKRIKSSSVLN   |      |      |      |      |      |      |
|       |   |        | MRYKNDKYVDTSGYDS      |      |      |      |      |      |      |
|       |   |        | NININGDVYKYPTNKNQ     |      |      |      |      |      |      |
|       |   |        | FGIYNDKLSEVNISQNDY    |      |      |      |      |      |      |
|       |   |        | UNDAKQKNEGICELANDIS   |      |      |      |      |      |      |

|       |   |        |                       |      |      |      |      |      |      |
|-------|---|--------|-----------------------|------|------|------|------|------|------|
|       |   |        | KSICIEINNGELFFVASEN   |      |      |      |      |      |      |
|       |   |        | SYNDDNINTPKEIDDTVT    |      |      |      |      |      |      |
|       |   |        | SNNNYENDLDQVILNFN     |      |      |      |      |      |      |
|       |   |        | SESAPGLSDEKLNLTIQN    |      |      |      |      |      |      |
|       |   |        | DAYIPKYDSNGTSDIEQH    |      |      |      |      |      |      |
|       |   |        | DVNELNVFFYLDAQKVP     |      |      |      |      |      |      |
|       |   |        | EGENNVNLTSSIDTALLE    |      |      |      |      |      |      |
|       |   |        | QPKIYFFSSEFINNVNK     |      |      |      |      |      |      |
|       |   |        | PVQAALFVSWIQQVLV      |      |      |      |      |      |      |
|       |   |        | DFTTEANQKSTVDKIADI    |      |      |      |      |      |      |
|       |   |        | SIVVPYIGLALNIGNEAQ    |      |      |      |      |      |      |
|       |   |        | KGNFKDALELLGAGILLE    |      |      |      |      |      |      |
|       |   |        | FEPELLIPTILVFTIKSFLGS |      |      |      |      |      |      |
| 38490 | 0 | 101815 | SDNKNKVIKAINNALKER    | 6.71 | 0.01 | 3.85 | 0.68 | 0.22 | 1.34 |
|       |   |        | DEKWKEVYSFIVSNWM      |      |      |      |      |      |      |
|       |   |        | TKINTQFNKRKEQMYQ      |      |      |      |      |      |      |
|       |   |        | ALQNQVNAIKTIIESKYN    |      |      |      |      |      |      |
|       |   |        | SYTLEEKNELTNKYDIKQI   |      |      |      |      |      |      |
|       |   |        | ENELNQKVSIAMNNIDR     |      |      |      |      |      |      |
|       |   |        | FLTESSISYLMKIINEVKIN  |      |      |      |      |      |      |
|       |   |        | KLREYDENVKTYLLNYIIQ   |      |      |      |      |      |      |
|       |   |        | HGSILGESQQELNSMVT     |      |      |      |      |      |      |
|       |   |        | DTLNNSIPFKLSSYTDDKI   |      |      |      |      |      |      |
|       |   |        | LISYFNKFFKRIKSSSVLN   |      |      |      |      |      |      |
|       |   |        | MRYKNDKYVDTSGYDS      |      |      |      |      |      |      |
|       |   |        | NININGDVYKYPTNKNQ     |      |      |      |      |      |      |
|       |   |        | FGIYNDKLSEVNISQNDY    |      |      |      |      |      |      |
|       |   |        | UNDAIKVINEFCIGFIAVND  |      |      |      |      |      |      |
| 38491 | 0 | 146401 | KSIHLGPGRAFYA         | 2.51 | 0.01 | 2.54 | 0.44 | 0.85 | 2.49 |
| 38492 | 0 | 520438 | KSISDVVNRLVAINR       | 2.70 | 0.01 | 2.24 | 0.44 | 1.41 | 1.28 |
| 38493 | 0 | 116761 | KSITDELDQTFSELS       | 2.70 | 0.01 | 2.36 | 0.44 | 1.23 | 1.28 |
| 38494 | 0 | 116761 | KSITDELDQTFSELS       | 2.70 | 0.01 | 2.36 | 0.44 | 1.23 | 1.27 |
| 38495 | 0 | 116761 | KSITDELDQTFSELS       | 2.70 | 0.01 | 2.36 | 0.44 | 1.23 | 1.28 |
| 38496 | 0 | 150865 | KSITIGPGRA            | 2.31 | 0.01 | 3.85 | 0.44 | 0.85 | 1.66 |
| 38497 | 0 | 150865 | KSITIGPGRA            | 2.31 | 0.01 | 3.85 | 0.44 | 0.85 | 1.66 |
| 38498 | 0 | 150865 | KSITIGPGRA            | 2.31 | 0.01 | 3.85 | 0.44 | 0.85 | 1.66 |
| 38499 | 0 | 150865 | KSITIGPGRA            | 2.31 | 0.01 | 3.85 | 0.44 | 0.85 | 1.66 |
| 38500 | 0 | 33358  | KSIVAYTMSLGADSSIA     | 2.79 | 0.01 | 2.48 | 0.44 | 0.85 | 0.28 |
| 38501 | 0 | 165622 | KSIYHQW               | 1.99 | 0.01 | 0.90 | 0.44 | 1.23 | 1.39 |
| 38502 | 0 | 165622 | KSIYHQW               | 1.99 | 0.01 | 0.90 | 0.44 | 1.23 | 1.39 |
| 38503 | 0 | 33364  | KSKDLQSAP             | 2.24 | 0.01 | 0.90 | 0.44 | 0.85 | 0.28 |
| 38504 | 0 | 33364  | KSKDLQSAP             | 2.24 | 0.01 | 0.90 | 0.44 | 0.85 | 0.28 |
| 38505 | 0 | 33364  | KSKDLQSAP             | 2.24 | 0.01 | 0.90 | 0.44 | 0.85 | 0.28 |
| 38506 | 0 | 33364  | KSKDLQSAP             | 2.24 | 0.01 | 0.90 | 0.44 | 0.85 | 1.39 |
| 38507 | 0 | 33365  | KSKFGYGAKDVRNL        | 2.60 | 0.01 | 1.96 | 0.44 | 0.85 | 0.28 |
| 38508 | 0 | 33365  | KSKFGYGAKDVRNL        | 2.60 | 0.01 | 1.96 | 0.44 | 0.85 | 0.28 |
| 38509 | 0 | 33365  | KSKFGYGAKDVRNL        | 2.60 | 0.01 | 1.96 | 0.44 | 0.85 | 0.28 |



|       |   |        |                                     |      |      |      |      |      |      |
|-------|---|--------|-------------------------------------|------|------|------|------|------|------|
| 38510 | 0 | 33365  | KSKFGYGAKDVRNL                      | 2.60 | 0.01 | 1.96 | 0.44 | 1.41 | 0.28 |
| 38511 | 0 | 33366  | KSKFGYSAKDVRSL                      | 2.62 | 0.01 | 2.41 | 0.44 | 0.85 | 0.28 |
| 38512 | 0 | 33366  | KSKFGYSAKDVRSL                      | 2.62 | 0.01 | 2.41 | 0.44 | 0.85 | 0.28 |
| 38513 | 0 | 33366  | KSKFGYSAKDVRSL                      | 2.62 | 0.01 | 2.41 | 0.44 | 0.85 | 0.28 |
| 38514 | 0 | 156349 | KSKGRGFNWANFDSVK<br>KKCYIFNTKPTCLIN | 3.35 | 0.01 | 3.44 | 0.44 | 0.85 | 0.28 |
| 38515 | 0 | 156349 | KSKGRGFNWANFDSVK<br>KKCYIFNTKPTCLIN | 3.35 | 0.01 | 3.44 | 0.44 | 1.59 | 0.28 |
| 38516 | 0 | 187070 | KSKHNRREGY                          | 2.31 | 0.01 | 3.53 | 0.68 | 0.22 | 0.28 |
| 38517 | 0 | 187070 | KSKHNRREGY                          | 2.31 | 0.01 | 3.53 | 0.68 | 0.22 | 0.85 |
| 38518 | 0 | 187070 | KSKHNRREGY                          | 2.31 | 0.01 | 3.53 | 0.68 | 0.22 | 0.28 |
| 38519 | 0 | 187070 | KSKHNRREGY                          | 2.31 | 0.01 | 3.53 | 0.68 | 0.22 | 0.28 |
| 38520 | 0 | 33378  | KSKKNP                              | 1.92 | 0.01 | 1.96 | 0.44 | 0.85 | 0.28 |
| 38521 | 0 | 120719 | KSKKREAVAGRGRGR                     | 2.73 | 0.01 | 0.78 | 3.01 | 0.22 | 0.28 |
| 38522 | 0 | 33380  | KSKKSS                              | 1.88 | 0.01 | 3.72 | 1.15 | 0.22 | 0.28 |
| 38523 | 0 | 79006  | KSKPYX                              | 1.91 | 0.01 | 0.90 | 0.68 | 0.22 | 1.39 |
| 38524 | 0 | 33393  | KSKRGHLLL                           | 2.23 | 0.01 | 0.90 | 2.02 | 0.22 | 0.28 |
| 38525 | 0 | 171931 | KSKVSSQFDPNKQTP                     | 2.70 | 0.01 | 0.78 | 0.44 | 1.13 | 0.28 |
| 38526 | 0 | 462377 | KSLDTQP                             | 1.99 | 0.01 | 0.78 | 1.12 | 0.22 | 1.28 |
| 38527 | 0 | 33414  | KSLKNINRP                           | 2.24 | 0.01 | 0.90 | 0.44 | 0.85 | 0.28 |
| 38528 | 0 | 33414  | KSLKNINRP                           | 2.24 | 0.01 | 0.90 | 0.44 | 0.85 | 0.28 |
| 38529 | 0 | 33414  | KSLKNINRP                           | 2.24 | 0.01 | 0.90 | 0.44 | 0.85 | 0.28 |
| 38530 | 0 | 33414  | KSLKNINRP                           | 2.24 | 0.01 | 0.90 | 0.44 | 0.85 | 1.39 |
| 38531 | 0 | 91600  | KSLNAGLAPETTQATLI                   | 2.79 | 0.01 | 3.12 | 1.12 | 0.22 | 0.28 |
| 38532 | 0 | 450764 | KSLNSTI                             | 2.02 | 0.01 | 0.90 | 0.44 | 1.41 | 1.39 |
| 38533 | 0 | 151673 | KSLQDIIAILGMDELSEE<br>DKLTVSRA      | 3.20 | 4.93 | 1.75 | 2.46 | 0.22 | 0.85 |
| 38534 | 0 | 151674 | KSLQDIIAILGMDELSEE<br>DKLTVSRA      | 3.20 | 4.93 | 1.75 | 2.25 | 0.22 | 0.85 |
| 38535 | 0 | 107949 | KSLSLSP                             | 2.04 | 0.01 | 0.78 | 1.20 | 0.22 | 0.28 |
| 38536 | 0 | 107949 | KSLSLSP                             | 2.04 | 0.01 | 0.78 | 1.15 | 0.22 | 0.28 |
| 38537 | 0 | 107949 | KSLSLSP                             | 2.04 | 0.01 | 0.78 | 1.20 | 0.22 | 1.27 |
| 38538 | 0 | 107949 | KSLSLSP                             | 2.04 | 0.01 | 0.78 | 0.44 | 1.13 | 1.27 |
| 38539 | 0 | 100992 | KLSLRHDIHHH                         | 2.48 | 0.01 | 0.90 | 0.68 | 0.22 | 1.39 |
| 38540 | 0 | 100992 | KLSLRHDIHHH                         | 2.48 | 0.01 | 0.90 | 0.68 | 0.22 | 1.27 |
| 38541 | 0 | 100992 | KLSLRHDIHHH                         | 2.48 | 0.01 | 0.90 | 2.00 | 0.22 | 1.39 |
| 38542 | 0 | 100992 | KLSLRHDIHHH                         | 2.48 | 0.01 | 0.90 | 2.00 | 0.22 | 0.85 |
| 38543 | 0 | 100992 | KLSLRHDIHHH                         | 2.48 | 0.01 | 0.90 | 2.00 | 0.22 | 2.35 |
| 38544 | 0 | 100992 | KLSLRHDIHHH                         | 2.48 | 0.01 | 0.90 | 2.00 | 0.22 | 0.85 |
| 38545 | 0 | 100992 | KLSLRHDIHHH                         | 2.48 | 0.01 | 0.90 | 2.00 | 0.22 | 0.85 |
| 38546 | 0 | 100992 | KLSLRHDIHHH                         | 2.48 | 0.01 | 0.90 | 2.00 | 0.22 | 0.85 |
| 38547 | 0 | 100992 | KLSLRHDIHHH                         | 2.48 | 0.01 | 0.90 | 2.00 | 0.22 | 0.85 |
| 38548 | 0 | 100992 | KLSLRHDIHHH                         | 2.48 | 0.01 | 0.90 | 2.00 | 0.22 | 0.85 |
| 38549 | 0 | 100992 | KLSLRHDIHHH                         | 2.48 | 0.01 | 0.90 | 2.00 | 0.22 | 1.48 |

|       |   |        |                                |      |      |      |      |      |      |
|-------|---|--------|--------------------------------|------|------|------|------|------|------|
| 38550 | 0 | 100992 | KSLSRHDHIIHHH                  | 2.48 | 0.01 | 0.90 | 0.68 | 0.22 | 0.28 |
| 38551 | 0 | 144712 | KSLSSTEFIPN                    | 2.38 | 0.01 | 2.48 | 0.44 | 0.85 | 0.28 |
| 38552 | 0 | 144712 | KSLSSTEFIPN                    | 2.38 | 0.01 | 2.48 | 0.68 | 0.22 | 0.28 |
| 38553 | 0 | 144712 | KSLSSTEFIPN                    | 2.38 | 0.01 | 2.48 | 0.68 | 0.22 | 1.48 |
| 38554 | 0 | 33424  | KSLSTLSY                       | 2.16 | 0.01 | 4.45 | 1.12 | 0.22 | 0.28 |
| 38555 | 0 | 156350 | KSLTALTNNKITAWK                | 2.65 | 0.01 | 2.83 | 4.15 | 0.22 | 0.28 |
| 38556 | 0 | 156350 | KSLTALTNNKITAWK                | 2.65 | 0.01 | 2.83 | 1.12 | 0.22 | 0.85 |
| 38557 | 0 | 156350 | KSLTALTNNKITAWK                | 2.65 | 0.01 | 2.83 | 1.12 | 0.22 | 0.85 |
| 38558 | 0 | 33425  | KSLTER                         | 1.88 | 0.01 | 1.96 | 0.44 | 0.85 | 0.28 |
| 38559 | 0 | 33436  | KSMDVRRRI                      | 2.11 | 0.01 | 2.40 | 2.43 | 0.22 | 0.28 |
| 38560 | 0 | 167771 | KSMDVRRRIE                     | 2.20 | 0.01 | 2.40 | 2.43 | 0.22 | 0.28 |
| 38561 | 0 | 136443 | KSMINAYLDKHPLMTVR<br>KIH       | 2.92 | 0.01 | 0.90 | 2.74 | 0.22 | 0.85 |
| 38562 | 0 | 33440  | KSMKVTVAFNQFG                  | 2.54 | 0.01 | 3.42 | 0.44 | 1.23 | 0.85 |
| 38563 | 0 | 33440  | KSMKVTVAFNQFG                  | 2.54 | 0.01 | 3.42 | 0.44 | 1.23 | 0.85 |
| 38564 | 0 | 33440  | KSMKVTVAFNQFG                  | 2.54 | 0.01 | 3.42 | 0.44 | 1.23 | 0.85 |
| 38565 | 0 | 33441  | KSMKVTVAFNQFGPN                | 2.67 | 0.01 | 3.24 | 1.15 | 2.26 | 0.28 |
| 38566 | 0 | 33448  | KSMRSANKP                      | 2.24 | 0.01 | 0.90 | 0.44 | 1.59 | 0.28 |
| 38567 | 0 | 33450  | KSNAATSYINAIINSKSVS<br>D       | 2.98 | 0.01 | 2.39 | 2.87 | 0.22 | 0.28 |
| 38568 | 0 | 33450  | KSNAATSYINAIINSKSVS<br>D       | 2.98 | 0.01 | 2.39 | 2.87 | 0.22 | 0.28 |
| 38569 | 0 | 33450  | KSNAATSYINAIINSKSVS<br>D       | 2.98 | 0.01 | 2.39 | 2.36 | 0.22 | 0.28 |
| 38570 | 0 | 33450  | KSNAATSYINAIINSKSVS<br>D       | 2.98 | 0.01 | 2.39 | 2.36 | 0.22 | 0.28 |
| 38571 | 0 | 33450  | KSNAATSYINAIINSKSVS<br>D       | 2.98 | 0.01 | 2.39 | 2.36 | 0.22 | 0.28 |
| 38572 | 0 | 33450  | KSNAATSYINAIINSKSVS<br>D       | 2.98 | 0.01 | 2.39 | 2.36 | 0.22 | 0.28 |
| 38573 | 0 | 33450  | KSNAATSYINAIINSKSVS<br>D       | 2.98 | 0.01 | 2.39 | 2.36 | 2.25 | 1.75 |
| 38574 | 0 | 33450  | KSNAATSYINAIINSKSVS<br>D       | 2.98 | 0.01 | 2.39 | 2.36 | 0.22 | 0.28 |
| 38575 | 0 | 33452  | KSNDLGSAPLQH                   | 2.45 | 0.01 | 0.90 | 0.44 | 1.23 | 0.28 |
| 38576 | 0 | 33460  | KSNHNNVYWLTIPPMK<br>NLALGVINTL | 3.19 | 0.01 | 2.72 | 1.12 | 0.22 | 0.28 |
| 38577 | 0 | 33460  | KSNHNNVYWLTIPPMK<br>NLALGVINTL | 3.19 | 0.01 | 2.72 | 1.12 | 0.22 | 0.28 |
| 38578 | 0 | 33460  | KSNHNNVYWLTIPPMK<br>NLALGVINTL | 3.19 | 0.01 | 2.72 | 1.12 | 0.22 | 0.28 |
| 38579 | 0 | 33460  | KSNHNNVYWLTIPPMK<br>NLALGVINTL | 3.19 | 0.01 | 2.72 | 1.12 | 0.22 | 0.28 |
| 38580 | 0 | 33460  | KSNHNNVYWLTIPPMK<br>NLALGVINTL | 3.19 | 0.01 | 2.72 | 1.12 | 0.22 | 0.28 |

|       |   |        |                                          |      |      |      |      |      |      |
|-------|---|--------|------------------------------------------|------|------|------|------|------|------|
| 38581 | 0 | 33460  | KSNHNNVYWLTIPPMK<br>NLALGVINTL           | 3.19 | 0.01 | 2.72 | 1.12 | 0.22 | 0.28 |
| 38582 | 0 | 33460  | KSNHNNVYWLTIPPMK<br>NLALGVINTL           | 3.19 | 0.01 | 2.72 | 1.12 | 0.22 | 0.28 |
| 38583 | 0 | 33460  | KSNHNNVYWLTIPPMK<br>NLALGVINTL           | 3.19 | 0.01 | 2.72 | 1.12 | 0.22 | 0.28 |
| 38584 | 0 | 175234 | KSNKESEDGKDYSMIM                         | 2.77 | 0.01 | 2.86 | 2.55 | 0.22 | 0.28 |
| 38585 | 0 | 175234 | KSNKESEDGKDYSMIM                         | 2.77 | 0.01 | 2.86 | 0.44 | 1.74 | 0.28 |
| 38586 | 0 | 177140 | KSNVPPTQDADTK                            | 2.55 | 0.01 | 2.22 | 2.69 | 0.22 | 0.28 |
| 38587 | 0 | 177140 | KSNVPPTQDADTK                            | 2.55 | 0.01 | 2.22 | 2.69 | 0.22 | 0.85 |
| 38588 | 0 | 105910 | KSP                                      | 1.37 | 0.01 | 4.93 | 1.15 | 0.22 | 0.85 |
| 38589 | 0 | 110645 | KSPAEAKSPAEAKSPAEA<br>KSPAEAKSPAEAKSPAEA | 3.60 | 3.63 | 2.19 | 2.36 | 0.22 | 0.28 |
| 38590 | 0 | 110645 | KSPAEAKSPAEAKSPAEA<br>KSPAEAKSPAEAKSPAEA | 3.60 | 3.63 | 2.19 | 2.36 | 0.22 | 0.28 |
| 38591 | 0 | 110645 | KSPAEAKSPAEAKSPAEA<br>KSPAEAKSPAEAKSPAEA | 3.60 | 3.63 | 2.19 | 0.68 | 0.22 | 0.28 |
| 38592 | 0 | 110645 | KSPAEAKSPAEAKSPAEA<br>KSPAEAKSPAEAKSPAEA | 3.60 | 3.63 | 2.19 | 0.68 | 0.22 | 0.28 |
| 38593 | 0 | 110645 | KSPAEAKSPAEAKSPAEA<br>KSPAEAKSPAEAKSPAEA | 3.60 | 3.63 | 2.19 | 2.36 | 0.22 | 0.28 |
| 38594 | 0 | 110645 | KSPAEAKSPAEAKSPAEA<br>KSPAEAKSPAEAKSPAEA | 3.60 | 3.63 | 2.19 | 1.15 | 0.22 | 0.28 |
| 38595 | 0 | 110645 | KSPAEAKSPAEAKSPAEA<br>KSPAEAKSPAEAKSPAEA | 3.60 | 3.63 | 2.19 | 1.15 | 0.22 | 0.28 |
| 38596 | 0 | 110645 | KSPAEAKSPAEAKSPAEA<br>KSPAEAKSPAEAKSPAEA | 3.60 | 3.63 | 2.19 | 1.15 | 2.26 | 0.28 |
| 38597 | 0 | 110645 | KSPAEAKSPAEAKSPAEA<br>KSPAEAKSPAEAKSPAEA | 3.60 | 3.63 | 2.19 | 1.15 | 2.26 | 0.28 |
| 38598 | 0 | 110645 | KSPAEAKSPAEAKSPAEA<br>KSPAEAKSPAEAKSPAEA | 3.60 | 3.63 | 2.19 | 1.15 | 2.26 | 0.28 |
| 38599 | 0 | 110645 | KSPAEAKSPAEAKSPAEA<br>KSPAEAKSPAEAKSPAEA | 3.60 | 3.63 | 2.19 | 2.36 | 0.22 | 0.28 |

|       |   |        |                                            |      |      |      |      |      |      |
|-------|---|--------|--------------------------------------------|------|------|------|------|------|------|
| 38600 | 0 | 110645 | KSPAEEKSPAEEKSPAEEA<br>KSPAEEKSPAEEKSPAEEA | 3.60 | 3.63 | 2.19 | 2.36 | 0.22 | 0.28 |
| 38601 | 0 | 110645 | KSPAEEKSPAEEKSPAEEA<br>KSPAEEKSPAEEKSPAEEA | 3.60 | 3.63 | 2.19 | 0.68 | 0.22 | 0.28 |
| 38602 | 0 | 110645 | KSPAEEKSPAEEKSPAEEA<br>KSPAEEKSPAEEKSPAEEA | 3.60 | 3.63 | 2.19 | 0.68 | 0.22 | 0.28 |
| 38603 | 0 | 110645 | KSPAEEKSPAEEKSPAEEA<br>KSPAEEKSPAEEKSPAEEA | 3.60 | 3.63 | 2.19 | 2.36 | 0.22 | 0.28 |
| 38604 | 0 | 110645 | KSPAEEKSPAEEKSPAEEA<br>KSPAEEKSPAEEKSPAEEA | 3.60 | 3.63 | 2.19 | 1.15 | 0.22 | 0.28 |
| 38605 | 0 | 110645 | KSPAEEKSPAEEKSPAEEA<br>KSPAEEKSPAEEKSPAEEA | 3.60 | 3.63 | 2.19 | 1.15 | 0.22 | 0.28 |
| 38606 | 0 | 110645 | KSPAEEKSPAEEKSPAEEA<br>KSPAEEKSPAEEKSPAEEA | 3.60 | 3.63 | 2.19 | 1.15 | 2.26 | 0.28 |
| 38607 | 0 | 110645 | KSPAEEKSPAEEKSPAEEA<br>KSPAEEKSPAEEKSPAEEA | 3.60 | 3.63 | 2.19 | 1.15 | 2.26 | 0.28 |
| 38608 | 0 | 110645 | KSPAEEKSPAEEKSPAEEA<br>KSPAEEKSPAEEKSPAEEA | 3.60 | 3.63 | 2.19 | 0.68 | 0.22 | 1.48 |
| 38609 | 0 | 110646 | KSPAEEKSPAEEKSPAEEA<br>KSPAEEKSPAEEKSPAEEA | 3.60 | 0.01 | 2.19 | 0.68 | 0.22 | 0.28 |
| 38610 | 0 | 110646 | KSPAEEKSPAEEKSPAEEA<br>KSPAEEKSPAEEKSPAEEA | 3.60 | 0.01 | 2.19 | 0.68 | 0.22 | 0.28 |
| 38611 | 0 | 110646 | KSPAEEKSPAEEKSPAEEA<br>KSPAEEKSPAEEKSPAEEA | 3.60 | 0.01 | 2.19 | 0.68 | 0.22 | 0.28 |
| 38612 | 0 | 165623 | KSPAFDL                                    | 1.99 | 0.01 | 0.90 | 0.44 | 1.23 | 1.39 |
| 38613 | 0 | 165624 | KSPAFNL                                    | 1.99 | 0.01 | 0.90 | 0.44 | 1.23 | 1.39 |
| 38614 | 0 | 128038 | KSPKKAKAAKPKKAP                            | 2.75 | 0.01 | 0.78 | 1.12 | 0.22 | 0.28 |
| 38615 | 0 | 128038 | KSPKKAKAAKPKKAP                            | 2.75 | 0.01 | 0.78 | 0.44 | 1.13 | 0.28 |
| 38616 | 0 | 129159 | KSPKKAKAAKPKKAPK                           | 2.82 | 0.01 | 0.78 | 0.44 | 1.13 | 0.28 |
| 38617 | 0 | 129159 | KSPKKAKAAKPKKAPK                           | 2.82 | 0.01 | 0.78 | 0.44 | 1.13 | 0.28 |
| 38618 | 0 | 129159 | KSPKKAKAAKPKKAPK                           | 2.82 | 0.01 | 0.78 | 1.12 | 0.22 | 0.28 |

|       |   |        |                           |      |      |      |      |      |      |
|-------|---|--------|---------------------------|------|------|------|------|------|------|
| 38619 | 0 | 129159 | KSPKKAKAAKPKKAPK          | 2.82 | 0.01 | 0.78 | 0.44 | 1.13 | 0.28 |
| 38620 | 0 | 129159 | KSPKKAKAAKPKKAPK          | 2.82 | 0.01 | 0.78 | 1.12 | 0.22 | 0.28 |
| 38621 | 0 | 129159 | KSPKKAKAAKPKKAPK          | 2.82 | 0.01 | 0.78 | 1.12 | 0.22 | 0.28 |
| 38622 | 0 | 129159 | KSPKKAKAAKPKKAPK          | 2.82 | 0.01 | 0.78 | 2.79 | 1.13 | 1.28 |
| 38623 | 0 | 323507 | KSPTLKAPAAPAAPA           | 2.74 | 0.01 | 1.61 | 0.44 | 0.85 | 1.28 |
| 38624 | 0 | 110647 | KSPVVKSPVEEKGKSPVP<br>EKG | 3.67 | 3.70 | 0.78 | 2.36 | 0.22 | 0.28 |
| 38625 | 0 | 110647 | KSPVVKSPVEEKGKSPVP<br>EKG | 3.67 | 3.70 | 0.78 | 2.36 | 0.22 | 0.28 |
| 38626 | 0 | 110647 | KSPVVKSPVEEKGKSPVP<br>EKG | 3.67 | 3.70 | 0.78 | 0.68 | 0.22 | 0.28 |
| 38627 | 0 | 110647 | KSPVVKSPVEEKGKSPVP<br>EKG | 3.67 | 3.70 | 0.78 | 0.68 | 0.22 | 0.28 |
| 38628 | 0 | 110647 | KSPVVKSPVEEKGKSPVP<br>EKG | 3.67 | 3.70 | 0.78 | 1.15 | 0.22 | 0.28 |
| 38629 | 0 | 110647 | KSPVVKSPVEEKGKSPVP<br>EKG | 3.67 | 3.70 | 0.78 | 1.15 | 0.22 | 0.28 |
| 38630 | 0 | 110647 | KSPVVKSPVEEKGKSPVP<br>EKG | 3.67 | 3.70 | 0.78 | 1.15 | 2.26 | 0.28 |
| 38631 | 0 | 110647 | KSPVVKSPVEEKGKSPVP<br>EKG | 3.67 | 3.70 | 0.78 | 1.15 | 2.26 | 0.28 |
| 38632 | 0 | 110647 | KSPVVKSPVEEKGKSPVP<br>EKG | 3.67 | 3.70 | 0.78 | 2.36 | 0.22 | 0.28 |
| 38633 | 0 | 110647 | KSPVVKSPVEEKGKSPVP<br>EKG | 3.67 | 3.70 | 0.78 | 2.36 | 0.22 | 0.28 |
| 38634 | 0 | 110647 | KSPVVKSPVEEKGKSPVP<br>EKG | 3.67 | 3.70 | 0.78 | 0.68 | 0.22 | 0.28 |
| 38635 | 0 | 110647 | KSPVVKSPVEEKGKSPVP<br>EKG | 3.67 | 3.70 | 0.78 | 0.68 | 0.22 | 0.28 |

|       |   |        |                            |      |      |      |      |      |      |
|-------|---|--------|----------------------------|------|------|------|------|------|------|
|       |   |        | KSPVPKSPVEEKGKSPVP         |      |      |      |      |      |      |
| 38636 | 0 | 110647 | KSPVEEKGKSPVPKSPVE<br>EKG  | 3.67 | 3.70 | 0.78 | 1.15 | 0.22 | 0.28 |
|       |   |        | KSPVPKSPVEEKGKSPVP         |      |      |      |      |      |      |
| 38637 | 0 | 110647 | KSPVEEKGKSPVPKSPVE<br>EKG  | 3.67 | 3.70 | 0.78 | 1.15 | 0.22 | 0.28 |
|       |   |        | KSPVPKSPVEEKGKSPVP         |      |      |      |      |      |      |
| 38638 | 0 | 110647 | KSPVEEKGKSPVPKSPVE<br>EKG  | 3.67 | 3.70 | 0.78 | 1.15 | 2.26 | 0.28 |
|       |   |        | KSPVPKSPVEEKGKSPVP         |      |      |      |      |      |      |
| 38639 | 0 | 110647 | KSPVEEKGKSPVPKSPVE<br>EKG  | 3.67 | 3.70 | 0.78 | 1.15 | 2.26 | 0.28 |
|       |   |        | KSPVPKSPVEEKGKSPVP         |      |      |      |      |      |      |
| 38640 | 0 | 110647 | KSPVEEKGKSPVPKSPVE<br>EKG  | 3.67 | 3.70 | 0.78 | 0.68 | 0.22 | 1.48 |
|       |   |        | KSPVPKSPVEEKGKSPVP         |      |      |      |      |      |      |
| 38641 | 0 | 110648 | KSPVEEKGKSPVPKSPVE<br>EKG  | 3.67 | 0.01 | 0.78 | 0.68 | 0.22 | 0.28 |
|       |   |        | KSPVPKSPVEEKGKSPVP         |      |      |      |      |      |      |
| 38642 | 0 | 110648 | KSPVEEKGKSPVPKSPVE<br>EKG  | 3.67 | 0.01 | 0.78 | 0.68 | 0.22 | 0.28 |
| 38643 | 0 | 33478  | KSQDADYH                   | 2.12 | 0.01 | 2.21 | 1.12 | 0.22 | 0.28 |
| 38644 | 0 | 33478  | KSQDADYH                   | 2.12 | 0.01 | 2.21 | 0.44 | 0.85 | 0.28 |
| 38645 | 0 | 123395 | KSQETPAT                   | 2.12 | 0.01 | 0.78 | 1.20 | 0.22 | 0.28 |
| 38646 | 0 | 33483  | KSQGERSWTWRKEAH            | 2.69 | 0.01 | 2.43 | 1.20 | 0.22 | 0.28 |
| 38647 | 0 | 147887 | KSQLAPRKL                  | 2.24 | 0.01 | 3.24 | 1.12 | 0.22 | 0.28 |
| 38648 | 0 | 107950 | KSQPNQTNNYHLLRT            | 2.66 | 0.01 | 0.90 | 0.44 | 1.13 | 1.39 |
| 38649 | 0 | 33488  | KSQQARQVKNNNPFS            | 2.69 | 0.01 | 2.72 | 0.44 | 1.23 | 0.85 |
| 38650 | 0 | 132415 | KSRANGGAGSIA               | 2.51 | 0.01 | 0.90 | 1.15 | 0.22 | 1.39 |
| 38651 | 0 | 132416 | KSRANGGAGSSA               | 2.52 | 0.01 | 0.90 | 1.15 | 0.22 | 1.39 |
| 38652 | 0 | 33493  | KSREQLSKLHGVDTS            | 2.67 | 0.01 | 0.90 | 0.44 | 1.59 | 0.28 |
| 38653 | 0 | 33494  | KSRGATGKS                  | 2.26 | 0.01 | 3.28 | 0.44 | 1.23 | 0.85 |
| 38654 | 0 | 123396 | KSRIEALPK                  | 2.22 | 0.01 | 2.28 | 2.00 | 0.22 | 0.28 |
| 38655 | 0 | 123397 | KSRIEDLPK                  | 2.22 | 0.01 | 2.28 | 2.00 | 0.22 | 0.28 |
| 38656 | 0 | 123397 | KSRIEDLPK                  | 2.22 | 0.01 | 2.28 | 2.00 | 0.22 | 0.28 |
| 38657 | 0 | 238673 | KSRIHAEFVQQKNFLVEE         | 2.82 | 0.01 | 0.78 | 0.44 | 1.13 | 0.28 |
| 38658 | 0 | 238673 | KSRIHAEFVQQKNFLVEE         | 2.82 | 0.01 | 0.78 | 0.44 | 1.13 | 0.28 |
| 38659 | 0 | 481170 | KSRIHAEFVQQKNFLVEE<br>EQRQ | 3.03 | 0.01 | 0.78 | 0.44 | 1.13 | 0.28 |
| 38660 | 0 | 481170 | KSRIHAEFVQQKNFLVEE<br>EQRQ | 3.03 | 0.01 | 0.78 | 0.44 | 1.13 | 0.28 |
| 38661 | 0 | 481170 | KSRIHAEFVQQKNFLVEE<br>EQRQ | 3.03 | 0.01 | 0.78 | 0.44 | 1.13 | 0.28 |

|       |   |        |                             |      |      |      |      |      |      |
|-------|---|--------|-----------------------------|------|------|------|------|------|------|
| 38662 | 0 | 481170 | KSRIHAEFVQQKNFLVEE<br>EQRQ  | 3.03 | 0.01 | 0.78 | 0.44 | 1.41 | 0.28 |
| 38663 | 0 | 129164 | KSRKASKAKVKRSK              | 2.75 | 0.01 | 2.25 | 1.12 | 0.22 | 0.28 |
| 38664 | 0 | 129164 | KSRKASKAKVKRSK              | 2.75 | 0.01 | 2.25 | 0.44 | 1.13 | 0.28 |
| 38665 | 0 | 129164 | KSRKASKAKVKRSK              | 2.75 | 0.01 | 2.25 | 0.44 | 1.13 | 0.28 |
| 38666 | 0 | 129164 | KSRKASKAKVKRSK              | 2.75 | 0.01 | 2.25 | 0.44 | 1.13 | 0.28 |
| 38667 | 0 | 129164 | KSRKASKAKVKRSK              | 2.75 | 0.01 | 2.25 | 1.12 | 0.22 | 0.28 |
| 38668 | 0 | 120002 | KSRSDLMFEKQSERHGL<br>ARR    | 2.94 | 0.01 | 0.78 | 2.04 | 0.22 | 1.57 |
| 38669 | 0 | 120002 | KSRSDLMFEKQSERHGL<br>ARR    | 2.94 | 0.01 | 0.78 | 2.04 | 0.22 | 1.57 |
| 38670 | 0 | 109443 | KSRWQEG                     | 1.99 | 0.01 | 0.78 | 0.44 | 1.13 | 0.28 |
| 38671 | 0 | 119605 | KSRWQQGN                    | 2.11 | 0.01 | 0.78 | 0.44 | 1.93 | 0.28 |
| 38672 | 0 | 33504  | KSRYGFGAKEVRSL              | 2.62 | 0.01 | 2.69 | 0.44 | 1.41 | 0.28 |
| 38673 | 0 | 33504  | KSRYGFGAKEVRSL              | 2.62 | 0.01 | 2.69 | 0.44 | 0.85 | 0.28 |
| 38674 | 0 | 178142 | KSSASPR                     | 2.04 | 0.01 | 3.06 | 0.68 | 0.22 | 0.85 |
| 38675 | 0 | 178142 | KSSASPR                     | 2.04 | 0.01 | 3.06 | 0.68 | 0.22 | 1.48 |
| 38676 | 0 | 178142 | KSSASPR                     | 2.04 | 0.01 | 3.06 | 0.68 | 0.22 | 1.48 |
| 38677 | 0 | 323565 | KSSEEGEIDDDSDVQ             | 2.71 | 0.01 | 1.61 | 0.44 | 0.85 | 1.28 |
| 38678 | 0 | 33512  | KSSLEDQKIKEKLQP             | 2.71 | 0.01 | 1.66 | 3.97 | 0.22 | 0.28 |
| 38679 | 0 | 33518  | KSSSPSSTKSSPSN              | 2.75 | 0.01 | 1.66 | 1.15 | 0.22 | 0.28 |
| 38680 | 0 | 33519  | KSSVDDGNINLTDS              | 2.69 | 0.01 | 1.66 | 1.15 | 0.22 | 0.28 |
| 38681 | 0 | 33519  | KSSVDDGNINLTDS              | 2.69 | 0.01 | 1.66 | 1.15 | 0.22 | 0.28 |
| 38682 | 0 | 174172 | KSSWGAIWRI                  | 2.32 | 0.01 | 3.10 | 0.44 | 1.23 | 0.85 |
| 38683 | 0 | 122825 | KSTAKDCTFKPDFEMTV<br>KE     | 2.91 | 0.01 | 0.78 | 0.44 | 1.13 | 0.28 |
| 38684 | 0 | 122825 | KSTAKDCTFKPDFEMTV<br>KE     | 2.91 | 0.01 | 0.78 | 0.44 | 1.41 | 0.28 |
| 38685 | 0 | 171942 | KSTDQEFQNFCTLHM             | 2.67 | 0.01 | 0.78 | 0.44 | 1.41 | 0.28 |
| 38686 | 0 | 142434 | KSTEDLSVAKDK                | 2.50 | 0.01 | 2.59 | 0.44 | 0.85 | 0.85 |
| 38687 | 0 | 33524  | KSTFHAVPAH                  | 2.31 | 3.85 | 2.70 | 0.44 | 0.85 | 0.28 |
| 38688 | 0 | 33527  | KSTILNLDINNDIISDISGF<br>NSS | 3.11 | 0.01 | 2.95 | 0.44 | 0.22 | 0.28 |
| 38689 | 0 | 127718 | KSTPQFT                     | 2.02 | 0.01 | 0.90 | 0.44 | 1.13 | 1.39 |
| 38690 | 0 | 419242 | KSTPSEIRHFDY                | 2.43 | 0.01 | 0.90 | 0.44 | 1.93 | 1.39 |
| 38691 | 0 | 180911 | KSTQNAIDGITNKVNSVI<br>EK    | 2.97 | 0.01 | 4.23 | 0.68 | 0.22 | 0.28 |
| 38692 | 0 | 180911 | KSTQNAIDGITNKVNSVI<br>EK    | 2.97 | 0.01 | 4.23 | 0.68 | 0.22 | 0.28 |
| 38693 | 0 | 180911 | KSTQNAIDGITNKVNSVI<br>EK    | 2.97 | 0.01 | 4.23 | 0.68 | 0.22 | 0.28 |
| 38694 | 0 | 180911 | KSTQNAIDGITNKVNSVI<br>EK    | 2.97 | 0.01 | 4.23 | 0.68 | 0.22 | 0.28 |
| 38695 | 0 | 180912 | KSTQNAINGITNKVNSVI<br>EK    | 2.98 | 0.01 | 2.97 | 0.68 | 0.22 | 0.28 |
| 38696 | 0 | 180912 | KSTQNAINGITNKVNSVI<br>EK    | 2.98 | 0.01 | 2.97 | 0.68 | 0.22 | 0.28 |

|       |   |        |                             |      |      |      |      |      |      |
|-------|---|--------|-----------------------------|------|------|------|------|------|------|
| 38697 | 0 | 180912 | KSTQNAINGITNKNVNSVI<br>EK   | 2.98 | 0.01 | 2.97 | 0.68 | 0.22 | 0.28 |
| 38698 | 0 | 33531  | KSTQRSTRRNLS                | 2.50 | 0.01 | 0.90 | 1.20 | 0.22 | 1.39 |
| 38699 | 0 | 33531  | KSTQRSTRRNLS                | 2.50 | 0.01 | 0.90 | 0.68 | 0.22 | 0.85 |
| 38700 | 0 | 33531  | KSTQRSTRRNLS                | 2.50 | 0.01 | 0.90 | 0.68 | 0.22 | 1.75 |
| 38701 | 0 | 323644 | KSTQTTGDDDDPAADG            | 2.69 | 0.01 | 1.61 | 0.44 | 0.85 | 1.28 |
| 38702 | 0 | 138200 | KSTSSLRDNSPPVCF             | 2.65 | 0.01 | 0.90 | 0.44 | 1.13 | 1.39 |
| 38703 | 0 | 33538  | KSTWDLALNNM                 | 2.38 | 0.01 | 3.05 | 0.44 | 1.23 | 1.57 |
| 38704 | 0 | 467437 | KSTYLTEPILTEEHF             | 2.67 | 0.01 | 1.66 | 0.44 | 0.85 | 1.28 |
| 38705 | 0 | 194943 | KSVATIYPTVVGGVLND<br>GAT    | 2.94 | 0.01 | 2.39 | 0.44 | 1.59 | 0.28 |
| 38706 | 0 | 33541  | KSVCGPVYCFTSPVTV<br>GTT     | 2.96 | 0.01 | 2.83 | 0.44 | 0.85 | 0.28 |
| 38707 | 0 | 33541  | KSVCGPVYCFTSPVTV<br>GTT     | 2.96 | 0.01 | 2.83 | 0.44 | 0.85 | 0.28 |
| 38708 | 0 | 323689 | KSVGLTAALSPRQRS             | 2.67 | 0.01 | 1.61 | 0.44 | 0.85 | 1.28 |
| 38709 | 0 | 33548  | KSVIIGCTGGSPEKHHC           | 2.79 | 0.01 | 4.08 | 3.38 | 0.22 | 0.85 |
| 38710 | 0 | 119482 | KSVKPRQAT                   | 2.22 | 0.01 | 0.90 | 0.44 | 1.13 | 0.28 |
| 38711 | 0 | 171943 | KSVMKERDNLRRVEE             | 2.68 | 0.01 | 0.78 | 0.44 | 1.41 | 0.28 |
| 38712 | 0 | 33556  | KSVRNDTGTYIVELLVTD<br>LRNCS | 3.08 | 0.01 | 3.72 | 0.68 | 0.22 | 0.28 |
| 38713 | 0 | 136446 | KSVTTLAMKAKCKLTICP<br>EE    | 2.95 | 0.01 | 0.78 | 0.44 | 1.13 | 0.28 |
| 38714 | 0 | 33561  | KSVTV                       | 1.75 | 0.01 | 3.38 | 1.15 | 0.22 | 0.85 |
| 38715 | 0 | 33561  | KSVTV                       | 1.75 | 0.01 | 3.38 | 1.15 | 0.22 | 1.34 |
| 38716 | 0 | 33562  | KSVVTKDSESKITQTQKD<br>SK    | 3.00 | 0.01 | 2.93 | 1.81 | 0.22 | 0.28 |
| 38717 | 0 | 33562  | KSVVTKDSESKITQTQKD<br>SK    | 3.00 | 0.01 | 2.93 | 2.69 | 0.22 | 0.28 |
| 38718 | 0 | 33562  | KSVVTKDSESKITQTQKD<br>SK    | 3.00 | 0.01 | 2.93 | 0.68 | 0.22 | 0.28 |
| 38719 | 0 | 33562  | KSVVTKDSESKITQTQKD<br>SK    | 3.00 | 0.01 | 2.93 | 1.81 | 0.22 | 0.28 |
| 38720 | 0 | 33562  | KSVVTKDSESKITQTQKD<br>SK    | 3.00 | 0.01 | 2.93 | 2.69 | 0.22 | 0.28 |
| 38721 | 0 | 33562  | KSVVTKDSESKITQTQKD<br>SK    | 3.00 | 0.01 | 2.93 | 0.68 | 0.22 | 0.28 |
| 38722 | 0 | 151956 | KSVYWHVIGMG                 | 2.39 | 0.01 | 0.78 | 0.44 | 1.93 | 0.28 |
| 38723 | 0 | 121510 | KSYCEIIVTHFPFDEQNC<br>SLKLG | 3.03 | 3.78 | 2.26 | 2.04 | 0.22 | 2.02 |
| 38724 | 0 | 121510 | KSYCEIIVTHFPFDEQNC<br>SLKLG | 3.03 | 3.78 | 2.26 | 2.04 | 0.22 | 2.02 |
| 38725 | 0 | 121510 | KSYCEIIVTHFPFDEQNC<br>SLKLG | 3.03 | 3.78 | 2.26 | 2.04 | 0.22 | 2.02 |
| 38726 | 0 | 121510 | KSYCEIIVTHFPFDEQNC<br>SLKLG | 3.03 | 3.78 | 2.26 | 2.04 | 0.22 | 2.02 |



|       |   |        |                             |      |      |      |      |      |      |
|-------|---|--------|-----------------------------|------|------|------|------|------|------|
| 38727 | 0 | 121510 | KSYCEIIVTHFPFDEQNC<br>SLKLG | 3.03 | 3.78 | 2.26 | 2.04 | 0.22 | 2.02 |
| 38728 | 0 | 121510 | KSYCEIIVTHFPFDEQNC<br>SLKLG | 3.03 | 3.78 | 2.26 | 2.04 | 0.22 | 1.34 |
| 38729 | 0 | 121510 | KSYCEIIVTHFPFDEQNC<br>SLKLG | 3.03 | 3.78 | 2.26 | 2.04 | 2.60 | 1.75 |
| 38730 | 0 | 121510 | KSYCEIIVTHFPFDEQNC<br>SLKLG | 3.03 | 3.78 | 2.26 | 2.04 | 0.22 | 2.02 |
| 38731 | 0 | 121511 | KSYCEIIVTHFPFDEQNC<br>SMKLG | 3.01 | 4.08 | 0.78 | 2.04 | 0.22 | 2.02 |
| 38732 | 0 | 121511 | KSYCEIIVTHFPFDEQNC<br>SMKLG | 3.01 | 4.08 | 0.78 | 2.04 | 0.22 | 2.02 |
| 38733 | 0 | 121511 | KSYCEIIVTHFPFDEQNC<br>SMKLG | 3.01 | 4.08 | 0.78 | 2.04 | 0.22 | 2.02 |
| 38734 | 0 | 121511 | KSYCEIIVTHFPFDEQNC<br>SMKLG | 3.01 | 4.08 | 0.78 | 2.04 | 0.22 | 0.28 |
| 38735 | 0 | 121511 | KSYCEIIVTHFPFDEQNC<br>SMKLG | 3.01 | 4.08 | 0.78 | 2.04 | 0.22 | 0.28 |
| 38736 | 0 | 121511 | KSYCEIIVTHFPFDEQNC<br>SMKLG | 3.01 | 4.08 | 0.78 | 2.04 | 0.22 | 0.28 |
| 38737 | 0 | 119606 | KSYCEIIVTHFPFDEQNC<br>SMKLG | 3.01 | 0.01 | 0.78 | 2.04 | 0.22 | 1.57 |
| 38738 | 0 | 119606 | KSYCEIIVTHFPFDEQNC<br>SMKLG | 3.01 | 0.01 | 0.78 | 2.04 | 0.22 | 1.57 |
| 38739 | 0 | 119606 | KSYCEIIVTHFPFDEQNC<br>SMKLG | 3.01 | 0.01 | 0.78 | 2.04 | 0.22 | 1.57 |
| 38740 | 0 | 119606 | KSYCEIIVTHFPFDEQNC<br>SMKLG | 3.01 | 0.01 | 0.78 | 2.04 | 0.22 | 2.02 |
| 38741 | 0 | 119606 | KSYCEIIVTHFPFDEQNC<br>SMKLG | 3.01 | 0.01 | 0.78 | 2.04 | 2.60 | 1.75 |
| 38742 | 0 | 119606 | KSYCEIIVTHFPFDEQNC<br>SMKLG | 3.01 | 0.01 | 0.78 | 2.04 | 0.22 | 2.02 |
| 38743 | 0 | 119606 | KSYCEIIVTHFPFDEQNC<br>SMKLG | 3.01 | 0.01 | 0.78 | 2.04 | 2.60 | 1.75 |
| 38744 | 0 | 121512 | KSYCEIIVTHFPFDQQNC<br>TLKLG | 3.02 | 3.78 | 2.26 | 2.04 | 0.22 | 2.02 |
| 38745 | 0 | 121512 | KSYCEIIVTHFPFDQQNC<br>TLKLG | 3.02 | 3.78 | 2.26 | 2.04 | 0.22 | 2.02 |
| 38746 | 0 | 121512 | KSYCEIIVTHFPFDQQNC<br>TLKLG | 3.02 | 3.78 | 2.26 | 2.04 | 0.22 | 2.02 |
| 38747 | 0 | 121512 | KSYCEIIVTHFPFDQQNC<br>TLKLG | 3.02 | 3.78 | 2.26 | 2.04 | 0.22 | 2.02 |
| 38748 | 0 | 121512 | KSYCEIIVTHFPFDQQNC<br>TLKLG | 3.02 | 3.78 | 2.26 | 2.04 | 0.22 | 2.02 |
| 38749 | 0 | 121512 | KSYCEIIVTHFPFDQQNC<br>TLKLG | 3.02 | 3.78 | 2.26 | 2.04 | 0.22 | 2.02 |

|       |   |        |                                     |      |      |      |      |      |      |
|-------|---|--------|-------------------------------------|------|------|------|------|------|------|
| 38750 | 0 | 121513 | KSYCEIIVTHFPFDQQNC<br>TMKLG         | 3.00 | 4.08 | 2.26 | 2.04 | 0.22 | 0.28 |
| 38751 | 0 | 120005 | KSYCEIIVTHFPFDQQNC<br>TMKLG         | 3.00 | 0.01 | 2.26 | 2.04 | 2.60 | 1.75 |
| 38752 | 0 | 120005 | KSYCEIIVTHFPFDQQNC<br>TMKLG         | 3.00 | 0.01 | 2.26 | 2.04 | 0.22 | 3.40 |
| 38753 | 0 | 120005 | KSYCEIIVTHFPFDQQNC<br>TMKLG         | 3.00 | 0.01 | 2.26 | 2.04 | 0.22 | 3.40 |
| 38754 | 0 | 120005 | KSYCEIIVTHFPFDQQNC<br>TMKLG         | 3.00 | 0.01 | 2.26 | 2.04 | 0.22 | 0.28 |
| 38755 | 0 | 120005 | KSYCEIIVTHFPFDQQNC<br>TMKLG         | 3.00 | 0.01 | 2.26 | 2.04 | 0.22 | 1.57 |
| 38756 | 0 | 120005 | KSYCEIIVTHFPFDQQNC<br>TMKLG         | 3.00 | 0.01 | 2.26 | 2.04 | 0.22 | 1.57 |
| 38757 | 0 | 120005 | KSYCEIIVTHFPFDQQNC<br>TMKLG         | 3.00 | 0.01 | 2.26 | 1.12 | 0.22 | 1.57 |
| 38758 | 0 | 120005 | KSYCEIIVTHFPFDQQNC<br>TMKLG         | 3.00 | 0.01 | 2.26 | 2.49 | 0.22 | 1.57 |
| 38759 | 0 | 120006 | KSYCEIIVTHFPFDQQNC<br>TMKLG I       | 3.05 | 0.01 | 2.26 | 1.81 | 0.22 | 1.57 |
| 38760 | 0 | 120006 | KSYCEIIVTHFPFDQQNC<br>TMKLG I       | 3.05 | 0.01 | 2.26 | 1.81 | 0.22 | 1.57 |
| 38761 | 0 | 120006 | KSYCEIIVTHFPFDQQNC<br>TMKLG I       | 3.05 | 0.01 | 2.26 | 1.81 | 0.22 | 1.57 |
| 38762 | 0 | 33577  | KSYGSDDNDDKNKSLIH<br>KHN            | 2.98 | 0.01 | 0.90 | 2.63 | 0.22 | 1.48 |
| 38763 | 0 | 323732 | KTAAAPAKAAAPAKA                     | 2.75 | 0.01 | 1.61 | 0.44 | 0.85 | 1.28 |
| 38764 | 0 | 165625 | KTAAFNL                             | 2.01 | 0.01 | 0.90 | 0.44 | 1.23 | 1.39 |
| 38765 | 0 | 323744 | KTAAKPAAKSAAKPA                     | 2.75 | 0.01 | 1.61 | 0.44 | 0.85 | 1.28 |
| 38766 | 0 | 323745 | KTAAKPAKPAVKPT                      | 2.75 | 0.01 | 1.61 | 0.44 | 0.85 | 1.28 |
| 38767 | 0 | 323746 | KTAAKTAAKPAAKSA                     | 2.75 | 0.01 | 1.61 | 0.44 | 0.85 | 1.28 |
| 38768 | 0 | 323749 | KTAAPKAAAAPQKAA                     | 2.74 | 0.01 | 1.61 | 0.44 | 0.85 | 1.28 |
| 38769 | 0 | 323750 | KTAAPAKAAAAPPAK                     | 2.75 | 0.01 | 1.61 | 0.44 | 0.85 | 1.28 |
| 38770 | 0 | 520482 | KTADTPATSKATIRD                     | 2.72 | 0.01 | 2.24 | 0.44 | 1.41 | 1.28 |
| 38771 | 0 | 323756 | KTAEAEKQRAAEATK                     | 2.74 | 0.01 | 1.61 | 0.44 | 0.85 | 1.28 |
| 38772 | 0 | 151675 | KTAFDEAIAELDTLSEESY<br>KDSTLIMQLLRD | 3.38 | 4.93 | 1.75 | 2.25 | 0.22 | 0.85 |
| 38773 | 0 | 78436  | KTAISPT                             | 2.02 | 0.01 | 0.90 | 0.68 | 0.22 | 1.27 |
| 38774 | 0 | 78436  | KTAISPT                             | 2.02 | 0.01 | 0.90 | 0.68 | 0.22 | 1.39 |
| 38775 | 0 | 78436  | KTAISPT                             | 2.02 | 0.01 | 0.90 | 0.68 | 0.22 | 1.39 |
| 38776 | 0 | 158932 | KTALARKAADTFNF                      | 2.70 | 0.01 | 3.26 | 0.44 | 1.23 | 0.28 |
| 38777 | 0 | 323785 | KTAPFGQAAAGDKPS<br>KTATPAQAQEVHKVVR | 2.69 | 0.01 | 1.61 | 0.44 | 0.85 | 1.28 |
| 38778 | 0 | 237803 | DWIRKHXVDAGIADKVRI<br>LYGGSVT       | 3.63 | 0.01 | 2.74 | 1.20 | 0.22 | 0.28 |

|       |   |        |                         |      |      |      |      |      |      |
|-------|---|--------|-------------------------|------|------|------|------|------|------|
| 38779 | 0 | 323818 | KTAVSKAAAPKAAA          | 2.71 | 0.01 | 1.61 | 0.44 | 0.85 | 1.28 |
| 38780 | 0 | 100993 | KTAYEAKLAQ              | 2.34 | 0.01 | 3.18 | 3.75 | 0.22 | 0.28 |
| 38781 | 0 | 177430 | KTCKQAGT                | 2.15 | 0.01 | 1.86 | 0.68 | 0.22 | 0.28 |
| 38782 | 0 | 177431 | KTCKQAGTCP              | 2.34 | 0.01 | 1.86 | 1.15 | 0.22 | 0.85 |
| 38783 | 0 | 177431 | KTCKQAGTCP              | 2.34 | 0.01 | 1.86 | 0.68 | 0.22 | 0.28 |
| 38784 | 0 | 177431 | KTCKQAGTCP              | 2.34 | 0.01 | 1.86 | 0.68 | 0.22 | 0.28 |
| 38785 | 0 | 177431 | KTCKQAGTCP              | 2.34 | 0.01 | 1.86 | 0.68 | 0.22 | 0.28 |
| 38786 | 0 | 177431 | KTCKQAGTCP              | 2.34 | 0.01 | 1.86 | 0.68 | 0.22 | 0.28 |
| 38787 | 0 | 110308 | KTCKQAGTCPPDIIPKVE<br>G | 2.90 | 0.01 | 1.86 | 0.68 | 0.22 | 0.28 |
| 38788 | 0 | 110308 | KTCKQAGTCPPDIIPKVE<br>G | 2.90 | 0.01 | 1.86 | 0.68 | 0.22 | 1.34 |
| 38789 | 0 | 110308 | KTCKQAGTCPPDIIPKVE<br>G | 2.90 | 0.01 | 1.86 | 0.68 | 0.22 | 1.34 |
| 38790 | 0 | 110308 | KTCKQAGTCPPDIIPKVE<br>G | 2.90 | 0.01 | 1.86 | 0.68 | 0.22 | 1.34 |
| 38791 | 0 | 110308 | KTCKQAGTCPPDIIPKVE<br>G | 2.90 | 0.01 | 1.86 | 0.68 | 0.22 | 1.34 |
| 38792 | 0 | 110308 | KTCKQAGTCPPDIIPKVE<br>G | 2.90 | 0.01 | 1.86 | 0.68 | 0.22 | 1.34 |
| 38793 | 0 | 110308 | KTCKQAGTCPPDIIPKVE<br>G | 2.90 | 0.01 | 1.86 | 0.68 | 0.22 | 1.34 |
| 38794 | 0 | 110308 | KTCKQAGTCPPDIIPKVE<br>G | 2.90 | 0.01 | 1.86 | 0.68 | 0.22 | 1.34 |
| 38795 | 0 | 110308 | KTCKQAGTCPPDIIPKVE<br>G | 2.90 | 0.01 | 1.86 | 0.68 | 0.22 | 1.34 |
| 38796 | 0 | 110308 | KTCKQAGTCPPDIIPKVE<br>G | 2.90 | 0.01 | 1.86 | 0.68 | 0.22 | 1.34 |
| 38797 | 0 | 110308 | KTCKQAGTCPPDIIPKVE<br>G | 2.90 | 0.01 | 1.86 | 0.68 | 0.22 | 1.34 |
| 38798 | 0 | 110308 | KTCKQAGTCPPDIIPKVE<br>G | 2.90 | 0.01 | 1.86 | 0.68 | 0.22 | 1.34 |
| 38799 | 0 | 110308 | KTCKQAGTCPPDIIPKVE<br>G | 2.90 | 0.01 | 1.86 | 0.68 | 0.22 | 1.34 |
| 38800 | 0 | 110308 | KTCKQAGTCPPDIIPKVE<br>G | 2.90 | 0.01 | 1.86 | 0.68 | 0.22 | 1.34 |
| 38801 | 0 | 110308 | KTCKQAGTCPPDIIPKVE<br>G | 2.90 | 0.01 | 1.86 | 0.68 | 0.22 | 1.34 |
| 38802 | 0 | 110308 | KTCKQAGTCPPDIIPKVE<br>G | 2.90 | 0.01 | 1.86 | 0.68 | 0.22 | 1.34 |
| 38803 | 0 | 110308 | KTCKQAGTCPPDIIPKVE<br>G | 2.90 | 0.01 | 1.86 | 0.68 | 0.22 | 1.34 |
| 38804 | 0 | 110308 | KTCKQAGTCPPDIIPKVE<br>G | 2.90 | 0.01 | 1.86 | 0.68 | 0.22 | 1.75 |
| 38805 | 0 | 110308 | KTCKQAGTCPPDIIPKVE<br>G | 2.90 | 0.01 | 1.86 | 0.68 | 0.22 | 1.34 |
| 38806 | 0 | 520490 | KTDDMLNSNDMIKLA         | 2.70 | 0.01 | 2.24 | 0.44 | 1.41 | 1.28 |

|       |   |        |                               |      |      |      |      |      |      |
|-------|---|--------|-------------------------------|------|------|------|------|------|------|
| 38807 | 0 | 323833 | KTDEAEEEEDEDEE                | 2.71 | 0.01 | 1.61 | 0.44 | 0.85 | 1.28 |
| 38808 | 0 | 142435 | KTDGKGEESE                    | 2.36 | 0.01 | 2.96 | 0.44 | 1.74 | 0.28 |
| 38809 | 0 | 142435 | KTDGKGEESE                    | 2.36 | 0.01 | 2.96 | 0.44 | 1.74 | 0.28 |
| 38810 | 0 | 142435 | KTDGKGEESE                    | 2.36 | 0.01 | 2.96 | 0.44 | 1.74 | 1.48 |
| 38811 | 0 | 142435 | KTDGKGEESE                    | 2.36 | 0.01 | 2.96 | 0.44 | 1.74 | 0.28 |
| 38812 | 0 | 142435 | KTDGKGEESE                    | 2.36 | 0.01 | 2.96 | 0.44 | 1.74 | 1.34 |
| 38813 | 0 | 142435 | KTDGKGEESE                    | 2.36 | 0.01 | 2.96 | 0.44 | 1.74 | 0.85 |
| 38814 | 0 | 142435 | KTDGKGEESE                    | 2.36 | 0.01 | 2.96 | 0.44 | 1.74 | 1.48 |
| 38815 | 0 | 142435 | KTDGKGEESE                    | 2.36 | 0.01 | 2.96 | 0.44 | 1.74 | 1.34 |
| 38816 | 0 | 179099 | KTDLRGTFDEIGRIA               | 2.68 | 0.01 | 2.36 | 0.44 | 1.23 | 1.28 |
| 38817 | 0 | 179099 | KTDLRGTFDEIGRIA               | 2.68 | 0.01 | 2.36 | 0.44 | 1.23 | 1.27 |
| 38818 | 0 | 179099 | KTDLRGTFDEIGRIA               | 2.68 | 0.01 | 2.36 | 0.44 | 1.23 | 1.28 |
| 38819 | 0 | 504010 | KTDMVYLQTFDFNELKR<br>IKTELLPQ | 3.15 | 0.01 | 3.72 | 0.44 | 1.41 | 0.28 |
| 38820 | 0 | 230147 | KTDPEI                        | 1.88 | 0.01 | 3.19 | 0.44 | 1.23 | 1.28 |
| 38821 | 0 | 230147 | KTDPEI                        | 1.88 | 0.01 | 3.19 | 0.44 | 1.23 | 1.28 |
| 38822 | 0 | 33641  | KTEAEDVIPEGWKADTS<br>YESK     | 3.00 | 0.01 | 2.53 | 0.44 | 1.23 | 0.85 |
| 38823 | 0 | 181699 | KTECTNYKKWINKKQ               | 2.69 | 0.01 | 2.86 | 2.36 | 0.22 | 1.28 |
| 38824 | 0 | 98186  | KTEEPAAP                      | 2.14 | 0.01 | 2.60 | 0.44 | 1.23 | 0.85 |
| 38825 | 0 | 98186  | KTEEPAAP                      | 2.14 | 0.01 | 2.60 | 0.68 | 0.22 | 0.85 |
| 38826 | 0 | 186874 | KTEKDPESE                     | 2.26 | 0.01 | 1.75 | 1.20 | 0.22 | 1.48 |
| 38827 | 0 | 186874 | KTEKDPESE                     | 2.26 | 0.01 | 1.75 | 1.20 | 0.22 | 0.85 |
| 38828 | 0 | 186874 | KTEKDPESE                     | 2.26 | 0.01 | 1.75 | 1.20 | 0.22 | 0.85 |
| 38829 | 0 | 186874 | KTEKDPESE                     | 2.26 | 0.01 | 1.75 | 1.20 | 0.22 | 2.12 |
| 38830 | 0 | 186874 | KTEKDPESE                     | 2.26 | 0.01 | 1.75 | 1.20 | 0.22 | 1.75 |
| 38831 | 0 | 171948 | KTELSYKTQELQECT               | 2.73 | 0.01 | 0.78 | 0.44 | 1.13 | 0.28 |
| 38832 | 0 | 33650  | KTEMLGNEIDIECIM               | 2.68 | 0.01 | 2.48 | 1.20 | 0.22 | 0.28 |
| 38833 | 0 | 98855  | KTENPCAQRCLQSCQ               | 2.66 | 0.01 | 2.16 | 0.44 | 1.23 | 0.85 |
| 38834 | 0 | 33661  | KTFESYRV                      | 2.10 | 0.01 | 2.66 | 2.61 | 0.22 | 0.28 |
| 38835 | 0 | 158933 | KTFFHTIGFASKSADDVK            | 2.86 | 0.01 | 3.26 | 0.44 | 1.23 | 0.28 |
| 38836 | 0 | 33663  | KTFGSSGSSAVDSG                | 2.64 | 0.01 | 1.96 | 0.44 | 0.85 | 0.28 |
| 38837 | 0 | 33663  | KTFGSSGSSAVDSG                | 2.64 | 0.01 | 1.96 | 0.44 | 0.85 | 0.28 |
| 38838 | 0 | 174950 | KTFIDFKKYNDK                  | 2.52 | 0.01 | 2.18 | 2.71 | 0.22 | 0.28 |
| 38839 | 0 | 33669  | KTFPPTPEPKDKKKK               | 2.72 | 0.01 | 2.91 | 0.44 | 0.85 | 0.28 |
| 38840 | 0 | 33669  | KTFPPTPEPKDKKKK               | 2.72 | 0.01 | 2.91 | 0.68 | 0.22 | 0.28 |
| 38841 | 0 | 97431  | KTFSMGAK                      | 2.13 | 0.01 | 2.87 | 0.68 | 0.22 | 0.28 |
| 38842 | 0 | 97431  | KTFSMGAK                      | 2.13 | 0.01 | 2.87 | 1.81 | 0.22 | 0.28 |
| 38843 | 0 | 238674 | KTFWNTHRGLRIDRG               | 2.66 | 0.01 | 2.56 | 1.20 | 0.22 | 0.85 |
| 38844 | 0 | 238674 | KTFWNTHRGLRIDRG               | 2.66 | 0.01 | 2.56 | 2.02 | 0.22 | 0.85 |
| 38845 | 0 | 135947 | KTGHPRYFNQLS                  | 2.40 | 0.01 | 0.78 | 0.44 | 1.13 | 0.28 |
| 38846 | 0 | 167304 | KTGKDVRKDNRAVQKL<br>RREV      | 2.96 | 3.24 | 0.78 | 0.44 | 1.13 | 0.28 |
| 38847 | 0 | 167305 | KTGKDVRKDNRAVQKL<br>RREV      | 2.96 | 0.01 | 0.78 | 0.44 | 1.13 | 0.28 |
| 38848 | 0 | 134714 | KTGKRKRSQMLFQ                 | 2.56 | 0.01 | 0.78 | 1.12 | 0.22 | 1.57 |

|       |   |        |                                 |      |      |      |      |      |      |
|-------|---|--------|---------------------------------|------|------|------|------|------|------|
| 38849 | 0 | 134714 | KTGKRKRSQMLFQ                   | 2.56 | 0.01 | 0.78 | 1.12 | 0.22 | 1.57 |
| 38850 | 0 | 134714 | KTGKRKRSQMLFQ                   | 2.56 | 0.01 | 0.78 | 1.12 | 0.22 | 1.34 |
| 38851 | 0 | 106578 | KTGPQRVHACEC                    | 2.43 | 0.01 | 3.08 | 0.44 | 1.23 | 0.85 |
| 38852 | 0 | 190832 | KTGQF                           | 1.74 | 0.01 | 0.78 | 3.05 | 1.13 | 0.28 |
| 38853 | 0 | 190832 | KTGQF                           | 1.74 | 0.01 | 0.78 | 3.05 | 1.13 | 1.75 |
| 38854 | 0 | 115832 | KTGQFL                          | 1.88 | 0.01 | 0.78 | 0.44 | 1.13 | 1.57 |
| 38855 | 0 | 115832 | KTGQFL                          | 1.88 | 0.01 | 0.78 | 0.44 | 1.41 | 1.57 |
| 38856 | 0 | 115832 | KTGQFL                          | 1.88 | 0.01 | 0.78 | 0.44 | 1.13 | 1.57 |
| 38857 | 0 | 115832 | KTGQFL                          | 1.88 | 0.01 | 0.78 | 0.44 | 1.13 | 1.57 |
| 38858 | 0 | 115832 | KTGQFL                          | 1.88 | 0.01 | 0.78 | 0.44 | 1.41 | 1.57 |
| 38859 | 0 | 226625 | KTGTTDIGSNTTVKTGDL              | 2.88 | 0.01 | 2.56 | 1.20 | 0.22 | 0.28 |
| 38860 | 0 | 226625 | KTGTTDIGSNTTVKTGDL              | 2.88 | 0.01 | 2.56 | 1.20 | 0.22 | 0.28 |
| 38861 | 0 | 119607 | KTHTCPPC                        | 2.15 | 0.01 | 0.78 | 0.44 | 1.93 | 0.28 |
| 38862 | 0 | 33698  | KTHVTGMVAGKNAHTL<br>SSIFTSGPSQN | 3.24 | 0.01 | 1.72 | 0.44 | 0.85 | 0.28 |
| 38863 | 0 | 33698  | KTHVTGMVAGKNAHTL<br>SSIFTSGPSQN | 3.24 | 0.01 | 1.72 | 0.68 | 0.22 | 0.28 |
| 38864 | 0 | 33698  | KTHVTGMVAGKNAHTL<br>SSIFTSGPSQN | 3.24 | 0.01 | 1.72 | 0.68 | 0.22 | 0.28 |
| 38865 | 0 | 33698  | KTHVTGMVAGKNAHTL<br>SSIFTSGPSQN | 3.24 | 0.01 | 1.72 | 0.44 | 0.85 | 0.28 |
| 38866 | 0 | 33698  | KTHVTGMVAGKNAHTL<br>SSIFTSGPSQN | 3.24 | 0.01 | 1.72 | 1.12 | 0.22 | 0.28 |
| 38867 | 0 | 33698  | KTHVTGMVAGKNAHTL<br>SSIFTSGPSQN | 3.24 | 0.01 | 1.72 | 1.12 | 0.22 | 0.28 |
| 38868 | 0 | 33698  | KTHVTGMVAGKNAHTL<br>SSIFTSGPSQN | 3.24 | 0.01 | 1.72 | 1.12 | 0.22 | 0.28 |
| 38869 | 0 | 33707  | KTIAYDEEARR                     | 2.37 | 0.01 | 2.04 | 3.01 | 0.22 | 0.28 |
| 38870 | 0 | 33709  | KTIAYDEEARRGLERGLN<br>SLADAVK   | 3.16 | 0.01 | 2.59 | 1.15 | 0.22 | 0.28 |
| 38871 | 0 | 33709  | KTIAYDEEARRGLERGLN<br>SLADAVK   | 3.16 | 0.01 | 2.59 | 1.15 | 0.22 | 0.85 |
| 38872 | 0 | 33715  | KTIENINELIEES                   | 2.58 | 0.01 | 3.34 | 0.44 | 1.74 | 0.28 |
| 38873 | 0 | 33717  | KTIINNDNFNDDYNY                 | 2.71 | 0.01 | 1.66 | 1.15 | 0.22 | 0.28 |
| 38874 | 0 | 33717  | KTIINNDNFNDDYNY                 | 2.71 | 0.01 | 1.66 | 1.15 | 0.22 | 0.28 |
| 38875 | 0 | 103327 | KTINLCAPDDPICTG                 | 2.67 | 0.01 | 2.04 | 0.44 | 0.85 | 1.28 |
| 38876 | 0 | 451343 | KTIQQILQQQYKNNT                 | 2.71 | 0.01 | 1.66 | 1.15 | 0.22 | 0.28 |
| 38877 | 0 | 451343 | KTIQQILQQQYKNNT                 | 2.71 | 0.01 | 1.66 | 1.15 | 0.22 | 1.48 |
| 38878 | 0 | 451343 | KTIQQILQQQYKNNT                 | 2.71 | 0.01 | 1.66 | 1.15 | 0.22 | 2.02 |
| 38879 | 0 | 451343 | KTIQQILQQQYKNNT                 | 2.71 | 0.01 | 1.66 | 1.15 | 0.22 | 0.28 |
| 38880 | 0 | 119483 | KTKFASDDEHDEHDENG<br>ATG        | 2.98 | 0.01 | 0.78 | 0.44 | 1.13 | 0.28 |
| 38881 | 0 | 33732  | KTKIPAVFKI                      | 2.34 | 0.01 | 1.60 | 0.44 | 1.23 | 0.85 |
| 38882 | 0 | 33732  | KTKIPAVFKI                      | 2.34 | 0.01 | 1.60 | 0.44 | 1.23 | 0.85 |
| 38883 | 0 | 33732  | KTKIPAVFKI                      | 2.34 | 0.01 | 1.60 | 0.44 | 1.23 | 0.85 |

|       |   |        |                               |      |      |      |      |      |      |
|-------|---|--------|-------------------------------|------|------|------|------|------|------|
| 38884 | 0 | 33732  | KTKIPAVFKI                    | 2.34 | 0.01 | 1.60 | 0.44 | 1.23 | 0.85 |
| 38885 | 0 | 33732  | KTKIPAVFKI                    | 2.34 | 0.01 | 1.60 | 0.44 | 2.98 | 0.85 |
| 38886 | 0 | 33733  | KTKIPAVFKIDA                  | 2.50 | 0.01 | 1.60 | 0.44 | 1.23 | 0.85 |
| 38887 | 0 | 33736  | KTKNADDDKGDKDKD               | 2.74 | 0.01 | 1.66 | 0.44 | 0.85 | 0.28 |
| 38888 | 0 | 107496 | KTKPREQ                       | 2.03 | 0.01 | 0.78 | 0.44 | 1.13 | 0.28 |
| 38889 | 0 | 33745  | KTKRNTN                       | 2.06 | 0.01 | 1.72 | 0.44 | 0.85 | 0.28 |
| 38890 | 0 | 33746  | KTKRNTNR                      | 2.18 | 0.01 | 1.96 | 0.44 | 0.85 | 0.28 |
| 38891 | 0 | 33747  | KTKRNTNRRPQDVKF               | 2.70 | 0.01 | 2.41 | 0.44 | 1.59 | 0.28 |
| 38892 | 0 | 33747  | KTKRNTNRRPQDVKF               | 2.70 | 0.01 | 3.81 | 0.44 | 0.85 | 0.28 |
| 38893 | 0 | 104017 | KTKRNTNRRPQDVKFPG<br>GGQ      | 2.96 | 0.01 | 1.72 | 0.44 | 0.85 | 0.28 |
| 38894 | 0 | 33748  | KTKRSAS                       | 2.05 | 0.01 | 0.90 | 0.44 | 1.59 | 0.28 |
| 38895 | 0 | 115150 | KTKSIVTLQRGSLNQVQ<br>RWDGKETI | 3.21 | 0.01 | 0.78 | 0.44 | 1.13 | 0.28 |
| 38896 | 0 | 115150 | KTKSIVTLQRGSLNQVQ<br>RWDGKETI | 3.21 | 0.01 | 0.78 | 0.44 | 1.41 | 0.28 |
| 38897 | 0 | 123400 | KTKVLYHDVQMDKSNR              | 2.72 | 0.01 | 1.75 | 0.68 | 0.22 | 0.28 |
| 38898 | 0 | 103328 | KTLDAAGKLLDNDK                | 2.70 | 0.01 | 2.04 | 0.44 | 0.85 | 1.28 |
| 38899 | 0 | 33754  | KTLEAILSFARRGTI               | 2.67 | 0.01 | 3.50 | 2.22 | 0.22 | 0.28 |
| 38900 | 0 | 123401 | KTLKMWSDF                     | 2.22 | 0.01 | 2.28 | 2.00 | 0.22 | 0.28 |
| 38901 | 0 | 182196 | KTLLPLHCGSKREWI               | 2.64 | 0.01 | 0.78 | 0.44 | 1.13 | 0.85 |
| 38902 | 0 | 33761  | KTLLSRFLWWLCYL                | 2.62 | 0.01 | 2.69 | 0.44 | 0.85 | 0.28 |
| 38903 | 0 | 33761  | KTLLSRFLWWLCYL                | 2.62 | 0.01 | 2.69 | 0.44 | 1.41 | 0.28 |
| 38904 | 0 | 79008  | KTLPYS                        | 1.88 | 0.01 | 0.90 | 0.68 | 0.22 | 1.39 |
| 38905 | 0 | 33767  | KTLRNTNRL                     | 2.26 | 0.01 | 0.90 | 0.44 | 0.85 | 0.28 |
| 38906 | 0 | 33767  | KTLRNTNRL                     | 2.26 | 0.01 | 0.90 | 0.44 | 0.85 | 0.28 |
| 38907 | 0 | 33767  | KTLRNTNRL                     | 2.26 | 0.01 | 0.90 | 0.44 | 0.85 | 1.39 |
| 38908 | 0 | 33767  | KTLRNTNRL                     | 2.26 | 0.01 | 0.90 | 0.44 | 0.85 | 0.28 |
| 38909 | 0 | 33770  | KTLTKTSL                      | 2.18 | 0.01 | 2.83 | 2.61 | 0.22 | 0.28 |
| 38910 | 0 | 116762 | KTLTNKLKAAEARAE               | 2.73 | 0.01 | 3.15 | 0.44 | 1.23 | 0.85 |
| 38911 | 0 | 101823 | KTLWWQW                       | 2.04 | 0.01 | 0.90 | 0.44 | 0.85 | 1.39 |
| 38912 | 0 | 33776  | KTMIRFGDVGLDLDFSA<br>FDA      | 2.95 | 0.01 | 2.82 | 0.44 | 0.85 | 0.28 |
| 38913 | 0 | 33776  | KTMIRFGDVGLDLDFSA<br>FDA      | 2.95 | 0.01 | 2.82 | 0.44 | 1.41 | 0.28 |
| 38914 | 0 | 137912 | KTMLTEDSFSAR                  | 2.45 | 0.01 | 2.21 | 0.44 | 0.85 | 0.28 |
| 38915 | 0 | 108510 | KTMSAKESKFEDMA                | 2.72 | 0.01 | 0.78 | 0.44 | 1.13 | 1.27 |
| 38916 | 0 | 33780  | KTN                           | 1.37 | 0.01 | 3.16 | 0.68 | 0.22 | 0.28 |
| 38917 | 0 | 33780  | KTN                           | 1.37 | 0.01 | 3.16 | 0.68 | 0.22 | 1.34 |
| 38918 | 0 | 99401  | KTNACHNGGGFSEVIFR             | 2.74 | 0.01 | 2.24 | 1.20 | 0.22 | 1.27 |
| 38919 | 0 | 99401  | KTNACHNGGGFSEVIFR             | 2.74 | 0.01 | 2.24 | 1.20 | 0.22 | 0.28 |
| 38920 | 0 | 462379 | KTNDGEEKM                     | 2.23 | 0.01 | 0.78 | 1.12 | 0.22 | 1.28 |

|       |   |        |                                  |      |      |      |      |      |      |
|-------|---|--------|----------------------------------|------|------|------|------|------|------|
| 38921 | 0 | 130531 | KTNFDPAEWGSKVEDR<br>FYNNHAFEEQEP | 3.24 | 0.01 | 0.78 | 3.53 | 0.22 | 0.28 |
| 38922 | 0 | 130531 | KTNFDPAEWGSKVEDR<br>FYNNHAFEEQEP | 3.24 | 0.01 | 0.78 | 3.89 | 0.22 | 0.28 |
| 38923 | 0 | 136070 | KTNLIVNYLP                       | 2.31 | 0.01 | 0.78 | 0.44 | 2.82 | 0.85 |
| 38924 | 0 | 33792  | KTNLKHAVAGAAAAGAV<br>VGGLG       | 3.03 | 0.01 | 1.75 | 3.00 | 2.25 | 1.75 |
| 38925 | 0 | 33792  | KTNLKHAVAGAAAAGAV<br>VGGLG       | 3.03 | 0.01 | 1.75 | 0.68 | 0.22 | 0.28 |
| 38926 | 0 | 135569 | KTNMK                            | 1.77 | 0.01 | 0.78 | 1.81 | 0.22 | 1.48 |
| 38927 | 0 | 135569 | KTNMK                            | 1.77 | 0.01 | 0.78 | 1.81 | 0.22 | 1.66 |
| 38928 | 0 | 135569 | KTNMK                            | 1.77 | 0.01 | 0.78 | 1.81 | 0.22 | 1.66 |
| 38929 | 0 | 135569 | KTNMK                            | 1.77 | 0.01 | 0.78 | 1.81 | 0.22 | 2.56 |
| 38930 | 0 | 135569 | KTNMK                            | 1.77 | 0.01 | 0.78 | 1.81 | 0.22 | 2.56 |
| 38931 | 0 | 135569 | KTNMK                            | 1.77 | 0.01 | 0.78 | 1.81 | 0.22 | 2.56 |
| 38932 | 0 | 135569 | KTNMK                            | 1.77 | 0.01 | 0.78 | 1.81 | 0.22 | 2.56 |
| 38933 | 0 | 135569 | KTNMK                            | 1.77 | 0.01 | 0.78 | 1.81 | 0.22 | 2.56 |
| 38934 | 0 | 135569 | KTNMK                            | 1.77 | 0.01 | 0.78 | 1.81 | 0.22 | 2.56 |
| 38935 | 0 | 135569 | KTNMK                            | 1.77 | 0.01 | 0.78 | 1.81 | 0.22 | 2.56 |
| 38936 | 0 | 135569 | KTNMK                            | 1.77 | 0.01 | 0.78 | 1.81 | 0.22 | 0.85 |
| 38937 | 0 | 135569 | KTNMK                            | 1.77 | 0.01 | 0.78 | 1.15 | 0.22 | 1.48 |
| 38938 | 0 | 135569 | KTNMK                            | 1.77 | 0.01 | 0.78 | 1.15 | 0.22 | 0.85 |
| 38939 | 0 | 135569 | KTNMK                            | 1.77 | 0.01 | 0.78 | 1.15 | 0.22 | 0.85 |
| 38940 | 0 | 135569 | KTNMK                            | 1.77 | 0.01 | 0.78 | 0.44 | 1.41 | 2.02 |
| 38941 | 0 | 135569 | KTNMK                            | 1.77 | 0.01 | 0.78 | 0.44 | 1.41 | 1.34 |
| 38942 | 0 | 33794  | KTNMKHM                          | 2.05 | 0.01 | 0.78 | 1.15 | 0.22 | 0.85 |
| 38943 | 0 | 33794  | KTNMKHM                          | 2.05 | 0.01 | 0.78 | 1.15 | 0.22 | 0.85 |
| 38944 | 0 | 33794  | KTNMKHM                          | 2.05 | 0.01 | 0.78 | 1.15 | 0.22 | 1.48 |
| 38945 | 0 | 33795  | KTNMKHMAGA                       | 2.34 | 0.01 | 0.78 | 2.19 | 0.22 | 0.28 |
| 38946 | 0 | 33795  | KTNMKHMAGA                       | 2.34 | 0.01 | 0.78 | 2.19 | 0.22 | 0.85 |
| 38947 | 0 | 33795  | KTNMKHMAGA                       | 2.34 | 0.01 | 0.78 | 2.19 | 0.22 | 0.85 |
| 38948 | 0 | 33795  | KTNMKHMAGA                       | 2.34 | 0.01 | 0.78 | 2.19 | 0.22 | 2.92 |
| 38949 | 0 | 33796  | KTNMKHMAGAAAAGA<br>VVGGLG        | 3.02 | 0.01 | 0.78 | 0.68 | 0.22 | 0.28 |
| 38950 | 0 | 33796  | KTNMKHMAGAAAAGA<br>VVGGLG        | 3.02 | 0.01 | 0.78 | 0.68 | 0.22 | 0.28 |
| 38951 | 0 | 33796  | KTNMKHMAGAAAAGA<br>VVGGLG        | 3.02 | 0.01 | 0.78 | 0.68 | 0.22 | 1.34 |
| 38952 | 0 | 33796  | KTNMKHMAGAAAAGA<br>VVGGLG        | 3.02 | 0.01 | 0.78 | 0.68 | 0.22 | 1.48 |
| 38953 | 0 | 33796  | KTNMKHMAGAAAAGA<br>VVGGLG        | 3.02 | 0.01 | 0.78 | 0.68 | 0.22 | 0.85 |
| 38954 | 0 | 33796  | KTNMKHMAGAAAAGA<br>VVGGLG        | 3.02 | 0.01 | 0.78 | 0.68 | 0.22 | 1.34 |
| 38955 | 0 | 33796  | KTNMKHMAGAAAAGA<br>VVGGLG        | 3.02 | 0.01 | 0.78 | 0.68 | 0.22 | 1.34 |

|       |   |        |                           |      |      |      |      |      |      |
|-------|---|--------|---------------------------|------|------|------|------|------|------|
| 38956 | 0 | 33796  | KTNMKHMGAAAAAGA<br>VVGGLG | 3.02 | 0.01 | 0.78 | 2.19 | 0.22 | 0.28 |
| 38957 | 0 | 33796  | KTNMKHMGAAAAAGA<br>VVGGLG | 3.02 | 0.01 | 0.78 | 2.19 | 0.22 | 1.27 |
| 38958 | 0 | 33796  | KTNMKHMGAAAAAGA<br>VVGGLG | 3.02 | 0.01 | 0.78 | 2.19 | 0.22 | 2.02 |
| 38959 | 0 | 33797  | KTNNSYIPPLTW              | 2.45 | 0.01 | 0.90 | 1.20 | 0.22 | 0.28 |
| 38960 | 0 | 181375 | KTNPNYKGNDIKCTS           | 2.69 | 0.01 | 2.82 | 1.15 | 0.22 | 0.28 |
| 38961 | 0 | 33799  | KTNSSLLT                  | 2.14 | 0.01 | 3.20 | 2.22 | 0.85 | 0.28 |
| 38962 | 0 | 132419 | KTNTPADVFIVFTDNETF<br>AG  | 2.96 | 0.01 | 0.78 | 3.72 | 0.22 | 0.28 |
| 38963 | 0 | 33803  | KTNYSSSIILEY              | 2.47 | 0.01 | 4.33 | 0.44 | 1.23 | 0.28 |
| 38964 | 0 | 192487 | KTPACW                    | 1.88 | 0.01 | 3.61 | 0.68 | 0.22 | 0.85 |
| 38965 | 0 | 192487 | KTPACW                    | 1.88 | 0.01 | 3.61 | 0.68 | 0.22 | 1.48 |
| 38966 | 0 | 192487 | KTPACW                    | 1.88 | 0.01 | 3.61 | 0.68 | 0.22 | 0.85 |
| 38967 | 0 | 192487 | KTPACW                    | 1.88 | 0.01 | 3.61 | 2.49 | 0.22 | 0.28 |
| 38968 | 0 | 192487 | KTPACW                    | 1.88 | 0.01 | 3.61 | 1.15 | 0.22 | 0.28 |
| 38969 | 0 | 195032 | KTPAEAR                   | 2.02 | 0.01 | 4.33 | 0.68 | 0.22 | 0.28 |
| 38970 | 0 | 195032 | KTPAEAR                   | 2.02 | 0.01 | 4.33 | 0.68 | 0.22 | 1.27 |
| 38971 | 0 | 195032 | KTPAEAR                   | 2.02 | 0.01 | 4.33 | 0.68 | 0.22 | 0.85 |
| 38972 | 0 | 195032 | KTPAEAR                   | 2.02 | 0.01 | 4.33 | 0.68 | 0.22 | 2.66 |
| 38973 | 0 | 33810  | KTPGENK                   | 2.03 | 0.01 | 3.38 | 2.22 | 0.85 | 0.85 |
| 38974 | 0 | 128039 | KTPKKAKKPKTPKKA           | 2.75 | 0.01 | 0.90 | 1.12 | 0.22 | 0.28 |
| 38975 | 0 | 128039 | KTPKKAKKPKTPKKA           | 2.75 | 0.01 | 0.90 | 0.44 | 1.13 | 0.28 |
| 38976 | 0 | 186875 | KTPLPK                    | 1.92 | 0.01 | 1.75 | 1.20 | 0.22 | 1.48 |
| 38977 | 0 | 520545 | KTPLPVSATAMAPSVDP<br>SAE  | 2.98 | 4.63 | 2.40 | 0.44 | 1.59 | 1.28 |
| 38978 | 0 | 520546 | KTPLPVSATAMAPSVDP<br>SAE  | 2.98 | 4.08 | 2.40 | 0.44 | 1.59 | 1.28 |
| 38979 | 0 | 520544 | KTPLPVSATAMAPSVDP<br>SAE  | 2.98 | 4.63 | 2.40 | 0.44 | 1.59 | 1.28 |
| 38980 | 0 | 520547 | KTPLPVSATAMAPSVDP<br>SAE  | 2.98 | 0.01 | 2.40 | 0.44 | 1.59 | 1.28 |
| 38981 | 0 | 33818  | KTPNSIAAIS                | 2.32 | 0.01 | 2.66 | 0.68 | 0.22 | 0.28 |
| 38982 | 0 | 132420 | KTPRNGGAGTAR              | 2.51 | 0.01 | 0.90 | 1.15 | 0.22 | 1.39 |
| 38983 | 0 | 195033 | KTPSEAR                   | 1.99 | 0.01 | 0.90 | 0.68 | 0.22 | 0.28 |
| 38984 | 0 | 195034 | KTPSEHR                   | 1.99 | 0.01 | 0.90 | 0.68 | 0.22 | 0.28 |
| 38985 | 0 | 171959 | KTPVKKKARKSAGAA           | 2.69 | 0.01 | 0.78 | 0.44 | 1.13 | 0.28 |
| 38986 | 0 | 100234 | KTQEEHLKEI                | 2.34 | 0.01 | 2.18 | 2.16 | 0.22 | 0.28 |
| 38987 | 0 | 159287 | KTQGHSYHLRRKNGVK<br>HPVY  | 2.94 | 0.01 | 0.90 | 2.74 | 0.22 | 1.48 |
| 38988 | 0 | 159287 | KTQGHSYHLRRKNGVK<br>HPVY  | 2.94 | 0.01 | 0.90 | 2.74 | 0.22 | 0.28 |
| 38989 | 0 | 33831  | KTQIDQVESTAGSLQ           | 2.66 | 0.01 | 2.04 | 0.68 | 0.22 | 0.28 |
| 38990 | 0 | 33831  | KTQIDQVESTAGSLQ           | 2.66 | 0.01 | 2.04 | 0.44 | 0.85 | 0.28 |
| 38991 | 0 | 158938 | KTQNQGPWDEGRVEID          | 2.71 | 0.01 | 3.05 | 0.68 | 0.22 | 0.28 |



|       |   |        |                    |      |      |      |      |      |      |
|-------|---|--------|--------------------|------|------|------|------|------|------|
| 38992 | 0 | 158938 | KTQNNQGPWDEGRVEID  | 2.71 | 0.01 | 3.05 | 0.68 | 0.22 | 0.28 |
| 38993 | 0 | 158938 | KTQNNQGPWDEGRVEID  | 2.71 | 0.01 | 3.05 | 0.68 | 0.22 | 1.48 |
| 38994 | 0 | 158938 | KTQNNQGPWDEGRVEID  | 2.71 | 0.01 | 3.05 | 0.68 | 0.22 | 0.28 |
| 38995 | 0 | 158938 | KTQNNQGPWDEGRVEID  | 2.71 | 0.01 | 3.05 | 2.43 | 0.22 | 0.28 |
| 38996 | 0 | 158938 | KTQNNQGPWDEGRVEID  | 2.71 | 0.01 | 3.05 | 3.55 | 0.22 | 0.28 |
| 38997 | 0 | 158938 | KTQNNQGPWDEGRVEID  | 2.71 | 0.01 | 3.04 | 0.68 | 0.22 | 0.85 |
| 38998 | 0 | 158938 | KTQNNQGPWDEGRVEID  | 2.71 | 0.01 | 3.04 | 0.68 | 0.22 | 0.85 |
| 38999 | 0 | 158939 | KTQNNQGPWDENGIVLD  | 2.71 | 0.01 | 3.04 | 0.68 | 0.22 | 0.28 |
| 39000 | 0 | 158940 | KTQSQGPWDEGRVEID   | 2.71 | 0.01 | 3.36 | 0.68 | 0.22 | 0.28 |
| 39001 | 0 | 33834  | KTQYSKF            | 2.03 | 0.01 | 3.13 | 0.68 | 0.22 | 0.28 |
| 39002 | 0 | 188298 | KTRDMEYERT         | 2.33 | 0.01 | 2.92 | 0.68 | 0.22 | 0.85 |
| 39003 | 0 | 33837  | KTRGGYGAEPMCTI     | 2.59 | 0.01 | 1.66 | 1.15 | 0.22 | 0.28 |
| 39004 | 0 | 33842  | KTRNQMGVSE         | 2.26 | 0.01 | 0.78 | 0.44 | 1.74 | 0.28 |
| 39005 | 0 | 33846  | KTRRMRIDQ          | 2.23 | 0.01 | 0.90 | 0.44 | 0.85 | 0.28 |
| 39006 | 0 | 33846  | KTRRMRIDQ          | 2.23 | 0.01 | 0.90 | 0.44 | 0.85 | 0.28 |
| 39007 | 0 | 33846  | KTRRMRIDQ          | 2.23 | 0.01 | 0.90 | 0.44 | 0.85 | 0.28 |
| 39008 | 0 | 33846  | KTRRMRIDQ          | 2.23 | 0.01 | 0.90 | 0.44 | 0.85 | 1.39 |
| 39009 | 0 | 33847  | KTRRNTNYQ          | 2.24 | 0.01 | 0.90 | 0.44 | 0.85 | 0.28 |
| 39010 | 0 | 33847  | KTRRNTNYQ          | 2.24 | 0.01 | 0.90 | 0.44 | 0.85 | 0.28 |
| 39011 | 0 | 33847  | KTRRNTNYQ          | 2.24 | 0.01 | 0.90 | 0.44 | 0.85 | 0.28 |
| 39012 | 0 | 33847  | KTRRNTNYQ          | 2.24 | 0.01 | 0.90 | 0.44 | 0.85 | 1.39 |
| 39013 | 0 | 33850  | KTRTHTNAT          | 2.25 | 0.01 | 0.90 | 0.44 | 0.85 | 1.39 |
| 39014 | 0 | 33850  | KTRTHTNAT          | 2.25 | 0.01 | 0.90 | 0.44 | 0.85 | 0.28 |
| 39015 | 0 | 33850  | KTRTHTNAT          | 2.25 | 0.01 | 0.90 | 0.44 | 0.85 | 0.28 |
| 39016 | 0 | 33850  | KTRTHTNAT          | 2.25 | 0.01 | 0.90 | 0.44 | 0.85 | 0.28 |
| 39017 | 0 | 33851  | KTRVYTNNNS         | 2.22 | 0.01 | 0.90 | 0.44 | 0.85 | 1.39 |
| 39018 | 0 | 33851  | KTRVYTNNNS         | 2.22 | 0.01 | 0.90 | 0.44 | 0.85 | 0.28 |
| 39019 | 0 | 33851  | KTRVYTNNNS         | 2.22 | 0.01 | 0.90 | 0.44 | 0.85 | 0.28 |
| 39020 | 0 | 33851  | KTRVYTNNNS         | 2.22 | 0.01 | 0.90 | 0.44 | 0.85 | 0.28 |
| 39021 | 0 | 33852  | K TSAEG            | 1.88 | 0.01 | 3.03 | 1.20 | 0.22 | 0.28 |
| 39022 | 0 | 115328 | KTSASIGSLCADA      | 2.56 | 0.01 | 2.19 | 1.12 | 0.22 | 0.28 |
| 39023 | 0 | 112563 | KTSASIGSLCADAR     | 2.61 | 0.01 | 0.78 | 2.25 | 0.22 | 0.28 |
| 39024 | 0 | 33857  | KTSERSQPRG         | 2.31 | 0.01 | 1.72 | 0.44 | 1.59 | 0.28 |
| 39025 | 0 | 33858  | KTSERSQPRGRRQPIPKA | 2.87 | 0.01 | 3.18 | 0.44 | 1.59 | 0.28 |
| 39026 | 0 | 33858  | KTSERSQPRGRRQPIPKA | 2.87 | 0.01 | 3.18 | 0.44 | 1.59 | 0.28 |

|       |   |        |                          |      |      |      |      |      |      |
|-------|---|--------|--------------------------|------|------|------|------|------|------|
| 39027 | 0 | 33859  | KTSESRQPRGRRQPIPKA<br>RR | 2.96 | 0.01 | 1.72 | 0.44 | 0.85 | 0.28 |
| 39028 | 0 | 33859  | KTSESRQPRGRRQPIPKA<br>RR | 2.96 | 0.01 | 1.72 | 1.20 | 0.22 | 0.85 |
| 39029 | 0 | 33859  | KTSESRQPRGRRQPIPKA<br>RR | 2.96 | 0.01 | 3.10 | 1.81 | 0.22 | 0.28 |
| 39030 | 0 | 33859  | KTSESRQPRGRRQPIPKA<br>RR | 2.96 | 0.01 | 3.10 | 0.44 | 0.85 | 0.28 |
| 39031 | 0 | 33859  | KTSESRQPRGRRQPIPKA<br>RR | 2.96 | 0.01 | 1.72 | 1.81 | 0.22 | 0.28 |
| 39032 | 0 | 33860  | KTSKRQAVPVT              | 2.48 | 0.01 | 2.69 | 0.44 | 0.85 | 0.28 |
| 39033 | 0 | 33860  | KTSKRQAVPVT              | 2.48 | 0.01 | 2.69 | 0.44 | 0.85 | 0.28 |
| 39034 | 0 | 164272 | KTSLKTL                  | 2.06 | 0.01 | 0.90 | 1.20 | 0.22 | 1.39 |
| 39035 | 0 | 33864  | KTSLSPD                  | 2.13 | 0.01 | 3.53 | 2.61 | 0.22 | 0.28 |
| 39036 | 0 | 93172  | KTSLWKEMQYNRDI           | 2.55 | 0.01 | 3.72 | 0.68 | 0.22 | 0.28 |
| 39037 | 0 | 93172  | KTSLWKEMQYNRDI           | 2.55 | 0.01 | 3.72 | 0.68 | 0.22 | 1.34 |
| 39038 | 0 | 33874  | KTSVDCNMYICGDSTEC        | 2.78 | 0.01 | 2.48 | 0.44 | 0.85 | 0.28 |
| 39039 | 0 | 33874  | KTSVDCNMYICGDSTEC        | 2.78 | 0.01 | 2.48 | 1.20 | 0.22 | 0.28 |
| 39040 | 0 | 115623 | KTTICGKGLSATVT           | 2.63 | 4.33 | 1.75 | 2.25 | 0.22 | 0.28 |
| 39041 | 0 | 115623 | KTTICGKGLSATVT           | 2.63 | 4.33 | 1.75 | 2.25 | 0.22 | 0.28 |
| 39042 | 0 | 115623 | KTTICGKGLSATVT           | 2.63 | 4.33 | 1.75 | 2.25 | 0.22 | 0.28 |
| 39043 | 0 | 115623 | KTTICGKGLSATVT           | 2.63 | 4.33 | 1.75 | 2.25 | 2.60 | 1.75 |
| 39044 | 0 | 107951 | KTTICGKGLSATVT           | 2.63 | 0.01 | 1.75 | 2.25 | 2.60 | 1.75 |
| 39045 | 0 | 107951 | KTTICGKGLSATVT           | 2.63 | 0.01 | 1.75 | 2.25 | 0.22 | 1.75 |
| 39046 | 0 | 107951 | KTTICGKGLSATVT           | 2.63 | 0.01 | 1.75 | 2.25 | 0.22 | 0.28 |
| 39047 | 0 | 107951 | KTTICGKGLSATVT           | 2.63 | 0.01 | 1.75 | 2.25 | 0.22 | 0.28 |
| 39048 | 0 | 107951 | KTTICGKGLSATVT           | 2.63 | 0.01 | 1.75 | 2.25 | 0.22 | 1.27 |
| 39049 | 0 | 107951 | KTTICGKGLSATVT           | 2.63 | 0.01 | 1.75 | 2.25 | 0.22 | 1.27 |
| 39050 | 0 | 107951 | KTTICGKGLSATVT           | 2.63 | 0.01 | 1.75 | 2.25 | 0.22 | 0.28 |
| 39051 | 0 | 107951 | KTTICGKGLSATVT           | 2.63 | 0.01 | 1.75 | 2.25 | 0.22 | 0.28 |
| 39052 | 0 | 107951 | KTTICGKGLSATVT           | 2.63 | 0.01 | 1.75 | 2.25 | 0.22 | 0.28 |
| 39053 | 0 | 107951 | KTTICGKGLSATVT           | 2.63 | 0.01 | 1.75 | 2.25 | 0.22 | 0.28 |
| 39054 | 0 | 33882  | KTTKKDHPQTT              | 2.51 | 0.01 | 2.38 | 0.44 | 1.74 | 0.28 |
| 39055 | 0 | 33882  | KTTKKDHPQTT              | 2.51 | 0.01 | 2.38 | 0.44 | 1.74 | 0.28 |
| 39056 | 0 | 122452 | KTTKQSFDSLVAQYKK<br>NKH  | 2.94 | 0.01 | 0.78 | 0.44 | 1.93 | 0.28 |
| 39057 | 0 | 122452 | KTTKQSFDSLVAQYKK<br>NKH  | 2.94 | 0.01 | 0.78 | 0.44 | 1.93 | 0.28 |
| 39058 | 0 | 122452 | KTTKQSFDSLVAQYKK<br>NKH  | 2.94 | 0.01 | 0.78 | 0.44 | 1.41 | 0.28 |
| 39059 | 0 | 122452 | KTTKQSFDSLVAQYKK<br>NKH  | 2.94 | 0.01 | 0.78 | 0.44 | 1.41 | 0.28 |
| 39060 | 0 | 122452 | KTTKQSFDSLVAQYKK<br>NKH  | 2.94 | 0.01 | 0.78 | 0.44 | 1.41 | 1.66 |

|       |   |        |                            |      |      |      |      |      |      |
|-------|---|--------|----------------------------|------|------|------|------|------|------|
| 39061 | 0 | 122452 | KTTKQSFDSL SVKAQYKK<br>NKH | 2.94 | 0.01 | 0.78 | 0.44 | 1.41 | 0.28 |
| 39062 | 0 | 122452 | KTTKQSFDSL SVKAQYKK<br>NKH | 2.94 | 0.01 | 0.78 | 0.44 | 1.41 | 1.48 |
| 39063 | 0 | 122452 | KTTKQSFDSL SVKAQYKK<br>NKH | 2.94 | 0.01 | 0.78 | 0.44 | 1.41 | 1.66 |
| 39064 | 0 | 122452 | KTTKQSFDSL SVKAQYKK<br>NKH | 2.94 | 0.01 | 0.78 | 0.44 | 1.41 | 1.66 |
| 39065 | 0 | 122452 | KTTKQSFDSL SVKAQYKK<br>NKH | 2.94 | 0.01 | 0.78 | 3.85 | 1.13 | 0.28 |
| 39066 | 0 | 122452 | KTTKQSFDSL SVKAQYKK<br>NKH | 2.94 | 0.01 | 0.78 | 3.85 | 1.13 | 0.28 |
| 39067 | 0 | 122452 | KTTKQSFDSL SVKAQYKK<br>NKH | 2.94 | 0.01 | 0.78 | 3.85 | 2.25 | 1.75 |
| 39068 | 0 | 122452 | KTTKQSFDSL SVKAQYKK<br>NKH | 2.94 | 0.01 | 0.78 | 3.85 | 0.22 | 0.28 |
| 39069 | 0 | 122452 | KTTKQSFDSL SVKAQYKK<br>NKH | 2.94 | 0.01 | 0.78 | 3.85 | 0.22 | 0.28 |
| 39070 | 0 | 122452 | KTTKQSFDSL SVKAQYKK<br>NKH | 2.94 | 0.01 | 0.78 | 3.85 | 0.22 | 0.85 |
| 39071 | 0 | 122452 | KTTKQSFDSL SVKAQYKK<br>NKH | 2.94 | 0.01 | 0.78 | 3.85 | 0.22 | 0.85 |
| 39072 | 0 | 122452 | KTTKQSFDSL SVKAQYKK<br>NKH | 2.94 | 0.01 | 0.78 | 3.85 | 0.22 | 0.28 |
| 39073 | 0 | 122452 | KTTKQSFDSL SVKAQYKK<br>NKH | 2.94 | 0.01 | 0.78 | 0.44 | 1.93 | 0.28 |
| 39074 | 0 | 122452 | KTTKQSFDSL SVKAQYKK<br>NKH | 2.94 | 0.01 | 0.78 | 0.44 | 1.93 | 0.28 |
| 39075 | 0 | 122452 | KTTKQSFDSL SVKAQYKK<br>NKH | 2.94 | 0.01 | 0.78 | 1.81 | 0.22 | 0.85 |
| 39076 | 0 | 122452 | KTTKQSFDSL SVKAQYKK<br>NKH | 2.94 | 0.01 | 0.78 | 1.15 | 0.22 | 0.28 |
| 39077 | 0 | 33888  | KT TLLK                    | 1.93 | 0.01 | 2.61 | 0.44 | 0.85 | 0.28 |
| 39078 | 0 | 33889  | KT TLLKILA                 | 2.27 | 0.01 | 2.61 | 0.44 | 0.85 | 0.28 |
| 39079 | 0 | 33891  | KT TQLSDITSRFNSAIEAL<br>N  | 2.94 | 0.01 | 3.21 | 3.14 | 0.22 | 0.28 |
| 39080 | 0 | 324305 | KTTTAATGDS DGSTA           | 2.73 | 0.01 | 1.61 | 0.44 | 0.85 | 1.28 |
| 39081 | 0 | 324308 | KTTTATTGDS DGSTA           | 2.73 | 0.01 | 1.61 | 0.44 | 0.85 | 1.28 |
| 39082 | 0 | 324309 | KTTTATTGDS DGSTA           | 2.73 | 0.01 | 1.61 | 0.44 | 0.85 | 1.28 |
| 39083 | 0 | 324310 | KTTTATTGDS DG VKA          | 2.72 | 0.01 | 1.61 | 0.44 | 0.85 | 1.28 |
| 39084 | 0 | 324311 | KTTTATTGDS DSSTA           | 2.73 | 0.01 | 1.61 | 0.44 | 0.85 | 1.28 |
| 39085 | 0 | 324312 | KTTTATTGNS DGSTA           | 2.71 | 0.01 | 1.61 | 0.44 | 0.85 | 1.28 |
| 39086 | 0 | 324313 | KTTTATTGNS DGSTA           | 2.72 | 0.01 | 1.61 | 0.44 | 0.85 | 1.28 |
| 39087 | 0 | 33892  | KTTTKPTKKPTF               | 2.54 | 0.01 | 2.38 | 0.68 | 0.22 | 0.28 |
| 39088 | 0 | 33892  | KTTTKPTKKPTF               | 2.54 | 0.01 | 2.38 | 0.44 | 1.74 | 0.28 |
| 39089 | 0 | 33893  | KTTTSSHP                   | 2.14 | 0.01 | 2.83 | 2.61 | 0.22 | 0.28 |
| 39090 | 0 | 324325 | KTTTTTTGDS DGSTA           | 2.72 | 0.01 | 1.61 | 0.44 | 0.85 | 1.28 |

|       |   |        |                                    |      |      |      |      |      |      |
|-------|---|--------|------------------------------------|------|------|------|------|------|------|
| 39091 | 0 | 33897  | KTTYGEESTSRGDPSALA<br>QRLSGRLPTSFN | 3.37 | 0.01 | 3.89 | 2.37 | 0.22 | 0.85 |
| 39092 | 0 | 33897  | KTTYGEESTSRGDPSALA<br>QRLSGRLPTSFN | 3.37 | 0.01 | 3.89 | 2.37 | 0.22 | 1.34 |
| 39093 | 0 | 95111  | KTVDH                              | 1.74 | 0.01 | 3.42 | 1.20 | 0.22 | 0.28 |
| 39094 | 0 | 149785 | KTVGVKDLQAQ                        | 2.48 | 0.01 | 3.53 | 0.68 | 0.22 | 0.28 |
| 39095 | 0 | 149785 | KTVGVKDLQAQ                        | 2.48 | 0.01 | 3.53 | 0.68 | 0.22 | 0.28 |
| 39096 | 0 | 496674 | KTVNAIVNELNKSSKIA<br>RKDEIIQVATIS  | 3.37 | 0.01 | 3.15 | 0.44 | 1.93 | 2.12 |
| 39097 | 0 | 496674 | KTVNAIVNELNKSSKIA<br>RKDEIIQVATIS  | 3.37 | 0.01 | 3.15 | 0.44 | 1.93 | 2.12 |
| 39098 | 0 | 120724 | KTVTIFGESAGGASVGM<br>HILSPGSR      | 3.15 | 0.01 | 2.26 | 1.20 | 0.22 | 1.48 |
| 39099 | 0 | 122129 | KTVTVKEDQVMQQNPP<br>KF             | 2.86 | 0.01 | 0.78 | 0.68 | 0.22 | 0.85 |
| 39100 | 0 | 122129 | KTVTVKEDQVMQQNPP<br>KF             | 2.86 | 0.01 | 0.78 | 0.68 | 0.22 | 0.28 |
| 39101 | 0 | 122129 | KTVTVKEDQVMQQNPP<br>KF             | 2.86 | 0.01 | 0.78 | 0.68 | 0.22 | 0.85 |
| 39102 | 0 | 122129 | KTVTVKEDQVMQQNPP<br>KF             | 2.86 | 0.01 | 0.78 | 0.68 | 0.22 | 0.85 |
| 39103 | 0 | 115329 | KTVYQHQKAMKPWIQ<br>KTKV            | 2.97 | 0.01 | 1.60 | 0.44 | 1.23 | 1.28 |
| 39104 | 0 | 78189  | KTVYQHQKAMKPWIQ<br>KTKVIPYVRYL     | 3.25 | 0.01 | 1.60 | 0.44 | 1.23 | 1.28 |
| 39105 | 0 | 79009  | KTWCDAWCG                          | 2.23 | 0.01 | 3.33 | 2.43 | 0.22 | 0.28 |
| 39106 | 0 | 79009  | KTWCDAWCG                          | 2.23 | 0.01 | 3.33 | 2.43 | 0.22 | 0.28 |
| 39107 | 0 | 79009  | KTWCDAWCG                          | 2.23 | 0.01 | 3.33 | 2.43 | 0.22 | 0.28 |
| 39108 | 0 | 79009  | KTWCDAWCG                          | 2.23 | 0.01 | 3.33 | 2.43 | 0.22 | 0.28 |
| 39109 | 0 | 79009  | KTWCDAWCG                          | 2.23 | 0.01 | 3.33 | 2.43 | 0.22 | 0.28 |
| 39110 | 0 | 79009  | KTWCDAWCG                          | 2.23 | 0.01 | 3.33 | 2.43 | 0.22 | 0.28 |
| 39111 | 0 | 79009  | KTWCDAWCG                          | 2.23 | 0.01 | 3.33 | 2.43 | 0.22 | 1.34 |
| 39112 | 0 | 79009  | KTWCDAWCG                          | 2.23 | 0.01 | 3.33 | 2.43 | 0.22 | 1.75 |
| 39113 | 0 | 141693 | KTWG                               | 1.57 | 0.01 | 2.30 | 0.68 | 0.22 | 1.48 |
| 39114 | 0 | 141693 | KTWG                               | 1.57 | 0.01 | 2.30 | 0.68 | 0.22 | 0.85 |
| 39115 | 0 | 141693 | KTWG                               | 1.57 | 0.01 | 2.30 | 0.68 | 0.22 | 0.85 |
| 39116 | 0 | 141693 | KTWG                               | 1.57 | 0.01 | 2.30 | 0.68 | 0.22 | 0.85 |
| 39117 | 0 | 141693 | KTWG                               | 1.57 | 0.01 | 2.30 | 0.68 | 0.22 | 0.85 |
| 39118 | 0 | 141693 | KTWG                               | 1.57 | 0.01 | 2.30 | 0.68 | 0.22 | 2.02 |
| 39119 | 0 | 141693 | KTWG                               | 1.57 | 0.01 | 2.30 | 0.68 | 0.22 | 1.27 |
| 39120 | 0 | 141693 | KTWG                               | 1.57 | 0.01 | 2.30 | 0.68 | 0.22 | 0.28 |
| 39121 | 0 | 141693 | KTWG                               | 1.57 | 0.01 | 2.30 | 0.68 | 0.22 | 1.34 |
| 39122 | 0 | 33915  | KTWGQYWQV                          | 2.23 | 0.01 | 0.78 | 0.44 | 1.41 | 2.12 |
| 39123 | 0 | 114880 | KTYGNKCNFC                         | 2.34 | 0.01 | 2.25 | 0.44 | 1.23 | 0.85 |
| 39124 | 0 | 114880 | KTYGNKCNFC                         | 2.34 | 0.01 | 2.25 | 0.44 | 1.23 | 0.85 |
| 39125 | 0 | 33923  | KTYGNKCNFCNAVVES                   | 2.73 | 0.01 | 2.25 | 0.44 | 1.23 | 0.85 |

|       |   |        |                                                          |      |      |      |      |      |      |
|-------|---|--------|----------------------------------------------------------|------|------|------|------|------|------|
| 39126 | 0 | 33936  | KTYSQYKV                                                 | 2.15 | 0.01 | 1.66 | 0.44 | 1.74 | 0.28 |
| 39127 | 0 | 125118 | KVAAEQSLITVEGDK                                          | 2.66 | 0.01 | 2.24 | 0.44 | 1.13 | 0.28 |
| 39128 | 0 | 125118 | KVAAEQSLITVEGDK                                          | 2.66 | 0.01 | 2.24 | 0.44 | 1.41 | 0.28 |
| 39129 | 0 | 142436 | KVAATSLERWQQ                                             | 2.42 | 0.01 | 0.90 | 0.68 | 0.22 | 0.85 |
| 39130 | 0 | 324385 | KVAEAEKQKAAEATK                                          | 2.74 | 0.01 | 1.61 | 0.44 | 0.85 | 1.28 |
| 39131 | 0 | 324386 | KVAEAEKQRAAAATK                                          | 2.71 | 0.01 | 1.61 | 0.44 | 0.85 | 1.28 |
| 39132 | 0 | 324387 | KVAEAEKQRAAEATK                                          | 2.73 | 0.01 | 1.61 | 0.44 | 0.85 | 1.28 |
| 39133 | 0 | 324389 | KVAEAEKRKAAEATK                                          | 2.74 | 0.01 | 1.61 | 0.44 | 0.85 | 1.28 |
| 39134 | 0 | 238676 | KVAGFELGADHAVA                                           | 2.63 | 0.01 | 2.14 | 2.65 | 0.22 | 0.85 |
| 39135 | 0 | 238677 | KVAGSDGYAVKGKY                                           | 2.67 | 0.01 | 2.14 | 2.65 | 0.22 | 0.85 |
| 39136 | 0 | 33951  | KVALEAPLKQIAFNS                                          | 2.67 | 0.01 | 2.04 | 2.97 | 0.22 | 0.28 |
| 39137 | 0 | 147895 | KVAPNLTNE                                                | 2.21 | 0.01 | 3.24 | 3.57 | 0.85 | 0.28 |
| 39138 | 0 | 107952 | KVCDLIGDAIGCKHCKLD<br>ELDEWNDVDMRD<br>KVCPTICKSHGCTAEGLC | 3.35 | 0.01 | 0.90 | 1.12 | 0.22 | 0.28 |
| 39139 | 0 | 103329 | CHSECLGNCSQPDDPTK<br>CVACRNF<br>KVCPTICKSHGCTAEGLC       | 3.67 | 0.01 | 0.78 | 1.12 | 0.22 | 0.85 |
| 39140 | 0 | 103329 | CHSECLGNCSQPDDPTK<br>CVACRNF                             | 3.67 | 0.01 | 0.78 | 1.12 | 0.22 | 2.02 |
| 39141 | 0 | 192986 | KVCRTKQGGTAKKYAKY<br>AEK                                 | 2.97 | 0.01 | 3.47 | 2.00 | 0.22 | 0.28 |
| 39142 | 0 | 192987 | KVCVTKKTSTSGNQYAK<br>YAS                                 | 2.98 | 0.01 | 3.47 | 2.00 | 0.22 | 0.28 |
| 39143 | 0 | 151676 | KVDFPQDQLATLTGRI                                         | 2.71 | 3.85 | 1.75 | 2.25 | 0.22 | 0.85 |
| 39144 | 0 | 79010  | KVDNAETIKKELGLSLTE<br>P                                  | 2.89 | 0.01 | 3.42 | 2.88 | 0.22 | 0.28 |
| 39145 | 0 | 79010  | KVDNAETIKKELGLSLTE<br>P                                  | 2.89 | 0.01 | 3.42 | 2.88 | 0.22 | 0.28 |
| 39146 | 0 | 188299 | KVDPATYGIIVPVL                                           | 2.67 | 0.01 | 1.66 | 1.20 | 0.22 | 0.28 |
| 39147 | 0 | 236250 | KVDYFIKNSDGSRGF                                          | 2.69 | 0.01 | 1.66 | 0.44 | 0.85 | 1.28 |
| 39148 | 0 | 129173 | KVEAKEESESEDEDM                                          | 2.73 | 0.01 | 0.78 | 0.44 | 1.13 | 0.85 |
| 39149 | 0 | 129174 | KVEAKKEESESDDD                                           | 2.71 | 0.01 | 0.78 | 0.44 | 1.13 | 0.85 |
| 39150 | 0 | 33975  | KVEEEHKKDHEKLE                                           | 2.67 | 0.01 | 3.97 | 2.42 | 0.22 | 0.28 |
| 39151 | 0 | 142827 | KVEFWPCSPITQGDR                                          | 2.60 | 0.01 | 3.06 | 2.13 | 0.22 | 0.28 |
| 39152 | 0 | 228431 | KVEGKTIAEQILQYGS                                         | 2.74 | 0.01 | 1.86 | 0.68 | 0.22 | 0.28 |
| 39153 | 0 | 467462 | KVEHEIVEVEEILPE                                          | 2.73 | 0.01 | 1.66 | 0.44 | 0.85 | 1.28 |
| 39154 | 0 | 181700 | KVEKGLQVVFGKIYN                                          | 2.68 | 0.01 | 1.66 | 2.37 | 0.22 | 1.28 |
| 39155 | 0 | 33985  | KVEQGASVDKRHDGGC<br>RKEL                                 | 2.94 | 0.01 | 2.25 | 0.44 | 1.23 | 0.28 |
| 39156 | 0 | 236561 | KVEVEGHLIDLKRVV                                          | 2.69 | 0.01 | 3.70 | 2.13 | 0.22 | 1.28 |
| 39157 | 0 | 33987  | KVFAGSLFES                                               | 2.31 | 3.85 | 2.70 | 0.44 | 0.85 | 0.28 |
| 39158 | 0 | 135097 | KVFDIVIFEKIIRE                                           | 2.73 | 0.01 | 3.59 | 2.13 | 0.85 | 0.85 |
| 39159 | 0 | 189702 | KVFEIIDQDKSDFVE                                          | 2.71 | 0.01 | 3.28 | 0.44 | 1.23 | 0.28 |
| 39160 | 0 | 34001  | KVFLARLIWWLQYF                                           | 2.60 | 0.01 | 1.96 | 0.44 | 1.41 | 0.28 |
| 39161 | 0 | 130933 | KVFQGNQDSFTPVVNSL<br>DPP                                 | 2.94 | 0.01 | 0.78 | 0.44 | 2.35 | 0.28 |

|       |   |        |                                             |      |      |      |      |      |      |
|-------|---|--------|---------------------------------------------|------|------|------|------|------|------|
| 39162 | 0 | 156907 | KVGDPLW                                     | 1.99 | 0.01 | 0.90 | 1.20 | 0.22 | 0.28 |
| 39163 | 0 | 156907 | KVGDPLW                                     | 1.99 | 0.01 | 0.90 | 1.81 | 0.22 | 0.28 |
| 39164 | 0 | 156907 | KVGDPLW                                     | 1.99 | 0.01 | 0.90 | 1.81 | 2.25 | 1.75 |
| 39165 | 0 | 98190  | KVGIV                                       | 1.75 | 0.01 | 3.97 | 0.44 | 0.85 | 0.28 |
| 39166 | 0 | 34028  | KVGNFTGLYSSTVPIFNP<br>EWQTPS                | 3.11 | 0.01 | 2.08 | 0.68 | 0.22 | 0.28 |
| 39167 | 0 | 34028  | KVGNFTGLYSSTVPIFNP<br>EWQTPS                | 3.11 | 0.01 | 2.08 | 0.68 | 0.22 | 1.39 |
| 39168 | 0 | 34028  | KVGNFTGLYSSTVPIFNP<br>EWQTPS                | 3.11 | 0.01 | 2.08 | 0.68 | 0.22 | 0.28 |
| 39169 | 0 | 158943 | KVIDQDASGFIEVEE                             | 2.66 | 0.01 | 3.26 | 0.44 | 1.23 | 0.28 |
| 39170 | 0 | 34040  | KVIDTLTCGFADLMGYIP<br>LV                    | 2.93 | 0.01 | 2.68 | 3.63 | 0.22 | 0.28 |
| 39171 | 0 | 34040  | KVIDTLTCGFADLMGYIP<br>LV                    | 2.93 | 0.01 | 2.68 | 3.63 | 0.22 | 0.28 |
| 39172 | 0 | 462381 | KVIDTLTCGFADLMGYIP<br>LVGAPLGGAARALAHG<br>V | 3.49 | 0.01 | 1.96 | 2.90 | 0.22 | 0.28 |
| 39173 | 0 | 34044  | KVIEQLTKRELEQVKLLA<br>DIYE                  | 3.06 | 0.01 | 3.85 | 0.68 | 0.22 | 0.85 |
| 39174 | 0 | 34044  | KVIEQLTKRELEQVKLLA<br>DIYE                  | 3.06 | 0.01 | 3.85 | 0.68 | 0.22 | 1.48 |
| 39175 | 0 | 34045  | KVIHDKFEIVE                                 | 2.43 | 0.01 | 3.10 | 1.12 | 0.22 | 0.85 |
| 39176 | 0 | 34045  | KVIHDKFEIVE                                 | 2.43 | 0.01 | 3.10 | 0.44 | 1.74 | 0.28 |
| 39177 | 0 | 118478 | KVISELNGKNIEDVI                             | 2.71 | 0.01 | 0.78 | 0.44 | 0.85 | 0.85 |
| 39178 | 0 | 34057  | KVITKGDDKPVIQVQ                             | 2.71 | 0.01 | 2.30 | 0.44 | 0.85 | 0.28 |
| 39179 | 0 | 34057  | KVITKGDDKPVIQVQ                             | 2.71 | 0.01 | 2.30 | 0.44 | 1.41 | 0.28 |
| 39180 | 0 | 181701 | KVKDTCQGYNNSGYR                             | 2.66 | 0.01 | 2.86 | 2.37 | 0.22 | 1.28 |
| 39181 | 0 | 181701 | KVKDTCQGYNNSGYR                             | 2.66 | 0.01 | 2.86 | 2.36 | 0.22 | 1.28 |
| 39182 | 0 | 520607 | KVKEDKQISDASRQG                             | 2.69 | 0.01 | 2.24 | 0.44 | 1.41 | 1.28 |
| 39183 | 0 | 520608 | KVKEEKQISDASRQG                             | 2.68 | 0.01 | 2.24 | 0.44 | 1.41 | 1.28 |
| 39184 | 0 | 34065  | KVKEISNQEPLKI                               | 2.56 | 0.01 | 2.56 | 2.69 | 0.22 | 0.28 |
| 39185 | 0 | 34068  | KVKILPKDRWTQHTTTG<br>G                      | 2.81 | 0.01 | 4.63 | 1.12 | 0.22 | 2.12 |
| 39186 | 0 | 34075  | KVKQAEDKLDASREAKK<br>QVEDKVKQLED            | 3.33 | 0.01 | 0.90 | 2.42 | 0.22 | 0.28 |
| 39187 | 0 | 117555 | KVKSKKREAVAGR                               | 2.59 | 0.01 | 0.78 | 0.44 | 1.13 | 0.85 |
| 39188 | 0 | 34081  | KVKTTVVYGRRRSK                              | 2.64 | 0.01 | 2.40 | 2.43 | 0.22 | 0.28 |
| 39189 | 0 | 34081  | KVKTTVVYGRRRSK                              | 2.64 | 0.01 | 2.40 | 2.43 | 0.22 | 0.28 |
| 39190 | 0 | 34081  | KVKTTVVYGRRRSK                              | 2.64 | 0.01 | 2.40 | 2.43 | 0.22 | 0.28 |
| 39191 | 0 | 450769 | KVKTYDM                                     | 2.03 | 0.01 | 0.90 | 0.44 | 1.41 | 1.39 |
| 39192 | 0 | 34082  | KVKVEYQKTMGSM                               | 2.56 | 0.01 | 3.00 | 0.44 | 0.85 | 0.28 |
| 39193 | 0 | 34084  | KVKYNCTCGTGNVGTT<br>NSDM                    | 2.97 | 0.01 | 3.13 | 2.43 | 0.22 | 0.28 |
| 39194 | 0 | 534613 | KVLESDLKKSDDID                              | 2.66 | 0.01 | 0.78 | 0.68 | 0.22 | 0.28 |
| 39195 | 0 | 34103  | KVLHKRTLGLSAMSTT                            | 2.74 | 0.01 | 2.08 | 0.44 | 0.85 | 0.28 |
| 39196 | 0 | 34103  | KVLHKRTLGLSAMSTT                            | 2.74 | 0.01 | 2.08 | 0.44 | 0.85 | 0.28 |

|       |   |        |                               |      |      |      |      |      |      |
|-------|---|--------|-------------------------------|------|------|------|------|------|------|
| 39197 | 0 | 34103  | KVLHKRTLGLSAMSTT              | 2.74 | 0.01 | 2.08 | 0.44 | 0.85 | 0.28 |
| 39198 | 0 | 125467 | KVLNRIMAGVRH                  | 2.45 | 0.01 | 0.90 | 0.68 | 0.22 | 1.39 |
| 39199 | 0 | 125467 | KVLNRIMAGVRH                  | 2.45 | 0.01 | 0.90 | 0.68 | 0.22 | 1.39 |
| 39200 | 0 | 115835 | KVLPVPQKAV                    | 2.36 | 0.01 | 1.60 | 0.44 | 1.23 | 0.85 |
| 39201 | 0 | 115835 | KVLPVPQKAV                    | 2.36 | 0.01 | 1.60 | 0.44 | 1.23 | 0.85 |
| 39202 | 0 | 171971 | KVLRDNIQGITKPAI               | 2.65 | 0.01 | 0.78 | 0.44 | 1.41 | 0.28 |
| 39203 | 0 | 34115  | KVLSPLQDNNDSGH                | 2.60 | 0.01 | 2.69 | 0.44 | 1.41 | 0.28 |
| 39204 | 0 | 34115  | KVLSPLQDNNDSGH                | 2.60 | 0.01 | 2.69 | 0.44 | 0.85 | 0.28 |
| 39205 | 0 | 34118  | KVLTAVDPLYA                   | 2.48 | 0.01 | 0.90 | 2.74 | 0.22 | 1.27 |
| 39206 | 0 | 151678 | KVLTPTQVMNRPSSISW<br>DGLDPGKL | 3.15 | 3.24 | 1.75 | 2.25 | 0.22 | 0.85 |
| 39207 | 0 | 240892 | KVLTRDVPALTNQEI               | 2.64 | 0.01 | 4.93 | 0.44 | 1.41 | 0.28 |
| 39208 | 0 | 131939 | KVLTSTFNKELQAYAK              | 2.74 | 0.01 | 1.75 | 0.68 | 0.22 | 0.85 |
| 39209 | 0 | 94575  | KVLTTLGLPALISW                | 2.52 | 0.01 | 3.57 | 0.68 | 2.25 | 1.75 |
| 39210 | 0 | 94575  | KVLTTLGLPALISW                | 2.52 | 0.01 | 3.57 | 0.68 | 2.25 | 1.75 |
| 39211 | 0 | 79894  | KVLVEGNTDERGTPEYN<br>IAL      | 2.93 | 0.01 | 3.10 | 1.12 | 0.22 | 2.35 |
| 39212 | 0 | 96517  | KVLVLDTDYKKYLLF               | 2.72 | 0.01 | 1.60 | 0.44 | 1.23 | 0.28 |
| 39213 | 0 | 34124  | KVLVVLL                       | 2.01 | 0.01 | 2.68 | 0.44 | 0.85 | 0.28 |
| 39214 | 0 | 34127  | KVMATIDSF                     | 2.18 | 0.01 | 3.75 | 0.44 | 0.85 | 0.85 |
| 39215 | 0 | 99405  | KVMIGKPKAQNIRQG               | 2.69 | 0.01 | 2.86 | 2.02 | 0.85 | 0.85 |
| 39216 | 0 | 324643 | KVMVHDDHSLA                   | 2.40 | 0.01 | 1.75 | 1.12 | 0.22 | 2.02 |
| 39217 | 0 | 230234 | KVMVLCNRAFNPVCGT<br>DGV       | 2.93 | 0.01 | 2.25 | 0.44 | 1.23 | 0.28 |
| 39218 | 0 | 34132  | KVND                          | 1.74 | 0.01 | 3.51 | 1.15 | 0.22 | 0.28 |
| 39219 | 0 | 167612 | KVNEQREESNKSQK                | 2.66 | 0.01 | 3.10 | 0.44 | 0.85 | 1.28 |
| 39220 | 0 | 167612 | KVNEQREESNKSQK                | 2.66 | 0.01 | 3.10 | 0.44 | 1.59 | 1.28 |
| 39221 | 0 | 134122 | KVNERGEYFW                    | 2.29 | 0.01 | 0.78 | 1.12 | 0.22 | 1.39 |
| 39222 | 0 | 34135  | KVNFPHGMLDLEEIAAN<br>SKD      | 2.90 | 0.01 | 2.82 | 0.44 | 0.85 | 0.28 |
| 39223 | 0 | 34135  | KVNFPHGMLDLEEIAAN<br>SKD      | 2.90 | 0.01 | 2.82 | 0.44 | 1.41 | 0.28 |
| 39224 | 0 | 324650 | KVNGRETIDPDPQKQ               | 2.67 | 0.01 | 1.61 | 0.44 | 0.85 | 1.28 |
| 39225 | 0 | 34138  | KVNIKPLEDK                    | 2.32 | 0.01 | 2.04 | 0.68 | 0.22 | 0.28 |
| 39226 | 0 | 34138  | KVNIKPLEDK                    | 2.32 | 0.01 | 2.04 | 0.68 | 0.22 | 0.28 |

|       |   |       |                                                                                                                                                                                                                                                            |      |      |      |      |      |      |
|-------|---|-------|------------------------------------------------------------------------------------------------------------------------------------------------------------------------------------------------------------------------------------------------------------|------|------|------|------|------|------|
| 39227 | 0 | 34140 | KVNNWDLFFSPSEDNFT<br>NDLNKGEEITSDTNIEAA<br>EENISLDLIQQYYLTFNFD<br>NEPENISIENLSSDIIGQL<br>ELMPNIERFPNGKKYEL<br>DKYTMFHYLRAQEFEHG<br>KSRIALTNSVNEALLNPS<br>RVYTFSSDYVKKVNKAT<br>EAAMFLGWVEQLVYDF<br>TDETSEVSTTDKIADITIII<br>PYIGPALNIGNMLYKDD<br>FVGALIFSGAV | 5.31 | 0.01 | 2.08 | 3.23 | 0.22 | 0.28 |
|-------|---|-------|------------------------------------------------------------------------------------------------------------------------------------------------------------------------------------------------------------------------------------------------------------|------|------|------|------|------|------|

|       |   |       |                                                                                                                                                                                                                                                            |      |      |      |      |      |      |
|-------|---|-------|------------------------------------------------------------------------------------------------------------------------------------------------------------------------------------------------------------------------------------------------------------|------|------|------|------|------|------|
| 39228 | 0 | 34140 | KVNNWDLFFSPSEDNFT<br>NDLNKGEEITSDTNIEAA<br>EENISLDLIQQYYLTFNFD<br>NEPENISIENLSSDIIGQL<br>ELMPNIERFPNGKKYEL<br>DKYTMFHYLRAQEFEHG<br>KSRIALTNSVNEALLNPS<br>RVYTFSSDYVKKVNKAT<br>EAAMFLGWVEQLVYDF<br>TDETSEVSTTDKIADITIII<br>PYIGPALNIGNMLYKDD<br>FVGALIFSGAV | 5.31 | 0.01 | 2.08 | 2.02 | 0.22 | 0.85 |
|-------|---|-------|------------------------------------------------------------------------------------------------------------------------------------------------------------------------------------------------------------------------------------------------------------|------|------|------|------|------|------|

|       |   |       |                                                                                                                                                                                                                                                            |      |      |      |      |      |      |
|-------|---|-------|------------------------------------------------------------------------------------------------------------------------------------------------------------------------------------------------------------------------------------------------------------|------|------|------|------|------|------|
| 39229 | 0 | 34140 | KVNNWDLFFSPSEDNFT<br>NDLNKGEEITSDTNIEAA<br>EENISLDLIQQYYLTFNFD<br>NEPENISIENLSSDIIGQL<br>ELMPNIERFPNGKKYEL<br>DKYTMFHYLRAQEFEHG<br>KSRIALTNSVNEALLNPS<br>RVYTFSSDYVKKVNKAT<br>EAAMFLGWVEQLVYDF<br>TDETSEVSTTDKIADITIII<br>PYIGPALNIGNMLYKDD<br>FVGALIFSGAV | 5.31 | 0.01 | 2.08 | 3.23 | 0.22 | 0.85 |
|-------|---|-------|------------------------------------------------------------------------------------------------------------------------------------------------------------------------------------------------------------------------------------------------------------|------|------|------|------|------|------|



|       |   |        |                                |      |      |      |      |      |      |
|-------|---|--------|--------------------------------|------|------|------|------|------|------|
|       |   |        | KVNNWDLFFSPSEDNFT              |      |      |      |      |      |      |
|       |   |        | NDLNKGEEITSDTNIEAA             |      |      |      |      |      |      |
|       |   |        | EENISLDLIQQYYLTFNFD            |      |      |      |      |      |      |
|       |   |        | NEPENISIENLSSDIIGQL            |      |      |      |      |      |      |
|       |   |        | ELMPNIERFPNGKKYEL              |      |      |      |      |      |      |
| 39230 | 0 | 34140  | DKYTMFHYLRAQEFEHG              | 5.31 | 0.01 | 2.08 | 3.23 | 2.25 | 1.75 |
|       |   |        | KSRIALTNSVNEALLNPS             |      |      |      |      |      |      |
|       |   |        | RVYTFSSDYVKKVNKAT              |      |      |      |      |      |      |
|       |   |        | EAAMFLGWVEQLVYDF               |      |      |      |      |      |      |
|       |   |        | TDETSEVSTTDKIADITIII           |      |      |      |      |      |      |
|       |   |        | PYIGPALNIGNMLYKDD              |      |      |      |      |      |      |
|       |   |        | FVGALIFSGAV                    |      |      |      |      |      |      |
| 39231 | 0 | 34143  | KVNSRCEQ                       | 2.10 | 0.01 | 2.99 | 0.44 | 0.85 | 0.28 |
| 39232 | 0 | 133867 | KVPAPKKGSKKAV                  | 2.60 | 0.01 | 1.60 | 3.05 | 0.22 | 0.28 |
| 39233 | 0 | 133867 | KVPAPKKGSKKAV                  | 2.60 | 0.01 | 1.60 | 3.05 | 0.22 | 0.28 |
| 39234 | 0 | 133867 | KVPAPKKGSKKAV                  | 2.60 | 0.01 | 1.60 | 3.05 | 0.22 | 0.28 |
| 39235 | 0 | 34153  | KVPAWARRL                      | 2.22 | 0.01 | 0.90 | 0.68 | 0.22 | 0.28 |
| 39236 | 0 | 423393 | KVPEDSEPQCNP LLP               | 2.67 | 0.01 | 2.51 | 0.44 | 2.35 | 1.28 |
| 39237 | 0 | 34154  | KVPEDTLN                       | 2.10 | 0.01 | 2.04 | 0.44 | 0.85 | 0.28 |
| 39238 | 0 | 34158  | KVPIPN                         | 1.90 | 0.01 | 1.86 | 0.44 | 1.23 | 0.28 |
| 39239 | 0 | 34165  | KVPPWARTA                      | 2.22 | 0.01 | 0.90 | 1.15 | 0.22 | 1.27 |
| 39240 | 0 | 34165  | KVPPWARTA                      | 2.22 | 0.01 | 0.90 | 0.68 | 0.22 | 0.28 |
| 39241 | 0 | 34165  | KVPPWARTA                      | 2.22 | 0.01 | 0.90 | 0.68 | 0.22 | 0.28 |
| 39242 | 0 | 34165  | KVPPWARTA                      | 2.22 | 0.01 | 0.90 | 0.68 | 0.22 | 1.48 |
| 39243 | 0 | 34169  | KVPTL                          | 1.74 | 0.01 | 3.38 | 1.15 | 0.22 | 0.85 |
| 39244 | 0 | 34169  | KVPTL                          | 1.74 | 0.01 | 3.38 | 1.15 | 0.22 | 1.34 |
| 39245 | 0 | 34170  | KVPTLK                         | 1.91 | 0.01 | 3.38 | 2.22 | 0.85 | 0.85 |
| 39246 | 0 | 117557 | KVQLLRNWH                      | 2.20 | 0.01 | 0.78 | 0.44 | 1.13 | 0.85 |
| 39247 | 0 | 140877 | KVQPYLDDFQKKWQEE               | 2.72 | 0.01 | 0.78 | 0.68 | 0.22 | 0.28 |
| 39248 | 0 | 534844 | KVQTAGIVTPYDILKQEL<br>DEF      | 2.99 | 0.01 | 3.44 | 1.15 | 0.22 | 3.93 |
| 39249 | 0 | 534844 | KVQTAGIVTPYDILKQEL<br>DEF      | 2.99 | 0.01 | 3.44 | 1.15 | 0.22 | 0.28 |
| 39250 | 0 | 158944 | KVQVQGPWDEEDIKLD               | 2.75 | 0.01 | 3.22 | 0.68 | 0.22 | 0.28 |
| 39251 | 0 | 34180  | KVQYDMPK                       | 2.13 | 0.01 | 1.66 | 0.44 | 1.74 | 0.28 |
| 39252 | 0 | 34181  | KVRAYTYGVIEMPENYA<br>KTRIINRKK | 3.21 | 0.01 | 3.50 | 3.26 | 0.22 | 0.28 |
| 39253 | 0 | 34182  | KVRAYTYGVVDMPQSYI<br>QNQEKKYKK | 3.12 | 0.01 | 3.50 | 2.00 | 1.59 | 0.28 |
| 39254 | 0 | 34182  | KVRAYTYGVVDMPQSYI<br>QNQEKKYKK | 3.12 | 0.01 | 3.50 | 3.26 | 1.59 | 1.27 |
| 39255 | 0 | 109456 | KVRAYTYGVVEMPSNIE<br>QKDRKKRD  | 3.14 | 0.01 | 4.63 | 2.00 | 0.22 | 0.28 |

|       |   |        |                                |      |      |      |      |      |      |
|-------|---|--------|--------------------------------|------|------|------|------|------|------|
| 39256 | 0 | 109456 | KVRAYTYGVVEMPSNYES<br>QKDRKKRD | 3.14 | 0.01 | 4.63 | 2.00 | 0.22 | 0.28 |
| 39257 | 0 | 34192  | KVRNWRESM                      | 2.21 | 0.01 | 0.90 | 1.20 | 0.22 | 0.85 |
| 39258 | 0 | 34192  | KVRNWRESM                      | 2.21 | 0.01 | 0.90 | 1.20 | 0.22 | 0.85 |
| 39259 | 0 | 419246 | KVRPDILTSPA                    | 2.44 | 0.01 | 0.90 | 0.44 | 1.93 | 1.39 |
| 39260 | 0 | 78191  | KVRVSD                         | 1.90 | 0.01 | 0.90 | 2.02 | 1.59 | 1.39 |
| 39261 | 0 | 34197  | KVSASQEIVQDGSVTE               | 2.75 | 0.01 | 1.66 | 0.44 | 1.74 | 0.28 |
| 39262 | 0 | 34197  | KVSASQEIVQDGSVTE               | 2.75 | 0.01 | 1.66 | 1.20 | 0.22 | 0.28 |
| 39263 | 0 | 34197  | KVSASQEIVQDGSVTE               | 2.75 | 0.01 | 1.66 | 0.44 | 1.74 | 0.28 |
| 39264 | 0 | 34197  | KVSASQEIVQDGSVTE               | 2.75 | 0.01 | 1.66 | 0.44 | 1.74 | 0.28 |
| 39265 | 0 | 34197  | KVSASQEIVQDGSVTE               | 2.75 | 0.01 | 1.66 | 3.27 | 0.22 | 0.28 |
| 39266 | 0 | 171978 | KVSEMEQLKKQIKDQ                | 2.70 | 0.01 | 0.78 | 0.44 | 1.41 | 0.28 |
| 39267 | 0 | 171978 | KVSEMEQLKKQIKDQ                | 2.70 | 0.01 | 0.78 | 0.44 | 1.13 | 0.28 |
| 39268 | 0 | 134123 | KVSFFCKNKEKKCSY                | 2.70 | 0.01 | 0.78 | 0.44 | 1.13 | 0.28 |
| 39269 | 0 | 134123 | KVSFFCKNKEKKCSY                | 2.70 | 0.01 | 0.78 | 0.44 | 1.13 | 0.28 |
| 39270 | 0 | 324725 | KVSGAVPEGEEYPT                 | 2.70 | 0.01 | 1.61 | 0.44 | 0.85 | 1.28 |
| 39271 | 0 | 34199  | KVSGKGQQQQGQTVTK<br>K          | 2.84 | 0.01 | 2.91 | 0.44 | 0.85 | 0.28 |
| 39272 | 0 | 98193  | KVSIYMVPQG                     | 2.29 | 0.01 | 3.57 | 0.44 | 0.85 | 0.28 |
| 39273 | 0 | 99406  | KVSKEHVEELTKHAK                | 2.71 | 0.01 | 2.16 | 0.44 | 1.23 | 1.48 |
| 39274 | 0 | 520623 | KVSLEEKQAANQTAI                | 2.68 | 0.01 | 2.24 | 0.44 | 1.41 | 1.28 |
| 39275 | 0 | 171979 | KVSLLEIYNEELFDL                | 2.67 | 0.01 | 0.78 | 0.44 | 1.41 | 0.28 |
| 39276 | 0 | 171979 | KVSLLEIYNEELFDL                | 2.67 | 0.01 | 0.78 | 0.44 | 1.13 | 0.28 |
| 39277 | 0 | 107497 | KVSNKAL                        | 2.03 | 0.01 | 0.78 | 0.44 | 1.13 | 0.28 |
| 39278 | 0 | 324741 | KVSSAVPEGEEYPT                 | 2.69 | 0.01 | 1.61 | 0.44 | 0.85 | 1.28 |
| 39279 | 0 | 151958 | KVSSFPSIRPI                    | 2.43 | 0.01 | 0.78 | 0.44 | 1.93 | 0.28 |
| 39280 | 0 | 34210  | KVTAFQHQNKKTK                  | 2.69 | 0.01 | 2.45 | 0.44 | 0.85 | 1.48 |
| 39281 | 0 | 34210  | KVTAFQHQNKKTK                  | 2.69 | 0.01 | 2.45 | 1.12 | 0.22 | 2.92 |
| 39282 | 0 | 149786 | KVTAQTDDRKTGL                  | 2.69 | 0.01 | 3.67 | 1.12 | 0.22 | 0.28 |
| 39283 | 0 | 152737 | KVTGRIDKNV                     | 2.32 | 0.01 | 2.18 | 2.16 | 0.22 | 0.28 |
| 39284 | 0 | 34215  | KVTKDGVTV                      | 2.36 | 0.01 | 0.78 | 0.44 | 1.41 | 0.28 |
| 39285 | 0 | 96521  | KVTKEKPTPP                     | 2.35 | 0.01 | 2.39 | 0.44 | 0.85 | 0.28 |
| 39286 | 0 | 34217  | KVTLADAGFMKQYGEC<br>L          | 2.76 | 0.01 | 2.48 | 0.68 | 0.22 | 0.28 |
| 39287 | 0 | 34217  | KVTLADAGFMKQYGEC<br>L          | 2.76 | 0.01 | 2.48 | 1.20 | 0.22 | 0.28 |
| 39288 | 0 | 34218  | KVTLGPKGRN                     | 2.32 | 0.01 | 3.20 | 0.44 | 1.41 | 0.28 |
| 39289 | 0 | 97432  | KVTLGPKVRN                     | 2.32 | 0.01 | 2.84 | 0.44 | 0.85 | 0.28 |
| 39290 | 0 | 112190 | KVTMTCK                        | 2.05 | 0.01 | 0.78 | 0.44 | 1.13 | 0.28 |
| 39291 | 0 | 78437  | KVTNGSKSYTLRYLASV<br>K         | 2.93 | 0.01 | 2.14 | 3.70 | 0.22 | 0.28 |

|       |   |        |                                                                     |      |      |      |      |      |      |
|-------|---|--------|---------------------------------------------------------------------|------|------|------|------|------|------|
| 39292 | 0 | 78437  | KVTNGSKSYTLRYLASV<br>K                                              | 2.93 | 0.01 | 2.14 | 3.70 | 0.22 | 0.28 |
| 39293 | 0 | 78437  | KVTNGSKSYTLRYLASV<br>K                                              | 2.93 | 0.01 | 2.14 | 3.70 | 0.22 | 0.28 |
| 39294 | 0 | 78437  | KVTNGSKSYTLRYLASV<br>K                                              | 2.93 | 0.01 | 2.14 | 1.15 | 0.22 | 0.28 |
| 39295 | 0 | 78437  | KVTNGSKSYTLRYLASV<br>K                                              | 2.93 | 0.01 | 2.14 | 1.15 | 0.22 | 0.28 |
| 39296 | 0 | 78437  | KVTNGSKSYTLRYLASV<br>K                                              | 2.93 | 0.01 | 2.14 | 3.70 | 0.22 | 0.28 |
| 39297 | 0 | 78437  | KVTNGSKSYTLRYLASV<br>K                                              | 2.93 | 0.01 | 2.14 | 3.70 | 0.22 | 0.28 |
| 39298 | 0 | 149787 | KVTTQTDDRKQTGL                                                      | 2.71 | 0.01 | 3.67 | 1.12 | 0.22 | 0.28 |
| 39299 | 0 | 171982 | KVTWLVSWTENIQGS                                                     | 2.66 | 0.01 | 0.78 | 0.44 | 1.13 | 0.28 |
| 39300 | 0 | 117968 | KVTWLVSWTENIQGSIK<br>YIM                                            | 2.94 | 0.01 | 0.78 | 0.44 | 1.13 | 0.28 |
| 39301 | 0 | 107955 | KVVHAMKYSFADIGCIK<br>GDDMMENNSSDKI                                  | 3.33 | 0.01 | 0.90 | 1.12 | 0.22 | 0.28 |
| 39302 | 0 | 177826 | KVVIDGKDQNV                                                         | 2.43 | 0.01 | 2.04 | 3.01 | 0.22 | 0.28 |
| 39303 | 0 | 230483 | KVVKALDYEQLQSVK                                                     | 2.70 | 0.01 | 0.78 | 0.44 | 1.13 | 0.28 |
| 39304 | 0 | 34238  | KVVLPE                                                              | 1.89 | 0.01 | 2.40 | 0.44 | 0.85 | 0.28 |
| 39305 | 0 | 34242  | KVVQERADMGVEKWLL<br>QKIGRGTQRRKADDGD<br>NDALLQLERMMSSEELE<br>RSVIES | 3.96 | 0.01 | 3.53 | 3.08 | 0.22 | 0.28 |
| 39306 | 0 | 34242  | KVVQERADMGVEKWLL<br>QKIGRGTQRRKADDGD<br>NDALLQLERMMSSEELE<br>RSVIES | 3.96 | 0.01 | 3.53 | 2.02 | 0.22 | 1.39 |
| 39307 | 0 | 34243  | KVVQLPKISKNALKANG                                                   | 2.81 | 0.01 | 2.14 | 0.44 | 0.85 | 0.28 |
| 39308 | 0 | 34243  | KVVQLPKISKNALKANG                                                   | 2.81 | 0.01 | 2.14 | 0.44 | 0.22 | 0.28 |
| 39309 | 0 | 34244  | KVVQLPKISKNALRNDG                                                   | 2.77 | 0.01 | 2.14 | 0.44 | 0.22 | 0.28 |
| 39310 | 0 | 34244  | KVVQLPKISKNALRNDG                                                   | 2.77 | 0.01 | 2.14 | 0.44 | 0.85 | 0.28 |
| 39311 | 0 | 34245  | KVVR                                                                | 1.59 | 0.01 | 2.25 | 0.68 | 0.22 | 0.85 |
| 39312 | 0 | 34246  | KVVRFD                                                              | 1.89 | 0.01 | 2.25 | 0.68 | 0.22 | 0.85 |
| 39313 | 0 | 178387 | KVWTLPR                                                             | 1.99 | 0.01 | 0.90 | 1.12 | 0.22 | 0.28 |
| 39314 | 0 | 196601 | KVWVLPI                                                             | 2.02 | 0.01 | 0.90 | 0.44 | 1.23 | 1.39 |
| 39315 | 0 | 196602 | KVWYITS                                                             | 1.99 | 0.01 | 0.90 | 0.44 | 1.23 | 1.39 |
| 39316 | 0 | 34264  | KVYKYF                                                              | 1.92 | 0.01 | 0.90 | 0.44 | 1.59 | 1.39 |
| 39317 | 0 | 34265  | KVYL                                                                | 1.57 | 0.01 | 2.25 | 0.68 | 0.22 | 0.85 |
| 39318 | 0 | 181703 | KVYPYENELKGILSN                                                     | 2.69 | 0.01 | 1.66 | 2.36 | 0.22 | 1.28 |
| 39319 | 0 | 34278  | KVYVGNPDF                                                           | 2.23 | 0.01 | 2.61 | 0.44 | 0.85 | 0.28 |
| 39320 | 0 | 178388 | KWDAT                                                               | 1.74 | 0.01 | 2.04 | 1.12 | 0.22 | 1.27 |

|       |   |        |                                    |      |      |      |      |      |      |
|-------|---|--------|------------------------------------|------|------|------|------|------|------|
| 39321 | 0 | 178388 | KWDAT                              | 1.74 | 0.01 | 2.04 | 0.44 | 0.85 | 0.28 |
| 39322 | 0 | 178388 | KWDAT                              | 1.74 | 0.01 | 2.04 | 0.68 | 0.22 | 0.28 |
| 39323 | 0 | 178389 | KWDATYT                            | 2.02 | 0.01 | 0.90 | 1.12 | 0.22 | 1.27 |
| 39324 | 0 | 178389 | KWDATYT                            | 2.02 | 0.01 | 0.90 | 0.44 | 0.85 | 0.28 |
| 39325 | 0 | 178389 | KWDATYT                            | 2.02 | 0.01 | 0.90 | 0.68 | 0.22 | 0.28 |
| 39326 | 0 | 34286  | KWDLFVERSK                         | 2.30 | 0.01 | 3.04 | 3.65 | 0.22 | 0.28 |
| 39327 | 0 | 34286  | KWDLFVERSK                         | 2.30 | 0.01 | 3.04 | 3.65 | 0.22 | 0.28 |
| 39328 | 0 | 139154 | KWEAAREAEQRR                       | 2.50 | 0.01 | 0.78 | 1.12 | 0.22 | 1.27 |
| 39329 | 0 | 139154 | KWEAAREAEQRR                       | 2.50 | 0.01 | 0.78 | 1.12 | 0.22 | 0.28 |
| 39330 | 0 | 139154 | KWEAAREAEQRR                       | 2.50 | 0.01 | 0.78 | 1.12 | 0.22 | 2.02 |
| 39331 | 0 | 139154 | KWEAAREAEQRR                       | 2.50 | 0.01 | 0.78 | 1.12 | 0.22 | 1.27 |
| 39332 | 0 | 139154 | KWEAAREAEQRR                       | 2.50 | 0.01 | 0.78 | 1.12 | 0.22 | 1.27 |
| 39333 | 0 | 34290  | KWEDSTSTLTISADSKKT<br>KD           | 2.99 | 0.01 | 2.73 | 0.68 | 0.22 | 1.34 |
| 39334 | 0 | 34290  | KWEDSTSTLTISADSKKT<br>KD           | 2.99 | 0.01 | 2.73 | 0.68 | 0.22 | 0.28 |
| 39335 | 0 | 34290  | KWEDSTSTLTISADSKKT<br>KD           | 2.99 | 0.01 | 2.73 | 0.68 | 0.22 | 0.28 |
| 39336 | 0 | 34295  | KWFKTNAPNGVDEKIRI                  | 2.76 | 0.01 | 3.10 | 2.69 | 0.22 | 0.28 |
| 39337 | 0 | 34295  | KWFKTNAPNGVDEKIRI                  | 2.76 | 0.01 | 3.10 | 1.12 | 0.22 | 0.28 |
| 39338 | 0 | 34295  | KWFKTNAPNGVDEKIRI                  | 2.76 | 0.01 | 3.10 | 1.12 | 0.22 | 0.28 |
| 39339 | 0 | 34295  | KWFKTNAPNGVDEKIRI                  | 2.76 | 0.01 | 3.10 | 0.68 | 0.22 | 0.28 |
| 39340 | 0 | 34295  | KWFKTNAPNGVDEKIRI                  | 2.76 | 0.01 | 2.86 | 0.68 | 0.22 | 0.28 |
| 39341 | 0 | 84902  | KWFKTNAPNGVDEKIRI<br>EVCVRQLKAIANK | 3.33 | 0.01 | 0.90 | 2.69 | 0.22 | 0.28 |
| 39342 | 0 | 113592 | KWGS LGVFFG                        | 2.32 | 0.01 | 3.85 | 1.12 | 0.22 | 0.28 |
| 39343 | 0 | 34297  | KWGVTTLS                           | 2.22 | 0.01 | 2.61 | 0.44 | 0.85 | 0.28 |
| 39344 | 0 | 181704 | KWINKKQGEFNKQKK                    | 2.70 | 0.01 | 2.86 | 2.37 | 0.22 | 1.28 |
| 39345 | 0 | 181704 | KWINKKQGEFNKQKK                    | 2.70 | 0.01 | 2.86 | 2.36 | 0.22 | 1.28 |
| 39346 | 0 | 34310  | KWKYENPCKKM                        | 2.41 | 0.01 | 3.10 | 1.15 | 0.22 | 0.28 |
| 39347 | 0 | 34311  | KWKYENPCKKMCTVSD<br>YISE           | 2.93 | 0.01 | 3.10 | 1.15 | 0.22 | 0.28 |
| 39348 | 0 | 123405 | KWLGDKFNM                          | 2.22 | 0.01 | 2.28 | 2.00 | 0.22 | 0.28 |
| 39349 | 0 | 123405 | KWLGDKFNM                          | 2.22 | 0.01 | 2.28 | 2.00 | 0.22 | 0.28 |
| 39350 | 0 | 130936 | KWNEANR                            | 2.02 | 0.01 | 0.78 | 3.75 | 0.22 | 1.27 |
| 39351 | 0 | 130936 | KWNEANR                            | 2.02 | 0.01 | 0.78 | 3.75 | 0.22 | 1.27 |
| 39352 | 0 | 118480 | KWNPDDYGGVK                        | 2.40 | 0.01 | 0.78 | 2.04 | 0.22 | 2.02 |
| 39353 | 0 | 118480 | KWNPDDYGGVK                        | 2.40 | 0.01 | 0.78 | 2.36 | 0.22 | 2.02 |
| 39354 | 0 | 118480 | KWNPDDYGGVK                        | 2.40 | 0.01 | 0.78 | 2.04 | 0.22 | 0.28 |
| 39355 | 0 | 118480 | KWNPDDYGGVK                        | 2.40 | 0.01 | 0.78 | 2.04 | 0.22 | 0.28 |

|       |   |        |                             |      |      |      |      |      |      |
|-------|---|--------|-----------------------------|------|------|------|------|------|------|
| 39356 | 0 | 118480 | KWNPDDYGGVK                 | 2.40 | 0.01 | 0.78 | 2.04 | 0.22 | 1.57 |
| 39357 | 0 | 118480 | KWNPDDYGGVK                 | 2.40 | 0.01 | 0.78 | 2.04 | 0.22 | 1.57 |
| 39358 | 0 | 118480 | KWNPDDYGGVK                 | 2.40 | 0.01 | 0.78 | 2.04 | 0.22 | 1.57 |
| 39359 | 0 | 158597 | KWPIIDT                     | 2.01 | 0.01 | 0.90 | 0.44 | 1.13 | 1.39 |
| 39360 | 0 | 123408 | KWPLNGWAA                   | 2.21 | 0.01 | 2.28 | 2.00 | 0.22 | 0.28 |
| 39361 | 0 | 123409 | KWPLNSWIA                   | 2.21 | 0.01 | 2.28 | 2.00 | 0.22 | 0.28 |
| 39362 | 0 | 34329  | KWSDKPK                     | 2.05 | 0.01 | 0.90 | 1.15 | 0.22 | 1.48 |
| 39363 | 0 | 34329  | KWSDKPK                     | 2.05 | 0.01 | 0.90 | 1.15 | 0.22 | 1.48 |
| 39364 | 0 | 34329  | KWSDKPK                     | 2.05 | 0.01 | 0.90 | 1.15 | 0.22 | 1.48 |
| 39365 | 0 | 34329  | KWSDKPK                     | 2.05 | 0.01 | 0.90 | 1.15 | 0.22 | 1.48 |
| 39366 | 0 | 34329  | KWSDKPK                     | 2.05 | 0.01 | 0.90 | 1.15 | 0.22 | 1.39 |
| 39367 | 0 | 127719 | KWSFTPP                     | 1.99 | 0.01 | 0.90 | 0.44 | 1.13 | 1.39 |
| 39368 | 0 | 34335  | KWVNGREI                    | 2.10 | 0.01 | 3.24 | 0.44 | 1.23 | 1.27 |
| 39369 | 0 | 34335  | KWVNGREI                    | 2.10 | 0.01 | 3.24 | 4.45 | 1.23 | 1.27 |
| 39370 | 0 | 34335  | KWVNGREI                    | 2.10 | 0.01 | 3.24 | 1.15 | 0.22 | 1.27 |
| 39371 | 0 | 34335  | KWVNGREI                    | 2.10 | 0.01 | 3.24 | 3.27 | 0.22 | 1.27 |
| 39372 | 0 | 34335  | KWVNGREI                    | 2.10 | 0.01 | 3.24 | 0.44 | 1.23 | 0.28 |
| 39373 | 0 | 34335  | KWVNGREI                    | 2.10 | 0.01 | 3.24 | 1.15 | 0.22 | 0.28 |
| 39374 | 0 | 34335  | KWVNGREI                    | 2.10 | 0.01 | 3.24 | 0.44 | 1.23 | 2.35 |
| 39375 | 0 | 34335  | KWVNGREI                    | 2.10 | 0.01 | 3.24 | 1.15 | 0.22 | 0.28 |
| 39376 | 0 | 136451 | KWWESRTVRPQY                | 2.44 | 0.01 | 3.48 | 3.70 | 0.85 | 1.34 |
| 39377 | 0 | 136451 | KWWESRTVRPQY                | 2.44 | 0.01 | 3.48 | 0.68 | 0.22 | 1.34 |
| 39378 | 0 | 34341  | KWYISKPQ                    | 2.13 | 0.01 | 0.90 | 0.68 | 0.22 | 0.28 |
| 39379 | 0 | 34341  | KWYISKPQ                    | 2.13 | 0.01 | 0.90 | 0.68 | 0.22 | 0.28 |
| 39380 | 0 | 34341  | KWYISKPQ                    | 2.13 | 0.01 | 0.90 | 0.68 | 0.22 | 1.34 |
| 39381 | 0 | 34351  | KYALADASLKMAD               | 2.60 | 4.93 | 2.40 | 0.68 | 2.25 | 1.75 |
| 39382 | 0 | 34353  | KYALADASLKMADPNR            | 2.75 | 0.01 | 2.40 | 1.20 | 0.22 | 0.85 |
| 39383 | 0 | 34353  | KYALADASLKMADPNR            | 2.75 | 0.01 | 2.40 | 1.20 | 0.22 | 0.85 |
| 39384 | 0 | 34353  | KYALADASLKMADPNR            | 2.75 | 0.01 | 2.40 | 1.20 | 0.22 | 0.85 |
| 39385 | 0 | 34353  | KYALADASLKMADPNR            | 2.75 | 0.01 | 2.40 | 1.20 | 0.22 | 0.85 |
| 39386 | 0 | 34355  | KYALADASLKMADPNRF<br>RGKDLP | 3.10 | 0.01 | 2.40 | 1.12 | 0.22 | 0.85 |
| 39387 | 0 | 34355  | KYALADASLKMADPNRF<br>RGKDLP | 3.10 | 0.01 | 2.40 | 1.12 | 0.22 | 0.85 |
| 39388 | 0 | 34355  | KYALADASLKMADPNRF<br>RGKDLP | 3.10 | 0.01 | 2.40 | 1.15 | 0.22 | 1.34 |
| 39389 | 0 | 34355  | KYALADASLKMADPNRF<br>RGKDLP | 3.10 | 0.01 | 2.40 | 1.12 | 0.22 | 0.85 |
| 39390 | 0 | 34355  | KYALADASLKMADPNRF<br>RGKDLP | 3.10 | 0.01 | 2.40 | 0.68 | 0.22 | 0.85 |
| 39391 | 0 | 34355  | KYALADASLKMADPNRF<br>RGKDLP | 3.10 | 0.01 | 2.40 | 1.15 | 0.22 | 0.28 |

|       |   |        |                                      |      |      |      |      |      |      |
|-------|---|--------|--------------------------------------|------|------|------|------|------|------|
| 39392 | 0 | 34355  | KYALADASLKMADPNRF<br>RGKDLP          | 3.10 | 0.01 | 2.40 | 0.68 | 0.22 | 0.28 |
| 39393 | 0 | 34355  | KYALADASLKMADPNRF<br>RGKDLP          | 3.10 | 0.01 | 2.40 | 0.68 | 2.25 | 1.75 |
| 39394 | 0 | 34356  | KYALADPSLKMADPNR                     | 2.75 | 0.01 | 2.40 | 1.12 | 0.22 | 0.85 |
| 39395 | 0 | 34356  | KYALADPSLKMADPNR                     | 2.75 | 0.01 | 2.40 | 1.20 | 0.22 | 0.85 |
| 39396 | 0 | 34356  | KYALADPSLKMADPNR                     | 2.75 | 0.01 | 2.40 | 1.20 | 0.22 | 0.85 |
| 39397 | 0 | 34356  | KYALADPSLKMADPNR                     | 2.75 | 0.01 | 2.40 | 1.20 | 0.22 | 0.85 |
| 39398 | 0 | 34356  | KYALADPSLKMADPNR                     | 2.75 | 0.01 | 2.40 | 1.20 | 0.22 | 0.85 |
| 39399 | 0 | 227795 | KYALADPSLKMADPNRF<br>RGK             | 2.95 | 0.01 | 2.40 | 0.44 | 0.22 | 0.28 |
| 39400 | 0 | 34357  | KYALADPSLKMADPNRF<br>RGKDLP          | 3.10 | 0.01 | 0.90 | 1.12 | 0.22 | 0.85 |
| 39401 | 0 | 34357  | KYALADPSLKMADPNRF<br>RGKDLP          | 3.10 | 0.01 | 0.90 | 0.68 | 0.22 | 0.85 |
| 39402 | 0 | 34358  | KYALADPSLKMADPNRF<br>RGKNLP          | 3.10 | 0.01 | 2.40 | 1.12 | 0.22 | 0.85 |
| 39403 | 0 | 34358  | KYALADPSLKMADPNRF<br>RGKNLP          | 3.10 | 0.01 | 2.40 | 1.12 | 0.22 | 0.85 |
| 39404 | 0 | 34358  | KYALADPSLKMADPNRF<br>RGKNLP          | 3.10 | 0.01 | 2.40 | 0.68 | 0.22 | 0.85 |
| 39405 | 0 | 34358  | KYALADPSLKMADPNRF<br>RGKNLP          | 3.10 | 0.01 | 2.40 | 0.68 | 0.22 | 0.28 |
| 39406 | 0 | 34358  | KYALADPSLKMADPNRF<br>RGKNLP          | 3.10 | 0.01 | 2.40 | 0.68 | 0.22 | 1.75 |
| 39407 | 0 | 489628 | KYAVTVETRLIDERAHV                    | 2.84 | 0.01 | 3.16 | 1.12 | 0.22 | 0.85 |
| 39408 | 0 | 489628 | KYAVTVETRLIDERAHV                    | 2.84 | 0.01 | 3.16 | 0.68 | 0.22 | 0.28 |
| 39409 | 0 | 489628 | KYAVTVETRLIDERAHV                    | 2.84 | 0.01 | 3.16 | 0.68 | 0.22 | 0.28 |
| 39410 | 0 | 489628 | KYAVTVETRLIDERAHV                    | 2.84 | 0.01 | 3.16 | 0.68 | 2.25 | 1.75 |
| 39411 | 0 | 34370  | KYCIEAKLTNTTTESRGLF<br>GKGGIVTCAMFTC | 3.39 | 0.01 | 0.90 | 0.68 | 0.22 | 0.28 |
| 39412 | 0 | 34370  | KYCIEAKLTNTTTESRGLF<br>GKGGIVTCAMFTC | 3.39 | 0.01 | 0.90 | 2.65 | 0.22 | 0.28 |
| 39413 | 0 | 113062 | KYDDYVATLS                           | 2.30 | 0.01 | 3.00 | 2.79 | 0.22 | 0.28 |
| 39414 | 0 | 229323 | KYDEDQKKTEEKAEL                      | 2.72 | 0.01 | 2.70 | 0.68 | 0.22 | 0.28 |
| 39415 | 0 | 178268 | KYDFDGVNRGTRG                        | 2.56 | 0.01 | 3.93 | 0.68 | 0.22 | 0.85 |
| 39416 | 0 | 34384  | KYDSLKEK                             | 2.15 | 0.01 | 1.66 | 0.44 | 1.74 | 0.28 |

|       |   |        |                           |      |      |      |      |      |      |
|-------|---|--------|---------------------------|------|------|------|------|------|------|
| 39417 | 0 | 34391  | KYEEDDKAQRDRVEAK<br>NGLE  | 2.96 | 0.01 | 2.78 | 2.49 | 0.85 | 0.28 |
| 39418 | 0 | 34391  | KYEEDDKAQRDRVEAK<br>NGLE  | 2.96 | 0.01 | 2.78 | 0.44 | 0.85 | 0.28 |
| 39419 | 0 | 123410 | KYEEQIYER                 | 2.25 | 0.01 | 2.28 | 2.00 | 0.22 | 0.28 |
| 39420 | 0 | 140254 | KYEHGGNIID                | 2.29 | 0.01 | 3.85 | 1.15 | 2.26 | 0.28 |
| 39421 | 0 | 140254 | KYEHGGNIID                | 2.29 | 0.01 | 3.85 | 1.15 | 2.26 | 0.28 |
| 39422 | 0 | 140254 | KYEHGGNIID                | 2.29 | 0.01 | 3.85 | 1.15 | 2.26 | 1.34 |
|       |   |        | KYEHGGNIIDIDFDSVPH        |      |      |      |      |      |      |
| 39423 | 0 | 140255 | IHGFNKHTEIIEEDTNKD<br>KP  | 3.59 | 0.01 | 3.85 | 1.15 | 2.26 | 1.66 |
|       |   |        | KYEHGGNIIDIDFDSVPH        |      |      |      |      |      |      |
| 39424 | 0 | 140255 | IHGFNKHTEIIEEDTNKD<br>KP  | 3.59 | 0.01 | 3.85 | 1.15 | 2.26 | 1.66 |
|       |   |        | KYEHGGNIIDIDFDSVPH        |      |      |      |      |      |      |
| 39425 | 0 | 140255 | IHGFNKHTEIIEEDTNKD<br>KP  | 3.59 | 0.01 | 3.85 | 1.15 | 2.26 | 1.66 |
| 39426 | 0 | 171984 | KYELLNAGYKKCDEY           | 2.69 | 0.01 | 0.78 | 0.44 | 1.41 | 0.28 |
| 39427 | 0 | 140256 | KYEQGGNIID                | 2.29 | 0.01 | 2.56 | 1.15 | 2.26 | 0.28 |
| 39428 | 0 | 140256 | KYEQGGNIID                | 2.29 | 0.01 | 2.56 | 1.15 | 2.26 | 0.28 |
| 39429 | 0 | 140256 | KYEQGGNIID                | 2.29 | 0.01 | 2.56 | 1.15 | 2.26 | 1.34 |
|       |   |        | KYEQGGNIIDIDFDSVPH        |      |      |      |      |      |      |
| 39430 | 0 | 140257 | IHGFNKHTEIIEEDTNKD<br>KP  | 3.58 | 0.01 | 2.56 | 1.15 | 2.26 | 1.66 |
|       |   |        | KYEQGGNIIDIDFDSVPH        |      |      |      |      |      |      |
| 39431 | 0 | 140257 | IHGFNKHTEIIEEDTNKD<br>KP  | 3.58 | 0.01 | 2.56 | 1.15 | 2.26 | 1.66 |
|       |   |        | KYEQGGNIIDIDFDSVPH        |      |      |      |      |      |      |
| 39432 | 0 | 140257 | IHGFNKHTEIIEEDTNKD<br>KP  | 3.58 | 0.01 | 2.56 | 1.15 | 2.26 | 1.66 |
| 39433 | 0 | 140258 | KYEQGGNIVD                | 2.28 | 0.01 | 3.85 | 1.15 | 2.26 | 0.28 |
| 39434 | 0 | 140258 | KYEQGGNIVD                | 2.28 | 0.01 | 3.85 | 1.15 | 2.26 | 0.28 |
| 39435 | 0 | 140258 | KYEQGGNIVD                | 2.28 | 0.01 | 2.56 | 1.15 | 2.26 | 0.28 |
| 39436 | 0 | 140258 | KYEQGGNIVD                | 2.28 | 0.01 | 2.56 | 1.15 | 2.26 | 0.28 |
| 39437 | 0 | 140258 | KYEQGGNIVD                | 2.28 | 0.01 | 3.85 | 1.15 | 2.26 | 1.34 |
| 39438 | 0 | 140258 | KYEQGGNIVD                | 2.28 | 0.01 | 2.56 | 1.15 | 2.26 | 1.34 |
|       |   |        | KYEQGGNIVDIDFDSVP         |      |      |      |      |      |      |
| 39439 | 0 | 140259 | QIHGQNKGNQSFEEDTE<br>KDKP | 3.59 | 0.01 | 3.85 | 1.15 | 2.26 | 1.66 |
|       |   |        | KYEQGGNIVDIDFDSVP         |      |      |      |      |      |      |
| 39440 | 0 | 140259 | QIHGQNKGNQSFEEDTE<br>KDKP | 3.59 | 0.01 | 3.85 | 1.15 | 2.26 | 1.66 |
|       |   |        | KYEQGGNIVDIDFDSVP         |      |      |      |      |      |      |
| 39441 | 0 | 140259 | QIHGQNKGNQSFEEDTE<br>KDKP | 3.59 | 0.01 | 3.85 | 1.15 | 2.26 | 1.66 |

|       |   |        |                                    |      |      |      |      |      |      |
|-------|---|--------|------------------------------------|------|------|------|------|------|------|
|       |   |        | KYEQGGNIVDIDFDSVP                  |      |      |      |      |      |      |
| 39442 | 0 | 140260 | QIHGQNNGNQSFEEDT<br>EKDKP          | 3.59 | 0.01 | 2.56 | 1.15 | 2.26 | 1.66 |
|       |   |        | KYEQGGNIVDIDFDSVP                  |      |      |      |      |      |      |
| 39443 | 0 | 140260 | QIHGQNNGNQSFEEDT<br>EKDKP          | 3.59 | 0.01 | 2.56 | 1.15 | 2.26 | 1.66 |
|       |   |        | KYEQGGNIVDIDFDSVP                  |      |      |      |      |      |      |
| 39444 | 0 | 140260 | QIHGQNNGNQSFEEDT<br>EKDKP          | 3.59 | 0.01 | 2.56 | 1.15 | 2.26 | 1.66 |
| 39445 | 0 | 120727 | KYFPEVKTGMAAVPKL                   | 2.79 | 0.01 | 0.78 | 1.20 | 0.22 | 0.28 |
| 39446 | 0 | 120727 | KYFPEVKTGMAAVPKL                   | 2.79 | 0.01 | 0.78 | 1.20 | 0.22 | 0.28 |
| 39447 | 0 | 120727 | KYFPEVKTGMAAVPKL                   | 2.79 | 0.01 | 0.78 | 0.44 | 1.13 | 0.28 |
| 39448 | 0 | 120727 | KYFPEVKTGMAAVPKL                   | 2.79 | 0.01 | 0.78 | 0.44 | 1.41 | 0.28 |
| 39449 | 0 | 34435  | KYGGTEIKYN                         | 2.33 | 0.01 | 2.04 | 0.68 | 0.22 | 0.28 |
| 39450 | 0 | 34435  | KYGGTEIKYN                         | 2.33 | 0.01 | 2.04 | 0.68 | 0.22 | 0.28 |
| 39451 | 0 | 34439  | KYGLFSTQPEAE                       | 2.43 | 0.01 | 0.90 | 0.44 | 0.85 | 0.28 |
| 39452 | 0 | 238680 | KYHRCSTKLTLYTST                    | 2.72 | 0.01 | 2.56 | 2.02 | 0.22 | 0.85 |
| 39453 | 0 | 238680 | KYHRCSTKLTLYTST                    | 2.72 | 0.01 | 2.56 | 1.20 | 0.22 | 0.85 |
| 39454 | 0 | 229710 | KYIPIQYVLSRPSYGLNY<br>Y            | 2.95 | 0.01 | 1.60 | 0.44 | 1.23 | 1.28 |
| 39455 | 0 | 34476  | KYKDKPLY                           | 2.17 | 0.01 | 2.83 | 2.61 | 0.22 | 0.28 |
| 39456 | 0 | 107957 | KYKGMDEFKNTFKNCEP<br>DANEPNANEYLKK | 3.35 | 0.01 | 0.90 | 1.12 | 0.22 | 0.28 |
|       |   |        | KYKIEINVLNDEITKLKNE                |      |      |      |      |      |      |
| 39457 | 0 | 34481  | INTYKNDLKNINATLDFY<br>KST          | 3.67 | 0.01 | 2.22 | 0.44 | 1.74 | 0.28 |
|       |   |        | KYKIEINVLNDEITKLKNE                |      |      |      |      |      |      |
| 39458 | 0 | 34481  | INTYKNDLKNINATLDFY<br>KST          | 3.67 | 0.01 | 2.22 | 0.44 | 1.74 | 0.28 |
| 39459 | 0 | 34489  | KYKSITDE                           | 2.13 | 0.01 | 3.15 | 0.44 | 1.23 | 0.85 |
| 39460 | 0 | 34490  | KYKVPQLEIV                         | 2.32 | 0.01 | 1.60 | 0.44 | 1.23 | 0.28 |
| 39461 | 0 | 34490  | KYKVPQLEIV                         | 2.32 | 0.01 | 1.60 | 0.44 | 1.23 | 0.28 |
| 39462 | 0 | 115334 | KYKVPQLEIVPNSAEERL<br>HS           | 2.93 | 0.01 | 1.60 | 0.44 | 1.23 | 1.28 |
| 39463 | 0 | 112191 | KYLATASTMDHARHGFL<br>PRH           | 2.93 | 0.01 | 1.75 | 2.25 | 0.22 | 0.28 |
| 39464 | 0 | 34498  | KYLEEPV                            | 2.01 | 0.01 | 0.90 | 0.44 | 1.23 | 1.27 |
| 39465 | 0 | 34498  | KYLEEPV                            | 2.01 | 0.01 | 0.90 | 0.44 | 1.23 | 1.27 |
| 39466 | 0 | 34498  | KYLEEPV                            | 2.01 | 0.01 | 0.90 | 0.44 | 1.23 | 0.28 |
|       |   |        | KYLFPGECQYVLVQDYC                  |      |      |      |      |      |      |
| 39467 | 0 | 134424 | GSNPGTFRILVGNKGCS<br>H             | 3.48 | 0.01 | 0.78 | 0.68 | 0.22 | 1.39 |
| 39468 | 0 | 34502  | KYLGFBVQDAA                        | 2.26 | 0.01 | 2.60 | 0.44 | 1.23 | 0.85 |



|       |   |        |                                     |      |      |      |      |      |      |
|-------|---|--------|-------------------------------------|------|------|------|------|------|------|
| 39469 | 0 | 34502  | KYLGFBVQDAA                         | 2.26 | 0.01 | 2.60 | 0.44 | 1.23 | 1.27 |
| 39470 | 0 | 34505  | KYLIDGYEEINELLYK                    | 2.78 | 0.01 | 3.34 | 0.44 | 1.74 | 0.28 |
| 39471 | 0 | 115335 | KYLLFCMENS                          | 2.28 | 0.01 | 1.60 | 0.44 | 1.23 | 0.85 |
| 39472 | 0 | 115335 | KYLLFCMENS                          | 2.28 | 0.01 | 1.60 | 0.44 | 1.23 | 0.85 |
| 39473 | 0 | 182200 | KYLNHIDHEIVEKDA                     | 2.69 | 0.01 | 0.78 | 0.44 | 1.13 | 0.85 |
| 39474 | 0 | 236111 | KYLP TYR                            | 2.02 | 0.01 | 0.78 | 0.44 | 1.13 | 2.66 |
| 39475 | 0 | 232657 | KYLTEMSRASDILSH                     | 2.64 | 0.01 | 2.28 | 0.68 | 0.22 | 0.28 |
| 39476 | 0 | 232657 | KYLTEMSRASDILSH                     | 2.64 | 0.01 | 2.28 | 0.68 | 0.22 | 0.28 |
| 39477 | 0 | 34537  | KYNDDDTFTVKVGD                      | 2.64 | 0.01 | 3.70 | 1.12 | 0.22 | 1.34 |
| 39478 | 0 | 34537  | KYNDDDTFTVKVGD                      | 2.64 | 0.01 | 3.70 | 1.81 | 2.25 | 1.75 |
| 39479 | 0 | 34537  | KYNDDDTFTVKVGD                      | 2.64 | 0.01 | 3.70 | 1.12 | 0.22 | 1.27 |
| 39480 | 0 | 152739 | KYNDKLPLYI                          | 2.34 | 0.01 | 2.18 | 2.16 | 0.22 | 0.28 |
| 39481 | 0 | 34539  | KYNGEEYLIL                          | 2.32 | 0.01 | 2.04 | 0.68 | 0.22 | 0.28 |
| 39482 | 0 | 34539  | KYNGEEYLIL                          | 2.32 | 0.01 | 2.04 | 0.68 | 0.22 | 0.28 |
| 39483 | 0 | 34540  | KYNGNLNTIRTR                        | 2.49 | 0.01 | 3.61 | 1.20 | 0.22 | 0.85 |
| 39484 | 0 | 149790 | KYPDYLQMSADPYGD                     | 2.68 | 0.01 | 3.11 | 1.12 | 0.22 | 0.28 |
| 39485 | 0 | 504013 | KYPPAVQKYIDSLPS                     | 2.69 | 0.01 | 3.29 | 2.13 | 0.22 | 0.85 |
| 39486 | 0 | 115839 | KYPVEPFTEs                          | 2.31 | 0.01 | 1.60 | 0.44 | 1.23 | 0.85 |
| 39487 | 0 | 115839 | KYPVEPFTEs                          | 2.31 | 0.01 | 1.60 | 0.44 | 1.23 | 0.85 |
| 39488 | 0 | 34576  | KYQAWNAG                            | 2.12 | 0.01 | 2.83 | 2.61 | 0.22 | 0.28 |
| 39489 | 0 | 177516 | KYQISVNKYRG TAGNAL<br>MDG           | 2.92 | 0.01 | 0.78 | 0.44 | 2.26 | 0.28 |
| 39490 | 0 | 177516 | KYQISVNKYRG TAGNAL<br>MDG           | 2.92 | 0.01 | 0.78 | 0.44 | 1.13 | 0.28 |
| 39491 | 0 | 142438 | KYQISVNKYRG TAGNAL<br>MDGASQLMGENRT | 3.34 | 4.93 | 0.78 | 0.44 | 1.13 | 0.28 |
| 39492 | 0 | 142437 | KYQISVNKYRG TAGNAL<br>MDGASQLMGENRT | 3.34 | 4.93 | 0.78 | 0.44 | 1.13 | 0.28 |
| 39493 | 0 | 229324 | KYQQELV                             | 2.01 | 0.01 | 2.70 | 0.68 | 0.22 | 0.28 |
| 39494 | 0 | 34585  | KYQVIKVRAYTYGV                      | 2.64 | 0.01 | 3.93 | 3.26 | 0.22 | 0.28 |
| 39495 | 0 | 187870 | KYRYHLKPFCKAD                       | 2.61 | 0.01 | 3.65 | 2.02 | 0.22 | 0.85 |
| 39496 | 0 | 34589  | KYRYLRHGKLRPFERD                    | 2.75 | 0.01 | 2.45 | 1.12 | 0.22 | 2.92 |
| 39497 | 0 | 34591  | KYSAGGMGRRGDLEPL<br>AARVAAQ         | 3.06 | 0.01 | 3.32 | 1.12 | 0.22 | 0.28 |
| 39498 | 0 | 34591  | KYSAGGMGRRGDLEPL<br>AARVAAQ         | 3.06 | 0.01 | 3.32 | 0.68 | 0.22 | 0.28 |
| 39499 | 0 | 34591  | KYSAGGMGRRGDLEPL<br>AARVAAQ         | 3.06 | 0.01 | 3.32 | 1.12 | 0.22 | 0.28 |
| 39500 | 0 | 34591  | KYSAGGMGRRGDLEPL<br>AARVAAQ         | 3.06 | 0.01 | 3.32 | 2.37 | 0.22 | 0.28 |
| 39501 | 0 | 34591  | KYSAGGMGRRGDLEPL<br>AARVAAQ         | 3.06 | 0.01 | 3.32 | 1.12 | 0.22 | 1.34 |
| 39502 | 0 | 34591  | KYSAGGMGRRGDLEPL<br>AARVAAQ         | 3.06 | 0.01 | 3.32 | 2.37 | 0.22 | 1.34 |

|       |   |        |                                |      |      |      |      |      |      |
|-------|---|--------|--------------------------------|------|------|------|------|------|------|
| 39503 | 0 | 34591  | KYSAGGMGRRGDLEPL<br>AARVAAQ    | 3.06 | 0.01 | 3.32 | 1.12 | 0.22 | 0.28 |
| 39504 | 0 | 34591  | KYSAGGMGRRGDLEPL<br>AARVAAQ    | 3.06 | 0.01 | 3.32 | 1.12 | 0.22 | 1.34 |
| 39505 | 0 | 34592  | KYSAGGMGRRGDLEPL<br>AARVAAQL   | 3.11 | 0.01 | 3.32 | 1.81 | 0.22 | 0.28 |
| 39506 | 0 | 34592  | KYSAGGMGRRGDLEPL<br>AARVAAQL   | 3.11 | 0.01 | 3.32 | 0.68 | 0.22 | 0.28 |
| 39507 | 0 | 34592  | KYSAGGMGRRGDLEPL<br>AARVAAQL   | 3.11 | 0.01 | 3.32 | 3.06 | 0.22 | 0.28 |
| 39508 | 0 | 34592  | KYSAGGMGRRGDLEPL<br>AARVAAQL   | 3.11 | 0.01 | 3.32 | 1.12 | 0.22 | 0.28 |
| 39509 | 0 | 34592  | KYSAGGMGRRGDLEPL<br>AARVAAQL   | 3.11 | 0.01 | 3.32 | 1.12 | 0.22 | 1.34 |
| 39510 | 0 | 34592  | KYSAGGMGRRGDLEPL<br>AARVAAQL   | 3.11 | 0.01 | 3.32 | 4.45 | 0.22 | 1.34 |
| 39511 | 0 | 34592  | KYSAGGMGRRGDLEPL<br>AARVAAQL   | 3.11 | 0.01 | 3.32 | 4.45 | 0.22 | 0.28 |
| 39512 | 0 | 34592  | KYSAGGMGRRGDLEPL<br>AARVAAQL   | 3.11 | 0.01 | 3.32 | 4.45 | 0.22 | 1.75 |
| 39513 | 0 | 34592  | KYSAGGMGRRGDLEPL<br>AARVAAQL   | 3.11 | 0.01 | 3.32 | 2.22 | 0.22 | 1.34 |
| 39514 | 0 | 34592  | KYSAGGMGRRGDLEPL<br>AARVAAQL   | 3.11 | 0.01 | 3.32 | 2.22 | 0.22 | 0.28 |
| 39515 | 0 | 34592  | KYSAGGMGRRGDLEPL<br>AARVAAQL   | 3.11 | 0.01 | 3.32 | 2.22 | 0.22 | 1.75 |
| 39516 | 0 | 34592  | KYSAGGMGRRGDLEPL<br>AARVAAQL   | 3.11 | 0.01 | 3.32 | 2.37 | 0.22 | 1.75 |
| 39517 | 0 | 34593  | KYSASGSGVRGDFGSLA<br>PRVAR     | 3.06 | 0.01 | 3.14 | 3.63 | 0.22 | 0.28 |
| 39518 | 0 | 34593  | KYSASGSGVRGDFGSLA<br>PRVAR     | 3.06 | 0.01 | 3.14 | 1.15 | 0.22 | 2.35 |
| 39519 | 0 | 34593  | KYSASGSGVRGDFGSLA<br>PRVAR     | 3.06 | 0.01 | 3.14 | 3.63 | 0.22 | 2.35 |
| 39520 | 0 | 161119 | KYSIDVESFDKLYKSLMF<br>G        | 2.91 | 0.01 | 2.08 | 0.44 | 1.93 | 1.57 |
| 39521 | 0 | 122456 | KYSLELIKLSKDEEDIKH<br>NEDVREEI | 3.29 | 0.01 | 2.22 | 0.44 | 1.74 | 0.28 |
| 39522 | 0 | 122456 | KYSLELIKLSKDEEDIKH<br>NEDVREEI | 3.29 | 0.01 | 2.22 | 0.44 | 1.74 | 1.34 |
| 39523 | 0 | 122456 | KYSLELIKLSKDEEDIKH<br>NEDVREEI | 3.29 | 0.01 | 2.22 | 0.44 | 1.74 | 0.28 |
| 39524 | 0 | 34597  | KYSNTFIN                       | 2.12 | 0.01 | 2.96 | 0.68 | 0.22 | 0.28 |
| 39525 | 0 | 34597  | KYSNTFIN                       | 2.12 | 0.01 | 2.96 | 0.68 | 0.22 | 0.28 |
| 39526 | 0 | 421273 | KYTGCGGNANR                    | 2.40 | 0.01 | 3.19 | 0.44 | 1.23 | 1.28 |
| 39527 | 0 | 34612  | KYTMFHYLRAQEFHGK<br>SR         | 2.88 | 0.01 | 3.03 | 0.68 | 0.22 | 1.57 |

|       |   |        |                            |      |      |      |      |      |      |
|-------|---|--------|----------------------------|------|------|------|------|------|------|
| 39528 | 0 | 34612  | KYTMFHYLRAQEFEHGK<br>SR    | 2.88 | 0.01 | 3.03 | 3.33 | 0.22 | 1.57 |
| 39529 | 0 | 34612  | KYTMFHYLRAQEFEHGK<br>SR    | 2.88 | 0.01 | 2.08 | 0.44 | 0.22 | 1.57 |
| 39530 | 0 | 34612  | KYTMFHYLRAQEFEHGK<br>SR    | 2.88 | 0.01 | 2.08 | 2.02 | 0.22 | 1.57 |
| 39531 | 0 | 34612  | KYTMFHYLRAQEFEHGK<br>SR    | 2.88 | 0.01 | 2.08 | 1.15 | 0.22 | 1.57 |
| 39532 | 0 | 34612  | KYTMFHYLRAQEFEHGK<br>SR    | 2.88 | 0.01 | 2.08 | 2.49 | 0.22 | 1.57 |
| 39533 | 0 | 34612  | KYTMFHYLRAQEFEHGK<br>SR    | 2.88 | 0.01 | 3.16 | 0.44 | 1.93 | 1.57 |
| 39534 | 0 | 34612  | KYTMFHYLRAQEFEHGK<br>SR    | 2.88 | 0.01 | 2.08 | 0.68 | 0.22 | 1.57 |
| 39535 | 0 | 34612  | KYTMFHYLRAQEFEHGK<br>SR    | 2.88 | 0.01 | 2.08 | 2.25 | 0.22 | 1.57 |
| 39536 | 0 | 34612  | KYTMFHYLRAQEFEHGK<br>SR    | 2.88 | 0.01 | 2.08 | 2.43 | 0.22 | 1.75 |
| 39537 | 0 | 34612  | KYTMFHYLRAQEFEHGK<br>SR    | 2.88 | 0.01 | 2.08 | 2.43 | 0.22 | 1.57 |
| 39538 | 0 | 34612  | KYTMFHYLRAQEFEHGK<br>SR    | 2.88 | 0.01 | 2.08 | 3.04 | 0.22 | 1.75 |
| 39539 | 0 | 34612  | KYTMFHYLRAQEFEHGK<br>SR    | 2.88 | 0.01 | 2.08 | 3.04 | 0.22 | 1.75 |
| 39540 | 0 | 34612  | KYTMFHYLRAQEFEHGK<br>SR    | 2.88 | 0.01 | 2.08 | 3.04 | 0.22 | 1.75 |
| 39541 | 0 | 34612  | KYTMFHYLRAQEFEHGK<br>SR    | 2.88 | 0.01 | 2.08 | 3.04 | 0.22 | 1.75 |
| 39542 | 0 | 34612  | KYTMFHYLRAQEFEHGK<br>SR    | 2.88 | 0.01 | 2.08 | 3.04 | 0.22 | 1.75 |
| 39543 | 0 | 34612  | KYTMFHYLRAQEFEHGK<br>SR    | 2.88 | 0.01 | 2.08 | 3.04 | 0.22 | 1.57 |
| 39544 | 0 | 164273 | KYTPQPS                    | 2.02 | 0.01 | 0.90 | 1.20 | 0.22 | 1.39 |
| 39545 | 0 | 171990 | KYTQQSTAIRGDRAVLA<br>VTADK | 3.64 | 0.01 | 4.33 | 2.49 | 1.41 | 1.27 |
| 39546 | 0 | 171990 | KYTQQSTAIRGDRAVLA<br>VTADK | 3.64 | 0.01 | 4.33 | 2.49 | 1.41 | 1.34 |
| 39547 | 0 | 171990 | KYTQQSTAIRGDRAVLA<br>VTADK | 3.64 | 0.01 | 4.33 | 2.49 | 1.41 | 0.28 |
| 39548 | 0 | 171990 | KYTQQSTAIRGDRAVLA<br>VTADK | 3.64 | 0.01 | 4.33 | 2.49 | 1.41 | 0.28 |
| 39549 | 0 | 34618  | KYTVIITVHTGDQHQ            | 2.69 | 0.01 | 3.45 | 0.44 | 1.59 | 0.28 |
| 39550 | 0 | 34618  | KYTVIITVHTGDQHQ            | 2.69 | 0.01 | 3.45 | 0.44 | 1.59 | 0.28 |

|       |   |       |                            |      |      |      |      |      |      |
|-------|---|-------|----------------------------|------|------|------|------|------|------|
| 39551 | 0 | 34621 | KYVDNQRLSTFTEYIKNI         | 2.87 | 0.01 | 3.03 | 0.68 | 0.22 | 1.57 |
| 39552 | 0 | 34621 | KYVDNQRLSTFTEYIKNI         | 2.87 | 0.01 | 3.03 | 3.33 | 0.22 | 1.57 |
| 39553 | 0 | 34621 | KYVDNQRLSTFTEYIKNI         | 2.87 | 0.01 | 2.08 | 2.02 | 0.22 | 1.57 |
| 39554 | 0 | 34621 | KYVDNQRLSTFTEYIKNI         | 2.87 | 0.01 | 2.08 | 1.15 | 0.22 | 1.57 |
| 39555 | 0 | 34621 | KYVDNQRLSTFTEYIKNI         | 2.87 | 0.01 | 3.16 | 0.44 | 1.93 | 1.57 |
| 39556 | 0 | 34621 | KYVDNQRLSTFTEYIKNI         | 2.87 | 0.01 | 2.08 | 2.02 | 0.22 | 1.57 |
| 39557 | 0 | 34621 | KYVDNQRLSTFTEYIKNI         | 2.87 | 0.01 | 2.08 | 1.15 | 0.22 | 1.57 |
| 39558 | 0 | 34621 | KYVDNQRLSTFTEYIKNI         | 2.87 | 0.01 | 2.08 | 2.25 | 0.22 | 1.57 |
| 39559 | 0 | 34621 | KYVDNQRLSTFTEYIKNI         | 2.87 | 0.01 | 2.08 | 0.68 | 0.22 | 1.57 |
| 39560 | 0 | 34621 | KYVDNQRLSTFTEYIKNI         | 2.87 | 0.01 | 2.08 | 2.25 | 0.22 | 1.57 |
| 39561 | 0 | 34621 | KYVDNQRLSTFTEYIKNI         | 2.87 | 0.01 | 2.08 | 2.25 | 0.22 | 1.57 |
| 39562 | 0 | 34622 | KYVDVNNVGIRGYMYL<br>KGP    | 2.91 | 0.01 | 3.03 | 0.68 | 0.22 | 1.57 |
| 39563 | 0 | 34622 | KYVDVNNVGIRGYMYL<br>KGP    | 2.91 | 0.01 | 2.08 | 0.44 | 0.22 | 1.57 |
| 39564 | 0 | 34622 | KYVDVNNVGIRGYMYL<br>KGP    | 2.91 | 0.01 | 2.08 | 2.02 | 0.22 | 1.57 |
| 39565 | 0 | 34622 | KYVDVNNVGIRGYMYL<br>KGP    | 2.91 | 0.01 | 2.08 | 1.15 | 0.22 | 1.57 |
| 39566 | 0 | 34622 | KYVDVNNVGIRGYMYL<br>KGP    | 2.91 | 0.01 | 2.08 | 2.49 | 0.22 | 1.57 |
| 39567 | 0 | 34622 | KYVDVNNVGIRGYMYL<br>KGP    | 2.91 | 0.01 | 3.16 | 0.44 | 1.93 | 1.57 |
| 39568 | 0 | 34622 | KYVDVNNVGIRGYMYL<br>KGP    | 2.91 | 0.01 | 2.08 | 2.02 | 0.22 | 1.57 |
| 39569 | 0 | 34622 | KYVDVNNVGIRGYMYL<br>KGP    | 2.91 | 0.01 | 2.08 | 0.44 | 0.22 | 1.57 |
| 39570 | 0 | 34622 | KYVDVNNVGIRGYMYL<br>KGP    | 2.91 | 0.01 | 2.08 | 1.15 | 0.22 | 1.57 |
| 39571 | 0 | 34622 | KYVDVNNVGIRGYMYL<br>KGP    | 2.91 | 0.01 | 2.08 | 2.25 | 0.22 | 1.57 |
| 39572 | 0 | 34622 | KYVDVNNVGIRGYMYL<br>KGP    | 2.91 | 0.01 | 2.08 | 2.25 | 0.22 | 1.57 |
| 39573 | 0 | 34628 | KYVKQEVEQNPPAAQK<br>VFKDEK | 3.06 | 0.01 | 4.23 | 2.49 | 0.22 | 0.28 |

|       |   |        |                                    |      |      |      |      |      |      |
|-------|---|--------|------------------------------------|------|------|------|------|------|------|
| 39574 | 0 | 34628  | KYVKQEVEQNPPAAQK<br>VFKDEK         | 3.06 | 0.01 | 4.23 | 2.49 | 0.22 | 0.28 |
| 39575 | 0 | 34639  | KYVTGIN                            | 1.99 | 0.01 | 2.75 | 0.44 | 0.85 | 0.28 |
| 39576 | 0 | 34639  | KYVTGIN                            | 1.99 | 0.01 | 2.75 | 0.44 | 0.85 | 0.85 |
| 39577 | 0 | 179110 | KYVVRYMYDIDNNGF                    | 2.66 | 0.01 | 2.36 | 0.44 | 1.23 | 1.28 |
| 39578 | 0 | 179110 | KYVVRYMYDIDNNGF                    | 2.66 | 0.01 | 2.36 | 0.44 | 1.23 | 1.27 |
| 39579 | 0 | 179110 | KYVVRYMYDIDNNGF                    | 2.66 | 0.01 | 2.36 | 0.44 | 1.23 | 1.28 |
| 39580 | 0 | 193280 | KYYFDEKGIMRT                       | 2.45 | 0.01 | 3.04 | 1.12 | 0.22 | 0.28 |
| 39581 | 0 | 193280 | KYYFDEKGIMRT                       | 2.45 | 0.01 | 3.04 | 1.12 | 0.22 | 0.28 |
| 39582 | 0 | 193282 | KYYFNSDGVMQK                       | 2.45 | 0.01 | 3.04 | 1.12 | 0.22 | 0.28 |
| 39583 | 0 | 193282 | KYYFNSDGVMQK                       | 2.45 | 0.01 | 3.04 | 1.12 | 0.22 | 0.28 |
| 39584 | 0 | 34645  | KYYGNGVTC                          | 2.22 | 0.01 | 4.45 | 1.20 | 0.22 | 1.27 |
| 39585 | 0 | 34645  | KYYGNGVTC                          | 2.22 | 0.01 | 4.45 | 1.20 | 0.22 | 0.28 |
| 39586 | 0 | 34645  | KYYGNGVTC                          | 2.22 | 0.01 | 4.45 | 1.20 | 0.22 | 0.28 |
| 39587 | 0 | 129193 | KYYRMM                             | 1.88 | 0.01 | 0.78 | 0.44 | 1.13 | 0.28 |
| 39588 | 0 | 325034 | LAAAMDKVFTTGFAQ                    | 2.66 | 0.01 | 1.61 | 0.44 | 0.85 | 1.28 |
| 39589 | 0 | 34656  | LAAAVLNL                           | 2.16 | 0.01 | 3.06 | 1.12 | 0.22 | 0.28 |
| 39590 | 0 | 189708 | LAACKAEGSFDHKAF                    | 2.68 | 0.01 | 3.28 | 0.44 | 1.23 | 0.28 |
| 39591 | 0 | 189708 | LAACKAEGSFDHKAF                    | 2.68 | 0.01 | 3.28 | 0.44 | 1.41 | 0.28 |
| 39592 | 0 | 34661  | LAAEFKQKALGLLQTATK<br>QA           | 3.00 | 0.01 | 1.96 | 0.44 | 0.85 | 0.28 |
| 39593 | 0 | 34664  | LAAEYHNTQIHTLD                     | 2.61 | 0.01 | 2.85 | 1.81 | 0.22 | 0.28 |
| 39594 | 0 | 34664  | LAAEYHNTQIHTLD                     | 2.61 | 0.01 | 2.85 | 1.81 | 0.22 | 0.28 |
| 39595 | 0 | 77939  | LAAKHMSNTFLAGLAQY<br>YTQ           | 2.94 | 0.01 | 3.14 | 0.68 | 0.22 | 0.28 |
| 39596 | 0 | 129197 | LAALGGNSSPSAKDI                    | 2.69 | 0.01 | 0.78 | 0.44 | 1.13 | 0.85 |
| 39597 | 0 | 103331 | LAALPDFLGGFAGLP                    | 2.74 | 0.01 | 2.04 | 0.44 | 0.85 | 1.28 |
| 39598 | 0 | 151679 | LAALTRTPVVSP                       | 2.50 | 0.01 | 0.90 | 1.15 | 0.22 | 0.28 |
| 39599 | 0 | 496679 | LAALVLNSVRGALKVCAI<br>KSPGFGDRRKAM | 3.34 | 0.01 | 4.63 | 0.44 | 1.93 | 2.12 |
| 39600 | 0 | 496679 | LAALVLNSVRGALKVCAI<br>KSPGFGDRRKAM | 3.34 | 0.01 | 4.63 | 0.44 | 1.93 | 2.12 |
| 39601 | 0 | 182394 | LAANFVVAL                          | 2.27 | 0.01 | 2.51 | 0.44 | 1.13 | 0.28 |
| 39602 | 0 | 182394 | LAANFVVAL                          | 2.27 | 0.01 | 2.51 | 0.44 | 1.41 | 0.28 |
| 39603 | 0 | 182394 | LAANFVVAL                          | 2.27 | 0.01 | 2.51 | 0.44 | 1.13 | 0.28 |
| 39604 | 0 | 182394 | LAANFVVAL                          | 2.27 | 0.01 | 2.51 | 0.44 | 1.41 | 0.28 |
| 39605 | 0 | 182394 | LAANFVVAL                          | 2.27 | 0.01 | 2.51 | 0.44 | 1.13 | 0.28 |
| 39606 | 0 | 182394 | LAANFVVAL                          | 2.27 | 0.01 | 2.51 | 0.44 | 1.41 | 0.28 |
| 39607 | 0 | 182394 | LAANFVVAL                          | 2.27 | 0.01 | 2.51 | 0.44 | 1.13 | 1.27 |
| 39608 | 0 | 182394 | LAANFVVAL                          | 2.27 | 0.01 | 2.51 | 0.44 | 1.13 | 0.28 |
| 39609 | 0 | 182394 | LAANFVVAL                          | 2.27 | 0.01 | 2.51 | 0.44 | 1.93 | 0.28 |
| 39610 | 0 | 182394 | LAANFVVAL                          | 2.27 | 0.01 | 2.51 | 0.44 | 1.41 | 0.28 |
| 39611 | 0 | 182394 | LAANFVVAL                          | 2.27 | 0.01 | 4.08 | 0.44 | 1.41 | 0.28 |
| 39612 | 0 | 182394 | LAANFVVAL                          | 2.27 | 0.01 | 2.51 | 0.44 | 1.41 | 0.28 |
| 39613 | 0 | 149064 | LAANLTQ                            | 2.04 | 0.01 | 0.90 | 2.13 | 1.59 | 1.39 |
| 39614 | 0 | 96526  | LAANNPA                            | 2.05 | 0.01 | 2.24 | 0.68 | 0.22 | 1.27 |

|       |   |        |                                                     |      |      |      |      |      |      |
|-------|---|--------|-----------------------------------------------------|------|------|------|------|------|------|
| 39615 | 0 | 96526  | LAANNPA                                             | 2.05 | 0.01 | 2.24 | 0.68 | 0.22 | 1.27 |
| 39616 | 0 | 96526  | LAANNPA                                             | 2.05 | 0.01 | 2.24 | 0.68 | 0.22 | 1.34 |
| 39617 | 0 | 133186 | LAANNPAIQNIRLR                                      | 2.66 | 4.33 | 2.24 | 1.20 | 0.22 | 1.48 |
| 39618 | 0 | 133186 | LAANNPAIQNIRLR                                      | 2.66 | 4.33 | 2.24 | 1.20 | 0.22 | 1.48 |
| 39619 | 0 | 133186 | LAANNPAIQNIRLR                                      | 2.66 | 4.33 | 2.24 | 1.20 | 0.22 | 1.48 |
| 39620 | 0 | 133186 | LAANNPAIQNIRLR                                      | 2.66 | 4.33 | 2.24 | 1.20 | 0.22 | 1.27 |
| 39621 | 0 | 186770 | LAANPAMAMGNLGAN                                     | 2.74 | 0.01 | 0.90 | 1.20 | 0.22 | 0.85 |
| 39622 | 0 | 34686  | LAAQLWRGRAGRRRYA<br>HPSV                            | 2.95 | 0.01 | 2.40 | 0.44 | 1.59 | 0.28 |
| 39623 | 0 | 325120 | LAARSMEIDGGEWTN                                     | 2.62 | 0.01 | 1.61 | 0.44 | 0.85 | 1.28 |
| 39624 | 0 | 95536  | LAARVVKQ                                            | 2.12 | 0.01 | 3.48 | 2.22 | 0.22 | 0.28 |
| 39625 | 0 | 34693  | LAARWFEANR                                          | 2.33 | 3.81 | 2.70 | 0.44 | 0.85 | 0.28 |
| 39626 | 0 | 114882 | LAASVDCSE                                           | 2.32 | 0.01 | 2.25 | 0.44 | 1.23 | 0.85 |
| 39627 | 0 | 243985 | LAAWENARGVDFGSRT<br>QADALVLLGGLDFEA                 | 3.39 | 0.01 | 3.34 | 1.20 | 0.22 | 2.66 |
| 39628 | 0 | 129198 | LACKYNGK                                            | 2.12 | 0.01 | 0.78 | 0.44 | 1.13 | 0.28 |
| 39629 | 0 | 98858  | LACQCLVRTP                                          | 2.32 | 0.01 | 1.60 | 0.44 | 1.23 | 0.85 |
| 39630 | 0 | 98858  | LACQCLVRTP                                          | 2.32 | 0.01 | 1.60 | 0.44 | 1.23 | 0.85 |
| 39631 | 0 | 98858  | LACQCLVRTP                                          | 2.32 | 0.01 | 1.60 | 0.44 | 2.98 | 0.85 |
| 39632 | 0 | 95537  | LACQCLVRTPEV                                        | 2.48 | 0.01 | 1.60 | 0.44 | 1.23 | 1.27 |
| 39633 | 0 | 34709  | LADALLEK                                            | 2.16 | 0.01 | 2.21 | 1.12 | 0.22 | 0.28 |
| 39634 | 0 | 34709  | LADALLEK                                            | 2.16 | 0.01 | 2.21 | 0.44 | 0.85 | 0.28 |
| 39635 | 0 | 34710  | LADALLEKGN                                          | 2.33 | 0.01 | 2.21 | 1.12 | 0.22 | 0.28 |
| 39636 | 0 | 137426 | LADARRDLKSAKADAKV<br>MKDAKTKKVVESKKKAV<br>QRLEEQLMK | 3.74 | 0.01 | 0.78 | 0.44 | 1.13 | 0.85 |
| 39637 | 0 | 107193 | LADAVAVTMGPKGRT                                     | 2.68 | 0.01 | 2.19 | 2.97 | 0.22 | 0.28 |
| 39638 | 0 | 187676 | LADGGCSGGAYDIIMC                                    | 2.75 | 0.01 | 1.96 | 0.68 | 0.22 | 1.48 |
| 39639 | 0 | 187676 | LADGGCSGGAYDIIMC                                    | 2.75 | 0.01 | 1.96 | 0.68 | 0.22 | 0.28 |
| 39640 | 0 | 187676 | LADGGCSGGAYDIIMC                                    | 2.75 | 0.01 | 1.96 | 0.68 | 0.22 | 0.28 |
| 39641 | 0 | 34719  | LADKLSSAEASRDKAFA                                   | 2.84 | 0.01 | 3.59 | 2.02 | 0.22 | 0.28 |
| 39642 | 0 | 171998 | LADKSSRKTYTFDMV                                     | 2.65 | 0.01 | 0.78 | 0.44 | 1.41 | 0.28 |
| 39643 | 0 | 171998 | LADKSSRKTYTFDMV                                     | 2.65 | 0.01 | 0.78 | 0.44 | 1.13 | 0.28 |
| 39644 | 0 | 79279  | LADLVLIAVIDHVTDLDK                                  | 2.90 | 0.01 | 2.86 | 0.44 | 0.85 | 0.28 |
| 39645 | 0 | 79279  | LADLVLIAVIDHVTDLDK                                  | 2.90 | 0.01 | 2.86 | 0.44 | 0.85 | 0.28 |
| 39646 | 0 | 79279  | LADLVLIAVIDHVTDLDK                                  | 2.90 | 0.01 | 2.86 | 0.44 | 0.85 | 0.28 |

|       |   |        |                                  |      |      |      |      |      |      |
|-------|---|--------|----------------------------------|------|------|------|------|------|------|
| 39647 | 0 | 34722  | LADLYSYNWIVDSQTHH<br>LTQ         | 2.94 | 0.01 | 2.86 | 2.89 | 0.22 | 0.85 |
| 39648 | 0 | 129199 | LADPSAFVAAAPVAA                  | 2.70 | 0.01 | 0.78 | 0.44 | 1.13 | 0.85 |
| 39649 | 0 | 137219 | LADRSVRYPIKARPNCG<br>GNLLGV      | 3.12 | 0.01 | 0.78 | 0.68 | 0.22 | 0.28 |
| 39650 | 0 | 195035 | LADVPLDDDSDFVA                   | 2.66 | 0.01 | 2.30 | 0.44 | 0.85 | 0.28 |
| 39651 | 0 | 34727  | LADYKRRMADAVSR                   | 2.63 | 0.01 | 2.56 | 2.69 | 0.22 | 0.28 |
| 39652 | 0 | 226492 | LAEAGYPNGNGFPILKLYN              | 2.98 | 0.01 | 2.73 | 0.44 | 0.85 | 0.28 |
| 39653 | 0 | 120734 | LAEARLVPLI                       | 2.34 | 0.01 | 3.59 | 0.44 | 1.59 | 0.28 |
| 39654 | 0 | 120735 | LAEARLVPLIGGGEPGLT<br>WQSCSCRANG | 3.27 | 0.01 | 0.90 | 0.44 | 1.59 | 0.28 |
| 39655 | 0 | 116764 | LAEEADRYDEVARK                   | 2.71 | 0.01 | 2.36 | 0.44 | 1.23 | 1.28 |
| 39656 | 0 | 116764 | LAEEADRYDEVARK                   | 2.71 | 0.01 | 2.36 | 0.44 | 1.23 | 1.27 |
| 39657 | 0 | 34734  | LAIEKQRSLMVHVGG                  | 2.63 | 0.01 | 4.33 | 0.68 | 0.22 | 0.28 |
| 39658 | 0 | 434626 | LAELEQLKGQGSRLGD                 | 2.83 | 3.89 | 0.78 | 0.44 | 1.13 | 0.28 |
| 39659 | 0 | 152743 | LAELNATNIY                       | 2.34 | 0.01 | 2.18 | 2.16 | 0.22 | 0.28 |
| 39660 | 0 | 34738  | LAELNKDYPGGYKLGK<br>K            | 2.86 | 0.01 | 3.75 | 2.75 | 0.22 | 0.85 |
| 39661 | 0 | 325265 | LAEEQISDDDEGE                    | 2.69 | 0.01 | 1.61 | 0.44 | 0.85 | 1.28 |
| 39662 | 0 | 34740  | LAEQELVDCASQHGCH<br>GDTIPRGIE    | 3.16 | 0.01 | 2.78 | 0.44 | 1.23 | 1.57 |
| 39663 | 0 | 34740  | LAEQELVDCASQHGCH<br>GDTIPRGIE    | 3.16 | 0.01 | 2.78 | 0.44 | 1.23 | 1.57 |
| 39664 | 0 | 34740  | LAEQELVDCASQHGCH<br>GDTIPRGIE    | 3.16 | 0.01 | 2.78 | 1.12 | 0.22 | 1.57 |
| 39665 | 0 | 34744  | LAEQFKQKALGLLQQAS<br>KQA         | 3.00 | 0.01 | 1.72 | 0.44 | 0.85 | 0.28 |
| 39666 | 0 | 34747  | LAEQFKQKALGLLQTAS<br>R           | 2.87 | 0.01 | 3.18 | 0.44 | 1.59 | 0.28 |
| 39667 | 0 | 34750  | LAEQFKQKALGLLQTAS<br>RQAEVIAP    | 3.16 | 0.01 | 1.72 | 0.44 | 1.59 | 0.28 |
| 39668 | 0 | 34752  | LAEQFKQKALGLLQTAT<br>RQA         | 2.99 | 0.01 | 1.72 | 0.44 | 0.85 | 0.28 |
| 39669 | 0 | 34754  | LAEQFKQKALGLLQTSTK<br>QA         | 2.99 | 0.01 | 1.96 | 0.44 | 0.85 | 0.28 |
| 39670 | 0 | 34755  | LAEQFKQKARGLLQTAT<br>KQA         | 2.99 | 0.01 | 1.96 | 0.44 | 0.85 | 0.28 |
| 39671 | 0 | 34757  | LAELKQKALGLLQTAT<br>KQA          | 3.01 | 0.01 | 1.96 | 0.44 | 0.85 | 0.28 |
| 39672 | 0 | 242865 | LAEQYDTFVKFT                     | 2.45 | 0.01 | 3.33 | 1.20 | 0.22 | 0.85 |
| 39673 | 0 | 242866 | LAEQYDTFVKFTYDQ                  | 2.68 | 0.01 | 3.32 | 1.20 | 0.22 | 0.85 |
| 39674 | 0 | 242866 | LAEQYDTFVKFTYDQ                  | 2.68 | 0.01 | 3.32 | 1.20 | 0.22 | 0.85 |
| 39675 | 0 | 34758  | LAERTVVIPSAIPTDPRN<br>VG         | 2.94 | 0.01 | 2.58 | 0.44 | 0.22 | 0.28 |
| 39676 | 0 | 98859  | LAFPGSGEQVEKLIK                  | 2.67 | 0.01 | 2.16 | 0.44 | 1.23 | 0.85 |

|       |   |        |                                     |      |      |      |      |      |      |
|-------|---|--------|-------------------------------------|------|------|------|------|------|------|
| 39677 | 0 | 141694 | LAFPGSSREVDRLT                      | 2.65 | 0.01 | 3.65 | 0.44 | 1.23 | 1.28 |
| 39678 | 0 | 34776  | LAGGAATAGAFSRPGLP<br>VEY            | 2.96 | 0.01 | 2.04 | 0.44 | 0.85 | 0.28 |
| 39679 | 0 | 422530 | LAGGSAQSQRAPDR                      | 2.64 | 0.01 | 0.78 | 0.68 | 0.22 | 2.49 |
| 39680 | 0 | 422530 | LAGGSAQSQRAPDR                      | 2.64 | 0.01 | 0.78 | 0.68 | 0.22 | 0.28 |
| 39681 | 0 | 34779  | LAGHGAFQITSLFTRG                    | 2.75 | 0.01 | 1.96 | 0.44 | 0.85 | 0.28 |
| 39682 | 0 | 34779  | LAGHGAFQITSLFTRG                    | 2.75 | 0.01 | 1.96 | 0.44 | 0.85 | 1.27 |
| 39683 | 0 | 34779  | LAGHGAFQITSLFTRG                    | 2.75 | 0.01 | 1.96 | 0.44 | 0.85 | 1.27 |
| 39684 | 0 | 34779  | LAGHGAFQITSLFTRG                    | 2.75 | 0.01 | 1.96 | 0.44 | 0.85 | 0.28 |
| 39685 | 0 | 138871 | LAGIRPLGPKNKAPDFS<br>GTAVV          | 3.02 | 0.01 | 3.81 | 0.44 | 1.74 | 0.28 |
| 39686 | 0 | 138871 | LAGIRPLGPKNKAPDFS<br>GTAVV          | 3.02 | 0.01 | 3.81 | 0.44 | 0.85 | 0.28 |
| 39687 | 0 | 138871 | LAGIRPLGPKNKAPDFS<br>GTAVV          | 3.02 | 0.01 | 3.81 | 0.44 | 0.85 | 0.28 |
| 39688 | 0 | 120737 | LAGNAARDNKKTRIIPR<br>HLQL           | 2.98 | 0.01 | 1.60 | 0.44 | 1.13 | 0.28 |
| 39689 | 0 | 120737 | LAGNAARDNKKTRIIPR<br>HLQL           | 2.98 | 0.01 | 1.60 | 0.44 | 1.41 | 0.28 |
| 39690 | 0 | 120737 | LAGNAARDNKKTRIIPR<br>HLQL           | 2.98 | 0.01 | 1.60 | 1.20 | 0.22 | 0.28 |
| 39691 | 0 | 120737 | LAGNAARDNKKTRIIPR<br>HLQL           | 2.98 | 0.01 | 1.60 | 0.44 | 1.13 | 0.28 |
| 39692 | 0 | 34791  | LAGPCILRQLRHLPSPVR<br>YPHYSLIKPESSL | 3.38 | 0.01 | 2.04 | 0.44 | 0.85 | 0.28 |
| 39693 | 0 | 34791  | LAGPCILRQLRHLPSPVR<br>YPHYSLIKPESSL | 3.38 | 0.01 | 2.04 | 0.44 | 0.85 | 0.28 |
| 39694 | 0 | 34791  | LAGPCILRQLRHLPSPVR<br>YPHYSLIKPESSL | 3.38 | 0.01 | 2.04 | 0.44 | 0.85 | 0.28 |
| 39695 | 0 | 34791  | LAGPCILRQLRHLPSPVR<br>YPHYSLIKPESSL | 3.38 | 0.01 | 2.04 | 0.44 | 1.59 | 0.28 |
| 39696 | 0 | 34791  | LAGPCILRQLRHLPSPVR<br>YPHYSLIKPESSL | 3.38 | 0.01 | 2.04 | 0.44 | 0.85 | 0.28 |
| 39697 | 0 | 34791  | LAGPCILRQLRHLPSPVR<br>YPHYSLIKPESSL | 3.38 | 0.01 | 2.04 | 0.44 | 0.85 | 0.28 |
| 39698 | 0 | 34791  | LAGPCILRQLRHLPSPVR<br>YPHYSLIKPESSL | 3.38 | 0.01 | 2.04 | 0.44 | 1.59 | 0.28 |
| 39699 | 0 | 34791  | LAGPCILRQLRHLPSPVR<br>YPHYSLIKPESSL | 3.38 | 0.01 | 2.04 | 0.44 | 2.82 | 0.28 |
| 39700 | 0 | 34791  | LAGPCILRQLRHLPSPVR<br>YPHYSLIKPESSL | 3.38 | 0.01 | 2.04 | 0.44 | 0.85 | 0.28 |
| 39701 | 0 | 107986 | LAGQRGIV                            | 2.12 | 0.01 | 0.78 | 2.46 | 0.22 | 0.28 |
| 39702 | 0 | 34792  | LAGRMIPK                            | 2.10 | 0.01 | 2.40 | 2.43 | 0.22 | 0.28 |
| 39703 | 0 | 98860  | LAGSGL                              | 1.92 | 0.01 | 2.14 | 0.44 | 0.85 | 0.28 |
| 39704 | 0 | 34793  | LAGSISGVNPNAAG                      | 2.70 | 0.01 | 3.35 | 1.12 | 0.22 | 0.85 |
| 39705 | 0 | 192988 | LAHCPDCGEGHSCHS                     | 2.70 | 0.01 | 3.26 | 0.68 | 0.22 | 0.28 |
| 39706 | 0 | 192988 | LAHCPDCGEGHSCHS                     | 2.70 | 0.01 | 3.26 | 0.68 | 0.22 | 1.48 |



|       |   |        |                               |      |      |      |      |      |      |
|-------|---|--------|-------------------------------|------|------|------|------|------|------|
| 39707 | 0 | 112194 | LAHIWWN                       | 2.01 | 0.01 | 0.78 | 0.44 | 1.13 | 0.28 |
| 39708 | 0 | 34806  | LAHLTTTHARHLP                 | 2.59 | 0.01 | 2.78 | 0.68 | 0.22 | 0.85 |
| 39709 | 0 | 34806  | LAHLTTTHARHLP                 | 2.59 | 0.01 | 2.78 | 0.68 | 0.22 | 0.85 |
| 39710 | 0 | 34806  | LAHLTTTHARHLP                 | 2.59 | 0.01 | 2.78 | 0.68 | 0.22 | 1.34 |
| 39711 | 0 | 34806  | LAHLTTTHARHLP                 | 2.59 | 0.01 | 2.78 | 0.68 | 0.22 | 1.34 |
| 39712 | 0 | 34806  | LAHLTTTHARHLP                 | 2.59 | 0.01 | 2.78 | 0.68 | 0.22 | 0.85 |
| 39713 | 0 | 34806  | LAHLTTTHARHLP                 | 2.59 | 0.01 | 2.78 | 0.68 | 0.22 | 0.85 |
| 39714 | 0 | 34806  | LAHLTTTHARHLP                 | 2.59 | 0.01 | 2.78 | 0.68 | 0.22 | 0.28 |
| 39715 | 0 | 34806  | LAHLTTTHARHLP                 | 2.59 | 0.01 | 2.78 | 0.68 | 0.22 | 0.28 |
| 39716 | 0 | 34806  | LAHLTTTHARHLP                 | 2.59 | 0.01 | 2.78 | 0.68 | 0.22 | 0.28 |
| 39717 | 0 | 34806  | LAHLTTTHARHLP                 | 2.59 | 0.01 | 2.78 | 2.78 | 0.22 | 1.27 |
| 39718 | 0 | 156909 | LAHPFTP                       | 2.02 | 0.01 | 0.90 | 2.74 | 0.22 | 0.85 |
| 39719 | 0 | 34807  | LAHRNQSLDLAEQELVD<br>CASQHGCH | 3.18 | 0.01 | 2.78 | 0.44 | 1.23 | 1.57 |
| 39720 | 0 | 34807  | LAHRNQSLDLAEQELVD<br>CASQHGCH | 3.18 | 0.01 | 2.78 | 0.44 | 1.23 | 1.57 |
| 39721 | 0 | 34807  | LAHRNQSLDLAEQELVD<br>CASQHGCH | 3.18 | 0.01 | 2.78 | 1.12 | 0.22 | 1.57 |
| 39722 | 0 | 34809  | LAHRRIPPENIR                  | 2.48 | 0.01 | 2.14 | 2.90 | 0.22 | 0.28 |
| 39723 | 0 | 120738 | LAIRNDEELNKLLGKV              | 2.74 | 0.01 | 1.60 | 0.44 | 1.13 | 0.28 |
| 39724 | 0 | 120738 | LAIRNDEELNKLLGKV              | 2.74 | 0.01 | 1.60 | 0.44 | 1.41 | 0.28 |
| 39725 | 0 | 34827  | LAKEKLQEQQSDLEQER<br>LAKEKLQ  | 3.72 | 0.01 | 1.66 | 2.74 | 0.22 | 0.28 |
| 39726 | 0 | 34827  | LAKEKLQEQQSDLEQER<br>LAKEKLQ  | 3.72 | 0.01 | 1.66 | 3.67 | 0.22 | 0.28 |
| 39727 | 0 | 34828  | LAKEKLQEQQSDLEQER<br>LAKEKLQ  | 3.71 | 0.01 | 1.66 | 0.44 | 1.74 | 0.28 |
| 39728 | 0 | 135710 | LAKEQKSKQNIGALKQE<br>LAK      | 2.99 | 0.01 | 2.24 | 0.44 | 1.13 | 0.28 |
| 39729 | 0 | 135710 | LAKEQKSKQNIGALKQE<br>LAK      | 2.99 | 0.01 | 2.24 | 0.44 | 1.41 | 0.28 |
| 39730 | 0 | 504103 | LAKGEKANVLIGQGD               | 2.69 | 0.01 | 3.89 | 0.44 | 1.74 | 1.28 |
| 39731 | 0 | 103334 | LAKHSEHPTVDDEEK               | 2.66 | 0.01 | 3.93 | 2.43 | 0.22 | 0.85 |
| 39732 | 0 | 125468 | LAKILVPEGTRDVPLGTP<br>LCIIVEK | 3.18 | 0.01 | 0.78 | 0.44 | 1.13 | 0.28 |
| 39733 | 0 | 125468 | LAKILVPEGTRDVPLGTP<br>LCIIVEK | 3.18 | 0.01 | 0.78 | 0.44 | 1.13 | 0.28 |
| 39734 | 0 | 34833  | LAKLAGGVAV                    | 2.36 | 0.01 | 3.20 | 0.44 | 1.41 | 0.28 |
| 39735 | 0 | 34833  | LAKLAGGVAV                    | 2.36 | 0.01 | 3.20 | 0.44 | 1.13 | 0.28 |
| 39736 | 0 | 133870 | LAKLAGGVAVICAGA               | 2.73 | 0.01 | 4.08 | 0.44 | 1.13 | 0.28 |
| 39737 | 0 | 133870 | LAKLAGGVAVICAGA               | 2.73 | 0.01 | 4.08 | 0.44 | 1.41 | 0.28 |
| 39738 | 0 | 133871 | LAKLGGAGQAARAGT               | 2.73 | 0.01 | 0.78 | 0.44 | 1.13 | 0.28 |
| 39739 | 0 | 133871 | LAKLGGAGQAARAGT               | 2.73 | 0.01 | 0.78 | 0.44 | 1.41 | 0.28 |
| 39740 | 0 | 34836  | LAKLSDGVAV                    | 2.34 | 0.01 | 0.78 | 0.44 | 1.41 | 0.28 |

|       |   |        |                                         |      |      |      |      |      |      |
|-------|---|--------|-----------------------------------------|------|------|------|------|------|------|
| 39741 | 0 | 34836  | LAKLSDGVAV                              | 2.34 | 0.01 | 0.78 | 0.44 | 1.13 | 0.28 |
| 39742 | 0 | 34847  | LALFLLAHASARQQ                          | 2.71 | 0.01 | 2.16 | 0.44 | 1.23 | 1.48 |
| 39743 | 0 | 124410 | LALKATLVE                               | 2.26 | 0.01 | 0.78 | 0.44 | 1.41 | 0.28 |
| 39744 | 0 | 34854  | LALLSCLTVPASAYQVRN<br>STGLYHV           | 3.17 | 0.01 | 1.72 | 0.44 | 0.85 | 0.28 |
| 39745 | 0 | 34854  | LALLSCLTVPASAYQVRN<br>STGLYHV           | 3.17 | 0.01 | 1.72 | 0.44 | 0.85 | 0.28 |
| 39746 | 0 | 174179 | LALLVKYAAG                              | 2.34 | 0.01 | 3.10 | 0.44 | 1.23 | 0.85 |
| 39747 | 0 | 34858  | LALPAPHLTLPFNWTHC<br>FDPQIQ             | 3.10 | 0.01 | 2.04 | 0.44 | 0.85 | 0.28 |
| 39748 | 0 | 78192  | LALPAPHLTLPFNWTHC<br>FDPQIQAIVSSPCHNSLI | 3.51 | 0.01 | 2.04 | 0.44 | 0.85 | 0.28 |
| 39749 | 0 | 237808 | LALPWKHEGAQNWNNAER                      | 2.85 | 0.01 | 3.19 | 0.44 | 0.85 | 0.85 |
| 39750 | 0 | 237808 | LALPWKHEGAQNWNNAER                      | 2.85 | 0.01 | 3.19 | 0.44 | 0.85 | 0.85 |
| 39751 | 0 | 520757 | LALQLASATEDKANL                         | 2.71 | 0.01 | 2.24 | 0.44 | 1.41 | 1.28 |
| 39752 | 0 | 148655 | LALQTLPAMC                              | 2.34 | 0.01 | 1.86 | 0.44 | 1.23 | 0.28 |
| 39753 | 0 | 34862  | LALSADQALQPPCPNLV<br>SYSSYH             | 3.10 | 0.01 | 2.04 | 0.44 | 0.85 | 0.28 |
| 39754 | 0 | 34862  | LALSADQALQPPCPNLV<br>SYSSYH             | 3.10 | 0.01 | 2.04 | 1.20 | 0.22 | 0.28 |
| 39755 | 0 | 34862  | LALSADQALQPPCPNLV<br>SYSSYH             | 3.10 | 0.01 | 2.04 | 0.44 | 0.85 | 0.28 |
| 39756 | 0 | 34862  | LALSADQALQPPCPNLV<br>SYSSYH             | 3.10 | 0.01 | 2.04 | 0.44 | 1.59 | 0.28 |
| 39757 | 0 | 118875 | LALVFEAPNQEKVSDYE<br>MKLMDLDVEQLGI      | 3.34 | 0.01 | 0.78 | 0.44 | 1.13 | 0.85 |
| 39758 | 0 | 115338 | LAMAASDISLLDAQSAP<br>LRV                | 2.98 | 0.01 | 1.60 | 0.44 | 1.23 | 2.51 |
| 39759 | 0 | 181706 | LAMTPLIPQSKD                            | 2.46 | 0.01 | 0.78 | 0.68 | 0.22 | 2.12 |
| 39760 | 0 | 181706 | LAMTPLIPQSKD                            | 2.46 | 0.01 | 0.78 | 0.68 | 0.22 | 0.28 |
| 39761 | 0 | 181706 | LAMTPLIPQSKD                            | 2.46 | 0.01 | 0.78 | 0.68 | 0.22 | 0.28 |
| 39762 | 0 | 181706 | LAMTPLIPQSKD                            | 2.46 | 0.01 | 0.78 | 0.68 | 0.22 | 2.02 |
| 39763 | 0 | 181706 | LAMTPLIPQSKD                            | 2.46 | 0.01 | 0.78 | 0.68 | 0.22 | 2.35 |
| 39764 | 0 | 181706 | LAMTPLIPQSKD                            | 2.46 | 0.01 | 0.78 | 0.68 | 0.22 | 2.12 |
| 39765 | 0 | 181706 | LAMTPLIPQSKD                            | 2.46 | 0.01 | 0.78 | 0.68 | 0.22 | 1.66 |
| 39766 | 0 | 181706 | LAMTPLIPQSKD                            | 2.46 | 0.01 | 0.78 | 0.68 | 0.22 | 1.66 |
| 39767 | 0 | 181706 | LAMTPLIPQSKD                            | 2.46 | 0.01 | 0.78 | 0.68 | 0.22 | 1.66 |
| 39768 | 0 | 181706 | LAMTPLIPQSKD                            | 2.46 | 0.01 | 0.78 | 0.68 | 0.22 | 1.34 |
| 39769 | 0 | 34878  | LAMVEADLERAEERA                         | 2.73 | 0.01 | 3.15 | 0.44 | 1.23 | 0.85 |
| 39770 | 0 | 34878  | LAMVEADLERAEERA                         | 2.73 | 0.01 | 2.36 | 0.44 | 1.23 | 1.28 |
| 39771 | 0 | 34878  | LAMVEADLERAEERA                         | 2.73 | 0.01 | 2.36 | 0.44 | 1.23 | 1.27 |
| 39772 | 0 | 34878  | LAMVEADLERAEERA                         | 2.73 | 0.01 | 2.36 | 0.44 | 1.23 | 1.28 |
| 39773 | 0 | 34879  | LAMVYLGAKDST                            | 2.46 | 0.01 | 2.25 | 0.44 | 1.23 | 0.85 |
| 39774 | 0 | 100244 | LANAYSHFYDGFAC                          | 2.61 | 0.01 | 2.96 | 0.44 | 0.22 | 0.28 |

|       |   |        |                                    |      |      |      |      |      |      |
|-------|---|--------|------------------------------------|------|------|------|------|------|------|
| 39775 | 0 | 534739 | LANG                               | 1.57 | 0.01 | 0.78 | 0.68 | 0.22 | 0.28 |
| 39776 | 0 | 534739 | LANG                               | 1.57 | 0.01 | 0.78 | 0.68 | 0.22 | 0.28 |
| 39777 | 0 | 132421 | LANKHEVGIIVR                       | 2.44 | 0.01 | 0.90 | 1.15 | 0.22 | 1.39 |
| 39778 | 0 | 34887  | LANKWVFITITNDR<br>LSSA<br>NLYIN    | 3.08 | 0.01 | 2.95 | 0.44 | 0.22 | 0.28 |
| 39779 | 0 | 131532 | LANSNYERTHS                        | 2.39 | 0.01 | 0.78 | 1.12 | 0.22 | 0.28 |
| 39780 | 0 | 34895  | LAPDNISL                           | 2.13 | 0.01 | 3.53 | 2.61 | 0.22 | 0.28 |
| 39781 | 0 | 99410  | LAPDRRVE                           | 2.11 | 0.01 | 2.24 | 0.68 | 0.22 | 0.28 |
| 39782 | 0 | 103338 | LAPDTVPLAGVVLAG                    | 2.73 | 0.01 | 2.04 | 0.44 | 0.85 | 1.28 |
| 39783 | 0 | 34896  | LAPEAR                             | 1.90 | 0.01 | 1.96 | 0.44 | 0.85 | 0.28 |
| 39784 | 0 | 34897  | LAPEDPEDSALLEDPVGT<br>VA           | 2.99 | 0.01 | 2.40 | 1.15 | 0.22 | 0.85 |
| 39785 | 0 | 34897  | LAPEDPEDSALLEDPVGT<br>VA           | 2.99 | 0.01 | 2.40 | 1.12 | 0.22 | 0.85 |
| 39786 | 0 | 34897  | LAPEDPEDSALLEDPVGT<br>VA           | 2.99 | 0.01 | 2.40 | 1.12 | 0.22 | 0.85 |
| 39787 | 0 | 34897  | LAPEDPEDSALLEDPVGT<br>VA           | 2.99 | 0.01 | 2.40 | 1.12 | 0.22 | 0.85 |
| 39788 | 0 | 34897  | LAPEDPEDSALLEDPVGT<br>VA           | 2.99 | 0.01 | 2.40 | 1.12 | 0.22 | 0.85 |
| 39789 | 0 | 34897  | LAPEDPEDSALLEDPVGT<br>VA           | 2.99 | 0.01 | 2.40 | 1.15 | 0.22 | 0.85 |
| 39790 | 0 | 34897  | LAPEDPEDSALLEDPVGT<br>VA           | 2.99 | 0.01 | 2.40 | 1.12 | 0.22 | 0.85 |
| 39791 | 0 | 34897  | LAPEDPEDSALLEDPVGT<br>VA           | 2.99 | 0.01 | 2.40 | 1.20 | 0.22 | 0.85 |
| 39792 | 0 | 34897  | LAPEDPEDSALLEDPVGT<br>VA           | 2.99 | 0.01 | 2.40 | 1.15 | 0.22 | 0.85 |
| 39793 | 0 | 34897  | LAPEDPEDSALLEDPVGT<br>VA           | 2.99 | 0.01 | 2.40 | 1.12 | 0.22 | 0.85 |
| 39794 | 0 | 34897  | LAPEDPEDSALLEDPVGT<br>VA           | 2.99 | 0.01 | 2.40 | 1.15 | 0.22 | 0.85 |
| 39795 | 0 | 164274 | LAPGDQG                            | 2.02 | 0.01 | 0.90 | 1.20 | 0.22 | 1.39 |
| 39796 | 0 | 123414 | LAPGQIPP                           | 2.11 | 0.01 | 0.78 | 1.20 | 0.22 | 0.28 |
| 39797 | 0 | 225786 | LAPHPDELSKNKVS                     | 2.69 | 0.01 | 3.28 | 0.44 | 0.22 | 0.85 |
| 39798 | 0 | 34904  | LAPHSALALLEDTMDYP<br>ARAHTFDD      | 3.17 | 0.01 | 2.70 | 0.44 | 0.85 | 0.28 |
| 39799 | 0 | 34904  | LAPHSALALLEDTMDYP<br>ARAHTFDD      | 3.17 | 0.01 | 2.70 | 0.44 | 0.85 | 0.28 |
| 39800 | 0 | 34905  | LAPHSALALLEDTMDYP<br>ARAHTFDDFCPEC | 3.35 | 0.01 | 2.53 | 0.44 | 0.85 | 0.28 |
| 39801 | 0 | 34905  | LAPHSALALLEDTMDYP<br>ARAHTFDDFCPEC | 3.35 | 0.01 | 2.53 | 0.44 | 0.85 | 0.28 |
| 39802 | 0 | 79280  | LAPISGTVQSAHLIRFD                  | 2.81 | 0.01 | 3.38 | 0.68 | 0.22 | 1.34 |
| 39803 | 0 | 79280  | LAPISGTVQSAHLIRFD                  | 2.81 | 0.01 | 3.38 | 0.68 | 0.22 | 1.39 |

|       |   |        |                                                                           |      |      |      |      |      |      |
|-------|---|--------|---------------------------------------------------------------------------|------|------|------|------|------|------|
| 39804 | 0 | 520771 | LAPKEMPLESAEEKEE                                                          | 2.72 | 0.01 | 2.24 | 0.44 | 1.41 | 1.28 |
| 39805 | 0 | 34908  | LAPLGE                                                                    | 1.91 | 0.01 | 3.27 | 0.44 | 1.59 | 0.28 |
| 39806 | 0 | 147901 | LAPMSDGAV                                                                 | 2.21 | 0.01 | 3.24 | 3.57 | 0.85 | 0.28 |
| 39807 | 0 | 192989 | LAPNKILIRKVPDNHPQH                                                        | 2.86 | 2.84 | 2.84 | 0.44 | 1.74 | 0.28 |
| 39808 | 0 | 34910  | LAPNTPRPPAQAPAKDMP<br>SG                                                  | 2.94 | 0.01 | 2.40 | 0.44 | 1.59 | 0.28 |
| 39809 | 0 | 520774 | LAPQAPAKTADTPAT                                                           | 2.73 | 0.01 | 2.24 | 0.44 | 1.41 | 1.28 |
| 39810 | 0 | 34912  | LAPRVAR                                                                   | 2.04 | 0.01 | 3.14 | 0.68 | 0.22 | 1.27 |
| 39811 | 0 | 34912  | LAPRVAR                                                                   | 2.04 | 0.01 | 3.14 | 0.68 | 0.22 | 1.34 |
| 39812 | 0 | 105918 | LAPRVARQL                                                                 | 2.26 | 0.01 | 3.14 | 3.67 | 0.22 | 1.27 |
| 39813 | 0 | 105919 | LAPRVARQLPASFNY                                                           | 2.69 | 0.01 | 3.14 | 3.67 | 0.22 | 1.27 |
| 39814 | 0 | 34914  | LAPSTLRLSRKRLSSP                                                          | 2.84 | 0.01 | 3.36 | 0.44 | 2.82 | 0.28 |
| 39815 | 0 | 34920  | LAPTVAHGVFNPEFG                                                           | 2.68 | 0.01 | 3.50 | 2.22 | 0.22 | 0.28 |
| 39816 | 0 | 34925  | LAPVPPPATRRRRRAVPI                                                        | 2.83 | 0.01 | 3.01 | 0.44 | 0.85 | 0.28 |
| 39817 | 0 | 419248 | LAPWPYY                                                                   | 2.00 | 0.01 | 0.90 | 0.44 | 1.93 | 1.39 |
| 39818 | 0 | 140879 | LAPYSDELQRRLAARLEAL<br>KE                                                 | 3.03 | 0.01 | 0.78 | 0.68 | 0.22 | 0.28 |
| 39819 | 0 | 34927  | LAQEAGNFERISGDL                                                           | 2.67 | 0.01 | 2.04 | 0.68 | 0.22 | 0.28 |
| 39820 | 0 | 34927  | LAQEAGNFERISGDL                                                           | 2.67 | 0.01 | 2.04 | 0.44 | 0.85 | 0.28 |
| 39821 | 0 | 143711 | LAQELEKE                                                                  | 2.17 | 0.01 | 0.78 | 0.68 | 0.22 | 0.85 |
| 39822 | 0 | 143711 | LAQELEKE                                                                  | 2.17 | 0.01 | 0.78 | 0.68 | 0.22 | 0.85 |
| 39823 | 0 | 143711 | LAQELEKE                                                                  | 2.17 | 0.01 | 0.78 | 0.68 | 0.22 | 0.85 |
| 39824 | 0 | 423397 | LAQFRGTMDDDEAAL                                                           | 2.66 | 0.01 | 2.51 | 0.44 | 2.35 | 1.28 |
| 39825 | 0 | 148656 | LAQIPQQLQC                                                                | 2.36 | 0.01 | 1.86 | 0.44 | 1.23 | 0.85 |
| 39826 | 0 | 34933  | LAQKVARTLP                                                                | 2.32 | 0.01 | 2.88 | 1.12 | 0.22 | 1.34 |
| 39827 | 0 | 34933  | LAQKVARTLP                                                                | 2.32 | 0.01 | 2.88 | 1.12 | 0.22 | 0.28 |
| 39828 | 0 | 34933  | LAQKVARTLP                                                                | 2.32 | 0.01 | 3.51 | 2.59 | 0.22 | 0.28 |
| 39829 | 0 | 34933  | LAQKVARTLP                                                                | 2.32 | 0.01 | 3.51 | 2.59 | 0.22 | 0.28 |
| 39830 | 0 | 34933  | LAQKVARTLP                                                                | 2.32 | 0.01 | 3.51 | 2.59 | 0.22 | 0.28 |
| 39831 | 0 | 34935  | LAQMYQANDNSLEDV                                                           | 2.69 | 0.01 | 1.66 | 0.44 | 0.85 | 0.28 |
| 39832 | 0 | 34936  | LAQPQRYCRHYWTIKDL<br>DAFRHYDGRTIIQRDNG<br>YQPNYHAVNIVGYSNA<br>QGV<br>DYWI | 3.99 | 0.01 | 2.78 | 0.44 | 1.23 | 1.57 |
| 39833 | 0 | 34936  | LAQPQRYCRHYWTIKDL<br>DAFRHYDGRTIIQRDNG<br>YQPNYHAVNIVGYSNA<br>QGV<br>DYWI | 3.99 | 0.01 | 2.78 | 1.12 | 0.22 | 1.57 |
| 39834 | 0 | 34936  | LAQPQRYCRHYWTIKDL<br>DAFRHYDGRTIIQRDNG<br>YQPNYHAVNIVGYSNA<br>QGV<br>DYWI | 3.99 | 0.01 | 2.78 | 0.44 | 1.23 | 1.57 |
| 39835 | 0 | 450773 | LAQQSQALQELISELDR                                                         | 2.84 | 0.01 | 0.78 | 2.79 | 1.13 | 1.28 |

|       |   |        |                                                                       |      |      |      |      |      |      |
|-------|---|--------|-----------------------------------------------------------------------|------|------|------|------|------|------|
| 39836 | 0 | 450773 | LAQQSQALQELISELDR                                                     | 2.84 | 0.01 | 0.78 | 2.79 | 1.13 | 1.28 |
| 39837 | 0 | 450773 | LAQQSQALQELISELDR                                                     | 2.84 | 0.01 | 0.78 | 1.81 | 1.41 | 1.28 |
| 39838 | 0 | 34938  | LAQTHSAIAVIIGIKDLDA<br>FRHYDGRTIIQRDNGYQ<br>PNYHAVNIVGYSNAQG<br>VDYWI | 3.99 | 0.01 | 2.78 | 0.44 | 1.23 | 1.27 |
| 39839 | 0 | 34939  | LARCPAGDSITMGFLLD<br>SVRHSCSV                                         | 3.15 | 0.01 | 3.36 | 0.68 | 0.22 | 0.28 |
| 39840 | 0 | 34939  | LARCPAGDSITMGFLLD<br>SVRHSCSV                                         | 3.15 | 0.01 | 3.36 | 0.68 | 0.22 | 0.28 |
| 39841 | 0 | 34939  | LARCPAGDSITMGFLLD<br>SVRHSCSV                                         | 3.15 | 0.01 | 3.36 | 0.68 | 0.22 | 0.28 |
| 39842 | 0 | 34942  | LARGSPPSLASSSASQLS<br>A                                               | 2.95 | 0.01 | 1.72 | 0.44 | 0.85 | 0.28 |
| 39843 | 0 | 106591 | LARHAKAHIL                                                            | 2.36 | 0.01 | 2.75 | 0.44 | 1.23 | 0.85 |
| 39844 | 0 | 172008 | LARNLRNMSNQLGLL                                                       | 2.70 | 0.01 | 0.78 | 0.44 | 1.41 | 0.28 |
| 39845 | 0 | 189105 | LARPYIADCPNCGHSR                                                      | 2.71 | 0.01 | 2.92 | 0.68 | 0.22 | 0.28 |
| 39846 | 0 | 189105 | LARPYIADCPNCGHSR                                                      | 2.71 | 0.01 | 2.92 | 2.49 | 0.22 | 0.28 |
| 39847 | 0 | 189105 | LARPYIADCPNCGHSR                                                      | 2.71 | 0.01 | 2.92 | 3.61 | 0.22 | 0.28 |
| 39848 | 0 | 34948  | LARSFADIGDIVRGKDLY                                                    | 2.86 | 0.01 | 1.66 | 2.36 | 0.22 | 0.28 |
| 39849 | 0 | 34948  | LARSFADIGDIVRGKDLY                                                    | 2.86 | 0.01 | 1.66 | 0.44 | 1.74 | 0.28 |
| 39850 | 0 | 181707 | LARSFADIGDIVRGR                                                       | 2.70 | 0.01 | 1.66 | 2.37 | 0.22 | 1.28 |
| 39851 | 0 | 34949  | LARTISEAGQAMASTEG<br>NVTGMFA                                          | 3.12 | 0.01 | 3.53 | 2.61 | 0.22 | 0.28 |
| 39852 | 0 | 34949  | LARTISEAGQAMASTEG<br>NVTGMFA                                          | 3.12 | 0.01 | 3.53 | 3.16 | 0.85 | 0.28 |
| 39853 | 0 | 34950  | LARTTADRRACNCLKQ<br>L                                                 | 2.87 | 0.01 | 4.33 | 0.44 | 1.23 | 0.85 |
| 39854 | 0 | 34951  | LARTTPDRRTACNCL                                                       | 2.71 | 0.01 | 4.33 | 0.44 | 1.23 | 0.85 |
| 39855 | 0 | 34953  | LASAGGQDN                                                             | 2.22 | 0.01 | 0.90 | 1.12 | 0.22 | 0.85 |
| 39856 | 0 | 34953  | LASAGGQDN                                                             | 2.22 | 0.01 | 0.90 | 0.44 | 0.85 | 0.85 |
| 39857 | 0 | 134128 | LASAHRPQGPAD                                                          | 2.48 | 0.01 | 0.78 | 3.06 | 0.22 | 0.28 |
| 39858 | 0 | 161252 | LASCRRLTDFAQGWGPI<br>SYA                                              | 2.91 | 0.01 | 2.45 | 0.68 | 0.22 | 0.28 |
| 39859 | 0 | 34962  | LASIVD                                                                | 1.88 | 0.01 | 4.08 | 2.66 | 0.22 | 0.28 |
| 39860 | 0 | 167306 | LASKPMP                                                               | 2.02 | 0.01 | 0.90 | 0.44 | 0.85 | 1.39 |
| 39861 | 0 | 34963  | LASLCNPKPSDAPVT                                                       | 2.69 | 0.01 | 0.90 | 1.15 | 0.22 | 1.39 |
| 39862 | 0 | 34963  | LASLCNPKPSDAPVT                                                       | 2.69 | 0.01 | 0.90 | 0.44 | 0.85 | 0.28 |
| 39863 | 0 | 232899 | LASLPFR                                                               | 2.03 | 0.01 | 0.90 | 2.49 | 0.85 | 1.39 |

|       |   |        |                                     |      |      |      |      |      |      |
|-------|---|--------|-------------------------------------|------|------|------|------|------|------|
| 39864 | 0 | 34965  | LASLRKAFADTVPVRPPS<br>NY            | 2.94 | 0.01 | 0.90 | 3.93 | 0.22 | 0.28 |
| 39865 | 0 | 34965  | LASLRKAFADTVPVRPPS<br>NY            | 2.94 | 0.01 | 0.90 | 0.44 | 1.74 | 1.34 |
| 39866 | 0 | 34965  | LASLRKAFADTVPVRPPS<br>NY            | 2.94 | 0.01 | 0.90 | 1.20 | 0.22 | 1.34 |
| 39867 | 0 | 34965  | LASLRKAFADTVPVRPPS<br>NY            | 2.94 | 0.01 | 0.90 | 0.44 | 1.74 | 0.28 |
| 39868 | 0 | 34965  | LASLRKAFADTVPVRPPS<br>NY            | 2.94 | 0.01 | 0.90 | 0.44 | 1.74 | 1.27 |
| 39869 | 0 | 34965  | LASLRKAFADTVPVRPPS<br>NY            | 2.94 | 0.01 | 0.90 | 1.20 | 0.22 | 0.28 |
| 39870 | 0 | 34965  | LASLRKAFADTVPVRPPS<br>NY            | 2.94 | 0.01 | 0.90 | 1.20 | 0.22 | 0.28 |
| 39871 | 0 | 34968  | LASPGESQDTPGPC                      | 2.61 | 0.01 | 1.72 | 0.44 | 0.85 | 0.28 |
| 39872 | 0 | 34968  | LASPGESQDTPGPC                      | 2.61 | 0.01 | 1.72 | 0.44 | 0.85 | 0.28 |
| 39873 | 0 | 419249 | LASPRVW                             | 1.99 | 0.01 | 0.90 | 0.44 | 1.93 | 1.39 |
| 39874 | 0 | 240893 | LASPSDLPALTPQEA                     | 2.72 | 0.01 | 4.45 | 0.44 | 1.41 | 0.28 |
| 39875 | 0 | 84989  | LASSAPSTAVAQ                        | 2.51 | 0.01 | 2.48 | 0.44 | 1.59 | 0.28 |
| 39876 | 0 | 129208 | LASSTIIKE                           | 2.21 | 0.01 | 1.60 | 0.68 | 0.22 | 1.27 |
| 39877 | 0 | 129208 | LASSTIIKE                           | 2.21 | 0.01 | 1.60 | 0.68 | 0.22 | 0.85 |
| 39878 | 0 | 34972  | LASSVKSAEVGCAGY                     | 2.70 | 0.01 | 0.90 | 0.44 | 0.85 | 1.39 |
| 39879 | 0 | 103339 | LASTLTDALKSHGPQ                     | 2.69 | 0.01 | 2.04 | 0.44 | 0.85 | 1.28 |
| 39880 | 0 | 114442 | LATAFQIPREDARRL                     | 2.68 | 0.01 | 3.27 | 0.44 | 1.23 | 0.85 |
| 39881 | 0 | 78715  | LATCPEHQITWDPIDGR<br>VIG            | 2.91 | 0.01 | 2.04 | 0.44 | 1.59 | 0.28 |
| 39882 | 0 | 34981  | LATCPEHQLTWDPIDGR<br>VVS            | 2.89 | 0.01 | 3.01 | 0.44 | 0.85 | 0.28 |
| 39883 | 0 | 98199  | LATDTEL                             | 2.05 | 0.01 | 4.15 | 1.15 | 0.22 | 2.12 |
| 39884 | 0 | 95540  | LATFNADLTKSVATIYPT<br>VV            | 2.94 | 0.01 | 2.39 | 0.44 | 1.74 | 0.28 |
| 39885 | 0 | 496680 | LATIVVNTLRKTISCVAV<br>KAPGFGDRRKSM  | 3.33 | 0.01 | 3.72 | 0.44 | 1.93 | 2.12 |
| 39886 | 0 | 496680 | LATIVVNTLRKTISCVAV<br>KAPGFGDRRKSM  | 3.33 | 0.01 | 3.72 | 0.44 | 1.93 | 2.12 |
| 39887 | 0 | 496681 | LATLIVNKLRLGLKICAVK<br>APGFGEHRKAL  | 3.35 | 0.01 | 2.22 | 0.44 | 1.93 | 2.12 |
| 39888 | 0 | 496681 | LATLIVNKLRLGLKICAVK<br>APGFGEHRKAL  | 3.35 | 0.01 | 2.22 | 0.44 | 1.93 | 2.12 |
| 39889 | 0 | 489630 | LATLNEVLSNEGGAP                     | 2.70 | 0.01 | 2.69 | 3.05 | 0.85 | 1.28 |
| 39890 | 0 | 496682 | LATLVVNAMRGILKVAA<br>VKAPGFGDRRKAM  | 3.35 | 0.01 | 4.93 | 0.44 | 1.93 | 2.12 |
| 39891 | 0 | 496683 | LATLVVNKIRGIFKSVAV<br>KAPGFGDRRKMM  | 3.33 | 0.01 | 4.93 | 0.44 | 1.93 | 2.12 |
| 39892 | 0 | 496684 | LATLVVNKLRLGGLKIAAV<br>KAPGFGDRRKAM | 3.35 | 0.01 | 4.93 | 0.44 | 1.93 | 2.12 |

|       |   |        |                                    |      |      |      |      |      |      |
|-------|---|--------|------------------------------------|------|------|------|------|------|------|
| 39893 | 0 | 496685 | LATLVVNNMRGIVKVCA<br>VKAPGFGDRRKAM | 3.34 | 0.01 | 4.93 | 0.44 | 1.93 | 2.12 |
| 39894 | 0 | 496686 | LATLVVNRLRAGFRVCA<br>VKAPGFGDRRKAM | 3.35 | 0.01 | 2.87 | 0.44 | 1.93 | 2.12 |
| 39895 | 0 | 496687 | LATLVVNRLRGGLKVAA<br>VKAPGFGDRRKAM | 3.36 | 0.01 | 4.93 | 0.44 | 1.93 | 2.12 |
| 39896 | 0 | 496689 | LATLVVNTMRGIVKVAA<br>VKAPGFGDRRKAM | 3.35 | 0.01 | 4.93 | 0.44 | 1.93 | 2.12 |
| 39897 | 0 | 34985  | LATNGVVTNVKGSPNKL<br>AYNGNA        | 3.12 | 0.01 | 2.75 | 1.20 | 0.22 | 0.85 |
| 39898 | 0 | 112801 | LATPNPS                            | 2.02 | 0.01 | 0.90 | 0.44 | 1.13 | 0.28 |
| 39899 | 0 | 34986  | LATRLMKKFKAIEIRDF                  | 2.80 | 0.01 | 1.66 | 2.43 | 0.22 | 0.28 |
| 39900 | 0 | 34986  | LATRLMKKFKAIEIRDF                  | 2.80 | 0.01 | 1.66 | 1.20 | 0.22 | 0.28 |
| 39901 | 0 | 34991  | LATTP                              | 1.75 | 0.01 | 4.08 | 0.68 | 0.22 | 0.28 |
| 39902 | 0 | 114443 | LATYHIFKQRIPL                      | 2.64 | 0.01 | 4.93 | 0.44 | 1.41 | 1.57 |
| 39903 | 0 | 104870 | LATYHLYNSQ                         | 2.32 | 0.01 | 2.60 | 0.44 | 1.23 | 0.85 |
| 39904 | 0 | 35001  | LAVFRPWKARNNGTNE<br>YRSR           | 2.91 | 0.01 | 0.90 | 0.44 | 1.74 | 0.28 |
| 39905 | 0 | 35001  | LAVFRPWKARNNGTNE<br>YRSR           | 2.91 | 0.01 | 0.90 | 3.93 | 0.22 | 0.28 |
| 39906 | 0 | 35006  | LAVLLGAC                           | 2.16 | 0.01 | 2.21 | 1.12 | 0.22 | 0.28 |
| 39907 | 0 | 35006  | LAVLLGAC                           | 2.16 | 0.01 | 2.21 | 0.44 | 0.85 | 0.28 |
| 39908 | 0 | 35007  | LAVLLGACSF                         | 2.33 | 0.01 | 2.21 | 1.12 | 0.22 | 0.28 |
| 39909 | 0 | 35007  | LAVLLGACSF                         | 2.33 | 0.01 | 2.21 | 1.12 | 0.22 | 0.28 |
| 39910 | 0 | 130938 | LAVLRFPVTRLHLRSSGV<br>QLAGDLWLDAYM | 3.33 | 0.01 | 0.90 | 0.44 | 1.93 | 0.85 |
| 39911 | 0 | 35010  | LAVLWVVKST                         | 2.33 | 0.01 | 0.78 | 0.44 | 1.74 | 0.28 |
| 39912 | 0 | 117972 | LAVTKYQQRNGWSHK                    | 2.62 | 0.01 | 0.78 | 0.44 | 1.13 | 0.28 |
| 39913 | 0 | 112196 | LAVYFCH                            | 1.99 | 0.01 | 0.78 | 0.44 | 1.13 | 0.28 |
| 39914 | 0 | 178143 | LAVYQAGAREGAERGLS<br>AIR           | 2.98 | 4.93 | 0.78 | 0.44 | 1.13 | 0.28 |
| 39915 | 0 | 95542  | LAYHTARGQVDR LATAL<br>GKMTKSEAKKWG | 3.30 | 0.01 | 3.65 | 2.22 | 0.22 | 0.28 |
| 39916 | 0 | 419250 | LAYPFFP                            | 2.03 | 0.01 | 0.90 | 0.44 | 1.93 | 1.39 |
| 39917 | 0 | 35034  | LCAACSKQVFCNRRPER<br>NGP           | 2.92 | 0.01 | 3.55 | 2.22 | 0.22 | 0.28 |
| 39918 | 0 | 35034  | LCAACSKQVFCNRRPER<br>NGP           | 2.92 | 0.01 | 3.55 | 2.22 | 0.22 | 0.28 |
| 39919 | 0 | 35036  | LCAEYHNTQIHTL                      | 2.54 | 0.01 | 2.85 | 1.12 | 0.22 | 1.57 |
| 39920 | 0 | 35036  | LCAEYHNTQIHTL                      | 2.54 | 0.01 | 3.24 | 1.12 | 0.22 | 0.28 |

|       |   |        |                                  |      |      |      |      |      |      |
|-------|---|--------|----------------------------------|------|------|------|------|------|------|
| 39921 | 0 | 35036  | LCAEYHNTQIHTL                    | 2.54 | 0.01 | 3.24 | 1.12 | 0.22 | 0.28 |
| 39922 | 0 | 35036  | LCAEYHNTQIHTL                    | 2.54 | 0.01 | 3.24 | 1.12 | 0.22 | 0.28 |
| 39923 | 0 | 35036  | LCAEYHNTQIHTL                    | 2.54 | 0.01 | 2.85 | 1.12 | 0.22 | 0.28 |
| 39924 | 0 | 35036  | LCAEYHNTQIHTL                    | 2.54 | 0.01 | 2.85 | 1.12 | 0.22 | 0.28 |
| 39925 | 0 | 35036  | LCAEYHNTQIHTL                    | 2.54 | 0.01 | 2.85 | 1.12 | 0.22 | 0.28 |
| 39926 | 0 | 35036  | LCAEYHNTQIHTL                    | 2.54 | 0.01 | 2.85 | 1.12 | 0.22 | 0.28 |
| 39927 | 0 | 79281  | LCAPCAVPGNEAWS                   | 2.61 | 0.01 | 0.90 | 0.68 | 0.22 | 1.39 |
| 39928 | 0 | 114885 | LCAYSIEFGT                       | 2.26 | 0.01 | 2.25 | 0.44 | 1.23 | 0.85 |
| 39929 | 0 | 114885 | LCAYSIEFGT                       | 2.26 | 0.01 | 2.25 | 0.44 | 1.23 | 0.85 |
| 39930 | 0 | 114885 | LCAYSIEFGT                       | 2.26 | 0.01 | 2.25 | 0.44 | 2.98 | 0.85 |
| 39931 | 0 | 230235 | LCAYSIEFGTNISKEHDG<br>EC         | 2.91 | 0.01 | 2.25 | 0.44 | 1.23 | 0.28 |
| 39932 | 0 | 35042  | LCCALHHR                         | 2.15 | 0.01 | 3.72 | 2.37 | 0.22 | 0.85 |
| 39933 | 0 | 98863  | LCCQHLWQIPEQ                     | 2.49 | 0.01 | 1.86 | 0.44 | 1.93 | 1.27 |
| 39934 | 0 | 98200  | LCCQHLWQIPEQSQCQ<br>AIHNV        | 3.00 | 0.01 | 1.86 | 0.44 | 1.93 | 0.28 |
| 39935 | 0 | 98200  | LCCQHLWQIPEQSQCQ<br>AIHNV        | 3.00 | 0.01 | 1.86 | 0.44 | 1.93 | 0.28 |
| 39936 | 0 | 104871 | LCCSQWGWCG<br>LCDLDGVHPLILRDCSVA | 2.35 | 0.01 | 2.60 | 0.44 | 1.23 | 0.85 |
| 39937 | 0 | 172018 | GWLLGNPMCDEFINVP<br>E            | 3.49 | 0.01 | 4.63 | 2.13 | 0.22 | 0.28 |
| 39938 | 0 | 79282  | LCEETPPNETTPCI                   | 2.65 | 0.01 | 0.90 | 0.68 | 0.22 | 1.39 |
| 39939 | 0 | 101010 | LCEIKRVYLRQECM                   | 2.62 | 0.01 | 0.90 | 0.44 | 0.85 | 1.39 |
| 39940 | 0 | 130536 | LCENIAGHLK                       | 2.30 | 0.01 | 1.60 | 2.66 | 0.22 | 0.85 |
| 39941 | 0 | 130536 | LCENIAGHLK                       | 2.30 | 0.01 | 1.60 | 2.66 | 0.22 | 0.85 |
| 39942 | 0 | 130536 | LCENIAGHLK                       | 2.30 | 0.01 | 1.60 | 2.55 | 0.22 | 0.85 |
| 39943 | 0 | 130536 | LCENIAGHLK                       | 2.30 | 0.01 | 1.60 | 2.55 | 0.22 | 0.85 |
| 39944 | 0 | 130537 | LCENIANHLK                       | 2.32 | 0.01 | 2.19 | 2.66 | 0.22 | 0.85 |
| 39945 | 0 | 130537 | LCENIANHLK                       | 2.32 | 0.01 | 2.19 | 2.66 | 0.22 | 0.85 |
| 39946 | 0 | 130537 | LCENIANHLK                       | 2.32 | 0.01 | 2.19 | 2.55 | 0.22 | 0.85 |
| 39947 | 0 | 130537 | LCENIANHLK                       | 2.32 | 0.01 | 2.19 | 2.55 | 0.22 | 0.85 |
| 39948 | 0 | 35050  | LCENPEWAPLKDNRI                  | 2.67 | 0.01 | 2.43 | 3.34 | 0.22 | 0.28 |
| 39949 | 0 | 35050  | LCENPEWAPLKDNRI                  | 2.67 | 0.01 | 2.43 | 0.68 | 0.22 | 0.28 |
| 39950 | 0 | 35050  | LCENPEWAPLKDNRI                  | 2.67 | 0.01 | 2.43 | 3.34 | 0.22 | 0.28 |
| 39951 | 0 | 35050  | LCENPEWAPLKDNRI                  | 2.67 | 0.01 | 2.43 | 0.44 | 0.85 | 0.28 |
| 39952 | 0 | 172019 | LCFGSEGTTYIKEQ                   | 2.64 | 0.01 | 0.78 | 0.44 | 1.13 | 0.28 |
| 39953 | 0 | 117973 | LCG                              | 1.37 | 0.01 | 0.78 | 0.44 | 1.13 | 0.85 |
| 39954 | 0 | 117973 | LCG                              | 1.37 | 0.01 | 0.78 | 0.44 | 1.41 | 0.85 |
| 39955 | 0 | 114886 | LCGSDNKTYG                       | 2.29 | 0.01 | 2.25 | 0.44 | 1.23 | 0.85 |
| 39956 | 0 | 161253 | LCGSVFLVGQLFTFSPRR<br>HW         | 2.94 | 0.01 | 2.45 | 0.68 | 0.22 | 0.28 |
| 39957 | 0 | 161253 | LCGSVFLVGQLFTFSPRR<br>HW         | 2.94 | 0.01 | 2.45 | 0.68 | 0.22 | 1.27 |
| 39958 | 0 | 35060  | LCKDKKADSGYCYWV                  | 2.67 | 0.01 | 2.56 | 0.68 | 0.22 | 0.85 |
| 39959 | 0 | 35060  | LCKDKKADSGYCYWV                  | 2.67 | 0.01 | 2.56 | 2.52 | 0.22 | 0.85 |



|       |   |        |                    |      |      |      |      |      |      |
|-------|---|--------|--------------------|------|------|------|------|------|------|
| 39960 | 0 | 35061  | LCKGPDALCLSNLTPML  | 2.80 | 0.01 | 0.90 | 0.68 | 0.22 | 1.27 |
| 39961 | 0 | 35062  | LCKHSM             | 1.88 | 0.01 | 2.40 | 0.44 | 0.85 | 0.28 |
| 39962 | 0 | 35063  | LCKIARSQDACIEFV    | 2.64 | 0.01 | 2.28 | 1.20 | 0.22 | 0.28 |
| 39963 | 0 | 35063  | LCKIARSQDACIEFV    | 2.64 | 0.01 | 2.28 | 1.20 | 0.22 | 0.28 |
| 39964 | 0 | 35063  | LCKIARSQDACIEFV    | 2.64 | 0.01 | 2.28 | 1.20 | 0.22 | 1.27 |
| 39965 | 0 | 151019 | LCKLRGVAPL         | 2.32 | 0.01 | 2.87 | 0.68 | 0.22 | 2.35 |
| 39966 | 0 | 151020 | LCKLRGVAPLH        | 2.40 | 0.01 | 2.87 | 0.68 | 0.22 | 2.35 |
| 39967 | 0 | 151021 | LCKLRGVAPLHL       | 2.48 | 0.01 | 2.87 | 0.68 | 0.22 | 2.35 |
| 39968 | 0 | 151022 | LCKLRGVAPLHLG      | 2.56 | 0.01 | 2.87 | 0.68 | 0.22 | 2.35 |
| 39969 | 0 | 151023 | LCKLRGVAPLHLGKC    | 2.71 | 0.01 | 2.87 | 0.44 | 0.85 | 0.28 |
| 39970 | 0 | 151023 | LCKLRGVAPLHLGKC    | 2.71 | 0.01 | 2.87 | 0.68 | 0.22 | 2.35 |
| 39971 | 0 | 151023 | LCKLRGVAPLHLGKC    | 2.71 | 0.01 | 2.87 | 0.68 | 0.22 | 0.28 |
| 39972 | 0 | 151023 | LCKLRGVAPLHLGKC    | 2.71 | 0.01 | 2.87 | 0.68 | 0.22 | 0.85 |
| 39973 | 0 | 151023 | LCKLRGVAPLHLGKC    | 2.71 | 0.01 | 2.87 | 0.68 | 0.22 | 0.85 |
| 39974 | 0 | 151023 | LCKLRGVAPLHLGKC    | 2.71 | 0.01 | 2.87 | 0.68 | 0.22 | 0.85 |
| 39975 | 0 | 151023 | LCKLRGVAPLHLGKC    | 2.71 | 0.01 | 2.87 | 0.68 | 0.22 | 0.85 |
| 39976 | 0 | 151023 | LCKLRGVAPLHLGKC    | 2.71 | 0.01 | 2.87 | 0.68 | 0.22 | 0.85 |
| 39977 | 0 | 79283  | LCKTEARTRAAPCA     | 2.64 | 0.01 | 0.90 | 0.68 | 0.22 | 1.39 |
| 39978 | 0 | 103340 | LCKTTSNFIWGQLLL    | 2.63 | 0.01 | 2.04 | 0.44 | 0.85 | 1.28 |
| 39979 | 0 | 35068  | LCLAGTTGGILWWYE    | 2.68 | 0.01 | 2.86 | 2.02 | 0.22 | 0.28 |
| 39980 | 0 | 35068  | LCLAGTTGGILWWYE    | 2.68 | 0.01 | 2.86 | 2.02 | 1.59 | 0.28 |
|       |   |        | LCLGHHAVPNGTLVKTIT |      |      |      |      |      |      |
| 39981 | 0 | 35073  | NDQIEVTNATELVQSSS  | 3.60 | 0.01 | 3.04 | 1.12 | 0.22 | 2.02 |
|       |   |        | TGKI               |      |      |      |      |      |      |
| 39982 | 0 | 110651 | LCLIGCKPPIGEHWGKG  | 2.93 | 0.01 | 1.86 | 0.44 | 0.85 | 0.28 |
|       |   |        | SP                 |      |      |      |      |      |      |
| 39983 | 0 | 110651 | LCLIGCKPPIGEHWGKG  | 2.93 | 0.01 | 1.86 | 0.44 | 0.85 | 0.28 |
|       |   |        | SP                 |      |      |      |      |      |      |
| 39984 | 0 | 110652 | LCLIGCKPPIGEHWGKG  | 2.98 | 0.01 | 1.86 | 0.44 | 0.85 | 0.28 |
|       |   |        | SPC                |      |      |      |      |      |      |
| 39985 | 0 | 110652 | LCLIGCKPPIGEHWGKG  | 2.98 | 0.01 | 1.86 | 0.44 | 0.85 | 0.28 |
|       |   |        | SPC                |      |      |      |      |      |      |
| 39986 | 0 | 110652 | LCLIGCKPPIGEHWGKG  | 2.98 | 0.01 | 1.86 | 0.44 | 0.85 | 0.28 |
|       |   |        | SPC                |      |      |      |      |      |      |
| 39987 | 0 | 110652 | LCLIGCKPPIGEHWGKG  | 2.98 | 0.01 | 1.86 | 0.44 | 1.41 | 0.28 |
|       |   |        | SPC                |      |      |      |      |      |      |
| 39988 | 0 | 110652 | LCLIGCKPPIGEHWGKG  | 2.98 | 0.01 | 1.86 | 0.44 | 0.85 | 0.28 |
|       |   |        | SPC                |      |      |      |      |      |      |
| 39989 | 0 | 110652 | LCLIGCKPPIGEHWGKG  | 2.98 | 0.01 | 1.86 | 0.44 | 1.41 | 0.28 |
|       |   |        | SPC                |      |      |      |      |      |      |
| 39990 | 0 | 110652 | LCLIGCKPPIGEHWGKG  | 2.98 | 0.01 | 1.86 | 0.44 | 0.85 | 0.28 |
|       |   |        | SPC                |      |      |      |      |      |      |
| 39991 | 0 | 110652 | LCLIGCKPPIGEHWGKG  | 2.98 | 0.01 | 1.86 | 0.44 | 1.41 | 0.28 |
|       |   |        | SPC                |      |      |      |      |      |      |
| 39992 | 0 | 110652 | LCLIGCKPPIGEHWGKG  | 2.98 | 0.01 | 1.86 | 2.37 | 0.22 | 1.48 |
|       |   |        | SPC                |      |      |      |      |      |      |

|       |   |        |                                             |      |      |      |      |      |      |
|-------|---|--------|---------------------------------------------|------|------|------|------|------|------|
| 39993 | 0 | 110652 | LCLIGCKPPIGEHWGKG<br>SPC                    | 2.98 | 0.01 | 1.86 | 2.37 | 0.22 | 0.28 |
| 39994 | 0 | 35076  | LCLILFATSVLAQE                              | 2.62 | 0.01 | 2.94 | 2.00 | 0.22 | 0.28 |
| 39995 | 0 | 230484 | LCLKI                                       | 1.77 | 0.01 | 3.97 | 0.68 | 0.22 | 0.28 |
| 39996 | 0 | 230484 | LCLKI                                       | 1.77 | 0.01 | 3.97 | 0.68 | 0.22 | 0.28 |
| 39997 | 0 | 230484 | LCLKI                                       | 1.77 | 0.01 | 3.97 | 0.68 | 0.22 | 0.85 |
| 39998 | 0 | 113597 | LCLPLAPQGLL                                 | 2.43 | 0.01 | 3.67 | 3.06 | 0.22 | 0.28 |
| 39999 | 0 | 121527 | LCNEKLLKKARIHPFH                            | 2.72 | 0.01 | 0.78 | 0.44 | 1.41 | 0.28 |
| 40000 | 0 | 141941 | LCNIHDLHKPHQSKPILT<br>DENDTQRTCS            | 3.29 | 0.01 | 3.13 | 2.13 | 0.22 | 0.28 |
| 40001 | 0 | 172022 | LCNLDGVKPLILRDCSVA<br>GWLLGNPMCDEFINVP<br>E | 3.49 | 0.01 | 4.63 | 2.13 | 0.22 | 0.28 |
| 40002 | 0 | 35083  | LCPFGEVFNATKFPSVY                           | 2.76 | 0.01 | 2.48 | 0.44 | 0.85 | 0.28 |
| 40003 | 0 | 95543  | LCPNNLCCSQ                                  | 2.34 | 0.01 | 2.60 | 0.44 | 1.23 | 0.85 |
| 40004 | 0 | 134129 | LCPPGMVRHENRCVAL<br>ER                      | 2.85 | 0.01 | 0.78 | 1.12 | 0.22 | 1.39 |
| 40005 | 0 | 187413 | LCQG                                        | 1.57 | 0.01 | 4.03 | 1.15 | 0.22 | 1.34 |
| 40006 | 0 | 187413 | LCQG                                        | 1.57 | 0.01 | 4.03 | 1.15 | 0.22 | 2.02 |
| 40007 | 0 | 187413 | LCQG                                        | 1.57 | 0.01 | 4.03 | 1.15 | 0.22 | 1.48 |
| 40008 | 0 | 187413 | LCQG                                        | 1.57 | 0.01 | 4.03 | 1.15 | 0.22 | 2.02 |
| 40009 | 0 | 35094  | LCSALYVGDLCGSVFLV<br>GQL                    | 2.98 | 0.01 | 2.83 | 0.44 | 0.85 | 0.28 |
| 40010 | 0 | 35096  | LCSEYRNTQI                                  | 2.26 | 0.01 | 2.66 | 0.68 | 0.22 | 0.28 |
| 40011 | 0 | 147083 | LCSEYRNTQIYTIN                              | 2.61 | 0.01 | 2.24 | 1.12 | 0.22 | 0.85 |
| 40012 | 0 | 147083 | LCSEYRNTQIYTIN                              | 2.61 | 0.01 | 2.24 | 1.12 | 0.22 | 0.28 |
| 40013 | 0 | 147083 | LCSEYRNTQIYTIN                              | 2.61 | 0.01 | 2.24 | 1.12 | 0.22 | 0.28 |
| 40014 | 0 | 147083 | LCSEYRNTQIYTIN                              | 2.61 | 0.01 | 2.24 | 1.12 | 0.22 | 1.34 |
| 40015 | 0 | 147083 | LCSEYRNTQIYTIN                              | 2.61 | 0.01 | 2.24 | 1.12 | 0.22 | 1.34 |
| 40016 | 0 | 35098  | LCSGGYTVSKSK                                | 2.48 | 0.01 | 2.69 | 0.68 | 0.22 | 0.28 |
| 40017 | 0 | 35098  | LCSGGYTVSKSK                                | 2.48 | 0.01 | 2.69 | 1.20 | 0.22 | 0.28 |
| 40018 | 0 | 77940  | LCSIQKRELYQLTLFPHQ<br>FI                    | 2.94 | 0.01 | 3.14 | 0.68 | 0.22 | 0.28 |
| 40019 | 0 | 134130 | LCSQNPPVLKRHQRE                             | 2.66 | 0.01 | 0.78 | 1.20 | 0.22 | 1.57 |
| 40020 | 0 | 95544  | LCSTFCKEVV                                  | 2.29 | 0.01 | 1.60 | 0.44 | 1.23 | 0.85 |
| 40021 | 0 | 35106  | LCVPSRVG                                    | 2.12 | 0.01 | 3.72 | 2.37 | 0.22 | 0.85 |
| 40022 | 0 | 35110  | LCVWNNKTPN                                  | 2.31 | 0.01 | 2.66 | 0.68 | 0.22 | 0.28 |
| 40023 | 0 | 35110  | LCVWNNKTPN                                  | 2.31 | 0.01 | 2.66 | 0.68 | 0.22 | 0.28 |
| 40024 | 0 | 85032  | LCVYGKLQKN                                  | 2.32 | 0.01 | 3.06 | 0.44 | 0.85 | 0.28 |
| 40025 | 0 | 79594  | LCWGELMTLATWVG<br>V<br>NLEDPASRDL           | 3.16 | 0.01 | 2.71 | 0.44 | 0.85 | 0.28 |
| 40026 | 0 | 492980 | LDAGPPSWRRlhsQ                              | 2.60 | 0.01 | 0.90 | 1.15 | 0.22 | 1.39 |
| 40027 | 0 | 128043 | LDAMPAGNPAFPVIPG                            | 2.75 | 0.01 | 2.40 | 2.75 | 0.22 | 0.28 |
| 40028 | 0 | 128043 | LDAMPAGNPAFPVIPG                            | 2.75 | 0.01 | 2.40 | 2.75 | 0.22 | 0.85 |

|       |   |        |                            |      |      |      |      |      |      |
|-------|---|--------|----------------------------|------|------|------|------|------|------|
| 40029 | 0 | 128043 | LDAMPAGNPAFPVIPG           | 2.75 | 0.01 | 2.40 | 2.75 | 0.22 | 1.34 |
| 40030 | 0 | 121529 | LDAPGGMELSDTNRAL<br>QL     | 2.83 | 0.01 | 2.73 | 0.68 | 0.22 | 0.28 |
| 40031 | 0 | 121529 | LDAPGGMELSDTNRAL<br>QL     | 2.83 | 0.01 | 2.73 | 0.68 | 0.22 | 0.28 |
| 40032 | 0 | 121529 | LDAPGGMELSDTNRAL<br>QL     | 2.83 | 0.01 | 2.73 | 0.68 | 0.22 | 1.48 |
| 40033 | 0 | 121529 | LDAPGGMELSDTNRAL<br>QL     | 2.83 | 0.01 | 2.73 | 0.68 | 0.22 | 1.48 |
| 40034 | 0 | 142217 | LDASREAKKQLEAEQQK<br>LEE   | 2.98 | 0.01 | 2.24 | 0.44 | 0.85 | 0.28 |
| 40035 | 0 | 142217 | LDASREAKKQLEAEQQK<br>LEE   | 2.98 | 0.01 | 2.24 | 0.44 | 1.74 | 0.28 |
| 40036 | 0 | 142217 | LDASREAKKQLEAEQQK<br>LEE   | 2.98 | 0.01 | 2.24 | 1.15 | 0.22 | 0.28 |
| 40037 | 0 | 35120  | LDASREAKKQVEKDLAN<br>LTAEL | 3.06 | 0.01 | 4.03 | 1.12 | 0.22 | 0.28 |
| 40038 | 0 | 35120  | LDASREAKKQVEKDLAN<br>LTAEL | 3.06 | 0.01 | 3.13 | 1.12 | 0.22 | 0.28 |
| 40039 | 0 | 35120  | LDASREAKKQVEKDLAN<br>LTAEL | 3.06 | 0.01 | 4.03 | 1.12 | 0.22 | 0.28 |
| 40040 | 0 | 137222 | LDATR                      | 1.74 | 0.01 | 2.72 | 2.37 | 0.22 | 3.40 |
| 40041 | 0 | 79284  | LDVPL                      | 1.91 | 0.01 | 0.90 | 3.00 | 0.22 | 1.27 |
| 40042 | 0 | 79284  | LDVPL                      | 1.91 | 0.01 | 0.90 | 1.15 | 0.22 | 0.28 |
| 40043 | 0 | 125472 | LDVYLNKNKYLTVIDKD<br>AF    | 2.98 | 0.01 | 0.78 | 0.44 | 1.13 | 0.28 |
| 40044 | 0 | 125472 | LDVYLNKNKYLTVIDKD<br>AF    | 2.98 | 0.01 | 0.78 | 0.44 | 1.13 | 1.34 |
| 40045 | 0 | 125472 | LDVYLNKNKYLTVIDKD<br>AF    | 2.98 | 0.01 | 0.78 | 0.44 | 1.13 | 0.85 |
| 40046 | 0 | 125472 | LDVYLNKNKYLTVIDKD<br>AF    | 2.98 | 0.01 | 0.78 | 1.20 | 0.22 | 0.28 |
| 40047 | 0 | 125472 | LDVYLNKNKYLTVIDKD<br>AF    | 2.98 | 0.01 | 0.78 | 1.20 | 0.22 | 1.34 |
| 40048 | 0 | 125472 | LDVYLNKNKYLTVIDKD<br>AF    | 2.98 | 0.01 | 0.78 | 0.44 | 1.13 | 0.28 |
| 40049 | 0 | 125472 | LDVYLNKNKYLTVIDKD<br>AF    | 2.98 | 0.01 | 0.78 | 0.44 | 1.13 | 1.34 |
| 40050 | 0 | 125472 | LDVYLNKNKYLTVIDKD<br>AF    | 2.98 | 0.01 | 0.78 | 0.68 | 0.22 | 0.28 |
| 40051 | 0 | 230149 | LDWVDTLG                   | 2.24 | 0.01 | 3.19 | 0.44 | 1.23 | 1.28 |
| 40052 | 0 | 230149 | LDWVDTLG                   | 2.24 | 0.01 | 3.19 | 0.44 | 1.23 | 1.28 |
| 40053 | 0 | 230150 | LDWVDTLGGDYKAKF<br>ETFK    | 2.96 | 0.01 | 3.19 | 0.44 | 1.23 | 1.28 |
| 40054 | 0 | 230150 | LDWVDTLGGDYKAKF<br>ETFK    | 2.96 | 0.01 | 3.19 | 0.44 | 1.23 | 1.28 |

|       |   |        |                                             |      |      |      |      |      |      |
|-------|---|--------|---------------------------------------------|------|------|------|------|------|------|
| 40055 | 0 | 135476 | LDCNAEVVVVPWEKKIY<br>PTVNCQPLGM             | 3.20 | 0.01 | 0.78 | 0.44 | 1.13 | 0.28 |
| 40056 | 0 | 115340 | LDDDLTDDIM                                  | 2.36 | 0.01 | 1.60 | 0.44 | 1.23 | 0.85 |
| 40057 | 0 | 123416 | LDDFPKLKE                                   | 2.25 | 0.01 | 2.28 | 2.00 | 0.22 | 0.28 |
| 40058 | 0 | 167956 | LDDGYRPPPFNPRPSP                            | 2.75 | 0.01 | 2.75 | 0.44 | 1.59 | 2.51 |
| 40059 | 0 | 167956 | LDDGYRPPPFNPRPSP                            | 2.75 | 0.01 | 2.75 | 0.44 | 0.85 | 2.51 |
| 40060 | 0 | 167956 | LDDGYRPPPFNPRPSP                            | 2.75 | 0.01 | 2.75 | 0.44 | 0.85 | 2.51 |
| 40061 | 0 | 167956 | LDDGYRPPPFNPRPSP                            | 2.75 | 0.01 | 2.75 | 0.44 | 0.85 | 2.51 |
| 40062 | 0 | 35126  | LDDPVFGFARRVPVV                             | 2.68 | 0.01 | 0.90 | 1.15 | 0.22 | 0.85 |
| 40063 | 0 | 35127  | LDDSYS                                      | 1.90 | 0.01 | 0.90 | 0.44 | 1.59 | 1.39 |
| 40064 | 0 | 35128  | LDDWGV                                      | 1.89 | 0.01 | 0.90 | 0.44 | 1.59 | 1.39 |
| 40065 | 0 | 230573 | LDDYNLEDVWQFMKVR<br>LMTEQE                  | 3.03 | 0.01 | 1.60 | 0.68 | 0.22 | 0.85 |
| 40066 | 0 | 230573 | LDDYNLEDVWQFMKVR<br>LMTEQE                  | 3.03 | 0.01 | 1.60 | 0.68 | 0.22 | 0.85 |
| 40067 | 0 | 230573 | LDDYNLEDVWQFMKVR<br>LMTEQE                  | 3.03 | 0.01 | 1.60 | 0.68 | 0.22 | 2.02 |
| 40068 | 0 | 131944 | LDEEDGEK                                    | 2.04 | 0.01 | 0.78 | 1.20 | 0.22 | 0.85 |
| 40069 | 0 | 35139  | LDEGKQSLTKLAAAWG                            | 2.74 | 0.01 | 2.04 | 0.44 | 0.85 | 0.28 |
| 40070 | 0 | 35139  | LDEGKQSLTKLAAAWG                            | 2.74 | 0.01 | 2.04 | 0.44 | 1.59 | 0.28 |
| 40071 | 0 | 124416 | LDELLTEHRMTWDPAQ<br>PPRDLTE                 | 3.10 | 0.01 | 0.78 | 0.44 | 1.13 | 1.57 |
| 40072 | 0 | 124417 | LDELLTEHRMTWDPAQ<br>PPRDLTEAFLAEMEKAK<br>GN | 3.49 | 0.01 | 0.78 | 0.44 | 1.13 | 1.57 |
| 40073 | 0 | 164275 | LDELSGTSSQTHDAIRRK<br>DME                   | 2.97 | 0.01 | 2.74 | 1.20 | 0.22 | 0.28 |
| 40074 | 0 | 164275 | LDELSGTSSQTHDAIRRK<br>DME                   | 2.97 | 0.01 | 2.74 | 1.20 | 0.22 | 0.85 |
| 40075 | 0 | 164275 | LDELSGTSSQTHDAIRRK<br>DME                   | 2.97 | 0.01 | 2.74 | 1.20 | 0.22 | 0.85 |
| 40076 | 0 | 164275 | LDELSGTSSQTHDAIRRK<br>DME                   | 2.97 | 0.01 | 2.74 | 2.13 | 0.22 | 0.28 |
| 40077 | 0 | 164275 | LDELSGTSSQTHDAIRRK<br>DME                   | 2.97 | 0.01 | 2.74 | 1.20 | 0.22 | 0.28 |
| 40078 | 0 | 164275 | LDELSGTSSQTHDAIRRK<br>DME                   | 2.97 | 0.01 | 2.74 | 1.20 | 0.22 | 0.28 |
| 40079 | 0 | 164275 | LDELSGTSSQTHDAIRRK<br>DME                   | 2.97 | 0.01 | 2.74 | 1.20 | 0.22 | 0.28 |
| 40080 | 0 | 164275 | LDELSGTSSQTHDAIRRK<br>DME                   | 2.97 | 0.01 | 2.74 | 1.20 | 0.22 | 0.28 |

|       |   |        |                           |      |      |      |      |      |      |
|-------|---|--------|---------------------------|------|------|------|------|------|------|
| 40081 | 0 | 164275 | LDELSGTSSQTHDAIRRK<br>DME | 2.97 | 0.01 | 2.74 | 1.20 | 0.22 | 0.28 |
| 40082 | 0 | 164275 | LDELSGTSSQTHDAIRRK<br>DME | 2.97 | 0.01 | 2.74 | 1.20 | 0.22 | 0.28 |
| 40083 | 0 | 164275 | LDELSGTSSQTHDAIRRK<br>DME | 2.97 | 0.01 | 2.74 | 1.20 | 0.22 | 0.28 |
| 40084 | 0 | 164275 | LDELSGTSSQTHDAIRRK<br>DME | 2.97 | 0.01 | 2.74 | 1.20 | 0.22 | 0.28 |
| 40085 | 0 | 164275 | LDELSGTSSQTHDAIRRK<br>DME | 2.97 | 0.01 | 2.74 | 1.20 | 0.22 | 0.28 |
| 40086 | 0 | 164275 | LDELSGTSSQTHDAIRRK<br>DME | 2.97 | 0.01 | 2.74 | 1.20 | 0.22 | 0.28 |
| 40087 | 0 | 164275 | LDELSGTSSQTHDAIRRK<br>DME | 2.97 | 0.01 | 2.74 | 1.20 | 0.22 | 0.28 |
| 40088 | 0 | 164275 | LDELSGTSSQTHDAIRRK<br>DME | 2.97 | 0.01 | 2.74 | 1.20 | 0.22 | 1.39 |
| 40089 | 0 | 164275 | LDELSGTSSQTHDAIRRK<br>DME | 2.97 | 0.01 | 2.74 | 1.20 | 0.22 | 1.39 |
| 40090 | 0 | 164275 | LDELSGTSSQTHDAIRRK<br>DME | 2.97 | 0.01 | 2.74 | 1.20 | 0.22 | 1.39 |
| 40091 | 0 | 164275 | LDELSGTSSQTHDAIRRK<br>DME | 2.97 | 0.01 | 2.74 | 1.20 | 0.22 | 1.39 |
| 40092 | 0 | 164275 | LDELSGTSSQTHDAIRRK<br>DME | 2.97 | 0.01 | 2.74 | 1.20 | 0.22 | 1.39 |
| 40093 | 0 | 164275 | LDELSGTSSQTHDAIRRK<br>DME | 2.97 | 0.01 | 2.74 | 1.20 | 0.22 | 1.39 |
| 40094 | 0 | 164275 | LDELSGTSSQTHDAIRRK<br>DME | 2.97 | 0.01 | 2.74 | 1.20 | 0.22 | 1.39 |
| 40095 | 0 | 164275 | LDELSGTSSQTHDAIRRK<br>DME | 2.97 | 0.01 | 2.74 | 1.20 | 0.22 | 1.39 |
| 40096 | 0 | 164275 | LDELSGTSSQTHDAIRRK<br>DME | 2.97 | 0.01 | 2.74 | 1.20 | 0.22 | 1.39 |
| 40097 | 0 | 164275 | LDELSGTSSQTHDAIRRK<br>DME | 2.97 | 0.01 | 2.74 | 1.20 | 0.22 | 1.39 |
| 40098 | 0 | 164275 | LDELSGTSSQTHDAIRRK<br>DME | 2.97 | 0.01 | 2.74 | 1.20 | 0.22 | 1.39 |
| 40099 | 0 | 164275 | LDELSGTSSQTHDAIRRK<br>DME | 2.97 | 0.01 | 2.74 | 1.20 | 0.22 | 1.39 |
| 40100 | 0 | 164275 | LDELSGTSSQTHDAIRRK<br>DME | 2.97 | 0.01 | 2.74 | 1.20 | 0.22 | 1.39 |
| 40101 | 0 | 164275 | LDELSGTSSQTHDAIRRK<br>DME | 2.97 | 0.01 | 2.74 | 1.20 | 0.22 | 1.39 |
| 40102 | 0 | 164275 | LDELSGTSSQTHDAIRRK<br>DME | 2.97 | 0.01 | 2.74 | 1.20 | 0.22 | 1.39 |
| 40103 | 0 | 164275 | LDELSGTSSQTHDAIRRK<br>DME | 2.97 | 0.01 | 2.74 | 1.20 | 0.22 | 1.39 |

|       |   |        |                           |      |      |      |      |      |      |
|-------|---|--------|---------------------------|------|------|------|------|------|------|
| 40104 | 0 | 164275 | LDELSGTSSQTHDAIRRK<br>DME | 2.97 | 0.01 | 2.74 | 1.20 | 0.22 | 1.39 |
| 40105 | 0 | 164275 | LDELSGTSSQTHDAIRRK<br>DME | 2.97 | 0.01 | 2.74 | 1.20 | 0.22 | 1.39 |
| 40106 | 0 | 164275 | LDELSGTSSQTHDAIRRK<br>DME | 2.97 | 0.01 | 2.74 | 1.20 | 0.22 | 1.39 |
| 40107 | 0 | 164275 | LDELSGTSSQTHDAIRRK<br>DME | 2.97 | 0.01 | 2.74 | 1.20 | 0.22 | 1.39 |
| 40108 | 0 | 164275 | LDELSGTSSQTHDAIRRK<br>DME | 2.97 | 0.01 | 2.74 | 1.20 | 0.22 | 1.39 |
| 40109 | 0 | 164275 | LDELSGTSSQTHDAIRRK<br>DME | 2.97 | 0.01 | 2.74 | 1.20 | 0.22 | 1.39 |
| 40110 | 0 | 164275 | LDELSGTSSQTHDAIRRK<br>DME | 2.97 | 0.01 | 2.74 | 1.20 | 0.22 | 1.39 |
| 40111 | 0 | 164275 | LDELSGTSSQTHDAIRRK<br>DME | 2.97 | 0.01 | 2.74 | 1.20 | 0.22 | 1.39 |
| 40112 | 0 | 164275 | LDELSGTSSQTHDAIRRK<br>DME | 2.97 | 0.01 | 2.74 | 1.20 | 0.22 | 1.39 |
| 40113 | 0 | 164275 | LDELSGTSSQTHDAIRRK<br>DME | 2.97 | 0.01 | 2.74 | 1.20 | 0.22 | 1.39 |
| 40114 | 0 | 164275 | LDELSGTSSQTHDAIRRK<br>DME | 2.97 | 0.01 | 2.74 | 1.20 | 0.22 | 1.39 |
| 40115 | 0 | 164275 | LDELSGTSSQTHDAIRRK<br>DME | 2.97 | 0.01 | 2.74 | 1.20 | 0.22 | 1.39 |
| 40116 | 0 | 164275 | LDELSGTSSQTHDAIRRK<br>DME | 2.97 | 0.01 | 2.74 | 1.20 | 0.22 | 1.39 |
| 40117 | 0 | 164275 | LDELSGTSSQTHDAIRRK<br>DME | 2.97 | 0.01 | 2.74 | 1.20 | 0.22 | 1.39 |
| 40118 | 0 | 164275 | LDELSGTSSQTHDAIRRK<br>DME | 2.97 | 0.01 | 2.74 | 1.20 | 0.22 | 1.39 |
| 40119 | 0 | 164275 | LDELSGTSSQTHDAIRRK<br>DME | 2.97 | 0.01 | 2.74 | 1.20 | 0.22 | 1.39 |
| 40120 | 0 | 164275 | LDELSGTSSQTHDAIRRK<br>DME | 2.97 | 0.01 | 2.74 | 1.20 | 0.22 | 1.39 |
| 40121 | 0 | 164275 | LDELSGTSSQTHDAIRRK<br>DME | 2.97 | 0.01 | 2.74 | 1.20 | 0.22 | 1.39 |
| 40122 | 0 | 164275 | LDELSGTSSQTHDAIRRK<br>DME | 2.97 | 0.01 | 2.74 | 1.20 | 0.22 | 1.39 |
| 40123 | 0 | 164275 | LDELSGTSSQTHDAIRRK<br>DME | 2.97 | 0.01 | 2.74 | 1.20 | 0.22 | 1.39 |
| 40124 | 0 | 164275 | LDELSGTSSQTHDAIRRK<br>DME | 2.97 | 0.01 | 2.74 | 1.20 | 0.22 | 1.39 |
| 40125 | 0 | 164275 | LDELSGTSSQTHDAIRRK<br>DME | 2.97 | 0.01 | 2.74 | 1.20 | 0.22 | 1.39 |
| 40126 | 0 | 164275 | LDELSGTSSQTHDAIRRK<br>DME | 2.97 | 0.01 | 2.74 | 1.20 | 0.22 | 1.39 |

|       |   |        |                                   |      |      |      |      |      |      |
|-------|---|--------|-----------------------------------|------|------|------|------|------|------|
| 40127 | 0 | 164275 | LDELSGTSSQTHDAIRRK<br>DME         | 2.97 | 0.01 | 2.74 | 1.20 | 0.22 | 1.39 |
| 40128 | 0 | 164275 | LDELSGTSSQTHDAIRRK<br>DME         | 2.97 | 0.01 | 2.74 | 1.20 | 0.22 | 1.39 |
| 40129 | 0 | 164275 | LDELSGTSSQTHDAIRRK<br>DME         | 2.97 | 0.01 | 2.74 | 1.20 | 0.22 | 1.39 |
| 40130 | 0 | 35142  | LDENEDNIKKMKSKIDD<br>MEKEIKYR     | 3.20 | 0.01 | 2.22 | 0.44 | 1.74 | 0.28 |
| 40131 | 0 | 35142  | LDENEDNIKKMKSKIDD<br>MEKEIKYR     | 3.20 | 0.01 | 2.22 | 0.44 | 1.74 | 0.28 |
| 40132 | 0 | 35142  | LDENEDNIKKMKSKIDD<br>MEKEIKYR     | 3.20 | 0.01 | 2.22 | 0.44 | 1.74 | 0.28 |
| 40133 | 0 | 35142  | LDENEDNIKKMKSKIDD<br>MEKEIKYR     | 3.20 | 0.01 | 2.22 | 0.44 | 0.85 | 1.34 |
| 40134 | 0 | 35142  | LDENEDNIKKMKSKIDD<br>MEKEIKYR     | 3.20 | 0.01 | 2.22 | 0.44 | 0.85 | 1.48 |
| 40135 | 0 | 35142  | LDENEDNIKKMKSKIDD<br>MEKEIKYR     | 3.20 | 0.01 | 2.22 | 1.15 | 0.22 | 0.28 |
| 40136 | 0 | 35143  | LDENGLLLGVHPRLAQRI<br>LF          | 2.92 | 0.01 | 2.82 | 0.44 | 0.85 | 0.28 |
| 40137 | 0 | 35146  | LDERECK                           | 2.13 | 0.01 | 1.66 | 1.15 | 0.22 | 0.28 |
| 40138 | 0 | 35148  | LDERPYCWHYPPRP                    | 2.63 | 0.01 | 2.45 | 2.36 | 0.22 | 1.34 |
| 40139 | 0 | 135711 | LDETVKDKLAKEQKSKQ<br>NI           | 2.91 | 0.01 | 2.24 | 0.44 | 1.13 | 0.28 |
| 40140 | 0 | 135711 | LDETVKDKLAKEQKSKQ<br>NI           | 2.91 | 0.01 | 2.24 | 0.44 | 1.41 | 0.28 |
| 40141 | 0 | 135711 | LDETVKDKLAKEQKSKQ<br>NI           | 2.91 | 0.01 | 2.24 | 0.44 | 1.13 | 1.27 |
| 40142 | 0 | 135711 | LDETVKDKLAKEQKSKQ<br>NI           | 2.91 | 0.01 | 2.24 | 0.44 | 1.13 | 1.27 |
| 40143 | 0 | 35152  | LDFEIRHQLTQ                       | 2.40 | 0.01 | 3.89 | 1.20 | 0.22 | 2.75 |
| 40144 | 0 | 35153  | LDFELI                            | 1.91 | 0.01 | 2.40 | 0.44 | 0.85 | 0.28 |
| 40145 | 0 | 35153  | LDFELI                            | 1.91 | 0.01 | 2.40 | 0.44 | 0.85 | 0.28 |
| 40146 | 0 | 35153  | LDFELI                            | 1.91 | 0.01 | 2.40 | 0.44 | 0.85 | 0.28 |
| 40147 | 0 | 238685 | LDFGYTIVCYKRHAS                   | 2.60 | 0.01 | 2.56 | 2.02 | 0.22 | 0.85 |
| 40148 | 0 | 238685 | LDFGYTIVCYKRHAS                   | 2.60 | 0.01 | 2.56 | 1.20 | 0.22 | 0.85 |
| 40149 | 0 | 238686 | LDFGYTTKCLTKFSP                   | 2.69 | 0.01 | 2.56 | 2.02 | 0.22 | 0.85 |
| 40150 | 0 | 238686 | LDFGYTTKCLTKFSP                   | 2.69 | 0.01 | 2.56 | 1.20 | 0.22 | 0.85 |
| 40151 | 0 | 35160  | LDFPALWLLKLSAQY                   | 2.69 | 0.01 | 2.72 | 0.44 | 1.23 | 0.85 |
| 40152 | 0 | 35161  | LDFSLPSSSSYSY                     | 2.59 | 0.01 | 3.00 | 0.44 | 0.85 | 0.28 |
| 40153 | 0 | 35161  | LDFSLPSSSSYSY                     | 2.59 | 0.01 | 3.00 | 1.15 | 2.39 | 0.28 |
| 40154 | 0 | 106595 | LDGETKTGPQRV                      | 2.45 | 0.01 | 3.08 | 0.44 | 1.23 | 0.85 |
| 40155 | 0 | 117558 | LDGPTYKRRLDECEE                   | 2.66 | 0.01 | 0.78 | 0.44 | 1.13 | 0.28 |
| 40156 | 0 | 117558 | LDGPTYKRRLDECEE                   | 2.66 | 0.01 | 0.78 | 0.44 | 1.13 | 1.27 |
| 40157 | 0 | 35171  | LDGRPLSTIQQYSKTFV<br>LPLRGKLSFWEA | 3.32 | 0.01 | 2.70 | 1.15 | 0.22 | 0.28 |
| 40158 | 0 | 35172  | LDGRPLSTTQ                        | 2.31 | 4.23 | 2.70 | 0.44 | 0.85 | 0.28 |

|       |   |        |                                                           |      |      |      |      |      |      |
|-------|---|--------|-----------------------------------------------------------|------|------|------|------|------|------|
| 40159 | 0 | 236570 | LDGSAATPLTRVSAE                                           | 2.69 | 0.01 | 3.70 | 2.13 | 0.22 | 1.28 |
| 40160 | 0 | 35174  | LDHILEPSIPWWSK                                            | 2.64 | 0.01 | 2.04 | 0.44 | 0.85 | 0.28 |
| 40161 | 0 | 107991 | LDHRTPRPDLLK                                              | 2.51 | 0.01 | 0.90 | 0.68 | 0.22 | 1.39 |
| 40162 | 0 | 35175  | LDHVLHDHV                                                 | 2.18 | 0.01 | 2.40 | 2.43 | 0.22 | 0.28 |
| 40163 | 0 | 167772 | LDHVLDHVQ                                                 | 2.27 | 0.01 | 2.40 | 2.43 | 0.22 | 0.28 |
| 40164 | 0 | 35176  | LDHVQTME                                                  | 2.10 | 0.01 | 2.40 | 2.43 | 0.22 | 0.28 |
| 40165 | 0 | 167773 | LDHVQTMEE                                                 | 2.18 | 0.01 | 2.40 | 2.43 | 0.22 | 0.28 |
| 40166 | 0 | 158947 | LDIDIDPKVKVATLS                                           | 2.71 | 0.01 | 4.33 | 3.01 | 0.22 | 1.27 |
| 40167 | 0 | 158947 | LDIDIDPKVKVATLS                                           | 2.71 | 0.01 | 4.33 | 3.01 | 0.22 | 0.28 |
| 40168 | 0 | 158947 | LDIDIDPKVKVATLS                                           | 2.71 | 0.01 | 4.33 | 3.01 | 0.22 | 2.02 |
| 40169 | 0 | 158947 | LDIDIDPKVKVATLS                                           | 2.71 | 0.01 | 4.33 | 3.01 | 0.22 | 0.28 |
| 40170 | 0 | 456000 | LDIDSLSMVEIAV                                             | 2.58 | 0.01 | 2.04 | 1.15 | 0.22 | 0.28 |
| 40171 | 0 | 94578  | LDIEKDKKKRTDEQLQAE<br>LDDKYAGK                            | 3.22 | 0.01 | 0.90 | 0.68 | 0.22 | 0.28 |
| 40172 | 0 | 94579  | LDIEKNKKKRTEAELQAE<br>LDDKYAGK                            | 3.21 | 0.01 | 3.75 | 0.68 | 0.22 | 0.28 |
| 40173 | 0 | 142440 | LDISPESADNITSK                                            | 2.61 | 0.01 | 2.59 | 0.44 | 0.85 | 0.85 |
| 40174 | 0 | 450776 | LDIVDAP                                                   | 2.02 | 0.01 | 0.90 | 0.44 | 1.41 | 1.39 |
| 40175 | 0 | 35193  | LDKAFHLLL                                                 | 2.23 | 0.01 | 3.75 | 0.44 | 1.59 | 0.28 |
| 40176 | 0 | 35193  | LDKAFHLLL                                                 | 2.23 | 0.01 | 3.75 | 0.44 | 0.85 | 0.28 |
| 40177 | 0 | 125473 | LDKIGLHSDSQEEL                                            | 2.63 | 0.01 | 0.78 | 0.44 | 1.13 | 0.85 |
| 40178 | 0 | 152751 | LDKIKLNAKM                                                | 2.34 | 0.01 | 2.18 | 2.16 | 0.22 | 0.28 |
| 40179 | 0 | 119484 | LDKK                                                      | 1.55 | 0.01 | 0.78 | 0.44 | 0.85 | 0.28 |
| 40180 | 0 | 119484 | LDKK                                                      | 1.55 | 0.01 | 0.78 | 0.44 | 0.85 | 0.28 |
| 40181 | 0 | 119484 | LDKK                                                      | 1.55 | 0.01 | 0.78 | 0.44 | 1.13 | 0.28 |
| 40182 | 0 | 119484 | LDKK                                                      | 1.55 | 0.01 | 0.78 | 0.44 | 0.85 | 0.28 |
| 40183 | 0 | 119484 | LDKK                                                      | 1.55 | 0.01 | 0.78 | 0.44 | 0.85 | 0.28 |
| 40184 | 0 | 35199  | LDKNHVADIDKLID                                            | 2.65 | 0.01 | 2.56 | 1.12 | 0.22 | 0.28 |
| 40185 | 0 | 35199  | LDKNHVADIDKLID                                            | 2.65 | 0.01 | 2.56 | 0.44 | 0.85 | 0.28 |
| 40186 | 0 | 172028 | LDKNVLSPPMPL                                              | 2.50 | 0.01 | 0.90 | 0.44 | 0.85 | 1.39 |
| 40187 | 0 | 35201  | LDKQQAIAIKVVCN                                            | 2.53 | 0.01 | 4.08 | 0.68 | 0.22 | 0.28 |
| 40188 | 0 | 100247 | LDKRNDPFPHLP                                              | 2.49 | 0.01 | 0.90 | 2.00 | 0.22 | 0.28 |
| 40189 | 0 | 167957 | LDKTIDWFHPNNK                                             | 2.52 | 0.01 | 3.93 | 0.68 | 0.22 | 0.28 |
| 40190 | 0 | 167957 | LDKTIDWFHPNNK                                             | 2.52 | 0.01 | 3.93 | 0.68 | 0.22 | 0.85 |
| 40191 | 0 | 520874 | LDKVKEKQISDASR                                            | 2.68 | 0.01 | 2.24 | 0.44 | 1.41 | 1.28 |
| 40192 | 0 | 520875 | LDKVKEEKQISDASR                                           | 2.67 | 0.01 | 2.24 | 0.44 | 1.41 | 1.28 |
| 40193 | 0 | 149794 | LDKYGVSDYHKN                                              | 2.48 | 0.01 | 3.53 | 0.68 | 0.22 | 0.28 |
| 40194 | 0 | 149794 | LDKYGVSDYHKN                                              | 2.48 | 0.01 | 3.53 | 0.68 | 0.22 | 0.28 |
| 40195 | 0 | 178144 | LDLAGRDLTDYLMK                                            | 2.64 | 3.50 | 0.78 | 0.44 | 1.13 | 0.28 |
| 40196 | 0 | 104876 | LDLDVNVFRQLDTDGK<br>GYERGHITVNYQFVDCG<br>DSFNPLFSVMKSSVIN | 3.83 | 0.01 | 2.60 | 1.12 | 0.22 | 0.85 |
| 40197 | 0 | 164276 | LDLERDARVRAERNANE<br>MSI                                  | 2.98 | 0.01 | 2.74 | 1.20 | 0.22 | 0.28 |
| 40198 | 0 | 164276 | LDLERDARVRAERNANE<br>MSI                                  | 2.98 | 0.01 | 2.74 | 1.20 | 0.22 | 0.85 |



|       |   |        |                          |      |      |      |      |      |      |
|-------|---|--------|--------------------------|------|------|------|------|------|------|
| 40199 | 0 | 164276 | LDLERDARVRAERNANE<br>MSI | 2.98 | 0.01 | 2.74 | 1.20 | 0.22 | 0.28 |
| 40200 | 0 | 164276 | LDLERDARVRAERNANE<br>MSI | 2.98 | 0.01 | 2.74 | 2.13 | 0.22 | 0.28 |
| 40201 | 0 | 164276 | LDLERDARVRAERNANE<br>MSI | 2.98 | 0.01 | 2.74 | 1.20 | 0.22 | 0.28 |
| 40202 | 0 | 164276 | LDLERDARVRAERNANE<br>MSI | 2.98 | 0.01 | 2.74 | 1.20 | 0.22 | 0.28 |
| 40203 | 0 | 164276 | LDLERDARVRAERNANE<br>MSI | 2.98 | 0.01 | 2.74 | 1.20 | 0.22 | 0.28 |
| 40204 | 0 | 164276 | LDLERDARVRAERNANE<br>MSI | 2.98 | 0.01 | 2.74 | 1.20 | 0.22 | 0.28 |
| 40205 | 0 | 164276 | LDLERDARVRAERNANE<br>MSI | 2.98 | 0.01 | 2.74 | 1.20 | 0.22 | 0.28 |
| 40206 | 0 | 164276 | LDLERDARVRAERNANE<br>MSI | 2.98 | 0.01 | 2.74 | 1.20 | 0.22 | 0.28 |
| 40207 | 0 | 164276 | LDLERDARVRAERNANE<br>MSI | 2.98 | 0.01 | 2.74 | 1.20 | 0.22 | 1.39 |
| 40208 | 0 | 164276 | LDLERDARVRAERNANE<br>MSI | 2.98 | 0.01 | 2.74 | 1.20 | 0.22 | 1.39 |
| 40209 | 0 | 164276 | LDLERDARVRAERNANE<br>MSI | 2.98 | 0.01 | 2.74 | 1.20 | 0.22 | 1.39 |
| 40210 | 0 | 164276 | LDLERDARVRAERNANE<br>MSI | 2.98 | 0.01 | 2.74 | 1.20 | 0.22 | 1.39 |
| 40211 | 0 | 164276 | LDLERDARVRAERNANE<br>MSI | 2.98 | 0.01 | 2.74 | 1.20 | 0.22 | 1.39 |
| 40212 | 0 | 164276 | LDLERDARVRAERNANE<br>MSI | 2.98 | 0.01 | 2.74 | 1.20 | 0.22 | 1.39 |
| 40213 | 0 | 164276 | LDLERDARVRAERNANE<br>MSI | 2.98 | 0.01 | 2.74 | 1.20 | 0.22 | 1.39 |
| 40214 | 0 | 164276 | LDLERDARVRAERNANE<br>MSI | 2.98 | 0.01 | 2.74 | 1.20 | 0.22 | 1.39 |
| 40215 | 0 | 164276 | LDLERDARVRAERNANE<br>MSI | 2.98 | 0.01 | 2.74 | 1.20 | 0.22 | 1.39 |
| 40216 | 0 | 164276 | LDLERDARVRAERNANE<br>MSI | 2.98 | 0.01 | 2.74 | 1.20 | 0.22 | 1.39 |
| 40217 | 0 | 164276 | LDLERDARVRAERNANE<br>MSI | 2.98 | 0.01 | 2.74 | 1.20 | 0.22 | 1.39 |
| 40218 | 0 | 164276 | LDLERDARVRAERNANE<br>MSI | 2.98 | 0.01 | 2.74 | 1.20 | 0.22 | 1.39 |
| 40219 | 0 | 164276 | LDLERDARVRAERNANE<br>MSI | 2.98 | 0.01 | 2.74 | 1.20 | 0.22 | 1.39 |
| 40220 | 0 | 164276 | LDLERDARVRAERNANE<br>MSI | 2.98 | 0.01 | 2.74 | 1.20 | 0.22 | 1.39 |
| 40221 | 0 | 164276 | LDLERDARVRAERNANE<br>MSI | 2.98 | 0.01 | 2.74 | 1.20 | 0.22 | 1.39 |

|       |   |        |                             |      |      |      |      |      |      |
|-------|---|--------|-----------------------------|------|------|------|------|------|------|
| 40222 | 0 | 164276 | LDLERDARVRAERNANE<br>MSI    | 2.98 | 0.01 | 2.74 | 1.20 | 0.22 | 1.39 |
| 40223 | 0 | 164276 | LDLERDARVRAERNANE<br>MSI    | 2.98 | 0.01 | 2.74 | 1.20 | 0.22 | 1.39 |
| 40224 | 0 | 164276 | LDLERDARVRAERNANE<br>MSI    | 2.98 | 0.01 | 2.74 | 1.20 | 0.22 | 1.39 |
| 40225 | 0 | 164276 | LDLERDARVRAERNANE<br>MSI    | 2.98 | 0.01 | 2.74 | 1.20 | 0.22 | 1.39 |
| 40226 | 0 | 164276 | LDLERDARVRAERNANE<br>MSI    | 2.98 | 0.01 | 2.74 | 1.20 | 0.22 | 1.39 |
| 40227 | 0 | 164276 | LDLERDARVRAERNANE<br>MSI    | 2.98 | 0.01 | 2.74 | 1.20 | 0.22 | 1.39 |
| 40228 | 0 | 164276 | LDLERDARVRAERNANE<br>MSI    | 2.98 | 0.01 | 2.74 | 1.20 | 0.22 | 1.39 |
| 40229 | 0 | 164276 | LDLERDARVRAERNANE<br>MSI    | 2.98 | 0.01 | 2.74 | 1.20 | 0.22 | 1.39 |
| 40230 | 0 | 164276 | LDLERDARVRAERNANE<br>MSI    | 2.98 | 0.01 | 2.74 | 1.20 | 0.22 | 1.39 |
| 40231 | 0 | 164276 | LDLERDARVRAERNANE<br>MSI    | 2.98 | 0.01 | 2.74 | 1.20 | 0.22 | 1.39 |
| 40232 | 0 | 164276 | LDLERDARVRAERNANE<br>MSI    | 2.98 | 0.01 | 2.74 | 1.20 | 0.22 | 1.39 |
| 40233 | 0 | 164276 | LDLERDARVRAERNANE<br>MSI    | 2.98 | 0.01 | 2.74 | 1.20 | 0.22 | 1.39 |
| 40234 | 0 | 164276 | LDLERDARVRAERNANE<br>MSI    | 2.98 | 0.01 | 2.74 | 1.20 | 0.22 | 1.39 |
| 40235 | 0 | 164276 | LDLERDARVRAERNANE<br>MSI    | 2.98 | 0.01 | 2.74 | 1.20 | 0.22 | 1.39 |
| 40236 | 0 | 164276 | LDLERDARVRAERNANE<br>MSI    | 2.98 | 0.01 | 2.74 | 1.20 | 0.22 | 1.39 |
| 40237 | 0 | 35214  | LDLGVDVRTYMPVHYK<br>VLKA    | 2.95 | 0.01 | 2.21 | 1.20 | 0.22 | 0.28 |
| 40238 | 0 | 35214  | LDLGVDVRTYMPVHYK<br>VLKA    | 2.95 | 0.01 | 2.21 | 1.20 | 0.22 | 0.28 |
| 40239 | 0 | 238688 | LDLGYTLECKICNFK             | 2.67 | 0.01 | 2.56 | 2.02 | 0.22 | 0.85 |
| 40240 | 0 | 238688 | LDLGYTLECKICNFK             | 2.67 | 0.01 | 2.56 | 1.20 | 0.22 | 0.85 |
| 40241 | 0 | 106596 | LDLKRTTTTHTS                | 2.50 | 0.01 | 0.90 | 3.00 | 1.93 | 0.28 |
| 40242 | 0 | 106597 | LDLKRTTTTHTSGGGC            | 2.74 | 0.01 | 0.90 | 3.00 | 1.93 | 0.28 |
| 40243 | 0 | 106597 | LDLKRTTTTHTSGGGC            | 2.74 | 0.01 | 0.90 | 1.81 | 0.22 | 0.28 |
| 40244 | 0 | 35217  | LDLLFWEQGGGLCKALQE<br>QCRFP | 3.04 | 0.01 | 2.04 | 0.44 | 0.85 | 0.28 |
| 40245 | 0 | 35217  | LDLLFWEQGGGLCKALQE<br>QCRFP | 3.04 | 0.01 | 2.04 | 0.44 | 0.85 | 0.28 |
| 40246 | 0 | 35217  | LDLLFWEQGGGLCKALQE<br>QCRFP | 3.04 | 0.01 | 2.04 | 0.44 | 0.85 | 0.28 |
| 40247 | 0 | 35217  | LDLLFWEQGGGLCKALQE<br>QCRFP | 3.04 | 0.01 | 2.04 | 0.44 | 0.85 | 0.28 |

|       |   |        |                                |      |      |      |      |      |      |
|-------|---|--------|--------------------------------|------|------|------|------|------|------|
| 40248 | 0 | 35217  | LDLLFWEQGGGLCKALQE<br>QCRFP    | 3.04 | 0.01 | 2.04 | 0.44 | 0.85 | 0.28 |
| 40249 | 0 | 35217  | LDLLFWEQGGGLCKALQE<br>QCRFP    | 3.04 | 0.01 | 2.04 | 0.44 | 1.59 | 0.28 |
| 40250 | 0 | 35217  | LDLLFWEQGGGLCKALQE<br>QCRFP    | 3.04 | 0.01 | 2.04 | 0.44 | 2.82 | 0.28 |
| 40251 | 0 | 35217  | LDLLFWEQGGGLCKALQE<br>QCRFP    | 3.04 | 0.01 | 2.04 | 0.44 | 0.85 | 0.28 |
| 40252 | 0 | 35218  | LDLPLP                         | 1.92 | 0.01 | 2.40 | 0.44 | 0.85 | 0.28 |
| 40253 | 0 | 123419 | LDLPNLPYY                      | 2.25 | 0.01 | 2.28 | 2.00 | 0.22 | 0.28 |
| 40254 | 0 | 123419 | LDLPNLPYY                      | 2.25 | 0.01 | 2.28 | 2.00 | 0.22 | 0.28 |
| 40255 | 0 | 123419 | LDLPNLPYY                      | 2.25 | 0.01 | 2.28 | 2.00 | 0.22 | 0.28 |
| 40256 | 0 | 142218 | LDLQPETTDLYC                   | 2.49 | 0.01 | 1.86 | 0.44 | 1.41 | 0.28 |
| 40257 | 0 | 186688 | LDLSAFPHTGLP                   | 2.48 | 0.01 | 0.90 | 0.68 | 0.22 | 1.39 |
| 40258 | 0 | 35222  | LDLTNITHVEKLCKGTAP<br>FGVAFGN  | 3.16 | 0.01 | 2.85 | 3.06 | 0.22 | 0.28 |
| 40259 | 0 | 35223  | LDLTNITHVEKLCKGTAP<br>FGVAFGNS | 3.18 | 0.01 | 2.85 | 1.15 | 0.22 | 0.85 |
| 40260 | 0 | 35223  | LDLTNITHVEKLCKGTAP<br>FGVAFGNS | 3.18 | 0.01 | 2.85 | 1.12 | 0.22 | 0.28 |
| 40261 | 0 | 35223  | LDLTNITHVEKLCKGTAP<br>FGVAFGNS | 3.18 | 0.01 | 2.85 | 1.12 | 0.22 | 0.28 |
| 40262 | 0 | 35223  | LDLTNITHVEKLCKGTAP<br>FGVAFGNS | 3.18 | 0.01 | 2.85 | 3.89 | 0.22 | 0.28 |
| 40263 | 0 | 35223  | LDLTNITHVEKLCKGTAP<br>FGVAFGNS | 3.18 | 0.01 | 2.85 | 4.03 | 0.22 | 0.28 |
| 40264 | 0 | 35223  | LDLTNITHVEKLCKGTAP<br>FGVAFGNS | 3.18 | 0.01 | 2.85 | 3.81 | 0.22 | 0.28 |
| 40265 | 0 | 35223  | LDLTNITHVEKLCKGTAP<br>FGVAFGNS | 3.18 | 0.01 | 2.85 | 3.89 | 0.22 | 0.28 |
| 40266 | 0 | 35223  | LDLTNITHVEKLCKGTAP<br>FGVAFGNS | 3.18 | 0.01 | 2.85 | 3.70 | 0.22 | 0.28 |
| 40267 | 0 | 35223  | LDLTNITHVEKLCKGTAP<br>FGVAFGNS | 3.18 | 0.01 | 2.85 | 3.81 | 0.22 | 0.28 |
| 40268 | 0 | 35223  | LDLTNITHVEKLCKGTAP<br>FGVAFGNS | 3.18 | 0.01 | 2.85 | 3.81 | 0.22 | 0.28 |
| 40269 | 0 | 520892 | LDMMLTCVEIKEGALML<br>PHFNSKA   | 3.08 | 0.01 | 2.16 | 1.12 | 0.22 | 1.39 |
| 40270 | 0 | 188308 | LDNADIDLET                     | 2.34 | 0.01 | 2.92 | 0.68 | 0.22 | 0.85 |
| 40271 | 0 | 188308 | LDNADIDLET                     | 2.34 | 0.01 | 2.92 | 1.81 | 0.22 | 0.85 |
| 40272 | 0 | 35231  | LDNAKYQA                       | 2.12 | 0.01 | 2.83 | 2.61 | 0.22 | 0.28 |
| 40273 | 0 | 35234  | LDNIKDNVGKMEDYIKK<br>NKT       | 2.96 | 0.01 | 1.66 | 0.68 | 0.22 | 0.28 |
| 40274 | 0 | 35234  | LDNIKDNVGKMEDYIKK<br>NKT       | 2.96 | 0.01 | 1.66 | 1.20 | 0.22 | 0.28 |
| 40275 | 0 | 35235  | LDNIKGNVGKMEDYIKK<br>NNK       | 2.97 | 0.01 | 1.66 | 1.12 | 0.22 | 0.28 |

|       |   |        |                          |      |      |      |      |      |      |
|-------|---|--------|--------------------------|------|------|------|------|------|------|
| 40276 | 0 | 35235  | LDNIKGNVGKMEDYIKK<br>NNK | 2.97 | 0.01 | 1.66 | 1.15 | 0.22 | 0.28 |
| 40277 | 0 | 35235  | LDNIKGNVGKMEDYIKK<br>NNK | 2.97 | 0.01 | 3.34 | 0.44 | 0.85 | 0.28 |
| 40278 | 0 | 35235  | LDNIKGNVGKMEDYIKK<br>NNK | 2.97 | 0.01 | 3.34 | 2.25 | 0.22 | 0.28 |
| 40279 | 0 | 35235  | LDNIKGNVGKMEDYIKK<br>NNK | 2.97 | 0.01 | 3.34 | 2.25 | 0.22 | 0.28 |
| 40280 | 0 | 35235  | LDNIKGNVGKMEDYIKK<br>NNK | 2.97 | 0.01 | 3.34 | 3.57 | 0.22 | 0.28 |
| 40281 | 0 | 35235  | LDNIKGNVGKMEDYIKK<br>NNK | 2.97 | 0.01 | 3.34 | 2.42 | 0.22 | 0.28 |
| 40282 | 0 | 35235  | LDNIKGNVGKMEDYIKK<br>NNK | 2.97 | 0.01 | 3.34 | 1.81 | 0.22 | 0.28 |
| 40283 | 0 | 35235  | LDNIKGNVGKMEDYIKK<br>NNK | 2.97 | 0.01 | 3.34 | 4.15 | 0.22 | 0.28 |
| 40284 | 0 | 35235  | LDNIKGNVGKMEDYIKK<br>NNK | 2.97 | 0.01 | 3.34 | 4.23 | 0.22 | 0.28 |
| 40285 | 0 | 35235  | LDNIKGNVGKMEDYIKK<br>NNK | 2.97 | 0.01 | 3.34 | 4.08 | 0.22 | 0.28 |
| 40286 | 0 | 35235  | LDNIKGNVGKMEDYIKK<br>NNK | 2.97 | 0.01 | 3.34 | 2.42 | 0.22 | 0.28 |
| 40287 | 0 | 35235  | LDNIKGNVGKMEDYIKK<br>NNK | 2.97 | 0.01 | 3.34 | 1.81 | 0.22 | 0.28 |
| 40288 | 0 | 35235  | LDNIKGNVGKMEDYIKK<br>NNK | 2.97 | 0.01 | 3.34 | 4.08 | 0.22 | 0.28 |
| 40289 | 0 | 35236  | LDNIKGNVGKNEDYIKK<br>NKK | 2.97 | 0.01 | 1.66 | 0.68 | 0.22 | 0.28 |
| 40290 | 0 | 94580  | LDNKYAGKGY               | 2.33 | 0.01 | 3.75 | 1.15 | 0.22 | 0.85 |
| 40291 | 0 | 94580  | LDNKYAGKGY               | 2.33 | 0.01 | 3.75 | 1.15 | 0.22 | 0.28 |
| 40292 | 0 | 94580  | LDNKYAGKGY               | 2.33 | 0.01 | 3.75 | 1.15 | 0.22 | 1.57 |
| 40293 | 0 | 94580  | LDNKYAGKGY               | 2.33 | 0.01 | 3.75 | 1.15 | 0.22 | 1.34 |
| 40294 | 0 | 35241  | LDNLGGNG                 | 2.18 | 0.01 | 2.83 | 1.12 | 0.22 | 0.28 |
| 40295 | 0 | 35242  | LDNLGGNGE                | 2.28 | 0.01 | 2.83 | 1.12 | 0.22 | 0.28 |
| 40296 | 0 | 35244  | LDNPLENPSSLFDLVARI<br>KN | 2.94 | 0.01 | 2.75 | 0.44 | 0.85 | 0.85 |
| 40297 | 0 | 79011  | LDPAFG                   | 1.88 | 0.01 | 2.08 | 0.68 | 0.22 | 0.28 |
| 40298 | 0 | 35247  | LDPAFR                   | 1.88 | 0.01 | 2.08 | 0.68 | 0.22 | 0.28 |
| 40299 | 0 | 35247  | LDPAFR                   | 1.88 | 0.01 | 2.08 | 0.68 | 0.22 | 0.28 |
| 40300 | 0 | 35247  | LDPAFR                   | 1.88 | 0.01 | 2.08 | 0.68 | 0.22 | 0.28 |
| 40301 | 0 | 35248  | LDPAFRANTANPDWD          | 2.70 | 0.01 | 2.08 | 0.68 | 0.22 | 0.28 |
| 40302 | 0 | 35248  | LDPAFRANTANPDWD          | 2.70 | 0.01 | 2.08 | 0.68 | 0.22 | 0.28 |
| 40303 | 0 | 125127 | LDPENLTL                 | 2.15 | 0.01 | 2.73 | 0.68 | 0.22 | 1.34 |
| 40304 | 0 | 125127 | LDPENLTL                 | 2.15 | 0.01 | 2.73 | 0.68 | 0.22 | 0.85 |
| 40305 | 0 | 125127 | LDPENLTL                 | 2.15 | 0.01 | 2.73 | 0.68 | 0.22 | 0.85 |

|       |   |        |                         |      |      |      |      |      |      |
|-------|---|--------|-------------------------|------|------|------|------|------|------|
| 40306 | 0 | 125127 | LDPENLTL                | 2.15 | 0.01 | 2.73 | 0.68 | 0.22 | 0.85 |
| 40307 | 0 | 125127 | LDPENLTL                | 2.15 | 0.01 | 2.73 | 0.68 | 0.22 | 0.28 |
| 40308 | 0 | 125127 | LDPENLTL                | 2.15 | 0.01 | 2.73 | 0.68 | 0.22 | 1.27 |
| 40309 | 0 | 125127 | LDPENLTL                | 2.15 | 0.01 | 2.73 | 0.68 | 0.22 | 1.27 |
| 40310 | 0 | 79285  | LDPEYWNFRNGDLT          | 2.60 | 0.01 | 3.38 | 0.68 | 0.22 | 1.39 |
| 40311 | 0 | 79285  | LDPEYWNFRNGDLT          | 2.60 | 0.01 | 3.38 | 0.68 | 0.22 | 1.34 |
| 40312 | 0 | 35252  | LDPHAFHLLL              | 2.33 | 0.01 | 2.76 | 0.68 | 0.22 | 0.85 |
| 40313 | 0 | 35252  | LDPHAFHLLL              | 2.33 | 0.01 | 2.76 | 0.68 | 0.22 | 1.48 |
| 40314 | 0 | 35252  | LDPHAFHLLL              | 2.33 | 0.01 | 2.76 | 0.68 | 0.22 | 0.85 |
| 40315 | 0 | 35252  | LDPHAFHLLL              | 2.33 | 0.01 | 2.76 | 0.44 | 1.59 | 0.85 |
| 40316 | 0 | 35252  | LDPHAFHLLL              | 2.33 | 0.01 | 2.51 | 0.44 | 1.59 | 0.28 |
| 40317 | 0 | 35252  | LDPHAFHLLL              | 2.33 | 0.01 | 2.51 | 0.44 | 0.85 | 0.28 |
| 40318 | 0 | 35252  | LDPHAFHLLL              | 2.33 | 0.01 | 2.51 | 0.68 | 0.22 | 0.85 |
| 40319 | 0 | 35252  | LDPHAFHLLL              | 2.33 | 0.01 | 2.51 | 0.68 | 0.22 | 0.85 |
| 40320 | 0 | 35252  | LDPHAFHLLL              | 2.33 | 0.01 | 2.51 | 0.68 | 0.22 | 0.85 |
| 40321 | 0 | 35252  | LDPHAFHLLL              | 2.33 | 0.01 | 2.51 | 0.68 | 0.22 | 0.85 |
| 40322 | 0 | 35252  | LDPHAFHLLL              | 2.33 | 0.01 | 2.51 | 0.68 | 0.22 | 0.85 |
| 40323 | 0 | 35252  | LDPHAFHLLL              | 2.33 | 0.01 | 2.51 | 0.68 | 0.22 | 0.85 |
| 40324 | 0 | 35252  | LDPHAFHLLL              | 2.33 | 0.01 | 2.51 | 0.68 | 0.22 | 2.35 |
| 40325 | 0 | 35252  | LDPHAFHLLL              | 2.33 | 0.01 | 2.51 | 0.68 | 0.22 | 2.12 |
| 40326 | 0 | 35252  | LDPHAFHLLL              | 2.33 | 0.01 | 2.51 | 0.68 | 0.22 | 1.34 |
| 40327 | 0 | 35252  | LDPHAFHLLL              | 2.33 | 0.01 | 2.51 | 0.68 | 0.22 | 1.34 |
| 40328 | 0 | 100249 | LDPLSEKGLTTY            | 2.47 | 0.01 | 2.96 | 1.12 | 0.22 | 0.28 |
| 40329 | 0 | 79898  | LDPLVTALLGAFD           | 2.57 | 0.01 | 2.72 | 0.68 | 0.22 | 1.66 |
| 40330 | 0 | 79898  | LDPLVTALLGAFD           | 2.57 | 0.01 | 2.72 | 0.68 | 0.22 | 1.66 |
| 40331 | 0 | 79898  | LDPLVTALLGAFD           | 2.57 | 0.01 | 2.72 | 0.68 | 0.22 | 0.28 |
| 40332 | 0 | 79898  | LDPLVTALLGAFD           | 2.57 | 0.01 | 2.72 | 0.68 | 0.22 | 0.28 |
| 40333 | 0 | 79898  | LDPLVTALLGAFD           | 2.57 | 0.01 | 2.72 | 0.68 | 0.22 | 0.28 |
| 40334 | 0 | 79898  | LDPLVTALLGAFD           | 2.57 | 0.01 | 2.72 | 0.68 | 0.22 | 0.28 |
| 40335 | 0 | 79898  | LDPLVTALLGAFD           | 2.57 | 0.01 | 2.72 | 0.68 | 0.22 | 0.28 |
| 40336 | 0 | 35253  | LDPMVEERSDLEPS          | 2.65 | 0.01 | 2.69 | 0.44 | 0.85 | 0.28 |
| 40337 | 0 | 35253  | LDPMVEERSDLEPS          | 2.65 | 0.01 | 2.69 | 0.44 | 0.85 | 0.28 |
| 40338 | 0 | 232658 | LDPYFNLVSPEVYNY         | 2.71 | 0.01 | 2.28 | 0.68 | 0.22 | 0.28 |
| 40339 | 0 | 232658 | LDPYFNLVSPEVYNY         | 2.71 | 0.01 | 2.28 | 0.68 | 0.22 | 0.28 |
| 40340 | 0 | 232658 | LDPYFNLVSPEVYNY         | 2.71 | 0.01 | 2.28 | 0.68 | 0.22 | 0.28 |
| 40341 | 0 | 96537  | LDQAAKDAKSAGVNVV<br>QDA | 2.93 | 0.01 | 2.39 | 0.44 | 1.59 | 0.28 |
| 40342 | 0 | 195036 | LDQKPERVPLADVP          | 2.64 | 0.01 | 2.30 | 0.44 | 0.85 | 0.28 |
| 40343 | 0 | 187677 | LDQNRYEYIWGLYP          | 2.60 | 0.01 | 2.14 | 1.20 | 0.22 | 0.28 |
| 40344 | 0 | 104877 | LDQRSSK                 | 2.01 | 0.01 | 0.90 | 0.44 | 1.13 | 1.39 |
| 40345 | 0 | 104878 | LDQSRLK                 | 2.03 | 0.01 | 0.90 | 0.44 | 1.13 | 1.39 |
| 40346 | 0 | 35269  | LDQVLDYV                | 2.17 | 0.01 | 3.28 | 0.44 | 0.85 | 0.28 |
| 40347 | 0 | 35269  | LDQVLDYV                | 2.17 | 0.01 | 3.28 | 0.44 | 0.85 | 0.28 |
| 40348 | 0 | 35274  | LDRERQS                 | 2.02 | 0.01 | 3.78 | 1.81 | 0.22 | 0.85 |
| 40349 | 0 | 326606 | LDRFLAAAMDKVFTT         | 2.67 | 0.01 | 1.61 | 0.44 | 0.85 | 1.28 |
| 40350 | 0 | 35282  | LDRLVESAKREMAQKLA       | 2.82 | 0.01 | 3.59 | 2.02 | 0.22 | 0.28 |

|       |   |        |                          |      |      |      |      |      |      |
|-------|---|--------|--------------------------|------|------|------|------|------|------|
| 40351 | 0 | 35284  | LDRNAHGQLLVR             | 2.47 | 0.01 | 0.90 | 0.68 | 0.22 | 0.28 |
| 40352 | 0 | 35285  | LDRRVQDVNDTISDVKQ<br>KWR | 2.96 | 0.01 | 3.10 | 1.12 | 0.22 | 0.28 |
| 40353 | 0 | 137540 | LDRTPRKFHLAGNPK          | 2.67 | 0.01 | 3.12 | 0.44 | 1.23 | 0.85 |
| 40354 | 0 | 109476 | LDSDGSF                  | 2.04 | 0.01 | 0.78 | 0.44 | 1.13 | 0.28 |
| 40355 | 0 | 142844 | LDSLGRFFGSDRGAP          | 2.71 | 0.01 | 1.60 | 3.06 | 0.22 | 2.12 |
| 40356 | 0 | 35291  | LDSMHFPFHSRSFWP          | 2.70 | 0.01 | 0.90 | 0.44 | 1.41 | 0.28 |
| 40357 | 0 | 35292  | LDSMTEVEDDREPS           | 2.62 | 0.01 | 2.69 | 0.44 | 1.41 | 0.28 |
| 40358 | 0 | 35292  | LDSMTEVEDDREPS           | 2.62 | 0.01 | 2.69 | 0.44 | 0.85 | 0.28 |
| 40359 | 0 | 35292  | LDSMTEVEDDREPS           | 2.62 | 0.01 | 2.69 | 0.44 | 0.85 | 0.28 |
| 40360 | 0 | 35292  | LDSMTEVEDDREPS           | 2.62 | 0.01 | 2.69 | 0.44 | 0.85 | 0.28 |
| 40361 | 0 | 481735 | LDSRLKKRNYFLDVLDE        | 2.87 | 0.01 | 3.12 | 0.68 | 0.22 | 0.28 |
| 40362 | 0 | 122135 | LDSRRSYRVRESGLNGV<br>VKH | 2.96 | 0.01 | 0.78 | 0.44 | 1.93 | 0.28 |
| 40363 | 0 | 122135 | LDSRRSYRVRESGLNGV<br>VKH | 2.96 | 0.01 | 0.78 | 0.44 | 1.41 | 0.28 |
| 40364 | 0 | 462384 | LDSSSDSDS                | 2.17 | 0.01 | 0.78 | 1.12 | 0.22 | 1.28 |
| 40365 | 0 | 95545  | LDTDYK                   | 1.90 | 0.01 | 1.60 | 0.44 | 1.23 | 0.28 |
| 40366 | 0 | 115342 | LDTDYKKYLL               | 2.34 | 0.01 | 1.60 | 0.44 | 1.23 | 0.85 |
| 40367 | 0 | 35304  | LDTEVAASCGGVVL           | 2.61 | 0.01 | 2.41 | 0.44 | 0.85 | 0.28 |
| 40368 | 0 | 120744 | LDTLVLDVEPKVKSK          | 2.71 | 0.01 | 0.78 | 3.01 | 0.22 | 0.28 |
| 40369 | 0 | 35310  | LDTNGGTGTAIV             | 2.49 | 0.01 | 2.24 | 1.20 | 0.22 | 0.28 |
| 40370 | 0 | 35310  | LDTNGGTGTAIV             | 2.49 | 0.01 | 2.24 | 1.20 | 0.22 | 0.85 |
| 40371 | 0 | 35310  | LDTNGGTGTAIV             | 2.49 | 0.01 | 2.24 | 0.68 | 0.22 | 0.28 |
| 40372 | 0 | 35311  | LDTNYEVSDETVSDNNK<br>WAV | 2.95 | 0.01 | 2.86 | 1.81 | 0.22 | 0.85 |
| 40373 | 0 | 35311  | LDTNYEVSDETVSDNNK<br>WAV | 2.95 | 0.01 | 2.86 | 1.81 | 0.22 | 0.85 |
| 40374 | 0 | 35312  | LDTSNKFA                 | 2.10 | 0.01 | 3.06 | 1.12 | 0.22 | 0.28 |
| 40375 | 0 | 35313  | LDTSNPVKT                | 2.21 | 0.01 | 3.33 | 1.15 | 0.22 | 0.28 |
| 40376 | 0 | 105279 | LDTTTL                   | 1.93 | 0.01 | 3.21 | 1.20 | 0.22 | 0.28 |
| 40377 | 0 | 35316  | LDVAEGDTVIYSKYG          | 2.66 | 0.01 | 2.04 | 0.44 | 1.74 | 0.28 |
| 40378 | 0 | 35316  | LDVAEGDTVIYSKYG          | 2.66 | 0.01 | 2.04 | 0.44 | 0.85 | 0.28 |
| 40379 | 0 | 35316  | LDVAEGDTVIYSKYG          | 2.66 | 0.01 | 2.04 | 0.44 | 0.85 | 0.28 |
| 40380 | 0 | 35316  | LDVAEGDTVIYSKYG          | 2.66 | 0.01 | 2.04 | 0.44 | 0.85 | 0.28 |
| 40381 | 0 | 35316  | LDVAEGDTVIYSKYG          | 2.66 | 0.01 | 2.04 | 0.44 | 1.74 | 0.28 |
| 40382 | 0 | 118877 | LDVEQLGIPEQEYSC          | 2.67 | 0.01 | 0.78 | 1.12 | 0.22 | 1.48 |
| 40383 | 0 | 118877 | LDVEQLGIPEQEYSC          | 2.67 | 0.01 | 0.78 | 1.12 | 0.22 | 0.28 |
| 40384 | 0 | 118877 | LDVEQLGIPEQEYSC          | 2.67 | 0.01 | 0.78 | 1.12 | 0.22 | 1.27 |
| 40385 | 0 | 118877 | LDVEQLGIPEQEYSC          | 2.67 | 0.01 | 0.78 | 0.68 | 0.22 | 1.27 |
| 40386 | 0 | 118877 | LDVEQLGIPEQEYSC          | 2.67 | 0.01 | 0.78 | 0.68 | 0.22 | 0.85 |
| 40387 | 0 | 118877 | LDVEQLGIPEQEYSC          | 2.67 | 0.01 | 0.78 | 0.68 | 0.22 | 1.34 |
| 40388 | 0 | 130538 | LDVPPALADFIHQQR          | 2.67 | 0.01 | 0.78 | 0.44 | 1.13 | 0.28 |
| 40389 | 0 | 130538 | LDVPPALADFIHQQR          | 2.67 | 0.01 | 0.78 | 0.44 | 1.13 | 0.28 |
| 40390 | 0 | 130538 | LDVPPALADFIHQQR          | 2.67 | 0.01 | 0.78 | 0.44 | 1.13 | 0.28 |
| 40391 | 0 | 130538 | LDVPPALADFIHQQR          | 2.67 | 0.01 | 0.78 | 0.44 | 1.41 | 0.28 |

|       |   |        |                                    |      |      |      |      |      |      |
|-------|---|--------|------------------------------------|------|------|------|------|------|------|
| 40392 | 0 | 130538 | LDVPPALADFIHQQR                    | 2.67 | 0.01 | 0.78 | 0.44 | 1.13 | 0.28 |
| 40393 | 0 | 100250 | LDVRKQYKRD                         | 2.33 | 0.01 | 2.18 | 2.16 | 0.22 | 0.28 |
| 40394 | 0 | 105280 | LDVTT                              | 1.72 | 0.01 | 4.15 | 1.20 | 0.22 | 0.28 |
| 40395 | 0 | 35329  | LDVTTLNPTI                         | 2.34 | 0.01 | 3.13 | 1.12 | 0.22 | 0.28 |
| 40396 | 0 | 35329  | LDVTTLNPTI                         | 2.34 | 0.01 | 3.13 | 1.12 | 0.22 | 0.28 |
| 40397 | 0 | 35329  | LDVTTLNPTI                         | 2.34 | 0.01 | 3.13 | 1.12 | 0.22 | 0.28 |
| 40398 | 0 | 35329  | LDVTTLNPTI                         | 2.34 | 0.01 | 3.13 | 0.68 | 0.22 | 0.28 |
| 40399 | 0 | 35329  | LDVTTLNPTI                         | 2.34 | 0.01 | 3.13 | 0.68 | 0.22 | 1.34 |
| 40400 | 0 | 35329  | LDVTTLNPTI                         | 2.34 | 0.01 | 3.13 | 0.68 | 0.22 | 0.28 |
| 40401 | 0 | 35329  | LDVTTLNPTI                         | 2.34 | 0.01 | 3.13 | 0.68 | 0.22 | 0.28 |
| 40402 | 0 | 35329  | LDVTTLNPTI                         | 2.34 | 0.01 | 3.13 | 0.68 | 0.22 | 0.28 |
| 40403 | 0 | 35329  | LDVTTLNPTI                         | 2.34 | 0.01 | 3.13 | 2.36 | 0.22 | 0.28 |
| 40404 | 0 | 35329  | LDVTTLNPTI                         | 2.34 | 0.01 | 3.13 | 2.36 | 0.22 | 0.28 |
| 40405 | 0 | 35329  | LDVTTLNPTI                         | 2.34 | 0.01 | 3.13 | 2.36 | 0.22 | 0.28 |
| 40406 | 0 | 35329  | LDVTTLNPTI                         | 2.34 | 0.01 | 3.13 | 0.68 | 0.22 | 1.34 |
| 40407 | 0 | 35329  | LDVTTLNPTI                         | 2.34 | 0.01 | 3.13 | 0.68 | 0.22 | 0.85 |
| 40408 | 0 | 35329  | LDVTTLNPTI                         | 2.34 | 0.01 | 3.13 | 0.68 | 0.22 | 0.28 |
| 40409 | 0 | 35329  | LDVTTLNPTI                         | 2.34 | 0.01 | 3.13 | 0.68 | 0.22 | 0.28 |
| 40410 | 0 | 35329  | LDVTTLNPTI                         | 2.34 | 0.01 | 3.13 | 0.68 | 0.22 | 0.28 |
| 40411 | 0 | 35329  | LDVTTLNPTI                         | 2.34 | 0.01 | 3.13 | 0.68 | 0.22 | 0.28 |
| 40412 | 0 | 35331  | LDVVCAMIEGAQGALER                  | 2.79 | 0.01 | 3.67 | 0.44 | 1.23 | 1.27 |
| 40413 | 0 | 35331  | LDVVCAMIEGAQGALER                  | 2.79 | 0.01 | 3.67 | 0.44 | 1.23 | 1.27 |
| 40414 | 0 | 79012  | LDWLQD                             | 1.92 | 0.01 | 0.90 | 0.68 | 0.22 | 1.39 |
| 40415 | 0 | 79286  | LDWLWEWAEQ                         | 2.36 | 0.01 | 0.90 | 0.68 | 0.22 | 0.28 |
| 40416 | 0 | 242882 | LDYEAYNSSSNTTCV                    | 2.65 | 0.01 | 0.78 | 0.44 | 1.59 | 0.28 |
| 40417 | 0 | 181378 | LDYGQCPNNMMGTFS                    | 2.62 | 0.01 | 2.82 | 1.15 | 0.22 | 0.28 |
| 40418 | 0 | 446129 | LDYKHYC                            | 2.02 | 0.01 | 0.90 | 2.66 | 0.22 | 1.39 |
| 40419 | 0 | 35341  | LDYSPAFS                           | 2.12 | 0.01 | 3.27 | 2.02 | 0.22 | 0.28 |
| 40420 | 0 | 35341  | LDYSPAFS                           | 2.12 | 0.01 | 3.27 | 2.82 | 0.22 | 0.28 |
| 40421 | 0 | 120745 | LDYTGKIMWTPPAIFKSY<br>CE           | 2.89 | 0.01 | 2.26 | 0.68 | 0.22 | 0.85 |
| 40422 | 0 | 125475 | LDYVPLKHRHRH                       | 2.50 | 0.01 | 0.90 | 0.68 | 0.22 | 1.39 |
| 40423 | 0 | 125475 | LDYVPLKHRHRH                       | 2.50 | 0.01 | 0.90 | 0.68 | 0.22 | 1.39 |
| 40424 | 0 | 35342  | LEAACNWTRGERCD                     | 2.60 | 0.01 | 2.68 | 1.15 | 0.22 | 0.28 |
| 40425 | 0 | 35343  | LEAACNWTRGERCDLE<br>DRDR           | 2.97 | 0.01 | 2.45 | 0.68 | 0.22 | 0.28 |
| 40426 | 0 | 35343  | LEAACNWTRGERCDLE<br>DRDR           | 2.97 | 0.01 | 2.45 | 0.68 | 0.22 | 1.27 |
| 40427 | 0 | 100251 | LEAAFNAEFNEIRRVILLE<br>EN          | 2.99 | 0.01 | 2.16 | 0.44 | 2.39 | 0.28 |
| 40428 | 0 | 103344 | LEAAGDKKIGVIKVV<br>LEAEHASRMSVLRKP | 2.69 | 0.01 | 2.04 | 0.44 | 0.85 | 1.28 |
| 40429 | 0 | 132423 | MSNSQRLLLSPGSPPR<br>T              | 3.46 | 0.01 | 0.78 | 0.44 | 1.13 | 1.39 |

|       |   |        |                             |      |      |      |      |      |      |
|-------|---|--------|-----------------------------|------|------|------|------|------|------|
| 40430 | 0 | 79899  | LEAEKAALAARKADLEK<br>ALEGAM | 3.14 | 0.01 | 3.70 | 1.20 | 0.22 | 0.28 |
| 40431 | 0 | 79899  | LEAEKAALAARKADLEK<br>ALEGAM | 3.14 | 0.01 | 3.70 | 1.20 | 0.22 | 1.34 |
| 40432 | 0 | 35352  | LEAFWHKHM                   | 2.21 | 0.01 | 2.59 | 0.44 | 0.85 | 0.28 |
| 40433 | 0 | 133876 | LEAKICHQIEYYFGD             | 2.63 | 0.01 | 0.78 | 0.44 | 1.41 | 0.28 |
| 40434 | 0 | 133876 | LEAKICHQIEYYFGD             | 2.63 | 0.01 | 0.78 | 0.44 | 1.13 | 0.28 |
| 40435 | 0 | 133876 | LEAKICHQIEYYFGD             | 2.63 | 0.01 | 0.78 | 2.79 | 1.13 | 1.28 |
| 40436 | 0 | 133876 | LEAKICHQIEYYFGD             | 2.63 | 0.01 | 0.78 | 2.79 | 1.13 | 1.28 |
| 40437 | 0 | 133876 | LEAKICHQIEYYFGD             | 2.63 | 0.01 | 0.78 | 1.81 | 1.41 | 1.28 |
| 40438 | 0 | 133876 | LEAKICHQIEYYFGD             | 2.63 | 0.01 | 0.78 | 1.81 | 1.41 | 1.28 |
| 40439 | 0 | 133877 | LEAKICHQIEYYFGDFNL          | 2.81 | 0.01 | 1.75 | 2.16 | 0.22 | 0.28 |
| 40440 | 0 | 133877 | LEAKICHQIEYYFGDFNL          | 2.81 | 0.01 | 1.75 | 2.16 | 0.22 | 0.85 |
| 40441 | 0 | 133877 | LEAKICHQIEYYFGDFNL          | 2.81 | 0.01 | 1.75 | 2.16 | 0.22 | 0.85 |
| 40442 | 0 | 133877 | LEAKICHQIEYYFGDFNL          | 2.81 | 0.01 | 1.75 | 2.16 | 0.22 | 0.85 |
| 40443 | 0 | 133877 | LEAKICHQIEYYFGDFNL          | 2.81 | 0.01 | 1.75 | 2.16 | 0.22 | 0.85 |
| 40444 | 0 | 133877 | LEAKICHQIEYYFGDFNL          | 2.81 | 0.01 | 1.75 | 2.16 | 0.22 | 0.85 |
| 40445 | 0 | 133877 | LEAKICHQIEYYFGDFNL          | 2.81 | 0.01 | 1.75 | 2.16 | 0.22 | 0.28 |
| 40446 | 0 | 133877 | LEAKICHQIEYYFGDFNL          | 2.81 | 0.01 | 1.75 | 2.16 | 0.22 | 0.28 |
| 40447 | 0 | 133877 | LEAKICHQIEYYFGDFNL          | 2.81 | 0.01 | 1.75 | 2.16 | 0.22 | 0.28 |
| 40448 | 0 | 520965 | LEALADQTDALQSEE             | 2.72 | 0.01 | 2.24 | 0.44 | 1.41 | 1.28 |
| 40449 | 0 | 35356  | LEALADQTDALQSEEA<br>VVK     | 2.97 | 0.01 | 3.37 | 3.23 | 0.22 | 0.28 |
| 40450 | 0 | 35356  | LEALADQTDALQSEEA<br>VVK     | 2.97 | 0.01 | 3.37 | 3.23 | 0.22 | 0.28 |
| 40451 | 0 | 35356  | LEALADQTDALQSEEA<br>VVK     | 2.97 | 0.01 | 3.37 | 3.23 | 0.22 | 0.28 |
| 40452 | 0 | 140880 | LEALKENGGARLAEYHA<br>KATEHL | 3.12 | 0.01 | 0.78 | 0.68 | 0.22 | 0.28 |
| 40453 | 0 | 127721 | LEAMRLPKNTPEEKDRR<br>TAAL   | 3.01 | 0.01 | 0.78 | 1.20 | 0.22 | 0.85 |
| 40454 | 0 | 127721 | LEAMRLPKNTPEEKDRR<br>TAAL   | 3.01 | 0.01 | 0.78 | 0.44 | 1.13 | 0.85 |
| 40455 | 0 | 158948 | LEARKAADTFNFKTF             | 2.69 | 0.01 | 3.26 | 0.44 | 1.23 | 0.28 |
| 40456 | 0 | 158948 | LEARKAADTFNFKTF             | 2.69 | 0.01 | 3.26 | 0.44 | 1.41 | 0.28 |
| 40457 | 0 | 326794 | LEATATKNTTATTGD             | 2.70 | 0.01 | 1.61 | 0.44 | 0.85 | 1.28 |
| 40458 | 0 | 106598 | LEAYAFDIAA                  | 2.31 | 0.01 | 2.75 | 0.44 | 1.23 | 0.85 |



|       |   |        |                                                         |      |      |      |      |      |      |
|-------|---|--------|---------------------------------------------------------|------|------|------|------|------|------|
| 40459 | 0 | 35369  | LECHNQSSQTPTTGC<br>SGGE                                 | 3.00 | 0.01 | 4.23 | 1.12 | 0.22 | 1.27 |
| 40460 | 0 | 35369  | LECHNQSSQTPTTGC<br>SGGE                                 | 3.00 | 0.01 | 3.89 | 1.12 | 0.22 | 1.27 |
| 40461 | 0 | 35369  | LECHNQSSQTPTTGC<br>SGGE                                 | 3.00 | 0.01 | 4.23 | 1.12 | 0.22 | 1.27 |
| 40462 | 0 | 78440  | LECHNQSSQTPTTGC<br>SGGETNCYK                            | 3.20 | 0.01 | 3.89 | 1.12 | 0.22 | 1.27 |
| 40463 | 0 | 238690 | LECKICNFKTCPTDE                                         | 2.68 | 0.01 | 2.56 | 2.02 | 0.22 | 0.85 |
| 40464 | 0 | 238691 | LECKICNFKTCPTDELRH                                      | 2.84 | 0.01 | 2.56 | 2.02 | 0.22 | 0.85 |
| 40465 | 0 | 238691 | LECKICNFKTCPTDELRH                                      | 2.84 | 0.01 | 2.56 | 1.20 | 0.22 | 0.85 |
| 40466 | 0 | 238691 | LECKICNFKTCPTDELRH                                      | 2.84 | 0.01 | 2.56 | 1.20 | 0.22 | 0.28 |
| 40467 | 0 | 35375  | LEDARRLKAIYEKKK                                         | 2.69 | 0.01 | 2.24 | 0.68 | 0.22 | 1.75 |
| 40468 | 0 | 35375  | LEDARRLKAIYEKKK                                         | 2.69 | 0.01 | 2.24 | 0.68 | 0.22 | 0.28 |
| 40469 | 0 | 35375  | LEDARRLKAIYEKKK                                         | 2.69 | 0.01 | 2.24 | 1.15 | 0.22 | 1.27 |
| 40470 | 0 | 35375  | LEDARRLKAIYEKKK                                         | 2.69 | 0.01 | 2.24 | 3.03 | 1.41 | 0.28 |
| 40471 | 0 | 35375  | LEDARRLKAIYEKKK                                         | 2.69 | 0.01 | 2.24 | 3.03 | 2.25 | 1.75 |
| 40472 | 0 | 35375  | LEDARRLKAIYEKKK                                         | 2.69 | 0.01 | 2.24 | 3.03 | 2.25 | 1.75 |
| 40473 | 0 | 35375  | LEDARRLKAIYEKKK                                         | 2.69 | 0.01 | 2.24 | 3.03 | 0.22 | 0.28 |
| 40474 | 0 | 35375  | LEDARRLKAIYEKKK                                         | 2.69 | 0.01 | 2.24 | 1.12 | 0.22 | 0.85 |
| 40475 | 0 | 35375  | LEDARRLKAIYEKKK                                         | 2.69 | 0.01 | 2.24 | 0.68 | 0.22 | 0.28 |
| 40476 | 0 | 35380  | LEDELLAEKEYKAISDEL<br>DQTFAGELAGY                       | 3.33 | 0.01 | 4.63 | 0.44 | 1.23 | 1.27 |
| 40477 | 0 | 116766 | LEDELVNEKEYKSI                                          | 2.71 | 0.01 | 2.36 | 0.44 | 1.23 | 1.28 |
| 40478 | 0 | 116766 | LEDELVNEKEYKSI                                          | 2.71 | 0.01 | 2.36 | 0.44 | 1.23 | 1.27 |
| 40479 | 0 | 116766 | LEDELVNEKEYKSI                                          | 2.71 | 0.01 | 2.36 | 0.44 | 1.23 | 1.28 |
| 40480 | 0 | 123420 | LEDFPKLKE                                               | 2.26 | 0.01 | 2.28 | 2.00 | 0.22 | 0.28 |
| 40481 | 0 | 132856 | LEDGRTLSDYNIQKES                                        | 2.72 | 0.01 | 0.78 | 0.68 | 0.22 | 1.57 |
| 40482 | 0 | 132856 | LEDGRTLSDYNIQKES                                        | 2.72 | 0.01 | 0.78 | 0.68 | 0.22 | 1.48 |
| 40483 | 0 | 132856 | LEDGRTLSDYNIQKES                                        | 2.72 | 0.01 | 0.78 | 0.68 | 0.22 | 1.57 |
| 40484 | 0 | 79900  | LEDGTVIPTDGRIVTEDC<br>FLQIDQSAITGESLAVDK<br>HYGDQTFSSST | 3.79 | 0.01 | 3.45 | 1.12 | 0.22 | 0.85 |
| 40485 | 0 | 35392  | LEDKVKQARRDLASRE<br>AKKELQDKVKQ                         | 3.33 | 0.01 | 0.90 | 2.42 | 0.22 | 0.28 |
| 40486 | 0 | 35392  | LEDKVKQARRDLASRE<br>AKKELQDKVKQ                         | 3.33 | 0.01 | 0.90 | 0.68 | 0.22 | 0.28 |
| 40487 | 0 | 35397  | LEDPASRDLV                                              | 2.32 | 0.01 | 2.71 | 0.44 | 1.59 | 0.28 |
| 40488 | 0 | 120020 | LEDPASRDLVVN                                            | 2.47 | 4.63 | 2.08 | 0.68 | 0.22 | 0.28 |
| 40489 | 0 | 120020 | LEDPASRDLVVN                                            | 2.47 | 4.63 | 2.08 | 0.68 | 0.22 | 1.27 |
| 40490 | 0 | 35398  | LEDPASRDLVVS                                            | 2.55 | 0.01 | 2.08 | 0.44 | 0.85 | 0.28 |
| 40491 | 0 | 35399  | LEDPCVK                                                 | 1.99 | 0.01 | 2.45 | 0.44 | 0.85 | 1.34 |
| 40492 | 0 | 35399  | LEDPCVK                                                 | 1.99 | 0.01 | 2.45 | 0.44 | 0.85 | 1.34 |
| 40493 | 0 | 35401  | LEDPISRDL                                               | 2.24 | 0.01 | 2.08 | 1.15 | 0.22 | 1.57 |

|       |   |        |                                                     |      |      |      |      |      |      |
|-------|---|--------|-----------------------------------------------------|------|------|------|------|------|------|
| 40494 | 0 | 35401  | LEDPISRDL                                           | 2.24 | 0.01 | 2.08 | 1.15 | 0.22 | 1.27 |
| 40495 | 0 | 35402  | LEDVPG                                              | 1.88 | 0.01 | 2.40 | 0.68 | 0.22 | 0.28 |
| 40496 | 0 | 35402  | LEDVPG                                              | 1.88 | 0.01 | 2.40 | 0.68 | 2.25 | 1.75 |
| 40497 | 0 | 35402  | LEDVPG                                              | 1.88 | 0.01 | 2.40 | 1.81 | 0.22 | 0.28 |
| 40498 | 0 | 35402  | LEDVPG                                              | 1.88 | 0.01 | 2.40 | 1.81 | 2.25 | 1.75 |
| 40499 | 0 | 35409  | LEDRDRSELSPLLLSTTE<br>WQ                            | 2.97 | 0.01 | 1.96 | 0.68 | 0.22 | 1.34 |
| 40500 | 0 | 35409  | LEDRDRSELSPLLLSTTE<br>WQ                            | 2.97 | 0.01 | 1.96 | 0.68 | 0.22 | 1.34 |
| 40501 | 0 | 35409  | LEDRDRSELSPLLLSTTE<br>WQ                            | 2.97 | 0.01 | 1.96 | 0.68 | 0.22 | 1.34 |
| 40502 | 0 | 35409  | LEDRDRSELSPLLLSTTE<br>WQ                            | 2.97 | 0.01 | 1.96 | 0.68 | 0.22 | 0.28 |
| 40503 | 0 | 35413  | LEDRSTQASLEEAILR                                    | 2.76 | 0.01 | 3.85 | 0.68 | 0.22 | 0.85 |
| 40504 | 0 | 35413  | LEDRSTQASLEEAILR                                    | 2.76 | 0.01 | 3.85 | 0.68 | 0.22 | 0.28 |
| 40505 | 0 | 35413  | LEDRSTQASLEEAILR                                    | 2.76 | 0.01 | 3.85 | 0.68 | 0.22 | 0.85 |
| 40506 | 0 | 35413  | LEDRSTQASLEEAILR                                    | 2.76 | 0.01 | 3.85 | 0.68 | 0.22 | 0.28 |
| 40507 | 0 | 35418  | LEDTMDYPARAHTFDDF<br>CPECRPLGLQGCA                  | 3.34 | 0.01 | 2.70 | 0.44 | 0.85 | 0.28 |
| 40508 | 0 | 35418  | LEDTMDYPARAHTFDDF<br>CPECRPLGLQGCA                  | 3.34 | 0.01 | 2.70 | 0.44 | 0.85 | 0.28 |
| 40509 | 0 | 35419  | LEDTV                                               | 1.90 | 0.01 | 1.96 | 0.44 | 0.85 | 0.28 |
| 40510 | 0 | 35420  | LEDVRN                                              | 1.88 | 0.01 | 4.08 | 1.15 | 0.22 | 0.85 |
| 40511 | 0 | 35420  | LEDVRN                                              | 1.88 | 0.01 | 4.08 | 1.15 | 0.22 | 0.85 |
| 40512 | 0 | 35420  | LEDVRN                                              | 1.88 | 0.01 | 4.08 | 1.15 | 0.22 | 0.85 |
| 40513 | 0 | 35420  | LEDVRN                                              | 1.88 | 0.01 | 4.08 | 1.15 | 0.22 | 0.85 |
| 40514 | 0 | 35420  | LEDVRN                                              | 1.88 | 0.01 | 4.08 | 1.15 | 0.22 | 0.85 |
| 40515 | 0 | 35420  | LEDVRN                                              | 1.88 | 0.01 | 4.08 | 1.15 | 0.22 | 0.85 |
| 40516 | 0 | 35420  | LEDVRN                                              | 1.88 | 0.01 | 4.08 | 1.15 | 0.22 | 0.28 |
| 40517 | 0 | 35423  | LEEAEGTSNLKKGLEFYK<br>SSLKLDQLDKEKPKKKKS<br>KRKKKRD | 3.71 | 0.01 | 1.66 | 1.15 | 0.22 | 0.28 |
| 40518 | 0 | 35423  | LEEAEGTSNLKKGLEFYK<br>SSLKLDQLDKEKPKKKKS<br>KRKKKRD | 3.71 | 0.01 | 1.66 | 1.15 | 0.22 | 0.28 |
| 40519 | 0 | 35423  | LEEAEGTSNLKKGLEFYK<br>SSLKLDQLDKEKPKKKKS<br>KRKKKRD | 3.71 | 0.01 | 1.66 | 0.68 | 0.22 | 0.85 |
| 40520 | 0 | 134131 | LEEAKTQGPYDVVVL                                     | 2.64 | 0.01 | 2.19 | 1.15 | 0.22 | 0.28 |
| 40521 | 0 | 326877 | LEEEEDVGPRHVDPD                                     | 2.69 | 0.01 | 1.61 | 0.44 | 0.85 | 1.28 |
| 40522 | 0 | 35432  | LEEELLTAQEA                                         | 2.45 | 0.01 | 3.78 | 1.81 | 0.22 | 0.85 |
| 40523 | 0 | 35433  | LEEELRVVGNNLKS                                      | 2.69 | 0.01 | 3.15 | 0.44 | 1.23 | 0.85 |
| 40524 | 0 | 35433  | LEEELRVVGNNLKS                                      | 2.69 | 0.01 | 2.36 | 0.44 | 1.23 | 1.28 |
| 40525 | 0 | 35433  | LEEELRVVGNNLKS                                      | 2.69 | 0.01 | 2.36 | 0.44 | 1.23 | 1.27 |
| 40526 | 0 | 35433  | LEEELRVVGNNLKS                                      | 2.69 | 0.01 | 2.36 | 0.44 | 1.23 | 1.28 |
| 40527 | 0 | 35438  | LEEIIKNLDILDEQIMTYH<br>NSIDEL                       | 3.18 | 0.01 | 1.66 | 0.44 | 1.74 | 0.28 |

|       |   |        |                                                          |      |      |      |      |      |      |
|-------|---|--------|----------------------------------------------------------|------|------|------|------|------|------|
| 40528 | 0 | 35438  | LEEIIKNLDILDEQIMTYH<br>NSIDEL                            | 3.18 | 0.01 | 1.66 | 0.44 | 1.74 | 0.28 |
| 40529 | 0 | 172042 | LEEIRIVAKERDELR                                          | 2.72 | 0.01 | 0.78 | 0.44 | 1.41 | 0.28 |
| 40530 | 0 | 99413  | LEEKMYACRDIGTTK                                          | 2.62 | 0.01 | 2.86 | 2.02 | 0.85 | 0.85 |
| 40531 | 0 | 520990 | LEEKQAANQTAINTI                                          | 2.70 | 0.01 | 2.24 | 0.44 | 1.41 | 1.28 |
| 40532 | 0 | 100253 | LEELKDQRML                                               | 2.33 | 0.01 | 2.18 | 2.16 | 0.22 | 0.28 |
| 40533 | 0 | 100253 | LEELKDQRML                                               | 2.33 | 0.01 | 2.18 | 2.16 | 0.22 | 0.28 |
| 40534 | 0 | 115842 | LEELNVPGEI                                               | 2.34 | 0.01 | 1.60 | 0.44 | 1.23 | 0.85 |
| 40535 | 0 | 115842 | LEELNVPGEI                                               | 2.34 | 0.01 | 1.60 | 0.44 | 1.23 | 0.85 |
| 40536 | 0 | 172044 | LEEMKSVMKERDNLR                                          | 2.70 | 0.01 | 0.78 | 0.44 | 1.41 | 0.28 |
| 40537 | 0 | 172044 | LEEMKSVMKERDNLR                                          | 2.70 | 0.01 | 0.78 | 0.44 | 1.13 | 0.28 |
| 40538 | 0 | 98867  | LEENAGGEQEERGQR                                          | 2.72 | 0.01 | 2.16 | 0.44 | 1.23 | 0.85 |
| 40539 | 0 | 98867  | LEENAGGEQEERGQR                                          | 2.72 | 0.01 | 2.16 | 0.44 | 1.23 | 1.48 |
| 40540 | 0 | 326956 | LEEQEDVGPRHVDPD                                          | 2.70 | 0.01 | 1.61 | 0.44 | 0.85 | 1.28 |
| 40541 | 0 | 35453  | LEESQVNDDIFNSLVKSV<br>QQEQQHNV                           | 3.22 | 0.01 | 1.66 | 0.44 | 0.85 | 1.48 |
| 40542 | 0 | 35453  | LEESQVNDDIFNSLVKSV<br>QQEQQHNV                           | 3.22 | 0.01 | 1.66 | 0.44 | 0.85 | 0.28 |
| 40543 | 0 | 35453  | LEESQVNDDIFNSLVKSV<br>QQEQQHNV                           | 3.22 | 0.01 | 1.66 | 0.44 | 0.85 | 1.48 |
| 40544 | 0 | 35453  | LEESQVNDDIFNSLVKSV<br>QQEQQHNV                           | 3.22 | 0.01 | 1.66 | 2.74 | 0.22 | 1.48 |
| 40545 | 0 | 35453  | LEESQVNDDIFNSLVKSV<br>QQEQQHNV                           | 3.22 | 0.01 | 1.66 | 2.74 | 0.22 | 1.48 |
| 40546 | 0 | 35453  | LEESQVNDDIFNSLVKSV<br>QQEQQHNV                           | 3.22 | 0.01 | 1.66 | 2.74 | 0.22 | 0.28 |
| 40547 | 0 | 35453  | LEESQVNDDIFNSLVKSV<br>QQEQQHNV                           | 3.22 | 0.01 | 1.66 | 3.67 | 0.22 | 0.28 |
| 40548 | 0 | 35453  | LEESQVNDDIFNSLVKSV<br>QQEQQHNV                           | 3.22 | 0.01 | 4.03 | 1.81 | 0.22 | 0.28 |
| 40549 | 0 | 35453  | LEESQVNDDIFNSLVKSV<br>QQEQQHNV                           | 3.22 | 0.01 | 4.03 | 2.74 | 0.22 | 0.28 |
| 40550 | 0 | 35453  | LEESQVNDDIFNSLVKSV<br>QQEQQHNV                           | 3.22 | 0.01 | 4.03 | 2.74 | 0.22 | 1.48 |
| 40551 | 0 | 35453  | LEESQVNDDIFNSLVKSV<br>QQEQQHNV                           | 3.22 | 0.01 | 4.03 | 2.82 | 0.22 | 1.48 |
| 40552 | 0 | 106599 | LEFRHSL                                                  | 2.03 | 0.01 | 0.90 | 3.00 | 1.93 | 0.28 |
| 40553 | 0 | 35473  | LEGAAR                                                   | 1.89 | 0.01 | 2.24 | 0.68 | 0.22 | 0.28 |
| 40554 | 0 | 35473  | LEGAAR                                                   | 1.89 | 0.01 | 2.24 | 0.68 | 0.22 | 0.85 |
| 40555 | 0 | 35474  | LEGAARQ                                                  | 2.01 | 0.01 | 2.24 | 0.68 | 0.22 | 0.28 |
| 40556 | 0 | 35474  | LEGAARQ                                                  | 2.01 | 0.01 | 2.24 | 0.68 | 0.22 | 0.28 |
| 40557 | 0 | 227925 | LEGEVNIKISALLSTNKA<br>VVSLSNGVSVLTSKVLDL<br>KNYIDKQLLPIV | 3.83 | 0.01 | 2.38 | 1.20 | 0.22 | 0.28 |
| 40558 | 0 | 35484  | LEGGSRGAPGGGFVPNL<br>Q                                   | 2.84 | 0.01 | 2.96 | 0.44 | 0.85 | 1.27 |

|       |   |        |                                   |      |      |      |      |      |      |
|-------|---|--------|-----------------------------------|------|------|------|------|------|------|
| 40559 | 0 | 35484  | LEGGSRGAPGGGFVPNL<br>Q            | 2.84 | 0.01 | 2.96 | 0.44 | 0.85 | 0.28 |
| 40560 | 0 | 35484  | LEGGSRGAPGGGFVPNL<br>Q            | 2.84 | 0.01 | 2.96 | 0.44 | 0.85 | 0.28 |
| 40561 | 0 | 35484  | LEGGSRGAPGGGFVPNL<br>Q            | 2.84 | 0.01 | 2.96 | 0.44 | 0.85 | 1.66 |
| 40562 | 0 | 35488  | LEGKPALVPDKEVLYQQ<br>YDE          | 2.97 | 0.01 | 1.96 | 0.44 | 0.85 | 0.28 |
| 40563 | 0 | 172049 | LEGQDPSGLQLGLTE                   | 2.72 | 0.01 | 0.78 | 0.44 | 1.41 | 0.28 |
| 40564 | 0 | 35495  | LEGTTPNG                          | 2.24 | 0.01 | 4.45 | 0.44 | 1.59 | 0.28 |
| 40565 | 0 | 35495  | LEGTTPNG                          | 2.24 | 0.01 | 4.45 | 0.44 | 1.59 | 0.85 |
| 40566 | 0 | 141697 | LEGVYVPPRRQQLCLY                  | 2.75 | 0.01 | 1.66 | 2.55 | 0.22 | 0.28 |
| 40567 | 0 | 141697 | LEGVYVPPRRQQLCLY                  | 2.75 | 0.01 | 1.66 | 1.20 | 0.22 | 0.28 |
| 40568 | 0 | 141697 | LEGVYVPPRRQQLCLY                  | 2.75 | 0.01 | 2.86 | 2.55 | 0.22 | 0.28 |
| 40569 | 0 | 106600 | LEGWGGHWRG                        | 2.35 | 0.01 | 2.75 | 0.44 | 1.23 | 0.85 |
| 40570 | 0 | 35509  | LEHRMQEAVEAERAGR<br>GTGHFI        | 3.05 | 0.01 | 2.14 | 0.44 | 0.22 | 0.28 |
| 40571 | 0 | 35509  | LEHRMQEAVEAERAGR<br>GTGHFI        | 3.05 | 0.01 | 2.14 | 0.44 | 0.22 | 0.28 |
| 40572 | 0 | 35509  | LEHRMQEAVEAERAGR<br>GTGHFI        | 3.05 | 0.01 | 2.14 | 3.00 | 0.22 | 0.28 |
| 40573 | 0 | 118487 | LEIANAHRKPLVI                     | 2.54 | 0.01 | 0.78 | 0.44 | 1.74 | 0.85 |
| 40574 | 0 | 118487 | LEIANAHRKPLVI                     | 2.54 | 0.01 | 0.78 | 0.44 | 1.59 | 0.85 |
| 40575 | 0 | 118487 | LEIANAHRKPLVI                     | 2.54 | 0.01 | 0.78 | 0.44 | 1.74 | 0.85 |
| 40576 | 0 | 118487 | LEIANAHRKPLVI                     | 2.54 | 0.01 | 0.78 | 1.20 | 0.22 | 0.85 |
| 40577 | 0 | 118487 | LEIANAHRKPLVI                     | 2.54 | 0.01 | 0.78 | 1.20 | 0.22 | 0.85 |
| 40578 | 0 | 118487 | LEIANAHRKPLVI                     | 2.54 | 0.01 | 0.78 | 1.20 | 0.22 | 0.85 |
| 40579 | 0 | 118487 | LEIANAHRKPLVI                     | 2.54 | 0.01 | 0.78 | 1.20 | 0.22 | 0.85 |
| 40580 | 0 | 118487 | LEIANAHRKPLVI                     | 2.54 | 0.01 | 0.78 | 1.20 | 0.22 | 1.48 |
| 40581 | 0 | 158949 | LEIGWKAWGKSILFAP                  | 2.75 | 0.01 | 3.04 | 0.68 | 0.22 | 0.85 |
| 40582 | 0 | 158949 | LEIGWKAWGKSILFAP                  | 2.75 | 0.01 | 3.04 | 0.68 | 0.22 | 0.85 |
| 40583 | 0 | 114450 | LEIEEFFKNKSGLK                    | 2.70 | 0.01 | 2.58 | 0.44 | 1.41 | 1.57 |
| 40584 | 0 | 496700 | LEIEGMKFDRGYISPYFI<br>NTSKGQKCEFQ | 3.32 | 0.01 | 0.78 | 0.44 | 1.93 | 2.12 |
| 40585 | 0 | 97437  | LEIQGEGQF                         | 2.25 | 0.01 | 3.13 | 1.12 | 0.22 | 0.28 |
| 40586 | 0 | 35528  | LEIVPNSAE                         | 2.21 | 0.01 | 1.60 | 0.44 | 1.23 | 0.85 |
| 40587 | 0 | 35528  | LEIVPNSAE                         | 2.21 | 0.01 | 1.60 | 0.44 | 1.23 | 0.85 |
| 40588 | 0 | 35529  | LEIVPNSAEE                        | 2.29 | 0.01 | 1.60 | 0.44 | 1.23 | 0.28 |
| 40589 | 0 | 35529  | LEIVPNSAEE                        | 2.29 | 0.01 | 1.60 | 0.44 | 1.23 | 0.28 |
| 40590 | 0 | 35530  | LEIVPNSAEERL                      | 2.47 | 0.01 | 1.60 | 0.44 | 1.23 | 0.28 |
| 40591 | 0 | 35530  | LEIVPNSAEERL                      | 2.47 | 0.01 | 1.60 | 0.44 | 1.23 | 0.85 |
| 40592 | 0 | 115343 | LEIVPNSAEERLHSMKEG<br>IH          | 2.93 | 0.01 | 1.60 | 0.44 | 1.23 | 1.28 |
| 40593 | 0 | 172051 | LEIYNEELFDLLNPS                   | 2.69 | 0.01 | 0.78 | 0.44 | 1.41 | 0.28 |
| 40594 | 0 | 172051 | LEIYNEELFDLLNPS                   | 2.69 | 0.01 | 0.78 | 0.44 | 1.13 | 0.28 |

|       |   |        |                                                  |      |      |      |      |      |      |
|-------|---|--------|--------------------------------------------------|------|------|------|------|------|------|
| 40595 | 0 | 167312 | LEKDEREQLRILGEKEAK<br>LAQQSQALQELISELD           | 3.52 | 0.01 | 0.78 | 0.68 | 0.22 | 0.28 |
| 40596 | 0 | 167312 | LEKDEREQLRILGEKEAK<br>LAQQSQALQELISELD           | 3.52 | 0.01 | 0.78 | 0.68 | 0.22 | 1.75 |
| 40597 | 0 | 167312 | LEKDEREQLRILGEKEAK<br>LAQQSQALQELISELD           | 3.52 | 0.01 | 0.78 | 0.68 | 0.22 | 0.28 |
| 40598 | 0 | 167312 | LEKDEREQLRILGEKEAK<br>LAQQSQALQELISELD           | 3.52 | 0.01 | 0.78 | 0.68 | 0.22 | 1.34 |
| 40599 | 0 | 117977 | LEKDEREQLRILGEKEAK<br>LAQQSQALQELISELDRR<br>CHSS | 3.65 | 0.01 | 0.78 | 3.18 | 0.22 | 0.28 |
| 40600 | 0 | 117977 | LEKDEREQLRILGEKEAK<br>LAQQSQALQELISELDRR<br>CHSS | 3.65 | 0.01 | 0.78 | 3.18 | 0.22 | 0.28 |
| 40601 | 0 | 117977 | LEKDEREQLRILGEKEAK<br>LAQQSQALQELISELDRR<br>CHSS | 3.65 | 0.01 | 0.78 | 0.44 | 1.13 | 0.28 |
| 40602 | 0 | 117977 | LEKDEREQLRILGEKEAK<br>LAQQSQALQELISELDRR<br>CHSS | 3.65 | 0.01 | 0.78 | 0.44 | 1.93 | 0.28 |
| 40603 | 0 | 117977 | LEKDEREQLRILGEKEAK<br>LAQQSQALQELISELDRR<br>CHSS | 3.65 | 0.01 | 0.78 | 0.44 | 1.13 | 1.48 |
| 40604 | 0 | 117977 | LEKDEREQLRILGEKEAK<br>LAQQSQALQELISELDRR<br>CHSS | 3.65 | 0.01 | 0.78 | 0.44 | 1.13 | 0.28 |
| 40605 | 0 | 117977 | LEKDEREQLRILGEKEAK<br>LAQQSQALQELISELDRR<br>CHSS | 3.65 | 0.01 | 0.78 | 0.44 | 1.13 | 0.28 |
| 40606 | 0 | 117977 | LEKDEREQLRILGEKEAK<br>LAQQSQALQELISELDRR<br>CHSS | 3.65 | 0.01 | 0.78 | 0.44 | 1.13 | 0.28 |
| 40607 | 0 | 117977 | LEKDEREQLRILGEKEAK<br>LAQQSQALQELISELDRR<br>CHSS | 3.65 | 0.01 | 0.78 | 3.18 | 0.22 | 1.48 |
| 40608 | 0 | 117977 | LEKDEREQLRILGEKEAK<br>LAQQSQALQELISELDRR<br>CHSS | 3.65 | 0.01 | 0.78 | 3.18 | 2.60 | 1.75 |
| 40609 | 0 | 117977 | LEKDEREQLRILGEKEAK<br>LAQQSQALQELISELDRR<br>CHSS | 3.65 | 0.01 | 0.78 | 0.68 | 0.22 | 0.28 |

|       |   |        |                            |      |      |      |      |      |      |
|-------|---|--------|----------------------------|------|------|------|------|------|------|
|       |   |        | LEKDEREQLRILGEKEAK         |      |      |      |      |      |      |
| 40610 | 0 | 117977 | LAQQSQALQELISELDRR<br>CHSS | 3.65 | 0.01 | 0.78 | 0.68 | 0.22 | 2.02 |
|       |   |        | LEKDEREQLRILGEKEAK         |      |      |      |      |      |      |
| 40611 | 0 | 117977 | LAQQSQALQELISELDRR<br>CHSS | 3.65 | 0.01 | 0.78 | 0.68 | 0.22 | 0.85 |
|       |   |        | LEKDEREQLRILGEKEAK         |      |      |      |      |      |      |
| 40612 | 0 | 117977 | LAQQSQALQELISELDRR<br>CHSS | 3.65 | 0.01 | 0.78 | 0.68 | 0.22 | 1.48 |
|       |   |        | LEKDEREQLRILGEKEAK         |      |      |      |      |      |      |
| 40613 | 0 | 117977 | LAQQSQALQELISELDRR<br>CHSS | 3.65 | 0.01 | 0.78 | 0.44 | 1.13 | 0.28 |
|       |   |        | LEKDEREQLRILGEKEAK         |      |      |      |      |      |      |
| 40614 | 0 | 117977 | LAQQSQALQELISELDRR<br>CHSS | 3.65 | 0.01 | 0.78 | 0.44 | 1.13 | 0.28 |
|       |   |        | LEKDEREQLRILGEKEAK         |      |      |      |      |      |      |
| 40615 | 0 | 117977 | LAQQSQALQELISELDRR<br>CHSS | 3.65 | 0.01 | 0.78 | 0.44 | 1.13 | 0.28 |
|       |   |        | LEKDEREQLRILGEKEAK         |      |      |      |      |      |      |
| 40616 | 0 | 117977 | LAQQSQALQELISELDRR<br>CHSS | 3.65 | 0.01 | 0.78 | 0.44 | 1.13 | 0.28 |
|       |   |        | LEKDEREQLRILGEKEAK         |      |      |      |      |      |      |
| 40617 | 0 | 117977 | LAQQSQALQELISELDRR<br>CHSS | 3.65 | 0.01 | 0.78 | 0.44 | 1.13 | 0.28 |
|       |   |        | LEKDEREQLRILGEKEAK         |      |      |      |      |      |      |
| 40618 | 0 | 117977 | LAQQSQALQELISELDRR<br>CHSS | 3.65 | 0.01 | 0.78 | 0.44 | 1.13 | 0.28 |
|       |   |        | LEKDEREQLRILGEKEAK         |      |      |      |      |      |      |
| 40619 | 0 | 117977 | LAQQSQALQELISELDRR<br>CHSS | 3.65 | 0.01 | 0.78 | 0.44 | 1.41 | 0.28 |
|       |   |        | LEKDKQQLKDDIGFLTGE<br>RE   | 2.97 | 0.01 | 3.50 | 2.13 | 0.22 | 0.28 |
| 40620 | 0 | 190835 |                            |      |      |      |      |      |      |
| 40621 | 0 | 35534  | LEKDNAMDRADTLEQ            | 2.69 | 0.01 | 3.15 | 0.44 | 1.23 | 0.85 |
| 40622 | 0 | 35534  | LEKDNAMDRADTLEQ            | 2.69 | 0.01 | 3.15 | 0.44 | 1.23 | 0.85 |
| 40623 | 0 | 35534  | LEKDNAMDRADTLEQ            | 2.69 | 0.01 | 2.36 | 0.44 | 1.23 | 1.28 |
| 40624 | 0 | 35534  | LEKDNAMDRADTLEQ            | 2.69 | 0.01 | 2.36 | 0.44 | 1.23 | 1.27 |
| 40625 | 0 | 35534  | LEKDNAMDRADTLEQ            | 2.69 | 0.01 | 2.36 | 0.44 | 1.23 | 1.28 |
| 40626 | 0 | 95547  | LEKFDK                     | 1.90 | 0.01 | 1.60 | 0.44 | 1.23 | 0.28 |
| 40627 | 0 | 98869  | LEKFDKALKA                 | 2.36 | 0.01 | 1.60 | 0.44 | 1.23 | 0.85 |
| 40628 | 0 | 98869  | LEKFDKALKA                 | 2.36 | 0.01 | 1.60 | 0.44 | 1.23 | 0.85 |
| 40629 | 0 | 98869  | LEKFDKALKA                 | 2.36 | 0.01 | 1.60 | 0.44 | 2.98 | 0.85 |
|       |   |        | LEKFDKALKALPMHIRLS<br>FN   | 2.94 | 0.01 | 1.60 | 0.44 | 1.23 | 1.28 |
| 40630 | 0 | 115344 |                            |      |      |      |      |      |      |
| 40631 | 0 | 35545  | LEKGNPEM                   | 2.12 | 0.01 | 2.21 | 0.44 | 0.85 | 0.28 |
| 40632 | 0 | 35547  | LEKGTPW                    | 1.99 | 0.01 | 0.90 | 0.44 | 1.23 | 1.27 |
| 40633 | 0 | 35547  | LEKGTPW                    | 1.99 | 0.01 | 0.90 | 0.44 | 1.23 | 1.27 |
| 40634 | 0 | 35547  | LEKGTPW                    | 1.99 | 0.01 | 0.90 | 0.44 | 1.23 | 1.27 |

|                    |   |        |                                        |      |      |      |      |      |      |
|--------------------|---|--------|----------------------------------------|------|------|------|------|------|------|
| 40635              | 0 | 35547  | LEKGPW                                 | 1.99 | 0.01 | 0.90 | 0.44 | 1.23 | 1.27 |
| 40636              | 0 | 35547  | LEKGPW                                 | 1.99 | 0.01 | 0.90 | 0.44 | 1.23 | 0.28 |
| 40637              | 0 | 141943 | LEKKETLGCDSESCV                        | 2.70 | 0.01 | 3.13 | 0.68 | 0.22 | 0.28 |
| 40638              | 0 | 35557  | LEKNFKGLTH                             | 2.32 | 0.01 | 3.18 | 2.74 | 0.22 | 0.28 |
| 40639              | 0 | 172053 | LEKQEELKIVHMLK                         | 2.71 | 0.01 | 0.78 | 0.44 | 1.13 | 0.28 |
| LEKWRDLAYEQIEIERDN |   |        |                                        |      |      |      |      |      |      |
| 40640              | 0 | 35574  | ERCLTHNTDPIYQLIKKM<br>RYGMMYPVHYML     | 3.80 | 0.01 | 3.53 | 1.15 | 0.22 | 1.39 |
| LEKWRDLAYEQIEIERDN |   |        |                                        |      |      |      |      |      |      |
| 40641              | 0 | 35574  | ERCLTHNTDPIYQLIKKM<br>RYGMMYPVHYML     | 3.80 | 0.01 | 3.53 | 3.08 | 0.22 | 0.28 |
| 40642              | 0 | 158950 | LELDKWAS                               | 2.13 | 0.01 | 3.44 | 0.44 | 0.85 | 2.49 |
| 40643              | 0 | 158950 | LELDKWAS                               | 2.13 | 0.01 | 3.44 | 0.44 | 0.85 | 2.49 |
| 40644              | 0 | 158950 | LELDKWAS                               | 2.13 | 0.01 | 3.44 | 0.44 | 0.85 | 2.49 |
| 40645              | 0 | 158950 | LELDKWAS                               | 2.13 | 0.01 | 3.44 | 0.44 | 0.85 | 2.49 |
| 40646              | 0 | 158950 | LELDKWAS                               | 2.13 | 0.01 | 3.44 | 0.44 | 0.85 | 2.49 |
| 40647              | 0 | 158950 | LELDKWAS                               | 2.13 | 0.01 | 3.44 | 0.44 | 0.85 | 2.49 |
| 40648              | 0 | 158950 | LELDKWAS                               | 2.13 | 0.01 | 3.44 | 0.44 | 0.85 | 2.49 |
| 40649              | 0 | 146417 | LELDKWASL                              | 2.24 | 0.01 | 2.54 | 0.44 | 0.85 | 2.49 |
| 40650              | 0 | 146417 | LELDKWASL                              | 2.24 | 0.01 | 2.54 | 0.44 | 0.85 | 2.49 |
| 40651              | 0 | 79903  | LELIRMVECSGK                           | 2.46 | 0.01 | 2.14 | 3.26 | 0.22 | 0.28 |
| 40652              | 0 | 79903  | LELIRMVECSGK                           | 2.46 | 0.01 | 2.14 | 3.55 | 0.22 | 0.28 |
| 40653              | 0 | 172054 | LELKEKMKELATTYK                        | 2.73 | 0.01 | 0.78 | 0.44 | 1.41 | 0.28 |
| 40654              | 0 | 238693 | LELLQEVIIVLERSESWN                     | 2.88 | 0.01 | 0.78 | 0.44 | 1.13 | 0.28 |
| 40655              | 0 | 238693 | LELLQEVIIVLERSESWN                     | 2.88 | 0.01 | 0.78 | 0.44 | 1.13 | 0.28 |
| 40656              | 0 | 327183 | LELMLRESDGECAPF                        | 2.67 | 0.01 | 1.61 | 0.44 | 0.85 | 1.28 |
| 40657              | 0 | 78719  | LELSGFHQLTDKLAVHYS<br>YKYTHWSRLTKLHASF | 3.47 | 0.01 | 2.98 | 2.16 | 0.22 | 0.28 |
| 40658              | 0 | 78719  | LELSGFHQLTDKLAVHYS<br>YKYTHWSRLTKLHASF | 3.47 | 0.01 | 2.98 | 0.44 | 0.85 | 0.28 |
| 40659              | 0 | 78719  | LELSGFHQLTDKLAVHYS<br>YKYTHWSRLTKLHASF | 3.47 | 0.01 | 2.98 | 1.12 | 0.22 | 0.28 |
| 40660              | 0 | 120749 | LELYAPDMFE                             | 2.32 | 0.01 | 2.18 | 2.16 | 0.22 | 0.28 |
| 40661              | 0 | 120749 | LELYAPDMFE                             | 2.32 | 0.01 | 2.18 | 2.16 | 0.22 | 0.28 |
| 40662              | 0 | 190836 | LEMMGNTYRVERPTGN<br>PDLL               | 2.94 | 0.01 | 3.50 | 2.13 | 0.22 | 0.28 |
| 40663              | 0 | 423714 | LEMTVDLPWSHN                           | 2.44 | 0.01 | 0.90 | 0.68 | 0.22 | 1.39 |
| 40664              | 0 | 35611  | LEN                                    | 1.37 | 0.01 | 3.89 | 0.68 | 0.22 | 0.28 |
| 40665              | 0 | 35611  | LEN                                    | 1.37 | 0.01 | 3.89 | 0.68 | 0.22 | 1.34 |
| 40666              | 0 | 105282 | LENDP                                  | 1.74 | 0.01 | 3.89 | 1.20 | 0.22 | 0.28 |

|       |   |        |                          |      |      |      |      |      |      |
|-------|---|--------|--------------------------|------|------|------|------|------|------|
| 40667 | 0 | 141698 | LENGRSLEGVYVPPRR         | 2.74 | 0.01 | 1.66 | 2.55 | 0.22 | 0.28 |
| 40668 | 0 | 141698 | LENGRSLEGVYVPPRR         | 2.74 | 0.01 | 1.66 | 1.20 | 0.22 | 0.28 |
| 40669 | 0 | 141698 | LENGRSLEGVYVPPRR         | 2.74 | 0.01 | 2.86 | 2.55 | 0.22 | 0.28 |
| 40670 | 0 | 152758 | LENIPSENQY               | 2.31 | 0.01 | 2.18 | 2.16 | 0.22 | 0.28 |
| 40671 | 0 | 35622  | LENIPSENQYFQ             | 2.48 | 0.01 | 2.18 | 0.68 | 0.22 | 0.28 |
| 40672 | 0 | 35630  | LENNLIEIFKKIHENL         | 2.79 | 0.01 | 1.66 | 0.44 | 0.85 | 0.28 |
| 40673 | 0 | 35630  | LENNLIEIFKKIHENL         | 2.79 | 0.01 | 1.66 | 0.44 | 0.85 | 0.28 |
| 40674 | 0 | 35632  | LENPLTLTFARY             | 2.48 | 0.01 | 0.90 | 0.68 | 0.22 | 0.28 |
| 40675 | 0 | 35633  | LENQLKEA                 | 2.15 | 0.01 | 3.15 | 0.44 | 1.23 | 0.85 |
| 40676 | 0 | 116767 | LENRSLDEERMDAL           | 2.71 | 0.01 | 2.36 | 0.44 | 1.23 | 1.28 |
| 40677 | 0 | 116767 | LENRSLDEERMDAL           | 2.71 | 0.01 | 2.36 | 0.44 | 1.23 | 1.27 |
| 40678 | 0 | 116767 | LENRSLDEERMDAL           | 2.71 | 0.01 | 2.36 | 0.44 | 1.23 | 1.28 |
| 40679 | 0 | 423399 | LENVTVYPTYDCVLS          | 2.69 | 0.01 | 2.51 | 0.44 | 1.59 | 1.28 |
| 40680 | 0 | 120022 | LENYNKVIRPVEHHTH         | 2.73 | 0.01 | 2.26 | 1.15 | 0.22 | 1.57 |
| 40681 | 0 | 120022 | LENYNKVIRPVEHHTH         | 2.73 | 0.01 | 2.26 | 1.12 | 0.22 | 1.57 |
| 40682 | 0 | 120022 | LENYNKVIRPVEHHTH         | 2.73 | 0.01 | 2.26 | 2.43 | 0.22 | 1.57 |
| 40683 | 0 | 120022 | LENYNKVIRPVEHHTH         | 2.73 | 0.01 | 2.26 | 2.25 | 0.22 | 1.57 |
| 40684 | 0 | 120022 | LENYNKVIRPVEHHTH         | 2.73 | 0.01 | 2.26 | 3.65 | 0.22 | 1.57 |
| 40685 | 0 | 122458 | LEPETGKDMSPYEAYKR<br>GII | 2.92 | 0.01 | 0.78 | 0.44 | 1.13 | 0.28 |
| 40686 | 0 | 122458 | LEPETGKDMSPYEAYKR<br>GII | 2.92 | 0.01 | 0.78 | 0.44 | 1.13 | 1.27 |
| 40687 | 0 | 103346 | LEPGVVAEKVRNLPA          | 2.70 | 0.01 | 2.04 | 0.44 | 0.85 | 1.28 |
| 40688 | 0 | 35646  | LEPGVVAEKVRNLPAG         | 2.77 | 0.01 | 2.04 | 2.97 | 0.22 | 0.28 |
| 40689 | 0 | 35646  | LEPGVVAEKVRNLPAG         | 2.77 | 0.01 | 2.04 | 2.97 | 1.41 | 0.28 |
| 40690 | 0 | 182206 | LEPHIFPNRSQLCVS          | 2.65 | 0.01 | 0.78 | 0.44 | 1.13 | 0.85 |
| 40691 | 0 | 181929 | LEPKGRYDDPWT             | 2.44 | 0.01 | 0.90 | 3.15 | 0.22 | 0.28 |
| 40692 | 0 | 116768 | LEPYISRCTVCEGP           | 2.59 | 0.01 | 1.60 | 1.12 | 0.22 | 1.27 |
| 40693 | 0 | 116768 | LEPYISRCTVCEGP           | 2.59 | 0.01 | 1.60 | 0.44 | 1.13 | 0.28 |
| 40694 | 0 | 233667 | LEQKTDPDVRRVYHVQ<br>P    | 2.84 | 0.01 | 3.67 | 2.61 | 0.85 | 1.28 |
| 40695 | 0 | 35659  | LEQLRLKKY                | 2.35 | 0.01 | 1.60 | 0.44 | 1.23 | 0.28 |
| 40696 | 0 | 35659  | LEQLRLKKY                | 2.35 | 0.01 | 1.60 | 0.44 | 1.23 | 0.28 |
| 40697 | 0 | 113601 | LEQLYMEHNNVYTPDS<br>YFR  | 2.91 | 4.63 | 0.78 | 1.81 | 0.22 | 0.28 |
| 40698 | 0 | 113601 | LEQLYMEHNNVYTPDS<br>YFR  | 2.91 | 4.63 | 0.78 | 3.61 | 0.22 | 0.28 |
| 40699 | 0 | 35662  | LEQPVSNDLS               | 2.32 | 0.01 | 2.43 | 1.20 | 0.22 | 0.28 |
| 40700 | 0 | 35662  | LEQPVSNDLS               | 2.32 | 0.01 | 2.43 | 1.20 | 0.22 | 0.28 |
| 40701 | 0 | 35662  | LEQPVSNDLS               | 2.32 | 0.01 | 2.43 | 1.20 | 0.22 | 0.28 |



|       |   |        |                                 |      |      |      |      |      |      |
|-------|---|--------|---------------------------------|------|------|------|------|------|------|
| 40702 | 0 | 35662  | LEQPVSNDSL                      | 2.32 | 0.01 | 2.43 | 1.20 | 0.22 | 0.28 |
| 40703 | 0 | 35662  | LEQPVSNDSL                      | 2.32 | 0.01 | 2.43 | 1.20 | 0.22 | 0.85 |
|       |   |        | LEQQLRESEERAAELASQ              |      |      |      |      |      |      |
| 40704 | 0 | 35664  | LEATAAAKSSAEQDREN<br>TRAT       | 3.64 | 0.01 | 4.23 | 2.49 | 0.85 | 0.28 |
|       |   |        | LEQQLRESEERAAELASQ              |      |      |      |      |      |      |
| 40705 | 0 | 35664  | LEATAAAKSSAEQDREN<br>TRAT       | 3.64 | 0.01 | 4.23 | 2.49 | 2.39 | 0.28 |
| 40706 | 0 | 35665  | LEQQNKEANNRAEKS                 | 2.70 | 0.01 | 3.15 | 0.44 | 1.23 | 0.85 |
| 40707 | 0 | 35665  | LEQQNKEANNRAEKS                 | 2.70 | 0.01 | 3.15 | 0.44 | 1.23 | 0.85 |
| 40708 | 0 | 107194 | LEQTELSVTRET                    | 2.52 | 0.01 | 1.75 | 1.12 | 0.22 | 0.28 |
| 40709 | 0 | 107194 | LEQTELSVTRET                    | 2.52 | 0.01 | 1.75 | 1.12 | 0.22 | 0.85 |
| 40710 | 0 | 107194 | LEQTELSVTRET                    | 2.52 | 0.01 | 1.75 | 1.12 | 0.22 | 0.85 |
| 40711 | 0 | 107194 | LEQTELSVTRET                    | 2.52 | 0.01 | 1.75 | 1.12 | 0.22 | 0.85 |
| 40712 | 0 | 107194 | LEQTELSVTRET                    | 2.52 | 0.01 | 1.75 | 1.12 | 0.22 | 0.85 |
| 40713 | 0 | 107194 | LEQTELSVTRET                    | 2.52 | 0.01 | 1.75 | 1.12 | 0.22 | 0.28 |
| 40714 | 0 | 107194 | LEQTELSVTRET                    | 2.52 | 0.01 | 1.75 | 1.12 | 0.22 | 0.28 |
| 40715 | 0 | 107194 | LEQTELSVTRET                    | 2.52 | 0.01 | 1.75 | 1.12 | 0.22 | 0.28 |
| 40716 | 0 | 107194 | LEQTELSVTRET                    | 2.52 | 0.01 | 1.75 | 1.12 | 0.22 | 0.28 |
| 40717 | 0 | 107194 | LEQTELSVTRET                    | 2.52 | 0.01 | 1.75 | 1.12 | 0.22 | 0.28 |
| 40718 | 0 | 107194 | LEQTELSVTRET                    | 2.52 | 0.01 | 1.75 | 1.12 | 0.22 | 0.85 |
| 40719 | 0 | 107194 | LEQTELSVTRET                    | 2.52 | 0.01 | 1.75 | 1.12 | 0.22 | 0.28 |
| 40720 | 0 | 107194 | LEQTELSVTRET                    | 2.52 | 0.01 | 1.75 | 1.12 | 0.22 | 0.28 |
| 40721 | 0 | 35672  | LEQWNLVIGFLFL                   | 2.56 | 0.01 | 2.45 | 0.68 | 0.22 | 0.85 |
| 40722 | 0 | 35672  | LEQWNLVIGFLFL                   | 2.56 | 0.01 | 2.45 | 0.68 | 0.22 | 0.28 |
| 40723 | 0 | 35672  | LEQWNLVIGFLFL                   | 2.56 | 0.01 | 2.45 | 0.68 | 0.22 | 0.85 |
| 40724 | 0 | 132427 | LERDFEY                         | 2.02 | 0.01 | 0.78 | 1.15 | 0.22 | 0.28 |
| 40725 | 0 | 97438  | LERELKRTDLNILERF                | 2.77 | 0.01 | 3.67 | 0.44 | 1.23 | 0.28 |
| 40726 | 0 | 122460 | LERGLGSGALPGTNIITE<br>EKYSLELIK | 3.26 | 0.01 | 2.22 | 0.44 | 1.74 | 0.28 |
| 40727 | 0 | 122460 | LERGLGSGALPGTNIITE<br>EKYSLELIK | 3.26 | 0.01 | 2.22 | 0.44 | 1.74 | 1.34 |
| 40728 | 0 | 122460 | LERGLGSGALPGTNIITE<br>EKYSLELIK | 3.26 | 0.01 | 2.22 | 0.44 | 1.74 | 0.28 |
| 40729 | 0 | 101019 | LERGQSATAT                      | 2.31 | 0.01 | 3.18 | 2.98 | 0.22 | 0.28 |
| 40730 | 0 | 129225 | LERIRRSILPYGDSMD                | 2.75 | 0.01 | 0.78 | 0.44 | 1.13 | 0.85 |
| 40731 | 0 | 35679  | LERKTAELTSEKKEHEAE<br>NDK       | 3.03 | 0.01 | 2.24 | 0.44 | 1.13 | 0.28 |
| 40732 | 0 | 423400 | LERRSHEELVLCPE                  | 2.70 | 0.01 | 2.51 | 0.44 | 2.35 | 1.28 |
| 40733 | 0 | 79596  | LERTPGK                         | 1.99 | 0.01 | 0.90 | 1.12 | 0.22 | 1.39 |
| 40734 | 0 | 521052 | LESAEKEEKKSEDKK                 | 2.72 | 0.01 | 2.24 | 0.44 | 1.41 | 1.28 |
| 40735 | 0 | 35713  | LESVCNPIMTKMYQSM<br>GGAA        | 2.87 | 0.01 | 2.78 | 2.49 | 0.85 | 0.28 |
| 40736 | 0 | 35713  | LESVCNPIMTKMYQSM<br>GGAA        | 2.87 | 0.01 | 2.78 | 0.44 | 0.85 | 0.28 |
| 40737 | 0 | 79597  | LETDELH                         | 2.05 | 0.01 | 0.90 | 1.12 | 0.22 | 1.39 |

|       |   |        |                                             |      |      |      |      |      |      |
|-------|---|--------|---------------------------------------------|------|------|------|------|------|------|
| 40738 | 0 | 521057 | LETFDELGESMGEAHPN<br>EFAVDLGYSR             | 3.23 | 4.33 | 2.84 | 0.44 | 1.13 | 0.28 |
| 40739 | 0 | 35723  | LETHPLYQ                                    | 2.13 | 0.01 | 2.40 | 2.43 | 0.22 | 0.28 |
| 40740 | 0 | 141699 | LETLQIVAEREAYYLW                            | 2.75 | 0.01 | 1.66 | 2.55 | 0.22 | 0.28 |
| 40741 | 0 | 141699 | LETLQIVAEREAYYLW                            | 2.75 | 0.01 | 1.66 | 1.20 | 0.22 | 0.28 |
| 40742 | 0 | 35725  | LETRTETWMSSEGAWK<br>HAQRIE                  | 3.02 | 0.01 | 2.30 | 0.68 | 0.22 | 0.28 |
| 40743 | 0 | 35725  | LETRTETWMSSEGAWK<br>HAQRIE                  | 3.02 | 0.01 | 2.30 | 0.68 | 0.22 | 0.28 |
| 40744 | 0 | 35725  | LETRTETWMSSEGAWK<br>HAQRIE                  | 3.02 | 0.01 | 2.30 | 0.68 | 0.22 | 0.28 |
| 40745 | 0 | 237816 | LETSEGFAVIKEA                               | 2.54 | 0.01 | 0.78 | 0.44 | 1.13 | 1.28 |
| 40746 | 0 | 489637 | LEV GKQRLKYAQEEL                            | 2.70 | 0.01 | 3.17 | 0.44 | 0.85 | 2.75 |
| 40747 | 0 | 467729 | LEVPAEGDP                                   | 2.23 | 0.01 | 3.67 | 0.68 | 0.22 | 0.28 |
| 40748 | 0 | 467729 | LEVPAEGDP                                   | 2.23 | 0.01 | 3.67 | 0.68 | 0.22 | 0.28 |
| 40749 | 0 | 467729 | LEVPAEGDP                                   | 2.23 | 0.01 | 3.67 | 0.68 | 0.22 | 0.28 |
| 40750 | 0 | 467729 | LEVPAEGDP                                   | 2.23 | 0.01 | 3.67 | 0.68 | 0.22 | 1.34 |
| 40751 | 0 | 35743  | LEVRYVAAGL                                  | 2.33 | 3.81 | 2.70 | 0.44 | 0.85 | 0.28 |
| 40752 | 0 | 181708 | LEVSYLAMTPLIPQSKDE<br>NSDDYTTFDDVGS         | 3.35 | 0.01 | 0.78 | 0.68 | 0.22 | 2.12 |
| 40753 | 0 | 79287  | LEVTVMLNKRPLPDSRTS                          | 2.80 | 0.01 | 3.12 | 1.12 | 0.22 | 0.28 |
| 40754 | 0 | 79287  | LEVTVMLNKRPLPDSRTS                          | 2.80 | 0.01 | 3.12 | 1.12 | 0.22 | 1.34 |
| 40755 | 0 | 79287  | LEVTVMLNKRPLPDSRTS                          | 2.80 | 0.01 | 3.12 | 1.12 | 0.22 | 0.28 |
| 40756 | 0 | 79287  | LEVTVMLNKRPLPDSRTS                          | 2.80 | 0.01 | 3.12 | 1.12 | 0.22 | 0.28 |
| 40757 | 0 | 112205 | LEWLAHI                                     | 2.03 | 0.01 | 0.78 | 0.44 | 1.13 | 0.28 |
| 40758 | 0 | 35755  | LEWLNNNQEASKEEY<br>LEWNDNTVRVTETIQR         | 2.68 | 0.01 | 2.30 | 0.44 | 1.41 | 0.28 |
| 40759 | 0 | 97440  | AWRNSDEDGRLPLPPN<br>QKR                     | 3.52 | 0.01 | 3.09 | 0.44 | 0.85 | 0.28 |
| 40760 | 0 | 97440  | LEWNDNTVRVTETIQR<br>AWRNSDEDGRLPLPPN<br>QKR | 3.52 | 0.01 | 3.09 | 0.44 | 1.74 | 0.28 |
| 40761 | 0 | 35756  | LEWRNTSGLYVLT                               | 2.54 | 0.01 | 2.59 | 0.44 | 0.85 | 0.28 |
| 40762 | 0 | 35756  | LEWRNTSGLYVLT                               | 2.54 | 0.01 | 2.59 | 0.44 | 0.85 | 0.28 |
| 40763 | 0 | 98871  | LEYDPRCVYD                                  | 2.31 | 0.01 | 2.16 | 0.44 | 1.23 | 0.85 |
| 40764 | 0 | 35763  | LEYDPRLVYD                                  | 2.34 | 0.01 | 0.90 | 0.44 | 1.23 | 0.85 |
| 40765 | 0 | 35769  | LEYIVGRVWI                                  | 2.31 | 0.01 | 0.78 | 0.44 | 1.74 | 0.28 |
| 40766 | 0 | 106602 | LEYNPWPWRNLI                                | 2.50 | 0.01 | 0.90 | 1.15 | 0.22 | 1.39 |
| 40767 | 0 | 35777  | LEYTIV                                      | 1.88 | 0.01 | 2.40 | 0.44 | 0.85 | 0.28 |
| 40768 | 0 | 35780  | LEYVNSGTKYLP                                | 2.46 | 0.01 | 4.33 | 0.44 | 1.23 | 0.28 |
| 40769 | 0 | 35783  | LEYLREK                                     | 2.16 | 0.01 | 3.18 | 2.74 | 0.22 | 0.28 |
| 40770 | 0 | 35787  | LFAAFPSFAGLRPTFDT<br>LM                     | 2.98 | 0.01 | 2.04 | 0.68 | 0.22 | 0.85 |

|       |   |        |                            |      |      |      |      |      |      |
|-------|---|--------|----------------------------|------|------|------|------|------|------|
| 40771 | 0 | 35787  | LFAAFPSFAGLRPTFDTR<br>LM   | 2.98 | 0.01 | 2.04 | 0.68 | 0.22 | 0.28 |
| 40772 | 0 | 35787  | LFAAFPSFAGLRPTFDTR<br>LM   | 2.98 | 0.01 | 2.04 | 0.68 | 0.22 | 1.27 |
| 40773 | 0 | 35794  | LFACYAEEVGEAVIDDDF<br>GY   | 2.96 | 0.01 | 3.40 | 0.44 | 1.74 | 0.28 |
| 40774 | 0 | 35794  | LFACYAEEVGEAVIDDDF<br>GY   | 2.96 | 0.01 | 3.40 | 0.44 | 0.85 | 0.28 |
| 40775 | 0 | 423402 | LFATTLFIGYMPIHC            | 2.66 | 0.01 | 2.51 | 0.44 | 1.59 | 1.28 |
| 40776 | 0 | 172074 | LFDAAYFGQKDSVCG            | 2.65 | 0.01 | 0.78 | 0.44 | 1.41 | 0.28 |
| 40777 | 0 | 135570 | LFDASDSSS                  | 2.23 | 0.01 | 0.78 | 1.12 | 0.22 | 0.28 |
| 40778 | 0 | 135570 | LFDASDSSS                  | 2.23 | 0.01 | 0.78 | 1.12 | 0.22 | 0.28 |
| 40779 | 0 | 135570 | LFDASDSSS                  | 2.23 | 0.01 | 0.78 | 1.12 | 0.22 | 1.34 |
| 40780 | 0 | 135570 | LFDASDSSS                  | 2.23 | 0.01 | 0.78 | 1.12 | 0.22 | 0.28 |
| 40781 | 0 | 35810  | LFDGRDNGAL                 | 2.34 | 0.01 | 3.16 | 0.68 | 0.22 | 0.28 |
| 40782 | 0 | 35810  | LFDGRDNGAL                 | 2.34 | 0.01 | 3.16 | 0.68 | 0.22 | 0.28 |
| 40783 | 0 | 227330 | LFDLDEDDTKPVP              | 2.72 | 0.01 | 2.97 | 0.44 | 1.59 | 0.28 |
| 40784 | 0 | 227330 | LFDLDEDDTKPVP              | 2.72 | 0.01 | 2.97 | 0.44 | 0.85 | 0.28 |
| 40785 | 0 | 35813  | LFDLGPKQK                  | 2.24 | 0.01 | 1.72 | 0.68 | 0.22 | 1.27 |
| 40786 | 0 | 327619 | LFDVATEKKKNPEAA            | 2.64 | 0.01 | 1.61 | 0.44 | 0.85 | 1.28 |
| 40787 | 0 | 125476 | LFDFIVG                    | 2.12 | 0.01 | 3.06 | 0.68 | 0.22 | 1.48 |
| 40788 | 0 | 125476 | LFDFIVG                    | 2.12 | 0.01 | 3.06 | 0.68 | 0.22 | 1.48 |
| 40789 | 0 | 125476 | LFDFIVG                    | 2.12 | 0.01 | 3.06 | 0.68 | 0.22 | 0.85 |
| 40790 | 0 | 125476 | LFDFIVG                    | 2.12 | 0.01 | 3.06 | 0.68 | 0.22 | 0.85 |
| 40791 | 0 | 125476 | LFDFIVG                    | 2.12 | 0.01 | 3.06 | 0.68 | 0.22 | 0.85 |
| 40792 | 0 | 35817  | LFDYNEKVDNLGRSG            | 2.67 | 0.01 | 1.66 | 0.44 | 1.59 | 0.28 |
| 40793 | 0 | 35817  | LFDYNEKVDNLGRSG            | 2.67 | 0.01 | 1.66 | 0.44 | 0.85 | 0.28 |
| 40794 | 0 | 172075 | LFEDAYLLTLHAGRV            | 2.67 | 0.01 | 0.78 | 0.44 | 1.41 | 0.28 |
| 40795 | 0 | 172075 | LFEDAYLLTLHAGRV            | 2.67 | 0.01 | 0.78 | 0.44 | 1.13 | 0.28 |
| 40796 | 0 | 110317 | LFEETSFIDAGAP              | 2.52 | 0.01 | 0.90 | 2.52 | 0.22 | 0.28 |
| 40797 | 0 | 110317 | LFEETSFIDAGAP              | 2.52 | 0.01 | 0.90 | 2.52 | 0.22 | 0.28 |
| 40798 | 0 | 236113 | LFEQVMR                    | 1.99 | 0.01 | 0.78 | 0.44 | 1.41 | 2.66 |
| 40799 | 0 | 236113 | LFEQVMR                    | 1.99 | 0.01 | 0.78 | 0.44 | 1.13 | 2.66 |
| 40800 | 0 | 236113 | LFEQVMR                    | 1.99 | 0.01 | 0.78 | 3.41 | 0.22 | 2.66 |
| 40801 | 0 | 112575 | LFFYLRRREQMFVRHLFN<br>RAG  | 2.94 | 0.01 | 1.86 | 2.37 | 0.22 | 0.28 |
| 40802 | 0 | 97441  | LFGAIAGFIEGGWQGM<br>VDGWYG | 3.04 | 0.01 | 3.09 | 0.44 | 0.85 | 0.28 |
| 40803 | 0 | 99416  | LFGILSVDCTSEEMN            | 2.64 | 0.01 | 2.86 | 2.02 | 0.85 | 0.85 |
| 40804 | 0 | 35840  | LFGKGG                     | 1.88 | 0.01 | 2.40 | 0.44 | 0.85 | 0.28 |
| 40805 | 0 | 151966 | LFGKSSPLTE                 | 2.40 | 0.01 | 0.78 | 0.44 | 1.93 | 0.28 |
| 40806 | 0 | 35842  | LFGPSLRDPISAEIS            | 2.69 | 0.01 | 2.43 | 0.44 | 1.59 | 0.28 |
| 40807 | 0 | 327704 | LFGQAAAGDKPAPFG            | 2.70 | 0.01 | 1.61 | 0.44 | 0.85 | 1.28 |
| 40808 | 0 | 327705 | LFGQAAAGDKPPFG             | 2.68 | 0.01 | 1.61 | 0.44 | 0.85 | 1.28 |
| 40809 | 0 | 327706 | LFGQAAAGDKPSPFG            | 2.68 | 0.01 | 1.61 | 0.44 | 0.85 | 1.28 |
| 40810 | 0 | 97442  | LFGVKGTT                   | 2.11 | 0.01 | 2.87 | 0.68 | 0.22 | 0.28 |
| 40811 | 0 | 156358 | LFHVSSDHNQLDQNP            | 2.70 | 0.01 | 3.67 | 0.44 | 1.23 | 1.27 |

|       |   |        |                                |      |      |      |      |      |      |
|-------|---|--------|--------------------------------|------|------|------|------|------|------|
| 40812 | 0 | 35852  | LFIG                           | 1.57 | 0.01 | 3.53 | 0.68 | 0.22 | 0.85 |
| 40813 | 0 | 35852  | LFIG                           | 1.57 | 0.01 | 3.53 | 0.68 | 0.22 | 1.27 |
| 40814 | 0 | 35852  | LFIG                           | 1.57 | 0.01 | 3.53 | 0.68 | 0.22 | 1.27 |
| 40815 | 0 | 35852  | LFIG                           | 1.57 | 0.01 | 3.53 | 0.68 | 0.22 | 1.34 |
| 40816 | 0 | 97443  | LFILTRDGM                      | 2.22 | 0.01 | 3.13 | 1.12 | 0.22 | 0.28 |
| 40817 | 0 | 35860  | LFIQGYSIYENYGNKEFN<br>A        | 2.96 | 0.01 | 3.10 | 1.12 | 0.22 | 0.28 |
| 40818 | 0 | 191582 | LFKAFILDGDNL                   | 2.50 | 0.01 | 2.76 | 1.20 | 0.22 | 0.28 |
| 40819 | 0 | 35869  | LFKEYKLTRPY                    | 2.42 | 0.01 | 3.59 | 2.65 | 0.22 | 0.28 |
| 40820 | 0 | 130944 | LFKHS                          | 1.74 | 0.01 | 2.19 | 1.20 | 0.22 | 0.28 |
| 40821 | 0 | 97444  | LFKLGKLFQ                      | 2.27 | 0.01 | 3.13 | 1.12 | 0.22 | 0.28 |
| 40822 | 0 | 35880  | LFKPPKYHPD                     | 2.33 | 0.01 | 0.78 | 0.44 | 1.74 | 0.28 |
| 40823 | 0 | 121542 | LFKPPKYHPDVPYVKR               | 2.76 | 0.01 | 0.78 | 0.44 | 1.13 | 0.28 |
| 40824 | 0 | 121542 | LFKPPKYHPDVPYVKR               | 2.76 | 0.01 | 0.78 | 0.44 | 1.13 | 0.28 |
| 40825 | 0 | 121542 | LFKPPKYHPDVPYVKR               | 2.76 | 0.01 | 0.78 | 0.44 | 1.13 | 0.28 |
| 40826 | 0 | 121542 | LFKPPKYHPDVPYVKR               | 2.76 | 0.01 | 0.78 | 0.44 | 1.41 | 0.28 |
| 40827 | 0 | 121542 | LFKPPKYHPDVPYVKR               | 2.76 | 0.01 | 0.78 | 0.68 | 1.41 | 1.27 |
| 40828 | 0 | 121542 | LFKPPKYHPDVPYVKR               | 2.76 | 0.01 | 0.78 | 0.44 | 1.41 | 0.28 |
| 40829 | 0 | 121542 | LFKPPKYHPDVPYVKR               | 2.76 | 0.01 | 0.78 | 0.44 | 1.13 | 0.28 |
| 40830 | 0 | 78722  | LFKTAQFSTGGVYIDSRI<br>NMNGDVTS | 3.18 | 0.01 | 2.98 | 2.16 | 0.22 | 0.28 |
| 40831 | 0 | 78722  | LFKTAQFSTGGVYIDSRI<br>NMNGDVTS | 3.18 | 0.01 | 2.98 | 1.12 | 0.22 | 0.28 |
| 40832 | 0 | 78722  | LFKTAQFSTGGVYIDSRI<br>NMNGDVTS | 3.18 | 0.01 | 2.98 | 0.44 | 0.85 | 0.28 |
| 40833 | 0 | 78722  | LFKTAQFSTGGVYIDSRI<br>NMNGDVTS | 3.18 | 0.01 | 2.98 | 1.12 | 0.22 | 0.85 |
| 40834 | 0 | 78722  | LFKTAQFSTGGVYIDSRI<br>NMNGDVTS | 3.18 | 0.01 | 2.98 | 1.12 | 0.22 | 0.85 |
| 40835 | 0 | 96548  | LFLLAAH                        | 2.05 | 0.01 | 2.16 | 2.82 | 0.22 | 1.57 |
| 40836 | 0 | 35907  | LFLPRV                         | 1.91 | 0.01 | 0.90 | 0.68 | 0.22 | 1.39 |
| 40837 | 0 | 172076 | LFMENKQPEDDLFDR                | 2.69 | 0.01 | 0.78 | 0.44 | 1.41 | 0.28 |
| 40838 | 0 | 182207 | LFNIGSGCLGLNFS                 | 2.73 | 0.01 | 0.78 | 0.44 | 1.13 | 0.85 |
| 40839 | 0 | 35922  | LFNLGPQQQ                      | 2.23 | 0.01 | 1.72 | 0.68 | 0.22 | 1.27 |
| 40840 | 0 | 35923  | LFNLWGPAFHeryPNVT<br>ITA       | 2.92 | 0.01 | 2.04 | 2.52 | 0.22 | 0.28 |
| 40841 | 0 | 35923  | LFNLWGPAFHeryPNVT<br>ITA       | 2.92 | 0.01 | 2.04 | 2.52 | 0.22 | 0.85 |
| 40842 | 0 | 172077 | LFNNMEELIKDGSSK                | 2.66 | 0.01 | 0.78 | 0.44 | 1.41 | 0.28 |
| 40843 | 0 | 172077 | LFNNMEELIKDGSSK                | 2.66 | 0.01 | 0.78 | 0.44 | 1.13 | 0.28 |

|       |   |        |                                                     |      |      |      |      |      |      |
|-------|---|--------|-----------------------------------------------------|------|------|------|------|------|------|
| 40844 | 0 | 120028 | LFNNYDPGSRPVREP                                     | 2.65 | 0.01 | 0.78 | 3.81 | 0.22 | 0.28 |
| 40845 | 0 | 450783 | LFNRAGAVGENVPDDL<br>IKGSGSTANLASSN                  | 3.36 | 0.01 | 1.86 | 0.68 | 0.22 | 0.28 |
| 40846 | 0 | 489640 | LFNVSQGNALLPPI                                      | 2.66 | 0.01 | 2.69 | 3.05 | 0.85 | 1.28 |
| 40847 | 0 | 35932  | LFPADP                                              | 1.90 | 0.01 | 2.96 | 3.67 | 0.22 | 0.28 |
| 40848 | 0 | 35937  | LFPHWIKKPNRQGLGY<br>SPSYNDP                         | 3.10 | 0.01 | 3.01 | 2.66 | 0.22 | 1.34 |
| 40849 | 0 | 35937  | LFPHWIKKPNRQGLGY<br>SPSYNDP                         | 3.10 | 0.01 | 3.01 | 2.66 | 0.22 | 1.34 |
| 40850 | 0 | 35937  | LFPHWIKKPNRQGLGY<br>SPSYNDP                         | 3.10 | 0.01 | 3.01 | 2.66 | 0.22 | 1.34 |
| 40851 | 0 | 35937  | LFPHWIKKPNRQGLGY<br>SPSYNDP                         | 3.10 | 0.01 | 3.01 | 2.66 | 0.22 | 1.75 |
| 40852 | 0 | 35940  | LFPKVAPQAISSVENIE<br>NGGPGTIKKISF                   | 3.35 | 0.01 | 2.76 | 1.12 | 0.22 | 2.35 |
| 40853 | 0 | 35940  | LFPKVAPQAISSVENIE<br>NGGPGTIKKISF                   | 3.35 | 0.01 | 2.76 | 0.44 | 1.23 | 0.28 |
| 40854 | 0 | 35940  | LFPKVAPQAISSVENIE<br>NGGPGTIKKISF                   | 3.35 | 0.01 | 2.76 | 0.44 | 1.23 | 0.28 |
| 40855 | 0 | 35940  | LFPKVAPQAISSVENIE<br>NGGPGTIKKISF                   | 3.35 | 0.01 | 2.76 | 1.12 | 0.22 | 1.34 |
| 40856 | 0 | 35940  | LFPKVAPQAISSVENIE<br>NGGPGTIKKISF                   | 3.35 | 0.01 | 2.76 | 1.20 | 0.22 | 0.28 |
| 40857 | 0 | 35940  | LFPKVAPQAISSVENIE<br>NGGPGTIKKISF                   | 3.35 | 0.01 | 2.76 | 1.20 | 0.22 | 0.28 |
| 40858 | 0 | 35940  | LFPKVAPQAISSVENIE<br>NGGPGTIKKISF                   | 3.35 | 0.01 | 2.76 | 0.68 | 0.22 | 0.85 |
| 40859 | 0 | 35940  | LFPKVAPQAISSVENIE<br>NGGPGTIKKISF                   | 3.35 | 0.01 | 2.76 | 0.68 | 0.22 | 0.28 |
| 40860 | 0 | 181123 | LFPKVAPQAISSVENIE<br>NGGPGTIKKISFPEGFP<br>KYVKDRVDE | 3.75 | 0.01 | 2.76 | 1.20 | 0.22 | 0.28 |
| 40861 | 0 | 181123 | LFPKVAPQAISSVENIE<br>NGGPGTIKKISFPEGFP<br>KYVKDRVDE | 3.75 | 0.01 | 2.76 | 1.20 | 0.22 | 0.28 |
| 40862 | 0 | 181123 | LFPKVAPQAISSVENIE<br>NGGPGTIKKISFPEGFP<br>KYVKDRVDE | 3.75 | 0.01 | 2.76 | 1.20 | 0.22 | 0.28 |
| 40863 | 0 | 181123 | LFPKVAPQAISSVENIE<br>NGGPGTIKKISFPEGFP<br>KYVKDRVDE | 3.75 | 0.01 | 2.76 | 1.20 | 0.22 | 0.28 |
| 40864 | 0 | 181123 | LFPKVAPQAISSVENIE<br>NGGPGTIKKISFPEGFP<br>KYVKDRVDE | 3.75 | 0.01 | 2.76 | 1.20 | 0.22 | 0.28 |

|       |   |        |                                    |      |      |      |      |      |      |
|-------|---|--------|------------------------------------|------|------|------|------|------|------|
|       |   |        | LFPKVAPQAISSVENIEG                 |      |      |      |      |      |      |
| 40865 | 0 | 181123 | NGGPGTIKKISFPEGFPF<br>KYVKDRVDE    | 3.75 | 0.01 | 2.76 | 1.20 | 0.22 | 0.28 |
| 40866 | 0 | 141047 | LFPKVAPQAISSVENIEG<br>NGGPPTIKKISF | 3.34 | 0.01 | 2.76 | 1.15 | 0.22 | 0.85 |
| 40867 | 0 | 107503 | LFPPKPK                            | 2.05 | 0.01 | 0.78 | 1.15 | 0.22 | 0.28 |
| 40868 | 0 | 107503 | LFPPKPK                            | 2.05 | 0.01 | 0.78 | 0.44 | 1.13 | 0.28 |
| 40869 | 0 | 107503 | LFPPKPK                            | 2.05 | 0.01 | 0.78 | 0.44 | 1.13 | 0.28 |
| 40870 | 0 | 106603 | LFPPSSEELQANKATLV                  | 2.77 | 0.01 | 0.78 | 1.12 | 0.22 | 1.48 |
| 40871 | 0 | 489641 | LFPQYVAYITNLKA                     | 2.60 | 0.01 | 0.78 | 4.45 | 0.22 | 0.28 |
| 40872 | 0 | 489641 | LFPQYVAYITNLKA                     | 2.60 | 0.01 | 0.78 | 4.45 | 0.22 | 1.34 |
| 40873 | 0 | 489641 | LFPQYVAYITNLKA                     | 2.60 | 0.01 | 0.78 | 4.45 | 0.22 | 1.34 |
| 40874 | 0 | 489641 | LFPQYVAYITNLKA                     | 2.60 | 0.01 | 0.78 | 1.12 | 0.22 | 0.28 |
| 40875 | 0 | 489641 | LFPQYVAYITNLKA                     | 2.60 | 0.01 | 0.78 | 1.12 | 2.25 | 3.16 |
| 40876 | 0 | 489641 | LFPQYVAYITNLKA                     | 2.60 | 0.01 | 0.78 | 1.12 | 0.22 | 1.34 |
| 40877 | 0 | 489641 | LFPQYVAYITNLKA                     | 2.60 | 0.01 | 0.78 | 4.33 | 0.22 | 0.28 |
| 40878 | 0 | 489641 | LFPQYVAYITNLKA                     | 2.60 | 0.01 | 0.78 | 4.33 | 2.25 | 3.16 |
| 40879 | 0 | 489641 | LFPQYVAYITNLKA                     | 2.60 | 0.01 | 0.78 | 4.33 | 0.22 | 1.34 |
| 40880 | 0 | 489641 | LFPQYVAYITNLKA                     | 2.60 | 0.01 | 0.78 | 4.33 | 0.22 | 0.85 |
| 40881 | 0 | 35947  | LFPTQIQVRNIMSP                     | 2.59 | 0.01 | 2.56 | 0.44 | 0.85 | 0.28 |
| 40882 | 0 | 78723  | LFQTPDSGPKTCTPSGE<br>APL           | 2.95 | 0.01 | 2.04 | 0.44 | 1.59 | 0.28 |
| 40883 | 0 | 35956  | LFREDGSACR                         | 2.29 | 0.01 | 3.53 | 0.68 | 0.22 | 0.85 |
| 40884 | 0 | 35956  | LFREDGSACR                         | 2.29 | 0.01 | 3.53 | 0.68 | 0.22 | 1.27 |
| 40885 | 0 | 35956  | LFREDGSACR                         | 2.29 | 0.01 | 3.53 | 0.68 | 0.22 | 1.27 |
| 40886 | 0 | 135571 | LFRGRRASQ                          | 2.22 | 0.01 | 0.78 | 1.12 | 0.22 | 0.28 |
| 40887 | 0 | 135571 | LFRGRRASQ                          | 2.22 | 0.01 | 0.78 | 1.12 | 1.41 | 0.28 |
| 40888 | 0 | 35962  | LFRQFYQLDA                         | 2.34 | 0.01 | 1.60 | 0.44 | 1.23 | 0.28 |
| 40889 | 0 | 35962  | LFRQFYQLDA                         | 2.34 | 0.01 | 1.60 | 0.44 | 1.23 | 0.28 |
| 40890 | 0 | 35973  | LFSGDESDSDSGYP                     | 2.71 | 0.01 | 2.76 | 0.44 | 1.59 | 0.28 |
| 40891 | 0 | 35974  | LFSGDESDSDSGYPPN<br>RQ             | 2.89 | 0.01 | 2.76 | 0.44 | 1.59 | 0.28 |
|       |   |        | LFSGEGAQTAQAAPVQ                   |      |      |      |      |      |      |
| 40892 | 0 | 35977  | EGVQQEGAQQPAPATA<br>PSQGGVNSPVNVT  | 3.78 | 0.01 | 4.33 | 0.44 | 0.85 | 0.85 |
|       |   |        | LFSGEGAQTAQAAPVQ                   |      |      |      |      |      |      |
| 40893 | 0 | 35977  | EGVQQEGAQQPAPATA<br>PSQGGVNSPVNVT  | 3.78 | 0.01 | 2.97 | 0.44 | 0.85 | 0.85 |
| 40894 | 0 | 35982  | LFSLMPDVAHSLA                      | 2.56 | 0.01 | 3.00 | 0.44 | 0.85 | 0.28 |
| 40895 | 0 | 35983  | LFSLNAPGL                          | 2.24 | 0.01 | 0.90 | 2.55 | 0.22 | 0.28 |
| 40896 | 0 | 142441 | LFSPWLRVQNHF                       | 2.46 | 0.01 | 0.90 | 1.20 | 0.22 | 0.85 |
| 40897 | 0 | 142441 | LFSPWLRVQNHF                       | 2.46 | 0.01 | 0.90 | 1.20 | 0.22 | 1.48 |
| 40898 | 0 | 142441 | LFSPWLRVQNHF                       | 2.46 | 0.01 | 0.90 | 0.68 | 0.22 | 1.27 |
| 40899 | 0 | 142441 | LFSPWLRVQNHF                       | 2.46 | 0.01 | 0.90 | 0.68 | 0.22 | 0.28 |

|       |   |        |                                  |      |      |      |      |      |      |
|-------|---|--------|----------------------------------|------|------|------|------|------|------|
| 40900 | 0 | 103347 | LFSRVEDVLGLPQNT                  | 2.65 | 0.01 | 2.04 | 0.44 | 0.85 | 1.28 |
| 40901 | 0 | 172083 | LFTFIQFKDLKESM                   | 2.69 | 0.01 | 0.78 | 0.44 | 1.41 | 0.28 |
| 40902 | 0 | 172083 | LFTFIQFKDLKESM                   | 2.69 | 0.01 | 0.78 | 0.44 | 1.13 | 0.28 |
| 40903 | 0 | 242895 | LFTFRQVGLICE                     | 2.46 | 0.01 | 3.33 | 1.20 | 0.22 | 0.85 |
| 40904 | 0 | 242896 | LFTFRQVGLICERMM                  | 2.65 | 0.01 | 3.33 | 1.20 | 0.22 | 0.85 |
| 40905 | 0 | 35994  | LFTGHL                           | 1.91 | 0.01 | 2.40 | 0.44 | 0.85 | 0.28 |
| 40906 | 0 | 35995  | LFTGHLKCRLRMDKLQL<br>KGM         | 2.97 | 0.01 | 2.30 | 0.44 | 2.26 | 0.28 |
| 40907 | 0 | 36004  | LFTPGAKQN                        | 2.18 | 0.01 | 1.72 | 0.68 | 0.22 | 1.27 |
| 40908 | 0 | 36005  | LFTPGPS                          | 2.02 | 0.01 | 1.72 | 0.44 | 0.85 | 0.28 |
| 40909 | 0 | 85174  | LFTQQGGAYGRC                     | 2.46 | 0.01 | 2.14 | 3.44 | 0.22 | 0.28 |
| 40910 | 0 | 85174  | LFTQQGGAYGRC                     | 2.46 | 0.01 | 2.14 | 3.44 | 0.22 | 1.34 |
| 40911 | 0 | 36007  | LFTYHKFNSSGCPERLAS<br>CRSLDD     | 3.08 | 0.01 | 1.72 | 0.44 | 0.85 | 0.28 |
| 40912 | 0 | 36012  | LFVESSVKRRPMKTVSQ<br>DTNIPIYAQIF | 3.24 | 0.01 | 0.90 | 1.12 | 0.22 | 1.34 |
| 40913 | 0 | 36012  | LFVESSVKRRPMKTVSQ<br>DTNIPIYAQIF | 3.24 | 0.01 | 0.90 | 0.44 | 1.74 | 1.27 |
| 40914 | 0 | 423403 | LFVGNLQARDASGLM                  | 2.67 | 0.01 | 2.51 | 0.44 | 2.35 | 1.28 |
| 40915 | 0 | 147906 | LFVKVAPNL                        | 2.24 | 0.01 | 3.24 | 3.57 | 0.85 | 0.28 |
| 40916 | 0 | 91640  | LFVKVAPNLTNEYDP                  | 2.67 | 0.01 | 3.05 | 1.20 | 0.22 | 0.28 |
| 40917 | 0 | 91640  | LFVKVAPNLTNEYDP                  | 2.67 | 0.01 | 3.05 | 1.20 | 0.22 | 0.28 |
| 40918 | 0 | 521116 | LFVLSGLPGTRGGSGVP<br>GPI         | 2.99 | 4.63 | 2.40 | 0.44 | 1.59 | 1.28 |
| 40919 | 0 | 521117 | LFVLSGLPGTRGGSGVP<br>GPI         | 2.99 | 4.08 | 2.40 | 0.44 | 1.59 | 1.28 |
| 40920 | 0 | 521115 | LFVLSGLPGTRGGSGVP<br>GPI         | 2.99 | 4.93 | 2.40 | 0.44 | 1.59 | 1.28 |
| 40921 | 0 | 521118 | LFVLSGLPGTRGGSGVP<br>GPI         | 2.99 | 0.01 | 2.40 | 0.44 | 1.59 | 1.28 |
| 40922 | 0 | 192996 | LFVNVNRKASTASDVYS<br>F           | 2.85 | 3.63 | 0.78 | 1.15 | 1.41 | 0.28 |
| 40923 | 0 | 420644 | LFWQYFVGKRTVPPGEC                | 2.75 | 0.01 | 0.78 | 0.44 | 1.41 | 0.28 |
| 40924 | 0 | 36025  | LFYHHKFNS                        | 2.22 | 0.01 | 3.18 | 0.44 | 0.85 | 0.28 |
| 40925 | 0 | 79904  | LGAAASSPDAHV                     | 2.48 | 0.01 | 2.14 | 3.26 | 0.22 | 0.28 |
| 40926 | 0 | 36042  | LGAALLQS                         | 2.15 | 0.01 | 2.21 | 0.44 | 0.85 | 0.28 |
| 40927 | 0 | 36042  | LGAALLQS                         | 2.15 | 0.01 | 2.21 | 1.12 | 0.22 | 0.28 |
| 40928 | 0 | 36043  | LGAALLQSAR                       | 2.35 | 0.01 | 2.21 | 1.12 | 0.22 | 0.28 |
| 40929 | 0 | 36043  | LGAALLQSAR                       | 2.35 | 0.01 | 2.21 | 1.12 | 0.22 | 0.28 |
| 40930 | 0 | 36045  | LGAARGYTFGAC                     | 2.49 | 0.01 | 3.75 | 1.20 | 0.22 | 0.85 |
| 40931 | 0 | 36045  | LGAARGYTFGAC                     | 2.49 | 0.01 | 3.75 | 0.68 | 0.22 | 0.85 |
| 40932 | 0 | 36045  | LGAARGYTFGAC                     | 2.49 | 0.01 | 3.75 | 0.68 | 0.22 | 0.85 |
| 40933 | 0 | 36045  | LGAARGYTFGAC                     | 2.49 | 0.01 | 3.75 | 1.20 | 0.22 | 0.85 |
| 40934 | 0 | 36045  | LGAARGYTFGAC                     | 2.49 | 0.01 | 3.75 | 0.68 | 0.22 | 1.27 |
| 40935 | 0 | 36048  | LGACSFSS                         | 2.11 | 0.01 | 2.21 | 0.44 | 0.85 | 0.28 |
| 40936 | 0 | 36048  | LGACSFSS                         | 2.11 | 0.01 | 2.21 | 1.12 | 0.22 | 0.28 |

|       |   |        |                              |      |      |      |      |      |      |
|-------|---|--------|------------------------------|------|------|------|------|------|------|
| 40937 | 0 | 36049  | LGACSFSSIP                   | 2.30 | 0.01 | 2.21 | 1.12 | 0.22 | 0.28 |
| 40938 | 0 | 36049  | LGACSFSSIP                   | 2.30 | 0.01 | 2.21 | 1.12 | 0.22 | 0.28 |
| 40939 | 0 | 36055  | LGAFQNRLES                   | 2.30 | 0.01 | 2.73 | 0.44 | 0.85 | 0.28 |
| 40940 | 0 | 135477 | LGAGLG                       | 1.92 | 0.01 | 0.78 | 0.68 | 0.22 | 1.48 |
| 40941 | 0 | 135477 | LGAGLG                       | 1.92 | 0.01 | 0.78 | 0.68 | 0.22 | 0.28 |
| 40942 | 0 | 135477 | LGAGLG                       | 1.92 | 0.01 | 0.78 | 0.68 | 0.22 | 0.28 |
| 40943 | 0 | 140265 | LGAHNVRT                     | 2.10 | 0.01 | 0.78 | 0.44 | 1.13 | 0.28 |
| 40944 | 0 | 167313 | LGALSHT                      | 2.03 | 0.01 | 0.90 | 2.37 | 0.22 | 1.39 |
| 40945 | 0 | 36067  | LGATSPSAPPLPPVVDLP<br>QLGLRR | 3.14 | 0.01 | 2.70 | 0.68 | 0.22 | 0.28 |
| 40946 | 0 | 36067  | LGATSPSAPPLPPVVDLP<br>QLGLRR | 3.14 | 0.01 | 2.70 | 0.68 | 0.22 | 1.48 |
| 40947 | 0 | 36067  | LGATSPSAPPLPPVVDLP<br>QLGLRR | 3.14 | 0.01 | 2.70 | 0.68 | 0.22 | 2.02 |
| 40948 | 0 | 36067  | LGATSPSAPPLPPVVDLP<br>QLGLRR | 3.14 | 0.01 | 2.70 | 0.68 | 0.22 | 1.34 |
| 40949 | 0 | 188708 | LGCDTAVAHWPWVY               | 2.65 | 0.01 | 0.90 | 0.68 | 0.22 | 1.39 |
| 40950 | 0 | 188708 | LGCDTAVAHWPWVY               | 2.65 | 0.01 | 0.90 | 0.68 | 0.22 | 0.28 |
| 40951 | 0 | 182209 | LGDCVFADSNRWHS               | 2.64 | 0.01 | 0.78 | 0.44 | 1.13 | 0.85 |
| 40952 | 0 | 36071  | LGDDTGIHVI                   | 2.32 | 0.01 | 3.27 | 0.44 | 0.85 | 0.28 |
| 40953 | 0 | 36072  | LGDDTGIHVIPTLNGDD<br>RHK     | 2.96 | 0.01 | 3.27 | 2.89 | 0.22 | 0.28 |
| 40954 | 0 | 36072  | LGDDTGIHVIPTLNGDD<br>RHK     | 2.96 | 0.01 | 3.27 | 3.16 | 0.22 | 0.28 |
| 40955 | 0 | 123424 | LGDKFNMGL                    | 2.24 | 0.01 | 2.28 | 2.00 | 0.22 | 0.28 |
| 40956 | 0 | 123424 | LGDKFNMGL                    | 2.24 | 0.01 | 2.28 | 2.00 | 0.22 | 0.28 |
| 40957 | 0 | 36077  | LGDTAW                       | 1.88 | 0.01 | 2.40 | 0.44 | 0.85 | 0.28 |
| 40958 | 0 | 149803 | LGDTGGENIELTYFG              | 2.70 | 0.01 | 4.03 | 1.12 | 0.22 | 0.28 |
| 40959 | 0 | 103348 | LGDVGEAFVDSLTSQ              | 2.69 | 0.01 | 2.04 | 0.44 | 0.85 | 1.28 |
| 40960 | 0 | 36083  | LGDYLIEQGL                   | 2.34 | 0.01 | 3.85 | 0.44 | 1.23 | 0.85 |
| 40961 | 0 | 36085  | LGEATALD                     | 2.15 | 0.01 | 3.06 | 1.12 | 0.22 | 0.28 |
| 40962 | 0 | 178146 | LGEAVMRMGDLHSLQS<br>RNGK     | 2.94 | 0.01 | 4.23 | 1.12 | 0.22 | 1.27 |
| 40963 | 0 | 123425 | LGEEYEEHL                    | 2.27 | 0.01 | 2.28 | 2.00 | 0.22 | 0.28 |
| 40964 | 0 | 123425 | LGEEYEEHL                    | 2.27 | 0.01 | 2.28 | 2.00 | 0.22 | 0.28 |
| 40965 | 0 | 123425 | LGEEYEEHL                    | 2.27 | 0.01 | 2.28 | 2.00 | 0.22 | 0.28 |
| 40966 | 0 | 238698 | LGEKEAKLAQQSQALQE<br>L       | 2.91 | 0.01 | 0.78 | 0.44 | 1.13 | 0.28 |
| 40967 | 0 | 238698 | LGEKEAKLAQQSQALQE<br>L       | 2.91 | 0.01 | 0.78 | 0.44 | 1.13 | 0.28 |
| 40968 | 0 | 137918 | LGKVLISKQETE                 | 2.50 | 0.01 | 2.21 | 1.20 | 0.22 | 0.28 |
| 40969 | 0 | 151967 | LGELPVDARFP                  | 2.40 | 0.01 | 0.78 | 0.44 | 1.93 | 1.27 |
| 40970 | 0 | 103349 | LGENGNGGMVTGCAE              | 2.70 | 0.01 | 2.04 | 0.44 | 0.85 | 1.28 |



|       |   |        |                                                      |      |      |      |      |      |      |
|-------|---|--------|------------------------------------------------------|------|------|------|------|------|------|
| 40971 | 0 | 132430 | LGFA                                                 | 1.57 | 0.01 | 0.78 | 0.68 | 0.22 | 0.85 |
| 40972 | 0 | 132430 | LGFA                                                 | 1.57 | 0.01 | 0.78 | 0.68 | 0.22 | 0.85 |
| 40973 | 0 | 132431 | LGFAE                                                | 1.74 | 0.01 | 0.78 | 0.68 | 0.22 | 0.85 |
| 40974 | 0 | 132431 | LGFAE                                                | 1.74 | 0.01 | 0.78 | 0.68 | 0.22 | 0.85 |
| 40975 | 0 | 132432 | LGFAELQ                                              | 2.03 | 0.01 | 0.78 | 0.68 | 0.22 | 0.85 |
| 40976 | 0 | 132432 | LGFAELQ                                              | 2.03 | 0.01 | 0.78 | 0.68 | 0.22 | 0.85 |
| 40977 | 0 | 237818 | LGGAFNSIFGGVGFLPKL                                   | 2.87 | 0.01 | 3.19 | 0.44 | 0.22 | 0.85 |
| 40978 | 0 | 134133 | LGGAKQAGDV                                           | 2.33 | 0.01 | 0.78 | 1.15 | 0.22 | 1.34 |
| 40979 | 0 | 134133 | LGGAKQAGDV                                           | 2.33 | 0.01 | 0.78 | 1.15 | 0.22 | 0.28 |
| 40980 | 0 | 134133 | LGGAKQAGDV                                           | 2.33 | 0.01 | 0.78 | 1.15 | 0.22 | 0.28 |
| 40981 | 0 | 134133 | LGGAKQAGDV                                           | 2.33 | 0.01 | 0.78 | 1.15 | 0.22 | 0.28 |
| 40982 | 0 | 36114  | LGGAYSRAMNDAAANV<br>VRSGVFLSVAAGNEAQ<br>DASNSSPASAPN | 3.74 | 0.01 | 3.28 | 0.44 | 1.23 | 1.39 |
| 40983 | 0 | 36116  | LGGDILFGWERTREDGV<br>QEY                             | 2.95 | 0.01 | 2.21 | 1.20 | 0.22 | 0.28 |
| 40984 | 0 | 36116  | LGGDILFGWERTREDGV<br>QEY                             | 2.95 | 0.01 | 2.21 | 1.20 | 0.22 | 0.28 |
| 40985 | 0 | 156910 | LGGGAGGGGDHADKLS<br>LYSETDSGYGSYTPSLKS<br>PN         | 3.54 | 0.01 | 0.78 | 0.44 | 2.82 | 1.39 |
| 40986 | 0 | 103352 | LGGGVGAFLNALFAG                                      | 2.74 | 0.01 | 2.04 | 0.44 | 0.85 | 1.28 |
| 40987 | 0 | 36123  | LGGKFLE                                              | 2.04 | 0.01 | 2.24 | 0.68 | 0.22 | 0.28 |
| 40988 | 0 | 36123  | LGGKFLE                                              | 2.04 | 0.01 | 2.24 | 0.68 | 0.22 | 0.85 |
| 40989 | 0 | 36124  | LGGKPAIVPDKEVLYQQ<br>YDE                             | 2.95 | 0.01 | 1.96 | 0.44 | 0.85 | 0.28 |
| 40990 | 0 | 36124  | LGGKPAIVPDKEVLYQQ<br>YDE                             | 2.95 | 0.01 | 4.03 | 0.44 | 1.59 | 0.85 |
| 40991 | 0 | 36126  | LGGKPALVPDKEVLYQQ<br>YDE                             | 2.97 | 0.01 | 1.96 | 0.44 | 0.85 | 0.28 |
| 40992 | 0 | 36127  | LGGKPALVPDRQVLYQ<br>QYDE                             | 2.95 | 0.01 | 1.96 | 0.44 | 0.85 | 0.28 |
| 40993 | 0 | 238699 | LGGLAGYTRGDRGFTGD<br>G                               | 2.90 | 0.01 | 2.14 | 2.65 | 0.22 | 0.85 |
| 40994 | 0 | 135478 | LGGLGVG                                              | 2.07 | 0.01 | 0.78 | 1.20 | 0.22 | 0.28 |
| 40995 | 0 | 149364 | LGGPSGSAALKAABD                                      | 2.71 | 0.01 | 3.67 | 3.16 | 0.22 | 0.28 |
| 40996 | 0 | 36134  | LGGTIGKV                                             | 2.14 | 0.01 | 2.83 | 2.61 | 0.22 | 0.28 |
| 40997 | 0 | 36136  | LGGVFT                                               | 1.89 | 0.01 | 2.40 | 0.44 | 0.85 | 0.28 |
| 40998 | 0 | 36137  | LGGWKLQSDPRAYAL                                      | 2.66 | 0.01 | 3.41 | 0.44 | 1.23 | 1.57 |
| 40999 | 0 | 36137  | LGGWKLQSDPRAYAL                                      | 2.66 | 0.01 | 3.41 | 1.12 | 0.22 | 1.57 |
| 41000 | 0 | 36137  | LGGWKLQSDPRAYAL                                      | 2.66 | 0.01 | 3.41 | 3.04 | 0.22 | 1.57 |
| 41001 | 0 | 36137  | LGGWKLQSDPRAYAL                                      | 2.66 | 0.01 | 3.41 | 0.44 | 1.23 | 1.57 |
| 41002 | 0 | 36139  | LGGYMLGSAMSRPLIHF<br>GNDY                            | 2.98 | 0.01 | 2.52 | 1.15 | 0.22 | 0.28 |

|       |   |        |                           |      |      |      |      |      |      |
|-------|---|--------|---------------------------|------|------|------|------|------|------|
| 41003 | 0 | 36139  | LGGYMLGSAMSRPLIHF<br>GNDY | 2.98 | 0.01 | 2.52 | 2.90 | 0.22 | 0.85 |
| 41004 | 0 | 36139  | LGGYMLGSAMSRPLIHF<br>GNDY | 2.98 | 0.01 | 2.52 | 3.93 | 0.22 | 0.85 |
| 41005 | 0 | 36139  | LGGYMLGSAMSRPLIHF<br>GNDY | 2.98 | 0.01 | 2.52 | 2.90 | 0.22 | 0.28 |
| 41006 | 0 | 36140  | LGGYMLGSAMSRPMIH<br>FGNDW | 2.97 | 0.01 | 1.75 | 3.85 | 0.22 | 0.85 |
| 41007 | 0 | 36140  | LGGYMLGSAMSRPMIH<br>FGNDW | 2.97 | 0.01 | 1.75 | 3.85 | 0.22 | 0.28 |
| 41008 | 0 | 140882 | LGHDEAAYSKNR              | 2.42 | 0.01 | 3.01 | 1.12 | 0.22 | 0.28 |
| 41009 | 0 | 419252 | LGHPISHLRNSV              | 2.48 | 0.01 | 0.90 | 0.44 | 1.93 | 1.39 |
| 41010 | 0 | 36153  | LGIASFIRGPKQNI            | 2.67 | 0.01 | 1.72 | 0.68 | 0.22 | 0.28 |
| 41011 | 0 | 79013  | LGIASFLTRGPKQNI           | 2.65 | 0.01 | 2.41 | 0.44 | 0.85 | 0.28 |
| 41012 | 0 | 36159  | LGIGTVLDQAETAGAR          | 2.75 | 0.01 | 1.96 | 0.68 | 0.22 | 0.28 |
| 41013 | 0 | 36159  | LGIGTVLDQAETAGAR          | 2.75 | 0.01 | 1.96 | 0.68 | 0.22 | 1.48 |
| 41014 | 0 | 36159  | LGIGTVLDQAETAGAR          | 2.75 | 0.01 | 1.96 | 0.68 | 0.22 | 0.28 |
| 41015 | 0 | 36162  | LGIHE                     | 1.74 | 0.01 | 2.69 | 1.12 | 0.22 | 0.28 |
| 41016 | 0 | 172091 | LGIKSLVSKGTLVQT           | 2.72 | 0.01 | 0.78 | 0.44 | 1.13 | 0.28 |
| 41017 | 0 | 36166  | LGIMGEYRGTPRNQDLY<br>DAA  | 2.92 | 0.01 | 3.00 | 0.68 | 0.22 | 0.28 |
| 41018 | 0 | 36166  | LGIMGEYRGTPRNQDLY<br>DAA  | 2.92 | 0.01 | 3.00 | 0.68 | 0.22 | 1.48 |
| 41019 | 0 | 36166  | LGIMGEYRGTPRNQDLY<br>DAA  | 2.92 | 0.01 | 3.00 | 0.68 | 0.22 | 1.57 |
| 41020 | 0 | 36166  | LGIMGEYRGTPRNQDLY<br>DAA  | 2.92 | 0.01 | 3.00 | 0.68 | 0.22 | 0.28 |
| 41021 | 0 | 36167  | LGINITNFRAILTAFSP         | 2.82 | 0.01 | 2.48 | 0.44 | 0.85 | 0.28 |
| 41022 | 0 | 241028 | LGITAEAAK                 | 2.22 | 0.01 | 3.35 | 2.37 | 0.22 | 0.85 |
| 41023 | 0 | 241028 | LGITAEAAK                 | 2.22 | 0.01 | 3.35 | 1.20 | 0.22 | 0.85 |
| 41024 | 0 | 119488 | LGIWTYDGTKVSISPES         | 2.78 | 0.01 | 2.26 | 1.81 | 0.22 | 1.57 |
| 41025 | 0 | 119488 | LGIWTYDGTKVSISPES         | 2.78 | 0.01 | 2.26 | 1.81 | 0.22 | 1.75 |
| 41026 | 0 | 119488 | LGIWTYDGTKVSISPES         | 2.78 | 0.01 | 2.26 | 1.81 | 0.22 | 1.75 |
| 41027 | 0 | 119488 | LGIWTYDGTKVSISPES         | 2.78 | 0.01 | 2.26 | 1.81 | 0.22 | 1.57 |
| 41028 | 0 | 119488 | LGIWTYDGTKVSISPES         | 2.78 | 0.01 | 2.26 | 1.81 | 2.25 | 1.75 |
| 41029 | 0 | 119488 | LGIWTYDGTKVSISPES         | 2.78 | 0.01 | 2.26 | 2.04 | 0.22 | 1.75 |
| 41030 | 0 | 119488 | LGIWTYDGTKVSISPES         | 2.78 | 0.01 | 2.26 | 1.15 | 0.22 | 1.57 |

|       |   |        |                                  |      |      |      |      |      |      |
|-------|---|--------|----------------------------------|------|------|------|------|------|------|
| 41031 | 0 | 119488 | LGIWTYDGTKVSISPES                | 2.78 | 0.01 | 2.26 | 1.12 | 0.22 | 1.57 |
| 41032 | 0 | 119488 | LGIWTYDGTKVSISPES                | 2.78 | 0.01 | 2.26 | 2.43 | 0.22 | 1.57 |
| 41033 | 0 | 119488 | LGIWTYDGTKVSISPES                | 2.78 | 0.01 | 2.26 | 2.25 | 0.22 | 1.57 |
| 41034 | 0 | 119488 | LGIWTYDGTKVSISPES                | 2.78 | 0.01 | 2.26 | 3.65 | 0.22 | 1.57 |
| 41035 | 0 | 36177  | LGKIIAQQN                        | 2.21 | 0.01 | 3.04 | 2.13 | 0.22 | 1.27 |
| 41036 | 0 | 36177  | LGKIIAQQN                        | 2.21 | 0.01 | 3.04 | 2.13 | 0.22 | 1.27 |
| 41037 | 0 | 36177  | LGKIIAQQN                        | 2.21 | 0.01 | 3.04 | 2.13 | 0.22 | 1.27 |
| 41038 | 0 | 36178  | LGKIIAQQNQSRGKGPG<br>KKIKNKNPEKP | 3.30 | 0.01 | 4.15 | 1.15 | 0.22 | 0.28 |
| 41039 | 0 | 36178  | LGKIIAQQNQSRGKGPG<br>KKIKNKNPEKP | 3.30 | 0.01 | 4.15 | 1.15 | 0.22 | 0.28 |
| 41040 | 0 | 36178  | LGKIIAQQNQSRGKGPG<br>KKIKNKNPEKP | 3.30 | 0.01 | 4.15 | 1.15 | 0.22 | 0.28 |
| 41041 | 0 | 36178  | LGKIIAQQNQSRGKGPG<br>KKIKNKNPEKP | 3.30 | 0.01 | 4.15 | 1.15 | 0.22 | 0.28 |
| 41042 | 0 | 36178  | LGKIIAQQNQSRGKGPG<br>KKIKNKNPEKP | 3.30 | 0.01 | 4.15 | 2.13 | 1.59 | 0.28 |
| 41043 | 0 | 36178  | LGKIIAQQNQSRGKGPG<br>KKIKNKNPEKP | 3.30 | 0.01 | 4.15 | 2.13 | 0.22 | 1.27 |
| 41044 | 0 | 36179  | LGKIIAQQNQSRGKGPG<br>KKNKKKNPEKP | 3.29 | 0.01 | 3.04 | 1.15 | 0.22 | 0.28 |
| 41045 | 0 | 36179  | LGKIIAQQNQSRGKGPG<br>KKNKKKNPEKP | 3.29 | 0.01 | 3.04 | 1.15 | 0.22 | 0.28 |
| 41046 | 0 | 36179  | LGKIIAQQNQSRGKGPG<br>KKNKKKNPEKP | 3.29 | 0.01 | 3.04 | 1.15 | 0.22 | 0.28 |
| 41047 | 0 | 36179  | LGKIIAQQNQSRGKGPG<br>KKNKKKNPEKP | 3.29 | 0.01 | 3.04 | 2.13 | 0.22 | 0.28 |
| 41048 | 0 | 36179  | LGKIIAQQNQSRGKGPG<br>KKNKKKNPEKP | 3.29 | 0.01 | 3.04 | 2.13 | 0.22 | 0.28 |
| 41049 | 0 | 36179  | LGKIIAQQNQSRGKGPG<br>KKNKKKNPEKP | 3.29 | 0.01 | 3.04 | 2.13 | 0.22 | 0.28 |
| 41050 | 0 | 36179  | LGKIIAQQNQSRGKGPG<br>KKNKKKNPEKP | 3.29 | 0.01 | 3.04 | 2.13 | 0.22 | 0.28 |
| 41051 | 0 | 36179  | LGKIIAQQNQSRGKGPG<br>KKNKKKNPEKP | 3.29 | 0.01 | 3.04 | 2.13 | 0.22 | 0.28 |
| 41052 | 0 | 36179  | LGKIIAQQNQSRGKGPG<br>KKNKKKNPEKP | 3.29 | 0.01 | 3.04 | 2.13 | 0.22 | 0.28 |
| 41053 | 0 | 36179  | LGKIIAQQNQSRGKGPG<br>KKNKKKNPEKP | 3.29 | 0.01 | 3.04 | 2.13 | 0.22 | 0.28 |
| 41054 | 0 | 36179  | LGKIIAQQNQSRGKGPG<br>KKNKKKNPEKP | 3.29 | 0.01 | 3.04 | 2.13 | 1.59 | 0.28 |
| 41055 | 0 | 36179  | LGKIIAQQNQSRGKGPG<br>KKNKKKNPEKP | 3.29 | 0.01 | 3.04 | 2.13 | 0.22 | 1.27 |

|       |   |        |                                                           |      |      |      |      |      |      |
|-------|---|--------|-----------------------------------------------------------|------|------|------|------|------|------|
| 41056 | 0 | 36180  | LGKIIAQQNQSRGKGPG<br>KKSKKKSPEKP                          | 3.29 | 0.01 | 2.80 | 1.15 | 0.22 | 0.28 |
| 41057 | 0 | 36180  | LGKIIAQQNQSRGKGPG<br>KKSKKKSPEKP                          | 3.29 | 0.01 | 2.80 | 1.15 | 0.22 | 0.28 |
| 41058 | 0 | 36180  | LGKIIAQQNQSRGKGPG<br>KKSKKKSPEKP                          | 3.29 | 0.01 | 2.80 | 1.15 | 0.22 | 0.28 |
| 41059 | 0 | 36180  | LGKIIAQQNQSRGKGPG<br>KKSKKKSPEKP                          | 3.29 | 0.01 | 2.80 | 1.15 | 0.22 | 0.28 |
| 41060 | 0 | 36180  | LGKIIAQQNQSRGKGPG<br>KKSKKKSPEKP                          | 3.29 | 0.01 | 2.80 | 2.13 | 1.59 | 0.28 |
| 41061 | 0 | 36180  | LGKIIAQQNQSRGKGPG<br>KKSKKKSPEKP                          | 3.29 | 0.01 | 2.80 | 2.13 | 0.22 | 1.27 |
| 41062 | 0 | 36181  | LGKIIAQQSQSRVKGPG<br>RKNKKKNPEKP                          | 3.28 | 0.01 | 4.33 | 1.15 | 0.22 | 0.28 |
| 41063 | 0 | 36181  | LGKIIAQQSQSRVKGPG<br>RKNKKKNPEKP                          | 3.28 | 0.01 | 4.33 | 1.15 | 0.22 | 0.28 |
| 41064 | 0 | 36181  | LGKIIAQQSQSRVKGPG<br>RKNKKKNPEKP                          | 3.28 | 0.01 | 4.33 | 1.15 | 0.22 | 0.28 |
| 41065 | 0 | 36181  | LGKIIAQQSQSRVKGPG<br>RKNKKKNPEKP                          | 3.28 | 0.01 | 4.33 | 2.13 | 1.59 | 0.28 |
| 41066 | 0 | 123426 | LGKNPYLRG                                                 | 2.24 | 0.01 | 2.28 | 2.00 | 0.22 | 0.28 |
| 41067 | 0 | 36189  | LGKPLPNALRSH                                              | 2.48 | 0.01 | 0.90 | 0.68 | 0.22 | 1.39 |
| 41068 | 0 | 132434 | LGKQVASGGAGG                                              | 2.49 | 0.01 | 0.90 | 1.15 | 0.22 | 1.39 |
| 41069 | 0 | 36192  | LGKQVKKAVVTVPAYFN<br>DSQ                                  | 2.92 | 0.01 | 2.78 | 2.49 | 0.85 | 0.28 |
| 41070 | 0 | 36192  | LGKQVKKAVVTVPAYFN<br>DSQ                                  | 2.92 | 0.01 | 2.30 | 0.44 | 0.85 | 0.28 |
| 41071 | 0 | 36192  | LGKQVKKAVVTVPAYFN<br>DSQ                                  | 2.92 | 0.01 | 2.30 | 0.44 | 1.41 | 0.28 |
| 41072 | 0 | 109478 | LGKRKATPTTSSTTTAK<br>RKKRKL                               | 3.18 | 0.01 | 1.86 | 1.12 | 0.22 | 2.02 |
| 41073 | 0 | 328351 | LGKSVGLTAALSPRQ                                           | 2.68 | 0.01 | 1.61 | 0.44 | 0.85 | 1.28 |
| 41074 | 0 | 143984 | LGLATSFNEKNMNITK                                          | 2.79 | 0.01 | 0.78 | 0.44 | 1.41 | 0.28 |
| 41075 | 0 | 36198  | LGLDPG                                                    | 1.92 | 0.01 | 0.90 | 0.44 | 1.59 | 1.39 |
| 41076 | 0 | 108518 | LGLHALQSP                                                 | 2.24 | 0.01 | 0.90 | 0.44 | 1.13 | 1.39 |
| 41077 | 0 | 36203  | LGLIDNDQVVVTPDKEIL<br>YEAFFEDEMEECASKALIE<br>EGQRMAEMLKSK | 3.79 | 0.01 | 1.72 | 1.15 | 0.22 | 0.28 |
| 41078 | 0 | 36205  | LGLKRGIEKAVE                                              | 2.50 | 0.01 | 2.04 | 1.15 | 0.22 | 0.28 |
| 41079 | 0 | 36205  | LGLKRGIEKAVE                                              | 2.50 | 0.01 | 2.04 | 1.15 | 0.22 | 0.28 |
| 41080 | 0 | 36208  | LGLLQRATQ                                                 | 2.25 | 0.01 | 2.59 | 0.44 | 0.85 | 0.28 |
| 41081 | 0 | 36209  | LGLLQTASR                                                 | 2.23 | 0.01 | 2.41 | 0.44 | 0.85 | 0.28 |
| 41082 | 0 | 147908 | LGLPPFLNS                                                 | 2.25 | 0.01 | 3.24 | 0.68 | 0.22 | 0.28 |
| 41083 | 0 | 156911 | LGMSTNPGPRIL                                              | 2.48 | 0.01 | 0.90 | 2.74 | 0.22 | 0.85 |
| 41084 | 0 | 156911 | LGMSTNPGPRIL                                              | 2.48 | 0.01 | 0.90 | 2.22 | 1.59 | 0.85 |

|       |   |        |                           |      |      |      |      |      |      |
|-------|---|--------|---------------------------|------|------|------|------|------|------|
| 41085 | 0 | 156911 | LGMSTNPGPRIL              | 2.48 | 0.01 | 0.90 | 0.68 | 0.22 | 0.28 |
| 41086 | 0 | 36223  | LGMTATSADKNVPQLK<br>PVSE  | 2.94 | 0.01 | 2.82 | 0.44 | 0.85 | 0.28 |
| 41087 | 0 | 97445  | LGNATALS                  | 2.15 | 0.01 | 2.87 | 0.68 | 0.22 | 0.28 |
| 41088 | 0 | 226061 | LGNGKKAQWATGLKY<br>DANN   | 2.95 | 0.01 | 2.24 | 3.06 | 0.22 | 0.28 |
| 41089 | 0 | 85207  | LGNGLKAIWQVE              | 2.46 | 0.01 | 2.87 | 0.44 | 0.22 | 0.28 |
| 41090 | 0 | 85207  | LGNGLKAIWQVE              | 2.46 | 0.01 | 2.90 | 0.68 | 0.22 | 0.28 |
| 41091 | 0 | 139799 | LGNGPLEEAISA              | 2.49 | 0.01 | 2.75 | 0.68 | 0.22 | 0.28 |
| 41092 | 0 | 36230  | LGNQSLLE                  | 2.14 | 0.01 | 2.40 | 2.43 | 0.22 | 0.28 |
| 41093 | 0 | 36241  | LGPADGMVSKGWRL            | 2.60 | 0.01 | 2.41 | 0.44 | 0.85 | 0.28 |
| 41094 | 0 | 36244  | LGPADSLEGQGWRL            | 2.62 | 0.01 | 1.96 | 0.44 | 0.85 | 0.28 |
| 41095 | 0 | 77946  | LGPALLLL                  | 2.25 | 0.01 | 2.25 | 0.44 | 2.26 | 0.28 |
| 41096 | 0 | 77946  | LGPALLLL                  | 2.25 | 0.01 | 2.25 | 0.44 | 2.26 | 0.28 |
| 41097 | 0 | 36250  | LGPAYLLKGALTRV            | 2.63 | 0.01 | 2.69 | 0.44 | 1.41 | 0.28 |
| 41098 | 0 | 109479 | LGPKGQTG                  | 2.14 | 0.01 | 1.60 | 2.55 | 2.60 | 0.28 |
| 41099 | 0 | 36264  | LGPLYLIQATITTT            | 2.63 | 0.01 | 2.59 | 0.44 | 0.85 | 0.28 |
| 41100 | 0 | 149065 | LGPNHTQ                   | 1.99 | 0.01 | 0.90 | 2.13 | 1.59 | 1.39 |
| 41101 | 0 | 188320 | LGPSVTDDAD                | 2.31 | 0.01 | 2.92 | 1.81 | 0.22 | 0.85 |
| 41102 | 0 | 79289  | LGPVNS                    | 1.88 | 0.01 | 0.90 | 0.68 | 0.22 | 1.39 |
| 41103 | 0 | 139800 | LGPYSFV                   | 1.99 | 0.01 | 0.90 | 2.00 | 0.22 | 0.28 |
| 41104 | 0 | 36274  | LGPYSLNW                  | 2.13 | 0.01 | 0.90 | 2.55 | 0.22 | 0.28 |
| 41105 | 0 | 115077 | LGQGPEFLIYFQGTGAA<br>DDSG | 2.99 | 0.01 | 0.78 | 0.44 | 1.13 | 0.28 |
| 41106 | 0 | 115077 | LGQGPEFLIYFQGTGAA<br>DDSG | 2.99 | 0.01 | 0.78 | 0.44 | 1.13 | 0.28 |
| 41107 | 0 | 115077 | LGQGPEFLIYFQGTGAA<br>DDSG | 2.99 | 0.01 | 0.78 | 0.44 | 1.13 | 0.28 |
| 41108 | 0 | 36278  | LGQGSFRPSQQN              | 2.48 | 0.01 | 1.86 | 0.68 | 0.22 | 0.28 |
| 41109 | 0 | 36278  | LGQGSFRPSQQN              | 2.48 | 0.01 | 1.86 | 0.68 | 0.22 | 0.28 |
| 41110 | 0 | 36278  | LGQGSFRPSQQN              | 2.48 | 0.01 | 1.86 | 0.68 | 0.22 | 0.28 |
| 41111 | 0 | 36278  | LGQGSFRPSQQN              | 2.48 | 0.01 | 1.86 | 0.68 | 0.22 | 0.28 |
| 41112 | 0 | 36278  | LGQGSFRPSQQN              | 2.48 | 0.01 | 1.86 | 0.68 | 0.22 | 0.28 |
| 41113 | 0 | 36278  | LGQGSFRPSQQN              | 2.48 | 0.01 | 1.86 | 0.44 | 1.93 | 0.28 |
| 41114 | 0 | 450786 | LGQLFPQ                   | 2.05 | 0.01 | 0.90 | 0.44 | 1.41 | 1.39 |
| 41115 | 0 | 137919 | LGQNVLSA                  | 2.13 | 0.01 | 2.21 | 0.44 | 0.85 | 0.28 |
| 41116 | 0 | 137919 | LGQNVLSA                  | 2.13 | 0.01 | 2.21 | 0.44 | 0.85 | 0.28 |
| 41117 | 0 | 78445  | LGQQQPFPPQQP              | 2.53 | 0.01 | 1.86 | 0.44 | 1.93 | 1.27 |
| 41118 | 0 | 36294  | LGQQQPFPPQQPYQP<br>QPF    | 2.96 | 0.01 | 1.86 | 1.15 | 0.22 | 0.28 |
| 41119 | 0 | 36294  | LGQQQPFPPQQPYQP<br>QPF    | 2.96 | 0.01 | 1.86 | 1.15 | 0.22 | 0.28 |
| 41120 | 0 | 36294  | LGQQQPFPPQQPYQP<br>QPF    | 2.96 | 0.01 | 1.86 | 1.15 | 0.22 | 0.28 |
| 41121 | 0 | 36294  | LGQQQPFPPQQPYQP<br>QPF    | 2.96 | 0.01 | 1.86 | 1.15 | 0.22 | 0.28 |

|       |   |        |                                                         |      |      |      |      |      |      |
|-------|---|--------|---------------------------------------------------------|------|------|------|------|------|------|
| 41122 | 0 | 36294  | LGQQQPFPPQQPYQP<br>QPF                                  | 2.96 | 0.01 | 1.86 | 1.15 | 0.22 | 0.28 |
| 41123 | 0 | 36294  | LGQQQPFPPQQPYQP<br>QPF                                  | 2.96 | 0.01 | 1.86 | 1.15 | 0.22 | 0.28 |
| 41124 | 0 | 140883 | LGQRRADAVKGY                                            | 2.46 | 0.01 | 3.01 | 1.12 | 0.22 | 0.28 |
| 41125 | 0 | 108519 | LGRDANAWK                                               | 2.21 | 0.01 | 0.90 | 0.44 | 1.13 | 1.39 |
| 41126 | 0 | 122136 | LGRGGSK                                                 | 2.03 | 0.01 | 0.90 | 0.44 | 1.13 | 1.27 |
| 41127 | 0 | 36304  | LGR LIT                                                 | 1.91 | 0.01 | 2.40 | 0.44 | 0.85 | 0.28 |
| 41128 | 0 | 127722 | LGRNSTV                                                 | 1.99 | 0.01 | 0.90 | 0.44 | 1.13 | 1.39 |
| 41129 | 0 | 36307  | LGRPDEDSSSSSSC                                          | 2.68 | 0.01 | 2.76 | 1.12 | 0.22 | 0.28 |
| 41130 | 0 | 36307  | LGRPDEDSSSSSSC                                          | 2.68 | 0.01 | 2.76 | 1.12 | 0.22 | 0.28 |
| 41131 | 0 | 36307  | LGRPDEDSSSSSSC                                          | 2.68 | 0.01 | 2.76 | 1.12 | 0.22 | 0.85 |
| 41132 | 0 | 36309  | LGRSGGDIKKMQTL                                          | 2.66 | 0.01 | 1.66 | 0.44 | 0.85 | 2.97 |
| 41133 | 0 | 36309  | LGRSGGDIKKMQTL                                          | 2.66 | 0.01 | 1.66 | 0.44 | 0.85 | 2.97 |
| 41134 | 0 | 36309  | LGRSGGDIKKMQTL                                          | 2.66 | 0.01 | 1.66 | 0.44 | 0.85 | 2.97 |
| 41135 | 0 | 36309  | LGRSGGDIKKMQTL                                          | 2.66 | 0.01 | 1.66 | 0.44 | 0.85 | 0.28 |
| 41136 | 0 | 36309  | LGRSGGDIKKMQTL                                          | 2.66 | 0.01 | 1.66 | 0.44 | 0.85 | 0.28 |
| 41137 | 0 | 132436 | LGRTSQYERXIG                                            | 2.45 | 0.01 | 0.90 | 1.15 | 0.22 | 1.39 |
| 41138 | 0 | 36312  | LGRWKAVEKSVAMKH                                         | 2.66 | 0.01 | 3.04 | 0.44 | 0.22 | 0.28 |
| 41139 | 0 | 36315  | LGSAYP                                                  | 1.88 | 0.01 | 2.59 | 1.15 | 2.26 | 0.28 |
| 41140 | 0 | 36315  | LGSAYP                                                  | 1.88 | 0.01 | 2.59 | 1.15 | 2.26 | 0.28 |
| 41141 | 0 | 462389 | LGSDPT                                                  | 1.88 | 0.01 | 0.78 | 1.12 | 0.22 | 1.28 |
| 41142 | 0 | 36317  | LGSAGFTIYKG                                             | 2.48 | 0.01 | 4.93 | 1.15 | 0.22 | 2.56 |
| 41143 | 0 | 36319  | LGSINQAMVTRCEPVVC<br>YLY                                | 2.89 | 0.01 | 2.82 | 0.44 | 0.85 | 0.28 |
| 41144 | 0 | 36319  | LGSINQAMVTRCEPVVC<br>YLY                                | 2.89 | 0.01 | 2.82 | 0.44 | 1.41 | 0.28 |
| 41145 | 0 | 125136 | LGSISERRALQDSQR                                         | 2.77 | 0.01 | 3.81 | 1.20 | 0.22 | 1.27 |
| 41146 | 0 | 125136 | LGSISERRALQDSQR                                         | 2.77 | 0.01 | 3.81 | 1.20 | 0.22 | 1.27 |
| 41147 | 0 | 125136 | LGSISERRALQDSQR                                         | 2.77 | 0.01 | 3.81 | 1.20 | 0.22 | 1.27 |
| 41148 | 0 | 125136 | LGSISERRALQDSQR                                         | 2.77 | 0.01 | 3.81 | 1.20 | 0.22 | 2.12 |
| 41149 | 0 | 85221  | LGSKIGFKGQED                                            | 2.48 | 0.01 | 2.87 | 0.44 | 0.85 | 0.28 |
| 41150 | 0 | 36324  | LGSQEG                                                  | 1.90 | 0.01 | 2.40 | 0.44 | 0.85 | 0.28 |
| 41151 | 0 | 120060 | LGSSERRALQDSQR                                          | 2.72 | 0.01 | 3.81 | 0.44 | 1.13 | 0.28 |
| 41152 | 0 | 108520 | LGSTAVSPTTLRGSTAVS<br>PTTLRGS                           | 3.22 | 0.01 | 0.90 | 1.12 | 0.22 | 0.85 |
| 41153 | 0 | 108520 | LGSTAVSPTTLRGSTAVS<br>PTTLRGS                           | 3.22 | 0.01 | 0.90 | 1.12 | 0.22 | 0.28 |
| 41154 | 0 | 108521 | LGSTAVSPTTLRGSTAVS<br>PTTLRGSTAVSPTTLRGS<br>TAVSPTTLRGS | 3.85 | 0.01 | 0.90 | 1.12 | 0.22 | 0.28 |
| 41155 | 0 | 123428 | LGSTPEERA                                               | 2.20 | 0.01 | 2.28 | 2.00 | 0.22 | 0.28 |
| 41156 | 0 | 123428 | LGSTPEERA                                               | 2.20 | 0.01 | 2.28 | 2.00 | 0.22 | 0.28 |
| 41157 | 0 | 510451 | LGSVQHT                                                 | 1.99 | 0.01 | 0.90 | 0.44 | 1.13 | 0.28 |
| 41158 | 0 | 510451 | LGSVQHT                                                 | 1.99 | 0.01 | 0.90 | 0.44 | 1.41 | 0.28 |
| 41159 | 0 | 139801 | LGSYSFI                                                 | 2.02 | 0.01 | 0.90 | 2.00 | 0.22 | 0.28 |

|       |   |        |                                    |      |      |      |      |      |      |
|-------|---|--------|------------------------------------|------|------|------|------|------|------|
| 41160 | 0 | 192999 | LGTDALHCRTHEVADKG                  | 2.80 | 2.84 | 2.84 | 0.44 | 1.74 | 0.28 |
| 41161 | 0 | 36332  | LGTIALKPD PADGTADIT<br>LTFTMGGAGPK | 3.36 | 0.01 | 3.61 | 1.20 | 0.22 | 0.28 |
| 41162 | 0 | 134430 | LGTLHVVQ                           | 2.14 | 0.01 | 0.78 | 0.44 | 1.13 | 0.28 |
| 41163 | 0 | 134430 | LGTLHVVQ                           | 2.14 | 0.01 | 0.78 | 0.44 | 1.13 | 0.28 |
| 41164 | 0 | 194744 | LGTQQNAALNRDLFLT                   | 2.75 | 0.01 | 3.61 | 1.12 | 0.22 | 0.28 |
| 41165 | 0 | 194744 | LGTQQNAALNRDLFLT                   | 2.75 | 0.01 | 3.61 | 1.12 | 0.22 | 1.34 |
| 41166 | 0 | 194744 | LGTQQNAALNRDLFLT                   | 2.75 | 0.01 | 3.61 | 1.12 | 0.22 | 0.28 |
| 41167 | 0 | 36333  | LGTQYTDAPS                         | 2.29 | 0.01 | 1.60 | 0.44 | 1.23 | 0.28 |
| 41168 | 0 | 115345 | LGTQYTDAPSFSDIPNPI<br>GS           | 2.95 | 0.01 | 1.60 | 0.44 | 1.23 | 1.28 |
| 41169 | 0 | 123429 | LGTTPERA                           | 2.21 | 0.01 | 2.28 | 2.00 | 0.22 | 0.28 |
| 41170 | 0 | 119608 | LGTWYDGSVVAINPES                   | 2.75 | 0.01 | 0.78 | 1.15 | 0.22 | 1.57 |
| 41171 | 0 | 119608 | LGTWYDGSVVAINPES                   | 2.75 | 0.01 | 0.78 | 0.44 | 1.41 | 1.57 |
| 41172 | 0 | 119608 | LGTWYDGSVVAINPES                   | 2.75 | 0.01 | 0.78 | 0.44 | 1.13 | 1.57 |
| 41173 | 0 | 36343  | LGVLEDNKG VVRGDYTA<br>C            | 2.83 | 0.01 | 2.86 | 2.02 | 0.22 | 0.28 |
| 41174 | 0 | 36343  | LGVLEDNKG VVRGDYTA<br>C            | 2.83 | 0.01 | 2.86 | 2.02 | 1.59 | 0.28 |
| 41175 | 0 | 36348  | LGVRVC                             | 1.90 | 0.01 | 1.96 | 0.44 | 0.85 | 0.28 |
| 41176 | 0 | 103355 | LGWKVSDLKSSTAVI                    | 2.68 | 0.01 | 2.04 | 0.44 | 0.85 | 1.28 |
| 41177 | 0 | 36353  | LGWLWG                             | 1.92 | 0.01 | 2.08 | 1.15 | 0.22 | 0.85 |
| 41178 | 0 | 36353  | LGWLWG                             | 1.92 | 0.01 | 2.08 | 1.15 | 0.22 | 0.28 |
| 41179 | 0 | 36353  | LGWLWG                             | 1.92 | 0.01 | 2.08 | 1.15 | 0.22 | 0.28 |
| 41180 | 0 | 36353  | LGWLWG                             | 1.92 | 0.01 | 2.08 | 1.15 | 0.22 | 2.35 |
| 41181 | 0 | 108002 | LGWMRYHPQA                         | 2.26 | 0.01 | 0.90 | 0.44 | 1.13 | 1.27 |
| 41182 | 0 | 108002 | LGWMRYHPQA                         | 2.26 | 0.01 | 0.90 | 0.44 | 1.13 | 0.28 |
| 41183 | 0 | 118879 | LG YIMSNYDYQKNLRF G<br>GSNEA       | 3.01 | 0.01 | 1.66 | 1.15 | 0.22 | 0.85 |
| 41184 | 0 | 118879 | LG YIMSNYDYQKNLRF G<br>GSNEA       | 3.01 | 0.01 | 1.66 | 1.15 | 0.22 | 1.27 |
| 41185 | 0 | 99419  | LG YTDRI G                         | 2.12 | 0.01 | 2.24 | 0.68 | 0.22 | 0.28 |
| 41186 | 0 | 177517 | LHALAEQVVQFVLADA                   | 2.78 | 0.01 | 1.86 | 0.44 | 1.23 | 0.85 |
| 41187 | 0 | 187678 | LHAPTGS GKSTKVPAA                  | 2.75 | 0.01 | 1.96 | 0.44 | 0.85 | 0.28 |
| 41188 | 0 | 187678 | LHAPTGS GKSTKVPAA                  | 2.75 | 0.01 | 1.96 | 0.44 | 0.85 | 0.28 |
| 41189 | 0 | 131232 | LHAYNPFLSWP                        | 2.47 | 0.01 | 0.90 | 0.44 | 1.13 | 1.39 |
| 41190 | 0 | 131232 | LHAYNPFLSWP                        | 2.47 | 0.01 | 0.90 | 0.44 | 1.13 | 1.39 |

|       |   |        |                                  |      |      |      |      |      |      |
|-------|---|--------|----------------------------------|------|------|------|------|------|------|
| 41191 | 0 | 36364  | LHDFRSDE                         | 2.12 | 0.01 | 3.36 | 0.68 | 0.22 | 0.28 |
| 41192 | 0 | 36364  | LHDFRSDE                         | 2.12 | 0.01 | 3.36 | 0.68 | 0.22 | 0.28 |
| 41193 | 0 | 36366  | LHDINHISKSDT                     | 2.49 | 0.01 | 2.24 | 1.12 | 0.22 | 0.28 |
| 41194 | 0 | 100259 | LHEHYVYAKE                       | 2.33 | 0.01 | 2.18 | 2.16 | 0.22 | 0.28 |
| 41195 | 0 | 36371  | LHELDKDLSQLTQALVKL<br>HKNLLKLAQY | 3.30 | 3.81 | 0.90 | 0.44 | 0.85 | 0.28 |
| 41196 | 0 | 36371  | LHELDKDLSQLTQALVKL<br>HKNLLKLAQY | 3.30 | 3.81 | 0.90 | 2.43 | 0.22 | 1.34 |
| 41197 | 0 | 36371  | LHELDKDLSQLTQALVKL<br>HKNLLKLAQY | 3.30 | 3.81 | 0.90 | 2.43 | 0.22 | 1.27 |
| 41198 | 0 | 36371  | LHELDKDLSQLTQALVKL<br>HKNLLKLAQY | 3.30 | 3.81 | 0.90 | 2.43 | 0.22 | 1.27 |
| 41199 | 0 | 36372  | LHEQYYF                          | 2.12 | 0.01 | 0.90 | 1.15 | 2.26 | 1.39 |
| 41200 | 0 | 36372  | LHEQYYF                          | 2.12 | 0.01 | 0.90 | 1.15 | 2.26 | 1.48 |
| 41201 | 0 | 172102 | LHESLEEIRIVAKER                  | 2.70 | 0.01 | 0.78 | 0.44 | 1.41 | 0.28 |
| 41202 | 0 | 36373  | LHEVDKDI                         | 2.12 | 0.01 | 2.04 | 0.44 | 0.85 | 0.28 |
| 41203 | 0 | 36374  | LHEVDKDISQLTQAIVKN<br>HKNLLKIAQY | 3.28 | 3.81 | 2.04 | 0.44 | 0.85 | 0.28 |
| 41204 | 0 | 36374  | LHEVDKDISQLTQAIVKN<br>HKNLLKIAQY | 3.28 | 3.81 | 2.04 | 2.43 | 0.22 | 1.27 |
| 41205 | 0 | 36374  | LHEVDKDISQLTQAIVKN<br>HKNLLKIAQY | 3.28 | 3.81 | 2.04 | 2.43 | 0.22 | 1.27 |
| 41206 | 0 | 36374  | LHEVDKDISQLTQAIVKN<br>HKNLLKIAQY | 3.28 | 3.81 | 2.04 | 2.43 | 0.22 | 1.34 |
| 41207 | 0 | 328783 | LHEVLQYGRLLDDFI                  | 2.66 | 0.01 | 1.61 | 0.44 | 0.85 | 1.28 |
| 41208 | 0 | 108522 | LHEYMLDLQPETTDL                  | 2.70 | 0.01 | 1.86 | 0.68 | 0.22 | 1.27 |
| 41209 | 0 | 108522 | LHEYMLDLQPETTDL                  | 2.70 | 0.01 | 1.86 | 1.12 | 0.22 | 0.28 |
| 41210 | 0 | 108522 | LHEYMLDLQPETTDL                  | 2.70 | 0.01 | 1.86 | 0.68 | 0.22 | 2.02 |
| 41211 | 0 | 132857 | LHFNKRIKSKMSES                   | 2.69 | 0.01 | 3.16 | 3.16 | 0.22 | 0.28 |
| 41212 | 0 | 177432 | LHFNPAR                          | 1.99 | 0.01 | 0.90 | 2.13 | 0.22 | 0.28 |
| 41213 | 0 | 106606 | LHFVKGEEKEPS                     | 2.47 | 0.01 | 3.08 | 0.44 | 1.23 | 0.85 |
| 41214 | 0 | 188323 | LHGAERLEEE                       | 2.33 | 0.01 | 2.92 | 0.68 | 0.22 | 0.85 |
| 41215 | 0 | 188323 | LHGAERLEEE                       | 2.33 | 0.01 | 2.92 | 1.81 | 0.22 | 0.85 |
| 41216 | 0 | 188323 | LHGAERLEEE                       | 2.33 | 0.01 | 2.92 | 3.37 | 0.22 | 0.85 |
| 41217 | 0 | 147910 | LHGEESERVAQRAGE                  | 2.70 | 0.01 | 2.75 | 0.44 | 1.23 | 0.28 |
| 41218 | 0 | 147910 | LHGEESERVAQRAGE                  | 2.70 | 0.01 | 2.75 | 0.44 | 1.23 | 1.34 |
| 41219 | 0 | 36377  | LHGLDAFSMHTYSHHEL<br>TRVASAL     | 3.12 | 0.01 | 4.23 | 0.68 | 0.22 | 0.85 |
| 41220 | 0 | 167314 | LHHKTHH                          | 2.03 | 0.01 | 0.90 | 1.15 | 0.22 | 1.39 |
| 41221 | 0 | 151973 | LHHSMDMVFTP                      | 2.35 | 0.01 | 0.78 | 0.44 | 1.93 | 0.28 |
| 41222 | 0 | 79599  | LHIRAGPYGHATVEMPE<br>WIH         | 2.93 | 0.01 | 2.85 | 0.44 | 1.59 | 0.28 |
| 41223 | 0 | 244240 | LHKEWPHSRNWRCNPT<br>WCW          | 2.91 | 0.01 | 3.61 | 0.44 | 0.85 | 0.28 |
| 41224 | 0 | 137224 | LHKVKVGKSPVVRGSL<br>GKVSPLCH     | 3.22 | 0.01 | 0.78 | 0.68 | 0.22 | 0.28 |
| 41225 | 0 | 182395 | LHLEEWSELNTH                     | 2.52 | 0.01 | 0.90 | 0.68 | 0.22 | 0.28 |



|       |   |        |                             |      |      |      |      |      |      |
|-------|---|--------|-----------------------------|------|------|------|------|------|------|
| 41226 | 0 | 99420  | LHLLGFGINAENNHR             | 2.69 | 0.01 | 2.16 | 0.44 | 1.23 | 1.48 |
| 41227 | 0 | 521205 | LHLLGFGINAENHRIFL<br>AGDKDN | 3.15 | 0.01 | 2.16 | 0.44 | 1.23 | 1.39 |
| 41228 | 0 | 115845 | LHLPLPLLQS                  | 2.36 | 0.01 | 1.60 | 0.44 | 1.23 | 0.85 |
| 41229 | 0 | 115845 | LHLPLPLLQS                  | 2.36 | 0.01 | 1.60 | 0.44 | 1.23 | 0.85 |
| 41230 | 0 | 164277 | LHMPPQMLSGTI                | 2.47 | 0.01 | 0.90 | 1.20 | 0.22 | 0.28 |
| 41231 | 0 | 108003 | LHNHYT                      | 1.90 | 0.01 | 0.78 | 1.15 | 0.22 | 0.28 |
| 41232 | 0 | 108003 | LHNHYT                      | 1.90 | 0.01 | 0.78 | 1.20 | 0.22 | 1.27 |
| 41233 | 0 | 108003 | LHNHYT                      | 1.90 | 0.01 | 0.78 | 1.20 | 0.22 | 1.27 |
| 41234 | 0 | 108003 | LHNHYT                      | 1.90 | 0.01 | 0.78 | 1.15 | 0.22 | 0.28 |
| 41235 | 0 | 109482 | LHNHYTQ                     | 2.02 | 0.01 | 0.78 | 0.44 | 1.13 | 0.28 |
| 41236 | 0 | 36406  | LHNNEAGRRTTVFS              | 2.49 | 0.01 | 0.78 | 1.15 | 0.22 | 2.56 |
| 41237 | 0 | 36406  | LHNNEAGRRTTVFS              | 2.49 | 0.01 | 0.78 | 1.15 | 0.22 | 2.56 |
| 41238 | 0 | 36406  | LHNNEAGRRTTVFS              | 2.49 | 0.01 | 0.78 | 1.15 | 0.22 | 2.56 |
| 41239 | 0 | 419253 | LHNPWRDTPPFA                | 2.44 | 0.01 | 0.90 | 1.15 | 0.22 | 1.39 |
| 41240 | 0 | 36407  | LHPDHPTLFSYRTLGEDP<br>QY    | 2.95 | 0.01 | 3.13 | 2.43 | 0.22 | 0.28 |
| 41241 | 0 | 167614 | LHPERVNV                    | 2.12 | 0.01 | 3.44 | 0.44 | 1.59 | 1.28 |
| 41242 | 0 | 167615 | LHPERVNVFD                  | 2.29 | 0.01 | 3.44 | 0.44 | 0.85 | 1.28 |
| 41243 | 0 | 167615 | LHPERVNVFD                  | 2.29 | 0.01 | 3.44 | 0.44 | 1.59 | 1.28 |
| 41244 | 0 | 167616 | LHPERVNVFDY                 | 2.36 | 0.01 | 3.44 | 0.44 | 0.85 | 1.28 |
| 41245 | 0 | 167616 | LHPERVNVFDY                 | 2.36 | 0.01 | 3.44 | 0.44 | 0.85 | 1.28 |
| 41246 | 0 | 167616 | LHPERVNVFDY                 | 2.36 | 0.01 | 3.44 | 0.44 | 1.59 | 1.28 |
| 41247 | 0 | 167617 | LHPGSVNE                    | 2.10 | 0.01 | 3.18 | 0.44 | 0.85 | 1.28 |
| 41248 | 0 | 167617 | LHPGSVNE                    | 2.10 | 0.01 | 3.18 | 0.44 | 0.85 | 1.28 |
| 41249 | 0 | 167617 | LHPGSVNE                    | 2.10 | 0.01 | 3.18 | 0.44 | 1.59 | 1.28 |
| 41250 | 0 | 167618 | LHPGSVNEFD                  | 2.26 | 0.01 | 3.18 | 0.44 | 1.59 | 1.28 |
| 41251 | 0 | 167619 | LHPGSVNEFDF                 | 2.36 | 0.01 | 3.18 | 0.44 | 1.59 | 1.28 |
| 41252 | 0 | 133197 | LHPTQESTKEQTTFPPR<br>WTPN   | 2.99 | 0.01 | 0.78 | 0.44 | 1.13 | 1.57 |
| 41253 | 0 | 133197 | LHPTQESTKEQTTFPPR<br>WTPN   | 2.99 | 0.01 | 0.78 | 0.44 | 1.13 | 1.27 |
| 41254 | 0 | 119609 | LHQDWLNG                    | 2.13 | 0.01 | 0.78 | 0.44 | 1.93 | 0.28 |
| 41255 | 0 | 125478 | LHQEYEENLGDSIVGYKE<br>KS    | 2.95 | 0.01 | 0.78 | 0.44 | 1.13 | 0.28 |
| 41256 | 0 | 125478 | LHQEYEENLGDSIVGYKE<br>KS    | 2.95 | 0.01 | 0.78 | 0.44 | 1.13 | 0.28 |
| 41257 | 0 | 125478 | LHQEYEENLGDSIVGYKE<br>KS    | 2.95 | 0.01 | 0.78 | 1.20 | 0.22 | 0.28 |
| 41258 | 0 | 125478 | LHQEYEENLGDSIVGYKE<br>KS    | 2.95 | 0.01 | 0.78 | 0.44 | 1.13 | 0.28 |
| 41259 | 0 | 125478 | LHQEYEENLGDSIVGYKE<br>KS    | 2.95 | 0.01 | 0.78 | 0.44 | 1.13 | 1.34 |
| 41260 | 0 | 125478 | LHQEYEENLGDSIVGYKE<br>KS    | 2.95 | 0.01 | 0.78 | 1.20 | 0.22 | 0.28 |
| 41261 | 0 | 125478 | LHQEYEENLGDSIVGYKE<br>KS    | 2.95 | 0.01 | 0.78 | 3.06 | 0.22 | 0.28 |

|       |   |        |                          |      |      |      |      |      |      |
|-------|---|--------|--------------------------|------|------|------|------|------|------|
| 41262 | 0 | 125478 | LHQEYEENLGDSIVGYKE<br>KS | 2.95 | 0.01 | 0.78 | 3.59 | 0.22 | 0.28 |
| 41263 | 0 | 125478 | LHQEYEENLGDSIVGYKE<br>KS | 2.95 | 0.01 | 0.78 | 3.59 | 0.22 | 2.12 |
| 41264 | 0 | 125478 | LHQEYEENLGDSIVGYKE<br>KS | 2.95 | 0.01 | 0.78 | 0.68 | 0.22 | 2.12 |
| 41265 | 0 | 125478 | LHQEYEENLGDSIVGYKE<br>KS | 2.95 | 0.01 | 0.78 | 3.59 | 0.22 | 0.28 |
| 41266 | 0 | 125478 | LHQEYEENLGDSIVGYKE<br>KS | 2.95 | 0.01 | 0.78 | 3.59 | 0.22 | 0.28 |
| 41267 | 0 | 125478 | LHQEYEENLGDSIVGYKE<br>KS | 2.95 | 0.01 | 0.78 | 3.59 | 0.22 | 0.85 |
| 41268 | 0 | 107507 | LHQNWLD                  | 2.03 | 0.01 | 0.78 | 0.44 | 1.13 | 0.28 |
| 41269 | 0 | 36413  | LHQPPPQIFLKILPQSGPI<br>G | 2.98 | 0.01 | 2.75 | 0.44 | 1.59 | 0.28 |
| 41270 | 0 | 36413  | LHQPPPQIFLKILPQSGPI<br>G | 2.98 | 0.01 | 2.75 | 0.44 | 1.59 | 1.34 |
| 41271 | 0 | 36413  | LHQPPPQIFLKILPQSGPI<br>G | 2.98 | 0.01 | 2.75 | 0.44 | 1.59 | 2.02 |
| 41272 | 0 | 36413  | LHQPPPQIFLKILPQSGPI<br>G | 2.98 | 0.01 | 2.75 | 0.44 | 0.85 | 0.85 |
| 41273 | 0 | 36415  | LHQVFG                   | 1.88 | 0.01 | 2.40 | 0.44 | 0.85 | 0.28 |
| 41274 | 0 | 172109 | LHRFLCFGSEGGTTY          | 2.66 | 0.01 | 0.78 | 0.44 | 1.13 | 0.28 |
| 41275 | 0 | 165629 | LHRPLHP                  | 2.06 | 0.01 | 0.90 | 0.44 | 1.23 | 1.39 |
| 41276 | 0 | 113606 | LHRRLAGQFLEELRNPF        | 2.80 | 0.01 | 2.19 | 2.04 | 0.22 | 0.28 |
| 41277 | 0 | 113606 | LHRRLAGQFLEELRNPF        | 2.80 | 0.01 | 2.19 | 2.04 | 0.22 | 0.28 |
| 41278 | 0 | 190841 | LHRTF                    | 1.74 | 0.01 | 0.78 | 3.05 | 1.13 | 0.28 |
| 41279 | 0 | 36419  | LHSAPKEA                 | 2.12 | 0.01 | 2.83 | 2.61 | 0.22 | 0.28 |
| 41280 | 0 | 127723 | LHSDARD                  | 2.02 | 0.01 | 0.90 | 0.44 | 1.13 | 1.39 |
| 41281 | 0 | 104036 | LHSDIMFYTIENAVPIHLL      | 2.85 | 0.01 | 3.00 | 1.20 | 0.22 | 0.28 |
| 41282 | 0 | 36421  | LHSQGYTGSNVKVAV          | 2.66 | 0.01 | 3.67 | 3.16 | 0.22 | 0.28 |
| 41283 | 0 | 111485 | LHSRPLP                  | 2.05 | 0.01 | 0.90 | 0.44 | 0.85 | 1.39 |
| 41284 | 0 | 36425  | LHSTSPEGN                | 2.21 | 0.01 | 3.75 | 0.44 | 0.85 | 0.28 |
| 41285 | 0 | 36426  | LHSTSPEGNPSP             | 2.49 | 0.01 | 3.75 | 0.44 | 0.85 | 0.28 |
| 41286 | 0 | 36426  | LHSTSPEGNPSP             | 2.49 | 0.01 | 3.75 | 0.44 | 0.85 | 0.28 |
| 41287 | 0 | 36427  | LHSTSSDGN                | 2.22 | 0.01 | 4.93 | 0.44 | 0.85 | 0.28 |
| 41288 | 0 | 36428  | LHSTSSEGN                | 2.22 | 0.01 | 4.03 | 0.44 | 0.85 | 0.28 |
| 41289 | 0 | 36429  | LHSTSSEGNTSP             | 2.49 | 0.01 | 4.03 | 0.44 | 0.85 | 0.28 |
| 41290 | 0 | 36429  | LHSTSSEGNTSP             | 2.49 | 0.01 | 4.03 | 0.44 | 0.85 | 0.28 |
| 41291 | 0 | 182213 | LHTIKGNTHGMPCMF          | 2.66 | 0.01 | 0.78 | 0.44 | 1.13 | 0.85 |
| 41292 | 0 | 36434  | LHTISRYSEYPHGDK          | 2.70 | 0.01 | 3.51 | 1.12 | 0.22 | 1.48 |
| 41293 | 0 | 36434  | LHTISRYSEYPHGDK          | 2.70 | 0.01 | 3.51 | 1.12 | 0.22 | 2.02 |
| 41294 | 0 | 36438  | LHTPGCVPCVREGNASR<br>CWV | 2.93 | 0.01 | 2.83 | 0.44 | 0.85 | 0.28 |

|       |   |        |                                                       |      |      |      |      |      |      |
|-------|---|--------|-------------------------------------------------------|------|------|------|------|------|------|
| 41295 | 0 | 36443  | LHYRNQGWRSVETSGV<br>AEEEATSGL                         | 3.16 | 0.01 | 2.53 | 0.44 | 0.85 | 0.28 |
| 41296 | 0 | 36444  | LHYTAVVKKSSAV                                         | 2.55 | 0.01 | 2.24 | 0.68 | 0.22 | 0.28 |
| 41297 | 0 | 36450  | LIAFASRGNHVSPTHYV                                     | 2.76 | 0.01 | 2.68 | 0.44 | 1.59 | 0.28 |
| 41298 | 0 | 36456  | LIAIHTLAIRYAN<br>LIALAEVVRKLKARVEELE                  | 2.58 | 0.01 | 4.33 | 0.68 | 0.22 | 0.28 |
| 41299 | 0 | 126554 | KTKVLYHDVQMDKSNR<br>DR                                | 3.56 | 0.01 | 1.75 | 1.20 | 0.22 | 0.85 |
| 41300 | 0 | 36463  | LIANCASILCKCYTT                                       | 2.69 | 0.01 | 2.43 | 0.44 | 1.59 | 0.28 |
| 41301 | 0 | 36472  | LICPTDCFRKHSEATYTK<br>CG                              | 2.90 | 0.01 | 2.83 | 1.12 | 0.22 | 0.28 |
| 41302 | 0 | 179146 | LIDDHFLFKEGDRFL<br>LIDTKCYKLEHPVTGCGE                 | 2.70 | 0.01 | 2.36 | 0.44 | 1.23 | 1.28 |
| 41303 | 0 | 36484  | RTEGRCLHYTVDKSKPK<br>VYQWFDLRKY<br>LIDTKCYKLEHPVTGCGE | 3.75 | 0.01 | 3.57 | 0.44 | 1.23 | 0.85 |
| 41304 | 0 | 36484  | RTEGRCLHYTVDKSKPK<br>VYQWFDLRKY<br>LIDTKCYKLEHPVTGCGE | 3.75 | 0.01 | 3.57 | 3.06 | 0.22 | 0.85 |
| 41305 | 0 | 36484  | RTEGRCLHYTVDKSKPK<br>VYQWFDLRKY<br>LIDTKCYKLEHPVTGCGE | 3.75 | 0.01 | 3.57 | 3.06 | 0.22 | 0.85 |
| 41306 | 0 | 36484  | RTEGRCLHYTVDKSKPK<br>VYQWFDLRKY                       | 3.75 | 0.01 | 3.57 | 0.44 | 1.23 | 0.28 |
| 41307 | 0 | 36488  | LIEANLLWR                                             | 2.23 | 0.01 | 1.96 | 0.44 | 0.85 | 1.34 |
| 41308 | 0 | 121549 | LIEDGRGC                                              | 2.12 | 0.01 | 0.78 | 1.12 | 0.22 | 0.28 |
| 41309 | 0 | 36490  | LIEEGQRMA                                             | 2.20 | 0.01 | 2.69 | 0.44 | 0.85 | 0.28 |
| 41310 | 0 | 111486 | LIEESAIINAGAP                                         | 2.55 | 0.01 | 3.25 | 0.68 | 0.22 | 0.28 |
| 41311 | 0 | 111486 | LIEESAIINAGAP                                         | 2.55 | 0.01 | 3.25 | 0.68 | 0.22 | 0.28 |
| 41312 | 0 | 111486 | LIEESAIINAGAP                                         | 2.55 | 0.01 | 3.25 | 0.68 | 0.22 | 0.28 |
| 41313 | 0 | 111486 | LIEESAIINAGAP                                         | 2.55 | 0.01 | 3.25 | 0.68 | 0.22 | 0.28 |
| 41314 | 0 | 111486 | LIEESAIINAGAP                                         | 2.55 | 0.01 | 3.03 | 0.68 | 0.22 | 0.28 |
| 41315 | 0 | 111486 | LIEESAIINAGAP                                         | 2.55 | 0.01 | 3.03 | 0.68 | 0.22 | 0.28 |
| 41316 | 0 | 111486 | LIEESAIINAGAP                                         | 2.55 | 0.01 | 3.03 | 0.68 | 0.22 | 0.28 |
| 41317 | 0 | 111486 | LIEESAIINAGAP                                         | 2.55 | 0.01 | 3.03 | 0.68 | 0.22 | 0.28 |
| 41318 | 0 | 111486 | LIEESAIINAGAP                                         | 2.55 | 0.01 | 3.25 | 0.68 | 0.22 | 0.28 |
| 41319 | 0 | 111486 | LIEESAIINAGAP                                         | 2.55 | 0.01 | 3.03 | 0.68 | 0.22 | 0.28 |
| 41320 | 0 | 111486 | LIEESAIINAGAP                                         | 2.55 | 0.01 | 3.25 | 0.68 | 0.22 | 0.28 |
| 41321 | 0 | 111486 | LIEESAIINAGAP                                         | 2.55 | 0.01 | 3.03 | 0.68 | 0.22 | 0.28 |
| 41322 | 0 | 111486 | LIEESAIINAGAP                                         | 2.55 | 0.01 | 3.25 | 1.20 | 0.22 | 0.28 |
| 41323 | 0 | 111486 | LIEESAIINAGAP                                         | 2.55 | 0.01 | 3.25 | 1.20 | 0.22 | 0.28 |
| 41324 | 0 | 111486 | LIEESAIINAGAP                                         | 2.55 | 0.01 | 3.25 | 1.20 | 0.22 | 0.28 |
| 41325 | 0 | 111486 | LIEESAIINAGAP                                         | 2.55 | 0.01 | 3.25 | 1.20 | 0.22 | 0.28 |
| 41326 | 0 | 111486 | LIEESAIINAGAP                                         | 2.55 | 0.01 | 3.25 | 1.20 | 0.22 | 0.28 |
| 41327 | 0 | 111486 | LIEESAIINAGAP                                         | 2.55 | 0.01 | 3.25 | 1.20 | 0.22 | 0.28 |
| 41328 | 0 | 111486 | LIEESAIINAGAP                                         | 2.55 | 0.01 | 3.25 | 1.20 | 0.22 | 0.28 |

|       |   |        |                               |      |      |      |      |      |      |
|-------|---|--------|-------------------------------|------|------|------|------|------|------|
| 41329 | 0 | 111486 | LIEESAIINAGAP                 | 2.55 | 0.01 | 3.25 | 1.20 | 0.22 | 0.28 |
| 41330 | 0 | 111486 | LIEESAIINAGAP                 | 2.55 | 0.01 | 3.25 | 1.20 | 0.22 | 0.28 |
| 41331 | 0 | 111486 | LIEESAIINAGAP                 | 2.55 | 0.01 | 3.25 | 1.20 | 0.22 | 0.28 |
| 41332 | 0 | 111486 | LIEESAIINAGAP                 | 2.55 | 0.01 | 3.03 | 1.20 | 0.22 | 0.28 |
| 41333 | 0 | 111486 | LIEESAIINAGAP                 | 2.55 | 0.01 | 3.03 | 1.20 | 0.22 | 0.28 |
| 41334 | 0 | 111486 | LIEESAIINAGAP                 | 2.55 | 0.01 | 3.03 | 1.20 | 0.22 | 0.28 |
| 41335 | 0 | 111486 | LIEESAIINAGAP                 | 2.55 | 0.01 | 3.03 | 1.20 | 0.22 | 0.28 |
| 41336 | 0 | 111486 | LIEESAIINAGAP                 | 2.55 | 0.01 | 3.03 | 1.20 | 0.22 | 0.28 |
| 41337 | 0 | 111486 | LIEESAIINAGAP                 | 2.55 | 0.01 | 3.03 | 1.20 | 0.22 | 0.28 |
| 41338 | 0 | 111486 | LIEESAIINAGAP                 | 2.55 | 0.01 | 3.03 | 1.20 | 0.22 | 0.28 |
| 41339 | 0 | 111486 | LIEESAIINAGAP                 | 2.55 | 0.01 | 3.03 | 1.20 | 0.22 | 0.28 |
| 41340 | 0 | 111486 | LIEESAIINAGAP                 | 2.55 | 0.01 | 3.03 | 1.20 | 0.22 | 0.28 |
| 41341 | 0 | 111486 | LIEESAIINAGAP                 | 2.55 | 0.01 | 3.03 | 1.20 | 0.22 | 0.28 |
| 41342 | 0 | 111486 | LIEESAIINAGAP                 | 2.55 | 0.01 | 3.03 | 1.20 | 0.22 | 0.28 |
| 41343 | 0 | 111486 | LIEESAIINAGAP                 | 2.55 | 0.01 | 3.25 | 0.68 | 0.22 | 0.28 |
| 41344 | 0 | 111486 | LIEESAIINAGAP                 | 2.55 | 0.01 | 3.25 | 1.20 | 0.22 | 0.28 |
| 41345 | 0 | 111486 | LIEESAIINAGAP                 | 2.55 | 0.01 | 3.03 | 0.68 | 0.22 | 0.28 |
| 41346 | 0 | 111486 | LIEESAIINAGAP                 | 2.55 | 0.01 | 3.03 | 1.20 | 0.22 | 0.28 |
| 41347 | 0 | 111486 | LIEESAIINAGAP                 | 2.55 | 0.01 | 3.25 | 0.68 | 0.22 | 0.28 |
| 41348 | 0 | 111486 | LIEESAIINAGAP                 | 2.55 | 0.01 | 3.25 | 1.20 | 0.22 | 0.28 |
| 41349 | 0 | 111486 | LIEESAIINAGAP                 | 2.55 | 0.01 | 3.03 | 0.68 | 0.22 | 0.28 |
| 41350 | 0 | 111486 | LIEESAIINAGAP                 | 2.55 | 0.01 | 3.03 | 1.20 | 0.22 | 0.28 |
| 41351 | 0 | 111486 | LIEESAIINAGAP                 | 2.55 | 0.01 | 3.25 | 0.68 | 0.22 | 0.28 |
| 41352 | 0 | 111486 | LIEESAIINAGAP                 | 2.55 | 0.01 | 3.25 | 1.20 | 0.22 | 0.28 |
| 41353 | 0 | 111486 | LIEESAIINAGAP                 | 2.55 | 0.01 | 3.03 | 0.68 | 0.22 | 0.28 |
| 41354 | 0 | 111486 | LIEESAIINAGAP                 | 2.55 | 0.01 | 3.03 | 1.20 | 0.22 | 0.28 |
| 41355 | 0 | 111486 | LIEESAIINAGAP                 | 2.55 | 0.01 | 3.25 | 0.68 | 0.22 | 0.28 |
| 41356 | 0 | 111486 | LIEESAIINAGAP                 | 2.55 | 0.01 | 3.25 | 1.20 | 0.22 | 0.28 |
| 41357 | 0 | 111486 | LIEESAIINAGAP                 | 2.55 | 0.01 | 3.03 | 0.68 | 0.22 | 0.28 |
| 41358 | 0 | 111486 | LIEESAIINAGAP                 | 2.55 | 0.01 | 3.03 | 1.20 | 0.22 | 0.28 |
| 41359 | 0 | 111486 | LIEESAIINAGAP                 | 2.55 | 0.01 | 3.03 | 0.68 | 0.22 | 0.28 |
| 41360 | 0 | 111486 | LIEESAIINAGAP                 | 2.55 | 0.01 | 3.03 | 1.20 | 0.22 | 0.28 |
| 41361 | 0 | 111486 | LIEESAIINAGAP                 | 2.55 | 0.01 | 3.25 | 0.68 | 0.22 | 0.28 |
| 41362 | 0 | 111486 | LIEESAIINAGAP                 | 2.55 | 0.01 | 3.25 | 1.20 | 0.22 | 0.28 |
| 41363 | 0 | 111486 | LIEESAIINAGAP                 | 2.55 | 0.01 | 3.25 | 0.68 | 0.22 | 1.34 |
| 41364 | 0 | 111486 | LIEESAIINAGAP                 | 2.55 | 0.01 | 3.03 | 0.68 | 0.22 | 1.34 |
|       |   |        | LIEKAGAWYSYKGEKIG             |      |      |      |      |      |      |
| 41365 | 0 | 36496  | QGGANATAWLKDNPET<br>AKEIE     | 3.60 | 0.01 | 2.24 | 0.68 | 0.22 | 0.28 |
| 41366 | 0 | 36515  | LIFIYETFSK                    | 2.31 | 0.01 | 0.78 | 0.44 | 1.74 | 0.28 |
| 41367 | 0 | 191584 | LIGDCNNWLERCNIPR              | 2.75 | 0.01 | 0.90 | 2.84 | 1.13 | 1.39 |
| 41368 | 0 | 191584 | LIGDCNNWLERCNIPR              | 2.75 | 0.01 | 0.90 | 2.84 | 1.13 | 1.66 |
| 41369 | 0 | 141700 | LIGFGINAKNNQRNFLA<br>GEEDNVIS | 3.16 | 0.01 | 3.65 | 0.44 | 1.23 | 1.27 |

|       |   |        |                              |      |      |      |      |      |      |
|-------|---|--------|------------------------------|------|------|------|------|------|------|
| 41370 | 0 | 36538  | LIGLLAIAGIRLHRAAIYT<br>AEIHK | 3.16 | 0.01 | 2.43 | 3.34 | 0.22 | 0.28 |
| 41371 | 0 | 36538  | LIGLLAIAGIRLHRAAIYT<br>AEIHK | 3.16 | 0.01 | 2.43 | 0.68 | 0.22 | 0.28 |
| 41372 | 0 | 36538  | LIGLLAIAGIRLHRAAIYT<br>AEIHK | 3.16 | 0.01 | 2.43 | 3.34 | 0.22 | 0.28 |
| 41373 | 0 | 36538  | LIGLLAIAGIRLHRAAIYT<br>AEIHK | 3.16 | 0.01 | 2.43 | 0.44 | 0.85 | 0.28 |
| 41374 | 0 | 36538  | LIGLLAIAGIRLHRAAIYT<br>AEIHK | 3.16 | 0.01 | 2.72 | 3.34 | 0.22 | 0.28 |
| 41375 | 0 | 489644 | LIGPRPLVNG                   | 2.34 | 0.01 | 3.85 | 3.72 | 0.22 | 1.34 |
| 41376 | 0 | 489644 | LIGPRPLVNG                   | 2.34 | 0.01 | 3.85 | 3.72 | 0.22 | 1.34 |
| 41377 | 0 | 489644 | LIGPRPLVNG                   | 2.34 | 0.01 | 3.85 | 3.72 | 0.22 | 2.75 |
| 41378 | 0 | 489644 | LIGPRPLVNG                   | 2.34 | 0.01 | 3.85 | 3.72 | 0.22 | 2.35 |
| 41379 | 0 | 489644 | LIGPRPLVNG                   | 2.34 | 0.01 | 3.85 | 3.72 | 0.22 | 1.34 |
| 41380 | 0 | 489644 | LIGPRPLVNG                   | 2.34 | 0.01 | 3.85 | 3.72 | 0.22 | 1.34 |
| 41381 | 0 | 489644 | LIGPRPLVNG                   | 2.34 | 0.01 | 3.85 | 3.72 | 0.22 | 1.34 |
| 41382 | 0 | 489644 | LIGPRPLVNG                   | 2.34 | 0.01 | 3.85 | 3.72 | 0.22 | 1.34 |
| 41383 | 0 | 489644 | LIGPRPLVNG                   | 2.34 | 0.01 | 3.85 | 3.72 | 0.22 | 1.34 |
| 41384 | 0 | 489644 | LIGPRPLVNG                   | 2.34 | 0.01 | 3.85 | 3.72 | 0.22 | 1.34 |
| 41385 | 0 | 489644 | LIGPRPLVNG                   | 2.34 | 0.01 | 3.85 | 3.72 | 0.22 | 1.34 |
| 41386 | 0 | 489644 | LIGPRPLVNG                   | 2.34 | 0.01 | 3.85 | 3.72 | 0.22 | 1.34 |
| 41387 | 0 | 96558  | LIGTGLQVKMPKSHKAI<br>QAD     | 2.94 | 0.01 | 3.89 | 1.81 | 0.22 | 1.34 |
| 41388 | 0 | 36542  | LIGVII                       | 1.88 | 0.01 | 2.40 | 0.44 | 0.85 | 0.28 |
| 41389 | 0 | 36543  | LIGVKGSS                     | 2.11 | 0.01 | 3.06 | 1.12 | 0.22 | 0.28 |
| 41390 | 0 | 161400 | LIHAGHRLYGIAINPNRV<br>F      | 2.91 | 0.01 | 2.08 | 2.49 | 0.22 | 1.57 |
| 41391 | 0 | 161400 | LIHAGHRLYGIAINPNRV<br>F      | 2.91 | 0.01 | 2.08 | 2.02 | 0.22 | 1.57 |
| 41392 | 0 | 161400 | LIHAGHRLYGIAINPNRV<br>F      | 2.91 | 0.01 | 2.08 | 2.43 | 0.22 | 1.57 |
| 41393 | 0 | 36546  | LIHFGND                      | 1.99 | 0.01 | 1.75 | 1.15 | 0.22 | 1.48 |
| 41394 | 0 | 36547  | LIHFGNDWE                    | 2.18 | 0.01 | 1.75 | 1.15 | 0.22 | 1.48 |
| 41395 | 0 | 120064 | LIKHPEVKSAIEGIKYIAET<br>MKSD | 3.11 | 0.01 | 0.78 | 2.04 | 0.22 | 2.02 |
| 41396 | 0 | 120064 | LIKHPEVKSAIEGIKYIAET<br>MKSD | 3.11 | 0.01 | 0.78 | 2.04 | 0.22 | 1.57 |
| 41397 | 0 | 36576  | LIKIFQDHPL                   | 2.32 | 0.01 | 0.78 | 0.44 | 1.74 | 0.28 |
| 41398 | 0 | 100262 | LIKVTNLYLV                   | 2.33 | 0.01 | 2.18 | 2.16 | 0.22 | 0.28 |
| 41399 | 0 | 137921 | LIKNPDV                      | 1.99 | 0.01 | 2.26 | 2.36 | 0.22 | 0.28 |
| 41400 | 0 | 36579  | LIKNQCVNFNFNGLTGT            | 2.82 | 0.01 | 2.48 | 0.44 | 0.85 | 0.28 |
| 41401 | 0 | 36579  | LIKNQCVNFNFNGLTGT            | 2.82 | 0.01 | 2.48 | 0.68 | 0.22 | 0.28 |
| 41402 | 0 | 36579  | LIKNQCVNFNFNGLTGT            | 2.82 | 0.01 | 2.48 | 1.20 | 0.22 | 0.28 |

|       |   |        |                                    |      |      |      |      |      |      |
|-------|---|--------|------------------------------------|------|------|------|------|------|------|
| 41403 | 0 | 186887 | LIKQLKSEDNRGGIVK                   | 2.73 | 0.01 | 3.12 | 2.37 | 0.22 | 2.66 |
| 41404 | 0 | 186888 | LIKQLKSEDNRGGIVKVK<br>DD           | 2.94 | 0.01 | 3.12 | 2.37 | 0.22 | 2.66 |
| 41405 | 0 | 186889 | LIKQLKSEDNRGGIVKVK<br>DDEL         | 3.05 | 0.01 | 3.12 | 2.37 | 0.22 | 2.66 |
| 41406 | 0 | 36580  | LIKRNPTIPTKKSQIF                   | 2.74 | 0.01 | 2.30 | 0.44 | 0.85 | 0.28 |
| 41407 | 0 | 36580  | LIKRNPTIPTKKSQIF                   | 2.74 | 0.01 | 2.30 | 0.44 | 1.41 | 0.28 |
| 41408 | 0 | 120758 | LIKSLSDSD                          | 2.37 | 0.01 | 2.18 | 2.16 | 0.22 | 0.28 |
| 41409 | 0 | 36587  | LIKYMNERYQNMQQGY<br>NNLTNYINQYE    | 3.27 | 0.01 | 1.66 | 0.44 | 1.74 | 0.28 |
| 41410 | 0 | 36587  | LIKYMNERYQNMQQGY<br>NNLTNYINQYE    | 3.27 | 0.01 | 1.66 | 0.44 | 1.74 | 0.28 |
| 41411 | 0 | 36590  | LILALYDFHGRDVGFA<br>QGTRTAAIVETVAR | 3.39 | 0.01 | 3.53 | 3.08 | 0.22 | 0.28 |
| 41412 | 0 | 329162 | LILDRFLAAAMDKVF                    | 2.69 | 0.01 | 1.61 | 0.44 | 0.85 | 1.28 |
| 41413 | 0 | 36595  | LILDSSSLHGWR                       | 2.48 | 0.01 | 0.90 | 0.68 | 0.22 | 0.28 |
| 41414 | 0 | 119489 | LILFKDDYFAKKNEERKQ<br>NK           | 2.95 | 0.01 | 0.78 | 0.44 | 1.13 | 0.28 |
| 41415 | 0 | 78450  | LILNQMANFSLPSFDTL<br>LV            | 2.94 | 0.01 | 2.69 | 0.68 | 0.22 | 0.28 |
| 41416 | 0 | 36612  | LILNR                              | 1.77 | 0.01 | 1.60 | 0.44 | 1.23 | 1.27 |
| 41417 | 0 | 36614  | LILSARDVLA                         | 2.34 | 0.01 | 2.04 | 0.68 | 0.22 | 0.28 |
| 41418 | 0 | 36614  | LILSARDVLA                         | 2.34 | 0.01 | 2.04 | 0.68 | 0.22 | 0.28 |
| 41419 | 0 | 103359 | LILTSYTSDEAMLDA                    | 2.71 | 0.01 | 2.04 | 0.44 | 0.85 | 1.28 |
| 41420 | 0 | 165630 | LINQALK                            | 2.03 | 0.01 | 0.90 | 0.44 | 1.23 | 1.39 |
| 41421 | 0 | 165630 | LINQALK                            | 2.03 | 0.01 | 0.90 | 0.44 | 1.23 | 1.39 |
| 41422 | 0 | 36645  | LINQRAVVAPDKEVLYE<br>AFD           | 2.93 | 0.01 | 1.96 | 0.44 | 0.85 | 0.28 |
| 41423 | 0 | 129244 | LINRAKAVK                          | 2.23 | 0.01 | 2.19 | 2.25 | 0.22 | 0.28 |
| 41424 | 0 | 232909 | LINTNGSW                           | 2.12 | 0.01 | 2.45 | 0.68 | 0.22 | 0.28 |
| 41425 | 0 | 232909 | LINTNGSW                           | 2.12 | 0.01 | 2.45 | 0.68 | 0.22 | 0.28 |
| 41426 | 0 | 232909 | LINTNGSW                           | 2.12 | 0.01 | 2.45 | 0.68 | 0.22 | 0.28 |
| 41427 | 0 | 232909 | LINTNGSW                           | 2.12 | 0.01 | 2.45 | 0.68 | 0.22 | 1.34 |
| 41428 | 0 | 232909 | LINTNGSW                           | 2.12 | 0.01 | 2.45 | 0.68 | 0.22 | 1.34 |
| 41429 | 0 | 232909 | LINTNGSW                           | 2.12 | 0.01 | 2.45 | 0.68 | 0.22 | 1.34 |
| 41430 | 0 | 232909 | LINTNGSW                           | 2.12 | 0.01 | 2.45 | 0.68 | 0.22 | 0.28 |
| 41431 | 0 | 232909 | LINTNGSW                           | 2.12 | 0.01 | 2.45 | 0.68 | 0.22 | 2.75 |
| 41432 | 0 | 36648  | LINTNGSWHI                         | 2.31 | 0.01 | 2.68 | 0.44 | 0.85 | 0.28 |
| 41433 | 0 | 36649  | LINTNGSWHINRTALNC<br>NDSLNTGA      | 3.18 | 0.01 | 1.72 | 0.44 | 0.85 | 0.28 |
| 41434 | 0 | 36649  | LINTNGSWHINRTALNC<br>NDSLNTGA      | 3.18 | 0.01 | 1.72 | 0.44 | 2.26 | 0.28 |
| 41435 | 0 | 153410 | LIPFHKHPHHRG                       | 2.48 | 0.01 | 0.90 | 1.12 | 0.22 | 0.28 |
| 41436 | 0 | 153410 | LIPFHKHPHHRG                       | 2.48 | 0.01 | 0.90 | 0.68 | 0.22 | 0.28 |
| 41437 | 0 | 153410 | LIPFHKHPHHRG                       | 2.48 | 0.01 | 0.90 | 0.68 | 0.22 | 0.28 |
| 41438 | 0 | 153410 | LIPFHKHPHHRG                       | 2.48 | 0.01 | 0.90 | 0.68 | 0.22 | 0.28 |
| 41439 | 0 | 153410 | LIPFHKHPHHRG                       | 2.48 | 0.01 | 0.90 | 0.68 | 0.22 | 0.28 |

|       |   |        |                                                    |      |      |      |      |      |      |
|-------|---|--------|----------------------------------------------------|------|------|------|------|------|------|
| 41440 | 0 | 153410 | LIPFHKHPHHRG                                       | 2.48 | 0.01 | 0.90 | 0.68 | 0.22 | 0.28 |
| 41441 | 0 | 153410 | LIPFHKHPHHRG                                       | 2.48 | 0.01 | 0.90 | 0.68 | 0.22 | 0.28 |
| 41442 | 0 | 153410 | LIPFHKHPHHRG                                       | 2.48 | 0.01 | 0.90 | 0.68 | 0.22 | 0.28 |
| 41443 | 0 | 153410 | LIPFHKHPHHRG                                       | 2.48 | 0.01 | 0.90 | 0.68 | 0.22 | 0.28 |
| 41444 | 0 | 153410 | LIPFHKHPHHRG                                       | 2.48 | 0.01 | 0.90 | 0.68 | 0.22 | 0.28 |
| 41445 | 0 | 153410 | LIPFHKHPHHRG                                       | 2.48 | 0.01 | 0.90 | 0.68 | 0.22 | 0.28 |
| 41446 | 0 | 153410 | LIPFHKHPHHRG                                       | 2.48 | 0.01 | 0.90 | 0.68 | 0.22 | 0.28 |
| 41447 | 0 | 153410 | LIPFHKHPHHRG                                       | 2.48 | 0.01 | 0.90 | 0.68 | 0.22 | 0.28 |
| 41448 | 0 | 153410 | LIPFHKHPHHRG                                       | 2.48 | 0.01 | 0.90 | 0.68 | 0.22 | 0.28 |
| 41449 | 0 | 153410 | LIPFHKHPHHRG                                       | 2.48 | 0.01 | 0.90 | 0.68 | 0.22 | 0.28 |
| 41450 | 0 | 79291  | LIPFNS                                             | 1.88 | 0.01 | 0.90 | 0.68 | 0.22 | 1.39 |
| 41451 | 0 | 36659  | LIPLRT                                             | 2.04 | 0.01 | 2.24 | 1.12 | 0.22 | 0.28 |
| 41452 | 0 | 36659  | LIPLRT                                             | 2.04 | 0.01 | 2.24 | 0.68 | 0.22 | 0.28 |
| 41453 | 0 | 329224 | LIPMLNLLKSHSKTV                                    | 2.68 | 0.01 | 1.61 | 0.44 | 0.85 | 1.28 |
| 41454 | 0 | 36664  | LIPSMNQLSCDLIGQ                                    | 2.69 | 0.01 | 2.43 | 0.44 | 1.59 | 0.28 |
| 41455 | 0 | 106608 | LIQIDHPESLLV                                       | 2.47 | 0.01 | 0.90 | 1.15 | 0.22 | 1.39 |
| 41456 | 0 | 450789 | LIQPITT                                            | 2.00 | 0.01 | 0.90 | 0.44 | 1.41 | 1.39 |
| 41457 | 0 | 121553 | LIQQAREMPLLKSEV                                    | 2.65 | 0.01 | 0.78 | 0.44 | 1.13 | 0.85 |
| 41458 | 0 | 36676  | LIRACMLVR                                          | 2.24 | 0.01 | 1.96 | 0.44 | 0.85 | 1.34 |
| 41459 | 0 | 36679  | LIRALFGL                                           | 2.15 | 0.01 | 3.57 | 0.44 | 1.23 | 1.27 |
| 41460 | 0 | 152771 | LIRDKRFHYD                                         | 2.31 | 0.01 | 2.18 | 2.16 | 0.22 | 0.28 |
| 41461 | 0 | 134720 | LIRKLPFSRLAREIC                                    | 2.69 | 0.01 | 0.78 | 3.05 | 1.13 | 0.85 |
| 41462 | 0 | 132439 | LIRLIEDGRGCEVIQEIKS<br>FSQEGR                      | 3.18 | 0.01 | 0.78 | 3.72 | 0.22 | 0.28 |
| 41463 | 0 | 79908  | LIRMVECSGKQD                                       | 2.40 | 0.01 | 2.14 | 3.26 | 0.22 | 0.28 |
| 41464 | 0 | 79908  | LIRMVECSGKQD                                       | 2.40 | 0.01 | 2.14 | 3.55 | 0.22 | 0.28 |
| 41465 | 0 | 161120 | LISNPGEVERKKGIFANLI                                | 2.89 | 0.01 | 2.08 | 0.44 | 1.93 | 1.57 |
| 41466 | 0 | 149366 | LISSSQDGHQW                                        | 2.39 | 0.01 | 0.78 | 0.44 | 1.93 | 2.66 |
| 41467 | 0 | 131539 | LISSSQDGHQWTLFFQN<br>GKV                           | 2.91 | 0.01 | 0.78 | 0.44 | 2.35 | 0.28 |
| 41468 | 0 | 36718  | LITDAAKDKGAAELEKLF<br>KAVENLAKAAKEMPLANS<br>VKELTS | 3.68 | 0.01 | 2.97 | 2.82 | 0.22 | 0.85 |
| 41469 | 0 | 36718  | LITDAAKDKGAAELEKLF<br>KAVENLAKAAKEMPLANS<br>VKELTS | 3.68 | 0.01 | 2.97 | 2.82 | 0.22 | 0.28 |
| 41470 | 0 | 36718  | LITDAAKDKGAAELEKLF<br>KAVENLAKAAKEMPLANS<br>VKELTS | 3.68 | 0.01 | 2.97 | 2.82 | 0.22 | 1.48 |
| 41471 | 0 | 36718  | LITDAAKDKGAAELEKLF<br>KAVENLAKAAKEMPLANS<br>VKELTS | 3.68 | 0.01 | 2.97 | 2.82 | 0.22 | 1.34 |
| 41472 | 0 | 99421  | LITFFRWTTPLK                                       | 2.48 | 0.01 | 0.90 | 1.12 | 0.22 | 1.39 |
| 41473 | 0 | 178278 | LITKNYDSKIKPYVLL                                   | 2.74 | 0.01 | 3.93 | 0.68 | 0.22 | 0.85 |
| 41474 | 0 | 36734  | LITVNP                                             | 1.88 | 0.01 | 2.40 | 0.44 | 0.85 | 0.28 |
| 41475 | 0 | 78194  | LITVNPI                                            | 2.02 | 0.01 | 2.30 | 0.68 | 0.22 | 0.28 |

|       |   |        |                                   |      |      |      |      |      |      |
|-------|---|--------|-----------------------------------|------|------|------|------|------|------|
| 41476 | 0 | 36735  | LITVNPIVT                         | 2.25 | 0.01 | 2.87 | 0.68 | 0.22 | 0.28 |
| 41477 | 0 | 36735  | LITVNPIVT                         | 2.25 | 0.01 | 2.87 | 0.68 | 0.22 | 0.28 |
| 41478 | 0 | 122463 | LIVEEKQLEVLQDIADLT<br>VKASEQAVFKC | 3.33 | 0.01 | 0.78 | 2.04 | 0.22 | 0.28 |
| 41479 | 0 | 94874  | LIVELIRG                          | 2.15 | 0.01 | 2.72 | 0.68 | 0.22 | 0.28 |
| 41480 | 0 | 94874  | LIVELIRG                          | 2.15 | 0.01 | 2.72 | 0.68 | 0.22 | 0.28 |
| 41481 | 0 | 94874  | LIVELIRG                          | 2.15 | 0.01 | 2.72 | 0.68 | 0.22 | 1.66 |
| 41482 | 0 | 94874  | LIVELIRG                          | 2.15 | 0.01 | 2.72 | 0.68 | 0.22 | 1.66 |
| 41483 | 0 | 36741  | LIVFPD                            | 1.88 | 0.01 | 1.96 | 0.44 | 0.85 | 0.28 |
| 41484 | 0 | 36742  | LIVFPDLGVR                        | 2.32 | 0.01 | 1.96 | 0.44 | 0.85 | 1.34 |
| 41485 | 0 | 36746  | LIVKVMNNEEIPNTKATI<br>DQ          | 2.94 | 0.01 | 2.86 | 1.81 | 0.22 | 0.85 |
| 41486 | 0 | 423406 | LIVLIGQRGGIYCYD                   | 2.70 | 0.01 | 2.51 | 0.44 | 2.35 | 1.28 |
| 41487 | 0 | 107201 | LIVPEGARTSLN                      | 2.44 | 0.01 | 1.75 | 1.12 | 0.22 | 0.28 |
| 41488 | 0 | 107201 | LIVPEGARTSLN                      | 2.44 | 0.01 | 1.75 | 1.12 | 0.22 | 0.28 |
| 41489 | 0 | 107201 | LIVPEGARTSLN                      | 2.44 | 0.01 | 1.75 | 1.12 | 0.22 | 0.85 |
| 41490 | 0 | 107201 | LIVPEGARTSLN                      | 2.44 | 0.01 | 1.75 | 1.12 | 0.22 | 0.28 |
| 41491 | 0 | 107201 | LIVPEGARTSLN                      | 2.44 | 0.01 | 1.75 | 1.12 | 0.22 | 0.28 |
| 41492 | 0 | 107201 | LIVPEGARTSLN                      | 2.44 | 0.01 | 1.75 | 1.12 | 0.22 | 0.85 |
| 41493 | 0 | 107201 | LIVPEGARTSLN                      | 2.44 | 0.01 | 1.75 | 1.12 | 0.22 | 0.85 |
| 41494 | 0 | 107201 | LIVPEGARTSLN                      | 2.44 | 0.01 | 1.75 | 1.12 | 0.22 | 0.85 |
| 41495 | 0 | 107201 | LIVPEGARTSLN                      | 2.44 | 0.01 | 1.75 | 1.12 | 0.22 | 0.85 |
| 41496 | 0 | 107201 | LIVPEGARTSLN                      | 2.44 | 0.01 | 1.75 | 1.12 | 0.22 | 0.85 |
| 41497 | 0 | 107201 | LIVPEGARTSLN                      | 2.44 | 0.01 | 1.75 | 1.12 | 0.22 | 0.28 |
| 41498 | 0 | 36760  | LIVTQTMK                          | 2.12 | 0.01 | 1.60 | 0.44 | 1.23 | 0.28 |
| 41499 | 0 | 36760  | LIVTQTMK                          | 2.12 | 0.01 | 1.60 | 2.36 | 0.22 | 1.34 |
| 41500 | 0 | 115347 | LIVTQTMKGL                        | 2.32 | 0.01 | 1.60 | 0.44 | 1.23 | 0.85 |
| 41501 | 0 | 115347 | LIVTQTMKGL                        | 2.32 | 0.01 | 1.60 | 0.44 | 1.23 | 0.85 |
| 41502 | 0 | 36761  | LIVTQTMKGLDIQK                    | 2.64 | 0.01 | 1.60 | 0.44 | 1.23 | 0.85 |
| 41503 | 0 | 96563  | LIVTQTMKGLDIQKV                   | 2.71 | 0.01 | 1.60 | 0.44 | 1.23 | 0.28 |
| 41504 | 0 | 96563  | LIVTQTMKGLDIQKV                   | 2.71 | 0.01 | 1.60 | 0.44 | 1.23 | 0.28 |
| 41505 | 0 | 36769  | LIYDAAVEGDLLFKL                   | 2.68 | 0.01 | 2.59 | 0.44 | 0.85 | 0.28 |
| 41506 | 0 | 36770  | LIYDAAVEGDLLKL                    | 2.69 | 0.01 | 2.59 | 0.44 | 0.85 | 0.28 |
| 41507 | 0 | 36770  | LIYDAAVEGDLLKL                    | 2.69 | 0.01 | 2.59 | 0.44 | 0.85 | 0.28 |
| 41508 | 0 | 114454 | LIYIERGRGITGVLF                   | 2.71 | 0.01 | 3.48 | 0.44 | 1.23 | 0.85 |
| 41509 | 0 | 36781  | LIYNLTLC                          | 2.15 | 0.01 | 3.04 | 2.13 | 0.22 | 1.27 |
| 41510 | 0 | 36781  | LIYNLTLC                          | 2.15 | 0.01 | 3.04 | 2.13 | 0.22 | 1.27 |
| 41511 | 0 | 36781  | LIYNLTLC                          | 2.15 | 0.01 | 3.04 | 1.15 | 0.22 | 1.27 |
| 41512 | 0 | 112206 | LIYWAST                           | 1.99 | 0.01 | 0.78 | 0.44 | 1.13 | 1.27 |
| 41513 | 0 | 116769 | LKAAEARAFAERSV                    | 2.71 | 0.01 | 2.36 | 0.44 | 1.23 | 1.28 |
| 41514 | 0 | 116769 | LKAAEARAFAERSV                    | 2.71 | 0.01 | 2.36 | 0.44 | 1.23 | 1.27 |
| 41515 | 0 | 108523 | LKAGEGNKIGPE                      | 2.49 | 0.01 | 3.45 | 0.44 | 1.23 | 0.28 |
| 41516 | 0 | 108523 | LKAGEGNKIGPE                      | 2.49 | 0.01 | 3.45 | 0.44 | 1.23 | 1.27 |
| 41517 | 0 | 36800  | LKANAAGKDKGVEELEK<br>SVKELTS      | 3.72 | 0.01 | 2.97 | 2.82 | 0.22 | 0.85 |



|       |   |        |                                                    |      |      |      |      |      |      |
|-------|---|--------|----------------------------------------------------|------|------|------|------|------|------|
| 41518 | 0 | 36800  | LKANAAGKDKGVEELEK<br>LSGSLESLSKAAKEMLAN<br>SVKELTS | 3.72 | 0.01 | 2.97 | 2.82 | 0.22 | 0.28 |
| 41519 | 0 | 36800  | LKANAAGKDKGVEELEK<br>LSGSLESLSKAAKEMLAN<br>SVKELTS | 3.72 | 0.01 | 2.97 | 2.82 | 0.22 | 1.48 |
| 41520 | 0 | 36800  | LKANAAGKDKGVEELEK<br>LSGSLESLSKAAKEMLAN<br>SVKELTS | 3.72 | 0.01 | 2.97 | 2.82 | 0.22 | 1.34 |
| 41521 | 0 | 172124 | LKANEHLITLKKDV                                     | 2.66 | 0.01 | 0.78 | 0.44 | 1.41 | 0.28 |
| 41522 | 0 | 329407 | LKAPAAPAAPAAAAE                                    | 2.73 | 0.01 | 1.61 | 0.44 | 0.85 | 1.28 |
| 41523 | 0 | 36803  | LKARDINDIFAILKN                                    | 2.72 | 0.01 | 2.88 | 2.22 | 0.22 | 0.28 |
| 41524 | 0 | 36803  | LKARDINDIFAILKN                                    | 2.72 | 0.01 | 2.88 | 2.22 | 0.22 | 0.28 |
| 41525 | 0 | 36803  | LKARDINDIFAILKN                                    | 2.72 | 0.01 | 2.88 | 2.22 | 0.22 | 0.28 |
| 41526 | 0 | 36803  | LKARDINDIFAILKN                                    | 2.72 | 0.01 | 2.88 | 2.22 | 0.22 | 0.28 |
| 41527 | 0 | 36803  | LKARDINDIFAILKN                                    | 2.72 | 0.01 | 2.88 | 2.22 | 0.22 | 0.28 |
| 41528 | 0 | 36803  | LKARDINDIFAILKN                                    | 2.72 | 0.01 | 2.96 | 2.22 | 0.22 | 0.28 |
| 41529 | 0 | 36803  | LKARDINDIFAILKN                                    | 2.72 | 0.01 | 2.96 | 2.22 | 0.22 | 0.28 |
| 41530 | 0 | 36803  | LKARDINDIFAILKN                                    | 2.72 | 0.01 | 2.96 | 2.22 | 0.22 | 0.28 |
| 41531 | 0 | 129249 | LKARVDELERIRRSIL                                   | 2.76 | 0.01 | 0.78 | 0.44 | 1.13 | 0.85 |
| 41532 | 0 | 36805  | LKASAA                                             | 1.88 | 0.01 | 1.96 | 0.44 | 0.85 | 0.28 |
| 41533 | 0 | 36807  | LKASSGYCAWPACYC                                    | 2.69 | 0.01 | 2.56 | 2.02 | 0.22 | 0.85 |
| 41534 | 0 | 117565 | LKAVKMTLKNREP                                      | 2.54 | 0.01 | 0.78 | 0.44 | 1.13 | 0.85 |
| 41535 | 0 | 120760 | LKAVKMTLKNREPVQ                                    | 2.67 | 0.01 | 0.78 | 3.01 | 0.22 | 0.28 |
| 41536 | 0 | 129250 | LKAVRKERSKESDDNYD<br>KTE                           | 2.96 | 0.01 | 0.78 | 3.01 | 0.22 | 0.28 |
| 41537 | 0 | 36813  | LKCRLR                                             | 1.92 | 0.01 | 2.40 | 0.44 | 0.85 | 0.28 |
| 41538 | 0 | 36815  | LKCSVKSFEIDKGIYQT                                  | 2.76 | 0.01 | 2.48 | 0.44 | 0.85 | 0.28 |
| 41539 | 0 | 36815  | LKCSVKSFEIDKGIYQT                                  | 2.76 | 0.01 | 2.48 | 0.68 | 0.22 | 0.28 |
| 41540 | 0 | 36815  | LKCSVKSFEIDKGIYQT                                  | 2.76 | 0.01 | 2.48 | 1.20 | 0.22 | 0.28 |
| 41541 | 0 | 165026 | LKDAEKAVEVDPDDVN<br>KSTLQSRRAAV                    | 3.25 | 0.01 | 3.24 | 0.68 | 0.22 | 0.85 |
| 41542 | 0 | 165026 | LKDAEKAVEVDPDDVN<br>KSTLQSRRAAV                    | 3.25 | 0.01 | 3.24 | 0.68 | 0.22 | 0.28 |
| 41543 | 0 | 165026 | LKDAEKAVEVDPDDVN<br>KSTLQSRRAAV                    | 3.25 | 0.01 | 3.24 | 0.68 | 0.22 | 0.28 |
| 41544 | 0 | 165026 | LKDAEKAVEVDPDDVN<br>KSTLQSRRAAV                    | 3.25 | 0.01 | 3.24 | 0.68 | 0.22 | 0.28 |
| 41545 | 0 | 165026 | LKDAEKAVEVDPDDVN<br>KSTLQSRRAAV                    | 3.25 | 0.01 | 3.24 | 0.68 | 0.22 | 0.28 |
| 41546 | 0 | 165026 | LKDAEKAVEVDPDDVN<br>KSTLQSRRAAV                    | 3.25 | 0.01 | 3.24 | 0.68 | 0.22 | 0.28 |
| 41547 | 0 | 165026 | LKDAEKAVEVDPDDVN<br>KSTLQSRRAAV                    | 3.25 | 0.01 | 3.24 | 0.68 | 0.22 | 0.28 |
| 41548 | 0 | 165026 | LKDAEKAVEVDPDDVN<br>KSTLQSRRAAV                    | 3.25 | 0.01 | 3.24 | 0.68 | 0.22 | 0.28 |

|       |   |        |                                 |      |      |      |      |      |      |
|-------|---|--------|---------------------------------|------|------|------|------|------|------|
| 41549 | 0 | 165026 | LKDAEKAVEVDPDDVN<br>KSTLQSRRAAV | 3.25 | 0.01 | 3.24 | 0.68 | 0.22 | 0.28 |
| 41550 | 0 | 165026 | LKDAEKAVEVDPDDVN<br>KSTLQSRRAAV | 3.25 | 0.01 | 3.24 | 0.68 | 0.22 | 0.28 |
| 41551 | 0 | 165026 | LKDAEKAVEVDPDDVN<br>KSTLQSRRAAV | 3.25 | 0.01 | 3.24 | 0.68 | 0.22 | 0.28 |
| 41552 | 0 | 165026 | LKDAEKAVEVDPDDVN<br>KSTLQSRRAAV | 3.25 | 0.01 | 3.24 | 0.68 | 0.22 | 0.28 |
| 41553 | 0 | 165026 | LKDAEKAVEVDPDDVN<br>KSTLQSRRAAV | 3.25 | 0.01 | 3.24 | 0.68 | 0.22 | 0.28 |
| 41554 | 0 | 165026 | LKDAEKAVEVDPDDVN<br>KSTLQSRRAAV | 3.25 | 0.01 | 3.24 | 0.68 | 0.22 | 1.48 |
| 41555 | 0 | 165026 | LKDAEKAVEVDPDDVN<br>KSTLQSRRAAV | 3.25 | 0.01 | 3.24 | 0.68 | 0.22 | 1.48 |
| 41556 | 0 | 165026 | LKDAEKAVEVDPDDVN<br>KSTLQSRRAAV | 3.25 | 0.01 | 3.24 | 0.68 | 0.22 | 1.48 |
| 41557 | 0 | 165026 | LKDAEKAVEVDPDDVN<br>KSTLQSRRAAV | 3.25 | 0.01 | 3.24 | 0.68 | 0.22 | 1.48 |
| 41558 | 0 | 36816  | LKDAERAVEVDPDD                  | 2.63 | 0.01 | 2.56 | 0.44 | 0.85 | 0.28 |
| 41559 | 0 | 115626 | LKDAIGEGKVTL                    | 2.48 | 0.01 | 0.78 | 0.44 | 1.41 | 0.28 |
| 41560 | 0 | 115626 | LKDAIGEGKVTL                    | 2.48 | 0.01 | 0.78 | 0.44 | 1.13 | 0.28 |
| 41561 | 0 | 115626 | LKDAIGEGKVTL                    | 2.48 | 0.01 | 0.78 | 0.44 | 1.13 | 0.28 |
| 41562 | 0 | 115626 | LKDAIGEGKVTL                    | 2.48 | 0.01 | 0.78 | 0.44 | 1.13 | 0.28 |
| 41563 | 0 | 115626 | LKDAIGEGKVTL                    | 2.48 | 0.01 | 0.78 | 0.44 | 1.41 | 0.28 |
| 41564 | 0 | 423407 | LKDALGRQVSLRSYD                 | 2.69 | 0.01 | 2.51 | 0.44 | 2.35 | 1.28 |
| 41565 | 0 | 329440 | LKDEEKEEDEEEED                  | 2.74 | 0.01 | 1.61 | 0.44 | 0.85 | 1.28 |
| 41566 | 0 | 193000 | LKDFVKATLLGDGSKNW<br>PTS        | 2.94 | 0.01 | 3.47 | 2.00 | 0.22 | 0.28 |
| 41567 | 0 | 118490 | LKDKYKNIGAKLV                   | 2.56 | 0.01 | 0.78 | 0.44 | 1.74 | 0.85 |
| 41568 | 0 | 118490 | LKDKYKNIGAKLV                   | 2.56 | 0.01 | 0.78 | 0.44 | 1.59 | 0.85 |
| 41569 | 0 | 118490 | LKDKYKNIGAKLV                   | 2.56 | 0.01 | 0.78 | 0.44 | 1.74 | 0.85 |
| 41570 | 0 | 118490 | LKDKYKNIGAKLV                   | 2.56 | 0.01 | 0.78 | 1.20 | 0.22 | 0.85 |
| 41571 | 0 | 118490 | LKDKYKNIGAKLV                   | 2.56 | 0.01 | 0.78 | 1.20 | 0.22 | 0.85 |
| 41572 | 0 | 118490 | LKDKYKNIGAKLV                   | 2.56 | 0.01 | 0.78 | 1.20 | 0.22 | 0.85 |
| 41573 | 0 | 118490 | LKDKYKNIGAKLV                   | 2.56 | 0.01 | 0.78 | 1.20 | 0.22 | 0.85 |
| 41574 | 0 | 118490 | LKDKYKNIGAKLV                   | 2.56 | 0.01 | 0.78 | 1.20 | 0.22 | 1.48 |
| 41575 | 0 | 123432 | LKDLPTTMK                       | 2.25 | 0.01 | 2.28 | 2.00 | 0.22 | 0.28 |
| 41576 | 0 | 135121 | LKDNKKITSSKKIRL                 | 2.70 | 0.01 | 3.59 | 2.13 | 0.85 | 0.85 |
| 41577 | 0 | 146421 | LKDRMNFDIPEEIKQL                | 2.73 | 0.01 | 0.78 | 3.75 | 0.22 | 0.28 |
| 41578 | 0 | 146421 | LKDRMNFDIPEEIKQL                | 2.73 | 0.01 | 0.78 | 1.12 | 0.22 | 0.28 |
| 41579 | 0 | 85372  | LKDTGDINPWDS                    | 2.45 | 0.01 | 2.87 | 0.44 | 0.22 | 0.28 |
| 41580 | 0 | 116770 | LKEARFLAEEADRKY                 | 2.71 | 0.01 | 2.36 | 0.44 | 1.23 | 1.28 |
| 41581 | 0 | 116770 | LKEARFLAEEADRKY                 | 2.71 | 0.01 | 2.36 | 0.44 | 1.23 | 1.27 |
| 41582 | 0 | 116770 | LKEARFLAEEADRKY                 | 2.71 | 0.01 | 2.36 | 0.44 | 1.23 | 1.28 |
| 41583 | 0 | 193001 | LKEDGNGNWPTSTTAD<br>GKEP        | 2.95 | 0.01 | 3.47 | 2.00 | 0.22 | 0.28 |
| 41584 | 0 | 141946 | LKEDSRDRT                       | 2.23 | 0.01 | 3.13 | 0.68 | 0.22 | 0.28 |

|       |   |        |                            |      |      |      |      |      |      |
|-------|---|--------|----------------------------|------|------|------|------|------|------|
| 41585 | 0 | 329485 | LKEEEAGSDEEDQDE            | 2.70 | 0.01 | 1.61 | 0.44 | 0.85 | 1.28 |
| 41586 | 0 | 141947 | LKEEEKEVVRMLVIKLLK<br>KNKL | 3.09 | 0.01 | 3.13 | 2.13 | 0.22 | 0.28 |
| 41587 | 0 | 123433 | LKEFKSRIE                  | 2.23 | 0.01 | 2.28 | 2.00 | 0.22 | 0.28 |
| 41588 | 0 | 123433 | LKEFKSRIE                  | 2.23 | 0.01 | 2.28 | 2.00 | 0.22 | 0.28 |
| 41589 | 0 | 123433 | LKEFKSRIE                  | 2.23 | 0.01 | 2.28 | 2.00 | 0.22 | 0.28 |
| 41590 | 0 | 100264 | LKEHPTDFSV                 | 2.26 | 0.01 | 2.18 | 2.16 | 0.22 | 0.28 |
| 41591 | 0 | 36831  | LKEKHTDLGKEGV              | 2.58 | 0.01 | 2.73 | 1.15 | 0.22 | 0.85 |
| 41592 | 0 | 36831  | LKEKHTDLGKEGV              | 2.58 | 0.01 | 2.73 | 0.44 | 0.85 | 0.85 |
| 41593 | 0 | 36832  | LKEKLQKT                   | 2.17 | 0.01 | 1.66 | 0.44 | 1.74 | 0.28 |
| 41594 | 0 | 172128 | LKEKNEKLFKNYQTL            | 2.72 | 0.01 | 0.78 | 0.44 | 1.13 | 0.28 |
| 41595 | 0 | 36834  | LKEKYKDK                   | 2.16 | 0.01 | 2.83 | 1.12 | 0.22 | 0.28 |
| 41596 | 0 | 521288 | LKELQQDYDLAKEST            | 2.70 | 0.01 | 2.24 | 0.44 | 1.41 | 1.28 |
| 41597 | 0 | 36838  | LKENIKYEVAIFVHGPTT<br>VE   | 2.92 | 0.01 | 2.85 | 2.02 | 0.22 | 0.28 |
| 41598 | 0 | 172135 | LKENTKEIVAKMKES            | 2.68 | 0.01 | 0.78 | 0.44 | 1.13 | 0.28 |
| 41599 | 0 | 36840  | LKEPTNEDILPNHNP            | 2.71 | 0.01 | 1.66 | 0.44 | 1.74 | 0.28 |
| 41600 | 0 | 36841  | LKEQLAKQAEELAKLRA<br>GKA   | 3.01 | 0.01 | 2.85 | 2.42 | 0.22 | 0.28 |
| 41601 | 0 | 36841  | LKEQLAKQAEELAKLRA<br>GKA   | 3.01 | 0.01 | 2.85 | 2.42 | 0.22 | 0.28 |
| 41602 | 0 | 36841  | LKEQLAKQAEELAKLRA<br>GKA   | 3.01 | 0.01 | 2.85 | 0.44 | 0.85 | 0.28 |
| 41603 | 0 | 147092 | LKESGVKPGQFAAIVGA<br>GGGL  | 3.00 | 0.01 | 3.45 | 0.44 | 1.23 | 0.28 |
| 41604 | 0 | 152772 | LKEVINDRYD                 | 2.29 | 0.01 | 2.18 | 2.16 | 0.22 | 0.28 |
| 41605 | 0 | 450791 | LKFDTPI                    | 1.99 | 0.01 | 0.90 | 0.44 | 1.23 | 1.39 |
| 41606 | 0 | 95552  | LKFILNTVNGTT               | 2.48 | 0.01 | 2.88 | 0.44 | 1.23 | 0.85 |
| 41607 | 0 | 95552  | LKFILNTVNGTT               | 2.48 | 0.01 | 2.88 | 1.12 | 0.22 | 0.85 |
| 41608 | 0 | 36853  | LKFKQNVNRPSPR              | 2.48 | 0.01 | 3.33 | 0.44 | 1.23 | 0.85 |
| 41609 | 0 | 79600  | LKFKTVRPVALPRALAPP<br>RN   | 2.99 | 0.01 | 2.85 | 0.44 | 1.59 | 0.28 |
| 41610 | 0 | 107202 | LKFVEQNE                   | 2.12 | 0.01 | 0.78 | 0.44 | 1.13 | 0.28 |
| 41611 | 0 | 107202 | LKFVEQNE                   | 2.12 | 0.01 | 0.78 | 0.44 | 1.13 | 1.34 |
| 41612 | 0 | 149809 | LKFWSIDLKEKLSLD            | 2.72 | 0.01 | 3.67 | 1.12 | 0.22 | 0.28 |
| 41613 | 0 | 36856  | LKGACSCGSCCKFDEDD          | 2.80 | 0.01 | 2.48 | 0.44 | 0.85 | 0.28 |
| 41614 | 0 | 142442 | LKGDDSAQEEL                | 2.49 | 0.01 | 0.90 | 0.68 | 0.22 | 0.85 |
| 41615 | 0 | 461808 | LKGDGPV                    | 2.02 | 0.01 | 0.78 | 2.97 | 0.22 | 0.28 |
| 41616 | 0 | 461808 | LKGDGPV                    | 2.02 | 0.01 | 0.78 | 2.97 | 0.22 | 1.48 |
| 41617 | 0 | 149367 | LKGDSFYYGKGLINV            | 2.68 | 0.01 | 3.67 | 3.16 | 0.22 | 0.28 |
| 41618 | 0 | 135123 | LKGELLEKVLKNNI             | 2.73 | 0.01 | 3.59 | 2.13 | 0.85 | 0.85 |
| 41619 | 0 | 99422  | LKGESGY                    | 2.02 | 0.01 | 3.33 | 1.12 | 0.22 | 0.28 |
| 41620 | 0 | 181710 | LKGILSNAIFVDQLR            | 2.65 | 0.01 | 1.66 | 2.36 | 0.22 | 1.28 |
| 41621 | 0 | 187424 | LKGNFIWICKLNVAVN           | 2.75 | 0.01 | 2.59 | 0.44 | 1.74 | 0.28 |

|       |   |        |                                     |      |      |      |      |      |      |
|-------|---|--------|-------------------------------------|------|------|------|------|------|------|
| 41622 | 0 | 36866  | LKGNNLIWTLKDSAGE                    | 2.73 | 0.01 | 2.95 | 3.38 | 0.22 | 0.28 |
| 41623 | 0 | 36873  | LKGRTMRYDMHGTIKEI<br>PLHQVSLY       | 3.14 | 0.01 | 3.36 | 0.68 | 0.22 | 0.28 |
| 41624 | 0 | 36873  | LKGRTMRYDMHGTIKEI<br>PLHQVSLY       | 3.14 | 0.01 | 3.36 | 0.68 | 0.22 | 0.28 |
| 41625 | 0 | 36873  | LKGRTMRYDMHGTIKEI<br>PLHQVSLY       | 3.14 | 0.01 | 3.36 | 0.68 | 0.22 | 0.28 |
| 41626 | 0 | 36877  | LKGTDISLKAVNPS                      | 2.60 | 0.01 | 2.94 | 2.00 | 0.22 | 0.28 |
| 41627 | 0 | 181711 | LKGTLSNARFHDGLH                     | 2.67 | 0.01 | 2.86 | 2.37 | 0.22 | 1.28 |
| 41628 | 0 | 179151 | LKGTYYPLTGMSKEV                     | 2.68 | 0.01 | 2.36 | 0.44 | 1.23 | 1.28 |
| 41629 | 0 | 179151 | LKGTYYPLTGMSKEV                     | 2.68 | 0.01 | 2.36 | 0.44 | 1.23 | 1.27 |
| 41630 | 0 | 179151 | LKGTYYPLTGMSKEV                     | 2.68 | 0.01 | 2.36 | 0.44 | 1.23 | 1.28 |
| 41631 | 0 | 115349 | LKGYGGSVSLP                         | 2.33 | 0.01 | 1.60 | 0.44 | 1.23 | 0.85 |
| 41632 | 0 | 115349 | LKGYGGSVSLP                         | 2.33 | 0.01 | 1.60 | 0.44 | 1.23 | 0.85 |
| 41633 | 0 | 161648 | LKGYGGSVSLPEW                       | 2.47 | 0.01 | 1.60 | 0.44 | 1.23 | 0.85 |
| 41634 | 0 | 226062 | LKHELDPDGFYSASMLVK<br>KDL           | 2.93 | 0.01 | 3.55 | 3.16 | 0.22 | 0.28 |
| 41635 | 0 | 36882  | LKHRVRNYLF                          | 2.32 | 0.01 | 3.18 | 2.74 | 0.22 | 0.28 |
| 41636 | 0 | 36884  | LKIAGWHGPKAPYTS                     | 2.66 | 0.01 | 2.40 | 0.44 | 1.59 | 0.28 |
| 41637 | 0 | 240896 | LKIDIIPNPQERTLTLDVT<br>GIGMT        | 3.12 | 3.40 | 0.78 | 0.44 | 1.13 | 0.28 |
| 41638 | 0 | 36886  | LKIESSCNFDLHVPATTT<br>QKYNQVDWTKKSS | 3.32 | 0.01 | 4.15 | 0.44 | 0.85 | 0.85 |
| 41639 | 0 | 36890  | LKIKIASGFGPLITH                     | 2.69 | 0.01 | 2.43 | 3.34 | 0.22 | 0.28 |
| 41640 | 0 | 36890  | LKIKIASGFGPLITH                     | 2.69 | 0.01 | 2.43 | 3.34 | 0.22 | 0.28 |
| 41641 | 0 | 36890  | LKIKIASGFGPLITH                     | 2.69 | 0.01 | 2.43 | 0.44 | 0.85 | 0.28 |
| 41642 | 0 | 36893  | LKILPQSGPIGGIKSMGIT<br>T            | 2.98 | 0.01 | 2.75 | 0.44 | 0.85 | 0.85 |
| 41643 | 0 | 36895  | LKIQFSAQIGIDKSDNHD<br>YT            | 2.93 | 0.01 | 3.13 | 2.43 | 0.22 | 0.28 |
| 41644 | 0 | 96566  | LKIVSPMVVK                          | 2.32 | 0.01 | 2.39 | 0.44 | 0.85 | 0.28 |
| 41645 | 0 | 36903  | LKKDKEGKVSTLPLD                     | 2.70 | 0.01 | 2.93 | 0.44 | 0.85 | 0.28 |
| 41646 | 0 | 122138 | LKKDV                               | 1.75 | 0.01 | 0.78 | 0.68 | 0.22 | 0.85 |
| 41647 | 0 | 122138 | LKKDV                               | 1.75 | 0.01 | 0.78 | 0.68 | 0.22 | 0.28 |
| 41648 | 0 | 122138 | LKKDV                               | 1.75 | 0.01 | 0.78 | 0.68 | 0.22 | 0.85 |
| 41649 | 0 | 36912  | LKKIQNSLSTEWSPCSV                   | 2.77 | 0.01 | 3.37 | 0.44 | 1.74 | 0.28 |
| 41650 | 0 | 122839 | LKKKDFELNALNARIEDE<br>QALGSQL       | 3.17 | 0.01 | 0.78 | 2.04 | 0.22 | 0.28 |
| 41651 | 0 | 132860 | LKKLKPGLKDF                         | 2.52 | 0.01 | 2.19 | 2.04 | 0.22 | 0.85 |
| 41652 | 0 | 132860 | LKKLKPGLKDF                         | 2.52 | 0.01 | 2.19 | 2.04 | 0.22 | 0.85 |
| 41653 | 0 | 132860 | LKKLKPGLKDF                         | 2.52 | 0.01 | 2.19 | 2.04 | 2.25 | 1.75 |

|       |   |        |                                                        |      |      |      |      |      |      |
|-------|---|--------|--------------------------------------------------------|------|------|------|------|------|------|
| 41654 | 0 | 98215  | LKKNSRSLGENDDGNNE<br>DNEKLRKPKHKKLKQPA<br>DGNPDPNANPNV | 3.80 | 0.01 | 3.33 | 3.23 | 0.22 | 0.28 |
| 41655 | 0 | 98215  | LKKNSRSLGENDDGNNE<br>DNEKLRKPKHKKLKQPA<br>DGNPDPNANPNV | 3.80 | 0.01 | 3.33 | 0.44 | 1.74 | 0.28 |
| 41656 | 0 | 98215  | LKKNSRSLGENDDGNNE<br>DNEKLRKPKHKKLKQPA<br>DGNPDPNANPNV | 3.80 | 0.01 | 3.33 | 0.44 | 1.74 | 0.28 |
| 41657 | 0 | 98215  | LKKNSRSLGENDDGNNE<br>DNEKLRKPKHKKLKQPA<br>DGNPDPNANPNV | 3.80 | 0.01 | 3.33 | 0.44 | 1.74 | 0.28 |
| 41658 | 0 | 98215  | LKKNSRSLGENDDGNNE<br>DNEKLRKPKHKKLKQPA<br>DGNPDPNANPNV | 3.80 | 0.01 | 3.33 | 0.44 | 1.74 | 1.27 |
| 41659 | 0 | 108525 | LKKPKDRNDLI                                            | 2.43 | 0.01 | 3.45 | 0.44 | 1.23 | 0.28 |
| 41660 | 0 | 108525 | LKKPKDRNDLI                                            | 2.43 | 0.01 | 3.45 | 0.44 | 1.23 | 1.27 |
| 41661 | 0 | 227797 | LKKQRESYFVDAQPQQ                                       | 2.68 | 0.01 | 2.72 | 1.20 | 1.59 | 0.28 |
| 41662 | 0 | 36928  | LKCTLQPGKTSTGET                                        | 2.72 | 0.01 | 3.37 | 2.22 | 0.22 | 0.85 |
| 41663 | 0 | 36928  | LKCTLQPGKTSTGET                                        | 2.72 | 0.01 | 3.37 | 2.22 | 0.22 | 0.85 |
| 41664 | 0 | 36929  | LKKYKVPQLE                                             | 2.34 | 0.01 | 1.60 | 0.44 | 1.23 | 0.28 |
| 41665 | 0 | 36929  | LKKYKVPQLE                                             | 2.34 | 0.01 | 1.60 | 0.44 | 1.23 | 0.28 |
| 41666 | 0 | 109484 | LKKYKVPQLEIVPNSAEE<br>RLHSMKEGIHAQQKE                  | 3.43 | 0.01 | 1.60 | 0.44 | 1.23 | 1.34 |
| 41667 | 0 | 109484 | LKKYKVPQLEIVPNSAEE<br>RLHSMKEGIHAQQKE                  | 3.43 | 0.01 | 1.60 | 0.44 | 1.23 | 0.85 |
| 41668 | 0 | 112581 | LKKYTFWEVNLKEKFSA<br>DLD                               | 2.95 | 0.01 | 1.86 | 2.37 | 0.22 | 0.28 |
| 41669 | 0 | 36931  | LKLAT                                                  | 1.77 | 0.01 | 2.36 | 1.15 | 0.22 | 0.28 |
| 41670 | 0 | 36931  | LKLAT                                                  | 1.77 | 0.01 | 2.36 | 0.68 | 0.22 | 0.28 |
| 41671 | 0 | 36931  | LKLAT                                                  | 1.77 | 0.01 | 2.36 | 0.68 | 0.22 | 0.28 |
| 41672 | 0 | 36931  | LKLAT                                                  | 1.77 | 0.01 | 3.78 | 0.68 | 0.22 | 1.27 |
| 41673 | 0 | 36931  | LKLAT                                                  | 1.77 | 0.01 | 3.78 | 1.15 | 0.22 | 1.27 |
| 41674 | 0 | 36931  | LKLAT                                                  | 1.77 | 0.01 | 3.27 | 0.68 | 0.22 | 0.28 |
| 41675 | 0 | 36931  | LKLAT                                                  | 1.77 | 0.01 | 3.27 | 0.68 | 0.22 | 0.28 |
| 41676 | 0 | 36931  | LKLAT                                                  | 1.77 | 0.01 | 3.97 | 0.68 | 0.22 | 0.28 |
| 41677 | 0 | 122840 | LKLIETHLRTIPSHAFSNL                                    | 2.90 | 0.01 | 0.78 | 3.01 | 0.22 | 1.27 |

|       |   |        |                                   |      |      |      |      |      |      |
|-------|---|--------|-----------------------------------|------|------|------|------|------|------|
| 41678 | 0 | 122840 | LKLIETHLRTIPSHAFSNL               | 2.90 | 0.01 | 0.78 | 3.01 | 0.22 | 0.28 |
| 41679 | 0 | 122840 | LKLIETHLRTIPSHAFSNL               | 2.90 | 0.01 | 0.78 | 3.01 | 0.22 | 1.27 |
| 41680 | 0 | 36940  | LKLKSIVSWAKKVL                    | 2.66 | 0.01 | 4.33 | 2.43 | 0.22 | 0.28 |
| 41681 | 0 | 36940  | LKLKSIVSWAKKVL                    | 2.66 | 0.01 | 4.33 | 1.20 | 0.22 | 0.28 |
| 41682 | 0 | 36940  | LKLKSIVSWAKKVL                    | 2.66 | 0.01 | 4.33 | 1.20 | 0.22 | 1.27 |
| 41683 | 0 | 133880 | LKLLLKEYV                         | 2.26 | 0.01 | 3.75 | 1.12 | 0.22 | 0.85 |
| 41684 | 0 | 36946  | LKLNEGLENIKQELHIIDR<br>ELKNIL     | 3.20 | 0.01 | 2.22 | 0.44 | 1.74 | 0.28 |
| 41685 | 0 | 36946  | LKLNEGLENIKQELHIIDR<br>ELKNIL     | 3.20 | 0.01 | 2.22 | 0.44 | 1.74 | 0.28 |
| 41686 | 0 | 36946  | LKLNEGLENIKQELHIIDR<br>ELKNIL     | 3.20 | 0.01 | 2.22 | 0.44 | 1.74 | 0.28 |
| 41687 | 0 | 36947  | LKLNWF                            | 1.91 | 0.01 | 2.40 | 0.44 | 0.85 | 0.28 |
| 41688 | 0 | 111488 | LKLRHLP                           | 2.05 | 0.01 | 0.90 | 0.44 | 0.85 | 1.39 |
| 41689 | 0 | 36948  | LKLSAQYGSLRKNAME                  | 2.69 | 0.01 | 2.72 | 0.44 | 1.23 | 0.85 |
| 41690 | 0 | 36950  | LKLSIPVAERAKPRK                   | 2.71 | 0.01 | 2.59 | 0.44 | 0.85 | 0.28 |
| 41691 | 0 | 242907 | LKLVVETLMSSLKPI                   | 2.69 | 0.01 | 0.78 | 0.44 | 1.59 | 0.28 |
| 41692 | 0 | 36953  | LKLYDDKNASL                       | 2.43 | 0.01 | 2.95 | 3.38 | 0.22 | 0.28 |
| 41693 | 0 | 36955  | LKLYFEP                           | 2.03 | 0.01 | 2.14 | 0.44 | 0.22 | 0.28 |
| 41694 | 0 | 36955  | LKLYFEP                           | 2.03 | 0.01 | 2.14 | 0.44 | 0.85 | 0.28 |
| 41695 | 0 | 36956  | LKMADPNRFRG                       | 2.36 | 0.01 | 2.40 | 0.68 | 0.22 | 1.66 |
| 41696 | 0 | 36956  | LKMADPNRFRG                       | 2.36 | 0.01 | 2.40 | 0.68 | 0.22 | 1.66 |
| 41697 | 0 | 36956  | LKMADPNRFRG                       | 2.36 | 0.01 | 2.40 | 0.68 | 0.22 | 1.66 |
| 41698 | 0 | 36956  | LKMADPNRFRG                       | 2.36 | 0.01 | 2.40 | 0.68 | 0.22 | 1.66 |
| 41699 | 0 | 36956  | LKMADPNRFRG                       | 2.36 | 0.01 | 2.40 | 1.15 | 0.22 | 0.28 |
| 41700 | 0 | 36957  | LKMADPNRFRGK                      | 2.45 | 0.01 | 2.40 | 0.68 | 0.22 | 1.27 |
| 41701 | 0 | 36957  | LKMADPNRFRGK                      | 2.45 | 0.01 | 2.40 | 1.15 | 0.22 | 1.27 |
| 41702 | 0 | 36958  | LKMADPNRFRGKD                     | 2.54 | 4.15 | 2.40 | 1.15 | 0.22 | 0.28 |
| 41703 | 0 | 36958  | LKMADPNRFRGKD                     | 2.54 | 4.15 | 2.40 | 0.68 | 2.25 | 1.75 |
| 41704 | 0 | 36958  | LKMADPNRFRGKD                     | 2.54 | 4.15 | 2.40 | 0.68 | 0.22 | 0.28 |
| 41705 | 0 | 36958  | LKMADPNRFRGKD                     | 2.54 | 4.15 | 2.40 | 1.15 | 0.22 | 1.27 |
| 41706 | 0 | 36959  | LKMADPNRFRGKD                     | 2.54 | 0.01 | 2.40 | 0.68 | 0.22 | 0.28 |
| 41707 | 0 | 36959  | LKMADPNRFRGKD                     | 2.54 | 0.01 | 2.40 | 0.68 | 0.22 | 0.28 |
| 41708 | 0 | 36959  | LKMADPNRFRGKD                     | 2.54 | 0.01 | 2.40 | 0.68 | 0.22 | 0.28 |
| 41709 | 0 | 36959  | LKMADPNRFRGKD                     | 2.54 | 0.01 | 2.40 | 0.68 | 0.22 | 1.75 |
| 41710 | 0 | 36959  | LKMADPNRFRGKD                     | 2.54 | 0.01 | 2.40 | 1.15 | 0.22 | 1.66 |
| 41711 | 0 | 36959  | LKMADPNRFRGKD                     | 2.54 | 0.01 | 2.40 | 1.15 | 0.22 | 1.66 |
| 41712 | 0 | 36960  | LKMADPNRFRGKDGGGL<br>KMADPNRFRGKD | 3.32 | 4.63 | 0.90 | 1.15 | 0.22 | 1.27 |
| 41713 | 0 | 36960  | LKMADPNRFRGKDGGGL<br>KMADPNRFRGKD | 3.32 | 4.63 | 0.90 | 1.12 | 0.22 | 1.34 |
| 41714 | 0 | 36961  | LKMADPNRFRGKDL                    | 2.62 | 0.01 | 2.40 | 1.15 | 0.22 | 1.27 |
| 41715 | 0 | 36961  | LKMADPNRFRGKDL                    | 2.62 | 0.01 | 2.40 | 1.15 | 0.22 | 1.27 |
| 41716 | 0 | 172146 | LKMERDQFIATLREM                   | 2.67 | 0.01 | 0.78 | 0.44 | 1.41 | 0.28 |

|       |   |        |                                 |      |      |      |      |      |      |
|-------|---|--------|---------------------------------|------|------|------|------|------|------|
| 41717 | 0 | 36962  | LKMFGEVKYFFERDPLG<br>QKVVDLLKEL | 3.25 | 0.01 | 2.94 | 0.44 | 0.85 | 0.85 |
| 41718 | 0 | 36962  | LKMFGEVKYFFERDPLG<br>QKVVDLLKEL | 3.25 | 0.01 | 2.94 | 0.44 | 0.85 | 0.28 |
| 41719 | 0 | 36962  | LKMFGEVKYFFERDPLG<br>QKVVDLLKEL | 3.25 | 0.01 | 2.94 | 0.68 | 0.22 | 0.28 |
| 41720 | 0 | 36962  | LKMFGEVKYFFERDPLG<br>QKVVDLLKEL | 3.25 | 0.01 | 2.94 | 0.68 | 0.22 | 0.85 |
| 41721 | 0 | 36962  | LKMFGEVKYFFERDPLG<br>QKVVDLLKEL | 3.25 | 0.01 | 2.94 | 0.44 | 0.85 | 0.28 |
| 41722 | 0 | 36962  | LKMFGEVKYFFERDPLG<br>QKVVDLLKEL | 3.25 | 0.01 | 2.94 | 0.44 | 0.85 | 0.28 |
| 41723 | 0 | 36962  | LKMFGEVKYFFERDPLG<br>QKVVDLLKEL | 3.25 | 0.01 | 2.94 | 1.15 | 0.22 | 0.28 |
| 41724 | 0 | 36962  | LKMFGEVKYFFERDPLG<br>QKVVDLLKEL | 3.25 | 0.01 | 2.94 | 1.15 | 0.22 | 2.35 |
| 41725 | 0 | 36963  | LKMLNRDLEQAYNELSG<br>EAH        | 2.94 | 0.01 | 3.85 | 2.42 | 0.22 | 0.28 |
| 41726 | 0 | 36963  | LKMLNRDLEQAYNELSG<br>EAH        | 2.94 | 0.01 | 3.85 | 2.42 | 0.22 | 1.34 |
| 41727 | 0 | 36963  | LKMLNRDLEQAYNELSG<br>EAH        | 2.94 | 0.01 | 3.85 | 2.42 | 0.22 | 1.34 |
| 41728 | 0 | 36963  | LKMLNRDLEQAYNELSG<br>EAH        | 2.94 | 0.01 | 3.85 | 2.42 | 0.22 | 0.28 |
| 41729 | 0 | 36963  | LKMLNRDLEQAYNELSG<br>EAH        | 2.94 | 0.01 | 3.85 | 2.42 | 0.22 | 0.28 |
| 41730 | 0 | 36963  | LKMLNRDLEQAYNELSG<br>EAH        | 2.94 | 0.01 | 3.85 | 2.42 | 0.22 | 0.28 |
| 41731 | 0 | 36963  | LKMLNRDLEQAYNELSG<br>EAH        | 2.94 | 0.01 | 3.85 | 2.42 | 0.22 | 0.28 |
| 41732 | 0 | 36963  | LKMLNRDLEQAYNELSG<br>EAH        | 2.94 | 0.01 | 3.85 | 2.42 | 0.22 | 0.28 |
| 41733 | 0 | 36963  | LKMLNRDLEQAYNELSG<br>EAH        | 2.94 | 0.01 | 2.24 | 0.68 | 0.22 | 0.28 |
| 41734 | 0 | 36963  | LKMLNRDLEQAYNELSG<br>EAH        | 2.94 | 0.01 | 2.24 | 0.68 | 0.22 | 0.28 |
| 41735 | 0 | 36965  | LKMPPMYIAGYKTFDG                | 2.66 | 0.01 | 3.24 | 1.15 | 0.22 | 0.28 |
| 41736 | 0 | 123436 | LKMREGQAF                       | 2.10 | 0.01 | 2.96 | 1.20 | 0.22 | 0.28 |
| 41737 | 0 | 36966  | LKMTNNAISFMSISASLE<br>KK        | 2.96 | 0.01 | 0.90 | 2.63 | 0.22 | 1.48 |
| 41738 | 0 | 123437 | LKMWSDFLG                       | 2.22 | 0.01 | 2.28 | 2.00 | 0.22 | 0.28 |
| 41739 | 0 | 123437 | LKMWSDFLG                       | 2.22 | 0.01 | 2.28 | 2.00 | 0.22 | 0.28 |
| 41740 | 0 | 123438 | LKMWSNFLG                       | 2.22 | 0.01 | 2.28 | 2.00 | 0.22 | 0.28 |
| 41741 | 0 | 96567  | LKNGVIKSG                       | 2.32 | 0.01 | 2.39 | 0.44 | 0.85 | 0.28 |
| 41742 | 0 | 36974  | LKNKIFPKKKEDNQAVD<br>T          | 2.82 | 0.01 | 1.66 | 0.44 | 0.85 | 0.28 |

|       |   |        |                                             |      |      |      |      |      |      |
|-------|---|--------|---------------------------------------------|------|------|------|------|------|------|
| 41743 | 0 | 36974  | LKNKIFPKKKEDNQAVD<br>T                      | 2.82 | 0.01 | 1.66 | 1.12 | 0.22 | 0.28 |
| 41744 | 0 | 36974  | LKNKIFPKKKEDNQAVD<br>T                      | 2.82 | 0.01 | 1.66 | 1.12 | 0.22 | 0.85 |
| 41745 | 0 | 36974  | LKNKIFPKKKEDNQAVD<br>T                      | 2.82 | 0.01 | 1.66 | 1.12 | 0.22 | 1.34 |
| 41746 | 0 | 36976  | LKNLAGSISGVNPNN<br>LKNNAKEIGNGCFEFYH        | 2.69 | 0.01 | 3.35 | 1.12 | 0.22 | 0.85 |
| 41747 | 0 | 181381 | KCDNTCMESVKNQTYD<br>YPKYSEEAKLNREEIDGV<br>K | 3.89 | 0.01 | 4.45 | 0.44 | 0.85 | 2.12 |
| 41748 | 0 | 36982  | LKNTVDVVSV                                  | 2.33 | 0.01 | 2.86 | 1.81 | 0.22 | 0.28 |
| 41749 | 0 | 36982  | LKNTVDVVSV                                  | 2.33 | 0.01 | 2.86 | 1.81 | 0.22 | 0.28 |
| 41750 | 0 | 114455 | LKPEEVAQEAAEEPLIEP<br>L                     | 2.94 | 0.01 | 1.75 | 2.04 | 0.22 | 0.28 |
| 41751 | 0 | 114455 | LKPEEVAQEAAEEPLIEP<br>L                     | 2.94 | 0.01 | 1.75 | 2.04 | 0.22 | 0.28 |
| 41752 | 0 | 114455 | LKPEEVAQEAAEEPLIEP<br>L                     | 2.94 | 0.01 | 1.75 | 2.04 | 0.22 | 0.28 |
| 41753 | 0 | 36988  | LKPGVDTIEN                                  | 2.26 | 0.01 | 2.60 | 0.44 | 1.23 | 0.85 |
| 41754 | 0 | 36991  | LKPIFKLPLGINITNFR                           | 2.83 | 0.01 | 2.48 | 0.44 | 0.85 | 0.28 |
| 41755 | 0 | 36991  | LKPIFKLPLGINITNFR                           | 2.83 | 0.01 | 2.48 | 0.68 | 0.22 | 0.28 |
| 41756 | 0 | 98216  | LKPIRKKVGIVFQFP                             | 2.69 | 0.01 | 3.97 | 0.44 | 0.85 | 1.39 |
| 41757 | 0 | 98216  | LKPIRKKVGIVFQFP                             | 2.69 | 0.01 | 3.97 | 0.44 | 0.85 | 1.75 |
| 41758 | 0 | 98217  | LKPKKGIVN                                   | 2.33 | 0.01 | 3.57 | 0.44 | 0.85 | 0.28 |
| 41759 | 0 | 141948 | LKPREYQPS                                   | 2.30 | 0.01 | 3.13 | 2.13 | 0.22 | 0.28 |
| 41760 | 0 | 96569  | LKPTPEGDLLEILLQK                            | 2.70 | 0.01 | 1.60 | 0.44 | 1.23 | 0.28 |
| 41761 | 0 | 96569  | LKPTPEGDLLEILLQK                            | 2.70 | 0.01 | 1.60 | 0.44 | 1.23 | 0.28 |
| 41762 | 0 | 115350 | LKPTPEGDLLEILLQKWEN<br>GE                   | 2.96 | 0.01 | 1.60 | 0.44 | 1.23 | 2.51 |
| 41763 | 0 | 489646 | LKQCHGIFTLTWEIW                             | 2.67 | 0.01 | 2.69 | 3.05 | 0.85 | 1.28 |
| 41764 | 0 | 111489 | LKQIAAHAGKEGAIIFQQ<br>VM                    | 2.94 | 0.01 | 2.40 | 0.44 | 1.74 | 0.28 |
| 41765 | 0 | 36999  | LKQKALGLLQTATKQAE<br>AAA                    | 2.99 | 0.01 | 1.96 | 0.44 | 0.85 | 0.28 |
| 41766 | 0 | 180989 | LKQKSSNSRK                                  | 2.35 | 0.01 | 2.18 | 2.16 | 0.22 | 0.28 |
| 41767 | 0 | 115351 | LKQKSSNSRKKRSTS                             | 2.72 | 0.01 | 2.18 | 0.68 | 0.22 | 0.85 |
| 41768 | 0 | 115351 | LKQKSSNSRKKRSTS                             | 2.72 | 0.01 | 2.18 | 0.68 | 0.22 | 0.28 |
| 41769 | 0 | 115351 | LKQKSSNSRKKRSTS                             | 2.72 | 0.01 | 2.18 | 0.68 | 0.22 | 0.28 |
| 41770 | 0 | 115351 | LKQKSSNSRKKRSTS                             | 2.72 | 0.01 | 2.18 | 0.68 | 0.22 | 0.28 |
| 41771 | 0 | 115351 | LKQKSSNSRKKRSTS                             | 2.72 | 0.01 | 2.18 | 0.68 | 0.22 | 1.34 |
| 41772 | 0 | 181712 | LKQNFNIVSDFFCPS                             | 2.65 | 0.01 | 2.86 | 2.36 | 0.22 | 1.28 |
| 41773 | 0 | 37001  | LKQPGDGN                                    | 2.12 | 0.01 | 3.29 | 1.20 | 0.22 | 0.28 |
| 41774 | 0 | 120066 | LKQQWVDYNLKWNP<br>D                         | 2.74 | 0.01 | 0.78 | 1.15 | 0.22 | 1.57 |
| 41775 | 0 | 120066 | LKQQWVDYNLKWNP<br>D                         | 2.74 | 0.01 | 0.78 | 0.44 | 1.13 | 1.57 |



|       |   |        |                                                   |      |      |      |      |      |      |
|-------|---|--------|---------------------------------------------------|------|------|------|------|------|------|
| 41776 | 0 | 120066 | LKQQWVDYNLKWNP<br>D                               | 2.74 | 0.01 | 0.78 | 0.44 | 1.41 | 1.57 |
| 41777 | 0 | 98218  | LKQYEADLAA                                        | 2.32 | 0.01 | 2.39 | 0.68 | 0.22 | 0.28 |
| 41778 | 0 | 37004  | LKRDKGKVSTLPLD                                    | 2.69 | 0.01 | 2.93 | 0.44 | 0.85 | 0.28 |
| 41779 | 0 | 122465 | LKRDMKSAHLLPEH                                    | 2.61 | 0.01 | 0.78 | 0.44 | 1.13 | 0.85 |
| 41780 | 0 | 122465 | LKRDMKSAHLLPEH                                    | 2.61 | 0.01 | 0.78 | 0.44 | 1.13 | 0.85 |
| 41781 | 0 | 122465 | LKRDMKSAHLLPEH                                    | 2.61 | 0.01 | 0.78 | 0.44 | 1.13 | 0.85 |
| 41782 | 0 | 132861 | LKRGIEKAV                                         | 2.21 | 0.01 | 2.59 | 0.68 | 0.22 | 0.85 |
| 41783 | 0 | 132861 | LKRGIEKAV                                         | 2.21 | 0.01 | 2.59 | 0.68 | 0.22 | 0.85 |
| 41784 | 0 | 132861 | LKRGIEKAV                                         | 2.21 | 0.01 | 2.59 | 0.68 | 0.22 | 0.85 |
| 41785 | 0 | 132861 | LKRGIEKAV                                         | 2.21 | 0.01 | 2.59 | 0.68 | 0.22 | 2.92 |
| 41786 | 0 | 37008  | LKRHFHMDYGTGFYK                                   | 2.68 | 0.01 | 3.50 | 2.22 | 0.22 | 0.28 |
| 41787 | 0 | 97456  | LKRTDLNILERFNYYE                                  | 2.74 | 0.01 | 3.67 | 0.44 | 1.23 | 0.28 |
| 41788 | 0 | 117989 | LKRVCAQIN                                         | 2.18 | 0.01 | 0.78 | 0.44 | 1.13 | 0.85 |
| 41789 | 0 | 117989 | LKRVCAQIN                                         | 2.18 | 0.01 | 0.78 | 0.44 | 1.13 | 0.85 |
| 41790 | 0 | 98219  | LKRVQEANAANE                                      | 2.48 | 0.01 | 2.39 | 2.42 | 0.22 | 0.28 |
| 41791 | 0 | 37014  | LKSAQETDETSVDKYIR<br>G<br>L                       | 2.88 | 0.01 | 3.97 | 0.68 | 0.22 | 0.85 |
| 41792 | 0 | 37014  | LKSAQETDETSVDKYIR<br>G<br>L                       | 2.88 | 0.01 | 3.97 | 0.68 | 0.22 | 0.85 |
| 41793 | 0 | 37014  | LKSAQETDETSVDKYIR<br>G<br>L                       | 2.88 | 0.01 | 3.97 | 0.68 | 0.22 | 0.85 |
| 41794 | 0 | 37019  | LKSHMNRESDDGELYDE<br>NS                           | 2.91 | 0.01 | 1.66 | 0.44 | 1.74 | 0.28 |
| 41795 | 0 | 37021  | LKSKIQGLLQQASK                                    | 2.65 | 0.01 | 2.69 | 0.44 | 1.41 | 0.28 |
| 41796 | 0 | 37021  | LKSKIQGLLQQASK                                    | 2.65 | 0.01 | 2.69 | 0.44 | 0.85 | 0.28 |
| 41797 | 0 | 37021  | LKSKIQGLLQQASK                                    | 2.65 | 0.01 | 2.69 | 0.44 | 0.85 | 0.28 |
| 41798 | 0 | 37021  | LKSKIQGLLQQASK                                    | 2.65 | 0.01 | 2.69 | 0.44 | 0.85 | 0.28 |
| 41799 | 0 | 37023  | LKSKIQGLLQQATR                                    | 2.62 | 0.01 | 2.69 | 0.44 | 0.85 | 0.28 |
| 41800 | 0 | 37023  | LKSKIQGLLQQATR                                    | 2.62 | 0.01 | 2.69 | 0.44 | 0.85 | 0.28 |
| 41801 | 0 | 37029  | LKTAAESA                                          | 2.14 | 0.01 | 2.58 | 0.68 | 0.22 | 0.28 |
| 41802 | 0 | 37029  | LKTAAESA                                          | 2.14 | 0.01 | 2.58 | 0.68 | 0.22 | 0.85 |
| 41803 | 0 | 79292  | LKTDLELKYQTADFS                                   | 2.75 | 0.01 | 3.12 | 1.12 | 0.22 | 0.28 |
| 41804 | 0 | 79292  | LKTDLELKYQTADFS                                   | 2.75 | 0.01 | 3.12 | 1.12 | 0.22 | 1.34 |
| 41805 | 0 | 79292  | LKTDLELKYQTADFS                                   | 2.75 | 0.01 | 3.12 | 1.12 | 0.22 | 1.34 |
| 41806 | 0 | 79292  | LKTDLELKYQTADFS                                   | 2.75 | 0.01 | 3.12 | 1.12 | 0.22 | 0.28 |
| 41807 | 0 | 172159 | LKTFYEPGEEITYSC                                   | 2.65 | 0.01 | 0.78 | 0.44 | 1.41 | 0.28 |
| 41808 | 0 | 37033  | LKTHNAKDKGAEELVKL<br>SESVAGLLKAAQAILANS<br>VKELTS | 3.68 | 0.01 | 2.97 | 2.82 | 0.22 | 0.85 |
| 41809 | 0 | 37033  | LKTHNAKDKGAEELVKL<br>SESVAGLLKAAQAILANS<br>VKELTS | 3.68 | 0.01 | 2.97 | 2.82 | 0.22 | 0.28 |
| 41810 | 0 | 37033  | LKTHNAKDKGAEELVKL<br>SESVAGLLKAAQAILANS<br>VKELTS | 3.68 | 0.01 | 2.97 | 2.82 | 0.22 | 1.48 |

|       |   |        |                                                                                            |      |      |      |      |      |      |
|-------|---|--------|--------------------------------------------------------------------------------------------|------|------|------|------|------|------|
|       |   |        | LKTHNAKDKGAEELVKL                                                                          |      |      |      |      |      |      |
| 41811 | 0 | 37033  | SESVAGLLKAAQAILANS<br>VKELTS                                                               | 3.68 | 0.01 | 2.97 | 2.82 | 0.22 | 1.34 |
| 41812 | 0 | 37035  | LKTKNEGLKTENEGLKTE                                                                         | 2.92 | 0.01 | 2.85 | 0.68 | 0.22 | 0.28 |
| 41813 | 0 | 37038  | LKTNSSLL                                                                                   | 2.13 | 0.01 | 3.20 | 2.22 | 0.85 | 0.28 |
| 41814 | 0 | 134136 | LKTPRV                                                                                     | 1.88 | 0.01 | 0.78 | 0.44 | 1.13 | 0.28 |
| 41815 | 0 | 134136 | LKTPRV                                                                                     | 1.88 | 0.01 | 0.90 | 0.44 | 1.13 | 0.28 |
| 41816 | 0 | 134136 | LKTPRV                                                                                     | 1.88 | 0.01 | 0.78 | 0.44 | 1.13 | 0.28 |
| 41817 | 0 | 134136 | LKTPRV                                                                                     | 1.88 | 0.01 | 0.78 | 0.44 | 1.41 | 0.28 |
| 41818 | 0 | 37040  | LKTQIDQVESTAG                                                                              | 2.51 | 0.01 | 2.04 | 0.44 | 0.85 | 1.28 |
| 41819 | 0 | 141546 | LKTRKLFWKYKD                                                                               | 2.50 | 0.01 | 0.90 | 3.06 | 0.22 | 1.39 |
|       |   |        | LKTRPILSPLTKGILGFVF                                                                        |      |      |      |      |      |      |
| 41820 | 0 | 37043  | TLTVPSEGLQRRRFVQ<br>NALNGNGD                                                               | 3.73 | 0.01 | 3.85 | 1.15 | 0.22 | 0.85 |
|       |   |        | LKTRPILSPLTKGILGFVF                                                                        |      |      |      |      |      |      |
| 41821 | 0 | 37043  | TLTVPSEGLQRRRFVQ<br>NALNGNGD                                                               | 3.73 | 0.01 | 3.85 | 0.68 | 0.22 | 0.85 |
| 41822 | 0 | 225396 | LKVEDPFYWVSPGVL                                                                            | 2.67 | 0.01 | 1.75 | 1.81 | 0.22 | 0.28 |
| 41823 | 0 | 37050  | LKVFG                                                                                      | 1.74 | 0.01 | 0.90 | 0.44 | 1.13 | 0.85 |
| 41824 | 0 | 118491 | LKVGLQVVAVKAP                                                                              | 2.59 | 0.01 | 0.78 | 0.44 | 1.74 | 0.85 |
| 41825 | 0 | 118491 | LKVGLQVVAVKAP                                                                              | 2.59 | 0.01 | 0.78 | 0.44 | 1.59 | 0.85 |
| 41826 | 0 | 161403 | LKVIDTNCINVIQPDGSY<br>R                                                                    | 2.86 | 0.01 | 2.08 | 0.68 | 0.22 | 1.57 |
| 41827 | 0 | 161403 | LKVIDTNCINVIQPDGSY<br>R                                                                    | 2.86 | 0.01 | 2.08 | 2.25 | 0.22 | 1.57 |
| 41828 | 0 | 161403 | LKVIDTNCINVIQPDGSY<br>R                                                                    | 2.86 | 0.01 | 2.08 | 2.49 | 0.22 | 1.57 |
| 41829 | 0 | 161403 | LKVIDTNCINVIQPDGSY<br>R                                                                    | 2.86 | 0.01 | 2.08 | 2.43 | 0.22 | 1.57 |
|       |   |        | LKVIDTNCINVIQPDGSY<br>RSEELNLVIIGPSADIIQF<br>ECKSFGHEVLNLTRNGY<br>GSTQYIRFSPDFTFGFEE       |      |      |      |      |      |      |
| 41830 | 0 | 37054  | SLEVDTNPLLGAGKFAT<br>DPAVTLAHELIHAGHRLY<br>GIAINPNRVFKVNTNAY<br>YEMSGLEVSFEELRTFGG<br>HDAK | 4.95 | 0.01 | 2.08 | 3.23 | 0.22 | 0.85 |

|       |   |        |                                                                                            |      |      |      |      |      |      |
|-------|---|--------|--------------------------------------------------------------------------------------------|------|------|------|------|------|------|
|       |   |        | LKVIDTNCINVIQPDGSY<br>RSEELNLVIIGPSADIIQF<br>ECKSFGHEVLNLTRNGY<br>GSTQYIRFSPDFTFGFEE       |      |      |      |      |      |      |
| 41831 | 0 | 37054  | SLEVDTNPLLGAGKFAT<br>DPAVTLAHELIHAGHRLY<br>GIAINPNRVFKVNTNAY<br>YEMSGLEVSFEELRTFGG<br>HDAK | 4.95 | 0.01 | 2.08 | 3.23 | 0.22 | 0.28 |
|       |   |        | LKVIDTNCINVIQPDGSY<br>RSEELNLVIIGPSADIIQF<br>ECKSFGHEVLNLTRNGY<br>GSTQYIRFSPDFTFGFEE       |      |      |      |      |      |      |
| 41832 | 0 | 37054  | SLEVDTNPLLGAGKFAT<br>DPAVTLAHELIHAGHRLY<br>GIAINPNRVFKVNTNAY<br>YEMSGLEVSFEELRTFGG<br>HDAK | 4.95 | 0.01 | 2.08 | 2.02 | 0.22 | 0.85 |
| 41833 | 0 | 37055  | LKVIRK                                                                                     | 1.90 | 0.01 | 2.69 | 0.44 | 0.85 | 0.28 |
| 41834 | 0 | 37055  | LKVIRK                                                                                     | 1.90 | 0.01 | 2.69 | 0.44 | 0.85 | 0.85 |
| 41835 | 0 | 37055  | LKVIRK                                                                                     | 1.90 | 0.01 | 2.69 | 1.81 | 0.22 | 0.28 |
| 41836 | 0 | 37055  | LKVIRK                                                                                     | 1.90 | 0.01 | 2.69 | 1.81 | 0.22 | 0.28 |
| 41837 | 0 | 37055  | LKVIRK                                                                                     | 1.90 | 0.01 | 2.69 | 1.81 | 0.22 | 0.85 |
| 41838 | 0 | 37056  | LKVIRKNIVKKMIE                                                                             | 2.64 | 0.01 | 2.69 | 1.12 | 0.22 | 0.85 |
| 41839 | 0 | 37056  | LKVIRKNIVKKMIE                                                                             | 2.64 | 0.01 | 2.69 | 1.12 | 0.22 | 0.85 |
| 41840 | 0 | 37056  | LKVIRKNIVKKMIE                                                                             | 2.64 | 0.01 | 2.69 | 1.20 | 0.22 | 1.27 |
| 41841 | 0 | 37056  | LKVIRKNIVKKMIE                                                                             | 2.64 | 0.01 | 2.69 | 1.20 | 0.22 | 0.85 |
| 41842 | 0 | 37056  | LKVIRKNIVKKMIE                                                                             | 2.64 | 0.01 | 2.69 | 1.20 | 0.22 | 0.85 |
| 41843 | 0 | 37056  | LKVIRKNIVKKMIE                                                                             | 2.64 | 0.01 | 2.69 | 0.68 | 0.22 | 0.85 |
| 41844 | 0 | 37056  | LKVIRKNIVKKMIE                                                                             | 2.64 | 0.01 | 2.69 | 0.68 | 0.22 | 0.85 |
| 41845 | 0 | 37056  | LKVIRKNIVKKMIE                                                                             | 2.64 | 0.01 | 2.69 | 0.68 | 0.22 | 0.85 |
| 41846 | 0 | 227798 | LKVREDENNPYFRSS                                                                            | 2.70 | 0.01 | 2.72 | 1.20 | 1.59 | 0.28 |
| 41847 | 0 | 227798 | LKVREDENNPYFRSS                                                                            | 2.70 | 0.01 | 2.72 | 4.03 | 1.59 | 0.28 |
| 41848 | 0 | 451491 | LKVSDEESK                                                                                  | 2.24 | 0.01 | 3.72 | 0.68 | 0.22 | 0.28 |
| 41849 | 0 | 451491 | LKVSDEESK                                                                                  | 2.24 | 0.01 | 3.72 | 0.68 | 0.22 | 0.28 |
| 41850 | 0 | 451491 | LKVSDEESK                                                                                  | 2.24 | 0.01 | 3.72 | 0.68 | 0.22 | 0.28 |
| 41851 | 0 | 451491 | LKVSDEESK                                                                                  | 2.24 | 0.01 | 3.72 | 0.68 | 0.22 | 1.34 |
| 41852 | 0 | 137542 | LKWLQLSVEKGVLYK                                                                            | 2.71 | 0.01 | 3.12 | 0.44 | 1.23 | 0.85 |
| 41853 | 0 | 120067 | LKWNPPDDYGGVKKIHI                                                                          | 2.70 | 0.01 | 0.78 | 2.04 | 0.22 | 0.28 |
| 41854 | 0 | 120067 | LKWNPPDDYGGVKKIHI                                                                          | 2.70 | 0.01 | 0.78 | 1.12 | 0.22 | 0.28 |
| 41855 | 0 | 120067 | LKWNPPDDYGGVKKIHI                                                                          | 2.70 | 0.01 | 0.78 | 1.81 | 0.22 | 0.28 |

|       |   |        |                                    |      |      |      |      |      |      |
|-------|---|--------|------------------------------------|------|------|------|------|------|------|
| 41856 | 0 | 117568 | LKYLEAVEKVKRTKDELE<br>VI           | 2.98 | 0.01 | 0.78 | 0.44 | 1.13 | 0.28 |
| 41857 | 0 | 226063 | LKYNPSRVEAFHRYGTT<br>VNC           | 2.89 | 0.01 | 2.40 | 1.12 | 0.22 | 0.85 |
| 41858 | 0 | 226063 | LKYNPSRVEAFHRYGTT<br>VNC           | 2.89 | 0.01 | 2.40 | 1.12 | 0.22 | 0.85 |
| 41859 | 0 | 226063 | LKYNPSRVEAFHRYGTT<br>VNC           | 2.89 | 0.01 | 2.40 | 1.12 | 0.22 | 0.85 |
| 41860 | 0 | 226063 | LKYNPSRVEAFHRYGTT<br>VNC           | 2.89 | 0.01 | 2.40 | 1.12 | 0.22 | 0.85 |
| 41861 | 0 | 226063 | LKYNPSRVEAFHRYGTT<br>VNC           | 2.89 | 0.01 | 2.40 | 1.12 | 0.22 | 1.66 |
| 41862 | 0 | 226063 | LKYNPSRVEAFHRYGTT<br>VNC           | 2.89 | 0.01 | 2.40 | 1.12 | 0.22 | 1.34 |
| 41863 | 0 | 37068  | LKYQQQQQGSQSQK                     | 2.72 | 0.01 | 2.72 | 0.44 | 1.23 | 0.85 |
| 41864 | 0 | 117569 | LKYYLAPKIEDEEGS                    | 2.67 | 0.01 | 0.78 | 0.44 | 1.13 | 2.02 |
| 41865 | 0 | 117569 | LKYYLAPKIEDEEGS                    | 2.67 | 0.01 | 0.78 | 1.12 | 0.22 | 0.28 |
| 41866 | 0 | 129261 | LKYRMMQ                            | 2.12 | 0.01 | 0.78 | 0.44 | 1.13 | 0.28 |
| 41867 | 0 | 232913 | LLAAGAVVALSTTFA                    | 2.71 | 0.01 | 2.89 | 1.12 | 0.22 | 1.28 |
| 41868 | 0 | 133204 | LLAAGVADPVKVTRS                    | 2.67 | 0.01 | 2.04 | 2.97 | 0.22 | 0.28 |
| 41869 | 0 | 496708 | LLADAVAVTMGPKGRT<br>VIIEQSWGSPKVTK | 3.32 | 0.01 | 0.78 | 0.44 | 1.93 | 2.12 |
| 41870 | 0 | 187072 | LLADLQHSINKWSVIY                   | 2.71 | 0.01 | 2.80 | 0.68 | 0.22 | 1.27 |
| 41871 | 0 | 187072 | LLADLQHSINKWSVIY                   | 2.71 | 0.01 | 2.80 | 0.68 | 0.22 | 0.28 |
| 41872 | 0 | 187072 | LLADLQHSINKWSVIY                   | 2.71 | 0.01 | 2.80 | 0.68 | 0.22 | 0.28 |
| 41873 | 0 | 187072 | LLADLQHSINKWSVIY                   | 2.71 | 0.01 | 2.80 | 0.68 | 0.22 | 1.27 |
| 41874 | 0 | 450793 | LLADMHA                            | 2.03 | 0.01 | 0.90 | 0.44 | 1.23 | 1.39 |
| 41875 | 0 | 37086  | LLAGEDLNHRVADA                     | 2.63 | 0.01 | 3.89 | 1.15 | 0.22 | 0.85 |
| 41876 | 0 | 131949 | LLAQQQRAQSQRSVP                    | 2.71 | 0.01 | 0.78 | 0.44 | 1.13 | 0.85 |
| 41877 | 0 | 123439 | LLARDAPDWDWCDSIP                   | 2.74 | 0.01 | 3.26 | 0.68 | 0.22 | 0.85 |
| 41878 | 0 | 123439 | LLARDAPDWDWCDSIP                   | 2.74 | 0.01 | 3.26 | 1.20 | 0.22 | 0.28 |
| 41879 | 0 | 123439 | LLARDAPDWDWCDSIP                   | 2.74 | 0.01 | 3.26 | 1.20 | 0.22 | 0.28 |
| 41880 | 0 | 149066 | LLATQPA                            | 2.03 | 0.01 | 0.90 | 2.13 | 1.59 | 1.39 |
| 41881 | 0 | 114888 | LLCAHKVEQG                         | 2.28 | 0.01 | 2.25 | 0.44 | 1.23 | 0.85 |
| 41882 | 0 | 114888 | LLCAHKVEQG                         | 2.28 | 0.01 | 2.25 | 0.44 | 1.23 | 0.85 |
| 41883 | 0 | 135572 | LLCEDGCLAL                         | 2.35 | 0.01 | 0.78 | 1.12 | 0.22 | 0.28 |
| 41884 | 0 | 135572 | LLCEDGCLAL                         | 2.35 | 0.01 | 0.78 | 1.12 | 0.22 | 0.28 |
| 41885 | 0 | 135572 | LLCEDGCLAL                         | 2.35 | 0.01 | 0.78 | 1.12 | 0.22 | 1.34 |
| 41886 | 0 | 135572 | LLCEDGCLAL                         | 2.35 | 0.01 | 0.78 | 1.12 | 0.22 | 0.28 |
| 41887 | 0 | 135950 | LLCLLLSSRPG                        | 2.50 | 0.01 | 0.78 | 0.44 | 1.41 | 0.28 |
| 41888 | 0 | 37123  | LLCNNNSNNYN                        | 2.53 | 0.01 | 2.86 | 2.02 | 1.59 | 0.28 |
| 41889 | 0 | 37123  | LLCNNNSNNYN                        | 2.53 | 0.01 | 2.86 | 2.02 | 0.22 | 0.28 |

|       |   |        |                          |      |      |      |      |      |      |
|-------|---|--------|--------------------------|------|------|------|------|------|------|
| 41890 | 0 | 98881  | LLDAQSAPLR               | 2.33 | 0.01 | 1.60 | 0.44 | 1.23 | 0.85 |
| 41891 | 0 | 98881  | LLDAQSAPLR               | 2.33 | 0.01 | 1.60 | 0.44 | 1.23 | 0.85 |
| 41892 | 0 | 96570  | LLDAQSAPLRVYVEE          | 2.66 | 0.01 | 1.60 | 0.44 | 1.23 | 0.28 |
| 41893 | 0 | 140575 | LLDDGFWPRV               | 2.29 | 0.01 | 0.90 | 0.68 | 0.22 | 0.28 |
| 41894 | 0 | 103361 | LLDIYRKLRPGEPT           | 2.67 | 0.01 | 2.04 | 0.44 | 0.85 | 1.28 |
| 41895 | 0 | 37165  | LLDKIYTSPLC              | 2.38 | 0.01 | 3.08 | 0.44 | 1.23 | 1.57 |
| 41896 | 0 | 37165  | LLDKIYTSPLC              | 2.38 | 0.01 | 3.08 | 0.68 | 0.22 | 1.57 |
| 41897 | 0 | 37165  | LLDKIYTSPLC              | 2.38 | 0.01 | 3.08 | 0.68 | 0.22 | 1.57 |
| 41898 | 0 | 122842 | LLDLPRDLGGMGCSPP<br>CE   | 2.92 | 0.01 | 0.78 | 0.44 | 1.13 | 0.28 |
| 41899 | 0 | 122842 | LLDLPRDLGGMGCSPP<br>CE   | 2.92 | 0.01 | 0.78 | 1.20 | 0.22 | 0.28 |
| 41900 | 0 | 122842 | LLDLPRDLGGMGCSPP<br>CE   | 2.92 | 0.01 | 0.78 | 1.20 | 0.22 | 1.27 |
| 41901 | 0 | 122842 | LLDLPRDLGGMGCSPP<br>CE   | 2.92 | 0.01 | 0.78 | 1.20 | 0.22 | 1.27 |
| 41902 | 0 | 122842 | LLDLPRDLGGMGCSPP<br>CE   | 2.92 | 0.01 | 0.78 | 1.20 | 0.22 | 0.28 |
| 41903 | 0 | 122842 | LLDLPRDLGGMGCSPP<br>CE   | 2.92 | 0.01 | 0.78 | 1.20 | 0.22 | 0.28 |
| 41904 | 0 | 122842 | LLDLPRDLGGMGCSPP<br>CE   | 2.92 | 0.01 | 0.78 | 1.20 | 0.22 | 2.02 |
| 41905 | 0 | 122842 | LLDLPRDLGGMGCSPP<br>CE   | 2.92 | 0.01 | 0.78 | 1.20 | 0.22 | 1.34 |
| 41906 | 0 | 37171  | LLDPSFDYFQLYTT           | 2.63 | 0.01 | 0.90 | 1.15 | 0.22 | 1.27 |
| 41907 | 0 | 37171  | LLDPSFDYFQLYTT           | 2.63 | 0.01 | 0.90 | 0.68 | 0.22 | 0.28 |
| 41908 | 0 | 37172  | LLDPSFDYFQLYTTS          | 2.70 | 0.01 | 0.90 | 1.15 | 0.22 | 1.27 |
| 41909 | 0 | 37172  | LLDPSFDYFQLYTTS          | 2.70 | 0.01 | 0.90 | 1.15 | 0.22 | 0.85 |
| 41910 | 0 | 120070 | LLDQRLALQW               | 2.35 | 0.01 | 0.78 | 0.68 | 0.22 | 0.28 |
| 41911 | 0 | 122468 | LLDRKSGKQYSIEAALRC<br>RR | 2.92 | 0.01 | 0.78 | 0.44 | 1.13 | 0.28 |
| 41912 | 0 | 122468 | LLDRKSGKQYSIEAALRC<br>RR | 2.92 | 0.01 | 0.78 | 0.44 | 1.13 | 1.27 |
| 41913 | 0 | 142224 | LLDTKGGLYRWSPV           | 2.65 | 0.01 | 2.71 | 1.20 | 0.22 | 0.28 |
| 41914 | 0 | 142224 | LLDTKGGLYRWSPV           | 2.65 | 0.01 | 2.71 | 2.13 | 1.59 | 0.28 |
| 41915 | 0 | 136474 | LLDTSNLELPEAVVFQDS<br>VV | 2.94 | 0.01 | 0.78 | 0.44 | 1.13 | 0.28 |
| 41916 | 0 | 136474 | LLDTSNLELPEAVVFQDS<br>VV | 2.94 | 0.01 | 0.78 | 0.44 | 1.41 | 0.28 |
| 41917 | 0 | 136474 | LLDTSNLELPEAVVFQDS<br>VV | 2.94 | 0.01 | 0.78 | 0.44 | 1.13 | 0.28 |
| 41918 | 0 | 79293  | LLDYGWLWMW               | 2.35 | 0.01 | 0.90 | 0.68 | 0.22 | 0.28 |
| 41919 | 0 | 37195  | LLEDTV                   | 1.89 | 0.01 | 1.96 | 0.44 | 0.85 | 0.28 |
| 41920 | 0 | 116771 | LLEEDLERSEERLNT          | 2.72 | 0.01 | 2.36 | 0.44 | 1.23 | 1.28 |
| 41921 | 0 | 116771 | LLEEDLERSEERLNT          | 2.72 | 0.01 | 2.36 | 0.44 | 1.23 | 1.27 |
| 41922 | 0 | 162870 | LLELDKWA                 | 2.14 | 0.01 | 2.54 | 0.44 | 0.85 | 2.49 |
| 41923 | 0 | 162870 | LLELDKWA                 | 2.14 | 0.01 | 2.54 | 0.44 | 0.85 | 1.66 |

|       |   |        |                    |      |      |      |      |      |      |
|-------|---|--------|--------------------|------|------|------|------|------|------|
| 41924 | 0 | 162870 | LLELDKWA           | 2.14 | 0.01 | 2.54 | 0.44 | 0.85 | 1.66 |
| 41925 | 0 | 162870 | LLELDKWA           | 2.14 | 0.01 | 2.54 | 0.44 | 0.85 | 1.66 |
| 41926 | 0 | 162870 | LLELDKWA           | 2.14 | 0.01 | 2.54 | 0.44 | 0.85 | 1.66 |
| 41927 | 0 | 162870 | LLELDKWA           | 2.14 | 0.01 | 2.54 | 0.44 | 0.85 | 1.66 |
| 41928 | 0 | 162870 | LLELDKWA           | 2.14 | 0.01 | 2.54 | 0.44 | 0.85 | 1.66 |
| 41929 | 0 | 162870 | LLELDKWA           | 2.14 | 0.01 | 2.54 | 0.68 | 0.22 | 2.49 |
| 41930 | 0 | 162870 | LLELDKWA           | 2.14 | 0.01 | 2.54 | 0.68 | 0.22 | 2.49 |
| 41931 | 0 | 162870 | LLELDKWA           | 2.14 | 0.01 | 2.54 | 0.68 | 0.22 | 1.66 |
| 41932 | 0 | 162870 | LLELDKWA           | 2.14 | 0.01 | 2.54 | 0.68 | 0.22 | 1.66 |
| 41933 | 0 | 162870 | LLELDKWA           | 2.14 | 0.01 | 2.54 | 0.68 | 0.22 | 1.66 |
| 41934 | 0 | 162870 | LLELDKWA           | 2.14 | 0.01 | 2.54 | 0.68 | 0.22 | 1.66 |
| 41935 | 0 | 162870 | LLELDKWA           | 2.14 | 0.01 | 2.54 | 0.68 | 0.22 | 1.66 |
| 41936 | 0 | 162870 | LLELDKWA           | 2.14 | 0.01 | 2.54 | 0.68 | 0.22 | 1.66 |
| 41937 | 0 | 174184 | LLELDKWASLW        | 2.43 | 4.45 | 2.54 | 0.44 | 0.85 | 2.49 |
| 41938 | 0 | 174184 | LLELDKWASLW        | 2.43 | 4.45 | 2.54 | 0.44 | 0.85 | 2.49 |
| 41939 | 0 | 174184 | LLELDKWASLW        | 2.43 | 4.45 | 2.54 | 0.44 | 0.85 | 2.49 |
| 41940 | 0 | 150371 | LLELDKWASLW        | 2.43 | 0.01 | 2.54 | 0.44 | 0.85 | 2.49 |
| 41941 | 0 | 238705 | LLENP              | 1.75 | 0.01 | 2.14 | 2.65 | 0.22 | 0.85 |
| 41942 | 0 | 150372 | LLEQIKIPSWDRNNIPDE | 3.93 | 0.01 | 2.22 | 0.44 | 0.85 | 1.34 |
|       |   |        | NEQVIEDPQEDNKDEDE  |      |      |      |      |      |      |
|       |   |        | DEETETENLETEDDNNE  |      |      |      |      |      |      |
| 41943 | 0 | 150372 | E                  | 3.93 | 0.01 | 2.22 | 0.44 | 0.85 | 0.28 |
|       |   |        | LLEQIKIPSWDRNNIPDE |      |      |      |      |      |      |
|       |   |        | NEQVIEDPQEDNKDEDE  |      |      |      |      |      |      |
| 41944 | 0 | 150372 | DEETETENLETEDDNNE  | 3.93 | 0.01 | 2.22 | 0.44 | 0.85 | 0.28 |
|       |   |        | E                  |      |      |      |      |      |      |
|       |   |        | LLEQIKIPSWDRNNIPDE |      |      |      |      |      |      |
| 41945 | 0 | 135951 | NEQVIEDPQEDNKDEDE  | 3.93 | 0.01 | 2.22 | 0.44 | 0.85 | 0.28 |
|       |   |        | DEETETENLETEDDNNE  |      |      |      |      |      |      |
|       |   |        | E                  |      |      |      |      |      |      |
| 41946 | 0 | 37227  | LLETHPLY           | 2.14 | 0.01 | 2.40 | 2.43 | 0.22 | 0.28 |
| 41947 | 0 | 123440 | LLEYGEKYE          | 2.26 | 0.01 | 2.28 | 2.00 | 0.22 | 0.28 |
| 41948 | 0 | 123441 | LLEYLGEEY          | 2.27 | 0.01 | 2.28 | 2.00 | 0.22 | 0.28 |
| 41949 | 0 | 95555  | LLFCME             | 1.89 | 0.01 | 1.60 | 0.44 | 1.23 | 0.28 |
| 41950 | 0 | 115354 | LLFCMENSAE         | 2.30 | 0.01 | 1.60 | 0.44 | 1.23 | 0.85 |
| 41951 | 0 | 115354 | LLFCMENSAE         | 2.30 | 0.01 | 1.60 | 0.44 | 1.23 | 0.85 |
| 41952 | 0 | 115355 | LLFCMENSAEPEQSLAC  | 2.97 | 0.01 | 1.60 | 0.44 | 1.23 | 2.51 |
| 41953 | 0 | 37257  | QCL                | 2.24 | 0.01 | 2.04 | 0.44 | 1.41 | 2.12 |
| 41954 | 0 | 225397 | LLFGYPVYV          | 2.88 | 0.01 | 2.61 | 0.68 | 0.22 | 0.28 |
| 41955 | 0 | 225397 | LLFKINGSKIDGSKILKT | 2.88 | 0.01 | 2.61 | 0.68 | 0.22 | 0.28 |
| 41956 | 0 | 225397 | LLFKINGSKIDGSKILKT | 2.88 | 0.01 | 2.61 | 0.68 | 0.22 | 0.28 |
| 41957 | 0 | 37274  | LLFLLADAR          | 2.35 | 0.01 | 1.96 | 0.44 | 0.85 | 1.34 |

|       |   |        |                                           |      |      |      |      |      |      |
|-------|---|--------|-------------------------------------------|------|------|------|------|------|------|
| 41958 | 0 | 37290  | LLFNKVTLADAGFMKQY<br>GECLGDINA            | 3.18 | 0.01 | 2.91 | 0.44 | 0.85 | 0.28 |
| 41959 | 0 | 109490 | LLFRQAHSV                                 | 2.20 | 0.01 | 3.37 | 4.63 | 0.22 | 0.28 |
| 41960 | 0 | 37300  | LLFSLGLSSSSSIS                            | 2.74 | 0.01 | 2.72 | 0.44 | 1.23 | 0.85 |
| 41961 | 0 | 37301  | LLFTGH                                    | 1.89 | 0.01 | 2.40 | 0.44 | 0.85 | 0.28 |
| 41962 | 0 | 100270 | LLFTNQLKEH                                | 2.31 | 0.01 | 2.18 | 2.16 | 0.22 | 0.28 |
| 41963 | 0 | 37304  | LLFVGVLFLPAR                              | 2.65 | 0.01 | 2.69 | 0.44 | 0.85 | 0.28 |
| 41964 | 0 | 37304  | LLFVGVLFLPAR                              | 2.65 | 0.01 | 2.69 | 0.44 | 1.41 | 0.28 |
| 41965 | 0 | 241030 | LLG                                       | 1.39 | 0.01 | 3.35 | 1.20 | 0.22 | 0.85 |
| 41966 | 0 | 37310  | LLGACSF                                   | 2.13 | 0.01 | 2.21 | 0.44 | 0.85 | 0.28 |
| 41967 | 0 | 37310  | LLGACSF                                   | 2.13 | 0.01 | 2.21 | 1.12 | 0.22 | 0.28 |
| 41968 | 0 | 37311  | LLGACSFSS                                 | 2.31 | 0.01 | 2.21 | 1.12 | 0.22 | 0.28 |
| 41969 | 0 | 238707 | LLGASSVPPRPLNLI                           | 2.69 | 0.01 | 2.56 | 2.02 | 0.22 | 0.85 |
| 41970 | 0 | 238707 | LLGASSVPPRPLNLI                           | 2.69 | 0.01 | 2.56 | 1.20 | 0.22 | 0.85 |
| 41971 | 0 | 37315  | LLGCIGSTC                                 | 2.24 | 0.01 | 3.16 | 1.15 | 0.22 | 0.28 |
| 41972 | 0 | 37315  | LLGCIGSTC                                 | 2.24 | 0.01 | 3.16 | 0.68 | 0.22 | 1.75 |
| 41973 | 0 | 37315  | LLGCIGSTC                                 | 2.24 | 0.01 | 3.16 | 0.68 | 0.22 | 0.85 |
| 41974 | 0 | 37315  | LLGCIGSTC                                 | 2.24 | 0.01 | 3.16 | 0.68 | 0.22 | 0.28 |
| 41975 | 0 | 37315  | LLGCIGSTC                                 | 2.24 | 0.01 | 3.16 | 0.68 | 0.22 | 0.28 |
| 41976 | 0 | 37316  | LLGCIGSTCA                                | 2.32 | 0.01 | 3.35 | 1.15 | 2.26 | 0.85 |
| 41977 | 0 | 37316  | LLGCIGSTCA                                | 2.32 | 0.01 | 3.35 | 0.68 | 0.22 | 0.28 |
| 41978 | 0 | 37316  | LLGCIGSTCA                                | 2.32 | 0.01 | 3.35 | 0.68 | 2.25 | 1.75 |
| 41979 | 0 | 191587 | LLGDCSQWGPECKVRR                          | 2.68 | 0.01 | 0.90 | 2.84 | 1.13 | 1.39 |
| 41980 | 0 | 191587 | LLGDCSQWGPECKVRR                          | 2.68 | 0.01 | 0.90 | 2.84 | 1.13 | 1.66 |
| 41981 | 0 | 244246 | LLGDFFRKSKEKIGKEFK<br>RIVQRIKDFLRNLVPRTES | 3.56 | 0.01 | 0.78 | 1.12 | 0.22 | 2.92 |
| 41982 | 0 | 37325  | LLGEATAL                                  | 2.16 | 0.01 | 3.06 | 1.12 | 0.22 | 0.28 |
| 41983 | 0 | 172167 | LLGEISEYIEEVFLP                           | 2.69 | 0.01 | 0.78 | 0.44 | 1.41 | 0.28 |
| 41984 | 0 | 37327  | LLGEKTRNQM                                | 2.28 | 0.01 | 0.78 | 0.44 | 1.74 | 0.28 |
| 41985 | 0 | 37335  | LLGILESRIKARIT                            | 2.70 | 0.01 | 2.43 | 0.44 | 1.59 | 0.28 |
| 41986 | 0 | 37335  | LLGILESRIKARIT                            | 2.70 | 0.01 | 2.43 | 0.68 | 0.22 | 0.28 |
| 41987 | 0 | 37335  | LLGILESRIKARIT                            | 2.70 | 0.01 | 2.43 | 0.68 | 0.22 | 0.28 |
| 41988 | 0 | 97459  | LLGNATAL                                  | 2.16 | 0.01 | 2.87 | 0.68 | 0.22 | 0.28 |
| 41989 | 0 | 37354  | LLGNQSL                                   | 2.13 | 0.01 | 2.40 | 2.43 | 0.22 | 0.28 |
| 41990 | 0 | 167776 | LLGNQSLLE                                 | 2.25 | 0.01 | 2.40 | 2.43 | 0.22 | 0.28 |
| 41991 | 0 | 181714 | LLGNVLVTAKYEGNY                           | 2.70 | 0.01 | 3.26 | 2.37 | 0.22 | 1.28 |
| 41992 | 0 | 37361  | LLGPYELWELSH                              | 2.49 | 0.01 | 0.90 | 0.44 | 2.26 | 0.28 |
| 41993 | 0 | 37361  | LLGPYELWELSH                              | 2.49 | 0.01 | 0.90 | 0.44 | 2.26 | 0.85 |
| 41994 | 0 | 37361  | LLGPYELWELSH                              | 2.49 | 0.01 | 0.90 | 0.68 | 0.22 | 0.28 |
| 41995 | 0 | 37361  | LLGPYELWELSH                              | 2.49 | 0.01 | 0.90 | 0.68 | 0.22 | 0.28 |
| 41996 | 0 | 37372  | LLGTTLL                                   | 2.03 | 0.01 | 3.75 | 1.15 | 2.26 | 0.28 |
| 41997 | 0 | 37372  | LLGTTLL                                   | 2.03 | 0.01 | 3.75 | 1.15 | 2.26 | 1.27 |
| 41998 | 0 | 37372  | LLGTTLL                                   | 2.03 | 0.01 | 3.75 | 1.15 | 2.26 | 0.28 |

|       |   |        |                                                             |      |      |      |      |      |      |
|-------|---|--------|-------------------------------------------------------------|------|------|------|------|------|------|
| 41999 | 0 | 37377  | LLGYKKGEGNTCVENNN<br>PTC                                    | 2.95 | 0.01 | 3.00 | 2.52 | 0.22 | 0.28 |
| 42000 | 0 | 37377  | LLGYKKGEGNTCVENNN<br>PTC                                    | 2.95 | 0.01 | 3.33 | 1.81 | 0.22 | 0.28 |
| 42001 | 0 | 37377  | LLGYKKGEGNTCVENNN<br>PTC                                    | 2.95 | 0.01 | 3.33 | 1.81 | 0.22 | 0.28 |
| 42002 | 0 | 172168 | LLGYSGWCHYCKSSC                                             | 2.70 | 0.01 | 0.78 | 0.44 | 1.41 | 0.28 |
| 42003 | 0 | 172168 | LLGYSGWCHYCKSSC                                             | 2.70 | 0.01 | 0.78 | 0.44 | 1.13 | 0.28 |
| 42004 | 0 | 167963 | LLHALTFSGAVWMCTP                                            | 2.71 | 0.01 | 2.75 | 0.44 | 0.85 | 2.51 |
| 42005 | 0 | 167963 | LLHALTFSGAVWMCTP                                            | 2.71 | 0.01 | 2.75 | 0.44 | 0.85 | 2.51 |
| 42006 | 0 | 93256  | LLHGGKGDDI                                                  | 2.34 | 0.01 | 2.67 | 2.00 | 0.22 | 0.28 |
| 42007 | 0 | 93256  | LLHGGKGDDI                                                  | 2.34 | 0.01 | 2.67 | 2.00 | 0.22 | 0.28 |
| 42008 | 0 | 93256  | LLHGGKGDDI                                                  | 2.34 | 0.01 | 2.67 | 2.00 | 0.22 | 0.28 |
| 42009 | 0 | 37393  | LLHRFWHLKSIG                                                | 2.47 | 0.01 | 2.69 | 0.68 | 0.22 | 0.28 |
| 42010 | 0 | 37393  | LLHRFWHLKSIG                                                | 2.47 | 0.01 | 2.69 | 1.20 | 0.22 | 0.28 |
| 42011 | 0 | 159288 | LLHYSTISQDNLDISFGEL<br>Q                                    | 2.94 | 0.01 | 0.90 | 2.74 | 0.22 | 1.48 |
| 42012 | 0 | 159288 | LLHYSTISQDNLDISFGEL<br>Q                                    | 2.94 | 0.01 | 0.90 | 2.74 | 0.22 | 0.28 |
| 42013 | 0 | 97460  | LLIEQANHAIEKGEHQ                                            | 2.76 | 0.01 | 3.67 | 0.44 | 1.23 | 0.28 |
| 42014 | 0 | 134140 | LLIIFKNQASRPYNIYPHG<br>I                                    | 2.92 | 0.01 | 0.78 | 0.44 | 2.35 | 0.28 |
| 42015 | 0 | 99427  | LLILRWLGPSAEYGN                                             | 2.66 | 0.01 | 2.16 | 0.44 | 1.23 | 1.48 |
| 42016 | 0 | 423408 | LLIQDGMYGRGEKEL                                             | 2.68 | 0.01 | 2.51 | 0.44 | 2.35 | 1.28 |
| 42017 | 0 | 37425  | LLISQAEAALENLVILNA<br>AS                                    | 2.99 | 0.01 | 1.72 | 0.44 | 0.85 | 0.28 |
| 42018 | 0 | 37425  | LLISQAEAALENLVILNA<br>AS                                    | 2.99 | 0.01 | 1.72 | 0.44 | 1.13 | 0.28 |
| 42019 | 0 | 37425  | LLISQAEAALENLVILNA<br>AS                                    | 2.99 | 0.01 | 1.72 | 0.44 | 1.93 | 0.28 |
| 42020 | 0 | 112209 | LLIYWAS                                                     | 2.01 | 0.01 | 0.78 | 0.44 | 1.13 | 0.28 |
| 42021 | 0 | 172169 | LLKAKYELLNAGYKK                                             | 2.70 | 0.01 | 0.78 | 0.44 | 1.13 | 0.28 |
| 42022 | 0 | 116772 | LLKANIQLVEKDKAL                                             | 2.70 | 0.01 | 2.36 | 0.44 | 1.23 | 1.28 |
| 42023 | 0 | 116772 | LLKANIQLVEKDKAL                                             | 2.70 | 0.01 | 2.36 | 0.44 | 1.23 | 1.27 |
| 42024 | 0 | 116772 | LLKANIQLVEKDKAL                                             | 2.70 | 0.01 | 2.36 | 0.44 | 1.23 | 1.28 |
| 42025 | 0 | 116772 | LLKANIQLVEKDKAL                                             | 2.70 | 0.01 | 2.36 | 0.44 | 1.23 | 1.27 |
| 42026 | 0 | 330399 | LLKDKKKVATAKVAV                                             | 2.72 | 0.01 | 1.61 | 0.44 | 0.85 | 1.28 |
| 42027 | 0 | 123442 | LLKDLRKN                                                    | 2.16 | 0.01 | 3.93 | 0.44 | 1.59 | 0.85 |
| 42028 | 0 | 123442 | LLKDLRKN                                                    | 2.16 | 0.01 | 3.93 | 0.44 | 1.59 | 0.28 |
| 42029 | 0 | 180122 | LLKEEVLDCQHCQRITPK<br>CIHKKYCFVDRQPRVAL<br>QYQMDSKYPRNQALLG | 3.85 | 0.01 | 0.78 | 0.44 | 1.93 | 0.28 |



|       |   |        |                                                 |      |      |      |      |      |      |
|-------|---|--------|-------------------------------------------------|------|------|------|------|------|------|
| 42030 | 0 | 129265 | LLKENTSLLKLGYHFELA<br>GPRMTVTNLLSRNMDK<br>QRQKR | 3.58 | 0.01 | 0.78 | 0.44 | 1.13 | 0.85 |
| 42031 | 0 | 129265 | LLKENTSLLKLGYHFELA<br>GPRMTVTNLLSRNMDK<br>QRQKR | 3.58 | 0.01 | 0.78 | 0.44 | 1.13 | 0.85 |
| 42032 | 0 | 129265 | LLKENTSLLKLGYHFELA<br>GPRMTVTNLLSRNMDK<br>QRQKR | 3.58 | 0.01 | 0.78 | 0.44 | 1.13 | 0.85 |
| 42033 | 0 | 129265 | LLKENTSLLKLGYHFELA<br>GPRMTVTNLLSRNMDK<br>QRQKR | 3.58 | 0.01 | 0.78 | 0.44 | 1.41 | 0.85 |
| 42034 | 0 | 125482 | LLKFLGIFNTGLKMFPDL<br>TK                        | 2.97 | 0.01 | 0.78 | 0.44 | 1.41 | 0.28 |
| 42035 | 0 | 125482 | LLKFLGIFNTGLKMFPDL<br>TK                        | 2.97 | 0.01 | 0.78 | 0.44 | 1.13 | 0.28 |
| 42036 | 0 | 130543 | LLKGKGDKAQIEKRI                                 | 2.69 | 0.01 | 0.78 | 0.44 | 1.93 | 0.28 |
| 42037 | 0 | 37441  | LLKIAQYAAQNRRGLDLL<br>FWEQG                     | 3.05 | 0.01 | 2.04 | 0.44 | 0.85 | 0.28 |
| 42038 | 0 | 85467  | LLKKA                                           | 1.77 | 0.01 | 3.59 | 0.44 | 0.85 | 0.28 |
| 42039 | 0 | 85467  | LLKKA                                           | 1.77 | 0.01 | 3.59 | 0.44 | 0.85 | 0.28 |
| 42040 | 0 | 133207 | LLKNLRPNRQLANMVN<br>NLKEISQEAREGTQGER           | 3.44 | 0.01 | 0.78 | 1.15 | 0.22 | 0.28 |
| 42041 | 0 | 172172 | LLKRYSEMDDHYECL                                 | 2.67 | 0.01 | 0.78 | 0.44 | 1.41 | 0.28 |
| 42042 | 0 | 172172 | LLKRYSEMDDHYECL                                 | 2.67 | 0.01 | 0.78 | 0.44 | 1.13 | 0.28 |
| 42043 | 0 | 186771 | LLLAANPAMAMGNLG                                 | 2.73 | 0.01 | 0.90 | 1.20 | 0.22 | 0.85 |
| 42044 | 0 | 37491  | LLLFKPPKYH                                      | 2.33 | 0.01 | 0.78 | 0.44 | 1.74 | 0.28 |
| 42045 | 0 | 182215 | LLLGAPRGCAEGVAA                                 | 2.68 | 0.01 | 0.78 | 0.44 | 1.13 | 0.85 |
| 42046 | 0 | 182216 | LLLGAPRGCAEGVAAAL<br>TPE                        | 2.97 | 0.01 | 0.78 | 0.44 | 1.13 | 0.28 |
| 42047 | 0 | 182216 | LLLGAPRGCAEGVAAAL<br>TPE                        | 2.97 | 0.01 | 0.78 | 0.44 | 1.41 | 0.28 |
| 42048 | 0 | 182216 | LLLGAPRGCAEGVAAAL<br>TPE                        | 2.97 | 0.01 | 0.78 | 0.44 | 1.13 | 1.27 |
| 42049 | 0 | 115151 | LLLLLLFYVVRYCWLRRQ<br>AALQRRLS                  | 3.21 | 0.01 | 0.78 | 0.44 | 1.13 | 0.28 |
| 42050 | 0 | 135952 | LLLSSRPGGCS                                     | 2.50 | 0.01 | 0.78 | 0.44 | 1.41 | 0.28 |
| 42051 | 0 | 330731 | LLLMTREVDDTMADE                                 | 2.70 | 0.01 | 1.61 | 0.44 | 0.85 | 1.28 |
| 42052 | 0 | 37537  | LLLNPTHQIYPVTQPLAP<br>VHNPISV                   | 3.18 | 0.01 | 0.78 | 1.12 | 0.22 | 3.25 |
| 42053 | 0 | 330752 | LLLPVDNDGDESSDK                                 | 2.67 | 0.01 | 1.61 | 0.44 | 0.85 | 1.28 |
| 42054 | 0 | 37547  | LLRRQFYR                                        | 2.26 | 0.01 | 0.90 | 0.44 | 0.85 | 1.39 |
| 42055 | 0 | 238708 | LLTLVVVTIMCLDL                                  | 2.71 | 0.01 | 2.56 | 2.02 | 0.22 | 0.85 |
| 42056 | 0 | 238708 | LLTLVVVTIMCLDL                                  | 2.71 | 0.01 | 2.56 | 1.20 | 0.22 | 0.85 |
| 42057 | 0 | 238708 | LLTLVVVTIMCLDL                                  | 2.71 | 0.01 | 2.56 | 1.20 | 0.22 | 0.85 |

|       |   |        |                                   |      |      |      |      |      |      |
|-------|---|--------|-----------------------------------|------|------|------|------|------|------|
| 42058 | 0 | 238709 | LLTLVVVTIVCLDF                    | 2.71 | 0.01 | 2.56 | 2.02 | 0.22 | 0.85 |
| 42059 | 0 | 238709 | LLTLVVVTIVCLDF                    | 2.71 | 0.01 | 2.56 | 1.20 | 0.22 | 0.85 |
| 42060 | 0 | 37560  | LLTVGGIFLLPAR                     | 2.60 | 0.01 | 2.59 | 0.44 | 0.85 | 0.28 |
| 42061 | 0 | 134141 | LLMPPKYHPKEPYVTR                  | 2.74 | 0.01 | 2.25 | 0.44 | 1.41 | 1.27 |
| 42062 | 0 | 134141 | LLMPPKYHPKEPYVTR                  | 2.74 | 0.01 | 2.25 | 0.68 | 1.41 | 1.27 |
| 42063 | 0 | 330874 | LLMTREVDDTMADEL                   | 2.71 | 0.01 | 1.61 | 0.44 | 0.85 | 1.28 |
| 42064 | 0 | 152777 | LLNIDKDIRK                        | 2.34 | 0.01 | 2.18 | 0.44 | 0.22 | 0.28 |
| 42065 | 0 | 152777 | LLNIDKDIRK                        | 2.34 | 0.01 | 2.18 | 0.44 | 0.22 | 1.75 |
| 42066 | 0 | 152777 | LLNIDKDIRK                        | 2.34 | 0.01 | 2.18 | 0.44 | 0.22 | 1.34 |
| 42067 | 0 | 152777 | LLNIDKDIRK                        | 2.34 | 0.01 | 2.18 | 2.16 | 0.22 | 0.28 |
| 42068 | 0 | 152777 | LLNIDKDIRK                        | 2.34 | 0.01 | 2.18 | 2.37 | 0.22 | 0.28 |
| 42069 | 0 | 152777 | LLNIDKDIRK                        | 2.34 | 0.01 | 2.18 | 1.81 | 0.22 | 0.28 |
| 42070 | 0 | 152777 | LLNIDKDIRK                        | 2.34 | 0.01 | 2.18 | 1.81 | 2.25 | 1.75 |
| 42071 | 0 | 118887 | LLNIDKDIRKIL                      | 2.52 | 0.01 | 2.18 | 0.44 | 0.22 | 0.28 |
| 42072 | 0 | 37620  | LLNNSNI                           | 2.17 | 0.01 | 3.42 | 0.68 | 0.22 | 0.28 |
| 42073 | 0 | 37624  | LLNPTHQIYPVTQPLAPV<br>HNPISV      | 3.15 | 0.01 | 0.78 | 1.12 | 0.22 | 3.25 |
| 42074 | 0 | 37625  | LLNQELLLNPTHQIYPVT<br>QPLAPVHNPIV | 3.36 | 0.01 | 0.78 | 1.12 | 0.22 | 3.25 |
| 42075 | 0 | 37626  | LLNQLAGR                          | 2.14 | 0.01 | 2.40 | 2.43 | 0.22 | 0.28 |
| 42076 | 0 | 37627  | LLNQATARAFPDCA                    | 2.52 | 0.01 | 2.69 | 1.12 | 0.22 | 0.28 |
| 42077 | 0 | 37627  | LLNQATARAFPDCA                    | 2.52 | 0.01 | 2.69 | 1.12 | 0.22 | 0.28 |
| 42078 | 0 | 37627  | LLNQATARAFPDCA                    | 2.52 | 0.01 | 2.69 | 1.12 | 0.22 | 0.28 |
| 42079 | 0 | 37627  | LLNQATARAFPDCA                    | 2.52 | 0.01 | 2.69 | 1.12 | 0.22 | 2.35 |
| 42080 | 0 | 37627  | LLNQATARAFPDCA                    | 2.52 | 0.01 | 2.69 | 0.68 | 0.22 | 0.28 |
| 42081 | 0 | 131951 | LLNVPKNMQVSIVCKIL<br>ADHVTFNN     | 3.12 | 0.01 | 1.75 | 1.12 | 0.22 | 1.48 |
| 42082 | 0 | 131951 | LLNVPKNMQVSIVCKIL<br>ADHVTFNN     | 3.12 | 0.01 | 1.75 | 1.12 | 0.22 | 0.85 |
| 42083 | 0 | 37638  | LLNYIDENKLYLIGSAEYE               | 2.92 | 0.01 | 2.08 | 0.44 | 1.93 | 1.57 |
| 42084 | 0 | 37638  | LLNYIDENKLYLIGSAEYE               | 2.92 | 0.01 | 3.45 | 0.44 | 0.22 | 1.57 |
| 42085 | 0 | 37639  | LLNYKQEG                          | 2.11 | 0.01 | 1.66 | 1.15 | 0.22 | 0.28 |
| 42086 | 0 | 101862 | LLNYKQEGD                         | 2.20 | 0.01 | 1.66 | 0.44 | 1.59 | 2.97 |
| 42087 | 0 | 37640  | LLPAAD                            | 1.91 | 0.01 | 2.45 | 0.44 | 0.85 | 1.34 |
| 42088 | 0 | 37640  | LLPAAD                            | 1.91 | 0.01 | 2.45 | 0.44 | 0.85 | 1.34 |
| 42089 | 0 | 37641  | LLPAADMDDFSRQLQN<br>SM            | 2.85 | 0.01 | 2.91 | 0.44 | 0.85 | 0.28 |
| 42090 | 0 | 37641  | LLPAADMDDFSRQLQN<br>SM            | 2.85 | 0.01 | 2.91 | 0.68 | 0.22 | 0.28 |
| 42091 | 0 | 131952 | LLPDPSAPT                         | 2.24 | 0.01 | 0.78 | 0.44 | 1.13 | 0.28 |
| 42092 | 0 | 131952 | LLPDPSAPT                         | 2.24 | 0.01 | 0.78 | 0.44 | 1.93 | 0.28 |
| 42093 | 0 | 79602  | LLPDSSI                           | 2.01 | 0.01 | 0.90 | 1.15 | 0.22 | 1.27 |
| 42094 | 0 | 79602  | LLPDSSI                           | 2.01 | 0.01 | 0.90 | 1.15 | 0.22 | 0.28 |
| 42095 | 0 | 177518 | LLPEIMP                           | 2.03 | 0.01 | 3.50 | 2.37 | 0.85 | 0.28 |
| 42096 | 0 | 177518 | LLPEIMP                           | 2.03 | 0.01 | 3.50 | 2.37 | 0.85 | 0.28 |

|                    |   |       |                                   |      |      |      |      |      |      |
|--------------------|---|-------|-----------------------------------|------|------|------|------|------|------|
| 42097              | 0 | 37656 | LLPHSNLD                          | 2.14 | 0.01 | 2.04 | 0.44 | 0.85 | 0.28 |
| 42098              | 0 | 37656 | LLPHSNLD                          | 2.14 | 0.01 | 3.19 | 1.15 | 0.22 | 0.28 |
| 42099              | 0 | 37656 | LLPHSNLD                          | 2.14 | 0.01 | 3.19 | 1.15 | 0.22 | 0.28 |
| 42100              | 0 | 37656 | LLPHSNLD                          | 2.14 | 0.01 | 3.19 | 1.15 | 0.22 | 2.12 |
| 42101              | 0 | 37656 | LLPHSNLD                          | 2.14 | 0.01 | 3.19 | 1.15 | 0.22 | 1.34 |
| 42102              | 0 | 37657 | LLPHSNLDHI                        | 2.33 | 0.01 | 2.04 | 1.15 | 0.22 | 0.85 |
| 42103              | 0 | 37657 | LLPHSNLDHI                        | 2.33 | 0.01 | 2.04 | 1.20 | 0.22 | 0.85 |
| 42104              | 0 | 37657 | LLPHSNLDHI                        | 2.33 | 0.01 | 2.04 | 1.20 | 0.22 | 0.28 |
| 42105              | 0 | 37657 | LLPHSNLDHI                        | 2.33 | 0.01 | 2.04 | 1.20 | 0.22 | 1.34 |
| 42106              | 0 | 37657 | LLPHSNLDHI                        | 2.33 | 0.01 | 2.04 | 1.20 | 0.22 | 0.28 |
| 42107              | 0 | 37657 | LLPHSNLDHI                        | 2.33 | 0.01 | 2.04 | 1.20 | 0.22 | 1.34 |
| 42108              | 0 | 37657 | LLPHSNLDHI                        | 2.33 | 0.01 | 2.04 | 1.20 | 2.25 | 1.75 |
| LLPHSNLDHILEPSIFWK |   |       |                                   |      |      |      |      |      |      |
| 42109              | 0 | 37658 | GGYAAQNRRGLDLLFW<br>EQGGLCKALQEQC | 3.78 | 0.01 | 0.90 | 0.44 | 0.85 | 0.28 |
| 42110              | 0 | 37659 | LLPHSNLDHILEPSIPWK                | 2.87 | 0.01 | 3.19 | 0.44 | 0.85 | 0.28 |
| 42111              | 0 | 37659 | LLPHSNLDHILEPSIPWK                | 2.87 | 0.01 | 3.19 | 0.44 | 2.98 | 0.28 |
| 42112              | 0 | 95116 | LLPHSNLDHILEPSIPWK<br>S           | 2.92 | 0.01 | 2.04 | 0.68 | 0.22 | 0.85 |
| 42113              | 0 | 37660 | LLPHSNLDHILEPSIPWK<br>SK          | 2.97 | 0.01 | 2.04 | 0.44 | 0.85 | 0.28 |
| 42114              | 0 | 37660 | LLPHSNLDHILEPSIPWK<br>SK          | 2.97 | 0.01 | 2.04 | 0.44 | 0.85 | 0.28 |
| 42115              | 0 | 37660 | LLPHSNLDHILEPSIPWK<br>SK          | 2.97 | 0.01 | 2.04 | 1.20 | 0.22 | 2.02 |
| 42116              | 0 | 37660 | LLPHSNLDHILEPSIPWK<br>SK          | 2.97 | 0.01 | 2.04 | 1.20 | 0.22 | 2.02 |
| 42117              | 0 | 37660 | LLPHSNLDHILEPSIPWK<br>SK          | 2.97 | 0.01 | 2.04 | 1.20 | 0.22 | 0.85 |
| 42118              | 0 | 37660 | LLPHSNLDHILEPSIPWK<br>SK          | 2.97 | 0.01 | 2.04 | 0.44 | 0.85 | 1.34 |
| 42119              | 0 | 37660 | LLPHSNLDHILEPSIPWK<br>SK          | 2.97 | 0.01 | 2.04 | 0.44 | 0.85 | 1.34 |
| 42120              | 0 | 37660 | LLPHSNLDHILEPSIPWK<br>SK          | 2.97 | 0.01 | 2.04 | 0.68 | 0.22 | 0.28 |
| 42121              | 0 | 37660 | LLPHSNLDHILEPSIPWK<br>SK          | 2.97 | 0.01 | 2.04 | 0.68 | 0.22 | 0.28 |
| 42122              | 0 | 37660 | LLPHSNLDHILEPSIPWK<br>SK          | 2.97 | 0.01 | 2.04 | 0.68 | 0.22 | 0.28 |
| 42123              | 0 | 37660 | LLPHSNLDHILEPSIPWK<br>SK          | 2.97 | 0.01 | 2.04 | 0.68 | 0.22 | 0.28 |
| 42124              | 0 | 37660 | LLPHSNLDHILEPSIPWK<br>SK          | 2.97 | 0.01 | 2.04 | 0.68 | 0.22 | 2.12 |

|       |   |       |                             |      |      |      |      |      |      |
|-------|---|-------|-----------------------------|------|------|------|------|------|------|
| 42125 | 0 | 37660 | LLPHSNLDHILEPSIPWK<br>SK    | 2.97 | 0.01 | 2.04 | 0.68 | 0.22 | 2.12 |
| 42126 | 0 | 37660 | LLPHSNLDHILEPSIPWK<br>SK    | 2.97 | 0.01 | 2.04 | 0.68 | 0.22 | 0.28 |
| 42127 | 0 | 37660 | LLPHSNLDHILEPSIPWK<br>SK    | 2.97 | 0.01 | 2.04 | 0.68 | 0.22 | 0.28 |
| 42128 | 0 | 37660 | LLPHSNLDHILEPSIPWK<br>SK    | 2.97 | 0.01 | 2.04 | 1.20 | 0.22 | 0.28 |
| 42129 | 0 | 37660 | LLPHSNLDHILEPSIPWK<br>SK    | 2.97 | 0.01 | 2.04 | 1.20 | 0.22 | 0.28 |
| 42130 | 0 | 37660 | LLPHSNLDHILEPSIPWK<br>SK    | 2.97 | 0.01 | 2.04 | 1.20 | 0.22 | 0.28 |
| 42131 | 0 | 37660 | LLPHSNLDHILEPSIPWK<br>SK    | 2.97 | 0.01 | 2.04 | 2.43 | 0.22 | 0.28 |
| 42132 | 0 | 37660 | LLPHSNLDHILEPSIPWK<br>SK    | 2.97 | 0.01 | 2.04 | 0.68 | 0.22 | 1.34 |
| 42133 | 0 | 37660 | LLPHSNLDHILEPSIPWK<br>SK    | 2.97 | 0.01 | 2.04 | 1.81 | 0.22 | 1.34 |
| 42134 | 0 | 37660 | LLPHSNLDHILEPSIPWK<br>SK    | 2.97 | 0.01 | 2.04 | 2.82 | 0.22 | 1.34 |
| 42135 | 0 | 37660 | LLPHSNLDHILEPSIPWK<br>SK    | 2.97 | 0.01 | 2.04 | 0.68 | 0.22 | 0.28 |
| 42136 | 0 | 37660 | LLPHSNLDHILEPSIPWK<br>SK    | 2.97 | 0.01 | 2.04 | 0.44 | 0.85 | 0.28 |
| 42137 | 0 | 37660 | LLPHSNLDHILEPSIPWK<br>SK    | 2.97 | 0.01 | 2.04 | 0.44 | 1.59 | 0.28 |
| 42138 | 0 | 37660 | LLPHSNLDHILEPSIPWK<br>SK    | 2.97 | 0.01 | 2.04 | 0.44 | 1.59 | 1.57 |
| 42139 | 0 | 37660 | LLPHSNLDHILEPSIPWK<br>SK    | 2.97 | 0.01 | 2.04 | 0.68 | 0.22 | 2.02 |
| 42140 | 0 | 37660 | LLPHSNLDHILEPSIPWK<br>SK    | 2.97 | 0.01 | 2.04 | 0.68 | 0.22 | 1.48 |
| 42141 | 0 | 37660 | LLPHSNLDHILEPSIPWK<br>SK    | 2.97 | 0.01 | 2.04 | 0.68 | 0.22 | 2.12 |
| 42142 | 0 | 37660 | LLPHSNLDHILEPSIPWK<br>SK    | 2.97 | 0.01 | 2.04 | 0.44 | 1.59 | 2.35 |
| 42143 | 0 | 37660 | LLPHSNLDHILEPSIPWK<br>SK    | 2.97 | 0.01 | 2.04 | 0.68 | 0.22 | 1.27 |
| 42144 | 0 | 37660 | LLPHSNLDHILEPSIPWK<br>SK    | 2.97 | 0.01 | 2.04 | 1.20 | 0.22 | 2.02 |
| 42145 | 0 | 37660 | LLPHSNLDHILEPSIPWK<br>SK    | 2.97 | 0.01 | 2.04 | 0.68 | 0.22 | 2.02 |
| 42146 | 0 | 37661 | LLPHSNLDHILEPSIPWK<br>SKLLT | 3.10 | 0.01 | 2.04 | 1.20 | 0.22 | 0.28 |
| 42147 | 0 | 37661 | LLPHSNLDHILEPSIPWK<br>SKLLT | 3.10 | 0.01 | 2.04 | 1.20 | 0.22 | 0.28 |

|       |   |        |                               |      |      |      |      |      |      |
|-------|---|--------|-------------------------------|------|------|------|------|------|------|
| 42148 | 0 | 37661  | LLPHSNLDHILEPSIPWK<br>SKLLT   | 3.10 | 0.01 | 2.04 | 1.20 | 0.22 | 0.28 |
| 42149 | 0 | 37661  | LLPHSNLDHILEPSIPWK<br>SKLLT   | 3.10 | 0.01 | 2.04 | 1.20 | 0.22 | 2.12 |
| 42150 | 0 | 37661  | LLPHSNLDHILEPSIPWK<br>SKLLT   | 3.10 | 0.01 | 2.04 | 1.20 | 0.22 | 2.02 |
| 42151 | 0 | 37661  | LLPHSNLDHILEPSIPWK<br>SKLLT   | 3.10 | 0.01 | 2.04 | 0.44 | 0.85 | 0.28 |
| 42152 | 0 | 37661  | LLPHSNLDHILEPSIPWK<br>SKLLT   | 3.10 | 0.01 | 2.04 | 0.44 | 1.59 | 0.28 |
| 42153 | 0 | 227347 | LLPNKSGKKGNSADL               | 2.70 | 0.01 | 2.97 | 0.44 | 1.59 | 0.28 |
| 42154 | 0 | 227347 | LLPNKSGKKGNSADL               | 2.70 | 0.01 | 2.97 | 0.44 | 0.85 | 0.28 |
| 42155 | 0 | 98225  | LLPNTHKSGA                    | 2.28 | 0.01 | 3.57 | 0.44 | 0.85 | 0.28 |
| 42156 | 0 | 37683  | LLPRRGAPS                     | 2.23 | 0.01 | 0.90 | 0.44 | 0.85 | 1.39 |
| 42157 | 0 | 37684  | LLPRRGPR                      | 2.16 | 0.01 | 1.72 | 0.44 | 0.85 | 0.28 |
| 42158 | 0 | 37690  | LLPSRRGDQLTL                  | 2.48 | 0.01 | 2.19 | 1.12 | 0.22 | 0.85 |
| 42159 | 0 | 37690  | LLPSRRGDQLTL                  | 2.48 | 0.01 | 2.19 | 1.12 | 0.22 | 1.48 |
| 42160 | 0 | 330986 | LLPVDNDGDESSDKE               | 2.68 | 0.01 | 1.61 | 0.44 | 0.85 | 1.28 |
| 42161 | 0 | 108007 | LLPWLDGHPM                    | 2.33 | 0.01 | 0.90 | 0.44 | 1.13 | 1.27 |
| 42162 | 0 | 108007 | LLPWLDGHPM                    | 2.33 | 0.01 | 0.90 | 0.44 | 1.13 | 0.28 |
| 42163 | 0 | 119611 | LLQAAPTLDCLKLEG               | 2.69 | 0.01 | 2.04 | 2.97 | 0.22 | 0.28 |
| 42164 | 0 | 111493 | LLQAGLKAKPKFTLGKRK<br>ATPTTSS | 3.18 | 0.01 | 1.86 | 3.14 | 0.22 | 0.28 |
| 42165 | 0 | 37698  | LLQAHRQLEER                   | 2.43 | 0.01 | 2.58 | 3.00 | 0.22 | 1.27 |
| 42166 | 0 | 37698  | LLQAHRQLEER                   | 2.43 | 0.01 | 2.58 | 3.00 | 0.22 | 2.02 |
| 42167 | 0 | 37698  | LLQAHRQLEER                   | 2.43 | 0.01 | 2.58 | 3.00 | 0.22 | 1.34 |
| 42168 | 0 | 115357 | LLQKWENGEC                    | 2.30 | 0.01 | 1.60 | 0.44 | 1.23 | 0.85 |
| 42169 | 0 | 37709  | LLQMED                        | 1.89 | 0.01 | 2.40 | 0.44 | 0.85 | 0.28 |
| 42170 | 0 | 37712  | LLQQATRQA                     | 2.26 | 0.01 | 2.69 | 0.44 | 0.85 | 0.28 |
| 42171 | 0 | 37713  | LLQRATQQQ                     | 2.23 | 0.01 | 2.59 | 0.44 | 0.85 | 0.28 |
| 42172 | 0 | 37716  | LLQSARRG                      | 2.12 | 0.01 | 2.21 | 0.44 | 0.85 | 0.28 |
| 42173 | 0 | 37716  | LLQSARRG                      | 2.12 | 0.01 | 2.21 | 1.12 | 0.22 | 0.28 |
| 42174 | 0 | 37717  | LLQSARRGEK                    | 2.29 | 0.01 | 2.21 | 1.12 | 0.22 | 0.28 |
| 42175 | 0 | 37717  | LLQSARRGEK                    | 2.29 | 0.01 | 2.21 | 1.12 | 0.22 | 0.28 |
| 42176 | 0 | 149817 | LLQSDPF                       | 2.01 | 0.01 | 0.90 | 2.37 | 0.22 | 0.28 |
| 42177 | 0 | 135953 | LLQYVVKSFDRS                  | 2.45 | 0.01 | 0.78 | 0.44 | 1.13 | 0.28 |
| 42178 | 0 | 115081 | LLRFFVAPFPEV                  | 2.50 | 0.01 | 1.60 | 0.44 | 1.23 | 1.27 |
| 42179 | 0 | 108526 | LLRPVARDT                     | 2.22 | 0.01 | 0.90 | 0.44 | 1.13 | 1.39 |
| 42180 | 0 | 37753  | LLRQARERP                     | 2.24 | 0.01 | 0.90 | 0.68 | 0.22 | 0.28 |
| 42181 | 0 | 423035 | LLRQNEPEDIDCWCNS              | 2.72 | 0.01 | 2.30 | 1.20 | 0.22 | 0.28 |
| 42182 | 0 | 37755  | LLRRQVNEVA                    | 2.31 | 0.01 | 2.24 | 1.12 | 0.22 | 0.28 |
| 42183 | 0 | 37757  | LLRSTSQK                      | 2.13 | 0.01 | 2.45 | 0.44 | 0.85 | 1.34 |
| 42184 | 0 | 37757  | LLRSTSQK                      | 2.13 | 0.01 | 2.45 | 0.44 | 0.85 | 1.34 |
| 42185 | 0 | 37757  | LLRSTSQK                      | 2.13 | 0.01 | 2.45 | 0.44 | 0.85 | 1.34 |
| 42186 | 0 | 37757  | LLRSTSQK                      | 2.13 | 0.01 | 2.45 | 0.44 | 0.85 | 1.34 |

|       |   |        |                                |      |      |      |      |      |      |
|-------|---|--------|--------------------------------|------|------|------|------|------|------|
| 42187 | 0 | 37758  | LLRSTSQKSIVAYTMSL              | 2.79 | 0.01 | 2.48 | 0.44 | 0.85 | 0.28 |
| 42188 | 0 | 37759  | LLRTAPGP                       | 2.13 | 0.01 | 2.85 | 0.44 | 0.22 | 0.28 |
| 42189 | 0 | 37760  | LLRTQFF                        | 2.00 | 0.01 | 2.24 | 1.12 | 0.22 | 0.28 |
| 42190 | 0 | 37760  | LLRTQFF                        | 2.00 | 0.01 | 2.24 | 0.68 | 0.22 | 0.28 |
| 42191 | 0 | 450798 | LLRVIPALDSLTPANED              | 2.79 | 0.01 | 0.78 | 2.79 | 1.13 | 1.28 |
| 42192 | 0 | 114457 | LLSAISFFKNTHDFI                | 2.67 | 0.01 | 2.24 | 0.44 | 1.74 | 1.57 |
| 42193 | 0 | 37778  | LLSCLTVPAS                     | 2.33 | 0.01 | 2.68 | 2.74 | 0.22 | 0.28 |
| 42194 | 0 | 37782  | LLSDTDNAAFPQMTKSY<br>KNT       | 2.93 | 0.01 | 4.15 | 1.12 | 0.22 | 0.28 |
| 42195 | 0 | 37782  | LLSDTDNAAFPQMTKSY<br>KNT       | 2.93 | 0.01 | 4.15 | 1.12 | 0.22 | 0.28 |
| 42196 | 0 | 37782  | LLSDTDNAAFPQMTKSY<br>KNT       | 2.93 | 0.01 | 4.15 | 1.12 | 0.22 | 0.28 |
| 42197 | 0 | 37782  | LLSDTDNAAFPQMTKSY<br>KNT       | 2.93 | 0.01 | 4.15 | 1.12 | 0.22 | 0.28 |
| 42198 | 0 | 37782  | LLSDTDNAAFPQMTKSY<br>KNT       | 2.93 | 0.01 | 4.15 | 1.12 | 0.22 | 0.28 |
| 42199 | 0 | 37782  | LLSDTDNAAFPQMTKSY<br>KNT       | 2.93 | 0.01 | 4.15 | 1.12 | 0.22 | 0.28 |
| 42200 | 0 | 37793  | LLSHSNLDHI                     | 2.35 | 0.01 | 4.45 | 1.15 | 0.22 | 0.28 |
| 42201 | 0 | 37793  | LLSHSNLDHI                     | 2.35 | 0.01 | 4.45 | 1.15 | 0.22 | 0.28 |
| 42202 | 0 | 37793  | LLSHSNLDHI                     | 2.35 | 0.01 | 4.45 | 1.15 | 0.22 | 2.12 |
| 42203 | 0 | 37794  | LLSHSNLDHILEPSIPWK             | 2.87 | 0.01 | 3.19 | 0.44 | 2.98 | 0.28 |
| 42204 | 0 | 37797  | LLSKDKEIEEKNNKKIKELN<br>NDIKKL | 3.22 | 0.01 | 2.22 | 0.44 | 1.74 | 0.28 |
| 42205 | 0 | 37797  | LLSKDKEIEEKNNKKIKELN<br>NDIKKL | 3.22 | 0.01 | 2.22 | 0.44 | 1.74 | 0.28 |
| 42206 | 0 | 37797  | LLSKDKEIEEKNNKKIKELN<br>NDIKKL | 3.22 | 0.01 | 2.22 | 0.44 | 1.74 | 0.28 |
| 42207 | 0 | 37797  | LLSKDKEIEEKNNKKIKELN<br>NDIKKL | 3.22 | 0.01 | 2.22 | 0.44 | 0.85 | 1.48 |
| 42208 | 0 | 37797  | LLSKDKEIEEKNNKKIKELN<br>NDIKKL | 3.22 | 0.01 | 2.22 | 1.15 | 0.22 | 0.28 |
| 42209 | 0 | 132443 | LLSKNNAIEPRFSQON               | 2.72 | 0.01 | 0.78 | 1.15 | 0.22 | 0.28 |
| 42210 | 0 | 128050 | LLSLQEPGSKTYSK                 | 2.63 | 0.01 | 0.78 | 0.44 | 1.13 | 0.28 |
| 42211 | 0 | 37808  | LLSNIEEPKENIIDNLLNN<br>I       | 2.99 | 0.01 | 1.66 | 3.67 | 0.22 | 0.28 |
| 42212 | 0 | 37810  | LLSNTDNASFPQMTKSY<br>KNT       | 2.94 | 0.01 | 4.15 | 1.12 | 0.22 | 0.28 |
| 42213 | 0 | 37810  | LLSNTDNASFPQMTKSY<br>KNT       | 2.94 | 0.01 | 4.15 | 1.12 | 0.22 | 0.28 |
| 42214 | 0 | 37810  | LLSNTDNASFPQMTKSY<br>KNT       | 2.94 | 0.01 | 4.15 | 1.12 | 0.22 | 0.28 |

|       |   |        |                                                                                                                                                                                                                                                                       |      |      |      |      |      |      |
|-------|---|--------|-----------------------------------------------------------------------------------------------------------------------------------------------------------------------------------------------------------------------------------------------------------------------|------|------|------|------|------|------|
| 42215 | 0 | 37810  | LLSNTDNASFPQMTKSY<br>KNT                                                                                                                                                                                                                                              | 2.94 | 0.01 | 4.15 | 1.12 | 0.22 | 0.28 |
| 42216 | 0 | 37810  | LLSNTDNASFPQMTKSY<br>KNT                                                                                                                                                                                                                                              | 2.94 | 0.01 | 4.15 | 1.12 | 0.22 | 0.28 |
| 42217 | 0 | 37810  | LLSNTDNASFPQMTKSY<br>KNT                                                                                                                                                                                                                                              | 2.94 | 0.01 | 4.15 | 1.12 | 0.22 | 0.28 |
| 42218 | 0 | 37814  | LLSPRGSRPSWG                                                                                                                                                                                                                                                          | 2.52 | 0.01 | 2.68 | 0.44 | 0.85 | 0.28 |
| 42219 | 0 | 139806 | LLSPVRRDQPLFTFRQV<br>G                                                                                                                                                                                                                                                | 2.86 | 0.01 | 3.65 | 1.12 | 0.22 | 0.28 |
| 42220 | 0 | 139806 | LLSPVRRDQPLFTFRQV<br>G                                                                                                                                                                                                                                                | 2.86 | 0.01 | 3.65 | 2.00 | 0.22 | 0.28 |
| 42221 | 0 | 230486 | LLSRNTGEVRTLTNS                                                                                                                                                                                                                                                       | 2.71 | 0.01 | 0.78 | 0.44 | 1.13 | 0.28 |
| 42222 | 0 | 232918 | LLSSKTL                                                                                                                                                                                                                                                               | 2.05 | 0.01 | 0.90 | 2.49 | 0.85 | 1.39 |
|       |   |        | LLSTFTEYIKNIINTSILNL<br>RYESNHLIDLSRYASKINI<br>GSKVNFDPIDKNQIQLF<br>NLESSKIEVILKNAIVYNS<br>MYENFSTSFWIRIPKYFN<br>SISLNNEYTIINCMENNS<br>GWKVSLNYGEIIWTLQD<br>TQEIKQRVVFKYSQMINI<br>SDYINRWIFVTITNNRLN<br>NSKIYINGRLIDQKPISNL<br>GNIHASNNIMFKLDGCR<br>DTHRYIWIKYFNLFDEL |      |      |      |      |      |      |
| 42223 | 0 | 37823  | NEKEIKDLYDNQNSGIL<br>KDFWGDYLQYDKPYM<br>LNLYDPNKYVDVNNVGI<br>RGYMYLKGRGSVMTT<br>NIYLNSSLYRGTKFIIKKY<br>ASGNKDNIVRNNDRVYI<br>NVVVKNKEYRLATNASQ<br>AGVEKILSALEIPDVGNL<br>SQVVVMKSKNDQGITN<br>KCKMNLQDNNGNDIGF<br>IGFHQFNNAKLVASNW<br>YNRQIERSRTLGCSEF<br>IPVDDGWERPL    | 6.06 | 0.01 | 2.08 | 2.43 | 2.25 | 1.75 |

|       |   |        |                                                                                                                                                                                                                                                                              |      |      |      |      |      |      |
|-------|---|--------|------------------------------------------------------------------------------------------------------------------------------------------------------------------------------------------------------------------------------------------------------------------------------|------|------|------|------|------|------|
|       |   |        | LLSTFTEYIKNIINTSILNL<br>RYESNHLIDLSRYASKINI<br>GSKVNFDPIDKNQIQLF<br>NLESSKIEVILKNAIVYNS<br>MYENFSTSFWIRIPKYFN<br>SISLNNEYTIINCMENNS<br>GWKVS LNYGEIIWTLQD<br>TQEIQRVVF KYSQMINI<br>SDYINRWIFVTITNNRLN<br>NSKIYINGRLIDQKPISNL<br>GNIHASNNIMFKLDGCR<br>DTHRYIWIKYFNLFDKEL      |      |      |      |      |      |      |
| 42224 | 0 | 37823  | NEKEIKDLYDNQSN SGIL<br>KDFWGDY LQYDKPYM<br>LNLYDPNKYVDVNNVGI<br>RGYMYLKGPRGSVMTT<br>NIYLNSSLYRGTKFIIKKY<br>ASGNKDNIVRNNDRVYI<br>NVVVKNKEYRLATNASQ<br>AGVEKILSALEIPDVGNL<br>SQVVVMKSKNDQGITN<br>KCKMNLQDNNGNDIGF<br>IGFHQFN NIAKLVASNW<br>YNRQIERSSRTLGC SWEF<br>IPVDDGWGERPL | 6.06 | 0.01 | 2.08 | 2.43 | 0.22 | 1.34 |
| 42225 | 0 | 37831  | LLSTTQWQVLPC                                                                                                                                                                                                                                                                 | 2.48 | 0.01 | 2.68 | 2.74 | 0.22 | 0.28 |
| 42226 | 0 | 37833  | LLSVGVGIFLLPAR                                                                                                                                                                                                                                                               | 2.62 | 0.01 | 2.69 | 0.44 | 1.41 | 0.28 |
| 42227 | 0 | 37833  | LLSVGVGIFLLPAR                                                                                                                                                                                                                                                               | 2.62 | 0.01 | 2.69 | 0.44 | 0.85 | 0.28 |
| 42228 | 0 | 128051 | LLSYEASVPSVPISTHGRL<br>L                                                                                                                                                                                                                                                     | 2.93 | 0.01 | 0.78 | 0.44 | 1.13 | 0.28 |
| 42229 | 0 | 122471 | LLTEHRMTWDPAQPPR<br>DL                                                                                                                                                                                                                                                       | 2.84 | 0.01 | 0.78 | 0.44 | 1.13 | 0.28 |
| 42230 | 0 | 122471 | LLTEHRMTWDPAQPPR<br>DL                                                                                                                                                                                                                                                       | 2.84 | 0.01 | 0.78 | 0.44 | 1.13 | 0.85 |
| 42231 | 0 | 122471 | LLTEHRMTWDPAQPPR<br>DL                                                                                                                                                                                                                                                       | 2.84 | 0.01 | 0.78 | 0.44 | 1.13 | 0.28 |
| 42232 | 0 | 122471 | LLTEHRMTWDPAQPPR<br>DL                                                                                                                                                                                                                                                       | 2.84 | 0.01 | 0.78 | 0.44 | 1.13 | 0.85 |
| 42233 | 0 | 123443 | LLTEHRMTWDPAQPPR<br>DLTE                                                                                                                                                                                                                                                     | 2.95 | 0.01 | 0.78 | 0.44 | 1.13 | 0.28 |
| 42234 | 0 | 123443 | LLTEHRMTWDPAQPPR<br>DLTE                                                                                                                                                                                                                                                     | 2.95 | 0.01 | 0.78 | 0.44 | 0.85 | 0.28 |
| 42235 | 0 | 124443 | LLTEHRMTWDPAQPPR<br>DLTEAFLA                                                                                                                                                                                                                                                 | 3.13 | 0.01 | 0.78 | 0.44 | 1.13 | 0.85 |
| 42236 | 0 | 161404 | LLTEVETPIR                                                                                                                                                                                                                                                                   | 2.32 | 0.01 | 2.36 | 2.75 | 0.22 | 0.28 |



|       |   |        |                             |      |      |      |      |      |      |
|-------|---|--------|-----------------------------|------|------|------|------|------|------|
| 42237 | 0 | 161404 | LLTEVETPIR                  | 2.32 | 0.01 | 2.36 | 2.75 | 0.22 | 0.28 |
| 42238 | 0 | 161404 | LLTEVETPIR                  | 2.32 | 0.01 | 2.36 | 2.75 | 0.22 | 0.28 |
| 42239 | 0 | 161404 | LLTEVETPIR                  | 2.32 | 0.01 | 2.36 | 2.75 | 0.22 | 1.66 |
| 42240 | 0 | 161404 | LLTEVETPIR                  | 2.32 | 0.01 | 2.36 | 2.75 | 0.22 | 0.28 |
| 42241 | 0 | 161404 | LLTEVETPIR                  | 2.32 | 0.01 | 2.36 | 2.75 | 0.22 | 0.28 |
| 42242 | 0 | 161404 | LLTEVETPIR                  | 2.32 | 0.01 | 2.36 | 2.75 | 0.22 | 0.28 |
| 42243 | 0 | 161404 | LLTEVETPIR                  | 2.32 | 0.01 | 2.36 | 2.75 | 0.22 | 0.28 |
| 42244 | 0 | 161404 | LLTEVETPIR                  | 2.32 | 0.01 | 2.36 | 2.75 | 0.22 | 0.28 |
| 42245 | 0 | 161404 | LLTEVETPIR                  | 2.32 | 0.01 | 2.36 | 2.75 | 0.22 | 0.28 |
| 42246 | 0 | 161404 | LLTEVETPIR                  | 2.32 | 0.01 | 2.36 | 2.75 | 0.22 | 0.28 |
| 42247 | 0 | 161404 | LLTEVETPIR                  | 2.32 | 0.01 | 2.36 | 2.75 | 0.22 | 0.28 |
| 42248 | 0 | 161404 | LLTEVETPIR                  | 2.32 | 0.01 | 2.36 | 2.75 | 0.22 | 0.28 |
| 42249 | 0 | 161404 | LLTEVETPIR                  | 2.32 | 0.01 | 2.36 | 2.75 | 0.22 | 0.28 |
| 42250 | 0 | 161404 | LLTEVETPIR                  | 2.32 | 0.01 | 2.36 | 2.75 | 0.22 | 0.28 |
| 42251 | 0 | 161404 | LLTEVETPIR                  | 2.32 | 0.01 | 2.36 | 2.75 | 0.22 | 0.28 |
| 42252 | 0 | 161404 | LLTEVETPIR                  | 2.32 | 0.01 | 2.36 | 2.75 | 0.22 | 0.28 |
| 42253 | 0 | 161404 | LLTEVETPIR                  | 2.32 | 0.01 | 2.36 | 2.75 | 0.22 | 0.28 |
| 42254 | 0 | 161404 | LLTEVETPIR                  | 2.32 | 0.01 | 2.36 | 2.75 | 0.22 | 0.28 |
| 42255 | 0 | 161404 | LLTEVETPIR                  | 2.32 | 0.01 | 2.36 | 2.75 | 0.22 | 0.28 |
| 42256 | 0 | 161404 | LLTEVETPIR                  | 2.32 | 0.01 | 2.36 | 2.75 | 0.22 | 0.28 |
| 42257 | 0 | 161404 | LLTEVETPIR                  | 2.32 | 0.01 | 2.36 | 2.75 | 0.22 | 0.28 |
| 42258 | 0 | 161404 | LLTEVETPIR                  | 2.32 | 0.01 | 2.36 | 2.75 | 0.22 | 0.28 |
| 42259 | 0 | 161404 | LLTEVETPIR                  | 2.32 | 0.01 | 2.36 | 2.75 | 0.22 | 0.28 |
| 42260 | 0 | 161404 | LLTEVETPIR                  | 2.32 | 0.01 | 2.36 | 2.75 | 0.22 | 0.28 |
| 42261 | 0 | 161404 | LLTEVETPIR                  | 2.32 | 0.01 | 2.36 | 2.75 | 0.22 | 1.66 |
| 42262 | 0 | 161404 | LLTEVETPIR                  | 2.32 | 0.01 | 2.36 | 2.75 | 0.22 | 1.66 |
| 42263 | 0 | 161404 | LLTEVETPIR                  | 2.32 | 0.01 | 2.36 | 2.75 | 0.22 | 1.75 |
| 42264 | 0 | 161404 | LLTEVETPIR                  | 2.32 | 0.01 | 2.36 | 2.75 | 0.22 | 1.75 |
| 42265 | 0 | 161404 | LLTEVETPIR                  | 2.32 | 0.01 | 2.36 | 2.75 | 0.22 | 0.28 |
| 42266 | 0 | 161405 | LLTEVETPIRNEWG              | 2.60 | 0.01 | 2.36 | 2.75 | 0.22 | 0.28 |
| 42267 | 0 | 161405 | LLTEVETPIRNEWG              | 2.60 | 0.01 | 2.36 | 2.75 | 0.22 | 0.28 |
| 42268 | 0 | 161405 | LLTEVETPIRNEWG              | 2.60 | 0.01 | 2.36 | 2.75 | 0.22 | 0.28 |
| 42269 | 0 | 161405 | LLTEVETPIRNEWG              | 2.60 | 0.01 | 2.36 | 2.75 | 0.22 | 0.28 |
| 42270 | 0 | 94590  | LLTLVQLTLQSTNYTCIV<br>CIDRA | 3.09 | 0.01 | 2.04 | 0.44 | 0.85 | 0.28 |
| 42271 | 0 | 94590  | LLTLVQLTLQSTNYTCIV<br>CIDRA | 3.09 | 0.01 | 2.04 | 0.44 | 1.59 | 0.28 |
| 42272 | 0 | 119255 | LLTMKNKAWMVHRQ<br>W         | 2.65 | 0.01 | 3.45 | 0.44 | 1.59 | 0.28 |
| 42273 | 0 | 119255 | LLTMKNKAWMVHRQ<br>W         | 2.65 | 0.01 | 3.45 | 0.68 | 0.22 | 0.28 |
| 42274 | 0 | 119255 | LLTMKNKAWMVHRQ<br>W         | 2.65 | 0.01 | 3.45 | 0.44 | 1.59 | 0.28 |
| 42275 | 0 | 131542 | LLTRYLRHPQSWVHQIA<br>LR     | 2.94 | 0.01 | 0.78 | 0.44 | 2.35 | 0.28 |
| 42276 | 0 | 131543 | LLTSMYVKEFLISSQDG<br>HQ     | 2.89 | 0.01 | 0.78 | 0.44 | 2.35 | 0.28 |

|                    |   |        |                                       |      |      |      |      |      |      |
|--------------------|---|--------|---------------------------------------|------|------|------|------|------|------|
| 42277              | 0 | 107207 | LLTTAEAVVTEIPKE                       | 2.70 | 0.01 | 2.19 | 2.97 | 0.22 | 0.28 |
| 42278              | 0 | 79603  | LLTTDEL                               | 2.05 | 0.01 | 0.90 | 1.12 | 0.22 | 1.39 |
| 42279              | 0 | 37876  | LLTTNTTGNPEY                          | 2.49 | 0.01 | 3.75 | 0.44 | 0.85 | 0.28 |
| 42280              | 0 | 189248 | LLTTRSLGSDANPTRQ                      | 2.74 | 0.01 | 2.92 | 2.49 | 0.22 | 0.28 |
| LLVAMIPEYLSTAQQDFL |   |        |                                       |      |      |      |      |      |      |
| 42281              | 0 | 169160 | GSWRDKTTDSTPGTWV<br>WNTYEAFFPGFPP     | 3.77 | 0.01 | 3.78 | 2.02 | 1.59 | 0.85 |
| LLVDAPGYDPIWFLNTE  |   |        |                                       |      |      |      |      |      |      |
| 42282              | 0 | 37886  | PSQLPP                                | 3.03 | 0.01 | 2.04 | 1.20 | 0.22 | 0.28 |
| 42283              | 0 | 121571 | LLVDVEPK                              | 2.13 | 0.01 | 0.78 | 3.05 | 1.13 | 0.28 |
| 42284              | 0 | 120769 | LLVDVEPKVKSKKRE                       | 2.70 | 0.01 | 0.78 | 3.01 | 0.22 | 0.28 |
| 42285              | 0 | 120769 | LLVDVEPKVKSKKRE                       | 2.70 | 0.01 | 0.78 | 3.01 | 0.22 | 1.27 |
| 42286              | 0 | 120769 | LLVDVEPKVKSKKRE                       | 2.70 | 0.01 | 0.78 | 3.01 | 0.22 | 0.28 |
| 42287              | 0 | 120769 | LLVDVEPKVKSKKRE                       | 2.70 | 0.01 | 0.78 | 3.01 | 0.22 | 2.02 |
| 42288              | 0 | 120769 | LLVDVEPKVKSKKRE                       | 2.70 | 0.01 | 0.78 | 3.01 | 0.22 | 0.28 |
| 42289              | 0 | 37891  | LLVETWKK                              | 2.10 | 0.01 | 2.68 | 0.44 | 1.59 | 0.28 |
| LLVGSATLCSALYVGDLG |   |        |                                       |      |      |      |      |      |      |
| 42290              | 0 | 161256 | GS                                    | 2.99 | 0.01 | 2.45 | 0.68 | 0.22 | 0.28 |
| LLVGSATLCSALYVGDLG |   |        |                                       |      |      |      |      |      |      |
| 42291              | 0 | 161256 | GS                                    | 2.99 | 0.01 | 2.45 | 0.68 | 0.22 | 1.27 |
| LLVGSATLCSALYVGDLG |   |        |                                       |      |      |      |      |      |      |
| 42292              | 0 | 161256 | GS                                    | 2.99 | 0.01 | 2.45 | 0.68 | 0.22 | 1.34 |
| LLVILAGPCILRQLRHLP |   |        |                                       |      |      |      |      |      |      |
| 42293              | 0 | 37899  | RVRY                                  | 3.09 | 0.01 | 2.04 | 0.44 | 0.85 | 0.28 |
| LLVILAGPCILRQLRHLP |   |        |                                       |      |      |      |      |      |      |
| 42294              | 0 | 37899  | RVRY                                  | 3.09 | 0.01 | 2.04 | 0.44 | 0.85 | 0.28 |
| LLVNSSQPWEPLQLHVD  |   |        |                                       |      |      |      |      |      |      |
| 42295              | 0 | 164544 | KAV                                   | 2.94 | 0.01 | 0.78 | 1.20 | 0.22 | 0.28 |
| LLVNSSQPWEPLQLHVD  |   |        |                                       |      |      |      |      |      |      |
| 42296              | 0 | 164544 | KAV                                   | 2.94 | 0.01 | 0.78 | 1.20 | 0.22 | 2.02 |
| 42297              | 0 | 37924  | LLVRMKRAELYCPRP                       | 2.68 | 0.01 | 3.32 | 0.68 | 0.22 | 0.28 |
| 42298              | 0 | 37924  | LLVRMKRAELYCPRP                       | 2.68 | 0.01 | 3.32 | 1.12 | 0.22 | 0.28 |
| LLVVCVPEAEMGCATLA  |   |        |                                       |      |      |      |      |      |      |
| 42299              | 0 | 37934  | NKPDPKSLSKGEIASTFE<br>SQNSTGETDVQANVI | 3.86 | 0.01 | 3.17 | 0.68 | 0.22 | 0.28 |
| LLVVCVPEAEMGCATLA  |   |        |                                       |      |      |      |      |      |      |
| 42300              | 0 | 37934  | NKPDPKSLSKGEIASTFE<br>SQNSTGETDVQANVI | 3.86 | 0.01 | 3.17 | 0.68 | 0.22 | 0.28 |
| LLVVCVPEAEMGCATLA  |   |        |                                       |      |      |      |      |      |      |
| 42301              | 0 | 37934  | NKPDPKSLSKGEIASTFE<br>SQNSTGETDVQANVI | 3.86 | 0.01 | 3.17 | 0.68 | 0.22 | 0.85 |

|       |   |        |                                                            |      |      |      |      |      |      |
|-------|---|--------|------------------------------------------------------------|------|------|------|------|------|------|
| 42302 | 0 | 37934  | LLVVCVPEAEMGCATLA<br>NKPDPKSLSKGEIASTFE<br>SQNSTGETDVQANVI | 3.86 | 0.01 | 3.17 | 0.68 | 0.22 | 0.28 |
| 42303 | 0 | 169161 | LLVVMVPEYVAEQQRD<br>FRGSWQDKDSDGLPGE<br>WKWQSYDALPRHLPP    | 3.79 | 0.01 | 3.93 | 2.36 | 0.22 | 0.28 |
| 42304 | 0 | 169161 | LLVVMVPEYVAEQQRD<br>FRGSWQDKDSDGLPGE<br>WKWQSYDALPRHLPP    | 3.79 | 0.01 | 3.93 | 2.02 | 1.59 | 0.85 |
| 42305 | 0 | 169161 | LLVVMVPEYVAEQQRD<br>FRGSWQDKDSDGLPGE<br>WKWQSYDALPRHLPP    | 3.79 | 0.01 | 3.93 | 2.02 | 1.59 | 0.85 |
| 42306 | 0 | 169161 | LLVVMVPEYVAEQQRD<br>FRGSWQDKDSDGLPGE<br>WKWQSYDALPRHLPP    | 3.79 | 0.01 | 3.93 | 2.36 | 0.22 | 0.85 |
| 42307 | 0 | 169162 | LLVVMVPEYVATSQTDF<br>RGSWQDKDNTDNLPGA<br>WMWQTYDALPSTLPP   | 3.78 | 0.01 | 3.89 | 2.02 | 1.59 | 0.85 |
| 42308 | 0 | 169162 | LLVVMVPEYVATSQTDF<br>RGSWQDKDNTDNLPGA<br>WMWQTYDALPSTLPP   | 3.78 | 0.01 | 3.89 | 2.02 | 1.59 | 0.85 |
| 42309 | 0 | 182218 | LLWCATTSRYERDEK                                            | 2.64 | 0.01 | 0.78 | 0.44 | 1.13 | 0.85 |
| 42310 | 0 | 136071 | LLYGEVGDTHLLIFK                                            | 2.66 | 0.01 | 0.78 | 1.20 | 0.22 | 0.85 |
| 42311 | 0 | 136071 | LLYGEVGDTHLLIFK                                            | 2.66 | 0.01 | 0.78 | 1.20 | 0.22 | 0.28 |
| 42312 | 0 | 115847 | LLYQEPVLGP                                                 | 2.33 | 0.01 | 1.60 | 0.44 | 1.23 | 0.85 |
| 42313 | 0 | 115847 | LLYQEPVLGP                                                 | 2.33 | 0.01 | 1.60 | 0.44 | 1.23 | 0.85 |
| 42314 | 0 | 37987  | LLYRLGAVQNEITLTHPV<br>TKYIMTC                              | 3.12 | 0.01 | 3.18 | 0.44 | 0.85 | 0.28 |
| 42315 | 0 | 331538 | LLYSDELFLSQQRG                                             | 2.68 | 0.01 | 1.61 | 0.44 | 0.85 | 1.28 |
| 42316 | 0 | 141049 | LMAISLQVVHVETHRC<br>NI                                     | 2.86 | 0.01 | 0.78 | 1.12 | 0.22 | 0.28 |
| 42317 | 0 | 141049 | LMAISLQVVHVETHRC<br>NI                                     | 2.86 | 0.01 | 0.78 | 1.12 | 0.22 | 0.28 |
| 42318 | 0 | 37997  | LMCDIDGNRL                                                 | 2.32 | 0.01 | 3.85 | 0.44 | 1.23 | 0.85 |
| 42319 | 0 | 38005  | LMDEGEDPSLLFQSYLD<br>NVGVQIVRQMRSGER                       | 3.42 | 0.01 | 4.45 | 0.68 | 0.22 | 0.85 |
| 42320 | 0 | 38007  | LMDHEGCKLSCFIRP                                            | 2.63 | 0.01 | 2.56 | 2.02 | 0.22 | 0.85 |

|       |   |        |                                    |      |      |      |      |      |      |
|-------|---|--------|------------------------------------|------|------|------|------|------|------|
|       |   |        | LMDHYLRIMSPVGTK                    |      |      |      |      |      |      |
| 42321 | 0 | 97462  | QIVYWKQWLSLKNPTQ<br>G              | 3.43 | 0.01 | 3.09 | 0.44 | 0.85 | 0.28 |
| 42322 | 0 | 38009  | LMDPVFGFDRRVPFV                    | 2.71 | 0.01 | 0.90 | 1.15 | 0.22 | 0.85 |
| 42323 | 0 | 38010  | LMDPVFGFDRRVVV                     | 2.69 | 0.01 | 0.90 | 1.15 | 0.22 | 0.85 |
| 42324 | 0 | 135482 | LMDRHD                             | 1.90 | 0.01 | 0.78 | 0.68 | 0.22 | 0.28 |
| 42325 | 0 | 104045 | LMEPCYAWGCTGPK                     | 2.59 | 0.01 | 0.90 | 0.44 | 1.13 | 1.39 |
| 42326 | 0 | 38014  | LMESELVIGAVIIRGHLR                 | 2.87 | 0.01 | 2.45 | 0.44 | 0.85 | 0.28 |
| 42327 | 0 | 38015  | LMESELVIGAVIIRGHLR<br>MAGHPLGRCDIK | 3.35 | 0.01 | 2.45 | 1.20 | 0.22 | 0.28 |
| 42328 | 0 | 38015  | LMESELVIGAVIIRGHLR<br>MAGHPLGRCDIK | 3.35 | 0.01 | 2.45 | 0.68 | 0.22 | 0.28 |
| 42329 | 0 | 38015  | LMESELVIGAVIIRGHLR<br>MAGHPLGRCDIK | 3.35 | 0.01 | 2.45 | 0.44 | 0.85 | 0.28 |
| 42330 | 0 | 38022  | LMGGQSESVEFTKDT                    | 2.65 | 0.01 | 2.24 | 1.15 | 0.22 | 0.85 |
| 42331 | 0 | 38023  | LMGGQSESVEFTKDTQ                   | 2.72 | 0.01 | 2.24 | 0.68 | 0.22 | 0.28 |
| 42332 | 0 | 111497 | LMGTLGIVCPICSQKP                   | 2.74 | 0.01 | 1.86 | 1.12 | 0.22 | 0.28 |
| 42333 | 0 | 111497 | LMGTLGIVCPICSQKP                   | 2.74 | 0.01 | 1.86 | 1.12 | 0.22 | 2.02 |
| 42334 | 0 | 38031  | LMGYIPLVGA                         | 2.32 | 0.01 | 1.72 | 0.44 | 0.85 | 0.28 |
| 42335 | 0 | 38031  | LMGYIPLVGA                         | 2.32 | 0.01 | 2.68 | 0.44 | 0.85 | 0.28 |
| 42336 | 0 | 38031  | LMGYIPLVGA                         | 2.32 | 0.01 | 2.68 | 2.74 | 0.22 | 0.28 |
| 42337 | 0 | 106612 | LMHRLYHVPA                         | 2.32 | 0.01 | 2.75 | 0.44 | 1.23 | 0.85 |
| 42338 | 0 | 38053  | LMIKEHILAIAYESRILKR                | 2.98 | 0.01 | 1.66 | 0.44 | 0.85 | 0.28 |
| 42339 | 0 | 103365 | LMILIATNLLGQNT                     | 2.70 | 0.01 | 2.04 | 0.44 | 0.85 | 1.28 |
| 42340 | 0 | 144720 | LMKFVDSKSG                         | 2.31 | 0.01 | 0.78 | 0.44 | 1.13 | 0.28 |
| 42341 | 0 | 144720 | LMKFVDSKSG                         | 2.31 | 0.01 | 0.78 | 0.44 | 1.41 | 0.28 |
| 42342 | 0 | 131545 | LMKINS                             | 1.99 | 0.01 | 0.78 | 0.44 | 1.41 | 0.28 |
| 42343 | 0 | 131545 | LMKINS                             | 1.99 | 0.01 | 0.78 | 0.44 | 1.13 | 0.28 |
| 42344 | 0 | 131545 | LMKINS                             | 1.99 | 0.01 | 0.78 | 1.15 | 0.22 | 0.28 |
| 42345 | 0 | 79016  | LMKKMGSGDGTETISE<br>GGG            | 2.97 | 0.01 | 2.84 | 0.44 | 0.85 | 0.28 |
| 42346 | 0 | 186693 | LMKPSYDTAHRP                       | 2.43 | 0.01 | 0.90 | 0.68 | 0.22 | 1.39 |
| 42347 | 0 | 172191 | LMLASFECTADHLFD                    | 2.69 | 0.01 | 0.78 | 0.44 | 1.41 | 0.28 |
| 42348 | 0 | 120772 | LMLLAQMRRISLFS                     | 2.64 | 0.01 | 0.78 | 0.44 | 1.13 | 0.85 |
| 42349 | 0 | 120772 | LMLLAQMRRISLFS                     | 2.64 | 0.01 | 0.78 | 0.44 | 1.41 | 0.85 |
| 42350 | 0 | 151983 | LMLLRQSPTPH                        | 2.41 | 0.01 | 0.78 | 0.44 | 1.93 | 0.28 |
| 42351 | 0 | 133209 | LMLQGVDLLADAVAV                    | 2.73 | 0.01 | 2.19 | 2.97 | 0.22 | 0.28 |
| 42352 | 0 | 331672 | LMLRESDGECAPFTT                    | 2.63 | 0.01 | 1.61 | 0.44 | 0.85 | 1.28 |
| 42353 | 0 | 38081  | LMNMDNKFRLSMLWS<br>LAKPT           | 2.95 | 0.01 | 3.93 | 4.03 | 0.22 | 0.28 |
| 42354 | 0 | 129279 | LMNSIHIDTAGSRARIGG<br>GVISGDLVK    | 3.24 | 0.01 | 4.93 | 0.44 | 1.13 | 0.85 |

|       |   |        |                           |      |      |      |      |      |      |
|-------|---|--------|---------------------------|------|------|------|------|------|------|
| 42355 | 0 | 108010 | LMPMNMAPITGRALE           | 2.69 | 0.01 | 0.78 | 1.15 | 0.22 | 0.28 |
| 42356 | 0 | 108010 | LMPMNMAPITGRALE           | 2.69 | 0.01 | 0.78 | 1.15 | 0.22 | 0.28 |
| 42357 | 0 | 172192 | LMPNKISNFASA              | 2.48 | 0.01 | 0.90 | 0.44 | 0.85 | 1.39 |
| 42358 | 0 | 134143 | LMPPKY                    | 1.89 | 0.01 | 2.25 | 0.44 | 1.41 | 1.27 |
| 42359 | 0 | 38100  | LMQILGLKLRDLIEDT<br>MK    | 2.97 | 0.01 | 2.86 | 2.89 | 0.22 | 0.85 |
| 42360 | 0 | 435418 | LMQINPTYQIM               | 2.48 | 0.01 | 0.90 | 0.68 | 0.22 | 1.27 |
| 42361 | 0 | 99433  | LMQIKRDEDSYERD            | 2.68 | 0.01 | 2.16 | 0.44 | 1.23 | 1.48 |
| 42362 | 0 | 106614 | LMQSRSPQEQLV              | 2.50 | 0.01 | 0.90 | 1.15 | 0.22 | 1.39 |
| 42363 | 0 | 38114  | LMRVGS                    | 1.88 | 0.01 | 0.90 | 0.44 | 1.59 | 1.39 |
| 42364 | 0 | 121575 | LMRY                      | 1.57 | 0.01 | 0.78 | 0.68 | 0.22 | 0.28 |
| 42365 | 0 | 38118  | LMSFPQAAPHGVVFLH<br>V     | 2.80 | 0.01 | 2.48 | 0.44 | 0.85 | 0.28 |
| 42366 | 0 | 227350 | LMTGRIPVSDIFCDI           | 2.64 | 0.01 | 2.97 | 0.44 | 0.85 | 0.28 |
| 42367 | 0 | 38142  | LMTPLDVSFVVITPF           | 2.70 | 0.01 | 0.90 | 1.15 | 0.22 | 0.85 |
| 42368 | 0 | 331749 | LMTREVDDTMADEL R          | 2.72 | 0.01 | 1.61 | 0.44 | 0.85 | 1.28 |
| 42369 | 0 | 147926 | LMVALDSNN                 | 2.22 | 0.01 | 3.24 | 3.57 | 0.85 | 0.28 |
| 42370 | 0 | 164468 | LMVGGV                    | 1.90 | 0.01 | 0.78 | 1.15 | 0.22 | 0.85 |
| 42371 | 0 | 105932 | LMVGGVV                   | 2.01 | 0.01 | 0.78 | 0.68 | 0.22 | 0.28 |
| 42372 | 0 | 105932 | LMVGGVV                   | 2.01 | 0.01 | 0.78 | 0.68 | 0.22 | 0.28 |
| 42373 | 0 | 107510 | LMVGGVVIA                 | 2.23 | 0.01 | 0.78 | 1.12 | 2.26 | 1.27 |
| 42374 | 0 | 38150  | LMVPKPQGPL                | 2.34 | 0.01 | 0.78 | 0.44 | 1.74 | 0.28 |
| 42375 | 0 | 38151  | LMVPKQGP                  | 2.12 | 0.01 | 0.78 | 0.44 | 1.74 | 0.28 |
| 42376 | 0 | 95558  | LNAASAYCST                | 2.33 | 0.01 | 2.60 | 0.44 | 1.23 | 0.85 |
| 42377 | 0 | 95558  | LNAASAYCST                | 2.33 | 0.01 | 2.60 | 1.12 | 0.22 | 0.85 |
| 42378 | 0 | 95558  | LNAASAYCST                | 2.33 | 0.01 | 2.60 | 0.44 | 1.23 | 0.85 |
| 42379 | 0 | 194746 | LNAGARGDVQQIFQGR<br>ND    | 2.87 | 0.01 | 3.42 | 2.37 | 0.85 | 0.28 |
| 42380 | 0 | 122843 | LNAGNQLS                  | 2.15 | 0.01 | 2.58 | 2.87 | 0.22 | 0.28 |
| 42381 | 0 | 172195 | LNAGYKKCDEYIEAL           | 2.68 | 0.01 | 0.78 | 0.44 | 1.41 | 0.28 |
| 42382 | 0 | 172195 | LNAGYKKCDEYIEAL           | 2.68 | 0.01 | 0.78 | 0.44 | 1.13 | 0.28 |
| 42383 | 0 | 157603 | LNAHSVYYALRG              | 2.47 | 0.01 | 3.65 | 0.44 | 1.23 | 0.85 |
| 42384 | 0 | 38169  | LNAMKGD LQSSLGAG          | 2.70 | 0.01 | 2.04 | 0.44 | 0.85 | 0.28 |
| 42385 | 0 | 38171  | LNAMTQNI R PVQSVA         | 2.66 | 0.01 | 2.43 | 0.44 | 1.59 | 0.28 |
| 42386 | 0 | 152779 | LNANIRYVNT                | 2.31 | 0.01 | 2.18 | 0.44 | 0.22 | 0.28 |
| 42387 | 0 | 38178  | LNCNESLNTGWL AGLFY<br>QHK | 2.92 | 0.01 | 1.72 | 0.44 | 1.59 | 0.28 |
| 42388 | 0 | 38178  | LNCNESLNTGWL AGLFY<br>QHK | 2.92 | 0.01 | 2.45 | 0.44 | 0.22 | 0.28 |
| 42389 | 0 | 38178  | LNCNESLNTGWL AGLFY<br>QHK | 2.92 | 0.01 | 2.45 | 0.44 | 0.22 | 1.27 |
| 42390 | 0 | 38178  | LNCNESLNTGWL AGLFY<br>QHK | 2.92 | 0.01 | 2.45 | 0.44 | 0.22 | 1.34 |

|       |   |        |                          |      |      |      |      |      |      |
|-------|---|--------|--------------------------|------|------|------|------|------|------|
| 42391 | 0 | 38178  | LNCNESLNTGWLGLFY<br>QHK  | 2.92 | 0.01 | 2.45 | 0.44 | 0.22 | 1.34 |
| 42392 | 0 | 181715 | LNCPRCENACSNYTK          | 2.66 | 0.01 | 1.66 | 2.36 | 0.22 | 1.28 |
| 42393 | 0 | 172196 | LNCQEFVAVDLEHHSY         | 2.64 | 0.01 | 0.78 | 0.44 | 1.13 | 0.28 |
| 42394 | 0 | 189724 | LNDADITAALAACKA          | 2.72 | 0.01 | 3.28 | 0.44 | 1.23 | 0.28 |
| 42395 | 0 | 189724 | LNDADITAALAACKA          | 2.72 | 0.01 | 3.28 | 0.44 | 1.41 | 0.28 |
| 42396 | 0 | 178282 | LNDALSLRTEARATYN         | 2.77 | 0.01 | 3.93 | 0.68 | 0.22 | 0.85 |
| 42397 | 0 | 38181  | LNDDQLLK                 | 2.15 | 0.01 | 3.53 | 2.61 | 0.22 | 0.28 |
| 42398 | 0 | 103367 | LNDESLIILENLTK           | 2.64 | 0.01 | 3.93 | 2.43 | 0.22 | 0.85 |
| 42399 | 0 | 38186  | LNDITKEYEKLLNEI          | 2.71 | 0.01 | 1.66 | 0.44 | 0.85 | 0.28 |
| 42400 | 0 | 38186  | LNDITKEYEKLLNEI          | 2.71 | 0.01 | 1.66 | 0.44 | 0.85 | 0.28 |
| 42401 | 0 | 38186  | LNDITKEYEKLLNEI          | 2.71 | 0.01 | 3.34 | 0.44 | 1.74 | 0.28 |
| 42402 | 0 | 141701 | LNDKHSNGTIKDRSPYR        | 2.78 | 0.01 | 3.40 | 1.20 | 0.22 | 0.28 |
| 42403 | 0 | 141701 | LNDKHSNGTIKDRSPYR        | 2.78 | 0.01 | 3.40 | 1.20 | 0.22 | 0.28 |
| 42404 | 0 | 141701 | LNDKHSNGTIKDRSPYR        | 2.78 | 0.01 | 3.40 | 1.20 | 0.22 | 0.28 |
| 42405 | 0 | 141701 | LNDKHSNGTIKDRSPYR        | 2.78 | 0.01 | 3.40 | 1.20 | 0.22 | 1.34 |
| 42406 | 0 | 38192  | LNDQVVVTPDKEILYEAF<br>DE | 2.92 | 0.01 | 1.96 | 0.44 | 0.85 | 0.28 |
| 42407 | 0 | 38193  | LNDRVVVAPDKEILYEAF<br>DE | 2.94 | 0.01 | 1.96 | 0.44 | 0.85 | 0.28 |
| 42408 | 0 | 38194  | LNDRVVVTP                | 2.21 | 0.01 | 2.69 | 0.44 | 0.85 | 0.28 |
| 42409 | 0 | 142225 | LNDSSEEEDEID             | 2.51 | 0.01 | 1.86 | 0.44 | 1.41 | 0.28 |
| 42410 | 0 | 38196  | LNDTLHNI                 | 2.15 | 0.01 | 2.83 | 1.12 | 0.22 | 0.28 |
| 42411 | 0 | 140701 | LNEDLRSWTA               | 2.30 | 0.01 | 0.78 | 1.15 | 0.22 | 1.27 |
| 42412 | 0 | 140701 | LNEDLRSWTA               | 2.30 | 0.01 | 0.78 | 1.15 | 0.22 | 2.12 |
| 42413 | 0 | 140701 | LNEDLRSWTA               | 2.30 | 0.01 | 0.78 | 1.15 | 0.22 | 2.12 |
| 42414 | 0 | 140701 | LNEDLRSWTA               | 2.30 | 0.01 | 0.78 | 1.15 | 0.22 | 2.12 |
| 42415 | 0 | 140701 | LNEDLRSWTA               | 2.30 | 0.01 | 0.78 | 1.15 | 0.22 | 2.12 |
| 42416 | 0 | 140701 | LNEDLRSWTA               | 2.30 | 0.01 | 0.78 | 1.15 | 0.22 | 2.12 |
| 42417 | 0 | 140701 | LNEDLRSWTA               | 2.30 | 0.01 | 0.78 | 1.15 | 0.22 | 2.12 |
| 42418 | 0 | 140701 | LNEDLRSWTA               | 2.30 | 0.01 | 0.78 | 1.15 | 0.22 | 2.12 |
| 42419 | 0 | 140701 | LNEDLRSWTA               | 2.30 | 0.01 | 0.78 | 1.15 | 0.22 | 2.12 |
| 42420 | 0 | 140701 | LNEDLRSWTA               | 2.30 | 0.01 | 0.78 | 1.15 | 0.22 | 2.12 |
| 42421 | 0 | 140701 | LNEDLRSWTA               | 2.30 | 0.01 | 0.78 | 1.15 | 0.22 | 2.12 |
| 42422 | 0 | 140701 | LNEDLRSWTA               | 2.30 | 0.01 | 0.78 | 1.15 | 0.22 | 2.12 |
| 42423 | 0 | 140701 | LNEDLRSWTA               | 2.30 | 0.01 | 0.78 | 1.15 | 0.22 | 2.12 |
| 42424 | 0 | 140701 | LNEDLRSWTA               | 2.30 | 0.01 | 0.78 | 1.15 | 0.22 | 2.12 |
| 42425 | 0 | 140701 | LNEDLRSWTA               | 2.30 | 0.01 | 0.78 | 1.15 | 0.22 | 2.12 |
| 42426 | 0 | 140701 | LNEDLRSWTA               | 2.30 | 0.01 | 0.78 | 1.15 | 0.22 | 2.12 |
| 42427 | 0 | 38199  | LNEEAERWVRQNPPGP<br>N    | 2.80 | 0.01 | 4.33 | 2.37 | 0.85 | 0.28 |
| 42428 | 0 | 38201  | LNEEQD                   | 1.89 | 0.01 | 2.40 | 0.44 | 0.85 | 0.28 |
| 42429 | 0 | 38202  | LNEGVVLDEVIFSKH          | 2.67 | 0.01 | 3.50 | 2.22 | 0.22 | 0.28 |

|       |   |        |                          |      |      |      |      |      |      |
|-------|---|--------|--------------------------|------|------|------|------|------|------|
| 42430 | 0 | 151984 | LNEHLGLLGPY              | 2.43 | 0.01 | 0.78 | 0.44 | 1.13 | 0.28 |
| 42431 | 0 | 115360 | LNEINQFYQKFPQYLQYL<br>YQ | 2.99 | 0.01 | 1.60 | 0.44 | 1.23 | 1.28 |
| 42432 | 0 | 38203  | LNEKEIKDLYDNQSNSGI<br>L  | 2.93 | 0.01 | 2.08 | 2.02 | 0.22 | 1.57 |
| 42433 | 0 | 38203  | LNEKEIKDLYDNQSNSGI<br>L  | 2.93 | 0.01 | 2.08 | 2.25 | 0.22 | 1.57 |
| 42434 | 0 | 38203  | LNEKEIKDLYDNQSNSGI<br>L  | 2.93 | 0.01 | 2.08 | 0.68 | 0.22 | 1.57 |
| 42435 | 0 | 38203  | LNEKEIKDLYDNQSNSGI<br>L  | 2.93 | 0.01 | 2.08 | 2.02 | 0.22 | 1.57 |
| 42436 | 0 | 38203  | LNEKEIKDLYDNQSNSGI<br>L  | 2.93 | 0.01 | 2.08 | 0.68 | 0.22 | 1.57 |
| 42437 | 0 | 38203  | LNEKEIKDLYDNQSNSGI<br>L  | 2.93 | 0.01 | 2.08 | 0.68 | 0.22 | 1.27 |
| 42438 | 0 | 172198 | LNEKFQESQEEIKSL          | 2.71 | 0.01 | 0.78 | 0.44 | 1.41 | 0.28 |
| 42439 | 0 | 172198 | LNEKFQESQEEIKSL          | 2.71 | 0.01 | 0.78 | 0.44 | 1.13 | 0.28 |
| 42440 | 0 | 156916 | LNEKQCTRPCLHLT           | 2.62 | 0.01 | 0.90 | 2.74 | 0.22 | 0.85 |
| 42441 | 0 | 98883  | LNENKVLVLD               | 2.36 | 0.01 | 1.60 | 0.44 | 1.23 | 0.85 |
| 42442 | 0 | 98883  | LNENKVLVLD               | 2.36 | 0.01 | 1.60 | 0.44 | 1.23 | 0.85 |
| 42443 | 0 | 38207  | LNENLLRFFVAPFPEVFG<br>KE | 2.97 | 0.01 | 1.60 | 0.44 | 1.23 | 0.28 |
| 42444 | 0 | 38207  | LNENLLRFFVAPFPEVFG<br>KE | 2.97 | 0.01 | 1.60 | 1.12 | 0.22 | 1.27 |
| 42445 | 0 | 38207  | LNENLLRFFVAPFPEVFG<br>KE | 2.97 | 0.01 | 1.60 | 0.44 | 1.23 | 1.28 |
| 42446 | 0 | 38207  | LNENLLRFFVAPFPEVFG<br>KE | 2.97 | 0.01 | 1.60 | 0.44 | 1.23 | 1.28 |
| 42447 | 0 | 38208  | LNENLLRFFVAPFPQVF<br>GKE | 2.96 | 0.01 | 1.60 | 0.44 | 1.23 | 0.28 |
| 42448 | 0 | 38208  | LNENLLRFFVAPFPQVF<br>GKE | 2.96 | 0.01 | 1.60 | 0.44 | 2.98 | 0.28 |
| 42449 | 0 | 38208  | LNENLLRFFVAPFPQVF<br>GKE | 2.96 | 0.01 | 1.60 | 2.82 | 0.22 | 0.28 |
| 42450 | 0 | 149067 | LNFDPPS                  | 2.01 | 0.01 | 0.90 | 2.13 | 1.59 | 1.39 |
| 42451 | 0 | 38214  | LNFGQTGDADSV             | 2.45 | 0.01 | 3.19 | 0.68 | 0.22 | 0.85 |
| 42452 | 0 | 38214  | LNFGQTGDADSV             | 2.45 | 0.01 | 3.19 | 0.68 | 0.22 | 1.27 |
| 42453 | 0 | 190472 | LNFGQTGDADSVDPDP         | 2.66 | 0.01 | 3.19 | 2.00 | 1.41 | 0.28 |
| 42454 | 0 | 190473 | LNFGQTGDATESVPDP         | 2.66 | 0.01 | 3.97 | 2.00 | 1.41 | 0.28 |
| 42455 | 0 | 504104 | LNFGRSYFDPA              | 2.36 | 0.01 | 3.89 | 0.68 | 0.22 | 0.85 |
| 42456 | 0 | 504104 | LNFGRSYFDPA              | 2.36 | 0.01 | 3.89 | 0.68 | 0.22 | 1.48 |
| 42457 | 0 | 504104 | LNFGRSYFDPA              | 2.36 | 0.01 | 3.89 | 0.68 | 0.22 | 0.28 |
| 42458 | 0 | 504104 | LNFGRSYFDPA              | 2.36 | 0.01 | 3.89 | 1.15 | 0.22 | 0.28 |
| 42459 | 0 | 38215  | LNFKGRWLRDRL             | 2.50 | 0.01 | 2.30 | 1.12 | 0.22 | 0.85 |
| 42460 | 0 | 38215  | LNFKGRWLRDRL             | 2.50 | 0.01 | 2.30 | 0.68 | 0.22 | 0.85 |
| 42461 | 0 | 38215  | LNFKGRWLRDRL             | 2.50 | 0.01 | 2.30 | 1.12 | 0.22 | 0.85 |
| 42462 | 0 | 38215  | LNFKGRWLRDRL             | 2.50 | 0.01 | 2.30 | 0.68 | 0.22 | 0.85 |

|       |   |        |                                |      |      |      |      |      |      |
|-------|---|--------|--------------------------------|------|------|------|------|------|------|
| 42463 | 0 | 38215  | LNFKGRWLRDRL                   | 2.50 | 0.01 | 2.30 | 0.44 | 0.85 | 0.85 |
| 42464 | 0 | 38215  | LNFKGRWLRDRL                   | 2.50 | 0.01 | 2.30 | 0.68 | 0.22 | 0.85 |
| 42465 | 0 | 38215  | LNFKGRWLRDRL                   | 2.50 | 0.01 | 2.30 | 0.68 | 0.22 | 0.85 |
| 42466 | 0 | 95560  | LNFLKKISQR                     | 2.31 | 0.01 | 1.60 | 0.44 | 1.23 | 0.85 |
| 42467 | 0 | 230154 | LNGIQKAQKIQAIYKTL<br>QS        | 2.97 | 0.01 | 3.19 | 0.44 | 1.23 | 1.28 |
| 42468 | 0 | 118497 | LNGKNIEDVIAQGIG                | 2.68 | 0.01 | 0.78 | 0.44 | 1.13 | 0.85 |
| 42469 | 0 | 118497 | LNGKNIEDVIAQGIG                | 2.68 | 0.01 | 0.78 | 0.44 | 0.85 | 0.85 |
| 42470 | 0 | 135714 | LNGKVDAF                       | 2.10 | 0.01 | 0.78 | 0.44 | 2.35 | 0.28 |
| 42471 | 0 | 78196  | LNLVL                          | 1.92 | 0.01 | 0.90 | 2.02 | 1.59 | 1.39 |
| 42472 | 0 | 123447 | LNGWHAQFG                      | 2.21 | 0.01 | 2.28 | 2.00 | 0.22 | 0.28 |
| 42473 | 0 | 181384 | LNHHSTQETAIGNFF                | 2.63 | 0.01 | 2.82 | 1.15 | 0.22 | 0.28 |
| 42474 | 0 | 38229  | LNHLKSEMEQRLRERDE<br>ELE       | 2.98 | 0.01 | 3.10 | 2.69 | 0.22 | 0.28 |
| 42475 | 0 | 38229  | LNHLKSEMEQRLRERDE<br>ELE       | 2.98 | 0.01 | 3.10 | 2.69 | 0.22 | 0.28 |
| 42476 | 0 | 38229  | LNHLKSEMEQRLRERDE<br>ELE       | 2.98 | 0.01 | 3.10 | 1.12 | 0.22 | 0.28 |
| 42477 | 0 | 38229  | LNHLKSEMEQRLRERDE<br>ELE       | 2.98 | 0.01 | 3.10 | 0.68 | 0.22 | 0.28 |
| 42478 | 0 | 85615  | LNIEKYQIHLV                    | 2.46 | 0.01 | 2.87 | 0.44 | 0.22 | 0.28 |
| 42479 | 0 | 85615  | LNIEKYQIHLV                    | 2.46 | 0.01 | 2.90 | 0.68 | 0.22 | 0.28 |
| 42480 | 0 | 97464  | LNIGDANIS                      | 2.23 | 0.01 | 3.13 | 1.12 | 0.22 | 0.28 |
| 42481 | 0 | 38249  | LNKHIDAYKTFPTEPK               | 2.77 | 0.01 | 2.91 | 0.44 | 0.85 | 0.28 |
| 42482 | 0 | 38252  | LNKNPENYFAEVEQ                 | 2.61 | 0.01 | 4.63 | 1.15 | 0.22 | 1.27 |
| 42483 | 0 | 147098 | LNKPLITVSNSKI                  | 2.58 | 0.01 | 0.78 | 2.49 | 0.22 | 0.85 |
| 42484 | 0 | 147098 | LNKPLITVSNSKI                  | 2.58 | 0.01 | 0.78 | 2.49 | 0.22 | 1.34 |
| 42485 | 0 | 38257  | LNKSINPDEAVAYGAAV<br>QAF       | 2.91 | 0.01 | 2.78 | 0.44 | 0.85 | 0.28 |
| 42486 | 0 | 104047 | LNKTFYY                        | 1.99 | 0.01 | 0.90 | 0.44 | 1.74 | 1.39 |
| 42487 | 0 | 38259  | LNKVDAAV                       | 2.13 | 0.01 | 2.04 | 0.44 | 0.85 | 0.28 |
| 42488 | 0 | 196632 | LNLDRKP                        | 2.03 | 0.01 | 0.90 | 0.44 | 1.23 | 1.39 |
| 42489 | 0 | 110932 | LNLKIDGLKISV                   | 2.50 | 0.01 | 3.15 | 3.53 | 0.22 | 0.28 |
| 42490 | 0 | 110932 | LNLKIDGLKISV                   | 2.50 | 0.01 | 3.15 | 0.44 | 1.59 | 0.28 |
| 42491 | 0 | 38268  | LNLPWSSAGSTVWRNR<br>ETLM       | 2.95 | 0.01 | 2.85 | 2.02 | 0.22 | 0.28 |
| 42492 | 0 | 97465  | LNLTAWNP                       | 2.15 | 0.01 | 2.87 | 0.68 | 0.22 | 0.28 |
| 42493 | 0 | 38270  | LNLTNITHVEKLCTGTAP<br>FTVAFGNS | 3.20 | 0.01 | 3.63 | 4.03 | 0.22 | 0.28 |
| 42494 | 0 | 38270  | LNLTNITHVEKLCTGTAP<br>FTVAFGNS | 3.20 | 0.01 | 3.63 | 3.70 | 0.22 | 0.28 |
| 42495 | 0 | 38270  | LNLTNITHVEKLCTGTAP<br>FTVAFGNS | 3.20 | 0.01 | 3.63 | 3.81 | 0.22 | 0.28 |
| 42496 | 0 | 38270  | LNLTNITHVEKLCTGTAP<br>FTVAFGNS | 3.20 | 0.01 | 3.63 | 3.81 | 0.22 | 0.28 |



|       |   |        |                                |      |      |      |      |      |      |
|-------|---|--------|--------------------------------|------|------|------|------|------|------|
| 42497 | 0 | 38270  | LNLTNITHVEKLCTGTAP<br>FTVAFGNS | 3.20 | 0.01 | 3.63 | 3.70 | 0.22 | 0.28 |
| 42498 | 0 | 38270  | LNLTNITHVEKLCTGTAP<br>FTVAFGNS | 3.20 | 0.01 | 3.63 | 4.03 | 0.22 | 0.28 |
| 42499 | 0 | 38270  | LNLTNITHVEKLCTGTAP<br>FTVAFGNS | 3.20 | 0.01 | 3.63 | 3.89 | 0.22 | 0.28 |
| 42500 | 0 | 149068 | LNLTQSR                        | 2.03 | 0.01 | 0.90 | 2.13 | 1.59 | 1.39 |
| 42501 | 0 | 38271  | LNLTASVPMLRWYAER<br>FCF        | 2.91 | 0.01 | 2.40 | 1.15 | 0.22 | 0.28 |
| 42502 | 0 | 38271  | LNLTASVPMLRWYAER<br>FCF        | 2.91 | 0.01 | 2.40 | 1.15 | 0.22 | 2.02 |
| 42503 | 0 | 38271  | LNLTASVPMLRWYAER<br>FCF        | 2.91 | 0.01 | 2.40 | 1.15 | 0.22 | 0.85 |
| 42504 | 0 | 38272  | LNLTWNP                        | 2.16 | 0.01 | 3.06 | 1.12 | 0.22 | 0.28 |
| 42505 | 0 | 38273  | LNLTWNPTLLG                    | 2.52 | 0.01 | 3.06 | 1.12 | 0.22 | 0.28 |
| 42506 | 0 | 38273  | LNLTWNPTLLG                    | 2.52 | 0.01 | 3.06 | 2.00 | 0.85 | 0.28 |
| 42507 | 0 | 38273  | LNLTWNPTLLG                    | 2.52 | 0.01 | 3.06 | 2.22 | 1.93 | 0.28 |
| 42508 | 0 | 38274  | LNLDVQGGKKKKDVEK<br>QKKEIEKL   | 3.21 | 0.01 | 2.22 | 0.44 | 1.74 | 0.28 |
| 42509 | 0 | 38274  | LNLDVQGGKKKKDVEK<br>QKKEIEKL   | 3.21 | 0.01 | 2.22 | 0.44 | 1.74 | 0.28 |
| 42510 | 0 | 152780 | LNVERRIAA                      | 2.31 | 0.01 | 2.18 | 2.16 | 0.22 | 0.28 |
| 42511 | 0 | 38275  | LNAMREHDCAAYIKLE<br>TKG        | 2.91 | 0.01 | 2.21 | 1.20 | 0.22 | 0.28 |
| 42512 | 0 | 423719 | LNMPVDLPHQKL                   | 2.48 | 0.01 | 0.90 | 0.68 | 0.22 | 1.39 |
| 42513 | 0 | 38285  | LNNNILGWEFGGAPQ<br>NGAAEDKKTEY | 3.21 | 0.01 | 2.22 | 0.44 | 0.85 | 0.28 |
| 42514 | 0 | 38285  | LNNNILGWEFGGAPQ<br>NGAAEDKKTEY | 3.21 | 0.01 | 2.22 | 0.44 | 0.85 | 0.28 |
| 42515 | 0 | 38285  | LNNNILGWEFGGAPQ<br>NGAAEDKKTEY | 3.21 | 0.01 | 2.22 | 0.44 | 0.85 | 1.34 |
| 42516 | 0 | 38285  | LNNNILGWEFGGAPQ<br>NGAAEDKKTEY | 3.21 | 0.01 | 2.22 | 0.44 | 1.74 | 1.27 |
| 42517 | 0 | 446274 | LNNTNPPQGNWFGCT                | 2.67 | 0.01 | 1.96 | 0.68 | 0.22 | 0.28 |
| 42518 | 0 | 100279 | LNP                            | 1.37 | 0.01 | 3.06 | 0.68 | 0.22 | 0.28 |
| 42519 | 0 | 100279 | LNP                            | 1.37 | 0.01 | 3.06 | 0.68 | 0.22 | 0.28 |
| 42520 | 0 | 100279 | LNP                            | 1.37 | 0.01 | 3.06 | 0.68 | 0.22 | 1.48 |
| 42521 | 0 | 100279 | LNP                            | 1.37 | 0.01 | 3.06 | 0.68 | 0.22 | 1.48 |
| 42522 | 0 | 38294  | LNPDQ                          | 1.91 | 0.01 | 3.27 | 0.68 | 0.22 | 0.28 |
| 42523 | 0 | 481923 | LNPFKYSSSGEYIKDPY              | 2.83 | 0.01 | 3.12 | 0.68 | 0.22 | 0.28 |
| 42524 | 0 | 38304  | LNPKTNKWEDK                    | 2.41 | 0.01 | 2.75 | 0.44 | 1.23 | 1.27 |
| 42525 | 0 | 38304  | LNPKTNKWEDK                    | 2.41 | 0.01 | 2.75 | 0.44 | 1.23 | 1.27 |
| 42526 | 0 | 38304  | LNPKTNKWEDK                    | 2.41 | 0.01 | 2.75 | 0.44 | 1.23 | 0.28 |
| 42527 | 0 | 38304  | LNPKTNKWEDK                    | 2.41 | 0.01 | 2.75 | 0.44 | 1.23 | 0.28 |
| 42528 | 0 | 38304  | LNPKTNKWEDK                    | 2.41 | 0.01 | 2.75 | 0.44 | 1.23 | 0.85 |

|       |   |        |                          |      |      |      |      |      |      |
|-------|---|--------|--------------------------|------|------|------|------|------|------|
| 42529 | 0 | 38304  | LNPKTNKWEDK              | 2.41 | 0.01 | 2.75 | 0.44 | 1.23 | 0.85 |
| 42530 | 0 | 38304  | LNPKTNKWEDK              | 2.41 | 0.01 | 2.75 | 0.44 | 1.23 | 0.28 |
| 42531 | 0 | 38304  | LNPKTNKWEDK              | 2.41 | 0.01 | 2.75 | 0.44 | 1.23 | 0.28 |
| 42532 | 0 | 38304  | LNPKTNKWEDK              | 2.41 | 0.01 | 2.75 | 0.44 | 1.23 | 1.66 |
| 42533 | 0 | 38304  | LNPKTNKWEDK              | 2.41 | 0.01 | 2.75 | 0.44 | 1.23 | 1.66 |
| 42534 | 0 | 38304  | LNPKTNKWEDK              | 2.41 | 0.01 | 2.75 | 0.44 | 1.23 | 1.66 |
| 42535 | 0 | 38304  | LNPKTNKWEDK              | 2.41 | 0.01 | 2.75 | 0.68 | 2.25 | 1.75 |
| 42536 | 0 | 38304  | LNPKTNKWEDK              | 2.41 | 0.01 | 2.75 | 0.68 | 2.25 | 1.75 |
| 42537 | 0 | 38304  | LNPKTNKWEDK              | 2.41 | 0.01 | 2.75 | 0.68 | 2.60 | 1.75 |
| 42538 | 0 | 38304  | LNPKTNKWEDK              | 2.41 | 0.01 | 2.75 | 0.68 | 2.60 | 1.75 |
| 42539 | 0 | 38305  | LNPKTNKWEDKRY            | 2.54 | 0.01 | 2.75 | 0.44 | 1.23 | 1.27 |
| 42540 | 0 | 38305  | LNPKTNKWEDKRY            | 2.54 | 0.01 | 2.75 | 0.44 | 1.23 | 1.27 |
| 42541 | 0 | 131954 | LNPLFGPQQVAMLNQ          | 2.70 | 0.01 | 0.78 | 0.44 | 1.13 | 0.85 |
| 42542 | 0 | 431006 | LNPPQAQGSVQPQQL          | 2.64 | 0.01 | 1.86 | 0.44 | 1.23 | 0.85 |
| 42543 | 0 | 38311  | LNPSVAATLGFGAYMSK<br>AHG | 2.93 | 0.01 | 1.72 | 0.44 | 0.85 | 0.28 |
| 42544 | 0 | 38312  | LNPTI                    | 1.74 | 0.01 | 2.40 | 1.15 | 0.22 | 0.28 |
| 42545 | 0 | 38312  | LNPTI                    | 1.74 | 0.01 | 3.47 | 1.20 | 0.22 | 0.28 |
| 42546 | 0 | 38313  | LNPTIA                   | 1.88 | 0.01 | 2.40 | 1.15 | 0.22 | 0.28 |
| 42547 | 0 | 38313  | LNPTIA                   | 1.88 | 0.01 | 2.40 | 1.15 | 0.22 | 0.28 |
| 42548 | 0 | 38313  | LNPTIA                   | 1.88 | 0.01 | 2.40 | 1.15 | 0.22 | 0.85 |
| 42549 | 0 | 38313  | LNPTIA                   | 1.88 | 0.01 | 3.03 | 1.20 | 0.22 | 0.28 |
| 42550 | 0 | 38313  | LNPTIA                   | 1.88 | 0.01 | 2.40 | 3.42 | 0.22 | 0.28 |
| 42551 | 0 | 38313  | LNPTIA                   | 1.88 | 0.01 | 2.40 | 3.42 | 0.22 | 0.28 |
| 42552 | 0 | 38313  | LNPTIA                   | 1.88 | 0.01 | 2.40 | 2.52 | 0.22 | 0.28 |
| 42553 | 0 | 38313  | LNPTIA                   | 1.88 | 0.01 | 2.40 | 2.52 | 0.22 | 0.28 |
| 42554 | 0 | 85636  | LNPTIAG                  | 1.99 | 0.01 | 3.03 | 2.52 | 0.22 | 0.28 |
| 42555 | 0 | 85636  | LNPTIAG                  | 1.99 | 0.01 | 3.03 | 3.16 | 0.22 | 0.28 |
| 42556 | 0 | 38314  | LNPTIAGAGDV              | 2.39 | 0.01 | 4.33 | 1.12 | 0.22 | 0.85 |
| 42557 | 0 | 38314  | LNPTIAGAGDV              | 2.39 | 0.01 | 4.33 | 1.12 | 0.22 | 0.85 |
| 42558 | 0 | 38314  | LNPTIAGAGDV              | 2.39 | 0.01 | 3.03 | 3.28 | 0.22 | 0.28 |
| 42559 | 0 | 38314  | LNPTIAGAGDV              | 2.39 | 0.01 | 3.03 | 3.28 | 0.22 | 0.85 |
| 42560 | 0 | 38314  | LNPTIAGAGDV              | 2.39 | 0.01 | 3.03 | 3.28 | 0.22 | 0.28 |
| 42561 | 0 | 38314  | LNPTIAGAGDV              | 2.39 | 0.01 | 3.03 | 3.28 | 0.22 | 0.85 |
| 42562 | 0 | 38314  | LNPTIAGAGDV              | 2.39 | 0.01 | 3.03 | 3.28 | 0.22 | 0.28 |
| 42563 | 0 | 38315  | LNPTITGKGA               | 2.31 | 0.01 | 3.13 | 1.12 | 0.22 | 0.28 |
| 42564 | 0 | 38315  | LNPTITGKGA               | 2.31 | 0.01 | 3.13 | 1.12 | 0.22 | 0.28 |
| 42565 | 0 | 38315  | LNPTITGKGA               | 2.31 | 0.01 | 3.13 | 1.12 | 0.22 | 0.28 |
| 42566 | 0 | 78197  | LNPWDQVKRNAVPITP<br>TLNR | 2.95 | 0.01 | 1.60 | 0.44 | 1.23 | 1.28 |
| 42567 | 0 | 78197  | LNPWDQVKRNAVPITP<br>TLNR | 2.95 | 0.01 | 1.60 | 0.44 | 1.23 | 1.28 |
| 42568 | 0 | 38321  | LNQLAGRM                 | 2.13 | 0.01 | 2.40 | 2.43 | 0.22 | 0.28 |
| 42569 | 0 | 167777 | LNQLAGRMI                | 2.22 | 0.01 | 2.40 | 2.43 | 0.22 | 0.28 |
| 42570 | 0 | 38323  | LNQTARAFPDCAICWEP<br>SPP | 2.90 | 0.01 | 2.69 | 1.12 | 0.22 | 2.35 |

|       |   |        |                                                                                                                                                                           |      |      |      |      |      |      |
|-------|---|--------|---------------------------------------------------------------------------------------------------------------------------------------------------------------------------|------|------|------|------|------|------|
| 42571 | 0 | 38323  | LNQTARAFPDCAICWEP<br>SPP                                                                                                                                                  | 2.90 | 0.01 | 2.69 | 0.68 | 0.22 | 0.28 |
| 42572 | 0 | 99434  | LNQWFRPSPTSG                                                                                                                                                              | 2.45 | 0.01 | 0.90 | 1.12 | 0.22 | 1.39 |
| 42573 | 0 | 38325  | LN RADIL                                                                                                                                                                  | 2.03 | 0.01 | 0.90 | 0.44 | 1.23 | 1.27 |
| 42574 | 0 | 38325  | LN RADIL                                                                                                                                                                  | 2.03 | 0.01 | 0.90 | 0.44 | 1.23 | 0.28 |
| 42575 | 0 | 116775 | LNRRQLLEEDLERS                                                                                                                                                            | 2.72 | 0.01 | 2.36 | 0.44 | 1.23 | 1.28 |
| 42576 | 0 | 116775 | LNRRQLLEEDLERS                                                                                                                                                            | 2.72 | 0.01 | 2.36 | 0.44 | 1.23 | 1.27 |
| 42577 | 0 | 116775 | LNRRQLLEEDLERS                                                                                                                                                            | 2.72 | 0.01 | 2.36 | 0.44 | 1.23 | 1.28 |
| 42578 | 0 | 116775 | LNRRQLLEEDLERS                                                                                                                                                            | 2.72 | 0.01 | 2.36 | 0.44 | 1.23 | 1.27 |
| 42579 | 0 | 38330  | LNRSGGNYTKTDDEA                                                                                                                                                           | 2.64 | 0.01 | 2.59 | 0.68 | 0.22 | 0.28 |
| 42580 | 0 | 38330  | LNRSGGNYTKTDDEA                                                                                                                                                           | 2.64 | 0.01 | 2.59 | 1.12 | 0.22 | 0.28 |
| 42581 | 0 | 38330  | LNRSGGNYTKTDDEA                                                                                                                                                           | 2.64 | 0.01 | 2.59 | 0.44 | 0.85 | 0.28 |
| 42582 | 0 | 38333  | LNSGQYTVFAPTNAAFS<br>KLP                                                                                                                                                  | 2.94 | 0.01 | 3.59 | 2.79 | 0.22 | 0.28 |
| 42583 | 0 | 137544 | LNSHSIIYGCKGKGQ                                                                                                                                                           | 2.67 | 0.01 | 3.12 | 0.44 | 1.23 | 0.85 |
| 42584 | 0 | 481924 | LNSIQKEYESLVNMAHT<br>Y                                                                                                                                                    | 2.82 | 0.01 | 3.12 | 0.68 | 0.22 | 0.28 |
| 42585 | 0 | 94878  | LNSMVTDTLNNSIPFKLS<br>SYTDDKILISYFNKFFKRIK<br>SSSVLNMRYKNDKYVDT<br>SGYDSNININGDVYKYPT<br>NKNQFGIYNDKLSE                                                                   | 4.43 | 0.01 | 3.85 | 0.68 | 0.22 | 0.85 |
| 42586 | 0 | 521517 | LNSNDMIKLAPKEMP                                                                                                                                                           | 2.69 | 0.01 | 2.24 | 0.44 | 1.41 | 1.28 |
| 42587 | 0 | 38342  | LNSSLYRGTKFIIKKYASG<br>NKDNIVRNNDRVYINVV<br>VKNKEYRLATNASQAGV<br>EKILSALEIPDVGNLSQV<br>VVMKSKNDQGITNKCK<br>MNLQDNNGNDIGFIGF<br>HQFNNAKLVASNWYN<br>RQIERSRTLGCSEFIP<br>VDD | 4.90 | 0.01 | 2.08 | 3.23 | 0.22 | 0.85 |
| 42588 | 0 | 38342  | LNSSLYRGTKFIIKKYASG<br>NKDNIVRNNDRVYINVV<br>VKNKEYRLATNASQAGV<br>EKILSALEIPDVGNLSQV<br>VVMKSKNDQGITNKCK<br>MNLQDNNGNDIGFIGF<br>HQFNNAKLVASNWYN<br>RQIERSRTLGCSEFIP<br>VDD | 4.90 | 0.01 | 2.08 | 3.23 | 2.25 | 1.75 |

|       |   |        |                                                                                      |      |      |      |      |      |      |
|-------|---|--------|--------------------------------------------------------------------------------------|------|------|------|------|------|------|
|       |   |        | LNSSLYRGTKFIIKKYASG<br>NKDNIVRNNDRVYINVV<br>VKNKEYRLATNASQAGV<br>EKILSALEIPDVGNLSQV  |      |      |      |      |      |      |
| 42589 | 0 | 38342  | VVMKSKNDQGITNKCK<br>MNLQDNNGNDIGFIGF<br>HQFNNAKLVASNWYN<br>RQIERSRTLGCSEWIFIP<br>VDD | 4.90 | 0.01 | 2.08 | 3.23 | 0.22 | 0.28 |
|       |   |        | LNSSLYRGTKFIIKKYASG<br>NKDNIVRNNDRVYINVV<br>VKNKEYRLATNASQAGV<br>EKILSALEIPDVGNLSQV  |      |      |      |      |      |      |
| 42590 | 0 | 38342  | VVMKSKNDQGITNKCK<br>MNLQDNNGNDIGFIGF<br>HQFNNAKLVASNWYN<br>RQIERSRTLGCSEWIFIP<br>VDD | 4.90 | 0.01 | 2.08 | 2.02 | 0.22 | 0.85 |
| 42591 | 0 | 130544 | LNSSMPLGMESKAISA<br>AC                                                               | 2.90 | 0.01 | 0.90 | 0.44 | 1.93 | 1.27 |
| 42592 | 0 | 108529 | LNTAKHRES                                                                            | 2.18 | 0.01 | 0.90 | 0.44 | 1.13 | 1.39 |
| 42593 | 0 | 116776 | LNTATTKLAEASQAA                                                                      | 2.70 | 0.01 | 2.36 | 0.44 | 1.23 | 1.28 |
| 42594 | 0 | 38345  | LNTEPSQLPPTAPP                                                                       | 2.63 | 0.01 | 2.04 | 0.44 | 0.85 | 0.28 |
| 42595 | 0 | 38345  | LNTEPSQLPPTAPP                                                                       | 2.63 | 0.01 | 2.04 | 1.20 | 0.22 | 2.02 |
| 42596 | 0 | 38345  | LNTEPSQLPPTAPP                                                                       | 2.63 | 0.01 | 2.04 | 1.20 | 0.22 | 2.02 |
| 42597 | 0 | 38345  | LNTEPSQLPPTAPP                                                                       | 2.63 | 0.01 | 2.04 | 1.20 | 0.22 | 0.85 |
| 42598 | 0 | 38345  | LNTEPSQLPPTAPP                                                                       | 2.63 | 0.01 | 2.04 | 0.44 | 1.59 | 1.57 |
| 42599 | 0 | 38345  | LNTEPSQLPPTAPP                                                                       | 2.63 | 0.01 | 2.04 | 0.44 | 2.98 | 0.28 |
| 42600 | 0 | 38346  | LNTEPSQLPPTAPPLPH<br>SNLDHI                                                          | 3.15 | 0.01 | 2.04 | 1.20 | 0.22 | 0.28 |
| 42601 | 0 | 38346  | LNTEPSQLPPTAPPLPH<br>SNLDHI                                                          | 3.15 | 0.01 | 2.04 | 1.20 | 0.22 | 0.28 |
| 42602 | 0 | 38346  | LNTEPSQLPPTAPPLPH<br>SNLDHI                                                          | 3.15 | 0.01 | 2.04 | 1.20 | 0.22 | 0.28 |
| 42603 | 0 | 38346  | LNTEPSQLPPTAPPLPH<br>SNLDHI                                                          | 3.15 | 0.01 | 2.04 | 1.20 | 0.22 | 2.12 |
| 42604 | 0 | 38346  | LNTEPSQLPPTAPPLPH<br>SNLDHI                                                          | 3.15 | 0.01 | 2.04 | 1.20 | 0.22 | 2.02 |
| 42605 | 0 | 38346  | LNTEPSQLPPTAPPLPH<br>SNLDHI                                                          | 3.15 | 0.01 | 2.04 | 0.44 | 0.85 | 0.28 |
| 42606 | 0 | 38346  | LNTEPSQLPPTAPPLPH<br>SNLDHI                                                          | 3.15 | 0.01 | 2.04 | 0.44 | 1.59 | 0.28 |
| 42607 | 0 | 135954 | LNTGWLAGLFYQHKF                                                                      | 2.67 | 0.01 | 2.41 | 0.44 | 0.22 | 0.28 |
| 42608 | 0 | 123449 | LNTKFTEELSSWYQSFL<br>KECPSGRITRQE                                                    | 3.33 | 0.01 | 1.60 | 2.04 | 0.22 | 0.28 |

|       |   |        |                                                   |      |      |      |      |      |      |
|-------|---|--------|---------------------------------------------------|------|------|------|------|------|------|
| 42609 | 0 | 237829 | LNTLTNIKVQLIRMMEG<br>E                            | 2.85 | 0.01 | 3.19 | 0.44 | 0.85 | 0.85 |
| 42610 | 0 | 237829 | LNTLTNIKVQLIRMMEG<br>E                            | 2.85 | 0.01 | 3.19 | 0.44 | 0.85 | 0.85 |
| 42611 | 0 | 237829 | LNTLTNIKVQLIRMMEG<br>E                            | 2.85 | 0.01 | 3.19 | 0.44 | 0.22 | 0.85 |
| 42612 | 0 | 79604  | LNTPPPYQVSCGGESDR<br>ASAGH                        | 2.98 | 0.01 | 2.85 | 0.44 | 1.59 | 0.28 |
| 42613 | 0 | 172212 | LNTQNHAPLPSI                                      | 2.48 | 0.01 | 0.90 | 0.44 | 0.85 | 1.39 |
| 42614 | 0 | 127724 | LNTTLKV                                           | 2.04 | 0.01 | 0.90 | 0.44 | 1.13 | 1.39 |
| 42615 | 0 | 95563  | LNTVNGTTRTVN                                      | 2.52 | 0.01 | 2.88 | 0.44 | 1.23 | 0.85 |
| 42616 | 0 | 95563  | LNTVNGTTRTVN                                      | 2.52 | 0.01 | 2.88 | 1.12 | 0.22 | 0.85 |
| 42617 | 0 | 78452  | LNVAHQLA                                          | 2.15 | 0.01 | 3.97 | 0.68 | 0.22 | 0.28 |
| 42618 | 0 | 237830 | LNVIPICIGELLSEREAGKT<br>NDVCFAQMDAIAKNVP<br>SKEAW | 3.61 | 0.01 | 2.74 | 1.20 | 0.22 | 0.28 |
| 42619 | 0 | 38369  | LNVSREVLQESRILRVIKK<br>K                          | 2.97 | 0.01 | 2.78 | 2.49 | 0.85 | 0.28 |
| 42620 | 0 | 38373  | LNWGRISNVLPYRCEA<br>GV                            | 2.88 | 0.01 | 0.90 | 3.00 | 0.22 | 0.28 |
| 42621 | 0 | 38374  | LNWGRISNVLPYRGEA<br>GV                            | 2.90 | 0.01 | 2.24 | 3.00 | 0.22 | 0.28 |
| 42622 | 0 | 158599 | LNWNPF                                            | 1.90 | 0.01 | 0.90 | 0.44 | 1.13 | 0.85 |
| 42623 | 0 | 38377  | LNWPLKADSIING                                     | 2.53 | 0.01 | 3.34 | 1.12 | 0.22 | 0.85 |
| 42624 | 0 | 510452 | LNWTPASTSLKN                                      | 2.50 | 0.01 | 0.90 | 3.07 | 1.13 | 1.39 |
| 42625 | 0 | 101873 | LVNYKQEGDK                                        | 2.21 | 0.01 | 1.66 | 0.44 | 1.59 | 2.97 |
| 42626 | 0 | 117993 | LVNYLDPRIWVAWCKKW<br>GVPI                         | 2.91 | 0.01 | 0.78 | 0.44 | 1.13 | 0.28 |
| 42627 | 0 | 38386  | LPAAAAATPGAGHTNTS<br>SAS                          | 2.98 | 0.01 | 2.40 | 0.44 | 1.59 | 0.28 |
| 42628 | 0 | 38387  | LPAADMDDFSRQLQN                                   | 2.67 | 0.01 | 3.30 | 0.68 | 0.22 | 0.28 |
| 42629 | 0 | 38387  | LPAADMDDFSRQLQN                                   | 2.67 | 0.01 | 3.30 | 4.08 | 0.22 | 0.28 |
| 42630 | 0 | 127725 | LPACNTPG                                          | 2.12 | 0.01 | 2.19 | 0.44 | 1.13 | 0.28 |
| 42631 | 0 | 127725 | LPACNTPG                                          | 2.12 | 0.01 | 2.19 | 0.44 | 1.13 | 0.28 |
| 42632 | 0 | 332157 | LPADSENSKTGCGEE                                   | 2.64 | 0.01 | 1.61 | 0.44 | 0.85 | 1.28 |
| 42633 | 0 | 103371 | LPADTAAQLTSAGRE                                   | 2.69 | 0.01 | 2.04 | 0.44 | 0.85 | 1.28 |
| 42634 | 0 | 167325 | LPAFFVTNQTD                                       | 2.46 | 0.01 | 0.90 | 1.15 | 0.22 | 1.39 |
| 42635 | 0 | 38397  | LPAHGPSLS                                         | 2.26 | 0.01 | 0.90 | 0.44 | 1.59 | 0.28 |
| 42636 | 0 | 38397  | LPAHGPSLS                                         | 2.26 | 0.01 | 0.90 | 0.44 | 0.85 | 1.39 |
| 42637 | 0 | 38397  | LPAHGPSLS                                         | 2.26 | 0.01 | 0.90 | 0.44 | 0.85 | 0.28 |
| 42638 | 0 | 38397  | LPAHGPSLS                                         | 2.26 | 0.01 | 0.90 | 0.44 | 0.85 | 0.28 |
| 42639 | 0 | 115362 | LPAHYPNHKCHS                                      | 2.48 | 0.01 | 0.90 | 0.68 | 0.22 | 1.39 |
| 42640 | 0 | 38404  | LPALSTGL                                          | 2.15 | 0.01 | 2.45 | 0.44 | 0.85 | 0.28 |
| 42641 | 0 | 240897 | LPALTSQEI                                         | 2.22 | 0.01 | 3.81 | 0.44 | 1.41 | 1.28 |
| 42642 | 0 | 240897 | LPALTSQEI                                         | 2.22 | 0.01 | 3.81 | 0.44 | 1.41 | 0.28 |

|       |   |        |                              |      |      |      |      |      |      |
|-------|---|--------|------------------------------|------|------|------|------|------|------|
| 42643 | 0 | 240897 | LPALTSQEI                    | 2.22 | 0.01 | 3.81 | 0.44 | 1.41 | 0.28 |
| 42644 | 0 | 240897 | LPALTSQEI                    | 2.22 | 0.01 | 3.81 | 1.12 | 0.22 | 0.28 |
| 42645 | 0 | 111503 | LPAMRNIYNALSSAG              | 2.68 | 0.01 | 3.20 | 1.12 | 0.22 | 0.85 |
| 42646 | 0 | 38408  | LPAMSTTDLEAYFKDC             | 2.71 | 0.01 | 2.08 | 1.12 | 0.22 | 1.57 |
| 42647 | 0 | 38408  | LPAMSTTDLEAYFKDC             | 2.71 | 0.01 | 2.08 | 1.12 | 0.22 | 1.57 |
| 42648 | 0 | 38408  | LPAMSTTDLEAYFKDC             | 2.71 | 0.01 | 2.08 | 1.12 | 0.22 | 1.57 |
| 42649 | 0 | 38408  | LPAMSTTDLEAYFKDC             | 2.71 | 0.01 | 2.08 | 1.12 | 0.22 | 1.57 |
| 42650 | 0 | 241329 | LPAPTS                       | 1.90 | 0.01 | 4.08 | 0.68 | 0.22 | 1.48 |
| 42651 | 0 | 241329 | LPAPTS                       | 1.90 | 0.01 | 4.08 | 0.68 | 0.22 | 0.28 |
| 42652 | 0 | 241329 | LPAPTS                       | 1.90 | 0.01 | 4.08 | 0.68 | 0.22 | 0.28 |
| 42653 | 0 | 241329 | LPAPTS                       | 1.90 | 0.01 | 4.08 | 0.68 | 0.22 | 1.27 |
| 42654 | 0 | 241329 | LPAPTS                       | 1.90 | 0.01 | 4.08 | 3.61 | 0.22 | 0.85 |
| 42655 | 0 | 241329 | LPAPTS                       | 1.90 | 0.01 | 4.08 | 0.68 | 0.22 | 0.85 |
| 42656 | 0 | 241329 | LPAPTS                       | 1.90 | 0.01 | 4.08 | 0.68 | 0.22 | 1.34 |
| 42657 | 0 | 38412  | LPAQPNACWPTMTPLC<br>A        | 2.83 | 0.01 | 0.90 | 1.15 | 0.22 | 0.28 |
| 42658 | 0 | 196634 | LPARTVT                      | 2.02 | 0.01 | 0.90 | 0.44 | 1.23 | 1.39 |
| 42659 | 0 | 38413  | LPASLAGPRSWYNRIPG<br>YSEQVKG | 3.11 | 0.01 | 3.72 | 0.68 | 0.22 | 0.28 |
| 42660 | 0 | 38422  | LPAYQDYTARAQVSE              | 2.66 | 0.01 | 3.30 | 1.12 | 0.22 | 1.57 |
| 42661 | 0 | 38422  | LPAYQDYTARAQVSE              | 2.66 | 0.01 | 3.30 | 1.12 | 0.22 | 1.57 |
| 42662 | 0 | 38422  | LPAYQDYTARAQVSE              | 2.66 | 0.01 | 3.30 | 1.12 | 0.22 | 2.02 |
| 42663 | 0 | 38422  | LPAYQDYTARAQVSE              | 2.66 | 0.01 | 3.59 | 1.12 | 0.22 | 0.28 |
| 42664 | 0 | 38422  | LPAYQDYTARAQVSE              | 2.66 | 0.01 | 3.59 | 1.20 | 0.22 | 0.85 |
| 42665 | 0 | 113618 | LPCIRMGQEPGVAKYRR<br>AQLA    | 2.98 | 0.01 | 0.78 | 2.61 | 0.22 | 0.28 |
| 42666 | 0 | 115628 | LPCRISPGKNAT                 | 2.43 | 0.01 | 0.78 | 0.44 | 1.41 | 0.28 |
| 42667 | 0 | 115628 | LPCRISPGKNAT                 | 2.43 | 0.01 | 0.78 | 0.44 | 1.13 | 0.28 |
| 42668 | 0 | 115628 | LPCRISPGKNAT                 | 2.43 | 0.01 | 0.78 | 0.44 | 1.13 | 0.28 |
| 42669 | 0 | 115628 | LPCRISPGKNAT                 | 2.43 | 0.01 | 0.78 | 0.44 | 1.41 | 0.28 |
| 42670 | 0 | 38428  | LPDDFFPKIDDLVR               | 2.64 | 0.01 | 2.40 | 2.43 | 0.22 | 0.28 |
| 42671 | 0 | 38428  | LPDDFFPKIDDLVR               | 2.64 | 0.01 | 2.40 | 2.43 | 0.22 | 0.28 |
| 42672 | 0 | 38428  | LPDDFFPKIDDLVR               | 2.64 | 0.01 | 2.40 | 2.43 | 0.22 | 0.28 |
| 42673 | 0 | 38434  | LPDKFNAYLANKWV               | 2.62 | 0.01 | 2.95 | 3.38 | 0.22 | 0.28 |
| 42674 | 0 | 38434  | LPDKFNAYLANKWV               | 2.62 | 0.01 | 2.95 | 3.38 | 0.22 | 1.34 |
| 42675 | 0 | 38437  | LPDSEPTKTNGKCKS              | 2.68 | 0.01 | 2.56 | 1.20 | 0.22 | 0.85 |
| 42676 | 0 | 120774 | LPDSLPLDTLLVDVE              | 2.73 | 0.01 | 0.78 | 3.01 | 0.22 | 0.28 |
| 42677 | 0 | 100281 | LPDTKASGPAHSKE               | 2.61 | 0.01 | 2.96 | 1.12 | 0.22 | 0.28 |
| 42678 | 0 | 38438  | LPDTLSS                      | 2.02 | 0.01 | 0.90 | 1.15 | 0.22 | 1.39 |
| 42679 | 0 | 38439  | LPDWLAANRGLAPGG              | 2.70 | 0.01 | 2.04 | 0.44 | 0.85 | 1.28 |
| 42680 | 0 | 172218 | LPECREVKCPFPSRP              | 2.70 | 0.01 | 0.78 | 0.44 | 1.41 | 0.28 |
| 42681 | 0 | 38442  | LPEELRKQTKGVELQQP<br>EYE     | 2.97 | 0.01 | 2.22 | 0.44 | 1.74 | 0.28 |
| 42682 | 0 | 172219 | LPEEMLSYARDDTHY              | 2.65 | 0.01 | 0.78 | 0.44 | 1.41 | 0.28 |
| 42683 | 0 | 226065 | LPEFGGDTAYSDDFFVG<br>RVG     | 2.93 | 0.01 | 2.24 | 3.57 | 0.22 | 0.28 |

|       |   |        |                               |      |      |      |      |      |      |
|-------|---|--------|-------------------------------|------|------|------|------|------|------|
| 42684 | 0 | 468028 | LPEPTVTNEETGFDDGS<br>AFGGGLPF | 3.17 | 0.01 | 0.90 | 0.44 | 0.85 | 1.28 |
| 42685 | 0 | 38463  | LPET                          | 1.57 | 0.01 | 2.08 | 1.15 | 0.22 | 0.28 |
| 42686 | 0 | 38463  | LPET                          | 1.57 | 0.01 | 2.08 | 1.15 | 0.22 | 0.28 |
| 42687 | 0 | 172220 | LPFDNLHDDPCLLTN               | 2.70 | 0.01 | 0.78 | 0.44 | 1.41 | 0.28 |
| 42688 | 0 | 38470  | LPFECISKREVCDTPM              | 2.69 | 0.01 | 0.90 | 0.44 | 1.41 | 0.28 |
| 42689 | 0 | 167326 | LPFHGHKKPVLS                  | 2.49 | 0.01 | 0.90 | 1.15 | 0.22 | 1.39 |
| 42690 | 0 | 450802 | LPFINS                        | 1.99 | 0.01 | 0.90 | 0.44 | 1.23 | 1.39 |
| 42691 | 0 | 38482  | LPFNWTHCFDPQ                  | 2.45 | 0.01 | 2.04 | 0.44 | 0.85 | 0.28 |
| 42692 | 0 | 38482  | LPFNWTHCFDPQ                  | 2.45 | 0.01 | 2.04 | 0.44 | 1.59 | 1.57 |
| 42693 | 0 | 187883 | LPFPYYTTY                     | 2.26 | 0.01 | 3.65 | 2.02 | 0.22 | 0.85 |
| 42694 | 0 | 187883 | LPFPYYTTY                     | 2.26 | 0.01 | 3.65 | 2.02 | 0.22 | 0.85 |
| 42695 | 0 | 134743 | LPFQRLVREIAQDFK               | 2.67 | 0.01 | 0.78 | 3.05 | 1.13 | 0.85 |
| 42696 | 0 | 38490  | LPGADT                        | 1.88 | 0.01 | 2.40 | 0.44 | 0.85 | 0.28 |
| 42697 | 0 | 38493  | LPGCRK                        | 1.88 | 0.01 | 1.86 | 0.44 | 1.23 | 0.28 |
| 42698 | 0 | 38496  | LPGCSFSIFLLA                  | 2.49 | 0.01 | 2.68 | 0.44 | 0.85 | 0.28 |
| 42699 | 0 | 38500  | LPGCSFSIFLLALLSCLTV<br>PASAYQ | 3.18 | 0.01 | 1.72 | 0.44 | 0.85 | 0.28 |
| 42700 | 0 | 38500  | LPGCSFSIFLLALLSCLTV<br>PASAYQ | 3.18 | 0.01 | 1.72 | 0.44 | 0.85 | 0.28 |
| 42701 | 0 | 38502  | LPGDMNPANWPRERA<br>WALKNP     | 3.02 | 0.01 | 2.76 | 0.44 | 1.59 | 0.28 |
| 42702 | 0 | 103372 | LPGEEDLPG                     | 2.27 | 0.01 | 0.78 | 0.68 | 0.22 | 2.49 |
| 42703 | 0 | 103372 | LPGEEDLPG                     | 2.27 | 0.01 | 0.78 | 0.68 | 0.22 | 3.13 |
| 42704 | 0 | 104889 | LPGERQI                       | 1.99 | 0.01 | 0.90 | 0.44 | 1.13 | 1.39 |
| 42705 | 0 | 38505  | LPGKCGVNVYPYKIST              | 2.66 | 0.01 | 3.35 | 0.44 | 1.23 | 0.85 |
| 42706 | 0 | 138784 | LPGLKGHNGLQGLPGLA<br>GHH      | 2.99 | 0.01 | 1.60 | 0.44 | 1.23 | 0.28 |
| 42707 | 0 | 190474 | LPGMVWQDRDVYLQG               | 2.69 | 0.01 | 3.19 | 2.00 | 1.41 | 0.28 |
| 42708 | 0 | 450803 | LPGNRLL                       | 2.02 | 0.01 | 0.90 | 0.44 | 1.41 | 1.39 |
| 42709 | 0 | 38516  | LPGTPHI                       | 2.02 | 0.01 | 0.90 | 1.15 | 0.22 | 1.39 |
| 42710 | 0 | 103373 | LPGVSEHLKLNKVL                | 2.71 | 0.01 | 2.04 | 0.44 | 0.85 | 1.28 |
| 42711 | 0 | 99436  | LPHFNSKAMVIVVVN               | 2.64 | 0.01 | 2.16 | 0.44 | 1.23 | 1.48 |
| 42712 | 0 | 99436  | LPHFNSKAMVIVVVN               | 2.64 | 0.01 | 2.16 | 0.44 | 1.23 | 1.48 |
| 42713 | 0 | 131955 | LPHGNALVRYSSKEE               | 2.62 | 0.01 | 0.78 | 0.44 | 1.13 | 0.85 |
| 42714 | 0 | 332414 | LPHPEEDEAFDEADD               | 2.71 | 0.01 | 1.61 | 0.44 | 0.85 | 1.28 |
| 42715 | 0 | 85672  | LPHSLNDHILEPSIPWKS<br>K       | 2.93 | 0.01 | 2.04 | 0.44 | 0.85 | 1.57 |
| 42716 | 0 | 85672  | LPHSLNDHILEPSIPWKS<br>K       | 2.93 | 0.01 | 2.04 | 0.44 | 2.82 | 1.57 |
| 42717 | 0 | 85672  | LPHSLNDHILEPSIPWKS<br>K       | 2.93 | 0.01 | 2.04 | 0.44 | 1.59 | 1.57 |
| 42718 | 0 | 38522  | LPHSNL                        | 1.91 | 0.01 | 2.04 | 2.36 | 0.22 | 1.27 |
| 42719 | 0 | 38522  | LPHSNL                        | 1.91 | 0.01 | 2.04 | 1.20 | 0.22 | 0.28 |
| 42720 | 0 | 38522  | LPHSNL                        | 1.91 | 0.01 | 2.04 | 2.36 | 0.22 | 0.85 |
| 42721 | 0 | 38522  | LPHSNL                        | 1.91 | 0.01 | 2.04 | 2.36 | 0.22 | 0.85 |

|       |   |        |                              |      |      |      |      |      |      |
|-------|---|--------|------------------------------|------|------|------|------|------|------|
| 42722 | 0 | 38522  | LPHSNL                       | 1.91 | 0.01 | 2.04 | 3.37 | 0.22 | 0.85 |
| 42723 | 0 | 38522  | LPHSNL                       | 1.91 | 0.01 | 2.04 | 3.37 | 0.22 | 1.34 |
| 42724 | 0 | 38522  | LPHSNL                       | 1.91 | 0.01 | 2.04 | 0.44 | 0.85 | 2.35 |
| 42725 | 0 | 38522  | LPHSNL                       | 1.91 | 0.01 | 2.04 | 3.37 | 0.22 | 0.28 |
| 42726 | 0 | 38522  | LPHSNL                       | 1.91 | 0.01 | 2.04 | 1.20 | 0.22 | 1.27 |
| 42727 | 0 | 38522  | LPHSNL                       | 1.91 | 0.01 | 2.04 | 1.20 | 0.22 | 1.27 |
| 42728 | 0 | 38522  | LPHSNL                       | 1.91 | 0.01 | 2.04 | 0.44 | 0.85 | 0.85 |
| 42729 | 0 | 38522  | LPHSNL                       | 1.91 | 0.01 | 2.04 | 0.44 | 0.85 | 0.28 |
| 42730 | 0 | 38522  | LPHSNL                       | 1.91 | 0.01 | 2.04 | 0.44 | 0.85 | 1.34 |
| 42731 | 0 | 38522  | LPHSNL                       | 1.91 | 0.01 | 2.04 | 0.44 | 0.85 | 1.27 |
| 42732 | 0 | 38522  | LPHSNL                       | 1.91 | 0.01 | 2.04 | 0.44 | 0.85 | 1.27 |
| 42733 | 0 | 38522  | LPHSNL                       | 1.91 | 0.01 | 2.04 | 3.37 | 0.22 | 0.28 |
| 42734 | 0 | 38522  | LPHSNL                       | 1.91 | 0.01 | 2.04 | 3.37 | 0.22 | 1.34 |
| 42735 | 0 | 38522  | LPHSNL                       | 1.91 | 0.01 | 2.04 | 3.37 | 0.22 | 0.28 |
| 42736 | 0 | 38522  | LPHSNL                       | 1.91 | 0.01 | 2.04 | 3.37 | 0.22 | 2.12 |
| 42737 | 0 | 38522  | LPHSNL                       | 1.91 | 0.01 | 2.04 | 1.20 | 0.22 | 0.28 |
| 42738 | 0 | 38522  | LPHSNL                       | 1.91 | 0.01 | 2.04 | 3.37 | 0.22 | 1.34 |
| 42739 | 0 | 38522  | LPHSNL                       | 1.91 | 0.01 | 2.04 | 3.37 | 0.22 | 1.34 |
| 42740 | 0 | 38522  | LPHSNL                       | 1.91 | 0.01 | 2.04 | 3.37 | 0.22 | 2.12 |
| 42741 | 0 | 38522  | LPHSNL                       | 1.91 | 0.01 | 2.04 | 3.37 | 0.22 | 1.34 |
| 42742 | 0 | 38522  | LPHSNL                       | 1.91 | 0.01 | 2.04 | 3.37 | 0.22 | 1.75 |
| 42743 | 0 | 96593  | LPHSNLDHIL                   | 2.34 | 0.01 | 2.04 | 3.37 | 0.22 | 0.28 |
| 42744 | 0 | 38524  | LPHSNLDHILEPSIPWKS<br>KLLTLV | 3.14 | 0.01 | 2.04 | 0.44 | 0.85 | 0.28 |
| 42745 | 0 | 38524  | LPHSNLDHILEPSIPWKS<br>KLLTLV | 3.14 | 0.01 | 2.04 | 0.44 | 0.85 | 0.28 |
| 42746 | 0 | 38524  | LPHSNLDHILEPSIPWKS<br>KLLTLV | 3.14 | 0.01 | 3.19 | 0.44 | 0.85 | 0.28 |
| 42747 | 0 | 38524  | LPHSNLDHILEPSIPWKS<br>KLLTLV | 3.14 | 0.01 | 3.19 | 2.61 | 0.85 | 0.28 |
| 42748 | 0 | 38524  | LPHSNLDHILEPSIPWKS<br>KLLTLV | 3.14 | 0.01 | 2.04 | 0.44 | 0.85 | 0.28 |
| 42749 | 0 | 38528  | LPHVVDLPQLGPRR               | 2.63 | 0.01 | 2.53 | 0.44 | 0.85 | 0.28 |
| 42750 | 0 | 153414 | LPHWHPHSHLQP                 | 2.53 | 0.01 | 0.90 | 1.12 | 0.22 | 0.28 |
| 42751 | 0 | 332426 | LPIDGDAEVDEDED               | 2.70 | 0.01 | 1.61 | 0.44 | 0.85 | 1.28 |
| 42752 | 0 | 489649 | LPISEGNNRHRRAW               | 2.65 | 0.01 | 2.69 | 3.05 | 0.85 | 1.28 |
| 42753 | 0 | 126595 | LPK                          | 1.37 | 0.01 | 1.60 | 1.15 | 0.22 | 1.57 |
| 42754 | 0 | 126595 | LPK                          | 1.37 | 0.01 | 1.60 | 1.15 | 0.22 | 1.34 |
| 42755 | 0 | 126595 | LPK                          | 1.37 | 0.01 | 1.60 | 1.15 | 0.22 | 1.34 |
| 42756 | 0 | 126595 | LPK                          | 1.37 | 0.01 | 1.60 | 1.15 | 0.22 | 1.57 |
| 42757 | 0 | 153415 | LPKFHKSPHFYR                 | 2.49 | 0.01 | 0.90 | 1.12 | 0.22 | 0.28 |
| 42758 | 0 | 149822 | LPKGSTDSGNMK                 | 2.48 | 0.01 | 0.90 | 2.37 | 0.22 | 0.28 |
| 42759 | 0 | 134147 | LPKGVKHLKDFPILPGEIF<br>K     | 2.98 | 0.01 | 0.78 | 0.44 | 2.35 | 0.28 |
| 42760 | 0 | 123452 | LPKIKAYME                    | 2.21 | 0.01 | 2.28 | 2.00 | 0.22 | 0.28 |
| 42761 | 0 | 123452 | LPKIKAYME                    | 2.21 | 0.01 | 2.28 | 2.00 | 0.22 | 0.28 |
| 42762 | 0 | 123453 | LPKIKEYMK                    | 2.23 | 0.01 | 2.28 | 2.00 | 0.22 | 0.28 |



|       |   |        |                                     |      |      |      |      |      |      |
|-------|---|--------|-------------------------------------|------|------|------|------|------|------|
|       |   |        | LPKKAAPAKKAAPAKKA                   |      |      |      |      |      |      |
| 42763 | 0 | 38555  | APAKKAAAKKAPAKKAA<br>AKKVTQK        | 3.71 | 4.93 | 4.93 | 0.68 | 0.22 | 0.85 |
| 42764 | 0 | 120775 | LPKKTESHKKAKGK                      | 2.62 | 0.01 | 1.60 | 0.44 | 1.13 | 0.28 |
| 42765 | 0 | 78198  | LPKNETPEVTKA                        | 2.49 | 0.01 | 2.60 | 0.44 | 1.23 | 0.85 |
| 42766 | 0 | 181931 | LPKNNLGLDALL                        | 2.49 | 0.01 | 0.90 | 3.15 | 0.22 | 0.28 |
|       |   |        | LPKPALPNPGRNDERRC                   |      |      |      |      |      |      |
| 42767 | 0 | 38560  | RHPRRDAHRSFPQPPG<br>HAEGQHDGRDALGDA | 3.83 | 0.01 | 4.63 | 0.68 | 0.22 | 0.85 |
| 42768 | 0 | 132446 | LPKQGVYERXFT                        | 2.40 | 0.01 | 0.90 | 1.15 | 0.22 | 1.39 |
| 42769 | 0 | 131956 | LPKSAKPVSQMRMATP<br>LL              | 2.86 | 0.01 | 1.75 | 1.12 | 0.22 | 0.28 |
| 42770 | 0 | 131956 | LPKSAKPVSQMRMATP<br>LL              | 2.86 | 0.01 | 1.75 | 1.12 | 0.22 | 2.02 |
| 42771 | 0 | 131956 | LPKSAKPVSQMRMATP<br>LL              | 2.86 | 0.01 | 1.75 | 1.12 | 0.22 | 2.12 |
| 42772 | 0 | 123454 | LPKTLKMWS                           | 2.24 | 0.01 | 2.28 | 2.00 | 0.22 | 0.28 |
| 42773 | 0 | 227357 | LPKYIGLDPVAPGDL                     | 2.71 | 0.01 | 2.97 | 0.44 | 1.59 | 0.28 |
| 42774 | 0 | 227357 | LPKYIGLDPVAPGDL                     | 2.71 | 0.01 | 2.97 | 0.44 | 0.85 | 0.28 |
| 42775 | 0 | 172223 | LPLATADKNGRT                        | 2.48 | 0.01 | 0.90 | 0.44 | 0.85 | 1.39 |
| 42776 | 0 | 172223 | LPLATADKNGRT                        | 2.48 | 0.01 | 0.90 | 0.44 | 0.85 | 0.28 |
| 42777 | 0 | 332513 | LPLEEEDVGPRHVD                      | 2.70 | 0.01 | 1.61 | 0.44 | 0.85 | 1.28 |
| 42778 | 0 | 332514 | LPLEEQEDVGPRHVD                     | 2.70 | 0.01 | 1.61 | 0.44 | 0.85 | 1.28 |
| 42779 | 0 | 111506 | LPLGQHGFNPSP                        | 2.50 | 0.01 | 0.90 | 0.44 | 0.85 | 1.39 |
|       |   |        | LPLHAVEKTGRPGQPAL                   |      |      |      |      |      |      |
| 42780 | 0 | 131957 | KMPGKLRS DAGLES DTA<br>MKKGETLRKQI  | 3.76 | 0.01 | 0.78 | 0.44 | 1.13 | 0.85 |
| 42781 | 0 | 103378 | LPLLEK VIGAGKPLL                    | 2.70 | 0.01 | 2.04 | 0.44 | 0.85 | 1.28 |
| 42782 | 0 | 115848 | LPLLQSWMHQ                          | 2.33 | 0.01 | 1.60 | 0.44 | 1.23 | 0.85 |
| 42783 | 0 | 115848 | LPLLQSWMHQ                          | 2.33 | 0.01 | 1.60 | 0.44 | 1.23 | 0.85 |
| 42784 | 0 | 161651 | LPLPLLQPLM                          | 2.38 | 0.01 | 0.78 | 0.44 | 1.23 | 0.85 |
| 42785 | 0 | 38582  | LPLPLLQSWM                          | 2.35 | 0.01 | 1.60 | 0.44 | 1.23 | 0.85 |
| 42786 | 0 | 38582  | LPLPLLQSWM                          | 2.35 | 0.01 | 1.60 | 0.44 | 2.98 | 0.85 |
| 42787 | 0 | 38582  | LPLPLLQSWM                          | 2.35 | 0.01 | 1.60 | 0.44 | 1.23 | 0.85 |
| 42788 | 0 | 229726 | LPLPLLQSWMHQPHQ                     | 2.73 | 0.01 | 1.60 | 0.44 | 1.23 | 1.28 |
| 42789 | 0 | 229727 | LPLPLVQSWMHQPPQ                     | 2.71 | 0.01 | 3.97 | 0.44 | 1.23 | 1.28 |
| 42790 | 0 | 229727 | LPLPLVQSWMHQPPQ                     | 2.71 | 0.01 | 3.97 | 0.44 | 1.23 | 1.28 |
| 42791 | 0 | 38583  | LPLPWL                              | 1.92 | 0.01 | 2.40 | 0.44 | 0.85 | 0.28 |
| 42792 | 0 | 38584  | LPLPWLPG                            | 2.18 | 0.01 | 2.40 | 1.12 | 0.22 | 0.28 |
| 42793 | 0 | 38584  | LPLPWLPG                            | 2.18 | 0.01 | 2.40 | 1.12 | 0.22 | 0.28 |
| 42794 | 0 | 38584  | LPLPWLPG                            | 2.18 | 0.01 | 2.40 | 1.12 | 0.22 | 0.28 |
| 42795 | 0 | 38584  | LPLPWLPG                            | 2.18 | 0.01 | 2.40 | 1.12 | 0.22 | 0.28 |
| 42796 | 0 | 38585  | LPLQPQQSFP                          | 2.36 | 0.01 | 2.83 | 0.68 | 0.22 | 0.28 |

|       |   |        |                               |      |      |      |      |      |      |
|-------|---|--------|-------------------------------|------|------|------|------|------|------|
| 42797 | 0 | 38585  | LPLQPQSF                      | 2.36 | 0.01 | 2.83 | 0.68 | 0.22 | 0.85 |
| 42798 | 0 | 133629 | LPLRF                         | 1.77 | 0.01 | 2.25 | 1.12 | 0.22 | 1.27 |
| 42799 | 0 | 38586  | LPLRGKLSFWEAGTTKA<br>GYPYNYNT | 3.17 | 0.01 | 2.53 | 0.44 | 0.85 | 0.28 |
| 42800 | 0 | 38586  | LPLRGKLSFWEAGTTKA<br>GYPYNYNT | 3.17 | 0.01 | 2.53 | 0.44 | 0.85 | 0.28 |
| 42801 | 0 | 196636 | LPLRLIL                       | 2.06 | 0.01 | 0.90 | 0.44 | 1.23 | 1.39 |
| 42802 | 0 | 482006 | LPLSQHEQVGQGSVLQ<br>GQGI      | 2.99 | 0.01 | 1.86 | 0.44 | 1.93 | 0.28 |
| 42803 | 0 | 482006 | LPLSQHEQVGQGSVLQ<br>GQGI      | 2.99 | 0.01 | 1.86 | 1.20 | 0.22 | 0.28 |
| 42804 | 0 | 139809 | LPLTPRS                       | 2.05 | 0.01 | 0.90 | 2.00 | 0.22 | 0.28 |
| 42805 | 0 | 95564  | LPMHIR                        | 1.88 | 0.01 | 1.60 | 0.44 | 1.23 | 0.28 |
| 42806 | 0 | 98885  | LPMHIRLSFN                    | 2.30 | 0.01 | 1.60 | 0.44 | 1.23 | 0.85 |
| 42807 | 0 | 98885  | LPMHIRLSFN                    | 2.30 | 0.01 | 1.60 | 0.44 | 1.23 | 0.85 |
| 42808 | 0 | 98885  | LPMHIRLSFN                    | 2.30 | 0.01 | 1.60 | 0.44 | 2.98 | 0.85 |
| 42809 | 0 | 121581 | LPMIWAQKTNT                   | 2.45 | 0.01 | 0.78 | 0.44 | 1.41 | 0.28 |
| 42810 | 0 | 85686  | LPNDVFREAQRS                  | 2.43 | 0.01 | 2.48 | 0.44 | 1.59 | 0.28 |
| 42811 | 0 | 100283 | LPNIAEQYTH                    | 2.26 | 0.01 | 2.18 | 2.16 | 0.22 | 0.28 |
| 42812 | 0 | 105937 | LPNIEADV                      | 2.10 | 0.01 | 3.05 | 1.20 | 0.22 | 0.28 |
| 42813 | 0 | 123455 | LPNLPYYID                     | 2.25 | 0.01 | 2.28 | 2.00 | 0.22 | 0.28 |
| 42814 | 0 | 123455 | LPNLPYYID                     | 2.25 | 0.01 | 2.28 | 2.00 | 0.22 | 0.28 |
| 42815 | 0 | 123455 | LPNLPYYID                     | 2.25 | 0.01 | 2.28 | 2.00 | 0.22 | 0.28 |
| 42816 | 0 | 38599  | LPNNTASWFTALTQH               | 2.68 | 0.01 | 3.30 | 0.68 | 0.22 | 0.28 |
| 42817 | 0 | 196637 | LPNPRNL                       | 2.06 | 0.01 | 0.90 | 0.44 | 1.23 | 1.39 |
| 42818 | 0 | 233228 | LPNR                          | 1.57 | 0.01 | 2.75 | 1.20 | 0.22 | 1.27 |
| 42819 | 0 | 104890 | LPNRSQI                       | 1.99 | 0.01 | 0.90 | 0.44 | 1.13 | 1.39 |
| 42820 | 0 | 191590 | LPNSCTANTYWCNDME              | 2.71 | 0.01 | 0.90 | 2.84 | 1.13 | 1.27 |
| 42821 | 0 | 191590 | LPNSCTANTYWCNDME              | 2.71 | 0.01 | 0.90 | 2.84 | 1.13 | 1.66 |
| 42822 | 0 | 191590 | LPNSCTANTYWCNDME              | 2.71 | 0.01 | 0.90 | 0.68 | 0.22 | 0.28 |
| 42823 | 0 | 191590 | LPNSCTANTYWCNDME              | 2.71 | 0.01 | 0.90 | 0.68 | 0.22 | 0.28 |
| 42824 | 0 | 38606  | LPNVGITQ                      | 2.10 | 0.01 | 3.06 | 1.12 | 0.22 | 0.28 |
| 42825 | 0 | 97468  | LPNVSLSN                      | 2.17 | 0.01 | 2.87 | 1.81 | 0.22 | 0.28 |
| 42826 | 0 | 38609  | LPNWVKVWD RATNKC              | 2.66 | 0.01 | 2.56 | 2.02 | 0.22 | 0.85 |
| 42827 | 0 | 104048 | LPNYETR                       | 1.99 | 0.01 | 0.90 | 0.44 | 1.13 | 1.39 |
| 42828 | 0 | 129293 | LPPARGTP                      | 2.14 | 0.01 | 0.78 | 0.44 | 1.13 | 0.28 |
| 42829 | 0 | 177433 | LPPASRN                       | 2.01 | 0.01 | 0.90 | 2.13 | 0.22 | 0.28 |
| 42830 | 0 | 147935 | LPPFLNSLP                     | 2.28 | 0.01 | 3.24 | 0.68 | 0.22 | 0.28 |
| 42831 | 0 | 133630 | LPPGLHVFPLASNRS               | 2.69 | 0.01 | 0.90 | 1.15 | 0.22 | 0.28 |
| 42832 | 0 | 133630 | LPPGLHVFPLASNRS               | 2.69 | 0.01 | 0.90 | 1.15 | 0.22 | 0.28 |
| 42833 | 0 | 133630 | LPPGLHVFPLASNRS               | 2.69 | 0.01 | 0.90 | 1.15 | 0.22 | 2.12 |
| 42834 | 0 | 133630 | LPPGLHVFPLASNRS               | 2.69 | 0.01 | 0.90 | 1.15 | 0.22 | 1.27 |

|       |   |        |                              |      |      |      |      |      |      |
|-------|---|--------|------------------------------|------|------|------|------|------|------|
| 42835 | 0 | 133630 | LPPGLHVFPLASNRS              | 2.69 | 0.01 | 0.90 | 1.15 | 0.22 | 1.66 |
| 42836 | 0 | 38617  | LPPIQNTRNVVP                 | 2.48 | 0.01 | 3.78 | 2.74 | 0.22 | 0.85 |
| 42837 | 0 | 38617  | LPPIQNTRNVVP                 | 2.48 | 0.01 | 3.78 | 2.74 | 0.22 | 1.34 |
| 42838 | 0 | 96598  | LPPKKIKDPD                   | 2.37 | 0.01 | 0.78 | 0.44 | 1.93 | 0.85 |
| 42839 | 0 | 104049 | LPPKLLTEPTTEGDQHPG<br>T      | 2.93 | 0.01 | 3.00 | 1.20 | 0.22 | 0.85 |
| 42840 | 0 | 489651 | LPPLEGLTKGKYFYEVDL<br>NG     | 2.96 | 0.01 | 2.70 | 0.44 | 0.85 | 0.28 |
| 42841 | 0 | 134744 | LPPLGTHPSMHP                 | 2.52 | 0.01 | 0.90 | 1.20 | 0.22 | 0.28 |
| 42842 | 0 | 165632 | LPPRGLF                      | 2.04 | 0.01 | 0.90 | 0.44 | 1.23 | 1.39 |
| 42843 | 0 | 165632 | LPPRGLF                      | 2.04 | 0.01 | 0.90 | 0.44 | 1.23 | 1.39 |
| 42844 | 0 | 130956 | LPPRVTPKWSLDAWST<br>WR       | 2.87 | 0.01 | 0.90 | 0.44 | 1.93 | 0.85 |
| 42845 | 0 | 95565  | LPPSGSGR                     | 2.15 | 0.01 | 0.90 | 2.59 | 0.22 | 0.28 |
| 42846 | 0 | 38627  | LPPSRDEL                     | 2.14 | 0.01 | 3.72 | 2.37 | 0.22 | 0.85 |
| 42847 | 0 | 238716 | LPPSRVVLRTDNVT               | 2.64 | 0.01 | 2.14 | 2.65 | 0.22 | 0.85 |
| 42848 | 0 | 38628  | LPPTAPPLL                    | 2.26 | 0.01 | 2.04 | 1.15 | 0.22 | 2.12 |
| 42849 | 0 | 38628  | LPPTAPPLL                    | 2.26 | 0.01 | 2.04 | 1.15 | 0.22 | 0.28 |
| 42850 | 0 | 78454  | LPPTAPPLLPHSNLDHIL<br>EPSIPW | 3.15 | 0.01 | 3.19 | 0.44 | 0.85 | 0.28 |
| 42851 | 0 | 38630  | LPPTVMFPPQ                   | 2.32 | 0.01 | 1.60 | 0.44 | 1.23 | 0.85 |
| 42852 | 0 | 38630  | LPPTVMFPPQ                   | 2.32 | 0.01 | 1.60 | 0.44 | 1.23 | 0.85 |
| 42853 | 0 | 38630  | LPPTVMFPPQ                   | 2.32 | 0.01 | 1.60 | 0.44 | 1.23 | 0.85 |
| 42854 | 0 | 38630  | LPPTVMFPPQ                   | 2.32 | 0.01 | 1.60 | 0.44 | 1.23 | 0.85 |
| 42855 | 0 | 38631  | LPPVAD                       | 1.89 | 0.01 | 3.27 | 0.44 | 1.59 | 0.28 |
| 42856 | 0 | 38632  | LPPVADLPQGLRR                | 2.63 | 0.01 | 3.27 | 0.44 | 0.85 | 0.28 |
| 42857 | 0 | 38639  | LPQDAVSRTQRRGRTG             | 2.75 | 0.01 | 2.41 | 3.27 | 0.22 | 0.28 |
| 42858 | 0 | 38639  | LPQDAVSRTQRRGRTG             | 2.75 | 0.01 | 2.41 | 2.42 | 0.22 | 0.28 |
| 42859 | 0 | 332719 | LPQEEEDVGPRHVD               | 2.67 | 0.01 | 1.61 | 0.44 | 0.85 | 1.28 |
| 42860 | 0 | 332722 | LPQEEQEDVGPRHVD              | 2.70 | 0.01 | 1.61 | 0.44 | 0.85 | 1.28 |
| 42861 | 0 | 190475 | LPQEVNLNLLRFFV               | 2.70 | 0.01 | 1.60 | 0.44 | 1.23 | 0.28 |
| 42862 | 0 | 240817 | LPQEWVLHIFYQEAAPA<br>QSDV    | 2.95 | 0.01 | 3.37 | 0.68 | 0.22 | 0.85 |
| 42863 | 0 | 240817 | LPQEWVLHIFYQEAAPA<br>QSDV    | 2.95 | 0.01 | 3.37 | 0.68 | 0.22 | 0.85 |
| 42864 | 0 | 240817 | LPQEWVLHIFYQEAAPA<br>QSDV    | 2.95 | 0.01 | 3.37 | 0.68 | 0.22 | 0.28 |
| 42865 | 0 | 240817 | LPQEWVLHIFYQEAAPA<br>QSDV    | 2.95 | 0.01 | 3.37 | 0.68 | 0.22 | 0.28 |
| 42866 | 0 | 240817 | LPQEWVLHIFYQEAAPA<br>QSDV    | 2.95 | 0.01 | 3.37 | 0.68 | 0.22 | 0.28 |
| 42867 | 0 | 240817 | LPQEWVLHIFYQEAAPA<br>QSDV    | 2.95 | 0.01 | 3.37 | 0.68 | 0.22 | 0.28 |
| 42868 | 0 | 240817 | LPQEWVLHIFYQEAAPA<br>QSDV    | 2.95 | 0.01 | 3.37 | 0.68 | 0.22 | 0.28 |

|       |   |        |                                                     |      |      |      |      |      |      |
|-------|---|--------|-----------------------------------------------------|------|------|------|------|------|------|
| 42869 | 0 | 240817 | LPQEWVLHFYQEAAPA<br>QSDV                            | 2.95 | 0.01 | 3.37 | 0.68 | 0.22 | 0.28 |
| 42870 | 0 | 240817 | LPQEWVLHFYQEAAPA<br>QSDV                            | 2.95 | 0.01 | 3.37 | 0.68 | 0.22 | 0.28 |
| 42871 | 0 | 240817 | LPQEWVLHFYQEAAPA<br>QSDV                            | 2.95 | 0.01 | 3.37 | 0.68 | 0.22 | 0.28 |
| 42872 | 0 | 240817 | LPQEWVLHFYQEAAPA<br>QSDV                            | 2.95 | 0.01 | 3.37 | 0.68 | 0.22 | 0.28 |
| 42873 | 0 | 240817 | LPQEWVLHFYQEAAPA<br>QSDV                            | 2.95 | 0.01 | 3.37 | 0.68 | 0.22 | 0.28 |
| 42874 | 0 | 240818 | LPQEWVLHFYQEAAPA<br>QSDVALLRFVNPDTGRV<br>LFECKLHKSG | 3.69 | 0.01 | 3.37 | 0.68 | 0.22 | 0.85 |
| 42875 | 0 | 240818 | LPQEWVLHFYQEAAPA<br>QSDVALLRFVNPDTGRV<br>LFECKLHKSG | 3.69 | 0.01 | 3.37 | 0.68 | 0.22 | 0.85 |
| 42876 | 0 | 240818 | LPQEWVLHFYQEAAPA<br>QSDVALLRFVNPDTGRV<br>LFECKLHKSG | 3.69 | 0.01 | 3.37 | 0.68 | 0.22 | 0.85 |
| 42877 | 0 | 240818 | LPQEWVLHFYQEAAPA<br>QSDVALLRFVNPDTGRV<br>LFECKLHKSG | 3.69 | 0.01 | 3.37 | 0.68 | 0.22 | 0.85 |
| 42878 | 0 | 240818 | LPQEWVLHFYQEAAPA<br>QSDVALLRFVNPDTGRV<br>LFECKLHKSG | 3.69 | 0.01 | 3.37 | 0.68 | 0.22 | 0.28 |
| 42879 | 0 | 240818 | LPQEWVLHFYQEAAPA<br>QSDVALLRFVNPDTGRV<br>LFECKLHKSG | 3.69 | 0.01 | 3.37 | 0.68 | 0.22 | 0.28 |
| 42880 | 0 | 240818 | LPQEWVLHFYQEAAPA<br>QSDVALLRFVNPDTGRV<br>LFECKLHKSG | 3.69 | 0.01 | 3.37 | 0.68 | 0.22 | 0.28 |
| 42881 | 0 | 240818 | LPQEWVLHFYQEAAPA<br>QSDVALLRFVNPDTGRV<br>LFECKLHKSG | 3.69 | 0.01 | 3.37 | 0.68 | 0.22 | 0.28 |
| 42882 | 0 | 240818 | LPQEWVLHFYQEAAPA<br>QSDVALLRFVNPDTGRV<br>LFECKLHKSG | 3.69 | 0.01 | 3.37 | 0.68 | 0.22 | 0.28 |
| 42883 | 0 | 240818 | LPQEWVLHFYQEAAPA<br>QSDVALLRFVNPDTGRV<br>LFECKLHKSG | 3.69 | 0.01 | 3.37 | 0.68 | 0.22 | 0.28 |
| 42884 | 0 | 240818 | LPQEWVLHFYQEAAPA<br>QSDVALLRFVNPDTGRV<br>LFECKLHKSG | 3.69 | 0.01 | 3.37 | 0.68 | 0.22 | 0.28 |
| 42885 | 0 | 240818 | LPQEWVLHFYQEAAPA<br>QSDVALLRFVNPDTGRV<br>LFECKLHKSG | 3.69 | 0.01 | 3.37 | 0.68 | 0.22 | 0.28 |

|       |   |        |                   |      |      |      |      |      |      |
|-------|---|--------|-------------------|------|------|------|------|------|------|
|       |   |        | LPQEWVLHFYQEAAPA  |      |      |      |      |      |      |
| 42886 | 0 | 240818 | QSDVALLRFVNPDTGRV | 3.69 | 0.01 | 3.37 | 0.68 | 0.22 | 0.28 |
|       |   |        | LFECKLHKSG        |      |      |      |      |      |      |
|       |   |        | LPQEWVLHFYQEAAPA  |      |      |      |      |      |      |
| 42887 | 0 | 240818 | QSDVALLRFVNPDTGRV | 3.69 | 0.01 | 3.37 | 0.68 | 0.22 | 0.28 |
|       |   |        | LFECKLHKSG        |      |      |      |      |      |      |
|       |   |        | LPQEWVLHFYQEAAPA  |      |      |      |      |      |      |
| 42888 | 0 | 240818 | QSDVALLRFVNPDTGRV | 3.69 | 0.01 | 3.37 | 0.68 | 0.22 | 0.28 |
|       |   |        | LFECKLHKSG        |      |      |      |      |      |      |
|       |   |        | LPQEWVLHFYQEAAPA  |      |      |      |      |      |      |
| 42889 | 0 | 240818 | QSDVALLRFVNPDTGRV | 3.69 | 0.01 | 3.37 | 0.68 | 0.22 | 0.28 |
|       |   |        | LFECKLHKSG        |      |      |      |      |      |      |
|       |   |        | LPQEWVLHFYQEAAPA  |      |      |      |      |      |      |
| 42890 | 0 | 240818 | QSDVALLRFVNPDTGRV | 3.69 | 0.01 | 3.37 | 0.68 | 0.22 | 0.28 |
|       |   |        | LFECKLHKSG        |      |      |      |      |      |      |
|       |   |        | LPQEWVLHFYQEAAPA  |      |      |      |      |      |      |
| 42891 | 0 | 240818 | QSDVALLRFVNPDTGRV | 3.69 | 0.01 | 3.37 | 0.68 | 0.22 | 0.28 |
|       |   |        | LFECKLHKSG        |      |      |      |      |      |      |
|       |   |        | LPQEWVLHFYQEAAPA  |      |      |      |      |      |      |
| 42892 | 0 | 240818 | QSDVALLRFVNPDTGRV | 3.69 | 0.01 | 3.37 | 0.68 | 0.22 | 0.28 |
|       |   |        | LFECKLHKSG        |      |      |      |      |      |      |
|       |   |        | LPQEWVLHFYQEAAPA  |      |      |      |      |      |      |
| 42893 | 0 | 240818 | QSDVALLRFVNPDTGRV | 3.69 | 0.01 | 3.37 | 0.68 | 0.22 | 0.28 |
|       |   |        | LFECKLHKSG        |      |      |      |      |      |      |
|       |   |        | LPQEWVLHFYQEAAPA  |      |      |      |      |      |      |
| 42894 | 0 | 240818 | QSDVALLRFVNPDTGRV | 3.69 | 0.01 | 3.37 | 0.68 | 0.22 | 0.28 |
|       |   |        | LFECKLHKSG        |      |      |      |      |      |      |
|       |   |        | LPQEWVLHFYQEAAPA  |      |      |      |      |      |      |
| 42895 | 0 | 240818 | QSDVALLRFVNPDTGRV | 3.69 | 0.01 | 3.37 | 0.68 | 0.22 | 0.28 |
|       |   |        | LFECKLHKSG        |      |      |      |      |      |      |
|       |   |        | LPQEWVLHFYQEAAPA  |      |      |      |      |      |      |
| 42896 | 0 | 240818 | QSDVALLRFVNPDTGRV | 3.69 | 0.01 | 3.37 | 0.68 | 0.22 | 0.28 |
|       |   |        | LFECKLHKSG        |      |      |      |      |      |      |
|       |   |        | LPQEWVLHFYQEAAPA  |      |      |      |      |      |      |
| 42897 | 0 | 240818 | QSDVALLRFVNPDTGRV | 3.69 | 0.01 | 3.37 | 0.68 | 0.22 | 0.28 |
|       |   |        | LFECKLHKSG        |      |      |      |      |      |      |
| 42898 | 0 | 172225 | LPQFGDEYDFYRSFP   | 2.68 | 0.01 | 0.78 | 0.44 | 1.41 | 0.28 |
| 42899 | 0 | 172225 | LPQFGDEYDFYRSFP   | 2.68 | 0.01 | 0.78 | 0.44 | 1.13 | 0.28 |
|       |   |        | LPQGASQEPSRMAWGP  |      |      |      |      |      |      |
| 42900 | 0 | 150397 | LKTG              | 2.95 | 0.01 | 2.59 | 0.44 | 0.85 | 0.28 |
| 42901 | 0 | 38648  | LPQGTTLPKG        | 2.35 | 3.81 | 2.45 | 0.44 | 0.85 | 0.28 |
| 42902 | 0 | 38649  | LPQGVFYGDA        | 2.29 | 4.23 | 2.70 | 0.44 | 0.85 | 0.28 |
| 42903 | 0 | 190850 | LPQIPQQSRY        | 2.32 | 0.01 | 1.86 | 0.44 | 1.23 | 0.28 |
| 42904 | 0 | 38654  | LPQLGP            | 1.92 | 0.01 | 2.53 | 0.44 | 1.59 | 0.28 |
| 42905 | 0 | 38654  | LPQLGP            | 1.92 | 0.01 | 2.53 | 0.44 | 1.59 | 0.28 |
| 42906 | 0 | 138785 | LPQNVWLHGWHT      | 2.48 | 0.01 | 0.90 | 0.68 | 0.22 | 0.28 |
| 42907 | 0 | 138785 | LPQNVWLHGWHT      | 2.48 | 0.01 | 0.90 | 0.68 | 0.22 | 0.28 |

|       |   |        |                                        |      |      |      |      |      |      |
|-------|---|--------|----------------------------------------|------|------|------|------|------|------|
| 42908 | 0 | 138785 | LPQNVWLHGWHT                           | 2.48 | 0.01 | 0.90 | 0.68 | 0.22 | 0.28 |
| 42909 | 0 | 105306 | LPQQCGLRAPQR                           | 2.52 | 0.01 | 2.16 | 0.44 | 1.23 | 0.85 |
| 42910 | 0 | 99438  | LPQQCGLRAPQRCDL                        | 2.72 | 0.01 | 2.16 | 0.44 | 1.23 | 1.48 |
| 42911 | 0 | 99438  | LPQQCGLRAPQRCDL                        | 2.72 | 0.01 | 2.16 | 0.44 | 1.23 | 1.48 |
| 42912 | 0 | 148667 | LPQQQIPQQP                             | 2.36 | 0.01 | 1.86 | 0.44 | 1.23 | 0.85 |
| 42913 | 0 | 173945 | LPQQQQIPQQPQQ                          | 2.59 | 0.01 | 1.86 | 0.44 | 1.23 | 0.85 |
| 42914 | 0 | 38657  | LPQRQKKQ                               | 2.15 | 0.01 | 2.45 | 0.44 | 0.85 | 1.34 |
| 42915 | 0 | 38657  | LPQRQKKQ                               | 2.15 | 0.01 | 2.45 | 0.44 | 0.85 | 1.34 |
| 42916 | 0 | 38659  | LPQSGPIGGIKSMGITTL<br>VQ               | 2.97 | 0.01 | 2.75 | 0.44 | 0.85 | 0.85 |
| 42917 | 0 | 38660  | LPQSPGPAFPLAE                          | 2.58 | 0.01 | 3.17 | 0.44 | 0.85 | 0.85 |
| 42918 | 0 | 450806 | LPQSWAM                                | 1.99 | 0.01 | 0.90 | 0.44 | 1.41 | 1.39 |
| 42919 | 0 | 38662  | LPQVVM                                 | 1.89 | 0.01 | 1.96 | 0.44 | 0.85 | 0.28 |
| 42920 | 0 | 38673  | LPRETHFGSHSN                           | 2.45 | 0.01 | 0.90 | 0.68 | 0.22 | 1.27 |
| 42921 | 0 | 38681  | LPRRGPRL                               | 2.18 | 0.01 | 1.72 | 0.44 | 0.85 | 0.28 |
| 42922 | 0 | 38683  | LPRRGPRLG                              | 2.37 | 0.01 | 2.68 | 0.44 | 0.85 | 0.28 |
| 42923 | 0 | 38684  | LPRRGPRLG                              | 2.53 | 0.01 | 2.68 | 0.44 | 0.85 | 0.28 |
| 42924 | 0 | 104050 | LPRRGPRLGVRATRKTS<br>E RS              | 2.98 | 0.01 | 1.72 | 0.44 | 0.85 | 0.28 |
| 42925 | 0 | 38686  | LPRRGPRLGVRATRKTS<br>E RSQPRGRRQPIPKAR | 3.47 | 0.01 | 1.72 | 0.44 | 0.85 | 0.28 |
| 42926 | 0 | 38687  | LPRRLRPQRSPQ                           | 2.54 | 0.01 | 0.90 | 1.20 | 0.22 | 1.39 |
| 42927 | 0 | 38687  | LPRRLRPQRSPQ                           | 2.54 | 0.01 | 0.90 | 0.68 | 0.22 | 0.85 |
| 42928 | 0 | 38687  | LPRRLRPQRSPQ                           | 2.54 | 0.01 | 0.90 | 0.68 | 0.22 | 1.75 |
| 42929 | 0 | 521724 | LPRRVVRHEPLGRSFLTG<br>GL               | 2.96 | 0.01 | 2.40 | 0.44 | 1.59 | 1.28 |
| 42930 | 0 | 38693  | LPRSNTSSGAIPPAD                        | 2.66 | 0.01 | 1.66 | 0.44 | 0.85 | 0.28 |
| 42931 | 0 | 38694  | LPRSNTSSGASPPAD                        | 2.69 | 0.01 | 3.26 | 0.44 | 1.74 | 0.28 |
| 42932 | 0 | 38694  | LPRSNTSSGASPPAD                        | 2.69 | 0.01 | 3.26 | 0.44 | 0.85 | 0.28 |
| 42933 | 0 | 38700  | LPSAVK                                 | 1.88 | 0.01 | 2.24 | 1.15 | 0.22 | 0.28 |
| 42934 | 0 | 38702  | LPSDFFPSVRDL                           | 2.51 | 0.01 | 2.08 | 0.68 | 0.22 | 0.85 |
| 42935 | 0 | 104051 | LPSDPIGGKSNMHFMN<br>TL                 | 2.83 | 0.01 | 3.00 | 1.20 | 0.22 | 0.85 |
| 42936 | 0 | 111510 | LPSEATVYLPPVPVS                        | 2.72 | 0.01 | 1.86 | 0.68 | 0.22 | 0.28 |
| 42937 | 0 | 125488 | LPSKGLEHLKELIARNTW<br>TL               | 2.94 | 0.01 | 0.78 | 0.44 | 1.13 | 1.34 |
| 42938 | 0 | 229351 | LPSKIKAEIDA                            | 2.42 | 0.01 | 2.70 | 0.68 | 0.22 | 0.28 |
| 42939 | 0 | 38718  | LPSPFHPYGTSK                           | 2.48 | 0.01 | 0.90 | 0.68 | 0.22 | 0.28 |
| 42940 | 0 | 332817 | LPSPPEEDVASREQD                        | 2.69 | 0.01 | 1.61 | 0.44 | 0.85 | 1.28 |
| 42941 | 0 | 196639 | LPSPWPY                                | 2.04 | 0.01 | 0.90 | 0.44 | 1.23 | 1.39 |
| 42942 | 0 | 165633 | LPSRGLF                                | 2.03 | 0.01 | 0.90 | 0.44 | 1.23 | 1.39 |
| 42943 | 0 | 165633 | LPSRGLF                                | 2.03 | 0.01 | 0.90 | 0.44 | 1.23 | 1.39 |
| 42944 | 0 | 510453 | LPSRSQT                                | 2.02 | 0.01 | 0.90 | 0.44 | 1.13 | 0.28 |
| 42945 | 0 | 510453 | LPSRSQT                                | 2.02 | 0.01 | 0.90 | 0.44 | 1.41 | 0.28 |
| 42946 | 0 | 136484 | LPSSSPTPFLSG                           | 2.52 | 0.01 | 0.90 | 0.44 | 1.41 | 0.28 |
| 42947 | 0 | 136484 | LPSSSPTPFLSG                           | 2.52 | 0.01 | 0.90 | 0.44 | 1.41 | 0.28 |

|       |   |        |                                                  |      |      |      |      |      |      |
|-------|---|--------|--------------------------------------------------|------|------|------|------|------|------|
| 42948 | 0 | 136484 | LPSSSPTPFLSG                                     | 2.52 | 0.01 | 0.90 | 0.44 | 1.41 | 1.34 |
| 42949 | 0 | 136484 | LPSSSPTPFLSG                                     | 2.52 | 0.01 | 0.90 | 0.44 | 1.41 | 1.34 |
| 42950 | 0 | 136484 | LPSSSPTPFLSG                                     | 2.52 | 0.01 | 0.90 | 0.44 | 1.41 | 0.28 |
| 42951 | 0 | 136484 | LPSSSPTPFLSG                                     | 2.52 | 0.01 | 0.90 | 0.44 | 1.41 | 0.28 |
| 42952 | 0 | 139810 | LPSWHRF                                          | 1.99 | 0.01 | 0.90 | 2.00 | 0.22 | 0.28 |
| 42953 | 0 | 149069 | LPSYLQE                                          | 2.03 | 0.01 | 0.90 | 2.13 | 1.59 | 1.39 |
| 42954 | 0 | 186772 | LPTAAAGLLLLAANP                                  | 2.72 | 0.01 | 0.90 | 1.20 | 0.22 | 0.85 |
| 42955 | 0 | 97471  | LPTDAGVA                                         | 2.12 | 0.01 | 2.87 | 1.81 | 0.22 | 0.28 |
| 42956 | 0 | 120082 | LPTDSGEK                                         | 2.10 | 0.01 | 2.26 | 2.04 | 0.22 | 1.27 |
| 42957 | 0 | 120082 | LPTDSGEK                                         | 2.10 | 0.01 | 2.26 | 2.04 | 0.22 | 1.27 |
| 42958 | 0 | 120082 | LPTDSGEK                                         | 2.10 | 0.01 | 2.26 | 2.04 | 0.22 | 0.85 |
| 42959 | 0 | 138202 | LPTITNT                                          | 2.04 | 0.01 | 0.90 | 1.15 | 2.26 | 0.28 |
| 42960 | 0 | 138202 | LPTITNT                                          | 2.04 | 0.01 | 0.90 | 1.15 | 2.26 | 2.35 |
| 42961 | 0 | 138202 | LPTITNT                                          | 2.04 | 0.01 | 0.90 | 0.44 | 1.41 | 1.34 |
| 42962 | 0 | 38730  | LPTLARSFIICIQMI                                  | 2.67 | 0.01 | 2.75 | 0.44 | 2.82 | 0.28 |
| 42963 | 0 | 38730  | LPTLARSFIICIQMI                                  | 2.67 | 0.01 | 2.75 | 0.44 | 2.82 | 1.27 |
| 42964 | 0 | 496740 | LPTLVLNKIRGTFNVVAV<br>KAPGFGDRRKAM               | 3.35 | 0.01 | 2.70 | 0.44 | 1.93 | 2.12 |
| 42965 | 0 | 77951  | LPTMLSPTGLSR                                     | 2.52 | 0.01 | 0.90 | 1.15 | 0.22 | 1.39 |
| 42966 | 0 | 78455  | LPTNLQ                                           | 2.05 | 0.01 | 0.90 | 0.68 | 0.22 | 0.28 |
| 42967 | 0 | 489653 | LPTRPSVQPWSTIVQ                                  | 2.70 | 0.01 | 2.69 | 3.05 | 0.85 | 1.28 |
| 42968 | 0 | 123457 | LPTTLKMWS                                        | 2.23 | 0.01 | 2.28 | 2.00 | 0.22 | 0.28 |
| 42969 | 0 | 123457 | LPTTLKMWS                                        | 2.23 | 0.01 | 2.28 | 2.00 | 0.22 | 0.28 |
| 42970 | 0 | 38747  | LPVCPL                                           | 1.92 | 0.01 | 2.08 | 1.12 | 0.22 | 2.02 |
| 42971 | 0 | 134437 | LPVCP LLPGTSTTSTGP                               | 2.85 | 0.01 | 3.07 | 0.44 | 0.22 | 1.66 |
| 42972 | 0 | 134437 | LPVCP LLPGTSTTSTGP                               | 2.85 | 0.01 | 3.07 | 0.44 | 0.22 | 0.28 |
| 42973 | 0 | 332917 | LPVDNDGDESSDKED<br>LPVGAPTKTTDAWQLK              | 2.69 | 0.01 | 1.61 | 0.44 | 0.85 | 1.28 |
| 42974 | 0 | 38751  | GGGNSVRIQKLAVAGM<br>SPTVVFKI<br>LPVGAPTKTTDAWQLK | 3.62 | 0.01 | 3.93 | 1.12 | 0.22 | 0.85 |
| 42975 | 0 | 38751  | GGGNSVRIQKLAVAGM<br>SPTVVFKI<br>LPVGAPTKTTDAWQLK | 3.62 | 0.01 | 3.93 | 2.02 | 0.22 | 0.85 |
| 42976 | 0 | 38751  | GGGNSVRIQKLAVAGM<br>SPTVVFKI                     | 3.62 | 0.01 | 3.93 | 1.12 | 0.22 | 0.85 |
| 42977 | 0 | 38753  | LPVGQIRNVPHPFVA                                  | 2.66 | 0.01 | 3.78 | 1.15 | 0.22 | 0.28 |
| 42978 | 0 | 38754  | LPVGYHGRAS                                       | 2.29 | 0.01 | 1.75 | 0.68 | 0.22 | 0.28 |
| 42979 | 0 | 38754  | LPVGYHGRAS                                       | 2.29 | 0.01 | 1.75 | 0.68 | 0.22 | 0.28 |
| 42980 | 0 | 115850 | LPVPQKAVPY                                       | 2.33 | 0.01 | 1.60 | 0.44 | 1.23 | 0.85 |
| 42981 | 0 | 115850 | LPVPQKAVPY                                       | 2.33 | 0.01 | 1.60 | 0.44 | 1.23 | 0.85 |
| 42982 | 0 | 120777 | LPVVALCTVSDIVLIAAGI<br>AGFGA                     | 3.15 | 0.01 | 2.86 | 0.44 | 1.41 | 0.28 |
| 42983 | 0 | 38764  | LPVWARPD                                         | 2.12 | 0.01 | 2.68 | 0.44 | 1.59 | 0.28 |
| 42984 | 0 | 173946 | LPWDPQELDILG                                     | 2.50 | 0.01 | 4.15 | 0.68 | 0.22 | 0.85 |

|       |   |        |                         |      |      |      |      |      |      |
|-------|---|--------|-------------------------|------|------|------|------|------|------|
| 42985 | 0 | 173946 | LPWDPQELDILG            | 2.50 | 0.01 | 4.15 | 0.68 | 0.22 | 0.28 |
| 42986 | 0 | 173946 | LPWDPQELDILG            | 2.50 | 0.01 | 4.15 | 0.68 | 0.22 | 1.48 |
| 42987 | 0 | 173946 | LPWDPQELDILG            | 2.50 | 0.01 | 4.15 | 0.68 | 0.22 | 1.48 |
| 42988 | 0 | 173946 | LPWDPQELDILG            | 2.50 | 0.01 | 4.15 | 0.68 | 0.22 | 1.48 |
| 42989 | 0 | 173946 | LPWDPQELDILG            | 2.50 | 0.01 | 4.15 | 0.68 | 0.22 | 1.48 |
| 42990 | 0 | 38769  | LPWGVAARR               | 2.20 | 0.01 | 0.90 | 0.44 | 0.85 | 0.28 |
| 42991 | 0 | 38769  | LPWGVAARR               | 2.20 | 0.01 | 0.90 | 0.44 | 0.85 | 0.28 |
| 42992 | 0 | 190283 | LPWHFKSRHRYQ            | 2.45 | 0.01 | 0.90 | 0.68 | 2.25 | 1.75 |
| 42993 | 0 | 190283 | LPWHFKSRHRYQ            | 2.45 | 0.01 | 0.90 | 1.15 | 2.25 | 1.75 |
| 42994 | 0 | 190283 | LPWHFKSRHRYQ            | 2.45 | 0.01 | 0.90 | 1.15 | 0.22 | 0.28 |
| 42995 | 0 | 190283 | LPWHFKSRHRYQ            | 2.45 | 0.01 | 0.90 | 1.15 | 0.22 | 0.28 |
| 42996 | 0 | 237832 | LPWKHEGAQNWNNAE<br>RLV  | 2.83 | 0.01 | 3.19 | 0.44 | 1.74 | 0.85 |
| 42997 | 0 | 237832 | LPWKHEGAQNWNNAE<br>RLV  | 2.83 | 0.01 | 3.19 | 0.44 | 0.22 | 0.85 |
| 42998 | 0 | 38771  | LPWLPG                  | 1.92 | 0.01 | 2.40 | 0.44 | 0.85 | 0.28 |
| 42999 | 0 | 112584 | LPWNAFPGK               | 2.21 | 0.01 | 0.78 | 2.25 | 0.22 | 1.27 |
| 43000 | 0 | 112584 | LPWNAFPGK               | 2.21 | 0.01 | 0.78 | 2.25 | 0.22 | 1.27 |
| 43001 | 0 | 112584 | LPWNAFPGK               | 2.21 | 0.01 | 1.60 | 2.04 | 0.22 | 0.28 |
| 43002 | 0 | 112584 | LPWNAFPGK               | 2.21 | 0.01 | 1.60 | 2.04 | 0.22 | 0.85 |
| 43003 | 0 | 112584 | LPWNAFPGK               | 2.21 | 0.01 | 1.60 | 2.04 | 0.22 | 0.28 |
| 43004 | 0 | 112584 | LPWNAFPGK               | 2.21 | 0.01 | 1.60 | 2.04 | 0.22 | 0.28 |
| 43005 | 0 | 112584 | LPWNAFPGK               | 2.21 | 0.01 | 1.60 | 2.04 | 0.22 | 0.85 |
| 43006 | 0 | 112584 | LPWNAFPGK               | 2.21 | 0.01 | 1.60 | 2.04 | 0.22 | 0.85 |
| 43007 | 0 | 112584 | LPWNAFPGK               | 2.21 | 0.01 | 1.60 | 1.20 | 0.22 | 0.28 |
| 43008 | 0 | 112584 | LPWNAFPGK               | 2.21 | 0.01 | 1.60 | 1.20 | 0.22 | 0.28 |
| 43009 | 0 | 38772  | LPWRAPSQPAALFL          | 2.70 | 0.01 | 3.19 | 1.12 | 0.22 | 2.92 |
| 43010 | 0 | 106618 | LPWYQIA                 | 1.99 | 0.01 | 0.90 | 3.00 | 1.93 | 0.28 |
| 43011 | 0 | 450807 | LPYDHLP                 | 2.05 | 0.01 | 0.90 | 0.44 | 1.23 | 1.39 |
| 43012 | 0 | 129296 | LPYGDSDRIEKDRLQ         | 2.72 | 0.01 | 0.78 | 0.44 | 1.13 | 0.85 |
| 43013 | 0 | 172229 | LPYGWTPGVKRNFGP         | 2.66 | 0.01 | 0.78 | 0.44 | 1.41 | 0.28 |
| 43014 | 0 | 38777  | LPYIEQGMM               | 2.18 | 0.01 | 2.41 | 0.44 | 0.85 | 0.28 |
| 43015 | 0 | 127726 | LPYKLTQ                 | 2.03 | 0.01 | 0.90 | 0.44 | 1.13 | 1.39 |
| 43016 | 0 | 149371 | LPYPQPQPFL              | 2.37 | 0.01 | 1.86 | 0.44 | 1.93 | 0.85 |
| 43017 | 0 | 149371 | LPYPQPQPFL              | 2.37 | 0.01 | 1.86 | 2.74 | 0.22 | 0.85 |
| 43018 | 0 | 149371 | LPYPQPQPFL              | 2.37 | 0.01 | 1.86 | 2.74 | 0.22 | 0.85 |
| 43019 | 0 | 98230  | LPYSQPQPFRPQQPY         | 2.72 | 0.01 | 1.86 | 0.44 | 1.93 | 0.28 |
| 43020 | 0 | 98230  | LPYSQPQPFRPQQPY         | 2.72 | 0.01 | 1.86 | 0.44 | 2.39 | 0.28 |
| 43021 | 0 | 98231  | LPYSQPQPFRPQQPY<br>PQPQ | 3.06 | 0.01 | 1.86 | 0.44 | 1.93 | 0.28 |
| 43022 | 0 | 98231  | LPYSQPQPFRPQQPY<br>PQPQ | 3.06 | 0.01 | 1.86 | 0.44 | 2.39 | 0.28 |
| 43023 | 0 | 98231  | LPYSQPQPFRPQQPY<br>PQPQ | 3.06 | 0.01 | 1.86 | 0.44 | 2.39 | 0.28 |
| 43024 | 0 | 101035 | LPYTAP                  | 1.90 | 0.01 | 3.18 | 1.12 | 0.22 | 0.28 |
| 43025 | 0 | 165634 | LPYTLK                  | 2.03 | 0.01 | 0.90 | 0.44 | 1.23 | 1.39 |



|       |   |        |                                  |      |      |      |      |      |      |
|-------|---|--------|----------------------------------|------|------|------|------|------|------|
| 43026 | 0 | 79606  | LPYTMWV                          | 1.99 | 0.01 | 0.90 | 1.12 | 0.22 | 1.39 |
| 43027 | 0 | 123458 | LPYYIDDKC                        | 2.21 | 0.01 | 2.28 | 2.00 | 0.22 | 0.28 |
| 43028 | 0 | 38799  | LQAAVLHVPGCVPC                   | 2.64 | 0.01 | 2.69 | 0.44 | 0.85 | 0.28 |
| 43029 | 0 | 126606 | LQAEAPSLGPGLGKAEL<br>DGYSQEAIWLF | 3.29 | 0.01 | 1.75 | 1.20 | 0.22 | 0.85 |
| 43030 | 0 | 126606 | LQAEAPSLGPGLGKAEL<br>DGYSQEAIWLF | 3.29 | 0.01 | 1.75 | 1.20 | 0.22 | 1.27 |
| 43031 | 0 | 126606 | LQAEAPSLGPGLGKAEL<br>DGYSQEAIWLF | 3.29 | 0.01 | 1.75 | 1.20 | 0.22 | 1.75 |
| 43032 | 0 | 124471 | LQAFDSHYDY                       | 2.31 | 0.01 | 0.78 | 0.68 | 0.22 | 0.85 |
| 43033 | 0 | 124471 | LQAFDSHYDY                       | 2.31 | 0.01 | 0.78 | 0.68 | 0.22 | 2.12 |
| 43034 | 0 | 124471 | LQAFDSHYDY                       | 2.31 | 0.01 | 0.78 | 0.68 | 0.22 | 2.02 |
| 43035 | 0 | 103384 | LQAHPHAVNGTAMRE                  | 2.64 | 0.01 | 2.04 | 0.44 | 0.85 | 1.28 |
| 43036 | 0 | 38806  | LQAKIAQLQDEIDG                   | 2.65 | 0.01 | 3.78 | 1.81 | 0.22 | 0.85 |
| 43037 | 0 | 111511 | LQALRNSNIQVLLDV                  | 2.70 | 0.01 | 3.20 | 1.12 | 0.22 | 0.85 |
| 43038 | 0 | 38810  | LQAMRKYSFPRNGYME<br>PTLG         | 2.92 | 0.01 | 2.04 | 0.44 | 0.85 | 0.28 |
| 43039 | 0 | 38810  | LQAMRKYSFPRNGYME<br>PTLG         | 2.92 | 0.01 | 2.04 | 0.44 | 0.85 | 1.27 |
| 43040 | 0 | 38810  | LQAMRKYSFPRNGYME<br>PTLG         | 2.92 | 0.01 | 2.04 | 0.44 | 2.82 | 0.28 |
| 43041 | 0 | 38810  | LQAMRKYSFPRNGYME<br>PTLG         | 2.92 | 0.01 | 2.04 | 0.44 | 0.85 | 0.28 |
| 43042 | 0 | 38810  | LQAMRKYSFPRNGYME<br>PTLG         | 2.92 | 0.01 | 2.04 | 0.44 | 1.59 | 0.28 |
| 43043 | 0 | 38810  | LQAMRKYSFPRNGYME<br>PTLG         | 2.92 | 0.01 | 2.04 | 0.44 | 0.85 | 0.28 |
| 43044 | 0 | 38810  | LQAMRKYSFPRNGYME<br>PTLG         | 2.92 | 0.01 | 2.04 | 0.44 | 1.59 | 0.28 |
| 43045 | 0 | 38810  | LQAMRKYSFPRNGYME<br>PTLG         | 2.92 | 0.01 | 2.04 | 0.44 | 0.85 | 0.28 |
| 43046 | 0 | 38810  | LQAMRKYSFPRNGYME<br>PTLG         | 2.92 | 0.01 | 2.04 | 0.44 | 1.59 | 0.28 |
| 43047 | 0 | 186694 | LQAQKIEVQNQI                     | 2.49 | 0.01 | 0.90 | 0.68 | 0.22 | 1.39 |
| 43048 | 0 | 136486 | LQATRGAVVAKW                     | 2.46 | 0.01 | 3.48 | 3.70 | 0.85 | 1.34 |
| 43049 | 0 | 136486 | LQATRGAVVAKW                     | 2.46 | 0.01 | 3.48 | 0.68 | 0.22 | 1.34 |
| 43050 | 0 | 131551 | LQCMGCCFSRAYPTPLR<br>SKKTMLVQK   | 3.19 | 0.01 | 0.78 | 1.12 | 0.22 | 2.56 |
| 43051 | 0 | 131551 | LQCMGCCFSRAYPTPLR<br>SKKTMLVQK   | 3.19 | 0.01 | 0.78 | 1.12 | 0.22 | 2.56 |
| 43052 | 0 | 131551 | LQCMGCCFSRAYPTPLR<br>SKKTMLVQK   | 3.19 | 0.01 | 0.78 | 1.12 | 0.22 | 2.56 |
| 43053 | 0 | 131551 | LQCMGCCFSRAYPTPLR<br>SKKTMLVQK   | 3.19 | 0.01 | 0.78 | 1.12 | 0.22 | 2.56 |
| 43054 | 0 | 131551 | LQCMGCCFSRAYPTPLR<br>SKKTMLVQK   | 3.19 | 0.01 | 0.78 | 1.12 | 0.22 | 0.28 |

|       |   |        |                                |      |      |      |      |      |      |
|-------|---|--------|--------------------------------|------|------|------|------|------|------|
| 43055 | 0 | 131551 | LQCMGCCFSRAYPTPLR<br>SKKTMLVQK | 3.19 | 0.01 | 0.78 | 1.12 | 0.22 | 2.56 |
| 43056 | 0 | 38813  | LQCVGS                         | 1.88 | 0.01 | 1.86 | 0.44 | 1.23 | 0.28 |
| 43057 | 0 | 38814  | LQDCTM                         | 1.88 | 0.01 | 1.96 | 0.44 | 0.85 | 0.28 |
| 43058 | 0 | 38816  | LQDGQVKI                       | 2.12 | 0.01 | 3.93 | 0.68 | 0.22 | 0.28 |
| 43059 | 0 | 38816  | LQDGQVKI                       | 2.12 | 0.01 | 3.93 | 0.68 | 0.22 | 0.28 |
| 43060 | 0 | 115851 | LQDKIHPPAQ                     | 2.29 | 0.01 | 1.60 | 0.44 | 1.23 | 0.85 |
| 43061 | 0 | 115851 | LQDKIHPPAQ                     | 2.29 | 0.01 | 1.60 | 0.44 | 1.23 | 0.85 |
| 43062 | 0 | 120778 | LQDLSEEEKN                     | 2.32 | 0.01 | 2.18 | 2.16 | 0.22 | 0.28 |
| 43063 | 0 | 120778 | LQDLSEEEKN                     | 2.32 | 0.01 | 2.18 | 2.16 | 0.22 | 0.28 |
| 43064 | 0 | 38823  | LQDPRVR                        | 2.02 | 0.01 | 2.58 | 1.15 | 0.22 | 0.28 |
| 43065 | 0 | 38824  | LQDPRVRGL                      | 2.24 | 0.01 | 2.58 | 1.15 | 0.22 | 0.28 |
| 43066 | 0 | 38825  | LQDPRVRGLYFPAGG                | 2.67 | 0.01 | 2.08 | 1.20 | 0.22 | 0.28 |
| 43067 | 0 | 38825  | LQDPRVRGLYFPAGG                | 2.67 | 0.01 | 2.08 | 1.20 | 0.22 | 0.28 |
| 43068 | 0 | 38825  | LQDPRVRGLYFPAGG                | 2.67 | 0.01 | 2.08 | 1.20 | 0.22 | 0.28 |
| 43069 | 0 | 38825  | LQDPRVRGLYFPAGG                | 2.67 | 0.01 | 2.08 | 1.20 | 0.22 | 0.28 |
| 43070 | 0 | 38825  | LQDPRVRGLYFPAGG                | 2.67 | 0.01 | 2.08 | 1.20 | 0.22 | 0.28 |
| 43071 | 0 | 38825  | LQDPRVRGLYFPAGG                | 2.67 | 0.01 | 2.08 | 1.20 | 0.22 | 0.85 |
| 43072 | 0 | 38826  | LQDPRVRGLYLP                   | 2.50 | 0.01 | 2.58 | 1.15 | 0.22 | 0.28 |
| 43073 | 0 | 172232 | LQDPVPKESPKSCFF                | 2.66 | 0.01 | 0.78 | 0.44 | 1.41 | 0.28 |
| 43074 | 0 | 122140 | LQDSGVHDVAVISEAQA<br>ATA       | 2.96 | 0.01 | 2.04 | 0.44 | 0.85 | 0.28 |
| 43075 | 0 | 122140 | LQDSGVHDVAVISEAQA<br>ATA       | 2.96 | 0.01 | 2.04 | 0.44 | 0.85 | 1.34 |
| 43076 | 0 | 176317 | LQDTALYLVDGMTNT                | 2.69 | 0.01 | 2.63 | 1.15 | 0.22 | 0.85 |
| 43077 | 0 | 176317 | LQDTALYLVDGMTNT                | 2.69 | 0.01 | 2.63 | 1.15 | 0.22 | 0.85 |
| 43078 | 0 | 176317 | LQDTALYLVDGMTNT                | 2.69 | 0.01 | 2.63 | 1.15 | 0.22 | 0.85 |
| 43079 | 0 | 99440  | LQEGHVLVVPQNFV                 | 2.69 | 0.01 | 2.16 | 0.44 | 1.23 | 1.48 |
| 43080 | 0 | 127727 | LQEGLRRA                       | 2.14 | 0.01 | 0.78 | 0.44 | 1.13 | 0.85 |
| 43081 | 0 | 132864 | LQEKLSPL                       | 2.15 | 0.01 | 0.78 | 0.68 | 0.22 | 0.85 |
| 43082 | 0 | 140886 | LQEKLSPLGEE                    | 2.41 | 0.01 | 0.78 | 0.68 | 0.22 | 0.28 |
| 43083 | 0 | 129301 | LQELEKDEREQ                    | 2.45 | 0.01 | 0.78 | 0.44 | 1.13 | 0.28 |
| 43084 | 0 | 129301 | LQELEKDEREQ                    | 2.45 | 0.01 | 0.78 | 0.44 | 1.13 | 0.28 |
| 43085 | 0 | 129301 | LQELEKDEREQ                    | 2.45 | 0.01 | 0.78 | 0.44 | 1.13 | 0.28 |
| 43086 | 0 | 129301 | LQELEKDEREQ                    | 2.45 | 0.01 | 0.78 | 0.44 | 1.13 | 0.28 |
| 43087 | 0 | 129301 | LQELEKDEREQ                    | 2.45 | 0.01 | 0.78 | 0.44 | 1.13 | 0.28 |
| 43088 | 0 | 129301 | LQELEKDEREQ                    | 2.45 | 0.01 | 0.78 | 0.44 | 1.13 | 0.28 |
| 43089 | 0 | 129301 | LQELEKDEREQ                    | 2.45 | 0.01 | 0.78 | 0.44 | 1.13 | 0.28 |
| 43090 | 0 | 129301 | LQELEKDEREQ                    | 2.45 | 0.01 | 0.78 | 0.44 | 1.13 | 0.28 |
| 43091 | 0 | 129301 | LQELEKDEREQ                    | 2.45 | 0.01 | 0.78 | 0.44 | 1.13 | 0.28 |
| 43092 | 0 | 129301 | LQELEKDEREQ                    | 2.45 | 0.01 | 0.78 | 0.44 | 1.13 | 0.28 |
| 43093 | 0 | 129301 | LQELEKDEREQ                    | 2.45 | 0.01 | 0.78 | 0.44 | 1.13 | 1.27 |
| 43094 | 0 | 129301 | LQELEKDEREQ                    | 2.45 | 0.01 | 0.78 | 0.44 | 1.13 | 0.85 |
| 43095 | 0 | 129301 | LQELEKDEREQ                    | 2.45 | 0.01 | 0.78 | 2.79 | 1.13 | 1.28 |
| 43096 | 0 | 129301 | LQELEKDEREQ                    | 2.45 | 0.01 | 0.78 | 2.79 | 1.13 | 1.28 |
| 43097 | 0 | 129301 | LQELEKDEREQ                    | 2.45 | 0.01 | 0.78 | 1.81 | 1.41 | 1.28 |

|       |   |        |                                                           |      |      |      |      |      |      |
|-------|---|--------|-----------------------------------------------------------|------|------|------|------|------|------|
| 43098 | 0 | 190852 | LQELEKDEREQLRILGE                                         | 2.84 | 0.01 | 0.78 | 1.12 | 0.22 | 2.66 |
| 43099 | 0 | 190852 | LQELEKDEREQLRILGE                                         | 2.84 | 0.01 | 0.78 | 1.12 | 0.22 | 1.27 |
| 43100 | 0 | 118000 | LQELEKDEREQLRILGEK<br>EAKLAQQSQALQELISEL                  | 3.57 | 0.01 | 0.78 | 0.44 | 1.13 | 0.28 |
| 43101 | 0 | 118000 | LQELEKDEREQLRILGEK<br>EAKLAQQSQALQELISEL                  | 3.57 | 0.01 | 0.78 | 0.44 | 1.13 | 0.28 |
| 43102 | 0 | 118000 | LQELEKDEREQLRILGEK<br>EAKLAQQSQALQELISEL                  | 3.57 | 0.01 | 0.78 | 3.18 | 0.22 | 0.28 |
| 43103 | 0 | 120779 | LQELEKDEREQLRILGEK<br>EAKLAQQSQALQELISEL<br>DRRC          | 3.67 | 0.01 | 0.78 | 0.44 | 1.13 | 0.28 |
| 43104 | 0 | 120779 | LQELEKDEREQLRILGEK<br>EAKLAQQSQALQELISEL<br>DRRC          | 3.67 | 0.01 | 0.78 | 0.44 | 1.13 | 0.28 |
| 43105 | 0 | 118001 | LQELEKDEREQLRILGEK<br>EAKLAQQSQALQELISEL<br>DRRCHSSALELLQ | 3.86 | 0.01 | 0.78 | 0.44 | 1.93 | 0.28 |
| 43106 | 0 | 118001 | LQELEKDEREQLRILGEK<br>EAKLAQQSQALQELISEL<br>DRRCHSSALELLQ | 3.86 | 0.01 | 0.78 | 0.44 | 1.41 | 0.28 |
| 43107 | 0 | 118001 | LQELEKDEREQLRILGEK<br>EAKLAQQSQALQELISEL<br>DRRCHSSALELLQ | 3.86 | 0.01 | 0.78 | 0.44 | 1.13 | 0.28 |
| 43108 | 0 | 118001 | LQELEKDEREQLRILGEK<br>EAKLAQQSQALQELISEL<br>DRRCHSSALELLQ | 3.86 | 0.01 | 0.78 | 0.44 | 1.13 | 0.28 |
| 43109 | 0 | 118001 | LQELEKDEREQLRILGEK<br>EAKLAQQSQALQELISEL<br>DRRCHSSALELLQ | 3.86 | 0.01 | 0.78 | 0.44 | 1.13 | 0.28 |
| 43110 | 0 | 186695 | LQEMPLTALLRNLGKMT                                         | 2.80 | 0.01 | 0.78 | 0.68 | 0.22 | 0.28 |
| 43111 | 0 | 186695 | LQEMPLTALLRNLGKMT                                         | 2.80 | 0.01 | 0.78 | 0.68 | 0.22 | 0.85 |
| 43112 | 0 | 186695 | LQEMPLTALLRNLGKMT                                         | 2.80 | 0.01 | 0.78 | 0.68 | 0.22 | 0.28 |
| 43113 | 0 | 186695 | LQEMPLTALLRNLGKMT                                         | 2.80 | 0.01 | 0.78 | 0.68 | 2.60 | 1.75 |
| 43114 | 0 | 186695 | LQEMPLTALLRNLGKMT                                         | 2.80 | 0.01 | 1.75 | 0.68 | 0.22 | 0.28 |
| 43115 | 0 | 186695 | LQEMPLTALLRNLGKMT                                         | 2.80 | 0.01 | 1.75 | 0.68 | 0.22 | 1.75 |
| 43116 | 0 | 118499 | LQEMPLTALLRNLGKM                                          | 2.73 | 0.01 | 0.78 | 1.12 | 0.22 | 0.28 |

|       |   |        |                            |      |      |      |      |      |      |
|-------|---|--------|----------------------------|------|------|------|------|------|------|
| 43117 | 0 | 118499 | LQEMPTLALLRNLGKM           | 2.73 | 0.01 | 0.78 | 1.12 | 0.22 | 0.28 |
| 43118 | 0 | 118499 | LQEMPTLALLRNLGKM           | 2.73 | 0.01 | 0.78 | 1.12 | 0.22 | 0.85 |
| 43119 | 0 | 118499 | LQEMPTLALLRNLGKM           | 2.73 | 0.01 | 0.78 | 1.12 | 0.22 | 0.85 |
| 43120 | 0 | 118499 | LQEMPTLALLRNLGKM           | 2.73 | 0.01 | 0.78 | 1.12 | 0.22 | 0.85 |
| 43121 | 0 | 118499 | LQEMPTLALLRNLGKM           | 2.73 | 0.01 | 0.78 | 1.12 | 0.22 | 0.85 |
| 43122 | 0 | 118499 | LQEMPTLALLRNLGKM           | 2.73 | 0.01 | 0.78 | 1.12 | 0.22 | 0.28 |
| 43123 | 0 | 38836  | LQFGYTSRSM                 | 2.29 | 0.01 | 3.16 | 0.68 | 0.22 | 0.28 |
| 43124 | 0 | 38836  | LQFGYTSRSM                 | 2.29 | 0.01 | 3.16 | 0.68 | 0.22 | 0.28 |
| 43125 | 0 | 38840  | LQGDRRCQSQLERAN            | 2.69 | 0.01 | 2.16 | 0.44 | 1.23 | 0.28 |
| 43126 | 0 | 98887  | LQGFSRNTLEAAFNA            | 2.69 | 0.01 | 2.16 | 0.44 | 1.23 | 0.85 |
| 43127 | 0 | 98887  | LQGFSRNTLEAAFNA            | 2.69 | 0.01 | 2.16 | 0.44 | 1.23 | 1.48 |
| 43128 | 0 | 110933 | LQGNRINEFSISSFCTVV<br>DV   | 2.92 | 0.01 | 0.78 | 2.46 | 0.22 | 1.28 |
| 43129 | 0 | 243816 | LQGRQQEQQ                  | 2.24 | 0.01 | 2.16 | 0.44 | 1.23 | 1.28 |
| 43130 | 0 | 151991 | LQGRSNAWRPQ                | 2.39 | 0.01 | 0.78 | 0.44 | 1.93 | 1.27 |
| 43131 | 0 | 38847  | LQGTLGAS                   | 2.15 | 0.01 | 4.08 | 1.15 | 2.26 | 0.85 |
| 43132 | 0 | 148670 | LQIPEQSQCQ                 | 2.33 | 0.01 | 1.86 | 0.44 | 1.23 | 0.85 |
| 43133 | 0 | 148670 | LQIPEQSQCQ                 | 2.33 | 0.01 | 1.86 | 0.44 | 1.23 | 0.28 |
| 43134 | 0 | 141704 | LQIVAEREAYYLWKQY           | 2.75 | 0.01 | 1.66 | 2.55 | 0.22 | 0.28 |
| 43135 | 0 | 141704 | LQIVAEREAYYLWKQY           | 2.75 | 0.01 | 1.66 | 1.20 | 0.22 | 0.28 |
| 43136 | 0 | 38859  | LQKDEPNGRASDTAGQ<br>EQQYDV | 3.01 | 0.01 | 3.35 | 2.02 | 0.85 | 0.28 |
| 43137 | 0 | 38860  | LQKEVDRLEDELV              | 2.60 | 0.01 | 3.15 | 0.44 | 1.23 | 0.85 |
| 43138 | 0 | 116778 | LQKRMQQLENDLDQV            | 2.70 | 0.01 | 2.36 | 0.44 | 1.23 | 1.28 |
| 43139 | 0 | 116778 | LQKRMQQLENDLDQV            | 2.70 | 0.01 | 2.36 | 0.44 | 1.23 | 1.27 |
| 43140 | 0 | 116778 | LQKRMQQLENDLDQV            | 2.70 | 0.01 | 2.36 | 0.44 | 1.23 | 1.28 |
| 43141 | 0 | 196640 | LQKTFMV                    | 1.99 | 0.01 | 0.90 | 0.44 | 1.23 | 1.39 |
| 43142 | 0 | 78200  | LQKTSG                     | 1.88 | 0.01 | 0.90 | 2.02 | 1.59 | 0.28 |
| 43143 | 0 | 38868  | LQKTYSQY                   | 2.14 | 0.01 | 1.66 | 0.44 | 1.74 | 0.28 |
| 43144 | 0 | 79297  | LQKVHR                     | 1.88 | 0.01 | 0.90 | 0.68 | 0.22 | 1.39 |
| 43145 | 0 | 78201  | LQKWENDECAQKKIIAE<br>KTK   | 2.95 | 0.01 | 1.60 | 0.44 | 1.23 | 1.28 |
| 43146 | 0 | 423417 | LQLDRLVFEEAAQRGL           | 2.70 | 0.01 | 2.51 | 0.44 | 2.35 | 1.28 |
| 43147 | 0 | 78456  | LQLISGLLNDTSSSN            | 2.70 | 0.01 | 0.90 | 0.68 | 0.22 | 0.28 |
| 43148 | 0 | 137924 | LQLLVVGCSSH                | 2.49 | 0.01 | 2.21 | 0.44 | 0.85 | 0.28 |

|       |   |        |                                      |      |      |      |      |      |      |
|-------|---|--------|--------------------------------------|------|------|------|------|------|------|
| 43149 | 0 | 109516 | LQLQFPQPQLPYPQPQ<br>LPYPQPQLPYPQPQPF | 3.52 | 4.93 | 1.86 | 0.44 | 1.93 | 0.28 |
| 43150 | 0 | 38901  | LQLQFPQPQLPYPQPQ<br>LPYPQPQLPYPQPQPF | 3.52 | 0.01 | 1.86 | 0.68 | 0.22 | 0.28 |
| 43151 | 0 | 38901  | LQLQFPQPQLPYPQPQ<br>LPYPQPQLPYPQPQPF | 3.52 | 0.01 | 1.86 | 0.68 | 0.22 | 1.27 |
| 43152 | 0 | 38901  | LQLQFPQPQLPYPQPQ<br>LPYPQPQLPYPQPQPF | 3.52 | 0.01 | 1.86 | 0.68 | 0.22 | 0.85 |
| 43153 | 0 | 38901  | LQLQFPQPQLPYPQPQ<br>LPYPQPQLPYPQPQPF | 3.52 | 0.01 | 1.86 | 0.68 | 0.22 | 0.85 |
| 43154 | 0 | 38901  | LQLQFPQPQLPYPQPQ<br>LPYPQPQLPYPQPQPF | 3.52 | 0.01 | 1.86 | 0.68 | 0.22 | 0.85 |
| 43155 | 0 | 38901  | LQLQFPQPQLPYPQPQ<br>LPYPQPQLPYPQPQPF | 3.52 | 0.01 | 1.86 | 0.68 | 0.22 | 1.27 |
| 43156 | 0 | 38901  | LQLQFPQPQLPYPQPQ<br>LPYPQPQLPYPQPQPF | 3.52 | 0.01 | 1.86 | 0.68 | 0.22 | 1.27 |
| 43157 | 0 | 172247 | LQMPHNSKTANP                         | 2.45 | 0.01 | 0.90 | 0.44 | 0.85 | 1.39 |
| 43158 | 0 | 38915  | LQN                                  | 1.37 | 0.01 | 3.13 | 0.68 | 0.22 | 0.28 |
| 43159 | 0 | 38918  | LQND                                 | 1.57 | 0.01 | 3.97 | 0.68 | 0.22 | 0.28 |
| 43160 | 0 | 38918  | LQND                                 | 1.57 | 0.01 | 3.47 | 0.68 | 0.22 | 0.28 |
| 43161 | 0 | 38918  | LQND                                 | 1.57 | 0.01 | 3.47 | 0.68 | 0.22 | 0.85 |
| 43162 | 0 | 38918  | LQND                                 | 1.57 | 0.01 | 3.47 | 0.68 | 0.22 | 2.02 |
| 43163 | 0 | 38918  | LQND                                 | 1.57 | 0.01 | 3.47 | 0.68 | 0.22 | 1.34 |
| 43164 | 0 | 95570  | LQNDPT                               | 1.88 | 0.01 | 2.40 | 2.52 | 0.22 | 0.28 |
| 43165 | 0 | 95570  | LQNDPT                               | 1.88 | 0.01 | 2.40 | 2.52 | 0.22 | 0.28 |
| 43166 | 0 | 38919  | LQNDPTTNVA                           | 2.30 | 0.01 | 3.13 | 1.12 | 0.22 | 0.28 |
| 43167 | 0 | 38919  | LQNDPTTNVA                           | 2.30 | 0.01 | 3.13 | 0.68 | 0.22 | 0.28 |
| 43168 | 0 | 38919  | LQNDPTTNVA                           | 2.30 | 0.01 | 3.13 | 0.68 | 0.22 | 1.34 |
| 43169 | 0 | 38919  | LQNDPTTNVA                           | 2.30 | 0.01 | 3.13 | 1.12 | 0.22 | 0.85 |
| 43170 | 0 | 38919  | LQNDPTTNVA                           | 2.30 | 0.01 | 3.13 | 0.68 | 0.22 | 0.28 |
| 43171 | 0 | 38919  | LQNDPTTNVA                           | 2.30 | 0.01 | 3.13 | 0.68 | 0.22 | 0.28 |
| 43172 | 0 | 38919  | LQNDPTTNVA                           | 2.30 | 0.01 | 3.13 | 0.68 | 0.22 | 0.28 |
| 43173 | 0 | 181386 | LQNLRDYRILEFNSKPNT<br>LLLPNHAD       | 3.17 | 0.01 | 2.72 | 0.44 | 1.23 | 1.27 |
| 43174 | 0 | 38923  | LQNQGAWP                             | 2.12 | 0.01 | 2.40 | 2.43 | 0.22 | 0.28 |
| 43175 | 0 | 167778 | LQNQGAWPA                            | 2.23 | 0.01 | 2.40 | 2.43 | 0.22 | 0.28 |
| 43176 | 0 | 187015 | LQNRAAIDFLLAQGHG<br>CQDVEGMCCF       | 3.22 | 0.01 | 4.63 | 1.20 | 0.22 | 0.28 |

|       |   |        |                                 |      |      |      |      |      |      |
|-------|---|--------|---------------------------------|------|------|------|------|------|------|
| 43177 | 0 | 187015 | LQNRAAIDFLLLAQGHG<br>CQDVEGMCCF | 3.22 | 0.01 | 4.63 | 1.20 | 0.22 | 1.34 |
| 43178 | 0 | 38925  | LQNSMSGASADSTQA                 | 2.70 | 0.01 | 2.91 | 0.44 | 0.85 | 0.28 |
| 43179 | 0 | 238727 | LQPEDLPPS                       | 2.25 | 0.01 | 2.14 | 2.65 | 0.22 | 0.85 |
| 43180 | 0 | 174188 | LQPEEPFPEQ                      | 2.36 | 0.01 | 0.90 | 0.44 | 1.23 | 1.27 |
| 43181 | 0 | 111515 | LQPETTDLYCYEQLNDSS<br>EE        | 2.95 | 0.01 | 1.86 | 3.22 | 0.22 | 0.28 |
| 43182 | 0 | 111515 | LQPETTDLYCYEQLNDSS<br>EE        | 2.95 | 0.01 | 1.86 | 2.69 | 0.22 | 0.28 |
| 43183 | 0 | 38937  | LQPFQPPE                        | 2.16 | 0.01 | 1.86 | 0.44 | 1.93 | 0.28 |
| 43184 | 0 | 38945  | LQPGDDPL                        | 2.16 | 0.01 | 2.40 | 2.43 | 0.22 | 0.28 |
| 43185 | 0 | 38946  | LQPGKTS                         | 1.99 | 0.01 | 3.37 | 0.68 | 0.22 | 1.34 |
| 43186 | 0 | 38946  | LQPGKTS                         | 1.99 | 0.01 | 3.37 | 0.68 | 0.22 | 0.28 |
| 43187 | 0 | 38946  | LQPGKTS                         | 1.99 | 0.01 | 3.37 | 0.68 | 0.22 | 0.85 |
| 43188 | 0 | 38948  | LQPGVDIIEG                      | 2.30 | 0.01 | 2.60 | 0.44 | 1.23 | 0.85 |
| 43189 | 0 | 38948  | LQPGVDIIEG                      | 2.30 | 0.01 | 2.60 | 0.44 | 1.23 | 1.27 |
| 43190 | 0 | 38950  | LQPQQPFPQQ                      | 2.35 | 0.01 | 2.83 | 0.68 | 0.22 | 0.85 |
| 43191 | 0 | 38950  | LQPQQPFPQQ                      | 2.35 | 0.01 | 2.83 | 0.68 | 0.22 | 0.28 |
| 43192 | 0 | 38950  | LQPQQPFPQQ                      | 2.35 | 0.01 | 1.86 | 0.44 | 1.23 | 0.85 |
| 43193 | 0 | 38950  | LQPQQPFPQQ                      | 2.35 | 0.01 | 1.86 | 0.44 | 1.23 | 0.85 |
| 43194 | 0 | 38950  | LQPQQPFPQQ                      | 2.35 | 0.01 | 1.86 | 0.44 | 1.23 | 0.85 |
| 43195 | 0 | 38950  | LQPQQPFPQQ                      | 2.35 | 0.01 | 1.86 | 0.44 | 1.23 | 0.28 |
| 43196 | 0 | 38950  | LQPQQPFPQQ                      | 2.35 | 0.01 | 1.86 | 0.44 | 1.23 | 0.28 |
| 43197 | 0 | 38952  | LQPQQPFSQQ                      | 2.34 | 0.01 | 2.83 | 0.68 | 0.22 | 0.85 |
| 43198 | 0 | 38952  | LQPQQPFSQQ                      | 2.34 | 0.01 | 2.83 | 0.68 | 0.22 | 0.28 |
| 43199 | 0 | 38953  | LQPQQSFPQP                      | 2.36 | 0.01 | 2.83 | 0.68 | 0.22 | 0.85 |
| 43200 | 0 | 38953  | LQPQQSFPQP                      | 2.36 | 0.01 | 2.83 | 0.68 | 0.22 | 0.28 |
| 43201 | 0 | 243817 | LQPWSSSWLLPN                    | 2.51 | 0.01 | 0.90 | 0.44 | 0.22 | 1.39 |
| 43202 | 0 | 38956  | LQQATRQAAQ                      | 2.27 | 0.01 | 2.69 | 0.44 | 0.85 | 0.28 |
| 43203 | 0 | 98890  | LQQHNIAHGRSQ                    | 2.47 | 0.01 | 1.86 | 0.44 | 1.93 | 1.27 |
| 43204 | 0 | 98233  | LQQHNIAHGRSQVLQQ<br>STYQL       | 3.00 | 0.01 | 1.86 | 0.44 | 1.93 | 0.28 |
| 43205 | 0 | 98233  | LQQHNIAHGRSQVLQQ<br>STYQL       | 3.00 | 0.01 | 1.86 | 0.44 | 1.93 | 0.28 |
| 43206 | 0 | 98233  | LQQHNIAHGRSQVLQQ<br>STYQL       | 3.00 | 0.01 | 1.86 | 0.44 | 2.39 | 0.28 |
| 43207 | 0 | 98233  | LQQHNIAHGRSQVLQQ<br>STYQL       | 3.00 | 0.01 | 1.86 | 0.44 | 2.39 | 0.28 |
| 43208 | 0 | 148674 | LQQILQQQLI                      | 2.37 | 0.01 | 1.86 | 2.74 | 0.22 | 0.85 |
| 43209 | 0 | 148674 | LQQILQQQLI                      | 2.37 | 0.01 | 1.86 | 2.74 | 0.22 | 0.85 |
| 43210 | 0 | 521906 | LQQIMENQSDRLQGRQ<br>QEQQFKRE    | 3.13 | 0.01 | 2.16 | 1.12 | 0.22 | 1.39 |
| 43211 | 0 | 521906 | LQQIMENQSDRLQGRQ<br>QEQQFKRE    | 3.13 | 0.01 | 2.16 | 0.44 | 1.23 | 1.39 |
| 43212 | 0 | 38962  | LQQQEIQIGEEV                    | 2.49 | 0.01 | 3.12 | 0.44 | 1.23 | 0.85 |

|       |   |        |                               |      |      |      |      |      |      |
|-------|---|--------|-------------------------------|------|------|------|------|------|------|
| 43213 | 0 | 98234  | LQQQLIFCMDVVLQQH<br>NIAHG     | 2.98 | 0.01 | 1.86 | 0.44 | 1.93 | 0.28 |
| 43214 | 0 | 98234  | LQQQLIFCMDVVLQQH<br>NIAHG     | 2.98 | 0.01 | 1.86 | 0.44 | 1.93 | 0.28 |
| 43215 | 0 | 98891  | LQQQLIPCMDVV                  | 2.46 | 0.01 | 1.86 | 0.44 | 1.93 | 1.27 |
| 43216 | 0 | 148678 | LQQQLIPCRD                    | 2.32 | 0.01 | 1.86 | 2.74 | 0.22 | 0.85 |
| 43217 | 0 | 167967 | LQQQNT                        | 1.91 | 0.01 | 3.61 | 1.81 | 0.22 | 2.98 |
| 43218 | 0 | 167967 | LQQQNT                        | 1.91 | 0.01 | 3.61 | 1.81 | 0.22 | 0.28 |
| 43219 | 0 | 167967 | LQQQNT                        | 1.91 | 0.01 | 3.61 | 1.81 | 0.22 | 1.34 |
| 43220 | 0 | 167967 | LQQQNT                        | 1.91 | 0.01 | 3.61 | 1.81 | 0.22 | 1.75 |
| 43221 | 0 | 167967 | LQQQNT                        | 1.91 | 0.01 | 3.61 | 1.81 | 0.22 | 1.48 |
| 43222 | 0 | 173947 | LQQQQIPQQQIPQ                 | 2.61 | 0.01 | 1.86 | 0.44 | 1.23 | 0.85 |
| 43223 | 0 | 148680 | LQQQQQQQQQ                    | 2.37 | 0.01 | 1.86 | 0.44 | 1.93 | 0.85 |
| 43224 | 0 | 148680 | LQQQQQQQQQ                    | 2.37 | 0.01 | 1.86 | 2.74 | 0.22 | 0.85 |
| 43225 | 0 | 148680 | LQQQQQQQQQ                    | 2.37 | 0.01 | 1.86 | 2.74 | 0.22 | 0.85 |
| 43226 | 0 | 148680 | LQQQQQQQQQ                    | 2.37 | 0.01 | 1.86 | 2.74 | 0.22 | 0.85 |
| 43227 | 0 | 148680 | LQQQQQQQQQ                    | 2.37 | 0.01 | 1.86 | 2.74 | 0.22 | 0.85 |
| 43228 | 0 | 38970  | LQRATQQQA                     | 2.25 | 0.01 | 2.59 | 0.44 | 0.85 | 0.28 |
| 43229 | 0 | 38971  | LQRAVRLALSGSDGRVG<br>SG       | 2.95 | 4.93 | 0.90 | 2.37 | 0.22 | 0.28 |
| 43230 | 0 | 99442  | LQRFDRSRQFQNLQ                | 2.73 | 0.01 | 2.16 | 0.44 | 1.23 | 1.48 |
| 43231 | 0 | 115152 | LQRRLSAMEKGKHLKPG<br>KDASKRGR | 3.18 | 0.01 | 0.78 | 0.44 | 1.41 | 0.28 |
| 43232 | 0 | 38980  | LQSALGASSGGG                  | 2.58 | 0.01 | 4.93 | 0.68 | 0.22 | 1.27 |
| 43233 | 0 | 38982  | LQSARRGE                      | 2.11 | 0.01 | 2.21 | 1.12 | 0.22 | 0.28 |
| 43234 | 0 | 38982  | LQSARRGE                      | 2.11 | 0.01 | 2.21 | 0.44 | 0.85 | 0.28 |
| 43235 | 0 | 38983  | LQSARRGEKE                    | 2.30 | 0.01 | 2.21 | 1.12 | 0.22 | 0.28 |
| 43236 | 0 | 38983  | LQSARRGEKE                    | 2.30 | 0.01 | 2.21 | 1.12 | 0.22 | 0.28 |
| 43237 | 0 | 99443  | LQSCQQEPDDLKQKA               | 2.69 | 0.01 | 2.16 | 0.44 | 1.23 | 1.48 |
| 43238 | 0 | 134148 | LQSDQEEIDY                    | 2.32 | 0.01 | 0.78 | 1.20 | 0.22 | 2.35 |
| 43239 | 0 | 134148 | LQSDQEEIDY                    | 2.32 | 0.01 | 0.78 | 1.20 | 0.22 | 1.57 |
| 43240 | 0 | 134148 | LQSDQEEIDY                    | 2.32 | 0.01 | 0.78 | 1.20 | 0.22 | 1.34 |
| 43241 | 0 | 38984  | LQSELENAPKTGGASSEE<br>VKRLEG  | 3.13 | 0.01 | 3.78 | 1.81 | 0.22 | 0.85 |
| 43242 | 0 | 38988  | LQSLGAEIAVEQAAL               | 2.71 | 0.01 | 2.04 | 0.44 | 0.85 | 1.28 |
| 43243 | 0 | 504105 | LQSLQQIESMIEAES               | 2.73 | 0.01 | 3.89 | 0.44 | 1.74 | 1.28 |
| 43244 | 0 | 38991  | LQSLRKKPKLRI                  | 2.52 | 0.01 | 0.90 | 1.20 | 0.22 | 1.39 |
| 43245 | 0 | 172252 | LQSMNIIPRLKLSKY               | 2.68 | 0.01 | 0.78 | 0.44 | 1.41 | 0.28 |
| 43246 | 0 | 172252 | LQSMNIIPRLKLSKY               | 2.68 | 0.01 | 0.78 | 0.44 | 1.13 | 0.28 |
| 43247 | 0 | 77952  | LQSPTGLTNYFL                  | 2.48 | 0.01 | 0.90 | 1.15 | 0.22 | 1.39 |
| 43248 | 0 | 38997  | LQTASRQAE                     | 2.23 | 0.01 | 2.41 | 0.44 | 0.85 | 0.28 |
| 43249 | 0 | 39001  | LQTTGRPSHEAPN                 | 2.50 | 0.01 | 3.17 | 0.44 | 0.85 | 0.85 |
| 43250 | 0 | 333603 | LQVAGIKTTTATTGD               | 2.68 | 0.01 | 1.61 | 0.44 | 0.85 | 1.28 |
| 43251 | 0 | 238732 | LQVALGELRRKQELAEKL            | 2.89 | 0.01 | 0.78 | 0.44 | 1.13 | 0.28 |
| 43252 | 0 | 39011  | LQVPSPSMGRDIKVQFQ<br>SGG      | 2.93 | 0.01 | 2.04 | 0.44 | 0.85 | 0.28 |

|       |   |        |                                 |      |      |      |      |      |      |
|-------|---|--------|---------------------------------|------|------|------|------|------|------|
| 43253 | 0 | 122845 | LQVQDQLMNEELTER                 | 2.70 | 0.01 | 0.78 | 1.20 | 0.22 | 0.28 |
| 43254 | 0 | 122845 | LQVQDQLMNEELTER                 | 2.70 | 0.01 | 0.78 | 1.20 | 0.22 | 1.27 |
| 43255 | 0 | 122845 | LQVQDQLMNEELTER                 | 2.70 | 0.01 | 0.78 | 1.20 | 0.22 | 0.28 |
| 43256 | 0 | 122845 | LQVQDQLMNEELTER                 | 2.70 | 0.01 | 0.78 | 1.20 | 0.22 | 0.28 |
| 43257 | 0 | 122845 | LQVQDQLMNEELTER                 | 2.70 | 0.01 | 0.78 | 1.20 | 0.22 | 0.28 |
| 43258 | 0 | 122845 | LQVQDQLMNEELTER                 | 2.70 | 0.01 | 0.78 | 1.20 | 0.22 | 0.28 |
| 43259 | 0 | 113625 | LQVVRLDGNEIKRSAMP<br>ADA        | 2.91 | 4.45 | 0.78 | 1.81 | 0.22 | 0.28 |
| 43260 | 0 | 113625 | LQVVRLDGNEIKRSAMP<br>ADA        | 2.91 | 4.45 | 0.78 | 3.61 | 0.22 | 0.28 |
| 43261 | 0 | 446451 | LQWLKRVHANPLLDVV<br>TYLVALIPEPS | 3.24 | 0.01 | 0.78 | 0.44 | 1.93 | 0.28 |
| 43262 | 0 | 446451 | LQWLKRVHANPLLDVV<br>TYLVALIPEPS | 3.24 | 0.01 | 0.78 | 0.44 | 1.41 | 0.28 |
| 43263 | 0 | 79298  | LQWLWEWPRT                      | 2.34 | 0.01 | 0.90 | 0.68 | 0.22 | 0.28 |
| 43264 | 0 | 117327 | LQWSASFTTS                      | 2.32 | 0.01 | 0.90 | 0.44 | 1.23 | 0.28 |
| 43265 | 0 | 106620 | LQYFALEAYA                      | 2.36 | 0.01 | 2.75 | 0.44 | 1.23 | 0.85 |
| 43266 | 0 | 39023  | LQYGSFCTQLNRALSGI               | 2.78 | 0.01 | 2.48 | 0.44 | 0.85 | 0.28 |
| 43267 | 0 | 39023  | LQYGSFCTQLNRALSGI               | 2.78 | 0.01 | 2.48 | 1.20 | 0.22 | 0.28 |
| 43268 | 0 | 181388 | LQYMYVPPGAPKPTS                 | 2.66 | 0.01 | 2.82 | 1.15 | 0.22 | 0.28 |
| 43269 | 0 | 39024  | LQYTPSWMLV                      | 2.30 | 0.01 | 0.90 | 0.68 | 0.22 | 1.39 |
| 43270 | 0 | 39024  | LQYTPSWMLV                      | 2.30 | 0.01 | 0.90 | 0.68 | 0.22 | 0.28 |
| 43271 | 0 | 39024  | LQYTPSWMLV                      | 2.30 | 0.01 | 0.90 | 0.68 | 0.22 | 0.28 |
| 43272 | 0 | 39024  | LQYTPSWMLV                      | 2.30 | 0.01 | 0.90 | 0.68 | 0.22 | 0.28 |
| 43273 | 0 | 39024  | LQYTPSWMLV                      | 2.30 | 0.01 | 0.90 | 0.68 | 0.22 | 1.27 |
| 43274 | 0 | 132450 | LRAHLKQ                         | 2.03 | 0.01 | 0.78 | 0.68 | 0.22 | 0.85 |
| 43275 | 0 | 132450 | LRAHLKQ                         | 2.03 | 0.01 | 0.78 | 0.68 | 0.22 | 0.85 |
| 43276 | 0 | 39028  | LRAKDGFIFY                      | 2.46 | 0.01 | 3.75 | 1.15 | 0.22 | 0.28 |
| 43277 | 0 | 39028  | LRAKDGFIFY                      | 2.46 | 0.01 | 3.75 | 1.15 | 0.22 | 0.28 |
| 43278 | 0 | 99445  | LRAPQRCDLDVESGG                 | 2.65 | 0.01 | 2.16 | 0.44 | 1.23 | 1.48 |
| 43279 | 0 | 99445  | LRAPQRCDLDVESGG                 | 2.65 | 0.01 | 2.16 | 0.44 | 1.23 | 1.48 |
| 43280 | 0 | 133632 | LRCYSHCTFYFASST                 | 2.69 | 0.01 | 0.90 | 1.15 | 0.22 | 0.28 |
| 43281 | 0 | 133632 | LRCYSHCTFYFASST                 | 2.69 | 0.01 | 0.90 | 1.15 | 0.22 | 0.28 |
| 43282 | 0 | 133632 | LRCYSHCTFYFASST                 | 2.69 | 0.01 | 0.90 | 1.15 | 0.22 | 2.12 |
| 43283 | 0 | 39046  | LRDCCQ                          | 1.89 | 0.01 | 1.86 | 0.44 | 1.23 | 0.28 |
| 43284 | 0 | 509274 | LRDFIAKWKSDDLIRPY<br>VNQS       | 3.00 | 0.01 | 3.75 | 2.49 | 1.59 | 0.28 |
| 43285 | 0 | 509274 | LRDFIAKWKSDDLIRPY<br>VNQS       | 3.00 | 0.01 | 3.75 | 0.68 | 0.22 | 0.85 |
| 43286 | 0 | 509275 | LRDFIEKWKGDDHLIRPY<br>VNQS      | 2.98 | 0.01 | 3.75 | 0.68 | 0.22 | 0.85 |
| 43287 | 0 | 509276 | LRDFIEKWKSDDHLIRPY<br>VNQS      | 3.00 | 0.01 | 3.75 | 0.68 | 0.22 | 0.28 |
| 43288 | 0 | 509276 | LRDFIEKWKSDDHLIRPY<br>VNQS      | 3.00 | 0.01 | 3.75 | 0.68 | 0.22 | 0.85 |



|       |   |        |                            |      |      |      |      |      |      |
|-------|---|--------|----------------------------|------|------|------|------|------|------|
| 43289 | 0 | 509277 | LRDFIEKWKSDDLLIRPY<br>VNQS | 3.00 | 0.01 | 3.75 | 0.68 | 0.22 | 0.28 |
| 43290 | 0 | 509277 | LRDFIEKWKSDDLLIRPY<br>VNQS | 3.00 | 0.01 | 3.75 | 2.49 | 1.59 | 0.28 |
| 43291 | 0 | 509277 | LRDFIEKWKSDDLLIRPY<br>VNQS | 3.00 | 0.01 | 3.75 | 0.68 | 0.22 | 0.85 |
| 43292 | 0 | 509278 | LRDFITKWKGDDHLIRPY<br>VNQS | 2.98 | 0.01 | 3.75 | 0.68 | 0.22 | 0.28 |
| 43293 | 0 | 509278 | LRDFITKWKGDDHLIRPY<br>VNQS | 2.98 | 0.01 | 3.75 | 0.68 | 0.22 | 0.85 |
| 43294 | 0 | 141052 | LRDIFAWEP                  | 2.18 | 0.01 | 4.03 | 2.00 | 0.22 | 0.28 |
| 43295 | 0 | 462115 | LRDKKQKVHALFYKADA<br>V     | 2.87 | 0.01 | 0.90 | 0.44 | 0.22 | 2.49 |
| 43296 | 0 | 462115 | LRDKKQKVHALFYKADA<br>V     | 2.87 | 0.01 | 0.90 | 0.44 | 0.22 | 1.66 |
| 43297 | 0 | 462115 | LRDKKQKVHALFYKADA<br>V     | 2.87 | 0.01 | 0.90 | 0.44 | 0.22 | 2.75 |
| 43298 | 0 | 462115 | LRDKKQKVHALFYKADA<br>V     | 2.87 | 0.01 | 0.90 | 0.44 | 0.22 | 2.75 |
| 43299 | 0 | 462115 | LRDKKQKVHALFYKADA<br>V     | 2.87 | 0.01 | 0.90 | 0.44 | 0.22 | 2.75 |
| 43300 | 0 | 462115 | LRDKKQKVHALFYKADA<br>V     | 2.87 | 0.01 | 0.90 | 0.44 | 0.22 | 2.75 |
| 43301 | 0 | 462115 | LRDKKQKVHALFYKADA<br>V     | 2.87 | 0.01 | 0.90 | 0.44 | 0.22 | 2.75 |
| 43302 | 0 | 462115 | LRDKKQKVHALFYKADA<br>V     | 2.87 | 0.01 | 0.90 | 0.44 | 0.22 | 2.75 |
| 43303 | 0 | 462116 | LRDKKQKVHALFYKLDIV         | 2.85 | 0.01 | 2.54 | 0.44 | 0.22 | 2.75 |
| 43304 | 0 | 462116 | LRDKKQKVHALFYKLDIV         | 2.85 | 0.01 | 2.54 | 0.44 | 0.22 | 2.75 |
| 43305 | 0 | 462116 | LRDKKQKVHALFYKLDIV         | 2.85 | 0.01 | 2.54 | 0.44 | 0.22 | 2.75 |
| 43306 | 0 | 462116 | LRDKKQKVHALFYKLDIV         | 2.85 | 0.01 | 2.54 | 0.44 | 0.22 | 2.75 |
| 43307 | 0 | 462116 | LRDKKQKVHALFYKLDIV         | 2.85 | 0.01 | 2.54 | 0.44 | 0.22 | 2.75 |
| 43308 | 0 | 462116 | LRDKKQKVHALFYKLDIV         | 2.85 | 0.01 | 2.54 | 0.44 | 0.22 | 2.75 |
| 43309 | 0 | 423420 | LRDLGHRVQTYCEDL            | 2.67 | 0.01 | 2.51 | 0.44 | 2.35 | 1.28 |
| 43310 | 0 | 39061  | LRDPISAEISIQALS            | 2.71 | 0.01 | 2.43 | 0.44 | 1.59 | 0.28 |
| 43311 | 0 | 39062  | LRDPVFNIAAGVALR            | 2.69 | 0.01 | 0.90 | 1.15 | 0.22 | 0.85 |
| 43312 | 0 | 181718 | LREDWWAINRKEVWK            | 2.68 | 0.01 | 1.66 | 2.36 | 0.22 | 1.28 |
| 43313 | 0 | 423421 | LREEEDDDDDDEFED            | 2.73 | 0.01 | 2.51 | 0.44 | 2.35 | 1.28 |
| 43314 | 0 | 39070  | LREGVTLGVGASFDQK<br>L      | 2.84 | 0.01 | 3.75 | 1.12 | 0.22 | 0.85 |

|       |   |        |                          |      |      |      |      |      |      |
|-------|---|--------|--------------------------|------|------|------|------|------|------|
| 43315 | 0 | 39070  | LREGVTLGVGASFDQK<br>L    | 2.84 | 0.01 | 3.75 | 1.12 | 0.22 | 1.27 |
| 43316 | 0 | 39070  | LREGVTLGVGASFDQK<br>L    | 2.84 | 0.01 | 3.75 | 1.12 | 0.22 | 0.28 |
| 43317 | 0 | 333829 | LREIDGSLSSSAWVC          | 2.65 | 0.01 | 1.61 | 0.44 | 0.85 | 1.28 |
| 43318 | 0 | 39072  | LREKNKKV                 | 2.13 | 0.01 | 3.18 | 2.74 | 0.22 | 0.28 |
| 43319 | 0 | 39074  | LRELKIWELPTGPLPPQ<br>WGS | 3.01 | 0.01 | 2.78 | 1.12 | 0.22 | 0.28 |
| 43320 | 0 | 39074  | LRELKIWELPTGPLPPQ<br>WGS | 3.01 | 0.01 | 2.78 | 1.12 | 0.22 | 0.28 |
| 43321 | 0 | 85751  | LRELQDIKKEIENKA          | 2.70 | 0.01 | 2.69 | 3.05 | 0.85 | 1.28 |
| 43322 | 0 | 139815 | LRENIELGNGPL             | 2.52 | 0.01 | 2.75 | 1.20 | 0.22 | 0.28 |
| 43323 | 0 | 134149 | LRENQLLPGFEL             | 2.50 | 0.01 | 0.78 | 3.06 | 0.22 | 0.28 |
| 43324 | 0 | 151026 | LREQLSSVSSFERFE          | 2.73 | 0.01 | 2.87 | 0.44 | 0.85 | 0.28 |
| 43325 | 0 | 236433 | LRESEGSTYLMDKLFKKL<br>SE | 2.96 | 0.01 | 0.90 | 0.68 | 0.22 | 1.75 |
| 43326 | 0 | 236433 | LRESEGSTYLMDKLFKKL<br>SE | 2.96 | 0.01 | 0.90 | 0.68 | 0.22 | 1.75 |
| 43327 | 0 | 236433 | LRESEGSTYLMDKLFKKL<br>SE | 2.96 | 0.01 | 0.90 | 0.68 | 0.22 | 0.85 |
| 43328 | 0 | 129314 | LREYRKKM                 | 2.13 | 0.01 | 0.78 | 0.44 | 1.13 | 0.28 |
| 43329 | 0 | 39082  | LRFDQNGVLMENSSL          | 2.66 | 0.01 | 3.03 | 1.12 | 0.22 | 0.28 |
| 43330 | 0 | 39083  | LRFFVAPFPE               | 2.33 | 0.01 | 1.60 | 0.44 | 1.23 | 0.28 |
| 43331 | 0 | 39083  | LRFFVAPFPE               | 2.33 | 0.01 | 1.60 | 0.44 | 1.23 | 0.28 |
| 43332 | 0 | 190478 | LRFFVAPFPEVFGKE          | 2.70 | 0.01 | 1.60 | 0.44 | 1.23 | 0.28 |
| 43333 | 0 | 190478 | LRFFVAPFPEVFGKE          | 2.70 | 0.01 | 1.60 | 0.44 | 1.23 | 0.28 |
| 43334 | 0 | 39085  | LRFGSK                   | 1.88 | 0.01 | 2.69 | 0.68 | 0.22 | 0.28 |
| 43335 | 0 | 39087  | LRFPRGQGVPIINTNS         | 2.66 | 0.01 | 2.45 | 1.20 | 0.22 | 0.85 |
| 43336 | 0 | 39089  | LRFTSARRMETTVN           | 2.59 | 0.01 | 2.08 | 0.44 | 0.85 | 0.28 |
| 43337 | 0 | 39090  | LRGDLQVL                 | 2.15 | 0.01 | 2.88 | 1.12 | 0.22 | 0.28 |
| 43338 | 0 | 39090  | LRGDLQVL                 | 2.15 | 0.01 | 2.96 | 2.59 | 0.22 | 0.28 |
| 43339 | 0 | 39091  | LRGDLQVLAQ               | 2.34 | 0.01 | 3.26 | 2.37 | 0.22 | 0.85 |
| 43340 | 0 | 39091  | LRGDLQVLAQ               | 2.34 | 0.01 | 3.26 | 2.59 | 0.22 | 0.85 |
| 43341 | 0 | 39092  | LRGDLQVLAQKVARTL         | 2.77 | 0.01 | 2.88 | 1.12 | 0.22 | 0.28 |
| 43342 | 0 | 39092  | LRGDLQVLAQKVARTL         | 2.77 | 0.01 | 2.88 | 1.12 | 0.22 | 0.28 |
| 43343 | 0 | 39092  | LRGDLQVLAQKVARTL         | 2.77 | 0.01 | 2.88 | 1.12 | 0.22 | 1.34 |
| 43344 | 0 | 39092  | LRGDLQVLAQKVARTL         | 2.77 | 0.01 | 2.88 | 1.12 | 0.22 | 1.34 |
| 43345 | 0 | 39092  | LRGDLQVLAQKVARTL         | 2.77 | 0.01 | 2.88 | 2.37 | 0.22 | 0.28 |
| 43346 | 0 | 39092  | LRGDLQVLAQKVARTL         | 2.77 | 0.01 | 2.88 | 0.68 | 0.22 | 1.27 |
| 43347 | 0 | 39092  | LRGDLQVLAQKVARTL         | 2.77 | 0.01 | 2.96 | 0.68 | 0.22 | 0.28 |

|       |   |        |                   |      |      |      |      |      |      |
|-------|---|--------|-------------------|------|------|------|------|------|------|
| 43348 | 0 | 39092  | LRGDLQVLAQKVARTL  | 2.77 | 0.01 | 2.96 | 0.68 | 0.22 | 0.28 |
| 43349 | 0 | 39092  | LRGDLQVLAQKVARTL  | 2.77 | 0.01 | 2.96 | 0.68 | 0.22 | 1.34 |
| 43350 | 0 | 39092  | LRGDLQVLAQKVARTL  | 2.77 | 0.01 | 2.96 | 0.68 | 0.22 | 1.27 |
| 43351 | 0 | 39092  | LRGDLQVLAQKVARTL  | 2.77 | 0.01 | 2.96 | 0.68 | 0.22 | 1.34 |
| 43352 | 0 | 39092  | LRGDLQVLAQKVARTL  | 2.77 | 0.01 | 2.96 | 1.12 | 0.22 | 0.85 |
| 43353 | 0 | 39092  | LRGDLQVLAQKVARTL  | 2.77 | 0.01 | 2.96 | 1.12 | 0.22 | 1.34 |
| 43354 | 0 | 39092  | LRGDLQVLAQKVARTL  | 2.77 | 0.01 | 2.96 | 1.12 | 0.22 | 1.34 |
| 43355 | 0 | 39092  | LRGDLQVLAQKVARTL  | 2.77 | 0.01 | 3.63 | 2.37 | 0.22 | 0.85 |
| 43356 | 0 | 39094  | LRGDLRQWVSAGRRVG  | 2.76 | 0.01 | 2.59 | 0.44 | 0.85 | 0.28 |
| 43357 | 0 | 189112 | LRGEGETFKGKLHVPF  | 2.75 | 0.01 | 2.92 | 0.68 | 0.22 | 0.28 |
| 43358 | 0 | 189112 | LRGEGETFKGKLHVPF  | 2.75 | 0.01 | 2.92 | 0.68 | 0.22 | 0.28 |
| 43359 | 0 | 39097  | LRGFLGRML         | 2.27 | 0.01 | 2.61 | 0.44 | 0.85 | 0.28 |
| 43360 | 0 | 186773 | LRGGNCNKNDHLFAC   | 2.68 | 0.01 | 0.90 | 1.20 | 0.22 | 0.85 |
| 43361 | 0 | 176318 | LRGISRSLHGIWPEK   | 2.69 | 0.01 | 2.63 | 1.15 | 0.22 | 0.85 |
| 43362 | 0 | 176318 | LRGISRSLHGIWPEK   | 2.69 | 0.01 | 2.63 | 1.15 | 0.22 | 0.85 |
| 43363 | 0 | 176318 | LRGISRSLHGIWPEK   | 2.69 | 0.01 | 2.63 | 1.15 | 0.22 | 0.85 |
| 43364 | 0 | 172257 | LRGIVSEKTDKLSNM   | 2.65 | 0.01 | 0.78 | 0.44 | 1.13 | 0.28 |
| 43365 | 0 | 172258 | LRGKLKWRPDEEILK   | 2.70 | 0.01 | 0.78 | 0.44 | 1.41 | 0.28 |
| 43366 | 0 | 172258 | LRGKLKWRPDEEILK   | 2.70 | 0.01 | 0.78 | 0.44 | 1.13 | 0.28 |
| 43367 | 0 | 156370 | LRGMAKDGGKFAVKD   | 2.63 | 0.01 | 2.73 | 0.44 | 0.85 | 1.28 |
| 43368 | 0 | 156370 | LRGMAKDGGKFAVKD   | 2.63 | 0.01 | 2.73 | 0.44 | 0.85 | 1.28 |
| 43369 | 0 | 39104  | LRGMAKDGGQFALKD   | 2.64 | 0.01 | 4.33 | 2.82 | 0.22 | 0.28 |
| 43370 | 0 | 99447  | LRGRAHVQVVDSENGN  | 2.67 | 0.01 | 2.16 | 0.44 | 1.23 | 1.48 |
| 43371 | 0 | 39107  | LRGSGDLQEYLRHVTR  | 2.74 | 0.01 | 2.14 | 1.12 | 0.22 | 0.28 |
| 43372 | 0 | 39107  | LRGSGDLQEYLRHVTR  | 2.74 | 0.01 | 2.14 | 1.12 | 0.22 | 0.28 |
| 43373 | 0 | 39107  | LRGSGDLQEYLRHVTR  | 2.74 | 0.01 | 2.14 | 1.12 | 0.22 | 0.28 |
| 43374 | 0 | 39107  | LRGSGDLQEYLRHVTR  | 2.74 | 0.01 | 2.14 | 1.12 | 0.22 | 0.85 |
| 43375 | 0 | 179196 | LRGTFDEIGRIATDQ   | 2.68 | 0.01 | 2.36 | 0.44 | 1.23 | 1.28 |
| 43376 | 0 | 179196 | LRGTFDEIGRIATDQ   | 2.68 | 0.01 | 2.36 | 0.44 | 1.23 | 1.27 |
| 43377 | 0 | 151028 | LRGVAPLHLGKC      | 2.48 | 0.01 | 2.87 | 0.68 | 0.22 | 2.35 |
| 43378 | 0 | 142881 | LRGYYNQSEGGSHI    | 2.64 | 0.01 | 2.19 | 3.42 | 0.22 | 1.34 |
| 43379 | 0 | 238735 | LRHCASGETICYKTF   | 2.62 | 0.01 | 2.56 | 2.02 | 0.22 | 0.85 |
| 43380 | 0 | 238735 | LRHCASGETICYKTF   | 2.62 | 0.01 | 2.56 | 1.20 | 0.22 | 0.85 |
| 43381 | 0 | 39110  | LRHGKLRPFERDISNVP | 2.76 | 0.01 | 2.48 | 0.68 | 0.22 | 0.28 |
| 43382 | 0 | 39110  | LRHGKLRPFERDISNVP | 2.76 | 0.01 | 2.48 | 1.20 | 0.22 | 0.28 |

|       |   |        |                  |      |      |      |      |      |      |
|-------|---|--------|------------------|------|------|------|------|------|------|
| 43383 | 0 | 176319 | LRIAGKRLEGRSKTW  | 2.69 | 0.01 | 2.63 | 1.15 | 0.22 | 0.85 |
| 43384 | 0 | 176319 | LRIAGKRLEGRSKTW  | 2.69 | 0.01 | 2.63 | 1.15 | 0.22 | 0.85 |
| 43385 | 0 | 176319 | LRIAGKRLEGRSKTW  | 2.69 | 0.01 | 2.63 | 1.15 | 0.22 | 0.85 |
| 43386 | 0 | 176319 | LRIAGKRLEGRSKTW  | 2.69 | 0.01 | 2.63 | 1.15 | 0.22 | 0.85 |
| 43387 | 0 | 176319 | LRIAGKRLEGRSKTW  | 2.69 | 0.01 | 2.63 | 1.15 | 0.22 | 0.85 |
| 43388 | 0 | 238736 | LRIDRGCAATCPTVK  | 2.65 | 0.01 | 2.56 | 2.02 | 0.22 | 0.85 |
| 43389 | 0 | 238736 | LRIDRGCAATCPTVK  | 2.65 | 0.01 | 2.56 | 1.20 | 0.22 | 0.85 |
| 43390 | 0 | 334020 | LRIEIDFREERIKEL  | 2.73 | 0.01 | 1.61 | 0.44 | 0.85 | 1.28 |
| 43391 | 0 | 225799 | LRIQHQDWLNGKKFK  | 2.67 | 0.01 | 3.28 | 0.44 | 0.22 | 0.85 |
| 43392 | 0 | 39121  | LRITYLTETK       | 2.34 | 0.01 | 2.66 | 0.68 | 0.22 | 0.28 |
| 43393 | 0 | 39121  | LRITYLTETK       | 2.34 | 0.01 | 2.66 | 0.68 | 0.22 | 0.28 |
| 43394 | 0 | 121589 | LRKFKNISYFPGKLR  | 2.69 | 0.01 | 0.78 | 0.44 | 1.41 | 0.28 |
| 43395 | 0 | 121589 | LRKFKNISYFPGKLR  | 2.69 | 0.01 | 0.78 | 0.44 | 1.41 | 0.28 |
| 43396 | 0 | 121589 | LRKFKNISYFPGKLR  | 2.69 | 0.01 | 0.78 | 0.44 | 1.13 | 0.28 |
| 43397 | 0 | 121589 | LRKFKNISYFPGKLR  | 2.69 | 0.01 | 0.78 | 0.44 | 1.13 | 0.28 |
| 43398 | 0 | 121589 | LRKFKNISYFPGKLR  | 2.69 | 0.01 | 0.78 | 0.44 | 1.13 | 0.28 |
| 43399 | 0 | 119492 | LRKKGYDPG        | 2.22 | 0.01 | 0.90 | 0.44 | 1.13 | 0.28 |
| 43400 | 0 | 106621 | LRKRL            | 1.77 | 0.01 | 0.78 | 2.49 | 0.22 | 0.85 |
| 43401 | 0 | 106621 | LRKRL            | 1.77 | 0.01 | 0.78 | 2.49 | 0.22 | 1.27 |
| 43402 | 0 | 39131  | LRKSRRFA         | 2.13 | 0.01 | 2.68 | 0.44 | 1.59 | 0.28 |
| 43403 | 0 | 39132  | LRKYCI           | 1.88 | 0.01 | 2.40 | 0.44 | 0.85 | 0.28 |
| 43404 | 0 | 489656 | LRLAILQADPTPADL  | 2.72 | 0.01 | 2.69 | 3.05 | 0.85 | 1.28 |
| 43405 | 0 | 131967 | LRLDCRHEN        | 2.24 | 0.01 | 2.19 | 1.15 | 0.22 | 1.34 |
| 43406 | 0 | 131967 | LRLDCRHEN        | 2.24 | 0.01 | 2.19 | 1.15 | 0.22 | 0.85 |
| 43407 | 0 | 131967 | LRLDCRHEN        | 2.24 | 0.01 | 2.19 | 1.15 | 0.22 | 0.85 |
| 43408 | 0 | 131967 | LRLDCRHEN        | 2.24 | 0.01 | 2.19 | 1.15 | 0.22 | 1.27 |
| 43409 | 0 | 113628 | LRLIHYSYDVN      | 2.40 | 0.01 | 2.19 | 2.04 | 0.22 | 0.28 |
| 43410 | 0 | 113628 | LRLIHYSYDVN      | 2.40 | 0.01 | 2.19 | 2.04 | 2.25 | 1.75 |
| 43411 | 0 | 113628 | LRLIHYSYDVN      | 2.40 | 0.01 | 2.19 | 1.20 | 0.22 | 1.75 |
| 43412 | 0 | 113628 | LRLIHYSYDVN      | 2.40 | 0.01 | 2.19 | 2.04 | 2.25 | 1.75 |
| 43413 | 0 | 113628 | LRLIHYSYDVN      | 2.40 | 0.01 | 2.19 | 1.20 | 0.22 | 2.12 |
| 43414 | 0 | 113628 | LRLIHYSYDVN      | 2.40 | 0.01 | 2.19 | 1.20 | 0.22 | 0.28 |
| 43415 | 0 | 113628 | LRLIHYSYDVN      | 2.40 | 0.01 | 2.19 | 2.04 | 0.22 | 0.28 |
| 43416 | 0 | 39136  | LRLKKYKVPQ       | 2.34 | 0.01 | 1.60 | 0.44 | 1.23 | 0.28 |
| 43417 | 0 | 39136  | LRLKKYKVPQ       | 2.34 | 0.01 | 1.60 | 0.44 | 1.23 | 0.28 |
| 43418 | 0 | 423422 | LRLACPDRPIIGDT   | 2.69 | 0.01 | 2.51 | 0.44 | 2.35 | 1.28 |
| 43419 | 0 | 135955 | LRLLLCLLLSS      | 2.52 | 0.01 | 0.78 | 0.44 | 1.13 | 0.28 |
| 43420 | 0 | 78457  | LRLPPAP          | 2.07 | 0.01 | 0.90 | 0.68 | 0.22 | 0.28 |
| 43421 | 0 | 78457  | LRLPPAP          | 2.07 | 0.01 | 0.90 | 0.68 | 0.22 | 1.27 |
| 43422 | 0 | 109520 | LRLQTAGNVDHVGLGT | 2.75 | 0.01 | 3.42 | 0.68 | 0.22 | 1.48 |
| 43423 | 0 | 109520 | LRLQTAGNVDHVGLGT | 2.75 | 0.01 | 3.42 | 0.68 | 0.22 | 1.48 |
| 43424 | 0 | 109520 | LRLQTAGNVDHVGLGT | 2.75 | 0.01 | 3.42 | 0.68 | 0.22 | 1.48 |
| 43425 | 0 | 109520 | LRLQTAGNVDHVGLGT | 2.75 | 0.01 | 3.42 | 0.68 | 0.22 | 1.48 |

|       |   |        |                            |      |      |      |      |      |      |
|-------|---|--------|----------------------------|------|------|------|------|------|------|
| 43426 | 0 | 109520 | LRLQTAGNVDHVGLGT           | 2.75 | 0.01 | 3.42 | 0.68 | 0.22 | 0.28 |
| 43427 | 0 | 109520 | LRLQTAGNVDHVGLGT           | 2.75 | 0.01 | 3.42 | 0.68 | 0.22 | 0.28 |
| 43428 | 0 | 118004 | LRLSHLKPS                  | 2.26 | 0.01 | 0.78 | 0.44 | 1.13 | 0.28 |
| 43429 | 0 | 118004 | LRLSHLKPS                  | 2.26 | 0.01 | 0.78 | 0.44 | 1.41 | 0.28 |
| 43430 | 0 | 121590 | LRLSHLKPSSEGLAIVTKY<br>ITK | 3.03 | 0.01 | 0.78 | 0.44 | 1.13 | 0.28 |
| 43431 | 0 | 39138  | LRLVDADD                   | 2.14 | 0.01 | 2.85 | 0.44 | 0.22 | 0.28 |
| 43432 | 0 | 39141  | LRMAGHSLGRCDIKDLP<br>K     | 2.84 | 0.01 | 2.45 | 0.44 | 0.85 | 0.28 |
| 43433 | 0 | 123465 | LRMGFVRVC                  | 2.23 | 0.01 | 2.28 | 2.00 | 0.22 | 0.28 |
| 43434 | 0 | 141949 | LRMTLAH                    | 2.03 | 0.01 | 0.78 | 0.44 | 2.35 | 0.28 |
| 43435 | 0 | 164286 | LRNALNE                    | 2.05 | 0.01 | 0.90 | 1.20 | 0.22 | 1.39 |
| 43436 | 0 | 39146  | LRNCEQDFFTLN               | 2.47 | 0.01 | 0.90 | 0.68 | 0.22 | 0.28 |
| 43437 | 0 | 39146  | LRNCEQDFFTLN               | 2.47 | 0.01 | 0.90 | 0.68 | 0.22 | 1.27 |
| 43438 | 0 | 39146  | LRNCEQDFFTLN               | 2.47 | 0.01 | 0.90 | 0.44 | 1.59 | 0.28 |
| 43439 | 0 | 132454 | LRNFYFINRLTG               | 2.50 | 0.01 | 0.78 | 0.44 | 1.13 | 0.28 |
| 43440 | 0 | 233229 | LRNLGLGKK                  | 2.25 | 0.01 | 0.78 | 0.44 | 1.13 | 0.28 |
| 43441 | 0 | 233229 | LRNLGLGKK                  | 2.25 | 0.01 | 0.78 | 3.57 | 0.22 | 0.28 |
| 43442 | 0 | 99448  | LRNLPPQQCGLRAPQR           | 2.72 | 0.01 | 2.16 | 0.44 | 1.23 | 1.48 |
| 43443 | 0 | 99448  | LRNLPPQQCGLRAPQR           | 2.72 | 0.01 | 2.16 | 0.44 | 1.23 | 1.48 |
| 43444 | 0 | 172265 | LRNMSNQLGLLAVNQ            | 2.70 | 0.01 | 0.78 | 0.44 | 1.41 | 0.28 |
| 43445 | 0 | 111517 | LRNSNIQVLLDVPRS            | 2.70 | 0.01 | 3.20 | 1.12 | 0.22 | 0.85 |
| 43446 | 0 | 103385 | LRPASCRFVPTCSQY            | 2.66 | 0.01 | 2.04 | 0.44 | 0.85 | 1.28 |
| 43447 | 0 | 39156  | LRPCEQHLMQ                 | 2.32 | 0.01 | 2.16 | 0.44 | 1.23 | 0.85 |
| 43448 | 0 | 79608  | LRPDSIF                    | 1.99 | 0.01 | 0.90 | 1.12 | 0.22 | 1.39 |
| 43449 | 0 | 99450  | LRPEDTLEEKMYACR            | 2.66 | 0.01 | 2.86 | 2.02 | 0.85 | 0.85 |
| 43450 | 0 | 39160  | LRPFHQILYGMS               | 2.44 | 0.01 | 0.90 | 0.68 | 0.22 | 1.39 |
| 43451 | 0 | 39160  | LRPFHQILYGMS               | 2.44 | 0.01 | 0.90 | 0.68 | 0.22 | 0.28 |
| 43452 | 0 | 39164  | LRPGPVSQPYHHWDTD<br>K      | 2.75 | 0.01 | 2.75 | 0.68 | 0.22 | 1.27 |
| 43453 | 0 | 39164  | LRPGPVSQPYHHWDTD<br>K      | 2.75 | 0.01 | 2.75 | 0.44 | 1.59 | 0.28 |
| 43454 | 0 | 39164  | LRPGPVSQPYHHWDTD<br>K      | 2.75 | 0.01 | 2.75 | 0.44 | 1.59 | 1.34 |
| 43455 | 0 | 39164  | LRPGPVSQPYHHWDTD<br>K      | 2.75 | 0.01 | 2.75 | 0.44 | 1.59 | 2.02 |
| 43456 | 0 | 39164  | LRPGPVSQPYHHWDTD<br>K      | 2.75 | 0.01 | 2.75 | 0.68 | 0.22 | 0.85 |
| 43457 | 0 | 39164  | LRPGPVSQPYHHWDTD<br>K      | 2.75 | 0.01 | 2.75 | 0.68 | 0.22 | 1.48 |
| 43458 | 0 | 39164  | LRPGPVSQPYHHWDTD<br>K      | 2.75 | 0.01 | 2.75 | 0.44 | 0.85 | 1.27 |
| 43459 | 0 | 39164  | LRPGPVSQPYHHWDTD<br>K      | 2.75 | 0.01 | 2.75 | 0.68 | 0.22 | 0.85 |

|       |   |        |                                   |      |      |      |      |      |      |
|-------|---|--------|-----------------------------------|------|------|------|------|------|------|
| 43460 | 0 | 39164  | LRPGPVSQPYHHWDTD<br>K             | 2.75 | 0.01 | 2.75 | 0.44 | 0.85 | 0.28 |
| 43461 | 0 | 227365 | LRPILLPNKSGKKGN                   | 2.70 | 0.01 | 2.97 | 0.44 | 1.59 | 0.28 |
| 43462 | 0 | 227365 | LRPILLPNKSGKKGN                   | 2.70 | 0.01 | 2.97 | 0.44 | 0.85 | 0.28 |
| 43463 | 0 | 39167  | LRPTFDTRLM                        | 2.34 | 0.01 | 2.04 | 0.68 | 0.22 | 1.27 |
| 43464 | 0 | 39167  | LRPTFDTRLM                        | 2.34 | 0.01 | 2.04 | 0.68 | 0.22 | 0.28 |
| 43465 | 0 | 39167  | LRPTFDTRLM                        | 2.34 | 0.01 | 2.04 | 0.68 | 0.22 | 0.85 |
| 43466 | 0 | 39169  | LRPTFDTRLMRLEDEMK<br>EGR          | 2.98 | 0.01 | 2.04 | 0.68 | 0.22 | 0.85 |
| 43467 | 0 | 39169  | LRPTFDTRLMRLEDEMK<br>EGR          | 2.98 | 0.01 | 2.04 | 0.68 | 0.22 | 0.28 |
| 43468 | 0 | 39169  | LRPTFDTRLMRLEDEMK<br>EGR          | 2.98 | 0.01 | 2.04 | 0.68 | 0.22 | 1.27 |
| 43469 | 0 | 39169  | LRPTFDTRLMRLEDEMK<br>EGR          | 2.98 | 0.01 | 2.04 | 3.01 | 0.22 | 0.28 |
| 43470 | 0 | 39172  | LRQAILCWGELM                      | 2.46 | 0.01 | 2.08 | 0.68 | 2.26 | 0.85 |
| 43471 | 0 | 39172  | LRQAILCWGELM                      | 2.46 | 0.01 | 2.08 | 0.44 | 1.59 | 0.85 |
| 43472 | 0 | 39174  | LRQLDFVEEVLRKHPDK<br>VE           | 2.93 | 0.01 | 2.30 | 0.44 | 0.85 | 1.27 |
| 43473 | 0 | 135956 | LRQLTPEQLSTL                      | 2.52 | 0.01 | 0.78 | 0.44 | 1.13 | 0.28 |
| 43474 | 0 | 120084 | LRQQWIDVRLRWNPAD                  | 2.75 | 0.01 | 2.26 | 1.81 | 0.22 | 1.57 |
| 43475 | 0 | 120084 | LRQQWIDVRLRWNPAD                  | 2.75 | 0.01 | 2.26 | 1.81 | 0.22 | 1.57 |
| 43476 | 0 | 120084 | LRQQWIDVRLRWNPAD                  | 2.75 | 0.01 | 2.26 | 1.81 | 0.22 | 1.57 |
| 43477 | 0 | 120084 | LRQQWIDVRLRWNPAD                  | 2.75 | 0.01 | 2.26 | 1.81 | 0.22 | 1.57 |
| 43478 | 0 | 120084 | LRQQWIDVRLRWNPAD                  | 2.75 | 0.01 | 2.26 | 1.15 | 0.22 | 1.57 |
| 43479 | 0 | 120084 | LRQQWIDVRLRWNPAD                  | 2.75 | 0.01 | 2.26 | 1.12 | 0.22 | 1.57 |
| 43480 | 0 | 120084 | LRQQWIDVRLRWNPAD                  | 2.75 | 0.01 | 2.26 | 2.43 | 0.22 | 1.57 |
| 43481 | 0 | 120084 | LRQQWIDVRLRWNPAD                  | 2.75 | 0.01 | 2.26 | 2.43 | 0.22 | 1.57 |
| 43482 | 0 | 120084 | LRQQWIDVRLRWNPAD                  | 2.75 | 0.01 | 2.26 | 2.43 | 0.22 | 1.57 |
| 43483 | 0 | 120084 | LRQQWIDVRLRWNPAD                  | 2.75 | 0.01 | 2.26 | 2.43 | 0.22 | 1.57 |
| 43484 | 0 | 122848 | LRQRKSVNALNSPLHQE<br>YEENLGDSIVGY | 3.30 | 0.01 | 0.78 | 0.44 | 1.13 | 2.02 |
| 43485 | 0 | 131555 | LRQTDLSL                          | 2.24 | 0.01 | 0.78 | 1.12 | 0.22 | 0.28 |
| 43486 | 0 | 39180  | LRRDLASRDVKKHVG<br>N ALE          | 2.96 | 0.01 | 2.24 | 0.44 | 0.85 | 1.27 |
| 43487 | 0 | 142226 | LRRDLASREAKKQLEA<br>EQQ           | 2.98 | 0.01 | 2.24 | 0.44 | 0.85 | 0.28 |

|       |   |        |                         |      |      |      |      |      |      |
|-------|---|--------|-------------------------|------|------|------|------|------|------|
| 43488 | 0 | 142226 | LRRDLASREAKKQLEA<br>EQQ | 2.98 | 0.01 | 2.24 | 0.44 | 1.74 | 0.28 |
| 43489 | 0 | 521993 | LRRDLASREAKKQV          | 2.69 | 0.01 | 2.24 | 0.44 | 1.41 | 1.28 |
| 43490 | 0 | 521993 | LRRDLASREAKKQV          | 2.69 | 0.01 | 2.24 | 0.44 | 1.41 | 1.28 |
| 43491 | 0 | 39182  | LRRDLASREAKKQVEK<br>AL  | 2.94 | 0.01 | 2.85 | 2.42 | 0.22 | 0.28 |
| 43492 | 0 | 39182  | LRRDLASREAKKQVEK<br>AL  | 2.94 | 0.01 | 2.85 | 2.42 | 0.22 | 1.34 |
| 43493 | 0 | 39182  | LRRDLASREAKKQVEK<br>AL  | 2.94 | 0.01 | 2.85 | 2.42 | 0.22 | 0.28 |
| 43494 | 0 | 39183  | LRRDLASREAKKQVEK<br>ALE | 2.99 | 0.01 | 2.85 | 4.08 | 0.85 | 0.28 |
| 43495 | 0 | 39183  | LRRDLASREAKKQVEK<br>ALE | 2.99 | 0.01 | 2.85 | 4.08 | 0.85 | 1.34 |
| 43496 | 0 | 39183  | LRRDLASREAKKQVEK<br>ALE | 2.99 | 0.01 | 2.85 | 0.44 | 0.85 | 0.28 |
| 43497 | 0 | 39183  | LRRDLASREAKKQVEK<br>ALE | 2.99 | 0.01 | 2.85 | 2.42 | 0.22 | 1.34 |
| 43498 | 0 | 39183  | LRRDLASREAKKQVEK<br>ALE | 2.99 | 0.01 | 2.85 | 0.44 | 0.85 | 1.34 |
| 43499 | 0 | 39183  | LRRDLASREAKKQVEK<br>ALE | 2.99 | 0.01 | 2.85 | 4.08 | 0.85 | 0.28 |
| 43500 | 0 | 39183  | LRRDLASREAKKQVEK<br>ALE | 2.99 | 0.01 | 2.85 | 4.08 | 0.85 | 1.34 |
| 43501 | 0 | 39183  | LRRDLASREAKKQVEK<br>ALE | 2.99 | 0.01 | 2.24 | 0.44 | 0.85 | 0.28 |
| 43502 | 0 | 39183  | LRRDLASREAKKQVEK<br>ALE | 2.99 | 0.01 | 2.24 | 1.15 | 0.22 | 1.34 |
| 43503 | 0 | 39183  | LRRDLASREAKKQVEK<br>ALE | 2.99 | 0.01 | 2.24 | 2.42 | 0.22 | 0.28 |
| 43504 | 0 | 39183  | LRRDLASREAKKQVEK<br>ALE | 2.99 | 0.01 | 2.24 | 2.42 | 0.22 | 1.34 |
| 43505 | 0 | 39183  | LRRDLASREAKKQVEK<br>ALE | 2.99 | 0.01 | 2.24 | 2.42 | 0.22 | 1.75 |
| 43506 | 0 | 39183  | LRRDLASREAKKQVEK<br>ALE | 2.99 | 0.01 | 2.24 | 2.42 | 0.22 | 0.28 |
| 43507 | 0 | 39183  | LRRDLASREAKKQVEK<br>ALE | 2.99 | 0.01 | 3.78 | 0.44 | 0.85 | 1.27 |
| 43508 | 0 | 39183  | LRRDLASREAKKQVEK<br>ALE | 2.99 | 0.01 | 3.78 | 0.44 | 0.85 | 1.34 |
| 43509 | 0 | 39183  | LRRDLASREAKKQVEK<br>ALE | 2.99 | 0.01 | 2.24 | 2.04 | 0.22 | 0.28 |
| 43510 | 0 | 39183  | LRRDLASREAKKQVEK<br>ALE | 2.99 | 0.01 | 2.24 | 0.68 | 0.22 | 0.28 |
| 43511 | 0 | 39183  | LRRDLASREAKKQVEK<br>ALE | 2.99 | 0.01 | 2.24 | 0.44 | 0.85 | 0.28 |

|       |   |        |                                  |      |      |      |      |      |      |
|-------|---|--------|----------------------------------|------|------|------|------|------|------|
| 43512 | 0 | 39183  | LRRDLASREAKKQVEK<br>ALE          | 2.99 | 0.01 | 2.24 | 0.44 | 1.74 | 0.28 |
| 43513 | 0 | 39184  | LRRDLEASREANKKVTSE<br>LT         | 2.97 | 0.01 | 2.24 | 0.44 | 0.85 | 1.27 |
| 43514 | 0 | 121592 | LRRDYIRSP                        | 2.23 | 0.01 | 0.90 | 2.46 | 0.22 | 1.27 |
| 43515 | 0 | 120085 | LRREI                            | 1.75 | 0.01 | 0.78 | 0.44 | 1.13 | 1.34 |
| 43516 | 0 | 39187  | LRRGMFRPSQCN                     | 2.45 | 0.01 | 3.93 | 0.44 | 1.59 | 0.28 |
| 43517 | 0 | 39195  | LRRLLYMIYMSGLAVRV<br>HVSKEEQYYDY | 3.26 | 0.01 | 2.14 | 1.20 | 0.22 | 0.28 |
| 43518 | 0 | 39195  | LRRLLYMIYMSGLAVRV<br>HVSKEEQYYDY | 3.26 | 0.01 | 2.14 | 1.20 | 0.22 | 0.28 |
| 43519 | 0 | 39195  | LRRLLYMIYMSGLAVRV<br>HVSKEEQYYDY | 3.26 | 0.01 | 2.14 | 1.20 | 0.22 | 1.34 |
| 43520 | 0 | 39195  | LRRLLYMIYMSGLAVRV<br>HVSKEEQYYDY | 3.26 | 0.01 | 2.14 | 1.20 | 0.22 | 0.28 |
| 43521 | 0 | 39195  | LRRLLYMIYMSGLAVRV<br>HVSKEEQYYDY | 3.26 | 0.01 | 2.14 | 1.20 | 0.22 | 0.85 |
| 43522 | 0 | 39196  | LRLRTACERAKRTL                   | 2.73 | 0.01 | 2.30 | 0.44 | 0.85 | 0.28 |
| 43523 | 0 | 39196  | LRLRTACERAKRTL                   | 2.73 | 0.01 | 2.30 | 0.44 | 1.41 | 0.28 |
| 43524 | 0 | 99451  | LRRNALRRPFYSNAP                  | 2.71 | 0.01 | 2.16 | 0.44 | 1.23 | 1.48 |
| 43525 | 0 | 99451  | LRRNALRRPFYSNAP                  | 2.71 | 0.01 | 2.16 | 0.44 | 1.23 | 1.48 |
| 43526 | 0 | 99451  | LRRNALRRPFYSNAP                  | 2.71 | 0.01 | 2.16 | 0.44 | 1.23 | 0.85 |
| 43527 | 0 | 39198  | LRRTQSMGIQLDQ                    | 2.55 | 0.01 | 3.00 | 0.44 | 0.85 | 0.28 |
| 43528 | 0 | 39198  | LRRTQSMGIQLDQ                    | 2.55 | 0.01 | 3.00 | 1.15 | 2.39 | 0.28 |
| 43529 | 0 | 39199  | LRRTQSMGIQLDQR                   | 2.63 | 0.01 | 2.56 | 2.69 | 0.22 | 0.28 |
| 43530 | 0 | 180628 | LRRVRISADA                       | 2.33 | 0.01 | 0.78 | 0.68 | 0.22 | 0.28 |
| 43531 | 0 | 39206  | LRSAGELELQFRRVKCKY<br>PEG        | 2.98 | 0.01 | 2.53 | 0.68 | 2.60 | 1.75 |
| 43532 | 0 | 172269 | LRSDMYILNESLTDP                  | 2.67 | 0.01 | 0.78 | 0.44 | 1.41 | 0.28 |
| 43533 | 0 | 39211  | LRSLHLVRG                        | 2.26 | 0.01 | 0.90 | 1.15 | 0.22 | 1.39 |
| 43534 | 0 | 238738 | LRSPIERKNAV                      | 2.36 | 0.01 | 0.78 | 3.41 | 0.22 | 0.28 |
| 43535 | 0 | 422558 | LRSSDCASGLCCARHFW<br>SKICKPVLKE  | 3.22 | 0.01 | 0.78 | 2.37 | 0.22 | 0.28 |
| 43536 | 0 | 422558 | LRSSDCASGLCCARHFW<br>SKICKPVLKE  | 3.22 | 0.01 | 0.78 | 0.68 | 0.22 | 0.28 |
| 43537 | 0 | 39216  | LRSSSGCV                         | 2.12 | 0.01 | 2.04 | 0.44 | 0.85 | 0.28 |
| 43538 | 0 | 39216  | LRSSSGCV                         | 2.12 | 0.01 | 2.04 | 0.44 | 0.85 | 0.28 |
| 43539 | 0 | 39216  | LRSSSGCV                         | 2.12 | 0.01 | 2.04 | 0.44 | 0.85 | 0.28 |
| 43540 | 0 | 135716 | LRSTKFTI                         | 2.12 | 0.01 | 0.78 | 0.44 | 2.35 | 0.28 |
| 43541 | 0 | 39217  | LRVYQ                            | 1.88 | 0.01 | 1.86 | 0.44 | 1.23 | 0.28 |
| 43542 | 0 | 39219  | LRTAPGPG                         | 2.14 | 0.01 | 2.85 | 0.44 | 0.22 | 0.28 |
| 43543 | 0 | 39224  | LRTGKKLELDATNAPAP<br>ANG         | 2.97 | 0.01 | 3.75 | 0.68 | 0.22 | 2.12 |
| 43544 | 0 | 39224  | LRTGKKLELDATNAPAP<br>ANG         | 2.97 | 0.01 | 3.75 | 0.68 | 0.22 | 0.85 |
| 43545 | 0 | 39224  | LRTGKKLELDATNAPAP<br>ANG         | 2.97 | 0.01 | 3.75 | 0.68 | 0.22 | 0.85 |



|       |   |        |                             |      |      |      |      |      |      |
|-------|---|--------|-----------------------------|------|------|------|------|------|------|
| 43546 | 0 | 39224  | LRTGKKLELDATNAPAP<br>ANG    | 2.97 | 0.01 | 3.75 | 0.68 | 0.22 | 0.85 |
| 43547 | 0 | 172273 | LRTKGKQYCGKGEDL             | 2.69 | 0.01 | 0.78 | 0.44 | 1.13 | 0.28 |
| 43548 | 0 | 242930 | LRTLRLRVISRAQG              | 2.69 | 0.01 | 0.78 | 0.44 | 1.59 | 0.28 |
| 43549 | 0 | 39230  | LRTQFFI                     | 2.01 | 0.01 | 2.24 | 1.12 | 0.22 | 0.28 |
| 43550 | 0 | 39230  | LRTQFFI                     | 2.01 | 0.01 | 2.24 | 0.68 | 0.22 | 0.28 |
| 43551 | 0 | 178286 | LRVFFDTNKSNIKDQY            | 2.70 | 0.01 | 3.93 | 0.68 | 0.22 | 0.85 |
| 43552 | 0 | 39234  | LRVGYNAPGIPLYKKME<br>AVKLRD | 3.08 | 0.01 | 2.95 | 0.44 | 0.22 | 0.28 |
| 43553 | 0 | 78735  | LRVKIERDDLSRETIIQII         | 2.90 | 0.01 | 3.11 | 1.15 | 0.22 | 0.28 |
| 43554 | 0 | 78735  | LRVKIERDDLSRETIIQII         | 2.90 | 0.01 | 3.11 | 1.12 | 0.22 | 0.28 |
| 43555 | 0 | 78735  | LRVKIERDDLSRETIIQII         | 2.90 | 0.01 | 3.11 | 1.15 | 0.22 | 0.28 |
| 43556 | 0 | 78735  | LRVKIERDDLSRETIIQII         | 2.90 | 0.01 | 3.11 | 1.12 | 0.22 | 0.28 |
| 43557 | 0 | 334514 | LRVSPYSIFLQELAR             | 2.67 | 0.01 | 1.61 | 0.44 | 0.85 | 1.28 |
| 43558 | 0 | 98892  | LRVYVEELKP                  | 2.33 | 0.01 | 1.60 | 0.44 | 1.23 | 0.85 |
| 43559 | 0 | 98892  | LRVYVEELKP                  | 2.33 | 0.01 | 1.60 | 0.44 | 1.23 | 0.85 |
| 43560 | 0 | 127729 | LRWAERQVGALGAES             | 2.71 | 0.01 | 0.78 | 0.44 | 1.13 | 0.85 |
| 43561 | 0 | 39243  | LRWAPTGAPADVTDQLI<br>GYTPSL | 3.08 | 0.01 | 3.02 | 2.25 | 0.22 | 0.85 |
| 43562 | 0 | 39243  | LRWAPTGAPADVTDQLI<br>GYTPSL | 3.08 | 0.01 | 3.02 | 0.68 | 0.22 | 0.85 |
| 43563 | 0 | 39243  | LRWAPTGAPADVTDQLI<br>GYTPSL | 3.08 | 0.01 | 3.02 | 1.81 | 0.22 | 0.85 |
| 43564 | 0 | 134441 | LRWEPVPR                    | 2.14 | 0.01 | 0.78 | 0.44 | 1.13 | 0.28 |
| 43565 | 0 | 99453  | LRWLGPSAEYGNLYR             | 2.69 | 0.01 | 2.16 | 0.44 | 1.23 | 1.48 |
| 43566 | 0 | 143995 | LRWLVGEMHCQKIACV<br>LP      | 2.80 | 0.01 | 0.78 | 0.68 | 0.22 | 0.85 |
| 43567 | 0 | 143995 | LRWLVGEMHCQKIACV<br>LP      | 2.80 | 0.01 | 0.78 | 0.68 | 0.22 | 0.85 |
| 43568 | 0 | 39253  | LRYHNKVYCTTSKSA             | 2.65 | 0.01 | 2.69 | 0.44 | 1.41 | 0.28 |
| 43569 | 0 | 39253  | LRYHNKVYCTTSKSA             | 2.65 | 0.01 | 2.69 | 0.44 | 0.85 | 0.28 |
| 43570 | 0 | 39253  | LRYHNKVYCTTSKSA             | 2.65 | 0.01 | 2.69 | 0.44 | 0.85 | 0.28 |
| 43571 | 0 | 39253  | LRYHNKVYCTTSKSA             | 2.65 | 0.01 | 2.69 | 0.44 | 0.85 | 0.28 |
| 43572 | 0 | 39253  | LRYHNKVYCTTSKSA             | 2.65 | 0.01 | 2.69 | 0.44 | 0.85 | 0.28 |
| 43573 | 0 | 39254  | LRYLEA                      | 1.77 | 0.01 | 2.14 | 0.44 | 0.22 | 0.28 |
| 43574 | 0 | 39254  | LRYLEA                      | 1.77 | 0.01 | 2.14 | 0.44 | 0.85 | 0.28 |
| 43575 | 0 | 99454  | LRYQQQSRQSRRRSL             | 2.74 | 0.01 | 2.16 | 0.44 | 1.23 | 1.48 |
| 43576 | 0 | 99454  | LRYQQQSRQSRRRSL             | 2.74 | 0.01 | 2.16 | 0.44 | 1.23 | 1.48 |
| 43577 | 0 | 105940 | LRYQQQSRRRSLPYS             | 2.72 | 0.01 | 2.16 | 0.44 | 1.23 | 0.85 |
| 43578 | 0 | 39255  | LRYSWKTWG                   | 2.21 | 0.01 | 2.87 | 0.44 | 0.85 | 0.28 |
| 43579 | 0 | 39255  | LRYSWKTWG                   | 2.21 | 0.01 | 2.87 | 3.04 | 0.22 | 0.28 |
| 43580 | 0 | 39255  | LRYSWKTWG                   | 2.21 | 0.01 | 2.87 | 1.15 | 0.22 | 0.28 |
| 43581 | 0 | 39256  | LRYSWKTWGKA                 | 2.39 | 4.23 | 2.87 | 0.68 | 0.22 | 0.28 |

|       |   |        |                                   |      |      |      |      |      |      |
|-------|---|--------|-----------------------------------|------|------|------|------|------|------|
| 43582 | 0 | 39256  | LRYSWKWTWGKA                      | 2.39 | 4.23 | 2.87 | 0.68 | 0.22 | 0.28 |
| 43583 | 0 | 179855 | LRYSWKWTWGKAKMLST<br>EL           | 2.86 | 0.01 | 2.87 | 3.63 | 0.22 | 0.28 |
| 43584 | 0 | 79299  | LRYVVWADDW                        | 2.31 | 0.01 | 0.90 | 0.68 | 0.22 | 0.28 |
| 43585 | 0 | 187682 | LSAARGADISG                       | 2.43 | 0.01 | 2.14 | 1.20 | 0.22 | 0.28 |
| 43586 | 0 | 39258  | LSAATETYSGLTPEQKAY<br>VPAMF       | 3.08 | 0.01 | 4.23 | 2.61 | 0.22 | 0.28 |
| 43587 | 0 | 137927 | LSADFTPG                          | 2.10 | 0.01 | 2.21 | 0.44 | 0.85 | 0.28 |
| 43588 | 0 | 137927 | LSADFTPG                          | 2.10 | 0.01 | 2.21 | 0.44 | 0.85 | 0.28 |
| 43589 | 0 | 137927 | LSADFTPG                          | 2.10 | 0.01 | 2.21 | 1.20 | 0.22 | 0.28 |
| 43590 | 0 | 105942 | LSADQISTVQASFDKVK<br>GD           | 2.91 | 0.01 | 3.05 | 1.20 | 0.22 | 0.28 |
| 43591 | 0 | 105942 | LSADQISTVQASFDKVK<br>GD           | 2.91 | 0.01 | 3.05 | 0.44 | 1.23 | 0.28 |
| 43592 | 0 | 196645 | LSAKITL                           | 2.03 | 0.01 | 0.90 | 0.44 | 1.23 | 1.39 |
| 43593 | 0 | 450816 | LSANHVV                           | 1.99 | 0.01 | 0.90 | 0.44 | 1.23 | 1.39 |
| 43594 | 0 | 181721 | LSARDVLENIGIGIY                   | 2.67 | 0.01 | 2.86 | 2.37 | 0.22 | 1.28 |
| 43595 | 0 | 181722 | LSATDVLEKIATGIY                   | 2.67 | 0.01 | 1.66 | 2.36 | 0.22 | 1.28 |
| 43596 | 0 | 181722 | LSATDVLEKIATGIY                   | 2.67 | 0.01 | 1.66 | 0.44 | 0.85 | 1.28 |
| 43597 | 0 | 39290  | LSAVDDLATVVYGSR                   | 2.69 | 0.01 | 0.90 | 1.15 | 0.22 | 0.28 |
| 43598 | 0 | 150406 | LSAYDPVDYPYSNSFAKC                | 2.85 | 3.89 | 0.90 | 0.68 | 0.22 | 0.28 |
| 43599 | 0 | 150406 | LSAYDPVDYPYSNSFAKC                | 2.85 | 3.89 | 0.90 | 0.68 | 0.22 | 0.28 |
| 43600 | 0 | 150406 | LSAYDPVDYPYSNSFAKC                | 2.85 | 3.89 | 0.90 | 0.68 | 2.25 | 1.75 |
| 43601 | 0 | 150406 | LSAYDPVDYPYSNSFAKC                | 2.85 | 3.89 | 0.90 | 0.68 | 0.22 | 0.28 |
| 43602 | 0 | 150406 | LSAYDPVDYPYSNSFAKC                | 2.85 | 3.89 | 0.90 | 0.68 | 0.22 | 0.28 |
| 43603 | 0 | 150406 | LSAYDPVDYPYSNSFAKC                | 2.85 | 3.89 | 0.90 | 0.68 | 0.22 | 0.28 |
| 43604 | 0 | 150406 | LSAYDPVDYPYSNSFAKC                | 2.85 | 3.89 | 0.90 | 0.68 | 0.22 | 0.28 |
| 43605 | 0 | 150406 | LSAYDPVDYPYSNSFAKC                | 2.85 | 3.89 | 0.90 | 0.68 | 0.22 | 0.28 |
| 43606 | 0 | 150406 | LSAYDPVDYPYSNSFAKC                | 2.85 | 3.89 | 0.90 | 0.68 | 0.22 | 0.28 |
| 43607 | 0 | 150406 | LSAYDPVDYPYSNSFAKC                | 2.85 | 3.89 | 0.90 | 0.68 | 0.22 | 0.28 |
| 43608 | 0 | 150406 | LSAYDPVDYPYSNSFAKC                | 2.85 | 3.89 | 0.90 | 0.68 | 0.22 | 0.28 |
| 43609 | 0 | 39294  | LSCFIRPSGYCGREC                   | 2.68 | 0.01 | 2.56 | 2.02 | 0.22 | 0.85 |
| 43610 | 0 | 238744 | LSDDGIRRLGTVT<br>LSDDVEGARAAAAQQL | 2.62 | 0.01 | 2.14 | 2.65 | 0.22 | 0.85 |
| 43611 | 0 | 225635 | SFYETIPSYRNVIAREGLS<br>NAVE       | 3.60 | 0.01 | 2.51 | 2.00 | 0.22 | 0.28 |

|       |   |        |                                                 |      |      |      |      |      |      |
|-------|---|--------|-------------------------------------------------|------|------|------|------|------|------|
| 43612 | 0 | 194748 | LSDKLWTDVVFN                                    | 2.47 | 0.01 | 3.61 | 1.12 | 0.22 | 0.28 |
| 43613 | 0 | 194748 | LSDKLWTDVVFN                                    | 2.47 | 0.01 | 3.61 | 1.12 | 0.22 | 1.34 |
| 43614 | 0 | 194748 | LSDKLWTDVVFN                                    | 2.47 | 0.01 | 3.61 | 1.12 | 0.22 | 0.28 |
| 43615 | 0 | 225409 | LSDKYKNKNIDLFGTNY                               | 2.86 | 0.01 | 2.61 | 0.68 | 0.22 | 0.28 |
| 43616 | 0 | 225409 | LSDKYKNKNIDLFGTNY                               | 2.86 | 0.01 | 2.61 | 0.68 | 0.22 | 0.28 |
| 43617 | 0 | 225409 | LSDKYKNKNIDLFGTNY                               | 2.86 | 0.01 | 2.61 | 0.68 | 0.22 | 0.28 |
| 43618 | 0 | 129328 | LSDNNNLEELPNDVFHG<br>ASGPVILDISRTRIHS<br>LPS YG | 3.58 | 0.01 | 0.78 | 0.68 | 0.22 | 0.28 |
| 43619 | 0 | 129328 | LSDNNNLEELPNDVFHG<br>ASGPVILDISRTRIHS<br>LPS YG | 3.58 | 0.01 | 0.78 | 0.68 | 0.22 | 1.27 |
| 43620 | 0 | 129328 | LSDNNNLEELPNDVFHG<br>ASGPVILDISRTRIHS<br>LPS YG | 3.58 | 0.01 | 0.78 | 0.68 | 0.22 | 1.48 |
| 43621 | 0 | 39319  | LSDRLFPGLSHLDCS                                 | 2.71 | 0.01 | 0.90 | 0.44 | 1.59 | 1.39 |
| 43622 | 0 | 111520 | LSDTQAVYSADN                                    | 2.48 | 0.01 | 0.90 | 0.44 | 0.85 | 1.39 |
| 43623 | 0 | 423423 | LSDVTQRRNRPLRCL                                 | 2.69 | 0.01 | 2.51 | 0.44 | 2.35 | 1.28 |
| 43624 | 0 | 39324  | LSEALRIIAGTLEVHG<br>V A                         | 2.94 | 0.01 | 3.00 | 1.15 | 0.22 | 0.28 |
| 43625 | 0 | 39324  | LSEALRIIAGTLEVHG<br>V A                         | 2.94 | 0.01 | 3.00 | 3.27 | 0.22 | 0.28 |
| 43626 | 0 | 39324  | LSEALRIIAGTLEVHG<br>V A                         | 2.94 | 0.01 | 3.00 | 3.27 | 0.22 | 0.28 |
| 43627 | 0 | 118504 | LSEDRRQVRLGDTQQS                                | 2.76 | 0.01 | 0.78 | 0.44 | 1.13 | 0.28 |
| 43628 | 0 | 118504 | LSEDRRQVRLGDTQQS                                | 2.76 | 0.01 | 0.78 | 0.44 | 1.13 | 0.28 |
| 43629 | 0 | 161406 | LSEDTSGKFSVDKLF<br>D K                          | 2.94 | 0.01 | 2.08 | 2.02 | 0.22 | 1.57 |
| 43630 | 0 | 106624 | LSEEVKTTEQ                                      | 2.32 | 0.01 | 3.08 | 0.44 | 1.23 | 0.85 |
| 43631 | 0 | 103386 | LSEGDMAAHKGLMNI                                 | 2.66 | 0.01 | 2.04 | 0.44 | 0.85 | 1.28 |
| 43632 | 0 | 39329  | LSEIKGVIVHRLEGV                                 | 2.71 | 0.01 | 2.72 | 2.16 | 0.22 | 0.28 |
| 43633 | 0 | 39329  | LSEIKGVIVHRLEGV                                 | 2.71 | 0.01 | 4.23 | 2.89 | 0.22 | 0.28 |
| 43634 | 0 | 39329  | LSEIKGVIVHRLEGV                                 | 2.71 | 0.01 | 4.23 | 2.25 | 0.22 | 0.28 |
| 43635 | 0 | 39329  | LSEIKGVIVHRLEGV                                 | 2.71 | 0.01 | 4.23 | 2.69 | 0.22 | 0.28 |
| 43636 | 0 | 39329  | LSEIKGVIVHRLEGV                                 | 2.71 | 0.01 | 4.23 | 0.68 | 0.22 | 0.28 |
| 43637 | 0 | 39329  | LSEIKGVIVHRLEGV                                 | 2.71 | 0.01 | 4.23 | 1.81 | 0.22 | 0.28 |
| 43638 | 0 | 39329  | LSEIKGVIVHRLEGV                                 | 2.71 | 0.01 | 2.72 | 3.34 | 0.22 | 0.28 |
| 43639 | 0 | 39329  | LSEIKGVIVHRLEGV                                 | 2.71 | 0.01 | 2.43 | 0.68 | 0.22 | 0.28 |
| 43640 | 0 | 39329  | LSEIKGVIVHRLEGV                                 | 2.71 | 0.01 | 2.72 | 0.68 | 0.22 | 0.28 |
| 43641 | 0 | 100287 | LSEKGLTTY                                       | 2.23 | 0.01 | 2.96 | 1.12 | 0.22 | 0.28 |
| 43642 | 0 | 118505 | LSEKKISSIQSIV                                   | 2.58 | 0.01 | 0.78 | 0.44 | 1.74 | 0.85 |
| 43643 | 0 | 118505 | LSEKKISSIQSIV                                   | 2.58 | 0.01 | 0.78 | 0.44 | 1.59 | 0.85 |

|       |   |        |                                       |      |      |      |      |      |      |
|-------|---|--------|---------------------------------------|------|------|------|------|------|------|
| 43644 | 0 | 118505 | LSEKKISSIQSIV                         | 2.58 | 0.01 | 0.78 | 0.44 | 1.74 | 0.85 |
| 43645 | 0 | 131968 | LSELQVEQTSLEP                         | 2.60 | 0.01 | 0.78 | 2.66 | 0.22 | 0.28 |
| 43646 | 0 | 123467 | LSENPPNH                              | 2.13 | 0.01 | 0.78 | 1.20 | 0.22 | 0.28 |
| 43647 | 0 | 39335  | LSERIVRDGLFNSQFIAL<br>MPTSGCAQVTGCSDA | 3.43 | 0.01 | 2.43 | 0.44 | 1.59 | 0.28 |
| 43648 | 0 | 99456  | LSERRAQS                              | 2.13 | 0.01 | 2.24 | 0.68 | 0.22 | 0.28 |
| 43649 | 0 | 39336  | LSESSVTVTPPDGTSALV<br>ECECGGT         | 3.19 | 0.01 | 3.36 | 0.68 | 0.22 | 0.28 |
| 43650 | 0 | 39336  | LSESSVTVTPPDGTSALV<br>ECECGGT         | 3.19 | 0.01 | 3.36 | 0.68 | 0.22 | 0.28 |
| 43651 | 0 | 39336  | LSESSVTVTPPDGTSALV<br>ECECGGT         | 3.19 | 0.01 | 3.36 | 0.68 | 0.22 | 0.28 |
| 43652 | 0 | 421359 | LSFKYTGC GG N A N R                   | 2.58 | 0.01 | 3.19 | 0.44 | 1.23 | 1.28 |
| 43653 | 0 | 122849 | LSFLHLTRADLSYPSHC                     | 2.80 | 0.01 | 0.78 | 3.01 | 0.22 | 0.28 |
| 43654 | 0 | 122849 | LSFLHLTRADLSYPSHC                     | 2.80 | 0.01 | 0.78 | 3.01 | 0.22 | 1.27 |
| 43655 | 0 | 115853 | LSFMAIPPKK                            | 2.28 | 0.01 | 1.60 | 0.44 | 1.23 | 0.85 |
| 43656 | 0 | 115853 | LSFMAIPPKK                            | 2.28 | 0.01 | 1.60 | 0.44 | 1.23 | 0.85 |
| 43657 | 0 | 115369 | LSFMAIPPKKNQDKTEIP<br>TI              | 2.92 | 0.01 | 1.60 | 0.44 | 1.23 | 2.51 |
| 43658 | 0 | 95574  | LSFNPT                                | 1.88 | 0.01 | 1.60 | 0.44 | 1.23 | 0.28 |
| 43659 | 0 | 98893  | LSFNPTQLEE                            | 2.30 | 0.01 | 1.60 | 0.44 | 1.23 | 0.85 |
| 43660 | 0 | 39349  | LSFNPTQLEE QCHI                       | 2.59 | 0.01 | 1.60 | 0.44 | 1.23 | 1.27 |
| 43661 | 0 | 39349  | LSFNPTQLEE QCHI                       | 2.59 | 0.01 | 1.60 | 2.36 | 0.22 | 1.34 |
| 43662 | 0 | 39349  | LSFNPTQLEE QCHI                       | 2.59 | 0.01 | 1.60 | 0.68 | 0.22 | 0.28 |
| 43663 | 0 | 39349  | LSFNPTQLEE QCHI                       | 2.59 | 0.01 | 1.60 | 0.68 | 0.22 | 0.28 |
| 43664 | 0 | 39349  | LSFNPTQLEE QCHI                       | 2.59 | 0.01 | 1.60 | 0.68 | 0.22 | 0.28 |
| 43665 | 0 | 39349  | LSFNPTQLEE QCHI                       | 2.59 | 0.01 | 1.60 | 0.68 | 0.22 | 0.28 |
| 43666 | 0 | 189114 | LSFPDWP                               | 2.02 | 0.01 | 0.90 | 2.13 | 0.22 | 0.28 |
| 43667 | 0 | 189114 | LSFPDWP                               | 2.02 | 0.01 | 0.90 | 3.41 | 0.22 | 0.28 |
| 43668 | 0 | 177434 | LSFPETR                               | 1.99 | 0.01 | 0.90 | 2.13 | 0.22 | 0.28 |
| 43669 | 0 | 232931 | LSFPFPG                               | 2.04 | 0.01 | 0.90 | 2.49 | 0.85 | 1.39 |
| 43670 | 0 | 232931 | LSFPFPG                               | 2.04 | 0.01 | 0.90 | 0.68 | 0.22 | 0.28 |
| 43671 | 0 | 78203  | LSFPMS                                | 1.90 | 0.01 | 0.90 | 2.02 | 1.59 | 0.28 |
| 43672 | 0 | 177435 | LSFPSPP                               | 2.02 | 0.01 | 0.90 | 2.13 | 0.22 | 0.28 |
| 43673 | 0 | 177436 | LSFPSVV                               | 2.00 | 0.01 | 0.90 | 2.13 | 0.22 | 0.28 |
| 43674 | 0 | 177436 | LSFPSVV                               | 2.00 | 0.01 | 0.90 | 0.44 | 0.85 | 0.28 |
| 43675 | 0 | 177437 | LSFPTQA                               | 1.99 | 0.01 | 0.90 | 2.13 | 0.22 | 0.28 |
| 43676 | 0 | 177438 | LSFPTYP                               | 2.02 | 0.01 | 0.90 | 2.13 | 0.22 | 0.28 |
| 43677 | 0 | 39352  | LSFSCYLSVTEQSEFYFPR<br>A              | 2.95 | 0.01 | 2.82 | 0.44 | 0.85 | 0.28 |
| 43678 | 0 | 334833 | LSFSDFLLMTREVD                        | 2.69 | 0.01 | 1.61 | 0.44 | 0.85 | 1.28 |
| 43679 | 0 | 93326  | LSFSDSLK D                            | 2.36 | 0.01 | 2.67 | 2.00 | 0.22 | 0.28 |
| 43680 | 0 | 93326  | LSFSDSLK D                            | 2.36 | 0.01 | 2.67 | 2.00 | 0.22 | 0.28 |
| 43681 | 0 | 93326  | LSFSDSLK D                            | 2.36 | 0.01 | 2.67 | 2.00 | 0.22 | 0.28 |
| 43682 | 0 | 177439 | LSFSYDR                               | 2.02 | 0.01 | 0.90 | 2.13 | 0.22 | 0.28 |
| 43683 | 0 | 39354  | LSFTLTGNPNRP                          | 2.50 | 0.01 | 2.86 | 0.44 | 0.85 | 0.28 |

|       |   |        |                                      |      |      |      |      |      |      |
|-------|---|--------|--------------------------------------|------|------|------|------|------|------|
| 43684 | 0 | 39354  | LSFTLTGNPNRP                         | 2.50 | 0.01 | 2.86 | 0.44 | 0.85 | 0.28 |
| 43685 | 0 | 39354  | LSFTLTGNPNRP                         | 2.50 | 0.01 | 2.86 | 0.44 | 0.85 | 0.28 |
| 43686 | 0 | 191592 | LSGDCWNWQGCRLPF                      | 2.72 | 0.01 | 0.90 | 2.84 | 1.13 | 1.27 |
| 43687 | 0 | 191592 | LSGDCWNWQGCRLPF                      | 2.72 | 0.01 | 0.90 | 2.84 | 1.13 | 1.66 |
| 43688 | 0 | 39361  | LSGDSVARIKKSPVLEDA<br>VN             | 2.94 | 0.01 | 2.78 | 2.49 | 0.85 | 0.28 |
| 43689 | 0 | 39367  | LSGHRMAWDMMMN<br>WS                  | 2.66 | 0.01 | 1.72 | 0.44 | 0.85 | 0.28 |
| 43690 | 0 | 179856 | LSGID                                | 1.74 | 0.01 | 3.63 | 0.68 | 0.22 | 0.28 |
| 43691 | 0 | 179856 | LSGID                                | 1.74 | 0.01 | 3.63 | 0.68 | 0.22 | 0.85 |
| 43692 | 0 | 179856 | LSGID                                | 1.74 | 0.01 | 3.63 | 0.68 | 0.22 | 1.48 |
| 43693 | 0 | 179856 | LSGID                                | 1.74 | 0.01 | 3.63 | 0.68 | 0.22 | 1.48 |
| 43694 | 0 | 179856 | LSGID                                | 1.74 | 0.01 | 3.63 | 0.68 | 0.22 | 0.85 |
| 43695 | 0 | 39368  | LSGIQLFDRI                           | 2.32 | 0.01 | 0.78 | 0.44 | 1.74 | 0.28 |
| 43696 | 0 | 98235  | LSGKFLLPNT                           | 2.31 | 0.01 | 3.57 | 0.44 | 0.85 | 0.28 |
| 43697 | 0 | 39370  | LSGKPAIIPDREALYQEF<br>DE             | 2.93 | 0.01 | 2.41 | 0.44 | 0.85 | 0.28 |
| 43698 | 0 | 39371  | LSGKPAIIPDREALYQQF<br>DE             | 2.92 | 0.01 | 1.96 | 0.44 | 0.85 | 0.28 |
| 43699 | 0 | 39372  | LSGKPAIIPDREVLYQAF<br>DE             | 2.91 | 0.01 | 2.41 | 0.44 | 0.85 | 0.28 |
| 43700 | 0 | 39373  | LSGKPAIIPDREVLYQEF<br>DE             | 2.91 | 0.01 | 2.41 | 0.44 | 0.85 | 0.28 |
| 43701 | 0 | 39374  | LSGKPAIIPDREVLYQEF<br>DEMEECSQLPYIEQ | 3.41 | 0.01 | 2.68 | 0.44 | 1.59 | 0.28 |
| 43702 | 0 | 39375  | LSGKPAIIPDREVLYREFD<br>E             | 2.93 | 0.01 | 1.72 | 0.44 | 0.85 | 0.28 |
| 43703 | 0 | 39375  | LSGKPAIIPDREVLYREFD<br>E             | 2.93 | 0.01 | 1.96 | 0.44 | 0.85 | 0.28 |
| 43704 | 0 | 39376  | LSGKPATIPDREALYREF<br>DE             | 2.94 | 0.01 | 1.96 | 0.44 | 0.85 | 0.28 |
| 43705 | 0 | 39377  | LSGKPATIPDREAVLYQE<br>FD             | 2.90 | 0.01 | 1.96 | 0.44 | 0.85 | 0.28 |
| 43706 | 0 | 39378  | LSGKPATIPDREVLYQEF<br>DE             | 2.90 | 0.01 | 1.72 | 0.44 | 0.85 | 0.28 |
| 43707 | 0 | 39379  | LSGKPATIPDREVLYREF<br>DE             | 2.92 | 0.01 | 1.96 | 0.44 | 0.85 | 0.28 |
| 43708 | 0 | 39380  | LSGKPATVPDREVLYQEF<br>DE             | 2.92 | 0.01 | 2.41 | 0.44 | 0.85 | 0.28 |
| 43709 | 0 | 39381  | LSGKPAVIPDRELLYREF<br>DE             | 2.93 | 0.01 | 1.72 | 0.44 | 0.85 | 0.28 |
| 43710 | 0 | 39382  | LSGKPAVIPDREVLYQAF<br>DE             | 2.92 | 0.01 | 1.72 | 0.44 | 0.85 | 0.28 |
| 43711 | 0 | 39383  | LSGKPAVIPDREVLYQGF<br>DE             | 2.92 | 0.01 | 1.72 | 0.44 | 0.85 | 0.28 |

|       |   |        |                          |      |      |      |      |      |      |
|-------|---|--------|--------------------------|------|------|------|------|------|------|
| 43712 | 0 | 39384  | LSGKPAVIPDREVLYREF<br>DE | 2.94 | 0.01 | 1.72 | 0.44 | 0.85 | 0.28 |
| 43713 | 0 | 39385  | LSGKPAVVPDREVLYQE<br>FDE | 2.93 | 0.01 | 2.41 | 0.44 | 0.85 | 0.28 |
| 43714 | 0 | 39391  | LSGQPAVIPDREVLYQQ<br>FDE | 2.93 | 0.01 | 4.45 | 3.27 | 0.22 | 0.28 |
| 43715 | 0 | 39391  | LSGQPAVIPDREVLYQQ<br>FDE | 2.93 | 0.01 | 4.45 | 3.67 | 0.22 | 0.28 |
| 43716 | 0 | 39391  | LSGQPAVIPDREVLYQQ<br>FDE | 2.93 | 0.01 | 4.45 | 0.44 | 0.85 | 0.28 |
| 43717 | 0 | 39391  | LSGQPAVIPDREVLYQQ<br>FDE | 2.93 | 0.01 | 1.96 | 0.44 | 0.85 | 0.28 |
| 43718 | 0 | 227802 | LSGRAILTLVNNDDRD         | 2.74 | 0.01 | 2.72 | 1.20 | 1.59 | 0.28 |
| 43719 | 0 | 39392  | LSGRPAIIPDREALYQEF<br>DE | 2.94 | 0.01 | 1.72 | 0.44 | 0.85 | 0.28 |
| 43720 | 0 | 39393  | LSGRPAIIPDREVLHREF<br>DE | 2.94 | 0.01 | 1.96 | 0.44 | 0.85 | 0.28 |
| 43721 | 0 | 39394  | LSGRPAIIPDREVLYQEF<br>DE | 2.93 | 0.01 | 2.41 | 0.44 | 0.85 | 0.28 |
| 43722 | 0 | 39395  | LSGRPAIIPDREVLYREFD<br>E | 2.94 | 0.01 | 1.96 | 0.44 | 0.85 | 0.28 |
| 43723 | 0 | 39396  | LSGRPAIVPDRELLYQEF<br>DE | 2.93 | 0.01 | 1.72 | 0.44 | 0.85 | 0.28 |
| 43724 | 0 | 39398  | LSGRPAIVPDREVLYQEF<br>DE | 2.94 | 0.01 | 1.96 | 0.44 | 0.85 | 0.28 |
| 43725 | 0 | 39398  | LSGRPAIVPDREVLYQEF<br>DE | 2.94 | 0.01 | 1.96 | 3.27 | 0.22 | 0.28 |
| 43726 | 0 | 39398  | LSGRPAIVPDREVLYQEF<br>DE | 2.94 | 0.01 | 1.96 | 3.67 | 0.22 | 0.28 |
| 43727 | 0 | 39398  | LSGRPAIVPDREVLYQEF<br>DE | 2.94 | 0.01 | 1.96 | 3.22 | 0.22 | 0.28 |
| 43728 | 0 | 39399  | LSGRPAIVPDREVLYREF<br>DE | 2.95 | 0.01 | 1.96 | 0.44 | 0.85 | 0.28 |
| 43729 | 0 | 39400  | LSGRPAVIPDREVLYQEF<br>DE | 2.94 | 0.01 | 2.41 | 0.44 | 0.85 | 0.28 |
| 43730 | 0 | 39401  | LSGRPAVIPDREVLYREF<br>DE | 2.95 | 0.01 | 1.96 | 0.44 | 0.85 | 0.28 |
| 43731 | 0 | 39402  | LSGRPAVVPDREVLYQE<br>FDE | 2.95 | 0.01 | 1.96 | 0.44 | 0.85 | 0.28 |
| 43732 | 0 | 39403  | LSGRPAVVPDREVLYREF<br>DE | 2.96 | 0.01 | 1.96 | 0.44 | 0.85 | 0.28 |
| 43733 | 0 | 39404  | LSGRPVIVPDREVLYREF<br>DE | 2.97 | 0.01 | 1.72 | 0.44 | 0.85 | 0.28 |
| 43734 | 0 | 39405  | LSGSPAIVPDREVLYQDF<br>DE | 2.94 | 0.01 | 1.72 | 0.44 | 0.85 | 0.28 |
| 43735 | 0 | 118898 | LSHIGDAVVISCAKD          | 2.67 | 0.01 | 0.78 | 1.12 | 0.22 | 1.48 |
| 43736 | 0 | 118898 | LSHIGDAVVISCAKD          | 2.67 | 0.01 | 0.78 | 1.12 | 0.22 | 0.28 |

|       |   |        |                          |      |      |      |      |      |      |
|-------|---|--------|--------------------------|------|------|------|------|------|------|
| 43737 | 0 | 118898 | LSHIGDAVVISCAKD          | 2.67 | 0.01 | 0.78 | 1.12 | 0.22 | 2.02 |
| 43738 | 0 | 39423  | LSHNPGASALL              | 2.41 | 0.01 | 2.40 | 1.15 | 0.22 | 0.28 |
| 43739 | 0 | 39423  | LSHNPGASALL              | 2.41 | 0.01 | 2.40 | 1.15 | 0.22 | 2.02 |
| 43740 | 0 | 39423  | LSHNPGASALL              | 2.41 | 0.01 | 2.40 | 1.15 | 0.22 | 0.85 |
| 43741 | 0 | 39429  | LSIAYPTLSEIKGVI          | 2.67 | 0.01 | 2.43 | 0.44 | 1.59 | 0.28 |
| 43742 | 0 | 85833  | LSIIAEQSNSTVDNQK         | 2.72 | 0.01 | 3.04 | 1.12 | 0.22 | 0.28 |
| 43743 | 0 | 85833  | LSIIAEQSNSTVDNQK         | 2.72 | 0.01 | 3.04 | 1.12 | 0.22 | 0.85 |
| 43744 | 0 | 85833  | LSIIAEQSNSTVDNQK         | 2.72 | 0.01 | 3.04 | 2.25 | 0.22 | 0.28 |
| 43745 | 0 | 85833  | LSIIAEQSNSTVDNQK         | 2.72 | 0.01 | 3.04 | 1.12 | 0.22 | 0.28 |
| 43746 | 0 | 85833  | LSIIAEQSNSTVDNQK         | 2.72 | 0.01 | 3.04 | 0.44 | 0.85 | 0.28 |
| 43747 | 0 | 117577 | LSIRGNNIRYFILPD          | 2.68 | 0.01 | 0.78 | 3.01 | 0.22 | 0.28 |
| 43748 | 0 | 39449  | LSIVMPVGGQSSFYS          | 2.67 | 0.01 | 2.04 | 0.44 | 0.85 | 1.28 |
| 43749 | 0 | 172278 | LSKCDFTQMSQYFKA          | 2.66 | 0.01 | 0.78 | 0.44 | 1.41 | 0.28 |
| 43750 | 0 | 172278 | LSKCDFTQMSQYFKA          | 2.66 | 0.01 | 0.78 | 0.44 | 1.13 | 0.28 |
| 43751 | 0 | 149828 | LSKDPFV                  | 1.99 | 0.01 | 0.90 | 2.37 | 0.22 | 0.28 |
| 43752 | 0 | 230157 | LSKIAEDDSLNG             | 2.47 | 0.01 | 3.19 | 0.44 | 1.23 | 1.28 |
| 43753 | 0 | 100288 | LSKINQPYQK               | 2.31 | 0.01 | 2.18 | 2.16 | 0.22 | 0.28 |
| 43754 | 0 | 450817 | LSKINSP                  | 2.02 | 0.01 | 0.90 | 0.44 | 1.23 | 1.39 |
| 43755 | 0 | 237834 | LSKLHEYFPEMQI            | 2.52 | 0.01 | 0.78 | 0.44 | 1.13 | 1.28 |
| 43756 | 0 | 111521 | LSKLLCVSPMCMMEIPP<br>KLR | 2.96 | 0.01 | 1.86 | 0.44 | 0.85 | 0.28 |
| 43757 | 0 | 111521 | LSKLLCVSPMCMMEIPP<br>KLR | 2.96 | 0.01 | 1.86 | 0.44 | 0.85 | 0.28 |
| 43758 | 0 | 136073 | LSKNNAIEPRSFQNSRH<br>PS  | 2.94 | 0.01 | 0.78 | 0.44 | 1.41 | 1.34 |
| 43759 | 0 | 39465  | LSKSFLAAGGVSK            | 2.57 | 0.01 | 2.24 | 1.20 | 0.22 | 0.28 |
| 43760 | 0 | 39465  | LSKSFLAAGGVSK            | 2.57 | 0.01 | 2.24 | 1.20 | 0.22 | 0.85 |
| 43761 | 0 | 151030 | LSKSYINDKGKEVLV          | 2.69 | 0.01 | 2.87 | 0.44 | 0.85 | 0.28 |
| 43762 | 0 | 93328  | LSKVVDNYEL               | 2.31 | 0.01 | 2.67 | 2.00 | 0.22 | 0.28 |
| 43763 | 0 | 93328  | LSKVVDNYEL               | 2.31 | 0.01 | 2.67 | 2.00 | 0.22 | 0.28 |
| 43764 | 0 | 93328  | LSKVVDNYEL               | 2.31 | 0.01 | 2.67 | 2.00 | 0.22 | 0.28 |
| 43765 | 0 | 39472  | LSKYTINP                 | 2.10 | 0.01 | 3.70 | 0.44 | 0.85 | 0.28 |
| 43766 | 0 | 39473  | LSLASPPSPPREPPRPSR<br>SL | 3.02 | 0.01 | 3.01 | 0.44 | 0.85 | 0.28 |
| 43767 | 0 | 100289 | LSLEELKDQR               | 2.33 | 0.01 | 2.18 | 2.16 | 0.22 | 0.28 |
| 43768 | 0 | 196650 | LSLELAL                  | 2.06 | 0.01 | 0.90 | 0.44 | 1.23 | 1.39 |
| 43769 | 0 | 335019 | LSLFGQAAAGDKPAP          | 2.69 | 0.01 | 1.61 | 0.44 | 0.85 | 1.28 |
| 43770 | 0 | 335020 | LSLFGQAAAGDKPSP          | 2.69 | 0.01 | 1.61 | 0.44 | 0.85 | 1.28 |
| 43771 | 0 | 39480  | LSLILNRLC                | 2.26 | 0.01 | 1.60 | 0.44 | 1.23 | 0.28 |
| 43772 | 0 | 39483  | LSLLDLYLGRGYNVS          | 2.72 | 0.01 | 2.43 | 0.44 | 0.85 | 0.28 |
| 43773 | 0 | 39485  | LSLLRRQVNEVA             | 2.48 | 0.01 | 2.24 | 1.20 | 0.22 | 1.57 |
| 43774 | 0 | 39485  | LSLLRRQVNEVA             | 2.48 | 0.01 | 2.24 | 1.20 | 0.22 | 1.57 |
| 43775 | 0 | 462391 | LSLMAALA                 | 2.18 | 0.01 | 0.78 | 1.12 | 0.22 | 1.28 |
| 43776 | 0 | 39487  | LSLNHARSP                | 2.24 | 0.01 | 0.90 | 2.55 | 0.22 | 0.28 |
| 43777 | 0 | 39488  | LSLNHHNNW                | 2.26 | 0.01 | 0.90 | 2.55 | 0.22 | 0.28 |
| 43778 | 0 | 39489  | LSLNWGSSA                | 2.25 | 0.01 | 0.90 | 2.55 | 0.22 | 0.28 |
| 43779 | 0 | 39490  | LSLNYAGAE                | 2.24 | 0.01 | 0.90 | 2.55 | 0.22 | 0.28 |

|       |   |        |                             |      |      |      |      |      |      |
|-------|---|--------|-----------------------------|------|------|------|------|------|------|
| 43780 | 0 | 100290 | LSLPKQQDSLPTDK              | 2.66 | 0.01 | 2.96 | 1.12 | 0.22 | 0.28 |
| 43781 | 0 | 122477 | LSLSDLLTFRT                 | 2.52 | 0.01 | 0.90 | 0.44 | 1.13 | 0.28 |
| 43782 | 0 | 122477 | LSLSDLLTFRT                 | 2.52 | 0.01 | 0.90 | 0.44 | 1.41 | 0.28 |
| 43783 | 0 | 115854 | LSLSQSKVLP                  | 2.36 | 0.01 | 1.60 | 0.44 | 1.23 | 0.85 |
| 43784 | 0 | 119613 | LSLSRFSWGAEGQRPGF<br>GYG    | 2.97 | 0.01 | 0.78 | 3.93 | 0.22 | 0.28 |
| 43785 | 0 | 119613 | LSLSRFSWGAEGQRPGF<br>GYG    | 2.97 | 0.01 | 0.78 | 3.93 | 0.22 | 0.28 |
| 43786 | 0 | 39504  | LSN                         | 1.37 | 0.01 | 3.85 | 0.68 | 0.22 | 0.85 |
| 43787 | 0 | 39504  | LSN                         | 1.37 | 0.01 | 3.85 | 0.68 | 0.22 | 0.28 |
| 43788 | 0 | 39504  | LSN                         | 1.37 | 0.01 | 3.85 | 0.68 | 0.22 | 1.34 |
| 43789 | 0 | 39504  | LSN                         | 1.37 | 0.01 | 3.85 | 0.68 | 0.22 | 1.34 |
| 43790 | 0 | 181723 | LSNAIFVDQLRKELN             | 2.65 | 0.01 | 1.66 | 2.37 | 0.22 | 1.28 |
| 43791 | 0 | 181723 | LSNAIFVDQLRKELN             | 2.65 | 0.01 | 1.66 | 2.36 | 0.22 | 1.28 |
| 43792 | 0 | 181724 | LSNARFHDGLHKAAD             | 2.68 | 0.01 | 2.86 | 2.37 | 0.22 | 1.28 |
| 43793 | 0 | 39517  | LSNPTPQE                    | 2.12 | 0.01 | 2.40 | 2.43 | 0.22 | 0.28 |
| 43794 | 0 | 167779 | LSNPTPQEI                   | 2.21 | 0.01 | 2.40 | 2.43 | 0.22 | 0.28 |
| 43795 | 0 | 79301  | LSNQSG                      | 1.90 | 0.01 | 0.90 | 0.68 | 0.22 | 1.39 |
| 43796 | 0 | 122850 | LSNSSTLDLASINLQ             | 2.72 | 0.01 | 0.78 | 1.20 | 0.22 | 0.28 |
| 43797 | 0 | 122850 | LSNSSTLDLASINLQ             | 2.72 | 0.01 | 0.78 | 1.20 | 0.22 | 0.28 |
| 43798 | 0 | 133633 | LSNTANPWSWDR                | 2.48 | 0.01 | 0.90 | 0.68 | 0.22 | 1.39 |
| 43799 | 0 | 182224 | LSPCQEKKGFKME               | 2.66 | 0.01 | 0.78 | 0.44 | 1.13 | 0.85 |
| 43800 | 0 | 182224 | LSPCQEKKGFKME               | 2.66 | 0.01 | 0.78 | 0.44 | 1.41 | 0.85 |
| 43801 | 0 | 141548 | LSPFPAYPIVGGQIYRF<br>GYKHEL | 3.10 | 0.01 | 3.45 | 1.12 | 0.22 | 0.85 |
| 43802 | 0 | 141548 | LSPFPAYPIVGGQIYRF<br>GYKHEL | 3.10 | 0.01 | 3.45 | 1.12 | 0.22 | 0.85 |
| 43803 | 0 | 141548 | LSPFPAYPIVGGQIYRF<br>GYKHEL | 3.10 | 0.01 | 3.45 | 0.44 | 0.85 | 0.85 |
| 43804 | 0 | 141705 | LSPGDVLVIPAGHPV             | 2.71 | 0.01 | 3.65 | 0.44 | 1.23 | 1.28 |
| 43805 | 0 | 182396 | LSPGKDM                     | 1.99 | 0.01 | 2.51 | 0.44 | 1.13 | 0.28 |
| 43806 | 0 | 182396 | LSPGKDM                     | 1.99 | 0.01 | 2.51 | 0.44 | 1.41 | 0.28 |
| 43807 | 0 | 182396 | LSPGKDM                     | 1.99 | 0.01 | 2.51 | 0.44 | 1.13 | 0.28 |
| 43808 | 0 | 182396 | LSPGKDM                     | 1.99 | 0.01 | 2.51 | 0.44 | 1.93 | 0.28 |
| 43809 | 0 | 182396 | LSPGKDM                     | 1.99 | 0.01 | 2.51 | 0.44 | 1.41 | 0.28 |
| 43810 | 0 | 165635 | LSPIIVY                     | 2.01 | 0.01 | 0.90 | 0.44 | 1.23 | 1.39 |
| 43811 | 0 | 165635 | LSPIIVY                     | 2.01 | 0.01 | 0.90 | 0.44 | 1.23 | 1.39 |
| 43812 | 0 | 132869 | LSPLGEEM                    | 2.14 | 0.01 | 0.78 | 0.68 | 0.22 | 0.85 |
| 43813 | 0 | 153269 | LSPPLRNTHPQAMQW             | 2.67 | 0.01 | 2.08 | 0.68 | 0.22 | 0.28 |
| 43814 | 0 | 39565  | LSPRIRKVGDI EFHACSD<br>YI   | 2.90 | 0.01 | 1.66 | 0.68 | 0.22 | 0.28 |
| 43815 | 0 | 164287 | LSPRPLWDAWEQ                | 2.48 | 0.01 | 0.90 | 1.20 | 0.22 | 1.39 |
| 43816 | 0 | 39586  | LSPYRPSWVNLVGTS             | 2.69 | 0.01 | 0.90 | 0.68 | 0.22 | 1.39 |
| 43817 | 0 | 39597  | LSQDEIDRMVNDAEKY            | 2.69 | 0.01 | 1.66 | 0.44 | 1.74 | 0.28 |



|       |   |        |                                  |      |      |      |      |      |      |
|-------|---|--------|----------------------------------|------|------|------|------|------|------|
| 43818 | 0 | 39597  | LSQDEIDRMVNDAEKY                 | 2.69 | 0.01 | 1.66 | 0.44 | 1.74 | 0.28 |
| 43819 | 0 | 39597  | LSQDEIDRMVNDAEKY                 | 2.69 | 0.01 | 1.66 | 0.68 | 0.22 | 0.28 |
| 43820 | 0 | 39597  | LSQDEIDRMVNDAEKY                 | 2.69 | 0.01 | 1.66 | 1.15 | 0.22 | 0.28 |
| 43821 | 0 | 39597  | LSQDEIDRMVNDAEKY                 | 2.69 | 0.01 | 1.66 | 3.33 | 0.22 | 0.28 |
| 43822 | 0 | 133634 | LSQDVCTY                         | 2.10 | 0.01 | 1.60 | 0.68 | 0.22 | 0.28 |
| 43823 | 0 | 39600  | LSQGNLIANCASILC                  | 2.72 | 0.01 | 2.43 | 0.44 | 1.59 | 0.28 |
| 43824 | 0 | 99460  | LSQIKSEGHPQEISK                  | 2.70 | 0.01 | 2.86 | 2.02 | 0.85 | 0.85 |
| 43825 | 0 | 131969 | LSQLNQLSQISQLQR                  | 2.75 | 0.01 | 0.78 | 0.44 | 1.13 | 0.85 |
| 43826 | 0 | 39608  | LSQNASV                          | 2.02 | 0.01 | 0.90 | 1.12 | 0.22 | 1.39 |
| 43827 | 0 | 108019 | LSQPKIVKWDR                      | 2.36 | 0.01 | 0.78 | 1.20 | 0.22 | 0.28 |
| 43828 | 0 | 108019 | LSQPKIVKWDR                      | 2.36 | 0.01 | 0.78 | 1.20 | 0.22 | 0.28 |
| 43829 | 0 | 108019 | LSQPKIVKWDR                      | 2.36 | 0.01 | 0.78 | 1.20 | 0.22 | 0.28 |
| 43830 | 0 | 108019 | LSQPKIVKWDR                      | 2.36 | 0.01 | 0.78 | 1.20 | 0.22 | 0.28 |
| 43831 | 0 | 108019 | LSQPKIVKWDR                      | 2.36 | 0.01 | 0.78 | 1.20 | 0.22 | 0.28 |
| 43832 | 0 | 108019 | LSQPKIVKWDR                      | 2.36 | 0.01 | 0.78 | 1.20 | 0.22 | 0.28 |
| 43833 | 0 | 108019 | LSQPKIVKWDR                      | 2.36 | 0.01 | 0.78 | 1.20 | 0.22 | 0.28 |
| 43834 | 0 | 108019 | LSQPKIVKWDR                      | 2.36 | 0.01 | 0.78 | 1.20 | 0.22 | 0.28 |
| 43835 | 0 | 108019 | LSQPKIVKWDR                      | 2.36 | 0.01 | 0.78 | 3.03 | 0.22 | 0.28 |
| 43836 | 0 | 108019 | LSQPKIVKWDR                      | 2.36 | 0.01 | 0.78 | 3.03 | 0.22 | 0.28 |
| 43837 | 0 | 108019 | LSQPKIVKWDR                      | 2.36 | 0.01 | 0.78 | 1.12 | 0.22 | 0.28 |
| 43838 | 0 | 108019 | LSQPKIVKWDR                      | 2.36 | 0.01 | 0.78 | 1.12 | 0.22 | 2.02 |
| 43839 | 0 | 108019 | LSQPKIVKWDR                      | 2.36 | 0.01 | 0.78 | 3.03 | 0.22 | 1.27 |
| 43840 | 0 | 108019 | LSQPKIVKWDR                      | 2.36 | 0.01 | 0.78 | 3.03 | 0.22 | 1.27 |
| 43841 | 0 | 431120 | LSQQPQQTFPQPQQTF<br>PHQP         | 3.01 | 0.01 | 1.86 | 0.44 | 1.23 | 0.85 |
| 43842 | 0 | 431121 | LSQQPQQTFPQPQQTF<br>PHQPQQQVPQPQ | 3.33 | 0.01 | 1.86 | 0.44 | 1.23 | 0.85 |
| 43843 | 0 | 39613  | LSQQSGNVKITVGGKKV<br>KYN         | 2.96 | 0.01 | 3.13 | 2.43 | 0.22 | 0.28 |
| 43844 | 0 | 115856 | LSQSKVLPVP                       | 2.36 | 0.01 | 1.60 | 0.44 | 1.23 | 0.85 |
| 43845 | 0 | 127731 | LSQSPLVLRSSP                     | 2.52 | 0.01 | 3.16 | 3.16 | 0.22 | 0.28 |
| 43846 | 0 | 149373 | LSQVSFQQPQ                       | 2.35 | 0.01 | 1.86 | 0.44 | 1.93 | 0.85 |
| 43847 | 0 | 149373 | LSQVSFQQPQ                       | 2.35 | 0.01 | 1.86 | 2.74 | 0.22 | 0.85 |
| 43848 | 0 | 149373 | LSQVSFQQPQ                       | 2.35 | 0.01 | 1.86 | 2.74 | 0.22 | 0.85 |
| 43849 | 0 | 108536 | LSRASLCTL                        | 2.26 | 0.01 | 0.90 | 0.44 | 1.13 | 1.39 |
| 43850 | 0 | 39623  | LSRDLEASREAKKKVEAA<br>LE         | 2.99 | 0.01 | 2.24 | 0.44 | 0.85 | 1.27 |
| 43851 | 0 | 177860 | LSRDLVQEEELMEE                   | 2.69 | 0.01 | 0.78 | 0.44 | 1.13 | 0.85 |
| 43852 | 0 | 39626  | LSREM                            | 1.74 | 0.01 | 2.69 | 0.44 | 0.85 | 0.28 |
| 43853 | 0 | 39626  | LSREM                            | 1.74 | 0.01 | 2.69 | 1.12 | 0.22 | 0.28 |
| 43854 | 0 | 112803 | LSRFSWGAEGQKPGFG<br>YGG          | 2.88 | 0.01 | 0.78 | 0.44 | 1.13 | 3.25 |

|       |   |        |                              |      |      |      |      |      |      |
|-------|---|--------|------------------------------|------|------|------|------|------|------|
| 43855 | 0 | 112803 | LSRFSWGAEGQKPGFG<br>YGG      | 2.88 | 0.01 | 0.78 | 0.44 | 1.13 | 2.66 |
| 43856 | 0 | 39631  | LSRISSKS                     | 2.26 | 0.01 | 3.28 | 0.44 | 1.23 | 0.85 |
| 43857 | 0 | 119493 | LSRKKTLLT                    | 2.24 | 0.01 | 0.90 | 0.44 | 1.13 | 0.28 |
| 43858 | 0 | 39638  | LSRNSQGFMTE                  | 2.44 | 0.01 | 0.90 | 0.68 | 0.22 | 0.28 |
| 43859 | 0 | 133635 | LSRSTKEYNKLK                 | 2.50 | 0.01 | 3.59 | 0.68 | 0.22 | 0.28 |
| 43860 | 0 | 39648  | LSSARSPRSLDRAV               | 2.72 | 0.01 | 0.90 | 1.15 | 0.22 | 0.85 |
| 43861 | 0 | 165059 | LSSDGVLTVNGPRKQVS<br>GPRTIPI | 3.17 | 0.01 | 0.78 | 0.44 | 1.41 | 0.28 |
| 43862 | 0 | 165059 | LSSDGVLTVNGPRKQVS<br>GPRTIPI | 3.17 | 0.01 | 0.78 | 0.44 | 1.13 | 0.28 |
| 43863 | 0 | 39652  | LSSDLHKPGQVSVQLP<br>GTNYV    | 3.03 | 0.01 | 2.75 | 1.12 | 0.22 | 0.85 |
| 43864 | 0 | 39652  | LSSDLHKPGQVSVQLP<br>GTNYV    | 3.03 | 0.01 | 2.75 | 1.12 | 0.22 | 0.28 |
| 43865 | 0 | 39652  | LSSDLHKPGQVSVQLP<br>GTNYV    | 3.03 | 0.01 | 2.75 | 1.12 | 0.22 | 1.34 |
| 43866 | 0 | 335360 | LSSFLKDKKKVATA               | 2.69 | 0.01 | 1.61 | 0.44 | 0.85 | 1.28 |
| 43867 | 0 | 39663  | LSSKAV                       | 1.89 | 0.01 | 1.96 | 0.44 | 0.85 | 0.28 |
| 43868 | 0 | 39664  | LSSKAVNHIRSVWKDLL<br>EDT     | 2.92 | 0.01 | 1.72 | 0.68 | 0.22 | 2.02 |
| 43869 | 0 | 39664  | LSSKAVNHIRSVWKDLL<br>EDT     | 2.92 | 0.01 | 1.72 | 0.68 | 0.22 | 0.28 |
| 43870 | 0 | 93332  | LSSLQFARAA                   | 2.33 | 0.01 | 2.67 | 2.00 | 0.22 | 0.28 |
| 43871 | 0 | 93332  | LSSLQFARAA                   | 2.33 | 0.01 | 2.67 | 2.00 | 0.22 | 0.28 |
| 43872 | 0 | 93332  | LSSLQFARAA                   | 2.33 | 0.01 | 2.67 | 2.00 | 0.22 | 0.28 |
| 43873 | 0 | 39673  | LSSMLR                       | 1.92 | 0.01 | 1.86 | 0.44 | 1.23 | 0.28 |
| 43874 | 0 | 106628 | LSSREPQAR                    | 2.22 | 0.01 | 0.90 | 0.44 | 1.13 | 1.39 |
| 43875 | 0 | 106628 | LSSREPQAR                    | 2.22 | 0.01 | 0.90 | 0.44 | 1.13 | 0.28 |
| 43876 | 0 | 135957 | LSSRPGGCSAVS                 | 2.48 | 0.01 | 0.78 | 0.44 | 1.41 | 0.28 |
| 43877 | 0 | 181725 | LSSRYGYVRNSDGNS              | 2.71 | 0.01 | 3.26 | 2.37 | 0.22 | 1.28 |
| 43878 | 0 | 229732 | LSSSEESITHINKKIEKFQS         | 2.96 | 4.93 | 3.97 | 0.44 | 1.23 | 1.28 |
| 43879 | 0 | 115373 | LSSSEESITRINKKIEKFQS         | 2.96 | 0.01 | 1.60 | 0.44 | 1.23 | 2.51 |
| 43880 | 0 | 39680  | LSSSKANSFNSYHT               | 2.62 | 0.01 | 2.22 | 1.12 | 0.22 | 1.48 |
| 43881 | 0 | 39683  | LSSSSSHAEPGENAVLS<br>SEDL    | 3.04 | 0.01 | 2.75 | 1.12 | 0.22 | 0.85 |
| 43882 | 0 | 39683  | LSSSSSHAEPGENAVLS<br>SEDL    | 3.04 | 0.01 | 2.75 | 1.12 | 0.22 | 0.28 |
| 43883 | 0 | 39684  | LSSSSSTR                     | 2.16 | 0.01 | 3.72 | 2.37 | 0.22 | 0.85 |
| 43884 | 0 | 227803 | LSSVDINEGALLPHF              | 2.69 | 0.01 | 2.72 | 4.33 | 1.59 | 0.28 |
| 43885 | 0 | 227803 | LSSVDINEGALLPHF              | 2.69 | 0.01 | 2.72 | 4.33 | 1.59 | 0.28 |
| 43886 | 0 | 227803 | LSSVDINEGALLPHF              | 2.69 | 0.01 | 2.72 | 4.03 | 1.59 | 0.28 |
| 43887 | 0 | 39688  | LSSVVVDPSIRHFDV              | 2.69 | 0.01 | 0.78 | 4.03 | 0.22 | 0.28 |
| 43888 | 0 | 39689  | LSSY                         | 1.59 | 0.01 | 3.85 | 1.15 | 0.22 | 1.34 |
| 43889 | 0 | 39689  | LSSY                         | 1.59 | 0.01 | 3.85 | 1.15 | 0.22 | 1.48 |

|       |   |        |                                                     |      |      |      |      |      |      |
|-------|---|--------|-----------------------------------------------------|------|------|------|------|------|------|
| 43890 | 0 | 39689  | LSSY                                                | 1.59 | 0.01 | 3.85 | 1.15 | 0.22 | 1.48 |
| 43891 | 0 | 39689  | LSSY                                                | 1.59 | 0.01 | 3.85 | 1.20 | 0.22 | 2.35 |
| 43892 | 0 | 196959 | LSTASTEKSWIN                                        | 2.48 | 0.01 | 0.90 | 0.44 | 1.41 | 1.39 |
| 43893 | 0 | 196959 | LSTASTEKSWIN                                        | 2.48 | 0.01 | 0.90 | 0.44 | 1.41 | 0.28 |
| 43894 | 0 | 196959 | LSTASTEKSWIN                                        | 2.48 | 0.01 | 0.90 | 0.44 | 1.41 | 1.48 |
| 43895 | 0 | 196959 | LSTASTEKSWIN                                        | 2.48 | 0.01 | 0.90 | 0.44 | 1.41 | 1.34 |
| 43896 | 0 | 196959 | LSTASTEKSWIN                                        | 2.48 | 0.01 | 0.90 | 0.44 | 1.41 | 1.34 |
| 43897 | 0 | 196959 | LSTASTEKSWIN                                        | 2.48 | 0.01 | 0.90 | 0.44 | 1.41 | 1.34 |
| 43898 | 0 | 196652 | LSTATVR                                             | 2.02 | 0.01 | 0.90 | 0.44 | 1.23 | 1.39 |
| 43899 | 0 | 100291 | LSTEEKEFLK                                          | 2.36 | 0.01 | 2.18 | 2.16 | 0.22 | 0.28 |
| 43900 | 0 | 100291 | LSTEEKEFLK                                          | 2.36 | 0.01 | 2.18 | 2.16 | 0.22 | 0.28 |
| 43901 | 0 | 39695  | LSTFMESGEWVMK                                       | 2.54 | 0.01 | 2.26 | 1.15 | 0.22 | 1.27 |
| 43902 | 0 | 39695  | LSTFMESGEWVMK                                       | 2.54 | 0.01 | 2.26 | 1.15 | 0.22 | 1.48 |
| 43903 | 0 | 125149 | LSTFQQMWITKQ                                        | 2.47 | 0.01 | 0.78 | 0.44 | 1.13 | 0.28 |
| 43904 | 0 | 125149 | LSTFQQMWITKQ                                        | 2.47 | 0.01 | 0.78 | 0.44 | 1.13 | 0.28 |
| 43905 | 0 | 139819 | LSTGFRA                                             | 1.99 | 0.01 | 0.90 | 2.00 | 0.22 | 0.28 |
| 43906 | 0 | 39697  | LSTGLIHL                                            | 2.15 | 0.01 | 2.45 | 0.44 | 0.85 | 0.28 |
| 43907 | 0 | 232548 | LSTHTKLNKADIQMP                                     | 2.65 | 0.01 | 0.90 | 2.22 | 0.85 | 1.27 |
| 43908 | 0 | 39702  | LSTKAACPTMGEAHND<br>KR                              | 2.79 | 0.01 | 4.03 | 2.02 | 0.85 | 0.28 |
| 43909 | 0 | 522145 | LSTKIAKQDSIISNL                                     | 2.70 | 0.01 | 2.24 | 0.44 | 1.41 | 1.28 |
| 43910 | 0 | 496750 | LSTLAINTLKGTVRCCAV<br>RAPGYGDVKKGV                  | 3.34 | 0.01 | 4.93 | 0.44 | 1.93 | 2.12 |
| 43911 | 0 | 79609  | LSTLPETTIVRRRGRSPR<br>RRTPSPR                       | 3.21 | 0.01 | 2.71 | 0.44 | 0.85 | 0.28 |
| 43912 | 0 | 39708  | LSTLSYLG                                            | 2.17 | 0.01 | 4.45 | 1.12 | 0.22 | 0.28 |
| 43913 | 0 | 496751 | LSTLVINKLRGGLKVTAV<br>KAPGFGDRRKEM                  | 3.33 | 0.01 | 4.93 | 0.44 | 1.93 | 2.12 |
| 43914 | 0 | 496754 | LSTLVNRLKVGLQVVA<br>VKAPGFGDNRKNQ                   | 3.36 | 0.01 | 0.78 | 0.44 | 1.93 | 2.12 |
| 43915 | 0 | 496755 | LSTLVVNKIRGTFKSVAV<br>KAPGFGDRRKAM                  | 3.34 | 0.01 | 2.86 | 0.44 | 1.93 | 2.12 |
| 43916 | 0 | 107517 | LSTNEVAM                                            | 2.10 | 0.01 | 0.78 | 0.68 | 0.22 | 0.28 |
| 43917 | 0 | 107517 | LSTNEVAM                                            | 2.10 | 0.01 | 0.78 | 0.68 | 0.22 | 0.85 |
| 43918 | 0 | 190286 | LSTPYSKSQAST                                        | 2.49 | 0.01 | 0.90 | 0.68 | 2.25 | 1.75 |
| 43919 | 0 | 190286 | LSTPYSKSQAST                                        | 2.49 | 0.01 | 0.90 | 0.68 | 0.22 | 0.28 |
| 43920 | 0 | 190286 | LSTPYSKSQAST                                        | 2.49 | 0.01 | 0.90 | 1.15 | 2.25 | 1.75 |
| 43921 | 0 | 190286 | LSTPYSKSQAST                                        | 2.49 | 0.01 | 0.90 | 1.15 | 0.22 | 0.28 |
| 43922 | 0 | 190286 | LSTPYSKSQAST                                        | 2.49 | 0.01 | 0.90 | 1.15 | 0.22 | 0.28 |
| 43923 | 0 | 39714  | LSTRGRQTVK                                          | 2.31 | 3.81 | 2.56 | 0.44 | 0.85 | 0.28 |
| 43924 | 0 | 97475  | LSTRGVQIASNENMEA<br>MDSNTLELRSRYWAIRT<br>RSGGNTNQQR | 3.71 | 0.01 | 3.09 | 0.44 | 0.85 | 0.28 |
| 43925 | 0 | 97476  | LSTTDSFS                                            | 2.15 | 0.01 | 2.87 | 0.68 | 0.22 | 0.28 |
| 43926 | 0 | 142443 | LSTTEVAM                                            | 2.11 | 0.01 | 0.78 | 1.12 | 2.26 | 1.27 |
| 43927 | 0 | 39719  | LSTTEWQILPCSFTT                                     | 2.67 | 0.01 | 1.96 | 0.44 | 0.85 | 0.28 |

|       |   |        |                                                          |      |      |      |      |      |      |
|-------|---|--------|----------------------------------------------------------|------|------|------|------|------|------|
| 43928 | 0 | 39726  | LSTWHVLYSPNVSPSS<br>SSTPLL                               | 3.10 | 0.01 | 2.04 | 0.44 | 0.85 | 0.28 |
| 43929 | 0 | 39726  | LSTWHVLYSPNVSPSS<br>SSTPLL                               | 3.10 | 0.01 | 2.04 | 0.44 | 1.59 | 0.28 |
| 43930 | 0 | 137546 | LSVCFLILFHGLAS                                           | 2.71 | 0.01 | 3.12 | 0.44 | 1.23 | 0.85 |
| 43931 | 0 | 39731  | LSVDLGYAYLKGGKVHF<br>KEVKTIGDKRTL                        | 3.31 | 0.01 | 2.98 | 1.15 | 0.22 | 1.27 |
| 43932 | 0 | 39731  | LSVDLGYAYLKGGKVHF<br>KEVKTIGDKRTL                        | 3.31 | 0.01 | 2.98 | 1.15 | 0.22 | 0.28 |
| 43933 | 0 | 39731  | LSVDLGYAYLKGGKVHF<br>KEVKTIGDKRTL                        | 3.31 | 0.01 | 2.98 | 1.15 | 0.22 | 0.85 |
| 43934 | 0 | 39731  | LSVDLGYAYLKGGKVHF<br>KEVKTIGDKRTL                        | 3.31 | 0.01 | 2.98 | 1.81 | 0.22 | 0.28 |
| 43935 | 0 | 39731  | LSVDLGYAYLKGGKVHF<br>KEVKTIGDKRTL                        | 3.31 | 0.01 | 2.98 | 2.37 | 0.22 | 0.28 |
| 43936 | 0 | 39731  | LSVDLGYAYLKGGKVHF<br>KEVKTIGDKRTL                        | 3.31 | 0.01 | 2.98 | 1.12 | 0.22 | 0.28 |
| 43937 | 0 | 39731  | LSVDLGYAYLKGGKVHF<br>KEVKTIGDKRTL                        | 3.31 | 0.01 | 2.98 | 0.44 | 0.85 | 0.28 |
| 43938 | 0 | 39731  | LSVDLGYAYLKGGKVHF<br>KEVKTIGDKRTL                        | 3.31 | 0.01 | 2.98 | 1.12 | 0.22 | 0.28 |
| 43939 | 0 | 39731  | LSVDLGYAYLKGGKVHF<br>KEVKTIGDKRTL                        | 3.31 | 0.01 | 2.98 | 1.12 | 0.22 | 0.85 |
| 43940 | 0 | 39731  | LSVDLGYAYLKGGKVHF<br>KEVKTIGDKRTL                        | 3.31 | 0.01 | 2.98 | 1.12 | 0.22 | 0.85 |
| 43941 | 0 | 39732  | LSVDLSLTVELIKI                                           | 2.72 | 0.01 | 2.43 | 0.44 | 0.85 | 0.28 |
| 43942 | 0 | 39742  | LSVPDGFKVS                                               | 2.31 | 0.01 | 0.78 | 0.44 | 1.74 | 0.28 |
| 43943 | 0 | 39745  | LSVPNPLGFFPD                                             | 2.49 | 0.01 | 2.58 | 2.25 | 0.22 | 1.57 |
| 43944 | 0 | 104056 | LSVPWVLIFMVSRACR<br>RR                                   | 2.89 | 0.01 | 0.90 | 0.44 | 1.59 | 0.28 |
| 43945 | 0 | 227369 | LSVQARLEPWQPLPG                                          | 2.69 | 0.01 | 2.48 | 0.44 | 1.59 | 0.28 |
| 43946 | 0 | 39748  | LSVSLV                                                   | 1.92 | 0.01 | 2.40 | 0.44 | 0.85 | 0.28 |
| 43947 | 0 | 104893 | LSVTNTGTGAKTTVRIVD<br>QCSNGGLDLVDNVFRQ<br>LDTDGKGYERG    | 3.75 | 0.01 | 2.60 | 1.12 | 0.22 | 0.85 |
| 43948 | 0 | 122143 | LSVVGDPDAPPTMVAV<br>APVA                                 | 2.98 | 0.01 | 2.04 | 0.44 | 0.85 | 0.28 |
| 43949 | 0 | 39750  | LSVVQPMTEQAEEAVV<br>ATPQRKTTEDRPQHSTL<br>SDASEDMEESSHSAT | 3.85 | 0.01 | 1.61 | 1.12 | 0.22 | 1.27 |
| 43950 | 0 | 39750  | LSVVQPMTEQAEEAVV<br>ATPQRKTTEDRPQHSTL<br>SDASEDMEESSHSAT | 3.85 | 0.01 | 1.61 | 0.44 | 0.85 | 0.28 |
| 43951 | 0 | 182226 | LSWSEAHSSCQMGGG                                          | 2.65 | 0.01 | 0.78 | 0.44 | 1.13 | 0.85 |

|       |   |        |                                     |      |      |      |      |      |      |
|-------|---|--------|-------------------------------------|------|------|------|------|------|------|
| 43952 | 0 | 182227 | LSWSEAHSSCQMGGT<br>LLSI             | 2.93 | 0.01 | 0.78 | 0.44 | 1.13 | 0.28 |
| 43953 | 0 | 182227 | LSWSEAHSSCQMGGT<br>LLSI             | 2.93 | 0.01 | 0.78 | 0.44 | 1.41 | 0.28 |
| 43954 | 0 | 182227 | LSWSEAHSSCQMGGT<br>LLSI             | 2.93 | 0.01 | 0.78 | 0.44 | 1.13 | 1.27 |
| 43955 | 0 | 489659 | LSYANANKECQQILQ                     | 2.69 | 0.01 | 2.69 | 3.05 | 0.85 | 1.28 |
| 43956 | 0 | 39763  | LSYLGZIA                            | 2.15 | 0.01 | 4.45 | 1.12 | 0.22 | 0.28 |
| 43957 | 0 | 125492 | LSYPSHCCAFKNQKKIRG<br>IL            | 2.90 | 0.01 | 0.78 | 0.44 | 1.13 | 0.28 |
| 43958 | 0 | 125492 | LSYPSHCCAFKNQKKIRG<br>IL            | 2.90 | 0.01 | 0.78 | 4.45 | 0.22 | 0.28 |
| 43959 | 0 | 125492 | LSYPSHCCAFKNQKKIRG<br>IL            | 2.90 | 0.01 | 0.78 | 0.68 | 0.22 | 0.28 |
| 43960 | 0 | 113081 | LSYSHSDYDLGKRPTKDS<br>YT            | 2.98 | 0.01 | 0.78 | 0.44 | 1.13 | 2.97 |
| 43961 | 0 | 113081 | LSYSHSDYDLGKRPTKDS<br>YT            | 2.98 | 0.01 | 0.78 | 0.44 | 1.41 | 2.97 |
| 43962 | 0 | 39778  | LTAAEYDQSTYGSSTGP<br>VYVSDSVTLVNVA  | 3.37 | 0.01 | 2.53 | 0.44 | 0.85 | 0.28 |
| 43963 | 0 | 39778  | LTAAEYDQSTYGSSTGP<br>VYVSDSVTLVNVA  | 3.37 | 0.01 | 2.53 | 0.44 | 0.85 | 0.28 |
| 43964 | 0 | 335605 | LTAAKPPAESPFKSV                     | 2.69 | 0.01 | 1.61 | 0.44 | 0.85 | 1.28 |
| 43965 | 0 | 39782  | LTAASV                              | 1.89 | 0.01 | 1.86 | 0.44 | 1.23 | 0.28 |
| 43966 | 0 | 141953 | LTACKV                              | 1.88 | 0.01 | 0.78 | 1.12 | 0.22 | 0.28 |
| 43967 | 0 | 141953 | LTACKV                              | 1.88 | 0.01 | 0.78 | 1.12 | 0.22 | 0.28 |
| 43968 | 0 | 111523 | LTADEVK                             | 1.99 | 0.01 | 3.81 | 4.33 | 0.85 | 0.85 |
| 43969 | 0 | 39785  | LTADQISTVQSSFAGVK<br>GDAVGILYAVFKAD | 3.40 | 0.01 | 3.05 | 0.44 | 1.23 | 1.57 |
| 43970 | 0 | 39788  | LTAELKIYSVIAEINKHL                  | 2.90 | 0.01 | 2.80 | 1.15 | 0.22 | 1.27 |
| 43971 | 0 | 39788  | LTAELKIYSVIAEINKHL                  | 2.90 | 0.01 | 2.80 | 1.12 | 0.22 | 1.27 |
| 43972 | 0 | 39788  | LTAELKIYSVIAEINKHL                  | 2.90 | 0.01 | 2.80 | 1.15 | 0.22 | 1.27 |
| 43973 | 0 | 39788  | LTAELKIYSVIAEINKHL                  | 2.90 | 0.01 | 2.80 | 1.15 | 0.22 | 1.27 |
| 43974 | 0 | 39788  | LTAELKIYSVIAEINKHL                  | 2.90 | 0.01 | 2.80 | 1.15 | 0.22 | 0.28 |
| 43975 | 0 | 39788  | LTAELKIYSVIAEINKHL                  | 2.90 | 0.01 | 2.80 | 1.15 | 0.22 | 0.28 |
| 43976 | 0 | 39788  | LTAELKIYSVIAEINKHL                  | 2.90 | 0.01 | 2.80 | 0.68 | 0.22 | 0.28 |
| 43977 | 0 | 39788  | LTAELKIYSVIAEINKHL                  | 2.90 | 0.01 | 2.80 | 0.68 | 0.22 | 0.28 |
| 43978 | 0 | 39788  | LTAELKIYSVIAEINKHL                  | 2.90 | 0.01 | 2.80 | 1.15 | 0.22 | 0.28 |

|       |   |        |                                      |      |      |      |      |      |      |
|-------|---|--------|--------------------------------------|------|------|------|------|------|------|
| 43979 | 0 | 39789  | LTAENTAI                             | 2.14 | 0.01 | 2.39 | 0.44 | 1.74 | 1.27 |
| 43980 | 0 | 97478  | LTAGALWNA                            | 2.26 | 0.01 | 3.13 | 1.12 | 0.22 | 0.28 |
| 43981 | 0 | 419012 | LTAGGPLPHGSWSWSG<br>TPPEVQTTGGSQIS   | 3.35 | 0.01 | 3.10 | 0.68 | 0.22 | 0.28 |
| 43982 | 0 | 419012 | LTAGGPLPHGSWSWSG<br>TPPEVQTTGGSQIS   | 3.35 | 0.01 | 3.10 | 0.68 | 0.22 | 0.28 |
| 43983 | 0 | 419012 | LTAGGPLPHGSWSWSG<br>TPPEVQTTGGSQIS   | 3.35 | 0.01 | 3.10 | 0.68 | 0.22 | 1.75 |
| 43984 | 0 | 419012 | LTAGGPLPHGSWSWSG<br>TPPEVQTTGGSQIS   | 3.35 | 0.01 | 3.10 | 0.68 | 0.22 | 1.75 |
| 43985 | 0 | 39793  | LTAGTDAATG                           | 2.35 | 0.01 | 3.42 | 3.28 | 0.22 | 0.28 |
| 43986 | 0 | 189117 | LTALENQHTADLTDSEA<br>NKLFEKTRRQLRENA | 3.44 | 4.63 | 0.90 | 0.68 | 0.22 | 0.28 |
| 43987 | 0 | 189117 | LTALENQHTADLTDSEA<br>NKLFEKTRRQLRENA | 3.44 | 4.63 | 0.90 | 0.68 | 0.22 | 0.28 |
| 43988 | 0 | 496758 | LTALILNKLQLNLKVCAV<br>KAPGFGDHRKQI   | 3.34 | 0.01 | 4.63 | 0.44 | 1.93 | 2.12 |
| 43989 | 0 | 496758 | LTALILNKLQLNLKVCAV<br>KAPGFGDHRKQI   | 3.34 | 0.01 | 4.63 | 0.44 | 1.93 | 2.12 |
| 43990 | 0 | 496759 | LTALILNNLKGSIKVVAV<br>KAPGFGDRKKEM   | 3.32 | 0.01 | 2.99 | 0.44 | 1.93 | 2.12 |
| 43991 | 0 | 121597 | LTALLRNL                             | 2.17 | 0.01 | 0.78 | 0.44 | 1.13 | 0.28 |
| 43992 | 0 | 172288 | LTALQFASTAKYMKN                      | 2.69 | 0.01 | 0.78 | 0.44 | 1.13 | 0.28 |
| 43993 | 0 | 496760 | LTALVLNRLKGLQVCA<br>VKAPGFGDNRKNT    | 3.36 | 0.01 | 2.86 | 0.44 | 1.93 | 2.12 |
| 43994 | 0 | 496760 | LTALVLNRLKGLQVCA<br>VKAPGFGDNRKNT    | 3.36 | 0.01 | 2.86 | 0.44 | 1.93 | 2.12 |
| 43995 | 0 | 39808  | LTANTKSMALSG                         | 2.50 | 0.01 | 0.90 | 1.20 | 0.22 | 0.28 |
| 43996 | 0 | 39808  | LTANTKSMALSG                         | 2.50 | 0.01 | 0.90 | 1.20 | 0.22 | 1.27 |
| 43997 | 0 | 39808  | LTANTKSMALSG                         | 2.50 | 0.01 | 0.90 | 1.20 | 0.22 | 0.28 |
| 43998 | 0 | 105313 | LTARE                                | 1.74 | 0.01 | 3.03 | 1.20 | 0.22 | 0.28 |
| 43999 | 0 | 522164 | LTASPPATAPGPSAANV<br>SVA             | 3.00 | 4.33 | 2.40 | 0.44 | 1.59 | 1.28 |
| 44000 | 0 | 39816  | LTATMIRDKSPSSGDGN<br>VPTILGNNQ       | 3.19 | 0.01 | 4.23 | 3.70 | 0.22 | 0.28 |
| 44001 | 0 | 39816  | LTATMIRDKSPSSGDGN<br>VPTILGNNQ       | 3.19 | 0.01 | 4.23 | 3.70 | 0.22 | 0.28 |
| 44002 | 0 | 39816  | LTATMIRDKSPSSGDGN<br>VPTILGNNQ       | 3.19 | 0.01 | 4.23 | 3.70 | 0.22 | 0.28 |
| 44003 | 0 | 39816  | LTATMIRDKSPSSGDGN<br>VPTILGNNQ       | 3.19 | 0.01 | 4.23 | 3.70 | 0.22 | 0.28 |
| 44004 | 0 | 39816  | LTATMIRDKSPSSGDGN<br>VPTILGNNQ       | 3.19 | 0.01 | 4.23 | 3.70 | 0.22 | 1.34 |
| 44005 | 0 | 135958 | LTAVETGHTSQV                         | 2.48 | 0.01 | 3.21 | 0.44 | 1.13 | 0.28 |
| 44006 | 0 | 135958 | LTAVETGHTSQV                         | 2.48 | 0.01 | 3.21 | 0.44 | 1.41 | 0.28 |

|       |   |        |                           |      |      |      |      |      |      |
|-------|---|--------|---------------------------|------|------|------|------|------|------|
| 44007 | 0 | 135958 | LTAVETGHTSQV              | 2.48 | 0.01 | 3.21 | 0.44 | 0.85 | 0.28 |
| 44008 | 0 | 97479  | LTAWNPSL                  | 2.13 | 0.01 | 2.87 | 0.68 | 0.22 | 0.28 |
| 44009 | 0 | 98237  | LTAYQTELAR                | 2.34 | 0.01 | 2.39 | 2.42 | 0.22 | 0.28 |
| 44010 | 0 | 39825  | LTCGFADLMGYIP             | 2.52 | 0.01 | 2.68 | 0.44 | 0.85 | 0.28 |
| 44011 | 0 | 112218 | LTCFSFG                   | 2.02 | 0.01 | 0.78 | 0.44 | 1.13 | 0.28 |
| 44012 | 0 | 39834  | LTCYLK                    | 1.91 | 0.01 | 1.96 | 0.44 | 0.85 | 0.28 |
| 44013 | 0 | 123469 | LTCYNPKFE                 | 2.18 | 0.01 | 2.28 | 2.00 | 0.22 | 0.28 |
| 44014 | 0 | 109526 | LTDCVVMRDPASKRSR<br>GFGFV | 2.98 | 0.01 | 1.75 | 3.05 | 1.41 | 0.28 |
| 44015 | 0 | 109526 | LTDCVVMRDPASKRSR<br>GFGFV | 2.98 | 0.01 | 1.75 | 0.44 | 1.13 | 0.28 |
| 44016 | 0 | 109526 | LTDCVVMRDPASKRSR<br>GFGFV | 2.98 | 0.01 | 1.75 | 0.44 | 1.13 | 0.28 |
| 44017 | 0 | 109526 | LTDCVVMRDPASKRSR<br>GFGFV | 2.98 | 0.01 | 1.75 | 0.44 | 1.13 | 0.28 |
| 44018 | 0 | 109526 | LTDCVVMRDPASKRSR<br>GFGFV | 2.98 | 0.01 | 1.75 | 0.44 | 1.13 | 0.28 |
| 44019 | 0 | 109526 | LTDCVVMRDPASKRSR<br>GFGFV | 2.98 | 0.01 | 1.75 | 0.44 | 1.93 | 0.28 |
| 44020 | 0 | 115374 | LTDDIMCVKK                | 2.28 | 0.01 | 1.60 | 0.44 | 1.23 | 0.85 |
| 44021 | 0 | 78458  | LTDESFLR                  | 2.13 | 0.01 | 3.97 | 0.68 | 0.22 | 0.28 |
| 44022 | 0 | 39849  | LTDIQEDITRHEQQ            | 2.63 | 0.01 | 2.56 | 0.44 | 0.85 | 0.28 |
| 44023 | 0 | 165636 | LTDLTQK                   | 2.05 | 0.01 | 0.90 | 0.44 | 1.23 | 1.39 |
| 44024 | 0 | 165636 | LTDLTQK                   | 2.05 | 0.01 | 0.90 | 0.44 | 1.23 | 1.39 |
| 44025 | 0 | 130551 | LTDSEMDVVRFDAAC           | 2.64 | 0.01 | 0.90 | 0.44 | 1.93 | 1.27 |
| 44026 | 0 | 122478 | LTDTKTGLHFNINEAIEQ<br>GT  | 2.95 | 0.01 | 0.78 | 0.44 | 1.13 | 1.27 |
| 44027 | 0 | 227373 | LTEENFGKPDISAKD           | 2.63 | 0.01 | 2.97 | 0.44 | 0.85 | 0.28 |
| 44028 | 0 | 167622 | LTEEQQRG                  | 2.12 | 0.01 | 3.10 | 0.44 | 0.85 | 1.28 |
| 44029 | 0 | 167622 | LTEEQQRG                  | 2.12 | 0.01 | 3.10 | 0.44 | 1.59 | 1.28 |
| 44030 | 0 | 104057 | LTEPTTEGDQHPGTLPA<br>ANT  | 2.97 | 0.01 | 3.00 | 1.20 | 0.22 | 0.85 |
| 44031 | 0 | 39883  | LTERLY                    | 1.91 | 0.01 | 1.96 | 0.44 | 0.85 | 0.28 |
| 44032 | 0 | 451499 | LTERYGG                   | 1.99 | 0.01 | 2.04 | 1.20 | 0.22 | 0.85 |
| 44033 | 0 | 39885  | LTETKIDKLC                | 2.34 | 0.01 | 2.66 | 0.68 | 0.22 | 0.28 |
| 44034 | 0 | 97480  | LTEVETPIRN                | 2.31 | 0.01 | 2.36 | 0.68 | 0.22 | 1.75 |
| 44035 | 0 | 97480  | LTEVETPIRN                | 2.31 | 0.01 | 2.36 | 0.68 | 0.22 | 2.12 |
| 44036 | 0 | 97480  | LTEVETPIRN                | 2.31 | 0.01 | 2.36 | 0.68 | 0.22 | 0.28 |
| 44037 | 0 | 39887  | LTEVETPIRNEWG             | 2.54 | 0.01 | 2.97 | 0.68 | 0.22 | 1.27 |
| 44038 | 0 | 39887  | LTEVETPIRNEWG             | 2.54 | 0.01 | 2.97 | 0.68 | 0.22 | 1.27 |
| 44039 | 0 | 39887  | LTEVETPIRNEWG             | 2.54 | 0.01 | 2.97 | 0.68 | 0.22 | 0.85 |
| 44040 | 0 | 39887  | LTEVETPIRNEWG             | 2.54 | 0.01 | 2.97 | 0.68 | 0.22 | 0.28 |
| 44041 | 0 | 39887  | LTEVETPIRNEWG             | 2.54 | 0.01 | 2.97 | 0.68 | 0.22 | 1.34 |
| 44042 | 0 | 39887  | LTEVETPIRNEWG             | 2.54 | 0.01 | 2.97 | 0.68 | 0.22 | 0.28 |
| 44043 | 0 | 39887  | LTEVETPIRNEWG             | 2.54 | 0.01 | 2.97 | 0.68 | 0.22 | 0.28 |
| 44044 | 0 | 39887  | LTEVETPIRNEWG             | 2.54 | 0.01 | 2.97 | 0.68 | 0.22 | 1.75 |
| 44045 | 0 | 39888  | LTEVETPIRNEWGC            | 2.59 | 0.01 | 2.36 | 0.68 | 0.22 | 0.28 |

|       |   |        |                                    |      |      |      |      |      |      |
|-------|---|--------|------------------------------------|------|------|------|------|------|------|
| 44046 | 0 | 39888  | LTEVETPIRNEWGC                     | 2.59 | 0.01 | 2.36 | 0.68 | 0.22 | 0.28 |
| 44047 | 0 | 39889  | LTEVVISRSADCRFRDVIT<br>GECCGWHRGCF | 3.34 | 0.01 | 0.90 | 1.15 | 0.22 | 1.27 |
| 44048 | 0 | 120788 | LTFLGFIGVLLAINLFGNR<br>AIKWAN      | 3.19 | 0.01 | 2.86 | 0.44 | 0.85 | 0.28 |
| 44049 | 0 | 120788 | LTFLGFIGVLLAINLFGNR<br>AIKWAN      | 3.19 | 0.01 | 2.86 | 0.44 | 1.41 | 0.28 |
| 44050 | 0 | 177440 | LTFPNSP                            | 2.02 | 0.01 | 0.90 | 2.13 | 0.22 | 0.28 |
| 44051 | 0 | 181128 | LTFTTNKGRVATFGVRR<br>GRY           | 2.97 | 0.01 | 1.75 | 3.97 | 0.22 | 0.28 |
| 44052 | 0 | 191595 | LTGDCGYEGVTCRLGK                   | 2.75 | 0.01 | 0.90 | 2.84 | 1.13 | 1.27 |
| 44053 | 0 | 191595 | LTGDCGYEGVTCRLGK                   | 2.75 | 0.01 | 0.90 | 2.84 | 1.13 | 1.66 |
| 44054 | 0 | 191595 | LTGDCGYEGVTCRLGK                   | 2.75 | 0.01 | 0.90 | 0.44 | 1.13 | 0.28 |
| 44055 | 0 | 191595 | LTGDCGYEGVTCRLGK                   | 2.75 | 0.01 | 0.90 | 0.68 | 0.22 | 0.28 |
| 44056 | 0 | 191595 | LTGDCGYEGVTCRLGK                   | 2.75 | 0.01 | 0.90 | 0.68 | 0.22 | 0.28 |
| 44057 | 0 | 97481  | LTGDVSAFK                          | 2.18 | 0.01 | 3.13 | 1.12 | 0.22 | 0.28 |
| 44058 | 0 | 94606  | LTGGFYEPL                          | 2.23 | 0.01 | 3.59 | 0.68 | 0.22 | 0.28 |
| 44059 | 0 | 94606  | LTGGFYEPL                          | 2.23 | 0.01 | 3.59 | 0.68 | 0.22 | 2.02 |
| 44060 | 0 | 94606  | LTGGFYEPL                          | 2.23 | 0.01 | 3.59 | 0.68 | 0.22 | 1.27 |
| 44061 | 0 | 39914  | LTGHRMAWDMMMNN<br>WS               | 2.64 | 0.01 | 1.72 | 0.44 | 0.85 | 0.28 |
| 44062 | 0 | 39915  | LTGHRMAWDMMQNN<br>WS               | 2.63 | 0.01 | 1.72 | 0.44 | 0.85 | 0.28 |
| 44063 | 0 | 135717 | LTGIISWG                           | 2.13 | 0.01 | 0.78 | 0.44 | 2.35 | 0.28 |
| 44064 | 0 | 39916  | LTGISICNPGSSLC                     | 2.64 | 0.01 | 2.14 | 1.12 | 0.22 | 0.28 |
| 44065 | 0 | 39916  | LTGISICNPGSSLC                     | 2.64 | 0.01 | 2.14 | 1.12 | 0.22 | 0.28 |
| 44066 | 0 | 39916  | LTGISICNPGSSLC                     | 2.64 | 0.01 | 2.14 | 1.12 | 0.22 | 0.85 |
| 44067 | 0 | 39917  | LTGKPAVIPDREILYQQF<br>DE           | 2.91 | 0.01 | 4.33 | 3.67 | 0.22 | 0.28 |
| 44068 | 0 | 39917  | LTGKPAVIPDREILYQQF<br>DE           | 2.91 | 0.01 | 4.33 | 3.27 | 0.22 | 0.28 |
| 44069 | 0 | 39917  | LTGKPAVIPDREILYQQF<br>DE           | 2.91 | 0.01 | 4.33 | 3.22 | 0.22 | 0.28 |
| 44070 | 0 | 39917  | LTGKPAVIPDREILYQQF<br>DE           | 2.91 | 0.01 | 4.33 | 0.44 | 0.85 | 0.28 |
| 44071 | 0 | 39918  | LTGKPAVIPDREVLYQEF<br>DE           | 2.92 | 0.01 | 2.41 | 0.44 | 0.85 | 0.28 |
| 44072 | 0 | 39919  | LTGKPAVVPDREILYQQF<br>DE           | 2.90 | 0.01 | 1.72 | 0.44 | 0.85 | 0.28 |
| 44073 | 0 | 39920  | LTGKVEDNHDDTNRIIT<br>VYM           | 2.91 | 0.01 | 3.47 | 0.44 | 0.22 | 0.85 |
| 44074 | 0 | 39925  | LTGNSTLSSDYAQARAP<br>AAG           | 2.95 | 0.01 | 2.21 | 1.20 | 0.22 | 0.28 |
| 44075 | 0 | 39926  | LTGNSTLSSGYATARAG<br>ADILWDVG      | 3.18 | 0.01 | 3.48 | 1.20 | 0.22 | 0.28 |
| 44076 | 0 | 39926  | LTGNSTLSSGYATARAG<br>ADILWDVG      | 3.18 | 0.01 | 3.48 | 1.20 | 0.22 | 0.28 |



|       |   |        |                          |      |      |      |      |      |      |
|-------|---|--------|--------------------------|------|------|------|------|------|------|
|       |   |        | LTGPFTVRYTTEGGTKTE       |      |      |      |      |      |      |
| 44077 | 0 | 39928  | AEDVIPEGWKADTSYES<br>K   | 3.52 | 0.01 | 2.53 | 0.44 | 1.23 | 0.85 |
| 44078 | 0 | 39933  | LTGTTPRSLPVL             | 2.52 | 0.01 | 0.90 | 0.44 | 0.85 | 0.28 |
| 44079 | 0 | 226068 | LTGYGQWEYNFQGNNS<br>EGAD | 2.94 | 0.01 | 2.24 | 3.06 | 0.22 | 0.28 |
| 44080 | 0 | 39936  | LTGYGT                   | 1.91 | 0.01 | 2.40 | 0.44 | 0.85 | 0.28 |
| 44081 | 0 | 105945 | LTHCGSGAS                | 2.23 | 0.01 | 0.90 | 3.01 | 0.22 | 0.28 |
| 44082 | 0 | 39950  | LTIDGGIFEVKATNGDTH<br>LG | 2.95 | 0.01 | 2.78 | 0.44 | 0.85 | 0.28 |
| 44083 | 0 | 39954  | LTIGELKPSTLYKM           | 2.62 | 0.01 | 2.94 | 2.00 | 0.22 | 0.28 |
| 44084 | 0 | 39954  | LTIGELKPSTLYKM           | 2.62 | 0.01 | 2.94 | 2.00 | 0.22 | 0.28 |
| 44085 | 0 | 39964  | LTILVALALFLAAH           | 2.72 | 0.01 | 2.16 | 0.44 | 1.23 | 1.48 |
| 44086 | 0 | 114462 | LTIPQNFVVKRARN           | 2.65 | 0.01 | 3.27 | 0.44 | 1.23 | 0.85 |
| 44087 | 0 | 39977  | LTITQLLKR                | 2.25 | 0.01 | 1.96 | 0.44 | 0.85 | 1.34 |
| 44088 | 0 | 39980  | LTIVSGGPTLFS             | 2.49 | 0.01 | 3.75 | 1.15 | 0.22 | 0.28 |
| 44089 | 0 | 115376 | LTKCEVFREL               | 2.32 | 0.01 | 1.60 | 0.44 | 1.23 | 0.85 |
| 44090 | 0 | 115376 | LTKCEVFREL               | 2.32 | 0.01 | 1.60 | 0.44 | 1.23 | 0.85 |
| 44091 | 0 | 39984  | LTKEYEDI                 | 2.12 | 0.01 | 3.18 | 1.12 | 0.22 | 0.28 |
| 44092 | 0 | 238749 | LTKFSPGLQTSQTCP          | 2.71 | 0.01 | 2.56 | 2.02 | 0.22 | 0.85 |
| 44093 | 0 | 238749 | LTKFSPGLQTSQTCP          | 2.71 | 0.01 | 2.56 | 1.20 | 0.22 | 0.85 |
| 44094 | 0 | 39985  | LTKFTTQKQVSSLFQ          | 2.72 | 0.01 | 2.72 | 0.44 | 1.23 | 0.85 |
| 44095 | 0 | 97482  | LTKGILGFVFTLTVPSE        | 2.86 | 0.01 | 2.36 | 1.12 | 0.22 | 0.85 |
| 44096 | 0 | 97482  | LTKGILGFVFTLTVPSE        | 2.86 | 0.01 | 2.36 | 1.12 | 0.22 | 1.48 |
| 44097 | 0 | 172293 | LTKKLHESLEEIRIV          | 2.69 | 0.01 | 0.78 | 0.44 | 1.13 | 0.28 |
| 44098 | 0 | 109530 | LTKNQVS                  | 1.99 | 0.01 | 0.78 | 0.44 | 1.13 | 0.28 |
| 44099 | 0 | 39998  | LTKSGSTYPVLNVT           | 2.64 | 0.01 | 2.36 | 0.44 | 0.85 | 1.57 |
| 44100 | 0 | 39998  | LTKSGSTYPVLNVT           | 2.64 | 0.01 | 2.36 | 1.15 | 0.22 | 1.57 |
| 44101 | 0 | 39998  | LTKSGSTYPVLNVT           | 2.64 | 0.01 | 2.36 | 1.15 | 0.22 | 1.57 |
| 44102 | 0 | 39998  | LTKSGSTYPVLNVT           | 2.64 | 0.01 | 2.36 | 1.15 | 0.22 | 1.57 |
| 44103 | 0 | 40000  | LTKTDVALAD               | 2.36 | 0.01 | 4.03 | 0.68 | 0.22 | 0.85 |
| 44104 | 0 | 40000  | LTKTDVALAD               | 2.36 | 0.01 | 4.03 | 0.68 | 0.22 | 1.48 |
| 44105 | 0 | 133219 | LTLNADLSLLGKAR           | 2.68 | 0.01 | 2.04 | 2.97 | 0.22 | 0.28 |
| 44106 | 0 | 122145 | LTLFPSRDTPSSQTD          | 2.78 | 0.01 | 0.78 | 0.44 | 1.93 | 0.28 |
| 44107 | 0 | 122145 | LTLFPSRDTPSSQTD          | 2.78 | 0.01 | 0.78 | 0.44 | 1.41 | 0.28 |
| 44108 | 0 | 230012 | LTLHFEGRNYEASVD          | 2.63 | 0.01 | 0.78 | 0.44 | 1.93 | 1.27 |
| 44109 | 0 | 230012 | LTLHFEGRNYEASVD          | 2.63 | 0.01 | 0.78 | 0.44 | 1.93 | 0.28 |
| 44110 | 0 | 230012 | LTLHFEGRNYEASVD          | 2.63 | 0.01 | 0.78 | 0.44 | 2.39 | 0.28 |
| 44111 | 0 | 40017  | LTLNHASSG                | 2.23 | 0.01 | 0.90 | 2.55 | 0.22 | 0.28 |
| 44112 | 0 | 40018  | LTLNLITEMG               | 2.34 | 0.01 | 2.40 | 0.44 | 0.85 | 0.28 |
| 44113 | 0 | 40019  | LTLNMDSGQ                | 2.22 | 0.01 | 0.90 | 2.55 | 0.22 | 0.28 |
| 44114 | 0 | 40021  | LTLNWP GDM               | 2.22 | 0.01 | 0.90 | 2.55 | 0.22 | 0.28 |
| 44115 | 0 | 40022  | LTLNWSKTL                | 2.26 | 0.01 | 0.90 | 2.55 | 0.22 | 0.28 |
| 44116 | 0 | 40023  | LTLNYADNV                | 2.24 | 0.01 | 0.90 | 2.55 | 0.22 | 0.28 |

|       |   |        |                                                                                                                            |      |      |      |      |      |      |
|-------|---|--------|----------------------------------------------------------------------------------------------------------------------------|------|------|------|------|------|------|
| 44117 | 0 | 118009 | LTLPKVEAMNKRLGSLV<br>DEFKELVYPPDYN                                                                                         | 3.33 | 0.01 | 0.78 | 0.44 | 1.13 | 0.85 |
| 44118 | 0 | 118009 | LTLPKVEAMNKRLGSLV<br>DEFKELVYPPDYN                                                                                         | 3.33 | 0.01 | 0.78 | 0.44 | 1.13 | 0.85 |
| 44119 | 0 | 117579 | LTLPKVEAMNKRLGSLV<br>DEFKELVYPPDYNPEGK<br>VT                                                                               | 3.53 | 0.01 | 0.78 | 0.68 | 0.22 | 0.85 |
| 44120 | 0 | 117579 | LTLPKVEAMNKRLGSLV<br>DEFKELVYPPDYNPEGK<br>VT                                                                               | 3.53 | 0.01 | 0.78 | 0.68 | 0.22 | 1.48 |
| 44121 | 0 | 117579 | LTLPKVEAMNKRLGSLV<br>DEFKELVYPPDYNPEGK<br>VT                                                                               | 3.53 | 0.01 | 0.78 | 0.68 | 0.22 | 2.02 |
| 44122 | 0 | 117579 | LTLPKVEAMNKRLGSLV<br>DEFKELVYPPDYNPEGK<br>VT                                                                               | 3.53 | 0.01 | 0.78 | 0.68 | 0.22 | 0.85 |
| 44123 | 0 | 419263 | LTLQPTF                                                                                                                    | 2.05 | 0.01 | 0.90 | 0.44 | 1.93 | 1.39 |
| 44124 | 0 | 40028  | LTLFSFGQTTQVAVVAP<br>NFSDPEDKTPKLTLEQAL<br>VKFALEKKNGKFYFHG<br>LEISKNEKIQVFLDSNTN<br>NDFENQLKNTADKDIM<br>HCHIKRNMNVLKVVITF | 4.60 | 0.01 | 3.97 | 1.12 | 0.22 | 0.85 |
| 44125 | 0 | 40028  | LTLFSFGQTTQVAVVAP<br>NFSDPEDKTPKLTLEQAL<br>VKFALEKKNGKFYFHG<br>LEISKNEKIQVFLDSNTN<br>NDFENQLKNTADKDIM<br>HCHIKRNMNVLKVVITF | 4.60 | 0.01 | 3.97 | 1.12 | 0.22 | 0.85 |
| 44126 | 0 | 40029  | LTLSIDL                                                                                                                    | 2.15 | 0.01 | 3.63 | 1.15 | 0.22 | 1.34 |
| 44127 | 0 | 40029  | LTLSIDL                                                                                                                    | 2.15 | 0.01 | 3.63 | 1.15 | 0.22 | 1.34 |
| 44128 | 0 | 40029  | LTLSIDL                                                                                                                    | 2.15 | 0.01 | 3.63 | 1.15 | 0.22 | 1.34 |
| 44129 | 0 | 40029  | LTLSIDL                                                                                                                    | 2.15 | 0.01 | 3.63 | 1.15 | 0.22 | 1.34 |
| 44130 | 0 | 40029  | LTLSIDL                                                                                                                    | 2.15 | 0.01 | 3.63 | 1.15 | 0.22 | 1.34 |
| 44131 | 0 | 40029  | LTLSIDL                                                                                                                    | 2.15 | 0.01 | 3.63 | 1.15 | 0.22 | 1.34 |
| 44132 | 0 | 40029  | LTLSIDL                                                                                                                    | 2.15 | 0.01 | 3.63 | 1.15 | 0.22 | 1.34 |
| 44133 | 0 | 40029  | LTLSIDL                                                                                                                    | 2.15 | 0.01 | 3.63 | 1.15 | 0.22 | 1.34 |
| 44134 | 0 | 172296 | LTLSKLEIENLNLAQ                                                                                                            | 2.71 | 0.01 | 0.78 | 0.44 | 1.13 | 0.28 |
| 44135 | 0 | 115858 | LTLDVENLH                                                                                                                  | 2.34 | 0.01 | 1.60 | 0.44 | 1.23 | 0.85 |
| 44136 | 0 | 98239  | LTLVPAVVGK                                                                                                                 | 2.33 | 0.01 | 3.08 | 0.68 | 0.22 | 0.28 |
| 44137 | 0 | 40034  | LTLWTTAPSPNCRL                                                                                                             | 2.70 | 0.01 | 3.38 | 1.12 | 0.22 | 0.28 |
| 44138 | 0 | 40034  | LTLWTTAPSPNCRL                                                                                                             | 2.70 | 0.01 | 3.38 | 1.12 | 0.22 | 0.28 |
| 44139 | 0 | 40035  | LTLWTTDPSPNCRI                                                                                                             | 2.68 | 0.01 | 3.03 | 1.12 | 0.22 | 0.28 |
| 44140 | 0 | 238751 | LTMMWEEVTCPICLDPF<br>V                                                                                                     | 2.84 | 0.01 | 0.78 | 0.44 | 1.13 | 0.28 |

|       |   |        |                                    |      |      |      |      |      |      |
|-------|---|--------|------------------------------------|------|------|------|------|------|------|
| 44141 | 0 | 238751 | LTMMWEEVTCPICLDPF<br>V             | 2.84 | 0.01 | 0.78 | 0.44 | 1.13 | 0.28 |
| 44142 | 0 | 157634 | LTMNTNQPRMPQ                       | 2.51 | 0.01 | 3.40 | 2.49 | 0.85 | 0.28 |
| 44143 | 0 | 40041  | LTMSNVKNVQTNFKSLL<br>RNLGVS        | 3.11 | 0.01 | 1.66 | 0.44 | 0.85 | 0.28 |
| 44144 | 0 | 40042  | LTMSNVKNVSQTNFKSL<br>LRNL          | 3.03 | 0.01 | 1.66 | 0.68 | 0.22 | 0.28 |
| 44145 | 0 | 40042  | LTMSNVKNVSQTNFKSL<br>LRNL          | 3.03 | 0.01 | 1.66 | 0.44 | 0.85 | 0.28 |
| 44146 | 0 | 79610  | LTMTSPI                            | 2.02 | 0.01 | 0.90 | 1.12 | 0.22 | 1.39 |
| 44147 | 0 | 496762 | LTNIVLNRMRGTFTAVA<br>VKAPGFGDRRKAM | 3.36 | 0.01 | 2.61 | 0.44 | 1.93 | 2.12 |
| 44148 | 0 | 496762 | LTNIVLNRMRGTFTAVA<br>VKAPGFGDRRKAM | 3.36 | 0.01 | 2.61 | 0.44 | 1.93 | 2.12 |
| 44149 | 0 | 156373 | LTNKITAWKSQQ                       | 2.45 | 0.01 | 2.83 | 0.68 | 0.22 | 0.85 |
| 44150 | 0 | 156373 | LTNKITAWKSQQ                       | 2.45 | 0.01 | 2.83 | 0.68 | 0.22 | 0.85 |
| 44151 | 0 | 156373 | LTNKITAWKSQQ                       | 2.45 | 0.01 | 2.83 | 0.68 | 0.22 | 0.85 |
| 44152 | 0 | 156373 | LTNKITAWKSQQ                       | 2.45 | 0.01 | 2.83 | 0.68 | 0.22 | 0.85 |
| 44153 | 0 | 156373 | LTNKITAWKSQQ                       | 2.45 | 0.01 | 2.83 | 0.68 | 0.22 | 0.85 |
| 44154 | 0 | 156373 | LTNKITAWKSQQ                       | 2.45 | 0.01 | 2.83 | 0.68 | 0.22 | 0.85 |
| 44155 | 0 | 156373 | LTNKITAWKSQQ                       | 2.45 | 0.01 | 2.83 | 0.68 | 0.22 | 0.28 |
| 44156 | 0 | 156373 | LTNKITAWKSQQ                       | 2.45 | 0.01 | 2.83 | 0.68 | 0.22 | 0.85 |
| 44157 | 0 | 156373 | LTNKITAWKSQQ                       | 2.45 | 0.01 | 2.83 | 0.68 | 0.22 | 0.28 |
| 44158 | 0 | 156373 | LTNKITAWKSQQ                       | 2.45 | 0.01 | 2.83 | 0.68 | 0.22 | 0.28 |
| 44159 | 0 | 156373 | LTNKITAWKSQQ                       | 2.45 | 0.01 | 2.83 | 0.68 | 0.22 | 0.28 |
| 44160 | 0 | 196655 | LTNSEWD                            | 1.99 | 0.01 | 0.90 | 0.44 | 1.23 | 1.39 |
| 44161 | 0 | 40070  | LTNSKG                             | 1.88 | 0.01 | 1.96 | 0.44 | 0.85 | 0.28 |
| 44162 | 0 | 108022 | LTNSNAPSITVQGLE                    | 2.67 | 0.01 | 0.90 | 0.44 | 1.13 | 1.39 |
| 44163 | 0 | 233230 | LTNVRGDLQVLAQKAA<br>RPLP           | 2.96 | 0.01 | 3.02 | 0.68 | 0.22 | 0.28 |
| 44164 | 0 | 233230 | LTNVRGDLQVLAQKAA<br>RPLP           | 2.96 | 0.01 | 3.02 | 0.68 | 0.22 | 0.28 |
| 44165 | 0 | 40074  | LTPANLIRGDNA                       | 2.48 | 0.01 | 2.40 | 3.28 | 0.22 | 0.28 |
| 44166 | 0 | 40074  | LTPANLIRGDNA                       | 2.48 | 0.01 | 2.40 | 3.28 | 0.22 | 0.85 |
| 44167 | 0 | 40075  | LTPAWRIYSTGNNVFQ                   | 2.66 | 0.01 | 2.45 | 2.49 | 0.22 | 0.28 |
| 44168 | 0 | 40075  | LTPAWRIYSTGNNVFQ                   | 2.66 | 0.01 | 2.45 | 0.44 | 0.85 | 0.28 |
| 44169 | 0 | 40076  | LTPCD                              | 1.74 | 0.01 | 3.72 | 0.68 | 0.22 | 0.28 |
| 44170 | 0 | 40076  | LTPCD                              | 1.74 | 0.01 | 3.72 | 0.44 | 1.59 | 0.28 |
| 44171 | 0 | 40077  | LTPCDN                             | 1.88 | 0.01 | 3.72 | 0.44 | 1.59 | 0.28 |
| 44172 | 0 | 40077  | LTPCDN                             | 1.88 | 0.01 | 3.72 | 0.68 | 0.22 | 0.28 |
| 44173 | 0 | 40079  | LTPCRNK                            | 1.99 | 0.01 | 0.90 | 0.68 | 0.22 | 1.39 |
| 44174 | 0 | 40079  | LTPCRNK                            | 1.99 | 0.01 | 0.90 | 0.68 | 0.22 | 0.85 |
| 44175 | 0 | 141053 | LTPDTQYEFQVR                       | 2.45 | 0.01 | 0.78 | 0.68 | 0.22 | 0.28 |

|       |   |        |                                   |      |      |      |      |      |      |
|-------|---|--------|-----------------------------------|------|------|------|------|------|------|
| 44176 | 0 | 240900 | LTPDEL PALNSQEE                   | 2.69 | 0.01 | 4.93 | 0.44 | 1.41 | 0.28 |
| 44177 | 0 | 240900 | LTPDEL PALNSQEE                   | 2.69 | 0.01 | 4.93 | 0.44 | 1.41 | 0.28 |
| 44178 | 0 | 237841 | LTPGQHLWWRSP                      | 2.47 | 0.01 | 0.90 | 1.20 | 0.22 | 1.39 |
| 44179 | 0 | 237842 | LTPGQLNQIWE                       | 2.47 | 0.01 | 0.90 | 1.20 | 0.22 | 1.39 |
| 44180 | 0 | 237842 | LTPGQLNQIWE                       | 2.47 | 0.01 | 0.90 | 1.20 | 0.22 | 0.85 |
| 44181 | 0 | 40099  | LTPGRFRTIVCGLF                    | 2.64 | 0.01 | 2.56 | 2.69 | 0.22 | 0.28 |
| 44182 | 0 | 419264 | LTPITQLAGPMP                      | 2.50 | 0.01 | 0.90 | 0.44 | 1.93 | 1.39 |
| 44183 | 0 | 40104  | LTPKELD                           | 2.03 | 0.01 | 2.93 | 0.44 | 0.85 | 0.28 |
| 44184 | 0 | 40110  | LTPLEELY                          | 2.16 | 0.01 | 1.66 | 1.15 | 2.26 | 1.34 |
| 44185 | 0 | 40110  | LTPLEELY                          | 2.16 | 0.01 | 1.66 | 1.15 | 2.26 | 0.28 |
| 44186 | 0 | 40110  | LTPLEELY                          | 2.16 | 0.01 | 1.66 | 1.20 | 0.22 | 0.28 |
| 44187 | 0 | 40110  | LTPLEELY                          | 2.16 | 0.01 | 2.22 | 2.43 | 0.22 | 0.28 |
| 44188 | 0 | 40110  | LTPLEELY                          | 2.16 | 0.01 | 1.66 | 0.44 | 1.74 | 0.28 |
| 44189 | 0 | 40110  | LTPLEELY                          | 2.16 | 0.01 | 1.66 | 0.44 | 1.74 | 0.28 |
| 44190 | 0 | 40111  | LTPLEELYP                         | 2.27 | 0.01 | 1.66 | 1.15 | 2.26 | 0.28 |
| 44191 | 0 | 40111  | LTPLEELYP                         | 2.27 | 0.01 | 1.66 | 1.15 | 2.26 | 1.34 |
| 44192 | 0 | 40111  | LTPLEELYP                         | 2.27 | 0.01 | 1.66 | 1.15 | 0.22 | 0.85 |
| 44193 | 0 | 153419 | LTPPPWQNPFPGGGS                   | 2.73 | 0.01 | 0.90 | 0.68 | 0.22 | 0.28 |
| 44194 | 0 | 40123  | LTPRPIHAV                         | 2.30 | 3.81 | 2.70 | 0.44 | 0.85 | 0.28 |
| 44195 | 0 | 446506 | LTPTLAARNASVPTTIR<br>RH           | 2.96 | 0.01 | 1.96 | 0.68 | 0.22 | 1.34 |
| 44196 | 0 | 446506 | LTPTLAARNASVPTTIR<br>RH           | 2.96 | 0.01 | 1.96 | 0.68 | 0.22 | 0.28 |
| 44197 | 0 | 40129  | LTPTLAARNATIPTTIRH<br>H           | 2.98 | 0.01 | 3.10 | 0.44 | 0.85 | 0.28 |
| 44198 | 0 | 40130  | LTPTPVNPSTAPAPA                   | 2.73 | 0.01 | 2.76 | 0.44 | 1.59 | 0.28 |
| 44199 | 0 | 40131  | LTPTPVNPSTAPAPAPT<br>TFAGTQTPVNGN | 3.39 | 0.01 | 2.76 | 0.44 | 1.74 | 0.28 |
| 44200 | 0 | 196656 | LTPYSSV                           | 2.01 | 0.01 | 0.90 | 0.44 | 1.23 | 1.39 |
| 44201 | 0 | 40142  | LTQQAQFDQIASGL                    | 2.70 | 0.01 | 2.59 | 0.68 | 0.22 | 0.28 |
| 44202 | 0 | 196657 | LTQQPPR                           | 2.02 | 0.01 | 0.90 | 0.44 | 1.23 | 1.39 |
| 44203 | 0 | 135718 | LTRA EAVF                         | 2.12 | 0.01 | 0.78 | 0.44 | 2.35 | 0.28 |
| 44204 | 0 | 78459  | LTRA IARAAYV                      | 2.42 | 0.01 | 3.42 | 1.12 | 0.22 | 1.27 |
| 44205 | 0 | 419265 | LTRAPYM                           | 1.99 | 0.01 | 0.90 | 0.44 | 1.93 | 1.39 |
| 44206 | 0 | 135959 | LTRAYAKDVKFG                      | 2.45 | 0.01 | 0.78 | 0.44 | 1.13 | 0.28 |
| 44207 | 0 | 135959 | LTRAYAKDVKFG                      | 2.45 | 0.01 | 0.78 | 0.44 | 1.41 | 0.28 |
| 44208 | 0 | 40150  | LTRGSPVTGPFA                      | 2.48 | 0.01 | 0.90 | 0.44 | 1.23 | 0.28 |
| 44209 | 0 | 40152  | LTRILTIPQSLDSW                    | 2.64 | 0.01 | 2.08 | 1.12 | 0.22 | 2.02 |
| 44210 | 0 | 40152  | LTRILTIPQSLDSW                    | 2.64 | 0.01 | 2.08 | 1.12 | 0.22 | 2.02 |
| 44211 | 0 | 40152  | LTRILTIPQSLDSW                    | 2.64 | 0.01 | 2.08 | 1.12 | 0.22 | 2.02 |
| 44212 | 0 | 40157  | LTRQAAA EYEPGRS                   | 2.64 | 0.01 | 2.71 | 2.13 | 0.22 | 0.85 |
| 44213 | 0 | 151998 | LTRYLRHPQS                        | 2.40 | 0.01 | 0.78 | 0.44 | 1.93 | 0.28 |
| 44214 | 0 | 40159  | LTSAILGLDGT VW                    | 2.63 | 0.01 | 3.34 | 1.12 | 0.22 | 0.85 |
| 44215 | 0 | 135579 | LTSADYVFQESYSSKLC<br>TLAIHA       | 3.10 | 0.01 | 0.78 | 1.12 | 0.22 | 0.28 |
| 44216 | 0 | 40164  | LTSELPQWLSANRAV                   | 2.67 | 0.01 | 2.04 | 0.68 | 0.22 | 0.28 |

|       |   |        |                                    |      |      |      |      |      |      |
|-------|---|--------|------------------------------------|------|------|------|------|------|------|
| 44217 | 0 | 40165  | LTSELPQWLSANRAVKP<br>TGS           | 2.94 | 0.01 | 2.04 | 0.44 | 0.85 | 0.28 |
| 44218 | 0 | 40167  | LTSGHLKCRVKMEKLQL<br>KGT           | 2.95 | 0.01 | 3.04 | 0.44 | 2.26 | 0.28 |
| 44219 | 0 | 40167  | LTSGHLKCRVKMEKLQL<br>KGT           | 2.95 | 0.01 | 2.85 | 2.02 | 0.22 | 0.28 |
| 44220 | 0 | 40167  | LTSGHLKCRVKMEKLQL<br>KGT           | 2.95 | 0.01 | 2.85 | 2.02 | 0.22 | 1.75 |
| 44221 | 0 | 40167  | LTSGHLKCRVKMEKLQL<br>KGT           | 2.95 | 0.01 | 2.85 | 2.02 | 0.22 | 1.48 |
| 44222 | 0 | 40167  | LTSGHLKCRVKMEKLQL<br>KGT           | 2.95 | 0.01 | 2.85 | 2.02 | 0.22 | 1.48 |
| 44223 | 0 | 40167  | LTSGHLKCRVKMEKLQL<br>KGT           | 2.95 | 0.01 | 2.85 | 2.02 | 0.22 | 0.28 |
| 44224 | 0 | 40167  | LTSGHLKCRVKMEKLQL<br>KGT           | 2.95 | 0.01 | 2.85 | 2.02 | 0.22 | 0.28 |
| 44225 | 0 | 40167  | LTSGHLKCRVKMEKLQL<br>KGT           | 2.95 | 0.01 | 2.85 | 2.02 | 0.22 | 0.28 |
| 44226 | 0 | 40167  | LTSGHLKCRVKMEKLQL<br>KGT           | 2.95 | 0.01 | 2.85 | 2.02 | 0.22 | 0.28 |
| 44227 | 0 | 225803 | LTSGVRTFP                          | 2.21 | 0.01 | 3.28 | 0.44 | 0.22 | 0.85 |
| 44228 | 0 | 122481 | LTSKDEEDIKHNEDVRE<br>EIEEQQEDIE    | 3.28 | 0.01 | 2.22 | 0.44 | 1.74 | 0.28 |
| 44229 | 0 | 122481 | LTSKDEEDIKHNEDVRE<br>EIEEQQEDIE    | 3.28 | 0.01 | 2.22 | 0.44 | 1.74 | 1.34 |
| 44230 | 0 | 122481 | LTSKDEEDIKHNEDVRE<br>EIEEQQEDIE    | 3.28 | 0.01 | 2.22 | 0.44 | 1.74 | 0.28 |
| 44231 | 0 | 122481 | LTSKDEEDIKHNEDVRE<br>EIEEQQEDIE    | 3.28 | 0.01 | 2.22 | 0.44 | 1.74 | 0.28 |
| 44232 | 0 | 122481 | LTSKDEEDIKHNEDVRE<br>EIEEQQEDIE    | 3.28 | 0.01 | 2.22 | 0.44 | 1.74 | 0.28 |
| 44233 | 0 | 122481 | LTSKDEEDIKHNEDVRE<br>EIEEQQEDIE    | 3.28 | 0.01 | 2.22 | 0.44 | 1.74 | 0.28 |
| 44234 | 0 | 122481 | LTSKDEEDIKHNEDVRE<br>EIEEQQEDIE    | 3.28 | 0.01 | 2.22 | 0.44 | 1.74 | 0.28 |
| 44235 | 0 | 40173  | LTSLFTP                            | 2.05 | 0.01 | 1.72 | 0.44 | 0.85 | 0.28 |
| 44236 | 0 | 522215 | LTSQIVARNEKLKNQ                    | 2.67 | 0.01 | 2.24 | 0.44 | 1.41 | 1.28 |
| 44237 | 0 | 133638 | LTSRPA                             | 1.88 | 0.01 | 0.78 | 0.44 | 1.13 | 0.28 |
| 44238 | 0 | 133638 | LTSRPA                             | 1.88 | 0.01 | 0.78 | 0.44 | 1.41 | 0.28 |
| 44239 | 0 | 133638 | LTSRPA                             | 1.88 | 0.01 | 0.78 | 0.44 | 1.13 | 0.28 |
| 44240 | 0 | 133638 | LTSRPA                             | 1.88 | 0.01 | 0.78 | 0.44 | 1.41 | 0.28 |
| 44241 | 0 | 133638 | LTSRPA                             | 1.88 | 0.01 | 0.78 | 0.44 | 1.13 | 0.28 |
| 44242 | 0 | 133638 | LTSRPA                             | 1.88 | 0.01 | 0.78 | 0.44 | 1.41 | 0.28 |
| 44243 | 0 | 114463 | LTSRPAHG                           | 2.10 | 0.01 | 2.24 | 0.44 | 1.41 | 0.28 |
| 44244 | 0 | 104059 | LTSSSQH                            | 2.02 | 0.01 | 0.90 | 1.15 | 0.22 | 1.39 |
| 44245 | 0 | 40186  | LTSSVATGTNLVLYAAPL<br>SPLLPLQDGTNT | 3.37 | 0.01 | 2.53 | 0.44 | 0.85 | 0.28 |

|       |   |        |                                     |      |      |      |      |      |      |
|-------|---|--------|-------------------------------------|------|------|------|------|------|------|
| 44246 | 0 | 40186  | LTSSVATGTNLVLYAAPL<br>SPLLPLQDGTNT  | 3.37 | 0.01 | 2.53 | 0.44 | 0.85 | 0.28 |
| 44247 | 0 | 131301 | LTSVYIAN                            | 2.10 | 0.01 | 0.78 | 0.44 | 1.13 | 2.02 |
| 44248 | 0 | 238752 | LTSVYIANHRPLFTHLAV<br>RIG           | 2.99 | 0.01 | 0.78 | 0.44 | 1.13 | 1.34 |
| 44249 | 0 | 238752 | LTSVYIANHRPLFTHLAV<br>RIG           | 2.99 | 0.01 | 0.78 | 0.44 | 1.13 | 0.28 |
| 44250 | 0 | 238752 | LTSVYIANHRPLFTHLAV<br>RIG           | 2.99 | 0.01 | 0.78 | 0.44 | 1.13 | 1.66 |
| 44251 | 0 | 238752 | LTSVYIANHRPLFTHLAV<br>RIG           | 2.99 | 0.01 | 0.78 | 0.44 | 1.13 | 0.85 |
| 44252 | 0 | 40194  | LTDDATTFEEVATAEKL                   | 2.90 | 0.01 | 3.29 | 1.20 | 0.22 | 0.85 |
| 44253 | 0 | 40194  | LTDDATTFEEVATAEKL                   | 2.90 | 0.01 | 3.29 | 1.20 | 0.22 | 1.57 |
| 44254 | 0 | 40195  | LTDDHSTTVING                        | 2.46 | 0.01 | 0.90 | 1.20 | 0.22 | 0.28 |
| 44255 | 0 | 522219 | LTTEKAGQKTDDMLN                     | 2.68 | 0.01 | 2.24 | 0.44 | 1.41 | 1.28 |
| 44256 | 0 | 107211 | LTTEPDTTKFWPAPS                     | 2.67 | 0.01 | 0.90 | 0.44 | 1.23 | 0.28 |
| 44257 | 0 | 40199  | LTTHALFHEVAKLDVVKL<br>LYNEQFAVQGLLR | 3.37 | 0.01 | 3.17 | 1.15 | 2.26 | 0.28 |
| 44258 | 0 | 40199  | LTTHALFHEVAKLDVVKL<br>LYNEQFAVQGLLR | 3.37 | 0.01 | 3.17 | 0.44 | 0.85 | 0.28 |
| 44259 | 0 | 40199  | LTTHALFHEVAKLDVVKL<br>LYNEQFAVQGLLR | 3.37 | 0.01 | 3.17 | 1.15 | 0.22 | 0.28 |
| 44260 | 0 | 40201  | LTHTKSMALSG                         | 2.50 | 0.01 | 0.90 | 1.20 | 0.22 | 0.28 |
| 44261 | 0 | 164288 | LTTKQHNALPRG                        | 2.45 | 0.01 | 0.90 | 1.20 | 0.22 | 1.39 |
| 44262 | 0 | 165637 | LTLLRALGAQKEAISPP<br>DA             | 2.93 | 0.01 | 0.78 | 0.44 | 0.85 | 0.28 |
| 44263 | 0 | 79922  | LTLLTPLGDSIRRIQESV<br>TTSGG         | 3.13 | 0.01 | 3.59 | 1.12 | 0.22 | 0.85 |
| 44264 | 0 | 496764 | LTLLVLNKLRLPIAAVR<br>APGFGETRKGILH  | 3.39 | 0.01 | 3.45 | 0.44 | 1.93 | 2.12 |
| 44265 | 0 | 496765 | LTLLVVKMRGVFNVV<br>AVKAPEFGDKRKQV   | 3.34 | 0.01 | 4.93 | 0.44 | 1.93 | 2.12 |
| 44266 | 0 | 489292 | LTNNIMEILRGDFSSANN<br>RD            | 2.93 | 3.37 | 0.78 | 0.44 | 1.13 | 0.28 |
| 44267 | 0 | 40207  | LTTRNGEPHMIVMRQE<br>KGKSLLFKTGDGV   | 3.28 | 0.01 | 2.30 | 0.68 | 0.22 | 0.28 |
| 44268 | 0 | 40207  | LTTRNGEPHMIVMRQE<br>KGKSLLFKTGDGV   | 3.28 | 0.01 | 2.30 | 0.68 | 0.22 | 0.28 |
| 44269 | 0 | 40207  | LTTRNGEPHMIVMRQE<br>KGKSLLFKTGDGV   | 3.28 | 0.01 | 2.30 | 0.68 | 2.25 | 1.75 |
| 44270 | 0 | 40207  | LTTRNGEPHMIVMRQE<br>KGKSLLFKTGDGV   | 3.28 | 0.01 | 2.30 | 0.68 | 0.22 | 0.28 |
| 44271 | 0 | 40213  | LTSTAATRFM                          | 2.34 | 4.23 | 2.70 | 0.44 | 0.85 | 0.28 |
| 44272 | 0 | 40214  | LTTERQHNAAYRDP                      | 2.57 | 0.01 | 4.15 | 0.68 | 0.22 | 0.28 |

|       |   |        |                                     |      |      |      |      |      |      |
|-------|---|--------|-------------------------------------|------|------|------|------|------|------|
| 44273 | 0 | 136498 | LTTTWKEYNHGLQLDD<br>GTVRAICIAG      | 3.15 | 0.01 | 4.15 | 1.15 | 0.22 | 1.48 |
| 44274 | 0 | 136498 | LTTTWKEYNHGLQLDD<br>GTVRAICIAG      | 3.15 | 0.01 | 4.15 | 1.15 | 0.22 | 1.48 |
| 44275 | 0 | 136498 | LTTTWKEYNHGLQLDD<br>GTVRAICIAG      | 3.15 | 0.01 | 4.15 | 1.15 | 0.22 | 1.48 |
| 44276 | 0 | 136498 | LTTTWKEYNHGLQLDD<br>GTVRAICIAG      | 3.15 | 0.01 | 4.15 | 1.15 | 0.22 | 1.48 |
| 44277 | 0 | 40217  | LTTWNPTL                            | 2.17 | 0.01 | 3.06 | 1.12 | 0.22 | 0.28 |
| 44278 | 0 | 103393 | LTTYILLPSQDLPLL                     | 2.69 | 0.01 | 2.04 | 0.44 | 0.85 | 1.28 |
| 44279 | 0 | 149833 | LTVGHPYYQVTVGDK                     | 2.67 | 0.01 | 3.67 | 1.20 | 0.22 | 2.98 |
| 44280 | 0 | 149833 | LTVGHPYYQVTVGDK                     | 2.67 | 0.01 | 3.67 | 1.20 | 0.22 | 1.34 |
| 44281 | 0 | 177523 | LTVGLTRRGQPRQY                      | 2.65 | 4.33 | 0.78 | 2.88 | 1.13 | 0.28 |
| 44282 | 0 | 177523 | LTVGLTRRGQPRQY                      | 2.65 | 4.33 | 0.78 | 2.88 | 1.13 | 0.28 |
| 44283 | 0 | 177523 | LTVGLTRRGQPRQY                      | 2.65 | 4.33 | 0.78 | 2.88 | 1.13 | 0.28 |
| 44284 | 0 | 177523 | LTVGLTRRGQPRQY                      | 2.65 | 4.33 | 0.78 | 2.88 | 1.13 | 0.28 |
| 44285 | 0 | 177524 | LTVGLTRRGQPRQY                      | 2.65 | 0.01 | 0.78 | 2.88 | 1.13 | 0.28 |
| 44286 | 0 | 177524 | LTVGLTRRGQPRQY                      | 2.65 | 0.01 | 0.78 | 2.88 | 1.13 | 0.28 |
| 44287 | 0 | 40220  | LTVKTPAVDAAGPVK                     | 2.71 | 0.01 | 3.75 | 2.37 | 0.22 | 0.28 |
| 44288 | 0 | 522227 | LTVLGAGFANQTEVK                     | 2.69 | 0.01 | 2.24 | 0.44 | 1.41 | 1.28 |
| 44289 | 0 | 107520 | LTVLHQN                             | 2.03 | 0.01 | 0.78 | 0.44 | 1.13 | 0.28 |
| 44290 | 0 | 107520 | LTVLHQN                             | 2.03 | 0.01 | 0.78 | 0.44 | 1.13 | 0.28 |
| 44291 | 0 | 134156 | LTVPLR                              | 1.91 | 0.01 | 0.78 | 0.44 | 1.41 | 1.27 |
| 44292 | 0 | 133220 | LTWLLLLGLLFLIALAEE<br>VRKLRVDELERIR | 3.49 | 0.01 | 0.78 | 0.44 | 1.13 | 0.28 |
| 44293 | 0 | 232936 | LTWLLPLSWEWQGT                      | 2.72 | 0.01 | 2.89 | 1.12 | 0.22 | 1.28 |
| 44294 | 0 | 232936 | LTWLLPLSWEWQGT                      | 2.72 | 0.01 | 2.89 | 1.12 | 0.22 | 1.28 |
| 44295 | 0 | 40236  | LTWSGKFP                            | 2.10 | 0.01 | 2.40 | 2.43 | 0.22 | 0.28 |
| 44296 | 0 | 172303 | LTWVSDSKSGNT                        | 2.48 | 0.01 | 0.90 | 0.44 | 0.85 | 1.39 |
| 44297 | 0 | 172303 | LTWVSDSKSGNT                        | 2.48 | 0.01 | 0.90 | 0.44 | 0.85 | 0.28 |
| 44298 | 0 | 240036 | LYEELANLY                           | 2.35 | 0.01 | 4.33 | 0.68 | 0.22 | 0.85 |
| 44299 | 0 | 240036 | LYEELANLY                           | 2.35 | 0.01 | 4.33 | 0.68 | 0.22 | 0.85 |
| 44300 | 0 | 240036 | LYEELANLY                           | 2.35 | 0.01 | 4.33 | 0.68 | 0.22 | 0.85 |
| 44301 | 0 | 240036 | LYEELANLY                           | 2.35 | 0.01 | 4.33 | 0.68 | 0.22 | 0.85 |
| 44302 | 0 | 149834 | LYFGSPRTSTPRSI                      | 2.70 | 0.01 | 4.03 | 1.12 | 0.22 | 0.28 |
| 44303 | 0 | 141955 | LYLRGISTKVTGNIV                     | 2.82 | 0.01 | 3.14 | 0.68 | 0.22 | 0.28 |
| 44304 | 0 | 141955 | LYLRGISTKVTGNIV                     | 2.82 | 0.01 | 3.14 | 0.68 | 0.22 | 0.28 |
| 44305 | 0 | 141955 | LYLRGISTKVTGNIV                     | 2.82 | 0.01 | 3.14 | 0.68 | 0.22 | 1.48 |
| 44306 | 0 | 125493 | LYVSLQGRQGH                         | 2.48 | 0.01 | 0.90 | 0.68 | 0.22 | 1.39 |
| 44307 | 0 | 125493 | LYVSLQGRQGH                         | 2.48 | 0.01 | 0.90 | 0.68 | 0.22 | 1.39 |
| 44308 | 0 | 79303  | LVAAGVDYEDERISFQD<br>WPK            | 2.89 | 0.01 | 2.86 | 0.44 | 0.85 | 0.28 |
| 44309 | 0 | 79303  | LVAAGVDYEDERISFQD<br>WPK            | 2.89 | 0.01 | 2.86 | 0.44 | 0.85 | 0.28 |
| 44310 | 0 | 79303  | LVAAGVDYEDERISFQD<br>WPK            | 2.89 | 0.01 | 2.86 | 0.44 | 0.85 | 0.28 |

|       |   |        |                                       |      |      |      |      |      |      |
|-------|---|--------|---------------------------------------|------|------|------|------|------|------|
| 44311 | 0 | 79303  | LVAAGVDYEDERISFQD<br>WPK              | 2.89 | 0.01 | 2.86 | 0.44 | 0.85 | 0.28 |
| 44312 | 0 | 79303  | LVAAGVDYEDERISFQD<br>WPK              | 2.89 | 0.01 | 2.86 | 3.63 | 0.22 | 0.85 |
| 44313 | 0 | 79303  | LVAAGVDYEDERISFQD<br>WPK              | 2.89 | 0.01 | 2.86 | 3.63 | 0.22 | 0.85 |
| 44314 | 0 | 79303  | LVAAGVDYEDERISFQD<br>WPK              | 2.89 | 0.01 | 2.86 | 3.63 | 0.22 | 0.85 |
| 44315 | 0 | 79303  | LVAAGVDYEDERISFQD<br>WPK              | 2.89 | 0.01 | 2.86 | 3.63 | 0.22 | 0.85 |
| 44316 | 0 | 79303  | LVAAGVDYEDERISFQD<br>WPK              | 2.89 | 0.01 | 2.86 | 3.63 | 0.22 | 1.34 |
| 44317 | 0 | 79303  | LVAAGVDYEDERISFQD<br>WPK              | 2.89 | 0.01 | 2.86 | 3.63 | 0.22 | 0.85 |
| 44318 | 0 | 79303  | LVAAGVDYEDERISFQD<br>WPK              | 2.89 | 0.01 | 2.86 | 3.63 | 0.22 | 0.85 |
| 44319 | 0 | 79303  | LVAAGVDYEDERISFQD<br>WPK              | 2.89 | 0.01 | 2.86 | 0.68 | 0.22 | 1.57 |
| 44320 | 0 | 189119 | LVADHSLLSIHSKVK                       | 2.78 | 0.01 | 2.92 | 2.49 | 0.22 | 0.28 |
| 44321 | 0 | 522241 | LVADMSSDIFSRPIDVSK<br>YDLIYGGAQK      | 3.27 | 3.40 | 4.93 | 0.44 | 1.13 | 0.28 |
| 44322 | 0 | 40254  | LVAEEDER                              | 2.14 | 0.01 | 2.68 | 0.44 | 1.59 | 0.28 |
| 44323 | 0 | 40258  | LVAGSNGYPNYRHQAD<br>VCHA              | 2.93 | 0.01 | 2.86 | 1.81 | 0.22 | 0.85 |
| 44324 | 0 | 40258  | LVAGSNGYPNYRHQAD<br>VCHA              | 2.93 | 0.01 | 2.86 | 1.81 | 0.22 | 0.85 |
| 44325 | 0 | 40258  | LVAGSNGYPNYRHQAD<br>VCHA              | 2.93 | 0.01 | 2.86 | 1.81 | 0.22 | 0.85 |
| 44326 | 0 | 40258  | LVAGSNGYPNYRHQAD<br>VCHA              | 2.93 | 0.01 | 2.86 | 1.81 | 0.22 | 0.85 |
| 44327 | 0 | 99464  | LVALALFLAAHASA                        | 2.74 | 0.01 | 2.16 | 0.44 | 1.23 | 1.48 |
| 44328 | 0 | 189120 | LVALENQHTIDLTDSSEM<br>NKLFEKTRRQLRENA | 3.40 | 0.01 | 3.78 | 0.68 | 0.22 | 0.28 |
| 44329 | 0 | 189120 | LVALENQHTIDLTDSSEM<br>NKLFEKTRRQLRENA | 3.40 | 0.01 | 3.78 | 0.68 | 0.22 | 0.28 |
| 44330 | 0 | 40263  | LVALPLLGMVHTAV                        | 2.78 | 0.01 | 3.41 | 0.68 | 0.22 | 0.85 |
| 44331 | 0 | 40268  | LVALYLAARLSWNQVD<br>QVIR              | 2.96 | 0.01 | 2.58 | 0.44 | 0.22 | 0.28 |
| 44332 | 0 | 153270 | LVAQINLEM                             | 2.22 | 0.01 | 0.90 | 1.15 | 0.22 | 1.27 |
| 44333 | 0 | 522248 | LVAQKEAAEKAAAEA                       | 2.73 | 0.01 | 2.24 | 0.44 | 1.41 | 1.28 |
| 44334 | 0 | 40278  | LVAQKEEFYDENME                        | 2.66 | 0.01 | 1.66 | 1.15 | 0.22 | 0.28 |
| 44335 | 0 | 40278  | LVAQKEEFYDENME                        | 2.66 | 0.01 | 1.66 | 1.15 | 0.22 | 0.28 |
| 44336 | 0 | 40279  | LVAQKEEFYDENMEKA<br>KQDKKKAL          | 3.18 | 0.01 | 1.66 | 4.45 | 0.22 | 0.85 |



|       |   |        |                              |      |      |      |      |      |      |
|-------|---|--------|------------------------------|------|------|------|------|------|------|
| 44337 | 0 | 40279  | LVAQKEEFYDENMEKA<br>KQDKKKAL | 3.18 | 0.01 | 1.66 | 4.45 | 0.22 | 1.34 |
| 44338 | 0 | 40280  | LVARIKNNLNKNSPDLYSH<br>HFQS  | 3.01 | 0.01 | 2.75 | 1.12 | 0.22 | 0.28 |
| 44339 | 0 | 40280  | LVARIKNNLNKNSPDLYSH<br>HFQS  | 3.01 | 0.01 | 2.75 | 1.12 | 0.22 | 0.85 |
| 44340 | 0 | 40281  | LVASNWYNRQIERSSRT<br>LG      | 2.87 | 0.01 | 3.03 | 0.68 | 0.22 | 1.57 |
| 44341 | 0 | 40281  | LVASNWYNRQIERSSRT<br>LG      | 2.87 | 0.01 | 3.03 | 3.33 | 0.22 | 1.57 |
| 44342 | 0 | 40281  | LVASNWYNRQIERSSRT<br>LG      | 2.87 | 0.01 | 2.08 | 0.44 | 0.22 | 1.57 |
| 44343 | 0 | 40281  | LVASNWYNRQIERSSRT<br>LG      | 2.87 | 0.01 | 2.08 | 2.02 | 0.22 | 1.57 |
| 44344 | 0 | 40281  | LVASNWYNRQIERSSRT<br>LG      | 2.87 | 0.01 | 2.08 | 2.49 | 0.22 | 1.57 |
| 44345 | 0 | 40281  | LVASNWYNRQIERSSRT<br>LG      | 2.87 | 0.01 | 2.08 | 0.44 | 0.22 | 1.57 |
| 44346 | 0 | 40281  | LVASNWYNRQIERSSRT<br>LG      | 2.87 | 0.01 | 2.08 | 2.02 | 0.22 | 1.57 |
| 44347 | 0 | 40281  | LVASNWYNRQIERSSRT<br>LG      | 2.87 | 0.01 | 2.08 | 2.25 | 0.22 | 1.57 |
| 44348 | 0 | 40281  | LVASNWYNRQIERSSRT<br>LG      | 2.87 | 0.01 | 2.08 | 2.25 | 0.22 | 1.57 |
| 44349 | 0 | 40283  | LVCAPAPCNFF TSA              | 2.62 | 0.01 | 2.08 | 0.44 | 0.85 | 0.28 |
| 44350 | 0 | 40283  | LVCAPAPCNFF TSA              | 2.62 | 0.01 | 2.08 | 0.44 | 0.85 | 0.28 |
| 44351 | 0 | 40283  | LVCAPAPCNFF TSA              | 2.62 | 0.01 | 2.08 | 0.44 | 0.85 | 0.28 |
| 44352 | 0 | 165638 | LVCASRELERFAVNPGLL<br>E      | 2.91 | 0.01 | 2.54 | 0.44 | 0.85 | 0.28 |
| 44353 | 0 | 165638 | LVCASRELERFAVNPGLL<br>E      | 2.91 | 0.01 | 2.54 | 0.44 | 0.85 | 1.27 |
| 44354 | 0 | 79923  | LVCGIAAKLGAA                 | 2.50 | 0.01 | 2.14 | 3.26 | 0.22 | 0.28 |
| 44355 | 0 | 40287  | LVCCKDGVKVPQDNNQ<br>YC       | 2.86 | 0.01 | 4.08 | 3.38 | 0.22 | 0.85 |
| 44356 | 0 | 238753 | LVCYTNVLEPPGTLE              | 2.70 | 0.01 | 2.56 | 2.02 | 0.22 | 0.85 |
| 44357 | 0 | 40292  | LVDADDPL                     | 2.16 | 0.01 | 2.85 | 0.44 | 0.22 | 0.28 |
| 44358 | 0 | 40293  | LVDADDPLLR                   | 2.34 | 0.01 | 2.85 | 0.44 | 0.22 | 0.28 |
| 44359 | 0 | 100295 | LVDGNRFRVF                   | 2.33 | 0.01 | 2.18 | 2.16 | 0.22 | 0.28 |
| 44360 | 0 | 172305 | LVDLAGSERAAQTGA              | 2.69 | 0.01 | 0.78 | 0.44 | 1.13 | 0.28 |
| 44361 | 0 | 122482 | LVDRKTGSQYDIQDAID<br>KGL     | 2.95 | 0.01 | 0.78 | 0.44 | 1.13 | 1.27 |
| 44362 | 0 | 40310  | LVDWLRQYA                    | 2.22 | 0.01 | 2.61 | 0.44 | 0.85 | 0.28 |
| 44363 | 0 | 140577 | LVDYPYRLWHYPCTI              | 2.67 | 0.01 | 1.72 | 0.44 | 0.85 | 0.28 |
| 44364 | 0 | 40311  | LVDYSPVSEKHLA                | 2.54 | 0.01 | 3.34 | 1.12 | 0.22 | 0.85 |
| 44365 | 0 | 104895 | LVEALYLVCGERG                | 2.58 | 0.01 | 1.75 | 3.33 | 1.13 | 0.28 |
| 44366 | 0 | 104895 | LVEALYLVCGERG                | 2.58 | 0.01 | 1.75 | 3.33 | 1.13 | 1.57 |
| 44367 | 0 | 104895 | LVEALYLVCGERG                | 2.58 | 0.01 | 1.75 | 3.33 | 1.13 | 1.75 |

|       |   |        |                 |      |      |      |      |      |      |
|-------|---|--------|-----------------|------|------|------|------|------|------|
| 44368 | 0 | 113082 | LVEEAIAYGRKLGGS | 2.67 | 0.01 | 0.78 | 1.20 | 0.22 | 0.85 |
| 44369 | 0 | 172307 | LVEEQRQLQELEKD  | 2.73 | 0.01 | 0.78 | 0.44 | 1.13 | 0.28 |
| 44370 | 0 | 190486 | LVEEPVKTAPGKKRP | 2.68 | 0.01 | 3.19 | 2.00 | 1.41 | 0.28 |
| 44371 | 0 | 97484  | LVEETSFIDAGAP   | 2.50 | 0.01 | 1.86 | 1.12 | 0.22 | 1.48 |
| 44372 | 0 | 97484  | LVEETSFIDAGAP   | 2.50 | 0.01 | 1.86 | 0.68 | 0.22 | 0.28 |
| 44373 | 0 | 97484  | LVEETSFIDAGAP   | 2.50 | 0.01 | 1.86 | 0.68 | 0.22 | 0.28 |
| 44374 | 0 | 97484  | LVEETSFIDAGAP   | 2.50 | 0.01 | 1.86 | 0.68 | 0.22 | 0.28 |
| 44375 | 0 | 97484  | LVEETSFIDAGAP   | 2.50 | 0.01 | 1.86 | 0.44 | 0.22 | 0.28 |
| 44376 | 0 | 97484  | LVEETSFIDAGAP   | 2.50 | 0.01 | 1.86 | 0.44 | 0.22 | 0.28 |
| 44377 | 0 | 97484  | LVEETSFIDAGAP   | 2.50 | 0.01 | 1.86 | 0.44 | 0.22 | 1.34 |
| 44378 | 0 | 97484  | LVEETSFIDAGAP   | 2.50 | 0.01 | 1.86 | 0.44 | 0.22 | 1.34 |
| 44379 | 0 | 97484  | LVEETSFIDAGAP   | 2.50 | 0.01 | 1.86 | 0.68 | 0.22 | 0.28 |
| 44380 | 0 | 97484  | LVEETSFIDAGAP   | 2.50 | 0.01 | 1.86 | 0.68 | 0.22 | 0.28 |
| 44381 | 0 | 97484  | LVEETSFIDAGAP   | 2.50 | 0.01 | 1.86 | 0.68 | 0.22 | 1.34 |
| 44382 | 0 | 97484  | LVEETSFIDAGAP   | 2.50 | 0.01 | 1.86 | 0.68 | 0.22 | 1.34 |
| 44383 | 0 | 97484  | LVEETSFIDAGAP   | 2.50 | 0.01 | 1.86 | 0.68 | 0.22 | 0.28 |
| 44384 | 0 | 97484  | LVEETSFIDAGAP   | 2.50 | 0.01 | 1.86 | 0.68 | 0.22 | 0.28 |
| 44385 | 0 | 97484  | LVEETSFIDAGAP   | 2.50 | 0.01 | 1.86 | 0.68 | 0.22 | 0.28 |
| 44386 | 0 | 97484  | LVEETSFIDAGAP   | 2.50 | 0.01 | 1.86 | 0.68 | 0.22 | 0.28 |
| 44387 | 0 | 97484  | LVEETSFIDAGAP   | 2.50 | 0.01 | 1.86 | 0.68 | 0.22 | 0.28 |
| 44388 | 0 | 97484  | LVEETSFIDAGAP   | 2.50 | 0.01 | 1.86 | 0.68 | 0.22 | 0.28 |
| 44389 | 0 | 97484  | LVEETSFIDAGAP   | 2.50 | 0.01 | 1.86 | 1.20 | 0.22 | 0.28 |
| 44390 | 0 | 97484  | LVEETSFIDAGAP   | 2.50 | 0.01 | 1.86 | 1.20 | 0.22 | 0.28 |
| 44391 | 0 | 97484  | LVEETSFIDAGAP   | 2.50 | 0.01 | 1.86 | 1.20 | 0.22 | 0.28 |
| 44392 | 0 | 97484  | LVEETSFIDAGAP   | 2.50 | 0.01 | 1.86 | 1.20 | 0.22 | 0.28 |
| 44393 | 0 | 97484  | LVEETSFIDAGAP   | 2.50 | 0.01 | 1.86 | 1.20 | 0.22 | 0.28 |
| 44394 | 0 | 97484  | LVEETSFIDAGAP   | 2.50 | 0.01 | 1.86 | 1.20 | 0.22 | 0.28 |
| 44395 | 0 | 97484  | LVEETSFIDAGAP   | 2.50 | 0.01 | 1.86 | 1.20 | 0.22 | 0.28 |
| 44396 | 0 | 97484  | LVEETSFIDAGAP   | 2.50 | 0.01 | 1.86 | 1.20 | 0.22 | 0.28 |
| 44397 | 0 | 97484  | LVEETSFIDAGAP   | 2.50 | 0.01 | 1.86 | 1.20 | 0.22 | 0.28 |
| 44398 | 0 | 97484  | LVEETSFIDAGAP   | 2.50 | 0.01 | 1.86 | 0.68 | 0.22 | 0.28 |
| 44399 | 0 | 97484  | LVEETSFIDAGAP   | 2.50 | 0.01 | 1.86 | 1.20 | 0.22 | 0.28 |
| 44400 | 0 | 97484  | LVEETSFIDAGAP   | 2.50 | 0.01 | 1.86 | 1.20 | 0.22 | 0.28 |
| 44401 | 0 | 97484  | LVEETSFIDAGAP   | 2.50 | 0.01 | 1.86 | 0.68 | 0.22 | 0.28 |
| 44402 | 0 | 97484  | LVEETSFIDAGAP   | 2.50 | 0.01 | 1.86 | 1.20 | 0.22 | 0.28 |
| 44403 | 0 | 97484  | LVEETSFIDAGAP   | 2.50 | 0.01 | 1.86 | 0.68 | 0.22 | 0.28 |
| 44404 | 0 | 97484  | LVEETSFIDAGAP   | 2.50 | 0.01 | 1.86 | 1.20 | 0.22 | 0.28 |
| 44405 | 0 | 97484  | LVEETSFIDAGAP   | 2.50 | 0.01 | 1.86 | 0.68 | 0.22 | 0.28 |
| 44406 | 0 | 97484  | LVEETSFIDAGAP   | 2.50 | 0.01 | 1.86 | 1.20 | 0.22 | 0.28 |
| 44407 | 0 | 97484  | LVEETSFIDAGAP   | 2.50 | 0.01 | 1.86 | 1.20 | 0.22 | 1.34 |
| 44408 | 0 | 97484  | LVEETSFIDAGAP   | 2.50 | 0.01 | 1.86 | 1.20 | 0.22 | 0.85 |
| 44409 | 0 | 97484  | LVEETSFIDAGAP   | 2.50 | 0.01 | 1.86 | 1.20 | 0.22 | 0.28 |
| 44410 | 0 | 97484  | LVEETSFIDAGAP   | 2.50 | 0.01 | 1.86 | 1.20 | 0.22 | 1.34 |
| 44411 | 0 | 97484  | LVEETSFIDAGAP   | 2.50 | 0.01 | 1.86 | 1.20 | 0.22 | 1.34 |
| 44412 | 0 | 97484  | LVEETSFIDAGAP   | 2.50 | 0.01 | 1.86 | 1.15 | 0.22 | 0.28 |
| 44413 | 0 | 97484  | LVEETSFIDAGAP   | 2.50 | 0.01 | 1.86 | 0.68 | 0.22 | 0.85 |
| 44414 | 0 | 97484  | LVEETSFIDAGAP   | 2.50 | 0.01 | 1.86 | 0.68 | 0.22 | 0.85 |

|                     |   |        |                                        |      |      |      |      |      |      |
|---------------------|---|--------|----------------------------------------|------|------|------|------|------|------|
| 44415               | 0 | 97484  | LVEETSFIDAGAP                          | 2.50 | 0.01 | 1.86 | 1.81 | 0.22 | 0.28 |
| 44416               | 0 | 97484  | LVEETSFIDAGAP                          | 2.50 | 0.01 | 1.86 | 1.12 | 0.22 | 0.28 |
| 44417               | 0 | 97484  | LVEETSFIDAGAP                          | 2.50 | 0.01 | 1.86 | 1.81 | 0.22 | 0.85 |
| 44418               | 0 | 97484  | LVEETSFIDAGAP                          | 2.50 | 0.01 | 1.86 | 0.68 | 0.22 | 0.28 |
| 44419               | 0 | 97484  | LVEETSFIDAGAP                          | 2.50 | 0.01 | 1.86 | 0.68 | 0.22 | 1.75 |
| 44420               | 0 | 97484  | LVEETSFIDAGAP                          | 2.50 | 0.01 | 1.86 | 0.68 | 0.22 | 1.75 |
| 44421               | 0 | 97484  | LVEETSFIDAGAP                          | 2.50 | 0.01 | 1.86 | 0.68 | 0.22 | 1.75 |
| 44422               | 0 | 40319  | LVEKPNLSSKRSELS                        | 2.72 | 0.01 | 2.43 | 0.68 | 0.22 | 0.28 |
| 44423               | 0 | 40319  | LVEKPNLSSKRSELS                        | 2.72 | 0.01 | 2.43 | 0.68 | 0.22 | 0.28 |
| 44424               | 0 | 40319  | LVEKPNLSSKRSELS                        | 2.72 | 0.01 | 2.43 | 0.44 | 0.85 | 0.28 |
| LVERDHKNEFCEITLISSG |   |        |                                        |      |      |      |      |      |      |
| 44425               | 0 | 149070 | RKDCNEIPTEGWAKPSL<br>KFKLNTVNGTTRTVNPL | 3.92 | 0.01 | 2.88 | 1.12 | 0.22 | 0.28 |
| LVERDHKNEFCEITLISSG |   |        |                                        |      |      |      |      |      |      |
| 44426               | 0 | 149070 | RKDCNEIPTEGWAKPSL<br>KFKLNTVNGTTRTVNPL | 3.92 | 0.01 | 2.88 | 1.12 | 0.22 | 0.85 |
| LVERDHKNEFCEITLISSG |   |        |                                        |      |      |      |      |      |      |
| 44427               | 0 | 149070 | RKDCNEIPTEGWAKPSL<br>KFKLNTVNGTTRTVNPL | 3.92 | 0.01 | 2.88 | 0.44 | 1.23 | 2.35 |
| 44428               | 0 | 152806 | LVERRIAAVN                             | 2.31 | 0.01 | 2.18 | 2.16 | 0.22 | 0.28 |
| 44429               | 0 | 40323  | LVETWKKP                               | 2.11 | 0.01 | 2.68 | 0.44 | 1.59 | 0.28 |
| 44430               | 0 | 118902 | LVFEAPNQEKVSDYE                        | 2.64 | 0.01 | 0.78 | 1.12 | 0.22 | 0.28 |
| 44431               | 0 | 118902 | LVFEAPNQEKVSDYE                        | 2.64 | 0.01 | 0.78 | 1.12 | 0.22 | 1.48 |
| 44432               | 0 | 106633 | LVFFAED                                | 2.01 | 0.01 | 0.78 | 1.15 | 2.26 | 0.85 |
| 44433               | 0 | 40332  | LVFFAEDV                               | 2.13 | 0.01 | 0.78 | 0.68 | 0.22 | 1.48 |
| 44434               | 0 | 40332  | LVFFAEDV                               | 2.13 | 0.01 | 0.78 | 0.68 | 0.22 | 2.66 |
| 44435               | 0 | 40332  | LVFFAEDV                               | 2.13 | 0.01 | 0.78 | 1.15 | 0.22 | 1.48 |
| 44436               | 0 | 40332  | LVFFAEDV                               | 2.13 | 0.01 | 0.78 | 1.15 | 0.22 | 0.85 |
| 44437               | 0 | 40332  | LVFFAEDV                               | 2.13 | 0.01 | 0.78 | 1.15 | 0.22 | 1.34 |
| 44438               | 0 | 40332  | LVFFAEDV                               | 2.13 | 0.01 | 0.78 | 1.15 | 0.22 | 1.66 |
| 44439               | 0 | 40332  | LVFFAEDV                               | 2.13 | 0.01 | 0.78 | 1.15 | 0.22 | 1.66 |
| 44440               | 0 | 40332  | LVFFAEDV                               | 2.13 | 0.01 | 0.78 | 1.15 | 0.22 | 1.66 |
| 44441               | 0 | 40332  | LVFFAEDV                               | 2.13 | 0.01 | 0.78 | 1.15 | 0.22 | 1.48 |
| 44442               | 0 | 40332  | LVFFAEDV                               | 2.13 | 0.01 | 1.60 | 1.15 | 0.22 | 1.48 |
| 44443               | 0 | 40332  | LVFFAEDV                               | 2.13 | 0.01 | 0.78 | 0.68 | 0.22 | 2.02 |
| 44444               | 0 | 40332  | LVFFAEDV                               | 2.13 | 0.01 | 0.78 | 0.68 | 0.22 | 0.85 |
| 44445               | 0 | 40332  | LVFFAEDV                               | 2.13 | 0.01 | 0.78 | 1.15 | 0.22 | 0.28 |
| 44446               | 0 | 40332  | LVFFAEDV                               | 2.13 | 0.01 | 0.78 | 0.68 | 0.22 | 0.85 |
| 44447               | 0 | 40332  | LVFFAEDV                               | 2.13 | 0.01 | 0.78 | 1.15 | 2.26 | 1.48 |
| 44448               | 0 | 40332  | LVFFAEDV                               | 2.13 | 0.01 | 0.78 | 1.15 | 0.22 | 1.75 |
| 44449               | 0 | 100297 | LVFFAEDVGS                             | 2.30 | 0.01 | 0.78 | 1.12 | 0.22 | 0.85 |
| 44450               | 0 | 105319 | LVFFAEDVGSNK                           | 2.44 | 0.01 | 0.78 | 0.44 | 1.41 | 0.28 |
| 44451               | 0 | 105319 | LVFFAEDVGSNK                           | 2.44 | 0.01 | 0.78 | 0.44 | 1.41 | 1.66 |
| 44452               | 0 | 105319 | LVFFAEDVGSNK                           | 2.44 | 0.01 | 0.78 | 0.44 | 1.41 | 1.66 |

|       |   |        |                              |      |      |      |      |      |      |
|-------|---|--------|------------------------------|------|------|------|------|------|------|
| 44453 | 0 | 105319 | LVFFAEDVGSNK                 | 2.44 | 0.01 | 0.78 | 0.44 | 1.41 | 1.66 |
| 44454 | 0 | 105319 | LVFFAEDVGSNK                 | 2.44 | 0.01 | 0.78 | 0.44 | 1.41 | 1.34 |
| 44455 | 0 | 105319 | LVFFAEDVGSNK                 | 2.44 | 0.01 | 0.78 | 3.59 | 0.22 | 0.28 |
| 44456 | 0 | 105319 | LVFFAEDVGSNK                 | 2.44 | 0.01 | 0.78 | 0.44 | 1.41 | 2.66 |
| 44457 | 0 | 105319 | LVFFAEDVGSNK                 | 2.44 | 0.01 | 0.78 | 0.44 | 1.41 | 0.28 |
| 44458 | 0 | 105319 | LVFFAEDVGSNK                 | 2.44 | 0.01 | 0.78 | 0.44 | 1.41 | 0.28 |
| 44459 | 0 | 105319 | LVFFAEDVGSNK                 | 2.44 | 0.01 | 0.78 | 0.44 | 1.41 | 2.66 |
| 44460 | 0 | 105319 | LVFFAEDVGSNK                 | 2.44 | 0.01 | 0.78 | 0.44 | 1.41 | 1.66 |
| 44461 | 0 | 105319 | LVFFAEDVGSNK                 | 2.44 | 0.01 | 0.78 | 0.44 | 1.41 | 1.66 |
| 44462 | 0 | 105319 | LVFFAEDVGSNK                 | 2.44 | 0.01 | 0.78 | 0.44 | 1.41 | 1.66 |
| 44463 | 0 | 105319 | LVFFAEDVGSNK                 | 2.44 | 0.01 | 0.78 | 0.44 | 1.41 | 1.66 |
| 44464 | 0 | 105319 | LVFFAEDVGSNK                 | 2.44 | 0.01 | 0.78 | 0.44 | 1.41 | 1.66 |
| 44465 | 0 | 105319 | LVFFAEDVGSNK                 | 2.44 | 0.01 | 0.78 | 0.44 | 1.41 | 1.66 |
| 44466 | 0 | 105319 | LVFFAEDVGSNK                 | 2.44 | 0.01 | 0.78 | 0.44 | 1.41 | 1.66 |
| 44467 | 0 | 105319 | LVFFAEDVGSNK                 | 2.44 | 0.01 | 0.78 | 0.44 | 1.41 | 1.66 |
| 44468 | 0 | 105319 | LVFFAEDVGSNK                 | 2.44 | 0.01 | 0.78 | 0.44 | 1.41 | 1.66 |
| 44469 | 0 | 105319 | LVFFAEDVGSNK                 | 2.44 | 0.01 | 0.78 | 0.44 | 1.41 | 1.66 |
| 44470 | 0 | 105319 | LVFFAEDVGSNK                 | 2.44 | 0.01 | 0.78 | 0.44 | 1.41 | 1.66 |
| 44471 | 0 | 105319 | LVFFAEDVGSNK                 | 2.44 | 0.01 | 0.78 | 0.44 | 1.41 | 1.66 |
| 44472 | 0 | 107521 | LVFFAEDVGSNKGAI              | 2.65 | 0.01 | 0.78 | 1.12 | 0.22 | 1.48 |
| 44473 | 0 | 107521 | LVFFAEDVGSNKGAI              | 2.65 | 0.01 | 0.78 | 2.71 | 0.22 | 0.28 |
| 44474 | 0 | 107521 | LVFFAEDVGSNKGAI              | 2.65 | 0.01 | 0.78 | 2.71 | 0.22 | 1.66 |
| 44475 | 0 | 107521 | LVFFAEDVGSNKGAI              | 2.65 | 0.01 | 0.78 | 2.71 | 0.22 | 1.66 |
| 44476 | 0 | 107521 | LVFFAEDVGSNKGAI              | 2.65 | 0.01 | 0.78 | 2.71 | 0.22 | 1.66 |
| 44477 | 0 | 107521 | LVFFAEDVGSNKGAI              | 2.65 | 0.01 | 0.78 | 2.71 | 0.22 | 2.66 |
| 44478 | 0 | 174195 | LVFFAEDVGSNKGAIIGA<br>MVGGVV | 3.11 | 0.01 | 0.90 | 1.15 | 0.22 | 1.66 |
| 44479 | 0 | 174195 | LVFFAEDVGSNKGAIIGA<br>MVGGVV | 3.11 | 0.01 | 0.90 | 1.15 | 0.22 | 1.66 |
| 44480 | 0 | 174195 | LVFFAEDVGSNKGAIIGA<br>MVGGVV | 3.11 | 0.01 | 0.90 | 1.15 | 0.22 | 1.66 |
| 44481 | 0 | 174196 | LVFFAEDVGSNKGAIIGL<br>MVGGAV | 3.12 | 0.01 | 0.90 | 1.15 | 0.22 | 1.66 |
| 44482 | 0 | 174196 | LVFFAEDVGSNKGAIIGL<br>MVGGAV | 3.12 | 0.01 | 0.90 | 1.15 | 0.22 | 1.66 |
| 44483 | 0 | 174196 | LVFFAEDVGSNKGAIIGL<br>MVGGAV | 3.12 | 0.01 | 0.90 | 1.15 | 0.22 | 1.66 |
| 44484 | 0 | 174197 | LVFFAEDVGSNKGAIIGL<br>MVGGVA | 3.12 | 0.01 | 0.90 | 1.15 | 0.22 | 1.66 |
| 44485 | 0 | 174197 | LVFFAEDVGSNKGAIIGL<br>MVGGVA | 3.12 | 0.01 | 0.90 | 1.15 | 0.22 | 1.66 |
| 44486 | 0 | 174197 | LVFFAEDVGSNKGAIIGL<br>MVGGVA | 3.12 | 0.01 | 0.90 | 1.15 | 0.22 | 1.66 |
| 44487 | 0 | 104897 | LVFFAEDVGSNKGAIIGL<br>MVGGVV | 3.11 | 0.01 | 0.78 | 3.16 | 0.22 | 0.28 |
| 44488 | 0 | 104897 | LVFFAEDVGSNKGAIIGL<br>MVGGVV | 3.11 | 0.01 | 0.78 | 1.81 | 0.22 | 0.28 |

|       |   |        |                                                   |      |      |      |      |      |      |
|-------|---|--------|---------------------------------------------------|------|------|------|------|------|------|
| 44489 | 0 | 104897 | LVFFAEDVGSNKGAIIGL<br>MVGGVV                      | 3.11 | 0.01 | 0.78 | 1.81 | 0.22 | 0.28 |
| 44490 | 0 | 104897 | LVFFAEDVGSNKGAIIGL<br>MVGGVV                      | 3.11 | 0.01 | 1.75 | 0.68 | 0.22 | 0.28 |
| 44491 | 0 | 104897 | LVFFAEDVGSNKGAIIGL<br>MVGGVV                      | 3.11 | 0.01 | 1.75 | 0.68 | 0.22 | 1.27 |
| 44492 | 0 | 104897 | LVFFAEDVGSNKGAIIGL<br>MVGGVV                      | 3.11 | 0.01 | 1.75 | 0.68 | 0.22 | 1.27 |
| 44493 | 0 | 139821 | LVFFAEDVGSNKGAIIGL<br>MVGGVVIA                    | 3.20 | 0.01 | 0.78 | 1.20 | 0.22 | 1.27 |
| 44494 | 0 | 139821 | LVFFAEDVGSNKGAIIGL<br>MVGGVVIA                    | 3.20 | 0.01 | 0.78 | 1.15 | 0.22 | 2.92 |
| 44495 | 0 | 139821 | LVFFAEDVGSNKGAIIGL<br>MVGGVVIA                    | 3.20 | 0.01 | 0.78 | 1.15 | 0.22 | 0.85 |
| 44496 | 0 | 139821 | LVFFAEDVGSNKGAIIGL<br>MVGGVVIA                    | 3.20 | 0.01 | 0.78 | 1.15 | 0.22 | 0.85 |
| 44497 | 0 | 139821 | LVFFAEDVGSNKGAIIGL<br>MVGGVVIA                    | 3.20 | 0.01 | 0.78 | 1.20 | 0.22 | 0.28 |
| 44498 | 0 | 128055 | LVFFHNTMDREESEGW<br>PAID                          | 2.86 | 0.01 | 0.78 | 0.44 | 1.13 | 0.28 |
| 44499 | 0 | 40340  | LVFKT                                             | 1.74 | 0.01 | 0.90 | 0.44 | 1.13 | 0.85 |
| 44500 | 0 | 40359  | LVGATPE                                           | 1.99 | 0.01 | 2.85 | 0.68 | 0.22 | 0.28 |
| 44501 | 0 | 40360  | LVGATPER                                          | 2.10 | 0.01 | 2.85 | 0.44 | 0.22 | 0.28 |
| 44502 | 0 | 190487 | LVGATPERPRLRLVDAD<br>DPLLRTAPGPGEVWVTP<br>VIGSQAR | 3.68 | 0.01 | 2.85 | 0.44 | 1.59 | 0.28 |
| 44503 | 0 | 190487 | LVGATPERPRLRLVDAD<br>DPLLRTAPGPGEVWVTP<br>VIGSQAR | 3.68 | 0.01 | 2.85 | 0.68 | 0.22 | 0.28 |
| 44504 | 0 | 190487 | LVGATPERPRLRLVDAD<br>DPLLRTAPGPGEVWVTP<br>VIGSQAR | 3.68 | 0.01 | 2.85 | 0.68 | 0.22 | 0.28 |
| 44505 | 0 | 190487 | LVGATPERPRLRLVDAD<br>DPLLRTAPGPGEVWVTP<br>VIGSQAR | 3.68 | 0.01 | 2.85 | 0.68 | 0.22 | 0.28 |
| 44506 | 0 | 225424 | LVGDEAELPCRISPGKNA<br>TGMEV                       | 3.05 | 0.01 | 1.75 | 1.81 | 0.22 | 0.28 |
| 44507 | 0 | 113083 | LVGDEVELPCRISPGKNA<br>TGMEVGWY                    | 3.15 | 0.01 | 0.78 | 0.44 | 1.13 | 0.28 |
| 44508 | 0 | 113083 | LVGDEVELPCRISPGKNA<br>TGMEVGWY                    | 3.15 | 0.01 | 0.78 | 0.44 | 1.41 | 0.28 |
| 44509 | 0 | 103395 | LVGIFARAPRGDTF                                    | 2.61 | 0.01 | 3.93 | 2.43 | 0.22 | 0.85 |
| 44510 | 0 | 40369  | LVGLIGVK                                          | 2.17 | 0.01 | 3.06 | 1.12 | 0.22 | 0.28 |
| 44511 | 0 | 177161 | LVGLLTPGA                                         | 2.25 | 0.01 | 2.45 | 1.20 | 0.22 | 0.28 |
| 44512 | 0 | 177161 | LVGLLTPGA                                         | 2.25 | 0.01 | 2.45 | 1.20 | 0.22 | 1.34 |
| 44513 | 0 | 177161 | LVGLLTPGA                                         | 2.25 | 0.01 | 2.45 | 0.68 | 0.22 | 0.28 |
| 44514 | 0 | 108023 | LVGPRGERGFP                                       | 2.43 | 4.45 | 0.78 | 0.44 | 1.13 | 0.28 |

|       |   |        |                                    |      |      |      |      |      |      |
|-------|---|--------|------------------------------------|------|------|------|------|------|------|
| 44515 | 0 | 108023 | LVGPRGERGFP                        | 2.43 | 4.45 | 0.78 | 0.44 | 1.13 | 0.28 |
| 44516 | 0 | 108023 | LVGPRGERGFP                        | 2.43 | 4.45 | 0.78 | 3.18 | 2.60 | 1.48 |
| 44517 | 0 | 109534 | LVGPRGERGFP                        | 2.43 | 4.33 | 2.19 | 3.16 | 0.22 | 0.28 |
| 44518 | 0 | 109534 | LVGPRGERGFP                        | 2.43 | 4.33 | 2.19 | 3.16 | 0.22 | 1.75 |
| 44519 | 0 | 109534 | LVGPRGERGFP                        | 2.43 | 4.33 | 2.19 | 3.16 | 0.22 | 0.28 |
| 44520 | 0 | 109534 | LVGPRGERGFP                        | 2.43 | 4.33 | 2.19 | 3.16 | 0.22 | 0.28 |
| 44521 | 0 | 177162 | LVGPRGERGFP                        | 2.43 | 4.93 | 0.78 | 1.15 | 0.22 | 0.28 |
| 44522 | 0 | 106634 | LVGPRGERGFP                        | 2.43 | 0.01 | 2.19 | 3.18 | 0.22 | 0.28 |
| 44523 | 0 | 106634 | LVGPRGERGFP                        | 2.43 | 0.01 | 2.19 | 3.16 | 0.22 | 0.28 |
| 44524 | 0 | 106634 | LVGPRGERGFP                        | 2.43 | 0.01 | 2.19 | 3.16 | 0.22 | 1.75 |
| 44525 | 0 | 106634 | LVGPRGERGFP                        | 2.43 | 0.01 | 2.19 | 3.16 | 0.22 | 1.34 |
| 44526 | 0 | 106634 | LVGPRGERGFP                        | 2.43 | 0.01 | 2.19 | 0.44 | 1.13 | 0.28 |
| 44527 | 0 | 106634 | LVGPRGERGFP                        | 2.43 | 0.01 | 2.19 | 0.44 | 1.41 | 0.28 |
| 44528 | 0 | 106634 | LVGPRGERGFP                        | 2.43 | 0.01 | 0.78 | 3.18 | 0.22 | 0.28 |
| 44529 | 0 | 106634 | LVGPRGERGFP                        | 2.43 | 0.01 | 0.78 | 3.18 | 0.22 | 0.28 |
| 44530 | 0 | 106634 | LVGPRGERGFP                        | 2.43 | 0.01 | 0.78 | 3.18 | 0.22 | 0.28 |
| 44531 | 0 | 106634 | LVGPRGERGFP                        | 2.43 | 0.01 | 2.19 | 3.16 | 0.22 | 0.28 |
| 44532 | 0 | 109535 | LVGQFHTPAWAE                       | 2.43 | 0.01 | 0.90 | 1.15 | 0.22 | 1.39 |
| 44533 | 0 | 109535 | LVGQFHTPAWAE                       | 2.43 | 0.01 | 0.90 | 1.15 | 0.22 | 0.85 |
| 44534 | 0 | 108541 | LVGTPQKTK                          | 2.23 | 0.01 | 0.90 | 0.44 | 1.13 | 1.39 |
| 44535 | 0 | 108541 | LVGTPQKTK                          | 2.23 | 0.01 | 0.90 | 0.44 | 1.13 | 1.39 |
| 44536 | 0 | 40380  | LVGVVT                             | 1.90 | 0.01 | 2.40 | 0.44 | 0.85 | 0.28 |
| 44537 | 0 | 40381  | LVHDSLEHVLTPSTSW<br>TTKI           | 3.01 | 0.01 | 3.01 | 0.44 | 1.59 | 0.28 |
| 44538 | 0 | 40383  | LVHRQW                             | 1.88 | 0.01 | 2.40 | 0.44 | 0.85 | 0.28 |
| 44539 | 0 | 450822 | LVHWNKKKYSSYEEAKK<br>H             | 2.84 | 0.01 | 4.08 | 0.68 | 0.22 | 0.28 |
| 44540 | 0 | 450822 | LVHWNKKKYSSYEEAKK<br>H             | 2.84 | 0.01 | 4.08 | 0.68 | 0.22 | 0.28 |
| 44541 | 0 | 450822 | LVHWNKKKYSSYEEAKK<br>H             | 2.84 | 0.01 | 4.08 | 0.68 | 0.22 | 0.28 |
| 44542 | 0 | 450822 | LVHWNKKKYSSYEEAKK<br>H             | 2.84 | 0.01 | 4.08 | 0.68 | 0.22 | 0.28 |
| 44543 | 0 | 450822 | LVHWNKKKYSSYEEAKK<br>H             | 2.84 | 0.01 | 4.08 | 0.68 | 0.22 | 0.28 |
| 44544 | 0 | 450822 | LVHWNKKKYSSYEEAKK<br>H             | 2.84 | 0.01 | 4.08 | 0.68 | 0.22 | 2.35 |
| 44545 | 0 | 40389  | LVIGAVIIRGHLRMAGHS<br>LGR          | 3.04 | 0.01 | 2.45 | 0.44 | 0.85 | 0.28 |
| 44546 | 0 | 496767 | LVIIAEDVDGEALSTLVL<br>NRLKVGLQVVAV | 3.35 | 0.01 | 0.78 | 0.44 | 1.93 | 2.12 |
| 44547 | 0 | 40417  | LVKGKLPVA                          | 2.36 | 0.01 | 2.84 | 0.44 | 0.85 | 0.28 |
| 44548 | 0 | 136074 | LVKK                               | 1.55 | 0.01 | 3.23 | 0.68 | 0.22 | 2.02 |
| 44549 | 0 | 136074 | LVKK                               | 1.55 | 0.01 | 3.23 | 0.68 | 0.22 | 2.02 |
| 44550 | 0 | 136074 | LVKK                               | 1.55 | 0.01 | 3.23 | 0.68 | 0.22 | 2.02 |
| 44551 | 0 | 136074 | LVKK                               | 1.55 | 0.01 | 3.23 | 0.68 | 0.22 | 2.02 |
| 44552 | 0 | 136074 | LVKK                               | 1.55 | 0.01 | 3.23 | 0.68 | 0.22 | 1.34 |

|       |   |        |                          |      |      |      |      |      |      |
|-------|---|--------|--------------------------|------|------|------|------|------|------|
| 44553 | 0 | 136074 | LVKK                     | 1.55 | 0.01 | 3.23 | 0.68 | 0.22 | 1.34 |
| 44554 | 0 | 136074 | LVKK                     | 1.55 | 0.01 | 3.23 | 0.68 | 0.22 | 1.34 |
| 44555 | 0 | 136074 | LVKK                     | 1.55 | 0.01 | 3.23 | 0.68 | 0.22 | 1.34 |
| 44556 | 0 | 136074 | LVKK                     | 1.55 | 0.01 | 3.23 | 0.68 | 0.22 | 1.34 |
| 44557 | 0 | 136074 | LVKK                     | 1.55 | 0.01 | 3.23 | 0.68 | 0.22 | 1.34 |
| 44558 | 0 | 136074 | LVKK                     | 1.55 | 0.01 | 3.23 | 0.68 | 0.22 | 1.75 |
| 44559 | 0 | 136074 | LVKK                     | 1.55 | 0.01 | 3.23 | 0.68 | 0.22 | 1.48 |
| 44560 | 0 | 136074 | LVKK                     | 1.55 | 0.01 | 3.23 | 0.68 | 0.22 | 1.34 |
| 44561 | 0 | 136074 | LVKK                     | 1.55 | 0.01 | 3.23 | 0.68 | 0.22 | 1.34 |
| 44562 | 0 | 136074 | LVKK                     | 1.55 | 0.01 | 3.23 | 0.68 | 0.22 | 1.34 |
| 44563 | 0 | 136074 | LVKK                     | 1.55 | 0.01 | 3.23 | 0.68 | 0.22 | 1.34 |
| 44564 | 0 | 136074 | LVKK                     | 1.55 | 0.01 | 3.23 | 0.68 | 0.22 | 1.34 |
| 44565 | 0 | 136074 | LVKK                     | 1.55 | 0.01 | 3.23 | 0.68 | 0.22 | 1.34 |
| 44566 | 0 | 136074 | LVKK                     | 1.55 | 0.01 | 3.23 | 0.68 | 0.22 | 1.48 |
| 44567 | 0 | 136074 | LVKK                     | 1.55 | 0.01 | 3.23 | 0.68 | 0.22 | 1.48 |
| 44568 | 0 | 136074 | LVKK                     | 1.55 | 0.01 | 3.23 | 0.68 | 0.22 | 1.48 |
| 44569 | 0 | 136074 | LVKK                     | 1.55 | 0.01 | 3.23 | 0.68 | 0.22 | 1.48 |
| 44570 | 0 | 136074 | LVKK                     | 1.55 | 0.01 | 3.23 | 0.68 | 0.22 | 1.48 |
| 44571 | 0 | 136074 | LVKK                     | 1.55 | 0.01 | 3.23 | 0.68 | 0.22 | 1.34 |
| 44572 | 0 | 136074 | LVKK                     | 1.55 | 0.01 | 3.23 | 0.68 | 0.22 | 0.28 |
| 44573 | 0 | 136074 | LVKK                     | 1.55 | 0.01 | 3.23 | 0.68 | 0.22 | 0.28 |
| 44574 | 0 | 136074 | LVKK                     | 1.55 | 0.01 | 3.23 | 0.68 | 0.22 | 0.28 |
| 44575 | 0 | 136074 | LVKK                     | 1.55 | 0.01 | 3.23 | 0.68 | 0.22 | 0.28 |
| 44576 | 0 | 136074 | LVKK                     | 1.55 | 0.01 | 3.23 | 0.68 | 0.22 | 0.28 |
| 44577 | 0 | 136074 | LVKK                     | 1.55 | 0.01 | 3.23 | 0.68 | 0.22 | 0.28 |
| 44578 | 0 | 136074 | LVKK                     | 1.55 | 0.01 | 3.23 | 0.68 | 0.22 | 0.28 |
| 44579 | 0 | 136074 | LVKK                     | 1.55 | 0.01 | 3.23 | 0.68 | 0.22 | 0.28 |
| 44580 | 0 | 136074 | LVKK                     | 1.55 | 0.01 | 3.23 | 0.68 | 0.22 | 0.28 |
| 44581 | 0 | 136074 | LVKK                     | 1.55 | 0.01 | 3.23 | 0.68 | 0.22 | 1.34 |
| 44582 | 0 | 136074 | LVKK                     | 1.55 | 0.01 | 3.23 | 0.68 | 0.22 | 1.34 |
| 44583 | 0 | 151031 | LVKKGNSYPKLSKSY          | 2.72 | 0.01 | 2.87 | 0.44 | 0.85 | 0.28 |
| 44584 | 0 | 151031 | LVKKGNSYPKLSKSY          | 2.72 | 0.01 | 2.87 | 0.68 | 0.22 | 0.28 |
| 44585 | 0 | 151031 | LVKKGNSYPKLSKSY          | 2.72 | 0.01 | 2.87 | 0.68 | 0.22 | 0.28 |
| 44586 | 0 | 238756 | LVLAAVCVSLLGASS          | 2.72 | 0.01 | 2.56 | 2.02 | 0.22 | 0.85 |
| 44587 | 0 | 238756 | LVLAAVCVSLLGASS          | 2.72 | 0.01 | 2.56 | 1.20 | 0.22 | 0.85 |
| 44588 | 0 | 151295 | LVLAKLGKDAGQPK           | 2.65 | 0.01 | 3.35 | 1.81 | 0.22 | 0.85 |
| 44589 | 0 | 95579  | LVLDTD                   | 1.92 | 0.01 | 1.60 | 0.44 | 1.23 | 0.28 |
| 44590 | 0 | 98896  | LVLDTDYKKY               | 2.35 | 0.01 | 1.60 | 0.44 | 1.23 | 0.85 |
| 44591 | 0 | 40439  | LVLGENLDTERILASYQE<br>GV | 2.94 | 0.01 | 2.59 | 0.68 | 0.22 | 0.28 |
| 44592 | 0 | 40439  | LVLGENLDTERILASYQE<br>GV | 2.94 | 0.01 | 2.59 | 2.42 | 0.22 | 0.28 |
| 44593 | 0 | 40439  | LVLGENLDTERILASYQE<br>GV | 2.94 | 0.01 | 2.59 | 0.68 | 0.22 | 0.28 |
| 44594 | 0 | 40439  | LVLGENLDTERILASYQE<br>GV | 2.94 | 0.01 | 2.59 | 2.42 | 0.22 | 0.28 |
| 44595 | 0 | 152001 | LVLGGKRAVKRG             | 2.53 | 0.01 | 2.80 | 2.78 | 0.22 | 0.28 |

|       |   |        |                                                             |      |      |      |      |      |      |
|-------|---|--------|-------------------------------------------------------------|------|------|------|------|------|------|
| 44596 | 0 | 121600 | LVLGHYSTDGRFRVP                                             | 2.67 | 0.01 | 0.90 | 0.68 | 0.22 | 1.39 |
| 44597 | 0 | 121600 | LVLGHYSTDGRFRVP                                             | 2.67 | 0.01 | 0.90 | 0.68 | 0.22 | 0.28 |
| 44598 | 0 | 121600 | LVLGHYSTDGRFRVP                                             | 2.67 | 0.01 | 0.90 | 0.68 | 0.22 | 0.28 |
| 44599 | 0 | 40448  | LVLLDYQGMLPVCPL                                             | 2.70 | 0.01 | 2.08 | 1.12 | 0.22 | 2.02 |
| 44600 | 0 | 40448  | LVLLDYQGMLPVCPL                                             | 2.70 | 0.01 | 2.08 | 1.12 | 0.22 | 2.02 |
| 44601 | 0 | 123474 | LVLLRGENLVS                                                 | 2.43 | 0.01 | 0.78 | 1.20 | 0.22 | 0.28 |
| 44602 | 0 | 101048 | LVLNRLKVGL                                                  | 2.36 | 0.01 | 0.78 | 0.44 | 0.85 | 0.28 |
| 44603 | 0 | 118510 | LVLNRLKVGLQVV                                               | 2.58 | 0.01 | 0.78 | 0.44 | 1.74 | 0.85 |
| 44604 | 0 | 118510 | LVLNRLKVGLQVV                                               | 2.58 | 0.01 | 0.78 | 0.44 | 1.59 | 0.85 |
| 44605 | 0 | 40453  | LVLNRLKVGLQVVAVKA<br>PGF                                    | 2.98 | 0.01 | 1.75 | 0.68 | 0.22 | 1.75 |
| 44606 | 0 | 40453  | LVLNRLKVGLQVVAVKA<br>PGF                                    | 2.98 | 0.01 | 1.75 | 0.68 | 0.22 | 0.28 |
| 44607 | 0 | 40453  | LVLNRLKVGLQVVAVKA<br>PGF                                    | 2.98 | 0.01 | 1.75 | 0.68 | 0.22 | 0.28 |
| 44608 | 0 | 496769 | LVLNRLKVGLQVVAVKA<br>PGFGDNRKNQLKD                          | 3.38 | 0.01 | 0.78 | 0.44 | 1.93 | 2.12 |
| 44609 | 0 | 40457  | LVLRKHIHTPLDDTNP                                            | 2.75 | 0.01 | 2.74 | 2.13 | 0.22 | 0.28 |
| 44610 | 0 | 40461  | LVLVGV                                                      | 1.92 | 0.01 | 2.40 | 0.44 | 0.85 | 0.28 |
| 44611 | 0 | 105947 | LVMLKKKQYTSIHGGVV<br>EVDAAVTPEERHLSKMQ<br>QNGYENPTYKFFEQQMQ | 3.83 | 0.01 | 0.78 | 1.12 | 0.22 | 0.85 |
| 44612 | 0 | 105947 | LVMLKKKQYTSIHGGVV<br>EVDAAVTPEERHLSKMQ<br>QNGYENPTYKFFEQQMQ | 3.83 | 0.01 | 0.78 | 1.12 | 0.22 | 1.27 |
| 44613 | 0 | 136499 | LVNCDRDNLESSAMDC<br>EDDE                                    | 2.97 | 0.01 | 0.78 | 0.44 | 1.13 | 0.28 |
| 44614 | 0 | 489662 | LVNLSTASSAPTRV                                              | 2.70 | 0.01 | 2.69 | 3.05 | 0.85 | 1.28 |
| 44615 | 0 | 227805 | LVNPHDHQNLKIIKLA                                            | 2.75 | 0.01 | 2.72 | 1.20 | 1.59 | 0.28 |
| 44616 | 0 | 151693 | LVNSSQPWEPLQLHV                                             | 2.70 | 0.01 | 0.78 | 1.20 | 0.22 | 2.51 |
| 44617 | 0 | 151693 | LVNSSQPWEPLQLHV                                             | 2.70 | 0.01 | 0.78 | 1.20 | 0.22 | 0.28 |
| 44618 | 0 | 151693 | LVNSSQPWEPLQLHV                                             | 2.70 | 0.01 | 0.78 | 1.20 | 0.22 | 0.28 |
| 44619 | 0 | 165075 | LVNSSQVNETLQLHVC                                            | 2.76 | 0.01 | 0.90 | 1.20 | 0.22 | 0.28 |
| 44620 | 0 | 40495  | LVNSVSTKEGDSSNTGA<br>GKA                                    | 2.97 | 0.01 | 2.75 | 0.44 | 0.85 | 0.85 |
| 44621 | 0 | 40497  | LVNTWK                                                      | 1.88 | 0.01 | 1.96 | 0.44 | 0.85 | 0.28 |
| 44622 | 0 | 40500  | LVNVATGAQAVARSLD<br>WTKVTL DGRPLSTI                         | 3.35 | 0.01 | 2.70 | 1.15 | 0.22 | 0.28 |
| 44623 | 0 | 98240  | LVPAVVGKPG                                                  | 2.34 | 0.01 | 3.08 | 0.68 | 0.22 | 0.28 |
| 44624 | 0 | 40505  | LVPDKEVLY                                                   | 2.24 | 0.01 | 2.59 | 0.44 | 0.85 | 0.28 |
| 44625 | 0 | 120790 | LVPEHADAFK                                                  | 2.29 | 0.01 | 2.18 | 2.16 | 0.22 | 0.28 |
| 44626 | 0 | 534745 | LVPEVNASDPLA                                                | 2.50 | 0.01 | 3.70 | 0.68 | 0.22 | 0.28 |
| 44627 | 0 | 534745 | LVPEVNASDPLA                                                | 2.50 | 0.01 | 3.70 | 0.68 | 0.22 | 0.28 |



|       |   |        |                                                         |      |      |      |      |      |      |
|-------|---|--------|---------------------------------------------------------|------|------|------|------|------|------|
| 44628 | 0 | 534745 | LVPEVNASDPLA                                            | 2.50 | 0.01 | 3.70 | 0.68 | 0.22 | 1.48 |
| 44629 | 0 | 534745 | LVPEVNASDPLA                                            | 2.50 | 0.01 | 3.70 | 0.68 | 0.22 | 1.48 |
| 44630 | 0 | 111527 | LVQAGLRRKPTIGPRKRS<br>APSATTS                           | 3.19 | 0.01 | 3.11 | 3.14 | 0.22 | 0.28 |
| 44631 | 0 | 40541  | LVQLTLQSTNYTCIVCID<br>RASLST                            | 3.14 | 0.01 | 2.04 | 0.44 | 0.85 | 0.28 |
| 44632 | 0 | 40541  | LVQLTLQSTNYTCIVCID<br>RASLST                            | 3.14 | 0.01 | 2.04 | 0.44 | 0.85 | 0.28 |
| 44633 | 0 | 40541  | LVQLTLQSTNYTCIVCID<br>RASLST                            | 3.14 | 0.01 | 2.04 | 0.44 | 0.85 | 1.27 |
| 44634 | 0 | 40541  | LVQLTLQSTNYTCIVCID<br>RASLST                            | 3.14 | 0.01 | 2.04 | 0.44 | 0.85 | 0.28 |
| 44635 | 0 | 40541  | LVQLTLQSTNYTCIVCID<br>RASLST                            | 3.14 | 0.01 | 2.04 | 0.44 | 0.85 | 0.28 |
| 44636 | 0 | 40541  | LVQLTLQSTNYTCIVCID<br>RASLST                            | 3.14 | 0.01 | 2.04 | 0.44 | 0.85 | 0.28 |
| 44637 | 0 | 40541  | LVQLTLQSTNYTCIVCID<br>RASLST                            | 3.14 | 0.01 | 2.04 | 0.44 | 1.59 | 0.28 |
| 44638 | 0 | 40541  | LVQLTLQSTNYTCIVCID<br>RASLST                            | 3.14 | 0.01 | 2.04 | 0.44 | 2.82 | 0.28 |
| 44639 | 0 | 40541  | LVQLTLQSTNYTCIVCID<br>RASLST                            | 3.14 | 0.01 | 2.04 | 0.44 | 0.85 | 1.34 |
| 44640 | 0 | 40541  | LVQLTLQSTNYTCIVCID<br>RASLST                            | 3.14 | 0.01 | 2.04 | 0.44 | 0.85 | 0.85 |
| 44641 | 0 | 40542  | LVQLTLQSTNYTCIVCID<br>RASLSTWHVLYSPNVSV<br>PSSSSTPLLYPS | 3.80 | 0.01 | 2.04 | 0.44 | 0.85 | 0.28 |
| 44642 | 0 | 40542  | LVQLTLQSTNYTCIVCID<br>RASLSTWHVLYSPNVSV<br>PSSSSTPLLYPS | 3.80 | 0.01 | 2.04 | 0.44 | 0.85 | 0.28 |
| 44643 | 0 | 40542  | LVQLTLQSTNYTCIVCID<br>RASLSTWHVLYSPNVSV<br>PSSSSTPLLYPS | 3.80 | 0.01 | 2.04 | 0.44 | 0.85 | 0.28 |
| 44644 | 0 | 40543  | LVQLTLQSTNYTCNCIDR<br>ASLST                             | 3.10 | 0.01 | 0.90 | 0.44 | 0.85 | 0.28 |
| 44645 | 0 | 40544  | LVQNAPYGLY                                              | 2.32 | 0.01 | 3.16 | 0.68 | 0.22 | 0.28 |
| 44646 | 0 | 40544  | LVQNAPYGLY                                              | 2.32 | 0.01 | 3.16 | 0.68 | 0.22 | 0.28 |
| 44647 | 0 | 129361 | LVQTKGTGASGSFKLN                                        | 2.75 | 0.01 | 0.78 | 0.44 | 1.13 | 0.28 |
| 44648 | 0 | 129361 | LVQTKGTGASGSFKLN                                        | 2.75 | 0.01 | 0.78 | 0.44 | 1.13 | 0.28 |
| 44649 | 0 | 120791 | LVRAALEKLEKGPESGQS<br>PE                                | 2.97 | 0.01 | 1.60 | 1.12 | 0.22 | 0.85 |
| 44650 | 0 | 120791 | LVRAALEKLEKGPESGQS<br>PE                                | 2.97 | 0.01 | 1.60 | 1.12 | 0.22 | 0.85 |
| 44651 | 0 | 40552  | LVRAYAGLARIILKW                                         | 2.70 | 0.01 | 0.90 | 1.15 | 0.22 | 1.39 |
| 44652 | 0 | 40553  | LVRDENGDFKWPS                                           | 2.49 | 0.01 | 0.90 | 0.68 | 0.22 | 0.28 |

|       |   |        |                              |      |      |      |      |      |      |
|-------|---|--------|------------------------------|------|------|------|------|------|------|
| 44653 | 0 | 132464 | LVRGRERPLXVV                 | 2.50 | 0.01 | 0.90 | 1.15 | 0.22 | 1.39 |
| 44654 | 0 | 40563  | LVRMKRA                      | 2.02 | 0.01 | 3.37 | 0.68 | 0.22 | 1.27 |
| 44655 | 0 | 40563  | LVRMKRA                      | 2.02 | 0.01 | 3.37 | 1.12 | 0.22 | 0.28 |
| 44656 | 0 | 40563  | LVRMKRA                      | 2.02 | 0.01 | 3.37 | 1.12 | 0.22 | 0.28 |
| 44657 | 0 | 40564  | LVRRFVHHRPHVESQ              | 2.69 | 0.01 | 0.90 | 0.68 | 0.22 | 1.39 |
| 44658 | 0 | 40564  | LVRRFVHHRPHVESQ              | 2.69 | 0.01 | 0.90 | 0.68 | 0.22 | 1.39 |
| 44659 | 0 | 40564  | LVRRFVHHRPHVESQ              | 2.69 | 0.01 | 0.90 | 0.68 | 0.22 | 0.28 |
| 44660 | 0 | 40566  | LVRSDYKFYEDANGTRD<br>HKKGRHT | 3.10 | 0.01 | 3.61 | 3.63 | 0.22 | 1.66 |
| 44661 | 0 | 40566  | LVRSDYKFYEDANGTRD<br>HKKGRHT | 3.10 | 0.01 | 3.61 | 0.44 | 0.85 | 1.66 |
| 44662 | 0 | 40566  | LVRSDYKFYEDANGTRD<br>HKKGRHT | 3.10 | 0.01 | 3.61 | 3.63 | 0.22 | 1.66 |
| 44663 | 0 | 40566  | LVRSDYKFYEDANGTRD<br>HKKGRHT | 3.10 | 0.01 | 3.10 | 3.63 | 0.22 | 1.66 |
| 44664 | 0 | 40566  | LVRSDYKFYEDANGTRD<br>HKKGRHT | 3.10 | 0.01 | 3.10 | 0.44 | 0.85 | 1.66 |
| 44665 | 0 | 181995 | LVRYFGCVVYLYPLKD             | 2.75 | 0.01 | 3.85 | 2.13 | 1.74 | 0.28 |
| 44666 | 0 | 40575  | LVSEEIVTEEGSVAQE             | 2.76 | 0.01 | 1.66 | 0.44 | 1.74 | 0.28 |
| 44667 | 0 | 40575  | LVSEEIVTEEGSVAQE             | 2.76 | 0.01 | 1.66 | 1.20 | 0.22 | 0.28 |
| 44668 | 0 | 40575  | LVSEEIVTEEGSVAQE             | 2.76 | 0.01 | 1.66 | 0.44 | 1.74 | 0.28 |
| 44669 | 0 | 40575  | LVSEEIVTEEGSVAQE             | 2.76 | 0.01 | 1.66 | 0.44 | 1.74 | 0.28 |
| 44670 | 0 | 40575  | LVSEEIVTEEGSVAQE             | 2.76 | 0.01 | 1.66 | 3.27 | 0.22 | 0.28 |
| 44671 | 0 | 40575  | LVSEEIVTEEGSVAQE             | 2.76 | 0.01 | 1.66 | 2.42 | 0.22 | 0.28 |
| 44672 | 0 | 97485  | LVSEGFLKL                    | 2.24 | 0.01 | 3.13 | 1.12 | 0.22 | 0.28 |
| 44673 | 0 | 40578  | LVSFGVWIRTPPAYRP             | 2.71 | 0.01 | 3.28 | 0.44 | 1.59 | 0.28 |
| 44674 | 0 | 40578  | LVSFGVWIRTPPAYRP             | 2.71 | 0.01 | 3.28 | 1.15 | 0.22 | 0.28 |
| 44675 | 0 | 40578  | LVSFGVWIRTPPAYRP             | 2.71 | 0.01 | 3.28 | 1.12 | 0.22 | 0.28 |
| 44676 | 0 | 40579  | LVSFGVWIRTPPAYRPP<br>N       | 2.80 | 0.01 | 2.08 | 1.15 | 0.22 | 0.28 |
| 44677 | 0 | 40579  | LVSFGVWIRTPPAYRPP<br>N       | 2.80 | 0.01 | 2.08 | 0.68 | 0.22 | 0.85 |
| 44678 | 0 | 40579  | LVSFGVWIRTPPAYRPP<br>N       | 2.80 | 0.01 | 2.08 | 1.15 | 0.22 | 0.28 |
| 44679 | 0 | 40579  | LVSFGVWIRTPPAYRPP<br>N       | 2.80 | 0.01 | 2.08 | 0.68 | 0.22 | 0.28 |
| 44680 | 0 | 195037 | LVSIVLT                      | 2.05 | 0.01 | 2.24 | 1.15 | 0.22 | 0.85 |
| 44681 | 0 | 195037 | LVSIVLT                      | 2.05 | 0.01 | 2.24 | 1.81 | 0.22 | 0.28 |
| 44682 | 0 | 195037 | LVSIVLT                      | 2.05 | 0.01 | 2.24 | 0.68 | 0.22 | 0.28 |
| 44683 | 0 | 195037 | LVSIVLT                      | 2.05 | 0.01 | 2.24 | 1.15 | 0.22 | 0.85 |
| 44684 | 0 | 40589  | LVSKKVTSKDKS                 | 2.52 | 0.01 | 2.73 | 0.44 | 0.85 | 0.28 |
| 44685 | 0 | 40589  | LVSKKVTSKDKS                 | 2.52 | 0.01 | 2.73 | 0.44 | 0.85 | 0.28 |
| 44686 | 0 | 40594  | LVSMFSGGPS                   | 2.33 | 0.01 | 2.83 | 0.44 | 0.85 | 0.28 |
| 44687 | 0 | 40594  | LVSMFSGGPS                   | 2.33 | 0.01 | 2.83 | 1.12 | 0.22 | 0.28 |

|       |   |        |                                              |      |      |      |      |      |      |
|-------|---|--------|----------------------------------------------|------|------|------|------|------|------|
| 44688 | 0 | 40594  | LVSMFVSGPS                                   | 2.33 | 0.01 | 2.83 | 0.44 | 0.85 | 0.28 |
| 44689 | 0 | 123477 | LVSRLKLM                                     | 2.15 | 0.01 | 2.96 | 1.20 | 0.22 | 0.28 |
| 44690 | 0 | 187016 | LVSRLKMRGQAF                                 | 2.54 | 0.01 | 2.96 | 1.20 | 0.22 | 0.28 |
| 44691 | 0 | 187016 | LVSRLKMRGQAF                                 | 2.54 | 0.01 | 2.96 | 1.20 | 0.22 | 2.02 |
| 44692 | 0 | 187016 | LVSRLKMRGQAF                                 | 2.54 | 0.01 | 2.96 | 1.20 | 0.22 | 1.48 |
| 44693 | 0 | 187016 | LVSRLKMRGQAF                                 | 2.54 | 0.01 | 2.96 | 1.20 | 2.60 | 1.75 |
| 44694 | 0 | 40610  | LVTfKN                                       | 1.88 | 0.01 | 2.40 | 0.44 | 0.85 | 0.28 |
| 44695 | 0 | 78460  | LVTHPVLGKVLILNQMA<br>NFS                     | 2.92 | 0.01 | 2.69 | 0.68 | 0.22 | 0.28 |
| 44696 | 0 | 40611  | LVTKDIDFD                                    | 2.23 | 0.01 | 3.75 | 0.44 | 0.85 | 0.85 |
| 44697 | 0 | 40619  | LVTVPFVSVATANS                               | 2.72 | 0.01 | 3.04 | 0.44 | 1.59 | 0.28 |
| 44698 | 0 | 40619  | LVTVPFVSVATANS                               | 2.72 | 0.01 | 3.04 | 0.68 | 0.22 | 1.75 |
| 44699 | 0 | 40619  | LVTVPFVSVATANS                               | 2.72 | 0.01 | 3.04 | 0.68 | 0.22 | 0.28 |
| 44700 | 0 | 40619  | LVTVPFVSVATANS                               | 2.72 | 0.01 | 3.04 | 0.68 | 0.22 | 0.28 |
| 44701 | 0 | 40619  | LVTVPFVSVATANS                               | 2.72 | 0.01 | 3.04 | 0.68 | 0.22 | 1.34 |
| 44702 | 0 | 131249 | LVVGLC                                       | 1.92 | 0.01 | 0.78 | 0.44 | 1.93 | 0.28 |
| 44703 | 0 | 77954  | LVVMVAPLTVNTEGA<br>PQIK                      | 2.94 | 0.01 | 3.14 | 0.68 | 0.22 | 0.28 |
| 44704 | 0 | 40636  | LVVNRLRGSL                                   | 2.35 | 0.01 | 2.84 | 0.44 | 0.85 | 0.28 |
| 44705 | 0 | 40636  | LVVNRLRGSL                                   | 2.35 | 0.01 | 2.84 | 0.44 | 0.85 | 0.28 |
| 44706 | 0 | 99466  | LVVPQNFAVAGKSQS                              | 2.68 | 0.01 | 2.16 | 0.44 | 1.23 | 1.48 |
| 44707 | 0 | 337020 | LVVRLWFEREVDGHD                              | 2.70 | 0.01 | 1.61 | 0.44 | 0.85 | 1.28 |
| 44708 | 0 | 40649  | LVYQTEKF                                     | 2.10 | 0.01 | 2.04 | 0.44 | 0.85 | 0.28 |
| 44709 | 0 | 40649  | LVYQTEKF                                     | 2.10 | 0.01 | 2.04 | 0.44 | 0.85 | 0.28 |
| 44710 | 0 | 40649  | LVYQTEKF                                     | 2.10 | 0.01 | 2.04 | 0.44 | 0.85 | 0.28 |
| 44711 | 0 | 450826 | LVYVDMH                                      | 2.02 | 0.01 | 0.90 | 0.44 | 1.23 | 1.39 |
| 44712 | 0 | 131970 | LWALHHNEKEWHQPD<br>QFMPEFLNPAGTQLIS<br>PSVSY | 3.51 | 0.01 | 0.78 | 0.44 | 1.13 | 0.85 |
| 44713 | 0 | 196660 | LWATRHI                                      | 1.99 | 0.01 | 0.90 | 0.44 | 1.23 | 1.39 |
| 44714 | 0 | 40656  | LWCRIGHDRCGEDDH                              | 2.69 | 0.01 | 2.71 | 2.13 | 0.22 | 0.85 |
| 44715 | 0 | 104065 | LWDDFW                                       | 1.90 | 0.01 | 0.90 | 1.15 | 0.22 | 0.28 |
| 44716 | 0 | 104065 | LWDDFW                                       | 1.90 | 0.01 | 0.90 | 1.15 | 0.22 | 0.28 |
| 44717 | 0 | 522340 | LWDEINYDDKGKEVI                              | 2.67 | 0.01 | 2.24 | 0.44 | 1.41 | 1.28 |
| 44718 | 0 | 119614 | LWDQTYGVDP                                   | 2.29 | 0.01 | 2.48 | 0.44 | 1.13 | 1.27 |
| 44719 | 0 | 337253 | LWFEREVDGHDFFIRE                             | 2.68 | 0.01 | 1.61 | 0.44 | 0.85 | 1.28 |
| 44720 | 0 | 96630  | LWFHISCLTFGRETVEYL<br>V                      | 2.94 | 0.01 | 2.71 | 0.44 | 0.85 | 0.28 |
| 44721 | 0 | 40665  | LWFHISCLTFGRETVEYL<br>VSFGVW                 | 3.17 | 0.01 | 2.08 | 1.12 | 0.22 | 0.28 |
| 44722 | 0 | 40665  | LWFHISCLTFGRETVEYL<br>VSFGVW                 | 3.17 | 0.01 | 2.08 | 1.12 | 0.22 | 0.28 |
| 44723 | 0 | 158999 | LWGDGILESDLIIPVT                             | 2.75 | 0.01 | 3.05 | 0.68 | 0.22 | 0.28 |
| 44724 | 0 | 158999 | LWGDGILESDLIIPVT                             | 2.75 | 0.01 | 3.05 | 2.49 | 0.22 | 0.28 |
| 44725 | 0 | 158999 | LWGDGILESDLIIPVT                             | 2.75 | 0.01 | 3.05 | 2.43 | 0.22 | 0.28 |
| 44726 | 0 | 158999 | LWGDGILESDLIIPVT                             | 2.75 | 0.01 | 3.05 | 3.55 | 0.22 | 0.28 |

|       |   |        |                          |      |      |      |      |      |      |
|-------|---|--------|--------------------------|------|------|------|------|------|------|
| 44727 | 0 | 158999 | LWGDGILESDLIIPVT         | 2.75 | 0.01 | 3.04 | 0.68 | 0.22 | 0.85 |
| 44728 | 0 | 158999 | LWGDGILESDLIIPVT         | 2.75 | 0.01 | 3.04 | 0.68 | 0.22 | 0.85 |
| 44729 | 0 | 159000 | LWGDGVLESDLIIPIT         | 2.75 | 0.01 | 3.36 | 0.68 | 0.22 | 0.28 |
| 44730 | 0 | 159000 | LWGDGVLESDLIIPIT         | 2.75 | 0.01 | 3.36 | 2.49 | 0.22 | 0.28 |
| 44731 | 0 | 159000 | LWGDGVLESDLIIPIT         | 2.75 | 0.01 | 3.36 | 2.43 | 0.22 | 0.28 |
| 44732 | 0 | 159000 | LWGDGVLESDLIIPIT         | 2.75 | 0.01 | 3.36 | 3.55 | 0.22 | 0.28 |
| 44733 | 0 | 127733 | LWRCALRWAERQVGA          | 2.71 | 0.01 | 0.78 | 0.44 | 1.13 | 0.85 |
| 44734 | 0 | 172323 | LWRRPFNVTDVLTPTA         | 2.68 | 0.01 | 0.78 | 0.44 | 1.13 | 0.28 |
| 44735 | 0 | 450827 | LYADSVL                  | 2.03 | 0.01 | 0.90 | 0.44 | 1.41 | 1.39 |
| 44736 | 0 | 196661 | LYALVPS                  | 2.03 | 0.01 | 0.90 | 0.44 | 1.23 | 1.39 |
| 44737 | 0 | 120793 | LYAPDMFEYM               | 2.31 | 0.01 | 2.18 | 2.16 | 0.22 | 0.28 |
| 44738 | 0 | 120793 | LYAPDMFEYM               | 2.31 | 0.01 | 2.18 | 2.16 | 0.22 | 0.28 |
| 44739 | 0 | 434632 | LYASSPGGVYATRSSAV        | 2.81 | 4.93 | 0.78 | 0.44 | 1.13 | 0.28 |
| 44740 | 0 | 40718  | LYATFDEFPPP              | 2.37 | 0.01 | 2.40 | 1.20 | 0.22 | 0.28 |
| 44741 | 0 | 40718  | LYATFDEFPPP              | 2.37 | 0.01 | 2.40 | 1.20 | 0.22 | 0.85 |
| 44742 | 0 | 40724  | LYCGGPMFNSKGAQ           | 2.56 | 0.01 | 2.59 | 0.44 | 1.41 | 0.28 |
| 44743 | 0 | 40724  | LYCGGPMFNSKGAQ           | 2.56 | 0.01 | 2.59 | 0.44 | 0.85 | 0.28 |
| 44744 | 0 | 142228 | LYCYEQLNDSSE             | 2.49 | 0.01 | 1.86 | 0.44 | 1.41 | 0.28 |
| 44745 | 0 | 40729  | LYDAAKAYAEQLKENG<br>VINY | 2.96 | 0.01 | 3.00 | 0.68 | 0.22 | 0.28 |
| 44746 | 0 | 40729  | LYDAAKAYAEQLKENG<br>VINY | 2.96 | 0.01 | 3.00 | 0.68 | 0.22 | 1.48 |
| 44747 | 0 | 40729  | LYDAAKAYAEQLKENG<br>VINY | 2.96 | 0.01 | 3.00 | 0.68 | 0.22 | 1.57 |
| 44748 | 0 | 40729  | LYDAAKAYAEQLKENG<br>VINY | 2.96 | 0.01 | 3.00 | 0.68 | 0.22 | 0.28 |
| 44749 | 0 | 40739  | LYDSYAYYG                | 2.24 | 0.01 | 1.66 | 1.15 | 0.22 | 0.28 |
| 44750 | 0 | 40739  | LYDSYAYYG                | 2.24 | 0.01 | 1.66 | 1.15 | 0.22 | 0.85 |
| 44751 | 0 | 40739  | LYDSYAYYG                | 2.24 | 0.01 | 1.66 | 1.15 | 0.22 | 1.48 |
| 44752 | 0 | 40739  | LYDSYAYYG                | 2.24 | 0.01 | 1.66 | 1.15 | 0.22 | 0.85 |
| 44753 | 0 | 40739  | LYDSYAYYG                | 2.24 | 0.01 | 1.66 | 1.15 | 0.22 | 0.85 |
| 44754 | 0 | 40739  | LYDSYAYYG                | 2.24 | 0.01 | 1.66 | 1.15 | 0.22 | 1.34 |
| 44755 | 0 | 40739  | LYDSYAYYG                | 2.24 | 0.01 | 1.66 | 1.15 | 0.22 | 1.34 |
| 44756 | 0 | 40739  | LYDSYAYYG                | 2.24 | 0.01 | 1.66 | 1.15 | 0.22 | 0.85 |
| 44757 | 0 | 40740  | LYDVVS                   | 1.89 | 0.01 | 1.96 | 0.44 | 0.85 | 0.28 |
| 44758 | 0 | 164291 | LYEGQFHS                 | 2.10 | 0.01 | 3.72 | 0.68 | 0.22 | 0.85 |
| 44759 | 0 | 164291 | LYEGQFHS                 | 2.10 | 0.01 | 3.72 | 0.68 | 0.22 | 0.85 |
| 44760 | 0 | 164291 | LYEGQFHS                 | 2.10 | 0.01 | 3.72 | 0.68 | 0.22 | 0.85 |
| 44761 | 0 | 164291 | LYEGQFHS                 | 2.10 | 0.01 | 3.72 | 0.68 | 0.22 | 0.85 |
| 44762 | 0 | 164291 | LYEGQFHS                 | 2.10 | 0.01 | 3.72 | 0.68 | 0.22 | 0.85 |
| 44763 | 0 | 164291 | LYEGQFHS                 | 2.10 | 0.01 | 3.72 | 0.68 | 0.22 | 0.28 |
| 44764 | 0 | 164291 | LYEGQFHS                 | 2.10 | 0.01 | 3.72 | 0.68 | 0.22 | 0.85 |
| 44765 | 0 | 164291 | LYEGQFHS                 | 2.10 | 0.01 | 3.72 | 0.68 | 0.22 | 1.48 |

|       |   |        |                                      |      |      |      |      |      |      |
|-------|---|--------|--------------------------------------|------|------|------|------|------|------|
| 44766 | 0 | 78741  | LYEKLTLRAGIAYDQAAS<br>RHHRSAaipDtdRT | 3.40 | 0.01 | 2.98 | 1.81 | 0.22 | 0.28 |
| 44767 | 0 | 78741  | LYEKLTLRAGIAYDQAAS<br>RHHRSAaipDtdRT | 3.40 | 0.01 | 2.98 | 1.12 | 0.22 | 0.28 |
| 44768 | 0 | 78741  | LYEKLTLRAGIAYDQAAS<br>RHHRSAaipDtdRT | 3.40 | 0.01 | 2.98 | 0.44 | 0.85 | 0.28 |
| 44769 | 0 | 78741  | LYEKLTLRAGIAYDQAAS<br>RHHRSAaipDtdRT | 3.40 | 0.01 | 2.98 | 1.12 | 0.22 | 0.28 |
| 44770 | 0 | 78741  | LYEKLTLRAGIAYDQAAS<br>RHHRSAaipDtdRT | 3.40 | 0.01 | 2.98 | 1.12 | 0.22 | 0.85 |
| 44771 | 0 | 78741  | LYEKLTLRAGIAYDQAAS<br>RHHRSAaipDtdRT | 3.40 | 0.01 | 2.98 | 1.12 | 0.22 | 0.85 |
| 44772 | 0 | 123479 | LYEPPASLP                            | 2.26 | 0.01 | 3.93 | 0.68 | 0.22 | 0.28 |
| 44773 | 0 | 140578 | LYFEDYRCEL                           | 2.34 | 0.01 | 0.90 | 0.68 | 0.22 | 0.28 |
| 44774 | 0 | 40755  | LYFP                                 | 1.57 | 0.01 | 4.08 | 1.15 | 0.22 | 0.28 |
| 44775 | 0 | 40755  | LYFP                                 | 1.57 | 0.01 | 4.08 | 1.15 | 0.22 | 0.28 |
| 44776 | 0 | 161124 | LYGIKVDDLPIVPNEKKF<br>F              | 2.88 | 0.01 | 2.08 | 0.44 | 1.93 | 1.57 |
| 44777 | 0 | 40772  | LYGNEGCGWA                           | 2.31 | 0.01 | 2.68 | 0.44 | 0.85 | 0.28 |
| 44778 | 0 | 40772  | LYGNEGCGWA                           | 2.31 | 0.01 | 2.68 | 2.74 | 0.22 | 0.28 |
| 44779 | 0 | 337459 | LYHPQLP                              | 2.05 | 0.01 | 2.40 | 1.20 | 0.22 | 0.28 |
| 44780 | 0 | 106636 | LYHVPVAVGQG                          | 2.31 | 0.01 | 2.75 | 0.44 | 1.23 | 0.85 |
| 44781 | 0 | 161259 | LYHVTNDPCPNSSIVYEAA<br>DA            | 2.92 | 0.01 | 2.45 | 0.68 | 0.22 | 0.28 |
| 44782 | 0 | 40793  | LYIGGP                               | 1.89 | 0.01 | 1.96 | 0.44 | 0.85 | 0.28 |
| 44783 | 0 | 40794  | LYIGGPLTNSKGQN                       | 2.61 | 0.01 | 1.96 | 0.44 | 1.41 | 0.28 |
| 44784 | 0 | 111533 | LYIKGSGSTANLASS                      | 2.69 | 0.01 | 1.86 | 0.68 | 0.22 | 0.28 |
| 44785 | 0 | 110938 | LYIKGSGSTANLASSNYF<br>PT             | 2.96 | 0.01 | 1.86 | 0.44 | 1.41 | 0.28 |
| 44786 | 0 | 110938 | LYIKGSGSTANLASSNYF<br>PT             | 2.96 | 0.01 | 1.86 | 0.44 | 0.85 | 0.28 |
| 44787 | 0 | 110938 | LYIKGSGSTANLASSNYF<br>PT             | 2.96 | 0.01 | 1.86 | 0.44 | 2.82 | 0.28 |
| 44788 | 0 | 110938 | LYIKGSGSTANLASSNYF<br>PT             | 2.96 | 0.01 | 1.86 | 0.44 | 0.85 | 0.28 |
| 44789 | 0 | 172327 | LYIYDKMRLEMWERG                      | 2.69 | 0.01 | 0.78 | 0.44 | 1.41 | 0.28 |
| 44790 | 0 | 118011 | LYKEKALS                             | 2.15 | 0.01 | 0.78 | 0.44 | 1.13 | 0.28 |
| 44791 | 0 | 118011 | LYKEKALS                             | 2.15 | 0.01 | 0.78 | 0.44 | 1.41 | 0.28 |
| 44792 | 0 | 423427 | LYKGTDLPTDYL                         | 2.71 | 0.01 | 2.51 | 0.44 | 2.35 | 1.28 |
| 44793 | 0 | 167333 | LYKKKTGKDVRKDNRAV<br>QKL             | 2.96 | 3.24 | 0.78 | 0.44 | 1.13 | 0.28 |

|       |   |        |                           |      |      |      |      |      |      |
|-------|---|--------|---------------------------|------|------|------|------|------|------|
| 44794 | 0 | 40826  | LYKSNHNNVYWLTP            | 2.66 | 0.01 | 2.43 | 0.44 | 0.85 | 0.28 |
| 44795 | 0 | 117220 | LYKTCKQAGTCPPD            | 2.60 | 0.01 | 1.86 | 1.20 | 0.22 | 0.28 |
| 44796 | 0 | 117220 | LYKTCKQAGTCPPD            | 2.60 | 0.01 | 1.86 | 1.20 | 0.22 | 0.28 |
| 44797 | 0 | 117220 | LYKTCKQAGTCPPD            | 2.60 | 0.01 | 1.86 | 1.20 | 0.22 | 1.34 |
| 44798 | 0 | 117220 | LYKTCKQAGTCPPD            | 2.60 | 0.01 | 1.86 | 1.20 | 0.22 | 1.34 |
| 44799 | 0 | 117220 | LYKTCKQAGTCPPD            | 2.60 | 0.01 | 1.86 | 1.20 | 0.22 | 1.34 |
| 44800 | 0 | 117220 | LYKTCKQAGTCPPD            | 2.60 | 0.01 | 1.86 | 1.20 | 0.22 | 1.34 |
| 44801 | 0 | 117220 | LYKTCKQAGTCPPD            | 2.60 | 0.01 | 1.86 | 1.20 | 0.22 | 1.34 |
| 44802 | 0 | 117220 | LYKTCKQAGTCPPD            | 2.60 | 0.01 | 1.86 | 1.20 | 0.22 | 1.34 |
| 44803 | 0 | 117220 | LYKTCKQAGTCPPD            | 2.60 | 0.01 | 1.86 | 1.20 | 0.22 | 1.34 |
| 44804 | 0 | 117220 | LYKTCKQAGTCPPD            | 2.60 | 0.01 | 1.86 | 1.20 | 0.22 | 1.34 |
| 44805 | 0 | 117220 | LYKTCKQAGTCPPD            | 2.60 | 0.01 | 1.86 | 0.68 | 0.22 | 0.28 |
| 44806 | 0 | 112591 | LYKTCKQAGTCPPDIIPK<br>VE  | 2.92 | 0.01 | 1.86 | 0.68 | 0.22 | 1.27 |
| 44807 | 0 | 110939 | LYKTCKQAGTCPPDIIPK<br>VEG | 2.97 | 0.01 | 1.86 | 2.66 | 0.22 | 0.28 |
| 44808 | 0 | 110939 | LYKTCKQAGTCPPDIIPK<br>VEG | 2.97 | 0.01 | 1.86 | 2.66 | 0.22 | 0.28 |
| 44809 | 0 | 110939 | LYKTCKQAGTCPPDIIPK<br>VEG | 2.97 | 0.01 | 1.86 | 2.66 | 0.22 | 1.34 |
| 44810 | 0 | 110939 | LYKTCKQAGTCPPDIIPK<br>VEG | 2.97 | 0.01 | 1.86 | 1.12 | 0.22 | 0.28 |
| 44811 | 0 | 110939 | LYKTCKQAGTCPPDIIPK<br>VEG | 2.97 | 0.01 | 1.86 | 1.12 | 0.22 | 1.34 |
| 44812 | 0 | 110939 | LYKTCKQAGTCPPDIIPK<br>VEG | 2.97 | 0.01 | 1.86 | 1.12 | 0.22 | 1.34 |
| 44813 | 0 | 110939 | LYKTCKQAGTCPPDIIPK<br>VEG | 2.97 | 0.01 | 1.86 | 2.66 | 0.22 | 1.34 |
| 44814 | 0 | 110939 | LYKTCKQAGTCPPDIIPK<br>VEG | 2.97 | 0.01 | 1.86 | 2.66 | 0.22 | 1.34 |
| 44815 | 0 | 110939 | LYKTCKQAGTCPPDIIPK<br>VEG | 2.97 | 0.01 | 1.86 | 1.12 | 0.22 | 1.34 |
| 44816 | 0 | 110939 | LYKTCKQAGTCPPDIIPK<br>VEG | 2.97 | 0.01 | 1.86 | 1.12 | 0.22 | 1.34 |
| 44817 | 0 | 40837  | LYLGAM                    | 1.91 | 0.01 | 2.40 | 0.44 | 0.85 | 0.28 |
| 44818 | 0 | 450829 | LYMEHNNVYTPDSYFR          | 2.75 | 0.01 | 0.78 | 2.79 | 1.13 | 1.28 |
| 44819 | 0 | 450829 | LYMEHNNVYTPDSYFR          | 2.75 | 0.01 | 0.78 | 1.81 | 1.41 | 1.28 |
| 44820 | 0 | 450829 | LYMEHNNVYTPDSYFR          | 2.75 | 0.01 | 0.78 | 1.81 | 1.41 | 1.28 |
| 44821 | 0 | 450829 | LYMEHNNVYTPDSYFR          | 2.75 | 0.01 | 0.78 | 1.81 | 1.41 | 1.28 |
| 44822 | 0 | 40858  | LYMPQLS                   | 2.03 | 0.01 | 0.90 | 1.15 | 0.22 | 1.39 |
| 44823 | 0 | 40858  | LYMPQLS                   | 2.03 | 0.01 | 0.90 | 1.15 | 0.22 | 1.27 |
| 44824 | 0 | 40859  | LYMPQLSLYMPQLS            | 2.68 | 0.01 | 0.90 | 1.15 | 0.22 | 1.27 |

|       |   |        |                             |      |      |      |      |      |      |
|-------|---|--------|-----------------------------|------|------|------|------|------|------|
| 44825 | 0 | 40866  | LYNEQFAVQGLLRHYTY<br>ARF    | 2.94 | 0.01 | 2.82 | 0.44 | 0.85 | 0.28 |
| 44826 | 0 | 435954 | LYNNKTIEKEQRKV              | 2.60 | 0.01 | 3.10 | 2.87 | 0.22 | 1.75 |
| 44827 | 0 | 95583  | LYNSQDHGWD                  | 2.29 | 0.01 | 2.60 | 0.44 | 1.23 | 0.85 |
| 44828 | 0 | 95583  | LYNSQDHGWD                  | 2.29 | 0.01 | 2.60 | 1.12 | 0.22 | 0.85 |
| 44829 | 0 | 40887  | LYNVVY                      | 1.90 | 0.01 | 0.90 | 0.68 | 0.22 | 1.39 |
| 44830 | 0 | 40889  | LYPANNTV                    | 2.11 | 0.01 | 2.83 | 1.12 | 0.22 | 0.28 |
| 44831 | 0 | 40901  | LYPTNVNLFNYKYSL             | 2.71 | 0.01 | 1.66 | 1.15 | 0.22 | 0.28 |
| 44832 | 0 | 40901  | LYPTNVNLFNYKYSL             | 2.71 | 0.01 | 1.66 | 1.15 | 0.22 | 0.28 |
| 44833 | 0 | 40905  | LYQDVNCTDVSTAIHAD           | 2.78 | 0.01 | 2.48 | 0.44 | 0.85 | 0.28 |
| 44834 | 0 | 236115 | LYQEAR                      | 1.88 | 0.01 | 0.78 | 0.44 | 1.13 | 2.66 |
| 44835 | 0 | 236116 | LYQEAR<br>KIVGAMVQIITY<br>R | 2.88 | 0.01 | 0.78 | 3.41 | 2.60 | 1.75 |
| 44836 | 0 | 236116 | LYQEAR<br>KIVGAMVQIITY<br>R | 2.88 | 0.01 | 0.78 | 3.41 | 2.60 | 1.75 |
| 44837 | 0 | 236116 | LYQEAR<br>KIVGAMVQIITY<br>R | 2.88 | 0.01 | 0.78 | 3.41 | 0.22 | 2.66 |
| 44838 | 0 | 236116 | LYQEAR<br>KIVGAMVQIITY<br>R | 2.88 | 0.01 | 0.78 | 3.41 | 0.22 | 2.66 |
| 44839 | 0 | 236116 | LYQEAR<br>KIVGAMVQIITY<br>R | 2.88 | 0.01 | 0.78 | 3.41 | 0.22 | 2.66 |
| 44840 | 0 | 236116 | LYQEAR<br>KIVGAMVQIITY<br>R | 2.88 | 0.01 | 0.78 | 3.41 | 0.22 | 2.66 |
| 44841 | 0 | 236116 | LYQEAR<br>KIVGAMVQIITY<br>R | 2.88 | 0.01 | 0.78 | 3.41 | 0.22 | 2.66 |
| 44842 | 0 | 236116 | LYQEAR<br>KIVGAMVQIITY<br>R | 2.88 | 0.01 | 0.78 | 3.41 | 0.22 | 2.66 |
| 44843 | 0 | 236116 | LYQEAR<br>KIVGAMVQIITY<br>R | 2.88 | 0.01 | 0.78 | 3.41 | 0.22 | 2.66 |
| 44844 | 0 | 236116 | LYQEAR<br>KIVGAMVQIITY<br>R | 2.88 | 0.01 | 0.78 | 3.41 | 0.22 | 2.66 |
| 44845 | 0 | 236116 | LYQEAR<br>KIVGAMVQIITY<br>R | 2.88 | 0.01 | 0.78 | 3.41 | 0.22 | 2.66 |
| 44846 | 0 | 236116 | LYQEAR<br>KIVGAMVQIITY<br>R | 2.88 | 0.01 | 0.78 | 3.41 | 0.22 | 2.66 |
| 44847 | 0 | 151032 | LYQNADTYVFGSSR              | 2.63 | 0.01 | 2.87 | 0.44 | 0.85 | 0.28 |
| 44848 | 0 | 167782 | LYQSEPAVP                   | 2.21 | 0.01 | 2.40 | 2.43 | 0.22 | 0.28 |
| 44849 | 0 | 40921  | LYREALESPEHC                | 2.48 | 0.01 | 2.08 | 0.68 | 2.26 | 0.85 |
| 44850 | 0 | 40921  | LYREALESPEHC                | 2.48 | 0.01 | 2.08 | 0.44 | 1.59 | 0.85 |
| 44851 | 0 | 79613  | LYREALESPEHCSPHHTA<br>LRQA  | 3.06 | 0.01 | 2.71 | 0.44 | 0.85 | 0.28 |
| 44852 | 0 | 40922  | LYREFD                      | 1.88 | 0.01 | 1.72 | 0.68 | 0.22 | 0.28 |
| 44853 | 0 | 40922  | LYREFD                      | 1.88 | 0.01 | 1.72 | 0.68 | 0.22 | 0.85 |
| 44854 | 0 | 40922  | LYREFD                      | 1.88 | 0.01 | 1.72 | 0.68 | 0.22 | 0.85 |
| 44855 | 0 | 40922  | LYREFD                      | 1.88 | 0.01 | 1.72 | 0.44 | 0.85 | 2.35 |

|       |   |        |                                                      |      |      |      |      |      |      |
|-------|---|--------|------------------------------------------------------|------|------|------|------|------|------|
| 44856 | 0 | 40925  | LYREFDEMEECSQHLPYI<br>EQ                             | 2.93 | 0.01 | 1.72 | 0.44 | 0.85 | 0.28 |
| 44857 | 0 | 40926  | LYRFGFED                                             | 2.12 | 0.01 | 0.90 | 1.15 | 2.26 | 1.39 |
| 44858 | 0 | 40926  | LYRFGFED                                             | 2.12 | 0.01 | 0.90 | 1.15 | 2.26 | 1.48 |
| 44859 | 0 | 99467  | LYRNALFVAHYNTNA                                      | 2.71 | 0.01 | 2.16 | 0.44 | 1.23 | 1.48 |
| 44860 | 0 | 225425 | LYRNGKDQDAEQAPEY<br>RGRTELL                          | 3.08 | 0.01 | 1.75 | 1.81 | 0.22 | 0.28 |
| 44861 | 0 | 112805 | LYRNGKDQDGAPEYR<br>GRTELLKD                          | 3.13 | 0.01 | 0.78 | 0.44 | 1.13 | 0.28 |
| 44862 | 0 | 112805 | LYRNGKDQDGAPEYR<br>GRTELLKD                          | 3.13 | 0.01 | 0.78 | 0.44 | 1.41 | 0.28 |
| 44863 | 0 | 112805 | LYRNGKDQDGAPEYR<br>GRTELLKD                          | 3.13 | 0.01 | 0.78 | 0.44 | 1.41 | 0.28 |
| 44864 | 0 | 112805 | LYRNGKDQDGAPEYR<br>GRTELLKD                          | 3.13 | 0.01 | 0.78 | 0.44 | 1.13 | 0.28 |
| 44865 | 0 | 112805 | LYRNGKDQDGAPEYR<br>GRTELLKD                          | 3.13 | 0.01 | 0.78 | 0.44 | 1.59 | 0.28 |
| 44866 | 0 | 40938  | LYRPSDSSLAGP                                         | 2.49 | 0.01 | 0.90 | 2.22 | 0.85 | 1.39 |
| 44867 | 0 | 40938  | LYRPSDSSLAGP                                         | 2.49 | 0.01 | 0.90 | 2.22 | 0.85 | 0.28 |
| 44868 | 0 | 40938  | LYRPSDSSLAGP                                         | 2.49 | 0.01 | 0.90 | 0.68 | 0.22 | 0.28 |
| 44869 | 0 | 40938  | LYRPSDSSLAGP                                         | 2.49 | 0.01 | 0.90 | 0.68 | 0.22 | 0.28 |
| 44870 | 0 | 40938  | LYRPSDSSLAGP                                         | 2.49 | 0.01 | 0.90 | 0.68 | 0.22 | 0.28 |
| 44871 | 0 | 40938  | LYRPSDSSLAGP                                         | 2.49 | 0.01 | 0.90 | 0.68 | 0.22 | 2.12 |
| 44872 | 0 | 110332 | LYRWR                                                | 1.75 | 0.01 | 2.71 | 0.68 | 0.22 | 0.28 |
| 44873 | 0 | 110332 | LYRWR                                                | 1.75 | 0.01 | 2.71 | 0.68 | 0.22 | 0.28 |
| 44874 | 0 | 110332 | LYRWR                                                | 1.75 | 0.01 | 2.71 | 0.68 | 0.22 | 1.48 |
| 44875 | 0 | 40948  | LYSHHFQSHGQLSDHPH<br>ALS                             | 2.98 | 0.01 | 2.75 | 0.44 | 0.85 | 0.85 |
| 44876 | 0 | 40960  | LYSLNWQDL                                            | 2.24 | 0.01 | 0.90 | 2.55 | 0.22 | 0.28 |
| 44877 | 0 | 172329 | LYSQDNQHAPLLYGV                                      | 2.66 | 0.01 | 0.78 | 0.44 | 1.41 | 0.28 |
| 44878 | 0 | 419014 | LYSRRLPKGVKHFD                                       | 2.59 | 0.01 | 0.90 | 0.44 | 1.13 | 1.27 |
| 44879 | 0 | 112222 | LYSSDHK                                              | 2.01 | 0.01 | 0.78 | 0.44 | 1.13 | 0.28 |
| 44880 | 0 | 150804 | LYSVQPCQTVSTQAVIV<br>NGSFVGLFLPASCRLAG<br>QFGLGNHTEY | 3.73 | 0.01 | 4.45 | 1.15 | 0.22 | 1.48 |
| 44881 | 0 | 150804 | LYSVQPCQTVSTQAVIV<br>NGSFVGLFLPASCRLAG<br>QFGLGNHTEY | 3.73 | 0.01 | 4.45 | 4.63 | 0.22 | 1.48 |
| 44882 | 0 | 150804 | LYSVQPCQTVSTQAVIV<br>NGSFVGLFLPASCRLAG<br>QFGLGNHTEY | 3.73 | 0.01 | 4.45 | 4.63 | 0.22 | 1.34 |
| 44883 | 0 | 127734 | LYVAYKRQSDTP                                         | 2.43 | 0.01 | 0.90 | 3.06 | 0.22 | 0.85 |
| 44884 | 0 | 78461  | LYVCLNET                                             | 2.13 | 0.01 | 3.97 | 0.68 | 0.22 | 0.28 |
| 44885 | 0 | 133640 | LYVEDISEPPLHDFYCSRL                                  | 2.89 | 0.01 | 0.78 | 0.68 | 0.22 | 0.85 |
| 44886 | 0 | 133640 | LYVEDISEPPLHDFYCSRL                                  | 2.89 | 0.01 | 0.78 | 0.68 | 0.22 | 0.85 |



|       |   |        |                                    |      |      |      |      |      |      |
|-------|---|--------|------------------------------------|------|------|------|------|------|------|
| 44887 | 0 | 133640 | LYVEDISEPPLHDFYCSRL                | 2.89 | 0.01 | 0.78 | 0.68 | 0.22 | 0.85 |
| 44888 | 0 | 40980  | LYVGGPLTNSRGEN                     | 2.61 | 0.01 | 2.41 | 0.44 | 0.85 | 0.28 |
| 44889 | 0 | 40980  | LYVGGPLTNSRGEN                     | 2.61 | 0.01 | 2.41 | 0.44 | 1.41 | 0.28 |
| 44890 | 0 | 40982  | LYVGGPMTNSKGQS                     | 2.59 | 0.01 | 2.69 | 0.44 | 0.85 | 0.28 |
| 44891 | 0 | 40986  | LYVREHLREQS                        | 2.42 | 0.01 | 3.67 | 1.15 | 2.26 | 2.02 |
| 44892 | 0 | 40988  | LYVVAYQA                           | 2.15 | 0.01 | 3.55 | 0.68 | 0.22 | 0.28 |
| 44893 | 0 | 132468 | LYWFTLY                            | 2.05 | 0.01 | 0.78 | 0.44 | 1.13 | 1.39 |
| 44894 | 0 | 132468 | LYWFTLY                            | 2.05 | 0.01 | 0.78 | 0.44 | 1.13 | 1.27 |
| 44895 | 0 | 132469 | LYWFTLYQFFLA                       | 2.51 | 0.01 | 0.78 | 0.44 | 1.13 | 1.39 |
| 44896 | 0 | 115378 | LYYIGTHSLNSY                       | 2.50 | 0.01 | 0.90 | 0.68 | 0.22 | 1.39 |
| 44897 | 0 | 119269 | MAADGYLPDWLEDNL                    | 2.67 | 0.01 | 3.61 | 2.00 | 1.41 | 0.28 |
| 44898 | 0 | 190491 | MAADGYLPDWLEDTL                    | 2.67 | 0.01 | 3.19 | 2.00 | 1.41 | 0.28 |
| 44899 | 0 | 41003  | MAAMSRLTGMTTAILPE<br>KKPLDFFLDLRDK | 3.35 | 0.01 | 4.93 | 1.12 | 0.22 | 0.28 |
| 44900 | 0 | 41004  | MAARLCCQLDPARDV                    | 2.69 | 0.01 | 2.08 | 0.44 | 0.85 | 0.28 |
| 44901 | 0 | 41004  | MAARLCCQLDPARDV                    | 2.69 | 0.01 | 2.08 | 0.44 | 0.85 | 0.28 |
| 44902 | 0 | 151033 | MAARVCCQLDPARDVL<br>CL             | 2.88 | 0.01 | 2.08 | 0.68 | 0.22 | 0.28 |
| 44903 | 0 | 41006  | MAATLRKLL                          | 2.22 | 0.01 | 3.34 | 1.12 | 0.22 | 0.85 |
| 44904 | 0 | 78205  | MAAWSERAGEAMVLV<br>YYESIAYSF       | 3.14 | 0.01 | 2.14 | 1.12 | 0.22 | 0.28 |
| 44905 | 0 | 78205  | MAAWSERAGEAMVLV<br>YYESIAYSF       | 3.14 | 0.01 | 2.14 | 1.12 | 0.22 | 0.28 |
| 44906 | 0 | 159002 | MACAHLCKEADIKTALE<br>A             | 2.87 | 0.01 | 3.26 | 0.44 | 1.23 | 0.28 |
| 44907 | 0 | 159002 | MACAHLCKEADIKTALE<br>A             | 2.87 | 0.01 | 3.26 | 0.44 | 1.41 | 0.28 |
| 44908 | 0 | 242963 | MACATLKRTHDWDPL                    | 2.66 | 0.01 | 3.32 | 1.20 | 0.22 | 0.85 |
| 44909 | 0 | 242963 | MACATLKRTHDWDPL                    | 2.66 | 0.01 | 3.32 | 1.20 | 0.22 | 0.85 |
| 44910 | 0 | 242963 | MACATLKRTHDWDPL                    | 2.66 | 0.01 | 3.33 | 1.20 | 0.22 | 0.85 |
| 44911 | 0 | 41011  | MACMSADLEVTTST                     | 2.63 | 0.01 | 2.59 | 0.44 | 0.85 | 0.28 |
| 44912 | 0 | 41011  | MACMSADLEVTTST                     | 2.63 | 0.01 | 2.59 | 0.44 | 0.85 | 0.28 |
| 44913 | 0 | 41012  | MACMSADLEVVTST                     | 2.63 | 0.01 | 2.41 | 0.44 | 0.85 | 0.28 |
| 44914 | 0 | 41012  | MACMSADLEVVTST                     | 2.63 | 0.01 | 2.41 | 0.44 | 0.85 | 0.28 |
| 44915 | 0 | 41012  | MACMSADLEVVTST                     | 2.63 | 0.01 | 1.96 | 0.44 | 0.85 | 0.28 |
| 44916 | 0 | 41012  | MACMSADLEVVTST                     | 2.63 | 0.01 | 1.96 | 0.44 | 0.85 | 0.28 |
| 44917 | 0 | 179235 | MADAABIEKLEAGFK                    | 2.68 | 0.01 | 2.36 | 0.44 | 1.23 | 1.28 |
| 44918 | 0 | 179235 | MADAABIEKLEAGFK                    | 2.68 | 0.01 | 2.36 | 0.44 | 1.23 | 1.27 |
| 44919 | 0 | 179235 | MADAABIEKLEAGFK                    | 2.68 | 0.01 | 2.36 | 0.44 | 1.23 | 1.28 |
| 44920 | 0 | 41014  | MADNGTITVEELKQL                    | 2.63 | 0.01 | 2.45 | 0.44 | 0.85 | 0.85 |

|       |   |        |                                                         |      |      |      |      |      |      |
|-------|---|--------|---------------------------------------------------------|------|------|------|------|------|------|
| 44921 | 0 | 41015  | MADNGTITVEELKQLL                                        | 2.68 | 0.01 | 2.45 | 0.44 | 0.85 | 0.28 |
| 44922 | 0 | 41016  | MADNGTITVEELKQLLE<br>Q                                  | 2.82 | 0.01 | 2.45 | 0.44 | 0.85 | 1.48 |
| 44923 | 0 | 41017  | MADNGTITVEELKQLLE<br>QWN                                | 2.92 | 0.01 | 2.48 | 0.68 | 0.22 | 0.28 |
| 44924 | 0 | 41018  | MADNGTITVEELKQLLE<br>QWNLVIGFLFLAWI                     | 3.38 | 0.01 | 2.45 | 0.44 | 0.85 | 0.28 |
| 44925 | 0 | 41018  | MADNGTITVEELKQLLE<br>QWNLVIGFLFLAWI                     | 3.38 | 0.01 | 2.45 | 0.68 | 0.22 | 0.28 |
| 44926 | 0 | 41018  | MADNGTITVEELKQLLE<br>QWNLVIGFLFLAWI                     | 3.38 | 0.01 | 2.45 | 1.20 | 0.22 | 0.28 |
| 44927 | 0 | 41019  | MADPNRFRG                                               | 2.21 | 0.01 | 2.40 | 1.15 | 0.22 | 0.85 |
| 44928 | 0 | 41019  | MADPNRFRG                                               | 2.21 | 0.01 | 2.40 | 0.68 | 0.22 | 0.28 |
| 44929 | 0 | 41019  | MADPNRFRG                                               | 2.21 | 0.01 | 2.40 | 0.68 | 0.22 | 1.34 |
| 44930 | 0 | 41019  | MADPNRFRG                                               | 2.21 | 0.01 | 2.40 | 0.68 | 2.25 | 1.75 |
| 44931 | 0 | 41019  | MADPNRFRG                                               | 2.21 | 0.01 | 2.40 | 1.15 | 0.22 | 0.28 |
| 44932 | 0 | 41019  | MADPNRFRG                                               | 2.21 | 0.01 | 2.40 | 1.15 | 0.22 | 0.85 |
| 44933 | 0 | 41019  | MADPNRFRG                                               | 2.21 | 0.01 | 2.40 | 1.15 | 0.22 | 1.48 |
| 44934 | 0 | 41019  | MADPNRFRG                                               | 2.21 | 0.01 | 2.40 | 1.12 | 0.22 | 0.85 |
| 44935 | 0 | 41019  | MADPNRFRG                                               | 2.21 | 0.01 | 2.40 | 1.12 | 0.22 | 0.85 |
| 44936 | 0 | 41019  | MADPNRFRG                                               | 2.21 | 0.01 | 2.40 | 1.15 | 0.22 | 0.85 |
| 44937 | 0 | 41019  | MADPNRFRG                                               | 2.21 | 0.01 | 2.40 | 1.15 | 0.22 | 0.85 |
| 44938 | 0 | 41019  | MADPNRFRG                                               | 2.21 | 0.01 | 2.40 | 1.15 | 0.22 | 0.85 |
| 44939 | 0 | 41019  | MADPNRFRG                                               | 2.21 | 0.01 | 2.40 | 1.15 | 0.22 | 0.85 |
| 44940 | 0 | 41020  | MADPNRFRGKDLP                                           | 2.54 | 0.01 | 2.40 | 1.12 | 0.22 | 0.85 |
| 44941 | 0 | 130964 | MADRAALEELVRLQGA<br>HV                                  | 2.86 | 0.01 | 1.75 | 4.33 | 0.22 | 0.28 |
| 44942 | 0 | 423429 | MADSVCLPPCLSPDM                                         | 2.72 | 0.01 | 2.51 | 0.44 | 2.35 | 1.28 |
| 44943 | 0 | 103403 | MAEDVRAEIVASVLE                                         | 2.70 | 0.01 | 2.04 | 0.44 | 0.85 | 1.28 |
| 44944 | 0 | 230016 | MAEELVLERCDLELE                                         | 2.71 | 0.01 | 0.78 | 0.44 | 1.93 | 1.27 |
| 44945 | 0 | 230016 | MAEELVLERCDLELE                                         | 2.71 | 0.01 | 0.78 | 0.44 | 1.93 | 0.28 |
| 44946 | 0 | 230016 | MAEELVLERCDLELE                                         | 2.71 | 0.01 | 0.78 | 0.44 | 2.39 | 0.28 |
| 44947 | 0 | 78206  | MAEEPTYTTEQVDELIH<br>AGLGTVDFFLSRPIDAQS<br>SLGKGSIPPGVT | 3.78 | 0.01 | 3.89 | 1.15 | 0.22 | 2.02 |
| 44948 | 0 | 41028  | MAEMKTDAATLAQEA                                         | 2.72 | 0.01 | 2.04 | 0.44 | 0.85 | 0.28 |
| 44949 | 0 | 119495 | MAENGDNEKMAALEA<br>KICHQ                                | 2.95 | 0.01 | 0.78 | 0.44 | 1.13 | 0.28 |
| 44950 | 0 | 189742 | MAFAGILNDADITAA                                         | 2.68 | 0.01 | 3.28 | 0.44 | 1.23 | 0.28 |
| 44951 | 0 | 189742 | MAFAGILNDADITAA                                         | 2.68 | 0.01 | 3.28 | 0.44 | 1.41 | 0.28 |
| 44952 | 0 | 41043  | MAGKREMVII                                              | 2.30 | 0.01 | 2.66 | 0.68 | 0.22 | 0.28 |
| 44953 | 0 | 41043  | MAGKREMVII                                              | 2.30 | 0.01 | 2.66 | 0.68 | 0.22 | 0.28 |
| 44954 | 0 | 41043  | MAGKREMVII                                              | 2.30 | 0.01 | 2.66 | 0.68 | 0.22 | 0.28 |
| 44955 | 0 | 41043  | MAGKREMVII                                              | 2.30 | 0.01 | 2.66 | 0.68 | 0.22 | 0.28 |
| 44956 | 0 | 41048  | MAHFPGFGQSLLYGYPV<br>YVF                                | 2.95 | 0.01 | 3.01 | 0.44 | 0.85 | 0.28 |

|       |   |        |                             |      |      |      |      |      |      |
|-------|---|--------|-----------------------------|------|------|------|------|------|------|
| 44957 | 0 | 140292 | MAHRPPSP                    | 2.14 | 0.01 | 0.78 | 0.44 | 1.13 | 0.28 |
| 44958 | 0 | 132471 | MAHRPPSPALASVLL             | 2.70 | 0.01 | 0.78 | 0.44 | 1.13 | 0.28 |
| 44959 | 0 | 132471 | MAHRPPSPALASVLL             | 2.70 | 0.01 | 0.78 | 0.44 | 1.41 | 0.28 |
| 44960 | 0 | 132471 | MAHRPPSPALASVLL             | 2.70 | 0.01 | 0.78 | 0.44 | 1.13 | 0.28 |
| 44961 | 0 | 41052  | MAILGD                      | 1.88 | 0.01 | 2.40 | 0.44 | 0.85 | 0.28 |
| 44962 | 0 | 115379 | MAIPPKKNQDKTEIPTIN<br>TI    | 2.97 | 0.01 | 1.60 | 0.44 | 1.23 | 1.28 |
| 44963 | 0 | 115379 | MAIPPKKNQDKTEIPTIN<br>TI    | 2.97 | 0.01 | 1.60 | 0.44 | 1.23 | 1.27 |
| 44964 | 0 | 156918 | MAITDHPGSAMV                | 2.46 | 0.01 | 0.90 | 2.74 | 0.22 | 0.85 |
| 44965 | 0 | 156918 | MAITDHPGSAMV                | 2.46 | 0.01 | 0.90 | 2.22 | 1.59 | 0.85 |
| 44966 | 0 | 156918 | MAITDHPGSAMV                | 2.46 | 0.01 | 0.90 | 0.68 | 0.22 | 0.28 |
| 44967 | 0 | 105954 | MAKFTQFA                    | 2.14 | 0.01 | 3.05 | 1.20 | 0.22 | 0.28 |
| 44968 | 0 | 41053  | MAKGKRSTDAKGSQRR<br>QKKV    | 2.96 | 0.01 | 3.78 | 2.49 | 0.85 | 0.28 |
| 44969 | 0 | 114467 | MAKLILVSFSLCLLV             | 2.69 | 0.01 | 3.48 | 0.44 | 1.23 | 0.85 |
| 44970 | 0 | 522386 | MAKLTLVALALFLLAAH<br>ASARQQ | 3.12 | 0.01 | 2.16 | 0.44 | 1.23 | 1.39 |
| 44971 | 0 | 41056  | MAKLVLSLCFLLFSG             | 2.69 | 0.01 | 2.72 | 0.44 | 1.23 | 0.85 |
| 44972 | 0 | 41057  | MAKNEV                      | 1.88 | 0.01 | 1.96 | 0.44 | 0.85 | 0.28 |
| 44973 | 0 | 41058  | MAKNKP                      | 1.90 | 0.01 | 2.40 | 0.44 | 0.85 | 0.28 |
| 44974 | 0 | 114468 | MAKPILLSIYFLIV              | 2.68 | 0.01 | 3.27 | 0.44 | 1.23 | 0.85 |
| 44975 | 0 | 41066  | MAKTIAYDEEARRGL             | 2.64 | 0.01 | 2.04 | 2.97 | 0.22 | 0.28 |
| 44976 | 0 | 41069  | MAKVKIKPLEDKILV             | 2.70 | 0.01 | 2.59 | 0.44 | 0.85 | 0.28 |
| 44977 | 0 | 41069  | MAKVKIKPLEDKILV             | 2.70 | 0.01 | 2.59 | 0.44 | 1.74 | 0.28 |
| 44978 | 0 | 41071  | MAKVNKPLEDKILV              | 2.68 | 0.01 | 2.04 | 0.44 | 0.85 | 0.28 |
| 44979 | 0 | 147962 | MALDDIHAQ                   | 2.22 | 0.01 | 3.24 | 3.57 | 0.85 | 0.28 |
| 44980 | 0 | 123482 | MALLHQIQGNELEPL             | 2.68 | 0.01 | 0.78 | 1.20 | 0.22 | 2.75 |
| 44981 | 0 | 186774 | MAMGNLGANSIETDV             | 2.67 | 0.01 | 0.90 | 1.20 | 0.22 | 0.85 |
| 44982 | 0 | 41092  | MANEGSNT                    | 2.12 | 0.01 | 2.96 | 0.68 | 0.22 | 0.28 |
| 44983 | 0 | 41092  | MANEGSNT                    | 2.12 | 0.01 | 2.96 | 0.68 | 0.22 | 0.28 |
| 44984 | 0 | 86153  | MANTGAMELV                  | 2.32 | 0.01 | 3.06 | 0.44 | 0.85 | 0.28 |
| 44985 | 0 | 41103  | MAPEVIRMQDDNP               | 2.53 | 0.01 | 4.03 | 1.12 | 0.22 | 0.85 |
| 44986 | 0 | 41103  | MAPEVIRMQDDNP               | 2.53 | 0.01 | 4.03 | 1.12 | 0.22 | 2.02 |
| 44987 | 0 | 129371 | MAPPPGMR                    | 2.15 | 0.01 | 0.78 | 0.44 | 1.13 | 0.28 |
| 44988 | 0 | 118012 | MAPPPGMRPP                  | 2.35 | 0.01 | 0.78 | 3.05 | 1.13 | 0.28 |
| 44989 | 0 | 522394 | MAPSVDPSAEPTAPATT<br>TPP    | 2.97 | 4.33 | 2.40 | 0.44 | 1.59 | 1.28 |
| 44990 | 0 | 522395 | MAPSVDPSAEPTAPATT<br>TPP    | 2.97 | 4.45 | 2.40 | 0.44 | 1.59 | 1.28 |
| 44991 | 0 | 522396 | MAPSVDPSAEPTAPATT<br>TPP    | 2.97 | 4.23 | 2.40 | 0.44 | 1.59 | 1.28 |
| 44992 | 0 | 522397 | MAPSVDPSAEPTAPATT<br>TPP    | 2.97 | 0.01 | 2.40 | 0.44 | 1.59 | 1.28 |
| 44993 | 0 | 139825 | MAQNITEEIKRLHRRKQ<br>L      | 2.84 | 0.01 | 3.93 | 1.12 | 0.22 | 0.28 |

|       |   |        |                                                            |      |      |      |      |      |      |
|-------|---|--------|------------------------------------------------------------|------|------|------|------|------|------|
| 44994 | 0 | 41110  | MARENTNKHYWLRKLK<br>KGTASVAVALSVLGAGL<br>VVNTNEVSAAVTRGTIN | 3.86 | 0.01 | 2.85 | 1.12 | 0.22 | 2.12 |
| 44995 | 0 | 41110  | MARENTNKHYWLRKLK<br>KGTASVAVALSVLGAGL<br>VVNTNEVSAAVTRGTIN | 3.86 | 0.01 | 2.85 | 1.12 | 0.22 | 1.34 |
| 44996 | 0 | 115863 | MARHPHPHLS                                                 | 2.33 | 0.01 | 1.60 | 0.44 | 1.23 | 0.85 |
| 44997 | 0 | 115863 | MARHPHPHLS                                                 | 2.33 | 0.01 | 1.60 | 0.44 | 1.23 | 0.85 |
| 44998 | 0 | 118514 | MASAARLTMMWEE                                              | 2.54 | 0.01 | 0.78 | 0.44 | 1.13 | 0.28 |
| 44999 | 0 | 118514 | MASAARLTMMWEE                                              | 2.54 | 0.01 | 0.78 | 0.44 | 1.13 | 0.28 |
| 45000 | 0 | 118514 | MASAARLTMMWEE                                              | 2.54 | 0.01 | 0.78 | 0.44 | 1.41 | 0.28 |
| 45001 | 0 | 238762 | MASAARLTMMWEEVT<br>CPI                                     | 2.82 | 0.01 | 0.78 | 0.44 | 1.13 | 0.28 |
| 45002 | 0 | 238762 | MASAARLTMMWEEVT<br>CPI                                     | 2.82 | 0.01 | 0.78 | 0.44 | 1.13 | 0.28 |
| 45003 | 0 | 41115  | MASCRPIDKFDQGW                                             | 2.55 | 0.01 | 1.96 | 0.44 | 1.41 | 0.28 |
| 45004 | 0 | 41117  | MASEAKESPANNPGL                                            | 2.69 | 0.01 | 3.97 | 1.20 | 0.22 | 0.85 |
| 45005 | 0 | 41118  | MASENKQRPGSPGPT                                            | 2.66 | 0.01 | 2.40 | 1.15 | 2.26 | 0.28 |
| 45006 | 0 | 41118  | MASENKQRPGSPGPT                                            | 2.66 | 0.01 | 2.40 | 1.15 | 2.26 | 0.85 |
| 45007 | 0 | 41120  | MASGGGETALALLLDR<br>L                                      | 2.85 | 0.01 | 2.91 | 0.44 | 0.85 | 0.28 |
| 45008 | 0 | 41121  | MASGGGETALALLLDR<br>LNQ                                    | 2.93 | 0.01 | 2.45 | 1.20 | 0.22 | 1.48 |
| 45009 | 0 | 41123  | MASGKAAGKTDAPAPV<br>IKLGGPKPPKVGSSGNA<br>SWFQAIKAKKLNTPPPK | 3.86 | 0.01 | 4.33 | 2.49 | 0.22 | 0.85 |
| 45010 | 0 | 152005 | MASHPVSLHAV                                                | 2.43 | 0.01 | 0.78 | 0.44 | 1.93 | 1.27 |
| 45011 | 0 | 41126  | MASLIYRQLL                                                 | 2.29 | 0.01 | 3.78 | 2.74 | 0.22 | 0.85 |
| 45012 | 0 | 41126  | MASLIYRQLL                                                 | 2.29 | 0.01 | 3.78 | 0.68 | 0.22 | 0.28 |
| 45013 | 0 | 41126  | MASLIYRQLL                                                 | 2.29 | 0.01 | 3.78 | 0.68 | 0.22 | 0.85 |
| 45014 | 0 | 41126  | MASLIYRQLL                                                 | 2.29 | 0.01 | 3.78 | 0.68 | 0.22 | 1.34 |
| 45015 | 0 | 41126  | MASLIYRQLL                                                 | 2.29 | 0.01 | 3.78 | 2.74 | 0.22 | 0.85 |
| 45016 | 0 | 41126  | MASLIYRQLL                                                 | 2.29 | 0.01 | 3.78 | 2.74 | 0.22 | 1.34 |
| 45017 | 0 | 79926  | MASMTGGQQMG                                                | 2.44 | 0.01 | 4.45 | 1.12 | 0.22 | 0.85 |
| 45018 | 0 | 79926  | MASMTGGQQMG                                                | 2.44 | 0.01 | 4.45 | 1.12 | 0.22 | 1.27 |
| 45019 | 0 | 79926  | MASMTGGQQMG                                                | 2.44 | 0.01 | 4.45 | 1.12 | 0.22 | 1.27 |
| 45020 | 0 | 101053 | MASPGS                                                     | 1.90 | 0.01 | 0.78 | 0.44 | 1.13 | 0.85 |
| 45021 | 0 | 101053 | MASPGS                                                     | 1.90 | 0.01 | 0.78 | 0.44 | 1.13 | 0.85 |
| 45022 | 0 | 101053 | MASPGS                                                     | 1.90 | 0.01 | 0.78 | 0.44 | 1.13 | 0.85 |
| 45023 | 0 | 104569 | MASPGSGFWSFGSEDG<br>S                                      | 2.83 | 0.01 | 0.78 | 0.68 | 0.22 | 2.35 |

|       |   |        |                                                    |      |      |      |      |      |      |
|-------|---|--------|----------------------------------------------------|------|------|------|------|------|------|
| 45024 | 0 | 104569 | MASPGSGFWSFGSEDG<br>S                              | 2.83 | 0.01 | 0.78 | 0.68 | 0.22 | 0.28 |
| 45025 | 0 | 104569 | MASPGSGFWSFGSEDG<br>S                              | 2.83 | 0.01 | 0.78 | 0.44 | 1.13 | 2.35 |
| 45026 | 0 | 104569 | MASPGSGFWSFGSEDG<br>S                              | 2.83 | 0.01 | 0.78 | 0.44 | 1.13 | 2.35 |
| 45027 | 0 | 104569 | MASPGSGFWSFGSEDG<br>S                              | 2.83 | 0.01 | 0.78 | 0.68 | 0.22 | 2.02 |
| 45028 | 0 | 101054 | MASPGSGFWSFGSEDG<br>SGDS                           | 2.99 | 0.01 | 0.78 | 0.44 | 1.13 | 1.27 |
| 45029 | 0 | 101054 | MASPGSGFWSFGSEDG<br>SGDS                           | 2.99 | 0.01 | 0.78 | 0.44 | 1.13 | 0.28 |
| 45030 | 0 | 101054 | MASPGSGFWSFGSEDG<br>SGDS                           | 2.99 | 0.01 | 0.78 | 0.44 | 1.13 | 0.28 |
| 45031 | 0 | 101054 | MASPGSGFWSFGSEDG<br>SGDS                           | 2.99 | 0.01 | 0.78 | 0.44 | 1.13 | 0.28 |
| 45032 | 0 | 101054 | MASPGSGFWSFGSEDG<br>SGDS                           | 2.99 | 0.01 | 0.78 | 0.44 | 1.93 | 1.27 |
| 45033 | 0 | 97491  | MASQGTKRSYEQMETG<br>GERQNATE                       | 3.15 | 0.01 | 3.09 | 0.44 | 0.85 | 0.28 |
| 45034 | 0 | 41131  | MASRPAASSPVE                                       | 2.49 | 0.01 | 2.40 | 1.12 | 0.22 | 0.85 |
| 45035 | 0 | 41132  | MASSRSAPRKASHAHKS<br>HRK                           | 3.01 | 0.01 | 3.78 | 2.49 | 0.85 | 0.28 |
| 45036 | 0 | 102644 | MASSTPSSSATSSNAGA<br>DPN                           | 2.99 | 0.01 | 0.78 | 0.44 | 1.13 | 1.27 |
| 45037 | 0 | 79304  | MASTTPITMEDLQKALE<br>AQSRALRAGLAAG                 | 3.35 | 0.01 | 2.85 | 1.20 | 0.22 | 0.85 |
| 45038 | 0 | 79304  | MASTTPITMEDLQKALE<br>AQSRALRAGLAAG                 | 3.35 | 0.01 | 2.85 | 0.44 | 1.59 | 0.28 |
| 45039 | 0 | 79304  | MASTTPITMEDLQKALE<br>AQSRALRAGLAAG                 | 3.35 | 0.01 | 2.85 | 1.15 | 0.22 | 0.28 |
| 45040 | 0 | 79304  | MASTTPITMEDLQKALE<br>AQSRALRAGLAAG                 | 3.35 | 0.01 | 2.85 | 1.12 | 0.22 | 0.28 |
| 45041 | 0 | 79304  | MASTTPITMEDLQKALE<br>AQSRALRAGLAAG                 | 3.35 | 0.01 | 2.85 | 1.12 | 0.22 | 0.85 |
| 45042 | 0 | 79927  | MASTVGAILCADGNVSR<br>TMFRTNKGRIFNGAAPL<br>AADTHMPS | 3.68 | 0.01 | 3.81 | 0.68 | 0.22 | 0.85 |
| 45043 | 0 | 79927  | MASTVGAILCADGNVSR<br>TMFRTNKGRIFNGAAPL<br>AADTHMPS | 3.68 | 0.01 | 3.81 | 0.68 | 0.22 | 2.02 |
| 45044 | 0 | 41140  | MASVEVESAAATALPKNE<br>TPE                          | 2.97 | 0.01 | 2.60 | 0.68 | 0.22 | 1.27 |
| 45045 | 0 | 41143  | MATAGVAAVVKRKEEN                                   | 2.74 | 0.01 | 2.85 | 2.42 | 0.22 | 0.28 |
| 45046 | 0 | 131974 | MATLEKLMKAFESLKSF                                  | 2.84 | 0.01 | 0.78 | 1.12 | 0.22 | 1.48 |

|       |   |        |                                                 |      |      |      |      |      |      |
|-------|---|--------|-------------------------------------------------|------|------|------|------|------|------|
| 45047 | 0 | 131974 | MATLEKLMKAFESLKSF                               | 2.84 | 0.01 | 0.78 | 1.20 | 0.22 | 0.85 |
| 45048 | 0 | 131974 | MATLEKLMKAFESLKSF                               | 2.84 | 0.01 | 0.78 | 0.44 | 1.41 | 2.49 |
| 45049 | 0 | 131974 | MATLEKLMKAFESLKSF                               | 2.84 | 0.01 | 0.78 | 0.44 | 1.41 | 1.34 |
| 45050 | 0 | 131974 | MATLEKLMKAFESLKSF                               | 2.84 | 0.01 | 0.78 | 0.44 | 1.41 | 3.25 |
| 45051 | 0 | 131974 | MATLEKLMKAFESLKSF                               | 2.84 | 0.01 | 0.78 | 0.44 | 1.41 | 3.30 |
| 45052 | 0 | 131974 | MATLEKLMKAFESLKSF                               | 2.84 | 0.01 | 0.78 | 0.44 | 1.41 | 3.13 |
| 45053 | 0 | 131974 | MATLEKLMKAFESLKSF                               | 2.84 | 0.01 | 0.78 | 0.44 | 1.41 | 3.13 |
| 45054 | 0 | 131974 | MATLEKLMKAFESLKSF                               | 2.84 | 0.01 | 0.78 | 0.44 | 1.41 | 3.13 |
| 45055 | 0 | 131974 | MATLEKLMKAFESLKSF                               | 2.84 | 0.01 | 0.78 | 0.44 | 1.41 | 3.13 |
| 45056 | 0 | 165111 | MATMEELQREINAHEG<br>QLVIARQKVRDAEKQYE<br>KDPD   | 3.55 | 0.01 | 3.75 | 1.15 | 0.22 | 0.28 |
| 45057 | 0 | 41155  | MATPRSAKKAARKSGSK<br>SAK                        | 3.00 | 0.01 | 2.78 | 2.49 | 0.85 | 0.28 |
| 45058 | 0 | 177164 | MATRSKVNGQSGRM                                  | 2.62 | 0.01 | 4.93 | 0.68 | 0.22 | 0.28 |
| 45059 | 0 | 196662 | MATSTLA                                         | 2.04 | 0.01 | 0.90 | 0.44 | 1.23 | 1.39 |
| 45060 | 0 | 237848 | MATTEGCLVASTN                                   | 2.53 | 0.01 | 0.78 | 0.44 | 1.13 | 1.28 |
| 45061 | 0 | 41157  | MATTEYRLSLMEQFIRA<br>FIE                        | 2.96 | 0.01 | 2.93 | 2.69 | 0.22 | 0.28 |
| 45062 | 0 | 41157  | MATTEYRLSLMEQFIRA<br>FIE                        | 2.96 | 0.01 | 2.93 | 1.81 | 0.22 | 0.28 |
| 45063 | 0 | 41157  | MATTEYRLSLMEQFIRA<br>FIE                        | 2.96 | 0.01 | 2.93 | 0.68 | 0.22 | 0.28 |
| 45064 | 0 | 41164  | MATTYEEFSAKLDRDLDEE<br>FNRKMQEQNAAFFADK<br>PDES | 3.58 | 0.01 | 3.51 | 0.44 | 0.85 | 0.28 |
| 45065 | 0 | 41164  | MATTYEEFSAKLDRDLDEE<br>FNRKMQEQNAAFFADK<br>PDES | 3.58 | 0.01 | 3.51 | 0.44 | 0.85 | 0.28 |
| 45066 | 0 | 41164  | MATTYEEFSAKLDRDLDEE<br>FNRKMQEQNAAFFADK<br>PDES | 3.58 | 0.01 | 3.51 | 0.44 | 0.85 | 0.28 |
| 45067 | 0 | 41169  | MAVPAFSDIAKSANDLL<br>NKD                        | 2.95 | 0.01 | 3.75 | 1.12 | 0.22 | 1.27 |
| 45068 | 0 | 41169  | MAVPAFSDIAKSANDLL<br>NKD                        | 2.95 | 0.01 | 3.75 | 1.12 | 0.22 | 0.28 |
| 45069 | 0 | 41169  | MAVPAFSDIAKSANDLL<br>NKD                        | 2.95 | 0.01 | 3.75 | 1.12 | 0.22 | 0.85 |

|       |   |        |                                    |      |      |      |      |      |      |
|-------|---|--------|------------------------------------|------|------|------|------|------|------|
| 45070 | 0 | 117329 | MAVPETRPNHT                        | 2.39 | 0.01 | 0.78 | 0.44 | 1.13 | 0.28 |
| 45071 | 0 | 117329 | MAVPETRPNHT                        | 2.39 | 0.01 | 0.78 | 0.44 | 1.13 | 0.28 |
| 45072 | 0 | 117329 | MAVPETRPNHT                        | 2.39 | 0.01 | 0.78 | 0.44 | 1.13 | 0.28 |
| 45073 | 0 | 117329 | MAVPETRPNHT                        | 2.39 | 0.01 | 0.78 | 0.44 | 1.13 | 0.28 |
| 45074 | 0 | 117329 | MAVPETRPNHT                        | 2.39 | 0.01 | 0.78 | 0.44 | 1.13 | 0.28 |
| 45075 | 0 | 117329 | MAVPETRPNHT                        | 2.39 | 0.01 | 0.78 | 0.44 | 1.41 | 0.28 |
| 45076 | 0 | 41171  | MAWDMMMNW                          | 2.26 | 0.01 | 1.72 | 0.44 | 0.85 | 0.85 |
| 45077 | 0 | 41171  | MAWDMMMNW                          | 2.26 | 0.01 | 1.72 | 0.44 | 0.85 | 0.85 |
| 45078 | 0 | 41175  | MAYGSDDNDDKNKSLD<br>HKHN           | 2.97 | 0.01 | 0.90 | 2.63 | 0.22 | 1.48 |
| 45079 | 0 | 41175  | MAYGSDDNDDKNKSLD<br>HKHN           | 2.97 | 0.01 | 0.90 | 2.63 | 2.25 | 1.75 |
| 45080 | 0 | 41177  | MAYRFNGIGVTQNVLYE                  | 2.76 | 0.01 | 2.48 | 0.44 | 0.85 | 0.28 |
| 45081 | 0 | 41177  | MAYRFNGIGVTQNVLYE                  | 2.76 | 0.01 | 2.48 | 0.68 | 0.22 | 0.28 |
| 45082 | 0 | 108030 | MAYVPPYEMIVRELK                    | 2.68 | 0.01 | 0.90 | 0.44 | 1.13 | 1.39 |
| 45083 | 0 | 161655 | MCAKILDIKGI                        | 2.49 | 0.01 | 0.78 | 0.44 | 1.23 | 0.85 |
| 45084 | 0 | 41183  | MCAVRDPAFSRSRLS                    | 2.68 | 0.01 | 0.90 | 1.15 | 0.22 | 1.27 |
| 45085 | 0 | 41183  | MCAVRDPAFSRSRLS                    | 2.68 | 0.01 | 0.90 | 0.68 | 0.22 | 0.28 |
| 45086 | 0 | 41183  | MCAVRDPAFSRSRLS                    | 2.68 | 0.01 | 0.90 | 1.15 | 0.22 | 1.27 |
| 45087 | 0 | 41183  | MCAVRDPAFSRSRLS                    | 2.68 | 0.01 | 0.90 | 1.15 | 0.22 | 0.85 |
| 45088 | 0 | 78463  | MCDIDGQGEEL                        | 2.40 | 0.01 | 2.76 | 0.44 | 1.23 | 1.39 |
| 45089 | 0 | 41184  | MCELNVMENNMNNIH<br>SNNNNISTHMDDVIE | 3.36 | 0.01 | 2.22 | 0.44 | 1.74 | 0.28 |
| 45090 | 0 | 41184  | MCELNVMENNMNNIH<br>SNNNNISTHMDDVIE | 3.36 | 0.01 | 2.22 | 0.44 | 1.74 | 0.28 |
| 45091 | 0 | 41184  | MCELNVMENNMNNIH<br>SNNNNISTHMDDVIE | 3.36 | 0.01 | 2.22 | 0.44 | 1.74 | 0.28 |
| 45092 | 0 | 41184  | MCELNVMENNMNNIH<br>SNNNNISTHMDDVIE | 3.36 | 0.01 | 2.22 | 0.44 | 0.85 | 1.48 |
| 45093 | 0 | 79305  | MCEYSHWSGFAFCK                     | 2.59 | 0.01 | 0.90 | 0.68 | 0.22 | 1.39 |
| 45094 | 0 | 41192  | MCITQYQRESQAYYQR<br>G              | 2.79 | 0.01 | 1.60 | 1.12 | 0.22 | 0.28 |
| 45095 | 0 | 41192  | MCITQYQRESQAYYQR<br>G              | 2.79 | 0.01 | 1.60 | 1.12 | 0.22 | 0.28 |
| 45096 | 0 | 41192  | MCITQYQRESQAYYQR<br>G              | 2.79 | 0.01 | 1.60 | 1.12 | 0.22 | 0.28 |
| 45097 | 0 | 79306  | MCNTDASYPHVPCD                     | 2.59 | 0.01 | 0.90 | 0.68 | 0.22 | 1.39 |
| 45098 | 0 | 133642 | MCPEMSFVAVHSCAR                    | 2.69 | 0.01 | 0.90 | 1.15 | 0.22 | 0.28 |
| 45099 | 0 | 133642 | MCPEMSFVAVHSCAR                    | 2.69 | 0.01 | 0.90 | 1.15 | 0.22 | 0.28 |

|       |   |        |                                    |      |      |      |      |      |      |
|-------|---|--------|------------------------------------|------|------|------|------|------|------|
| 45100 | 0 | 133642 | MCPEMS FVAVHSCAR                   | 2.69 | 0.01 | 0.90 | 1.15 | 0.22 | 2.12 |
| 45101 | 0 | 133642 | MCPEMS FVAVHSCAR                   | 2.69 | 0.01 | 0.90 | 1.15 | 0.22 | 1.27 |
| 45102 | 0 | 41201  | MCPPLYSPSACA                       | 2.51 | 0.01 | 0.90 | 1.15 | 0.22 | 0.28 |
| 45103 | 0 | 41204  | MCQCVQKYGTEFCKKRL<br>A             | 2.81 | 0.01 | 3.19 | 1.15 | 0.22 | 0.28 |
| 45104 | 0 | 41204  | MCQCVQKYGTEFCKKRL<br>A             | 2.81 | 0.01 | 3.19 | 1.15 | 0.22 | 1.27 |
| 45105 | 0 | 41204  | MCQCVQKYGTEFCKKRL<br>A             | 2.81 | 0.01 | 3.19 | 0.44 | 1.23 | 1.27 |
| 45106 | 0 | 41205  | MCRPGIPTHHCA                       | 2.46 | 0.01 | 0.90 | 1.15 | 0.22 | 0.28 |
| 45107 | 0 | 77955  | MCSPTALRCQAH                       | 2.45 | 0.01 | 0.90 | 1.15 | 0.22 | 1.27 |
| 45108 | 0 | 77955  | MCSPTALRCQAH                       | 2.45 | 0.01 | 0.90 | 1.15 | 0.22 | 1.27 |
| 45109 | 0 | 77955  | MCSPTALRCQAH                       | 2.45 | 0.01 | 0.90 | 1.15 | 0.22 | 0.28 |
| 45110 | 0 | 161656 | MCVKKILDKVGI                       | 2.49 | 0.01 | 1.60 | 0.44 | 1.23 | 0.85 |
| 45111 | 0 | 41208  | MCVTQYQKESQAYYDG<br>RRSS           | 2.94 | 0.01 | 1.75 | 2.19 | 0.22 | 0.28 |
| 45112 | 0 | 41208  | MCVTQYQKESQAYYDG<br>RRSS           | 2.94 | 0.01 | 1.75 | 2.19 | 0.22 | 0.28 |
| 45113 | 0 | 41209  | MCWDCTLHARSD                       | 2.45 | 0.01 | 0.90 | 0.68 | 0.22 | 1.34 |
| 45114 | 0 | 41209  | MCWDCTLHARSD                       | 2.45 | 0.01 | 0.90 | 0.68 | 0.22 | 0.28 |
| 45115 | 0 | 172338 | MCYVVCQYGPAGN<br>MDADKIVFKVNNRVVSL | 2.55 | 0.01 | 3.38 | 0.44 | 0.85 | 2.51 |
| 45116 | 0 | 41213  | KPEIIVDQYEYKYPAILDL<br>KKPCIT      | 3.66 | 0.01 | 4.08 | 0.68 | 0.22 | 0.85 |
| 45117 | 0 | 100301 | MDAEFRHDSG                         | 2.29 | 0.01 | 0.78 | 0.44 | 1.93 | 0.28 |
| 45118 | 0 | 167335 | MDAHHAL                            | 2.03 | 0.01 | 0.90 | 1.15 | 0.22 | 1.39 |
| 45119 | 0 | 41215  | MDAIKKKMQAMKLEK                    | 2.71 | 0.01 | 3.15 | 0.44 | 1.23 | 0.85 |
| 45120 | 0 | 41215  | MDAIKKKMQAMKLEK                    | 2.71 | 0.01 | 3.15 | 0.44 | 1.23 | 0.85 |
| 45121 | 0 | 41215  | MDAIKKKMQAMKLEK                    | 2.71 | 0.01 | 2.36 | 0.44 | 1.23 | 1.28 |
| 45122 | 0 | 41215  | MDAIKKKMQAMKLEK                    | 2.71 | 0.01 | 2.36 | 0.44 | 1.23 | 1.27 |
| 45123 | 0 | 41215  | MDAIKKKMQAMKLEK                    | 2.71 | 0.01 | 2.36 | 0.44 | 1.23 | 1.28 |
| 45124 | 0 | 176348 | MDASEGNTYTCKLQ                     | 2.61 | 0.01 | 2.63 | 1.15 | 0.22 | 0.85 |
| 45125 | 0 | 176348 | MDASEGNTYTCKLQ                     | 2.61 | 0.01 | 2.63 | 1.15 | 0.22 | 0.85 |
| 45126 | 0 | 176348 | MDASEGNTYTCKLQ                     | 2.61 | 0.01 | 2.63 | 1.15 | 0.22 | 0.85 |
| 45127 | 0 | 118014 | MDC                                | 1.37 | 0.01 | 0.78 | 0.44 | 1.13 | 0.85 |
| 45128 | 0 | 118014 | MDC                                | 1.37 | 0.01 | 0.78 | 0.44 | 1.41 | 0.85 |
| 45129 | 0 | 196664 | MDDDDDETYRGG                       | 2.46 | 0.01 | 1.61 | 1.81 | 0.22 | 0.28 |
| 45130 | 0 | 196664 | MDDDDDETYRGG                       | 2.46 | 0.01 | 1.61 | 1.81 | 0.22 | 0.28 |
| 45131 | 0 | 196664 | MDDDDDETYRGG                       | 2.46 | 0.01 | 1.61 | 1.81 | 0.22 | 0.28 |
| 45132 | 0 | 196664 | MDDDDDETYRGG                       | 2.46 | 0.01 | 1.61 | 0.44 | 0.85 | 0.28 |



|       |   |        |                               |      |      |      |      |      |      |
|-------|---|--------|-------------------------------|------|------|------|------|------|------|
| 45133 | 0 | 196664 | MDDDDDETYRGG                  | 2.46 | 0.01 | 1.61 | 0.44 | 0.85 | 0.28 |
| 45134 | 0 | 196664 | MDDDDDETYRGG                  | 2.46 | 0.01 | 1.61 | 0.44 | 0.85 | 0.28 |
| 45135 | 0 | 41218  | MDDDTERFPTHRS LP              | 2.66 | 0.01 | 0.90 | 1.15 | 0.22 | 0.28 |
| 45136 | 0 | 41218  | MDDDTERFPTHRS LP              | 2.66 | 0.01 | 0.90 | 0.68 | 0.22 | 0.28 |
| 45137 | 0 | 41218  | MDDDTERFPTHRS LP              | 2.66 | 0.01 | 0.90 | 0.68 | 2.25 | 1.75 |
| 45138 | 0 | 41219  | MDDEADRYFTYE                  | 2.49 | 0.01 | 2.88 | 2.22 | 0.85 | 0.28 |
| 45139 | 0 | 41219  | MDDEADRYFTYE                  | 2.49 | 0.01 | 2.88 | 2.22 | 0.22 | 0.28 |
| 45140 | 0 | 41219  | MDDEADRYFTYE                  | 2.49 | 0.01 | 2.88 | 2.37 | 0.22 | 0.28 |
| 45141 | 0 | 41219  | MDDEADRYFTYE                  | 2.49 | 0.01 | 2.88 | 2.22 | 0.22 | 0.28 |
| 45142 | 0 | 242968 | MDEEEDGAGAEESGQP<br>RSFTQL    | 3.03 | 0.01 | 2.19 | 1.12 | 0.22 | 0.85 |
| 45143 | 0 | 242968 | MDEEEDGAGAEESGQP<br>RSFTQL    | 3.03 | 0.01 | 2.19 | 1.12 | 0.22 | 2.35 |
| 45144 | 0 | 242968 | MDEEEDGAGAEESGQP<br>RSFTQL    | 3.03 | 0.01 | 2.19 | 1.12 | 0.22 | 2.02 |
| 45145 | 0 | 79023  | MDGTASVNIPAGTYDFA<br>IAA      | 2.93 | 0.01 | 2.84 | 0.44 | 0.85 | 0.28 |
| 45146 | 0 | 102645 | MDGTLFPGDDDLAIPAT<br>EFF      | 2.95 | 0.01 | 3.44 | 0.68 | 0.22 | 0.28 |
| 45147 | 0 | 41232  | MDIDPYKEFG                    | 2.29 | 0.01 | 3.89 | 0.68 | 0.22 | 1.27 |
| 45148 | 0 | 41232  | MDIDPYKEFG                    | 2.29 | 0.01 | 3.89 | 0.68 | 0.22 | 0.28 |
| 45149 | 0 | 41232  | MDIDPYKEFG                    | 2.29 | 0.01 | 3.89 | 0.68 | 0.22 | 0.28 |
| 45150 | 0 | 41232  | MDIDPYKEFG                    | 2.29 | 0.01 | 3.89 | 0.68 | 0.22 | 1.48 |
| 45151 | 0 | 41232  | MDIDPYKEFG                    | 2.29 | 0.01 | 3.89 | 0.68 | 0.22 | 1.48 |
| 45152 | 0 | 41233  | MDIDPYKEFGA                   | 2.36 | 0.01 | 2.08 | 0.68 | 0.22 | 1.27 |
| 45153 | 0 | 41233  | MDIDPYKEFGA                   | 2.36 | 0.01 | 2.08 | 0.68 | 0.22 | 1.27 |
| 45154 | 0 | 41233  | MDIDPYKEFGA                   | 2.36 | 0.01 | 2.08 | 0.68 | 0.22 | 2.98 |
| 45155 | 0 | 41238  | MDIDPYKEFGATVELLSF<br>LP      | 2.91 | 0.01 | 2.71 | 1.20 | 0.22 | 0.28 |
| 45156 | 0 | 41238  | MDIDPYKEFGATVELLSF<br>LP      | 2.91 | 0.01 | 2.71 | 0.44 | 0.85 | 0.28 |
| 45157 | 0 | 41239  | MDIDPYKEFGATVELLSF<br>LPSDFFP | 3.14 | 0.01 | 2.08 | 0.68 | 0.22 | 0.28 |
| 45158 | 0 | 41239  | MDIDPYKEFGATVELLSF<br>LPSDFFP | 3.14 | 0.01 | 2.08 | 0.68 | 0.22 | 1.27 |
| 45159 | 0 | 41239  | MDIDPYKEFGATVELLSF<br>LPSDFFP | 3.14 | 0.01 | 2.08 | 0.68 | 0.22 | 0.28 |
| 45160 | 0 | 41239  | MDIDPYKEFGATVELLSF<br>LPSDFFP | 3.14 | 0.01 | 2.08 | 0.68 | 0.22 | 0.28 |
| 45161 | 0 | 41239  | MDIDPYKEFGATVELLSF<br>LPSDFFP | 3.14 | 0.01 | 2.08 | 1.12 | 0.22 | 0.28 |
| 45162 | 0 | 41244  | MDINASRALANVYD                | 2.61 | 0.01 | 2.40 | 2.43 | 0.22 | 0.28 |
| 45163 | 0 | 41244  | MDINASRALANVYD                | 2.61 | 0.01 | 2.40 | 2.43 | 0.22 | 0.28 |
| 45164 | 0 | 41244  | MDINASRALANVYD                | 2.61 | 0.01 | 2.40 | 2.43 | 0.22 | 0.28 |
| 45165 | 0 | 41245  | MDINKRKY                      | 2.12 | 0.01 | 1.66 | 0.44 | 1.74 | 0.28 |
| 45166 | 0 | 135580 | MDIPPPTGPT                    | 2.34 | 4.63 | 0.78 | 1.12 | 0.22 | 0.28 |
| 45167 | 0 | 135580 | MDIPPPTGPT                    | 2.34 | 4.63 | 0.78 | 1.12 | 0.22 | 0.28 |

|       |   |        |                                  |      |      |      |      |      |      |
|-------|---|--------|----------------------------------|------|------|------|------|------|------|
| 45168 | 0 | 41246  | MDKCSSFNIVSNSLG<br>FVIL          | 2.96 | 0.01 | 3.00 | 0.68 | 0.22 | 0.28 |
| 45169 | 0 | 100302 | MDKFNEQEIN                       | 2.31 | 0.01 | 2.18 | 2.16 | 0.22 | 0.28 |
| 45170 | 0 | 93373  | MDKVLNREESL                      | 2.38 | 0.01 | 3.36 | 0.68 | 0.22 | 1.27 |
| 45171 | 0 | 93373  | MDKVLNREESL                      | 2.38 | 0.01 | 3.36 | 0.68 | 0.22 | 1.48 |
| 45172 | 0 | 172340 | MDLHIEEILKDFSES                  | 2.70 | 0.01 | 0.78 | 0.44 | 1.13 | 0.28 |
| 45173 | 0 | 123484 | MDLRIGFGL                        | 2.23 | 0.01 | 2.28 | 2.00 | 0.22 | 0.28 |
| 45174 | 0 | 123486 | MDLRMGFVR                        | 2.24 | 0.01 | 2.28 | 2.00 | 0.22 | 0.28 |
| 45175 | 0 | 118516 | MDNPiEVYVND<br>SVWV              | 2.68 | 0.01 | 3.97 | 0.44 | 1.13 | 0.85 |
| 45176 | 0 | 41258  | MDPELRGLAQ                       | 2.29 | 0.01 | 2.56 | 0.68 | 0.22 | 0.28 |
| 45177 | 0 | 41259  | MDPELRGLAQALID                   | 2.61 | 0.01 | 2.56 | 2.69 | 0.22 | 0.28 |
| 45178 | 0 | 105963 | MDPGLKESPLQT<br>PADDGSE          | 2.90 | 0.01 | 1.60 | 1.12 | 0.22 | 0.85 |
| 45179 | 0 | 130553 | MDPNCSC                          | 2.02 | 3.97 | 0.78 | 0.68 | 0.22 | 2.56 |
| 45180 | 0 | 130553 | MDPNCSC                          | 2.02 | 3.97 | 0.78 | 0.68 | 0.22 | 2.56 |
| 45181 | 0 | 130553 | MDPNCSC                          | 2.02 | 3.97 | 0.78 | 0.68 | 0.22 | 2.56 |
| 45182 | 0 | 130553 | MDPNCSC                          | 2.02 | 3.97 | 0.78 | 0.68 | 0.22 | 2.56 |
| 45183 | 0 | 130553 | MDPNCSC                          | 2.02 | 3.97 | 0.78 | 0.68 | 0.22 | 2.56 |
| 45184 | 0 | 130553 | MDPNCSC                          | 2.02 | 3.97 | 0.78 | 0.68 | 0.22 | 2.56 |
| 45185 | 0 | 130553 | MDPNCSC                          | 2.02 | 3.97 | 0.78 | 0.68 | 0.22 | 2.56 |
| 45186 | 0 | 130553 | MDPNCSC                          | 2.02 | 3.97 | 0.78 | 0.68 | 0.22 | 2.56 |
| 45187 | 0 | 132472 | MDPNCSCATD<br>GSCSCA<br>GCKCKQCK | 3.19 | 0.01 | 2.19 | 1.12 | 0.22 | 1.57 |
| 45188 | 0 | 164295 | MDPNLPN                          | 2.04 | 0.01 | 0.90 | 1.20 | 0.22 | 1.39 |
| 45189 | 0 | 41267  | MDRADTLEQQN<br>KEAN              | 2.67 | 0.01 | 3.15 | 0.44 | 1.23 | 0.85 |
| 45190 | 0 | 41267  | MDRADTLEQQN<br>KEAN              | 2.67 | 0.01 | 2.36 | 0.44 | 1.23 | 1.28 |
| 45191 | 0 | 41267  | MDRADTLEQQN<br>KEAN              | 2.67 | 0.01 | 2.36 | 0.44 | 1.23 | 1.27 |
| 45192 | 0 | 41267  | MDRADTLEQQN<br>KEAN              | 2.67 | 0.01 | 2.36 | 0.44 | 1.23 | 1.28 |
| 45193 | 0 | 135483 | MDRHDFGF                         | 2.14 | 0.01 | 0.78 | 0.68 | 0.22 | 0.28 |
| 45194 | 0 | 240045 | MDRKHTCQLCYL<br>KHSK             | 2.73 | 0.01 | 2.70 | 0.68 | 0.22 | 0.28 |
| 45195 | 0 | 41270  | MDRPRTPPPSYSE                    | 2.55 | 0.01 | 4.63 | 0.44 | 2.39 | 0.28 |
| 45196 | 0 | 79928  | MDRPTSMKALDH                     | 2.46 | 0.01 | 3.81 | 0.68 | 0.22 | 0.85 |
| 45197 | 0 | 79928  | MDRPTSMKALDH                     | 2.46 | 0.01 | 3.81 | 0.68 | 0.22 | 2.02 |
| 45198 | 0 | 175618 | MDSFNYYTPDY<br>GHYDD<br>KDTLD    | 2.99 | 0.01 | 0.78 | 1.81 | 0.22 | 0.28 |
| 45199 | 0 | 175618 | MDSFNYYTPDY<br>GHYDD<br>KDTLD    | 2.99 | 0.01 | 0.78 | 1.81 | 0.22 | 0.28 |
| 45200 | 0 | 175618 | MDSFNYYTPDY<br>GHYDD<br>KDTLD    | 2.99 | 0.01 | 0.78 | 1.81 | 0.22 | 0.28 |
| 45201 | 0 | 175618 | MDSFNYYTPDY<br>GHYDD<br>KDTLD    | 2.99 | 0.01 | 0.78 | 1.81 | 2.25 | 1.75 |

|       |   |        |                                                |      |      |      |      |      |      |
|-------|---|--------|------------------------------------------------|------|------|------|------|------|------|
| 45202 | 0 | 175618 | MDSFNYTTPDYGHYDD<br>KDTLD                      | 2.99 | 0.01 | 0.78 | 1.81 | 0.22 | 0.28 |
| 45203 | 0 | 175618 | MDSFNYTTPDYGHYDD<br>KDTLD                      | 2.99 | 0.01 | 0.78 | 1.81 | 0.22 | 0.28 |
| 45204 | 0 | 178147 | MDSNTVSSFQDILMRM<br>SKMQ                       | 2.95 | 0.01 | 4.23 | 1.12 | 0.22 | 1.27 |
| 45205 | 0 | 450830 | MDTPDRI                                        | 2.02 | 0.01 | 0.90 | 0.44 | 1.41 | 1.39 |
| 45206 | 0 | 78746  | MDTWNPPLGSTSQPCL<br>FQTP                       | 2.94 | 0.01 | 2.04 | 0.44 | 1.59 | 0.28 |
| 45207 | 0 | 225636 | MDVFMKGLSKAKEGV                                | 2.69 | 0.01 | 0.78 | 0.68 | 0.22 | 0.85 |
| 45208 | 0 | 225636 | MDVFMKGLSKAKEGV                                | 2.69 | 0.01 | 0.78 | 0.68 | 0.22 | 1.66 |
| 45209 | 0 | 225636 | MDVFMKGLSKAKEGV                                | 2.69 | 0.01 | 0.78 | 0.68 | 0.22 | 1.66 |
| 45210 | 0 | 114469 | MDVFMKGLSMAKEGV<br>VAAAEKTKQ                   | 3.12 | 0.01 | 1.75 | 2.04 | 0.22 | 0.28 |
| 45211 | 0 | 194948 | MDVRCRDSFVYQCHVG<br>T                          | 2.78 | 0.01 | 0.90 | 0.44 | 1.93 | 0.28 |
| 45212 | 0 | 41284  | MDVRRIEG                                       | 2.11 | 0.01 | 2.40 | 2.43 | 0.22 | 0.28 |
| 45213 | 0 | 167783 | MDVRRIEGG                                      | 2.20 | 0.01 | 2.40 | 2.43 | 0.22 | 0.28 |
| 45214 | 0 | 41286  | MDVVINQLRDIDRQML<br>DLYKELDEK                  | 3.19 | 0.01 | 1.66 | 0.44 | 1.74 | 0.28 |
| 45215 | 0 | 41286  | MDVVINQLRDIDRQML<br>DLYKELDEK                  | 3.19 | 0.01 | 1.66 | 0.44 | 1.74 | 0.28 |
| 45216 | 0 | 41288  | MDWAVKDSKSRGATG<br>KSMNMMSLGGAYSRA<br>MNDAAANV | 3.59 | 0.01 | 3.28 | 0.44 | 1.23 | 1.39 |
| 45217 | 0 | 153420 | MDWINPFPNFNSGGGS                               | 2.75 | 0.01 | 0.90 | 0.68 | 0.22 | 0.28 |
| 45218 | 0 | 153420 | MDWINPFPNFNSGGGS                               | 2.75 | 0.01 | 0.90 | 0.44 | 0.85 | 2.35 |
| 45219 | 0 | 41289  | MDWNMH                                         | 1.91 | 0.01 | 0.90 | 1.15 | 0.22 | 0.28 |
| 45220 | 0 | 126667 | MDWNMHAA                                       | 2.12 | 4.93 | 0.90 | 1.15 | 0.22 | 1.27 |
| 45221 | 0 | 41290  | MDWNMHAA                                       | 2.12 | 0.01 | 0.90 | 0.68 | 0.22 | 2.49 |
| 45222 | 0 | 41290  | MDWNMHAA                                       | 2.12 | 0.01 | 0.90 | 0.68 | 0.22 | 1.27 |
| 45223 | 0 | 41290  | MDWNMHAA                                       | 2.12 | 0.01 | 0.90 | 0.68 | 0.22 | 1.27 |
| 45224 | 0 | 41290  | MDWNMHAA                                       | 2.12 | 0.01 | 0.90 | 0.68 | 0.22 | 1.27 |
| 45225 | 0 | 175619 | MDWNMHAAGG                                     | 2.31 | 0.01 | 0.90 | 0.68 | 0.22 | 0.28 |
| 45226 | 0 | 175619 | MDWNMHAAGG                                     | 2.31 | 0.01 | 0.90 | 0.68 | 0.22 | 0.28 |
| 45227 | 0 | 175619 | MDWNMHAAGG                                     | 2.31 | 0.01 | 0.90 | 1.15 | 0.22 | 0.28 |
| 45228 | 0 | 175619 | MDWNMHAAGG                                     | 2.31 | 0.01 | 0.90 | 1.15 | 0.22 | 0.28 |
| 45229 | 0 | 41293  | MDYPARAHTFDDFCPE<br>CRPLGLQGC                  | 3.15 | 0.01 | 2.70 | 0.44 | 0.85 | 0.28 |
| 45230 | 0 | 41293  | MDYPARAHTFDDFCPE<br>CRPLGLQGC                  | 3.15 | 0.01 | 2.70 | 0.44 | 0.85 | 0.28 |

|       |   |        |                           |      |      |      |      |      |      |
|-------|---|--------|---------------------------|------|------|------|------|------|------|
| 45231 | 0 | 41294  | MDYVSCTPGLRVELSTV<br>SNA  | 2.91 | 0.01 | 2.78 | 2.49 | 0.85 | 0.28 |
| 45232 | 0 | 41296  | MEACAPHLPYIEQGMQ<br>LAEQ  | 2.97 | 0.01 | 1.96 | 0.44 | 0.85 | 0.28 |
| 45233 | 0 | 41307  | MECSPR                    | 1.88 | 0.01 | 2.40 | 0.44 | 0.85 | 0.28 |
| 45234 | 0 | 140053 | MEDDYNLKDMFSRAVT<br>M     | 2.76 | 0.01 | 0.90 | 1.20 | 0.22 | 0.28 |
| 45235 | 0 | 140053 | MEDDYNLKDMFSRAVT<br>M     | 2.76 | 0.01 | 0.90 | 1.20 | 0.22 | 1.34 |
| 45236 | 0 | 41310  | MEDKAW                    | 1.88 | 0.01 | 2.40 | 0.44 | 0.85 | 0.28 |
| 45237 | 0 | 79024  | MEDLQKALEAQSRALRA<br>GLAA | 3.01 | 0.01 | 4.23 | 0.68 | 0.22 | 0.28 |
| 45238 | 0 | 79024  | MEDLQKALEAQSRALRA<br>GLAA | 3.01 | 0.01 | 4.23 | 0.68 | 0.22 | 0.85 |
| 45239 | 0 | 41320  | MEECASHLPYFEQGMQ<br>LAEQ  | 2.95 | 0.01 | 2.41 | 0.44 | 0.85 | 0.28 |
| 45240 | 0 | 41322  | MEECASHLPYIEQGMHL<br>AEQ  | 2.95 | 0.01 | 2.41 | 0.44 | 0.85 | 0.28 |
| 45241 | 0 | 41323  | MEECASHLPYIEQGMQL<br>AAE  | 2.94 | 0.01 | 1.96 | 0.44 | 0.85 | 0.28 |
| 45242 | 0 | 41324  | MEECASHLPYIEQGMQL<br>AEQ  | 2.95 | 0.01 | 2.41 | 0.44 | 0.85 | 0.28 |
| 45243 | 0 | 41325  | MEECASHLPYIEQGVQL<br>AEQ  | 2.93 | 0.01 | 1.96 | 0.44 | 0.85 | 0.28 |
| 45244 | 0 | 41329  | MEECASQLPYIEQGMQ<br>LAEQ  | 2.96 | 0.01 | 2.41 | 0.44 | 0.85 | 0.28 |
| 45245 | 0 | 41331  | MEECASRAALLEEGQRI<br>AEM  | 2.97 | 0.01 | 1.96 | 0.44 | 0.85 | 0.28 |
| 45246 | 0 | 41332  | MEECGSHLPYIEQGMQ<br>LAEQ  | 2.95 | 0.01 | 1.72 | 0.44 | 0.85 | 0.28 |
| 45247 | 0 | 41333  | MEECPSHLPYIEQGMQL<br>AEQ  | 2.95 | 0.01 | 1.72 | 0.44 | 0.85 | 0.28 |
| 45248 | 0 | 41334  | MEECSASLPYMDETRAI<br>AGQ  | 2.91 | 0.01 | 1.96 | 0.44 | 0.85 | 0.28 |
| 45249 | 0 | 41335  | MEECSKARPYIEQAQVI<br>AHQ  | 2.93 | 0.01 | 1.96 | 0.44 | 0.85 | 0.28 |
| 45250 | 0 | 41336  | MEECSKHLPLVEHGLQL<br>AEQ  | 2.94 | 0.01 | 1.96 | 0.44 | 0.85 | 0.28 |
| 45251 | 0 | 41338  | MEECSQAAPYIEQAQAI<br>AHQ  | 2.97 | 0.01 | 1.96 | 0.44 | 0.85 | 0.28 |
| 45252 | 0 | 41339  | MEECSQAAPYIEQAQVI<br>AHQ  | 2.96 | 0.01 | 1.96 | 0.44 | 0.85 | 0.28 |
| 45253 | 0 | 41340  | MEECSQAGPYIEQAQVI<br>AHQ  | 2.94 | 0.01 | 1.96 | 0.44 | 0.85 | 0.28 |
| 45254 | 0 | 41341  | MEECSQARPYIEQAQVI<br>AHQ  | 2.94 | 0.01 | 1.96 | 0.44 | 0.85 | 0.28 |

|       |   |        |                                                                 |      |      |      |      |      |      |
|-------|---|--------|-----------------------------------------------------------------|------|------|------|------|------|------|
| 45255 | 0 | 41343  | MEECSQHLPYIEQGMM<br>LAEQ                                        | 2.94 | 0.01 | 1.96 | 0.44 | 0.85 | 0.28 |
| 45256 | 0 | 41344  | MEECSQSAPYIEQAQAI<br>AQQ                                        | 2.97 | 0.01 | 1.96 | 0.44 | 0.85 | 0.28 |
| 45257 | 0 | 41350  | MEEINTLQ                                                        | 2.11 | 0.01 | 2.40 | 2.43 | 0.22 | 0.28 |
| 45258 | 0 | 167784 | MEEINTLQN                                                       | 2.22 | 0.01 | 2.40 | 2.43 | 0.22 | 0.28 |
| 45259 | 0 | 41351  | MEEKATYVHKKNDGTT<br>VDLT                                        | 2.93 | 0.01 | 2.82 | 0.44 | 0.85 | 0.28 |
| 45260 | 0 | 135719 | MEEKCSFE                                                        | 2.14 | 0.01 | 0.78 | 0.44 | 2.35 | 0.28 |
| 45261 | 0 | 172345 | MEELIKDGSSKQKAM                                                 | 2.67 | 0.01 | 0.78 | 0.44 | 1.13 | 0.28 |
| 45262 | 0 | 41359  | MEESTYQTMPRRGME                                                 | 2.69 | 0.01 | 4.08 | 0.44 | 1.23 | 1.28 |
| 45263 | 0 | 121613 | MEESVNQMQLNEKQI<br>ANSQDG                                       | 3.03 | 0.01 | 0.78 | 0.44 | 1.13 | 0.28 |
| 45264 | 0 | 117330 | MEESVNQMQLNEKQI<br>ANSQDGY                                      | 3.06 | 0.01 | 0.78 | 0.44 | 1.13 | 0.28 |
| 45265 | 0 | 117330 | MEESVNQMQLNEKQI<br>ANSQDGY                                      | 3.06 | 0.01 | 0.78 | 0.44 | 1.13 | 0.28 |
| 45266 | 0 | 117330 | MEESVNQMQLNEKQI<br>ANSQDGY                                      | 3.06 | 0.01 | 0.78 | 0.44 | 1.13 | 0.28 |
| 45267 | 0 | 117330 | MEESVNQMQLNEKQI<br>ANSQDGY                                      | 3.06 | 0.01 | 0.78 | 0.44 | 1.13 | 0.28 |
| 45268 | 0 | 117330 | MEESVNQMQLNEKQI<br>ANSQDGY                                      | 3.06 | 0.01 | 0.78 | 0.44 | 1.41 | 0.28 |
| 45269 | 0 | 422942 | MEFIPTQTFYNRRYQPR<br>PWTPRP TIQVIRPRPR<br>Q                     | 3.53 | 0.01 | 3.26 | 0.68 | 0.22 | 0.85 |
| 45270 | 0 | 422942 | MEFIPTQTFYNRRYQPR<br>PWTPRP TIQVIRPRPR<br>Q                     | 3.53 | 0.01 | 3.26 | 0.68 | 0.22 | 1.48 |
| 45271 | 0 | 422942 | MEFIPTQTFYNRRYQPR<br>PWTPRP TIQVIRPRPR<br>Q                     | 3.53 | 0.01 | 3.26 | 0.68 | 0.22 | 0.85 |
| 45272 | 0 | 187443 | MEGIGYSKVVENNL                                                  | 2.59 | 0.01 | 2.59 | 0.44 | 1.74 | 0.28 |
| 45273 | 0 | 187443 | MEGIGYSKVVENNL                                                  | 2.59 | 0.01 | 2.59 | 0.44 | 1.74 | 1.34 |
| 45274 | 0 | 187443 | MEGIGYSKVVENNL                                                  | 2.59 | 0.01 | 2.59 | 0.44 | 1.74 | 1.27 |
| 45275 | 0 | 41365  | MEGKVV                                                          | 1.86 | 0.01 | 2.40 | 0.44 | 0.85 | 0.28 |
| 45276 | 0 | 172349 | MEGLTAKVFRTYNAS                                                 | 2.62 | 0.01 | 0.78 | 0.44 | 1.41 | 0.28 |
| 45277 | 0 | 172349 | MEGLTAKVFRTYNAS                                                 | 2.62 | 0.01 | 0.78 | 0.44 | 1.13 | 0.28 |
| 45278 | 0 | 180131 | MEGPFFRDYALNVFVG<br>KVETNQLDLVASFVKNQ<br>TQHLMGNSLKDEPLLEE<br>L | 3.87 | 0.01 | 0.78 | 0.44 | 1.93 | 0.28 |
| 45279 | 0 | 41368  | MEGQYKSNLLFT                                                    | 2.42 | 0.01 | 0.90 | 1.15 | 0.22 | 1.39 |
| 45280 | 0 | 119615 | MEGVEEKKKEVPAVPET<br>LKKKRRNFAEL                                | 3.27 | 0.01 | 0.78 | 0.44 | 1.13 | 0.85 |

|       |   |        |                                      |      |      |      |      |      |      |
|-------|---|--------|--------------------------------------|------|------|------|------|------|------|
| 45281 | 0 | 131975 | MEIDDGTSAWGDPSK                      | 2.66 | 0.01 | 0.78 | 0.44 | 1.13 | 0.85 |
| 45282 | 0 | 338202 | MEIDGGEWTNGTAIV                      | 2.68 | 0.01 | 1.61 | 0.44 | 0.85 | 1.28 |
| 45283 | 0 | 131976 | MEIDKHSLNIGDYNR                      | 2.64 | 0.01 | 0.78 | 0.44 | 1.13 | 0.85 |
| 45284 | 0 | 41374  | MEIKTIVQNSYNSFSDIN<br>KNINDIDKEMKTLI | 3.43 | 0.01 | 2.22 | 0.44 | 1.74 | 0.28 |
| 45285 | 0 | 41374  | MEIKTIVQNSYNSFSDIN<br>KNINDIDKEMKTLI | 3.43 | 0.01 | 2.22 | 0.44 | 1.74 | 0.28 |
| 45286 | 0 | 41375  | MEILGIAINRYNGLTLRG                   | 2.87 | 0.01 | 3.42 | 0.68 | 0.22 | 1.27 |
| 45287 | 0 | 41375  | MEILGIAINRYNGLTLRG                   | 2.87 | 0.01 | 3.42 | 1.15 | 0.22 | 1.27 |
| 45288 | 0 | 41375  | MEILGIAINRYNGLTLRG                   | 2.87 | 0.01 | 3.42 | 0.68 | 0.22 | 2.35 |
| 45289 | 0 | 41375  | MEILGIAINRYNGLTLRG                   | 2.87 | 0.01 | 3.42 | 0.68 | 0.22 | 2.35 |
| 45290 | 0 | 41375  | MEILGIAINRYNGLTLRG                   | 2.87 | 0.01 | 3.42 | 0.68 | 0.22 | 0.28 |
| 45291 | 0 | 41376  | MEIQNTKP                             | 2.10 | 0.01 | 3.53 | 2.61 | 0.22 | 0.28 |
| 45292 | 0 | 141957 | MEKIAEEDI                            | 2.24 | 0.01 | 3.13 | 0.68 | 0.22 | 0.28 |
| 45293 | 0 | 423430 | MELDSVEEEDDFGAS                      | 2.67 | 0.01 | 2.51 | 0.44 | 2.35 | 1.28 |
| 45294 | 0 | 139554 | MELERPGGNEITRGG                      | 2.68 | 4.45 | 0.78 | 0.44 | 1.13 | 0.28 |
| 45295 | 0 | 41402  | MENATTINETLVEEVYN<br>MTMSYFE         | 3.15 | 0.01 | 3.85 | 0.68 | 0.22 | 0.85 |
| 45296 | 0 | 41402  | MENATTINETLVEEVYN<br>MTMSYFE         | 3.15 | 0.01 | 3.85 | 0.68 | 0.22 | 1.48 |
| 45297 | 0 | 172350 | MENDIQLYQSQLEAK                      | 2.66 | 0.01 | 0.78 | 0.44 | 1.13 | 0.28 |
| 45298 | 0 | 152812 | MENIILSKNE                           | 2.32 | 0.01 | 2.18 | 2.16 | 0.22 | 0.28 |
| 45299 | 0 | 41406  | MENITSGFLGPLLVLQ                     | 2.71 | 0.01 | 2.08 | 1.12 | 0.22 | 2.02 |
| 45300 | 0 | 41406  | MENITSGFLGPLLVLQ                     | 2.71 | 0.01 | 2.08 | 1.12 | 0.22 | 2.02 |
| 45301 | 0 | 41406  | MENITSGFLGPLLVLQ                     | 2.71 | 0.01 | 2.08 | 1.12 | 0.22 | 2.02 |
| 45302 | 0 | 95590  | MENSAE                               | 1.90 | 0.01 | 1.60 | 0.44 | 1.23 | 0.28 |
| 45303 | 0 | 98902  | MENSAEPEQS                           | 2.33 | 0.01 | 1.60 | 0.44 | 1.23 | 0.85 |
| 45304 | 0 | 41413  | MENVGSLDRLVESAKRE                    | 2.79 | 0.01 | 3.59 | 2.02 | 0.22 | 0.28 |
| 45305 | 0 | 41416  | MENYFHWGPVTNQSIQ                     | 2.67 | 0.01 | 2.74 | 2.13 | 0.22 | 0.28 |
| 45306 | 0 | 41419  | MEPDTPAGLPWALQG                      | 2.68 | 0.01 | 3.50 | 2.22 | 0.22 | 0.28 |
| 45307 | 0 | 41421  | MEQFIRAFIEIDKDNNEL<br>ID             | 2.95 | 0.01 | 2.93 | 1.81 | 0.22 | 0.28 |
| 45308 | 0 | 41421  | MEQFIRAFIEIDKDNNEL<br>ID             | 2.95 | 0.01 | 2.93 | 2.69 | 0.22 | 0.28 |
| 45309 | 0 | 109585 | MEREKEQFRKLFIGGLSF<br>ETT            | 2.99 | 0.01 | 1.75 | 0.44 | 1.13 | 0.28 |
| 45310 | 0 | 240052 | MERFLRKYNISGDYAN                     | 2.69 | 0.01 | 2.70 | 0.68 | 0.22 | 0.28 |

|       |   |        |                              |      |      |      |      |      |      |
|-------|---|--------|------------------------------|------|------|------|------|------|------|
| 45311 | 0 | 240052 | MERFLRKYNISGDYAN             | 2.69 | 0.01 | 2.70 | 0.68 | 0.22 | 0.28 |
| 45312 | 0 | 118904 | MERKRRE                      | 2.04 | 0.01 | 0.78 | 0.44 | 1.13 | 1.27 |
| 45313 | 0 | 132473 | MERKRREKIE                   | 2.35 | 0.01 | 0.78 | 0.44 | 1.13 | 0.28 |
| 45314 | 0 | 118905 | MERKRREKIER                  | 2.45 | 0.01 | 0.78 | 1.12 | 0.22 | 0.28 |
| 45315 | 0 | 41430  | MERVVEQMCITQYQRE<br>SQAY     | 2.96 | 0.01 | 2.52 | 1.15 | 0.22 | 0.85 |
| 45316 | 0 | 41430  | MERVVEQMCITQYQRE<br>SQAY     | 2.96 | 0.01 | 2.52 | 1.15 | 0.22 | 0.28 |
| 45317 | 0 | 41430  | MERVVEQMCITQYQRE<br>SQAY     | 2.96 | 0.01 | 2.52 | 1.15 | 0.22 | 0.85 |
| 45318 | 0 | 41430  | MERVVEQMCITQYQRE<br>SQAY     | 2.96 | 0.01 | 2.52 | 3.93 | 0.22 | 0.85 |
| 45319 | 0 | 41430  | MERVVEQMCITQYQRE<br>SQAY     | 2.96 | 0.01 | 2.52 | 2.90 | 0.22 | 0.85 |
| 45320 | 0 | 41430  | MERVVEQMCITQYQRE<br>SQAY     | 2.96 | 0.01 | 2.52 | 2.90 | 0.22 | 0.28 |
| 45321 | 0 | 41430  | MERVVEQMCITQYQRE<br>SQAY     | 2.96 | 0.01 | 1.60 | 0.68 | 0.22 | 0.85 |
| 45322 | 0 | 41430  | MERVVEQMCITQYQRE<br>SQAY     | 2.96 | 0.01 | 1.60 | 0.68 | 0.22 | 0.85 |
| 45323 | 0 | 41430  | MERVVEQMCITQYQRE<br>SQAY     | 2.96 | 0.01 | 1.60 | 0.68 | 0.22 | 0.85 |
| 45324 | 0 | 41430  | MERVVEQMCITQYQRE<br>SQAY     | 2.96 | 0.01 | 1.60 | 0.68 | 0.22 | 1.48 |
| 45325 | 0 | 41431  | MERVVEQMCVTQYQKE<br>SQAY     | 2.96 | 0.01 | 1.75 | 2.90 | 0.22 | 0.28 |
| 45326 | 0 | 41431  | MERVVEQMCVTQYQKE<br>SQAY     | 2.96 | 0.01 | 1.75 | 2.90 | 0.22 | 0.85 |
| 45327 | 0 | 41431  | MERVVEQMCVTQYQKE<br>SQAY     | 2.96 | 0.01 | 1.75 | 2.90 | 0.22 | 0.85 |
| 45328 | 0 | 41431  | MERVVEQMCVTQYQKE<br>SQAY     | 2.96 | 0.01 | 1.75 | 2.90 | 0.22 | 0.85 |
| 45329 | 0 | 41431  | MERVVEQMCVTQYQKE<br>SQAY     | 2.96 | 0.01 | 1.75 | 2.90 | 0.22 | 0.85 |
| 45330 | 0 | 113091 | MESALDQLKQFTTVV              | 2.63 | 0.01 | 0.78 | 0.44 | 1.13 | 0.85 |
| 45331 | 0 | 172352 | MESFENPFRMFLPSL              | 2.72 | 0.01 | 0.78 | 0.44 | 1.13 | 0.28 |
| 45332 | 0 | 532920 | MESLSEETKKDIFGEVYT<br>DSIGKE | 3.13 | 0.01 | 2.56 | 0.68 | 0.22 | 1.75 |
| 45333 | 0 | 532920 | MESLSEETKKDIFGEVYT<br>DSIGKE | 3.13 | 0.01 | 2.56 | 0.68 | 0.22 | 0.28 |
| 45334 | 0 | 532920 | MESLSEETKKDIFGEVYT<br>DSIGKE | 3.13 | 0.01 | 2.56 | 0.68 | 0.22 | 0.28 |
| 45335 | 0 | 532920 | MESLSEETKKDIFGEVYT<br>DSIGKE | 3.13 | 0.01 | 2.56 | 0.68 | 0.22 | 1.34 |
| 45336 | 0 | 532920 | MESLSEETKKDIFGEVYT<br>DSIGKE | 3.13 | 0.01 | 2.56 | 0.68 | 0.22 | 0.28 |

|       |   |        |                              |      |      |      |      |      |      |
|-------|---|--------|------------------------------|------|------|------|------|------|------|
| 45337 | 0 | 532920 | MESLSEETKKDIFGEVYT<br>DSIGKE | 3.13 | 0.01 | 2.56 | 0.68 | 0.22 | 0.28 |
| 45338 | 0 | 123487 | MESNRFIKW                    | 2.18 | 0.01 | 2.28 | 2.00 | 0.22 | 0.28 |
| 45339 | 0 | 137930 | MESPHDLVVDTV                 | 2.47 | 0.01 | 2.21 | 0.44 | 0.85 | 0.28 |
| 45340 | 0 | 137930 | MESPHDLVVDTV                 | 2.47 | 0.01 | 2.21 | 1.20 | 0.22 | 0.28 |
| 45341 | 0 | 41439  | MESSAKRKMDPDNPD              | 2.70 | 0.01 | 2.51 | 0.44 | 2.35 | 1.28 |
| 45342 | 0 | 41445  | METIKSIADMATGV               | 2.62 | 0.01 | 3.65 | 1.12 | 0.22 | 0.28 |
| 45343 | 0 | 41445  | METIKSIADMATGV               | 2.62 | 0.01 | 3.65 | 1.12 | 0.22 | 0.28 |
| 45344 | 0 | 41445  | METIKSIADMATGV               | 2.62 | 0.01 | 3.65 | 1.12 | 0.22 | 0.28 |
| 45345 | 0 | 41449  | METMKLMMEKVD                 | 2.51 | 0.01 | 3.51 | 2.36 | 0.22 | 0.28 |
| 45346 | 0 | 41449  | METMKLMMEKVD                 | 2.51 | 0.01 | 3.51 | 2.02 | 2.39 | 0.28 |
| 45347 | 0 | 41449  | METMKLMMEKVD                 | 2.51 | 0.01 | 3.51 | 1.12 | 0.22 | 0.28 |
| 45348 | 0 | 187683 | METTMRSPVFTDNSSP             | 2.74 | 0.01 | 1.96 | 0.68 | 0.22 | 0.28 |
| 45349 | 0 | 187683 | METTMRSPVFTDNSSP             | 2.74 | 0.01 | 1.96 | 0.68 | 0.22 | 0.28 |
| 45350 | 0 | 187683 | METTMRSPVFTDNSSP             | 2.74 | 0.01 | 1.96 | 0.68 | 0.22 | 1.48 |
| 45351 | 0 | 41454  | METTVKAQPFLPKVLHK<br>RT      | 2.89 | 0.01 | 2.08 | 1.15 | 0.22 | 0.28 |
| 45352 | 0 | 112226 | MEVGWYRPPFSRVVHL<br>YRNGK    | 2.95 | 0.01 | 0.78 | 3.41 | 0.22 | 0.28 |
| 45353 | 0 | 112226 | MEVGWYRPPFSRVVHL<br>YRNGK    | 2.95 | 0.01 | 0.78 | 3.41 | 0.22 | 0.28 |
| 45354 | 0 | 112226 | MEVGWYRPPFSRVVHL<br>YRNGK    | 2.95 | 0.01 | 0.78 | 1.81 | 0.22 | 1.27 |
| 45355 | 0 | 112226 | MEVGWYRPPFSRVVHL<br>YRNGK    | 2.95 | 0.01 | 0.78 | 1.81 | 0.22 | 0.28 |
| 45356 | 0 | 112226 | MEVGWYRPPFSRVVHL<br>YRNGK    | 2.95 | 0.01 | 0.78 | 1.81 | 0.22 | 1.27 |
| 45357 | 0 | 112226 | MEVGWYRPPFSRVVHL<br>YRNGK    | 2.95 | 0.01 | 0.78 | 1.81 | 0.22 | 0.28 |
| 45358 | 0 | 112226 | MEVGWYRPPFSRVVHL<br>YRNGK    | 2.95 | 0.01 | 0.78 | 0.44 | 1.41 | 1.27 |
| 45359 | 0 | 112226 | MEVGWYRPPFSRVVHL<br>YRNGK    | 2.95 | 0.01 | 0.78 | 0.44 | 1.13 | 0.28 |
| 45360 | 0 | 112226 | MEVGWYRPPFSRVVHL<br>YRNGK    | 2.95 | 0.01 | 0.78 | 0.44 | 1.13 | 0.28 |
| 45361 | 0 | 112226 | MEVGWYRPPFSRVVHL<br>YRNGK    | 2.95 | 0.01 | 0.78 | 0.44 | 1.41 | 0.28 |
| 45362 | 0 | 112226 | MEVGWYRPPFSRVVHL<br>YRNGK    | 2.95 | 0.01 | 0.78 | 1.81 | 2.60 | 1.75 |
| 45363 | 0 | 112226 | MEVGWYRPPFSRVVHL<br>YRNGK    | 2.95 | 0.01 | 0.78 | 0.44 | 1.13 | 0.28 |
| 45364 | 0 | 112226 | MEVGWYRPPFSRVVHL<br>YRNGK    | 2.95 | 0.01 | 0.78 | 0.44 | 1.41 | 0.28 |



|       |   |        |                        |      |      |      |      |      |      |
|-------|---|--------|------------------------|------|------|------|------|------|------|
| 45365 | 0 | 133226 | MEVGWYRPPFSRVVHLYRNGKD | 2.98 | 0.01 | 0.78 | 2.61 | 0.22 | 0.28 |
| 45366 | 0 | 133226 | MEVGWYRPPFSRVVHLYRNGKD | 2.98 | 0.01 | 0.78 | 2.61 | 0.22 | 0.28 |
| 45367 | 0 | 133226 | MEVGWYRPPFSRVVHLYRNGKD | 2.98 | 0.01 | 0.78 | 2.61 | 0.22 | 0.28 |
| 45368 | 0 | 133226 | MEVGWYRPPFSRVVHLYRNGKD | 2.98 | 0.01 | 0.78 | 2.61 | 0.22 | 0.28 |
| 45369 | 0 | 113645 | MEVGWYRSPFSRVVHLYRNGK  | 2.96 | 0.01 | 1.75 | 3.41 | 0.22 | 0.28 |
| 45370 | 0 | 113645 | MEVGWYRSPFSRVVHLYRNGK  | 2.96 | 0.01 | 1.75 | 3.41 | 0.22 | 0.28 |
| 45371 | 0 | 113645 | MEVGWYRSPFSRVVHLYRNGK  | 2.96 | 0.01 | 2.19 | 2.04 | 2.60 | 1.75 |
| 45372 | 0 | 113645 | MEVGWYRSPFSRVVHLYRNGK  | 2.96 | 0.01 | 2.19 | 2.04 | 0.22 | 0.28 |
| 45373 | 0 | 113645 | MEVGWYRSPFSRVVHLYRNGK  | 2.96 | 0.01 | 2.19 | 2.04 | 0.22 | 0.28 |
| 45374 | 0 | 113645 | MEVGWYRSPFSRVVHLYRNGK  | 2.96 | 0.01 | 1.75 | 1.81 | 0.22 | 0.28 |
| 45375 | 0 | 113645 | MEVGWYRSPFSRVVHLYRNGK  | 2.96 | 0.01 | 1.75 | 2.04 | 0.22 | 0.28 |
| 45376 | 0 | 113645 | MEVGWYRSPFSRVVHLYRNGK  | 2.96 | 0.01 | 1.75 | 2.04 | 0.22 | 0.28 |
| 45377 | 0 | 113645 | MEVGWYRSPFSRVVHLYRNGK  | 2.96 | 0.01 | 1.75 | 2.04 | 0.22 | 0.28 |
| 45378 | 0 | 113645 | MEVGWYRSPFSRVVHLYRNGK  | 2.96 | 0.01 | 1.75 | 2.04 | 0.22 | 0.28 |
| 45379 | 0 | 113645 | MEVGWYRSPFSRVVHLYRNGK  | 2.96 | 0.01 | 1.75 | 1.81 | 0.22 | 0.28 |
| 45380 | 0 | 113645 | MEVGWYRSPFSRVVHLYRNGK  | 2.96 | 0.01 | 1.75 | 4.93 | 0.22 | 0.28 |
| 45381 | 0 | 113645 | MEVGWYRSPFSRVVHLYRNGK  | 2.96 | 0.01 | 1.75 | 3.33 | 2.60 | 1.75 |
| 45382 | 0 | 113645 | MEVGWYRSPFSRVVHLYRNGK  | 2.96 | 0.01 | 1.75 | 3.33 | 0.22 | 0.28 |
| 45383 | 0 | 113645 | MEVGWYRSPFSRVVHLYRNGK  | 2.96 | 0.01 | 1.75 | 3.33 | 0.22 | 0.28 |
| 45384 | 0 | 113645 | MEVGWYRSPFSRVVHLYRNGK  | 2.96 | 0.01 | 1.75 | 3.33 | 0.22 | 0.28 |
| 45385 | 0 | 113645 | MEVGWYRSPFSRVVHLYRNGK  | 2.96 | 0.01 | 1.75 | 3.33 | 0.22 | 0.28 |
| 45386 | 0 | 113645 | MEVGWYRSPFSRVVHLYRNGK  | 2.96 | 0.01 | 1.75 | 3.33 | 0.22 | 0.28 |
| 45387 | 0 | 113645 | MEVGWYRSPFSRVVHLYRNGK  | 2.96 | 0.01 | 1.75 | 1.81 | 2.60 | 1.75 |

|       |   |        |                           |      |      |      |      |      |      |
|-------|---|--------|---------------------------|------|------|------|------|------|------|
| 45388 | 0 | 113645 | MEVGWYRSPFSRVVHL<br>YRNGK | 2.96 | 0.01 | 1.75 | 3.75 | 2.60 | 1.75 |
| 45389 | 0 | 113645 | MEVGWYRSPFSRVVHL<br>YRNGK | 2.96 | 0.01 | 1.75 | 1.81 | 0.22 | 0.28 |
| 45390 | 0 | 113645 | MEVGWYRSPFSRVVHL<br>YRNGK | 2.96 | 0.01 | 1.75 | 1.81 | 0.22 | 0.28 |
| 45391 | 0 | 113645 | MEVGWYRSPFSRVVHL<br>YRNGK | 2.96 | 0.01 | 1.75 | 1.81 | 0.22 | 0.28 |
| 45392 | 0 | 113645 | MEVGWYRSPFSRVVHL<br>YRNGK | 2.96 | 0.01 | 1.75 | 1.81 | 0.22 | 0.28 |
| 45393 | 0 | 113645 | MEVGWYRSPFSRVVHL<br>YRNGK | 2.96 | 0.01 | 1.75 | 1.81 | 0.22 | 0.28 |
| 45394 | 0 | 113645 | MEVGWYRSPFSRVVHL<br>YRNGK | 2.96 | 0.01 | 1.75 | 1.81 | 0.22 | 0.28 |
| 45395 | 0 | 113645 | MEVGWYRSPFSRVVHL<br>YRNGK | 2.96 | 0.01 | 1.75 | 1.81 | 0.22 | 0.28 |
| 45396 | 0 | 113645 | MEVGWYRSPFSRVVHL<br>YRNGK | 2.96 | 0.01 | 2.19 | 2.04 | 0.22 | 0.28 |
| 45397 | 0 | 113645 | MEVGWYRSPFSRVVHL<br>YRNGK | 2.96 | 0.01 | 2.19 | 2.04 | 0.22 | 0.28 |
| 45398 | 0 | 113645 | MEVGWYRSPFSRVVHL<br>YRNGK | 2.96 | 0.01 | 2.19 | 2.04 | 0.22 | 0.28 |
| 45399 | 0 | 113645 | MEVGWYRSPFSRVVHL<br>YRNGK | 2.96 | 0.01 | 2.19 | 2.04 | 0.22 | 0.28 |
| 45400 | 0 | 113645 | MEVGWYRSPFSRVVHL<br>YRNGK | 2.96 | 0.01 | 2.19 | 2.04 | 0.22 | 0.28 |
| 45401 | 0 | 113645 | MEVGWYRSPFSRVVHL<br>YRNGK | 2.96 | 0.01 | 1.75 | 3.72 | 0.22 | 0.28 |
| 45402 | 0 | 113645 | MEVGWYRSPFSRVVHL<br>YRNGK | 2.96 | 0.01 | 1.75 | 3.72 | 0.22 | 0.28 |
| 45403 | 0 | 113645 | MEVGWYRSPFSRVVHL<br>YRNGK | 2.96 | 0.01 | 1.75 | 3.72 | 0.22 | 0.28 |
| 45404 | 0 | 113645 | MEVGWYRSPFSRVVHL<br>YRNGK | 2.96 | 0.01 | 1.75 | 1.81 | 0.22 | 0.28 |
| 45405 | 0 | 113645 | MEVGWYRSPFSRVVHL<br>YRNGK | 2.96 | 0.01 | 1.75 | 1.81 | 0.22 | 0.85 |
| 45406 | 0 | 113645 | MEVGWYRSPFSRVVHL<br>YRNGK | 2.96 | 0.01 | 1.75 | 1.81 | 0.22 | 0.85 |
| 45407 | 0 | 113645 | MEVGWYRSPFSRVVHL<br>YRNGK | 2.96 | 0.01 | 1.75 | 1.81 | 0.22 | 0.28 |
| 45408 | 0 | 113645 | MEVGWYRSPFSRVVHL<br>YRNGK | 2.96 | 0.01 | 1.75 | 1.81 | 0.22 | 0.28 |
| 45409 | 0 | 113645 | MEVGWYRSPFSRVVHL<br>YRNGK | 2.96 | 0.01 | 1.75 | 3.40 | 0.22 | 0.28 |
| 45410 | 0 | 113645 | MEVGWYRSPFSRVVHL<br>YRNGK | 2.96 | 0.01 | 1.75 | 1.81 | 0.22 | 0.28 |

|       |   |        |                           |      |      |      |      |      |      |
|-------|---|--------|---------------------------|------|------|------|------|------|------|
| 45411 | 0 | 113645 | MEVGWYRSPFSRVVHL<br>YRNGK | 2.96 | 0.01 | 1.75 | 1.81 | 0.22 | 0.28 |
| 45412 | 0 | 113645 | MEVGWYRSPFSRVVHL<br>YRNGK | 2.96 | 0.01 | 1.75 | 1.81 | 0.22 | 0.28 |
| 45413 | 0 | 113645 | MEVGWYRSPFSRVVHL<br>YRNGK | 2.96 | 0.01 | 1.75 | 1.81 | 0.22 | 0.28 |
| 45414 | 0 | 113645 | MEVGWYRSPFSRVVHL<br>YRNGK | 2.96 | 0.01 | 1.75 | 1.81 | 0.22 | 0.28 |
| 45415 | 0 | 113645 | MEVGWYRSPFSRVVHL<br>YRNGK | 2.96 | 0.01 | 1.75 | 1.81 | 0.22 | 1.27 |
| 45416 | 0 | 113645 | MEVGWYRSPFSRVVHL<br>YRNGK | 2.96 | 0.01 | 1.75 | 1.81 | 0.22 | 0.28 |
| 45417 | 0 | 113645 | MEVGWYRSPFSRVVHL<br>YRNGK | 2.96 | 0.01 | 1.75 | 1.81 | 0.22 | 1.27 |
| 45418 | 0 | 113645 | MEVGWYRSPFSRVVHL<br>YRNGK | 2.96 | 0.01 | 1.75 | 1.81 | 0.22 | 0.28 |
| 45419 | 0 | 113645 | MEVGWYRSPFSRVVHL<br>YRNGK | 2.96 | 0.01 | 1.75 | 1.81 | 0.22 | 0.28 |
| 45420 | 0 | 113645 | MEVGWYRSPFSRVVHL<br>YRNGK | 2.96 | 0.01 | 1.75 | 1.81 | 0.22 | 0.28 |
| 45421 | 0 | 113645 | MEVGWYRSPFSRVVHL<br>YRNGK | 2.96 | 0.01 | 1.75 | 1.81 | 2.60 | 1.75 |
| 45422 | 0 | 113645 | MEVGWYRSPFSRVVHL<br>YRNGK | 2.96 | 0.01 | 1.75 | 1.81 | 0.22 | 0.85 |
| 45423 | 0 | 113645 | MEVGWYRSPFSRVVHL<br>YRNGK | 2.96 | 0.01 | 1.75 | 3.41 | 2.60 | 1.75 |
| 45424 | 0 | 113645 | MEVGWYRSPFSRVVHL<br>YRNGK | 2.96 | 0.01 | 1.75 | 0.44 | 1.41 | 0.28 |
| 45425 | 0 | 113645 | MEVGWYRSPFSRVVHL<br>YRNGK | 2.96 | 0.01 | 1.75 | 0.44 | 1.41 | 0.28 |
| 45426 | 0 | 113645 | MEVGWYRSPFSRVVHL<br>YRNGK | 2.96 | 0.01 | 1.75 | 0.44 | 1.41 | 1.66 |
| 45427 | 0 | 113645 | MEVGWYRSPFSRVVHL<br>YRNGK | 2.96 | 0.01 | 1.75 | 1.81 | 0.22 | 0.85 |
| 45428 | 0 | 113645 | MEVGWYRSPFSRVVHL<br>YRNGK | 2.96 | 0.01 | 1.75 | 1.81 | 0.22 | 0.85 |
| 45429 | 0 | 113645 | MEVGWYRSPFSRVVHL<br>YRNGK | 2.96 | 0.01 | 1.75 | 1.81 | 0.22 | 0.85 |
| 45430 | 0 | 113645 | MEVGWYRSPFSRVVHL<br>YRNGK | 2.96 | 0.01 | 1.75 | 1.81 | 0.22 | 0.85 |
| 45431 | 0 | 113645 | MEVGWYRSPFSRVVHL<br>YRNGK | 2.96 | 0.01 | 1.75 | 1.81 | 0.22 | 0.85 |
| 45432 | 0 | 113645 | MEVGWYRSPFSRVVHL<br>YRNGK | 2.96 | 0.01 | 1.75 | 1.81 | 0.22 | 0.85 |
| 45433 | 0 | 113645 | MEVGWYRSPFSRVVHL<br>YRNGK | 2.96 | 0.01 | 1.75 | 1.81 | 0.22 | 0.85 |

|       |   |        |                             |      |      |      |      |      |      |
|-------|---|--------|-----------------------------|------|------|------|------|------|------|
| 45434 | 0 | 113645 | MEVGWYRSPFSRVVHL<br>YRNGK   | 2.96 | 0.01 | 1.75 | 1.81 | 0.22 | 0.85 |
| 45435 | 0 | 113645 | MEVGWYRSPFSRVVHL<br>YRNGK   | 2.96 | 0.01 | 1.75 | 1.81 | 0.22 | 0.85 |
| 45436 | 0 | 113645 | MEVGWYRSPFSRVVHL<br>YRNGK   | 2.96 | 0.01 | 1.75 | 1.81 | 0.22 | 0.85 |
| 45437 | 0 | 113645 | MEVGWYRSPFSRVVHL<br>YRNGK   | 2.96 | 0.01 | 1.75 | 1.81 | 0.22 | 0.85 |
| 45438 | 0 | 113645 | MEVGWYRSPFSRVVHL<br>YRNGK   | 2.96 | 0.01 | 1.75 | 1.81 | 0.22 | 0.85 |
| 45439 | 0 | 113645 | MEVGWYRSPFSRVVHL<br>YRNGK   | 2.96 | 0.01 | 1.75 | 1.81 | 2.60 | 1.75 |
| 45440 | 0 | 113645 | MEVGWYRSPFSRVVHL<br>YRNGK   | 2.96 | 0.01 | 1.75 | 1.81 | 0.22 | 0.28 |
| 45441 | 0 | 113645 | MEVGWYRSPFSRVVHL<br>YRNGK   | 2.96 | 0.01 | 1.75 | 1.81 | 0.22 | 0.28 |
| 45442 | 0 | 113645 | MEVGWYRSPFSRVVHL<br>YRNGK   | 2.96 | 0.01 | 1.75 | 1.81 | 0.22 | 0.28 |
| 45443 | 0 | 113645 | MEVGWYRSPFSRVVHL<br>YRNGK   | 2.96 | 0.01 | 1.75 | 1.81 | 0.22 | 0.28 |
| 45444 | 0 | 113645 | MEVGWYRSPFSRVVHL<br>YRNGK   | 2.96 | 0.01 | 1.75 | 3.41 | 0.22 | 0.28 |
| 45445 | 0 | 113645 | MEVGWYRSPFSRVVHL<br>YRNGK   | 2.96 | 0.01 | 2.19 | 1.81 | 0.22 | 0.28 |
| 45446 | 0 | 113645 | MEVGWYRSPFSRVVHL<br>YRNGK   | 2.96 | 0.01 | 1.75 | 1.81 | 0.22 | 0.28 |
| 45447 | 0 | 113645 | MEVGWYRSPFSRVVHL<br>YRNGK   | 2.96 | 0.01 | 1.75 | 1.81 | 0.22 | 0.28 |
| 45448 | 0 | 113645 | MEVGWYRSPFSRVVHL<br>YRNGK   | 2.96 | 0.01 | 1.75 | 2.71 | 0.22 | 0.28 |
| 45449 | 0 | 113645 | MEVGWYRSPFSRVVHL<br>YRNGK   | 2.96 | 0.01 | 1.75 | 2.71 | 0.22 | 0.28 |
| 45450 | 0 | 113645 | MEVGWYRSPFSRVVHL<br>YRNGK   | 2.96 | 0.01 | 1.75 | 1.81 | 0.22 | 0.28 |
| 45451 | 0 | 113645 | MEVGWYRSPFSRVVHL<br>YRNGK   | 2.96 | 0.01 | 1.75 | 1.81 | 0.22 | 0.28 |
| 45452 | 0 | 225427 | MEVGWYRSPFSRVVHL<br>YRNGKDQ | 3.02 | 0.01 | 1.75 | 1.81 | 0.22 | 0.28 |
| 45453 | 0 | 131562 | MEVLGCEAQDLY                | 2.45 | 0.01 | 0.78 | 0.44 | 2.35 | 0.28 |
| 45454 | 0 | 41461  | MEVTPSGTWLTYHGAIK           | 2.74 | 0.01 | 2.91 | 0.44 | 0.85 | 0.28 |
| 45455 | 0 | 190495 | MEWELKKENSKRWNP             | 2.70 | 0.01 | 3.97 | 2.00 | 1.41 | 0.28 |
| 45456 | 0 | 188359 | MEYERTTEWL                  | 2.32 | 0.01 | 2.92 | 0.68 | 0.22 | 0.85 |
| 45457 | 0 | 188359 | MEYERTTEWL                  | 2.32 | 0.01 | 2.92 | 1.81 | 0.22 | 0.85 |
| 45458 | 0 | 41467  | MEYHPDLENLDEGYT             | 2.75 | 0.01 | 0.78 | 1.12 | 0.22 | 0.85 |

|       |   |        |                                              |      |      |      |      |      |      |
|-------|---|--------|----------------------------------------------|------|------|------|------|------|------|
| 45459 | 0 | 41475  | MFANSSAAVTAASNS<br>PQRS                      | 2.96 | 0.01 | 3.97 | 0.44 | 0.85 | 0.28 |
| 45460 | 0 | 225637 | MFATWSPSKARLH<br>MFATWSPSKARLHLQG            | 2.51 | 0.01 | 0.78 | 4.93 | 0.22 | 3.93 |
| 45461 | 0 | 225638 | RSNAWRPQVNNPKEW<br>LQVDF<br>MFAVKHCLLVVAVGAL | 3.50 | 0.01 | 0.78 | 0.44 | 2.35 | 3.93 |
| 45462 | 0 | 41478  | VNVSVRAAEFSGVVNQ<br>GPVD                     | 3.51 | 0.01 | 2.75 | 0.44 | 0.85 | 0.85 |
| 45463 | 0 | 41480  | MFDFASGL<br>MFEARLVQGSILKKVLEA               | 2.12 | 0.01 | 3.78 | 0.68 | 0.22 | 0.85 |
| 45464 | 0 | 117581 | LKDLNEACWDISSGV<br>NLQS                      | 3.59 | 0.01 | 0.78 | 0.44 | 1.13 | 2.02 |
| 45465 | 0 | 131977 | MFGVGNTAAQPRGMQ                              | 2.68 | 0.01 | 0.78 | 0.44 | 1.13 | 0.85 |
| 45466 | 0 | 41504  | MFIFLLFLTLTSGSDL                             | 2.84 | 0.01 | 2.48 | 0.44 | 0.85 | 0.28 |
| 45467 | 0 | 423431 | MFLGYSDCVDPLAV                               | 2.66 | 0.01 | 2.51 | 0.44 | 2.35 | 1.28 |
| 45468 | 0 | 41513  | MFLPMLPAPPPGQPSG<br>RRRGRRSGG                | 3.19 | 0.01 | 2.53 | 0.44 | 0.85 | 0.28 |
| 45469 | 0 | 41513  | MFLPMLPAPPPGQPSG<br>RRRGRRSGG                | 3.19 | 0.01 | 2.53 | 0.44 | 0.85 | 0.28 |
| 45470 | 0 | 41514  | MFLPMLPAPPPGQPSG<br>RRRGRRSGGSGGGF           | 3.38 | 0.01 | 2.53 | 0.44 | 0.85 | 0.28 |
| 45471 | 0 | 41514  | MFLPMLPAPPPGQPSG<br>RRRGRRSGGSGGGF           | 3.38 | 0.01 | 2.53 | 0.44 | 0.85 | 0.28 |
| 45472 | 0 | 41519  | MFNAGNKNSYIKLKDS<br>PV                       | 2.87 | 0.01 | 2.08 | 2.02 | 0.22 | 1.57 |
| 45473 | 0 | 101902 | MFNDPRLLAGPN                                 | 2.46 | 0.01 | 0.90 | 0.44 | 0.85 | 1.39 |
| 45474 | 0 | 41529  | MFNPV                                        | 1.74 | 0.01 | 4.08 | 0.68 | 0.22 | 0.28 |
| 45475 | 0 | 158600 | MFNWHPF                                      | 2.02 | 0.01 | 0.90 | 0.44 | 1.13 | 1.39 |
| 45476 | 0 | 119496 | MFPEVKEKGMAAL                                | 2.55 | 0.01 | 0.78 | 0.44 | 1.13 | 2.02 |
| 45477 | 0 | 119496 | MFPEVKEKGMAAL                                | 2.55 | 0.01 | 0.78 | 0.44 | 1.13 | 0.28 |
| 45478 | 0 | 180913 | MFPSCCCT                                     | 2.12 | 0.01 | 2.08 | 0.44 | 0.85 | 2.75 |
| 45479 | 0 | 153856 | MFQDPQER                                     | 2.12 | 0.01 | 1.86 | 1.12 | 0.22 | 2.02 |
| 45480 | 0 | 153856 | MFQDPQER                                     | 2.12 | 0.01 | 1.86 | 1.12 | 0.22 | 2.02 |
| 45481 | 0 | 153856 | MFQDPQER                                     | 2.12 | 0.01 | 1.86 | 1.12 | 0.22 | 2.02 |
| 45482 | 0 | 41536  | MFRGKENALL                                   | 2.26 | 0.01 | 1.75 | 0.68 | 0.22 | 0.28 |
| 45483 | 0 | 41536  | MFRGKENALL                                   | 2.26 | 0.01 | 1.75 | 0.68 | 0.22 | 0.28 |
| 45484 | 0 | 41537  | MFSGGGGPLSPGGKS                              | 2.71 | 0.01 | 4.08 | 0.68 | 0.22 | 0.28 |
| 45485 | 0 | 41537  | MFSGGGGPLSPGGKS                              | 2.71 | 0.01 | 4.08 | 0.68 | 0.22 | 2.02 |
| 45486 | 0 | 41537  | MFSGGGGPLSPGGKS                              | 2.71 | 0.01 | 4.08 | 0.68 | 0.22 | 1.27 |
| 45487 | 0 | 41537  | MFSGGGGPLSPGGKS                              | 2.71 | 0.01 | 4.08 | 0.68 | 0.22 | 1.48 |
| 45488 | 0 | 41541  | MFTCKK                                       | 1.86 | 0.01 | 2.40 | 0.44 | 0.85 | 0.28 |
| 45489 | 0 | 41544  | MFTKYNGNLNTI                                 | 2.48 | 0.01 | 3.61 | 1.20 | 0.22 | 0.85 |
| 45490 | 0 | 41548  | MFVPHYTLNANSIY                               | 2.63 | 0.01 | 2.72 | 0.44 | 1.23 | 0.85 |
| 45491 | 0 | 124505 | MFVYGCCQGNNNN                                | 2.54 | 0.01 | 0.78 | 0.68 | 0.22 | 0.28 |
| 45492 | 0 | 124505 | MFVYGCCQGNNNN                                | 2.54 | 0.01 | 0.78 | 0.68 | 0.22 | 0.28 |

|       |   |        |                    |      |      |      |      |      |      |
|-------|---|--------|--------------------|------|------|------|------|------|------|
|       |   |        | MFVYGGCQGNNNNM     |      |      |      |      |      |      |
| 45493 | 0 | 159003 | VYGGCQGNNNNM       | 3.64 | 0.01 | 0.90 | 0.68 | 0.22 | 3.16 |
|       |   |        | GGCQGNNNN          |      |      |      |      |      |      |
| 45494 | 0 | 193299 | MFYFGEDGVMQIGVFN   | 3.04 | 0.01 | 3.04 | 1.12 | 0.22 | 0.28 |
|       |   |        | TPDGFK             |      |      |      |      |      |      |
| 45495 | 0 | 193299 | MFYFGEDGVMQIGVFN   | 3.04 | 0.01 | 3.04 | 1.12 | 0.22 | 0.28 |
|       |   |        | TPDGFK             |      |      |      |      |      |      |
| 45496 | 0 | 97494  | MGAKPTGS           | 2.12 | 0.01 | 2.87 | 1.81 | 0.22 | 0.28 |
| 45497 | 0 | 41554  | MGAQVSTQKTGAHETS   | 2.96 | 0.01 | 3.61 | 0.44 | 2.39 | 0.28 |
|       |   |        | LSAS               |      |      |      |      |      |      |
| 45498 | 0 | 238765 | MGCGCPQSSRGVKVD    | 2.67 | 0.01 | 2.56 | 2.02 | 0.22 | 0.85 |
| 45499 | 0 | 238765 | MGCGCPQSSRGVKVD    | 2.67 | 0.01 | 2.56 | 1.20 | 0.22 | 0.85 |
| 45500 | 0 | 122857 | MGCSSPPCECHQEE     | 2.61 | 0.01 | 0.78 | 1.15 | 0.22 | 0.28 |
| 45501 | 0 | 122857 | MGCSSPPCECHQEE     | 2.61 | 0.01 | 0.78 | 1.81 | 0.22 | 0.85 |
| 45502 | 0 | 122857 | MGCSSPPCECHQEE     | 2.61 | 0.01 | 0.78 | 1.81 | 0.22 | 0.85 |
| 45503 | 0 | 122857 | MGCSSPPCECHQEE     | 2.61 | 0.01 | 0.78 | 0.68 | 0.22 | 0.28 |
| 45504 | 0 | 122857 | MGCSSPPCECHQEE     | 2.61 | 0.01 | 0.78 | 0.68 | 0.22 | 1.34 |
| 45505 | 0 | 122857 | MGCSSPPCECHQEE     | 2.61 | 0.01 | 0.78 | 0.68 | 0.22 | 2.02 |
| 45506 | 0 | 122857 | MGCSSPPCECHQEE     | 2.61 | 0.01 | 0.78 | 0.68 | 0.22 | 2.02 |
| 45507 | 0 | 125498 | MGCSSPPCECHQEEDFR  | 2.91 | 0.01 | 0.78 | 0.44 | 1.13 | 0.28 |
|       |   |        | VTC                |      |      |      |      |      |      |
| 45508 | 0 | 125498 | MGCSSPPCECHQEEDFR  | 2.91 | 0.01 | 0.78 | 4.45 | 0.22 | 0.28 |
|       |   |        | VTC                |      |      |      |      |      |      |
| 45509 | 0 | 41557  | MGDAGGYKAADMWG     | 3.19 | 0.01 | 2.59 | 0.44 | 0.85 | 0.28 |
|       |   |        | PPNDPAWQRND        |      |      |      |      |      |      |
| 45510 | 0 | 41557  | MGDAGGYKAADMWG     | 3.19 | 0.01 | 2.59 | 0.44 | 0.85 | 0.28 |
|       |   |        | PPNDPAWQRND        |      |      |      |      |      |      |
| 45511 | 0 | 41557  | MGDAGGYKAADMWG     | 3.19 | 0.01 | 2.59 | 0.44 | 0.85 | 0.28 |
|       |   |        | PPNDPAWQRND        |      |      |      |      |      |      |
| 45512 | 0 | 138203 | MGEFFMPYPGTRIN     | 2.61 | 0.01 | 2.51 | 1.20 | 0.22 | 0.28 |
|       |   |        | MGETLLRAVESYAGELEL |      |      |      |      |      |      |
| 45513 | 0 | 41566  | QFRRVKCKYTVATAPEV  | 3.76 | 0.01 | 0.90 | 0.68 | 2.60 | 1.75 |
|       |   |        | KYTVFETALK         |      |      |      |      |      |      |
|       |   |        | MGETLLRAVESYAGELEL |      |      |      |      |      |      |
| 45514 | 0 | 41566  | QFRRVKCKYTVATAPEV  | 3.76 | 0.01 | 0.90 | 0.68 | 2.60 | 1.75 |
|       |   |        | KYTVFETALK         |      |      |      |      |      |      |
|       |   |        | MGETLLRAVESYAGELEL |      |      |      |      |      |      |
| 45515 | 0 | 41566  | QFRRVKCKYTVATAPEV  | 3.76 | 0.01 | 0.90 | 0.68 | 2.60 | 1.75 |
|       |   |        | KYTVFETALK         |      |      |      |      |      |      |
| 45516 | 0 | 41567  | MGETLLRAVESYLL     | 2.59 | 0.01 | 2.76 | 0.68 | 2.25 | 0.28 |
| 45517 | 0 | 41567  | MGETLLRAVESYLL     | 2.59 | 0.01 | 2.76 | 0.68 | 2.25 | 1.75 |
| 45518 | 0 | 41571  | MGFGLFD            | 2.04 | 0.01 | 2.30 | 0.44 | 1.13 | 0.28 |
| 45519 | 0 | 41571  | MGFGLFD            | 2.04 | 0.01 | 2.30 | 0.44 | 0.85 | 0.28 |
| 45520 | 0 | 41571  | MGFGLFD            | 2.04 | 0.01 | 2.30 | 0.44 | 1.13 | 0.28 |
| 45521 | 0 | 41571  | MGFGLFD            | 2.04 | 0.01 | 2.30 | 0.44 | 1.13 | 0.28 |

|       |   |        |                                                   |      |      |      |      |      |      |
|-------|---|--------|---------------------------------------------------|------|------|------|------|------|------|
| 45522 | 0 | 41571  | MGFGLFD                                           | 2.04 | 0.01 | 2.30 | 0.44 | 0.85 | 0.28 |
| 45523 | 0 | 41571  | MGFGLFD                                           | 2.04 | 0.01 | 2.30 | 0.44 | 1.13 | 1.27 |
| 45524 | 0 | 41571  | MGFGLFD                                           | 2.04 | 0.01 | 2.30 | 0.44 | 0.85 | 1.27 |
| 45525 | 0 | 41571  | MGFGLFD                                           | 2.04 | 0.01 | 2.30 | 0.44 | 1.13 | 1.27 |
| 45526 | 0 | 41573  | MGFSYD                                            | 1.88 | 0.01 | 1.96 | 0.44 | 0.85 | 0.28 |
| 45527 | 0 | 41575  | MGGAAGGMPGGMPG<br>MSGMSG                          | 3.02 | 0.01 | 2.78 | 2.49 | 0.85 | 0.28 |
| 45528 | 0 | 41575  | MGGAAGGMPGGMPG<br>MSGMSG                          | 3.02 | 0.01 | 2.78 | 0.44 | 0.85 | 0.28 |
| 45529 | 0 | 179250 | MGGDLGQVFRRLTSA                                   | 2.65 | 0.01 | 2.36 | 0.44 | 1.23 | 1.28 |
| 45530 | 0 | 179250 | MGGDLGQVFRRLTSA                                   | 2.65 | 0.01 | 2.36 | 0.44 | 1.23 | 1.27 |
| 45531 | 0 | 179250 | MGGDLGQVFRRLTSA                                   | 2.65 | 0.01 | 2.36 | 0.44 | 1.23 | 1.28 |
| 45532 | 0 | 152008 | MGGLDDFCNDPI                                      | 2.46 | 0.01 | 2.80 | 2.78 | 0.22 | 0.28 |
| 45533 | 0 | 134160 | MGGPPMMPMMGPPP<br>PGM                             | 2.87 | 0.01 | 0.78 | 0.44 | 1.13 | 0.85 |
| 45534 | 0 | 41581  | MGGQSESVFTKDTQ                                    | 2.67 | 0.01 | 2.24 | 1.15 | 0.22 | 0.85 |
| 45535 | 0 | 41582  | MGGQSESVFTKDTQT                                   | 2.74 | 0.01 | 2.24 | 0.68 | 0.22 | 0.28 |
| 45536 | 0 | 41584  | MGGWSSKPRKGMGTN<br>LSVNP                          | 3.01 | 0.01 | 2.58 | 0.44 | 0.85 | 0.28 |
| 45537 | 0 | 41584  | MGGWSSKPRKGMGTN<br>LSVNP                          | 3.01 | 0.01 | 2.58 | 1.20 | 0.22 | 0.28 |
| 45538 | 0 | 41584  | MGGWSSKPRKGMGTN<br>LSVNP                          | 3.01 | 0.01 | 2.58 | 1.20 | 0.22 | 0.28 |
| 45539 | 0 | 41584  | MGGWSSKPRKGMGTN<br>LSVNP                          | 3.01 | 0.01 | 2.58 | 1.12 | 0.22 | 1.57 |
| 45540 | 0 | 41584  | MGGWSSKPRKGMGTN<br>LSVNP                          | 3.01 | 0.01 | 2.58 | 0.44 | 0.85 | 1.57 |
| 45541 | 0 | 41584  | MGGWSSKPRKGMGTN<br>LSVNP                          | 3.01 | 0.01 | 2.58 | 1.12 | 0.22 | 1.57 |
| 45542 | 0 | 104571 | MGILKLQVFLIVLSVALN<br>HLKATPIESHQVEKRKC<br>N<br>T | 3.54 | 0.01 | 0.78 | 0.44 | 1.13 | 1.27 |
| 45543 | 0 | 104571 | MGILKLQVFLIVLSVALN<br>HLKATPIESHQVEKRKC<br>N<br>T | 3.54 | 0.01 | 0.78 | 0.44 | 1.41 | 1.27 |
| 45544 | 0 | 104571 | MGILKLQVFLIVLSVALN<br>HLKATPIESHQVEKRKC<br>N<br>T | 3.54 | 0.01 | 0.78 | 1.12 | 0.22 | 0.28 |
| 45545 | 0 | 104571 | MGILKLQVFLIVLSVALN<br>HLKATPIESHQVEKRKC<br>N<br>T | 3.54 | 0.01 | 0.78 | 0.44 | 1.93 | 1.27 |
| 45546 | 0 | 123489 | MGIPPGRG                                          | 2.15 | 0.01 | 0.78 | 1.20 | 0.22 | 0.28 |
| 45547 | 0 | 41592  | MGIQLDQRIILLFM                                    | 2.64 | 0.01 | 2.56 | 2.69 | 0.22 | 0.28 |
| 45548 | 0 | 232551 | MGIRALPPCQNARQRLS                                 | 2.79 | 0.01 | 0.90 | 2.22 | 0.85 | 0.28 |

|       |   |        |                                |      |      |      |      |      |      |
|-------|---|--------|--------------------------------|------|------|------|------|------|------|
| 45549 | 0 | 232551 | MGIRALPPCQNARQRLS              | 2.79 | 0.01 | 0.90 | 2.22 | 0.85 | 1.27 |
| 45550 | 0 | 94608  | MGKFLATLILFFQFCPLIF<br>GDYSPSC | 3.19 | 0.01 | 2.04 | 0.44 | 0.85 | 0.28 |
| 45551 | 0 | 421391 | MGLCCPTKEELFA                  | 2.58 | 0.01 | 3.19 | 0.44 | 1.23 | 1.28 |
| 45552 | 0 | 123491 | MGLDLPNLP                      | 2.25 | 0.01 | 2.28 | 2.00 | 0.22 | 0.28 |
| 45553 | 0 | 123491 | MGLDLPNLP                      | 2.25 | 0.01 | 2.28 | 2.00 | 0.22 | 0.28 |
| 45554 | 0 | 123491 | MGLDLPNLP                      | 2.25 | 0.01 | 2.28 | 2.00 | 0.22 | 0.28 |
| 45555 | 0 | 41601  | MGLIAGAVGGSLLAALV              | 2.84 | 0.01 | 2.40 | 1.15 | 0.22 | 0.85 |
| 45556 | 0 | 41604  | MGLKVNVSALFMAVL                | 2.69 | 0.01 | 2.43 | 0.44 | 1.59 | 0.28 |
| 45557 | 0 | 115381 | MGLLECCARCLVGAPF               | 2.74 | 0.01 | 2.19 | 1.12 | 0.22 | 0.28 |
| 45558 | 0 | 179251 | MGLTEFQAVKEMQDG                | 2.67 | 0.01 | 2.36 | 0.44 | 1.23 | 1.28 |
| 45559 | 0 | 179251 | MGLTEFQAVKEMQDG                | 2.67 | 0.01 | 2.36 | 0.44 | 1.23 | 1.27 |
| 45560 | 0 | 179251 | MGLTEFQAVKEMQDG                | 2.67 | 0.01 | 2.36 | 0.44 | 1.23 | 1.28 |
| 45561 | 0 | 186776 | MGNLGANSIETDVSF                | 2.64 | 0.01 | 0.90 | 1.20 | 0.22 | 0.85 |
| 45562 | 0 | 41606  | MGNNIKVTFNPDKIAA<br>WWPAVGTTY  | 3.14 | 0.01 | 4.08 | 1.12 | 0.22 | 0.28 |
| 45563 | 0 | 41606  | MGNNIKVTFNPDKIAA<br>WWPAVGTTY  | 3.14 | 0.01 | 4.08 | 1.12 | 0.22 | 0.28 |
| 45564 | 0 | 41606  | MGNNIKVTFNPDKIAA<br>WWPAVGTTY  | 3.14 | 0.01 | 4.08 | 1.12 | 0.22 | 0.28 |
| 45565 | 0 | 489665 | MGNSPSYNPPAGISP                | 2.71 | 0.01 | 2.69 | 3.05 | 0.85 | 1.28 |
| 45566 | 0 | 134752 | MGPKRRQLTF                     | 2.28 | 0.01 | 0.78 | 0.44 | 1.13 | 0.85 |
| 45567 | 0 | 134752 | MGPKRRQLTF                     | 2.28 | 0.01 | 0.78 | 3.05 | 1.13 | 0.85 |
| 45568 | 0 | 181728 | MGPKRRQLTFREK                  | 2.53 | 0.01 | 0.78 | 0.44 | 1.13 | 0.28 |
| 45569 | 0 | 167624 | MGPKRRQLTFREKSR                | 2.66 | 0.01 | 0.78 | 0.44 | 1.13 | 0.85 |
| 45570 | 0 | 41608  | MGPNLVLPDQKPPS                 | 2.60 | 0.01 | 3.27 | 1.15 | 0.22 | 1.27 |
| 45571 | 0 | 41608  | MGPNLVLPDQKPPS                 | 2.60 | 0.01 | 3.27 | 1.15 | 0.22 | 0.28 |
| 45572 | 0 | 41608  | MGPNLVLPDQKPPS                 | 2.60 | 0.01 | 3.27 | 1.15 | 0.22 | 1.34 |
| 45573 | 0 | 86247  | MGPNLVLPDQKPPSRQ<br>SQTGSKVA   | 3.12 | 0.01 | 3.27 | 0.68 | 0.22 | 0.28 |
| 45574 | 0 | 86247  | MGPNLVLPDQKPPSRQ<br>SQTGSKVA   | 3.12 | 0.01 | 3.27 | 1.20 | 0.22 | 0.28 |
| 45575 | 0 | 86247  | MGPNLVLPDQKPPSRQ<br>SQTGSKVA   | 3.12 | 0.01 | 3.27 | 3.16 | 0.22 | 0.28 |
| 45576 | 0 | 86247  | MGPNLVLPDQKPPSRQ<br>SQTGSKVA   | 3.12 | 0.01 | 3.27 | 0.68 | 0.22 | 1.27 |
| 45577 | 0 | 86247  | MGPNLVLPDQKPPSRQ<br>SQTGSKVA   | 3.12 | 0.01 | 3.27 | 0.68 | 0.22 | 1.48 |
| 45578 | 0 | 86247  | MGPNLVLPDQKPPSRQ<br>SQTGSKVA   | 3.12 | 0.01 | 3.27 | 0.68 | 0.22 | 1.34 |
| 45579 | 0 | 119272 | MGPPIGLPPAR                    | 2.42 | 0.01 | 0.78 | 0.44 | 1.13 | 0.85 |



|       |   |        |                   |      |      |      |      |      |      |
|-------|---|--------|-------------------|------|------|------|------|------|------|
| 45580 | 0 | 133231 | MGPRRRSRKP        | 2.34 | 0.01 | 0.78 | 0.44 | 1.13 | 0.85 |
| 45581 | 0 | 133231 | MGPRRRSRKP        | 2.34 | 0.01 | 0.78 | 0.44 | 1.13 | 0.85 |
| 45582 | 0 | 133231 | MGPRRRSRKP        | 2.34 | 0.01 | 0.78 | 0.44 | 1.13 | 0.85 |
| 45583 | 0 | 133231 | MGPRRRSRKP        | 2.34 | 0.01 | 0.78 | 0.44 | 1.13 | 0.85 |
| 45584 | 0 | 133231 | MGPRRRSRKP        | 2.34 | 0.01 | 0.78 | 0.44 | 1.13 | 0.85 |
| 45585 | 0 | 133231 | MGPRRRSRKP        | 2.34 | 0.01 | 0.78 | 0.44 | 1.13 | 0.85 |
| 45586 | 0 | 133231 | MGPRRRSRKP        | 2.34 | 0.01 | 0.78 | 0.44 | 1.13 | 0.85 |
| 45587 | 0 | 133231 | MGPRRRSRKP        | 2.34 | 0.01 | 0.78 | 0.44 | 1.13 | 0.28 |
| 45588 | 0 | 133231 | MGPRRRSRKP        | 2.34 | 0.01 | 0.78 | 3.05 | 1.13 | 0.85 |
| 45589 | 0 | 133232 | MGPRRRSRKPEA      | 2.48 | 0.01 | 0.78 | 0.44 | 1.13 | 0.28 |
| 45590 | 0 | 133232 | MGPRRRSRKPEA      | 2.48 | 0.01 | 0.78 | 0.44 | 1.13 | 0.28 |
| 45591 | 0 | 134753 | MGPRRRSRKPEAPRR   | 2.69 | 0.01 | 0.78 | 3.05 | 1.13 | 0.85 |
| 45592 | 0 | 134753 | MGPRRRSRKPEAPRR   | 2.69 | 0.01 | 0.78 | 0.44 | 1.13 | 0.28 |
| 45593 | 0 | 181729 | MGPRRRSRKPEAPRRRS | 2.82 | 0.01 | 0.78 | 0.44 | 1.13 | 0.28 |
| 45594 | 0 | 181729 | MGPRRRSRKPEAPRRRS | 2.82 | 0.01 | 0.78 | 0.44 | 1.13 | 2.12 |
| 45595 | 0 | 181729 | MGPRRRSRKPEAPRRRS | 2.82 | 0.01 | 0.78 | 0.44 | 1.13 | 1.27 |
| 45596 | 0 | 181729 | MGPRRRSRKPEAPRRRS | 2.82 | 0.01 | 0.78 | 0.44 | 1.13 | 1.39 |
| 45597 | 0 | 181729 | MGPRRRSRKPEAPRRRS | 2.82 | 0.01 | 0.78 | 0.44 | 1.13 | 1.39 |
| 45598 | 0 | 181729 | MGPRRRSRKPEAPRRRS | 2.82 | 0.01 | 0.78 | 0.44 | 1.13 | 1.39 |
| 45599 | 0 | 181729 | MGPRRRSRKPEAPRRRS | 2.82 | 0.01 | 0.78 | 0.44 | 1.13 | 1.39 |
| 45600 | 0 | 181729 | MGPRRRSRKPEAPRRRS | 2.82 | 0.01 | 0.78 | 0.44 | 1.13 | 1.39 |
| 45601 | 0 | 181729 | MGPRRRSRKPEAPRRRS | 2.82 | 0.01 | 0.78 | 0.44 | 1.13 | 1.39 |
| 45602 | 0 | 181729 | MGPRRRSRKPEAPRRRS | 2.82 | 0.01 | 0.78 | 0.44 | 1.13 | 1.39 |
| 45603 | 0 | 181729 | MGPRRRSRKPEAPRRRS | 2.82 | 0.01 | 0.78 | 0.44 | 1.13 | 1.39 |
| 45604 | 0 | 181729 | MGPRRRSRKPEAPRRRS | 2.82 | 0.01 | 0.78 | 0.44 | 1.13 | 1.39 |
| 45605 | 0 | 181729 | MGPRRRSRKPEAPRRRS | 2.82 | 0.01 | 0.78 | 0.44 | 1.13 | 1.39 |
| 45606 | 0 | 181729 | MGPRRRSRKPEAPRRRS | 2.82 | 0.01 | 0.78 | 0.44 | 1.13 | 1.39 |
| 45607 | 0 | 181729 | MGPRRRSRKPEAPRRRS | 2.82 | 0.01 | 0.78 | 0.44 | 1.13 | 1.39 |
| 45608 | 0 | 181729 | MGPRRRSRKPEAPRRRS | 2.82 | 0.01 | 0.78 | 0.44 | 1.13 | 1.39 |
| 45609 | 0 | 181729 | MGPRRRSRKPEAPRRRS | 2.82 | 0.01 | 0.78 | 0.44 | 1.13 | 1.39 |

|       |   |        |                           |      |      |      |      |      |      |
|-------|---|--------|---------------------------|------|------|------|------|------|------|
| 45610 | 0 | 181729 | MGPRRRSRKPEAPRRRS         | 2.82 | 0.01 | 0.78 | 0.44 | 1.13 | 1.39 |
| 45611 | 0 | 181729 | MGPRRRSRKPEAPRRRS         | 2.82 | 0.01 | 0.78 | 0.44 | 1.13 | 1.39 |
| 45612 | 0 | 181729 | MGPRRRSRKPEAPRRRS         | 2.82 | 0.01 | 0.78 | 0.44 | 1.13 | 1.39 |
| 45613 | 0 | 181729 | MGPRRRSRKPEAPRRRS         | 2.82 | 0.01 | 0.78 | 0.44 | 1.13 | 0.28 |
| 45614 | 0 | 181729 | MGPRRRSRKPEAPRRRS         | 2.82 | 0.01 | 0.78 | 0.44 | 1.13 | 0.28 |
| 45615 | 0 | 181729 | MGPRRRSRKPEAPRRRS         | 2.82 | 0.01 | 0.78 | 0.44 | 1.41 | 0.28 |
| 45616 | 0 | 111543 | MGQDCPIDIKNKYEHN<br>LAD   | 2.90 | 0.01 | 3.55 | 2.22 | 0.22 | 0.28 |
| 45617 | 0 | 41609  | MGQHPAKS                  | 2.10 | 0.01 | 2.40 | 2.43 | 0.22 | 0.28 |
| 45618 | 0 | 167785 | MGQHPAKSM                 | 2.22 | 0.01 | 2.40 | 2.43 | 0.22 | 0.28 |
| 45619 | 0 | 41610  | MGQHPAKSMDVRR             | 2.50 | 0.01 | 2.40 | 1.12 | 0.22 | 2.02 |
| 45620 | 0 | 41610  | MGQHPAKSMDVRR             | 2.50 | 0.01 | 2.40 | 1.12 | 0.22 | 1.57 |
| 45621 | 0 | 41610  | MGQHPAKSMDVRR             | 2.50 | 0.01 | 2.40 | 1.12 | 0.22 | 0.85 |
| 45622 | 0 | 41610  | MGQHPAKSMDVRR             | 2.50 | 0.01 | 2.40 | 1.12 | 0.22 | 0.85 |
| 45623 | 0 | 41613  | MGQNLSTSNPLGFFP           | 2.69 | 0.01 | 2.08 | 0.68 | 0.22 | 0.28 |
| 45624 | 0 | 41613  | MGQNLSTSNPLGFFP           | 2.69 | 0.01 | 2.08 | 0.68 | 0.22 | 0.28 |
| 45625 | 0 | 41613  | MGQNLSTSNPLGFFP           | 2.69 | 0.01 | 2.08 | 0.68 | 0.22 | 0.28 |
| 45626 | 0 | 41615  | MGQNLSTSNPLGFFPD<br>HQLDP | 3.01 | 0.01 | 2.71 | 2.25 | 0.22 | 1.57 |
| 45627 | 0 | 450831 | MGQPTVK                   | 1.99 | 0.01 | 0.90 | 0.44 | 1.41 | 1.39 |
| 45628 | 0 | 118019 | MGRGAPPPGMMG              | 2.52 | 0.01 | 0.78 | 0.44 | 1.13 | 1.27 |
| 45629 | 0 | 118019 | MGRGAPPPGMMG              | 2.52 | 0.01 | 0.78 | 0.44 | 1.13 | 0.28 |
| 45630 | 0 | 118019 | MGRGAPPPGMMG              | 2.52 | 0.01 | 0.78 | 0.44 | 1.13 | 1.27 |
| 45631 | 0 | 134161 | MGSASGHFTDFE              | 2.48 | 0.01 | 0.78 | 3.06 | 0.22 | 0.28 |
| 45632 | 0 | 95594  | MGLAARV                   | 2.11 | 0.01 | 3.48 | 2.22 | 0.22 | 0.28 |
| 45633 | 0 | 105964 | MGSRTDR                   | 2.14 | 0.01 | 0.78 | 1.15 | 0.22 | 0.28 |
| 45634 | 0 | 105964 | MGSRTDR                   | 2.14 | 0.01 | 0.78 | 1.15 | 0.22 | 0.28 |
| 45635 | 0 | 105964 | MGSRTDR                   | 2.14 | 0.01 | 0.78 | 1.15 | 0.22 | 0.28 |
| 45636 | 0 | 41629  | MGSSYG                    | 1.90 | 0.01 | 1.96 | 0.44 | 0.85 | 0.28 |
| 45637 | 0 | 41631  | MGTNLSVPNPLGFFPD<br>HQLDP | 2.99 | 0.01 | 2.58 | 0.44 | 0.85 | 0.28 |
| 45638 | 0 | 41631  | MGTNLSVPNPLGFFPD<br>HQLDP | 2.99 | 0.01 | 2.58 | 2.25 | 0.22 | 1.57 |
| 45639 | 0 | 41631  | MGTNLSVPNPLGFFPD<br>HQLDP | 2.99 | 0.01 | 2.58 | 2.25 | 0.22 | 1.57 |
| 45640 | 0 | 41631  | MGTNLSVPNPLGFFPD<br>HQLDP | 2.99 | 0.01 | 2.58 | 1.12 | 0.22 | 0.28 |
| 45641 | 0 | 41631  | MGTNLSVPNPLGFFPD<br>HQLDP | 2.99 | 0.01 | 2.58 | 1.12 | 0.22 | 0.28 |
| 45642 | 0 | 41631  | MGTNLSVPNPLGFFPD<br>HQLDP | 2.99 | 0.01 | 2.58 | 0.44 | 0.22 | 0.28 |

|       |   |        |                                              |      |      |      |      |      |      |
|-------|---|--------|----------------------------------------------|------|------|------|------|------|------|
| 45643 | 0 | 41631  | MGTNLSVPNPLGFFPD<br>HQLDP                    | 2.99 | 0.01 | 2.58 | 1.20 | 0.22 | 0.28 |
| 45644 | 0 | 41631  | MGTNLSVPNPLGFFPD<br>HQLDP                    | 2.99 | 0.01 | 2.58 | 1.20 | 0.22 | 0.28 |
| 45645 | 0 | 41631  | MGTNLSVPNPLGFFPD<br>HQLDP                    | 2.99 | 0.01 | 2.58 | 0.44 | 0.85 | 1.57 |
| 45646 | 0 | 41631  | MGTNLSVPNPLGFFPD<br>HQLDP                    | 2.99 | 0.01 | 2.58 | 0.44 | 0.22 | 1.57 |
| 45647 | 0 | 41631  | MGTNLSVPNPLGFFPD<br>HQLDP                    | 2.99 | 0.01 | 2.58 | 1.12 | 0.22 | 1.57 |
| 45648 | 0 | 41631  | MGTNLSVPNPLGFFPD<br>HQLDP                    | 2.99 | 0.01 | 2.58 | 1.12 | 0.22 | 1.57 |
| 45649 | 0 | 41631  | MGTNLSVPNPLGFFPD<br>HQLDP                    | 2.99 | 0.01 | 2.08 | 2.25 | 0.22 | 1.57 |
| 45650 | 0 | 41631  | MGTNLSVPNPLGFFPD<br>HQLDP                    | 2.99 | 0.01 | 2.08 | 2.89 | 0.22 | 1.57 |
| 45651 | 0 | 41632  | MGTNLSVPNPLGFFPD<br>HQLDPAFGANSNNPD<br>WDFNP | 3.53 | 4.45 | 2.58 | 2.74 | 2.25 | 1.75 |
| 45652 | 0 | 41632  | MGTNLSVPNPLGFFPD<br>HQLDPAFGANSNNPD<br>WDFNP | 3.53 | 4.45 | 2.58 | 2.74 | 0.22 | 1.57 |
| 45653 | 0 | 41632  | MGTNLSVPNPLGFFPD<br>HQLDPAFGANSNNPD<br>WDFNP | 3.53 | 4.45 | 2.58 | 2.74 | 0.22 | 1.57 |
| 45654 | 0 | 153422 | MGTNLSVPNPLGFFPD<br>HQLDPAFGANSNNPD<br>WDFNP | 3.53 | 0.01 | 2.58 | 1.20 | 0.22 | 1.27 |
| 45655 | 0 | 153422 | MGTNLSVPNPLGFFPD<br>HQLDPAFGANSNNPD<br>WDFNP | 3.53 | 0.01 | 2.58 | 1.12 | 0.22 | 1.57 |
| 45656 | 0 | 153422 | MGTNLSVPNPLGFFPD<br>HQLDPAFGANSNNPD<br>WDFNP | 3.53 | 0.01 | 2.58 | 1.12 | 0.22 | 1.57 |
| 45657 | 0 | 153422 | MGTNLSVPNPLGFFPD<br>HQLDPAFGANSNNPD<br>WDFNP | 3.53 | 0.01 | 2.58 | 1.20 | 0.22 | 1.34 |
| 45658 | 0 | 153422 | MGTNLSVPNPLGFFPD<br>HQLDPAFGANSNNPD<br>WDFNP | 3.53 | 0.01 | 2.58 | 1.20 | 0.22 | 2.02 |
| 45659 | 0 | 153422 | MGTNLSVPNPLGFFPD<br>HQLDPAFGANSNNPD<br>WDFNP | 3.53 | 0.01 | 2.58 | 0.68 | 0.22 | 1.57 |
| 45660 | 0 | 153422 | MGTNLSVPNPLGFFPD<br>HQLDPAFGANSNNPD<br>WDFNP | 3.53 | 0.01 | 2.58 | 0.68 | 0.22 | 1.57 |

|       |   |        |                              |      |      |      |      |      |      |
|-------|---|--------|------------------------------|------|------|------|------|------|------|
|       |   |        | MGTNLSVPNPLGFFPD             |      |      |      |      |      |      |
| 45661 | 0 | 153422 | HQLDPAFGANSNNPD<br>WDFNP     | 3.53 | 0.01 | 2.58 | 2.25 | 0.22 | 1.57 |
|       |   |        | MGTNLSVPNPLGFFPD             |      |      |      |      |      |      |
| 45662 | 0 | 153422 | HQLDPAFGANSNNPD<br>WDFNP     | 3.53 | 0.01 | 2.58 | 2.25 | 0.22 | 1.57 |
|       |   |        | MGTNLSVPNPLGFFPD             |      |      |      |      |      |      |
| 45663 | 0 | 41633  | HQLDPAFKANSENPDW<br>DLNP     | 3.52 | 0.01 | 3.28 | 0.68 | 0.22 | 0.28 |
|       |   |        | MGTNLSVPNPLGFFPD             |      |      |      |      |      |      |
| 45664 | 0 | 41634  | HQLDPAFKANSENPDW<br>DLNS     | 3.52 | 0.01 | 2.58 | 0.68 | 0.22 | 0.28 |
|       |   |        | MGTNLSVPNPLGFFPD             |      |      |      |      |      |      |
| 45665 | 0 | 41634  | HQLDPAFKANSENPDW<br>DLNS     | 3.52 | 0.01 | 2.58 | 0.68 | 0.22 | 0.28 |
| 45666 | 0 | 108031 | MGTVLLPNGEFSIEN              | 2.65 | 0.01 | 0.90 | 0.44 | 1.13 | 1.39 |
| 45667 | 0 | 41636  | MGTVNKPVVGVLMGF<br>GIITG     | 2.97 | 0.01 | 3.27 | 0.44 | 0.85 | 0.28 |
| 45668 | 0 | 149842 | MGVFFGGLGIGTGSG              | 2.70 | 0.01 | 1.86 | 0.68 | 0.22 | 0.28 |
| 45669 | 0 | 41641  | MGVFNYETETTSVIPAA<br>RLFKAfi | 3.08 | 0.01 | 2.76 | 1.12 | 0.22 | 2.35 |
| 45670 | 0 | 41641  | MGVFNYETETTSVIPAA<br>RLFKAfi | 3.08 | 0.01 | 2.76 | 0.44 | 1.23 | 0.28 |
| 45671 | 0 | 41641  | MGVFNYETETTSVIPAA<br>RLFKAfi | 3.08 | 0.01 | 2.76 | 1.20 | 0.22 | 0.28 |
| 45672 | 0 | 41642  | MGVGVELENSMGGLGF<br>GRSYFD   | 3.06 | 0.01 | 3.70 | 0.68 | 0.22 | 1.48 |
| 45673 | 0 | 41642  | MGVGVELENSMGGLGF<br>GRSYFD   | 3.06 | 0.01 | 3.70 | 0.68 | 0.22 | 1.48 |
| 45674 | 0 | 41643  | MGVICMNMECDRNM               | 2.64 | 0.01 | 0.90 | 1.15 | 0.22 | 0.28 |
| 45675 | 0 | 41644  | MGVIGSFFVKDWS                | 2.62 | 0.01 | 2.56 | 2.69 | 0.22 | 0.28 |
| 45676 | 0 | 41648  | MGWAGWLLSPRGSRPS<br>WGPT     | 2.98 | 0.01 | 3.10 | 1.15 | 0.22 | 0.28 |
| 45677 | 0 | 138205 | MHEALHN                      | 2.02 | 0.01 | 0.78 | 0.44 | 1.13 | 0.28 |
| 45678 | 0 | 109589 | MHEGLHN                      | 2.02 | 0.01 | 0.78 | 0.44 | 1.13 | 0.28 |
| 45679 | 0 | 127737 | MHETTKA                      | 2.01 | 0.01 | 0.90 | 0.44 | 1.13 | 1.39 |
| 45680 | 0 | 228520 | MHFGNDWEDRYR                 | 2.52 | 0.01 | 2.98 | 2.19 | 0.22 | 0.85 |
| 45681 | 0 | 41659  | MHGDTPTLHEYM                 | 2.48 | 0.01 | 1.86 | 0.44 | 1.41 | 0.28 |
| 45682 | 0 | 169284 | MHGDTPTLHEYML                | 2.56 | 0.01 | 1.86 | 0.68 | 0.22 | 0.28 |
| 45683 | 0 | 169284 | MHGDTPTLHEYML                | 2.56 | 0.01 | 1.86 | 0.68 | 0.22 | 0.28 |
| 45684 | 0 | 169284 | MHGDTPTLHEYML                | 2.56 | 0.01 | 1.86 | 0.68 | 0.22 | 1.48 |
| 45685 | 0 | 169284 | MHGDTPTLHEYML                | 2.56 | 0.01 | 1.86 | 0.68 | 0.22 | 1.48 |
| 45686 | 0 | 110941 | MHGDTPTLHEYMLDLQ<br>PE       | 2.87 | 0.01 | 1.86 | 1.81 | 0.22 | 0.28 |
| 45687 | 0 | 110941 | MHGDTPTLHEYMLDLQ<br>PE       | 2.87 | 0.01 | 1.86 | 3.57 | 0.22 | 0.28 |

|       |   |        |                               |      |      |      |      |      |      |
|-------|---|--------|-------------------------------|------|------|------|------|------|------|
| 45688 | 0 | 41660  | MHGDTPTLHEYMLDLQ<br>PETT      | 2.97 | 0.01 | 1.86 | 2.49 | 0.22 | 0.28 |
| 45689 | 0 | 41660  | MHGDTPTLHEYMLDLQ<br>PETT      | 2.97 | 0.01 | 1.86 | 1.20 | 0.22 | 0.28 |
| 45690 | 0 | 41660  | MHGDTPTLHEYMLDLQ<br>PETT      | 2.97 | 0.01 | 1.86 | 3.57 | 0.22 | 0.28 |
| 45691 | 0 | 41660  | MHGDTPTLHEYMLDLQ<br>PETT      | 2.97 | 0.01 | 1.86 | 3.89 | 2.82 | 0.28 |
| 45692 | 0 | 41660  | MHGDTPTLHEYMLDLQ<br>PETT      | 2.97 | 0.01 | 1.86 | 0.68 | 0.22 | 0.28 |
| 45693 | 0 | 41660  | MHGDTPTLHEYMLDLQ<br>PETT      | 2.97 | 0.01 | 1.86 | 3.22 | 0.22 | 0.28 |
| 45694 | 0 | 41660  | MHGDTPTLHEYMLDLQ<br>PETT      | 2.97 | 0.01 | 1.86 | 2.69 | 0.22 | 0.28 |
| 45695 | 0 | 41660  | MHGDTPTLHEYMLDLQ<br>PETT      | 2.97 | 0.01 | 1.86 | 3.38 | 0.22 | 0.28 |
| 45696 | 0 | 41660  | MHGDTPTLHEYMLDLQ<br>PETT      | 2.97 | 0.01 | 1.86 | 0.44 | 0.85 | 0.28 |
| 45697 | 0 | 169285 | MHGDTPTLHEYMLDLQ<br>PETTDLYCY | 3.19 | 0.01 | 1.86 | 0.68 | 0.22 | 0.28 |
| 45698 | 0 | 169285 | MHGDTPTLHEYMLDLQ<br>PETTDLYCY | 3.19 | 0.01 | 1.86 | 0.68 | 0.22 | 0.28 |
| 45699 | 0 | 169285 | MHGDTPTLHEYMLDLQ<br>PETTDLYCY | 3.19 | 0.01 | 1.86 | 0.68 | 0.22 | 0.28 |
| 45700 | 0 | 169285 | MHGDTPTLHEYMLDLQ<br>PETTDLYCY | 3.19 | 0.01 | 1.86 | 0.68 | 0.22 | 1.48 |
| 45701 | 0 | 169285 | MHGDTPTLHEYMLDLQ<br>PETTDLYCY | 3.19 | 0.01 | 1.86 | 0.68 | 0.22 | 1.48 |
| 45702 | 0 | 41661  | MHGSRNNH                      | 2.13 | 0.01 | 3.42 | 0.68 | 0.22 | 0.28 |
| 45703 | 0 | 41662  | MHGSRNNHPQNTSDS<br>QKECT      | 2.93 | 0.01 | 2.96 | 0.44 | 1.74 | 0.28 |
| 45704 | 0 | 123495 | MHHMPGQP                      | 2.16 | 0.01 | 0.78 | 1.20 | 0.22 | 0.28 |
| 45705 | 0 | 127738 | MHIPTPD                       | 2.02 | 0.01 | 0.90 | 0.44 | 1.13 | 1.39 |
| 45706 | 0 | 95595  | MHIRLS                        | 1.88 | 0.01 | 1.60 | 0.44 | 1.23 | 0.28 |
| 45707 | 0 | 98903  | MHIRLSFNPT                    | 2.26 | 0.01 | 1.60 | 0.44 | 1.23 | 0.85 |
| 45708 | 0 | 98903  | MHIRLSFNPT                    | 2.26 | 0.01 | 1.60 | 0.44 | 1.23 | 0.85 |
| 45709 | 0 | 98903  | MHIRLSFNPT                    | 2.26 | 0.01 | 1.60 | 0.44 | 2.98 | 0.85 |
| 45710 | 0 | 115382 | MHIRLSFNPTQLEEQCHI            | 2.81 | 0.01 | 1.60 | 0.44 | 1.23 | 2.51 |
| 45711 | 0 | 127739 | MHLNTAS                       | 1.99 | 0.01 | 0.90 | 0.44 | 1.13 | 1.39 |
| 45712 | 0 | 127739 | MHLNTAS                       | 1.99 | 0.01 | 0.90 | 0.44 | 1.13 | 0.28 |
| 45713 | 0 | 106642 | MHLNTPP                       | 1.99 | 0.01 | 0.90 | 0.44 | 1.13 | 1.39 |
| 45714 | 0 | 106642 | MHLNTPP                       | 1.99 | 0.01 | 0.90 | 0.44 | 1.13 | 0.28 |
| 45715 | 0 | 106642 | MHLNTPP                       | 1.99 | 0.01 | 0.90 | 0.44 | 1.13 | 1.34 |
| 45716 | 0 | 106642 | MHLNTPP                       | 1.99 | 0.01 | 0.90 | 0.44 | 1.13 | 0.28 |
| 45717 | 0 | 106642 | MHLNTPP                       | 1.99 | 0.01 | 0.90 | 1.12 | 0.22 | 0.28 |
| 45718 | 0 | 41665  | MHLPATIGDY                    | 2.26 | 0.01 | 1.75 | 0.68 | 0.22 | 0.28 |

|       |   |        |                                  |      |      |      |      |      |      |
|-------|---|--------|----------------------------------|------|------|------|------|------|------|
| 45719 | 0 | 41665  | MHLPATIGDY                       | 2.26 | 0.01 | 1.75 | 0.68 | 0.22 | 0.28 |
| 45720 | 0 | 106646 | MHLTQSP                          | 1.99 | 0.01 | 0.90 | 0.44 | 1.13 | 1.39 |
| 45721 | 0 | 106646 | MHLTQSP                          | 1.99 | 0.01 | 0.90 | 0.44 | 1.13 | 0.28 |
| 45722 | 0 | 106646 | MHLTQSP                          | 1.99 | 0.01 | 0.90 | 0.44 | 1.13 | 1.34 |
| 45723 | 0 | 106646 | MHLTQSP                          | 1.99 | 0.01 | 0.90 | 0.44 | 1.13 | 0.28 |
| 45724 | 0 | 106647 | MHLTTNI                          | 2.01 | 0.01 | 0.90 | 0.44 | 1.13 | 1.39 |
| 45725 | 0 | 106647 | MHLTTNI                          | 2.01 | 0.01 | 0.90 | 0.44 | 1.13 | 0.28 |
| 45726 | 0 | 106647 | MHLTTNI                          | 2.01 | 0.01 | 0.90 | 0.44 | 1.13 | 0.28 |
| 45727 | 0 | 41667  | MHMLSNKSAS                       | 2.34 | 0.01 | 2.73 | 0.44 | 0.85 | 0.28 |
| 45728 | 0 | 41667  | MHMLSNKSAS                       | 2.34 | 0.01 | 2.73 | 0.68 | 0.22 | 0.28 |
| 45729 | 0 | 41668  | MHNISQHQSVMKMSD<br>QNS           | 2.89 | 0.01 | 0.90 | 2.63 | 0.22 | 1.48 |
| 45730 | 0 | 41669  | MHNISQHQSVMMMSD<br>QNS           | 2.89 | 0.01 | 0.90 | 2.63 | 0.22 | 1.48 |
| 45731 | 0 | 41669  | MHNISQHQSVMMMSD<br>QNS           | 2.89 | 0.01 | 0.90 | 2.74 | 0.22 | 1.48 |
| 45732 | 0 | 41670  | MHNISQLQTVKKQTDQ<br>NS           | 2.84 | 0.01 | 0.90 | 2.63 | 0.22 | 1.48 |
| 45733 | 0 | 41671  | MHNISQLQVVKKMVPQ<br>K            | 2.81 | 0.01 | 0.90 | 2.63 | 0.22 | 1.48 |
| 45734 | 0 | 161414 | MHNISQMQSVKKMVD<br>QNS           | 2.88 | 0.01 | 0.90 | 2.74 | 0.22 | 1.48 |
| 45735 | 0 | 161415 | MHNISQMQSVKKQSD<br>QNS           | 2.88 | 0.01 | 0.90 | 2.74 | 0.22 | 1.48 |
| 45736 | 0 | 161417 | MHNISQMQSVMKMSD<br>QNS           | 2.89 | 0.01 | 0.90 | 2.74 | 0.22 | 1.48 |
| 45737 | 0 | 106648 | MHNPSMT                          | 2.03 | 0.01 | 0.90 | 0.44 | 1.13 | 1.39 |
| 45738 | 0 | 106648 | MHNPSMT                          | 2.03 | 0.01 | 0.90 | 0.44 | 1.13 | 0.28 |
| 45739 | 0 | 129396 | MHNPSMTMHNPSMT<br>MHNPSMTMHNPSMT | 3.35 | 0.01 | 0.90 | 0.44 | 1.13 | 0.28 |
| 45740 | 0 | 130555 | MHNRTQALEDSR                     | 2.43 | 0.01 | 0.90 | 3.18 | 1.41 | 1.39 |
| 45741 | 0 | 130555 | MHNRTQALEDSR                     | 2.43 | 0.01 | 0.90 | 3.18 | 1.41 | 0.28 |
| 45742 | 0 | 130555 | MHNRTQALEDSR                     | 2.43 | 0.01 | 0.90 | 3.18 | 1.41 | 0.85 |
| 45743 | 0 | 130555 | MHNRTQALEDSR                     | 2.43 | 0.01 | 0.90 | 3.18 | 1.41 | 1.34 |
| 45744 | 0 | 195039 | MHNTAKTPAAYR                     | 2.46 | 0.01 | 0.90 | 0.68 | 0.22 | 0.28 |
| 45745 | 0 | 418861 | MHPNAGHGSLMR                     | 2.48 | 0.01 | 0.90 | 1.12 | 0.22 | 1.39 |
| 45746 | 0 | 111546 | MHPSNSKSPPRH                     | 2.50 | 0.01 | 0.90 | 0.44 | 0.85 | 1.39 |
| 45747 | 0 | 110669 | MHQKRTAMFQDPQER<br>PRKLPQLC      | 3.08 | 0.01 | 1.86 | 0.44 | 0.85 | 0.28 |
| 45748 | 0 | 110669 | MHQKRTAMFQDPQER<br>PRKLPQLC      | 3.08 | 0.01 | 1.86 | 0.44 | 0.85 | 0.28 |
| 45749 | 0 | 110669 | MHQKRTAMFQDPQER<br>PRKLPQLC      | 3.08 | 0.01 | 1.86 | 3.57 | 0.22 | 0.28 |
| 45750 | 0 | 111548 | MHQTTAQPLRSP                     | 2.46 | 0.01 | 0.90 | 0.44 | 0.85 | 1.39 |
| 45751 | 0 | 176820 | MHRAPSTKHLLP                     | 2.46 | 0.01 | 0.90 | 0.68 | 0.22 | 1.27 |
| 45752 | 0 | 106649 | MHRLYHVPAPV                      | 2.31 | 0.01 | 2.75 | 0.44 | 1.23 | 0.85 |

|                  |   |        |                                    |      |      |      |      |      |      |
|------------------|---|--------|------------------------------------|------|------|------|------|------|------|
| 45753            | 0 | 127740 | MHRPNLE                            | 1.99 | 0.01 | 0.90 | 0.44 | 1.13 | 1.39 |
| 45754            | 0 | 127741 | MHSPAAT                            | 2.01 | 0.01 | 0.90 | 0.44 | 1.13 | 0.28 |
| 45755            | 0 | 127741 | MHSPAAT                            | 2.01 | 0.01 | 0.90 | 0.44 | 1.13 | 0.28 |
| 45756            | 0 | 106651 | MHSPLPI                            | 2.02 | 0.01 | 0.90 | 0.44 | 1.13 | 1.39 |
| 45757            | 0 | 106651 | MHSPLPI                            | 2.02 | 0.01 | 0.90 | 0.44 | 1.13 | 0.28 |
| 45758            | 0 | 129397 | MHSPLPIMHSPLPI                     | 2.68 | 0.01 | 0.90 | 0.44 | 1.13 | 0.28 |
| 45759            | 0 | 129398 | MHSPSNA                            | 2.02 | 0.01 | 0.90 | 0.44 | 1.13 | 0.28 |
| 45760            | 0 | 127742 | MHSPSTQ                            | 2.02 | 0.01 | 0.90 | 0.44 | 1.13 | 1.39 |
| 45761            | 0 | 496786 | MHTFLYNKIQGRISGCA<br>VKAPGFGDMRINQ | 3.30 | 0.01 | 3.40 | 0.44 | 1.93 | 2.12 |
| 45762            | 0 | 186697 | MHTNYCRTCFLS                       | 2.45 | 0.01 | 0.90 | 2.13 | 0.85 | 0.28 |
| MHTNYCRTCFLSGGGM |   |        |                                    |      |      |      |      |      |      |
| 45763            | 0 | 186698 | HTNYCRTCFLSGGGMH<br>TNYCRTCFLSGKKK | 3.79 | 0.01 | 0.90 | 3.47 | 0.22 | 0.28 |
| MHTNYCRTCFLSGGGM |   |        |                                    |      |      |      |      |      |      |
| 45764            | 0 | 186698 | HTNYCRTCFLSGGGMH<br>TNYCRTCFLSGKKK | 3.79 | 0.01 | 0.90 | 3.47 | 0.22 | 0.28 |
| MHTNYCRTCFLSGGGM |   |        |                                    |      |      |      |      |      |      |
| 45765            | 0 | 186698 | HTNYCRTCFLSGGGMH<br>TNYCRTCFLSGKKK | 3.79 | 0.01 | 0.90 | 3.47 | 0.22 | 0.28 |
| MHTNYCRTCFLSGGGM |   |        |                                    |      |      |      |      |      |      |
| 45766            | 0 | 186698 | HTNYCRTCFLSGGGMH<br>TNYCRTCFLSGKKK | 3.79 | 0.01 | 0.90 | 3.47 | 0.22 | 0.28 |
| MHTNYCRTCFLSGGGM |   |        |                                    |      |      |      |      |      |      |
| 45767            | 0 | 186698 | HTNYCRTCFLSGGGMH<br>TNYCRTCFLSGKKK | 3.79 | 0.01 | 0.90 | 3.47 | 0.22 | 0.28 |
| 45768            | 0 | 127743 | MHTPAIG                            | 1.99 | 0.01 | 0.90 | 0.44 | 1.13 | 0.28 |
| 45769            | 0 | 127743 | MHTPAIG                            | 1.99 | 0.01 | 0.90 | 0.44 | 1.13 | 0.28 |
| 45770            | 0 | 106652 | MHTPNSR                            | 1.99 | 0.01 | 0.90 | 0.44 | 1.13 | 1.39 |
| 45771            | 0 | 106652 | MHTPNSR                            | 1.99 | 0.01 | 0.90 | 0.44 | 1.13 | 1.39 |
| 45772            | 0 | 106652 | MHTPNSR                            | 1.99 | 0.01 | 0.90 | 0.44 | 1.13 | 0.28 |
| 45773            | 0 | 450832 | MHTVAVQ                            | 2.02 | 0.01 | 0.90 | 0.44 | 1.23 | 1.39 |
| 45774            | 0 | 112603 | MIAATYNFAVLKLMGR<br>GTKF           | 2.95 | 0.01 | 1.60 | 2.04 | 0.22 | 0.28 |
| 45775            | 0 | 112603 | MIAATYNFAVLKLMGR<br>GTKF           | 2.95 | 0.01 | 1.60 | 2.04 | 0.22 | 0.28 |
| 45776            | 0 | 112603 | MIAATYNFAVLKLMGR<br>GTKF           | 2.95 | 0.01 | 1.60 | 2.04 | 0.22 | 1.27 |
| 45777            | 0 | 112603 | MIAATYNFAVLKLMGR<br>GTKF           | 2.95 | 0.01 | 1.60 | 1.20 | 0.22 | 0.28 |
| 45778            | 0 | 112603 | MIAATYNFAVLKLMGR<br>GTKF           | 2.95 | 0.01 | 1.60 | 1.20 | 0.22 | 0.28 |

|       |   |        |                                  |      |      |      |      |      |      |
|-------|---|--------|----------------------------------|------|------|------|------|------|------|
| 45779 | 0 | 112603 | MIAATYNFAVLKLMGR<br>GTKF         | 2.95 | 0.01 | 1.60 | 1.20 | 0.22 | 1.48 |
| 45780 | 0 | 182398 | MIAVALAGL                        | 2.25 | 0.01 | 2.51 | 0.44 | 1.13 | 0.28 |
| 45781 | 0 | 182398 | MIAVALAGL                        | 2.25 | 0.01 | 2.51 | 0.44 | 1.41 | 0.28 |
| 45782 | 0 | 182398 | MIAVALAGL                        | 2.25 | 0.01 | 2.51 | 0.44 | 1.13 | 0.28 |
| 45783 | 0 | 182398 | MIAVALAGL                        | 2.25 | 0.01 | 2.51 | 0.44 | 1.41 | 0.28 |
| 45784 | 0 | 182398 | MIAVALAGL                        | 2.25 | 0.01 | 2.51 | 0.44 | 1.13 | 0.28 |
| 45785 | 0 | 182398 | MIAVALAGL                        | 2.25 | 0.01 | 2.51 | 0.44 | 1.41 | 0.28 |
| 45786 | 0 | 182398 | MIAVALAGL                        | 2.25 | 0.01 | 2.51 | 0.44 | 1.13 | 1.27 |
| 45787 | 0 | 182398 | MIAVALAGL                        | 2.25 | 0.01 | 2.51 | 0.44 | 1.13 | 0.28 |
| 45788 | 0 | 182398 | MIAVALAGL                        | 2.25 | 0.01 | 2.51 | 0.44 | 1.93 | 0.28 |
| 45789 | 0 | 182398 | MIAVALAGL                        | 2.25 | 0.01 | 2.51 | 0.44 | 1.41 | 0.28 |
| 45790 | 0 | 182398 | MIAVALAGL                        | 2.25 | 0.01 | 4.08 | 0.44 | 1.41 | 0.28 |
| 45791 | 0 | 182398 | MIAVALAGL                        | 2.25 | 0.01 | 2.51 | 0.44 | 1.41 | 0.28 |
| 45792 | 0 | 181392 | MIDQTVNNQVNRSLT                  | 2.68 | 0.01 | 2.82 | 1.15 | 0.22 | 0.28 |
| 45793 | 0 | 41693  | MIDRPYVLLAVLFVM                  | 2.69 | 0.01 | 2.72 | 0.44 | 0.85 | 0.28 |
| 45794 | 0 | 123496 | MIEGAAMD                         | 2.23 | 0.01 | 2.28 | 2.00 | 0.22 | 0.28 |
| 45795 | 0 | 123496 | MIEGAAMD                         | 2.23 | 0.01 | 2.28 | 2.00 | 0.22 | 0.28 |
| 45796 | 0 | 123496 | MIEGAAMD                         | 2.23 | 0.01 | 2.28 | 2.00 | 0.22 | 0.28 |
| 45797 | 0 | 97497  | MIEGAQGALERELKRT                 | 2.75 | 0.01 | 3.67 | 0.44 | 1.23 | 0.28 |
| 45798 | 0 | 41698  | MIEKINVGFKAAVAAAG<br>GVP         | 2.95 | 0.01 | 3.00 | 1.15 | 0.22 | 0.28 |
| 45799 | 0 | 159004 | MIGIDEFAVLVKQ                    | 2.51 | 0.01 | 3.26 | 0.44 | 1.23 | 0.28 |
| 45800 | 0 | 41713  | MIHFGND                          | 1.99 | 0.01 | 1.75 | 2.19 | 0.22 | 0.28 |
| 45801 | 0 | 41713  | MIHFGND                          | 1.99 | 0.01 | 1.75 | 2.19 | 0.22 | 0.85 |
| 45802 | 0 | 41713  | MIHFGND                          | 1.99 | 0.01 | 1.75 | 2.19 | 0.22 | 0.85 |
| 45803 | 0 | 41713  | MIHFGND                          | 1.99 | 0.01 | 1.75 | 2.19 | 0.22 | 2.12 |
| 45804 | 0 | 41713  | MIHFGND                          | 1.99 | 0.01 | 1.75 | 2.19 | 0.22 | 0.85 |
| 45805 | 0 | 41713  | MIHFGND                          | 1.99 | 0.01 | 1.75 | 2.19 | 0.22 | 0.85 |
| 45806 | 0 | 41713  | MIHFGND                          | 1.99 | 0.01 | 1.75 | 2.19 | 0.22 | 0.85 |
| 45807 | 0 | 41713  | MIHFGND                          | 1.99 | 0.01 | 1.75 | 2.19 | 0.22 | 0.85 |
| 45808 | 0 | 450833 | MIHPRDQ                          | 1.99 | 0.01 | 0.90 | 0.44 | 1.41 | 1.39 |
| 45809 | 0 | 423432 | MIIGGGVSGCA<br>MIINHNTSAINASRNNG | 2.41 | 0.01 | 4.93 | 0.44 | 1.41 | 0.28 |
| 45810 | 0 | 41722  | INAANLSKTQEKLSSGYR<br>IN         | 3.55 | 0.01 | 2.97 | 1.15 | 0.22 | 0.85 |
| 45811 | 0 | 172362 | MIIVSSCAV                        | 2.23 | 0.01 | 0.78 | 0.44 | 1.13 | 0.28 |
| 45812 | 0 | 172362 | MIIVSSCAV                        | 2.23 | 0.01 | 0.78 | 0.44 | 1.41 | 0.28 |
| 45813 | 0 | 172362 | MIIVSSCAV                        | 2.23 | 0.01 | 0.78 | 0.44 | 1.13 | 0.28 |
| 45814 | 0 | 172362 | MIIVSSCAV                        | 2.23 | 0.01 | 0.78 | 0.44 | 1.41 | 0.28 |
| 45815 | 0 | 172362 | MIIVSSCAV                        | 2.23 | 0.01 | 0.78 | 0.44 | 1.13 | 0.28 |
| 45816 | 0 | 172362 | MIIVSSCAV                        | 2.23 | 0.01 | 0.78 | 0.44 | 1.41 | 0.28 |
| 45817 | 0 | 172362 | MIIVSSCAV                        | 2.23 | 0.01 | 0.78 | 0.44 | 1.13 | 1.27 |
| 45818 | 0 | 172362 | MIIVSSCAV                        | 2.23 | 0.01 | 0.78 | 0.44 | 1.41 | 0.28 |
| 45819 | 0 | 172362 | MIIVSSCAV                        | 2.23 | 0.01 | 0.78 | 0.44 | 1.41 | 0.28 |



|       |   |        |                           |      |      |      |      |      |      |
|-------|---|--------|---------------------------|------|------|------|------|------|------|
| 45820 | 0 | 161420 | MIKAAFHPTGAFKSDR<br>WKSH  | 2.93 | 0.01 | 0.90 | 2.74 | 0.22 | 1.48 |
| 45821 | 0 | 161420 | MIKAAFHPTGAFKSDR<br>WKSH  | 2.93 | 0.01 | 0.90 | 2.74 | 0.22 | 1.75 |
| 45822 | 0 | 161421 | MIKAAFHPTGAFMSDR<br>WKSH  | 2.93 | 0.01 | 0.90 | 2.74 | 0.22 | 1.48 |
| 45823 | 0 | 161421 | MIKAAFHPTGAFMSDR<br>WKSH  | 2.93 | 0.01 | 0.90 | 2.74 | 0.22 | 1.75 |
| 45824 | 0 | 41726  | MIKAAFLPTGAFKADRY<br>KSH  | 2.91 | 0.01 | 0.90 | 2.63 | 0.22 | 1.48 |
| 45825 | 0 | 41727  | MIKAAFLPTGAFMADRY<br>KSH  | 2.91 | 0.01 | 0.90 | 2.63 | 0.22 | 1.48 |
| 45826 | 0 | 41727  | MIKAAFLPTGAFMADRY<br>KSH  | 2.91 | 0.01 | 0.90 | 2.63 | 2.25 | 1.75 |
| 45827 | 0 | 41727  | MIKAAFLPTGAFMADRY<br>KSH  | 2.91 | 0.01 | 0.90 | 2.63 | 0.22 | 1.48 |
| 45828 | 0 | 41727  | MIKAAFLPTGAFMADRY<br>KSH  | 2.91 | 0.01 | 0.90 | 2.63 | 2.25 | 1.75 |
| 45829 | 0 | 41728  | MIKASFDPTGAFKSPRYK<br>SH  | 2.93 | 0.01 | 1.66 | 1.12 | 0.22 | 0.28 |
| 45830 | 0 | 41728  | MIKASFDPTGAFKSPRYK<br>SH  | 2.93 | 0.01 | 1.66 | 1.12 | 0.22 | 0.85 |
| 45831 | 0 | 161422 | MIKASFHVTGAFMSPR<br>WKSH  | 2.94 | 0.01 | 0.90 | 2.74 | 0.22 | 1.48 |
| 45832 | 0 | 522467 | MIKLAPKEMPLESAE           | 2.72 | 0.01 | 2.24 | 0.44 | 1.41 | 1.28 |
| 45833 | 0 | 41735  | MIKVG FHPTGAFKSPR<br>WKSH | 2.93 | 0.01 | 0.90 | 2.63 | 0.22 | 1.48 |
| 45834 | 0 | 41735  | MIKVG FHPTGAFKSPR<br>WKSH | 2.93 | 0.01 | 0.90 | 2.74 | 0.22 | 1.48 |
| 45835 | 0 | 41736  | MIKVG FHPTGAFMSPR<br>WKSH | 2.94 | 0.01 | 0.90 | 2.63 | 0.22 | 1.48 |
| 45836 | 0 | 41736  | MIKVG FHPTGAFMSPR<br>WKSH | 2.94 | 0.01 | 0.90 | 2.74 | 0.22 | 1.48 |
| 45837 | 0 | 41737  | MIKVGFLPTGAFKSPRYK<br>SH  | 2.91 | 0.01 | 0.90 | 2.63 | 0.22 | 1.48 |
| 45838 | 0 | 41738  | MILAVQGVQDYINNE           | 2.65 | 0.01 | 2.43 | 0.44 | 1.59 | 0.28 |
| 45839 | 0 | 122486 | MILHPDVQRRVQQEID<br>DVI   | 2.90 | 0.01 | 0.78 | 0.44 | 1.13 | 0.85 |
| 45840 | 0 | 122486 | MILHPDVQRRVQQEID<br>DVI   | 2.90 | 0.01 | 0.78 | 0.44 | 0.85 | 0.28 |
| 45841 | 0 | 122486 | MILHPDVQRRVQQEID<br>DVI   | 2.90 | 0.01 | 0.78 | 0.44 | 1.13 | 0.85 |
| 45842 | 0 | 122486 | MILHPDVQRRVQQEID<br>DVI   | 2.90 | 0.01 | 0.78 | 0.44 | 0.85 | 0.85 |
| 45843 | 0 | 122486 | MILHPDVQRRVQQEID<br>DVI   | 2.90 | 0.01 | 0.78 | 0.44 | 1.13 | 0.85 |

|       |   |        |                                     |      |      |      |      |      |      |
|-------|---|--------|-------------------------------------|------|------|------|------|------|------|
| 45844 | 0 | 122486 | MILHPDVQRRVQQEID<br>DVI             | 2.90 | 0.01 | 0.78 | 0.44 | 0.85 | 0.85 |
| 45845 | 0 | 130971 | MILHPDVQRRVQQEID<br>DVIG            | 2.94 | 0.01 | 0.78 | 0.44 | 1.13 | 0.28 |
| 45846 | 0 | 122858 | MILHPDVQRRVQQEID<br>DVIGQVRRPEMGDQA | 3.39 | 0.01 | 0.78 | 0.44 | 1.13 | 0.85 |
| 45847 | 0 | 104115 | MILSLQM                             | 2.05 | 0.01 | 0.90 | 0.44 | 1.13 | 1.39 |
| 45848 | 0 | 172364 | MIMEDWDFLQLQCAL                     | 2.69 | 0.01 | 0.78 | 0.44 | 1.41 | 0.28 |
| 45849 | 0 | 172364 | MIMEDWDFLQLQCAL                     | 2.69 | 0.01 | 0.78 | 0.44 | 1.13 | 0.28 |
| 45850 | 0 | 41754  | MINVQAKPAAAAS                       | 2.53 | 0.01 | 2.04 | 1.12 | 0.22 | 0.28 |
| 45851 | 0 | 41754  | MINVQAKPAAAAS                       | 2.53 | 0.01 | 2.04 | 1.12 | 0.22 | 0.28 |
| 45852 | 0 | 41754  | MINVQAKPAAAAS                       | 2.53 | 0.01 | 2.04 | 1.12 | 0.22 | 0.85 |
| 45853 | 0 | 420646 | MIPHDEN                             | 1.99 | 0.01 | 0.90 | 2.13 | 0.85 | 0.28 |
| 45854 | 0 | 420646 | MIPHDEN                             | 1.99 | 0.01 | 0.90 | 0.44 | 0.85 | 0.28 |
| 45855 | 0 | 420646 | MIPHDEN                             | 1.99 | 0.01 | 0.90 | 2.49 | 0.22 | 0.28 |
| 45856 | 0 | 420646 | MIPHDEN                             | 1.99 | 0.01 | 0.90 | 2.49 | 0.22 | 0.28 |
| 45857 | 0 | 420646 | MIPHDEN                             | 1.99 | 0.01 | 0.90 | 0.68 | 0.22 | 0.28 |
| 45858 | 0 | 41759  | MIPKGTLT                            | 2.12 | 0.01 | 2.40 | 2.43 | 0.22 | 0.28 |
| 45859 | 0 | 123498 | MIPPPGLA                            | 2.12 | 0.01 | 0.78 | 1.20 | 0.22 | 0.28 |
| 45860 | 0 | 123498 | MIPPPGLA                            | 2.12 | 0.01 | 0.78 | 0.44 | 1.13 | 0.28 |
| 45861 | 0 | 41770  | MIRAYEQNPQHFIEDLE<br>KVRVEQLTGHGSS  | 3.28 | 0.01 | 3.21 | 3.14 | 0.22 | 0.28 |
| 45862 | 0 | 41770  | MIRAYEQNPQHFIEDLE<br>KVRVEQLTGHGSS  | 3.28 | 0.01 | 3.21 | 3.14 | 0.22 | 0.28 |
| 45863 | 0 | 41770  | MIRAYEQNPQHFIEDLE<br>KVRVEQLTGHGSS  | 3.28 | 0.01 | 3.21 | 3.14 | 2.25 | 1.75 |
| 45864 | 0 | 41772  | MISDQRANLG                          | 2.26 | 0.01 | 2.73 | 0.44 | 0.85 | 0.28 |
| 45865 | 0 | 117043 | MISDYSTRPDRR                        | 2.47 | 0.01 | 0.90 | 1.15 | 0.22 | 0.28 |
| 45866 | 0 | 117043 | MISDYSTRPDRR                        | 2.47 | 0.01 | 0.90 | 0.44 | 0.85 | 0.28 |
| 45867 | 0 | 41775  | MISGPCPKAGQPSLVVQ<br>SSL            | 2.95 | 0.01 | 3.01 | 0.44 | 0.85 | 0.28 |
| 45868 | 0 | 78748  | MISGPCPKDGQPSLVLQ<br>SSS            | 2.94 | 0.01 | 2.04 | 0.44 | 1.59 | 0.28 |
| 45869 | 0 | 172365 | MISPVILIFSSFLCH                     | 2.69 | 0.01 | 0.78 | 0.44 | 1.41 | 0.28 |
| 45870 | 0 | 172365 | MISPVILIFSSFLCH                     | 2.69 | 0.01 | 0.78 | 0.44 | 1.13 | 0.28 |
| 45871 | 0 | 117044 | MISYSTRPDRQ                         | 2.39 | 0.01 | 0.90 | 1.15 | 0.22 | 0.28 |
| 45872 | 0 | 117044 | MISYSTRPDRQ                         | 2.39 | 0.01 | 0.90 | 0.44 | 0.85 | 0.28 |
| 45873 | 0 | 41780  | MITEFENP                            | 2.12 | 0.01 | 2.99 | 0.44 | 0.85 | 0.28 |
| 45874 | 0 | 41798  | MIYSTQPFEASS                        | 2.43 | 0.01 | 0.90 | 0.44 | 0.85 | 0.28 |
| 45875 | 0 | 98248  | MKAHKYVKGK                          | 2.33 | 0.01 | 3.57 | 0.44 | 0.85 | 0.28 |
| 45876 | 0 | 77957  | MKALVAATA                           | 2.25 | 0.01 | 2.25 | 0.44 | 2.26 | 0.28 |
| 45877 | 0 | 77957  | MKALVAATA                           | 2.25 | 0.01 | 2.25 | 0.44 | 2.26 | 0.28 |
| 45878 | 0 | 118021 | MKCGMWGRA                           | 2.24 | 0.01 | 0.78 | 0.44 | 1.13 | 0.28 |
| 45879 | 0 | 118021 | MKCGMWGRA                           | 2.24 | 0.01 | 0.78 | 0.44 | 1.41 | 0.28 |

|       |   |        |                                    |      |      |      |      |      |      |
|-------|---|--------|------------------------------------|------|------|------|------|------|------|
| 45880 | 0 | 41807  | MKDFDEPGHLAPTGMF<br>VAGAKYMVIQG    | 3.23 | 0.01 | 2.53 | 0.68 | 0.22 | 0.28 |
| 45881 | 0 | 41807  | MKDFDEPGHLAPTGMF<br>VAGAKYMVIQG    | 3.23 | 0.01 | 2.53 | 0.68 | 0.22 | 0.28 |
| 45882 | 0 | 41807  | MKDFDEPGHLAPTGMF<br>VAGAKYMVIQG    | 3.23 | 0.01 | 2.53 | 0.68 | 0.22 | 0.28 |
| 45883 | 0 | 41809  | MKDTLR                             | 1.88 | 0.01 | 3.24 | 1.12 | 0.22 | 0.28 |
| 45884 | 0 | 41810  | MKDTLRITYL                         | 2.31 | 0.01 | 2.66 | 0.68 | 0.22 | 0.28 |
| 45885 | 0 | 509989 | MKEAYSTMYIDILLT                    | 2.68 | 0.01 | 4.08 | 1.20 | 0.22 | 0.85 |
| 45886 | 0 | 434634 | MKEEMARHLREYQDLL<br>N              | 2.79 | 4.93 | 0.78 | 0.44 | 1.13 | 0.28 |
| 45887 | 0 | 41811  | MKEGIHAQQK                         | 2.30 | 0.01 | 1.60 | 0.44 | 1.23 | 0.85 |
| 45888 | 0 | 41811  | MKEGIHAQQK                         | 2.30 | 0.01 | 1.60 | 0.44 | 1.23 | 0.28 |
| 45889 | 0 | 41811  | MKEGIHAQQK                         | 2.30 | 0.01 | 1.60 | 0.44 | 1.23 | 0.28 |
| 45890 | 0 | 139829 | MKERESQIRDEYDHVLS<br>A             | 2.82 | 0.01 | 3.65 | 1.12 | 0.22 | 0.28 |
| 45891 | 0 | 41821  | MKFREGSSEVC                        | 2.38 | 0.01 | 3.61 | 0.44 | 0.85 | 0.28 |
| 45892 | 0 | 135720 | MKGKYGIY                           | 2.16 | 0.01 | 0.78 | 0.44 | 2.35 | 0.28 |
| 45893 | 0 | 98904  | MKGLDIQKVA                         | 2.29 | 0.01 | 1.60 | 0.44 | 1.23 | 0.85 |
| 45894 | 0 | 98904  | MKGLDIQKVA                         | 2.29 | 0.01 | 1.60 | 0.44 | 1.23 | 0.85 |
| 45895 | 0 | 138791 | MKGLRGHGGGLQGMPG<br>PNGPS          | 2.98 | 0.01 | 4.93 | 0.44 | 1.23 | 0.28 |
| 45896 | 0 | 138792 | MKGLRGHPGLQGMPG<br>PNGPS           | 2.98 | 0.01 | 4.93 | 0.44 | 1.23 | 0.28 |
| 45897 | 0 | 138793 | MKGLRGHPGLQGMPG<br>PSGPS           | 2.99 | 0.01 | 4.93 | 0.44 | 1.23 | 0.28 |
| 45898 | 0 | 41823  | MKGQNVTLQDIAIELED<br>TISPINLHCEEEI | 3.31 | 0.01 | 3.55 | 2.22 | 0.22 | 0.28 |
| 45899 | 0 | 41823  | MKGQNVTLQDIAIELED<br>TISPINLHCEEEI | 3.31 | 0.01 | 3.55 | 2.22 | 0.22 | 0.28 |
| 45900 | 0 | 115153 | MKGVVCTRIYEV                       | 2.53 | 0.01 | 0.78 | 0.44 | 1.13 | 0.28 |
| 45901 | 0 | 115153 | MKGVVCTRIYEV                       | 2.53 | 0.01 | 0.78 | 0.44 | 1.41 | 0.28 |
| 45902 | 0 | 115153 | MKGVVCTRIYEV                       | 2.53 | 0.01 | 0.78 | 0.44 | 1.41 | 0.28 |
| 45903 | 0 | 115153 | MKGVVCTRIYEV                       | 2.53 | 0.01 | 0.78 | 0.44 | 1.13 | 0.28 |
| 45904 | 0 | 41826  | MKHM                               | 1.60 | 0.01 | 0.78 | 1.15 | 2.26 | 0.85 |
| 45905 | 0 | 41826  | MKHM                               | 1.60 | 0.01 | 2.98 | 1.15 | 0.22 | 2.02 |
| 45906 | 0 | 41826  | MKHM                               | 1.60 | 0.01 | 2.98 | 1.15 | 0.22 | 2.02 |
| 45907 | 0 | 41826  | MKHM                               | 1.60 | 0.01 | 2.98 | 1.15 | 0.22 | 2.02 |
| 45908 | 0 | 41826  | MKHM                               | 1.60 | 0.01 | 2.98 | 1.15 | 0.22 | 2.12 |
| 45909 | 0 | 41826  | MKHM                               | 1.60 | 0.01 | 0.78 | 1.15 | 0.22 | 1.48 |
| 45910 | 0 | 41826  | MKHM                               | 1.60 | 0.01 | 0.78 | 1.15 | 0.22 | 2.92 |
| 45911 | 0 | 41826  | MKHM                               | 1.60 | 0.01 | 2.98 | 3.26 | 0.22 | 0.85 |
| 45912 | 0 | 41826  | MKHM                               | 1.60 | 0.01 | 2.98 | 3.26 | 0.22 | 0.28 |
| 45913 | 0 | 41826  | MKHM                               | 1.60 | 0.01 | 2.98 | 3.26 | 0.22 | 1.48 |
| 45914 | 0 | 41826  | MKHM                               | 1.60 | 0.01 | 2.98 | 3.26 | 0.22 | 1.48 |
| 45915 | 0 | 41826  | MKHM                               | 1.60 | 0.01 | 0.78 | 0.68 | 0.22 | 0.85 |
| 45916 | 0 | 41826  | MKHM                               | 1.60 | 0.01 | 2.98 | 1.15 | 0.22 | 1.48 |

|       |   |        |                                 |      |      |      |      |      |      |
|-------|---|--------|---------------------------------|------|------|------|------|------|------|
| 45917 | 0 | 134162 | MKHMAGA                         | 2.05 | 0.01 | 0.78 | 3.40 | 0.22 | 0.28 |
| 45918 | 0 | 134162 | MKHMAGA                         | 2.05 | 0.01 | 0.78 | 3.40 | 0.22 | 0.85 |
| 45919 | 0 | 134162 | MKHMAGA                         | 2.05 | 0.01 | 0.78 | 3.40 | 0.22 | 0.85 |
| 45920 | 0 | 134162 | MKHMAGA                         | 2.05 | 0.01 | 0.78 | 3.40 | 0.22 | 0.85 |
| 45921 | 0 | 178148 | MKILTERGYSFTTTAEREI<br>VRDIKEKL | 3.22 | 3.33 | 0.78 | 0.44 | 1.13 | 0.28 |
| 45922 | 0 | 178148 | MKILTERGYSFTTTAEREI<br>VRDIKEKL | 3.22 | 3.33 | 0.78 | 0.44 | 1.13 | 0.28 |
| 45923 | 0 | 178148 | MKILTERGYSFTTTAEREI<br>VRDIKEKL | 3.22 | 3.33 | 0.78 | 0.44 | 1.13 | 0.28 |
| 45924 | 0 | 111549 | MKIPNNKFLPV                     | 2.48 | 0.01 | 0.90 | 0.44 | 0.85 | 0.28 |
| 45925 | 0 | 41840  | MKIRLHTLLAVLTAAPLL<br>LA        | 2.96 | 0.01 | 2.04 | 2.52 | 0.22 | 0.28 |
| 45926 | 0 | 41840  | MKIRLHTLLAVLTAAPLL<br>LA        | 2.96 | 0.01 | 2.04 | 2.52 | 0.22 | 0.28 |
| 45927 | 0 | 191619 | MKKACLERAINCVPTL                | 2.70 | 0.01 | 0.90 | 2.84 | 1.13 | 1.39 |
| 45928 | 0 | 191619 | MKKACLERAINCVPTL                | 2.70 | 0.01 | 0.90 | 2.84 | 1.13 | 1.66 |
| 45929 | 0 | 41843  | MKKDDQIAAAIALRGM<br>A           | 2.81 | 0.01 | 2.73 | 0.44 | 0.85 | 0.28 |
| 45930 | 0 | 41844  | MKKDDQIAAAIALRGM<br>AKDGKFAVK   | 3.18 | 0.01 | 2.73 | 0.44 | 0.85 | 0.28 |
| 45931 | 0 | 41844  | MKKDDQIAAAIALRGM<br>AKDGKFAVK   | 3.18 | 0.01 | 2.73 | 0.44 | 0.85 | 0.28 |
| 45932 | 0 | 41844  | MKKDDQIAAAIALRGM<br>AKDGKFAVK   | 3.18 | 0.01 | 2.73 | 0.44 | 0.85 | 0.28 |
| 45933 | 0 | 41844  | MKKDDQIAAAIALRGM<br>AKDGKFAVK   | 3.18 | 0.01 | 2.73 | 0.44 | 0.85 | 1.27 |
| 45934 | 0 | 41845  | MKKDDQIAAAMVLRG<br>MA           | 2.79 | 0.01 | 3.93 | 0.44 | 0.85 | 0.28 |
| 45935 | 0 | 41846  | MKKDDQIAAAMVLRG<br>MAKDGGFALK   | 3.18 | 0.01 | 3.93 | 2.61 | 0.22 | 0.28 |
| 45936 | 0 | 41846  | MKKDDQIAAAMVLRG<br>MAKDGGFALK   | 3.18 | 0.01 | 3.93 | 2.82 | 0.22 | 0.28 |
| 45937 | 0 | 41846  | MKKDDQIAAAMVLRG<br>MAKDGGFALK   | 3.18 | 0.01 | 3.93 | 0.44 | 0.85 | 0.28 |
| 45938 | 0 | 41846  | MKKDDQIAAAMVLRG<br>MAKDGGFALK   | 3.18 | 0.01 | 3.93 | 1.20 | 0.22 | 2.02 |
| 45939 | 0 | 41846  | MKKDDQIAAAMVLRG<br>MAKDGGFALK   | 3.18 | 0.01 | 3.93 | 1.20 | 0.22 | 1.48 |
| 45940 | 0 | 41846  | MKKDDQIAAAMVLRG<br>MAKDGGFALK   | 3.18 | 0.01 | 3.93 | 0.44 | 0.85 | 0.28 |
| 45941 | 0 | 41846  | MKKDDQIAAAMVLRG<br>MAKDGGFALK   | 3.18 | 0.01 | 2.97 | 0.44 | 0.85 | 0.28 |
| 45942 | 0 | 41847  | MKKDDQIAAAMVLRG<br>MAKDGGFALKD  | 3.22 | 0.01 | 3.93 | 2.61 | 0.22 | 0.28 |

|       |   |        |                                |      |      |      |      |      |      |
|-------|---|--------|--------------------------------|------|------|------|------|------|------|
| 45943 | 0 | 41847  | MKKDDQIAAAMVLRG<br>MAKDGQFALKD | 3.22 | 0.01 | 3.93 | 0.44 | 0.85 | 0.28 |
| 45944 | 0 | 41847  | MKKDDQIAAAMVLRG<br>MAKDGQFALKD | 3.22 | 0.01 | 3.93 | 2.82 | 0.22 | 0.28 |
| 45945 | 0 | 139830 | MKKISSVIAIALFGTIA              | 2.79 | 0.01 | 3.85 | 0.44 | 1.41 | 0.28 |
| 45946 | 0 | 139830 | MKKISSVIAIALFGTIA              | 2.79 | 0.01 | 3.85 | 0.44 | 1.41 | 0.28 |
| 45947 | 0 | 139830 | MKKISSVIAIALFGTIA              | 2.79 | 0.01 | 3.85 | 0.44 | 1.41 | 2.12 |
| 45948 | 0 | 139830 | MKKISSVIAIALFGTIA              | 2.79 | 0.01 | 3.85 | 0.44 | 1.41 | 1.48 |
| 45949 | 0 | 139830 | MKKISSVIAIALFGTIA              | 2.79 | 0.01 | 3.85 | 0.44 | 1.41 | 1.75 |
| 45950 | 0 | 41852  | MKKNDQIAAAIVLR                 | 2.58 | 0.01 | 2.97 | 2.82 | 0.22 | 0.28 |
| 45951 | 0 | 95119  | MKKPGENIKPLSCKYSYP<br>KH       | 2.94 | 0.01 | 2.25 | 2.04 | 0.22 | 0.28 |
| 45952 | 0 | 95119  | MKKPGENIKPLSCKYSYP<br>KH       | 2.94 | 0.01 | 2.25 | 2.04 | 0.22 | 1.27 |
| 45953 | 0 | 105966 | MKKRH                          | 1.75 | 0.01 | 0.78 | 0.44 | 1.13 | 1.27 |
| 45954 | 0 | 225433 | MKLFAFICVKSCSLF                | 2.88 | 0.01 | 2.61 | 0.68 | 0.22 | 0.28 |
| 45955 | 0 | 41862  | MKLTA                          | 1.86 | 0.01 | 1.86 | 0.44 | 1.23 | 0.28 |
| 45956 | 0 | 131568 | MKLVRFLMKLSHETVTIE<br>L        | 2.91 | 0.01 | 0.78 | 0.44 | 1.13 | 0.28 |
| 45957 | 0 | 117331 | MKLVRFLMKLSHETVTIE<br>LK       | 2.97 | 0.01 | 0.78 | 0.44 | 1.13 | 0.28 |
| 45958 | 0 | 117331 | MKLVRFLMKLSHETVTIE<br>LK       | 2.97 | 0.01 | 0.78 | 0.44 | 1.41 | 0.28 |
| 45959 | 0 | 117331 | MKLVRFLMKLSHETVTIE<br>LK       | 2.97 | 0.01 | 0.78 | 0.44 | 1.13 | 0.28 |
| 45960 | 0 | 117331 | MKLVRFLMKLSHETVTIE<br>LK       | 2.97 | 0.01 | 0.78 | 0.44 | 1.13 | 0.28 |
| 45961 | 0 | 117331 | MKLVRFLMKLSHETVTIE<br>LK       | 2.97 | 0.01 | 0.78 | 0.44 | 1.13 | 0.28 |
| 45962 | 0 | 117331 | MKLVRFLMKLSHETVTIE<br>LK       | 2.97 | 0.01 | 0.78 | 0.44 | 1.13 | 0.28 |
| 45963 | 0 | 117331 | MKLVRFLMKLSHETVTIE<br>LK       | 2.97 | 0.01 | 0.78 | 0.44 | 1.13 | 0.28 |
| 45964 | 0 | 117331 | MKLVRFLMKLSHETVTIE<br>LK       | 2.97 | 0.01 | 0.78 | 0.44 | 1.13 | 0.28 |
| 45965 | 0 | 117331 | MKLVRFLMKLSHETVTIE<br>LK       | 2.97 | 0.01 | 0.78 | 0.44 | 1.13 | 0.28 |
| 45966 | 0 | 117331 | MKLVRFLMKLSHETVTIE<br>LK       | 2.97 | 0.01 | 0.78 | 0.44 | 1.13 | 0.28 |
| 45967 | 0 | 117331 | MKLVRFLMKLSHETVTIE<br>LK       | 2.97 | 0.01 | 0.78 | 3.44 | 0.22 | 0.28 |
| 45968 | 0 | 117331 | MKLVRFLMKLSHETVTIE<br>LK       | 2.97 | 0.01 | 0.78 | 3.44 | 0.22 | 0.28 |
| 45969 | 0 | 117331 | MKLVRFLMKLSHETVTIE<br>LK       | 2.97 | 0.01 | 0.78 | 3.44 | 0.22 | 0.28 |

|       |   |        |                             |      |      |      |      |      |      |
|-------|---|--------|-----------------------------|------|------|------|------|------|------|
| 45970 | 0 | 117331 | MKLVRFMKLSHETVTIE<br>LK     | 2.97 | 0.01 | 0.78 | 3.05 | 1.41 | 0.28 |
| 45971 | 0 | 117331 | MKLVRFMKLSHETVTIE<br>LK     | 2.97 | 0.01 | 0.78 | 3.44 | 0.22 | 0.28 |
| 45972 | 0 | 117331 | MKLVRFMKLSHETVTIE<br>LK     | 2.97 | 0.01 | 0.78 | 3.44 | 0.22 | 0.28 |
| 45973 | 0 | 117331 | MKLVRFMKLSHETVTIE<br>LK     | 2.97 | 0.01 | 0.78 | 3.44 | 0.22 | 0.28 |
| 45974 | 0 | 117331 | MKLVRFMKLSHETVTIE<br>LK     | 2.97 | 0.01 | 0.78 | 3.44 | 0.22 | 0.28 |
| 45975 | 0 | 117331 | MKLVRFMKLSHETVTIE<br>LK     | 2.97 | 0.01 | 0.78 | 3.44 | 0.22 | 0.28 |
| 45976 | 0 | 117331 | MKLVRFMKLSHETVTIE<br>LK     | 2.97 | 0.01 | 0.78 | 3.44 | 0.22 | 0.28 |
| 45977 | 0 | 117331 | MKLVRFMKLSHETVTIE<br>LK     | 2.97 | 0.01 | 0.78 | 0.44 | 1.13 | 0.28 |
| 45978 | 0 | 117331 | MKLVRFMKLSHETVTIE<br>LK     | 2.97 | 0.01 | 0.78 | 0.44 | 1.13 | 0.28 |
| 45979 | 0 | 117331 | MKLVRFMKLSHETVTIE<br>LK     | 2.97 | 0.01 | 0.78 | 0.44 | 1.13 | 0.28 |
| 45980 | 0 | 117331 | MKLVRFMKLSHETVTIE<br>LK     | 2.97 | 0.01 | 0.78 | 0.44 | 1.13 | 0.28 |
| 45981 | 0 | 117331 | MKLVRFMKLSHETVTIE<br>LK     | 2.97 | 0.01 | 0.78 | 0.44 | 1.13 | 0.28 |
| 45982 | 0 | 117331 | MKLVRFMKLSHETVTIE<br>LK     | 2.97 | 0.01 | 0.78 | 0.44 | 1.13 | 0.28 |
| 45983 | 0 | 117331 | MKLVRFMKLSHETVTIE<br>LK     | 2.97 | 0.01 | 0.78 | 0.44 | 1.13 | 0.28 |
| 45984 | 0 | 41866  | MKNNPIYSEGS                 | 2.44 | 0.01 | 3.75 | 2.02 | 0.22 | 0.28 |
| 45985 | 0 | 41866  | MKNNPIYSEGS                 | 2.44 | 0.01 | 3.75 | 2.02 | 0.85 | 0.28 |
| 45986 | 0 | 41866  | MKNNPIYSEGS                 | 2.44 | 0.01 | 4.45 | 2.02 | 0.22 | 0.28 |
| 45987 | 0 | 41866  | MKNNPIYSEGS                 | 2.44 | 0.01 | 4.45 | 2.02 | 0.85 | 0.28 |
| 45988 | 0 | 41867  | MKNNPIYSEGSMLNV<br>QHDDSIHT | 3.09 | 0.01 | 4.45 | 2.02 | 0.22 | 0.28 |
| 45989 | 0 | 41868  | MKNNPVYSESL                 | 2.38 | 0.01 | 3.75 | 2.02 | 0.85 | 0.28 |
| 45990 | 0 | 41868  | MKNNPVYSESL                 | 2.38 | 0.01 | 3.75 | 2.02 | 0.85 | 0.28 |
| 45991 | 0 | 41868  | MKNNPVYSESL                 | 2.38 | 0.01 | 3.75 | 2.02 | 0.22 | 0.28 |
| 45992 | 0 | 41869  | MKNQTFHLQGFVDGL             | 2.66 | 0.01 | 4.15 | 0.68 | 0.22 | 0.28 |
| 45993 | 0 | 41869  | MKNQTFHLQGFVDGL             | 2.66 | 0.01 | 4.15 | 1.15 | 0.22 | 0.28 |
| 45994 | 0 | 41869  | MKNQTFHLQGFVDGL             | 2.66 | 0.01 | 4.15 | 1.15 | 0.22 | 0.28 |
| 45995 | 0 | 338913 | MKNTTATGDSGDSTA             | 2.71 | 0.01 | 1.61 | 0.44 | 0.85 | 1.28 |
| 45996 | 0 | 338914 | MKNTTATTGDSGDST             | 2.71 | 0.01 | 1.61 | 0.44 | 0.85 | 1.28 |
| 45997 | 0 | 338915 | MKNTTATTGDSDSST             | 2.70 | 0.01 | 1.61 | 0.44 | 0.85 | 1.28 |

|       |   |        |                     |      |      |      |      |      |      |
|-------|---|--------|---------------------|------|------|------|------|------|------|
|       |   |        | MKNVIKCTGESQTGNT    |      |      |      |      |      |      |
| 45998 | 0 | 227384 | GGGQAGNTVGDQAGS     | 3.69 | 0.01 | 3.28 | 0.44 | 1.59 | 0.28 |
|       |   |        | TGGSPQGSTGA         |      |      |      |      |      |      |
|       |   |        | MKNVIKCTGESQTGNT    |      |      |      |      |      |      |
| 45999 | 0 | 227384 | GGGQAGNTVGDQAGS     | 3.69 | 0.01 | 3.28 | 1.15 | 0.22 | 0.28 |
|       |   |        | TGGSPQGSTGA         |      |      |      |      |      |      |
|       |   |        | MKNVIKCTGESQTGNT    |      |      |      |      |      |      |
| 46000 | 0 | 227384 | GGGQAGNTVGDQAGS     | 3.69 | 0.01 | 3.28 | 3.33 | 0.22 | 0.28 |
|       |   |        | TGGSPQGSTGA         |      |      |      |      |      |      |
| 46001 | 0 | 41870  | MKNYLSFGMFALL       | 2.54 | 0.01 | 3.47 | 2.16 | 0.22 | 0.85 |
| 46002 | 0 | 41870  | MKNYLSFGMFALL       | 2.54 | 0.01 | 3.47 | 0.68 | 0.22 | 2.35 |
| 46003 | 0 | 41870  | MKNYLSFGMFALL       | 2.54 | 0.01 | 3.47 | 0.68 | 0.22 | 0.28 |
| 46004 | 0 | 41870  | MKNYLSFGMFALL       | 2.54 | 0.01 | 3.47 | 0.44 | 1.59 | 2.35 |
| 46005 | 0 | 108545 | MKNYVPPKGDKKGKK     | 2.69 | 0.01 | 0.78 | 0.44 | 1.13 | 1.27 |
| 46006 | 0 | 176349 | MKPALCEPLCG         | 2.41 | 0.01 | 0.90 | 1.15 | 0.22 | 1.39 |
| 46007 | 0 | 115384 | MKPWIQPKTKVIPYVRY   | 2.85 | 0.01 | 1.60 | 0.44 | 1.23 | 1.28 |
|       |   |        | L                   |      |      |      |      |      |      |
| 46008 | 0 | 79932  | MKPYEVTPTRM         | 2.42 | 0.01 | 2.14 | 3.17 | 0.22 | 0.28 |
| 46009 | 0 | 79932  | MKPYEVTPTRM         | 2.42 | 0.01 | 2.14 | 3.17 | 0.22 | 0.28 |
| 46010 | 0 | 41874  | MKQYPSTSTTVEGHT     | 2.66 | 0.01 | 3.70 | 2.43 | 0.22 | 0.28 |
| 46011 | 0 | 41874  | MKQYPSTSTTVEGHT     | 2.66 | 0.01 | 3.70 | 2.43 | 0.22 | 0.28 |
| 46012 | 0 | 41874  | MKQYPSTSTTVEGHT     | 2.66 | 0.01 | 2.58 | 2.43 | 0.22 | 0.28 |
| 46013 | 0 | 105967 | MKRGLTVAVAGAAILVA   | 2.97 | 0.01 | 2.04 | 0.44 | 1.13 | 0.28 |
|       |   |        | GLS                 |      |      |      |      |      |      |
| 46014 | 0 | 105967 | MKRGLTVAVAGAAILVA   | 2.97 | 0.01 | 2.04 | 0.44 | 0.22 | 0.28 |
|       |   |        | GLS                 |      |      |      |      |      |      |
| 46015 | 0 | 142231 | MKRGLTVAVAGAAILVA   | 3.14 | 0.01 | 2.04 | 0.68 | 0.22 | 0.28 |
|       |   |        | GLSGCSS             |      |      |      |      |      |      |
| 46016 | 0 | 120097 | MKRPSREKQDKKIFTEDI  | 2.90 | 0.01 | 0.78 | 2.04 | 0.22 | 1.57 |
|       |   |        | D                   |      |      |      |      |      |      |
| 46017 | 0 | 120097 | MKRPSREKQDKKIFTEDI  | 2.90 | 0.01 | 0.78 | 2.04 | 0.22 | 1.57 |
|       |   |        | D                   |      |      |      |      |      |      |
| 46018 | 0 | 120097 | MKRPSREKQDKKIFTEDI  | 2.90 | 0.01 | 0.78 | 2.04 | 0.22 | 1.57 |
|       |   |        | D                   |      |      |      |      |      |      |
| 46019 | 0 | 174663 | MKRSGYGQPIA         | 2.36 | 0.01 | 3.97 | 0.68 | 0.22 | 0.28 |
| 46020 | 0 | 174663 | MKRSGYGQPIA         | 2.36 | 0.01 | 3.97 | 0.68 | 0.22 | 1.34 |
| 46021 | 0 | 174663 | MKRSGYGQPIA         | 2.36 | 0.01 | 3.97 | 0.68 | 0.22 | 0.85 |
| 46022 | 0 | 174663 | MKRSGYGQPIA         | 2.36 | 0.01 | 3.97 | 0.68 | 0.22 | 1.57 |
| 46023 | 0 | 149843 | MKTAMPIKTKWP        | 2.52 | 0.01 | 0.90 | 2.37 | 0.22 | 0.28 |
| 46024 | 0 | 98249  | MKTFLILALLAIVATTATT | 3.04 | 0.01 | 1.86 | 0.44 | 1.93 | 0.28 |
|       |   |        | AV                  |      |      |      |      |      |      |
| 46025 | 0 | 98249  | MKTFLILALLAIVATTATT | 3.04 | 0.01 | 1.86 | 0.44 | 2.39 | 0.28 |
|       |   |        | AV                  |      |      |      |      |      |      |
| 46026 | 0 | 238768 | MKTLLLTLLVVVTIMC    | 2.71 | 0.01 | 2.56 | 2.02 | 0.22 | 0.85 |
| 46027 | 0 | 238768 | MKTLLLTLLVVVTIMC    | 2.71 | 0.01 | 2.56 | 1.20 | 0.22 | 0.85 |
| 46028 | 0 | 238768 | MKTLLLTLLVVVTIMC    | 2.71 | 0.01 | 2.56 | 1.20 | 0.22 | 0.85 |

|       |   |        |                                                            |      |      |      |      |      |      |
|-------|---|--------|------------------------------------------------------------|------|------|------|------|------|------|
| 46029 | 0 | 238769 | MKTLLTLVVVTIVC                                             | 2.71 | 0.01 | 2.56 | 2.02 | 0.22 | 0.85 |
| 46030 | 0 | 238769 | MKTLLTLVVVTIVC                                             | 2.71 | 0.01 | 2.56 | 1.20 | 0.22 | 0.85 |
| 46031 | 0 | 172375 | MKTMAYDCEVEKT                                              | 2.56 | 0.01 | 3.38 | 0.44 | 0.85 | 2.51 |
| 46032 | 0 | 172375 | MKTMAYDCEVEKT                                              | 2.56 | 0.01 | 3.38 | 0.44 | 0.85 | 2.51 |
| 46033 | 0 | 338967 | MKTTAATTGDSDGST                                            | 2.72 | 0.01 | 1.61 | 0.44 | 0.85 | 1.28 |
| 46034 | 0 | 338971 | MKTTTATTGDSDGST                                            | 2.72 | 0.01 | 1.61 | 0.44 | 0.85 | 1.28 |
| 46035 | 0 | 338972 | MKTTTATTGDSDSST                                            | 2.71 | 0.01 | 1.61 | 0.44 | 0.85 | 1.28 |
| 46036 | 0 | 338973 | MKTTTATTGNSDGST                                            | 2.70 | 0.01 | 1.61 | 0.44 | 0.85 | 1.28 |
| 46037 | 0 | 338974 | MKTTTTTTGDSDGST                                            | 2.72 | 0.01 | 1.61 | 0.44 | 0.85 | 1.28 |
| 46038 | 0 | 41884  | MKTVAFDLSSPQKSGTG<br>PQPGSAGM                              | 3.18 | 0.01 | 2.76 | 0.44 | 0.85 | 0.85 |
| 46039 | 0 | 41885  | MKTVAFDLSSPQKSGTG<br>PQPGSAGMGGAKTPSD<br>AVQNILQKIEKIKNTEE | 3.86 | 0.01 | 2.76 | 0.44 | 1.59 | 0.85 |
| 46040 | 0 | 41885  | MKTVAFDLSSPQKSGTG<br>PQPGSAGMGGAKTPSD<br>AVQNILQKIEKIKNTEE | 3.86 | 0.01 | 2.76 | 0.44 | 0.85 | 0.85 |
| 46041 | 0 | 41886  | MKTVAFDLSSPQKSGTG<br>PQPGSAGMGGAKTPSD<br>AVQNISQKIEKIKNTEE | 3.86 | 0.01 | 2.76 | 0.44 | 1.59 | 0.85 |
| 46042 | 0 | 41886  | MKTVAFDLSSPQKSGTG<br>PQPGSAGMGGAKTPSD<br>AVQNISQKIEKIKNTEE | 3.86 | 0.01 | 2.76 | 0.44 | 0.85 | 0.85 |
| 46043 | 0 | 167973 | MKVIDDVQQLEKDKQQ                                           | 2.76 | 0.01 | 2.75 | 0.44 | 1.59 | 2.51 |
| 46044 | 0 | 167973 | MKVIDDVQQLEKDKQQ                                           | 2.76 | 0.01 | 2.75 | 0.44 | 0.85 | 2.51 |
| 46045 | 0 | 167973 | MKVIDDVQQLEKDKQQ                                           | 2.76 | 0.01 | 2.75 | 0.44 | 0.85 | 2.51 |
| 46046 | 0 | 167973 | MKVIDDVQQLEKDKQQ                                           | 2.76 | 0.01 | 2.75 | 0.44 | 0.85 | 2.51 |
| 46047 | 0 | 111550 | MKVNILR                                                    | 1.99 | 0.01 | 0.90 | 0.44 | 0.85 | 1.39 |
| 46048 | 0 | 111551 | MKVSNHKDIPPL                                               | 2.44 | 0.01 | 0.90 | 0.44 | 0.85 | 1.39 |
| 46049 | 0 | 111552 | MKVSNSK                                                    | 2.04 | 0.01 | 0.90 | 0.44 | 0.85 | 1.39 |
| 46050 | 0 | 41892  | MKVTVAFNQFGPN                                              | 2.54 | 0.01 | 3.24 | 1.15 | 0.22 | 0.28 |
| 46051 | 0 | 456901 | MKYAETNLLKAFAQLFIE<br>T                                    | 2.91 | 0.01 | 2.40 | 2.82 | 0.22 | 0.28 |
| 46052 | 0 | 186778 | MKYLLPTAAAGLLLL<br>MLAKGLPPRSVLVKGYQ                       | 2.67 | 0.01 | 4.63 | 1.20 | 0.22 | 0.85 |
| 46053 | 0 | 128059 | TFLSAPREGLRRLRVPTG<br>EGAGI                                | 3.64 | 0.01 | 0.78 | 1.12 | 0.22 | 0.85 |
| 46054 | 0 | 41919  | MLDLQPETT                                                  | 2.21 | 0.01 | 1.86 | 0.44 | 2.39 | 0.28 |
| 46055 | 0 | 41919  | MLDLQPETT                                                  | 2.21 | 0.01 | 1.86 | 0.44 | 2.39 | 0.28 |



|       |   |        |                                   |      |      |      |      |      |      |
|-------|---|--------|-----------------------------------|------|------|------|------|------|------|
| 46056 | 0 | 41919  | MLDLQPETT                         | 2.21 | 0.01 | 1.86 | 0.44 | 2.39 | 0.28 |
| 46057 | 0 | 41921  | MLDMVDGRP                         | 2.24 | 0.01 | 3.61 | 1.15 | 0.22 | 0.85 |
| 46058 | 0 | 41921  | MLDMVDGRP                         | 2.24 | 0.01 | 3.61 | 1.15 | 0.22 | 0.85 |
| 46059 | 0 | 41921  | MLDMVDGRP                         | 2.24 | 0.01 | 3.61 | 1.15 | 0.22 | 0.85 |
| 46060 | 0 | 41921  | MLDMVDGRP                         | 2.24 | 0.01 | 3.61 | 1.15 | 0.22 | 0.28 |
| 46061 | 0 | 41921  | MLDMVDGRP                         | 2.24 | 0.01 | 3.61 | 1.15 | 0.22 | 0.28 |
| 46062 | 0 | 144723 | MLDNFPTNLH                        | 2.31 | 0.01 | 0.78 | 0.44 | 2.35 | 0.28 |
| 46063 | 0 | 144723 | MLDNFPTNLH                        | 2.31 | 0.01 | 0.78 | 0.44 | 2.35 | 0.28 |
| 46064 | 0 | 141706 | MLEPFQIL                          | 2.12 | 0.01 | 3.61 | 0.68 | 0.22 | 0.28 |
| 46065 | 0 | 141706 | MLEPFQIL                          | 2.12 | 0.01 | 3.61 | 0.68 | 0.22 | 1.34 |
| 46066 | 0 | 141706 | MLEPFQIL                          | 2.12 | 0.01 | 3.61 | 0.68 | 0.22 | 1.34 |
| 46067 | 0 | 99469  | MLGMDDPRMRR                       | 2.42 | 0.01 | 0.90 | 1.12 | 0.22 | 1.39 |
| 46068 | 0 | 41948  | MLGNAPSVVPNTTLGM                  | 2.75 | 0.01 | 2.04 | 0.44 | 0.85 | 0.28 |
| 46069 | 0 | 41948  | MLGNAPSVVPNTTLGM                  | 2.75 | 0.01 | 2.04 | 0.44 | 2.98 | 0.28 |
| 46070 | 0 | 111555 | MLGNNLPPPPSEVVSL                  | 2.68 | 0.01 | 3.20 | 1.12 | 0.22 | 0.85 |
| 46071 | 0 | 41950  | MLGSAMSRPMIHFGND<br>WEDRYRENMYRYP | 3.33 | 0.01 | 1.75 | 2.19 | 0.22 | 0.28 |
| 46072 | 0 | 97500  | MLGTAEKVRV                        | 2.29 | 0.01 | 2.84 | 0.44 | 0.85 | 0.28 |
| 46073 | 0 | 41952  | MLGTGTPNRARINFNC                  | 2.73 | 0.01 | 2.04 | 0.44 | 2.98 | 0.28 |
| 46074 | 0 | 41952  | MLGTGTPNRARINFNC                  | 2.73 | 0.01 | 2.04 | 0.44 | 0.85 | 0.28 |
| 46075 | 0 | 450834 | MLHELLE                           | 2.04 | 0.01 | 0.90 | 0.44 | 1.23 | 1.39 |
| 46076 | 0 | 156919 | MLHTSM                            | 1.91 | 0.01 | 0.90 | 2.74 | 0.22 | 0.85 |
| 46077 | 0 | 121620 | MLKIAEELPKEPQGI                   | 2.70 | 0.01 | 0.78 | 0.44 | 1.13 | 0.85 |
| 46078 | 0 | 121620 | MLKIAEELPKEPQGI                   | 2.70 | 0.01 | 0.78 | 0.44 | 1.41 | 0.28 |
| 46079 | 0 | 121620 | MLKIAEELPKEPQGI                   | 2.70 | 0.01 | 0.78 | 0.44 | 1.13 | 0.28 |
| 46080 | 0 | 41979  | MLKRNIYFMQRQD                     | 2.62 | 0.01 | 2.56 | 2.69 | 0.22 | 0.28 |
| 46081 | 0 | 41979  | MLKRNIYFMQRQD                     | 2.62 | 0.01 | 3.16 | 2.69 | 0.22 | 0.28 |
| 46082 | 0 | 41982  | MLKSLDNL                          | 2.14 | 0.01 | 2.83 | 1.12 | 0.22 | 0.28 |
| 46083 | 0 | 41984  | MLKYDENGITDAVDCS                  | 2.74 | 0.01 | 2.48 | 0.44 | 0.85 | 0.28 |
| 46084 | 0 | 41984  | MLKYDENGITDAVDCS                  | 2.74 | 0.01 | 2.48 | 0.68 | 0.22 | 0.28 |
| 46085 | 0 | 118521 | MLLKGGDKAQIE                      | 2.55 | 0.01 | 0.78 | 0.44 | 1.74 | 0.85 |
| 46086 | 0 | 118521 | MLLKGGDKAQIE                      | 2.55 | 0.01 | 0.78 | 0.44 | 1.74 | 0.85 |
| 46087 | 0 | 172379 | MLLSDLMTYKGEVLG                   | 2.69 | 0.01 | 0.78 | 0.44 | 1.41 | 0.28 |
| 46088 | 0 | 42007  | MLMRTDPFRELDRAFA                  | 2.71 | 0.01 | 2.59 | 0.44 | 0.85 | 0.28 |
| 46089 | 0 | 42007  | MLMRTDPFRELDRAFA                  | 2.71 | 0.01 | 2.59 | 0.44 | 0.85 | 0.28 |
| 46090 | 0 | 42008  | MLMRTDPFRELDRAFAE<br>QVLG         | 2.95 | 0.01 | 2.59 | 0.68 | 0.22 | 0.28 |
| 46091 | 0 | 42008  | MLMRTDPFRELDRAFAE<br>QVLG         | 2.95 | 0.01 | 2.59 | 2.42 | 0.22 | 0.28 |

|       |   |        |                         |      |      |      |      |      |      |
|-------|---|--------|-------------------------|------|------|------|------|------|------|
| 46092 | 0 | 42008  | MLMRTDPFRELDRAE<br>QVLG | 2.95 | 0.01 | 2.59 | 2.42 | 0.22 | 0.28 |
| 46093 | 0 | 42008  | MLMRTDPFRELDRAE<br>QVLG | 2.95 | 0.01 | 2.59 | 2.42 | 0.22 | 0.28 |
| 46094 | 0 | 42008  | MLMRTDPFRELDRAE<br>QVLG | 2.95 | 0.01 | 2.59 | 1.15 | 0.22 | 0.28 |
| 46095 | 0 | 42008  | MLMRTDPFRELDRAE<br>QVLG | 2.95 | 0.01 | 2.59 | 2.42 | 0.22 | 0.28 |
| 46096 | 0 | 42008  | MLMRTDPFRELDRAE<br>QVLG | 2.95 | 0.01 | 2.59 | 0.68 | 0.22 | 0.28 |
| 46097 | 0 | 42008  | MLMRTDPFRELDRAE<br>QVLG | 2.95 | 0.01 | 2.59 | 2.42 | 0.22 | 0.28 |
| 46098 | 0 | 225435 | MLNGNPKPEQLNKASE<br>FT  | 2.84 | 0.01 | 2.61 | 0.68 | 0.22 | 0.28 |
| 46099 | 0 | 225435 | MLNGNPKPEQLNKASE<br>FT  | 2.84 | 0.01 | 2.61 | 0.68 | 0.22 | 0.28 |
| 46100 | 0 | 225435 | MLNGNPKPEQLNKASE<br>FT  | 2.84 | 0.01 | 2.61 | 0.68 | 0.22 | 0.28 |
| 46101 | 0 | 42014  | MLNISMLQTVMMMT<br>QK    | 2.80 | 0.01 | 0.90 | 2.63 | 0.22 | 1.48 |
| 46102 | 0 | 42014  | MLNISMLQTVMMMT<br>QK    | 2.80 | 0.01 | 0.90 | 2.63 | 2.25 | 1.75 |
| 46103 | 0 | 42014  | MLNISMLQTVMMMT<br>QK    | 2.80 | 0.01 | 0.90 | 2.63 | 0.22 | 1.48 |
| 46104 | 0 | 42014  | MLNISMLQTVMMMT<br>QK    | 2.80 | 0.01 | 0.90 | 2.63 | 2.25 | 1.75 |
| 46105 | 0 | 42014  | MLNISMLQTVMMMT<br>QK    | 2.80 | 0.01 | 0.90 | 2.74 | 0.22 | 1.75 |
| 46106 | 0 | 42014  | MLNISMLQTVMMMT<br>QK    | 2.80 | 0.01 | 0.90 | 2.74 | 0.22 | 1.48 |
| 46107 | 0 | 42017  | MLNISQHQSVMKMSD<br>QNS  | 2.87 | 0.01 | 0.90 | 2.63 | 0.22 | 1.48 |
| 46108 | 0 | 42017  | MLNISQHQSVMKMSD<br>QNS  | 2.87 | 0.01 | 0.90 | 2.63 | 0.22 | 1.48 |
| 46109 | 0 | 161425 | MLNISQHQSVMMMSD<br>QNS  | 2.87 | 0.01 | 0.90 | 2.74 | 0.22 | 1.48 |
| 46110 | 0 | 161426 | MLNISQHQTVMKMT<br>QNS   | 2.86 | 0.01 | 0.90 | 2.74 | 0.22 | 1.75 |
| 46111 | 0 | 161427 | MLNISQHQTVMMMT<br>QNS   | 2.86 | 0.01 | 0.90 | 2.74 | 0.22 | 1.75 |
| 46112 | 0 | 161427 | MLNISQHQTVMMMT<br>QNS   | 2.86 | 0.01 | 0.90 | 2.74 | 0.22 | 1.48 |
| 46113 | 0 | 42018  | MLNISQMQSVKKQSD<br>NS   | 2.88 | 0.01 | 0.90 | 2.63 | 0.22 | 1.48 |
| 46114 | 0 | 42018  | MLNISQMQSVKKQSD<br>NS   | 2.88 | 0.01 | 0.90 | 2.63 | 0.22 | 1.48 |

|       |   |        |                                                   |      |      |      |      |      |      |
|-------|---|--------|---------------------------------------------------|------|------|------|------|------|------|
| 46115 | 0 | 42018  | MLNISQMQSVKKQSDQ<br>NS                            | 2.88 | 0.01 | 0.90 | 2.74 | 0.22 | 1.48 |
| 46116 | 0 | 161429 | MLNISQMQSVMKMSD<br>QNS                            | 2.89 | 0.01 | 0.90 | 2.74 | 0.22 | 1.48 |
| 46117 | 0 | 161430 | MLNISQMQVVKKQSDQ<br>K                             | 2.82 | 0.01 | 0.90 | 2.74 | 0.22 | 1.48 |
| 46118 | 0 | 161431 | MLNISQMQVVKKQVD<br>QK                             | 2.83 | 0.01 | 0.90 | 2.74 | 0.22 | 1.48 |
| 46119 | 0 | 152817 | MLNISSLRQD                                        | 2.30 | 0.01 | 2.18 | 2.16 | 0.22 | 0.28 |
| 46120 | 0 | 339113 | MLNLLKSHSKTVGIR                                   | 2.65 | 0.01 | 1.61 | 0.44 | 0.85 | 1.28 |
| 46121 | 0 | 522493 | MLNSNDMIKLAPKEM                                   | 2.69 | 0.01 | 2.24 | 0.44 | 1.41 | 1.28 |
| 46122 | 0 | 42023  | MLNSQAIDNLRASLE                                   | 2.68 | 0.01 | 2.43 | 0.44 | 1.59 | 0.28 |
| 46123 | 0 | 42026  | MLPAPPPGQPSGRRRG<br>RRSGGSGGG                     | 3.19 | 0.01 | 2.53 | 0.44 | 0.85 | 0.28 |
| 46124 | 0 | 42026  | MLPAPPPGQPSGRRRG<br>RRSGGSGGG                     | 3.19 | 0.01 | 2.53 | 0.44 | 0.85 | 0.28 |
| 46125 | 0 | 125501 | MLPGTSGVTDFQ                                      | 2.45 | 0.01 | 0.90 | 0.44 | 1.23 | 0.28 |
| 46126 | 0 | 339121 | MLPHPEEDEAFDEAD                                   | 2.71 | 0.01 | 1.61 | 0.44 | 0.85 | 1.28 |
| 46127 | 0 | 78207  | MLPLKS                                            | 1.90 | 0.01 | 0.90 | 2.02 | 1.59 | 1.39 |
| 46128 | 0 | 129414 | MLPSVLD                                           | 2.02 | 0.01 | 0.90 | 2.88 | 2.35 | 0.28 |
| 46129 | 0 | 42039  | MLQDMAILTGGQVI                                    | 2.63 | 0.01 | 2.04 | 1.15 | 0.22 | 0.28 |
| 46130 | 0 | 42039  | MLQDMAILTGGQVI                                    | 2.63 | 0.01 | 2.04 | 1.15 | 0.22 | 0.28 |
| 46131 | 0 | 42041  | MLQEMGREPTPEELAER                                 | 2.83 | 0.01 | 2.24 | 3.03 | 0.22 | 0.85 |
| 46132 | 0 | 42041  | MLQEMGREPTPEELAER                                 | 2.83 | 0.01 | 2.24 | 3.03 | 0.22 | 0.85 |
| 46133 | 0 | 42042  | MLQGVD                                            | 1.88 | 4.93 | 0.78 | 1.15 | 0.22 | 1.27 |
| 46134 | 0 | 79933  | MLRAVFMQQRPL                                      | 2.49 | 0.01 | 2.14 | 3.26 | 0.22 | 0.28 |
| 46135 | 0 | 339141 | MLRESDGECAPFTTL                                   | 2.63 | 0.01 | 1.61 | 0.44 | 0.85 | 1.28 |
| 46136 | 0 | 496789 | MLRLPTVFRQMRPVSR<br>VLAPHLTRAYAKDV                | 3.35 | 0.01 | 0.78 | 0.44 | 1.93 | 2.12 |
| 46137 | 0 | 172381 | MLRTCAVHITLDPDT                                   | 2.66 | 0.01 | 0.78 | 0.44 | 1.41 | 0.28 |
| 46138 | 0 | 42053  | MLRTWLMKTQGIESW                                   | 2.67 | 0.01 | 0.90 | 0.44 | 1.59 | 0.28 |
| 46139 | 0 | 119616 | MLSHLYVSSKDKENISKE<br>NDDVLDEKEEEAEETEEE<br>ELEEK | 3.66 | 0.01 | 2.22 | 0.44 | 1.74 | 0.28 |
| 46140 | 0 | 119616 | MLSHLYVSSKDKENISKE<br>NDDVLDEKEEEAEETEEE<br>ELEEK | 3.66 | 0.01 | 2.22 | 0.44 | 1.74 | 0.28 |
| 46141 | 0 | 119616 | MLSHLYVSSKDKENISKE<br>NDDVLDEKEEEAEETEEE<br>ELEEK | 3.66 | 0.01 | 2.22 | 0.44 | 1.74 | 0.28 |
| 46142 | 0 | 119616 | MLSHLYVSSKDKENISKE<br>NDDVLDEKEEEAEETEEE<br>ELEEK | 3.66 | 0.01 | 2.22 | 0.44 | 1.74 | 0.28 |

|       |   |        |                                                   |      |      |      |      |      |      |
|-------|---|--------|---------------------------------------------------|------|------|------|------|------|------|
| 46143 | 0 | 119616 | MLSHLYVSSKDKENISKE<br>NDDVLDEKEEEAEETEEE<br>ELEEK | 3.66 | 0.01 | 2.22 | 0.44 | 1.74 | 0.28 |
| 46144 | 0 | 119616 | MLSHLYVSSKDKENISKE<br>NDDVLDEKEEEAEETEEE<br>ELEEK | 3.66 | 0.01 | 2.22 | 0.44 | 1.74 | 0.28 |
| 46145 | 0 | 119616 | MLSHLYVSSKDKENISKE<br>NDDVLDEKEEEAEETEEE<br>ELEEK | 3.66 | 0.01 | 2.22 | 1.81 | 0.22 | 0.28 |
| 46146 | 0 | 42057  | MLSHLYVSSKDKENISKE<br>NDDVLDEKEEEAEETEEE<br>ELEKN | 3.69 | 0.01 | 2.22 | 0.44 | 1.59 | 1.48 |
| 46147 | 0 | 42057  | MLSHLYVSSKDKENISKE<br>NDDVLDEKEEEAEETEEE<br>ELEKN | 3.69 | 0.01 | 2.22 | 0.44 | 2.39 | 0.28 |
| 46148 | 0 | 42057  | MLSHLYVSSKDKENISKE<br>NDDVLDEKEEEAEETEEE<br>ELEKN | 3.69 | 0.01 | 2.22 | 0.44 | 1.59 | 1.75 |
| 46149 | 0 | 42060  | MLSKYSLPIVEEPEDYKE<br>AS                          | 2.96 | 0.01 | 2.82 | 0.44 | 0.85 | 0.28 |
| 46150 | 0 | 42060  | MLSKYSLPIVEEPEDYKE<br>AS                          | 2.96 | 0.01 | 2.82 | 0.44 | 1.41 | 0.28 |
| 46151 | 0 | 94883  | MLSLLQKEGLLMSPSDL<br>YSPGSW                       | 3.11 | 0.01 | 3.85 | 0.68 | 0.22 | 0.85 |
| 46152 | 0 | 94883  | MLSLLQKEGLLMSPSDL<br>YSPGSW                       | 3.11 | 0.01 | 3.85 | 0.68 | 0.22 | 0.85 |
| 46153 | 0 | 94883  | MLSLLQKEGLLMSPSDL<br>YSPGSW                       | 3.11 | 0.01 | 3.85 | 0.68 | 0.22 | 0.85 |
| 46154 | 0 | 42062  | MLSNKSASQN                                        | 2.33 | 0.01 | 2.73 | 0.44 | 0.85 | 0.28 |
| 46155 | 0 | 42062  | MLSNKSASQN                                        | 2.33 | 0.01 | 2.73 | 0.68 | 0.22 | 0.28 |
| 46156 | 0 | 42074  | MLTESTFKNLSVTFKFGE<br>EF                          | 2.97 | 0.01 | 2.93 | 1.81 | 0.22 | 0.28 |
| 46157 | 0 | 42074  | MLTESTFKNLSVTFKFGE<br>EF                          | 2.97 | 0.01 | 2.93 | 0.68 | 0.22 | 0.28 |
| 46158 | 0 | 42074  | MLTESTFKNLSVTFKFGE<br>EF                          | 2.97 | 0.01 | 2.93 | 1.81 | 0.22 | 0.28 |
| 46159 | 0 | 42074  | MLTESTFKNLSVTFKFGE<br>EF                          | 2.97 | 0.01 | 2.93 | 2.69 | 0.22 | 0.28 |
| 46160 | 0 | 188363 | MLTPINEEADPLDDADD<br>ETS                          | 2.96 | 0.01 | 3.21 | 2.88 | 0.22 | 0.28 |
| 46161 | 0 | 188363 | MLTPINEEADPLDDADD<br>ETS                          | 2.96 | 0.01 | 3.21 | 2.88 | 0.22 | 0.28 |
| 46162 | 0 | 188363 | MLTPINEEADPLDDADD<br>ETS                          | 2.96 | 0.01 | 3.21 | 2.88 | 0.22 | 0.85 |
| 46163 | 0 | 149071 | MLVERDHKNEFCEITLIS<br>SGRKDCNEIPTGWA              | 3.39 | 0.01 | 2.88 | 1.12 | 0.22 | 0.28 |

|       |   |        |                                                                                                                                                                                                                                                                                                                                 |      |      |      |      |      |      |
|-------|---|--------|---------------------------------------------------------------------------------------------------------------------------------------------------------------------------------------------------------------------------------------------------------------------------------------------------------------------------------|------|------|------|------|------|------|
| 46164 | 0 | 149071 | MLVERDHKNEFCEITLIS<br>SGRKDCNEIPTEGWA                                                                                                                                                                                                                                                                                           | 3.39 | 0.01 | 2.88 | 1.12 | 0.22 | 0.85 |
| 46165 | 0 | 149071 | MLVERDHKNEFCEITLIS<br>SGRKDCNEIPTEGWA                                                                                                                                                                                                                                                                                           | 3.39 | 0.01 | 2.88 | 0.44 | 1.23 | 2.35 |
| 46166 | 0 | 131978 | MLVGGSTLCV                                                                                                                                                                                                                                                                                                                      | 2.32 | 0.01 | 0.78 | 0.44 | 1.13 | 1.27 |
| 46167 | 0 | 131978 | MLVGGSTLCV                                                                                                                                                                                                                                                                                                                      | 2.32 | 0.01 | 0.78 | 0.44 | 2.35 | 1.27 |
| 46168 | 0 | 131978 | MLVGGSTLCV                                                                                                                                                                                                                                                                                                                      | 2.32 | 0.01 | 0.78 | 0.44 | 1.93 | 1.27 |
| 46169 | 0 | 131978 | MLVGGSTLCV                                                                                                                                                                                                                                                                                                                      | 2.32 | 0.01 | 0.78 | 0.44 | 1.41 | 0.28 |
| 46170 | 0 | 98906  | MLVQHLLDRDLRVEIPG<br>VDT                                                                                                                                                                                                                                                                                                        | 2.94 | 0.01 | 2.04 | 0.44 | 0.85 | 0.28 |
|       |   |        |                                                                                                                                                                                                                                                                                                                                 |      |      |      |      |      |      |
| 46171 | 0 | 42088  | MLVSKFENSVKNSNKNY<br>FTINGLMGYFFENDFFN<br>LNIISPTLDGNLTFSKEDI<br>NSILGNKIIKSARWIGLIK<br>PSITGEYILSTNSPNCRVE<br>LNGEIFNLSLNTSNTVNL<br>IQGNVYDIRIEQLMSEN<br>QLLKNYEGIKLYWETSDII<br>KEIIPSEVLLKPNYSNTNE<br>KSKFIPNNTLFSNAKLKA<br>NANRDTDRDGIPDEWEI<br>NGYTMNQKAWAWDD<br>KFAANGYKKYVSNPFPK<br>CTANDPYTDFEKVSGQI<br>DPSVSMVARDPMISAY | 5.56 | 0.01 | 3.97 | 1.12 | 0.22 | 0.85 |
|       |   |        |                                                                                                                                                                                                                                                                                                                                 |      |      |      |      |      |      |
| 46172 | 0 | 42088  | MLVSKFENSVKNSNKNY<br>FTINGLMGYFFENDFFN<br>LNIISPTLDGNLTFSKEDI<br>NSILGNKIIKSARWIGLIK<br>PSITGEYILSTNSPNCRVE<br>LNGEIFNLSLNTSNTVNL<br>IQGNVYDIRIEQLMSEN<br>QLLKNYEGIKLYWETSDII<br>KEIIPSEVLLKPNYSNTNE<br>KSKFIPNNTLFSNAKLKA<br>NANRDTDRDGIPDEWEI<br>NGYTMNQKAWAWDD<br>KFAANGYKKYVSNPFPK<br>CTANDPYTDFEKVSGQI<br>DPSVSMVARDPMISAY | 5.56 | 0.01 | 3.97 | 1.12 | 0.22 | 0.85 |
| 46173 | 0 | 123503 | MLYETLDSI                                                                                                                                                                                                                                                                                                                       | 2.21 | 0.01 | 2.28 | 2.00 | 0.22 | 0.28 |

|       |   |        |                                                     |      |      |      |      |      |      |
|-------|---|--------|-----------------------------------------------------|------|------|------|------|------|------|
|       |   |        | MLYTPLRANNSGDDVFT                                   |      |      |      |      |      |      |
| 46174 | 0 | 42101  | VSCRVLTRPSPDFSFNFL<br>VPPTV                         | 3.64 | 0.01 | 3.72 | 0.68 | 0.22 | 0.28 |
| 46175 | 0 | 42110  | MMDPNSTSEDVKFTPD<br>PYQVPF                          | 3.04 | 0.01 | 2.43 | 0.44 | 1.59 | 0.28 |
| 46176 | 0 | 42110  | MMDPNSTSEDVKFTPD<br>PYQVPF                          | 3.04 | 0.01 | 2.43 | 0.44 | 1.59 | 0.28 |
| 46177 | 0 | 42111  | MMELGRV                                             | 2.01 | 0.01 | 0.90 | 0.68 | 0.22 | 0.28 |
| 46178 | 0 | 181396 | MMGTFSIRTVGTEKS                                     | 2.67 | 0.01 | 2.82 | 1.15 | 0.22 | 0.28 |
| 46179 | 0 | 42122  | MMHF                                                | 1.59 | 0.01 | 2.98 | 0.68 | 0.22 | 2.12 |
| 46180 | 0 | 133647 | MMHVERKEC                                           | 2.22 | 0.01 | 1.60 | 0.68 | 0.22 | 0.28 |
| 46181 | 0 | 136509 | MMKKTRKRTKRR                                        | 2.51 | 0.01 | 0.90 | 0.68 | 0.22 | 1.27 |
| 46182 | 0 | 136509 | MMKKTRKRTKRR                                        | 2.51 | 0.01 | 0.90 | 0.68 | 0.22 | 1.48 |
| 46183 | 0 | 136509 | MMKKTRKRTKRR                                        | 2.51 | 0.01 | 0.90 | 0.68 | 0.22 | 1.27 |
| 46184 | 0 | 42136  | MMLFSLFLISILHILLVKC<br>Q                            | 2.96 | 0.01 | 2.86 | 1.81 | 0.22 | 0.85 |
| 46185 | 0 | 42136  | MMLFSLFLISILHILLVKC<br>Q                            | 2.96 | 0.01 | 2.86 | 1.81 | 0.22 | 0.85 |
| 46186 | 0 | 42142  | MMMASKDATSSVDGA<br>SGAGQLVPEVNTSDPLA<br>MDPVAGSSTAV | 3.72 | 0.01 | 3.78 | 0.68 | 0.22 | 0.28 |
| 46187 | 0 | 42142  | MMMASKDATSSVDGA<br>SGAGQLVPEVNTSDPLA<br>MDPVAGSSTAV | 3.72 | 0.01 | 3.78 | 0.68 | 0.22 | 0.28 |
| 46188 | 0 | 42142  | MMMASKDATSSVDGA<br>SGAGQLVPEVNTSDPLA<br>MDPVAGSSTAV | 3.72 | 0.01 | 3.78 | 0.68 | 0.22 | 0.28 |
| 46189 | 0 | 42142  | MMMASKDATSSVDGA<br>SGAGQLVPEVNTSDPLA<br>MDPVAGSSTAV | 3.72 | 0.01 | 3.78 | 0.68 | 0.22 | 0.28 |
| 46190 | 0 | 446644 | MMMNWSPTTALVVSQ<br>LLRIP                            | 2.91 | 0.01 | 1.96 | 0.68 | 0.22 | 0.28 |
| 46191 | 0 | 42155  | MMNHDTESHVKISRTIY<br>RGVSPSTT                       | 3.13 | 0.01 | 3.10 | 2.69 | 0.22 | 0.28 |
| 46192 | 0 | 42155  | MMNHDTESHVKISRTIY<br>RGVSPSTT                       | 3.13 | 0.01 | 3.10 | 2.69 | 0.22 | 0.28 |
| 46193 | 0 | 42155  | MMNHDTESHVKISRTIY<br>RGVSPSTT                       | 3.13 | 0.01 | 3.10 | 1.12 | 0.22 | 0.28 |
| 46194 | 0 | 42155  | MMNHDTESHVKISRTIY<br>RGVSPSTT                       | 3.13 | 0.01 | 3.10 | 0.68 | 0.22 | 0.28 |
| 46195 | 0 | 42159  | MMNWSPT                                             | 2.01 | 0.01 | 3.18 | 0.44 | 0.85 | 0.85 |
| 46196 | 0 | 42162  | MMNWSPTTC<br>MMPLLLLILLSTRNLLGA                     | 2.21 | 0.01 | 1.72 | 0.44 | 0.85 | 0.85 |
| 46197 | 0 | 42164  | AQSQESPVAGERRALDL<br>TTV                            | 3.57 | 0.01 | 4.63 | 0.68 | 0.22 | 0.85 |
| 46198 | 0 | 132481 | MMPVGPAPGM                                          | 2.36 | 0.01 | 0.78 | 0.44 | 1.13 | 0.28 |
| 46199 | 0 | 129416 | MMQTVR                                              | 1.89 | 0.01 | 0.78 | 0.44 | 1.13 | 0.28 |

|       |   |        |                                       |      |      |      |      |      |      |
|-------|---|--------|---------------------------------------|------|------|------|------|------|------|
| 46200 | 0 | 118525 | MMRKAIRG                              | 2.13 | 0.01 | 0.78 | 0.44 | 1.13 | 0.28 |
| 46201 | 0 | 42173  | MMRSYLMKAHGIESL                       | 2.66 | 0.01 | 0.90 | 0.44 | 1.59 | 0.28 |
| 46202 | 0 | 193502 | MMTAEVGV                              | 2.24 | 0.01 | 2.51 | 0.44 | 2.39 | 0.28 |
| 46203 | 0 | 193502 | MMTAEVGV                              | 2.24 | 0.01 | 2.51 | 0.44 | 2.39 | 0.28 |
| 46204 | 0 | 172384 | MMWEEVTCPICLDPF                       | 2.64 | 0.01 | 0.78 | 0.44 | 1.41 | 0.28 |
| 46205 | 0 | 172384 | MMWEEVTCPICLDPF                       | 2.64 | 0.01 | 0.78 | 0.44 | 1.13 | 0.28 |
| 46206 | 0 | 42187  | MNALVNSTLLETRT                        | 2.67 | 0.01 | 2.43 | 0.68 | 0.22 | 0.28 |
| 46207 | 0 | 42187  | MNALVNSTLLETRT                        | 2.67 | 0.01 | 2.43 | 0.44 | 0.85 | 0.28 |
| 46208 | 0 | 42196  | MNDIQIKTITIIYI                        | 2.64 | 0.01 | 1.66 | 1.12 | 0.22 | 0.28 |
| 46209 | 0 | 42196  | MNDIQIKTITIIYI                        | 2.64 | 0.01 | 1.66 | 0.44 | 1.59 | 1.57 |
| 46210 | 0 | 42196  | MNDIQIKTITIIYI                        | 2.64 | 0.01 | 1.66 | 0.44 | 1.59 | 1.57 |
| 46211 | 0 | 172386 | MNESTEFEERSATIS                       | 2.69 | 0.01 | 0.78 | 0.44 | 1.13 | 0.28 |
| 46212 | 0 | 42201  | MNHDPVFDTCGGCGR                       | 2.66 | 0.01 | 0.90 | 1.15 | 0.22 | 0.85 |
| 46213 | 0 | 103415 | MNIALAISAQQVNYN                       | 2.69 | 0.01 | 2.04 | 0.44 | 0.85 | 1.28 |
| 46214 | 0 | 482334 | MNIQVDPSPGQVWLQ<br>QQLV               | 2.89 | 0.01 | 1.86 | 1.20 | 0.22 | 0.28 |
| 46215 | 0 | 188364 | MNKIGDDLAETISNE                       | 2.65 | 0.01 | 1.66 | 1.20 | 0.22 | 0.28 |
| 46216 | 0 | 104120 | MNKSYHL                               | 1.99 | 0.01 | 0.90 | 0.44 | 1.74 | 1.39 |
| 46217 | 0 | 104121 | MNKSYTI                               | 1.99 | 0.01 | 0.90 | 0.44 | 1.74 | 0.28 |
| 46218 | 0 | 104121 | MNKSYTI                               | 1.99 | 0.01 | 0.90 | 0.44 | 1.74 | 0.28 |
| 46219 | 0 | 104122 | MNKTFFS                               | 2.01 | 0.01 | 0.90 | 0.44 | 1.74 | 0.28 |
| 46220 | 0 | 104123 | MNKTFSA                               | 1.99 | 0.01 | 0.90 | 0.44 | 1.74 | 1.39 |
| 46221 | 0 | 104124 | MNKTFVD                               | 1.99 | 0.01 | 0.90 | 0.44 | 1.74 | 1.39 |
| 46222 | 0 | 104125 | MNKTFVP                               | 1.99 | 0.01 | 0.90 | 0.44 | 1.74 | 1.39 |
| 46223 | 0 | 104126 | MNKTFWF                               | 2.02 | 0.01 | 0.90 | 0.44 | 1.74 | 1.39 |
| 46224 | 0 | 104127 | MNKTWYP                               | 1.99 | 0.01 | 0.90 | 0.44 | 1.74 | 0.28 |
| 46225 | 0 | 42213  | MNKVKCYVLFALLSSLY<br>AHGAPQTITELCSEYR | 3.43 | 0.01 | 2.24 | 1.12 | 0.22 | 0.28 |
| 46226 | 0 | 104128 | MNKVYLP                               | 1.99 | 0.01 | 0.90 | 0.44 | 1.74 | 1.39 |
| 46227 | 0 | 104129 | MNKYHNP                               | 2.02 | 0.01 | 0.90 | 0.44 | 1.74 | 1.39 |
| 46228 | 0 | 122859 | MNLEPPKAEIRSATRV<br>GGPVTPRKGPPK      | 3.32 | 0.01 | 1.60 | 2.04 | 0.22 | 0.28 |
| 46229 | 0 | 42219  | MNLVDWLRQ                             | 2.21 | 0.01 | 2.61 | 0.44 | 0.85 | 0.28 |
| 46230 | 0 | 42220  | MNMSKQGIFQTVGSGL<br>DHILSLA           | 3.07 | 0.01 | 3.17 | 1.15 | 0.22 | 0.28 |
| 46231 | 0 | 238771 | MNPAHLLVLAACVS                        | 2.69 | 0.01 | 2.56 | 2.02 | 0.22 | 0.85 |
| 46232 | 0 | 238771 | MNPAHLLVLAACVS                        | 2.69 | 0.01 | 2.56 | 1.20 | 0.22 | 0.85 |
| 46233 | 0 | 42227  | MNPHNTVFDKRLIGRK<br>FND               | 2.91 | 0.01 | 2.78 | 2.49 | 0.85 | 0.28 |
| 46234 | 0 | 42227  | MNPHNTVFDKRLIGRK<br>FND               | 2.91 | 0.01 | 2.78 | 0.44 | 0.85 | 0.28 |
| 46235 | 0 | 192531 | MNPNQKIITIGS                          | 2.47 | 0.01 | 2.36 | 1.20 | 0.22 | 0.28 |
| 46236 | 0 | 192531 | MNPNQKIITIGS                          | 2.47 | 0.01 | 2.36 | 1.20 | 0.22 | 0.28 |
| 46237 | 0 | 192531 | MNPNQKIITIGS                          | 2.47 | 0.01 | 2.36 | 1.20 | 0.22 | 0.85 |
| 46238 | 0 | 192531 | MNPNQKIITIGS                          | 2.47 | 0.01 | 2.36 | 1.20 | 0.22 | 0.85 |

|       |   |        |                                     |      |      |      |      |      |      |
|-------|---|--------|-------------------------------------|------|------|------|------|------|------|
| 46239 | 0 | 192531 | MNPNQKIITIGS                        | 2.47 | 0.01 | 2.36 | 1.20 | 0.22 | 0.85 |
| 46240 | 0 | 192531 | MNPNQKIITIGS                        | 2.47 | 0.01 | 2.36 | 1.20 | 0.22 | 0.85 |
| 46241 | 0 | 192531 | MNPNQKIITIGS                        | 2.47 | 0.01 | 2.36 | 1.20 | 0.22 | 0.85 |
| 46242 | 0 | 192531 | MNPNQKIITIGS                        | 2.47 | 0.01 | 2.36 | 1.20 | 0.22 | 0.85 |
| 46243 | 0 | 192531 | MNPNQKIITIGS                        | 2.47 | 0.01 | 2.36 | 1.20 | 0.22 | 0.85 |
| 46244 | 0 | 192531 | MNPNQKIITIGS                        | 2.47 | 0.01 | 2.36 | 1.20 | 0.22 | 0.85 |
| 46245 | 0 | 192531 | MNPNQKIITIGS                        | 2.47 | 0.01 | 2.36 | 1.20 | 0.22 | 0.85 |
| 46246 | 0 | 192531 | MNPNQKIITIGS                        | 2.47 | 0.01 | 2.36 | 1.20 | 0.22 | 0.85 |
| 46247 | 0 | 192531 | MNPNQKIITIGS                        | 2.47 | 0.01 | 2.36 | 1.20 | 0.22 | 0.85 |
| 46248 | 0 | 192531 | MNPNQKIITIGS                        | 2.47 | 0.01 | 2.36 | 1.20 | 0.22 | 0.85 |
| 46249 | 0 | 192531 | MNPNQKIITIGS                        | 2.47 | 0.01 | 2.36 | 1.20 | 0.22 | 0.85 |
| 46250 | 0 | 42235  | MNPRNTVFDKRLIGRK<br>FSD             | 2.91 | 0.01 | 2.30 | 0.44 | 0.85 | 0.28 |
| 46251 | 0 | 42235  | MNPRNTVFDKRLIGRK<br>FSD             | 2.91 | 0.01 | 2.30 | 0.44 | 1.41 | 0.28 |
| 46252 | 0 | 132483 | MNQRVLGSILNASTVAA<br>AMCMVVTR       | 3.17 | 0.01 | 0.78 | 3.72 | 0.22 | 0.28 |
| 46253 | 0 | 181934 | MNQTTKFSIHGA                        | 2.42 | 0.01 | 0.90 | 3.15 | 0.22 | 1.39 |
| 46254 | 0 | 176350 | MNRTQANLAEGPPAK                     | 2.65 | 0.01 | 2.63 | 1.15 | 0.22 | 0.85 |
| 46255 | 0 | 176350 | MNRTQANLAEGPPAK                     | 2.65 | 0.01 | 2.63 | 1.15 | 0.22 | 0.85 |
| 46256 | 0 | 119274 | MNRWALGNLACDLW                      | 2.63 | 0.01 | 0.78 | 0.44 | 1.13 | 1.66 |
| 46257 | 0 | 119274 | MNRWALGNLACDLW                      | 2.63 | 0.01 | 0.78 | 0.44 | 1.41 | 1.66 |
| 46258 | 0 | 420647 | MNRWALGNLACDLWL                     | 2.70 | 0.01 | 0.78 | 0.44 | 1.41 | 0.28 |
| 46259 | 0 | 42238  | MNSFNYTTPDYGHYDD<br>KDTLDLNTPVDKTSN | 3.39 | 0.01 | 0.78 | 0.44 | 1.41 | 2.12 |
| 46260 | 0 | 42238  | MNSFNYTTPDYGHYDD<br>KDTLDLNTPVDKTSN | 3.39 | 0.01 | 0.78 | 0.44 | 1.41 | 2.35 |
| 46261 | 0 | 42238  | MNSFNYTTPDYGHYDD<br>KDTLDLNTPVDKTSN | 3.39 | 0.01 | 0.78 | 0.44 | 1.41 | 0.28 |
| 46262 | 0 | 42238  | MNSFNYTTPDYGHYDD<br>KDTLDLNTPVDKTSN | 3.39 | 0.01 | 0.78 | 1.81 | 0.22 | 0.28 |
| 46263 | 0 | 42238  | MNSFNYTTPDYGHYDD<br>KDTLDLNTPVDKTSN | 3.39 | 0.01 | 0.78 | 1.81 | 0.22 | 0.28 |
| 46264 | 0 | 42238  | MNSFNYTTPDYGHYDD<br>KDTLDLNTPVDKTSN | 3.39 | 0.01 | 0.78 | 1.81 | 0.22 | 0.28 |



|       |   |        |                                          |      |      |      |      |      |      |
|-------|---|--------|------------------------------------------|------|------|------|------|------|------|
| 46265 | 0 | 42238  | MNSFNYTTPDYGHYDD<br>KDTLDLNTPVDKTSN      | 3.39 | 0.01 | 0.78 | 1.81 | 0.22 | 0.28 |
| 46266 | 0 | 238772 | MNTLLLTLVVVTIVC                          | 2.71 | 0.01 | 2.56 | 1.20 | 0.22 | 0.85 |
| 46267 | 0 | 133648 | MNTTANPSNIIVG                            | 2.54 | 0.01 | 2.90 | 2.97 | 0.22 | 0.28 |
| 46268 | 0 | 180993 | MNTYQLVGDQPP                             | 2.43 | 0.01 | 0.90 | 0.68 | 0.22 | 1.39 |
| 46269 | 0 | 79309  | MNVGAH                                   | 1.88 | 0.01 | 0.90 | 0.68 | 0.22 | 1.39 |
| 46270 | 0 | 104904 | MNVQNGKWSDPSGT<br>KTC                    | 2.84 | 0.01 | 0.78 | 1.12 | 0.22 | 1.48 |
| 46271 | 0 | 190499 | MNVRNFLKEDAMKTKT<br>HYHAM                | 2.99 | 0.01 | 0.78 | 1.20 | 0.22 | 1.48 |
| 46272 | 0 | 190499 | MNVRNFLKEDAMKTKT<br>HYHAM                | 2.99 | 0.01 | 0.78 | 1.20 | 0.22 | 2.02 |
| 46273 | 0 | 190499 | MNVRNFLKEDAMKTKT<br>HYHAM                | 2.99 | 0.01 | 0.78 | 1.20 | 0.22 | 2.12 |
| 46274 | 0 | 42246  | MNVTLSSSLDGP                             | 2.45 | 0.01 | 0.90 | 2.22 | 0.85 | 1.39 |
| 46275 | 0 | 164297 | MNVTVSGRLSGP                             | 2.48 | 0.01 | 0.90 | 1.20 | 0.22 | 1.39 |
| 46276 | 0 | 42248  | MNWSPTTCL                                | 2.20 | 0.01 | 1.72 | 0.44 | 0.85 | 0.85 |
| 46277 | 0 | 42251  | MNYLLFCLFFAF                             | 2.51 | 0.01 | 2.69 | 0.68 | 0.22 | 0.28 |
| 46278 | 0 | 42251  | MNYLLFCLFFAF<br>MNYTGNQQSRWGLGS          | 2.51 | 0.01 | 2.69 | 1.20 | 0.22 | 0.28 |
| 46279 | 0 | 42252  | PNCHGPDWASPVCQR<br>HS                    | 3.39 | 0.01 | 2.85 | 0.44 | 0.85 | 0.28 |
| 46280 | 0 | 42252  | MNYTGNQQSRWGLGS<br>PNCHGPDWASPVCQR<br>HS | 3.39 | 0.01 | 3.16 | 0.68 | 0.22 | 0.28 |
| 46281 | 0 | 42252  | MNYTGNQQSRWGLGS<br>PNCHGPDWASPVCQR<br>HS | 3.39 | 0.01 | 3.16 | 0.68 | 0.22 | 0.28 |
| 46282 | 0 | 42252  | MNYTGNQQSRWGLGS<br>PNCHGPDWASPVCQR<br>HS | 3.39 | 0.01 | 3.16 | 1.12 | 0.22 | 0.28 |
| 46283 | 0 | 42252  | MNYTGNQQSRWGLGS<br>PNCHGPDWASPVCQR<br>HS | 3.39 | 0.01 | 3.16 | 1.12 | 0.22 | 0.28 |
| 46284 | 0 | 42252  | MNYTGNQQSRWGLGS<br>PNCHGPDWASPVCQR<br>HS | 3.39 | 0.01 | 3.16 | 1.12 | 0.22 | 0.28 |
| 46285 | 0 | 42252  | MNYTGNQQSRWGLGS<br>PNCHGPDWASPVCQR<br>HS | 3.39 | 0.01 | 3.16 | 1.12 | 0.22 | 0.28 |
| 46286 | 0 | 42252  | MNYTGNQQSRWGLGS<br>PNCHGPDWASPVCQR<br>HS | 3.39 | 0.01 | 3.16 | 1.12 | 0.22 | 1.34 |
| 46287 | 0 | 196675 | MNYVPAP                                  | 2.02 | 0.01 | 0.90 | 0.44 | 1.23 | 1.39 |
| 46288 | 0 | 339522 | MPAKSANKPASKPAA                          | 2.72 | 0.01 | 1.61 | 0.44 | 0.85 | 1.28 |

|       |   |        |                          |      |      |      |      |      |      |
|-------|---|--------|--------------------------|------|------|------|------|------|------|
| 46289 | 0 | 339523 | MPAKTAVSKAAAPKK          | 2.70 | 0.01 | 1.61 | 0.44 | 0.85 | 1.28 |
| 46290 | 0 | 106655 | MPCLHFVKGE               | 2.26 | 0.01 | 3.08 | 0.44 | 1.23 | 0.85 |
| 46291 | 0 | 182234 | MPCMFPFQYNHQWHH          | 2.69 | 0.01 | 0.78 | 0.44 | 1.13 | 0.85 |
| 46292 | 0 | 42264  | MPDHALRPQYSI             | 2.43 | 0.01 | 0.90 | 0.68 | 0.22 | 0.28 |
| 46293 | 0 | 42264  | MPDHALRPQYSI             | 2.43 | 0.01 | 0.90 | 0.68 | 0.22 | 1.34 |
| 46294 | 0 | 141707 | MPEEVHHGEEEV             | 2.51 | 0.01 | 0.78 | 0.44 | 1.93 | 0.28 |
| 46295 | 0 | 179860 | MPFEK                    | 1.74 | 0.01 | 3.89 | 0.44 | 0.85 | 0.85 |
| 46296 | 0 | 115865 | MPFPKYPVEP               | 2.33 | 0.01 | 1.60 | 0.44 | 1.23 | 0.85 |
| 46297 | 0 | 115865 | MPFPKYPVEP               | 2.33 | 0.01 | 1.60 | 0.44 | 1.23 | 0.85 |
| 46298 | 0 | 229741 | MPFPKYPVEPFTERQ          | 2.68 | 0.01 | 1.60 | 0.44 | 1.23 | 1.28 |
| 46299 | 0 | 161432 | MPFVNKQFNYKDPVNG<br>VDI  | 2.91 | 0.01 | 2.08 | 2.02 | 0.22 | 1.57 |
| 46300 | 0 | 42273  | MPFVTHN                  | 1.99 | 0.01 | 0.90 | 1.12 | 0.22 | 1.39 |
| 46301 | 0 | 109599 | MPGERGAAGIAGPK           | 2.64 | 3.97 | 2.19 | 3.16 | 0.22 | 0.28 |
| 46302 | 0 | 109599 | MPGERGAAGIAGPK           | 2.64 | 3.97 | 2.19 | 2.46 | 0.22 | 1.75 |
| 46303 | 0 | 109599 | MPGERGAAGIAGPK           | 2.64 | 3.97 | 2.19 | 2.46 | 0.22 | 0.28 |
| 46304 | 0 | 109599 | MPGERGAAGIAGPK           | 2.64 | 3.97 | 2.19 | 2.46 | 0.22 | 0.28 |
| 46305 | 0 | 109599 | MPGERGAAGIAGPK           | 2.64 | 3.97 | 1.75 | 2.46 | 0.22 | 2.49 |
| 46306 | 0 | 109599 | MPGERGAAGIAGPK           | 2.64 | 3.97 | 1.75 | 2.46 | 0.22 | 0.28 |
| 46307 | 0 | 109599 | MPGERGAAGIAGPK           | 2.64 | 3.97 | 1.75 | 2.46 | 0.22 | 1.66 |
| 46308 | 0 | 109599 | MPGERGAAGIAGPK           | 2.64 | 3.97 | 1.75 | 2.46 | 0.22 | 1.66 |
| 46309 | 0 | 109599 | MPGERGAAGIAGPK           | 2.64 | 3.97 | 1.75 | 2.46 | 0.22 | 1.66 |
| 46310 | 0 | 106656 | MPGERGAAGIAGPK           | 2.64 | 0.01 | 1.75 | 2.46 | 0.22 | 1.75 |
| 46311 | 0 | 106656 | MPGERGAAGIAGPK           | 2.64 | 0.01 | 1.75 | 2.46 | 0.22 | 1.75 |
| 46312 | 0 | 106656 | MPGERGAAGIAGPK           | 2.64 | 0.01 | 0.78 | 2.46 | 0.22 | 0.28 |
| 46313 | 0 | 106656 | MPGERGAAGIAGPK           | 2.64 | 0.01 | 0.78 | 1.15 | 0.22 | 0.28 |
| 46314 | 0 | 42274  | MPGGMPGGMPGGMP<br>GG     | 2.80 | 0.01 | 1.66 | 1.12 | 0.22 | 2.02 |
| 46315 | 0 | 42274  | MPGGMPGGMPGGMP<br>GG     | 2.80 | 0.01 | 1.66 | 1.12 | 0.22 | 2.02 |
| 46316 | 0 | 42274  | MPGGMPGGMPGGMP<br>GG     | 2.80 | 0.01 | 1.66 | 1.12 | 0.22 | 1.48 |
| 46317 | 0 | 339563 | MPGKEVKKAAKPAAK          | 2.72 | 0.01 | 1.61 | 0.44 | 0.85 | 1.28 |
| 46318 | 0 | 123507 | MPGQPPYM                 | 2.16 | 0.01 | 0.78 | 1.20 | 0.22 | 0.28 |
| 46319 | 0 | 42276  | MPHGFINWHGAF             | 2.48 | 0.01 | 0.90 | 0.68 | 0.22 | 1.39 |
| 46320 | 0 | 42277  | MPHKLEKADLLKAIQEQ<br>LIA | 2.97 | 0.01 | 3.47 | 0.44 | 0.22 | 0.85 |
| 46321 | 0 | 115866 | MPIQAFLLYQ               | 2.30 | 0.01 | 1.60 | 0.44 | 1.23 | 0.85 |
| 46322 | 0 | 42283  | MPIQAFLLYQEP             | 2.46 | 0.01 | 1.60 | 0.44 | 1.23 | 0.85 |
| 46323 | 0 | 42283  | MPIQAFLLYQEP             | 2.46 | 0.01 | 1.60 | 0.44 | 1.23 | 0.85 |
| 46324 | 0 | 42284  | MPIRRKRKNIRTIIS          | 2.70 | 0.01 | 0.90 | 0.44 | 1.59 | 1.39 |
| 46325 | 0 | 153423 | MPKDMLPYANPNGGG<br>S     | 2.74 | 0.01 | 0.90 | 0.68 | 0.22 | 1.39 |
| 46326 | 0 | 123508 | MPKFYCDYCD               | 2.33 | 0.01 | 0.78 | 0.44 | 1.13 | 0.85 |

|       |   |        |                              |      |      |      |      |      |      |
|-------|---|--------|------------------------------|------|------|------|------|------|------|
| 46327 | 0 | 134166 | MPKFYCDYCDTYLTHDS            | 2.79 | 0.01 | 0.78 | 0.44 | 1.13 | 0.85 |
| 46328 | 0 | 42289  | MPKTRRQRTRRRARRNR<br>PPTP    | 3.00 | 0.01 | 3.01 | 0.44 | 0.85 | 0.28 |
| 46329 | 0 | 78749  | MPKTRRRRPRRSQRKRPP<br>TPW    | 2.99 | 0.01 | 2.04 | 0.44 | 1.59 | 0.28 |
| 46330 | 0 | 78749  | MPKTRRRRPRRSQRKRPP<br>TPW    | 2.99 | 0.01 | 2.04 | 0.44 | 0.85 | 0.28 |
| 46331 | 0 | 78749  | MPKTRRRRPRRSQRKRPP<br>TPW    | 2.99 | 0.01 | 2.04 | 0.44 | 1.59 | 0.28 |
| 46332 | 0 | 78749  | MPKTRRRRPRRSQRKRPP<br>TPW    | 2.99 | 0.01 | 2.04 | 0.44 | 0.85 | 0.28 |
| 46333 | 0 | 522523 | MPLESAEKEEKKSED              | 2.70 | 0.01 | 2.24 | 0.44 | 1.41 | 1.28 |
| 46334 | 0 | 125159 | MPLLWLRGFLASCWII<br>VRSSPTPG | 3.14 | 0.01 | 2.52 | 2.00 | 0.22 | 1.57 |
| 46335 | 0 | 125159 | MPLLWLRGFLASCWII<br>VRSSPTPG | 3.14 | 0.01 | 2.52 | 2.00 | 0.22 | 1.34 |
| 46336 | 0 | 196960 | MPLMSEPALEML                 | 2.53 | 0.01 | 0.90 | 0.44 | 1.41 | 1.39 |
| 46337 | 0 | 196960 | MPLMSEPALEML                 | 2.53 | 0.01 | 0.90 | 0.44 | 1.41 | 0.28 |
| 46338 | 0 | 196960 | MPLMSEPALEML                 | 2.53 | 0.01 | 0.90 | 0.44 | 1.41 | 1.48 |
| 46339 | 0 | 196960 | MPLMSEPALEML                 | 2.53 | 0.01 | 0.90 | 0.44 | 1.41 | 1.34 |
| 46340 | 0 | 196960 | MPLMSEPALEML                 | 2.53 | 0.01 | 0.90 | 0.44 | 1.41 | 1.34 |
| 46341 | 0 | 196960 | MPLMSEPALEML                 | 2.53 | 0.01 | 0.90 | 0.44 | 1.41 | 1.34 |
| 46342 | 0 | 111556 | MPLQNSK                      | 1.99 | 0.01 | 0.90 | 0.44 | 0.85 | 1.39 |
| 46343 | 0 | 104130 | MPLQRTL                      | 2.02 | 0.01 | 0.90 | 0.44 | 1.13 | 1.39 |
| 46344 | 0 | 156378 | MPLSEKQ                      | 1.99 | 0.01 | 0.90 | 0.44 | 1.93 | 1.27 |
| 46345 | 0 | 111557 | MPLSQNVAPFRT                 | 2.43 | 0.01 | 0.90 | 0.44 | 0.85 | 1.39 |
| 46346 | 0 | 121625 | MPLTALLR                     | 2.13 | 0.01 | 0.78 | 0.44 | 1.13 | 0.28 |
| 46347 | 0 | 111558 | MPLTQKD                      | 1.99 | 0.01 | 0.90 | 0.44 | 0.85 | 1.39 |
| 46348 | 0 | 111559 | MPLVSQK                      | 1.99 | 0.01 | 0.90 | 0.44 | 0.85 | 1.39 |
| 46349 | 0 | 195040 | MPLYKTPSEHRN                 | 2.43 | 0.01 | 0.90 | 0.68 | 0.22 | 0.28 |
| 46350 | 0 | 123509 | MPMMGPPPPG                   | 2.36 | 0.01 | 0.78 | 0.44 | 1.13 | 0.85 |
| 46351 | 0 | 42293  | MPMRRKRKNIRSIVS              | 2.72 | 0.01 | 0.90 | 0.44 | 1.59 | 1.39 |
| 46352 | 0 | 111560 | MPMTPAK                      | 2.05 | 0.01 | 0.90 | 0.44 | 0.85 | 1.39 |
| 46353 | 0 | 42294  | MPNDPNRN                     | 2.16 | 0.01 | 3.29 | 1.20 | 0.22 | 0.28 |
| 46354 | 0 | 42295  | MPNDPNRNV                    | 2.25 | 0.01 | 3.37 | 1.12 | 0.22 | 0.28 |
| 46355 | 0 | 522525 | MPNNPYDSTPLGER               | 2.58 | 3.89 | 2.84 | 0.44 | 1.13 | 0.28 |
| 46356 | 0 | 42306  | MPNYDRL                      | 1.99 | 0.01 | 0.90 | 0.44 | 1.23 | 1.27 |
| 46357 | 0 | 42306  | MPNYDRL                      | 1.99 | 0.01 | 0.90 | 0.44 | 1.23 | 0.28 |
| 46358 | 0 | 111561 | MPPCNYK                      | 2.01 | 0.01 | 0.90 | 0.44 | 0.85 | 1.39 |
| 46359 | 0 | 123511 | MPPMTQAP                     | 2.17 | 0.01 | 0.78 | 1.20 | 0.22 | 0.28 |
| 46360 | 0 | 123511 | MPPMTQAP                     | 2.17 | 0.01 | 0.78 | 0.44 | 1.13 | 0.28 |
| 46361 | 0 | 188726 | MPPNLIANYESALSR              | 2.67 | 0.01 | 0.90 | 0.68 | 0.22 | 1.39 |
| 46362 | 0 | 188726 | MPPNLIANYESALSR              | 2.67 | 0.01 | 0.90 | 0.68 | 0.22 | 2.02 |
| 46363 | 0 | 123512 | MPPPGMIP                     | 2.18 | 0.01 | 0.78 | 1.20 | 0.22 | 0.28 |
| 46364 | 0 | 123512 | MPPPGMIP                     | 2.18 | 0.01 | 0.78 | 0.44 | 1.13 | 0.28 |
| 46365 | 0 | 423435 | MPPPVAELCERGRDD              | 2.64 | 0.01 | 2.51 | 0.44 | 2.35 | 1.28 |

|       |   |        |                                    |      |      |      |      |      |      |
|-------|---|--------|------------------------------------|------|------|------|------|------|------|
| 46366 | 0 | 123513 | MPPQQLMP                           | 2.18 | 0.01 | 0.78 | 1.20 | 0.22 | 0.28 |
| 46367 | 0 | 123513 | MPPQQLMP                           | 2.18 | 0.01 | 0.78 | 0.44 | 1.13 | 0.28 |
| 46368 | 0 | 42308  | MPPYPTGGPPPV                       | 2.51 | 0.01 | 3.42 | 1.15 | 0.22 | 0.28 |
| 46369 | 0 | 42308  | MPPYPTGGPPPV                       | 2.51 | 0.01 | 3.42 | 2.13 | 0.22 | 0.28 |
| 46370 | 0 | 42308  | MPPYPTGGPPPV                       | 2.51 | 0.01 | 3.42 | 0.44 | 0.85 | 0.28 |
| 46371 | 0 | 164298 | MPQILSASRLYA                       | 2.48 | 0.01 | 0.90 | 1.20 | 0.22 | 1.39 |
| 46372 | 0 | 42310  | MPRARYGL                           | 2.12 | 0.01 | 3.42 | 0.44 | 1.23 | 0.85 |
| 46373 | 0 | 42310  | MPRARYGL                           | 2.12 | 0.01 | 3.42 | 0.44 | 1.23 | 0.85 |
| 46374 | 0 | 105339 | MPCRFGF                            | 2.14 | 0.01 | 4.08 | 0.44 | 1.23 | 0.85 |
| 46375 | 0 | 105340 | MPCRHHGY                           | 2.12 | 0.01 | 4.33 | 0.44 | 1.23 | 0.85 |
| 46376 | 0 | 105340 | MPCRHHGY                           | 2.12 | 0.01 | 4.93 | 0.44 | 1.23 | 0.85 |
| 46377 | 0 | 105341 | MPCRHHGY                           | 2.13 | 0.01 | 4.23 | 0.44 | 1.23 | 0.85 |
| 46378 | 0 | 105342 | MPCRHHGY                           | 2.12 | 0.01 | 4.63 | 0.44 | 1.23 | 0.85 |
| 46379 | 0 | 111562 | MPSEHTSVPST                        | 2.51 | 0.01 | 0.90 | 0.44 | 0.85 | 1.39 |
| 46380 | 0 | 42320  | MPSFLKKILKLRGRRQEE<br>ESRSRMLSDSSM | 3.35 | 0.01 | 4.23 | 1.12 | 0.22 | 0.28 |
| 46381 | 0 | 42322  | MPSIGLEEEEEEE                      | 2.54 | 0.01 | 3.17 | 0.44 | 0.85 | 0.85 |
| 46382 | 0 | 42327  | MPTAQSTMKA                         | 2.34 | 3.97 | 2.56 | 0.44 | 0.85 | 0.28 |
| 46383 | 0 | 42329  | MPTAQSTMKAELT                      | 2.63 | 0.01 | 2.56 | 2.69 | 0.22 | 0.28 |
| 46384 | 0 | 177441 | MPTITAS                            | 2.02 | 0.01 | 0.90 | 2.13 | 0.22 | 0.28 |
| 46385 | 0 | 78208  | MPTKSL                             | 1.88 | 0.01 | 0.90 | 2.02 | 1.59 | 1.39 |
| 46386 | 0 | 174204 | MPTPDATTPQAKGF                     | 2.62 | 0.01 | 0.78 | 0.44 | 1.13 | 1.27 |
| 46387 | 0 | 174204 | MPTPDATTPQAKGF                     | 2.62 | 0.01 | 0.78 | 0.44 | 1.13 | 0.28 |
| 46388 | 0 | 450840 | MPTWLHH                            | 1.99 | 0.01 | 0.90 | 0.44 | 1.23 | 1.39 |

|       |   |        |                                                                                                                                                                                                                                                                                |      |      |      |      |      |      |
|-------|---|--------|--------------------------------------------------------------------------------------------------------------------------------------------------------------------------------------------------------------------------------------------------------------------------------|------|------|------|------|------|------|
|       |   |        | MPVAINSFNYNDPVND<br>DTILYMQIPYEEKSKKYY<br>KAFEIMRNVWIIPERN<br>GTNPSTDFPPASLKNGS<br>SAYYDPNYLTDAEKDR<br>YLKTTIKLFRINSNPAGK<br>VLLQEISYAKPYLGNDHT<br>PIDFSPVTRTTSVNIKLS<br>TNVESSMLLNLLVLGAG<br>PDIFESCCYPVRKLIDPD<br>VVYDPSNYGFGSINIVTF<br>SPEYEYTFNDISGGHNSS                   |      |      |      |      |      |      |
| 46389 | 0 | 42339  | TESFIADPAISLAHELIHA<br>LHGLYGARGVTYEETIEV<br>KQAPLMIAEKPIRLEEFLT<br>FGGQDLNIITSAMKEKIY<br>NNLLANYEKIATRLSEVN<br>SAPPEYDINEYKDYFQW<br>KYGLDKNADGSYTVNE<br>NKFNEIYKKLYSFTESDLA<br>NKFVKVCRNTYFIKYEFL<br>KVPNLLDDDIYTVSEGFN<br>IGNLAVNNRGQSIKLN<br>KIIDSIPDKGLVEKIVKFC<br>KSVIPRK | 6.06 | 0.01 | 4.45 | 0.68 | 0.22 | 0.85 |
| 46390 | 0 | 42344  | MPVHWAPAPAQPPADI<br>YFPV                                                                                                                                                                                                                                                       | 2.96 | 0.01 | 3.48 | 1.12 | 0.22 | 0.28 |
| 46391 | 0 | 42345  | MPVHYKVLKALPRADIIH<br>FPV                                                                                                                                                                                                                                                      | 2.95 | 0.01 | 2.21 | 1.20 | 0.22 | 0.28 |
| 46392 | 0 | 42346  | MPVHYKVLKAQARAPA<br>RVDIYFPV                                                                                                                                                                                                                                                   | 3.12 | 0.01 | 3.48 | 1.12 | 0.22 | 0.28 |
| 46393 | 0 | 42347  | MPVHYKVLKARARAGA<br>AVPAAADDIYFPV                                                                                                                                                                                                                                              | 3.30 | 0.01 | 3.48 | 1.12 | 0.22 | 0.28 |
| 46394 | 0 | 42347  | MPVHYKVLKARARAGA<br>AVPAAADDIYFPV                                                                                                                                                                                                                                              | 3.30 | 0.01 | 3.48 | 1.20 | 0.22 | 0.28 |
| 46395 | 0 | 111563 | MPVNDTK                                                                                                                                                                                                                                                                        | 1.99 | 0.01 | 0.90 | 0.44 | 0.85 | 1.39 |
| 46396 | 0 | 113650 | MPVSRLCIELDWCPP                                                                                                                                                                                                                                                                | 2.64 | 0.01 | 0.90 | 0.44 | 1.13 | 0.28 |
| 46397 | 0 | 161125 | MPVTINNFNYPIDN<br>NNI                                                                                                                                                                                                                                                          | 2.92 | 0.01 | 2.08 | 0.44 | 1.93 | 1.57 |

|       |   |       |                     |      |      |      |      |      |      |
|-------|---|-------|---------------------|------|------|------|------|------|------|
|       |   |       | MPVTINNFNYNDPIDN    |      |      |      |      |      |      |
|       |   |       | NNIIMMEPPFARGTGRY   |      |      |      |      |      |      |
|       |   |       | YKAFKITDRIWIIPERYTF |      |      |      |      |      |      |
|       |   |       | GYKPEDFNKSSGIFNRD   |      |      |      |      |      |      |
|       |   |       | VCEYYDPDYLNTNDKKN   |      |      |      |      |      |      |
|       |   |       | IFLQTMIKLFNRIKSKPLG |      |      |      |      |      |      |
|       |   |       | EKLLEMIINGIPYLGDRR  |      |      |      |      |      |      |
|       |   |       | VPLEEFNTNIASVTVNKL  |      |      |      |      |      |      |
|       |   |       | ISNPGEVERKKGIFANLII |      |      |      |      |      |      |
|       |   |       | FGPGPVLNENETIDIGIQ  |      |      |      |      |      |      |
|       |   |       | NHFASREGFGGIMQMK    |      |      |      |      |      |      |
|       |   |       | FCPEYVSVFNNVQENKG   |      |      |      |      |      |      |
| 46398 | 0 | 42351 | ASIFNRRGYFSDPALILM  | 6.08 | 0.01 | 4.33 | 1.15 | 0.22 | 0.28 |
|       |   |       | HELIHVLHGLYGIKVDDL  |      |      |      |      |      |      |
|       |   |       | PIVPNEKKFFMQSTDAI   |      |      |      |      |      |      |
|       |   |       | QAEELYTFGGQDPSIITP  |      |      |      |      |      |      |
|       |   |       | STDKSIYDKVLQNFRGIV  |      |      |      |      |      |      |
|       |   |       | DRLNKVLVCISDPNININI |      |      |      |      |      |      |
|       |   |       | YKNKFKDKYKFVEDSEG   |      |      |      |      |      |      |
|       |   |       | KYSIDVESFDKLYKSLMF  |      |      |      |      |      |      |
|       |   |       | GFTETNIAENYKIKTRAS  |      |      |      |      |      |      |
|       |   |       | YFSDSLPPVKIKNLLDNEI |      |      |      |      |      |      |
|       |   |       | YTIEEGFNISDKNMEKEY  |      |      |      |      |      |      |
|       |   |       | RGQNKAINKQAYEEISKE  |      |      |      |      |      |      |
|       |   |       | HLAVYKIQMCKSVR      |      |      |      |      |      |      |

|       |   |        |                                                                                                                                                                                                                                                                                        |      |      |      |      |      |      |
|-------|---|--------|----------------------------------------------------------------------------------------------------------------------------------------------------------------------------------------------------------------------------------------------------------------------------------------|------|------|------|------|------|------|
|       |   |        | MPVTINNFNYNDPIDN<br>NNIIMMEPPFARGTGRY<br>YKAFKITDRIWIIPERYTF<br>GYKPEDFNKSSGIFNRD<br>VCEYYDPDYLTNDKKN<br>IFLQTMIKLFNRIKSKPLG<br>EKLEMIINGIPYLGDRR<br>VPLEEFNTNIASVTVNKL<br>ISNPGEVERKKGIFANLII<br>FGPGPVLNENETIDIGIQ<br>NHFASREGFGGIMQMK<br>FCPEYVSFNNVQENKG                           |      |      |      |      |      |      |
| 46399 | 0 | 42351  | ASIFNRRGYFSDPALILM<br>HELIHVLHGLYGIKVDDL<br>PIVPNEKKFFMQSTDAI<br>QAEELYTFGGQDPSIITP<br>STDKSIYDKVLQNFRGIV<br>DRLNKVLVCISDPNININI<br>YKNKFKDKYKFVEDSEG<br>KYSIDVESFDKLYKSLMF<br>GFTETNIAENYKIKTRAS<br>YFSDSLPPVKIKNLLDNEI<br>YTIEEGFNISDKNMEKEY<br>RGQNKAINKQAYEEISKE<br>HLAVYKIQMCKSVR | 6.08 | 0.01 | 4.33 | 1.15 | 0.22 | 0.28 |
| 46400 | 0 | 187688 | MPVVPATWEAETGESL<br>EPGRRRLQ                                                                                                                                                                                                                                                           | 3.12 | 0.01 | 0.90 | 0.44 | 1.13 | 1.27 |
| 46401 | 0 | 187688 | MPVVPATWEAETGESL<br>EPGRRRLQ                                                                                                                                                                                                                                                           | 3.12 | 0.01 | 0.90 | 0.44 | 1.13 | 0.28 |
| 46402 | 0 | 187688 | MPVVPATWEAETGESL<br>EPGRRRLQ                                                                                                                                                                                                                                                           | 3.12 | 0.01 | 0.90 | 0.44 | 1.41 | 0.28 |
| 46403 | 0 | 187688 | MPVVPATWEAETGESL<br>EPGRRRLQ                                                                                                                                                                                                                                                           | 3.12 | 0.01 | 0.90 | 1.12 | 0.22 | 2.02 |
| 46404 | 0 | 187688 | MPVVPATWEAETGESL<br>EPGRRRLQ                                                                                                                                                                                                                                                           | 3.12 | 0.01 | 0.90 | 1.12 | 0.22 | 0.28 |
| 46405 | 0 | 187688 | MPVVPATWEAETGESL<br>EPGRRRLQ                                                                                                                                                                                                                                                           | 3.12 | 0.01 | 0.90 | 0.44 | 1.13 | 0.28 |
| 46406 | 0 | 339684 | MQADQPTQFSVGTPD                                                                                                                                                                                                                                                                        | 2.68 | 0.01 | 1.61 | 0.44 | 0.85 | 1.28 |
| 46407 | 0 | 158601 | MQAHQTK                                                                                                                                                                                                                                                                                | 2.02 | 0.01 | 0.90 | 0.44 | 1.13 | 1.39 |
| 46408 | 0 | 193504 | MQCLANGPG                                                                                                                                                                                                                                                                              | 2.21 | 0.01 | 2.51 | 0.44 | 2.39 | 0.28 |
| 46409 | 0 | 193504 | MQCLANGPG                                                                                                                                                                                                                                                                              | 2.21 | 0.01 | 2.51 | 0.44 | 2.39 | 0.28 |
| 46410 | 0 | 238776 | MQDASGQHR                                                                                                                                                                                                                                                                              | 2.21 | 0.01 | 2.14 | 2.65 | 0.22 | 0.85 |
| 46411 | 0 | 153424 | MQDSRLRLALSAGGS                                                                                                                                                                                                                                                                        | 2.76 | 0.01 | 0.90 | 0.68 | 0.22 | 1.39 |

|       |   |        |                                    |      |      |      |      |      |      |
|-------|---|--------|------------------------------------|------|------|------|------|------|------|
| 46412 | 0 | 108032 | MQEITKYTNIGNEACQIK<br>EQVDIPAELEDV | 3.33 | 0.01 | 0.90 | 1.12 | 0.22 | 0.28 |
| 46413 | 0 | 177526 | MQEVQSSRSGRGNGFG<br>FGDS           | 2.97 | 0.01 | 0.78 | 0.44 | 2.26 | 0.28 |
| 46414 | 0 | 42363  | MQFDRGYISP                         | 2.26 | 0.01 | 2.84 | 0.44 | 0.85 | 0.28 |
| 46415 | 0 | 95121  | MQGSVTEFLKPRLVDIE<br>QVSSTH        | 3.04 | 0.01 | 2.24 | 2.25 | 0.22 | 2.02 |
| 46416 | 0 | 95121  | MQGSVTEFLKPRLVDIE<br>QVSSTH        | 3.04 | 0.01 | 2.24 | 2.25 | 0.22 | 2.02 |
| 46417 | 0 | 153425 | MQIFVKTLTGKTITL                    | 2.70 | 0.01 | 1.60 | 0.68 | 0.22 | 0.28 |
| 46418 | 0 | 153425 | MQIFVKTLTGKTITL                    | 2.70 | 0.01 | 1.60 | 0.68 | 0.22 | 0.28 |
| 46419 | 0 | 42382  | MQKGFVSINDNKHYFD<br>DSG            | 2.88 | 0.01 | 3.04 | 2.75 | 0.22 | 0.28 |
| 46420 | 0 | 42382  | MQKGFVSINDNKHYFD<br>DSG            | 2.88 | 0.01 | 3.04 | 2.75 | 0.22 | 0.28 |
| 46421 | 0 | 42382  | MQKGFVSINDNKHYFD<br>DSG            | 2.88 | 0.01 | 3.04 | 2.75 | 0.22 | 0.28 |
| 46422 | 0 | 42382  | MQKGFVSINDNKHYFD<br>DSG            | 2.88 | 0.01 | 3.04 | 2.75 | 0.22 | 0.28 |
| 46423 | 0 | 176351 | MLAEQFKQKALGLL                     | 2.70 | 0.01 | 1.96 | 0.44 | 0.85 | 2.97 |
| 46424 | 0 | 196677 | MQPHYWQ                            | 2.02 | 0.01 | 0.90 | 0.44 | 1.23 | 1.39 |
| 46425 | 0 | 493327 | MQPLNEKQIA                         | 2.29 | 0.01 | 0.78 | 1.15 | 0.22 | 0.28 |
| 46426 | 0 | 493327 | MQPLNEKQIA                         | 2.29 | 0.01 | 0.78 | 1.15 | 0.22 | 0.28 |
| 46427 | 0 | 79310  | MQPVYF                             | 1.88 | 0.01 | 0.90 | 0.68 | 0.22 | 1.39 |
| 46428 | 0 | 42399  | MQQCIDFTFSDVININIY<br>NP           | 2.94 | 0.01 | 3.10 | 1.12 | 0.22 | 0.28 |
| 46429 | 0 | 42400  | MQQLENDLDQVQESLL<br>K              | 2.82 | 0.01 | 4.15 | 0.44 | 1.23 | 0.85 |
| 46430 | 0 | 42400  | MQQLENDLDQVQESLL<br>K              | 2.82 | 0.01 | 4.15 | 0.44 | 1.23 | 0.85 |
| 46431 | 0 | 42400  | MQQLENDLDQVQESLL<br>K              | 2.82 | 0.01 | 4.15 | 0.44 | 1.23 | 1.27 |
| 46432 | 0 | 79934  | MQQRPLRM                           | 2.16 | 0.01 | 2.14 | 3.17 | 0.22 | 0.28 |
| 46433 | 0 | 79934  | MQQRPLRM                           | 2.16 | 0.01 | 2.14 | 3.17 | 0.22 | 0.28 |
| 46434 | 0 | 79935  | MQQRPLRMFLGP                       | 2.51 | 0.01 | 2.14 | 3.17 | 0.22 | 0.28 |
| 46435 | 0 | 42408  | MQRQDVLDKNHVAD                     | 2.61 | 0.01 | 3.16 | 2.69 | 0.22 | 0.28 |
| 46436 | 0 | 42413  | MQSWVPLSTDDPVID                    | 2.68 | 0.01 | 2.43 | 0.44 | 0.85 | 0.28 |
| 46437 | 0 | 132870 | MQTLTLQEAMQQGYS                    | 2.70 | 0.01 | 3.16 | 3.16 | 0.22 | 0.28 |
| 46438 | 0 | 42416  | MQTLWDEIMDINKRK                    | 2.67 | 0.01 | 1.66 | 0.44 | 0.85 | 0.28 |
| 46439 | 0 | 42416  | MQTLWDEIMDINKRK                    | 2.67 | 0.01 | 1.66 | 0.44 | 0.85 | 2.97 |
| 46440 | 0 | 42416  | MQTLWDEIMDINKRK                    | 2.67 | 0.01 | 1.66 | 0.44 | 0.85 | 2.97 |



|       |   |        |                                |      |      |      |      |      |      |
|-------|---|--------|--------------------------------|------|------|------|------|------|------|
| 46441 | 0 | 42416  | MQTLWDEIMDINKRK                | 2.67 | 0.01 | 1.66 | 0.44 | 0.85 | 2.97 |
| 46442 | 0 | 42416  | MQTLWDEIMDINKRK                | 2.67 | 0.01 | 1.66 | 0.44 | 0.85 | 0.28 |
| 46443 | 0 | 42416  | MQTLWDEIMDINKRK                | 2.67 | 0.01 | 1.66 | 0.44 | 1.59 | 0.28 |
| 46444 | 0 | 42416  | MQTLWDEIMDINKRK                | 2.67 | 0.01 | 1.66 | 0.44 | 0.85 | 0.28 |
| 46445 | 0 | 42416  | MQTLWDEIMDINKRK                | 2.67 | 0.01 | 1.66 | 0.44 | 1.74 | 0.28 |
| 46446 | 0 | 108033 | MQTPPGNLENVETL                 | 2.67 | 0.01 | 0.90 | 0.44 | 1.13 | 1.39 |
| 46447 | 0 | 86469  | MQTRHVKNYHSRSES                | 2.66 | 0.01 | 3.75 | 0.44 | 0.85 | 0.28 |
| 46448 | 0 | 159291 | MQVTDD                         | 1.86 | 0.01 | 0.78 | 1.20 | 0.22 | 0.85 |
| 46449 | 0 | 152013 | MQWGHCGVKSAS                   | 2.45 | 0.01 | 2.80 | 2.78 | 0.22 | 0.28 |
| 46450 | 0 | 172401 | MQWGQLLDHDLDFTP                | 2.68 | 0.01 | 0.78 | 0.44 | 1.41 | 0.28 |
| 46451 | 0 | 42425  | MQWNST                         | 1.88 | 4.63 | 3.81 | 0.68 | 0.22 | 0.85 |
| 46452 | 0 | 78465  | MQWNSTA                        | 1.99 | 0.01 | 2.08 | 0.68 | 0.22 | 1.57 |
| 46453 | 0 | 78465  | MQWNSTA                        | 1.99 | 0.01 | 2.08 | 0.68 | 0.22 | 1.57 |
| 46454 | 0 | 78465  | MQWNSTA                        | 1.99 | 0.01 | 2.08 | 0.68 | 0.22 | 1.57 |
| 46455 | 0 | 42426  | MQWNSTAFH                      | 2.18 | 0.01 | 2.58 | 1.15 | 0.22 | 0.28 |
| 46456 | 0 | 42429  | MQWNSTAFHQTLQ                  | 2.54 | 0.01 | 2.58 | 3.20 | 0.22 | 1.57 |
| 46457 | 0 | 42429  | MQWNSTAFHQTLQ                  | 2.54 | 0.01 | 2.58 | 2.42 | 0.22 | 1.57 |
| 46458 | 0 | 42429  | MQWNSTAFHQTLQ                  | 2.54 | 0.01 | 2.58 | 3.20 | 0.22 | 1.57 |
| 46459 | 0 | 42429  | MQWNSTAFHQTLQ                  | 2.54 | 0.01 | 2.58 | 3.20 | 0.22 | 1.57 |
| 46460 | 0 | 42429  | MQWNSTAFHQTLQ                  | 2.54 | 0.01 | 2.58 | 3.20 | 0.22 | 1.57 |
| 46461 | 0 | 42429  | MQWNSTAFHQTLQ                  | 2.54 | 0.01 | 2.58 | 2.52 | 0.22 | 1.57 |
| 46462 | 0 | 42430  | MQWNSTAFHQTLQDP                | 2.64 | 0.01 | 2.58 | 1.20 | 0.22 | 0.28 |
| 46463 | 0 | 42430  | MQWNSTAFHQTLQDP                | 2.64 | 0.01 | 2.58 | 1.20 | 0.22 | 0.28 |
| 46464 | 0 | 42431  | MQWNSTAFHQTLQDP<br>RVRGLY      | 2.93 | 0.01 | 2.58 | 3.20 | 0.22 | 1.57 |
| 46465 | 0 | 42431  | MQWNSTAFHQTLQDP<br>RVRGLY      | 2.93 | 0.01 | 2.58 | 2.52 | 0.22 | 1.57 |
| 46466 | 0 | 42431  | MQWNSTAFHQTLQDP<br>RVRGLY      | 2.93 | 0.01 | 2.58 | 2.42 | 0.22 | 1.57 |
| 46467 | 0 | 42432  | MQWNSTAFHQTLQDP<br>RVRGLYLPAGG | 3.15 | 0.01 | 2.58 | 2.52 | 0.22 | 1.57 |
| 46468 | 0 | 42432  | MQWNSTAFHQTLQDP<br>RVRGLYLPAGG | 3.15 | 0.01 | 2.58 | 2.42 | 0.22 | 1.57 |
| 46469 | 0 | 42432  | MQWNSTAFHQTLQDP<br>RVRGLYLPAGG | 3.15 | 0.01 | 2.58 | 3.20 | 0.22 | 1.57 |
| 46470 | 0 | 42432  | MQWNSTAFHQTLQDP<br>RVRGLYLPAGG | 3.15 | 0.01 | 2.58 | 2.52 | 0.22 | 0.28 |
| 46471 | 0 | 42432  | MQWNSTAFHQTLQDP<br>RVRGLYLPAGG | 3.15 | 0.01 | 2.58 | 3.27 | 0.22 | 0.28 |

|       |   |       |                                |      |      |      |      |      |      |
|-------|---|-------|--------------------------------|------|------|------|------|------|------|
| 46472 | 0 | 42432 | MQWNSTAFHQTLDQD<br>RVRGLYLPAGG | 3.15 | 0.01 | 2.58 | 3.22 | 0.22 | 0.28 |
| 46473 | 0 | 42432 | MQWNSTAFHQTLDQD<br>RVRGLYLPAGG | 3.15 | 0.01 | 2.58 | 3.20 | 0.22 | 0.28 |
| 46474 | 0 | 42432 | MQWNSTAFHQTLDQD<br>RVRGLYLPAGG | 3.15 | 0.01 | 2.58 | 3.20 | 0.22 | 0.28 |
| 46475 | 0 | 42432 | MQWNSTAFHQTLDQD<br>RVRGLYLPAGG | 3.15 | 0.01 | 2.58 | 3.20 | 0.22 | 0.28 |
| 46476 | 0 | 42432 | MQWNSTAFHQTLDQD<br>RVRGLYLPAGG | 3.15 | 0.01 | 2.58 | 2.52 | 0.22 | 0.28 |
| 46477 | 0 | 42432 | MQWNSTAFHQTLDQD<br>RVRGLYLPAGG | 3.15 | 0.01 | 2.58 | 3.67 | 0.22 | 0.28 |
| 46478 | 0 | 42432 | MQWNSTAFHQTLDQD<br>RVRGLYLPAGG | 3.15 | 0.01 | 2.58 | 2.25 | 0.22 | 1.57 |
| 46479 | 0 | 42432 | MQWNSTAFHQTLDQD<br>RVRGLYLPAGG | 3.15 | 0.01 | 2.58 | 1.12 | 0.22 | 0.28 |
| 46480 | 0 | 42432 | MQWNSTAFHQTLDQD<br>RVRGLYLPAGG | 3.15 | 0.01 | 2.58 | 1.12 | 0.22 | 0.28 |
| 46481 | 0 | 42432 | MQWNSTAFHQTLDQD<br>RVRGLYLPAGG | 3.15 | 0.01 | 2.58 | 0.44 | 0.22 | 0.28 |
| 46482 | 0 | 42432 | MQWNSTAFHQTLDQD<br>RVRGLYLPAGG | 3.15 | 0.01 | 2.58 | 0.68 | 0.22 | 1.27 |
| 46483 | 0 | 42432 | MQWNSTAFHQTLDQD<br>RVRGLYLPAGG | 3.15 | 0.01 | 2.58 | 0.68 | 0.22 | 0.28 |
| 46484 | 0 | 42432 | MQWNSTAFHQTLDQD<br>RVRGLYLPAGG | 3.15 | 0.01 | 2.58 | 0.68 | 0.22 | 0.85 |
| 46485 | 0 | 42432 | MQWNSTAFHQTLDQD<br>RVRGLYLPAGG | 3.15 | 0.01 | 2.58 | 1.20 | 0.22 | 0.28 |
| 46486 | 0 | 42432 | MQWNSTAFHQTLDQD<br>RVRGLYLPAGG | 3.15 | 0.01 | 2.58 | 1.20 | 0.22 | 0.28 |
| 46487 | 0 | 42432 | MQWNSTAFHQTLDQD<br>RVRGLYLPAGG | 3.15 | 0.01 | 2.58 | 1.20 | 0.22 | 0.28 |
| 46488 | 0 | 42432 | MQWNSTAFHQTLDQD<br>RVRGLYLPAGG | 3.15 | 0.01 | 2.58 | 1.20 | 0.22 | 0.28 |
| 46489 | 0 | 42432 | MQWNSTAFHQTLDQD<br>RVRGLYLPAGG | 3.15 | 0.01 | 2.58 | 1.81 | 0.22 | 0.28 |
| 46490 | 0 | 42432 | MQWNSTAFHQTLDQD<br>RVRGLYLPAGG | 3.15 | 0.01 | 2.58 | 0.44 | 0.85 | 1.57 |
| 46491 | 0 | 42432 | MQWNSTAFHQTLDQD<br>RVRGLYLPAGG | 3.15 | 0.01 | 2.58 | 0.44 | 0.22 | 1.57 |
| 46492 | 0 | 42432 | MQWNSTAFHQTLDQD<br>RVRGLYLPAGG | 3.15 | 0.01 | 2.58 | 1.12 | 0.22 | 1.57 |
| 46493 | 0 | 42432 | MQWNSTAFHQTLDQD<br>RVRGLYLPAGG | 3.15 | 0.01 | 2.58 | 1.12 | 0.22 | 1.57 |
| 46494 | 0 | 42432 | MQWNSTAFHQTLDQD<br>RVRGLYLPAGG | 3.15 | 0.01 | 2.58 | 1.12 | 0.22 | 1.34 |

|       |   |        |                                            |      |      |      |      |      |      |
|-------|---|--------|--------------------------------------------|------|------|------|------|------|------|
| 46495 | 0 | 42432  | MQWNSTAFHQTLDQP<br>RVRGLYLPAGG             | 3.15 | 0.01 | 2.58 | 1.12 | 0.22 | 1.75 |
| 46496 | 0 | 42432  | MQWNSTAFHQTLDQP<br>RVRGLYLPAGG             | 3.15 | 0.01 | 2.08 | 2.16 | 0.22 | 1.57 |
| 46497 | 0 | 42432  | MQWNSTAFHQTLDQP<br>RVRGLYLPAGG             | 3.15 | 0.01 | 2.08 | 0.68 | 0.22 | 1.57 |
| 46498 | 0 | 133892 | MQWNSTAFHQTLDQP<br>RVRGLYLPAGGSS           | 3.23 | 0.01 | 2.58 | 0.68 | 0.22 | 1.27 |
| 46499 | 0 | 133892 | MQWNSTAFHQTLDQP<br>RVRGLYLPAGGSS           | 3.23 | 0.01 | 2.58 | 0.68 | 0.22 | 0.28 |
| 46500 | 0 | 133892 | MQWNSTAFHQTLDQP<br>RVRGLYLPAGGSS           | 3.23 | 0.01 | 2.58 | 1.15 | 0.22 | 1.27 |
| 46501 | 0 | 133892 | MQWNSTAFHQTLDQP<br>RVRGLYLPAGGSS           | 3.23 | 0.01 | 2.58 | 1.15 | 0.22 | 0.28 |
| 46502 | 0 | 133892 | MQWNSTAFHQTLDQP<br>RVRGLYLPAGGSS           | 3.23 | 0.01 | 2.58 | 0.68 | 0.22 | 0.28 |
| 46503 | 0 | 133892 | MQWNSTAFHQTLDQP<br>RVRGLYLPAGGSS           | 3.23 | 0.01 | 2.58 | 0.68 | 0.22 | 0.28 |
| 46504 | 0 | 96653  | MQWNSTAFHQTLDQP<br>RVRGLYLPAGGSSSGT        | 3.34 | 0.01 | 2.08 | 0.68 | 0.22 | 1.57 |
| 46505 | 0 | 42433  | MQWNSTAFHQTLDQP<br>RVRGLYLPAGGSSSGTV<br>NP | 3.44 | 0.01 | 2.58 | 1.12 | 0.22 | 1.27 |
| 46506 | 0 | 42433  | MQWNSTAFHQTLDQP<br>RVRGLYLPAGGSSSGTV<br>NP | 3.44 | 0.01 | 2.58 | 1.12 | 0.22 | 1.27 |
| 46507 | 0 | 42433  | MQWNSTAFHQTLDQP<br>RVRGLYLPAGGSSSGTV<br>NP | 3.44 | 0.01 | 2.58 | 1.12 | 0.22 | 1.57 |
| 46508 | 0 | 42433  | MQWNSTAFHQTLDQP<br>RVRGLYLPAGGSSSGTV<br>NP | 3.44 | 0.01 | 2.58 | 1.12 | 0.22 | 1.34 |
| 46509 | 0 | 42433  | MQWNSTAFHQTLDQP<br>RVRGLYLPAGGSSSGTV<br>NP | 3.44 | 0.01 | 2.58 | 1.12 | 0.22 | 1.57 |
| 46510 | 0 | 42433  | MQWNSTAFHQTLDQP<br>RVRGLYLPAGGSSSGTV<br>NP | 3.44 | 0.01 | 2.58 | 1.12 | 0.22 | 1.57 |
| 46511 | 0 | 42433  | MQWNSTAFHQTLDQP<br>RVRGLYLPAGGSSSGTV<br>NP | 3.44 | 0.01 | 2.58 | 1.12 | 0.22 | 1.57 |
| 46512 | 0 | 42433  | MQWNSTAFHQTLDQP<br>RVRGLYLPAGGSSSGTV<br>NP | 3.44 | 0.01 | 2.58 | 1.12 | 0.22 | 1.57 |

|       |   |       |                                            |      |      |      |      |      |      |
|-------|---|-------|--------------------------------------------|------|------|------|------|------|------|
| 46513 | 0 | 42433 | MQWNSTAFHQTLQDP<br>RVRGLYLPAGGSSSGTV<br>NP | 3.44 | 0.01 | 2.58 | 1.12 | 0.22 | 1.57 |
| 46514 | 0 | 42433 | MQWNSTAFHQTLQDP<br>RVRGLYLPAGGSSSGTV<br>NP | 3.44 | 0.01 | 2.58 | 1.15 | 0.22 | 0.28 |
| 46515 | 0 | 42433 | MQWNSTAFHQTLQDP<br>RVRGLYLPAGGSSSGTV<br>NP | 3.44 | 0.01 | 2.58 | 1.15 | 0.22 | 1.57 |
| 46516 | 0 | 42433 | MQWNSTAFHQTLQDP<br>RVRGLYLPAGGSSSGTV<br>NP | 3.44 | 0.01 | 2.58 | 1.15 | 0.22 | 1.57 |
| 46517 | 0 | 42433 | MQWNSTAFHQTLQDP<br>RVRGLYLPAGGSSSGTV<br>NP | 3.44 | 0.01 | 2.58 | 1.20 | 0.22 | 0.28 |
| 46518 | 0 | 42433 | MQWNSTAFHQTLQDP<br>RVRGLYLPAGGSSSGTV<br>NP | 3.44 | 0.01 | 2.58 | 1.20 | 0.22 | 0.28 |
| 46519 | 0 | 42433 | MQWNSTAFHQTLQDP<br>RVRGLYLPAGGSSSGTV<br>NP | 3.44 | 0.01 | 2.58 | 1.20 | 0.22 | 0.28 |
| 46520 | 0 | 42433 | MQWNSTAFHQTLQDP<br>RVRGLYLPAGGSSSGTV<br>NP | 3.44 | 0.01 | 2.58 | 1.20 | 0.22 | 0.28 |
| 46521 | 0 | 42434 | MQWNSTAFHQTLQDP<br>RYRGLYLPAGG             | 3.17 | 0.01 | 2.58 | 1.12 | 0.22 | 1.34 |
| 46522 | 0 | 42434 | MQWNSTAFHQTLQDP<br>RYRGLYLPAGG             | 3.17 | 0.01 | 2.58 | 1.12 | 0.22 | 1.34 |
| 46523 | 0 | 42435 | MQWNSTALHQAL                               | 2.48 | 0.01 | 3.28 | 3.20 | 0.22 | 1.57 |
| 46524 | 0 | 42437 | MQWNSTALHQALQDP<br>RVRGLYLPAGG             | 3.17 | 0.01 | 3.28 | 1.12 | 0.22 | 1.57 |
| 46525 | 0 | 42437 | MQWNSTALHQALQDP<br>RVRGLYLPAGG             | 3.17 | 0.01 | 3.28 | 1.12 | 0.22 | 1.57 |
| 46526 | 0 | 42437 | MQWNSTALHQALQDP<br>RVRGLYLPAGG             | 3.17 | 0.01 | 3.28 | 1.12 | 0.22 | 1.57 |
| 46527 | 0 | 42437 | MQWNSTALHQALQDP<br>RVRGLYLPAGG             | 3.17 | 0.01 | 3.28 | 1.12 | 0.22 | 1.57 |
| 46528 | 0 | 42437 | MQWNSTALHQALQDP<br>RVRGLYLPAGG             | 3.17 | 0.01 | 3.28 | 1.12 | 0.22 | 2.02 |
| 46529 | 0 | 42437 | MQWNSTALHQALQDP<br>RVRGLYLPAGG             | 3.17 | 0.01 | 3.28 | 1.12 | 0.22 | 2.02 |
| 46530 | 0 | 42437 | MQWNSTALHQALQDP<br>RVRGLYLPAGG             | 3.17 | 0.01 | 3.28 | 1.12 | 0.22 | 2.02 |
| 46531 | 0 | 42437 | MQWNSTALHQALQDP<br>RVRGLYLPAGG             | 3.17 | 0.01 | 3.28 | 0.44 | 0.85 | 0.28 |
| 46532 | 0 | 42437 | MQWNSTALHQALQDP<br>RVRGLYLPAGG             | 3.17 | 0.01 | 3.28 | 2.52 | 0.22 | 1.27 |

|       |   |       |                                 |      |      |      |      |      |      |
|-------|---|-------|---------------------------------|------|------|------|------|------|------|
| 46533 | 0 | 42437 | MQWNSTALHQALQDP<br>RVRGLYLPAGG  | 3.17 | 0.01 | 3.28 | 1.15 | 0.22 | 1.57 |
| 46534 | 0 | 42437 | MQWNSTALHQALQDP<br>RVRGLYLPAGG  | 3.17 | 0.01 | 3.28 | 1.12 | 0.22 | 2.35 |
| 46535 | 0 | 42438 | MQWNSTTFHQALLDPR<br>VRGLSFPAGG  | 3.16 | 0.01 | 0.90 | 0.68 | 0.22 | 0.28 |
| 46536 | 0 | 42438 | MQWNSTTFHQALLDPR<br>VRGLSFPAGG  | 3.16 | 0.01 | 0.90 | 0.68 | 0.22 | 0.28 |
| 46537 | 0 | 42439 | MQWNSTTFHQALLDPR<br>VRGLYFPAGG  | 3.14 | 0.01 | 3.07 | 1.15 | 0.22 | 2.56 |
| 46538 | 0 | 42439 | MQWNSTTFHQALLDPR<br>VRGLYFPAGG  | 3.14 | 0.01 | 3.07 | 0.68 | 0.22 | 1.27 |
| 46539 | 0 | 42439 | MQWNSTTFHQALLDPR<br>VRGLYFPAGG  | 3.14 | 0.01 | 3.07 | 1.20 | 0.22 | 1.27 |
| 46540 | 0 | 42439 | MQWNSTTFHQALLDPR<br>VRGLYFPAGG  | 3.14 | 0.01 | 2.08 | 0.68 | 0.22 | 0.28 |
| 46541 | 0 | 42439 | MQWNSTTFHQALLDPR<br>VRGLYFPAGG  | 3.14 | 0.01 | 2.08 | 0.68 | 0.22 | 0.28 |
| 46542 | 0 | 42439 | MQWNSTTFHQALLDPR<br>VRGLYFPAGG  | 3.14 | 0.01 | 3.07 | 1.15 | 0.22 | 0.28 |
| 46543 | 0 | 42440 | MQWNSTTFHQALLDPR<br>VRGLYFPAGGS | 3.19 | 0.01 | 3.07 | 0.68 | 0.22 | 0.28 |
| 46544 | 0 | 42440 | MQWNSTTFHQALLDPR<br>VRGLYFPAGGS | 3.19 | 0.01 | 3.07 | 1.15 | 2.26 | 0.85 |
| 46545 | 0 | 42441 | MQWNSTTFHQTLQ                   | 2.55 | 0.01 | 2.71 | 2.52 | 0.22 | 1.57 |
| 46546 | 0 | 42441 | MQWNSTTFHQTLQ                   | 2.55 | 0.01 | 2.71 | 2.42 | 0.22 | 1.57 |
| 46547 | 0 | 42441 | MQWNSTTFHQTLQ                   | 2.55 | 0.01 | 2.71 | 3.20 | 0.22 | 1.57 |
| 46548 | 0 | 42441 | MQWNSTTFHQTLQ                   | 2.55 | 0.01 | 2.71 | 3.20 | 0.22 | 1.57 |
| 46549 | 0 | 42441 | MQWNSTTFHQTLQ                   | 2.55 | 0.01 | 2.71 | 3.20 | 0.22 | 1.57 |
| 46550 | 0 | 42441 | MQWNSTTFHQTLQ                   | 2.55 | 0.01 | 2.71 | 3.20 | 0.22 | 1.57 |
| 46551 | 0 | 42441 | MQWNSTTFHQTLQ                   | 2.55 | 0.01 | 2.71 | 3.20 | 0.22 | 1.57 |
| 46552 | 0 | 42441 | MQWNSTTFHQTLQ                   | 2.55 | 0.01 | 2.71 | 3.20 | 0.22 | 1.57 |
| 46553 | 0 | 42441 | MQWNSTTFHQTLQ                   | 2.55 | 0.01 | 2.71 | 3.20 | 0.22 | 1.57 |
| 46554 | 0 | 42441 | MQWNSTTFHQTLQ                   | 2.55 | 0.01 | 2.71 | 3.20 | 0.22 | 1.57 |
| 46555 | 0 | 42441 | MQWNSTTFHQTLQ                   | 2.55 | 0.01 | 2.71 | 3.20 | 0.22 | 1.57 |
| 46556 | 0 | 42441 | MQWNSTTFHQTLQ                   | 2.55 | 0.01 | 2.71 | 3.20 | 0.22 | 1.57 |
| 46557 | 0 | 42441 | MQWNSTTFHQTLQ                   | 2.55 | 0.01 | 2.71 | 3.20 | 0.22 | 1.57 |
| 46558 | 0 | 42441 | MQWNSTTFHQTLQ                   | 2.55 | 0.01 | 2.08 | 2.82 | 0.22 | 0.28 |
| 46559 | 0 | 42443 | MQWNSTTFHQTLQDP<br>RVRGLYFPAGG  | 3.15 | 0.01 | 2.08 | 4.93 | 0.22 | 0.28 |
| 46560 | 0 | 42443 | MQWNSTTFHQTLQDP<br>RVRGLYFPAGG  | 3.15 | 0.01 | 2.71 | 0.44 | 0.85 | 1.57 |
| 46561 | 0 | 42443 | MQWNSTTFHQTLQDP<br>RVRGLYFPAGG  | 3.15 | 0.01 | 2.71 | 0.68 | 0.22 | 2.02 |
| 46562 | 0 | 42443 | MQWNSTTFHQTLQDP<br>RVRGLYFPAGG  | 3.15 | 0.01 | 2.71 | 1.12 | 0.22 | 0.28 |

|       |   |       |                                |      |      |      |      |      |      |
|-------|---|-------|--------------------------------|------|------|------|------|------|------|
| 46563 | 0 | 42443 | MQWNSTTFHQTLDQD<br>RVRGLYFPAGG | 3.15 | 0.01 | 2.71 | 2.52 | 0.22 | 1.57 |
| 46564 | 0 | 42443 | MQWNSTTFHQTLDQD<br>RVRGLYFPAGG | 3.15 | 0.01 | 2.71 | 2.42 | 0.22 | 1.57 |
| 46565 | 0 | 42443 | MQWNSTTFHQTLDQD<br>RVRGLYFPAGG | 3.15 | 0.01 | 2.71 | 3.20 | 0.22 | 1.57 |
| 46566 | 0 | 42443 | MQWNSTTFHQTLDQD<br>RVRGLYFPAGG | 3.15 | 0.01 | 2.71 | 3.20 | 0.22 | 1.57 |
| 46567 | 0 | 42443 | MQWNSTTFHQTLDQD<br>RVRGLYFPAGG | 3.15 | 0.01 | 2.71 | 3.20 | 0.22 | 1.57 |
| 46568 | 0 | 42443 | MQWNSTTFHQTLDQD<br>RVRGLYFPAGG | 3.15 | 0.01 | 2.71 | 3.20 | 0.22 | 1.57 |
| 46569 | 0 | 42443 | MQWNSTTFHQTLDQD<br>RVRGLYFPAGG | 3.15 | 0.01 | 2.71 | 3.20 | 0.22 | 1.57 |
| 46570 | 0 | 42443 | MQWNSTTFHQTLDQD<br>RVRGLYFPAGG | 3.15 | 0.01 | 2.71 | 3.20 | 0.22 | 1.57 |
| 46571 | 0 | 42443 | MQWNSTTFHQTLDQD<br>RVRGLYFPAGG | 3.15 | 0.01 | 2.71 | 3.20 | 0.22 | 1.57 |
| 46572 | 0 | 42443 | MQWNSTTFHQTLDQD<br>RVRGLYFPAGG | 3.15 | 0.01 | 2.71 | 3.20 | 0.22 | 1.57 |
| 46573 | 0 | 42443 | MQWNSTTFHQTLDQD<br>RVRGLYFPAGG | 3.15 | 0.01 | 2.71 | 3.20 | 0.22 | 1.57 |
| 46574 | 0 | 42443 | MQWNSTTFHQTLDQD<br>RVRGLYFPAGG | 3.15 | 0.01 | 2.71 | 3.20 | 0.22 | 1.57 |
| 46575 | 0 | 42443 | MQWNSTTFHQTLDQD<br>RVRGLYFPAGG | 3.15 | 0.01 | 2.71 | 3.20 | 0.22 | 1.57 |
| 46576 | 0 | 42443 | MQWNSTTFHQTLDQD<br>RVRGLYFPAGG | 3.15 | 0.01 | 2.71 | 3.20 | 0.22 | 1.57 |
| 46577 | 0 | 42443 | MQWNSTTFHQTLDQD<br>RVRGLYFPAGG | 3.15 | 0.01 | 2.71 | 1.15 | 0.22 | 0.28 |
| 46578 | 0 | 42443 | MQWNSTTFHQTLDQD<br>RVRGLYFPAGG | 3.15 | 0.01 | 2.71 | 2.52 | 0.22 | 0.28 |
| 46579 | 0 | 42443 | MQWNSTTFHQTLDQD<br>RVRGLYFPAGG | 3.15 | 0.01 | 2.71 | 3.22 | 0.22 | 0.28 |
| 46580 | 0 | 42443 | MQWNSTTFHQTLDQD<br>RVRGLYFPAGG | 3.15 | 0.01 | 2.71 | 3.22 | 0.22 | 0.28 |
| 46581 | 0 | 42443 | MQWNSTTFHQTLDQD<br>RVRGLYFPAGG | 3.15 | 0.01 | 2.71 | 0.44 | 0.85 | 0.28 |
| 46582 | 0 | 42443 | MQWNSTTFHQTLDQD<br>RVRGLYFPAGG | 3.15 | 0.01 | 2.71 | 1.20 | 0.22 | 0.28 |
| 46583 | 0 | 42443 | MQWNSTTFHQTLDQD<br>RVRGLYFPAGG | 3.15 | 0.01 | 2.71 | 1.20 | 0.22 | 0.28 |
| 46584 | 0 | 42443 | MQWNSTTFHQTLDQD<br>RVRGLYFPAGG | 3.15 | 0.01 | 2.71 | 1.20 | 0.22 | 0.28 |
| 46585 | 0 | 42443 | MQWNSTTFHQTLDQD<br>RVRGLYFPAGG | 3.15 | 0.01 | 2.71 | 1.20 | 0.22 | 0.28 |

|       |   |       |                                           |      |      |      |      |      |      |
|-------|---|-------|-------------------------------------------|------|------|------|------|------|------|
| 46586 | 0 | 42443 | MQWNSTTFHQLQDP<br>RVRGLYFPAGG             | 3.15 | 0.01 | 2.71 | 1.15 | 0.22 | 2.56 |
| 46587 | 0 | 42443 | MQWNSTTFHQLQDP<br>RVRGLYFPAGG             | 3.15 | 0.01 | 2.71 | 1.15 | 0.22 | 0.28 |
| 46588 | 0 | 42443 | MQWNSTTFHQLQDP<br>RVRGLYFPAGG             | 3.15 | 0.01 | 2.08 | 4.93 | 0.22 | 0.28 |
| 46589 | 0 | 42444 | MQWNSTTFHQLQDP<br>RVRGLYFPAGGSSSGTV<br>NP | 3.44 | 0.01 | 2.71 | 1.12 | 0.22 | 1.27 |
| 46590 | 0 | 42444 | MQWNSTTFHQLQDP<br>RVRGLYFPAGGSSSGTV<br>NP | 3.44 | 0.01 | 2.71 | 1.12 | 0.22 | 1.57 |
| 46591 | 0 | 42444 | MQWNSTTFHQLQDP<br>RVRGLYFPAGGSSSGTV<br>NP | 3.44 | 0.01 | 2.71 | 1.12 | 0.22 | 1.27 |
| 46592 | 0 | 42444 | MQWNSTTFHQLQDP<br>RVRGLYFPAGGSSSGTV<br>NP | 3.44 | 0.01 | 2.71 | 1.12 | 0.22 | 1.34 |
| 46593 | 0 | 42444 | MQWNSTTFHQLQDP<br>RVRGLYFPAGGSSSGTV<br>NP | 3.44 | 0.01 | 2.71 | 1.12 | 0.22 | 1.27 |
| 46594 | 0 | 42444 | MQWNSTTFHQLQDP<br>RVRGLYFPAGGSSSGTV<br>NP | 3.44 | 0.01 | 2.71 | 1.12 | 0.22 | 1.57 |
| 46595 | 0 | 42444 | MQWNSTTFHQLQDP<br>RVRGLYFPAGGSSSGTV<br>NP | 3.44 | 0.01 | 2.71 | 1.12 | 0.22 | 1.57 |
| 46596 | 0 | 42444 | MQWNSTTFHQLQDP<br>RVRGLYFPAGGSSSGTV<br>NP | 3.44 | 0.01 | 2.71 | 1.12 | 0.22 | 1.57 |
| 46597 | 0 | 42444 | MQWNSTTFHQLQDP<br>RVRGLYFPAGGSSSGTV<br>NP | 3.44 | 0.01 | 2.71 | 1.12 | 0.22 | 1.57 |
| 46598 | 0 | 42444 | MQWNSTTFHQLQDP<br>RVRGLYFPAGGSSSGTV<br>NP | 3.44 | 0.01 | 2.71 | 1.12 | 0.22 | 1.57 |
| 46599 | 0 | 42444 | MQWNSTTFHQLQDP<br>RVRGLYFPAGGSSSGTV<br>NP | 3.44 | 0.01 | 2.71 | 1.15 | 0.22 | 0.28 |
| 46600 | 0 | 42444 | MQWNSTTFHQLQDP<br>RVRGLYFPAGGSSSGTV<br>NP | 3.44 | 0.01 | 2.71 | 1.15 | 0.22 | 1.57 |
| 46601 | 0 | 42444 | MQWNSTTFHQLQDP<br>RVRGLYFPAGGSSSGTV<br>NP | 3.44 | 0.01 | 2.71 | 1.20 | 0.22 | 0.28 |

|       |   |        |                                    |      |      |      |      |      |      |
|-------|---|--------|------------------------------------|------|------|------|------|------|------|
|       |   |        | MQWNSTTFHQLQDP                     |      |      |      |      |      |      |
| 46602 | 0 | 42444  | RVRGLYFPAGGSSSGTV<br>NP            | 3.44 | 0.01 | 2.71 | 1.20 | 0.22 | 0.28 |
|       |   |        | MQWNSTTFHQLQDP                     |      |      |      |      |      |      |
| 46603 | 0 | 42444  | RVRGLYFPAGGSSSGTV<br>NP            | 3.44 | 0.01 | 2.71 | 1.20 | 0.22 | 0.28 |
|       |   |        | MQWNSTTFHQLQDP                     |      |      |      |      |      |      |
| 46604 | 0 | 42444  | RVRGLYFPAGGSSSGTV<br>NP            | 3.44 | 0.01 | 2.71 | 1.20 | 0.22 | 0.28 |
|       |   |        | MQWNSTTFHQLQDP                     |      |      |      |      |      |      |
| 46605 | 0 | 42444  | RVRGLYFPAGGSSSGTV<br>NP            | 3.44 | 0.01 | 2.71 | 1.20 | 0.22 | 0.28 |
|       |   |        | MQWNSTTFHQLQDP                     |      |      |      |      |      |      |
| 46606 | 0 | 42444  | RVRGLYFPAGGSSSGTV<br>NP            | 3.44 | 0.01 | 2.71 | 1.12 | 0.22 | 1.57 |
|       |   |        | MQWNSTTFHQLQDP                     |      |      |      |      |      |      |
| 46607 | 0 | 42444  | RVRGLYFPAGGSSSGTV<br>NP            | 3.44 | 0.01 | 2.71 | 0.68 | 0.22 | 1.57 |
| 46608 | 0 | 435446 | MQYVYTPTYML                        | 2.51 | 0.01 | 3.93 | 0.68 | 0.22 | 1.27 |
| 46609 | 0 | 435446 | MQYVYTPTYML                        | 2.51 | 0.01 | 3.93 | 0.68 | 0.22 | 1.27 |
| 46610 | 0 | 435446 | MQYVYTPTYML                        | 2.51 | 0.01 | 3.93 | 0.68 | 0.22 | 1.27 |
| 46611 | 0 | 435446 | MQYVYTPTYML                        | 2.51 | 0.01 | 3.93 | 0.68 | 0.22 | 0.28 |
| 46612 | 0 | 120802 | MRASPAERVDGAYAGA<br>GPHTQSV        | 3.08 | 0.01 | 2.86 | 0.44 | 0.85 | 0.28 |
| 46613 | 0 | 42453  | MRCIGISNRDFVEGVSG<br>GSWVDIVLEHGSC | 3.34 | 0.01 | 2.30 | 2.65 | 0.22 | 0.28 |
| 46614 | 0 | 42453  | MRCIGISNRDFVEGVSG<br>GSWVDIVLEHGSC | 3.34 | 0.01 | 2.30 | 2.65 | 0.22 | 0.28 |
| 46615 | 0 | 42453  | MRCIGISNRDFVEGVSG<br>GSWVDIVLEHGSC | 3.34 | 0.01 | 2.30 | 2.65 | 0.22 | 0.28 |
| 46616 | 0 | 42453  | MRCIGISNRDFVEGVSG<br>GSWVDIVLEHGSC | 3.34 | 0.01 | 2.30 | 2.65 | 0.22 | 0.28 |
| 46617 | 0 | 42453  | MRCIGISNRDFVEGVSG<br>GSWVDIVLEHGSC | 3.34 | 0.01 | 2.30 | 2.65 | 0.22 | 0.28 |
| 46618 | 0 | 42453  | MRCIGISNRDFVEGVSG<br>GSWVDIVLEHGSC | 3.34 | 0.01 | 2.30 | 2.65 | 0.22 | 0.28 |
| 46619 | 0 | 42453  | MRCIGISNRDFVEGVSG<br>GSWVDIVLEHGSC | 3.34 | 0.01 | 2.30 | 2.65 | 0.22 | 0.28 |
| 46620 | 0 | 42453  | MRCIGISNRDFVEGVSG<br>GSWVDIVLEHGSC | 3.34 | 0.01 | 2.30 | 2.65 | 0.22 | 0.28 |
| 46621 | 0 | 42453  | MRCIGISNRDFVEGVSG<br>GSWVDIVLEHGSC | 3.34 | 0.01 | 2.30 | 2.65 | 0.22 | 0.28 |
| 46622 | 0 | 42453  | MRCIGISNRDFVEGVSG<br>GSWVDIVLEHGSC | 3.34 | 0.01 | 2.30 | 2.65 | 0.22 | 0.28 |
| 46623 | 0 | 112229 | MRDGAWF                            | 1.99 | 0.01 | 0.78 | 0.44 | 1.13 | 0.28 |
| 46624 | 0 | 177873 | MRELEAKATKDVERN                    | 2.68 | 0.01 | 0.78 | 0.44 | 1.13 | 0.85 |



|       |   |        |                                      |      |      |      |      |      |      |
|-------|---|--------|--------------------------------------|------|------|------|------|------|------|
| 46625 | 0 | 142233 | MRFAQPSALSRFSALTR<br>DWFTSTFAAPTAAQA | 3.44 | 0.01 | 2.04 | 0.68 | 0.22 | 0.28 |
| 46626 | 0 | 42462  | MRFDRGYI                             | 2.12 | 0.01 | 2.99 | 0.44 | 0.85 | 0.28 |
| 46627 | 0 | 108035 | MRGFIFTRHSQTTANPS<br>CPE             | 2.90 | 0.01 | 2.19 | 2.55 | 0.22 | 0.28 |
| 46628 | 0 | 108035 | MRGFIFTRHSQTTANPS<br>CPE             | 2.90 | 0.01 | 2.19 | 2.55 | 0.22 | 0.28 |
| 46629 | 0 | 450843 | MRGKSTEEARKELQAAG                    | 2.80 | 0.01 | 0.78 | 2.79 | 1.13 | 1.28 |
| 46630 | 0 | 450843 | MRGKSTEEARKELQAAG                    | 2.80 | 0.01 | 0.78 | 1.81 | 1.41 | 1.28 |
| 46631 | 0 | 100312 | MRGRVSPLMLLLGILVL<br>ASV             | 2.98 | 0.01 | 2.16 | 0.44 | 2.39 | 0.28 |
| 46632 | 0 | 522544 | MRGRVSPLMLLLGILVL<br>ASVSATQ         | 3.15 | 0.01 | 2.16 | 0.44 | 1.23 | 1.39 |
| 46633 | 0 | 99474  | MRHLRPEDTLEEKMY                      | 2.68 | 0.01 | 2.86 | 2.02 | 0.85 | 0.85 |
| 46634 | 0 | 181398 | MRIKHVRAWIPRPLR                      | 2.68 | 0.01 | 2.82 | 1.15 | 0.22 | 0.28 |
| 46635 | 0 | 119497 | MRKANSPPT                            | 2.20 | 0.01 | 0.90 | 0.44 | 1.13 | 1.27 |
| 46636 | 0 | 119498 | MRKSTGTAS                            | 2.23 | 0.01 | 0.90 | 0.44 | 1.13 | 0.28 |
| 46637 | 0 | 42475  | MRKTKLAPTVAHG VF                     | 2.66 | 0.01 | 2.88 | 2.22 | 0.22 | 0.28 |
| 46638 | 0 | 42475  | MRKTKLAPTVAHG VF                     | 2.66 | 0.01 | 2.88 | 2.22 | 0.22 | 0.28 |
| 46639 | 0 | 42475  | MRKTKLAPTVAHG VF                     | 2.66 | 0.01 | 2.88 | 2.22 | 0.22 | 0.28 |
| 46640 | 0 | 42475  | MRKTKLAPTVAHG VF                     | 2.66 | 0.01 | 2.88 | 2.22 | 0.22 | 0.28 |
| 46641 | 0 | 42475  | MRKTKLAPTVAHG VF                     | 2.66 | 0.01 | 2.88 | 2.22 | 0.22 | 0.28 |
| 46642 | 0 | 42475  | MRKTKLAPTVAHG VF                     | 2.66 | 0.01 | 2.88 | 2.22 | 0.22 | 0.28 |
| 46643 | 0 | 42475  | MRKTKLAPTVAHG VF                     | 2.66 | 0.01 | 3.50 | 2.22 | 0.22 | 0.28 |
| 46644 | 0 | 42475  | MRKTKLAPTVAHG VF                     | 2.66 | 0.01 | 3.50 | 0.68 | 0.22 | 0.28 |
| 46645 | 0 | 42475  | MRKTKLAPTVAHG VF                     | 2.66 | 0.01 | 3.50 | 0.68 | 0.22 | 0.28 |
| 46646 | 0 | 42475  | MRKTKLAPTVAHG VF                     | 2.66 | 0.01 | 3.50 | 0.68 | 0.22 | 2.35 |
| 46647 | 0 | 42475  | MRKTKLAPTVAHG VF                     | 2.66 | 0.01 | 3.50 | 2.22 | 0.22 | 2.35 |
| 46648 | 0 | 42475  | MRKTKLAPTVAHG VF                     | 2.66 | 0.01 | 3.50 | 2.00 | 0.22 | 2.35 |
| 46649 | 0 | 42475  | MRKTKLAPTVAHG VF                     | 2.66 | 0.01 | 2.96 | 2.22 | 0.22 | 0.28 |
| 46650 | 0 | 42476  | MRLAENIPSRCNLS                       | 2.61 | 0.01 | 4.08 | 0.44 | 1.23 | 0.85 |
| 46651 | 0 | 111567 | MRLETSK                              | 1.99 | 0.01 | 0.90 | 0.44 | 0.85 | 1.39 |
| 46652 | 0 | 42477  | MRLQVSPETLFWMECS                     | 2.72 | 0.01 | 0.90 | 0.68 | 0.22 | 0.28 |
| 46653 | 0 | 176823 | MRMKHVRAWIPRPMR                      | 2.71 | 0.01 | 2.60 | 0.68 | 0.22 | 0.28 |
| 46654 | 0 | 176823 | MRMKHVRAWIPRPMR                      | 2.71 | 0.01 | 2.60 | 0.68 | 0.22 | 1.34 |
| 46655 | 0 | 176823 | MRMKHVRAWIPRPMR                      | 2.71 | 0.01 | 2.60 | 0.68 | 0.22 | 1.34 |
| 46656 | 0 | 176823 | MRMKHVRAWIPRPMR                      | 2.71 | 0.01 | 2.60 | 0.68 | 0.22 | 1.34 |
| 46657 | 0 | 176823 | MRMKHVRAWIPRPMR                      | 2.71 | 0.01 | 2.60 | 0.68 | 0.22 | 1.34 |

|       |   |        |                           |      |      |      |      |      |      |
|-------|---|--------|---------------------------|------|------|------|------|------|------|
| 46658 | 0 | 176823 | MRMKHVRAWIPRPMR           | 2.71 | 0.01 | 2.60 | 0.68 | 0.22 | 1.34 |
| 46659 | 0 | 111568 | MRNIYNALSSAG              | 2.46 | 0.01 | 3.20 | 0.44 | 1.23 | 0.85 |
| 46660 | 0 | 111569 | MRNIYNALSSAGLQN           | 2.67 | 0.01 | 3.20 | 1.12 | 0.22 | 0.85 |
| 46661 | 0 | 179274 | MRNLWNEIAELADFN           | 2.68 | 0.01 | 2.36 | 0.44 | 1.23 | 1.28 |
| 46662 | 0 | 179274 | MRNLWNEIAELADFN           | 2.68 | 0.01 | 2.36 | 0.44 | 1.23 | 1.27 |
| 46663 | 0 | 179274 | MRNLWNEIAELADFN           | 2.68 | 0.01 | 2.36 | 0.44 | 1.23 | 1.28 |
| 46664 | 0 | 150452 | MRNQNYLFKANPNYA           | 2.68 | 0.01 | 3.45 | 1.12 | 0.22 | 0.28 |
| 46665 | 0 | 42487  | MRNVPEKQT                 | 2.18 | 0.01 | 3.78 | 0.68 | 0.22 | 1.27 |
| 46666 | 0 | 42487  | MRNVPEKQT                 | 2.18 | 0.01 | 3.78 | 1.15 | 0.22 | 1.27 |
| 46667 | 0 | 111570 | MRPDNAK                   | 1.99 | 0.01 | 0.90 | 0.44 | 0.85 | 1.39 |
| 46668 | 0 | 134167 | MRPPARPMMPVTRPG<br>MTRPDR | 3.05 | 0.01 | 0.78 | 0.44 | 1.13 | 0.85 |
| 46669 | 0 | 118023 | MRPPMGPPIG                | 2.37 | 0.01 | 0.78 | 3.05 | 1.13 | 0.28 |
| 46670 | 0 | 42493  | MRQLDTNVER                | 2.29 | 0.01 | 0.78 | 0.44 | 0.85 | 0.28 |
| 46671 | 0 | 42493  | MRQLDTNVER                | 2.29 | 0.01 | 0.78 | 0.68 | 0.22 | 0.28 |
| 46672 | 0 | 42493  | MRQLDTNVER                | 2.29 | 0.01 | 0.78 | 0.44 | 0.85 | 0.85 |
| 46673 | 0 | 42493  | MRQLDTNVER                | 2.29 | 0.01 | 0.78 | 0.44 | 0.85 | 0.85 |
| 46674 | 0 | 42493  | MRQLDTNVER                | 2.29 | 0.01 | 0.78 | 0.44 | 0.85 | 0.85 |
| 46675 | 0 | 42493  | MRQLDTNVER                | 2.29 | 0.01 | 0.78 | 0.44 | 0.85 | 1.27 |
| 46676 | 0 | 42493  | MRQLDTNVER                | 2.29 | 0.01 | 0.78 | 0.44 | 0.85 | 1.27 |
| 46677 | 0 | 42493  | MRQLDTNVER                | 2.29 | 0.01 | 0.78 | 0.44 | 0.85 | 1.27 |
| 46678 | 0 | 42494  | MRQLDTNVERRALGEIQ<br>NV   | 2.88 | 0.01 | 0.78 | 0.44 | 0.85 | 0.28 |
| 46679 | 0 | 94884  | MRRAHHRRRRASHRR<br>MRGG   | 2.95 | 0.01 | 3.03 | 0.68 | 0.22 | 0.28 |
| 46680 | 0 | 94884  | MRRAHHRRRRASHRR<br>MRGG   | 2.95 | 0.01 | 3.03 | 0.68 | 0.22 | 0.85 |
| 46681 | 0 | 94884  | MRRAHHRRRRASHRR<br>MRGG   | 2.95 | 0.01 | 3.03 | 0.68 | 0.22 | 0.85 |
| 46682 | 0 | 243820 | MRRERGRQGDSSS             | 2.56 | 0.01 | 2.16 | 0.44 | 1.23 | 1.28 |
| 46683 | 0 | 135961 | MRRPRRPGGLGG              | 2.51 | 0.01 | 0.78 | 0.44 | 1.41 | 0.28 |
| 46684 | 0 | 42498  | MRRTHLQR                  | 2.14 | 0.01 | 0.90 | 0.68 | 0.22 | 0.28 |
| 46685 | 0 | 98255  | MRRVAIAGVLAMRPE           | 2.70 | 0.01 | 3.97 | 1.20 | 0.22 | 0.85 |
| 46686 | 0 | 98255  | MRRVAIAGVLAMRPE           | 2.70 | 0.01 | 3.97 | 0.44 | 0.85 | 1.39 |
| 46687 | 0 | 98255  | MRRVAIAGVLAMRPE           | 2.70 | 0.01 | 3.97 | 0.44 | 0.85 | 1.75 |
| 46688 | 0 | 120804 | MRSFSLSTNLQESL            | 2.63 | 0.01 | 0.78 | 0.44 | 1.13 | 0.85 |
| 46689 | 0 | 42505  | MRTKRRTRRIMM              | 2.52 | 0.01 | 0.90 | 1.20 | 0.22 | 1.39 |
| 46690 | 0 | 157683 | MRTSDMPSQHI               | 2.48 | 0.01 | 3.40 | 2.49 | 0.85 | 0.28 |
| 46691 | 0 | 123519 | MRYIADKHG                 | 2.18 | 0.01 | 2.28 | 2.00 | 0.22 | 0.28 |

|       |   |        |                                                     |      |      |      |      |      |      |
|-------|---|--------|-----------------------------------------------------|------|------|------|------|------|------|
| 46692 | 0 | 123519 | MRYIADKHG                                           | 2.18 | 0.01 | 2.28 | 2.00 | 0.22 | 0.28 |
| 46693 | 0 | 123519 | MRYIADKHG                                           | 2.18 | 0.01 | 2.28 | 2.00 | 0.22 | 0.28 |
| 46694 | 0 | 42510  | MRYLPAPSLNAY                                        | 2.49 | 0.01 | 0.90 | 0.68 | 0.22 | 0.28 |
| 46695 | 0 | 122488 | MSAKAALEPRLLAPG                                     | 2.69 | 0.01 | 0.90 | 1.15 | 0.22 | 1.39 |
| 46696 | 0 | 118930 | MSDEGPGTGPGNGLGE<br>KGDT                            | 2.98 | 0.01 | 2.43 | 0.44 | 1.13 | 1.27 |
| 46697 | 0 | 118930 | MSDEGPGTGPGNGLGE<br>KGDT                            | 2.98 | 0.01 | 2.43 | 0.44 | 1.41 | 1.27 |
| 46698 | 0 | 136514 | MSDEGPGTGPGNGLGE<br>KGDTSGPEGSSGSPQ<br>RRGGDNHGRGRG | 3.75 | 0.01 | 2.43 | 0.44 | 1.74 | 0.28 |
| 46699 | 0 | 136514 | MSDEGPGTGPGNGLGE<br>KGDTSGPEGSSGSPQ<br>RRGGDNHGRGRG | 3.75 | 0.01 | 2.43 | 0.44 | 1.74 | 0.28 |
| 46700 | 0 | 147976 | MSDGAVQPD                                           | 2.21 | 0.01 | 3.24 | 3.57 | 0.85 | 0.28 |
| 46701 | 0 | 79026  | MSDGAVQPDGGQPAV                                     | 2.71 | 0.01 | 3.05 | 4.33 | 0.22 | 0.28 |
| 46702 | 0 | 79026  | MSDGAVQPDGGQPAV                                     | 2.71 | 0.01 | 3.05 | 4.33 | 0.22 | 0.28 |
| 46703 | 0 | 79026  | MSDGAVQPDGGQPAV                                     | 2.71 | 0.01 | 3.05 | 1.20 | 0.22 | 0.28 |
| 46704 | 0 | 79026  | MSDGAVQPDGGQPAV                                     | 2.71 | 0.01 | 3.05 | 1.20 | 0.22 | 1.34 |
| 46705 | 0 | 79026  | MSDGAVQPDGGQPAV                                     | 2.71 | 0.01 | 3.05 | 1.20 | 0.22 | 0.28 |
| 46706 | 0 | 141056 | MSDGAVQPDGGQPAV<br>RNER                             | 2.90 | 0.01 | 3.05 | 2.37 | 0.22 | 1.34 |
| 46707 | 0 | 141056 | MSDGAVQPDGGQPAV<br>RNER                             | 2.90 | 0.01 | 3.05 | 2.49 | 0.22 | 1.34 |
| 46708 | 0 | 42526  | MSDGAVQPDGGQPAV<br>RNERAT                           | 2.99 | 0.01 | 3.05 | 0.68 | 0.22 | 0.85 |
| 46709 | 0 | 42526  | MSDGAVQPDGGQPAV<br>RNERAT                           | 2.99 | 0.01 | 3.05 | 2.89 | 0.22 | 0.28 |
| 46710 | 0 | 42526  | MSDGAVQPDGGQPAV<br>RNERAT                           | 2.99 | 0.01 | 3.05 | 2.89 | 0.22 | 0.28 |
| 46711 | 0 | 42526  | MSDGAVQPDGGQPAV<br>RNERAT                           | 2.99 | 0.01 | 3.05 | 0.68 | 0.22 | 0.28 |
| 46712 | 0 | 42526  | MSDGAVQPDGGQPAV<br>RNERAT                           | 2.99 | 0.01 | 3.05 | 0.68 | 0.22 | 0.85 |
| 46713 | 0 | 42526  | MSDGAVQPDGGQPAV<br>RNERAT                           | 2.99 | 0.01 | 3.05 | 0.68 | 0.22 | 0.85 |
| 46714 | 0 | 42526  | MSDGAVQPDGGQPAV<br>RNERAT                           | 2.99 | 0.01 | 3.05 | 0.68 | 0.22 | 0.28 |
| 46715 | 0 | 42527  | MSDGAVQPDGGQPAV<br>RNERATG                          | 3.04 | 0.01 | 3.05 | 0.68 | 0.22 | 0.28 |

|       |   |       |                                                       |      |      |      |      |      |      |
|-------|---|-------|-------------------------------------------------------|------|------|------|------|------|------|
| 46716 | 0 | 42527 | MSDGAVQPDGGQPAV<br>RNERATG                            | 3.04 | 0.01 | 3.05 | 0.68 | 0.22 | 0.28 |
| 46717 | 0 | 42527 | MSDGAVQPDGGQPAV<br>RNERATG                            | 3.04 | 0.01 | 3.05 | 1.12 | 0.22 | 0.28 |
| 46718 | 0 | 42527 | MSDGAVQPDGGQPAV<br>RNERATG                            | 3.04 | 0.01 | 3.05 | 1.12 | 0.22 | 0.28 |
| 46719 | 0 | 42527 | MSDGAVQPDGGQPAV<br>RNERATG                            | 3.04 | 0.01 | 3.05 | 1.12 | 0.22 | 1.34 |
| 46720 | 0 | 42527 | MSDGAVQPDGGQPAV<br>RNERATG                            | 3.04 | 0.01 | 3.05 | 1.15 | 0.22 | 1.34 |
| 46721 | 0 | 42527 | MSDGAVQPDGGQPAV<br>RNERATG                            | 3.04 | 0.01 | 3.05 | 0.68 | 0.22 | 0.28 |
| 46722 | 0 | 42527 | MSDGAVQPDGGQPAV<br>RNERATG                            | 3.04 | 0.01 | 3.05 | 0.68 | 0.22 | 0.28 |
| 46723 | 0 | 42527 | MSDGAVQPDGGQPAV<br>RNERATG                            | 3.04 | 0.01 | 3.05 | 0.68 | 0.22 | 0.85 |
| 46724 | 0 | 42527 | MSDGAVQPDGGQPAV<br>RNERATG                            | 3.04 | 0.01 | 3.05 | 0.68 | 0.22 | 0.85 |
| 46725 | 0 | 42527 | MSDGAVQPDGGQPAV<br>RNERATG                            | 3.04 | 0.01 | 3.05 | 0.68 | 0.22 | 0.85 |
| 46726 | 0 | 42528 | MSDHWR                                                | 1.88 | 0.01 | 0.90 | 0.44 | 1.74 | 1.39 |
| 46727 | 0 | 42531 | MSDLTDIQED                                            | 2.31 | 0.01 | 4.15 | 2.69 | 0.22 | 0.28 |
| 46728 | 0 | 42532 | MSDLTDIQEDITRH                                        | 2.61 | 0.01 | 2.56 | 1.12 | 0.22 | 0.28 |
| 46729 | 0 | 42532 | MSDLTDIQEDITRH                                        | 2.61 | 0.01 | 2.56 | 0.44 | 0.85 | 0.28 |
| 46730 | 0 | 42532 | MSDLTDIQEDITRH                                        | 2.61 | 0.01 | 3.16 | 2.69 | 0.22 | 0.28 |
| 46731 | 0 | 42533 | MSDLTDIQEDITRHEQQ<br>LVVARQKLKDAEKAVE<br>MYPDDVNKNTLQ | 3.75 | 0.01 | 3.16 | 1.12 | 0.22 | 0.85 |
| 46732 | 0 | 42533 | MSDLTDIQEDITRHEQQ<br>LVVARQKLKDAEKAVE<br>MYPDDVNKNTLQ | 3.75 | 0.01 | 3.16 | 0.68 | 0.22 | 0.28 |
| 46733 | 0 | 42533 | MSDLTDIQEDITRHEQQ<br>LVVARQKLKDAEKAVE<br>MYPDDVNKNTLQ | 3.75 | 0.01 | 3.16 | 1.15 | 2.26 | 0.85 |
| 46734 | 0 | 42533 | MSDLTDIQEDITRHEQQ<br>LVVARQKLKDAEKAVE<br>MYPDDVNKNTLQ | 3.75 | 0.01 | 4.15 | 1.12 | 0.22 | 0.28 |
| 46735 | 0 | 42533 | MSDLTDIQEDITRHEQQ<br>LVVARQKLKDAEKAVE<br>MYPDDVNKNTLQ | 3.75 | 0.01 | 4.15 | 2.69 | 0.22 | 0.28 |
| 46736 | 0 | 42533 | MSDLTDIQEDITRHEQQ<br>LVVARQKLKDAEKAVE<br>MYPDDVNKNTLQ | 3.75 | 0.01 | 4.15 | 2.69 | 2.25 | 1.75 |
| 46737 | 0 | 42536 | MSDLTDIQEEITRHEQQ<br>LVVARQKLKDAERAVEV<br>DPDDVNKSTLQ | 3.75 | 0.01 | 4.08 | 2.69 | 2.25 | 1.75 |

|       |   |        |                                                       |      |      |      |      |      |      |
|-------|---|--------|-------------------------------------------------------|------|------|------|------|------|------|
| 46738 | 0 | 42536  | MSDLTDIQEEITRHEQQ<br>LVVARQKLKDAERAVEV<br>DPDDVNKSTLQ | 3.75 | 0.01 | 4.08 | 2.69 | 2.25 | 1.75 |
| 46739 | 0 | 42536  | MSDLTDIQEEITRHEQQ<br>LVVARQKLKDAERAVEV<br>DPDDVNKSTLQ | 3.75 | 0.01 | 4.08 | 2.69 | 0.22 | 0.28 |
| 46740 | 0 | 42540  | MSDNGPQSNQRSAPRI                                      | 2.75 | 0.01 | 2.91 | 0.44 | 0.85 | 0.28 |
| 46741 | 0 | 42541  | MSDNGPQSNQRSAPRI<br>T                                 | 2.79 | 0.01 | 2.45 | 0.44 | 0.85 | 1.48 |
| 46742 | 0 | 42541  | MSDNGPQSNQRSAPRI<br>T                                 | 2.79 | 0.01 | 2.45 | 1.12 | 0.22 | 2.92 |
| 46743 | 0 | 42542  | MSDNGPQSNQRSAPRI<br>TFGG                              | 2.93 | 0.01 | 2.45 | 1.20 | 0.22 | 1.48 |
| 46744 | 0 | 165639 | MSDRGIF                                               | 1.99 | 0.01 | 0.90 | 0.44 | 1.23 | 1.39 |
| 46745 | 0 | 165639 | MSDRGIF                                               | 1.99 | 0.01 | 0.90 | 0.44 | 1.23 | 1.39 |
| 46746 | 0 | 165639 | MSDRGIF                                               | 1.99 | 0.01 | 0.90 | 0.44 | 1.23 | 1.39 |
| 46747 | 0 | 165639 | MSDRGIF                                               | 1.99 | 0.01 | 0.90 | 0.44 | 1.23 | 1.39 |
| 46748 | 0 | 144725 | MSDRPTARRWGKCGPL<br>CTRENI                            | 3.00 | 0.01 | 0.78 | 0.44 | 1.13 | 1.27 |
| 46749 | 0 | 144725 | MSDRPTARRWGKCGPL<br>CTRENI                            | 3.00 | 0.01 | 0.78 | 0.44 | 1.13 | 0.28 |
| 46750 | 0 | 144725 | MSDRPTARRWGKCGPL<br>CTRENI                            | 3.00 | 0.01 | 0.78 | 0.44 | 1.13 | 0.28 |
| 46751 | 0 | 195041 | MSDTDIQDQQPDTVDA                                      | 2.76 | 0.01 | 3.51 | 0.68 | 0.22 | 1.39 |
| 46752 | 0 | 195041 | MSDTDIQDQQPDTVDA                                      | 2.76 | 0.01 | 3.51 | 0.44 | 0.85 | 1.39 |
| 46753 | 0 | 195042 | MSDTDIQDQQPDTVDA<br>PQNT                              | 2.97 | 0.01 | 3.51 | 0.68 | 0.22 | 1.39 |
| 46754 | 0 | 195042 | MSDTDIQDQQPDTVDA<br>PQNT                              | 2.97 | 0.01 | 3.51 | 0.44 | 0.85 | 1.39 |
| 46755 | 0 | 123520 | MSEKFNMG                                              | 2.22 | 0.01 | 2.28 | 2.00 | 0.22 | 0.28 |
| 46756 | 0 | 195043 | MSENEIQDQQPSDSME<br>ERGG                              | 2.95 | 0.01 | 4.03 | 0.68 | 0.22 | 1.39 |
| 46757 | 0 | 195043 | MSENEIQDQQPSDSME<br>ERGG                              | 2.95 | 0.01 | 4.03 | 0.44 | 0.85 | 1.39 |
| 46758 | 0 | 195044 | MSENEIQDQQPSEPND<br>GQRGGGGGATGS                      | 3.28 | 0.01 | 3.85 | 0.68 | 0.22 | 1.39 |
| 46759 | 0 | 195044 | MSENEIQDQQPSEPND<br>GQRGGGGGATGS                      | 3.28 | 0.01 | 3.85 | 0.44 | 0.85 | 1.39 |
| 46760 | 0 | 104132 | MSENVEQHNPINAGT                                       | 2.64 | 0.01 | 3.00 | 1.20 | 0.22 | 1.34 |
| 46761 | 0 | 104132 | MSENVEQHNPINAGT                                       | 2.64 | 0.01 | 3.00 | 1.20 | 0.22 | 0.85 |
| 46762 | 0 | 42546  | MSESHVKISRTIIRGTSPS<br>T                              | 2.95 | 0.01 | 2.74 | 1.12 | 0.22 | 0.28 |

|       |   |        |                                                 |      |      |      |      |      |      |
|-------|---|--------|-------------------------------------------------|------|------|------|------|------|------|
| 46763 | 0 | 42546  | MSESHVKISRTIIRGTSPS<br>T                        | 2.95 | 0.01 | 2.74 | 1.12 | 0.22 | 1.39 |
| 46764 | 0 | 182235 | MSFEAAHEFCKKEGS                                 | 2.68 | 0.01 | 0.78 | 0.44 | 1.13 | 0.85 |
| 46765 | 0 | 182235 | MSFEAAHEFCKKEGS                                 | 2.68 | 0.01 | 0.78 | 0.44 | 1.13 | 0.28 |
| 46766 | 0 | 182235 | MSFEAAHEFCKKEGS                                 | 2.68 | 0.01 | 0.78 | 0.44 | 1.41 | 0.28 |
| 46767 | 0 | 182235 | MSFEAAHEFCKKEGS                                 | 2.68 | 0.01 | 0.78 | 0.44 | 1.13 | 1.27 |
| 46768 | 0 | 42553  | MSFIPVAEDS                                      | 2.29 | 0.01 | 1.75 | 0.68 | 0.22 | 0.28 |
| 46769 | 0 | 42553  | MSFIPVAEDS                                      | 2.29 | 0.01 | 1.75 | 0.68 | 0.22 | 0.28 |
| 46770 | 0 | 42557  | MSFTWSWESGKYTTETF<br>ATNS                       | 3.01 | 0.01 | 3.03 | 1.12 | 0.22 | 1.34 |
| 46771 | 0 | 190501 | MSFVDHPPDWLEEVG                                 | 2.64 | 0.01 | 3.97 | 2.00 | 1.41 | 0.28 |
| 46772 | 0 | 42559  | MSFVPGQENA                                      | 2.26 | 0.01 | 3.16 | 0.68 | 0.22 | 0.28 |
| 46773 | 0 | 42559  | MSFVPGQENA                                      | 2.26 | 0.01 | 3.16 | 0.68 | 0.22 | 0.28 |
| 46774 | 0 | 151299 | MSFVPGQENAGSRS                                  | 2.59 | 0.01 | 3.35 | 1.81 | 0.22 | 0.85 |
| 46775 | 0 | 103420 | MSFVTIQPVVLAAT                                  | 2.65 | 0.01 | 2.04 | 0.44 | 0.85 | 1.28 |
| 46776 | 0 | 165121 | MSGCEVFPCDNA                                    | 2.43 | 0.01 | 3.78 | 0.44 | 1.23 | 0.85 |
| 46777 | 0 | 161433 | MSGLEVSFEELRTFGGH<br>DA                         | 2.88 | 0.01 | 2.08 | 2.25 | 0.22 | 1.57 |
| 46778 | 0 | 161433 | MSGLEVSFEELRTFGGH<br>DA                         | 2.88 | 0.01 | 2.08 | 2.49 | 0.22 | 1.57 |
| 46779 | 0 | 161433 | MSGLEVSFEELRTFGGH<br>DA                         | 2.88 | 0.01 | 2.08 | 2.43 | 0.22 | 1.57 |
| 46780 | 0 | 120805 | MSGRGKQGGKARAKA                                 | 2.72 | 0.01 | 1.60 | 0.44 | 1.13 | 0.28 |
| 46781 | 0 | 147139 | MSGRGKQGGKARAKAK<br>TRSS                        | 2.98 | 0.01 | 1.60 | 0.44 | 1.13 | 0.28 |
| 46782 | 0 | 419273 | MSHAVHF                                         | 2.02 | 0.01 | 0.90 | 0.44 | 1.93 | 1.39 |
| 46783 | 0 | 129435 | MSHQWPP                                         | 1.99 | 0.01 | 0.90 | 2.88 | 2.35 | 0.28 |
| 46784 | 0 | 134450 | MSIAKFEVNNPQVQRQ<br>AFNELIRVVHQLSPESSL<br>RKRKR | 3.61 | 0.01 | 1.75 | 1.20 | 0.22 | 1.27 |
| 46785 | 0 | 134450 | MSIAKFEVNNPQVQRQ<br>AFNELIRVVHQLSPESSL<br>RKRKR | 3.61 | 0.01 | 1.75 | 1.20 | 0.22 | 1.34 |
| 46786 | 0 | 147978 | MSINVDNQF                                       | 2.21 | 0.01 | 3.24 | 3.57 | 0.85 | 0.28 |
| 46787 | 0 | 122489 | MSIQVEHPAGGYKKLFE<br>TVEELSSPLTAHV              | 3.31 | 0.01 | 0.78 | 2.04 | 0.22 | 0.28 |
| 46788 | 0 | 42576  | MSIRRSMA                                        | 2.16 | 0.01 | 2.96 | 0.68 | 0.22 | 0.28 |
| 46789 | 0 | 42576  | MSIRRSMA                                        | 2.16 | 0.01 | 2.96 | 0.68 | 0.22 | 0.28 |
| 46790 | 0 | 42580  | MSKAKQYNICCKFKE                                 | 2.65 | 0.01 | 2.93 | 0.44 | 0.85 | 0.28 |
| 46791 | 0 | 153426 | MSKHKNQRTARTLEKT<br>WD                          | 2.82 | 0.01 | 3.00 | 0.68 | 0.22 | 0.28 |
| 46792 | 0 | 42583  | MSKKSGKWWESDDKF<br>AKAVY                        | 2.94 | 0.01 | 2.75 | 1.12 | 0.22 | 0.85 |
| 46793 | 0 | 119278 | MSKTEWNASQLPRLGG<br>KEDR                        | 2.90 | 0.01 | 0.90 | 2.04 | 2.60 | 1.75 |

|       |   |        |                              |      |      |      |      |      |      |
|-------|---|--------|------------------------------|------|------|------|------|------|------|
| 46794 | 0 | 119279 | MSKTEWNASQSRFGW<br>FENKE     | 2.95 | 0.01 | 0.90 | 2.04 | 2.60 | 1.75 |
| 46795 | 0 | 119279 | MSKTEWNASQSRFGW<br>FENKE     | 2.95 | 0.01 | 0.90 | 2.04 | 2.25 | 1.75 |
| 46796 | 0 | 122150 | MSKTLHAQLGFKKT               | 2.60 | 0.01 | 2.72 | 1.20 | 0.22 | 0.28 |
| 46797 | 0 | 122150 | MSKTLHAQLGFKKT               | 2.60 | 0.01 | 2.72 | 1.20 | 0.22 | 2.02 |
| 46798 | 0 | 122150 | MSKTLHAQLGFKKT               | 2.60 | 0.01 | 2.72 | 1.20 | 0.22 | 2.02 |
| 46799 | 0 | 42587  | MSKVGKDSAKPLDKFG<br>NIYD     | 2.93 | 0.01 | 1.66 | 0.68 | 0.22 | 0.28 |
| 46800 | 0 | 42587  | MSKVGKDSAKPLDKFG<br>NIYD     | 2.93 | 0.01 | 1.66 | 0.68 | 0.22 | 0.28 |
| 46801 | 0 | 42592  | MSLLDGRGPVRFVLA              | 2.68 | 0.01 | 3.04 | 0.44 | 0.22 | 0.28 |
| 46802 | 0 | 42592  | MSLLDGRGPVRFVLA              | 2.68 | 0.01 | 3.04 | 0.44 | 1.59 | 0.28 |
| 46803 | 0 | 140488 | MSLLGHK                      | 2.01 | 0.01 | 0.90 | 0.68 | 0.22 | 0.28 |
| 46804 | 0 | 140488 | MSLLGHK                      | 2.01 | 0.01 | 0.90 | 0.68 | 0.22 | 1.34 |
| 46805 | 0 | 118528 | MSLLNKPKSEMTP                | 2.57 | 0.01 | 0.78 | 0.44 | 1.13 | 0.28 |
| 46806 | 0 | 42594  | MSLLTEVETLTRNGWEC<br>KCRDSSD | 3.11 | 0.01 | 4.93 | 0.68 | 2.25 | 1.75 |
| 46807 | 0 | 42595  | MSLLTEVETLTRNGWGC<br>RCDSSD  | 3.13 | 0.01 | 4.45 | 0.68 | 2.25 | 1.75 |
| 46808 | 0 | 42595  | MSLLTEVETLTRNGWGC<br>RCDSSD  | 3.13 | 0.01 | 3.89 | 3.50 | 0.22 | 0.28 |
| 46809 | 0 | 42595  | MSLLTEVETLTRNGWGC<br>RCDSSD  | 3.13 | 0.01 | 3.89 | 3.50 | 0.22 | 0.28 |
| 46810 | 0 | 42595  | MSLLTEVETLTRNGWGC<br>RCDSSD  | 3.13 | 0.01 | 3.89 | 3.50 | 0.22 | 0.28 |
| 46811 | 0 | 42595  | MSLLTEVETLTRNGWGC<br>RCDSSD  | 3.13 | 0.01 | 3.89 | 3.50 | 0.22 | 0.28 |
| 46812 | 0 | 42595  | MSLLTEVETLTRNGWGC<br>RCDSSD  | 3.13 | 0.01 | 3.89 | 3.50 | 2.25 | 1.75 |
| 46813 | 0 | 42595  | MSLLTEVETLTRNGWGC<br>RCDSSD  | 3.13 | 0.01 | 3.89 | 3.50 | 2.25 | 1.75 |
| 46814 | 0 | 42595  | MSLLTEVETLTRNGWGC<br>RCDSSD  | 3.13 | 0.01 | 3.89 | 3.50 | 0.22 | 0.28 |
| 46815 | 0 | 42595  | MSLLTEVETLTRNGWGC<br>RCDSSD  | 3.13 | 0.01 | 3.89 | 3.50 | 2.25 | 1.75 |
| 46816 | 0 | 42595  | MSLLTEVETLTRNGWGC<br>RCDSSD  | 3.13 | 0.01 | 4.93 | 0.68 | 0.22 | 0.28 |
| 46817 | 0 | 153427 | MSLLTEVETPIRNEWEC<br>RCNGSSD | 3.10 | 0.01 | 4.63 | 0.68 | 0.22 | 0.28 |
| 46818 | 0 | 153427 | MSLLTEVETPIRNEWEC<br>RCNGSSD | 3.10 | 0.01 | 4.63 | 0.68 | 0.22 | 0.28 |
| 46819 | 0 | 153428 | MSLLTEVETPIRNEWGC<br>KCNDSSD | 3.08 | 0.01 | 4.23 | 0.68 | 0.22 | 0.28 |
| 46820 | 0 | 153428 | MSLLTEVETPIRNEWGC<br>KCNDSSD | 3.08 | 0.01 | 4.23 | 0.68 | 0.22 | 0.28 |

|       |   |       |                              |      |      |      |      |      |      |
|-------|---|-------|------------------------------|------|------|------|------|------|------|
| 46821 | 0 | 42596 | MSLLTEVETPIRNEWGC<br>RCNDSSD | 3.10 | 0.01 | 3.67 | 0.68 | 2.25 | 1.75 |
| 46822 | 0 | 42596 | MSLLTEVETPIRNEWGC<br>RCNDSSD | 3.10 | 0.01 | 3.85 | 0.68 | 0.22 | 2.02 |
| 46823 | 0 | 42596 | MSLLTEVETPIRNEWGC<br>RCNDSSD | 3.10 | 0.01 | 3.85 | 0.68 | 0.22 | 1.34 |
| 46824 | 0 | 42596 | MSLLTEVETPIRNEWGC<br>RCNDSSD | 3.10 | 0.01 | 3.67 | 0.68 | 0.22 | 0.28 |
| 46825 | 0 | 42596 | MSLLTEVETPIRNEWGC<br>RCNDSSD | 3.10 | 0.01 | 3.67 | 0.68 | 0.22 | 0.28 |
| 46826 | 0 | 42596 | MSLLTEVETPIRNEWGC<br>RCNDSSD | 3.10 | 0.01 | 3.67 | 2.61 | 0.22 | 0.28 |
| 46827 | 0 | 42596 | MSLLTEVETPIRNEWGC<br>RCNDSSD | 3.10 | 0.01 | 3.67 | 4.45 | 0.22 | 0.28 |
| 46828 | 0 | 42596 | MSLLTEVETPIRNEWGC<br>RCNDSSD | 3.10 | 0.01 | 3.40 | 0.68 | 0.22 | 0.28 |
| 46829 | 0 | 42596 | MSLLTEVETPIRNEWGC<br>RCNDSSD | 3.10 | 0.01 | 3.40 | 0.68 | 2.25 | 1.75 |
| 46830 | 0 | 42596 | MSLLTEVETPIRNEWGC<br>RCNDSSD | 3.10 | 0.01 | 3.40 | 0.68 | 0.22 | 0.28 |
| 46831 | 0 | 42596 | MSLLTEVETPIRNEWGC<br>RCNDSSD | 3.10 | 0.01 | 2.36 | 3.50 | 0.22 | 0.28 |
| 46832 | 0 | 42596 | MSLLTEVETPIRNEWGC<br>RCNDSSD | 3.10 | 0.01 | 2.36 | 3.50 | 0.22 | 0.28 |
| 46833 | 0 | 42596 | MSLLTEVETPIRNEWGC<br>RCNDSSD | 3.10 | 0.01 | 2.36 | 3.50 | 0.22 | 0.28 |
| 46834 | 0 | 42596 | MSLLTEVETPIRNEWGC<br>RCNDSSD | 3.10 | 0.01 | 2.36 | 3.50 | 0.22 | 0.28 |
| 46835 | 0 | 42596 | MSLLTEVETPIRNEWGC<br>RCNDSSD | 3.10 | 0.01 | 2.36 | 3.50 | 2.25 | 1.75 |
| 46836 | 0 | 42596 | MSLLTEVETPIRNEWGC<br>RCNDSSD | 3.10 | 0.01 | 2.36 | 3.50 | 2.25 | 1.75 |
| 46837 | 0 | 42596 | MSLLTEVETPIRNEWGC<br>RCNDSSD | 3.10 | 0.01 | 2.36 | 0.68 | 0.22 | 1.75 |
| 46838 | 0 | 42596 | MSLLTEVETPIRNEWGC<br>RCNDSSD | 3.10 | 0.01 | 2.36 | 0.68 | 0.22 | 2.02 |
| 46839 | 0 | 42596 | MSLLTEVETPIRNEWGC<br>RCNDSSD | 3.10 | 0.01 | 2.36 | 0.68 | 0.22 | 1.34 |
| 46840 | 0 | 42596 | MSLLTEVETPIRNEWGC<br>RCNDSSD | 3.10 | 0.01 | 2.36 | 0.68 | 0.22 | 1.34 |
| 46841 | 0 | 42596 | MSLLTEVETPIRNEWGC<br>RCNDSSD | 3.10 | 0.01 | 2.36 | 0.68 | 0.22 | 1.34 |
| 46842 | 0 | 42596 | MSLLTEVETPIRNEWGC<br>RCNDSSD | 3.10 | 0.01 | 2.36 | 0.68 | 0.22 | 1.34 |
| 46843 | 0 | 42596 | MSLLTEVETPIRNEWGC<br>RCNDSSD | 3.10 | 0.01 | 2.36 | 0.68 | 0.22 | 1.34 |



|       |   |       |                              |      |      |      |      |      |      |
|-------|---|-------|------------------------------|------|------|------|------|------|------|
| 46844 | 0 | 42596 | MSLLTEVETPIRNEWGC<br>RCNDSSD | 3.10 | 0.01 | 2.36 | 0.68 | 0.22 | 1.75 |
| 46845 | 0 | 42596 | MSLLTEVETPIRNEWGC<br>RCNDSSD | 3.10 | 0.01 | 3.67 | 0.68 | 0.22 | 0.28 |
| 46846 | 0 | 42596 | MSLLTEVETPIRNEWGC<br>RCNDSSD | 3.10 | 0.01 | 3.67 | 0.68 | 0.22 | 0.28 |
| 46847 | 0 | 42596 | MSLLTEVETPIRNEWGC<br>RCNDSSD | 3.10 | 0.01 | 3.67 | 0.68 | 2.25 | 1.75 |
| 46848 | 0 | 42596 | MSLLTEVETPIRNEWGC<br>RCNDSSD | 3.10 | 0.01 | 3.67 | 4.45 | 2.25 | 1.75 |
| 46849 | 0 | 42596 | MSLLTEVETPIRNEWGC<br>RCNDSSD | 3.10 | 0.01 | 3.67 | 2.61 | 0.22 | 1.75 |
| 46850 | 0 | 42596 | MSLLTEVETPIRNEWGC<br>RCNDSSD | 3.10 | 0.01 | 3.67 | 0.68 | 0.22 | 0.28 |
| 46851 | 0 | 42596 | MSLLTEVETPIRNEWGC<br>RCNDSSD | 3.10 | 0.01 | 2.36 | 0.68 | 0.22 | 0.28 |
| 46852 | 0 | 42596 | MSLLTEVETPIRNEWGC<br>RCNDSSD | 3.10 | 0.01 | 2.36 | 0.68 | 0.22 | 0.28 |
| 46853 | 0 | 42596 | MSLLTEVETPIRNEWGC<br>RCNDSSD | 3.10 | 0.01 | 2.36 | 0.68 | 0.22 | 1.75 |
| 46854 | 0 | 42596 | MSLLTEVETPIRNEWGC<br>RCNDSSD | 3.10 | 0.01 | 2.36 | 0.68 | 0.22 | 0.28 |
| 46855 | 0 | 42596 | MSLLTEVETPIRNEWGC<br>RCNDSSD | 3.10 | 0.01 | 2.36 | 0.68 | 0.22 | 0.28 |
| 46856 | 0 | 42596 | MSLLTEVETPIRNEWGC<br>RCNDSSD | 3.10 | 0.01 | 2.36 | 0.68 | 0.22 | 0.28 |
| 46857 | 0 | 42596 | MSLLTEVETPIRNEWGC<br>RCNDSSD | 3.10 | 0.01 | 2.36 | 1.12 | 0.22 | 0.85 |
| 46858 | 0 | 42596 | MSLLTEVETPIRNEWGC<br>RCNDSSD | 3.10 | 0.01 | 2.36 | 0.68 | 0.22 | 0.28 |
| 46859 | 0 | 42596 | MSLLTEVETPIRNEWGC<br>RCNDSSD | 3.10 | 0.01 | 2.36 | 0.68 | 0.22 | 0.28 |
| 46860 | 0 | 42596 | MSLLTEVETPIRNEWGC<br>RCNDSSD | 3.10 | 0.01 | 2.36 | 0.68 | 0.22 | 0.28 |
| 46861 | 0 | 42596 | MSLLTEVETPIRNEWGC<br>RCNDSSD | 3.10 | 0.01 | 2.36 | 0.68 | 0.22 | 1.75 |
| 46862 | 0 | 42596 | MSLLTEVETPIRNEWGC<br>RCNDSSD | 3.10 | 0.01 | 3.40 | 0.68 | 0.22 | 0.28 |
| 46863 | 0 | 42596 | MSLLTEVETPIRNEWGC<br>RCNDSSD | 3.10 | 0.01 | 3.40 | 3.15 | 0.22 | 0.28 |
| 46864 | 0 | 42597 | MSLLTEVETPIRNEWGC<br>RCNGSSD | 3.10 | 0.01 | 2.97 | 0.68 | 0.22 | 0.28 |
| 46865 | 0 | 42597 | MSLLTEVETPIRNEWGC<br>RCNGSSD | 3.10 | 0.01 | 2.97 | 0.68 | 0.22 | 0.28 |
| 46866 | 0 | 42597 | MSLLTEVETPIRNEWGC<br>RCNGSSD | 3.10 | 0.01 | 2.97 | 3.50 | 0.22 | 0.28 |

|       |   |       |                              |      |      |      |      |      |      |
|-------|---|-------|------------------------------|------|------|------|------|------|------|
| 46867 | 0 | 42597 | MSLLTEVETPIRNEWGC<br>RCNGSSD | 3.10 | 0.01 | 2.97 | 0.68 | 0.22 | 0.28 |
| 46868 | 0 | 42597 | MSLLTEVETPIRNEWGC<br>RCNGSSD | 3.10 | 0.01 | 2.97 | 0.68 | 0.22 | 0.28 |
| 46869 | 0 | 42597 | MSLLTEVETPIRNEWGC<br>RCNGSSD | 3.10 | 0.01 | 2.97 | 0.68 | 0.22 | 0.28 |
| 46870 | 0 | 97504 | MSLLTEVETPTKNEWEC<br>RCNDSSD | 3.11 | 0.01 | 4.08 | 3.50 | 0.22 | 0.28 |
| 46871 | 0 | 97504 | MSLLTEVETPTKNEWEC<br>RCNDSSD | 3.11 | 0.01 | 4.08 | 3.50 | 0.22 | 0.28 |
| 46872 | 0 | 97504 | MSLLTEVETPTKNEWEC<br>RCNDSSD | 3.11 | 0.01 | 4.08 | 3.50 | 0.22 | 0.28 |
| 46873 | 0 | 97504 | MSLLTEVETPTKNEWEC<br>RCNDSSD | 3.11 | 0.01 | 4.08 | 3.50 | 0.22 | 0.28 |
| 46874 | 0 | 97504 | MSLLTEVETPTKNEWEC<br>RCNDSSD | 3.11 | 0.01 | 4.08 | 3.50 | 2.25 | 1.75 |
| 46875 | 0 | 97504 | MSLLTEVETPTKNEWEC<br>RCNDSSD | 3.11 | 0.01 | 4.08 | 3.50 | 2.25 | 1.75 |
| 46876 | 0 | 97504 | MSLLTEVETPTKNEWEC<br>RCNDSSD | 3.11 | 0.01 | 4.08 | 3.50 | 0.22 | 0.28 |
| 46877 | 0 | 97505 | MSLLTEVETPTRNEWEC<br>RCDSSD  | 3.12 | 0.01 | 4.93 | 3.50 | 0.22 | 0.28 |
| 46878 | 0 | 97505 | MSLLTEVETPTRNEWEC<br>RCDSSD  | 3.12 | 0.01 | 2.77 | 0.68 | 0.22 | 0.28 |
| 46879 | 0 | 97505 | MSLLTEVETPTRNEWEC<br>RCDSSD  | 3.12 | 0.01 | 2.77 | 0.68 | 0.22 | 1.75 |
| 46880 | 0 | 97505 | MSLLTEVETPTRNEWEC<br>RCDSSD  | 3.12 | 0.01 | 2.77 | 0.68 | 0.22 | 1.75 |
| 46881 | 0 | 97505 | MSLLTEVETPTRNEWEC<br>RCDSSD  | 3.12 | 0.01 | 2.77 | 0.68 | 0.22 | 1.75 |
| 46882 | 0 | 97505 | MSLLTEVETPTRNEWEC<br>RCDSSD  | 3.12 | 0.01 | 2.77 | 0.68 | 0.22 | 1.75 |
| 46883 | 0 | 97505 | MSLLTEVETPTRNEWEC<br>RCDSSD  | 3.12 | 0.01 | 2.77 | 0.68 | 0.22 | 0.28 |
| 46884 | 0 | 97505 | MSLLTEVETPTRNEWEC<br>RCDSSD  | 3.12 | 0.01 | 2.77 | 0.68 | 0.22 | 1.75 |
| 46885 | 0 | 97505 | MSLLTEVETPTRNEWEC<br>RCDSSD  | 3.12 | 0.01 | 2.77 | 0.68 | 0.22 | 1.75 |
| 46886 | 0 | 97505 | MSLLTEVETPTRNEWEC<br>RCDSSD  | 3.12 | 0.01 | 2.77 | 0.68 | 0.22 | 1.75 |
| 46887 | 0 | 97505 | MSLLTEVETPTRNEWEC<br>RCDSSD  | 3.12 | 0.01 | 2.94 | 0.68 | 0.22 | 0.28 |
| 46888 | 0 | 97505 | MSLLTEVETPTRNEWEC<br>RCDSSD  | 3.12 | 0.01 | 2.94 | 3.15 | 0.22 | 0.28 |
| 46889 | 0 | 97505 | MSLLTEVETPTRNEWEC<br>RCDSSD  | 3.12 | 0.01 | 2.77 | 0.68 | 0.22 | 0.28 |

|       |   |        |                              |      |      |      |      |      |      |
|-------|---|--------|------------------------------|------|------|------|------|------|------|
| 46890 | 0 | 97505  | MSLLTEVETPTRNEWEC<br>RCSDSSD | 3.12 | 0.01 | 2.77 | 0.68 | 0.22 | 0.28 |
| 46891 | 0 | 97505  | MSLLTEVETPTRNEWEC<br>RCSDSSD | 3.12 | 0.01 | 2.77 | 0.68 | 0.22 | 1.75 |
| 46892 | 0 | 97505  | MSLLTEVETPTRNEWEC<br>RCSDSSD | 3.12 | 0.01 | 2.77 | 0.68 | 0.22 | 0.28 |
| 46893 | 0 | 125502 | MSLLTEVETPTRNEWES<br>RSSDSSD | 3.14 | 0.01 | 0.90 | 1.15 | 0.22 | 0.28 |
| 46894 | 0 | 125502 | MSLLTEVETPTRNEWES<br>RSSDSSD | 3.14 | 0.01 | 0.90 | 4.33 | 0.22 | 0.28 |
| 46895 | 0 | 125502 | MSLLTEVETPTRNEWES<br>RSSDSSD | 3.14 | 0.01 | 0.90 | 4.33 | 0.22 | 2.12 |
| 46896 | 0 | 125502 | MSLLTEVETPTRNEWES<br>RSSDSSD | 3.14 | 0.01 | 0.90 | 4.33 | 0.22 | 2.12 |
| 46897 | 0 | 125502 | MSLLTEVETPTRNEWES<br>RSSDSSD | 3.14 | 0.01 | 0.90 | 4.33 | 0.22 | 1.34 |
| 46898 | 0 | 153429 | MSLLTEVETPTRNGWEC<br>KCSDSSD | 3.10 | 0.01 | 3.93 | 0.68 | 0.22 | 0.28 |
| 46899 | 0 | 153429 | MSLLTEVETPTRNGWEC<br>KCSDSSD | 3.10 | 0.01 | 3.93 | 0.68 | 0.22 | 0.28 |
| 46900 | 0 | 153429 | MSLLTEVETPTRNGWEC<br>KCSDSSD | 3.10 | 0.01 | 3.93 | 0.68 | 0.22 | 0.28 |
| 46901 | 0 | 153429 | MSLLTEVETPTRNGWEC<br>KCSDSSD | 3.10 | 0.01 | 3.93 | 0.68 | 0.22 | 0.28 |
| 46902 | 0 | 153429 | MSLLTEVETPTRNGWEC<br>KCSDSSD | 3.10 | 0.01 | 3.93 | 0.68 | 0.22 | 1.75 |
| 46903 | 0 | 153429 | MSLLTEVETPTRNGWEC<br>KCSDSSD | 3.10 | 0.01 | 3.93 | 0.68 | 0.22 | 1.75 |
| 46904 | 0 | 153429 | MSLLTEVETPTRNGWEC<br>KCSDSSD | 3.10 | 0.01 | 3.93 | 3.15 | 0.22 | 0.28 |
| 46905 | 0 | 153429 | MSLLTEVETPTRNGWEC<br>KCSDSSD | 3.10 | 0.01 | 3.93 | 3.15 | 0.22 | 0.28 |
| 46906 | 0 | 153429 | MSLLTEVETPTRNGWEC<br>KCSDSSD | 3.10 | 0.01 | 3.93 | 3.15 | 0.22 | 0.28 |
| 46907 | 0 | 153429 | MSLLTEVETPTRNGWEC<br>KCSDSSD | 3.10 | 0.01 | 3.93 | 3.15 | 0.22 | 0.28 |
| 46908 | 0 | 190295 | MSLLTEVETPTRNGWG<br>CRCSDSSD | 3.11 | 0.01 | 4.63 | 0.68 | 0.22 | 0.28 |
| 46909 | 0 | 190295 | MSLLTEVETPTRNGWG<br>CRCSDSSD | 3.11 | 0.01 | 4.63 | 3.15 | 0.22 | 0.28 |
| 46910 | 0 | 136516 | MSLLTEVETPTRSEWEC<br>RCSDSSD | 3.14 | 0.01 | 4.93 | 0.68 | 0.22 | 0.28 |
| 46911 | 0 | 136516 | MSLLTEVETPTRSEWEC<br>RCSDSSD | 3.14 | 0.01 | 2.87 | 0.68 | 0.22 | 1.75 |
| 46912 | 0 | 136516 | MSLLTEVETPTRSEWEC<br>RCSDSSD | 3.14 | 0.01 | 2.87 | 0.68 | 0.22 | 0.28 |

|       |   |        |                                                             |      |      |      |      |      |      |
|-------|---|--------|-------------------------------------------------------------|------|------|------|------|------|------|
| 46913 | 0 | 136516 | MSLLTEVETPTRSEWEC<br>RCSDSSD                                | 3.14 | 0.01 | 2.87 | 0.68 | 0.22 | 0.28 |
| 46914 | 0 | 136516 | MSLLTEVETPTRSEWEC<br>RCSDSSD                                | 3.14 | 0.01 | 2.87 | 0.68 | 0.22 | 0.28 |
| 46915 | 0 | 136516 | MSLLTEVETPTRSEWEC<br>RCSDSSD                                | 3.14 | 0.01 | 2.87 | 0.68 | 0.22 | 0.28 |
| 46916 | 0 | 136516 | MSLLTEVETPTRSEWEC<br>RCSDSSD                                | 3.14 | 0.01 | 2.87 | 0.68 | 0.22 | 0.28 |
| 46917 | 0 | 420648 | MSLLTEVETPTRTGWEC<br>NCSGSSE                                | 3.12 | 0.01 | 4.93 | 0.68 | 0.22 | 0.28 |
| 46918 | 0 | 97507  | MSLLTEVETYVLSIIPSGP<br>LKAIEAQKLEDVFAGKNT<br>DLEALMEWLKTRPI | 3.87 | 0.01 | 3.09 | 0.44 | 0.85 | 0.28 |
| 46919 | 0 | 97507  | MSLLTEVETYVLSIIPSGP<br>LKAIEAQKLEDVFAGKNT<br>DLEALMEWLKTRPI | 3.87 | 0.01 | 3.09 | 0.44 | 0.85 | 0.28 |
| 46920 | 0 | 97507  | MSLLTEVETYVLSIIPSGP<br>LKAIEAQKLEDVFAGKNT<br>DLEALMEWLKTRPI | 3.87 | 0.01 | 3.09 | 0.44 | 1.74 | 0.28 |
| 46921 | 0 | 149384 | MSLPGRWKPK                                                  | 2.31 | 0.01 | 4.63 | 0.68 | 0.22 | 1.34 |
| 46922 | 0 | 149384 | MSLPGRWKPK                                                  | 2.31 | 0.01 | 4.63 | 0.68 | 0.22 | 2.49 |
| 46923 | 0 | 42599  | MSLQFIGLQRRDVVALV<br>NFL                                    | 2.94 | 0.01 | 2.76 | 0.44 | 1.59 | 0.28 |
| 46924 | 0 | 167338 | MSLQQEH                                                     | 2.01 | 0.01 | 0.90 | 1.15 | 0.22 | 1.39 |
| 46925 | 0 | 129439 | MSLRGKAVVLMGKNT                                             | 2.68 | 0.01 | 0.78 | 0.44 | 1.13 | 0.85 |
| 46926 | 0 | 42603  | MSLSLLDLYLGRGYN                                             | 2.71 | 0.01 | 2.72 | 0.44 | 0.85 | 0.28 |
| 46927 | 0 | 42614  | MSNFKVRDPVIQERLDH<br>DYA                                    | 2.88 | 0.01 | 3.36 | 0.44 | 2.82 | 0.28 |
| 46928 | 0 | 147140 | MSNIPQEQW                                                   | 2.21 | 0.01 | 3.45 | 0.44 | 1.23 | 0.28 |
| 46929 | 0 | 115154 | MSNKFLGTWKLVSSENF<br>DDYMKALGV                              | 3.19 | 0.01 | 0.78 | 0.44 | 1.41 | 0.28 |
| 46930 | 0 | 224888 | MSNSRFPVPIDSLHTSPT<br>E                                     | 2.88 | 0.01 | 4.03 | 1.12 | 0.22 | 2.66 |
| 46931 | 0 | 42620  | MSPILDFPSRKTMTKT                                            | 2.69 | 0.01 | 0.90 | 2.02 | 0.22 | 0.28 |
| 46932 | 0 | 42623  | MSPRATI                                                     | 1.99 | 0.01 | 0.90 | 1.15 | 0.22 | 1.39 |
| 46933 | 0 | 42623  | MSPRATI                                                     | 1.99 | 0.01 | 0.90 | 1.12 | 0.22 | 1.39 |
| 46934 | 0 | 42623  | MSPRATI                                                     | 1.99 | 0.01 | 0.90 | 0.44 | 0.85 | 0.28 |
| 46935 | 0 | 111572 | MSPRFPQ                                                     | 2.02 | 0.01 | 0.90 | 0.44 | 0.85 | 1.39 |
| 46936 | 0 | 232958 | MSPTYLL                                                     | 1.99 | 0.01 | 0.90 | 2.49 | 0.85 | 1.39 |
| 46937 | 0 | 42633  | MSPVNSFEIEVTCS                                              | 2.66 | 0.01 | 3.53 | 0.68 | 0.22 | 0.28 |
| 46938 | 0 | 42633  | MSPVNSFEIEVTCS                                              | 2.66 | 0.01 | 2.04 | 0.44 | 1.13 | 0.28 |
| 46939 | 0 | 42633  | MSPVNSFEIEVTCS                                              | 2.66 | 0.01 | 2.04 | 0.44 | 0.22 | 0.28 |
| 46940 | 0 | 140489 | MSQDGHT                                                     | 1.99 | 0.01 | 0.90 | 0.68 | 0.22 | 0.28 |

|       |   |        |                                                          |      |      |      |      |      |      |
|-------|---|--------|----------------------------------------------------------|------|------|------|------|------|------|
| 46941 | 0 | 140489 | MSQDGHT                                                  | 1.99 | 0.01 | 0.90 | 0.68 | 0.22 | 1.34 |
| 46942 | 0 | 42635  | MSQEKISEIHKDISALKTS<br>CEKLNSQLDELITQ                    | 3.47 | 0.01 | 2.22 | 0.44 | 1.74 | 0.28 |
| 46943 | 0 | 42635  | MSQEKISEIHKDISALKTS<br>CEKLNSQLDELITQ                    | 3.47 | 0.01 | 2.22 | 0.44 | 1.74 | 0.28 |
| 46944 | 0 | 42646  | MSRIAAGDLESSVDDPR<br>SEE                                 | 2.93 | 0.01 | 2.82 | 0.44 | 0.85 | 0.28 |
| 46945 | 0 | 42646  | MSRIAAGDLESSVDDPR<br>SEE                                 | 2.93 | 0.01 | 2.82 | 0.44 | 1.41 | 0.28 |
| 46946 | 0 | 141961 | MSRIFRGDNALNMGRP<br>KFLSDQIFNKV                          | 3.24 | 0.01 | 3.13 | 2.13 | 0.22 | 0.28 |
| 46947 | 0 | 42652  | MSRLWLMKAHGISE                                           | 2.66 | 0.01 | 0.90 | 0.44 | 1.59 | 0.28 |
| 46948 | 0 | 135484 | MSRPLIHFGN                                               | 2.26 | 0.01 | 0.78 | 2.19 | 0.22 | 0.85 |
| 46949 | 0 | 135484 | MSRPLIHFGN                                               | 2.26 | 0.01 | 0.78 | 2.19 | 0.22 | 0.85 |
| 46950 | 0 | 135484 | MSRPLIHFGN                                               | 2.26 | 0.01 | 0.78 | 2.19 | 0.22 | 1.34 |
| 46951 | 0 | 42653  | MSRPMMHFGNDWED<br>RYYRENMNRYP                            | 3.18 | 0.01 | 2.98 | 2.19 | 0.22 | 2.12 |
| 46952 | 0 | 42655  | MSRSER                                                   | 1.91 | 0.01 | 2.96 | 3.67 | 0.85 | 0.28 |
| 46953 | 0 | 244254 | MSRSESRKNRGGREEILE                                       | 2.87 | 0.01 | 2.96 | 0.44 | 0.85 | 1.66 |
| 46954 | 0 | 42656  | MSRTFLMKAHGIESW                                          | 2.63 | 0.01 | 0.90 | 0.44 | 1.59 | 0.28 |
| 46955 | 0 | 42657  | MSRTKETARAKRTITSKK<br>SK                                 | 3.00 | 0.01 | 2.78 | 2.49 | 0.85 | 0.28 |
| 46956 | 0 | 42658  | MSRTKETARAKRTITSKK<br>SKKAPSGASGVKRSHRR<br>WRPG          | 3.63 | 0.01 | 2.78 | 2.49 | 0.85 | 0.28 |
| 46957 | 0 | 42659  | MSRTWLMKAHGIESW                                          | 2.65 | 0.01 | 0.90 | 0.44 | 1.59 | 0.28 |
| 46958 | 0 | 227807 | MSSDSAVALSAAMTS<br>PQKS                                  | 2.97 | 0.01 | 2.78 | 0.68 | 0.22 | 0.28 |
| 46959 | 0 | 78209  | MSSEEFQHSMNQYIRA<br>MHEQYRGSQDDDAND<br>ATDGNDISLELVGDFDS | 3.82 | 0.01 | 4.45 | 1.15 | 0.22 | 2.02 |
| 46960 | 0 | 97509  | MSSEGRY                                                  | 2.01 | 0.01 | 3.89 | 3.55 | 0.22 | 0.85 |
| 46961 | 0 | 42667  | MSSFLGKWKLSESHNFD<br>AVM                                 | 2.93 | 0.01 | 2.93 | 1.81 | 0.22 | 0.28 |
| 46962 | 0 | 42667  | MSSFLGKWKLSESHNFD<br>AVM                                 | 2.93 | 0.01 | 2.93 | 2.69 | 0.22 | 0.28 |
| 46963 | 0 | 42667  | MSSFLGKWKLSESHNFD<br>AVM                                 | 2.93 | 0.01 | 2.93 | 0.68 | 0.22 | 0.28 |
| 46964 | 0 | 42667  | MSSFLGKWKLSESHNFD<br>AVM                                 | 2.93 | 0.01 | 2.93 | 2.69 | 0.22 | 0.28 |
| 46965 | 0 | 42669  | MSSGNL                                                   | 1.89 | 0.01 | 2.40 | 0.44 | 0.85 | 0.28 |
| 46966 | 0 | 193022 | MSSILPFTPPVVKRLL                                         | 2.71 | 4.33 | 0.78 | 1.15 | 1.41 | 0.28 |
| 46967 | 0 | 193022 | MSSILPFTPPVVKRLL                                         | 2.71 | 4.33 | 0.78 | 1.15 | 1.41 | 0.28 |
| 46968 | 0 | 111573 | MSSQFYQ                                                  | 2.03 | 0.01 | 0.90 | 0.44 | 0.85 | 1.39 |

|       |   |        |                    |      |      |      |      |      |      |
|-------|---|--------|--------------------|------|------|------|------|------|------|
| 46969 | 0 | 113095 | MSSSPVKRQRMESAL    | 2.68 | 0.01 | 0.78 | 1.20 | 0.22 | 0.85 |
| 46970 | 0 | 113095 | MSSSPVKRQRMESAL    | 2.68 | 0.01 | 0.78 | 0.44 | 1.13 | 0.85 |
|       |   |        | MSSVLKTFERFTIQQELQ |      |      |      |      |      |      |
| 46971 | 0 | 78210  | EQSDDTPVPLETIKPTIR | 3.80 | 0.01 | 4.45 | 1.15 | 0.22 | 2.02 |
|       |   |        | VFVINNNDPVV        |      |      |      |      |      |      |
| 46972 | 0 | 42674  | MSTIPLPZRLTKRNTNRR | 2.97 | 0.01 | 2.68 | 0.44 | 0.85 | 0.85 |
|       |   |        | PZ                 |      |      |      |      |      |      |
| 46973 | 0 | 42674  | MSTIPLPZRLTKRNTNRR | 2.97 | 0.01 | 2.68 | 2.74 | 0.22 | 0.85 |
|       |   |        | PZ                 |      |      |      |      |      |      |
| 46974 | 0 | 42676  | MSTLNTHGAF         | 2.29 | 0.01 | 3.21 | 1.12 | 0.22 | 0.28 |
| 46975 | 0 | 42676  | MSTLNTHGAF         | 2.29 | 0.01 | 3.21 | 1.12 | 0.22 | 0.28 |
| 46976 | 0 | 42676  | MSTLNTHGAF         | 2.29 | 0.01 | 3.21 | 1.12 | 0.22 | 0.28 |
| 46977 | 0 | 42676  | MSTLNTHGAF         | 2.29 | 0.01 | 3.21 | 1.12 | 0.22 | 1.34 |
| 46978 | 0 | 42676  | MSTLNTHGAF         | 2.29 | 0.01 | 3.21 | 1.12 | 0.22 | 0.28 |
| 46979 | 0 | 42676  | MSTLNTHGAF         | 2.29 | 0.01 | 3.21 | 0.68 | 0.22 | 0.28 |
| 46980 | 0 | 42676  | MSTLNTHGAF         | 2.29 | 0.01 | 3.21 | 1.12 | 0.22 | 0.28 |
| 46981 | 0 | 42676  | MSTLNTHGAF         | 2.29 | 0.01 | 3.21 | 1.12 | 0.22 | 0.28 |
|       |   |        | MSTLPKPQRQTKRNTPR  |      |      |      |      |      |      |
| 46982 | 0 | 42677  | RPQNVKFPGGGQIVGG   | 3.74 | 0.01 | 4.93 | 1.15 | 0.22 | 0.28 |
|       |   |        | VYVLPRRGPR         |      |      |      |      |      |      |
| 46983 | 0 | 42678  | MSTLQELQENITA      | 2.56 | 0.01 | 3.00 | 0.44 | 0.85 | 0.28 |
| 46984 | 0 | 42678  | MSTLQELQENITA      | 2.56 | 0.01 | 3.00 | 1.15 | 2.39 | 0.28 |
| 46985 | 0 | 42683  | MSTNPKPQKKNKRNT    | 2.71 | 0.01 | 1.72 | 0.44 | 1.59 | 0.28 |
| 46986 | 0 | 42684  | MSTNPKPQKKNKRNTN   | 2.88 | 0.01 | 3.18 | 0.44 | 1.59 | 0.28 |
|       |   |        | RR                 |      |      |      |      |      |      |
| 46987 | 0 | 42684  | MSTNPKPQKKNKRNTN   | 2.88 | 0.01 | 3.18 | 0.44 | 1.59 | 0.28 |
|       |   |        | RR                 |      |      |      |      |      |      |
| 46988 | 0 | 42684  | MSTNPKPQKKNKRNTN   | 2.88 | 0.01 | 3.18 | 0.44 | 1.59 | 0.28 |
|       |   |        | RR                 |      |      |      |      |      |      |
| 46989 | 0 | 42686  | MSTNPKPQKKNKRNTN   | 3.06 | 0.01 | 1.72 | 0.44 | 0.85 | 0.28 |
|       |   |        | RRPQDV             |      |      |      |      |      |      |
| 46990 | 0 | 42686  | MSTNPKPQKKNKRNTN   | 3.06 | 0.01 | 1.72 | 1.20 | 0.22 | 0.85 |
|       |   |        | RRPQDV             |      |      |      |      |      |      |
| 46991 | 0 | 42687  | MSTNPKPQKKNKRNTN   | 3.27 | 0.01 | 2.41 | 0.44 | 0.85 | 0.28 |
|       |   |        | RRPQDVKFPGGG       |      |      |      |      |      |      |
| 46992 | 0 | 42688  | MSTNPKPQKKNKRNTN   | 3.34 | 0.01 | 2.41 | 0.44 | 0.85 | 0.28 |
|       |   |        | RRPQDVKFPGGGQI     |      |      |      |      |      |      |
| 46993 | 0 | 42693  | MSTNPKPQRKIKRNTNR  | 3.26 | 0.01 | 1.72 | 1.15 | 0.22 | 0.28 |
|       |   |        | RPQDVKFPGGG        |      |      |      |      |      |      |
| 46994 | 0 | 42694  | MSTNPKPQRKTK       | 2.49 | 0.01 | 2.68 | 0.44 | 0.85 | 0.28 |
| 46995 | 0 | 42694  | MSTNPKPQRKTK       | 2.49 | 0.01 | 2.68 | 2.74 | 0.22 | 0.28 |
| 46996 | 0 | 42696  | MSTNPKPQRKTKRNT    | 2.72 | 0.01 | 2.41 | 0.44 | 1.59 | 0.28 |
| 46997 | 0 | 42697  | MSTNPKPQRKTKRNTN   | 2.78 | 0.01 | 1.72 | 0.68 | 0.22 | 0.28 |

|       |   |        |                                                     |      |      |      |      |      |      |
|-------|---|--------|-----------------------------------------------------|------|------|------|------|------|------|
| 46998 | 0 | 42698  | MSTNPKPQRKTKRNTN<br>RR                              | 2.88 | 0.01 | 1.72 | 0.44 | 0.85 | 1.27 |
| 46999 | 0 | 42698  | MSTNPKPQRKTKRNTN<br>RR                              | 2.88 | 0.01 | 3.81 | 0.44 | 0.85 | 0.28 |
| 47000 | 0 | 42699  | MSTNPKPQRKTKRNTN<br>RRPQ                            | 2.99 | 0.01 | 1.72 | 0.44 | 0.85 | 0.28 |
| 47001 | 0 | 42699  | MSTNPKPQRKTKRNTN<br>RRPQ                            | 2.99 | 0.01 | 1.72 | 0.44 | 0.85 | 0.28 |
| 47002 | 0 | 42699  | MSTNPKPQRKTKRNTN<br>RRPQ                            | 2.99 | 0.01 | 3.10 | 0.44 | 0.85 | 0.28 |
| 47003 | 0 | 42700  | MSTNPKPQRKTKRNTN<br>RRPQDV                          | 3.07 | 0.01 | 1.72 | 0.44 | 0.85 | 1.39 |
| 47004 | 0 | 42701  | MSTNPKPQRKTKRNTN<br>RRPQDVKFPG                      | 3.21 | 0.01 | 1.72 | 0.44 | 0.85 | 0.85 |
| 47005 | 0 | 42702  | MSTNPKPQRKTKRNTN<br>RRPQDVKFPGGG                    | 3.28 | 0.01 | 1.72 | 0.44 | 0.85 | 0.28 |
| 47006 | 0 | 42703  | MSTNPKPQRKTKRNTN<br>RRPQDVKFPGGGQI                  | 3.34 | 0.01 | 4.03 | 0.44 | 0.85 | 0.28 |
| 47007 | 0 | 462400 | MSTNPKPQRKTKRNTN<br>RRPQDVKFPGGGQIVG<br>GVY         | 3.49 | 0.01 | 1.96 | 2.90 | 0.22 | 0.28 |
| 47008 | 0 | 42704  | MSTNPKPQRKTKRNTN<br>RRPQDVKFPGGGQIVG<br>GVYLLPRRGPR | 3.73 | 0.01 | 1.72 | 1.15 | 0.22 | 0.28 |
| 47009 | 0 | 42705  | MSTNPKPQRKTKRNTSR<br>RPQDVKFPGGGQI                  | 3.34 | 0.01 | 2.69 | 0.44 | 0.85 | 0.28 |
| 47010 | 0 | 42705  | MSTNPKPQRKTKRNTSR<br>RPQDVKFPGGGQI                  | 3.34 | 0.01 | 2.69 | 0.44 | 0.85 | 0.28 |
| 47011 | 0 | 146463 | MSTRSVSSSYRRMFG                                     | 2.76 | 4.45 | 0.78 | 0.44 | 1.13 | 0.28 |
| 47012 | 0 | 110946 | MSTRSVSSSYRRMFGG<br>PGT                             | 2.97 | 4.45 | 0.78 | 2.46 | 0.22 | 2.51 |
| 47013 | 0 | 110946 | MSTRSVSSSYRRMFGG<br>PGT                             | 2.97 | 4.45 | 0.78 | 2.46 | 0.22 | 1.27 |
| 47014 | 0 | 110947 | MSTRSVSSSYRRMFGG<br>PGT                             | 2.97 | 0.01 | 0.78 | 2.46 | 0.22 | 2.51 |
| 47015 | 0 | 110947 | MSTRSVSSSYRRMFGG<br>PGT                             | 2.97 | 0.01 | 0.78 | 2.46 | 0.22 | 1.27 |
| 47016 | 0 | 108036 | MSVPQTTYSKITELI                                     | 2.66 | 0.01 | 0.90 | 0.44 | 1.13 | 1.39 |
| 47017 | 0 | 446815 | MSVSKPC                                             | 2.02 | 0.01 | 0.90 | 2.66 | 0.22 | 1.39 |
| 47018 | 0 | 125504 | MSVTLSCDHRVVDGAV<br>GAQWLAEFR                       | 3.14 | 0.01 | 0.78 | 0.44 | 1.41 | 0.28 |
| 47019 | 0 | 125504 | MSVTLSCDHRVVDGAV<br>GAQWLAEFR                       | 3.14 | 0.01 | 0.78 | 0.44 | 1.13 | 0.28 |
| 47020 | 0 | 42717  | MSWQAYV                                             | 1.99 | 0.01 | 3.34 | 0.68 | 0.22 | 0.85 |
| 47021 | 0 | 42717  | MSWQAYV                                             | 1.99 | 0.01 | 3.34 | 0.68 | 0.22 | 2.35 |

|       |   |        |                                                                   |      |      |      |      |      |      |
|-------|---|--------|-------------------------------------------------------------------|------|------|------|------|------|------|
| 47022 | 0 | 42719  | MSWQAYVDEHLMCD                                                    | 2.58 | 0.01 | 3.34 | 1.12 | 0.22 | 0.85 |
| 47023 | 0 | 78466  | MSWQTYVDEHLMCDID<br>GQGEELAASAIVG                                 | 3.29 | 0.01 | 2.76 | 0.44 | 1.23 | 1.39 |
| 47024 | 0 | 78467  | MSWQTYVDEHLMCDID<br>GQGEELAASAIVGHDG                              | 3.40 | 0.01 | 2.76 | 0.44 | 1.23 | 1.39 |
| 47025 | 0 | 42720  | MSWQTYVDEHLMCEIE<br>GHHLASA                                       | 3.04 | 0.01 | 2.53 | 0.68 | 0.22 | 0.28 |
| 47026 | 0 | 42720  | MSWQTYVDEHLMCEIE<br>GHHLASA                                       | 3.04 | 0.01 | 2.53 | 0.68 | 0.22 | 0.28 |
| 47027 | 0 | 132485 | MSYNLLGFLQRS                                                      | 2.47 | 0.01 | 0.78 | 0.44 | 1.13 | 0.28 |
| 47028 | 0 | 42734  | MTADPAFHHPYSLIG                                                   | 2.63 | 0.01 | 0.90 | 1.15 | 0.22 | 0.85 |
| 47029 | 0 | 86551  | MTAEPKTIVL                                                        | 2.29 | 0.01 | 3.06 | 0.44 | 0.85 | 0.28 |
| 47030 | 0 | 103425 | MTAHTHDGTRTWRTG                                                   | 2.72 | 0.01 | 2.04 | 0.44 | 0.85 | 1.28 |
| 47031 | 0 | 340312 | MTALRVSPYSIFLQE                                                   | 2.62 | 0.01 | 1.61 | 0.44 | 0.85 | 1.28 |
| 47032 | 0 | 137239 | MTANVTDKSYLY                                                      | 2.45 | 0.01 | 4.33 | 2.13 | 0.22 | 0.28 |
| 47033 | 0 | 193507 | MTAPPGGIY                                                         | 2.21 | 0.01 | 2.51 | 0.44 | 2.39 | 0.28 |
| 47034 | 0 | 193507 | MTAPPGGIY                                                         | 2.21 | 0.01 | 2.51 | 0.44 | 2.39 | 0.28 |
| 47035 | 0 | 193508 | MTAVDDSKD                                                         | 2.23 | 0.01 | 2.51 | 0.44 | 2.39 | 0.28 |
| 47036 | 0 | 78211  | MTDIDIVTGNITEGSYKG<br>VELAKLGKQTLTRFTSN<br>EPVSSAGSAQDPNFKRG<br>G | 3.93 | 0.01 | 3.89 | 1.15 | 0.22 | 2.02 |
| 47037 | 0 | 78211  | MTDIDIVTGNITEGSYKG<br>VELAKLGKQTLTRFTSN<br>EPVSSAGSAQDPNFKRG<br>G | 3.93 | 0.01 | 3.89 | 1.15 | 0.22 | 2.02 |
| 47038 | 0 | 42748  | MTDSPGGVAP                                                        | 2.30 | 0.01 | 3.17 | 0.68 | 0.22 | 2.02 |
| 47039 | 0 | 42748  | MTDSPGGVAP                                                        | 2.30 | 0.01 | 3.17 | 0.68 | 0.22 | 1.34 |
| 47040 | 0 | 42750  | MTDVIRFRYSNNYEASD<br>H                                            | 2.81 | 0.01 | 0.90 | 2.63 | 0.22 | 1.48 |
| 47041 | 0 | 42750  | MTDVIRFRYSNNYEASD<br>H                                            | 2.81 | 0.01 | 0.90 | 2.63 | 0.22 | 1.48 |
| 47042 | 0 | 42751  | MTDVIRFRYSNNYMSN<br>PH                                            | 2.84 | 0.01 | 0.90 | 2.63 | 0.22 | 1.48 |
| 47043 | 0 | 42751  | MTDVIRFRYSNNYMSN<br>PH                                            | 2.84 | 0.01 | 0.90 | 2.63 | 0.22 | 1.48 |
| 47044 | 0 | 42755  | MTDVIRYRYSNIYEASDK                                                | 2.84 | 0.01 | 0.90 | 2.63 | 0.22 | 1.48 |
| 47045 | 0 | 42755  | MTDVIRYRYSNIYEASDK                                                | 2.84 | 0.01 | 0.90 | 2.63 | 0.22 | 1.48 |
| 47046 | 0 | 42757  | MTDVIRYRYSNNYEAE<br>S<br>HIS                                      | 2.94 | 0.01 | 0.90 | 2.63 | 0.22 | 1.48 |
| 47047 | 0 | 42757  | MTDVIRYRYSNNYEAE<br>S<br>HIS                                      | 2.94 | 0.01 | 0.90 | 2.63 | 0.22 | 1.48 |



|       |   |        |                                                          |      |      |      |      |      |      |
|-------|---|--------|----------------------------------------------------------|------|------|------|------|------|------|
| 47048 | 0 | 42758  | MTDVIRYRYSNNYEAI<br>D<br>HIS                             | 2.94 | 0.01 | 0.90 | 2.63 | 0.22 | 1.48 |
| 47049 | 0 | 42758  | MTDVIRYRYSNNYEAI<br>D<br>HIS                             | 2.94 | 0.01 | 0.90 | 2.63 | 2.25 | 1.75 |
| 47050 | 0 | 42761  | MTDVIRYRYSNNYEAS<br>D<br>HIS                             | 2.94 | 0.01 | 0.90 | 2.63 | 0.22 | 1.48 |
| 47051 | 0 | 42761  | MTDVIRYRYSNNYEAS<br>D<br>HIS                             | 2.94 | 0.01 | 0.90 | 2.63 | 2.25 | 1.75 |
| 47052 | 0 | 42761  | MTDVIRYRYSNNYEAS<br>D<br>HIS                             | 2.94 | 0.01 | 0.90 | 2.63 | 0.22 | 1.48 |
| 47053 | 0 | 42761  | MTDVIRYRYSNNYEAS<br>D<br>HIS                             | 2.94 | 0.01 | 0.90 | 2.63 | 2.25 | 1.75 |
| 47054 | 0 | 42761  | MTDVIRYRYSNNYEAS<br>D<br>HIS                             | 2.94 | 0.01 | 0.90 | 2.74 | 0.22 | 1.48 |
| 47055 | 0 | 42761  | MTDVIRYRYSNNYEAS<br>D<br>HIS                             | 2.94 | 0.01 | 0.90 | 2.63 | 0.22 | 1.48 |
| 47056 | 0 | 42761  | MTDVIRYRYSNNYEAS<br>D<br>HIS                             | 2.94 | 0.01 | 0.90 | 2.63 | 2.25 | 1.75 |
| 47057 | 0 | 42766  | MTDVIRYRYSNNYES<br>E<br>S<br>HIS                         | 2.95 | 0.01 | 0.90 | 2.63 | 0.22 | 1.48 |
| 47058 | 0 | 42767  | MTDVIRYRYSNNYES<br>N<br>D<br>HIS                         | 2.96 | 0.01 | 0.90 | 2.63 | 0.22 | 1.48 |
| 47059 | 0 | 42770  | MTDVIRYRYSNNYES<br>S<br>D<br>K                           | 2.84 | 0.01 | 0.90 | 2.63 | 0.22 | 1.48 |
| 47060 | 0 | 42770  | MTDVIRYRYSNNYES<br>S<br>D<br>K                           | 2.84 | 0.01 | 0.90 | 2.63 | 0.22 | 1.48 |
| 47061 | 0 | 42776  | MTDVNRWRYVNNY<br>E<br>S<br>NPHKS                         | 2.93 | 0.01 | 0.90 | 2.63 | 0.22 | 1.48 |
| 47062 | 0 | 42776  | MTDVNRWRYVNNY<br>E<br>S<br>NPHKS                         | 2.93 | 0.01 | 0.90 | 2.63 | 2.25 | 1.75 |
| 47063 | 0 | 42780  | MTDVNRYRYSNNY<br>E<br>E<br>Q<br>PHIS                     | 2.91 | 0.01 | 0.90 | 2.63 | 0.22 | 1.48 |
| 47064 | 0 | 42780  | MTDVNRYRYSNNY<br>E<br>E<br>Q<br>PHIS                     | 2.91 | 0.01 | 0.90 | 2.63 | 2.25 | 1.75 |
| 47065 | 0 | 42782  | MTDVNRYRYSNNY<br>E<br>Q<br>E<br>PHIS                     | 2.92 | 0.01 | 0.90 | 2.63 | 0.22 | 1.48 |
| 47066 | 0 | 42782  | MTDVNRYRYSNNY<br>E<br>Q<br>E<br>PHIS                     | 2.92 | 0.01 | 0.90 | 2.63 | 2.25 | 1.75 |
| 47067 | 0 | 42784  | MTDVNRYRYSNNY<br>E<br>R<br>P<br>HIS                      | 2.88 | 0.01 | 0.90 | 2.63 | 0.22 | 1.48 |
| 47068 | 0 | 42790  | MTDVSRKIRAWGRR<br>L<br>M<br>IGTA                         | 2.94 | 0.01 | 2.04 | 0.44 | 0.85 | 0.28 |
| 47069 | 0 | 181733 | MTDVSRKIRAWGRR<br>L<br>M<br>IGTAAAVVLPGLVGLAG<br>GAATAGA | 3.64 | 0.01 | 2.04 | 0.68 | 0.22 | 0.28 |
| 47070 | 0 | 42791  | MTDVVFYRYSNNY<br>E<br>G<br>Q<br>PHIS                     | 2.88 | 0.01 | 0.90 | 2.63 | 0.22 | 1.48 |

|       |   |        |                             |      |      |      |      |      |      |
|-------|---|--------|-----------------------------|------|------|------|------|------|------|
| 47071 | 0 | 42791  | MTDVVFYRYSNNYEGQ<br>PHIS    | 2.88 | 0.01 | 0.90 | 2.63 | 0.22 | 1.48 |
| 47072 | 0 | 156379 | MTDYQKIQQGFRQNNR<br>EMIKSAF | 3.06 | 0.01 | 3.44 | 0.44 | 0.85 | 0.28 |
| 47073 | 0 | 156379 | MTDYQKIQQGFRQNNR<br>EMIKSAF | 3.06 | 0.01 | 3.44 | 0.44 | 1.59 | 0.28 |
| 47074 | 0 | 156379 | MTDYQKIQQGFRQNNR<br>EMIKSAF | 3.06 | 0.01 | 3.44 | 0.44 | 0.85 | 0.28 |
| 47075 | 0 | 156379 | MTDYQKIQQGFRQNNR<br>EMIKSAF | 3.06 | 0.01 | 3.44 | 0.44 | 1.59 | 0.28 |
| 47076 | 0 | 340337 | MTEKEDGDNEDEEVE             | 2.71 | 0.01 | 1.61 | 0.44 | 0.85 | 1.28 |
| 47077 | 0 | 340342 | MTENEDDDEDEEENE             | 2.74 | 0.01 | 1.61 | 0.44 | 0.85 | 1.28 |
| 47078 | 0 | 42795  | MTEQQWNFAGIEAAAS            | 2.70 | 0.01 | 2.04 | 0.44 | 0.85 | 0.28 |
| 47079 | 0 | 42795  | MTEQQWNFAGIEAAAS            | 2.70 | 0.01 | 2.04 | 0.44 | 1.59 | 0.28 |
| 47080 | 0 | 42797  | MTEQQWNFAGIEAAAS<br>AIQG    | 2.95 | 0.01 | 3.53 | 2.61 | 0.22 | 0.28 |
| 47081 | 0 | 42797  | MTEQQWNFAGIEAAAS<br>AIQG    | 2.95 | 0.01 | 3.53 | 3.16 | 0.85 | 0.28 |
| 47082 | 0 | 147142 | MTEVALRVVSRNP               | 2.52 | 0.01 | 1.60 | 0.44 | 0.85 | 0.85 |
| 47083 | 0 | 340348 | MTFANTLLYSDDDEL             | 2.67 | 0.01 | 1.61 | 0.44 | 0.85 | 1.28 |
| 47084 | 0 | 42802  | MTFEGAIGIDLGTYS<br>GV       | 2.92 | 0.01 | 2.78 | 2.49 | 0.85 | 0.28 |
| 47085 | 0 | 42802  | MTFEGAIGIDLGTYS<br>GV       | 2.92 | 0.01 | 2.78 | 0.44 | 0.85 | 0.28 |
| 47086 | 0 | 119499 | MTFSVPIS                    | 2.12 | 0.01 | 3.29 | 3.97 | 0.22 | 1.27 |
| 47087 | 0 | 119499 | MTFSVPIS                    | 2.12 | 0.01 | 3.29 | 3.97 | 0.22 | 0.85 |
| 47088 | 0 | 119499 | MTFSVPIS                    | 2.12 | 0.01 | 3.29 | 3.97 | 0.22 | 0.28 |
| 47089 | 0 | 191622 | MTGDCKHWQNACFWS<br>S        | 2.67 | 0.01 | 0.90 | 2.84 | 1.13 | 1.27 |
| 47090 | 0 | 191622 | MTGDCKHWQNACFWS<br>S        | 2.67 | 0.01 | 0.90 | 2.84 | 1.13 | 1.66 |
| 47091 | 0 | 191622 | MTGDCKHWQNACFWS<br>S        | 2.67 | 0.01 | 0.90 | 0.44 | 1.13 | 0.28 |
| 47092 | 0 | 421406 | MTILGKSCDDQFCPEDA           | 2.73 | 0.01 | 3.19 | 0.44 | 1.23 | 1.28 |
| 47093 | 0 | 42818  | MTKDCHLLGTFDL<br>SGIP       | 2.92 | 0.01 | 2.78 | 2.49 | 0.85 | 0.28 |
| 47094 | 0 | 42818  | MTKDCHLLGTFDL<br>SGIP       | 2.92 | 0.01 | 2.78 | 0.44 | 0.85 | 0.28 |
| 47095 | 0 | 181231 | MTLFLFISCNNSGKD             | 2.65 | 0.01 | 2.97 | 0.44 | 0.85 | 0.28 |
| 47096 | 0 | 181231 | MTLFLFISCNNSGKD             | 2.65 | 0.01 | 2.97 | 0.44 | 0.85 | 0.28 |
| 47097 | 0 | 181231 | MTLFLFISCNNSGKD             | 2.65 | 0.01 | 2.97 | 0.44 | 0.85 | 0.28 |
| 47098 | 0 | 181231 | MTLFLFISCNNSGKD             | 2.65 | 0.01 | 2.97 | 0.44 | 0.85 | 0.28 |
| 47099 | 0 | 174965 | MTLKEALKIAFG                | 2.48 | 0.01 | 2.18 | 2.71 | 0.22 | 0.28 |
| 47100 | 0 | 103426 | MTLLELSDFVKKFEE             | 2.67 | 0.01 | 2.04 | 0.44 | 0.85 | 1.28 |

|       |   |        |                                                           |      |      |      |      |      |      |
|-------|---|--------|-----------------------------------------------------------|------|------|------|------|------|------|
| 47101 | 0 | 42826  | MTLLEVIIVLGIMGVVSA<br>GVVTLAQR                            | 3.22 | 0.01 | 2.85 | 1.12 | 0.22 | 0.28 |
| 47102 | 0 | 42829  | MTLLVDAPGYDPLWFIT<br>SEPTQPPPTSPPLVHDS<br>DLEHVLTPSTSWTTK | 3.82 | 0.01 | 3.01 | 0.44 | 0.85 | 0.85 |
| 47103 | 0 | 423437 | MTLRTFLQTYFSSDK                                           | 2.67 | 0.01 | 2.51 | 0.44 | 2.35 | 1.28 |
| 47104 | 0 | 190674 | MTLVCGKDGVKVPQDN<br>NQYCSGTTLTGCNE                        | 3.34 | 0.01 | 2.75 | 2.13 | 0.22 | 0.28 |
| 47105 | 0 | 42840  | MTNEAFLVSSGENQITA<br>RLA                                  | 2.92 | 0.01 | 2.78 | 2.49 | 0.85 | 0.28 |
| 47106 | 0 | 78212  | MTNNRI                                                    | 1.89 | 0.01 | 0.90 | 2.02 | 1.59 | 1.39 |
| 47107 | 0 | 129443 | MTNVYRL                                                   | 1.99 | 0.01 | 0.90 | 2.88 | 2.35 | 0.28 |
| 47108 | 0 | 122490 | MTPNDRRIHRYEPR                                            | 2.66 | 0.01 | 0.90 | 1.15 | 0.22 | 1.39 |
| 47109 | 0 | 123522 | MTQAPRIM                                                  | 2.13 | 0.01 | 0.78 | 1.20 | 0.22 | 0.28 |
| 47110 | 0 | 123522 | MTQAPRIM                                                  | 2.13 | 0.01 | 0.78 | 0.44 | 1.13 | 0.28 |
| 47111 | 0 | 123523 | MTQAPRIMH                                                 | 2.22 | 0.01 | 0.78 | 1.20 | 0.22 | 0.28 |
| 47112 | 0 | 132486 | MTQFLPPNLL                                                | 2.30 | 0.01 | 0.78 | 0.44 | 1.13 | 0.28 |
| 47113 | 0 | 42859  | MTQKAR                                                    | 1.88 | 0.01 | 2.40 | 0.44 | 0.85 | 0.28 |
| 47114 | 0 | 108037 | MTQMPTNHAMQLILE                                           | 2.69 | 0.01 | 0.90 | 0.44 | 1.13 | 1.39 |
| 47115 | 0 | 340438 | MTREVDDTMADELRS                                           | 2.70 | 0.01 | 1.61 | 0.44 | 0.85 | 1.28 |
| 47116 | 0 | 42866  | MTRGRLKAE                                                 | 2.21 | 0.01 | 2.51 | 0.68 | 0.22 | 0.28 |
| 47117 | 0 | 42866  | MTRGRLKAE                                                 | 2.21 | 0.01 | 2.51 | 0.68 | 0.22 | 2.02 |
| 47118 | 0 | 132487 | MTSNGFTIADPDDRGM<br>LDMCGFDTG                             | 3.17 | 0.01 | 0.78 | 3.72 | 0.22 | 0.28 |
| 47119 | 0 | 149073 | MTSSETQ                                                   | 2.03 | 0.01 | 0.90 | 2.13 | 1.59 | 1.39 |
| 47120 | 0 | 446819 | MTSVMMC                                                   | 2.04 | 0.01 | 0.90 | 2.66 | 0.22 | 1.39 |
| 47121 | 0 | 42883  | MTSVNSAEASTGAGGG<br>GSNSVK                                | 3.07 | 0.01 | 2.75 | 0.44 | 1.59 | 0.28 |
| 47122 | 0 | 42883  | MTSVNSAEASTGAGGG<br>GSNSVK                                | 3.07 | 0.01 | 2.75 | 0.44 | 1.59 | 2.02 |
| 47123 | 0 | 42885  | MTTAQGTSMYPSC                                             | 2.56 | 0.01 | 2.71 | 1.12 | 0.22 | 1.57 |
| 47124 | 0 | 42885  | MTTAQGTSMYPSC                                             | 2.56 | 0.01 | 2.71 | 1.12 | 0.22 | 2.02 |
| 47125 | 0 | 42888  | MTTISSSKDCMGEA                                            | 2.59 | 0.01 | 3.08 | 0.68 | 0.22 | 1.57 |
| 47126 | 0 | 153857 | MTTISSSKDCMGEAVQ<br>NTVEDLKLNTLGR                         | 3.29 | 0.01 | 3.08 | 1.12 | 0.22 | 0.85 |
| 47127 | 0 | 240902 | MTTNDDLAALTQEI                                            | 2.67 | 0.01 | 4.93 | 0.44 | 1.41 | 0.28 |
| 47128 | 0 | 225639 | MTTSLTAGTLPKEYQDL<br>RDTVAE                               | 3.06 | 0.01 | 2.51 | 2.00 | 0.85 | 0.28 |
| 47129 | 0 | 434763 | MTVKVGINGFGRIGRLA<br>FRRIQ                                | 3.04 | 0.01 | 3.55 | 1.81 | 0.22 | 0.28 |

|       |   |       |                      |      |      |      |      |      |      |
|-------|---|-------|----------------------|------|------|------|------|------|------|
|       |   |       | MTWPKDFNYSDPVN       |      |      |      |      |      |      |
|       |   |       | DNDILYLRIPOKLIITPV   |      |      |      |      |      |      |
|       |   |       | KAFMITQNIWVIPERFSS   |      |      |      |      |      |      |
|       |   |       | DTNPSLSKPPRPTSKYQS   |      |      |      |      |      |      |
|       |   |       | YYDPSYLSTDEQKDTFLK   |      |      |      |      |      |      |
|       |   |       | GIIKLFKRINERDIGKKLIN |      |      |      |      |      |      |
|       |   |       | YLVVGSPFMGDSSTPED    |      |      |      |      |      |      |
|       |   |       | TFDFTRHTTNIAVEKFEN   |      |      |      |      |      |      |
|       |   |       | GSWKVTNIITPSVLIFGP   |      |      |      |      |      |      |
|       |   |       | LPNILDYASLTQGGQS     |      |      |      |      |      |      |
|       |   |       | NPSFEGFGTSLKVAPE     |      |      |      |      |      |      |
|       |   |       | FLLTFSDVTSNQSSAVLG   |      |      |      |      |      |      |
| 47130 | 0 | 42896 | KSIFCMDPVIALMHILT    | 6.08 | 0.01 | 4.15 | 1.12 | 0.22 | 1.34 |
|       |   |       | HSLHQLYGINIPSDKRIRP  |      |      |      |      |      |      |
|       |   |       | QVSEGGFSQDGPVQF      |      |      |      |      |      |      |
|       |   |       | EELYTFGGLDVEIIPQIER  |      |      |      |      |      |      |
|       |   |       | SQLREKALGHYKDIKRL    |      |      |      |      |      |      |
|       |   |       | NNINKTIPSSWISNIDKY   |      |      |      |      |      |      |
|       |   |       | KKIFSEKYNFDKDNITGNF  |      |      |      |      |      |      |
|       |   |       | VVNIDKFNSLYSDLTNV    |      |      |      |      |      |      |
|       |   |       | MSEVVYSSQYNVKNRT     |      |      |      |      |      |      |
|       |   |       | HYFSRHYLPVFANILDDN   |      |      |      |      |      |      |
|       |   |       | IYTIRDGFNLTKGFNIE    |      |      |      |      |      |      |
|       |   |       | NSGQNIERNPALQKLSS    |      |      |      |      |      |      |
|       |   |       | ESVVDLFTKVCLRLTK     |      |      |      |      |      |      |

|       |   |       |                      |      |      |      |      |      |      |
|-------|---|-------|----------------------|------|------|------|------|------|------|
|       |   |       | MTWPKDFNYSDPVN       |      |      |      |      |      |      |
|       |   |       | DNDILYLRIPOKLIITPV   |      |      |      |      |      |      |
|       |   |       | KAFMITQNIWVIPERFSS   |      |      |      |      |      |      |
|       |   |       | DTNPSLSKPPRPTSKYQS   |      |      |      |      |      |      |
|       |   |       | YYDPSYLSTDEQKDTFLK   |      |      |      |      |      |      |
|       |   |       | GIIKLFKRINERDIGKKLIN |      |      |      |      |      |      |
|       |   |       | YLVVGSPFMGDSSTPED    |      |      |      |      |      |      |
|       |   |       | TFDFTRHTTNIAVEKFEN   |      |      |      |      |      |      |
|       |   |       | GSWKVTNIITPSVLIFGP   |      |      |      |      |      |      |
|       |   |       | LPNILDYASLTQGGQS     |      |      |      |      |      |      |
|       |   |       | NPSFEGFGTSLKVAPE     |      |      |      |      |      |      |
|       |   |       | FLLTFSDVTSNQSSAVLG   |      |      |      |      |      |      |
| 47131 | 0 | 42896 | KSIFCMDPVIALMHFLT    | 6.08 | 0.01 | 4.15 | 0.68 | 0.22 | 0.28 |
|       |   |       | HSLHQLYGINIPSDKRIRP  |      |      |      |      |      |      |
|       |   |       | QVSEGGFSQDGPVQF      |      |      |      |      |      |      |
|       |   |       | EELYTFGGLDVEIIPQIER  |      |      |      |      |      |      |
|       |   |       | SQLREKALGHYKDIKRL    |      |      |      |      |      |      |
|       |   |       | NNINKTIPSSWISNIDKY   |      |      |      |      |      |      |
|       |   |       | KKIFSEKYNFDKDNLTGNF  |      |      |      |      |      |      |
|       |   |       | VVNIDKFNSLYSDLTNV    |      |      |      |      |      |      |
|       |   |       | MSEVVYSSQYNVKNRT     |      |      |      |      |      |      |
|       |   |       | HYFSRHLYPVFANILDDN   |      |      |      |      |      |      |
|       |   |       | IYTIRDGFNLTKGFNIE    |      |      |      |      |      |      |
|       |   |       | NSGQNIERNPALQKLSS    |      |      |      |      |      |      |
|       |   |       | ESVVDLFTKVCLRLTK     |      |      |      |      |      |      |

|       |   |       |                      |      |      |      |      |      |      |
|-------|---|-------|----------------------|------|------|------|------|------|------|
|       |   |       | MTWPKDFNYSDPVN       |      |      |      |      |      |      |
|       |   |       | DNDILYLRIPOKLIITPV   |      |      |      |      |      |      |
|       |   |       | KAFMITQNIWVIPERFSS   |      |      |      |      |      |      |
|       |   |       | DTNPSLSKPPRPTSKYQS   |      |      |      |      |      |      |
|       |   |       | YYDPSYLSTDEQKDTFLK   |      |      |      |      |      |      |
|       |   |       | GIIKLFKRINERDIGKKLIN |      |      |      |      |      |      |
|       |   |       | YLVVGSPFMGDSSTPED    |      |      |      |      |      |      |
|       |   |       | TFDFTRHTTNIAVEKFEN   |      |      |      |      |      |      |
|       |   |       | GSWKVTNIITPSVLIFGP   |      |      |      |      |      |      |
|       |   |       | LPNILDYASLTQGGQS     |      |      |      |      |      |      |
|       |   |       | NPSFEGFGTSLKVAPE     |      |      |      |      |      |      |
|       |   |       | FLLTFSDVTSNQSSAVLG   |      |      |      |      |      |      |
| 47132 | 0 | 42896 | KSIFCMDPVIALMHILT    | 6.08 | 0.01 | 4.15 | 0.68 | 0.22 | 1.34 |
|       |   |       | HSLHQLYGINIPSDKRIRP  |      |      |      |      |      |      |
|       |   |       | QVSEGGFSQDGPVQF      |      |      |      |      |      |      |
|       |   |       | EELYTFGGLDVEIIPQIER  |      |      |      |      |      |      |
|       |   |       | SQLREKALGHYKDIKRL    |      |      |      |      |      |      |
|       |   |       | NNINKTIPSSWISNIDKY   |      |      |      |      |      |      |
|       |   |       | KKIFSEKYNFDKDNITGNF  |      |      |      |      |      |      |
|       |   |       | VVNIDKFNSLYSDLTNV    |      |      |      |      |      |      |
|       |   |       | MSEVVYSSQYNVKNRT     |      |      |      |      |      |      |
|       |   |       | HYFSRHYLPVFANILDDN   |      |      |      |      |      |      |
|       |   |       | IYTIRDGFNLTKGFNIE    |      |      |      |      |      |      |
|       |   |       | NSGQNIERNPALQKLSS    |      |      |      |      |      |      |
|       |   |       | ESVVDLFTKVCLRLTK     |      |      |      |      |      |      |

|       |   |        |                     |      |      |      |      |      |      |
|-------|---|--------|---------------------|------|------|------|------|------|------|
|       |   |        | MTWPKDFNYSDPVN      |      |      |      |      |      |      |
|       |   |        | DNDILYLRIPQNKLITTPV |      |      |      |      |      |      |
|       |   |        | KAFMITQNIWVIPERFSS  |      |      |      |      |      |      |
|       |   |        | DTNPSSLKPPRPTSKYQS  |      |      |      |      |      |      |
|       |   |        | YYDPSYLTDEQKDTFLK   |      |      |      |      |      |      |
|       |   |        | GIKLFKRINERDIGKKLIN |      |      |      |      |      |      |
|       |   |        | YLVVGSPFMGDSSTPED   |      |      |      |      |      |      |
|       |   |        | TFDFTRHTTNIAVEKFEN  |      |      |      |      |      |      |
|       |   |        | GSWKVTNIITPSVLIFGP  |      |      |      |      |      |      |
|       |   |        | LPNILDYTASLTQGQQS   |      |      |      |      |      |      |
|       |   |        | NPSFEGFGTSLKVAPE    |      |      |      |      |      |      |
|       |   |        | FLLTFSDVTSNQSSAVLG  |      |      |      |      |      |      |
| 47133 | 0 | 42896  | KSIFCMDPVIALMHILT   | 6.08 | 0.01 | 4.63 | 1.12 | 0.22 | 0.28 |
|       |   |        | HSLHQLYGINIPSDKRIRP |      |      |      |      |      |      |
|       |   |        | QVSEGFFSQDGPVNVQF   |      |      |      |      |      |      |
|       |   |        | EELYTFGGLDVEIIPQIER |      |      |      |      |      |      |
|       |   |        | SQLREKALGHYKDIKRL   |      |      |      |      |      |      |
|       |   |        | NNINKTIPSSWISNIDKY  |      |      |      |      |      |      |
|       |   |        | KKIFSEKYNFDKDNLTGNF |      |      |      |      |      |      |
|       |   |        | VVNIDKFNSLYSDLTNV   |      |      |      |      |      |      |
|       |   |        | MSEVVYSSQYNVKNRT    |      |      |      |      |      |      |
|       |   |        | HYFSRHYLPVFANILDDN  |      |      |      |      |      |      |
|       |   |        | IYTIRDGFNLTKGFNIE   |      |      |      |      |      |      |
|       |   |        | NSGQNIERNPALQKLSS   |      |      |      |      |      |      |
|       |   |        | ESVVDLFTKVCLRLTK    |      |      |      |      |      |      |
| 47134 | 0 | 42898  | MTYEGAIGIDLGTTYSCV  | 2.94 | 0.01 | 2.30 | 0.44 | 1.41 | 0.28 |
|       |   |        | GV                  |      |      |      |      |      |      |
| 47135 | 0 | 147983 | MVALDSNNT           | 2.20 | 0.01 | 3.24 | 3.57 | 0.85 | 0.28 |
| 47136 | 0 | 42923  | MVDHFHLGDD          | 2.31 | 0.01 | 3.41 | 2.69 | 0.22 | 0.28 |
| 47137 | 0 | 42928  | MVDRGW              | 1.88 | 0.01 | 2.40 | 0.44 | 0.85 | 0.28 |
| 47138 | 0 | 141963 | MVDRGWG             | 2.02 | 0.01 | 2.30 | 0.68 | 0.22 | 0.28 |
| 47139 | 0 | 141963 | MVDRGWG             | 2.02 | 0.01 | 2.30 | 0.68 | 0.22 | 1.39 |
| 47140 | 0 | 141963 | MVDRGWG             | 2.02 | 0.01 | 2.30 | 0.68 | 0.22 | 1.39 |
| 47141 | 0 | 141963 | MVDRGWG             | 2.02 | 0.01 | 2.30 | 0.68 | 0.22 | 1.39 |
| 47142 | 0 | 141963 | MVDRGWG             | 2.02 | 0.01 | 2.30 | 0.68 | 0.22 | 1.39 |
| 47143 | 0 | 141963 | MVDRGWG             | 2.02 | 0.01 | 2.30 | 0.68 | 0.22 | 1.48 |
| 47144 | 0 | 141963 | MVDRGWG             | 2.02 | 0.01 | 2.30 | 0.68 | 0.22 | 1.48 |
| 47145 | 0 | 141963 | MVDRGWG             | 2.02 | 0.01 | 2.30 | 0.68 | 0.22 | 1.48 |
| 47146 | 0 | 141963 | MVDRGWG             | 2.02 | 0.01 | 2.30 | 0.68 | 0.22 | 1.48 |
| 47147 | 0 | 141963 | MVDRGWG             | 2.02 | 0.01 | 2.30 | 0.68 | 0.22 | 1.48 |
| 47148 | 0 | 141963 | MVDRGWG             | 2.02 | 0.01 | 2.30 | 0.68 | 0.22 | 1.48 |
| 47149 | 0 | 141963 | MVDRGWG             | 2.02 | 0.01 | 2.30 | 0.68 | 0.22 | 1.48 |
| 47150 | 0 | 141963 | MVDRGWG             | 2.02 | 0.01 | 2.30 | 0.68 | 0.22 | 1.48 |
| 47151 | 0 | 141963 | MVDRGWG             | 2.02 | 0.01 | 2.30 | 0.68 | 0.22 | 1.34 |
| 47152 | 0 | 141963 | MVDRGWG             | 2.02 | 0.01 | 2.30 | 0.68 | 0.22 | 1.34 |

|       |   |        |              |      |      |      |      |      |      |
|-------|---|--------|--------------|------|------|------|------|------|------|
| 47153 | 0 | 141963 | MVDRGWG      | 2.02 | 0.01 | 2.30 | 0.68 | 0.22 | 1.34 |
| 47154 | 0 | 141963 | MVDRGWG      | 2.02 | 0.01 | 2.30 | 0.68 | 0.22 | 1.34 |
| 47155 | 0 | 141963 | MVDRGWG      | 2.02 | 0.01 | 2.30 | 0.68 | 0.22 | 1.34 |
| 47156 | 0 | 141963 | MVDRGWG      | 2.02 | 0.01 | 2.30 | 0.68 | 0.22 | 1.34 |
| 47157 | 0 | 141963 | MVDRGWG      | 2.02 | 0.01 | 2.30 | 0.68 | 0.22 | 1.34 |
| 47158 | 0 | 141963 | MVDRGWG      | 2.02 | 0.01 | 2.30 | 0.68 | 0.22 | 1.34 |
| 47159 | 0 | 141963 | MVDRGWG      | 2.02 | 0.01 | 2.30 | 0.68 | 0.22 | 1.75 |
| 47160 | 0 | 141963 | MVDRGWG      | 2.02 | 0.01 | 2.30 | 0.68 | 0.22 | 1.75 |
| 47161 | 0 | 141963 | MVDRGWG      | 2.02 | 0.01 | 2.30 | 0.68 | 0.22 | 1.75 |
| 47162 | 0 | 141963 | MVDRGWG      | 2.02 | 0.01 | 2.30 | 0.68 | 0.22 | 1.75 |
| 47163 | 0 | 141963 | MVDRGWG      | 2.02 | 0.01 | 2.30 | 0.68 | 0.22 | 1.75 |
| 47164 | 0 | 141963 | MVDRGWG      | 2.02 | 0.01 | 2.30 | 0.68 | 0.22 | 0.85 |
| 47165 | 0 | 141963 | MVDRGWG      | 2.02 | 0.01 | 2.30 | 0.68 | 0.22 | 0.28 |
| 47166 | 0 | 42929  | MVDRGWGNGCGL | 2.48 | 0.01 | 2.40 | 0.44 | 0.85 | 0.28 |
| 47167 | 0 | 42929  | MVDRGWGNGCGL | 2.48 | 0.01 | 2.40 | 0.44 | 0.85 | 0.28 |
| 47168 | 0 | 42929  | MVDRGWGNGCGL | 2.48 | 0.01 | 2.40 | 0.44 | 0.85 | 0.28 |
| 47169 | 0 | 42929  | MVDRGWGNGCGL | 2.48 | 0.01 | 2.40 | 0.44 | 0.85 | 0.28 |
| 47170 | 0 | 42932  | MVDVVTGA     | 2.13 | 0.01 | 2.21 | 0.44 | 0.85 | 0.28 |
| 47171 | 0 | 42932  | MVDVVTGA     | 2.13 | 0.01 | 2.21 | 1.12 | 0.22 | 0.28 |
| 47172 | 0 | 42933  | MVDVVTGATV   | 2.35 | 0.01 | 2.21 | 1.12 | 0.22 | 0.28 |
| 47173 | 0 | 104905 | MVGGV        | 1.75 | 0.01 | 0.78 | 1.15 | 0.22 | 1.66 |
| 47174 | 0 | 107214 | MVGGVV       | 1.88 | 0.01 | 0.78 | 1.15 | 0.22 | 0.28 |
| 47175 | 0 | 107214 | MVGGVV       | 1.88 | 0.01 | 0.78 | 1.15 | 0.22 | 0.28 |
| 47176 | 0 | 107214 | MVGGVV       | 1.88 | 0.01 | 0.78 | 1.15 | 0.22 | 1.75 |
| 47177 | 0 | 107214 | MVGGVV       | 1.88 | 0.01 | 0.78 | 1.15 | 0.22 | 2.02 |
| 47178 | 0 | 107214 | MVGGVV       | 1.88 | 0.01 | 0.78 | 1.15 | 0.22 | 2.02 |
| 47179 | 0 | 107214 | MVGGVV       | 1.88 | 0.01 | 0.78 | 1.15 | 0.22 | 0.28 |
| 47180 | 0 | 104906 | MVGGVVIA     | 2.14 | 0.01 | 0.78 | 0.68 | 0.22 | 1.27 |
| 47181 | 0 | 104906 | MVGGVVIA     | 2.14 | 0.01 | 0.78 | 0.68 | 0.22 | 1.48 |
| 47182 | 0 | 104906 | MVGGVVIA     | 2.14 | 0.01 | 0.78 | 0.68 | 0.22 | 0.28 |
| 47183 | 0 | 104906 | MVGGVVIA     | 2.14 | 0.01 | 0.78 | 0.68 | 0.22 | 0.28 |
| 47184 | 0 | 104906 | MVGGVVIA     | 2.14 | 0.01 | 0.78 | 1.15 | 0.22 | 0.28 |
| 47185 | 0 | 104906 | MVGGVVIA     | 2.14 | 0.01 | 0.78 | 1.15 | 0.22 | 0.28 |
| 47186 | 0 | 104906 | MVGGVVIA     | 2.14 | 0.01 | 0.78 | 1.15 | 0.22 | 1.75 |
| 47187 | 0 | 104906 | MVGGVVIA     | 2.14 | 0.01 | 0.78 | 1.15 | 0.22 | 2.02 |
| 47188 | 0 | 104906 | MVGGVVIA     | 2.14 | 0.01 | 0.78 | 1.15 | 0.22 | 2.02 |
| 47189 | 0 | 104906 | MVGGVVIA     | 2.14 | 0.01 | 0.78 | 1.15 | 0.22 | 0.28 |
| 47190 | 0 | 105971 | MVGGVVIAT    | 2.23 | 0.01 | 0.78 | 0.68 | 0.22 | 0.28 |
| 47191 | 0 | 105971 | MVGGVVIAT    | 2.23 | 0.01 | 0.78 | 0.68 | 0.22 | 0.28 |
| 47192 | 0 | 105971 | MVGGVVIAT    | 2.23 | 0.01 | 0.78 | 0.68 | 0.22 | 0.28 |
| 47193 | 0 | 105971 | MVGGVVIAT    | 2.23 | 0.01 | 0.78 | 0.68 | 0.22 | 1.48 |
| 47194 | 0 | 105971 | MVGGVVIAT    | 2.23 | 0.01 | 0.78 | 0.68 | 0.22 | 1.48 |
| 47195 | 0 | 105971 | MVGGVVIAT    | 2.23 | 0.01 | 0.78 | 0.68 | 0.22 | 0.85 |
| 47196 | 0 | 105971 | MVGGVVIAT    | 2.23 | 0.01 | 0.78 | 0.68 | 0.22 | 0.85 |
| 47197 | 0 | 105971 | MVGGVVIAT    | 2.23 | 0.01 | 0.78 | 0.68 | 0.22 | 0.85 |
| 47198 | 0 | 121634 | MVHWKNQFDH   | 2.29 | 0.01 | 0.78 | 0.68 | 0.22 | 0.28 |
| 47199 | 0 | 42951  | MVIITFKSGA   | 2.28 | 0.01 | 2.66 | 0.68 | 0.22 | 0.28 |



|       |   |        |                                |      |      |      |      |      |      |
|-------|---|--------|--------------------------------|------|------|------|------|------|------|
| 47200 | 0 | 42951  | MVIITFKSGA                     | 2.28 | 0.01 | 2.66 | 0.68 | 0.22 | 0.28 |
| 47201 | 0 | 42951  | MVIITFKSGA                     | 2.28 | 0.01 | 2.66 | 0.68 | 0.22 | 0.28 |
| 47202 | 0 | 42951  | MVIITFKSGA                     | 2.28 | 0.01 | 2.66 | 0.68 | 0.22 | 0.28 |
| 47203 | 0 | 42951  | MVIITFKSGA                     | 2.28 | 0.01 | 2.66 | 0.68 | 0.22 | 0.28 |
| 47204 | 0 | 42951  | MVIITFKSGA                     | 2.28 | 0.01 | 2.66 | 0.68 | 0.22 | 0.28 |
| 47205 | 0 | 42951  | MVIITFKSGA                     | 2.28 | 0.01 | 2.66 | 0.68 | 0.22 | 0.28 |
| 47206 | 0 | 42952  | MVIITFKSGETFQVEVPG<br>SQHIDSQK | 3.21 | 0.01 | 2.24 | 1.12 | 0.22 | 0.28 |
| 47207 | 0 | 42952  | MVIITFKSGETFQVEVPG<br>SQHIDSQK | 3.21 | 0.01 | 2.24 | 1.12 | 0.22 | 0.28 |
| 47208 | 0 | 42952  | MVIITFKSGETFQVEVPG<br>SQHIDSQK | 3.21 | 0.01 | 2.24 | 2.36 | 0.22 | 0.28 |
| 47209 | 0 | 42952  | MVIITFKSGETFQVEVPG<br>SQHIDSQK | 3.21 | 0.01 | 2.24 | 2.36 | 0.22 | 0.28 |
| 47210 | 0 | 42952  | MVIITFKSGETFQVEVPG<br>SQHIDSQK | 3.21 | 0.01 | 2.24 | 0.44 | 0.22 | 0.28 |
| 47211 | 0 | 42952  | MVIITFKSGETFQVEVPG<br>SQHIDSQK | 3.21 | 0.01 | 2.24 | 0.44 | 0.22 | 1.34 |
| 47212 | 0 | 227398 | MVITQDCDCHSPAS                 | 2.66 | 0.01 | 2.97 | 0.44 | 1.59 | 0.28 |
| 47213 | 0 | 227398 | MVITQDCDCHSPAS                 | 2.66 | 0.01 | 2.97 | 0.44 | 0.85 | 0.28 |
| 47214 | 0 | 172427 | MVKRYLTSFPIDDRV                | 2.63 | 0.01 | 0.78 | 0.44 | 1.41 | 0.28 |
| 47215 | 0 | 42957  | MVKSHIGSWILVLFVA               | 2.73 | 0.01 | 2.52 | 1.15 | 0.22 | 0.28 |
| 47216 | 0 | 42965  | MVLLQM                         | 1.92 | 0.01 | 2.40 | 0.44 | 0.85 | 0.28 |
| 47217 | 0 | 42965  | MVLLQM                         | 1.92 | 0.01 | 2.40 | 0.44 | 0.85 | 0.28 |
| 47218 | 0 | 42965  | MVLLQM                         | 1.92 | 0.01 | 2.40 | 0.44 | 0.85 | 0.28 |
| 47219 | 0 | 42965  | MVLLQM                         | 1.92 | 0.01 | 2.40 | 0.44 | 0.85 | 0.28 |
| 47220 | 0 | 42965  | MVLLQM                         | 1.92 | 0.01 | 2.40 | 0.44 | 0.85 | 0.28 |
| 47221 | 0 | 142913 | MVLNEGTSHTA                    | 2.39 | 0.01 | 1.66 | 1.20 | 0.22 | 1.27 |
| 47222 | 0 | 142913 | MVLNEGTSHTA                    | 2.39 | 0.01 | 1.66 | 1.20 | 0.22 | 1.48 |
| 47223 | 0 | 142913 | MVLNEGTSHTA                    | 2.39 | 0.01 | 1.66 | 1.20 | 0.22 | 0.85 |
| 47224 | 0 | 142913 | MVLNEGTSHTA                    | 2.39 | 0.01 | 1.66 | 1.20 | 0.22 | 1.34 |
| 47225 | 0 | 142913 | MVLNEGTSHTA                    | 2.39 | 0.01 | 1.66 | 1.20 | 0.22 | 1.75 |
| 47226 | 0 | 78213  | MVLVYESIAYSF                   | 2.55 | 0.01 | 2.14 | 1.12 | 0.22 | 0.28 |
| 47227 | 0 | 78213  | MVLVYESIAYSF                   | 2.55 | 0.01 | 2.14 | 1.12 | 0.22 | 0.28 |
| 47228 | 0 | 187076 | MVNAIGQIDFVNLG                 | 2.66 | 0.01 | 3.36 | 1.20 | 0.22 | 0.28 |
| 47229 | 0 | 187076 | MVNAIGQIDFVNLG                 | 2.66 | 0.01 | 3.36 | 1.20 | 0.22 | 1.27 |
| 47230 | 0 | 42977  | MVNINDTDWIPKGCN<br>E           | 2.78 | 0.01 | 2.86 | 2.02 | 1.59 | 0.28 |
| 47231 | 0 | 42977  | MVNINDTDWIPKGCN<br>E           | 2.78 | 0.01 | 2.86 | 2.02 | 0.22 | 0.28 |
| 47232 | 0 | 120810 | MVNKSRRMMPAV                   | 2.41 | 0.01 | 2.86 | 0.44 | 0.85 | 0.28 |
| 47233 | 0 | 127747 | MVPELTE                        | 2.02 | 0.01 | 0.90 | 0.44 | 1.13 | 1.39 |
| 47234 | 0 | 42980  | MVPKQGPL                       | 2.12 | 0.01 | 0.78 | 0.44 | 1.74 | 0.28 |
| 47235 | 0 | 172428 | MVPLEEAAQEYQEK                 | 2.69 | 0.01 | 0.78 | 0.44 | 1.41 | 0.28 |
| 47236 | 0 | 450846 | MVPPSYD                        | 2.01 | 0.01 | 0.90 | 0.44 | 1.23 | 1.39 |
| 47237 | 0 | 450847 | MVQHYAE                        | 1.99 | 0.01 | 0.90 | 0.44 | 1.23 | 1.39 |

|       |   |        |                                   |      |      |      |      |      |      |
|-------|---|--------|-----------------------------------|------|------|------|------|------|------|
| 47238 | 0 | 172429 | MVQIITYRDYLPLVL                   | 2.67 | 0.01 | 0.78 | 0.44 | 1.41 | 0.28 |
| 47239 | 0 | 172429 | MVQIITYRDYLPLVL                   | 2.67 | 0.01 | 0.78 | 0.44 | 1.13 | 0.28 |
| 47240 | 0 | 42984  | MVQVVYD                           | 2.03 | 0.01 | 2.21 | 0.44 | 0.85 | 0.28 |
| 47241 | 0 | 42984  | MVQVVYD                           | 2.03 | 0.01 | 2.21 | 1.12 | 0.22 | 0.28 |
| 47242 | 0 | 42984  | MVQVVYD                           | 2.03 | 0.01 | 2.21 | 1.20 | 0.22 | 0.85 |
| 47243 | 0 | 42984  | MVQVVYD                           | 2.03 | 0.01 | 2.21 | 1.12 | 0.22 | 0.28 |
| 47244 | 0 | 42984  | MVQVVYD                           | 2.03 | 0.01 | 2.21 | 1.12 | 0.22 | 0.28 |
| 47245 | 0 | 42985  | MVQVVYDYQH                        | 2.34 | 0.01 | 2.21 | 1.12 | 0.22 | 0.28 |
| 47246 | 0 | 42985  | MVQVVYDYQH                        | 2.34 | 0.01 | 2.21 | 1.12 | 0.22 | 0.28 |
| 47247 | 0 | 134170 | MVRHENRCVA                        | 2.31 | 0.01 | 0.78 | 0.68 | 0.22 | 1.27 |
| 47248 | 0 | 134170 | MVRHENRCVA                        | 2.31 | 0.01 | 0.78 | 0.68 | 0.22 | 1.39 |
| 47249 | 0 | 136518 | MVRKGEKKLAKP                      | 2.47 | 0.01 | 3.48 | 3.70 | 0.85 | 1.34 |
| 47250 | 0 | 136518 | MVRKGEKKLAKP                      | 2.47 | 0.01 | 3.48 | 0.68 | 0.22 | 1.34 |
| 47251 | 0 | 190860 | MVRVSAIVGAAASVFVC<br>LSA          | 2.97 | 0.01 | 3.50 | 2.13 | 0.22 | 0.28 |
| 47252 | 0 | 172430 | MVSFYNITDHGSLIY                   | 2.64 | 0.01 | 0.78 | 0.44 | 1.41 | 0.28 |
| 47253 | 0 | 172430 | MVSFYNITDHGSLIY                   | 2.64 | 0.01 | 0.78 | 0.44 | 1.13 | 0.28 |
| 47254 | 0 | 118529 | MVSGMSLRPRVNYLQ                   | 2.69 | 0.01 | 3.78 | 0.44 | 1.13 | 0.85 |
| 47255 | 0 | 340620 | MVSQIFFGSDGVNLE                   | 2.65 | 0.01 | 1.61 | 0.44 | 0.85 | 1.28 |
| 47256 | 0 | 231251 | MVTGLRNIPSIQSRGLF<br>GAIAGFIE     | 3.15 | 0.01 | 2.97 | 0.68 | 0.22 | 2.97 |
| 47257 | 0 | 231251 | MVTGLRNIPSIQSRGLF<br>GAIAGFIE     | 3.15 | 0.01 | 2.97 | 0.68 | 0.22 | 0.28 |
| 47258 | 0 | 42999  | MVTILLCCMTSCCCLK                  | 2.84 | 0.01 | 2.48 | 0.44 | 0.85 | 0.28 |
| 47259 | 0 | 110948 | MVTSDAQIFNKPYWL                   | 2.57 | 0.01 | 1.86 | 0.68 | 0.22 | 1.48 |
| 47260 | 0 | 110948 | MVTSDAQIFNKPYWL                   | 2.57 | 0.01 | 1.86 | 0.68 | 0.22 | 0.85 |
| 47261 | 0 | 110948 | MVTSDAQIFNKPYWL                   | 2.57 | 0.01 | 1.86 | 0.68 | 0.22 | 0.85 |
| 47262 | 0 | 110948 | MVTSDAQIFNKPYWL                   | 2.57 | 0.01 | 1.86 | 0.68 | 0.22 | 0.85 |
| 47263 | 0 | 110948 | MVTSDAQIFNKPYWL                   | 2.57 | 0.01 | 1.86 | 0.68 | 0.22 | 1.27 |
| 47264 | 0 | 117333 | MVTSTITEKLLKNLVKI                 | 2.82 | 0.01 | 4.33 | 0.44 | 1.13 | 1.27 |
| 47265 | 0 | 117333 | MVTSTITEKLLKNLVKI                 | 2.82 | 0.01 | 4.33 | 0.44 | 1.13 | 0.28 |
| 47266 | 0 | 117333 | MVTSTITEKLLKNLVKI                 | 2.82 | 0.01 | 4.33 | 0.44 | 1.13 | 0.28 |
| 47267 | 0 | 117333 | MVTSTITEKLLKNLVKI                 | 2.82 | 0.01 | 4.33 | 0.44 | 1.41 | 0.28 |
| 47268 | 0 | 340638 | MVVNPLVVRLWFERE                   | 2.69 | 0.01 | 1.61 | 0.44 | 0.85 | 1.28 |
| 47269 | 0 | 120103 | MVVTRTEKDSYVVAFS<br>D<br>EMVPCPVT | 3.16 | 0.01 | 0.78 | 0.68 | 0.22 | 0.28 |
| 47270 | 0 | 132489 | MVVTRTEKDSYVVASF<br>D<br>EMVPCPVT | 3.16 | 0.01 | 0.78 | 3.72 | 0.22 | 0.28 |
| 47271 | 0 | 79938  | MVVTSVAMKPYE                      | 2.48 | 0.01 | 2.14 | 3.17 | 0.22 | 0.28 |
| 47272 | 0 | 79939  | MVVTSVAMKPYEVTPT<br>RMLVCGIAA     | 3.14 | 0.01 | 2.14 | 3.17 | 0.22 | 0.28 |
| 47273 | 0 | 79939  | MVVTSVAMKPYEVTPT<br>RMLVCGIAA     | 3.14 | 0.01 | 2.14 | 1.12 | 0.22 | 0.28 |
| 47274 | 0 | 172432 | MVWQETVKLGCVV                     | 2.51 | 0.01 | 3.38 | 0.44 | 0.85 | 2.51 |

|       |   |        |                         |      |      |      |      |      |      |
|-------|---|--------|-------------------------|------|------|------|------|------|------|
| 47275 | 0 | 123526 | MVYEALDCI               | 2.18 | 0.01 | 2.28 | 2.00 | 0.22 | 0.28 |
| 47276 | 0 | 123526 | MVYEALDCI               | 2.18 | 0.01 | 2.28 | 2.00 | 0.22 | 0.28 |
| 47277 | 0 | 172433 | MVYGSEEP LARNLRN        | 2.65 | 0.01 | 0.78 | 0.44 | 1.13 | 0.28 |
|       |   |        | MVYGTGGLAYGKV KSA       |      |      |      |      |      |      |
| 47278 | 0 | 156380 | FNLGDDAPALHTWSDK<br>TK  | 3.46 | 0.01 | 4.15 | 0.68 | 0.22 | 0.28 |
|       |   |        | MVYGTGGLAYGKV KSA       |      |      |      |      |      |      |
| 47279 | 0 | 156380 | FNLGDDAPALHTWSDK<br>TK  | 3.46 | 0.01 | 4.15 | 0.68 | 0.22 | 0.28 |
|       |   |        | MVYGTGGLAYGKV KSA       |      |      |      |      |      |      |
| 47280 | 0 | 156380 | FNLGDDAPALHTWSDK<br>TK  | 3.46 | 0.01 | 4.15 | 0.68 | 0.22 | 0.28 |
|       |   |        |                         |      |      |      |      |      |      |
| 47281 | 0 | 165129 | MWAAESRKPMMSG           | 2.47 | 0.01 | 0.90 | 0.44 | 1.23 | 1.27 |
| 47282 | 0 | 145369 | MWCKIGHDRCEE            | 2.43 | 0.01 | 2.80 | 0.68 | 0.22 | 0.28 |
| 47283 | 0 | 145369 | MWCKIGHDRCEE            | 2.43 | 0.01 | 2.80 | 0.68 | 0.22 | 0.85 |
| 47284 | 0 | 145369 | MWCKIGHDRCEE            | 2.43 | 0.01 | 2.80 | 0.68 | 0.22 | 0.28 |
| 47285 | 0 | 145369 | MWCKIGHDRCEE            | 2.43 | 0.01 | 2.80 | 0.68 | 0.22 | 0.28 |
| 47286 | 0 | 145369 | MWCKIGHDRCEE            | 2.43 | 0.01 | 2.80 | 0.68 | 0.22 | 0.28 |
| 47287 | 0 | 145369 | MWCKIGHDRCEE            | 2.43 | 0.01 | 2.80 | 2.78 | 0.22 | 0.28 |
| 47288 | 0 | 103431 | MWELYLAYSEAGFRS         | 2.68 | 0.01 | 2.04 | 0.44 | 0.85 | 1.28 |
| 47289 | 0 | 132871 | MWGENTP                 | 1.99 | 0.01 | 0.90 | 0.44 | 1.41 | 1.39 |
|       |   |        |                         |      |      |      |      |      |      |
| 47290 | 0 | 340654 | MWGPRHVDPDHFRST         | 2.66 | 0.01 | 1.61 | 0.44 | 0.85 | 1.28 |
|       |   |        |                         |      |      |      |      |      |      |
| 47291 | 0 | 118028 | MWGRALRKAIA             | 2.41 | 0.01 | 0.78 | 0.44 | 1.13 | 0.28 |
| 47292 | 0 | 118028 | MWGRALRKAIA             | 2.41 | 0.01 | 0.78 | 0.44 | 1.41 | 0.28 |
| 47293 | 0 | 43013  | MWLDVMYLKGGG            | 2.47 | 0.01 | 0.90 | 1.15 | 0.22 | 0.28 |
| 47294 | 0 | 43013  | MWLDVMYLKGGG            | 2.47 | 0.01 | 0.90 | 0.44 | 0.85 | 0.28 |
| 47295 | 0 | 43013  | MWLDVMYLKGGG            | 2.47 | 0.01 | 0.90 | 1.15 | 0.22 | 1.27 |
| 47296 | 0 | 43013  | MWLDVMYLKGGG            | 2.47 | 0.01 | 0.90 | 0.68 | 0.22 | 0.28 |
| 47297 | 0 | 43013  | MWLDVMYLKGGG            | 2.47 | 0.01 | 0.90 | 0.68 | 0.22 | 0.28 |
| 47298 | 0 | 103432 | MWLSPNGTIRN ILGG        | 2.66 | 0.01 | 2.04 | 0.44 | 0.85 | 1.28 |
| 47299 | 0 | 104139 | MWNDFW                  | 1.90 | 0.01 | 0.90 | 1.15 | 0.22 | 0.28 |
| 47300 | 0 | 104139 | MWNDFW                  | 1.90 | 0.01 | 0.90 | 1.15 | 0.22 | 0.28 |
| 47301 | 0 | 165131 | MWPAEARKPMMSG           | 2.48 | 0.01 | 0.90 | 0.44 | 1.23 | 0.85 |
| 47302 | 0 | 165132 | MWPAESAKPMMSG           | 2.50 | 0.01 | 0.90 | 0.44 | 1.23 | 0.85 |
| 47303 | 0 | 165133 | MWPAESRAPMSG            | 2.50 | 0.01 | 0.90 | 0.44 | 1.23 | 0.85 |
| 47304 | 0 | 165135 | MWPAESRK PASG           | 2.48 | 0.01 | 0.90 | 0.44 | 1.23 | 0.85 |
| 47305 | 0 | 165136 | MWPAESRKPMAG            | 2.48 | 0.01 | 0.90 | 0.44 | 1.23 | 0.85 |
| 47306 | 0 | 165137 | MWPAESRKPM SA           | 2.50 | 0.01 | 0.90 | 0.44 | 1.23 | 0.85 |
| 47307 | 0 | 165138 | MWPAESRKPMMSG           | 2.48 | 0.01 | 3.78 | 0.44 | 1.23 | 0.85 |
| 47308 | 0 | 78214  | MWPQKT                  | 1.88 | 0.01 | 0.90 | 2.02 | 1.59 | 1.39 |
|       |   |        |                         |      |      |      |      |      |      |
| 47309 | 0 | 43023  | MWRTWLMKTHGIESW         | 2.67 | 0.01 | 0.90 | 0.44 | 1.59 | 0.28 |
|       |   |        |                         |      |      |      |      |      |      |
| 47310 | 0 | 225809 | MWRVRKRGYFGIWSFP<br>LII | 2.88 | 0.01 | 2.19 | 0.44 | 1.41 | 0.28 |
|       |   |        |                         |      |      |      |      |      |      |
| 47311 | 0 | 225809 | MWRVRKRGYFGIWSFP<br>LII | 2.88 | 0.01 | 2.19 | 0.44 | 1.41 | 1.48 |

|       |   |        |                                    |      |      |      |      |      |      |
|-------|---|--------|------------------------------------|------|------|------|------|------|------|
| 47312 | 0 | 225809 | MWRVRKRGYFGIWSFP<br>LII            | 2.88 | 0.01 | 2.19 | 0.44 | 1.41 | 2.75 |
| 47313 | 0 | 225809 | MWRVRKRGYFGIWSFP<br>LII            | 2.88 | 0.01 | 2.19 | 0.44 | 1.41 | 2.75 |
| 47314 | 0 | 225809 | MWRVRKRGYFGIWSFP<br>LII            | 2.88 | 0.01 | 2.19 | 0.44 | 1.41 | 2.75 |
| 47315 | 0 | 225809 | MWRVRKRGYFGIWSFP<br>LII            | 2.88 | 0.01 | 2.19 | 0.44 | 1.41 | 1.27 |
| 47316 | 0 | 123527 | MWSDFLGDR                          | 2.21 | 0.01 | 2.28 | 2.00 | 0.22 | 0.28 |
| 47317 | 0 | 123527 | MWSDFLGDR                          | 2.21 | 0.01 | 2.28 | 2.00 | 0.22 | 0.28 |
| 47318 | 0 | 123528 | MWSNFLGDR                          | 2.18 | 0.01 | 2.28 | 2.00 | 0.22 | 0.28 |
| 47319 | 0 | 43039  | MYASSGIG                           | 2.13 | 0.01 | 2.21 | 1.12 | 0.22 | 0.28 |
| 47320 | 0 | 43039  | MYASSGIG                           | 2.13 | 0.01 | 2.21 | 0.44 | 0.85 | 0.28 |
| 47321 | 0 | 43040  | MYASSGIGPE                         | 2.30 | 0.01 | 2.21 | 1.12 | 0.22 | 0.28 |
| 47322 | 0 | 43040  | MYASSGIGPE                         | 2.30 | 0.01 | 2.21 | 1.12 | 0.22 | 0.28 |
| 47323 | 0 | 179285 | MYDIDNNGFLDKNDF                    | 2.70 | 0.01 | 2.36 | 0.44 | 1.23 | 1.28 |
| 47324 | 0 | 179285 | MYDIDNNGFLDKNDF                    | 2.70 | 0.01 | 2.36 | 0.44 | 1.23 | 1.27 |
| 47325 | 0 | 179285 | MYDIDNNGFLDKNDF                    | 2.70 | 0.01 | 2.36 | 0.44 | 1.23 | 1.28 |
| 47326 | 0 | 101914 | MYKLAGKTLQRVVESEV<br>G             | 2.83 | 0.01 | 3.11 | 1.20 | 0.22 | 0.28 |
| 47327 | 0 | 43060  | MYLICPEQRSPL                       | 2.45 | 0.01 | 0.90 | 0.44 | 0.85 | 0.28 |
| 47328 | 0 | 43084  | MYRVFEVSVIRNPGL                    | 2.64 | 0.01 | 2.72 | 0.44 | 0.85 | 0.28 |
| 47329 | 0 | 43085  | MYRYPNQVYRVPV                      | 2.58 | 0.01 | 1.75 | 2.19 | 0.22 | 1.34 |
| 47330 | 0 | 43085  | MYRYPNQVYRVPV                      | 2.58 | 0.01 | 1.75 | 2.19 | 0.22 | 0.28 |
| 47331 | 0 | 181400 | MYVPPGAPKPTSRS                     | 2.66 | 0.01 | 2.82 | 1.15 | 0.22 | 0.28 |
| 47332 | 0 | 43106  | MYYLKNTNF                          | 2.22 | 0.01 | 2.24 | 1.12 | 0.22 | 0.28 |
| 47333 | 0 | 172439 | MYYVLQFLKEDLPKV                    | 2.67 | 0.01 | 0.78 | 0.44 | 1.41 | 0.28 |
| 47334 | 0 | 43107  | NAAAAALDKKQRNFD                    | 2.69 | 0.01 | 0.78 | 0.44 | 0.85 | 1.27 |
| 47335 | 0 | 43110  | NAAFS                              | 1.75 | 0.01 | 3.20 | 2.22 | 0.85 | 0.28 |
| 47336 | 0 | 43115  | NAAGHRVAISTYTTSLG<br>AGPVSISAVAVLA | 3.36 | 0.01 | 2.53 | 0.44 | 0.85 | 0.28 |
| 47337 | 0 | 43116  | NAAGNAAGNAAGNAA<br>G               | 2.81 | 0.01 | 3.93 | 1.15 | 0.22 | 0.28 |
| 47338 | 0 | 43116  | NAAGNAAGNAAGNAA<br>G               | 2.81 | 0.01 | 3.93 | 1.15 | 0.22 | 0.28 |
| 47339 | 0 | 43116  | NAAGNAAGNAAGNAA<br>G               | 2.81 | 0.01 | 3.93 | 2.16 | 0.22 | 0.28 |
| 47340 | 0 | 43116  | NAAGNAAGNAAGNAA<br>G               | 2.81 | 0.01 | 3.93 | 1.15 | 0.22 | 0.28 |
| 47341 | 0 | 43116  | NAAGNAAGNAAGNAA<br>G               | 2.81 | 0.01 | 3.93 | 0.44 | 1.74 | 0.28 |
| 47342 | 0 | 43116  | NAAGNAAGNAAGNAA<br>G               | 2.81 | 0.01 | 3.93 | 1.15 | 0.22 | 0.28 |
| 47343 | 0 | 43117  | NAAGNAAGNAAGNAA<br>GNAAGNAAG       | 3.20 | 0.01 | 1.66 | 1.15 | 0.22 | 0.28 |

|       |   |        |                               |      |      |      |      |      |      |
|-------|---|--------|-------------------------------|------|------|------|------|------|------|
| 47344 | 0 | 43117  | NAAGNAAGNAAGNAA<br>GNAAGNAAG  | 3.20 | 0.01 | 1.66 | 0.44 | 1.74 | 1.48 |
| 47345 | 0 | 43117  | NAAGNAAGNAAGNAA<br>GNAAGNAAG  | 3.20 | 0.01 | 1.66 | 0.44 | 1.74 | 0.28 |
| 47346 | 0 | 43117  | NAAGNAAGNAAGNAA<br>GNAAGNAAG  | 3.20 | 0.01 | 4.63 | 2.82 | 0.22 | 0.28 |
| 47347 | 0 | 43117  | NAAGNAAGNAAGNAA<br>GNAAGNAAG  | 3.20 | 0.01 | 4.63 | 2.82 | 0.22 | 1.27 |
| 47348 | 0 | 98264  | NAANEADYQA                    | 2.36 | 0.01 | 2.39 | 0.68 | 0.22 | 0.28 |
| 47349 | 0 | 98264  | NAANEADYQA                    | 2.36 | 0.01 | 2.39 | 2.98 | 0.22 | 0.28 |
| 47350 | 0 | 104907 | NAASAYCSTW                    | 2.33 | 0.01 | 2.60 | 0.44 | 1.23 | 0.85 |
| 47351 | 0 | 522626 | NAASDALEALADQTD               | 2.71 | 0.01 | 2.24 | 0.44 | 1.41 | 1.28 |
| 47352 | 0 | 43123  | NAASIAGLFL                    | 2.33 | 0.01 | 3.20 | 0.44 | 1.41 | 0.28 |
| 47353 | 0 | 188373 | NADIDLETKA                    | 2.31 | 0.01 | 2.92 | 1.81 | 0.22 | 0.85 |
| 47354 | 0 | 122860 | NADLCDSVPKWDR LPC<br>ASS      | 2.89 | 0.01 | 3.08 | 1.12 | 0.22 | 0.28 |
| 47355 | 0 | 43134  | NADMNEITER YFKLAEN<br>YY      | 2.88 | 0.01 | 1.66 | 0.44 | 0.85 | 0.28 |
| 47356 | 0 | 130977 | NADYIKNFIMEKVKEHQ<br>KLLDVNNP | 3.14 | 0.01 | 2.96 | 0.68 | 0.22 | 0.85 |
| 47357 | 0 | 130977 | NADYIKNFIMEKVKEHQ<br>KLLDVNNP | 3.14 | 0.01 | 2.96 | 0.68 | 0.22 | 0.28 |
| 47358 | 0 | 130977 | NADYIKNFIMEKVKEHQ<br>KLLDVNNP | 3.14 | 0.01 | 2.96 | 0.68 | 0.22 | 0.28 |
| 47359 | 0 | 130977 | NADYIKNFIMEKVKEHQ<br>KLLDVNNP | 3.14 | 0.01 | 2.96 | 0.68 | 0.22 | 0.28 |
| 47360 | 0 | 130977 | NADYIKNFIMEKVKEHQ<br>KLLDVNNP | 3.14 | 0.01 | 2.96 | 0.68 | 0.22 | 0.28 |
| 47361 | 0 | 130977 | NADYIKNFIMEKVKEHQ<br>KLLDVNNP | 3.14 | 0.01 | 2.96 | 0.68 | 0.22 | 1.34 |
| 47362 | 0 | 110949 | NAEKVLEKLGYA                  | 2.49 | 0.01 | 3.15 | 3.53 | 0.22 | 0.28 |
| 47363 | 0 | 110949 | NAEKVLEKLGYA                  | 2.49 | 0.01 | 3.15 | 0.44 | 1.59 | 0.28 |
| 47364 | 0 | 110949 | NAEKVLEKLGYA                  | 2.49 | 0.01 | 3.15 | 1.12 | 0.22 | 1.27 |
| 47365 | 0 | 133652 | NAENVYVWKQGV DVK<br>AMTSNVAS  | 3.08 | 0.01 | 0.90 | 1.15 | 0.22 | 0.28 |
| 47366 | 0 | 133652 | NAENVYVWKQGV DVK<br>AMTSNVAS  | 3.08 | 0.01 | 0.90 | 1.15 | 0.22 | 0.28 |
| 47367 | 0 | 133652 | NAENVYVWKQGV DVK<br>AMTSNVAS  | 3.08 | 0.01 | 0.90 | 1.15 | 0.22 | 2.12 |
| 47368 | 0 | 133652 | NAENVYVWKQGV DVK<br>AMTSNVAS  | 3.08 | 0.01 | 0.90 | 1.15 | 0.22 | 1.27 |
| 47369 | 0 | 133652 | NAENVYVWKQGV DVK<br>AMTSNVAS  | 3.08 | 0.01 | 0.90 | 1.15 | 0.22 | 1.66 |
| 47370 | 0 | 522634 | NAESNKQNTASTETT               | 2.72 | 0.01 | 2.24 | 0.44 | 1.41 | 1.28 |
| 47371 | 0 | 152824 | NAEVHASFFD                    | 2.30 | 0.01 | 2.18 | 2.16 | 0.22 | 0.28 |
| 47372 | 0 | 103434 | NAFLTALTNAGIAYD               | 2.71 | 0.01 | 2.04 | 0.44 | 0.85 | 1.28 |

|       |   |        |                                              |      |      |      |      |      |      |
|-------|---|--------|----------------------------------------------|------|------|------|------|------|------|
| 47373 | 0 | 43145  | NAFNCTFEYISDAFSLD                            | 2.80 | 0.01 | 2.48 | 0.44 | 0.85 | 0.28 |
| 47374 | 0 | 77960  | NAFQLSPTRLLM                                 | 2.44 | 0.01 | 0.90 | 1.15 | 0.22 | 1.39 |
| 47375 | 0 | 235408 | NAGADPNTTN                                   | 2.35 | 0.01 | 0.78 | 1.15 | 0.22 | 0.28 |
| 47376 | 0 | 118029 | NAGG                                         | 1.55 | 0.01 | 4.33 | 2.43 | 0.22 | 0.28 |
| 47377 | 0 | 99480  | NAGGEQEERGQRRWS                              | 2.70 | 0.01 | 2.16 | 0.44 | 1.23 | 1.48 |
| 47378 | 0 | 43152  | NAGGNAGGNAGGNAG<br>GNAGG                     | 3.02 | 0.01 | 4.33 | 2.43 | 0.22 | 0.28 |
| 47379 | 0 | 43152  | NAGGNAGGNAGGNAG<br>GNAGG                     | 3.02 | 0.01 | 4.33 | 2.43 | 0.22 | 1.48 |
| 47380 | 0 | 43152  | NAGGNAGGNAGGNAG<br>GNAGG                     | 3.02 | 0.01 | 4.33 | 2.43 | 0.22 | 1.34 |
| 47381 | 0 | 43153  | NAGKEGAIIFQQ                                 | 2.46 | 0.01 | 2.40 | 0.44 | 1.59 | 0.28 |
| 47382 | 0 | 43153  | NAGKEGAIIFQQ                                 | 2.46 | 0.01 | 2.40 | 1.20 | 0.22 | 0.28 |
| 47383 | 0 | 43153  | NAGKEGAIIFQQ                                 | 2.46 | 0.01 | 2.40 | 0.44 | 1.59 | 0.28 |
| 47384 | 0 | 43153  | NAGKEGAIIFQQ                                 | 2.46 | 0.01 | 2.40 | 0.44 | 1.59 | 0.28 |
| 47385 | 0 | 43157  | NAGTSL                                       | 1.88 | 0.01 | 3.27 | 2.02 | 0.22 | 0.28 |
| 47386 | 0 | 43157  | NAGTSL                                       | 1.88 | 0.01 | 3.27 | 2.82 | 0.22 | 0.28 |
| 47387 | 0 | 43159  | NAGVLTCSLSK                                  | 2.39 | 0.01 | 3.24 | 0.68 | 0.22 | 0.28 |
| 47388 | 0 | 43159  | NAGVLTCSLSK                                  | 2.39 | 0.01 | 3.24 | 0.44 | 1.23 | 2.35 |
| 47389 | 0 | 43159  | NAGVLTCSLSK                                  | 2.39 | 0.01 | 3.24 | 0.68 | 0.22 | 0.28 |
| 47390 | 0 | 43160  | NAGVLTCSLSKR                                 | 2.45 | 0.01 | 3.24 | 0.68 | 0.22 | 1.27 |
| 47391 | 0 | 43160  | NAGVLTCSLSKR                                 | 2.45 | 0.01 | 3.24 | 0.68 | 0.22 | 0.28 |
| 47392 | 0 | 156381 | NAGYAGGKFKHPFSSFD<br>KEDGEHVSGSPDVTAG<br>GFV | 3.54 | 0.01 | 4.15 | 0.68 | 0.22 | 0.28 |
| 47393 | 0 | 156381 | NAGYAGGKFKHPFSSFD<br>KEDGEHVSGSPDVTAG<br>GFV | 3.54 | 0.01 | 4.23 | 0.68 | 0.22 | 0.28 |
| 47394 | 0 | 156381 | NAGYAGGKFKHPFSSFD<br>KEDGEHVSGSPDVTAG<br>GFV | 3.54 | 0.01 | 4.15 | 0.68 | 0.22 | 0.28 |
| 47395 | 0 | 156381 | NAGYAGGKFKHPFSSFD<br>KEDGEHVSGSPDVTAG<br>GFV | 3.54 | 0.01 | 4.23 | 0.68 | 0.22 | 0.28 |
| 47396 | 0 | 156381 | NAGYAGGKFKHPFSSFD<br>KEDGEHVSGSPDVTAG<br>GFV | 3.54 | 0.01 | 4.23 | 0.68 | 0.22 | 0.28 |
| 47397 | 0 | 156381 | NAGYAGGKFKHPFSSFD<br>KEDGEHVSGSPDVTAG<br>GFV | 3.54 | 0.01 | 4.15 | 0.68 | 0.22 | 0.28 |
| 47398 | 0 | 156381 | NAGYAGGKFKHPFSSFD<br>KEDGEHVSGSPDVTAG<br>GFV | 3.54 | 0.01 | 4.23 | 0.68 | 0.22 | 0.28 |

|       |   |        |                          |      |      |      |      |      |      |
|-------|---|--------|--------------------------|------|------|------|------|------|------|
|       |   |        | NAGYAGGKFKHPFSSFD        |      |      |      |      |      |      |
| 47399 | 0 | 156381 | KEDGEHVSIGSPDVTAG<br>GFV | 3.54 | 0.01 | 4.93 | 2.00 | 1.74 | 0.28 |
|       |   |        | NAGYAGGKFKHPFSSFD        |      |      |      |      |      |      |
| 47400 | 0 | 156381 | KEDGEHVSIGSPDVTAG<br>GFV | 3.54 | 0.01 | 4.23 | 0.68 | 0.22 | 0.28 |
|       |   |        | NAGYAGGKFKHPFSSFD        |      |      |      |      |      |      |
| 47401 | 0 | 43162  | KEDNEQVSGS               | 3.25 | 0.01 | 3.57 | 0.68 | 0.22 | 0.28 |
|       |   |        | NAGYAGGKFKHPFSSFD        |      |      |      |      |      |      |
| 47402 | 0 | 43162  | KEDNEQVSGS               | 3.25 | 0.01 | 3.57 | 0.68 | 0.22 | 0.28 |
|       |   |        | NAGYAGGKFKHPFSSFD        |      |      |      |      |      |      |
| 47403 | 0 | 43162  | KEDNEQVSGS               | 3.25 | 0.01 | 3.57 | 0.68 | 0.22 | 0.28 |
|       |   |        | NAGYAGGKFKHPFSSFD        |      |      |      |      |      |      |
| 47404 | 0 | 43162  | KEDNEQVSGS               | 3.25 | 0.01 | 3.57 | 0.68 | 0.22 | 0.28 |
|       |   |        | NAGYAGGKFKHPFSSFD        |      |      |      |      |      |      |
| 47405 | 0 | 43162  | KEDNEQVSGS               | 3.25 | 0.01 | 3.57 | 0.68 | 0.22 | 0.28 |
|       |   |        | NAGYAGGKFKHPFSSFD        |      |      |      |      |      |      |
| 47406 | 0 | 43162  | KEDNEQVSGS               | 3.25 | 0.01 | 3.57 | 0.68 | 0.22 | 0.28 |
|       |   |        | NAGYAGGKFKHPFSSFD        |      |      |      |      |      |      |
| 47407 | 0 | 43162  | KEDNEQVSGS               | 3.25 | 0.01 | 3.57 | 0.68 | 2.25 | 1.75 |
|       |   |        | NAGYAGGKFKHPFSSFD        |      |      |      |      |      |      |
| 47408 | 0 | 43162  | KEDNEQVSGS               | 3.25 | 0.01 | 3.57 | 0.68 | 2.25 | 1.75 |
|       |   |        | NAGYAGGKFKHPFSSFD        |      |      |      |      |      |      |
| 47409 | 0 | 43163  | KEDNEQVSGSLDVTAG<br>GFV  | 3.52 | 0.01 | 3.97 | 0.68 | 0.22 | 0.85 |
|       |   |        | NAGYAGGKFKHPFSSFD        |      |      |      |      |      |      |
| 47410 | 0 | 130559 | NAHYVVFEEQE              | 2.48 | 0.01 | 0.78 | 0.68 | 0.22 | 1.28 |
| 47411 | 0 | 130559 | NAHYVVFEEQE              | 2.48 | 0.01 | 0.78 | 0.68 | 0.22 | 1.27 |
| 47412 | 0 | 43171  | NAILGPRWNLNA             | 2.50 | 0.01 | 3.33 | 0.44 | 1.23 | 0.85 |
| 47413 | 0 | 43176  | NAINPRLT                 | 2.13 | 0.01 | 3.65 | 0.44 | 0.85 | 0.28 |
| 47414 | 0 | 43176  | NAINPRLT                 | 2.13 | 0.01 | 3.65 | 0.44 | 0.85 | 0.28 |
| 47415 | 0 | 43177  | NAINPRLTPWTYRN           | 2.64 | 0.01 | 3.57 | 0.68 | 0.22 | 0.28 |
| 47416 | 0 | 43177  | NAINPRLTPWTYRN           | 2.64 | 0.01 | 3.57 | 0.68 | 0.22 | 1.34 |
| 47417 | 0 | 43179  | NAIRMISDQR               | 2.31 | 0.01 | 2.73 | 0.44 | 0.85 | 0.28 |
| 47418 | 0 | 172445 | NAISTGNWSLKRFKM          | 2.65 | 0.01 | 0.78 | 0.44 | 1.41 | 0.28 |
| 47419 | 0 | 78468  | NAKATYEAAL               | 2.32 | 0.01 | 2.39 | 2.42 | 0.22 | 0.28 |
| 47420 | 0 | 78468  | NAKATYEAAL               | 2.32 | 0.01 | 2.39 | 0.68 | 0.22 | 0.28 |
| 47421 | 0 | 78469  | NAKATYEAALKQY            | 2.56 | 0.01 | 2.39 | 3.67 | 0.22 | 0.28 |
| 47422 | 0 | 78469  | NAKATYEAALKQY            | 2.56 | 0.01 | 2.39 | 3.67 | 0.22 | 0.28 |
| 47423 | 0 | 43190  | NAKATYEAALKQYEADL        | 2.82 | 0.01 | 3.18 | 1.15 | 0.22 | 0.28 |
| 47424 | 0 | 43190  | NAKATYEAALKQYEADL        | 2.82 | 0.01 | 3.18 | 1.15 | 0.22 | 0.28 |
| 47425 | 0 | 43190  | NAKATYEAALKQYEADL        | 2.82 | 0.01 | 3.18 | 1.15 | 0.22 | 0.28 |
| 47426 | 0 | 43190  | NAKATYEAALKQYEADL        | 2.82 | 0.01 | 3.18 | 1.15 | 0.22 | 0.28 |

|       |   |        |                                |      |      |      |      |      |      |
|-------|---|--------|--------------------------------|------|------|------|------|------|------|
| 47427 | 0 | 43190  | NAKATYEAALKQYEADL              | 2.82 | 0.01 | 3.18 | 1.15 | 0.22 | 0.28 |
| 47428 | 0 | 43190  | NAKATYEAALKQYEADL              | 2.82 | 0.01 | 3.18 | 1.15 | 0.22 | 0.28 |
| 47429 | 0 | 43190  | NAKATYEAALKQYEADL              | 2.82 | 0.01 | 3.18 | 1.15 | 0.22 | 1.34 |
| 47430 | 0 | 43191  | NAKATYEAALKQYEADL<br>AA        | 2.92 | 0.01 | 2.39 | 0.44 | 1.74 | 0.28 |
| 47431 | 0 | 43191  | NAKATYEAALKQYEADL<br>AA        | 2.92 | 0.01 | 2.39 | 2.98 | 0.22 | 0.28 |
| 47432 | 0 | 43191  | NAKATYEAALKQYEADL<br>AA        | 2.92 | 0.01 | 2.39 | 2.98 | 0.22 | 0.28 |
| 47433 | 0 | 43191  | NAKATYEAALKQYEADL<br>AA        | 2.92 | 0.01 | 2.39 | 2.98 | 0.22 | 1.34 |
| 47434 | 0 | 86632  | NAKATYEAALKQYEADL<br>AAVKKANAA | 3.23 | 0.01 | 3.18 | 0.44 | 0.85 | 0.28 |
| 47435 | 0 | 86632  | NAKATYEAALKQYEADL<br>AAVKKANAA | 3.23 | 0.01 | 3.18 | 3.70 | 0.22 | 0.28 |
| 47436 | 0 | 86632  | NAKATYEAALKQYEADL<br>AAVKKANAA | 3.23 | 0.01 | 2.39 | 0.44 | 0.85 | 0.28 |
| 47437 | 0 | 86632  | NAKATYEAALKQYEADL<br>AAVKKANAA | 3.23 | 0.01 | 2.39 | 0.44 | 1.59 | 0.28 |
| 47438 | 0 | 195045 | NAKE                           | 1.57 | 0.01 | 2.30 | 0.44 | 0.85 | 0.28 |
| 47439 | 0 | 43195  | NAKGMPSTTAYPFND<br>NSRE        | 2.93 | 0.01 | 3.42 | 1.12 | 0.22 | 0.28 |
| 47440 | 0 | 43195  | NAKGMPSTTAYPFND<br>NSRE        | 2.93 | 0.01 | 3.42 | 1.12 | 0.22 | 0.28 |
| 47441 | 0 | 43195  | NAKGMPSTTAYPFND<br>NSRE        | 2.93 | 0.01 | 3.42 | 1.12 | 0.22 | 0.28 |
| 47442 | 0 | 43195  | NAKGMPSTTAYPFND<br>NSRE        | 2.93 | 0.01 | 3.42 | 1.12 | 0.22 | 0.28 |
| 47443 | 0 | 152825 | NAKMNILIRD                     | 2.32 | 0.01 | 2.18 | 2.16 | 0.22 | 0.28 |
| 47444 | 0 | 141708 | NAKNNQRNFLAGED                 | 2.68 | 0.01 | 3.65 | 0.44 | 1.23 | 1.28 |
| 47445 | 0 | 43198  | NAKNVNDMYRDGEMS                | 2.67 | 0.01 | 1.66 | 0.44 | 0.85 | 0.28 |
| 47446 | 0 | 107527 | NAKTKPR                        | 2.02 | 0.01 | 0.78 | 1.15 | 0.22 | 0.28 |
| 47447 | 0 | 107527 | NAKTKPR                        | 2.02 | 0.01 | 0.78 | 0.44 | 1.13 | 0.28 |
| 47448 | 0 | 99482  | NALDEYFTKPSL                   | 2.43 | 0.01 | 0.90 | 1.12 | 0.22 | 1.39 |
| 47449 | 0 | 99483  | NALFVAHYNTNAHSI                | 2.69 | 0.01 | 2.16 | 0.44 | 1.23 | 1.48 |
| 47450 | 0 | 178149 | NALNGNGDPNNMDRA<br>VKLYR       | 2.96 | 0.01 | 3.51 | 1.12 | 0.22 | 1.27 |
| 47451 | 0 | 122861 | NALNSPLHQEYEENL                | 2.70 | 0.01 | 0.78 | 1.20 | 0.22 | 2.12 |
| 47452 | 0 | 122861 | NALNSPLHQEYEENL                | 2.70 | 0.01 | 0.78 | 1.20 | 0.22 | 1.27 |
| 47453 | 0 | 122861 | NALNSPLHQEYEENL                | 2.70 | 0.01 | 0.78 | 0.44 | 1.13 | 0.28 |
| 47454 | 0 | 122861 | NALNSPLHQEYEENL                | 2.70 | 0.01 | 0.78 | 1.20 | 0.22 | 0.28 |
| 47455 | 0 | 122861 | NALNSPLHQEYEENL                | 2.70 | 0.01 | 0.78 | 1.20 | 0.22 | 1.27 |



|       |   |        |                                 |      |      |      |      |      |      |
|-------|---|--------|---------------------------------|------|------|------|------|------|------|
| 47456 | 0 | 122861 | NALNSPLHQEYEENL                 | 2.70 | 0.01 | 0.78 | 1.20 | 0.22 | 1.27 |
| 47457 | 0 | 122861 | NALNSPLHQEYEENL                 | 2.70 | 0.01 | 0.78 | 1.20 | 0.22 | 0.28 |
| 47458 | 0 | 122861 | NALNSPLHQEYEENL                 | 2.70 | 0.01 | 0.78 | 1.20 | 0.22 | 0.28 |
| 47459 | 0 | 122861 | NALNSPLHQEYEENL                 | 2.70 | 0.01 | 0.78 | 1.20 | 0.22 | 2.02 |
| 47460 | 0 | 179862 | NALQAGNWGNEER                   | 2.57 | 0.01 | 3.89 | 0.44 | 0.85 | 0.85 |
| 47461 | 0 | 99484  | NALRRPFYSNAPQEI                 | 2.66 | 0.01 | 2.16 | 0.44 | 1.23 | 0.85 |
| 47462 | 0 | 226361 | NALSENK                         | 2.03 | 0.01 | 0.90 | 2.66 | 0.22 | 1.39 |
| 47463 | 0 | 43212  | NALSFTNK                        | 2.13 | 0.01 | 3.57 | 0.68 | 0.22 | 0.28 |
| 47464 | 0 | 43212  | NALSFTNK                        | 2.13 | 0.01 | 3.57 | 0.68 | 0.22 | 0.28 |
| 47465 | 0 | 43212  | NALSFTNK                        | 2.13 | 0.01 | 3.57 | 0.68 | 0.22 | 1.34 |
| 47466 | 0 | 238784 | NALSKRLGELRLNP                  | 2.64 | 0.01 | 2.14 | 2.65 | 0.22 | 0.85 |
| 47467 | 0 | 43214  | NALSSLVDRAFFNSF                 | 2.72 | 0.01 | 0.90 | 1.15 | 0.22 | 0.85 |
| 47468 | 0 | 145371 | NALTESKYVKLL                    | 2.45 | 0.01 | 0.90 | 0.44 | 1.13 | 0.28 |
| 47469 | 0 | 43215  | NALTQPVQQLK                     | 2.46 | 0.01 | 3.51 | 2.36 | 0.22 | 0.28 |
| 47470 | 0 | 43215  | NALTQPVQQLK                     | 2.46 | 0.01 | 3.51 | 1.15 | 0.22 | 2.02 |
| 47471 | 0 | 43215  | NALTQPVQQLK                     | 2.46 | 0.01 | 3.51 | 2.02 | 2.39 | 0.28 |
| 47472 | 0 | 43215  | NALTQPVQQLK                     | 2.46 | 0.01 | 3.51 | 1.15 | 0.22 | 0.28 |
| 47473 | 0 | 43215  | NALTQPVQQLK                     | 2.46 | 0.01 | 3.51 | 1.12 | 0.22 | 0.28 |
| 47474 | 0 | 43216  | NALTSHTASPAP                    | 2.51 | 0.01 | 0.90 | 1.12 | 2.26 | 1.39 |
| 47475 | 0 | 43218  | NALWMPT                         | 1.99 | 0.01 | 0.90 | 0.68 | 0.22 | 0.85 |
| 47476 | 0 | 43219  | NALYPMSPLLQECLR                 | 2.66 | 0.01 | 2.43 | 0.44 | 1.59 | 0.28 |
| 47477 | 0 | 111576 | NAMLAPAWPLSGHRVF<br>YVLRGEAQRQI | 3.21 | 0.01 | 3.33 | 0.44 | 1.23 | 0.85 |
| 47478 | 0 | 111577 | NAMSPPA                         | 2.03 | 0.01 | 0.90 | 0.44 | 0.85 | 1.39 |
| 47479 | 0 | 43222  | NANADPN                         | 2.06 | 0.01 | 1.66 | 1.15 | 0.22 | 0.28 |
| 47480 | 0 | 43224  | NANANNAVK                       | 2.27 | 0.01 | 3.37 | 1.12 | 0.22 | 0.28 |
| 47481 | 0 | 43226  | NANANPN                         | 2.06 | 0.01 | 1.66 | 1.15 | 0.22 | 0.28 |
| 47482 | 0 | 43227  | NANDPP                          | 1.89 | 0.01 | 3.37 | 0.68 | 0.22 | 0.28 |
| 47483 | 0 | 43227  | NANDPP                          | 1.89 | 0.01 | 3.37 | 0.68 | 0.22 | 0.85 |
| 47484 | 0 | 43227  | NANDPP                          | 1.89 | 0.01 | 3.37 | 0.68 | 0.22 | 0.85 |
| 47485 | 0 | 43227  | NANDPP                          | 1.89 | 0.01 | 3.37 | 0.68 | 0.22 | 1.34 |
| 47486 | 0 | 43227  | NANDPP                          | 1.89 | 0.01 | 3.37 | 0.68 | 0.22 | 1.34 |
| 47487 | 0 | 43227  | NANDPP                          | 1.89 | 0.01 | 3.37 | 0.68 | 0.22 | 1.48 |
| 47488 | 0 | 167340 | NANEAHSSLLNNALSI                | 2.79 | 0.01 | 0.90 | 0.68 | 0.22 | 0.28 |
| 47489 | 0 | 167340 | NANEAHSSLLNNALSI                | 2.79 | 0.01 | 0.90 | 0.68 | 0.22 | 0.85 |
| 47490 | 0 | 167340 | NANEAHSSLLNNALSI                | 2.79 | 0.01 | 0.90 | 0.44 | 0.85 | 0.28 |
| 47491 | 0 | 99487  | NANEECRNAMRHLRP                 | 2.70 | 0.01 | 2.86 | 2.02 | 0.85 | 0.85 |
| 47492 | 0 | 115386 | NANEEYSIGSSSEESAE<br>VA         | 2.99 | 0.01 | 1.60 | 0.44 | 1.23 | 2.51 |
| 47493 | 0 | 86642  | NANKECQQILQGRGL                 | 2.69 | 0.01 | 2.69 | 3.05 | 0.85 | 1.28 |
| 47494 | 0 | 117334 | NANNGNLQLRNKEVT                 | 2.69 | 0.01 | 1.75 | 2.16 | 0.22 | 0.28 |
| 47495 | 0 | 117334 | NANNGNLQLRNKEVT                 | 2.69 | 0.01 | 1.75 | 2.16 | 0.22 | 0.28 |
| 47496 | 0 | 43232  | NANNPDWDF                       | 2.25 | 0.01 | 0.90 | 0.68 | 0.22 | 1.39 |
| 47497 | 0 | 43232  | NANNPDWDF                       | 2.25 | 0.01 | 0.90 | 0.68 | 0.22 | 2.35 |

|       |   |       |              |      |      |      |      |      |      |
|-------|---|-------|--------------|------|------|------|------|------|------|
| 47498 | 0 | 43232 | NANNPDWDF    | 2.25 | 0.01 | 0.90 | 0.68 | 0.22 | 2.02 |
| 47499 | 0 | 43233 | NANP         | 1.60 | 0.01 | 1.66 | 2.61 | 0.22 | 0.28 |
| 47500 | 0 | 43233 | NANP         | 1.60 | 0.01 | 1.66 | 2.61 | 0.22 | 1.48 |
| 47501 | 0 | 43233 | NANP         | 1.60 | 0.01 | 1.66 | 1.15 | 2.26 | 0.28 |
| 47502 | 0 | 43233 | NANP         | 1.60 | 0.01 | 1.66 | 1.15 | 0.22 | 0.85 |
| 47503 | 0 | 43233 | NANP         | 1.60 | 0.01 | 3.33 | 0.44 | 1.74 | 0.28 |
| 47504 | 0 | 43233 | NANP         | 1.60 | 0.01 | 1.66 | 1.15 | 0.22 | 1.34 |
| 47505 | 0 | 43233 | NANP         | 1.60 | 0.01 | 1.66 | 1.15 | 0.22 | 0.28 |
| 47506 | 0 | 43233 | NANP         | 1.60 | 0.01 | 1.66 | 1.20 | 0.22 | 0.28 |
| 47507 | 0 | 43233 | NANP         | 1.60 | 0.01 | 1.66 | 1.81 | 0.22 | 0.28 |
| 47508 | 0 | 43237 | NANPDPN      | 2.06 | 0.01 | 1.66 | 1.15 | 0.22 | 0.28 |
| 47509 | 0 | 43238 | NANPN        | 1.77 | 0.01 | 3.29 | 1.15 | 0.22 | 0.28 |
| 47510 | 0 | 43238 | NANPN        | 1.77 | 0.01 | 3.29 | 1.15 | 0.22 | 0.28 |
| 47511 | 0 | 43239 | NANPNAN      | 2.06 | 0.01 | 1.66 | 1.15 | 0.22 | 0.28 |
| 47512 | 0 | 43240 | NANPNANP     | 2.18 | 0.01 | 1.66 | 1.15 | 0.22 | 1.27 |
| 47513 | 0 | 43241 | NANPNANPNA   | 2.38 | 0.01 | 1.66 | 1.15 | 0.22 | 0.28 |
| 47514 | 0 | 43242 | NANPNANPNANP | 2.55 | 0.01 | 3.33 | 0.44 | 0.22 | 0.28 |
| 47515 | 0 | 43242 | NANPNANPNANP | 2.55 | 0.01 | 1.66 | 1.15 | 0.22 | 1.48 |
| 47516 | 0 | 43242 | NANPNANPNANP | 2.55 | 0.01 | 1.66 | 1.15 | 0.22 | 1.34 |
| 47517 | 0 | 43242 | NANPNANPNANP | 2.55 | 0.01 | 1.66 | 1.15 | 0.22 | 0.28 |
| 47518 | 0 | 43242 | NANPNANPNANP | 2.55 | 0.01 | 1.66 | 0.68 | 0.22 | 0.28 |
| 47519 | 0 | 43242 | NANPNANPNANP | 2.55 | 0.01 | 1.66 | 1.15 | 0.22 | 1.27 |
| 47520 | 0 | 43242 | NANPNANPNANP | 2.55 | 0.01 | 1.66 | 0.68 | 0.22 | 0.28 |
| 47521 | 0 | 43242 | NANPNANPNANP | 2.55 | 0.01 | 1.66 | 1.81 | 0.22 | 0.28 |
| 47522 | 0 | 43242 | NANPNANPNANP | 2.55 | 0.01 | 1.66 | 2.16 | 0.22 | 0.28 |
| 47523 | 0 | 43242 | NANPNANPNANP | 2.55 | 0.01 | 1.66 | 3.01 | 0.22 | 0.28 |
| 47524 | 0 | 43242 | NANPNANPNANP | 2.55 | 0.01 | 1.66 | 0.44 | 0.22 | 0.28 |
| 47525 | 0 | 43242 | NANPNANPNANP | 2.55 | 0.01 | 1.66 | 1.81 | 0.22 | 0.28 |
| 47526 | 0 | 43242 | NANPNANPNANP | 2.55 | 0.01 | 1.66 | 0.44 | 0.22 | 0.28 |
| 47527 | 0 | 43242 | NANPNANPNANP | 2.55 | 0.01 | 1.66 | 0.68 | 0.22 | 0.28 |
| 47528 | 0 | 43242 | NANPNANPNANP | 2.55 | 0.01 | 1.66 | 1.15 | 0.22 | 0.28 |
| 47529 | 0 | 43242 | NANPNANPNANP | 2.55 | 0.01 | 1.66 | 1.15 | 0.22 | 0.28 |
| 47530 | 0 | 43242 | NANPNANPNANP | 2.55 | 0.01 | 1.66 | 1.15 | 0.22 | 0.85 |
| 47531 | 0 | 43242 | NANPNANPNANP | 2.55 | 0.01 | 1.66 | 0.68 | 0.22 | 0.28 |
| 47532 | 0 | 43242 | NANPNANPNANP | 2.55 | 0.01 | 1.66 | 3.16 | 0.22 | 0.28 |
| 47533 | 0 | 43242 | NANPNANPNANP | 2.55 | 0.01 | 1.66 | 3.16 | 0.22 | 1.48 |
| 47534 | 0 | 43242 | NANPNANPNANP | 2.55 | 0.01 | 1.66 | 1.81 | 0.22 | 1.48 |
| 47535 | 0 | 43242 | NANPNANPNANP | 2.55 | 0.01 | 1.66 | 2.16 | 0.22 | 1.48 |
| 47536 | 0 | 43242 | NANPNANPNANP | 2.55 | 0.01 | 1.66 | 3.01 | 0.22 | 1.48 |
| 47537 | 0 | 43242 | NANPNANPNANP | 2.55 | 0.01 | 1.66 | 2.16 | 0.22 | 0.28 |
| 47538 | 0 | 43242 | NANPNANPNANP | 2.55 | 0.01 | 1.66 | 3.01 | 0.22 | 0.28 |
| 47539 | 0 | 43242 | NANPNANPNANP | 2.55 | 0.01 | 1.66 | 1.81 | 0.22 | 0.28 |
| 47540 | 0 | 43242 | NANPNANPNANP | 2.55 | 0.01 | 1.66 | 1.20 | 0.22 | 0.85 |
| 47541 | 0 | 43242 | NANPNANPNANP | 2.55 | 0.01 | 1.66 | 1.15 | 0.22 | 1.57 |
| 47542 | 0 | 43242 | NANPNANPNANP | 2.55 | 0.01 | 1.66 | 1.15 | 0.22 | 2.35 |
| 47543 | 0 | 43242 | NANPNANPNANP | 2.55 | 0.01 | 1.66 | 0.44 | 1.74 | 1.27 |
| 47544 | 0 | 43242 | NANPNANPNANP | 2.55 | 0.01 | 1.66 | 0.44 | 0.85 | 0.28 |

|       |   |       |              |      |      |      |      |      |      |
|-------|---|-------|--------------|------|------|------|------|------|------|
| 47545 | 0 | 43242 | NANPNANPNANP | 2.55 | 0.01 | 1.66 | 1.15 | 0.22 | 2.35 |
| 47546 | 0 | 43242 | NANPNANPNANP | 2.55 | 0.01 | 1.66 | 0.44 | 1.74 | 1.57 |
| 47547 | 0 | 43242 | NANPNANPNANP | 2.55 | 0.01 | 1.66 | 0.44 | 1.74 | 1.57 |
| 47548 | 0 | 43242 | NANPNANPNANP | 2.55 | 0.01 | 1.66 | 0.44 | 1.74 | 1.27 |
| 47549 | 0 | 43242 | NANPNANPNANP | 2.55 | 0.01 | 1.66 | 0.44 | 0.85 | 1.57 |
| 47550 | 0 | 43242 | NANPNANPNANP | 2.55 | 0.01 | 1.66 | 1.81 | 0.22 | 0.28 |
| 47551 | 0 | 43242 | NANPNANPNANP | 2.55 | 0.01 | 1.66 | 1.81 | 0.22 | 1.27 |
| 47552 | 0 | 43242 | NANPNANPNANP | 2.55 | 0.01 | 1.66 | 1.15 | 0.22 | 1.27 |
| 47553 | 0 | 43242 | NANPNANPNANP | 2.55 | 0.01 | 1.66 | 0.68 | 0.22 | 0.28 |
| 47554 | 0 | 43242 | NANPNANPNANP | 2.55 | 0.01 | 1.66 | 0.44 | 1.74 | 1.57 |
| 47555 | 0 | 43242 | NANPNANPNANP | 2.55 | 0.01 | 1.66 | 0.44 | 0.22 | 1.57 |
| 47556 | 0 | 43242 | NANPNANPNANP | 2.55 | 0.01 | 1.66 | 1.12 | 0.22 | 1.57 |
| 47557 | 0 | 43242 | NANPNANPNANP | 2.55 | 0.01 | 1.66 | 1.12 | 0.22 | 0.85 |
| 47558 | 0 | 43242 | NANPNANPNANP | 2.55 | 0.01 | 1.66 | 1.12 | 0.22 | 1.34 |
| 47559 | 0 | 43242 | NANPNANPNANP | 2.55 | 0.01 | 1.66 | 1.12 | 0.22 | 1.27 |
| 47560 | 0 | 43242 | NANPNANPNANP | 2.55 | 0.01 | 1.66 | 2.63 | 0.22 | 0.28 |
| 47561 | 0 | 43242 | NANPNANPNANP | 2.55 | 0.01 | 1.66 | 2.63 | 0.22 | 1.48 |
| 47562 | 0 | 43242 | NANPNANPNANP | 2.55 | 0.01 | 1.66 | 1.81 | 0.22 | 0.28 |
| 47563 | 0 | 43242 | NANPNANPNANP | 2.55 | 0.01 | 1.66 | 0.68 | 0.22 | 0.28 |
| 47564 | 0 | 43242 | NANPNANPNANP | 2.55 | 0.01 | 1.66 | 0.68 | 0.22 | 0.28 |
| 47565 | 0 | 43242 | NANPNANPNANP | 2.55 | 0.01 | 1.66 | 1.81 | 0.22 | 0.28 |
| 47566 | 0 | 43242 | NANPNANPNANP | 2.55 | 0.01 | 1.66 | 1.81 | 0.22 | 0.28 |
| 47567 | 0 | 43242 | NANPNANPNANP | 2.55 | 0.01 | 1.66 | 1.81 | 0.22 | 1.48 |
| 47568 | 0 | 43242 | NANPNANPNANP | 2.55 | 0.01 | 1.66 | 4.08 | 0.22 | 0.28 |
| 47569 | 0 | 43242 | NANPNANPNANP | 2.55 | 0.01 | 1.66 | 4.93 | 0.22 | 0.28 |
| 47570 | 0 | 43242 | NANPNANPNANP | 2.55 | 0.01 | 1.66 | 1.81 | 0.22 | 0.28 |
| 47571 | 0 | 43242 | NANPNANPNANP | 2.55 | 0.01 | 1.66 | 3.06 | 0.22 | 0.28 |
| 47572 | 0 | 43242 | NANPNANPNANP | 2.55 | 0.01 | 1.66 | 2.16 | 0.22 | 0.28 |
| 47573 | 0 | 43242 | NANPNANPNANP | 2.55 | 0.01 | 1.66 | 3.20 | 0.22 | 0.28 |
| 47574 | 0 | 43242 | NANPNANPNANP | 2.55 | 0.01 | 1.66 | 2.43 | 0.22 | 0.28 |
| 47575 | 0 | 43242 | NANPNANPNANP | 2.55 | 0.01 | 1.66 | 1.20 | 0.22 | 0.28 |
| 47576 | 0 | 43242 | NANPNANPNANP | 2.55 | 0.01 | 1.66 | 0.68 | 0.22 | 0.28 |
| 47577 | 0 | 43242 | NANPNANPNANP | 2.55 | 0.01 | 1.66 | 1.15 | 0.22 | 1.48 |
| 47578 | 0 | 43242 | NANPNANPNANP | 2.55 | 0.01 | 1.66 | 1.15 | 0.22 | 0.28 |
| 47579 | 0 | 43242 | NANPNANPNANP | 2.55 | 0.01 | 1.66 | 1.15 | 0.22 | 0.28 |
| 47580 | 0 | 43242 | NANPNANPNANP | 2.55 | 0.01 | 1.66 | 1.15 | 0.22 | 1.48 |
| 47581 | 0 | 43242 | NANPNANPNANP | 2.55 | 0.01 | 1.66 | 2.43 | 0.22 | 0.28 |
| 47582 | 0 | 43242 | NANPNANPNANP | 2.55 | 0.01 | 1.66 | 2.16 | 0.22 | 0.28 |
| 47583 | 0 | 43242 | NANPNANPNANP | 2.55 | 0.01 | 1.66 | 0.68 | 0.22 | 0.28 |
| 47584 | 0 | 43242 | NANPNANPNANP | 2.55 | 0.01 | 1.66 | 1.15 | 0.22 | 0.28 |
| 47585 | 0 | 43242 | NANPNANPNANP | 2.55 | 0.01 | 1.66 | 1.15 | 0.22 | 0.28 |
| 47586 | 0 | 43242 | NANPNANPNANP | 2.55 | 0.01 | 1.66 | 1.15 | 0.22 | 1.48 |
| 47587 | 0 | 43242 | NANPNANPNANP | 2.55 | 0.01 | 1.66 | 1.15 | 0.22 | 0.28 |
| 47588 | 0 | 43242 | NANPNANPNANP | 2.55 | 0.01 | 1.66 | 0.44 | 0.22 | 1.34 |
| 47589 | 0 | 43242 | NANPNANPNANP | 2.55 | 0.01 | 1.66 | 1.15 | 0.22 | 1.66 |
| 47590 | 0 | 43242 | NANPNANPNANP | 2.55 | 0.01 | 1.66 | 2.43 | 0.22 | 1.66 |
| 47591 | 0 | 43242 | NANPNANPNANP | 2.55 | 0.01 | 1.66 | 1.15 | 0.22 | 0.28 |

|       |   |       |                      |      |      |      |      |      |      |
|-------|---|-------|----------------------|------|------|------|------|------|------|
| 47592 | 0 | 43242 | NANPNANPNANP         | 2.55 | 0.01 | 1.66 | 1.15 | 0.22 | 1.27 |
| 47593 | 0 | 43242 | NANPNANPNANP         | 2.55 | 0.01 | 1.66 | 0.44 | 1.59 | 1.27 |
| 47594 | 0 | 43242 | NANPNANPNANP         | 2.55 | 0.01 | 1.66 | 1.15 | 0.22 | 1.48 |
| 47595 | 0 | 43242 | NANPNANPNANP         | 2.55 | 0.01 | 1.66 | 1.15 | 0.22 | 0.28 |
| 47596 | 0 | 43242 | NANPNANPNANP         | 2.55 | 0.01 | 1.66 | 0.44 | 1.59 | 2.35 |
| 47597 | 0 | 43242 | NANPNANPNANP         | 2.55 | 0.01 | 1.66 | 0.68 | 0.22 | 1.48 |
| 47598 | 0 | 43242 | NANPNANPNANP         | 2.55 | 0.01 | 1.66 | 0.68 | 0.22 | 0.28 |
| 47599 | 0 | 43242 | NANPNANPNANP         | 2.55 | 0.01 | 1.66 | 1.15 | 0.22 | 1.57 |
| 47600 | 0 | 43242 | NANPNANPNANP         | 2.55 | 0.01 | 1.66 | 0.68 | 0.22 | 0.28 |
| 47601 | 0 | 43242 | NANPNANPNANP         | 2.55 | 0.01 | 1.66 | 3.63 | 0.22 | 0.28 |
| 47602 | 0 | 43242 | NANPNANPNANP         | 2.55 | 0.01 | 1.66 | 3.63 | 0.22 | 1.48 |
| 47603 | 0 | 43242 | NANPNANPNANP         | 2.55 | 0.01 | 1.66 | 2.52 | 0.22 | 0.28 |
| 47604 | 0 | 43242 | NANPNANPNANP         | 2.55 | 0.01 | 1.66 | 2.52 | 0.22 | 1.48 |
| 47605 | 0 | 43242 | NANPNANPNANP         | 2.55 | 0.01 | 1.66 | 3.22 | 0.22 | 0.28 |
| 47606 | 0 | 43242 | NANPNANPNANP         | 2.55 | 0.01 | 1.66 | 3.22 | 0.22 | 1.48 |
| 47607 | 0 | 43242 | NANPNANPNANP         | 2.55 | 0.01 | 1.66 | 2.42 | 0.22 | 0.28 |
| 47608 | 0 | 43242 | NANPNANPNANP         | 2.55 | 0.01 | 1.66 | 2.42 | 0.22 | 1.48 |
| 47609 | 0 | 43242 | NANPNANPNANP         | 2.55 | 0.01 | 1.66 | 3.67 | 0.22 | 0.28 |
| 47610 | 0 | 43242 | NANPNANPNANP         | 2.55 | 0.01 | 1.66 | 3.67 | 0.22 | 1.48 |
| 47611 | 0 | 43242 | NANPNANPNANP         | 2.55 | 0.01 | 1.66 | 3.75 | 0.22 | 0.28 |
| 47612 | 0 | 43242 | NANPNANPNANP         | 2.55 | 0.01 | 1.66 | 3.75 | 0.22 | 1.48 |
| 47613 | 0 | 43242 | NANPNANPNANP         | 2.55 | 0.01 | 1.66 | 3.27 | 0.22 | 0.28 |
| 47614 | 0 | 43242 | NANPNANPNANP         | 2.55 | 0.01 | 1.66 | 3.27 | 0.22 | 1.48 |
| 47615 | 0 | 43242 | NANPNANPNANP         | 2.55 | 0.01 | 1.66 | 0.44 | 0.22 | 0.28 |
| 47616 | 0 | 43242 | NANPNANPNANP         | 2.55 | 0.01 | 1.66 | 1.15 | 0.22 | 0.28 |
| 47617 | 0 | 43242 | NANPNANPNANP         | 2.55 | 0.01 | 1.66 | 0.44 | 0.85 | 0.28 |
| 47618 | 0 | 43242 | NANPNANPNANP         | 2.55 | 0.01 | 1.66 | 3.32 | 0.22 | 1.48 |
| 47619 | 0 | 43242 | NANPNANPNANP         | 2.55 | 0.01 | 1.66 | 1.81 | 0.22 | 0.28 |
| 47620 | 0 | 43242 | NANPNANPNANP         | 2.55 | 0.01 | 1.66 | 1.81 | 0.22 | 0.28 |
| 47621 | 0 | 43242 | NANPNANPNANP         | 2.55 | 0.01 | 1.66 | 1.81 | 0.22 | 1.34 |
| 47622 | 0 | 43242 | NANPNANPNANP         | 2.55 | 0.01 | 1.66 | 1.81 | 0.22 | 1.34 |
| 47623 | 0 | 43242 | NANPNANPNANP         | 2.55 | 0.01 | 1.66 | 1.81 | 0.22 | 0.28 |
| 47624 | 0 | 43242 | NANPNANPNANP         | 2.55 | 0.01 | 1.66 | 1.81 | 0.22 | 0.28 |
| 47625 | 0 | 43242 | NANPNANPNANP         | 2.55 | 0.01 | 1.66 | 2.61 | 0.22 | 1.27 |
| 47626 | 0 | 43242 | NANPNANPNANP         | 2.55 | 0.01 | 1.66 | 1.81 | 0.22 | 0.28 |
| 47627 | 0 | 43242 | NANPNANPNANP         | 2.55 | 0.01 | 1.66 | 1.81 | 0.22 | 1.34 |
| 47628 | 0 | 43246 | NANPNANPNANPNAN<br>p | 2.82 | 0.01 | 1.66 | 2.37 | 0.22 | 0.28 |
| 47629 | 0 | 43246 | NANPNANPNANPNAN<br>p | 2.82 | 0.01 | 1.66 | 2.89 | 0.22 | 0.28 |
| 47630 | 0 | 43246 | NANPNANPNANPNAN<br>p | 2.82 | 0.01 | 1.66 | 2.89 | 0.22 | 1.48 |
| 47631 | 0 | 43246 | NANPNANPNANPNAN<br>p | 2.82 | 0.01 | 1.66 | 2.89 | 0.22 | 1.34 |
| 47632 | 0 | 43246 | NANPNANPNANPNAN<br>p | 2.82 | 0.01 | 3.33 | 1.15 | 0.22 | 0.28 |

|       |   |       |                        |      |      |      |      |      |      |
|-------|---|-------|------------------------|------|------|------|------|------|------|
| 47633 | 0 | 43246 | NANPNANPNANPNAN<br>P   | 2.82 | 0.01 | 3.33 | 1.15 | 0.22 | 0.28 |
| 47634 | 0 | 43246 | NANPNANPNANPNAN<br>P   | 2.82 | 0.01 | 3.33 | 1.15 | 0.22 | 1.27 |
| 47635 | 0 | 43246 | NANPNANPNANPNAN<br>P   | 2.82 | 0.01 | 1.66 | 1.81 | 0.22 | 0.28 |
| 47636 | 0 | 43246 | NANPNANPNANPNAN<br>P   | 2.82 | 0.01 | 1.66 | 1.15 | 0.22 | 0.85 |
| 47637 | 0 | 43246 | NANPNANPNANPNAN<br>P   | 2.82 | 0.01 | 1.66 | 2.52 | 0.22 | 0.28 |
| 47638 | 0 | 43246 | NANPNANPNANPNAN<br>P   | 2.82 | 0.01 | 1.66 | 2.52 | 0.22 | 0.28 |
| 47639 | 0 | 43246 | NANPNANPNANPNAN<br>P   | 2.82 | 0.01 | 1.66 | 0.68 | 0.22 | 0.28 |
| 47640 | 0 | 43246 | NANPNANPNANPNAN<br>P   | 2.82 | 0.01 | 1.66 | 1.81 | 0.22 | 0.28 |
| 47641 | 0 | 43246 | NANPNANPNANPNAN<br>P   | 2.82 | 0.01 | 1.66 | 2.52 | 0.22 | 0.28 |
| 47642 | 0 | 43246 | NANPNANPNANPNAN<br>P   | 2.82 | 0.01 | 1.66 | 2.42 | 0.22 | 0.28 |
| 47643 | 0 | 43246 | NANPNANPNANPNAN<br>P   | 2.82 | 0.01 | 1.66 | 2.82 | 0.22 | 0.28 |
| 47644 | 0 | 43246 | NANPNANPNANPNAN<br>P   | 2.82 | 0.01 | 1.66 | 3.23 | 0.22 | 0.28 |
| 47645 | 0 | 43246 | NANPNANPNANPNAN<br>P   | 2.82 | 0.01 | 1.66 | 0.44 | 0.85 | 0.28 |
| 47646 | 0 | 43246 | NANPNANPNANPNAN<br>P   | 2.82 | 0.01 | 1.66 | 1.12 | 0.22 | 0.28 |
| 47647 | 0 | 43246 | NANPNANPNANPNAN<br>P   | 2.82 | 0.01 | 1.66 | 1.12 | 0.22 | 0.28 |
| 47648 | 0 | 43246 | NANPNANPNANPNAN<br>P   | 2.82 | 0.01 | 1.66 | 1.12 | 0.22 | 0.28 |
| 47649 | 0 | 43246 | NANPNANPNANPNAN<br>P   | 2.82 | 0.01 | 1.66 | 2.75 | 0.22 | 0.28 |
| 47650 | 0 | 43246 | NANPNANPNANPNAN<br>P   | 2.82 | 0.01 | 2.22 | 0.68 | 0.22 | 0.28 |
| 47651 | 0 | 43246 | NANPNANPNANPNAN<br>P   | 2.82 | 0.01 | 1.66 | 0.44 | 1.74 | 0.28 |
| 47652 | 0 | 43246 | NANPNANPNANPNAN<br>P   | 2.82 | 0.01 | 1.66 | 0.44 | 0.85 | 0.28 |
| 47653 | 0 | 43247 | NANPNANPNANPNAN<br>PNA | 2.93 | 0.01 | 1.66 | 1.12 | 0.22 | 0.28 |
| 47654 | 0 | 43247 | NANPNANPNANPNAN<br>PNA | 2.93 | 0.01 | 1.66 | 1.12 | 0.22 | 0.85 |
| 47655 | 0 | 43247 | NANPNANPNANPNAN<br>PNA | 2.93 | 0.01 | 1.66 | 1.12 | 0.22 | 0.28 |

|       |   |       |                              |      |      |      |      |      |      |
|-------|---|-------|------------------------------|------|------|------|------|------|------|
| 47656 | 0 | 43248 | NANPNANPNANPNAN<br>PNANP     | 3.03 | 0.01 | 1.66 | 0.44 | 0.85 | 0.28 |
| 47657 | 0 | 43248 | NANPNANPNANPNAN<br>PNANP     | 3.03 | 0.01 | 1.66 | 1.81 | 0.22 | 0.28 |
| 47658 | 0 | 43248 | NANPNANPNANPNAN<br>PNANP     | 3.03 | 0.01 | 1.66 | 0.44 | 1.74 | 0.28 |
| 47659 | 0 | 43248 | NANPNANPNANPNAN<br>PNANP     | 3.03 | 0.01 | 1.66 | 0.44 | 0.85 | 0.28 |
| 47660 | 0 | 43248 | NANPNANPNANPNAN<br>PNANP     | 3.03 | 0.01 | 1.66 | 0.44 | 1.41 | 0.28 |
| 47661 | 0 | 43248 | NANPNANPNANPNAN<br>PNANP     | 3.03 | 0.01 | 1.66 | 0.44 | 0.85 | 0.28 |
| 47662 | 0 | 43248 | NANPNANPNANPNAN<br>PNANP     | 3.03 | 0.01 | 1.66 | 1.15 | 0.22 | 0.28 |
| 47663 | 0 | 43248 | NANPNANPNANPNAN<br>PNANP     | 3.03 | 0.01 | 1.66 | 0.44 | 0.85 | 0.28 |
| 47664 | 0 | 43248 | NANPNANPNANPNAN<br>PNANP     | 3.03 | 0.01 | 1.66 | 2.75 | 0.22 | 0.28 |
| 47665 | 0 | 43248 | NANPNANPNANPNAN<br>PNANP     | 3.03 | 0.01 | 1.66 | 0.68 | 0.22 | 1.48 |
| 47666 | 0 | 43248 | NANPNANPNANPNAN<br>PNANP     | 3.03 | 0.01 | 1.66 | 1.81 | 0.22 | 0.28 |
| 47667 | 0 | 43248 | NANPNANPNANPNAN<br>PNANP     | 3.03 | 0.01 | 1.66 | 1.81 | 0.22 | 1.48 |
| 47668 | 0 | 43248 | NANPNANPNANPNAN<br>PNANP     | 3.03 | 0.01 | 1.66 | 1.81 | 0.22 | 1.34 |
| 47669 | 0 | 43248 | NANPNANPNANPNAN<br>PNANP     | 3.03 | 0.01 | 1.66 | 0.68 | 0.22 | 1.48 |
| 47670 | 0 | 43248 | NANPNANPNANPNAN<br>PNANP     | 3.03 | 0.01 | 1.66 | 0.68 | 0.22 | 1.34 |
| 47671 | 0 | 43248 | NANPNANPNANPNAN<br>PNANP     | 3.03 | 0.01 | 1.66 | 1.81 | 0.22 | 0.28 |
| 47672 | 0 | 43248 | NANPNANPNANPNAN<br>PNANP     | 3.03 | 0.01 | 1.66 | 1.81 | 0.22 | 1.75 |
| 47673 | 0 | 43248 | NANPNANPNANPNAN<br>PNANP     | 3.03 | 0.01 | 1.66 | 1.81 | 0.22 | 1.34 |
| 47674 | 0 | 43248 | NANPNANPNANPNAN<br>PNANP     | 3.03 | 0.01 | 1.66 | 3.32 | 0.22 | 0.28 |
| 47675 | 0 | 43248 | NANPNANPNANPNAN<br>PNANP     | 3.03 | 0.01 | 1.66 | 3.32 | 0.22 | 0.28 |
| 47676 | 0 | 43248 | NANPNANPNANPNAN<br>PNANP     | 3.03 | 0.01 | 1.66 | 3.32 | 0.22 | 1.48 |
| 47677 | 0 | 43249 | NANPNANPNANPNAN<br>PNANPNANP | 3.21 | 0.01 | 1.66 | 0.68 | 0.22 | 0.28 |
| 47678 | 0 | 43249 | NANPNANPNANPNAN<br>PNANPNANP | 3.21 | 0.01 | 1.66 | 1.15 | 0.22 | 0.28 |

|       |   |       |                                                 |      |      |      |      |      |      |
|-------|---|-------|-------------------------------------------------|------|------|------|------|------|------|
| 47679 | 0 | 43249 | NANPNANPNANPNAN<br>PNANPNANP                    | 3.21 | 0.01 | 1.66 | 1.15 | 0.22 | 1.48 |
| 47680 | 0 | 43249 | NANPNANPNANPNAN<br>PNANPNANP                    | 3.21 | 0.01 | 1.66 | 2.71 | 0.22 | 0.28 |
| 47681 | 0 | 43249 | NANPNANPNANPNAN<br>PNANPNANP                    | 3.21 | 0.01 | 1.66 | 0.44 | 0.22 | 0.28 |
| 47682 | 0 | 43249 | NANPNANPNANPNAN<br>PNANPNANP                    | 3.21 | 0.01 | 1.66 | 1.81 | 0.22 | 0.28 |
| 47683 | 0 | 43249 | NANPNANPNANPNAN<br>PNANPNANP                    | 3.21 | 0.01 | 1.66 | 1.81 | 0.22 | 1.34 |
| 47684 | 0 | 43249 | NANPNANPNANPNAN<br>PNANPNANP                    | 3.21 | 0.01 | 1.66 | 1.81 | 0.22 | 1.75 |
| 47685 | 0 | 43249 | NANPNANPNANPNAN<br>PNANPNANP                    | 3.21 | 0.01 | 1.66 | 2.61 | 0.22 | 1.34 |
| 47686 | 0 | 43250 | NANPNANPNANPNAN<br>PNANPNANPNANPNA<br>NP        | 3.49 | 0.01 | 1.66 | 4.08 | 1.59 | 0.28 |
| 47687 | 0 | 43250 | NANPNANPNANPNAN<br>PNANPNANPNANPNA<br>NP        | 3.49 | 0.01 | 1.66 | 4.93 | 1.59 | 0.28 |
| 47688 | 0 | 43250 | NANPNANPNANPNAN<br>PNANPNANPNANPNA<br>NP        | 3.49 | 0.01 | 1.66 | 0.44 | 1.74 | 0.28 |
| 47689 | 0 | 43250 | NANPNANPNANPNAN<br>PNANPNANPNANPNA<br>NP        | 3.49 | 0.01 | 1.66 | 4.08 | 1.59 | 1.27 |
| 47690 | 0 | 43252 | NANPNANPNANPNAN<br>PNANPNANPNANPNA<br>NPANPNANP | 3.71 | 0.01 | 3.81 | 2.61 | 0.22 | 0.28 |
| 47691 | 0 | 43254 | NANPNPN                                         | 2.06 | 0.01 | 1.66 | 1.15 | 0.22 | 0.28 |
| 47692 | 0 | 43255 | NANPNVDP                                        | 2.17 | 0.01 | 1.66 | 0.44 | 1.74 | 0.28 |
| 47693 | 0 | 43257 | NANPNVDPNANPNAN<br>PNANP                        | 3.03 | 0.01 | 1.66 | 1.15 | 0.22 | 0.28 |
| 47694 | 0 | 43257 | NANPNVDPNANPNAN<br>PNANP                        | 3.03 | 0.01 | 1.66 | 3.32 | 0.22 | 0.28 |
| 47695 | 0 | 43257 | NANPNVDPNANPNAN<br>PNANP                        | 3.03 | 0.01 | 1.66 | 3.32 | 0.22 | 0.28 |
| 47696 | 0 | 43257 | NANPNVDPNANPNAN<br>PNANP                        | 3.03 | 0.01 | 1.66 | 3.32 | 0.22 | 1.27 |
| 47697 | 0 | 43257 | NANPNVDPNANPNAN<br>PNANP                        | 3.03 | 0.01 | 1.66 | 1.20 | 0.22 | 0.28 |
| 47698 | 0 | 43257 | NANPNVDPNANPNAN<br>PNANP                        | 3.03 | 0.01 | 1.66 | 1.20 | 0.22 | 0.28 |
| 47699 | 0 | 43257 | NANPNVDPNANPNAN<br>PNANP                        | 3.03 | 0.01 | 1.66 | 1.20 | 0.22 | 0.28 |

|       |   |        |                              |      |      |      |      |      |      |
|-------|---|--------|------------------------------|------|------|------|------|------|------|
| 47700 | 0 | 43257  | NANPNVDPNANPNAN<br>PNANP     | 3.03 | 0.01 | 1.66 | 1.20 | 0.22 | 1.75 |
| 47701 | 0 | 43257  | NANPNVDPNANPNAN<br>PNANP     | 3.03 | 0.01 | 1.66 | 3.32 | 0.22 | 0.28 |
| 47702 | 0 | 43257  | NANPNVDPNANPNAN<br>PNANP     | 3.03 | 0.01 | 1.66 | 3.32 | 0.22 | 0.28 |
| 47703 | 0 | 43257  | NANPNVDPNANPNAN<br>PNANP     | 3.03 | 0.01 | 1.66 | 3.32 | 0.22 | 1.48 |
| 47704 | 0 | 43257  | NANPNVDPNANPNAN<br>PNANP     | 3.03 | 0.01 | 1.66 | 3.32 | 0.22 | 0.28 |
| 47705 | 0 | 43258  | NANPNVDPNANPNAN<br>PNANPNANP | 3.21 | 0.01 | 1.66 | 1.15 | 0.22 | 0.85 |
| 47706 | 0 | 43258  | NANPNVDPNANPNAN<br>PNANPNANP | 3.21 | 0.01 | 1.66 | 0.68 | 0.22 | 0.28 |
| 47707 | 0 | 43258  | NANPNVDPNANPNAN<br>PNANPNANP | 3.21 | 0.01 | 1.66 | 0.68 | 0.22 | 0.85 |
| 47708 | 0 | 43258  | NANPNVDPNANPNAN<br>PNANPNANP | 3.21 | 0.01 | 1.66 | 1.81 | 0.22 | 0.28 |
| 47709 | 0 | 43258  | NANPNVDPNANPNAN<br>PNANPNANP | 3.21 | 0.01 | 1.66 | 1.81 | 0.22 | 1.48 |
| 47710 | 0 | 43258  | NANPNVDPNANPNAN<br>PNANPNANP | 3.21 | 0.01 | 1.66 | 0.68 | 0.22 | 0.85 |
| 47711 | 0 | 43258  | NANPNVDPNANPNAN<br>PNANPNANP | 3.21 | 0.01 | 1.66 | 0.68 | 0.22 | 1.34 |
| 47712 | 0 | 43262  | NANSIIYALNGRALV              | 2.70 | 0.01 | 2.72 | 0.44 | 1.23 | 0.85 |
| 47713 | 0 | 43264  | NAPATVCGPKLSTDLIK            | 2.78 | 0.01 | 2.48 | 0.44 | 0.85 | 0.28 |
| 47714 | 0 | 43270  | NAPILSTLP                    | 2.23 | 0.01 | 2.08 | 1.15 | 0.22 | 1.57 |
| 47715 | 0 | 43270  | NAPILSTLP                    | 2.23 | 0.01 | 2.08 | 1.15 | 0.22 | 1.27 |
| 47716 | 0 | 100318 | NAPKTFQFIN                   | 2.32 | 0.01 | 2.18 | 2.16 | 0.22 | 0.28 |
| 47717 | 0 | 111578 | NAPPPLFWSHQW                 | 2.45 | 0.01 | 0.90 | 0.44 | 0.85 | 1.39 |
| 47718 | 0 | 99488  | NAPQEIFIQQGRGYF              | 2.67 | 0.01 | 2.16 | 0.44 | 1.23 | 1.48 |
| 47719 | 0 | 341176 | NAPSRLREIDGSLSS              | 2.66 | 0.01 | 1.61 | 0.44 | 0.85 | 1.28 |
| 47720 | 0 | 43280  | NAPSYTNGKLNIIYRRLY<br>NGLKF  | 3.09 | 0.01 | 2.95 | 0.44 | 0.22 | 0.28 |
| 47721 | 0 | 182239 | NAQFDGNNETIKWFD              | 2.66 | 0.01 | 0.78 | 1.12 | 0.22 | 0.85 |
| 47722 | 0 | 43287  | NAQQDKGIAIPHDIDLG<br>ESR     | 2.92 | 0.01 | 2.70 | 0.44 | 0.85 | 0.28 |
| 47723 | 0 | 122153 | NASGLSRPSPSAH                | 2.57 | 0.01 | 2.72 | 1.20 | 0.22 | 0.28 |
| 47724 | 0 | 122153 | NASGLSRPSPSAH                | 2.57 | 0.01 | 2.72 | 1.20 | 0.22 | 2.02 |
| 47725 | 0 | 122153 | NASGLSRPSPSAH                | 2.57 | 0.01 | 2.72 | 1.20 | 0.22 | 2.02 |
| 47726 | 0 | 195046 | NASHPWDEDVMPD                | 2.54 | 0.01 | 3.51 | 0.44 | 0.85 | 1.27 |
| 47727 | 0 | 195046 | NASHPWDEDVMPD                | 2.54 | 0.01 | 3.51 | 0.68 | 0.22 | 1.27 |
| 47728 | 0 | 195046 | NASHPWDEDVMPD                | 2.54 | 0.01 | 3.51 | 0.68 | 0.22 | 0.28 |
| 47729 | 0 | 195046 | NASHPWDEDVMPD                | 2.54 | 0.01 | 3.51 | 0.68 | 0.22 | 0.85 |
| 47730 | 0 | 195046 | NASHPWDEDVMPD                | 2.54 | 0.01 | 3.51 | 0.68 | 0.22 | 0.85 |



|       |   |        |                                        |      |      |      |      |      |      |
|-------|---|--------|----------------------------------------|------|------|------|------|------|------|
| 47731 | 0 | 195046 | NASHPWDEDVMPD                          | 2.54 | 0.01 | 3.51 | 0.68 | 0.22 | 0.85 |
| 47732 | 0 | 195046 | NASHPWDEDVMPD                          | 2.54 | 0.01 | 3.51 | 0.68 | 0.22 | 0.85 |
| 47733 | 0 | 43304  | NASLGLVGTHNGQIGN<br>DPNRDI             | 3.04 | 0.01 | 2.95 | 3.38 | 0.22 | 0.28 |
| 47734 | 0 | 98269  | NASNDSSSHLQLIYNLTL<br>CELNGTDWLANKFDWA | 3.45 | 0.01 | 3.04 | 2.78 | 0.22 | 0.28 |
| 47735 | 0 | 43308  | NASNVDRPG                              | 2.30 | 4.93 | 2.70 | 0.44 | 0.85 | 0.28 |
| 47736 | 0 | 164301 | NASQQA                                 | 2.02 | 0.01 | 0.90 | 1.20 | 0.22 | 1.39 |
| 47737 | 0 | 98908  | NASSELHLLGFGINA                        | 2.69 | 0.01 | 2.16 | 0.44 | 1.23 | 0.85 |
| 47738 | 0 | 100319 | NASSELHLLGFGINAEN<br>NHR               | 2.96 | 0.01 | 2.16 | 0.44 | 2.39 | 0.28 |
| 47739 | 0 | 43313  | NASSEVAVLYQDVNCTD                      | 2.79 | 0.01 | 2.48 | 0.44 | 0.85 | 0.28 |
| 47740 | 0 | 43314  | NASSTNTQ                               | 2.16 | 0.01 | 3.18 | 2.74 | 0.22 | 0.28 |
| 47741 | 0 | 43315  | NASVQNKVPI                             | 2.32 | 0.01 | 2.84 | 0.44 | 0.85 | 0.28 |
| 47742 | 0 | 43317  | NATAEGRAINRRVE                         | 2.64 | 0.01 | 3.70 | 2.43 | 0.22 | 0.28 |
| 47743 | 0 | 43317  | NATAEGRAINRRVE                         | 2.64 | 0.01 | 3.70 | 2.43 | 2.25 | 1.75 |
| 47744 | 0 | 43317  | NATAEGRAINRRVE                         | 2.64 | 0.01 | 2.58 | 2.43 | 0.22 | 0.28 |
| 47745 | 0 | 43317  | NATAEGRAINRRVE                         | 2.64 | 0.01 | 2.58 | 1.15 | 2.25 | 1.75 |
| 47746 | 0 | 43317  | NATAEGRAINRRVE                         | 2.64 | 0.01 | 2.58 | 1.81 | 0.22 | 0.28 |
| 47747 | 0 | 43317  | NATAEGRAINRRVE                         | 2.64 | 0.01 | 2.58 | 1.81 | 0.22 | 0.85 |
| 47748 | 0 | 43317  | NATAEGRAINRRVE                         | 2.64 | 0.01 | 2.58 | 1.81 | 0.22 | 0.28 |
| 47749 | 0 | 43317  | NATAEGRAINRRVE                         | 2.64 | 0.01 | 2.58 | 1.81 | 0.22 | 0.28 |
| 47750 | 0 | 43317  | NATAEGRAINRRVE                         | 2.64 | 0.01 | 3.70 | 2.43 | 0.22 | 0.28 |
| 47751 | 0 | 43317  | NATAEGRAINRRVE                         | 2.64 | 0.01 | 3.70 | 2.43 | 0.22 | 0.28 |
| 47752 | 0 | 43317  | NATAEGRAINRRVE                         | 2.64 | 0.01 | 3.70 | 2.43 | 0.22 | 0.28 |
| 47753 | 0 | 43317  | NATAEGRAINRRVE                         | 2.64 | 0.01 | 3.70 | 2.43 | 2.25 | 1.75 |
| 47754 | 0 | 43317  | NATAEGRAINRRVE                         | 2.64 | 0.01 | 2.58 | 2.43 | 0.22 | 0.28 |
| 47755 | 0 | 43317  | NATAEGRAINRRVE                         | 2.64 | 0.01 | 2.58 | 2.43 | 0.22 | 0.28 |
| 47756 | 0 | 43317  | NATAEGRAINRRVE                         | 2.64 | 0.01 | 2.58 | 2.43 | 0.22 | 1.27 |
| 47757 | 0 | 43317  | NATAEGRAINRRVE                         | 2.64 | 0.01 | 2.58 | 2.43 | 0.22 | 1.34 |
| 47758 | 0 | 43317  | NATAEGRAINRRVE                         | 2.64 | 0.01 | 2.58 | 2.43 | 0.22 | 1.34 |
| 47759 | 0 | 43317  | NATAEGRAINRRVE                         | 2.64 | 0.01 | 2.58 | 2.43 | 0.22 | 0.28 |
| 47760 | 0 | 43317  | NATAEGRAINRRVE                         | 2.64 | 0.01 | 2.58 | 2.36 | 2.25 | 1.75 |
| 47761 | 0 | 43317  | NATAEGRAINRRVE                         | 2.64 | 0.01 | 2.58 | 1.81 | 0.22 | 0.85 |
| 47762 | 0 | 43317  | NATAEGRAINRRVE                         | 2.64 | 0.01 | 2.58 | 1.81 | 0.22 | 0.28 |
| 47763 | 0 | 43317  | NATAEGRAINRRVE                         | 2.64 | 0.01 | 2.58 | 1.81 | 2.25 | 1.75 |
| 47764 | 0 | 43317  | NATAEGRAINRRVE                         | 2.64 | 0.01 | 2.58 | 0.68 | 0.22 | 0.28 |
| 47765 | 0 | 43317  | NATAEGRAINRRVE                         | 2.64 | 0.01 | 2.58 | 0.68 | 0.22 | 0.28 |
| 47766 | 0 | 43317  | NATAEGRAINRRVE                         | 2.64 | 0.01 | 2.58 | 1.81 | 0.22 | 0.28 |
| 47767 | 0 | 43317  | NATAEGRAINRRVE                         | 2.64 | 0.01 | 2.58 | 0.68 | 0.22 | 0.28 |
| 47768 | 0 | 43317  | NATAEGRAINRRVE                         | 2.64 | 0.01 | 2.58 | 0.68 | 0.22 | 1.75 |
| 47769 | 0 | 429098 | NATAMVAQINAVNKPQ<br>TVS                | 2.93 | 0.01 | 3.34 | 1.12 | 0.22 | 0.28 |
| 47770 | 0 | 429098 | NATAMVAQINAVNKPQ<br>TVS                | 2.93 | 0.01 | 3.34 | 1.12 | 0.22 | 0.28 |

|       |   |        |                                     |      |      |      |      |      |      |
|-------|---|--------|-------------------------------------|------|------|------|------|------|------|
| 47771 | 0 | 429098 | NATAMVAQINAVNKPQ<br>TVS             | 2.93 | 0.01 | 3.34 | 1.12 | 0.22 | 0.28 |
| 47772 | 0 | 429098 | NATAMVAQINAVNKPQ<br>TVS             | 2.93 | 0.01 | 3.34 | 1.12 | 0.22 | 1.34 |
| 47773 | 0 | 429098 | NATAMVAQINAVNKPQ<br>TVS             | 2.93 | 0.01 | 3.34 | 0.44 | 1.59 | 0.28 |
| 47774 | 0 | 429098 | NATAMVAQINAVNKPQ<br>TVS             | 2.93 | 0.01 | 3.34 | 0.44 | 0.85 | 0.28 |
| 47775 | 0 | 230237 | NATDKEGKDVLCNKDL<br>RPI             | 2.94 | 0.01 | 2.25 | 0.44 | 1.23 | 0.28 |
| 47776 | 0 | 43321  | NATELVQSSSTGKICNN<br>PHRILDGINC     | 3.19 | 0.01 | 3.04 | 1.12 | 0.22 | 0.28 |
| 47777 | 0 | 43321  | NATELVQSSSTGKICNN<br>PHRILDGINC     | 3.19 | 0.01 | 3.04 | 1.12 | 0.22 | 0.28 |
| 47778 | 0 | 43321  | NATELVQSSSTGKICNN<br>PHRILDGINC     | 3.19 | 0.01 | 3.04 | 1.12 | 0.22 | 0.28 |
| 47779 | 0 | 43323  | NATHAAFEYSKISIGGTPA<br>LD           | 2.90 | 0.01 | 3.10 | 1.12 | 0.22 | 0.28 |
| 47780 | 0 | 152827 | NATNIYTVLD                          | 2.32 | 0.01 | 2.18 | 2.16 | 0.22 | 0.28 |
| 47781 | 0 | 43326  | NATPQLTKNAGV                        | 2.48 | 0.01 | 3.24 | 0.44 | 1.23 | 0.85 |
| 47782 | 0 | 149076 | NATQAST                             | 2.04 | 0.01 | 0.90 | 2.13 | 1.59 | 1.39 |
| 47783 | 0 | 149077 | NATQERY                             | 1.99 | 0.01 | 0.90 | 2.13 | 1.59 | 1.39 |
| 47784 | 0 | 227809 | NATQPELVPEDPEDSAL<br>LED            | 2.97 | 0.01 | 2.40 | 0.44 | 0.22 | 0.28 |
| 47785 | 0 | 106669 | NATQRRQIEA                          | 2.32 | 0.01 | 2.75 | 0.44 | 1.23 | 0.85 |
| 47786 | 0 | 118532 | NATRAAVEEGIVL                       | 2.54 | 0.01 | 0.78 | 0.44 | 1.74 | 0.85 |
| 47787 | 0 | 118532 | NATRAAVEEGIVL                       | 2.54 | 0.01 | 0.78 | 0.44 | 1.74 | 0.85 |
| 47788 | 0 | 43330  | NAVFHFDQNG                          | 2.32 | 0.01 | 4.08 | 1.81 | 0.22 | 0.85 |
| 47789 | 0 | 43332  | NAVFNFPPNGTHSWEY<br>WGAQ            | 2.93 | 0.01 | 3.78 | 1.12 | 0.22 | 0.28 |
| 47790 | 0 | 43332  | NAVFNFPPNGTHSWEY<br>WGAQ            | 2.93 | 0.01 | 2.04 | 0.44 | 0.85 | 0.28 |
| 47791 | 0 | 43337  | NAVKNNNNEEPSDKHIE<br>QYLKKIKNSISTEW | 3.35 | 0.01 | 3.29 | 0.44 | 0.85 | 0.28 |
| 47792 | 0 | 115387 | NAVPIPTLNREQLSTSE<br>EN             | 2.96 | 0.01 | 1.60 | 0.44 | 1.23 | 1.28 |
| 47793 | 0 | 114900 | NAVVESNGTL                          | 2.31 | 0.01 | 2.25 | 0.44 | 1.23 | 0.85 |
| 47794 | 0 | 230238 | NAVVESNGTLTLSHFGK<br>C              | 2.83 | 0.01 | 2.25 | 0.44 | 1.23 | 0.28 |
| 47795 | 0 | 136521 | NAWLQEPNHRNL                        | 2.48 | 0.01 | 0.90 | 2.74 | 0.22 | 0.85 |
| 47796 | 0 | 136521 | NAWLQEPNHRNL                        | 2.48 | 0.01 | 0.90 | 2.74 | 0.22 | 0.85 |
| 47797 | 0 | 94885  | NAYANEEATK                          | 2.35 | 0.01 | 0.90 | 3.55 | 0.22 | 1.57 |
| 47798 | 0 | 94885  | NAYANEEATK                          | 2.35 | 0.01 | 0.90 | 3.55 | 0.22 | 1.57 |
| 47799 | 0 | 95031  | NAYANEEATKL                         | 2.43 | 0.01 | 0.90 | 1.12 | 0.22 | 1.27 |
| 47800 | 0 | 95031  | NAYANEEATKL                         | 2.43 | 0.01 | 0.90 | 1.12 | 0.22 | 1.57 |
| 47801 | 0 | 43348  | NAYCDKLCKDKKADS                     | 2.71 | 0.01 | 2.56 | 2.02 | 0.22 | 0.85 |
| 47802 | 0 | 43348  | NAYCDKLCKDKKADS                     | 2.71 | 0.01 | 2.56 | 1.20 | 0.22 | 0.85 |

|       |   |        |                             |      |      |      |      |      |      |
|-------|---|--------|-----------------------------|------|------|------|------|------|------|
| 47803 | 0 | 43348  | NAYCDKLCKDKKADS             | 2.71 | 0.01 | 2.56 | 2.52 | 0.22 | 0.85 |
| 47804 | 0 | 94886  | NAYCNEECLK                  | 2.33 | 0.01 | 3.33 | 1.12 | 0.22 | 1.27 |
| 47805 | 0 | 43352  | NAYNM                       | 1.77 | 0.01 | 2.22 | 1.15 | 0.22 | 0.28 |
| 47806 | 0 | 420505 | NAYNMSIRR                   | 2.22 | 0.01 | 2.22 | 2.69 | 0.22 | 2.49 |
| 47807 | 0 | 420505 | NAYNMSIRR                   | 2.22 | 0.01 | 2.22 | 2.69 | 0.22 | 3.13 |
| 47808 | 0 | 420505 | NAYNMSIRR                   | 2.22 | 0.01 | 2.22 | 2.69 | 0.22 | 1.66 |
| 47809 | 0 | 420505 | NAYNMSIRR                   | 2.22 | 0.01 | 2.22 | 2.69 | 0.22 | 1.66 |
| 47810 | 0 | 420505 | NAYNMSIRR                   | 2.22 | 0.01 | 2.22 | 2.69 | 0.22 | 1.66 |
| 47811 | 0 | 420505 | NAYNMSIRR                   | 2.22 | 0.01 | 2.22 | 2.69 | 0.22 | 1.66 |
| 47812 | 0 | 420505 | NAYNMSIRR                   | 2.22 | 0.01 | 2.22 | 2.69 | 0.22 | 1.66 |
| 47813 | 0 | 420505 | NAYNMSIRR                   | 2.22 | 0.01 | 2.22 | 2.69 | 0.22 | 1.66 |
| 47814 | 0 | 420505 | NAYNMSIRR                   | 2.22 | 0.01 | 2.22 | 2.69 | 0.22 | 2.49 |
| 47815 | 0 | 420505 | NAYNMSIRR                   | 2.22 | 0.01 | 2.22 | 2.69 | 0.22 | 3.13 |
| 47816 | 0 | 420505 | NAYNMSIRR                   | 2.22 | 0.01 | 2.22 | 2.69 | 0.22 | 3.13 |
| 47817 | 0 | 420505 | NAYNMSIRR                   | 2.22 | 0.01 | 2.22 | 2.69 | 0.22 | 3.13 |
| 47818 | 0 | 420505 | NAYNMSIRR                   | 2.22 | 0.01 | 2.22 | 2.69 | 0.22 | 3.13 |
| 47819 | 0 | 420505 | NAYNMSIRR                   | 2.22 | 0.01 | 2.22 | 2.69 | 0.22 | 2.49 |
| 47820 | 0 | 420505 | NAYNMSIRR                   | 2.22 | 0.01 | 2.22 | 2.69 | 0.22 | 2.49 |
| 47821 | 0 | 420505 | NAYNMSIRR                   | 2.22 | 0.01 | 2.22 | 2.69 | 0.22 | 3.30 |
| 47822 | 0 | 420505 | NAYNMSIRR                   | 2.22 | 0.01 | 2.22 | 2.69 | 0.22 | 3.30 |
| 47823 | 0 | 420505 | NAYNMSIRR                   | 2.22 | 0.01 | 2.22 | 2.69 | 0.22 | 3.30 |
| 47824 | 0 | 43354  | NAYRDPFTTLSPAV              | 2.58 | 0.01 | 4.15 | 0.68 | 0.22 | 0.28 |
| 47825 | 0 | 43356  | NAYVDNCPATNYSK              | 2.62 | 0.01 | 3.42 | 0.44 | 1.23 | 0.85 |
| 47826 | 0 | 145373 | NCAFWLGKLYCR                | 2.45 | 0.01 | 0.90 | 0.44 | 1.13 | 0.28 |
| 47827 | 0 | 106672 | NCALEGWGGHWRGAN             | 2.70 | 0.01 | 2.75 | 0.44 | 1.23 | 1.27 |
| 47828 | 0 | 43361  | NCAICWNYDNAYCD              | 2.73 | 0.01 | 2.56 | 1.20 | 0.22 | 0.85 |
| 47829 | 0 | 130980 | NCAIKTTQANKQAQIH<br>GPR     | 2.89 | 0.01 | 0.90 | 3.15 | 2.60 | 1.75 |
| 47830 | 0 | 100320 | NCDFSQTATLTN                | 2.48 | 0.01 | 2.88 | 1.20 | 0.22 | 0.85 |
| 47831 | 0 | 238785 | NCDRTAALCFGRAPYNK<br>NN     | 2.88 | 0.01 | 2.56 | 1.20 | 0.22 | 0.28 |
| 47832 | 0 | 137244 | NCEQHCKMPDRGACA             | 2.64 | 0.01 | 3.19 | 0.44 | 1.23 | 0.28 |
| 47833 | 0 | 189252 | NCGHSRCDSPIAIEEV            | 2.70 | 0.01 | 2.92 | 3.61 | 0.22 | 0.28 |
| 47834 | 0 | 79313  | NCGSRTQYCKSRCT              | 2.63 | 0.01 | 0.90 | 0.68 | 0.22 | 1.39 |
| 47835 | 0 | 79616  | NCHGPDWASPVCQRHS<br>PDCS    | 2.95 | 0.01 | 2.85 | 0.44 | 1.59 | 0.28 |
| 47836 | 0 | 106673 | NCHTHEGGQL                  | 2.30 | 0.01 | 2.75 | 0.44 | 1.23 | 0.85 |
| 47837 | 0 | 91742  | NCIEYGKQNPDSKL              | 2.64 | 0.01 | 3.12 | 1.12 | 0.22 | 0.28 |
| 47838 | 0 | 91742  | NCIEYGKQNPDSKL              | 2.64 | 0.01 | 3.12 | 1.12 | 0.22 | 0.28 |
| 47839 | 0 | 43375  | NCKITKTPTAWKPNYAP<br>ANCPKS | 3.12 | 0.01 | 4.23 | 1.12 | 0.22 | 1.66 |
| 47840 | 0 | 43375  | NCKITKTPTAWKPNYAP<br>ANCPKS | 3.12 | 0.01 | 4.23 | 1.12 | 0.22 | 1.66 |

|       |   |        |                             |      |      |      |      |      |      |
|-------|---|--------|-----------------------------|------|------|------|------|------|------|
| 47841 | 0 | 43375  | NCKITKTPTAWKPNYAP<br>ANCPKS | 3.12 | 0.01 | 4.23 | 1.12 | 0.22 | 1.66 |
| 47842 | 0 | 43375  | NCKITKTPTAWKPNYAP<br>ANCPKS | 3.12 | 0.01 | 4.23 | 1.12 | 0.22 | 1.66 |
| 47843 | 0 | 43375  | NCKITKTPTAWKPNYAP<br>ANCPKS | 3.12 | 0.01 | 4.23 | 1.15 | 0.22 | 3.30 |
| 47844 | 0 | 187893 | NCKPKTDRYSYSRE              | 2.61 | 0.01 | 3.65 | 2.02 | 0.22 | 0.85 |
| 47845 | 0 | 79314  | NCKSVRSGVIERCW              | 2.61 | 0.01 | 0.90 | 0.68 | 0.22 | 1.39 |
| 47846 | 0 | 78470  | NCLSSDEPLHIRWCQ             | 2.63 | 0.01 | 0.90 | 0.68 | 0.22 | 1.27 |
| 47847 | 0 | 173949 | NCNKNDHLFACW                | 2.48 | 0.01 | 0.90 | 0.68 | 0.22 | 0.28 |
| 47848 | 0 | 173949 | NCNKNDHLFACW                | 2.48 | 0.01 | 0.90 | 1.20 | 0.22 | 0.28 |
| 47849 | 0 | 173949 | NCNKNDHLFACW                | 2.48 | 0.01 | 0.90 | 1.20 | 0.22 | 0.28 |
| 47850 | 0 | 173949 | NCNKNDHLFACW                | 2.48 | 0.01 | 0.90 | 1.20 | 0.22 | 0.28 |
| 47851 | 0 | 173949 | NCNKNDHLFACW                | 2.48 | 0.01 | 0.90 | 1.20 | 0.22 | 0.28 |
| 47852 | 0 | 173949 | NCNKNDHLFACW                | 2.48 | 0.01 | 0.90 | 0.68 | 0.22 | 0.85 |
| 47853 | 0 | 173949 | NCNKNDHLFACW                | 2.48 | 0.01 | 0.90 | 1.20 | 2.25 | 1.75 |
| 47854 | 0 | 173949 | NCNKNDHLFACW                | 2.48 | 0.01 | 0.90 | 0.68 | 0.22 | 0.85 |
| 47855 | 0 | 173949 | NCNKNDHLFACW                | 2.48 | 0.01 | 0.90 | 1.20 | 0.22 | 0.28 |
| 47856 | 0 | 173949 | NCNKNDHLFACW                | 2.48 | 0.01 | 0.90 | 1.20 | 0.22 | 0.28 |
| 47857 | 0 | 186779 | NCNKNDHLFACWLEH             | 2.69 | 0.01 | 0.90 | 1.20 | 0.22 | 0.85 |
| 47858 | 0 | 43383  | NCPYVSYGKFCIKPDGSI<br>ST    | 2.95 | 0.01 | 3.32 | 2.49 | 0.22 | 0.28 |
| 47859 | 0 | 43383  | NCPYVSYGKFCIKPDGSI<br>ST    | 2.95 | 0.01 | 3.32 | 2.49 | 0.22 | 0.28 |
| 47860 | 0 | 43383  | NCPYVSYGKFCIKPDGSI<br>ST    | 2.95 | 0.01 | 3.32 | 2.49 | 0.22 | 0.28 |
| 47861 | 0 | 43383  | NCPYVSYGKFCIKPDGSI<br>ST    | 2.95 | 0.01 | 3.32 | 2.49 | 0.22 | 1.75 |
| 47862 | 0 | 43383  | NCPYVSYGKFCIKPDGSI<br>ST    | 2.95 | 0.01 | 3.32 | 2.49 | 0.22 | 0.28 |
| 47863 | 0 | 482437 | NCQIEKKETEIIVKKLED          | 2.85 | 0.01 | 3.12 | 0.68 | 0.22 | 0.28 |
| 47864 | 0 | 79315  | NCQTKVTRITESCC              | 2.59 | 0.01 | 0.90 | 0.68 | 0.22 | 1.39 |
| 47865 | 0 | 43384  | NCRDPCCDAASCKLHS<br>W       | 2.78 | 0.01 | 3.93 | 0.68 | 0.22 | 0.85 |
| 47866 | 0 | 43384  | NCRDPCCDAASCKLHS<br>W       | 2.78 | 0.01 | 3.93 | 0.68 | 0.22 | 0.85 |
| 47867 | 0 | 43387  | NCRPRLELMPCV                | 2.49 | 0.01 | 0.90 | 0.68 | 0.22 | 0.28 |
| 47868 | 0 | 43392  | NCSSYA                      | 1.89 | 0.01 | 2.25 | 0.44 | 1.23 | 0.85 |
| 47869 | 0 | 114901 | NCSSYANTTS                  | 2.35 | 0.01 | 2.25 | 0.44 | 1.23 | 0.85 |
| 47870 | 0 | 225810 | NCSVAGWILGNPECELLI<br>S     | 2.91 | 0.01 | 3.72 | 1.12 | 0.22 | 1.28 |
| 47871 | 0 | 145375 | NCSWCHVLQRCS                | 2.48 | 0.01 | 0.78 | 0.44 | 1.13 | 0.85 |
| 47872 | 0 | 145375 | NCSWCHVLQRCS                | 2.48 | 0.01 | 0.78 | 0.44 | 1.13 | 1.27 |
| 47873 | 0 | 145375 | NCSWCHVLQRCS                | 2.48 | 0.01 | 0.78 | 0.44 | 1.13 | 0.85 |
| 47874 | 0 | 132875 | NCTKDFMSVSFSQJL             | 2.64 | 0.01 | 3.16 | 3.16 | 0.22 | 0.28 |

|       |   |        |                                                |      |      |      |      |      |      |
|-------|---|--------|------------------------------------------------|------|------|------|------|------|------|
| 47875 | 0 | 43396  | NCTLIDALLGDPH                                  | 2.52 | 4.93 | 4.93 | 0.68 | 0.22 | 0.28 |
| 47876 | 0 | 120812 | NCTMKLGIWTDGTV<br>SISP                         | 2.91 | 0.01 | 2.26 | 0.68 | 0.22 | 0.85 |
| 47877 | 0 | 187167 | NCTRPNNNTRKSINIGP<br>GRALYTTGEII               | 3.26 | 0.01 | 3.89 | 0.44 | 0.85 | 0.28 |
| 47878 | 0 | 187167 | NCTRPNNNTRKSINIGP<br>GRALYTTGEII               | 3.26 | 0.01 | 3.89 | 0.44 | 0.85 | 0.28 |
| 47879 | 0 | 187167 | NCTRPNNNTRKSINIGP<br>GRALYTTGEII               | 3.26 | 0.01 | 3.89 | 0.44 | 0.85 | 0.28 |
| 47880 | 0 | 187167 | NCTRPNNNTRKSINIGP<br>GRALYTTGEII               | 3.26 | 0.01 | 3.89 | 0.44 | 0.85 | 0.28 |
| 47881 | 0 | 43399  | NCTRPNNNTRKSIRIQR<br>GPGRAFTVIGKIGNMRQ<br>AHCN | 3.58 | 0.01 | 4.63 | 0.68 | 0.22 | 0.28 |
| 47882 | 0 | 43399  | NCTRPNNNTRKSIRIQR<br>GPGRAFTVIGKIGNMRQ<br>AHCN | 3.58 | 0.01 | 4.63 | 0.68 | 0.22 | 0.28 |
| 47883 | 0 | 145376 | NCWKPQVLHC                                     | 2.29 | 0.01 | 4.33 | 0.44 | 1.13 | 1.27 |
| 47884 | 0 | 145376 | NCWKPQVLHC                                     | 2.29 | 0.01 | 4.33 | 0.44 | 1.13 | 0.85 |
| 47885 | 0 | 145376 | NCWKPQVLHC                                     | 2.29 | 0.01 | 4.33 | 0.44 | 1.13 | 0.85 |
| 47886 | 0 | 145376 | NCWKPQVLHC                                     | 2.29 | 0.01 | 4.33 | 0.44 | 1.13 | 0.28 |
| 47887 | 0 | 419274 | NCWTHPGAT                                      | 2.21 | 0.01 | 0.90 | 0.44 | 1.93 | 1.39 |
| 47888 | 0 | 43403  | NDAEKYKAEDEENRKRI<br>EA                        | 2.95 | 0.01 | 1.66 | 1.12 | 0.22 | 0.28 |
| 47889 | 0 | 423724 | NDALETVDIPHH                                   | 2.43 | 0.01 | 0.90 | 0.68 | 0.22 | 1.39 |
| 47890 | 0 | 522673 | NDAPQEASRPFSASR                                | 2.70 | 2.84 | 2.84 | 0.44 | 1.13 | 0.28 |
| 47891 | 0 | 142446 | NDATEAKKQAEKAKAA<br>AEEAKTHGEK                 | 3.24 | 0.01 | 2.59 | 0.44 | 0.85 | 0.85 |
| 47892 | 0 | 193303 | NDATYQRTRALVRTG                                | 2.68 | 0.01 | 2.36 | 0.68 | 0.22 | 0.28 |
| 47893 | 0 | 193303 | NDATYQRTRALVRTG                                | 2.68 | 0.01 | 2.36 | 0.68 | 0.22 | 0.28 |
| 47894 | 0 | 144731 | NDAYVMSAWGKANQV<br>TGDDI                       | 2.93 | 0.01 | 2.75 | 3.17 | 0.22 | 0.28 |
| 47895 | 0 | 114902 | NDCLLCAYSI                                     | 2.30 | 0.01 | 2.25 | 0.44 | 1.23 | 0.85 |
| 47896 | 0 | 114902 | NDCLLCAYSI                                     | 2.30 | 0.01 | 2.25 | 0.44 | 1.23 | 0.85 |
| 47897 | 0 | 43411  | NDDASVDFVAEPVK                                 | 2.63 | 0.01 | 3.02 | 1.81 | 0.22 | 0.85 |
| 47898 | 0 | 43411  | NDDASVDFVAEPVK                                 | 2.63 | 0.01 | 3.02 | 1.81 | 0.22 | 0.85 |
| 47899 | 0 | 43411  | NDDASVDFVAEPVK                                 | 2.63 | 0.01 | 3.02 | 1.81 | 0.22 | 0.85 |
| 47900 | 0 | 43411  | NDDASVDFVAEPVK                                 | 2.63 | 0.01 | 3.02 | 0.68 | 0.22 | 0.85 |
| 47901 | 0 | 43411  | NDDASVDFVAEPVK                                 | 2.63 | 0.01 | 3.02 | 0.68 | 0.22 | 0.85 |
| 47902 | 0 | 43411  | NDDASVDFVAEPVK                                 | 2.63 | 0.01 | 3.02 | 1.81 | 0.22 | 0.28 |
| 47903 | 0 | 43411  | NDDASVDFVAEPVK                                 | 2.63 | 0.01 | 3.02 | 2.25 | 0.22 | 0.28 |
| 47904 | 0 | 43411  | NDDASVDFVAEPVK                                 | 2.63 | 0.01 | 3.02 | 2.25 | 0.22 | 0.28 |
| 47905 | 0 | 43411  | NDDASVDFVAEPVK                                 | 2.63 | 0.01 | 3.02 | 1.81 | 0.22 | 0.85 |
| 47906 | 0 | 43411  | NDDASVDFVAEPVK                                 | 2.63 | 0.01 | 3.02 | 2.25 | 0.22 | 0.28 |
| 47907 | 0 | 43411  | NDDASVDFVAEPVK                                 | 2.63 | 0.01 | 3.02 | 2.25 | 0.22 | 0.28 |
| 47908 | 0 | 43411  | NDDASVDFVAEPVK                                 | 2.63 | 0.01 | 3.02 | 2.25 | 0.22 | 0.85 |
| 47909 | 0 | 43411  | NDDASVDFVAEPVK                                 | 2.63 | 0.01 | 3.02 | 2.25 | 2.25 | 1.75 |

|       |   |        |                          |      |      |      |      |      |      |
|-------|---|--------|--------------------------|------|------|------|------|------|------|
| 47910 | 0 | 229382 | NDDCELCVNVACTGC          | 2.70 | 0.01 | 0.78 | 2.37 | 0.22 | 1.27 |
| 47911 | 0 | 229382 | NDDCELCVNVACTGC          | 2.70 | 0.01 | 0.78 | 1.12 | 0.22 | 1.27 |
| 47912 | 0 | 229382 | NDDCELCVNVACTGC          | 2.70 | 0.01 | 0.78 | 1.12 | 0.22 | 1.27 |
| 47913 | 0 | 229382 | NDDCELCVNVACTGC          | 2.70 | 0.01 | 0.78 | 0.68 | 2.26 | 1.27 |
| 47914 | 0 | 229382 | NDDCELCVNVACTGC          | 2.70 | 0.01 | 0.78 | 0.68 | 0.22 | 0.28 |
| 47915 | 0 | 341620 | NDDDDDDPEEEEEKEK         | 2.72 | 0.01 | 1.61 | 0.44 | 0.85 | 1.28 |
| 47916 | 0 | 99489  | NDDDTF                   | 1.91 | 0.01 | 2.24 | 1.20 | 0.22 | 0.28 |
| 47917 | 0 | 104143 | NDDEPNGAIRFTMGYQ<br>HGQ  | 2.85 | 0.01 | 3.00 | 1.20 | 0.22 | 0.28 |
| 47918 | 0 | 43415  | NDDITSMTPILSGVGPG<br>NA  | 2.91 | 0.01 | 4.63 | 2.42 | 0.22 | 0.28 |
| 47919 | 0 | 43415  | NDDITSMTPILSGVGPG<br>NA  | 2.91 | 0.01 | 4.63 | 2.42 | 0.22 | 1.34 |
| 47920 | 0 | 43416  | NDDLMATRHGLA             | 2.46 | 0.01 | 0.90 | 0.44 | 1.23 | 0.28 |
| 47921 | 0 | 43419  | NDDSYIPSAEKI             | 2.46 | 0.01 | 3.01 | 0.68 | 0.22 | 0.28 |
| 47922 | 0 | 95610  | NDECAQ                   | 1.88 | 0.01 | 1.60 | 0.44 | 1.23 | 0.28 |
| 47923 | 0 | 188375 | NDEDVSDIER               | 2.33 | 0.01 | 2.92 | 1.81 | 0.22 | 0.85 |
| 47924 | 0 | 341664 | NDEELKDEEKEEDEE          | 2.73 | 0.01 | 1.61 | 0.44 | 0.85 | 1.28 |
| 47925 | 0 | 122862 | NDEYFIRK                 | 2.10 | 0.01 | 2.26 | 2.04 | 0.22 | 0.28 |
| 47926 | 0 | 122862 | NDEYFIRK                 | 2.10 | 0.01 | 2.26 | 2.04 | 0.22 | 0.28 |
| 47927 | 0 | 122862 | NDEYFIRK                 | 2.10 | 0.01 | 2.26 | 2.04 | 0.22 | 2.02 |
| 47928 | 0 | 136522 | NDDFTYHIRHGEVHCGT<br>NVR | 2.94 | 0.01 | 0.78 | 0.44 | 1.13 | 0.28 |
| 47929 | 0 | 43435  | NDFHFEVFNFP              | 2.52 | 0.01 | 2.38 | 0.68 | 0.22 | 0.28 |
| 47930 | 0 | 43435  | NDFHFEVFNFP              | 2.52 | 0.01 | 2.38 | 0.68 | 0.22 | 0.28 |
| 47931 | 0 | 43435  | NDFHFEVFNFP              | 2.52 | 0.01 | 2.38 | 0.68 | 0.22 | 0.28 |
| 47932 | 0 | 43435  | NDFHFEVFNFP              | 2.52 | 0.01 | 2.38 | 0.44 | 1.59 | 0.28 |
| 47933 | 0 | 43435  | NDFHFEVFNFP              | 2.52 | 0.01 | 2.38 | 0.44 | 1.74 | 0.28 |
| 47934 | 0 | 43435  | NDFHFEVFNFP              | 2.52 | 0.01 | 2.38 | 0.44 | 1.74 | 0.28 |
| 47935 | 0 | 186780 | NDFLKGLRGGNCNKN          | 2.71 | 0.01 | 0.90 | 1.20 | 0.22 | 0.85 |
| 47936 | 0 | 43437  | NDFNFDDYNYWTPIN          | 2.71 | 0.01 | 1.66 | 1.15 | 0.22 | 0.28 |
| 47937 | 0 | 43437  | NDFNFDDYNYWTPIN          | 2.71 | 0.01 | 1.66 | 1.15 | 0.22 | 0.28 |
| 47938 | 0 | 43438  | NDFPINELILDTDLISKIE      | 2.93 | 0.01 | 2.08 | 0.44 | 1.93 | 1.57 |
| 47939 | 0 | 43438  | NDFPINELILDTDLISKIE      | 2.93 | 0.01 | 2.08 | 2.43 | 0.22 | 1.57 |
| 47940 | 0 | 43438  | NDFPINELILDTDLISKIE      | 2.93 | 0.01 | 3.45 | 0.44 | 0.22 | 1.57 |
| 47941 | 0 | 341702 | NDGDESSDKEDAAPT          | 2.69 | 0.01 | 1.61 | 0.44 | 0.85 | 1.28 |
| 47942 | 0 | 43442  | NDGEERQSYWFE             | 2.45 | 0.01 | 2.88 | 2.37 | 0.22 | 0.28 |
| 47943 | 0 | 43442  | NDGEERQSYWFE             | 2.45 | 0.01 | 2.88 | 2.37 | 0.22 | 0.28 |
| 47944 | 0 | 43442  | NDGEERQSYWFE             | 2.45 | 0.01 | 2.88 | 2.22 | 0.85 | 0.28 |
| 47945 | 0 | 238788 | NDGGKNTAPLTLCPNIG        | 2.87 | 0.01 | 0.78 | 0.44 | 1.13 | 0.28 |

|       |   |        |                               |      |      |      |      |      |      |
|-------|---|--------|-------------------------------|------|------|------|------|------|------|
| 47946 | 0 | 109620 | NDGQPGPA                      | 2.14 | 0.01 | 1.60 | 2.55 | 2.60 | 0.28 |
| 47947 | 0 | 225444 | NDGRLEKTCMYGGVTE<br>H         | 2.79 | 0.01 | 2.61 | 0.68 | 0.22 | 0.28 |
| 47948 | 0 | 225444 | NDGRLEKTCMYGGVTE<br>H         | 2.79 | 0.01 | 2.61 | 0.68 | 0.22 | 0.28 |
| 47949 | 0 | 225444 | NDGRLEKTCMYGGVTE<br>H         | 2.79 | 0.01 | 2.61 | 0.68 | 0.22 | 0.28 |
| 47950 | 0 | 43448  | NDGWAGYW                      | 2.14 | 0.01 | 2.69 | 0.68 | 0.22 | 0.28 |
| 47951 | 0 | 110951 | NDGYFWEDGTNG                  | 2.50 | 0.01 | 3.15 | 0.44 | 1.59 | 0.28 |
| 47952 | 0 | 43449  | NDHEPQISPGGLEPPSE<br>KHFRETEV | 3.12 | 0.01 | 2.04 | 0.44 | 0.85 | 0.28 |
| 47953 | 0 | 43449  | NDHEPQISPGGLEPPSE<br>KHFRETEV | 3.12 | 0.01 | 2.04 | 0.44 | 0.85 | 0.28 |
| 47954 | 0 | 186781 | NDHLFACWLEHHHHH               | 2.66 | 0.01 | 0.90 | 1.20 | 0.22 | 0.85 |
| 47955 | 0 | 93475  | NDIITDSDGN                    | 2.35 | 0.01 | 2.67 | 2.00 | 0.22 | 0.28 |
| 47956 | 0 | 93475  | NDIITDSDGN                    | 2.35 | 0.01 | 2.67 | 2.00 | 0.22 | 0.28 |
| 47957 | 0 | 93475  | NDIITDSDGN                    | 2.35 | 0.01 | 2.67 | 2.00 | 0.22 | 0.28 |
| 47958 | 0 | 133239 | NDINRTKYYYNEIKLK              | 2.75 | 0.01 | 0.90 | 1.20 | 0.22 | 0.85 |
| 47959 | 0 | 450852 | NDIPHLM                       | 1.99 | 0.01 | 0.90 | 0.44 | 1.41 | 1.39 |
| 47960 | 0 | 43460  | NDIRVE                        | 1.88 | 0.01 | 1.96 | 0.44 | 0.85 | 0.28 |
| 47961 | 0 | 341757 | NDKDEDDGDNDADD                | 2.72 | 0.01 | 1.61 | 0.44 | 0.85 | 1.28 |
| 47962 | 0 | 134452 | NDKGRLSQDEIDRMVN<br>DAEK      | 2.94 | 0.01 | 1.66 | 0.68 | 0.22 | 1.39 |
| 47963 | 0 | 43462  | NDKGRLSRAEIERMV               | 2.64 | 0.01 | 2.30 | 0.44 | 0.85 | 0.28 |
| 47964 | 0 | 43462  | NDKGRLSRAEIERMV               | 2.64 | 0.01 | 2.30 | 0.44 | 1.41 | 0.28 |
| 47965 | 0 | 215815 | NDKHSNGTIKDRSPY               | 2.67 | 0.01 | 4.93 | 0.44 | 1.74 | 1.28 |
| 47966 | 0 | 181736 | NDKIIGNSDKYGSCA               | 2.70 | 0.01 | 2.86 | 2.37 | 0.22 | 1.28 |
| 47967 | 0 | 522681 | NDKIYSLNYNELEVL               | 2.71 | 0.01 | 2.24 | 0.44 | 1.41 | 1.28 |
| 47968 | 0 | 152829 | NDKLPLYISN                    | 2.32 | 0.01 | 2.18 | 2.16 | 0.22 | 0.28 |
| 47969 | 0 | 93476  | NDKLSFSDSN                    | 2.36 | 0.01 | 2.67 | 2.00 | 0.22 | 0.28 |
| 47970 | 0 | 93476  | NDKLSFSDSN                    | 2.36 | 0.01 | 2.67 | 2.00 | 0.22 | 0.28 |
| 47971 | 0 | 93476  | NDKLSFSDSN                    | 2.36 | 0.01 | 2.67 | 2.00 | 0.22 | 0.28 |
| 47972 | 0 | 43470  | NDKLYRMEYWWTIKKDV<br>W        | 2.83 | 0.01 | 0.90 | 2.74 | 0.22 | 1.48 |
| 47973 | 0 | 43480  | NDKSGSSS                      | 2.12 | 0.01 | 3.45 | 0.44 | 0.85 | 0.28 |
| 47974 | 0 | 43481  | NDLALPWKHEGAQNW<br>NNAER      | 2.94 | 0.01 | 4.15 | 0.68 | 0.22 | 0.28 |
| 47975 | 0 | 43481  | NDLALPWKHEGAQNW<br>NNAER      | 2.94 | 0.01 | 4.15 | 0.68 | 0.22 | 0.85 |
| 47976 | 0 | 43481  | NDLALPWKHEGAQNW<br>NNAER      | 2.94 | 0.01 | 4.15 | 0.68 | 0.22 | 1.27 |
| 47977 | 0 | 43482  | NDLDQVQESLLKANI               | 2.68 | 0.01 | 2.36 | 0.44 | 1.23 | 1.28 |
| 47978 | 0 | 43482  | NDLDQVQESLLKANI               | 2.68 | 0.01 | 2.36 | 0.44 | 1.23 | 1.27 |
| 47979 | 0 | 110952 | NDLQTVLG                      | 2.12 | 0.01 | 3.15 | 1.12 | 0.22 | 1.27 |

|       |   |        |                                        |      |      |      |      |      |      |
|-------|---|--------|----------------------------------------|------|------|------|------|------|------|
| 47980 | 0 | 43490  | NDLTAICQKLQLKIREVL<br>KKYVKNLVEEKDDDSK | 3.46 | 0.01 | 2.94 | 0.44 | 0.85 | 0.28 |
| 47981 | 0 | 43493  | NDMFNNFTVSFWLRVP<br>KVSA               | 2.93 | 0.01 | 2.95 | 3.38 | 0.22 | 0.28 |
| 47982 | 0 | 522686 | NDMIKLAPKEMPLES                        | 2.68 | 0.01 | 2.24 | 0.44 | 1.41 | 1.28 |
| 47983 | 0 | 341835 | NDPAADGAETREEKK                        | 2.67 | 0.01 | 1.61 | 0.44 | 0.85 | 1.28 |
| 47984 | 0 | 43506  | NDPN                                   | 1.60 | 0.01 | 3.29 | 1.15 | 0.22 | 0.28 |
| 47985 | 0 | 43509  | NDPNRNVD                               | 2.17 | 0.01 | 3.29 | 1.20 | 0.22 | 0.28 |
| 47986 | 0 | 43512  | NDPPPPNPNDPAPPQG                       | 2.79 | 0.01 | 3.01 | 1.15 | 0.22 | 1.27 |
| 47987 | 0 | 43512  | NDPPPPNPNDPAPPQG                       | 2.79 | 0.01 | 3.01 | 1.15 | 0.22 | 1.27 |
| 47988 | 0 | 43512  | NDPPPPNPNDPAPPQG                       | 2.79 | 0.01 | 3.01 | 1.15 | 0.22 | 0.85 |
| 47989 | 0 | 176359 | NDPQYQAELPEGSDTSV<br>DAV               | 2.95 | 0.01 | 2.04 | 0.44 | 0.85 | 0.28 |
| 47990 | 0 | 176359 | NDPQYQAELPEGSDTSV<br>DAV               | 2.95 | 0.01 | 2.04 | 0.44 | 0.85 | 0.28 |
| 47991 | 0 | 43514  | NDPTQQIPKLVANNTRL<br>WVY               | 2.92 | 0.01 | 2.04 | 0.44 | 0.85 | 0.28 |
| 47992 | 0 | 95611  | NDPTTN                                 | 1.92 | 0.01 | 2.40 | 2.52 | 0.22 | 0.28 |
| 47993 | 0 | 95611  | NDPTTN                                 | 1.92 | 0.01 | 2.40 | 2.52 | 0.22 | 0.28 |
| 47994 | 0 | 95611  | NDPTTN                                 | 1.92 | 0.01 | 2.40 | 2.52 | 0.22 | 0.28 |
| 47995 | 0 | 148691 | NDQDKSPILPVKEEENV<br>KIIEDNEQGNVIKDG   | 3.44 | 0.01 | 3.57 | 2.49 | 0.22 | 0.28 |
| 47996 | 0 | 43515  | NDQGNRTTPSYVAFTDS<br>ERL               | 2.91 | 0.01 | 2.78 | 2.49 | 0.85 | 0.28 |
| 47997 | 0 | 43515  | NDQGNRTTPSYVAFTDS<br>ERL               | 2.91 | 0.01 | 2.78 | 0.44 | 0.85 | 0.28 |
| 47998 | 0 | 100321 | NDQIGDSLYSAMTV                         | 2.57 | 0.01 | 2.96 | 1.12 | 0.22 | 0.28 |
| 47999 | 0 | 186903 | NDRAMTSPLAGRTSVLG                      | 2.79 | 0.01 | 3.12 | 2.37 | 0.22 | 2.66 |
| 48000 | 0 | 123532 | NDREKWLGD                              | 2.21 | 0.01 | 2.28 | 2.00 | 0.22 | 0.28 |
| 48001 | 0 | 94887  | NDRNLLD                                | 2.05 | 0.01 | 2.72 | 0.68 | 0.22 | 0.85 |
| 48002 | 0 | 94887  | NDRNLLD                                | 2.05 | 0.01 | 2.72 | 0.68 | 0.22 | 0.85 |
| 48003 | 0 | 450853 | NDRPHMP                                | 2.02 | 0.01 | 0.90 | 0.44 | 1.41 | 1.39 |
| 48004 | 0 | 43525  | NDRVYINVVVKKEYRL<br>AT                 | 2.90 | 0.01 | 3.03 | 0.68 | 0.22 | 1.57 |
| 48005 | 0 | 43525  | NDRVYINVVVKKEYRL<br>AT                 | 2.90 | 0.01 | 3.03 | 3.33 | 0.22 | 1.57 |
| 48006 | 0 | 43525  | NDRVYINVVVKKEYRL<br>AT                 | 2.90 | 0.01 | 2.08 | 0.44 | 0.22 | 1.57 |
| 48007 | 0 | 43525  | NDRVYINVVVKKEYRL<br>AT                 | 2.90 | 0.01 | 2.08 | 1.15 | 0.22 | 1.57 |



|       |   |        |                                   |      |      |      |      |      |      |
|-------|---|--------|-----------------------------------|------|------|------|------|------|------|
| 48008 | 0 | 43525  | NDRVYINVVVKKEYRL<br>AT            | 2.90 | 0.01 | 2.08 | 2.49 | 0.22 | 1.57 |
| 48009 | 0 | 43525  | NDRVYINVVVKKEYRL<br>AT            | 2.90 | 0.01 | 2.08 | 0.68 | 0.22 | 1.57 |
| 48010 | 0 | 43525  | NDRVYINVVVKKEYRL<br>AT            | 2.90 | 0.01 | 2.08 | 0.68 | 0.22 | 1.57 |
| 48011 | 0 | 43525  | NDRVYINVVVKKEYRL<br>AT            | 2.90 | 0.01 | 2.08 | 2.25 | 0.22 | 1.57 |
| 48012 | 0 | 43525  | NDRVYINVVVKKEYRL<br>AT            | 2.90 | 0.01 | 3.16 | 0.44 | 1.93 | 1.57 |
| 48013 | 0 | 43525  | NDRVYINVVVKKEYRL<br>AT            | 2.90 | 0.01 | 2.08 | 1.15 | 0.22 | 1.57 |
| 48014 | 0 | 43525  | NDRVYINVVVKKEYRL<br>AT            | 2.90 | 0.01 | 2.08 | 0.44 | 0.22 | 1.57 |
| 48015 | 0 | 43525  | NDRVYINVVVKKEYRL<br>AT            | 2.90 | 0.01 | 2.08 | 2.25 | 0.22 | 1.57 |
| 48016 | 0 | 43525  | NDRVYINVVVKKEYRL<br>AT            | 2.90 | 0.01 | 2.08 | 0.68 | 0.22 | 1.57 |
| 48017 | 0 | 43525  | NDRVYINVVVKKEYRL<br>AT            | 2.90 | 0.01 | 2.08 | 0.68 | 0.22 | 1.57 |
| 48018 | 0 | 43525  | NDRVYINVVVKKEYRL<br>AT            | 2.90 | 0.01 | 2.08 | 2.25 | 0.22 | 1.57 |
| 48019 | 0 | 43525  | NDRVYINVVVKKEYRL<br>AT            | 2.90 | 0.01 | 2.08 | 0.68 | 0.22 | 1.57 |
| 48020 | 0 | 43525  | NDRVYINVVVKKEYRL<br>AT            | 2.90 | 0.01 | 2.08 | 2.25 | 0.22 | 1.57 |
| 48021 | 0 | 108551 | NDSLNTGFLAFLFYTKK                 | 2.80 | 0.01 | 1.72 | 0.44 | 0.85 | 0.28 |
| 48022 | 0 | 108551 | NDSLNTGFLAFLFYTKK                 | 2.80 | 0.01 | 1.72 | 2.37 | 0.22 | 0.28 |
| 48023 | 0 | 108551 | NDSLNTGFLAFLFYTKK                 | 2.80 | 0.01 | 1.72 | 2.37 | 0.22 | 0.85 |
| 48024 | 0 | 108551 | NDSLNTGFLAFLFYTKK                 | 2.80 | 0.01 | 1.72 | 2.37 | 0.22 | 1.34 |
| 48025 | 0 | 104144 | NDSQCWKLGCIAEK                    | 2.57 | 0.01 | 0.90 | 0.44 | 1.13 | 1.39 |
| 48026 | 0 | 43527  | NDSSSHLQ                          | 2.12 | 0.01 | 3.04 | 2.13 | 0.22 | 1.27 |
| 48027 | 0 | 43527  | NDSSSHLQ                          | 2.12 | 0.01 | 3.04 | 2.13 | 0.22 | 1.27 |
| 48028 | 0 | 43528  | NDSSSHLQLIYNLTLCEL<br>NGTDW       | 3.07 | 0.01 | 3.04 | 2.13 | 0.22 | 1.27 |
| 48029 | 0 | 43528  | NDSSSHLQLIYNLTLCEL<br>NGTDW       | 3.07 | 0.01 | 3.04 | 2.13 | 0.22 | 1.27 |
| 48030 | 0 | 115388 | NDSTEYGLFQ                        | 2.26 | 0.01 | 1.60 | 0.44 | 1.23 | 0.85 |
| 48031 | 0 | 43530  | NDTGKH                            | 1.88 | 0.01 | 2.40 | 0.44 | 0.85 | 0.28 |
| 48032 | 0 | 43533  | NDTLHNIR                          | 2.13 | 0.01 | 2.83 | 1.12 | 0.22 | 0.28 |
| 48033 | 0 | 108039 | NDVDMRDPYNKYKGC<br>PPRRRLQCFSRIVR | 3.32 | 0.01 | 0.90 | 1.12 | 0.22 | 0.28 |
| 48034 | 0 | 86674  | NDVFREAQRSYL                      | 2.43 | 0.01 | 2.48 | 0.44 | 1.59 | 0.28 |

|       |   |        |                                 |      |      |      |      |      |      |
|-------|---|--------|---------------------------------|------|------|------|------|------|------|
| 48035 | 0 | 43541  | NDVRCKLWLCPMPD                  | 2.61 | 0.01 | 0.90 | 0.44 | 1.41 | 0.28 |
| 48036 | 0 | 229747 | NDVRQAVEGAIGRVA                 | 2.70 | 0.01 | 4.93 | 0.44 | 0.85 | 1.27 |
| 48037 | 0 | 157694 | NDWEDPMATKHFSV                  | 2.55 | 0.01 | 3.51 | 2.49 | 0.85 | 0.28 |
| 48038 | 0 | 228539 | NDWEDRYRE                       | 2.34 | 0.01 | 1.75 | 2.19 | 0.22 | 0.85 |
| 48039 | 0 | 228540 | NDWEDRYRENMN                    | 2.59 | 0.01 | 2.98 | 2.19 | 0.22 | 0.85 |
| 48040 | 0 | 43543  | NDWPCLSHTTVCNGTQ                | 2.71 | 0.01 | 0.90 | 0.44 | 1.41 | 0.28 |
| 48041 | 0 | 43545  | NDYCLRECKQQGYKG                 | 2.67 | 0.01 | 3.75 | 2.71 | 0.22 | 0.28 |
| 48042 | 0 | 43545  | NDYCLRECKQQGYKG                 | 2.67 | 0.01 | 3.75 | 2.71 | 0.22 | 0.28 |
| 48043 | 0 | 43547  | NDYDGFLENAHEHHGV<br>YNQG        | 2.96 | 0.01 | 3.27 | 3.16 | 0.22 | 0.28 |
| 48044 | 0 | 230022 | NDYEDRY                         | 2.13 | 0.01 | 2.52 | 3.15 | 0.22 | 0.85 |
| 48045 | 0 | 230022 | NDYEDRY                         | 2.13 | 0.01 | 2.52 | 3.15 | 0.22 | 0.85 |
| 48046 | 0 | 230022 | NDYEDRY                         | 2.13 | 0.01 | 2.52 | 3.15 | 0.22 | 0.85 |
| 48047 | 0 | 230022 | NDYEDRY                         | 2.13 | 0.01 | 2.52 | 3.15 | 0.22 | 0.85 |
| 48048 | 0 | 230022 | NDYEDRY                         | 2.13 | 0.01 | 2.52 | 3.15 | 0.22 | 0.85 |
| 48049 | 0 | 43548  | NDYEDRYRE                       | 2.35 | 0.01 | 2.52 | 1.15 | 0.22 | 0.85 |
| 48050 | 0 | 43549  | NDYEDRYREN                      | 2.45 | 0.01 | 2.52 | 1.15 | 0.22 | 0.85 |
| 48051 | 0 | 186904 | NDYEDRYRENMYRYP<br>NQ           | 2.90 | 0.01 | 4.63 | 4.63 | 0.22 | 0.28 |
| 48052 | 0 | 177528 | NDYLHLLTQRGSVLRVEL<br>ED        | 2.94 | 3.37 | 0.78 | 0.44 | 2.26 | 0.28 |
| 48053 | 0 | 177528 | NDYLHLLTQRGSVLRVEL<br>ED        | 2.94 | 3.37 | 0.78 | 0.44 | 1.13 | 0.28 |
| 48054 | 0 | 43551  | NEAALKELGEVAVHKDS               | 2.81 | 0.01 | 3.65 | 1.12 | 0.22 | 0.85 |
| 48055 | 0 | 43551  | NEAALKELGEVAVHKDS               | 2.81 | 0.01 | 3.65 | 1.12 | 0.22 | 1.27 |
| 48056 | 0 | 98273  | NEADYQAKLT                      | 2.29 | 0.01 | 3.18 | 2.98 | 0.22 | 0.28 |
| 48057 | 0 | 43557  | NEALPGDARDTTT                   | 2.52 | 0.01 | 3.34 | 1.12 | 0.22 | 0.85 |
| 48058 | 0 | 450854 | NEAPRHA                         | 2.02 | 0.01 | 0.90 | 0.44 | 1.41 | 1.39 |
| 48059 | 0 | 120813 | NEAVKYTGTY                      | 2.31 | 0.01 | 2.18 | 2.16 | 0.22 | 0.28 |
| 48060 | 0 | 43565  | NECTGGAYETYK<br>NEDAVQGIADWDAAQ | 2.48 | 0.01 | 3.22 | 0.44 | 1.23 | 0.85 |
| 48061 | 0 | 156920 | GIADGVAAQGIALDDAV<br>HGIA       | 3.56 | 0.01 | 0.78 | 0.44 | 2.82 | 1.39 |
| 48062 | 0 | 342117 | NEDDDEDEEENEEDA                 | 2.74 | 0.01 | 1.61 | 0.44 | 0.85 | 1.28 |
| 48063 | 0 | 43567  | NEDEQIGARIVL                    | 2.45 | 0.01 | 2.40 | 0.44 | 1.59 | 0.28 |
| 48064 | 0 | 43567  | NEDEQIGARIVL                    | 2.45 | 0.01 | 2.40 | 1.20 | 0.22 | 0.28 |
| 48065 | 0 | 43567  | NEDEQIGARIVL                    | 2.45 | 0.01 | 2.40 | 0.44 | 1.59 | 0.28 |
| 48066 | 0 | 43567  | NEDEQIGARIVL                    | 2.45 | 0.01 | 2.40 | 0.44 | 1.59 | 0.28 |
| 48067 | 0 | 43568  | NEDEQIGARIVLKALSA               | 2.78 | 0.01 | 2.40 | 2.82 | 0.22 | 0.28 |
| 48068 | 0 | 43568  | NEDEQIGARIVLKALSA               | 2.78 | 0.01 | 2.40 | 2.82 | 0.22 | 0.28 |
| 48069 | 0 | 462401 | NEDLYISCTM                      | 2.26 | 0.01 | 0.78 | 1.12 | 0.22 | 1.28 |

|       |   |        |                         |      |      |      |      |      |      |
|-------|---|--------|-------------------------|------|------|------|------|------|------|
| 48070 | 0 | 43575  | NEDNEKLRL               | 2.15 | 0.01 | 3.29 | 1.20 | 0.22 | 0.28 |
| 48071 | 0 | 43576  | NEDNEKLRLPKHKKLKQ<br>PG | 2.93 | 0.01 | 1.66 | 1.15 | 0.22 | 0.28 |
| 48072 | 0 | 43576  | NEDNEKLRLPKHKKLKQ<br>PG | 2.93 | 0.01 | 1.66 | 1.15 | 0.22 | 1.27 |
| 48073 | 0 | 43576  | NEDNEKLRLPKHKKLKQ<br>PG | 2.93 | 0.01 | 1.66 | 1.15 | 0.22 | 1.34 |
| 48074 | 0 | 43578  | NEDQKIGIEIKRALKI        | 2.81 | 0.01 | 1.75 | 1.81 | 0.22 | 0.28 |
| 48075 | 0 | 43578  | NEDQKIGIEIKRALKI        | 2.81 | 0.01 | 1.75 | 1.81 | 0.22 | 0.28 |
| 48076 | 0 | 43578  | NEDQKIGIEIKRALKI        | 2.81 | 0.01 | 1.75 | 1.81 | 0.22 | 0.28 |
| 48077 | 0 | 43578  | NEDQKIGIEIKRALKI        | 2.81 | 0.01 | 1.75 | 2.82 | 0.22 | 0.28 |
| 48078 | 0 | 43578  | NEDQKIGIEIKRALKI        | 2.81 | 0.01 | 1.75 | 2.82 | 0.22 | 0.28 |
| 48079 | 0 | 43578  | NEDQKIGIEIKRALKI        | 2.81 | 0.01 | 1.75 | 0.68 | 0.22 | 1.75 |
| 48080 | 0 | 43578  | NEDQKIGIEIKRALKI        | 2.81 | 0.01 | 1.75 | 0.68 | 0.22 | 0.28 |
| 48081 | 0 | 43578  | NEDQKIGIEIKRALKI        | 2.81 | 0.01 | 1.75 | 0.68 | 0.22 | 0.28 |
| 48082 | 0 | 43578  | NEDQKIGIEIKRALKI        | 2.81 | 0.01 | 1.75 | 0.68 | 0.22 | 0.28 |
| 48083 | 0 | 43582  | NEDQRVGI                | 2.10 | 0.01 | 2.99 | 0.44 | 0.85 | 0.28 |
| 48084 | 0 | 130981 | NEEAEDYDDDLTDSE         | 2.70 | 0.01 | 0.78 | 0.44 | 2.35 | 1.27 |
| 48085 | 0 | 118533 | NEEAGDGTATTATV          | 2.57 | 0.01 | 0.78 | 0.44 | 1.59 | 0.85 |
| 48086 | 0 | 43589  | NEECTKLKGESGYCQ         | 2.68 | 0.01 | 3.33 | 0.68 | 0.22 | 0.28 |
| 48087 | 0 | 43589  | NEECTKLKGESGYCQ         | 2.68 | 0.01 | 3.33 | 0.68 | 0.22 | 1.34 |
| 48088 | 0 | 43589  | NEECTKLKGESGYCQ         | 2.68 | 0.01 | 3.33 | 0.68 | 0.22 | 0.28 |
| 48089 | 0 | 43592  | NEEEIAQV                | 2.12 | 0.01 | 2.99 | 0.44 | 0.85 | 0.28 |
| 48090 | 0 | 120814 | NEEFPEKDNE              | 2.36 | 0.01 | 2.18 | 2.16 | 0.22 | 0.28 |
| 48091 | 0 | 106675 | NEEGFFSARGHRPLDKK       | 2.74 | 2.84 | 0.78 | 0.44 | 1.13 | 0.28 |
| 48092 | 0 | 106675 | NEEGFFSARGHRPLDKK       | 2.74 | 2.84 | 0.78 | 0.44 | 1.13 | 0.28 |
| 48093 | 0 | 106675 | NEEGFFSARGHRPLDKK       | 2.74 | 2.84 | 0.78 | 0.44 | 1.13 | 0.28 |
| 48094 | 0 | 106675 | NEEGFFSARGHRPLDKK       | 2.74 | 2.84 | 0.78 | 0.44 | 1.41 | 0.28 |
| 48095 | 0 | 106675 | NEEGFFSARGHRPLDKK       | 2.74 | 2.84 | 0.78 | 0.44 | 1.13 | 0.28 |
| 48096 | 0 | 106675 | NEEGFFSARGHRPLDKK       | 2.74 | 2.84 | 0.78 | 0.44 | 1.13 | 1.27 |
| 48097 | 0 | 106675 | NEEGFFSARGHRPLDKK       | 2.74 | 2.84 | 0.78 | 0.44 | 1.13 | 0.28 |
| 48098 | 0 | 106675 | NEEGFFSARGHRPLDKK       | 2.74 | 2.84 | 0.78 | 0.44 | 1.13 | 0.28 |
| 48099 | 0 | 106675 | NEEGFFSARGHRPLDKK       | 2.74 | 2.84 | 0.78 | 0.44 | 1.13 | 0.28 |
| 48100 | 0 | 106675 | NEEGFFSARGHRPLDKK       | 2.74 | 2.84 | 0.78 | 0.44 | 1.13 | 1.66 |
| 48101 | 0 | 106675 | NEEGFFSARGHRPLDKK       | 2.74 | 2.84 | 0.78 | 0.44 | 1.13 | 1.66 |

|       |   |        |                   |      |      |      |      |      |      |
|-------|---|--------|-------------------|------|------|------|------|------|------|
| 48102 | 0 | 106675 | NEEGFFSARGHRPLDKK | 2.74 | 2.84 | 0.78 | 0.44 | 1.13 | 1.66 |
| 48103 | 0 | 106675 | NEEGFFSARGHRPLDKK | 2.74 | 2.84 | 0.78 | 0.44 | 1.13 | 1.66 |
| 48104 | 0 | 106675 | NEEGFFSARGHRPLDKK | 2.74 | 2.84 | 0.78 | 0.44 | 1.13 | 1.66 |
| 48105 | 0 | 106675 | NEEGFFSARGHRPLDKK | 2.74 | 2.84 | 0.78 | 0.44 | 1.13 | 1.66 |
| 48106 | 0 | 106675 | NEEGFFSARGHRPLDKK | 2.74 | 2.84 | 0.78 | 0.44 | 1.13 | 1.66 |
| 48107 | 0 | 106675 | NEEGFFSARGHRPLDKK | 2.74 | 2.84 | 0.78 | 0.44 | 1.13 | 1.66 |
| 48108 | 0 | 106675 | NEEGFFSARGHRPLDKK | 2.74 | 2.84 | 0.78 | 0.44 | 1.13 | 1.66 |
| 48109 | 0 | 106675 | NEEGFFSARGHRPLDKK | 2.74 | 2.84 | 0.78 | 0.44 | 1.13 | 1.66 |
| 48110 | 0 | 106675 | NEEGFFSARGHRPLDKK | 2.74 | 2.84 | 0.78 | 0.44 | 1.13 | 1.66 |
| 48111 | 0 | 106675 | NEEGFFSARGHRPLDKK | 2.74 | 2.84 | 0.78 | 0.44 | 1.13 | 1.66 |
| 48112 | 0 | 106675 | NEEGFFSARGHRPLDKK | 2.74 | 2.84 | 0.78 | 0.44 | 1.13 | 1.66 |
| 48113 | 0 | 106675 | NEEGFFSARGHRPLDKK | 2.74 | 2.84 | 0.78 | 0.44 | 1.13 | 1.66 |
| 48114 | 0 | 106675 | NEEGFFSARGHRPLDKK | 2.74 | 2.84 | 0.78 | 0.44 | 1.13 | 1.66 |
| 48115 | 0 | 106675 | NEEGFFSARGHRPLDKK | 2.74 | 2.84 | 0.78 | 0.44 | 1.13 | 1.66 |
| 48116 | 0 | 106675 | NEEGFFSARGHRPLDKK | 2.74 | 2.84 | 0.78 | 0.44 | 1.13 | 1.66 |
| 48117 | 0 | 106675 | NEEGFFSARGHRPLDKK | 2.74 | 2.84 | 0.78 | 0.44 | 1.13 | 1.66 |
| 48118 | 0 | 106675 | NEEGFFSARGHRPLDKK | 2.74 | 2.84 | 0.78 | 0.44 | 1.13 | 1.66 |
| 48119 | 0 | 106675 | NEEGFFSARGHRPLDKK | 2.74 | 2.84 | 0.78 | 0.44 | 1.13 | 1.66 |
| 48120 | 0 | 106675 | NEEGFFSARGHRPLDKK | 2.74 | 2.84 | 0.78 | 0.44 | 1.13 | 1.66 |
| 48121 | 0 | 106675 | NEEGFFSARGHRPLDKK | 2.74 | 2.84 | 0.78 | 0.44 | 1.13 | 1.66 |
| 48122 | 0 | 106675 | NEEGFFSARGHRPLDKK | 2.74 | 2.84 | 0.78 | 0.44 | 1.13 | 1.66 |
| 48123 | 0 | 106675 | NEEGFFSARGHRPLDKK | 2.74 | 2.84 | 0.78 | 0.44 | 1.13 | 1.66 |
| 48124 | 0 | 106675 | NEEGFFSARGHRPLDKK | 2.74 | 2.84 | 0.78 | 0.44 | 1.13 | 1.66 |

|       |   |        |                   |      |      |      |      |      |      |
|-------|---|--------|-------------------|------|------|------|------|------|------|
| 48125 | 0 | 106675 | NEEGFFSARGHRPLDKK | 2.74 | 2.84 | 0.78 | 0.44 | 1.13 | 1.66 |
| 48126 | 0 | 106675 | NEEGFFSARGHRPLDKK | 2.74 | 2.84 | 0.78 | 0.44 | 1.13 | 1.66 |
| 48127 | 0 | 106675 | NEEGFFSARGHRPLDKK | 2.74 | 2.84 | 0.78 | 0.44 | 1.13 | 1.66 |
| 48128 | 0 | 106675 | NEEGFFSARGHRPLDKK | 2.74 | 2.84 | 0.78 | 0.44 | 1.13 | 1.66 |
| 48129 | 0 | 106675 | NEEGFFSARGHRPLDKK | 2.74 | 2.84 | 0.78 | 0.44 | 1.13 | 1.66 |
| 48130 | 0 | 106675 | NEEGFFSARGHRPLDKK | 2.74 | 2.84 | 0.78 | 0.44 | 1.13 | 1.66 |
| 48131 | 0 | 106675 | NEEGFFSARGHRPLDKK | 2.74 | 2.84 | 0.78 | 0.44 | 1.13 | 1.66 |
| 48132 | 0 | 106675 | NEEGFFSARGHRPLDKK | 2.74 | 2.84 | 0.78 | 0.44 | 1.13 | 1.66 |
| 48133 | 0 | 106675 | NEEGFFSARGHRPLDKK | 2.74 | 2.84 | 0.78 | 0.44 | 1.13 | 1.66 |
| 48134 | 0 | 106675 | NEEGFFSARGHRPLDKK | 2.74 | 2.84 | 0.78 | 0.44 | 1.13 | 1.66 |
| 48135 | 0 | 106675 | NEEGFFSARGHRPLDKK | 2.74 | 2.84 | 0.78 | 0.44 | 1.13 | 1.66 |
| 48136 | 0 | 106675 | NEEGFFSARGHRPLDKK | 2.74 | 2.84 | 0.78 | 0.44 | 1.13 | 1.66 |
| 48137 | 0 | 106675 | NEEGFFSARGHRPLDKK | 2.74 | 2.84 | 0.78 | 0.44 | 1.13 | 1.66 |
| 48138 | 0 | 106675 | NEEGFFSARGHRPLDKK | 2.74 | 2.84 | 0.78 | 0.44 | 1.13 | 1.66 |
| 48139 | 0 | 106675 | NEEGFFSARGHRPLDKK | 2.74 | 2.84 | 0.78 | 0.44 | 1.13 | 1.66 |
| 48140 | 0 | 106675 | NEEGFFSARGHRPLDKK | 2.74 | 2.84 | 0.78 | 0.44 | 1.13 | 1.66 |
| 48141 | 0 | 106675 | NEEGFFSARGHRPLDKK | 2.74 | 2.84 | 0.78 | 0.44 | 1.13 | 1.66 |
| 48142 | 0 | 106675 | NEEGFFSARGHRPLDKK | 2.74 | 2.84 | 0.78 | 0.44 | 1.13 | 1.66 |
| 48143 | 0 | 106675 | NEEGFFSARGHRPLDKK | 2.74 | 2.84 | 0.78 | 0.44 | 1.13 | 1.66 |
| 48144 | 0 | 106675 | NEEGFFSARGHRPLDKK | 2.74 | 2.84 | 0.78 | 0.44 | 1.13 | 1.66 |
| 48145 | 0 | 106675 | NEEGFFSARGHRPLDKK | 2.74 | 2.84 | 0.78 | 0.44 | 1.13 | 1.66 |
| 48146 | 0 | 106675 | NEEGFFSARGHRPLDKK | 2.74 | 2.84 | 0.78 | 0.44 | 1.13 | 1.66 |
| 48147 | 0 | 106675 | NEEGFFSARGHRPLDKK | 2.74 | 2.84 | 0.78 | 0.44 | 1.13 | 1.66 |

|       |   |        |                   |      |      |      |      |      |      |
|-------|---|--------|-------------------|------|------|------|------|------|------|
| 48148 | 0 | 106675 | NEEGFFSARGHRPLDKK | 2.74 | 2.84 | 0.78 | 0.44 | 1.13 | 1.66 |
| 48149 | 0 | 106675 | NEEGFFSARGHRPLDKK | 2.74 | 2.84 | 0.78 | 0.44 | 1.13 | 1.66 |
| 48150 | 0 | 106675 | NEEGFFSARGHRPLDKK | 2.74 | 2.84 | 0.78 | 0.44 | 1.13 | 1.66 |
| 48151 | 0 | 106675 | NEEGFFSARGHRPLDKK | 2.74 | 2.84 | 0.78 | 0.44 | 1.13 | 1.66 |
| 48152 | 0 | 106675 | NEEGFFSARGHRPLDKK | 2.74 | 2.84 | 0.78 | 0.44 | 1.13 | 1.66 |
| 48153 | 0 | 106675 | NEEGFFSARGHRPLDKK | 2.74 | 2.84 | 0.78 | 0.44 | 1.13 | 1.66 |
| 48154 | 0 | 181132 | NEEGFFSARGHRPLDKK | 2.74 | 3.70 | 0.78 | 0.44 | 1.13 | 0.28 |
| 48155 | 0 | 106675 | NEEGFFSARGHRPLDKK | 2.74 | 2.84 | 0.78 | 0.44 | 1.13 | 0.28 |
| 48156 | 0 | 181132 | NEEGFFSARGHRPLDKK | 2.74 | 3.70 | 0.78 | 0.44 | 1.13 | 1.66 |
| 48157 | 0 | 181132 | NEEGFFSARGHRPLDKK | 2.74 | 3.70 | 0.78 | 0.44 | 1.13 | 1.66 |
| 48158 | 0 | 181132 | NEEGFFSARGHRPLDKK | 2.74 | 3.70 | 0.78 | 0.44 | 1.13 | 1.66 |
| 48159 | 0 | 106675 | NEEGFFSARGHRPLDKK | 2.74 | 2.84 | 0.78 | 0.44 | 1.13 | 0.28 |
| 48160 | 0 | 106675 | NEEGFFSARGHRPLDKK | 2.74 | 2.84 | 0.78 | 0.44 | 1.13 | 0.28 |
| 48161 | 0 | 106675 | NEEGFFSARGHRPLDKK | 2.74 | 2.84 | 0.78 | 0.44 | 1.13 | 1.28 |
| 48162 | 0 | 106675 | NEEGFFSARGHRPLDKK | 2.74 | 2.84 | 0.78 | 0.44 | 1.41 | 1.28 |
| 48163 | 0 | 106675 | NEEGFFSARGHRPLDKK | 2.74 | 2.84 | 0.78 | 0.44 | 1.13 | 1.28 |
| 48164 | 0 | 106675 | NEEGFFSARGHRPLDKK | 2.74 | 2.84 | 0.78 | 0.44 | 1.13 | 0.28 |
| 48165 | 0 | 106675 | NEEGFFSARGHRPLDKK | 2.74 | 2.84 | 0.78 | 0.44 | 1.13 | 0.28 |
| 48166 | 0 | 106675 | NEEGFFSARGHRPLDKK | 2.74 | 2.84 | 0.78 | 0.44 | 1.13 | 0.28 |
| 48167 | 0 | 106675 | NEEGFFSARGHRPLDKK | 2.74 | 2.84 | 0.78 | 0.44 | 1.13 | 0.28 |
| 48168 | 0 | 106675 | NEEGFFSARGHRPLDKK | 2.74 | 2.84 | 0.78 | 0.44 | 1.13 | 0.28 |
| 48169 | 0 | 106675 | NEEGFFSARGHRPLDKK | 2.74 | 2.84 | 0.78 | 0.44 | 1.13 | 0.28 |
| 48170 | 0 | 106675 | NEEGFFSARGHRPLDKK | 2.74 | 2.84 | 0.78 | 0.44 | 1.13 | 0.28 |

|       |   |        |                          |      |      |      |      |      |      |
|-------|---|--------|--------------------------|------|------|------|------|------|------|
| 48171 | 0 | 106675 | NEEGFFSARGHRPLDKK        | 2.74 | 2.84 | 0.78 | 0.44 | 1.13 | 0.28 |
| 48172 | 0 | 106675 | NEEGFFSARGHRPLDKK        | 2.74 | 2.84 | 0.78 | 0.44 | 1.13 | 0.28 |
| 48173 | 0 | 106675 | NEEGFFSARGHRPLDKK        | 2.74 | 2.84 | 0.78 | 0.44 | 1.13 | 0.85 |
| 48174 | 0 | 156383 | NEEGFFSARGHRPLDKK        | 2.74 | 0.01 | 0.78 | 0.44 | 1.13 | 0.28 |
| 48175 | 0 | 156383 | NEEGFFSARGHRPLDKK        | 2.74 | 0.01 | 0.78 | 0.44 | 1.13 | 0.28 |
| 48176 | 0 | 342196 | NEEGNQDADEEDEGE          | 2.74 | 0.01 | 1.61 | 0.44 | 0.85 | 1.28 |
| 48177 | 0 | 43602  | NEEPIAPYHFDLSGHAF<br>G   | 2.83 | 0.01 | 2.53 | 0.44 | 1.23 | 0.85 |
| 48178 | 0 | 43602  | NEEPIAPYHFDLSGHAF<br>G   | 2.83 | 0.01 | 2.53 | 0.44 | 1.23 | 0.85 |
| 48179 | 0 | 182400 | NEERWEAQTHHR             | 2.48 | 0.01 | 0.90 | 0.68 | 0.22 | 0.28 |
| 48180 | 0 | 43632  | NEGSNTNS                 | 2.17 | 0.01 | 2.96 | 0.68 | 0.22 | 0.28 |
| 48181 | 0 | 43632  | NEGSNTNS                 | 2.17 | 0.01 | 2.96 | 0.68 | 0.22 | 0.28 |
| 48182 | 0 | 98910  | NEGVIVKVSKEHVEE          | 2.70 | 0.01 | 2.16 | 0.44 | 1.23 | 0.85 |
| 48183 | 0 | 100323 | NEGVIVKVSKEHVEELTK<br>HA | 2.95 | 0.01 | 2.16 | 0.44 | 1.23 | 1.28 |
| 48184 | 0 | 133900 | NEHPVFAYLKDKLP           | 2.59 | 0.01 | 0.78 | 0.44 | 1.13 | 1.27 |
| 48185 | 0 | 133900 | NEHPVFAYLKDKLP           | 2.59 | 0.01 | 0.78 | 0.44 | 1.13 | 0.28 |
| 48186 | 0 | 133900 | NEHPVFAYLKDKLP           | 2.59 | 0.01 | 0.78 | 0.44 | 1.41 | 0.28 |
| 48187 | 0 | 133900 | NEHPVFAYLKDKLP           | 2.59 | 0.01 | 0.78 | 0.44 | 1.93 | 0.28 |
| 48188 | 0 | 181737 | NEIELSARDVLENIG          | 2.69 | 0.01 | 2.86 | 2.37 | 0.22 | 1.28 |
| 48189 | 0 | 181737 | NEIELSARDVLENIG          | 2.69 | 0.01 | 2.86 | 2.36 | 0.22 | 1.28 |
| 48190 | 0 | 43642  | NEIKELNNTLNKYKEEM<br>LCK | 3.67 | 0.01 | 2.22 | 0.44 | 1.74 | 0.28 |
| 48191 | 0 | 43642  | NEIKELNNTLNKYKEEM<br>LCK | 3.67 | 0.01 | 2.22 | 0.44 | 1.74 | 0.28 |
| 48192 | 0 | 172462 | NEISNMQKDLEHSND          | 2.69 | 0.01 | 0.78 | 0.44 | 1.13 | 0.28 |
| 48193 | 0 | 116789 | NEKEYKSITDELDQ           | 2.68 | 0.01 | 3.15 | 0.44 | 1.23 | 0.85 |
| 48194 | 0 | 116789 | NEKEYKSITDELDQ           | 2.68 | 0.01 | 2.36 | 0.44 | 1.23 | 1.28 |
| 48195 | 0 | 116789 | NEKEYKSITDELDQ           | 2.68 | 0.01 | 2.36 | 0.44 | 1.23 | 1.27 |
| 48196 | 0 | 116789 | NEKEYKSITDELDQ           | 2.68 | 0.01 | 2.36 | 0.44 | 1.23 | 1.28 |
| 48197 | 0 | 189760 | NEKHDEEF                 | 2.13 | 0.01 | 3.47 | 0.44 | 0.85 | 0.28 |
| 48198 | 0 | 43652  | NEKIERNNKLKQP            | 2.57 | 0.01 | 3.01 | 4.23 | 0.22 | 1.57 |
| 48199 | 0 | 43652  | NEKIERNNKLKQP            | 2.57 | 0.01 | 3.01 | 4.23 | 0.22 | 1.57 |
| 48200 | 0 | 451353 | NEKLEKYTNKFEHNIKPH<br>I  | 2.93 | 0.01 | 1.66 | 1.15 | 0.22 | 0.28 |
| 48201 | 0 | 451353 | NEKLEKYTNKFEHNIKPH<br>I  | 2.93 | 0.01 | 1.66 | 1.15 | 0.22 | 1.48 |
| 48202 | 0 | 451353 | NEKLEKYTNKFEHNIKPH<br>I  | 2.93 | 0.01 | 1.66 | 1.15 | 0.22 | 0.28 |

|       |   |        |                                                                    |      |      |      |      |      |      |
|-------|---|--------|--------------------------------------------------------------------|------|------|------|------|------|------|
| 48203 | 0 | 522724 | NEKLKNQARSAYKNN                                                    | 2.69 | 0.01 | 2.24 | 0.44 | 1.41 | 1.28 |
| 48204 | 0 | 118032 | NEKLLKKARIHPFH                                                     | 2.59 | 0.01 | 0.78 | 0.44 | 1.13 | 0.28 |
| 48205 | 0 | 118032 | NEKLLKKARIHPFH                                                     | 2.59 | 0.01 | 0.78 | 0.44 | 1.13 | 0.28 |
| 48206 | 0 | 118032 | NEKLLKKARIHPFH                                                     | 2.59 | 0.01 | 0.78 | 0.44 | 1.13 | 0.28 |
| 48207 | 0 | 342404 | NEKQQQSDEAQVQQH                                                    | 2.68 | 0.01 | 1.61 | 0.44 | 0.85 | 1.28 |
| 48208 | 0 | 434636 | NEKVELQELNDRFANYI                                                  | 2.78 | 3.40 | 0.78 | 0.44 | 1.13 | 0.28 |
| 48209 | 0 | 79617  | NELADTMQIVSLQLNK<br>MKSRLKSCGI                                     | 3.14 | 0.01 | 3.21 | 2.16 | 0.22 | 0.28 |
| 48210 | 0 | 79617  | NELADTMQIVSLQLNK<br>MKSRLKSCGI                                     | 3.14 | 0.01 | 3.21 | 2.16 | 0.22 | 0.28 |
| 48211 | 0 | 79617  | NELADTMQIVSLQLNK<br>MKSRLKSCGI                                     | 3.14 | 0.01 | 3.21 | 2.16 | 0.22 | 0.28 |
| 48212 | 0 | 79617  | NELADTMQIVSLQLNK<br>MKSRLKSCGI                                     | 3.14 | 0.01 | 3.21 | 2.16 | 0.22 | 0.28 |
| 48213 | 0 | 106676 | NELSTNPNQLMV                                                       | 2.48 | 0.01 | 0.90 | 1.15 | 0.22 | 1.39 |
| 48214 | 0 | 121643 | NEMHLLIQQAREMPL                                                    | 2.67 | 0.01 | 0.78 | 0.44 | 1.13 | 0.85 |
| 48215 | 0 | 43692  | NEMNKEVNKMNEEVN<br>KMNEEVNKMNEEVNK<br>MNKEVNKMDEEVNKM<br>NKEVNKMNK | 4.00 | 0.01 | 2.22 | 0.44 | 1.74 | 0.28 |
| 48216 | 0 | 43692  | NEMNKEVNKMNEEVN<br>KMNEEVNKMNEEVNK<br>MNKEVNKMDEEVNKM<br>NKEVNKMNK | 4.00 | 0.01 | 2.22 | 0.44 | 1.74 | 0.28 |
| 48217 | 0 | 43692  | NEMNKEVNKMNEEVN<br>KMNEEVNKMNEEVNK<br>MNKEVNKMDEEVNKM<br>NKEVNKMNK | 4.00 | 0.01 | 2.22 | 0.44 | 1.74 | 0.28 |
| 48218 | 0 | 43693  | NEMVLL<br>NENIKELLDKINEIKNPPP                                      | 1.86 | 0.01 | 2.40 | 0.44 | 0.85 | 0.28 |
| 48219 | 0 | 125167 | ANSGNTPNTLLDKNKKI<br>E<br>NENIKELLDKINEIKNPPP                      | 3.58 | 0.01 | 1.66 | 0.44 | 1.74 | 1.34 |
| 48220 | 0 | 125167 | ANSGNTPNTLLDKNKKI<br>E<br>NENIKELLDKINEIKNPPP                      | 3.58 | 0.01 | 1.66 | 0.44 | 1.74 | 1.34 |
| 48221 | 0 | 125167 | ANSGNTPNTLLDKNKKI<br>E<br>NENIKELLDKINEIKNPPP                      | 3.58 | 0.01 | 1.66 | 0.44 | 1.74 | 1.34 |
| 48222 | 0 | 125167 | ANSGNTPNTLLDKNKKI<br>E<br>NENIKELLDKINEIKNPPP                      | 3.58 | 0.01 | 1.66 | 0.44 | 1.74 | 1.34 |
| 48223 | 0 | 125167 | ANSGNTPNTLLDKNKKI<br>E                                             | 3.58 | 0.01 | 1.66 | 0.44 | 1.74 | 1.34 |



|       |   |        |                           |      |      |      |      |      |      |
|-------|---|--------|---------------------------|------|------|------|------|------|------|
|       |   |        | NENIKELLDKINEIKNPPP       |      |      |      |      |      |      |
| 48224 | 0 | 125167 | ANSGNTPNPTLLDKNKKI<br>E   | 3.58 | 0.01 | 1.66 | 0.44 | 1.74 | 1.34 |
|       |   |        | NENIKKLLDKINEIKNPPP       |      |      |      |      |      |      |
| 48225 | 0 | 125168 | ANSGNTPNPLPENKKKE<br>VEG  | 3.63 | 0.01 | 1.66 | 0.44 | 1.74 | 1.34 |
|       |   |        | NENIKKLLDKINEIKNPPP       |      |      |      |      |      |      |
| 48226 | 0 | 125168 | ANSGNTPNPLPENKKKE<br>VEG  | 3.63 | 0.01 | 1.66 | 0.44 | 1.74 | 1.34 |
|       |   |        | NENIKKLLDKINEIKNPPP       |      |      |      |      |      |      |
| 48227 | 0 | 125168 | ANSGNTPNPLPENKKKE<br>VEG  | 3.63 | 0.01 | 1.66 | 0.44 | 1.74 | 1.34 |
|       |   |        | NENIKKLLDKINEIKNPPP       |      |      |      |      |      |      |
| 48228 | 0 | 125168 | ANSGNTPNPLPENKKKE<br>VEG  | 3.63 | 0.01 | 1.66 | 0.44 | 1.74 | 1.34 |
|       |   |        | NENIKKLEDDIDKIKTDAE       |      |      |      |      |      |      |
| 48229 | 0 | 125169 | KPTTGSKPNTLLDKNKKI<br>E   | 3.61 | 0.01 | 1.66 | 0.44 | 1.74 | 1.34 |
|       |   |        | NENIKKLEDDIDKIKTDAE       |      |      |      |      |      |      |
| 48230 | 0 | 125169 | KPTTGSKPNTLLDKNKKI<br>E   | 3.61 | 0.01 | 1.66 | 0.44 | 1.74 | 1.34 |
|       |   |        | NENIKKLEDDIDKIKTDAE       |      |      |      |      |      |      |
| 48231 | 0 | 125169 | KPTTGSKPNTLLDKNKKI<br>E   | 3.61 | 0.01 | 1.66 | 0.44 | 1.74 | 1.34 |
|       |   |        | NENIKKLEDDIDKIKTDAE       |      |      |      |      |      |      |
| 48232 | 0 | 125169 | KPTTGSKPNTLLDKNKKI<br>E   | 3.61 | 0.01 | 1.66 | 0.44 | 1.74 | 1.34 |
|       |   |        | NENIKKLEDDIDKIKTDAE       |      |      |      |      |      |      |
| 48233 | 0 | 125169 | KPTTGSKPNTLLDKNKKI<br>E   | 3.61 | 0.01 | 1.66 | 0.44 | 1.74 | 1.34 |
|       |   |        | NENIKKLEDDIDKIKTDAE       |      |      |      |      |      |      |
| 48234 | 0 | 125170 | NPTTGSKPNPLPENKKK<br>EVEG | 3.65 | 0.01 | 1.66 | 0.44 | 1.74 | 1.34 |
|       |   |        | NENIKKLEDDIDKIKTDAE       |      |      |      |      |      |      |
| 48235 | 0 | 125170 | NPTTGSKPNPLPENKKK<br>EVEG | 3.65 | 0.01 | 1.66 | 0.44 | 1.74 | 1.34 |
|       |   |        | NENIKKLEDDIDKIKTDAE       |      |      |      |      |      |      |
| 48236 | 0 | 125170 | NPTTGSKPNPLPENKKK<br>EVEG | 3.65 | 0.01 | 1.66 | 0.44 | 1.74 | 1.34 |
|       |   |        | NENIKKLEDDIDKIKTDAE       |      |      |      |      |      |      |
| 48237 | 0 | 125170 | NPTTGSKPNPLPENKKK<br>EVEG | 3.65 | 0.01 | 1.66 | 0.44 | 1.74 | 1.34 |
|       |   |        | NENIKKLEDDIDKIKTDAE       |      |      |      |      |      |      |
| 48238 | 0 | 125170 | NPTTGSKPNPLPENKKK<br>EVEG | 3.65 | 0.01 | 1.66 | 0.44 | 1.74 | 1.34 |

|       |   |        |                                  |      |      |      |      |      |      |
|-------|---|--------|----------------------------------|------|------|------|------|------|------|
|       |   |        | NENIKKLEDDIDKIKTDAE              |      |      |      |      |      |      |
| 48239 | 0 | 125170 | NPTTGSKPNPLPENKKK<br>EVEG        | 3.65 | 0.01 | 1.66 | 0.44 | 1.74 | 1.34 |
| 48240 | 0 | 43702  | NENLDDLDEGIEKSSEEL<br>SEEKI      | 3.13 | 0.01 | 1.66 | 0.44 | 0.85 | 0.28 |
| 48241 | 0 | 43703  | NENLLRFFVA                       | 2.32 | 0.01 | 1.60 | 0.44 | 1.23 | 0.28 |
| 48242 | 0 | 43703  | NENLLRFFVA                       | 2.32 | 0.01 | 1.60 | 0.44 | 1.23 | 0.28 |
| 48243 | 0 | 43704  | NENLLRFFVAPFPE                   | 2.64 | 0.01 | 1.60 | 0.44 | 1.23 | 0.85 |
| 48244 | 0 | 43705  | NENLLRFFVAPFPEVFGK<br>EK         | 2.97 | 0.01 | 1.60 | 0.44 | 1.23 | 0.28 |
| 48245 | 0 | 43705  | NENLLRFFVAPFPEVFGK<br>EK         | 2.97 | 0.01 | 1.60 | 0.44 | 1.23 | 1.28 |
| 48246 | 0 | 229748 | NENLLRFVVAPFPEVFRK<br>EN         | 2.98 | 0.01 | 3.97 | 0.44 | 1.23 | 1.28 |
| 48247 | 0 | 101918 | NENNGGCDA                        | 2.25 | 0.01 | 1.66 | 0.44 | 1.59 | 2.97 |
| 48248 | 0 | 172470 | NENYEEVKSITKERK                  | 2.70 | 0.01 | 0.78 | 0.44 | 1.41 | 0.28 |
| 48249 | 0 | 342542 | NEPQARKQQGRDAPQ                  | 2.70 | 0.01 | 1.61 | 0.44 | 0.85 | 1.28 |
| 48250 | 0 | 342543 | NEPQARRQQGRNEPQ                  | 2.73 | 0.01 | 1.61 | 0.44 | 0.85 | 1.28 |
| 48251 | 0 | 100324 | NEQEINLSLE                       | 2.36 | 0.01 | 2.18 | 2.16 | 0.22 | 0.28 |
| 48252 | 0 | 187168 | NEQELLELDKWASLW                  | 2.70 | 0.01 | 2.54 | 0.44 | 0.85 | 1.34 |
| 48253 | 0 | 187168 | NEQELLELDKWASLW                  | 2.70 | 0.01 | 2.54 | 0.44 | 0.85 | 1.34 |
| 48254 | 0 | 187168 | NEQELLELDKWASLW                  | 2.70 | 0.01 | 2.54 | 0.44 | 0.85 | 1.34 |
| 48255 | 0 | 179863 | NEQELLELDKWASLWN                 | 2.77 | 0.01 | 2.54 | 0.44 | 0.85 | 1.66 |
| 48256 | 0 | 179863 | NEQELLELDKWASLWN                 | 2.77 | 0.01 | 2.54 | 0.44 | 0.85 | 1.66 |
| 48257 | 0 | 179863 | NEQELLELDKWASLWN                 | 2.77 | 0.01 | 2.54 | 0.44 | 0.85 | 1.66 |
| 48258 | 0 | 179863 | NEQELLELDKWASLWN                 | 2.77 | 0.01 | 2.54 | 0.44 | 0.85 | 1.66 |
| 48259 | 0 | 179863 | NEQELLELDKWASLWN                 | 2.77 | 0.01 | 2.54 | 0.44 | 0.85 | 0.28 |
| 48260 | 0 | 179863 | NEQELLELDKWASLWN                 | 2.77 | 0.01 | 2.54 | 0.44 | 0.85 | 1.27 |
| 48261 | 0 | 179863 | NEQELLELDKWASLWN                 | 2.77 | 0.01 | 2.54 | 0.44 | 0.85 | 2.12 |
| 48262 | 0 | 179863 | NEQELLELDKWASLWN                 | 2.77 | 0.01 | 2.54 | 0.44 | 0.85 | 1.34 |
| 48263 | 0 | 179863 | NEQELLELDKWASLWN                 | 2.77 | 0.01 | 2.54 | 0.44 | 0.85 | 2.75 |
| 48264 | 0 | 179864 | NEQELLELDKWASLWN<br>WFDITNWLWYIR | 3.27 | 0.01 | 2.54 | 0.44 | 0.85 | 2.49 |
| 48265 | 0 | 179864 | NEQELLELDKWASLWN<br>WFDITNWLWYIR | 3.27 | 0.01 | 2.54 | 0.44 | 0.85 | 1.34 |

|       |   |        |                                  |      |      |      |      |      |      |
|-------|---|--------|----------------------------------|------|------|------|------|------|------|
| 48266 | 0 | 179864 | NEQELLELDKWASLWN<br>WFDITNWLWYIR | 3.27 | 0.01 | 2.54 | 0.44 | 0.85 | 0.28 |
| 48267 | 0 | 179864 | NEQELLELDKWASLWN<br>WFDITNWLWYIR | 3.27 | 0.01 | 2.54 | 0.44 | 0.85 | 0.28 |
| 48268 | 0 | 179864 | NEQELLELDKWASLWN<br>WFDITNWLWYIR | 3.27 | 0.01 | 2.54 | 0.44 | 0.85 | 0.28 |
| 48269 | 0 | 179864 | NEQELLELDKWASLWN<br>WFDITNWLWYIR | 3.27 | 0.01 | 2.54 | 0.44 | 0.85 | 1.27 |
| 48270 | 0 | 179864 | NEQELLELDKWASLWN<br>WFDITNWLWYIR | 3.27 | 0.01 | 2.54 | 0.44 | 0.85 | 1.27 |
| 48271 | 0 | 179864 | NEQELLELDKWASLWN<br>WFDITNWLWYIR | 3.27 | 0.01 | 2.54 | 0.44 | 0.85 | 1.66 |
| 48272 | 0 | 179864 | NEQELLELDKWASLWN<br>WFDITNWLWYIR | 3.27 | 0.01 | 2.54 | 0.44 | 0.85 | 1.66 |
| 48273 | 0 | 179864 | NEQELLELDKWASLWN<br>WFDITNWLWYIR | 3.27 | 0.01 | 2.54 | 0.44 | 0.85 | 1.66 |
| 48274 | 0 | 179864 | NEQELLELDKWASLWN<br>WFDITNWLWYIR | 3.27 | 0.01 | 2.54 | 0.44 | 0.85 | 1.27 |
| 48275 | 0 | 179864 | NEQELLELDKWASLWN<br>WFDITNWLWYIR | 3.27 | 0.01 | 2.54 | 0.44 | 0.85 | 2.12 |
| 48276 | 0 | 179864 | NEQELLELDKWASLWN<br>WFDITNWLWYIR | 3.27 | 0.01 | 2.54 | 0.44 | 0.85 | 1.34 |
| 48277 | 0 | 179864 | NEQELLELDKWASLWN<br>WFDITNWLWYIR | 3.27 | 0.01 | 2.54 | 0.44 | 0.85 | 1.75 |
| 48278 | 0 | 522736 | NEQPKPESELTEK                    | 2.70 | 0.01 | 2.24 | 0.44 | 1.41 | 1.28 |
| 48279 | 0 | 43724  | NEQSLGLR                         | 2.12 | 0.01 | 3.57 | 0.68 | 0.22 | 0.28 |
| 48280 | 0 | 43724  | NEQSLGLR                         | 2.12 | 0.01 | 3.57 | 0.68 | 0.22 | 0.28 |
| 48281 | 0 | 43724  | NEQSLGLR                         | 2.12 | 0.01 | 3.57 | 0.68 | 0.22 | 1.34 |
| 48282 | 0 | 43729  | NEREDERT                         | 2.16 | 0.01 | 3.18 | 1.12 | 0.22 | 0.28 |
| 48283 | 0 | 43730  | NEREDERTLTKEYEDIVL<br>K          | 2.92 | 0.01 | 1.66 | 1.20 | 0.22 | 1.48 |
| 48284 | 0 | 43730  | NEREDERTLTKEYEDIVL<br>K          | 2.92 | 0.01 | 1.66 | 1.20 | 0.22 | 0.28 |
| 48285 | 0 | 43730  | NEREDERTLTKEYEDIVL<br>K          | 2.92 | 0.01 | 3.18 | 1.12 | 0.22 | 1.34 |
| 48286 | 0 | 43730  | NEREDERTLTKEYEDIVL<br>K          | 2.92 | 0.01 | 3.18 | 1.12 | 0.22 | 1.27 |
| 48287 | 0 | 43730  | NEREDERTLTKEYEDIVL<br>K          | 2.92 | 0.01 | 3.18 | 1.12 | 0.22 | 1.27 |
| 48288 | 0 | 43730  | NEREDERTLTKEYEDIVL<br>K          | 2.92 | 0.01 | 1.66 | 1.20 | 0.22 | 0.28 |
| 48289 | 0 | 43730  | NEREDERTLTKEYEDIVL<br>K          | 2.92 | 0.01 | 1.66 | 2.43 | 0.22 | 0.28 |
| 48290 | 0 | 43730  | NEREDERTLTKEYEDIVL<br>K          | 2.92 | 0.01 | 3.18 | 0.44 | 1.74 | 0.28 |
| 48291 | 0 | 43732  | NERIEYNTQSNYIENDFP<br>I          | 2.91 | 0.01 | 2.08 | 0.44 | 1.93 | 1.57 |

|       |   |        |                            |      |      |      |      |      |      |
|-------|---|--------|----------------------------|------|------|------|------|------|------|
| 48292 | 0 | 43732  | NERIEYNTQSNYIENDFP<br>I    | 2.91 | 0.01 | 2.08 | 2.43 | 0.22 | 1.57 |
| 48293 | 0 | 101066 | NERLAKLSDG                 | 2.29 | 0.01 | 0.78 | 0.44 | 0.85 | 0.28 |
| 48294 | 0 | 118534 | NERLAKLSDGVAV              | 2.54 | 0.01 | 0.78 | 0.44 | 1.74 | 0.85 |
| 48295 | 0 | 118534 | NERLAKLSDGVAV              | 2.54 | 0.01 | 0.78 | 0.44 | 1.74 | 0.85 |
| 48296 | 0 | 95616  | NERLEYNTQSNYIENDFP<br>I    | 2.90 | 0.01 | 3.45 | 0.44 | 0.22 | 1.57 |
| 48297 | 0 | 342609 | NERQQQSDDETQVQQQ           | 2.68 | 0.01 | 1.61 | 0.44 | 0.85 | 1.28 |
| 48298 | 0 | 151034 | NERTLDYHDSNVKNL            | 2.67 | 0.01 | 2.87 | 0.44 | 0.85 | 0.28 |
| 48299 | 0 | 43746  | NESKYSNT                   | 2.15 | 0.01 | 2.96 | 0.68 | 0.22 | 0.28 |
| 48300 | 0 | 43746  | NESKYSNT                   | 2.15 | 0.01 | 2.96 | 0.68 | 0.22 | 0.28 |
| 48301 | 0 | 43747  | NESKYSNTFINNAYNMS<br>IR    | 2.91 | 0.01 | 1.66 | 2.52 | 0.22 | 0.28 |
| 48302 | 0 | 43747  | NESKYSNTFINNAYNMS<br>IR    | 2.91 | 0.01 | 1.66 | 1.15 | 0.22 | 0.85 |
| 48303 | 0 | 434637 | NESLERQMREMEENFA<br>V      | 2.81 | 4.33 | 0.78 | 0.44 | 1.13 | 0.28 |
| 48304 | 0 | 185046 | NESLNTGWLGLF               | 2.56 | 0.01 | 2.68 | 0.68 | 0.22 | 2.49 |
| 48305 | 0 | 185046 | NESLNTGWLGLF               | 2.56 | 0.01 | 2.68 | 0.68 | 0.22 | 1.27 |
| 48306 | 0 | 43760  | NETGFSGNMVETEDT            | 2.71 | 0.01 | 2.24 | 1.15 | 0.22 | 0.85 |
| 48307 | 0 | 144925 | NETIYNTTLK                 | 2.33 | 0.01 | 2.76 | 0.44 | 0.85 | 0.28 |
| 48308 | 0 | 43764  | NETIYNTTLKYGDV             | 2.61 | 0.01 | 2.51 | 0.44 | 1.59 | 0.28 |
| 48309 | 0 | 43764  | NETIYNTTLKYGDV             | 2.61 | 0.01 | 2.51 | 0.44 | 1.59 | 1.34 |
| 48310 | 0 | 43764  | NETIYNTTLKYGDV             | 2.61 | 0.01 | 2.51 | 0.44 | 1.59 | 0.28 |
| 48311 | 0 | 98277  | NETPEVTK                   | 2.14 | 0.01 | 2.60 | 0.68 | 0.22 | 0.85 |
| 48312 | 0 | 43781  | NEVFCV                     | 1.90 | 0.01 | 1.96 | 0.44 | 0.85 | 0.28 |
| 48313 | 0 | 43785  | NEVRSPRRGIKRHRV            | 2.68 | 0.01 | 0.90 | 0.44 | 1.59 | 1.39 |
| 48314 | 0 | 43790  | NEVYIDRIEFVPAEVTFE<br>AEYD | 3.06 | 0.01 | 4.63 | 0.68 | 0.22 | 0.85 |
| 48315 | 0 | 43791  | NEWCRC                     | 1.90 | 0.01 | 1.86 | 0.44 | 1.23 | 0.28 |
| 48316 | 0 | 43792  | NEWGCRCNDSSD               | 2.49 | 0.01 | 3.67 | 1.12 | 0.22 | 0.28 |
| 48317 | 0 | 43792  | NEWGCRCNDSSD               | 2.49 | 0.01 | 3.67 | 1.12 | 0.22 | 0.28 |
| 48318 | 0 | 43792  | NEWGCRCNDSSD               | 2.49 | 0.01 | 3.67 | 1.12 | 0.22 | 0.28 |
| 48319 | 0 | 181739 | NEWIVKKLEEFYKQN            | 2.68 | 0.01 | 3.26 | 2.37 | 0.22 | 1.28 |
| 48320 | 0 | 130561 | NEWREFCGLPRLETPAD<br>LSTAI | 3.02 | 0.01 | 0.78 | 0.44 | 1.13 | 0.28 |
| 48321 | 0 | 130561 | NEWREFCGLPRLETPAD<br>LSTAI | 3.02 | 0.01 | 0.78 | 0.44 | 1.13 | 0.28 |
| 48322 | 0 | 130561 | NEWREFCGLPRLETPAD<br>LSTAI | 3.02 | 0.01 | 0.78 | 0.44 | 1.13 | 1.27 |
| 48323 | 0 | 130561 | NEWREFCGLPRLETPAD<br>LSTAI | 3.02 | 0.01 | 0.78 | 0.44 | 1.13 | 1.27 |
| 48324 | 0 | 43796  | NEYGVEGGRVNAV              | 2.67 | 0.01 | 3.70 | 2.43 | 0.22 | 0.28 |
| 48325 | 0 | 43796  | NEYGVEGGRVNAV              | 2.67 | 0.01 | 3.70 | 2.43 | 0.22 | 0.28 |
| 48326 | 0 | 43796  | NEYGVEGGRVNAV              | 2.67 | 0.01 | 3.70 | 2.43 | 0.22 | 0.28 |
| 48327 | 0 | 43796  | NEYGVEGGRVNAV              | 2.67 | 0.01 | 2.58 | 2.43 | 0.22 | 0.28 |

|       |   |        |                          |      |      |      |      |      |      |
|-------|---|--------|--------------------------|------|------|------|------|------|------|
| 48328 | 0 | 43796  | NEYGVEGGRVNAV            | 2.67 | 0.01 | 2.58 | 2.43 | 0.22 | 0.28 |
| 48329 | 0 | 43796  | NEYGVEGGRVNAV            | 2.67 | 0.01 | 2.58 | 2.43 | 0.22 | 1.34 |
| 48330 | 0 | 43796  | NEYGVEGGRVNAV            | 2.67 | 0.01 | 2.58 | 0.68 | 0.22 | 0.28 |
|       |   |        | NEYGVEGGRVNAVSG          |      |      |      |      |      |      |
| 48331 | 0 | 43797  | DNATAEGRAINRRVEAE<br>V   | 3.50 | 0.01 | 0.90 | 2.43 | 0.22 | 0.28 |
|       |   |        | NEYGVEGGRVNAVSG          |      |      |      |      |      |      |
| 48332 | 0 | 43797  | DNATAEGRAINRRVEAE<br>V   | 3.50 | 0.01 | 0.90 | 2.43 | 0.22 | 1.34 |
|       |   |        | NEYGVEGGRVNAVSG          |      |      |      |      |      |      |
| 48333 | 0 | 43797  | DNATAEGRAINRRVEAE<br>V   | 3.50 | 0.01 | 0.90 | 2.43 | 0.22 | 1.75 |
|       |   |        | NEYGVEGGRVNAVSG          |      |      |      |      |      |      |
| 48334 | 0 | 43797  | DNATAEGRAINRRVEAE<br>V   | 3.50 | 0.01 | 0.90 | 0.68 | 0.22 | 0.28 |
|       |   |        | NEYGVEGGRVNAVSG          |      |      |      |      |      |      |
| 48335 | 0 | 43797  | DNATAEGRAINRRVEAE<br>V   | 3.50 | 0.01 | 0.90 | 0.68 | 0.22 | 0.28 |
|       |   |        | NEYGVEGGRVNAVSG          |      |      |      |      |      |      |
| 48336 | 0 | 43797  | DNATAEGRAINRRVEAE<br>V   | 3.50 | 0.01 | 0.90 | 0.68 | 0.22 | 1.34 |
|       |   |        |                          |      |      |      |      |      |      |
| 48337 | 0 | 43798  | NEYIEKANITDDK            | 2.64 | 0.01 | 2.88 | 2.22 | 0.22 | 0.28 |
| 48338 | 0 | 43798  | NEYIEKANITDDK            | 2.64 | 0.01 | 2.88 | 2.22 | 0.22 | 0.28 |
| 48339 | 0 | 43798  | NEYIEKANITDDK            | 2.64 | 0.01 | 2.88 | 2.22 | 0.22 | 0.28 |
| 48340 | 0 | 43798  | NEYIEKANITDDK            | 2.64 | 0.01 | 2.88 | 2.22 | 0.22 | 0.28 |
| 48341 | 0 | 43798  | NEYIEKANITDDK            | 2.64 | 0.01 | 2.88 | 2.22 | 0.22 | 0.28 |
| 48342 | 0 | 43798  | NEYIEKANITDDK            | 2.64 | 0.01 | 2.88 | 2.22 | 0.22 | 0.28 |
| 48343 | 0 | 43798  | NEYIEKANITDDK            | 2.64 | 0.01 | 2.96 | 2.22 | 0.22 | 0.28 |
| 48344 | 0 | 43798  | NEYIEKANITDDK            | 2.64 | 0.01 | 2.96 | 2.22 | 0.22 | 0.28 |
| 48345 | 0 | 43798  | NEYIEKANITDDK            | 2.64 | 0.01 | 2.96 | 2.22 | 0.22 | 0.28 |
| 48346 | 0 | 43798  | NEYIEKANITDDK            | 2.64 | 0.01 | 2.96 | 2.22 | 0.22 | 0.28 |
| 48347 | 0 | 141965 | NEYTNSPEKAEGQLS<br>DLRN  | 2.99 | 0.01 | 3.13 | 0.68 | 0.22 | 0.28 |
| 48348 | 0 | 112608 | NFAVLKLMGRGT             | 2.45 | 0.01 | 1.60 | 2.04 | 0.22 | 0.28 |
| 48349 | 0 | 144015 | NFCASCLLPVSR             | 2.46 | 0.01 | 0.90 | 0.68 | 0.22 | 1.39 |
| 48350 | 0 | 144015 | NFCASCLLPVSR             | 2.46 | 0.01 | 0.90 | 0.68 | 0.22 | 0.28 |
| 48351 | 0 | 230239 | NFCNAVVESNGTLTSLH<br>FGK | 2.94 | 0.01 | 2.25 | 0.44 | 1.23 | 0.28 |
| 48352 | 0 | 159019 | NFCPKARELTAETK           | 2.66 | 0.01 | 3.26 | 0.44 | 1.23 | 0.28 |
| 48353 | 0 | 159019 | NFCPKARELTAETK           | 2.66 | 0.01 | 3.26 | 0.44 | 1.41 | 0.28 |
| 48354 | 0 | 43818  | NFDGLLGTLLNLDA           | 2.79 | 0.01 | 3.75 | 0.68 | 0.22 | 0.28 |
| 48355 | 0 | 43818  | NFDGLLGTLLNLDA           | 2.79 | 0.01 | 3.75 | 0.68 | 0.22 | 0.28 |
| 48356 | 0 | 43818  | NFDGLLGTLLNLDA           | 2.79 | 0.01 | 3.75 | 0.68 | 0.22 | 0.28 |
| 48357 | 0 | 146471 | NFDIPEEI                 | 2.13 | 0.01 | 0.78 | 1.12 | 0.22 | 0.28 |
| 48358 | 0 | 115630 | NFDKLYIWG                | 2.18 | 0.01 | 3.67 | 0.44 | 0.22 | 1.48 |
| 48359 | 0 | 115630 | NFDKLYIWG                | 2.18 | 0.01 | 3.67 | 0.44 | 0.22 | 0.85 |
| 48360 | 0 | 115630 | NFDKLYIWG                | 2.18 | 0.01 | 3.67 | 0.44 | 0.22 | 1.34 |

|       |   |        |                                    |      |      |      |      |      |      |
|-------|---|--------|------------------------------------|------|------|------|------|------|------|
| 48361 | 0 | 115630 | NFDKLYIWG                          | 2.18 | 0.01 | 3.67 | 0.44 | 0.22 | 1.34 |
| 48362 | 0 | 115630 | NFDKLYIWG                          | 2.18 | 0.01 | 3.67 | 0.44 | 0.22 | 1.34 |
| 48363 | 0 | 115630 | NFDKLYIWG                          | 2.18 | 0.01 | 3.67 | 0.44 | 0.22 | 1.34 |
| 48364 | 0 | 115630 | NFDKLYIWG                          | 2.18 | 0.01 | 3.67 | 0.44 | 0.22 | 1.34 |
| 48365 | 0 | 115630 | NFDKLYIWG                          | 2.18 | 0.01 | 3.67 | 0.44 | 0.22 | 1.34 |
| 48366 | 0 | 115630 | NFDKLYIWG                          | 2.18 | 0.01 | 3.67 | 0.44 | 0.22 | 1.28 |
| 48367 | 0 | 243004 | NFDNLGQALMSLFVL                    | 2.69 | 0.01 | 0.78 | 0.44 | 1.59 | 0.28 |
| 48368 | 0 | 423439 | NFEAVLARGMHVEAG                    | 2.68 | 0.01 | 2.51 | 0.44 | 2.35 | 1.28 |
| 48369 | 0 | 163024 | NFEKL                              | 1.74 | 0.01 | 2.25 | 0.68 | 0.22 | 2.49 |
| 48370 | 0 | 43825  | NFELCDNPFFAVSKPMG                  | 2.75 | 0.01 | 2.48 | 0.44 | 0.85 | 0.28 |
| 48371 | 0 | 43825  | NFELCDNPFFAVSKPMG                  | 2.75 | 0.01 | 2.48 | 1.20 | 0.22 | 0.28 |
| 48372 | 0 | 43826  | NFENAFEIAGASILLEFIP                | 2.94 | 0.01 | 2.08 | 0.44 | 1.93 | 1.57 |
| 48373 | 0 | 43826  | NFENAFEIAGASILLEFIP                | 2.94 | 0.01 | 2.08 | 2.43 | 0.22 | 1.57 |
| 48374 | 0 | 43826  | NFENAFEIAGASILLEFIP                | 2.94 | 0.01 | 3.45 | 0.44 | 0.22 | 1.57 |
| 48375 | 0 | 182240 | NFEPFVEDHCGTFSS                    | 2.64 | 0.01 | 0.78 | 0.44 | 1.13 | 0.85 |
| 48376 | 0 | 181403 | NFFAIGINAENNQRNFL<br>AGSQ          | 3.03 | 0.01 | 2.72 | 0.44 | 1.23 | 1.27 |
| 48377 | 0 | 43833  | NFFLEQMENDMSSTYD<br>KMNRLNMDLSKLKR | 3.35 | 0.01 | 2.22 | 0.44 | 1.74 | 0.28 |
| 48378 | 0 | 43833  | NFFLEQMENDMSSTYD<br>KMNRLNMDLSKLKR | 3.35 | 0.01 | 2.22 | 0.44 | 1.74 | 0.28 |
| 48379 | 0 | 101067 | NFFRMVISNPAAT                      | 2.52 | 0.01 | 0.78 | 0.44 | 1.41 | 2.12 |
| 48380 | 0 | 101067 | NFFRMVISNPAAT                      | 2.52 | 0.01 | 0.78 | 0.44 | 1.41 | 2.12 |
| 48381 | 0 | 101067 | NFFRMVISNPAAT                      | 2.52 | 0.01 | 0.78 | 0.44 | 1.41 | 1.66 |
| 48382 | 0 | 101067 | NFFRMVISNPAAT                      | 2.52 | 0.01 | 0.78 | 0.44 | 1.41 | 1.66 |
| 48383 | 0 | 101067 | NFFRMVISNPAAT                      | 2.52 | 0.01 | 0.78 | 0.44 | 1.41 | 1.66 |
| 48384 | 0 | 101067 | NFFRMVISNPAAT                      | 2.52 | 0.01 | 0.78 | 0.44 | 1.41 | 0.28 |
| 48385 | 0 | 43834  | NFFSPQIITDNTFVSG                   | 2.80 | 0.01 | 2.48 | 0.68 | 0.22 | 0.28 |
| 48386 | 0 | 181404 | NFFSRAGLVSIITMP                    | 2.62 | 0.01 | 2.82 | 1.15 | 0.22 | 0.28 |
| 48387 | 0 | 149852 | NFFTEPL                            | 2.01 | 0.01 | 0.90 | 2.37 | 0.22 | 0.28 |
| 48388 | 0 | 147995 | NFGDIGVQQ                          | 2.21 | 0.01 | 3.24 | 1.12 | 0.22 | 0.28 |
| 48389 | 0 | 43839  | NFGDQDLIRQGTDYK                    | 2.66 | 0.01 | 3.30 | 4.08 | 0.22 | 0.28 |
| 48390 | 0 | 43840  | NFGDQDLIRQGTDYKH<br>WPQI           | 2.91 | 0.01 | 2.45 | 1.20 | 0.22 | 1.48 |
| 48391 | 0 | 230024 | NFGQFEDGILDICLI                    | 2.70 | 0.01 | 0.78 | 0.44 | 1.93 | 1.27 |
| 48392 | 0 | 43848  | NFIKELELQIKNLNNEINT<br>TLEEK       | 3.67 | 0.01 | 2.22 | 0.44 | 1.74 | 0.28 |

|       |   |        |                                                   |      |      |      |      |      |      |
|-------|---|--------|---------------------------------------------------|------|------|------|------|------|------|
| 48393 | 0 | 43848  | NFIKELELQIKNLNNEINT<br>LNDMLKDSEEEIRMLNH<br>TLEEK | 3.67 | 0.01 | 2.22 | 0.44 | 1.74 | 0.28 |
| 48394 | 0 | 43854  | NFISGIQYLAGLSTLPGN<br>PA                          | 2.97 | 0.01 | 3.67 | 0.44 | 0.85 | 0.28 |
| 48395 | 0 | 152019 | NFIVDDRGRVHR                                      | 2.48 | 0.01 | 2.80 | 2.78 | 0.22 | 0.28 |
| 48396 | 0 | 43856  | NFIVDDRGRVHRWKSPI                                 | 2.77 | 0.01 | 2.80 | 1.15 | 0.22 | 2.02 |
| 48397 | 0 | 43856  | NFIVDDRGRVHRWKSPI                                 | 2.77 | 0.01 | 2.80 | 1.15 | 0.22 | 2.02 |
| 48398 | 0 | 434764 | NFKEGKDNTAGSSYED                                  | 2.75 | 0.01 | 3.89 | 0.68 | 0.22 | 0.28 |
| 48399 | 0 | 86712  | NFKQGQG                                           | 2.04 | 0.01 | 3.59 | 0.44 | 0.85 | 0.28 |
| 48400 | 0 | 86712  | NFKQGQG                                           | 2.04 | 0.01 | 3.59 | 0.44 | 0.85 | 0.28 |
| 48401 | 0 | 238791 | NFKTCPTDELRHCA                                    | 2.62 | 0.01 | 2.56 | 2.02 | 0.22 | 0.85 |
| 48402 | 0 | 468974 | NFLNDLFKKNKNDLD<br>DFFKNEKEYDDLCD                 | 3.40 | 0.01 | 1.66 | 0.44 | 0.85 | 1.28 |
| 48403 | 0 | 468974 | NFLNDLFKKNKNDLD<br>DFFKNEKEYDDLCD                 | 3.40 | 0.01 | 1.66 | 0.44 | 0.85 | 1.28 |
| 48404 | 0 | 126749 | NFLPRARTG                                         | 2.21 | 0.01 | 0.78 | 1.20 | 0.22 | 0.28 |
| 48405 | 0 | 126749 | NFLPRARTG                                         | 2.21 | 0.01 | 0.78 | 1.20 | 0.22 | 0.28 |
| 48406 | 0 | 43884  | NFLPRP                                            | 1.90 | 0.01 | 0.90 | 0.68 | 0.22 | 1.39 |
| 48407 | 0 | 164545 | NFLRGKCLKLYTGEACRTG<br>DR                         | 2.95 | 0.01 | 0.78 | 1.20 | 0.22 | 0.28 |
| 48408 | 0 | 164545 | NFLRGKCLKLYTGEACRTG<br>DR                         | 2.95 | 0.01 | 0.78 | 0.44 | 0.85 | 0.28 |
| 48409 | 0 | 164545 | NFLRGKCLKLYTGEACRTG<br>DR                         | 2.95 | 0.01 | 0.78 | 0.44 | 0.85 | 1.27 |
| 48410 | 0 | 185051 | NFLVEEEQRQLQELE                                   | 2.72 | 0.01 | 0.78 | 1.12 | 0.22 | 1.28 |
| 48411 | 0 | 190867 | NFLVEEEQRQLQELEKD<br>EREQLRILGEK                  | 3.30 | 0.01 | 0.78 | 1.12 | 0.22 | 2.66 |
| 48412 | 0 | 120108 | NFMESGEWVIKESRGW                                  | 2.73 | 0.01 | 0.78 | 2.04 | 0.22 | 0.28 |
| 48413 | 0 | 120108 | NFMESGEWVIKESRGW                                  | 2.73 | 0.01 | 0.78 | 1.12 | 0.22 | 0.28 |
| 48414 | 0 | 120108 | NFMESGEWVIKESRGW                                  | 2.73 | 0.01 | 0.78 | 1.81 | 0.22 | 0.28 |
| 48415 | 0 | 43890  | NFNFEVEV                                          | 2.18 | 0.01 | 2.99 | 0.44 | 0.85 | 0.28 |
| 48416 | 0 | 43893  | NFNGLTGTGVLTTPSSKR                                | 2.81 | 0.01 | 2.48 | 0.44 | 0.85 | 0.28 |
| 48417 | 0 | 43893  | NFNGLTGTGVLTTPSSKR                                | 2.81 | 0.01 | 2.48 | 0.68 | 0.22 | 0.28 |
| 48418 | 0 | 43893  | NFNGLTGTGVLTTPSSKR                                | 2.81 | 0.01 | 2.48 | 1.20 | 0.22 | 0.28 |
| 48419 | 0 | 43894  | NFNGLTGTGVLTTPSSKR<br>F                           | 2.87 | 0.01 | 2.45 | 1.81 | 0.22 | 1.34 |
| 48420 | 0 | 86716  | NFNSNNYTYD                                        | 2.35 | 0.01 | 3.06 | 0.44 | 0.85 | 0.28 |

|       |   |        |                                        |      |      |      |      |      |      |
|-------|---|--------|----------------------------------------|------|------|------|------|------|------|
| 48421 | 0 | 137935 | NFNTVRYDYYGD                           | 2.49 | 0.01 | 2.21 | 1.20 | 0.22 | 0.28 |
| 48422 | 0 | 43906  | NFQLQLTEPPSKSQPV<br>KVTk               | 3.02 | 0.01 | 3.97 | 1.15 | 2.26 | 0.85 |
| 48423 | 0 | 43906  | NFQLQLTEPPSKSQPV<br>KVTk               | 3.02 | 0.01 | 3.97 | 0.68 | 0.22 | 0.28 |
| 48424 | 0 | 43906  | NFQLQLTEPPSKSQPV<br>KVTk               | 3.02 | 0.01 | 3.97 | 0.68 | 0.22 | 0.28 |
| 48425 | 0 | 238793 | NFQRMIQCTTRRSaW                        | 2.64 | 0.01 | 2.56 | 2.02 | 0.22 | 0.85 |
| 48426 | 0 | 238793 | NFQRMIQCTTRRSaW                        | 2.64 | 0.01 | 2.56 | 1.20 | 0.22 | 0.85 |
| 48427 | 0 | 136524 | NFREaMRIGaEVYHNLK<br>N                 | 2.82 | 4.23 | 0.78 | 0.44 | 1.13 | 0.28 |
| 48428 | 0 | 136524 | NFREaMRIGaEVYHNLK<br>N                 | 2.82 | 4.23 | 0.78 | 0.44 | 1.41 | 0.28 |
| 48429 | 0 | 136524 | NFREaMRIGaEVYHNLK<br>N                 | 2.82 | 4.23 | 0.78 | 0.44 | 1.13 | 0.28 |
| 48430 | 0 | 161126 | NFRGIVDRLNKVLVCISD<br>P                | 2.90 | 0.01 | 2.08 | 0.44 | 1.93 | 1.57 |
| 48431 | 0 | 43909  | NFRNGDLTEGTAYTN                        | 2.69 | 0.01 | 3.38 | 1.12 | 0.22 | 0.28 |
| 48432 | 0 | 43910  | NFRNGNSTNaNPYTN                        | 2.71 | 0.01 | 3.03 | 1.12 | 0.22 | 0.28 |
| 48433 | 0 | 189763 | NFSAGARALSdaETK                        | 2.66 | 0.01 | 3.28 | 0.44 | 1.23 | 0.28 |
| 48434 | 0 | 187077 | NFSGFTKGTDIADLdaV<br>A                 | 2.85 | 0.01 | 2.80 | 0.68 | 0.22 | 1.27 |
| 48435 | 0 | 187077 | NFSGFTKGTDIADLdaV<br>A                 | 2.85 | 0.01 | 2.80 | 0.68 | 0.22 | 0.28 |
| 48436 | 0 | 187077 | NFSGFTKGTDIADLdaV<br>A                 | 2.85 | 0.01 | 2.80 | 0.68 | 0.22 | 0.28 |
| 48437 | 0 | 187077 | NFSGFTKGTDIADLdaV<br>A                 | 2.85 | 0.01 | 2.80 | 0.68 | 0.22 | 1.27 |
| 48438 | 0 | 43916  | NFSISi                                 | 1.91 | 0.01 | 2.45 | 0.44 | 0.85 | 1.34 |
| 48439 | 0 | 43916  | NFSISi                                 | 1.91 | 0.01 | 2.45 | 0.44 | 0.85 | 1.34 |
| 48440 | 0 | 43916  | NFSISi                                 | 1.91 | 0.01 | 2.45 | 0.44 | 0.85 | 1.34 |
| 48441 | 0 | 43924  | NFSQILPDPLKPTKRSF                      | 2.79 | 0.01 | 2.48 | 1.20 | 0.22 | 0.28 |
| 48442 | 0 | 43927  | NFSTADSaKIKTLaEaKa<br>ALaARKADLEKaLEGa | 3.49 | 4.63 | 3.70 | 1.15 | 0.22 | 1.27 |
| 48443 | 0 | 43927  | NFSTADSaKIKTLaEaKa<br>ALaARKADLEKaLEGa | 3.49 | 4.63 | 3.70 | 1.15 | 0.22 | 1.27 |
| 48444 | 0 | 43928  | NFSTADSaKIKTLaEaKa<br>ALaARKADLEKaLEGa | 3.49 | 0.01 | 2.24 | 2.37 | 0.22 | 0.28 |



|       |   |        |                                                 |      |      |      |      |      |      |
|-------|---|--------|-------------------------------------------------|------|------|------|------|------|------|
| 48445 | 0 | 43928  | NFSTADSAKIKTLEAEKA<br>ALAARKADLEKALEGA          | 3.49 | 0.01 | 2.24 | 0.68 | 0.22 | 0.28 |
| 48446 | 0 | 43928  | NFSTADSAKIKTLEAEKA<br>ALAARKADLEKALEGA          | 3.49 | 0.01 | 2.24 | 0.68 | 0.22 | 0.28 |
| 48447 | 0 | 43929  | NFSTADSAKIKTLEAEKA<br>ALAARKADLEKALEGAM         | 3.51 | 4.63 | 3.70 | 1.15 | 0.22 | 1.27 |
| 48448 | 0 | 43929  | NFSTADSAKIKTLEAEKA<br>ALAARKADLEKALEGAM         | 3.51 | 4.63 | 3.70 | 1.15 | 0.22 | 1.27 |
| 48449 | 0 | 94888  | NFSTADSAKIKTLEAEKA<br>ALAARKADLEKALEGAM         | 3.51 | 0.01 | 2.24 | 2.89 | 0.22 | 1.27 |
| 48450 | 0 | 451354 | NFTHKTIQQILQQQYKN<br>NT                         | 2.92 | 0.01 | 1.66 | 1.15 | 0.22 | 0.28 |
| 48451 | 0 | 451354 | NFTHKTIQQILQQQYKN<br>NT                         | 2.92 | 0.01 | 1.66 | 1.15 | 0.22 | 1.48 |
| 48452 | 0 | 451354 | NFTHKTIQQILQQQYKN<br>NT                         | 2.92 | 0.01 | 1.66 | 1.15 | 0.22 | 2.02 |
| 48453 | 0 | 451354 | NFTHKTIQQILQQQYKN<br>NT                         | 2.92 | 0.01 | 1.66 | 1.15 | 0.22 | 0.28 |
| 48454 | 0 | 419284 | NFTHPGS                                         | 1.99 | 0.01 | 0.90 | 0.44 | 1.93 | 1.39 |
| 48455 | 0 | 419285 | NFTHPGV                                         | 1.99 | 0.01 | 0.90 | 0.44 | 1.93 | 1.27 |
| 48456 | 0 | 43936  | NFTQVG                                          | 1.88 | 0.01 | 0.90 | 0.44 | 1.74 | 1.39 |
| 48457 | 0 | 43938  | NFTTGEDSVAEVWRE                                 | 2.65 | 0.01 | 3.41 | 0.44 | 1.23 | 1.57 |
| 48458 | 0 | 43942  | NFVHDCVNITIKQHTVT                               | 2.82 | 0.01 | 1.75 | 1.81 | 0.22 | 0.28 |
| 48459 | 0 | 43944  | NFVNYYINENILNLKSVD<br>NYLEKINN KIKDLDDNIN<br>DR | 3.62 | 0.01 | 2.22 | 0.44 | 1.74 | 0.28 |
| 48460 | 0 | 43944  | NFVNYYINENILNLKSVD<br>NYLEKINN KIKDLDDNIN<br>DR | 3.62 | 0.01 | 2.22 | 0.44 | 1.74 | 0.28 |
| 48461 | 0 | 43946  | NFVPTSVTEGRTDITTM                               | 2.77 | 0.01 | 3.17 | 0.68 | 0.22 | 0.28 |
| 48462 | 0 | 43946  | NFVPTSVTEGRTDITTM                               | 2.77 | 0.01 | 3.17 | 0.68 | 0.22 | 0.28 |
| 48463 | 0 | 43946  | NFVPTSVTEGRTDITTM                               | 2.77 | 0.01 | 3.17 | 0.68 | 0.22 | 0.85 |
| 48464 | 0 | 43946  | NFVPTSVTEGRTDITTM                               | 2.77 | 0.01 | 3.17 | 0.68 | 0.22 | 0.28 |
| 48465 | 0 | 43946  | NFVPTSVTEGRTDITTM                               | 2.77 | 0.01 | 3.17 | 2.13 | 0.22 | 2.35 |
| 48466 | 0 | 43954  | NGAAQTFGGYSVADL                                 | 2.65 | 0.01 | 3.75 | 0.44 | 1.74 | 0.28 |
| 48467 | 0 | 104147 | NGAIRFTMGYQHGGQ                                 | 2.59 | 0.01 | 3.00 | 2.13 | 0.22 | 0.28 |

|       |   |        |                                |      |      |      |      |      |      |
|-------|---|--------|--------------------------------|------|------|------|------|------|------|
| 48468 | 0 | 102671 | NGALYPRFFPDYSILMFP<br>II       | 2.93 | 0.01 | 0.90 | 1.20 | 0.22 | 0.28 |
| 48469 | 0 | 102671 | NGALYPRFFPDYSILMFP<br>II       | 2.93 | 0.01 | 0.90 | 0.44 | 0.85 | 0.28 |
| 48470 | 0 | 43963  | NGCGLF                         | 1.90 | 0.01 | 2.40 | 0.44 | 0.85 | 0.28 |
| 48471 | 0 | 43964  | NGCGLFGK                       | 2.14 | 0.01 | 2.40 | 1.12 | 0.22 | 0.28 |
| 48472 | 0 | 121645 | NGDAKTDQAQKAEGA                | 2.72 | 0.01 | 0.78 | 0.44 | 1.13 | 1.27 |
| 48473 | 0 | 96674  | NGDGNPREVIED                   | 2.50 | 0.01 | 2.24 | 0.68 | 0.22 | 0.28 |
| 48474 | 0 | 96674  | NGDGNPREVIED                   | 2.50 | 0.01 | 2.24 | 0.68 | 0.22 | 0.28 |
| 48475 | 0 | 96674  | NGDGNPREVIED                   | 2.50 | 0.01 | 2.24 | 0.68 | 0.22 | 1.34 |
| 48476 | 0 | 96674  | NGDGNPREVIED                   | 2.50 | 0.01 | 2.24 | 0.68 | 0.22 | 0.28 |
| 48477 | 0 | 133242 | NGDGNPREVIEDLAAN<br>NPAI       | 2.97 | 4.93 | 2.24 | 1.20 | 0.22 | 1.34 |
| 48478 | 0 | 133243 | NGDGNPREVIEDLAAN<br>NPAIQNI    | 3.11 | 4.63 | 2.24 | 1.20 | 0.22 | 0.28 |
| 48479 | 0 | 133243 | NGDGNPREVIEDLAAN<br>NPAIQNI    | 3.11 | 4.63 | 2.24 | 1.20 | 0.22 | 1.34 |
| 48480 | 0 | 133244 | NGDGNPREVIEDLAAN<br>NPAIQNIRLR | 3.23 | 4.15 | 2.24 | 1.20 | 0.22 | 0.28 |
| 48481 | 0 | 133244 | NGDGNPREVIEDLAAN<br>NPAIQNIRLR | 3.23 | 4.15 | 2.24 | 1.20 | 0.22 | 1.34 |
| 48482 | 0 | 133244 | NGDGNPREVIEDLAAN<br>NPAIQNIRLR | 3.23 | 4.15 | 2.24 | 1.20 | 0.22 | 1.48 |
| 48483 | 0 | 133244 | NGDGNPREVIEDLAAN<br>NPAIQNIRLR | 3.23 | 4.15 | 2.24 | 1.20 | 0.22 | 1.48 |
| 48484 | 0 | 133244 | NGDGNPREVIEDLAAN<br>NPAIQNIRLR | 3.23 | 4.15 | 2.24 | 1.20 | 0.22 | 1.48 |
| 48485 | 0 | 133244 | NGDGNPREVIEDLAAN<br>NPAIQNIRLR | 3.23 | 4.15 | 2.24 | 1.20 | 0.22 | 1.27 |
| 48486 | 0 | 133245 | NGDGNPREVIEDLAAN<br>NPAIRLR    | 3.11 | 4.15 | 0.90 | 1.20 | 0.22 | 0.28 |
| 48487 | 0 | 133245 | NGDGNPREVIEDLAAN<br>NPAIRLR    | 3.11 | 4.15 | 0.90 | 1.20 | 0.22 | 1.34 |
| 48488 | 0 | 133245 | NGDGNPREVIEDLAAN<br>NPAIRLR    | 3.11 | 4.15 | 0.90 | 1.20 | 0.22 | 1.48 |
| 48489 | 0 | 133245 | NGDGNPREVIEDLAAN<br>NPAIRLR    | 3.11 | 4.15 | 0.90 | 1.20 | 0.22 | 1.48 |
| 48490 | 0 | 133245 | NGDGNPREVIEDLAAN<br>NPAIRLR    | 3.11 | 4.15 | 0.90 | 1.20 | 0.22 | 1.48 |
| 48491 | 0 | 133245 | NGDGNPREVIEDLAAN<br>NPAIRLR    | 3.11 | 4.15 | 0.90 | 1.20 | 0.22 | 1.27 |
| 48492 | 0 | 94889  | NGDGNPREVIEDLAAN<br>NPAIRLR    | 3.11 | 0.01 | 0.90 | 1.12 | 0.22 | 0.28 |
| 48493 | 0 | 94889  | NGDGNPREVIEDLAAN<br>NPAIRLR    | 3.11 | 0.01 | 0.90 | 1.20 | 0.22 | 0.28 |

|       |   |        |                                                  |      |      |      |      |      |      |
|-------|---|--------|--------------------------------------------------|------|------|------|------|------|------|
| 48494 | 0 | 94889  | NGDGNPREVIEDLAAN<br>NPAIRLR                      | 3.11 | 0.01 | 0.90 | 1.20 | 0.22 | 0.28 |
| 48495 | 0 | 94889  | NGDGNPREVIEDLAAN<br>NPAIRLR                      | 3.11 | 0.01 | 0.90 | 1.20 | 0.22 | 1.34 |
| 48496 | 0 | 179865 | NGDIALHFNPR                                      | 2.37 | 0.01 | 3.89 | 0.44 | 0.85 | 0.85 |
| 48497 | 0 | 179865 | NGDIALHFNPR                                      | 2.37 | 0.01 | 3.89 | 0.44 | 0.85 | 0.85 |
| 48498 | 0 | 106679 | NGDKANVLF                                        | 2.30 | 0.01 | 2.75 | 0.44 | 1.23 | 0.85 |
| 48499 | 0 | 141967 | NGDKSTQKYNELKT                                   | 2.62 | 0.01 | 2.73 | 0.44 | 0.85 | 0.28 |
| 48500 | 0 | 43968  | NGDLTKELNKTRQELAN<br>KQQESKE                     | 3.15 | 0.01 | 2.85 | 1.12 | 0.22 | 2.12 |
| 48501 | 0 | 157695 | NGDRYDGEWKDDKR                                   | 2.64 | 0.01 | 3.47 | 2.49 | 0.85 | 0.28 |
| 48502 | 0 | 172480 | NGDYLQYKAPNP<br>NGECRYNRNAVPNLRG                 | 2.48 | 0.01 | 0.90 | 0.44 | 0.85 | 1.39 |
| 48503 | 0 | 189765 | DLQVLAQKVARTLPTSF<br>NYGAIKA<br>NGECRYNRNAVPNLRG | 3.62 | 0.01 | 2.96 | 2.22 | 0.22 | 0.28 |
| 48504 | 0 | 189765 | DLQVLAQKVARTLPTSF<br>NYGAIKA<br>NGECRYNRNAVPNLRG | 3.62 | 0.01 | 2.96 | 2.22 | 0.85 | 0.28 |
| 48505 | 0 | 189765 | DLQVLAQKVARTLPTSF<br>NYGAIKA                     | 3.62 | 0.01 | 2.96 | 2.22 | 1.59 | 0.28 |
| 48506 | 0 | 157696 | NGEDGKTRNDT                                      | 2.43 | 0.01 | 3.47 | 2.49 | 0.85 | 0.28 |
| 48507 | 0 | 43976  | NGEYLILSA                                        | 2.30 | 0.01 | 2.04 | 0.68 | 0.22 | 0.28 |
| 48508 | 0 | 43976  | NGEYLILSA                                        | 2.30 | 0.01 | 2.04 | 0.68 | 0.22 | 0.28 |
| 48509 | 0 | 43977  | NGEYLILSARDVLA                                   | 2.65 | 0.01 | 2.04 | 0.44 | 0.85 | 1.28 |
| 48510 | 0 | 193315 | NGEMQIGVFNTEDG                                   | 2.62 | 0.01 | 3.04 | 1.12 | 0.22 | 0.28 |
| 48511 | 0 | 193315 | NGEMQIGVFNTEDG                                   | 2.62 | 0.01 | 3.04 | 1.12 | 0.22 | 0.28 |
| 48512 | 0 | 179298 | NGFLDKNDFECLAVR                                  | 2.67 | 0.01 | 2.36 | 0.44 | 1.23 | 1.28 |
| 48513 | 0 | 236117 | NGFPVALAR                                        | 2.21 | 0.01 | 0.78 | 0.44 | 1.13 | 2.66 |
| 48514 | 0 | 127748 | NGFTSVQGYAFNGTKLD<br>AVT                         | 2.95 | 0.01 | 0.78 | 0.44 | 1.41 | 0.28 |
| 48515 | 0 | 125506 | NGFTSVQGYAFNGTKLD<br>AVY                         | 2.95 | 0.01 | 0.78 | 0.44 | 1.13 | 0.28 |
| 48516 | 0 | 125506 | NGFTSVQGYAFNGTKLD<br>AVY                         | 2.95 | 0.01 | 0.78 | 1.20 | 0.22 | 0.28 |
| 48517 | 0 | 101921 | NGGCCADAT                                        | 2.24 | 0.01 | 1.66 | 0.44 | 1.59 | 2.97 |
| 48518 | 0 | 43990  | NGGPCVFIKRV                                      | 2.44 | 0.01 | 3.24 | 0.44 | 1.23 | 0.85 |
| 48519 | 0 | 161435 | NGGRIYDKNGLMIKEHIL<br>AI                         | 2.95 | 0.01 | 0.90 | 2.74 | 0.22 | 1.75 |
| 48520 | 0 | 161436 | NGGRIYDKNLLMIKEHIL<br>AI                         | 2.94 | 0.01 | 0.90 | 2.74 | 0.22 | 1.48 |
| 48521 | 0 | 161436 | NGGRIYDKNLLMIKEHIL<br>AI                         | 2.94 | 0.01 | 0.90 | 2.74 | 0.22 | 1.75 |
| 48522 | 0 | 343136 | NGGSTSSTPPSGTEN                                  | 2.74 | 0.01 | 1.61 | 0.44 | 0.85 | 1.28 |
| 48523 | 0 | 43993  | NGGVMKEKD                                        | 2.22 | 0.01 | 2.43 | 1.12 | 0.22 | 0.85 |
| 48524 | 0 | 43993  | NGGVMKEKD                                        | 2.22 | 0.01 | 2.43 | 1.12 | 0.22 | 1.48 |

|       |   |        |                                             |      |      |      |      |      |      |
|-------|---|--------|---------------------------------------------|------|------|------|------|------|------|
| 48525 | 0 | 169384 | NGGYLAAGKLTWADF                             | 2.68 | 0.01 | 3.36 | 0.44 | 1.23 | 0.85 |
| 48526 | 0 | 169384 | NGGYLAAGKLTWADF                             | 2.68 | 0.01 | 3.36 | 0.44 | 1.23 | 0.85 |
| 48527 | 0 | 169384 | NGGYLAAGKLTWADF                             | 2.68 | 0.01 | 3.36 | 0.44 | 1.23 | 0.85 |
| 48528 | 0 | 188376 | NGHNSSSSLYNGSQF                             | 2.70 | 0.01 | 1.66 | 1.20 | 0.22 | 0.28 |
| 48529 | 0 | 450858 | NGHSIHT                                     | 2.02 | 0.01 | 0.90 | 0.44 | 1.23 | 1.39 |
| 48530 | 0 | 111581 | NGICWGNQLFVTVVDT<br>TRST                    | 2.92 | 0.01 | 1.86 | 0.44 | 0.85 | 0.28 |
| 48531 | 0 | 111581 | NGICWGNQLFVTVVDT<br>TRST                    | 2.92 | 0.01 | 1.86 | 0.44 | 1.41 | 0.28 |
| 48532 | 0 | 111581 | NGICWGNQLFVTVVDT<br>TRST                    | 2.92 | 0.01 | 1.86 | 0.44 | 0.85 | 0.28 |
| 48533 | 0 | 111581 | NGICWGNQLFVTVVDT<br>TRST                    | 2.92 | 0.01 | 1.86 | 0.44 | 1.41 | 0.28 |
| 48534 | 0 | 111581 | NGICWGNQLFVTVVDT<br>TRST                    | 2.92 | 0.01 | 1.86 | 2.37 | 0.22 | 1.48 |
| 48535 | 0 | 105975 | NGIETICTASFCKN                              | 2.67 | 0.01 | 2.16 | 0.44 | 1.23 | 0.85 |
| 48536 | 0 | 44002  | NGIRRPKHLYVSMP                              | 2.56 | 0.01 | 2.56 | 2.69 | 0.22 | 0.28 |
| 48537 | 0 | 44002  | NGIRRPKHLYVSMP                              | 2.56 | 0.01 | 2.56 | 0.44 | 0.85 | 0.28 |
| 48538 | 0 | 44004  | NGITSLNHT                                   | 2.24 | 0.01 | 0.90 | 2.55 | 0.22 | 0.28 |
| 48539 | 0 | 44007  | NGKAIHLVNNESEVIV<br>HKAMDI                  | 3.08 | 0.01 | 2.95 | 0.44 | 0.22 | 0.28 |
| 48540 | 0 | 44009  | NGKDDVKEEKKTNEKKD<br>DGKTDKVQEKVLEKSPK      | 3.50 | 0.01 | 1.66 | 2.74 | 0.22 | 0.28 |
| 48541 | 0 | 44009  | NGKDDVKEEKKTNEKKD<br>DGKTDKVQEKVLEKSPK      | 3.50 | 0.01 | 1.66 | 3.67 | 0.22 | 0.28 |
| 48542 | 0 | 44010  | NGKDDVKEEKKTNEKKD<br>DGKTDKVQEKVLEKSPK<br>E | 3.53 | 0.01 | 1.66 | 2.89 | 0.22 | 0.28 |
| 48543 | 0 | 44010  | NGKDDVKEEKKTNEKKD<br>DGKTDKVQEKVLEKSPK<br>E | 3.53 | 0.01 | 1.66 | 0.44 | 1.74 | 1.48 |
| 48544 | 0 | 44010  | NGKDDVKEEKKTNEKKD<br>DGKTDKVQEKVLEKSPK<br>E | 3.53 | 0.01 | 1.66 | 2.89 | 0.22 | 0.28 |
| 48545 | 0 | 44010  | NGKDDVKEEKKTNEKKD<br>DGKTDKVQEKVLEKSPK<br>E | 3.53 | 0.01 | 1.66 | 0.44 | 1.74 | 0.28 |
| 48546 | 0 | 44011  | NGKDDVKEEKKTNEKKD<br>DGKTDQEKVLEKSPKEF      | 3.49 | 0.01 | 0.90 | 0.44 | 1.74 | 1.48 |

|       |   |        |                                       |      |      |      |      |      |      |
|-------|---|--------|---------------------------------------|------|------|------|------|------|------|
| 48547 | 0 | 44011  | NGKDDVKEEKTNEKKD<br>DGKTDQEKVLEKSPKEF | 3.49 | 0.01 | 0.90 | 0.44 | 1.74 | 0.28 |
| 48548 | 0 | 44015  | NGKKNWKKIM                            | 2.44 | 0.01 | 3.65 | 1.15 | 0.22 | 0.28 |
| 48549 | 0 | 44018  | NGKQVESAPSGHHLK<br>KPA                | 2.94 | 0.01 | 2.78 | 2.49 | 0.85 | 0.28 |
| 48550 | 0 | 44018  | NGKQVESAPSGHHLK<br>KPA                | 2.94 | 0.01 | 2.78 | 0.44 | 0.85 | 0.28 |
| 48551 | 0 | 44018  | NGKQVESAPSGHHLK<br>KPA                | 2.94 | 0.01 | 2.78 | 4.03 | 0.22 | 0.28 |
| 48552 | 0 | 343187 | NGKRIYDREFDYED                        | 2.70 | 0.01 | 1.61 | 0.44 | 0.85 | 1.28 |
| 48553 | 0 | 134455 | NGKRVSLSVYLGEFFDIH<br>L               | 2.87 | 0.01 | 0.78 | 0.68 | 0.22 | 1.39 |
| 48554 | 0 | 134455 | NGKRVSLSVYLGEFFDIH<br>L               | 2.87 | 0.01 | 0.78 | 0.68 | 0.22 | 0.85 |
| 48555 | 0 | 135722 | NGKVDAFC                              | 2.10 | 0.01 | 0.78 | 0.44 | 2.35 | 0.28 |
| 48556 | 0 | 44021  | NGKVNNKVAY                            | 2.35 | 4.63 | 0.90 | 0.68 | 0.22 | 0.28 |
| 48557 | 0 | 44021  | NGKVNNKVAY                            | 2.35 | 4.63 | 0.90 | 0.68 | 0.22 | 1.34 |
| 48558 | 0 | 186783 | NGLANSIETDVSFDD                       | 2.65 | 0.01 | 0.90 | 1.20 | 0.22 | 0.85 |
| 48559 | 0 | 44025  | NGLEYIVGRV                            | 2.31 | 0.01 | 0.78 | 0.44 | 1.74 | 0.28 |
| 48560 | 0 | 44028  | NGLKFIKRYTPNNEIDSF<br>VKSG            | 3.06 | 0.01 | 2.95 | 0.44 | 0.22 | 0.28 |
| 48561 | 0 | 182242 | NGLNFDWSDGTSKF                        | 2.70 | 0.01 | 0.78 | 0.44 | 1.13 | 0.85 |
| 48562 | 0 | 172484 | NGMSEEARQKFLE                         | 2.51 | 0.01 | 3.38 | 0.44 | 0.85 | 2.51 |
| 48563 | 0 | 44035  | NGNATPQLTKNA                          | 2.50 | 0.01 | 3.24 | 0.44 | 1.23 | 1.27 |
| 48564 | 0 | 243006 | NGNFIAPEYAYKI                         | 2.56 | 0.01 | 3.70 | 0.68 | 0.22 | 0.85 |
| 48565 | 0 | 243006 | NGNFIAPEYAYKI                         | 2.56 | 0.01 | 3.70 | 0.68 | 0.22 | 0.85 |
| 48566 | 0 | 243006 | NGNFIAPEYAYKI                         | 2.56 | 0.01 | 3.70 | 0.68 | 0.22 | 0.85 |
| 48567 | 0 | 243006 | NGNFIAPEYAYKI                         | 2.56 | 0.01 | 3.70 | 0.68 | 0.22 | 1.48 |
| 48568 | 0 | 243006 | NGNFIAPEYAYKI                         | 2.56 | 0.01 | 3.70 | 0.68 | 0.22 | 1.34 |
| 48569 | 0 | 243006 | NGNFIAPEYAYKI                         | 2.56 | 0.01 | 3.70 | 0.68 | 0.22 | 1.34 |
| 48570 | 0 | 243006 | NGNFIAPEYAYKI                         | 2.56 | 0.01 | 3.70 | 0.68 | 0.22 | 1.34 |
| 48571 | 0 | 243006 | NGNFIAPEYAYKI                         | 2.56 | 0.01 | 3.70 | 0.68 | 0.22 | 1.34 |
| 48572 | 0 | 243006 | NGNFIAPEYAYKI                         | 2.56 | 0.01 | 3.70 | 0.68 | 0.22 | 1.34 |
| 48573 | 0 | 243006 | NGNFIAPEYAYKI                         | 2.56 | 0.01 | 3.70 | 0.68 | 0.22 | 1.34 |
| 48574 | 0 | 243006 | NGNFIAPEYAYKI                         | 2.56 | 0.01 | 3.70 | 0.68 | 0.22 | 1.34 |
| 48575 | 0 | 243006 | NGNFIAPEYAYKI                         | 2.56 | 0.01 | 3.70 | 0.68 | 0.22 | 1.34 |
| 48576 | 0 | 243006 | NGNFIAPEYAYKI                         | 2.56 | 0.01 | 3.70 | 0.68 | 0.22 | 1.34 |
| 48577 | 0 | 243006 | NGNFIAPEYAYKI                         | 2.56 | 0.01 | 3.70 | 0.68 | 0.22 | 1.34 |
| 48578 | 0 | 243006 | NGNFIAPEYAYKI                         | 2.56 | 0.01 | 3.70 | 0.68 | 0.22 | 1.34 |
| 48579 | 0 | 243006 | NGNFIAPEYAYKI                         | 2.56 | 0.01 | 3.70 | 0.68 | 0.22 | 1.34 |
| 48580 | 0 | 243006 | NGNFIAPEYAYKI                         | 2.56 | 0.01 | 3.70 | 0.68 | 0.22 | 1.48 |
| 48581 | 0 | 119501 | NGNLQLRNKEVT                          | 2.48 | 0.01 | 0.78 | 0.44 | 1.13 | 0.28 |
| 48582 | 0 | 119501 | NGNLQLRNKEVT                          | 2.48 | 0.01 | 0.78 | 0.44 | 1.13 | 0.28 |
| 48583 | 0 | 119501 | NGNLQLRNKEVT                          | 2.48 | 0.01 | 0.78 | 0.44 | 1.13 | 0.28 |
| 48584 | 0 | 119501 | NGNLQLRNKEVT                          | 2.48 | 0.01 | 0.78 | 0.44 | 1.41 | 0.28 |
| 48585 | 0 | 119501 | NGNLQLRNKEVT                          | 2.48 | 0.01 | 0.78 | 0.44 | 1.13 | 1.27 |

|       |   |        |                                   |      |      |      |      |      |      |
|-------|---|--------|-----------------------------------|------|------|------|------|------|------|
| 48586 | 0 | 97522  | NGNLVNKAG                         | 2.26 | 0.01 | 3.13 | 1.12 | 0.22 | 0.28 |
| 48587 | 0 | 147998 | NGNMALDDI                         | 2.23 | 0.01 | 3.24 | 3.57 | 0.85 | 0.28 |
| 48588 | 0 | 44041  | NGNRSPTTLMGP                      | 2.49 | 0.01 | 0.90 | 2.22 | 0.85 | 1.39 |
| 48589 | 0 | 510027 | NGNSDKIRRRIHGGGVE<br>IWSNKDLINVQ  | 3.27 | 0.01 | 0.90 | 0.68 | 0.22 | 0.28 |
| 48590 | 0 | 510027 | NGNSDKIRRRIHGGGVE<br>IWSNKDLINVQ  | 3.27 | 0.01 | 0.90 | 1.20 | 0.22 | 0.28 |
| 48591 | 0 | 510027 | NGNSDKIRRRIHGGGVE<br>IWSNKDLINVQ  | 3.27 | 0.01 | 0.90 | 0.68 | 0.22 | 0.85 |
| 48592 | 0 | 510027 | NGNSDKIRRRIHGGGVE<br>IWSNKDLINVQ  | 3.27 | 0.01 | 0.90 | 0.68 | 0.22 | 0.85 |
| 48593 | 0 | 510027 | NGNSDKIRRRIHGGGVE<br>IWSNKDLINVQ  | 3.27 | 0.01 | 0.90 | 0.68 | 0.22 | 1.34 |
| 48594 | 0 | 141712 | NGNYICCSCKNIGAYN                  | 2.78 | 0.01 | 2.86 | 0.44 | 1.74 | 0.28 |
| 48595 | 0 | 44043  | NGPADSGDALLERNYPT<br>GAE          | 2.96 | 0.01 | 0.90 | 0.44 | 0.22 | 0.28 |
| 48596 | 0 | 446857 | NGPFGKC                           | 2.02 | 0.01 | 0.90 | 2.66 | 0.22 | 1.39 |
| 48597 | 0 | 44051  | NGPQEIIYQQGNGIF                   | 2.71 | 0.01 | 2.72 | 0.44 | 1.23 | 0.85 |
| 48598 | 0 | 135963 | NGQEEKAGVVSTGLIGG<br>G            | 2.81 | 0.01 | 0.90 | 0.68 | 0.22 | 0.28 |
| 48599 | 0 | 186699 | NGQHAPTVAYSK                      | 2.43 | 0.01 | 0.90 | 0.68 | 0.22 | 1.39 |
| 48600 | 0 | 119617 | NGQPENNY                          | 2.14 | 0.01 | 0.78 | 0.44 | 1.93 | 0.28 |
| 48601 | 0 | 238794 | NGQWSLVGAKAPPA                    | 2.60 | 0.01 | 2.14 | 2.65 | 0.22 | 0.85 |
| 48602 | 0 | 44064  | NGREGKDE                          | 2.14 | 0.01 | 3.29 | 1.20 | 0.22 | 0.28 |
| 48603 | 0 | 100331 | NGRFVFTDIT                        | 2.31 | 0.01 | 2.18 | 2.16 | 0.22 | 0.28 |
| 48604 | 0 | 97523  | NGRGEGTVL                         | 2.23 | 0.01 | 3.13 | 1.12 | 0.22 | 0.28 |
| 48605 | 0 | 99496  | NGRIRVLQRFDQRSR                   | 2.68 | 0.01 | 2.16 | 0.44 | 1.23 | 1.48 |
| 48606 | 0 | 343331 | NGRPGRVKRVKRKAA                   | 2.71 | 0.01 | 1.61 | 0.44 | 0.85 | 1.28 |
| 48607 | 0 | 44067  | NGSAFYLVCPIGWT                    | 2.55 | 0.01 | 3.37 | 2.13 | 2.25 | 1.75 |
| 48608 | 0 | 122497 | NGSSESRRALQDSQR                   | 2.69 | 0.01 | 0.90 | 0.44 | 1.13 | 0.28 |
| 48609 | 0 | 122497 | NGSSESRRALQDSQR                   | 2.69 | 0.01 | 0.90 | 0.44 | 1.41 | 0.28 |
| 48610 | 0 | 44073  | NGSSKYGDTSTNNVRG<br>DLQVLAQKAERTL | 3.32 | 0.01 | 3.93 | 0.68 | 0.22 | 0.28 |
| 48611 | 0 | 44073  | NGSSKYGDTSTNNVRG<br>DLQVLAQKAERTL | 3.32 | 0.01 | 3.93 | 0.68 | 0.22 | 0.28 |
| 48612 | 0 | 44073  | NGSSKYGDTSTNNVRG<br>DLQVLAQKAERTL | 3.32 | 0.01 | 3.93 | 2.13 | 0.22 | 0.28 |
| 48613 | 0 | 44073  | NGSSKYGDTSTNNVRG<br>DLQVLAQKAERTL | 3.32 | 0.01 | 3.93 | 0.68 | 0.22 | 0.28 |
| 48614 | 0 | 44073  | NGSSKYGDTSTNNVRG<br>DLQVLAQKAERTL | 3.32 | 0.01 | 3.93 | 0.68 | 0.22 | 0.28 |
| 48615 | 0 | 44073  | NGSSKYGDTSTNNVRG<br>DLQVLAQKAERTL | 3.32 | 0.01 | 3.93 | 0.68 | 0.22 | 1.48 |
| 48616 | 0 | 44073  | NGSSKYGDTSTNNVRG<br>DLQVLAQKAERTL | 3.32 | 0.01 | 3.93 | 0.68 | 0.22 | 1.48 |

|       |   |        |                                   |      |      |      |      |      |      |
|-------|---|--------|-----------------------------------|------|------|------|------|------|------|
| 48617 | 0 | 44073  | NGSSKYGDTSTNNVRG<br>DLQVLAQKAERTL | 3.32 | 0.01 | 3.93 | 0.68 | 0.22 | 1.34 |
| 48618 | 0 | 44073  | NGSSKYGDTSTNNVRG<br>DLQVLAQKAERTL | 3.32 | 0.01 | 3.93 | 0.68 | 0.22 | 1.34 |
| 48619 | 0 | 504110 | NGSWH                             | 1.74 | 0.01 | 2.68 | 0.44 | 0.85 | 2.49 |
| 48620 | 0 | 504110 | NGSWH                             | 1.74 | 0.01 | 2.68 | 0.44 | 0.85 | 0.28 |
| 48621 | 0 | 504110 | NGSWH                             | 1.74 | 0.01 | 2.68 | 0.44 | 0.85 | 1.34 |
| 48622 | 0 | 141713 | NGTDRKTIRQLVWDAM                  | 2.69 | 0.01 | 1.66 | 2.55 | 0.22 | 0.28 |
| 48623 | 0 | 141713 | NGTDRKTIRQLVWDAM                  | 2.69 | 0.01 | 2.86 | 2.55 | 0.22 | 0.28 |
| 48624 | 0 | 141713 | NGTDRKTIRQLVWDAM                  | 2.69 | 0.01 | 2.86 | 2.55 | 0.22 | 0.28 |
| 48625 | 0 | 236587 | NGTDWLAQKFDWAVE                   | 2.64 | 0.01 | 3.70 | 2.13 | 0.22 | 1.28 |
| 48626 | 0 | 343417 | NGTGENLDGDEEEDG                   | 2.73 | 0.01 | 1.61 | 0.44 | 0.85 | 1.28 |
| 48627 | 0 | 93488  | NGTLFSWLPALASNFDQ                 | 2.80 | 0.01 | 3.81 | 1.12 | 0.22 | 0.28 |
| 48628 | 0 | 93488  | NGTLFSWLPALASNFDQ                 | 2.80 | 0.01 | 3.81 | 1.12 | 0.22 | 0.28 |
| 48629 | 0 | 93488  | NGTLFSWLPALASNFDQ                 | 2.80 | 0.01 | 3.81 | 1.12 | 0.22 | 0.28 |
| 48630 | 0 | 93488  | NGTLFSWLPALASNFDQ                 | 2.80 | 0.01 | 3.81 | 1.12 | 0.22 | 0.28 |
| 48631 | 0 | 114903 | NGTLTSLHFG                        | 2.33 | 0.01 | 2.25 | 0.44 | 1.23 | 0.85 |
| 48632 | 0 | 114903 | NGTLTSLHFG                        | 2.33 | 0.01 | 2.25 | 0.44 | 1.23 | 0.85 |
| 48633 | 0 | 44083  | NGTLTSLHFGKC                      | 2.48 | 0.01 | 2.25 | 0.44 | 1.23 | 0.85 |
| 48634 | 0 | 44083  | NGTLTSLHFGKC                      | 2.48 | 0.01 | 2.25 | 0.44 | 1.23 | 0.85 |
| 48635 | 0 | 44088  | NGTPSELGGTNVPAE                   | 2.70 | 0.01 | 2.59 | 0.44 | 0.85 | 0.28 |
| 48636 | 0 | 78215  | NGTSKYAVGGSGRRGD<br>MGS LAARVVKQ  | 3.23 | 0.01 | 3.48 | 3.47 | 0.22 | 1.34 |
| 48637 | 0 | 78215  | NGTSKYAVGGSGRRGD<br>MGS LAARVVKQ  | 3.23 | 0.01 | 3.48 | 3.47 | 0.22 | 1.34 |
| 48638 | 0 | 78215  | NGTSKYAVGGSGRRGD<br>MGS LAARVVKQ  | 3.23 | 0.01 | 3.48 | 3.47 | 0.22 | 1.75 |
| 48639 | 0 | 78215  | NGTSKYAVGGSGRRGD<br>MGS LAARVVKQ  | 3.23 | 0.01 | 3.48 | 3.47 | 0.22 | 1.75 |
| 48640 | 0 | 95619  | NGTTRTVNPLGF                      | 2.50 | 0.01 | 2.88 | 0.44 | 1.23 | 0.85 |
| 48641 | 0 | 151035 | NGTYDYPKYSEEAKL                   | 2.65 | 0.01 | 2.87 | 0.44 | 0.85 | 0.28 |
| 48642 | 0 | 141969 | NGTYQTW                           | 2.02 | 0.01 | 0.78 | 0.44 | 2.35 | 0.28 |
| 48643 | 0 | 44095  | NGTYRATY                          | 2.14 | 0.01 | 2.21 | 0.44 | 0.85 | 0.28 |
| 48644 | 0 | 44095  | NGTYRATY                          | 2.14 | 0.01 | 2.21 | 1.12 | 0.22 | 0.28 |
| 48645 | 0 | 44096  | NGTYRATYQD                        | 2.31 | 0.01 | 2.21 | 1.12 | 0.22 | 0.28 |
| 48646 | 0 | 44097  | NGTYSADARG                        | 2.31 | 0.01 | 2.73 | 0.68 | 0.22 | 0.28 |
| 48647 | 0 | 124560 | NGVELRD                           | 1.99 | 0.01 | 0.78 | 0.68 | 0.22 | 0.28 |
| 48648 | 0 | 124560 | NGVELRD                           | 1.99 | 0.01 | 0.78 | 0.68 | 0.22 | 0.28 |
| 48649 | 0 | 124560 | NGVELRD                           | 1.99 | 0.01 | 0.78 | 0.68 | 0.22 | 0.28 |

|       |   |        |                          |      |      |      |      |      |      |
|-------|---|--------|--------------------------|------|------|------|------|------|------|
| 48650 | 0 | 124560 | NGVELRD                  | 1.99 | 0.01 | 0.78 | 0.68 | 0.22 | 0.28 |
| 48651 | 0 | 124560 | NGVELRD                  | 1.99 | 0.01 | 0.78 | 0.68 | 0.22 | 0.85 |
| 48652 | 0 | 44104  | NGVLGGDAIA               | 2.32 | 0.01 | 3.34 | 1.12 | 0.22 | 0.85 |
| 48653 | 0 | 105976 | NGVTLGYTSGTCQGNA<br>SATK | 2.97 | 0.01 | 2.04 | 0.44 | 1.13 | 0.28 |
| 48654 | 0 | 101075 | NGVTYSSNTV               | 2.35 | 0.01 | 3.18 | 3.75 | 0.22 | 0.28 |
| 48655 | 0 | 86742  | NGVWVMMDGNEQVE<br>YPLK   | 2.83 | 0.01 | 3.05 | 1.12 | 0.22 | 0.28 |
| 48656 | 0 | 86742  | NGVWVMMDGNEQVE<br>YPLK   | 2.83 | 0.01 | 3.05 | 1.12 | 0.22 | 0.28 |
| 48657 | 0 | 86742  | NGVWVMMDGNEQVE<br>YPLK   | 2.83 | 0.01 | 3.05 | 1.12 | 0.22 | 0.28 |
| 48658 | 0 | 86742  | NGVWVMMDGNEQVE<br>YPLK   | 2.83 | 0.01 | 3.05 | 1.12 | 0.22 | 0.28 |
| 48659 | 0 | 86742  | NGVWVMMDGNEQVE<br>YPLK   | 2.83 | 0.01 | 3.05 | 1.12 | 0.22 | 0.28 |
| 48660 | 0 | 86742  | NGVWVMMDGNEQVE<br>YPLK   | 2.83 | 0.01 | 3.05 | 1.12 | 0.22 | 0.28 |
| 48661 | 0 | 86742  | NGVWVMMDGNEQVE<br>YPLK   | 2.83 | 0.01 | 3.05 | 1.12 | 0.22 | 0.28 |
| 48662 | 0 | 86742  | NGVWVMMDGNEQVE<br>YPLK   | 2.83 | 0.01 | 3.05 | 1.12 | 0.22 | 0.28 |
| 48663 | 0 | 86742  | NGVWVMMDGNEQVE<br>YPLK   | 2.83 | 0.01 | 3.05 | 1.12 | 0.22 | 0.28 |
| 48664 | 0 | 86742  | NGVWVMMDGNEQVE<br>YPLK   | 2.83 | 0.01 | 3.05 | 1.12 | 0.22 | 0.28 |
| 48665 | 0 | 86742  | NGVWVMMDGNEQVE<br>YPLK   | 2.83 | 0.01 | 3.05 | 1.12 | 0.22 | 0.28 |
| 48666 | 0 | 86742  | NGVWVMMDGNEQVE<br>YPLK   | 2.83 | 0.01 | 3.05 | 1.12 | 0.22 | 0.28 |
| 48667 | 0 | 86742  | NGVWVMMDGNEQVE<br>YPLK   | 2.83 | 0.01 | 3.05 | 1.12 | 0.22 | 0.28 |
| 48668 | 0 | 86742  | NGVWVMMDGNEQVE<br>YPLK   | 2.83 | 0.01 | 3.05 | 1.12 | 0.22 | 0.28 |
| 48669 | 0 | 86742  | NGVWVMMDGNEQVE<br>YPLK   | 2.83 | 0.01 | 3.05 | 1.12 | 0.22 | 0.28 |
| 48670 | 0 | 86742  | NGVWVMMDGNEQVE<br>YPLK   | 2.83 | 0.01 | 3.05 | 1.12 | 0.22 | 0.28 |
| 48671 | 0 | 86742  | NGVWVMMDGNEQVE<br>YPLK   | 2.83 | 0.01 | 3.05 | 1.12 | 0.22 | 0.28 |
| 48672 | 0 | 86742  | NGVWVMMDGNEQVE<br>YPLK   | 2.83 | 0.01 | 3.05 | 1.12 | 0.22 | 0.28 |
| 48673 | 0 | 123537 | NGWAASFGA                | 2.25 | 0.01 | 2.28 | 2.00 | 0.22 | 0.28 |
| 48674 | 0 | 44117  | NGWGAPTKEESTYNWL<br>P    | 2.79 | 0.01 | 3.93 | 2.02 | 0.22 | 0.85 |
| 48675 | 0 | 44117  | NGWGAPTKEESTYNWL<br>P    | 2.79 | 0.01 | 3.93 | 1.12 | 0.22 | 0.85 |



|       |   |        |                    |      |      |      |      |      |      |
|-------|---|--------|--------------------|------|------|------|------|------|------|
| 48676 | 0 | 44118  | NGWHYQSFEW         | 2.29 | 0.01 | 2.72 | 0.44 | 1.23 | 0.85 |
| 48677 | 0 | 131981 | NGWKSTEEEDQGSAT    | 2.66 | 0.01 | 0.78 | 0.44 | 1.13 | 0.85 |
| 48678 | 0 | 117336 | NGWSHKDLLR         | 2.28 | 0.01 | 0.78 | 0.44 | 1.13 | 1.57 |
| 48679 | 0 | 117336 | NGWSHKDLLR         | 2.28 | 0.01 | 0.78 | 0.44 | 1.41 | 1.57 |
| 48680 | 0 | 117336 | NGWSHKDLLR         | 2.28 | 0.01 | 0.78 | 0.44 | 1.13 | 0.28 |
| 48681 | 0 | 44124  | NGYHCLSEFCMPHP     | 2.59 | 0.01 | 0.90 | 0.44 | 1.41 | 0.28 |
| 48682 | 0 | 233238 | NGYL               | 1.57 | 0.01 | 3.61 | 1.15 | 0.22 | 0.85 |
| 48683 | 0 | 233238 | NGYL               | 1.57 | 0.01 | 3.61 | 1.20 | 0.22 | 0.85 |
| 48684 | 0 | 186700 | NGYLCRTCSTT        | 2.47 | 0.01 | 0.90 | 0.68 | 0.22 | 1.39 |
| 48685 | 0 | 233239 | NGYLDKHK           | 2.12 | 0.01 | 3.61 | 2.00 | 0.85 | 0.85 |
| 48686 | 0 | 44134  | NHDTRINDYNKRLTEYN  | 3.58 | 0.01 | 2.22 | 0.44 | 1.74 | 0.28 |
|       |   |        | KRLTEYNKRLTEYTKRLN |      |      |      |      |      |      |
| 48687 | 0 | 44134  | E                  | 3.58 | 0.01 | 2.22 | 0.44 | 1.74 | 0.28 |
|       |   |        | NHDTRINDYNKRLTEYN  |      |      |      |      |      |      |
| 48688 | 0 | 44134  | KRLTEYNKRLTEYTKRLN | 3.58 | 0.01 | 2.22 | 0.44 | 1.74 | 0.28 |
|       |   |        | E                  |      |      |      |      |      |      |
| 48689 | 0 | 44135  | NHDYTKIRYADGHAIEN  | 2.95 | 0.01 | 3.13 | 2.43 | 0.22 | 0.28 |
| 48690 | 0 | 105977 | AVR                | 2.66 | 0.01 | 2.16 | 0.44 | 1.23 | 0.85 |
| 48691 | 0 | 167979 | NHEQEFLRYQQQSRR    | 2.92 | 0.01 | 2.75 | 0.44 | 1.59 | 2.51 |
| 48692 | 0 | 167979 | NHFTLKCPKTALTEPPTL | 2.92 | 0.01 | 2.75 | 0.44 | 0.85 | 2.51 |
|       |   |        | A                  |      |      |      |      |      |      |
| 48693 | 0 | 44140  | NHFTLKCPKTALTEPPTL | 2.44 | 0.01 | 0.90 | 0.44 | 0.85 | 0.28 |
| 48694 | 0 | 423440 | A                  | 2.69 | 0.01 | 2.51 | 0.44 | 2.35 | 1.28 |
| 48695 | 0 | 44142  | NHGVPPQPPSRTW      | 2.58 | 0.01 | 3.78 | 3.57 | 0.22 | 0.28 |
| 48696 | 0 | 44142  | NHGAGGTAASVYQGA    | 2.58 | 0.01 | 3.78 | 3.57 | 0.22 | 0.28 |
| 48697 | 0 | 44142  | NHGNYSQVVGASQ      | 2.58 | 0.01 | 3.78 | 3.57 | 0.22 | 1.34 |
| 48698 | 0 | 44142  | NHGNYSQVVGASQ      | 2.58 | 0.01 | 3.04 | 0.68 | 0.22 | 0.28 |
| 48699 | 0 | 44142  | NHGNYSQVVGASQ      | 2.58 | 0.01 | 3.04 | 0.68 | 0.22 | 0.28 |
| 48700 | 0 | 44142  | NHGNYSQVVGASQ      | 2.58 | 0.01 | 3.04 | 0.68 | 0.22 | 1.75 |
| 48701 | 0 | 44142  | NHGNYSQVVGASQ      | 2.58 | 0.01 | 3.04 | 0.68 | 0.22 | 1.75 |
| 48702 | 0 | 195047 | NHGNYSQVVGASQ      | 1.92 | 0.01 | 3.04 | 2.13 | 2.26 | 0.28 |
| 48703 | 0 | 195047 | NHHWHK             | 1.92 | 0.01 | 3.04 | 2.13 | 2.26 | 0.28 |
| 48704 | 0 | 86748  | NHHWHK             | 2.32 | 0.01 | 3.06 | 0.44 | 0.85 | 0.28 |
| 48705 | 0 | 44144  | NHIENDPLKI         | 1.90 | 0.01 | 1.96 | 0.44 | 0.85 | 0.28 |
| 48706 | 0 | 510454 | NHIHSV             | 2.49 | 0.01 | 0.90 | 3.07 | 1.13 | 1.39 |
| 48707 | 0 | 164303 | NHLANNFNKGI        | 2.02 | 0.01 | 0.90 | 1.20 | 0.22 | 1.39 |
| 48708 | 0 | 131982 | NHLHSQR            | 1.88 | 0.01 | 0.78 | 2.66 | 0.22 | 0.28 |
| 48709 | 0 | 44156  | NHLQ GK            | 2.50 | 0.01 | 0.90 | 0.68 | 0.22 | 0.28 |
| 48710 | 0 | 44159  | NHLYSPSVRVNH       | 2.46 | 0.01 | 0.90 | 0.68 | 0.22 | 1.39 |
| 48711 | 0 | 137432 | NHNDFRPMTWR        | 2.48 | 0.01 | 0.90 | 0.68 | 0.22 | 1.39 |
| 48712 | 0 | 137432 | NHNYPPLSLLTF       | 2.48 | 0.01 | 0.90 | 0.68 | 0.22 | 1.27 |

|       |   |        |                   |      |      |      |      |      |      |
|-------|---|--------|-------------------|------|------|------|------|------|------|
| 48713 | 0 | 137432 | NHNYPPLSLLTF      | 2.48 | 0.01 | 0.90 | 0.68 | 0.22 | 0.28 |
| 48714 | 0 | 137432 | NHNYPPLSLLTF      | 2.48 | 0.01 | 0.90 | 0.68 | 0.22 | 0.28 |
| 48715 | 0 | 137432 | NHNYPPLSLLTF      | 2.48 | 0.01 | 0.90 | 0.68 | 0.22 | 0.28 |
| 48716 | 0 | 137432 | NHNYPPLSLLTF      | 2.48 | 0.01 | 0.90 | 0.68 | 0.22 | 0.28 |
| 48717 | 0 | 137432 | NHNYPPLSLLTF      | 2.48 | 0.01 | 0.90 | 0.68 | 0.22 | 0.28 |
| 48718 | 0 | 137432 | NHNYPPLSLLTF      | 2.48 | 0.01 | 0.90 | 0.68 | 0.22 | 0.28 |
| 48719 | 0 | 137432 | NHNYPPLSLLTF      | 2.48 | 0.01 | 0.90 | 0.68 | 0.22 | 0.28 |
| 48720 | 0 | 137432 | NHNYPPLSLLTF      | 2.48 | 0.01 | 0.90 | 0.68 | 0.22 | 1.75 |
| 48721 | 0 | 137432 | NHNYPPLSLLTF      | 2.48 | 0.01 | 0.90 | 0.68 | 0.22 | 1.34 |
| 48722 | 0 | 137432 | NHNYPPLSLLTF      | 2.48 | 0.01 | 0.90 | 0.68 | 0.22 | 0.28 |
| 48723 | 0 | 137432 | NHNYPPLSLLTF      | 2.48 | 0.01 | 0.90 | 0.68 | 0.22 | 0.28 |
| 48724 | 0 | 79619  | NHPPKRQPG         | 2.23 | 0.01 | 3.10 | 0.68 | 0.22 | 1.75 |
| 48725 | 0 | 79619  | NHPPKRQPG         | 2.23 | 0.01 | 3.10 | 0.68 | 0.22 | 1.57 |
| 48726 | 0 | 79619  | NHPPKRQPG         | 2.23 | 0.01 | 3.10 | 2.43 | 0.22 | 1.57 |
| 48727 | 0 | 79619  | NHPPKRQPG         | 2.23 | 0.01 | 3.10 | 0.68 | 0.22 | 1.57 |
| 48728 | 0 | 79619  | NHPPKRQPG         | 2.23 | 0.01 | 3.10 | 0.68 | 0.22 | 1.57 |
| 48729 | 0 | 79619  | NHPPKRQPG         | 2.23 | 0.01 | 3.10 | 2.25 | 0.22 | 1.57 |
| 48730 | 0 | 79619  | NHPPKRQPG         | 2.23 | 0.01 | 3.10 | 2.25 | 0.22 | 1.57 |
| 48731 | 0 | 44163  | NHPQNTSD          | 2.13 | 0.01 | 3.42 | 0.68 | 0.22 | 0.28 |
| 48732 | 0 | 109624 | NHQH              | 1.57 | 0.01 | 3.11 | 0.68 | 0.22 | 0.28 |
| 48733 | 0 | 109624 | NHQH              | 1.57 | 0.01 | 3.11 | 0.68 | 0.22 | 1.48 |
| 48734 | 0 | 109624 | NHQH              | 1.57 | 0.01 | 3.11 | 0.68 | 0.22 | 0.28 |
| 48735 | 0 | 343593 | NHRFQPGYYGNDSEFN  | 2.68 | 0.01 | 3.78 | 3.67 | 1.41 | 1.39 |
| 48736 | 0 | 343593 | NHRFQPGYYGNDSEFN  | 2.68 | 0.01 | 3.78 | 3.67 | 1.41 | 0.28 |
| 48737 | 0 | 44168  | NHSQTPRYRRPKFPWFK | 2.79 | 0.01 | 3.40 | 0.44 | 0.85 | 0.28 |
| 48738 | 0 | 44168  | NHSQTPRYRRPKFPWFK | 2.79 | 0.01 | 3.40 | 0.44 | 1.74 | 0.28 |
| 48739 | 0 | 510455 | NHSVNNLNKGI       | 2.50 | 0.01 | 0.90 | 3.07 | 1.13 | 1.39 |
| 48740 | 0 | 134172 | NHTVGVLASAHR      | 2.48 | 0.01 | 0.78 | 3.06 | 0.22 | 0.28 |
| 48741 | 0 | 196690 | NHTYYQP           | 2.01 | 0.01 | 0.90 | 0.44 | 1.23 | 1.39 |
| 48742 | 0 | 44172  | NHVADIDKLIDYAA    | 2.61 | 0.01 | 2.56 | 1.12 | 0.22 | 0.28 |
| 48743 | 0 | 44172  | NHVADIDKLIDYAA    | 2.61 | 0.01 | 2.56 | 0.44 | 0.85 | 0.28 |
| 48744 | 0 | 131250 | NHVQAWSEQFWDSEFN  | 2.45 | 0.01 | 0.90 | 0.44 | 1.13 | 0.28 |
| 48745 | 0 | 131250 | NHVQAWSEQFWDSEFN  | 2.45 | 0.01 | 0.90 | 0.44 | 1.41 | 0.28 |
| 48746 | 0 | 131250 | NHVQAWSEQFWDSEFN  | 2.45 | 0.01 | 0.90 | 0.44 | 1.13 | 0.28 |
| 48747 | 0 | 131250 | NHVQAWSEQFWDSEFN  | 2.45 | 0.01 | 0.90 | 0.44 | 1.41 | 0.28 |
| 48748 | 0 | 131250 | NHVQAWSEQFWDSEFN  | 2.45 | 0.01 | 0.90 | 0.44 | 1.13 | 0.28 |
| 48749 | 0 | 131250 | NHVQAWSEQFWDSEFN  | 2.45 | 0.01 | 0.90 | 0.44 | 1.41 | 0.28 |
| 48750 | 0 | 44174  | NHVRIPIGYWAV      | 2.45 | 0.01 | 4.33 | 0.68 | 0.22 | 0.28 |
| 48751 | 0 | 44174  | NHVRIPIGYWAV      | 2.45 | 0.01 | 4.33 | 0.68 | 0.22 | 1.34 |
| 48752 | 0 | 44174  | NHVRIPIGYWAV      | 2.45 | 0.01 | 4.33 | 0.68 | 0.22 | 1.75 |
| 48753 | 0 | 44175  | NHVSPTHYVPESDAAAR | 2.78 | 0.01 | 2.68 | 0.44 | 1.59 | 0.28 |

|       |   |        |                              |      |      |      |      |      |      |
|-------|---|--------|------------------------------|------|------|------|------|------|------|
| 48754 | 0 | 44175  | NHVSPTHYVPESDAAAR            | 2.78 | 0.01 | 2.68 | 0.44 | 1.59 | 0.28 |
| 48755 | 0 | 104148 | NHVSPTHYVPESDAAAR<br>VTQ     | 2.93 | 0.01 | 1.72 | 0.44 | 0.85 | 0.28 |
| 48756 | 0 | 461835 | NHWMNWVRQ\$PEKGL             | 2.63 | 0.01 | 1.75 | 0.44 | 0.22 | 1.28 |
| 48757 | 0 | 104149 | NHYFLRS                      | 1.99 | 0.01 | 0.90 | 0.44 | 1.13 | 1.39 |
| 48758 | 0 | 119618 | NHYTQKSL                     | 2.10 | 0.01 | 0.78 | 0.44 | 1.93 | 0.28 |
| 48759 | 0 | 229387 | NIAEANSDYDREKLQE             | 2.74 | 0.01 | 3.65 | 0.68 | 0.22 | 0.28 |
| 48760 | 0 | 229387 | NIAEANSDYDREKLQE             | 2.74 | 0.01 | 3.65 | 0.68 | 0.22 | 0.28 |
| 48761 | 0 | 229387 | NIAEANSDYDREKLQE             | 2.74 | 0.01 | 3.65 | 0.68 | 0.22 | 0.28 |
| 48762 | 0 | 229387 | NIAEANSDYDREKLQE             | 2.74 | 0.01 | 3.65 | 0.68 | 0.22 | 0.28 |
| 48763 | 0 | 229387 | NIAEANSDYDREKLQE             | 2.74 | 0.01 | 3.65 | 0.68 | 0.22 | 3.93 |
| 48764 | 0 | 229387 | NIAEANSDYDREKLQE             | 2.74 | 0.01 | 3.65 | 0.68 | 0.22 | 1.39 |
| 48765 | 0 | 100333 | NIAEQYTHQD                   | 2.29 | 0.01 | 2.18 | 2.16 | 0.22 | 0.28 |
| 48766 | 0 | 431475 | NIAHASSQVLQQST               | 2.62 | 0.01 | 1.86 | 0.44 | 1.23 | 0.85 |
| 48767 | 0 | 133655 | NIAHPDRWDRLR                 | 2.48 | 0.01 | 0.90 | 0.68 | 0.22 | 1.39 |
| 48768 | 0 | 140888 | NIALGQRRADAV                 | 2.46 | 0.01 | 3.01 | 1.12 | 0.22 | 0.28 |
| 48769 | 0 | 44187  | NIAPASIVSRNIVYTRAQ<br>PNQDIA | 3.15 | 0.01 | 0.90 | 1.15 | 0.22 | 1.34 |
| 48770 | 0 | 44189  | NIASHISSISARTGDPVT<br>N      | 2.91 | 0.01 | 2.58 | 3.20 | 0.22 | 0.28 |
| 48771 | 0 | 44189  | NIASHISSISARTGDPVT<br>N      | 2.91 | 0.01 | 2.58 | 2.52 | 0.22 | 0.28 |
| 48772 | 0 | 44189  | NIASHISSISARTGDPVT<br>N      | 2.91 | 0.01 | 2.58 | 2.52 | 0.22 | 0.28 |
| 48773 | 0 | 44191  | NIASINKF                     | 2.15 | 0.01 | 3.42 | 0.68 | 0.22 | 0.28 |
| 48774 | 0 | 115392 | NICNISCDKF                   | 2.34 | 0.01 | 1.60 | 0.44 | 1.23 | 0.85 |
| 48775 | 0 | 133248 | NICTFVPRRKAGIC               | 2.58 | 0.01 | 0.78 | 0.44 | 1.13 | 0.85 |
| 48776 | 0 | 133248 | NICTFVPRRKAGIC               | 2.58 | 0.01 | 0.78 | 0.44 | 1.13 | 1.27 |
| 48777 | 0 | 44198  | NIDATSTGNYNKYRYL             | 2.80 | 0.01 | 2.48 | 0.44 | 0.85 | 0.28 |
| 48778 | 0 | 179301 | NIDCDTFRHALMTWG              | 2.62 | 0.01 | 2.36 | 0.44 | 1.23 | 1.28 |
| 48779 | 0 | 179301 | NIDCDTFRHALMTWG              | 2.62 | 0.01 | 2.36 | 0.44 | 1.23 | 1.27 |
| 48780 | 0 | 179301 | NIDCDTFRHALMTWG              | 2.62 | 0.01 | 2.36 | 0.44 | 1.23 | 1.28 |
| 48781 | 0 | 137936 | NIDIGLKGVLT                  | 2.49 | 0.01 | 2.21 | 0.44 | 0.85 | 0.28 |
| 48782 | 0 | 152844 | NIDKDIRKIL                   | 2.35 | 0.01 | 2.18 | 2.16 | 0.22 | 0.28 |

|       |   |        |                           |      |      |      |      |      |      |
|-------|---|--------|---------------------------|------|------|------|------|------|------|
|       |   |        | NIDRIYDKNLLMIKEHILA       |      |      |      |      |      |      |
| 48783 | 0 | 44205  | IAIYESRIIKRKYKNKDDK<br>EV | 3.65 | 0.01 | 1.66 | 2.63 | 0.22 | 0.28 |
| 48784 | 0 | 105979 | NIEADVNT                  | 2.13 | 0.01 | 3.05 | 1.20 | 0.22 | 0.28 |
| 48785 | 0 | 451357 | NIEHIKQILINYIQECKPI       | 2.93 | 0.01 | 1.66 | 1.15 | 0.22 | 0.28 |
| 48786 | 0 | 451357 | NIEHIKQILINYIQECKPI       | 2.93 | 0.01 | 1.66 | 1.15 | 0.22 | 0.28 |
| 48787 | 0 | 44218  | NIERFPNGKKYELDKYT<br>MF   | 2.88 | 0.01 | 3.03 | 0.68 | 0.22 | 1.57 |
| 48788 | 0 | 44218  | NIERFPNGKKYELDKYT<br>MF   | 2.88 | 0.01 | 3.03 | 3.33 | 0.22 | 1.57 |
| 48789 | 0 | 44218  | NIERFPNGKKYELDKYT<br>MF   | 2.88 | 0.01 | 2.08 | 0.44 | 0.22 | 1.57 |
| 48790 | 0 | 44218  | NIERFPNGKKYELDKYT<br>MF   | 2.88 | 0.01 | 2.08 | 2.02 | 0.22 | 1.57 |
| 48791 | 0 | 44218  | NIERFPNGKKYELDKYT<br>MF   | 2.88 | 0.01 | 2.08 | 1.15 | 0.22 | 1.57 |
| 48792 | 0 | 44218  | NIERFPNGKKYELDKYT<br>MF   | 2.88 | 0.01 | 2.08 | 2.49 | 0.22 | 1.57 |
| 48793 | 0 | 44218  | NIERFPNGKKYELDKYT<br>MF   | 2.88 | 0.01 | 2.08 | 2.25 | 0.22 | 1.57 |
| 48794 | 0 | 44218  | NIERFPNGKKYELDKYT<br>MF   | 2.88 | 0.01 | 2.08 | 0.68 | 0.22 | 1.57 |
| 48795 | 0 | 44221  | NIETVIEFQQKNNRLE          | 2.79 | 0.01 | 2.67 | 0.68 | 0.22 | 0.28 |
| 48796 | 0 | 44221  | NIETVIEFQQKNNRLE          | 2.79 | 0.01 | 4.33 | 2.22 | 0.22 | 1.27 |
| 48797 | 0 | 44221  | NIETVIEFQQKNNRLE          | 2.79 | 0.01 | 2.67 | 0.68 | 0.22 | 1.27 |
| 48798 | 0 | 44221  | NIETVIEFQQKNNRLE          | 2.79 | 0.01 | 2.67 | 2.22 | 0.22 | 1.27 |
| 48799 | 0 | 44221  | NIETVIEFQQKNNRLE          | 2.79 | 0.01 | 2.38 | 2.37 | 0.22 | 0.85 |
| 48800 | 0 | 123540 | NIFEYEVDAEPLRPCELE<br>R   | 2.89 | 0.01 | 0.78 | 0.68 | 0.22 | 0.28 |
| 48801 | 0 | 123540 | NIFEYEVDAEPLRPCELE<br>R   | 2.89 | 0.01 | 0.78 | 0.68 | 1.41 | 0.28 |
| 48802 | 0 | 123540 | NIFEYEVDAEPLRPCELE<br>R   | 2.89 | 0.01 | 0.78 | 0.68 | 1.41 | 0.28 |
| 48803 | 0 | 123540 | NIFEYEVDAEPLRPCELE<br>R   | 2.89 | 0.01 | 0.78 | 0.68 | 1.41 | 1.48 |
| 48804 | 0 | 130563 | NIFEYQVDAQPL              | 2.43 | 4.08 | 0.78 | 3.06 | 0.22 | 0.28 |
| 48805 | 0 | 130563 | NIFEYQVDAQPL              | 2.43 | 4.08 | 0.78 | 3.06 | 0.22 | 0.28 |
| 48806 | 0 | 172491 | NIFMSSDSGMDKA             | 2.55 | 0.01 | 3.38 | 0.44 | 0.85 | 2.51 |
| 48807 | 0 | 44227  | NIFSGFTPEFLEQAF           | 2.66 | 0.01 | 2.16 | 0.44 | 1.23 | 0.85 |
| 48808 | 0 | 44227  | NIFSGFTPEFLEQAF           | 2.66 | 0.01 | 2.16 | 0.44 | 1.23 | 1.48 |

|       |   |        |                                |      |      |      |      |      |      |
|-------|---|--------|--------------------------------|------|------|------|------|------|------|
| 48809 | 0 | 44227  | NIFSGFTPEFLEQAF                | 2.66 | 0.01 | 2.16 | 0.44 | 1.23 | 1.48 |
| 48810 | 0 | 44231  | NIGFGNRGDANI                   | 2.52 | 0.01 | 2.86 | 0.44 | 0.85 | 0.28 |
| 48811 | 0 | 44231  | NIGFGNRGDANI                   | 2.52 | 0.01 | 2.86 | 0.44 | 0.85 | 0.28 |
| 48812 | 0 | 44231  | NIGFGNRGDANI                   | 2.52 | 0.01 | 2.86 | 0.44 | 0.85 | 0.28 |
| 48813 | 0 | 44232  | NIGGEGNHNESPL                  | 2.58 | 0.01 | 2.59 | 0.44 | 1.41 | 0.28 |
| 48814 | 0 | 44232  | NIGGEGNHNESPL                  | 2.58 | 0.01 | 2.59 | 0.44 | 0.85 | 0.28 |
| 48815 | 0 | 44233  | NIGGVGNNTLTCPT                 | 2.64 | 0.01 | 1.96 | 0.44 | 0.85 | 0.28 |
| 48816 | 0 | 181741 | NIGIGIYNQEKIKKN                | 2.73 | 0.01 | 2.86 | 2.37 | 0.22 | 1.28 |
| 48817 | 0 | 44235  | NIGTGTSAYTSLNVLARF<br>TD       | 2.95 | 0.01 | 2.82 | 0.44 | 0.85 | 0.28 |
| 48818 | 0 | 120109 | NIHPKAPIWGIITSNF               | 2.73 | 0.01 | 0.90 | 2.36 | 0.22 | 1.34 |
| 48819 | 0 | 120109 | NIHPKAPIWGIITSNF               | 2.73 | 0.01 | 0.90 | 2.36 | 0.22 | 1.75 |
| 48820 | 0 | 120109 | NIHPKAPIWGIITSNF               | 2.73 | 0.01 | 0.90 | 2.36 | 0.22 | 0.28 |
| 48821 | 0 | 120109 | NIHPKAPIWGIITSNF               | 2.73 | 0.01 | 0.90 | 2.04 | 0.22 | 1.27 |
| 48822 | 0 | 120109 | NIHPKAPIWGIITSNF               | 2.73 | 0.01 | 0.90 | 2.04 | 0.22 | 0.28 |
| 48823 | 0 | 120109 | NIHPKAPIWGIITSNF               | 2.73 | 0.01 | 0.90 | 2.04 | 2.25 | 1.75 |
| 48824 | 0 | 120109 | NIHPKAPIWGIITSNF               | 2.73 | 0.01 | 0.90 | 2.04 | 0.22 | 0.28 |
| 48825 | 0 | 113659 | NIKNREGYEMVFDGKP               | 2.77 | 0.01 | 0.78 | 0.44 | 1.13 | 2.02 |
| 48826 | 0 | 152845 | NIILSKNEDQ                     | 2.31 | 0.01 | 2.18 | 2.16 | 0.22 | 0.28 |
| 48827 | 0 | 44249  | NIIQIKNDIEQCQSIKKI<br>EDNLNTYE | 3.27 | 0.01 | 2.22 | 0.44 | 1.74 | 0.28 |
| 48828 | 0 | 44250  | NIIRTKKQ                       | 2.12 | 0.01 | 0.90 | 0.68 | 0.22 | 0.28 |
| 48829 | 0 | 44250  | NIIRTKKQ                       | 2.12 | 0.01 | 0.90 | 0.68 | 0.22 | 0.28 |
| 48830 | 0 | 44250  | NIIRTKKQ                       | 2.12 | 0.01 | 0.90 | 0.68 | 0.22 | 1.75 |
| 48831 | 0 | 44250  | NIIRTKKQ                       | 2.12 | 0.01 | 0.90 | 0.68 | 0.22 | 0.28 |
| 48832 | 0 | 44250  | NIIRTKKQ                       | 2.12 | 0.01 | 0.90 | 0.68 | 0.22 | 1.75 |
| 48833 | 0 | 44250  | NIIRTKKQ                       | 2.12 | 0.01 | 0.90 | 0.68 | 0.22 | 1.34 |
| 48834 | 0 | 44250  | NIIRTKKQ                       | 2.12 | 0.01 | 0.90 | 0.68 | 0.22 | 1.75 |
| 48835 | 0 | 44251  | NIISCNKNDKNQ                   | 2.51 | 0.01 | 1.66 | 0.44 | 0.85 | 0.28 |
| 48836 | 0 | 44251  | NIISCNKNDKNQ                   | 2.51 | 0.01 | 1.66 | 1.12 | 0.22 | 0.28 |
| 48837 | 0 | 44251  | NIISCNKNDKNQ                   | 2.51 | 0.01 | 1.66 | 1.12 | 0.22 | 0.28 |
| 48838 | 0 | 44251  | NIISCNKNDKNQ                   | 2.51 | 0.01 | 1.66 | 1.12 | 0.22 | 0.85 |
| 48839 | 0 | 44251  | NIISCNKNDKNQ                   | 2.51 | 0.01 | 1.66 | 1.12 | 0.22 | 1.34 |
| 48840 | 0 | 135965 | NIISDAMKKVGR                   | 2.43 | 0.01 | 0.78 | 0.44 | 1.41 | 0.28 |
| 48841 | 0 | 225447 | NIKAQEKFLQHDLLEFKIN            | 2.87 | 0.01 | 2.61 | 0.68 | 0.22 | 0.28 |
| 48842 | 0 | 225447 | NIKAQEKFLQHDLLEFKIN            | 2.87 | 0.01 | 2.61 | 0.68 | 0.22 | 0.28 |
| 48843 | 0 | 225447 | NIKAQEKFLQHDLLEFKIN            | 2.87 | 0.01 | 2.61 | 0.68 | 0.22 | 0.28 |
| 48844 | 0 | 44255  | NIKDLLDWYSS                    | 2.37 | 0.01 | 3.89 | 1.20 | 0.22 | 2.75 |
| 48845 | 0 | 44258  | NIKFNP                         | 2.02 | 0.01 | 0.90 | 0.68 | 0.22 | 1.27 |
| 48846 | 0 | 44258  | NIKFNP                         | 2.02 | 0.01 | 0.90 | 0.68 | 0.22 | 1.27 |
| 48847 | 0 | 230492 | NIKILDVNDNIPYME                | 2.69 | 0.01 | 0.78 | 0.44 | 1.13 | 0.28 |
| 48848 | 0 | 172496 | NIKMDLSYSLESIED                | 2.70 | 0.01 | 0.78 | 0.44 | 1.13 | 0.28 |
| 48849 | 0 | 44268  | NIKPLEDKIL                     | 2.33 | 0.01 | 2.04 | 0.68 | 0.22 | 0.28 |

|       |   |        |                                  |      |      |      |      |      |      |
|-------|---|--------|----------------------------------|------|------|------|------|------|------|
| 48850 | 0 | 44268  | NIKPLEDKIL                       | 2.33 | 0.01 | 2.04 | 0.68 | 0.22 | 0.28 |
| 48851 | 0 | 104913 | NIKSSLP                          | 2.01 | 0.01 | 0.90 | 0.44 | 1.13 | 1.39 |
| 48852 | 0 | 181742 | NIKTGYNEGRKPCYG                  | 2.69 | 0.01 | 3.26 | 2.37 | 0.22 | 1.28 |
| 48853 | 0 | 44271  | NIKTMNTQISTLKNDVH<br>LLNEQIDKLN  | 3.26 | 0.01 | 2.22 | 0.44 | 1.74 | 0.28 |
| 48854 | 0 | 44271  | NIKTMNTQISTLKNDVH<br>LLNEQIDKLN  | 3.26 | 0.01 | 2.22 | 0.44 | 1.74 | 0.28 |
| 48855 | 0 | 152846 | NILIRDKRFH                       | 2.31 | 0.01 | 2.18 | 2.16 | 0.22 | 0.28 |
| 48856 | 0 | 44276  | NILISLTDLEIW                     | 2.49 | 0.01 | 3.61 | 1.20 | 0.22 | 0.85 |
| 48857 | 0 | 44278  | NILKDNQQKIEKAIEEAD<br>EF         | 2.98 | 0.01 | 2.82 | 0.44 | 0.85 | 0.28 |
| 48858 | 0 | 44278  | NILKDNQQKIEKAIEEAD<br>EF         | 2.98 | 0.01 | 2.82 | 0.44 | 1.41 | 0.28 |
| 48859 | 0 | 44293  | NIMSPVMGVIGFSF                   | 2.65 | 0.01 | 2.56 | 2.69 | 0.22 | 0.28 |
| 48860 | 0 | 44294  | NINDTDTWIP                       | 2.36 | 0.01 | 2.86 | 0.68 | 0.22 | 0.28 |
| 48861 | 0 | 44301  | NINILKNEGDLVAQK                  | 2.69 | 0.01 | 1.66 | 1.15 | 0.22 | 0.28 |
| 48862 | 0 | 44301  | NINILKNEGDLVAQK                  | 2.69 | 0.01 | 1.66 | 1.15 | 0.22 | 0.28 |
| 48863 | 0 | 44303  | NINNIYELAQQDQHSS<br>DIKTL        | 3.03 | 0.01 | 3.75 | 1.15 | 0.22 | 0.85 |
| 48864 | 0 | 44303  | NINNIYELAQQDQHSS<br>DIKTL        | 3.03 | 0.01 | 3.75 | 1.15 | 0.22 | 0.85 |
| 48865 | 0 | 423730 | NINSKLPYVVR                      | 2.47 | 0.01 | 0.90 | 2.46 | 0.22 | 1.39 |
| 48866 | 0 | 423730 | NINSKLPYVVR                      | 2.47 | 0.01 | 0.90 | 0.44 | 1.13 | 0.28 |
| 48867 | 0 | 423731 | NINSKPALPVAG                     | 2.48 | 0.01 | 0.90 | 2.46 | 0.22 | 1.39 |
| 48868 | 0 | 423731 | NINSKPALPVAG                     | 2.48 | 0.01 | 0.90 | 0.44 | 1.13 | 0.28 |
| 48869 | 0 | 423732 | NINSKTTNV TAL                    | 2.50 | 0.01 | 0.90 | 2.46 | 0.22 | 1.39 |
| 48870 | 0 | 423732 | NINSKTTNV TAL                    | 2.50 | 0.01 | 0.90 | 0.44 | 1.13 | 0.28 |
| 48871 | 0 | 44305  | NINSVNNNNINSVDNNIN<br>NVDNNINSVN | 3.31 | 0.01 | 2.22 | 0.44 | 1.74 | 0.28 |
| 48872 | 0 | 44305  | NINSVNNNNINSVDNNIN<br>NVDNNINSVN | 3.31 | 0.01 | 2.22 | 0.44 | 1.74 | 0.28 |
| 48873 | 0 | 130564 | NIPAFAAAYF                       | 2.33 | 0.01 | 0.78 | 0.44 | 1.41 | 0.28 |
| 48874 | 0 | 113660 | NIPLVSGPDIPINITDQAP<br>S         | 2.97 | 0.01 | 1.86 | 2.37 | 0.22 | 1.48 |
| 48875 | 0 | 115393 | NIPPLTQTPVVVPPFLQP<br>EV         | 2.98 | 0.01 | 1.60 | 0.44 | 1.23 | 1.28 |
| 48876 | 0 | 161438 | NIPRIYDKNHLMIKMHIL<br>AI         | 2.97 | 0.01 | 0.90 | 2.74 | 0.22 | 1.48 |
| 48877 | 0 | 152847 | NIPSENQYFQ                       | 2.32 | 0.01 | 2.18 | 2.16 | 0.22 | 0.28 |
| 48878 | 0 | 190870 | NIPSRISYWTIVKPGD                 | 2.78 | 0.01 | 2.36 | 1.20 | 0.22 | 0.28 |
| 48879 | 0 | 44314  | NIPYKISASTNCATVK                 | 2.75 | 0.01 | 4.33 | 0.44 | 1.23 | 0.85 |
| 48880 | 0 | 93493  | NIQENTQTPTVQEEES                 | 2.71 | 0.01 | 1.75 | 0.68 | 0.22 | 0.28 |
| 48881 | 0 | 44319  | NIQLHMHHRHTRHKTE                 | 2.68 | 0.01 | 0.90 | 0.68 | 0.22 | 1.39 |
| 48882 | 0 | 44320  | NIQLINTNGSWHIN                   | 2.64 | 0.01 | 2.45 | 2.36 | 0.22 | 1.34 |
| 48883 | 0 | 178301 | NIQLINTNGSWHINST                 | 2.77 | 0.01 | 2.45 | 0.44 | 0.85 | 0.28 |

|       |   |        |                  |      |      |      |      |      |      |
|-------|---|--------|------------------|------|------|------|------|------|------|
| 48884 | 0 | 178301 | NIQLINTNGSWHINST | 2.77 | 0.01 | 2.45 | 0.44 | 0.85 | 1.34 |
| 48885 | 0 | 178301 | NIQLINTNGSWHINST | 2.77 | 0.01 | 2.45 | 0.44 | 0.85 | 1.34 |
| 48886 | 0 | 178301 | NIQLINTNGSWHINST | 2.77 | 0.01 | 2.45 | 0.44 | 0.85 | 1.34 |
| 48887 | 0 | 178301 | NIQLINTNGSWHINST | 2.77 | 0.01 | 2.45 | 0.44 | 0.85 | 1.34 |
| 48888 | 0 | 178301 | NIQLINTNGSWHINST | 2.77 | 0.01 | 2.45 | 0.44 | 0.85 | 1.34 |
| 48889 | 0 | 178301 | NIQLINTNGSWHINST | 2.77 | 0.01 | 2.45 | 0.44 | 0.85 | 1.34 |
| 48890 | 0 | 178301 | NIQLINTNGSWHINST | 2.77 | 0.01 | 2.45 | 0.44 | 0.85 | 1.34 |
| 48891 | 0 | 178301 | NIQLINTNGSWHINST | 2.77 | 0.01 | 2.45 | 0.44 | 0.85 | 0.28 |
| 48892 | 0 | 178301 | NIQLINTNGSWHINST | 2.77 | 0.01 | 2.45 | 0.44 | 0.85 | 1.66 |
| 48893 | 0 | 178301 | NIQLINTNGSWHINST | 2.77 | 0.01 | 2.45 | 0.44 | 0.85 | 1.66 |
| 48894 | 0 | 178301 | NIQLINTNGSWHINST | 2.77 | 0.01 | 2.45 | 0.44 | 0.85 | 1.66 |
| 48895 | 0 | 178301 | NIQLINTNGSWHINST | 2.77 | 0.01 | 2.45 | 0.44 | 0.85 | 1.66 |
| 48896 | 0 | 178301 | NIQLINTNGSWHINST | 2.77 | 0.01 | 2.45 | 0.44 | 0.85 | 1.66 |
| 48897 | 0 | 178301 | NIQLINTNGSWHINST | 2.77 | 0.01 | 2.45 | 0.44 | 0.85 | 1.66 |
| 48898 | 0 | 178301 | NIQLINTNGSWHINST | 2.77 | 0.01 | 2.45 | 0.44 | 0.85 | 1.66 |
| 48899 | 0 | 178301 | NIQLINTNGSWHINST | 2.77 | 0.01 | 2.45 | 0.44 | 0.85 | 1.66 |
| 48900 | 0 | 178301 | NIQLINTNGSWHINST | 2.77 | 0.01 | 2.45 | 0.44 | 0.85 | 1.66 |
| 48901 | 0 | 178301 | NIQLINTNGSWHINST | 2.77 | 0.01 | 2.45 | 0.44 | 0.85 | 1.66 |
| 48902 | 0 | 178301 | NIQLINTNGSWHINST | 2.77 | 0.01 | 2.45 | 0.44 | 0.85 | 1.66 |
| 48903 | 0 | 178301 | NIQLINTNGSWHINST | 2.77 | 0.01 | 2.45 | 0.44 | 0.85 | 1.66 |
| 48904 | 0 | 178301 | NIQLINTNGSWHINST | 2.77 | 0.01 | 2.45 | 0.44 | 0.85 | 1.66 |
| 48905 | 0 | 178301 | NIQLINTNGSWHINST | 2.77 | 0.01 | 2.45 | 0.44 | 0.85 | 1.66 |
| 48906 | 0 | 178301 | NIQLINTNGSWHINST | 2.77 | 0.01 | 2.45 | 0.44 | 0.85 | 1.66 |

|       |   |        |                  |      |      |      |      |      |      |
|-------|---|--------|------------------|------|------|------|------|------|------|
| 48907 | 0 | 178301 | NIQLINTNGSWHINST | 2.77 | 0.01 | 2.45 | 0.44 | 0.85 | 1.66 |
| 48908 | 0 | 178301 | NIQLINTNGSWHINST | 2.77 | 0.01 | 2.45 | 0.44 | 0.85 | 1.66 |
| 48909 | 0 | 178301 | NIQLINTNGSWHINST | 2.77 | 0.01 | 2.45 | 0.44 | 0.85 | 1.66 |
| 48910 | 0 | 178301 | NIQLINTNGSWHINST | 2.77 | 0.01 | 2.45 | 0.44 | 0.85 | 1.66 |
| 48911 | 0 | 178301 | NIQLINTNGSWHINST | 2.77 | 0.01 | 2.45 | 0.44 | 0.85 | 1.66 |
| 48912 | 0 | 178301 | NIQLINTNGSWHINST | 2.77 | 0.01 | 2.45 | 0.44 | 0.85 | 1.66 |
| 48913 | 0 | 178301 | NIQLINTNGSWHINST | 2.77 | 0.01 | 2.45 | 0.44 | 0.85 | 1.66 |
| 48914 | 0 | 178301 | NIQLINTNGSWHINST | 2.77 | 0.01 | 2.45 | 0.44 | 0.85 | 1.66 |
| 48915 | 0 | 178301 | NIQLINTNGSWHINST | 2.77 | 0.01 | 2.45 | 0.44 | 0.85 | 1.66 |
| 48916 | 0 | 178301 | NIQLINTNGSWHINST | 2.77 | 0.01 | 2.45 | 0.44 | 0.85 | 1.66 |
| 48917 | 0 | 178301 | NIQLINTNGSWHINST | 2.77 | 0.01 | 2.45 | 0.44 | 0.85 | 1.66 |
| 48918 | 0 | 178301 | NIQLINTNGSWHINST | 2.77 | 0.01 | 2.45 | 0.44 | 0.85 | 1.66 |
| 48919 | 0 | 178301 | NIQLINTNGSWHINST | 2.77 | 0.01 | 2.45 | 0.44 | 0.85 | 1.66 |
| 48920 | 0 | 178301 | NIQLINTNGSWHINST | 2.77 | 0.01 | 2.45 | 0.44 | 0.85 | 1.66 |
| 48921 | 0 | 178301 | NIQLINTNGSWHINST | 2.77 | 0.01 | 2.45 | 0.44 | 0.85 | 1.66 |
| 48922 | 0 | 178301 | NIQLINTNGSWHINST | 2.77 | 0.01 | 2.45 | 0.44 | 0.85 | 1.66 |
| 48923 | 0 | 178301 | NIQLINTNGSWHINST | 2.77 | 0.01 | 2.45 | 0.44 | 0.85 | 1.66 |
| 48924 | 0 | 178301 | NIQLINTNGSWHINST | 2.77 | 0.01 | 2.45 | 0.44 | 0.85 | 1.66 |
| 48925 | 0 | 178301 | NIQLINTNGSWHINST | 2.77 | 0.01 | 2.45 | 0.44 | 0.85 | 1.66 |
| 48926 | 0 | 178301 | NIQLINTNGSWHINST | 2.77 | 0.01 | 2.45 | 0.44 | 0.85 | 1.66 |
| 48927 | 0 | 178301 | NIQLINTNGSWHINST | 2.77 | 0.01 | 1.72 | 0.44 | 0.85 | 1.34 |
| 48928 | 0 | 178301 | NIQLINTNGSWHINST | 2.77 | 0.01 | 1.72 | 0.44 | 0.85 | 1.34 |
| 48929 | 0 | 178301 | NIQLINTNGSWHINST | 2.77 | 0.01 | 1.72 | 0.44 | 0.85 | 1.34 |



|       |   |        |                                                         |      |      |      |      |      |      |
|-------|---|--------|---------------------------------------------------------|------|------|------|------|------|------|
| 48930 | 0 | 178301 | NIQLINTNGSWHINST                                        | 2.77 | 0.01 | 1.72 | 0.44 | 0.85 | 1.34 |
| 48931 | 0 | 178301 | NIQLINTNGSWHINST                                        | 2.77 | 0.01 | 1.72 | 0.44 | 0.85 | 1.34 |
| 48932 | 0 | 178301 | NIQLINTNGSWHINST                                        | 2.77 | 0.01 | 1.72 | 0.44 | 0.85 | 1.34 |
| 48933 | 0 | 165150 | NIQPIYVYPDDKNNLK                                        | 2.75 | 0.01 | 3.57 | 0.68 | 0.22 | 0.28 |
| 48934 | 0 | 165150 | NIQPIYVYPDDKNNLK                                        | 2.75 | 0.01 | 3.57 | 0.68 | 0.22 | 0.28 |
| 48935 | 0 | 165150 | NIQPIYVYPDDKNNLK                                        | 2.75 | 0.01 | 3.57 | 2.00 | 0.22 | 0.28 |
| 48936 | 0 | 120828 | NIRYFILPDSLPLDT                                         | 2.68 | 0.01 | 0.78 | 3.01 | 0.22 | 0.28 |
| 48937 | 0 | 44339  | NISGHCSDFLGE                                            | 2.64 | 0.01 | 4.33 | 0.44 | 1.23 | 0.28 |
| 48938 | 0 | 44340  | NISGHVRMGTMKIT                                          | 2.61 | 0.01 | 2.69 | 0.44 | 0.85 | 0.28 |
| 48939 | 0 | 227409 | NISGQSPARTSSDPG                                         | 2.67 | 0.01 | 2.97 | 0.44 | 1.59 | 0.28 |
| 48940 | 0 | 227409 | NISGQSPARTSSDPG                                         | 2.67 | 0.01 | 2.97 | 0.44 | 0.85 | 0.28 |
| 48941 | 0 | 44342  | NISGTGEKAQQHRKQ                                         | 2.66 | 0.01 | 2.59 | 0.44 | 0.85 | 0.28 |
| 48942 | 0 | 114904 | NISKEHDGEC                                              | 2.29 | 0.01 | 2.25 | 0.44 | 1.23 | 0.85 |
| 48943 | 0 | 114904 | NISKEHDGEC                                              | 2.29 | 0.01 | 2.25 | 0.44 | 1.23 | 0.85 |
| 48944 | 0 | 44350  | NISLDNPLENPSSFLDLV<br>AR                                | 2.96 | 0.01 | 2.75 | 0.44 | 0.85 | 0.85 |
| 48945 | 0 | 44351  | NISLDNPLENPSSFLDLV<br>ARIK                              | 3.04 | 0.01 | 2.75 | 1.12 | 0.22 | 0.85 |
| 48946 | 0 | 44351  | NISLDNPLENPSSFLDLV<br>ARIK                              | 3.04 | 0.01 | 2.75 | 1.12 | 0.22 | 0.28 |
| 48947 | 0 | 44351  | NISLDNPLENPSSFLDLV<br>ARIK                              | 3.04 | 0.01 | 2.75 | 1.12 | 0.22 | 1.34 |
| 48948 | 0 | 44355  | NISQHCVKKQCPQNSG<br>CFRHLDERE                           | 3.14 | 0.01 | 3.57 | 0.44 | 0.85 | 0.28 |
| 48949 | 0 | 101925 | NISQHQCVK                                               | 2.21 | 0.01 | 1.66 | 0.44 | 1.59 | 2.97 |
| 48950 | 0 | 44357  | NISQHQCVKKQCPENSG<br>CFRHLDEREECKLLNYK<br>QEGDKCVENPNPT | 3.81 | 0.01 | 1.66 | 1.15 | 0.22 | 0.85 |
| 48951 | 0 | 44357  | NISQHQCVKKQCPENSG<br>CFRHLDEREECKLLNYK<br>QEGDKCVENPNPT | 3.81 | 0.01 | 1.66 | 1.15 | 0.22 | 0.85 |
| 48952 | 0 | 44357  | NISQHQCVKKQCPENSG<br>CFRHLDEREECKLLNYK<br>QEGDKCVENPNPT | 3.81 | 0.01 | 2.22 | 0.44 | 0.85 | 0.28 |
| 48953 | 0 | 44358  | NISQHQCVKKQCPQNS<br>GCFRHLDEREECKLLNY<br>KQEGDKCVENPNPT | 3.81 | 0.01 | 1.66 | 1.15 | 0.22 | 0.85 |

|       |   |        |                                                         |      |      |      |      |      |      |
|-------|---|--------|---------------------------------------------------------|------|------|------|------|------|------|
| 48954 | 0 | 44358  | NISQHQCCKKQCPQNS<br>GCFRHLDEREECKLLNY<br>KQEGDKCVENPNPT | 3.81 | 0.01 | 1.66 | 1.15 | 0.22 | 0.85 |
| 48955 | 0 | 44358  | NISQHQCCKKQCPQNS<br>GCFRHLDEREECKLLNY<br>KQEGDKCVENPNPT | 3.81 | 0.01 | 3.57 | 0.44 | 0.85 | 0.28 |
| 48956 | 0 | 44358  | NISQHQCCKKQCPQNS<br>GCFRHLDEREECKLLNY<br>KQEGDKCVENPNPT | 3.81 | 0.01 | 3.57 | 0.44 | 0.85 | 0.28 |
| 48957 | 0 | 152849 | NISSLRQDGK                                              | 2.28 | 0.01 | 2.18 | 2.16 | 0.22 | 0.28 |
| 48958 | 0 | 118536 | NITDHGSLIYSFSECAF                                       | 2.76 | 0.01 | 0.78 | 0.44 | 1.13 | 0.28 |
| 48959 | 0 | 108554 | NITEGE                                                  | 1.90 | 0.01 | 2.19 | 1.15 | 0.22 | 0.85 |
| 48960 | 0 | 108554 | NITEGE                                                  | 1.90 | 0.01 | 0.78 | 1.12 | 0.22 | 0.85 |
| 48961 | 0 | 44369  | NITKGGMSVPFYNSR                                         | 2.64 | 0.01 | 3.12 | 0.44 | 1.23 | 1.57 |
| 48962 | 0 | 44375  | NITNINKNIENIKNDMS<br>NLNNMNDNSNQ                        | 3.28 | 0.01 | 2.22 | 0.44 | 1.74 | 0.28 |
| 48963 | 0 | 44375  | NITNINKNIENIKNDMS<br>NLNNMNDNSNQ                        | 3.28 | 0.01 | 2.22 | 0.44 | 1.74 | 0.28 |
| 48964 | 0 | 44375  | NITNINKNIENIKNDMS<br>NLNNMNDNSNQ                        | 3.28 | 0.01 | 2.22 | 0.44 | 1.74 | 0.28 |
| 48965 | 0 | 149078 | NITQEAF                                                 | 1.99 | 0.01 | 0.90 | 2.13 | 1.59 | 1.39 |
| 48966 | 0 | 135725 | NITQSTQSFN                                              | 2.36 | 0.01 | 0.78 | 0.44 | 2.35 | 1.27 |
| 48967 | 0 | 44380  | NITRVESETKVVVL                                          | 2.61 | 0.01 | 2.59 | 0.44 | 1.41 | 0.28 |
| 48968 | 0 | 44380  | NITRVESETKVVVL                                          | 2.61 | 0.01 | 2.59 | 0.44 | 0.85 | 0.28 |
| 48969 | 0 | 44380  | NITRVESETKVVVL                                          | 2.61 | 0.01 | 2.59 | 0.44 | 0.85 | 0.28 |
| 48970 | 0 | 44381  | NITSATYQSAIPPRGTQA<br>VV                                | 2.94 | 0.01 | 2.04 | 0.44 | 0.85 | 0.28 |

|       |   |       |                      |      |      |      |      |      |      |
|-------|---|-------|----------------------|------|------|------|------|------|------|
|       |   |       | NIVNTSILSIVYKKDDLID  |      |      |      |      |      |      |
|       |   |       | LSRYGAKINIGDRVYYDSI  |      |      |      |      |      |      |
|       |   |       | DKNQIKLINLESSTIEVILK |      |      |      |      |      |      |
|       |   |       | NAIVYNSMYENFSTSFW    |      |      |      |      |      |      |
|       |   |       | IKIPKYFSKINLNNEYTIIN |      |      |      |      |      |      |
|       |   |       | CIENNSGWKVSLNYGEII   |      |      |      |      |      |      |
|       |   |       | WTLQDNKQNIQRVVK      |      |      |      |      |      |      |
|       |   |       | YSQMVNISDYINRWIFV    |      |      |      |      |      |      |
|       |   |       | TITNNRLTKSKIYINGRLI  |      |      |      |      |      |      |
|       |   |       | DQKPISNLGNIHASNKI    |      |      |      |      |      |      |
|       |   |       | MFKLDGCRDPRRYIMIK    |      |      |      |      |      |      |
|       |   |       | YFNLFDKELNEKEIKDLY   |      |      |      |      |      |      |
| 48971 | 0 | 44398 | DSQNSGILKDFWGNYL     | 6.04 | 0.01 | 4.33 | 1.20 | 0.22 | 0.28 |
|       |   |       | QYDKPYMLNLFDPNKY     |      |      |      |      |      |      |
|       |   |       | VDVNNIGIRGYMYLKGP    |      |      |      |      |      |      |
|       |   |       | RGSVVTTNIYLNSTLYEG   |      |      |      |      |      |      |
|       |   |       | TKFIIKKYASGNEDNIVR   |      |      |      |      |      |      |
|       |   |       | NNDRVYINVVVKKEYR     |      |      |      |      |      |      |
|       |   |       | LATNASQAGVEKILSALE   |      |      |      |      |      |      |
|       |   |       | IPDVGNLSQVVVMKSK     |      |      |      |      |      |      |
|       |   |       | DDQGIRNKCKMNLQDN     |      |      |      |      |      |      |
|       |   |       | NGNDIGFIGFHLVDNIAK   |      |      |      |      |      |      |
|       |   |       | LVASNWYNRQVGKASR     |      |      |      |      |      |      |
|       |   |       | TFGCSWEFIPVDDGWG     |      |      |      |      |      |      |
|       |   |       | ESSL                 |      |      |      |      |      |      |

|       |   |       |                      |      |      |      |      |      |      |
|-------|---|-------|----------------------|------|------|------|------|------|------|
|       |   |       | NIVNTSILSIVYKKDDLID  |      |      |      |      |      |      |
|       |   |       | LSRYGAKINIGDRVYYDSI  |      |      |      |      |      |      |
|       |   |       | DKNQIKLINLESSTIEVILK |      |      |      |      |      |      |
|       |   |       | NAIVYN SmyENFSTSFW   |      |      |      |      |      |      |
|       |   |       | IKIPKYFSKINLNNEYTIIN |      |      |      |      |      |      |
|       |   |       | CIENNSGWKVSLNYGEII   |      |      |      |      |      |      |
|       |   |       | WTLQDNKQNIQRVVK      |      |      |      |      |      |      |
|       |   |       | YSQMVNISDYINRWIFV    |      |      |      |      |      |      |
|       |   |       | TITNNRLTKSKIYINGRLI  |      |      |      |      |      |      |
|       |   |       | DQKPISNLGNIHASNKI    |      |      |      |      |      |      |
|       |   |       | MFKLDGCRDP RRYIMIK   |      |      |      |      |      |      |
|       |   |       | YFNLFDKELNEKEIKDLY   |      |      |      |      |      |      |
| 48972 | 0 | 44398 | DSQNSGILKDFWGNYL     | 6.04 | 0.01 | 4.33 | 2.43 | 0.22 | 0.85 |
|       |   |       | QYDKPYMLNLFDPNKY     |      |      |      |      |      |      |
|       |   |       | VDVNNIGIRGYMYLKGP    |      |      |      |      |      |      |
|       |   |       | RGSVVTTNIYLNSTLYEG   |      |      |      |      |      |      |
|       |   |       | TKFIIKKYASGNEDNIVR   |      |      |      |      |      |      |
|       |   |       | NNDRVYINVVVKKEYR     |      |      |      |      |      |      |
|       |   |       | LATNASQAGVEKILSALE   |      |      |      |      |      |      |
|       |   |       | IPDVGNLSQVVVMKSK     |      |      |      |      |      |      |
|       |   |       | DDQGIRNKCKMNLQDN     |      |      |      |      |      |      |
|       |   |       | NGNDIGFIGFHLVDNIAK   |      |      |      |      |      |      |
|       |   |       | LVASNWYNRQVGKASR     |      |      |      |      |      |      |
|       |   |       | TFGCSWEFIPVDDGWG     |      |      |      |      |      |      |
|       |   |       | ESSL                 |      |      |      |      |      |      |

|       |   |       |                      |      |      |      |      |      |      |
|-------|---|-------|----------------------|------|------|------|------|------|------|
|       |   |       | NIVNTSILSIVYKKDDLID  |      |      |      |      |      |      |
|       |   |       | LSRYGAKINIGDRVYYDSI  |      |      |      |      |      |      |
|       |   |       | DKNQIKLINLESSTIEVILK |      |      |      |      |      |      |
|       |   |       | NAIVYNSMYENFSTSEFW   |      |      |      |      |      |      |
|       |   |       | IKIPKYFSKINLNNEYTIIN |      |      |      |      |      |      |
|       |   |       | CIENNSGWKVSLNYGEII   |      |      |      |      |      |      |
|       |   |       | WTLQDNKQNIQRVVF      |      |      |      |      |      |      |
|       |   |       | YSQMVNISDYINRWIFV    |      |      |      |      |      |      |
|       |   |       | TITNNRLTKSKIYINGRLI  |      |      |      |      |      |      |
|       |   |       | DQKPISNLGNIHASNKI    |      |      |      |      |      |      |
|       |   |       | MFKLDGCRDPRRYIMIK    |      |      |      |      |      |      |
|       |   |       | YFNLFDKELNEKEIKDLY   |      |      |      |      |      |      |
| 48973 | 0 | 44398 | DSQNSGILKDFWGNYL     | 6.04 | 0.01 | 4.33 | 1.20 | 0.22 | 0.85 |
|       |   |       | QYDKPYMLNLFDPNKY     |      |      |      |      |      |      |
|       |   |       | VDVNNIGIRGYMYLKGP    |      |      |      |      |      |      |
|       |   |       | RGSVVTTNIYLNSTLYEG   |      |      |      |      |      |      |
|       |   |       | TKFIIKKYASGNEDNIVR   |      |      |      |      |      |      |
|       |   |       | NNDRVYINVVVKKEYR     |      |      |      |      |      |      |
|       |   |       | LATNASQAGVEKILSALE   |      |      |      |      |      |      |
|       |   |       | IPDVGNLSQVVVMKSK     |      |      |      |      |      |      |
|       |   |       | DDQGIRNKCKMNLQDN     |      |      |      |      |      |      |
|       |   |       | NGNDIGFIGFHLVDNIAK   |      |      |      |      |      |      |
|       |   |       | LVASNWYNRQVGKASR     |      |      |      |      |      |      |
|       |   |       | TFGCSWEFIPVDDGWG     |      |      |      |      |      |      |
|       |   |       | ESSL                 |      |      |      |      |      |      |

|       |   |        |                                                                                                                                                                                                                                                                      |      |      |      |      |      |      |
|-------|---|--------|----------------------------------------------------------------------------------------------------------------------------------------------------------------------------------------------------------------------------------------------------------------------|------|------|------|------|------|------|
|       |   |        | NIVNTSILSIVYKKDDLID<br>LSRYGAKINIGDRVYYDSI<br>DKNQIKLINLESSTIEVILK<br>NAIVYNMYENFSTSFW<br>IKIPKYFSKINLNNEYTIIN<br>CIENNSGWKVSLNYGEII<br>WTLQDNKQNIQRVVFK<br>YSQMVNISDYINRWIFV<br>TITNNRLTKSKIYINGRLI<br>DQKPISNLGNIHASNKI<br>MFKLDGCRDPRRYIMIK<br>YFNLFDKELNEKEIKDLY |      |      |      |      |      |      |
| 48974 | 0 | 44398  | DSQSNSGILKDFWGNYL<br>QYDKPYMLNLFDPNKY<br>VDVNNIGIRGYMYLKGP<br>RGSVVTTNIYLNSTLYEG<br>TKFIIKKYASGNEDNIVR<br>NNDRVYINVVVKKEYR<br>LATNASQAGVEKILSALE<br>IPDVGNLSQVVVMKSK<br>DDQGIRNKCKMNLQDN<br>NGNDIGFIGFHLVDNIAK<br>LVASNWYNRQVGKASR<br>TFGCSWEFIPVDDGWG<br>ESSL       | 6.04 | 0.01 | 4.33 | 2.43 | 0.22 | 0.85 |
| 48975 | 0 | 118036 | NIVTPRTPPP                                                                                                                                                                                                                                                           | 2.32 | 0.01 | 2.96 | 3.18 | 0.22 | 1.27 |
| 48976 | 0 | 118036 | NIVTPRTPPP                                                                                                                                                                                                                                                           | 2.32 | 0.01 | 2.96 | 3.18 | 0.22 | 0.28 |
| 48977 | 0 | 118036 | NIVTPRTPPP                                                                                                                                                                                                                                                           | 2.32 | 0.01 | 2.96 | 3.18 | 0.22 | 0.28 |
| 48978 | 0 | 118036 | NIVTPRTPPP                                                                                                                                                                                                                                                           | 2.32 | 0.01 | 2.96 | 3.18 | 0.22 | 0.28 |
| 48979 | 0 | 118036 | NIVTPRTPPP                                                                                                                                                                                                                                                           | 2.32 | 0.01 | 2.96 | 3.18 | 0.22 | 0.28 |
| 48980 | 0 | 44409  | NIYFNIY                                                                                                                                                                                                                                                              | 2.06 | 0.01 | 4.15 | 0.68 | 0.22 | 0.85 |
| 48981 | 0 | 44409  | NIYFNIY                                                                                                                                                                                                                                                              | 2.06 | 0.01 | 4.15 | 0.68 | 0.22 | 2.02 |
| 48982 | 0 | 44409  | NIYFNIY                                                                                                                                                                                                                                                              | 2.06 | 0.01 | 4.15 | 0.68 | 0.22 | 0.85 |
| 48983 | 0 | 98283  | NIYHIHISI                                                                                                                                                                                                                                                            | 2.35 | 0.01 | 3.57 | 0.44 | 0.85 | 0.28 |
| 48984 | 0 | 120829 | NIYNCEPANPSEKNSPST<br>QYCYSIQ                                                                                                                                                                                                                                        | 3.20 | 4.33 | 0.78 | 0.68 | 0.22 | 2.49 |
| 48985 | 0 | 120829 | NIYNCEPANPSEKNSPST<br>QYCYSIQ                                                                                                                                                                                                                                        | 3.20 | 4.33 | 0.78 | 0.68 | 0.22 | 0.28 |
| 48986 | 0 | 120829 | NIYNCEPANPSEKNSPST<br>QYCYSIQ                                                                                                                                                                                                                                        | 3.20 | 4.33 | 0.78 | 0.68 | 0.22 | 1.27 |
| 48987 | 0 | 120829 | NIYNCEPANPSEKNSPST<br>QYCYSIQ                                                                                                                                                                                                                                        | 3.20 | 4.33 | 0.78 | 0.68 | 0.22 | 1.34 |
| 48988 | 0 | 149390 | NIYPHGITDVRPLY                                                                                                                                                                                                                                                       | 2.59 | 0.01 | 0.78 | 0.44 | 1.93 | 2.66 |
| 48989 | 0 | 86807  | NIYTFVPEKIYGLIAKKQS<br>N                                                                                                                                                                                                                                             | 2.91 | 0.01 | 3.06 | 2.37 | 0.22 | 0.28 |

|       |   |        |                           |      |      |      |      |      |      |
|-------|---|--------|---------------------------|------|------|------|------|------|------|
| 48990 | 0 | 193318 | NIYYFDDNYRGAVE            | 2.61 | 0.01 | 3.04 | 1.12 | 0.22 | 0.28 |
| 48991 | 0 | 108555 | NKALTFFLP                 | 2.22 | 0.01 | 0.90 | 0.44 | 1.13 | 1.39 |
| 48992 | 0 | 104151 | NKAPESEEELEM              | 2.41 | 0.01 | 0.78 | 1.12 | 0.22 | 1.34 |
| 48993 | 0 | 104151 | NKAPESEEELEM              | 2.41 | 0.01 | 0.78 | 1.12 | 0.22 | 1.34 |
| 48994 | 0 | 104151 | NKAPESEEELEM              | 2.41 | 0.01 | 0.78 | 1.12 | 0.22 | 1.34 |
| 48995 | 0 | 489678 | NKAPGSQVWIQTLRL           | 2.62 | 0.01 | 2.69 | 3.05 | 0.85 | 1.28 |
| 48996 | 0 | 44467  | NKAWFPN                   | 2.03 | 0.01 | 0.90 | 0.68 | 0.22 | 0.85 |
| 48997 | 0 | 44468  | NKCKMNLQDNNGNDI<br>GFIG   | 2.93 | 0.01 | 3.03 | 0.68 | 0.22 | 1.57 |
| 48998 | 0 | 44468  | NKCKMNLQDNNGNDI<br>GFIG   | 2.93 | 0.01 | 3.03 | 3.33 | 0.22 | 1.57 |
| 48999 | 0 | 44468  | NKCKMNLQDNNGNDI<br>GFIG   | 2.93 | 0.01 | 2.08 | 0.44 | 0.22 | 1.57 |
| 49000 | 0 | 44468  | NKCKMNLQDNNGNDI<br>GFIG   | 2.93 | 0.01 | 3.16 | 0.44 | 1.93 | 1.57 |
| 49001 | 0 | 44468  | NKCKMNLQDNNGNDI<br>GFIG   | 2.93 | 0.01 | 2.08 | 0.44 | 0.22 | 1.57 |
| 49002 | 0 | 44468  | NKCKMNLQDNNGNDI<br>GFIG   | 2.93 | 0.01 | 2.08 | 2.25 | 0.22 | 1.57 |
| 49003 | 0 | 44468  | NKCKMNLQDNNGNDI<br>GFIG   | 2.93 | 0.01 | 2.08 | 2.25 | 0.22 | 1.57 |
| 49004 | 0 | 114905 | NKCNFCNAV                 | 2.34 | 0.01 | 2.25 | 0.44 | 1.23 | 0.85 |
| 49005 | 0 | 114905 | NKCNFCNAV                 | 2.34 | 0.01 | 2.25 | 0.44 | 1.23 | 0.85 |
| 49006 | 0 | 230241 | NKCNFCNAVVE\$NGTLT<br>LSH | 2.94 | 0.01 | 2.25 | 0.44 | 1.23 | 0.28 |
| 49007 | 0 | 44471  | NKDARELL                  | 2.09 | 0.01 | 2.83 | 1.12 | 0.22 | 0.28 |
| 49008 | 0 | 44474  | NKDKLFAVWK                | 2.31 | 0.01 | 2.57 | 1.20 | 0.22 | 0.85 |
| 49009 | 0 | 44474  | NKDKLFAVWK                | 2.31 | 0.01 | 2.57 | 1.20 | 0.22 | 0.85 |
| 49010 | 0 | 44474  | NKDKLFAVWK                | 2.31 | 0.01 | 2.57 | 1.20 | 0.22 | 1.27 |
| 49011 | 0 | 44474  | NKDKLFAVWK                | 2.31 | 0.01 | 2.57 | 2.04 | 0.22 | 1.27 |
| 49012 | 0 | 44474  | NKDKLFAVWK                | 2.31 | 0.01 | 2.57 | 2.04 | 0.22 | 0.85 |
| 49013 | 0 | 44474  | NKDKLFAVWK                | 2.31 | 0.01 | 2.57 | 2.04 | 0.22 | 1.34 |
| 49014 | 0 | 44474  | NKDKLFAVWK                | 2.31 | 0.01 | 2.57 | 2.04 | 0.22 | 1.34 |
| 49015 | 0 | 44474  | NKDKLFAVWK                | 2.31 | 0.01 | 2.57 | 1.20 | 0.22 | 0.85 |
| 49016 | 0 | 44474  | NKDKLFAVWK                | 2.31 | 0.01 | 2.57 | 1.20 | 0.22 | 0.85 |
| 49017 | 0 | 44474  | NKDKLFAVWK                | 2.31 | 0.01 | 2.57 | 1.20 | 0.22 | 0.85 |
| 49018 | 0 | 44474  | NKDKLFAVWK                | 2.31 | 0.01 | 2.57 | 2.04 | 0.22 | 0.85 |
| 49019 | 0 | 44474  | NKDKLFAVWK                | 2.31 | 0.01 | 2.57 | 2.04 | 0.22 | 0.85 |
| 49020 | 0 | 44474  | NKDKLFAVWK                | 2.31 | 0.01 | 2.57 | 2.04 | 0.22 | 0.85 |
| 49021 | 0 | 44474  | NKDKLFAVWK                | 2.31 | 0.01 | 2.57 | 1.20 | 0.22 | 0.85 |
| 49022 | 0 | 44474  | NKDKLFAVWK                | 2.31 | 0.01 | 2.57 | 2.04 | 0.22 | 0.85 |
| 49023 | 0 | 44476  | NKDKLFTVWK                | 2.31 | 0.01 | 3.70 | 1.20 | 0.22 | 0.85 |
| 49024 | 0 | 44476  | NKDKLFTVWK                | 2.31 | 0.01 | 3.70 | 1.20 | 0.22 | 0.85 |
| 49025 | 0 | 44476  | NKDKLFTVWK                | 2.31 | 0.01 | 3.70 | 2.04 | 0.22 | 0.85 |
| 49026 | 0 | 44476  | NKDKLFTVWK                | 2.31 | 0.01 | 3.70 | 2.04 | 0.22 | 0.85 |
| 49027 | 0 | 44477  | NKDKPSYQFG                | 2.29 | 0.01 | 2.56 | 1.20 | 0.22 | 0.28 |
| 49028 | 0 | 44477  | NKDKPSYQFG                | 2.29 | 0.01 | 2.56 | 1.20 | 0.22 | 0.28 |

|       |   |        |                                        |      |      |      |      |      |      |
|-------|---|--------|----------------------------------------|------|------|------|------|------|------|
| 49029 | 0 | 114906 | NKDLPICGT                              | 2.26 | 0.01 | 2.25 | 0.44 | 1.23 | 0.85 |
| 49030 | 0 | 114906 | NKDLPICGT                              | 2.26 | 0.01 | 2.25 | 0.44 | 1.23 | 0.85 |
| 49031 | 0 | 44478  | NKDLPICGTDGVITYTN<br>DCLLCAYSIEFGTNISK | 3.45 | 0.01 | 2.25 | 0.44 | 1.23 | 0.85 |
| 49032 | 0 | 44480  | NKDPRLNEGVLDEV                         | 2.70 | 0.01 | 3.50 | 2.22 | 0.22 | 0.28 |
| 49033 | 0 | 44487  | NKENCGAA                               | 2.12 | 0.01 | 3.42 | 0.68 | 0.22 | 0.28 |
| 49034 | 0 | 44487  | NKENCGAA                               | 2.12 | 0.01 | 2.22 | 2.69 | 0.22 | 0.28 |
| 49035 | 0 | 44487  | NKENCGAA                               | 2.12 | 0.01 | 2.22 | 2.69 | 0.22 | 0.85 |
| 49036 | 0 | 44487  | NKENCGAA                               | 2.12 | 0.01 | 2.22 | 2.69 | 0.22 | 0.85 |
| 49037 | 0 | 44487  | NKENCGAA                               | 2.12 | 0.01 | 2.22 | 2.69 | 0.22 | 1.48 |
| 49038 | 0 | 44487  | NKENCGAA                               | 2.12 | 0.01 | 2.22 | 2.69 | 0.22 | 1.48 |
| 49039 | 0 | 44489  | NKFADFLQ                               | 2.12 | 0.01 | 3.06 | 1.12 | 0.22 | 0.28 |
| 49040 | 0 | 157702 | NKFAVELT                               | 2.10 | 0.01 | 0.78 | 3.70 | 0.22 | 1.28 |
| 49041 | 0 | 111583 | NKFGFPDTSFYNPDTQR<br>LVW               | 2.92 | 0.01 | 1.86 | 0.44 | 0.85 | 0.28 |
| 49042 | 0 | 111583 | NKFGFPDTSFYNPDTQR<br>LVW               | 2.92 | 0.01 | 1.86 | 0.44 | 1.41 | 0.28 |
| 49043 | 0 | 111583 | NKFGFPDTSFYNPDTQR<br>LVW               | 2.92 | 0.01 | 1.86 | 0.44 | 0.85 | 0.28 |
| 49044 | 0 | 111583 | NKFGFPDTSFYNPDTQR<br>LVW               | 2.92 | 0.01 | 1.86 | 0.44 | 1.41 | 0.28 |
| 49045 | 0 | 111583 | NKFGFPDTSFYNPDTQR<br>LVW               | 2.92 | 0.01 | 1.86 | 0.44 | 0.85 | 0.28 |
| 49046 | 0 | 111583 | NKFGFPDTSFYNPDTQR<br>LVW               | 2.92 | 0.01 | 1.86 | 0.44 | 1.41 | 0.28 |
| 49047 | 0 | 111583 | NKFGFPDTSFYNPDTQR<br>LVW               | 2.92 | 0.01 | 1.86 | 2.37 | 0.22 | 0.28 |
| 49048 | 0 | 44491  | NKFLNQCSVSYLMNSMI<br>PY                | 2.90 | 0.01 | 3.03 | 0.68 | 0.22 | 1.57 |
| 49049 | 0 | 44491  | NKFLNQCSVSYLMNSMI<br>PY                | 2.90 | 0.01 | 3.03 | 3.33 | 0.22 | 1.57 |
| 49050 | 0 | 44491  | NKFLNQCSVSYLMNSMI<br>PY                | 2.90 | 0.01 | 2.08 | 0.44 | 0.22 | 1.57 |
| 49051 | 0 | 44491  | NKFLNQCSVSYLMNSMI<br>PY                | 2.90 | 0.01 | 2.08 | 2.02 | 0.22 | 1.57 |
| 49052 | 0 | 44491  | NKFLNQCSVSYLMNSMI<br>PY                | 2.90 | 0.01 | 2.08 | 1.15 | 0.22 | 1.57 |
| 49053 | 0 | 44491  | NKFLNQCSVSYLMNSMI<br>PY                | 2.90 | 0.01 | 2.08 | 2.49 | 0.22 | 1.57 |
| 49054 | 0 | 44491  | NKFLNQCSVSYLMNSMI<br>PY                | 2.90 | 0.01 | 3.16 | 0.44 | 1.93 | 1.57 |
| 49055 | 0 | 44491  | NKFLNQCSVSYLMNSMI<br>PY                | 2.90 | 0.01 | 2.08 | 0.68 | 0.22 | 1.57 |
| 49056 | 0 | 44491  | NKFLNQCSVSYLMNSMI<br>PY                | 2.90 | 0.01 | 2.08 | 2.25 | 0.22 | 1.57 |



|       |   |        |                             |      |      |      |      |      |      |
|-------|---|--------|-----------------------------|------|------|------|------|------|------|
| 49057 | 0 | 44491  | NKFLNQCSVSYLMNSMI<br>PY     | 2.90 | 0.01 | 2.08 | 2.43 | 0.22 | 1.75 |
| 49058 | 0 | 44491  | NKFLNQCSVSYLMNSMI<br>PY     | 2.90 | 0.01 | 2.08 | 2.43 | 0.22 | 1.57 |
| 49059 | 0 | 44491  | NKFLNQCSVSYLMNSMI<br>PY     | 2.90 | 0.01 | 2.08 | 3.04 | 0.22 | 1.75 |
| 49060 | 0 | 44491  | NKFLNQCSVSYLMNSMI<br>PY     | 2.90 | 0.01 | 2.08 | 3.04 | 0.22 | 1.75 |
| 49061 | 0 | 44491  | NKFLNQCSVSYLMNSMI<br>PY     | 2.90 | 0.01 | 2.08 | 3.04 | 0.22 | 1.75 |
| 49062 | 0 | 44491  | NKFLNQCSVSYLMNSMI<br>PY     | 2.90 | 0.01 | 2.08 | 3.04 | 0.22 | 1.75 |
| 49063 | 0 | 44491  | NKFLNQCSVSYLMNSMI<br>PY     | 2.90 | 0.01 | 2.08 | 3.04 | 0.22 | 1.57 |
| 49064 | 0 | 504019 | NKFVKSLLVAGSVAALA<br>ACSSNN | 3.15 | 0.01 | 3.72 | 0.44 | 1.41 | 0.28 |
| 49065 | 0 | 156386 | NKFYQSVIQLGNGF              | 2.62 | 0.01 | 2.73 | 0.44 | 0.85 | 1.28 |
| 49066 | 0 | 105982 | NKGAIIGLMVG                 | 2.40 | 0.01 | 0.78 | 1.12 | 0.22 | 0.28 |
| 49067 | 0 | 159024 | NKGAIIGLMVGGVVIA            | 2.76 | 0.01 | 0.78 | 1.20 | 0.22 | 0.28 |
| 49068 | 0 | 190871 | NKGETVEEAIEDVAQAE<br>GLN    | 2.96 | 0.01 | 3.50 | 2.13 | 0.22 | 0.28 |
| 49069 | 0 | 86822  | NKGKDKDVNAGTSGTH<br>T       | 2.83 | 0.01 | 3.05 | 1.12 | 0.22 | 0.28 |
| 49070 | 0 | 86822  | NKGKDKDVNAGTSGTH<br>T       | 2.83 | 0.01 | 3.05 | 1.12 | 0.22 | 0.28 |
| 49071 | 0 | 86822  | NKGKDKDVNAGTSGTH<br>T       | 2.83 | 0.01 | 3.05 | 1.12 | 0.22 | 0.28 |
| 49072 | 0 | 86822  | NKGKDKDVNAGTSGTH<br>T       | 2.83 | 0.01 | 3.05 | 1.12 | 0.22 | 0.28 |
| 49073 | 0 | 86822  | NKGKDKDVNAGTSGTH<br>T       | 2.83 | 0.01 | 3.05 | 1.12 | 0.22 | 0.28 |
| 49074 | 0 | 86822  | NKGKDKDVNAGTSGTH<br>T       | 2.83 | 0.01 | 3.05 | 1.12 | 0.22 | 0.28 |
| 49075 | 0 | 86822  | NKGKDKDVNAGTSGTH<br>T       | 2.83 | 0.01 | 3.05 | 1.12 | 0.22 | 0.28 |
| 49076 | 0 | 86822  | NKGKDKDVNAGTSGTH<br>T       | 2.83 | 0.01 | 3.05 | 1.12 | 0.22 | 0.28 |
| 49077 | 0 | 86822  | NKGKDKDVNAGTSGTH<br>T       | 2.83 | 0.01 | 3.05 | 1.12 | 0.22 | 0.28 |
| 49078 | 0 | 86822  | NKGKDKDVNAGTSGTH<br>T       | 2.83 | 0.01 | 3.05 | 1.12 | 0.22 | 0.28 |
| 49079 | 0 | 78752  | NKGKWKEHIKEVTEKLK<br>KA     | 2.90 | 0.01 | 3.11 | 1.15 | 0.22 | 0.28 |
| 49080 | 0 | 44498  | NKGVNPDE                    | 2.13 | 0.01 | 3.45 | 0.68 | 0.22 | 1.27 |
| 49081 | 0 | 44498  | NKGVNPDE                    | 2.13 | 0.01 | 3.45 | 0.68 | 0.22 | 1.27 |
| 49082 | 0 | 44498  | NKGVNPDE                    | 2.13 | 0.01 | 3.45 | 0.68 | 0.22 | 1.48 |

|                    |   |        |                                    |      |      |      |      |      |      |
|--------------------|---|--------|------------------------------------|------|------|------|------|------|------|
| 49083              | 0 | 44498  | NKGVNPDE                           | 2.13 | 0.01 | 3.45 | 0.68 | 0.22 | 0.85 |
| 49084              | 0 | 44498  | NKGVNPDE                           | 2.13 | 0.01 | 3.45 | 0.68 | 0.22 | 0.85 |
| 49085              | 0 | 44498  | NKGVNPDE                           | 2.13 | 0.01 | 3.45 | 0.68 | 0.22 | 1.48 |
| 49086              | 0 | 44498  | NKGVNPDE                           | 2.13 | 0.01 | 3.45 | 0.68 | 0.22 | 1.48 |
| 49087              | 0 | 44498  | NKGVNPDE                           | 2.13 | 0.01 | 3.45 | 0.68 | 0.22 | 1.48 |
| 49088              | 0 | 44498  | NKGVNPDE                           | 2.13 | 0.01 | 3.45 | 0.68 | 0.22 | 1.48 |
| 49089              | 0 | 44498  | NKGVNPDE                           | 2.13 | 0.01 | 3.45 | 0.68 | 0.22 | 1.48 |
| 49090              | 0 | 137937 | NKIFADDI                           | 2.13 | 0.01 | 2.26 | 2.36 | 0.22 | 0.28 |
| 49091              | 0 | 137937 | NKIFADDI                           | 2.13 | 0.01 | 2.26 | 2.36 | 0.22 | 2.98 |
| NKIFADDIDISDISGKQV |   |        |                                    |      |      |      |      |      |      |
| 49092              | 0 | 44505  | TGEVIFQTPLIKNPDVKS<br>AIEGVKYIAEHM | 3.81 | 0.01 | 2.26 | 1.15 | 0.22 | 0.28 |
| NKIFADDIDISDISGKQV |   |        |                                    |      |      |      |      |      |      |
| 49093              | 0 | 44505  | TGEVIFQTPLIKNPDVKS<br>AIEGVKYIAEHM | 3.81 | 0.01 | 2.26 | 1.15 | 0.22 | 1.48 |
| 49094              | 0 | 187690 | NKIRLMGPLQ                         | 2.29 | 0.01 | 2.14 | 1.20 | 0.22 | 1.39 |
| 49095              | 0 | 44512  | NKISDASRKGLRRDLAS                  | 2.88 | 0.01 | 2.85 | 0.68 | 0.22 | 0.28 |
| 49096              | 0 | 104581 | NKISEASRKGLRRDLAS<br>RE            | 2.97 | 0.01 | 2.24 | 2.04 | 0.22 | 0.28 |
| 49097              | 0 | 104581 | NKISEASRKGLRRDLAS<br>RE            | 2.97 | 0.01 | 2.24 | 2.04 | 0.22 | 0.28 |
| 49098              | 0 | 167342 | NKITITNDQNRLTPEEIER<br>M           | 2.96 | 3.24 | 0.78 | 0.44 | 1.13 | 0.28 |
| 49099              | 0 | 186784 | NKKDHLFACWLEHHH                    | 2.64 | 0.01 | 0.90 | 1.20 | 0.22 | 0.85 |
| 49100              | 0 | 115869 | NKKIEKFQSE                         | 2.33 | 0.01 | 1.60 | 0.44 | 1.23 | 0.85 |
| 49101              | 0 | 115869 | NKKIEKFQSE                         | 2.33 | 0.01 | 1.60 | 0.44 | 1.23 | 0.85 |
| 49102              | 0 | 135174 | NKKITSSKIRLLYT                     | 2.69 | 0.01 | 3.59 | 2.13 | 0.85 | 0.85 |
| 49103              | 0 | 44531  | NKKP                               | 1.59 | 0.01 | 3.38 | 1.15 | 0.22 | 0.85 |
| 49104              | 0 | 44531  | NKKP                               | 1.59 | 0.01 | 3.38 | 1.15 | 0.22 | 1.34 |
| 49105              | 0 | 44532  | NKKPGKKTTP                         | 2.53 | 0.01 | 2.38 | 0.44 | 1.74 | 0.28 |
| 49106              | 0 | 187691 | NKLGRIRAGEDM                       | 2.45 | 0.01 | 2.14 | 1.20 | 0.22 | 0.28 |
| 49107              | 0 | 187692 | NKLGRIRAGEDMHLDA<br>PRIE           | 2.95 | 0.01 | 2.14 | 1.20 | 0.22 | 0.28 |
| 49108              | 0 | 44544  | NKLKEKHTDLGKE                      | 2.57 | 0.01 | 2.73 | 0.44 | 0.85 | 0.85 |
| 49109              | 0 | 44544  | NKLKEKHTDLGKE                      | 2.57 | 0.01 | 2.73 | 1.15 | 0.22 | 0.85 |
| 49110              | 0 | 138884 | NKLLIAFGLVILLVTLP<br>CA<br>S       | 2.94 | 0.01 | 3.33 | 0.44 | 1.74 | 0.28 |
| 49111              | 0 | 138884 | NKLLIAFGLVILLVTLP<br>CA<br>S       | 2.94 | 0.01 | 3.33 | 0.44 | 0.85 | 0.28 |
| 49112              | 0 | 138884 | NKLLIAFGLVILLVTLP<br>CA<br>S       | 2.94 | 0.01 | 3.33 | 0.44 | 0.85 | 0.28 |
| 49113              | 0 | 138884 | NKLLIAFGLVILLVTLP<br>CA<br>S       | 2.94 | 0.01 | 3.33 | 0.68 | 0.22 | 0.28 |

|       |   |        |                                   |      |      |      |      |      |      |
|-------|---|--------|-----------------------------------|------|------|------|------|------|------|
| 49114 | 0 | 138884 | NKLLIAFGLVILLVTLP<br>CA S         | 2.94 | 0.01 | 3.33 | 1.15 | 0.22 | 0.28 |
| 49115 | 0 | 78216  | NKLSAA                            | 1.86 | 0.01 | 0.90 | 2.02 | 1.59 | 0.28 |
| 49116 | 0 | 482668 | NKMGELYKQHLEAVNA<br>QI            | 2.84 | 0.01 | 3.12 | 0.68 | 0.22 | 0.28 |
| 49117 | 0 | 44554  | NKND                              | 1.60 | 0.01 | 3.18 | 1.15 | 0.22 | 1.39 |
| 49118 | 0 | 44554  | NKND                              | 1.60 | 0.01 | 3.18 | 1.15 | 0.22 | 0.85 |
| 49119 | 0 | 44554  | NKND                              | 1.60 | 0.01 | 3.18 | 1.15 | 0.22 | 0.28 |
| 49120 | 0 | 44555  | NKNDNKND                          | 2.18 | 0.01 | 1.66 | 0.68 | 0.22 | 0.28 |
| 49121 | 0 | 44555  | NKNDNKND                          | 2.18 | 0.01 | 1.66 | 1.20 | 0.22 | 0.28 |
| 49122 | 0 | 44556  | NKNDNKNDNKND                      | 2.55 | 0.01 | 1.66 | 0.68 | 0.22 | 0.28 |
| 49123 | 0 | 44556  | NKNDNKNDNKND                      | 2.55 | 0.01 | 1.66 | 1.15 | 0.22 | 0.28 |
| 49124 | 0 | 225448 | NKNIDLFGTNYYYQCY                  | 2.72 | 0.01 | 2.61 | 0.68 | 0.22 | 1.34 |
| 49125 | 0 | 225449 | NKNIDLFGTNYYYQCYFS                | 2.83 | 0.01 | 2.61 | 0.68 | 0.22 | 0.28 |
| 49126 | 0 | 225449 | NKNIDLFGTNYYYQCYFS                | 2.83 | 0.01 | 2.61 | 0.68 | 2.25 | 1.75 |
| 49127 | 0 | 225449 | NKNIDLFGTNYYYQCYFS                | 2.83 | 0.01 | 2.61 | 0.68 | 0.22 | 0.28 |
| 49128 | 0 | 225449 | NKNIDLFGTNYYYQCYFS                | 2.83 | 0.01 | 2.61 | 0.68 | 0.22 | 0.28 |
| 49129 | 0 | 225449 | NKNIDLFGTNYYYQCYFS                | 2.83 | 0.01 | 2.61 | 0.68 | 0.22 | 1.34 |
| 49130 | 0 | 44559  | NKNLQEEISDLTEQLGSS                | 2.86 | 0.01 | 0.78 | 0.44 | 1.13 | 0.85 |
| 49131 | 0 | 44559  | NKNLQEEISDLTEQLGSS                | 2.86 | 0.01 | 0.78 | 0.44 | 1.13 | 1.27 |
| 49132 | 0 | 44559  | NKNLQEEISDLTEQLGSS                | 2.86 | 0.01 | 0.78 | 0.44 | 1.13 | 1.27 |
| 49133 | 0 | 44559  | NKNLQEEISDLTEQLGSS                | 2.86 | 0.01 | 0.78 | 0.44 | 1.13 | 1.27 |
| 49134 | 0 | 44559  | NKNLQEEISDLTEQLGSS                | 2.86 | 0.01 | 0.78 | 0.44 | 1.13 | 1.34 |
| 49135 | 0 | 344056 | NKNNDKDEDDGDND                    | 2.75 | 0.01 | 1.61 | 0.44 | 0.85 | 1.28 |
| 49136 | 0 | 181406 | NKNPFLFGSNRFETLFK<br>NQYGRIRVLQRF | 3.31 | 0.01 | 2.72 | 0.44 | 1.23 | 1.27 |
| 49137 | 0 | 44563  | NKNTLQARQQT<br>VSA                | 2.63 | 0.01 | 2.56 | 2.69 | 0.22 | 0.28 |
| 49138 | 0 | 44563  | NKNTLQARQQT<br>VSA                | 2.63 | 0.01 | 3.16 | 2.69 | 0.22 | 0.28 |
| 49139 | 0 | 44563  | NKNTLQARQQT<br>VSA                | 2.63 | 0.01 | 3.16 | 2.69 | 0.22 | 0.28 |
| 49140 | 0 | 181743 | NKNTNTTHDLLGNVL                   | 2.71 | 0.01 | 1.66 | 2.36 | 0.22 | 1.28 |
| 49141 | 0 | 78217  | NKNWWS                            | 1.92 | 0.01 | 0.90 | 2.02 | 1.59 | 1.39 |
| 49142 | 0 | 344076 | NKPASKPAAKPA<br>AKA               | 2.75 | 0.01 | 1.61 | 0.44 | 0.85 | 1.28 |
| 49143 | 0 | 344078 | NKPATGEAPSQ<br>PGAS               | 2.70 | 0.01 | 1.61 | 0.44 | 0.85 | 1.28 |
| 49144 | 0 | 141970 | NKPEDDEESGAK<br>PKKKH             | 2.80 | 0.01 | 3.13 | 0.68 | 0.22 | 0.28 |

|       |   |        |                               |      |      |      |      |      |      |
|-------|---|--------|-------------------------------|------|------|------|------|------|------|
| 49145 | 0 | 44568  | NKPKDELD                      | 2.14 | 0.01 | 3.29 | 1.20 | 0.22 | 0.28 |
| 49146 | 0 | 126757 | NKPLITVTNSKY                  | 2.48 | 0.01 | 0.78 | 0.44 | 1.13 | 0.28 |
| 49147 | 0 | 126757 | NKPLITVTNSKY                  | 2.48 | 0.01 | 0.78 | 0.44 | 1.13 | 1.34 |
| 49148 | 0 | 44569  | NKPNNDFHFEVF                  | 2.49 | 0.01 | 2.38 | 0.68 | 0.22 | 0.28 |
| 49149 | 0 | 44569  | NKPNNDFHFEVF                  | 2.49 | 0.01 | 2.38 | 0.68 | 0.22 | 0.28 |
| 49150 | 0 | 44569  | NKPNNDFHFEVF                  | 2.49 | 0.01 | 2.38 | 0.68 | 0.22 | 0.28 |
| 49151 | 0 | 44569  | NKPNNDFHFEVF                  | 2.49 | 0.01 | 2.38 | 0.44 | 1.59 | 0.28 |
| 49152 | 0 | 44569  | NKPNNDFHFEVF                  | 2.49 | 0.01 | 2.38 | 0.44 | 1.74 | 0.28 |
| 49153 | 0 | 44569  | NKPNNDFHFEVF                  | 2.49 | 0.01 | 2.38 | 0.44 | 1.74 | 0.28 |
| 49154 | 0 | 44570  | NKPNWDGYA                     | 2.22 | 0.01 | 0.90 | 0.68 | 0.22 | 0.28 |
| 49155 | 0 | 44570  | NKPNWDGYA                     | 2.22 | 0.01 | 0.90 | 3.48 | 0.22 | 0.28 |
| 49156 | 0 | 44571  | NKPPNKPNNDFH                  | 2.52 | 0.01 | 2.38 | 0.68 | 0.22 | 0.28 |
| 49157 | 0 | 44571  | NKPPNKPNNDFH                  | 2.52 | 0.01 | 2.38 | 0.68 | 0.22 | 0.28 |
| 49158 | 0 | 44571  | NKPPNKPNNDFH                  | 2.52 | 0.01 | 2.38 | 0.68 | 0.22 | 0.28 |
| 49159 | 0 | 44571  | NKPPNKPNNDFH                  | 2.52 | 0.01 | 2.38 | 0.44 | 1.59 | 0.28 |
| 49160 | 0 | 44571  | NKPPNKPNNDFH                  | 2.52 | 0.01 | 2.38 | 0.44 | 1.74 | 0.28 |
| 49161 | 0 | 44571  | NKPPNKPNNDFH                  | 2.52 | 0.01 | 2.38 | 0.44 | 1.74 | 0.28 |
| 49162 | 0 | 44572  | NKPSKPKTNLKH                  | 2.52 | 0.01 | 1.75 | 1.20 | 0.22 | 0.28 |
| 49163 | 0 | 105983 | NKPTGYGSSRRAPQTG              | 2.79 | 0.01 | 0.78 | 3.75 | 0.22 | 1.27 |
| 49164 | 0 | 105983 | NKPTGYGSSRRAPQTG              | 2.79 | 0.01 | 0.78 | 3.75 | 0.22 | 1.27 |
| 49165 | 0 | 44575  | NKPTLDFELI                    | 2.29 | 0.01 | 2.30 | 0.68 | 0.22 | 0.28 |
| 49166 | 0 | 101079 | NKPVEPTYEV                    | 2.33 | 0.01 | 3.18 | 3.75 | 0.22 | 0.28 |
| 49167 | 0 | 95622  | NKPVEPTYEVIPTPPTDP<br>VY      | 2.99 | 0.01 | 2.39 | 2.25 | 0.22 | 0.28 |
| 49168 | 0 | 44576  | NKPVQA                        | 1.88 | 0.01 | 2.08 | 0.44 | 0.22 | 2.75 |
| 49169 | 0 | 44576  | NKPVQA                        | 1.88 | 0.01 | 2.08 | 0.44 | 0.22 | 1.34 |
| 49170 | 0 | 141971 | NKPVTDNPVTDRL                 | 2.58 | 0.01 | 3.13 | 2.13 | 0.22 | 0.28 |
| 49171 | 0 | 104915 | NKPYSWRISKY                   | 2.33 | 0.01 | 2.60 | 0.44 | 1.23 | 0.85 |
| 49172 | 0 | 131983 | NKQEEAWINPFVKQF               | 2.68 | 0.01 | 0.78 | 0.44 | 1.13 | 0.85 |
| 49173 | 0 | 122500 | NKQFRNCMVTTL                  | 2.45 | 0.01 | 1.60 | 2.04 | 0.22 | 0.28 |
| 49174 | 0 | 522919 | NKQNTASTETTTTNE               | 2.71 | 0.01 | 2.24 | 0.44 | 1.41 | 1.28 |
| 49175 | 0 | 172507 | NKQPEDDLFDRLNTG               | 2.67 | 0.01 | 0.78 | 0.44 | 1.41 | 0.28 |
| 49176 | 0 | 78218  | NKQWFT                        | 1.88 | 0.01 | 0.90 | 2.02 | 1.59 | 0.28 |
| 49177 | 0 | 78219  | NKQWYL                        | 1.88 | 0.01 | 0.90 | 2.02 | 1.59 | 1.39 |
| 49178 | 0 | 44586  | NKRKYDSL                      | 2.12 | 0.01 | 1.66 | 0.44 | 1.74 | 0.28 |
| 49179 | 0 | 44588  | NKRNTNRRPQDVKFPG<br>GG        | 2.84 | 0.01 | 3.18 | 0.44 | 1.59 | 0.28 |
| 49180 | 0 | 44588  | NKRNTNRRPQDVKFPG<br>GG        | 2.84 | 0.01 | 3.18 | 0.44 | 1.59 | 0.28 |
| 49181 | 0 | 44588  | NKRNTNRRPQDVKFPG<br>GG        | 2.84 | 0.01 | 3.18 | 0.44 | 1.59 | 0.28 |
| 49182 | 0 | 44590  | NKRNTNRRPQDVKFPG<br>GGQIVGGVY | 3.16 | 0.01 | 1.72 | 0.44 | 0.85 | 0.28 |

|       |   |        |                               |      |      |      |      |      |      |
|-------|---|--------|-------------------------------|------|------|------|------|------|------|
| 49183 | 0 | 44590  | NKRNTNRRPQDVKFPG<br>GGQIVGGVY | 3.16 | 0.01 | 1.72 | 0.44 | 0.85 | 0.28 |
| 49184 | 0 | 111585 | NKSEVPLDICTSICKYPDY<br>       | 2.95 | 0.01 | 1.86 | 0.44 | 0.85 | 0.28 |
| 49185 | 0 | 111585 | NKSEVPLDICTSICKYPDY<br>       | 2.95 | 0.01 | 1.86 | 0.44 | 1.41 | 0.28 |
| 49186 | 0 | 111585 | NKSEVPLDICTSICKYPDY<br>       | 2.95 | 0.01 | 1.86 | 0.44 | 0.85 | 0.28 |
| 49187 | 0 | 111585 | NKSEVPLDICTSICKYPDY<br>       | 2.95 | 0.01 | 1.86 | 0.44 | 1.41 | 0.28 |
| 49188 | 0 | 111585 | NKSEVPLDICTSICKYPDY<br>       | 2.95 | 0.01 | 1.86 | 0.44 | 0.85 | 0.28 |
| 49189 | 0 | 111585 | NKSEVPLDICTSICKYPDY<br>       | 2.95 | 0.01 | 1.86 | 0.44 | 1.41 | 0.28 |
| 49190 | 0 | 111585 | NKSEVPLDICTSICKYPDY<br>       | 2.95 | 0.01 | 1.86 | 1.12 | 0.22 | 0.28 |
| 49191 | 0 | 111585 | NKSEVPLDICTSICKYPDY<br>       | 2.95 | 0.01 | 1.86 | 2.37 | 0.22 | 0.28 |
| 49192 | 0 | 111585 | NKSEVPLDICTSICKYPDY<br>       | 2.95 | 0.01 | 1.86 | 2.37 | 0.22 | 1.48 |
| 49193 | 0 | 44598  | NKSLGACPIR                    | 2.26 | 0.01 | 3.36 | 1.20 | 0.22 | 0.28 |
| 49194 | 0 | 44598  | NKSLGACPIR                    | 2.26 | 0.01 | 3.36 | 1.20 | 0.22 | 0.28 |
| 49195 | 0 | 44598  | NKSLGACPIR                    | 2.26 | 0.01 | 2.40 | 1.20 | 0.22 | 1.34 |
| 49196 | 0 | 44602  | NKSTLQNRRAAVS                 | 2.54 | 0.01 | 3.00 | 0.44 | 0.85 | 0.28 |
| 49197 | 0 | 44602  | NKSTLQNRRAAVS                 | 2.54 | 0.01 | 3.00 | 1.15 | 2.39 | 0.28 |
| 49198 | 0 | 172509 | NKSTTNDFLRSP                  | 2.47 | 0.01 | 0.90 | 0.44 | 0.85 | 1.39 |
| 49199 | 0 | 141972 | NKSYGKPDPEPT                  | 2.48 | 0.01 | 3.13 | 0.68 | 0.22 | 0.28 |
| 49200 | 0 | 44606  | NKTKQNP NL                    | 2.26 | 0.01 | 0.90 | 0.68 | 0.22 | 0.28 |
| 49201 | 0 | 44606  | NKTKQNP NL                    | 2.26 | 0.01 | 0.90 | 0.44 | 1.59 | 0.28 |
| 49202 | 0 | 44610  | NKTPNSIAAI                    | 2.33 | 0.01 | 2.66 | 0.68 | 0.22 | 0.28 |
| 49203 | 0 | 172510 | NKTQREKFAWAIDMA               | 2.64 | 0.01 | 0.78 | 0.44 | 1.13 | 0.28 |
| 49204 | 0 | 44611  | NKTSFSPPLSI                   | 2.47 | 0.01 | 0.90 | 0.68 | 0.22 | 1.39 |
| 49205 | 0 | 78220  | NKTWYL                        | 1.88 | 0.01 | 0.90 | 2.02 | 1.59 | 0.28 |
| 49206 | 0 | 44613  | NKVDAAVA                      | 2.16 | 0.01 | 2.04 | 0.44 | 0.85 | 0.28 |
| 49207 | 0 | 180914 | NKVG VGA                      | 2.04 | 0.01 | 2.08 | 0.44 | 0.85 | 2.75 |
| 49208 | 0 | 44616  | NKVIWDRDWMYP                  | 2.45 | 0.01 | 0.90 | 3.03 | 0.22 | 0.28 |
| 49209 | 0 | 44616  | NKVIWDRDWMYP                  | 2.45 | 0.01 | 0.90 | 0.68 | 0.22 | 0.28 |
| 49210 | 0 | 44616  | NKVIWDRDWMYP                  | 2.45 | 0.01 | 0.90 | 3.03 | 0.22 | 1.27 |
| 49211 | 0 | 44617  | NKVIWEADWAFS                  | 2.45 | 0.01 | 0.90 | 3.03 | 0.22 | 1.39 |
| 49212 | 0 | 44617  | NKVIWEADWAFS                  | 2.45 | 0.01 | 0.90 | 3.03 | 0.22 | 1.27 |
| 49213 | 0 | 44619  | NKVLTVQTIDNALS KRN<br>EK      | 2.90 | 0.01 | 3.03 | 0.68 | 0.22 | 1.57 |
| 49214 | 0 | 44619  | NKVLTVQTIDNALS KRN<br>EK      | 2.90 | 0.01 | 2.08 | 0.44 | 0.22 | 1.57 |
| 49215 | 0 | 44619  | NKVLTVQTIDNALS KRN<br>EK      | 2.90 | 0.01 | 2.08 | 2.02 | 0.22 | 1.57 |

|       |   |        |                          |      |      |      |      |      |      |
|-------|---|--------|--------------------------|------|------|------|------|------|------|
| 49216 | 0 | 44620  | NKVPIIVKRA               | 2.32 | 0.01 | 2.84 | 0.44 | 0.85 | 0.28 |
| 49217 | 0 | 77790  | NKVSARGCTF               | 2.26 | 0.01 | 3.93 | 0.44 | 1.59 | 0.28 |
| 49218 | 0 | 77791  | NKVSARGCTFYGCWKG<br>LVG  | 2.88 | 0.01 | 3.93 | 0.44 | 1.59 | 0.28 |
| 49219 | 0 | 225814 | NKVSVTCLVKDFLPT          | 2.68 | 0.01 | 3.28 | 0.44 | 0.22 | 0.85 |
| 49220 | 0 | 44625  | NKVWPPS                  | 2.01 | 0.01 | 0.90 | 0.68 | 0.22 | 0.85 |
| 49221 | 0 | 140718 | NKWERARYAER              | 2.43 | 0.01 | 2.19 | 3.42 | 0.22 | 0.28 |
| 49222 | 0 | 140718 | NKWERARYAER              | 2.43 | 0.01 | 2.19 | 3.42 | 0.22 | 0.28 |
| 49223 | 0 | 140718 | NKWERARYAER              | 2.43 | 0.01 | 2.19 | 3.42 | 2.35 | 0.28 |
| 49224 | 0 | 140718 | NKWERARYAER              | 2.43 | 0.01 | 2.19 | 3.42 | 2.35 | 0.28 |
| 49225 | 0 | 140718 | NKWERARYAER              | 2.43 | 0.01 | 2.19 | 3.42 | 0.22 | 0.28 |
| 49226 | 0 | 140718 | NKWERARYAER              | 2.43 | 0.01 | 2.19 | 3.42 | 0.22 | 0.28 |
| 49227 | 0 | 243822 | NKWSPPAWLLPP             | 2.48 | 0.01 | 0.90 | 0.44 | 0.22 | 1.39 |
| 49228 | 0 | 44630  | NKYAGKGY                 | 2.16 | 0.01 | 3.75 | 1.15 | 0.22 | 0.28 |
| 49229 | 0 | 181745 | NKYCSGDGHDCKRTY          | 2.68 | 0.01 | 1.66 | 2.36 | 0.22 | 1.28 |
| 49230 | 0 | 44634  | NKYLKVQLKKGETVENT<br>NS  | 2.92 | 0.01 | 1.66 | 0.44 | 0.85 | 0.28 |
| 49231 | 0 | 236435 | NKYMYMNDVQSILNNH<br>HLEN | 2.94 | 0.01 | 0.90 | 0.68 | 0.22 | 1.75 |
| 49232 | 0 | 236435 | NKYMYMNDVQSILNNH<br>HLEN | 2.94 | 0.01 | 0.90 | 0.68 | 0.22 | 1.75 |
| 49233 | 0 | 236435 | NKYMYMNDVQSILNNH<br>HLEN | 2.94 | 0.01 | 0.90 | 0.68 | 0.22 | 0.85 |
| 49234 | 0 | 236435 | NKYMYMNDVQSILNNH<br>HLEN | 2.94 | 0.01 | 0.90 | 0.68 | 0.22 | 1.48 |

NKYNSEILNNIILNLRKD  
NNLIDLSGYGAKVEVYD  
GVELNDKNQFKLTSSAN  
SKIRVTQNQNIIFNSVFL  
DFSVSFWIRIPKYKNDGI  
QNYIHNEYTIINCMKNN  
SGWKISIRGNRIIWTLIDI  
NGKTKSVFFEYNIREDIS  
EYINRWFFVTITNNLNN  
AKIYINGKLESNTDIKDIR  
EVIANGEIIFKLDGDIDRT  
QFIWMKYFSIFNTELSQS  
NIEERYKIQSYSEYLKDF  
WGNPLMYNKEYYMFN  
AGNKNSYIKLKKDSPVG  
EILTRSKYNQNSKYINYR  
DLYIGEKFIIRRSNSQSI  
NDDIVRKEDIYLDFFNL  
NQEWRVYTYKYFKKEE  
KLFLAPISDSDEFYNTIQI  
KEYDEQPTYSCQLLFKKD  
EESTDEIGLIGIHRFYESGI  
VFEEYKDYFCISKWYLKE  
VKRKPYNLKLGCNWQFI  
PKDEGWTE

49235 0 44635 6.07 0.01 2.08 1.15 2.25 1.75

|       |   |       |                      |      |      |      |      |      |      |
|-------|---|-------|----------------------|------|------|------|------|------|------|
|       |   |       | NKYNSEILNNIILNLRKD   |      |      |      |      |      |      |
|       |   |       | NNLIDLSGYGAKVEVYD    |      |      |      |      |      |      |
|       |   |       | GVELNDKNQFKLTSSAN    |      |      |      |      |      |      |
|       |   |       | SKIRVTQNNIIFNSVFL    |      |      |      |      |      |      |
|       |   |       | DFSVSFWIRIPKYKNDGI   |      |      |      |      |      |      |
|       |   |       | QNYIHNEYTIINCMKNN    |      |      |      |      |      |      |
|       |   |       | SGWKISIRGNRIIWTLID   |      |      |      |      |      |      |
|       |   |       | NGKTKSVFFEYNIREDIS   |      |      |      |      |      |      |
|       |   |       | EYINRWFFVTITNNLNN    |      |      |      |      |      |      |
|       |   |       | AKIYINGKLESNTDIKDIR  |      |      |      |      |      |      |
|       |   |       | EVIANGEIIFKLDGDIDRT  |      |      |      |      |      |      |
|       |   |       | QFIWMKYFSIFNTELSQS   |      |      |      |      |      |      |
| 49236 | 0 | 44635 | NIEERYKIQSYSEYLKDF   | 6.07 | 0.01 | 2.08 | 2.61 | 0.22 | 1.34 |
|       |   |       | WGNPLMYNKEYYMFN      |      |      |      |      |      |      |
|       |   |       | AGNKNSYIKLKKDSPVG    |      |      |      |      |      |      |
|       |   |       | EILTRSKYNQNSKYINYR   |      |      |      |      |      |      |
|       |   |       | DLYIGEKFIIRRSNSQSI   |      |      |      |      |      |      |
|       |   |       | NDDIVRKEDIYLDFFNL    |      |      |      |      |      |      |
|       |   |       | NQEWVRVYTYKYFKKEE    |      |      |      |      |      |      |
|       |   |       | KLFLAPISDSDEFYNTIQI  |      |      |      |      |      |      |
|       |   |       | KEYDEQPTYSCQLLFKKD   |      |      |      |      |      |      |
|       |   |       | EESTDEIGLIGIHRFYESGI |      |      |      |      |      |      |
|       |   |       | VFEYKDYFCISKWYLKE    |      |      |      |      |      |      |
|       |   |       | VKRKPYNLKLGCNWQFI    |      |      |      |      |      |      |
|       |   |       | PKDEGWTE             |      |      |      |      |      |      |



|       |   |        |                                                                                                                                                                                                                                                                             |      |      |      |      |      |      |
|-------|---|--------|-----------------------------------------------------------------------------------------------------------------------------------------------------------------------------------------------------------------------------------------------------------------------------|------|------|------|------|------|------|
|       |   |        | NKYNSEILNNIILNLRYKD<br>NNLIDLSGYGAKVEVYD<br>GVELNDKNQFKLTSSAN<br>SKIRVTQNNIIFNSVFL<br>DFSVSFWIRIPKYKNDGI<br>QNYIHNEYTIINCMKNN<br>SGWKISIRGNRIIWTLID<br>NGKTKSVFFEYNIREDIS<br>EYINRWFFVTITNNLNN<br>AKIYINGKLESNTDIKDIR<br>EVIANGEIIFKLDGDIDRT<br>QFIWMKYFSIFNTELSQS          |      |      |      |      |      |      |
| 49237 | 0 | 44635  | NIEERYKIQSYSEYLKDF<br>WGNPLMYNKEYYMFN<br>AGNKNSYIKLKKDSPVG<br>EILTRSKYNQNSKYINYR<br>DLYIGEKFIIRRSNSQSI<br>NDDIVRKEDIYLDFFNL<br>NQEWRVYTYKYFKKEE<br>KLFLAPISDSDEFYNTIQI<br>KEYDEQPTYSCQLLFKKD<br>EESTDEIGLIGIHRFYESGI<br>VFEEYKDYFCISKWYLKE<br>VKRKPYNLKLGCNWQFI<br>PKDEGWTE | 6.07 | 0.01 | 2.08 | 2.61 | 2.25 | 1.75 |
| 49238 | 0 | 142447 | NKYRGTAGNALMDGAS<br>QL                                                                                                                                                                                                                                                      | 2.84 | 4.63 | 0.78 | 0.44 | 1.41 | 0.28 |
| 49239 | 0 | 142448 | NKYRGTAGNALMDGAS<br>QL                                                                                                                                                                                                                                                      | 2.84 | 3.97 | 0.78 | 0.44 | 1.41 | 0.28 |
| 49240 | 0 | 142447 | NKYRGTAGNALMDGAS<br>QL                                                                                                                                                                                                                                                      | 2.84 | 4.63 | 0.78 | 0.44 | 1.13 | 0.28 |
| 49241 | 0 | 142448 | NKYRGTAGNALMDGAS<br>QL                                                                                                                                                                                                                                                      | 2.84 | 3.97 | 0.78 | 0.44 | 1.13 | 0.28 |
| 49242 | 0 | 142448 | NKYRGTAGNALMDGAS<br>QL                                                                                                                                                                                                                                                      | 2.84 | 3.97 | 0.78 | 0.44 | 1.13 | 0.28 |
| 49243 | 0 | 44636  | NKYSASGSGVRGDFGSL<br>APRVARQL                                                                                                                                                                                                                                               | 3.17 | 0.01 | 3.14 | 2.59 | 0.22 | 1.34 |
| 49244 | 0 | 44637  | NKYSASGSGVRGDFGSL<br>APRVARQLPASFNYGAI<br>K                                                                                                                                                                                                                                 | 3.51 | 0.01 | 3.14 | 2.59 | 0.22 | 1.34 |
| 49245 | 0 | 181232 | NKYSTSPSPTPNSTAQHL<br>VY                                                                                                                                                                                                                                                    | 2.97 | 0.01 | 3.75 | 0.68 | 0.22 | 1.34 |
| 49246 | 0 | 181232 | NKYSTSPSPTPNSTAQHL<br>VY                                                                                                                                                                                                                                                    | 2.97 | 0.01 | 3.75 | 0.68 | 0.22 | 0.28 |

|       |   |        |                          |      |      |      |      |      |      |
|-------|---|--------|--------------------------|------|------|------|------|------|------|
| 49247 | 0 | 181232 | NKYSTSPSPTPNSTAQHL<br>VY | 2.97 | 0.01 | 3.75 | 0.68 | 0.22 | 0.28 |
| 49248 | 0 | 44642  | NLADFMKQ                 | 2.10 | 0.01 | 2.58 | 1.15 | 0.22 | 0.28 |
| 49249 | 0 | 44642  | NLADFMKQ                 | 2.10 | 0.01 | 2.58 | 1.15 | 0.22 | 0.28 |
| 49250 | 0 | 159025 | NLAIHSDLSYWIESRF         | 2.71 | 0.01 | 3.36 | 0.68 | 0.22 | 0.28 |
| 49251 | 0 | 159026 | NLAIHSDLSYWIESRL         | 2.73 | 0.01 | 3.05 | 0.68 | 0.22 | 0.28 |
| 49252 | 0 | 159026 | NLAIHSDLSYWIESRL         | 2.73 | 0.01 | 3.05 | 0.68 | 0.22 | 0.28 |
| 49253 | 0 | 159026 | NLAIHSDLSYWIESRL         | 2.73 | 0.01 | 3.05 | 0.68 | 0.22 | 1.48 |
| 49254 | 0 | 159026 | NLAIHSDLSYWIESRL         | 2.73 | 0.01 | 3.05 | 0.68 | 0.22 | 0.28 |
| 49255 | 0 | 159026 | NLAIHSDLSYWIESRL         | 2.73 | 0.01 | 3.05 | 2.49 | 0.22 | 0.28 |
| 49256 | 0 | 159026 | NLAIHSDLSYWIESRL         | 2.73 | 0.01 | 3.05 | 2.43 | 0.22 | 0.28 |
| 49257 | 0 | 159026 | NLAIHSDLSYWIESRL         | 2.73 | 0.01 | 3.04 | 0.68 | 0.22 | 0.85 |
| 49258 | 0 | 159026 | NLAIHSDLSYWIESRL         | 2.73 | 0.01 | 3.04 | 0.68 | 0.22 | 0.85 |
| 49259 | 0 | 141973 | NLAKEAQDDSEKSK           | 2.64 | 0.01 | 2.73 | 0.44 | 0.85 | 0.28 |
| 49260 | 0 | 522939 | NLALQLASATEDKAN          | 2.71 | 0.01 | 2.24 | 0.44 | 1.41 | 1.28 |
| 49261 | 0 | 44654  | NLARTTPDRQ               | 2.30 | 0.01 | 3.33 | 0.44 | 1.23 | 0.85 |
| 49262 | 0 | 44654  | NLARTTPDRQ               | 2.30 | 0.01 | 3.33 | 0.44 | 1.23 | 0.85 |
| 49263 | 0 | 44654  | NLARTTPDRQ               | 2.30 | 0.01 | 3.33 | 0.44 | 1.23 | 0.85 |
| 49264 | 0 | 110343 | NLASSNYFPTPSGSM          | 2.69 | 0.01 | 1.86 | 0.68 | 0.22 | 0.28 |
| 49265 | 0 | 126761 | NLASSTIIE                | 2.29 | 0.01 | 1.60 | 1.15 | 0.22 | 0.85 |
| 49266 | 0 | 126761 | NLASSTIIE                | 2.29 | 0.01 | 1.60 | 2.04 | 0.22 | 1.27 |
| 49267 | 0 | 44655  | NLATAQSL                 | 2.14 | 0.01 | 3.53 | 2.61 | 0.22 | 0.28 |
| 49268 | 0 | 95624  | NLCCSQWGWC               | 2.33 | 0.01 | 2.60 | 0.44 | 1.23 | 0.85 |
| 49269 | 0 | 95624  | NLCCSQWGWC               | 2.33 | 0.01 | 2.60 | 1.12 | 0.22 | 0.85 |
| 49270 | 0 | 95624  | NLCCSQWGWC               | 2.33 | 0.01 | 2.60 | 0.44 | 1.23 | 0.85 |
| 49271 | 0 | 115395 | NLCSTFCKEVVRNANEE<br>EYS | 2.93 | 0.01 | 1.60 | 0.44 | 1.23 | 2.51 |
| 49272 | 0 | 44662  | NLDDRDRSELSPLLLSTT<br>EW | 2.97 | 0.01 | 3.10 | 1.81 | 0.22 | 0.28 |
| 49273 | 0 | 44662  | NLDDRDRSELSPLLLSTT<br>EW | 2.97 | 0.01 | 3.10 | 0.44 | 0.85 | 0.28 |
| 49274 | 0 | 44665  | NLDFRDLYDPRDKAKLLY<br>NN | 2.97 | 0.01 | 3.47 | 0.44 | 0.22 | 0.85 |
| 49275 | 0 | 141715 | NLDHI                    | 1.74 | 0.01 | 2.04 | 1.20 | 0.22 | 0.28 |
| 49276 | 0 | 181746 | NLDHLFHTNIKTGYN          | 2.69 | 0.01 | 3.26 | 2.37 | 0.22 | 1.28 |
| 49277 | 0 | 44669  | NLDKANLELEELRQEAD        | 2.84 | 0.01 | 3.78 | 1.81 | 0.22 | 0.85 |
| 49278 | 0 | 434640 | NLDSLPLVDTHSKRTFL        | 2.79 | 3.89 | 0.78 | 0.44 | 1.13 | 0.28 |
| 49279 | 0 | 44684  | NLEDPASRDL               | 2.31 | 0.01 | 2.08 | 0.44 | 0.85 | 0.28 |
| 49280 | 0 | 44684  | NLEDPASRDL               | 2.31 | 0.01 | 2.08 | 0.44 | 1.59 | 0.28 |
| 49281 | 0 | 101081 | NLEQSNDDVAS              | 2.32 | 0.01 | 3.18 | 3.75 | 0.22 | 0.28 |
| 49282 | 0 | 135726 | NLERECME                 | 2.14 | 0.01 | 0.78 | 0.44 | 2.35 | 0.28 |
| 49283 | 0 | 44699  | NLEYTI                   | 1.88 | 0.01 | 2.40 | 0.44 | 0.85 | 0.28 |
| 49284 | 0 | 44700  | NLEYTIVITP               | 2.31 | 0.01 | 2.40 | 0.44 | 0.85 | 0.28 |
| 49285 | 0 | 44700  | NLEYTIVITP               | 2.31 | 0.01 | 2.40 | 0.44 | 0.85 | 0.28 |
| 49286 | 0 | 44700  | NLEYTIVITP               | 2.31 | 0.01 | 2.40 | 0.44 | 0.85 | 0.28 |

|       |   |        |                                 |      |      |      |      |      |      |
|-------|---|--------|---------------------------------|------|------|------|------|------|------|
| 49287 | 0 | 44700  | NLEYTIVITP                      | 2.31 | 0.01 | 2.40 | 0.44 | 0.85 | 0.28 |
| 49288 | 0 | 86870  | NLFGATLVNA                      | 2.34 | 0.01 | 3.06 | 0.44 | 0.85 | 0.28 |
| 49289 | 0 | 172515 | NLFKRIPAEDVPLLL                 | 2.63 | 0.01 | 0.78 | 0.44 | 1.41 | 0.28 |
| 49290 | 0 | 172515 | NLFKRIPAEDVPLLL                 | 2.63 | 0.01 | 0.78 | 0.44 | 1.13 | 0.28 |
| 49291 | 0 | 44712  | NLFQVVHWSYNRPAYS<br>PG          | 2.81 | 0.01 | 3.42 | 1.12 | 0.22 | 1.27 |
| 49292 | 0 | 108557 | NLFTQTGTP                       | 2.23 | 0.01 | 0.90 | 0.44 | 1.13 | 1.39 |
| 49293 | 0 | 125173 | NLGANSIETDVSFDDNA<br>NPEYTYHGIP | 3.23 | 0.01 | 3.36 | 0.68 | 0.22 | 0.28 |
| 49294 | 0 | 125173 | NLGANSIETDVSFDDNA<br>NPEYTYHGIP | 3.23 | 0.01 | 3.36 | 0.68 | 0.22 | 0.28 |
| 49295 | 0 | 125173 | NLGANSIETDVSFDDNA<br>NPEYTYHGIP | 3.23 | 0.01 | 3.36 | 0.68 | 0.22 | 0.28 |
| 49296 | 0 | 125173 | NLGANSIETDVSFDDNA<br>NPEYTYHGIP | 3.23 | 0.01 | 3.36 | 1.20 | 0.22 | 0.28 |
| 49297 | 0 | 125173 | NLGANSIETDVSFDDNA<br>NPEYTYHGIP | 3.23 | 0.01 | 3.36 | 1.20 | 0.22 | 0.28 |
| 49298 | 0 | 125173 | NLGANSIETDVSFDDNA<br>NPEYTYHGIP | 3.23 | 0.01 | 3.36 | 1.20 | 0.22 | 0.28 |
| 49299 | 0 | 125173 | NLGANSIETDVSFDDNA<br>NPEYTYHGIP | 3.23 | 0.01 | 3.36 | 1.20 | 0.22 | 0.28 |
| 49300 | 0 | 125173 | NLGANSIETDVSFDDNA<br>NPEYTYHGIP | 3.23 | 0.01 | 3.36 | 1.20 | 0.22 | 0.28 |
| 49301 | 0 | 125173 | NLGANSIETDVSFDDNA<br>NPEYTYHGIP | 3.23 | 0.01 | 3.36 | 1.20 | 0.22 | 1.75 |
| 49302 | 0 | 125173 | NLGANSIETDVSFDDNA<br>NPEYTYHGIP | 3.23 | 0.01 | 3.36 | 0.68 | 0.22 | 1.75 |
| 49303 | 0 | 125173 | NLGANSIETDVSFDDNA<br>NPEYTYHGIP | 3.23 | 0.01 | 3.36 | 1.20 | 0.22 | 0.28 |
| 49304 | 0 | 125173 | NLGANSIETDVSFDDNA<br>NPEYTYHGIP | 3.23 | 0.01 | 3.36 | 1.20 | 0.22 | 0.28 |
| 49305 | 0 | 133656 | NLGEKYNTLSLL                    | 2.48 | 0.01 | 0.90 | 0.44 | 0.85 | 0.28 |
| 49306 | 0 | 44727  | NLGKVIDTLTCGFADLM<br>GYIPLVGA   | 3.15 | 0.01 | 1.72 | 0.44 | 1.41 | 2.97 |
| 49307 | 0 | 44727  | NLGKVIDTLTCGFADLM<br>GYIPLVGA   | 3.15 | 0.01 | 1.72 | 0.44 | 1.41 | 2.97 |
| 49308 | 0 | 44731  | NLGRAVFQAKKRVLEPL<br>GLV        | 2.95 | 0.01 | 3.19 | 0.44 | 1.59 | 1.27 |
| 49309 | 0 | 177885 | NLGSVAVKVLNSQSES                | 2.71 | 0.01 | 0.78 | 0.44 | 1.13 | 0.85 |
| 49310 | 0 | 240098 | NLGSFLDIILKGPELG                | 2.74 | 0.01 | 2.70 | 0.68 | 0.22 | 0.28 |
| 49311 | 0 | 240098 | NLGSFLDIILKGPELG                | 2.74 | 0.01 | 2.70 | 0.68 | 0.22 | 0.28 |
| 49312 | 0 | 240098 | NLGSFLDIILKGPELG                | 2.74 | 0.01 | 2.70 | 0.68 | 0.22 | 0.28 |
| 49313 | 0 | 240098 | NLGSFLDIILKGPELG                | 2.74 | 0.01 | 2.70 | 0.68 | 0.22 | 1.48 |
| 49314 | 0 | 240098 | NLGSFLDIILKGPELG                | 2.74 | 0.01 | 2.70 | 0.68 | 0.22 | 1.48 |
| 49315 | 0 | 240098 | NLGSFLDIILKGPELG                | 2.74 | 0.01 | 2.70 | 0.68 | 0.22 | 1.48 |
| 49316 | 0 | 240098 | NLGSFLDIILKGPELG                | 2.74 | 0.01 | 2.70 | 0.68 | 0.22 | 1.48 |
| 49317 | 0 | 240098 | NLGSFLDIILKGPELG                | 2.74 | 0.01 | 2.70 | 0.68 | 0.22 | 1.48 |

|                  |   |        |                                         |      |      |      |      |      |      |
|------------------|---|--------|-----------------------------------------|------|------|------|------|------|------|
| 49318            | 0 | 240098 | NLGSFLDIILKGPELG                        | 2.74 | 0.01 | 2.70 | 0.68 | 0.22 | 1.48 |
| 49319            | 0 | 240098 | NLGSFLDIILKGPELG                        | 2.74 | 0.01 | 2.70 | 0.68 | 0.22 | 1.48 |
| 49320            | 0 | 240098 | NLGSFLDIILKGPELG                        | 2.74 | 0.01 | 2.70 | 0.68 | 0.22 | 1.48 |
| 49321            | 0 | 240098 | NLGSFLDIILKGPELG                        | 2.74 | 0.01 | 2.70 | 0.68 | 0.22 | 1.48 |
| 49322            | 0 | 240098 | NLGSFLDIILKGPELG                        | 2.74 | 0.01 | 2.70 | 0.68 | 0.22 | 1.48 |
| 49323            | 0 | 240098 | NLGSFLDIILKGPELG                        | 2.74 | 0.01 | 2.70 | 0.68 | 0.22 | 1.48 |
| 49324            | 0 | 240098 | NLGSFLDIILKGPELG                        | 2.74 | 0.01 | 2.70 | 0.68 | 0.22 | 1.48 |
| 49325            | 0 | 240098 | NLGSFLDIILKGPELG                        | 2.74 | 0.01 | 2.70 | 0.68 | 0.22 | 1.48 |
| 49326            | 0 | 240098 | NLGSFLDIILKGPELG                        | 2.74 | 0.01 | 2.70 | 0.68 | 0.22 | 1.48 |
| 49327            | 0 | 240098 | NLGSFLDIILKGPELG                        | 2.74 | 0.01 | 2.70 | 0.68 | 0.22 | 1.48 |
| 49328            | 0 | 240098 | NLGSFLDIILKGPELG                        | 2.74 | 0.01 | 2.70 | 0.68 | 0.22 | 1.48 |
| 49329            | 0 | 240098 | NLGSFLDIILKGPELG                        | 2.74 | 0.01 | 2.70 | 0.68 | 0.22 | 1.48 |
| 49330            | 0 | 240098 | NLGSFLDIILKGPELG                        | 2.74 | 0.01 | 2.70 | 0.68 | 0.22 | 1.48 |
| 49331            | 0 | 240098 | NLGSFLDIILKGPELG                        | 2.74 | 0.01 | 2.70 | 0.68 | 0.22 | 1.48 |
| 49332            | 0 | 240098 | NLGSFLDIILKGPELG                        | 2.74 | 0.01 | 2.70 | 0.68 | 0.22 | 1.48 |
| 49333            | 0 | 240098 | NLGSFLDIILKGPELG                        | 2.74 | 0.01 | 2.70 | 0.68 | 0.22 | 1.48 |
| 49334            | 0 | 240098 | NLGSFLDIILKGPELG                        | 2.74 | 0.01 | 2.70 | 0.68 | 0.22 | 1.48 |
| 49335            | 0 | 240098 | NLGSFLDIILKGPELG                        | 2.74 | 0.01 | 2.70 | 0.68 | 0.22 | 1.48 |
| 49336            | 0 | 240098 | NLGSFLDIILKGPELG                        | 2.74 | 0.01 | 2.70 | 0.68 | 0.22 | 1.48 |
| 49337            | 0 | 122156 | NLHIDPTLI                               | 2.23 | 0.01 | 3.61 | 0.68 | 0.22 | 0.28 |
| 49338            | 0 | 122156 | NLHIDPTLI                               | 2.23 | 0.01 | 3.61 | 0.68 | 0.22 | 0.28 |
| 49339            | 0 | 122156 | NLHIDPTLI                               | 2.23 | 0.01 | 3.61 | 0.68 | 0.22 | 0.28 |
| 49340            | 0 | 122156 | NLHIDPTLI                               | 2.23 | 0.01 | 3.61 | 0.68 | 0.22 | 2.98 |
| 49341            | 0 | 156922 | NLHLGLA                                 | 2.04 | 0.01 | 0.90 | 2.74 | 0.22 | 0.85 |
| 49342            | 0 | 172519 | NLHPELDGQEYVVEF                         | 2.65 | 0.01 | 0.78 | 0.44 | 1.41 | 0.28 |
| 49343            | 0 | 172519 | NLHPELDGQEYVVEF                         | 2.65 | 0.01 | 0.78 | 0.44 | 1.13 | 0.28 |
| 49344            | 0 | 156923 | NLHTSF                                  | 1.88 | 0.01 | 0.90 | 2.74 | 0.22 | 0.85 |
| 49345            | 0 | 44740  | NLIDTS                                  | 1.88 | 0.01 | 1.66 | 0.44 | 0.85 | 0.28 |
| 49346            | 0 | 44742  | NLIESEHSNNNN                            | 2.50 | 0.01 | 4.63 | 0.68 | 0.22 | 0.28 |
| 49347            | 0 | 44742  | NLIESEHSNNNN                            | 2.50 | 0.01 | 4.63 | 0.68 | 0.22 | 0.85 |
| 49348            | 0 | 193511 | NLIGALGVA                               | 2.25 | 0.01 | 2.51 | 0.44 | 2.39 | 0.28 |
| 49349            | 0 | 193511 | NLIGALGVA                               | 2.25 | 0.01 | 2.51 | 0.44 | 2.39 | 0.28 |
| 49350            | 0 | 120836 | NLIKSGVATK                              | 2.29 | 0.01 | 2.18 | 2.16 | 0.22 | 0.28 |
| 49351            | 0 | 238799 | NLINFQRMIQCTTRR                         | 2.68 | 0.01 | 2.56 | 2.02 | 0.22 | 0.85 |
| 49352            | 0 | 238799 | NLINFQRMIQCTTRR                         | 2.68 | 0.01 | 2.56 | 1.20 | 0.22 | 0.85 |
| 49353            | 0 | 238800 | NLINFQRMIQCTTRRSA<br>W                  | 2.82 | 0.01 | 2.56 | 1.20 | 0.22 | 0.28 |
| 49354            | 0 | 44747  | NLINTNGSWHIN                            | 2.50 | 0.01 | 1.72 | 0.44 | 0.85 | 0.28 |
| 49355            | 0 | 44747  | NLINTNGSWHIN                            | 2.50 | 0.01 | 1.72 | 1.15 | 0.22 | 0.28 |
| 49356            | 0 | 44747  | NLINTNGSWHIN                            | 2.50 | 0.01 | 1.72 | 2.36 | 0.22 | 0.28 |
| 49357            | 0 | 111588 | NLIQHVKGKGGTPKRPN                       | 2.66 | 0.01 | 2.60 | 0.44 | 1.23 | 0.85 |
| 49358            | 0 | 111589 | NLIRHVGGGTPR                            | 2.45 | 0.01 | 3.20 | 0.44 | 1.23 | 0.85 |
| 49359            | 0 | 111590 | NLIRHVGGGTPRRPG                         | 2.68 | 0.01 | 3.20 | 1.12 | 0.22 | 0.85 |
| NLISKQNNNEKNVKEA |   |        |                                         |      |      |      |      |      |      |
| 49360            | 0 | 44750  | AESIMKTLAGLIKGNQI<br>DSTLKDLVEELSKYFKNH | 3.92 | 0.01 | 2.22 | 0.44 | 1.59 | 1.48 |

|       |   |        |                                                              |      |      |      |      |      |      |
|-------|---|--------|--------------------------------------------------------------|------|------|------|------|------|------|
| 49361 | 0 | 44750  | NLISKNQNNNEKNVKEA<br>AESIMKTLAGLIKGNQI<br>DSTLKDLEELSKYFKNH  | 3.92 | 0.01 | 2.22 | 0.44 | 2.39 | 0.28 |
| 49362 | 0 | 150472 | NLISNKNKKNDETKKTA<br>ENIVKTLVGLFNEKNEID<br>STINNLVQEMIHLFSNN | 3.90 | 0.01 | 2.22 | 0.44 | 0.85 | 1.34 |
| 49363 | 0 | 150472 | NLISNKNKKNDETKKTA<br>ENIVKTLVGLFNEKNEID<br>STINNLVQEMIHLFSNN | 3.90 | 0.01 | 2.22 | 0.44 | 0.85 | 0.28 |
| 49364 | 0 | 150472 | NLISNKNKKNDETKKTA<br>ENIVKTLVGLFNEKNEID<br>STINNLVQEMIHLFSNN | 3.90 | 0.01 | 2.22 | 0.44 | 0.85 | 0.28 |
| 49365 | 0 | 98289  | NLKCSLPHRNESNKWTC<br>KSQRDSYIAGRDFWGK                        | 3.40 | 0.01 | 4.45 | 2.00 | 0.22 | 0.85 |
| 49366 | 0 | 93496  | NLKDLTFEKV                                                   | 2.31 | 0.01 | 2.67 | 2.00 | 0.22 | 0.28 |
| 49367 | 0 | 93496  | NLKDLTFEKV                                                   | 2.31 | 0.01 | 2.67 | 2.00 | 0.22 | 0.28 |
| 49368 | 0 | 93496  | NLKDLTFEKV                                                   | 2.31 | 0.01 | 2.67 | 2.00 | 0.22 | 0.28 |
| 49369 | 0 | 140057 | NLKDMFSRAVTMTAAS<br>RKRAE                                    | 3.00 | 0.01 | 0.90 | 1.20 | 0.22 | 0.28 |
| 49370 | 0 | 140057 | NLKDMFSRAVTMTAAS<br>RKRAE                                    | 3.00 | 0.01 | 0.90 | 1.20 | 0.22 | 1.34 |
| 49371 | 0 | 195048 | NLKTPSEWRNAP                                                 | 2.46 | 0.01 | 0.90 | 0.68 | 0.22 | 0.28 |
| 49372 | 0 | 450867 | NLLDSLH                                                      | 2.04 | 0.01 | 0.90 | 0.44 | 1.23 | 1.39 |
| 49373 | 0 | 151036 | NLLEDKHNGKLCKLR                                              | 2.70 | 0.01 | 2.87 | 0.44 | 0.85 | 0.28 |
| 49374 | 0 | 106685 | NLLEFRH                                                      | 2.01 | 0.01 | 0.90 | 1.81 | 0.22 | 0.28 |
| 49375 | 0 | 44778  | NLLFTG                                                       | 1.89 | 0.01 | 2.40 | 0.44 | 0.85 | 0.28 |
| 49376 | 0 | 44779  | NLLHKKPKITQL                                                 | 2.49 | 0.01 | 0.90 | 1.20 | 0.22 | 1.39 |
| 49377 | 0 | 44779  | NLLHKKPKITQL                                                 | 2.49 | 0.01 | 0.90 | 0.68 | 0.22 | 0.85 |
| 49378 | 0 | 95124  | NLLIPCVLISALALLVFLLP<br>A                                    | 3.03 | 0.01 | 2.25 | 2.04 | 0.22 | 1.57 |
| 49379 | 0 | 44793  | NLLRFFVAPF                                                   | 2.32 | 0.01 | 1.60 | 0.44 | 1.23 | 0.28 |
| 49380 | 0 | 44793  | NLLRFFVAPF                                                   | 2.32 | 0.01 | 1.60 | 0.44 | 1.23 | 0.28 |
| 49381 | 0 | 115090 | NLLRFFVAPFPE                                                 | 2.48 | 0.01 | 1.60 | 0.44 | 1.23 | 0.28 |
| 49382 | 0 | 115090 | NLLRFFVAPFPE                                                 | 2.48 | 0.01 | 1.60 | 0.44 | 1.23 | 0.28 |
| 49383 | 0 | 115396 | NLLRFFVAPFPEVFGKEK<br>VN                                     | 2.97 | 0.01 | 1.60 | 0.44 | 1.23 | 1.28 |
| 49384 | 0 | 115397 | NLLSICKTAEF                                                  | 2.35 | 0.01 | 2.19 | 1.12 | 0.22 | 0.28 |
| 49385 | 0 | 44809  | NLNAHSALYVTR                                                 | 2.48 | 0.01 | 3.33 | 0.44 | 1.23 | 0.85 |
| 49386 | 0 | 118038 | NLNEKIKKD                                                    | 2.25 | 0.01 | 0.78 | 0.44 | 1.13 | 0.28 |
| 49387 | 0 | 44816  | NLNFEMYGAVYSVN                                               | 2.62 | 0.01 | 2.69 | 0.44 | 1.41 | 0.28 |
| 49388 | 0 | 44816  | NLNFEMYGAVYSVN                                               | 2.62 | 0.01 | 2.69 | 0.44 | 0.85 | 0.28 |
| 49389 | 0 | 44816  | NLNFEMYGAVYSVN                                               | 2.62 | 0.01 | 2.69 | 0.44 | 0.85 | 0.28 |

|       |   |        |                                 |      |      |      |      |      |      |
|-------|---|--------|---------------------------------|------|------|------|------|------|------|
| 49390 | 0 | 44817  | NLNFEMYGAVYSVS                  | 2.62 | 0.01 | 2.69 | 0.44 | 0.85 | 0.28 |
| 49391 | 0 | 156924 | NLNHWYKSWLLP                    | 2.49 | 0.01 | 0.90 | 2.74 | 0.22 | 0.85 |
| 49392 | 0 | 238801 | NLNKEK                          | 1.92 | 0.01 | 4.45 | 1.15 | 0.22 | 0.85 |
| 49393 | 0 | 238801 | NLNKEK                          | 1.92 | 0.01 | 4.45 | 1.15 | 0.22 | 0.28 |
| 49394 | 0 | 238801 | NLNKEK                          | 1.92 | 0.01 | 4.45 | 1.15 | 0.22 | 0.28 |
| 49395 | 0 | 139180 | NLNKTLVDLDWLNRIET<br>YVK        | 2.97 | 0.01 | 3.55 | 3.16 | 0.22 | 0.28 |
| 49396 | 0 | 44822  | NLNKVKININDLNNNIV<br>DVNNSIHNIE | 3.29 | 0.01 | 2.22 | 0.44 | 1.74 | 0.28 |
| 49397 | 0 | 44822  | NLNKVKININDLNNNIV<br>DVNNSIHNIE | 3.29 | 0.01 | 2.22 | 0.44 | 1.74 | 0.28 |
| 49398 | 0 | 99499  | NLNQHRSLSIP                     | 2.50 | 0.01 | 0.90 | 1.12 | 0.22 | 1.39 |
| 49399 | 0 | 135178 | NLNTSKFKKNEFIKK                 | 2.70 | 0.01 | 3.59 | 2.13 | 0.85 | 0.85 |
| 49400 | 0 | 86900  | NLPNDVFREAQR                    | 2.46 | 0.01 | 2.48 | 0.44 | 1.59 | 0.28 |
| 49401 | 0 | 149857 | NLPSPDPF                        | 2.02 | 0.01 | 0.90 | 2.37 | 0.22 | 0.28 |
| 49402 | 0 | 44844  | NLPSTETRHVTR                    | 2.48 | 0.01 | 0.90 | 0.44 | 0.85 | 0.28 |
| 49403 | 0 | 123545 | NLPYYIDDK                       | 2.21 | 0.01 | 2.28 | 2.00 | 0.22 | 0.28 |
| 49404 | 0 | 123545 | NLPYYIDDK                       | 2.21 | 0.01 | 2.28 | 2.00 | 0.22 | 0.28 |
| 49405 | 0 | 123545 | NLPYYIDDK                       | 2.21 | 0.01 | 2.28 | 2.00 | 0.22 | 0.28 |
| 49406 | 0 | 423443 | NLQARDASGLMFPII                 | 2.62 | 0.01 | 2.51 | 0.44 | 2.35 | 1.28 |
| 49407 | 0 | 190504 | NLQEIVPGSVWMERD                 | 2.62 | 0.01 | 3.97 | 2.00 | 1.41 | 0.28 |
| 49408 | 0 | 240905 | NLQEMTLPALTRQEI                 | 2.68 | 0.01 | 4.93 | 0.44 | 1.41 | 0.28 |
| 49409 | 0 | 44851  | NLQKDEPNGRA                     | 2.37 | 0.01 | 3.35 | 2.02 | 0.85 | 0.28 |
| 49410 | 0 | 44852  | NLQKDEPNGRASDT                  | 2.58 | 0.01 | 3.35 | 1.12 | 0.22 | 0.28 |
| 49411 | 0 | 44852  | NLQKDEPNGRASDT                  | 2.58 | 0.01 | 3.35 | 2.02 | 0.85 | 0.28 |
| 49412 | 0 | 44852  | NLQKDEPNGRASDT                  | 2.58 | 0.01 | 3.35 | 1.12 | 0.22 | 0.28 |
| 49413 | 0 | 44852  | NLQKDEPNGRASDT                  | 2.58 | 0.01 | 3.35 | 2.02 | 0.85 | 0.28 |
| 49414 | 0 | 44852  | NLQKDEPNGRASDT                  | 2.58 | 0.01 | 3.35 | 1.12 | 0.22 | 0.85 |
| 49415 | 0 | 44852  | NLQKDEPNGRASDT                  | 2.58 | 0.01 | 3.35 | 1.12 | 0.22 | 1.34 |
| 49416 | 0 | 153860 | NLQKRMQQLENDLDQ                 | 2.72 | 0.01 | 3.93 | 0.44 | 1.23 | 1.27 |
| 49417 | 0 | 152858 | NLQLPELKQK                      | 2.35 | 0.01 | 2.18 | 2.16 | 0.22 | 0.28 |
| 49418 | 0 | 44855  | NLQTLVQK                        | 2.14 | 0.01 | 2.83 | 2.61 | 0.22 | 0.28 |
| 49419 | 0 | 434641 | NLRETNLDSLPLVDTHS               | 2.82 | 3.81 | 0.78 | 0.44 | 1.13 | 0.28 |
| 49420 | 0 | 44858  | NLRGDLQVLA                      | 2.31 | 0.01 | 3.26 | 2.37 | 0.22 | 0.85 |
| 49421 | 0 | 44858  | NLRGDLQVLA                      | 2.31 | 0.01 | 3.26 | 2.59 | 0.22 | 0.85 |
| 49422 | 0 | 522963 | NLRPCEQHLMQKIQRD<br>EDSYGRDP    | 3.09 | 0.01 | 2.16 | 0.44 | 1.23 | 1.39 |
| 49423 | 0 | 522963 | NLRPCEQHLMQKIQRD<br>EDSYGRDP    | 3.09 | 0.01 | 2.16 | 0.44 | 1.23 | 0.85 |
| 49424 | 0 | 44864  | NLSCTHPLGSPPPAP                 | 2.69 | 0.01 | 0.90 | 0.44 | 1.41 | 0.28 |
| 49425 | 0 | 44865  | NLSDAHKKKNLYDHAL                | 2.71 | 0.01 | 3.47 | 2.37 | 0.22 | 0.28 |
| 49426 | 0 | 44865  | NLSDAHKKKNLYDHAL                | 2.71 | 0.01 | 3.47 | 1.12 | 0.22 | 0.28 |
| 49427 | 0 | 44865  | NLSDAHKKKNLYDHAL                | 2.71 | 0.01 | 3.47 | 1.12 | 0.22 | 1.34 |

|       |   |        |                                       |      |      |      |      |      |      |
|-------|---|--------|---------------------------------------|------|------|------|------|------|------|
| 49428 | 0 | 176361 | NLSDNGTNGIQHAMY                       | 2.65 | 0.01 | 2.63 | 1.15 | 0.22 | 0.85 |
| 49429 | 0 | 176361 | NLSDNGTNGIQHAMY                       | 2.65 | 0.01 | 2.63 | 1.15 | 0.22 | 0.85 |
| 49430 | 0 | 176361 | NLSDNGTNGIQHAMY                       | 2.65 | 0.01 | 2.63 | 1.15 | 0.22 | 0.85 |
| 49431 | 0 | 423039 | NLSELDRLLEL                           | 2.52 | 0.01 | 0.78 | 0.44 | 1.41 | 2.49 |
| 49432 | 0 | 423039 | NLSELDRLLEL                           | 2.52 | 0.01 | 0.78 | 0.44 | 1.41 | 1.66 |
| 49433 | 0 | 423039 | NLSELDRLLEL                           | 2.52 | 0.01 | 0.78 | 0.44 | 1.41 | 2.02 |
| 49434 | 0 | 423039 | NLSELDRLLEL                           | 2.52 | 0.01 | 0.78 | 0.44 | 1.41 | 1.48 |
| 49435 | 0 | 423039 | NLSELDRLLEL                           | 2.52 | 0.01 | 0.78 | 0.44 | 1.41 | 2.02 |
| 49436 | 0 | 44869  | NLSGKAINHIRS                          | 2.48 | 0.01 | 1.96 | 0.44 | 0.85 | 0.28 |
| 49437 | 0 | 44870  | NLSGKAVNHIRS                          | 2.46 | 0.01 | 1.96 | 0.44 | 0.85 | 0.28 |
| 49438 | 0 | 44871  | NLSGPAAVTARIKE                        | 2.56 | 0.01 | 2.75 | 1.20 | 0.22 | 0.85 |
| 49439 | 0 | 44872  | NLSGSTWFFSWR                          | 2.48 | 0.01 | 0.90 | 0.44 | 0.85 | 0.28 |
| 49440 | 0 | 510456 | NLSHFLPLSAPV                          | 2.49 | 0.01 | 0.90 | 3.07 | 1.13 | 1.39 |
| 49441 | 0 | 152025 | NLSLAILTLEM                           | 2.41 | 0.01 | 0.78 | 0.44 | 1.93 | 0.28 |
| 49442 | 0 | 423444 | NLSLPPSNALSSKDY                       | 2.70 | 0.01 | 2.51 | 0.44 | 2.35 | 1.28 |
| 49443 | 0 | 139837 | NLSRAPF                               | 1.99 | 0.01 | 0.90 | 2.00 | 0.22 | 0.28 |
| 49444 | 0 | 44880  | NLSSDIIGQLELMPNIER<br>F               | 2.89 | 0.01 | 3.03 | 0.68 | 0.22 | 1.57 |
| 49445 | 0 | 44880  | NLSSDIIGQLELMPNIER<br>F               | 2.89 | 0.01 | 3.03 | 3.33 | 0.22 | 1.57 |
| 49446 | 0 | 44880  | NLSSDIIGQLELMPNIER<br>F               | 2.89 | 0.01 | 2.08 | 0.44 | 0.22 | 1.57 |
| 49447 | 0 | 44880  | NLSSDIIGQLELMPNIER<br>F               | 2.89 | 0.01 | 2.08 | 2.02 | 0.22 | 1.57 |
| 49448 | 0 | 44880  | NLSSDIIGQLELMPNIER<br>F               | 2.89 | 0.01 | 2.08 | 1.15 | 0.22 | 1.57 |
| 49449 | 0 | 44880  | NLSSDIIGQLELMPNIER<br>F               | 2.89 | 0.01 | 2.08 | 2.49 | 0.22 | 1.57 |
| 49450 | 0 | 44880  | NLSSDIIGQLELMPNIER<br>F               | 2.89 | 0.01 | 2.08 | 2.25 | 0.22 | 1.57 |
| 49451 | 0 | 44880  | NLSSDIIGQLELMPNIER<br>F               | 2.89 | 0.01 | 2.08 | 0.68 | 0.22 | 1.57 |
| 49452 | 0 | 44881  | NLSSKA                                | 1.89 | 0.01 | 1.96 | 0.44 | 0.85 | 0.28 |
| 49453 | 0 | 44882  | NLSSKAVNHIHS                          | 2.50 | 0.01 | 1.96 | 0.44 | 0.85 | 0.28 |
| 49454 | 0 | 117587 | NLSSLELGDSALYFCA                      | 2.75 | 0.01 | 0.78 | 0.44 | 1.41 | 0.28 |
| 49455 | 0 | 117587 | NLSSLELGDSALYFCA                      | 2.75 | 0.01 | 0.78 | 1.12 | 0.22 | 0.28 |
| 49456 | 0 | 167344 | NLSSSWI                               | 2.02 | 0.01 | 0.90 | 1.15 | 0.22 | 1.39 |
| 49457 | 0 | 167345 | NLSSSWT                               | 2.02 | 0.01 | 0.90 | 0.44 | 0.85 | 1.39 |
| 49458 | 0 | 153274 | NLSTSNPLGFFPDHQ                       | 2.68 | 0.01 | 2.08 | 0.68 | 0.22 | 0.28 |
| 49459 | 0 | 153274 | NLSTSNPLGFFPDHQ                       | 2.68 | 0.01 | 2.08 | 0.68 | 0.22 | 0.28 |
| 49460 | 0 | 44884  | NLSTSNPLGFFPDHQLD<br>PAFRANTANPDWDFNP | 3.46 | 0.01 | 2.71 | 1.12 | 0.22 | 1.57 |

|       |   |        |                                           |      |      |      |      |      |      |
|-------|---|--------|-------------------------------------------|------|------|------|------|------|------|
| 49461 | 0 | 44884  | NLSTSNPLGFFPDHQLD<br>PAFRANTANPDWDFNP     | 3.46 | 0.01 | 2.71 | 1.12 | 0.22 | 1.57 |
| 49462 | 0 | 44884  | NLSTSNPLGFFPDHQLD<br>PAFRANTANPDWDFNP     | 3.46 | 0.01 | 2.71 | 1.12 | 0.22 | 1.57 |
| 49463 | 0 | 44884  | NLSTSNPLGFFPDHQLD<br>PAFRANTANPDWDFNP     | 3.46 | 0.01 | 2.71 | 1.12 | 0.22 | 1.57 |
| 49464 | 0 | 44884  | NLSTSNPLGFFPDHQLD<br>PAFRANTANPDWDFNP     | 3.46 | 0.01 | 2.71 | 1.12 | 0.22 | 1.57 |
| 49465 | 0 | 44884  | NLSTSNPLGFFPDHQLD<br>PAFRANTANPDWDFNP     | 3.46 | 0.01 | 2.71 | 1.12 | 0.22 | 1.27 |
| 49466 | 0 | 44884  | NLSTSNPLGFFPDHQLD<br>PAFRANTANPDWDFNP     | 3.46 | 0.01 | 2.71 | 1.20 | 0.22 | 0.28 |
| 49467 | 0 | 44884  | NLSTSNPLGFFPDHQLD<br>PAFRANTANPDWDFNP     | 3.46 | 0.01 | 2.71 | 1.20 | 0.22 | 0.28 |
| 49468 | 0 | 105985 | NLSVEGGVW                                 | 2.22 | 0.01 | 0.90 | 3.01 | 0.22 | 0.28 |
| 49469 | 0 | 44890  | NLSVPNPLGFFPDHQLD<br>PAFGANSNNPDWDFN<br>P | 3.47 | 0.01 | 2.58 | 1.12 | 0.22 | 1.57 |
| 49470 | 0 | 44890  | NLSVPNPLGFFPDHQLD<br>PAFGANSNNPDWDFN<br>P | 3.47 | 0.01 | 2.58 | 1.12 | 0.22 | 1.57 |
| 49471 | 0 | 44890  | NLSVPNPLGFFPDHQLD<br>PAFGANSNNPDWDFN<br>P | 3.47 | 0.01 | 2.58 | 1.12 | 0.22 | 1.57 |
| 49472 | 0 | 44890  | NLSVPNPLGFFPDHQLD<br>PAFGANSNNPDWDFN<br>P | 3.47 | 0.01 | 2.58 | 1.12 | 0.22 | 1.57 |
| 49473 | 0 | 44890  | NLSVPNPLGFFPDHQLD<br>PAFGANSNNPDWDFN<br>P | 3.47 | 0.01 | 2.58 | 1.12 | 0.22 | 1.57 |
| 49474 | 0 | 44890  | NLSVPNPLGFFPDHQLD<br>PAFGANSNNPDWDFN<br>P | 3.47 | 0.01 | 2.58 | 1.12 | 0.22 | 1.27 |
| 49475 | 0 | 44890  | NLSVPNPLGFFPDHQLD<br>PAFGANSNNPDWDFN<br>P | 3.47 | 0.01 | 2.58 | 1.20 | 0.22 | 0.28 |
| 49476 | 0 | 44890  | NLSVPNPLGFFPDHQLD<br>PAFGANSNNPDWDFN<br>P | 3.47 | 0.01 | 2.58 | 1.20 | 0.22 | 0.28 |



|       |   |        |                                       |      |      |      |      |      |      |
|-------|---|--------|---------------------------------------|------|------|------|------|------|------|
| 49477 | 0 | 44891  | NLSVPNPLGFLPDHQLD<br>PAFGANSTNPWDFNPC | 3.45 | 0.01 | 2.08 | 2.25 | 0.22 | 0.28 |
| 49478 | 0 | 44891  | NLSVPNPLGFLPDHQLD<br>PAFGANSTNPWDFNPC | 3.45 | 0.01 | 2.08 | 2.25 | 0.22 | 0.28 |
| 49479 | 0 | 97525  | NLTAWNPS                              | 2.13 | 0.01 | 2.87 | 0.68 | 0.22 | 0.28 |
| 49480 | 0 | 97525  | NLTAWNPS                              | 2.13 | 0.01 | 2.87 | 0.68 | 0.22 | 0.28 |
| 49481 | 0 | 44896  | NLTDILP                               | 2.02 | 0.01 | 0.90 | 1.12 | 0.22 | 1.39 |
| 49482 | 0 | 44897  | NLTDINL                               | 2.05 | 0.01 | 0.90 | 1.12 | 0.22 | 1.39 |
| 49483 | 0 | 120839 | NLTEFQHAFS                            | 2.29 | 0.01 | 2.18 | 2.16 | 0.22 | 0.28 |
| 49484 | 0 | 101082 | NLTEPSAQN                             | 2.32 | 0.01 | 3.18 | 2.98 | 0.22 | 0.28 |
| 49485 | 0 | 98290  | NLTLVPAVVG                            | 2.32 | 0.01 | 3.08 | 0.68 | 0.22 | 0.28 |
| 49486 | 0 | 44904  | NLTQHPSAPTMP                          | 2.48 | 0.01 | 3.65 | 1.15 | 0.22 | 0.28 |
| 49487 | 0 | 44904  | NLTQHPSAPTMP                          | 2.48 | 0.01 | 3.65 | 1.12 | 0.22 | 0.28 |
| 49488 | 0 | 44904  | NLTQHPSAPTMP                          | 2.48 | 0.01 | 3.65 | 1.12 | 0.22 | 1.34 |
| 49489 | 0 | 149079 | NLTQTQM                               | 2.04 | 0.01 | 0.90 | 2.13 | 1.59 | 1.39 |
| 49490 | 0 | 131302 | NLTRPDITFT                            | 2.31 | 0.01 | 0.78 | 0.44 | 1.13 | 2.02 |
| 49491 | 0 | 44907  | NLTTWNPT                              | 2.17 | 0.01 | 3.06 | 1.12 | 0.22 | 0.28 |
| 49492 | 0 | 156925 | NLVADFPRPLLS                          | 2.46 | 0.01 | 0.90 | 2.74 | 0.22 | 0.85 |
| 49493 | 0 | 522983 | NLVAQKEAAEKA                          | 2.71 | 0.01 | 2.24 | 0.44 | 1.41 | 1.28 |
| 49494 | 0 | 44911  | NLVDWLRQY                             | 2.21 | 0.01 | 2.61 | 0.44 | 0.85 | 0.28 |
| 49495 | 0 | 44915  | NLVILPGQDLQYVLA                       | 2.68 | 0.01 | 2.43 | 0.68 | 0.22 | 0.28 |
| 49496 | 0 | 44915  | NLVILPGQDLQYVLA                       | 2.68 | 0.01 | 2.43 | 0.44 | 0.85 | 0.28 |
| 49497 | 0 | 172532 | NLVLDYEQLRTEKEE                       | 2.66 | 0.01 | 0.78 | 0.44 | 1.41 | 0.28 |
| 49498 | 0 | 165640 | NLVLFYSY                              | 2.02 | 0.01 | 0.90 | 0.44 | 1.23 | 1.39 |
| 49499 | 0 | 165640 | NLVLFYSY                              | 2.02 | 0.01 | 0.90 | 0.44 | 1.23 | 1.39 |
| 49500 | 0 | 44917  | NLVLNRDVSFQDL                         | 2.58 | 0.01 | 3.00 | 0.44 | 0.85 | 0.28 |
| 49501 | 0 | 44917  | NLVLNRDVSFQDL                         | 2.58 | 0.01 | 3.00 | 1.15 | 2.39 | 0.28 |
| 49502 | 0 | 44920  | NLVPMVATV                             | 2.23 | 0.01 | 2.76 | 0.44 | 1.74 | 0.28 |
| 49503 | 0 | 44920  | NLVPMVATV                             | 2.23 | 0.01 | 2.76 | 0.44 | 1.74 | 1.66 |
| 49504 | 0 | 44920  | NLVPMVATV                             | 2.23 | 0.01 | 2.76 | 0.44 | 1.74 | 1.66 |
| 49505 | 0 | 44920  | NLVPMVATV                             | 2.23 | 0.01 | 2.76 | 0.44 | 1.74 | 1.66 |
| 49506 | 0 | 44920  | NLVPMVATV                             | 2.23 | 0.01 | 2.76 | 0.44 | 1.74 | 2.12 |
| 49507 | 0 | 44920  | NLVPMVATV                             | 2.23 | 0.01 | 2.76 | 0.44 | 2.39 | 0.28 |
| 49508 | 0 | 44920  | NLVPMVATV                             | 2.23 | 0.01 | 2.76 | 0.44 | 2.39 | 0.28 |
| 49509 | 0 | 44920  | NLVPMVATV                             | 2.23 | 0.01 | 2.76 | 0.44 | 2.39 | 0.28 |
| 49510 | 0 | 240906 | NLVRDDLPA                             | 2.63 | 0.01 | 3.81 | 0.44 | 1.41 | 0.28 |
| 49511 | 0 | 240906 | NLVRDDLPA                             | 2.63 | 0.01 | 3.81 | 1.12 | 0.22 | 0.28 |
| 49512 | 0 | 240906 | NLVRDDLPA                             | 2.63 | 0.01 | 3.81 | 1.12 | 0.22 | 0.28 |
| 49513 | 0 | 240907 | NLVRDDLPS                             | 2.65 | 0.01 | 3.81 | 0.44 | 1.41 | 1.28 |
| 49514 | 0 | 144422 | NLYAGDTQNTNSDSYTR<br>SKYGDETNR        | 3.47 | 0.01 | 3.63 | 0.68 | 0.22 | 0.85 |
| 49515 | 0 | 144422 | NLYAGDTQNTNSDSYTR<br>SKYGDETNR        | 3.47 | 0.01 | 3.63 | 0.68 | 0.22 | 2.12 |

|       |   |        |                      |      |      |      |      |      |      |
|-------|---|--------|----------------------|------|------|------|------|------|------|
| 49516 | 0 | 44930  | NLYAVDMLVLAR         | 2.49 | 0.01 | 0.90 | 2.74 | 0.22 | 1.27 |
|       |   |        | NLYDPNKYVDVNNVGIR    |      |      |      |      |      |      |
|       |   |        | GYMYLKGRGSVMTTN      |      |      |      |      |      |      |
|       |   |        | IYLNSSLYRGTKFIIKKYAS |      |      |      |      |      |      |
| 49517 | 0 | 44934  | GNKDNIVRNNDRVYINV    | 4.66 | 0.01 | 2.08 | 1.15 | 0.22 | 0.28 |
|       |   |        | VVKNKEYRLATNASQAG    |      |      |      |      |      |      |
|       |   |        | VEKILSALEIPDVGNLSQ   |      |      |      |      |      |      |
|       |   |        | VVVM                 |      |      |      |      |      |      |
| 49518 | 0 | 44940  | NLYINGVLMGSAEITGL    | 3.08 | 0.01 | 2.95 | 0.44 | 0.22 | 0.28 |
|       |   |        | GAIED                |      |      |      |      |      |      |
| 49519 | 0 | 125509 | NLYSNRSVAVTSL        | 2.50 | 0.01 | 0.90 | 0.44 | 1.23 | 0.28 |
| 49520 | 0 | 115399 | NMAINPSKENLCSTFCK    | 2.92 | 0.01 | 1.60 | 0.44 | 1.23 | 1.28 |
|       |   |        | EVV                  |      |      |      |      |      |      |
| 49521 | 0 | 115399 | NMAINPSKENLCSTFCK    | 2.92 | 0.01 | 1.60 | 0.44 | 1.23 | 1.27 |
|       |   |        | EVV                  |      |      |      |      |      |      |
| 49522 | 0 | 148012 | NMALDDIHA            | 2.22 | 0.01 | 3.24 | 3.57 | 0.85 | 0.28 |
| 49523 | 0 | 94894  | NMEDEADQYFSHDDPIS    | 3.28 | 0.01 | 2.72 | 0.68 | 0.22 | 0.85 |
|       |   |        | SDQSRFGWFENK         |      |      |      |      |      |      |
| 49524 | 0 | 94894  | NMEDEADQYFSHDDPIS    | 3.28 | 0.01 | 2.72 | 0.68 | 0.22 | 0.85 |
|       |   |        | SDQSRFGWFENK         |      |      |      |      |      |      |
| 49525 | 0 | 44967  | NMEGKV               | 1.88 | 0.01 | 2.40 | 0.44 | 0.85 | 0.28 |
| 49526 | 0 | 149393 | NMERDLASGLIGPL       | 2.59 | 0.01 | 0.78 | 0.44 | 1.93 | 2.66 |
| 49527 | 0 | 115091 | NMGDELRLIHYSYDVNR    | 2.97 | 0.01 | 2.19 | 1.12 | 0.22 | 0.28 |
|       |   |        | TEKG                 |      |      |      |      |      |      |
| 49528 | 0 | 115091 | NMGDELRLIHYSYDVNR    | 2.97 | 0.01 | 2.19 | 1.12 | 0.22 | 0.28 |
|       |   |        | TEKG                 |      |      |      |      |      |      |
| 49529 | 0 | 115091 | NMGDELRLIHYSYDVNR    | 2.97 | 0.01 | 2.19 | 1.12 | 0.22 | 0.28 |
|       |   |        | TEKG                 |      |      |      |      |      |      |
| 49530 | 0 | 115091 | NMGDELRLIHYSYDVNR    | 2.97 | 0.01 | 2.19 | 1.12 | 0.22 | 0.28 |
|       |   |        | TEKG                 |      |      |      |      |      |      |
| 49531 | 0 | 44978  | NMGLIAGAVG           | 2.33 | 0.01 | 3.36 | 1.20 | 0.22 | 0.28 |
| 49532 | 0 | 44978  | NMGLIAGAVG           | 2.33 | 0.01 | 3.36 | 1.20 | 0.22 | 0.28 |
| 49533 | 0 | 44978  | NMGLIAGAVG           | 2.33 | 0.01 | 3.36 | 1.20 | 0.22 | 1.34 |
| 49534 | 0 | 44978  | NMGLIAGAVG           | 2.33 | 0.01 | 2.40 | 1.20 | 0.22 | 1.34 |
| 49535 | 0 | 104152 | NMHFMNTLNTYGPLTA     | 2.82 | 0.01 | 3.00 | 1.20 | 0.22 | 0.28 |
|       |   |        | L                    |      |      |      |      |      |      |
| 49536 | 0 | 161261 | NMIVMKQLGEVRRFF      | 2.63 | 0.01 | 2.74 | 0.44 | 0.85 | 0.28 |
| 49537 | 0 | 44989  | NMKH                 | 1.57 | 0.01 | 0.78 | 1.15 | 0.22 | 0.85 |
| 49538 | 0 | 45003  | NMLYKDDFVGALIFSGA    | 2.88 | 0.01 | 3.03 | 0.68 | 0.22 | 1.57 |
|       |   |        | VI                   |      |      |      |      |      |      |
| 49539 | 0 | 45003  | NMLYKDDFVGALIFSGA    | 2.88 | 0.01 | 3.03 | 3.33 | 0.22 | 1.57 |
|       |   |        | VI                   |      |      |      |      |      |      |
| 49540 | 0 | 45003  | NMLYKDDFVGALIFSGA    | 2.88 | 0.01 | 2.08 | 2.49 | 0.22 | 1.57 |
|       |   |        | VI                   |      |      |      |      |      |      |
| 49541 | 0 | 45003  | NMLYKDDFVGALIFSGA    | 2.88 | 0.01 | 2.08 | 2.25 | 0.22 | 1.57 |
|       |   |        | VI                   |      |      |      |      |      |      |

|       |   |        |                                     |      |      |      |      |      |      |
|-------|---|--------|-------------------------------------|------|------|------|------|------|------|
| 49542 | 0 | 45003  | NMLYKDDFVGALIFSGA<br>VI             | 2.88 | 0.01 | 2.08 | 0.68 | 0.22 | 1.57 |
| 49543 | 0 | 45004  | NMMKYISPPIFL                        | 2.45 | 0.01 | 0.90 | 1.20 | 0.22 | 1.39 |
| 49544 | 0 | 45004  | NMMKYISPPIFL                        | 2.45 | 0.01 | 0.90 | 1.20 | 0.22 | 0.28 |
| 49545 | 0 | 45004  | NMMKYISPPIFL                        | 2.45 | 0.01 | 0.90 | 0.68 | 0.22 | 0.28 |
| 49546 | 0 | 45004  | NMMKYISPPIFL                        | 2.45 | 0.01 | 0.90 | 1.20 | 0.22 | 0.28 |
| 49547 | 0 | 45004  | NMMKYISPPIFL                        | 2.45 | 0.01 | 0.90 | 1.20 | 0.22 | 1.75 |
| 49548 | 0 | 45005  | NMMNYIMDPRTH                        | 2.48 | 0.01 | 0.90 | 1.20 | 0.22 | 1.39 |
| 49549 | 0 | 45005  | NMMNYIMDPRTH                        | 2.48 | 0.01 | 0.90 | 1.20 | 0.22 | 0.28 |
| 49550 | 0 | 45005  | NMMNYIMDPRTH                        | 2.48 | 0.01 | 0.90 | 0.68 | 0.22 | 0.28 |
| 49551 | 0 | 45005  | NMMNYIMDPRTH                        | 2.48 | 0.01 | 0.90 | 1.20 | 0.22 | 0.28 |
| 49552 | 0 | 45005  | NMMNYIMDPRTH                        | 2.48 | 0.01 | 0.90 | 1.20 | 0.22 | 1.75 |
| 49553 | 0 | 45006  | NMMRFTTELSTPS                       | 2.46 | 0.01 | 0.90 | 1.20 | 0.22 | 1.39 |
| 49554 | 0 | 45006  | NMMRFTTELSTPS                       | 2.46 | 0.01 | 0.90 | 1.20 | 0.22 | 0.28 |
| 49555 | 0 | 45006  | NMMRFTTELSTPS                       | 2.46 | 0.01 | 0.90 | 0.68 | 0.22 | 0.28 |
| 49556 | 0 | 45006  | NMMRFTTELSTPS                       | 2.46 | 0.01 | 0.90 | 1.20 | 0.22 | 0.28 |
| 49557 | 0 | 45006  | NMMRFTTELSTPS                       | 2.46 | 0.01 | 0.90 | 1.20 | 0.22 | 1.75 |
| 49558 | 0 | 45007  | NMMRFTSQPPNN                        | 2.46 | 0.01 | 0.90 | 1.20 | 0.22 | 1.39 |
| 49559 | 0 | 45009  | NMNLVDWLR                           | 2.24 | 0.01 | 2.61 | 0.44 | 0.85 | 0.28 |
| 49560 | 0 | 45010  | NMNNMNNNMNNMN<br>N<br>NMNNMNNNMNNMN | 3.31 | 0.01 | 2.22 | 0.44 | 1.74 | 0.28 |
| 49561 | 0 | 45010  | NMNNMNNNMNNMN<br>N                  | 3.31 | 0.01 | 2.22 | 0.44 | 1.74 | 0.28 |
| 49562 | 0 | 228562 | NMNRYPNQVYYP                        | 2.59 | 0.01 | 2.98 | 2.19 | 0.22 | 0.85 |
| 49563 | 0 | 45013  | NMPASMKRVRIE                        | 2.45 | 0.01 | 0.90 | 3.41 | 0.22 | 0.28 |
| 49564 | 0 | 45013  | NMPASMKRVRIE                        | 2.45 | 0.01 | 0.90 | 3.41 | 2.25 | 1.75 |
| 49565 | 0 | 45013  | NMPASMKRVRIE                        | 2.45 | 0.01 | 0.90 | 2.36 | 1.41 | 0.28 |
| 49566 | 0 | 45016  | NMPNDPNR                            | 2.17 | 0.01 | 3.29 | 1.20 | 0.22 | 0.28 |
| 49567 | 0 | 45017  | NMPNDPNRN                           | 2.27 | 0.01 | 3.37 | 1.12 | 0.22 | 0.28 |
| 49568 | 0 | 423733 | NMPPPHPINHYK                        | 2.51 | 0.01 | 0.90 | 2.46 | 0.22 | 1.39 |
| 49569 | 0 | 423733 | NMPPPHPINHYK                        | 2.51 | 0.01 | 0.90 | 0.44 | 1.13 | 0.28 |
| 49570 | 0 | 104153 | NMPQQNR                             | 2.04 | 0.01 | 0.90 | 0.44 | 1.13 | 1.39 |
| 49571 | 0 | 172537 | NMQKDLEHSNDALKA                     | 2.69 | 0.01 | 0.78 | 0.44 | 1.13 | 0.28 |
| 49572 | 0 | 111592 | NMRFRHNLGPRTEADIA<br>SRQAGRIHSVD    | 3.25 | 0.01 | 3.33 | 0.44 | 1.23 | 0.85 |
| 49573 | 0 | 45026  | NMSIRRS                             | 2.15 | 0.01 | 2.96 | 0.68 | 0.22 | 0.28 |
| 49574 | 0 | 45026  | NMSIRRS                             | 2.15 | 0.01 | 2.96 | 0.68 | 0.22 | 0.28 |
| 49575 | 0 | 153430 | NMSLRDHYSPPGGGS                     | 2.73 | 0.01 | 0.90 | 0.68 | 0.22 | 1.39 |
| 49576 | 0 | 344708 | NMTFANTLLYSDEL                      | 2.68 | 0.01 | 1.61 | 0.44 | 0.85 | 1.28 |
| 49577 | 0 | 149080 | NMTQAAQ                             | 2.03 | 0.01 | 0.90 | 2.13 | 1.59 | 1.39 |
| 49578 | 0 | 45033  | NMTVM                               | 1.75 | 0.01 | 2.74 | 0.44 | 0.85 | 0.85 |
| 49579 | 0 | 45033  | NMTVM                               | 1.75 | 0.01 | 2.74 | 0.44 | 0.85 | 1.27 |
| 49580 | 0 | 79322  | NMVIWDWQWT                          | 2.31 | 0.01 | 0.90 | 0.68 | 0.22 | 0.28 |

|       |   |        |                                    |      |      |      |      |      |      |
|-------|---|--------|------------------------------------|------|------|------|------|------|------|
| 49581 | 0 | 180997 | NMVPLWR                            | 1.99 | 0.01 | 0.90 | 0.68 | 0.22 | 1.39 |
| 49582 | 0 | 180998 | NMVPMSR                            | 2.02 | 0.01 | 0.90 | 0.68 | 0.22 | 1.39 |
| 49583 | 0 | 45039  | NMVSERHVYHNLMIH<br>KD GK           | 2.94 | 0.01 | 0.90 | 2.74 | 0.22 | 1.48 |
| 49584 | 0 | 167346 | NMWQALN                            | 2.03 | 0.01 | 0.90 | 2.37 | 0.22 | 1.39 |
| 49585 | 0 | 102680 | NMYAMLIARYKMFPEV<br>KEKG           | 2.93 | 0.01 | 1.75 | 3.89 | 0.22 | 0.28 |
| 49586 | 0 | 45046  | NMYRYPNQVYYRPVD                    | 2.71 | 0.01 | 1.75 | 2.19 | 0.22 | 0.28 |
| 49587 | 0 | 120841 | NNADGDFAIVHMTKLLL<br>DYT           | 2.91 | 0.01 | 2.26 | 0.68 | 0.22 | 0.28 |
| 49588 | 0 | 132504 | NNAIEPRSFQNPV                      | 2.67 | 0.01 | 0.78 | 1.15 | 0.22 | 0.28 |
| 49589 | 0 | 132504 | NNAIEPRSFQNPV                      | 2.67 | 0.01 | 0.78 | 1.15 | 0.22 | 1.27 |
| 49590 | 0 | 132504 | NNAIEPRSFQNPV                      | 2.67 | 0.01 | 0.78 | 1.15 | 0.22 | 0.28 |
| 49591 | 0 | 132504 | NNAIEPRSFQNPV                      | 2.67 | 0.01 | 0.78 | 0.44 | 1.41 | 1.27 |
| 49592 | 0 | 132504 | NNAIEPRSFQNPV                      | 2.67 | 0.01 | 0.78 | 0.44 | 1.93 | 1.27 |
| 49593 | 0 | 138209 | NNAKAAVRLGSDMG                     | 2.59 | 0.01 | 2.51 | 1.20 | 0.22 | 0.28 |
| 49594 | 0 | 45052  | NNAYNMSI                           | 2.14 | 0.01 | 2.96 | 0.68 | 0.22 | 0.28 |
| 49595 | 0 | 45052  | NNAYNMSI                           | 2.14 | 0.01 | 2.96 | 0.68 | 0.22 | 0.28 |
| 49596 | 0 | 155291 | NNAYP                              | 1.75 | 0.01 | 4.08 | 0.68 | 0.22 | 1.27 |
| 49597 | 0 | 155291 | NNAYP                              | 1.75 | 0.01 | 4.08 | 0.68 | 0.22 | 1.27 |
| 49598 | 0 | 155291 | NNAYP                              | 1.75 | 0.01 | 4.08 | 0.68 | 0.22 | 1.27 |
| 49599 | 0 | 155291 | NNAYP                              | 1.75 | 0.01 | 4.08 | 0.68 | 0.22 | 1.27 |
| 49600 | 0 | 155291 | NNAYP                              | 1.75 | 0.01 | 4.08 | 0.68 | 0.22 | 1.27 |
| 49601 | 0 | 155291 | NNAYP                              | 1.75 | 0.01 | 4.08 | 0.68 | 0.22 | 1.27 |
| 49602 | 0 | 155291 | NNAYP                              | 1.75 | 0.01 | 4.08 | 0.68 | 0.22 | 1.27 |
| 49603 | 0 | 45053  | NNCTRVEIAEYRLL                     | 2.64 | 0.01 | 2.43 | 0.44 | 1.59 | 0.28 |
| 49604 | 0 | 108046 | NNDDTWTDLVKNSSCN<br>KGVLLPPRRKNLFL | 3.34 | 0.01 | 0.90 | 1.12 | 0.22 | 0.28 |
| 49605 | 0 | 45054  | NNDFHFEVFNFV                       | 2.52 | 0.01 | 2.38 | 0.68 | 0.22 | 0.28 |
| 49606 | 0 | 45054  | NNDFHFEVFNFV                       | 2.52 | 0.01 | 2.38 | 0.68 | 0.22 | 0.28 |
| 49607 | 0 | 45054  | NNDFHFEVFNFV                       | 2.52 | 0.01 | 2.38 | 0.44 | 1.59 | 0.28 |
| 49608 | 0 | 45054  | NNDFHFEVFNFV                       | 2.52 | 0.01 | 2.38 | 0.44 | 1.74 | 0.28 |
| 49609 | 0 | 45054  | NNDFHFEVFNFV                       | 2.52 | 0.01 | 2.38 | 0.44 | 1.74 | 0.28 |
| 49610 | 0 | 344779 | NNDKDEDDGDNDAD                     | 2.73 | 0.01 | 1.61 | 0.44 | 0.85 | 1.28 |
| 49611 | 0 | 45059  | NNDNPQ                             | 1.92 | 0.01 | 0.90 | 1.15 | 0.22 | 1.27 |
| 49612 | 0 | 45059  | NNDNPQ                             | 1.92 | 0.01 | 0.90 | 1.15 | 0.22 | 1.39 |
| 49613 | 0 | 344786 | NNDPAADGAETREEK                    | 2.68 | 0.01 | 1.61 | 0.44 | 0.85 | 1.28 |
| 49614 | 0 | 45062  | NNDRIYDMNHLMIKMH<br>ILAI           | 2.97 | 0.01 | 0.90 | 2.74 | 0.22 | 1.48 |
| 49615 | 0 | 45062  | NNDRIYDMNHLMIKMH<br>ILAI           | 2.97 | 0.01 | 0.90 | 2.74 | 0.22 | 1.48 |
| 49616 | 0 | 45062  | NNDRIYDMNHLMIKMH<br>ILAI           | 2.97 | 0.01 | 0.90 | 2.74 | 0.22 | 1.75 |
| 49617 | 0 | 45065  | NNEDNEKL                           | 2.16 | 0.01 | 3.29 | 1.20 | 0.22 | 0.28 |
| 49618 | 0 | 45067  | NNEEPSDKH                          | 2.21 | 0.01 | 3.37 | 1.12 | 0.22 | 0.28 |

|       |   |        |                                                       |      |      |      |      |      |      |
|-------|---|--------|-------------------------------------------------------|------|------|------|------|------|------|
| 49619 | 0 | 45073  | NNEMDETINKLKKDINK<br>LNEKIEKYDNFMKM                   | 3.42 | 0.01 | 2.22 | 0.44 | 1.74 | 0.28 |
| 49620 | 0 | 45073  | NNEMDETINKLKKDINK<br>LNEKIEKYDNFMKM                   | 3.42 | 0.01 | 2.22 | 0.44 | 1.74 | 0.28 |
| 49621 | 0 | 98915  | NNFGKLFEVK                                            | 2.32 | 0.01 | 2.16 | 0.44 | 1.23 | 0.85 |
| 49622 | 0 | 98916  | NNFGKLFEVKPDKKN                                       | 2.69 | 0.01 | 2.16 | 0.44 | 1.23 | 1.48 |
| 49623 | 0 | 45104  | NNFVHDCVNI                                            | 2.33 | 0.01 | 2.52 | 2.90 | 0.22 | 0.85 |
| 49624 | 0 | 45104  | NNFVHDCVNI                                            | 2.33 | 0.01 | 2.52 | 2.90 | 0.22 | 0.28 |
| 49625 | 0 | 45105  | NNFVHDCVNIT                                           | 2.41 | 0.01 | 2.52 | 1.15 | 0.22 | 0.28 |
| 49626 | 0 | 45107  | NNFVNNKMNNMNNM<br>KNNMNNMNNIMNNI<br>MN                | 3.41 | 0.01 | 2.22 | 0.44 | 1.74 | 0.28 |
| 49627 | 0 | 45107  | NNFVNNKMNNMNNM<br>KNNMNNMNNIMNNI<br>MN                | 3.41 | 0.01 | 2.22 | 0.44 | 1.74 | 0.28 |
| 49628 | 0 | 45110  | NNGDNGREGKDEDKRD<br>GNNEDNEKLRKPKHKKL<br>KQPGDGNPDPNA | 3.79 | 0.01 | 3.29 | 0.44 | 0.85 | 0.28 |
| 49629 | 0 | 101932 | NNGGCDADA                                             | 2.25 | 0.01 | 1.66 | 0.44 | 1.59 | 2.97 |
| 49630 | 0 | 45112  | NNGGCDADAKCTEEDS<br>GSGKKITC                          | 3.19 | 0.01 | 3.57 | 0.44 | 0.85 | 0.28 |
| 49631 | 0 | 113666 | NNGLYDIYADDFITDTST<br>TP                              | 2.94 | 0.01 | 1.86 | 2.37 | 0.22 | 1.48 |
| 49632 | 0 | 113666 | NNGLYDIYADDFITDTST<br>TP                              | 2.94 | 0.01 | 1.86 | 2.37 | 0.22 | 0.28 |
| 49633 | 0 | 118538 | NNGNLQLRKEVTWEVL<br>EG                                | 2.87 | 0.01 | 0.78 | 0.68 | 0.22 | 1.27 |
| 49634 | 0 | 118538 | NNGNLQLRKEVTWEVL<br>EG                                | 2.87 | 0.01 | 0.78 | 0.68 | 0.22 | 1.27 |
| 49635 | 0 | 118538 | NNGNLQLRKEVTWEVL<br>EG                                | 2.87 | 0.01 | 0.78 | 0.68 | 0.22 | 1.27 |
| 49636 | 0 | 118538 | NNGNLQLRKEVTWEVL<br>EG                                | 2.87 | 0.01 | 0.78 | 0.68 | 0.22 | 0.28 |
| 49637 | 0 | 118539 | NNGNLQLRNKEVTWEV<br>LEG                               | 2.92 | 0.01 | 0.78 | 0.44 | 1.13 | 0.28 |
| 49638 | 0 | 118539 | NNGNLQLRNKEVTWEV<br>LEG                               | 2.92 | 0.01 | 0.78 | 0.44 | 1.13 | 0.28 |
| 49639 | 0 | 118539 | NNGNLQLRNKEVTWEV<br>LEG                               | 2.92 | 0.01 | 0.78 | 0.44 | 1.13 | 0.28 |
| 49640 | 0 | 45115  | NNGTWSKHKAEVKKFL                                      | 2.69 | 0.01 | 3.53 | 3.08 | 0.22 | 0.28 |
| 49641 | 0 | 45116  | NNGTWSKHKAEVKKFL<br>N                                 | 2.76 | 0.01 | 3.53 | 3.08 | 0.22 | 1.39 |

|       |   |        |                                                                                                                                                                                                                                                                                                                                                                                                                                                                                                                                         |      |      |      |      |      |      |
|-------|---|--------|-----------------------------------------------------------------------------------------------------------------------------------------------------------------------------------------------------------------------------------------------------------------------------------------------------------------------------------------------------------------------------------------------------------------------------------------------------------------------------------------------------------------------------------------|------|------|------|------|------|------|
| 49642 | 0 | 45122  | NNHVSIVEAWSNDTP<br>YLHD                                                                                                                                                                                                                                                                                                                                                                                                                                                                                                                 | 2.93 | 0.01 | 3.93 | 2.36 | 0.22 | 0.28 |
| 49643 | 0 | 111593 | NNIARMRLYDPNQAA                                                                                                                                                                                                                                                                                                                                                                                                                                                                                                                         | 2.66 | 0.01 | 3.20 | 1.12 | 0.22 | 0.85 |
| 49644 | 0 | 111593 | NNIARMRLYDPNQAA                                                                                                                                                                                                                                                                                                                                                                                                                                                                                                                         | 2.66 | 0.01 | 3.20 | 0.44 | 1.23 | 1.27 |
| 49645 | 0 | 236118 | NNIFMSNTYPR                                                                                                                                                                                                                                                                                                                                                                                                                                                                                                                             | 2.38 | 0.01 | 0.78 | 0.44 | 1.13 | 2.66 |
| 49646 | 0 | 236118 | NNIFMSNTYPR                                                                                                                                                                                                                                                                                                                                                                                                                                                                                                                             | 2.38 | 0.01 | 0.78 | 3.41 | 0.22 | 2.66 |
| 49647 | 0 | 230495 | NNIAHRYWGTDLNA                                                                                                                                                                                                                                                                                                                                                                                                                                                                                                                          | 2.66 | 0.01 | 0.90 | 0.44 | 0.85 | 0.85 |
| 49648 | 0 | 230495 | NNIAHRYWGTDLNA                                                                                                                                                                                                                                                                                                                                                                                                                                                                                                                          | 2.66 | 0.01 | 0.90 | 2.89 | 0.22 | 0.85 |
| 49649 | 0 | 45124  | NNIILNLRYKDNNLIDLS<br>G                                                                                                                                                                                                                                                                                                                                                                                                                                                                                                                 | 2.93 | 0.01 | 2.08 | 0.44 | 1.93 | 1.57 |
| 49650 | 0 | 45124  | NNIILNLRYKDNNLIDLS<br>G                                                                                                                                                                                                                                                                                                                                                                                                                                                                                                                 | 2.93 | 0.01 | 2.08 | 2.43 | 0.22 | 1.57 |
| 49651 | 0 | 45124  | NNIILNLRYKDNNLIDLS<br>G                                                                                                                                                                                                                                                                                                                                                                                                                                                                                                                 | 2.93 | 0.01 | 3.45 | 0.44 | 0.22 | 1.57 |
| 49652 | 0 | 45125  | NNIILNLRYKDNNLIDLS<br>GYGAKVEVYDGVELND<br>KNQFKLTSSANSKIRVTQ<br>NQNIIFNSVFLDFSVSFW<br>IRIPKYKNDGIQNYIHNE<br>YTIINCMKNNSGWKISIR<br>GNRIIWTLIDINGKTKSV<br>FFEYNIREDISEYINRWFF<br>VTITNNLNNAKIYINGKL<br>ESNTDIKDIREVIANGEII<br>FKLDGDIDRTQFIWMKY<br>FSIFNTELSQSNIERYKI<br>QSYSEYKDFWGNPLM<br>YNKEYYMFNAGNKNSYI<br>KLKKDSPVGEILTRSKYN<br>QNSKYINYRDLYIGEFII<br>RRKSNSQSINDDIVRKED<br>YIYLDFFNLNQEWRYVT<br>YKYFKKEEEKLFLAPISDS<br>DEFYNTIQIKEYDEQPTY<br>SCQLLFKKDEESTDEIGLI<br>GIHRFYESGIVFEEYKDYF<br>CISKWYLKEVKRKPYNLK<br>LGCNWQFIPKDEGWTE | 6.05 | 0.01 | 4.33 | 1.15 | 0.22 | 0.28 |
|       |   |        |                                                                                                                                                                                                                                                                                                                                                                                                                                                                                                                                         |      |      |      |      |      |      |
|       |   |        |                                                                                                                                                                                                                                                                                                                                                                                                                                                                                                                                         |      |      |      |      |      |      |
|       |   |        |                                                                                                                                                                                                                                                                                                                                                                                                                                                                                                                                         |      |      |      |      |      |      |
|       |   |        |                                                                                                                                                                                                                                                                                                                                                                                                                                                                                                                                         |      |      |      |      |      |      |
|       |   |        |                                                                                                                                                                                                                                                                                                                                                                                                                                                                                                                                         |      |      |      |      |      |      |
|       |   |        |                                                                                                                                                                                                                                                                                                                                                                                                                                                                                                                                         |      |      |      |      |      |      |
|       |   |        |                                                                                                                                                                                                                                                                                                                                                                                                                                                                                                                                         |      |      |      |      |      |      |
|       |   |        |                                                                                                                                                                                                                                                                                                                                                                                                                                                                                                                                         |      |      |      |      |      |      |
|       |   |        |                                                                                                                                                                                                                                                                                                                                                                                                                                                                                                                                         |      |      |      |      |      |      |
|       |   |        |                                                                                                                                                                                                                                                                                                                                                                                                                                                                                                                                         |      |      |      |      |      |      |
|       |   |        |                                                                                                                                                                                                                                                                                                                                                                                                                                                                                                                                         |      |      |      |      |      |      |
|       |   |        |                                                                                                                                                                                                                                                                                                                                                                                                                                                                                                                                         |      |      |      |      |      |      |
|       |   |        |                                                                                                                                                                                                                                                                                                                                                                                                                                                                                                                                         |      |      |      |      |      |      |
|       |   |        |                                                                                                                                                                                                                                                                                                                                                                                                                                                                                                                                         |      |      |      |      |      |      |
|       |   |        |                                                                                                                                                                                                                                                                                                                                                                                                                                                                                                                                         |      |      |      |      |      |      |
|       |   |        |                                                                                                                                                                                                                                                                                                                                                                                                                                                                                                                                         |      |      |      |      |      |      |
|       |   |        |                                                                                                                                                                                                                                                                                                                                                                                                                                                                                                                                         |      |      |      |      |      |      |
|       |   |        |                                                                                                                                                                                                                                                                                                                                                                                                                                                                                                                                         |      |      |      |      |      |      |
|       |   |        |                                                                                                                                                                                                                                                                                                                                                                                                                                                                                                                                         |      |      |      |      |      |      |
|       |   |        |                                                                                                                                                                                                                                                                                                                                                                                                                                                                                                                                         |      |      |      |      |      |      |
|       |   |        |                                                                                                                                                                                                                                                                                                                                                                                                                                                                                                                                         |      |      |      |      |      |      |
|       |   |        |                                                                                                                                                                                                                                                                                                                                                                                                                                                                                                                                         |      |      |      |      |      |      |
|       |   |        |                                                                                                                                                                                                                                                                                                                                                                                                                                                                                                                                         |      |      |      |      |      |      |
|       |   |        |                                                                                                                                                                                                                                                                                                                                                                                                                                                                                                                                         |      |      |      |      |      |      |
|       |   |        |                                                                                                                                                                                                                                                                                                                                                                                                                                                                                                                                         |      |      |      |      |      |      |
|       |   |        |                                                                                                                                                                                                                                                                                                                                                                                                                                                                                                                                         |      |      |      |      |      |      |
|       |   |        |                                                                                                                                                                                                                                                                                                                                                                                                                                                                                                                                         |      |      |      |      |      |      |
|       |   |        |                                                                                                                                                                                                                                                                                                                                                                                                                                                                                                                                         |      |      |      |      |      |      |
|       |   |        |                                                                                                                                                                                                                                                                                                                                                                                                                                                                                                                                         |      |      |      |      |      |      |
|       |   |        |                                                                                                                                                                                                                                                                                                                                                                                                                                                                                                                                         |      |      |      |      |      |      |
|       |   |        |                                                                                                                                                                                                                                                                                                                                                                                                                                                                                                                                         |      |      |      |      |      |      |
|       |   |        |                                                                                                                                                                                                                                                                                                                                                                                                                                                                                                                                         |      |      |      |      |      |      |
|       |   |        |                                                                                                                                                                                                                                                                                                                                                                                                                                                                                                                                         |      |      |      |      |      |      |
|       |   |        |                                                                                                                                                                                                                                                                                                                                                                                                                                                                                                                                         |      |      |      |      |      |      |
|       |   |        |                                                                                                                                                                                                                                                                                                                                                                                                                                                                                                                                         |      |      |      |      |      |      |
|       |   |        |                                                                                                                                                                                                                                                                                                                                                                                                                                                                                                                                         |      |      |      |      |      |      |
|       |   |        |                                                                                                                                                                                                                                                                                                                                                                                                                                                                                                                                         |      |      |      |      |      |      |
|       |   |        |                                                                                                                                                                                                                                                                                                                                                                                                                                                                                                                                         |      |      |      |      |      |      |
|       |   |        |                                                                                                                                                                                                                                                                                                                                                                                                                                                                                                                                         |      |      |      |      |      |      |
|       |   |        |                                                                                                                                                                                                                                                                                                                                                                                                                                                                                                                                         |      |      |      |      |      |      |
|       |   |        |                                                                                                                                                                                                                                                                                                                                                                                                                                                                                                                                         |      |      |      |      |      |      |
|       |   |        |                                                                                                                                                                                                                                                                                                                                                                                                                                                                                                                                         |      |      |      |      |      |      |
|       |   |        |                                                                                                                                                                                                                                                                                                                                                                                                                                                                                                                                         |      |      |      |      |      |      |
|       |   |        |                                                                                                                                                                                                                                                                                                                                                                                                                                                                                                                                         |      |      |      |      |      |      |
|       |   |        |                                                                                                                                                                                                                                                                                                                                                                                                                                                                                                                                         |      |      |      |      |      |      |
|       |   |        |                                                                                                                                                                                                                                                                                                                                                                                                                                                                                                                                         |      |      |      |      |      |      |
|       |   |        |                                                                                                                                                                                                                                                                                                                                                                                                                                                                                                                                         |      |      |      |      |      |      |
|       |   |        |                                                                                                                                                                                                                                                                                                                                                                                                                                                                                                                                         |      |      |      |      |      |      |
|       |   |        |                                                                                                                                                                                                                                                                                                                                                                                                                                                                                                                                         |      |      |      |      |      |      |
|       |   |        |                                                                                                                                                                                                                                                                                                                                                                                                                                                                                                                                         |      |      |      |      |      |      |
|       |   |        |                                                                                                                                                                                                                                                                                                                                                                                                                                                                                                                                         |      |      |      |      |      |      |
|       |   |        |                                                                                                                                                                                                                                                                                                                                                                                                                                                                                                                                         |      |      |      |      |      |      |
|       |   |        |                                                                                                                                                                                                                                                                                                                                                                                                                                                                                                                                         |      |      |      |      |      |      |
|       |   |        |                                                                                                                                                                                                                                                                                                                                                                                                                                                                                                                                         |      |      |      |      |      |      |
|       |   |        |                                                                                                                                                                                                                                                                                                                                                                                                                                                                                                                                         |      |      |      |      |      |      |
|       |   |        |                                                                                                                                                                                                                                                                                                                                                                                                                                                                                                                                         |      |      |      |      |      |      |
|       |   |        |                                                                                                                                                                                                                                                                                                                                                                                                                                                                                                                                         |      |      |      |      |      |      |
|       |   |        |                                                                                                                                                                                                                                                                                                                                                                                                                                                                                                                                         |      |      |      |      |      |      |
|       |   |        |                                                                                                                                                                                                                                                                                                                                                                                                                                                                                                                                         |      |      |      |      |      |      |
|       |   |        |                                                                                                                                                                                                                                                                                                                                                                                                                                                                                                                                         |      |      |      |      |      |      |
|       |   |        |                                                                                                                                                                                                                                                                                                                                                                                                                                                                                                                                         |      |      |      |      |      |      |
|       |   |        |                                                                                                                                                                                                                                                                                                                                                                                                                                                                                                                                         |      |      |      |      |      |      |
|       |   |        |                                                                                                                                                                                                                                                                                                                                                                                                                                                                                                                                         |      |      |      |      |      |      |
|       |   |        |                                                                                                                                                                                                                                                                                                                                                                                                                                                                                                                                         |      |      |      |      |      |      |
|       |   |        |                                                                                                                                                                                                                                                                                                                                                                                                                                                                                                                                         |      |      |      |      |      |      |
|       |   |        |                                                                                                                                                                                                                                                                                                                                                                                                                                                                                                                                         |      |      |      |      |      |      |
|       |   |        |                                                                                                                                                                                                                                                                                                                                                                                                                                                                                                                                         |      |      |      |      |      |      |
|       |   |        |                                                                                                                                                                                                                                                                                                                                                                                                                                                                                                                                         |      |      |      |      |      |      |
|       |   |        |                                                                                                                                                                                                                                                                                                                                                                                                                                                                                                                                         |      |      |      |      |      |      |
|       |   |        |                                                                                                                                                                                                                                                                                                                                                                                                                                                                                                                                         |      |      |      |      |      |      |
|       |   |        |                                                                                                                                                                                                                                                                                                                                                                                                                                                                                                                                         |      |      |      |      |      |      |
|       |   |        |                                                                                                                                                                                                                                                                                                                                                                                                                                                                                                                                         |      |      |      |      |      |      |
|       |   |        |                                                                                                                                                                                                                                                                                                                                                                                                                                                                                                                                         |      |      |      |      |      |      |
|       |   |        |                                                                                                                                                                                                                                                                                                                                                                                                                                                                                                                                         |      |      |      |      |      |      |
|       |   |        |                                                                                                                                                                                                                                                                                                                                                                                                                                                                                                                                         |      |      |      |      |      |      |
|       |   |        |                                                                                                                                                                                                                                                                                                                                                                                                                                                                                                                                         |      |      |      |      |      |      |
|       |   |        |                                                                                                                                                                                                                                                                                                                                                                                                                                                                                                                                         |      |      |      |      |      |      |
|       |   |        |                                                                                                                                                                                                                                                                                                                                                                                                                                                                                                                                         |      |      |      |      |      |      |
|       |   |        |                                                                                                                                                                                                                                                                                                                                                                                                                                                                                                                                         |      |      |      |      |      |      |
|       |   |        |                                                                                                                                                                                                                                                                                                                                                                                                                                                                                                                                         |      |      |      |      |      |      |
|       |   |        |                                                                                                                                                                                                                                                                                                                                                                                                                                                                                                                                         |      |      |      |      |      |      |
|       |   |        |                                                                                                                                                                                                                                                                                                                                                                                                                                                                                                                                         |      |      |      |      |      |      |
|       |   |        |                                                                                                                                                                                                                                                                                                                                                                                                                                                                                                                                         |      |      |      |      |      |      |
|       |   |        |                                                                                                                                                                                                                                                                                                                                                                                                                                                                                                                                         |      |      |      |      |      |      |
|       |   |        |                                                                                                                                                                                                                                                                                                                                                                                                                                                                                                                                         |      |      |      |      |      |      |
|       |   |        |                                                                                                                                                                                                                                                                                                                                                                                                                                                                                                                                         |      |      |      |      |      |      |
|       |   |        |                                                                                                                                                                                                                                                                                                                                                                                                                                                                                                                                         |      |      |      |      |      |      |
|       |   |        |                                                                                                                                                                                                                                                                                                                                                                                                                                                                                                                                         |      |      |      |      |      |      |
|       |   |        |                                                                                                                                                                                                                                                                                                                                                                                                                                                                                                                                         |      |      |      |      |      |      |
|       |   |        |                                                                                                                                                                                                                                                                                                                                                                                                                                                                                                                                         |      |      |      |      |      |      |
|       |   |        |                                                                                                                                                                                                                                                                                                                                                                                                                                                                                                                                         |      |      |      |      |      |      |
|       |   |        |                                                                                                                                                                                                                                                                                                                                                                                                                                                                                                                                         |      |      |      |      |      |      |
|       |   |        |                                                                                                                                                                                                                                                                                                                                                                                                                                                                                                                                         |      |      |      |      |      |      |
|       |   |        |                                                                                                                                                                                                                                                                                                                                                                                                                                                                                                                                         |      |      |      |      |      |      |
|       |   |        |                                                                                                                                                                                                                                                                                                                                                                                                                                                                                                                                         |      |      |      |      |      |      |
|       |   |        |                                                                                                                                                                                                                                                                                                                                                                                                                                                                                                                                         |      |      |      |      |      |      |
|       |   |        |                                                                                                                                                                                                                                                                                                                                                                                                                                                                                                                                         |      |      |      |      |      |      |
|       |   |        |                                                                                                                                                                                                                                                                                                                                                                                                                                                                                                                                         |      |      |      |      |      |      |
|       |   |        |                                                                                                                                                                                                                                                                                                                                                                                                                                                                                                                                         |      |      |      |      |      |      |
|       |   |        |                                                                                                                                                                                                                                                                                                                                                                                                                                                                                                                                         |      |      |      |      |      |      |
|       |   |        |                                                                                                                                                                                                                                                                                                                                                                                                                                                                                                                                         |      |      |      |      |      |      |
|       |   |        |                                                                                                                                                                                                                                                                                                                                                                                                                                                                                                                                         |      |      |      |      |      |      |
|       |   |        |                                                                                                                                                                                                                                                                                                                                                                                                                                                                                                                                         |      |      |      |      |      |      |
|       |   |        |                                                                                                                                                                                                                                                                                                                                                                                                                                                                                                                                         |      |      |      |      |      |      |
|       |   |        |                                                                                                                                                                                                                                                                                                                                                                                                                                                                                                                                         |      |      |      |      |      |      |
|       |   |        |                                                                                                                                                                                                                                                                                                                                                                                                                                                                                                                                         |      |      |      |      |      |      |
|       |   |        |                                                                                                                                                                                                                                                                                                                                                                                                                                                                                                                                         |      |      |      |      |      |      |
|       |   |        |                                                                                                                                                                                                                                                                                                                                                                                                                                                                                                                                         |      |      |      |      |      |      |
|       |   |        |                                                                                                                                                                                                                                                                                                                                                                                                                                                                                                                                         |      |      |      |      |      |      |
|       |   |        |                                                                                                                                                                                                                                                                                                                                                                                                                                                                                                                                         |      |      |      |      |      |      |
|       |   |        |                                                                                                                                                                                                                                                                                                                                                                                                                                                                                                                                         |      |      |      |      |      |      |
|       |   |        |                                                                                                                                                                                                                                                                                                                                                                                                                                                                                                                                         |      |      |      |      |      |      |
|       |   |        |                                                                                                                                                                                                                                                                                                                                                                                                                                                                                                                                         |      |      |      |      |      |      |
|       |   |        |                                                                                                                                                                                                                                                                                                                                                                                                                                                                                                                                         |      |      |      |      |      |      |
|       |   |        |                                                                                                                                                                                                                                                                                                                                                                                                                                                                                                                                         |      |      |      |      |      |      |
|       |   |        |                                                                                                                                                                                                                                                                                                                                                                                                                                                                                                                                         |      |      |      |      |      |      |
|       |   |        |                                                                                                                                                                                                                                                                                                                                                                                                                                                                                                                                         |      |      |      |      |      |      |
|       |   |        |                                                                                                                                                                                                                                                                                                                                                                                                                                                                                                                                         |      |      |      |      |      |      |
|       |   |        |                                                                                                                                                                                                                                                                                                                                                                                                                                                                                                                                         |      |      |      |      |      |      |
|       |   |        |                                                                                                                                                                                                                                                                                                                                                                                                                                                                                                                                         |      |      |      |      |      |      |
|       |   |        |                                                                                                                                                                                                                                                                                                                                                                                                                                                                                                                                         |      |      |      |      |      |      |
|       |   |        |                                                                                                                                                                                                                                                                                                                                                                                                                                                                                                                                         |      |      |      |      |      |      |
|       |   |        |                                                                                                                                                                                                                                                                                                                                                                                                                                                                                                                                         |      |      |      |      |      |      |
|       |   |        |                                                                                                                                                                                                                                                                                                                                                                                                                                                                                                                                         |      |      |      |      |      |      |
|       |   |        |                                                                                                                                                                                                                                                                                                                                                                                                                                                                                                                                         |      |      |      |      |      |      |
|       |   |        |                                                                                                                                                                                                                                                                                                                                                                                                                                                                                                                                         |      |      |      |      |      |      |
|       |   |        |                                                                                                                                                                                                                                                                                                                                                                                                                                                                                                                                         |      |      |      |      |      |      |
|       |   |        |                                                                                                                                                                                                                                                                                                                                                                                                                                                                                                                                         |      |      |      |      |      |      |
|       |   |        |                                                                                                                                                                                                                                                                                                                                                                                                                                                                                                                                         |      |      |      |      |      |      |
|       |   |        |                                                                                                                                                                                                                                                                                                                                                                                                                                                                                                                                         |      |      |      |      |      |      |
|       |   |        |                                                                                                                                                                                                                                                                                                                                                                                                                                                                                                                                         |      |      |      |      |      |      |
|       |   |        |                                                                                                                                                                                                                                                                                                                                                                                                                                                                                                                                         |      |      |      |      |      |      |
|       |   |        |                                                                                                                                                                                                                                                                                                                                                                                                                                                                                                                                         |      |      |      |      |      |      |
|       |   |        |                                                                                                                                                                                                                                                                                                                                                                                                                                                                                                                                         |      |      |      |      |      |      |
|       |   |        |                                                                                                                                                                                                                                                                                                                                                                                                                                                                                                                                         |      |      |      |      |      |      |
|       |   |        |                                                                                                                                                                                                                                                                                                                                                                                                                                                                                                                                         |      |      |      |      |      |      |
|       |   |        |                                                                                                                                                                                                                                                                                                                                                                                                                                                                                                                                         |      |      |      |      |      |      |
|       |   |        |                                                                                                                                                                                                                                                                                                                                                                                                                                                                                                                                         |      |      |      |      |      |      |
|       |   |        |                                                                                                                                                                                                                                                                                                                                                                                                                                                                                                                                         |      |      |      |      |      |      |
|       |   |        |                                                                                                                                                                                                                                                                                                                                                                                                                                                                                                                                         |      |      |      |      |      |      |
|       |   |        |                                                                                                                                                                                                                                                                                                                                                                                                                                                                                                                                         |      |      |      |      |      |      |
|       |   |        |                                                                                                                                                                                                                                                                                                                                                                                                                                                                                                                                         |      |      |      |      |      |      |
|       |   |        |                                                                                                                                                                                                                                                                                                                                                                                                                                                                                                                                         |      |      |      |      |      |      |
|       |   |        |                                                                                                                                                                                                                                                                                                                                                                                                                                                                                                                                         |      |      |      |      |      |      |
|       |   |        |                                                                                                                                                                                                                                                                                                                                                                                                                                                                                                                                         |      |      |      |      |      |      |
|       |   |        |                                                                                                                                                                                                                                                                                                                                                                                                                                                                                                                                         |      |      |      |      |      |      |
|       |   |        |                                                                                                                                                                                                                                                                                                                                                                                                                                                                                                                                         |      |      |      |      |      |      |
|       |   |        |                                                                                                                                                                                                                                                                                                                                                                                                                                                                                                                                         |      |      |      |      |      |      |
|       |   |        |                                                                                                                                                                                                                                                                                                                                                                                                                                                                                                                                         |      |      |      |      |      |      |
|       |   |        |                                                                                                                                                                                                                                                                                                                                                                                                                                                                                                                                         |      |      |      |      |      |      |
|       |   |        |                                                                                                                                                                                                                                                                                                                                                                                                                                                                                                                                         |      |      |      |      |      |      |
|       |   |        |                                                                                                                                                                                                                                                                                                                                                                                                                                                                                                                                         |      |      |      |      |      |      |
|       |   |        |                                                                                                                                                                                                                                                                                                                                                                                                                                                                                                                                         |      |      |      |      |      |      |
|       |   |        |                                                                                                                                                                                                                                                                                                                                                                                                                                                                                                                                         |      |      |      |      |      |      |
|       |   |        |                                                                                                                                                                                                                                                                                                                                                                                                                                                                                                                                         |      |      |      |      |      |      |
|       |   |        |                                                                                                                                                                                                                                                                                                                                                                                                                                                                                                                                         |      |      |      |      |      |      |
|       |   |        |                                                                                                                                                                                                                                                                                                                                                                                                                                                                                                                                         |      |      |      |      |      |      |
|       |   |        |                                                                                                                                                                                                                                                                                                                                                                                                                                                                                                                                         |      |      |      |      |      |      |
|       |   |        |                                                                                                                                                                                                                                                                                                                                                                                                                                                                                                                                         |      |      |      |      |      |      |
|       |   |        |                                                                                                                                                                                                                                                                                                                                                                                                                                                                                                                                         |      |      |      |      |      |      |
|       |   |        |                                                                                                                                                                                                                                                                                                                                                                                                                                                                                                                                         |      |      |      |      |      |      |
|       |   |        |                                                                                                                                                                                                                                                                                                                                                                                                                                                                                                                                         |      |      |      |      |      |      |
|       |   |        |                                                                                                                                                                                                                                                                                                                                                                                                                                                                                                                                         |      |      |      |      |      |      |
|       |   |        |                                                                                                                                                                                                                                                                                                                                                                                                                                                                                                                                         |      |      |      |      |      |      |
|       |   |        |                                                                                                                                                                                                                                                                                                                                                                                                                                                                                                                                         |      |      |      |      |      |      |
|       |   |        |                                                                                                                                                                                                                                                                                                                                                                                                                                                                                                                                         |      |      |      |      |      |      |
|       |   |        |                                                                                                                                                                                                                                                                                                                                                                                                                                                                                                                                         |      |      |      |      |      |      |
|       |   |        |                                                                                                                                                                                                                                                                                                                                                                                                                                                                                                                                         |      |      |      |      |      |      |
|       |   |        |                                                                                                                                                                                                                                                                                                                                                                                                                                                                                                                                         |      |      |      |      |      |      |
|       |   |        |                                                                                                                                                                                                                                                                                                                                                                                                                                                                                                                                         |      |      |      |      |      |      |
|       |   |        |                                                                                                                                                                                                                                                                                                                                                                                                                                                                                                                                         |      |      |      |      |      |      |
|       |   |        |                                                                                                                                                                                                                                                                                                                                                                                                                                                                                                                                         |      |      |      |      |      |      |
|       |   |        |                                                                                                                                                                                                                                                                                                                                                                                                                                                                                                                                         |      |      |      |      |      |      |
|       |   |        |                                                                                                                                                                                                                                                                                                                                                                                                                                                                                                                                         |      |      |      |      |      |      |
|       |   |        |                                                                                                                                                                                                                                                                                                                                                                                                                                                                                                                                         |      |      |      |      |      |      |
|       |   |        |                                                                                                                                                                                                                                                                                                                                                                                                                                                                                                                                         |      |      |      |      |      |      |
|       |   |        |                                                                                                                                                                                                                                                                                                                                                                                                                                                                                                                                         |      |      |      |      |      |      |
|       |   |        |                                                                                                                                                                                                                                                                                                                                                                                                                                                                                                                                         |      |      |      |      |      |      |
|       |   |        |                                                                                                                                                                                                                                                                                                                                                                                                                                                                                                                                         |      |      |      |      |      |      |
|       |   |        |                                                                                                                                                                                                                                                                                                                                                                                                                                                                                                                                         |      |      |      |      |      |      |
|       |   |        |                                                                                                                                                                                                                                                                                                                                                                                                                                                                                                                                         |      |      |      |      |      |      |
|       |   |        |                                                                                                                                                                                                                                                                                                                                                                                                                                                                                                                                         |      |      |      |      |      |      |
|       |   |        |                                                                                                                                                                                                                                                                                                                                                                                                                                                                                                                                         |      |      |      |      |      |      |
|       |   |        |                                                                                                                                                                                                                                                                                                                                                                                                                                                                                                                                         |      |      |      |      |      |      |
|       |   |        |                                                                                                                                                                                                                                                                                                                                                                                                                                                                                                                                         |      |      |      |      |      |      |
|       |   |        |                                                                                                                                                                                                                                                                                                                                                                                                                                                                                                                                         |      |      |      |      |      |      |
|       |   |        |                                                                                                                                                                                                                                                                                                                                                                                                                                                                                                                                         |      |      |      |      |      |      |
|       |   |        |                                                                                                                                                                                                                                                                                                                                                                                                                                                                                                                                         |      |      |      |      |      |      |
|       |   |        |                                                                                                                                                                                                                                                                                                                                                                                                                                                                                                                                         |      |      |      |      |      |      |
|       |   |        |                                                                                                                                                                                                                                                                                                                                                                                                                                                                                                                                         |      |      |      |      |      |      |
|       |   |        |                                                                                                                                                                                                                                                                                                                                                                                                                                                                                                                                         |      |      |      |      |      |      |
|       |   |        |                                                                                                                                                                                                                                                                                                                                                                                                                                                                                                                                         |      |      |      |      |      |      |
|       |   |        |                                                                                                                                                                                                                                                                                                                                                                                                                                                                                                                                         |      |      |      |      |      |      |
|       |   |        |                                                                                                                                                                                                                                                                                                                                                                                                                                                                                                                                         |      |      |      |      |      |      |
|       |   |        |                                                                                                                                                                                                                                                                                                                                                                                                                                                                                                                                         |      |      |      |      |      |      |
|       |   |        |                                                                                                                                                                                                                                                                                                                                                                                                                                                                                                                                         |      |      |      |      |      |      |
|       |   |        |                                                                                                                                                                                                                                                                                                                                                                                                                                                                                                                                         |      |      |      |      |      |      |
|       |   |        |                                                                                                                                                                                                                                                                                                                                                                                                                                                                                                                                         |      |      |      |      |      |      |
|       |   |        |                                                                                                                                                                                                                                                                                                                                                                                                                                                                                                                                         |      |      |      |      |      |      |
|       |   |        |                                                                                                                                                                                                                                                                                                                                                                                                                                                                                                                                         |      |      |      |      |      |      |
|       |   |        |                                                                                                                                                                                                                                                                                                                                                                                                                                                                                                                                         |      |      |      |      |      |      |
|       |   |        |                                                                                                                                                                                                                                                                                                                                                                                                                                                                                                                                         |      |      |      |      |      |      |
|       |   |        |                                                                                                                                                                                                                                                                                                                                                                                                                                                                                                                                         |      |      |      |      |      |      |
|       |   |        |                                                                                                                                                                                                                                                                                                                                                                                                                                                                                                                                         |      |      |      |      |      |      |
|       |   |        |                                                                                                                                                                                                                                                                                                                                                                                                                                                                                                                                         |      |      |      |      |      |      |
|       |   |        |                                                                                                                                                                                                                                                                                                                                                                                                                                                                                                                                         |      |      |      |      |      |      |
|       |   |        |                                                                                                                                                                                                                                                                                                                                                                                                                                                                                                                                         |      |      |      |      |      |      |
|       |   |        |                                                                                                                                                                                                                                                                                                                                                                                                                                                                                                                                         |      |      |      |      |      |      |
|       |   |        |                                                                                                                                                                                                                                                                                                                                                                                                                                                                                                                                         |      |      |      |      |      |      |
|       |   |        |                                                                                                                                                                                                                                                                                                                                                                                                                                                                                                                                         |      |      |      |      |      |      |
|       |   |        |                                                                                                                                                                                                                                                                                                                                                                                                                                                                                                                                         |      |      |      |      |      |      |
|       |   |        |                                                                                                                                                                                                                                                                                                                                                                                                                                                                                                                                         |      |      |      |      |      |      |
|       |   |        |                                                                                                                                                                                                                                                                                                                                                                                                                                                                                                                                         |      |      |      |      |      |      |
|       |   |        |                                                                                                                                                                                                                                                                                                                                                                                                                                                                                                                                         |      |      |      |      |      |      |
|       |   |        |                                                                                                                                                                                                                                                                                                                                                                                                                                                                                                                                         |      |      |      |      |      |      |
|       |   |        |                                                                                                                                                                                                                                                                                                                                                                                                                                                                                                                                         |      |      |      |      |      |      |
|       |   |        |                                                                                                                                                                                                                                                                                                                                                                                                                                                                                                                                         |      |      |      |      |      |      |
|       |   |        |                                                                                                                                                                                                                                                                                                                                                                                                                                                                                                                                         |      |      |      |      |      |      |
|       |   |        |                                                                                                                                                                                                                                                                                                                                                                                                                                                                                                                                         |      |      |      |      |      |      |
|       |   |        |                                                                                                                                                                                                                                                                                                                                                                                                                                                                                                                                         |      |      |      |      |      |      |
|       |   |        |                                                                                                                                                                                                                                                                                                                                                                                                                                                                                                                                         |      |      |      |      |      |      |
|       |   |        |                                                                                                                                                                                                                                                                                                                                                                                                                                                                                                                                         |      |      |      |      |      |      |
|       |   |        |                                                                                                                                                                                                                                                                                                                                                                                                                                                                                                                                         |      |      |      |      |      |      |
|       |   |        |                                                                                                                                                                                                                                                                                                                                                                                                                                                                                                                                         |      |      |      |      |      |      |
|       |   |        |                                                                                                                                                                                                                                                                                                                                                                                                                                                                                                                                         |      |      |      |      |      |      |
|       |   |        |                                                                                                                                                                                                                                                                                                                                                                                                                                                                                                                                         |      |      |      |      |      |      |
|       |   |        |                                                                                                                                                                                                                                                                                                                                                                                                                                                                                                                                         |      |      |      |      |      |      |
|       |   |        |                                                                                                                                                                                                                                                                                                                                                                                                                                                                                                                                         |      |      |      |      |      |      |
|       |   |        |                                                                                                                                                                                                                                                                                                                                                                                                                                                                                                                                         |      |      |      |      |      |      |
|       |   |        |                                                                                                                                                                                                                                                                                                                                                                                                                                                                                                                                         |      |      |      |      |      |      |
|       |   |        |                                                                                                                                                                                                                                                                                                                                                                                                                                                                                                                                         |      |      |      |      |      |      |
|       |   |        |                                                                                                                                                                                                                                                                                                                                                                                                                                                                                                                                         |      |      |      |      |      |      |
|       |   |        |                                                                                                                                                                                                                                                                                                                                                                                                                                                                                                                                         |      |      |      |      |      |      |
|       |   |        |                                                                                                                                                                                                                                                                                                                                                                                                                                                                                                                                         |      |      |      |      |      |      |
|       |   |        |                                                                                                                                                                                                                                                                                                                                                                                                                                                                                                                                         |      |      |      |      |      |      |
|       |   |        |                                                                                                                                                                                                                                                                                                                                                                                                                                                                                                                                         |      |      |      |      |      |      |
|       |   |        |                                                                                                                                                                                                                                                                                                                                                                                                                                                                                                                                         |      |      |      |      |      |      |
|       |   |        |                                                                                                                                                                                                                                                                                                                                                                                                                                                                                                                                         |      |      |      |      |      |      |
|       |   |        |                                                                                                                                                                                                                                                                                                                                                                                                                                                                                                                                         |      |      |      |      |      |      |
|       |   |        |                                                                                                                                                                                                                                                                                                                                                                                                                                                                                                                                         |      |      |      |      |      |      |
|       |   |        |                                                                                                                                                                                                                                                                                                                                                                                                                                                                                                                                         |      |      |      |      |      |      |
|       |   |        |                                                                                                                                                                                                                                                                                                                                                                                                                                                                                                                                         |      |      |      |      |      |      |
|       |   |        |                                                                                                                                                                                                                                                                                                                                                                                                                                                                                                                                         |      |      |      |      |      |      |
|       |   |        |                                                                                                                                                                                                                                                                                                                                                                                                                                                                                                                                         |      |      |      |      |      |      |
|       |   |        |                                                                                                                                                                                                                                                                                                                                                                                                                                                                                                                                         |      |      |      |      |      |      |
|       |   |        |                                                                                                                                                                                                                                                                                                                                                                                                                                                                                                                                         |      |      |      |      |      |      |
|       |   |        |                                                                                                                                                                                                                                                                                                                                                                                                                                                                                                                                         |      |      |      |      |      |      |
|       |   |        |                                                                                                                                                                                                                                                                                                                                                                                                                                                                                                                                         |      |      |      |      |      |      |
|       |   |        |                                                                                                                                                                                                                                                                                                                                                                                                                                                                                                                                         |      |      |      |      |      |      |
|       |   |        |                                                                                                                                                                                                                                                                                                                                                                                                                                                                                                                                         |      |      |      |      |      |      |
|       |   |        |                                                                                                                                                                                                                                                                                                                                                                                                                                                                                                                                         |      |      |      |      |      |      |
|       |   |        |                                                                                                                                                                                                                                                                                                                                                                                                                                                                                                                                         |      |      |      |      |      |      |
|       |   |        |                                                                                                                                                                                                                                                                                                                                                                                                                                                                                                                                         |      |      |      |      |      |      |
|       |   |        |                                                                                                                                                                                                                                                                                                                                                                                                                                                                                                                                         |      |      |      |      |      |      |
|       |   |        |                                                                                                                                                                                                                                                                                                                                                                                                                                                                                                                                         |      |      |      |      |      |      |
|       |   |        |                                                                                                                                                                                                                                                                                                                                                                                                                                                                                                                                         |      |      |      |      |      |      |
|       |   |        |                                                                                                                                                                                                                                                                                                                                                                                                                                                                                                                                         |      |      |      |      |      |      |
|       |   |        |                                                                                                                                                                                                                                                                                                                                                                                                                                                                                                                                         |      |      |      |      |      |      |
|       |   |        |                                                                                                                                                                                                                                                                                                                                                                                                                                                                                                                                         |      |      |      |      |      |      |
|       |   |        |                                                                                                                                                                                                                                                                                                                                                                                                                                                                                                                                         |      |      |      |      |      |      |
|       |   |        |                                                                                                                                                                                                                                                                                                                                                                                                                                                                                                                                         |      |      |      |      |      |      |
|       |   |        |                                                                                                                                                                                                                                                                                                                                                                                                                                                                                                                                         |      |      |      |      |      |      |
|       |   |        |                                                                                                                                                                                                                                                                                                                                                                                                                                                                                                                                         |      |      |      |      |      |      |
|       |   |        |                                                                                                                                                                                                                                                                                                                                                                                                                                                                                                                                         |      |      |      |      |      |      |
|       |   |        |                                                                                                                                                                                                                                                                                                                                                                                                                                                                                                                                         |      |      |      |      |      |      |
|       |   |        |                                                                                                                                                                                                                                                                                                                                                                                                                                                                                                                                         |      |      |      |      |      |      |
|       |   |        |                                                                                                                                                                                                                                                                                                                                                                                                                                                                                                                                         |      |      |      |      |      |      |
|       |   |        |                                                                                                                                                                                                                                                                                                                                                                                                                                                                                                                                         |      |      |      |      |      |      |
|       |   |        |                                                                                                                                                                                                                                                                                                                                                                                                                                                                                                                                         |      |      |      |      |      |      |
|       |   |        |                                                                                                                                                                                                                                                                                                                                                                                                                                                                                                                                         |      |      |      |      |      |      |
|       |   |        |                                                                                                                                                                                                                                                                                                                                                                                                                                                                                                                                         |      |      |      |      |      |      |
|       |   |        |                                                                                                                                                                                                                                                                                                                                                                                                                                                                                                                                         |      |      |      |      |      |      |
|       |   |        |                                                                                                                                                                                                                                                                                                                                                                                                                                                                                                                                         |      |      |      |      |      |      |
|       |   |        |                                                                                                                                                                                                                                                                                                                                                                                                                                                                                                                                         |      |      |      |      |      |      |
|       |   |        |                                                                                                                                                                                                                                                                                                                                                                                                                                                                                                                                         |      |      |      |      |      |      |
|       |   |        |                                                                                                                                                                                                                                                                                                                                                                                                                                                                                                                                         |      |      |      |      |      |      |
|       |   |        |                                                                                                                                                                                                                                                                                                                                                                                                                                                                                                                                         |      |      |      |      |      |      |
|       |   |        |                                                                                                                                                                                                                                                                                                                                                                                                                                                                                                                                         |      |      |      |      |      |      |
|       |   |        |                                                                                                                                                                                                                                                                                                                                                                                                                                                                                                                                         |      |      |      |      |      |      |
|       |   |        |                                                                                                                                                                                                                                                                                                                                                                                                                                                                                                                                         |      |      |      |      |      |      |
|       |   |        |                                                                                                                                                                                                                                                                                                                                                                                                                                                                                                                                         |      |      |      |      |      |      |
|       |   |        |                                                                                                                                                                                                                                                                                                                                                                                                                                                                                                                                         |      |      |      |      |      |      |
|       |   |        |                                                                                                                                                                                                                                                                                                                                                                                                                                                                                                                                         |      |      |      |      |      |      |
|       |   |        |                                                                                                                                                                                                                                                                                                                                                                                                                                                                                                                                         |      |      |      |      |      |      |
|       |   |        |                                                                                                                                                                                                                                                                                                                                                                                                                                                                                                                                         |      |      |      |      |      |      |
|       |   |        |                                                                                                                                                                                                                                                                                                                                                                                                                                                                                                                                         |      |      |      |      |      |      |
|       |   |        |                                                                                                                                                                                                                                                                                                                                                                                                                                                                                                                                         |      |      |      |      |      |      |
|       |   |        |                                                                                                                                                                                                                                                                                                                                                                                                                                                                                                                                         |      |      |      |      |      |      |
|       |   |        |                                                                                                                                                                                                                                                                                                                                                                                                                                                                                                                                         |      |      |      |      |      |      |
|       |   |        |                                                                                                                                                                                                                                                                                                                                                                                                                                                                                                                                         |      |      |      |      |      |      |
|       |   |        |                                                                                                                                                                                                                                                                                                                                                                                                                                                                                                                                         |      |      |      |      |      |      |
|       |   |        |                                                                                                                                                                                                                                                                                                                                                                                                                                                                                                                                         |      |      |      |      |      |      |
|       |   |        |                                                                                                                                                                                                                                                                                                                                                                                                                                                                                                                                         |      |      |      |      |      |      |
|       |   |        |                                                                                                                                                                                                                                                                                                                                                                                                                                                                                                                                         |      |      |      |      |      |      |
|       |   |        |                                                                                                                                                                                                                                                                                                                                                                                                                                                                                                                                         |      |      |      |      |      |      |
|       |   |        |                                                                                                                                                                                                                                                                                                                                                                                                                                                                                                                                         |      |      |      |      |      |      |
|       |   |        |                                                                                                                                                                                                                                                                                                                                                                                                                                                                                                                                         |      |      |      |      |      |      |
|       |   |        |                                                                                                                                                                                                                                                                                                                                                                                                                                                                                                                                         |      |      |      |      |      |      |
|       |   |        |                                                                                                                                                                                                                                                                                                                                                                                                                                                                                                                                         |      |      |      |      |      |      |
|       |   |        |                                                                                                                                                                                                                                                                                                                                                                                                                                                                                                                                         |      |      |      |      |      |      |
|       |   |        |                                                                                                                                                                                                                                                                                                                                                                                                                                                                                                                                         |      |      |      |      |      |      |
|       |   |        |                                                                                                                                                                                                                                                                                                                                                                                                                                                                                                                                         |      |      |      |      |      |      |
|       |   |        |                                                                                                                                                                                                                                                                                                                                                                                                                                                                                                                                         |      |      |      |      |      |      |
|       |   |        |                                                                                                                                                                                                                                                                                                                                                                                                                                                                                                                                         |      |      |      |      |      |      |
|       |   |        |                                                                                                                                                                                                                                                                                                                                                                                                                                                                                                                                         |      |      |      |      |      |      |
|       |   |        |                                                                                                                                                                                                                                                                                                                                                                                                                                                                                                                                         |      |      |      |      |      |      |
|       |   |        |                                                                                                                                                                                                                                                                                                                                                                                                                                                                                                                                         |      |      |      |      |      |      |
|       |   |        |                                                                                                                                                                                                                                                                                                                                                                                                                                                                                                                                         |      |      |      |      |      |      |
|       |   |        |                                                                                                                                                                                                                                                                                                                                                                                                                                                                                                                                         |      |      |      |      |      |      |
|       |   |        |                                                                                                                                                                                                                                                                                                                                                                                                                                                                                                                                         |      |      |      |      |      |      |
|       |   |        |                                                                                                                                                                                                                                                                                                                                                                                                                                                                                                                                         |      |      |      |      |      |      |
|       |   |        |                                                                                                                                                                                                                                                                                                                                                                                                                                                                                                                                         |      |      |      |      |      |      |
|       |   |        |                                                                                                                                                                                                                                                                                                                                                                                                                                                                                                                                         |      |      |      |      |      |      |
|       |   |        |                                                                                                                                                                                                                                                                                                                                                                                                                                                                                                                                         |      |      |      |      |      |      |
|       |   |        |                                                                                                                                                                                                                                                                                                                                                                                                                                                                                                                                         |      |      |      |      |      |      |
|       |   |        |                                                                                                                                                                                                                                                                                                                                                                                                                                                                                                                                         |      |      |      |      |      |      |
|       |   |        |                                                                                                                                                                                                                                                                                                                                                                                                                                                                                                                                         |      |      |      |      |      |      |
|       |   |        |                                                                                                                                                                                                                                                                                                                                                                                                                                                                                                                                         |      |      |      |      |      |      |
|       |   |        |                                                                                                                                                                                                                                                                                                                                                                                                                                                                                                                                         |      |      |      |      |      |      |
|       |   |        |                                                                                                                                                                                                                                                                                                                                                                                                                                                                                                                                         |      |      |      |      |      |      |
|       |   |        |                                                                                                                                                                                                                                                                                                                                                                                                                                                                                                                                         |      |      |      |      |      |      |
|       |   |        |                                                                                                                                                                                                                                                                                                                                                                                                                                                                                                                                         |      |      |      |      |      |      |
|       |   |        |                                                                                                                                                                                                                                                                                                                                                                                                                                                                                                                                         |      |      |      |      |      |      |
|       |   |        |                                                                                                                                                                                                                                                                                                                                                                                                                                                                                                                                         |      |      |      |      |      |      |
|       |   |        |                                                                                                                                                                                                                                                                                                                                                                                                                                                                                                                                         |      |      |      |      |      |      |
|       |   |        |                                                                                                                                                                                                                                                                                                                                                                                                                                                                                                                                         |      |      |      |      |      |      |
|       |   |        |                                                                                                                                                                                                                                                                                                                                                                                                                                                                                                                                         |      |      |      |      |      |      |
|       |   |        |                                                                                                                                                                                                                                                                                                                                                                                                                                                                                                                                         |      |      |      |      |      |      |
|       |   |        |                                                                                                                                                                                                                                                                                                                                                                                                                                                                                                                                         |      |      |      |      |      |      |
|       |   |        |                                                                                                                                                                                                                                                                                                                                                                                                                                                                                                                                         |      |      |      |      |      |      |
|       |   |        |                                                                                                                                                                                                                                                                                                                                                                                                                                                                                                                                         |      |      |      |      |      |      |
|       |   |        |                                                                                                                                                                                                                                                                                                                                                                                                                                                                                                                                         |      |      |      |      |      |      |
|       |   |        |                                                                                                                                                                                                                                                                                                                                                                                                                                                                                                                                         |      |      |      |      |      |      |
|       |   |        |                                                                                                                                                                                                                                                                                                                                                                                                                                                                                                                                         |      |      |      |      |      |      |
|       |   |        |                                                                                                                                                                                                                                                                                                                                                                                                                                                                                                                                         |      |      |      |      |      |      |
|       |   |        |                                                                                                                                                                                                                                                                                                                                                                                                                                                                                                                                         |      |      |      |      |      |      |
|       |   |        |                                                                                                                                                                                                                                                                                                                                                                                                                                                                                                                                         |      |      |      |      |      |      |
|       |   |        |                                                                                                                                                                                                                                                                                                                                                                                                                                                                                                                                         |      |      |      |      |      |      |
|       |   |        |                                                                                                                                                                                                                                                                                                                                                                                                                                                                                                                                         |      |      |      |      |      |      |
|       |   |        |                                                                                                                                                                                                                                                                                                                                                                                                                                                                                                                                         |      |      |      |      |      |      |
|       |   |        |                                                                                                                                                                                                                                                                                                                                                                                                                                                                                                                                         |      |      |      |      |      |      |
|       |   |        |                                                                                                                                                                                                                                                                                                                                                                                                                                                                                                                                         |      |      |      |      |      |      |
|       |   |        |                                                                                                                                                                                                                                                                                                                                                                                                                                                                                                                                         |      |      |      |      |      |      |
|       |   |        |                                                                                                                                                                                                                                                                                                                                                                                                                                                                                                                                         |      |      |      |      |      |      |
|       |   |        |                                                                                                                                                                                                                                                                                                                                                                                                                                                                                                                                         |      |      |      |      |      |      |
|       |   |        |                                                                                                                                                                                                                                                                                                                                                                                                                                                                                                                                         |      |      |      |      |      |      |
|       |   |        |                                                                                                                                                                                                                                                                                                                                                                                                                                                                                                                                         |      |      |      |      |      |      |
|       |   |        |                                                                                                                                                                                                                                                                                                                                                                                                                                                                                                                                         |      |      |      |      |      |      |
|       |   |        |                                                                                                                                                                                                                                                                                                                                                                                                                                                                                                                                         |      |      |      |      |      |      |
|       |   |        |                                                                                                                                                                                                                                                                                                                                                                                                                                                                                                                                         |      |      |      |      |      |      |
|       |   |        |                                                                                                                                                                                                                                                                                                                                                                                                                                                                                                                                         |      |      |      |      |      |      |
|       |   |        |                                                                                                                                                                                                                                                                                                                                                                                                                                                                                                                                         |      |      |      |      |      |      |
|       |   |        |                                                                                                                                                                                                                                                                                                                                                                                                                                                                                                                                         |      |      |      |      |      |      |
|       |   |        |                                                                                                                                                                                                                                                                                                                                                                                                                                                                                                                                         |      |      |      |      |      |      |
|       |   |        |                                                                                                                                                                                                                                                                                                                                                                                                                                                                                                                                         |      |      |      |      |      |      |
|       |   |        |                                                                                                                                                                                                                                                                                                                                                                                                                                                                                                                                         |      |      |      |      |      |      |
|       |   |        |                                                                                                                                                                                                                                                                                                                                                                                                                                                                                                                                         |      |      |      |      |      |      |
|       |   |        |                                                                                                                                                                                                                                                                                                                                                                                                                                                                                                                                         |      |      |      |      |      |      |
|       |   |        |                                                                                                                                                                                                                                                                                                                                                                                                                                                                                                                                         |      |      |      |      |      |      |
|       |   |        |                                                                                                                                                                                                                                                                                                                                                                                                                                                                                                                                         |      |      |      |      |      |      |
|       |   |        |                                                                                                                                                                                                                                                                                                                                                                                                                                                                                                                                         |      |      |      |      |      |      |
|       |   |        |                                                                                                                                                                                                                                                                                                                                                                                                                                                                                                                                         |      |      |      |      |      |      |
|       |   |        |                                                                                                                                                                                                                                                                                                                                                                                                                                                                                                                                         |      |      |      |      |      |      |
|       |   |        |                                                                                                                                                                                                                                                                                                                                                                                                                                                                                                                                         |      |      |      |      |      |      |
|       |   |        |                                                                                                                                                                                                                                                                                                                                                                                                                                                                                                                                         |      |      |      |      |      |      |
|       |   |        |                                                                                                                                                                                                                                                                                                                                                                                                                                                                                                                                         |      |      |      |      |      |      |
|       |   |        |                                                                                                                                                                                                                                                                                                                                                                                                                                                                                                                                         |      |      |      |      |      |      |
|       |   |        |                                                                                                                                                                                                                                                                                                                                                                                                                                                                                                                                         |      |      |      |      |      |      |
|       |   |        |                                                                                                                                                                                                                                                                                                                                                                                                                                                                                                                                         |      |      |      |      |      |      |
|       |   |        |                                                                                                                                                                                                                                                                                                                                                                                                                                                                                                                                         |      |      |      |      |      |      |
|       |   |        |                                                                                                                                                                                                                                                                                                                                                                                                                                                                                                                                         |      |      |      |      |      |      |
|       |   |        |                                                                                                                                                                                                                                                                                                                                                                                                                                                                                                                                         |      |      |      |      |      |      |
|       |   |        |                                                                                                                                                                                                                                                                                                                                                                                                                                                                                                                                         |      |      |      |      |      |      |
|       |   |        |                                                                                                                                                                                                                                                                                                                                                                                                                                                                                                                                         |      |      |      |      |      |      |
|       |   |        |                                                                                                                                                                                                                                                                                                                                                                                                                                                                                                                                         |      |      |      |      |      |      |
|       |   |        |                                                                                                                                                                                                                                                                                                                                                                                                                                                                                                                                         |      |      |      |      |      |      |
|       |   |        |                                                                                                                                                                                                                                                                                                                                                                                                                                                                                                                                         |      |      |      |      |      |      |
|       |   |        |                                                                                                                                                                                                                                                                                                                                                                                                                                                                                                                                         |      |      |      |      |      |      |
|       |   |        |                                                                                                                                                                                                                                                                                                                                                                                                                                                                                                                                         |      |      |      |      |      |      |
|       |   |        |                                                                                                                                                                                                                                                                                                                                                                                                                                                                                                                                         |      |      |      |      |      |      |
|       |   |        |                                                                                                                                                                                                                                                                                                                                                                                                                                                                                                                                         |      |      |      |      |      |      |
|       |   |        |                                                                                                                                                                                                                                                                                                                                                                                                                                                                                                                                         |      |      |      |      |      |      |
|       |   |        |                                                                                                                                                                                                                                                                                                                                                                                                                                                                                                                                         |      |      |      |      |      |      |
|       |   |        |                                                                                                                                                                                                                                                                                                                                                                                                                                                                                                                                         |      |      |      |      |      |      |
|       |   |        |                                                                                                                                                                                                                                                                                                                                                                                                                                                                                                                                         |      |      |      |      |      |      |
|       |   |        |                                                                                                                                                                                                                                                                                                                                                                                                                                                                                                                                         |      |      |      |      |      |      |
|       |   |        |                                                                                                                                                                                                                                                                                                                                                                                                                                                                                                                                         |      |      |      |      |      |      |
|       |   |        |                                                                                                                                                                                                                                                                                                                                                                                                                                                                                                                                         |      |      |      |      |      |      |
|       |   |        |                                                                                                                                                                                                                                                                                                                                                                                                                                                                                                                                         |      |      |      |      |      |      |
|       |   |        |                                                                                                                                                                                                                                                                                                                                                                                                                                                                                                                                         |      |      |      |      |      |      |
|       |   |        |                                                                                                                                                                                                                                                                                                                                                                                                                                                                                                                                         |      |      |      |      |      |      |
|       |   |        |                                                                                                                                                                                                                                                                                                                                                                                                                                                                                                                                         |      |      |      |      |      |      |
|       |   |        |                                                                                                                                                                                                                                                                                                                                                                                                                                                                                                                                         |      |      |      |      |      |      |
|       |   |        |                                                                                                                                                                                                                                                                                                                                                                                                                                                                                                                                         |      |      |      |      |      |      |
|       |   |        |                                                                                                                                                                                                                                                                                                                                                                                                                                                                                                                                         |      |      |      |      |      |      |
|       |   |        |                                                                                                                                                                                                                                                                                                                                                                                                                                                                                                                                         |      |      |      |      |      |      |
|       |   |        |                                                                                                                                                                                                                                                                                                                                                                                                                                                                                                                                         |      |      |      |      |      |      |
|       |   |        |                                                                                                                                                                                                                                                                                                                                                                                                                                                                                                                                         |      |      |      |      |      |      |
|       |   |        |                                                                                                                                                                                                                                                                                                                                                                                                                                                                                                                                         |      |      |      |      |      |      |
|       |   |        |                                                                                                                                                                                                                                                                                                                                                                                                                                                                                                                                         |      |      |      |      |      |      |
|       |   |        |                                                                                                                                                                                                                                                                                                                                                                                                                                                                                                                                         |      |      |      |      |      |      |
|       |   |        |                                                                                                                                                                                                                                                                                                                                                                                                                                                                                                                                         |      |      |      |      |      |      |
|       |   |        |                                                                                                                                                                                                                                                                                                                                                                                                                                                                                                                                         |      |      |      |      |      |      |
|       |   |        |                                                                                                                                                                                                                                                                                                                                                                                                                                                                                                                                         |      |      |      |      |      |      |
|       |   |        |                                                                                                                                                                                                                                                                                                                                                                                                                                                                                                                                         |      |      |      |      |      |      |
|       |   |        |                                                                                                                                                                                                                                                                                                                                                                                                                                                                                                                                         |      |      |      |      |      |      |
|       |   |        |                                                                                                                                                                                                                                                                                                                                                                                                                                                                                                                                         |      |      |      |      |      |      |
|       |   |        |                                                                                                                                                                                                                                                                                                                                                                                                                                                                                                                                         |      |      |      |      |      |      |
|       |   |        |                                                                                                                                                                                                                                                                                                                                                                                                                                                                                                                                         |      |      |      |      |      |      |
|       |   |        |                                                                                                                                                                                                                                                                                                                                                                                                                                                                                                                                         |      |      |      |      |      |      |
|       |   |        |                                                                                                                                                                                                                                                                                                                                                                                                                                                                                                                                         |      |      |      |      |      |      |
|       |   |        |                                                                                                                                                                                                                                                                                                                                                                                                                                                                                                                                         |      |      |      |      |      |      |
|       |   |        |                                                                                                                                                                                                                                                                                                                                                                                                                                                                                                                                         |      |      |      |      |      |      |
|       |   |        |                                                                                                                                                                                                                                                                                                                                                                                                                                                                                                                                         |      |      |      |      |      |      |
|       |   |        |                                                                                                                                                                                                                                                                                                                                                                                                                                                                                                                                         |      |      |      |      |      |      |
|       |   |        |                                                                                                                                                                                                                                                                                                                                                                                                                                                                                                                                         |      |      |      |      |      |      |
|       |   |        |                                                                                                                                                                                                                                                                                                                                                                                                                                                                                                                                         |      |      |      |      |      |      |
|       |   |        |                                                                                                                                                                                                                                                                                                                                                                                                                                                                                                                                         |      |      |      |      |      |      |
|       |   |        |                                                                                                                                                                                                                                                                                                                                                                                                                                                                                                                                         |      |      |      |      |      |      |
|       |   |        |                                                                                                                                                                                                                                                                                                                                                                                                                                                                                                                                         |      |      |      |      |      |      |
|       |   |        |                                                                                                                                                                                                                                                                                                                                                                                                                                                                                                                                         |      |      |      |      |      |      |
|       |   |        |                                                                                                                                                                                                                                                                                                                                                                                                                                                                                                                                         |      |      |      |      |      |      |
|       |   |        |                                                                                                                                                                                                                                                                                                                                                                                                                                                                                                                                         |      |      |      |      |      |      |
|       |   |        |                                                                                                                                                                                                                                                                                                                                                                                                                                                                                                                                         |      |      |      |      |      |      |
|       |   |        |                                                                                                                                                                                                                                                                                                                                                                                                                                                                                                                                         |      |      |      |      |      |      |
|       |   |        |                                                                                                                                                                                                                                                                                                                                                                                                                                                                                                                                         |      |      |      |      |      |      |
|       |   |        |                                                                                                                                                                                                                                                                                                                                                                                                                                                                                                                                         |      |      |      |      |      |      |
|       |   |        |                                                                                                                                                                                                                                                                                                                                                                                                                                                                                                                                         |      |      |      |      |      |      |
|       |   |        |                                                                                                                                                                                                                                                                                                                                                                                                                                                                                                                                         |      |      |      |      |      |      |
|       |   |        |                                                                                                                                                                                                                                                                                                                                                                                                                                                                                                                                         |      |      |      |      |      |      |
|       |   |        |                                                                                                                                                                                                                                                                                                                                                                                                                                                                                                                                         |      |      |      |      |      |      |
|       |   |        |                                                                                                                                                                                                                                                                                                                                                                                                                                                                                                                                         |      |      |      |      |      |      |
|       |   |        |                                                                                                                                                                                                                                                                                                                                                                                                                                                                                                                                         |      |      |      |      |      |      |
|       |   |        |                                                                                                                                                                                                                                                                                                                                                                                                                                                                                                                                         |      |      |      |      |      |      |
|       |   |        |                                                                                                                                                                                                                                                                                                                                                                                                                                                                                                                                         |      |      |      |      |      |      |
|       |   |        |                                                                                                                                                                                                                                                                                                                                                                                                                                                                                                                                         |      |      |      |      |      |      |
|       |   |        |                                                                                                                                                                                                                                                                                                                                                                                                                                                                                                                                         |      |      |      |      |      |      |
|       |   |        |                                                                                                                                                                                                                                                                                                                                                                                                                                                                                                                                         |      |      |      |      |      |      |
|       |   |        |                                                                                                                                                                                                                                                                                                                                                                                                                                                                                                                                         |      |      |      |      |      |      |
|       |   |        |                                                                                                                                                                                                                                                                                                                                                                                                                                                                                                                                         |      |      |      |      |      |      |
|       |   |        |                                                                                                                                                                                                                                                                                                                                                                                                                                                                                                                                         |      |      |      |      |      |      |
|       |   |        |                                                                                                                                                                                                                                                                                                                                                                                                                                                                                                                                         |      |      |      |      |      |      |
|       |   |        |                                                                                                                                                                                                                                                                                                                                                                                                                                                                                                                                         |      |      |      |      |      |      |
|       |   |        |                                                                                                                                                                                                                                                                                                                                                                                                                                                                                                                                         |      |      |      |      |      |      |
|       |   |        |                                                                                                                                                                                                                                                                                                                                                                                                                                                                                                                                         |      |      |      |      |      |      |
|       |   |        |                                                                                                                                                                                                                                                                                                                                                                                                                                                                                                                                         |      |      |      |      |      |      |
|       |   |        |                                                                                                                                                                                                                                                                                                                                                                                                                                                                                                                                         |      |      |      |      |      |      |
|       |   |        |                                                                                                                                                                                                                                                                                                                                                                                                                                                                                                                                         |      |      |      |      |      |      |
|       |   |        |                                                                                                                                                                                                                                                                                                                                                                                                                                                                                                                                         |      |      |      |      |      |      |
|       |   |        |                                                                                                                                                                                                                                                                                                                                                                                                                                                                                                                                         |      |      |      |      |      |      |
|       |   |        |                                                                                                                                                                                                                                                                                                                                                                                                                                                                                                                                         |      |      |      |      |      |      |
|       |   |        |                                                                                                                                                                                                                                                                                                                                                                                                                                                                                                                                         |      |      |      |      |      |      |
|       |   |        |                                                                                                                                                                                                                                                                                                                                                                                                                                                                                                                                         |      |      |      |      |      |      |
|       |   |        |                                                                                                                                                                                                                                                                                                                                                                                                                                                                                                                                         |      |      |      |      |      |      |
|       |   |        |                                                                                                                                                                                                                                                                                                                                                                                                                                                                                                                                         |      |      |      |      |      |      |
|       |   |        |                                                                                                                                                                                                                                                                                                                                                                                                                                                                                                                                         |      |      |      |      |      |      |
|       |   |        |                                                                                                                                                                                                                                                                                                                                                                                                                                                                                                                                         |      |      |      |      |      |      |
|       |   |        |                                                                                                                                                                                                                                                                                                                                                                                                                                                                                                                                         |      |      |      |      |      |      |
|       |   |        |                                                                                                                                                                                                                                                                                                                                                                                                                                                                                                                                         |      |      |      |      |      |      |
|       |   |        |                                                                                                                                                                                                                                                                                                                                                                                                                                                                                                                                         |      |      |      |      |      |      |
|       |   |        |                                                                                                                                                                                                                                                                                                                                                                                                                                                                                                                                         |      |      |      |      |      |      |
|       |   |        |                                                                                                                                                                                                                                                                                                                                                                                                                                                                                                                                         |      |      |      |      |      |      |
|       |   |        |                                                                                                                                                                                                                                                                                                                                                                                                                                                                                                                                         |      |      |      |      |      |      |
|       |   |        |                                                                                                                                                                                                                                                                                                                                                                                                                                                                                                                                         |      |      |      |      |      |      |
|       |   |        |                                                                                                                                                                                                                                                                                                                                                                                                                                                                                                                                         |      |      |      |      |      |      |
|       |   |        |                                                                                                                                                                                                                                                                                                                                                                                                                                                                                                                                         |      |      |      |      |      |      |
|       |   |        |                                                                                                                                                                                                                                                                                                                                                                                                                                                                                                                                         |      |      |      |      |      |      |
|       |   |        |                                                                                                                                                                                                                                                                                                                                                                                                                                                                                                                                         |      |      |      |      |      |      |
|       |   |        |                                                                                                                                                                                                                                                                                                                                                                                                                                                                                                                                         |      |      |      |      |      |      |
|       |   |        |                                                                                                                                                                                                                                                                                                                                                                                                                                                                                                                                         |      |      |      |      |      |      |
|       |   |        |                                                                                                                                                                                                                                                                                                                                                                                                                                                                                                                                         |      |      |      |      |      |      |
|       |   |        |                                                                                                                                                                                                                                                                                                                                                                                                                                                                                                                                         |      |      |      |      |      |      |
|       |   |        |                                                                                                                                                                                                                                                                                                                                                                                                                                                                                                                                         |      |      |      |      |      |      |
|       |   |        |                                                                                                                                                                                                                                                                                                                                                                                                                                                                                                                                         |      |      |      |      |      |      |
|       |   |        |                                                                                                                                                                                                                                                                                                                                                                                                                                                                                                                                         |      |      |      |      |      |      |
|       |   |        |                                                                                                                                                                                                                                                                                                                                                                                                                                                                                                                                         |      |      |      |      |      |      |
|       |   |        |                                                                                                                                                                                                                                                                                                                                                                                                                                                                                                                                         |      |      |      |      |      |      |
|       |   |        |                                                                                                                                                                                                                                                                                                                                                                                                                                                                                                                                         |      |      |      |      |      |      |
|       |   |        |                                                                                                                                                                                                                                                                                                                                                                                                                                                                                                                                         |      |      |      |      |      |      |
|       |   |        |                                                                                                                                                                                                                                                                                                                                                                                                                                                                                                                                         |      |      |      |      |      |      |
|       |   |        |                                                                                                                                                                                                                                                                                                                                                                                                                                                                                                                                         |      |      |      |      |      |      |
|       |   |        |                                                                                                                                                                                                                                                                                                                                                                                                                                                                                                                                         |      |      |      |      |      |      |
|       |   |        |                                                                                                                                                                                                                                                                                                                                                                                                                                                                                                                                         |      |      |      |      |      |      |
|       |   |        |                                                                                                                                                                                                                                                                                                                                                                                                                                                                                                                                         |      |      |      |      |      |      |
|       |   |        |                                                                                                                                                                                                                                                                                                                                                                                                                                                                                                                                         |      |      |      |      |      |      |
|       |   |        |                                                                                                                                                                                                                                                                                                                                                                                                                                                                                                                                         |      |      |      |      |      |      |
|       |   |        |                                                                                                                                                                                                                                                                                                                                                                                                                                                                                                                                         |      |      |      |      |      |      |
|       |   |        |                                                                                                                                                                                                                                                                                                                                                                                                                                                                                                                                         |      |      |      |      |      |      |
|       |   |        |                                                                                                                                                                                                                                                                                                                                                                                                                                                                                                                                         |      |      |      |      |      |      |
|       |   |        |                                                                                                                                                                                                                                                                                                                                                                                                                                                                                                                                         |      |      |      |      |      |      |
|       |   |        |                                                                                                                                                                                                                                                                                                                                                                                                                                                                                                                                         |      |      |      |      |      |      |
|       |   |        |                                                                                                                                                                                                                                                                                                                                                                                                                                                                                                                                         |      |      |      |      |      |      |
|       |   |        |                                                                                                                                                                                                                                                                                                                                                                                                                                                                                                                                         |      |      |      |      |      |      |
|       |   |        |                                                                                                                                                                                                                                                                                                                                                                                                                                                                                                                                         |      |      |      |      |      |      |
|       |   |        |                                                                                                                                                                                                                                                                                                                                                                                                                                                                                                                                         |      |      |      |      |      |      |
|       |   |        |                                                                                                                                                                                                                                                                                                                                                                                                                                                                                                                                         |      |      |      |      |      |      |
|       |   |        |                                                                                                                                                                                                                                                                                                                                                                                                                                                                                                                                         |      |      |      |      |      |      |
|       |   |        |                                                                                                                                                                                                                                                                                                                                                                                                                                                                                                                                         |      |      |      |      |      |      |
|       |   |        |                                                                                                                                                                                                                                                                                                                                                                                                                                                                                                                                         |      |      |      |      |      |      |
|       |   |        |                                                                                                                                                                                                                                                                                                                                                                                                                                                                                                                                         |      |      |      |      |      |      |
|       |   |        |                                                                                                                                                                                                                                                                                                                                                                                                                                                                                                                                         |      |      |      |      |      |      |
|       |   |        |                                                                                                                                                                                                                                                                                                                                                                                                                                                                                                                                         |      |      |      |      |      |      |
|       |   |        |                                                                                                                                                                                                                                                                                                                                                                                                                                                                                                                                         |      |      |      |      |      |      |
|       |   |        |                                                                                                                                                                                                                                                                                                                                                                                                                                                                                                                                         |      |      |      |      |      |      |
|       |   |        |                                                                                                                                                                                                                                                                                                                                                                                                                                                                                                                                         |      |      |      |      |      |      |
|       |   |        |                                                                                                                                                                                                                                                                                                                                                                                                                                                                                                                                         |      |      |      |      |      |      |
|       |   |        |                                                                                                                                                                                                                                                                                                                                                                                                                                                                                                                                         |      |      |      |      |      |      |
|       |   |        |                                                                                                                                                                                                                                                                                                                                                                                                                                                                                                                                         |      |      |      |      |      |      |
|       |   |        |                                                                                                                                                                                                                                                                                                                                                                                                                                                                                                                                         |      |      |      |      |      |      |
|       |   |        |                                                                                                                                                                                                                                                                                                                                                                                                                                                                                                                                         |      |      |      |      |      |      |
|       |   |        |                                                                                                                                                                                                                                                                                                                                                                                                                                                                                                                                         |      |      |      |      |      |      |
|       |   |        |                                                                                                                                                                                                                                                                                                                                                                                                                                                                                                                                         |      |      |      |      |      |      |
|       |   |        |                                                                                                                                                                                                                                                                                                                                                                                                                                                                                                                                         |      |      |      |      |      |      |
|       |   |        |                                                                                                                                                                                                                                                                                                                                                                                                                                                                                                                                         |      |      |      |      |      |      |
|       |   |        |                                                                                                                                                                                                                                                                                                                                                                                                                                                                                                                                         |      |      |      |      |      |      |
|       |   |        |                                                                                                                                                                                                                                                                                                                                                                                                                                                                                                                                         |      |      |      |      |      |      |
|       |   |        |                                                                                                                                                                                                                                                                                                                                                                                                                                                                                                                                         |      |      |      |      |      |      |
|       |   |        |                                                                                                                                                                                                                                                                                                                                                                                                                                                                                                                                         |      |      |      |      |      |      |
|       |   |        |                                                                                                                                                                                                                                                                                                                                                                                                                                                                                                                                         |      |      |      |      |      |      |
|       |   |        |                                                                                                                                                                                                                                                                                                                                                                                                                                                                                                                                         |      |      |      |      |      |      |
|       |   |        |                                                                                                                                                                                                                                                                                                                                                                                                                                                                                                                                         |      |      |      |      |      |      |
|       |   |        |                                                                                                                                                                                                                                                                                                                                                                                                                                                                                                                                         |      |      |      |      |      |      |
|       |   |        |                                                                                                                                                                                                                                                                                                                                                                                                                                                                                                                                         |      |      |      |      |      |      |
|       |   |        |                                                                                                                                                                                                                                                                                                                                                                                                                                                                                                                                         |      |      |      |      |      |      |
|       |   |        |                                                                                                                                                                                                                                                                                                                                                                                                                                                                                                                                         |      |      |      |      |      |      |
|       |   |        |                                                                                                                                                                                                                                                                                                                                                                                                                                                                                                                                         |      |      |      |      |      |      |
|       |   |        |                                                                                                                                                                                                                                                                                                                                                                                                                                                                                                                                         |      |      |      |      |      |      |
|       |   |        |                                                                                                                                                                                                                                                                                                                                                                                                                                                                                                                                         |      |      |      |      |      |      |
|       |   |        |                                                                                                                                                                                                                                                                                                                                                                                                                                                                                                                                         |      |      |      |      |      |      |
|       |   |        |                                                                                                                                                                                                                                                                                                                                                                                                                                                                                                                                         |      |      |      |      |      |      |
|       |   |        |                                                                                                                                                                                                                                                                                                                                                                                                                                                                                                                                         |      |      |      |      |      |      |
|       |   |        |                                                                                                                                                                                                                                                                                                                                                                                                                                                                                                                                         |      |      |      |      |      |      |
|       |   |        |                                                                                                                                                                                                                                                                                                                                                                                                                                                                                                                                         |      |      |      |      |      |      |
|       |   |        |                                                                                                                                                                                                                                                                                                                                                                                                                                                                                                                                         |      |      |      |      |      |      |
|       |   |        |                                                                                                                                                                                                                                                                                                                                                                                                                                                                                                                                         |      |      |      |      |      |      |
|       |   |        |                                                                                                                                                                                                                                                                                                                                                                                                                                                                                                                                         |      |      |      |      |      |      |
|       |   |        |                                                                                                                                                                                                                                                                                                                                                                                                                                                                                                                                         |      |      |      |      |      |      |
|       |   |        |                                                                                                                                                                                                                                                                                                                                                                                                                                                                                                                                         |      |      |      |      |      |      |
|       |   |        |                                                                                                                                                                                                                                                                                                                                                                                                                                                                                                                                         |      |      |      |      |      |      |
|       |   |        |                                                                                                                                                                                                                                                                                                                                                                                                                                                                                                                                         |      |      |      |      |      |      |
|       |   |        |                                                                                                                                                                                                                                                                                                                                                                                                                                                                                                                                         |      |      |      |      |      |      |
|       |   |        |                                                                                                                                                                                                                                                                                                                                                                                                                                                                                                                                         |      |      |      |      |      |      |
|       |   |        |                                                                                                                                                                                                                                                                                                                                                                                                                                                                                                                                         |      |      |      |      |      |      |
|       |   |        |                                                                                                                                                                                                                                                                                                                                                                                                                                                                                                                                         |      |      |      |      |      |      |
|       |   |        |                                                                                                                                                                                                                                                                                                                                                                                                                                                                                                                                         |      |      |      |      |      |      |
|       |   |        |                                                                                                                                                                                                                                                                                                                                                                                                                                                                                                                                         |      |      |      |      |      |      |
|       |   |        |                                                                                                                                                                                                                                                                                                                                                                                                                                                                                                                                         |      |      |      |      |      |      |
|       |   |        |                                                                                                                                                                                                                                                                                                                                                                                                                                                                                                                                         |      |      |      |      |      |      |
|       |   |        |                                                                                                                                                                                                                                                                                                                                                                                                                                                                                                                                         |      |      |      |      |      |      |
|       |   |        |                                                                                                                                                                                                                                                                                                                                                                                                                                                                                                                                         |      |      |      |      |      |      |
|       |   |        |                                                                                                                                                                                                                                                                                                                                                                                                                                                                                                                                         |      |      |      |      |      |      |
|       |   |        |                                                                                                                                                                                                                                                                                                                                                                                                                                                                                                                                         |      |      |      |      |      |      |
|       |   |        |                                                                                                                                                                                                                                                                                                                                                                                                                                                                                                                                         |      |      |      |      |      |      |
|       |   |        |                                                                                                                                                                                                                                                                                                                                                                                                                                                                                                                                         |      |      |      |      |      |      |
|       |   |        |                                                                                                                                                                                                                                                                                                                                                                                                                                                                                                                                         |      |      |      |      |      |      |
|       |   |        |                                                                                                                                                                                                                                                                                                                                                                                                                                                                                                                                         |      |      |      |      |      |      |
|       |   |        |                                                                                                                                                                                                                                                                                                                                                                                                                                                                                                                                         |      |      |      |      |      |      |
|       |   |        |                                                                                                                                                                                                                                                                                                                                                                                                                                                                                                                                         |      |      |      |      |      |      |
|       |   |        |                                                                                                                                                                                                                                                                                                                                                                                                                                                                                                                                         |      |      |      |      |      |      |
|       |   |        |                                                                                                                                                                                                                                                                                                                                                                                                                                                                                                                                         |      |      |      |      |      |      |
|       |   |        |                                                                                                                                                                                                                                                                                                                                                                                                                                                                                                                                         |      |      |      |      |      |      |
|       |   |        |                                                                                                                                                                                                                                                                                                                                                                                                                                                                                                                                         |      |      |      |      |      |      |
|       |   |        |                                                                                                                                                                                                                                                                                                                                                                                                                                                                                                                                         |      |      |      |      |      |      |
|       |   |        |                                                                                                                                                                                                                                                                                                                                                                                                                                                                                                                                         |      |      |      |      |      |      |
|       |   |        |                                                                                                                                                                                                                                                                                                                                                                                                                                                                                                                                         |      |      |      |      |      |      |
|       |   |        |                                                                                                                                                                                                                                                                                                                                                                                                                                                                                                                                         |      |      |      |      |      |      |
|       |   |        |                                                                                                                                                                                                                                                                                                                                                                                                                                                                                                                                         |      |      |      |      |      |      |
|       |   |        |                                                                                                                                                                                                                                                                                                                                                                                                                                                                                                                                         |      |      |      |      |      |      |
|       |   |        |                                                                                                                                                                                                                                                                                                                                                                                                                                                                                                                                         |      |      |      |      |      |      |
|       |   |        |                                                                                                                                                                                                                                                                                                                                                                                                                                                                                                                                         |      |      |      |      |      |      |
|       |   |        |                                                                                                                                                                                                                                                                                                                                                                                                                                                                                                                                         |      |      |      |      |      |      |
|       |   |        |                                                                                                                                                                                                                                                                                                                                                                                                                                                                                                                                         |      |      |      |      |      |      |
|       |   |        |                                                                                                                                                                                                                                                                                                                                                                                                                                                                                                                                         |      |      |      |      |      |      |
|       |   |        |                                                                                                                                                                                                                                                                                                                                                                                                                                                                                                                                         |      |      |      |      |      |      |
|       |   |        |                                                                                                                                                                                                                                                                                                                                                                                                                                                                                                                                         |      |      |      |      |      |      |
|       |   |        |                                                                                                                                                                                                                                                                                                                                                                                                                                                                                                                                         |      |      |      |      |      |      |
|       |   |        |                                                                                                                                                                                                                                                                                                                                                                                                                                                                                                                                         |      |      |      |      |      |      |
|       |   |        |                                                                                                                                                                                                                                                                                                                                                                                                                                                                                                                                         |      |      |      |      |      |      |
|       |   |        |                                                                                                                                                                                                                                                                                                                                                                                                                                                                                                                                         |      |      |      |      |      |      |
|       |   |        |                                                                                                                                                                                                                                                                                                                                                                                                                                                                                                                                         |      |      |      |      |      |      |
|       |   |        |                                                                                                                                                                                                                                                                                                                                                                                                                                                                                                                                         |      |      |      |      |      |      |
|       |   |        |                                                                                                                                                                                                                                                                                                                                                                                                                                                                                                                                         |      |      |      |      |      |      |
|       |   |        |                                                                                                                                                                                                                                                                                                                                                                                                                                                                                                                                         |      |      |      |      |      |      |
|       |   |        |                                                                                                                                                                                                                                                                                                                                                                                                                                                                                                                                         |      |      |      |      |      |      |
|       |   |        |                                                                                                                                                                                                                                                                                                                                                                                                                                                                                                                                         |      |      |      |      |      |      |
|       |   |        |                                                                                                                                                                                                                                                                                                                                                                                                                                                                                                                                         |      |      |      |      |      |      |
|       |   |        |                                                                                                                                                                                                                                                                                                                                                                                                                                                                                                                                         |      |      |      |      |      |      |
|       |   |        |                                                                                                                                                                                                                                                                                                                                                                                                                                                                                                                                         |      |      |      |      |      |      |
|       |   |        |                                                                                                                                                                                                                                                                                                                                                                                                                                                                                                                                         |      |      |      |      |      |      |
|       |   |        |                                                                                                                                                                                                                                                                                                                                                                                                                                                                                                                                         |      |      |      |      |      |      |
|       |   |        |                                                                                                                                                                                                                                                                                                                                                                                                                                                                                                                                         |      |      |      |      |      |      |
|       |   |        |                                                                                                                                                                                                                                                                                                                                                                                                                                                                                                                                         |      |      |      |      |      |      |
|       |   |        |                                                                                                                                                                                                                                                                                                                                                                                                                                                                                                                                         |      |      |      |      |      |      |
|       |   |        |                                                                                                                                                                                                                                                                                                                                                                                                                                                                                                                                         |      |      |      |      |      |      |
|       |   |        |                                                                                                                                                                                                                                                                                                                                                                                                                                                                                                                                         |      |      |      |      |      |      |
|       |   |        |                                                                                                                                                                                                                                                                                                                                                                                                                                                                                                                                         |      |      |      |      |      |      |
|       |   |        |                                                                                                                                                                                                                                                                                                                                                                                                                                                                                                                                         |      |      |      |      |      |      |
|       |   |        |                                                                                                                                                                                                                                                                                                                                                                                                                                                                                                                                         |      |      |      |      |      |      |
|       |   |        |                                                                                                                                                                                                                                                                                                                                                                                                                                                                                                                                         |      |      |      |      |      |      |
|       |   |        |                                                                                                                                                                                                                                                                                                                                                                                                                                                                                                                                         |      |      |      |      |      |      |
|       |   |        |                                                                                                                                                                                                                                                                                                                                                                                                                                                                                                                                         |      |      |      |      |      |      |
|       |   |        |                                                                                                                                                                                                                                                                                                                                                                                                                                                                                                                                         |      |      |      |      |      |      |
|       |   |        |                                                                                                                                                                                                                                                                                                                                                                                                                                                                                                                                         |      |      |      |      |      |      |
|       |   |        |                                                                                                                                                                                                                                                                                                                                                                                                                                                                                                                                         |      |      |      |      |      |      |
|       |   |        |                                                                                                                                                                                                                                                                                                                                                                                                                                                                                                                                         |      |      |      |      |      |      |
|       |   |        |                                                                                                                                                                                                                                                                                                                                                                                                                                                                                                                                         |      |      |      |      |      |      |
|       |   |        |                                                                                                                                                                                                                                                                                                                                                                                                                                                                                                                                         |      |      |      |      |      |      |
|       |   |        |                                                                                                                                                                                                                                                                                                                                                                                                                                                                                                                                         |      |      |      |      |      |      |
|       |   |        |                                                                                                                                                                                                                                                                                                                                                                                                                                                                                                                                         |      |      |      |      |      |      |
|       |   |        |                                                                                                                                                                                                                                                                                                                                                                                                                                                                                                                                         |      |      |      |      |      |      |
|       |   |        |                                                                                                                                                                                                                                                                                                                                                                                                                                                                                                                                         |      |      |      |      |      |      |
|       |   |        |                                                                                                                                                                                                                                                                                                                                                                                                                                                                                                                                         |      |      |      |      |      |      |
|       |   |        |                                                                                                                                                                                                                                                                                                                                                                                                                                                                                                                                         |      |      |      |      |      |      |
|       |   |        |                                                                                                                                                                                                                                                                                                                                                                                                                                                                                                                                         |      |      |      |      |      |      |
|       |   |        |                                                                                                                                                                                                                                                                                                                                                                                                                                                                                                                                         |      |      |      |      |      |      |
|       |   |        |                                                                                                                                                                                                                                                                                                                                                                                                                                                                                                                                         |      |      |      |      |      |      |
|       |   |        |                                                                                                                                                                                                                                                                                                                                                                                                                                                                                                                                         |      |      |      |      |      |      |
|       |   |        |                                                                                                                                                                                                                                                                                                                                                                                                                                                                                                                                         |      |      |      |      |      |      |
|       |   |        |                                                                                                                                                                                                                                                                                                                                                                                                                                                                                                                                         |      |      |      |      |      |      |
|       |   |        |                                                                                                                                                                                                                                                                                                                                                                                                                                                                                                                                         |      |      |      |      |      |      |
|       |   |        |                                                                                                                                                                                                                                                                                                                                                                                                                                                                                                                                         |      |      |      |      |      |      |
|       |   |        |                                                                                                                                                                                                                                                                                                                                                                                                                                                                                                                                         |      |      |      |      |      |      |
|       |   |        |                                                                                                                                                                                                                                                                                                                                                                                                                                                                                                                                         |      |      |      |      |      |      |
|       |   |        |                                                                                                                                                                                                                                                                                                                                                                                                                                                                                                                                         |      |      |      |      |      |      |
|       |   |        |                                                                                                                                                                                                                                                                                                                                                                                                                                                                                                                                         |      |      |      |      |      |      |
|       |   |        |                                                                                                                                                                                                                                                                                                                                                                                                                                                                                                                                         |      |      |      |      |      |      |
|       |   |        |                                                                                                                                                                                                                                                                                                                                                                                                                                                                                                                                         |      |      |      |      |      |      |
|       |   |        |                                                                                                                                                                                                                                                                                                                                                                                                                                                                                                                                         |      |      |      |      |      |      |
|       |   |        |                                                                                                                                                                                                                                                                                                                                                                                                                                                                                                                                         |      |      |      |      |      |      |
|       |   |        |                                                                                                                                                                                                                                                                                                                                                                                                                                                                                                                                         |      |      |      |      |      |      |
|       |   |        |                                                                                                                                                                                                                                                                                                                                                                                                                                                                                                                                         |      |      |      |      |      |      |
|       |   |        |                                                                                                                                                                                                                                                                                                                                                                                                                                                                                                                                         |      |      |      |      |      |      |
|       |   |        |                                                                                                                                                                                                                                                                                                                                                                                                                                                                                                                                         |      |      |      |      |      |      |
|       |   |        |                                                                                                                                                                                                                                                                                                                                                                                                                                                                                                                                         |      |      |      |      |      |      |
|       |   |        |                                                                                                                                                                                                                                                                                                                                                                                                                                                                                                                                         |      |      |      |      |      |      |
|       |   |        |                                                                                                                                                                                                                                                                                                                                                                                                                                                                                                                                         |      |      |      |      |      |      |
|       |   |        |                                                                                                                                                                                                                                                                                                                                                                                                                                                                                                                                         |      |      |      |      |      |      |
|       |   |        |                                                                                                                                                                                                                                                                                                                                                                                                                                                                                                                                         |      |      |      |      |      |      |
|       |   |        |                                                                                                                                                                                                                                                                                                                                                                                                                                                                                                                                         |      |      |      |      |      |      |
|       |   |        |                                                                                                                                                                                                                                                                                                                                                                                                                                                                                                                                         |      |      |      |      |      |      |
|       |   |        |                                                                                                                                                                                                                                                                                                                                                                                                                                                                                                                                         |      |      |      |      |      |      |
|       |   |        |                                                                                                                                                                                                                                                                                                                                                                                                                                                                                                                                         |      |      |      |      |      |      |
|       |   |        |                                                                                                                                                                                                                                                                                                                                                                                                                                                                                                                                         |      |      |      |      |      |      |
|       |   |        |                                                                                                                                                                                                                                                                                                                                                                                                                                                                                                                                         |      |      |      |      |      |      |
|       |   |        |                                                                                                                                                                                                                                                                                                                                                                                                                                                                                                                                         |      |      |      |      |      |      |
|       |   |        |                                                                                                                                                                                                                                                                                                                                                                                                                                                                                                                                         |      |      |      |      |      |      |
|       |   |        |                                                                                                                                                                                                                                                                                                                                                                                                                                                                                                                                         |      |      |      |      |      |      |
|       |   |        |                                                                                                                                                                                                                                                                                                                                                                                                                                                                                                                                         |      |      |      |      |      |      |
|       |   |        |                                                                                                                                                                                                                                                                                                                                                                                                                                                                                                                                         |      |      |      |      |      |      |
|       |   |        |                                                                                                                                                                                                                                                                                                                                                                                                                                                                                                                                         |      |      |      |      |      |      |
|       |   |        |                                                                                                                                                                                                                                                                                                                                                                                                                                                                                                                                         |      |      |      |      |      |      |
|       |   |        |                                                                                                                                                                                                                                                                                                                                                                                                                                                                                                                                         |      |      |      |      |      |      |
|       |   |        |                                                                                                                                                                                                                                                                                                                                                                                                                                                                                                                                         |      |      |      |      |      |      |
|       |   |        |                                                                                                                                                                                                                                                                                                                                                                                                                                                                                                                                         |      |      |      |      |      |      |
|       |   |        |                                                                                                                                                                                                                                                                                                                                                                                                                                                                                                                                         |      |      |      |      |      |      |
|       |   |        |                                                                                                                                                                                                                                                                                                                                                                                                                                                                                                                                         |      |      |      |      |      |      |
|       |   |        |                                                                                                                                                                                                                                                                                                                                                                                                                                                                                                                                         |      |      |      |      |      |      |
|       |   |        |                                                                                                                                                                                                                                                                                                                                                                                                                                                                                                                                         |      |      |      |      |      |      |
|       |   |        |                                                                                                                                                                                                                                                                                                                                                                                                                                                                                                                                         |      |      |      |      |      |      |
|       |   |        |                                                                                                                                                                                                                                                                                                                                                                                                                                                                                                                                         |      |      |      |      |      |      |
|       |   |        |                                                                                                                                                                                                                                                                                                                                                                                                                                                                                                                                         |      |      |      |      |      |      |
|       |   |        |                                                                                                                                                                                                                                                                                                                                                                                                                                                                                                                                         |      |      |      |      |      |      |
|       |   |        |                                                                                                                                                                                                                                                                                                                                                                                                                                                                                                                                         |      |      |      |      |      |      |
|       |   |        |                                                                                                                                                                                                                                                                                                                                                                                                                                                                                                                                         |      |      |      |      |      |      |
|       |   |        |                                                                                                                                                                                                                                                                                                                                                                                                                                                                                                                                         |      |      |      |      |      |      |
|       |   |        |                                                                                                                                                                                                                                                                                                                                                                                                                                                                                                                                         |      |      |      |      |      |      |
|       |   |        |                                                                                                                                                                                                                                                                                                                                                                                                                                                                                                                                         |      |      |      |      |      |      |
|       |   |        |                                                                                                                                                                                                                                                                                                                                                                                                                                                                                                                                         |      |      |      |      |      |      |
|       |   |        |                                                                                                                                                                                                                                                                                                                                                                                                                                                                                                                                         |      |      |      |      |      |      |
|       |   |        |                                                                                                                                                                                                                                                                                                                                                                                                                                                                                                                                         |      |      |      |      |      |      |
|       |   |        |                                                                                                                                                                                                                                                                                                                                                                                                                                                                                                                                         |      |      |      |      |      |      |
|       |   |        |                                                                                                                                                                                                                                                                                                                                                                                                                                                                                                                                         |      |      |      |      |      |      |
|       |   |        |                                                                                                                                                                                                                                                                                                                                                                                                                                                                                                                                         |      |      |      |      |      |      |
|       |   |        |                                                                                                                                                                                                                                                                                                                                                                                                                                                                                                                                         |      |      |      |      |      |      |
|       |   |        |                                                                                                                                                                                                                                                                                                                                                                                                                                                                                                                                         |      |      |      |      |      |      |
|       |   |        |                                                                                                                                                                                                                                                                                                                                                                                                                                                                                                                                         |      |      |      |      |      |      |
|       |   |        |                                                                                                                                                                                                                                                                                                                                                                                                                                                                                                                                         |      |      |      |      |      |      |
|       |   |        |                                                                                                                                                                                                                                                                                                                                                                                                                                                                                                                                         |      |      |      |      |      |      |
|       |   |        |                                                                                                                                                                                                                                                                                                                                                                                                                                                                                                                                         |      |      |      |      |      |      |
|       |   |        |                                                                                                                                                                                                                                                                                                                                                                                                                                                                                                                                         |      |      |      |      |      |      |
|       |   |        |                                                                                                                                                                                                                                                                                                                                                                                                                                                                                                                                         |      |      |      |      |      |      |
|       |   |        |                                                                                                                                                                                                                                                                                                                                                                                                                                                                                                                                         |      |      |      |      |      |      |
|       |   |        |                                                                                                                                                                                                                                                                                                                                                                                                                                                                                                                                         |      |      |      |      |      |      |
|       |   |        |                                                                                                                                                                                                                                                                                                                                                                                                                                                                                                                                         |      |      |      |      |      |      |
|       |   |        |                                                                                                                                                                                                                                                                                                                                                                                                                                                                                                                                         |      |      |      |      |      |      |
|       |   |        |                                                                                                                                                                                                                                                                                                                                                                                                                                                                                                                                         |      |      |      |      |      |      |
|       |   |        |                                                                                                                                                                                                                                                                                                                                                                                                                                                                                                                                         |      |      |      |      |      |      |
|       |   |        |                                                                                                                                                                                                                                                                                                                                                                                                                                                                                                                                         |      |      |      |      |      |      |
|       |   |        |                                                                                                                                                                                                                                                                                                                                                                                                                                                                                                                                         |      |      |      |      |      |      |
|       |   |        |                                                                                                                                                                                                                                                                                                                                                                                                                                                                                                                                         |      |      |      |      |      |      |
|       |   |        |                                                                                                                                                                                                                                                                                                                                                                                                                                                                                                                                         |      |      |      |      |      |      |
|       |   |        |                                                                                                                                                                                                                                                                                                                                                                                                                                                                                                                                         |      |      |      |      |      |      |
|       |   |        |                                                                                                                                                                                                                                                                                                                                                                                                                                                                                                                                         |      |      |      |      |      |      |
|       |   |        |                                                                                                                                                                                                                                                                                                                                                                                                                                                                                                                                         |      |      |      |      |      |      |
|       |   |        |                                                                                                                                                                                                                                                                                                                                                                                                                                                                                                                                         |      |      |      |      |      |      |
|       |   |        |                                                                                                                                                                                                                                                                                                                                                                                                                                                                                                                                         |      |      |      |      |      |      |
|       |   |        |                                                                                                                                                                                                                                                                                                                                                                                                                                                                                                                                         |      |      |      |      |      |      |
|       |   |        |                                                                                                                                                                                                                                                                                                                                                                                                                                                                                                                                         |      |      |      |      |      |      |
|       |   |        |                                                                                                                                                                                                                                                                                                                                                                                                                                                                                                                                         |      |      |      |      |      |      |
|       |   |        |                                                                                                                                                                                                                                                                                                                                                                                                                                                                                                                                         |      |      |      |      |      |      |
|       |   |        |                                                                                                                                                                                                                                                                                                                                                                                                                                                                                                                                         |      |      |      |      |      |      |
|       |   |        |                                                                                                                                                                                                                                                                                                                                                                                                                                                                                                                                         |      |      |      |      |      |      |
|       |   |        |                                                                                                                                                                                                                                                                                                                                                                                                                                                                                                                                         |      |      |      |      |      |      |
|       |   |        |                                                                                                                                                                                                                                                                                                                                                                                                                                                                                                                                         |      |      |      |      |      |      |
|       |   |        |                                                                                                                                                                                                                                                                                                                                                                                                                                                                                                                                         |      |      |      |      |      |      |
|       |   |        |                                                                                                                                                                                                                                                                                                                                                                                                                                                                                                                                         |      |      |      |      |      |      |
|       |   |        |                                                                                                                                                                                                                                                                                                                                                                                                                                                                                                                                         |      |      |      |      |      |      |
|       |   |        |                                                                                                                                                                                                                                                                                                                                                                                                                                                                                                                                         |      |      |      |      |      |      |
|       |   |        |                                                                                                                                                                                                                                                                                                                                                                                                                                                                                                                                         |      |      |      |      |      |      |
|       |   |        |                                                                                                                                                                                                                                                                                                                                                                                                                                                                                                                                         |      |      |      |      |      |      |
|       |   |        |                                                                                                                                                                                                                                                                                                                                                                                                                                                                                                                                         |      |      |      |      |      |      |
|       |   |        |                                                                                                                                                                                                                                                                                                                                                                                                                                                                                                                                         |      |      |      |      |      |      |
|       |   |        |                                                                                                                                                                                                                                                                                                                                                                                                                                                                                                                                         |      |      |      |      |      |      |
|       |   |        |                                                                                                                                                                                                                                                                                                                                                                                                                                                                                                                                         |      |      |      |      |      |      |
|       |   |        |                                                                                                                                                                                                                                                                                                                                                                                                                                                                                                                                         |      |      |      |      |      |      |
|       |   |        |                                                                                                                                                                                                                                                                                                                                                                                                                                                                                                                                         |      |      |      |      |      |      |
|       |   |        |                                                                                                                                                                                                                                                                                                                                                                                                                                                                                                                                         |      |      |      |      |      |      |
|       |   |        |                                                                                                                                                                                                                                                                                                                                                                                                                                                                                                                                         |      |      |      |      |      |      |
|       |   |        |                                                                                                                                                                                                                                                                                                                                                                                                                                                                                                                                         |      |      |      |      |      |      |
|       |   |        |                                                                                                                                                                                                                                                                                                                                                                                                                                                                                                                                         |      |      |      |      |      |      |
|       |   |        |                                                                                                                                                                                                                                                                                                                                                                                                                                                                                                                                         |      |      |      |      |      |      |
|       |   |        |                                                                                                                                                                                                                                                                                                                                                                                                                                                                                                                                         |      |      |      |      |      |      |
|       |   |        |                                                                                                                                                                                                                                                                                                                                                                                                                                                                                                                                         |      |      |      |      |      |      |
|       |   |        |                                                                                                                                                                                                                                                                                                                                                                                                                                                                                                                                         |      |      |      |      |      |      |
|       |   |        |                                                                                                                                                                                                                                                                                                                                                                                                                                                                                                                                         |      |      |      |      |      |      |
|       |   |        |                                                                                                                                                                                                                                                                                                                                                                                                                                                                                                                                         |      |      |      |      |      |      |
|       |   |        |                                                                                                                                                                                                                                                                                                                                                                                                                                                                                                                                         |      |      |      |      |      |      |
|       |   |        |                                                                                                                                                                                                                                                                                                                                                                                                                                                                                                                                         |      |      |      |      |      |      |
|       |   |        |                                                                                                                                                                                                                                                                                                                                                                                                                                                                                                                                         |      |      |      |      |      |      |
|       |   |        |                                                                                                                                                                                                                                                                                                                                                                                                                                                                                                                                         |      |      |      |      |      |      |
|       |   |        |                                                                                                                                                                                                                                                                                                                                                                                                                                                                                                                                         |      |      |      |      |      |      |
|       |   |        |                                                                                                                                                                                                                                                                                                                                                                                                                                                                                                                                         |      |      |      |      |      |      |
|       |   |        |                                                                                                                                                                                                                                                                                                                                                                                                                                                                                                                                         |      |      |      |      |      |      |
|       |   |        |                                                                                                                                                                                                                                                                                                                                                                                                                                                                                                                                         |      |      |      |      |      |      |
|       |   |        |                                                                                                                                                                                                                                                                                                                                                                                                                                                                                                                                         |      |      |      |      |      |      |
|       |   |        |                                                                                                                                                                                                                                                                                                                                                                                                                                                                                                                                         |      |      |      |      |      |      |
|       |   |        |                                                                                                                                                                                                                                                                                                                                                                                                                                                                                                                                         |      |      |      |      |      |      |
|       |   |        |                                                                                                                                                                                                                                                                                                                                                                                                                                                                                                                                         |      |      |      |      |      |      |
|       |   |        |                                                                                                                                                                                                                                                                                                                                                                                                                                                                                                                                         |      |      |      |      |      |      |
|       |   |        |                                                                                                                                                                                                                                                                                                                                                                                                                                                                                                                                         |      |      |      |      |      |      |
|       |   |        |                                                                                                                                                                                                                                                                                                                                                                                                                                                                                                                                         |      |      |      |      |      |      |
|       |   |        |                                                                                                                                                                                                                                                                                                                                                                                                                                                                                                                                         |      |      |      |      |      |      |
|       |   |        |                                                                                                                                                                                                                                                                                                                                                                                                                                                                                                                                         |      |      |      |      |      |      |
|       |   |        |                                                                                                                                                                                                                                                                                                                                                                                                                                                                                                                                         |      |      |      |      |      |      |
|       |   |        |                                                                                                                                                                                                                                                                                                                                                                                                                                                                                                                                         |      |      |      |      |      |      |
|       |   |        |                                                                                                                                                                                                                                                                                                                                                                                                                                                                                                                                         |      |      |      |      |      |      |
|       |   |        |                                                                                                                                                                                                                                                                                                                                                                                                                                                                                                                                         |      |      |      |      |      |      |
|       |   |        |                                                                                                                                                                                                                                                                                                                                                                                                                                                                                                                                         |      |      |      |      |      |      |
|       |   |        |                                                                                                                                                                                                                                                                                                                                                                                                                                                                                                                                         |      |      |      |      |      |      |
|       |   |        |                                                                                                                                                                                                                                                                                                                                                                                                                                                                                                                                         |      |      |      |      |      |      |
|       |   |        |                                                                                                                                                                                                                                                                                                                                                                                                                                                                                                                                         |      |      |      |      |      |      |
|       |   |        |                                                                                                                                                                                                                                                                                                                                                                                                                                                                                                                                         |      |      |      |      |      |      |
|       |   |        |                                                                                                                                                                                                                                                                                                                                                                                                                                                                                                                                         |      |      |      |      |      |      |
|       |   |        |                                                                                                                                                                                                                                                                                                                                                                                                                                                                                                                                         |      |      |      |      |      |      |
|       |   |        |                                                                                                                                                                                                                                                                                                                                                                                                                                                                                                                                         |      |      |      |      |      |      |
|       |   |        |                                                                                                                                                                                                                                                                                                                                                                                                                                                                                                                                         |      |      |      |      |      |      |
|       |   |        |                                                                                                                                                                                                                                                                                                                                                                                                                                                                                                                                         |      |      |      |      |      |      |
|       |   |        |                                                                                                                                                                                                                                                                                                                                                                                                                                                                                                                                         |      |      |      |      |      |      |
|       |   |        |                                                                                                                                                                                                                                                                                                                                                                                                                                                                                                                                         |      |      |      |      |      |      |
|       |   |        |                                                                                                                                                                                                                                                                                                                                                                                                                                                                                                                                         |      |      |      |      |      |      |
|       |   |        |                                                                                                                                                                                                                                                                                                                                                                                                                                                                                                                                         |      |      |      |      |      |      |
|       |   |        |                                                                                                                                                                                                                                                                                                                                                                                                                                                                                                                                         |      |      |      |      |      |      |
|       |   |        |                                                                                                                                                                                                                                                                                                                                                                                                                                                                                                                                         |      |      |      |      |      |      |
|       |   |        |                                                                                                                                                                                                                                                                                                                                                                                                                                                                                                                                         |      |      |      |      |      |      |
|       |   |        |                                                                                                                                                                                                                                                                                                                                                                                                                                                                                                                                         |      |      |      |      |      |      |
|       |   |        |                                                                                                                                                                                                                                                                                                                                                                                                                                                                                                                                         |      |      |      |      |      |      |
|       |   |        |                                                                                                                                                                                                                                                                                                                                                                                                                                                                                                                                         |      |      |      |      |      |      |
|       |   |        |                                                                                                                                                                                                                                                                                                                                                                                                                                                                                                                                         |      |      |      |      |      |      |
|       |   |        |                                                                                                                                                                                                                                                                                                                                                                                                                                                                                                                                         |      |      |      |      |      |      |
|       |   |        |                                                                                                                                                                                                                                                                                                                                                                                                                                                                                                                                         |      |      |      |      |      |      |
|       |   |        |                                                                                                                                                                                                                                                                                                                                                                                                                                                                                                                                         |      |      |      |      |      |      |
|       |   |        |                                                                                                                                                                                                                                                                                                                                                                                                                                                                                                                                         |      |      |      |      |      |      |
|       |   |        |                                                                                                                                                                                                                                                                                                                                                                                                                                                                                                                                         |      |      |      |      |      |      |
|       |   |        |                                                                                                                                                                                                                                                                                                                                                                                                                                                                                                                                         |      |      |      |      |      |      |
|       |   |        |                                                                                                                                                                                                                                                                                                                                                                                                                                                                                                                                         |      |      |      |      |      |      |
|       |   |        |                                                                                                                                                                                                                                                                                                                                                                                                                                                                                                                                         |      |      |      |      |      |      |
|       |   |        |                                                                                                                                                                                                                                                                                                                                                                                                                                                                                                                                         |      |      |      |      |      |      |
|       |   |        |                                                                                                                                                                                                                                                                                                                                                                                                                                                                                                                                         |      |      |      |      |      |      |
|       |   |        |                                                                                                                                                                                                                                                                                                                                                                                                                                                                                                                                         |      |      |      |      |      |      |
|       |   |        |                                                                                                                                                                                                                                                                                                                                                                                                                                                                                                                                         |      |      |      |      |      |      |
|       |   |        |                                                                                                                                                                                                                                                                                                                                                                                                                                                                                                                                         |      |      |      |      |      |      |
|       |   |        |                                                                                                                                                                                                                                                                                                                                                                                                                                                                                                                                         |      |      |      |      |      |      |
|       |   |        |                                                                                                                                                                                                                                                                                                                                                                                                                                                                                                                                         |      |      |      |      |      |      |
|       |   |        |                                                                                                                                                                                                                                                                                                                                                                                                                                                                                                                                         |      |      |      |      |      |      |
|       |   |        |                                                                                                                                                                                                                                                                                                                                                                                                                                                                                                                                         |      |      |      |      |      |      |
|       |   |        |                                                                                                                                                                                                                                                                                                                                                                                                                                                                                                                                         |      |      |      |      |      |      |
|       |   |        |                                                                                                                                                                                                                                                                                                                                                                                                                                                                                                                                         |      |      |      |      |      |      |
|       |   |        |                                                                                                                                                                                                                                                                                                                                                                                                                                                                                                                                         |      |      |      |      |      |      |
|       |   |        |                                                                                                                                                                                                                                                                                                                                                                                                                                                                                                                                         |      |      |      |      |      |      |
|       |   |        |                                                                                                                                                                                                                                                                                                                                                                                                                                                                                                                                         |      |      |      |      |      |      |
|       |   |        |                                                                                                                                                                                                                                                                                                                                                                                                                                                                                                                                         |      |      |      |      |      |      |
|       |   |        |                                                                                                                                                                                                                                                                                                                                                                                                                                                                                                                                         |      |      |      |      |      |      |
|       |   |        |                                                                                                                                                                                                                                                                                                                                                                                                                                                                                                                                         |      |      |      |      |      |      |
|       |   |        |                                                                                                                                                                                                                                                                                                                                                                                                                                                                                                                                         |      |      |      |      |      |      |
|       |   |        |                                                                                                                                                                                                                                                                                                                                                                                                                                                                                                                                         |      |      |      |      |      |      |
|       |   |        |                                                                                                                                                                                                                                                                                                                                                                                                                                                                                                                                         |      |      |      |      |      |      |
|       |   |        |                                                                                                                                                                                                                                                                                                                                                                                                                                                                                                                                         |      |      |      |      |      |      |
|       |   |        |                                                                                                                                                                                                                                                                                                                                                                                                                                                                                                                                         |      |      |      |      |      |      |
|       |   |        |                                                                                                                                                                                                                                                                                                                                                                                                                                                                                                                                         |      |      |      |      |      |      |
|       |   |        |                                                                                                                                                                                                                                                                                                                                                                                                                                                                                                                                         |      |      |      |      |      |      |
|       |   |        |                                                                                                                                                                                                                                                                                                                                                                                                                                                                                                                                         |      |      |      |      |      |      |
|       |   |        |                                                                                                                                                                                                                                                                                                                                                                                                                                                                                                                                         |      |      |      |      |      |      |
|       |   |        |                                                                                                                                                                                                                                                                                                                                                                                                                                                                                                                                         |      |      |      |      |      |      |
|       |   |        |                                                                                                                                                                                                                                                                                                                                                                                                                                                                                                                                         |      |      |      |      |      |      |
|       |   |        |                                                                                                                                                                                                                                                                                                                                                                                                                                                                                                                                         |      |      |      |      |      |      |
|       |   |        |                                                                                                                                                                                                                                                                                                                                                                                                                                                                                                                                         |      |      |      |      |      |      |
|       |   |        |                                                                                                                                                                                                                                                                                                                                                                                                                                                                                                                                         |      |      |      |      |      |      |
|       |   |        |                                                                                                                                                                                                                                                                                                                                                                                                                                                                                                                                         |      |      |      |      |      |      |
|       |   |        |                                                                                                                                                                                                                                                                                                                                                                                                                                                                                                                                         |      |      |      |      |      |      |
|       |   |        |                                                                                                                                                                                                                                                                                                                                                                                                                                                                                                                                         |      |      |      |      |      |      |
|       |   |        |                                                                                                                                                                                                                                                                                                                                                                                                                                                                                                                                         |      |      |      |      |      |      |
|       |   |        |                                                                                                                                                                                                                                                                                                                                                                                                                                                                                                                                         |      |      |      |      |      |      |
|       |   |        |                                                                                                                                                                                                                                                                                                                                                                                                                                                                                                                                         |      |      |      |      |      |      |
|       |   |        |                                                                                                                                                                                                                                                                                                                                                                                                                                                                                                                                         |      |      |      |      |      |      |
|       |   |        |                                                                                                                                                                                                                                                                                                                                                                                                                                                                                                                                         |      |      |      |      |      |      |
|       |   |        |                                                                                                                                                                                                                                                                                                                                                                                                                                                                                                                                         |      |      |      |      |      |      |
|       |   |        |                                                                                                                                                                                                                                                                                                                                                                                                                                                                                                                                         |      |      |      |      |      |      |
|       |   |        |                                                                                                                                                                                                                                                                                                                                                                                                                                                                                                                                         |      |      |      |      |      |      |
|       |   |        |                                                                                                                                                                                                                                                                                                                                                                                                                                                                                                                                         |      |      |      |      |      |      |
|       |   |        |                                                                                                                                                                                                                                                                                                                                                                                                                                                                                                                                         |      |      |      |      |      |      |
|       |   |        |                                                                                                                                                                                                                                                                                                                                                                                                                                                                                                                                         |      |      |      |      |      |      |
|       |   |        |                                                                                                                                                                                                                                                                                                                                                                                                                                                                                                                                         |      |      |      |      |      |      |
|       |   |        |                                                                                                                                                                                                                                                                                                                                                                                                                                                                                                                                         |      |      |      |      |      |      |
|       |   |        |                                                                                                                                                                                                                                                                                                                                                                                                                                                                                                                                         |      |      |      |      |      |      |
|       |   |        |                                                                                                                                                                                                                                                                                                                                                                                                                                                                                                                                         |      |      |      |      |      |      |
|       |   |        |                                                                                                                                                                                                                                                                                                                                                                                                                                                                                                                                         |      |      |      |      |      |      |
|       |   |        |                                                                                                                                                                                                                                                                                                                                                                                                                                                                                                                                         |      |      |      |      |      |      |
|       |   |        |                                                                                                                                                                                                                                                                                                                                                                                                                                                                                                                                         |      |      |      |      |      |      |
|       |   |        |                                                                                                                                                                                                                                                                                                                                                                                                                                                                                                                                         |      |      |      |      |      |      |
|       |   |        |                                                                                                                                                                                                                                                                                                                                                                                                                                                                                                                                         |      |      |      |      |      |      |
|       |   |        |                                                                                                                                                                                                                                                                                                                                                                                                                                                                                                                                         |      |      |      |      |      |      |
|       |   |        |                                                                                                                                                                                                                                                                                                                                                                                                                                                                                                                                         |      |      |      |      |      |      |
|       |   |        |                                                                                                                                                                                                                                                                                                                                                                                                                                                                                                                                         |      |      |      |      |      |      |
|       |   |        |                                                                                                                                                                                                                                                                                                                                                                                                                                                                                                                                         |      |      |      |      |      |      |
|       |   |        |                                                                                                                                                                                                                                                                                                                                                                                                                                                                                                                                         |      |      |      |      |      |      |
|       |   |        |                                                                                                                                                                                                                                                                                                                                                                                                                                                                                                                                         |      |      |      |      |      |      |
|       |   |        |                                                                                                                                                                                                                                                                                                                                                                                                                                                                                                                                         |      |      |      |      |      |      |
|       |   |        |                                                                                                                                                                                                                                                                                                                                                                                                                                                                                                                                         |      |      |      |      |      |      |
|       |   |        |                                                                                                                                                                                                                                                                                                                                                                                                                                                                                                                                         |      |      |      |      |      |      |
|       |   |        |                                                                                                                                                                                                                                                                                                                                                                                                                                                                                                                                         |      |      |      |      |      |      |
|       |   |        |                                                                                                                                                                                                                                                                                                                                                                                                                                                                                                                                         |      |      |      |      |      |      |
|       |   |        |                                                                                                                                                                                                                                                                                                                                                                                                                                                                                                                                         |      |      |      |      |      |      |
|       |   |        |                                                                                                                                                                                                                                                                                                                                                                                                                                                                                                                                         |      |      |      |      |      |      |
|       |   |        |                                                                                                                                                                                                                                                                                                                                                                                                                                                                                                                                         |      |      |      |      |      |      |
|       |   |        |                                                                                                                                                                                                                                                                                                                                                                                                                                                                                                                                         |      |      |      |      |      |      |
|       |   |        |                                                                                                                                                                                                                                                                                                                                                                                                                                                                                                                                         |      |      |      |      |      |      |
|       |   |        |                                                                                                                                                                                                                                                                                                                                                                                                                                                                                                                                         |      |      |      |      |      |      |
|       |   |        |                                                                                                                                                                                                                                                                                                                                                                                                                                                                                                                                         |      |      |      |      |      |      |
|       |   |        |                                                                                                                                                                                                                                                                                                                                                                                                                                                                                                                                         |      |      |      |      |      |      |
|       |   |        |                                                                                                                                                                                                                                                                                                                                                                                                                                                                                                                                         |      |      |      |      |      |      |
|       |   |        |                                                                                                                                                                                                                                                                                                                                                                                                                                                                                                                                         |      |      |      |      |      |      |
|       |   |        |                                                                                                                                                                                                                                                                                                                                                                                                                                                                                                                                         |      |      |      |      |      |      |
|       |   |        |                                                                                                                                                                                                                                                                                                                                                                                                                                                                                                                                         |      |      |      |      |      |      |
|       |   |        |                                                                                                                                                                                                                                                                                                                                                                                                                                                                                                                                         |      |      |      |      |      |      |
|       |   |        |                                                                                                                                                                                                                                                                                                                                                                                                                                                                                                                                         |      |      |      |      |      |      |
|       |   |        |                                                                                                                                                                                                                                                                                                                                                                                                                                                                                                                                         |      |      |      |      |      |      |
|       |   |        |                                                                                                                                                                                                                                                                                                                                                                                                                                                                                                                                         |      |      |      |      |      |      |
|       |   |        |                                                                                                                                                                                                                                                                                                                                                                                                                                                                                                                                         |      |      |      |      |      |      |
|       |   |        |                                                                                                                                                                                                                                                                                                                                                                                                                                                                                                                                         |      |      |      |      |      |      |
|       |   |        |                                                                                                                                                                                                                                                                                                                                                                                                                                                                                                                                         |      |      |      |      |      |      |
|       |   |        |                                                                                                                                                                                                                                                                                                                                                                                                                                                                                                                                         |      |      |      |      |      |      |
|       |   |        |                                                                                                                                                                                                                                                                                                                                                                                                                                                                                                                                         |      |      |      |      |      |      |
|       |   |        |                                                                                                                                                                                                                                                                                                                                                                                                                                                                                                                                         |      |      |      |      |      |      |
|       |   |        |                                                                                                                                                                                                                                                                                                                                                                                                                                                                                                                                         |      |      |      |      |      |      |
|       |   |        |                                                                                                                                                                                                                                                                                                                                                                                                                                                                                                                                         |      |      |      |      |      |      |
|       |   |        |                                                                                                                                                                                                                                                                                                                                                                                                                                                                                                                                         |      |      |      |      |      |      |
|       |   |        |                                                                                                                                                                                                                                                                                                                                                                                                                                                                                                                                         |      |      |      |      |      |      |
|       |   |        |                                                                                                                                                                                                                                                                                                                                                                                                                                                                                                                                         |      |      |      |      |      |      |
|       |   |        |                                                                                                                                                                                                                                                                                                                                                                                                                                                                                                                                         |      |      |      |      |      |      |
|       |   |        |                                                                                                                                                                                                                                                                                                                                                                                                                                                                                                                                         |      |      |      |      |      |      |
|       |   |        |                                                                                                                                                                                                                                                                                                                                                                                                                                                                                                                                         |      |      |      |      |      |      |
|       |   |        |                                                                                                                                                                                                                                                                                                                                                                                                                                                                                                                                         |      |      |      |      |      |      |
|       |   |        |                                                                                                                                                                                                                                                                                                                                                                                                                                                                                                                                         |      |      |      |      |      |      |
|       |   |        |                                                                                                                                                                                                                                                                                                                                                                                                                                                                                                                                         |      |      |      |      |      |      |
|       |   |        |                                                                                                                                                                                                                                                                                                                                                                                                                                                                                                                                         |      |      |      |      |      |      |
|       |   |        |                                                                                                                                                                                                                                                                                                                                                                                                                                                                                                                                         |      |      |      |      |      |      |
|       |   |        |                                                                                                                                                                                                                                                                                                                                                                                                                                                                                                                                         |      |      |      |      |      |      |
|       |   |        |                                                                                                                                                                                                                                                                                                                                                                                                                                                                                                                                         |      |      |      |      |      |      |
|       |   |        |                                                                                                                                                                                                                                                                                                                                                                                                                                                                                                                                         |      |      |      |      |      |      |
|       |   |        |                                                                                                                                                                                                                                                                                                                                                                                                                                                                                                                                         |      |      |      |      |      |      |
|       |   |        |                                                                                                                                                                                                                                                                                                                                                                                                                                                                                                                                         |      |      |      |      |      |      |
|       |   |        |                                                                                                                                                                                                                                                                                                                                                                                                                                                                                                                                         |      |      |      |      |      |      |
|       |   |        |                                                                                                                                                                                                                                                                                                                                                                                                                                                                                                                                         |      |      |      |      |      |      |
|       |   |        |                                                                                                                                                                                                                                                                                                                                                                                                                                                                                                                                         |      |      |      |      |      |      |
|       |   |        |                                                                                                                                                                                                                                                                                                                                                                                                                                                                                                                                         |      |      |      |      |      |      |
|       |   |        |                                                                                                                                                                                                                                                                                                                                                                                                                                                                                                                                         |      |      |      |      |      |      |
|       |   |        |                                                                                                                                                                                                                                                                                                                                                                                                                                                                                                                                         |      |      |      |      |      |      |
|       |   |        |                                                                                                                                                                                                                                                                                                                                                                                                                                                                                                                                         |      |      |      |      |      |      |
|       |   |        |                                                                                                                                                                                                                                                                                                                                                                                                                                                                                                                                         |      |      |      |      |      |      |
|       |   |        |                                                                                                                                                                                                                                                                                                                                                                                                                                                                                                                                         |      |      |      |      |      |      |
|       |   |        |                                                                                                                                                                                                                                                                                                                                                                                                                                                                                                                                         |      |      |      |      |      |      |
|       |   |        |                                                                                                                                                                                                                                                                                                                                                                                                                                                                                                                                         |      |      |      |      |      |      |
|       |   |        |                                                                                                                                                                                                                                                                                                                                                                                                                                                                                                                                         |      |      |      |      |      |      |
|       |   |        |                                                                                                                                                                                                                                                                                                                                                                                                                                                                                                                                         |      |      |      |      |      |      |
|       |   |        |                                                                                                                                                                                                                                                                                                                                                                                                                                                                                                                                         |      |      |      |      |      |      |
|       |   |        |                                                                                                                                                                                                                                                                                                                                                                                                                                                                                                                                         |      |      |      |      |      |      |
|       |   |        |                                                                                                                                                                                                                                                                                                                                                                                                                                                                                                                                         |      |      |      |      |      |      |
|       |   |        |                                                                                                                                                                                                                                                                                                                                                                                                                                                                                                                                         |      |      |      |      |      |      |
|       |   |        |                                                                                                                                                                                                                                                                                                                                                                                                                                                                                                                                         |      |      |      |      |      |      |
|       |   |        |                                                                                                                                                                                                                                                                                                                                                                                                                                                                                                                                         |      |      |      |      |      |      |
|       |   |        |                                                                                                                                                                                                                                                                                                                                                                                                                                                                                                                                         |      |      |      |      |      |      |
|       |   |        |                                                                                                                                                                                                                                                                                                                                                                                                                                                                                                                                         |      |      |      |      |      |      |
|       |   |        |                                                                                                                                                                                                                                                                                                                                                                                                                                                                                                                                         |      |      |      |      |      |      |
|       |   |        |                                                                                                                                                                                                                                                                                                                                                                                                                                                                                                                                         |      |      |      |      |      |      |
|       |   |        |                                                                                                                                                                                                                                                                                                                                                                                                                                                                                                                                         |      |      |      |      |      |      |
|       |   |        |                                                                                                                                                                                                                                                                                                                                                                                                                                                                                                                                         |      |      |      |      |      |      |
|       |   |        |                                                                                                                                                                                                                                                                                                                                                                                                                                                                                                                                         |      |      |      |      |      |      |
|       |   |        |                                                                                                                                                                                                                                                                                                                                                                                                                                                                                                                                         |      |      |      |      |      |      |
|       |   |        |                                                                                                                                                                                                                                                                                                                                                                                                                                                                                                                                         |      |      |      |      |      |      |
|       |   |        |                                                                                                                                                                                                                                                                                                                                                                                                                                                                                                                                         |      |      |      |      |      |      |
|       |   |        |                                                                                                                                                                                                                                                                                                                                                                                                                                                                                                                                         |      |      |      |      |      |      |
|       |   |        |                                                                                                                                                                                                                                                                                                                                                                                                                                                                                                                                         |      |      |      |      |      |      |
|       |   |        |                                                                                                                                                                                                                                                                                                                                                                                                                                                                                                                                         |      |      |      |      |      |      |
|       |   |        |                                                                                                                                                                                                                                                                                                                                                                                                                                                                                                                                         |      |      |      |      |      |      |
|       |   |        |                                                                                                                                                                                                                                                                                                                                                                                                                                                                                                                                         |      |      |      |      |      |      |
|       |   |        |                                                                                                                                                                                                                                                                                                                                                                                                                                                                                                                                         |      |      |      |      |      |      |
|       |   |        |                                                                                                                                                                                                                                                                                                                                                                                                                                                                                                                                         |      |      |      |      |      |      |
|       |   |        |                                                                                                                                                                                                                                                                                                                                                                                                                                                                                                                                         |      |      |      |      |      |      |
|       |   |        |                                                                                                                                                                                                                                                                                                                                                                                                                                                                                                                                         |      |      |      |      |      |      |
|       |   |        |                                                                                                                                                                                                                                                                                                                                                                                                                                                                                                                                         |      |      |      |      |      |      |
|       |   |        |                                                                                                                                                                                                                                                                                                                                                                                                                                                                                                                                         |      |      |      |      |      |      |
|       |   |        |                                                                                                                                                                                                                                                                                                                                                                                                                                                                                                                                         |      |      |      |      |      |      |
|       |   |        |                                                                                                                                                                                                                                                                                                                                                                                                                                                                                                                                         |      |      |      |      |      |      |
|       |   |        |                                                                                                                                                                                                                                                                                                                                                                                                                                                                                                                                         |      |      |      |      |      |      |
|       |   |        |                                                                                                                                                                                                                                                                                                                                                                                                                                                                                                                                         |      |      |      |      |      |      |
|       |   |        |                                                                                                                                                                                                                                                                                                                                                                                                                                                                                                                                         |      |      |      |      |      |      |
|       |   |        |                                                                                                                                                                                                                                                                                                                                                                                                                                                                                                                                         |      |      |      |      |      |      |
|       |   |        |                                                                                                                                                                                                                                                                                                                                                                                                                                                                                                                                         |      |      |      |      |      |      |
|       |   |        |                                                                                                                                                                                                                                                                                                                                                                                                                                                                                                                                         |      |      |      |      |      |      |
|       |   |        |                                                                                                                                                                                                                                                                                                                                                                                                                                                                                                                                         |      |      |      |      |      |      |
|       |   |        |                                                                                                                                                                                                                                                                                                                                                                                                                                                                                                                                         |      |      |      |      |      |      |
|       |   |        |                                                                                                                                                                                                                                                                                                                                                                                                                                                                                                                                         |      |      |      |      |      |      |
|       |   |        |                                                                                                                                                                                                                                                                                                                                                                                                                                                                                                                                         |      |      |      |      |      |      |
|       |   |        |                                                                                                                                                                                                                                                                                                                                                                                                                                                                                                                                         |      |      |      |      |      |      |
|       |   |        |                                                                                                                                                                                                                                                                                                                                                                                                                                                                                                                                         |      |      |      |      |      |      |
|       |   |        |                                                                                                                                                                                                                                                                                                                                                                                                                                                                                                                                         |      |      |      |      |      |      |
|       |   |        |                                                                                                                                                                                                                                                                                                                                                                                                                                                                                                                                         |      |      |      |      |      |      |
|       |   |        |                                                                                                                                                                                                                                                                                                                                                                                                                                                                                                                                         |      |      |      |      |      |      |
|       |   |        |                                                                                                                                                                                                                                                                                                                                                                                                                                                                                                                                         |      |      |      |      |      |      |
|       |   |        |                                                                                                                                                                                                                                                                                                                                                                                                                                                                                                                                         |      |      |      |      |      |      |
|       |   |        |                                                                                                                                                                                                                                                                                                                                                                                                                                                                                                                                         |      |      |      |      |      |      |
|       |   |        |                                                                                                                                                                                                                                                                                                                                                                                                                                                                                                                                         |      |      |      |      |      |      |
|       |   |        |                                                                                                                                                                                                                                                                                                                                                                                                                                                                                                                                         |      |      |      |      |      |      |
|       |   |        |                                                                                                                                                                                                                                                                                                                                                                                                                                                                                                                                         |      |      |      |      |      |      |
|       |   |        |                                                                                                                                                                                                                                                                                                                                                                                                                                                                                                                                         |      |      |      |      |      |      |
|       |   |        |                                                                                                                                                                                                                                                                                                                                                                                                                                                                                                                                         |      |      |      |      |      |      |
|       |   |        |                                                                                                                                                                                                                                                                                                                                                                                                                                                                                                                                         |      |      |      |      |      |      |
|       |   |        |                                                                                                                                                                                                                                                                                                                                                                                                                                                                                                                                         |      |      |      |      |      |      |
|       |   |        |                                                                                                                                                                                                                                                                                                                                                                                                                                                                                                                                         |      |      |      |      |      |      |
|       |   |        |                                                                                                                                                                                                                                                                                                                                                                                                                                                                                                                                         |      |      |      |      |      |      |
|       |   |        |                                                                                                                                                                                                                                                                                                                                                                                                                                                                                                                                         |      |      |      |      |      |      |
|       |   |        |                                                                                                                                                                                                                                                                                                                                                                                                                                                                                                                                         |      |      |      |      |      |      |
|       |   |        |                                                                                                                                                                                                                                                                                                                                                                                                                                                                                                                                         |      |      |      |      |      |      |
|       |   |        |                                                                                                                                                                                                                                                                                                                                                                                                                                                                                                                                         |      |      |      |      |      |      |
|       |   |        |                                                                                                                                                                                                                                                                                                                                                                                                                                                                                                                                         |      |      |      |      |      |      |
|       |   |        |                                                                                                                                                                                                                                                                                                                                                                                                                                                                                                                                         |      |      |      |      |      |      |
|       |   |        |                                                                                                                                                                                                                                                                                                                                                                                                                                                                                                                                         |      |      |      |      |      |      |
|       |   |        |                                                                                                                                                                                                                                                                                                                                                                                                                                                                                                                                         |      |      |      |      |      |      |
|       |   |        |                                                                                                                                                                                                                                                                                                                                                                                                                                                                                                                                         |      |      |      |      |      |      |
|       |   |        |                                                                                                                                                                                                                                                                                                                                                                                                                                                                                                                                         |      |      |      |      |      |      |
|       |   |        |                                                                                                                                                                                                                                                                                                                                                                                                                                                                                                                                         |      |      |      |      |      |      |
|       |   |        |                                                                                                                                                                                                                                                                                                                                                                                                                                                                                                                                         |      |      |      |      |      |      |
|       |   |        |                                                                                                                                                                                                                                                                                                                                                                                                                                                                                                                                         |      |      |      |      |      |      |
|       |   |        |                                                                                                                                                                                                                                                                                                                                                                                                                                                                                                                                         |      |      |      |      |      |      |
|       |   |        |                                                                                                                                                                                                                                                                                                                                                                                                                                                                                                                                         |      |      |      |      |      |      |
|       |   |        |                                                                                                                                                                                                                                                                                                                                                                                                                                                                                                                                         |      |      |      |      |      |      |
|       |   |        |                                                                                                                                                                                                                                                                                                                                                                                                                                                                                                                                         |      |      |      |      |      |      |
|       |   |        |                                                                                                                                                                                                                                                                                                                                                                                                                                                                                                                                         |      |      |      |      |      |      |
|       |   |        |                                                                                                                                                                                                                                                                                                                                                                                                                                                                                                                                         |      |      |      |      |      |      |
|       |   |        |                                                                                                                                                                                                                                                                                                                                                                                                                                                                                                                                         |      |      |      |      |      |      |
|       |   |        |                                                                                                                                                                                                                                                                                                                                                                                                                                                                                                                                         |      |      |      |      |      |      |
|       |   |        |                                                                                                                                                                                                                                                                                                                                                                                                                                                                                                                                         |      |      |      |      |      |      |
|       |   |        |                                                                                                                                                                                                                                                                                                                                                                                                                                                                                                                                         |      |      |      |      |      |      |
|       |   |        |                                                                                                                                                                                                                                                                                                                                                                                                                                                                                                                                         |      |      |      |      |      |      |
|       |   |        |                                                                                                                                                                                                                                                                                                                                                                                                                                                                                                                                         |      |      |      |      |      |      |
|       |   |        |                                                                                                                                                                                                                                                                                                                                                                                                                                                                                                                                         |      |      |      |      |      |      |
|       |   |        |                                                                                                                                                                                                                                                                                                                                                                                                                                                                                                                                         |      |      |      |      |      |      |
|       |   |        |                                                                                                                                                                                                                                                                                                                                                                                                                                                                                                                                         |      |      |      |      |      |      |
|       |   |        |                                                                                                                                                                                                                                                                                                                                                                                                                                                                                                                                         |      |      |      |      |      |      |
|       |   |        |                                                                                                                                                                                                                                                                                                                                                                                                                                                                                                                                         |      |      |      |      |      |      |
|       |   |        |                                                                                                                                                                                                                                                                                                                                                                                                                                                                                                                                         |      |      |      |      |      |      |
|       |   |        |                                                                                                                                                                                                                                                                                                                                                                                                                                                                                                                                         |      |      |      |      |      |      |
|       |   |        |                                                                                                                                                                                                                                                                                                                                                                                                                                                                                                                                         |      |      |      |      |      |      |
|       |   |        |                                                                                                                                                                                                                                                                                                                                                                                                                                                                                                                                         |      |      |      |      |      |      |
|       |   |        |                                                                                                                                                                                                                                                                                                                                                                                                                                                                                                                                         |      |      |      |      |      |      |
|       |   |        |                                                                                                                                                                                                                                                                                                                                                                                                                                                                                                                                         |      |      |      |      |      |      |
|       |   |        |                                                                                                                                                                                                                                                                                                                                                                                                                                                                                                                                         |      |      |      |      |      |      |
|       |   |        |                                                                                                                                                                                                                                                                                                                                                                                                                                                                                                                                         |      |      |      |      |      |      |
|       |   |        |                                                                                                                                                                                                                                                                                                                                                                                                                                                                                                                                         |      |      |      |      |      |      |
|       |   |        |                                                                                                                                                                                                                                                                                                                                                                                                                                                                                                                                         |      |      |      |      |      |      |
|       |   |        |                                                                                                                                                                                                                                                                                                                                                                                                                                                                                                                                         |      |      |      |      |      |      |
|       |   |        |                                                                                                                                                                                                                                                                                                                                                                                                                                                                                                                                         |      |      |      |      |      |      |
|       |   |        |                                                                                                                                                                                                                                                                                                                                                                                                                                                                                                                                         |      |      |      |      |      |      |
|       |   |        |                                                                                                                                                                                                                                                                                                                                                                                                                                                                                                                                         |      |      |      |      |      |      |
|       |   |        |                                                                                                                                                                                                                                                                                                                                                                                                                                                                                                                                         |      |      |      |      |      |      |
|       |   |        |                                                                                                                                                                                                                                                                                                                                                                                                                                                                                                                                         |      |      |      |      |      |      |
|       |   |        |                                                                                                                                                                                                                                                                                                                                                                                                                                                                                                                                         |      |      |      |      |      |      |
|       |   |        |                                                                                                                                                                                                                                                                                                                                                                                                                                                                                                                                         |      |      |      |      |      |      |
|       |   |        |                                                                                                                                                                                                                                                                                                                                                                                                                                                                                                                                         |      |      |      |      |      |      |
|       |   |        |                                                                                                                                                                                                                                                                                                                                                                                                                                                                                                                                         |      |      |      |      |      |      |
|       |   |        |                                                                                                                                                                                                                                                                                                                                                                                                                                                                                                                                         |      |      |      |      |      |      |
|       |   |        |                                                                                                                                                                                                                                                                                                                                                                                                                                                                                                                                         |      |      |      |      |      |      |
|       |   |        |                                                                                                                                                                                                                                                                                                                                                                                                                                                                                                                                         |      |      |      |      |      |      |
|       |   |        |                                                                                                                                                                                                                                                                                                                                                                                                                                                                                                                                         |      |      |      |      |      |      |
|       |   |        |                                                                                                                                                                                                                                                                                                                                                                                                                                                                                                                                         |      |      |      |      |      |      |
|       |   |        |                                                                                                                                                                                                                                                                                                                                                                                                                                                                                                                                         |      |      |      |      |      |      |
|       |   |        |                                                                                                                                                                                                                                                                                                                                                                                                                                                                                                                                         |      |      |      |      |      |      |
|       |   |        |                                                                                                                                                                                                                                                                                                                                                                                                                                                                                                                                         |      |      |      |      |      |      |
|       |   |        |                                                                                                                                                                                                                                                                                                                                                                                                                                                                                                                                         |      |      |      |      |      |      |
|       |   |        |                                                                                                                                                                                                                                                                                                                                                                                                                                                                                                                                         |      |      |      |      |      |      |
|       |   |        |                                                                                                                                                                                                                                                                                                                                                                                                                                                                                                                                         |      |      |      |      |      |      |
|       |   |        |                                                                                                                                                                                                                                                                                                                                                                                                                                                                                                                                         |      |      |      |      |      |      |
|       |   |        |                                                                                                                                                                                                                                                                                                                                                                                                                                                                                                                                         |      |      |      |      |      |      |
|       |   |        |                                                                                                                                                                                                                                                                                                                                                                                                                                                                                                                                         |      |      |      |      |      |      |
|       |   |        |                                                                                                                                                                                                                                                                                                                                                                                                                                                                                                                                         |      |      |      |      |      |      |
|       |   |        |                                                                                                                                                                                                                                                                                                                                                                                                                                                                                                                                         |      |      |      |      |      |      |
|       |   |        |                                                                                                                                                                                                                                                                                                                                                                                                                                                                                                                                         |      |      |      |      |      |      |
|       |   |        |                                                                                                                                                                                                                                                                                                                                                                                                                                                                                                                                         |      |      |      |      |      |      |
|       |   |        |                                                                                                                                                                                                                                                                                                                                                                                                                                                                                                                                         |      |      |      |      |      |      |
|       |   |        |                                                                                                                                                                                                                                                                                                                                                                                                                                                                                                                                         |      |      |      |      |      |      |
|       |   |        |                                                                                                                                                                                                                                                                                                                                                                                                                                                                                                                                         |      |      |      |      |      |      |
|       |   |        |                                                                                                                                                                                                                                                                                                                                                                                                                                                                                                                                         |      |      |      |      |      |      |
|       |   |        |                                                                                                                                                                                                                                                                                                                                                                                                                                                                                                                                         |      |      |      |      |      |      |
|       |   |        |                                                                                                                                                                                                                                                                                                                                                                                                                                                                                                                                         |      |      |      |      |      |      |
|       |   |        |                                                                                                                                                                                                                                                                                                                                                                                                                                                                                                                                         |      |      |      |      |      |      |
|       |   |        |                                                                                                                                                                                                                                                                                                                                                                                                                                                                                                                                         |      |      |      |      |      |      |
|       |   |        |                                                                                                                                                                                                                                                                                                                                                                                                                                                                                                                                         |      |      |      |      |      |      |
|       |   |        |                                                                                                                                                                                                                                                                                                                                                                                                                                                                                                                                         |      |      |      |      |      |      |
|       |   |        |                                                                                                                                                                                                                                                                                                                                                                                                                                                                                                                                         |      |      |      |      |      |      |
|       |   |        |                                                                                                                                                                                                                                                                                                                                                                                                                                                                                                                                         |      |      |      |      |      |      |
|       |   |        |                                                                                                                                                                                                                                                                                                                                                                                                                                                                                                                                         |      |      |      |      |      |      |
|       |   |        |                                                                                                                                                                                                                                                                                                                                                                                                                                                                                                                                         |      |      |      |      |      |      |
|       |   |        |                                                                                                                                                                                                                                                                                                                                                                                                                                                                                                                                         |      |      |      |      |      |      |
|       |   |        |                                                                                                                                                                                                                                                                                                                                                                                                                                                                                                                                         |      |      |      |      |      |      |
|       |   |        |                                                                                                                                                                                                                                                                                                                                                                                                                                                                                                                                         |      |      |      |      |      |      |
|       |   |        |                                                                                                                                                                                                                                                                                                                                                                                                                                                                                                                                         |      |      |      |      |      |      |
|       |   |        |                                                                                                                                                                                                                                                                                                                                                                                                                                                                                                                                         |      |      |      |      |      |      |
|       |   |        |                                                                                                                                                                                                                                                                                                                                                                                                                                                                                                                                         |      |      |      |      |      |      |
|       |   |        |                                                                                                                                                                                                                                                                                                                                                                                                                                                                                                                                         |      |      |      |      |      |      |
|       |   |        |                                                                                                                                                                                                                                                                                                                                                                                                                                                                                                                                         |      |      |      |      |      |      |
|       |   |        |                                                                                                                                                                                                                                                                                                                                                                                                                                                                                                                                         |      |      |      |      |      |      |
|       |   |        |                                                                                                                                                                                                                                                                                                                                                                                                                                                                                                                                         |      |      |      |      |      |      |
|       |   |        |                                                                                                                                                                                                                                                                                                                                                                                                                                                                                                                                         |      |      |      |      |      |      |
|       |   |        |                                                                                                                                                                                                                                                                                                                                                                                                                                                                                                                                         |      |      |      |      |      |      |
|       |   |        |                                                                                                                                                                                                                                                                                                                                                                                                                                                                                                                                         |      |      |      |      |      |      |
|       |   |        |                                                                                                                                                                                                                                                                                                                                                                                                                                                                                                                                         |      |      |      |      |      |      |
|       |   |        |                                                                                                                                                                                                                                                                                                                                                                                                                                                                                                                                         |      |      |      |      |      |      |
|       |   |        |                                                                                                                                                                                                                                                                                                                                                                                                                                                                                                                                         |      |      |      |      |      |      |
|       |   |        |                                                                                                                                                                                                                                                                                                                                                                                                                                                                                                                                         |      |      |      |      |      |      |
|       |   |        |                                                                                                                                                                                                                                                                                                                                                                                                                                                                                                                                         |      |      |      |      |      |      |
|       |   |        |                                                                                                                                                                                                                                                                                                                                                                                                                                                                                                                                         |      |      |      |      |      |      |
|       |   |        |                                                                                                                                                                                                                                                                                                                                                                                                                                                                                                                                         |      |      |      |      |      |      |
|       |   |        |                                                                                                                                                                                                                                                                                                                                                                                                                                                                                                                                         |      |      |      |      |      |      |
|       |   |        |                                                                                                                                                                                                                                                                                                                                                                                                                                                                                                                                         |      |      |      |      |      |      |
|       |   |        |                                                                                                                                                                                                                                                                                                                                                                                                                                                                                                                                         |      |      |      |      |      |      |
|       |   |        |                                                                                                                                                                                                                                                                                                                                                                                                                                                                                                                                         |      |      |      |      |      |      |
|       |   |        |                                                                                                                                                                                                                                                                                                                                                                                                                                                                                                                                         |      |      |      |      |      |      |
|       |   |        |                                                                                                                                                                                                                                                                                                                                                                                                                                                                                                                                         |      |      |      |      |      |      |
|       |   |        |                                                                                                                                                                                                                                                                                                                                                                                                                                                                                                                                         |      |      |      |      |      |      |
|       |   |        |                                                                                                                                                                                                                                                                                                                                                                                                                                                                                                                                         |      |      |      |      |      |      |
|       |   |        |                                                                                                                                                                                                                                                                                                                                                                                                                                                                                                                                         |      |      |      |      |      |      |
|       |   |        |                                                                                                                                                                                                                                                                                                                                                                                                                                                                                                                                         |      |      |      |      |      |      |
|       |   |        |                                                                                                                                                                                                                                                                                                                                                                                                                                                                                                                                         |      |      |      |      |      |      |
|       |   |        |                                                                                                                                                                                                                                                                                                                                                                                                                                                                                                                                         |      |      |      |      |      |      |
|       |   |        |                                                                                                                                                                                                                                                                                                                                                                                                                                                                                                                                         |      |      |      |      |      |      |
|       |   |        |                                                                                                                                                                                                                                                                                                                                                                                                                                                                                                                                         |      |      |      |      |      |      |
|       |   |        |                                                                                                                                                                                                                                                                                                                                                                                                                                                                                                                                         |      |      |      |      |      |      |
|       |   |        |                                                                                                                                                                                                                                                                                                                                                                                                                                                                                                                                         |      |      |      |      |      |      |
|       |   |        |                                                                                                                                                                                                                                                                                                                                                                                                                                                                                                                                         |      |      |      |      |      |      |
|       |   |        |                                                                                                                                                                                                                                                                                                                                                                                                                                                                                                                                         |      |      |      |      |      |      |
|       |   |        |                                                                                                                                                                                                                                                                                                                                                                                                                                                                                                                                         |      |      |      |      |      |      |
|       |   |        |                                                                                                                                                                                                                                                                                                                                                                                                                                                                                                                                         |      |      |      |      |      |      |
|       |   |        |                                                                                                                                                                                                                                                                                                                                                                                                                                                                                                                                         |      |      |      |      |      |      |
|       |   |        |                                                                                                                                                                                                                                                                                                                                                                                                                                                                                                                                         |      |      |      |      |      |      |
|       |   |        |                                                                                                                                                                                                                                                                                                                                                                                                                                                                                                                                         |      |      |      |      |      |      |
|       |   |        |                                                                                                                                                                                                                                                                                                                                                                                                                                                                                                                                         |      |      |      |      |      |      |
|       |   |        |                                                                                                                                                                                                                                                                                                                                                                                                                                                                                                                                         |      |      |      |      |      |      |
|       |   |        |                                                                                                                                                                                                                                                                                                                                                                                                                                                                                                                                         |      |      |      |      |      |      |
|       |   |        |                                                                                                                                                                                                                                                                                                                                                                                                                                                                                                                                         |      |      |      |      |      |      |
|       |   |        |                                                                                                                                                                                                                                                                                                                                                                                                                                                                                                                                         |      |      |      |      |      |      |
|       |   |        |                                                                                                                                                                                                                                                                                                                                                                                                                                                                                                                                         |      |      |      |      |      |      |
|       |   |        |                                                                                                                                                                                                                                                                                                                                                                                                                                                                                                                                         |      |      |      |      |      |      |
|       |   |        |                                                                                                                                                                                                                                                                                                                                                                                                                                                                                                                                         |      |      |      |      |      |      |
|       |   |        |                                                                                                                                                                                                                                                                                                                                                                                                                                                                                                                                         |      |      |      |      |      |      |
|       |   |        |                                                                                                                                                                                                                                                                                                                                                                                                                                                                                                                                         |      |      |      |      |      |      |
|       |   |        |                                                                                                                                                                                                                                                                                                                                                                                                                                                                                                                                         |      |      |      |      |      |      |
|       |   |        |                                                                                                                                                                                                                                                                                                                                                                                                                                                                                                                                         |      |      |      |      |      |      |
|       |   |        |                                                                                                                                                                                                                                                                                                                                                                                                                                                                                                                                         |      |      |      |      |      |      |
|       |   |        |                                                                                                                                                                                                                                                                                                                                                                                                                                                                                                                                         |      |      |      |      |      |      |
|       |   |        |                                                                                                                                                                                                                                                                                                                                                                                                                                                                                                                                         |      |      |      |      |      |      |
|       |   |        |                                                                                                                                                                                                                                                                                                                                                                                                                                                                                                                                         |      |      |      |      |      |      |
|       |   |        |                                                                                                                                                                                                                                                                                                                                                                                                                                                                                                                                         |      |      |      |      |      |      |
|       |   |        |                                                                                                                                                                                                                                                                                                                                                                                                                                                                                                                                         |      |      |      |      |      |      |
|       |   |        |                                                                                                                                                                                                                                                                                                                                                                                                                                                                                                                                         |      |      |      |      |      |      |
|       |   |        |                                                                                                                                                                                                                                                                                                                                                                                                                                                                                                                                         |      |      |      |      |      |      |
|       |   |        |                                                                                                                                                                                                                                                                                                                                                                                                                                                                                                                                         |      |      |      |      |      |      |
|       |   |        |                                                                                                                                                                                                                                                                                                                                                                                                                                                                                                                                         |      |      |      |      |      |      |
|       |   |        |                                                                                                                                                                                                                                                                                                                                                                                                                                                                                                                                         |      |      |      |      |      |      |
|       |   |        |                                                                                                                                                                                                                                                                                                                                                                                                                                                                                                                                         |      |      |      |      |      |      |
|       |   |        |                                                                                                                                                                                                                                                                                                                                                                                                                                                                                                                                         |      |      |      |      |      |      |
|       |   |        |                                                                                                                                                                                                                                                                                                                                                                                                                                                                                                                                         |      |      |      |      |      |      |
|       |   |        |                                                                                                                                                                                                                                                                                                                                                                                                                                                                                                                                         |      |      |      |      |      |      |
|       |   |        |                                                                                                                                                                                                                                                                                                                                                                                                                                                                                                                                         |      |      |      |      |      |      |
|       |   |        |                                                                                                                                                                                                                                                                                                                                                                                                                                                                                                                                         |      |      |      |      |      |      |
|       |   |        |                                                                                                                                                                                                                                                                                                                                                                                                                                                                                                                                         |      |      |      |      |      |      |
|       |   |        |                                                                                                                                                                                                                                                                                                                                                                                                                                                                                                                                         |      |      |      |      |      |      |
|       |   |        |                                                                                                                                                                                                                                                                                                                                                                                                                                                                                                                                         |      |      |      |      |      |      |
|       |   |        |                                                                                                                                                                                                                                                                                                                                                                                                                                                                                                                                         |      |      |      |      |      |      |
|       |   |        |                                                                                                                                                                                                                                                                                                                                                                                                                                                                                                                                         |      |      |      |      |      |      |
|       |   |        |                                                                                                                                                                                                                                                                                                                                                                                                                                                                                                                                         |      |      |      |      |      |      |
|       |   |        |                                                                                                                                                                                                                                                                                                                                                                                                                                                                                                                                         |      |      |      |      |      |      |
|       |   |        |                                                                                                                                                                                                                                                                                                                                                                                                                                                                                                                                         |      |      |      |      |      |      |
|       |   |        |                                                                                                                                                                                                                                                                                                                                                                                                                                                                                                                                         |      |      |      |      |      |      |
|       |   |        |                                                                                                                                                                                                                                                                                                                                                                                                                                                                                                                                         |      |      |      |      |      |      |
|       |   |        |                                                                                                                                                                                                                                                                                                                                                                                                                                                                                                                                         |      |      |      |      |      |      |
|       |   |        |                                                                                                                                                                                                                                                                                                                                                                                                                                                                                                                                         |      |      |      |      |      |      |
|       |   |        |                                                                                                                                                                                                                                                                                                                                                                                                                                                                                                                                         |      |      |      |      |      |      |
|       |   |        |                                                                                                                                                                                                                                                                                                                                                                                                                                                                                                                                         |      |      |      |      |      |      |
|       |   |        |                                                                                                                                                                                                                                                                                                                                                                                                                                                                                                                                         |      |      |      |      |      |      |
|       |   |        |                                                                                                                                                                                                                                                                                                                                                                                                                                                                                                                                         |      |      |      |      |      |      |
|       |   |        |                                                                                                                                                                                                                                                                                                                                                                                                                                                                                                                                         |      |      |      |      |      |      |
|       |   |        |                                                                                                                                                                                                                                                                                                                                                                                                                                                                                                                                         |      |      |      |      |      |      |
|       |   |        |                                                                                                                                                                                                                                                                                                                                                                                                                                                                                                                                         |      |      |      |      |      |      |
|       |   |        |                                                                                                                                                                                                                                                                                                                                                                                                                                                                                                                                         |      |      |      |      |      |      |
|       |   |        |                                                                                                                                                                                                                                                                                                                                                                                                                                                                                                                                         |      |      |      |      |      |      |
|       |   |        |                                                                                                                                                                                                                                                                                                                                                                                                                                                                                                                                         |      |      |      |      |      |      |
|       |   |        |                                                                                                                                                                                                                                                                                                                                                                                                                                                                                                                                         |      |      |      |      |      |      |
|       |   |        |                                                                                                                                                                                                                                                                                                                                                                                                                                                                                                                                         |      |      |      |      |      |      |
|       |   |        |                                                                                                                                                                                                                                                                                                                                                                                                                                                                                                                                         |      |      |      |      |      |      |
|       |   |        |                                                                                                                                                                                                                                                                                                                                                                                                                                                                                                                                         |      |      |      |      |      |      |
|       |   |        |                                                                                                                                                                                                                                                                                                                                                                                                                                                                                                                                         |      |      |      |      |      |      |
|       |   |        |                                                                                                                                                                                                                                                                                                                                                                                                                                                                                                                                         |      |      |      |      |      |      |
|       |   |        |                                                                                                                                                                                                                                                                                                                                                                                                                                                                                                                                         |      |      |      |      |      |      |
|       |   |        |                                                                                                                                                                                                                                                                                                                                                                                                                                                                                                                                         |      |      |      |      |      |      |
|       |   |        |                                                                                                                                                                                                                                                                                                                                                                                                                                                                                                                                         |      |      |      |      |      |      |
|       |   |        |                                                                                                                                                                                                                                                                                                                                                                                                                                                                                                                                         |      |      |      |      |      |      |
|       |   |        |                                                                                                                                                                                                                                                                                                                                                                                                                                                                                                                                         |      |      |      |      |      |      |
|       |   |        |                                                                                                                                                                                                                                                                                                                                                                                                                                                                                                                                         |      |      |      |      |      |      |
|       |   |        |                                                                                                                                                                                                                                                                                                                                                                                                                                                                                                                                         |      |      |      |      |      |      |
|       |   |        |                                                                                                                                                                                                                                                                                                                                                                                                                                                                                                                                         |      |      |      |      |      |      |
|       |   |        |                                                                                                                                                                                                                                                                                                                                                                                                                                                                                                                                         |      |      |      |      |      |      |
|       |   |        |                                                                                                                                                                                                                                                                                                                                                                                                                                                                                                                                         |      |      |      |      |      |      |
|       |   |        |                                                                                                                                                                                                                                                                                                                                                                                                                                                                                                                                         |      |      |      |      |      |      |
|       |   |        |                                                                                                                                                                                                                                                                                                                                                                                                                                                                                                                                         |      |      |      |      |      |      |
|       |   |        |                                                                                                                                                                                                                                                                                                                                                                                                                                                                                                                                         |      |      |      |      |      |      |
|       |   |        |                                                                                                                                                                                                                                                                                                                                                                                                                                                                                                                                         |      |      |      |      |      |      |
|       |   |        |                                                                                                                                                                                                                                                                                                                                                                                                                                                                                                                                         |      |      |      |      |      |      |
|       |   |        |                                                                                                                                                                                                                                                                                                                                                                                                                                                                                                                                         |      |      |      |      |      |      |
|       |   |        |                                                                                                                                                                                                                                                                                                                                                                                                                                                                                                                                         |      |      |      |      |      |      |
|       |   |        |                                                                                                                                                                                                                                                                                                                                                                                                                                                                                                                                         |      |      |      |      |      |      |
|       |   |        |                                                                                                                                                                                                                                                                                                                                                                                                                                                                                                                                         |      |      |      |      |      |      |
|       |   |        |                                                                                                                                                                                                                                                                                                                                                                                                                                                                                                                                         |      |      |      |      |      |      |
|       |   |        |                                                                                                                                                                                                                                                                                                                                                                                                                                                                                                                                         |      |      |      |      |      |      |
|       |   |        |                                                                                                                                                                                                                                                                                                                                                                                                                                                                                                                                         |      |      |      |      |      |      |
|       |   |        |                                                                                                                                                                                                                                                                                                                                                                                                                                                                                                                                         |      |      |      |      |      |      |
|       |   |        |                                                                                                                                                                                                                                                                                                                                                                                                                                                                                                                                         |      |      |      |      |      |      |
|       |   |        |                                                                                                                                                                                                                                                                                                                                                                                                                                                                                                                                         |      |      |      |      |      |      |
|       |   |        |                                                                                                                                                                                                                                                                                                                                                                                                                                                                                                                                         |      |      |      |      |      |      |
|       |   |        |                                                                                                                                                                                                                                                                                                                                                                                                                                                                                                                                         |      |      |      |      |      |      |
|       |   |        |                                                                                                                                                                                                                                                                                                                                                                                                                                                                                                                                         |      |      |      |      |      |      |
|       |   |        |                                                                                                                                                                                                                                                                                                                                                                                                                                                                                                                                         |      |      |      |      |      |      |
|       |   |        |                                                                                                                                                                                                                                                                                                                                                                                                                                                                                                                                         |      |      |      |      |      |      |
|       |   |        |                                                                                                                                                                                                                                                                                                                                                                                                                                                                                                                                         |      |      |      |      |      |      |
|       |   |        |                                                                                                                                                                                                                                                                                                                                                                                                                                                                                                                                         |      |      |      |      |      |      |
|       |   |        |                                                                                                                                                                                                                                                                                                                                                                                                                                                                                                                                         |      |      |      |      |      |      |
|       |   |        |                                                                                                                                                                                                                                                                                                                                                                                                                                                                                                                                         |      |      |      |      |      |      |
|       |   |        |                                                                                                                                                                                                                                                                                                                                                                                                                                                                                                                                         |      |      |      |      |      |      |
|       |   |        |                                                                                                                                                                                                                                                                                                                                                                                                                                                                                                                                         |      |      |      |      |      |      |
|       |   |        |                                                                                                                                                                                                                                                                                                                                                                                                                                                                                                                                         |      |      |      |      |      |      |
|       |   |        |                                                                                                                                                                                                                                                                                                                                                                                                                                                                                                                                         |      |      |      |      |      |      |
|       |   |        |                                                                                                                                                                                                                                                                                                                                                                                                                                                                                                                                         |      |      |      |      |      |      |
|       |   |        |                                                                                                                                                                                                                                                                                                                                                                                                                                                                                                                                         |      |      |      |      |      |      |
|       |   |        |                                                                                                                                                                                                                                                                                                                                                                                                                                                                                                                                         |      |      |      |      |      |      |
|       |   |        |                                                                                                                                                                                                                                                                                                                                                                                                                                                                                                                                         |      |      |      |      |      |      |
|       |   |        |                                                                                                                                                                                                                                                                                                                                                                                                                                                                                                                                         |      |      |      |      |      |      |
|       |   |        |                                                                                                                                                                                                                                                                                                                                                                                                                                                                                                                                         |      |      |      |      |      |      |
|       |   |        |                                                                                                                                                                                                                                                                                                                                                                                                                                                                                                                                         |      |      |      |      |      |      |
|       |   |        |                                                                                                                                                                                                                                                                                                                                                                                                                                                                                                                                         |      |      |      |      |      |      |
|       |   |        |                                                                                                                                                                                                                                                                                                                                                                                                                                                                                                                                         |      |      |      |      |      |      |
|       |   |        |                                                                                                                                                                                                                                                                                                                                                                                                                                                                                                                                         |      |      |      |      |      |      |
|       |   |        |                                                                                                                                                                                                                                                                                                                                                                                                                                                                                                                                         |      |      |      |      |      |      |
|       |   |        |                                                                                                                                                                                                                                                                                                                                                                                                                                                                                                                                         |      |      |      |      |      |      |
|       |   |        |                                                                                                                                                                                                                                                                                                                                                                                                                                                                                                                                         |      |      |      |      |      |      |
|       |   |        |                                                                                                                                                                                                                                                                                                                                                                                                                                                                                                                                         |      |      |      |      |      |      |
|       |   |        |                                                                                                                                                                                                                                                                                                                                                                                                                                                                                                                                         |      |      |      |      |      |      |
|       |   |        |                                                                                                                                                                                                                                                                                                                                                                                                                                                                                                                                         |      |      |      |      |      |      |
|       |   |        |                                                                                                                                                                                                                                                                                                                                                                                                                                                                                                                                         |      |      |      |      |      |      |
|       |   |        |                                                                                                                                                                                                                                                                                                                                                                                                                                                                                                                                         |      |      |      |      |      |      |
|       |   |        |                                                                                                                                                                                                                                                                                                                                                                                                                                                                                                                                         |      |      |      |      |      |      |
|       |   |        |                                                                                                                                                                                                                                                                                                                                                                                                                                                                                                                                         |      |      |      |      |      |      |
|       |   |        |                                                                                                                                                                                                                                                                                                                                                                                                                                                                                                                                         |      |      |      |      |      |      |
|       |   |        |                                                                                                                                                                                                                                                                                                                                                                                                                                                                                                                                         |      |      |      |      |      |      |
|       |   |        |                                                                                                                                                                                                                                                                                                                                                                                                                                                                                                                                         |      |      |      |      |      |      |
|       |   |        |                                                                                                                                                                                                                                                                                                                                                                                                                                                                                                                                         |      |      |      |      |      |      |
|       |   |        |                                                                                                                                                                                                                                                                                                                                                                                                                                                                                                                                         |      |      |      |      |      |      |
|       |   |        |                                                                                                                                                                                                                                                                                                                                                                                                                                                                                                                                         |      |      |      |      |      |      |
|       |   |        |                                                                                                                                                                                                                                                                                                                                                                                                                                                                                                                                         |      |      |      |      |      |      |
|       |   |        |                                                                                                                                                                                                                                                                                                                                                                                                                                                                                                                                         |      |      |      |      |      |      |
|       |   |        |                                                                                                                                                                                                                                                                                                                                                                                                                                                                                                                                         |      |      |      |      |      |      |
|       |   |        |                                                                                                                                                                                                                                                                                                                                                                                                                                                                                                                                         |      |      |      |      |      |      |
|       |   |        |                                                                                                                                                                                                                                                                                                                                                                                                                                                                                                                                         |      |      |      |      |      |      |
|       |   |        |                                                                                                                                                                                                                                                                                                                                                                                                                                                                                                                                         |      |      |      |      |      |      |
|       |   |        |                                                                                                                                                                                                                                                                                                                                                                                                                                                                                                                                         |      |      |      |      |      |      |
|       |   |        |                                                                                                                                                                                                                                                                                                                                                                                                                                                                                                                                         |      |      |      |      |      |      |
|       |   |        |                                                                                                                                                                                                                                                                                                                                                                                                                                                                                                                                         |      |      |      |      |      |      |
|       |   |        |                                                                                                                                                                                                                                                                                                                                                                                                                                                                                                                                         |      |      |      |      |      |      |
|       |   |        |                                                                                                                                                                                                                                                                                                                                                                                                                                                                                                                                         |      |      |      |      |      |      |
|       |   |        |                                                                                                                                                                                                                                                                                                                                                                                                                                                                                                                                         |      |      |      |      |      |      |
|       |   |        |                                                                                                                                                                                                                                                                                                                                                                                                                                                                                                                                         |      |      |      |      |      |      |
|       |   |        |                                                                                                                                                                                                                                                                                                                                                                                                                                                                                                                                         |      |      |      |      |      |      |
|       |   |        |                                                                                                                                                                                                                                                                                                                                                                                                                                                                                                                                         |      |      |      |      |      |      |
|       |   |        |                                                                                                                                                                                                                                                                                                                                                                                                                                                                                                                                         |      |      |      |      |      |      |
|       |   |        |                                                                                                                                                                                                                                                                                                                                                                                                                                                                                                                                         |      |      |      |      |      |      |
|       |   |        |                                                                                                                                                                                                                                                                                                                                                                                                                                                                                                                                         |      |      |      |      |      |      |
|       |   |        |                                                                                                                                                                                                                                                                                                                                                                                                                                                                                                                                         |      |      |      |      |      |      |
|       |   |        |                                                                                                                                                                                                                                                                                                                                                                                                                                                                                                                                         |      |      |      |      |      |      |
|       |   |        |                                                                                                                                                                                                                                                                                                                                                                                                                                                                                                                                         |      |      |      |      |      |      |
|       |   |        |                                                                                                                                                                                                                                                                                                                                                                                                                                                                                                                                         |      |      |      |      |      |      |
|       |   |        |                                                                                                                                                                                                                                                                                                                                                                                                                                                                                                                                         |      |      |      |      |      |      |
|       |   |        |                                                                                                                                                                                                                                                                                                                                                                                                                                                                                                                                         |      |      |      |      |      |      |
|       |   |        |                                                                                                                                                                                                                                                                                                                                                                                                                                                                                                                                         |      |      |      |      |      |      |
|       |   |        |                                                                                                                                                                                                                                                                                                                                                                                                                                                                                                                                         |      |      |      |      |      |      |
|       |   |        |                                                                                                                                                                                                                                                                                                                                                                                                                                                                                                                                         |      |      |      |      |      |      |
|       |   |        |                                                                                                                                                                                                                                                                                                                                                                                                                                                                                                                                         |      |      |      |      |      |      |
|       |   |        |                                                                                                                                                                                                                                                                                                                                                                                                                                                                                                                                         |      |      |      |      |      |      |
|       |   |        |                                                                                                                                                                                                                                                                                                                                                                                                                                                                                                                                         |      |      |      |      |      |      |
|       |   |        |                                                                                                                                                                                                                                                                                                                                                                                                                                                                                                                                         |      |      |      |      |      |      |
|       |   |        |                                                                                                                                                                                                                                                                                                                                                                                                                                                                                                                                         |      |      |      |      |      |      |
|       |   |        |                                                                                                                                                                                                                                                                                                                                                                                                                                                                                                                                         |      |      |      |      |      |      |

|       |   |       |                         |      |      |      |      |      |      |
|-------|---|-------|-------------------------|------|------|------|------|------|------|
| 49654 | 0 | 45130 | NNIMFKLDGCRDTHRYI<br>WI | 2.85 | 0.01 | 3.03 | 0.68 | 0.22 | 1.57 |
| 49655 | 0 | 45130 | NNIMFKLDGCRDTHRYI<br>WI | 2.85 | 0.01 | 3.03 | 3.33 | 0.22 | 1.57 |
| 49656 | 0 | 45130 | NNIMFKLDGCRDTHRYI<br>WI | 2.85 | 0.01 | 2.08 | 0.44 | 0.22 | 1.57 |
| 49657 | 0 | 45130 | NNIMFKLDGCRDTHRYI<br>WI | 2.85 | 0.01 | 2.08 | 2.02 | 0.22 | 1.57 |
| 49658 | 0 | 45130 | NNIMFKLDGCRDTHRYI<br>WI | 2.85 | 0.01 | 2.08 | 1.15 | 0.22 | 1.57 |
| 49659 | 0 | 45130 | NNIMFKLDGCRDTHRYI<br>WI | 2.85 | 0.01 | 2.08 | 2.49 | 0.22 | 1.57 |
| 49660 | 0 | 45130 | NNIMFKLDGCRDTHRYI<br>WI | 2.85 | 0.01 | 2.08 | 2.25 | 0.22 | 1.57 |
| 49661 | 0 | 45130 | NNIMFKLDGCRDTHRYI<br>WI | 2.85 | 0.01 | 3.16 | 0.44 | 1.93 | 1.57 |
| 49662 | 0 | 45130 | NNIMFKLDGCRDTHRYI<br>WI | 2.85 | 0.01 | 2.08 | 0.44 | 0.22 | 1.57 |
| 49663 | 0 | 45130 | NNIMFKLDGCRDTHRYI<br>WI | 2.85 | 0.01 | 2.08 | 2.02 | 0.22 | 1.57 |
| 49664 | 0 | 45130 | NNIMFKLDGCRDTHRYI<br>WI | 2.85 | 0.01 | 2.08 | 1.15 | 0.22 | 1.57 |
| 49665 | 0 | 45130 | NNIMFKLDGCRDTHRYI<br>WI | 2.85 | 0.01 | 2.08 | 2.25 | 0.22 | 1.57 |
| 49666 | 0 | 45130 | NNIMFKLDGCRDTHRYI<br>WI | 2.85 | 0.01 | 2.08 | 0.68 | 0.22 | 1.57 |
| 49667 | 0 | 45130 | NNIMFKLDGCRDTHRYI<br>WI | 2.85 | 0.01 | 2.08 | 0.68 | 0.22 | 1.57 |
| 49668 | 0 | 45130 | NNIMFKLDGCRDTHRYI<br>WI | 2.85 | 0.01 | 2.08 | 2.25 | 0.22 | 1.57 |
| 49669 | 0 | 45130 | NNIMFKLDGCRDTHRYI<br>WI | 2.85 | 0.01 | 2.08 | 0.68 | 0.22 | 1.57 |
| 49670 | 0 | 45130 | NNIMFKLDGCRDTHRYI<br>WI | 2.85 | 0.01 | 2.08 | 2.25 | 0.22 | 1.57 |
| 49671 | 0 | 45130 | NNIMFKLDGCRDTHRYI<br>WI | 2.85 | 0.01 | 2.08 | 2.43 | 0.22 | 1.75 |
| 49672 | 0 | 45130 | NNIMFKLDGCRDTHRYI<br>WI | 2.85 | 0.01 | 2.08 | 2.43 | 0.22 | 1.57 |
| 49673 | 0 | 45130 | NNIMFKLDGCRDTHRYI<br>WI | 2.85 | 0.01 | 2.08 | 3.04 | 0.22 | 1.75 |
| 49674 | 0 | 45130 | NNIMFKLDGCRDTHRYI<br>WI | 2.85 | 0.01 | 2.08 | 3.04 | 0.22 | 1.75 |
| 49675 | 0 | 45130 | NNIMFKLDGCRDTHRYI<br>WI | 2.85 | 0.01 | 2.08 | 3.04 | 0.22 | 1.75 |
| 49676 | 0 | 45130 | NNIMFKLDGCRDTHRYI<br>WI | 2.85 | 0.01 | 2.08 | 3.04 | 0.22 | 1.75 |

|       |   |        |                                                    |      |      |      |      |      |      |
|-------|---|--------|----------------------------------------------------|------|------|------|------|------|------|
| 49677 | 0 | 45130  | NNIMFKLDGCRDTHRYI<br>WI                            | 2.85 | 0.01 | 2.08 | 3.04 | 0.22 | 1.57 |
| 49678 | 0 | 45130  | NNIMFKLDGCRDTHRYI<br>WI                            | 2.85 | 0.01 | 2.08 | 3.04 | 0.22 | 1.75 |
| 49679 | 0 | 45130  | NNIMFKLDGCRDTHRYI<br>WI                            | 2.85 | 0.01 | 2.08 | 3.04 | 0.22 | 1.75 |
| 49680 | 0 | 45131  | NNINNINNNINNNINNI<br>NNINNINNNINNNVNN<br>YY        | 3.55 | 0.01 | 2.22 | 0.44 | 1.74 | 0.28 |
| 49681 | 0 | 45131  | NNINNINNNINNNINNI<br>NNINNINNNINNNVNN<br>YY        | 3.55 | 0.01 | 2.22 | 0.44 | 1.74 | 0.28 |
| 49682 | 0 | 99503  | NNINQFFRSQPF                                       | 2.51 | 0.01 | 0.90 | 1.12 | 0.22 | 1.39 |
| 49683 | 0 | 45134  | NNIPSRYNLYDKMLDLD<br>DL                            | 2.91 | 0.01 | 0.90 | 2.63 | 0.22 | 1.48 |
| 49684 | 0 | 161439 | NNIRIYDKNLLMIKEHILA<br>I                           | 2.96 | 0.01 | 0.90 | 2.74 | 0.22 | 1.48 |
| 49685 | 0 | 45151  | NNKSQSVIIINNSTNVV                                  | 2.82 | 0.01 | 2.48 | 0.44 | 0.85 | 0.28 |
| 49686 | 0 | 45151  | NNKSQSVIIINNSTNVV                                  | 2.82 | 0.01 | 2.48 | 0.68 | 0.22 | 0.28 |
| 49687 | 0 | 45156  | NNKTPNSIAA<br>NNKVDVRKYLINEKETPF                   | 2.31 | 0.01 | 2.66 | 0.68 | 0.22 | 0.28 |
| 49688 | 0 | 227414 | TSILIHAYKEHNGTNLIES<br>KNYAL<br>NNKVDVRKYLINEKETPF | 3.68 | 0.01 | 3.28 | 3.33 | 0.22 | 0.28 |
| 49689 | 0 | 227414 | TSILIHAYKEHNGTNLIES<br>KNYAL                       | 3.68 | 0.01 | 3.28 | 3.33 | 0.22 | 0.28 |
| 49690 | 0 | 45160  | NNLEDPASRDLVVNYV                                   | 2.74 | 0.01 | 3.28 | 0.44 | 1.59 | 0.28 |
| 49691 | 0 | 45160  | NNLEDPASRDLVVNYV                                   | 2.74 | 0.01 | 3.28 | 1.12 | 0.22 | 0.28 |
| 49692 | 0 | 45162  | NNLGLLCEYQAIGSA                                    | 2.66 | 0.01 | 2.22 | 0.44 | 1.74 | 0.28 |
| 49693 | 0 | 119502 | NNLGTI                                             | 1.89 | 0.01 | 0.78 | 0.44 | 0.85 | 0.28 |
| 49694 | 0 | 116791 | NNLKSLEVSEEKANQ                                    | 2.70 | 0.01 | 2.36 | 0.44 | 1.23 | 1.28 |
| 49695 | 0 | 116791 | NNLKSLEVSEEKANQ                                    | 2.70 | 0.01 | 2.36 | 0.44 | 1.23 | 1.27 |
| 49696 | 0 | 45165  | NNLMEIAEVD                                         | 2.30 | 0.01 | 3.17 | 0.68 | 0.22 | 0.28 |
| 49697 | 0 | 45165  | NNLMEIAEVD                                         | 2.30 | 0.01 | 3.17 | 0.68 | 0.22 | 0.28 |
| 49698 | 0 | 45165  | NNLMEIAEVD                                         | 2.30 | 0.01 | 3.17 | 0.68 | 0.22 | 0.85 |
| 49699 | 0 | 45165  | NNLMEIAEVD                                         | 2.30 | 0.01 | 3.17 | 0.68 | 0.22 | 0.28 |
| 49700 | 0 | 123550 | NNLNEKIKDELKK                                      | 2.58 | 0.01 | 0.78 | 1.20 | 0.22 | 0.28 |
| 49701 | 0 | 510457 | NNLNYTSNPVAH                                       | 2.47 | 0.01 | 0.90 | 3.07 | 1.13 | 1.39 |
| 49702 | 0 | 45167  | NNLPILEFIQLS                                       | 2.48 | 0.01 | 3.33 | 0.44 | 1.23 | 0.85 |
| 49703 | 0 | 86944  | NNLPNDVFREAQ                                       | 2.45 | 0.01 | 2.48 | 0.44 | 1.59 | 0.28 |
| 49704 | 0 | 111595 | NNLPPPSEVVSLYKS                                    | 2.68 | 0.01 | 3.20 | 1.12 | 0.22 | 0.85 |
| 49705 | 0 | 45169  | NNLSKEDKAVVAGAFAR<br>AVEGAEVIEVRAI                 | 3.36 | 0.01 | 3.65 | 2.22 | 0.22 | 0.28 |



|       |   |        |                                 |      |      |      |      |      |      |
|-------|---|--------|---------------------------------|------|------|------|------|------|------|
| 49706 | 0 | 98294  | NNLTLVPAVV                      | 2.32 | 0.01 | 3.08 | 0.68 | 0.22 | 0.28 |
| 49707 | 0 | 145388 | NNLTQSKFLRLQ                    | 2.48 | 0.01 | 0.90 | 0.44 | 1.13 | 0.28 |
| 49708 | 0 | 145388 | NNLTQSKFLRLQ                    | 2.48 | 0.01 | 0.90 | 0.44 | 1.13 | 0.28 |
| 49709 | 0 | 45177  | NNMEENINILKNEGD                 | 2.71 | 0.01 | 1.66 | 1.15 | 0.22 | 0.28 |
| 49710 | 0 | 45177  | NNMEENINILKNEGD                 | 2.71 | 0.01 | 1.66 | 1.15 | 0.22 | 0.28 |
| 49711 | 0 | 45178  | NNMSCLSHETICGRNP                | 2.71 | 0.01 | 0.90 | 0.44 | 1.41 | 0.28 |
| 49712 | 0 | 45181  | NNNEEPSDK                       | 2.23 | 0.01 | 3.37 | 1.12 | 0.22 | 0.28 |
| 49713 | 0 | 124562 | NNNFQSKANCLN                    | 2.48 | 0.01 | 0.78 | 0.68 | 0.22 | 0.28 |
| 49714 | 0 | 98295  | NNNLTLPVAV                      | 2.33 | 0.01 | 3.08 | 0.68 | 0.22 | 0.28 |
| 49715 | 0 | 45190  | NNNLTLPVAVVGKPGS<br>DV          | 2.85 | 0.01 | 2.90 | 0.44 | 0.22 | 1.27 |
| 49716 | 0 | 45190  | NNNLTLPVAVVGKPGS<br>DV          | 2.85 | 0.01 | 2.90 | 0.68 | 0.22 | 0.28 |
| 49717 | 0 | 45192  | NNNNEEPSD                       | 2.25 | 0.01 | 3.37 | 1.12 | 0.22 | 0.28 |
| 49718 | 0 | 125175 | NNNNFQSKAN                      | 2.34 | 0.01 | 0.78 | 0.68 | 0.22 | 0.28 |
| 49719 | 0 | 125175 | NNNNFQSKAN                      | 2.34 | 0.01 | 0.78 | 0.68 | 0.22 | 1.34 |
| 49720 | 0 | 105988 | NNNPFKFFVPPSEQS                 | 2.68 | 0.01 | 2.16 | 0.44 | 1.23 | 0.85 |
| 49721 | 0 | 187169 | NNNTRKSINIGPGRALYT<br>T         | 2.88 | 0.01 | 3.89 | 0.44 | 0.85 | 0.28 |
| 49722 | 0 | 45204  | NNNVNNINMNNINSN<br>VNNINNSMNNIN | 3.31 | 0.01 | 2.22 | 0.44 | 1.74 | 0.28 |
| 49723 | 0 | 45204  | NNNVNNINMNNINSN<br>VNNINNSMNNIN | 3.31 | 0.01 | 2.22 | 0.44 | 1.74 | 0.28 |
| 49724 | 0 | 145389 | NNPAPVYTHRVL                    | 2.46 | 0.01 | 0.90 | 0.44 | 1.13 | 0.28 |
| 49725 | 0 | 113667 | NNPDWGTFFEEVSGNVS<br>PGTR       | 2.95 | 0.01 | 0.78 | 1.81 | 0.22 | 0.28 |
| 49726 | 0 | 113667 | NNPDWGTFFEEVSGNVS<br>PGTR       | 2.95 | 0.01 | 0.78 | 3.61 | 0.22 | 0.28 |
| 49727 | 0 | 45207  | NNPELTTL                        | 2.14 | 0.01 | 3.20 | 2.22 | 0.85 | 0.28 |
| 49728 | 0 | 510458 | NNPFQLW                         | 2.01 | 0.01 | 0.90 | 0.44 | 1.13 | 0.28 |
| 49729 | 0 | 510458 | NNPFQLW                         | 2.01 | 0.01 | 0.90 | 0.44 | 1.41 | 0.28 |
| 49730 | 0 | 99505  | NNPFYFPSRRFSTRY                 | 2.72 | 0.01 | 2.16 | 0.44 | 1.23 | 1.48 |
| 49731 | 0 | 99505  | NNPFYFPSRRFSTRY                 | 2.72 | 0.01 | 2.16 | 0.44 | 1.23 | 1.48 |
| 49732 | 0 | 227416 | NNPGLCYASQMQQTK                 | 2.62 | 0.01 | 2.97 | 0.44 | 0.85 | 0.28 |
| 49733 | 0 | 161440 | NNPRIYDKNHLKIKMHIL<br>AI        | 2.96 | 0.01 | 0.90 | 2.74 | 0.22 | 1.48 |
| 49734 | 0 | 161441 | NNPRIYDMNHLMIKMH<br>ILAI        | 2.96 | 0.01 | 0.90 | 2.74 | 0.22 | 1.48 |
| 49735 | 0 | 94613  | NNPTCWAICKRI                    | 2.46 | 0.01 | 2.38 | 0.68 | 0.22 | 0.28 |
| 49736 | 0 | 94613  | NNPTCWAICKRI                    | 2.46 | 0.01 | 2.38 | 0.44 | 1.59 | 0.28 |
| 49737 | 0 | 94613  | NNPTCWAICKRI                    | 2.46 | 0.01 | 2.38 | 0.44 | 1.74 | 0.28 |
| 49738 | 0 | 94613  | NNPTCWAICKRI                    | 2.46 | 0.01 | 2.38 | 0.44 | 1.74 | 0.28 |
| 49739 | 0 | 115402 | NNQFLPYPPYAKPAAVR<br>SPA        | 2.94 | 0.01 | 1.60 | 0.44 | 1.23 | 1.28 |
| 49740 | 0 | 142449 | NNQNLSVVQALL                    | 2.50 | 0.01 | 0.90 | 0.68 | 0.22 | 0.85 |

|       |   |        |                          |      |      |      |      |      |      |
|-------|---|--------|--------------------------|------|------|------|------|------|------|
| 49741 | 0 | 177889 | NNQQPQQQQQQQQP<br>Q      | 2.74 | 0.01 | 0.78 | 0.44 | 1.13 | 0.85 |
| 49742 | 0 | 115155 | NNQRKKAKNTPFNMLK<br>RERN | 2.96 | 0.01 | 2.30 | 0.68 | 0.22 | 0.28 |
| 49743 | 0 | 115155 | NNQRKKAKNTPFNMLK<br>RERN | 2.96 | 0.01 | 2.30 | 0.68 | 0.22 | 0.28 |
| 49744 | 0 | 115155 | NNQRKKAKNTPFNMLK<br>RERN | 2.96 | 0.01 | 2.30 | 0.68 | 0.22 | 0.85 |
| 49745 | 0 | 141716 | NNQRNFLAGEEDNVI          | 2.65 | 0.01 | 3.65 | 0.44 | 1.23 | 1.28 |
| 49746 | 0 | 181408 | NNQVNRSLTALQVLP          | 2.70 | 0.01 | 2.82 | 1.15 | 0.22 | 0.28 |
| 49747 | 0 | 45221  | NNRAVPDKIDWRESGY<br>VTE  | 2.85 | 0.01 | 2.28 | 3.06 | 0.22 | 0.28 |
| 49748 | 0 | 45221  | NNRAVPDKIDWRESGY<br>VTE  | 2.85 | 0.01 | 2.28 | 3.06 | 0.22 | 0.28 |
| 49749 | 0 | 45221  | NNRAVPDKIDWRESGY<br>VTE  | 2.85 | 0.01 | 2.28 | 3.06 | 0.22 | 1.75 |
| 49750 | 0 | 45221  | NNRAVPDKIDWRESGY<br>VTE  | 2.85 | 0.01 | 2.28 | 3.06 | 0.22 | 0.28 |
| 49751 | 0 | 45221  | NNRAVPDKIDWRESGY<br>VTE  | 2.85 | 0.01 | 2.28 | 3.63 | 0.22 | 0.28 |
| 49752 | 0 | 45222  | NNRDVPASIDWREYGY<br>VTE  | 2.87 | 0.01 | 2.28 | 3.63 | 0.22 | 0.28 |
| 49753 | 0 | 131984 | NNRMNAWGTVSSSSN          | 2.67 | 0.01 | 0.78 | 0.44 | 1.13 | 0.85 |
| 49754 | 0 | 45225  | NNRNRLTKLFRYKSSRSE<br>SE | 2.98 | 0.01 | 2.78 | 2.49 | 0.85 | 0.28 |
| 49755 | 0 | 45225  | NNRNRLTKLFRYKSSRSE<br>SE | 2.98 | 0.01 | 2.78 | 0.44 | 0.85 | 0.28 |
| 49756 | 0 | 45225  | NNRNRLTKLFRYKSSRSE<br>SE | 2.98 | 0.01 | 2.78 | 4.03 | 0.22 | 0.28 |
| 49757 | 0 | 45236  | NNSAFNNNLSSKNAMG<br>LVLN | 2.97 | 0.01 | 0.90 | 2.63 | 0.22 | 1.48 |
| 49758 | 0 | 108558 | NNSFEKVQK                | 2.22 | 0.01 | 0.90 | 0.44 | 1.13 | 1.39 |
| 49759 | 0 | 45239  | NNSFLDPEYWNFRNG          | 2.66 | 0.01 | 3.38 | 1.12 | 0.22 | 0.28 |
| 49760 | 0 | 45240  | NNSGKGGDSASTNPAD         | 2.77 | 0.01 | 4.63 | 0.68 | 0.22 | 0.85 |
| 49761 | 0 | 45245  | NNSNDL                   | 1.92 | 0.01 | 3.51 | 1.15 | 0.22 | 0.28 |
| 49762 | 0 | 45246  | NNSNLFDTIESLQGRIID       | 2.84 | 0.01 | 1.66 | 0.44 | 1.74 | 0.28 |
| 49763 | 0 | 45247  | NNSPARPETS RPK           | 2.56 | 0.01 | 3.17 | 0.44 | 0.85 | 0.85 |
| 49764 | 0 | 45250  | NNSPAVYLLDGLRAQD<br>DYNG | 2.95 | 0.01 | 2.04 | 0.44 | 0.85 | 0.28 |
| 49765 | 0 | 45251  | NNSSNIAS                 | 2.18 | 0.01 | 3.42 | 0.68 | 0.22 | 0.28 |
| 49766 | 0 | 125176 | NNSTGDFEL                | 2.20 | 0.01 | 4.93 | 3.15 | 0.22 | 0.28 |
| 49767 | 0 | 225817 | NNSTYRVVSVLRIQH          | 2.67 | 0.01 | 3.28 | 0.44 | 0.22 | 0.85 |
| 49768 | 0 | 45255  | NNT                      | 1.39 | 0.01 | 4.93 | 0.68 | 0.22 | 0.28 |

|       |   |        |                                    |      |      |      |      |      |      |
|-------|---|--------|------------------------------------|------|------|------|------|------|------|
| 49769 | 0 | 187078 | NNTFYCCELCCNFACAG<br>C             | 2.88 | 0.01 | 0.90 | 1.81 | 0.22 | 0.28 |
| 49770 | 0 | 187078 | NNTFYCCELCCNFACAG<br>C             | 2.88 | 0.01 | 0.90 | 1.81 | 0.22 | 0.28 |
| 49771 | 0 | 187078 | NNTFYCCELCCNFACAG<br>C             | 2.88 | 0.01 | 0.90 | 1.81 | 0.22 | 1.34 |
| 49772 | 0 | 45256  | NNTGNRSG                           | 2.16 | 0.01 | 2.99 | 0.44 | 0.85 | 0.28 |
| 49773 | 0 | 163039 | NNTKKSIRPRQAFYAT<br>NGIIG          | 3.08 | 0.01 | 4.23 | 0.44 | 0.85 | 2.49 |
| 49774 | 0 | 163039 | NNTKKSIRPRQAFYAT<br>NGIIG          | 3.08 | 0.01 | 4.23 | 0.44 | 0.85 | 0.28 |
| 49775 | 0 | 45258  | NNTLLCPTDCFR                       | 2.47 | 0.01 | 2.68 | 2.74 | 0.22 | 0.28 |
| 49776 | 0 | 161262 | NNTLLCPTDCFRKHPEA<br>TYS           | 2.90 | 0.01 | 2.45 | 0.68 | 0.22 | 0.28 |
| 49777 | 0 | 45262  | NNTNNTNNTNNTNNT<br>NNTNNTNNT       | 3.20 | 0.01 | 0.90 | 3.97 | 0.22 | 0.85 |
| 49778 | 0 | 45262  | NNTNNTNNTNNTNNT<br>NNTNNTNNT       | 3.20 | 0.01 | 0.90 | 3.97 | 0.22 | 0.85 |
| 49779 | 0 | 163040 | NNTRKSIHLGPGRFYA<br>TGDIIIG        | 3.05 | 0.01 | 4.03 | 0.44 | 0.85 | 2.49 |
| 49780 | 0 | 163040 | NNTRKSIHLGPGRFYA<br>TGDIIIG        | 3.05 | 0.01 | 4.03 | 0.44 | 0.85 | 0.28 |
| 49781 | 0 | 163040 | NNTRKSIHLGPGRFYA<br>TGDIIIG        | 3.05 | 0.01 | 4.03 | 0.44 | 0.85 | 0.28 |
| 49782 | 0 | 45272  | NNTTGNPKL                          | 2.25 | 0.01 | 2.38 | 0.44 | 0.85 | 0.28 |
| 49783 | 0 | 45276  | NNVARCSYGADSTLGPV                  | 2.77 | 0.01 | 3.10 | 3.06 | 0.22 | 1.48 |
| 49784 | 0 | 45276  | NNVARCSYGADSTLGPV                  | 2.77 | 0.01 | 3.10 | 3.06 | 0.22 | 1.34 |
| 49785 | 0 | 45279  | NNVDQI                             | 1.89 | 0.01 | 3.57 | 0.44 | 1.23 | 1.27 |
| 49786 | 0 | 45279  | NNVDQI                             | 1.89 | 0.01 | 3.57 | 0.44 | 1.23 | 0.28 |
| 49787 | 0 | 229394 | NNVEDYIK                           | 2.11 | 0.01 | 2.70 | 0.68 | 0.22 | 0.28 |
| 49788 | 0 | 229395 | NNVEDYIKEG                         | 2.30 | 0.01 | 2.70 | 0.68 | 0.22 | 0.28 |
| 49789 | 0 | 229395 | NNVEDYIKEG                         | 2.30 | 0.01 | 2.70 | 0.68 | 0.22 | 0.28 |
| 49790 | 0 | 229396 | NNVEDYVKEG                         | 2.32 | 0.01 | 2.70 | 0.68 | 0.22 | 0.28 |
| 49791 | 0 | 157725 | NNVFSGFDAEFL                       | 2.46 | 0.01 | 3.65 | 0.44 | 1.23 | 0.85 |
| 49792 | 0 | 45280  | NNVIRSKMYNIKKRISKI<br>NDELHELNSFFL | 3.35 | 0.01 | 2.22 | 0.44 | 1.74 | 0.28 |
| 49793 | 0 | 45280  | NNVIRSKMYNIKKRISKI<br>NDELHELNSFFL | 3.35 | 0.01 | 2.22 | 0.44 | 1.74 | 0.28 |
| 49794 | 0 | 45283  | NNWPCLNETCPTKG                     | 2.63 | 0.01 | 0.90 | 0.44 | 1.41 | 0.28 |
| 49795 | 0 | 94614  | NNYCKIKCRKGIHTLCKF<br>GT           | 2.95 | 0.01 | 3.65 | 0.68 | 0.22 | 0.28 |
| 49796 | 0 | 94614  | NNYCKIKCRKGIHTLCKF<br>GT           | 2.95 | 0.01 | 3.65 | 0.68 | 0.22 | 0.28 |
| 49797 | 0 | 119619 | NNYKTPP                            | 2.12 | 0.01 | 0.78 | 0.44 | 1.93 | 0.28 |

|       |   |        |                              |      |      |      |      |      |      |
|-------|---|--------|------------------------------|------|------|------|------|------|------|
| 49798 | 0 | 45291  | NNYNNNAKNVNDMYR<br>DGE       | 2.86 | 0.01 | 1.66 | 0.44 | 0.85 | 0.28 |
| 49799 | 0 | 94615  | NPA                          | 1.37 | 0.01 | 3.22 | 2.37 | 0.22 | 0.28 |
| 49800 | 0 | 94616  | NPAC                         | 1.57 | 0.01 | 3.22 | 2.37 | 0.22 | 0.28 |
| 49801 | 0 | 94616  | NPAC                         | 1.57 | 0.01 | 3.22 | 1.20 | 0.22 | 0.28 |
| 49802 | 0 | 94617  | NPACG                        | 1.74 | 0.01 | 3.70 | 2.37 | 0.22 | 0.28 |
| 49803 | 0 | 94618  | NPACGP                       | 1.90 | 0.01 | 3.70 | 2.37 | 0.22 | 0.28 |
| 49804 | 0 | 94620  | NPACGPKY                     | 2.12 | 0.01 | 3.70 | 2.37 | 0.22 | 0.28 |
| 49805 | 0 | 94622  | NPACGR                       | 1.88 | 0.01 | 3.22 | 2.37 | 0.22 | 0.28 |
| 49806 | 0 | 94622  | NPACGR                       | 1.88 | 0.01 | 3.22 | 1.20 | 0.22 | 0.28 |
| 49807 | 0 | 94623  | NPACGRH                      | 1.99 | 0.01 | 3.22 | 2.37 | 0.22 | 0.28 |
| 49808 | 0 | 94623  | NPACGRH                      | 1.99 | 0.01 | 3.22 | 1.20 | 0.22 | 0.28 |
| 49809 | 0 | 94624  | NPACGRHY                     | 2.10 | 0.01 | 3.22 | 2.37 | 0.22 | 0.28 |
| 49810 | 0 | 94624  | NPACGRHY                     | 2.10 | 0.01 | 3.22 | 1.20 | 0.22 | 0.28 |
| 49811 | 0 | 462405 | NPADRD                       | 1.90 | 0.01 | 0.78 | 1.12 | 0.22 | 1.28 |
| 49812 | 0 | 423445 | NPANWPRERAWALKN              | 2.72 | 0.01 | 2.51 | 0.44 | 2.35 | 1.28 |
| 49813 | 0 | 45301  | NPAPQEIPQPQWTPEE<br>DQKAREAF | 3.13 | 0.01 | 2.40 | 0.68 | 0.22 | 1.34 |
| 49814 | 0 | 45301  | NPAPQEIPQPQWTPEE<br>DQKAREAF | 3.13 | 0.01 | 2.40 | 0.68 | 0.22 | 0.85 |
| 49815 | 0 | 45303  | NPASTTNKDK                   | 2.33 | 0.01 | 3.51 | 0.68 | 0.22 | 0.28 |
| 49816 | 0 | 45303  | NPASTTNKDK                   | 2.33 | 0.01 | 3.51 | 0.68 | 0.22 | 1.34 |
| 49817 | 0 | 144423 | NPATAKEINVGHFS               | 2.64 | 0.01 | 0.78 | 0.44 | 2.35 | 2.66 |
| 49818 | 0 | 45306  | NPAYGRHMQD                   | 2.26 | 0.01 | 3.42 | 3.28 | 0.22 | 0.28 |
| 49819 | 0 | 130567 | NPCEDI                       | 1.88 | 0.01 | 0.78 | 0.68 | 0.22 | 1.28 |
| 49820 | 0 | 130567 | NPCEDI                       | 1.88 | 0.01 | 0.78 | 0.68 | 0.22 | 1.27 |
| 49821 | 0 | 236266 | NPCELKYQWHTNATR              | 2.63 | 0.01 | 1.66 | 0.44 | 0.85 | 1.28 |
| 49822 | 0 | 125510 | NPCFPIQLPEEARPA              | 2.67 | 0.01 | 0.78 | 0.68 | 0.22 | 0.85 |
| 49823 | 0 | 45309  | NPCVVPNINNAECQFLK<br>SVL     | 2.94 | 0.01 | 3.10 | 1.12 | 0.22 | 0.28 |
| 49824 | 0 | 45311  | NPDDDFRPLKDTKLLK<br>TLA      | 2.96 | 0.01 | 3.47 | 0.44 | 0.22 | 0.85 |
| 49825 | 0 | 119620 | NPDDYGGVK                    | 2.21 | 0.01 | 0.78 | 2.04 | 0.22 | 0.28 |
| 49826 | 0 | 119620 | NPDDYGGVK                    | 2.21 | 0.01 | 0.78 | 2.04 | 0.22 | 0.28 |
| 49827 | 0 | 119620 | NPDDYGGVK                    | 2.21 | 0.01 | 0.78 | 2.04 | 0.22 | 0.28 |
| 49828 | 0 | 345202 | NPDEHQGLSKSLAAEK<br>QFTDDSP  | 3.11 | 0.01 | 3.36 | 0.44 | 2.39 | 0.28 |
| 49829 | 0 | 141717 | NPDHPIVETL                   | 2.29 | 0.01 | 0.78 | 0.44 | 1.93 | 0.28 |
| 49830 | 0 | 153431 | NPDHPRVPTFMA                 | 2.45 | 0.01 | 0.90 | 1.12 | 0.22 | 0.28 |
| 49831 | 0 | 153431 | NPDHPRVPTFMA                 | 2.45 | 0.01 | 0.90 | 0.68 | 0.22 | 0.28 |
| 49832 | 0 | 153431 | NPDHPRVPTFMA                 | 2.45 | 0.01 | 0.90 | 0.68 | 0.22 | 0.28 |
| 49833 | 0 | 153431 | NPDHPRVPTFMA                 | 2.45 | 0.01 | 0.90 | 0.68 | 0.22 | 0.28 |
| 49834 | 0 | 153431 | NPDHPRVPTFMA                 | 2.45 | 0.01 | 0.90 | 0.68 | 0.22 | 0.28 |
| 49835 | 0 | 153431 | NPDHPRVPTFMA                 | 2.45 | 0.01 | 0.90 | 0.68 | 0.22 | 0.28 |
| 49836 | 0 | 153431 | NPDHPRVPTFMA                 | 2.45 | 0.01 | 0.90 | 0.68 | 0.22 | 0.28 |

|       |   |        |                     |      |      |      |      |      |      |
|-------|---|--------|---------------------|------|------|------|------|------|------|
| 49837 | 0 | 153431 | NPDHPRVPTFMA        | 2.45 | 0.01 | 0.90 | 0.68 | 0.22 | 0.28 |
| 49838 | 0 | 153431 | NPDHPRVPTFMA        | 2.45 | 0.01 | 0.90 | 0.68 | 0.22 | 0.28 |
| 49839 | 0 | 153431 | NPDHPRVPTFMA        | 2.45 | 0.01 | 0.90 | 0.68 | 0.22 | 0.28 |
| 49840 | 0 | 153431 | NPDHPRVPTFMA        | 2.45 | 0.01 | 0.90 | 0.68 | 0.22 | 0.28 |
| 49841 | 0 | 153431 | NPDHPRVPTFMA        | 2.45 | 0.01 | 0.90 | 0.68 | 0.22 | 0.28 |
| 49842 | 0 | 153431 | NPDHPRVPTFMA        | 2.45 | 0.01 | 0.90 | 0.68 | 0.22 | 0.28 |
| 49843 | 0 | 153431 | NPDHPRVPTFMA        | 2.45 | 0.01 | 0.90 | 0.68 | 0.22 | 0.28 |
| 49844 | 0 | 153431 | NPDHPRVPTFMA        | 2.45 | 0.01 | 0.90 | 0.68 | 0.22 | 0.28 |
| 49845 | 0 | 45316  | NPDK                | 1.57 | 0.01 | 4.08 | 1.12 | 0.22 | 0.28 |
| 49846 | 0 | 45316  | NPDK                | 1.57 | 0.01 | 4.08 | 3.67 | 0.22 | 0.28 |
| 49847 | 0 | 45317  | NPDKARELLNK         | 2.41 | 0.01 | 3.13 | 1.20 | 0.22 | 1.34 |
| 49848 | 0 | 45317  | NPDKARELLNK         | 2.41 | 0.01 | 3.13 | 1.20 | 0.22 | 0.28 |
| 49849 | 0 | 45317  | NPDKARELLNK         | 2.41 | 0.01 | 3.13 | 1.20 | 0.22 | 1.34 |
| 49850 | 0 | 45317  | NPDKARELLNK         | 2.41 | 0.01 | 3.13 | 1.20 | 0.22 | 0.28 |
| 49851 | 0 | 45317  | NPDKARELLNK         | 2.41 | 0.01 | 3.13 | 1.20 | 0.22 | 0.28 |
| 49852 | 0 | 45317  | NPDKARELLNK         | 2.41 | 0.01 | 3.13 | 1.20 | 0.22 | 1.34 |
| 49853 | 0 | 45317  | NPDKARELLNK         | 2.41 | 0.01 | 3.13 | 1.20 | 0.22 | 0.28 |
| 49854 | 0 | 45317  | NPDKARELLNK         | 2.41 | 0.01 | 3.13 | 1.20 | 0.22 | 0.28 |
| 49855 | 0 | 45317  | NPDKARELLNK         | 2.41 | 0.01 | 3.13 | 1.20 | 0.22 | 0.28 |
| 49856 | 0 | 45317  | NPDKARELLNK         | 2.41 | 0.01 | 3.13 | 1.20 | 0.22 | 0.28 |
| 49857 | 0 | 45317  | NPDKARELLNK         | 2.41 | 0.01 | 3.13 | 1.20 | 0.22 | 1.34 |
| 49858 | 0 | 45317  | NPDKARELLNK         | 2.41 | 0.01 | 3.13 | 1.20 | 0.22 | 1.34 |
| 49859 | 0 | 45317  | NPDKARELLNK         | 2.41 | 0.01 | 3.13 | 1.20 | 0.22 | 0.28 |
| 49860 | 0 | 45317  | NPDKARELLNK         | 2.41 | 0.01 | 3.13 | 1.20 | 0.22 | 1.34 |
| 49861 | 0 | 45320  | NPDPPDN             | 2.06 | 0.01 | 1.66 | 1.15 | 0.22 | 0.28 |
| 49862 | 0 | 45322  | NPDPPN              | 1.77 | 0.01 | 3.29 | 1.15 | 0.22 | 0.28 |
| 49863 | 0 | 45325  | NPDPPNP             | 2.06 | 0.01 | 1.66 | 1.15 | 0.22 | 0.28 |
| 49864 | 0 | 45327  | NPDREYDFRD          | 2.33 | 0.01 | 2.43 | 1.20 | 0.22 | 0.28 |
| 49865 | 0 | 45327  | NPDREYDFRD          | 2.33 | 0.01 | 2.43 | 1.20 | 0.22 | 0.28 |
| 49866 | 0 | 45327  | NPDREYDFRD          | 2.33 | 0.01 | 2.43 | 1.20 | 0.22 | 0.28 |
| 49867 | 0 | 45327  | NPDREYDFRD          | 2.33 | 0.01 | 2.43 | 1.20 | 0.22 | 0.28 |
| 49868 | 0 | 45327  | NPDREYDFRD          | 2.33 | 0.01 | 2.43 | 1.20 | 0.22 | 0.28 |
| 49869 | 0 | 45327  | NPDREYDFRD          | 2.33 | 0.01 | 2.43 | 1.20 | 0.22 | 1.48 |
| 49870 | 0 | 45327  | NPDREYDFRD          | 2.33 | 0.01 | 2.43 | 1.15 | 2.26 | 0.28 |
| 49871 | 0 | 45327  | NPDREYDFRD          | 2.33 | 0.01 | 2.43 | 1.15 | 2.26 | 0.28 |
| 49872 | 0 | 120843 | NPDKSAI             | 2.10 | 0.01 | 2.26 | 2.36 | 0.22 | 0.28 |
| 49873 | 0 | 78472  | NPDWDFNP            | 2.17 | 0.01 | 2.08 | 0.68 | 0.22 | 1.57 |
| 49874 | 0 | 78472  | NPDWDFNP            | 2.17 | 0.01 | 2.08 | 0.68 | 0.22 | 1.57 |
| 49875 | 0 | 78472  | NPDWDFNP            | 2.17 | 0.01 | 2.08 | 0.68 | 0.22 | 1.57 |
| 49876 | 0 | 345216 | NPEAASKKAPLSVVT     | 2.68 | 0.01 | 1.61 | 0.44 | 0.85 | 1.28 |
| 49877 | 0 | 225818 | NPECELLISKESWSYIVEK | 2.90 | 0.01 | 3.72 | 1.12 | 0.22 | 1.28 |
| 49878 | 0 | 504111 | NPECELLISRESWSY     | 2.67 | 0.01 | 4.93 | 0.44 | 1.74 | 1.28 |
| 49879 | 0 | 104155 | NPEDCFKTCNSPT       | 2.62 | 0.01 | 0.90 | 0.44 | 1.13 | 1.39 |
| 49880 | 0 | 145921 | NPEIVYQY            | 2.23 | 0.01 | 2.54 | 0.68 | 0.22 | 2.12 |
| 49881 | 0 | 145921 | NPEIVYQY            | 2.23 | 0.01 | 2.54 | 0.68 | 0.22 | 2.12 |
| 49882 | 0 | 145921 | NPEIVYQY            | 2.23 | 0.01 | 2.54 | 0.68 | 0.22 | 2.12 |

|       |   |        |                         |      |      |      |      |      |      |
|-------|---|--------|-------------------------|------|------|------|------|------|------|
| 49883 | 0 | 145921 | NPEIVYQY                | 2.23 | 0.01 | 2.54 | 0.68 | 0.22 | 2.12 |
| 49884 | 0 | 167347 | NPENTVFDKRLIGRTW<br>NDP | 2.92 | 3.24 | 0.78 | 0.44 | 1.13 | 0.28 |
| 49885 | 0 | 510459 | NPFFLTA                 | 2.01 | 0.01 | 0.90 | 0.44 | 1.13 | 0.28 |
| 49886 | 0 | 510459 | NPFFLTA                 | 2.01 | 0.01 | 0.90 | 0.44 | 1.41 | 0.28 |
| 49887 | 0 | 510460 | NPFSLLA                 | 2.01 | 0.01 | 0.90 | 0.44 | 1.41 | 0.28 |
| 49888 | 0 | 190505 | NPGIAMATHKDDEER         | 2.62 | 0.01 | 3.61 | 2.00 | 1.41 | 0.28 |
| 49889 | 0 | 45357  | NPGISGSRLGT             | 2.48 | 0.01 | 3.78 | 1.12 | 0.22 | 0.28 |
| 49890 | 0 | 45359  | NPGNAEIEDLIFLAR         | 2.69 | 0.01 | 3.93 | 1.15 | 0.22 | 2.66 |
| 49891 | 0 | 45360  | NPGNAEIEDLTFLAR         | 2.67 | 0.01 | 3.72 | 1.15 | 0.22 | 2.66 |
| 49892 | 0 | 226363 | NPGSENK                 | 2.03 | 0.01 | 0.90 | 2.66 | 0.22 | 1.39 |
| 49893 | 0 | 104921 | NPGSSLG                 | 2.03 | 0.01 | 0.90 | 0.44 | 1.13 | 1.39 |
| 49894 | 0 | 510461 | NPGWLGS                 | 2.02 | 0.01 | 0.90 | 0.44 | 1.13 | 0.28 |
| 49895 | 0 | 510461 | NPGWLGS                 | 2.02 | 0.01 | 0.90 | 0.44 | 1.41 | 0.28 |
| 49896 | 0 | 45364  | NPHE                    | 1.57 | 0.01 | 4.63 | 0.68 | 0.22 | 0.28 |
| 49897 | 0 | 178391 | NPHEQAG                 | 1.99 | 0.01 | 0.90 | 1.12 | 0.22 | 0.28 |
| 49898 | 0 | 99507  | NPHLNHIFRSKM            | 2.46 | 0.01 | 0.90 | 1.12 | 0.22 | 1.39 |
| 49899 | 0 | 45367  | NPIDATARS               | 2.21 | 0.01 | 0.90 | 1.12 | 0.22 | 0.85 |
| 49900 | 0 | 45367  | NPIDATARS               | 2.21 | 0.01 | 0.90 | 0.68 | 0.22 | 0.85 |
| 49901 | 0 | 45367  | NPIDATARS               | 2.21 | 0.01 | 0.90 | 0.68 | 0.22 | 0.85 |
| 49902 | 0 | 45367  | NPIDATARS               | 2.21 | 0.01 | 0.90 | 0.68 | 0.22 | 0.85 |
| 49903 | 0 | 45367  | NPIDATARS               | 2.21 | 0.01 | 0.90 | 0.68 | 0.22 | 0.85 |
| 49904 | 0 | 45367  | NPIDATARS               | 2.21 | 0.01 | 0.90 | 0.68 | 0.22 | 0.85 |
| 49905 | 0 | 45367  | NPIDATARS               | 2.21 | 0.01 | 0.90 | 0.68 | 0.22 | 0.85 |
| 49906 | 0 | 45367  | NPIDATARS               | 2.21 | 0.01 | 0.90 | 0.68 | 0.22 | 0.85 |
| 49907 | 0 | 45368  | NPIDHSARS               | 2.21 | 0.01 | 0.90 | 1.12 | 0.22 | 0.85 |
| 49908 | 0 | 45368  | NPIDHSARS               | 2.21 | 0.01 | 0.90 | 0.44 | 0.85 | 0.85 |
| 49909 | 0 | 45368  | NPIDHSARS               | 2.21 | 0.01 | 0.90 | 0.68 | 0.22 | 0.85 |
| 49910 | 0 | 45368  | NPIDHSARS               | 2.21 | 0.01 | 0.90 | 0.68 | 0.22 | 0.85 |
| 49911 | 0 | 130986 | NPIENMMDRDSQ            | 2.47 | 0.01 | 0.90 | 0.44 | 1.93 | 0.28 |
| 49912 | 0 | 130986 | NPIENMMDRDSQ            | 2.47 | 0.01 | 0.90 | 0.44 | 1.41 | 0.28 |
| 49913 | 0 | 419291 | NPIEWIMDRNRV            | 2.48 | 0.01 | 0.90 | 0.44 | 1.93 | 1.39 |
| 49914 | 0 | 229750 | NPIGSENSEKTTM           | 2.55 | 0.01 | 1.60 | 0.44 | 1.23 | 1.28 |
| 49915 | 0 | 229750 | NPIGSENSEKTTM           | 2.55 | 0.01 | 1.60 | 0.44 | 1.23 | 1.28 |
| 49916 | 0 | 86972  | NPITESAHLN              | 2.30 | 0.01 | 3.06 | 0.44 | 0.85 | 0.28 |
| 49917 | 0 | 123553 | NPKFEELKG               | 2.22 | 0.01 | 2.28 | 2.00 | 0.22 | 0.28 |
| 49918 | 0 | 123554 | NPKFEEVKE               | 2.25 | 0.01 | 2.28 | 2.00 | 0.22 | 0.28 |
| 49919 | 0 | 123555 | NPKFEEVKG               | 2.22 | 0.01 | 2.28 | 2.00 | 0.22 | 0.28 |
| 49920 | 0 | 45381  | NPKFSPP                 | 2.00 | 0.01 | 0.90 | 0.68 | 0.22 | 1.39 |
| 49921 | 0 | 177202 | NPKGKGGEVQEPNQ          | 2.60 | 0.01 | 2.22 | 2.69 | 0.22 | 0.28 |
| 49922 | 0 | 177202 | NPKGKGGEVQEPNQ          | 2.60 | 0.01 | 2.22 | 2.69 | 0.22 | 0.85 |
| 49923 | 0 | 164305 | NPKHIGAEVPQR            | 2.43 | 0.01 | 0.90 | 1.20 | 0.22 | 1.39 |
| 49924 | 0 | 164306 | NPKHPLH                 | 2.04 | 0.01 | 0.90 | 1.20 | 0.22 | 1.39 |
| 49925 | 0 | 136533 | NPKRIAKAVNEKSCNCLL      | 2.84 | 3.93 | 0.78 | 0.44 | 1.13 | 0.28 |
| 49926 | 0 | 345312 | NPKSTQTTGDDDPAA         | 2.66 | 0.01 | 1.61 | 0.44 | 0.85 | 1.28 |
| 49927 | 0 | 102686 | NPKTSQYSY               | 2.23 | 0.01 | 3.10 | 0.68 | 0.22 | 0.28 |

|       |   |        |                                                  |      |      |      |      |      |      |
|-------|---|--------|--------------------------------------------------|------|------|------|------|------|------|
| 49928 | 0 | 102686 | NPKTSQYSY                                        | 2.23 | 0.01 | 3.10 | 0.68 | 0.22 | 0.28 |
| 49929 | 0 | 148025 | NPLDFYAPSILP                                     | 2.48 | 0.01 | 0.90 | 0.44 | 1.41 | 1.39 |
| 49930 | 0 | 457254 | NPLGFFPDHQLDPAFRA<br>NTANPDWDFNP                 | 3.30 | 0.01 | 2.08 | 0.68 | 0.22 | 0.28 |
| 49931 | 0 | 457254 | NPLGFFPDHQLDPAFRA<br>NTANPDWDFNP                 | 3.30 | 0.01 | 2.08 | 0.68 | 0.22 | 0.28 |
| 49932 | 0 | 153275 | NPLGFFPDHQLDPAFRA<br>NTANPDWDFNPNKDT<br>WPDANKVG | 3.65 | 0.01 | 2.08 | 0.68 | 0.22 | 0.28 |
| 49933 | 0 | 153275 | NPLGFFPDHQLDPAFRA<br>NTANPDWDFNPNKDT<br>WPDANKVG | 3.65 | 0.01 | 2.08 | 0.68 | 0.22 | 0.28 |
| 49934 | 0 | 153275 | NPLGFFPDHQLDPAFRA<br>NTANPDWDFNPNKDT<br>WPDANKVG | 3.65 | 0.01 | 2.08 | 0.68 | 0.22 | 0.28 |
| 49935 | 0 | 153275 | NPLGFFPDHQLDPAFRA<br>NTANPDWDFNPNKDT<br>WPDANKVG | 3.65 | 0.01 | 2.08 | 0.68 | 0.22 | 1.34 |
| 49936 | 0 | 153275 | NPLGFFPDHQLDPAFRA<br>NTANPDWDFNPNKDT<br>WPDANKVG | 3.65 | 0.01 | 2.08 | 0.68 | 0.22 | 0.28 |
| 49937 | 0 | 153275 | NPLGFFPDHQLDPAFRA<br>NTANPDWDFNPNKDT<br>WPDANKVG | 3.65 | 0.01 | 2.08 | 0.68 | 0.22 | 2.02 |
| 49938 | 0 | 153275 | NPLGFFPDHQLDPAFRA<br>NTANPDWDFNPNKDT<br>WPDANKVG | 3.65 | 0.01 | 2.08 | 0.68 | 0.22 | 0.28 |
| 49939 | 0 | 45390  | NPLGLKRGIEKAVEK                                  | 2.68 | 0.01 | 3.20 | 2.04 | 0.22 | 0.28 |
| 49940 | 0 | 45390  | NPLGLKRGIEKAVEK                                  | 2.68 | 0.01 | 3.20 | 2.04 | 0.22 | 1.27 |
| 49941 | 0 | 45390  | NPLGLKRGIEKAVEK                                  | 2.68 | 0.01 | 2.04 | 0.44 | 1.13 | 0.28 |
| 49942 | 0 | 45390  | NPLGLKRGIEKAVEK                                  | 2.68 | 0.01 | 2.04 | 0.44 | 1.13 | 0.28 |
| 49943 | 0 | 45390  | NPLGLKRGIEKAVEK                                  | 2.68 | 0.01 | 2.04 | 0.44 | 1.13 | 1.27 |
| 49944 | 0 | 45390  | NPLGLKRGIEKAVEK                                  | 2.68 | 0.01 | 2.04 | 0.44 | 1.13 | 1.27 |
| 49945 | 0 | 148026 | NPLLNIFYAPLRN                                    | 2.52 | 0.01 | 0.90 | 0.44 | 1.41 | 1.39 |
| 49946 | 0 | 45392  | NPLLVETW                                         | 2.11 | 0.01 | 2.68 | 0.44 | 1.59 | 0.28 |
| 49947 | 0 | 345346 | NPLVVRLWFEREVDG                                  | 2.68 | 0.01 | 1.61 | 0.44 | 0.85 | 1.28 |
| 49948 | 0 | 45398  | NPLYGSRLGVPTLGGD<br>PKF                          | 2.94 | 0.01 | 2.75 | 0.44 | 0.85 | 0.85 |
| 49949 | 0 | 450879 | NPMYHSS                                          | 1.99 | 0.01 | 0.90 | 0.44 | 1.41 | 1.39 |
| 49950 | 0 | 45404  | NPNADPN                                          | 2.06 | 0.01 | 1.66 | 1.15 | 0.22 | 0.28 |
| 49951 | 0 | 45405  | NPNANP                                           | 1.92 | 0.01 | 3.33 | 0.68 | 0.22 | 0.28 |
| 49952 | 0 | 45405  | NPNANP                                           | 1.92 | 0.01 | 3.33 | 0.68 | 0.22 | 0.85 |
| 49953 | 0 | 45405  | NPNANP                                           | 1.92 | 0.01 | 3.33 | 0.68 | 0.22 | 0.85 |
| 49954 | 0 | 45405  | NPNANP                                           | 1.92 | 0.01 | 3.33 | 0.68 | 0.22 | 1.34 |
| 49955 | 0 | 45405  | NPNANP                                           | 1.92 | 0.01 | 3.33 | 0.68 | 0.22 | 1.34 |
| 49956 | 0 | 45406  | NPNANPN                                          | 2.06 | 0.01 | 1.66 | 1.15 | 0.22 | 0.28 |
| 49957 | 0 | 45406  | NPNANPN                                          | 2.06 | 0.01 | 1.66 | 1.15 | 0.22 | 0.28 |

|       |   |        |                             |      |      |      |      |      |      |
|-------|---|--------|-----------------------------|------|------|------|------|------|------|
| 49958 | 0 | 45407  | NPANPNPNA                   | 2.18 | 0.01 | 1.66 | 1.81 | 0.22 | 1.34 |
| 49959 | 0 | 45407  | NPANPNPNA                   | 2.18 | 0.01 | 3.29 | 1.15 | 0.22 | 0.28 |
| 49960 | 0 | 45410  | NPANPNANPNPNA               | 2.55 | 0.01 | 1.66 | 1.15 | 0.22 | 1.27 |
| 49961 | 0 | 45412  | NPANPNANPNANPN<br>ANPN      | 2.98 | 0.01 | 1.66 | 1.81 | 0.22 | 0.28 |
| 49962 | 0 | 45415  | NPANPNANPNANPN<br>ANPNANPNA | 3.21 | 0.01 | 1.66 | 2.52 | 0.22 | 0.28 |
| 49963 | 0 | 45415  | NPANPNANPNANPN<br>ANPNANPNA | 3.21 | 0.01 | 1.66 | 2.43 | 0.22 | 0.28 |
| 49964 | 0 | 45415  | NPANPNANPNANPN<br>ANPNANPNA | 3.21 | 0.01 | 3.28 | 3.97 | 0.22 | 0.85 |
| 49965 | 0 | 45415  | NPANPNANPNANPN<br>ANPNANPNA | 3.21 | 0.01 | 3.28 | 3.97 | 0.22 | 0.85 |
| 49966 | 0 | 45415  | NPANPNANPNANPN<br>ANPNANPNA | 3.21 | 0.01 | 1.66 | 2.42 | 0.22 | 0.28 |
| 49967 | 0 | 45416  | NPANPNANPNANPN<br>ENPNA     | 3.03 | 0.01 | 0.90 | 0.44 | 0.22 | 0.28 |
| 49968 | 0 | 45416  | NPANPNANPNANPN<br>ENPNA     | 3.03 | 0.01 | 0.90 | 0.44 | 0.22 | 1.48 |
| 49969 | 0 | 45416  | NPANPNANPNANPN<br>ENPNA     | 3.03 | 0.01 | 0.90 | 0.44 | 0.22 | 1.34 |
| 49970 | 0 | 45420  | NPNDPP                      | 1.89 | 0.01 | 3.37 | 0.68 | 0.22 | 0.28 |
| 49971 | 0 | 45420  | NPNDPP                      | 1.89 | 0.01 | 3.37 | 0.68 | 0.22 | 0.85 |
| 49972 | 0 | 45420  | NPNDPP                      | 1.89 | 0.01 | 3.37 | 0.68 | 0.22 | 0.85 |
| 49973 | 0 | 45420  | NPNDPP                      | 1.89 | 0.01 | 3.37 | 0.68 | 0.22 | 1.34 |
| 49974 | 0 | 45420  | NPNDPP                      | 1.89 | 0.01 | 3.37 | 0.68 | 0.22 | 1.34 |
| 49975 | 0 | 45420  | NPNDPP                      | 1.89 | 0.01 | 3.37 | 0.68 | 0.22 | 1.48 |
| 49976 | 0 | 45422  | NPNEPSNPNEPSNPNEP<br>S      | 2.93 | 0.01 | 3.00 | 1.15 | 0.22 | 0.28 |
| 49977 | 0 | 45422  | NPNEPSNPNEPSNPNEP<br>S      | 2.93 | 0.01 | 3.00 | 1.15 | 0.22 | 0.85 |
| 49978 | 0 | 45422  | NPNEPSNPNEPSNPNEP<br>S      | 2.93 | 0.01 | 3.00 | 0.68 | 0.22 | 0.85 |
| 49979 | 0 | 45422  | NPNEPSNPNEPSNPNEP<br>S      | 2.93 | 0.01 | 3.00 | 2.16 | 0.22 | 0.28 |
| 49980 | 0 | 45422  | NPNEPSNPNEPSNPNEP<br>S      | 2.93 | 0.01 | 3.00 | 0.68 | 0.22 | 0.28 |
| 49981 | 0 | 45422  | NPNEPSNPNEPSNPNEP<br>S      | 2.93 | 0.01 | 3.00 | 1.81 | 0.22 | 0.28 |
| 49982 | 0 | 45433  | NPNNNAATVLQLPQGT<br>TLPK    | 2.97 | 0.01 | 2.45 | 1.20 | 0.22 | 1.48 |
| 49983 | 0 | 45434  | NPNPDPN                     | 2.06 | 0.01 | 1.66 | 1.15 | 0.22 | 0.28 |
| 49984 | 0 | 45436  | NPNPAN                      | 2.06 | 0.01 | 1.66 | 1.15 | 0.22 | 0.28 |
| 49985 | 0 | 45438  | NPNPNP                      | 2.04 | 0.01 | 1.66 | 1.15 | 0.22 | 0.28 |
| 49986 | 0 | 101937 | NPNPTCEN                    | 2.27 | 0.01 | 1.66 | 0.44 | 1.59 | 2.97 |



|       |   |        |                     |      |      |      |      |      |      |
|-------|---|--------|---------------------|------|------|------|------|------|------|
|       |   |        | NPNPTCNENNGGCDAD    |      |      |      |      |      |      |
| 49987 | 0 | 45440  | ATCTEEDSGSSRKKITCE  | 3.92 | 0.01 | 3.78 | 0.44 | 0.85 | 0.28 |
|       |   |        | CTKPD SYPLFDGIFCSSS |      |      |      |      |      |      |
|       |   |        | N                   |      |      |      |      |      |      |
|       |   |        | NPNPTCNENNGGCDAD    |      |      |      |      |      |      |
| 49988 | 0 | 45440  | ATCTEEDSGSSRKKITCE  | 3.92 | 0.01 | 3.78 | 0.44 | 0.85 | 1.34 |
|       |   |        | CTKPD SYPLFDGIFCSSS |      |      |      |      |      |      |
|       |   |        | N                   |      |      |      |      |      |      |
| 49989 | 0 | 149081 | NPNQTRM             | 2.03 | 0.01 | 0.90 | 2.13 | 1.59 | 1.39 |
| 49990 | 0 | 345364 | NPNSTQTTGDDDPAA     | 2.68 | 0.01 | 1.61 | 0.44 | 0.85 | 1.28 |
| 49991 | 0 | 45443  | NPNVDP              | 1.92 | 0.01 | 3.33 | 0.68 | 0.22 | 0.28 |
| 49992 | 0 | 45443  | NPNVDP              | 1.92 | 0.01 | 3.33 | 0.68 | 0.22 | 0.85 |
| 49993 | 0 | 45443  | NPNVDP              | 1.92 | 0.01 | 3.33 | 0.68 | 0.22 | 0.85 |
| 49994 | 0 | 45443  | NPNVDP              | 1.92 | 0.01 | 3.33 | 0.68 | 0.22 | 1.34 |
| 49995 | 0 | 45443  | NPNVDP              | 1.92 | 0.01 | 3.33 | 0.68 | 0.22 | 1.34 |
| 49996 | 0 | 150475 | NPNYAGNSIKPTGAS     | 2.71 | 0.01 | 3.45 | 1.12 | 0.22 | 0.28 |
| 49997 | 0 | 45447  | NPPDHS              | 1.89 | 0.01 | 2.53 | 0.44 | 1.59 | 0.28 |
| 49998 | 0 | 45447  | NPPDHS              | 1.89 | 0.01 | 2.53 | 0.44 | 1.59 | 0.28 |
| 49999 | 0 | 45450  | NPPGATVPSGTASTK     | 2.71 | 0.01 | 3.97 | 0.44 | 0.85 | 0.28 |
| 50000 | 0 | 145923 | NPPIPVGEI           | 2.25 | 0.01 | 2.54 | 0.68 | 0.22 | 2.12 |
| 50001 | 0 | 145923 | NPPIPVGEI           | 2.25 | 0.01 | 2.54 | 0.68 | 0.22 | 2.12 |
| 50002 | 0 | 145923 | NPPIPVGEI           | 2.25 | 0.01 | 2.54 | 0.68 | 0.22 | 2.12 |
| 50003 | 0 | 145923 | NPPIPVGEI           | 2.25 | 0.01 | 2.54 | 0.68 | 0.22 | 2.12 |
| 50004 | 0 | 172546 | NPPIWGTATKGI        | 2.48 | 0.01 | 0.90 | 0.44 | 0.85 | 1.39 |
| 50005 | 0 | 128065 | NPPLVETWKKPDYEPP    | 2.72 | 0.01 | 1.72 | 0.44 | 0.85 | 0.28 |
| 50006 | 0 | 128065 | NPPLVETWKKPDYEPP    | 2.72 | 0.01 | 1.72 | 0.44 | 0.85 | 0.28 |
| 50007 | 0 | 128065 | NPPLVETWKKPDYEPP    | 2.72 | 0.01 | 1.72 | 0.44 | 0.85 | 0.28 |
| 50008 | 0 | 226495 | NPPPAHSPANFH        | 2.52 | 0.01 | 0.90 | 0.68 | 0.22 | 0.85 |
| 50009 | 0 | 226495 | NPPPAHSPANFH        | 2.52 | 0.01 | 0.90 | 0.68 | 0.22 | 1.27 |
| 50010 | 0 | 226495 | NPPPAHSPANFH        | 2.52 | 0.01 | 0.90 | 0.68 | 0.22 | 0.28 |
| 50011 | 0 | 226495 | NPPPAHSPANFH        | 2.52 | 0.01 | 0.90 | 0.68 | 0.22 | 1.34 |
| 50012 | 0 | 226496 | NPPPAHSPANFT        | 2.51 | 0.01 | 0.90 | 0.68 | 0.22 | 1.27 |
| 50013 | 0 | 226496 | NPPPAHSPANFT        | 2.51 | 0.01 | 0.90 | 0.68 | 0.22 | 0.85 |
| 50014 | 0 | 226496 | NPPPAHSPANFT        | 2.51 | 0.01 | 0.90 | 0.68 | 0.22 | 0.28 |
| 50015 | 0 | 226496 | NPPPAHSPANFT        | 2.51 | 0.01 | 0.90 | 0.68 | 0.22 | 1.34 |
| 50016 | 0 | 45456  | NPPRPRMMVLTD        | 2.48 | 0.01 | 0.90 | 0.68 | 0.22 | 0.28 |
| 50017 | 0 | 450880 | NPPWFHT             | 2.01 | 0.01 | 0.90 | 0.44 | 1.23 | 1.39 |
| 50018 | 0 | 147169 | NPQEETLQAFDSHYDYTI  | 3.15 | 0.01 | 0.78 | 2.49 | 0.22 | 0.85 |
|       |   |        | CGDSEDMV            |      |      |      |      |      |      |
| 50019 | 0 | 147169 | NPQEETLQAFDSHYDYTI  | 3.15 | 0.01 | 0.78 | 2.49 | 0.22 | 1.34 |
|       |   |        | CGDSEDMV            |      |      |      |      |      |      |
| 50020 | 0 | 45460  | NPQLGISPSNPSEIT     | 2.71 | 0.01 | 2.67 | 1.12 | 0.22 | 0.28 |
| 50021 | 0 | 45460  | NPQLGISPSNPSEIT     | 2.71 | 0.01 | 2.67 | 1.12 | 0.22 | 0.28 |

|       |   |        |                           |      |      |      |      |      |      |
|-------|---|--------|---------------------------|------|------|------|------|------|------|
| 50022 | 0 | 45460  | NPQLGISPSNPSEIT           | 2.71 | 0.01 | 2.67 | 1.12 | 0.22 | 0.28 |
| 50023 | 0 | 45460  | NPQLGISPSNPSEIT           | 2.71 | 0.01 | 2.67 | 1.12 | 0.22 | 0.28 |
| 50024 | 0 | 45460  | NPQLGISPSNPSEIT           | 2.71 | 0.01 | 2.67 | 1.12 | 0.22 | 0.28 |
| 50025 | 0 | 45460  | NPQLGISPSNPSEIT           | 2.71 | 0.01 | 2.67 | 1.12 | 0.22 | 0.28 |
| 50026 | 0 | 45460  | NPQLGISPSNPSEIT           | 2.71 | 0.01 | 2.67 | 1.12 | 0.22 | 0.28 |
| 50027 | 0 | 45460  | NPQLGISPSNPSEIT           | 2.71 | 0.01 | 2.67 | 1.12 | 0.22 | 0.28 |
| 50028 | 0 | 227812 | NPQLRDLDFLSSVDI           | 2.74 | 0.01 | 2.72 | 4.03 | 1.59 | 0.28 |
| 50029 | 0 | 108048 | NPQPNISLSQRGYPQ           | 2.71 | 0.01 | 0.90 | 0.44 | 1.13 | 1.39 |
| 50030 | 0 | 45462  | NPQVNLVD                  | 2.15 | 0.01 | 3.20 | 2.22 | 0.85 | 0.28 |
| 50031 | 0 | 45464  | NPRENKLKQPGDRADG<br>QPAG  | 2.98 | 0.01 | 2.59 | 3.05 | 1.41 | 0.28 |
| 50032 | 0 | 45464  | NPRENKLKQPGDRADG<br>QPAG  | 2.98 | 0.01 | 2.59 | 3.05 | 0.85 | 0.28 |
| 50033 | 0 | 45464  | NPRENKLKQPGDRADG<br>QPAG  | 2.98 | 0.01 | 2.59 | 0.44 | 0.85 | 0.28 |
| 50034 | 0 | 45472  | NPRVCMNKWECEQAI           | 2.65 | 0.01 | 0.90 | 0.44 | 1.41 | 0.28 |
| 50035 | 0 | 243823 | NPSCPGGLGVTVCWTY          | 2.75 | 0.01 | 0.78 | 0.44 | 1.13 | 0.28 |
| 50036 | 0 | 243823 | NPSCPGGLGVTVCWTY          | 2.75 | 0.01 | 0.78 | 0.44 | 1.41 | 0.28 |
| 50037 | 0 | 100349 | NPSIFYTYGAAPAR            | 2.61 | 0.01 | 2.96 | 0.44 | 0.22 | 0.28 |
| 50038 | 0 | 148698 | NPSNKELQSP                | 2.34 | 0.01 | 1.86 | 0.44 | 1.23 | 0.28 |
| 50039 | 0 | 45478  | NPSPKTVYVKEAIDRRLLH<br>FK | 2.89 | 0.01 | 2.82 | 0.44 | 0.85 | 0.28 |
| 50040 | 0 | 149082 | NPSQGPL                   | 2.02 | 0.01 | 0.90 | 2.13 | 1.59 | 1.39 |
| 50041 | 0 | 172547 | NPSSDVSERLQMFDD           | 2.64 | 0.01 | 0.78 | 0.44 | 1.13 | 0.28 |
| 50042 | 0 | 45480  | NPSSLFDLVARIKNNLKN<br>SP  | 2.96 | 0.01 | 2.75 | 0.44 | 0.85 | 0.85 |
| 50043 | 0 | 101938 | NPTCNENNG                 | 2.25 | 0.01 | 1.66 | 0.44 | 1.59 | 2.97 |
| 50044 | 0 | 94626  | NPTCWAICKRIP              | 2.48 | 0.01 | 2.38 | 0.68 | 0.22 | 0.28 |
| 50045 | 0 | 94626  | NPTCWAICKRIP              | 2.48 | 0.01 | 2.38 | 0.44 | 1.59 | 0.28 |
| 50046 | 0 | 94626  | NPTCWAICKRIP              | 2.48 | 0.01 | 2.38 | 0.44 | 1.74 | 0.28 |
| 50047 | 0 | 94626  | NPTCWAICKRIP              | 2.48 | 0.01 | 2.38 | 0.44 | 1.74 | 0.28 |
| 50048 | 0 | 345487 | NPTEGSQSTLAATDT           | 2.67 | 0.01 | 1.61 | 0.44 | 0.85 | 1.28 |
| 50049 | 0 | 79949  | NPTEKGLDFKLYWTD SQ<br>NKK | 2.92 | 0.01 | 2.18 | 0.44 | 0.22 | 0.28 |
| 50050 | 0 | 45489  | NPTGPASV                  | 2.12 | 0.01 | 3.20 | 1.15 | 0.22 | 0.28 |
| 50051 | 0 | 450882 | NPTHPIY                   | 2.02 | 0.01 | 0.90 | 0.44 | 1.23 | 1.39 |
| 50052 | 0 | 45491  | NPTI                      | 1.57 | 0.01 | 2.40 | 0.68 | 0.22 | 0.28 |
| 50053 | 0 | 45491  | NPTI                      | 1.57 | 0.01 | 3.21 | 1.20 | 0.22 | 0.28 |
| 50054 | 0 | 45491  | NPTI                      | 1.57 | 0.01 | 3.03 | 1.20 | 0.22 | 0.28 |
| 50055 | 0 | 45491  | NPTI                      | 1.57 | 0.01 | 3.47 | 1.20 | 0.22 | 0.28 |
| 50056 | 0 | 45491  | NPTI                      | 1.57 | 0.01 | 3.97 | 1.20 | 0.22 | 0.28 |
| 50057 | 0 | 45491  | NPTI                      | 1.57 | 0.01 | 3.89 | 1.20 | 0.22 | 0.28 |
| 50058 | 0 | 45491  | NPTI                      | 1.57 | 0.01 | 4.15 | 1.20 | 0.22 | 0.28 |
| 50059 | 0 | 45491  | NPTI                      | 1.57 | 0.01 | 3.45 | 1.20 | 0.22 | 0.28 |

|       |   |        |                                   |      |      |      |      |      |      |
|-------|---|--------|-----------------------------------|------|------|------|------|------|------|
| 50060 | 0 | 45492  | NPTIAG                            | 1.88 | 0.01 | 3.16 | 0.68 | 0.22 | 0.28 |
| 50061 | 0 | 45492  | NPTIAG                            | 1.88 | 0.01 | 2.40 | 2.52 | 0.22 | 0.28 |
| 50062 | 0 | 45492  | NPTIAG                            | 1.88 | 0.01 | 3.03 | 1.20 | 0.22 | 0.28 |
| 50063 | 0 | 45492  | NPTIAG                            | 1.88 | 0.01 | 2.40 | 3.42 | 0.22 | 0.28 |
| 50064 | 0 | 45492  | NPTIAG                            | 1.88 | 0.01 | 2.40 | 2.42 | 0.22 | 0.28 |
| 50065 | 0 | 45492  | NPTIAG                            | 1.88 | 0.01 | 2.40 | 2.52 | 0.22 | 0.28 |
| 50066 | 0 | 45492  | NPTIAG                            | 1.88 | 0.01 | 2.40 | 2.52 | 0.22 | 0.28 |
| 50067 | 0 | 79620  | NPTIAGKGTVVSSAENEL<br>ADTMQIV     | 3.15 | 0.01 | 3.21 | 2.46 | 0.22 | 0.28 |
| 50068 | 0 | 79620  | NPTIAGKGTVVSSAENEL<br>ADTMQIV     | 3.15 | 0.01 | 3.21 | 2.16 | 0.22 | 0.28 |
| 50069 | 0 | 45495  | NPTLLGEA                          | 2.11 | 0.01 | 3.06 | 1.12 | 0.22 | 0.28 |
| 50070 | 0 | 45496  | NPTPQEIP                          | 2.14 | 0.01 | 2.40 | 2.43 | 0.22 | 0.28 |
| 50071 | 0 | 167786 | NPTPQEIPQ                         | 2.25 | 0.01 | 2.40 | 2.43 | 0.22 | 0.28 |
| 50072 | 0 | 45497  | NPTPQEIPQPQWTPEED<br>QKAREAF      | 3.13 | 0.01 | 2.40 | 0.68 | 0.22 | 0.85 |
| 50073 | 0 | 45497  | NPTPQEIPQPQWTPEED<br>QKAREAF      | 3.13 | 0.01 | 2.40 | 0.68 | 0.22 | 0.85 |
| 50074 | 0 | 45497  | NPTPQEIPQPQWTPEED<br>QKAREAF      | 3.13 | 0.01 | 2.40 | 0.68 | 0.22 | 0.85 |
| 50075 | 0 | 149083 | NPTQGSP                           | 2.02 | 0.01 | 0.90 | 2.13 | 1.59 | 1.39 |
| 50076 | 0 | 149084 | NPTQHSY                           | 1.99 | 0.01 | 0.90 | 2.13 | 1.59 | 1.39 |
| 50077 | 0 | 149085 | NPTQIRR                           | 1.99 | 0.01 | 0.90 | 2.13 | 1.59 | 1.39 |
| 50078 | 0 | 149086 | NPTQRPD                           | 2.02 | 0.01 | 0.90 | 2.13 | 1.59 | 1.39 |
| 50079 | 0 | 149087 | NPTQSPP                           | 2.00 | 0.01 | 0.90 | 2.13 | 1.59 | 1.39 |
| 50080 | 0 | 419292 | NPVEEWAFAPHE                      | 2.49 | 0.01 | 0.90 | 0.44 | 1.93 | 1.39 |
| 50081 | 0 | 419293 | NPVEGMISYWHF                      | 2.40 | 0.01 | 0.90 | 0.44 | 1.93 | 1.39 |
| 50082 | 0 | 145391 | NPVEHWLAVLPT                      | 2.48 | 0.01 | 0.90 | 0.44 | 1.13 | 1.39 |
| 50083 | 0 | 145391 | NPVEHWLAVLPT                      | 2.48 | 0.01 | 0.90 | 0.44 | 1.93 | 1.39 |
| 50084 | 0 | 135966 | NPVEIRRGVMLA                      | 2.44 | 0.01 | 0.78 | 0.44 | 1.41 | 0.28 |
| 50085 | 0 | 118540 | NPVEIRRGVMLAV                     | 2.52 | 0.01 | 0.78 | 0.44 | 1.74 | 0.85 |
| 50086 | 0 | 118540 | NPVEIRRGVMLAV                     | 2.52 | 0.01 | 0.78 | 0.44 | 1.59 | 0.85 |
| 50087 | 0 | 118540 | NPVEIRRGVMLAV                     | 2.52 | 0.01 | 0.78 | 0.44 | 1.74 | 0.85 |
| 50088 | 0 | 108049 | NPVEIRRGVMLAVDA                   | 2.65 | 0.01 | 0.78 | 2.04 | 0.22 | 0.28 |
| 50089 | 0 | 108049 | NPVEIRRGVMLAVDA                   | 2.65 | 0.01 | 0.78 | 0.44 | 1.13 | 0.28 |
| 50090 | 0 | 108049 | NPVEIRRGVMLAVDA                   | 2.65 | 0.01 | 0.78 | 0.44 | 1.13 | 0.28 |
| 50091 | 0 | 496818 | NPVEIRRGVMLAVDAVI<br>AELKKQSKPVTP | 3.32 | 0.01 | 0.78 | 0.44 | 1.93 | 2.12 |
| 50092 | 0 | 130987 | NPVENMMDRDSQ                      | 2.47 | 0.01 | 0.90 | 0.44 | 1.93 | 1.27 |
| 50093 | 0 | 130987 | NPVENMMDRDSQ                      | 2.47 | 0.01 | 0.90 | 0.44 | 1.41 | 0.28 |
| 50094 | 0 | 130987 | NPVENMMDRDSQ                      | 2.47 | 0.01 | 0.90 | 0.44 | 2.35 | 1.27 |
| 50095 | 0 | 130987 | NPVENMMDRDSQ                      | 2.47 | 0.01 | 0.90 | 0.44 | 2.35 | 0.28 |
| 50096 | 0 | 164167 | NPVENYIDSVLNEVLVV<br>PNIQ         | 3.02 | 0.01 | 4.23 | 0.44 | 0.85 | 0.28 |
| 50097 | 0 | 164167 | NPVENYIDSVLNEVLVV<br>PNIQ         | 3.02 | 0.01 | 4.23 | 1.12 | 0.22 | 0.28 |

|       |   |        |                           |      |      |      |      |      |      |
|-------|---|--------|---------------------------|------|------|------|------|------|------|
| 50098 | 0 | 164167 | NPVENYIDSVLNEVLVV<br>PNIQ | 3.02 | 0.01 | 4.23 | 2.37 | 0.22 | 0.28 |
| 50099 | 0 | 129509 | NPVERSL                   | 1.99 | 0.01 | 0.90 | 2.88 | 2.35 | 0.28 |
| 50100 | 0 | 419294 | NPVEWFMSTVNT              | 2.48 | 0.01 | 0.90 | 0.44 | 1.93 | 1.39 |
| 50101 | 0 | 45506  | NPVIPFKDGIYFAATEK         | 2.77 | 0.01 | 2.48 | 0.44 | 0.85 | 0.28 |
| 50102 | 0 | 113101 | NPVMERFAAHAGDLV           | 2.64 | 0.01 | 2.40 | 0.44 | 1.13 | 0.85 |
| 50103 | 0 | 45512  | NPVRASVLRYYDDFHTDE<br>DKL | 2.91 | 0.01 | 3.27 | 0.44 | 0.85 | 0.28 |
| 50104 | 0 | 113670 | NPVVHFFKNIVTP             | 2.57 | 0.01 | 0.78 | 1.20 | 0.22 | 1.57 |
| 50105 | 0 | 113670 | NPVVHFFKNIVTP             | 2.57 | 0.01 | 0.78 | 2.00 | 0.22 | 1.57 |
| 50106 | 0 | 113670 | NPVVHFFKNIVTP             | 2.57 | 0.01 | 0.78 | 1.20 | 0.22 | 1.57 |
| 50107 | 0 | 113670 | NPVVHFFKNIVTP             | 2.57 | 0.01 | 0.78 | 1.20 | 0.22 | 1.57 |
| 50108 | 0 | 113670 | NPVVHFFKNIVTP             | 2.57 | 0.01 | 0.78 | 2.00 | 0.22 | 1.57 |
| 50109 | 0 | 113670 | NPVVHFFKNIVTP             | 2.57 | 0.01 | 0.78 | 2.00 | 0.22 | 1.57 |
| 50110 | 0 | 113670 | NPVVHFFKNIVTP             | 2.57 | 0.01 | 0.78 | 1.20 | 0.22 | 1.57 |
| 50111 | 0 | 113670 | NPVVHFFKNIVTP             | 2.57 | 0.01 | 0.78 | 1.20 | 0.22 | 1.57 |
| 50112 | 0 | 113670 | NPVVHFFKNIVTP             | 2.57 | 0.01 | 0.78 | 1.20 | 0.22 | 1.57 |
| 50113 | 0 | 113670 | NPVVHFFKNIVTP             | 2.57 | 0.01 | 0.78 | 1.20 | 0.22 | 1.57 |
| 50114 | 0 | 113670 | NPVVHFFKNIVTP             | 2.57 | 0.01 | 0.78 | 1.20 | 0.22 | 1.57 |
| 50115 | 0 | 113670 | NPVVHFFKNIVTP             | 2.57 | 0.01 | 0.78 | 2.00 | 0.22 | 1.57 |
| 50116 | 0 | 45515  | NPVYLIPET                 | 2.21 | 0.01 | 2.48 | 1.20 | 0.22 | 0.28 |
| 50117 | 0 | 133659 | NPWYNDLSLLTA              | 2.47 | 0.01 | 0.90 | 0.44 | 0.85 | 1.39 |
| 50118 | 0 | 176362 | NPYCEPVCQDWA              | 2.45 | 0.01 | 0.90 | 1.15 | 0.22 | 1.39 |
| 50119 | 0 | 102690 | NPYTESYSY                 | 2.25 | 0.01 | 2.73 | 0.68 | 0.22 | 0.28 |
| 50120 | 0 | 102690 | NPYTESYSY                 | 2.25 | 0.01 | 2.73 | 0.68 | 0.22 | 0.28 |
| 50121 | 0 | 510462 | NQAQFELLNKVK              | 2.49 | 0.01 | 0.90 | 3.07 | 1.13 | 1.39 |
| 50122 | 0 | 127751 | NQAQVQRYVACHTEGK<br>AKL   | 2.88 | 0.01 | 2.19 | 0.44 | 1.13 | 0.28 |
| 50123 | 0 | 127751 | NQAQVQRYVACHTEGK<br>AKL   | 2.88 | 0.01 | 2.19 | 0.44 | 1.13 | 0.28 |
| 50124 | 0 | 117338 | NQARSQSDRQ                | 2.35 | 0.01 | 1.86 | 0.44 | 1.23 | 0.85 |
| 50125 | 0 | 79621  | NQAVDSYDPD                | 2.31 | 0.01 | 3.03 | 0.68 | 0.22 | 0.28 |
| 50126 | 0 | 79621  | NQAVDSYDPD                | 2.31 | 0.01 | 3.03 | 0.68 | 0.22 | 0.28 |
| 50127 | 0 | 79621  | NQAVDSYDPD                | 2.31 | 0.01 | 3.03 | 0.68 | 0.22 | 0.28 |
| 50128 | 0 | 79621  | NQAVDSYDPD                | 2.31 | 0.01 | 3.03 | 0.68 | 0.22 | 0.28 |
| 50129 | 0 | 79621  | NQAVDSYDPD                | 2.31 | 0.01 | 3.03 | 0.68 | 0.22 | 0.28 |
| 50130 | 0 | 79621  | NQAVDSYDPD                | 2.31 | 0.01 | 3.03 | 0.68 | 0.22 | 0.28 |
| 50131 | 0 | 79621  | NQAVDSYDPD                | 2.31 | 0.01 | 3.03 | 0.68 | 0.22 | 0.28 |
| 50132 | 0 | 79621  | NQAVDSYDPD                | 2.31 | 0.01 | 3.03 | 0.68 | 0.22 | 0.28 |
| 50133 | 0 | 345551 | NQDADEEDEGEDEEE           | 2.71 | 0.01 | 1.61 | 0.44 | 0.85 | 1.28 |
| 50134 | 0 | 115873 | NQDKTEIPTI                | 2.31 | 0.01 | 1.60 | 0.44 | 1.23 | 0.85 |
| 50135 | 0 | 45531  | NQDPDKILTYIAADH           | 2.65 | 0.01 | 2.72 | 0.68 | 0.22 | 1.27 |
| 50136 | 0 | 45531  | NQDPDKILTYIAADH           | 2.65 | 0.01 | 2.72 | 1.81 | 0.22 | 1.27 |
| 50137 | 0 | 45531  | NQDPDKILTYIAADH           | 2.65 | 0.01 | 2.72 | 2.69 | 0.22 | 1.27 |

|       |   |        |                                   |      |      |      |      |      |      |
|-------|---|--------|-----------------------------------|------|------|------|------|------|------|
| 50138 | 0 | 45532  | NQEAAKEEYEHKQKELE<br>SVC          | 2.95 | 0.01 | 2.78 | 2.49 | 0.85 | 0.28 |
| 50139 | 0 | 45532  | NQEAAKEEYEHKQKELE<br>SVC          | 2.95 | 0.01 | 2.78 | 0.44 | 0.85 | 0.28 |
| 50140 | 0 | 137759 | NQEDAEAITHLF                      | 2.45 | 0.01 | 2.75 | 0.68 | 0.22 | 0.28 |
| 50141 | 0 | 137759 | NQEDAEAITHLF                      | 2.45 | 0.01 | 2.75 | 0.68 | 0.22 | 1.66 |
| 50142 | 0 | 137759 | NQEDAEAITHLF                      | 2.45 | 0.01 | 2.75 | 0.68 | 0.22 | 1.66 |
| 50143 | 0 | 137759 | NQEDAEAITHLF                      | 2.45 | 0.01 | 2.75 | 0.68 | 0.22 | 1.66 |
| 50144 | 0 | 137759 | NQEDAEAITHLF                      | 2.45 | 0.01 | 2.75 | 0.68 | 0.22 | 0.28 |
| 50145 | 0 | 137759 | NQEDAEAITHLF                      | 2.45 | 0.01 | 2.75 | 0.68 | 0.22 | 1.34 |
| 50146 | 0 | 137759 | NQEDAEAITHLF                      | 2.45 | 0.01 | 2.75 | 0.68 | 0.22 | 1.75 |
| 50147 | 0 | 137759 | NQEDAEAITHLF                      | 2.45 | 0.01 | 2.75 | 1.20 | 0.22 | 0.28 |
| 50148 | 0 | 137759 | NQEDAEAITHLF                      | 2.45 | 0.01 | 2.75 | 0.68 | 0.22 | 0.28 |
| 50149 | 0 | 137759 | NQEDAEAITHLF                      | 2.45 | 0.01 | 2.75 | 0.68 | 0.22 | 0.28 |
| 50150 | 0 | 137759 | NQEDAEAITHLF                      | 2.45 | 0.01 | 2.75 | 0.68 | 0.22 | 0.28 |
| 50151 | 0 | 137759 | NQEDAEAITHLF                      | 2.45 | 0.01 | 2.75 | 0.68 | 0.22 | 0.28 |
| 50152 | 0 | 137759 | NQEDAEAITHLF                      | 2.45 | 0.01 | 2.75 | 0.68 | 0.22 | 1.34 |
| 50153 | 0 | 137759 | NQEDAEAITHLF                      | 2.45 | 0.01 | 2.75 | 0.68 | 0.22 | 1.75 |
| 50154 | 0 | 137759 | NQEDAEAITHLF                      | 2.45 | 0.01 | 2.75 | 0.68 | 0.22 | 1.34 |
| 50155 | 0 | 137759 | NQEDAEAITHLF                      | 2.45 | 0.01 | 2.75 | 0.68 | 0.22 | 0.28 |
| 50156 | 0 | 137759 | NQEDAEAITHLF                      | 2.45 | 0.01 | 2.75 | 0.68 | 0.22 | 1.66 |
| 50157 | 0 | 137759 | NQEDAEAITHLF                      | 2.45 | 0.01 | 2.75 | 0.68 | 0.22 | 1.66 |
| 50158 | 0 | 137759 | NQEDAEAITHLF                      | 2.45 | 0.01 | 2.75 | 0.68 | 0.22 | 2.35 |
| 50159 | 0 | 137759 | NQEDAEAITHLF                      | 2.45 | 0.01 | 2.75 | 2.61 | 0.22 | 2.35 |
| 50160 | 0 | 137759 | NQEDAEAITHLF                      | 2.45 | 0.01 | 2.75 | 0.44 | 0.22 | 2.35 |
| 50161 | 0 | 137759 | NQEDAEAITHLF                      | 2.45 | 0.01 | 2.75 | 0.68 | 0.22 | 0.28 |
| 50162 | 0 | 137759 | NQEDAEAITHLF                      | 2.45 | 0.01 | 2.75 | 0.68 | 0.22 | 1.34 |
| 50163 | 0 | 137759 | NQEDAEAITHLF                      | 2.45 | 0.01 | 2.75 | 0.68 | 0.22 | 1.75 |
| 50164 | 0 | 137759 | NQEDAEAITHLF                      | 2.45 | 0.01 | 2.75 | 0.68 | 0.22 | 0.28 |
| 50165 | 0 | 45538  | NQELAYFYPE                        | 2.31 | 0.01 | 1.60 | 0.44 | 1.23 | 0.28 |
| 50166 | 0 | 45538  | NQELAYFYPE                        | 2.31 | 0.01 | 1.60 | 0.44 | 1.23 | 0.28 |
| 50167 | 0 | 45540  | NQELAYFYPELFRQ                    | 2.63 | 0.01 | 1.60 | 0.44 | 1.23 | 0.85 |
| 50168 | 0 | 45541  | NQELAYFYPELFRQF                   | 2.70 | 0.01 | 1.60 | 0.44 | 1.23 | 0.28 |
| 50169 | 0 | 229753 | NQELAYFYPELFRQFY                  | 2.77 | 0.01 | 1.60 | 0.44 | 1.23 | 1.28 |
| 50170 | 0 | 115403 | NQELAYFYPELFRQFYQL<br>DA          | 2.98 | 0.01 | 1.60 | 0.44 | 1.23 | 1.28 |
| 50171 | 0 | 229754 | NQELAYFYPLFRQFY                   | 2.77 | 0.01 | 4.08 | 0.44 | 1.23 | 1.28 |
| 50172 | 0 | 45543  | NQELLLNPTHQIYPVTQ<br>PLAPVHNPISV  | 3.29 | 0.01 | 0.78 | 1.12 | 0.22 | 3.25 |
| 50173 | 0 | 115404 | NQEQPIRCEKDERFFSD<br>KIA          | 2.94 | 0.01 | 1.60 | 0.44 | 1.23 | 1.28 |
| 50174 | 0 | 115874 | NQFLPYPPYA                        | 2.32 | 0.01 | 1.60 | 0.44 | 1.23 | 0.85 |
| 50175 | 0 | 115874 | NQFLPYPPYA                        | 2.32 | 0.01 | 1.60 | 0.44 | 1.23 | 0.85 |
| 50176 | 0 | 45550  | NQFLPYPPYAKPAA                    | 2.62 | 0.01 | 1.60 | 0.44 | 1.23 | 0.85 |
| 50177 | 0 | 45551  | NQFLTDDFQSPSAMP<br>QFDVTPEMDIPGQV | 3.34 | 0.01 | 3.17 | 0.68 | 0.22 | 0.28 |

|       |   |        |                                    |      |      |      |      |      |      |
|-------|---|--------|------------------------------------|------|------|------|------|------|------|
| 50178 | 0 | 45551  | NQFLTSDDFQSPSAMP<br>QFDVTPEMDIPGQV | 3.34 | 0.01 | 3.17 | 0.68 | 0.22 | 0.28 |
| 50179 | 0 | 45551  | NQFLTSDDFQSPSAMP<br>QFDVTPEMDIPGQV | 3.34 | 0.01 | 3.17 | 0.68 | 0.22 | 0.85 |
| 50180 | 0 | 45551  | NQFLTSDDFQSPSAMP<br>QFDVTPEMDIPGQV | 3.34 | 0.01 | 3.17 | 0.68 | 0.22 | 0.28 |
| 50181 | 0 | 123557 | NQFPGFKE                           | 2.12 | 0.01 | 0.78 | 1.20 | 0.22 | 0.28 |
| 50182 | 0 | 45556  | NQGAWPAG                           | 2.14 | 0.01 | 2.40 | 2.43 | 0.22 | 0.28 |
| 50183 | 0 | 167787 | NQGAWPAGA                          | 2.25 | 0.01 | 2.40 | 2.43 | 0.22 | 0.28 |
| 50184 | 0 | 45557  | NQGDLRLCSH                         | 2.29 | 0.01 | 4.93 | 0.44 | 1.23 | 0.28 |
| 50185 | 0 | 99510  | NQGLSERR                           | 2.09 | 0.01 | 4.45 | 0.68 | 0.22 | 0.28 |
| 50186 | 0 | 45561  | NQGQFEHFREC                        | 2.41 | 0.01 | 3.89 | 0.44 | 1.23 | 0.85 |
| 50187 | 0 | 45563  | NQGSCLKSFDEHLK                     | 2.68 | 0.01 | 1.66 | 0.44 | 1.74 | 0.28 |
| 50188 | 0 | 172551 | NQIAVDEIRERLFEQ                    | 2.68 | 0.01 | 0.78 | 0.44 | 1.13 | 0.28 |
| 50189 | 0 | 172551 | NQIAVDEIRERLFEQ                    | 2.68 | 0.01 | 0.78 | 2.79 | 1.13 | 1.28 |
| 50190 | 0 | 172551 | NQIAVDEIRERLFEQ                    | 2.68 | 0.01 | 0.78 | 2.79 | 1.13 | 1.28 |
| 50191 | 0 | 100351 | NQILKPKLISYTLPVVG                  | 2.79 | 0.01 | 4.08 | 1.12 | 0.22 | 2.12 |
| 50192 | 0 | 100351 | NQILKPKLISYTLPVVG                  | 2.79 | 0.01 | 4.08 | 1.12 | 0.22 | 2.12 |
| 50193 | 0 | 100351 | NQILKPKLISYTLPVVG                  | 2.79 | 0.01 | 4.08 | 1.12 | 0.22 | 1.34 |
| 50194 | 0 | 236119 | NQINALTSFVDASMV                    | 2.67 | 0.01 | 0.78 | 0.44 | 1.13 | 2.66 |
| 50195 | 0 | 45571  | NQITSALSTQ                         | 2.33 | 0.01 | 3.67 | 0.68 | 0.22 | 1.27 |
| 50196 | 0 | 45571  | NQITSALSTQ                         | 2.33 | 0.01 | 3.67 | 0.68 | 0.22 | 0.28 |
| 50197 | 0 | 237862 | NQKCDSEETGI                        | 2.49 | 0.01 | 0.78 | 0.44 | 1.13 | 1.28 |
| 50198 | 0 | 86999  | NQKNVRTLEWE                        | 2.48 | 0.01 | 3.72 | 1.15 | 0.22 | 2.02 |
| 50199 | 0 | 86999  | NQKNVRTLEWE                        | 2.48 | 0.01 | 3.72 | 1.15 | 0.22 | 2.02 |
| 50200 | 0 | 152867 | NQLAELNATN                         | 2.36 | 0.01 | 2.18 | 2.16 | 0.22 | 0.28 |
| 50201 | 0 | 45573  | NQLAGRMIP                          | 2.18 | 0.01 | 2.40 | 2.43 | 0.22 | 0.28 |
| 50202 | 0 | 45574  | NQLDQMPPRFYLAGN                    | 2.66 | 0.01 | 2.72 | 0.44 | 1.23 | 0.85 |
| 50203 | 0 | 100352 | NQLKEHPTDF                         | 2.26 | 0.01 | 2.18 | 2.16 | 0.22 | 0.28 |
| 50204 | 0 | 196705 | NQLLGST                            | 2.01 | 0.01 | 0.90 | 0.44 | 1.23 | 1.39 |
| 50205 | 0 | 45584  | NQLSCDLIGQKLGLK                    | 2.70 | 0.01 | 2.43 | 0.44 | 1.59 | 0.28 |
| 50206 | 0 | 45588  | NQMMDMKQIDPWIA<br>DTDKD            | 2.95 | 0.01 | 2.93 | 1.81 | 0.22 | 0.28 |
| 50207 | 0 | 45588  | NQMMDMKQIDPWIA<br>DTDKD            | 2.95 | 0.01 | 2.93 | 2.69 | 0.22 | 0.28 |
| 50208 | 0 | 45588  | NQMMDMKQIDPWIA<br>DTDKD            | 2.95 | 0.01 | 2.93 | 0.68 | 0.22 | 0.28 |
| 50209 | 0 | 45589  | NQMHMLSNS                          | 2.34 | 0.01 | 2.73 | 0.44 | 0.85 | 0.28 |
| 50210 | 0 | 45589  | NQMHMLSNS                          | 2.34 | 0.01 | 2.73 | 0.68 | 0.22 | 0.28 |
| 50211 | 0 | 45591  | NQMIITM                            | 2.03 | 0.01 | 3.75 | 1.15 | 2.26 | 0.28 |
| 50212 | 0 | 45597  | NQNNFVHDCVNITIK<br>HTVT            | 2.98 | 0.01 | 0.78 | 2.19 | 0.22 | 0.28 |
| 50213 | 0 | 45597  | NQNNFVHDCVNITIK<br>HTVT            | 2.98 | 0.01 | 0.78 | 2.19 | 0.22 | 2.02 |
| 50214 | 0 | 45597  | NQNNFVHDCVNITIK<br>HTVT            | 2.98 | 0.01 | 0.78 | 2.19 | 0.22 | 2.02 |

|       |   |        |                                                            |      |      |      |      |      |      |
|-------|---|--------|------------------------------------------------------------|------|------|------|------|------|------|
| 50215 | 0 | 45597  | NQNNFVHDCVNITIKQ<br>HTVT                                   | 2.98 | 0.01 | 0.78 | 2.19 | 0.22 | 2.02 |
| 50216 | 0 | 45597  | NQNNFVHDCVNITIKQ<br>HTVT                                   | 2.98 | 0.01 | 0.78 | 2.19 | 0.22 | 2.02 |
| 50217 | 0 | 45597  | NQNNFVHDCVNITIKQ<br>HTVT                                   | 2.98 | 0.01 | 0.78 | 2.19 | 0.22 | 2.12 |
| 50218 | 0 | 87003  | NQNNLPNDVFRE                                               | 2.48 | 0.01 | 2.48 | 0.44 | 1.59 | 0.28 |
| 50219 | 0 | 110955 | NQNPGRPGSTGTWN<br>PGSS                                     | 2.99 | 3.70 | 0.78 | 1.81 | 1.41 | 2.51 |
| 50220 | 0 | 110955 | NQNPGRPGSTGTWN<br>PGSS                                     | 2.99 | 3.70 | 0.78 | 1.81 | 1.41 | 1.27 |
| 50221 | 0 | 45598  | NQNSKYINYRDLYIGEF<br>                                      | 2.90 | 0.01 | 2.08 | 0.44 | 1.93 | 1.57 |
| 50222 | 0 | 45598  | NQNSKYINYRDLYIGEF<br>                                      | 2.90 | 0.01 | 2.08 | 2.43 | 0.22 | 1.57 |
| 50223 | 0 | 45598  | NQNSKYINYRDLYIGEF<br>                                      | 2.90 | 0.01 | 2.08 | 2.02 | 0.22 | 1.57 |
| 50224 | 0 | 45598  | NQNSKYINYRDLYIGEF<br>                                      | 2.90 | 0.01 | 3.45 | 0.44 | 0.22 | 1.57 |
| 50225 | 0 | 45599  | NQNTKTAKIEIKASIDGL<br>EVDVPGIDPNACHYMK<br>CPLVKGQQYDIKYTWN | 3.85 | 0.01 | 2.78 | 0.68 | 0.22 | 0.28 |
| 50226 | 0 | 45599  | NQNTKTAKIEIKASIDGL<br>EVDVPGIDPNACHYMK<br>CPLVKGQQYDIKYTWN | 3.85 | 0.01 | 2.78 | 0.68 | 0.22 | 0.28 |
| 50227 | 0 | 45599  | NQNTKTAKIEIKASIDGL<br>EVDVPGIDPNACHYMK<br>CPLVKGQQYDIKYTWN | 3.85 | 0.01 | 2.78 | 0.68 | 0.22 | 0.28 |
| 50228 | 0 | 45599  | NQNTKTAKIEIKASIDGL<br>EVDVPGIDPNACHYMK<br>CPLVKGQQYDIKYTWN | 3.85 | 0.01 | 2.78 | 0.44 | 1.23 | 0.28 |
| 50229 | 0 | 45602  | NQPGHL                                                     | 1.88 | 0.01 | 3.27 | 2.37 | 0.22 | 0.28 |
| 50230 | 0 | 45603  | NQPGVHIQVFEGRAM<br>TKDC                                    | 2.88 | 0.01 | 2.78 | 2.49 | 0.85 | 0.28 |
| 50231 | 0 | 45603  | NQPGVHIQVFEGRAM<br>TKDC                                    | 2.88 | 0.01 | 2.78 | 0.44 | 0.85 | 0.28 |
| 50232 | 0 | 181410 | NQPFLKTNPNYKGN                                             | 2.71 | 0.01 | 2.82 | 1.15 | 0.22 | 0.28 |
| 50233 | 0 | 181410 | NQPFLKTNPNYKGN                                             | 2.71 | 0.01 | 2.82 | 1.15 | 0.22 | 1.27 |
| 50234 | 0 | 45610  | NQQIAGIGAALIE                                              | 2.57 | 0.01 | 3.34 | 1.12 | 0.22 | 0.85 |
| 50235 | 0 | 226247 | NQQKRNEQELLELDKW<br>ASL                                    | 2.92 | 0.01 | 0.90 | 0.44 | 0.85 | 2.49 |
| 50236 | 0 | 226247 | NQQKRNEQELLELDKW<br>ASL                                    | 2.92 | 0.01 | 0.90 | 0.44 | 0.85 | 1.34 |

|       |   |        |                                       |      |      |      |      |      |      |
|-------|---|--------|---------------------------------------|------|------|------|------|------|------|
| 50237 | 0 | 226247 | NQQKRNEQELLELDKW<br>ASL               | 2.92 | 0.01 | 0.90 | 0.44 | 0.85 | 0.28 |
| 50238 | 0 | 164307 | NQQLSRS                               | 2.03 | 0.01 | 0.90 | 1.20 | 0.22 | 1.39 |
| 50239 | 0 | 45612  | NQQSRWGLGSPNCHG<br>PDWASPVCQRHS       | 3.25 | 0.01 | 2.85 | 0.44 | 0.85 | 0.28 |
| 50240 | 0 | 45612  | NQQSRWGLGSPNCHG<br>PDWASPVCQRHS       | 3.25 | 0.01 | 3.16 | 0.44 | 0.22 | 0.28 |
| 50241 | 0 | 45612  | NQQSRWGLGSPNCHG<br>PDWASPVCQRHS       | 3.25 | 0.01 | 2.85 | 1.15 | 2.26 | 0.28 |
| 50242 | 0 | 45612  | NQQSRWGLGSPNCHG<br>PDWASPVCQRHS       | 3.25 | 0.01 | 2.85 | 0.44 | 0.22 | 0.28 |
| 50243 | 0 | 45612  | NQQSRWGLGSPNCHG<br>PDWASPVCQRHS       | 3.25 | 0.01 | 2.85 | 0.44 | 0.85 | 0.28 |
| 50244 | 0 | 45612  | NQQSRWGLGSPNCHG<br>PDWASPVCQRHS       | 3.25 | 0.01 | 2.85 | 1.15 | 2.26 | 1.34 |
| 50245 | 0 | 45612  | NQQSRWGLGSPNCHG<br>PDWASPVCQRHS       | 3.25 | 0.01 | 3.16 | 0.44 | 1.59 | 0.28 |
| 50246 | 0 | 45612  | NQQSRWGLGSPNCHG<br>PDWASPVCQRHS       | 3.25 | 0.01 | 2.85 | 0.44 | 0.85 | 1.66 |
| 50247 | 0 | 45612  | NQQSRWGLGSPNCHG<br>PDWASPVCQRHS       | 3.25 | 0.01 | 2.85 | 0.68 | 0.22 | 0.28 |
| 50248 | 0 | 45616  | NQRKKARN                              | 2.16 | 0.01 | 3.65 | 1.15 | 0.22 | 0.28 |
| 50249 | 0 | 45616  | NQRKKARN                              | 2.16 | 0.01 | 3.65 | 0.44 | 0.85 | 0.28 |
| 50250 | 0 | 153862 | NQRVNQVAEVLQL                         | 2.60 | 0.01 | 3.53 | 0.68 | 0.22 | 0.85 |
| 50251 | 0 | 45624  | NQSFEEDTEE                            | 2.31 | 0.01 | 2.56 | 1.20 | 0.22 | 0.28 |
| 50252 | 0 | 45625  | NQSFEEDTEK                            | 2.31 | 0.01 | 2.56 | 1.20 | 0.22 | 0.28 |
| 50253 | 0 | 96701  | NQSLAFIRKSDEL                         | 2.51 | 0.01 | 2.38 | 1.12 | 0.22 | 0.85 |
| 50254 | 0 | 96701  | NQSLAFIRKSDEL                         | 2.51 | 0.01 | 2.38 | 1.12 | 0.22 | 0.28 |
| 50255 | 0 | 45627  | NQSLDLAEQELVDCASQ<br>HGC              | 2.96 | 0.01 | 2.78 | 1.12 | 0.22 | 1.27 |
| 50256 | 0 | 45627  | NQSLDLAEQELVDCASQ<br>HGC              | 2.96 | 0.01 | 2.78 | 1.12 | 0.22 | 1.27 |
| 50257 | 0 | 45627  | NQSLDLAEQELVDCASQ<br>HGC              | 2.96 | 0.01 | 2.78 | 1.12 | 0.22 | 0.85 |
| 50258 | 0 | 45627  | NQSLDLAEQELVDCASQ<br>HGC              | 2.96 | 0.01 | 2.78 | 1.12 | 0.22 | 0.85 |
| 50259 | 0 | 45627  | NQSLDLAEQELVDCASQ<br>HGC              | 2.96 | 0.01 | 2.78 | 0.44 | 1.23 | 1.34 |
| 50260 | 0 | 45627  | NQSLDLAEQELVDCASQ<br>HGC              | 2.96 | 0.01 | 2.78 | 0.44 | 1.23 | 0.85 |
| 50261 | 0 | 45627  | NQSLDLAEQELVDCASQ<br>HGC              | 2.96 | 0.01 | 2.78 | 0.44 | 1.23 | 0.85 |
| 50262 | 0 | 174211 | NQSLDLAEQELVDCASQ<br>HGCHGDTIPRGIEYIQ | 3.42 | 0.01 | 2.78 | 1.12 | 0.22 | 0.85 |
| 50263 | 0 | 131988 | NQSLGWGDSSKPVSS                       | 2.66 | 0.01 | 0.78 | 0.44 | 1.13 | 0.85 |
| 50264 | 0 | 131988 | NQSLGWGDSSKPVSS                       | 2.66 | 0.01 | 0.78 | 0.44 | 1.13 | 0.85 |



|       |   |        |                                    |      |      |      |      |      |      |
|-------|---|--------|------------------------------------|------|------|------|------|------|------|
| 50265 | 0 | 45628  | NQSLLETH                           | 2.11 | 0.01 | 2.40 | 2.43 | 0.22 | 0.28 |
| 50266 | 0 | 45629  | NQSTVK                             | 1.88 | 0.01 | 3.42 | 0.68 | 0.22 | 0.28 |
| 50267 | 0 | 45630  | NQSTVKT                            | 2.02 | 0.01 | 3.16 | 0.68 | 0.22 | 1.34 |
| 50268 | 0 | 45630  | NQSTVKT                            | 2.02 | 0.01 | 3.16 | 0.68 | 0.22 | 0.28 |
| 50269 | 0 | 45631  | NQTARDEIRRA                        | 2.40 | 0.01 | 3.53 | 3.08 | 0.22 | 0.28 |
| 50270 | 0 | 186701 | NQTDHLFSTFIS                       | 2.48 | 0.01 | 0.90 | 0.68 | 0.22 | 1.39 |
| 50271 | 0 | 45632  | NQTEPSQTHNRLYQER<br>QRL            | 2.93 | 0.01 | 4.63 | 2.42 | 0.22 | 0.28 |
| 50272 | 0 | 45632  | NQTEPSQTHNRLYQER<br>QRL            | 2.93 | 0.01 | 4.63 | 2.42 | 0.22 | 1.34 |
| 50273 | 0 | 419295 | NQTHDWVPYAGR                       | 2.40 | 0.01 | 0.90 | 1.15 | 0.22 | 1.27 |
| 50274 | 0 | 97531  | NQTIQRDKV                          | 2.21 | 0.01 | 3.13 | 1.12 | 0.22 | 0.28 |
| 50275 | 0 | 105412 | NQTKV                              | 1.74 | 0.01 | 3.03 | 1.20 | 0.22 | 0.28 |
| 50276 | 0 | 121661 | NQTNNHNNMY                         | 2.35 | 0.01 | 1.75 | 4.15 | 1.13 | 1.27 |
| 50277 | 0 | 121661 | NQTNNHNNMY                         | 2.35 | 0.01 | 1.75 | 4.15 | 1.13 | 1.27 |
| 50278 | 0 | 149088 | NQTQHSV                            | 2.02 | 0.01 | 0.90 | 2.13 | 1.59 | 1.39 |
| 50279 | 0 | 523208 | NQVDDKSTDHKSSTD                    | 2.71 | 0.01 | 2.24 | 0.44 | 1.41 | 1.28 |
| 50280 | 0 | 188388 | NQVSGSENTDNKPH                     | 2.60 | 0.01 | 4.63 | 1.12 | 0.22 | 0.28 |
| 50281 | 0 | 188388 | NQVSGSENTDNKPH                     | 2.60 | 0.01 | 4.63 | 1.12 | 0.22 | 0.28 |
| 50282 | 0 | 109630 | NQVSLTC                            | 1.99 | 0.01 | 0.78 | 0.44 | 1.13 | 0.28 |
| 50283 | 0 | 45637  | NQVYYRP                            | 2.01 | 0.01 | 0.78 | 0.68 | 0.22 | 0.28 |
| 50284 | 0 | 45639  | NQVYYRPMDEYSN                      | 2.54 | 0.01 | 0.78 | 0.68 | 0.22 | 0.28 |
| 50285 | 0 | 45639  | NQVYYRPMDEYSN                      | 2.54 | 0.01 | 0.78 | 0.68 | 0.22 | 0.28 |
| 50286 | 0 | 45639  | NQVYYRPMDEYSN                      | 2.54 | 0.01 | 0.78 | 0.68 | 0.22 | 0.28 |
| 50287 | 0 | 228571 | NQVYYRPVDQYNN                      | 2.57 | 0.01 | 2.98 | 2.19 | 0.22 | 0.85 |
| 50288 | 0 | 175625 | NQVYYRPVDQYS                       | 2.49 | 0.01 | 1.60 | 2.19 | 0.22 | 0.28 |
| 50289 | 0 | 175625 | NQVYYRPVDQYS                       | 2.49 | 0.01 | 1.60 | 2.19 | 0.22 | 0.28 |
| 50290 | 0 | 175625 | NQVYYRPVDQYS                       | 2.49 | 0.01 | 1.60 | 2.19 | 0.22 | 0.85 |
| 50291 | 0 | 175625 | NQVYYRPVDQYS                       | 2.49 | 0.01 | 1.60 | 2.19 | 0.22 | 0.85 |
| 50292 | 0 | 175625 | NQVYYRPVDQYS                       | 2.49 | 0.01 | 1.60 | 2.19 | 0.22 | 0.85 |
| 50293 | 0 | 175625 | NQVYYRPVDQYS                       | 2.49 | 0.01 | 1.60 | 2.19 | 0.22 | 0.85 |
| 50294 | 0 | 175625 | NQVYYRPVDQYS                       | 2.49 | 0.01 | 1.60 | 2.19 | 0.22 | 0.85 |
| 50295 | 0 | 175625 | NQVYYRPVDQYS                       | 2.49 | 0.01 | 1.60 | 2.19 | 0.22 | 0.85 |
| 50296 | 0 | 175625 | NQVYYRPVDQYS                       | 2.49 | 0.01 | 1.60 | 2.19 | 0.22 | 0.28 |
| 50297 | 0 | 175625 | NQVYYRPVDQYS                       | 2.49 | 0.01 | 1.60 | 2.19 | 0.22 | 0.85 |
| 50298 | 0 | 45640  | NQVYYRPVDQYSNQNN<br>FVHDCVNITIKQHT | 3.34 | 0.01 | 1.75 | 1.81 | 0.22 | 0.28 |
| 50299 | 0 | 45640  | NQVYYRPVDQYSNQNN<br>FVHDCVNITIKQHT | 3.34 | 0.01 | 1.75 | 1.81 | 0.22 | 0.28 |
| 50300 | 0 | 45640  | NQVYYRPVDQYSNQNN<br>FVHDCVNITIKQHT | 3.34 | 0.01 | 1.75 | 1.81 | 0.22 | 0.28 |
| 50301 | 0 | 45640  | NQVYYRPVDQYSNQNN<br>FVHDCVNITIKQHT | 3.34 | 0.01 | 1.75 | 2.19 | 0.22 | 0.28 |

|       |   |        |                                    |      |      |      |      |      |      |
|-------|---|--------|------------------------------------|------|------|------|------|------|------|
| 50302 | 0 | 45640  | NQVYYRPVDQYSNQNN<br>FVHDCVNITIKQHT | 3.34 | 0.01 | 1.75 | 2.19 | 0.22 | 0.28 |
| 50303 | 0 | 45640  | NQVYYRPVDQYSNQNN<br>FVHDCVNITIKQHT | 3.34 | 0.01 | 1.75 | 2.19 | 0.22 | 0.28 |
| 50304 | 0 | 45640  | NQVYYRPVDQYSNQNN<br>FVHDCVNITIKQHT | 3.34 | 0.01 | 1.75 | 1.81 | 0.22 | 0.28 |
| 50305 | 0 | 45640  | NQVYYRPVDQYSNQNN<br>FVHDCVNITIKQHT | 3.34 | 0.01 | 1.75 | 2.19 | 0.22 | 0.28 |
| 50306 | 0 | 45640  | NQVYYRPVDQYSNQNN<br>FVHDCVNITIKQHT | 3.34 | 0.01 | 1.75 | 1.81 | 0.22 | 0.28 |
| 50307 | 0 | 45640  | NQVYYRPVDQYSNQNN<br>FVHDCVNITIKQHT | 3.34 | 0.01 | 1.75 | 1.81 | 0.22 | 1.48 |
| 50308 | 0 | 45640  | NQVYYRPVDQYSNQNN<br>FVHDCVNITIKQHT | 3.34 | 0.01 | 1.75 | 1.81 | 0.22 | 0.28 |
| 50309 | 0 | 45640  | NQVYYRPVDQYSNQNN<br>FVHDCVNITIKQHT | 3.34 | 0.01 | 1.75 | 1.81 | 0.22 | 0.28 |
| 50310 | 0 | 45640  | NQVYYRPVDQYSNQNN<br>FVHDCVNITIKQHT | 3.34 | 0.01 | 1.75 | 1.81 | 0.22 | 0.28 |
| 50311 | 0 | 45640  | NQVYYRPVDQYSNQNN<br>FVHDCVNITIKQHT | 3.34 | 0.01 | 1.75 | 1.81 | 0.22 | 0.28 |
| 50312 | 0 | 45643  | NQW NKPSKPKTN                      | 2.52 | 0.01 | 2.98 | 1.20 | 0.22 | 0.28 |
| 50313 | 0 | 45643  | NQW NKPSKPKTN                      | 2.52 | 0.01 | 2.98 | 1.20 | 0.22 | 0.85 |
| 50314 | 0 | 130568 | NQYCIYAGRYC                        | 2.41 | 0.01 | 0.90 | 0.68 | 0.22 | 0.28 |
| 50315 | 0 | 130568 | NQYCIYAGRYC                        | 2.41 | 0.01 | 0.90 | 0.68 | 0.22 | 1.34 |
| 50316 | 0 | 130568 | NQYCIYAGRYC                        | 2.41 | 0.01 | 0.90 | 0.68 | 0.22 | 0.28 |
| 50317 | 0 | 130568 | NQYCIYAGRYC                        | 2.41 | 0.01 | 0.90 | 0.68 | 0.22 | 0.28 |
| 50318 | 0 | 130568 | NQYCIYAGRYC                        | 2.41 | 0.01 | 0.90 | 0.68 | 0.22 | 1.34 |
| 50319 | 0 | 45646  | NQYGRIRVLQRFNQR                    | 2.71 | 0.01 | 2.72 | 2.13 | 0.22 | 0.85 |
| 50320 | 0 | 45650  | NQYVSIDKFRIFCKALNP<br>KEIEK        | 3.05 | 0.01 | 2.95 | 0.44 | 0.22 | 0.28 |
| 50321 | 0 | 230242 | NRAFNPCGTDGVTYD<br>NECL            | 2.94 | 0.01 | 2.25 | 0.44 | 1.23 | 0.28 |
| 50322 | 0 | 226364 | NRAFVTD<br>NRARGNPALAVARLLAR       | 1.99 | 0.01 | 0.90 | 2.66 | 0.22 | 1.39 |
| 50323 | 0 | 130988 | SSADELPCTRAPVTAVS<br>GR            | 3.56 | 0.01 | 0.90 | 0.44 | 1.93 | 0.85 |
| 50324 | 0 | 152026 | NRAYAVRKPGLT                       | 2.45 | 0.01 | 2.80 | 2.78 | 0.22 | 0.28 |

|       |   |        |                                     |      |      |      |      |      |      |
|-------|---|--------|-------------------------------------|------|------|------|------|------|------|
| 50325 | 0 | 45659  | NRDFVE                              | 1.88 | 0.01 | 2.40 | 0.44 | 0.85 | 0.28 |
| 50326 | 0 | 108050 | NRDNTYNRVSEDLRSRI                   | 2.82 | 4.45 | 0.78 | 0.44 | 1.13 | 0.28 |
| 50327 | 0 | 108050 | NRDNTYNRVSEDLRSRI                   | 2.82 | 4.45 | 0.78 | 0.44 | 1.13 | 0.28 |
| 50328 | 0 | 108050 | NRDNTYNRVSEDLRSRI                   | 2.82 | 4.45 | 0.78 | 0.44 | 1.13 | 0.28 |
| 50329 | 0 | 45667  | NRDQGRKPTPPTPP                      | 2.63 | 0.01 | 4.08 | 1.12 | 0.22 | 0.28 |
| 50330 | 0 | 45667  | NRDQGRKPTPPTPP                      | 2.63 | 0.01 | 4.08 | 1.12 | 0.22 | 1.27 |
| 50331 | 0 | 125179 | NRDYDVVEENEETESDS<br>DNDEEQEIQNRPLP | 3.39 | 0.01 | 4.08 | 0.68 | 0.22 | 0.85 |
| 50332 | 0 | 125179 | NRDYDVVEENEETESDS<br>DNDEEQEIQNRPLP | 3.39 | 0.01 | 4.08 | 0.68 | 0.22 | 0.85 |
| 50333 | 0 | 125179 | NRDYDVVEENEETESDS<br>DNDEEQEIQNRPLP | 3.39 | 0.01 | 4.08 | 0.68 | 0.22 | 1.48 |
| 50334 | 0 | 142242 | NREEYARFSDSDVGEYR                   | 2.75 | 0.01 | 2.19 | 2.04 | 2.35 | 1.75 |
| 50335 | 0 | 45671  | NREKMITE                            | 2.12 | 0.01 | 2.99 | 0.44 | 0.85 | 0.28 |
| 50336 | 0 | 423447 | NRELPSLFCDCPGGG                     | 2.65 | 0.01 | 2.51 | 0.44 | 2.35 | 1.28 |
| 50337 | 0 | 120846 | NREPVQLETLSIRGN                     | 2.67 | 0.01 | 0.78 | 3.01 | 0.22 | 0.28 |
| 50338 | 0 | 45673  | NRFAGMFSLGARQKI                     | 2.66 | 0.01 | 1.72 | 0.68 | 0.22 | 1.66 |
| 50339 | 0 | 45673  | NRFAGMFSLGARQKI                     | 2.66 | 0.01 | 1.72 | 0.68 | 0.22 | 0.28 |
| 50340 | 0 | 45673  | NRFAGMFSLGARQKI                     | 2.66 | 0.01 | 1.72 | 0.68 | 0.22 | 1.66 |
| 50341 | 0 | 45673  | NRFAGMFSLGARQKI                     | 2.66 | 0.01 | 1.72 | 0.68 | 0.22 | 1.66 |
| 50342 | 0 | 45673  | NRFAGMFSLGARQKI                     | 2.66 | 0.01 | 1.72 | 0.68 | 0.22 | 1.66 |
| 50343 | 0 | 159035 | NRFEHQMWESVRDELN                    | 2.72 | 0.01 | 3.22 | 0.68 | 0.22 | 0.28 |
| 50344 | 0 | 45674  | NRFETLFKNQYGRIR                     | 2.67 | 0.01 | 2.72 | 2.13 | 0.22 | 0.85 |
| 50345 | 0 | 45679  | NRGFDART                            | 2.12 | 0.01 | 2.99 | 0.44 | 0.85 | 0.28 |
| 50346 | 0 | 189777 | NRGGDENPRGPVSR                      | 2.65 | 0.01 | 3.61 | 0.44 | 0.85 | 0.28 |
| 50347 | 0 | 100354 | NRGIFNEFKK                          | 2.32 | 0.01 | 2.18 | 2.16 | 0.22 | 0.28 |
| 50348 | 0 | 172560 | NRGINTLERSKVEET                     | 2.68 | 0.01 | 0.78 | 0.44 | 1.13 | 0.28 |
| 50349 | 0 | 45681  | NRGKMDVSGVQAPVG<br>AITTI            | 2.92 | 0.01 | 2.82 | 0.44 | 0.85 | 0.28 |
| 50350 | 0 | 45681  | NRGKMDVSGVQAPVG<br>AITTI            | 2.92 | 0.01 | 2.82 | 0.44 | 1.41 | 0.28 |
| 50351 | 0 | 45684  | NRIGGKNA                            | 2.14 | 0.01 | 2.24 | 1.12 | 0.22 | 0.28 |
| 50352 | 0 | 100355 | NRIQVDSSNP                          | 2.31 | 0.01 | 2.18 | 2.16 | 0.22 | 0.28 |
| 50353 | 0 | 100355 | NRIQVDSSNP                          | 2.31 | 0.01 | 2.18 | 2.16 | 0.22 | 0.28 |
| 50354 | 0 | 423448 | NRKASGTGVAAVGAY                     | 2.70 | 0.01 | 2.51 | 0.44 | 2.35 | 1.28 |
| 50355 | 0 | 181749 | NRKEVWKAITCRAPN                     | 2.67 | 0.01 | 1.66 | 2.36 | 0.22 | 1.28 |
| 50356 | 0 | 119503 | NRKLKSNMM                           | 2.24 | 0.01 | 0.90 | 0.44 | 1.13 | 0.28 |
| 50357 | 0 | 45693  | NRKNQLKDMA                          | 2.32 | 0.01 | 0.78 | 1.20 | 0.22 | 0.28 |

|       |   |        |                                |      |      |      |      |      |      |
|-------|---|--------|--------------------------------|------|------|------|------|------|------|
| 50358 | 0 | 115406 | NRKVKPTTEGGVETE                | 2.70 | 0.01 | 3.93 | 1.20 | 0.22 | 1.34 |
| 50359 | 0 | 115406 | NRKVKPTTEGGVETE                | 2.70 | 0.01 | 3.93 | 1.20 | 0.22 | 0.28 |
| 50360 | 0 | 100356 | NRLFDRVDRFYA                   | 2.49 | 0.01 | 0.90 | 2.00 | 0.22 | 0.28 |
| 50361 | 0 | 45695  | NRLGGLFNFGPKQKI                | 2.70 | 0.01 | 1.72 | 0.68 | 0.22 | 0.28 |
| 50362 | 0 | 111599 | NRLHAYP                        | 1.99 | 0.01 | 0.90 | 0.44 | 0.85 | 1.39 |
| 50363 | 0 | 45696  | NRLIAFAFAGNHVSPTH<br>YVP       | 2.94 | 0.01 | 1.72 | 0.44 | 0.85 | 0.28 |
| 50364 | 0 | 45697  | NRLIAFASRGNHDSPTH<br>YV        | 2.86 | 0.01 | 1.96 | 0.44 | 0.85 | 0.28 |
| 50365 | 0 | 45698  | NRLIAFASRGNHVAPTH<br>YVT       | 2.94 | 0.01 | 1.72 | 0.44 | 0.85 | 0.28 |
| 50366 | 0 | 45699  | NRLIAFASRGNHVAPTH<br>YVV       | 2.92 | 0.01 | 1.72 | 0.44 | 0.85 | 0.28 |
| 50367 | 0 | 45701  | NRLIAFASRGNHVSPA<br>H YVP      | 2.95 | 0.01 | 1.72 | 0.44 | 0.85 | 0.28 |
| 50368 | 0 | 45702  | NRLIAFASRGNHVSPRH<br>YV        | 2.90 | 0.01 | 1.96 | 0.44 | 0.85 | 0.28 |
| 50369 | 0 | 45704  | NRLIAFASRGNHVSPTH<br>YVP       | 2.94 | 0.01 | 1.72 | 0.44 | 0.85 | 0.28 |
| 50370 | 0 | 45706  | NRLNFLKKIS                     | 2.33 | 0.01 | 1.60 | 0.44 | 1.23 | 0.85 |
| 50371 | 0 | 45706  | NRLNFLKKIS                     | 2.33 | 0.01 | 1.60 | 0.44 | 1.23 | 0.85 |
| 50372 | 0 | 45706  | NRLNFLKKIS                     | 2.33 | 0.01 | 1.60 | 0.44 | 1.23 | 0.85 |
| 50373 | 0 | 523242 | NRLVAINRAVSANAK                | 2.72 | 0.01 | 2.24 | 0.44 | 1.41 | 1.28 |
| 50374 | 0 | 45709  | NRLWMPS                        | 1.99 | 0.01 | 0.90 | 0.68 | 0.22 | 0.85 |
| 50375 | 0 | 45712  | NRNAVPNLRGDLQVLA<br>QKVARTLPTS | 3.22 | 0.01 | 2.96 | 1.15 | 0.22 | 1.34 |
| 50376 | 0 | 45712  | NRNAVPNLRGDLQVLA<br>QKVARTLPTS | 3.22 | 0.01 | 2.96 | 1.15 | 0.22 | 0.28 |
| 50377 | 0 | 45712  | NRNAVPNLRGDLQVLA<br>QKVARTLPTS | 3.22 | 0.01 | 2.96 | 2.59 | 0.22 | 1.34 |
| 50378 | 0 | 45712  | NRNAVPNLRGDLQVLA<br>QKVARTLPTS | 3.22 | 0.01 | 3.63 | 1.12 | 0.22 | 0.85 |
| 50379 | 0 | 45712  | NRNAVPNLRGDLQVLA<br>QKVARTLPTS | 3.22 | 0.01 | 3.63 | 1.12 | 0.22 | 0.28 |
| 50380 | 0 | 45712  | NRNAVPNLRGDLQVLA<br>QKVARTLPTS | 3.22 | 0.01 | 3.63 | 1.12 | 0.22 | 1.34 |
| 50381 | 0 | 45712  | NRNAVPNLRGDLQVLA<br>QKVARTLPTS | 3.22 | 0.01 | 3.02 | 1.12 | 0.22 | 0.28 |
| 50382 | 0 | 45712  | NRNAVPNLRGDLQVLA<br>QKVARTLPTS | 3.22 | 0.01 | 3.02 | 1.12 | 0.22 | 0.28 |
| 50383 | 0 | 45712  | NRNAVPNLRGDLQVLA<br>QKVARTLPTS | 3.22 | 0.01 | 3.02 | 1.12 | 0.22 | 0.28 |
| 50384 | 0 | 45712  | NRNAVPNLRGDLQVLA<br>QKVARTLPTS | 3.22 | 0.01 | 3.02 | 1.12 | 0.22 | 1.34 |
| 50385 | 0 | 182247 | NRNCYKLQKEEKTWH                | 2.66 | 0.01 | 0.78 | 0.44 | 1.13 | 0.85 |
| 50386 | 0 | 523244 | NRPED                          | 1.74 | 0.01 | 0.78 | 0.44 | 1.41 | 0.28 |
| 50387 | 0 | 523244 | NRPED                          | 1.74 | 0.01 | 0.78 | 0.44 | 1.41 | 1.39 |

|       |   |        |                                    |      |      |      |      |      |      |
|-------|---|--------|------------------------------------|------|------|------|------|------|------|
| 50388 | 0 | 523244 | NRPED                              | 1.74 | 0.01 | 0.78 | 0.44 | 1.41 | 2.75 |
| 50389 | 0 | 45719  | NRPRWVKEA                          | 2.21 | 0.01 | 0.90 | 0.68 | 0.22 | 0.28 |
| 50390 | 0 | 176363 | NRPTTLTGCKKGKNF                    | 2.70 | 0.01 | 2.63 | 1.15 | 0.22 | 0.85 |
| 50391 | 0 | 176363 | NRPTTLTGCKKGKNF                    | 2.70 | 0.01 | 2.63 | 1.15 | 0.22 | 0.85 |
| 50392 | 0 | 176363 | NRPTTLTGCKKGKNF                    | 2.70 | 0.01 | 2.63 | 1.15 | 0.22 | 0.85 |
| 50393 | 0 | 45721  | NRQDFTQDPG                         | 2.31 | 0.01 | 3.17 | 0.68 | 0.22 | 0.28 |
| 50394 | 0 | 45721  | NRQDFTQDPG                         | 2.31 | 0.01 | 3.17 | 0.68 | 0.22 | 0.28 |
| 50395 | 0 | 45721  | NRQDFTQDPG                         | 2.31 | 0.01 | 3.17 | 0.68 | 0.22 | 0.85 |
| 50396 | 0 | 45721  | NRQDFTQDPG                         | 2.31 | 0.01 | 3.17 | 0.68 | 0.22 | 0.28 |
| 50397 | 0 | 193325 | NRQNMIVEPNYDL                      | 2.52 | 0.01 | 3.04 | 1.12 | 0.22 | 0.28 |
| 50398 | 0 | 193325 | NRQNMIVEPNYDL                      | 2.52 | 0.01 | 3.04 | 1.12 | 0.22 | 0.28 |
| 50399 | 0 | 45728  | NRRGLDLLFWEQGGLC<br>KALQEQCRF      | 3.17 | 0.01 | 2.04 | 0.44 | 0.85 | 0.28 |
| 50400 | 0 | 45728  | NRRGLDLLFWEQGGLC<br>KALQEQCRF      | 3.17 | 0.01 | 2.04 | 0.44 | 0.85 | 0.28 |
| 50401 | 0 | 153863 | NRRIQLLEEDLERSEER                  | 2.83 | 0.01 | 3.93 | 0.44 | 1.23 | 1.27 |
| 50402 | 0 | 119504 | NRRLPMPE                           | 2.23 | 0.01 | 0.90 | 0.44 | 1.13 | 0.28 |
| 50403 | 0 | 45731  | NRNFTAPV                           | 2.23 | 0.01 | 0.90 | 0.44 | 1.59 | 0.28 |
| 50404 | 0 | 45732  | NRRPQDV                            | 2.01 | 0.01 | 1.72 | 0.44 | 0.85 | 0.28 |
| 50405 | 0 | 346004 | NRSLRQLRECDDLER                    | 2.71 | 0.01 | 1.61 | 0.44 | 0.85 | 1.28 |
| 50406 | 0 | 45739  | NRSMWQ                             | 1.88 | 0.01 | 0.90 | 0.44 | 1.74 | 1.39 |
| 50407 | 0 | 99513  | NRSPDIYNPQAGSLK                    | 2.65 | 0.01 | 2.16 | 0.44 | 1.23 | 0.85 |
| 50408 | 0 | 135727 | NRSPSTGEQKSSGI                     | 2.60 | 0.01 | 2.69 | 0.68 | 0.22 | 0.28 |
| 50409 | 0 | 135727 | NRSPSTGEQKSSGI                     | 2.60 | 0.01 | 2.69 | 0.68 | 0.22 | 0.28 |
| 50410 | 0 | 45740  | NRSSLNITHRTRRSTSDN<br>NTTHLSSMESVH | 3.36 | 0.01 | 2.51 | 1.15 | 0.22 | 1.48 |
| 50411 | 0 | 131989 | NRTDLDPRLSNSGW                     | 2.69 | 0.01 | 0.78 | 0.44 | 1.13 | 0.85 |
| 50412 | 0 | 104586 | NRVAPNVRQ                          | 2.26 | 0.01 | 0.90 | 0.44 | 1.13 | 0.28 |
| 50413 | 0 | 104586 | NRVAPNVRQ                          | 2.26 | 0.01 | 0.90 | 0.44 | 1.13 | 0.28 |
| 50414 | 0 | 104586 | NRVAPNVRQ                          | 2.26 | 0.01 | 0.90 | 0.44 | 1.41 | 0.28 |
| 50415 | 0 | 104586 | NRVAPNVRQ                          | 2.26 | 0.01 | 0.90 | 1.20 | 0.22 | 0.28 |
| 50416 | 0 | 104586 | NRVAPNVRQ                          | 2.26 | 0.01 | 0.90 | 1.20 | 0.22 | 1.48 |
| 50417 | 0 | 104586 | NRVAPNVRQ                          | 2.26 | 0.01 | 0.90 | 1.20 | 0.22 | 1.48 |
| 50418 | 0 | 104586 | NRVAPNVRQ                          | 2.26 | 0.01 | 0.90 | 0.44 | 1.13 | 1.48 |
| 50419 | 0 | 104586 | NRVAPNVRQ                          | 2.26 | 0.01 | 0.90 | 0.44 | 1.13 | 1.48 |
| 50420 | 0 | 45748  | NRVITDDIELLKKILAYFL<br>PEDAILKGGHY | 3.32 | 0.01 | 3.21 | 3.14 | 0.22 | 0.28 |
| 50421 | 0 | 45748  | NRVITDDIELLKKILAYFL<br>PEDAILKGGHY | 3.32 | 0.01 | 3.21 | 3.14 | 0.22 | 0.28 |
| 50422 | 0 | 45748  | NRVITDDIELLKKILAYFL<br>PEDAILKGGHY | 3.32 | 0.01 | 3.21 | 3.14 | 0.22 | 0.28 |
| 50423 | 0 | 228574 | NRYPNQVYYRPVD                      | 2.59 | 0.01 | 2.98 | 2.19 | 0.22 | 0.85 |
| 50424 | 0 | 126786 | NRYTGPYT                           | 2.14 | 0.01 | 0.78 | 0.44 | 1.13 | 0.85 |
| 50425 | 0 | 189132 | NRYTHKRADQGHYVEM                   | 2.69 | 0.01 | 2.92 | 2.49 | 0.22 | 0.28 |
| 50426 | 0 | 189132 | NRYTHKRADQGHYVEM                   | 2.69 | 0.01 | 2.92 | 3.61 | 0.22 | 0.28 |

|       |   |        |                   |      |      |      |      |      |      |
|-------|---|--------|-------------------|------|------|------|------|------|------|
| 50427 | 0 | 45757  | NRYVELKRGEGKGA    | 2.63 | 0.01 | 2.86 | 1.12 | 0.22 | 0.28 |
| 50428 | 0 | 45757  | NRYVELKRGEGKGA    | 2.63 | 0.01 | 2.86 | 1.12 | 0.22 | 0.28 |
| 50429 | 0 | 95638  | NSAEPE            | 1.90 | 0.01 | 1.60 | 0.44 | 1.23 | 0.28 |
| 50430 | 0 | 98919  | NSAEPEQSLA        | 2.33 | 0.01 | 1.60 | 0.44 | 1.23 | 0.85 |
| 50431 | 0 | 346068 | NSAEPKPAEPKSAEP   | 2.74 | 0.01 | 1.61 | 0.44 | 0.85 | 1.28 |
| 50432 | 0 | 45767  | NSAPLTVASSPH      | 2.48 | 0.01 | 0.90 | 0.68 | 0.22 | 0.28 |
| 50433 | 0 | 45768  | NSARARADSCRI      | 2.51 | 0.01 | 4.23 | 1.12 | 0.22 | 0.28 |
| 50434 | 0 | 45768  | NSARARADSCRI      | 2.51 | 0.01 | 4.23 | 0.44 | 1.23 | 1.27 |
| 50435 | 0 | 45768  | NSARARADSCRI      | 2.51 | 0.01 | 4.23 | 0.44 | 1.23 | 1.27 |
| 50436 | 0 | 45770  | NSARVGTSSCRI      | 2.46 | 0.01 | 4.23 | 0.44 | 1.23 | 1.27 |
| 50437 | 0 | 45770  | NSARVGTSSCRI      | 2.46 | 0.01 | 4.23 | 0.44 | 1.23 | 1.27 |
| 50438 | 0 | 45773  | NSAVHFQRQFSQ      | 2.49 | 0.01 | 0.90 | 2.13 | 0.22 | 1.39 |
| 50439 | 0 | 45775  | NSDASNTSPASAPNALT | 3.59 | 0.01 | 2.75 | 1.20 | 0.22 | 0.85 |
|       |   |        | VAAINKSNARASFSNYG |      |      |      |      |      |      |
|       |   |        | SVVD              |      |      |      |      |      |      |
| 50440 | 0 | 45775  | NSDASNTSPASAPNALT | 3.59 | 0.01 | 2.75 | 0.44 | 1.23 | 0.85 |
|       |   |        | VAAINKSNARASFSNYG |      |      |      |      |      |      |
|       |   |        | SVVD              |      |      |      |      |      |      |
| 50441 | 0 | 45776  | NSDDDPVNPAPG      | 2.50 | 0.01 | 3.24 | 0.44 | 1.23 | 0.85 |
| 50442 | 0 | 45777  | NSDDEDYFSGETRSPEA | 2.94 | 0.01 | 4.08 | 0.68 | 0.22 | 0.85 |
| 50443 | 0 | 131575 | NSDGSH            | 2.02 | 0.01 | 0.78 | 1.15 | 0.22 | 0.28 |
|       |   |        | NSDGSH            |      |      |      |      |      |      |
| 50445 | 0 | 106690 | NSDHFLQDPDPL      | 2.48 | 0.01 | 0.90 | 1.15 | 0.22 | 0.85 |
| 50446 | 0 | 106690 | NSDHFLQDPDPL      | 2.48 | 0.01 | 0.90 | 1.15 | 0.22 | 0.85 |
| 50447 | 0 | 106690 | NSDHFLQDPDPL      | 2.48 | 0.01 | 0.90 | 1.15 | 0.22 | 1.34 |
| 50448 | 0 | 106690 | NSDHFLQDPDPL      | 2.48 | 0.01 | 0.90 | 1.15 | 2.25 | 1.75 |
| 50449 | 0 | 106690 | NSDHFLQDPDPL      | 2.48 | 0.01 | 0.90 | 1.15 | 2.25 | 1.75 |
| 50450 | 0 | 106690 | NSDHFLQDPDPL      | 2.48 | 0.01 | 0.90 | 1.15 | 0.22 | 1.39 |
| 50451 | 0 | 45782  | NSDIKTTT          | 2.10 | 0.01 | 2.83 | 2.61 | 0.22 | 0.28 |
| 50452 | 0 | 45783  | NSDKLYIWGVHHPSTDK | 3.04 | 0.01 | 3.04 | 1.12 | 0.22 | 0.28 |
|       |   |        | EQTNLY            |      |      |      |      |      |      |
| 50453 | 0 | 45783  | NSDKLYIWGVHHPSTDK | 3.04 | 0.01 | 3.04 | 1.12 | 0.22 | 0.28 |
|       |   |        | EQTNLY            |      |      |      |      |      |      |
| 50454 | 0 | 45783  | NSDKLYIWGVHHPSTDK | 3.04 | 0.01 | 3.04 | 1.12 | 0.22 | 0.28 |
|       |   |        | EQTNLY            |      |      |      |      |      |      |
| 50455 | 0 | 45784  | NSDKLYIWGVHHPSTDK | 3.09 | 0.01 | 3.04 | 1.12 | 0.22 | 2.02 |
|       |   |        | EQTNLYV           |      |      |      |      |      |      |
| 50456 | 0 | 174212 | NSDNGTCYPGDFINYEE | 2.83 | 0.01 | 2.36 | 0.68 | 0.22 | 0.28 |
| 50457 | 0 | 149861 | L                 | 1.88 | 0.01 | 0.90 | 2.37 | 0.22 | 0.28 |
|       |   |        | NSDPWV            |      |      |      |      |      |      |
| 50458 | 0 | 79953  | NSDWVPSVRSWAL     | 2.56 | 0.01 | 2.69 | 1.15 | 0.22 | 0.85 |
| 50459 | 0 | 167628 | NSEDDDTFHDA       | 2.40 | 0.01 | 3.10 | 0.44 | 0.85 | 1.28 |
| 50460 | 0 | 167628 | NSEDDDTFHDA       | 2.40 | 0.01 | 3.10 | 0.44 | 0.85 | 1.28 |
| 50461 | 0 | 167628 | NSEDDDTFHDA       | 2.40 | 0.01 | 3.10 | 0.44 | 1.59 | 1.28 |
| 50462 | 0 | 167629 | NSEDDTFHDA        | 2.31 | 0.01 | 3.18 | 0.44 | 0.85 | 1.28 |
| 50463 | 0 | 167629 | NSEDDTFHDA        | 2.31 | 0.01 | 3.18 | 0.44 | 0.85 | 1.28 |

|       |   |        |                                    |      |      |      |      |      |      |
|-------|---|--------|------------------------------------|------|------|------|------|------|------|
| 50464 | 0 | 167629 | NSEDDTFHDA                         | 2.31 | 0.01 | 3.18 | 0.44 | 1.59 | 1.28 |
| 50465 | 0 | 139185 | NSELLSLIHDMPITNDQK<br>KLMSNNVQIVRQ | 3.34 | 0.01 | 0.90 | 0.68 | 0.22 | 0.28 |
| 50466 | 0 | 139185 | NSELLSLIHDMPITNDQK<br>KLMSNNVQIVRQ | 3.34 | 0.01 | 0.90 | 0.68 | 0.22 | 1.66 |
| 50467 | 0 | 139185 | NSELLSLIHDMPITNDQK<br>KLMSNNVQIVRQ | 3.34 | 0.01 | 0.90 | 0.68 | 0.22 | 1.66 |
| 50468 | 0 | 139185 | NSELLSLIHDMPITNDQK<br>KLMSNNVQIVRQ | 3.34 | 0.01 | 0.90 | 0.68 | 0.22 | 1.66 |
| 50469 | 0 | 139186 | NSELLSLINDMPITNDQK<br>KLMSNN       | 3.13 | 0.01 | 2.67 | 0.68 | 0.22 | 2.49 |
| 50470 | 0 | 139186 | NSELLSLINDMPITNDQK<br>KLMSNN       | 3.13 | 0.01 | 3.00 | 0.68 | 0.22 | 0.28 |
| 50471 | 0 | 139186 | NSELLSLINDMPITNDQK<br>KLMSNN       | 3.13 | 0.01 | 2.67 | 0.68 | 0.22 | 1.34 |
| 50472 | 0 | 139186 | NSELLSLINDMPITNDQK<br>KLMSNN       | 3.13 | 0.01 | 2.67 | 0.68 | 0.22 | 2.02 |
| 50473 | 0 | 139186 | NSELLSLINDMPITNDQK<br>KLMSNN       | 3.13 | 0.01 | 3.00 | 0.68 | 0.22 | 1.66 |
| 50474 | 0 | 139186 | NSELLSLINDMPITNDQK<br>KLMSNN       | 3.13 | 0.01 | 3.00 | 0.68 | 0.22 | 1.66 |
| 50475 | 0 | 139186 | NSELLSLINDMPITNDQK<br>KLMSNN       | 3.13 | 0.01 | 3.00 | 0.68 | 0.22 | 1.66 |
| 50476 | 0 | 139186 | NSELLSLINDMPITNDQK<br>KLMSNN       | 3.13 | 0.01 | 3.00 | 0.68 | 0.22 | 1.66 |
| 50477 | 0 | 139186 | NSELLSLINDMPITNDQK<br>KLMSNN       | 3.13 | 0.01 | 3.00 | 0.68 | 0.22 | 1.66 |
| 50478 | 0 | 139186 | NSELLSLINDMPITNDQK<br>KLMSNN       | 3.13 | 0.01 | 3.00 | 0.68 | 0.22 | 1.66 |
| 50479 | 0 | 139186 | NSELLSLINDMPITNDQK<br>KLMSNN       | 3.13 | 0.01 | 3.00 | 0.68 | 0.22 | 1.66 |
| 50480 | 0 | 139186 | NSELLSLINDMPITNDQK<br>KLMSNN       | 3.13 | 0.01 | 3.00 | 0.68 | 0.22 | 1.66 |
| 50481 | 0 | 139186 | NSELLSLINDMPITNDQK<br>KLMSNN       | 3.13 | 0.01 | 3.00 | 0.68 | 0.22 | 1.66 |
| 50482 | 0 | 139186 | NSELLSLINDMPITNDQK<br>KLMSNN       | 3.13 | 0.01 | 3.00 | 0.68 | 0.22 | 0.28 |
| 50483 | 0 | 139186 | NSELLSLINDMPITNDQK<br>KLMSNN       | 3.13 | 0.01 | 3.00 | 0.68 | 0.22 | 1.66 |
| 50484 | 0 | 139186 | NSELLSLINDMPITNDQK<br>KLMSNN       | 3.13 | 0.01 | 3.00 | 0.68 | 0.22 | 3.13 |
| 50485 | 0 | 139186 | NSELLSLINDMPITNDQK<br>KLMSNN       | 3.13 | 0.01 | 3.00 | 0.68 | 0.22 | 3.13 |
| 50486 | 0 | 139186 | NSELLSLINDMPITNDQK<br>KLMSNN       | 3.13 | 0.01 | 3.00 | 0.68 | 0.22 | 3.13 |
| 50487 | 0 | 139186 | NSELLSLINDMPITNDQK<br>KLMSNN       | 3.13 | 0.01 | 3.00 | 1.81 | 0.22 | 2.35 |

|       |   |        |                               |      |      |      |      |      |      |
|-------|---|--------|-------------------------------|------|------|------|------|------|------|
| 50488 | 0 | 139186 | NSELLSLINDMPITNDQK<br>KLMSNN  | 3.13 | 0.01 | 3.00 | 0.68 | 0.22 | 2.49 |
| 50489 | 0 | 139186 | NSELLSLINDMPITNDQK<br>KLMSNN  | 3.13 | 0.01 | 2.67 | 0.68 | 0.22 | 1.34 |
| 50490 | 0 | 139186 | NSELLSLINDMPITNDQK<br>KLMSNN  | 3.13 | 0.01 | 2.67 | 0.68 | 0.22 | 0.28 |
| 50491 | 0 | 139186 | NSELLSLINDMPITNDQK<br>KLMSNN  | 3.13 | 0.01 | 3.00 | 0.44 | 1.74 | 0.28 |
| 50492 | 0 | 139186 | NSELLSLINDMPITNDQK<br>KLMSNN  | 3.13 | 0.01 | 3.00 | 0.68 | 0.22 | 1.75 |
| 50493 | 0 | 139186 | NSELLSLINDMPITNDQK<br>KLMSNN  | 3.13 | 0.01 | 3.00 | 0.68 | 0.22 | 1.34 |
| 50494 | 0 | 139186 | NSELLSLINDMPITNDQK<br>KLMSNN  | 3.13 | 0.01 | 3.00 | 0.68 | 0.22 | 0.28 |
| 50495 | 0 | 139186 | NSELLSLINDMPITNDQK<br>KLMSNN  | 3.13 | 0.01 | 3.00 | 0.68 | 0.22 | 1.27 |
| 50496 | 0 | 139186 | NSELLSLINDMPITNDQK<br>KLMSNN  | 3.13 | 0.01 | 3.00 | 0.68 | 0.22 | 0.28 |
| 50497 | 0 | 139186 | NSELLSLINDMPITNDQK<br>KLMSNN  | 3.13 | 0.01 | 3.00 | 4.45 | 0.22 | 1.75 |
| 50498 | 0 | 139186 | NSELLSLINDMPITNDQK<br>KLMSNN  | 3.13 | 0.01 | 3.00 | 4.45 | 0.22 | 1.34 |
| 50499 | 0 | 139186 | NSELLSLINDMPITNDQK<br>KLMSNN  | 3.13 | 0.01 | 3.00 | 4.45 | 0.22 | 0.28 |
| 50500 | 0 | 139186 | NSELLSLINDMPITNDQK<br>KLMSNN  | 3.13 | 0.01 | 3.00 | 3.32 | 0.22 | 1.34 |
| 50501 | 0 | 139186 | NSELLSLINDMPITNDQK<br>KLMSNN  | 3.13 | 0.01 | 3.00 | 3.32 | 0.22 | 0.28 |
| 50502 | 0 | 139186 | NSELLSLINDMPITNDQK<br>KLMSNN  | 3.13 | 0.01 | 3.00 | 0.68 | 0.22 | 1.75 |
| 50503 | 0 | 139186 | NSELLSLINDMPITNDQK<br>KLMSNN  | 3.13 | 0.01 | 3.00 | 0.68 | 0.22 | 1.34 |
| 50504 | 0 | 139186 | NSELLSLINDMPITNDQK<br>KLMSNN  | 3.13 | 0.01 | 3.00 | 0.68 | 0.22 | 1.75 |
| 50505 | 0 | 139186 | NSELLSLINDMPITNDQK<br>KLMSNN  | 3.13 | 0.01 | 3.00 | 0.68 | 0.22 | 1.34 |
| 50506 | 0 | 139186 | NSELLSLINDMPITNDQK<br>KLMSNN  | 3.13 | 0.01 | 3.00 | 0.68 | 0.22 | 2.35 |
| 50507 | 0 | 139186 | NSELLSLINDMPITNDQK<br>KLMSNN  | 3.13 | 0.01 | 3.00 | 0.68 | 0.22 | 1.34 |
| 50508 | 0 | 139187 | NSELLSLINDMPITNDQK<br>KLMSNNC | 3.17 | 0.01 | 0.90 | 0.68 | 0.22 | 0.28 |
| 50509 | 0 | 139187 | NSELLSLINDMPITNDQK<br>KLMSNNC | 3.17 | 0.01 | 0.90 | 0.68 | 0.22 | 1.66 |
| 50510 | 0 | 139187 | NSELLSLINDMPITNDQK<br>KLMSNNC | 3.17 | 0.01 | 0.90 | 0.68 | 0.22 | 1.66 |



|       |   |        |                                        |      |      |      |      |      |      |
|-------|---|--------|----------------------------------------|------|------|------|------|------|------|
| 50511 | 0 | 139187 | NSELLSLINDMPITNDQK<br>KLMSNNC          | 3.17 | 0.01 | 0.90 | 0.68 | 0.22 | 1.66 |
| 50512 | 0 | 139188 | NSELLSLINDMPITNDQK<br>KLMSNNOC         | 3.20 | 0.01 | 0.90 | 0.68 | 0.22 | 0.28 |
| 50513 | 0 | 139188 | NSELLSLINDMPITNDQK<br>KLMSNNOC         | 3.20 | 0.01 | 0.90 | 0.68 | 0.22 | 1.66 |
| 50514 | 0 | 139188 | NSELLSLINDMPITNDQK<br>KLMSNNOC         | 3.20 | 0.01 | 0.90 | 0.68 | 0.22 | 1.66 |
| 50515 | 0 | 139188 | NSELLSLINDMPITNDQK<br>KLMSNNOC         | 3.20 | 0.01 | 0.90 | 0.68 | 0.22 | 1.66 |
| 50516 | 0 | 172565 | NSENGTCYPGDFIDYEEL<br>REQLVSSVSFEKFEIF | 3.45 | 0.01 | 4.23 | 2.13 | 0.22 | 0.28 |
| 50517 | 0 | 188390 | NSFTSAFLESQSMNK                        | 2.69 | 0.01 | 1.66 | 1.20 | 0.22 | 0.28 |
| 50518 | 0 | 45816  | NSGCFRHL                               | 2.10 | 0.01 | 1.66 | 1.15 | 0.22 | 0.28 |
| 50519 | 0 | 45817  | NSGCFRHLDEREECKCLL                     | 2.83 | 0.01 | 1.66 | 1.20 | 0.22 | 0.28 |
| 50520 | 0 | 45817  | NSGCFRHLDEREECKCLL                     | 2.83 | 0.01 | 1.66 | 2.43 | 0.22 | 0.28 |
| 50521 | 0 | 45817  | NSGCFRHLDEREECKCLL                     | 2.83 | 0.01 | 3.78 | 0.44 | 1.74 | 0.28 |
| 50522 | 0 | 45817  | NSGCFRHLDEREECKCLL                     | 2.83 | 0.01 | 3.78 | 0.44 | 1.74 | 0.28 |
| 50523 | 0 | 45817  | NSGCFRHLDEREECKCLL                     | 2.83 | 0.01 | 1.66 | 1.20 | 0.22 | 0.28 |
| 50524 | 0 | 45818  | NSGCFRHLDEREECKCLL<br>N                | 2.90 | 0.01 | 1.66 | 0.44 | 1.74 | 0.28 |
| 50525 | 0 | 45819  | NSGCFRHLDEREECKCLL<br>NYKQEGD          | 3.16 | 0.01 | 3.57 | 0.44 | 0.85 | 0.28 |
| 50526 | 0 | 45824  | NSGILKDFWGDYLYDK<br>PY                 | 2.89 | 0.01 | 3.03 | 0.68 | 0.22 | 1.57 |
| 50527 | 0 | 45824  | NSGILKDFWGDYLYDK<br>PY                 | 2.89 | 0.01 | 3.03 | 3.33 | 0.22 | 1.57 |
| 50528 | 0 | 45824  | NSGILKDFWGDYLYDK<br>PY                 | 2.89 | 0.01 | 2.08 | 2.02 | 0.22 | 1.57 |
| 50529 | 0 | 45824  | NSGILKDFWGDYLYDK<br>PY                 | 2.89 | 0.01 | 2.08 | 1.15 | 0.22 | 1.57 |
| 50530 | 0 | 45824  | NSGILKDFWGDYLYDK<br>PY                 | 2.89 | 0.01 | 2.08 | 2.49 | 0.22 | 1.57 |
| 50531 | 0 | 45824  | NSGILKDFWGDYLYDK<br>PY                 | 2.89 | 0.01 | 2.08 | 0.68 | 0.22 | 1.57 |
| 50532 | 0 | 45824  | NSGILKDFWGDYLYDK<br>PY                 | 2.89 | 0.01 | 2.08 | 0.68 | 0.22 | 1.57 |
| 50533 | 0 | 45824  | NSGILKDFWGDYLYDK<br>PY                 | 2.89 | 0.01 | 3.16 | 0.44 | 1.93 | 1.57 |
| 50534 | 0 | 45824  | NSGILKDFWGDYLYDK<br>PY                 | 2.89 | 0.01 | 2.08 | 1.15 | 0.22 | 1.57 |

|       |   |        |                               |      |      |      |      |      |      |
|-------|---|--------|-------------------------------|------|------|------|------|------|------|
| 50535 | 0 | 45824  | NSGILKDFWGDYLYQYDK<br>PY      | 2.89 | 0.01 | 2.08 | 2.02 | 0.22 | 1.57 |
| 50536 | 0 | 45824  | NSGILKDFWGDYLYQYDK<br>PY      | 2.89 | 0.01 | 2.08 | 2.25 | 0.22 | 1.57 |
| 50537 | 0 | 45824  | NSGILKDFWGDYLYQYDK<br>PY      | 2.89 | 0.01 | 2.08 | 0.68 | 0.22 | 1.57 |
| 50538 | 0 | 45824  | NSGILKDFWGDYLYQYDK<br>PY      | 2.89 | 0.01 | 2.08 | 0.68 | 0.22 | 1.27 |
| 50539 | 0 | 45824  | NSGILKDFWGDYLYQYDK<br>PY      | 2.89 | 0.01 | 2.08 | 2.25 | 0.22 | 1.27 |
| 50540 | 0 | 45824  | NSGILKDFWGDYLYQYDK<br>PY      | 2.89 | 0.01 | 2.08 | 2.25 | 0.22 | 1.57 |
| 50541 | 0 | 45824  | NSGILKDFWGDYLYQYDK<br>PY      | 2.89 | 0.01 | 2.08 | 2.25 | 0.22 | 1.57 |
| 50542 | 0 | 167349 | NSGMFVR                       | 1.99 | 0.01 | 0.90 | 1.15 | 0.22 | 1.39 |
| 50543 | 0 | 423449 | NSGNYFNDAKEESDS               | 2.70 | 0.01 | 2.51 | 0.44 | 2.35 | 1.28 |
| 50544 | 0 | 346241 | NSGTDGDESIDEEEE               | 2.70 | 0.01 | 1.61 | 0.44 | 0.85 | 1.28 |
| 50545 | 0 | 45833  | NSHAARDAW                     | 2.23 | 0.01 | 0.90 | 1.20 | 0.22 | 0.85 |
| 50546 | 0 | 45833  | NSHAARDAW                     | 2.23 | 0.01 | 0.90 | 1.20 | 0.22 | 0.85 |
| 50547 | 0 | 45834  | NSHCHTHADGEV                  | 2.45 | 0.01 | 2.69 | 1.20 | 0.22 | 0.28 |
| 50548 | 0 | 45834  | NSHCHTHADGEV                  | 2.45 | 0.01 | 2.69 | 0.68 | 0.22 | 0.28 |
| 50549 | 0 | 225450 | NSHNILIKVFENERNSLS            | 2.87 | 0.01 | 2.61 | 0.68 | 0.22 | 0.28 |
| 50550 | 0 | 225450 | NSHNILIKVFENERNSLS            | 2.87 | 0.01 | 2.61 | 0.68 | 0.22 | 0.28 |
| 50551 | 0 | 225450 | NSHNILIKVFENERNSLS            | 2.87 | 0.01 | 2.61 | 0.68 | 0.22 | 0.28 |
| 50552 | 0 | 186785 | NSIETDVSFDDNANP               | 2.68 | 0.01 | 3.36 | 1.20 | 0.22 | 0.85 |
| 50553 | 0 | 141064 | NSIGLTWQR                     | 2.18 | 0.01 | 4.03 | 2.00 | 0.22 | 0.28 |
| 50554 | 0 | 45847  | NSIILPPFSLAPVPPPATR<br>RRRA   | 3.08 | 0.01 | 3.01 | 0.44 | 1.59 | 0.28 |
| 50555 | 0 | 45850  | NSIYALNGRALVQV                | 2.68 | 0.01 | 2.72 | 0.44 | 1.23 | 0.85 |
| 50556 | 0 | 523259 | NSKAMVIVVVVNKGTGN<br>LELVAVRK | 3.13 | 0.01 | 2.16 | 0.44 | 1.23 | 1.39 |
| 50557 | 0 | 45875  | NSKGKMNTCHKVGNS               | 2.71 | 0.01 | 0.90 | 0.44 | 0.85 | 1.39 |
| 50558 | 0 | 45876  | NSKGQN                        | 1.91 | 0.01 | 1.96 | 0.44 | 0.85 | 0.28 |
| 50559 | 0 | 100358 | NSKKFIDIFK                    | 2.35 | 0.01 | 2.18 | 2.16 | 0.22 | 0.28 |
| 50560 | 0 | 45877  | NSKKIICTCKEPTPNAYYE<br>G      | 2.95 | 0.01 | 3.00 | 3.22 | 0.22 | 0.28 |
| 50561 | 0 | 45878  | NSKNPVPVKKEAKLSEA<br>EL       | 2.95 | 0.01 | 3.97 | 2.42 | 0.22 | 0.28 |
| 50562 | 0 | 45878  | NSKNPVPVKKEAKLSEA<br>EL       | 2.95 | 0.01 | 3.97 | 2.42 | 0.22 | 1.34 |
| 50563 | 0 | 45878  | NSKNPVPVKKEAKLSEA<br>EL       | 2.95 | 0.01 | 3.97 | 2.42 | 0.22 | 0.28 |

|       |   |        |                                 |      |      |      |      |      |      |
|-------|---|--------|---------------------------------|------|------|------|------|------|------|
| 50564 | 0 | 45878  | NSKNPVPVKKEAKLSEA<br>EL         | 2.95 | 0.01 | 3.97 | 2.42 | 0.22 | 1.34 |
| 50565 | 0 | 45878  | NSKNPVPVKKEAKLSEA<br>EL         | 2.95 | 0.01 | 3.97 | 2.42 | 0.22 | 0.28 |
| 50566 | 0 | 45878  | NSKNPVPVKKEAKLSEA<br>EL         | 2.95 | 0.01 | 3.97 | 2.42 | 0.22 | 0.28 |
| 50567 | 0 | 45878  | NSKNPVPVKKEAKLSEA<br>EL         | 2.95 | 0.01 | 3.97 | 2.42 | 0.22 | 0.28 |
| 50568 | 0 | 45878  | NSKNPVPVKKEAKLSEA<br>EL         | 2.95 | 0.01 | 2.24 | 0.68 | 0.22 | 0.28 |
| 50569 | 0 | 45878  | NSKNPVPVKKEAKLSEA<br>EL         | 2.95 | 0.01 | 2.24 | 0.68 | 0.22 | 0.28 |
| 50570 | 0 | 45878  | NSKNPVPVKKEAKLSEA<br>EL         | 2.95 | 0.01 | 2.24 | 0.68 | 0.22 | 1.27 |
| 50571 | 0 | 45878  | NSKNPVPVKKEAKLSEA<br>EL         | 2.95 | 0.01 | 2.24 | 0.68 | 0.22 | 0.28 |
| 50572 | 0 | 177896 | NSKNQSDINHSTSGS                 | 2.71 | 0.01 | 0.78 | 0.44 | 1.13 | 0.85 |
| 50573 | 0 | 123559 | NSKQAERE                        | 2.12 | 0.01 | 0.78 | 1.20 | 0.22 | 0.28 |
| 50574 | 0 | 230497 | NSKRNPIAKITSYQ                  | 2.67 | 0.01 | 0.78 | 0.44 | 1.13 | 0.28 |
| 50575 | 0 | 98301  | NSKSAYTPAY                      | 2.33 | 0.01 | 3.08 | 1.20 | 0.22 | 0.28 |
| 50576 | 0 | 45880  | NSKTPAPAPVPVKKEA<br>TK          | 2.95 | 0.01 | 3.78 | 2.42 | 0.22 | 0.28 |
| 50577 | 0 | 45880  | NSKTPAPAPVPVKKEA<br>TK          | 2.95 | 0.01 | 3.78 | 2.42 | 0.22 | 1.34 |
| 50578 | 0 | 45881  | NSKTPAPAPVPVKKEA<br>TKSKLSEAELH | 3.32 | 0.01 | 3.78 | 2.42 | 0.22 | 0.28 |
| 50579 | 0 | 45881  | NSKTPAPAPVPVKKEA<br>TKSKLSEAELH | 3.32 | 0.01 | 3.78 | 2.42 | 0.22 | 1.34 |
| 50580 | 0 | 45881  | NSKTPAPAPVPVKKEA<br>TKSKLSEAELH | 3.32 | 0.01 | 3.78 | 2.42 | 0.22 | 0.28 |
| 50581 | 0 | 45881  | NSKTPAPAPVPVKKEA<br>TKSKLSEAELH | 3.32 | 0.01 | 3.78 | 2.42 | 0.22 | 1.34 |
| 50582 | 0 | 45881  | NSKTPAPAPVPVKKEA<br>TKSKLSEAELH | 3.32 | 0.01 | 3.78 | 2.42 | 0.22 | 0.28 |
| 50583 | 0 | 45881  | NSKTPAPAPVPVKKEA<br>TKSKLSEAELH | 3.32 | 0.01 | 3.78 | 2.42 | 0.22 | 0.28 |
| 50584 | 0 | 45881  | NSKTPAPAPVPVKKEA<br>TKSKLSEAELH | 3.32 | 0.01 | 3.78 | 2.42 | 0.22 | 0.28 |
| 50585 | 0 | 45881  | NSKTPAPAPVPVKKEA<br>TKSKLSEAELH | 3.32 | 0.01 | 3.78 | 2.42 | 0.22 | 0.28 |
| 50586 | 0 | 45881  | NSKTPAPAPVPVKKEA<br>TKSKLSEAELH | 3.32 | 0.01 | 3.78 | 2.42 | 0.22 | 0.28 |
| 50587 | 0 | 45881  | NSKTPAPAPVPVKKEA<br>TKSKLSEAELH | 3.32 | 0.01 | 2.24 | 0.68 | 0.22 | 0.28 |
| 50588 | 0 | 45881  | NSKTPAPAPVPVKKEA<br>TKSKLSEAELH | 3.32 | 0.01 | 2.24 | 0.68 | 0.22 | 0.28 |

|       |   |        |                                                |      |      |      |      |      |      |
|-------|---|--------|------------------------------------------------|------|------|------|------|------|------|
| 50589 | 0 | 45881  | NSKTPAPAPAVPVKKEA<br>TKSKLSEAELH               | 3.32 | 0.01 | 2.24 | 0.68 | 0.22 | 1.27 |
| 50590 | 0 | 93510  | NSLDKLISSV                                     | 2.32 | 0.01 | 2.67 | 2.00 | 0.22 | 0.28 |
| 50591 | 0 | 93510  | NSLDKLISSV                                     | 2.32 | 0.01 | 2.67 | 2.00 | 0.22 | 0.28 |
| 50592 | 0 | 93510  | NSLDKLISSV                                     | 2.32 | 0.01 | 2.67 | 2.00 | 0.22 | 0.28 |
| 50593 | 0 | 45887  | NSLDYYKKVIIKLKNNIN<br>NMEEYTNNTNDINVLK<br>AHID | 3.62 | 0.01 | 2.22 | 0.44 | 1.74 | 0.28 |
| 50594 | 0 | 45887  | NSLDYYKKVIIKLKNNIN<br>NMEEYTNNTNDINVLK<br>AHID | 3.62 | 0.01 | 2.22 | 0.44 | 1.74 | 0.28 |
| 50595 | 0 | 45887  | NSLDYYKKVIIKLKNNIN<br>NMEEYTNNTNDINVLK<br>AHID | 3.62 | 0.01 | 1.66 | 0.44 | 1.59 | 0.28 |
| 50596 | 0 | 45894  | NSLILPPFSLSPVPTLGSR<br>SRRA                    | 3.10 | 0.01 | 2.04 | 0.44 | 0.85 | 0.28 |
| 50597 | 0 | 45894  | NSLILPPFSLSPVPTLGSR<br>SRRA                    | 3.10 | 0.01 | 2.04 | 0.44 | 1.59 | 0.28 |
| 50598 | 0 | 104159 | NSLLVSI                                        | 2.03 | 0.01 | 0.90 | 1.15 | 0.22 | 1.39 |
| 50599 | 0 | 172566 | NSLRADYDNLVLDYE                                | 2.71 | 0.01 | 0.78 | 0.44 | 1.41 | 0.28 |
| 50600 | 0 | 99515  | NSLSNHFRSQHS                                   | 2.52 | 0.01 | 0.90 | 1.12 | 0.22 | 1.39 |
| 50601 | 0 | 225451 | NSLTPCAKTRTAKC                                 | 2.63 | 0.01 | 0.90 | 0.68 | 0.22 | 0.28 |
| 50602 | 0 | 225452 | NSLTPCAREVTLLC                                 | 2.60 | 0.01 | 0.90 | 1.15 | 0.22 | 0.28 |
| 50603 | 0 | 225452 | NSLTPCAREVTLLC                                 | 2.60 | 0.01 | 0.90 | 0.68 | 0.22 | 0.28 |
| 50604 | 0 | 225452 | NSLTPCAREVTLLC                                 | 2.60 | 0.01 | 0.90 | 1.15 | 0.22 | 1.75 |
| 50605 | 0 | 225453 | NSLTPCCKSLRPHC                                 | 2.63 | 0.01 | 0.90 | 1.15 | 0.22 | 0.28 |
| 50606 | 0 | 225453 | NSLTPCCKSLRPHC                                 | 2.63 | 0.01 | 0.90 | 0.68 | 0.22 | 0.28 |
| 50607 | 0 | 225453 | NSLTPCCKSLRPHC                                 | 2.63 | 0.01 | 0.90 | 1.15 | 0.22 | 1.75 |
| 50608 | 0 | 225454 | NSLTPCDRILSPSC                                 | 2.63 | 0.01 | 0.90 | 1.15 | 0.22 | 0.28 |
| 50609 | 0 | 225454 | NSLTPCDRILSPSC                                 | 2.63 | 0.01 | 0.90 | 1.15 | 0.22 | 1.75 |
| 50610 | 0 | 225455 | NSLTPCDTKKNHCC                                 | 2.61 | 0.01 | 0.90 | 0.68 | 0.22 | 0.28 |
| 50611 | 0 | 225456 | NSLTPCDTTIANCC                                 | 2.61 | 0.01 | 0.90 | 1.15 | 0.22 | 0.28 |
| 50612 | 0 | 225456 | NSLTPCDTTIANCC                                 | 2.61 | 0.01 | 0.90 | 1.15 | 0.22 | 1.75 |
| 50613 | 0 | 225457 | NSLTPCFTVARACC                                 | 2.59 | 0.01 | 0.90 | 0.68 | 0.22 | 0.28 |
| 50614 | 0 | 225458 | NSLTPCGAESLTPC                                 | 2.63 | 0.01 | 0.90 | 0.68 | 0.22 | 0.28 |
| 50615 | 0 | 225459 | NSLTPCGPKRKATC                                 | 2.61 | 0.01 | 0.90 | 0.68 | 0.22 | 0.28 |
| 50616 | 0 | 225460 | NSLTPCGRTRDN                                   | 2.48 | 0.01 | 0.90 | 1.15 | 0.22 | 0.28 |
| 50617 | 0 | 225460 | NSLTPCGRTRDN                                   | 2.48 | 0.01 | 0.90 | 0.68 | 0.22 | 0.28 |
| 50618 | 0 | 225460 | NSLTPCGRTRDN                                   | 2.48 | 0.01 | 0.90 | 1.15 | 0.22 | 1.75 |
| 50619 | 0 | 225461 | NSLTPCGSESLTPC                                 | 2.65 | 0.01 | 0.90 | 0.68 | 0.22 | 0.28 |
| 50620 | 0 | 225462 | NSLTPCGSNSLTPC                                 | 2.67 | 0.01 | 0.90 | 1.15 | 0.22 | 0.28 |
| 50621 | 0 | 225462 | NSLTPCGSNSLTPC                                 | 2.67 | 0.01 | 0.90 | 1.15 | 0.22 | 1.75 |
| 50622 | 0 | 225463 | NSLTPCKTRKSGSC                                 | 2.63 | 0.01 | 0.90 | 0.68 | 0.22 | 0.28 |
| 50623 | 0 | 225464 | NSLTPCLGRVLANC                                 | 2.62 | 0.01 | 0.90 | 0.68 | 0.22 | 0.28 |
| 50624 | 0 | 225465 | NSLTPCNICARQYC                                 | 2.60 | 0.01 | 0.90 | 0.68 | 0.22 | 0.28 |
| 50625 | 0 | 45913  | NSLTPCNNKPSNRC                                 | 2.65 | 0.01 | 0.90 | 0.68 | 0.22 | 1.27 |
| 50626 | 0 | 45913  | NSLTPCNNKPSNRC                                 | 2.65 | 0.01 | 0.90 | 0.68 | 0.22 | 1.66 |

|       |   |        |                          |      |      |      |      |      |      |
|-------|---|--------|--------------------------|------|------|------|------|------|------|
| 50627 | 0 | 225466 | NSLTPCPYPRKGSC           | 2.61 | 0.01 | 0.90 | 0.68 | 0.22 | 0.28 |
| 50628 | 0 | 225467 | NSLTPCRFLRRTVC           | 2.62 | 0.01 | 0.90 | 0.68 | 0.22 | 0.28 |
| 50629 | 0 | 225468 | NSLTPCRGRTHPLC           | 2.63 | 0.01 | 0.90 | 0.68 | 0.22 | 0.28 |
| 50630 | 0 | 225469 | NSLTPCRGRTLHLC           | 2.63 | 0.01 | 0.90 | 0.68 | 0.22 | 0.28 |
| 50631 | 0 | 225470 | NSLTPCRTKKSGTC           | 2.62 | 0.01 | 0.90 | 0.68 | 0.22 | 0.28 |
| 50632 | 0 | 225471 | NSLTPCSGLLVANC           | 2.63 | 0.01 | 0.90 | 0.68 | 0.22 | 0.28 |
| 50633 | 0 | 225472 | NSLTPCSKKNPGNC           | 2.64 | 0.01 | 0.90 | 0.68 | 0.22 | 0.28 |
| 50634 | 0 | 225473 | NSLTPCSREVTLIC           | 2.62 | 0.01 | 0.90 | 1.15 | 0.22 | 0.28 |
| 50635 | 0 | 225473 | NSLTPCSREVTLIC           | 2.62 | 0.01 | 0.90 | 1.15 | 0.22 | 1.75 |
| 50636 | 0 | 225474 | NSLTPCSTKRKPNC           | 2.65 | 0.01 | 0.90 | 1.15 | 0.22 | 0.28 |
| 50637 | 0 | 225474 | NSLTPCSTKRKPNC           | 2.65 | 0.01 | 0.90 | 1.15 | 0.22 | 1.75 |
| 50638 | 0 | 225475 | NSLTPCTKPKRNNC           | 2.64 | 0.01 | 0.90 | 1.15 | 0.22 | 1.75 |
| 50639 | 0 | 225476 | NSLTPCTPKKSGRC           | 2.62 | 0.01 | 0.90 | 1.15 | 0.22 | 0.28 |
| 50640 | 0 | 225476 | NSLTPCTPKKSGRC           | 2.62 | 0.01 | 0.90 | 1.15 | 0.22 | 1.75 |
| 50641 | 0 | 225477 | NSLTPCTTSSLTDC           | 2.65 | 0.01 | 0.90 | 1.15 | 0.22 | 0.28 |
| 50642 | 0 | 225477 | NSLTPCTTSSLTDC           | 2.65 | 0.01 | 0.90 | 1.15 | 0.22 | 1.75 |
| 50643 | 0 | 225478 | NSLTPCVPKKNRTC           | 2.63 | 0.01 | 0.90 | 0.68 | 0.22 | 0.28 |
| 50644 | 0 | 225479 | NSLTPCVRNSLTPC           | 2.65 | 0.01 | 0.90 | 0.68 | 0.22 | 0.28 |
| 50645 | 0 | 118940 | NSMFPSCCCTKP             | 2.47 | 0.01 | 2.08 | 0.68 | 0.22 | 0.28 |
| 50646 | 0 | 45922  | NSNDKSGS                 | 2.17 | 0.01 | 3.45 | 0.44 | 0.85 | 0.28 |
| 50647 | 0 | 523265 | NSNDMIKLAPKEMPL          | 2.69 | 0.01 | 2.24 | 0.44 | 1.41 | 1.28 |
| 50648 | 0 | 79031  | NSNGCVYSESFGLGGIG<br>VLT | 2.96 | 0.01 | 2.84 | 0.44 | 0.85 | 0.28 |
| 50649 | 0 | 152872 | NSNKIRLEKGRLYQ           | 2.62 | 0.01 | 2.18 | 0.44 | 0.22 | 0.28 |
| 50650 | 0 | 173951 | NSNKNDHLFASW             | 2.48 | 0.01 | 0.90 | 0.68 | 0.22 | 0.28 |
| 50651 | 0 | 173951 | NSNKNDHLFASW             | 2.48 | 0.01 | 0.90 | 1.20 | 0.22 | 0.28 |
| 50652 | 0 | 173951 | NSNKNDHLFASW             | 2.48 | 0.01 | 0.90 | 1.20 | 0.22 | 0.28 |
| 50653 | 0 | 173951 | NSNKNDHLFASW             | 2.48 | 0.01 | 0.90 | 1.20 | 0.22 | 0.28 |
| 50654 | 0 | 173951 | NSNKNDHLFASW             | 2.48 | 0.01 | 0.90 | 1.20 | 0.22 | 0.28 |
| 50655 | 0 | 173951 | NSNKNDHLFASW             | 2.48 | 0.01 | 0.90 | 1.20 | 2.25 | 1.75 |
| 50656 | 0 | 173951 | NSNKNDHLFASW             | 2.48 | 0.01 | 0.90 | 0.68 | 0.22 | 0.85 |
| 50657 | 0 | 173951 | NSNKNDHLFASW             | 2.48 | 0.01 | 0.90 | 0.68 | 0.22 | 0.85 |
| 50658 | 0 | 45931  | NSNNKEYT                 | 2.14 | 0.01 | 3.17 | 1.12 | 0.22 | 1.34 |
| 50659 | 0 | 45931  | NSNNKEYT                 | 2.14 | 0.01 | 3.17 | 2.37 | 0.22 | 0.28 |
| 50660 | 0 | 45932  | NSNNPDWDF                | 2.25 | 0.01 | 3.07 | 1.15 | 0.22 | 0.85 |
| 50661 | 0 | 45932  | NSNNPDWDF                | 2.25 | 0.01 | 3.07 | 1.15 | 0.22 | 1.34 |
| 50662 | 0 | 45932  | NSNNPDWDF                | 2.25 | 0.01 | 2.08 | 0.68 | 0.22 | 1.27 |
| 50663 | 0 | 45932  | NSNNPDWDF                | 2.25 | 0.01 | 2.08 | 1.15 | 0.22 | 2.49 |
| 50664 | 0 | 45932  | NSNNPDWDF                | 2.25 | 0.01 | 2.08 | 1.15 | 0.22 | 1.66 |
| 50665 | 0 | 45932  | NSNNPDWDF                | 2.25 | 0.01 | 3.07 | 0.68 | 0.22 | 1.66 |
| 50666 | 0 | 45932  | NSNNPDWDF                | 2.25 | 0.01 | 3.07 | 0.68 | 0.22 | 1.66 |
| 50667 | 0 | 45932  | NSNNPDWDF                | 2.25 | 0.01 | 3.07 | 0.68 | 0.22 | 1.66 |
| 50668 | 0 | 45932  | NSNNPDWDF                | 2.25 | 0.01 | 3.07 | 0.68 | 0.22 | 1.66 |
| 50669 | 0 | 45932  | NSNNPDWDF                | 2.25 | 0.01 | 3.07 | 0.68 | 0.22 | 1.66 |
| 50670 | 0 | 45932  | NSNNPDWDF                | 2.25 | 0.01 | 3.07 | 0.68 | 0.22 | 1.66 |
| 50671 | 0 | 45932  | NSNNPDWDF                | 2.25 | 0.01 | 3.07 | 0.68 | 0.22 | 1.66 |
| 50672 | 0 | 45932  | NSNNPDWDF                | 2.25 | 0.01 | 3.07 | 0.68 | 0.22 | 1.66 |

|       |   |        |                 |      |      |      |      |      |      |
|-------|---|--------|-----------------|------|------|------|------|------|------|
| 50673 | 0 | 45932  | NSNNPDWDF       | 2.25 | 0.01 | 3.07 | 0.68 | 0.22 | 1.66 |
| 50674 | 0 | 45932  | NSNNPDWDF       | 2.25 | 0.01 | 3.07 | 0.68 | 0.22 | 1.66 |
| 50675 | 0 | 45932  | NSNNPDWDF       | 2.25 | 0.01 | 3.07 | 0.68 | 0.22 | 1.66 |
| 50676 | 0 | 45932  | NSNNPDWDF       | 2.25 | 0.01 | 3.07 | 0.68 | 0.22 | 1.66 |
| 50677 | 0 | 45932  | NSNNPDWDF       | 2.25 | 0.01 | 3.07 | 0.68 | 0.22 | 1.27 |
| 50678 | 0 | 45932  | NSNNPDWDF       | 2.25 | 0.01 | 3.07 | 0.68 | 0.22 | 0.28 |
| 50679 | 0 | 45932  | NSNNPDWDF       | 2.25 | 0.01 | 3.07 | 0.68 | 0.22 | 2.12 |
| 50680 | 0 | 45932  | NSNNPDWDF       | 2.25 | 0.01 | 3.07 | 0.68 | 0.22 | 0.28 |
| 50681 | 0 | 45932  | NSNNPDWDF       | 2.25 | 0.01 | 3.07 | 0.68 | 0.22 | 0.28 |
| 50682 | 0 | 45932  | NSNNPDWDF       | 2.25 | 0.01 | 3.07 | 0.68 | 0.22 | 1.34 |
| 50683 | 0 | 45932  | NSNNPDWDF       | 2.25 | 0.01 | 3.07 | 0.68 | 0.22 | 1.34 |
| 50684 | 0 | 419299 | NSNQMPQDFAFP    | 2.50 | 0.01 | 0.90 | 0.44 | 1.93 | 1.27 |
| 50685 | 0 | 510463 | NSNWKTFGGWPS    | 2.49 | 0.01 | 0.90 | 3.07 | 1.13 | 1.39 |
| 50686 | 0 | 450892 | NSPELTS         | 2.02 | 0.01 | 0.90 | 0.44 | 1.23 | 1.39 |
| 50687 | 0 | 153434 | NSPFMLHSALSGGGS | 2.68 | 0.01 | 0.90 | 0.68 | 0.22 | 1.27 |
| 50688 | 0 | 153434 | NSPFMLHSALSGGGS | 2.68 | 0.01 | 0.90 | 0.68 | 0.22 | 0.28 |
| 50689 | 0 | 510464 | NSPFQLF         | 2.02 | 0.01 | 0.90 | 0.44 | 1.13 | 0.28 |
| 50690 | 0 | 510464 | NSPFQLF         | 2.02 | 0.01 | 0.90 | 0.44 | 1.41 | 0.28 |
| 50691 | 0 | 131990 | NSPLRIGGGWGNSDA | 2.68 | 0.01 | 0.78 | 0.44 | 1.13 | 0.85 |
| 50692 | 0 | 181236 | NSPQRER         | 2.02 | 0.01 | 2.94 | 0.68 | 0.22 | 1.27 |
| 50693 | 0 | 181236 | NSPQRER         | 2.02 | 0.01 | 2.94 | 0.68 | 0.22 | 0.28 |
| 50694 | 0 | 181236 | NSPQRER         | 2.02 | 0.01 | 2.94 | 0.68 | 0.22 | 0.28 |
| 50695 | 0 | 181236 | NSPQRER         | 2.02 | 0.01 | 2.94 | 0.68 | 0.22 | 0.28 |
| 50696 | 0 | 181236 | NSPQRER         | 2.02 | 0.01 | 2.94 | 0.68 | 0.22 | 1.66 |
| 50697 | 0 | 181236 | NSPQRER         | 2.02 | 0.01 | 2.94 | 0.68 | 0.22 | 1.66 |
| 50698 | 0 | 181236 | NSPQRER         | 2.02 | 0.01 | 2.94 | 0.68 | 0.22 | 1.66 |
| 50699 | 0 | 181236 | NSPQRER         | 2.02 | 0.01 | 2.94 | 0.68 | 0.22 | 1.66 |
| 50700 | 0 | 181236 | NSPQRER         | 2.02 | 0.01 | 2.94 | 0.68 | 0.22 | 1.66 |
| 50701 | 0 | 181236 | NSPQRER         | 2.02 | 0.01 | 2.94 | 0.68 | 0.22 | 1.66 |
| 50702 | 0 | 181236 | NSPQRER         | 2.02 | 0.01 | 2.94 | 0.68 | 0.22 | 1.66 |
| 50703 | 0 | 181236 | NSPQRER         | 2.02 | 0.01 | 2.94 | 0.68 | 0.22 | 1.66 |
| 50704 | 0 | 181236 | NSPQRER         | 2.02 | 0.01 | 2.94 | 0.68 | 0.22 | 1.66 |
| 50705 | 0 | 181236 | NSPQRER         | 2.02 | 0.01 | 2.94 | 0.68 | 0.22 | 1.66 |
| 50706 | 0 | 181236 | NSPQRER         | 2.02 | 0.01 | 2.94 | 0.68 | 0.22 | 1.66 |
| 50707 | 0 | 181236 | NSPQRER         | 2.02 | 0.01 | 2.94 | 0.68 | 0.22 | 1.66 |
| 50708 | 0 | 181236 | NSPQRER         | 2.02 | 0.01 | 2.94 | 0.68 | 0.22 | 1.66 |
| 50709 | 0 | 181236 | NSPQRER         | 2.02 | 0.01 | 2.94 | 0.68 | 0.22 | 1.66 |
| 50710 | 0 | 181236 | NSPQRER         | 2.02 | 0.01 | 2.94 | 0.68 | 0.22 | 1.66 |
| 50711 | 0 | 181236 | NSPQRER         | 2.02 | 0.01 | 2.94 | 0.68 | 0.22 | 1.66 |
| 50712 | 0 | 181236 | NSPQRER         | 2.02 | 0.01 | 2.94 | 0.68 | 0.22 | 1.66 |
| 50713 | 0 | 181236 | NSPQRER         | 2.02 | 0.01 | 2.94 | 0.68 | 0.22 | 1.66 |
| 50714 | 0 | 181236 | NSPQRER         | 2.02 | 0.01 | 2.94 | 0.68 | 0.22 | 1.66 |
| 50715 | 0 | 181236 | NSPQRER         | 2.02 | 0.01 | 2.94 | 0.68 | 0.22 | 1.66 |
| 50716 | 0 | 181236 | NSPQRER         | 2.02 | 0.01 | 2.94 | 0.68 | 0.22 | 1.66 |
| 50717 | 0 | 181236 | NSPQRER         | 2.02 | 0.01 | 2.94 | 0.68 | 0.22 | 1.66 |
| 50718 | 0 | 181236 | NSPQRER         | 2.02 | 0.01 | 2.94 | 0.68 | 0.22 | 1.66 |

|       |   |        |                           |      |      |      |      |      |      |
|-------|---|--------|---------------------------|------|------|------|------|------|------|
| 50719 | 0 | 181236 | NSPQRER                   | 2.02 | 0.01 | 2.94 | 0.68 | 0.22 | 1.66 |
| 50720 | 0 | 181236 | NSPQRER                   | 2.02 | 0.01 | 2.94 | 0.68 | 0.22 | 1.48 |
| 50721 | 0 | 45940  | NSPTKHGRVSND              | 2.46 | 0.01 | 0.90 | 0.68 | 0.22 | 1.39 |
| 50722 | 0 | 243824 | NSQCIRWVTPPTQIV           | 2.67 | 0.01 | 0.78 | 0.44 | 1.13 | 0.28 |
| 50723 | 0 | 243824 | NSQCIRWVTPPTQIV           | 2.67 | 0.01 | 0.78 | 0.44 | 1.41 | 0.28 |
| 50724 | 0 | 118545 | NSQDGYVWQVTDMNR<br>LHRFLC | 2.95 | 0.01 | 0.78 | 0.44 | 1.13 | 0.28 |
| 50725 | 0 | 118545 | NSQDGYVWQVTDMNR<br>LHRFLC | 2.95 | 0.01 | 0.78 | 0.44 | 1.13 | 0.28 |
| 50726 | 0 | 95640  | NSQDHGWDLN                | 2.32 | 0.01 | 2.60 | 0.44 | 1.23 | 0.85 |
| 50727 | 0 | 187903 | NSQHPELKCAGVTVSK          | 2.69 | 0.01 | 2.72 | 2.13 | 2.39 | 1.27 |
| 50728 | 0 | 45948  | NSQLRLNYEKS               | 2.50 | 0.01 | 0.90 | 0.68 | 0.22 | 0.28 |
| 50729 | 0 | 45950  | NSQLTKSPSMKHRVE           | 2.64 | 0.01 | 0.90 | 2.02 | 0.22 | 0.28 |
| 50730 | 0 | 120849 | NSQPEILERTRAELD           | 2.66 | 0.01 | 1.75 | 1.81 | 0.22 | 1.57 |
| 50731 | 0 | 120849 | NSQPEILERTRAELD           | 2.66 | 0.01 | 1.75 | 1.81 | 0.22 | 1.57 |
| 50732 | 0 | 120849 | NSQPEILERTRAELD           | 2.66 | 0.01 | 1.75 | 1.81 | 0.22 | 1.75 |
| 50733 | 0 | 120849 | NSQPEILERTRAELD           | 2.66 | 0.01 | 1.75 | 1.81 | 0.22 | 1.75 |
| 50734 | 0 | 120849 | NSQPEILERTRAELD           | 2.66 | 0.01 | 1.75 | 1.81 | 0.22 | 1.75 |
| 50735 | 0 | 120849 | NSQPEILERTRAELD           | 2.66 | 0.01 | 1.75 | 1.81 | 0.22 | 1.75 |
| 50736 | 0 | 120849 | NSQPEILERTRAELD           | 2.66 | 0.01 | 1.75 | 1.81 | 0.22 | 1.75 |
| 50737 | 0 | 120849 | NSQPEILERTRAELD           | 2.66 | 0.01 | 1.75 | 1.81 | 0.22 | 1.75 |
| 50738 | 0 | 120849 | NSQPEILERTRAELD           | 2.66 | 0.01 | 1.75 | 0.68 | 0.22 | 1.57 |
| 50739 | 0 | 120849 | NSQPEILERTRAELD           | 2.66 | 0.01 | 1.75 | 0.68 | 0.22 | 1.27 |
| 50740 | 0 | 120849 | NSQPEILERTRAELD           | 2.66 | 0.01 | 1.75 | 0.68 | 0.22 | 1.57 |
| 50741 | 0 | 120849 | NSQPEILERTRAELD           | 2.66 | 0.01 | 1.75 | 0.68 | 0.22 | 1.27 |
| 50742 | 0 | 120849 | NSQPEILERTRAELD           | 2.66 | 0.01 | 1.75 | 0.68 | 0.22 | 1.27 |
| 50743 | 0 | 120849 | NSQPEILERTRAELD           | 2.66 | 0.01 | 1.75 | 0.68 | 0.22 | 1.75 |
| 50744 | 0 | 120849 | NSQPEILERTRAELD           | 2.66 | 0.01 | 1.75 | 0.68 | 0.22 | 1.75 |
| 50745 | 0 | 120849 | NSQPEILERTRAELD           | 2.66 | 0.01 | 1.75 | 0.68 | 0.22 | 1.75 |
| 50746 | 0 | 120849 | NSQPEILERTRAELD           | 2.66 | 0.01 | 1.75 | 0.68 | 0.22 | 1.75 |
| 50747 | 0 | 120849 | NSQPEILERTRAELD           | 2.66 | 0.01 | 1.75 | 0.68 | 0.22 | 1.75 |
| 50748 | 0 | 120849 | NSQPEILERTRAELD           | 2.66 | 0.01 | 1.75 | 0.68 | 0.22 | 1.75 |
| 50749 | 0 | 120849 | NSQPEILERTRAELD           | 2.66 | 0.01 | 1.75 | 0.68 | 0.22 | 1.75 |
| 50750 | 0 | 120849 | NSQPEILERTRAELD           | 2.66 | 0.01 | 1.75 | 0.68 | 0.22 | 1.75 |
| 50751 | 0 | 120849 | NSQPEILERTRAELD           | 2.66 | 0.01 | 1.75 | 0.68 | 0.22 | 1.75 |
| 50752 | 0 | 120849 | NSQPEILERTRAELD           | 2.66 | 0.01 | 1.75 | 0.68 | 0.22 | 1.75 |
| 50753 | 0 | 120849 | NSQPEILERTRAELD           | 2.66 | 0.01 | 1.75 | 0.68 | 0.22 | 1.75 |
| 50754 | 0 | 120849 | NSQPEILERTRAELD           | 2.66 | 0.01 | 1.75 | 1.81 | 0.22 | 1.57 |
| 50755 | 0 | 120849 | NSQPEILERTRAELD           | 2.66 | 0.01 | 1.75 | 1.81 | 0.22 | 1.57 |
| 50756 | 0 | 120849 | NSQPEILERTRAELD           | 2.66 | 0.01 | 1.75 | 1.81 | 2.25 | 1.75 |
| 50757 | 0 | 120849 | NSQPEILERTRAELD           | 2.66 | 0.01 | 1.75 | 1.81 | 0.22 | 1.75 |
| 50758 | 0 | 120849 | NSQPEILERTRAELD           | 2.66 | 0.01 | 1.75 | 1.81 | 0.22 | 1.75 |
| 50759 | 0 | 120849 | NSQPEILERTRAELD           | 2.66 | 0.01 | 1.75 | 1.81 | 0.22 | 1.75 |
| 50760 | 0 | 120849 | NSQPEILERTRAELD           | 2.66 | 0.01 | 1.75 | 1.81 | 0.22 | 1.75 |
| 50761 | 0 | 120849 | NSQPEILERTRAELD           | 2.66 | 0.01 | 1.75 | 1.81 | 0.22 | 1.75 |
| 50762 | 0 | 120849 | NSQPEILERTRAELD           | 2.66 | 0.01 | 1.75 | 1.81 | 0.22 | 1.75 |

|       |   |        |                                                                                                                                                                                                                                                                                                                                 |      |      |      |      |      |      |
|-------|---|--------|---------------------------------------------------------------------------------------------------------------------------------------------------------------------------------------------------------------------------------------------------------------------------------------------------------------------------------|------|------|------|------|------|------|
| 50763 | 0 | 120849 | NSQPEILERTRAELD<br>NSRDDSTCIKVKNRRLP<br>YVADKDSISQEIFENKIIT<br>DETNVQNYSDKFSLDESI<br>LDGQVPINPEIVDPLLPN<br>VNMEPLNLPGEEIVFYD<br>DITKYVDYLSYYYYLESQ<br>KLSNNVENITLTTSVEEA<br>LGYSNKIYTFPLSLAEKV<br>NKGVQAGLFLNWANEV<br>VEDFTTNIMKKDLDKIS<br>DVSVIIPYIGPALNIGNSA<br>LRGNFNQAFATAGVAFL<br>LEGFPEFTIPALGVFTFYS                      | 2.66 | 0.01 | 1.75 | 1.81 | 0.22 | 1.75 |
| 50764 | 0 | 45956  | SIQEREKIKTIENTCLEQR<br>VKRWKDSYQWMVSN<br>WLSRITTQFNHINYQMY<br>DSLSYQADAIKAKIDLEY<br>KKYSGSDKENIKSQVENL<br>KNSLDVKISEAMNNINK<br>FIRECSVTYLFKNMLPKV<br>IDELNKFDLRTKTELINLI<br>DSHNILVGEVDRLKAKV<br>NESFENTMPFNIFSYPN<br>NSLLKDIINEYFNSINDSK<br>ILSLQNKKNALVDTSKY<br>NAEVRVGDNVQLNTIYT<br>NDFKLSSSGDKIIVNLNN<br>NLLVCAVEMCCVCEMVKI | 6.20 | 0.01 | 4.15 | 1.12 | 0.22 | 1.34 |



|       |   |       |                     |      |      |      |      |      |      |
|-------|---|-------|---------------------|------|------|------|------|------|------|
|       |   |       | NSRDDSTCIKVKNRRLP   |      |      |      |      |      |      |
|       |   |       | YVADKDSISQEIFENKIIT |      |      |      |      |      |      |
|       |   |       | DETNVQNYSDKFSLDESI  |      |      |      |      |      |      |
|       |   |       | LDGQVPINPEIVDPLLPN  |      |      |      |      |      |      |
|       |   |       | VNMEPLNLPGEEIVFYD   |      |      |      |      |      |      |
|       |   |       | DITKYVDYLSYYYLESQ   |      |      |      |      |      |      |
|       |   |       | KLSNNVENITLTTSVEEA  |      |      |      |      |      |      |
|       |   |       | LGYSNKIYTFPLSLAEKV  |      |      |      |      |      |      |
|       |   |       | NKGVQAGLFLNWANEV    |      |      |      |      |      |      |
|       |   |       | VEDFTTNIMKKDTLDKIS  |      |      |      |      |      |      |
|       |   |       | DVSVIIPYIGPALNIGNSA |      |      |      |      |      |      |
|       |   |       | LRGNFNQAFATAGVAFL   |      |      |      |      |      |      |
|       |   |       | LEGFPEFTIPALGVFTFYS |      |      |      |      |      |      |
| 50765 | 0 | 45956 | SIQEREKIIKTIENCLEQR | 6.20 | 0.01 | 4.15 | 0.68 | 0.22 | 0.28 |
|       |   |       | VKRWKDSYQWMVSN      |      |      |      |      |      |      |
|       |   |       | WLSRITTQFNHINYQMY   |      |      |      |      |      |      |
|       |   |       | DSLSYQADAIKAKIDLEY  |      |      |      |      |      |      |
|       |   |       | KKYSGSDKENIKSQVENL  |      |      |      |      |      |      |
|       |   |       | KNSLDVKISEAMNNINK   |      |      |      |      |      |      |
|       |   |       | FIRECSVTYLFKNMLPKV  |      |      |      |      |      |      |
|       |   |       | IDELNKFDLRTKTELINLI |      |      |      |      |      |      |
|       |   |       | DSHNILVGEVDRLKAKV   |      |      |      |      |      |      |
|       |   |       | NESFENTMPFNIFSITN   |      |      |      |      |      |      |
|       |   |       | NSLLKDIINEYFNSINDSK |      |      |      |      |      |      |
|       |   |       | ILSLQNKKNALVDTSKY   |      |      |      |      |      |      |
|       |   |       | NAEVRVGDNVQLNTIYT   |      |      |      |      |      |      |
|       |   |       | NDFKLSSSGDKIIVNLNN  |      |      |      |      |      |      |
|       |   |       | ALLVCANENCSVCEMUKI  |      |      |      |      |      |      |

|       |   |       |                     |      |      |      |      |      |      |
|-------|---|-------|---------------------|------|------|------|------|------|------|
|       |   |       | NSRDDSTCIKVKNRLP    |      |      |      |      |      |      |
|       |   |       | YVADKDSISQEIFENKIIT |      |      |      |      |      |      |
|       |   |       | DETNVQNYSDKFSLDESI  |      |      |      |      |      |      |
|       |   |       | LDGQVPINPEIVDPLLPN  |      |      |      |      |      |      |
|       |   |       | VNMEPLNLPGEEIVFYD   |      |      |      |      |      |      |
|       |   |       | DITKYVDYLSYYYLESQ   |      |      |      |      |      |      |
|       |   |       | KLSNNVENITLTTSVEEA  |      |      |      |      |      |      |
|       |   |       | LGYSNKIYTFPLSLAEKV  |      |      |      |      |      |      |
|       |   |       | NKGVQAGFLNWANEV     |      |      |      |      |      |      |
|       |   |       | VEDFTTNIMKKDTLDKIS  |      |      |      |      |      |      |
|       |   |       | DVSVIIPYIGPALNIGNSA |      |      |      |      |      |      |
|       |   |       | LRGNFNQAFATAGVAFL   |      |      |      |      |      |      |
|       |   |       | LEGFPEFTIPALGVFTFYS |      |      |      |      |      |      |
| 50766 | 0 | 45956 | SIQEREKIIKTIENCLEQR | 6.20 | 0.01 | 4.15 | 0.68 | 0.22 | 1.34 |
|       |   |       | VKRWKDSYQWMVSN      |      |      |      |      |      |      |
|       |   |       | WLSRITTQFNHINYQMY   |      |      |      |      |      |      |
|       |   |       | DSLSYQADAIKAKIDLEY  |      |      |      |      |      |      |
|       |   |       | KKYSGSDKENIKSQVENL  |      |      |      |      |      |      |
|       |   |       | KNSLDVKISEAMNNINK   |      |      |      |      |      |      |
|       |   |       | FIRECSVTYLFKNMLPKV  |      |      |      |      |      |      |
|       |   |       | IDELNKFDLRTKTELINLI |      |      |      |      |      |      |
|       |   |       | DSHNILVGEVDRLKAKV   |      |      |      |      |      |      |
|       |   |       | NESFENTMPFNIFSYTN   |      |      |      |      |      |      |
|       |   |       | NSLLKDIINEYFNSINDSK |      |      |      |      |      |      |
|       |   |       | ILSLQNKKNALVDTSKY   |      |      |      |      |      |      |
|       |   |       | NAEVRVGDNVQLNTIYT   |      |      |      |      |      |      |
|       |   |       | NDFKLSSSGDKIIVNLNN  |      |      |      |      |      |      |
|       |   |       | ALLVCANENCSVCEMUKI  |      |      |      |      |      |      |

|       |   |        |                     |      |      |      |      |      |      |
|-------|---|--------|---------------------|------|------|------|------|------|------|
|       |   |        | NSRDDSTCIKVKNRRLP   |      |      |      |      |      |      |
|       |   |        | YVADKDSISQEIFENKIIT |      |      |      |      |      |      |
|       |   |        | DETNVQNYSDKFSLDESI  |      |      |      |      |      |      |
|       |   |        | LDGQVPINPEIVDPLLPN  |      |      |      |      |      |      |
|       |   |        | VNMEPLNLPGEEIVFYD   |      |      |      |      |      |      |
|       |   |        | DITKYVDYLSYYYLESQ   |      |      |      |      |      |      |
|       |   |        | KLSNNVENITLTTSVEEA  |      |      |      |      |      |      |
|       |   |        | LGYSNKIYTFLPSLAEKV  |      |      |      |      |      |      |
|       |   |        | NKGVQAGLFLNWANEV    |      |      |      |      |      |      |
|       |   |        | VEDFTTNIMKKDTLDKIS  |      |      |      |      |      |      |
|       |   |        | DVSVIIPYIGPALNIGNSA |      |      |      |      |      |      |
|       |   |        | LRGNFNQAFATAGVAFL   |      |      |      |      |      |      |
|       |   |        | LEGFPEFTIPALGVFTFYS |      |      |      |      |      |      |
| 50767 | 0 | 45956  | SIQEREKIIKTIENCLEQR | 6.20 | 0.01 | 4.63 | 1.12 | 0.22 | 0.28 |
|       |   |        | VKRWKDSYQWMVSN      |      |      |      |      |      |      |
|       |   |        | WLSRITTQFNHINYQMY   |      |      |      |      |      |      |
|       |   |        | DSLSYQADAIKAKIDLEY  |      |      |      |      |      |      |
|       |   |        | KKYSGSDKENIKSQVENL  |      |      |      |      |      |      |
|       |   |        | KNSLDVKISEAMNNINK   |      |      |      |      |      |      |
|       |   |        | FIRECSVTYLFKNMLPKV  |      |      |      |      |      |      |
|       |   |        | IDELNKFDLRTKTELINLI |      |      |      |      |      |      |
|       |   |        | DSHNILVGEVDRLKAKV   |      |      |      |      |      |      |
|       |   |        | NESFENTMPFNIFSYPN   |      |      |      |      |      |      |
|       |   |        | NSLLKDIINEYFNSINDSK |      |      |      |      |      |      |
|       |   |        | ILSLQNKKNALVDTSKY   |      |      |      |      |      |      |
|       |   |        | NAEVRVGDNVQLNTIYT   |      |      |      |      |      |      |
|       |   |        | NDFKLSSSGDKIIVNLNN  |      |      |      |      |      |      |
|       |   |        | NSRDSKEISIIKTNRESIT |      |      |      |      |      |      |
| 50768 | 0 | 45958  | TNVEGRRDIHKGHL      | 3.49 | 0.01 | 1.66 | 2.74 | 0.22 | 0.28 |
|       |   |        | NSRDSKEISIIKTNRESIT |      |      |      |      |      |      |
| 50769 | 0 | 45958  | TNVEGRRDIHKGHL      | 3.49 | 0.01 | 1.66 | 3.67 | 0.22 | 0.28 |
|       |   |        | NSRDSKEISIIKTNRESIT |      |      |      |      |      |      |
| 50770 | 0 | 45958  | TNVEGRRDIHKGHL      | 3.49 | 0.01 | 1.66 | 0.44 | 1.74 | 0.28 |
| 50771 | 0 | 172570 | NSREESLGETAQVYW     | 2.64 | 0.01 | 0.78 | 0.44 | 1.41 | 0.28 |
| 50772 | 0 | 172570 | NSREESLGETAQVYW     | 2.64 | 0.01 | 0.78 | 0.44 | 1.13 | 0.28 |
| 50773 | 0 | 45959  | NSREWLSKAHGIEGM     | 2.64 | 0.01 | 0.90 | 0.44 | 1.59 | 0.28 |
| 50774 | 0 | 120850 | NSRGEKVPFA          | 2.26 | 0.01 | 2.18 | 2.16 | 0.22 | 0.28 |
| 50775 | 0 | 181004 | NSRKKRSTSA          | 2.34 | 0.01 | 2.18 | 2.16 | 0.22 | 0.28 |
| 50776 | 0 | 131576 | NSRQTDREDELI        | 2.48 | 0.01 | 3.34 | 1.12 | 0.22 | 0.28 |
| 50777 | 0 | 131576 | NSRQTDREDELI        | 2.48 | 0.01 | 3.34 | 2.36 | 0.22 | 0.28 |
| 50778 | 0 | 131576 | NSRQTDREDELI        | 2.48 | 0.01 | 3.34 | 2.36 | 0.22 | 1.48 |
| 50779 | 0 | 131576 | NSRQTDREDELI        | 2.48 | 0.01 | 3.34 | 2.36 | 0.22 | 1.27 |
| 50780 | 0 | 45965  | NSRSTS              | 1.91 | 0.01 | 2.40 | 0.44 | 0.85 | 0.28 |
| 50781 | 0 | 174674 | NSRTNNSQWTFQ        | 2.51 | 0.01 | 0.90 | 1.15 | 1.41 | 1.39 |

|       |   |        |                                              |      |      |      |      |      |      |
|-------|---|--------|----------------------------------------------|------|------|------|------|------|------|
| 50782 | 0 | 156926 | NSRTWLT                                      | 2.02 | 0.01 | 0.90 | 2.74 | 0.22 | 0.85 |
| 50783 | 0 | 45967  | NSSARGWVIH                                   | 2.28 | 0.01 | 0.78 | 0.44 | 1.74 | 0.28 |
| 50784 | 0 | 45971  | NSSEESTTKSSKRSA                              | 2.71 | 0.01 | 1.66 | 1.15 | 0.22 | 0.28 |
| 50785 | 0 | 161263 | NSSGCPERLASCRRLTDF<br>AQ                     | 2.92 | 0.01 | 2.45 | 0.68 | 0.22 | 0.28 |
| 50786 | 0 | 161264 | NSSGCPERLASCRRLTDF<br>AQGWGPISYANGSGLD<br>ER | 3.52 | 0.01 | 2.45 | 0.68 | 0.22 | 1.34 |
| 50787 | 0 | 236591 | NSSHIQLIYNLTCE                               | 2.68 | 0.01 | 3.70 | 2.13 | 0.22 | 1.28 |
| 50788 | 0 | 152028 | NSSHLPAASYR                                  | 2.40 | 0.01 | 0.78 | 0.44 | 1.93 | 0.28 |
| 50789 | 0 | 534746 | NSSNYCCEACCNPACTG<br>CY                      | 2.93 | 0.01 | 0.90 | 1.12 | 0.22 | 0.28 |
| 50790 | 0 | 534747 | NSSNYCCECCNPACTG<br>CY                       | 2.93 | 0.01 | 0.90 | 1.12 | 0.22 | 0.28 |
| 50791 | 0 | 534748 | NSSNYCCEGCCNPACTG<br>CY                      | 2.93 | 0.01 | 0.90 | 1.12 | 0.22 | 0.28 |
| 50792 | 0 | 534749 | NSSNYCCELCCAPACTG<br>CY                      | 2.92 | 0.01 | 0.90 | 1.12 | 0.22 | 0.28 |
| 50793 | 0 | 534750 | NSSNYCCELCCPACTG<br>CY                       | 2.92 | 0.01 | 0.90 | 1.12 | 0.22 | 0.28 |
| 50794 | 0 | 534751 | NSSNYCCELCCGPACTG<br>CY                      | 2.92 | 0.01 | 0.90 | 1.12 | 0.22 | 0.28 |
| 50795 | 0 | 534752 | NSSNYCCELCKPACTG<br>CY                       | 2.90 | 0.01 | 0.90 | 1.12 | 0.22 | 0.28 |
| 50796 | 0 | 229399 | NSSNYCCELCCNPACTG<br>CF                      | 2.90 | 0.01 | 0.90 | 0.68 | 0.22 | 1.27 |
| 50797 | 0 | 229399 | NSSNYCCELCCNPACTG<br>CF                      | 2.90 | 0.01 | 0.90 | 0.68 | 0.22 | 1.27 |
| 50798 | 0 | 229399 | NSSNYCCELCCNPACTG<br>CF                      | 2.90 | 0.01 | 0.90 | 0.68 | 0.22 | 1.27 |
| 50799 | 0 | 229399 | NSSNYCCELCCNPACTG<br>CF                      | 2.90 | 0.01 | 0.90 | 0.68 | 0.22 | 0.28 |
| 50800 | 0 | 229399 | NSSNYCCELCCNPACTG<br>CF                      | 2.90 | 0.01 | 0.90 | 0.68 | 0.22 | 0.28 |
| 50801 | 0 | 144735 | NSSNYCCELCCNPACTG<br>CY                      | 2.92 | 0.01 | 2.24 | 0.68 | 0.22 | 0.28 |
| 50802 | 0 | 144735 | NSSNYCCELCCNPACTG<br>CY                      | 2.92 | 0.01 | 2.24 | 0.68 | 0.22 | 0.28 |
| 50803 | 0 | 144735 | NSSNYCCELCCNPACTG<br>CY                      | 2.92 | 0.01 | 2.24 | 0.68 | 0.22 | 1.34 |
| 50804 | 0 | 144735 | NSSNYCCELCCNPACTG<br>CY                      | 2.92 | 0.01 | 2.24 | 1.12 | 0.22 | 1.27 |
| 50805 | 0 | 144735 | NSSNYCCELCCNPACTG<br>CY                      | 2.92 | 0.01 | 2.24 | 1.12 | 0.22 | 1.27 |
| 50806 | 0 | 144735 | NSSNYCCELCCNPACTG<br>CY                      | 2.92 | 0.01 | 2.24 | 1.12 | 0.22 | 1.27 |

|       |   |        |                         |      |      |      |      |      |      |
|-------|---|--------|-------------------------|------|------|------|------|------|------|
| 50807 | 0 | 144735 | NSSNYCCELCCNPACTG<br>CY | 2.92 | 0.01 | 2.24 | 0.68 | 0.22 | 1.27 |
| 50808 | 0 | 144735 | NSSNYCCELCCNPACTG<br>CY | 2.92 | 0.01 | 2.24 | 0.68 | 0.22 | 0.28 |
| 50809 | 0 | 144735 | NSSNYCCELCCNPACTG<br>CY | 2.92 | 0.01 | 2.24 | 1.12 | 0.22 | 0.28 |
| 50810 | 0 | 144735 | NSSNYCCELCCNPACTG<br>CY | 2.92 | 0.01 | 2.24 | 0.68 | 0.22 | 0.28 |
| 50811 | 0 | 144735 | NSSNYCCELCCNPACTG<br>CY | 2.92 | 0.01 | 2.24 | 1.15 | 0.22 | 0.28 |
| 50812 | 0 | 144735 | NSSNYCCELCCNPACTG<br>CY | 2.92 | 0.01 | 2.24 | 1.12 | 0.22 | 0.28 |
| 50813 | 0 | 144735 | NSSNYCCELCCNPACTG<br>CY | 2.92 | 0.01 | 2.24 | 1.12 | 0.22 | 0.28 |
| 50814 | 0 | 144735 | NSSNYCCELCCNPACTG<br>CY | 2.92 | 0.01 | 2.24 | 1.12 | 0.22 | 0.28 |
| 50815 | 0 | 144735 | NSSNYCCELCCNPACTG<br>CY | 2.92 | 0.01 | 2.24 | 1.12 | 0.22 | 0.28 |
| 50816 | 0 | 144735 | NSSNYCCELCCNPACTG<br>CY | 2.92 | 0.01 | 2.24 | 1.12 | 0.22 | 0.28 |
| 50817 | 0 | 144735 | NSSNYCCELCCNPACTG<br>CY | 2.92 | 0.01 | 2.24 | 1.12 | 0.22 | 0.28 |
| 50818 | 0 | 144735 | NSSNYCCELCCNPACTG<br>CY | 2.92 | 0.01 | 2.24 | 1.12 | 0.22 | 0.28 |
| 50819 | 0 | 144735 | NSSNYCCELCCNPACTG<br>CY | 2.92 | 0.01 | 2.24 | 1.12 | 0.22 | 0.28 |
| 50820 | 0 | 144735 | NSSNYCCELCCNPACTG<br>CY | 2.92 | 0.01 | 2.24 | 1.12 | 0.22 | 0.28 |
| 50821 | 0 | 144735 | NSSNYCCELCCNPACTG<br>CY | 2.92 | 0.01 | 2.24 | 1.12 | 0.22 | 0.28 |
| 50822 | 0 | 144735 | NSSNYCCELCCNPACTG<br>CY | 2.92 | 0.01 | 2.24 | 1.12 | 0.22 | 0.28 |
| 50823 | 0 | 144735 | NSSNYCCELCCNPACTG<br>CY | 2.92 | 0.01 | 2.24 | 1.12 | 0.22 | 0.28 |
| 50824 | 0 | 144735 | NSSNYCCELCCNPACTG<br>CY | 2.92 | 0.01 | 2.24 | 1.12 | 0.22 | 0.28 |
| 50825 | 0 | 144735 | NSSNYCCELCCNPACTG<br>CY | 2.92 | 0.01 | 2.24 | 1.12 | 0.22 | 0.28 |
| 50826 | 0 | 144735 | NSSNYCCELCCNPACTG<br>CY | 2.92 | 0.01 | 2.24 | 1.12 | 0.22 | 0.28 |
| 50827 | 0 | 144735 | NSSNYCCELCCNPACTG<br>CY | 2.92 | 0.01 | 2.24 | 1.12 | 0.22 | 0.28 |
| 50828 | 0 | 144735 | NSSNYCCELCCNPACTG<br>CY | 2.92 | 0.01 | 2.24 | 1.12 | 0.22 | 0.28 |
| 50829 | 0 | 144735 | NSSNYCCELCCNPACTG<br>CY | 2.92 | 0.01 | 2.24 | 1.12 | 0.22 | 0.28 |

|       |   |        |                         |      |      |      |      |      |      |
|-------|---|--------|-------------------------|------|------|------|------|------|------|
| 50830 | 0 | 144735 | NSSNYCCELCCNPACTG<br>CY | 2.92 | 0.01 | 2.24 | 1.12 | 0.22 | 0.28 |
| 50831 | 0 | 144735 | NSSNYCCELCCNPACTG<br>CY | 2.92 | 0.01 | 2.24 | 1.12 | 0.22 | 0.28 |
| 50832 | 0 | 144735 | NSSNYCCELCCNPACTG<br>CY | 2.92 | 0.01 | 2.24 | 1.12 | 0.22 | 0.28 |
| 50833 | 0 | 144735 | NSSNYCCELCCNPACTG<br>CY | 2.92 | 0.01 | 2.24 | 1.12 | 0.22 | 0.28 |
| 50834 | 0 | 144735 | NSSNYCCELCCNPACTG<br>CY | 2.92 | 0.01 | 2.24 | 1.12 | 0.22 | 0.28 |
| 50835 | 0 | 144735 | NSSNYCCELCCNPACTG<br>CY | 2.92 | 0.01 | 2.24 | 1.12 | 0.22 | 0.28 |
| 50836 | 0 | 144735 | NSSNYCCELCCNPACTG<br>CY | 2.92 | 0.01 | 2.24 | 1.12 | 0.22 | 0.28 |
| 50837 | 0 | 144735 | NSSNYCCELCCNPACTG<br>CY | 2.92 | 0.01 | 2.24 | 1.12 | 0.22 | 0.28 |
| 50838 | 0 | 144735 | NSSNYCCELCCNPACTG<br>CY | 2.92 | 0.01 | 2.24 | 1.12 | 0.22 | 0.28 |
| 50839 | 0 | 144735 | NSSNYCCELCCNPACTG<br>CY | 2.92 | 0.01 | 2.24 | 1.12 | 0.22 | 0.28 |
| 50840 | 0 | 144735 | NSSNYCCELCCNPACTG<br>CY | 2.92 | 0.01 | 2.24 | 1.12 | 0.22 | 0.28 |
| 50841 | 0 | 144735 | NSSNYCCELCCNPACTG<br>CY | 2.92 | 0.01 | 2.24 | 1.12 | 0.22 | 0.28 |
| 50842 | 0 | 144735 | NSSNYCCELCCNPACTG<br>CY | 2.92 | 0.01 | 2.24 | 1.12 | 0.22 | 0.28 |
| 50843 | 0 | 534753 | NSSNYCCELCCNPDCTG<br>CY | 2.92 | 0.01 | 0.90 | 1.12 | 0.22 | 0.28 |
| 50844 | 0 | 534754 | NSSNYCCELCCNPECTG<br>CY | 2.93 | 0.01 | 0.90 | 1.12 | 0.22 | 0.28 |
| 50845 | 0 | 534755 | NSSNYCCELCCNPFCTG<br>CY | 2.92 | 0.01 | 0.90 | 1.12 | 0.22 | 0.28 |
| 50846 | 0 | 534756 | NSSNYCCELCCNPHCTG<br>CY | 2.92 | 0.01 | 0.90 | 1.12 | 0.22 | 0.28 |
| 50847 | 0 | 534757 | NSSNYCCELCCNPICTGC<br>Y | 2.92 | 0.01 | 0.90 | 1.12 | 0.22 | 0.28 |
| 50848 | 0 | 534758 | NSSNYCCELCCNPKCTG<br>CY | 2.92 | 0.01 | 0.90 | 1.12 | 0.22 | 0.28 |
| 50849 | 0 | 534759 | NSSNYCCELCCNPLCTG<br>CY | 2.93 | 0.01 | 0.90 | 1.12 | 0.22 | 0.28 |
| 50850 | 0 | 534760 | NSSNYCCELCCNPMCTG<br>CY | 2.92 | 0.01 | 0.90 | 1.12 | 0.22 | 0.28 |
| 50851 | 0 | 534761 | NSSNYCCELCCNPNCTG<br>CY | 2.93 | 0.01 | 0.90 | 1.12 | 0.22 | 0.28 |
| 50852 | 0 | 534762 | NSSNYCCELCCNPQCTG<br>CY | 2.92 | 0.01 | 0.90 | 1.12 | 0.22 | 0.28 |

|       |   |        |                          |      |      |      |      |      |      |
|-------|---|--------|--------------------------|------|------|------|------|------|------|
| 50853 | 0 | 534763 | NSSNYCCELCCNPRCTG<br>CY  | 2.92 | 0.01 | 0.90 | 1.12 | 0.22 | 0.28 |
| 50854 | 0 | 534764 | NSSNYCCELCCNPTCTG<br>CY  | 2.93 | 0.01 | 0.90 | 1.12 | 0.22 | 0.28 |
| 50855 | 0 | 534765 | NSSNYCCELCCNPVCTG<br>CY  | 2.92 | 0.01 | 0.90 | 1.12 | 0.22 | 0.28 |
| 50856 | 0 | 534766 | NSSNYCCELCCNPWCT<br>GCY  | 2.92 | 0.01 | 0.90 | 1.12 | 0.22 | 0.28 |
| 50857 | 0 | 534767 | NSSNYCCELCCNPYCTG<br>CY  | 2.93 | 0.01 | 0.90 | 1.12 | 0.22 | 0.28 |
| 50858 | 0 | 534768 | NSSNYCCELCCQPACTG<br>CY  | 2.90 | 0.01 | 0.90 | 1.12 | 0.22 | 0.28 |
| 50859 | 0 | 534769 | NSSNYCCELCCRPACTG<br>CY  | 2.90 | 0.01 | 0.90 | 1.12 | 0.22 | 0.28 |
| 50860 | 0 | 534770 | NSSNYCCELCCSPACTG<br>CY  | 2.92 | 0.01 | 0.90 | 1.12 | 0.22 | 0.28 |
| 50861 | 0 | 534771 | NSSNYCCELCCTPACTG<br>CY  | 2.92 | 0.01 | 0.90 | 1.12 | 0.22 | 0.28 |
| 50862 | 0 | 534772 | NSSNYCCELCCVPACTG<br>CY  | 2.90 | 0.01 | 0.90 | 1.12 | 0.22 | 0.28 |
| 50863 | 0 | 534773 | NSSNYCCELCCWPACTG<br>CY  | 2.90 | 0.01 | 0.90 | 1.12 | 0.22 | 0.28 |
| 50864 | 0 | 534774 | NSSNYCCEPCCNPACTG<br>CY  | 2.93 | 0.01 | 0.90 | 1.12 | 0.22 | 0.28 |
| 50865 | 0 | 534775 | NSSNYCCESCCNPACTG<br>CY  | 2.94 | 0.01 | 0.90 | 1.12 | 0.22 | 0.28 |
| 50866 | 0 | 133263 | NSSPEYPRKEFASSTRG<br>RS  | 2.95 | 0.01 | 0.78 | 0.44 | 1.13 | 0.28 |
| 50867 | 0 | 133263 | NSSPEYPRKEFASSTRG<br>RS  | 2.95 | 0.01 | 0.78 | 0.44 | 1.41 | 0.85 |
| 50868 | 0 | 108559 | NSSPYLNTK                | 2.23 | 0.01 | 0.90 | 0.44 | 1.13 | 1.39 |
| 50869 | 0 | 108559 | NSSPYLNTK                | 2.23 | 0.01 | 0.90 | 0.44 | 1.13 | 1.39 |
| 50870 | 0 | 45990  | NSSSFNTTQGWHHPSQ<br>RLLF | 2.94 | 0.01 | 2.69 | 1.12 | 0.22 | 0.28 |
| 50871 | 0 | 45990  | NSSSFNTTQGWHHPSQ<br>RLLF | 2.94 | 0.01 | 2.69 | 0.68 | 0.22 | 0.28 |
| 50872 | 0 | 45990  | NSSSFNTTQGWHHPSQ<br>RLLF | 2.94 | 0.01 | 2.69 | 1.12 | 0.22 | 0.28 |
| 50873 | 0 | 45990  | NSSSFNTTQGWHHPSQ<br>RLLF | 2.94 | 0.01 | 2.69 | 0.68 | 0.22 | 1.27 |
| 50874 | 0 | 45990  | NSSSFNTTQGWHHPSQ<br>RLLF | 2.94 | 0.01 | 2.69 | 0.68 | 0.22 | 2.35 |
| 50875 | 0 | 45990  | NSSSFNTTQGWHHPSQ<br>RLLF | 2.94 | 0.01 | 2.69 | 1.12 | 0.22 | 2.35 |
| 50876 | 0 | 45990  | NSSSFNTTQGWHHPSQ<br>RLLF | 2.94 | 0.01 | 2.69 | 1.12 | 0.22 | 2.35 |

|       |   |        |                           |      |      |      |      |      |      |
|-------|---|--------|---------------------------|------|------|------|------|------|------|
| 50877 | 0 | 45990  | NSSSFNTTQGWHHP SQ<br>RLLF | 2.94 | 0.01 | 2.69 | 0.68 | 0.22 | 0.28 |
| 50878 | 0 | 141718 | NSSSNKHWGSVP              | 2.49 | 0.01 | 0.90 | 0.68 | 0.22 | 1.39 |
| 50879 | 0 | 125512 | NSSSSQFQ                  | 2.15 | 0.01 | 1.75 | 3.15 | 2.60 | 1.75 |
| 50880 | 0 | 125512 | NSSSSQFQ                  | 2.15 | 0.01 | 1.75 | 3.15 | 0.22 | 1.48 |
| 50881 | 0 | 123561 | NSSSSQFQI                 | 2.25 | 0.01 | 1.75 | 3.15 | 0.22 | 1.48 |
| 50882 | 0 | 132878 | NSSSSQFQIH                | 2.33 | 0.01 | 1.75 | 3.15 | 0.22 | 1.48 |
| 50883 | 0 | 125185 | NSSSSQFQIHG               | 2.40 | 0.01 | 1.75 | 3.15 | 0.22 | 0.28 |
| 50884 | 0 | 125185 | NSSSSQFQIHG               | 2.40 | 0.01 | 1.75 | 3.15 | 2.60 | 1.75 |
| 50885 | 0 | 125185 | NSSSSQFQIHG               | 2.40 | 0.01 | 1.75 | 3.15 | 2.60 | 1.75 |
| 50886 | 0 | 125185 | NSSSSQFQIHG               | 2.40 | 0.01 | 1.75 | 3.15 | 0.22 | 0.28 |
| 50887 | 0 | 125185 | NSSSSQFQIHG               | 2.40 | 0.01 | 1.75 | 3.15 | 0.22 | 0.28 |
| 50888 | 0 | 125185 | NSSSSQFQIHG               | 2.40 | 0.01 | 1.75 | 3.15 | 2.60 | 1.75 |
| 50889 | 0 | 125185 | NSSSSQFQIHG               | 2.40 | 0.01 | 1.75 | 3.15 | 0.22 | 1.48 |
| 50890 | 0 | 125185 | NSSSSQFQIHG               | 2.40 | 0.01 | 1.75 | 3.15 | 0.22 | 3.16 |
| 50891 | 0 | 125185 | NSSSSQFQIHG               | 2.40 | 0.01 | 1.75 | 3.15 | 0.22 | 1.48 |
| 50892 | 0 | 125185 | NSSSSQFQIHG               | 2.40 | 0.01 | 1.75 | 3.15 | 0.22 | 0.28 |
| 50893 | 0 | 123562 | NSSSSQFQIHGPR             | 2.53 | 0.01 | 1.75 | 3.15 | 2.25 | 1.75 |
| 50894 | 0 | 123562 | NSSSSQFQIHGPR             | 2.53 | 0.01 | 1.75 | 2.16 | 2.60 | 1.75 |
| 50895 | 0 | 123562 | NSSSSQFQIHGPR             | 2.53 | 0.01 | 1.75 | 2.16 | 0.22 | 0.28 |
| 50896 | 0 | 123562 | NSSSSQFQIHGPR             | 2.53 | 0.01 | 1.75 | 2.16 | 0.22 | 0.28 |
| 50897 | 0 | 123562 | NSSSSQFQIHGPR             | 2.53 | 0.01 | 1.75 | 3.15 | 2.60 | 1.27 |
| 50898 | 0 | 123562 | NSSSSQFQIHGPR             | 2.53 | 0.01 | 1.75 | 3.15 | 2.60 | 1.75 |
| 50899 | 0 | 123562 | NSSSSQFQIHGPR             | 2.53 | 0.01 | 1.75 | 3.15 | 0.22 | 1.75 |
| 50900 | 0 | 123562 | NSSSSQFQIHGPR             | 2.53 | 0.01 | 1.75 | 3.15 | 0.22 | 1.48 |
| 50901 | 0 | 123562 | NSSSSQFQIHGPR             | 2.53 | 0.01 | 1.75 | 3.15 | 0.22 | 0.28 |
| 50902 | 0 | 123562 | NSSSSQFQIHGPR             | 2.53 | 0.01 | 1.75 | 3.15 | 0.22 | 1.48 |
| 50903 | 0 | 123562 | NSSSSQFQIHGPR             | 2.53 | 0.01 | 1.75 | 3.15 | 0.22 | 0.28 |
| 50904 | 0 | 123562 | NSSSSQFQIHGPR             | 2.53 | 0.01 | 1.75 | 3.15 | 0.22 | 0.28 |
| 50905 | 0 | 45992  | NSSTKNLIYNLTCELNV<br>TGF  | 3.00 | 0.01 | 3.42 | 0.68 | 0.22 | 0.28 |
| 50906 | 0 | 45992  | NSSTKNLIYNLTCELNV<br>TGF  | 3.00 | 0.01 | 3.42 | 0.68 | 0.22 | 0.28 |
| 50907 | 0 | 79032  | NST                       | 1.37 | 0.01 | 2.08 | 0.68 | 0.22 | 0.28 |
| 50908 | 0 | 151039 | NSTDVTDVLEKNVT            | 2.72 | 0.01 | 2.87 | 0.44 | 0.85 | 0.28 |
| 50909 | 0 | 135728 | NSTEAETI                  | 2.14 | 0.01 | 0.78 | 0.44 | 2.35 | 0.28 |
| 50910 | 0 | 46000  | NSTGADAADSGGRT            | 2.64 | 0.01 | 2.69 | 0.44 | 1.41 | 0.28 |
| 50911 | 0 | 46006  | NSTLGVKSAREF              | 2.43 | 0.01 | 3.89 | 0.68 | 0.22 | 0.28 |
| 50912 | 0 | 46006  | NSTLGVKSAREF              | 2.43 | 0.01 | 3.89 | 0.68 | 0.22 | 1.34 |
| 50913 | 0 | 46006  | NSTLGVKSAREF              | 2.43 | 0.01 | 3.89 | 0.68 | 0.22 | 1.34 |
| 50914 | 0 | 46006  | NSTLGVKSAREF              | 2.43 | 0.01 | 3.89 | 0.68 | 0.22 | 1.34 |
| 50915 | 0 | 119505 | NSTMGY                    | 1.88 | 0.01 | 0.78 | 0.44 | 0.85 | 0.28 |
| 50916 | 0 | 119505 | NSTMGY                    | 1.88 | 0.01 | 0.78 | 0.44 | 0.85 | 0.28 |
| 50917 | 0 | 119505 | NSTMGY                    | 1.88 | 0.01 | 0.78 | 0.44 | 0.85 | 0.28 |
| 50918 | 0 | 119505 | NSTMGY                    | 1.88 | 0.01 | 0.78 | 0.44 | 0.85 | 0.28 |
| 50919 | 0 | 346581 | NSTPTTGDDPAADG            | 2.71 | 0.01 | 1.61 | 0.44 | 0.85 | 1.28 |
| 50920 | 0 | 346582 | NSTPTTGDDPAADV            | 2.69 | 0.01 | 1.61 | 0.44 | 0.85 | 1.28 |



|       |   |        |                                                         |      |      |      |      |      |      |
|-------|---|--------|---------------------------------------------------------|------|------|------|------|------|------|
| 50921 | 0 | 149090 | NSTQGPV                                                 | 1.99 | 0.01 | 0.90 | 2.13 | 1.59 | 1.39 |
| 50922 | 0 | 149091 | NSTQMRI                                                 | 1.99 | 0.01 | 0.90 | 2.13 | 1.59 | 1.39 |
| 50923 | 0 | 346587 | NSTQTTGDDDDPAADG                                        | 2.69 | 0.01 | 1.61 | 0.44 | 0.85 | 1.28 |
| 50924 | 0 | 46011  | NSTSTWVTYGTCTTTGE<br>HRREKRSV                           | 3.17 | 0.01 | 2.30 | 0.68 | 2.25 | 1.75 |
| 50925 | 0 | 46011  | NSTSTWVTYGTCTTTGE<br>HRREKRSV                           | 3.17 | 0.01 | 2.30 | 0.68 | 0.22 | 0.28 |
| 50926 | 0 | 46011  | NSTSTWVTYGTCTTTGE<br>HRREKRSV                           | 3.17 | 0.01 | 2.30 | 0.68 | 0.22 | 0.28 |
| 50927 | 0 | 46011  | NSTSTWVTYGTCTTTGE<br>HRREKRSV                           | 3.17 | 0.01 | 2.30 | 0.68 | 0.22 | 0.28 |
| 50928 | 0 | 46013  | NSTTFHQLQDPRVRGL<br>YFPAGGSSSGTVNPVPT<br>TVSPISSIFSRIGD | 3.82 | 0.01 | 2.08 | 0.44 | 0.85 | 0.28 |
| 50929 | 0 | 46013  | NSTTFHQLQDPRVRGL<br>YFPAGGSSSGTVNPVPT<br>TVSPISSIFSRIGD | 3.82 | 0.01 | 2.08 | 1.12 | 0.22 | 0.85 |
| 50930 | 0 | 46013  | NSTTFHQLQDPRVRGL<br>YFPAGGSSSGTVNPVPT<br>TVSPISSIFSRIGD | 3.82 | 0.01 | 2.08 | 1.12 | 0.22 | 2.98 |
| 50931 | 0 | 46013  | NSTTFHQLQDPRVRGL<br>YFPAGGSSSGTVNPVPT<br>TVSPISSIFSRIGD | 3.82 | 0.01 | 2.08 | 1.15 | 0.22 | 0.85 |
| 50932 | 0 | 46013  | NSTTFHQLQDPRVRGL<br>YFPAGGSSSGTVNPVPT<br>TVSPISSIFSRIGD | 3.82 | 0.01 | 2.08 | 1.15 | 0.22 | 0.85 |
| 50933 | 0 | 46014  | NSTTGNLEH                                               | 2.23 | 0.01 | 4.03 | 0.44 | 0.85 | 0.28 |
| 50934 | 0 | 133660 | NSTWHDWNSWTH                                            | 2.53 | 0.01 | 0.90 | 0.44 | 0.85 | 1.39 |
| 50935 | 0 | 107532 | NSTYRVV                                                 | 1.99 | 0.01 | 0.78 | 0.44 | 1.13 | 0.28 |
| 50936 | 0 | 46021  | NSVDFEEDTL                                              | 2.30 | 0.01 | 2.56 | 1.20 | 0.22 | 0.28 |
| 50937 | 0 | 46025  | NSVGANAP                                                | 2.15 | 0.01 | 2.96 | 0.68 | 0.22 | 0.28 |
| 50938 | 0 | 46025  | NSVGANAP                                                | 2.15 | 0.01 | 2.96 | 0.68 | 0.22 | 0.28 |
| 50939 | 0 | 46026  | NSVGANAPNADTIAS                                         | 2.71 | 0.01 | 1.66 | 2.52 | 0.22 | 0.28 |
| 50940 | 0 | 46026  | NSVGANAPNADTIAS                                         | 2.71 | 0.01 | 1.66 | 1.15 | 0.22 | 0.28 |
| 50941 | 0 | 46026  | NSVGANAPNADTIAS                                         | 2.71 | 0.01 | 1.66 | 2.52 | 0.22 | 1.48 |
| 50942 | 0 | 46026  | NSVGANAPNADTIAS                                         | 2.71 | 0.01 | 1.66 | 1.15 | 0.22 | 0.85 |
| 50943 | 0 | 510465 | NSVHTNTGNLGL                                            | 2.52 | 0.01 | 0.90 | 3.07 | 1.13 | 1.39 |
| 50944 | 0 | 229755 | NSWGSQMDLTDPLCI                                         | 2.64 | 0.01 | 3.65 | 0.44 | 0.85 | 1.27 |
| 50945 | 0 | 123563 | NSWIASFGG                                               | 2.21 | 0.01 | 2.28 | 2.00 | 0.22 | 0.28 |
| 50946 | 0 | 164308 | NSWLSHR                                                 | 2.02 | 0.01 | 0.90 | 1.20 | 0.22 | 1.39 |
| 50947 | 0 | 174675 | NSWTNASLSTFH                                            | 2.50 | 0.01 | 0.90 | 1.15 | 1.41 | 1.39 |

|       |   |        |                                         |      |      |      |      |      |      |
|-------|---|--------|-----------------------------------------|------|------|------|------|------|------|
| 50948 | 0 | 128066 | NSYDVLSALSGNLKL                         | 2.71 | 0.01 | 2.40 | 0.44 | 0.85 | 0.28 |
| 50949 | 0 | 128066 | NSYDVLSALSGNLKL                         | 2.71 | 0.01 | 2.40 | 2.75 | 0.22 | 0.28 |
| 50950 | 0 | 128066 | NSYDVLSALSGNLKL                         | 2.71 | 0.01 | 2.40 | 2.75 | 0.22 | 0.85 |
| 50951 | 0 | 46042  | NSYEDEFSSSEFLEN                         | 2.73 | 0.01 | 1.66 | 1.15 | 0.22 | 0.28 |
| 50952 | 0 | 172573 | NSYPRDFVNCSTLPA                         | 2.65 | 0.01 | 0.78 | 0.44 | 1.41 | 0.28 |
| 50953 | 0 | 46048  | NSYVNDVMERICMEAA<br>SIVR                | 2.96 | 0.01 | 3.78 | 2.49 | 0.85 | 0.28 |
| 50954 | 0 | 46050  | NTAEYWGFK                               | 2.18 | 0.01 | 2.86 | 0.68 | 0.22 | 0.28 |
| 50955 | 0 | 46054  | NTANPDW                                 | 2.03 | 0.01 | 2.71 | 0.68 | 0.22 | 0.85 |
| 50956 | 0 | 46054  | NTANPDW                                 | 2.03 | 0.01 | 2.71 | 0.68 | 0.22 | 1.66 |
| 50957 | 0 | 46054  | NTANPDW                                 | 2.03 | 0.01 | 2.71 | 0.68 | 0.22 | 1.66 |
| 50958 | 0 | 46054  | NTANPDW                                 | 2.03 | 0.01 | 2.71 | 0.68 | 0.22 | 1.66 |
| 50959 | 0 | 46054  | NTANPDW                                 | 2.03 | 0.01 | 2.71 | 0.68 | 0.22 | 1.66 |
| 50960 | 0 | 46054  | NTANPDW                                 | 2.03 | 0.01 | 2.71 | 0.68 | 0.22 | 1.66 |
| 50961 | 0 | 46054  | NTANPDW                                 | 2.03 | 0.01 | 2.71 | 0.68 | 0.22 | 1.66 |
| 50962 | 0 | 46055  | NTANPDWDF                               | 2.24 | 0.01 | 2.71 | 1.15 | 0.22 | 0.85 |
| 50963 | 0 | 167350 | NTAPHPH                                 | 2.04 | 0.01 | 0.90 | 1.15 | 0.22 | 1.39 |
| 50964 | 0 | 523280 | NTASTETTTTNEQPK                         | 2.70 | 0.01 | 2.24 | 0.44 | 1.41 | 1.28 |
| 50965 | 0 | 46072  | NTDGSTDYGILQINSR                        | 2.75 | 0.01 | 2.25 | 0.68 | 0.22 | 0.28 |
| 50966 | 0 | 232968 | NTDLSFGPFKEWYFA                         | 2.62 | 0.01 | 2.89 | 1.12 | 0.22 | 1.28 |
| 50967 | 0 | 232968 | NTDLSFGPFKEWYFA                         | 2.62 | 0.01 | 2.89 | 1.12 | 0.22 | 1.28 |
| 50968 | 0 | 232968 | NTDLSFGPFKEWYFA                         | 2.62 | 0.01 | 2.89 | 1.12 | 0.22 | 1.28 |
| 50969 | 0 | 232968 | NTDLSFGPFKEWYFA                         | 2.62 | 0.01 | 2.89 | 1.12 | 0.22 | 1.28 |
| 50970 | 0 | 232968 | NTDLSFGPFKEWYFA                         | 2.62 | 0.01 | 2.89 | 1.12 | 0.22 | 1.28 |
| 50971 | 0 | 46078  | NTDSALRLPPFY                            | 2.44 | 0.01 | 0.90 | 0.44 | 1.23 | 0.28 |
| 50972 | 0 | 450893 | NTDTTRE                                 | 2.03 | 0.01 | 0.90 | 0.44 | 1.41 | 1.39 |
| 50973 | 0 | 136537 | NTDVVNVSVLCR                            | 2.50 | 0.01 | 3.48 | 3.70 | 0.85 | 1.34 |
| 50974 | 0 | 136537 | NTDVVNVSVLCR                            | 2.50 | 0.01 | 3.48 | 0.68 | 0.22 | 1.34 |
| 50975 | 0 | 181413 | NTEASSHRLGTGVVP                         | 2.64 | 0.01 | 2.82 | 1.15 | 0.22 | 0.28 |
| 50976 | 0 | 144736 | NTECTLKKGGGLPDSVKI                      | 2.82 | 0.01 | 0.90 | 1.20 | 0.22 | 0.85 |
| 50977 | 0 | 46081  | NTECTLKKGSSGYCA                         | 2.66 | 0.01 | 2.56 | 1.20 | 0.22 | 0.85 |
| 50978 | 0 | 46081  | NTECTLKKGSSGYCA                         | 2.66 | 0.01 | 2.56 | 1.20 | 0.22 | 0.85 |
| 50979 | 0 | 46081  | NTECTLKKGSSGYCA                         | 2.66 | 0.01 | 2.56 | 2.00 | 0.22 | 0.85 |
| 50980 | 0 | 46081  | NTECTLKKGSSGYCA                         | 2.66 | 0.01 | 2.56 | 2.02 | 0.22 | 0.85 |
| 50981 | 0 | 46081  | NTECTLKKGSSGYCA                         | 2.66 | 0.01 | 2.56 | 1.20 | 0.22 | 0.85 |
| 50982 | 0 | 141719 | NTEEYIDG                                | 2.11 | 0.01 | 0.78 | 0.44 | 1.13 | 0.28 |
| 50983 | 0 | 141719 | NTEEYIDG                                | 2.11 | 0.01 | 0.78 | 0.44 | 1.13 | 0.28 |
| 50984 | 0 | 141719 | NTEEYIDG                                | 2.11 | 0.01 | 0.78 | 0.44 | 1.41 | 0.28 |
| 50985 | 0 | 46084  | NTEPSQLPPTA                             | 2.40 | 0.01 | 2.04 | 1.20 | 0.22 | 1.34 |
| 50986 | 0 | 46084  | NTEPSQLPPTA                             | 2.40 | 0.01 | 2.04 | 1.20 | 0.22 | 1.34 |
| 50987 | 0 | 46085  | NTEPSQLPPTAPLLPHS<br>NLDHILEPSIPWKSLLTL | 3.57 | 0.01 | 2.04 | 0.44 | 0.85 | 0.28 |
| 50988 | 0 | 119297 | NTFCDSCIPKTFWN                          | 2.62 | 0.01 | 0.78 | 0.44 | 1.13 | 1.27 |
| 50989 | 0 | 119297 | NTFCDSCIPKTFWN                          | 2.62 | 0.01 | 0.78 | 0.44 | 1.13 | 1.66 |
| 50990 | 0 | 133264 | NTFGLQLEL                               | 2.23 | 0.01 | 2.04 | 0.44 | 1.59 | 0.28 |

|       |   |        |                  |      |      |      |      |      |      |
|-------|---|--------|------------------|------|------|------|------|------|------|
| 50991 | 0 | 46087  | NTFINNAY         | 2.14 | 0.01 | 2.96 | 0.68 | 0.22 | 0.28 |
| 50992 | 0 | 46087  | NTFINNAY         | 2.14 | 0.01 | 2.96 | 0.68 | 0.22 | 0.28 |
| 50993 | 0 | 101096 | NTFNEFWPSNSW     | 2.52 | 0.01 | 0.90 | 0.68 | 0.22 | 1.39 |
| 50994 | 0 | 101096 | NTFNEFWPSNSW     | 2.52 | 0.01 | 0.90 | 0.68 | 0.22 | 1.27 |
| 50995 | 0 | 156927 | NTFQAFY          | 2.02 | 0.01 | 0.90 | 2.74 | 0.22 | 0.85 |
| 50996 | 0 | 172575 | NTFRLMRRAGYINEF  | 2.66 | 0.01 | 0.78 | 0.44 | 1.13 | 0.28 |
| 50997 | 0 | 172575 | NTFRLMRRAGYINEF  | 2.66 | 0.01 | 0.78 | 2.79 | 1.13 | 1.28 |
| 50998 | 0 | 172575 | NTFRLMRRAGYINEF  | 2.66 | 0.01 | 0.78 | 2.79 | 1.13 | 1.28 |
| 50999 | 0 | 172575 | NTFRLMRRAGYINEF  | 2.66 | 0.01 | 0.78 | 1.81 | 1.41 | 1.28 |
| 51000 | 0 | 172575 | NTFRLMRRAGYINEF  | 2.66 | 0.01 | 0.78 | 1.81 | 1.41 | 1.28 |
| 51001 | 0 | 159041 | NTFVIDGPETKECPTQ | 2.71 | 0.01 | 3.36 | 0.68 | 0.22 | 0.28 |
| 51002 | 0 | 159041 | NTFVIDGPETKECPTQ | 2.71 | 0.01 | 3.36 | 2.49 | 0.22 | 0.28 |
| 51003 | 0 | 159041 | NTFVIDGPETKECPTQ | 2.71 | 0.01 | 3.36 | 2.43 | 0.22 | 0.28 |
| 51004 | 0 | 159041 | NTFVIDGPETKECPTQ | 2.71 | 0.01 | 3.36 | 3.55 | 0.22 | 0.28 |
| 51005 | 0 | 159042 | NTFVVDGPETKECPTA | 2.72 | 0.01 | 3.93 | 0.68 | 0.22 | 0.28 |
| 51006 | 0 | 159042 | NTFVVDGPETKECPTA | 2.72 | 0.01 | 3.93 | 2.49 | 0.22 | 0.28 |
| 51007 | 0 | 159042 | NTFVVDGPETKECPTA | 2.72 | 0.01 | 3.93 | 2.43 | 0.22 | 0.28 |
| 51008 | 0 | 159042 | NTFVVDGPETKECPTA | 2.72 | 0.01 | 3.93 | 3.55 | 0.22 | 0.28 |
| 51009 | 0 | 159043 | NTFVVDGPETKECPTQ | 2.72 | 0.01 | 3.05 | 0.68 | 0.22 | 0.28 |
| 51010 | 0 | 159043 | NTFVVDGPETKECPTQ | 2.72 | 0.01 | 3.05 | 0.68 | 0.22 | 0.28 |
| 51011 | 0 | 159043 | NTFVVDGPETKECPTQ | 2.72 | 0.01 | 3.05 | 0.68 | 0.22 | 1.48 |
| 51012 | 0 | 159043 | NTFVVDGPETKECPTQ | 2.72 | 0.01 | 3.05 | 0.68 | 0.22 | 1.48 |
| 51013 | 0 | 159043 | NTFVVDGPETKECPTQ | 2.72 | 0.01 | 3.05 | 0.68 | 0.22 | 0.28 |
| 51014 | 0 | 159043 | NTFVVDGPETKECPTQ | 2.72 | 0.01 | 3.05 | 0.68 | 0.22 | 0.28 |
| 51015 | 0 | 159043 | NTFVVDGPETKECPTQ | 2.72 | 0.01 | 3.05 | 0.68 | 0.22 | 0.28 |
| 51016 | 0 | 159043 | NTFVVDGPETKECPTQ | 2.72 | 0.01 | 3.05 | 0.68 | 0.22 | 0.28 |
| 51017 | 0 | 159043 | NTFVVDGPETKECPTQ | 2.72 | 0.01 | 3.05 | 2.49 | 0.22 | 0.28 |
| 51018 | 0 | 159043 | NTFVVDGPETKECPTQ | 2.72 | 0.01 | 3.05 | 2.43 | 0.22 | 0.28 |
| 51019 | 0 | 159043 | NTFVVDGPETKECPTQ | 2.72 | 0.01 | 3.05 | 3.55 | 0.22 | 0.28 |
| 51020 | 0 | 159043 | NTFVVDGPETKECPTQ | 2.72 | 0.01 | 3.04 | 0.68 | 0.22 | 0.85 |

|       |   |        |                        |      |      |      |      |      |      |
|-------|---|--------|------------------------|------|------|------|------|------|------|
| 51021 | 0 | 159043 | NTFVVDGPETKECPTQ       | 2.72 | 0.01 | 3.04 | 0.68 | 0.22 | 0.85 |
| 51022 | 0 | 106691 | NTFWASDLMH             | 2.26 | 0.01 | 2.75 | 0.44 | 1.23 | 0.85 |
| 51023 | 0 | 46094  | NTFYCCELCCNPACAGC<br>Y | 2.87 | 0.01 | 2.24 | 1.20 | 0.22 | 0.28 |
| 51024 | 0 | 46094  | NTFYCCELCCNPACAGC<br>Y | 2.87 | 0.01 | 2.24 | 1.20 | 0.22 | 1.34 |
| 51025 | 0 | 46094  | NTFYCCELCCNPACAGC<br>Y | 2.87 | 0.01 | 3.75 | 2.22 | 0.22 | 0.28 |
| 51026 | 0 | 46094  | NTFYCCELCCNPACAGC<br>Y | 2.87 | 0.01 | 3.75 | 2.13 | 0.22 | 0.28 |
| 51027 | 0 | 46094  | NTFYCCELCCNPACAGC<br>Y | 2.87 | 0.01 | 3.75 | 2.22 | 0.22 | 1.34 |
| 51028 | 0 | 46094  | NTFYCCELCCNPACAGC<br>Y | 2.87 | 0.01 | 3.75 | 2.13 | 0.22 | 1.34 |
| 51029 | 0 | 46094  | NTFYCCELCCNPACAGC<br>Y | 2.87 | 0.01 | 3.75 | 2.22 | 0.22 | 1.34 |
| 51030 | 0 | 46094  | NTFYCCELCCNPACAGC<br>Y | 2.87 | 0.01 | 3.75 | 2.13 | 0.22 | 1.34 |
| 51031 | 0 | 46094  | NTFYCCELCCNPACAGC<br>Y | 2.87 | 0.01 | 3.75 | 2.22 | 0.22 | 1.75 |
| 51032 | 0 | 46094  | NTFYCCELCCNPACAGC<br>Y | 2.87 | 0.01 | 3.75 | 2.13 | 0.22 | 1.75 |
| 51033 | 0 | 46094  | NTFYCCELCCNPACAGC<br>Y | 2.87 | 0.01 | 2.66 | 1.12 | 0.22 | 1.34 |
| 51034 | 0 | 46094  | NTFYCCELCCNPACAGC<br>Y | 2.87 | 0.01 | 2.66 | 1.12 | 0.22 | 0.28 |
| 51035 | 0 | 46094  | NTFYCCELCCNPACAGC<br>Y | 2.87 | 0.01 | 2.24 | 1.12 | 0.22 | 1.27 |
| 51036 | 0 | 46094  | NTFYCCELCCNPACAGC<br>Y | 2.87 | 0.01 | 2.24 | 1.12 | 0.22 | 1.27 |
| 51037 | 0 | 46094  | NTFYCCELCCNPACAGC<br>Y | 2.87 | 0.01 | 2.24 | 0.68 | 0.22 | 1.27 |
| 51038 | 0 | 46094  | NTFYCCELCCNPACAGC<br>Y | 2.87 | 0.01 | 2.24 | 1.15 | 0.22 | 1.34 |
| 51039 | 0 | 46094  | NTFYCCELCCNPACAGC<br>Y | 2.87 | 0.01 | 2.24 | 1.15 | 0.22 | 1.34 |
| 51040 | 0 | 46094  | NTFYCCELCCNPACAGC<br>Y | 2.87 | 0.01 | 2.24 | 0.68 | 0.22 | 0.28 |
| 51041 | 0 | 46094  | NTFYCCELCCNPACAGC<br>Y | 2.87 | 0.01 | 2.24 | 1.15 | 0.22 | 0.28 |
| 51042 | 0 | 46094  | NTFYCCELCCNPACAGC<br>Y | 2.87 | 0.01 | 2.24 | 1.12 | 0.22 | 0.28 |
| 51043 | 0 | 46095  | NTFYCCELCCYPACAGC<br>N | 2.87 | 0.01 | 2.24 | 0.44 | 0.22 | 0.28 |
| 51044 | 0 | 46095  | NTFYCCELCCYPACAGC<br>N | 2.87 | 0.01 | 2.24 | 0.44 | 0.22 | 1.34 |

|       |   |        |                           |      |      |      |      |      |      |
|-------|---|--------|---------------------------|------|------|------|------|------|------|
| 51045 | 0 | 46096  | NTGEIPFYGK                | 2.29 | 0.01 | 1.96 | 0.44 | 0.85 | 1.34 |
| 51046 | 0 | 46097  | NTGGSRYPGQGSPGGN<br>RYPPQ | 3.04 | 0.01 | 2.52 | 1.20 | 0.22 | 0.28 |
| 51047 | 0 | 46102  | NTGNRS GG                 | 2.14 | 0.01 | 2.99 | 0.44 | 0.85 | 0.28 |
| 51048 | 0 | 77965  | NTGSIINNYMQQYQN<br>SMDT   | 2.98 | 0.01 | 3.14 | 0.68 | 0.22 | 0.28 |
| 51049 | 0 | 152876 | NTGTAPIYNV                | 2.32 | 0.01 | 2.18 | 2.16 | 0.22 | 0.28 |
| 51050 | 0 | 232556 | NTGWLAGLF                 | 2.23 | 0.01 | 2.68 | 0.68 | 0.22 | 2.49 |
| 51051 | 0 | 167351 | NTGWLAGLFYQHK             | 2.51 | 0.01 | 2.45 | 0.44 | 0.85 | 1.34 |
| 51052 | 0 | 167351 | NTGWLAGLFYQHK             | 2.51 | 0.01 | 2.45 | 0.44 | 0.85 | 0.28 |
| 51053 | 0 | 167351 | NTGWLAGLFYQHK             | 2.51 | 0.01 | 2.45 | 0.44 | 0.85 | 0.28 |
| 51054 | 0 | 167351 | NTGWLAGLFYQHK             | 2.51 | 0.01 | 2.45 | 0.44 | 0.85 | 0.28 |
| 51055 | 0 | 167351 | NTGWLAGLFYQHK             | 2.51 | 0.01 | 2.45 | 0.44 | 0.85 | 0.28 |
| 51056 | 0 | 167351 | NTGWLAGLFYQHK             | 2.51 | 0.01 | 2.45 | 0.44 | 0.85 | 1.34 |
| 51057 | 0 | 167351 | NTGWLAGLFYQHK             | 2.51 | 0.01 | 2.45 | 0.44 | 0.85 | 1.34 |
| 51058 | 0 | 167351 | NTGWLAGLFYQHK             | 2.51 | 0.01 | 2.45 | 0.44 | 0.85 | 1.34 |
| 51059 | 0 | 167351 | NTGWLAGLFYQHK             | 2.51 | 0.01 | 2.45 | 0.44 | 0.85 | 0.28 |
| 51060 | 0 | 167351 | NTGWLAGLFYQHK             | 2.51 | 0.01 | 2.45 | 0.44 | 0.85 | 1.34 |
| 51061 | 0 | 167351 | NTGWLAGLFYQHK             | 2.51 | 0.01 | 2.45 | 0.44 | 0.85 | 0.28 |
| 51062 | 0 | 167351 | NTGWLAGLFYQHK             | 2.51 | 0.01 | 2.45 | 2.36 | 0.22 | 0.28 |
| 51063 | 0 | 167351 | NTGWLAGLFYQHK             | 2.51 | 0.01 | 2.45 | 0.44 | 0.85 | 0.28 |
| 51064 | 0 | 167351 | NTGWLAGLFYQHK             | 2.51 | 0.01 | 2.45 | 0.44 | 0.85 | 0.28 |
| 51065 | 0 | 167351 | NTGWLAGLFYQHK             | 2.51 | 0.01 | 2.45 | 0.44 | 0.85 | 0.28 |
| 51066 | 0 | 167351 | NTGWLAGLFYQHK             | 2.51 | 0.01 | 2.45 | 0.44 | 0.85 | 0.28 |
| 51067 | 0 | 167351 | NTGWLAGLFYQHK             | 2.51 | 0.01 | 2.45 | 0.44 | 0.85 | 0.28 |
| 51068 | 0 | 167351 | NTGWLAGLFYQHK             | 2.51 | 0.01 | 2.45 | 0.44 | 0.85 | 0.28 |
| 51069 | 0 | 167351 | NTGWLAGLFYQHK             | 2.51 | 0.01 | 2.45 | 0.44 | 0.85 | 0.28 |
| 51070 | 0 | 167351 | NTGWLAGLFYQHK             | 2.51 | 0.01 | 2.45 | 0.44 | 0.85 | 0.28 |
| 51071 | 0 | 167351 | NTGWLAGLFYQHK             | 2.51 | 0.01 | 2.45 | 0.44 | 0.85 | 1.34 |
| 51072 | 0 | 167351 | NTGWLAGLFYQHK             | 2.51 | 0.01 | 2.45 | 0.44 | 0.85 | 2.02 |
| 51073 | 0 | 167351 | NTGWLAGLFYQHK             | 2.51 | 0.01 | 2.45 | 0.44 | 0.85 | 1.66 |
| 51074 | 0 | 167351 | NTGWLAGLFYQHK             | 2.51 | 0.01 | 2.45 | 0.44 | 0.85 | 1.66 |
| 51075 | 0 | 167351 | NTGWLAGLFYQHK             | 2.51 | 0.01 | 2.45 | 0.44 | 0.85 | 1.66 |
| 51076 | 0 | 167351 | NTGWLAGLFYQHK             | 2.51 | 0.01 | 2.45 | 0.44 | 0.85 | 1.34 |
| 51077 | 0 | 167351 | NTGWLAGLFYQHK             | 2.51 | 0.01 | 2.45 | 0.44 | 0.85 | 1.34 |
| 51078 | 0 | 167351 | NTGWLAGLFYQHK             | 2.51 | 0.01 | 2.45 | 0.44 | 0.85 | 1.34 |
| 51079 | 0 | 167351 | NTGWLAGLFYQHK             | 2.51 | 0.01 | 2.45 | 0.44 | 0.85 | 1.34 |
| 51080 | 0 | 167351 | NTGWLAGLFYQHK             | 2.51 | 0.01 | 2.45 | 0.44 | 0.85 | 1.34 |
| 51081 | 0 | 167351 | NTGWLAGLFYQHK             | 2.51 | 0.01 | 2.45 | 0.44 | 0.85 | 1.34 |
| 51082 | 0 | 167351 | NTGWLAGLFYQHK             | 2.51 | 0.01 | 2.45 | 0.44 | 0.85 | 1.34 |
| 51083 | 0 | 167351 | NTGWLAGLFYQHK             | 2.51 | 0.01 | 2.45 | 0.44 | 0.85 | 1.66 |
| 51084 | 0 | 167351 | NTGWLAGLFYQHK             | 2.51 | 0.01 | 2.45 | 0.44 | 0.85 | 1.66 |
| 51085 | 0 | 167351 | NTGWLAGLFYQHK             | 2.51 | 0.01 | 2.45 | 0.44 | 0.85 | 1.66 |
| 51086 | 0 | 167351 | NTGWLAGLFYQHK             | 2.51 | 0.01 | 2.45 | 0.44 | 0.85 | 1.48 |
| 51087 | 0 | 167351 | NTGWLAGLFYQHK             | 2.51 | 0.01 | 2.45 | 0.44 | 0.85 | 1.27 |
| 51088 | 0 | 167351 | NTGWLAGLFYQHK             | 2.51 | 0.01 | 2.45 | 0.44 | 0.85 | 1.66 |
| 51089 | 0 | 167351 | NTGWLAGLFYQHK             | 2.51 | 0.01 | 2.45 | 0.44 | 0.85 | 1.66 |

|       |   |        |                                  |      |      |      |      |      |      |
|-------|---|--------|----------------------------------|------|------|------|------|------|------|
| 51090 | 0 | 167351 | NTGWLAGLFYQHK                    | 2.51 | 0.01 | 2.45 | 0.44 | 0.85 | 1.66 |
| 51091 | 0 | 167351 | NTGWLAGLFYQHK                    | 2.51 | 0.01 | 2.45 | 0.44 | 0.85 | 1.66 |
| 51092 | 0 | 167351 | NTGWLAGLFYQHK                    | 2.51 | 0.01 | 2.45 | 0.44 | 0.85 | 1.66 |
| 51093 | 0 | 167351 | NTGWLAGLFYQHK                    | 2.51 | 0.01 | 2.45 | 0.44 | 0.85 | 1.66 |
| 51094 | 0 | 167351 | NTGWLAGLFYQHK                    | 2.51 | 0.01 | 2.45 | 0.68 | 0.22 | 0.28 |
| 51095 | 0 | 167351 | NTGWLAGLFYQHK                    | 2.51 | 0.01 | 2.45 | 0.68 | 0.22 | 0.28 |
| 51096 | 0 | 167351 | NTGWLAGLFYQHK                    | 2.51 | 0.01 | 2.45 | 0.68 | 0.22 | 1.34 |
| 51097 | 0 | 167351 | NTGWLAGLFYQHK                    | 2.51 | 0.01 | 2.45 | 0.68 | 0.22 | 1.34 |
| 51098 | 0 | 167351 | NTGWLAGLFYQHK                    | 2.51 | 0.01 | 2.45 | 0.68 | 0.22 | 2.35 |
| 51099 | 0 | 167351 | NTGWLAGLFYQHK                    | 2.51 | 0.01 | 1.72 | 0.44 | 0.85 | 2.49 |
| 51100 | 0 | 167351 | NTGWLAGLFYQHK                    | 2.51 | 0.01 | 1.72 | 0.44 | 0.85 | 2.49 |
| 51101 | 0 | 46108  | NTHAMGGVVARSA<br>YRITSFLSPGAAQN  | 3.21 | 0.01 | 1.72 | 0.44 | 0.85 | 0.28 |
| 51102 | 0 | 46108  | NTHAMGGVVARSA<br>YRITSFLSPGAAQN  | 3.21 | 0.01 | 1.72 | 0.68 | 0.22 | 0.28 |
| 51103 | 0 | 46108  | NTHAMGGVVARSA<br>YRITSFLSPGAAQN  | 3.21 | 0.01 | 1.72 | 1.12 | 0.22 | 0.28 |
| 51104 | 0 | 46108  | NTHAMGGVVARSA<br>YRITSFLSPGAAQN  | 3.21 | 0.01 | 1.72 | 1.12 | 0.22 | 0.28 |
| 51105 | 0 | 46108  | NTHAMGGVVARSA<br>YRITSFLSPGAAQN  | 3.21 | 0.01 | 1.72 | 1.12 | 0.22 | 0.28 |
| 51106 | 0 | 46109  | NTHGIASLFAFGPAQK                 | 2.71 | 0.01 | 1.72 | 0.68 | 0.22 | 0.28 |
| 51107 | 0 | 117591 | NTHLKAVKMTLKN                    | 2.58 | 0.01 | 0.78 | 0.44 | 1.13 | 0.85 |
| 51108 | 0 | 121667 | NTHLKAVKMTLKNR                   | 2.64 | 0.01 | 0.78 | 0.44 | 1.13 | 0.28 |
| 51109 | 0 | 153276 | NTHPQAMQWNSTTFH                  | 2.68 | 0.01 | 2.08 | 0.68 | 0.22 | 0.28 |
| 51110 | 0 | 46111  | NHTTVGAAAASRSTAGLT<br>SLFSIGRSQK | 3.24 | 0.01 | 1.72 | 0.44 | 0.85 | 0.28 |
| 51111 | 0 | 46111  | NHTTVGAAAASRSTAGLT<br>SLFSIGRSQK | 3.24 | 0.01 | 1.72 | 0.44 | 0.85 | 0.28 |
| 51112 | 0 | 46111  | NHTTVGAAAASRSTAGLT<br>SLFSIGRSQK | 3.24 | 0.01 | 1.72 | 0.68 | 0.22 | 0.28 |
| 51113 | 0 | 46111  | NHTTVGAAAASRSTAGLT<br>SLFSIGRSQK | 3.24 | 0.01 | 1.72 | 0.68 | 0.22 | 0.28 |
| 51114 | 0 | 46111  | NHTTVGAAAASRSTAGLT<br>SLFSIGRSQK | 3.24 | 0.01 | 1.72 | 1.12 | 0.22 | 0.28 |
| 51115 | 0 | 46111  | NHTTVGAAAASRSTAGLT<br>SLFSIGRSQK | 3.24 | 0.01 | 1.72 | 1.12 | 0.22 | 0.28 |
| 51116 | 0 | 46112  | NHTTVGGTEGFATQRLT<br>SLFALGPSQK  | 3.23 | 0.01 | 3.63 | 0.44 | 0.85 | 0.28 |
| 51117 | 0 | 46112  | NHTTVGGTEGFATQRLT<br>SLFALGPSQK  | 3.23 | 0.01 | 3.63 | 0.44 | 0.85 | 0.28 |
| 51118 | 0 | 46112  | NHTTVGGTEGFATQRLT<br>SLFALGPSQK  | 3.23 | 0.01 | 3.63 | 0.68 | 0.22 | 0.28 |
| 51119 | 0 | 46112  | NHTTVGGTEGFATQRLT<br>SLFALGPSQK  | 3.23 | 0.01 | 3.63 | 0.68 | 0.22 | 0.28 |

|       |   |        |                                     |      |      |      |      |      |      |
|-------|---|--------|-------------------------------------|------|------|------|------|------|------|
| 51120 | 0 | 46112  | NHTTVGGTEGFATQRLT<br>SLFALGPSQK     | 3.23 | 0.01 | 1.72 | 0.44 | 0.85 | 0.28 |
| 51121 | 0 | 46112  | NHTTVGGTEGFATQRLT<br>SLFALGPSQK     | 3.23 | 0.01 | 3.63 | 0.44 | 0.85 | 0.28 |
| 51122 | 0 | 46112  | NHTTVGGTEGFATQRLT<br>SLFALGPSQK     | 3.23 | 0.01 | 3.63 | 1.12 | 0.22 | 0.28 |
| 51123 | 0 | 46112  | NHTTVGGTEGFATQRLT<br>SLFALGPSQK     | 3.23 | 0.01 | 3.63 | 1.12 | 0.22 | 0.28 |
| 51124 | 0 | 46113  | NTHVSGGRVGHTRSLT<br>SFFTPGPQQK      | 3.24 | 0.01 | 1.72 | 0.44 | 0.85 | 0.28 |
| 51125 | 0 | 46113  | NTHVSGGRVGHTRSLT<br>SFFTPGPQQK      | 3.24 | 0.01 | 1.72 | 0.44 | 0.85 | 0.28 |
| 51126 | 0 | 46113  | NTHVSGGRVGHTRSLT<br>SFFTPGPQQK      | 3.24 | 0.01 | 1.72 | 0.68 | 0.22 | 0.28 |
| 51127 | 0 | 46113  | NTHVSGGRVGHTRSLT<br>SFFTPGPQQK      | 3.24 | 0.01 | 1.72 | 0.68 | 0.22 | 0.28 |
| 51128 | 0 | 46113  | NTHVSGGRVGHTRSLT<br>SFFTPGPQQK      | 3.24 | 0.01 | 1.72 | 1.12 | 0.22 | 0.28 |
| 51129 | 0 | 46113  | NTHVSGGRVGHTRSLT<br>SFFTPGPQQK      | 3.24 | 0.01 | 1.72 | 1.12 | 0.22 | 0.28 |
| 51130 | 0 | 46114  | NTHVTGAVQGHGAFTL<br>TSLFQPGASQKIQLV | 3.39 | 0.01 | 1.72 | 0.68 | 0.22 | 0.28 |
| 51131 | 0 | 46115  | NTHVTGGVVARNAIRIT<br>TFLNPGPAQN     | 3.24 | 0.01 | 1.72 | 0.44 | 0.85 | 0.28 |
| 51132 | 0 | 46115  | NTHVTGGVVARNAIRIT<br>TFLNPGPAQN     | 3.24 | 0.01 | 1.72 | 0.44 | 0.85 | 0.28 |
| 51133 | 0 | 46115  | NTHVTGGVVARNAIRIT<br>TFLNPGPAQN     | 3.24 | 0.01 | 1.72 | 0.68 | 0.22 | 0.28 |
| 51134 | 0 | 46115  | NTHVTGGVVARNAIRIT<br>TFLNPGPAQN     | 3.24 | 0.01 | 1.72 | 0.68 | 0.22 | 0.28 |
| 51135 | 0 | 46115  | NTHVTGGVVARNAIRIT<br>TFLNPGPAQN     | 3.24 | 0.01 | 1.72 | 0.44 | 0.85 | 0.28 |
| 51136 | 0 | 46115  | NTHVTGGVVARNAIRIT<br>TFLNPGPAQN     | 3.24 | 0.01 | 1.72 | 1.12 | 0.22 | 0.28 |
| 51137 | 0 | 46115  | NTHVTGGVVARNAIRIT<br>TFLNPGPAQN     | 3.24 | 0.01 | 1.72 | 1.12 | 0.22 | 0.28 |
| 51138 | 0 | 46115  | NTHVTGGVVARNAIRIT<br>TFLNPGPAQN     | 3.24 | 0.01 | 1.72 | 1.12 | 0.22 | 0.28 |
| 51139 | 0 | 46115  | NTHVTGGVVARNAIRIT<br>TFLNPGPAQN     | 3.24 | 0.01 | 1.72 | 1.12 | 0.22 | 0.28 |
| 51140 | 0 | 115875 | NTIASGEPTS                          | 2.31 | 0.01 | 1.60 | 0.44 | 1.23 | 0.85 |
| 51141 | 0 | 115875 | NTIASGEPTS                          | 2.31 | 0.01 | 1.60 | 0.44 | 1.23 | 0.85 |
| 51142 | 0 | 46127  | NTIMASKSVGTAE                       | 2.54 | 0.01 | 3.00 | 0.44 | 0.85 | 0.28 |
| 51143 | 0 | 100366 | NTKINRGIFN                          | 2.34 | 0.01 | 2.18 | 2.16 | 0.22 | 0.28 |
| 51144 | 0 | 236273 | NTKLQTLTLHQVREY                     | 2.68 | 0.01 | 1.66 | 0.44 | 0.85 | 1.28 |
| 51145 | 0 | 102696 | NTKWDIYGY                           | 2.21 | 0.01 | 4.23 | 0.68 | 0.22 | 1.27 |

|       |   |        |                                    |      |      |      |      |      |      |
|-------|---|--------|------------------------------------|------|------|------|------|------|------|
| 51146 | 0 | 102697 | NTKWDIYRY                          | 2.21 | 0.01 | 3.97 | 0.68 | 0.22 | 0.28 |
| 51147 | 0 | 102697 | NTKWDIYRY                          | 2.21 | 0.01 | 3.97 | 0.68 | 0.22 | 0.28 |
| 51148 | 0 | 238813 | NTLAGSGLFRMNVF                     | 2.62 | 0.01 | 2.14 | 2.65 | 0.22 | 0.85 |
|       |   |        | NTLGAPIDGKGPLDHDG                  |      |      |      |      |      |      |
| 51149 | 0 | 78475  | FSAVEAIAPGVIERQSVD<br>QPVQTGYKAV   | 3.75 | 0.01 | 2.24 | 1.15 | 0.22 | 0.85 |
| 51150 | 0 | 135191 | NTLKTPRVGGC                        | 2.38 | 0.01 | 0.90 | 0.44 | 1.13 | 1.27 |
| 51151 | 0 | 135191 | NTLKTPRVGGC                        | 2.38 | 0.01 | 0.90 | 0.44 | 1.13 | 0.28 |
| 51152 | 0 | 135191 | NTLKTPRVGGC                        | 2.38 | 0.01 | 0.90 | 0.44 | 1.13 | 1.34 |
| 51153 | 0 | 135191 | NTLKTPRVGGC                        | 2.38 | 0.01 | 0.90 | 0.44 | 1.13 | 0.28 |
| 51154 | 0 | 135191 | NTLKTPRVGGC                        | 2.38 | 0.01 | 0.90 | 0.44 | 1.13 | 1.75 |
| 51155 | 0 | 135191 | NTLKTPRVGGC                        | 2.38 | 0.01 | 0.90 | 0.44 | 1.13 | 1.75 |
| 51156 | 0 | 135191 | NTLKTPRVGGC                        | 2.38 | 0.01 | 0.90 | 0.44 | 1.13 | 0.28 |
| 51157 | 0 | 135191 | NTLKTPRVGGC                        | 2.38 | 0.01 | 0.90 | 0.44 | 1.13 | 1.75 |
| 51158 | 0 | 346967 | NTLLYSDDDELFLSQQ                   | 2.67 | 0.01 | 1.61 | 0.44 | 0.85 | 1.28 |
| 51159 | 0 | 46165  | NTLQNQGA                           | 2.15 | 0.01 | 2.40 | 2.43 | 0.22 | 0.28 |
| 51160 | 0 | 167788 | NTLQNQGAW                          | 2.24 | 0.01 | 2.40 | 2.43 | 0.22 | 0.28 |
| 51161 | 0 | 237863 | NTLTNIKVQLIRMMEGE<br>G             | 2.85 | 0.01 | 3.19 | 0.44 | 0.85 | 0.85 |
| 51162 | 0 | 237863 | NTLTNIKVQLIRMMEGE<br>G             | 2.85 | 0.01 | 3.19 | 0.44 | 0.85 | 0.85 |
| 51163 | 0 | 237863 | NTLTNIKVQLIRMMEGE<br>G             | 2.85 | 0.01 | 3.19 | 0.44 | 0.22 | 0.85 |
| 51164 | 0 | 195049 | NTLVGVLT                           | 2.26 | 0.01 | 2.24 | 1.15 | 0.22 | 0.85 |
| 51165 | 0 | 195049 | NTLVGVLT                           | 2.26 | 0.01 | 2.24 | 1.81 | 0.22 | 0.28 |
| 51166 | 0 | 195049 | NTLVGVLT                           | 2.26 | 0.01 | 2.24 | 0.68 | 0.22 | 0.28 |
| 51167 | 0 | 195049 | NTLVGVLT                           | 2.26 | 0.01 | 2.24 | 1.15 | 0.22 | 0.85 |
| 51168 | 0 | 91775  | NTLWTGPKPEANCII                    | 2.65 | 0.01 | 3.12 | 1.12 | 0.22 | 0.28 |
| 51169 | 0 | 91775  | NTLWTGPKPEANCII                    | 2.65 | 0.01 | 3.12 | 1.12 | 0.22 | 0.28 |
| 51170 | 0 | 46179  | NTMDVIKKMLADQTV                    | 2.67 | 0.01 | 2.28 | 0.68 | 0.22 | 0.28 |
| 51171 | 0 | 46179  | NTMDVIKKMLADQTV                    | 2.67 | 0.01 | 2.28 | 1.20 | 0.22 | 0.28 |
| 51172 | 0 | 46179  | NTMDVIKKMLADQTV                    | 2.67 | 0.01 | 2.28 | 1.20 | 0.22 | 0.28 |
| 51173 | 0 | 46179  | NTMDVIKKMLADQTV                    | 2.67 | 0.01 | 2.28 | 1.20 | 0.22 | 1.27 |
| 51174 | 0 | 181005 | NTMTQMY                            | 2.04 | 0.01 | 0.90 | 0.68 | 0.22 | 1.39 |
| 51175 | 0 | 504112 | NTNGSWHIN                          | 2.24 | 0.01 | 2.68 | 0.44 | 0.85 | 2.49 |
| 51176 | 0 | 504112 | NTNGSWHIN                          | 2.24 | 0.01 | 2.68 | 0.44 | 0.85 | 0.28 |
| 51177 | 0 | 46184  | NTNGSWHINR                         | 2.32 | 0.01 | 1.96 | 0.44 | 0.85 | 1.34 |
| 51178 | 0 | 46194  | NTNRRPQ                            | 2.04 | 0.01 | 1.72 | 0.44 | 0.85 | 0.28 |
| 51179 | 0 | 46196  | NTNRRPQDVKFPGGGQ<br>IVGGVYLLPRRGPR | 3.38 | 0.01 | 1.72 | 0.44 | 1.59 | 0.28 |
| 51180 | 0 | 46198  | NTNSGPDDQIGYYRRAT<br>R             | 2.84 | 0.01 | 2.91 | 0.44 | 0.85 | 0.28 |



|       |   |        |                                                  |      |      |      |      |      |      |
|-------|---|--------|--------------------------------------------------|------|------|------|------|------|------|
| 51181 | 0 | 46198  | NTNSGPDDQIGYYRRAT<br>R                           | 2.84 | 0.01 | 2.91 | 0.68 | 0.22 | 0.28 |
| 51182 | 0 | 46199  | NTNSGPDDQIGYYRRAT<br>RRV                         | 2.93 | 0.01 | 2.45 | 1.20 | 0.22 | 1.48 |
| 51183 | 0 | 347018 | NTNSTPTTGDDDPAA                                  | 2.70 | 0.01 | 1.61 | 0.44 | 0.85 | 1.28 |
| 51184 | 0 | 46200  | NTNSVGAN                                         | 2.15 | 0.01 | 2.96 | 0.68 | 0.22 | 0.28 |
| 51185 | 0 | 46200  | NTNSVGAN                                         | 2.15 | 0.01 | 2.96 | 0.68 | 0.22 | 0.28 |
| 51186 | 0 | 46202  | NTNTGNDVVGVGRLSE<br>SNAAKMNDDVDGIVRT<br>PLAELLDG | 3.64 | 0.01 | 3.57 | 0.44 | 0.85 | 0.85 |
| 51187 | 0 | 46202  | NTNTGNDVVGVGRLSE<br>SNAAKMNDDVDGIVRT<br>PLAELLDG | 3.64 | 0.01 | 3.57 | 0.44 | 0.85 | 0.85 |
| 51188 | 0 | 153435 | NTPAANNRAREAPQY<br>M                             | 2.81 | 0.01 | 3.00 | 0.68 | 0.22 | 0.28 |
| 51189 | 0 | 103452 | NTPAIAVNEAEYGEM                                  | 2.69 | 0.01 | 2.04 | 0.44 | 0.85 | 1.28 |
| 51190 | 0 | 167352 | NTPAWLNHTTVI                                     | 2.47 | 0.01 | 0.90 | 1.15 | 0.22 | 1.39 |
| 51191 | 0 | 127754 | NTPEEKD                                          | 2.01 | 0.01 | 0.78 | 0.44 | 1.13 | 0.85 |
| 51192 | 0 | 46215  | NTPFKIGYGDGSSSQGT<br>LYKDTVGFGG                  | 3.22 | 0.01 | 4.45 | 0.68 | 0.22 | 0.85 |
| 51193 | 0 | 46215  | NTPFKIGYGDGSSSQGT<br>LYKDTVGFGG                  | 3.22 | 0.01 | 4.45 | 0.68 | 0.22 | 0.85 |
| 51194 | 0 | 46215  | NTPFKIGYGDGSSSQGT<br>LYKDTVGFGG                  | 3.22 | 0.01 | 4.45 | 0.68 | 0.22 | 0.85 |
| 51195 | 0 | 46234  | NTQIHT                                           | 1.90 | 0.01 | 3.24 | 1.12 | 0.22 | 0.28 |
| 51196 | 0 | 46235  | NTQIYTINDK                                       | 2.34 | 0.01 | 2.66 | 0.68 | 0.22 | 0.28 |
| 51197 | 0 | 46236  | NTQIYTINDKILSYTESM<br>AGK                        | 2.99 | 0.01 | 2.24 | 1.12 | 0.22 | 0.28 |
| 51198 | 0 | 46240  | NTREVFAQVKQMYKTP<br>T                            | 2.78 | 0.01 | 2.48 | 1.20 | 0.22 | 0.28 |
| 51199 | 0 | 46242  | NTRNIDATSTGN                                     | 2.50 | 0.01 | 2.45 | 0.44 | 0.85 | 2.35 |
| 51200 | 0 | 46242  | NTRNIDATSTGN                                     | 2.50 | 0.01 | 2.45 | 0.68 | 0.22 | 0.28 |
| 51201 | 0 | 46242  | NTRNIDATSTGN                                     | 2.50 | 0.01 | 2.45 | 0.68 | 0.22 | 0.28 |
| 51202 | 0 | 46242  | NTRNIDATSTGN                                     | 2.50 | 0.01 | 2.45 | 0.68 | 0.22 | 2.97 |
| 51203 | 0 | 46242  | NTRNIDATSTGN                                     | 2.50 | 0.01 | 2.45 | 0.44 | 0.85 | 0.28 |
| 51204 | 0 | 46249  | NTRTIGGTAGSTAFKFTS<br>LFTSGPTQK                  | 3.26 | 0.01 | 0.90 | 0.44 | 0.85 | 0.28 |
| 51205 | 0 | 46250  | NTRTVGGSVASQARGFT<br>SLFTSGPAQKIQLV              | 3.39 | 0.01 | 1.72 | 0.44 | 0.85 | 0.28 |
| 51206 | 0 | 46250  | NTRTVGGSVASQARGFT<br>SLFTSGPAQKIQLV              | 3.39 | 0.01 | 1.72 | 2.74 | 0.22 | 0.28 |
| 51207 | 0 | 46250  | NTRTVGGSVASQARGFT<br>SLFTSGPAQKIQLV              | 3.39 | 0.01 | 1.72 | 3.27 | 0.22 | 0.28 |
| 51208 | 0 | 489683 | NTRVAGQTVAFI                                     | 2.48 | 0.01 | 0.78 | 1.12 | 0.22 | 0.28 |

|       |   |        |                                    |      |      |      |      |      |      |
|-------|---|--------|------------------------------------|------|------|------|------|------|------|
| 51209 | 0 | 489683 | NTRVAGQTVAF                        | 2.48 | 0.01 | 0.78 | 1.12 | 2.25 | 3.16 |
| 51210 | 0 | 489683 | NTRVAGQTVAF                        | 2.48 | 0.01 | 0.78 | 1.12 | 0.22 | 1.34 |
| 51211 | 0 | 46254  | NTRVTGGRQGAAHSL<br>TSLFSPGASQN     | 3.26 | 0.01 | 1.72 | 0.44 | 0.85 | 2.02 |
| 51212 | 0 | 46255  | NTRVTGGVQS                         | 2.32 | 0.01 | 1.72 | 0.44 | 0.85 | 1.27 |
| 51213 | 0 | 46256  | NTRVTGGVQSHTRGF<br>VGMFSLGPSQR     | 3.25 | 0.01 | 1.72 | 0.44 | 0.85 | 0.28 |
| 51214 | 0 | 46256  | NTRVTGGVQSHTRGF<br>VGMFSLGPSQR     | 3.25 | 0.01 | 1.72 | 0.68 | 0.22 | 0.28 |
| 51215 | 0 | 46256  | NTRVTGGVQSHTRGF<br>VGMFSLGPSQR     | 3.25 | 0.01 | 1.72 | 0.44 | 0.85 | 1.27 |
| 51216 | 0 | 46256  | NTRVTGGVQSHTRGF<br>VGMFSLGPSQR     | 3.25 | 0.01 | 1.72 | 1.12 | 0.22 | 0.28 |
| 51217 | 0 | 46256  | NTRVTGGVQSHTRGF<br>VGMFSLGPSQR     | 3.25 | 0.01 | 1.72 | 1.12 | 0.22 | 0.28 |
| 51218 | 0 | 46256  | NTRVTGGVQSHTRGF<br>VGMFSLGPSQR     | 3.25 | 0.01 | 1.72 | 1.12 | 0.22 | 0.28 |
| 51219 | 0 | 46257  | NTRVTGGVQSRTTGTFV<br>GLFTPGPSQR    | 3.28 | 0.01 | 1.72 | 0.68 | 0.22 | 0.28 |
| 51220 | 0 | 46257  | NTRVTGGVQSRTTGTFV<br>GLFTPGPSQR    | 3.28 | 0.01 | 1.72 | 1.12 | 0.22 | 0.28 |
| 51221 | 0 | 46257  | NTRVTGGVQSRTTGTFV<br>GLFTPGPSQR    | 3.28 | 0.01 | 1.72 | 1.12 | 0.22 | 0.28 |
| 51222 | 0 | 46257  | NTRVTGGVQSRTTGTFV<br>GLFTPGPSQR    | 3.28 | 0.01 | 1.72 | 1.12 | 0.22 | 0.28 |
| 51223 | 0 | 347120 | NTSAPAAGGFGSATT                    | 2.71 | 0.01 | 1.61 | 0.44 | 0.85 | 1.28 |
| 51224 | 0 | 46258  | NTSDSQKE                           | 2.12 | 0.01 | 1.66 | 0.44 | 0.85 | 0.28 |
| 51225 | 0 | 46258  | NTSDSQKE                           | 2.12 | 0.01 | 1.66 | 0.44 | 0.85 | 0.28 |
| 51226 | 0 | 46258  | NTSDSQKE                           | 2.12 | 0.01 | 1.66 | 3.23 | 0.22 | 0.28 |
| 51227 | 0 | 46258  | NTSDSQKE                           | 2.12 | 0.01 | 1.66 | 3.23 | 0.22 | 0.85 |
| 51228 | 0 | 46258  | NTSDSQKE                           | 2.12 | 0.01 | 3.42 | 0.68 | 0.22 | 0.28 |
| 51229 | 0 | 46268  | NTSSASAAKTPPTPAPT<br>TP            | 3.01 | 0.01 | 2.40 | 0.44 | 1.59 | 0.28 |
| 51230 | 0 | 46271  | NTSSGASPPADASDS                    | 2.72 | 0.01 | 3.26 | 0.44 | 0.85 | 0.28 |
| 51231 | 0 | 152877 | NTSTSRTHTS                         | 2.36 | 0.01 | 2.18 | 2.16 | 0.22 | 0.28 |
| 51232 | 0 | 46275  | NTTASDQLLVENAAGHR<br>V             | 2.82 | 0.01 | 2.53 | 0.44 | 0.85 | 0.28 |
| 51233 | 0 | 46276  | NTTASDQLLVENAAGHR<br>VA            | 2.88 | 0.01 | 2.70 | 0.44 | 0.85 | 0.28 |
| 51234 | 0 | 46276  | NTTASDQLLVENAAGHR<br>VA            | 2.88 | 0.01 | 2.53 | 2.37 | 0.22 | 0.28 |
| 51235 | 0 | 46276  | NTTASDQLLVENAAGHR<br>VA            | 2.88 | 0.01 | 2.53 | 2.37 | 0.22 | 0.85 |
| 51236 | 0 | 46276  | NTTASDQLLVENAAGHR<br>VA            | 2.88 | 0.01 | 2.53 | 2.37 | 0.22 | 0.28 |
| 51237 | 0 | 46277  | NTTASDQLLVENAAGHR<br>VAISTYTTSLGAG | 3.34 | 0.01 | 2.70 | 1.15 | 0.22 | 0.28 |

|       |   |        |                                                         |      |      |      |      |      |      |
|-------|---|--------|---------------------------------------------------------|------|------|------|------|------|------|
| 51238 | 0 | 347171 | NTTATTGSDSGSTAV                                         | 2.73 | 0.01 | 1.61 | 0.44 | 0.85 | 1.28 |
| 51239 | 0 | 347172 | NTTATTGSDSSTAV                                          | 2.72 | 0.01 | 1.61 | 0.44 | 0.85 | 1.28 |
| 51240 | 0 | 243020 | NTTCVNWNQYYTNCS                                         | 2.71 | 0.01 | 0.78 | 0.44 | 1.59 | 0.28 |
| 51241 | 0 | 130571 | NTTDMMIFDLIHNYNR                                        | 2.74 | 4.63 | 1.75 | 3.06 | 0.22 | 0.28 |
| 51242 | 0 | 130571 | NTTDMMIFDLIHNYNR                                        | 2.74 | 4.63 | 1.75 | 3.06 | 0.22 | 0.28 |
| 51243 | 0 | 534776 | NTTDSDSLWVWWDGG<br>SKAYLYISTYTTMLGTGP<br>VNITGLGAVGPNSA | 3.81 | 0.01 | 2.70 | 0.68 | 0.22 | 0.28 |
| 51244 | 0 | 534776 | NTTDSDSLWVWWDGG<br>SKAYLYISTYTTMLGTGP<br>VNITGLGAVGPNSA | 3.81 | 0.01 | 2.70 | 0.68 | 0.22 | 2.75 |
| 51245 | 0 | 534776 | NTTDSDSLWVWWDGG<br>SKAYLYISTYTTMLGTGP<br>VNITGLGAVGPNSA | 3.81 | 0.01 | 2.70 | 0.68 | 0.22 | 1.48 |
| 51246 | 0 | 534776 | NTTDSDSLWVWWDGG<br>SKAYLYISTYTTMLGTGP<br>VNITGLGAVGPNSA | 3.81 | 0.01 | 2.70 | 0.68 | 0.22 | 1.48 |
| 51247 | 0 | 534776 | NTTDSDSLWVWWDGG<br>SKAYLYISTYTTMLGTGP<br>VNITGLGAVGPNSA | 3.81 | 0.01 | 2.70 | 0.68 | 0.22 | 0.85 |
| 51248 | 0 | 534776 | NTTDSDSLWVWWDGG<br>SKAYLYISTYTTMLGTGP<br>VNITGLGAVGPNSA | 3.81 | 0.01 | 2.70 | 0.68 | 0.22 | 1.34 |
| 51249 | 0 | 182248 | NTTEVQKHIPLCALL                                         | 2.61 | 0.01 | 0.78 | 0.44 | 1.13 | 0.85 |
| 51250 | 0 | 181751 | NTTHDLLGNVLVTAK                                         | 2.70 | 0.01 | 1.66 | 2.36 | 0.22 | 1.28 |
| 51251 | 0 | 229401 | NTTIIDGAGEKEIAKRIN<br>VIK                               | 3.07 | 0.01 | 3.65 | 0.68 | 0.22 | 3.93 |
| 51252 | 0 | 229401 | NTTIIDGAGEKEIAKRIN<br>VIK                               | 3.07 | 0.01 | 3.65 | 0.68 | 0.22 | 0.28 |
| 51253 | 0 | 229401 | NTTIIDGAGEKEIAKRIN<br>VIK                               | 3.07 | 0.01 | 3.65 | 0.68 | 0.22 | 0.28 |
| 51254 | 0 | 229401 | NTTIIDGAGEKEIAKRIN<br>VIK                               | 3.07 | 0.01 | 3.65 | 0.68 | 0.22 | 0.28 |
| 51255 | 0 | 229401 | NTTIIDGAGEKEIAKRIN<br>VIK                               | 3.07 | 0.01 | 3.65 | 0.68 | 0.22 | 0.28 |
| 51256 | 0 | 229401 | NTTIIDGAGEKEIAKRIN<br>VIK                               | 3.07 | 0.01 | 3.65 | 0.68 | 0.22 | 1.75 |

|       |   |        |                                                    |      |      |      |      |      |      |
|-------|---|--------|----------------------------------------------------|------|------|------|------|------|------|
| 51257 | 0 | 229401 | NTTIIDGAGEKEIAKRIN<br>VIK                          | 3.07 | 0.01 | 3.65 | 0.68 | 0.22 | 1.39 |
| 51258 | 0 | 101098 | NTTNPT                                             | 1.94 | 0.01 | 3.02 | 1.12 | 0.22 | 0.28 |
| 51259 | 0 | 523307 | NTTPVDISIIDSVD                                     | 2.72 | 0.01 | 2.24 | 0.44 | 1.41 | 1.28 |
| 51260 | 0 | 114910 | NTTSEDGKVM                                         | 2.28 | 0.01 | 2.25 | 0.44 | 1.23 | 0.85 |
| 51261 | 0 | 114910 | NTTSEDGKVM                                         | 2.28 | 0.01 | 2.25 | 0.44 | 1.23 | 0.85 |
| 51262 | 0 | 114910 | NTTSEDGKVM                                         | 2.28 | 0.01 | 2.25 | 0.44 | 2.98 | 0.85 |
| 51263 | 0 | 227422 | NTTTEDHKIMASENS                                    | 2.67 | 0.01 | 2.97 | 0.44 | 1.59 | 0.28 |
| 51264 | 0 | 227422 | NTTTEDHKIMASENS                                    | 2.67 | 0.01 | 2.97 | 0.44 | 0.85 | 0.28 |
| 51265 | 0 | 78222  | NTTTESRCPT                                         | 2.32 | 0.01 | 2.30 | 0.68 | 0.22 | 0.28 |
| 51266 | 0 | 46290  | NTTTTQTQPSKP                                       | 2.51 | 0.01 | 2.38 | 0.44 | 1.74 | 0.28 |
| 51267 | 0 | 46293  | NTTVIVREIVGDTMKTT<br>VTV                           | 2.97 | 0.01 | 2.93 | 1.81 | 0.22 | 0.28 |
| 51268 | 0 | 46293  | NTTVIVREIVGDTMKTT<br>VTV                           | 2.97 | 0.01 | 2.93 | 2.69 | 0.22 | 0.28 |
| 51269 | 0 | 46297  | NTTYILVKGK                                         | 2.30 | 0.01 | 2.84 | 0.44 | 0.85 | 0.28 |
| 51270 | 0 | 227423 | NTVGDQAGSTGGSPQG<br>STGASQPGSSEPSNPVS<br>SGHSVSTVS | 3.72 | 0.01 | 3.28 | 0.44 | 1.59 | 0.28 |
| 51271 | 0 | 227423 | NTVGDQAGSTGGSPQG<br>STGASQPGSSEPSNPVS<br>SGHSVSTVS | 3.72 | 0.01 | 3.28 | 3.33 | 0.22 | 0.28 |
| 51272 | 0 | 450897 | NTVGTQVQ                                           | 2.04 | 0.01 | 0.90 | 0.44 | 1.41 | 1.39 |
| 51273 | 0 | 131992 | NTVREVDHLRDRNSG                                    | 2.69 | 0.01 | 0.78 | 0.44 | 1.13 | 0.85 |
| 51274 | 0 | 172585 | NTVRPPTLFYHW                                       | 2.44 | 0.01 | 0.90 | 0.44 | 0.85 | 1.39 |
| 51275 | 0 | 46313  | NTWEGQAASAALGAL                                    | 2.69 | 0.01 | 2.59 | 0.68 | 0.22 | 0.28 |
| 51276 | 0 | 46313  | NTWEGQAASAALGAL                                    | 2.69 | 0.01 | 2.59 | 1.12 | 0.22 | 0.28 |
| 51277 | 0 | 46316  | NTWKSK                                             | 1.90 | 0.01 | 1.96 | 0.44 | 0.85 | 0.28 |
| 51278 | 0 | 106692 | NTWKSWKRVDNNTDG                                    | 2.70 | 0.01 | 3.47 | 0.68 | 0.22 | 0.28 |
| 51279 | 0 | 106692 | NTWKSWKRVDNNTDG                                    | 2.70 | 0.01 | 3.47 | 0.68 | 0.22 | 0.28 |
| 51280 | 0 | 181752 | NTWPTINKASGV                                       | 2.46 | 0.01 | 0.90 | 0.68 | 0.22 | 0.28 |
| 51281 | 0 | 117223 | NTWTTCDIAFPSK                                      | 2.58 | 0.01 | 0.78 | 2.25 | 0.22 | 1.27 |
| 51282 | 0 | 117223 | NTWTTCDIAFPSK                                      | 2.58 | 0.01 | 0.78 | 2.25 | 2.60 | 1.75 |
| 51283 | 0 | 117223 | NTWTTCDIAFPSK                                      | 2.58 | 0.01 | 0.78 | 2.25 | 0.22 | 1.27 |
| 51284 | 0 | 117223 | NTWTTCDIAFPSK                                      | 2.58 | 0.01 | 0.78 | 2.25 | 0.22 | 1.27 |
| 51285 | 0 | 117223 | NTWTTCDIAFPSK                                      | 2.58 | 0.01 | 0.78 | 2.25 | 0.22 | 1.27 |
| 51286 | 0 | 46317  | NTWTTCQIAFPSK                                      | 2.58 | 0.01 | 0.78 | 1.12 | 0.22 | 0.28 |
| 51287 | 0 | 46317  | NTWTTCQIAFPSK                                      | 2.58 | 0.01 | 1.75 | 2.25 | 0.22 | 0.28 |
| 51288 | 0 | 46317  | NTWTTCQIAFPSK                                      | 2.58 | 0.01 | 1.75 | 2.25 | 0.22 | 0.28 |
| 51289 | 0 | 46317  | NTWTTCQIAFPSK                                      | 2.58 | 0.01 | 1.75 | 2.25 | 0.22 | 1.48 |
| 51290 | 0 | 46317  | NTWTTCQIAFPSK                                      | 2.58 | 0.01 | 1.75 | 2.25 | 2.60 | 1.75 |
| 51291 | 0 | 46317  | NTWTTCQIAFPSK                                      | 2.58 | 0.01 | 1.75 | 2.25 | 0.22 | 1.75 |
| 51292 | 0 | 46317  | NTWTTCQIAFPSK                                      | 2.58 | 0.01 | 1.75 | 2.25 | 0.22 | 0.28 |

|       |   |        |                                  |      |      |      |      |      |      |
|-------|---|--------|----------------------------------|------|------|------|------|------|------|
| 51293 | 0 | 46317  | NTW TTCQSI AFPSK                 | 2.58 | 0.01 | 1.75 | 2.25 | 0.22 | 0.28 |
| 51294 | 0 | 46317  | NTW TTCQSI AFPSK                 | 2.58 | 0.01 | 1.75 | 2.25 | 0.22 | 1.27 |
| 51295 | 0 | 46317  | NTW TTCQSI AFPSK                 | 2.58 | 0.01 | 1.75 | 2.25 | 0.22 | 1.27 |
| 51296 | 0 | 46317  | NTW TTCQSI AFPSK                 | 2.58 | 0.01 | 1.75 | 2.25 | 0.22 | 0.28 |
| 51297 | 0 | 46317  | NTW TTCQSI AFPSK                 | 2.58 | 0.01 | 1.75 | 2.25 | 0.22 | 0.28 |
| 51298 | 0 | 46317  | NTW TTCQSI AFPSK                 | 2.58 | 0.01 | 1.75 | 2.25 | 0.22 | 0.28 |
| 51299 | 0 | 46317  | NTW TTCQSI AFPSK                 | 2.58 | 0.01 | 1.75 | 2.25 | 0.22 | 0.28 |
| 51300 | 0 | 46317  | NTW TTCQSI AFPSK                 | 2.58 | 0.01 | 1.75 | 2.25 | 2.60 | 3.40 |
| 51301 | 0 | 46318  | NTYASGGAVGHQTASF<br>VRLLAPGPQQN  | 3.24 | 0.01 | 1.72 | 0.68 | 0.22 | 0.28 |
| 51302 | 0 | 46318  | NTYASGGAVGHQTASF<br>VRLLAPGPQQN  | 3.24 | 0.01 | 1.72 | 1.12 | 0.22 | 0.28 |
| 51303 | 0 | 46318  | NTYASGGAVGHQTASF<br>VRLLAPGPQQN  | 3.24 | 0.01 | 1.72 | 1.12 | 0.22 | 0.28 |
| 51304 | 0 | 46318  | NTYASGGAVGHQTASF<br>VRLLAPGPQQN  | 3.24 | 0.01 | 1.72 | 1.12 | 0.22 | 0.28 |
| 51305 | 0 | 46319  | NTYFTAFLDGP K                    | 2.45 | 0.01 | 0.90 | 0.68 | 0.22 | 0.28 |
| 51306 | 0 | 46319  | NTYFTAFLDGP K                    | 2.45 | 0.01 | 0.90 | 0.44 | 0.85 | 0.28 |
| 51307 | 0 | 135842 | NTYGDFMVKSPN                     | 2.44 | 0.01 | 0.90 | 1.15 | 0.22 | 0.28 |
| 51308 | 0 | 135842 | NTYGDFMVKSPN                     | 2.44 | 0.01 | 0.90 | 1.15 | 0.22 | 1.27 |
| 51309 | 0 | 135842 | NTYGDFMVKSPN                     | 2.44 | 0.01 | 0.90 | 0.68 | 0.22 | 0.28 |
| 51310 | 0 | 46321  | NTYGLTALLSPGPSQQ                 | 2.74 | 0.01 | 1.72 | 0.68 | 0.22 | 0.28 |
| 51311 | 0 | 46330  | NTYVTGGAAAARGASGIT<br>SLFSRGPSQK | 3.22 | 0.01 | 1.72 | 0.44 | 0.85 | 0.28 |
| 51312 | 0 | 46330  | NTYVTGGAAAARGASGIT<br>SLFSRGPSQK | 3.22 | 0.01 | 1.72 | 0.44 | 0.85 | 0.28 |
| 51313 | 0 | 46330  | NTYVTGGAAAARGASGIT<br>SLFSRGPSQK | 3.22 | 0.01 | 1.72 | 0.68 | 0.22 | 0.28 |
| 51314 | 0 | 46330  | NTYVTGGAAAARGASGIT<br>SLFSRGPSQK | 3.22 | 0.01 | 1.72 | 0.68 | 0.22 | 0.28 |
| 51315 | 0 | 46330  | NTYVTGGAAAARGASGIT<br>SLFSRGPSQK | 3.22 | 0.01 | 1.72 | 0.44 | 0.85 | 0.28 |
| 51316 | 0 | 46330  | NTYVTGGAAAARGASGIT<br>SLFSRGPSQK | 3.22 | 0.01 | 1.72 | 1.12 | 0.22 | 0.28 |
| 51317 | 0 | 46330  | NTYVTGGAAAARGASGIT<br>SLFSRGPSQK | 3.22 | 0.01 | 1.72 | 1.12 | 0.22 | 0.28 |
| 51318 | 0 | 46330  | NTYVTGGAAAARGASGIT<br>SLFSRGPSQK | 3.22 | 0.01 | 1.72 | 1.12 | 0.22 | 0.28 |
| 51319 | 0 | 46330  | NTYVTGGAAAARGASGIT<br>SLFSRGPSQK | 3.22 | 0.01 | 1.72 | 1.12 | 0.22 | 0.28 |
| 51320 | 0 | 46331  | NTYVTGGSAAHTTSRFT<br>SLFSPGPQQNK | 3.26 | 0.01 | 0.90 | 0.44 | 0.85 | 0.28 |
| 51321 | 0 | 46332  | NTYVTGGSAGRAVAGF<br>AGLLQPGAKQN  | 3.24 | 0.01 | 1.72 | 0.44 | 0.85 | 0.28 |
| 51322 | 0 | 46332  | NTYVTGGSAGRAVAGF<br>AGLLQPGAKQN  | 3.24 | 0.01 | 1.72 | 0.44 | 0.85 | 0.28 |

|       |   |        |                                               |      |      |      |      |      |      |
|-------|---|--------|-----------------------------------------------|------|------|------|------|------|------|
| 51323 | 0 | 46332  | NTYVTGGSAGRAVAGF<br>AGLLQPGAKQN               | 3.24 | 0.01 | 1.72 | 0.68 | 0.22 | 0.28 |
| 51324 | 0 | 46332  | NTYVTGGSAGRAVAGF<br>AGLLQPGAKQN               | 3.24 | 0.01 | 1.72 | 0.68 | 0.22 | 0.28 |
| 51325 | 0 | 46332  | NTYVTGGSAGRAVAGF<br>AGLLQPGAKQN               | 3.24 | 0.01 | 1.72 | 0.44 | 0.85 | 0.28 |
| 51326 | 0 | 46332  | NTYVTGGSAGRAVAGF<br>AGLLQPGAKQN               | 3.24 | 0.01 | 1.72 | 0.44 | 0.85 | 0.28 |
| 51327 | 0 | 46332  | NTYVTGGSAGRAVAGF<br>AGLLQPGAKQN               | 3.24 | 0.01 | 1.72 | 1.12 | 0.22 | 0.28 |
| 51328 | 0 | 46332  | NTYVTGGSAGRAVAGF<br>AGLLQPGAKQN               | 3.24 | 0.01 | 1.72 | 1.12 | 0.22 | 0.28 |
| 51329 | 0 | 450898 | NVAHKMF                                       | 1.99 | 0.01 | 0.90 | 0.44 | 1.41 | 1.39 |
| 51330 | 0 | 111603 | NVAVVVSSESGWPSAG                              | 2.70 | 0.01 | 3.20 | 1.12 | 0.22 | 0.85 |
| 51331 | 0 | 46348  | NVDENANA                                      | 2.17 | 0.01 | 3.29 | 1.20 | 0.22 | 0.28 |
| 51332 | 0 | 46349  | NVDENANAN                                     | 2.27 | 0.01 | 3.37 | 1.12 | 0.22 | 0.28 |
| 51333 | 0 | 190506 | NVDIEKVMITDEEEI                               | 2.70 | 0.01 | 3.19 | 2.00 | 1.41 | 0.28 |
| 51334 | 0 | 46353  | NVDPN                                         | 1.77 | 0.01 | 3.29 | 1.15 | 0.22 | 0.28 |
| 51335 | 0 | 46354  | NVDPNANPNANPNAN<br>P                          | 2.81 | 0.01 | 3.33 | 0.44 | 0.85 | 0.28 |
| 51336 | 0 | 237864 | NVDQGRDPLPRE<br>NVDSILAVKKYFQRITLYL           | 2.48 | 0.01 | 0.90 | 1.20 | 0.22 | 1.39 |
| 51337 | 0 | 134459 | TEKKYSPCAWEVVRAEI<br>M<br>NVDSILAVKKYFQRITLYL | 3.51 | 0.01 | 0.78 | 0.68 | 0.22 | 1.34 |
| 51338 | 0 | 134459 | TEKKYSPCAWEVVRAEI<br>M<br>NVDSILAVKKYFQRITLYL | 3.51 | 0.01 | 0.78 | 0.68 | 0.22 | 1.57 |
| 51339 | 0 | 134459 | TEKKYSPCAWEVVRAEI<br>M<br>NVDSILAVKKYFQRITLYL | 3.51 | 0.01 | 0.78 | 0.68 | 0.22 | 1.57 |
| 51340 | 0 | 134459 | TEKKYSPCAWEVVRAEI<br>M<br>NVDSILAVKKYFQRITLYL | 3.51 | 0.01 | 0.78 | 0.68 | 0.22 | 1.34 |
| 51341 | 0 | 134459 | TEKKYSPCAWEVVRAEI<br>M<br>NVDSILAVKKYFQRITLYL | 3.51 | 0.01 | 0.78 | 0.68 | 0.22 | 1.34 |
| 51342 | 0 | 134459 | TEKKYSPCAWEVVRAEI<br>M                        | 3.51 | 0.01 | 0.78 | 0.68 | 0.22 | 1.34 |
| 51343 | 0 | 229402 | NVEDYVKEG                                     | 2.23 | 0.01 | 2.70 | 0.68 | 0.22 | 0.28 |
| 51344 | 0 | 46363  | NVEENVEE                                      | 2.16 | 0.01 | 1.66 | 1.15 | 0.22 | 0.28 |
| 51345 | 0 | 46364  | NVEHTGLGYALQNAT                               | 2.69 | 0.01 | 4.23 | 2.13 | 0.22 | 0.28 |
| 51346 | 0 | 46371  | NVESQPGGQPNT                                  | 2.49 | 0.01 | 0.90 | 2.22 | 0.85 | 1.39 |
| 51347 | 0 | 46371  | NVESQPGGQPNT                                  | 2.49 | 0.01 | 0.90 | 2.22 | 0.85 | 0.28 |
| 51348 | 0 | 46371  | NVESQPGGQPNT                                  | 2.49 | 0.01 | 0.90 | 2.22 | 0.22 | 0.28 |
| 51349 | 0 | 46371  | NVESQPGGQPNT                                  | 2.49 | 0.01 | 0.90 | 0.68 | 0.22 | 0.28 |

|       |   |        |                                   |      |      |      |      |      |      |
|-------|---|--------|-----------------------------------|------|------|------|------|------|------|
| 51350 | 0 | 46371  | NVESQPGGQPNT                      | 2.49 | 0.01 | 0.90 | 0.68 | 0.22 | 0.28 |
| 51351 | 0 | 46371  | NVESQPGGQPNT                      | 2.49 | 0.01 | 0.90 | 0.68 | 0.22 | 0.85 |
| 51352 | 0 | 46371  | NVESQPGGQPNT                      | 2.49 | 0.01 | 0.90 | 0.68 | 0.22 | 0.28 |
| 51353 | 0 | 46371  | NVESQPGGQPNT                      | 2.49 | 0.01 | 0.90 | 0.68 | 0.22 | 2.12 |
| 51354 | 0 | 46374  | NVETSWSLHGGLVSKD                  | 2.72 | 0.01 | 3.41 | 0.68 | 0.22 | 0.85 |
| 51355 | 0 | 179323 | NVFDMMFTQRQVAEFK                  | 2.66 | 0.01 | 2.36 | 0.44 | 1.23 | 1.28 |
| 51356 | 0 | 179323 | NVFDMMFTQRQVAEFK                  | 2.66 | 0.01 | 2.36 | 0.44 | 1.23 | 1.27 |
| 51357 | 0 | 179323 | NVFDMMFTQRQVAEFK                  | 2.66 | 0.01 | 2.36 | 0.44 | 1.23 | 1.28 |
| 51358 | 0 | 46375  | NVFFLLLSLTHFPLAQ                  | 2.80 | 0.01 | 3.01 | 0.44 | 0.85 | 0.28 |
| 51359 | 0 | 121670 | NVFQLEVAMALVDGL                   | 2.68 | 0.01 | 0.90 | 0.68 | 0.22 | 1.39 |
| 51360 | 0 | 121670 | NVFQLEVAMALVDGL                   | 2.68 | 0.01 | 0.90 | 0.68 | 0.22 | 0.28 |
| 51361 | 0 | 121670 | NVFQLEVAMALVDGL                   | 2.68 | 0.01 | 0.90 | 0.68 | 0.22 | 0.28 |
| 51362 | 0 | 46379  | NVFQTQAGCLIGAEHVD                 | 2.76 | 0.01 | 2.48 | 0.44 | 0.85 | 0.28 |
| 51363 | 0 | 46379  | NVFQTQAGCLIGAEHVD                 | 2.76 | 0.01 | 2.48 | 1.20 | 0.22 | 0.28 |
| 51364 | 0 | 109638 | NVFSCSV                           | 2.04 | 0.01 | 0.78 | 0.44 | 1.13 | 0.28 |
| 51365 | 0 | 119621 | NVFSCSVM                          | 2.14 | 0.01 | 0.78 | 0.44 | 1.93 | 0.28 |
| 51366 | 0 | 144738 | NVGEACHSLHEC                      | 2.48 | 0.01 | 0.90 | 0.68 | 0.22 | 0.28 |
| 51367 | 0 | 138886 | NVGGDNVDIHSIVPVG<br>QDPH          | 2.99 | 0.01 | 4.08 | 0.68 | 2.60 | 1.75 |
| 51368 | 0 | 138886 | NVGGDNVDIHSIVPVG<br>QDPH          | 2.99 | 0.01 | 4.08 | 0.68 | 0.22 | 0.85 |
| 51369 | 0 | 138886 | NVGGDNVDIHSIVPVG<br>QDPH          | 2.99 | 0.01 | 4.08 | 0.68 | 0.22 | 1.48 |
| 51370 | 0 | 138886 | NVGGDNVDIHSIVPVG<br>QDPH          | 2.99 | 0.01 | 4.08 | 0.68 | 0.22 | 0.28 |
| 51371 | 0 | 138886 | NVGGDNVDIHSIVPVG<br>QDPH          | 2.99 | 0.01 | 4.08 | 0.68 | 0.22 | 0.28 |
| 51372 | 0 | 138886 | NVGGDNVDIHSIVPVG<br>QDPH          | 2.99 | 0.01 | 4.08 | 0.44 | 1.13 | 0.28 |
| 51373 | 0 | 138886 | NVGGDNVDIHSIVPVG<br>QDPH          | 2.99 | 0.01 | 4.08 | 0.44 | 1.13 | 0.28 |
| 51374 | 0 | 181753 | NVGIDSTQEAPK                      | 2.40 | 0.01 | 0.90 | 0.68 | 0.22 | 0.28 |
| 51375 | 0 | 46381  | NVGIMFRGKE                        | 2.29 | 0.01 | 1.75 | 0.68 | 0.22 | 0.28 |
| 51376 | 0 | 46381  | NVGIMFRGKE                        | 2.29 | 0.01 | 1.75 | 0.68 | 0.22 | 0.28 |
| 51377 | 0 | 46382  | NVGITQGI                          | 2.14 | 0.01 | 3.06 | 1.12 | 0.22 | 0.28 |
| 51378 | 0 | 130989 | NVGTCTSSPARCGWPR<br>RRTSCAALAGLLV | 3.33 | 0.01 | 0.90 | 0.68 | 0.22 | 1.27 |

|       |   |        |                                   |      |      |      |      |      |      |
|-------|---|--------|-----------------------------------|------|------|------|------|------|------|
| 51379 | 0 | 130989 | NVGTCTSSPARCGWPR<br>RRTSCAALAGLLV | 3.33 | 0.01 | 0.90 | 0.68 | 0.22 | 1.34 |
| 51380 | 0 | 123565 | NVKDYYQKWM                        | 2.30 | 0.01 | 0.78 | 0.44 | 1.13 | 0.85 |
| 51381 | 0 | 123565 | NVKDYYQKWM                        | 2.30 | 0.01 | 0.78 | 1.12 | 1.41 | 0.85 |
| 51382 | 0 | 121671 | NVKELLVASPLVDPF                   | 2.68 | 0.01 | 0.90 | 0.68 | 0.22 | 1.39 |
| 51383 | 0 | 121671 | NVKELLVASPLVDPF                   | 2.68 | 0.01 | 0.90 | 0.68 | 0.22 | 0.28 |
| 51384 | 0 | 121671 | NVKELLVASPLVDPF                   | 2.68 | 0.01 | 0.90 | 0.68 | 0.22 | 0.28 |
|       |   |        | NVKFFNSNKKKRDDFEK                 |      |      |      |      |      |      |
| 51385 | 0 | 135585 | LTNYSVTDLNVQRKAIH<br>ELIQVM       | 3.62 | 4.63 | 0.78 | 1.12 | 1.41 | 0.28 |
|       |   |        | NVKFPGGGQIVGGVYV<br>LPRR          | 2.93 | 0.01 | 2.59 | 0.44 | 0.85 | 0.28 |
| 51387 | 0 | 121672 | NVKHLSVAYPLVDPF                   | 2.66 | 0.01 | 0.90 | 0.68 | 0.22 | 1.39 |
| 51388 | 0 | 121672 | NVKHLSVAYPLVDPF                   | 2.66 | 0.01 | 0.90 | 0.68 | 0.22 | 0.28 |
| 51389 | 0 | 121672 | NVKHLSVAYPLVDPF                   | 2.66 | 0.01 | 0.90 | 0.68 | 0.22 | 0.28 |
| 51390 | 0 | 121673 | NVKKLCVAKPLVDSF                   | 2.68 | 0.01 | 0.90 | 0.68 | 0.22 | 1.39 |
| 51391 | 0 | 121673 | NVKKLCVAKPLVDSF                   | 2.68 | 0.01 | 0.90 | 0.68 | 0.22 | 0.28 |
| 51392 | 0 | 121673 | NVKKLCVAKPLVDSF                   | 2.68 | 0.01 | 0.90 | 0.68 | 0.22 | 0.28 |
| 51393 | 0 | 121674 | NVKKLLVAKPLVDWF                   | 2.69 | 0.01 | 0.90 | 0.68 | 0.22 | 1.39 |
| 51394 | 0 | 121674 | NVKKLLVAKPLVDWF                   | 2.69 | 0.01 | 0.90 | 0.68 | 0.22 | 0.28 |
| 51395 | 0 | 121674 | NVKKLLVAKPLVDWF                   | 2.69 | 0.01 | 0.90 | 0.68 | 0.22 | 0.28 |
| 51396 | 0 | 121675 | NVKKLLVANPLVDSF                   | 2.69 | 0.01 | 0.90 | 0.68 | 0.22 | 1.39 |
| 51397 | 0 | 121675 | NVKKLLVANPLVDSF                   | 2.69 | 0.01 | 0.90 | 0.68 | 0.22 | 0.28 |
| 51398 | 0 | 121675 | NVKKLLVANPLVDSF                   | 2.69 | 0.01 | 0.90 | 0.68 | 0.22 | 0.28 |
| 51399 | 0 | 46407  | NVKQQQDTKGNRSDS                   | 2.69 | 0.01 | 3.37 | 2.22 | 0.22 | 0.28 |
| 51400 | 0 | 121676 | NVKVLLVASPLVDPF                   | 2.70 | 0.01 | 0.90 | 0.68 | 0.22 | 1.39 |
| 51401 | 0 | 121676 | NVKVLLVASPLVDPF                   | 2.70 | 0.01 | 0.90 | 0.68 | 0.22 | 0.28 |
| 51402 | 0 | 121676 | NVKVLLVASPLVDPF                   | 2.70 | 0.01 | 0.90 | 0.68 | 0.22 | 0.28 |
| 51403 | 0 | 121677 | NVLALCVHSYLV DGA                  | 2.68 | 0.01 | 0.90 | 0.68 | 0.22 | 1.39 |
| 51404 | 0 | 121677 | NVLALCVHSYLV DGA                  | 2.68 | 0.01 | 0.90 | 0.68 | 0.22 | 0.28 |
| 51405 | 0 | 121677 | NVLALCVHSYLV DGA                  | 2.68 | 0.01 | 0.90 | 0.68 | 0.22 | 0.28 |
| 51406 | 0 | 46417  | NVLDVNAIDIEEPS                    | 2.63 | 0.01 | 2.56 | 2.69 | 0.22 | 0.28 |
| 51407 | 0 | 46417  | NVLDVNAIDIEEPS                    | 2.63 | 0.01 | 2.56 | 1.12 | 0.22 | 0.28 |
| 51408 | 0 | 46417  | NVLDVNAIDIEEPS                    | 2.63 | 0.01 | 2.56 | 0.44 | 0.85 | 0.28 |
|       |   |        | NVLEYAELI DRQRDKIN                |      |      |      |      |      |      |
| 51409 | 0 | 46418  | ELEKKLEELRSSEELQKN<br>VIK         | 3.65 | 0.01 | 2.22 | 0.44 | 1.74 | 0.28 |
|       |   |        | NVLEYAELI DRQRDKIN                |      |      |      |      |      |      |
| 51410 | 0 | 46418  | ELEKKLEELRSSEELQKN<br>VIK         | 3.65 | 0.01 | 2.22 | 0.44 | 1.74 | 0.28 |
|       |   |        |                                   |      |      |      |      |      |      |
| 51411 | 0 | 181938 | NVLFFRIMMRHW                      | 2.45 | 0.01 | 0.90 | 3.15 | 0.22 | 1.39 |
| 51412 | 0 | 46423  | NVLMVPKPQG                        | 2.31 | 0.01 | 0.78 | 0.44 | 1.74 | 0.28 |
| 51413 | 0 | 46424  | NVLQNFSVF                         | 2.26 | 0.01 | 3.18 | 2.74 | 0.22 | 0.28 |
| 51414 | 0 | 130990 | NVLRGMGGAF                        | 2.30 | 0.01 | 0.78 | 0.44 | 1.93 | 0.85 |
| 51415 | 0 | 137939 | NVLSADFT                          | 2.10 | 0.01 | 2.21 | 1.20 | 0.22 | 0.28 |
| 51416 | 0 | 137939 | NVLSADFT                          | 2.10 | 0.01 | 2.21 | 0.44 | 0.85 | 0.28 |



|       |   |        |                                                       |      |      |      |      |      |      |
|-------|---|--------|-------------------------------------------------------|------|------|------|------|------|------|
| 51417 | 0 | 137939 | NVLSADFT                                              | 2.10 | 0.01 | 2.21 | 0.44 | 0.85 | 0.28 |
| 51418 | 0 | 121678 | NVLTLRVAKPLVDTF                                       | 2.68 | 0.01 | 0.90 | 0.68 | 0.22 | 1.39 |
| 51419 | 0 | 121678 | NVLTLRVAKPLVDTF                                       | 2.68 | 0.01 | 0.90 | 0.68 | 0.22 | 0.28 |
| 51420 | 0 | 121678 | NVLTLRVAKPLVDTF                                       | 2.68 | 0.01 | 0.90 | 0.68 | 0.22 | 0.28 |
| 51421 | 0 | 181754 | NVLVTAKYEGDSIVN                                       | 2.65 | 0.01 | 1.66 | 2.36 | 0.22 | 1.28 |
| 51422 | 0 | 46432  | NVMFRQNNSHLAQMY                                       | 2.66 | 0.01 | 1.66 | 0.44 | 0.85 | 0.28 |
| 51423 | 0 | 46434  | NVNELRFNIGQFLPP                                       | 2.67 | 0.01 | 4.23 | 2.13 | 0.22 | 0.28 |
| 51424 | 0 | 119622 | NVNHKPSN                                              | 2.15 | 0.01 | 0.78 | 0.44 | 1.93 | 0.28 |
| 51425 | 0 | 108051 | NVNMKKNNDDTWTDC<br>KNSSDINKGVLLPPR                    | 3.33 | 0.01 | 0.90 | 1.12 | 0.22 | 0.28 |
| 51426 | 0 | 423735 | NVNSKSPVERIT                                          | 2.48 | 0.01 | 0.90 | 2.46 | 0.22 | 1.39 |
| 51427 | 0 | 423735 | NVNSKSPVERIT                                          | 2.48 | 0.01 | 0.90 | 0.44 | 1.41 | 0.28 |
| 51428 | 0 | 423735 | NVNSKSPVERIT                                          | 2.48 | 0.01 | 0.90 | 0.44 | 1.13 | 0.85 |
| 51429 | 0 | 46440  | NVPAGAGAAILTPTP                                       | 2.71 | 0.01 | 2.76 | 0.44 | 1.59 | 0.28 |
| 51430 | 0 | 510051 | NVPAPVALYQIS                                          | 2.48 | 0.01 | 0.90 | 0.68 | 0.22 | 0.28 |
| 51431 | 0 | 46443  | NVPEKQT                                               | 1.99 | 0.01 | 3.78 | 0.68 | 0.22 | 0.28 |
| 51432 | 0 | 46443  | NVPEKQT                                               | 1.99 | 0.01 | 3.78 | 0.68 | 0.22 | 1.27 |
| 51433 | 0 | 46443  | NVPEKQT                                               | 1.99 | 0.01 | 3.27 | 1.15 | 0.22 | 0.28 |
| 51434 | 0 | 46443  | NVPEKQT                                               | 1.99 | 0.01 | 3.27 | 1.15 | 0.22 | 0.28 |
| 51435 | 0 | 46443  | NVPEKQT                                               | 1.99 | 0.01 | 3.27 | 1.15 | 0.22 | 0.28 |
| 51436 | 0 | 46443  | NVPEKQT                                               | 1.99 | 0.01 | 3.27 | 1.15 | 0.22 | 1.27 |
| 51437 | 0 | 46443  | NVPEKQT                                               | 1.99 | 0.01 | 3.78 | 1.15 | 2.26 | 1.57 |
| 51438 | 0 | 46443  | NVPEKQT                                               | 1.99 | 0.01 | 3.27 | 0.68 | 0.22 | 0.28 |
| 51439 | 0 | 46444  | NVPEKQTRGIFGAIAGFI<br>E                               | 2.89 | 0.01 | 4.03 | 0.68 | 2.25 | 1.75 |
| 51440 | 0 | 46444  | NVPEKQTRGIFGAIAGFI<br>E                               | 2.89 | 0.01 | 4.03 | 0.68 | 2.25 | 1.75 |
| 51441 | 0 | 46444  | NVPEKQTRGIFGAIAGFI<br>E                               | 2.89 | 0.01 | 4.03 | 0.68 | 2.25 | 1.75 |
| 51442 | 0 | 482841 | NVPENAAACYRYLDGTEE<br>W                               | 2.80 | 0.01 | 3.12 | 0.68 | 0.22 | 0.28 |
| 51443 | 0 | 186786 | NVPEWSYIVEKANPAN<br>DLCYPGNFNNDYEELKHLL<br>SRINHFEKIQ | 3.71 | 0.01 | 3.29 | 0.68 | 0.22 | 1.34 |
| 51444 | 0 | 186786 | NVPEWSYIVEKANPAN<br>DLCYPGNFNNDYEELKHLL<br>SRINHFEKIQ | 3.71 | 0.01 | 3.29 | 0.68 | 0.22 | 1.34 |
| 51445 | 0 | 186786 | NVPEWSYIVEKANPAN<br>DLCYPGNFNNDYEELKHLL<br>SRINHFEKIQ | 3.71 | 0.01 | 3.29 | 0.68 | 0.22 | 1.34 |
| 51446 | 0 | 186786 | NVPEWSYIVEKANPAN<br>DLCYPGNFNNDYEELKHLL<br>SRINHFEKIQ | 3.71 | 0.01 | 3.29 | 0.68 | 0.22 | 1.34 |

|       |   |        |                        |      |      |      |      |      |      |  |
|-------|---|--------|------------------------|------|------|------|------|------|------|--|
|       |   |        | NVPEWSYIVEKANPAN       |      |      |      |      |      |      |  |
| 51447 | 0 | 186786 | DLCYPGNFNDYEELKHLL     | 3.71 | 0.01 | 3.29 | 0.68 | 0.22 | 1.34 |  |
|       |   |        | SRINHFEKIQ             |      |      |      |      |      |      |  |
|       |   |        | NVPEWSYIVEKANPAN       |      |      |      |      |      |      |  |
| 51448 | 0 | 186786 | DLCYPGNFNDYEELKHLL     | 3.71 | 0.01 | 3.29 | 0.68 | 0.22 | 1.34 |  |
|       |   |        | SRINHFEKIQ             |      |      |      |      |      |      |  |
|       |   |        | NVPEWSYIVEKANPAN       |      |      |      |      |      |      |  |
| 51449 | 0 | 186786 | DLCYPGNFNDYEELKHLL     | 3.71 | 0.01 | 3.29 | 0.68 | 0.22 | 1.34 |  |
|       |   |        | SRINHFEKIQ             |      |      |      |      |      |      |  |
|       |   |        | NVPEWSYIVEKANPAN       |      |      |      |      |      |      |  |
| 51450 | 0 | 186786 | DLCYPGNFNDYEELKHLL     | 3.71 | 0.01 | 3.29 | 0.68 | 0.22 | 1.34 |  |
|       |   |        | SRINHFEKIQ             |      |      |      |      |      |      |  |
|       |   |        | NVPEWSYIVEKANPAN       |      |      |      |      |      |      |  |
| 51451 | 0 | 186786 | DLCYPGNFNDYEELKHLL     | 3.71 | 0.01 | 3.29 | 0.68 | 0.22 | 1.75 |  |
|       |   |        | SRINHFEKIQ             |      |      |      |      |      |      |  |
|       |   |        | NVPEWSYIVEKANPAN       |      |      |      |      |      |      |  |
| 51452 | 0 | 186786 | DLCYPGNFNDYEELKHLL     | 3.71 | 0.01 | 3.29 | 0.68 | 0.22 | 1.75 |  |
|       |   |        | SRINHFEKIQ             |      |      |      |      |      |      |  |
|       |   |        | NVPEWSYIVEKANPAN       |      |      |      |      |      |      |  |
| 51453 | 0 | 186786 | DLCYPGNFNDYEELKHLL     | 3.71 | 0.01 | 3.29 | 0.68 | 0.22 | 0.28 |  |
|       |   |        | SRINHFEKIQ             |      |      |      |      |      |      |  |
|       |   |        | NVPEWSYIVEKANPAN       |      |      |      |      |      |      |  |
| 51454 | 0 | 186786 | DLCYPGNFNDYEELKHLL     | 3.71 | 0.01 | 3.29 | 0.68 | 0.22 | 0.28 |  |
|       |   |        | SRINHFEKIQ             |      |      |      |      |      |      |  |
|       |   |        | NVPEWSYIVEKANPAN       |      |      |      |      |      |      |  |
| 51455 | 0 | 186786 | DLCYPGNFNDYEELKHLL     | 3.71 | 0.01 | 3.29 | 0.68 | 0.22 | 0.28 |  |
|       |   |        | SRINHFEKIQ             |      |      |      |      |      |      |  |
|       |   |        | NVPEWSYIVEKANPAN       |      |      |      |      |      |      |  |
| 51456 | 0 | 186786 | DLCYPGNFNDYEELKHLL     | 3.71 | 0.01 | 3.29 | 0.68 | 0.22 | 0.28 |  |
|       |   |        | SRINHFEKIQ             |      |      |      |      |      |      |  |
|       |   |        | NVPEWSYIVEKANPAN       |      |      |      |      |      |      |  |
| 51457 | 0 | 186786 | DLCYPGNFNDYEELKHLL     | 3.71 | 0.01 | 3.29 | 0.68 | 0.22 | 2.98 |  |
|       |   |        | SRINHFEKIQ             |      |      |      |      |      |      |  |
| 51458 | 0 | 115877 | NVPGEIVESL             | 2.31 | 0.01 | 1.60 | 0.44 | 1.23 | 0.85 |  |
| 51459 | 0 | 115877 | NVPGEIVESL             | 2.31 | 0.01 | 1.60 | 0.44 | 1.23 | 0.85 |  |
| 51460 | 0 | 115408 | NVPGEIVESLSSEESITRI    | 2.96 | 0.01 | 1.60 | 0.44 | 1.23 | 2.51 |  |
| 51461 | 0 | 96714  | NVPKINPKKD             | 2.35 | 0.01 | 2.39 | 0.44 | 0.85 | 0.28 |  |
| 51462 | 0 | 96714  | NVPKINPKKD             | 2.35 | 0.01 | 2.39 | 0.44 | 0.85 | 0.28 |  |
| 51463 | 0 | 46454  | NVPPTQDA               | 2.11 | 0.01 | 3.42 | 0.68 | 0.22 | 0.28 |  |
| 51464 | 0 | 46455  | NVPYKISASTNCATVK       | 2.75 | 0.01 | 4.33 | 0.44 | 1.23 | 0.85 |  |
| 51465 | 0 | 46459  | NVQLINTNGSWHLNST<br>AL | 2.86 | 0.01 | 3.18 | 0.44 | 1.59 | 0.28 |  |
| 51466 | 0 | 482843 | NVQTQMLNMSSAHKCI<br>DT | 2.81 | 0.01 | 3.12 | 0.68 | 0.22 | 0.28 |  |
| 51467 | 0 | 121679 | NVQVLCVASPLVDVF        | 2.68 | 0.01 | 0.90 | 0.68 | 0.22 | 1.39 |  |

|       |   |        |                          |      |      |      |      |      |      |
|-------|---|--------|--------------------------|------|------|------|------|------|------|
| 51468 | 0 | 121679 | NVQVLCVASPLVDVF          | 2.68 | 0.01 | 0.90 | 0.68 | 0.22 | 0.28 |
| 51469 | 0 | 121679 | NVQVLCVASPLVDVF          | 2.68 | 0.01 | 0.90 | 0.68 | 0.22 | 0.28 |
| 51470 | 0 | 121680 | NVQVLSVARPLVDYF          | 2.66 | 0.01 | 0.90 | 0.68 | 0.22 | 1.39 |
| 51471 | 0 | 121680 | NVQVLSVARPLVDYF          | 2.66 | 0.01 | 0.90 | 0.68 | 0.22 | 0.28 |
| 51472 | 0 | 121680 | NVQVLSVARPLVDYF          | 2.66 | 0.01 | 0.90 | 0.68 | 0.22 | 0.28 |
| 51473 | 0 | 115631 | NVRFSDEGGFTC             | 2.44 | 0.01 | 0.78 | 0.44 | 1.41 | 0.28 |
| 51474 | 0 | 115631 | NVRFSDEGGFTC             | 2.44 | 0.01 | 0.78 | 0.44 | 1.13 | 0.28 |
| 51475 | 0 | 115631 | NVRFSDEGGFTC             | 2.44 | 0.01 | 0.78 | 0.44 | 1.13 | 0.28 |
| 51476 | 0 | 115631 | NVRFSDEGGFTC             | 2.44 | 0.01 | 0.78 | 0.44 | 1.13 | 0.28 |
| 51477 | 0 | 115631 | NVRFSDEGGFTC             | 2.44 | 0.01 | 0.78 | 0.44 | 1.41 | 0.28 |
| 51478 | 0 | 450900 | NVRLPYQ                  | 1.99 | 0.01 | 0.90 | 0.44 | 1.23 | 1.39 |
| 51479 | 0 | 46466  | NVRRLNINRKDYTGIIQ<br>VP  | 2.89 | 0.01 | 2.86 | 2.02 | 0.22 | 0.28 |
| 51480 | 0 | 46466  | NVRRLNINRKDYTGIIQ<br>VP  | 2.89 | 0.01 | 2.86 | 2.02 | 1.59 | 0.28 |
| 51481 | 0 | 138525 | NVRTQEP                  | 1.99 | 0.01 | 0.78 | 1.12 | 0.22 | 0.28 |
| 51482 | 0 | 46469  | NVRYSW                   | 1.88 | 0.01 | 0.90 | 0.44 | 1.59 | 1.39 |
| 51483 | 0 | 46472  | NVSAFNNNLSSKNAMG<br>LVLN | 2.98 | 0.01 | 0.90 | 2.63 | 0.22 | 1.48 |
| 51484 | 0 | 46473  | NVSAIFMAVLLTLQT          | 2.68 | 0.01 | 2.43 | 0.44 | 1.59 | 0.28 |
| 51485 | 0 | 121682 | NVSDLTVAGPLVDLF          | 2.68 | 0.01 | 0.90 | 0.68 | 0.22 | 1.39 |
| 51486 | 0 | 121682 | NVSDLTVAGPLVDLF          | 2.68 | 0.01 | 0.90 | 0.68 | 0.22 | 0.28 |
| 51487 | 0 | 121682 | NVSDLTVAGPLVDLF          | 2.68 | 0.01 | 0.90 | 0.68 | 0.22 | 0.28 |
| 51488 | 0 | 46479  | NVSINNNNNNNNSNT          | 2.73 | 0.01 | 1.66 | 0.44 | 0.85 | 0.28 |
| 51489 | 0 | 121683 | NVSLLLVARPKYLLF          | 2.66 | 0.01 | 0.90 | 0.68 | 0.22 | 1.39 |
| 51490 | 0 | 121683 | NVSLLLVARPKYLLF          | 2.66 | 0.01 | 0.90 | 0.68 | 0.22 | 0.28 |
| 51491 | 0 | 121683 | NVSLLLVARPKYLLF          | 2.66 | 0.01 | 0.90 | 0.68 | 0.22 | 0.28 |
| 51492 | 0 | 97534  | NVSLSNGV                 | 2.17 | 0.01 | 2.87 | 0.68 | 0.22 | 0.28 |
| 51493 | 0 | 97534  | NVSLSNGV                 | 2.17 | 0.01 | 2.87 | 1.81 | 0.22 | 0.28 |
| 51494 | 0 | 46488  | NVSVSPSPSTPLLY           | 2.64 | 0.01 | 2.04 | 0.44 | 0.85 | 0.28 |
| 51495 | 0 | 46488  | NVSVSPSPSTPLLY           | 2.64 | 0.01 | 3.19 | 1.15 | 0.22 | 0.85 |
| 51496 | 0 | 46488  | NVSVSPSPSTPLLY           | 2.64 | 0.01 | 3.19 | 1.15 | 0.22 | 2.12 |
| 51497 | 0 | 46489  | NVSVSPSSSTPLLY           | 2.63 | 0.01 | 3.19 | 0.44 | 0.85 | 0.28 |
| 51498 | 0 | 121684 | NVTCLMVALPLVDSF          | 2.66 | 0.01 | 0.90 | 0.68 | 0.22 | 1.39 |
| 51499 | 0 | 121684 | NVTCLMVALPLVDSF          | 2.66 | 0.01 | 0.90 | 0.68 | 0.22 | 0.28 |
| 51500 | 0 | 121684 | NVTCLMVALPLVDSF          | 2.66 | 0.01 | 0.90 | 0.68 | 0.22 | 0.28 |
| 51501 | 0 | 121684 | NVTCLMVALPLVDSF          | 2.66 | 0.01 | 0.90 | 0.68 | 0.22 | 0.28 |
| 51502 | 0 | 423450 | NVTFRGLQNKTEDFL          | 2.67 | 0.01 | 2.51 | 0.44 | 2.35 | 1.28 |
| 51503 | 0 | 226497 | NVTLHASMLNMD             | 2.48 | 0.01 | 0.90 | 0.68 | 0.22 | 1.27 |
| 51504 | 0 | 226497 | NVTLHASMLNMD             | 2.48 | 0.01 | 0.90 | 0.68 | 0.22 | 0.85 |
| 51505 | 0 | 226497 | NVTLHASMLNMD             | 2.48 | 0.01 | 0.90 | 0.68 | 0.22 | 0.28 |
| 51506 | 0 | 226497 | NVTLHASMLNMD             | 2.48 | 0.01 | 0.90 | 0.68 | 0.22 | 1.34 |
| 51507 | 0 | 93522  | NVTNSLDKLI               | 2.32 | 0.01 | 2.67 | 2.00 | 0.22 | 0.28 |
| 51508 | 0 | 93522  | NVTNSLDKLI               | 2.32 | 0.01 | 2.67 | 2.00 | 0.22 | 0.28 |
| 51509 | 0 | 93522  | NVTNSLDKLI               | 2.32 | 0.01 | 2.67 | 2.00 | 0.22 | 0.28 |
| 51510 | 0 | 46500  | NVTSIHSLLEDEGQSL         | 2.71 | 0.01 | 2.04 | 0.44 | 0.85 | 0.28 |

|       |   |        |                                 |      |      |      |      |      |      |
|-------|---|--------|---------------------------------|------|------|------|------|------|------|
| 51511 | 0 | 46500  | NVTSIHSLLEDEGKQSL               | 2.71 | 0.01 | 2.04 | 0.44 | 1.59 | 0.28 |
| 51512 | 0 | 97536  | NVTNQTIQ                        | 2.28 | 0.01 | 3.13 | 1.12 | 0.22 | 0.28 |
| 51513 | 0 | 46508  | NVVGTRQ                         | 2.01 | 0.01 | 3.20 | 2.22 | 0.85 | 0.28 |
| 51514 | 0 | 104161 | NVVLKTITESATSPPT                | 2.73 | 0.01 | 3.00 | 1.20 | 0.22 | 0.85 |
| 51515 | 0 | 91781  | NVVLKTVSESATQPPTK               | 2.80 | 0.01 | 3.05 | 1.20 | 0.22 | 0.28 |
| 51516 | 0 | 91781  | NVVLKTVSESATQPPTK               | 2.80 | 0.01 | 3.05 | 1.20 | 0.22 | 0.28 |
| 51517 | 0 | 121685 | NVVPLIVASPYVDAF                 | 2.68 | 0.01 | 0.90 | 0.68 | 0.22 | 1.39 |
| 51518 | 0 | 121685 | NVVPLIVASPYVDAF                 | 2.68 | 0.01 | 0.90 | 0.68 | 0.22 | 0.28 |
| 51519 | 0 | 121685 | NVVPLIVASPYVDAF                 | 2.68 | 0.01 | 0.90 | 0.68 | 0.22 | 0.28 |
| 51520 | 0 | 121686 | NVVPLSVANPLVDAF                 | 2.72 | 0.01 | 0.90 | 0.68 | 0.22 | 1.39 |
| 51521 | 0 | 121686 | NVVPLSVANPLVDAF                 | 2.72 | 0.01 | 0.90 | 0.68 | 0.22 | 0.28 |
| 51522 | 0 | 121686 | NVVPLSVANPLVDAF                 | 2.72 | 0.01 | 0.90 | 0.68 | 0.22 | 0.28 |
| 51523 | 0 | 227813 | NVVRQIERQVQELAFP                | 2.75 | 0.01 | 2.72 | 1.20 | 1.59 | 0.28 |
| 51524 | 0 | 510466 | NVVVTVKVMGDDGVL<br>ACAIATHAKIRD | 3.24 | 0.01 | 2.78 | 0.68 | 0.22 | 1.75 |
| 51525 | 0 | 510466 | NVVVTVKVMGDDGVL<br>ACAIATHAKIRD | 3.24 | 0.01 | 2.78 | 1.12 | 0.22 | 0.85 |
| 51526 | 0 | 46522  | NVYADSFVVKGDDVRQI               | 2.76 | 0.01 | 2.48 | 0.44 | 0.85 | 0.28 |
| 51527 | 0 | 226498 | NVYPTPESSL                      | 2.49 | 0.01 | 0.90 | 0.68 | 0.22 | 1.27 |
| 51528 | 0 | 226498 | NVYPTPESSL                      | 2.49 | 0.01 | 0.90 | 0.68 | 0.22 | 0.85 |
| 51529 | 0 | 226498 | NVYPTPESSL                      | 2.49 | 0.01 | 0.90 | 0.68 | 0.22 | 0.28 |
| 51530 | 0 | 226498 | NVYPTPESSL                      | 2.49 | 0.01 | 0.90 | 0.68 | 0.22 | 1.34 |
| 51531 | 0 | 434196 | NWDPTQFPGK                      | 2.29 | 0.01 | 0.90 | 0.68 | 0.22 | 0.28 |
| 51532 | 0 | 434196 | NWDPTQFPGK                      | 2.29 | 0.01 | 0.90 | 2.36 | 0.22 | 1.39 |
| 51533 | 0 | 150874 | NWFDISKWLWYI                    | 2.48 | 0.01 | 3.85 | 0.44 | 0.85 | 1.66 |
| 51534 | 0 | 150874 | NWFDISKWLWYI                    | 2.48 | 0.01 | 3.85 | 0.44 | 0.85 | 1.66 |
| 51535 | 0 | 150874 | NWFDISKWLWYI                    | 2.48 | 0.01 | 3.85 | 0.44 | 0.85 | 1.66 |
| 51536 | 0 | 150874 | NWFDISKWLWYI                    | 2.48 | 0.01 | 3.85 | 0.44 | 0.85 | 1.66 |
| 51537 | 0 | 150874 | NWFDISKWLWYI                    | 2.48 | 0.01 | 3.85 | 0.44 | 0.85 | 3.13 |
| 51538 | 0 | 150874 | NWFDISKWLWYI                    | 2.48 | 0.01 | 3.85 | 0.44 | 0.85 | 1.34 |
| 51539 | 0 | 150874 | NWFDISKWLWYI                    | 2.48 | 0.01 | 3.85 | 0.44 | 0.85 | 1.34 |
| 51540 | 0 | 150874 | NWFDISKWLWYI                    | 2.48 | 0.01 | 3.85 | 0.44 | 0.85 | 1.66 |
| 51541 | 0 | 175628 | NWFDIT                          | 1.88 | 0.01 | 2.54 | 0.68 | 0.22 | 0.28 |
| 51542 | 0 | 175628 | NWFDIT                          | 1.88 | 0.01 | 2.54 | 0.44 | 0.85 | 0.28 |
| 51543 | 0 | 175628 | NWFDIT                          | 1.88 | 0.01 | 2.54 | 0.44 | 1.41 | 2.49 |
| 51544 | 0 | 175628 | NWFDIT                          | 1.88 | 0.01 | 2.54 | 0.44 | 1.41 | 1.34 |
| 51545 | 0 | 175628 | NWFDIT                          | 1.88 | 0.01 | 2.54 | 0.44 | 1.41 | 1.66 |
| 51546 | 0 | 175628 | NWFDIT                          | 1.88 | 0.01 | 2.54 | 0.44 | 1.41 | 1.66 |
| 51547 | 0 | 175628 | NWFDIT                          | 1.88 | 0.01 | 2.54 | 0.44 | 1.41 | 1.66 |
| 51548 | 0 | 175628 | NWFDIT                          | 1.88 | 0.01 | 2.54 | 0.44 | 1.41 | 2.49 |
| 51549 | 0 | 175628 | NWFDIT                          | 1.88 | 0.01 | 2.54 | 0.44 | 1.41 | 1.66 |
| 51550 | 0 | 175628 | NWFDIT                          | 1.88 | 0.01 | 2.54 | 0.44 | 1.41 | 1.66 |
| 51551 | 0 | 175628 | NWFDIT                          | 1.88 | 0.01 | 2.54 | 0.44 | 1.41 | 1.66 |

|       |   |        |                             |      |      |      |      |      |      |
|-------|---|--------|-----------------------------|------|------|------|------|------|------|
| 51552 | 0 | 175628 | NWFDIT                      | 1.88 | 0.01 | 2.54 | 0.44 | 1.41 | 2.49 |
| 51553 | 0 | 175628 | NWFDIT                      | 1.88 | 0.01 | 2.54 | 0.44 | 1.41 | 1.66 |
| 51554 | 0 | 175628 | NWFDIT                      | 1.88 | 0.01 | 2.54 | 0.44 | 1.41 | 1.66 |
| 51555 | 0 | 175628 | NWFDIT                      | 1.88 | 0.01 | 2.54 | 0.44 | 1.41 | 1.66 |
| 51556 | 0 | 175628 | NWFDIT                      | 1.88 | 0.01 | 2.54 | 0.44 | 0.85 | 1.66 |
| 51557 | 0 | 175628 | NWFDIT                      | 1.88 | 0.01 | 2.54 | 0.44 | 0.85 | 1.66 |
| 51558 | 0 | 175628 | NWFDIT                      | 1.88 | 0.01 | 2.54 | 0.44 | 0.85 | 1.66 |
| 51559 | 0 | 175628 | NWFDIT                      | 1.88 | 0.01 | 2.54 | 0.44 | 0.85 | 1.39 |
| 51560 | 0 | 175628 | NWFDIT                      | 1.88 | 0.01 | 2.54 | 0.44 | 1.41 | 1.39 |
| 51561 | 0 | 175628 | NWFDIT                      | 1.88 | 0.01 | 2.54 | 0.44 | 1.41 | 1.39 |
| 51562 | 0 | 507471 | NWFDITNWLWYIK               | 2.56 | 4.63 | 2.54 | 0.44 | 0.85 | 2.49 |
| 51563 | 0 | 164136 | NWFDITNWLWYIK               | 2.56 | 0.01 | 2.54 | 0.44 | 0.85 | 2.49 |
| 51564 | 0 | 164136 | NWFDITNWLWYIK               | 2.56 | 0.01 | 2.54 | 0.44 | 0.85 | 1.66 |
| 51565 | 0 | 164136 | NWFDITNWLWYIK               | 2.56 | 0.01 | 2.54 | 0.44 | 0.85 | 1.66 |
| 51566 | 0 | 164136 | NWFDITNWLWYIK               | 2.56 | 0.01 | 2.54 | 0.44 | 0.85 | 1.66 |
| 51567 | 0 | 164136 | NWFDITNWLWYIK               | 2.56 | 0.01 | 2.54 | 0.44 | 0.85 | 2.49 |
| 51568 | 0 | 164136 | NWFDITNWLWYIK               | 2.56 | 0.01 | 2.54 | 0.44 | 0.85 | 2.49 |
| 51569 | 0 | 164136 | NWFDITNWLWYIK               | 2.56 | 0.01 | 2.54 | 0.44 | 0.85 | 1.66 |
| 51570 | 0 | 164136 | NWFDITNWLWYIK               | 2.56 | 0.01 | 2.54 | 0.44 | 0.85 | 1.66 |
| 51571 | 0 | 164136 | NWFDITNWLWYIK               | 2.56 | 0.01 | 2.54 | 0.44 | 0.85 | 1.66 |
| 51572 | 0 | 164136 | NWFDITNWLWYIK               | 2.56 | 0.01 | 2.54 | 0.44 | 0.85 | 1.66 |
| 51573 | 0 | 164136 | NWFDITNWLWYIK               | 2.56 | 0.01 | 2.54 | 0.44 | 0.85 | 1.66 |
| 51574 | 0 | 164136 | NWFDITNWLWYIK               | 2.56 | 0.01 | 2.54 | 0.44 | 0.85 | 1.66 |
| 51575 | 0 | 164136 | NWFDITNWLWYIK               | 2.56 | 0.01 | 2.54 | 0.44 | 0.85 | 1.34 |
| 51576 | 0 | 164136 | NWFDITNWLWYIK               | 2.56 | 0.01 | 2.54 | 0.44 | 0.85 | 1.34 |
| 51577 | 0 | 164136 | NWFDITNWLWYIK               | 2.56 | 0.01 | 2.54 | 0.44 | 0.85 | 1.34 |
| 51578 | 0 | 164136 | NWFDITNWLWYIK               | 2.56 | 0.01 | 2.54 | 0.44 | 0.85 | 2.49 |
| 51579 | 0 | 164136 | NWFDITNWLWYIK               | 2.56 | 0.01 | 2.54 | 0.44 | 0.85 | 3.13 |
| 51580 | 0 | 164136 | NWFDITNWLWYIK               | 2.56 | 0.01 | 2.54 | 0.44 | 0.85 | 3.13 |
| 51581 | 0 | 164136 | NWFDITNWLWYIK               | 2.56 | 0.01 | 2.54 | 0.44 | 0.85 | 1.34 |
| 51582 | 0 | 164136 | NWFDITNWLWYIK               | 2.56 | 0.01 | 2.54 | 0.44 | 0.85 | 3.13 |
| 51583 | 0 | 164136 | NWFDITNWLWYIK               | 2.56 | 0.01 | 2.54 | 0.44 | 0.85 | 2.49 |
| 51584 | 0 | 164136 | NWFDITNWLWYIK               | 2.56 | 0.01 | 2.54 | 0.44 | 0.85 | 2.49 |
| 51585 | 0 | 347770 | NWFDITNWLWYIKLFIM<br>IVGGLV | 3.09 | 0.01 | 2.54 | 1.20 | 0.22 | 0.28 |
| 51586 | 0 | 347770 | NWFDITNWLWYIKLFIM<br>IVGGLV | 3.09 | 0.01 | 2.54 | 0.44 | 0.85 | 3.13 |
| 51587 | 0 | 347770 | NWFDITNWLWYIKLFIM<br>IVGGLV | 3.09 | 0.01 | 2.54 | 1.20 | 0.22 | 1.34 |
| 51588 | 0 | 163068 | NWFDITNWLWYIR               | 2.56 | 0.01 | 2.54 | 1.12 | 0.22 | 0.28 |
| 51589 | 0 | 163068 | NWFDITNWLWYIR               | 2.56 | 0.01 | 2.54 | 1.12 | 0.22 | 1.27 |
| 51590 | 0 | 163068 | NWFDITNWLWYIR               | 2.56 | 0.01 | 2.54 | 0.44 | 0.85 | 0.28 |
| 51591 | 0 | 163068 | NWFDITNWLWYIR               | 2.56 | 0.01 | 2.54 | 0.44 | 0.85 | 1.34 |
| 51592 | 0 | 163068 | NWFDITNWLWYIR               | 2.56 | 0.01 | 2.54 | 0.44 | 0.85 | 0.28 |
| 51593 | 0 | 163068 | NWFDITNWLWYIR               | 2.56 | 0.01 | 2.54 | 0.44 | 0.85 | 0.28 |
| 51594 | 0 | 163068 | NWFDITNWLWYIR               | 2.56 | 0.01 | 2.54 | 0.44 | 0.85 | 1.27 |
| 51595 | 0 | 163068 | NWFDITNWLWYIR               | 2.56 | 0.01 | 2.54 | 0.44 | 0.85 | 1.66 |

|       |   |        |                          |      |      |      |      |      |      |
|-------|---|--------|--------------------------|------|------|------|------|------|------|
| 51596 | 0 | 163068 | NWFDITNWLWYIR            | 2.56 | 0.01 | 2.54 | 0.44 | 0.85 | 1.66 |
| 51597 | 0 | 163068 | NWFDITNWLWYIR            | 2.56 | 0.01 | 2.54 | 0.44 | 0.85 | 1.66 |
| 51598 | 0 | 163068 | NWFDITNWLWYIR            | 2.56 | 0.01 | 2.54 | 0.44 | 0.85 | 1.27 |
| 51599 | 0 | 163068 | NWFDITNWLWYIR            | 2.56 | 0.01 | 2.54 | 0.44 | 0.85 | 2.12 |
| 51600 | 0 | 163068 | NWFDITNWLWYIR            | 2.56 | 0.01 | 2.54 | 0.44 | 0.85 | 1.66 |
| 51601 | 0 | 163068 | NWFDITNWLWYIR            | 2.56 | 0.01 | 2.54 | 0.44 | 0.85 | 2.75 |
| 51602 | 0 | 230498 | NWFEIEMNERTNVGI          | 2.69 | 0.01 | 0.78 | 0.44 | 1.13 | 0.28 |
| 51603 | 0 | 46532  | NWFGCTWMN                | 2.24 | 0.01 | 3.18 | 0.44 | 0.85 | 0.28 |
| 51604 | 0 | 46532  | NWFGCTWMN                | 2.24 | 0.01 | 3.18 | 0.44 | 1.41 | 0.28 |
| 51605 | 0 | 236090 | NWFNITNVLWLIKKKK         | 2.75 | 4.63 | 0.90 | 0.44 | 0.85 | 2.49 |
| 51606 | 0 | 236090 | NWFNITNVLWLIKKKK         | 2.75 | 4.63 | 0.90 | 0.44 | 0.85 | 2.56 |
| 51607 | 0 | 236091 | NWFNITNVLWLISKKK         | 2.74 | 4.63 | 0.90 | 0.44 | 0.85 | 2.49 |
| 51608 | 0 | 236091 | NWFNITNVLWLISKKK         | 2.74 | 4.63 | 0.90 | 0.44 | 0.85 | 2.56 |
| 51609 | 0 | 462143 | NWFNITNWLWYIK            | 2.58 | 0.01 | 3.50 | 0.44 | 0.85 | 2.49 |
| 51610 | 0 | 462143 | NWFNITNWLWYIK            | 2.58 | 0.01 | 3.50 | 0.44 | 0.85 | 2.49 |
| 51611 | 0 | 462143 | NWFNITNWLWYIK            | 2.58 | 0.01 | 3.50 | 0.44 | 0.85 | 1.34 |
| 51612 | 0 | 462143 | NWFNITNWLWYIK            | 2.58 | 0.01 | 3.50 | 0.44 | 0.85 | 1.66 |
| 51613 | 0 | 462143 | NWFNITNWLWYIK            | 2.58 | 0.01 | 3.50 | 0.44 | 0.85 | 1.66 |
| 51614 | 0 | 462143 | NWFNITNWLWYIK            | 2.58 | 0.01 | 3.50 | 0.44 | 0.85 | 1.66 |
| 51615 | 0 | 462143 | NWFNITNWLWYIK            | 2.58 | 0.01 | 3.50 | 0.44 | 0.85 | 1.66 |
| 51616 | 0 | 462143 | NWFNITNWLWYIK            | 2.58 | 0.01 | 3.50 | 0.44 | 0.85 | 1.66 |
| 51617 | 0 | 462143 | NWFNITNWLWYIK            | 2.58 | 0.01 | 3.50 | 0.44 | 0.85 | 1.66 |
| 51618 | 0 | 462143 | NWFNITNWLWYIK            | 2.58 | 0.01 | 3.50 | 0.44 | 0.85 | 1.66 |
| 51619 | 0 | 462143 | NWFNITNWLWYIK            | 2.58 | 0.01 | 3.50 | 0.44 | 0.85 | 1.66 |
| 51620 | 0 | 462143 | NWFNITNWLWYIK            | 2.58 | 0.01 | 3.50 | 0.44 | 0.85 | 1.66 |
| 51621 | 0 | 462143 | NWFNITNWLWYIK            | 2.58 | 0.01 | 3.50 | 0.44 | 0.85 | 0.28 |
| 51622 | 0 | 462143 | NWFNITNWLWYIK            | 2.58 | 0.01 | 3.50 | 0.44 | 0.85 | 0.28 |
| 51623 | 0 | 93523  | NWFREADFAK               | 2.31 | 0.01 | 2.67 | 2.00 | 0.22 | 0.28 |
| 51624 | 0 | 142250 | NWGDEPSKRRDRSNSR<br>GRKN | 2.99 | 0.01 | 3.55 | 3.16 | 0.22 | 0.28 |
| 51625 | 0 | 109641 | NWGQVESDLEFE             | 2.45 | 0.01 | 0.90 | 1.15 | 0.22 | 1.39 |
| 51626 | 0 | 117594 | NWHQLHGKKEAY             | 2.44 | 0.01 | 0.78 | 0.44 | 1.13 | 0.85 |
| 51627 | 0 | 117594 | NWHQLHGKKEAY             | 2.44 | 0.01 | 0.78 | 0.44 | 1.13 | 0.85 |
| 51628 | 0 | 117594 | NWHQLHGKKEAY             | 2.44 | 0.01 | 0.78 | 0.44 | 1.13 | 0.85 |
| 51629 | 0 | 117594 | NWHQLHGKKEAY             | 2.44 | 0.01 | 0.78 | 0.44 | 1.41 | 0.85 |
| 51630 | 0 | 46543  | NWITEDCPIP               | 2.31 | 0.01 | 2.69 | 0.44 | 0.85 | 0.28 |
| 51631 | 0 | 46543  | NWITEDCPIP               | 2.31 | 0.01 | 2.69 | 0.44 | 0.85 | 0.28 |
| 51632 | 0 | 46547  | NWKFAPP                  | 1.99 | 0.01 | 0.90 | 0.68 | 0.22 | 1.39 |
| 51633 | 0 | 237865 | NWKMNGSYSHINTFFD<br>TLQK | 2.91 | 0.01 | 2.74 | 1.20 | 0.22 | 1.34 |
| 51634 | 0 | 237865 | NWKMNGSYSHINTFFD<br>TLQK | 2.91 | 0.01 | 2.74 | 1.20 | 0.22 | 0.28 |

|       |   |        |                          |      |      |      |      |      |      |
|-------|---|--------|--------------------------|------|------|------|------|------|------|
| 51635 | 0 | 237865 | NWKMNGSYSHINTFFD<br>TLQK | 2.91 | 0.01 | 2.74 | 1.20 | 0.22 | 0.28 |
| 51636 | 0 | 237865 | NWKMNGSYSHINTFFD<br>TLQK | 2.91 | 0.01 | 2.74 | 1.20 | 0.22 | 0.28 |
| 51637 | 0 | 237865 | NWKMNGSYSHINTFFD<br>TLQK | 2.91 | 0.01 | 2.74 | 1.20 | 0.22 | 0.28 |
| 51638 | 0 | 237865 | NWKMNGSYSHINTFFD<br>TLQK | 2.91 | 0.01 | 2.74 | 1.20 | 0.22 | 0.28 |
| 51639 | 0 | 237865 | NWKMNGSYSHINTFFD<br>TLQK | 2.91 | 0.01 | 2.74 | 1.20 | 0.22 | 0.28 |
| 51640 | 0 | 174217 | NWKPDTVYTS               | 2.29 | 0.01 | 3.10 | 0.44 | 1.23 | 0.85 |
| 51641 | 0 | 107533 | NWLDGKE                  | 1.99 | 0.01 | 0.78 | 0.44 | 1.13 | 0.28 |
| 51642 | 0 | 108052 | NWLSLITAAR               | 2.30 | 0.01 | 0.90 | 0.44 | 1.13 | 1.27 |
| 51643 | 0 | 108052 | NWLSLITAAR               | 2.30 | 0.01 | 0.90 | 0.44 | 1.13 | 0.28 |
| 51644 | 0 | 46550  | NWNFD                    | 1.77 | 0.01 | 3.65 | 1.15 | 2.26 | 0.28 |
| 51645 | 0 | 46550  | NWNFD                    | 1.77 | 0.01 | 3.65 | 1.15 | 2.26 | 0.28 |
| 51646 | 0 | 46550  | NWNFD                    | 1.77 | 0.01 | 3.65 | 1.15 | 2.26 | 1.27 |
| 51647 | 0 | 46550  | NWNFD                    | 1.77 | 0.01 | 3.65 | 1.15 | 2.26 | 0.28 |
| 51648 | 0 | 46550  | NWNFD                    | 1.77 | 0.01 | 3.65 | 1.15 | 2.26 | 0.28 |
| 51649 | 0 | 46551  | NWNFDFG                  | 2.05 | 0.01 | 3.65 | 1.15 | 2.26 | 0.28 |
| 51650 | 0 | 46551  | NWNFDFG                  | 2.05 | 0.01 | 3.75 | 1.15 | 2.26 | 0.28 |
| 51651 | 0 | 46551  | NWNFDFG                  | 2.05 | 0.01 | 3.75 | 1.15 | 2.26 | 1.27 |
| 51652 | 0 | 46551  | NWNFDFG                  | 2.05 | 0.01 | 3.75 | 1.15 | 2.26 | 0.28 |
| 51653 | 0 | 510467 | NWNNPPIRLVAS             | 2.46 | 0.01 | 0.90 | 3.07 | 1.13 | 1.39 |
| 51654 | 0 | 193033 | NWPTSKENGNTARVEV<br>KSKQ | 2.95 | 0.01 | 3.47 | 2.00 | 0.22 | 0.28 |
| 51655 | 0 | 46557  | NWRFHDT                  | 1.99 | 0.01 | 0.90 | 0.68 | 0.22 | 1.39 |
| 51656 | 0 | 172598 | NWSAMPSCASCKVP           | 2.70 | 0.01 | 0.78 | 0.44 | 1.13 | 0.28 |
| 51657 | 0 | 46565  | NWSPTTCLV                | 2.20 | 0.01 | 1.72 | 0.44 | 0.85 | 0.85 |
| 51658 | 0 | 462410 | NWTRGERCDLEDRDRS<br>E    | 2.81 | 0.01 | 2.45 | 0.68 | 0.22 | 2.02 |
| 51659 | 0 | 462410 | NWTRGERCDLEDRDRS<br>E    | 2.81 | 0.01 | 2.45 | 0.68 | 0.22 | 0.28 |
| 51660 | 0 | 462410 | NWTRGERCDLEDRDRS<br>E    | 2.81 | 0.01 | 2.45 | 0.68 | 0.22 | 0.28 |
| 51661 | 0 | 462410 | NWTRGERCDLEDRDRS<br>E    | 2.81 | 0.01 | 2.45 | 0.68 | 0.22 | 1.66 |
| 51662 | 0 | 462410 | NWTRGERCDLEDRDRS<br>E    | 2.81 | 0.01 | 2.45 | 0.68 | 0.22 | 0.28 |
| 51663 | 0 | 462410 | NWTRGERCDLEDRDRS<br>E    | 2.81 | 0.01 | 2.45 | 0.68 | 0.22 | 0.28 |
| 51664 | 0 | 462410 | NWTRGERCDLEDRDRS<br>E    | 2.81 | 0.01 | 2.45 | 0.68 | 0.22 | 0.28 |
| 51665 | 0 | 462410 | NWTRGERCDLEDRDRS<br>E    | 2.81 | 0.01 | 2.45 | 0.68 | 0.22 | 0.28 |

|       |   |        |                                     |      |      |      |      |      |      |
|-------|---|--------|-------------------------------------|------|------|------|------|------|------|
| 51666 | 0 | 462410 | NWTRGERCDLEDRDRS<br>E               | 2.81 | 0.01 | 2.45 | 0.68 | 0.22 | 0.28 |
| 51667 | 0 | 87157  | NWVDAEGKTY                          | 2.26 | 0.01 | 3.06 | 0.44 | 0.85 | 0.28 |
| 51668 | 0 | 450902 | NWVSRLANLTQGEDQY<br>Y               | 2.74 | 0.01 | 0.78 | 2.79 | 1.13 | 1.28 |
| 51669 | 0 | 450902 | NWVSRLANLTQGEDQY<br>Y               | 2.74 | 0.01 | 0.78 | 2.79 | 1.13 | 1.28 |
| 51670 | 0 | 450902 | NWVSRLANLTQGEDQY<br>Y               | 2.74 | 0.01 | 0.78 | 1.81 | 1.41 | 1.28 |
| 51671 | 0 | 450902 | NWVSRLANLTQGEDQY<br>Y               | 2.74 | 0.01 | 0.78 | 1.81 | 1.41 | 1.28 |
| 51672 | 0 | 450902 | NWVSRLANLTQGEDQY<br>Y               | 2.74 | 0.01 | 0.78 | 1.81 | 1.41 | 1.28 |
| 51673 | 0 | 507472 | NWWDITNWLWYIK                       | 2.58 | 0.01 | 0.90 | 0.44 | 0.85 | 2.49 |
| 51674 | 0 | 107534 | NWYVDGV                             | 2.02 | 0.01 | 0.78 | 0.44 | 1.13 | 0.28 |
| 51675 | 0 | 107534 | NWYVDGV                             | 2.02 | 0.01 | 0.78 | 0.44 | 1.13 | 0.28 |
| 51676 | 0 | 46577  | NYAGVDPGFAGCSC                      | 2.61 | 0.01 | 0.90 | 1.15 | 0.22 | 0.85 |
| 51677 | 0 | 232970 | NYAHWHYSIVARYFH                     | 2.68 | 0.01 | 2.89 | 1.12 | 0.22 | 1.28 |
| 51678 | 0 | 232970 | NYAHWHYSIVARYFH                     | 2.68 | 0.01 | 2.89 | 1.12 | 0.22 | 1.28 |
| 51679 | 0 | 232970 | NYAHWHYSIVARYFH                     | 2.68 | 0.01 | 2.89 | 1.12 | 0.22 | 1.28 |
| 51680 | 0 | 232970 | NYAHWHYSIVARYFH                     | 2.68 | 0.01 | 2.89 | 1.12 | 0.22 | 1.28 |
| 51681 | 0 | 232970 | NYAHWHYSIVARYFH                     | 2.68 | 0.01 | 2.89 | 1.12 | 0.22 | 1.28 |
| 51682 | 0 | 79622  | NYARTGGQVTAG                        | 2.49 | 0.01 | 2.24 | 1.12 | 0.22 | 0.85 |
| 51683 | 0 | 79622  | NYARTGGQVTAG                        | 2.49 | 0.01 | 2.24 | 2.43 | 0.22 | 0.28 |
| 51684 | 0 | 79622  | NYARTGGQVTAG                        | 2.49 | 0.01 | 2.24 | 2.43 | 0.22 | 0.28 |
| 51685 | 0 | 79622  | NYARTGGQVTAG                        | 2.49 | 0.01 | 2.24 | 2.43 | 0.22 | 0.28 |
| 51686 | 0 | 79622  | NYARTGGQVTAG                        | 2.49 | 0.01 | 2.24 | 2.43 | 0.22 | 0.28 |
| 51687 | 0 | 79622  | NYARTGGQVTAG                        | 2.49 | 0.01 | 2.24 | 2.43 | 0.22 | 0.28 |
| 51688 | 0 | 523377 | NYDDKGKEVITKRRW                     | 2.64 | 0.01 | 2.24 | 0.44 | 1.41 | 1.28 |
| 51689 | 0 | 510468 | NYEFSISEQSHN                        | 2.50 | 0.01 | 0.90 | 3.07 | 1.13 | 1.39 |
| 51690 | 0 | 138527 | NYEVAYRGILQR                        | 2.45 | 0.01 | 0.78 | 1.20 | 0.22 | 0.28 |
| 51691 | 0 | 138527 | NYEVAYRGILQR                        | 2.45 | 0.01 | 0.78 | 1.20 | 0.22 | 0.28 |
| 51692 | 0 | 138527 | NYEVAYRGILQR                        | 2.45 | 0.01 | 0.78 | 1.20 | 0.22 | 0.28 |
| 51693 | 0 | 138527 | NYEVAYRGILQR                        | 2.45 | 0.01 | 0.78 | 1.20 | 0.22 | 1.48 |
| 51694 | 0 | 450903 | NYFKHEA                             | 1.99 | 0.01 | 0.90 | 0.44 | 1.23 | 1.39 |
| 51695 | 0 | 238814 | NYGCYCGAGGSGTPV                     | 2.70 | 0.01 | 2.56 | 2.02 | 0.22 | 0.85 |
| 51696 | 0 | 46616  | NYGGETQIQRRQHTDV                    | 2.71 | 0.01 | 2.88 | 1.12 | 0.22 | 0.28 |
| 51697 | 0 | 132512 | NYGGETQTARRLH                       | 2.51 | 0.01 | 3.89 | 1.12 | 0.22 | 0.28 |
| 51698 | 0 | 97538  | NYHYEECSCYPNAGEITC<br>VCRDNWHGSNRPW | 3.37 | 0.01 | 3.09 | 0.44 | 0.85 | 0.28 |
| 51699 | 0 | 87165  | NYKNGGFFVQYG                        | 2.51 | 0.01 | 2.87 | 0.44 | 0.22 | 0.28 |
| 51700 | 0 | 101947 | NYKQEGDKC                           | 2.21 | 0.01 | 1.66 | 0.44 | 1.59 | 2.97 |
| 51701 | 0 | 534846 | NYKRKR                              | 1.91 | 0.01 | 3.44 | 1.15 | 0.22 | 0.28 |
| 51702 | 0 | 117049 | NYKSPLFAVPMT                        | 2.43 | 0.01 | 0.90 | 1.15 | 0.22 | 0.28 |
| 51703 | 0 | 117049 | NYKSPLFAVPMT                        | 2.43 | 0.01 | 0.90 | 0.44 | 0.85 | 0.28 |



|       |   |        |                             |      |      |      |      |      |      |
|-------|---|--------|-----------------------------|------|------|------|------|------|------|
| 51704 | 0 | 109643 | NYKTTTP                     | 2.00 | 0.01 | 0.78 | 0.44 | 1.13 | 0.28 |
| 51705 | 0 | 94628  | NYKVGLOQNSNFRKVGH<br>YTQM   | 2.94 | 0.01 | 3.65 | 0.68 | 0.22 | 0.28 |
| 51706 | 0 | 46644  | NYLALLVKYIDGDGDVV<br>AVDI   | 3.03 | 0.01 | 3.67 | 0.44 | 1.23 | 0.85 |
| 51707 | 0 | 112248 | NYLAWYQ                     | 2.02 | 0.01 | 0.78 | 0.44 | 1.13 | 1.27 |
| 51708 | 0 | 226499 | NYLPLESSLQY                 | 2.50 | 0.01 | 0.90 | 0.68 | 0.22 | 0.85 |
| 51709 | 0 | 226499 | NYLPLESSLQY                 | 2.50 | 0.01 | 0.90 | 0.68 | 0.22 | 1.27 |
| 51710 | 0 | 226499 | NYLPLESSLQY                 | 2.50 | 0.01 | 0.90 | 0.68 | 0.22 | 0.28 |
| 51711 | 0 | 226499 | NYLPLESSLQY                 | 2.50 | 0.01 | 0.90 | 0.68 | 0.22 | 1.34 |
| 51712 | 0 | 100371 | NYLVDGNGRF                  | 2.32 | 0.01 | 2.18 | 2.16 | 0.22 | 0.28 |
| 51713 | 0 | 100372 | NYMDKFNEQE                  | 2.32 | 0.01 | 2.18 | 2.16 | 0.22 | 0.28 |
| 51714 | 0 | 121687 | NYMGWYSTKLGFYRA             | 2.64 | 0.01 | 0.90 | 0.68 | 0.22 | 1.39 |
| 51715 | 0 | 121687 | NYMGWYSTKLGFYRA             | 2.64 | 0.01 | 0.90 | 0.68 | 0.22 | 0.28 |
| 51716 | 0 | 121687 | NYMGWYSTKLGFYRA             | 2.64 | 0.01 | 0.90 | 0.68 | 0.22 | 0.28 |
| 51717 | 0 | 79327  | NYNKRKRIHIGPGRAFYT<br>TKNII | 3.09 | 0.01 | 3.70 | 0.44 | 1.41 | 0.28 |
| 51718 | 0 | 46676  | NYNVLMVPKP                  | 2.34 | 0.01 | 0.78 | 0.44 | 1.74 | 0.28 |
| 51719 | 0 | 46677  | NYNWKR                      | 1.91 | 0.01 | 0.90 | 0.68 | 0.22 | 1.34 |
| 51720 | 0 | 46677  | NYNWKR                      | 1.91 | 0.01 | 0.90 | 0.68 | 0.22 | 0.28 |
| 51721 | 0 | 46677  | NYNWKR                      | 1.91 | 0.01 | 0.90 | 0.68 | 0.22 | 1.39 |
| 51722 | 0 | 46678  | NYNWTP                      | 2.04 | 0.01 | 0.90 | 0.44 | 0.85 | 1.39 |
| 51723 | 0 | 46681  | NYNYKYRYLRH GKLRPF          | 2.83 | 0.01 | 2.48 | 0.44 | 0.85 | 0.28 |
| 51724 | 0 | 46681  | NYNYKYRYLRH GKLRPF          | 2.83 | 0.01 | 2.45 | 0.68 | 0.22 | 0.28 |
| 51725 | 0 | 46681  | NYNYKYRYLRH GKLRPF          | 2.83 | 0.01 | 2.45 | 0.68 | 0.22 | 0.28 |
| 51726 | 0 | 431692 | NYPASDDYRASASNGSD<br>DASAH  | 3.08 | 0.01 | 2.04 | 0.44 | 0.85 | 0.28 |
| 51727 | 0 | 431692 | NYPASDDYRASASNGSD<br>DASAH  | 3.08 | 0.01 | 2.04 | 0.44 | 1.93 | 0.28 |
| 51728 | 0 | 46686  | NYPMDH                      | 1.88 | 0.01 | 0.90 | 1.15 | 0.22 | 0.28 |
| 51729 | 0 | 145398 | NYPSWLHAYRLA                | 2.48 | 0.01 | 0.90 | 0.44 | 1.13 | 1.39 |
| 51730 | 0 | 182402 | NYQFLELMTHE                 | 2.47 | 0.01 | 0.90 | 0.68 | 0.22 | 0.28 |
| 51731 | 0 | 182402 | NYQFLELMTHE                 | 2.47 | 0.01 | 0.90 | 0.68 | 0.22 | 0.28 |
| 51732 | 0 | 95644  | NYQFVDCGDS                  | 2.29 | 0.01 | 2.60 | 0.44 | 1.23 | 0.85 |
| 51733 | 0 | 95644  | NYQFVDCGDS                  | 2.29 | 0.01 | 2.60 | 0.44 | 1.23 | 0.85 |
| 51734 | 0 | 133661 | NYSPLHNSDITV                | 2.46 | 0.01 | 0.90 | 0.44 | 0.85 | 0.28 |
| 51735 | 0 | 139191 | NYTCCKLQ                    | 2.11 | 0.01 | 2.63 | 0.68 | 0.22 | 0.85 |
| 51736 | 0 | 180690 | NYTEGRAVLHVALRNRS<br>NT     | 2.91 | 4.33 | 0.78 | 0.44 | 1.13 | 0.28 |
| 51737 | 0 | 180690 | NYTEGRAVLHVALRNRS<br>NT     | 2.91 | 4.33 | 0.78 | 0.44 | 1.13 | 0.28 |
| 51738 | 0 | 180690 | NYTEGRAVLHVALRNRS<br>NT     | 2.91 | 4.33 | 0.78 | 0.44 | 1.41 | 0.28 |

|       |   |        |                                     |      |      |      |      |      |      |
|-------|---|--------|-------------------------------------|------|------|------|------|------|------|
| 51739 | 0 | 104164 | NYTGNQQSRWGLGSP<br>NCHGPDWASPV      | 3.18 | 0.01 | 3.16 | 0.44 | 1.59 | 0.28 |
| 51740 | 0 | 46713  | NYTIFKIRM                           | 2.21 | 0.01 | 2.69 | 0.44 | 0.85 | 2.12 |
| 51741 | 0 | 97539  | NYTTAVDR                            | 2.11 | 0.01 | 2.87 | 0.68 | 0.22 | 0.28 |
| 51742 | 0 | 97539  | NYTTAVDR                            | 2.11 | 0.01 | 2.87 | 1.81 | 0.22 | 0.28 |
| 51743 | 0 | 46717  | NYTVCPCLTRQAAAE                     | 2.70 | 0.01 | 2.71 | 2.13 | 0.22 | 0.85 |
| 51744 | 0 | 128067 | NYVADNFFYNVEGRWG<br>SQ              | 2.83 | 0.01 | 2.40 | 2.75 | 0.22 | 0.28 |
| 51745 | 0 | 128067 | NYVADNFFYNVEGRWG<br>SQ              | 2.83 | 0.01 | 2.40 | 2.75 | 0.22 | 0.28 |
| 51746 | 0 | 128067 | NYVADNFFYNVEGRWG<br>SQ              | 2.83 | 0.01 | 2.40 | 2.75 | 0.22 | 0.85 |
| 51747 | 0 | 46722  | NYVLMVPK                            | 2.12 | 0.01 | 0.78 | 0.44 | 1.74 | 0.28 |
| 51748 | 0 | 167066 | NYYDMNAANVGWNNS<br>TFA              | 2.84 | 0.01 | 0.78 | 0.44 | 1.41 | 0.28 |
| 51749 | 0 | 167066 | NYYDMNAANVGWNNS<br>TFA              | 2.84 | 0.01 | 0.78 | 0.44 | 1.41 | 1.34 |
| 51750 | 0 | 167066 | NYYDMNAANVGWNNS<br>TFA              | 2.84 | 0.01 | 0.78 | 0.44 | 1.41 | 1.66 |
| 51751 | 0 | 167066 | NYYDMNAANVGWNNS<br>TFA              | 2.84 | 0.01 | 0.78 | 0.44 | 1.41 | 1.66 |
| 51752 | 0 | 167066 | NYYDMNAANVGWNNS<br>TFA              | 2.84 | 0.01 | 0.78 | 0.44 | 1.41 | 1.66 |
| 51753 | 0 | 167066 | NYYDMNAANVGWNNS<br>TFA              | 2.84 | 0.01 | 0.78 | 0.44 | 1.41 | 1.66 |
| 51754 | 0 | 167066 | NYYDMNAANVGWNNS<br>TFA              | 2.84 | 0.01 | 0.78 | 0.44 | 1.41 | 1.66 |
| 51755 | 0 | 167066 | NYYDMNAANVGWNNS<br>TFA              | 2.84 | 0.01 | 0.78 | 0.44 | 1.41 | 1.66 |
| 51756 | 0 | 46733  | NYYKDAASNSANRQDF<br>TQDPSKFTEPVKDV  | 3.35 | 0.01 | 3.61 | 0.44 | 2.39 | 0.28 |
| 51757 | 0 | 181757 | NYYKLREDWWAINRK                     | 2.67 | 0.01 | 1.66 | 2.36 | 0.22 | 1.28 |
| 51758 | 0 | 115879 | NYYQQKPVAL                          | 2.29 | 0.01 | 1.60 | 0.44 | 1.23 | 0.85 |
| 51759 | 0 | 115879 | NYYQQKPVAL                          | 2.29 | 0.01 | 1.60 | 0.44 | 1.23 | 0.85 |
| 51760 | 0 | 129543 | AAAAAPAKVEAKEE                      | 2.72 | 0.01 | 0.78 | 0.44 | 1.13 | 0.85 |
| 51761 | 0 | 347915 | AAAAEEEEEDDDMGF                     | 2.69 | 0.01 | 1.61 | 0.44 | 0.85 | 1.28 |
| 51762 | 0 | 347916 | AAAAEPEEEDDDDD<br>AAAAALQAIENARILEP | 2.72 | 0.01 | 1.61 | 0.44 | 0.85 | 1.28 |
| 51763 | 0 | 77792  | HIDVIMEDCSTPSLCGSS<br>R             | 3.53 | 0.01 | 3.59 | 0.44 | 0.85 | 0.28 |
| 51764 | 0 | 139839 | PAAAQAL                             | 2.05 | 0.01 | 0.90 | 2.00 | 0.22 | 0.28 |
| 51765 | 0 | 347947 | PAADGAETREEKKNE                     | 2.69 | 0.01 | 1.61 | 0.44 | 0.85 | 1.28 |

|       |   |        |                            |      |      |      |      |      |      |
|-------|---|--------|----------------------------|------|------|------|------|------|------|
| 51766 | 0 | 347949 | PAADGAGTAEGKQNE            | 2.70 | 0.01 | 1.61 | 0.44 | 0.85 | 1.28 |
| 51767 | 0 | 347951 | PAADGAGTQEEKQNE            | 2.69 | 0.01 | 1.61 | 0.44 | 0.85 | 1.28 |
| 51768 | 0 | 46737  | PAADLNWGENQDGIV<br>WV      | 2.79 | 0.01 | 3.32 | 2.49 | 0.22 | 0.28 |
| 51769 | 0 | 46738  | PAADRAAAPDAVAA             | 2.67 | 0.01 | 2.59 | 0.44 | 0.85 | 0.28 |
| 51770 | 0 | 139840 | PAAFAFL                    | 2.05 | 0.01 | 0.90 | 2.00 | 0.22 | 0.28 |
| 51771 | 0 | 347982 | PAAGGFGSAAHTSAP            | 2.73 | 0.01 | 1.61 | 0.44 | 0.85 | 1.28 |
| 51772 | 0 | 347983 | PAAGGFGSAAHTSTP            | 2.73 | 0.01 | 1.61 | 0.44 | 0.85 | 1.28 |
| 51773 | 0 | 347984 | PAAGGFGSATHTSAP            | 2.73 | 0.01 | 1.61 | 0.44 | 0.85 | 1.28 |
| 51774 | 0 | 347985 | PAAGGFGSATHTSTP            | 2.73 | 0.01 | 1.61 | 0.44 | 0.85 | 1.28 |
| 51775 | 0 | 347986 | PAAGGFGSATNTSAP            | 2.73 | 0.01 | 1.61 | 0.44 | 0.85 | 1.28 |
| 51776 | 0 | 347987 | PAAGGFGSATTTTAP            | 2.73 | 0.01 | 1.61 | 0.44 | 0.85 | 1.28 |
| 51777 | 0 | 347988 | PAAGGFGSATTTSTP            | 2.74 | 0.01 | 1.61 | 0.44 | 0.85 | 1.28 |
| 51778 | 0 | 46740  | PAAGTDAGEDAG               | 2.52 | 0.01 | 3.17 | 1.12 | 0.22 | 2.02 |
| 51779 | 0 | 113104 | PAAGYTPAAP                 | 2.37 | 0.01 | 3.00 | 2.79 | 0.22 | 0.28 |
| 51780 | 0 | 348014 | PAAKPAAKAPAPKAE            | 2.76 | 0.01 | 1.61 | 0.44 | 0.85 | 1.28 |
| 51781 | 0 | 348015 | PAAKPAAKPAAKPAA            | 2.74 | 0.01 | 1.61 | 0.44 | 0.85 | 1.28 |
| 51782 | 0 | 348016 | PAAKPAAKPAAKTAA            | 2.74 | 0.01 | 1.61 | 0.44 | 0.85 | 1.28 |
| 51783 | 0 | 348017 | PAAKPAAKTAAKPAK            | 2.76 | 0.01 | 1.61 | 0.44 | 0.85 | 1.28 |
| 51784 | 0 | 348018 | PAAKSAAKPAAKPAA            | 2.74 | 0.01 | 1.61 | 0.44 | 0.85 | 1.28 |
| 51785 | 0 | 348019 | PAAKTAAKPAKKPAV            | 2.75 | 0.01 | 1.61 | 0.44 | 0.85 | 1.28 |
| 51786 | 0 | 348020 | PAAKTAAKTAAKPAA            | 2.74 | 0.01 | 1.61 | 0.44 | 0.85 | 1.28 |
| 51787 | 0 | 46744  | PAANQVGVGAFGPRLT<br>PPHGG  | 2.99 | 0.01 | 2.58 | 1.12 | 0.22 | 1.57 |
| 51788 | 0 | 46745  | PAANQVGVGAFGPRLT<br>PPHGGI | 3.03 | 0.01 | 2.58 | 0.44 | 0.85 | 0.28 |
| 51789 | 0 | 104165 | PAANTRKGYHQTMMNS<br>YTE    | 2.86 | 0.01 | 3.00 | 1.20 | 0.22 | 0.28 |
| 51790 | 0 | 138210 | PAAPAPNDPNAAPP             | 2.67 | 0.01 | 2.51 | 1.20 | 0.22 | 0.28 |
| 51791 | 0 | 138210 | PAAPAPNDPNAAPP             | 2.67 | 0.01 | 2.51 | 1.20 | 0.22 | 0.28 |
| 51792 | 0 | 138211 | PAAPGAPAAPGAPA             | 2.69 | 0.01 | 2.51 | 1.20 | 0.22 | 0.28 |
| 51793 | 0 | 138211 | PAAPGAPAAPGAPA             | 2.69 | 0.01 | 2.51 | 1.20 | 0.22 | 0.28 |
| 51794 | 0 | 138212 | PAAPPAAPGGPGAP             | 2.70 | 0.01 | 2.51 | 1.20 | 0.22 | 0.28 |
| 51795 | 0 | 138212 | PAAPPAAPGGPGAP             | 2.70 | 0.01 | 2.51 | 1.20 | 0.22 | 0.28 |
| 51796 | 0 | 46753  | PAASSCHNASGKEAKVC<br>TIS   | 2.94 | 0.01 | 2.75 | 0.44 | 0.85 | 0.85 |
| 51797 | 0 | 450905 | PAATHQDIDFLIEEIER          | 2.78 | 0.01 | 0.78 | 2.79 | 1.13 | 1.28 |
| 51798 | 0 | 450905 | PAATHQDIDFLIEEIER          | 2.78 | 0.01 | 0.78 | 2.79 | 1.13 | 1.28 |
| 51799 | 0 | 450905 | PAATHQDIDFLIEEIER          | 2.78 | 0.01 | 0.78 | 1.81 | 1.41 | 1.28 |
| 51800 | 0 | 450905 | PAATHQDIDFLIEEIER          | 2.78 | 0.01 | 0.78 | 1.81 | 1.41 | 1.28 |
| 51801 | 0 | 115409 | PAAVRSPAQILQWQVLS<br>NTV   | 2.96 | 0.01 | 1.60 | 0.44 | 1.23 | 1.28 |

|       |   |        |                          |      |      |      |      |      |      |
|-------|---|--------|--------------------------|------|------|------|------|------|------|
| 51802 | 0 | 115409 | PAAVRSPAQILQWQVLS<br>NTV | 2.96 | 0.01 | 1.60 | 0.44 | 1.41 | 0.28 |
| 51803 | 0 | 115409 | PAAVRSPAQILQWQVLS<br>NTV | 2.96 | 0.01 | 1.60 | 0.44 | 1.93 | 0.28 |
| 51804 | 0 | 110957 | PAAVTLAEADRT             | 2.49 | 0.01 | 3.15 | 3.53 | 0.22 | 0.28 |
| 51805 | 0 | 94630  | PACGKHFSC                | 2.21 | 0.01 | 3.22 | 2.37 | 0.22 | 0.28 |
| 51806 | 0 | 94635  | PACGRHY                  | 1.99 | 0.01 | 3.22 | 1.20 | 0.22 | 0.28 |
| 51807 | 0 | 94636  | PACGRHYS                 | 2.10 | 0.01 | 3.22 | 1.20 | 0.22 | 0.28 |
| 51808 | 0 | 94637  | PACGRHYSC                | 2.21 | 0.01 | 3.22 | 2.37 | 0.22 | 0.28 |
| 51809 | 0 | 94637  | PACGRHYSC                | 2.21 | 0.01 | 3.22 | 1.20 | 0.22 | 0.28 |
| 51810 | 0 | 94638  | PACGRHYSCG               | 2.31 | 0.01 | 3.22 | 2.37 | 0.22 | 0.28 |
| 51811 | 0 | 94638  | PACGRHYSCG               | 2.31 | 0.01 | 3.22 | 1.20 | 0.22 | 0.28 |
| 51812 | 0 | 46756  | PACYCYGLPDSVKIW          | 2.65 | 0.01 | 2.56 | 2.00 | 0.22 | 0.85 |
| 51813 | 0 | 46756  | PACYCYGLPDSVKIW          | 2.65 | 0.01 | 2.56 | 2.02 | 0.22 | 0.85 |
| 51814 | 0 | 46757  | PACYCYGVDPHIKVV          | 2.67 | 0.01 | 2.56 | 2.02 | 0.22 | 0.85 |
| 51815 | 0 | 46758  | PADAQSDCKILCFVSAC<br>NDF | 2.95 | 0.01 | 3.17 | 0.68 | 0.22 | 0.28 |
| 51816 | 0 | 46758  | PADAQSDCKILCFVSAC<br>NDF | 2.95 | 0.01 | 3.17 | 0.68 | 0.22 | 0.28 |
| 51817 | 0 | 46758  | PADAQSDCKILCFVSAC<br>NDF | 2.95 | 0.01 | 3.17 | 0.68 | 0.22 | 0.85 |
| 51818 | 0 | 46758  | PADAQSDCKILCFVSAC<br>NDF | 2.95 | 0.01 | 3.17 | 0.68 | 0.22 | 0.28 |
| 51819 | 0 | 46764  | PADKSDKGFVLGHSI          | 2.66 | 0.01 | 3.50 | 2.22 | 0.22 | 0.28 |
| 51820 | 0 | 46765  | PADPPF                   | 1.92 | 0.01 | 2.96 | 0.44 | 0.85 | 0.28 |
| 51821 | 0 | 348163 | PADRDAALMATDEL           | 2.70 | 0.01 | 1.61 | 0.44 | 0.85 | 1.28 |
| 51822 | 0 | 348164 | PADRDATAALMATDEL         | 2.72 | 0.01 | 1.61 | 0.44 | 0.85 | 1.28 |
| 51823 | 0 | 155333 | PADS                     | 1.57 | 0.01 | 2.30 | 1.15 | 0.22 | 0.85 |
| 51824 | 0 | 155333 | PADS                     | 1.57 | 0.01 | 2.30 | 1.15 | 0.22 | 0.85 |
| 51825 | 0 | 348167 | PADSENSKTGCGEAA          | 2.67 | 0.01 | 1.61 | 0.44 | 0.85 | 1.28 |
| 51826 | 0 | 155334 | PADSS                    | 1.72 | 0.01 | 2.30 | 1.20 | 0.22 | 0.85 |
| 51827 | 0 | 155334 | PADSS                    | 1.72 | 0.01 | 2.30 | 1.20 | 0.22 | 0.85 |
| 51828 | 0 | 155334 | PADSS                    | 1.72 | 0.01 | 2.30 | 1.20 | 0.22 | 0.85 |
| 51829 | 0 | 155334 | PADSS                    | 1.72 | 0.01 | 2.30 | 1.20 | 0.22 | 0.85 |
| 51830 | 0 | 155334 | PADSS                    | 1.72 | 0.01 | 2.30 | 1.20 | 0.22 | 0.85 |
| 51831 | 0 | 155334 | PADSS                    | 1.72 | 0.01 | 2.30 | 1.20 | 0.22 | 0.85 |
| 51832 | 0 | 167983 | PAEAGKTELDDGYRPP         | 2.73 | 0.01 | 2.75 | 0.44 | 1.59 | 2.51 |
| 51833 | 0 | 167983 | PAEAGKTELDDGYRPP         | 2.73 | 0.01 | 2.75 | 0.44 | 0.85 | 2.51 |
| 51834 | 0 | 167983 | PAEAGKTELDDGYRPP         | 2.73 | 0.01 | 2.75 | 0.44 | 0.85 | 2.51 |
| 51835 | 0 | 167983 | PAEAGKTELDDGYRPP         | 2.73 | 0.01 | 2.75 | 0.44 | 0.85 | 2.51 |
| 51836 | 0 | 46774  | PAEEEEK                  | 1.91 | 0.01 | 2.60 | 0.68 | 0.22 | 0.85 |
| 51837 | 0 | 46774  | PAEEEEK                  | 1.91 | 0.01 | 2.60 | 0.68 | 0.22 | 1.27 |
| 51838 | 0 | 103457 | PAEFLENFVRSSNLK          | 2.67 | 0.01 | 2.04 | 0.44 | 0.85 | 1.28 |

|       |   |        |                                    |      |      |      |      |      |      |
|-------|---|--------|------------------------------------|------|------|------|------|------|------|
| 51839 | 0 | 46777  | PAEGEK                             | 1.90 | 0.01 | 2.60 | 0.68 | 0.22 | 0.85 |
| 51840 | 0 | 46777  | PAEGEK                             | 1.90 | 0.01 | 2.60 | 0.68 | 0.22 | 1.27 |
| 51841 | 0 | 105993 | PAEGT                              | 1.74 | 0.01 | 0.78 | 0.44 | 1.13 | 2.02 |
| 51842 | 0 | 46778  | PAEILRKPRKFPPALPIW                 | 2.89 | 0.01 | 1.72 | 0.44 | 0.85 | 0.28 |
| 51843 | 0 | 46779  | PAEILRKS                           | 2.10 | 0.01 | 2.68 | 0.44 | 1.59 | 0.28 |
| 51844 | 0 | 46783  | PAELAKHAMAEGTKAVS<br>SASA          | 3.01 | 0.01 | 3.78 | 2.49 | 0.85 | 0.28 |
| 51845 | 0 | 108056 | PAELEDVIYRLKHHCDKG<br>NDYICNKYKNIN | 3.34 | 0.01 | 0.90 | 1.12 | 0.22 | 0.28 |
| 51846 | 0 | 148701 | PAELMRRFELYF                       | 2.48 | 0.01 | 0.78 | 1.15 | 0.22 | 1.48 |
| 51847 | 0 | 148701 | PAELMRRFELYF                       | 2.48 | 0.01 | 0.78 | 1.15 | 0.22 | 0.28 |
| 51848 | 0 | 148701 | PAELMRRFELYF                       | 2.48 | 0.01 | 0.78 | 1.15 | 0.22 | 0.85 |
| 51849 | 0 | 148701 | PAELMRRFELYF                       | 2.48 | 0.01 | 0.78 | 1.15 | 0.22 | 0.28 |
| 51850 | 0 | 148701 | PAELMRRFELYF                       | 2.48 | 0.01 | 0.78 | 1.15 | 0.22 | 0.85 |
| 51851 | 0 | 348235 | PAEPKSAEPKPAEPK                    | 2.75 | 0.01 | 1.61 | 0.44 | 0.85 | 1.28 |
| 51852 | 0 | 348236 | PAEPKSAEPKPAEPN                    | 2.75 | 0.01 | 1.61 | 0.44 | 0.85 | 1.28 |
| 51853 | 0 | 348237 | PAEPKSAEPKPAESK                    | 2.75 | 0.01 | 1.61 | 0.44 | 0.85 | 1.28 |
| 51854 | 0 | 127755 | PAEPLSKRVVFE                       | 2.47 | 0.01 | 3.16 | 3.16 | 0.22 | 0.28 |
| 51855 | 0 | 348240 | PAEPNSAEPKPAEPK                    | 2.75 | 0.01 | 1.61 | 0.44 | 0.85 | 1.28 |
| 51856 | 0 | 523405 | PAEPREREREEDWRQPR<br>EDWRRPS       | 3.18 | 0.01 | 2.16 | 0.44 | 1.23 | 1.39 |
| 51857 | 0 | 348245 | PAEPYSAEPKPAEPK                    | 2.75 | 0.01 | 1.61 | 0.44 | 0.85 | 1.28 |
| 51858 | 0 | 102706 | PAESGGSQPPRA                       | 2.50 | 0.01 | 0.78 | 0.44 | 1.13 | 0.28 |
| 51859 | 0 | 348252 | PAESKSAEPKPAEPK                    | 2.75 | 0.01 | 1.61 | 0.44 | 0.85 | 1.28 |
| 51860 | 0 | 348263 | PAESTVIKTTTATTG                    | 2.68 | 0.01 | 1.61 | 0.44 | 0.85 | 1.28 |
| 51861 | 0 | 489687 | PAESYVEFVNRLQIS                    | 2.64 | 0.01 | 2.69 | 3.05 | 0.85 | 1.28 |
| 51862 | 0 | 46786  | PAEVTQLKGLS                        | 2.36 | 0.01 | 2.40 | 1.15 | 0.22 | 0.28 |
| 51863 | 0 | 46786  | PAEVTQLKGLS                        | 2.36 | 0.01 | 2.40 | 1.15 | 0.22 | 2.02 |
| 51864 | 0 | 46786  | PAEVTQLKGLS                        | 2.36 | 0.01 | 2.40 | 1.15 | 0.22 | 0.85 |
| 51865 | 0 | 79034  | PAFGAN                             | 1.90 | 0.01 | 2.08 | 0.68 | 0.22 | 0.28 |
| 51866 | 0 | 46792  | PAFGANSNNPDWDFN<br>p               | 2.78 | 0.01 | 2.58 | 1.15 | 0.22 | 0.28 |
| 51867 | 0 | 46792  | PAFGANSNNPDWDFN<br>p               | 2.78 | 0.01 | 2.58 | 1.15 | 0.22 | 1.27 |
| 51868 | 0 | 46792  | PAFGANSNNPDWDFN<br>p               | 2.78 | 0.01 | 2.58 | 1.15 | 0.22 | 1.27 |
| 51869 | 0 | 46792  | PAFGANSNNPDWDFN<br>p               | 2.78 | 0.01 | 2.08 | 0.44 | 0.85 | 0.28 |
| 51870 | 0 | 46792  | PAFGANSNNPDWDFN<br>p               | 2.78 | 0.01 | 2.08 | 0.44 | 0.85 | 0.28 |
| 51871 | 0 | 46792  | PAFGANSNNPDWDFN<br>p               | 2.78 | 0.01 | 2.08 | 0.44 | 0.85 | 0.28 |
| 51872 | 0 | 46792  | PAFGANSNNPDWDFN<br>p               | 2.78 | 0.01 | 2.58 | 0.44 | 0.22 | 1.27 |
| 51873 | 0 | 46793  | PAFGANSNNPDWDFN<br>PVKDDWP         | 3.07 | 0.01 | 2.58 | 1.15 | 0.22 | 0.28 |

|       |   |        |                                    |      |      |      |      |      |      |
|-------|---|--------|------------------------------------|------|------|------|------|------|------|
| 51874 | 0 | 46793  | PAFGANSNNPDWDFN<br>PVKDDWP         | 3.07 | 0.01 | 2.58 | 0.44 | 0.85 | 0.28 |
| 51875 | 0 | 46793  | PAFGANSNNPDWDFN<br>PVKDDWP         | 3.07 | 0.01 | 2.58 | 3.22 | 0.22 | 0.28 |
| 51876 | 0 | 46793  | PAFGANSNNPDWDFN<br>PVKDDWP         | 3.07 | 0.01 | 2.58 | 3.27 | 0.22 | 0.28 |
| 51877 | 0 | 46793  | PAFGANSNNPDWDFN<br>PVKDDWP         | 3.07 | 0.01 | 2.58 | 1.15 | 0.22 | 1.57 |
| 51878 | 0 | 46793  | PAFGANSNNPDWDFN<br>PVKDDWP         | 3.07 | 0.01 | 2.58 | 2.25 | 0.22 | 1.57 |
| 51879 | 0 | 46793  | PAFGANSNNPDWDFN<br>PVKDDWP         | 3.07 | 0.01 | 2.58 | 1.12 | 0.22 | 1.57 |
| 51880 | 0 | 46793  | PAFGANSNNPDWDFN<br>PVKDDWP         | 3.07 | 0.01 | 2.58 | 1.12 | 0.22 | 1.57 |
| 51881 | 0 | 132879 | PAFKNPSQDMVRFHI                    | 2.63 | 0.01 | 3.16 | 3.16 | 0.22 | 0.28 |
| 51882 | 0 | 46795  | PAFLGCSSRFGSFGSGVE<br>P            | 2.93 | 0.01 | 0.90 | 0.68 | 0.22 | 1.27 |
| 51883 | 0 | 46795  | PAFLGCSSRFGSFGSGVE<br>P            | 2.93 | 0.01 | 0.90 | 0.68 | 0.22 | 0.85 |
| 51884 | 0 | 46795  | PAFLGCSSRFGSFGSGVE<br>P            | 2.93 | 0.01 | 0.90 | 0.68 | 0.22 | 0.85 |
| 51885 | 0 | 46795  | PAFLGCSSRFGSFGSGVE<br>P            | 2.93 | 0.01 | 0.90 | 0.68 | 0.22 | 0.28 |
| 51886 | 0 | 46795  | PAFLGCSSRFGSFGSGVE<br>P            | 2.93 | 0.01 | 0.90 | 0.68 | 0.22 | 0.28 |
| 51887 | 0 | 46796  | PAFPLAEDVEKDK                      | 2.58 | 0.01 | 3.17 | 0.44 | 0.85 | 0.85 |
| 51888 | 0 | 46797  | PAFRANTANPDWDFNP<br>NKDTWP         | 3.09 | 0.01 | 2.71 | 3.22 | 0.22 | 0.28 |
| 51889 | 0 | 46797  | PAFRANTANPDWDFNP<br>NKDTWP         | 3.09 | 0.01 | 2.71 | 3.27 | 0.22 | 0.28 |
| 51890 | 0 | 46797  | PAFRANTANPDWDFNP<br>NKDTWP         | 3.09 | 0.01 | 2.71 | 1.15 | 0.22 | 1.57 |
| 51891 | 0 | 130991 | PAFSCWKWVTVLVICPT<br>RFARPNNAFLYDA | 3.33 | 0.01 | 0.90 | 0.44 | 1.93 | 0.85 |
| 51892 | 0 | 46799  | PAFVSEYYEF                         | 2.32 | 0.01 | 3.16 | 0.68 | 0.22 | 0.28 |
| 51893 | 0 | 46799  | PAFVSEYYEF                         | 2.32 | 0.01 | 3.16 | 0.68 | 0.22 | 0.28 |
| 51894 | 0 | 129546 | PAGAAKKPKKATGAAT                   | 2.80 | 0.01 | 0.78 | 0.44 | 1.13 | 0.28 |
| 51895 | 0 | 129546 | PAGAAKKPKKATGAAT                   | 2.80 | 0.01 | 0.78 | 0.44 | 1.13 | 0.28 |
| 51896 | 0 | 129546 | PAGAAKKPKKATGAAT                   | 2.80 | 0.01 | 0.78 | 0.44 | 1.13 | 0.28 |
| 51897 | 0 | 46800  | PAGAGAAILTPVPVN                    | 2.71 | 0.01 | 2.76 | 0.44 | 1.59 | 0.28 |
| 51898 | 0 | 46801  | PAGAGRRV                           | 2.15 | 0.01 | 2.40 | 2.43 | 0.22 | 0.28 |
| 51899 | 0 | 147182 | PAGAYLKAPVFETVIKMI                 | 2.84 | 0.01 | 3.45 | 0.44 | 1.23 | 0.28 |
| 51900 | 0 | 46803  | PAGEIKVGKLRQLQR                    | 2.68 | 0.01 | 0.90 | 1.15 | 0.22 | 1.39 |

|       |   |        |                                 |      |      |      |      |      |      |
|-------|---|--------|---------------------------------|------|------|------|------|------|------|
| 51901 | 0 | 46804  | PAGFCDGYCKTHLKA                 | 2.66 | 0.01 | 2.56 | 0.68 | 0.22 | 0.85 |
| 51902 | 0 | 46804  | PAGFCDGYCKTHLKA                 | 2.66 | 0.01 | 2.56 | 2.52 | 0.22 | 0.85 |
| 51903 | 0 | 118546 | PAGGAVAVSAAPGSA                 | 2.75 | 0.01 | 0.78 | 0.44 | 1.13 | 0.85 |
| 51904 | 0 | 118546 | PAGGAVAVSAAPGSA                 | 2.75 | 0.01 | 0.78 | 0.44 | 0.85 | 0.85 |
| 51905 | 0 | 46806  | PAGGAYSMYTNWEQD                 | 2.63 | 0.01 | 2.04 | 0.44 | 0.85 | 1.28 |
| 51906 | 0 | 107218 | PAGGPGFPG                       | 2.18 | 0.01 | 1.60 | 2.55 | 0.22 | 0.28 |
| 51907 | 0 | 107218 | PAGGPGFPG                       | 2.18 | 0.01 | 1.60 | 2.55 | 0.22 | 0.28 |
| 51908 | 0 | 107219 | PAGGPGFPG                       | 2.28 | 0.01 | 1.60 | 2.55 | 0.22 | 0.28 |
| 51909 | 0 | 107219 | PAGGPGFPG                       | 2.28 | 0.01 | 1.60 | 2.55 | 0.22 | 0.28 |
| 51910 | 0 | 107219 | PAGGPGFPG                       | 2.28 | 0.01 | 1.60 | 2.55 | 0.22 | 0.28 |
| 51911 | 0 | 107219 | PAGGPGFPG                       | 2.28 | 0.01 | 1.60 | 2.55 | 0.22 | 0.28 |
| 51912 | 0 | 107219 | PAGGPGFPG                       | 2.28 | 0.01 | 1.60 | 2.55 | 0.22 | 0.28 |
| 51913 | 0 | 107219 | PAGGPGFPG                       | 2.28 | 0.01 | 1.60 | 2.55 | 0.22 | 0.28 |
| 51914 | 0 | 107219 | PAGGPGFPG                       | 2.28 | 0.01 | 1.60 | 2.55 | 0.22 | 0.28 |
| 51915 | 0 | 107219 | PAGGPGFPG                       | 2.28 | 0.01 | 1.60 | 2.55 | 0.22 | 0.28 |
| 51916 | 0 | 107219 | PAGGPGFPG                       | 2.28 | 0.01 | 1.60 | 2.55 | 0.22 | 0.28 |
| 51917 | 0 | 120118 | PAGGTDCSLPMIWAQK<br>TNTPADVFI   | 3.12 | 0.01 | 0.78 | 2.25 | 0.22 | 0.28 |
| 51918 | 0 | 120118 | PAGGTDCSLPMIWAQK<br>TNTPADVFI   | 3.12 | 0.01 | 0.78 | 2.25 | 0.22 | 0.85 |
| 51919 | 0 | 120118 | PAGGTDCSLPMIWAQK<br>TNTPADVFI   | 3.12 | 0.01 | 0.78 | 2.25 | 0.22 | 0.85 |
| 51920 | 0 | 120118 | PAGGTDCSLPMIWAQK<br>TNTPADVFI   | 3.12 | 0.01 | 0.78 | 2.25 | 0.22 | 0.85 |
| 51921 | 0 | 120118 | PAGGTDCSLPMIWAQK<br>TNTPADVFI   | 3.12 | 0.01 | 0.78 | 2.25 | 0.22 | 0.85 |
| 51922 | 0 | 120118 | PAGGTDCSLPMIWAQK<br>TNTPADVFI   | 3.12 | 0.01 | 0.78 | 2.25 | 0.22 | 0.85 |
| 51923 | 0 | 120118 | PAGGTDCSLPMIWAQK<br>TNTPADVFI   | 3.12 | 0.01 | 0.78 | 2.25 | 0.22 | 1.27 |
| 51924 | 0 | 141721 | PAGHPVAINASSDLNLIG<br>FGINAKNNQ | 3.24 | 0.01 | 3.65 | 0.44 | 1.23 | 1.27 |
| 51925 | 0 | 193035 | PAGPVRAIAEYERSAAVL<br>VRYPFG    | 3.15 | 4.93 | 2.84 | 0.44 | 1.74 | 0.28 |
| 51926 | 0 | 109649 | PAGQAEPDRAHYNIVTF<br>CCK        | 2.87 | 0.01 | 1.86 | 2.49 | 0.22 | 0.28 |
| 51927 | 0 | 167632 | PAGRNNDGGSSAPTPK                | 2.75 | 0.01 | 3.18 | 0.44 | 0.85 | 1.28 |
| 51928 | 0 | 167632 | PAGRNNDGGSSAPTPK                | 2.75 | 0.01 | 3.18 | 0.44 | 0.85 | 1.28 |
| 51929 | 0 | 167632 | PAGRNNDGGSSAPTPK                | 2.75 | 0.01 | 3.18 | 0.44 | 1.59 | 1.28 |
| 51930 | 0 | 167633 | PAGRNNDGSSAP                    | 2.50 | 0.01 | 3.44 | 0.44 | 0.85 | 1.28 |
| 51931 | 0 | 167633 | PAGRNNDGSSAP                    | 2.50 | 0.01 | 3.44 | 0.44 | 1.59 | 1.28 |

|       |   |        |                                     |      |      |      |      |      |      |
|-------|---|--------|-------------------------------------|------|------|------|------|------|------|
| 51932 | 0 | 167634 | PAGRNNDGSSAPTPK                     | 2.69 | 0.01 | 3.44 | 0.44 | 0.85 | 1.28 |
| 51933 | 0 | 167634 | PAGRNNDGSSAPTPK                     | 2.69 | 0.01 | 3.44 | 0.44 | 1.59 | 1.28 |
| 51934 | 0 | 139841 | PAGRQARRPATVPEG                     | 2.71 | 0.01 | 0.90 | 0.68 | 0.22 | 1.27 |
| 51935 | 0 | 139841 | PAGRQARRPATVPEG                     | 2.71 | 0.01 | 0.90 | 0.68 | 0.22 | 0.28 |
| 51936 | 0 | 139841 | PAGRQARRPATVPEG                     | 2.71 | 0.01 | 0.90 | 0.68 | 0.22 | 1.34 |
| 51937 | 0 | 95032  | PAGTGDRL                            | 2.12 | 0.01 | 3.47 | 1.12 | 0.22 | 1.34 |
| 51938 | 0 | 95032  | PAGTGDRL                            | 2.12 | 0.01 | 3.47 | 3.75 | 0.22 | 0.28 |
| 51939 | 0 | 95032  | PAGTGDRL                            | 2.12 | 0.01 | 3.47 | 3.75 | 0.22 | 0.28 |
| 51940 | 0 | 95032  | PAGTGDRL                            | 2.12 | 0.01 | 3.47 | 3.75 | 0.22 | 1.75 |
| 51941 | 0 | 95032  | PAGTGDRL                            | 2.12 | 0.01 | 3.47 | 1.12 | 0.22 | 0.28 |
| 51942 | 0 | 95032  | PAGTGDRL                            | 2.12 | 0.01 | 3.47 | 3.75 | 0.22 | 0.28 |
| 51943 | 0 | 95032  | PAGTGDRL                            | 2.12 | 0.01 | 3.47 | 1.12 | 0.22 | 0.28 |
| 51944 | 0 | 95032  | PAGTGDRL                            | 2.12 | 0.01 | 3.47 | 1.12 | 0.22 | 1.27 |
| 51945 | 0 | 106696 | PAHKARLERP                          | 2.34 | 0.01 | 3.08 | 0.44 | 1.23 | 0.85 |
| 51946 | 0 | 46817  | PAHYANYLP                           | 2.26 | 0.01 | 0.90 | 0.44 | 1.59 | 0.28 |
| 51947 | 0 | 121690 | PAIALREY                            | 2.12 | 0.01 | 0.78 | 0.44 | 1.13 | 0.28 |
| 51948 | 0 | 46822  | PAICHEGKAYFPREGV<br>FNGTSWFITQRNFFS | 3.41 | 0.01 | 2.91 | 0.44 | 0.85 | 0.28 |
| 51949 | 0 | 46823  | PAIIPDREALYQEFDEME<br>EC            | 2.94 | 0.01 | 1.72 | 0.44 | 0.85 | 0.28 |
| 51950 | 0 | 46824  | PAIIPDREALYQQFDEM<br>EEC            | 2.93 | 0.01 | 1.96 | 0.44 | 0.85 | 0.28 |
| 51951 | 0 | 46825  | PAIIPDREV                           | 2.23 | 0.01 | 2.41 | 0.44 | 0.85 | 0.28 |
| 51952 | 0 | 46826  | PAIIPDREVLHREFDEME<br>EC            | 2.94 | 0.01 | 1.96 | 0.44 | 0.85 | 0.28 |
| 51953 | 0 | 46827  | PAIIPDREVLQAFDEME<br>EC             | 2.92 | 0.01 | 2.41 | 0.44 | 0.85 | 0.28 |
| 51954 | 0 | 46828  | PAIIPDREVLQEFDEME<br>EC             | 2.92 | 0.01 | 2.41 | 0.44 | 0.85 | 0.28 |
| 51955 | 0 | 46829  | PAIIPDREVLQREFDEME<br>EC            | 2.94 | 0.01 | 1.96 | 0.44 | 0.85 | 0.28 |
| 51956 | 0 | 181237 | PAINVAMHVFRK                        | 2.45 | 0.01 | 0.78 | 0.44 | 1.93 | 0.28 |
| 51957 | 0 | 181237 | PAINVAMHVFRK                        | 2.45 | 0.01 | 0.78 | 0.44 | 1.93 | 0.28 |
| 51958 | 0 | 46833  | PAIVPDKEVLYQQYDEM<br>EEC            | 2.94 | 0.01 | 1.96 | 0.44 | 0.85 | 0.28 |
| 51959 | 0 | 46834  | PAIVPDRELLYQEFDEME<br>EC            | 2.92 | 0.01 | 1.72 | 0.44 | 0.85 | 0.28 |
| 51960 | 0 | 46835  | PAIVPDREVLQDFDEM<br>EEC             | 2.93 | 0.01 | 1.72 | 0.44 | 0.85 | 0.28 |
| 51961 | 0 | 46836  | PAIVPDREVLQREFDEM<br>EEC            | 2.94 | 0.01 | 1.96 | 0.44 | 0.85 | 0.28 |
| 51962 | 0 | 348442 | PAKAAAAPAKAAAAP                     | 2.74 | 0.01 | 1.61 | 0.44 | 0.85 | 1.28 |
| 51963 | 0 | 348443 | PAKAAAAPAKAAAAPP                    | 2.72 | 0.01 | 1.61 | 0.44 | 0.85 | 1.28 |



|       |   |        |                                                         |      |      |      |      |      |      |
|-------|---|--------|---------------------------------------------------------|------|------|------|------|------|------|
| 51964 | 0 | 348444 | PAKAAAAPAKAATAP                                         | 2.75 | 0.01 | 1.61 | 0.44 | 0.85 | 1.28 |
| 51965 | 0 | 348446 | PAKAAAAPAKAAAPPA                                        | 2.74 | 0.01 | 1.61 | 0.44 | 0.85 | 1.28 |
| 51966 | 0 | 46837  | PAKAAAAPPAA                                             | 2.35 | 0.01 | 2.30 | 0.44 | 0.85 | 1.27 |
| 51967 | 0 | 348447 | PAKAAAAPPAAARSAE                                        | 2.73 | 0.01 | 1.61 | 0.44 | 0.85 | 1.28 |
| 51968 | 0 | 348448 | PAKAAAAPPAKAAAAP                                        | 2.74 | 0.01 | 1.61 | 0.44 | 0.85 | 1.28 |
| 51969 | 0 | 348449 | PAKAAAAPPAKAAAPP                                        | 2.73 | 0.01 | 1.61 | 0.44 | 0.85 | 1.28 |
| 51970 | 0 | 348450 | PAKAAAAPPAKTAAAP                                        | 2.74 | 0.01 | 1.61 | 0.44 | 0.85 | 1.28 |
| 51971 | 0 | 348451 | PAKAAAAPPAKTAAPP                                        | 2.73 | 0.01 | 1.61 | 0.44 | 0.85 | 1.28 |
| 51972 | 0 | 348452 | PAKAATAPAKAAAAP                                         | 2.74 | 0.01 | 1.61 | 0.44 | 0.85 | 1.28 |
| 51973 | 0 | 130992 | PAKKEMELLIMTKDSGK<br>VFTASPASIAATSFSEDTL<br>KKEKQAAYNAD | 3.79 | 0.01 | 0.78 | 0.44 | 1.13 | 0.85 |
| 51974 | 0 | 130992 | PAKKEMELLIMTKDSGK<br>VFTASPASIAATSFSEDTL<br>KKEKQAAYNAD | 3.79 | 0.01 | 0.78 | 0.44 | 1.41 | 0.85 |
| 51975 | 0 | 348480 | PAKKPAVKPTVKPAA                                         | 2.74 | 0.01 | 1.61 | 0.44 | 0.85 | 1.28 |
| 51976 | 0 | 123567 | PAKLGWYWKI                                              | 2.21 | 0.01 | 2.28 | 2.00 | 0.22 | 0.28 |
| 51977 | 0 | 123567 | PAKLGWYWKI                                              | 2.21 | 0.01 | 2.28 | 2.00 | 0.22 | 0.28 |
| 51978 | 0 | 123567 | PAKLGWYWKI                                              | 2.21 | 0.01 | 2.28 | 2.00 | 0.22 | 0.28 |
| 51979 | 0 | 123568 | PAKLGWYWL                                               | 2.23 | 0.01 | 2.28 | 2.00 | 0.22 | 0.28 |
| 51980 | 0 | 46841  | PAKLLKERGFFGAIAGFL<br>E                                 | 2.93 | 0.01 | 3.61 | 0.68 | 0.22 | 0.28 |
| 51981 | 0 | 46841  | PAKLLKERGFFGAIAGFL<br>E                                 | 2.93 | 0.01 | 3.61 | 0.68 | 2.25 | 1.75 |
| 51982 | 0 | 46841  | PAKLLKERGFFGAIAGFL<br>E                                 | 2.93 | 0.01 | 3.61 | 0.68 | 0.22 | 1.75 |
| 51983 | 0 | 46841  | PAKLLKERGFFGAIAGFL<br>E                                 | 2.93 | 0.01 | 3.61 | 0.68 | 2.25 | 1.75 |
| 51984 | 0 | 46841  | PAKLLKERGFFGAIAGFL<br>E                                 | 2.93 | 0.01 | 3.61 | 0.68 | 2.25 | 1.75 |
| 51985 | 0 | 46841  | PAKLLKERGFFGAIAGFL<br>E                                 | 2.93 | 0.01 | 3.61 | 1.15 | 2.26 | 2.56 |
| 51986 | 0 | 46841  | PAKLLKERGFFGAIAGFL<br>E                                 | 2.93 | 0.01 | 3.61 | 1.15 | 2.26 | 2.56 |
| 51987 | 0 | 164309 | PAKNPSA                                                 | 2.05 | 0.01 | 0.90 | 1.20 | 0.22 | 1.39 |
| 51988 | 0 | 348498 | PAKSANKPASKPAAK                                         | 2.75 | 0.01 | 1.61 | 0.44 | 0.85 | 1.28 |
| 51989 | 0 | 131994 | PAKSAPAPKK                                              | 2.36 | 0.01 | 1.75 | 2.84 | 1.13 | 1.27 |
| 51990 | 0 | 46844  | PAKSMDVR                                                | 2.10 | 0.01 | 2.40 | 2.43 | 0.22 | 0.28 |
| 51991 | 0 | 167789 | PAKSMDVRR                                               | 2.18 | 0.01 | 2.40 | 2.43 | 0.22 | 0.28 |

|       |   |        |                                     |      |      |      |      |      |      |
|-------|---|--------|-------------------------------------|------|------|------|------|------|------|
| 51992 | 0 | 348504 | PAKTAAAPAKAAAPA                     | 2.75 | 0.01 | 1.61 | 0.44 | 0.85 | 1.28 |
| 51993 | 0 | 348505 | PAKTAAPPAKAAAPP                     | 2.73 | 0.01 | 1.61 | 0.44 | 0.85 | 1.28 |
| 51994 | 0 | 348507 | PAKTAVSKAAAPKKA                     | 2.73 | 0.01 | 1.61 | 0.44 | 0.85 | 1.28 |
| 51995 | 0 | 46849  | PALDKLKLGTGDEATGA                   | 2.78 | 0.01 | 2.59 | 0.68 | 0.22 | 0.28 |
| 51996 | 0 | 46849  | PALDKLKLGTGDEATGA                   | 2.78 | 0.01 | 2.59 | 2.42 | 0.22 | 0.28 |
| 51997 | 0 | 129551 | PALEKLLPHIRGNVG                     | 2.66 | 0.01 | 0.78 | 0.44 | 1.13 | 0.85 |
| 51998 | 0 | 79957  | PALELIRMVECS                        | 2.45 | 0.01 | 2.14 | 3.26 | 0.22 | 0.28 |
| 51999 | 0 | 79958  | PALELIRMVECSGK                      | 2.57 | 0.01 | 2.14 | 3.17 | 0.22 | 0.28 |
| 52000 | 0 | 79958  | PALELIRMVECSGK                      | 2.57 | 0.01 | 2.14 | 3.17 | 0.22 | 0.28 |
| 52001 | 0 | 46851  | PALICCCRGRCNKKG                     | 2.68 | 0.01 | 2.43 | 0.44 | 1.59 | 0.28 |
| 52002 | 0 | 46856  | PALPVWAR                            | 2.15 | 0.01 | 2.68 | 0.44 | 1.59 | 0.28 |
| 52003 | 0 | 46857  | PALSTGLI                            | 2.12 | 0.01 | 1.72 | 0.44 | 0.85 | 0.28 |
| 52004 | 0 | 46858  | PALTAAETG                           | 2.24 | 0.01 | 3.67 | 0.44 | 0.85 | 0.28 |
| 52005 | 0 | 46858  | PALTAAETG                           | 2.24 | 0.01 | 3.67 | 0.44 | 0.85 | 1.27 |
| 52006 | 0 | 46859  | PALTAVETGATNPL                      | 2.65 | 0.01 | 2.57 | 0.44 | 0.85 | 0.28 |
| 52007 | 0 | 46859  | PALTAVETGATNPL                      | 2.65 | 0.01 | 2.57 | 0.44 | 0.85 | 1.27 |
| 52008 | 0 | 46859  | PALTAVETGATNPL                      | 2.65 | 0.01 | 2.57 | 0.44 | 0.85 | 0.28 |
| 52009 | 0 | 46859  | PALTAVETGATNPL                      | 2.65 | 0.01 | 2.57 | 0.44 | 0.85 | 1.27 |
| 52010 | 0 | 46859  | PALTAVETGATNPL                      | 2.65 | 0.01 | 2.96 | 1.12 | 0.22 | 0.28 |
| 52011 | 0 | 46859  | PALTAVETGATNPL                      | 2.65 | 0.01 | 2.96 | 1.12 | 0.22 | 2.02 |
| 52012 | 0 | 46860  | PALVPDKEV                           | 2.24 | 0.01 | 2.59 | 0.44 | 0.85 | 0.28 |
| 52013 | 0 | 46861  | PALVPDKEVLYQQYDE<br>MEEC            | 2.95 | 0.01 | 1.96 | 0.44 | 0.85 | 0.28 |
| 52014 | 0 | 46862  | PALVPDRQVLYQQYDE<br>MEEC            | 2.95 | 0.01 | 1.96 | 0.44 | 0.85 | 0.28 |
| 52015 | 0 | 186787 | PAMAMGNLGANSIET                     | 2.68 | 0.01 | 0.90 | 1.20 | 0.22 | 0.85 |
| 52016 | 0 | 148702 | PAMCNVYIPP                          | 2.30 | 0.01 | 1.86 | 0.44 | 1.23 | 0.85 |
| 52017 | 0 | 46867  | PAN                                 | 1.37 | 0.01 | 4.93 | 4.93 | 2.26 | 0.85 |
| 52018 | 0 | 193512 | PANAAPSGW                           | 2.25 | 0.01 | 2.51 | 0.44 | 2.39 | 0.28 |
| 52019 | 0 | 193512 | PANAAPSGW                           | 2.25 | 0.01 | 2.51 | 0.44 | 2.39 | 0.28 |
| 52020 | 0 | 101108 | PANAHPQ                             | 2.05 | 0.01 | 0.90 | 0.44 | 1.13 | 1.39 |
| 52021 | 0 | 46868  | PANCPKS                             | 2.03 | 0.01 | 2.58 | 0.68 | 0.22 | 0.28 |
| 52022 | 0 | 46868  | PANCPKS                             | 2.03 | 0.01 | 2.58 | 0.68 | 0.22 | 0.85 |
| 52023 | 0 | 46871  | PANKEESISFHFQ                       | 2.52 | 0.01 | 3.00 | 0.44 | 0.85 | 0.28 |
| 52024 | 0 | 46873  | PANNTVSQ                            | 2.11 | 0.01 | 2.83 | 1.12 | 0.22 | 0.28 |
| 52025 | 0 | 153279 | PANPPPASTNRQSGRQ<br>PTPLSPPLRNTHPQA | 3.42 | 0.01 | 2.08 | 0.68 | 0.22 | 0.28 |
| 52026 | 0 | 153279 | PANPPPASTNRQSGRQ<br>PTPLSPPLRNTHPQA | 3.42 | 0.01 | 2.08 | 0.68 | 0.22 | 0.28 |
| 52027 | 0 | 153279 | PANPPPASTNRQSGRQ<br>PTPLSPPLRNTHPQA | 3.42 | 0.01 | 2.08 | 0.68 | 0.22 | 0.28 |

|       |   |        |                                     |      |      |      |      |      |      |
|-------|---|--------|-------------------------------------|------|------|------|------|------|------|
| 52028 | 0 | 153279 | PANPPPASTNRQSGRQ<br>PTPLSPPLRNTHPQA | 3.42 | 0.01 | 2.08 | 0.68 | 0.22 | 2.02 |
| 52029 | 0 | 153279 | PANPPPASTNRQSGRQ<br>PTPLSPPLRNTHPQA | 3.42 | 0.01 | 2.08 | 0.68 | 0.22 | 0.28 |
| 52030 | 0 | 114505 | PAPADLFFKNADINV                     | 2.70 | 0.01 | 3.78 | 0.44 | 1.41 | 1.57 |
| 52031 | 0 | 348613 | PAPAKAAAPPAAARS                     | 2.73 | 0.01 | 1.61 | 0.44 | 0.85 | 1.28 |
| 52032 | 0 | 229407 | PAPAPKPEQPAPAPK                     | 2.75 | 0.01 | 2.70 | 0.68 | 0.22 | 0.28 |
| 52033 | 0 | 46878  | PAPAPKRALGTL                        | 2.52 | 0.01 | 3.14 | 1.20 | 0.22 | 0.28 |
| 52034 | 0 | 46878  | PAPAPKRALGTL                        | 2.52 | 0.01 | 3.14 | 1.20 | 0.22 | 0.28 |
| 52035 | 0 | 107536 | PAPDTLKE                            | 2.13 | 0.01 | 0.78 | 2.36 | 0.22 | 0.28 |
| 52036 | 0 | 107536 | PAPDTLKE                            | 2.13 | 0.01 | 0.78 | 2.36 | 0.22 | 0.85 |
| 52037 | 0 | 226881 | PAPELLG                             | 2.04 | 0.01 | 0.78 | 1.12 | 0.22 | 2.49 |
| 52038 | 0 | 226881 | PAPELLG                             | 2.04 | 0.01 | 0.78 | 1.12 | 0.22 | 1.34 |
| 52039 | 0 | 226881 | PAPELLG                             | 2.04 | 0.01 | 0.78 | 1.12 | 0.22 | 1.66 |
| 52040 | 0 | 226881 | PAPELLG                             | 2.04 | 0.01 | 0.78 | 1.12 | 0.22 | 1.66 |
| 52041 | 0 | 226881 | PAPELLG                             | 2.04 | 0.01 | 0.78 | 1.12 | 0.22 | 1.66 |
| 52042 | 0 | 226881 | PAPELLG                             | 2.04 | 0.01 | 0.78 | 1.12 | 0.22 | 2.49 |
| 52043 | 0 | 226881 | PAPELLG                             | 2.04 | 0.01 | 0.78 | 1.12 | 0.22 | 1.66 |
| 52044 | 0 | 226881 | PAPELLG                             | 2.04 | 0.01 | 0.78 | 1.12 | 0.22 | 1.66 |
| 52045 | 0 | 348626 | PAPFGQAAAADKPSL                     | 2.68 | 0.01 | 1.61 | 0.44 | 0.85 | 1.28 |
| 52046 | 0 | 348627 | PAPFGQAAAAGDKLSL                    | 2.69 | 0.01 | 1.61 | 0.44 | 0.85 | 1.28 |
| 52047 | 0 | 348628 | PAPFGQAAAAGDKPAP                    | 2.73 | 0.01 | 1.61 | 0.44 | 0.85 | 1.28 |
| 52048 | 0 | 348629 | PAPFGQAAAAGDKPSP                    | 2.70 | 0.01 | 1.61 | 0.44 | 0.85 | 1.28 |
| 52049 | 0 | 118548 | PAPGMRPP                            | 2.14 | 0.01 | 0.78 | 0.44 | 1.13 | 1.27 |
| 52050 | 0 | 118548 | PAPGMRPP                            | 2.14 | 0.01 | 0.78 | 0.44 | 1.13 | 0.28 |
| 52051 | 0 | 179339 | PAPINFTMLLNMFAE                     | 2.70 | 0.01 | 2.36 | 0.44 | 1.23 | 1.28 |
| 52052 | 0 | 179339 | PAPINFTMLLNMFAE                     | 2.70 | 0.01 | 2.36 | 0.44 | 1.23 | 1.27 |
| 52053 | 0 | 180694 | PAPIRRRSSNY                         | 2.41 | 0.01 | 0.78 | 0.68 | 0.22 | 0.28 |
| 52054 | 0 | 348636 | PAPKAAAPAPKAAAA                     | 2.73 | 0.01 | 1.61 | 0.44 | 0.85 | 1.28 |
| 52055 | 0 | 185151 | PAPKK                               | 1.74 | 3.93 | 0.78 | 0.44 | 1.13 | 1.28 |
| 52056 | 0 | 185152 | PAPKK                               | 1.74 | 4.08 | 0.78 | 0.44 | 1.13 | 1.28 |
| 52057 | 0 | 185153 | PAPKKGS                             | 2.04 | 0.01 | 0.78 | 0.44 | 1.13 | 1.28 |
| 52058 | 0 | 185154 | PAPKKGSK                            | 2.17 | 4.93 | 0.78 | 0.44 | 1.13 | 1.28 |
| 52059 | 0 | 185155 | PAPKKGSKK                           | 2.25 | 4.93 | 0.78 | 0.44 | 1.13 | 1.28 |
| 52060 | 0 | 461363 | PAPKPEQPAEQPKPAPA<br>PQPAPAPKPEKT   | 3.39 | 0.01 | 2.70 | 3.00 | 0.22 | 0.28 |
| 52061 | 0 | 461363 | PAPKPEQPAEQPKPAPA<br>PQPAPAPKPEKT   | 3.39 | 0.01 | 2.70 | 3.00 | 0.22 | 1.27 |
| 52062 | 0 | 461363 | PAPKPEQPAEQPKPAPA<br>PQPAPAPKPEKT   | 3.39 | 0.01 | 2.70 | 3.00 | 0.22 | 2.12 |

|       |   |        |                                    |      |      |      |      |      |      |
|-------|---|--------|------------------------------------|------|------|------|------|------|------|
| 52063 | 0 | 461363 | PAPKPEQPAEQPKPAPA<br>PQPAPAPKPEKT  | 3.39 | 0.01 | 2.70 | 3.00 | 0.22 | 1.75 |
| 52064 | 0 | 46885  | PAPNASL                            | 2.05 | 0.01 | 0.90 | 1.12 | 0.22 | 1.39 |
| 52065 | 0 | 46886  | PAPNIASHISSISARTGDP                | 2.93 | 0.01 | 2.58 | 1.12 | 0.22 | 1.57 |
| 52066 | 0 | 423453 | PAPPADIDTGMSPWA                    | 2.70 | 0.01 | 3.97 | 0.44 | 2.35 | 1.28 |
| 52067 | 0 | 121692 | PAPPKPEPKPKKAPA                    | 2.75 | 0.01 | 0.78 | 0.44 | 1.13 | 1.27 |
| 52068 | 0 | 46890  | PAPPPGQPSGRRRGRRS<br>GGSGGGFWGDRVD | 3.37 | 0.01 | 2.53 | 0.44 | 0.85 | 0.28 |
| 52069 | 0 | 46894  | PAPQAPYQGY                         | 2.37 | 0.01 | 2.48 | 0.68 | 0.22 | 2.02 |
| 52070 | 0 | 46894  | PAPQAPYQGY                         | 2.37 | 0.01 | 2.48 | 0.68 | 0.22 | 1.27 |
| 52071 | 0 | 46894  | PAPQAPYQGY                         | 2.37 | 0.01 | 2.48 | 0.68 | 0.22 | 0.28 |
| 52072 | 0 | 46895  | PAPQAPYQGYQEPPAP<br>QAPY           | 3.02 | 0.01 | 2.48 | 0.44 | 1.74 | 0.28 |
| 52073 | 0 | 46895  | PAPQAPYQGYQEPPAP<br>QAPY           | 3.02 | 0.01 | 2.48 | 0.44 | 1.59 | 0.28 |
| 52074 | 0 | 46895  | PAPQAPYQGYQEPPAP<br>QAPY           | 3.02 | 0.01 | 2.48 | 0.44 | 0.85 | 0.28 |
| 52075 | 0 | 46895  | PAPQAPYQGYQEPPAP<br>QAPY           | 3.02 | 0.01 | 2.48 | 1.12 | 0.22 | 0.85 |
| 52076 | 0 | 46895  | PAPQAPYQGYQEPPAP<br>QAPY           | 3.02 | 0.01 | 2.48 | 1.12 | 0.22 | 0.85 |
| 52077 | 0 | 98922  | PAPQPP                             | 1.89 | 0.01 | 2.14 | 0.44 | 0.85 | 0.28 |
| 52078 | 0 | 98922  | PAPQPP                             | 1.89 | 0.01 | 2.14 | 0.68 | 0.22 | 0.28 |
| 52079 | 0 | 98922  | PAPQPP                             | 1.89 | 0.01 | 2.14 | 0.68 | 0.22 | 0.28 |
| 52080 | 0 | 238822 | PAPQPPAGRELSAA                     | 2.63 | 0.01 | 2.14 | 2.65 | 0.22 | 0.85 |
| 52081 | 0 | 156928 | PAPRFF                             | 1.89 | 0.01 | 0.90 | 2.74 | 0.22 | 0.85 |
| 52082 | 0 | 46899  | PAPRRKFQQVKRL                      | 2.57 | 0.01 | 2.71 | 0.68 | 0.22 | 0.28 |
| 52083 | 0 | 46899  | PAPRRKFQQVKRL                      | 2.57 | 0.01 | 2.71 | 2.78 | 0.22 | 0.28 |
| 52084 | 0 | 46899  | PAPRRKFQQVKRL                      | 2.57 | 0.01 | 2.71 | 0.68 | 0.22 | 0.85 |
| 52085 | 0 | 46899  | PAPRRKFQQVKRL                      | 2.57 | 0.01 | 2.71 | 0.68 | 0.22 | 1.48 |
| 52086 | 0 | 46900  | PAPSGCPPDSDAES                     | 2.66 | 0.01 | 2.41 | 0.44 | 1.41 | 0.28 |
| 52087 | 0 | 46900  | PAPSGCPPDSDAES                     | 2.66 | 0.01 | 2.41 | 0.44 | 0.85 | 0.28 |
| 52088 | 0 | 46900  | PAPSGCPPDSDAES                     | 2.66 | 0.01 | 2.41 | 0.44 | 0.85 | 0.28 |
| 52089 | 0 | 510469 | PAPSRSQ                            | 2.05 | 0.01 | 0.90 | 0.44 | 1.41 | 0.28 |
| 52090 | 0 | 523437 | PAPTTPPPTSTHATPRPT<br>TP           | 3.01 | 4.23 | 2.40 | 0.44 | 1.59 | 1.28 |
| 52091 | 0 | 523438 | PAPTTPPPTSTHATPRPT<br>TP           | 3.01 | 4.08 | 2.40 | 0.44 | 1.59 | 1.28 |
| 52092 | 0 | 523434 | PAPTTPPPTSTHATPRPT<br>TP           | 3.01 | 4.33 | 2.40 | 0.44 | 1.59 | 1.28 |
| 52093 | 0 | 523435 | PAPTTPPPTSTHATPRPT<br>TP           | 3.01 | 4.45 | 2.40 | 0.44 | 1.59 | 1.28 |
| 52094 | 0 | 523436 | PAPTTPPPTSTHATPRPT<br>TP           | 3.01 | 3.97 | 2.40 | 0.44 | 1.59 | 1.28 |

|       |   |        |                               |      |      |      |      |      |      |
|-------|---|--------|-------------------------------|------|------|------|------|------|------|
| 52095 | 0 | 523439 | PAPTTTPPTSTHATPRPT<br>TP      | 3.01 | 0.01 | 2.40 | 0.44 | 1.59 | 1.28 |
| 52096 | 0 | 46912  | PAQEIEMLR                     | 2.29 | 0.01 | 2.56 | 0.44 | 0.85 | 0.28 |
| 52097 | 0 | 46915  | PAQGNSMFPSCCCTKPT<br>DANCTCIP | 3.16 | 0.01 | 0.90 | 0.44 | 0.22 | 0.28 |
| 52098 | 0 | 46916  | PAQGNSMFPSCCCTKPT<br>DGNCTCIP | 3.16 | 0.01 | 2.58 | 0.44 | 0.22 | 0.28 |
| 52099 | 0 | 46916  | PAQGNSMFPSCCCTKPT<br>DGNCTCIP | 3.16 | 0.01 | 2.58 | 0.44 | 0.22 | 0.28 |
| 52100 | 0 | 46917  | PAQGNSMFPSCCCTKPT<br>DKNCTCIP | 3.16 | 0.01 | 0.90 | 0.44 | 0.22 | 0.28 |
| 52101 | 0 | 46918  | PAQGNSMFPSCCCTKPT<br>DRNCTCIP | 3.15 | 0.01 | 2.58 | 0.44 | 0.22 | 0.28 |
| 52102 | 0 | 46919  | PAQGTSMFPSCCCTKPS<br>DGNCTCIP | 3.16 | 0.01 | 3.07 | 0.44 | 0.22 | 0.28 |
| 52103 | 0 | 115410 | PAQILQWQVLSNTVPA<br>KSCQ      | 2.95 | 0.01 | 1.60 | 0.44 | 1.23 | 2.51 |
| 52104 | 0 | 115410 | PAQILQWQVLSNTVPA<br>KSCQ      | 2.95 | 0.01 | 1.60 | 0.44 | 1.41 | 0.28 |
| 52105 | 0 | 115410 | PAQILQWQVLSNTVPA<br>KSCQ      | 2.95 | 0.01 | 1.60 | 0.44 | 1.93 | 0.28 |
| 52106 | 0 | 181414 | PAQVSVPFMSPASAY               | 2.72 | 0.01 | 2.82 | 1.15 | 0.22 | 1.27 |
| 52107 | 0 | 181414 | PAQVSVPFMSPASAY               | 2.72 | 0.01 | 2.82 | 0.68 | 0.22 | 0.28 |
| 52108 | 0 | 181414 | PAQVSVPFMSPASAY               | 2.72 | 0.01 | 2.82 | 0.68 | 0.22 | 1.48 |
| 52109 | 0 | 181414 | PAQVSVPFMSPASAY               | 2.72 | 0.01 | 2.82 | 0.68 | 0.22 | 0.85 |
| 52110 | 0 | 181414 | PAQVSVPFMSPASAY               | 2.72 | 0.01 | 2.82 | 0.68 | 0.22 | 1.34 |
| 52111 | 0 | 181414 | PAQVSVPFMSPASAY               | 2.72 | 0.01 | 2.82 | 0.68 | 0.22 | 1.34 |
| 52112 | 0 | 164310 | PARDQKL                       | 1.99 | 0.01 | 0.90 | 1.20 | 0.22 | 1.39 |
| 52113 | 0 | 177205 | PARDR                         | 1.75 | 0.01 | 0.78 | 0.68 | 0.22 | 0.28 |
| 52114 | 0 | 177205 | PARDR                         | 1.75 | 0.01 | 0.78 | 0.68 | 0.22 | 1.48 |
| 52115 | 0 | 177205 | PARDR                         | 1.75 | 0.01 | 0.78 | 0.68 | 0.22 | 1.34 |
| 52116 | 0 | 177205 | PARDR                         | 1.75 | 0.01 | 0.78 | 0.68 | 0.22 | 0.85 |
| 52117 | 0 | 177205 | PARDR                         | 1.75 | 0.01 | 0.78 | 0.68 | 0.22 | 0.85 |
| 52118 | 0 | 46927  | PARDVLCLRPVGAES               | 2.69 | 0.01 | 2.08 | 0.44 | 0.85 | 0.28 |
| 52119 | 0 | 46929  | PARLIV                        | 1.88 | 0.01 | 1.96 | 0.44 | 0.85 | 0.28 |
| 52120 | 0 | 46933  | PARPETSRPKTPP                 | 2.58 | 0.01 | 3.17 | 0.44 | 0.85 | 0.85 |
| 52121 | 0 | 46936  | PASCGRPSRALHPASVS<br>NGGCRHPV | 3.20 | 0.01 | 2.59 | 0.44 | 0.85 | 0.28 |
| 52122 | 0 | 348816 | PASKPAAKPAAKAPA               | 2.76 | 0.01 | 1.61 | 0.44 | 0.85 | 1.28 |
| 52123 | 0 | 230500 | PASKTFTVQKGISSK               | 2.67 | 0.01 | 0.78 | 0.44 | 1.13 | 0.28 |
| 52124 | 0 | 46949  | PASQDMPTNTTDITYV              | 2.73 | 0.01 | 2.48 | 1.15 | 0.22 | 0.85 |
| 52125 | 0 | 46949  | PASQDMPTNTTDITYV              | 2.73 | 0.01 | 2.48 | 1.15 | 0.22 | 0.85 |
| 52126 | 0 | 348848 | PASSEDEEEDDADGD               | 2.72 | 0.01 | 1.61 | 0.44 | 0.85 | 1.28 |
| 52127 | 0 | 348849 | PASSEDKEEDDADGD               | 2.71 | 0.01 | 1.61 | 0.44 | 0.85 | 1.28 |
| 52128 | 0 | 46951  | PASSHTILV                     | 2.20 | 0.01 | 0.90 | 0.44 | 1.59 | 0.28 |

|       |   |        |                              |      |      |      |      |      |      |
|-------|---|--------|------------------------------|------|------|------|------|------|------|
| 52129 | 0 | 46954  | PASTNRQSGRQP                 | 2.50 | 0.01 | 2.58 | 1.15 | 0.22 | 1.57 |
| 52130 | 0 | 46954  | PASTNRQSGRQP                 | 2.50 | 0.01 | 2.58 | 2.25 | 0.22 | 1.57 |
| 52131 | 0 | 46955  | PASTNRQSGRQPTPI              | 2.71 | 0.01 | 2.58 | 1.15 | 0.22 | 0.28 |
| 52132 | 0 | 46957  | PASTNRQSGRQPTPISP<br>PLRDSHP | 3.14 | 0.01 | 2.58 | 1.15 | 0.22 | 0.28 |
| 52133 | 0 | 46957  | PASTNRQSGRQPTPISP<br>PLRDSHP | 3.14 | 0.01 | 2.58 | 0.44 | 0.85 | 0.28 |
| 52134 | 0 | 46957  | PASTNRQSGRQPTPISP<br>PLRDSHP | 3.14 | 0.01 | 2.08 | 0.44 | 0.85 | 0.28 |
| 52135 | 0 | 46957  | PASTNRQSGRQPTPISP<br>PLRDSHP | 3.14 | 0.01 | 2.08 | 0.44 | 0.85 | 0.28 |
| 52136 | 0 | 46957  | PASTNRQSGRQPTPISP<br>PLRDSHP | 3.14 | 0.01 | 2.08 | 0.44 | 0.85 | 0.28 |
| 52137 | 0 | 46957  | PASTNRQSGRQPTPISP<br>PLRDSHP | 3.14 | 0.01 | 2.58 | 1.15 | 0.22 | 1.57 |
| 52138 | 0 | 46957  | PASTNRQSGRQPTPISP<br>PLRDSHP | 3.14 | 0.01 | 2.58 | 0.44 | 0.85 | 0.28 |
| 52139 | 0 | 46957  | PASTNRQSGRQPTPISP<br>PLRDSHP | 3.14 | 0.01 | 2.58 | 1.12 | 0.22 | 1.57 |
| 52140 | 0 | 46957  | PASTNRQSGRQPTPISP<br>PLRDSHP | 3.14 | 0.01 | 2.58 | 1.12 | 0.22 | 1.57 |
| 52141 | 0 | 46957  | PASTNRQSGRQPTPISP<br>PLRDSHP | 3.14 | 0.01 | 2.08 | 0.44 | 0.22 | 1.27 |
| 52142 | 0 | 46958  | PASTNRQSGRQPTPLSP<br>PLRNTHP | 3.16 | 0.01 | 2.71 | 1.15 | 0.22 | 1.57 |
| 52143 | 0 | 46960  | PASTTNKDKL                   | 2.30 | 0.01 | 2.57 | 1.20 | 0.22 | 0.28 |
| 52144 | 0 | 46960  | PASTTNKDKL                   | 2.30 | 0.01 | 2.57 | 1.20 | 0.22 | 1.34 |
| 52145 | 0 | 46960  | PASTTNKDKL                   | 2.30 | 0.01 | 2.57 | 1.15 | 0.22 | 1.27 |
| 52146 | 0 | 523448 | PATAPGPSAANVSVAAT<br>TAT     | 3.01 | 4.93 | 2.40 | 0.44 | 1.59 | 1.28 |
| 52147 | 0 | 348898 | PATGEAPSQPGASSG              | 2.73 | 0.01 | 1.61 | 0.44 | 0.85 | 1.28 |
| 52148 | 0 | 120857 | PATGGVKKPHRYRPGT             | 2.76 | 0.01 | 1.60 | 0.44 | 1.13 | 0.28 |
| 52149 | 0 | 120857 | PATGGVKKPHRYRPGT             | 2.76 | 0.01 | 1.60 | 0.44 | 1.41 | 0.28 |
| 52150 | 0 | 120857 | PATGGVKKPHRYRPGT             | 2.76 | 0.01 | 1.60 | 0.44 | 1.13 | 0.28 |
| 52151 | 0 | 46967  | PATGYK                       | 1.88 | 0.01 | 1.86 | 0.44 | 1.23 | 0.28 |
| 52152 | 0 | 46969  | PATIGDYTDF                   | 2.31 | 0.01 | 1.75 | 0.68 | 0.22 | 0.28 |
| 52153 | 0 | 46969  | PATIGDYTDF                   | 2.31 | 0.01 | 1.75 | 0.68 | 0.22 | 0.28 |
| 52154 | 0 | 46970  | PATIPDREALYREFDEME<br>EC     | 2.94 | 0.01 | 1.96 | 0.44 | 0.85 | 0.28 |
| 52155 | 0 | 46971  | PATIPDREAVLYQEFDE<br>MEE     | 2.92 | 0.01 | 1.96 | 0.44 | 0.85 | 0.28 |
| 52156 | 0 | 46972  | PATIPDREVLVYQEFDEM<br>EEC    | 2.91 | 0.01 | 1.72 | 0.44 | 0.85 | 0.28 |

|       |   |        |                               |      |      |      |      |      |      |
|-------|---|--------|-------------------------------|------|------|------|------|------|------|
| 52157 | 0 | 46973  | PATIPDREVLYREFDEME<br>EC      | 2.93 | 0.01 | 1.96 | 0.44 | 0.85 | 0.28 |
| 52158 | 0 | 46974  | PATIPLSSVIVAENS               | 2.70 | 0.01 | 2.51 | 0.44 | 2.35 | 1.28 |
| 52159 | 0 | 123570 | PATKKAVQ                      | 2.13 | 0.01 | 0.78 | 1.20 | 0.22 | 0.28 |
| 52160 | 0 | 123570 | PATKKAVQ                      | 2.13 | 0.01 | 0.78 | 0.44 | 1.13 | 0.28 |
| 52161 | 0 | 101110 | PATLTKK                       | 2.00 | 0.01 | 0.90 | 0.44 | 1.13 | 1.39 |
| 52162 | 0 | 46982  | PATVPDREVLYQEFDEM<br>EEC      | 2.93 | 0.01 | 2.41 | 0.44 | 0.85 | 0.28 |
| 52163 | 0 | 78223  | PATVYRYDSRPPEDV               | 2.70 | 0.01 | 2.14 | 1.12 | 0.22 | 0.28 |
| 52164 | 0 | 78223  | PATVYRYDSRPPEDV               | 2.70 | 0.01 | 2.14 | 1.12 | 0.22 | 0.28 |
| 52165 | 0 | 78223  | PATVYRYDSRPPEDV               | 2.70 | 0.01 | 2.14 | 1.12 | 0.22 | 0.28 |
| 52166 | 0 | 46984  | PAVARDDAEGLS DPR              | 2.70 | 0.01 | 2.40 | 1.15 | 0.22 | 1.27 |
| 52167 | 0 | 46985  | PAVASRRRPTTAGAAPL<br>T        | 2.88 | 0.01 | 2.53 | 0.44 | 0.85 | 0.28 |
| 52168 | 0 | 46987  | PAVFK                         | 1.74 | 0.01 | 1.60 | 0.44 | 1.23 | 0.28 |
| 52169 | 0 | 98923  | PAVFKIDALN                    | 2.29 | 0.01 | 1.60 | 0.44 | 1.23 | 0.85 |
| 52170 | 0 | 98923  | PAVFKIDALN                    | 2.29 | 0.01 | 1.60 | 0.44 | 1.23 | 0.85 |
| 52171 | 0 | 98923  | PAVFKIDALN                    | 2.29 | 0.01 | 1.60 | 0.44 | 2.98 | 0.85 |
| 52172 | 0 | 46989  | PAVIPDRELLYREFDEME<br>EC      | 2.94 | 0.01 | 1.72 | 0.44 | 0.85 | 0.28 |
| 52173 | 0 | 46990  | PAVIPDREVLYQAFDEM<br>EEC      | 2.93 | 0.01 | 1.72 | 0.44 | 0.85 | 0.28 |
| 52174 | 0 | 46991  | PAVIPDREVLYQEFDEM<br>EEC      | 2.93 | 0.01 | 2.41 | 0.44 | 0.85 | 0.28 |
| 52175 | 0 | 46992  | PAVIPDREVLYQGFDEM<br>EEC      | 2.91 | 0.01 | 1.72 | 0.44 | 0.85 | 0.28 |
| 52176 | 0 | 46993  | PAVIPDREVLYQQFDEM<br>EEC      | 2.92 | 0.01 | 1.96 | 0.44 | 0.85 | 0.28 |
| 52177 | 0 | 46994  | PAVIPDREVLYREFDEM<br>EEC      | 2.94 | 0.01 | 1.72 | 0.44 | 0.85 | 0.28 |
| 52178 | 0 | 348979 | PAVKPTVKPAAKAAA               | 2.73 | 0.01 | 1.61 | 0.44 | 0.85 | 1.28 |
| 52179 | 0 | 140889 | PAVLGHDEAAYS                  | 2.44 | 0.01 | 3.01 | 1.12 | 0.22 | 0.28 |
| 52180 | 0 | 119623 | PAVPETLKKKRRNFAELK<br>IKRLRKK | 3.17 | 0.01 | 0.78 | 0.44 | 1.13 | 0.85 |
| 52181 | 0 | 119623 | PAVPETLKKKRRNFAELK<br>IKRLRKK | 3.17 | 0.01 | 0.78 | 0.44 | 1.13 | 0.85 |
| 52182 | 0 | 119623 | PAVPETLKKKRRNFAELK<br>IKRLRKK | 3.17 | 0.01 | 0.78 | 0.44 | 1.13 | 0.85 |
| 52183 | 0 | 148054 | PAVRNERAT                     | 2.23 | 0.01 | 3.24 | 0.68 | 0.22 | 0.28 |
| 52184 | 0 | 98319  | PAVVGKPGSD                    | 2.33 | 0.01 | 3.08 | 0.68 | 0.22 | 0.28 |
| 52185 | 0 | 98319  | PAVVGKPGSD                    | 2.33 | 0.01 | 3.08 | 1.20 | 0.22 | 0.28 |
| 52186 | 0 | 46998  | PAVVPDREILYQQFDEM<br>EEC      | 2.91 | 0.01 | 1.72 | 0.44 | 0.85 | 0.28 |
| 52187 | 0 | 46999  | PAVVPDREVLYQEFDEM<br>EEC      | 2.94 | 0.01 | 1.96 | 0.44 | 0.85 | 0.28 |

|       |   |        |                                      |      |      |      |      |      |      |
|-------|---|--------|--------------------------------------|------|------|------|------|------|------|
| 52188 | 0 | 47000  | PAVVPDREVLYREFDEM<br>EAC             | 2.96 | 0.01 | 1.96 | 0.44 | 0.85 | 0.28 |
| 52189 | 0 | 47001  | PAVVPDREVLYREFDEM<br>EEC             | 2.96 | 0.01 | 1.96 | 0.44 | 0.85 | 0.28 |
| 52190 | 0 | 191674 | PAWDCWAWRWQCNS<br>YD                 | 2.75 | 0.01 | 0.90 | 2.84 | 1.13 | 1.39 |
| 52191 | 0 | 191674 | PAWDCWAWRWQCNS<br>YD                 | 2.75 | 0.01 | 0.90 | 2.84 | 1.13 | 1.66 |
| 52192 | 0 | 47006  | PAYEKL                               | 1.88 | 0.01 | 0.78 | 1.15 | 0.22 | 0.85 |
| 52193 | 0 | 225641 | PAYGPLIEQDHARF                       | 2.58 | 0.01 | 2.51 | 2.00 | 0.85 | 0.28 |
| 52194 | 0 | 129556 | PAYQVSKGHKIRLTVELA<br>DHDAEVKWLKNGQE | 3.38 | 0.01 | 0.78 | 2.04 | 0.22 | 0.28 |
| 52195 | 0 | 98320  | PAYYTKDTNN                           | 2.30 | 0.01 | 2.87 | 0.68 | 0.22 | 0.28 |
| 52196 | 0 | 98320  | PAYYTKDTNN                           | 2.30 | 0.01 | 2.87 | 1.20 | 0.22 | 0.28 |
| 52197 | 0 | 47012  | PAYYTKDTNNNL                         | 2.47 | 0.01 | 2.87 | 0.68 | 0.22 | 0.28 |
| 52198 | 0 | 47012  | PAYYTKDTNNNL                         | 2.47 | 0.01 | 2.87 | 0.68 | 0.22 | 0.28 |
| 52199 | 0 | 47013  | PAYYTKDTNNNLT                        | 2.55 | 0.01 | 2.87 | 0.68 | 0.22 | 1.34 |
| 52200 | 0 | 47013  | PAYYTKDTNNNLT                        | 2.55 | 0.01 | 2.87 | 0.68 | 0.22 | 0.28 |
| 52201 | 0 | 47013  | PAYYTKDTNNNLT                        | 2.55 | 0.01 | 2.87 | 0.68 | 0.22 | 0.28 |
| 52202 | 0 | 47014  | PAYYTKDTNNNLTL                       | 2.62 | 0.01 | 2.87 | 0.68 | 0.22 | 1.34 |
| 52203 | 0 | 47014  | PAYYTKDTNNNLTL                       | 2.62 | 0.01 | 2.87 | 0.68 | 0.22 | 0.28 |
| 52204 | 0 | 47014  | PAYYTKDTNNNLTL                       | 2.62 | 0.01 | 2.87 | 0.68 | 0.22 | 0.28 |
| 52205 | 0 | 98321  | PAYYTKNTNN                           | 2.32 | 0.01 | 3.45 | 0.68 | 0.22 | 0.28 |
| 52206 | 0 | 99520  | PCAQRCLQSCQQEPD                      | 2.70 | 0.01 | 2.16 | 0.44 | 1.23 | 1.48 |
| 52207 | 0 | 47020  | PCEQHLMQKIQRDED                      | 2.66 | 0.01 | 2.16 | 0.44 | 1.23 | 0.85 |
| 52208 | 0 | 122508 | PCGEESVLLDRKSGKQYS<br>IE             | 2.92 | 0.01 | 0.78 | 0.44 | 1.13 | 0.28 |
| 52209 | 0 | 122508 | PCGEESVLLDRKSGKQYS<br>IE             | 2.92 | 0.01 | 0.78 | 0.44 | 1.13 | 1.27 |
| 52210 | 0 | 108058 | PCGFNDMQEITKYTCG<br>NEAFKQIKEQVDIP   | 3.34 | 0.01 | 0.90 | 1.12 | 0.22 | 0.28 |
| 52211 | 0 | 47022  | PCHNSLILPPFSLSPVPTL<br>GSRSR         | 3.17 | 0.01 | 2.04 | 3.37 | 0.22 | 1.48 |
| 52212 | 0 | 47022  | PCHNSLILPPFSLSPVPTL<br>GSRSR         | 3.17 | 0.01 | 2.04 | 3.37 | 0.22 | 2.35 |
| 52213 | 0 | 47022  | PCHNSLILPPFSLSPVPTL<br>GSRSR         | 3.17 | 0.01 | 2.04 | 3.37 | 0.22 | 0.28 |
| 52214 | 0 | 47022  | PCHNSLILPPFSLSPVPTL<br>GSRSR         | 3.17 | 0.01 | 2.04 | 3.37 | 0.22 | 1.48 |
| 52215 | 0 | 47022  | PCHNSLILPPFSLSPVPTL<br>GSRSR         | 3.17 | 0.01 | 2.04 | 0.68 | 0.22 | 0.28 |
| 52216 | 0 | 47022  | PCHNSLILPPFSLSPVPTL<br>GSRSR         | 3.17 | 0.01 | 2.04 | 0.68 | 0.22 | 0.28 |
| 52217 | 0 | 78224  | PCHNSLILPPFSLSPVPTL<br>GSRSRRAVPVA   | 3.35 | 0.01 | 2.04 | 0.44 | 2.82 | 0.28 |



|       |   |        |                                     |      |      |      |      |      |      |
|-------|---|--------|-------------------------------------|------|------|------|------|------|------|
| 52218 | 0 | 78224  | PCHNSLILPPFSLSPVPTL<br>GSRSRRAVPVA  | 3.35 | 0.01 | 2.04 | 0.44 | 0.85 | 1.27 |
| 52219 | 0 | 78224  | PCHNSLILPPFSLSPVPTL<br>GSRSRRAVPVA  | 3.35 | 0.01 | 2.04 | 0.44 | 0.85 | 1.34 |
| 52220 | 0 | 78224  | PCHNSLILPPFSLSPVPTL<br>GSRSRRAVPVA  | 3.35 | 0.01 | 2.04 | 0.44 | 0.85 | 0.85 |
| 52221 | 0 | 47023  | PCHNSLILPPFSLSPVPVP<br>TLGSRRRAVPVA | 3.35 | 0.01 | 0.90 | 0.44 | 0.85 | 0.28 |
| 52222 | 0 | 47023  | PCHNSLILPPFSLSPVPVP<br>TLGSRRRAVPVA | 3.35 | 0.01 | 0.90 | 0.44 | 0.85 | 0.28 |
| 52223 | 0 | 47023  | PCHNSLILPPFSLSPVPVP<br>TLGSRRRAVPVA | 3.35 | 0.01 | 0.90 | 0.44 | 0.85 | 0.28 |
| 52224 | 0 | 47023  | PCHNSLILPPFSLSPVPVP<br>TLGSRRRAVPVA | 3.35 | 0.01 | 2.04 | 0.44 | 0.85 | 0.28 |
| 52225 | 0 | 47023  | PCHNSLILPPFSLSPVPVP<br>TLGSRRRAVPVA | 3.35 | 0.01 | 2.04 | 0.44 | 0.85 | 0.28 |
| 52226 | 0 | 47023  | PCHNSLILPPFSLSPVPVP<br>TLGSRRRAVPVA | 3.35 | 0.01 | 2.04 | 0.44 | 0.85 | 0.28 |
| 52227 | 0 | 47024  | PCIGYVRSGGAVPPA                     | 2.69 | 0.01 | 3.35 | 1.12 | 0.22 | 0.85 |
| 52228 | 0 | 102709 | PCKKMCTVSDYISELYNK<br>PL            | 2.93 | 0.01 | 3.44 | 0.68 | 0.22 | 0.28 |
| 52229 | 0 | 47026  | PCKPLLRDDITFMV                      | 2.58 | 0.01 | 2.59 | 0.44 | 0.85 | 0.28 |
| 52230 | 0 | 47026  | PCKPLLRDDITFMV                      | 2.58 | 0.01 | 2.59 | 0.44 | 1.41 | 0.28 |
| 52231 | 0 | 47026  | PCKPLLRDDITFMV                      | 2.58 | 0.01 | 2.59 | 0.44 | 0.85 | 0.28 |
| 52232 | 0 | 47027  | PCKPLLRDDITFMV                      | 2.58 | 0.01 | 2.59 | 0.44 | 0.85 | 0.28 |
| 52233 | 0 | 47027  | PCKPLLRDDITFMV                      | 2.58 | 0.01 | 2.59 | 0.44 | 0.85 | 0.28 |
| 52234 | 0 | 47027  | PCKPLLRDDITFMV                      | 2.58 | 0.01 | 2.59 | 0.44 | 0.85 | 0.28 |
| 52235 | 0 | 47027  | PCKPLLRDDITFMV                      | 2.58 | 0.01 | 2.59 | 0.44 | 0.85 | 0.28 |
| 52236 | 0 | 149403 | PCKSNT                              | 1.88 | 0.01 | 2.75 | 0.68 | 0.22 | 0.28 |
| 52237 | 0 | 149403 | PCKSNT                              | 1.88 | 0.01 | 2.75 | 0.68 | 0.22 | 0.28 |
| 52238 | 0 | 149403 | PCKSNT                              | 1.88 | 0.01 | 2.75 | 0.68 | 0.22 | 1.66 |
| 52239 | 0 | 149403 | PCKSNT                              | 1.88 | 0.01 | 2.75 | 0.68 | 0.22 | 1.34 |
| 52240 | 0 | 149403 | PCKSNT                              | 1.88 | 0.01 | 2.75 | 0.68 | 0.22 | 1.75 |
| 52241 | 0 | 47028  | PCKT                                | 1.57 | 0.01 | 2.08 | 1.15 | 0.22 | 0.28 |
| 52242 | 0 | 47028  | PCKT                                | 1.57 | 0.01 | 2.08 | 1.15 | 0.22 | 1.48 |
| 52243 | 0 | 134462 | PCKTCTIPAQGTSMFPS                   | 2.80 | 0.01 | 3.07 | 0.44 | 0.22 | 1.34 |
| 52244 | 0 | 134462 | PCKTCTIPAQGTSMFPS                   | 2.80 | 0.01 | 3.07 | 0.44 | 0.22 | 1.66 |
| 52245 | 0 | 134462 | PCKTCTIPAQGTSMFPS                   | 2.80 | 0.01 | 3.07 | 0.44 | 0.22 | 0.28 |
| 52246 | 0 | 47029  | PCKTCTIPAQGTSMFPS<br>CCCTKPSD       | 3.17 | 0.01 | 3.07 | 0.44 | 0.22 | 0.28 |
| 52247 | 0 | 47031  | PCKTCTIPAQGTSMFPS<br>CCCTKPTD       | 3.17 | 0.01 | 2.58 | 0.44 | 0.22 | 0.28 |
| 52248 | 0 | 47031  | PCKTCTIPAQGTSMFPS<br>CCCTKPTD       | 3.17 | 0.01 | 2.58 | 0.44 | 0.22 | 0.28 |

|       |   |        |                               |      |      |      |      |      |      |
|-------|---|--------|-------------------------------|------|------|------|------|------|------|
| 52249 | 0 | 135732 | PCLNGGSC                      | 2.13 | 0.01 | 0.78 | 0.44 | 2.35 | 0.28 |
| 52250 | 0 | 98924  | PCMDVVLQQHNI                  | 2.43 | 0.01 | 1.86 | 0.44 | 1.93 | 1.27 |
| 52251 | 0 | 176370 | PCNFNVSVEDILYGD               | 2.64 | 0.01 | 2.63 | 1.15 | 0.22 | 0.85 |
| 52252 | 0 | 176370 | PCNFNVSVEDILYGD               | 2.64 | 0.01 | 2.63 | 1.15 | 0.22 | 0.85 |
| 52253 | 0 | 176370 | PCNFNVSVEDILYGD               | 2.64 | 0.01 | 2.63 | 1.15 | 0.22 | 0.85 |
| 52254 | 0 | 47033  | PCNTRKTA                      | 2.12 | 0.01 | 0.90 | 0.44 | 1.59 | 0.28 |
| 52255 | 0 | 132515 | PCPVTDTMTLQQVLMA<br>MSQIPAGGT | 3.17 | 0.01 | 0.78 | 3.72 | 0.22 | 0.28 |
| 52256 | 0 | 113107 | PCRFDLPDELRAVVHG<br>VHYFNS    | 3.06 | 0.01 | 0.78 | 0.44 | 1.13 | 2.97 |
| 52257 | 0 | 113107 | PCRFDLPDELRAVVHG<br>VHYFNS    | 3.06 | 0.01 | 0.78 | 0.44 | 1.41 | 2.97 |
| 52258 | 0 | 226544 | PCSICSNNPTCWA                 | 2.57 | 0.01 | 2.67 | 0.68 | 0.22 | 0.28 |
| 52259 | 0 | 226544 | PCSICSNNPTCWA                 | 2.57 | 0.01 | 2.67 | 0.68 | 0.22 | 1.48 |
| 52260 | 0 | 226544 | PCSICSNNPTCWA                 | 2.57 | 0.01 | 2.67 | 0.68 | 0.22 | 1.48 |
| 52261 | 0 | 226544 | PCSICSNNPTCWA                 | 2.57 | 0.01 | 2.67 | 1.15 | 0.22 | 0.28 |
| 52262 | 0 | 47045  | PCSICSNNPTCWAICK              | 2.76 | 0.01 | 3.00 | 1.15 | 0.22 | 0.85 |
| 52263 | 0 | 47045  | PCSICSNNPTCWAICK              | 2.76 | 0.01 | 3.00 | 0.44 | 1.59 | 0.85 |
| 52264 | 0 | 47045  | PCSICSNNPTCWAICK              | 2.76 | 0.01 | 3.00 | 0.68 | 0.22 | 0.28 |
| 52265 | 0 | 47045  | PCSICSNNPTCWAICK              | 2.76 | 0.01 | 3.00 | 0.68 | 2.25 | 1.75 |
| 52266 | 0 | 47046  | PCSICSNNPTCWAICKR             | 2.81 | 0.01 | 2.67 | 1.15 | 0.22 | 1.66 |
| 52267 | 0 | 172627 | PCSKCENCCKEKG                 | 2.57 | 0.01 | 3.38 | 0.44 | 0.85 | 2.51 |
| 52268 | 0 | 47047  | PCSLKCPYLGCQSWTCP<br>YTGAVS   | 3.10 | 0.01 | 2.04 | 0.44 | 0.85 | 0.28 |
| 52269 | 0 | 47047  | PCSLKCPYLGCQSWTCP<br>YTGAVS   | 3.10 | 0.01 | 2.04 | 0.44 | 1.59 | 0.28 |
| 52270 | 0 | 142941 | PCSPITQGDRGVGSS               | 2.67 | 0.01 | 3.06 | 2.13 | 0.22 | 0.28 |
| 52271 | 0 | 79328  | PCSRAETNPTMQCP                | 2.62 | 0.01 | 0.90 | 0.68 | 0.22 | 1.39 |
| 52272 | 0 | 111611 | PCTNVAVNPGDC                  | 2.50 | 0.01 | 1.86 | 0.68 | 0.22 | 0.28 |
| 52273 | 0 | 111611 | PCTNVAVNPGDC                  | 2.50 | 0.01 | 1.86 | 0.68 | 0.22 | 0.28 |
| 52274 | 0 | 111611 | PCTNVAVNPGDC                  | 2.50 | 0.01 | 1.86 | 0.68 | 0.22 | 1.66 |
| 52275 | 0 | 111611 | PCTNVAVNPGDC                  | 2.50 | 0.01 | 1.86 | 0.68 | 0.22 | 0.28 |
| 52276 | 0 | 447042 | PCTVNFTIFKVRMYV               | 2.66 | 0.01 | 1.96 | 0.68 | 0.22 | 0.28 |
| 52277 | 0 | 47054  | PCVREGNASRCW                  | 2.45 | 0.01 | 2.68 | 0.44 | 0.85 | 0.28 |
| 52278 | 0 | 47054  | PCVREGNASRCW                  | 2.45 | 0.01 | 2.68 | 2.74 | 0.22 | 0.28 |
| 52279 | 0 | 172628 | PCWAGGLTAEMKLLL               | 2.64 | 0.01 | 0.78 | 0.44 | 1.13 | 0.28 |
| 52280 | 0 | 181758 | PCYERNEKRFSNEGE               | 2.68 | 0.01 | 1.66 | 2.36 | 0.22 | 1.28 |
| 52281 | 0 | 179340 | PDAEAYTLFAPLFDP               | 2.72 | 0.01 | 2.36 | 0.44 | 1.23 | 1.28 |
| 52282 | 0 | 121695 | PDAPQATAEANAFGF               | 2.71 | 0.01 | 0.90 | 0.68 | 0.22 | 1.39 |
| 52283 | 0 | 121695 | PDAPQATAEANAFGF               | 2.71 | 0.01 | 0.90 | 0.68 | 0.22 | 0.28 |

|       |   |        |                         |      |      |      |      |      |      |
|-------|---|--------|-------------------------|------|------|------|------|------|------|
| 52284 | 0 | 121695 | PDAPQATAEANAFGF         | 2.71 | 0.01 | 0.90 | 0.68 | 0.22 | 0.28 |
| 52285 | 0 | 47063  | PDCAICWEPSPPWAPE        | 2.78 | 0.01 | 2.69 | 1.12 | 0.22 | 0.28 |
| 52286 | 0 | 47063  | PDCAICWEPSPPWAPE        | 2.78 | 0.01 | 2.69 | 1.12 | 0.22 | 0.28 |
| 52287 | 0 | 47063  | PDCAICWEPSPPWAPE        | 2.78 | 0.01 | 2.69 | 1.12 | 0.22 | 1.34 |
| 52288 | 0 | 47063  | PDCAICWEPSPPWAPE        | 2.78 | 0.01 | 2.69 | 1.12 | 0.22 | 0.28 |
| 52289 | 0 | 47063  | PDCAICWEPSPPWAPE        | 2.78 | 0.01 | 2.69 | 2.00 | 0.22 | 0.28 |
| 52290 | 0 | 47063  | PDCAICWEPSPPWAPE        | 2.78 | 0.01 | 2.69 | 2.00 | 0.22 | 0.28 |
| 52291 | 0 | 47063  | PDCAICWEPSPPWAPE        | 2.78 | 0.01 | 2.69 | 2.00 | 0.22 | 0.28 |
| 52292 | 0 | 47067  | PDCPGVGTGCTA            | 2.52 | 0.01 | 2.56 | 2.69 | 2.26 | 0.85 |
| 52293 | 0 | 79623  | PDCSRLVGATPERPRRL<br>VD | 2.97 | 0.01 | 2.85 | 0.44 | 1.59 | 0.28 |
| 52294 | 0 | 523461 | PDDAEETIADDANDL         | 2.70 | 0.01 | 2.24 | 0.44 | 1.41 | 1.28 |
| 52295 | 0 | 349177 | PDDDDPAADAAGTRE         | 2.72 | 0.01 | 1.61 | 0.44 | 0.85 | 1.28 |
| 52296 | 0 | 349178 | PDDDDPAADGAGTRE         | 2.72 | 0.01 | 1.61 | 0.44 | 0.85 | 1.28 |
| 52297 | 0 | 47068  | PDDDPQGPSREYRYVL        | 2.80 | 0.01 | 3.36 | 0.44 | 2.82 | 0.28 |
| 52298 | 0 | 238823 | PDDFTCVKKWEGGGR<br>V    | 2.75 | 0.01 | 2.56 | 2.02 | 0.22 | 0.85 |
| 52299 | 0 | 238823 | PDDFTCVKKWEGGGR<br>V    | 2.75 | 0.01 | 2.56 | 1.20 | 0.22 | 0.85 |
| 52300 | 0 | 238823 | PDDFTCVKKWEGGGR<br>V    | 2.75 | 0.01 | 2.56 | 1.20 | 0.22 | 0.28 |
| 52301 | 0 | 47072  | PDDHLKERSS              | 2.28 | 0.01 | 2.56 | 0.68 | 0.22 | 0.28 |
| 52302 | 0 | 176371 | PDDLPFST                | 2.14 | 0.01 | 0.78 | 0.44 | 1.13 | 0.28 |
| 52303 | 0 | 176371 | PDDLPFST                | 2.14 | 0.01 | 0.78 | 0.44 | 1.13 | 0.28 |
| 52304 | 0 | 176371 | PDDLPFST                | 2.14 | 0.01 | 0.78 | 0.44 | 1.13 | 2.02 |
| 52305 | 0 | 176371 | PDDLPFST                | 2.14 | 0.01 | 0.78 | 0.44 | 1.13 | 1.48 |
| 52306 | 0 | 176371 | PDDLPFST                | 2.14 | 0.01 | 0.78 | 0.44 | 1.13 | 1.27 |
| 52307 | 0 | 176371 | PDDLPFST                | 2.14 | 0.01 | 0.78 | 0.44 | 1.13 | 0.85 |
| 52308 | 0 | 176371 | PDDLPFST                | 2.14 | 0.01 | 0.78 | 0.44 | 1.13 | 1.34 |
| 52309 | 0 | 47077  | PDDVNKNTLQ              | 2.30 | 3.85 | 2.56 | 0.44 | 0.85 | 0.28 |
| 52310 | 0 | 47078  | PDDVNKNTLQ              | 2.30 | 0.01 | 4.15 | 2.69 | 0.22 | 0.28 |
| 52311 | 0 | 47084  | PDELALSETGMVPL          | 2.62 | 0.01 | 2.69 | 0.44 | 0.85 | 0.28 |
| 52312 | 0 | 47084  | PDELALSETGMVPL          | 2.62 | 0.01 | 2.69 | 0.44 | 0.85 | 0.28 |
| 52313 | 0 | 47084  | PDELALSETGMVPL          | 2.62 | 0.01 | 2.69 | 0.44 | 0.85 | 0.28 |
| 52314 | 0 | 140725 | PDELHK                  | 1.88 | 0.01 | 2.56 | 1.15 | 0.22 | 0.85 |
| 52315 | 0 | 140725 | PDELHK                  | 1.88 | 0.01 | 2.56 | 1.15 | 0.22 | 1.66 |

|       |   |        |                                          |      |      |      |      |      |      |
|-------|---|--------|------------------------------------------|------|------|------|------|------|------|
| 52316 | 0 | 140725 | PDELHK                                   | 1.88 | 0.01 | 2.56 | 1.15 | 0.22 | 1.66 |
| 52317 | 0 | 140725 | PDELHK                                   | 1.88 | 0.01 | 2.56 | 1.15 | 0.22 | 1.66 |
| 52318 | 0 | 140725 | PDELHK                                   | 1.88 | 0.01 | 2.56 | 1.15 | 0.22 | 0.85 |
| 52319 | 0 | 47086  | PDEQDYQIRMAKSS                           | 2.57 | 0.01 | 3.59 | 2.49 | 0.22 | 0.28 |
| 52320 | 0 | 156394 | PDEVLANAYQISREQ                          | 2.64 | 0.01 | 3.67 | 0.44 | 1.23 | 1.27 |
| 52321 | 0 | 47092  | PDFDAYNEKLGSIQSIDS<br>EIKKKIDNLQKEIKVANK | 3.53 | 0.01 | 2.22 | 0.44 | 1.74 | 0.28 |
| 52322 | 0 | 47092  | PDFDAYNEKLGSIQSIDS<br>EIKKKIDNLQKEIKVANK | 3.53 | 0.01 | 2.22 | 0.44 | 1.74 | 0.28 |
| 52323 | 0 | 47092  | PDFDAYNEKLGSIQSIDS<br>EIKKKIDNLQKEIKVANK | 3.53 | 0.01 | 1.66 | 0.44 | 1.59 | 0.28 |
| 52324 | 0 | 47096  | PDFYGDPLE                                | 2.24 | 0.01 | 0.78 | 0.68 | 0.22 | 0.85 |
| 52325 | 0 | 151327 | PDGAAAGGG                                | 2.24 | 0.01 | 2.51 | 0.68 | 0.22 | 0.28 |
| 52326 | 0 | 151327 | PDGAAAGGG                                | 2.24 | 0.01 | 2.51 | 0.68 | 0.22 | 0.28 |
| 52327 | 0 | 151327 | PDGAAAGGG                                | 2.24 | 0.01 | 2.51 | 0.68 | 0.22 | 2.12 |
| 52328 | 0 | 148058 | PDGGQPAVR                                | 2.23 | 0.01 | 3.24 | 1.12 | 0.22 | 0.28 |
| 52329 | 0 | 148058 | PDGGQPAVR                                | 2.23 | 0.01 | 3.24 | 0.68 | 0.22 | 0.28 |
| 52330 | 0 | 191675 | PDGGSILKISNK                             | 2.48 | 0.01 | 2.76 | 1.20 | 0.22 | 0.28 |
| 52331 | 0 | 141722 | PDGPDGPE                                 | 2.18 | 0.01 | 0.78 | 0.44 | 1.41 | 0.28 |
| 52332 | 0 | 141722 | PDGPDGPE                                 | 2.18 | 0.01 | 0.78 | 0.44 | 1.13 | 0.28 |
| 52333 | 0 | 141722 | PDGPDGPE                                 | 2.18 | 0.01 | 0.78 | 0.44 | 1.13 | 0.28 |
| 52334 | 0 | 121699 | PDGPLGSAEAKAFRF                          | 2.69 | 0.01 | 0.90 | 0.68 | 0.22 | 1.39 |
| 52335 | 0 | 121699 | PDGPLGSAEAKAFRF                          | 2.69 | 0.01 | 0.90 | 0.68 | 0.22 | 0.28 |
| 52336 | 0 | 121699 | PDGPLGSAEAKAFRF                          | 2.69 | 0.01 | 0.90 | 0.68 | 0.22 | 0.28 |
| 52337 | 0 | 98322  | PDGREDLTVGGPLDL                          | 2.71 | 0.01 | 2.71 | 2.78 | 0.22 | 0.28 |
| 52338 | 0 | 136542 | PDGSESPTDQET                             | 2.52 | 0.01 | 0.78 | 0.68 | 0.22 | 1.27 |
| 52339 | 0 | 136542 | PDGSESPTDQET                             | 2.52 | 0.01 | 0.78 | 0.68 | 0.22 | 0.28 |
| 52340 | 0 | 47101  | PDGSKVFAGS                               | 2.31 | 3.85 | 2.70 | 0.44 | 0.85 | 0.28 |
| 52341 | 0 | 104926 | PDGSRLV                                  | 1.99 | 0.01 | 0.90 | 0.44 | 1.13 | 1.27 |
| 52342 | 0 | 104926 | PDGSRLV                                  | 1.99 | 0.01 | 0.90 | 0.44 | 1.41 | 1.27 |
| 52343 | 0 | 47104  | PDHIKVWDYATNKC                           | 2.57 | 0.01 | 2.56 | 2.02 | 0.22 | 0.85 |
| 52344 | 0 | 108565 | PDHLPRHVS                                | 2.24 | 0.01 | 0.90 | 0.44 | 1.13 | 1.39 |
| 52345 | 0 | 79329  | PDHVRTK                                  | 1.99 | 0.01 | 3.85 | 3.55 | 0.22 | 0.28 |
| 52346 | 0 | 79329  | PDHVRTK                                  | 1.99 | 0.01 | 3.33 | 1.12 | 0.22 | 0.28 |
| 52347 | 0 | 47108  | PDHVRTKGPGRCH                            | 2.56 | 0.01 | 3.33 | 0.68 | 0.22 | 0.28 |
| 52348 | 0 | 47108  | PDHVRTKGPGRCH                            | 2.56 | 0.01 | 3.33 | 0.68 | 0.22 | 1.75 |
| 52349 | 0 | 47108  | PDHVRTKGPGRCH                            | 2.56 | 0.01 | 3.33 | 0.68 | 0.22 | 1.34 |
| 52350 | 0 | 47108  | PDHVRTKGPGRCH                            | 2.56 | 0.01 | 3.33 | 0.68 | 0.22 | 0.28 |
| 52351 | 0 | 145934 | PDIIPK                                   | 1.92 | 0.01 | 1.86 | 0.68 | 0.22 | 0.28 |
| 52352 | 0 | 145934 | PDIIPK                                   | 1.92 | 0.01 | 1.86 | 0.68 | 0.22 | 0.28 |
| 52353 | 0 | 131579 | PDIITGFSS                                | 2.20 | 0.01 | 0.78 | 1.12 | 0.22 | 0.28 |
| 52354 | 0 | 131579 | PDIITGFSS                                | 2.20 | 0.01 | 0.78 | 1.12 | 0.22 | 2.02 |
| 52355 | 0 | 131579 | PDIITGFSS                                | 2.20 | 0.01 | 0.78 | 1.12 | 0.22 | 1.27 |
| 52356 | 0 | 47112  | PDISLQDK                                 | 2.12 | 0.01 | 3.53 | 2.61 | 0.22 | 0.28 |

|       |   |        |                                                          |      |      |      |      |      |      |
|-------|---|--------|----------------------------------------------------------|------|------|------|------|------|------|
| 52357 | 0 | 47119  | PDKEILYEA                                                | 2.21 | 0.01 | 2.69 | 0.44 | 0.85 | 0.28 |
| 52358 | 0 | 47120  | PDKEILYEAFCDEMEECAS<br>KA                                | 2.94 | 0.01 | 1.96 | 0.44 | 0.85 | 0.28 |
| 52359 | 0 | 47122  | PDKEVLYEAFDEMEECA<br>SKA                                 | 2.94 | 0.01 | 1.96 | 0.44 | 0.85 | 0.28 |
| 52360 | 0 | 47123  | PDKEVLYEAFDEMEECA<br>SRA                                 | 2.92 | 0.01 | 1.96 | 0.44 | 0.85 | 0.28 |
| 52361 | 0 | 47124  | PDKEVLYQQ                                                | 2.18 | 0.01 | 2.59 | 0.44 | 0.85 | 0.28 |
| 52362 | 0 | 47125  | PDKEVLYQQYDEMEEC<br>S KAR                                | 2.91 | 0.01 | 1.96 | 0.44 | 0.85 | 0.28 |
| 52363 | 0 | 47126  | PDKEVLYQQYDEMEEC<br>S QAA                                | 2.92 | 0.01 | 1.96 | 0.44 | 0.85 | 0.28 |
| 52364 | 0 | 47127  | PDKEVLYQQYDEMEEC<br>S QAG                                | 2.92 | 0.01 | 1.96 | 0.44 | 0.85 | 0.28 |
| 52365 | 0 | 47128  | PDKEVLYQQYDEMEEC<br>S QAR                                | 2.92 | 0.01 | 1.96 | 0.44 | 0.85 | 0.28 |
| 52366 | 0 | 47131  | PDKILTYAADHC                                             | 2.52 | 0.01 | 2.43 | 1.81 | 0.22 | 0.28 |
| 52367 | 0 | 47131  | PDKILTYAADHC                                             | 2.52 | 0.01 | 2.43 | 1.81 | 0.22 | 0.28 |
| 52368 | 0 | 47131  | PDKILTYAADHC                                             | 2.52 | 0.01 | 2.43 | 1.81 | 2.25 | 1.75 |
| 52369 | 0 | 47131  | PDKILTYAADHC                                             | 2.52 | 0.01 | 2.72 | 1.81 | 0.22 | 2.97 |
| 52370 | 0 | 190676 | PDKKSTAAVILTPTENHF<br>TLKCPKTALTEP                       | 3.34 | 0.01 | 2.75 | 2.13 | 0.22 | 0.28 |
| 52371 | 0 | 47133  | PDKQDYQIRKAKSS                                           | 2.61 | 0.01 | 3.59 | 2.49 | 0.22 | 0.28 |
| 52372 | 0 | 47134  | PDKQDYQIRMAKSS                                           | 2.59 | 0.01 | 3.59 | 2.49 | 0.22 | 0.28 |
| 52373 | 0 | 47136  | PDLERYAG                                                 | 2.10 | 0.01 | 3.55 | 0.68 | 0.22 | 0.28 |
| 52374 | 0 | 47136  | PDLERYAG                                                 | 2.10 | 0.01 | 3.55 | 0.68 | 0.22 | 0.28 |
| 52375 | 0 | 47137  | PDLGFISEPS                                               | 2.32 | 3.85 | 2.70 | 0.44 | 0.85 | 0.28 |
| 52376 | 0 | 47138  | PDLGVR                                                   | 1.88 | 0.01 | 1.96 | 0.44 | 0.85 | 0.28 |
| 52377 | 0 | 47140  | PDLIPLL                                                  | 2.03 | 0.01 | 2.24 | 1.12 | 0.22 | 0.28 |
| 52378 | 0 | 47140  | PDLIPLL                                                  | 2.03 | 0.01 | 2.24 | 0.68 | 0.22 | 0.28 |
| 52379 | 0 | 125515 | PDLTKVYSTDIFFILEITD<br>N                                 | 2.94 | 0.01 | 0.78 | 0.44 | 1.13 | 0.28 |
| 52380 | 0 | 93546  | PDMAEEIAALVLAKLGK<br>DA                                  | 2.91 | 0.01 | 3.35 | 0.68 | 0.22 | 0.28 |
| 52381 | 0 | 93546  | PDMAEEIAALVLAKLGK<br>DA                                  | 2.91 | 0.01 | 3.35 | 0.68 | 0.22 | 0.28 |
| 52382 | 0 | 439601 | PDN                                                      | 1.37 | 0.01 | 0.78 | 1.20 | 0.22 | 0.85 |
| 52383 | 0 | 172632 | PDNGMSEEARQKF                                            | 2.48 | 0.01 | 3.38 | 0.44 | 0.85 | 2.51 |
| 52384 | 0 | 102712 | PDNPNNYIKPTKVNKN<br>ENG                                  | 2.97 | 0.01 | 2.39 | 0.68 | 0.22 | 0.28 |
| 52385 | 0 | 47155  | PDNWEDEPLDLSRSALT<br>AATTLVREQTPHNP<br>GSS TGVRPATAQEFIP | 3.79 | 0.01 | 3.72 | 2.13 | 0.22 | 0.28 |

|       |   |        |                                                         |      |      |      |      |      |      |
|-------|---|--------|---------------------------------------------------------|------|------|------|------|------|------|
| 52386 | 0 | 47155  | PDNWEDEPLDLSRSALT<br>AATTLVREQTPHNPGSS<br>TGVRPATAQEFIP | 3.79 | 0.01 | 3.72 | 2.13 | 0.22 | 0.28 |
| 52387 | 0 | 79035  | PDNYLITPALDLPNGGKL<br>TF                                | 2.96 | 0.01 | 2.84 | 0.44 | 0.85 | 0.28 |
| 52388 | 0 | 47157  | PDPLKPTKR                                               | 2.26 | 0.01 | 2.91 | 0.68 | 0.22 | 0.28 |
| 52389 | 0 | 47157  | PDPLKPTKR                                               | 2.26 | 0.01 | 2.91 | 0.68 | 0.22 | 0.28 |
| 52390 | 0 | 101953 | PDPLSPGE                                                | 2.15 | 0.01 | 3.11 | 0.68 | 0.22 | 0.28 |
| 52391 | 0 | 101953 | PDPLSPGE                                                | 2.15 | 0.01 | 3.11 | 0.68 | 0.22 | 0.85 |
| 52392 | 0 | 101953 | PDPLSPGE                                                | 2.15 | 0.01 | 3.11 | 0.68 | 0.22 | 0.85 |
| 52393 | 0 | 101953 | PDPLSPGE                                                | 2.15 | 0.01 | 3.11 | 0.68 | 0.22 | 0.85 |
| 52394 | 0 | 101954 | PDPLSPGEQLLYNK                                          | 2.61 | 0.01 | 3.11 | 1.20 | 0.22 | 0.28 |
| 52395 | 0 | 47159  | PDNNNSPARPETS                                           | 2.57 | 0.01 | 3.17 | 0.44 | 0.85 | 0.85 |
| 52396 | 0 | 47160  | PDPPQPDFPQLN                                            | 2.53 | 0.01 | 2.69 | 1.12 | 0.22 | 0.28 |
| 52397 | 0 | 47160  | PDPPQPDFPQLN                                            | 2.53 | 0.01 | 2.69 | 1.12 | 0.22 | 0.28 |
| 52398 | 0 | 47160  | PDPPQPDFPQLN                                            | 2.53 | 0.01 | 2.69 | 1.12 | 0.22 | 0.28 |
| 52399 | 0 | 47161  | PDPPQPDFPQLNSD                                          | 2.67 | 0.01 | 2.69 | 1.12 | 0.22 | 1.27 |
| 52400 | 0 | 47161  | PDPPQPDFPQLNSD                                          | 2.67 | 0.01 | 2.69 | 1.12 | 0.22 | 0.28 |
| 52401 | 0 | 47161  | PDPPQPDFPQLNSD                                          | 2.67 | 0.01 | 2.69 | 1.12 | 0.22 | 0.28 |
| 52402 | 0 | 489690 | PDPPQPDFPQLNSDW                                         | 2.72 | 0.01 | 2.69 | 3.05 | 0.85 | 1.28 |
| 52403 | 0 | 47166  | PDPSPTPSAP                                              | 2.37 | 3.85 | 2.70 | 0.44 | 0.85 | 0.28 |
| 52404 | 0 | 131996 | PDQDSELLSDNHILTTIG<br>DIFGAGV                           | 3.14 | 0.01 | 0.78 | 0.44 | 1.13 | 0.85 |
| 52405 | 0 | 130994 | PDQRPYCWHYPPKPC                                         | 2.70 | 0.01 | 1.96 | 0.68 | 0.22 | 0.85 |
| 52406 | 0 | 130994 | PDQRPYCWHYPPKPC                                         | 2.70 | 0.01 | 1.96 | 0.68 | 0.22 | 1.34 |
| 52407 | 0 | 130994 | PDQRPYCWHYPPKPC                                         | 2.70 | 0.01 | 1.72 | 0.44 | 0.85 | 0.28 |
| 52408 | 0 | 152885 | PDRDNDGIPD                                              | 2.36 | 0.01 | 2.18 | 2.16 | 0.22 | 0.28 |
| 52409 | 0 | 47174  | PDREALYQFDEMEECA<br>SHL                                 | 2.92 | 0.01 | 1.72 | 0.44 | 0.85 | 0.28 |
| 52410 | 0 | 47175  | PDREALYQQFDEMEEC<br>ASL                                 | 2.93 | 0.01 | 1.96 | 0.44 | 0.85 | 0.28 |
| 52411 | 0 | 47176  | PDREALYREFDEMEECA<br>SHL                                | 2.94 | 0.01 | 1.96 | 0.44 | 0.85 | 0.28 |
| 52412 | 0 | 172634 | PDREFLLRVSYMEIY                                         | 2.65 | 0.01 | 0.78 | 0.44 | 1.13 | 0.28 |
| 52413 | 0 | 172634 | PDREFLLRVSYMEIY                                         | 2.65 | 0.01 | 0.78 | 2.79 | 1.13 | 1.28 |
| 52414 | 0 | 172634 | PDREFLLRVSYMEIY                                         | 2.65 | 0.01 | 0.78 | 1.81 | 1.41 | 1.28 |
| 52415 | 0 | 172634 | PDREFLLRVSYMEIY                                         | 2.65 | 0.01 | 0.78 | 1.81 | 1.41 | 1.28 |
| 52416 | 0 | 47177  | PDREILYQQFDEMEEC<br>RHI                                 | 2.91 | 0.01 | 1.72 | 0.44 | 0.85 | 0.28 |
| 52417 | 0 | 47179  | PDRELLYREFDEMEECPS<br>HL                                | 2.96 | 0.01 | 1.72 | 0.44 | 0.85 | 0.28 |

|       |   |        |                          |      |      |      |      |      |      |
|-------|---|--------|--------------------------|------|------|------|------|------|------|
| 52418 | 0 | 47180  | PDREVLHREFDEMEECA<br>SHL | 2.94 | 0.01 | 1.96 | 0.44 | 0.85 | 0.28 |
| 52419 | 0 | 47181  | PDREVLYQAFDEMEECA<br>SHL | 2.90 | 0.01 | 2.41 | 0.44 | 0.85 | 0.28 |
| 52420 | 0 | 47182  | PDREVLYQDFDEMEECA<br>SHL | 2.90 | 0.01 | 1.72 | 0.44 | 0.85 | 0.28 |
| 52421 | 0 | 47183  | PDREVLYQEFDEMEECA<br>SHL | 2.90 | 0.01 | 1.96 | 0.44 | 0.85 | 0.28 |
| 52422 | 0 | 47184  | PDREVLYQEFDEMEECA<br>SQL | 2.92 | 0.01 | 2.41 | 0.44 | 0.85 | 0.28 |
| 52423 | 0 | 47185  | PDREVLYQEFDEMEECG<br>SHL | 2.90 | 0.01 | 1.72 | 0.44 | 0.85 | 0.28 |
| 52424 | 0 | 47186  | PDREVLYQEFDEMEEC<br>QHL  | 2.92 | 0.01 | 1.96 | 0.44 | 0.85 | 0.28 |
| 52425 | 0 | 47187  | PDREVLYQGFDEMEECA<br>SHL | 2.89 | 0.01 | 1.72 | 0.44 | 0.85 | 0.28 |
| 52426 | 0 | 47188  | PDREVLYQQFDEMEEC<br>KHL  | 2.90 | 0.01 | 1.96 | 0.44 | 0.85 | 0.28 |
| 52427 | 0 | 47189  | PDREVLYRE                | 2.23 | 0.01 | 2.41 | 0.44 | 0.85 | 0.28 |
| 52428 | 0 | 47190  | PDREVLYREFDEMEACA<br>PHL | 2.95 | 0.01 | 1.96 | 0.44 | 0.85 | 0.28 |
| 52429 | 0 | 47191  | PDREVLYREFDEMEECA<br>AHI | 2.91 | 0.01 | 1.96 | 0.44 | 0.85 | 0.28 |
| 52430 | 0 | 47192  | PDREVLYREFDEMEECA<br>SHL | 2.92 | 0.01 | 1.96 | 0.44 | 0.85 | 0.28 |
| 52431 | 0 | 47193  | PDREVLYREFDEMEECG<br>SHL | 2.92 | 0.01 | 1.72 | 0.44 | 0.85 | 0.28 |
| 52432 | 0 | 47194  | PDREVLYREFDEMEEC<br>QHL  | 2.92 | 0.01 | 1.96 | 0.44 | 0.85 | 0.28 |
| 52433 | 0 | 132518 | PDRFLE                   | 1.88 | 0.01 | 0.78 | 0.68 | 0.22 | 2.35 |
| 52434 | 0 | 131580 | PDRFSGS                  | 2.02 | 0.01 | 0.78 | 0.44 | 1.41 | 0.28 |
| 52435 | 0 | 131580 | PDRFSGS                  | 2.02 | 0.01 | 0.78 | 0.44 | 1.13 | 0.28 |
| 52436 | 0 | 131580 | PDRFSGS                  | 2.02 | 0.01 | 0.78 | 1.15 | 0.22 | 0.28 |
| 52437 | 0 | 131580 | PDRFSGS                  | 2.02 | 0.01 | 0.78 | 1.15 | 0.22 | 0.28 |
| 52438 | 0 | 131580 | PDRFSGS                  | 2.02 | 0.01 | 0.78 | 1.15 | 0.22 | 0.28 |
| 52439 | 0 | 131580 | PDRFSGS                  | 2.02 | 0.01 | 0.78 | 0.44 | 1.41 | 0.28 |
| 52440 | 0 | 421471 | PDRGACALGKKPAE           | 2.63 | 0.01 | 3.19 | 0.44 | 1.23 | 1.28 |
| 52441 | 0 | 421471 | PDRGACALGKKPAE           | 2.63 | 0.01 | 3.19 | 0.44 | 1.23 | 1.28 |
| 52442 | 0 | 534778 | PDRKAAVSHWQQ             | 2.42 | 0.01 | 0.78 | 3.85 | 0.22 | 2.49 |
| 52443 | 0 | 534778 | PDRKAAVSHWQQ             | 2.42 | 0.01 | 0.78 | 3.85 | 0.22 | 1.66 |
| 52444 | 0 | 534778 | PDRKAAVSHWQQ             | 2.42 | 0.01 | 0.78 | 3.85 | 0.22 | 1.66 |
| 52445 | 0 | 534778 | PDRKAAVSHWQQ             | 2.42 | 0.01 | 0.78 | 3.85 | 0.22 | 1.66 |
| 52446 | 0 | 534778 | PDRKAAVSHWQQ             | 2.42 | 0.01 | 0.78 | 3.85 | 0.22 | 2.02 |
| 52447 | 0 | 534778 | PDRKAAVSHWQQ             | 2.42 | 0.01 | 0.78 | 3.85 | 0.22 | 1.27 |
| 52448 | 0 | 534778 | PDRKAAVSHWQQ             | 2.42 | 0.01 | 0.78 | 3.85 | 0.22 | 0.85 |
| 52449 | 0 | 534778 | PDRKAAVSHWQQ             | 2.42 | 0.01 | 0.78 | 3.85 | 0.22 | 1.48 |

|       |   |        |                          |      |      |      |      |      |      |
|-------|---|--------|--------------------------|------|------|------|------|------|------|
| 52450 | 0 | 47198  | PDRQVLYQQYDEMEEC<br>SQSA | 2.94 | 0.01 | 1.96 | 0.44 | 0.85 | 0.28 |
| 52451 | 0 | 103462 | PDRSAERCGSPAIDL          | 2.69 | 0.01 | 2.04 | 0.44 | 0.85 | 1.28 |
| 52452 | 0 | 47200  | PDSDAESYSSMPPL           | 2.64 | 0.01 | 2.41 | 0.44 | 0.85 | 0.28 |
| 52453 | 0 | 47200  | PDSDAESYSSMPPL           | 2.64 | 0.01 | 2.41 | 0.44 | 0.85 | 0.28 |
| 52454 | 0 | 78478  | PSDDPQI                  | 2.05 | 0.01 | 2.04 | 0.44 | 1.59 | 0.28 |
| 52455 | 0 | 78478  | PSDDPQI                  | 2.05 | 0.01 | 2.04 | 0.44 | 1.59 | 0.28 |
| 52456 | 0 | 47201  | PSDDPQIPPPYVEPTAP<br>QVL | 2.96 | 0.01 | 2.04 | 0.44 | 1.59 | 0.28 |
| 52457 | 0 | 47201  | PSDDPQIPPPYVEPTAP<br>QVL | 2.96 | 0.01 | 2.04 | 0.44 | 1.59 | 1.27 |
| 52458 | 0 | 47201  | PSDDPQIPPPYVEPTAP<br>QVL | 2.96 | 0.01 | 2.04 | 0.44 | 1.59 | 0.28 |
| 52459 | 0 | 47202  | PDSEPTKTNGKCKSG          | 2.71 | 0.01 | 2.56 | 2.02 | 0.22 | 0.85 |
| 52460 | 0 | 47202  | PDSEPTKTNGKCKSG          | 2.71 | 0.01 | 2.56 | 0.68 | 0.22 | 0.85 |
| 52461 | 0 | 127759 | PDSLIYSTVLHY             | 2.48 | 0.01 | 3.16 | 3.16 | 0.22 | 0.28 |
| 52462 | 0 | 121701 | PDSPQRVAEAEAVSF          | 2.71 | 0.01 | 0.90 | 0.68 | 0.22 | 1.39 |
| 52463 | 0 | 121701 | PDSPQRVAEAEAVSF          | 2.71 | 0.01 | 0.90 | 0.68 | 0.22 | 0.28 |
| 52464 | 0 | 121701 | PDSPQRVAEAEAVSF          | 2.71 | 0.01 | 0.90 | 0.68 | 0.22 | 0.28 |
| 52465 | 0 | 131581 | PDSRAVTCGMASLSAEK<br>V   | 2.82 | 0.01 | 1.75 | 0.68 | 0.22 | 0.28 |
| 52466 | 0 | 131581 | PDSRAVTCGMASLSAEK<br>V   | 2.82 | 0.01 | 1.75 | 0.68 | 0.22 | 0.28 |
| 52467 | 0 | 131581 | PDSRAVTCGMASLSAEK<br>V   | 2.82 | 0.01 | 1.75 | 0.68 | 0.22 | 0.28 |
| 52468 | 0 | 194864 | PDSRESLAWQTAT            | 2.54 | 0.01 | 2.60 | 0.68 | 0.22 | 1.34 |
| 52469 | 0 | 194864 | PDSRESLAWQTAT            | 2.54 | 0.01 | 2.60 | 0.68 | 0.22 | 0.28 |
| 52470 | 0 | 194864 | PDSRESLAWQTAT            | 2.54 | 0.01 | 2.60 | 0.68 | 0.22 | 1.75 |
| 52471 | 0 | 194864 | PDSRESLAWQTAT            | 2.54 | 0.01 | 2.60 | 0.68 | 0.22 | 0.28 |
| 52472 | 0 | 225960 | PDSRESLAWQTATNP          | 2.67 | 0.01 | 2.60 | 0.68 | 0.22 | 0.28 |
| 52473 | 0 | 225960 | PDSRESLAWQTATNP          | 2.67 | 0.01 | 2.60 | 0.68 | 0.22 | 1.34 |
| 52474 | 0 | 47209  | PDTAKEKPQEGTVVA          | 2.70 | 0.01 | 2.04 | 0.44 | 0.85 | 0.28 |
| 52475 | 0 | 47209  | PDTAKEKPQEGTVVA          | 2.70 | 0.01 | 2.04 | 0.44 | 0.85 | 0.28 |
| 52476 | 0 | 47209  | PDTAKEKPQEGTVVA          | 2.70 | 0.01 | 2.04 | 0.44 | 1.74 | 0.28 |
| 52477 | 0 | 534847 | PDTDVPLSSV               | 2.35 | 0.01 | 0.78 | 0.68 | 0.22 | 0.28 |
| 52478 | 0 | 534847 | PDTDVPLSSV               | 2.35 | 0.01 | 0.78 | 0.68 | 0.22 | 2.56 |
| 52479 | 0 | 534847 | PDTDVPLSSV               | 2.35 | 0.01 | 0.78 | 0.68 | 0.22 | 2.12 |
| 52480 | 0 | 534847 | PDTDVPLSSV               | 2.35 | 0.01 | 0.78 | 0.68 | 0.22 | 0.28 |
| 52481 | 0 | 534847 | PDTDVPLSSV               | 2.35 | 0.01 | 0.78 | 0.68 | 0.22 | 2.56 |
| 52482 | 0 | 534847 | PDTDVPLSSV               | 2.35 | 0.01 | 0.78 | 0.68 | 0.22 | 2.56 |
| 52483 | 0 | 133908 | PDTGISSKAM               | 2.28 | 0.01 | 1.60 | 1.12 | 0.22 | 0.28 |
| 52484 | 0 | 133908 | PDTGISSKAM               | 2.28 | 0.01 | 1.60 | 1.20 | 0.22 | 0.28 |
| 52485 | 0 | 423454 | PDTPRTPRQKKISQR          | 2.71 | 0.01 | 2.51 | 0.44 | 2.35 | 1.28 |
| 52486 | 0 | 120123 | PDTPYLDITYHFIMQRI        | 2.80 | 0.01 | 2.26 | 1.15 | 0.22 | 1.57 |
| 52487 | 0 | 120123 | PDTPYLDITYHFIMQRI        | 2.80 | 0.01 | 2.26 | 1.12 | 0.22 | 1.57 |
| 52488 | 0 | 120123 | PDTPYLDITYHFIMQRI        | 2.80 | 0.01 | 2.26 | 2.25 | 0.22 | 1.57 |
| 52489 | 0 | 120123 | PDTPYLDITYHFIMQRI        | 2.80 | 0.01 | 2.26 | 3.65 | 0.22 | 1.57 |



|       |   |        |                               |      |      |      |      |      |      |
|-------|---|--------|-------------------------------|------|------|------|------|------|------|
| 52490 | 0 | 119624 | PDTPYLDITYHFVMQRL             | 2.78 | 0.01 | 0.78 | 1.15 | 0.22 | 1.57 |
| 52491 | 0 | 119624 | PDTPYLDITYHFVMQRL             | 2.78 | 0.01 | 0.78 | 0.44 | 1.41 | 1.57 |
| 52492 | 0 | 119624 | PDTPYLDITYHFVMQRL             | 2.78 | 0.01 | 0.78 | 0.44 | 1.13 | 1.57 |
| 52493 | 0 | 47212  | PDTRPA                        | 1.91 | 0.01 | 0.78 | 1.15 | 0.22 | 0.28 |
| 52494 | 0 | 47212  | PDTRPA                        | 1.91 | 0.01 | 0.78 | 0.68 | 0.22 | 0.28 |
| 52495 | 0 | 79330  | PDVAPS                        | 1.91 | 0.01 | 0.90 | 0.68 | 0.22 | 1.39 |
| 52496 | 0 | 120862 | PDVKSIEGV                     | 2.29 | 0.01 | 2.26 | 2.04 | 0.22 | 0.28 |
| 52497 | 0 | 47219  | PDVPYVKR                      | 2.15 | 0.01 | 0.78 | 0.44 | 1.74 | 0.28 |
| 52498 | 0 | 47220  | PDVPYVKRVK                    | 2.36 | 0.01 | 0.78 | 0.44 | 1.74 | 0.28 |
| 52499 | 0 | 47220  | PDVPYVKRVK                    | 2.36 | 0.01 | 0.78 | 1.15 | 0.22 | 0.28 |
| 52500 | 0 | 241046 | PDVSIRLV                      | 2.12 | 0.01 | 3.35 | 2.37 | 0.22 | 0.85 |
| 52501 | 0 | 47224  | PDVTAAAGAGPRVRQP<br>ARPLGSAWR | 3.19 | 0.01 | 2.53 | 0.44 | 0.85 | 0.28 |
| 52502 | 0 | 47224  | PDVTAAAGAGPRVRQP<br>ARPLGSAWR | 3.19 | 0.01 | 2.53 | 0.44 | 0.85 | 0.28 |
| 52503 | 0 | 47228  | PDWDFNPVKDDWP                 | 2.59 | 0.01 | 2.58 | 1.15 | 0.22 | 1.57 |
| 52504 | 0 | 131997 | PDWNNKQDIVGSWGI               | 2.67 | 0.01 | 0.78 | 0.44 | 1.13 | 0.85 |
| 52505 | 0 | 47229  | PDYASLR                       | 1.99 | 0.01 | 3.93 | 1.15 | 0.22 | 2.66 |
| 52506 | 0 | 47229  | PDYASLR                       | 1.99 | 0.01 | 3.72 | 1.15 | 0.22 | 2.66 |
| 52507 | 0 | 47229  | PDYASLR                       | 1.99 | 0.01 | 3.72 | 2.25 | 0.22 | 2.66 |
| 52508 | 0 | 47229  | PDYASLR                       | 1.99 | 0.01 | 3.72 | 0.68 | 0.22 | 2.66 |
| 52509 | 0 | 47230  | PDYEPPVV                      | 2.13 | 0.01 | 2.68 | 0.44 | 1.59 | 0.28 |
| 52510 | 0 | 128068 | PDYEPPVVHGCPLPPP              | 2.74 | 0.01 | 1.72 | 0.44 | 0.85 | 0.28 |
| 52511 | 0 | 128068 | PDYEPPVVHGCPLPPP              | 2.74 | 0.01 | 1.72 | 0.44 | 0.85 | 0.28 |
| 52512 | 0 | 128068 | PDYEPPVVHGCPLPPP              | 2.74 | 0.01 | 1.72 | 0.44 | 0.85 | 0.28 |
| 52513 | 0 | 175629 | PDYGHYDDKDTLDLNT<br>VDKTSN    | 3.11 | 0.01 | 0.78 | 1.81 | 0.22 | 0.28 |
| 52514 | 0 | 175629 | PDYGHYDDKDTLDLNT<br>VDKTSN    | 3.11 | 0.01 | 0.78 | 1.81 | 0.22 | 0.28 |
| 52515 | 0 | 175629 | PDYGHYDDKDTLDLNT<br>VDKTSN    | 3.11 | 0.01 | 0.78 | 1.81 | 0.22 | 0.28 |
| 52516 | 0 | 175629 | PDYGHYDDKDTLDLNT<br>VDKTSN    | 3.11 | 0.01 | 0.78 | 1.81 | 2.25 | 1.75 |
| 52517 | 0 | 175629 | PDYGHYDDKDTLDLNT<br>VDKTSN    | 3.11 | 0.01 | 0.78 | 1.81 | 0.22 | 0.28 |
| 52518 | 0 | 175629 | PDYGHYDDKDTLDLNT<br>VDKTSN    | 3.11 | 0.01 | 0.78 | 1.81 | 0.22 | 0.28 |
| 52519 | 0 | 47231  | PDYNPLL                       | 2.14 | 0.01 | 2.68 | 0.44 | 1.59 | 0.28 |
| 52520 | 0 | 185160 | PE                            | 1.10 | 0.01 | 0.78 | 1.12 | 0.22 | 1.28 |
| 52521 | 0 | 185160 | PE                            | 1.10 | 0.01 | 0.78 | 1.12 | 0.22 | 1.27 |

|       |   |        |                                  |      |      |      |      |      |      |
|-------|---|--------|----------------------------------|------|------|------|------|------|------|
| 52522 | 0 | 101115 | PEAALS                           | 1.89 | 0.01 | 3.18 | 1.12 | 0.22 | 0.28 |
| 52523 | 0 | 457356 | PEAAQALRAKIES                    | 2.55 | 0.01 | 2.04 | 1.15 | 0.22 | 0.28 |
| 52524 | 0 | 349511 | PEAASKKAPLSVVTG                  | 2.69 | 0.01 | 1.61 | 0.44 | 0.85 | 1.28 |
| 52525 | 0 | 47233  | PEADTDPL                         | 2.15 | 0.01 | 3.81 | 2.22 | 0.22 | 0.28 |
| 52526 | 0 | 47233  | PEADTDPL                         | 2.15 | 0.01 | 3.81 | 2.37 | 0.22 | 0.28 |
| 52527 | 0 | 47233  | PEADTDPL                         | 2.15 | 0.01 | 3.81 | 2.22 | 0.22 | 0.28 |
| 52528 | 0 | 47233  | PEADTDPL                         | 2.15 | 0.01 | 3.81 | 2.37 | 0.22 | 0.28 |
| 52529 | 0 | 47233  | PEADTDPL                         | 2.15 | 0.01 | 3.81 | 2.22 | 0.22 | 0.28 |
| 52530 | 0 | 47233  | PEADTDPL                         | 2.15 | 0.01 | 3.81 | 2.37 | 0.22 | 0.28 |
| 52531 | 0 | 100376 | PEAFNYMDKF                       | 2.29 | 0.01 | 2.18 | 2.16 | 0.22 | 0.28 |
| 52532 | 0 | 349536 | PEALHEVLQYGRlid                  | 2.64 | 0.01 | 1.61 | 0.44 | 0.85 | 1.28 |
| 52533 | 0 | 134757 | PEAPRRRSPSPTPTP                  | 2.73 | 0.01 | 0.78 | 3.05 | 1.13 | 0.85 |
| 52534 | 0 | 134757 | PEAPRRRSPSPTPTP                  | 2.73 | 0.01 | 0.78 | 2.79 | 1.13 | 1.28 |
| 52535 | 0 | 134757 | PEAPRRRSPSPTPTP                  | 2.73 | 0.01 | 0.78 | 1.81 | 1.41 | 1.28 |
| 52536 | 0 | 87229  | PEARLISVRYDS                     | 2.45 | 0.01 | 2.87 | 0.44 | 0.22 | 0.28 |
| 52537 | 0 | 47239  | PEARQA                           | 1.90 | 0.01 | 1.96 | 0.44 | 0.85 | 0.28 |
| 52538 | 0 | 233747 | PEASDVTIQGPAPAPSG<br>HTGA        | 3.02 | 0.01 | 3.67 | 2.61 | 0.85 | 1.28 |
| 52539 | 0 | 47240  | PEAVLR                           | 1.88 | 0.01 | 1.86 | 0.44 | 1.23 | 0.28 |
| 52540 | 0 | 145935 | PECPDDQRAWNIWEVE<br>DYGFGIFTTNIW | 3.25 | 0.01 | 4.15 | 0.68 | 0.22 | 0.85 |
| 52541 | 0 | 145935 | PECPDDQRAWNIWEVE<br>DYGFGIFTTNIW | 3.25 | 0.01 | 4.15 | 0.68 | 0.22 | 0.85 |
| 52542 | 0 | 145935 | PECPDDQRAWNIWEVE<br>DYGFGIFTTNIW | 3.25 | 0.01 | 4.15 | 0.68 | 0.22 | 1.48 |
| 52543 | 0 | 145935 | PECPDDQRAWNIWEVE<br>DYGFGIFTTNIW | 3.25 | 0.01 | 4.15 | 0.68 | 0.22 | 1.48 |
| 52544 | 0 | 145936 | PECPSASRAWNVWEVE<br>DYGFGVFTTNIW | 3.26 | 0.01 | 4.03 | 0.68 | 0.22 | 0.85 |
| 52545 | 0 | 145936 | PECPSASRAWNVWEVE<br>DYGFGVFTTNIW | 3.26 | 0.01 | 4.03 | 0.68 | 0.22 | 0.85 |
| 52546 | 0 | 145936 | PECPSASRAWNVWEVE<br>DYGFGVFTTNIW | 3.26 | 0.01 | 4.03 | 0.68 | 0.22 | 1.48 |
| 52547 | 0 | 145936 | PECPSASRAWNVWEVE<br>DYGFGVFTTNIW | 3.26 | 0.01 | 4.03 | 0.68 | 0.22 | 1.48 |
| 52548 | 0 | 47248  | PEDDWASDYDLAQA                   | 2.63 | 0.01 | 3.72 | 2.13 | 0.22 | 0.28 |
| 52549 | 0 | 47248  | PEDDWASDYDLAQA                   | 2.63 | 0.01 | 3.72 | 2.13 | 0.22 | 0.28 |
| 52550 | 0 | 349603 | PEDGVDSREQDGEVT                  | 2.70 | 0.01 | 1.61 | 0.44 | 0.85 | 1.28 |
| 52551 | 0 | 423041 | PEDIDWCNSTSTWVT                  | 2.75 | 0.01 | 2.30 | 1.20 | 0.22 | 0.28 |
| 52552 | 0 | 125516 | PEDIEAFKNYTLDSAAAP<br>TPQAAPA    | 3.16 | 0.01 | 0.78 | 0.44 | 1.13 | 0.28 |
| 52553 | 0 | 125189 | PEDPDTAKESF                      | 2.42 | 0.01 | 1.60 | 0.68 | 0.22 | 0.85 |
| 52554 | 0 | 125189 | PEDPDTAKESF                      | 2.42 | 0.01 | 1.60 | 0.68 | 0.22 | 0.28 |
| 52555 | 0 | 125189 | PEDPDTAKESF                      | 2.42 | 0.01 | 1.60 | 0.68 | 0.22 | 0.28 |
| 52556 | 0 | 125189 | PEDPDTAKESF                      | 2.42 | 0.01 | 1.60 | 0.68 | 0.22 | 1.27 |
| 52557 | 0 | 47257  | PEDPEDSALLEDPVG                  | 2.71 | 0.01 | 2.40 | 0.68 | 0.22 | 0.28 |

|       |   |        |                               |      |      |      |      |      |      |
|-------|---|--------|-------------------------------|------|------|------|------|------|------|
| 52558 | 0 | 47257  | PEDPEDSALLEDPVG               | 2.71 | 0.01 | 2.40 | 3.81 | 0.22 | 0.28 |
| 52559 | 0 | 47259  | PEDSALLED                     | 2.24 | 0.01 | 2.40 | 0.68 | 0.22 | 1.27 |
| 52560 | 0 | 47259  | PEDSALLED                     | 2.24 | 0.01 | 2.40 | 0.68 | 2.25 | 1.75 |
| 52561 | 0 | 349624 | PEDSVASREKDGEDT               | 2.68 | 0.01 | 1.61 | 0.44 | 0.85 | 1.28 |
| 52562 | 0 | 47260  | PEDTLNKV                      | 2.10 | 0.01 | 2.04 | 0.44 | 0.85 | 0.28 |
| 52563 | 0 | 131582 | PEEDDITWTSDQRHGVI<br>GS       | 2.88 | 0.01 | 1.75 | 0.68 | 0.22 | 0.28 |
| 52564 | 0 | 131582 | PEEDDITWTSDQRHGVI<br>GS       | 2.88 | 0.01 | 1.75 | 0.68 | 0.22 | 0.28 |
| 52565 | 0 | 131582 | PEEDDITWTSDQRHGVI<br>GS       | 2.88 | 0.01 | 1.75 | 0.68 | 0.22 | 1.34 |
| 52566 | 0 | 131582 | PEEDDITWTSDQRHGVI<br>GS       | 2.88 | 0.01 | 1.75 | 0.68 | 2.25 | 1.75 |
| 52567 | 0 | 349637 | PEEDEAFDEADDDEL               | 2.72 | 0.01 | 1.61 | 0.44 | 0.85 | 1.28 |
| 52568 | 0 | 47262  | PEEDQKAR                      | 2.11 | 0.01 | 2.40 | 2.43 | 0.22 | 0.28 |
| 52569 | 0 | 349642 | PEEDVASREQDGEDT               | 2.68 | 0.01 | 1.61 | 0.44 | 0.85 | 1.28 |
| 52570 | 0 | 349643 | PEEEDDDDDFGMGAL               | 2.68 | 0.01 | 1.61 | 0.44 | 0.85 | 1.28 |
| 52571 | 0 | 142942 | PEEETGEMGQLVHR                | 2.60 | 0.01 | 0.78 | 0.44 | 1.41 | 1.27 |
| 52572 | 0 | 142943 | PEEETGETGQLVHR                | 2.62 | 0.01 | 0.78 | 0.44 | 1.41 | 1.27 |
| 52573 | 0 | 47266  | PEEFEGAGDGEPPEDDD<br>S        | 2.89 | 0.01 | 2.40 | 0.44 | 0.85 | 0.28 |
| 52574 | 0 | 47266  | PEEFEGAGDGEPPEDDD<br>S        | 2.89 | 0.01 | 2.40 | 0.44 | 0.85 | 0.28 |
| 52575 | 0 | 47267  | PEEFEGAGDGEPPEDDD<br>SAT      | 2.99 | 0.01 | 2.40 | 0.44 | 1.59 | 0.85 |
| 52576 | 0 | 47267  | PEEFEGAGDGEPPEDDD<br>SAT      | 2.99 | 0.01 | 2.40 | 0.44 | 1.59 | 1.28 |
| 52577 | 0 | 98324  | PEEKPAEP                      | 2.18 | 0.01 | 2.60 | 0.44 | 1.23 | 0.85 |
| 52578 | 0 | 165175 | PEELKVKVLGDVIEVHGK<br>HEERQDE | 3.19 | 0.01 | 0.78 | 0.44 | 1.13 | 0.28 |
| 52579 | 0 | 165175 | PEELKVKVLGDVIEVHGK<br>HEERQDE | 3.19 | 0.01 | 0.78 | 0.44 | 1.13 | 0.28 |
| 52580 | 0 | 165175 | PEELKVKVLGDVIEVHGK<br>HEERQDE | 3.19 | 0.01 | 0.78 | 0.44 | 1.41 | 0.28 |
| 52581 | 0 | 167984 | PEEPVSQRASRVAEQL              | 2.78 | 0.01 | 2.75 | 0.44 | 0.85 | 2.51 |
| 52582 | 0 | 167984 | PEEPVSQRASRVAEQL              | 2.78 | 0.01 | 2.75 | 0.44 | 0.85 | 2.51 |
| 52583 | 0 | 79624  | PEEQVPQLIPPPPIPRAG            | 2.87 | 0.01 | 4.15 | 0.68 | 0.22 | 0.85 |
| 52584 | 0 | 79624  | PEEQVPQLIPPPPIPRAG            | 2.87 | 0.01 | 4.15 | 0.68 | 0.22 | 2.02 |
| 52585 | 0 | 123571 | PEERARISM                     | 2.22 | 0.01 | 2.28 | 2.00 | 0.22 | 0.28 |
| 52586 | 0 | 123571 | PEERARISM                     | 2.22 | 0.01 | 2.28 | 2.00 | 0.22 | 0.28 |
| 52587 | 0 | 123571 | PEERARISM                     | 2.22 | 0.01 | 2.28 | 2.00 | 0.22 | 0.28 |
| 52588 | 0 | 137551 | PEEVLANAFQISRED               | 2.64 | 0.01 | 3.12 | 0.44 | 1.23 | 0.85 |
| 52589 | 0 | 136544 | PEEYVSPDAEVIG                 | 2.56 | 0.01 | 2.19 | 0.68 | 0.22 | 1.27 |

|       |   |        |                     |      |      |      |      |      |      |
|-------|---|--------|---------------------|------|------|------|------|------|------|
| 52590 | 0 | 136544 | PEEYVSPDAEVIG       | 2.56 | 0.01 | 2.19 | 0.68 | 0.22 | 0.28 |
| 52591 | 0 | 87232  | PEFAGLSGSVQY        | 2.45 | 0.01 | 2.87 | 0.44 | 0.22 | 0.28 |
| 52592 | 0 | 87232  | PEFAGLSGSVQY        | 2.45 | 0.01 | 2.90 | 0.68 | 0.22 | 0.28 |
| 52593 | 0 | 109652 | PEGAQGPR            | 2.15 | 0.01 | 1.60 | 2.55 | 2.60 | 0.28 |
| 52594 | 0 | 349732 | PEGEEYPTAERPVA      | 2.72 | 0.01 | 1.61 | 0.44 | 0.85 | 1.28 |
|       |   |        | PEGENASYHLAYDKDRY   |      |      |      |      |      |      |
| 52595 | 0 | 47283  | TEEEREVYSYLRGTGPIPI | 3.69 | 0.01 | 3.47 | 0.44 | 2.39 | 0.28 |
|       |   |        | DNPNDK              |      |      |      |      |      |      |
|       |   |        | PEGENASYHLAYDKDRY   |      |      |      |      |      |      |
| 52596 | 0 | 47283  | TEEEREVYSYLRGTGPIPI | 3.69 | 0.01 | 3.47 | 0.44 | 1.74 | 0.28 |
|       |   |        | DNPNDK              |      |      |      |      |      |      |
|       |   |        | PEGFPFKYVKDRVDEVD   |      |      |      |      |      |      |
| 52597 | 0 | 181135 | HTNFKYNYSVIEGGPIGD  | 3.76 | 0.01 | 2.76 | 1.20 | 0.22 | 0.28 |
|       |   |        | TLEKISNEIK          |      |      |      |      |      |      |
|       |   |        | PEGFPFKYVKDRVDEVD   |      |      |      |      |      |      |
| 52598 | 0 | 181135 | HTNFKYNYSVIEGGPIGD  | 3.76 | 0.01 | 2.76 | 1.20 | 0.22 | 0.28 |
|       |   |        | TLEKISNEIK          |      |      |      |      |      |      |
|       |   |        | PEGFPFKYVKDRVDEVD   |      |      |      |      |      |      |
| 52599 | 0 | 181135 | HTNFKYNYSVIEGGPIGD  | 3.76 | 0.01 | 2.76 | 1.20 | 0.22 | 0.28 |
|       |   |        | TLEKISNEIK          |      |      |      |      |      |      |
|       |   |        | PEGFPFKYVKDRVDEVD   |      |      |      |      |      |      |
| 52600 | 0 | 181135 | HTNFKYNYSVIEGGPIGD  | 3.76 | 0.01 | 2.76 | 1.20 | 0.22 | 0.28 |
|       |   |        | TLEKISNEIK          |      |      |      |      |      |      |
|       |   |        | PEGPRANNRNENNQNT    |      |      |      |      |      |      |
| 52601 | 0 | 122511 | DPYNHYFAWE          | 3.21 | 0.01 | 2.22 | 0.44 | 1.74 | 0.28 |
|       |   |        | PEGPRANNRNENNQNT    |      |      |      |      |      |      |
| 52602 | 0 | 122511 | DPYNHYFAWE          | 3.21 | 0.01 | 2.22 | 0.44 | 1.74 | 1.34 |
|       |   |        | PEGPRANNRNENNQNT    |      |      |      |      |      |      |
| 52603 | 0 | 122511 | DPYNHYFAWE          | 3.21 | 0.01 | 2.22 | 0.44 | 1.74 | 0.28 |
|       |   |        | PEGRAWAQPGYPWPLY    |      |      |      |      |      |      |
| 52604 | 0 | 47288  | GNEG                | 2.98 | 0.01 | 3.10 | 0.68 | 0.22 | 0.28 |
| 52605 | 0 | 47289  | PEGRTWAQ            | 2.10 | 0.01 | 1.72 | 0.44 | 0.85 | 0.28 |
| 52606 | 0 | 47289  | PEGRTWAQ            | 2.10 | 0.01 | 3.18 | 0.44 | 0.85 | 1.27 |
|       |   |        | PEGRTWAQPGYPWPLY    |      |      |      |      |      |      |
| 52607 | 0 | 47294  | GNEG                | 2.97 | 0.01 | 1.72 | 2.82 | 0.22 | 0.28 |
|       |   |        | PEHFLDAQGHFVKPEAF   |      |      |      |      |      |      |
| 52608 | 0 | 130995 | LPF                 | 2.97 | 0.01 | 0.78 | 0.44 | 1.13 | 0.28 |
|       |   |        | PEHKKEENMLSHLYVSS   |      |      |      |      |      |      |
| 52609 | 0 | 47302  | KDKENISKEND         | 3.29 | 0.01 | 2.22 | 0.44 | 1.59 | 0.28 |
|       |   |        | PEHKKEENMLSHLYVSS   |      |      |      |      |      |      |
| 52610 | 0 | 47302  | KDKENISKEND         | 3.29 | 0.01 | 2.22 | 0.44 | 1.59 | 1.48 |
|       |   |        | PEHKKEENMLSHLYVSS   |      |      |      |      |      |      |
| 52611 | 0 | 47302  | KDKENISKEND         | 3.29 | 0.01 | 2.22 | 0.44 | 2.39 | 0.28 |
|       |   |        | PEHKKEENMLSHLYVSS   |      |      |      |      |      |      |
| 52612 | 0 | 47302  | KDKENISKEND         | 3.29 | 0.01 | 2.22 | 1.81 | 0.22 | 0.28 |
|       |   |        | PEHKKEENMLSHLYVSS   |      |      |      |      |      |      |
| 52613 | 0 | 47302  | KDKENISKEND         | 3.29 | 0.01 | 2.22 | 0.68 | 0.22 | 0.28 |

|       |   |        |                                        |      |      |      |      |      |      |
|-------|---|--------|----------------------------------------|------|------|------|------|------|------|
| 52614 | 0 | 47303  | PEHKKEENMLSHLYVSS<br>KDKENISKENE       | 3.29 | 0.01 | 1.66 | 0.44 | 0.85 | 0.28 |
| 52615 | 0 | 47303  | PEHKKEENMLSHLYVSS<br>KDKENISKENE       | 3.29 | 0.01 | 1.66 | 0.44 | 0.85 | 2.12 |
| 52616 | 0 | 47304  | PEHRGGPEEFEGAGDGE<br>PPE               | 3.00 | 0.01 | 2.40 | 0.44 | 1.59 | 0.85 |
| 52617 | 0 | 108567 | PEIIENFDP                              | 2.25 | 0.01 | 0.90 | 0.44 | 1.13 | 1.39 |
| 52618 | 0 | 115881 | PEINTVQVTS                             | 2.31 | 0.01 | 1.60 | 0.44 | 1.23 | 0.85 |
| 52619 | 0 | 115881 | PEINTVQVTS                             | 2.31 | 0.01 | 1.60 | 0.44 | 1.23 | 0.85 |
| 52620 | 0 | 47315  | PEKAFREL                               | 2.12 | 0.01 | 2.21 | 1.12 | 0.22 | 0.28 |
| 52621 | 0 | 47315  | PEKAFREL                               | 2.12 | 0.01 | 2.21 | 0.44 | 0.85 | 0.28 |
| 52622 | 0 | 47316  | PEKAFRELAD                             | 2.31 | 0.01 | 2.21 | 1.12 | 0.22 | 0.28 |
| 52623 | 0 | 47316  | PEKAFRELAD                             | 2.31 | 0.01 | 2.21 | 1.12 | 0.22 | 0.28 |
| 52624 | 0 | 98927  | PEKESPEKED                             | 2.37 | 0.01 | 2.16 | 0.44 | 1.23 | 0.85 |
| 52625 | 0 | 47324  | PEKGGR                                 | 1.89 | 0.01 | 1.96 | 0.44 | 0.85 | 0.28 |
| 52626 | 0 | 47333  | PEKPHFPLAAEDDIRHH                      | 2.78 | 0.01 | 3.93 | 2.13 | 1.59 | 0.28 |
| 52627 | 0 | 47333  | PEKPHFPLAAEDDIRHH                      | 2.78 | 0.01 | 3.93 | 1.15 | 0.22 | 0.85 |
| 52628 | 0 | 47333  | PEKPHFPLAAEDDIRHH                      | 2.78 | 0.01 | 3.93 | 1.15 | 0.22 | 0.85 |
| 52629 | 0 | 47333  | PEKPHFPLAAEDDIRHH                      | 2.78 | 0.01 | 3.93 | 1.15 | 0.22 | 0.85 |
| 52630 | 0 | 47336  | PEKTPLPVSATAMAPSV<br>DPS               | 2.98 | 0.01 | 2.40 | 1.15 | 0.22 | 0.85 |
| 52631 | 0 | 47336  | PEKTPLPVSATAMAPSV<br>DPS               | 2.98 | 0.01 | 2.40 | 0.44 | 1.59 | 0.85 |
| 52632 | 0 | 47338  | PELAPEDPEDSALL                         | 2.66 | 0.01 | 2.40 | 1.15 | 0.22 | 0.85 |
| 52633 | 0 | 47338  | PELAPEDPEDSALL                         | 2.66 | 0.01 | 2.40 | 1.12 | 0.22 | 0.85 |
| 52634 | 0 | 47341  | PELDSFKEELDKYFKNH                      | 2.80 | 0.01 | 2.48 | 0.68 | 0.22 | 0.28 |
| 52635 | 0 | 47341  | PELDSFKEELDKYFKNH                      | 2.80 | 0.01 | 2.48 | 1.20 | 0.22 | 0.28 |
| 52636 | 0 | 135486 | PELEETLTHITIKLNAEN<br>NA               | 2.98 | 0.01 | 0.78 | 0.44 | 1.13 | 0.28 |
| 52637 | 0 | 47345  | PELFRQFYQL                             | 2.33 | 0.01 | 1.60 | 0.44 | 1.23 | 0.28 |
| 52638 | 0 | 47345  | PELFRQFYQL                             | 2.33 | 0.01 | 1.60 | 0.44 | 1.23 | 0.28 |
| 52639 | 0 | 79331  | PELGPPTNPFQAAVARG<br>LRPPLHDPDTEAPTEAC | 3.47 | 0.01 | 2.85 | 1.20 | 0.22 | 0.85 |
| 52640 | 0 | 79331  | PELGPPTNPFQAAVARG<br>LRPPLHDPDTEAPTEAC | 3.47 | 0.01 | 2.85 | 0.44 | 1.59 | 0.28 |
| 52641 | 0 | 79331  | PELGPPTNPFQAAVARG<br>LRPPLHDPDTEAPTEAC | 3.47 | 0.01 | 2.85 | 1.15 | 0.22 | 0.28 |

|       |   |        |                                        |      |      |      |      |      |      |
|-------|---|--------|----------------------------------------|------|------|------|------|------|------|
| 52642 | 0 | 79331  | PELGPPTNPFQAAVARG<br>LRPPLHDPDTEAPTEAC | 3.47 | 0.01 | 2.85 | 1.12 | 0.22 | 0.85 |
| 52643 | 0 | 181006 | PELKQKSSNS                             | 2.33 | 0.01 | 2.18 | 2.16 | 0.22 | 0.28 |
| 52644 | 0 | 47350  | PELPYPQP                               | 2.17 | 0.01 | 1.86 | 0.44 | 1.93 | 0.28 |
| 52645 | 0 | 148707 | PELQQPIPQQ                             | 2.35 | 0.01 | 1.86 | 0.44 | 1.23 | 0.85 |
| 52646 | 0 | 148707 | PELQQPIPQQ                             | 2.35 | 0.01 | 1.86 | 0.44 | 1.23 | 0.28 |
| 52647 | 0 | 167636 | PELTEEQQRG                             | 2.31 | 0.01 | 3.10 | 0.44 | 0.85 | 1.28 |
| 52648 | 0 | 167636 | PELTEEQQRG                             | 2.31 | 0.01 | 3.10 | 0.44 | 1.59 | 1.28 |
| 52649 | 0 | 167637 | PELTEQQQTG                             | 2.33 | 0.01 | 3.18 | 0.44 | 1.59 | 1.28 |
| 52650 | 0 | 47358  | PELVPEDPEDSALL                         | 2.65 | 0.01 | 2.40 | 1.15 | 0.22 | 0.85 |
| 52651 | 0 | 47358  | PELVPEDPEDSALL                         | 2.65 | 0.01 | 2.40 | 1.12 | 0.22 | 0.85 |
| 52652 | 0 | 47358  | PELVPEDPEDSALL                         | 2.65 | 0.01 | 2.40 | 1.12 | 0.22 | 0.85 |
| 52653 | 0 | 130996 | PEMGDQAHMPYTTAVI<br>HEVQ               | 2.94 | 0.01 | 0.78 | 0.44 | 1.13 | 0.28 |
| 52654 | 0 | 47363  | PEMVDVVT                               | 2.13 | 0.01 | 2.21 | 1.12 | 0.22 | 0.28 |
| 52655 | 0 | 47366  | PENAKEKPQEGTVVA                        | 2.70 | 0.01 | 2.59 | 0.44 | 0.85 | 0.28 |
| 52656 | 0 | 47366  | PENAKEKPQEGTVVA                        | 2.70 | 0.01 | 2.59 | 0.44 | 0.85 | 0.28 |
| 52657 | 0 | 47366  | PENAKEKPQEGTVVA                        | 2.70 | 0.01 | 2.59 | 0.44 | 0.85 | 0.28 |
| 52658 | 0 | 119625 | PENNYKTT                               | 2.10 | 0.01 | 0.78 | 0.44 | 1.93 | 0.28 |
| 52659 | 0 | 47376  | PENSGCFR                               | 2.10 | 0.01 | 1.66 | 1.15 | 0.22 | 0.28 |
| 52660 | 0 | 172641 | PENVSTHVSQIFNMI                        | 2.66 | 0.01 | 0.78 | 0.44 | 1.13 | 0.28 |
| 52661 | 0 | 349956 | PEPAEPKSAEPKPAE                        | 2.75 | 0.01 | 1.61 | 0.44 | 0.85 | 1.28 |
| 52662 | 0 | 185163 | PEPAK                                  | 1.77 | 0.01 | 0.78 | 0.44 | 1.13 | 1.28 |
| 52663 | 0 | 133909 | PEPAKKVPAPK                            | 2.46 | 0.01 | 1.60 | 1.20 | 0.22 | 0.28 |
| 52664 | 0 | 133909 | PEPAKKVPAPK                            | 2.46 | 0.01 | 1.60 | 3.05 | 0.22 | 0.28 |
| 52665 | 0 | 133909 | PEPAKKVPAPK                            | 2.46 | 0.01 | 1.60 | 3.05 | 0.22 | 0.28 |
| 52666 | 0 | 133909 | PEPAKKVPAPK                            | 2.46 | 0.01 | 1.60 | 3.05 | 0.22 | 0.28 |
| 52667 | 0 | 117598 | PEPAKSAPAPKKG                          | 2.60 | 0.01 | 1.60 | 3.05 | 1.13 | 1.27 |
| 52668 | 0 | 117598 | PEPAKSAPAPKKG                          | 2.60 | 0.01 | 1.60 | 3.05 | 1.13 | 0.28 |
| 52669 | 0 | 122512 | PEPAKSAPAPKKGSK                        | 2.74 | 0.01 | 1.75 | 2.84 | 1.13 | 1.27 |
| 52670 | 0 | 122512 | PEPAKSAPAPKKGSK                        | 2.74 | 0.01 | 1.75 | 2.84 | 1.13 | 1.48 |
| 52671 | 0 | 118549 | PEPAKSAPAPKKGSKKA<br>V                 | 2.90 | 4.15 | 1.75 | 3.05 | 1.13 | 1.27 |
| 52672 | 0 | 118550 | PEPAKSAPAPKKGSKKA<br>V                 | 2.90 | 0.01 | 1.75 | 3.05 | 1.41 | 1.27 |
| 52673 | 0 | 118550 | PEPAKSAPAPKKGSKKA<br>V                 | 2.90 | 0.01 | 1.75 | 3.05 | 1.13 | 1.27 |
| 52674 | 0 | 185164 | PEPAKSAPAPKKGSKKA<br>VTKA              | 3.05 | 4.15 | 0.78 | 0.44 | 1.13 | 0.28 |
| 52675 | 0 | 185165 | PEPAKSAPAPKKGSKKA<br>VTKA              | 3.05 | 4.45 | 0.78 | 0.44 | 1.13 | 0.28 |
| 52676 | 0 | 185165 | PEPAKSAPAPKKGSKKA<br>VTKA              | 3.05 | 4.45 | 0.78 | 0.44 | 1.41 | 1.28 |
| 52677 | 0 | 185165 | PEPAKSAPAPKKGSKKA<br>VTKA              | 3.05 | 4.45 | 0.78 | 0.44 | 1.13 | 1.28 |

|       |   |        |                                    |      |      |      |      |      |      |
|-------|---|--------|------------------------------------|------|------|------|------|------|------|
| 52678 | 0 | 188940 | PEPAKSAPAPKKGSKKA<br>VTKA          | 3.05 | 4.63 | 0.78 | 0.44 | 1.41 | 1.28 |
| 52679 | 0 | 188940 | PEPAKSAPAPKKGSKKA<br>VTKA          | 3.05 | 4.63 | 0.78 | 0.44 | 1.13 | 1.28 |
| 52680 | 0 | 185164 | PEPAKSAPAPKKGSKKA<br>VTKA          | 3.05 | 4.15 | 0.78 | 0.44 | 1.41 | 1.28 |
| 52681 | 0 | 185164 | PEPAKSAPAPKKGSKKA<br>VTKA          | 3.05 | 4.15 | 0.78 | 0.44 | 1.13 | 1.28 |
| 52682 | 0 | 185166 | PEPAKSAPAPKKGSKKA<br>VTKA          | 3.05 | 0.01 | 0.78 | 0.44 | 1.13 | 0.28 |
| 52683 | 0 | 185166 | PEPAKSAPAPKKGSKKA<br>VTKA          | 3.05 | 0.01 | 0.78 | 0.44 | 1.41 | 1.28 |
| 52684 | 0 | 185166 | PEPAKSAPAPKKGSKKA<br>VTKA          | 3.05 | 0.01 | 0.78 | 0.44 | 1.13 | 1.28 |
| 52685 | 0 | 188941 | PEPAKSAPAPKKGSKKA<br>VTKAQK        | 3.13 | 4.08 | 0.78 | 0.44 | 1.41 | 1.28 |
| 52686 | 0 | 188941 | PEPAKSAPAPKKGSKKA<br>VTKAQK        | 3.13 | 4.08 | 0.78 | 0.44 | 1.13 | 1.28 |
| 52687 | 0 | 117599 | PEPAKSAPAPKKGSKKA<br>VTKAQKDD      | 3.20 | 0.01 | 1.60 | 0.44 | 1.13 | 0.28 |
| 52688 | 0 | 117599 | PEPAKSAPAPKKGSKKA<br>VTKAQKDD      | 3.20 | 0.01 | 1.60 | 0.44 | 1.41 | 0.28 |
| 52689 | 0 | 117599 | PEPAKSAPAPKKGSKKA<br>VTKAQKDD      | 3.20 | 0.01 | 1.60 | 1.20 | 0.22 | 0.28 |
| 52690 | 0 | 117599 | PEPAKSAPAPKKGSKKA<br>VTKAQKDD      | 3.20 | 0.01 | 1.60 | 3.05 | 1.13 | 1.27 |
| 52691 | 0 | 117599 | PEPAKSAPAPKKGSKKA<br>VTKAQKDD      | 3.20 | 0.01 | 1.60 | 3.05 | 1.13 | 0.28 |
| 52692 | 0 | 117599 | PEPAKSAPAPKKGSKKA<br>VTKAQKDD      | 3.20 | 0.01 | 1.60 | 0.44 | 1.13 | 0.28 |
| 52693 | 0 | 117599 | PEPAKSAPAPKKGSKKA<br>VTKAQKDD      | 3.20 | 0.01 | 1.60 | 0.44 | 1.13 | 0.28 |
| 52694 | 0 | 131998 | PEPAKSAPAPKKGSKKA<br>VTKAQKDDGKKRK | 3.37 | 0.01 | 1.75 | 2.84 | 1.13 | 0.28 |
| 52695 | 0 | 131998 | PEPAKSAPAPKKGSKKA<br>VTKAQKDDGKKRK | 3.37 | 0.01 | 1.75 | 2.84 | 1.13 | 1.27 |
| 52696 | 0 | 131998 | PEPAKSAPAPKKGSKKA<br>VTKAQKDDGKKRK | 3.37 | 0.01 | 1.75 | 2.84 | 0.22 | 0.28 |
| 52697 | 0 | 131998 | PEPAKSAPAPKKGSKKA<br>VTKAQKDDGKKRK | 3.37 | 0.01 | 1.75 | 2.84 | 0.22 | 0.28 |
| 52698 | 0 | 131998 | PEPAKSAPAPKKGSKKA<br>VTKAQKDDGKKRK | 3.37 | 0.01 | 1.75 | 2.84 | 0.22 | 0.28 |
| 52699 | 0 | 174221 | PEPCVGMSC                          | 2.24 | 0.01 | 0.78 | 1.15 | 0.22 | 1.34 |
| 52700 | 0 | 174221 | PEPCVGMSC                          | 2.24 | 0.01 | 0.78 | 1.15 | 0.22 | 1.39 |
| 52701 | 0 | 121702 | PEPKPKAPAKKGEK                     | 2.75 | 0.01 | 0.78 | 0.44 | 1.13 | 1.27 |
| 52702 | 0 | 229414 | PEPTELAKDQRKAEE                    | 2.69 | 0.01 | 2.70 | 0.68 | 0.22 | 0.28 |
| 52703 | 0 | 349991 | PEPTEPKSAEPPAE                     | 2.75 | 0.01 | 1.61 | 0.44 | 0.85 | 1.28 |

|       |   |        |                          |      |      |      |      |      |      |
|-------|---|--------|--------------------------|------|------|------|------|------|------|
| 52704 | 0 | 469233 | PEPTVTNEE                | 2.25 | 0.01 | 1.66 | 0.44 | 0.85 | 1.28 |
| 52705 | 0 | 469234 | PEPTVTNEEYVEELK          | 2.71 | 0.01 | 1.66 | 0.44 | 0.85 | 1.28 |
| 52706 | 0 | 101962 | PEPVQEP                  | 2.06 | 0.01 | 3.10 | 1.15 | 0.22 | 0.28 |
| 52707 | 0 | 101962 | PEPVQEP                  | 2.06 | 0.01 | 3.10 | 1.15 | 0.22 | 1.48 |
| 52708 | 0 | 101962 | PEPVQEP                  | 2.06 | 0.01 | 3.10 | 1.15 | 0.22 | 1.48 |
| 52709 | 0 | 101962 | PEPVQEP                  | 2.06 | 0.01 | 3.10 | 1.15 | 0.22 | 0.85 |
| 52710 | 0 | 461383 | PEQPAKPEKP               | 2.37 | 0.01 | 2.70 | 3.00 | 0.22 | 1.27 |
| 52711 | 0 | 112814 | PEQPPIH                  | 2.04 | 0.01 | 0.90 | 0.44 | 1.13 | 0.28 |
| 52712 | 0 | 148708 | PEQQQFPQQQ               | 2.35 | 0.01 | 1.86 | 0.44 | 1.23 | 0.85 |
| 52713 | 0 | 95652  | PEQSLA                   | 1.88 | 0.01 | 1.60 | 0.44 | 1.23 | 0.28 |
| 52714 | 0 | 98928  | PEQSLACQCL               | 2.33 | 0.01 | 1.60 | 0.44 | 1.23 | 0.85 |
| 52715 | 0 | 131584 | PERGLRY                  | 2.02 | 0.01 | 0.78 | 1.15 | 0.22 | 0.28 |
| 52716 | 0 | 47398  | PERIKLDYDQYCADV          | 2.64 | 0.01 | 2.43 | 0.44 | 0.85 | 0.28 |
| 52717 | 0 | 47399  | PERLASCRPL               | 2.34 | 0.01 | 1.72 | 0.44 | 0.85 | 0.28 |
| 52718 | 0 | 47406  | PERPRLRL                 | 2.18 | 0.01 | 2.85 | 0.44 | 0.22 | 0.28 |
| 52719 | 0 | 47420  | PESDQPD                  | 2.15 | 0.01 | 0.78 | 1.12 | 0.22 | 0.28 |
| 52720 | 0 | 47420  | PESDQPD                  | 2.15 | 0.01 | 0.78 | 1.12 | 0.22 | 0.28 |
| 52721 | 0 | 47420  | PESDQPD                  | 2.15 | 0.01 | 0.78 | 1.12 | 0.22 | 0.28 |
| 52722 | 0 | 47420  | PESDQPD                  | 2.15 | 0.01 | 0.78 | 0.44 | 1.13 | 1.57 |
| 52723 | 0 | 47420  | PESDQPD                  | 2.15 | 0.01 | 0.78 | 1.20 | 0.22 | 0.28 |
| 52724 | 0 | 47420  | PESDQPD                  | 2.15 | 0.01 | 0.78 | 1.20 | 0.22 | 0.28 |
| 52725 | 0 | 120865 | PESDRPDLSTFMESGEW<br>VMK | 2.94 | 0.01 | 2.26 | 0.68 | 0.22 | 0.28 |
| 52726 | 0 | 149867 | PESFDGDPASNTAPLQP<br>E   | 2.86 | 0.01 | 0.78 | 0.44 | 1.13 | 0.28 |
| 52727 | 0 | 149867 | PESFDGDPASNTAPLQP<br>E   | 2.86 | 0.01 | 0.78 | 0.44 | 1.13 | 1.27 |
| 52728 | 0 | 149867 | PESFDGDPASNTAPLQP<br>E   | 2.86 | 0.01 | 0.78 | 0.68 | 0.22 | 0.28 |
| 52729 | 0 | 149867 | PESFDGDPASNTAPLQP<br>E   | 2.86 | 0.01 | 0.78 | 0.68 | 0.22 | 1.27 |
| 52730 | 0 | 149867 | PESFDGDPASNTAPLQP<br>E   | 2.86 | 0.01 | 0.78 | 0.68 | 0.22 | 0.28 |
| 52731 | 0 | 149867 | PESFDGDPASNTAPLQP<br>E   | 2.86 | 0.01 | 0.78 | 0.44 | 1.13 | 0.28 |
| 52732 | 0 | 149867 | PESFDGDPASNTAPLQP<br>E   | 2.86 | 0.01 | 0.78 | 0.68 | 0.22 | 0.28 |
| 52733 | 0 | 47426  | PESPFA                   | 1.91 | 0.01 | 2.96 | 0.44 | 0.85 | 0.28 |
| 52734 | 0 | 134758 | PESPSKLASA               | 2.36 | 0.01 | 2.30 | 1.20 | 0.22 | 1.27 |
| 52735 | 0 | 47427  | PESRESLAWQTATNP          | 2.69 | 0.01 | 2.60 | 0.68 | 0.22 | 1.34 |
| 52736 | 0 | 47427  | PESRESLAWQTATNP          | 2.69 | 0.01 | 2.60 | 0.68 | 0.22 | 0.85 |
| 52737 | 0 | 47427  | PESRESLAWQTATNP          | 2.69 | 0.01 | 2.60 | 0.68 | 0.22 | 0.28 |
| 52738 | 0 | 47427  | PESRESLAWQTATNP          | 2.69 | 0.01 | 2.60 | 0.68 | 0.22 | 0.28 |
| 52739 | 0 | 47427  | PESRESLAWQTATNP          | 2.69 | 0.01 | 2.60 | 0.68 | 0.22 | 0.28 |
| 52740 | 0 | 47427  | PESRESLAWQTATNP          | 2.69 | 0.01 | 2.60 | 0.68 | 0.22 | 0.28 |
| 52741 | 0 | 47427  | PESRESLAWQTATNP          | 2.69 | 0.01 | 2.60 | 0.68 | 0.22 | 0.28 |
| 52742 | 0 | 47427  | PESRESLAWQTATNP          | 2.69 | 0.01 | 2.60 | 0.68 | 0.22 | 0.28 |



|       |   |        |                           |      |      |      |      |      |      |
|-------|---|--------|---------------------------|------|------|------|------|------|------|
| 52743 | 0 | 47427  | PESRESLAWQTATNP           | 2.69 | 0.01 | 2.60 | 0.68 | 0.22 | 1.34 |
| 52744 | 0 | 47427  | PESRESLAWQTATNP           | 2.69 | 0.01 | 2.60 | 0.68 | 0.22 | 1.34 |
| 52745 | 0 | 47427  | PESRESLAWQTATNP           | 2.69 | 0.01 | 2.60 | 0.68 | 0.22 | 1.34 |
| 52746 | 0 | 47427  | PESRESLAWQTATNP           | 2.69 | 0.01 | 2.60 | 0.68 | 0.22 | 1.34 |
| 52747 | 0 | 47427  | PESRESLAWQTATNP           | 2.69 | 0.01 | 2.60 | 0.68 | 0.22 | 1.34 |
| 52748 | 0 | 47427  | PESRESLAWQTATNP           | 2.69 | 0.01 | 2.60 | 0.68 | 0.22 | 0.28 |
| 52749 | 0 | 47427  | PESRESLAWQTATNP           | 2.69 | 0.01 | 2.60 | 0.68 | 0.22 | 0.28 |
| 52750 | 0 | 47427  | PESRESLAWQTATNP           | 2.69 | 0.01 | 2.60 | 0.68 | 0.22 | 0.85 |
| 52751 | 0 | 47427  | PESRESLAWQTATNP           | 2.69 | 0.01 | 2.60 | 0.68 | 0.22 | 1.34 |
| 52752 | 0 | 47427  | PESRESLAWQTATNP           | 2.69 | 0.01 | 2.60 | 0.68 | 0.22 | 0.28 |
| 52753 | 0 | 47428  | PESRGFVENSY               | 2.39 | 0.01 | 4.15 | 1.15 | 0.22 | 1.39 |
| 52754 | 0 | 47428  | PESRGFVENSY               | 2.39 | 0.01 | 4.15 | 1.15 | 0.22 | 0.85 |
| 52755 | 0 | 523512 | PESSELTTEKAGQKT           | 2.69 | 0.01 | 2.24 | 0.44 | 1.41 | 1.28 |
| 52756 | 0 | 94641  | PESWHTRWDE                | 2.31 | 0.01 | 0.90 | 0.44 | 0.22 | 1.27 |
| 52757 | 0 | 103464 | PETINYRTLKPEKDG           | 2.67 | 0.01 | 2.04 | 0.44 | 0.85 | 1.28 |
| 52758 | 0 | 78479  | PETLPYL                   | 2.05 | 0.01 | 0.90 | 0.68 | 0.22 | 0.85 |
| 52759 | 0 | 122871 | PETQPGPLTLELQIAKDK        | 2.87 | 0.01 | 0.78 | 1.20 | 0.22 | 1.27 |
| 52760 | 0 | 122871 | PETQPGPLTLELQIAKDK        | 2.87 | 0.01 | 0.78 | 1.20 | 0.22 | 1.48 |
| 52761 | 0 | 153865 | PETTDLYCY                 | 2.22 | 0.01 | 1.86 | 2.37 | 0.22 | 0.28 |
| 52762 | 0 | 153865 | PETTDLYCY                 | 2.22 | 0.01 | 1.86 | 2.37 | 0.22 | 2.02 |
| 52763 | 0 | 153865 | PETTDLYCY                 | 2.22 | 0.01 | 1.86 | 2.37 | 0.22 | 2.02 |
| 52764 | 0 | 110679 | PETTDLYCYEQLNDSSEE<br>ED  | 2.95 | 0.01 | 1.86 | 0.44 | 0.85 | 0.28 |
| 52765 | 0 | 110679 | PETTDLYCYEQLNDSSEE<br>ED  | 2.95 | 0.01 | 1.86 | 0.44 | 0.85 | 0.28 |
| 52766 | 0 | 110960 | PETTDLYCYEQLNDSSEE<br>EDE | 3.00 | 0.01 | 1.86 | 0.44 | 0.85 | 0.28 |
| 52767 | 0 | 47442  | PETTTIPP                  | 2.14 | 0.01 | 2.40 | 2.43 | 0.22 | 0.28 |
| 52768 | 0 | 167790 | PETTTIPPS                 | 2.26 | 0.01 | 2.40 | 2.43 | 0.22 | 0.28 |
| 52769 | 0 | 47446  | PEVCKV                    | 1.90 | 0.01 | 1.86 | 0.44 | 1.23 | 0.28 |
| 52770 | 0 | 96729  | PEVDDEALEKFDKAL           | 2.71 | 0.01 | 1.60 | 0.44 | 1.23 | 0.28 |
| 52771 | 0 | 96729  | PEVDDEALEKFDKAL           | 2.71 | 0.01 | 1.60 | 0.44 | 1.23 | 0.28 |
| 52772 | 0 | 447043 | PEVDNE                    | 1.90 | 0.01 | 1.60 | 2.66 | 0.22 | 0.85 |
| 52773 | 0 | 47449  | PEVEAALKMEKREY            | 2.69 | 0.01 | 3.50 | 2.22 | 0.22 | 0.28 |
| 52774 | 0 | 47450  | PEVFGKEKVN                | 2.33 | 0.01 | 1.60 | 0.44 | 1.23 | 0.28 |
| 52775 | 0 | 47453  | PEVIRMQDNNP               | 2.38 | 0.01 | 0.78 | 1.12 | 0.22 | 0.85 |
| 52776 | 0 | 47453  | PEVIRMQDNNP               | 2.38 | 0.01 | 0.78 | 1.12 | 0.22 | 2.02 |
| 52777 | 0 | 113679 | PEVPEVEDE                 | 2.28 | 0.01 | 3.67 | 0.68 | 0.22 | 0.85 |
| 52778 | 0 | 113679 | PEVPEVEDE                 | 2.28 | 0.01 | 3.67 | 0.68 | 0.22 | 1.48 |
| 52779 | 0 | 113679 | PEVPEVEDE                 | 2.28 | 0.01 | 3.67 | 0.68 | 0.22 | 0.85 |
| 52780 | 0 | 98328  | PEVTKAE                   | 2.11 | 0.01 | 2.60 | 0.68 | 0.22 | 0.85 |
| 52781 | 0 | 47459  | PEVTKAEETKTEEPAAPP<br>AS  | 3.00 | 0.01 | 2.60 | 0.68 | 0.22 | 1.27 |
| 52782 | 0 | 119301 | PEVVVLGSQEGAMHT           | 2.64 | 0.01 | 3.45 | 0.44 | 1.59 | 0.28 |

|       |   |        |                                  |      |      |      |      |      |      |
|-------|---|--------|----------------------------------|------|------|------|------|------|------|
| 52783 | 0 | 119301 | PEVVVLGSQEGAMHT                  | 2.64 | 0.01 | 3.45 | 0.68 | 0.22 | 0.28 |
| 52784 | 0 | 119301 | PEVVVLGSQEGAMHT                  | 2.64 | 0.01 | 3.45 | 0.44 | 1.59 | 0.28 |
| 52785 | 0 | 139565 | PEWKALTDMPQMRME                  | 2.67 | 3.67 | 0.78 | 0.44 | 1.13 | 0.28 |
| 52786 | 0 | 139846 | PEWWLEPPPFISGK                   | 2.67 | 0.01 | 0.90 | 0.68 | 0.22 | 1.27 |
| 52787 | 0 | 139846 | PEWWLEPPPFISGK                   | 2.67 | 0.01 | 0.90 | 0.68 | 0.22 | 0.28 |
| 52788 | 0 | 139846 | PEWWLEPPPFISGK                   | 2.67 | 0.01 | 0.90 | 0.68 | 0.22 | 1.34 |
| 52789 | 0 | 504022 | PEYNIALGQRRADAVKG<br>YLAGKGVDAKG | 3.28 | 0.01 | 3.72 | 0.44 | 1.41 | 0.28 |
| 52790 | 0 | 112815 | PEYRGRTELLKDAIGEGK<br>VTLRIRN    | 3.16 | 0.01 | 0.78 | 0.44 | 1.41 | 0.28 |
| 52791 | 0 | 112815 | PEYRGRTELLKDAIGEGK<br>VTLRIRN    | 3.16 | 0.01 | 0.78 | 0.44 | 1.13 | 0.28 |
| 52792 | 0 | 112815 | PEYRGRTELLKDAIGEGK<br>VTLRIRN    | 3.16 | 0.01 | 0.78 | 0.44 | 1.59 | 0.28 |
| 52793 | 0 | 112815 | PEYRGRTELLKDAIGEGK<br>VTLRIRN    | 3.16 | 0.01 | 0.78 | 0.44 | 1.13 | 0.28 |
| 52794 | 0 | 161129 | PEYVSFNNVQENKGAS<br>IF           | 2.89 | 0.01 | 2.08 | 0.44 | 1.93 | 1.57 |
| 52795 | 0 | 138804 | PEYWEQQTRIAKEWEQI<br>YRVDLRT     | 3.12 | 0.01 | 2.19 | 2.04 | 0.22 | 1.57 |
| 52796 | 0 | 138804 | PEYWEQQTRIAKEWEQI<br>YRVDLRT     | 3.12 | 0.01 | 2.19 | 4.45 | 0.22 | 1.57 |
| 52797 | 0 | 47478  | PFAECSNPTRLP                     | 2.46 | 0.01 | 0.90 | 0.44 | 0.85 | 0.28 |
| 52798 | 0 | 47479  | PFAMQMAYRFNGIGVT<br>Q            | 2.78 | 0.01 | 2.48 | 0.44 | 0.85 | 0.28 |
| 52799 | 0 | 47479  | PFAMQMAYRFNGIGVT<br>Q            | 2.78 | 0.01 | 2.48 | 0.68 | 0.22 | 0.28 |
| 52800 | 0 | 115882 | PFAQTQSLVY                       | 2.29 | 0.01 | 1.60 | 0.44 | 1.23 | 0.85 |
| 52801 | 0 | 115882 | PFAQTQSLVY                       | 2.29 | 0.01 | 1.60 | 0.44 | 1.23 | 0.85 |
| 52802 | 0 | 47483  | PFCGESTLYT                       | 2.29 | 3.85 | 2.70 | 0.44 | 0.85 | 0.28 |
| 52803 | 0 | 226367 | PFDENKS                          | 1.99 | 0.01 | 0.90 | 2.66 | 0.22 | 1.39 |
| 52804 | 0 | 182252 | PFDIINIPSHNTTEV                  | 2.68 | 0.01 | 0.78 | 0.44 | 1.13 | 0.85 |
| 52805 | 0 | 120867 | PFDQDLSKKH                       | 2.30 | 0.01 | 2.18 | 2.16 | 0.22 | 0.28 |
| 52806 | 0 | 121703 | PFDYSSDHPR                       | 2.33 | 0.01 | 2.26 | 2.36 | 0.22 | 0.85 |
| 52807 | 0 | 350251 | PFEATAMKTTTTTTG                  | 2.68 | 0.01 | 1.61 | 0.44 | 0.85 | 1.28 |
| 52808 | 0 | 181996 | PFEPGDRFHSGIQDPSK<br>VQNT        | 2.97 | 0.01 | 3.89 | 2.13 | 1.74 | 0.28 |
| 52809 | 0 | 47489  | PFFFSDVRSNFSKLV                  | 2.69 | 0.01 | 2.88 | 2.22 | 0.22 | 0.28 |
| 52810 | 0 | 47489  | PFFFSDVRSNFSKLV                  | 2.69 | 0.01 | 2.96 | 2.22 | 0.22 | 0.28 |
| 52811 | 0 | 47491  | PFFRKYFGNDTA                     | 2.45 | 0.01 | 2.69 | 0.68 | 0.22 | 0.28 |
| 52812 | 0 | 47491  | PFFRKYFGNDTA                     | 2.45 | 0.01 | 2.69 | 1.20 | 0.22 | 0.28 |
| 52813 | 0 | 133272 | PFFSQPG                          | 2.04 | 0.01 | 0.78 | 1.15 | 0.22 | 1.34 |
| 52814 | 0 | 133272 | PFFSQPG                          | 2.04 | 0.01 | 0.78 | 1.15 | 0.22 | 0.28 |

|       |   |        |                            |      |      |      |      |      |      |
|-------|---|--------|----------------------------|------|------|------|------|------|------|
| 52815 | 0 | 47492  | PFFTAALTMATAGVA<br>AVV     | 2.97 | 0.01 | 2.85 | 0.44 | 0.85 | 0.28 |
| 52816 | 0 | 47494  | PFGDSY                     | 1.88 | 0.01 | 2.40 | 0.44 | 0.85 | 0.28 |
| 52817 | 0 | 47495  | PFGDSYIIIGVE               | 2.45 | 0.01 | 2.40 | 0.44 | 0.85 | 0.28 |
| 52818 | 0 | 47495  | PFGDSYIIIGVE               | 2.45 | 0.01 | 2.40 | 0.44 | 0.85 | 0.28 |
| 52819 | 0 | 47495  | PFGDSYIIIGVE               | 2.45 | 0.01 | 2.40 | 0.44 | 0.85 | 0.28 |
| 52820 | 0 | 47495  | PFGDSYIIIGVE               | 2.45 | 0.01 | 2.40 | 0.44 | 0.85 | 0.28 |
| 52821 | 0 | 113680 | PFGGAYNIPL                 | 2.31 | 0.01 | 1.86 | 1.12 | 0.22 | 0.28 |
| 52822 | 0 | 136546 | PFGPVINGRCCLEEKVCS<br>LL   | 2.93 | 0.01 | 0.78 | 0.44 | 1.13 | 0.28 |
| 52823 | 0 | 136546 | PFGPVINGRCCLEEKVCS<br>LL   | 2.93 | 0.01 | 0.78 | 0.44 | 1.13 | 0.28 |
| 52824 | 0 | 350280 | PFGQAAAADKPSLFG            | 2.68 | 0.01 | 1.61 | 0.44 | 0.85 | 1.28 |
| 52825 | 0 | 350281 | PFGQAAAAGDKLSLFG           | 2.68 | 0.01 | 1.61 | 0.44 | 0.85 | 1.28 |
| 52826 | 0 | 350282 | PFGQAAAAGDKPAPFG           | 2.73 | 0.01 | 1.61 | 0.44 | 0.85 | 1.28 |
| 52827 | 0 | 350283 | PFGQAAAAGDKPPFG            | 2.71 | 0.01 | 1.61 | 0.44 | 0.85 | 1.28 |
| 52828 | 0 | 47501  | PFGQAAAAGDKPS              | 2.48 | 0.01 | 2.30 | 0.44 | 0.85 | 1.27 |
| 52829 | 0 | 350284 | PFGQAAAAGDKPSLFG           | 2.69 | 0.01 | 1.61 | 0.44 | 0.85 | 1.28 |
| 52830 | 0 | 350285 | PFGQAAAAGDKPSPFG           | 2.70 | 0.01 | 1.61 | 0.44 | 0.85 | 1.28 |
| 52831 | 0 | 350286 | PFGQAAAAGGKPSFG            | 2.72 | 0.01 | 1.61 | 0.44 | 0.85 | 1.28 |
| 52832 | 0 | 350287 | PFGQAAEGDKPPFG             | 2.70 | 0.01 | 1.61 | 0.44 | 0.85 | 1.28 |
| 52833 | 0 | 157739 | PFHSSEIQRDELAPAGTG<br>VSRE | 3.02 | 0.01 | 0.78 | 3.70 | 0.22 | 1.28 |
| 52834 | 0 | 105997 | PFKFFVPPSEQSLRA            | 2.67 | 0.01 | 2.16 | 0.44 | 1.23 | 0.85 |
| 52835 | 0 | 148065 | PFLNSLPQS                  | 2.26 | 0.01 | 3.24 | 0.68 | 0.22 | 0.28 |
| 52836 | 0 | 172648 | PFLPKIFIKPNAQKP            | 2.72 | 0.01 | 0.78 | 0.44 | 1.13 | 0.28 |
| 52837 | 0 | 47519  | PFLPRP                     | 1.92 | 0.01 | 0.90 | 0.68 | 0.22 | 1.39 |
| 52838 | 0 | 148711 | PFLQPQQPFP                 | 2.37 | 0.01 | 1.86 | 0.44 | 1.23 | 0.85 |
| 52839 | 0 | 47523  | PFMFSENKFLENQVK            | 2.68 | 0.01 | 1.66 | 1.15 | 0.22 | 0.28 |
| 52840 | 0 | 47523  | PFMFSENKFLENQVK            | 2.68 | 0.01 | 1.66 | 1.15 | 0.22 | 0.28 |
| 52841 | 0 | 135586 | PFMLAQFDG                  | 2.21 | 0.01 | 0.78 | 1.12 | 0.22 | 0.28 |
| 52842 | 0 | 135586 | PFMLAQFDG                  | 2.21 | 0.01 | 0.78 | 1.12 | 0.22 | 0.28 |
| 52843 | 0 | 135586 | PFMLAQFDG                  | 2.21 | 0.01 | 0.78 | 1.12 | 0.22 | 1.34 |
| 52844 | 0 | 135586 | PFMLAQFDG                  | 2.21 | 0.01 | 0.78 | 1.12 | 0.22 | 0.28 |
| 52845 | 0 | 181416 | PFMSPASAYQWFYDG            | 2.69 | 0.01 | 2.82 | 1.15 | 0.22 | 0.28 |
| 52846 | 0 | 227814 | PFNLRSRNPISNNFG            | 2.76 | 0.01 | 2.72 | 1.20 | 1.59 | 0.28 |
| 52847 | 0 | 47533  | PFNQWPDY                   | 2.13 | 0.01 | 3.65 | 0.44 | 0.85 | 0.28 |
| 52848 | 0 | 47533  | PFNQWPDY                   | 2.13 | 0.01 | 3.65 | 0.44 | 0.85 | 0.28 |
| 52849 | 0 | 103469 | PFNVNLKLQLHDAF             | 2.68 | 0.01 | 2.04 | 0.44 | 0.85 | 1.28 |
| 52850 | 0 | 190510 | PFPADEVFMIPQYGYL           | 2.67 | 0.01 | 3.61 | 2.00 | 1.41 | 0.28 |
| 52851 | 0 | 47537  | PFPEVFGKEK                 | 2.36 | 0.01 | 1.60 | 0.44 | 1.23 | 0.28 |
| 52852 | 0 | 47537  | PFPEVFGKEK                 | 2.36 | 0.01 | 1.60 | 0.44 | 1.23 | 0.28 |
| 52853 | 0 | 115883 | PFPGPIPNSL                 | 2.34 | 0.01 | 1.60 | 0.44 | 1.23 | 0.85 |
| 52854 | 0 | 115883 | PFPGPIPNSL                 | 2.34 | 0.01 | 1.60 | 0.44 | 1.23 | 0.85 |

|       |   |        |                          |      |      |      |      |      |      |
|-------|---|--------|--------------------------|------|------|------|------|------|------|
| 52855 | 0 | 229759 | PFPKYPVEPFTESQSL         | 2.75 | 0.01 | 1.60 | 0.44 | 1.23 | 1.28 |
| 52856 | 0 | 229760 | PFPKYPVEPFTESQSLTLT<br>D | 2.97 | 0.01 | 1.60 | 0.44 | 1.23 | 1.28 |
| 52857 | 0 | 47538  | PFPQPELP                 | 2.17 | 0.01 | 1.86 | 0.44 | 1.93 | 0.28 |
| 52858 | 0 | 109654 | PFPQPQLPY                | 2.27 | 3.97 | 1.86 | 0.44 | 2.39 | 0.28 |
| 52859 | 0 | 109654 | PFPQPQLPY                | 2.27 | 3.97 | 1.86 | 0.44 | 2.39 | 0.28 |
| 52860 | 0 | 109654 | PFPQPQLPY                | 2.27 | 3.97 | 1.86 | 0.44 | 1.23 | 0.28 |
| 52861 | 0 | 109654 | PFPQPQLPY                | 2.27 | 3.97 | 1.86 | 0.44 | 1.23 | 0.28 |
| 52862 | 0 | 47544  | PFPQPQQPFC               | 2.37 | 0.01 | 1.86 | 0.68 | 0.22 | 0.85 |
| 52863 | 0 | 47544  | PFPQPQQPFC               | 2.37 | 0.01 | 1.86 | 0.68 | 0.22 | 0.28 |
| 52864 | 0 | 148713 | PFPQPQQPFP               | 2.37 | 0.01 | 1.86 | 0.44 | 1.23 | 0.85 |
| 52865 | 0 | 47545  | PFPQPQQQFP               | 2.36 | 0.01 | 1.86 | 0.68 | 0.22 | 0.28 |
| 52866 | 0 | 47545  | PFPQPQQQFP               | 2.36 | 0.01 | 1.86 | 0.68 | 0.22 | 0.85 |
| 52867 | 0 | 47546  | PFPQPQQQLP               | 2.36 | 0.01 | 2.83 | 0.68 | 0.22 | 0.28 |
| 52868 | 0 | 47546  | PFPQPQQQLP               | 2.36 | 0.01 | 2.83 | 0.68 | 0.22 | 0.85 |
| 52869 | 0 | 482907 | PFPQQPQQPFPQTQQP<br>QQ   | 2.92 | 0.01 | 1.86 | 1.20 | 0.22 | 0.28 |
| 52870 | 0 | 482907 | PFPQQPQQPFPQTQQP<br>QQ   | 2.92 | 0.01 | 1.86 | 0.44 | 1.93 | 0.28 |
| 52871 | 0 | 47549  | PFPQRPQQPF               | 2.37 | 0.01 | 2.83 | 0.68 | 0.22 | 0.85 |
| 52872 | 0 | 47549  | PFPQRPQQPF               | 2.37 | 0.01 | 2.83 | 0.68 | 0.22 | 0.28 |
| 52873 | 0 | 482908 | PFPQTQQPQQPFPQLQ<br>QPQQ | 3.01 | 0.01 | 1.86 | 1.20 | 0.22 | 0.28 |
| 52874 | 0 | 482908 | PFPQTQQPQQPFPQLQ<br>QPQQ | 3.01 | 0.01 | 1.86 | 0.44 | 1.93 | 0.28 |
| 52875 | 0 | 482908 | PFPQTQQPQQPFPQLQ<br>QPQQ | 3.01 | 0.01 | 1.86 | 0.44 | 1.93 | 0.28 |
| 52876 | 0 | 226368 | PFRSAA                   | 2.02 | 0.01 | 0.90 | 2.66 | 0.22 | 1.39 |
| 52877 | 0 | 151041 | PFQNIHPITIGKCPK          | 2.69 | 0.01 | 2.87 | 0.68 | 0.22 | 0.28 |
| 52878 | 0 | 504113 | PFQNIHPVTIGECPK          | 2.65 | 0.01 | 4.93 | 0.44 | 1.74 | 1.28 |
| 52879 | 0 | 122514 | PFRFHPEHFLDAQGHFV<br>K   | 2.84 | 0.01 | 0.78 | 0.44 | 1.13 | 0.28 |
| 52880 | 0 | 98930  | PFRPQQPYPQPQ             | 2.54 | 0.01 | 1.86 | 0.44 | 1.93 | 1.27 |
| 52881 | 0 | 137941 | PFRSYTK                  | 1.99 | 0.01 | 0.90 | 0.68 | 0.22 | 1.39 |
| 52882 | 0 | 137941 | PFRSYTK                  | 1.99 | 0.01 | 0.90 | 0.68 | 0.22 | 1.66 |
| 52883 | 0 | 137941 | PFRSYTK                  | 1.99 | 0.01 | 0.90 | 0.68 | 0.22 | 1.66 |
| 52884 | 0 | 137941 | PFRSYTK                  | 1.99 | 0.01 | 0.90 | 0.68 | 0.22 | 1.66 |
| 52885 | 0 | 137941 | PFRSYTK                  | 1.99 | 0.01 | 0.90 | 0.68 | 0.22 | 1.34 |
| 52886 | 0 | 137941 | PFRSYTK                  | 1.99 | 0.01 | 0.90 | 0.68 | 0.22 | 0.28 |
| 52887 | 0 | 137941 | PFRSYTK                  | 1.99 | 0.01 | 0.90 | 0.68 | 0.22 | 0.28 |
| 52888 | 0 | 118947 | PFSAPPPA                 | 2.16 | 0.01 | 0.78 | 0.44 | 1.13 | 0.28 |
| 52889 | 0 | 118947 | PFSAPPPA                 | 2.16 | 0.01 | 0.78 | 0.44 | 1.13 | 0.28 |
| 52890 | 0 | 118947 | PFSAPPPA                 | 2.16 | 0.01 | 0.78 | 0.44 | 1.41 | 0.28 |
| 52891 | 0 | 236277 | PFSAYRPNYGNPCEL          | 2.67 | 0.01 | 1.66 | 0.44 | 0.85 | 1.28 |
| 52892 | 0 | 167986 | PFSGKPLDERAVGGKG         | 2.73 | 0.01 | 2.75 | 0.44 | 0.85 | 2.51 |

|       |   |        |                              |      |      |      |      |      |      |
|-------|---|--------|------------------------------|------|------|------|------|------|------|
| 52893 | 0 | 167986 | PFSGKPLDERAVGGKG             | 2.73 | 0.01 | 2.75 | 0.44 | 0.85 | 2.51 |
| 52894 | 0 | 167986 | PFSGKPLDERAVGGKG             | 2.73 | 0.01 | 2.75 | 0.44 | 0.85 | 2.51 |
| 52895 | 0 | 78225  | PFSNLDFM                     | 2.12 | 0.01 | 0.90 | 0.44 | 0.85 | 1.39 |
| 52896 | 0 | 130575 | PFSNTHYRIPQGFGNL             | 2.72 | 0.01 | 0.78 | 0.44 | 1.41 | 0.28 |
| 52897 | 0 | 47565  | PFSPDGKPCTPP                 | 2.48 | 0.01 | 2.45 | 0.68 | 0.22 | 0.28 |
| 52898 | 0 | 47565  | PFSPDGKPCTPP                 | 2.48 | 0.01 | 2.45 | 0.44 | 0.85 | 0.28 |
| 52899 | 0 | 47565  | PFSPDGKPCTPP                 | 2.48 | 0.01 | 2.45 | 0.68 | 0.22 | 0.28 |
| 52900 | 0 | 47565  | PFSPDGKPCTPP                 | 2.48 | 0.01 | 2.45 | 0.68 | 0.22 | 2.97 |
| 52901 | 0 | 47565  | PFSPDGKPCTPP                 | 2.48 | 0.01 | 2.45 | 0.44 | 0.85 | 2.35 |
| 52902 | 0 | 47568  | PFSQPQQPFP                   | 2.37 | 0.01 | 2.83 | 0.68 | 0.22 | 0.85 |
| 52903 | 0 | 47568  | PFSQPQQPFP                   | 2.37 | 0.01 | 2.83 | 0.68 | 0.22 | 0.28 |
| 52904 | 0 | 114223 | PFSRVVHL                     | 2.11 | 0.01 | 1.75 | 2.04 | 0.22 | 0.28 |
| 52905 | 0 | 114223 | PFSRVVHL                     | 2.11 | 0.01 | 2.19 | 2.04 | 0.22 | 0.28 |
| 52906 | 0 | 114223 | PFSRVVHL                     | 2.11 | 0.01 | 2.19 | 2.04 | 0.22 | 0.28 |
| 52907 | 0 | 47575  | PFTFYKCDLEVTVSA              | 2.64 | 0.01 | 3.02 | 2.69 | 0.22 | 0.28 |
| 52908 | 0 | 78226  | PFTNLAHV                     | 2.10 | 0.01 | 0.90 | 0.44 | 0.85 | 1.39 |
| 52909 | 0 | 243036 | PFVEVPPKLSSEEIAANIR<br>EEMRR | 3.10 | 0.01 | 3.33 | 1.20 | 0.22 | 0.85 |
| 52910 | 0 | 190890 | PFVHPSILQQ                   | 2.30 | 0.01 | 1.86 | 0.44 | 1.23 | 0.28 |
| 52911 | 0 | 47588  | PFVNKQFNYKDPVNGV             | 2.77 | 0.01 | 2.08 | 1.12 | 0.22 | 0.85 |

|       |   |       |                      |      |      |      |      |      |      |
|-------|---|-------|----------------------|------|------|------|------|------|------|
|       |   |       | PFV NKQFN YKDPVNGV   |      |      |      |      |      |      |
|       |   |       | DIAYIKIPNVGQM QPVK   |      |      |      |      |      |      |
|       |   |       | AFKIH NKIWVIPERDTFT  |      |      |      |      |      |      |
|       |   |       | NPEEGDLNPPPEAKQVP    |      |      |      |      |      |      |
|       |   |       | VSYYDSTYLSTDNEKDNY   |      |      |      |      |      |      |
|       |   |       | LKGVTKL FERIYSTDLGR  |      |      |      |      |      |      |
|       |   |       | MLLTSIVRGIPFWGGSTI   |      |      |      |      |      |      |
|       |   |       | DTELKVIDTNCINVIQPD   |      |      |      |      |      |      |
|       |   |       | GSYRSEELNLVIIGPSADII |      |      |      |      |      |      |
|       |   |       | QFECKSFGHEVLNLTRN    |      |      |      |      |      |      |
|       |   |       | GYGSTQYIRFSPDFTFGF   |      |      |      |      |      |      |
|       |   |       | EESLEVDTNPLL GAGKFA  |      |      |      |      |      |      |
| 52912 | 0 | 47589 | TDPAVTLAHEL IHAGHRL  | 6.09 | 0.01 | 2.08 | 2.43 | 0.22 | 0.28 |
|       |   |       | YGI AINPNRVFKVNTNA   |      |      |      |      |      |      |
|       |   |       | YYEMSGLEVSFEELRTFG   |      |      |      |      |      |      |
|       |   |       | GHDAKFIDSLQENEFRLY   |      |      |      |      |      |      |
|       |   |       | YYNKFKDIAS TLNKAKSI  |      |      |      |      |      |      |
|       |   |       | VGTTASLQYMKNVFKEK    |      |      |      |      |      |      |
|       |   |       | YLLSEDTSGKFSVDKLF    |      |      |      |      |      |      |
|       |   |       | DKLYKMLTEIYTEDNFVK   |      |      |      |      |      |      |
|       |   |       | FFKVLNRKTYLNFDKAVF   |      |      |      |      |      |      |
|       |   |       | KINIVPKVNYTIYDGFNL   |      |      |      |      |      |      |
|       |   |       | RNTNLAANFNGQNTEI     |      |      |      |      |      |      |
|       |   |       | NNMNFTKLKNFTGLFEF    |      |      |      |      |      |      |
|       |   |       | YKLLCVRGIITSKTKSLDK  |      |      |      |      |      |      |
|       |   |       | GYNK                 |      |      |      |      |      |      |

|       |   |       |                      |      |      |      |      |      |      |
|-------|---|-------|----------------------|------|------|------|------|------|------|
|       |   |       | PFV NKQFNYKDPVNGV    |      |      |      |      |      |      |
|       |   |       | DIAYIKIPNVGQMMPVK    |      |      |      |      |      |      |
|       |   |       | AFKIH NKIWVIPERDTFT  |      |      |      |      |      |      |
|       |   |       | NPEEGDLNPPPEAKQVP    |      |      |      |      |      |      |
|       |   |       | VSYYDSTYLSTDNEKDNY   |      |      |      |      |      |      |
|       |   |       | LKGVTKLFERIYSTDLGR   |      |      |      |      |      |      |
|       |   |       | MLLTSIVRGIPFWGGSTI   |      |      |      |      |      |      |
|       |   |       | DTELKVIDTNCINVIQPD   |      |      |      |      |      |      |
|       |   |       | GSYRSEELNLVIIGPSADII |      |      |      |      |      |      |
|       |   |       | QFECKSFGHEVLNLTRN    |      |      |      |      |      |      |
|       |   |       | GYGSTQYIRFSPDFTFGF   |      |      |      |      |      |      |
|       |   |       | EESLEVDTNPLL GAGKFA  |      |      |      |      |      |      |
| 52913 | 0 | 47589 | TDPAVTLAHEL IHAGHRL  | 6.09 | 0.01 | 3.30 | 1.15 | 0.22 | 1.34 |
|       |   |       | YGI AINPNRVFKVNTNA   |      |      |      |      |      |      |
|       |   |       | YYEMSGLEVSFEELRTFG   |      |      |      |      |      |      |
|       |   |       | GHDAKFIDSLQENEFRLY   |      |      |      |      |      |      |
|       |   |       | YYNKFKDIAS TLNKAKSI  |      |      |      |      |      |      |
|       |   |       | VGTTASLQYMKNVFKEK    |      |      |      |      |      |      |
|       |   |       | YLLSEDTSGKFSVDKLF    |      |      |      |      |      |      |
|       |   |       | DKLYKMLTEIYTEDNFVK   |      |      |      |      |      |      |
|       |   |       | FFKVLNRKTYLNFDKAVF   |      |      |      |      |      |      |
|       |   |       | KINIVPKVNYTIYDGFNL   |      |      |      |      |      |      |
|       |   |       | RNTNLAANFNGQNTEI     |      |      |      |      |      |      |
|       |   |       | NNMNFTKLKNFTGLFEF    |      |      |      |      |      |      |
|       |   |       | YKLLCVRGIITSKTKSLDK  |      |      |      |      |      |      |
|       |   |       | GYNK                 |      |      |      |      |      |      |

|       |   |       |                      |      |      |      |      |      |      |
|-------|---|-------|----------------------|------|------|------|------|------|------|
|       |   |       | PFV NKQFNYKDPVNGV    |      |      |      |      |      |      |
|       |   |       | DIAYIKIPNVGQMGPVK    |      |      |      |      |      |      |
|       |   |       | AFKIHNKIWVIPERDTFT   |      |      |      |      |      |      |
|       |   |       | NPEEGDLNPPPEAKQVP    |      |      |      |      |      |      |
|       |   |       | VSYYDSTYLSTDNEKDNY   |      |      |      |      |      |      |
|       |   |       | LKGVTKLFERIYSTDLGR   |      |      |      |      |      |      |
|       |   |       | MLLTSIVRGIPFWGGSTI   |      |      |      |      |      |      |
|       |   |       | DTELKVIDTNCINVIQPD   |      |      |      |      |      |      |
|       |   |       | GSYRSEELNLVIIGPSADII |      |      |      |      |      |      |
|       |   |       | QFECKSFGHEVLNLTRN    |      |      |      |      |      |      |
|       |   |       | GYGSTQYIRFSPDFTFGF   |      |      |      |      |      |      |
|       |   |       | EESLEVDTNPLL GAGKFA  |      |      |      |      |      |      |
| 52914 | 0 | 47589 | TDPAVTLAHELIIHAGHRL  | 6.09 | 0.01 | 3.30 | 1.15 | 0.22 | 0.28 |
|       |   |       | YGI AINPNRVFKVNTNA   |      |      |      |      |      |      |
|       |   |       | YYEMSGLEVSFEELRTFG   |      |      |      |      |      |      |
|       |   |       | GHDAKFIDSLQENEFRLY   |      |      |      |      |      |      |
|       |   |       | YYNKFKDIASTLNKAKSI   |      |      |      |      |      |      |
|       |   |       | VGTTASLQYMKNVFKEK    |      |      |      |      |      |      |
|       |   |       | YLLSEDTS GKFSVDKLKF  |      |      |      |      |      |      |
|       |   |       | DKLYKMLTEIYTEDNFVK   |      |      |      |      |      |      |
|       |   |       | FFKVLNRKTYLNFDKAVF   |      |      |      |      |      |      |
|       |   |       | KINIVPKVNYTIYDGFNL   |      |      |      |      |      |      |
|       |   |       | RNTNLAANFNGQNTEI     |      |      |      |      |      |      |
|       |   |       | NNMNFTKLKNFTGLFEF    |      |      |      |      |      |      |
|       |   |       | YKLLCVRGIITSKTKSLDK  |      |      |      |      |      |      |
|       |   |       | GYNK                 |      |      |      |      |      |      |



|       |   |       |                      |      |      |      |      |      |      |
|-------|---|-------|----------------------|------|------|------|------|------|------|
|       |   |       | PFV NKQFNYKDPVNGV    |      |      |      |      |      |      |
|       |   |       | DIAYIKIPNVGQMGPVK    |      |      |      |      |      |      |
|       |   |       | AFKIH NKIWVIPERDTFT  |      |      |      |      |      |      |
|       |   |       | NPEEGDLNPPPEAKQVP    |      |      |      |      |      |      |
|       |   |       | VSYYDSTYLSTDNEKDNY   |      |      |      |      |      |      |
|       |   |       | LKGVTKLFERIYSTDLGR   |      |      |      |      |      |      |
|       |   |       | MLLTSIVRGIPFWGGSTI   |      |      |      |      |      |      |
|       |   |       | DTELKVIDTNCINVIQPD   |      |      |      |      |      |      |
|       |   |       | GSYRSEELNLVIIGPSADII |      |      |      |      |      |      |
|       |   |       | QFECKSFGHEVLNLTRN    |      |      |      |      |      |      |
|       |   |       | GYGSTQYIRFSPDFTFGF   |      |      |      |      |      |      |
|       |   |       | EESLEVDTNPLL GAGKFA  |      |      |      |      |      |      |
| 52915 | 0 | 47589 | TDPAVTLAHEL IHAGHRL  | 6.09 | 0.01 | 2.08 | 0.68 | 0.22 | 1.34 |
|       |   |       | YGI AINPNRVFKVNTNA   |      |      |      |      |      |      |
|       |   |       | YYEMSGLEVSFEELRTFG   |      |      |      |      |      |      |
|       |   |       | GHDAKFIDSLQENEFRLY   |      |      |      |      |      |      |
|       |   |       | YYNKFKDIAS TLNKAKSI  |      |      |      |      |      |      |
|       |   |       | VGTTASLQYMKNVFKEK    |      |      |      |      |      |      |
|       |   |       | YLLSEDTSGKFSVDKLF    |      |      |      |      |      |      |
|       |   |       | DKLYKMLTEIYTEDNFVK   |      |      |      |      |      |      |
|       |   |       | FFKVLNRKTYLNFDKAVF   |      |      |      |      |      |      |
|       |   |       | KINIVPKVNYTIYDGFNL   |      |      |      |      |      |      |
|       |   |       | RNTNLAANFNGQNTEI     |      |      |      |      |      |      |
|       |   |       | NNMNFTKLKNFTGLFEF    |      |      |      |      |      |      |
|       |   |       | YKLLCVRGIITSKTKSLDK  |      |      |      |      |      |      |
|       |   |       | GYNK                 |      |      |      |      |      |      |

|       |   |       |                      |      |      |      |      |      |      |
|-------|---|-------|----------------------|------|------|------|------|------|------|
|       |   |       | PFV NKQFN YKDPVNGV   |      |      |      |      |      |      |
|       |   |       | DIAYIKIPNVGQM QPVK   |      |      |      |      |      |      |
|       |   |       | AFKIH NKIWWIPERDTFT  |      |      |      |      |      |      |
|       |   |       | NPEEGDLNPPPEAKQVP    |      |      |      |      |      |      |
|       |   |       | VSYYDSTYLSTDNEKDNY   |      |      |      |      |      |      |
|       |   |       | LKGVTKL FERIYSTDLGR  |      |      |      |      |      |      |
|       |   |       | MLLTSIVRGIPFWGGSTI   |      |      |      |      |      |      |
|       |   |       | DTELKVIDTNCINVIQPD   |      |      |      |      |      |      |
|       |   |       | GSYRSEELNLVIIGPSADII |      |      |      |      |      |      |
|       |   |       | QFECKSFGHEVLNLTRN    |      |      |      |      |      |      |
|       |   |       | GYGSTQYIRFSPDFTFGF   |      |      |      |      |      |      |
|       |   |       | EESLEVDTNPLL GAGKFA  |      |      |      |      |      |      |
| 52916 | 0 | 47589 | TDPAVTLAHEL IHAGHRL  | 6.09 | 0.01 | 2.08 | 0.68 | 0.22 | 0.85 |
|       |   |       | YGI AINPNRVFKVNTNA   |      |      |      |      |      |      |
|       |   |       | YYEMSGLEVSFEELRTFG   |      |      |      |      |      |      |
|       |   |       | GHDAKFIDSLQENEFRLY   |      |      |      |      |      |      |
|       |   |       | YYNKFKDIAS TLNKAKSI  |      |      |      |      |      |      |
|       |   |       | VGTTASLQYMKNVFKEK    |      |      |      |      |      |      |
|       |   |       | YLLSEDTSGKFSVDKLF    |      |      |      |      |      |      |
|       |   |       | DKLYKMLTEIYTEDNFVK   |      |      |      |      |      |      |
|       |   |       | FFKVLNRKTYLNFDKAVF   |      |      |      |      |      |      |
|       |   |       | KINIVPKVNYTIYDGFNL   |      |      |      |      |      |      |
|       |   |       | RNTNLAANFNGQNTEI     |      |      |      |      |      |      |
|       |   |       | NNMNFTKLKNFTGLFEF    |      |      |      |      |      |      |
|       |   |       | YKLLCVRGIITSKTKSLDK  |      |      |      |      |      |      |
|       |   |       | GYNK                 |      |      |      |      |      |      |

|       |   |       |                      |      |      |      |      |      |      |
|-------|---|-------|----------------------|------|------|------|------|------|------|
|       |   |       | PFV NKQFNYKDPVNGV    |      |      |      |      |      |      |
|       |   |       | DIAYIKIPNVGQMGPVK    |      |      |      |      |      |      |
|       |   |       | AFKIH NKIWVIPERDTFT  |      |      |      |      |      |      |
|       |   |       | NPEEGDLNPPPEAKQVP    |      |      |      |      |      |      |
|       |   |       | VSYYDSTYLSTDNEKDNY   |      |      |      |      |      |      |
|       |   |       | LKGVTKLFERIYSTDLGR   |      |      |      |      |      |      |
|       |   |       | MLLTSIVRGIPFWGGSTI   |      |      |      |      |      |      |
|       |   |       | DTELKVIDTNCINVIQPD   |      |      |      |      |      |      |
|       |   |       | GSYRSEELNLVIIGPSADII |      |      |      |      |      |      |
|       |   |       | QFECKSFGHEVLNLTRN    |      |      |      |      |      |      |
|       |   |       | GYGSTQYIRFSPDFTFGF   |      |      |      |      |      |      |
|       |   |       | EESLEVDTNPLL GAGKFA  |      |      |      |      |      |      |
| 52917 | 0 | 47589 | TDPAVTLAHEL IHAGHRL  | 6.09 | 0.01 | 2.08 | 2.43 | 0.22 | 0.28 |
|       |   |       | YGI AINPNRVFKVNTNA   |      |      |      |      |      |      |
|       |   |       | YYEMSGLEVSFEELRTFG   |      |      |      |      |      |      |
|       |   |       | GHDAKFIDSLQENEFRLY   |      |      |      |      |      |      |
|       |   |       | YYNKFKDIAS TLNKAKSI  |      |      |      |      |      |      |
|       |   |       | VGTTASLQYMKNVFKEK    |      |      |      |      |      |      |
|       |   |       | YLLSEDTSGKFSVDKLF    |      |      |      |      |      |      |
|       |   |       | DKLYKMLTEIYTEDNFVK   |      |      |      |      |      |      |
|       |   |       | FFKVLNRKTYLNFDKAVF   |      |      |      |      |      |      |
|       |   |       | KINIVPKVNYTIYDGFNL   |      |      |      |      |      |      |
|       |   |       | RNTNLAANFNGQNTEI     |      |      |      |      |      |      |
|       |   |       | NNMNFTKLKNFTGLFEF    |      |      |      |      |      |      |
|       |   |       | YKLLCVRGIITSKTKSLDK  |      |      |      |      |      |      |
|       |   |       | GYNK                 |      |      |      |      |      |      |

|       |   |       |                      |      |      |      |      |      |      |
|-------|---|-------|----------------------|------|------|------|------|------|------|
|       |   |       | PFV NKQFN YKDPVNGV   |      |      |      |      |      |      |
|       |   |       | DIAYIKIPNVGQM QPVK   |      |      |      |      |      |      |
|       |   |       | AFKIH NKI WVIPERDTFT |      |      |      |      |      |      |
|       |   |       | NPEEGDLNPPPEAKQVP    |      |      |      |      |      |      |
|       |   |       | VSYYDSTYLSTDNEKDNY   |      |      |      |      |      |      |
|       |   |       | LKGVTKL FERIYSTDLGR  |      |      |      |      |      |      |
|       |   |       | MLLTSIVRGIPFWGGSTI   |      |      |      |      |      |      |
|       |   |       | DTELKVIDTNCINVIQPD   |      |      |      |      |      |      |
|       |   |       | GSYRSEELNLVIIGPSADII |      |      |      |      |      |      |
|       |   |       | QFECKSFGHEVLNLTRN    |      |      |      |      |      |      |
|       |   |       | GYGSTQYIRFSPDFTFGF   |      |      |      |      |      |      |
|       |   |       | EESLEVDTNPLL GAGKFA  |      |      |      |      |      |      |
| 52918 | 0 | 47589 | TDPAVTLAHEL IHAGHRL  | 6.09 | 0.01 | 2.08 | 0.68 | 0.22 | 0.28 |
|       |   |       | YGI AINPNRVFKVNTNA   |      |      |      |      |      |      |
|       |   |       | YYEMSGLEVSFEELRTFG   |      |      |      |      |      |      |
|       |   |       | GHDAKFIDSLQENEFRLY   |      |      |      |      |      |      |
|       |   |       | YYNKFKDIAS TLNKAKSI  |      |      |      |      |      |      |
|       |   |       | VGTTASLQYMKNVFKEK    |      |      |      |      |      |      |
|       |   |       | YLLSEDTSGKFSVDKLF    |      |      |      |      |      |      |
|       |   |       | DKLYKMLTEIYTEDNFVK   |      |      |      |      |      |      |
|       |   |       | FFKVLNRKTYLNFDKAVF   |      |      |      |      |      |      |
|       |   |       | KINIVPKVNYTIYDGFNL   |      |      |      |      |      |      |
|       |   |       | RNTNLAANFNGQNTEI     |      |      |      |      |      |      |
|       |   |       | NNMNFTKLKNFTGLFEF    |      |      |      |      |      |      |
|       |   |       | YKLLCVRGIITSKTKSLDK  |      |      |      |      |      |      |
|       |   |       | GYNK                 |      |      |      |      |      |      |

|       |   |       |                      |      |      |      |      |      |      |
|-------|---|-------|----------------------|------|------|------|------|------|------|
|       |   |       | PFV NKQFN YKDPVNGV   |      |      |      |      |      |      |
|       |   |       | DIAYIKIPNVGQM QPVK   |      |      |      |      |      |      |
|       |   |       | AFKIH NKI WVIPERDTFT |      |      |      |      |      |      |
|       |   |       | NPEEGDLNPPPEAKQVP    |      |      |      |      |      |      |
|       |   |       | VSYYDSTYLSTDNEKDNY   |      |      |      |      |      |      |
|       |   |       | LKGVTKL FERIYSTDLGR  |      |      |      |      |      |      |
|       |   |       | MLLTSIVRGIPFWGGSTI   |      |      |      |      |      |      |
|       |   |       | DTELKVIDTNCINVIQPD   |      |      |      |      |      |      |
|       |   |       | GSYRSEELNLVIIGPSADII |      |      |      |      |      |      |
|       |   |       | QFECKSFGHEVLNLTRN    |      |      |      |      |      |      |
|       |   |       | GYGSTQYIRFSPDFTFGF   |      |      |      |      |      |      |
|       |   |       | EESLEVDTNPLL GAGKFA  |      |      |      |      |      |      |
| 52919 | 0 | 47589 | TDPAVTLAHEL IHAGHRL  | 6.09 | 0.01 | 3.30 | 1.15 | 0.22 | 1.66 |
|       |   |       | YGI AINPNRVFKVNTNA   |      |      |      |      |      |      |
|       |   |       | YYEMSGLEVSFEELRTFG   |      |      |      |      |      |      |
|       |   |       | GHDAKFIDSLQENEFRLY   |      |      |      |      |      |      |
|       |   |       | YYNKFKDIAS TLNKAKSI  |      |      |      |      |      |      |
|       |   |       | VGTTASLQYMKNVFKEK    |      |      |      |      |      |      |
|       |   |       | YLLSEDTSGKFSVDKLF    |      |      |      |      |      |      |
|       |   |       | DKLYKMLTEIYTEDNFVK   |      |      |      |      |      |      |
|       |   |       | FFKVLNRKTYLNFDKAVF   |      |      |      |      |      |      |
|       |   |       | KINIVPKVNYTIYDGFNL   |      |      |      |      |      |      |
|       |   |       | RNTNLAANFNGQNTEI     |      |      |      |      |      |      |
|       |   |       | NNMNFTKLKNFTGLFEF    |      |      |      |      |      |      |
|       |   |       | YKLLCVRGIITSKTKSLDK  |      |      |      |      |      |      |
|       |   |       | GYNK                 |      |      |      |      |      |      |

|       |   |       |                      |      |      |      |      |      |      |
|-------|---|-------|----------------------|------|------|------|------|------|------|
|       |   |       | PFV NKQFNYKDPVNGV    |      |      |      |      |      |      |
|       |   |       | DIAYIKIPNVGQMGPVK    |      |      |      |      |      |      |
|       |   |       | AFKIH NKIWVIPERDTFT  |      |      |      |      |      |      |
|       |   |       | NPEEGDLNPPPEAKQVP    |      |      |      |      |      |      |
|       |   |       | VSYYDSTYLSTDNEKDNY   |      |      |      |      |      |      |
|       |   |       | LKGVTKLFERIYSTDLGR   |      |      |      |      |      |      |
|       |   |       | MLLTSIVRGIPFWGGSTI   |      |      |      |      |      |      |
|       |   |       | DTELKVIDTNCINVIQPD   |      |      |      |      |      |      |
|       |   |       | GSYRSEELNLVIIGPSADII |      |      |      |      |      |      |
|       |   |       | QFECKSFGHEVLNLTRN    |      |      |      |      |      |      |
|       |   |       | GYGSTQYIRFSPDFTFGF   |      |      |      |      |      |      |
|       |   |       | EESLEVDTNPLL GAGKFA  |      |      |      |      |      |      |
| 52920 | 0 | 47589 | TDPAVTLAHEL IHAGHRL  | 6.09 | 0.01 | 3.30 | 1.15 | 0.22 | 1.66 |
|       |   |       | YGI AINPNRVFKVNTNA   |      |      |      |      |      |      |
|       |   |       | YYEMSGLEVSFEELRTFG   |      |      |      |      |      |      |
|       |   |       | GHDAKFIDSLQENEFRLY   |      |      |      |      |      |      |
|       |   |       | YYNKFKDIAS TLNKAKSI  |      |      |      |      |      |      |
|       |   |       | VGTTASLQYMKNVFKEK    |      |      |      |      |      |      |
|       |   |       | YLLSEDTSGKFSVDKLKF   |      |      |      |      |      |      |
|       |   |       | DKLYKMLTEIYTEDNFVK   |      |      |      |      |      |      |
|       |   |       | FFKVLNRKTYLNFDKAVF   |      |      |      |      |      |      |
|       |   |       | KINIVPKVNYTIYDGFNL   |      |      |      |      |      |      |
|       |   |       | RNTNLAANFNGQNTEI     |      |      |      |      |      |      |
|       |   |       | NNMNFTKLKNFTGLFEF    |      |      |      |      |      |      |
|       |   |       | YKLLCVRGIITSKTKSLDK  |      |      |      |      |      |      |
|       |   |       | GYNK                 |      |      |      |      |      |      |

|       |   |       |                      |      |      |      |      |      |      |
|-------|---|-------|----------------------|------|------|------|------|------|------|
|       |   |       | PFV NKQFNYKDPVNGV    |      |      |      |      |      |      |
|       |   |       | DIAYIKIPNVGQMGPVK    |      |      |      |      |      |      |
|       |   |       | AFKIH NKIWVIPERDTFT  |      |      |      |      |      |      |
|       |   |       | NPEEGDLNPPPEAKQVP    |      |      |      |      |      |      |
|       |   |       | VSYYDSTYLSTDNEKDNY   |      |      |      |      |      |      |
|       |   |       | LKGVTKLFERIYSTDLGR   |      |      |      |      |      |      |
|       |   |       | MLLTSIVRGIPFWGGSTI   |      |      |      |      |      |      |
|       |   |       | DTELKVIDTNCINVIQPD   |      |      |      |      |      |      |
|       |   |       | GSYRSEELNLVIIGPSADII |      |      |      |      |      |      |
|       |   |       | QFECKSFGHEVLNLTRN    |      |      |      |      |      |      |
|       |   |       | GYGSTQYIRFSPDFTFGF   |      |      |      |      |      |      |
|       |   |       | EESLEVDTNPLL GAGKFA  |      |      |      |      |      |      |
| 52921 | 0 | 47589 | TDPAVTLAHEL IHAGHRL  | 6.09 | 0.01 | 3.30 | 1.15 | 0.22 | 1.66 |
|       |   |       | YGI AINPNRVFKVNTNA   |      |      |      |      |      |      |
|       |   |       | YYEMSGLEVSFEELRTFG   |      |      |      |      |      |      |
|       |   |       | GHDAKFIDSLQENEFRLY   |      |      |      |      |      |      |
|       |   |       | YYNKFKDIAS TLNKAKSI  |      |      |      |      |      |      |
|       |   |       | VGTTASLQYMKNVFKEK    |      |      |      |      |      |      |
|       |   |       | YLLSEDTSGKFSVDKLF    |      |      |      |      |      |      |
|       |   |       | DKLYKMLTEIYTEDNFVK   |      |      |      |      |      |      |
|       |   |       | FFKVLNRKTYLNFDKAVF   |      |      |      |      |      |      |
|       |   |       | KINIVPKVNYTIYDGFNL   |      |      |      |      |      |      |
|       |   |       | RNTNLAANFNGQNTEI     |      |      |      |      |      |      |
|       |   |       | NNMNFTKLKNFTGLFEF    |      |      |      |      |      |      |
|       |   |       | YKLLCVRGIITSKTKSLDK  |      |      |      |      |      |      |
|       |   |       | GYNK                 |      |      |      |      |      |      |

|       |   |       |                      |      |      |      |      |      |      |
|-------|---|-------|----------------------|------|------|------|------|------|------|
|       |   |       | PFV NKQFNYKDPVNGV    |      |      |      |      |      |      |
|       |   |       | DIAYIKIPNVGQMGPVK    |      |      |      |      |      |      |
|       |   |       | AFKIH NKIWVIPERDTFT  |      |      |      |      |      |      |
|       |   |       | NPEEGDLNPPPEAKQVP    |      |      |      |      |      |      |
|       |   |       | VSYYDSTYLSTDNEKDNY   |      |      |      |      |      |      |
|       |   |       | LKGVTKLFERIYSTDLGR   |      |      |      |      |      |      |
|       |   |       | MLLTSIVRGIPFWGGSTI   |      |      |      |      |      |      |
|       |   |       | DTELKVIDTNCINVIQPD   |      |      |      |      |      |      |
|       |   |       | GSYRSEELNLVIIGPSADII |      |      |      |      |      |      |
|       |   |       | QFECKSFGHEVLNLTRN    |      |      |      |      |      |      |
|       |   |       | GYGSTQYIRFSPDFTFGF   |      |      |      |      |      |      |
|       |   |       | EESLEVDTNPLL GAGKFA  |      |      |      |      |      |      |
| 52922 | 0 | 47589 | TDPAVTLAHEL IHAGHRL  | 6.09 | 0.01 | 3.30 | 1.15 | 0.22 | 1.66 |
|       |   |       | YGI AINPNRVFKVNTNA   |      |      |      |      |      |      |
|       |   |       | YYEMSGLEVSFEELRTFG   |      |      |      |      |      |      |
|       |   |       | GHDAKFIDSLQENEFRLY   |      |      |      |      |      |      |
|       |   |       | YYNKFKDIAS TLNKAKSI  |      |      |      |      |      |      |
|       |   |       | VGTTASLQYMKNVFKEK    |      |      |      |      |      |      |
|       |   |       | YLLSEDTSGKFSVDKLF    |      |      |      |      |      |      |
|       |   |       | DKLYKMLTEIYTEDNFVK   |      |      |      |      |      |      |
|       |   |       | FFKVLNRKTYLNFDKAVF   |      |      |      |      |      |      |
|       |   |       | KINIVPKVNYTIYDGFNL   |      |      |      |      |      |      |
|       |   |       | RNTNLAANFNGQNTEI     |      |      |      |      |      |      |
|       |   |       | NNMNFTKLKNFTGLFEF    |      |      |      |      |      |      |
|       |   |       | YKLLCVRGIITSKTKSLDK  |      |      |      |      |      |      |
|       |   |       | GYNK                 |      |      |      |      |      |      |



|       |   |       |                      |      |      |      |      |      |      |
|-------|---|-------|----------------------|------|------|------|------|------|------|
|       |   |       | PFV NKQFNYKDPVNGV    |      |      |      |      |      |      |
|       |   |       | DIAYIKIPNVGQMMPVK    |      |      |      |      |      |      |
|       |   |       | AFKIH NKIWVIPERDTFT  |      |      |      |      |      |      |
|       |   |       | NPEEGDLNPPPEAKQVP    |      |      |      |      |      |      |
|       |   |       | VSYYDSTYLSTDNEKDNY   |      |      |      |      |      |      |
|       |   |       | LKGVTKLFERIYSTDLGR   |      |      |      |      |      |      |
|       |   |       | MLLTSIVRGIPFWGGSTI   |      |      |      |      |      |      |
|       |   |       | DTELKVIDTNCINVIQPD   |      |      |      |      |      |      |
|       |   |       | GSYRSEELNLVIIGPSADII |      |      |      |      |      |      |
|       |   |       | QFECKSFGHEVLNLTRN    |      |      |      |      |      |      |
|       |   |       | GYGSTQYIRFSPDFTFGF   |      |      |      |      |      |      |
|       |   |       | EESLEVDTNPLL GAGKFA  |      |      |      |      |      |      |
| 52923 | 0 | 47589 | TDPAVTLAHEL IHAGHRL  | 6.09 | 0.01 | 3.30 | 1.15 | 0.22 | 1.66 |
|       |   |       | YGI AINPNRVFKVNTNA   |      |      |      |      |      |      |
|       |   |       | YYEMSGLEVSFEELRTFG   |      |      |      |      |      |      |
|       |   |       | GHDAKFIDSLQENEFRLY   |      |      |      |      |      |      |
|       |   |       | YYNKFKDIAS TLNKAKSI  |      |      |      |      |      |      |
|       |   |       | VGTTASLQYMKNVFKEK    |      |      |      |      |      |      |
|       |   |       | YLLSEDTSGKFSVDKLF    |      |      |      |      |      |      |
|       |   |       | DKLYKMLTEIYTEDNFVK   |      |      |      |      |      |      |
|       |   |       | FFKVLNRKTYLNFDKAVF   |      |      |      |      |      |      |
|       |   |       | KINIVPKVNYTIYDGFNL   |      |      |      |      |      |      |
|       |   |       | RNTNLAANFNGQNTEI     |      |      |      |      |      |      |
|       |   |       | NNMNFTKLKNFTGLFEF    |      |      |      |      |      |      |
|       |   |       | YKLLCVRGIITSKTKSLDK  |      |      |      |      |      |      |
|       |   |       | GYNK                 |      |      |      |      |      |      |

|       |   |       |                                                                                                                                                                                                                                                                                                                                                                                                                                                                                                                                                                              |      |      |      |      |      |      |
|-------|---|-------|------------------------------------------------------------------------------------------------------------------------------------------------------------------------------------------------------------------------------------------------------------------------------------------------------------------------------------------------------------------------------------------------------------------------------------------------------------------------------------------------------------------------------------------------------------------------------|------|------|------|------|------|------|
|       |   |       | PFV NKQFNYKDPVNGV<br>DIAYIKIPNVGQMMPVK<br>AFKIH NKIWVIPERDTFT<br>NPEEGDLNPPPEAKQVP<br>VSYYDSTYLSTDNEKDNY<br>LKGVT KLFERIYSTDLGR<br>MLLTSIVRGIPFWGGSTI<br>DTELKVIDTNCINVIQPD<br>GSYRSEELNLVIIGPSADII<br>QFECKSFGHEVLNLTRN<br>GYGSTQYIRFSPDFTFGF<br>EESLEVD TNPLL GAGKFA<br>TDPAVTLAHEL IHAGHRL<br>YGIAINPNRVFKVNTNA<br>YYEMSGLEVSFEELRTFG<br>GHDAKFIDSLQENEFRLY<br>YYNKFKDIAS TLNKA KSI<br>VGT TASLQYMKNVFKEK<br>YLLSEDTSGKFSVDKLKF<br>DKLYKMLTEIYTEDNFVK<br>FFKVLNRKTYLNFDKAVF<br>KINIVPKVNYTIYDGFNL<br>RNTNLAANFNGQNTEI<br>NNMNFTKLKNFTGLFEF<br>YKLLCVRGIITSKTKSLDK<br>GYNK | 6.09 | 0.01 | 3.30 | 1.15 | 0.22 | 1.66 |
| 52925 | 0 | 97547 | PFVPRADEPARKGKVH                                                                                                                                                                                                                                                                                                                                                                                                                                                                                                                                                             | 2.75 | 0.01 | 3.13 | 0.68 | 0.22 | 0.28 |
| 52926 | 0 | 97547 | PFVPRADEPARKGKVH                                                                                                                                                                                                                                                                                                                                                                                                                                                                                                                                                             | 2.75 | 0.01 | 3.13 | 0.68 | 0.22 | 0.28 |
| 52927 | 0 | 97547 | PFVPRADEPARKGKVH                                                                                                                                                                                                                                                                                                                                                                                                                                                                                                                                                             | 2.75 | 0.01 | 3.13 | 0.68 | 2.25 | 1.75 |
| 52928 | 0 | 97547 | PFVPRADEPARKGKVH                                                                                                                                                                                                                                                                                                                                                                                                                                                                                                                                                             | 2.75 | 0.01 | 3.13 | 0.68 | 0.22 | 0.28 |
| 52929 | 0 | 97547 | PFVPRADEPARKGKVH                                                                                                                                                                                                                                                                                                                                                                                                                                                                                                                                                             | 2.75 | 0.01 | 3.13 | 0.68 | 0.22 | 0.28 |
| 52930 | 0 | 97547 | PFVPRADEPARKGKVH                                                                                                                                                                                                                                                                                                                                                                                                                                                                                                                                                             | 2.75 | 0.01 | 3.13 | 0.68 | 0.22 | 0.28 |
| 52931 | 0 | 97547 | PFVPRADEPARKGKVH                                                                                                                                                                                                                                                                                                                                                                                                                                                                                                                                                             | 2.75 | 0.01 | 3.13 | 0.68 | 0.22 | 1.27 |
| 52932 | 0 | 47590 | PFVPRADEPARKGKVHG<br>REKFTIRPHYGKEI                                                                                                                                                                                                                                                                                                                                                                                                                                                                                                                                          | 3.40 | 0.01 | 0.90 | 0.68 | 0.22 | 0.28 |
| 52933 | 0 | 47590 | PFVPRADEPARKGKVHG<br>REKFTIRPHYGKEI                                                                                                                                                                                                                                                                                                                                                                                                                                                                                                                                          | 3.40 | 0.01 | 0.90 | 0.68 | 0.22 | 1.75 |
| 52934 | 0 | 47590 | PFVPRADEPARKGKVHG<br>REKFTIRPHYGKEI                                                                                                                                                                                                                                                                                                                                                                                                                                                                                                                                          | 3.40 | 0.01 | 0.90 | 0.68 | 0.22 | 0.28 |

|       |   |        |                           |      |      |      |      |      |      |
|-------|---|--------|---------------------------|------|------|------|------|------|------|
| 52935 | 0 | 106705 | PFVQGKEKEP                | 2.34 | 0.01 | 3.08 | 0.44 | 1.23 | 0.85 |
| 52936 | 0 | 106706 | PFVQGKEKEPSK              | 2.50 | 0.01 | 3.08 | 0.44 | 1.23 | 0.85 |
| 52937 | 0 | 47591  | PFVQWFMGL                 | 2.21 | 0.01 | 2.71 | 0.44 | 2.26 | 0.28 |
| 52938 | 0 | 47593  | PFVQWFBVL                 | 2.23 | 0.01 | 3.07 | 0.44 | 2.26 | 0.28 |
| 52939 | 0 | 79332  | PFVVWDWQWL                | 2.32 | 0.01 | 0.90 | 0.68 | 0.22 | 0.28 |
| 52940 | 0 | 79037  | PFWLRD                    | 1.88 | 0.01 | 0.90 | 0.68 | 0.22 | 1.39 |
| 52941 | 0 | 79038  | PFWLSD                    | 1.88 | 0.01 | 0.90 | 0.68 | 0.22 | 1.39 |
| 52942 | 0 | 47598  | PFWVRGTTW                 | 2.22 | 0.01 | 0.90 | 0.44 | 1.23 | 0.28 |
| 52943 | 0 | 47598  | PFWVRGTTW                 | 2.22 | 0.01 | 0.90 | 0.44 | 1.23 | 1.27 |
| 52944 | 0 | 144742 | PFYGYRE                   | 2.02 | 0.01 | 2.40 | 0.68 | 0.22 | 1.48 |
| 52945 | 0 | 144742 | PFYGYRE                   | 2.02 | 0.01 | 2.40 | 0.68 | 0.22 | 0.85 |
| 52946 | 0 | 144742 | PFYGYRE                   | 2.02 | 0.01 | 2.40 | 0.68 | 0.22 | 0.85 |
| 52947 | 0 | 144742 | PFYGYRE                   | 2.02 | 0.01 | 2.40 | 0.68 | 0.22 | 1.48 |
| 52948 | 0 | 144742 | PFYGYRE                   | 2.02 | 0.01 | 2.40 | 0.68 | 0.22 | 1.48 |
| 52949 | 0 | 144742 | PFYGYRE                   | 2.02 | 0.01 | 2.40 | 0.68 | 0.22 | 1.34 |
| 52950 | 0 | 144742 | PFYGYRE                   | 2.02 | 0.01 | 2.40 | 0.68 | 0.22 | 1.34 |
| 52951 | 0 | 144742 | PFYGYRE                   | 2.02 | 0.01 | 2.40 | 0.68 | 0.22 | 1.75 |
| 52952 | 0 | 144742 | PFYGYRE                   | 2.02 | 0.01 | 2.40 | 0.68 | 0.22 | 1.75 |
| 52953 | 0 | 128069 | PFYPAYEGQFSLEEKSLSL<br>K  | 2.97 | 0.01 | 0.78 | 0.44 | 1.13 | 0.28 |
| 52954 | 0 | 47604  | PGACYSRPLV                | 2.30 | 0.01 | 2.40 | 0.44 | 1.59 | 0.28 |
| 52955 | 0 | 240908 | PGADIRLPALTSQDI           | 2.69 | 0.01 | 4.93 | 0.44 | 1.41 | 0.28 |
| 52956 | 0 | 110961 | PGAIEIIAEVHPPPVEYEG<br>PE | 3.04 | 0.01 | 3.55 | 2.22 | 2.25 | 1.75 |
| 52957 | 0 | 110961 | PGAIEIIAEVHPPPVEYEG<br>PE | 3.04 | 0.01 | 3.55 | 2.22 | 0.22 | 0.28 |
| 52958 | 0 | 110961 | PGAIEIIAEVHPPPVEYEG<br>PE | 3.04 | 0.01 | 3.55 | 2.22 | 0.22 | 0.28 |
| 52959 | 0 | 110961 | PGAIEIIAEVHPPPVEYEG<br>PE | 3.04 | 0.01 | 3.55 | 2.22 | 0.22 | 0.28 |
| 52960 | 0 | 110961 | PGAIEIIAEVHPPPVEYEG<br>PE | 3.04 | 0.01 | 3.55 | 2.22 | 0.22 | 0.28 |
| 52961 | 0 | 419301 | PGAIVTPGYSLQLRQQ<br>SQY   | 2.96 | 0.01 | 3.50 | 2.13 | 0.22 | 0.28 |
| 52962 | 0 | 523546 | PGAGHTNTSSASAATP<br>PTT   | 2.98 | 0.01 | 2.40 | 0.44 | 1.59 | 1.28 |
| 52963 | 0 | 118948 | PGAIEQGPADDPGEGPS<br>TGP  | 2.99 | 0.01 | 2.43 | 0.44 | 1.13 | 1.27 |
| 52964 | 0 | 118948 | PGAIEQGPADDPGEGPS<br>TGP  | 2.99 | 0.01 | 2.43 | 0.44 | 1.41 | 1.27 |
| 52965 | 0 | 118948 | PGAIEQGPADDPGEGPS<br>TGP  | 2.99 | 0.01 | 2.48 | 0.44 | 1.74 | 0.28 |
| 52966 | 0 | 118948 | PGAIEQGPADDPGEGPS<br>TGP  | 2.99 | 0.01 | 2.48 | 0.44 | 1.74 | 0.28 |
| 52967 | 0 | 108061 | PGAKGLPGPPGPPGPY          | 2.80 | 4.63 | 0.78 | 0.68 | 0.22 | 0.28 |

|       |   |        |                                                  |      |      |      |      |      |      |
|-------|---|--------|--------------------------------------------------|------|------|------|------|------|------|
| 52968 | 0 | 108061 | PGAKGLPGPPGPPGPY                                 | 2.80 | 4.63 | 0.78 | 0.68 | 0.22 | 0.28 |
|       |   |        | PGAKQNVQLINTNGSW                                 |      |      |      |      |      |      |
| 52969 | 0 | 47610  | HLNSTALNCNDSLNTG<br>WLAGLFYH                     | 3.62 | 0.01 | 1.72 | 0.44 | 0.85 | 0.28 |
| 52970 | 0 | 117339 | PGALLRQDNAPN                                     | 2.49 | 0.01 | 0.90 | 0.44 | 1.23 | 0.28 |
| 52971 | 0 | 123576 | PGAMPPQQ                                         | 2.13 | 0.01 | 0.78 | 1.20 | 0.22 | 0.28 |
| 52972 | 0 | 123576 | PGAMPPQQ                                         | 2.13 | 0.01 | 0.78 | 0.44 | 1.13 | 0.28 |
| 52973 | 0 | 193513 | PGANQWMMT                                        | 2.20 | 0.01 | 2.51 | 0.44 | 2.39 | 0.28 |
| 52974 | 0 | 193513 | PGANQWMMT                                        | 2.20 | 0.01 | 2.51 | 0.44 | 2.39 | 0.28 |
| 52975 | 0 | 47613  | PGAPGSGSGSP                                      | 2.47 | 0.01 | 2.43 | 0.44 | 1.59 | 0.28 |
| 52976 | 0 | 109662 | PGARGPPG                                         | 2.17 | 0.01 | 1.60 | 2.55 | 2.60 | 0.28 |
| 52977 | 0 | 177208 | PGARPKVNGQAGRI                                   | 2.64 | 0.01 | 4.93 | 0.68 | 0.22 | 0.28 |
| 52978 | 0 | 177209 | PGARPVNGQSGRI                                    | 2.64 | 0.01 | 4.93 | 0.68 | 0.22 | 0.28 |
| 52979 | 0 | 47619  | PGASSGEAEA                                       | 2.35 | 0.01 | 2.30 | 0.68 | 0.22 | 0.85 |
| 52980 | 0 | 47620  | PGATARAPAI                                       | 2.36 | 3.85 | 2.70 | 0.44 | 0.85 | 0.28 |
| 52981 | 0 | 167639 | PGAVLTAKVQQPAKGP                                 | 2.78 | 0.01 | 3.10 | 0.44 | 0.85 | 1.28 |
| 52982 | 0 | 167639 | PGAVLTAKVQQPAKGP                                 | 2.78 | 0.01 | 3.10 | 0.44 | 0.85 | 1.28 |
| 52983 | 0 | 167639 | PGAVLTAKVQQPAKGP                                 | 2.78 | 0.01 | 3.10 | 0.44 | 1.59 | 1.28 |
| 52984 | 0 | 47624  | PGCATQAPVPVRLAGV<br>RFESKIVDGGCFA                | 3.30 | 0.01 | 4.63 | 0.44 | 1.59 | 0.28 |
| 52985 | 0 | 47626  | PGCIVPASQV                                       | 2.32 | 0.01 | 1.72 | 0.44 | 0.85 | 0.28 |
| 52986 | 0 | 47628  | PGDDPLL                                          | 2.16 | 0.01 | 2.40 | 2.43 | 0.22 | 0.28 |
| 52987 | 0 | 434204 | PGDHRSA                                          | 1.99 | 0.01 | 0.90 | 2.36 | 0.22 | 1.39 |
|       |   |        | PGDILQLEDGTVIPTDGR                               |      |      |      |      |      |      |
| 52988 | 0 | 79961  | IVTEDCFLQIDQSAITGES<br>LAVDKHYGDQTFSSSTV<br>KRGE | 4.01 | 0.01 | 3.45 | 1.12 | 0.22 | 0.85 |
| 52989 | 0 | 98931  | PGDYDDRRQ                                        | 2.33 | 0.01 | 2.16 | 0.44 | 1.23 | 0.85 |
| 52990 | 0 | 98932  | PGDYDDRRQPRREE                                   | 2.70 | 0.01 | 2.16 | 0.44 | 1.23 | 0.85 |
| 52991 | 0 | 109665 | PGEAGLPG                                         | 2.17 | 0.01 | 1.60 | 2.55 | 2.60 | 0.28 |
| 52992 | 0 | 93568  | PGEATETVPATEQEL                                  | 2.72 | 0.01 | 1.75 | 0.68 | 0.22 | 0.28 |
| 52993 | 0 | 47636  | PGEGPSTGPRGQGDGG<br>RRKK                         | 2.97 | 0.01 | 2.43 | 0.44 | 1.59 | 0.28 |
| 52994 | 0 | 47636  | PGEGPSTGPRGQGDGG<br>RRKK                         | 2.97 | 0.01 | 2.43 | 0.44 | 2.82 | 0.28 |
| 52995 | 0 | 47636  | PGEGPSTGPRGQGDGG<br>RRKK                         | 2.97 | 0.01 | 2.43 | 0.44 | 2.82 | 0.28 |
| 52996 | 0 | 115884 | PGEIVESLSS                                       | 2.31 | 0.01 | 1.60 | 0.44 | 1.23 | 0.85 |
| 52997 | 0 | 115884 | PGEIVESLSS                                       | 2.31 | 0.01 | 1.60 | 0.44 | 1.23 | 0.85 |
| 52998 | 0 | 434205 | PGEMMRA                                          | 2.01 | 0.01 | 0.90 | 2.36 | 0.22 | 1.39 |
| 52999 | 0 | 423455 | PGEPLKDALGRQVSL                                  | 2.67 | 0.01 | 2.51 | 0.44 | 1.59 | 1.28 |
| 53000 | 0 | 132000 | PGEPWKGYPNIDPET                                  | 2.69 | 0.01 | 0.78 | 0.44 | 1.13 | 0.85 |

|       |   |        |                          |      |      |      |      |      |      |
|-------|---|--------|--------------------------|------|------|------|------|------|------|
| 53001 | 0 | 127761 | PGEQTMGVLPTSAAGC<br>TNDS | 2.93 | 0.01 | 2.19 | 0.44 | 1.13 | 0.28 |
| 53002 | 0 | 109668 | PGERGAPG                 | 2.17 | 0.01 | 1.60 | 2.55 | 2.60 | 0.28 |
| 53003 | 0 | 99528  | PGERTRGRQPGDYDD          | 2.70 | 0.01 | 2.16 | 0.44 | 1.23 | 1.48 |
| 53004 | 0 | 47638  | PGEVWVTP                 | 2.15 | 0.01 | 2.85 | 0.44 | 0.22 | 0.28 |
| 53005 | 0 | 47641  | PGFGDNRKNQ               | 2.31 | 0.01 | 0.78 | 1.20 | 0.22 | 0.28 |
| 53006 | 0 | 47641  | PGFGDNRKNQ               | 2.31 | 0.01 | 0.78 | 0.44 | 0.85 | 0.28 |
| 53007 | 0 | 47641  | PGFGDNRKNQ               | 2.31 | 0.01 | 0.78 | 1.81 | 0.22 | 0.28 |
| 53008 | 0 | 47641  | PGFGDNRKNQ               | 2.31 | 0.01 | 0.78 | 1.81 | 0.22 | 0.28 |
| 53009 | 0 | 47641  | PGFGDNRKNQ               | 2.31 | 0.01 | 0.78 | 1.81 | 0.22 | 0.28 |
| 53010 | 0 | 47643  | PGFGDRRKAM               | 2.30 | 0.01 | 3.20 | 0.44 | 1.41 | 0.28 |
| 53011 | 0 | 47643  | PGFGDRRKAM               | 2.30 | 0.01 | 2.84 | 0.44 | 0.85 | 0.28 |
| 53012 | 0 | 97548  | PGFGDRRKAMLEDIA          | 2.65 | 0.01 | 2.84 | 0.44 | 0.85 | 0.28 |
| 53013 | 0 | 144024 | PGFGRFERSGHSRWCD<br>K    | 2.79 | 0.01 | 0.78 | 0.44 | 1.41 | 0.28 |
| 53014 | 0 | 114914 | PGFGYGG                  | 2.02 | 0.01 | 0.78 | 3.06 | 0.22 | 0.28 |
| 53015 | 0 | 114914 | PGFGYGG                  | 2.02 | 0.01 | 0.78 | 3.06 | 0.22 | 0.28 |
| 53016 | 0 | 114914 | PGFGYGG                  | 2.02 | 0.01 | 0.78 | 3.06 | 0.22 | 0.28 |
| 53017 | 0 | 114914 | PGFGYGG                  | 2.02 | 0.01 | 0.78 | 3.06 | 0.22 | 0.28 |
| 53018 | 0 | 116434 | PGFGYGGGRASDYKSAHK<br>G  | 2.87 | 0.01 | 0.78 | 0.44 | 1.13 | 0.28 |
| 53019 | 0 | 47650  | PGFMFSRPSDPAFAA          | 2.70 | 0.01 | 0.90 | 1.15 | 0.22 | 1.27 |
| 53020 | 0 | 47650  | PGFMFSRPSDPAFAA          | 2.70 | 0.01 | 0.90 | 1.15 | 0.22 | 0.85 |
| 53021 | 0 | 47651  | PGFMGRSRPSDPAFA          | 2.72 | 0.01 | 0.90 | 1.15 | 0.22 | 0.85 |
| 53022 | 0 | 47651  | PGFMGRSRPSDPAFA          | 2.72 | 0.01 | 0.90 | 1.15 | 0.22 | 1.27 |
| 53023 | 0 | 109672 | PGFPGARG                 | 2.17 | 0.01 | 1.60 | 2.55 | 2.60 | 0.28 |
| 53024 | 0 | 47653  | PGFTVMAAIL               | 2.28 | 0.01 | 2.30 | 0.68 | 0.22 | 0.28 |
| 53025 | 0 | 47653  | PGFTVMAAIL               | 2.28 | 0.01 | 2.30 | 0.68 | 0.22 | 0.28 |
| 53026 | 0 | 47653  | PGFTVMAAIL               | 2.28 | 0.01 | 2.30 | 0.68 | 0.22 | 0.28 |
| 53027 | 0 | 47653  | PGFTVMAAIL               | 2.28 | 0.01 | 2.30 | 0.68 | 0.22 | 0.28 |
| 53028 | 0 | 47653  | PGFTVMAAIL               | 2.28 | 0.01 | 2.30 | 0.68 | 0.22 | 0.28 |
| 53029 | 0 | 47653  | PGFTVMAAIL               | 2.28 | 0.01 | 2.30 | 0.68 | 0.22 | 0.85 |
| 53030 | 0 | 47653  | PGFTVMAAIL               | 2.28 | 0.01 | 2.30 | 0.68 | 0.22 | 0.85 |
| 53031 | 0 | 47653  | PGFTVMAAIL               | 2.28 | 0.01 | 2.30 | 0.68 | 0.22 | 1.34 |
| 53032 | 0 | 47653  | PGFTVMAAIL               | 2.28 | 0.01 | 2.30 | 0.68 | 0.22 | 0.85 |
| 53033 | 0 | 47653  | PGFTVMAAIL               | 2.28 | 0.01 | 2.30 | 0.68 | 0.22 | 0.85 |
| 53034 | 0 | 47653  | PGFTVMAAIL               | 2.28 | 0.01 | 2.30 | 0.68 | 0.22 | 0.85 |
| 53035 | 0 | 47653  | PGFTVMAAIL               | 2.28 | 0.01 | 2.30 | 0.68 | 0.22 | 0.85 |
| 53036 | 0 | 47653  | PGFTVMAAIL               | 2.28 | 0.01 | 2.30 | 0.68 | 0.22 | 0.85 |
| 53037 | 0 | 244264 | PGGDPRGAPGGGFVPT<br>ML   | 2.86 | 0.01 | 2.96 | 0.44 | 0.85 | 1.66 |
| 53038 | 0 | 47662  | PGGGQIVGGVYLLPRR         | 2.75 | 0.01 | 2.68 | 0.44 | 0.85 | 0.28 |
| 53039 | 0 | 47662  | PGGGQIVGGVYLLPRR         | 2.75 | 0.01 | 2.68 | 2.74 | 0.22 | 0.28 |

|       |   |        |                                                            |      |      |      |      |      |      |
|-------|---|--------|------------------------------------------------------------|------|------|------|------|------|------|
| 53040 | 0 | 47664  | PGGGQIVGGVYLLPRRG<br>PRLGVRATRKTSESRQP                     | 3.48 | 0.01 | 1.72 | 0.44 | 0.85 | 1.39 |
| 53041 | 0 | 122516 | PGGGTLPPSG                                                 | 2.36 | 0.01 | 2.96 | 3.03 | 0.22 | 0.28 |
| 53042 | 0 | 122516 | PGGGTLPPSG                                                 | 2.36 | 0.01 | 2.96 | 3.03 | 0.22 | 3.16 |
| 53043 | 0 | 193514 | PGGGYPYPG                                                  | 2.28 | 0.01 | 2.51 | 0.44 | 2.39 | 0.28 |
| 53044 | 0 | 193514 | PGGGYPYPG                                                  | 2.28 | 0.01 | 2.51 | 0.44 | 2.39 | 0.28 |
| 53045 | 0 | 136547 | PGGKHNMDFYVEALAF<br>PDTD                                   | 2.91 | 0.01 | 0.78 | 0.44 | 1.13 | 0.28 |
| 53046 | 0 | 180881 | PGGNNNNKNNNNDDDS<br>YIPSAEKILEFVKQI                        | 3.31 | 0.01 | 3.37 | 0.68 | 0.22 | 1.48 |
| 53047 | 0 | 180881 | PGGNNNNKNNNNDDDS<br>YIPSAEKILEFVKQI                        | 3.31 | 0.01 | 3.37 | 0.68 | 0.22 | 0.28 |
| 53048 | 0 | 180881 | PGGNNNNKNNNNDDDS<br>YIPSAEKILEFVKQI                        | 3.31 | 0.01 | 3.37 | 0.68 | 0.22 | 1.34 |
| 53049 | 0 | 47668  | PGGNRYPPQGGGGWG<br>QPHGGGGWGQPHGGG<br>WGQPHGGGGWGQPHG<br>G | 3.76 | 0.01 | 2.52 | 2.19 | 0.22 | 0.28 |
| 53050 | 0 | 47668  | PGGNRYPPQGGGGWG<br>QPHGGGGWGQPHGGG<br>WGQPHGGGGWGQPHG<br>G | 3.76 | 0.01 | 2.52 | 2.19 | 0.22 | 2.12 |
| 53051 | 0 | 47668  | PGGNRYPPQGGGGWG<br>QPHGGGGWGQPHGGG<br>WGQPHGGGGWGQPHG<br>G | 3.76 | 0.01 | 2.52 | 2.19 | 0.22 | 0.28 |
| 53052 | 0 | 47669  | PGGPDRFTLLTPGSH                                            | 2.69 | 0.01 | 3.41 | 1.15 | 0.22 | 1.57 |
| 53053 | 0 | 47669  | PGGPDRFTLLTPGSH                                            | 2.69 | 0.01 | 3.41 | 1.15 | 0.22 | 1.57 |
| 53054 | 0 | 47669  | PGGPDRFTLLTPGSH                                            | 2.69 | 0.01 | 3.41 | 3.04 | 0.22 | 1.57 |
| 53055 | 0 | 47669  | PGGPDRFTLLTPGSH                                            | 2.69 | 0.01 | 3.41 | 0.44 | 1.23 | 1.57 |
| 53056 | 0 | 47669  | PGGPDRFTLLTPGSH                                            | 2.69 | 0.01 | 3.41 | 1.12 | 0.22 | 1.57 |
| 53057 | 0 | 193515 | PGGPYPGAP                                                  | 2.28 | 0.01 | 2.51 | 0.44 | 2.39 | 0.28 |
| 53058 | 0 | 193515 | PGGPYPGAP                                                  | 2.28 | 0.01 | 2.51 | 0.44 | 2.39 | 0.28 |
| 53059 | 0 | 193516 | PGGPYSPGP                                                  | 2.28 | 0.01 | 2.51 | 0.44 | 2.39 | 0.28 |
| 53060 | 0 | 193516 | PGGPYSPGP                                                  | 2.28 | 0.01 | 2.51 | 0.44 | 2.39 | 0.28 |
| 53061 | 0 | 47670  | PGGRERGIYHIE                                               | 2.51 | 0.01 | 0.90 | 1.15 | 2.26 | 0.85 |
| 53062 | 0 | 47670  | PGGRERGIYHIE                                               | 2.51 | 0.01 | 0.90 | 0.68 | 0.22 | 0.28 |
| 53063 | 0 | 47670  | PGGRERGIYHIE                                               | 2.51 | 0.01 | 0.90 | 1.15 | 2.26 | 1.39 |
| 53064 | 0 | 113681 | PGGS                                                       | 1.59 | 0.01 | 0.78 | 0.44 | 1.13 | 2.02 |
| 53065 | 0 | 103472 | PGGTTTLVEHMGIL                                             | 2.68 | 0.01 | 2.04 | 0.44 | 0.85 | 1.28 |
| 53066 | 0 | 434644 | PGGVYATRSSAVRLRSS                                          | 2.80 | 4.93 | 0.78 | 0.44 | 1.13 | 0.28 |
| 53067 | 0 | 135487 | PGGWNTGG                                                   | 2.13 | 0.01 | 0.78 | 2.19 | 0.22 | 0.85 |
| 53068 | 0 | 172655 | PGGYFIVKGVEKVIL                                            | 2.70 | 0.01 | 0.78 | 0.44 | 1.41 | 0.28 |
| 53069 | 0 | 47673  | PGHITGHRMAWDMM<br>M                                        | 2.65 | 0.01 | 2.41 | 0.44 | 0.85 | 0.28 |

|       |   |        |                                                                                                                                                                                                                                                                                                                                                                                                                                                                                                                                 |      |      |      |      |      |      |
|-------|---|--------|---------------------------------------------------------------------------------------------------------------------------------------------------------------------------------------------------------------------------------------------------------------------------------------------------------------------------------------------------------------------------------------------------------------------------------------------------------------------------------------------------------------------------------|------|------|------|------|------|------|
| 53070 | 0 | 47673  | PGHITGHRMAWDMM<br>M                                                                                                                                                                                                                                                                                                                                                                                                                                                                                                             | 2.65 | 0.01 | 2.41 | 0.44 | 0.85 | 0.28 |
| 53071 | 0 | 47673  | PGHITGHRMAWDMM<br>M                                                                                                                                                                                                                                                                                                                                                                                                                                                                                                             | 2.65 | 0.01 | 2.41 | 0.44 | 0.85 | 0.28 |
| 53072 | 0 | 118046 | PGHKWKEVRHDNKVT<br>WLVSW                                                                                                                                                                                                                                                                                                                                                                                                                                                                                                        | 2.93 | 0.01 | 0.78 | 0.44 | 1.13 | 1.27 |
| 53073 | 0 | 47674  | PGHLAP                                                                                                                                                                                                                                                                                                                                                                                                                                                                                                                          | 1.91 | 0.01 | 3.27 | 0.44 | 1.59 | 0.28 |
| 53074 | 0 | 47674  | PGHLAP                                                                                                                                                                                                                                                                                                                                                                                                                                                                                                                          | 1.91 | 0.01 | 3.27 | 0.44 | 1.59 | 0.28 |
| 53075 | 0 | 121706 | PGHPDDVGNYWAIPS                                                                                                                                                                                                                                                                                                                                                                                                                                                                                                                 | 2.66 | 0.01 | 0.90 | 0.68 | 0.22 | 1.39 |
| 53076 | 0 | 121706 | PGHPDDVGNYWAIPS                                                                                                                                                                                                                                                                                                                                                                                                                                                                                                                 | 2.66 | 0.01 | 0.90 | 0.68 | 0.22 | 0.28 |
| 53077 | 0 | 121706 | PGHPDDVGNYWAIPS                                                                                                                                                                                                                                                                                                                                                                                                                                                                                                                 | 2.66 | 0.01 | 0.90 | 0.68 | 0.22 | 0.28 |
| 53078 | 0 | 47675  | PGHVSghRMAWDMM<br>M                                                                                                                                                                                                                                                                                                                                                                                                                                                                                                             | 2.65 | 0.01 | 1.96 | 0.44 | 0.85 | 0.28 |
| 53079 | 0 | 47675  | PGHVSghRMAWDMM<br>M                                                                                                                                                                                                                                                                                                                                                                                                                                                                                                             | 2.65 | 0.01 | 1.96 | 0.44 | 0.85 | 0.28 |
| 53080 | 0 | 47675  | PGHVSghRMAWDMM<br>M                                                                                                                                                                                                                                                                                                                                                                                                                                                                                                             | 2.65 | 0.01 | 1.96 | 0.44 | 0.85 | 0.28 |
| 53081 | 0 | 178151 | PGIADRMQKEI                                                                                                                                                                                                                                                                                                                                                                                                                                                                                                                     | 2.36 | 3.50 | 0.78 | 0.44 | 1.13 | 0.28 |
| 53082 | 0 | 47677  | PGICIDVDNEDLFFIADK<br>NSFSDDLskNERIEYNTQ<br>SNYIENDFPINELILDtdLI<br>SKIeLPSeNTESLTDFNV<br>DVPVYEkQPAIKKIFTDE<br>NTIFQYLYSQTFPLDIRDI<br>SLTSSFDdALLFSNKVYS<br>FFSMDYIKTANKVVEAG<br>LFAGWVKQIVNDfVIEA<br>NKSNTMDKIADISLIVPYI<br>GLALNVGNETAKGNFE<br>NAFEIAGASILLEFIPELLI<br>PVVGAFLLesYIDNKNKII<br>KTIDNALtKRNEKWSD<br>MYGLIVAqWLSTVNTQ<br>FYTIKEGMYKALNYQAQ<br>ALEEIIKYRYNIYSEKEKSN<br>INIDFNDINSKLNEGINQ<br>AIDNINNfINGCSVSYLM<br>KKMIPLAVEKLLDFDNTL<br>KKNLLNYIDENKLYLIGSA<br>EYEKSKVNkYLKTIMPFD<br>LSIYTNDtILIEMFNKYNS<br>EIL | 6.03 | 0.01 | 4.33 | 1.15 | 0.22 | 0.28 |

|       |   |        |                                                      |      |      |      |      |      |      |
|-------|---|--------|------------------------------------------------------|------|------|------|------|------|------|
| 53083 | 0 | 95130  | PGIFKSSCYIDVRWFPPD<br>VQ                             | 2.93 | 0.01 | 2.25 | 2.04 | 0.22 | 1.57 |
| 53084 | 0 | 47679  | PGIKADSLDIDIERNVVT<br>VR                             | 2.93 | 0.01 | 2.59 | 0.68 | 0.22 | 0.28 |
| 53085 | 0 | 47679  | PGIKADSLDIDIERNVVT<br>VR                             | 2.93 | 0.01 | 2.59 | 2.42 | 0.22 | 0.28 |
| 53086 | 0 | 118047 | PGIMAPPPGM                                           | 2.36 | 0.01 | 0.78 | 3.05 | 1.13 | 0.28 |
| 53087 | 0 | 350816 | PGKEVKKAAKPAAKT                                      | 2.73 | 0.01 | 1.61 | 0.44 | 0.85 | 1.28 |
| 53088 | 0 | 47689  | PGKKTTPKPTKK                                         | 2.53 | 0.01 | 2.38 | 0.68 | 0.22 | 0.28 |
| 53089 | 0 | 47689  | PGKKTTPKPTKK                                         | 2.53 | 0.01 | 2.38 | 0.68 | 0.22 | 0.28 |
| 53090 | 0 | 47690  | PGKKTTPKPTKKPTL                                      | 2.74 | 0.01 | 2.67 | 1.12 | 0.22 | 0.28 |
| 53091 | 0 | 47690  | PGKKTTPKPTKKPTL                                      | 2.74 | 0.01 | 2.67 | 1.12 | 0.22 | 0.28 |
| 53092 | 0 | 47690  | PGKKTTPKPTKKPTL                                      | 2.74 | 0.01 | 2.67 | 1.12 | 0.22 | 0.28 |
| 53093 | 0 | 47690  | PGKKTTPKPTKKPTL                                      | 2.74 | 0.01 | 2.67 | 1.12 | 0.22 | 0.28 |
| 53094 | 0 | 47690  | PGKKTTPKPTKKPTL                                      | 2.74 | 0.01 | 2.67 | 1.12 | 0.22 | 0.28 |
| 53095 | 0 | 112619 | PGKVCGSNLLSICK                                       | 2.62 | 0.01 | 0.78 | 2.25 | 0.22 | 1.27 |
| 53096 | 0 | 112816 | PGKVCGSNLLSICKTAEF                                   | 2.81 | 0.01 | 1.75 | 2.82 | 0.22 | 0.28 |
| 53097 | 0 | 112816 | PGKVCGSNLLSICKTAEF                                   | 2.81 | 0.01 | 1.75 | 2.82 | 0.22 | 0.28 |
| 53098 | 0 | 112816 | PGKVCGSNLLSICKTAEF                                   | 2.81 | 0.01 | 1.75 | 2.82 | 0.22 | 1.48 |
| 53099 | 0 | 176827 | PGKVGPKGPMGPK                                        | 2.62 | 0.01 | 0.78 | 0.44 | 1.13 | 1.28 |
| 53100 | 0 | 176827 | PGKVGPKGPMGPK                                        | 2.62 | 0.01 | 0.78 | 0.44 | 1.13 | 1.66 |
| 53101 | 0 | 176827 | PGKVGPKGPMGPK                                        | 2.62 | 0.01 | 0.78 | 0.44 | 1.13 | 1.66 |
| 53102 | 0 | 176827 | PGKVGPKGPMGPK                                        | 2.62 | 0.01 | 0.78 | 0.44 | 1.13 | 1.66 |
| 53103 | 0 | 176827 | PGKVGPKGPMGPK                                        | 2.62 | 0.01 | 0.78 | 0.44 | 1.13 | 1.66 |
| 53104 | 0 | 176827 | PGKVGPKGPMGPK                                        | 2.62 | 0.01 | 0.78 | 0.44 | 1.13 | 1.66 |
| 53105 | 0 | 176827 | PGKVGPKGPMGPK                                        | 2.62 | 0.01 | 0.78 | 0.44 | 1.13 | 1.66 |
| 53106 | 0 | 176827 | PGKVGPKGPMGPK                                        | 2.62 | 0.01 | 0.78 | 0.44 | 1.13 | 1.66 |
| 53107 | 0 | 176827 | PGKVGPKGPMGPK                                        | 2.62 | 0.01 | 0.78 | 0.44 | 1.13 | 1.66 |
| 53108 | 0 | 123578 | PGLAPGQI                                             | 2.15 | 0.01 | 0.78 | 1.20 | 0.22 | 0.28 |
| 53109 | 0 | 510470 | PGLATNF                                              | 1.99 | 0.01 | 0.90 | 0.44 | 1.13 | 0.28 |
| 53110 | 0 | 510470 | PGLATNF                                              | 1.99 | 0.01 | 0.90 | 0.44 | 1.41 | 0.28 |
| 53111 | 0 | 47694  | PGLGAPVFHMTNYLE<br>PGLKGKRGDSGSPATW                  | 2.65 | 0.01 | 2.43 | 0.44 | 0.85 | 0.28 |
| 53112 | 0 | 132880 | TTRGFVFTRHSQTTAIPS<br>CPEGTVPLYS<br>PGLKGKRGDSGSPATW | 3.71 | 0.01 | 0.78 | 0.44 | 1.13 | 0.85 |
| 53113 | 0 | 132880 | TTRGFVFTRHSQTTAIPS<br>CPEGTVPLYS<br>PGLKGKRGDSGSPATW | 3.71 | 0.01 | 0.78 | 2.97 | 2.60 | 1.75 |
| 53114 | 0 | 132880 | TTRGFVFTRHSQTTAIPS<br>CPEGTVPLYS                     | 3.71 | 0.01 | 0.78 | 2.97 | 0.22 | 0.28 |
| 53115 | 0 | 78481  | PGLKND                                               | 1.88 | 0.01 | 0.90 | 0.68 | 0.22 | 0.28 |
| 53116 | 0 | 78759  | PGLRPQNLYTLWGGSV<br>VCMY                             | 2.92 | 0.01 | 2.04 | 0.44 | 1.59 | 0.28 |



|       |   |        |                          |      |      |      |      |      |      |
|-------|---|--------|--------------------------|------|------|------|------|------|------|
| 53117 | 0 | 126819 | PGLWLHQAFFSPWTLLR        | 2.78 | 0.01 | 0.78 | 1.20 | 0.22 | 0.28 |
| 53118 | 0 | 126819 | PGLWLHQAFFSPWTLLR        | 2.78 | 0.01 | 0.78 | 1.20 | 0.22 | 0.28 |
| 53119 | 0 | 123579 | PGMIPPPG                 | 2.16 | 0.01 | 0.78 | 1.20 | 0.22 | 0.28 |
| 53120 | 0 | 123579 | PGMIPPPG                 | 2.16 | 0.01 | 0.78 | 0.44 | 1.13 | 0.28 |
| 53121 | 0 | 132524 | PGMMPVGPAP               | 2.36 | 0.01 | 0.78 | 0.44 | 1.13 | 0.28 |
| 53122 | 0 | 123580 | PGMPPMTQ                 | 2.16 | 0.01 | 0.78 | 1.20 | 0.22 | 0.28 |
| 53123 | 0 | 118048 | PGMRPPMGPP               | 2.36 | 0.01 | 0.78 | 3.05 | 1.13 | 0.28 |
| 53124 | 0 | 79039  | PGNAPGIAGYNSNGCV<br>YSES | 2.98 | 0.01 | 2.84 | 0.44 | 0.85 | 0.28 |
| 53125 | 0 | 238839 | PGNEERFDSYPMVLGA<br>QH   | 2.77 | 0.01 | 0.78 | 0.44 | 1.13 | 0.28 |
| 53126 | 0 | 47706  | PGNELIDVTGITLK           | 2.61 | 0.01 | 3.17 | 1.15 | 2.26 | 0.28 |
| 53127 | 0 | 47708  | PGNKKFVVNNLFFNGP<br>CQPH | 2.96 | 0.01 | 3.24 | 0.44 | 1.23 | 0.28 |
| 53128 | 0 | 47710  | PGNKPRIAEM               | 2.30 | 0.01 | 3.50 | 2.37 | 1.59 | 0.28 |
| 53129 | 0 | 47710  | PGNKPRIAEM               | 2.30 | 0.01 | 3.50 | 1.12 | 0.22 | 0.28 |
| 53130 | 0 | 132001 | PGNRPTGWEEEDVE           | 2.69 | 0.01 | 0.78 | 0.44 | 1.13 | 0.85 |
| 53131 | 0 | 109677 | PGPAGEEG                 | 2.17 | 0.01 | 1.60 | 2.55 | 2.60 | 0.28 |
| 53132 | 0 | 47719  | PGPARVIYTY               | 2.32 | 0.01 | 2.75 | 0.44 | 1.23 | 0.28 |
| 53133 | 0 | 47721  | PGPGEVWV                 | 2.17 | 0.01 | 2.85 | 0.44 | 0.22 | 0.28 |
| 53134 | 0 | 174223 | PGPNITATYG               | 2.34 | 0.01 | 3.10 | 0.44 | 1.23 | 0.85 |
| 53135 | 0 | 174223 | PGPNITATYG               | 2.34 | 0.01 | 3.10 | 0.44 | 1.23 | 0.85 |
| 53136 | 0 | 174223 | PGPNITATYG               | 2.34 | 0.01 | 3.10 | 0.44 | 1.23 | 0.85 |
| 53137 | 0 | 174223 | PGPNITATYG               | 2.34 | 0.01 | 3.10 | 0.44 | 1.23 | 0.85 |
| 53138 | 0 | 108064 | PGPPGPP                  | 2.03 | 4.63 | 0.78 | 0.68 | 0.22 | 1.27 |
| 53139 | 0 | 108064 | PGPPGPP                  | 2.03 | 4.63 | 0.78 | 0.68 | 0.22 | 0.28 |
| 53140 | 0 | 193517 | PGPPPGGPG                | 2.28 | 0.01 | 2.51 | 0.44 | 2.39 | 0.28 |
| 53141 | 0 | 193517 | PGPPPGGPG                | 2.28 | 0.01 | 2.51 | 0.44 | 2.39 | 0.28 |
| 53142 | 0 | 156929 | PGPRFF                   | 1.89 | 0.01 | 0.90 | 2.74 | 0.22 | 0.85 |
| 53143 | 0 | 195832 | PGPSDTPILPQ              | 2.42 | 0.01 | 0.78 | 1.15 | 0.22 | 2.35 |
| 53144 | 0 | 195832 | PGPSDTPILPQ              | 2.42 | 0.01 | 0.78 | 1.15 | 0.22 | 2.51 |
| 53145 | 0 | 195832 | PGPSDTPILPQ              | 2.42 | 0.01 | 0.78 | 1.15 | 0.22 | 2.51 |
| 53146 | 0 | 195832 | PGPSDTPILPQ              | 2.42 | 0.01 | 0.78 | 1.15 | 0.22 | 2.51 |
| 53147 | 0 | 195832 | PGPSDTPILPQ              | 2.42 | 0.01 | 0.78 | 1.15 | 0.22 | 2.51 |
| 53148 | 0 | 195832 | PGPSDTPILPQ              | 2.42 | 0.01 | 0.78 | 1.15 | 0.22 | 1.57 |
| 53149 | 0 | 195832 | PGPSDTPILPQ              | 2.42 | 0.01 | 0.78 | 1.15 | 0.22 | 1.57 |
| 53150 | 0 | 195832 | PGPSDTPILPQ              | 2.42 | 0.01 | 0.78 | 1.15 | 0.22 | 1.57 |
| 53151 | 0 | 195832 | PGPSDTPILPQ              | 2.42 | 0.01 | 0.78 | 1.15 | 0.22 | 2.66 |
| 53152 | 0 | 195832 | PGPSDTPILPQ              | 2.42 | 0.01 | 0.78 | 1.15 | 0.22 | 1.57 |
| 53153 | 0 | 132525 | PGPSPLPHRD               | 2.34 | 0.01 | 0.78 | 0.44 | 1.13 | 0.28 |
| 53154 | 0 | 47726  | PGPSQKI                  | 2.03 | 0.01 | 1.72 | 0.44 | 0.85 | 0.28 |
| 53155 | 0 | 106707 | PGPSRAHFL                | 2.22 | 0.01 | 0.90 | 0.44 | 1.13 | 1.39 |
| 53156 | 0 | 106707 | PGPSRAHFL                | 2.22 | 0.01 | 0.90 | 0.44 | 1.13 | 1.39 |
| 53157 | 0 | 127762 | PGPSTTS                  | 2.05 | 0.01 | 0.90 | 0.44 | 1.13 | 1.39 |
| 53158 | 0 | 127762 | PGPSTTS                  | 2.05 | 0.01 | 0.90 | 0.44 | 1.13 | 1.39 |

|       |   |        |                                   |      |      |      |      |      |      |
|-------|---|--------|-----------------------------------|------|------|------|------|------|------|
| 53159 | 0 | 109682 | PGPTGASG                          | 2.17 | 0.01 | 1.60 | 2.55 | 2.60 | 0.28 |
| 53160 | 0 | 47730  | PGQAEPPQAFIDEV                    | 2.63 | 0.01 | 3.44 | 0.68 | 0.22 | 0.28 |
| 53161 | 0 | 47730  | PGQAEPPQAFIDEV                    | 2.63 | 0.01 | 3.44 | 0.68 | 0.22 | 1.48 |
| 53162 | 0 | 47730  | PGQAEPPQAFIDEV                    | 2.63 | 0.01 | 3.44 | 2.49 | 0.22 | 0.28 |
| 53163 | 0 | 47730  | PGQAEPPQAFIDEV                    | 2.63 | 0.01 | 3.44 | 1.15 | 0.22 | 0.28 |
| 53164 | 0 | 99529  | PGQAGQKQILLDAID                   | 2.71 | 0.01 | 2.86 | 2.02 | 0.85 | 0.85 |
| 53165 | 0 | 99530  | PGQFEDFFPASSRDQ                   | 2.69 | 0.01 | 2.16 | 0.44 | 1.23 | 1.48 |
| 53166 | 0 | 135734 | PGQFPWQV                          | 2.15 | 0.01 | 0.78 | 0.44 | 2.35 | 0.28 |
| 53167 | 0 | 103476 | PGQGAYAAANSWVDV                   | 2.66 | 0.01 | 2.04 | 0.44 | 0.85 | 1.28 |
| 53168 | 0 | 113686 | PGQGQQGQQPGQGQ                    | 2.69 | 0.01 | 1.86 | 0.44 | 1.23 | 0.85 |
| 53169 | 0 | 113687 | PGQGQQPGQGQQGY                    | 2.68 | 0.01 | 1.86 | 0.44 | 1.23 | 0.85 |
| 53170 | 0 | 104593 | PGQGSPGGNRYPPQGG<br>TWGQPHGGGWGQP | 3.35 | 0.01 | 1.75 | 3.78 | 0.22 | 0.28 |
| 53171 | 0 | 123581 | PGQIPPGA                          | 2.16 | 0.01 | 0.78 | 1.20 | 0.22 | 0.28 |
| 53172 | 0 | 79040  | PGQNLCTYK                         | 2.18 | 0.01 | 3.33 | 2.43 | 0.22 | 0.28 |
| 53173 | 0 | 79040  | PGQNLCTYK                         | 2.18 | 0.01 | 3.33 | 2.43 | 0.22 | 0.28 |
| 53174 | 0 | 79040  | PGQNLCTYK                         | 2.18 | 0.01 | 3.33 | 2.43 | 0.22 | 0.28 |
| 53175 | 0 | 79040  | PGQNLCTYK                         | 2.18 | 0.01 | 3.33 | 2.43 | 0.22 | 0.28 |
| 53176 | 0 | 79040  | PGQNLCTYK                         | 2.18 | 0.01 | 3.33 | 2.43 | 0.22 | 0.28 |
| 53177 | 0 | 79040  | PGQNLCTYK                         | 2.18 | 0.01 | 3.33 | 2.43 | 0.22 | 1.34 |
| 53178 | 0 | 79040  | PGQNLCTYK                         | 2.18 | 0.01 | 3.33 | 2.43 | 0.22 | 1.75 |
| 53179 | 0 | 193518 | PGQPFGPGG                         | 2.26 | 0.01 | 2.51 | 0.44 | 2.39 | 0.28 |
| 53180 | 0 | 193518 | PGQPFGPGG                         | 2.26 | 0.01 | 2.51 | 0.44 | 2.39 | 1.27 |
| 53181 | 0 | 123583 | PGQPPYMP                          | 2.17 | 0.01 | 0.78 | 1.20 | 0.22 | 0.28 |
| 53182 | 0 | 148716 | PGQQQQFPPQ                        | 2.37 | 0.01 | 1.86 | 0.68 | 0.22 | 0.28 |
| 53183 | 0 | 47736  | PGQRVE                            | 1.88 | 0.01 | 1.96 | 0.44 | 0.85 | 0.28 |
| 53184 | 0 | 112253 | PGQSPKL                           | 2.03 | 0.01 | 0.78 | 0.44 | 1.13 | 0.28 |
| 53185 | 0 | 47739  | PGQTKILAKVFY                      | 2.43 | 0.01 | 2.60 | 0.44 | 1.23 | 0.28 |
| 53186 | 0 | 113690 | PGQWQQPGQGQPGY                    | 2.69 | 0.01 | 1.86 | 0.44 | 1.23 | 0.85 |
| 53187 | 0 | 123584 | PGRGTPMGMPPPGMR<br>PPPPGMRGP      | 3.19 | 0.01 | 0.78 | 1.20 | 0.22 | 0.28 |
| 53188 | 0 | 129575 | PGRGTPPP                          | 2.14 | 0.01 | 0.78 | 0.44 | 1.13 | 0.28 |
| 53189 | 0 | 108065 | PGRMTDNSGPQRFSA                   | 2.67 | 0.01 | 0.90 | 0.44 | 1.13 | 1.39 |
| 53190 | 0 | 152037 | PGRNMWCKIGHD                      | 2.43 | 0.01 | 2.80 | 2.78 | 0.22 | 0.28 |
| 53191 | 0 | 108066 | PGRNNSPLGADSVQS                   | 2.68 | 0.01 | 0.90 | 0.44 | 1.13 | 1.27 |
| 53192 | 0 | 434208 | PGRPRR                            | 1.89 | 0.01 | 0.90 | 2.36 | 0.22 | 1.39 |
| 53193 | 0 | 431702 | PGRRPFFHPVGEAD                    | 2.62 | 0.01 | 2.43 | 0.44 | 1.74 | 0.28 |
| 53194 | 0 | 431702 | PGRRPFFHPVGEAD                    | 2.62 | 0.01 | 2.43 | 0.44 | 1.74 | 0.28 |
| 53195 | 0 | 431702 | PGRRPFFHPVGEAD                    | 2.62 | 0.01 | 2.43 | 0.44 | 1.74 | 1.27 |
| 53196 | 0 | 431702 | PGRRPFFHPVGEAD                    | 2.62 | 0.01 | 2.43 | 0.44 | 0.85 | 0.28 |
| 53197 | 0 | 431702 | PGRRPFFHPVGEAD                    | 2.62 | 0.01 | 2.43 | 0.44 | 1.74 | 0.28 |

|       |   |        |                         |      |      |      |      |      |      |
|-------|---|--------|-------------------------|------|------|------|------|------|------|
| 53198 | 0 | 431703 | PGRRPFTRKELQ            | 2.48 | 0.01 | 2.51 | 0.44 | 1.13 | 0.28 |
| 53199 | 0 | 431703 | PGRRPFTRKELQ            | 2.48 | 0.01 | 2.51 | 0.44 | 1.41 | 0.28 |
| 53200 | 0 | 431703 | PGRRPFTRKELQ            | 2.48 | 0.01 | 2.51 | 0.44 | 1.13 | 1.27 |
| 53201 | 0 | 431703 | PGRRPFTRKELQ            | 2.48 | 0.01 | 2.51 | 0.44 | 0.85 | 0.28 |
| 53202 | 0 | 431703 | PGRRPFTRKELQ            | 2.48 | 0.01 | 2.51 | 0.44 | 1.74 | 0.28 |
| 53203 | 0 | 351055 | PGRVKRVKRKAACKG         | 2.72 | 0.01 | 1.61 | 0.44 | 0.85 | 1.28 |
| 53204 | 0 | 117341 | PGSALLFDIPEF            | 2.47 | 0.01 | 0.90 | 0.44 | 1.23 | 0.28 |
| 53205 | 0 | 117342 | PGSALLRQSMHK            | 2.44 | 0.01 | 0.90 | 0.44 | 1.23 | 0.28 |
| 53206 | 0 | 47747  | PGSANKPKDEL DYEND       | 2.75 | 0.01 | 3.37 | 0.44 | 1.74 | 1.27 |
| 53207 | 0 | 227815 | PGSAQDVERLLKKQRE        | 2.71 | 0.01 | 2.72 | 1.20 | 1.59 | 0.28 |
| 53208 | 0 | 98330  | PGSDVYYAGL              | 2.30 | 0.01 | 3.08 | 0.68 | 0.22 | 0.28 |
| 53209 | 0 | 98330  | PGSDVYYAGL              | 2.30 | 0.01 | 3.08 | 1.20 | 0.22 | 0.28 |
| 53210 | 0 | 137942 | PGSEYT                  | 1.88 | 0.01 | 1.60 | 1.20 | 0.22 | 1.27 |
| 53211 | 0 | 137942 | PGSEYT                  | 1.88 | 0.01 | 1.60 | 1.20 | 0.22 | 1.27 |
| 53212 | 0 | 137942 | PGSEYT                  | 1.88 | 0.01 | 1.60 | 1.20 | 0.22 | 1.75 |
| 53213 | 0 | 137942 | PGSEYT                  | 1.88 | 0.01 | 1.60 | 1.20 | 0.22 | 1.27 |
| 53214 | 0 | 137942 | PGSEYT                  | 1.88 | 0.01 | 1.60 | 1.20 | 0.22 | 1.27 |
| 53215 | 0 | 137942 | PGSEYT                  | 1.88 | 0.01 | 1.60 | 1.20 | 0.22 | 1.27 |
| 53216 | 0 | 139848 | PGSFSFI                 | 2.04 | 0.01 | 0.90 | 2.00 | 0.22 | 0.28 |
| 53217 | 0 | 103477 | PGSGFWSFGSEDGS          | 2.66 | 0.01 | 0.78 | 3.33 | 1.13 | 0.28 |
| 53218 | 0 | 103477 | PGSGFWSFGSEDGS          | 2.66 | 0.01 | 0.78 | 3.33 | 1.13 | 1.39 |
| 53219 | 0 | 103477 | PGSGFWSFGSEDGS          | 2.66 | 0.01 | 0.78 | 3.33 | 1.13 | 1.39 |
| 53220 | 0 | 103477 | PGSGFWSFGSEDGS          | 2.66 | 0.01 | 0.78 | 3.33 | 1.13 | 1.39 |
| 53221 | 0 | 103477 | PGSGFWSFGSEDGS          | 2.66 | 0.01 | 0.78 | 3.33 | 1.13 | 1.39 |
| 53222 | 0 | 103477 | PGSGFWSFGSEDGS          | 2.66 | 0.01 | 0.78 | 3.33 | 1.13 | 1.39 |
| 53223 | 0 | 103477 | PGSGFWSFGSEDGS          | 2.66 | 0.01 | 0.78 | 3.33 | 1.13 | 1.39 |
| 53224 | 0 | 103477 | PGSGFWSFGSEDGS          | 2.66 | 0.01 | 0.78 | 3.33 | 1.13 | 1.39 |
| 53225 | 0 | 103477 | PGSGFWSFGSEDGS          | 2.66 | 0.01 | 0.78 | 3.33 | 1.13 | 1.39 |
| 53226 | 0 | 103477 | PGSGFWSFGSEDGS          | 2.66 | 0.01 | 0.78 | 3.33 | 1.13 | 1.39 |
| 53227 | 0 | 103477 | PGSGFWSFGSEDGS          | 2.66 | 0.01 | 0.78 | 3.33 | 1.13 | 1.39 |
| 53228 | 0 | 103477 | PGSGFWSFGSEDGS          | 2.66 | 0.01 | 0.78 | 3.33 | 1.13 | 1.39 |
| 53229 | 0 | 104171 | PGSGFWSFGSEDGSGD<br>PE  | 2.91 | 0.01 | 2.19 | 1.12 | 0.22 | 2.02 |
| 53230 | 0 | 104171 | PGSGFWSFGSEDGSGD<br>PE  | 2.91 | 0.01 | 2.19 | 1.12 | 0.22 | 0.85 |
| 53231 | 0 | 100378 | PGSGFWSFGSEDGSGD<br>SEN | 2.95 | 0.01 | 0.78 | 0.68 | 0.22 | 1.57 |
| 53232 | 0 | 100378 | PGSGFWSFGSEDGSGD<br>SEN | 2.95 | 0.01 | 0.78 | 0.68 | 0.22 | 2.02 |
| 53233 | 0 | 100378 | PGSGFWSFGSEDGSGD<br>SEN | 2.95 | 0.01 | 0.78 | 0.44 | 1.13 | 2.35 |
| 53234 | 0 | 100378 | PGSGFWSFGSEDGSGD<br>SEN | 2.95 | 0.01 | 0.78 | 0.68 | 0.22 | 1.66 |
| 53235 | 0 | 100378 | PGSGFWSFGSEDGSGD<br>SEN | 2.95 | 0.01 | 0.78 | 0.68 | 0.22 | 1.66 |

|       |   |        |                                               |      |      |      |      |      |      |
|-------|---|--------|-----------------------------------------------|------|------|------|------|------|------|
| 53236 | 0 | 100378 | PGSGFWSFGSEDGSGD<br>SEN                       | 2.95 | 0.01 | 0.78 | 0.68 | 0.22 | 1.66 |
| 53237 | 0 | 100378 | PGSGFWSFGSEDGSGD<br>SEN                       | 2.95 | 0.01 | 0.78 | 0.68 | 0.22 | 1.66 |
| 53238 | 0 | 100378 | PGSGFWSFGSEDGSGD<br>SEN                       | 2.95 | 0.01 | 0.78 | 0.68 | 0.22 | 1.66 |
| 53239 | 0 | 100378 | PGSGFWSFGSEDGSGD<br>SEN                       | 2.95 | 0.01 | 0.78 | 0.68 | 0.22 | 1.66 |
| 53240 | 0 | 100378 | PGSGFWSFGSEDGSGD<br>SEN                       | 2.95 | 0.01 | 0.78 | 0.44 | 1.13 | 2.35 |
| 53241 | 0 | 100378 | PGSGFWSFGSEDGSGD<br>SEN                       | 2.95 | 0.01 | 0.78 | 0.68 | 0.22 | 1.27 |
| 53242 | 0 | 100378 | PGSGFWSFGSEDGSGD<br>SEN                       | 2.95 | 0.01 | 0.78 | 0.68 | 0.22 | 1.57 |
| 53243 | 0 | 100378 | PGSGFWSFGSEDGSGD<br>SEN                       | 2.95 | 0.01 | 0.78 | 0.68 | 0.22 | 1.57 |
| 53244 | 0 | 100378 | PGSGFWSFGSEDGSGD<br>SEN                       | 2.95 | 0.01 | 0.78 | 0.68 | 0.22 | 1.57 |
| 53245 | 0 | 100378 | PGSGFWSFGSEDGSGD<br>SEN                       | 2.95 | 0.01 | 0.78 | 0.68 | 0.22 | 2.92 |
| 53246 | 0 | 140310 | PGSHFCGG                                      | 2.11 | 0.01 | 0.78 | 0.44 | 1.13 | 0.28 |
| 53247 | 0 | 132526 | PGSHFCGGTLIHPSF                               | 2.70 | 0.01 | 0.78 | 0.44 | 1.41 | 0.28 |
| 53248 | 0 | 132526 | PGSHFCGGTLIHPSF                               | 2.70 | 0.01 | 0.78 | 0.44 | 1.13 | 0.28 |
| 53249 | 0 | 137943 | PGSHLTPIERESSPLSSN<br>QSEPGSIALNSYHSRNCS<br>E | 3.59 | 0.01 | 0.78 | 0.68 | 0.22 | 0.85 |
| 53250 | 0 | 137943 | PGSHLTPIERESSPLSSN<br>QSEPGSIALNSYHSRNCS<br>E | 3.59 | 0.01 | 0.78 | 0.68 | 0.22 | 0.85 |
| 53251 | 0 | 98933  | PGSHVREETSRNNPF                               | 2.67 | 0.01 | 2.16 | 0.44 | 1.23 | 0.85 |
| 53252 | 0 | 117343 | PGSLLRFDNYTL                                  | 2.45 | 0.01 | 0.90 | 0.44 | 1.23 | 0.28 |
| 53253 | 0 | 177533 | PGSNFRGSDGYGSGR<br>GFGD                       | 3.00 | 0.01 | 0.78 | 0.44 | 2.26 | 0.28 |
| 53254 | 0 | 47750  | PGSPAPPPPEHRGGPEE<br>FEG                      | 2.99 | 0.01 | 2.40 | 0.44 | 1.59 | 0.85 |
| 53255 | 0 | 47751  | PGSQHI                                        | 1.88 | 0.01 | 3.24 | 1.12 | 0.22 | 0.28 |
| 53256 | 0 | 47751  | PGSQHI                                        | 1.88 | 0.01 | 3.24 | 1.12 | 0.22 | 0.28 |
| 53257 | 0 | 47753  | PGSQHIDSQKKAIERMK<br>DTLR                     | 2.96 | 0.01 | 2.24 | 1.12 | 0.22 | 0.28 |
| 53258 | 0 | 104928 | PGSRLQP                                       | 2.03 | 0.01 | 0.90 | 0.44 | 1.13 | 1.39 |
| 53259 | 0 | 132002 | PGSRPQISKESMER                                | 2.70 | 0.01 | 0.78 | 0.44 | 1.13 | 0.85 |
| 53260 | 0 | 127763 | PGSSFSPPPVVA                                  | 2.51 | 0.01 | 3.16 | 3.16 | 0.22 | 0.28 |
| 53261 | 0 | 79963  | PGSSPMEVMLRA                                  | 2.47 | 0.01 | 2.14 | 3.26 | 0.22 | 0.28 |
| 53262 | 0 | 79963  | PGSSPMEVMLRA                                  | 2.47 | 0.01 | 2.14 | 3.55 | 0.22 | 0.28 |
| 53263 | 0 | 79964  | PGSSPMEVMLRAVF                                | 2.61 | 0.01 | 2.14 | 3.17 | 0.22 | 0.28 |
| 53264 | 0 | 79964  | PGSSPMEVMLRAVF                                | 2.61 | 0.01 | 2.14 | 3.17 | 0.22 | 0.28 |

|       |   |        |                    |      |      |      |      |      |      |
|-------|---|--------|--------------------|------|------|------|------|------|------|
|       |   |        | PGSSTTSTGPCRTCTTPA |      |      |      |      |      |      |
| 53265 | 0 | 47755  | QGTSMYPSCCCTKPSDG  | 3.62 | 0.01 | 2.08 | 1.15 | 0.22 | 0.28 |
|       |   |        | NCTC               |      |      |      |      |      |      |
|       |   |        | PGSSTTSTGPCRTCTTPA |      |      |      |      |      |      |
| 53266 | 0 | 47755  | QGTSMYPSCCCTKPSDG  | 3.62 | 0.01 | 2.08 | 1.15 | 0.22 | 0.28 |
|       |   |        | NCTC               |      |      |      |      |      |      |
|       |   |        | PGSSTTSTGPCRTCTTPA |      |      |      |      |      |      |
| 53267 | 0 | 47755  | QGTSMYPSCCCTKPSDG  | 3.62 | 0.01 | 2.08 | 1.15 | 0.22 | 2.35 |
|       |   |        | NCTC               |      |      |      |      |      |      |
| 53268 | 0 | 136075 | PGSSYP             | 1.92 | 0.01 | 0.78 | 2.04 | 0.22 | 0.28 |
| 53269 | 0 | 136076 | PGSSYP             | 2.03 | 0.01 | 0.78 | 2.04 | 0.22 | 0.28 |
| 53270 | 0 | 47757  | PGSTTTSTGPCKTC     | 2.67 | 0.01 | 2.58 | 2.25 | 0.22 | 0.28 |
| 53271 | 0 | 167640 | PGSVNEFDF          | 2.21 | 0.01 | 3.18 | 0.44 | 0.85 | 1.28 |
| 53272 | 0 | 167640 | PGSVNEFDF          | 2.21 | 0.01 | 3.18 | 0.44 | 1.59 | 1.28 |
| 53273 | 0 | 229415 | PGTCEICAYAACTGC    | 2.71 | 0.01 | 0.78 | 1.12 | 0.22 | 1.27 |
| 53274 | 0 | 229415 | PGTCEICAYAACTGC    | 2.71 | 0.01 | 0.78 | 1.12 | 0.22 | 2.35 |
| 53275 | 0 | 229415 | PGTCEICAYAACTGC    | 2.71 | 0.01 | 0.78 | 1.12 | 0.22 | 1.27 |
| 53276 | 0 | 229415 | PGTCEICAYAACTGC    | 2.71 | 0.01 | 0.78 | 1.12 | 0.22 | 0.28 |
| 53277 | 0 | 451503 | PGTEPIWEQL         | 2.32 | 0.01 | 2.04 | 1.20 | 0.22 | 0.85 |
| 53278 | 0 | 137944 | PGTEYT             | 1.90 | 0.01 | 3.93 | 1.20 | 0.22 | 1.75 |
| 53279 | 0 | 137944 | PGTEYT             | 1.90 | 0.01 | 3.93 | 1.20 | 0.22 | 1.27 |
| 53280 | 0 | 137944 | PGTEYT             | 1.90 | 0.01 | 3.93 | 1.20 | 0.22 | 1.27 |
| 53281 | 0 | 137944 | PGTEYT             | 1.90 | 0.01 | 1.60 | 1.20 | 0.22 | 1.27 |
| 53282 | 0 | 137944 | PGTEYT             | 1.90 | 0.01 | 1.60 | 1.20 | 0.22 | 1.75 |
| 53283 | 0 | 137944 | PGTEYT             | 1.90 | 0.01 | 1.60 | 1.20 | 0.22 | 1.27 |
| 53284 | 0 | 137944 | PGTEYT             | 1.90 | 0.01 | 3.93 | 1.20 | 0.22 | 1.27 |
| 53285 | 0 | 137944 | PGTEYT             | 1.90 | 0.01 | 3.93 | 1.20 | 0.22 | 1.27 |
| 53286 | 0 | 137944 | PGTEYT             | 1.90 | 0.01 | 1.60 | 1.20 | 0.22 | 1.27 |
| 53287 | 0 | 137944 | PGTEYT             | 1.90 | 0.01 | 1.60 | 1.20 | 0.22 | 1.27 |
| 53288 | 0 | 137945 | PGTEYTV            | 2.14 | 0.01 | 2.21 | 1.20 | 0.22 | 0.28 |
| 53289 | 0 | 137945 | PGTEYTV            | 2.14 | 0.01 | 2.21 | 0.44 | 0.85 | 0.28 |
| 53290 | 0 | 137945 | PGTEYTV            | 2.14 | 0.01 | 2.21 | 0.44 | 0.85 | 0.28 |
| 53291 | 0 | 137945 | PGTEYTV            | 2.14 | 0.01 | 2.21 | 1.20 | 0.22 | 0.28 |
| 53292 | 0 | 137945 | PGTEYTV            | 2.14 | 0.01 | 2.21 | 1.20 | 0.22 | 0.28 |
| 53293 | 0 | 434209 | PGTLRRG            | 2.03 | 0.01 | 0.90 | 2.36 | 0.22 | 1.39 |
| 53294 | 0 | 47764  | PGTNYVGP           |      |      |      |      |      |      |
|       |   |        | QAGP               |      |      |      |      |      |      |
|       |   |        | PQSAVD             | 3.04 | 0.01 | 2.75 | 1.12 | 0.22 | 1.34 |
| 53295 | 0 | 47764  | PGTNYVGP           |      |      |      |      |      |      |
|       |   |        | QAGP               |      |      |      |      |      |      |
|       |   |        | PQSAVD             | 3.04 | 0.01 | 2.75 | 1.12 | 0.22 | 0.28 |
| 53296 | 0 | 47764  | PGTNYVGP           |      |      |      |      |      |      |
|       |   |        | QAGP               |      |      |      |      |      |      |
|       |   |        | PQSAVD             | 3.04 | 0.01 | 2.75 | 1.12 | 0.22 | 0.85 |
| 53297 | 0 | 47765  | PGTPAQEI           |      |      |      |      |      |      |
|       |   |        | MLKRN              | 2.58 | 0.01 | 2.56 | 1.12 | 0.22 | 0.28 |
| 53298 | 0 | 47765  | PGTPAQEI           |      |      |      |      |      |      |
|       |   |        | MLKRN              | 2.58 | 0.01 | 2.56 | 0.44 | 0.85 | 0.28 |
| 53299 | 0 | 109687 | PGTPGAPG           | 2.18 | 0.01 | 1.60 | 2.55 | 2.60 | 0.28 |
| 53300 | 0 | 104929 | PGTRLQP            | 2.03 | 0.01 | 0.90 | 0.44 | 1.13 | 1.39 |
| 53301 | 0 | 47769  | PGVAGSGA           | 2.16 | 0.01 | 2.04 | 0.44 | 0.85 | 0.28 |
| 53302 | 0 | 47770  | PGVDII             |      |      |      |      |      |      |
|       |   |        | EGPVKNV            | 2.57 | 0.01 | 2.60 | 0.44 | 1.23 | 0.28 |

|       |   |        |                                                       |      |      |      |      |      |      |
|-------|---|--------|-------------------------------------------------------|------|------|------|------|------|------|
| 53303 | 0 | 47770  | PGVDIIEGPVKNV                                         | 2.57 | 0.01 | 2.60 | 1.20 | 0.22 | 0.28 |
| 53304 | 0 | 47773  | PGVGTGCTACGV                                          | 2.52 | 0.01 | 2.56 | 2.69 | 2.26 | 0.85 |
| 53305 | 0 | 47778  | PGVLMGGQSESVEFT                                       | 2.67 | 0.01 | 2.24 | 1.15 | 0.22 | 0.85 |
| 53306 | 0 | 47779  | PGVLMGGQSESVEFTK                                      | 2.72 | 0.01 | 2.24 | 0.68 | 0.22 | 0.28 |
| 53307 | 0 | 128070 | PGVSEDCLYLNVFIPQN<br>VAP                              | 2.92 | 0.01 | 0.78 | 0.44 | 1.13 | 0.28 |
| 53308 | 0 | 129579 | PGVSYRTR                                              | 2.12 | 0.01 | 0.78 | 0.44 | 1.13 | 0.28 |
| 53309 | 0 | 47786  | PGWFADPGFHINSSF                                       | 2.68 | 0.01 | 0.90 | 1.15 | 0.22 | 0.85 |
| 53310 | 0 | 130577 | PGYNEWREFCGLPRLET<br>PADLSTAI                         | 3.14 | 0.01 | 0.78 | 0.44 | 1.13 | 0.28 |
| 53311 | 0 | 130577 | PGYNEWREFCGLPRLET<br>PADLSTAI                         | 3.14 | 0.01 | 0.78 | 0.44 | 1.13 | 1.27 |
| 53312 | 0 | 130577 | PGYNEWREFCGLPRLET<br>PADLSTAI                         | 3.14 | 0.01 | 0.78 | 0.44 | 1.13 | 1.27 |
| 53313 | 0 | 130578 | PGYNEWREFCGLPRLET<br>PADLSTAIASRSVADKIL<br>DLYKHPDNID | 3.74 | 0.01 | 0.78 | 0.44 | 1.13 | 0.28 |
| 53314 | 0 | 130578 | PGYNEWREFCGLPRLET<br>PADLSTAIASRSVADKIL<br>DLYKHPDNID | 3.74 | 0.01 | 0.78 | 0.44 | 1.13 | 0.28 |
| 53315 | 0 | 130578 | PGYNEWREFCGLPRLET<br>PADLSTAIASRSVADKIL<br>DLYKHPDNID | 3.74 | 0.01 | 0.78 | 0.44 | 1.13 | 1.27 |
| 53316 | 0 | 130578 | PGYNEWREFCGLPRLET<br>PADLSTAIASRSVADKIL<br>DLYKHPDNID | 3.74 | 0.01 | 0.78 | 0.44 | 1.13 | 1.27 |
| 53317 | 0 | 103479 | PGYPVAGQVWEATAT                                       | 2.71 | 0.01 | 2.04 | 0.44 | 0.85 | 1.28 |
| 53318 | 0 | 47789  | PGYPWPLY                                              | 2.17 | 0.01 | 1.72 | 0.44 | 0.85 | 0.28 |
| 53319 | 0 | 47792  | PGYPWPLYGNEG                                          | 2.52 | 0.01 | 2.68 | 0.44 | 0.85 | 0.28 |
| 53320 | 0 | 47793  | PGYPWPLYGNEGCGW<br>AGWLLSPRGS                         | 3.19 | 0.01 | 1.72 | 0.44 | 1.41 | 2.97 |
| 53321 | 0 | 47793  | PGYPWPLYGNEGCGW<br>AGWLLSPRGS                         | 3.19 | 0.01 | 1.72 | 0.44 | 1.41 | 2.97 |
| 53322 | 0 | 120869 | PGYRSISGPDPRIRKT                                      | 2.77 | 0.01 | 3.41 | 1.15 | 0.22 | 1.27 |
| 53323 | 0 | 120869 | PGYRSISGPDPRIRKT                                      | 2.77 | 0.01 | 3.41 | 1.15 | 0.22 | 1.27 |
| 53324 | 0 | 120869 | PGYRSISGPDPRIRKT                                      | 2.77 | 0.01 | 3.41 | 1.15 | 0.22 | 0.85 |
| 53325 | 0 | 120869 | PGYRSISGPDPRIRKT                                      | 2.77 | 0.01 | 3.41 | 1.15 | 0.22 | 0.85 |
| 53326 | 0 | 120869 | PGYRSISGPDPRIRKT                                      | 2.77 | 0.01 | 3.41 | 1.15 | 0.22 | 0.85 |
| 53327 | 0 | 120869 | PGYRSISGPDPRIRKT                                      | 2.77 | 0.01 | 3.41 | 1.15 | 0.22 | 0.85 |
| 53328 | 0 | 120869 | PGYRSISGPDPRIRKT                                      | 2.77 | 0.01 | 3.41 | 1.15 | 0.22 | 1.48 |
| 53329 | 0 | 120869 | PGYRSISGPDPRIRKT                                      | 2.77 | 0.01 | 3.41 | 1.15 | 0.22 | 1.48 |
| 53330 | 0 | 137946 | PGYYRLTIANG                                           | 2.46 | 0.01 | 2.21 | 0.44 | 0.85 | 0.28 |
| 53331 | 0 | 47800  | PHACYSTVFDKLHLVD<br>EP                                | 2.88 | 0.01 | 1.60 | 0.44 | 1.23 | 0.28 |
| 53332 | 0 | 78227  | PHAMVDHL                                              | 2.12 | 0.01 | 0.90 | 0.44 | 0.85 | 1.39 |

|       |   |        |                                                       |      |      |      |      |      |      |
|-------|---|--------|-------------------------------------------------------|------|------|------|------|------|------|
| 53333 | 0 | 78228  | PHANMTHI<br>PHAYTSYLEESSGKVYAK                        | 2.12 | 0.01 | 0.90 | 0.44 | 0.85 | 1.39 |
| 53334 | 0 | 79965  | PPSGKNITYECKCGDYKT<br>GTVSTRTKITGC                    | 3.82 | 0.01 | 4.45 | 0.68 | 0.22 | 1.39 |
| 53335 | 0 | 79965  | PPSGKNITYECKCGDYKT<br>GTVSTRTKITGC                    | 3.82 | 0.01 | 4.45 | 0.68 | 0.22 | 1.34 |
| 53336 | 0 | 47805  | PHDGNRAFPRTKVTM                                       | 2.65 | 0.01 | 0.90 | 0.68 | 0.22 | 1.27 |
| 53337 | 0 | 47805  | PHDGNRAFPRTKVTM                                       | 2.65 | 0.01 | 0.90 | 0.68 | 0.22 | 1.39 |
| 53338 | 0 | 434505 | PHDIDLGESRVVIQD                                       | 2.65 | 0.01 | 2.70 | 0.68 | 0.22 | 0.28 |
| 53339 | 0 | 434505 | PHDIDLGESRVVIQD                                       | 2.65 | 0.01 | 2.70 | 0.68 | 0.22 | 0.85 |
| 53340 | 0 | 47806  | PHDIDLGESRVVIQDYD<br>NQH                              | 2.92 | 0.01 | 2.70 | 0.44 | 0.85 | 0.28 |
| 53341 | 0 | 47810  | PHDTNSGKSVRN<br>PHEFEDINKGLVSVPTRII                   | 2.45 | 0.01 | 0.90 | 0.68 | 0.22 | 1.39 |
| 53342 | 0 | 149407 | HLPLSVTSVSAVASGHYL<br>HRVTYRVT<br>PHEFEDINKGLVSVPTRII | 3.75 | 0.01 | 3.47 | 4.45 | 0.22 | 0.28 |
| 53343 | 0 | 149407 | HLPLSVTSVSAVASGHYL<br>HRVTYRVT                        | 3.75 | 0.01 | 3.47 | 4.45 | 0.22 | 0.28 |
| 53344 | 0 | 130999 | PHESDATVR                                             | 2.18 | 0.01 | 0.90 | 0.44 | 1.13 | 1.39 |
| 53345 | 0 | 47818  | PHGESNSSEESTTKS                                       | 2.70 | 0.01 | 1.66 | 1.15 | 0.22 | 0.28 |
| 53346 | 0 | 47818  | PHGESNSSEESTTKS                                       | 2.70 | 0.01 | 1.66 | 1.15 | 0.22 | 0.28 |
| 53347 | 0 | 47819  | PHGGGWGQGGGTHN<br>QWNKPSKPKTNLKHVA                    | 3.35 | 0.01 | 1.75 | 2.19 | 0.22 | 0.28 |
| 53348 | 0 | 47819  | PHGGGWGQGGGTHN<br>QWNKPSKPKTNLKHVA                    | 3.35 | 0.01 | 1.75 | 2.19 | 0.22 | 0.28 |
| 53349 | 0 | 47819  | PHGGGWGQGGGTHN<br>QWNKPSKPKTNLKHVA                    | 3.35 | 0.01 | 1.75 | 2.19 | 0.22 | 0.28 |
| 53350 | 0 | 47819  | PHGGGWGQGGGTHN<br>QWNKPSKPKTNLKHVA                    | 3.35 | 0.01 | 1.75 | 2.19 | 0.22 | 0.28 |
| 53351 | 0 | 47819  | PHGGGWGQGGGTHN<br>QWNKPSKPKTNLKHVA                    | 3.35 | 0.01 | 1.75 | 1.81 | 0.22 | 0.28 |
| 53352 | 0 | 47819  | PHGGGWGQGGGTHN<br>QWNKPSKPKTNLKHVA                    | 3.35 | 0.01 | 1.75 | 3.78 | 0.22 | 0.28 |
| 53353 | 0 | 47819  | PHGGGWGQGGGTHN<br>QWNKPSKPKTNLKHVA                    | 3.35 | 0.01 | 1.75 | 1.81 | 0.22 | 0.28 |

|       |   |        |                                                              |      |      |      |      |      |      |
|-------|---|--------|--------------------------------------------------------------|------|------|------|------|------|------|
| 53354 | 0 | 47819  | PHGGGWGQGGGTHN<br>QWNKPSKPKTNLKHVA                           | 3.35 | 0.01 | 1.75 | 1.81 | 0.22 | 0.28 |
| 53355 | 0 | 47819  | PHGGGWGQGGGTHN<br>QWNKPSKPKTNLKHVA                           | 3.35 | 0.01 | 1.75 | 1.81 | 0.22 | 0.28 |
| 53356 | 0 | 47820  | PHGGGWGQPHGGGW<br>GQPHGGGWGQPHGG<br>GWGQPHGGGWGQPH<br>GGGWGQ | 3.87 | 0.01 | 0.90 | 2.19 | 0.22 | 0.28 |
| 53357 | 0 | 47820  | PHGGGWGQPHGGGW<br>GQPHGGGWGQPHGG<br>GWGQPHGGGWGQPH<br>GGGWGQ | 3.87 | 0.01 | 0.90 | 2.19 | 0.22 | 0.28 |
| 53358 | 0 | 180915 | PHGGLLGW                                                     | 2.15 | 0.01 | 2.08 | 0.44 | 0.85 | 2.75 |
| 53359 | 0 | 419026 | PHGGSWGQ                                                     | 2.14 | 0.01 | 1.75 | 2.19 | 0.22 | 2.49 |
| 53360 | 0 | 47821  | PHGPADAPPGSPAPPPP<br>EHR                                     | 2.99 | 0.01 | 2.40 | 0.44 | 1.59 | 0.85 |
| 53361 | 0 | 47821  | PHGPADAPPGSPAPPPP<br>EHR                                     | 2.99 | 0.01 | 2.40 | 0.44 | 1.59 | 0.28 |
| 53362 | 0 | 132528 | PHGTQCLAMGWGRVG                                              | 2.64 | 0.01 | 0.78 | 0.44 | 1.41 | 0.28 |
| 53363 | 0 | 132528 | PHGTQCLAMGWGRVG                                              | 2.64 | 0.01 | 0.78 | 0.44 | 1.13 | 0.28 |
| 53364 | 0 | 47823  | PHGVVFLHVTYVPSQER                                            | 2.78 | 0.01 | 2.48 | 0.44 | 0.85 | 0.28 |
| 53365 | 0 | 47838  | PHIVTPPSARPRIMAPPV<br>VR                                     | 2.98 | 0.01 | 2.48 | 0.44 | 1.59 | 0.28 |
| 53366 | 0 | 227436 | PHIYIDVDTEDTNIELRTT<br>LKETNNAISFESNSGSLE<br>KKKYV           | 3.67 | 0.01 | 3.28 | 0.44 | 1.59 | 0.28 |
| 53367 | 0 | 227436 | PHIYIDVDTEDTNIELRTT<br>LKETNNAISFESNSGSLE<br>KKKYV           | 3.67 | 0.01 | 3.28 | 3.33 | 0.22 | 0.28 |
| 53368 | 0 | 47839  | PHKAAVDVGPLSVGPQ<br>S                                        | 2.81 | 0.01 | 3.51 | 0.68 | 0.22 | 0.28 |
| 53369 | 0 | 187695 | PHLRNTGQVVAG                                                 | 2.44 | 0.01 | 2.14 | 1.20 | 0.22 | 0.28 |
| 53370 | 0 | 115886 | PHLSFMAIPP                                                   | 2.30 | 0.01 | 1.60 | 0.44 | 1.23 | 0.85 |
| 53371 | 0 | 115886 | PHLSFMAIPP                                                   | 2.30 | 0.01 | 1.60 | 0.44 | 1.23 | 0.85 |
| 53372 | 0 | 47842  | PHLSFMAIPPCKNQ                                               | 2.58 | 0.01 | 1.60 | 0.44 | 1.23 | 0.85 |
| 53373 | 0 | 104594 | PHLVEALYLVCGERG                                              | 2.68 | 0.01 | 1.75 | 4.45 | 0.22 | 1.57 |
| 53374 | 0 | 104594 | PHLVEALYLVCGERG                                              | 2.68 | 0.01 | 1.75 | 4.45 | 0.22 | 1.57 |
| 53375 | 0 | 78229  | PHMNNFHL                                                     | 2.13 | 0.01 | 0.90 | 0.44 | 0.85 | 1.39 |
| 53376 | 0 | 78230  | PHMNNYHL                                                     | 2.13 | 0.01 | 0.90 | 0.44 | 0.85 | 1.39 |
| 53377 | 0 | 78231  | PHMQLHHL                                                     | 2.15 | 0.01 | 0.90 | 0.44 | 0.85 | 1.39 |
| 53378 | 0 | 131000 | PHNRQESPA                                                    | 2.22 | 0.01 | 0.90 | 0.44 | 1.13 | 1.39 |
| 53379 | 0 | 47844  | PHNVLQNF                                                     | 2.12 | 0.01 | 3.18 | 2.74 | 0.22 | 0.28 |



|       |   |        |                            |      |      |      |      |      |      |
|-------|---|--------|----------------------------|------|------|------|------|------|------|
| 53380 | 0 | 351388 | PHPEEDEAFDEADDD            | 2.72 | 0.01 | 1.61 | 0.44 | 0.85 | 1.28 |
| 53381 | 0 | 115887 | PHPHLSFMAI                 | 2.32 | 0.01 | 1.60 | 0.44 | 1.23 | 0.85 |
| 53382 | 0 | 115887 | PHPHLSFMAI                 | 2.32 | 0.01 | 1.60 | 0.44 | 1.23 | 0.85 |
| 53383 | 0 | 117053 | PHPSTMFDRQED               | 2.46 | 0.01 | 0.90 | 0.44 | 0.85 | 1.39 |
| 53384 | 0 | 173952 | PHQEFPPHQISQQP             | 2.66 | 0.01 | 1.86 | 0.44 | 1.23 | 0.85 |
| 53385 | 0 | 146494 | PHQIINLRTNNSAT             | 2.59 | 0.01 | 2.96 | 0.44 | 0.22 | 0.28 |
| 53386 | 0 | 157740 | PHRAGETSAAGL               | 2.46 | 0.01 | 3.40 | 2.49 | 0.85 | 0.28 |
| 53387 | 0 | 226369 | PHRGNE                     | 1.99 | 0.01 | 0.90 | 2.66 | 0.22 | 1.39 |
| 53388 | 0 | 47850  | PHSALALLEDTMDYPAR<br>A     | 2.85 | 0.01 | 2.70 | 0.44 | 0.85 | 0.28 |
| 53389 | 0 | 194954 | PHSIDGRVV                  | 2.18 | 0.01 | 0.78 | 1.15 | 0.22 | 1.27 |
| 53390 | 0 | 194954 | PHSIDGRVV                  | 2.18 | 0.01 | 0.78 | 1.15 | 0.22 | 0.28 |
| 53391 | 0 | 181417 | PHSITLRVYMRIKHV            | 2.66 | 0.01 | 2.82 | 1.15 | 0.22 | 0.28 |
| 53392 | 0 | 78232  | PHSNKSHL                   | 2.14 | 0.01 | 0.90 | 0.44 | 0.85 | 1.39 |
| 53393 | 0 | 47853  | PHSNLDH                    | 2.02 | 0.01 | 2.04 | 0.44 | 0.85 | 0.28 |
| 53394 | 0 | 78233  | PHSNLDHI                   | 2.12 | 0.01 | 2.04 | 0.44 | 0.85 | 1.27 |
| 53395 | 0 | 78234  | PHSNLWHG                   | 2.12 | 0.01 | 0.90 | 0.44 | 0.85 | 0.85 |
| 53396 | 0 | 78235  | PHSNSYHT                   | 2.14 | 0.01 | 0.90 | 0.44 | 0.85 | 1.39 |
| 53397 | 0 | 138537 | PHSRPYM                    | 2.03 | 0.01 | 0.78 | 1.12 | 0.22 | 0.28 |
| 53398 | 0 | 140313 | PHSRPYMA                   | 2.13 | 0.01 | 0.78 | 0.44 | 1.13 | 0.28 |
| 53399 | 0 | 132532 | PHSRPYMASLQMRGN            | 2.67 | 0.01 | 0.78 | 0.44 | 1.13 | 0.28 |
| 53400 | 0 | 78236  | PHSSLWHL                   | 2.15 | 0.01 | 0.90 | 0.44 | 0.85 | 1.39 |
| 53401 | 0 | 115414 | PHSSNICNIS                 | 2.35 | 0.01 | 1.60 | 0.44 | 1.23 | 0.85 |
| 53402 | 0 | 78237  | PHTNLDHF                   | 2.12 | 0.01 | 0.90 | 0.44 | 0.85 | 0.85 |
| 53403 | 0 | 78238  | PHTNRSHQ                   | 2.12 | 0.01 | 0.90 | 0.44 | 0.85 | 1.39 |
| 53404 | 0 | 78239  | PHTQTLHL                   | 2.16 | 0.01 | 0.90 | 0.44 | 0.85 | 1.39 |
| 53405 | 0 | 78240  | PHTSLYHL                   | 2.14 | 0.01 | 0.90 | 0.44 | 0.85 | 1.39 |
| 53406 | 0 | 120870 | PHVKPAALAEQPG              | 2.56 | 0.01 | 2.86 | 0.44 | 0.85 | 0.28 |
| 53407 | 0 | 47856  | PHVRGS                     | 1.88 | 0.01 | 0.90 | 0.44 | 1.59 | 1.39 |
| 53408 | 0 | 47858  | PHVVDL                     | 1.89 | 0.01 | 2.53 | 0.44 | 1.59 | 0.28 |
| 53409 | 0 | 47858  | PHVVDL                     | 1.89 | 0.01 | 2.53 | 0.44 | 1.59 | 0.28 |
| 53410 | 0 | 47859  | PHWA                       | 1.57 | 0.01 | 2.40 | 0.68 | 0.22 | 0.85 |
| 53411 | 0 | 47859  | PHWA                       | 1.57 | 0.01 | 2.40 | 0.68 | 0.22 | 1.27 |
| 53412 | 0 | 47860  | PHWIKKPNRQGLGYYS           | 2.70 | 0.01 | 3.01 | 2.37 | 0.22 | 1.27 |
| 53413 | 0 | 114508 | PHWNLNAHSVVYALR            | 2.67 | 0.01 | 3.27 | 0.44 | 1.23 | 0.85 |
| 53414 | 0 | 47861  | PHWTKKPNRNGGGYYS<br>ASYSDP | 3.03 | 0.01 | 2.04 | 0.44 | 0.85 | 0.28 |
| 53415 | 0 | 47861  | PHWTKKPNRNGGGYYS<br>ASYSDP | 3.03 | 0.01 | 2.04 | 1.20 | 0.22 | 2.02 |
| 53416 | 0 | 47861  | PHWTKKPNRNGGGYYS<br>ASYSDP | 3.03 | 0.01 | 2.04 | 1.20 | 0.22 | 2.02 |
| 53417 | 0 | 47861  | PHWTKKPNRNGGGYYS<br>ASYSDP | 3.03 | 0.01 | 2.04 | 2.37 | 0.22 | 1.34 |

|       |   |        |                            |      |      |      |      |      |      |
|-------|---|--------|----------------------------|------|------|------|------|------|------|
| 53418 | 0 | 47861  | PHWTKKPNRNGGGYYS<br>ASYSDP | 3.03 | 0.01 | 3.19 | 0.44 | 0.85 | 0.28 |
| 53419 | 0 | 47861  | PHWTKKPNRNGGGYYS<br>ASYSDP | 3.03 | 0.01 | 3.19 | 0.44 | 0.85 | 0.28 |
| 53420 | 0 | 47861  | PHWTKKPNRNGGGYYS<br>ASYSDP | 3.03 | 0.01 | 3.19 | 0.44 | 2.82 | 0.28 |
| 53421 | 0 | 47861  | PHWTKKPNRNGGGYYS<br>ASYSDP | 3.03 | 0.01 | 2.04 | 2.43 | 0.22 | 0.28 |
| 53422 | 0 | 47861  | PHWTKKPNRNGGGYYS<br>ASYSDP | 3.03 | 0.01 | 2.04 | 0.68 | 0.22 | 0.28 |
| 53423 | 0 | 47861  | PHWTKKPNRNGGGYYS<br>ASYSDP | 3.03 | 0.01 | 2.04 | 2.82 | 0.22 | 0.28 |
| 53424 | 0 | 47861  | PHWTKKPNRNGGGYYS<br>ASYSDP | 3.03 | 0.01 | 2.04 | 1.81 | 0.22 | 0.28 |
| 53425 | 0 | 47861  | PHWTKKPNRNGGGYYS<br>ASYSDP | 3.03 | 0.01 | 2.04 | 1.20 | 0.22 | 0.28 |
| 53426 | 0 | 47861  | PHWTKKPNRNGGGYYS<br>ASYSDP | 3.03 | 0.01 | 2.04 | 1.20 | 0.22 | 0.28 |
| 53427 | 0 | 47861  | PHWTKKPNRNGGGYYS<br>ASYSDP | 3.03 | 0.01 | 2.04 | 0.44 | 1.59 | 1.57 |
| 53428 | 0 | 98333  | PHYGKEI                    | 1.99 | 0.01 | 3.13 | 0.68 | 0.22 | 0.28 |
| 53429 | 0 | 47863  | PHYSLIKPESSL               | 2.49 | 0.01 | 2.04 | 1.20 | 0.22 | 0.85 |
| 53430 | 0 | 157741 | PHYSNAPQLVYI               | 2.46 | 0.01 | 3.65 | 0.44 | 1.23 | 0.85 |
| 53431 | 0 | 47865  | PIAAAGQLDLSGWF             | 2.59 | 0.01 | 2.41 | 0.44 | 0.85 | 0.28 |
| 53432 | 0 | 189258 | PIAIEEVRGDAHAGVI           | 2.76 | 0.01 | 2.92 | 2.49 | 0.22 | 0.28 |
| 53433 | 0 | 189258 | PIAIEEVRGDAHAGVI           | 2.76 | 0.01 | 2.92 | 3.61 | 0.22 | 0.28 |
| 53434 | 0 | 47868  | PIAPYHFD                   | 2.13 | 0.01 | 2.53 | 0.44 | 1.23 | 0.85 |
| 53435 | 0 | 47869  | PIAPYHFDLSGHAFG            | 2.69 | 0.01 | 2.53 | 0.44 | 1.23 | 0.85 |
| 53436 | 0 | 47869  | PIAPYHFDLSGHAFG            | 2.69 | 0.01 | 2.53 | 0.44 | 1.23 | 0.85 |
| 53437 | 0 | 230243 | PICGTDGVITYTNDCLLC<br>AYS  | 2.94 | 0.01 | 2.25 | 0.44 | 1.23 | 0.28 |
| 53438 | 0 | 351486 | PIDGDAEVEDEDDDD            | 2.70 | 0.01 | 1.61 | 0.44 | 0.85 | 1.28 |
| 53439 | 0 | 429106 | PIDNASYRLISCNTS            | 2.66 | 0.01 | 3.89 | 1.15 | 0.22 | 0.28 |
| 53440 | 0 | 429106 | PIDNASYRLISCNTS            | 2.66 | 0.01 | 3.89 | 1.15 | 0.22 | 0.28 |
| 53441 | 0 | 104174 | PIDQLLY                    | 2.01 | 0.01 | 0.90 | 1.15 | 0.22 | 1.39 |
| 53442 | 0 | 47882  | PIDTTI                     | 1.90 | 0.01 | 1.96 | 0.44 | 0.85 | 0.28 |
| 53443 | 0 | 110962 | PIDVVDP                    | 2.05 | 0.01 | 3.67 | 0.68 | 0.22 | 0.28 |
| 53444 | 0 | 110962 | PIDVVDP                    | 2.05 | 0.01 | 3.67 | 0.68 | 0.22 | 2.02 |
| 53445 | 0 | 128071 | PIDYIIANSQANPEVFIAD<br>S   | 2.96 | 0.01 | 2.40 | 2.75 | 0.22 | 0.28 |
| 53446 | 0 | 128071 | PIDYIIANSQANPEVFIAD<br>S   | 2.96 | 0.01 | 2.40 | 2.75 | 0.22 | 0.85 |
| 53447 | 0 | 351500 | PIEATATKTTTATTG            | 2.71 | 0.01 | 1.61 | 0.44 | 0.85 | 1.28 |
| 53448 | 0 | 122519 | PIECRYPRQGNVSS             | 2.58 | 0.01 | 0.78 | 1.20 | 0.22 | 1.48 |
| 53449 | 0 | 167988 | PIEKFPVTTQTFVVGCIK<br>G    | 2.92 | 0.01 | 2.75 | 0.44 | 1.59 | 2.51 |

|       |   |        |                              |      |      |      |      |      |      |
|-------|---|--------|------------------------------|------|------|------|------|------|------|
| 53450 | 0 | 167988 | PIEKFPVTTQTFVVGCIK<br>G      | 2.92 | 0.01 | 2.75 | 0.44 | 0.85 | 2.51 |
| 53451 | 0 | 167988 | PIEKFPVTTQTFVVGCIK<br>G      | 2.92 | 0.01 | 2.75 | 0.44 | 0.85 | 2.51 |
| 53452 | 0 | 167988 | PIEKFPVTTQTFVVGCIK<br>G      | 2.92 | 0.01 | 2.75 | 0.44 | 0.85 | 2.51 |
| 53453 | 0 | 47890  | PIELQVECFTWDQKL              | 2.64 | 0.01 | 2.43 | 0.68 | 0.22 | 0.28 |
| 53454 | 0 | 47890  | PIELQVECFTWDQKL              | 2.64 | 0.01 | 2.43 | 0.44 | 0.85 | 0.28 |
| 53455 | 0 | 47890  | PIELQVECFTWDQKL              | 2.64 | 0.01 | 2.72 | 0.68 | 0.22 | 0.28 |
| 53456 | 0 | 47890  | PIELQVECFTWDQKL              | 2.64 | 0.01 | 2.72 | 2.22 | 0.22 | 0.28 |
| 53457 | 0 | 131001 | PIERVKLLLQ                   | 2.29 | 0.01 | 0.78 | 0.44 | 1.93 | 0.85 |
| 53458 | 0 | 79966  | PIFCNAKNQTEYRR               | 2.55 | 0.01 | 4.03 | 1.12 | 0.22 | 0.85 |
| 53459 | 0 | 79966  | PIFCNAKNQTEYRR               | 2.55 | 0.01 | 4.03 | 1.12 | 0.22 | 0.85 |
| 53460 | 0 | 47895  | PIFKDGRGCGSCFEIK             | 2.75 | 0.01 | 3.67 | 0.44 | 1.23 | 0.85 |
| 53461 | 0 | 47897  | PIFKSGRGCGSCFEI              | 2.70 | 0.01 | 2.53 | 0.44 | 1.23 | 0.85 |
| 53462 | 0 | 135488 | PIFPGG                       | 1.89 | 0.01 | 0.78 | 1.20 | 0.22 | 0.28 |
| 53463 | 0 | 191679 | PIGDTLEKISNE                 | 2.45 | 0.01 | 2.76 | 1.20 | 0.22 | 0.28 |
| 53464 | 0 | 230035 | PIGLYRLSLEASTGY              | 2.68 | 0.01 | 0.78 | 0.44 | 1.93 | 1.27 |
| 53465 | 0 | 47907  | PIGSENSEKT                   | 2.31 | 0.01 | 1.60 | 0.44 | 1.23 | 0.28 |
| 53466 | 0 | 47907  | PIGSENSEKT                   | 2.31 | 0.01 | 1.60 | 0.44 | 1.23 | 0.28 |
| 53467 | 0 | 47910  | PIGVPSQVVYVPPAYID<br>MPS     | 2.98 | 0.01 | 3.01 | 0.44 | 0.85 | 0.28 |
| 53468 | 0 | 47911  | PIGWTGVIECTAVS               | 2.61 | 0.01 | 3.37 | 2.13 | 2.25 | 1.75 |
| 53469 | 0 | 137255 | PIHTPREGCYGDKDEFP<br>GVRTYGI | 3.13 | 0.01 | 0.78 | 0.68 | 0.22 | 0.28 |
| 53470 | 0 | 193519 | PIKTSPITV                    | 2.26 | 0.01 | 2.51 | 0.44 | 2.39 | 0.28 |
| 53471 | 0 | 193519 | PIKTSPITV                    | 2.26 | 0.01 | 2.51 | 0.44 | 2.39 | 0.28 |
| 53472 | 0 | 103480 | PILGAPWLADLVRRS              | 2.68 | 0.01 | 2.04 | 0.44 | 0.85 | 2.51 |
| 53473 | 0 | 96731  | PILPIQPTGDRHKQPLVA<br>PAKQLL | 3.13 | 0.01 | 4.03 | 1.15 | 0.22 | 0.85 |
| 53474 | 0 | 96731  | PILPIQPTGDRHKQPLVA<br>PAKQLL | 3.13 | 0.01 | 4.03 | 1.15 | 0.22 | 0.85 |
| 53475 | 0 | 47925  | PILQERPPLENR                 | 2.51 | 0.01 | 2.04 | 1.20 | 0.22 | 2.02 |
| 53476 | 0 | 47925  | PILQERPPLENR                 | 2.51 | 0.01 | 2.04 | 1.20 | 0.22 | 0.85 |
| 53477 | 0 | 172668 | PILRGLMATPAKLNK              | 2.69 | 0.01 | 0.78 | 0.44 | 1.41 | 0.28 |
| 53478 | 0 | 47928  | PILSTLPE                     | 2.15 | 0.01 | 2.08 | 1.15 | 0.22 | 0.28 |
| 53479 | 0 | 47928  | PILSTLPE                     | 2.15 | 0.01 | 2.08 | 1.15 | 0.22 | 0.28 |
| 53480 | 0 | 47928  | PILSTLPE                     | 2.15 | 0.01 | 2.08 | 0.68 | 0.22 | 0.28 |
| 53481 | 0 | 47928  | PILSTLPE                     | 2.15 | 0.01 | 2.08 | 0.68 | 0.22 | 0.28 |
| 53482 | 0 | 47928  | PILSTLPE                     | 2.15 | 0.01 | 2.08 | 0.68 | 0.22 | 0.28 |
| 53483 | 0 | 136550 | PIMTQGSLYNDS                 | 2.43 | 0.01 | 3.48 | 3.70 | 0.85 | 1.34 |
| 53484 | 0 | 104175 | PINAGTELSATGNESG             | 2.77 | 0.01 | 3.00 | 1.20 | 0.22 | 1.34 |
| 53485 | 0 | 104175 | PINAGTELSATGNESG             | 2.77 | 0.01 | 3.00 | 1.20 | 0.22 | 0.85 |
| 53486 | 0 | 47941  | PIPAASQLDLSGWF               | 2.61 | 0.01 | 1.96 | 0.44 | 0.85 | 0.28 |
| 53487 | 0 | 47941  | PIPAASQLDLSGWF               | 2.61 | 0.01 | 1.96 | 0.44 | 0.85 | 0.28 |
| 53488 | 0 | 47957  | PIPTRFPPPMPLQDSM<br>AVG      | 2.92 | 0.01 | 2.48 | 0.44 | 1.59 | 0.28 |

|       |   |        |                                                 |      |      |      |      |      |      |
|-------|---|--------|-------------------------------------------------|------|------|------|------|------|------|
| 53489 | 0 | 91791  | PIPVGAEIIPESMKYLRG<br>AKSQYGGIKDKNGELKL<br>PLTL | 3.60 | 0.01 | 3.81 | 3.26 | 0.22 | 0.85 |
| 53490 | 0 | 91791  | PIPVGAEIIPESMKYLRG<br>AKSQYGGIKDKNGELKL<br>PLTL | 3.60 | 0.01 | 3.81 | 3.26 | 0.22 | 1.39 |
| 53491 | 0 | 122162 | PIPVPIIIPFPGWQPGM<br>PT                         | 2.98 | 0.01 | 2.04 | 0.44 | 0.85 | 0.28 |
| 53492 | 0 | 164314 | PIQHLSQ                                         | 2.02 | 0.01 | 0.90 | 1.20 | 0.22 | 1.39 |
| 53493 | 0 | 78241  | PIQIGA                                          | 1.90 | 0.01 | 0.90 | 2.02 | 1.59 | 1.39 |
| 53494 | 0 | 47965  | PIQNLPYGVF                                      | 2.30 | 0.01 | 1.75 | 0.68 | 0.22 | 0.28 |
| 53495 | 0 | 47965  | PIQNLPYGVF                                      | 2.30 | 0.01 | 1.75 | 0.68 | 0.22 | 0.28 |
| 53496 | 0 | 98334  | PIQNSKSAYT                                      | 2.29 | 0.01 | 3.08 | 0.68 | 0.22 | 0.28 |
| 53497 | 0 | 47967  | PIQNSKSAYTPAHYTRQ<br>NNADVFPVAVVGKPGS           | 3.43 | 0.01 | 3.97 | 1.15 | 2.26 | 0.85 |
| 53498 | 0 | 47967  | PIQNSKSAYTPAHYTRQ<br>NNADVFPVAVVGKPGS           | 3.43 | 0.01 | 3.97 | 0.68 | 0.22 | 0.28 |
| 53499 | 0 | 47967  | PIQNSKSAYTPAHYTRQ<br>NNADVFPVAVVGKPGS           | 3.43 | 0.01 | 3.97 | 0.68 | 0.22 | 0.28 |
| 53500 | 0 | 47967  | PIQNSKSAYTPAHYTRQ<br>NNADVFPVAVVGKPGS           | 3.43 | 0.01 | 3.97 | 0.68 | 0.22 | 0.28 |
| 53501 | 0 | 47967  | PIQNSKSAYTPAHYTRQ<br>NNADVFPVAVVGKPGS           | 3.43 | 0.01 | 3.97 | 0.68 | 0.22 | 0.28 |
| 53502 | 0 | 47967  | PIQNSKSAYTPAHYTRQ<br>NNADVFPVAVVGKPGS           | 3.43 | 0.01 | 3.97 | 0.68 | 0.22 | 1.34 |
| 53503 | 0 | 47968  | PIQNSKSAYTPAYYTKNT<br>NNNLTLPVAVVGKPGS          | 3.48 | 0.01 | 3.45 | 0.68 | 0.22 | 1.48 |
| 53504 | 0 | 47968  | PIQNSKSAYTPAYYTKNT<br>NNNLTLPVAVVGKPGS          | 3.48 | 0.01 | 3.45 | 1.81 | 0.22 | 1.48 |
| 53505 | 0 | 47968  | PIQNSKSAYTPAYYTKNT<br>NNNLTLPVAVVGKPGS          | 3.48 | 0.01 | 3.45 | 0.68 | 0.22 | 1.34 |
| 53506 | 0 | 47968  | PIQNSKSAYTPAYYTKNT<br>NNNLTLPVAVVGKPGS          | 3.48 | 0.01 | 3.45 | 1.81 | 0.22 | 1.34 |
| 53507 | 0 | 100380 | PIQPGGACFEPN                                    | 2.47 | 0.01 | 2.88 | 0.44 | 1.23 | 0.85 |
| 53508 | 0 | 47969  | PIQPQQPFPQ                                      | 2.38 | 0.01 | 2.83 | 0.68 | 0.22 | 0.28 |
| 53509 | 0 | 47969  | PIQPQQPFPQ                                      | 2.38 | 0.01 | 2.83 | 0.68 | 0.22 | 0.85 |
| 53510 | 0 | 136551 | PIQRKRRQMPLS                                    | 2.49 | 0.01 | 0.90 | 0.68 | 0.22 | 1.27 |

|       |   |        |                                                       |      |      |      |      |      |      |
|-------|---|--------|-------------------------------------------------------|------|------|------|------|------|------|
| 53511 | 0 | 136551 | PIQRKRRQMPLS                                          | 2.49 | 0.01 | 0.90 | 0.68 | 0.22 | 1.48 |
| 53512 | 0 | 136551 | PIQRKRRQMPLS                                          | 2.49 | 0.01 | 0.90 | 0.68 | 0.22 | 1.48 |
| 53513 | 0 | 136551 | PIQRKRRQMPLS                                          | 2.49 | 0.01 | 0.90 | 0.68 | 0.22 | 1.27 |
| 53514 | 0 | 115890 | PIQYVLSRYP                                            | 2.32 | 0.01 | 1.60 | 0.44 | 1.23 | 0.85 |
| 53515 | 0 | 112255 | PIRALVGDEVELPCRISP<br>GK                              | 2.95 | 0.01 | 0.78 | 4.93 | 0.22 | 0.28 |
| 53516 | 0 | 47972  | PIRTVSQLTREIYTNPVLE<br>NFDGSFRG                       | 3.24 | 0.01 | 4.63 | 0.68 | 0.22 | 0.85 |
| 53517 | 0 | 156930 | PISKEHV                                               | 1.99 | 0.01 | 0.90 | 2.74 | 0.22 | 0.85 |
| 53518 | 0 | 47983  | PISLERLDVGTNLGN                                       | 2.66 | 0.01 | 2.43 | 0.44 | 1.59 | 0.28 |
| 53519 | 0 | 47984  | PISLLFNEKEADDNDHEP<br>QI                              | 2.94 | 0.01 | 2.04 | 0.44 | 0.85 | 0.28 |
| 53520 | 0 | 47984  | PISLLFNEKEADDNDHEP<br>QI                              | 2.94 | 0.01 | 2.04 | 0.44 | 0.85 | 1.27 |
| 53521 | 0 | 47984  | PISLLFNEKEADDNDHEP<br>QI                              | 2.94 | 0.01 | 2.04 | 0.44 | 2.82 | 0.28 |
| 53522 | 0 | 47984  | PISLLFNEKEADDNDHEP<br>QI                              | 2.94 | 0.01 | 2.04 | 0.44 | 0.85 | 0.28 |
| 53523 | 0 | 47984  | PISLLFNEKEADDNDHEP<br>QI                              | 2.94 | 0.01 | 2.04 | 0.44 | 1.59 | 0.28 |
| 53524 | 0 | 47984  | PISLLFNEKEADDNDHEP<br>QI                              | 2.94 | 0.01 | 2.04 | 0.44 | 0.85 | 0.28 |
| 53525 | 0 | 47984  | PISLLFNEKEADDNDHEP<br>QI                              | 2.94 | 0.01 | 2.04 | 0.44 | 1.59 | 0.28 |
| 53526 | 0 | 47984  | PISLLFNEKEADDNDHEP<br>QI                              | 2.94 | 0.01 | 2.04 | 0.44 | 0.85 | 0.28 |
| 53527 | 0 | 47985  | PISLVNLSTASS                                          | 2.47 | 0.01 | 2.69 | 0.68 | 0.22 | 0.28 |
| 53528 | 0 | 47986  | PISLVNLSTASSAPPTRV<br>RR                              | 2.97 | 0.01 | 2.69 | 1.12 | 0.22 | 0.28 |
| 53529 | 0 | 47986  | PISLVNLSTASSAPPTRV<br>RR                              | 2.97 | 0.01 | 2.69 | 0.68 | 0.22 | 0.28 |
| 53530 | 0 | 47986  | PISLVNLSTASSAPPTRV<br>RR                              | 2.97 | 0.01 | 2.69 | 0.68 | 0.22 | 1.27 |
| 53531 | 0 | 47986  | PISLVNLSTASSAPPTRV<br>RR                              | 2.97 | 0.01 | 2.69 | 1.12 | 0.22 | 0.28 |
| 53532 | 0 | 47989  | PISYANGSGPDQRPYCW<br>HY                               | 2.88 | 0.01 | 2.83 | 0.44 | 0.85 | 0.28 |
| 53533 | 0 | 47993  | PITAKVPSTSSTDTLKGT<br>AFAGVPMYSSLSTLVKN<br>ADPEFVFSPG | 3.76 | 0.01 | 3.00 | 0.44 | 0.85 | 0.28 |
| 53534 | 0 | 47993  | PITAKVPSTSSTDTLKGT<br>AFAGVPMYSSLSTLVKN<br>ADPEFVFSPG | 3.76 | 0.01 | 3.00 | 1.15 | 2.39 | 0.28 |
| 53535 | 0 | 47994  | PITARIHAHLKAYA                                        | 2.63 | 0.01 | 2.40 | 2.43 | 0.22 | 0.28 |
| 53536 | 0 | 47994  | PITARIHAHLKAYA                                        | 2.63 | 0.01 | 2.40 | 2.43 | 0.22 | 0.28 |
| 53537 | 0 | 78242  | PIEAAET                                               | 2.15 | 0.01 | 2.60 | 0.44 | 1.23 | 0.85 |

|       |   |       |                                                                                                                                                                                                                                                                                             |      |      |      |      |      |      |
|-------|---|-------|---------------------------------------------------------------------------------------------------------------------------------------------------------------------------------------------------------------------------------------------------------------------------------------------|------|------|------|------|------|------|
| 53538 | 0 | 47995 | PITEAAETATTEVPVEKT<br>EE                                                                                                                                                                                                                                                                    | 3.00 | 0.01 | 2.60 | 0.68 | 0.22 | 1.27 |
|       |   |       | PITINNFNYSDPVDNKN<br>LYLDTHLNTLANEPEKAF<br>RITGNIWVIPDRFSRNSN<br>PNLNKPPRVTSPKSGYY<br>DPNYLSTDSDKDPFLKEI<br>KLFKRINSREIGEELIYRLS<br>TDIPFPGNNNTPIINTFDF<br>DVDFNSVDVKTRQGNN<br>WVKTGSINPSVIITGPRE<br>NIIDPETSTFKLTNNTFA<br>AQEGFGALSIIISPRFML<br>TYSNATNDVGEGRFSKS                          |      |      |      |      |      |      |
| 53539 | 0 | 47996 | EFCMDPILILMHELNHA<br>MHNLYGIAIPNDQTISSV<br>TSNIFYSQYNVKLEYAEIY<br>AFGGPTIDLIPKSARKYFE<br>EKALDYYSIAKRLNSITT<br>ANPSSFNKYIGEYKQKLI<br>RKYRFVVESSGEVTVNR<br>NKFVELYNELTQIFTEFN<br>YAKIYNVQNRKIYLSNVY<br>TPVTANILDDNVYDIQN<br>GFNIPKSNLNVLFMGQ<br>NLSRNPALRKVNPENM<br>LYLFTKFCHKAIDGRSLY<br>NK | 6.09 | 0.01 | 3.93 | 1.12 | 0.22 | 1.34 |

|       |   |       |                      |      |      |      |      |      |      |
|-------|---|-------|----------------------|------|------|------|------|------|------|
|       |   |       | PITINNFNYSDPVDNKNI   |      |      |      |      |      |      |
|       |   |       | LYLDTHLNTLANEPEKAF   |      |      |      |      |      |      |
|       |   |       | RITGNIWVIPDRFSRNSN   |      |      |      |      |      |      |
|       |   |       | PNLNKPPRVTSPKSGYY    |      |      |      |      |      |      |
|       |   |       | DPNYLSTDSKDPLKEII    |      |      |      |      |      |      |
|       |   |       | KLFKRINSREIGEELIYRLS |      |      |      |      |      |      |
|       |   |       | TDIPFPGNNNTPINTFDF   |      |      |      |      |      |      |
|       |   |       | DVDFNSVDVKTRQGNN     |      |      |      |      |      |      |
|       |   |       | WVKTGSINPSVIITGPRE   |      |      |      |      |      |      |
|       |   |       | NIIDPETSTFKLTNNTFA   |      |      |      |      |      |      |
|       |   |       | AQEGFGALSIIISPRFML   |      |      |      |      |      |      |
|       |   |       | TYSNATNDVGEGRFSKS    |      |      |      |      |      |      |
| 53540 | 0 | 47996 | EFCMDPILILMHELNHA    | 6.09 | 0.01 | 3.93 | 0.68 | 0.22 | 0.28 |
|       |   |       | MHNLYGIAIPNDQTISSV   |      |      |      |      |      |      |
|       |   |       | TSNIFYSQYNVKLEYAEIY  |      |      |      |      |      |      |
|       |   |       | AFGGPTIDLIPKSARKYFE  |      |      |      |      |      |      |
|       |   |       | EKALDYYSIAKRLNSITT   |      |      |      |      |      |      |
|       |   |       | ANPSSFNKYIGEYKQKLI   |      |      |      |      |      |      |
|       |   |       | RKYRFVVESSGEVTVNR    |      |      |      |      |      |      |
|       |   |       | NKFVELYNELTQIFTEFN   |      |      |      |      |      |      |
|       |   |       | YAKIYNVQNRKIYLSNVY   |      |      |      |      |      |      |
|       |   |       | TPVTANILDDNVYDIQN    |      |      |      |      |      |      |
|       |   |       | GFNIPKSNLNVLFMGQ     |      |      |      |      |      |      |
|       |   |       | NLSRNPALRKVNPENM     |      |      |      |      |      |      |
|       |   |       | LYLFTKFCHKAIDGRSLY   |      |      |      |      |      |      |
|       |   |       | NK                   |      |      |      |      |      |      |

|       |   |        |                           |      |      |      |      |      |      |
|-------|---|--------|---------------------------|------|------|------|------|------|------|
|       |   |        | PITINNFNYSDPVDNKN         |      |      |      |      |      |      |
|       |   |        | LYLDTHLNTLANEPEKAF        |      |      |      |      |      |      |
|       |   |        | RITGNIWVIPDRFSRNSN        |      |      |      |      |      |      |
|       |   |        | PNLNKPPRVTSPKSGYY         |      |      |      |      |      |      |
|       |   |        | DPNYLSTDSDKDPFLKEI        |      |      |      |      |      |      |
|       |   |        | KLFKRINSREIGEELIYRLS      |      |      |      |      |      |      |
|       |   |        | TDIPFPGNNNTPIINTFDF       |      |      |      |      |      |      |
|       |   |        | DVDFNSVDVKTRQGNN          |      |      |      |      |      |      |
|       |   |        | WVKTGSINPSVIITGPRE        |      |      |      |      |      |      |
|       |   |        | NIIDPETSTFKLTNNTFA        |      |      |      |      |      |      |
|       |   |        | AQEGFGALSIIISPRFML        |      |      |      |      |      |      |
|       |   |        | TYSNATNDVGEGRFSKS         |      |      |      |      |      |      |
| 53541 | 0 | 47996  | EFCMDPILILMHENHA          | 6.09 | 0.01 | 3.93 | 1.12 | 0.22 | 0.28 |
|       |   |        | MHNLYGIAIPNDQTISSV        |      |      |      |      |      |      |
|       |   |        | TSNIFYSQYNVKLEYAEIY       |      |      |      |      |      |      |
|       |   |        | AFGGPTIDLIPKSARKYFE       |      |      |      |      |      |      |
|       |   |        | EKALDYYSIAKRLNSITT        |      |      |      |      |      |      |
|       |   |        | ANPSSFNKYIGEYKQKLI        |      |      |      |      |      |      |
|       |   |        | RKYRFVVESSGEVTVNR         |      |      |      |      |      |      |
|       |   |        | NKFVELYNELTQIFTEFN        |      |      |      |      |      |      |
|       |   |        | YAKIYNVQNRKIYLSNVY        |      |      |      |      |      |      |
|       |   |        | TPVTANILDDNVYDIQN         |      |      |      |      |      |      |
|       |   |        | GFNIPKSNLNVLFMGQ          |      |      |      |      |      |      |
|       |   |        | NLSRNPALRKVNPENM          |      |      |      |      |      |      |
|       |   |        | LYLFTKFCHKAIDGRSLY        |      |      |      |      |      |      |
|       |   |        | NK                        |      |      |      |      |      |      |
| 53542 | 0 | 48001  | PITNDQKK                  | 2.09 | 0.01 | 2.67 | 1.15 | 0.22 | 0.28 |
| 53543 | 0 | 48001  | PITNDQKK                  | 2.09 | 0.01 | 2.67 | 1.15 | 0.22 | 0.85 |
| 53544 | 0 | 48001  | PITNDQKK                  | 2.09 | 0.01 | 2.67 | 1.15 | 0.22 | 0.85 |
| 53545 | 0 | 48002  | PITNDQKKLMSNN             | 2.50 | 0.01 | 2.67 | 0.68 | 0.22 | 0.28 |
| 53546 | 0 | 48005  | PIVATNWQK                 | 2.18 | 0.01 | 2.59 | 0.44 | 0.85 | 0.28 |
| 53547 | 0 | 119506 | PIVET                     | 1.74 | 0.01 | 0.78 | 0.44 | 0.85 | 0.28 |
| 53548 | 0 | 119506 | PIVET                     | 1.74 | 0.01 | 0.78 | 0.44 | 1.13 | 0.28 |
| 53549 | 0 | 152889 | PIVHVDMENI                | 2.31 | 0.01 | 2.18 | 2.16 | 0.22 | 0.28 |
| 53550 | 0 | 115416 | PIVLNPWDQVKRNAVPI<br>TPT  | 2.95 | 0.01 | 1.60 | 0.44 | 1.23 | 1.28 |
| 53551 | 0 | 48006  | PIVNKQSCSISNIETV          | 2.75 | 0.01 | 2.38 | 1.12 | 0.22 | 0.28 |
| 53552 | 0 | 48006  | PIVNKQSCSISNIETV          | 2.75 | 0.01 | 2.38 | 0.68 | 0.22 | 0.28 |
| 53553 | 0 | 48006  | PIVNKQSCSISNIETV          | 2.75 | 0.01 | 2.38 | 0.68 | 0.22 | 0.85 |
| 53554 | 0 | 48006  | PIVNKQSCSISNIETV          | 2.75 | 0.01 | 2.38 | 0.68 | 0.22 | 0.28 |
| 53555 | 0 | 48007  | PIVNKQSCSISNIETVIEF       | 2.91 | 0.01 | 3.00 | 0.68 | 0.22 | 0.28 |
| 53556 | 0 | 48007  | PIVNKQSCSISNIETVIEF       | 2.91 | 0.01 | 3.00 | 0.68 | 0.22 | 0.28 |
| 53557 | 0 | 48008  | PIVNKQSCSISNIETVIEF<br>QQ | 3.00 | 0.01 | 2.38 | 1.12 | 0.22 | 1.27 |



|       |   |       |                           |      |      |      |      |      |      |
|-------|---|-------|---------------------------|------|------|------|------|------|------|
| 53558 | 0 | 48008 | PIVKNQSCSISNIETVIEF<br>QQ | 3.00 | 0.01 | 2.38 | 0.68 | 0.22 | 0.28 |
| 53559 | 0 | 48008 | PIVKNQSCSISNIETVIEF<br>QQ | 3.00 | 0.01 | 2.38 | 0.68 | 0.22 | 0.85 |
| 53560 | 0 | 48008 | PIVKNQSCSISNIETVIEF<br>QQ | 3.00 | 0.01 | 2.38 | 0.68 | 0.22 | 0.28 |
| 53561 | 0 | 48008 | PIVKNQSCSISNIETVIEF<br>QQ | 3.00 | 0.01 | 2.38 | 1.12 | 0.22 | 0.28 |
| 53562 | 0 | 48008 | PIVKNQSCSISNIETVIEF<br>QQ | 3.00 | 0.01 | 2.38 | 1.12 | 0.22 | 1.34 |
| 53563 | 0 | 48008 | PIVKNQSCSISNIETVIEF<br>QQ | 3.00 | 0.01 | 2.38 | 1.12 | 0.22 | 0.28 |
| 53564 | 0 | 48008 | PIVKNQSCSISNIETVIEF<br>QQ | 3.00 | 0.01 | 2.38 | 0.68 | 0.22 | 0.28 |
| 53565 | 0 | 48008 | PIVKNQSCSISNIETVIEF<br>QQ | 3.00 | 0.01 | 2.38 | 0.68 | 0.22 | 0.28 |
| 53566 | 0 | 48008 | PIVKNQSCSISNIETVIEF<br>QQ | 3.00 | 0.01 | 2.38 | 0.68 | 0.22 | 1.34 |
| 53567 | 0 | 48008 | PIVKNQSCSISNIETVIEF<br>QQ | 3.00 | 0.01 | 3.00 | 0.68 | 0.22 | 0.28 |
| 53568 | 0 | 48008 | PIVKNQSCSISNIETVIEF<br>QQ | 3.00 | 0.01 | 3.00 | 0.68 | 0.22 | 0.28 |
| 53569 | 0 | 48008 | PIVKNQSCSISNIETVIEF<br>QQ | 3.00 | 0.01 | 3.00 | 0.68 | 0.22 | 1.34 |
| 53570 | 0 | 48008 | PIVKNQSCSISNIETVIEF<br>QQ | 3.00 | 0.01 | 3.00 | 0.68 | 0.22 | 0.28 |
| 53571 | 0 | 48008 | PIVKNQSCSISNIETVIEF<br>QQ | 3.00 | 0.01 | 3.00 | 1.12 | 0.22 | 0.28 |
| 53572 | 0 | 48008 | PIVKNQSCSISNIETVIEF<br>QQ | 3.00 | 0.01 | 3.00 | 1.12 | 0.22 | 0.28 |
| 53573 | 0 | 48008 | PIVKNQSCSISNIETVIEF<br>QQ | 3.00 | 0.01 | 3.00 | 1.12 | 0.22 | 1.34 |
| 53574 | 0 | 48008 | PIVKNQSCSISNIETVIEF<br>QQ | 3.00 | 0.01 | 3.00 | 1.12 | 0.22 | 0.28 |
| 53575 | 0 | 48008 | PIVKNQSCSISNIETVIEF<br>QQ | 3.00 | 0.01 | 2.67 | 1.15 | 0.22 | 0.28 |
| 53576 | 0 | 48008 | PIVKNQSCSISNIETVIEF<br>QQ | 3.00 | 0.01 | 2.67 | 0.68 | 0.22 | 0.28 |
| 53577 | 0 | 48008 | PIVKNQSCSISNIETVIEF<br>QQ | 3.00 | 0.01 | 2.67 | 0.68 | 0.22 | 0.28 |
| 53578 | 0 | 48008 | PIVKNQSCSISNIETVIEF<br>QQ | 3.00 | 0.01 | 2.67 | 0.68 | 0.22 | 0.28 |
| 53579 | 0 | 48008 | PIVKNQSCSISNIETVIEF<br>QQ | 3.00 | 0.01 | 2.67 | 1.12 | 0.22 | 1.34 |
| 53580 | 0 | 48008 | PIVKNQSCSISNIETVIEF<br>QQ | 3.00 | 0.01 | 2.67 | 1.12 | 0.22 | 1.34 |

|       |   |        |                              |      |      |      |      |      |      |
|-------|---|--------|------------------------------|------|------|------|------|------|------|
| 53581 | 0 | 48008  | PIV NKQSCSISNIETVIEF<br>QQ   | 3.00 | 0.01 | 2.67 | 0.68 | 0.22 | 0.28 |
| 53582 | 0 | 48008  | PIV NKQSCSISNIETVIEF<br>QQ   | 3.00 | 0.01 | 2.67 | 0.68 | 0.22 | 0.28 |
| 53583 | 0 | 48009  | PIV NQQSCRISNIETVIEF<br>QQ   | 3.00 | 0.01 | 3.72 | 1.15 | 0.22 | 0.28 |
| 53584 | 0 | 48009  | PIV NQQSCRISNIETVIEF<br>QQ   | 3.00 | 0.01 | 3.72 | 1.12 | 0.22 | 0.28 |
| 53585 | 0 | 48009  | PIV NQQSCRISNIETVIEF<br>QQ   | 3.00 | 0.01 | 3.72 | 0.68 | 0.22 | 0.28 |
| 53586 | 0 | 48009  | PIV NQQSCRISNIETVIEF<br>QQ   | 3.00 | 0.01 | 3.72 | 0.68 | 0.22 | 0.28 |
| 53587 | 0 | 48009  | PIV NQQSCRISNIETVIEF<br>QQ   | 3.00 | 0.01 | 3.72 | 1.12 | 0.22 | 1.34 |
| 53588 | 0 | 48009  | PIV NQQSCRISNIETVIEF<br>QQ   | 3.00 | 0.01 | 3.72 | 1.12 | 0.22 | 0.28 |
| 53589 | 0 | 48009  | PIV NQQSCRISNIETVIEF<br>QQ   | 3.00 | 0.01 | 3.72 | 0.68 | 0.22 | 0.28 |
| 53590 | 0 | 48009  | PIV NQQSCRISNIETVIEF<br>QQ   | 3.00 | 0.01 | 3.72 | 0.68 | 0.22 | 0.28 |
| 53591 | 0 | 48009  | PIV NQQSCRISNIETVIEF<br>QQ   | 3.00 | 0.01 | 3.72 | 0.68 | 0.22 | 0.28 |
| 53592 | 0 | 48016  | PIW FLNTEPSQLPPTAPP<br>LLPHS | 3.08 | 0.01 | 2.04 | 1.20 | 0.22 | 0.28 |
| 53593 | 0 | 48016  | PIW FLNTEPSQLPPTAPP<br>LLPHS | 3.08 | 0.01 | 2.04 | 0.68 | 0.22 | 0.28 |
| 53594 | 0 | 48016  | PIW FLNTEPSQLPPTAPP<br>LLPHS | 3.08 | 0.01 | 2.04 | 0.44 | 0.85 | 0.28 |
| 53595 | 0 | 48016  | PIW FLNTEPSQLPPTAPP<br>LLPHS | 3.08 | 0.01 | 2.04 | 0.44 | 1.59 | 0.28 |
| 53596 | 0 | 421490 | PIYDIN                       | 1.90 | 0.01 | 0.78 | 0.68 | 0.22 | 1.27 |
| 53597 | 0 | 421490 | PIYDIN                       | 1.90 | 0.01 | 0.78 | 0.68 | 0.22 | 0.28 |
| 53598 | 0 | 421490 | PIYDIN                       | 1.90 | 0.01 | 0.78 | 0.68 | 0.22 | 2.75 |
| 53599 | 0 | 421490 | PIYDIN                       | 1.90 | 0.01 | 0.78 | 0.68 | 0.22 | 1.34 |
| 53600 | 0 | 48017  | PIYGKTISTPSDYM               | 2.64 | 0.01 | 3.02 | 1.81 | 0.22 | 0.85 |
| 53601 | 0 | 48017  | PIYGKTISTPSDYM               | 2.64 | 0.01 | 3.02 | 0.68 | 0.22 | 0.85 |
| 53602 | 0 | 48017  | PIYGKTISTPSDYM               | 2.64 | 0.01 | 3.02 | 2.25 | 0.22 | 0.85 |
| 53603 | 0 | 48017  | PIYGKTISTPSDYM               | 2.64 | 0.01 | 3.02 | 0.68 | 0.22 | 0.85 |
| 53604 | 0 | 48017  | PIYGKTISTPSDYM               | 2.64 | 0.01 | 3.02 | 1.81 | 0.22 | 0.85 |
| 53605 | 0 | 48017  | PIYGKTISTPSDYM               | 2.64 | 0.01 | 3.02 | 1.81 | 0.22 | 0.85 |
| 53606 | 0 | 48017  | PIYGKTISTPSDYM               | 2.64 | 0.01 | 3.02 | 1.81 | 0.22 | 1.34 |
| 53607 | 0 | 48017  | PIYGKTISTPSDYM               | 2.64 | 0.01 | 3.02 | 2.25 | 0.22 | 0.28 |
| 53608 | 0 | 48017  | PIYGKTISTPSDYM               | 2.64 | 0.01 | 3.02 | 2.25 | 0.22 | 0.28 |
| 53609 | 0 | 48026  | PKAFDEKLFT                   | 2.31 | 0.01 | 1.60 | 0.44 | 1.23 | 0.28 |
| 53610 | 0 | 48027  | PKALFTQQGGAYGRC              | 2.65 | 0.01 | 2.14 | 1.20 | 0.22 | 0.28 |
| 53611 | 0 | 48027  | PKALFTQQGGAYGRC              | 2.65 | 0.01 | 2.14 | 1.20 | 0.22 | 0.28 |
| 53612 | 0 | 48027  | PKALFTQQGGAYGRC              | 2.65 | 0.01 | 2.14 | 1.20 | 0.22 | 1.34 |

|       |   |        |                                             |      |      |      |      |      |      |
|-------|---|--------|---------------------------------------------|------|------|------|------|------|------|
| 53613 | 0 | 48029  | PKAPTEAAKP                                  | 2.36 | 3.85 | 3.55 | 1.12 | 0.22 | 0.85 |
| 53614 | 0 | 48030  | PKAPYTSTLLPPELSETPN<br>ATQPE                | 3.16 | 0.01 | 2.40 | 0.68 | 0.22 | 0.28 |
| 53615 | 0 | 48030  | PKAPYTSTLLPPELSETPN<br>ATQPE                | 3.16 | 0.01 | 2.40 | 3.81 | 0.22 | 0.28 |
| 53616 | 0 | 99534  | PKAQNIRQGAKEPYP                             | 2.69 | 0.01 | 2.86 | 2.02 | 0.85 | 0.85 |
| 53617 | 0 | 159048 | PKARELTAETKAFL                              | 2.70 | 0.01 | 3.26 | 0.44 | 1.23 | 0.28 |
| 53618 | 0 | 159048 | PKARELTAETKAFL                              | 2.70 | 0.01 | 3.26 | 0.44 | 1.41 | 0.28 |
| 53619 | 0 | 79041  | PKARQPEGRAWAQPG                             | 2.72 | 0.01 | 3.81 | 0.44 | 0.85 | 0.28 |
| 53620 | 0 | 189134 | PKASGEVLKGKLVHVP                            | 2.75 | 0.01 | 4.63 | 0.68 | 0.22 | 0.28 |
| 53621 | 0 | 187910 | PKDATDRCC                                   | 2.21 | 0.01 | 3.65 | 2.02 | 0.22 | 0.85 |
| 53622 | 0 | 187910 | PKDATDRCC                                   | 2.21 | 0.01 | 3.65 | 2.02 | 0.22 | 0.85 |
| 53623 | 0 | 172673 | PKDLLCNLEEGKIT                              | 2.68 | 0.01 | 0.78 | 0.44 | 1.41 | 0.28 |
| 53624 | 0 | 141977 | PKDSQHGREGYQEFSA<br>NRH                     | 2.82 | 0.01 | 3.13 | 0.68 | 0.22 | 0.28 |
| 53625 | 0 | 351823 | PKDSVDSREQDGEGT                             | 2.68 | 0.01 | 1.61 | 0.44 | 0.85 | 1.28 |
| 53626 | 0 | 149874 | PKEDPYAGLKFWSID                             | 2.65 | 0.01 | 3.67 | 1.20 | 0.22 | 2.98 |
| 53627 | 0 | 48052  | PKEITVATSRTLSYYKL                           | 2.79 | 0.01 | 2.45 | 0.44 | 0.85 | 0.28 |
| 53628 | 0 | 523622 | PKEMPLESAEKEEKK                             | 2.71 | 0.01 | 2.24 | 0.44 | 1.41 | 1.28 |
| 53629 | 0 | 48055  | PKENTERSHKLINPWEK<br>FME                    | 2.94 | 0.01 | 4.63 | 1.15 | 0.22 | 0.28 |
| 53630 | 0 | 489701 | PKEPIIDSLSYANAN                             | 2.68 | 0.01 | 2.69 | 3.05 | 0.85 | 1.28 |
| 53631 | 0 | 48058  | PKEQPWSEFRPAGM                              | 2.60 | 0.01 | 0.90 | 0.44 | 1.41 | 0.28 |
| 53632 | 0 | 123588 | PKFEQLKEG                                   | 2.23 | 0.01 | 2.28 | 2.00 | 0.22 | 0.28 |
| 53633 | 0 | 161665 | PKFLDQRRVAYTGGTDN<br>Y                      | 2.81 | 0.01 | 3.81 | 3.55 | 0.22 | 0.85 |
| 53634 | 0 | 48067  | PKGIFYAEGSRGGSQASS<br>R                     | 2.85 | 0.01 | 2.91 | 0.44 | 0.85 | 0.28 |
| 53635 | 0 | 233372 | PKGKCLGSQDYLELANR<br>FPQQAWEERQFFLKKE<br>KK | 3.51 | 0.01 | 0.78 | 0.44 | 1.41 | 1.39 |
| 53636 | 0 | 237875 | PKGKGGEVQEPNQANKE<br>TQNN                   | 2.98 | 0.01 | 2.22 | 0.44 | 1.74 | 0.28 |
| 53637 | 0 | 141978 | PKGQTRTLGNSNRERERI                          | 2.79 | 0.01 | 3.13 | 2.13 | 0.22 | 0.28 |
| 53638 | 0 | 48071  | PKGRNVVLEK                                  | 2.30 | 0.01 | 3.20 | 0.44 | 1.41 | 0.28 |
| 53639 | 0 | 48072  | PKGRTVIIIEQ                                 | 2.28 | 0.01 | 0.78 | 0.44 | 1.41 | 0.28 |
| 53640 | 0 | 48072  | PKGRTVIIIEQ                                 | 2.28 | 0.01 | 0.78 | 1.20 | 0.22 | 0.28 |
| 53641 | 0 | 48073  | PKGTLTWS                                    | 2.12 | 0.01 | 2.40 | 2.43 | 0.22 | 0.28 |
| 53642 | 0 | 523624 | PKHADADNILVIQQGQA<br>TVTVANG                | 3.13 | 0.01 | 2.16 | 0.44 | 1.23 | 1.39 |
| 53643 | 0 | 106710 | PKHCGIVDSK                                  | 2.29 | 0.01 | 3.08 | 0.44 | 1.23 | 0.85 |
| 53644 | 0 | 229762 | PKHKEMPFKYPVEPFT<br>ERQ                     | 2.97 | 0.01 | 1.60 | 0.44 | 1.23 | 1.28 |
| 53645 | 0 | 48076  | PKHVKAWIIPRPRLC                             | 2.68 | 0.01 | 3.78 | 2.02 | 0.22 | 0.28 |

|       |   |        |                |      |      |      |      |      |      |
|-------|---|--------|----------------|------|------|------|------|------|------|
| 53646 | 0 | 100382 | PKHVRVWCPRPPRA | 2.64 | 0.01 | 2.96 | 0.44 | 0.22 | 0.28 |
| 53647 | 0 | 48084  | PKINRSAPEPSL   | 2.48 | 0.01 | 4.03 | 1.12 | 0.22 | 0.85 |
| 53648 | 0 | 48084  | PKINRSAPEPSL   | 2.48 | 0.01 | 4.03 | 1.12 | 0.22 | 2.02 |
| 53649 | 0 | 48085  | PKINRSAPEPSL   | 2.48 | 0.01 | 0.78 | 1.12 | 0.22 | 0.85 |

|       |   |       |                      |      |      |      |      |      |      |
|-------|---|-------|----------------------|------|------|------|------|------|------|
|       |   |       | PKINSFNYNDPVNDRTIL   |      |      |      |      |      |      |
|       |   |       | YIKPGGCQEFYKSFNIMK   |      |      |      |      |      |      |
|       |   |       | NIWIIPERNVIGTTPQDF   |      |      |      |      |      |      |
|       |   |       | HPPTSLKNGDSSYYDPN    |      |      |      |      |      |      |
|       |   |       | YLQSDDEEKDRFLKIVTKIF |      |      |      |      |      |      |
|       |   |       | NRINNNLSGGILLEELSK   |      |      |      |      |      |      |
|       |   |       | ANPYLGNDNTPDNQFH     |      |      |      |      |      |      |
|       |   |       | IGDASAVEIKFSNGSQDI   |      |      |      |      |      |      |
|       |   |       | LLPNVIIMGAEPDLFETN   |      |      |      |      |      |      |
|       |   |       | SSNISLRNNYMPSNHRF    |      |      |      |      |      |      |
|       |   |       | GSIAIVTFSPEYSFRFND   |      |      |      |      |      |      |
| 53650 | 0 | 48087 | NCMNEFIQDPALTLMH     | 6.03 | 0.01 | 3.81 | 0.68 | 0.22 | 0.85 |
|       |   |       | ELIHS LHGLYGAKGITTKY |      |      |      |      |      |      |
|       |   |       | TITQKQNPLITNIRGTNIE  |      |      |      |      |      |      |
|       |   |       | EFLTGGTDLNIITSAQS    |      |      |      |      |      |      |
|       |   |       | NDIYTNLLADYKKIASKLS  |      |      |      |      |      |      |
|       |   |       | KVQVSNPLLNPYKDVFE    |      |      |      |      |      |      |
|       |   |       | AKYGLDKDASGIYSVNIN   |      |      |      |      |      |      |
|       |   |       | KFNDIFKKLYSFTEFDLRT  |      |      |      |      |      |      |
|       |   |       | KFQVKCRQTYIGQYKYF    |      |      |      |      |      |      |
|       |   |       | KLSNLLNDSIYNISEGYNI  |      |      |      |      |      |      |
|       |   |       | NNLKVNFRGQNANLNP     |      |      |      |      |      |      |
|       |   |       | RIITPITGRGLVKKIIRFCK |      |      |      |      |      |      |
|       |   |       | NIVSVKGIR            |      |      |      |      |      |      |

|       |   |       |                      |      |      |      |      |      |      |
|-------|---|-------|----------------------|------|------|------|------|------|------|
|       |   |       | PKINSFNYNDPVNDRTIL   |      |      |      |      |      |      |
|       |   |       | YIKPGGCQEFYKSFNIMK   |      |      |      |      |      |      |
|       |   |       | NIWIIPERNVIGTTPQDF   |      |      |      |      |      |      |
|       |   |       | HPPTSLKNGDSSYYDPN    |      |      |      |      |      |      |
|       |   |       | YLQSDDEEKDRFLKIVTKIF |      |      |      |      |      |      |
|       |   |       | NRINNNLSGGILLEELSK   |      |      |      |      |      |      |
|       |   |       | ANPYLGNDNTPDNQFH     |      |      |      |      |      |      |
|       |   |       | IGDASAVEIKFSNGSQDI   |      |      |      |      |      |      |
|       |   |       | LLPNVIIMGAEPDLFETN   |      |      |      |      |      |      |
|       |   |       | SSNISLRNNYMPSNHRF    |      |      |      |      |      |      |
|       |   |       | GSIAIVTFSPEYSFRFND   |      |      |      |      |      |      |
| 53651 | 0 | 48087 | NCMNEFIQDPALTLMH     | 6.03 | 0.01 | 3.81 | 0.68 | 0.22 | 0.28 |
|       |   |       | ELIHS LHGLYGAKGITTKY |      |      |      |      |      |      |
|       |   |       | TITQKQNPLITNIRGTNIE  |      |      |      |      |      |      |
|       |   |       | EFLTFGGTDLNIITSAQS   |      |      |      |      |      |      |
|       |   |       | NDIYTNLLADYKKIASKLS  |      |      |      |      |      |      |
|       |   |       | KVQVSNPLLNPYKDVFE    |      |      |      |      |      |      |
|       |   |       | AKYGLDKDASGIYSVNIN   |      |      |      |      |      |      |
|       |   |       | KFNDIFKKLYSFTEFDLRT  |      |      |      |      |      |      |
|       |   |       | KFQVKCRQTYIGQYKYF    |      |      |      |      |      |      |
|       |   |       | KLSNLLNDSIYNISEGYNI  |      |      |      |      |      |      |
|       |   |       | NNLKVNFRGQNANLNP     |      |      |      |      |      |      |
|       |   |       | RIITPITGRGLVKKIIRFCK |      |      |      |      |      |      |
|       |   |       | NIVSVKGIR            |      |      |      |      |      |      |

|       |   |       |                      |      |      |      |      |      |      |
|-------|---|-------|----------------------|------|------|------|------|------|------|
|       |   |       | PKINSFNYNDPVNDRTIL   |      |      |      |      |      |      |
|       |   |       | YIKPGGCQEFYKSFNIMK   |      |      |      |      |      |      |
|       |   |       | NIWIIPERNVIGTTPQDF   |      |      |      |      |      |      |
|       |   |       | HPPTSLKNGDSSYYDPN    |      |      |      |      |      |      |
|       |   |       | YLQSDDEEKDRFLKIVTKIF |      |      |      |      |      |      |
|       |   |       | NRINNNLSGGILLEELSK   |      |      |      |      |      |      |
|       |   |       | ANPYLGNDNTPDNQFH     |      |      |      |      |      |      |
|       |   |       | IGDASAVEIKFSNGSQDI   |      |      |      |      |      |      |
|       |   |       | LLPNVIIMGAEPDLFETN   |      |      |      |      |      |      |
|       |   |       | SSNISLRNNYMPSNHRF    |      |      |      |      |      |      |
|       |   |       | GSIAIVTFSPEYSFRFND   |      |      |      |      |      |      |
| 53652 | 0 | 48087 | NCMNEFIQDPALTLMH     | 6.03 | 0.01 | 3.81 | 0.68 | 0.22 | 0.28 |
|       |   |       | ELIHS LHGLYGAKGITTKY |      |      |      |      |      |      |
|       |   |       | TITQKQNPLITNIRGTNIE  |      |      |      |      |      |      |
|       |   |       | EFLTFGGTDLNIITSAQS   |      |      |      |      |      |      |
|       |   |       | NDIYTNLLADYKKIASKLS  |      |      |      |      |      |      |
|       |   |       | KVQVSNPLLNPYKDVFE    |      |      |      |      |      |      |
|       |   |       | AKYGLDKDASGIYSVNIN   |      |      |      |      |      |      |
|       |   |       | KFNDIFKKLYSFTEFDLRT  |      |      |      |      |      |      |
|       |   |       | KFQVKCRQTYIGQYKYF    |      |      |      |      |      |      |
|       |   |       | KLSNLLNDSIYNISEGYNI  |      |      |      |      |      |      |
|       |   |       | NNLKVNFRGQNANLNP     |      |      |      |      |      |      |
|       |   |       | RIITPITGRGLVKKIIRFCK |      |      |      |      |      |      |
|       |   |       | NIVSVKGIR            |      |      |      |      |      |      |

|       |   |       |                      |      |      |      |      |      |      |
|-------|---|-------|----------------------|------|------|------|------|------|------|
|       |   |       | PKINSFNYNDPVNDRTIL   |      |      |      |      |      |      |
|       |   |       | YIKPGGCQEFYKSFNIMK   |      |      |      |      |      |      |
|       |   |       | NIWIIPERNVIGTTPQDF   |      |      |      |      |      |      |
|       |   |       | HPPTSLKNGDSSYYDPN    |      |      |      |      |      |      |
|       |   |       | YLQSDDEEKDRFLKIVTKIF |      |      |      |      |      |      |
|       |   |       | NRINNNLSGGILLEELSK   |      |      |      |      |      |      |
|       |   |       | ANPYLGNDNTPDNQFH     |      |      |      |      |      |      |
|       |   |       | IGDASAVEIKFSNGSQDI   |      |      |      |      |      |      |
|       |   |       | LLPNVIIMGAEPDLFETN   |      |      |      |      |      |      |
|       |   |       | SSNISLRNNYMPSNHRF    |      |      |      |      |      |      |
|       |   |       | GSIAIVTFSPEYSFRFND   |      |      |      |      |      |      |
| 53653 | 0 | 48087 | NCMNEFIQDPALTLMH     | 6.03 | 0.01 | 3.85 | 0.68 | 0.22 | 0.28 |
|       |   |       | ELIHS LHGLYGAKGITTKY |      |      |      |      |      |      |
|       |   |       | TITQKQNPLITNIRGTNIE  |      |      |      |      |      |      |
|       |   |       | EFLTFGGTDLNIITSAQS   |      |      |      |      |      |      |
|       |   |       | NDIYTNLLADYKKIASKLS  |      |      |      |      |      |      |
|       |   |       | KVQVSNPLLNPYKDVFE    |      |      |      |      |      |      |
|       |   |       | AKYGLDKDASGIYSVNIN   |      |      |      |      |      |      |
|       |   |       | KFNDIFKKLYSFTEFDLRT  |      |      |      |      |      |      |
|       |   |       | KFQVKCRQTYIGQYKYF    |      |      |      |      |      |      |
|       |   |       | KLSNLLNDSIYNISEGYNI  |      |      |      |      |      |      |
|       |   |       | NNLKVNFRGQNANLNP     |      |      |      |      |      |      |
|       |   |       | RIITPITGRGLVKKIIRFCK |      |      |      |      |      |      |
|       |   |       | NIVSVKGIR            |      |      |      |      |      |      |

|       |   |       |                      |      |      |      |      |      |      |
|-------|---|-------|----------------------|------|------|------|------|------|------|
|       |   |       | PKINSFNYNDPVNDRTIL   |      |      |      |      |      |      |
|       |   |       | YIKPGGCQEFYKSFNIMK   |      |      |      |      |      |      |
|       |   |       | NIWIIPERNVIGTTPQDF   |      |      |      |      |      |      |
|       |   |       | HPPTSLKNGDSSYYDPN    |      |      |      |      |      |      |
|       |   |       | YLQSDDEEKDRFLKIVTKIF |      |      |      |      |      |      |
|       |   |       | NRINNNLSGGILLEELSK   |      |      |      |      |      |      |
|       |   |       | ANPYLGNDNTPDNQFH     |      |      |      |      |      |      |
|       |   |       | IGDASAVEIKFSNGSQDI   |      |      |      |      |      |      |
|       |   |       | LLPNVIIMGAEPDLFETN   |      |      |      |      |      |      |
|       |   |       | SSNISLRNNYMPSNHRF    |      |      |      |      |      |      |
|       |   |       | GSIAIVTFSPEYSFRFND   |      |      |      |      |      |      |
| 53654 | 0 | 48087 | NCMNEFIQDPALTLMH     | 6.03 | 0.01 | 3.85 | 0.68 | 0.22 | 0.28 |
|       |   |       | ELIHS LHGLYGAKGITTKY |      |      |      |      |      |      |
|       |   |       | TITQKQNPLITNIRGTNIE  |      |      |      |      |      |      |
|       |   |       | EFLTFGGTDLNIITSAQS   |      |      |      |      |      |      |
|       |   |       | NDIYTNLLADYKKIASKLS  |      |      |      |      |      |      |
|       |   |       | KVQVSNPLLNPYKDVFE    |      |      |      |      |      |      |
|       |   |       | AKYGLDKDASGIYSVNIN   |      |      |      |      |      |      |
|       |   |       | KFNDIFKKLYSFTEFDLRT  |      |      |      |      |      |      |
|       |   |       | KFQVKCRQTYIGQYKYF    |      |      |      |      |      |      |
|       |   |       | KLSNLLNDSIYNISEGYNI  |      |      |      |      |      |      |
|       |   |       | NNLKVNFRGQNANLNP     |      |      |      |      |      |      |
|       |   |       | RIITPITGRGLVKKIIRFCK |      |      |      |      |      |      |
|       |   |       | NIVSVKGIR            |      |      |      |      |      |      |



|       |   |       |                       |      |      |      |      |      |      |
|-------|---|-------|-----------------------|------|------|------|------|------|------|
|       |   |       | PKINSFNYNDPVNDRTIL    |      |      |      |      |      |      |
|       |   |       | YIKPGGCQEFYKSFNIMK    |      |      |      |      |      |      |
|       |   |       | NIWIIPERNVIGTTPQDF    |      |      |      |      |      |      |
|       |   |       | HPPTSLKNGDSSYYDPN     |      |      |      |      |      |      |
|       |   |       | YLQSDDEEKDRFLKIVTKIF  |      |      |      |      |      |      |
|       |   |       | NRINNNLSGGILLEELSK    |      |      |      |      |      |      |
|       |   |       | ANPYLGNDNTPDNQFH      |      |      |      |      |      |      |
|       |   |       | IGDASAVEIKFSNGSQDI    |      |      |      |      |      |      |
|       |   |       | LLPNVIIMGAEPDLFETN    |      |      |      |      |      |      |
|       |   |       | SSNISLRNNYMPSNHRF     |      |      |      |      |      |      |
|       |   |       | GSIAIVTFSPEYSFRFND    |      |      |      |      |      |      |
| 53655 | 0 | 48087 | NCMNEFIQDPALTLMH      | 6.03 | 0.01 | 3.85 | 0.68 | 0.22 | 0.28 |
|       |   |       | ELIHS LHGLYGAKGITT KY |      |      |      |      |      |      |
|       |   |       | TITQKQNPLITNIRGTNIE   |      |      |      |      |      |      |
|       |   |       | EFLTFGGTDLNIITSAQS    |      |      |      |      |      |      |
|       |   |       | NDIYTNLLADYKKIASKLS   |      |      |      |      |      |      |
|       |   |       | KVQVSNPLLNPYKDVFE     |      |      |      |      |      |      |
|       |   |       | AKYGLDKDASGIYSVNIN    |      |      |      |      |      |      |
|       |   |       | KFNDIFKKLYSFTEFDLRT   |      |      |      |      |      |      |
|       |   |       | KFQVKCRQTYIGQYKYF     |      |      |      |      |      |      |
|       |   |       | KLSNLLNDSIYNISEGYNI   |      |      |      |      |      |      |
|       |   |       | NNLKVNF RGQNANLNP     |      |      |      |      |      |      |
|       |   |       | RIITPITGRGLVKKIIRFCK  |      |      |      |      |      |      |
|       |   |       | NIVSVKGIR             |      |      |      |      |      |      |

|       |   |       |                      |      |      |      |      |      |      |
|-------|---|-------|----------------------|------|------|------|------|------|------|
|       |   |       | PKINSFNYNDPVNDRTIL   |      |      |      |      |      |      |
|       |   |       | YIKPGGCQEFYKSFNIMK   |      |      |      |      |      |      |
|       |   |       | NIWIIPERNVIGTTPQDF   |      |      |      |      |      |      |
|       |   |       | HPPTSLKNGDSSYYDPN    |      |      |      |      |      |      |
|       |   |       | YLQSDDEEKDRFLKIVTKIF |      |      |      |      |      |      |
|       |   |       | NRINNNLSGGILLEELSK   |      |      |      |      |      |      |
|       |   |       | ANPYLGNDNTPDNQFH     |      |      |      |      |      |      |
|       |   |       | IGDASAVEIKFSNGSQDI   |      |      |      |      |      |      |
|       |   |       | LLPNVIIMGAEPDLFETN   |      |      |      |      |      |      |
|       |   |       | SSNISLRNNYMPSNHRF    |      |      |      |      |      |      |
|       |   |       | GSIAIVTFSPEYSFRFND   |      |      |      |      |      |      |
| 53656 | 0 | 48087 | NCMNEFIQDPALTLMH     | 6.03 | 0.01 | 3.85 | 0.68 | 0.22 | 0.28 |
|       |   |       | ELIHS LHGLYGAKGITTKY |      |      |      |      |      |      |
|       |   |       | TITQKQNPLITNIRGTNIE  |      |      |      |      |      |      |
|       |   |       | EFLTFGGTDLNIITSAQS   |      |      |      |      |      |      |
|       |   |       | NDIYTNLLADYKKIASKLS  |      |      |      |      |      |      |
|       |   |       | KVQVSNPLLNPYKDVFE    |      |      |      |      |      |      |
|       |   |       | AKYGLDKDASGIYSVNIN   |      |      |      |      |      |      |
|       |   |       | KFNDIFKKLYSFTEFDLRT  |      |      |      |      |      |      |
|       |   |       | KFQVKCRQTYIGQYKYF    |      |      |      |      |      |      |
|       |   |       | KLSNLLNDSIYNISEGYNI  |      |      |      |      |      |      |
|       |   |       | NNLKVNFRGQNANLNP     |      |      |      |      |      |      |
|       |   |       | RIITPITGRGLVKKIIRFCK |      |      |      |      |      |      |
|       |   |       | NIVSVKGIR            |      |      |      |      |      |      |

|       |   |       |                      |      |      |      |      |      |      |
|-------|---|-------|----------------------|------|------|------|------|------|------|
|       |   |       | PKINSFNYNDPVNDRTIL   |      |      |      |      |      |      |
|       |   |       | YIKPGGCQEFYKSFNIMK   |      |      |      |      |      |      |
|       |   |       | NIWIIPERNVIGTTPQDF   |      |      |      |      |      |      |
|       |   |       | HPPTSLKNGDSSYYDPN    |      |      |      |      |      |      |
|       |   |       | YLQSDDEEKDRFLKIVTKIF |      |      |      |      |      |      |
|       |   |       | NRINNNLSGGILLEELSK   |      |      |      |      |      |      |
|       |   |       | ANPYLGNDNTPDNQFH     |      |      |      |      |      |      |
|       |   |       | IGDASAVEIKFSNGSQDI   |      |      |      |      |      |      |
|       |   |       | LLPNVIIMGAEPDLFETN   |      |      |      |      |      |      |
|       |   |       | SSNISLRNNYMPSNHRF    |      |      |      |      |      |      |
|       |   |       | GSIAIVTFSPEYSFRFND   |      |      |      |      |      |      |
| 53657 | 0 | 48087 | NCMNEFIQDPALTLMH     | 6.03 | 0.01 | 3.85 | 0.68 | 0.22 | 0.28 |
|       |   |       | ELIHS LHGLYGAKGITTKY |      |      |      |      |      |      |
|       |   |       | TITQKQNPLITNIRGTNIE  |      |      |      |      |      |      |
|       |   |       | EFLTFGGTDLNIITSAQS   |      |      |      |      |      |      |
|       |   |       | NDIYTNLLADYKKIASKLS  |      |      |      |      |      |      |
|       |   |       | KVQVSNPLLNPYKDVFE    |      |      |      |      |      |      |
|       |   |       | AKYGLDKDASGIYSVNIN   |      |      |      |      |      |      |
|       |   |       | KFNDIFKKLYSFTEFDLRT  |      |      |      |      |      |      |
|       |   |       | KFQVKCRQTYIGQYKYF    |      |      |      |      |      |      |
|       |   |       | KLSNLLNDSIYNISEGYNI  |      |      |      |      |      |      |
|       |   |       | NNLKVNFRGQNANLNP     |      |      |      |      |      |      |
|       |   |       | RIITPITGRGLVKKIIRFCK |      |      |      |      |      |      |
|       |   |       | NIVSVKGIR            |      |      |      |      |      |      |

|       |   |        |                                                                                                                                                                                                                                                                                                                                                                                                                                                                                                                                       |      |      |      |      |      |      |
|-------|---|--------|---------------------------------------------------------------------------------------------------------------------------------------------------------------------------------------------------------------------------------------------------------------------------------------------------------------------------------------------------------------------------------------------------------------------------------------------------------------------------------------------------------------------------------------|------|------|------|------|------|------|
|       |   |        | PKINSFNYNDPVNDRTIL<br>YIKPGGCQEFYKSFNIMK<br>NIWIIPERNVIGTTPQDF<br>HPPTSLKNGDSSYYDPN<br>YLQSDDEEKDRFLKIVTKIF<br>NRINNNLSGGILLEELSK<br>ANPYLGNDNTPDNQFH<br>IGDASAVEIKFSNGSQDI<br>LLPNVIIMGAEPDLFETN<br>SSNISLRNNYMPSNHRF<br>GSIAIVTFSPEYSFRFND<br>NCMNEFIQDPALTLMH<br>ELIHS LHGLYGAKGITT KY<br>TITQKQNPLITNIRGTNIE<br>EFLTGGTDLNIITSAQS<br>NDIYT NLLADYKKIASKLS<br>KVQVSNPLLNPYKDVFE<br>AKYGLDKDASGIYSVNIN<br>KFNDIFKKLYSFTEFDLRT<br>KFQVKCRQTYIGQYKYF<br>KLSNLLNDSIYNISEGYNI<br>NNLKV NFRGQNANLNP<br>RIITPITGRGLVKKIIRFCK<br>NIVSVKGIR | 6.03 | 0.01 | 3.85 | 0.68 | 0.22 | 0.28 |
| 53659 | 0 | 185174 | PKK                                                                                                                                                                                                                                                                                                                                                                                                                                                                                                                                   | 1.32 | 4.63 | 0.78 | 1.12 | 0.22 | 1.28 |
| 53660 | 0 | 185174 | PKK                                                                                                                                                                                                                                                                                                                                                                                                                                                                                                                                   | 1.32 | 4.63 | 0.78 | 1.12 | 0.22 | 1.27 |
| 53661 | 0 | 351956 | PKKAAAPKKAAAPQK                                                                                                                                                                                                                                                                                                                                                                                                                                                                                                                       | 2.75 | 0.01 | 1.61 | 0.44 | 0.85 | 1.28 |
| 53662 | 0 | 351957 | PKKAAAPQKAAAPKK                                                                                                                                                                                                                                                                                                                                                                                                                                                                                                                       | 2.73 | 0.01 | 1.61 | 0.44 | 0.85 | 1.28 |
| 53663 | 0 | 351958 | PKKAAAPQKAAVAKK                                                                                                                                                                                                                                                                                                                                                                                                                                                                                                                       | 2.74 | 0.01 | 1.61 | 0.44 | 0.85 | 1.28 |
| 53664 | 0 | 117600 | PKKAK                                                                                                                                                                                                                                                                                                                                                                                                                                                                                                                                 | 1.78 | 0.01 | 0.78 | 0.44 | 1.93 | 0.85 |
| 53665 | 0 | 117600 | PKKAK                                                                                                                                                                                                                                                                                                                                                                                                                                                                                                                                 | 1.78 | 0.01 | 0.78 | 0.44 | 1.93 | 0.85 |
| 53666 | 0 | 167643 | PKKDKESGTETGAP                                                                                                                                                                                                                                                                                                                                                                                                                                                                                                                        | 2.65 | 0.01 | 3.10 | 0.44 | 0.85 | 1.28 |
| 53667 | 0 | 167643 | PKKDKESGTETGAP                                                                                                                                                                                                                                                                                                                                                                                                                                                                                                                        | 2.65 | 0.01 | 3.10 | 0.44 | 1.59 | 1.28 |
| 53668 | 0 | 133913 | PKKGSKKAVTKAQKKDG<br>KKRKR SRKE                                                                                                                                                                                                                                                                                                                                                                                                                                                                                                       | 3.22 | 0.01 | 1.60 | 4.15 | 0.22 | 0.28 |
| 53669 | 0 | 133913 | PKKGSKKAVTKAQKKDG<br>KKRKR SRKE                                                                                                                                                                                                                                                                                                                                                                                                                                                                                                       | 3.22 | 0.01 | 1.60 | 3.05 | 0.22 | 0.28 |
| 53670 | 0 | 117601 | PKKKRKV                                                                                                                                                                                                                                                                                                                                                                                                                                                                                                                               | 2.05 | 0.01 | 3.36 | 0.44 | 1.13 | 0.28 |
| 53671 | 0 | 48093  | PKKPNENKLKQPNE                                                                                                                                                                                                                                                                                                                                                                                                                                                                                                                        | 2.68 | 0.01 | 3.12 | 1.20 | 0.22 | 1.48 |
| 53672 | 0 | 48093  | PKKPNENKLKQPNE                                                                                                                                                                                                                                                                                                                                                                                                                                                                                                                        | 2.68 | 0.01 | 3.12 | 1.20 | 0.22 | 0.85 |
| 53673 | 0 | 48093  | PKKPNENKLKQPNE                                                                                                                                                                                                                                                                                                                                                                                                                                                                                                                        | 2.68 | 0.01 | 3.12 | 1.20 | 2.25 | 1.75 |

|       |   |        |                   |      |      |      |      |      |      |
|-------|---|--------|-------------------|------|------|------|------|------|------|
| 53674 | 0 | 48093  | PKKPNENKLKQPNE    | 2.68 | 0.01 | 3.12 | 1.20 | 0.22 | 1.57 |
| 53675 | 0 | 48093  | PKKPNENKLKQPNE    | 2.68 | 0.01 | 3.12 | 1.12 | 0.22 | 1.57 |
| 53676 | 0 | 48093  | PKKPNENKLKQPNE    | 2.68 | 0.01 | 3.12 | 2.16 | 0.22 | 0.85 |
| 53677 | 0 | 48093  | PKKPNENKLKQPNE    | 2.68 | 0.01 | 3.12 | 2.16 | 0.22 | 1.48 |
| 53678 | 0 | 48093  | PKKPNENKLKQPNE    | 2.68 | 0.01 | 3.12 | 2.16 | 0.22 | 1.57 |
| 53679 | 0 | 141979 | PKKRVVPNFERKG     | 2.57 | 0.01 | 3.13 | 0.68 | 0.22 | 0.28 |
| 53680 | 0 | 48094  | PKKS              | 1.59 | 0.01 | 3.72 | 0.68 | 0.22 | 0.28 |
| 53681 | 0 | 128073 | PKKSAKKTPKKAKKP   | 2.75 | 0.01 | 0.78 | 1.12 | 0.22 | 0.28 |
| 53682 | 0 | 128073 | PKKSAKKTPKKAKKP   | 2.75 | 0.01 | 0.78 | 0.44 | 1.13 | 0.28 |
| 53683 | 0 | 351987 | PKKTAAPKAAAAPQK   | 2.75 | 0.01 | 1.61 | 0.44 | 0.85 | 1.28 |
| 53684 | 0 | 48099  | PKLAAAVL          | 2.14 | 0.01 | 3.06 | 1.12 | 0.22 | 0.28 |
| 53685 | 0 | 163073 | PKLEPWKHP         | 2.26 | 0.01 | 2.54 | 1.15 | 0.22 | 2.49 |
| 53686 | 0 | 163073 | PKLEPWKHP         | 2.26 | 0.01 | 2.54 | 1.15 | 0.22 | 2.49 |
| 53687 | 0 | 163073 | PKLEPWKHP         | 2.26 | 0.01 | 2.54 | 1.15 | 0.22 | 0.28 |
| 53688 | 0 | 163073 | PKLEPWKHP         | 2.26 | 0.01 | 2.54 | 1.15 | 0.22 | 0.28 |
| 53689 | 0 | 163073 | PKLEPWKHP         | 2.26 | 0.01 | 2.54 | 1.15 | 0.22 | 0.28 |
| 53690 | 0 | 123589 | PKLKEFKSR         | 2.23 | 0.01 | 2.28 | 2.00 | 0.22 | 0.28 |
| 53691 | 0 | 123589 | PKLKEFKSR         | 2.23 | 0.01 | 2.28 | 2.00 | 0.22 | 0.28 |
| 53692 | 0 | 123589 | PKLKEFKSR         | 2.23 | 0.01 | 2.28 | 2.00 | 0.22 | 0.28 |
| 53693 | 0 | 112256 | PKLLIYW           | 2.01 | 0.01 | 0.78 | 0.44 | 1.13 | 0.28 |
| 53694 | 0 | 243040 | PKLSSEEIAANIREE   | 2.66 | 0.01 | 3.32 | 1.20 | 0.22 | 0.85 |
| 53695 | 0 | 243040 | PKLSSEEIAANIREE   | 2.66 | 0.01 | 3.32 | 1.20 | 0.22 | 0.85 |
| 53696 | 0 | 352055 | PKNGTATTGDSGDST   | 2.71 | 0.01 | 1.61 | 0.44 | 0.85 | 1.28 |
|       |   |        | PKNRVLEGVIDRYQQSK |      |      |      |      |      |      |
| 53697 | 0 | 156931 | AAALKCQLCEKAPKEAT | 3.50 | 0.01 | 0.78 | 0.44 | 2.82 | 1.39 |
|       |   |        | VM                |      |      |      |      |      |      |
| 53698 | 0 | 48107  | PKNTLTPLEELYPT    | 2.66 | 0.01 | 1.66 | 2.63 | 0.22 | 0.28 |
| 53699 | 0 | 48107  | PKNTLTPLEELYPT    | 2.66 | 0.01 | 1.66 | 4.45 | 0.22 | 0.28 |
| 53700 | 0 | 48108  | PKNTLTPLEELYPTN   | 2.73 | 0.01 | 1.66 | 1.15 | 0.22 | 0.28 |
| 53701 | 0 | 48108  | PKNTLTPLEELYPTN   | 2.73 | 0.01 | 1.66 | 1.15 | 0.22 | 0.28 |
| 53702 | 0 | 352073 | PKPAEPKSAEPEPAE   | 2.75 | 0.01 | 1.61 | 0.44 | 0.85 | 1.28 |
| 53703 | 0 | 352076 | PKPAEPKSAEPKPAE   | 2.75 | 0.01 | 1.61 | 0.44 | 0.85 | 1.28 |
| 53704 | 0 | 352079 | PKPAEPNSAEPKPAE   | 2.75 | 0.01 | 1.61 | 0.44 | 0.85 | 1.28 |
| 53705 | 0 | 352081 | PKPAEPYSAEPKPAE   | 2.75 | 0.01 | 1.61 | 0.44 | 0.85 | 1.28 |
| 53706 | 0 | 352082 | PKPAESKSAEPKPAE   | 2.75 | 0.01 | 1.61 | 0.44 | 0.85 | 1.28 |
| 53707 | 0 | 95034  | PKPAKSP           | 2.06 | 0.01 | 3.47 | 3.75 | 0.22 | 0.28 |
| 53708 | 0 | 95034  | PKPAKSP           | 2.06 | 0.01 | 3.47 | 1.12 | 0.22 | 0.28 |
| 53709 | 0 | 95034  | PKPAKSP           | 2.06 | 0.01 | 3.47 | 1.12 | 0.22 | 0.28 |
|       |   |        | PKPDCTAEDRPLCGSDN |      |      |      |      |      |      |
| 53710 | 0 | 230244 | KTY               | 2.94 | 0.01 | 2.25 | 0.44 | 1.23 | 0.28 |
| 53711 | 0 | 121708 | PKPEPKPK          | 2.18 | 0.01 | 0.78 | 0.44 | 1.13 | 1.27 |
| 53712 | 0 | 134471 | PKPEQ             | 1.77 | 0.01 | 2.70 | 2.69 | 0.22 | 0.85 |
| 53713 | 0 | 134471 | PKPEQ             | 1.77 | 0.01 | 2.70 | 2.69 | 0.22 | 2.12 |
| 53714 | 0 | 134471 | PKPEQ             | 1.77 | 0.01 | 2.70 | 2.69 | 0.22 | 1.75 |
| 53715 | 0 | 461386 | PKPEQPAPAPK       | 2.46 | 0.01 | 2.70 | 3.00 | 0.22 | 1.27 |
| 53716 | 0 | 461386 | PKPEQPAPAPK       | 2.46 | 0.01 | 2.70 | 3.00 | 0.22 | 1.48 |
| 53717 | 0 | 461386 | PKPEQPAPAPK       | 2.46 | 0.01 | 2.70 | 3.00 | 0.22 | 1.75 |

|       |   |        |                             |      |      |      |      |      |      |
|-------|---|--------|-----------------------------|------|------|------|------|------|------|
| 53718 | 0 | 461387 | PKPEQPAPAPKPEQPAK<br>PEKP   | 3.08 | 0.01 | 2.70 | 3.00 | 0.22 | 0.28 |
| 53719 | 0 | 461387 | PKPEQPAPAPKPEQPAK<br>PEKP   | 3.08 | 0.01 | 2.70 | 3.00 | 0.22 | 1.27 |
| 53720 | 0 | 461387 | PKPEQPAPAPKPEQPAK<br>PEKP   | 3.08 | 0.01 | 2.70 | 3.00 | 0.22 | 2.12 |
| 53721 | 0 | 461387 | PKPEQPAPAPKPEQPAK<br>PEKP   | 3.08 | 0.01 | 2.70 | 3.00 | 0.22 | 1.75 |
| 53722 | 0 | 461387 | PKPEQPAPAPKPEQPAK<br>PEKP   | 3.08 | 0.01 | 2.70 | 3.00 | 0.22 | 1.27 |
| 53723 | 0 | 461387 | PKPEQPAPAPKPEQPAK<br>PEKP   | 3.08 | 0.01 | 2.70 | 3.00 | 0.22 | 1.27 |
| 53724 | 0 | 523627 | PKPESELTEKAGQ               | 2.69 | 0.01 | 2.24 | 0.44 | 1.41 | 1.28 |
| 53725 | 0 | 187466 | PKPGGWNTGGSRYPGQ            | 2.75 | 0.01 | 0.78 | 1.15 | 0.22 | 0.28 |
| 53726 | 0 | 238846 | PKPKKDETIQCCTKN             | 2.69 | 0.01 | 2.56 | 2.02 | 0.22 | 0.85 |
| 53727 | 0 | 238846 | PKPKKDETIQCCTKN             | 2.69 | 0.01 | 2.56 | 1.20 | 0.22 | 0.85 |
| 53728 | 0 | 238847 | PKPKKDETIQCCTKNN            | 2.74 | 0.01 | 2.56 | 2.02 | 0.22 | 0.85 |
| 53729 | 0 | 238847 | PKPKKDETIQCCTKNN            | 2.74 | 0.01 | 2.56 | 1.20 | 0.22 | 0.85 |
| 53730 | 0 | 238847 | PKPKKDETIQCCTKNN            | 2.74 | 0.01 | 2.56 | 1.20 | 0.22 | 0.28 |
| 53731 | 0 | 48115  | PKPKVASEAFMST               | 2.56 | 0.01 | 3.00 | 0.44 | 0.85 | 0.28 |
| 53732 | 0 | 48124  | PKPQRKTKRNTNRRP             | 2.74 | 0.01 | 1.72 | 0.44 | 0.85 | 0.28 |
| 53733 | 0 | 48124  | PKPQRKTKRNTNRRP             | 2.74 | 0.01 | 1.72 | 0.44 | 0.85 | 0.28 |
| 53734 | 0 | 48124  | PKPQRKTKRNTNRRP             | 2.74 | 0.01 | 1.72 | 0.44 | 0.85 | 0.28 |
| 53735 | 0 | 48124  | PKPQRKTKRNTNRRP             | 2.74 | 0.01 | 1.72 | 0.44 | 0.85 | 1.27 |
| 53736 | 0 | 48125  | PKPQRKTKRNTNRRPQ<br>DVK     | 2.95 | 0.01 | 4.23 | 0.44 | 1.59 | 1.27 |
| 53737 | 0 | 48125  | PKPQRKTKRNTNRRPQ<br>DVK     | 2.95 | 0.01 | 1.72 | 0.44 | 0.85 | 0.28 |
| 53738 | 0 | 104176 | PKPQRKTKRNTNRRPQ<br>DVKF    | 2.99 | 0.01 | 1.72 | 0.44 | 0.85 | 0.28 |
| 53739 | 0 | 48126  | PKPQRKTKRNTNRRPQ<br>DVKFPGG | 3.10 | 0.01 | 1.72 | 0.44 | 0.85 | 0.28 |
| 53740 | 0 | 48129  | PKQGPLPN                    | 2.15 | 0.01 | 0.78 | 0.44 | 1.74 | 0.28 |
| 53741 | 0 | 79969  | PKQLTFEGK                   | 2.21 | 0.01 | 2.14 | 3.17 | 0.22 | 0.28 |
| 53742 | 0 | 79969  | PKQLTFEGK                   | 2.21 | 0.01 | 2.14 | 3.17 | 0.22 | 0.28 |
| 53743 | 0 | 100384 | PKQQDSLPTKASG               | 2.63 | 0.01 | 2.96 | 1.12 | 0.22 | 0.28 |
| 53744 | 0 | 48131  | PKQRRPQGLPNNTASW<br>FT      | 2.82 | 0.01 | 2.45 | 0.44 | 0.85 | 1.48 |
| 53745 | 0 | 151337 | PKQTATTQPNSGSVVP            | 2.75 | 0.01 | 3.35 | 1.81 | 0.22 | 0.85 |
| 53746 | 0 | 137256 | PKRECHFFNGTERVR             | 2.65 | 0.01 | 0.78 | 1.15 | 0.22 | 1.57 |
| 53747 | 0 | 137256 | PKRECHFFNGTERVR             | 2.65 | 0.01 | 0.78 | 1.12 | 0.22 | 1.57 |
| 53748 | 0 | 181136 | PKRGSGKDSHHPART             | 2.70 | 0.01 | 0.78 | 0.44 | 1.13 | 0.28 |

|       |   |        |                          |      |      |      |      |      |      |
|-------|---|--------|--------------------------|------|------|------|------|------|------|
| 53749 | 0 | 181136 | PKRGSGKDSHHPART          | 2.70 | 0.01 | 0.78 | 0.44 | 1.13 | 0.28 |
| 53750 | 0 | 181136 | PKRGSGKDSHHPART          | 2.70 | 0.01 | 0.78 | 0.44 | 1.13 | 1.34 |
| 53751 | 0 | 181136 | PKRGSGKDSHHPART          | 2.70 | 0.01 | 0.78 | 0.44 | 1.13 | 0.28 |
| 53752 | 0 | 121709 | PKRKAEGDAKDGKAK          | 2.73 | 0.01 | 0.78 | 0.44 | 1.13 | 1.27 |
| 53753 | 0 | 128074 | PKRKAEGDAKDGKAK          | 2.73 | 0.01 | 2.73 | 1.12 | 0.22 | 0.28 |
| 53754 | 0 | 128074 | PKRKAEGDAKDGKAK          | 2.73 | 0.01 | 2.73 | 0.44 | 1.13 | 0.28 |
| 53755 | 0 | 159050 | PKRLTATTEKLEIGWK         | 2.74 | 0.01 | 3.05 | 0.68 | 0.22 | 0.28 |
| 53756 | 0 | 159050 | PKRLTATTEKLEIGWK         | 2.74 | 0.01 | 3.05 | 0.68 | 0.22 | 0.28 |
| 53757 | 0 | 159050 | PKRLTATTEKLEIGWK         | 2.74 | 0.01 | 3.05 | 0.68 | 0.22 | 1.48 |
| 53758 | 0 | 159050 | PKRLTATTEKLEIGWK         | 2.74 | 0.01 | 3.05 | 0.68 | 0.22 | 0.28 |
| 53759 | 0 | 159050 | PKRLTATTEKLEIGWK         | 2.74 | 0.01 | 3.05 | 2.49 | 0.22 | 0.28 |
| 53760 | 0 | 159050 | PKRLTATTEKLEIGWK         | 2.74 | 0.01 | 3.04 | 0.68 | 0.22 | 0.85 |
| 53761 | 0 | 159050 | PKRLTATTEKLEIGWK         | 2.74 | 0.01 | 3.04 | 0.68 | 0.22 | 0.85 |
| 53762 | 0 | 48135  | PKRSWNVYVGRSLKAIN<br>AQM | 2.91 | 0.01 | 3.78 | 2.49 | 0.85 | 0.28 |
| 53763 | 0 | 352164 | PKSAEPEPAEPKSAE          | 2.75 | 0.01 | 1.61 | 0.44 | 0.85 | 1.28 |
| 53764 | 0 | 352165 | PKSAEPEPAEPKSAG          | 2.75 | 0.01 | 1.61 | 0.44 | 0.85 | 1.28 |
| 53765 | 0 | 352169 | PKSAEPKPAEPKSAE          | 2.75 | 0.01 | 1.61 | 0.44 | 0.85 | 1.28 |
| 53766 | 0 | 352170 | PKSAEPKPAEPKSAG          | 2.75 | 0.01 | 1.61 | 0.44 | 0.85 | 1.28 |
| 53767 | 0 | 352172 | PKSAEPKPAEPNSAE          | 2.75 | 0.01 | 1.61 | 0.44 | 0.85 | 1.28 |
| 53768 | 0 | 352174 | PKSAEPKPAESKSAE          | 2.75 | 0.01 | 1.61 | 0.44 | 0.85 | 1.28 |
| 53769 | 0 | 352175 | PKSAEPKPAESKSAG          | 2.75 | 0.01 | 1.61 | 0.44 | 0.85 | 1.28 |
| 53770 | 0 | 48136  | PKSAET                   | 1.88 | 0.01 | 2.40 | 3.42 | 0.22 | 0.28 |
| 53771 | 0 | 48136  | PKSAET                   | 1.88 | 0.01 | 2.40 | 2.52 | 0.22 | 0.28 |
| 53772 | 0 | 352176 | PKSAGPKPAEPKSAE          | 2.75 | 0.01 | 1.61 | 0.44 | 0.85 | 1.28 |
| 53773 | 0 | 48147  | PKSGKELGETQ              | 2.41 | 0.01 | 3.81 | 1.15 | 0.22 | 0.28 |
| 53774 | 0 | 48147  | PKSGKELGETQ              | 2.41 | 0.01 | 3.81 | 1.15 | 0.22 | 1.34 |
| 53775 | 0 | 77793  | PKSKLSVKKC               | 2.34 | 0.01 | 3.93 | 0.44 | 1.59 | 0.28 |
| 53776 | 0 | 79042  | PKSKPFA                  | 2.05 | 0.01 | 3.47 | 0.68 | 0.22 | 0.85 |
| 53777 | 0 | 79042  | PKSKPFA                  | 2.05 | 0.01 | 3.47 | 0.68 | 0.22 | 0.85 |
| 53778 | 0 | 79042  | PKSKPFA                  | 2.05 | 0.01 | 3.47 | 0.68 | 0.22 | 1.27 |
| 53779 | 0 | 123591 | PKSQETPA                 | 2.13 | 0.01 | 0.78 | 1.20 | 0.22 | 0.28 |
| 53780 | 0 | 48150  | PKSSCTQNPILCAILS         | 2.75 | 0.01 | 0.90 | 0.44 | 0.85 | 0.28 |
| 53781 | 0 | 226370 | PKSTQPQ                  | 2.05 | 0.01 | 0.90 | 2.66 | 0.22 | 1.39 |
| 53782 | 0 | 352209 | PKSTQTTGDDDDPAAD         | 2.70 | 0.01 | 1.61 | 0.44 | 0.85 | 1.28 |
| 53783 | 0 | 100385 | PKTFQFINDQ               | 2.31 | 0.01 | 2.18 | 2.16 | 0.22 | 0.28 |
| 53784 | 0 | 48153  | PKTGSP                   | 1.91 | 0.01 | 3.17 | 1.12 | 0.22 | 0.28 |
| 53785 | 0 | 48154  | PKTHNSGRSNVD             | 2.45 | 0.01 | 0.90 | 0.68 | 0.22 | 1.39 |
| 53786 | 0 | 48154  | PKTHNSGRSNVD             | 2.45 | 0.01 | 0.90 | 0.68 | 0.22 | 1.27 |
| 53787 | 0 | 48155  | PKTSEILDISPCAFGGV        | 2.75 | 0.01 | 2.48 | 0.44 | 0.85 | 0.28 |
| 53788 | 0 | 48155  | PKTSEILDISPCAFGGV        | 2.75 | 0.01 | 2.48 | 1.20 | 0.22 | 0.28 |
| 53789 | 0 | 352237 | PKTSWRRVSVG              | 2.40 | 0.01 | 2.40 | 1.20 | 0.22 | 0.28 |
| 53790 | 0 | 451504 | PKTTEQPNQKVEY            | 2.57 | 0.01 | 3.72 | 0.68 | 0.22 | 0.28 |
| 53791 | 0 | 451504 | PKTTEQPNQKVEY            | 2.57 | 0.01 | 3.72 | 0.68 | 0.22 | 0.28 |
| 53792 | 0 | 451504 | PKTTEQPNQKVEY            | 2.57 | 0.01 | 3.72 | 0.68 | 0.22 | 0.28 |
| 53793 | 0 | 451504 | PKTTEQPNQKVEY            | 2.57 | 0.01 | 3.72 | 0.68 | 0.22 | 1.34 |

|       |   |        |                                             |      |      |      |      |      |      |
|-------|---|--------|---------------------------------------------|------|------|------|------|------|------|
| 53794 | 0 | 431708 | PKTYCEELKGTDTGQAC<br>Q                      | 2.84 | 0.01 | 2.04 | 0.44 | 0.85 | 0.28 |
| 53795 | 0 | 431708 | PKTYCEELKGTDTGQAC<br>Q                      | 2.84 | 0.01 | 2.04 | 0.44 | 1.93 | 0.28 |
| 53796 | 0 | 228610 | PKVEGKTIAEQILQYGS<br>MG                     | 2.88 | 0.01 | 1.86 | 0.68 | 0.22 | 0.28 |
| 53797 | 0 | 225826 | PKVFPLAPS                                   | 2.24 | 0.01 | 3.28 | 0.44 | 0.22 | 0.85 |
| 53798 | 0 | 117602 | PKVKSKKREAVAGRG                             | 2.71 | 4.93 | 0.78 | 0.44 | 1.13 | 0.28 |
| 53799 | 0 | 117603 | PKVKSKKREAVAGRG                             | 2.71 | 0.01 | 0.78 | 0.44 | 1.13 | 0.28 |
| 53800 | 0 | 117604 | PKVKSKKREAVAGRGRG<br>RGRGRGRGRGRGRGGP<br>RR | 3.54 | 0.01 | 0.78 | 3.05 | 1.13 | 2.02 |
| 53801 | 0 | 117604 | PKVKSKKREAVAGRGRG<br>RGRGRGRGRGRGRGGP<br>RR | 3.54 | 0.01 | 0.78 | 3.05 | 1.13 | 2.02 |
| 53802 | 0 | 117604 | PKVKSKKREAVAGRGRG<br>RGRGRGRGRGRGRGGP<br>RR | 3.54 | 0.01 | 0.78 | 3.05 | 1.13 | 0.85 |
| 53803 | 0 | 117604 | PKVKSKKREAVAGRGRG<br>RGRGRGRGRGRGRGGP<br>RR | 3.54 | 0.01 | 0.78 | 3.05 | 1.13 | 2.02 |
| 53804 | 0 | 352253 | PKVNGRETIDPDPQK                             | 2.67 | 0.01 | 1.61 | 0.44 | 0.85 | 1.28 |
| 53805 | 0 | 48168  | PKVQSLVSDFFGGKELN<br>KSI                    | 2.93 | 0.01 | 2.78 | 2.49 | 0.85 | 0.28 |
| 53806 | 0 | 48168  | PKVQSLVSDFFGGKELN<br>KSI                    | 2.93 | 0.01 | 2.78 | 0.44 | 0.85 | 0.28 |
| 53807 | 0 | 118552 | PKVTKDGVTVAKS                               | 2.57 | 0.01 | 0.78 | 0.44 | 1.74 | 0.85 |
| 53808 | 0 | 95657  | PKVTKEKPTPPVKPTAPT<br>KP                    | 3.02 | 0.01 | 2.39 | 0.44 | 1.74 | 0.28 |
| 53809 | 0 | 126828 | PKYA                                        | 1.57 | 0.01 | 1.60 | 1.15 | 0.22 | 1.34 |
| 53810 | 0 | 126828 | PKYA                                        | 1.57 | 0.01 | 1.60 | 1.15 | 0.22 | 1.57 |
| 53811 | 0 | 126828 | PKYA                                        | 1.57 | 0.01 | 1.60 | 1.15 | 0.22 | 1.57 |
| 53812 | 0 | 48176  | PKYEQGGNIV                                  | 2.28 | 0.01 | 2.56 | 1.20 | 0.22 | 0.28 |
| 53813 | 0 | 48180  | PKYHPDVPYV                                  | 2.36 | 0.01 | 0.78 | 0.44 | 1.74 | 0.28 |
| 53814 | 0 | 95663  | PKYVKQNT                                    | 2.12 | 0.01 | 3.27 | 0.68 | 0.22 | 0.28 |
| 53815 | 0 | 48238  | PKYVKQNTLKLATG                              | 2.61 | 0.01 | 2.36 | 0.68 | 0.22 | 0.28 |
| 53816 | 0 | 48240  | PKYVKQNTLKLATGMR<br>NVPEKQT                 | 3.08 | 0.01 | 3.78 | 1.15 | 2.26 | 0.28 |
| 53817 | 0 | 48240  | PKYVKQNTLKLATGMR<br>NVPEKQT                 | 3.08 | 0.01 | 3.78 | 0.68 | 0.22 | 0.28 |
| 53818 | 0 | 48240  | PKYVKQNTLKLATGMR<br>NVPEKQT                 | 3.08 | 0.01 | 2.36 | 0.68 | 0.22 | 0.28 |
| 53819 | 0 | 48240  | PKYVKQNTLKLATGMR<br>NVPEKQT                 | 3.08 | 0.01 | 2.36 | 0.68 | 0.22 | 0.28 |
| 53820 | 0 | 48271  | PLAEDVEKDKPNR                               | 2.56 | 0.01 | 3.17 | 0.44 | 0.85 | 0.85 |
| 53821 | 0 | 78483  | PLAHNS                                      | 1.88 | 0.01 | 0.90 | 0.68 | 0.22 | 0.28 |
| 53822 | 0 | 156932 | PLAQHL                                      | 2.02 | 0.01 | 0.90 | 2.74 | 0.22 | 0.85 |



|       |   |        |                               |      |      |      |      |      |      |
|-------|---|--------|-------------------------------|------|------|------|------|------|------|
| 53823 | 0 | 523644 | PLAPNTPRPPAQAPAKD<br>MPS      | 2.96 | 3.97 | 2.40 | 0.44 | 1.59 | 1.28 |
| 53824 | 0 | 523645 | PLAPNTPRPPAQAPAKD<br>MPS      | 2.96 | 0.01 | 2.40 | 0.44 | 1.59 | 1.28 |
| 53825 | 0 | 48279  | PLATQPPVLAL                   | 2.44 | 0.01 | 2.40 | 1.15 | 0.22 | 0.28 |
| 53826 | 0 | 48279  | PLATQPPVLAL                   | 2.44 | 0.01 | 2.40 | 1.15 | 0.22 | 2.02 |
| 53827 | 0 | 48279  | PLATQPPVLAL                   | 2.44 | 0.01 | 2.40 | 1.15 | 0.22 | 0.85 |
| 53828 | 0 | 48279  | PLATQPPVLAL                   | 2.44 | 0.01 | 2.40 | 1.15 | 0.22 | 1.34 |
| 53829 | 0 | 157743 | PLATQSYGFGSD                  | 2.45 | 0.01 | 3.40 | 2.49 | 0.85 | 0.28 |
| 53830 | 0 | 423456 | PLCASEPEDDDEDPT               | 2.71 | 0.01 | 2.51 | 0.44 | 2.35 | 1.28 |
| 53831 | 0 | 125518 | PLCIIVEKEADISAFADYR<br>PTEVTD | 3.15 | 0.01 | 0.78 | 0.44 | 1.13 | 0.28 |
| 53832 | 0 | 125518 | PLCIIVEKEADISAFADYR<br>PTEVTD | 3.15 | 0.01 | 0.78 | 0.44 | 1.13 | 0.28 |
| 53833 | 0 | 237876 | PLCLDEKEFQVPM                 | 2.54 | 0.01 | 0.78 | 0.44 | 1.13 | 1.28 |
| 53834 | 0 | 48282  | PLCNTRKSRQSGI                 | 2.51 | 0.01 | 3.42 | 0.44 | 0.85 | 0.28 |
| 53835 | 0 | 48282  | PLCNTRKSRQSGI                 | 2.51 | 0.01 | 3.42 | 0.68 | 0.22 | 0.28 |
| 53836 | 0 | 96738  | PLCTTNTKEGSNICLTRT<br>DRG     | 3.00 | 0.01 | 2.38 | 1.12 | 0.22 | 0.85 |
| 53837 | 0 | 96738  | PLCTTNTKEGSNICLTRT<br>DRG     | 3.00 | 0.01 | 2.38 | 1.12 | 0.22 | 0.28 |
| 53838 | 0 | 237877 | PLDDRFGKALYFLNDMA<br>K        | 2.85 | 0.01 | 3.19 | 0.44 | 1.59 | 0.85 |
| 53839 | 0 | 237877 | PLDDRFGKALYFLNDMA<br>K        | 2.85 | 0.01 | 3.19 | 0.44 | 0.85 | 0.85 |
| 53840 | 0 | 237877 | PLDDRFGKALYFLNDMA<br>K        | 2.85 | 0.01 | 3.19 | 0.44 | 0.22 | 0.85 |
| 53841 | 0 | 48285  | PLDFEMYGATYSVT                | 2.57 | 0.01 | 2.59 | 0.44 | 0.85 | 0.28 |
| 53842 | 0 | 136554 | PLDLPQIER                     | 2.33 | 0.01 | 1.96 | 0.44 | 0.85 | 0.28 |
| 53843 | 0 | 136554 | PLDLPQIER                     | 2.33 | 0.01 | 1.96 | 3.57 | 0.22 | 2.02 |
| 53844 | 0 | 141980 | PLDRRIEAQRLDRKHI              | 2.75 | 0.01 | 3.13 | 0.68 | 0.22 | 0.28 |
| 53845 | 0 | 131589 | PLDTIRVDVEPKVSKKR<br>EA       | 2.96 | 0.01 | 0.78 | 0.44 | 1.13 | 0.28 |
| 53846 | 0 | 103482 | PLDTPPAPAPPPFRL               | 2.72 | 0.01 | 2.04 | 0.44 | 0.85 | 1.28 |
| 53847 | 0 | 352377 | PLEATATKNTTATTG               | 2.70 | 0.01 | 1.61 | 0.44 | 0.85 | 1.28 |
| 53848 | 0 | 238848 | PLEEAAQEYQEKLQVAL<br>G        | 2.88 | 0.01 | 0.78 | 0.44 | 1.13 | 0.28 |
| 53849 | 0 | 352385 | PLEEEEDVGPRHVDP               | 2.70 | 0.01 | 1.61 | 0.44 | 0.85 | 1.28 |
| 53850 | 0 | 352390 | PLEEQEDVGPRHVDP               | 2.70 | 0.01 | 1.61 | 0.44 | 0.85 | 1.28 |
| 53851 | 0 | 48301  | PLEGEPGDPDLSGGSWS<br>T        | 2.90 | 0.01 | 1.72 | 0.44 | 0.85 | 0.28 |
| 53852 | 0 | 156933 | PLEKSHL                       | 2.02 | 0.01 | 0.90 | 2.74 | 0.22 | 0.85 |
| 53853 | 0 | 156933 | PLEKSHL                       | 2.02 | 0.01 | 0.90 | 0.68 | 0.22 | 0.28 |
| 53854 | 0 | 48307  | PLENPSSLFDLVARIKNN<br>LK      | 2.94 | 0.01 | 2.75 | 0.44 | 0.85 | 0.85 |
| 53855 | 0 | 48308  | PLENRVLT                      | 2.12 | 0.01 | 2.04 | 4.03 | 1.59 | 0.85 |

|       |   |        |                                                           |      |      |      |      |      |      |
|-------|---|--------|-----------------------------------------------------------|------|------|------|------|------|------|
| 53856 | 0 | 48309  | PLENRVLTGWGLNWDL<br>GLSQWAR                               | 3.08 | 0.01 | 2.04 | 0.44 | 0.85 | 0.28 |
| 53857 | 0 | 48309  | PLENRVLTGWGLNWDL<br>GLSQWAR                               | 3.08 | 0.01 | 2.04 | 0.44 | 0.85 | 0.28 |
| 53858 | 0 | 48309  | PLENRVLTGWGLNWDL<br>GLSQWAR                               | 3.08 | 0.01 | 2.04 | 0.44 | 1.59 | 0.28 |
| 53859 | 0 | 134759 | PLEPKREVCELNPDCDEL<br>ADHIGFQEAYRRFYGPV                   | 3.49 | 4.45 | 1.60 | 0.68 | 0.22 | 1.27 |
| 53860 | 0 | 134759 | PLEPKREVCELNPDCDEL<br>ADHIGFQEAYRRFYGPV                   | 3.49 | 4.45 | 1.60 | 0.68 | 0.22 | 0.28 |
| 53861 | 0 | 134759 | PLEPKREVCELNPDCDEL<br>ADHIGFQEAYRRFYGPV                   | 3.49 | 4.45 | 1.60 | 4.93 | 0.22 | 1.27 |
| 53862 | 0 | 181939 | PLERKKREKEQFRKLFIG<br>GL                                  | 2.98 | 0.01 | 0.78 | 0.44 | 1.13 | 0.28 |
| 53863 | 0 | 48311  | PLERQKPLKVRACL                                            | 2.65 | 0.01 | 2.88 | 2.22 | 0.22 | 0.28 |
| 53864 | 0 | 48311  | PLERQKPLKVRACL                                            | 2.65 | 0.01 | 2.88 | 2.22 | 0.22 | 0.28 |
| 53865 | 0 | 48311  | PLERQKPLKVRACL                                            | 2.65 | 0.01 | 2.88 | 2.22 | 0.22 | 0.28 |
| 53866 | 0 | 48311  | PLERQKPLKVRACL                                            | 2.65 | 0.01 | 2.88 | 2.22 | 0.22 | 0.28 |
| 53867 | 0 | 48311  | PLERQKPLKVRACL                                            | 2.65 | 0.01 | 2.88 | 2.22 | 0.22 | 0.28 |
| 53868 | 0 | 48311  | PLERQKPLKVRACL                                            | 2.65 | 0.01 | 2.88 | 2.22 | 0.22 | 0.28 |
| 53869 | 0 | 48311  | PLERQKPLKVRACL                                            | 2.65 | 0.01 | 2.96 | 2.22 | 0.22 | 0.28 |
| 53870 | 0 | 523652 | PLESAEKEEKKSEDK                                           | 2.73 | 0.01 | 2.24 | 0.44 | 1.41 | 1.28 |
| 53871 | 0 | 48319  | PLFDGIFCSSSNFLGISFL                                       | 2.93 | 0.01 | 1.66 | 0.44 | 1.74 | 0.28 |
| 53872 | 0 | 118553 | PLFPAGRGRGRGRGRG<br>RGRGRGRGRGRGRGRG<br>RGRGRGRGRGRGSLIYI | 3.89 | 0.01 | 1.75 | 0.44 | 1.13 | 0.85 |
| 53873 | 0 | 118553 | PLFPAGRGRGRGRGRG<br>RGRGRGRGRGRGRGRG<br>RGRGRGRGRGRGSLIYI | 3.89 | 0.01 | 1.75 | 0.44 | 1.13 | 0.85 |
| 53874 | 0 | 118553 | PLFPAGRGRGRGRGRG<br>RGRGRGRGRGRGRGRG<br>RGRGRGRGRGRGSLIYI | 3.89 | 0.01 | 1.75 | 0.44 | 1.41 | 0.85 |
| 53875 | 0 | 78243  | PLFRPS                                                    | 1.91 | 0.01 | 0.90 | 2.02 | 1.59 | 1.39 |
| 53876 | 0 | 48327  | PLGEIR                                                    | 1.88 | 0.01 | 3.27 | 0.44 | 1.59 | 0.28 |
| 53877 | 0 | 48327  | PLGEIR                                                    | 1.88 | 0.01 | 3.27 | 0.44 | 1.59 | 0.28 |
| 53878 | 0 | 48328  | PLGFFKKEALPK                                              | 2.51 | 0.01 | 2.88 | 1.12 | 0.22 | 0.85 |
| 53879 | 0 | 48331  | PLGFFPDHQLDP                                              | 2.51 | 0.01 | 2.08 | 0.44 | 0.85 | 0.28 |
| 53880 | 0 | 48331  | PLGFFPDHQLDP                                              | 2.51 | 0.01 | 2.08 | 0.44 | 0.85 | 0.28 |
| 53881 | 0 | 48331  | PLGFFPDHQLDP                                              | 2.51 | 0.01 | 2.58 | 0.44 | 0.22 | 1.27 |
| 53882 | 0 | 48332  | PLGFFPDHQLDPAFG                                           | 2.72 | 0.01 | 3.07 | 0.68 | 0.22 | 0.85 |

|       |   |        |                                 |      |      |      |      |      |      |
|-------|---|--------|---------------------------------|------|------|------|------|------|------|
| 53883 | 0 | 48332  | PLGFFPDHQLDPAFG                 | 2.72 | 0.01 | 3.07 | 0.68 | 0.22 | 0.28 |
| 53884 | 0 | 48332  | PLGFFPDHQLDPAFG                 | 2.72 | 0.01 | 3.07 | 0.68 | 0.22 | 2.02 |
| 53885 | 0 | 48335  | PLGFFPDHQLDPAFGAN<br>SNNPDWDFN  | 3.23 | 0.01 | 2.08 | 0.44 | 0.85 | 0.28 |
| 53886 | 0 | 48336  | PLGFFPDHQLDPAFGAN<br>SNNPDWDFNP | 3.27 | 4.93 | 2.58 | 1.12 | 0.22 | 1.34 |
| 53887 | 0 | 48337  | PLGFFPDHQLDPAFGAN<br>SNNPDWDFNP | 3.27 | 0.01 | 2.58 | 1.12 | 0.22 | 1.27 |
| 53888 | 0 | 48337  | PLGFFPDHQLDPAFGAN<br>SNNPDWDFNP | 3.27 | 0.01 | 2.58 | 1.12 | 0.22 | 1.27 |
| 53889 | 0 | 48337  | PLGFFPDHQLDPAFGAN<br>SNNPDWDFNP | 3.27 | 0.01 | 2.58 | 1.12 | 0.22 | 1.27 |
| 53890 | 0 | 48337  | PLGFFPDHQLDPAFGAN<br>SNNPDWDFNP | 3.27 | 0.01 | 2.58 | 1.12 | 0.22 | 1.27 |
| 53891 | 0 | 48337  | PLGFFPDHQLDPAFGAN<br>SNNPDWDFNP | 3.27 | 0.01 | 2.58 | 1.12 | 0.22 | 1.27 |
| 53892 | 0 | 48337  | PLGFFPDHQLDPAFGAN<br>SNNPDWDFNP | 3.27 | 0.01 | 2.08 | 1.15 | 2.26 | 0.85 |
| 53893 | 0 | 48337  | PLGFFPDHQLDPAFGAN<br>SNNPDWDFNP | 3.27 | 0.01 | 2.08 | 1.15 | 2.26 | 0.28 |
| 53894 | 0 | 48337  | PLGFFPDHQLDPAFGAN<br>SNNPDWDFNP | 3.27 | 0.01 | 2.08 | 0.44 | 0.85 | 0.28 |
| 53895 | 0 | 48337  | PLGFFPDHQLDPAFGAN<br>SNNPDWDFNP | 3.27 | 0.01 | 2.08 | 1.15 | 0.22 | 0.28 |
| 53896 | 0 | 48337  | PLGFFPDHQLDPAFGAN<br>SNNPDWDFNP | 3.27 | 0.01 | 2.08 | 0.68 | 0.22 | 0.28 |
| 53897 | 0 | 48337  | PLGFFPDHQLDPAFGAN<br>SNNPDWDFNP | 3.27 | 0.01 | 2.08 | 0.68 | 0.22 | 2.02 |
| 53898 | 0 | 48337  | PLGFFPDHQLDPAFGAN<br>SNNPDWDFNP | 3.27 | 0.01 | 3.07 | 1.15 | 2.26 | 0.85 |
| 53899 | 0 | 48337  | PLGFFPDHQLDPAFGAN<br>SNNPDWDFNP | 3.27 | 0.01 | 3.07 | 0.68 | 0.22 | 0.28 |
| 53900 | 0 | 48337  | PLGFFPDHQLDPAFGAN<br>SNNPDWDFNP | 3.27 | 0.01 | 2.58 | 1.12 | 0.22 | 0.28 |
| 53901 | 0 | 48337  | PLGFFPDHQLDPAFGAN<br>SNNPDWDFNP | 3.27 | 0.01 | 2.58 | 1.15 | 0.22 | 0.28 |
| 53902 | 0 | 48337  | PLGFFPDHQLDPAFGAN<br>SNNPDWDFNP | 3.27 | 0.01 | 2.08 | 1.15 | 0.22 | 0.85 |
| 53903 | 0 | 48337  | PLGFFPDHQLDPAFGAN<br>SNNPDWDFNP | 3.27 | 0.01 | 2.08 | 0.68 | 0.22 | 0.28 |
| 53904 | 0 | 48337  | PLGFFPDHQLDPAFGAN<br>SNNPDWDFNP | 3.27 | 0.01 | 2.08 | 0.68 | 0.22 | 2.75 |
| 53905 | 0 | 48337  | PLGFFPDHQLDPAFGAN<br>SNNPDWDFNP | 3.27 | 0.01 | 2.08 | 0.68 | 0.22 | 1.34 |
| 53906 | 0 | 153280 | PLGFFPDHQLDPAFR                 | 2.70 | 0.01 | 2.08 | 0.68 | 0.22 | 0.28 |
| 53907 | 0 | 153280 | PLGFFPDHQLDPAFR                 | 2.70 | 0.01 | 2.08 | 0.68 | 0.22 | 0.28 |

|       |   |        |                                      |      |      |      |      |      |      |
|-------|---|--------|--------------------------------------|------|------|------|------|------|------|
| 53908 | 0 | 48338  | PLGFFPDHQLDPAFRAN<br>TANPDWDFNP      | 3.26 | 0.01 | 2.71 | 1.12 | 0.22 | 1.27 |
| 53909 | 0 | 48338  | PLGFFPDHQLDPAFRAN<br>TANPDWDFNP      | 3.26 | 0.01 | 2.71 | 1.15 | 2.26 | 0.28 |
| 53910 | 0 | 48338  | PLGFFPDHQLDPAFRAN<br>TANPDWDFNP      | 3.26 | 0.01 | 2.71 | 1.15 | 2.26 | 0.28 |
| 53911 | 0 | 48338  | PLGFFPDHQLDPAFRAN<br>TANPDWDFNP      | 3.26 | 0.01 | 2.71 | 1.20 | 0.22 | 0.28 |
| 53912 | 0 | 48339  | PLGFLPDHQLDPAFGAN<br>STNP            | 3.02 | 0.01 | 3.28 | 0.44 | 0.85 | 0.28 |
| 53913 | 0 | 78761  | PLGGAARALAHGVRVLE<br>DGVNYATGN       | 3.22 | 0.01 | 1.72 | 0.44 | 1.59 | 0.28 |
| 53914 | 0 | 48343  | PLGLKRGIEK                           | 2.33 | 0.01 | 3.20 | 0.44 | 1.41 | 0.28 |
| 53915 | 0 | 48344  | PLGLQGCAFAQSTVAELQ<br>R              | 2.84 | 0.01 | 2.53 | 0.44 | 0.85 | 0.28 |
| 53916 | 0 | 48345  | PLGLRSEFPI                           | 2.32 | 0.01 | 0.78 | 0.44 | 1.74 | 0.28 |
| 53917 | 0 | 48345  | PLGLRSEFPI                           | 2.32 | 0.01 | 0.78 | 1.15 | 0.22 | 0.28 |
| 53918 | 0 | 233758 | PLGPAAATPVVSPRASP<br>APPVPAATPT      | 3.29 | 0.01 | 3.67 | 2.61 | 0.85 | 1.28 |
| 53919 | 0 | 109700 | PLGPKGQT                             | 2.15 | 0.01 | 1.60 | 2.55 | 2.60 | 0.28 |
| 53920 | 0 | 48348  | PLGPPAAEYWN                          | 2.40 | 0.01 | 0.78 | 0.44 | 2.39 | 0.28 |
| 53921 | 0 | 48350  | PLGSAWRDQAQRPAVA<br>SRRRPTTAG        | 3.18 | 0.01 | 2.53 | 0.44 | 0.85 | 0.28 |
| 53922 | 0 | 48350  | PLGSAWRDQAQRPAVA<br>SRRRPTTAG        | 3.18 | 0.01 | 2.53 | 0.44 | 0.85 | 0.28 |
| 53923 | 0 | 109701 | PLGTQYTDAPSFSDIPNP<br>IGSENSEKTTMPLW | 3.39 | 0.01 | 1.60 | 0.44 | 1.23 | 1.34 |
| 53924 | 0 | 109701 | PLGTQYTDAPSFSDIPNP<br>IGSENSEKTTMPLW | 3.39 | 0.01 | 1.60 | 0.44 | 1.23 | 0.85 |
| 53925 | 0 | 48351  | PLGVTR                               | 1.88 | 0.01 | 2.53 | 0.44 | 1.59 | 0.28 |
| 53926 | 0 | 48351  | PLGVTR                               | 1.88 | 0.01 | 2.53 | 0.44 | 1.59 | 0.28 |
| 53927 | 0 | 167358 | PLHARLP                              | 2.05 | 0.01 | 0.90 | 1.15 | 0.22 | 1.39 |
| 53928 | 0 | 167358 | PLHARLP                              | 2.05 | 0.01 | 0.90 | 0.44 | 0.85 | 1.39 |
| 53929 | 0 | 226371 | PLHENKS                              | 1.99 | 0.01 | 0.90 | 2.66 | 0.22 | 1.39 |
| 53930 | 0 | 238851 | PLHLQVPPCQVGIFLDYE                   | 2.83 | 0.01 | 0.78 | 0.44 | 1.13 | 0.28 |
| 53931 | 0 | 238851 | PLHLQVPPCQVGIFLDYE                   | 2.83 | 0.01 | 0.78 | 0.44 | 1.13 | 0.28 |
| 53932 | 0 | 156934 | PLHTSL                               | 1.90 | 0.01 | 0.90 | 2.74 | 0.22 | 0.85 |
| 53933 | 0 | 230037 | PLIHFG                               | 1.88 | 0.01 | 2.52 | 3.15 | 0.22 | 0.85 |
| 53934 | 0 | 230037 | PLIHFG                               | 1.88 | 0.01 | 2.52 | 3.15 | 0.22 | 0.85 |
| 53935 | 0 | 230037 | PLIHFG                               | 1.88 | 0.01 | 2.52 | 3.15 | 0.22 | 0.85 |
| 53936 | 0 | 230037 | PLIHFG                               | 1.88 | 0.01 | 2.52 | 3.15 | 0.22 | 0.85 |
| 53937 | 0 | 230037 | PLIHFG                               | 1.88 | 0.01 | 2.52 | 3.15 | 0.22 | 0.85 |
| 53938 | 0 | 230037 | PLIHFG                               | 1.88 | 0.01 | 2.52 | 3.15 | 0.22 | 0.85 |

|       |   |        |                          |      |      |      |      |      |      |
|-------|---|--------|--------------------------|------|------|------|------|------|------|
| 53939 | 0 | 230037 | PLIHFG                   | 1.88 | 0.01 | 2.52 | 3.15 | 0.22 | 0.85 |
| 53940 | 0 | 230037 | PLIHFG                   | 1.88 | 0.01 | 2.52 | 3.15 | 0.22 | 1.48 |
| 53941 | 0 | 230037 | PLIHFG                   | 1.88 | 0.01 | 2.52 | 3.15 | 0.22 | 1.48 |
| 53942 | 0 | 230037 | PLIHFG                   | 1.88 | 0.01 | 2.52 | 3.15 | 0.22 | 1.48 |
| 53943 | 0 | 230037 | PLIHFG                   | 1.88 | 0.01 | 2.52 | 3.15 | 0.22 | 0.85 |
| 53944 | 0 | 48359  | PLIHFGND                 | 2.10 | 0.01 | 2.52 | 1.15 | 0.22 | 0.85 |
| 53945 | 0 | 120872 | PLIKNPDVKSAI             | 2.48 | 0.01 | 2.26 | 2.04 | 0.22 | 0.28 |
| 53946 | 0 | 48370  | PLITHGSGMDLYKSN          | 2.64 | 0.01 | 2.43 | 3.34 | 0.22 | 0.28 |
| 53947 | 0 | 48370  | PLITHGSGMDLYKSN          | 2.64 | 0.01 | 2.43 | 3.34 | 0.22 | 0.28 |
| 53948 | 0 | 48370  | PLITHGSGMDLYKSN          | 2.64 | 0.01 | 2.43 | 0.44 | 0.85 | 0.28 |
| 53949 | 0 | 48377  | PLKDNRIPSYGVLSV          | 2.67 | 0.01 | 2.72 | 1.12 | 0.22 | 0.28 |
| 53950 | 0 | 109702 | PLKP                     | 1.60 | 0.01 | 3.42 | 0.68 | 0.22 | 1.48 |
| 53951 | 0 | 109702 | PLKP                     | 1.60 | 0.01 | 3.42 | 0.68 | 0.22 | 1.48 |
| 53952 | 0 | 109702 | PLKP                     | 1.60 | 0.01 | 3.42 | 0.68 | 0.22 | 1.48 |
| 53953 | 0 | 109702 | PLKP                     | 1.60 | 0.01 | 3.42 | 0.68 | 0.22 | 0.28 |
| 53954 | 0 | 109702 | PLKP                     | 1.60 | 0.01 | 3.42 | 0.68 | 0.22 | 0.28 |
| 53955 | 0 | 109702 | PLKP                     | 1.60 | 0.01 | 3.42 | 0.68 | 0.22 | 0.28 |
| 53956 | 0 | 48382  | PLKPTKRSFIEDLLF          | 2.68 | 0.01 | 2.45 | 0.44 | 0.85 | 1.48 |
| 53957 | 0 | 48382  | PLKPTKRSFIEDLLF          | 2.68 | 0.01 | 2.45 | 0.44 | 0.85 | 1.48 |
| 53958 | 0 | 48382  | PLKPTKRSFIEDLLF          | 2.68 | 0.01 | 2.45 | 0.44 | 0.85 | 0.28 |
| 53959 | 0 | 48383  | PLKPTKRSFIEDLLFNK        | 2.79 | 0.01 | 2.48 | 0.44 | 0.85 | 0.28 |
| 53960 | 0 | 48383  | PLKPTKRSFIEDLLFNK        | 2.79 | 0.01 | 2.48 | 1.20 | 0.22 | 0.28 |
| 53961 | 0 | 48384  | PLKQIAFNSG               | 2.26 | 0.01 | 3.20 | 0.44 | 1.41 | 0.28 |
| 53962 | 0 | 100387 | PLKTDANDQIGDSL           | 2.59 | 0.01 | 2.96 | 1.12 | 0.22 | 0.28 |
| 53963 | 0 | 423457 | PLLAYAYFRSVFYVI          | 2.69 | 0.01 | 2.51 | 0.44 | 1.59 | 1.28 |
| 53964 | 0 | 48390  | PLLDRWKAPDYVPP           | 2.61 | 0.01 | 2.59 | 0.44 | 0.85 | 0.28 |
| 53965 | 0 | 48390  | PLLDRWKAPDYVPP           | 2.61 | 0.01 | 2.59 | 0.44 | 0.85 | 0.28 |
| 53966 | 0 | 48390  | PLLDRWKAPDYVPP           | 2.61 | 0.01 | 2.59 | 0.44 | 0.85 | 0.28 |
| 53967 | 0 | 48390  | PLLDRWKAPDYVPP           | 2.61 | 0.01 | 2.59 | 0.44 | 0.85 | 0.28 |
| 53968 | 0 | 48392  | PLLESWKDPDYVPP           | 2.61 | 0.01 | 1.96 | 0.44 | 0.85 | 0.28 |
| 53969 | 0 | 48395  | PLLGIGSTCAEDGN           | 2.65 | 0.01 | 3.35 | 1.15 | 2.26 | 0.85 |
| 53970 | 0 | 48395  | PLLGIGSTCAEDGN           | 2.65 | 0.01 | 3.35 | 0.68 | 0.22 | 0.28 |
| 53971 | 0 | 48395  | PLLGIGSTCAEDGN           | 2.65 | 0.01 | 3.35 | 0.68 | 2.25 | 1.75 |
| 53972 | 0 | 48395  | PLLGIGSTCAEDGN           | 2.65 | 0.01 | 3.35 | 0.68 | 0.22 | 0.28 |
| 53973 | 0 | 48396  | PLLGNOQL                 | 2.14 | 0.01 | 2.40 | 2.43 | 0.22 | 0.28 |
| 53974 | 0 | 447046 | PLLLSTTEWQILPCSFTTL<br>p | 2.96 | 0.01 | 1.96 | 0.68 | 0.22 | 1.34 |
| 53975 | 0 | 447046 | PLLLSTTEWQILPCSFTTL<br>p | 2.96 | 0.01 | 1.96 | 0.68 | 0.22 | 1.34 |
| 53976 | 0 | 447046 | PLLLSTTEWQILPCSFTTL<br>p | 2.96 | 0.01 | 1.96 | 0.68 | 0.22 | 0.28 |
| 53977 | 0 | 134472 | PLLPGTSTTSTGPCKT         | 2.79 | 0.01 | 3.07 | 0.44 | 0.22 | 1.34 |
| 53978 | 0 | 134472 | PLLPGTSTTSTGPCKT         | 2.79 | 0.01 | 3.07 | 0.44 | 0.22 | 1.34 |
| 53979 | 0 | 134472 | PLLPGTSTTSTGPCKT         | 2.79 | 0.01 | 3.07 | 0.44 | 0.22 | 1.66 |
| 53980 | 0 | 134472 | PLLPGTSTTSTGPCKT         | 2.79 | 0.01 | 3.07 | 0.44 | 0.22 | 0.28 |
| 53981 | 0 | 78762  | PLPHVIFCHPGQLGAFL<br>TN  | 2.95 | 0.01 | 2.04 | 0.44 | 1.59 | 0.28 |

|       |   |        |                                                           |      |      |      |      |      |      |
|-------|---|--------|-----------------------------------------------------------|------|------|------|------|------|------|
| 53982 | 0 | 48401  | PLLPIF                                                    | 1.92 | 0.01 | 2.08 | 0.68 | 0.22 | 0.28 |
| 53983 | 0 | 48401  | PLLPIF                                                    | 1.92 | 0.01 | 2.08 | 0.68 | 0.22 | 0.28 |
| 53984 | 0 | 534780 | PLLPLQDGSNTHIMATE<br>ASNYAQYRVQAATLRFR<br>PLVPNSVGGYAVSMS | 3.83 | 0.01 | 2.70 | 0.68 | 0.22 | 0.28 |
| 53985 | 0 | 534780 | PLLPLQDGSNTHIMATE<br>ASNYAQYRVQAATLRFR<br>PLVPNSVGGYAVSMS | 3.83 | 0.01 | 2.70 | 0.68 | 0.22 | 0.28 |
| 53986 | 0 | 534780 | PLLPLQDGSNTHIMATE<br>ASNYAQYRVQAATLRFR<br>PLVPNSVGGYAVSMS | 3.83 | 0.01 | 2.70 | 0.68 | 0.22 | 1.48 |
| 53987 | 0 | 48408  | PLLRTAPG                                                  | 2.14 | 0.01 | 2.85 | 0.44 | 0.22 | 0.28 |
| 53988 | 0 | 48409  | PLLRTQF                                                   | 2.01 | 0.01 | 2.24 | 1.12 | 0.22 | 0.28 |
| 53989 | 0 | 48409  | PLLRTQF                                                   | 2.01 | 0.01 | 2.24 | 0.68 | 0.22 | 0.28 |
| 53990 | 0 | 48410  | PLLSAGIFGAKPLQSLQ                                         | 2.83 | 0.01 | 3.30 | 0.68 | 0.22 | 0.28 |
| 53991 | 0 | 48410  | PLLSAGIFGAKPLQSLQ                                         | 2.83 | 0.01 | 3.30 | 0.68 | 0.22 | 0.28 |
| 53992 | 0 | 48412  | PLLSNTLAELYVREHLRE<br>QS                                  | 2.94 | 0.01 | 2.40 | 0.68 | 0.22 | 0.28 |
| 53993 | 0 | 48414  | PLLVETWK                                                  | 2.11 | 0.01 | 2.68 | 0.44 | 1.59 | 0.28 |
| 53994 | 0 | 134184 | PLLYGEVGDTLIIFKNQ<br>AS                                   | 2.87 | 0.01 | 0.78 | 0.44 | 2.35 | 0.28 |
| 53995 | 0 | 48418  | PLLYPS                                                    | 1.92 | 0.01 | 2.04 | 0.44 | 0.85 | 0.28 |
| 53996 | 0 | 226372 | PLNENKD                                                   | 2.02 | 0.01 | 0.90 | 2.66 | 0.22 | 1.39 |
| 53997 | 0 | 243826 | PLNFRPYVSIPVPEQ                                           | 2.67 | 0.01 | 0.78 | 0.44 | 1.41 | 0.28 |
| 53998 | 0 | 243826 | PLNFRPYVSIPVPEQ                                           | 2.67 | 0.01 | 0.78 | 0.44 | 1.13 | 0.28 |
| 53999 | 0 | 123593 | PLNGWAASF                                                 | 2.20 | 0.01 | 2.28 | 2.00 | 0.22 | 0.28 |
| 54000 | 0 | 48431  | PLNSNAMLSTESMMSRI<br>AAG                                  | 2.95 | 0.01 | 2.82 | 0.44 | 0.85 | 0.28 |
| 54001 | 0 | 123594 | PLNSWIASF                                                 | 2.21 | 0.01 | 2.28 | 2.00 | 0.22 | 0.28 |
| 54002 | 0 | 48433  | PLNVGKNP                                                  | 2.15 | 0.01 | 3.53 | 2.61 | 0.22 | 0.28 |
| 54003 | 0 | 48437  | PLPEARLLDLSSWF                                            | 2.63 | 0.01 | 2.69 | 0.44 | 0.85 | 0.28 |
| 54004 | 0 | 48439  | PLPENAQGFSKEPIEVEP<br>LPNDRLNTTQADESAPI<br>PI             | 3.55 | 0.01 | 3.93 | 0.44 | 0.85 | 0.28 |
| 54005 | 0 | 48440  | PLPENKKKEVEG                                              | 2.50 | 0.01 | 3.78 | 1.15 | 0.22 | 1.48 |
| 54006 | 0 | 172702 | PLPENVKFYDGM                                              | 2.66 | 0.01 | 0.78 | 0.44 | 1.13 | 0.28 |
| 54007 | 0 | 48442  | PLPHVVDLPQ                                                | 2.35 | 4.45 | 2.70 | 0.44 | 0.85 | 0.28 |
| 54008 | 0 | 352823 | PLPIDGDAEVDEDED                                           | 2.72 | 0.01 | 1.61 | 0.44 | 0.85 | 1.28 |
| 54009 | 0 | 48448  | PLPNTALLSL                                                | 2.36 | 0.01 | 0.78 | 0.44 | 1.74 | 0.28 |
| 54010 | 0 | 79335  | PLPPHTTERIETRSARHP<br>WRIRFGAP                            | 3.22 | 0.01 | 2.85 | 1.20 | 0.22 | 0.85 |

|       |   |        |                                |      |      |      |      |      |      |
|-------|---|--------|--------------------------------|------|------|------|------|------|------|
| 54011 | 0 | 79335  | PLPPHTTERIETRSARHP<br>WRIRFGAP | 3.22 | 0.01 | 2.85 | 1.12 | 0.22 | 0.28 |
| 54012 | 0 | 79335  | PLPPHTTERIETRSARHP<br>WRIRFGAP | 3.22 | 0.01 | 2.85 | 1.12 | 0.22 | 0.85 |
| 54013 | 0 | 48452  | PLPPVA                         | 1.92 | 0.01 | 3.27 | 0.44 | 1.59 | 0.28 |
| 54014 | 0 | 48452  | PLPPVA                         | 1.92 | 0.01 | 3.27 | 2.37 | 0.22 | 0.28 |
| 54015 | 0 | 423458 | PLPPWLRKKKACALT                | 2.70 | 0.01 | 2.51 | 0.44 | 2.35 | 1.28 |
| 54016 | 0 | 121712 | PLPQALSKERRERPO                | 2.72 | 0.01 | 0.78 | 0.44 | 1.13 | 0.85 |
| 54017 | 0 | 48453  | PLPRSSSSHHRSPS                 | 2.67 | 0.01 | 2.40 | 2.43 | 0.22 | 0.28 |
| 54018 | 0 | 48453  | PLPRSSSSHHRSPS                 | 2.67 | 0.01 | 2.40 | 2.43 | 0.22 | 0.28 |
| 54019 | 0 | 48453  | PLPRSSSSHHRSPS                 | 2.67 | 0.01 | 2.40 | 2.43 | 0.22 | 0.28 |
| 54020 | 0 | 97555  | PLPTDAGV                       | 2.13 | 0.01 | 2.87 | 0.68 | 0.22 | 0.28 |
| 54021 | 0 | 97555  | PLPTDAGV                       | 2.13 | 0.01 | 2.87 | 1.81 | 0.22 | 0.28 |
| 54022 | 0 | 48459  | PLPWL                          | 1.92 | 0.01 | 2.40 | 0.44 | 0.85 | 0.28 |
| 54023 | 0 | 48460  | PLPWLPGA                       | 2.17 | 0.01 | 2.40 | 1.12 | 0.22 | 0.28 |
| 54024 | 0 | 48460  | PLPWLPGA                       | 2.17 | 0.01 | 2.40 | 1.12 | 0.22 | 0.28 |
| 54025 | 0 | 48460  | PLPWLPGA                       | 2.17 | 0.01 | 2.40 | 1.12 | 0.22 | 0.28 |
| 54026 | 0 | 48460  | PLPWLPGA                       | 2.17 | 0.01 | 2.40 | 1.12 | 0.22 | 0.28 |
| 54027 | 0 | 48463  | PLQKTYNY                       | 2.12 | 0.01 | 0.78 | 0.44 | 1.74 | 0.28 |
| 54028 | 0 | 48464  | PLQKTYNYNV                     | 2.31 | 0.01 | 0.78 | 0.44 | 1.74 | 0.28 |
| 54029 | 0 | 462413 | PLQPE                          | 1.77 | 0.01 | 0.78 | 1.12 | 0.22 | 1.28 |
| 54030 | 0 | 462149 | PLQPQQPFP                      | 2.27 | 4.63 | 1.86 | 0.44 | 1.93 | 0.28 |
| 54031 | 0 | 462150 | PLQPQQPFP                      | 2.27 | 0.01 | 1.86 | 0.44 | 1.93 | 0.28 |
| 54032 | 0 | 148719 | PLQPQQPFPQ                     | 2.38 | 0.01 | 1.86 | 0.44 | 1.23 | 0.85 |
| 54033 | 0 | 79971  | PLRMFLGPKQLT                   | 2.48 | 0.01 | 2.14 | 3.26 | 0.22 | 0.28 |
| 54034 | 0 | 79971  | PLRMFLGPKQLT                   | 2.48 | 0.01 | 2.14 | 3.17 | 0.22 | 0.28 |
| 54035 | 0 | 181420 | PLRNQPYLFKTNPNY                | 2.71 | 0.01 | 2.82 | 1.15 | 0.22 | 0.28 |
| 54036 | 0 | 153281 | PLRNTHPQAMQWNST                | 2.67 | 0.01 | 2.08 | 0.68 | 0.22 | 0.28 |
| 54037 | 0 | 153282 | PLRNTHPQAMQWNST<br>TF          | 2.77 | 0.01 | 2.08 | 0.68 | 0.22 | 0.28 |
| 54038 | 0 | 153282 | PLRNTHPQAMQWNST<br>TF          | 2.77 | 0.01 | 2.08 | 0.68 | 0.22 | 0.28 |
| 54039 | 0 | 153282 | PLRNTHPQAMQWNST<br>TF          | 2.77 | 0.01 | 2.08 | 0.68 | 0.22 | 2.02 |
| 54040 | 0 | 153282 | PLRNTHPQAMQWNST<br>TF          | 2.77 | 0.01 | 2.08 | 0.68 | 0.22 | 0.28 |
| 54041 | 0 | 243045 | PLRVISRAQGLKLVV                | 2.66 | 0.01 | 0.78 | 0.44 | 1.59 | 0.28 |
| 54042 | 0 | 48472  | PLSAGPPAAGPHIVTPPS<br>AR       | 2.97 | 0.01 | 2.48 | 0.44 | 1.59 | 0.28 |
| 54043 | 0 | 156935 | PLSKMHI                        | 1.99 | 0.01 | 0.90 | 2.74 | 0.22 | 0.85 |
| 54044 | 0 | 141067 | PLSLEPDP                       | 2.17 | 0.01 | 0.78 | 0.68 | 0.22 | 0.28 |
| 54045 | 0 | 141067 | PLSLEPDP                       | 2.17 | 0.01 | 0.78 | 0.68 | 0.22 | 2.12 |
| 54046 | 0 | 141067 | PLSLEPDP                       | 2.17 | 0.01 | 0.78 | 0.68 | 0.22 | 0.28 |
| 54047 | 0 | 48477  | PLSLPNPYQLDAAF                 | 2.63 | 0.01 | 4.15 | 2.22 | 0.85 | 0.28 |
| 54048 | 0 | 48479  | PLSLRSK                        | 2.04 | 0.01 | 0.90 | 1.12 | 0.22 | 0.85 |
| 54049 | 0 | 48479  | PLSLRSK                        | 2.04 | 0.01 | 0.90 | 0.44 | 1.41 | 0.85 |

|       |   |        |                              |      |      |      |      |      |      |
|-------|---|--------|------------------------------|------|------|------|------|------|------|
| 54050 | 0 | 48479  | PLSLRSK                      | 2.04 | 0.01 | 0.90 | 1.12 | 0.22 | 0.85 |
| 54051 | 0 | 48479  | PLSLRSK                      | 2.04 | 0.01 | 0.90 | 1.12 | 0.22 | 0.85 |
| 54052 | 0 | 48479  | PLSLRSK                      | 2.04 | 0.01 | 0.90 | 1.12 | 0.22 | 0.85 |
| 54053 | 0 | 48479  | PLSLRSK                      | 2.04 | 0.01 | 0.90 | 1.12 | 0.22 | 0.85 |
| 54054 | 0 | 48479  | PLSLRSK                      | 2.04 | 0.01 | 0.90 | 1.12 | 0.22 | 0.85 |
| 54055 | 0 | 48479  | PLSLRSK                      | 2.04 | 0.01 | 0.90 | 1.12 | 0.22 | 0.85 |
| 54056 | 0 | 48479  | PLSLRSK                      | 2.04 | 0.01 | 0.90 | 1.12 | 0.22 | 0.85 |
| 54057 | 0 | 48479  | PLSLRSK                      | 2.04 | 0.01 | 0.90 | 0.68 | 0.22 | 0.85 |
| 54058 | 0 | 48479  | PLSLRSK                      | 2.04 | 0.01 | 0.90 | 0.68 | 0.22 | 0.85 |
| 54059 | 0 | 48479  | PLSLRSK                      | 2.04 | 0.01 | 0.90 | 0.68 | 0.22 | 0.85 |
| 54060 | 0 | 48479  | PLSLRSK                      | 2.04 | 0.01 | 0.90 | 0.68 | 0.22 | 0.85 |
| 54061 | 0 | 48479  | PLSLRSK                      | 2.04 | 0.01 | 0.90 | 0.68 | 0.22 | 0.85 |
| 54062 | 0 | 48479  | PLSLRSK                      | 2.04 | 0.01 | 0.90 | 1.12 | 0.22 | 0.85 |
| 54063 | 0 | 48487  | PLSRVDLGDCI                  | 2.39 | 0.01 | 3.67 | 1.15 | 2.26 | 2.02 |
| 54064 | 0 | 132006 | PLSSSQPNLRAQVPP              | 2.69 | 0.01 | 0.78 | 0.44 | 1.13 | 0.85 |
| 54065 | 0 | 132007 | PLSSTAQSTSARNSD              | 2.70 | 0.01 | 0.78 | 0.44 | 1.13 | 0.85 |
| 54066 | 0 | 523662 | PLSYSKIDTTPLVQEMVK<br>ETKQLE | 3.17 | 0.01 | 2.24 | 0.44 | 1.41 | 1.28 |
| 54067 | 0 | 121713 | PLTALLRN                     | 2.13 | 0.01 | 0.78 | 0.44 | 1.13 | 0.28 |
| 54068 | 0 | 523663 | PLTASPPATAPGPSAAN<br>VSV     | 3.00 | 4.08 | 2.40 | 0.44 | 1.59 | 1.28 |
| 54069 | 0 | 48494  | PLTASPPATAPGPSAAN<br>VSV     | 3.00 | 0.01 | 2.40 | 0.44 | 1.59 | 0.28 |
| 54070 | 0 | 48496  | PLTDFDQGWG                   | 2.31 | 0.01 | 1.72 | 2.74 | 0.22 | 0.28 |
| 54071 | 0 | 48498  | PLTDFDQGWGPISYAN<br>GSGP     | 2.94 | 0.01 | 2.83 | 0.44 | 0.85 | 0.28 |
| 54072 | 0 | 48498  | PLTDFDQGWGPISYAN<br>GSGP     | 2.94 | 0.01 | 2.83 | 0.44 | 0.85 | 0.28 |
| 54073 | 0 | 179346 | PLTGMSKEVQQKLID              | 2.63 | 0.01 | 2.36 | 0.44 | 1.23 | 1.28 |
| 54074 | 0 | 179346 | PLTGMSKEVQQKLID              | 2.63 | 0.01 | 2.36 | 0.44 | 1.23 | 1.27 |
| 54075 | 0 | 179346 | PLTGMSKEVQQKLID              | 2.63 | 0.01 | 2.36 | 0.44 | 1.23 | 1.28 |
| 54076 | 0 | 129610 | PLTKGILGFVFT                 | 2.49 | 0.01 | 2.36 | 0.68 | 0.22 | 1.27 |
| 54077 | 0 | 122872 | PLTLEL                       | 1.91 | 0.01 | 0.78 | 1.12 | 0.22 | 0.85 |
| 54078 | 0 | 108575 | PLTNRRLRG                    | 2.25 | 0.01 | 0.90 | 0.44 | 1.13 | 1.39 |
| 54079 | 0 | 48511  | PLTNSK                       | 1.88 | 0.01 | 1.96 | 0.44 | 0.85 | 0.28 |
| 54080 | 0 | 98336  | PLTPLQNMGILEVGG              | 2.67 | 0.01 | 2.71 | 2.78 | 0.22 | 0.28 |
| 54081 | 0 | 115420 | PLTQTPVVVPPFLQPEV<br>MGV     | 2.98 | 0.01 | 1.60 | 0.44 | 1.23 | 1.28 |
| 54082 | 0 | 48513  | PLTRATADNKDELIKRA<br>N DY    | 2.96 | 0.01 | 4.63 | 2.42 | 0.22 | 0.28 |
| 54083 | 0 | 48513  | PLTRATADNKDELIKRA<br>N DY    | 2.96 | 0.01 | 4.63 | 2.42 | 0.22 | 1.34 |
| 54084 | 0 | 152891 | PLVAAYPIVH                   | 2.33 | 0.01 | 2.18 | 2.16 | 0.22 | 0.28 |
| 54085 | 0 | 48518  | PLVAEEDE                     | 2.14 | 0.01 | 2.68 | 0.44 | 1.59 | 0.28 |
| 54086 | 0 | 48519  | PLVEHGLQLAEQFKQKA<br>LGL     | 2.98 | 0.01 | 1.96 | 0.44 | 0.85 | 0.28 |
| 54087 | 0 | 189135 | PLVEHKHRSILHLHP              | 2.77 | 0.01 | 2.92 | 0.68 | 0.22 | 0.28 |



|       |   |        |                            |      |      |      |      |      |      |
|-------|---|--------|----------------------------|------|------|------|------|------|------|
| 54088 | 0 | 189136 | PLVEHKKHRTLILHLHP          | 2.77 | 0.01 | 2.92 | 0.68 | 0.22 | 0.28 |
| 54089 | 0 | 189137 | PLVEHKKHRTLILHLYP          | 2.75 | 0.01 | 2.92 | 0.68 | 0.22 | 0.28 |
| 54090 | 0 | 189137 | PLVEHKKHRTLILHLYP          | 2.75 | 0.01 | 2.92 | 0.68 | 0.22 | 0.28 |
| 54091 | 0 | 189137 | PLVEHKKHRTLILHLYP          | 2.75 | 0.01 | 2.92 | 0.68 | 0.22 | 0.28 |
| 54092 | 0 | 189137 | PLVEHKKHRTLILHLYP          | 2.75 | 0.01 | 2.92 | 0.68 | 0.22 | 1.48 |
| 54093 | 0 | 48520  | PLVESWKRPDYQPA             | 2.58 | 0.01 | 2.69 | 0.44 | 0.85 | 0.28 |
| 54094 | 0 | 48520  | PLVESWKRPDYQPA             | 2.58 | 0.01 | 2.69 | 0.44 | 0.85 | 0.28 |
| 54095 | 0 | 48520  | PLVESWKRPDYQPA             | 2.58 | 0.01 | 2.69 | 0.44 | 0.85 | 0.28 |
| 54096 | 0 | 48520  | PLVESWKRPDYQPA             | 2.58 | 0.01 | 2.69 | 0.44 | 0.85 | 0.28 |
| 54097 | 0 | 48520  | PLVESWKRPDYQPA             | 2.58 | 0.01 | 2.69 | 0.44 | 1.41 | 0.28 |
| 54098 | 0 | 48521  | PLVETWKKPDYEP              | 2.61 | 0.01 | 2.41 | 0.44 | 0.85 | 0.28 |
| 54099 | 0 | 48521  | PLVETWKKPDYEP              | 2.61 | 0.01 | 2.41 | 0.44 | 1.41 | 0.28 |
| 54100 | 0 | 48521  | PLVETWKKPDYEP              | 2.61 | 0.01 | 2.41 | 0.44 | 0.85 | 0.28 |
| 54101 | 0 | 243047 | PLVEVPPKLSSEEIA            | 2.70 | 0.01 | 3.32 | 1.20 | 0.22 | 0.85 |
| 54102 | 0 | 243047 | PLVEVPPKLSSEEIA            | 2.70 | 0.01 | 3.32 | 1.20 | 0.22 | 0.85 |
| 54103 | 0 | 48523  | PLVHDSLEHVLTPTS<br>WTTKILK | 3.15 | 0.01 | 3.01 | 0.44 | 1.59 | 0.28 |
| 54104 | 0 | 150498 | PLVIRIYMRMKHVRA            | 2.68 | 0.01 | 3.45 | 1.12 | 0.22 | 0.28 |
| 54105 | 0 | 147197 | PLVQEQQF                   | 2.13 | 0.01 | 1.86 | 0.44 | 1.93 | 0.85 |
| 54106 | 0 | 149410 | PLVQEQQFQG                 | 2.33 | 0.01 | 1.86 | 0.44 | 1.93 | 0.85 |
| 54107 | 0 | 148721 | PLVQQQQFPG                 | 2.34 | 0.01 | 1.86 | 0.68 | 0.22 | 0.28 |
| 54108 | 0 | 148721 | PLVQQQQFPG                 | 2.34 | 0.01 | 1.86 | 0.44 | 1.23 | 0.85 |
| 54109 | 0 | 431720 | PLVQQQQFPGQQQQ             | 2.64 | 0.01 | 1.86 | 0.44 | 1.23 | 0.85 |
| 54110 | 0 | 353120 | PLVVRLWFEREVDGH            | 2.68 | 0.01 | 1.61 | 0.44 | 0.85 | 1.28 |
| 54111 | 0 | 510074 | PLYGDDANHYQW               | 2.44 | 0.01 | 0.90 | 0.68 | 0.22 | 0.28 |
| 54112 | 0 | 48536  | PLYISNPNY                  | 2.26 | 0.01 | 2.18 | 3.16 | 0.22 | 0.28 |
| 54113 | 0 | 48536  | PLYISNPNY                  | 2.26 | 0.01 | 2.18 | 3.16 | 0.22 | 1.34 |
| 54114 | 0 | 48536  | PLYISNPNY                  | 2.26 | 0.01 | 2.18 | 3.16 | 0.22 | 1.66 |
| 54115 | 0 | 48536  | PLYISNPNY                  | 2.26 | 0.01 | 2.18 | 3.16 | 0.22 | 1.66 |
| 54116 | 0 | 152892 | PLYISNPNYK                 | 2.34 | 0.01 | 2.18 | 2.16 | 0.22 | 0.28 |
| 54117 | 0 | 48543  | PMCSNRMADDIWSVP<br>WYCVR   | 2.94 | 0.01 | 0.90 | 2.69 | 2.26 | 0.85 |
| 54118 | 0 | 110685 | PMDTFIVSTNPNTVTSS<br>TPI   | 2.99 | 0.01 | 1.86 | 0.44 | 0.85 | 0.28 |
| 54119 | 0 | 110685 | PMDTFIVSTNPNTVTSS<br>TPI   | 2.99 | 0.01 | 1.86 | 0.44 | 0.85 | 0.28 |
| 54120 | 0 | 110685 | PMDTFIVSTNPNTVTSS<br>TPI   | 2.99 | 0.01 | 1.86 | 0.44 | 0.85 | 0.28 |
| 54121 | 0 | 110685 | PMDTFIVSTNPNTVTSS<br>TPI   | 2.99 | 0.01 | 1.86 | 0.44 | 1.41 | 0.28 |
| 54122 | 0 | 110685 | PMDTFIVSTNPNTVTSS<br>TPI   | 2.99 | 0.01 | 1.86 | 0.44 | 0.85 | 0.28 |
| 54123 | 0 | 110685 | PMDTFIVSTNPNTVTSS<br>TPI   | 2.99 | 0.01 | 1.86 | 0.44 | 1.41 | 0.28 |
| 54124 | 0 | 110685 | PMDTFIVSTNPNTVTSS<br>TPI   | 2.99 | 0.01 | 1.86 | 0.44 | 1.41 | 0.28 |

|       |   |        |                                            |      |      |      |      |      |      |
|-------|---|--------|--------------------------------------------|------|------|------|------|------|------|
| 54125 | 0 | 110685 | PMDTFIVSTNPNTVTSS<br>TPI                   | 2.99 | 0.01 | 1.86 | 2.37 | 0.22 | 0.28 |
| 54126 | 0 | 48548  | PMEKKVIVWGAETA<br>PMELTEEVVDEFMEDV         | 2.60 | 0.01 | 2.69 | 0.44 | 1.41 | 0.28 |
| 54127 | 0 | 134760 | PMSIRLAKFRSRTGKKSD<br>VRK                  | 3.56 | 0.01 | 2.72 | 1.15 | 0.22 | 0.85 |
| 54128 | 0 | 48550  | PMERQKPLKVKAKA                             | 2.64 | 0.01 | 2.88 | 2.22 | 0.22 | 0.28 |
| 54129 | 0 | 48550  | PMERQKPLKVKAKA                             | 2.64 | 0.01 | 2.88 | 2.22 | 0.22 | 0.28 |
| 54130 | 0 | 48550  | PMERQKPLKVKAKA                             | 2.64 | 0.01 | 2.88 | 2.22 | 0.22 | 0.28 |
| 54131 | 0 | 48550  | PMERQKPLKVKAKA                             | 2.64 | 0.01 | 2.88 | 2.22 | 0.22 | 0.28 |
| 54132 | 0 | 48550  | PMERQKPLKVKAKA                             | 2.64 | 0.01 | 2.88 | 2.22 | 0.22 | 0.28 |
| 54133 | 0 | 48550  | PMERQKPLKVKAKA                             | 2.64 | 0.01 | 2.96 | 2.22 | 0.22 | 0.28 |
| 54134 | 0 | 48550  | PMERQKPLKVKAKA                             | 2.64 | 0.01 | 2.96 | 2.22 | 0.22 | 0.28 |
| 54135 | 0 | 48550  | PMERQKPLKVKAKA                             | 2.64 | 0.01 | 2.96 | 2.22 | 0.22 | 0.28 |
| 54136 | 0 | 48550  | PMERQKPLKVKAKA                             | 2.64 | 0.01 | 2.96 | 2.22 | 0.22 | 0.28 |
| 54137 | 0 | 144432 | PMFIVNTNVPRASVPD<br>GFLSE                  | 2.97 | 0.01 | 0.78 | 0.44 | 1.41 | 0.28 |
| 54138 | 0 | 144432 | PMFIVNTNVPRASVPD<br>GFLSE                  | 2.97 | 0.01 | 0.78 | 0.44 | 1.41 | 0.28 |
| 54139 | 0 | 123596 | PMGGHMPMMPGPPM<br>MR                       | 2.80 | 0.01 | 0.78 | 1.20 | 0.22 | 0.28 |
| 54140 | 0 | 48554  | PMGTQTHTMIFDNAFN<br>C                      | 2.78 | 0.01 | 2.48 | 0.44 | 0.85 | 0.28 |
| 54141 | 0 | 48555  | PMHECLSAPSVCADNY                           | 2.72 | 0.01 | 0.90 | 0.44 | 1.41 | 0.28 |
| 54142 | 0 | 109705 | PMIGVNQELAYFYPELF<br>RQFYQLDAYPSGAWYY<br>V | 3.45 | 0.01 | 1.60 | 0.44 | 1.23 | 1.34 |
| 54143 | 0 | 109705 | PMIGVNQELAYFYPELF<br>RQFYQLDAYPSGAWYY<br>V | 3.45 | 0.01 | 1.60 | 0.44 | 1.23 | 0.85 |
| 54144 | 0 | 48557  | PMIHFGNDWEDRYRE<br>N                       | 2.77 | 0.01 | 1.75 | 2.19 | 0.22 | 0.28 |
| 54145 | 0 | 48557  | PMIHFGNDWEDRYRE<br>N                       | 2.77 | 0.01 | 1.75 | 2.19 | 0.22 | 2.12 |
| 54146 | 0 | 48557  | PMIHFGNDWEDRYRE<br>N                       | 2.77 | 0.01 | 1.75 | 2.19 | 0.22 | 2.02 |
| 54147 | 0 | 48557  | PMIHFGNDWEDRYRE<br>N                       | 2.77 | 0.01 | 1.75 | 2.19 | 0.22 | 0.28 |
| 54148 | 0 | 48557  | PMIHFGNDWEDRYRE<br>N                       | 2.77 | 0.01 | 1.75 | 2.19 | 0.22 | 0.28 |
| 54149 | 0 | 48562  | PMILTITLNGTSEST                            | 2.70 | 0.01 | 3.03 | 1.12 | 0.22 | 0.28 |
| 54150 | 0 | 48562  | PMILTITLNGTSEST                            | 2.70 | 0.01 | 3.03 | 1.12 | 0.22 | 0.28 |
| 54151 | 0 | 48566  | PMKTDLELDFSLP                              | 2.56 | 0.01 | 3.00 | 0.44 | 0.85 | 0.28 |
| 54152 | 0 | 353205 | PMLNLLKSHSKTVGI                            | 2.65 | 0.01 | 1.61 | 0.44 | 0.85 | 1.28 |
| 54153 | 0 | 48568  | PMLPSHPA                                   | 2.15 | 0.01 | 3.51 | 2.36 | 0.22 | 0.28 |
| 54154 | 0 | 48568  | PMLPSHPA                                   | 2.15 | 0.01 | 3.51 | 2.02 | 2.39 | 0.28 |

|       |   |        |                             |      |      |      |      |      |      |
|-------|---|--------|-----------------------------|------|------|------|------|------|------|
| 54155 | 0 | 48568  | PMLPSHPA                    | 2.15 | 0.01 | 3.51 | 1.12 | 0.22 | 0.28 |
| 54156 | 0 | 228613 | PMMHFGNDWEDRY               | 2.50 | 0.01 | 2.98 | 2.19 | 0.22 | 0.85 |
| 54157 | 0 | 48572  | PMMHFGNDWEDRYR              | 2.64 | 0.01 | 2.98 | 2.19 | 0.22 | 0.85 |
| 54158 | 0 | 48572  | PMMHFGNDWEDRYR              | 2.64 | 0.01 | 2.98 | 2.19 | 0.22 | 0.85 |
| 54159 | 0 | 48572  | PMMHFGNDWEDRYR              | 2.64 | 0.01 | 2.98 | 2.19 | 0.22 | 0.85 |
| 54160 | 0 | 134186 | PMMPGPPMMRPPARP<br>MMVPTRP  | 3.10 | 0.01 | 0.78 | 1.12 | 1.41 | 0.85 |
| 54161 | 0 | 123597 | PMMPMMGPPP                  | 2.35 | 0.01 | 0.78 | 0.44 | 1.13 | 0.85 |
| 54162 | 0 | 114917 | PMNCSSYANT                  | 2.30 | 0.01 | 2.25 | 0.44 | 1.23 | 0.85 |
| 54163 | 0 | 230245 | PMNCSSYANTTSEDGKV<br>MVL    | 2.90 | 0.01 | 2.25 | 0.44 | 1.23 | 0.28 |
| 54164 | 0 | 156936 | PMPRFF                      | 1.89 | 0.01 | 0.90 | 2.74 | 0.22 | 0.85 |
| 54165 | 0 | 148078 | PMSDGAVQP                   | 2.22 | 0.01 | 3.24 | 3.57 | 0.85 | 0.28 |
| 54166 | 0 | 156937 | PMSKSHL                     | 2.02 | 0.01 | 0.90 | 2.74 | 0.22 | 0.85 |
| 54167 | 0 | 134187 | PMSTPSAT                    | 2.17 | 0.01 | 3.42 | 4.33 | 2.25 | 1.75 |
| 54168 | 0 | 134188 | PMSTPSATSVR                 | 2.43 | 0.01 | 3.42 | 1.20 | 0.22 | 1.48 |
| 54169 | 0 | 134188 | PMSTPSATSVR                 | 2.43 | 0.01 | 3.42 | 4.33 | 2.25 | 1.75 |
| 54170 | 0 | 134188 | PMSTPSATSVR                 | 2.43 | 0.01 | 3.42 | 1.20 | 0.22 | 1.48 |
| 54171 | 0 | 134188 | PMSTPSATSVR                 | 2.43 | 0.01 | 3.42 | 1.20 | 0.22 | 1.48 |
| 54172 | 0 | 134188 | PMSTPSATSVR                 | 2.43 | 0.01 | 3.42 | 1.20 | 0.22 | 1.48 |
| 54173 | 0 | 134188 | PMSTPSATSVR                 | 2.43 | 0.01 | 3.42 | 1.20 | 0.22 | 1.48 |
| 54174 | 0 | 124583 | PMTLPENYFSEPHYH             | 2.67 | 0.01 | 0.90 | 2.04 | 0.22 | 1.27 |
| 54175 | 0 | 48586  | PMTPGQCNMVVERLG<br>DYLVEQGM | 3.08 | 0.01 | 2.53 | 0.68 | 0.22 | 0.28 |
| 54176 | 0 | 48586  | PMTPGQCNMVVERLG<br>DYLVEQGM | 3.08 | 0.01 | 2.53 | 0.68 | 0.22 | 0.28 |
| 54177 | 0 | 98339  | PMTPLSEPALMPALQ             | 2.72 | 0.01 | 2.71 | 2.78 | 0.22 | 0.28 |
| 54178 | 0 | 123602 | PMTQAPRI                    | 2.13 | 0.01 | 0.78 | 1.20 | 0.22 | 0.28 |
| 54179 | 0 | 123602 | PMTQAPRI                    | 2.13 | 0.01 | 0.78 | 0.44 | 1.13 | 0.28 |
| 54180 | 0 | 172711 | PMVLGAQHFGHSGKHY            | 2.64 | 0.01 | 0.78 | 0.44 | 1.41 | 0.28 |
| 54181 | 0 | 78244  | PMWPME                      | 1.92 | 0.01 | 0.90 | 2.02 | 1.59 | 1.39 |
| 54182 | 0 | 489706 | PNAGDLRSQYQNLWL             | 2.66 | 0.01 | 2.69 | 3.05 | 0.85 | 1.28 |
| 54183 | 0 | 48594  | PNAKSVKEYLDKVRATV<br>GC     | 2.86 | 0.01 | 2.59 | 0.44 | 1.74 | 1.27 |
| 54184 | 0 | 48595  | PNAN                        | 1.57 | 0.01 | 1.66 | 1.15 | 0.22 | 2.35 |
| 54185 | 0 | 48595  | PNAN                        | 1.57 | 0.01 | 1.66 | 1.15 | 0.22 | 2.35 |
| 54186 | 0 | 48595  | PNAN                        | 1.57 | 0.01 | 1.66 | 1.15 | 0.22 | 0.85 |
| 54187 | 0 | 48596  | PNANP                       | 1.77 | 0.01 | 3.29 | 1.15 | 0.22 | 0.28 |
| 54188 | 0 | 48596  | PNANP                       | 1.77 | 0.01 | 3.29 | 1.15 | 0.22 | 0.28 |
| 54189 | 0 | 48596  | PNANP                       | 1.77 | 0.01 | 3.29 | 1.15 | 0.22 | 0.28 |
| 54190 | 0 | 48597  | PNANPN                      | 1.92 | 0.01 | 3.33 | 0.68 | 0.22 | 0.28 |
| 54191 | 0 | 48597  | PNANPN                      | 1.92 | 0.01 | 3.33 | 0.68 | 0.22 | 0.85 |

|       |   |        |                                   |      |      |      |      |      |      |
|-------|---|--------|-----------------------------------|------|------|------|------|------|------|
| 54192 | 0 | 48597  | PNANPN                            | 1.92 | 0.01 | 3.33 | 0.68 | 0.22 | 0.85 |
| 54193 | 0 | 48597  | PNANPN                            | 1.92 | 0.01 | 3.33 | 0.68 | 0.22 | 1.34 |
| 54194 | 0 | 48597  | PNANPN                            | 1.92 | 0.01 | 3.33 | 0.68 | 0.22 | 1.34 |
| 54195 | 0 | 48598  | PNANPNA                           | 2.06 | 0.01 | 3.29 | 1.15 | 0.22 | 1.27 |
| 54196 | 0 | 48598  | PNANPNA                           | 2.06 | 0.01 | 3.29 | 1.15 | 0.22 | 0.28 |
| 54197 | 0 | 48599  | PNANPNANPNA                       | 2.47 | 0.01 | 1.66 | 1.15 | 0.22 | 0.28 |
| 54198 | 0 | 48600  | PNANPNANPNANPNA<br>NPNAN          | 3.03 | 0.01 | 1.66 | 0.44 | 0.85 | 0.28 |
| 54199 | 0 | 104180 | PNAPDAS                           | 2.05 | 0.01 | 0.90 | 1.15 | 0.22 | 1.39 |
| 54200 | 0 | 48601  | PNAPIL                            | 1.91 | 0.01 | 2.08 | 1.15 | 0.22 | 0.28 |
| 54201 | 0 | 48601  | PNAPIL                            | 1.91 | 0.01 | 2.08 | 1.15 | 0.22 | 0.28 |
| 54202 | 0 | 48603  | PNAPWVFACA                        | 2.34 | 0.01 | 2.56 | 0.68 | 0.22 | 0.28 |
| 54203 | 0 | 114918 | PNATDKEGKD                        | 2.31 | 0.01 | 2.25 | 0.44 | 1.23 | 0.85 |
| 54204 | 0 | 114918 | PNATDKEGKD                        | 2.31 | 0.01 | 2.25 | 0.44 | 1.23 | 0.85 |
| 54205 | 0 | 48606  | PNATQPEL                          | 2.13 | 0.01 | 2.40 | 1.12 | 0.22 | 0.28 |
| 54206 | 0 | 48606  | PNATQPEL                          | 2.13 | 0.01 | 2.40 | 1.12 | 0.22 | 0.28 |
| 54207 | 0 | 48606  | PNATQPEL                          | 2.13 | 0.01 | 2.40 | 1.12 | 0.22 | 0.28 |
| 54208 | 0 | 48606  | PNATQPEL                          | 2.13 | 0.01 | 2.40 | 1.12 | 0.22 | 0.28 |
| 54209 | 0 | 48606  | PNATQPEL                          | 2.13 | 0.01 | 2.40 | 1.12 | 0.22 | 0.28 |
| 54210 | 0 | 48606  | PNATQPEL                          | 2.13 | 0.01 | 2.40 | 1.20 | 0.22 | 0.28 |
| 54211 | 0 | 423459 | PNCCQVSVD RSRVPE                  | 2.70 | 0.01 | 2.51 | 0.44 | 2.35 | 1.28 |
| 54212 | 0 | 87356  | PNCHGPDWASPVCQR<br>HS             | 2.78 | 0.01 | 3.16 | 0.68 | 0.22 | 0.28 |
| 54213 | 0 | 87356  | PNCHGPDWASPVCQR<br>HS             | 2.78 | 0.01 | 3.16 | 0.68 | 0.22 | 0.28 |
| 54214 | 0 | 87356  | PNCHGPDWASPVCQR<br>HS             | 2.78 | 0.01 | 3.16 | 0.68 | 0.22 | 1.34 |
| 54215 | 0 | 87356  | PNCHGPDWASPVCQR<br>HS             | 2.78 | 0.01 | 3.16 | 0.68 | 0.22 | 1.34 |
| 54216 | 0 | 48610  | PNCRIHSDNDCKFTL                   | 2.64 | 0.01 | 3.03 | 1.12 | 0.22 | 0.28 |
| 54217 | 0 | 48610  | PNCRIHSDNDCKFTL                   | 2.64 | 0.01 | 3.03 | 1.12 | 0.22 | 0.28 |
| 54218 | 0 | 123603 | PNCTYILNPEKFTLRVTYPE<br>NCTRRVHGG | 3.26 | 0.01 | 3.26 | 1.12 | 0.22 | 0.85 |
| 54219 | 0 | 123603 | PNCTYILNPEKFTLRVTYPE<br>NCTRRVHGG | 3.26 | 0.01 | 3.26 | 1.20 | 0.22 | 0.28 |
| 54220 | 0 | 123603 | PNCTYILNPEKFTLRVTYPE<br>NCTRRVHGG | 3.26 | 0.01 | 3.26 | 1.20 | 0.22 | 0.28 |
| 54221 | 0 | 48612  | PNCWVGLTGAHSCFL                   | 2.64 | 0.01 | 0.90 | 0.44 | 1.41 | 0.28 |
| 54222 | 0 | 48613  | PNDGEERQSYWF                      | 2.42 | 0.01 | 2.88 | 2.37 | 0.22 | 0.28 |
| 54223 | 0 | 48613  | PNDGEERQSYWF                      | 2.42 | 0.01 | 2.88 | 2.22 | 0.85 | 0.28 |
| 54224 | 0 | 48613  | PNDGEERQSYWF                      | 2.42 | 0.01 | 2.88 | 2.22 | 0.22 | 0.28 |
| 54225 | 0 | 48617  | PNDPNRNV                          | 2.17 | 0.01 | 3.29 | 1.20 | 0.22 | 0.28 |
| 54226 | 0 | 48618  | PNDPNRNVD                         | 2.27 | 0.01 | 1.66 | 0.44 | 1.74 | 0.28 |
| 54227 | 0 | 48618  | PNDPNRNVD                         | 2.27 | 0.01 | 3.37 | 0.68 | 0.22 | 0.28 |
| 54228 | 0 | 48618  | PNDPNRNVD                         | 2.27 | 0.01 | 3.37 | 0.68 | 0.22 | 1.48 |
| 54229 | 0 | 48618  | PNDPNRNVD                         | 2.27 | 0.01 | 3.37 | 1.12 | 0.22 | 0.28 |
| 54230 | 0 | 48620  | PNDPPP                            | 1.90 | 0.01 | 3.37 | 0.68 | 0.22 | 0.28 |

|       |   |        |                                   |      |      |      |      |      |      |
|-------|---|--------|-----------------------------------|------|------|------|------|------|------|
| 54231 | 0 | 48620  | PNDPPP                            | 1.90 | 0.01 | 3.37 | 0.68 | 0.22 | 0.85 |
| 54232 | 0 | 48620  | PNDPPP                            | 1.90 | 0.01 | 3.37 | 0.68 | 0.22 | 0.85 |
| 54233 | 0 | 48620  | PNDPPP                            | 1.90 | 0.01 | 3.37 | 0.68 | 0.22 | 1.34 |
| 54234 | 0 | 48620  | PNDPPP                            | 1.90 | 0.01 | 3.37 | 0.68 | 0.22 | 1.34 |
| 54235 | 0 | 48620  | PNDPPP                            | 1.90 | 0.01 | 3.37 | 0.68 | 0.22 | 1.48 |
| 54236 | 0 | 87359  | PNDVFREAQRSY                      | 2.43 | 0.01 | 2.48 | 0.44 | 1.59 | 0.28 |
| 54237 | 0 | 144433 | PNEEITATMDKIQTSFHC<br>C           | 2.83 | 0.01 | 2.93 | 0.44 | 1.41 | 1.27 |
| 54238 | 0 | 225828 | PNEEQNNSTYRVVSV                   | 2.68 | 0.01 | 3.28 | 0.44 | 0.22 | 0.85 |
| 54239 | 0 | 172713 | PNEEYTWEEDPLAGI                   | 2.66 | 0.01 | 0.78 | 0.44 | 1.41 | 0.28 |
| 54240 | 0 | 172713 | PNEEYTWEEDPLAGI                   | 2.66 | 0.01 | 0.78 | 0.44 | 1.13 | 0.28 |
| 54241 | 0 | 48627  | PNEPDDALAMRIIRI                   | 2.69 | 0.01 | 0.90 | 0.68 | 0.22 | 0.28 |
| 54242 | 0 | 48627  | PNEPDDALAMRIIRI                   | 2.69 | 0.01 | 0.90 | 0.68 | 0.22 | 1.27 |
| 54243 | 0 | 48627  | PNEPDDALAMRIIRI                   | 2.69 | 0.01 | 0.90 | 0.68 | 0.22 | 1.48 |
| 54244 | 0 | 48627  | PNEPDDALAMRIIRI                   | 2.69 | 0.01 | 0.90 | 0.44 | 1.59 | 0.28 |
| 54245 | 0 | 48631  | PNFKIAIWRVAASE                    | 2.58 | 0.01 | 2.69 | 0.44 | 1.41 | 0.28 |
| 54246 | 0 | 101129 | PNFSWLR                           | 1.99 | 0.01 | 0.90 | 0.44 | 1.13 | 1.39 |
| 54247 | 0 | 48635  | PNFVDSQPNPQEPVEPS<br>FVKIEKVPSEEN | 3.35 | 0.01 | 1.66 | 0.44 | 0.85 | 1.34 |
| 54248 | 0 | 48635  | PNFVDSQPNPQEPVEPS<br>FVKIEKVPSEEN | 3.35 | 0.01 | 1.66 | 0.44 | 0.85 | 0.28 |
| 54249 | 0 | 48635  | PNFVDSQPNPQEPVEPS<br>FVKIEKVPSEEN | 3.35 | 0.01 | 1.66 | 0.44 | 0.85 | 1.48 |
| 54250 | 0 | 48635  | PNFVDSQPNPQEPVEPS<br>FVKIEKVPSEEN | 3.35 | 0.01 | 1.66 | 0.44 | 0.85 | 0.28 |
| 54251 | 0 | 181421 | PNGELVPQLQYMYV                    | 2.70 | 0.01 | 2.82 | 1.15 | 0.22 | 0.28 |
| 54252 | 0 | 152894 | PNGNLQYQGK                        | 2.33 | 0.01 | 2.18 | 2.16 | 0.22 | 0.28 |
| 54253 | 0 | 48641  | PNGNVPAGVTPSKYGL<br>GGD           | 2.91 | 0.01 | 3.48 | 1.12 | 0.22 | 0.28 |
| 54254 | 0 | 48641  | PNGNVPAGVTPSKYGL<br>GGD           | 2.91 | 0.01 | 3.48 | 1.20 | 0.22 | 0.28 |
| 54255 | 0 | 48641  | PNGNVPAGVTPSKYGL<br>GGD           | 2.91 | 0.01 | 3.48 | 1.20 | 0.22 | 0.28 |
| 54256 | 0 | 48643  | PNGRASDTAGQ                       | 2.39 | 0.01 | 3.35 | 2.02 | 0.85 | 0.28 |
| 54257 | 0 | 48643  | PNGRASDTAGQ                       | 2.39 | 0.01 | 3.35 | 2.02 | 0.85 | 0.28 |
| 54258 | 0 | 48644  | PNGTATGPAGTQPEG                   | 2.73 | 0.01 | 3.37 | 2.22 | 0.22 | 0.28 |
| 54259 | 0 | 48646  | PNGTHSWEYWGAQ                     | 2.51 | 0.01 | 2.04 | 0.44 | 0.85 | 1.28 |
| 54260 | 0 | 48648  | PNGTYRAT                          | 2.12 | 0.01 | 2.21 | 0.44 | 0.85 | 0.28 |
| 54261 | 0 | 48648  | PNGTYRAT                          | 2.12 | 0.01 | 2.21 | 1.12 | 0.22 | 0.28 |
| 54262 | 0 | 48649  | PNGTYRATYQ                        | 2.31 | 0.01 | 2.21 | 1.12 | 0.22 | 0.28 |
| 54263 | 0 | 48649  | PNGTYRATYQ                        | 2.31 | 0.01 | 2.21 | 1.12 | 0.22 | 0.28 |
| 54264 | 0 | 117605 | PNHPSSSGSFSDADLAD                 | 2.82 | 0.01 | 0.78 | 3.48 | 0.22 | 0.28 |
| 54265 | 0 | 106001 | PNIEADVNI                         | 2.12 | 0.01 | 3.05 | 1.20 | 0.22 | 0.28 |
| 54266 | 0 | 133663 | PNKHQRS                           | 1.99 | 0.01 | 0.90 | 0.68 | 0.22 | 0.28 |
| 54267 | 0 | 48662  | PNKKPGKKTTHK                      | 2.54 | 0.01 | 2.38 | 0.68 | 0.22 | 0.28 |
| 54268 | 0 | 48662  | PNKKPGKKTTHK                      | 2.54 | 0.01 | 2.38 | 0.44 | 1.74 | 0.28 |

|       |   |        |                          |      |      |      |      |      |      |
|-------|---|--------|--------------------------|------|------|------|------|------|------|
| 54269 | 0 | 94644  | PNKKPGKKTITTKPTK         | 2.75 | 0.01 | 2.38 | 0.68 | 0.22 | 1.75 |
| 54270 | 0 | 48663  | PNKPNNDFHFEV             | 2.49 | 0.01 | 2.38 | 0.68 | 0.22 | 0.28 |
| 54271 | 0 | 48663  | PNKPNNDFHFEV             | 2.49 | 0.01 | 2.38 | 0.68 | 0.22 | 0.28 |
| 54272 | 0 | 48663  | PNKPNNDFHFEV             | 2.49 | 0.01 | 2.38 | 0.44 | 1.59 | 0.28 |
| 54273 | 0 | 48663  | PNKPNNDFHFEV             | 2.49 | 0.01 | 2.38 | 0.44 | 1.74 | 0.28 |
| 54274 | 0 | 102721 | PNKPTPPTYETEKPLEPA<br>PV | 2.99 | 0.01 | 2.39 | 0.68 | 0.22 | 0.28 |
| 54275 | 0 | 102722 | PNKPVEPTYEVIPTPPTD<br>PV | 2.99 | 0.01 | 2.39 | 0.68 | 0.22 | 0.28 |
| 54276 | 0 | 121715 | PNKQTPSGKKCIAAK          | 2.68 | 0.01 | 0.78 | 0.44 | 1.13 | 0.85 |
| 54277 | 0 | 121715 | PNKQTPSGKKCIAAK          | 2.68 | 0.01 | 0.78 | 0.44 | 1.41 | 0.85 |
| 54278 | 0 | 48664  | PNKTACMYGGVTLHDN<br>NRLT | 2.90 | 0.01 | 2.56 | 1.12 | 0.22 | 0.28 |
| 54279 | 0 | 48664  | PNKTACMYGGVTLHDN<br>NRLT | 2.90 | 0.01 | 2.56 | 1.12 | 0.22 | 0.28 |
| 54280 | 0 | 48664  | PNKTACMYGGVTLHDN<br>NRLT | 2.90 | 0.01 | 2.56 | 3.12 | 0.22 | 0.28 |
| 54281 | 0 | 110964 | PNLKLNNGTDYK             | 2.48 | 0.01 | 3.15 | 3.53 | 0.22 | 0.28 |
| 54282 | 0 | 110964 | PNLKLNNGTDYK             | 2.48 | 0.01 | 3.15 | 0.44 | 1.59 | 0.28 |
| 54283 | 0 | 48667  | PNLLAYPKTQSQTAK          | 2.70 | 0.01 | 3.03 | 1.12 | 0.22 | 0.28 |
| 54284 | 0 | 123606 | PNLPYYIDD                | 2.23 | 0.01 | 2.28 | 2.00 | 0.22 | 0.28 |
| 54285 | 0 | 95673  | PNLRGDLQ                 | 2.12 | 0.01 | 2.96 | 2.59 | 0.22 | 0.28 |
| 54286 | 0 | 48668  | PNLRGDLQVL               | 2.31 | 0.01 | 3.26 | 2.37 | 0.22 | 0.85 |
| 54287 | 0 | 48668  | PNLRGDLQVL               | 2.31 | 0.01 | 3.26 | 2.59 | 0.22 | 0.85 |
| 54288 | 0 | 48669  | PNLRGDLQVLA              | 2.39 | 0.01 | 3.02 | 2.37 | 0.22 | 1.34 |
| 54289 | 0 | 48669  | PNLRGDLQVLA              | 2.39 | 0.01 | 3.02 | 2.37 | 0.22 | 1.75 |
| 54290 | 0 | 48669  | PNLRGDLQVLA              | 2.39 | 0.01 | 3.02 | 2.13 | 0.22 | 1.34 |
| 54291 | 0 | 48669  | PNLRGDLQVLA              | 2.39 | 0.01 | 3.02 | 2.13 | 0.22 | 1.75 |
| 54292 | 0 | 48670  | PNLRGDLQVLAQKVART<br>LP  | 2.91 | 0.01 | 2.88 | 2.37 | 0.22 | 0.28 |
| 54293 | 0 | 48670  | PNLRGDLQVLAQKVART<br>LP  | 2.91 | 0.01 | 2.88 | 1.12 | 0.22 | 0.28 |
| 54294 | 0 | 48670  | PNLRGDLQVLAQKVART<br>LP  | 2.91 | 0.01 | 2.96 | 1.12 | 0.22 | 0.85 |
| 54295 | 0 | 48670  | PNLRGDLQVLAQKVART<br>LP  | 2.91 | 0.01 | 2.96 | 2.59 | 0.22 | 1.34 |
| 54296 | 0 | 48670  | PNLRGDLQVLAQKVART<br>LP  | 2.91 | 0.01 | 2.96 | 2.69 | 0.22 | 1.57 |
| 54297 | 0 | 48670  | PNLRGDLQVLAQKVART<br>LP  | 2.91 | 0.01 | 2.96 | 2.69 | 0.22 | 1.57 |
| 54298 | 0 | 48670  | PNLRGDLQVLAQKVART<br>LP  | 2.91 | 0.01 | 2.96 | 2.46 | 0.22 | 1.57 |
| 54299 | 0 | 48672  | PNLSAYPKSHGKTAK          | 2.69 | 0.01 | 3.38 | 1.12 | 0.22 | 0.28 |
| 54300 | 0 | 48676  | PNM                      | 1.37 | 0.01 | 3.70 | 0.44 | 0.85 | 0.28 |
| 54301 | 0 | 48680  | PNNAAGLPGKCGVNV          | 2.71 | 0.01 | 3.35 | 1.12 | 0.22 | 0.85 |

|       |   |        |                                       |      |      |      |      |      |      |
|-------|---|--------|---------------------------------------|------|------|------|------|------|------|
| 54302 | 0 | 48680  | PNNAAGLPKCGVNV                        | 2.71 | 0.01 | 3.35 | 0.44 | 1.23 | 0.85 |
| 54303 | 0 | 48681  | PNNDFHFEVFNF                          | 2.51 | 0.01 | 2.38 | 0.68 | 0.22 | 0.28 |
| 54304 | 0 | 48681  | PNNDFHFEVFNF                          | 2.51 | 0.01 | 2.38 | 0.68 | 0.22 | 0.28 |
| 54305 | 0 | 48681  | PNNDFHFEVFNF                          | 2.51 | 0.01 | 2.38 | 0.44 | 1.59 | 0.28 |
| 54306 | 0 | 48681  | PNNDFHFEVFNF                          | 2.51 | 0.01 | 2.38 | 0.44 | 1.74 | 0.28 |
| 54307 | 0 | 48681  | PNNDFHFEVFNF                          | 2.51 | 0.01 | 2.38 | 0.44 | 1.74 | 0.28 |
| 54308 | 0 | 353440 | PNNDDPAADGAETREE                      | 2.69 | 0.01 | 1.61 | 0.44 | 0.85 | 1.28 |
| 54309 | 0 | 132008 | PNNGGLNPLFGPQQV                       | 2.73 | 0.01 | 0.78 | 0.44 | 1.13 | 0.85 |
| 54310 | 0 | 172716 | PNNIDIWMGGVSEPL                       | 2.65 | 0.01 | 0.78 | 0.44 | 1.41 | 0.28 |
| 54311 | 0 | 95674  | PNNLCCSQWG                            | 2.29 | 0.01 | 2.60 | 0.44 | 1.23 | 0.85 |
| 54312 | 0 | 181422 | PNNMMGTFSIRTVGT                       | 2.66 | 0.01 | 2.82 | 1.15 | 0.22 | 0.28 |
| 54313 | 0 | 150500 | PNNMMGTFSVRTVGT                       | 2.68 | 0.01 | 3.45 | 1.12 | 0.22 | 0.28 |
| 54314 | 0 | 110965 | PNNNKILVPKVSGLQYR<br>VFR              | 2.94 | 0.01 | 1.86 | 0.44 | 1.41 | 0.28 |
| 54315 | 0 | 110965 | PNNNKILVPKVSGLQYR<br>VFR              | 2.94 | 0.01 | 1.86 | 0.44 | 0.85 | 0.28 |
| 54316 | 0 | 110965 | PNNNKILVPKVSGLQYR<br>VFR              | 2.94 | 0.01 | 1.86 | 0.44 | 2.82 | 0.28 |
| 54317 | 0 | 110965 | PNNNKILVPKVSGLQYR<br>VFR              | 2.94 | 0.01 | 1.86 | 0.44 | 0.85 | 0.28 |
| 54318 | 0 | 153438 | PNNNTRKSIRIQRGPGR<br>AFVTIGKIGNMRQAHC | 3.43 | 0.01 | 2.54 | 1.12 | 0.22 | 1.57 |
| 54319 | 0 | 153438 | PNNNTRKSIRIQRGPGR<br>AFVTIGKIGNMRQAHC | 3.43 | 0.01 | 2.54 | 1.12 | 0.22 | 1.57 |
| 54320 | 0 | 153438 | PNNNTRKSIRIQRGPGR<br>AFVTIGKIGNMRQAHC | 3.43 | 0.01 | 2.54 | 1.12 | 0.22 | 0.85 |
| 54321 | 0 | 122873 | PNNSVSELWTLSQLERGE<br>RYGSKKSM        | 3.14 | 0.01 | 1.60 | 2.04 | 0.22 | 0.28 |
| 54322 | 0 | 122873 | PNNSVSELWTLSQLERGE<br>RYGSKKSM        | 3.14 | 0.01 | 1.60 | 2.04 | 0.22 | 0.85 |
| 54323 | 0 | 122873 | PNNSVSELWTLSQLERGE<br>RYGSKKSM        | 3.14 | 0.01 | 1.60 | 2.04 | 0.22 | 0.85 |
| 54324 | 0 | 98340  | PNPATAAGKI                            | 2.33 | 0.01 | 3.57 | 0.44 | 0.85 | 0.28 |
| 54325 | 0 | 510471 | PNPFVLD                               | 2.03 | 0.01 | 0.90 | 0.44 | 1.13 | 0.28 |
| 54326 | 0 | 510471 | PNPFVLD                               | 2.03 | 0.01 | 0.90 | 0.44 | 1.41 | 0.28 |
| 54327 | 0 | 48684  | PNPIGSENSE                            | 2.36 | 0.01 | 1.60 | 0.44 | 1.23 | 0.28 |
| 54328 | 0 | 48684  | PNPIGSENSE                            | 2.36 | 0.01 | 1.60 | 0.44 | 1.23 | 0.28 |
| 54329 | 0 | 48685  | PNPLGFFP                              | 2.16 | 0.01 | 3.07 | 1.15 | 0.22 | 0.85 |
| 54330 | 0 | 48685  | PNPLGFFP                              | 2.16 | 0.01 | 3.07 | 1.15 | 0.22 | 1.34 |
| 54331 | 0 | 48688  | PNPLGFLP                              | 2.17 | 0.01 | 3.07 | 1.15 | 0.22 | 0.85 |
| 54332 | 0 | 48690  | PNPNDP                                | 1.92 | 0.01 | 3.37 | 0.68 | 0.22 | 0.28 |

|       |   |        |                             |      |      |      |      |      |      |
|-------|---|--------|-----------------------------|------|------|------|------|------|------|
| 54333 | 0 | 48690  | PNPNDP                      | 1.92 | 0.01 | 3.37 | 0.68 | 0.22 | 0.85 |
| 54334 | 0 | 48690  | PNPNDP                      | 1.92 | 0.01 | 3.37 | 0.68 | 0.22 | 0.85 |
| 54335 | 0 | 48690  | PNPNDP                      | 1.92 | 0.01 | 3.37 | 0.68 | 0.22 | 1.34 |
| 54336 | 0 | 48690  | PNPNDP                      | 1.92 | 0.01 | 3.37 | 0.68 | 0.22 | 1.34 |
| 54337 | 0 | 48690  | PNPNDP                      | 1.92 | 0.01 | 3.37 | 0.68 | 0.22 | 1.48 |
| 54338 | 0 | 79044  | PNPNPNPNPGTTTLES<br>FEN     | 2.99 | 0.01 | 2.84 | 0.44 | 0.85 | 0.28 |
| 54339 | 0 | 101976 | PNPTCNENN                   | 2.25 | 0.01 | 1.66 | 0.44 | 1.59 | 2.97 |
| 54340 | 0 | 48695  | PNPTCNENNGGCDADA<br>TCT     | 2.94 | 0.01 | 1.66 | 0.44 | 1.74 | 0.28 |
| 54341 | 0 | 119304 | PNQEKVSGIPEQEYSC            | 2.74 | 0.01 | 0.90 | 1.12 | 0.22 | 1.48 |
| 54342 | 0 | 119304 | PNQEKVSGIPEQEYSC            | 2.74 | 0.01 | 0.90 | 1.12 | 0.22 | 1.27 |
| 54343 | 0 | 119304 | PNQEKVSGIPEQEYSC            | 2.74 | 0.01 | 0.90 | 1.12 | 0.22 | 1.27 |
| 54344 | 0 | 119304 | PNQEKVSGIPEQEYSC            | 2.74 | 0.01 | 0.90 | 1.12 | 0.22 | 1.27 |
| 54345 | 0 | 119304 | PNQEKVSGIPEQEYSC            | 2.74 | 0.01 | 0.90 | 1.12 | 0.22 | 1.27 |
| 54346 | 0 | 48697  | PNRDILIASNWYFNHLK<br>DKILGC | 3.05 | 0.01 | 2.95 | 0.44 | 0.22 | 0.28 |
| 54347 | 0 | 161444 | PNRVFKVNTNAYYEMS<br>GLE     | 2.85 | 0.01 | 2.08 | 2.02 | 0.22 | 1.57 |
| 54348 | 0 | 161444 | PNRVFKVNTNAYYEMS<br>GLE     | 2.85 | 0.01 | 2.08 | 2.43 | 0.22 | 1.57 |
| 54349 | 0 | 353516 | PNSAEPKPAEPKSAE             | 2.75 | 0.01 | 1.61 | 0.44 | 0.85 | 1.28 |
| 54350 | 0 | 115893 | PNSLPQNIPP                  | 2.34 | 0.01 | 1.60 | 0.44 | 1.23 | 0.85 |
| 54351 | 0 | 161268 | PNSSIVYEAADAILHTPG<br>CV    | 2.90 | 0.01 | 2.45 | 0.68 | 0.22 | 0.28 |
| 54352 | 0 | 122522 | PNSSLTKTTLVPLLANN<br>RE     | 2.96 | 0.01 | 1.60 | 2.04 | 0.22 | 0.28 |
| 54353 | 0 | 353544 | PNSTQTTGDDDDPAAD            | 2.70 | 0.01 | 1.61 | 0.44 | 0.85 | 1.28 |
| 54354 | 0 | 78245  | PNSVEQKHIQKEDVPSE<br>RYL    | 2.94 | 0.01 | 1.60 | 0.44 | 1.23 | 1.28 |
| 54355 | 0 | 78245  | PNSVEQKHIQKEDVPSE<br>RYL    | 2.94 | 0.01 | 1.60 | 0.44 | 1.23 | 2.51 |
| 54356 | 0 | 96743  | PNSWYGAGAIKMSGPN<br>NHV     | 2.89 | 0.01 | 2.39 | 0.44 | 1.59 | 0.28 |
| 54357 | 0 | 48708  | PNTALLSLVL                  | 2.33 | 0.01 | 0.78 | 0.44 | 1.74 | 0.28 |
| 54358 | 0 | 137947 | PNTMKTQ                     | 2.02 | 0.01 | 0.90 | 0.68 | 0.22 | 1.39 |
| 54359 | 0 | 137947 | PNTMKTQ                     | 2.02 | 0.01 | 0.90 | 0.68 | 0.22 | 1.66 |
| 54360 | 0 | 137947 | PNTMKTQ                     | 2.02 | 0.01 | 0.90 | 0.68 | 0.22 | 1.66 |
| 54361 | 0 | 137947 | PNTMKTQ                     | 2.02 | 0.01 | 0.90 | 0.68 | 0.22 | 1.66 |
| 54362 | 0 | 137947 | PNTMKTQ                     | 2.02 | 0.01 | 0.90 | 0.68 | 0.22 | 1.34 |
| 54363 | 0 | 137947 | PNTMKTQ                     | 2.02 | 0.01 | 0.90 | 0.68 | 0.22 | 0.28 |
| 54364 | 0 | 137947 | PNTMKTQ                     | 2.02 | 0.01 | 0.90 | 0.68 | 0.22 | 0.28 |
| 54365 | 0 | 48714  | PNVDP                       | 1.77 | 0.01 | 3.29 | 1.15 | 0.22 | 0.28 |
| 54366 | 0 | 48715  | PNVDPN                      | 1.92 | 0.01 | 3.33 | 0.68 | 0.22 | 0.28 |
| 54367 | 0 | 48715  | PNVDPN                      | 1.92 | 0.01 | 3.33 | 0.68 | 0.22 | 0.85 |
| 54368 | 0 | 48715  | PNVDPN                      | 1.92 | 0.01 | 3.33 | 0.68 | 0.22 | 0.85 |



|       |   |        |                               |      |      |      |      |      |      |
|-------|---|--------|-------------------------------|------|------|------|------|------|------|
| 54369 | 0 | 48715  | PNVDPN                        | 1.92 | 0.01 | 3.33 | 0.68 | 0.22 | 1.34 |
| 54370 | 0 | 48715  | PNVDPN                        | 1.92 | 0.01 | 3.33 | 0.68 | 0.22 | 1.34 |
| 54371 | 0 | 48716  | PNVGITQG                      | 2.12 | 0.01 | 3.06 | 1.12 | 0.22 | 0.28 |
| 54372 | 0 | 97557  | PNVSLSNG                      | 2.14 | 0.01 | 2.87 | 1.81 | 0.22 | 0.28 |
| 54373 | 0 | 48720  | PNVSVPSSTPLLY                 | 2.71 | 0.01 | 2.04 | 0.44 | 0.85 | 0.28 |
| 54374 | 0 | 93575  | PNYKATKDEK                    | 2.31 | 0.01 | 2.67 | 2.00 | 0.22 | 0.28 |
| 54375 | 0 | 181423 | PNYKGNDIKCTSTSR               | 2.66 | 0.01 | 2.82 | 1.15 | 0.22 | 0.28 |
| 54376 | 0 | 118963 | PNYKVNYYAVTK                  | 2.51 | 0.01 | 2.18 | 0.68 | 0.22 | 0.28 |
| 54377 | 0 | 118963 | PNYKVNYYAVTK                  | 2.51 | 0.01 | 2.18 | 0.68 | 0.22 | 1.34 |
| 54378 | 0 | 118963 | PNYKVNYYAVTK                  | 2.51 | 0.01 | 2.18 | 0.68 | 0.22 | 1.34 |
| 54379 | 0 | 118963 | PNYKVNYYAVTK                  | 2.51 | 0.01 | 2.18 | 0.68 | 0.22 | 1.75 |
| 54380 | 0 | 118963 | PNYKVNYYAVTK                  | 2.51 | 0.01 | 2.18 | 0.68 | 0.22 | 1.66 |
| 54381 | 0 | 118963 | PNYKVNYYAVTK                  | 2.51 | 0.01 | 2.18 | 0.68 | 0.22 | 1.66 |
| 54382 | 0 | 118963 | PNYKVNYYAVTK                  | 2.51 | 0.01 | 2.18 | 0.44 | 0.22 | 0.28 |
| 54383 | 0 | 48728  | PNYSRALWRVAAEE                | 2.58 | 0.01 | 1.96 | 0.44 | 0.85 | 0.28 |
| 54384 | 0 | 139193 | PNYTTPELNLLLDIFNQTKL          | 2.95 | 0.01 | 3.55 | 3.16 | 0.22 | 0.28 |
| 54385 | 0 | 48732  | PPA                           | 1.39 | 0.01 | 2.08 | 1.15 | 2.26 | 0.28 |
| 54386 | 0 | 48732  | PPA                           | 1.39 | 0.01 | 2.08 | 1.15 | 2.26 | 0.28 |
| 54387 | 0 | 48732  | PPA                           | 1.39 | 0.01 | 2.08 | 1.15 | 2.26 | 2.35 |
| 54388 | 0 | 48733  | PPAAEYPPAAEY                  | 2.53 | 0.01 | 0.90 | 1.20 | 0.22 | 0.28 |
| 54389 | 0 | 48733  | PPAAEYPPAAEY                  | 2.53 | 0.01 | 0.90 | 0.44 | 2.39 | 0.28 |
| 54390 | 0 | 48735  | PPAAGPPAAGPPAAGPPAAG          | 3.03 | 0.01 | 2.48 | 0.44 | 1.59 | 0.28 |
| 54391 | 0 | 48736  | PPAAGPPAAGPPAAGPPAAGP<br>RILA | 3.02 | 0.01 | 2.48 | 0.44 | 1.59 | 0.28 |
| 54392 | 0 | 48738  | PPAAGPRILAPLSAGPPAAG<br>AG    | 3.00 | 0.01 | 2.48 | 0.44 | 1.59 | 0.28 |
| 54393 | 0 | 48741  | PPADASDSADAKSYAD              | 2.73 | 0.01 | 3.26 | 0.44 | 0.85 | 0.28 |
| 54394 | 0 | 353662 | PPAESPFRSVFGAPS               | 2.71 | 0.01 | 1.61 | 0.44 | 0.85 | 1.28 |
| 54395 | 0 | 353679 | PPAKAAAAPAKAAAA               | 2.72 | 0.01 | 1.61 | 0.44 | 0.85 | 1.28 |
| 54396 | 0 | 353681 | PPAKAAAAPAKAAAA               | 2.72 | 0.01 | 1.61 | 0.44 | 0.85 | 1.28 |
| 54397 | 0 | 353682 | PPAKAAAAPAKAAAP               | 2.74 | 0.01 | 1.61 | 0.44 | 0.85 | 1.28 |
| 54398 | 0 | 353683 | PPAKAAAAPAKTAAP               | 2.74 | 0.01 | 1.61 | 0.44 | 0.85 | 1.28 |
| 54399 | 0 | 353690 | PPAKTAAAPAKAAAP               | 2.74 | 0.01 | 1.61 | 0.44 | 0.85 | 1.28 |
| 54400 | 0 | 353691 | PPAKTAAAPAKAAAP               | 2.74 | 0.01 | 1.61 | 0.44 | 0.85 | 1.28 |
| 54401 | 0 | 78764  | PPALPIWARPDYNPPLLE<br>SWKDPD  | 3.13 | 0.01 | 1.72 | 0.44 | 1.59 | 0.28 |
| 54402 | 0 | 78764  | PPALPIWARPDYNPPLLE<br>SWKDPD  | 3.13 | 0.01 | 1.72 | 0.44 | 0.85 | 0.28 |
| 54403 | 0 | 123608 | PPAQPLSE                      | 2.14 | 0.01 | 0.78 | 0.44 | 1.13 | 0.28 |
| 54404 | 0 | 123608 | PPAQPLSE                      | 2.14 | 0.01 | 0.78 | 0.44 | 1.13 | 0.28 |
| 54405 | 0 | 123608 | PPAQPLSE                      | 2.14 | 0.01 | 0.78 | 0.44 | 1.41 | 0.28 |

|       |   |        |                              |      |      |      |      |      |      |
|-------|---|--------|------------------------------|------|------|------|------|------|------|
| 54406 | 0 | 122874 | PPARALKRSLWVEVDLLI<br>GS     | 2.93 | 0.01 | 0.78 | 0.44 | 1.13 | 0.28 |
| 54407 | 0 | 122874 | PPARALKRSLWVEVDLLI<br>GS     | 2.93 | 0.01 | 0.78 | 0.44 | 1.13 | 0.28 |
| 54408 | 0 | 122874 | PPARALKRSLWVEVDLLI<br>GS     | 2.93 | 0.01 | 0.78 | 0.44 | 1.41 | 0.28 |
| 54409 | 0 | 122874 | PPARALKRSLWVEVDLLI<br>GS     | 2.93 | 0.01 | 0.78 | 0.44 | 1.13 | 1.27 |
| 54410 | 0 | 129621 | PPARGTPI                     | 2.14 | 0.01 | 0.78 | 0.44 | 1.13 | 0.28 |
| 54411 | 0 | 153283 | PPASTNRQSGRQPTP              | 2.71 | 0.01 | 2.08 | 0.68 | 0.22 | 0.28 |
| 54412 | 0 | 153283 | PPASTNRQSGRQPTP              | 2.71 | 0.01 | 2.08 | 0.68 | 0.22 | 0.28 |
| 54413 | 0 | 523700 | PPATAPG                      | 2.05 | 4.08 | 2.40 | 0.44 | 1.59 | 1.28 |
| 54414 | 0 | 523701 | PPATAPG                      | 2.05 | 4.93 | 2.40 | 0.44 | 1.59 | 1.28 |
| 54415 | 0 | 523700 | PPATAPG                      | 2.05 | 4.08 | 2.40 | 0.44 | 1.59 | 1.27 |
| 54416 | 0 | 523705 | PPATAPGPSAANVSVA<br>TTA      | 3.00 | 4.08 | 2.40 | 0.44 | 1.59 | 1.28 |
| 54417 | 0 | 523704 | PPATAPGPSAANVSVA<br>TTA      | 3.00 | 4.63 | 2.40 | 0.44 | 1.59 | 1.28 |
| 54418 | 0 | 523703 | PPATAPGPSAANVSVA<br>TTA      | 3.00 | 4.63 | 2.40 | 0.44 | 1.59 | 1.28 |
| 54419 | 0 | 523706 | PPATAPGPSAANVSVA<br>TTA      | 3.00 | 0.01 | 2.40 | 0.44 | 1.59 | 1.28 |
| 54420 | 0 | 48751  | PPATVYRYDSRPPE               | 2.62 | 0.01 | 2.14 | 0.44 | 0.85 | 1.27 |
| 54421 | 0 | 48751  | PPATVYRYDSRPPE               | 2.62 | 0.01 | 2.14 | 0.44 | 2.98 | 1.27 |
| 54422 | 0 | 48752  | PPAVGPPAAGPPAAGP<br>PAAG     | 3.02 | 0.01 | 2.48 | 0.44 | 1.59 | 0.28 |
| 54423 | 0 | 48753  | PPAYEK                       | 1.89 | 0.01 | 0.78 | 1.15 | 0.22 | 0.85 |
| 54424 | 0 | 48754  | PPAYEKLAEQSPPP               | 2.69 | 0.01 | 0.78 | 1.15 | 0.22 | 0.85 |
| 54425 | 0 | 48758  | PPAYSCLCPWAHM                | 2.55 | 0.01 | 0.90 | 0.44 | 1.41 | 0.28 |
| 54426 | 0 | 238856 | PPCQVGIFLDYEAGMVS<br>F       | 2.79 | 0.01 | 0.78 | 0.44 | 1.13 | 0.28 |
| 54427 | 0 | 238856 | PPCQVGIFLDYEAGMVS<br>F       | 2.79 | 0.01 | 0.78 | 0.44 | 1.13 | 0.28 |
| 54428 | 0 | 48762  | PPDHSA                       | 1.89 | 0.01 | 2.53 | 0.44 | 1.59 | 0.28 |
| 54429 | 0 | 145947 | PPDIIPK                      | 2.05 | 0.01 | 1.86 | 0.68 | 0.22 | 0.28 |
| 54430 | 0 | 145947 | PPDIIPK                      | 2.05 | 0.01 | 1.86 | 0.68 | 0.22 | 0.28 |
| 54431 | 0 | 145947 | PPDIIPK                      | 2.05 | 0.01 | 1.86 | 0.68 | 0.22 | 0.28 |
| 54432 | 0 | 145947 | PPDIIPK                      | 2.05 | 0.01 | 1.86 | 0.68 | 0.22 | 0.28 |
| 54433 | 0 | 48764  | PPDQLVNLHAFVRSDEI<br>EHLVVEE | 3.10 | 0.01 | 3.36 | 0.44 | 0.22 | 0.28 |
| 54434 | 0 | 48764  | PPDQLVNLHAFVRSDEI<br>EHLVVEE | 3.10 | 0.01 | 3.36 | 0.44 | 0.22 | 2.35 |
| 54435 | 0 | 48764  | PPDQLVNLHAFVRSDEI<br>EHLVVEE | 3.10 | 0.01 | 3.36 | 0.44 | 0.22 | 1.34 |
| 54436 | 0 | 48764  | PPDQLVNLHAFVRSDEI<br>EHLVVEE | 3.10 | 0.01 | 3.36 | 2.49 | 0.22 | 0.28 |

|       |   |        |                               |      |      |      |      |      |      |
|-------|---|--------|-------------------------------|------|------|------|------|------|------|
| 54437 | 0 | 48764  | PPDQLVNLHAFVRSDEI<br>EHLVVEE  | 3.10 | 0.01 | 3.36 | 2.49 | 0.22 | 1.34 |
| 54438 | 0 | 48765  | PPDQLVNLHDFRSDEIE<br>HLVVEE   | 3.07 | 0.01 | 3.36 | 2.75 | 0.22 | 0.28 |
| 54439 | 0 | 48765  | PPDQLVNLHDFRSDEIE<br>HLVVEE   | 3.07 | 0.01 | 3.36 | 2.75 | 2.25 | 1.75 |
| 54440 | 0 | 48765  | PPDQLVNLHDFRSDEIE<br>HLVVEE   | 3.07 | 0.01 | 3.36 | 2.75 | 0.22 | 0.28 |
| 54441 | 0 | 48765  | PPDQLVNLHDFRSDEIE<br>HLVVEE   | 3.07 | 0.01 | 3.36 | 2.75 | 2.25 | 1.75 |
| 54442 | 0 | 48765  | PPDQLVNLHDFRSDEIE<br>HLVVEE   | 3.07 | 0.01 | 4.08 | 1.15 | 0.22 | 0.85 |
| 54443 | 0 | 48765  | PPDQLVNLHDFRSDEIE<br>HLVVEE   | 3.07 | 0.01 | 4.08 | 3.01 | 0.22 | 0.85 |
| 54444 | 0 | 48765  | PPDQLVNLHDFRSDEIE<br>HLVVEE   | 3.07 | 0.01 | 4.08 | 3.01 | 0.22 | 0.85 |
| 54445 | 0 | 48765  | PPDQLVNLHDFRSDEIE<br>HLVVEE   | 3.07 | 0.01 | 4.08 | 3.01 | 0.22 | 1.34 |
| 54446 | 0 | 48765  | PPDQLVNLHDFRSDEIE<br>HLVVEE   | 3.07 | 0.01 | 4.08 | 3.01 | 2.25 | 1.75 |
| 54447 | 0 | 48765  | PPDQLVNLHDFRSDEIE<br>HLVVEE   | 3.07 | 0.01 | 3.36 | 3.26 | 0.22 | 0.28 |
| 54448 | 0 | 48765  | PPDQLVNLHDFRSDEIE<br>HLVVEE   | 3.07 | 0.01 | 3.36 | 3.26 | 0.22 | 0.28 |
| 54449 | 0 | 48765  | PPDQLVNLHDFRSDEIE<br>HLVVEE   | 3.07 | 0.01 | 3.36 | 2.75 | 0.22 | 0.28 |
| 54450 | 0 | 48765  | PPDQLVNLHDFRSDEIE<br>HLVVEE   | 3.07 | 0.01 | 3.36 | 2.75 | 0.22 | 1.34 |
| 54451 | 0 | 137258 | PPDSRFDAYCFKRRMSD<br>LSVIGHPI | 3.13 | 0.01 | 0.78 | 0.68 | 0.22 | 0.28 |
| 54452 | 0 | 482931 | PPECSIMRAPFASIVAGI<br>GGQ     | 2.99 | 0.01 | 1.86 | 1.20 | 0.22 | 0.28 |
| 54453 | 0 | 353817 | PPEDSVASREKDGED               | 2.69 | 0.01 | 1.61 | 0.44 | 0.85 | 1.28 |
| 54454 | 0 | 353820 | PPEEDVASREQDGED               | 2.69 | 0.01 | 1.61 | 0.44 | 0.85 | 1.28 |
| 54455 | 0 | 132009 | PPEFRPGEPWKGYPN               | 2.70 | 0.01 | 0.78 | 0.44 | 1.13 | 0.85 |
| 54456 | 0 | 189264 | PPEHGVELPCNRYTHK              | 2.71 | 0.01 | 2.92 | 2.49 | 0.22 | 0.28 |
| 54457 | 0 | 48768  | PPEHRGGPEEFEGAGD<br>GEPP      | 2.98 | 0.01 | 2.40 | 0.44 | 1.59 | 0.28 |
| 54458 | 0 | 156938 | PPEKIHV                       | 2.01 | 0.01 | 0.90 | 2.74 | 0.22 | 0.85 |
| 54459 | 0 | 156938 | PPEKIHV                       | 2.01 | 0.01 | 0.90 | 0.68 | 0.22 | 0.28 |
| 54460 | 0 | 156939 | PPEKSHL                       | 2.01 | 0.01 | 0.90 | 2.74 | 0.22 | 0.85 |
| 54461 | 0 | 135969 | PPEPRPRDRSGL                  | 2.51 | 0.01 | 0.78 | 0.44 | 1.13 | 0.28 |
| 54462 | 0 | 48771  | PPETTTIP                      | 2.17 | 0.01 | 2.40 | 2.43 | 0.22 | 0.28 |
| 54463 | 0 | 48774  | PPFFLVQEKG                    | 2.36 | 0.01 | 2.86 | 0.68 | 0.22 | 0.28 |
| 54464 | 0 | 353873 | PPFGQAAAGDKLSLF               | 2.67 | 0.01 | 1.61 | 0.44 | 0.85 | 1.28 |

|       |   |        |                   |      |      |      |      |      |      |
|-------|---|--------|-------------------|------|------|------|------|------|------|
| 54465 | 0 | 353874 | PPFGQAAAGDKPAPF   | 2.72 | 0.01 | 1.61 | 0.44 | 0.85 | 1.28 |
| 54466 | 0 | 353875 | PPFGQAAAGDKPPPF   | 2.70 | 0.01 | 1.61 | 0.44 | 0.85 | 1.28 |
| 54467 | 0 | 353876 | PPFGQAAAGDKPSLF   | 2.68 | 0.01 | 1.61 | 0.44 | 0.85 | 1.28 |
| 54468 | 0 | 353877 | PPFGQAAAGDKPSPF   | 2.70 | 0.01 | 1.61 | 0.44 | 0.85 | 1.28 |
| 54469 | 0 | 353878 | PPFGQAAEGDKPPPF   | 2.69 | 0.01 | 1.61 | 0.44 | 0.85 | 1.28 |
| 54470 | 0 | 230166 | PPFLAGAPQDVV      | 2.47 | 0.01 | 3.19 | 0.44 | 1.23 | 1.28 |
| 54471 | 0 | 230166 | PPFLAGAPQDVV      | 2.47 | 0.01 | 3.19 | 0.44 | 1.23 | 1.28 |
| 54472 | 0 | 148083 | PPFLNSLPQ         | 2.25 | 0.01 | 3.24 | 0.68 | 0.22 | 0.28 |
| 54473 | 0 | 115895 | PPFLQPEVMG        | 2.31 | 0.01 | 1.60 | 0.44 | 1.23 | 0.85 |
| 54474 | 0 | 115895 | PPFLQPEVMG        | 2.31 | 0.01 | 1.60 | 0.44 | 1.23 | 0.85 |
| 54475 | 0 | 190512 | PPFPADVFMIPQYGY   | 2.68 | 0.01 | 3.61 | 2.00 | 1.41 | 0.28 |
| 54476 | 0 | 48778  | PPFSLSPVPTL       | 2.44 | 0.01 | 2.04 | 1.20 | 0.22 | 0.85 |
| 54477 | 0 | 48778  | PPFSLSPVPTL       | 2.44 | 0.01 | 2.04 | 0.44 | 0.85 | 0.85 |
| 54478 | 0 | 48778  | PPFSLSPVPTL       | 2.44 | 0.01 | 2.04 | 1.20 | 0.22 | 0.85 |
| 54479 | 0 | 48779  | PPFSLSPVPTLGSRSRR | 2.82 | 0.01 | 2.04 | 0.44 | 0.85 | 0.28 |
| 54480 | 0 | 48779  | PPFSLSPVPTLGSRSRR | 2.82 | 0.01 | 2.04 | 0.44 | 0.85 | 0.28 |
| 54481 | 0 | 48779  | PPFSLSPVPTLGSRSRR | 2.82 | 0.01 | 2.04 | 1.20 | 0.22 | 2.02 |
| 54482 | 0 | 48779  | PPFSLSPVPTLGSRSRR | 2.82 | 0.01 | 2.04 | 1.20 | 0.22 | 2.02 |
| 54483 | 0 | 48779  | PPFSLSPVPTLGSRSRR | 2.82 | 0.01 | 2.04 | 1.20 | 0.22 | 0.85 |
| 54484 | 0 | 48779  | PPFSLSPVPTLGSRSRR | 2.82 | 0.01 | 2.04 | 1.20 | 0.22 | 1.27 |
| 54485 | 0 | 48779  | PPFSLSPVPTLGSRSRR | 2.82 | 0.01 | 2.04 | 0.44 | 0.85 | 1.34 |
| 54486 | 0 | 48779  | PPFSLSPVPTLGSRSRR | 2.82 | 0.01 | 2.04 | 0.44 | 1.59 | 1.57 |
| 54487 | 0 | 48779  | PPFSLSPVPTLGSRSRR | 2.82 | 0.01 | 2.04 | 0.44 | 2.98 | 0.28 |
| 54488 | 0 | 48780  | PPFSPQ            | 1.92 | 0.01 | 2.96 | 0.44 | 0.85 | 0.28 |
| 54489 | 0 | 99833  | PPFSQQ            | 1.88 | 0.01 | 1.86 | 0.68 | 0.22 | 0.28 |
| 54490 | 0 | 99833  | PPFSQQ            | 1.88 | 0.01 | 1.86 | 0.68 | 0.22 | 2.02 |
| 54491 | 0 | 99833  | PPFSQQ            | 1.88 | 0.01 | 1.86 | 0.68 | 0.22 | 2.02 |
| 54492 | 0 | 99833  | PPFSQQ            | 1.88 | 0.01 | 1.86 | 0.68 | 0.22 | 2.02 |
| 54493 | 0 | 99833  | PPFSQQ            | 1.88 | 0.01 | 1.86 | 0.68 | 0.22 | 2.02 |
| 54494 | 0 | 99833  | PPFSQQ            | 1.88 | 0.01 | 1.86 | 0.68 | 0.22 | 0.85 |
| 54495 | 0 | 99833  | PPFSQQ            | 1.88 | 0.01 | 1.86 | 0.68 | 0.22 | 0.85 |
| 54496 | 0 | 99833  | PPFSQQ            | 1.88 | 0.01 | 1.86 | 0.68 | 0.22 | 0.85 |
| 54497 | 0 | 115633 | PPFSRVVHLYRN      | 2.45 | 0.01 | 0.78 | 0.44 | 1.41 | 0.28 |
| 54498 | 0 | 115633 | PPFSRVVHLYRN      | 2.45 | 0.01 | 0.78 | 0.44 | 1.13 | 0.28 |
| 54499 | 0 | 48782  | PPFTSAVGGVDHRS    | 2.59 | 0.01 | 0.90 | 0.68 | 2.25 | 1.75 |
| 54500 | 0 | 48782  | PPFTSAVGGVDHRS    | 2.59 | 0.01 | 0.90 | 0.68 | 0.22 | 0.28 |
| 54501 | 0 | 48782  | PPFTSAVGGVDHRS    | 2.59 | 0.01 | 0.90 | 1.15 | 0.22 | 0.28 |

|       |   |        |                             |      |      |      |      |      |      |
|-------|---|--------|-----------------------------|------|------|------|------|------|------|
| 54502 | 0 | 118052 | PPGAMPP                     | 2.03 | 0.01 | 0.78 | 0.44 | 1.13 | 0.28 |
| 54503 | 0 | 123610 | PPGAMPPQ                    | 2.15 | 0.01 | 0.78 | 1.20 | 0.22 | 0.28 |
| 54504 | 0 | 123610 | PPGAMPPQ                    | 2.15 | 0.01 | 0.78 | 0.44 | 1.13 | 0.28 |
| 54505 | 0 | 353891 | PPGAPKP                     | 2.05 | 0.01 | 2.60 | 1.15 | 0.22 | 1.27 |
| 54506 | 0 | 353891 | PPGAPKP                     | 2.05 | 0.01 | 2.60 | 1.15 | 0.22 | 1.27 |
| 54507 | 0 | 353891 | PPGAPKP                     | 2.05 | 0.01 | 2.60 | 1.12 | 0.22 | 0.28 |
| 54508 | 0 | 353891 | PPGAPKP                     | 2.05 | 0.01 | 0.78 | 1.12 | 0.22 | 0.28 |
| 54509 | 0 | 353891 | PPGAPKP                     | 2.05 | 0.01 | 2.60 | 0.44 | 0.85 | 0.28 |
| 54510 | 0 | 353891 | PPGAPKP                     | 2.05 | 0.01 | 2.60 | 1.15 | 0.22 | 2.92 |
| 54511 | 0 | 353891 | PPGAPKP                     | 2.05 | 0.01 | 2.60 | 1.15 | 0.22 | 0.28 |
| 54512 | 0 | 353891 | PPGAPKP                     | 2.05 | 0.01 | 2.60 | 1.15 | 0.22 | 1.48 |
| 54513 | 0 | 353891 | PPGAPKP                     | 2.05 | 0.01 | 2.60 | 1.15 | 0.22 | 2.75 |
| 54514 | 0 | 353891 | PPGAPKP                     | 2.05 | 0.01 | 2.60 | 1.15 | 0.22 | 0.85 |
| 54515 | 0 | 353891 | PPGAPKP                     | 2.05 | 0.01 | 2.60 | 1.15 | 0.22 | 0.28 |
| 54516 | 0 | 181424 | PPGAPKPTRDSFAW              | 2.68 | 0.01 | 2.82 | 1.15 | 0.22 | 0.28 |
| 54517 | 0 | 48785  | PPGAPVPEKWDDYTW<br>QTSSNP   | 2.96 | 0.01 | 2.57 | 1.20 | 0.22 | 1.34 |
| 54518 | 0 | 48785  | PPGAPVPEKWDDYTW<br>QTSSNP   | 2.96 | 0.01 | 2.57 | 1.20 | 0.22 | 1.27 |
| 54519 | 0 | 48785  | PPGAPVPEKWDDYTW<br>QTSSNP   | 2.96 | 0.01 | 2.57 | 1.20 | 0.22 | 0.85 |
| 54520 | 0 | 48785  | PPGAPVPEKWDDYTW<br>QTSSNP   | 2.96 | 0.01 | 2.57 | 2.04 | 0.22 | 1.27 |
| 54521 | 0 | 48785  | PPGAPVPEKWDDYTW<br>QTSSNP   | 2.96 | 0.01 | 2.57 | 2.04 | 0.22 | 0.85 |
| 54522 | 0 | 48785  | PPGAPVPEKWDDYTW<br>QTSSNP   | 2.96 | 0.01 | 2.57 | 2.04 | 0.22 | 0.85 |
| 54523 | 0 | 48785  | PPGAPVPEKWDDYTW<br>QTSSNP   | 2.96 | 0.01 | 2.57 | 2.04 | 0.22 | 0.85 |
| 54524 | 0 | 146496 | PPGAQPPTSKEAM               | 2.60 | 0.01 | 2.96 | 0.44 | 0.22 | 0.28 |
| 54525 | 0 | 48788  | PPGEFLQVSIQDTRNAV<br>RAC    | 2.89 | 0.01 | 3.13 | 2.43 | 0.22 | 0.28 |
| 54526 | 0 | 132538 | PPGELGPDGP                  | 2.36 | 0.01 | 0.78 | 0.44 | 1.13 | 0.28 |
| 54527 | 0 | 127765 | PPGEQTMGV                   | 2.22 | 0.01 | 2.19 | 0.44 | 1.13 | 0.85 |
| 54528 | 0 | 109708 | PPGERGAP                    | 2.16 | 0.01 | 1.60 | 2.55 | 2.60 | 0.28 |
| 54529 | 0 | 48789  | PPGFQQLPGPAGTAGE<br>PAGARGE | 3.67 | 0.01 | 1.60 | 0.44 | 1.23 | 0.28 |
| 54530 | 0 | 118554 | PPGIRGP                     | 2.05 | 0.01 | 0.78 | 0.44 | 1.13 | 0.28 |
| 54531 | 0 | 118554 | PPGIRGP                     | 2.05 | 0.01 | 0.78 | 0.44 | 1.13 | 0.28 |
| 54532 | 0 | 118554 | PPGIRGP                     | 2.05 | 0.01 | 0.78 | 0.44 | 1.41 | 0.28 |
| 54533 | 0 | 123611 | PPGLAPGQ                    | 2.16 | 0.01 | 0.78 | 1.20 | 0.22 | 0.28 |
| 54534 | 0 | 132010 | PPGLTGQKPPLSTWD             | 2.69 | 0.01 | 0.78 | 0.44 | 1.13 | 0.85 |
| 54535 | 0 | 118054 | PPGMIPP                     | 2.03 | 0.01 | 0.78 | 0.44 | 1.13 | 0.28 |
| 54536 | 0 | 123612 | PPGMIPPP                    | 2.14 | 0.01 | 0.78 | 1.20 | 0.22 | 0.28 |
| 54537 | 0 | 123612 | PPGMIPPP                    | 2.14 | 0.01 | 0.78 | 0.44 | 1.13 | 0.28 |
| 54538 | 0 | 117344 | PPGMRPP                     | 2.03 | 0.01 | 0.78 | 1.20 | 0.22 | 0.28 |

|       |   |        |                                    |      |      |      |      |      |      |
|-------|---|--------|------------------------------------|------|------|------|------|------|------|
| 54539 | 0 | 117344 | PPGMRPP                            | 2.03 | 0.01 | 0.78 | 1.20 | 0.22 | 0.85 |
| 54540 | 0 | 117344 | PPGMRPP                            | 2.03 | 0.01 | 0.78 | 1.20 | 0.22 | 0.85 |
| 54541 | 0 | 117344 | PPGMRPP                            | 2.03 | 0.01 | 0.78 | 1.20 | 2.60 | 1.75 |
| 54542 | 0 | 117344 | PPGMRPP                            | 2.03 | 0.01 | 0.78 | 1.20 | 0.22 | 0.28 |
| 54543 | 0 | 117344 | PPGMRPP                            | 2.03 | 0.01 | 0.78 | 0.44 | 1.13 | 0.28 |
| 54544 | 0 | 117344 | PPGMRPP                            | 2.03 | 0.01 | 0.78 | 0.44 | 1.13 | 0.28 |
| 54545 | 0 | 117344 | PPGMRPP                            | 2.03 | 0.01 | 0.78 | 0.44 | 1.13 | 0.28 |
| 54546 | 0 | 117344 | PPGMRPP                            | 2.03 | 0.01 | 0.78 | 3.05 | 1.13 | 0.28 |
| 54547 | 0 | 118055 | PPGMRPPMGP                         | 2.37 | 0.01 | 0.78 | 3.05 | 1.13 | 0.28 |
| 54548 | 0 | 135970 | PPGMRPPMGPMPGIPP                   | 2.73 | 0.01 | 0.78 | 0.44 | 1.13 | 0.85 |
| 54549 | 0 | 135970 | PPGMRPPMGPMPGIPP                   | 2.73 | 0.01 | 0.78 | 0.44 | 1.13 | 0.85 |
| 54550 | 0 | 489708 | PPGPCPICKDPSHWK                    | 2.70 | 0.01 | 2.69 | 3.05 | 0.85 | 1.28 |
| 54551 | 0 | 108072 | PPGPTGASG                          | 2.27 | 0.01 | 0.78 | 0.44 | 1.13 | 0.28 |
| 54552 | 0 | 48791  | PPGQ                               | 1.59 | 0.01 | 3.89 | 2.88 | 2.26 | 0.85 |
| 54553 | 0 | 129628 | PPGRGTPP                           | 2.14 | 0.01 | 0.78 | 0.44 | 1.13 | 0.28 |
| 54554 | 0 | 235502 | PPGSVVHLYRD                        | 2.36 | 0.01 | 3.59 | 0.44 | 1.13 | 0.28 |
| 54555 | 0 | 235502 | PPGSVVHLYRD                        | 2.36 | 0.01 | 3.59 | 0.44 | 1.41 | 0.28 |
| 54556 | 0 | 103490 | PPGYDITALLQAHPH                    | 2.67 | 0.01 | 2.04 | 0.44 | 0.85 | 1.28 |
| 54557 | 0 | 48799  | PPHRPGVRMRRVPVTH<br>P              | 2.84 | 0.01 | 3.36 | 0.44 | 2.82 | 0.28 |
| 54558 | 0 | 118555 | PPICLGRAPGCLMPA                    | 2.71 | 0.01 | 3.78 | 0.44 | 1.13 | 0.85 |
| 54559 | 0 | 125200 | PPIPQMPQNIDWEVRL<br>AEIERRNQMAARDR | 3.39 | 0.01 | 4.08 | 0.68 | 0.22 | 0.85 |
| 54560 | 0 | 125200 | PPIPQMPQNIDWEVRL<br>AEIERRNQMAARDR | 3.39 | 0.01 | 4.08 | 0.68 | 0.22 | 0.85 |
| 54561 | 0 | 125200 | PPIPQMPQNIDWEVRL<br>AEIERRNQMAARDR | 3.39 | 0.01 | 4.08 | 0.68 | 0.22 | 1.48 |
| 54562 | 0 | 125200 | PPIPQMPQNIDWEVRL<br>AEIERRNQMAARDR | 3.39 | 0.01 | 4.08 | 0.68 | 0.22 | 0.85 |
| 54563 | 0 | 354015 | PPKDSVDSREQDGEG                    | 2.69 | 0.01 | 1.61 | 0.44 | 0.85 | 1.28 |
| 54564 | 0 | 108578 | PPKGDKKGKKKDPNA                    | 2.73 | 0.01 | 0.78 | 0.44 | 1.13 | 1.27 |
| 54565 | 0 | 226500 | PPKKKPAQKKKKPGRRE<br>RMCMKIEND     | 3.20 | 0.01 | 3.26 | 3.16 | 0.22 | 0.28 |
| 54566 | 0 | 115896 | PPKKNQDKTE                         | 2.32 | 0.01 | 1.60 | 0.44 | 1.23 | 0.85 |
| 54567 | 0 | 115896 | PPKKNQDKTE                         | 2.32 | 0.01 | 1.60 | 0.44 | 1.23 | 0.85 |
| 54568 | 0 | 115423 | PPKKNQDKTEIPTINTIAS<br>G           | 2.96 | 0.01 | 1.60 | 0.44 | 1.23 | 1.28 |
| 54569 | 0 | 115423 | PPKKNQDKTEIPTINTIAS<br>G           | 2.96 | 0.01 | 1.60 | 0.44 | 1.41 | 0.28 |

|       |   |        |                                              |      |      |      |      |      |      |
|-------|---|--------|----------------------------------------------|------|------|------|------|------|------|
| 54570 | 0 | 115423 | PPKKNQDKTEIPTINTIAS<br>G                     | 2.96 | 0.01 | 1.60 | 0.44 | 1.93 | 0.28 |
| 54571 | 0 | 354026 | PPKKS WKQISNLSGG                             | 2.67 | 0.01 | 1.61 | 0.44 | 0.85 | 1.28 |
| 54572 | 0 | 48809  | PPKPCGIVPAKSVCGPV<br>YCF                     | 2.97 | 0.01 | 2.83 | 0.44 | 0.85 | 0.28 |
| 54573 | 0 | 128078 | PPKPEPKPKKAPAKK                              | 2.73 | 0.01 | 2.73 | 1.12 | 0.22 | 0.28 |
| 54574 | 0 | 128078 | PPKPEPKPKKAPAKK                              | 2.73 | 0.01 | 2.73 | 0.44 | 1.13 | 0.28 |
| 54575 | 0 | 189138 | PPKRVWAQESGEGNPH                             | 2.71 | 0.01 | 2.92 | 0.68 | 0.22 | 0.28 |
| 54576 | 0 | 189138 | PPKRVWAQESGEGNPH                             | 2.71 | 0.01 | 2.92 | 2.49 | 0.22 | 0.28 |
| 54577 | 0 | 189138 | PPKRVWAQESGEGNPH                             | 2.71 | 0.01 | 2.92 | 3.61 | 0.22 | 0.28 |
| 54578 | 0 | 189265 | PPKRVWAQESGEGNPH<br>GWPHEI                   | 3.03 | 0.01 | 2.92 | 2.49 | 0.22 | 0.28 |
| 54579 | 0 | 189265 | PPKRVWAQESGEGNPH<br>GWPHEI                   | 3.03 | 0.01 | 2.92 | 3.61 | 0.22 | 0.28 |
| 54580 | 0 | 189266 | PPKRVWAQESGEGNPH<br>GWPHEV                   | 3.04 | 0.01 | 2.92 | 2.49 | 0.22 | 0.28 |
| 54581 | 0 | 189266 | PPKRVWAQESGEGNPH<br>GWPHEV                   | 3.04 | 0.01 | 2.92 | 3.61 | 0.22 | 0.28 |
| 54582 | 0 | 94646  | PPKVPPDLMS                                   | 2.32 | 0.01 | 0.90 | 0.44 | 0.22 | 1.27 |
| 54583 | 0 | 227450 | PPKVVNYEAGEWAEN                              | 2.68 | 0.01 | 2.97 | 0.44 | 1.59 | 0.28 |
| 54584 | 0 | 227450 | PPKVVNYEAGEWAEN                              | 2.68 | 0.01 | 2.97 | 0.44 | 0.85 | 0.28 |
| 54585 | 0 | 112623 | PPLLEINTVIQDGMVH<br>TGF                      | 2.92 | 0.01 | 1.86 | 2.37 | 0.22 | 0.28 |
| 54586 | 0 | 48817  | PPLENRVLTG                                   | 2.30 | 0.01 | 2.04 | 4.03 | 1.59 | 1.27 |
| 54587 | 0 | 48818  | PPLENRVLTGWGLN                               | 2.62 | 0.01 | 2.04 | 4.03 | 1.59 | 0.85 |
| 54588 | 0 | 48819  | PPLGNWFG                                     | 2.13 | 0.01 | 2.68 | 1.15 | 0.22 | 1.34 |
| 54589 | 0 | 48819  | PPLGNWFG                                     | 2.13 | 0.01 | 2.45 | 2.36 | 0.22 | 1.34 |
| 54590 | 0 | 48819  | PPLGNWFG                                     | 2.13 | 0.01 | 2.45 | 2.36 | 0.22 | 2.12 |
| 54591 | 0 | 131005 | PPLKPVIDE                                    | 2.23 | 0.01 | 0.90 | 0.44 | 1.13 | 1.39 |
| 54592 | 0 | 176375 | PPLDRWKTPDYVPPTV<br>HG                       | 2.89 | 0.01 | 4.03 | 0.44 | 0.85 | 2.97 |
| 54593 | 0 | 48823  | PPLLESWKDPDYVPPVV<br>HG                      | 2.88 | 0.01 | 1.72 | 0.44 | 0.85 | 0.28 |
| 54594 | 0 | 48823  | PPLLESWKDPDYVPPVV<br>HG                      | 2.88 | 0.01 | 1.72 | 1.15 | 0.22 | 0.28 |
| 54595 | 0 | 108579 | PPLLLTDVT                                    | 2.25 | 0.01 | 0.90 | 0.44 | 1.13 | 1.39 |
| 54596 | 0 | 78246  | PPLLP                                        | 1.93 | 0.01 | 2.04 | 0.44 | 0.85 | 0.28 |
| 54597 | 0 | 48824  | PPLPHSNLDHILEPSIP<br>WWSK                    | 3.07 | 0.01 | 2.04 | 0.44 | 1.59 | 0.28 |
| 54598 | 0 | 48825  | PPLPHSNLDHILEPSIP<br>WWSKLLTLVQLTLQSTN<br>YT | 3.56 | 0.01 | 2.04 | 0.44 | 2.39 | 0.28 |

|       |   |        |                          |      |      |      |      |      |      |
|-------|---|--------|--------------------------|------|------|------|------|------|------|
|       |   |        | PPLPHSNLDHILEPSIP        |      |      |      |      |      |      |
| 54599 | 0 | 48825  | WKSLLTLVQLTLQSTN<br>YT   | 3.56 | 0.01 | 2.04 | 0.44 | 2.39 | 0.28 |
| 54600 | 0 | 423460 | PPLPGHARRPRRKRC          | 2.71 | 0.01 | 2.51 | 0.44 | 1.59 | 1.28 |
| 54601 | 0 | 48827  | PPLPHV                   | 1.92 | 0.01 | 2.53 | 2.37 | 0.22 | 0.28 |
| 54602 | 0 | 48827  | PPLPHV                   | 1.92 | 0.01 | 2.53 | 0.44 | 1.59 | 0.28 |
| 54603 | 0 | 48827  | PPLPHV                   | 1.92 | 0.01 | 2.53 | 0.44 | 1.59 | 0.28 |
| 54604 | 0 | 48828  | PPLPPV                   | 1.93 | 0.01 | 3.27 | 0.44 | 1.59 | 0.28 |
| 54605 | 0 | 48828  | PPLPPV                   | 1.93 | 0.01 | 3.27 | 0.44 | 1.59 | 0.28 |
| 54606 | 0 | 48832  | PPLSQRRAL                | 2.23 | 0.01 | 0.90 | 0.68 | 0.22 | 0.28 |
| 54607 | 0 | 123615 | PPMGRGAP                 | 2.16 | 0.01 | 0.78 | 1.20 | 0.22 | 0.28 |
| 54608 | 0 | 123616 | PPMTQAPR                 | 2.14 | 0.01 | 0.78 | 1.20 | 0.22 | 0.28 |
| 54609 | 0 | 123616 | PPMTQAPR                 | 2.14 | 0.01 | 0.78 | 0.44 | 1.13 | 0.28 |
| 54610 | 0 | 504024 | PPMVEGAAAEGDDGD<br>DGDEG | 2.99 | 0.01 | 2.48 | 0.44 | 1.74 | 0.28 |
| 54611 | 0 | 504024 | PPMVEGAAAEGDDGD<br>DGDEG | 2.99 | 0.01 | 2.48 | 0.44 | 1.74 | 0.28 |
| 54612 | 0 | 48837  | PPNAPIL                  | 2.04 | 0.01 | 2.08 | 0.68 | 0.22 | 0.28 |
| 54613 | 0 | 48837  | PPNAPIL                  | 2.04 | 0.01 | 2.08 | 0.68 | 0.22 | 0.28 |
| 54614 | 0 | 48837  | PPNAPIL                  | 2.04 | 0.01 | 2.08 | 0.68 | 0.22 | 0.28 |
| 54615 | 0 | 48838  | PPNAPILSTLPE             | 2.49 | 0.01 | 2.08 | 1.15 | 0.22 | 1.27 |
| 54616 | 0 | 48838  | PPNAPILSTLPE             | 2.49 | 0.01 | 2.08 | 1.15 | 0.22 | 1.57 |
| 54617 | 0 | 48839  | PPNKPNNDFHFE             | 2.50 | 0.01 | 2.38 | 0.68 | 0.22 | 0.28 |
| 54618 | 0 | 48839  | PPNKPNNDFHFE             | 2.50 | 0.01 | 2.38 | 0.68 | 0.22 | 0.28 |
| 54619 | 0 | 48839  | PPNKPNNDFHFE             | 2.50 | 0.01 | 2.38 | 0.44 | 1.59 | 0.28 |
| 54620 | 0 | 48844  | PPNRQDPRFTDTLVD          | 2.70 | 0.01 | 2.76 | 0.44 | 1.59 | 0.28 |
| 54621 | 0 | 174690 | PPNSDV                   | 1.89 | 0.01 | 3.97 | 0.68 | 0.22 | 0.28 |
| 54622 | 0 | 174690 | PPNSDV                   | 1.89 | 0.01 | 3.97 | 0.68 | 0.22 | 0.85 |
| 54623 | 0 | 174690 | PPNSDV                   | 1.89 | 0.01 | 3.97 | 0.68 | 0.22 | 0.28 |
| 54624 | 0 | 174690 | PPNSDV                   | 1.89 | 0.01 | 3.97 | 0.68 | 0.22 | 0.85 |
| 54625 | 0 | 48846  | PPNSGGVNTIQLYQTKT<br>AQ  | 2.88 | 0.01 | 3.32 | 2.49 | 0.22 | 0.28 |
| 54626 | 0 | 48846  | PPNSGGVNTIQLYQTKT<br>AQ  | 2.88 | 0.01 | 3.32 | 2.49 | 0.22 | 0.28 |
| 54627 | 0 | 48846  | PPNSGGVNTIQLYQTKT<br>AQ  | 2.88 | 0.01 | 3.32 | 2.49 | 0.22 | 0.28 |
| 54628 | 0 | 48846  | PPNSGGVNTIQLYQTKT<br>AQ  | 2.88 | 0.01 | 3.32 | 2.49 | 0.22 | 0.28 |
| 54629 | 0 | 48846  | PPNSGGVNTIQLYQTKT<br>AQ  | 2.88 | 0.01 | 3.32 | 2.49 | 0.22 | 1.75 |
| 54630 | 0 | 48849  | PPPAPDPSPT               | 2.36 | 3.85 | 2.70 | 0.44 | 0.85 | 0.28 |
| 54631 | 0 | 48851  | PPPEHRGGPEEFEGAGD<br>GEP | 2.99 | 0.01 | 2.40 | 0.44 | 1.59 | 0.85 |
| 54632 | 0 | 354197 | PPPFQAAAAGDKLSL          | 2.67 | 0.01 | 1.61 | 0.44 | 0.85 | 1.28 |
| 54633 | 0 | 354198 | PPPFQAAAAGDKPAP          | 2.71 | 0.01 | 1.61 | 0.44 | 0.85 | 1.28 |



|       |   |        |                               |      |      |      |      |      |      |
|-------|---|--------|-------------------------------|------|------|------|------|------|------|
| 54634 | 0 | 354199 | PPFFGQAAAAGDKPPP              | 2.69 | 0.01 | 1.61 | 0.44 | 0.85 | 1.28 |
| 54635 | 0 | 354200 | PPFFGQAAAAGDKPSL              | 2.67 | 0.01 | 1.61 | 0.44 | 0.85 | 1.28 |
| 54636 | 0 | 354201 | PPFFGQAAAAGDKPSP              | 2.69 | 0.01 | 1.61 | 0.44 | 0.85 | 1.28 |
| 54637 | 0 | 354202 | PPFFGQAAEGDKPPP               | 2.68 | 0.01 | 1.61 | 0.44 | 0.85 | 1.28 |
| 54638 | 0 | 167991 | PPPFNPRPSPYAELLK              | 2.73 | 0.01 | 2.75 | 0.44 | 0.85 | 2.51 |
| 54639 | 0 | 167991 | PPPFNPRPSPYAELLK              | 2.73 | 0.01 | 2.75 | 0.44 | 0.85 | 2.51 |
| 54640 | 0 | 167991 | PPPFNPRPSPYAELLK              | 2.73 | 0.01 | 2.75 | 0.44 | 0.85 | 2.51 |
| 54641 | 0 | 129634 | PPPGIMAP                      | 2.15 | 0.01 | 0.78 | 0.44 | 1.13 | 0.28 |
| 54642 | 0 | 145422 | PPPGIR                        | 1.91 | 0.01 | 0.78 | 0.44 | 1.13 | 0.28 |
| 54643 | 0 | 118058 | PPPGIRGP                      | 2.16 | 0.01 | 0.78 | 3.05 | 1.13 | 0.28 |
| 54644 | 0 | 118058 | PPPGIRGP                      | 2.16 | 0.01 | 0.78 | 0.44 | 1.13 | 0.28 |
| 54645 | 0 | 118058 | PPPGIRGP                      | 2.16 | 0.01 | 0.78 | 0.44 | 1.13 | 0.28 |
| 54646 | 0 | 118058 | PPPGIRGP                      | 2.16 | 0.01 | 0.78 | 0.44 | 1.13 | 0.28 |
| 54647 | 0 | 118058 | PPPGIRGP                      | 2.16 | 0.01 | 0.78 | 0.44 | 1.13 | 0.28 |
| 54648 | 0 | 118058 | PPPGIRGP                      | 2.16 | 0.01 | 0.78 | 0.44 | 1.13 | 0.28 |
| 54649 | 0 | 118058 | PPPGIRGP                      | 2.16 | 0.01 | 0.78 | 1.20 | 0.22 | 0.28 |
| 54650 | 0 | 118058 | PPPGIRGP                      | 2.16 | 0.01 | 0.78 | 1.20 | 0.22 | 0.28 |
| 54651 | 0 | 118058 | PPPGIRGP                      | 2.16 | 0.01 | 0.78 | 1.20 | 0.22 | 1.34 |
| 54652 | 0 | 118058 | PPPGIRGP                      | 2.16 | 0.01 | 0.78 | 1.20 | 0.22 | 2.02 |
| 54653 | 0 | 118058 | PPPGIRGP                      | 2.16 | 0.01 | 0.78 | 1.20 | 2.60 | 1.75 |
| 54654 | 0 | 123618 | PPPG LAPG                     | 2.16 | 0.01 | 0.78 | 1.20 | 0.22 | 0.28 |
| 54655 | 0 | 123618 | PPPG LAPG                     | 2.16 | 0.01 | 0.78 | 0.44 | 1.13 | 0.28 |
| 54656 | 0 | 118556 | PPPGMIPP                      | 2.14 | 0.01 | 0.78 | 0.44 | 1.13 | 0.28 |
| 54657 | 0 | 118556 | PPPGMIPP                      | 2.14 | 0.01 | 0.78 | 1.20 | 0.22 | 0.28 |
| 54658 | 0 | 118556 | PPPGMIPP                      | 2.14 | 0.01 | 0.78 | 0.44 | 1.13 | 0.28 |
| 54659 | 0 | 123619 | PPPGMMGPPPGMRPP<br>MGPPMGIPPG | 3.23 | 0.01 | 0.78 | 1.20 | 0.22 | 0.28 |
| 54660 | 0 | 132540 | PPPGMMPVGP                    | 2.36 | 0.01 | 0.78 | 0.44 | 1.13 | 0.28 |
| 54661 | 0 | 145423 | PPPGMR                        | 1.91 | 0.01 | 0.78 | 0.44 | 1.13 | 0.28 |
| 54662 | 0 | 118557 | PPPGMRGP                      | 2.16 | 0.01 | 0.78 | 0.44 | 1.13 | 0.28 |
| 54663 | 0 | 118059 | PPPGMRP                       | 2.05 | 0.01 | 0.78 | 3.05 | 1.13 | 0.28 |
| 54664 | 0 | 123620 | PPPGMRPGPPP                   | 2.43 | 0.01 | 0.78 | 1.20 | 0.22 | 0.28 |
| 54665 | 0 | 118060 | PPPGMRPP                      | 2.14 | 0.01 | 0.78 | 3.97 | 1.13 | 0.28 |
| 54666 | 0 | 118060 | PPPGMRPP                      | 2.14 | 0.01 | 0.78 | 2.25 | 0.22 | 0.28 |
| 54667 | 0 | 118060 | PPPGMRPP                      | 2.14 | 0.01 | 0.78 | 2.25 | 0.22 | 0.28 |
| 54668 | 0 | 118060 | PPPGMRPP                      | 2.14 | 0.01 | 0.78 | 0.44 | 1.13 | 0.28 |
| 54669 | 0 | 118060 | PPPGMRPP                      | 2.14 | 0.01 | 0.78 | 0.44 | 1.13 | 0.28 |
| 54670 | 0 | 118060 | PPPGMRPP                      | 2.14 | 0.01 | 0.78 | 3.75 | 1.13 | 1.27 |
| 54671 | 0 | 118060 | PPPGMRPP                      | 2.14 | 0.01 | 0.78 | 3.75 | 1.13 | 0.85 |
| 54672 | 0 | 118060 | PPPGMRPP                      | 2.14 | 0.01 | 0.78 | 3.75 | 1.13 | 0.85 |
| 54673 | 0 | 118060 | PPPGMRPP                      | 2.14 | 0.01 | 0.78 | 3.75 | 1.13 | 0.85 |
| 54674 | 0 | 118060 | PPPGMRPP                      | 2.14 | 0.01 | 0.78 | 3.75 | 1.13 | 0.85 |
| 54675 | 0 | 118060 | PPPGMRPP                      | 2.14 | 0.01 | 0.78 | 3.75 | 1.13 | 0.85 |
| 54676 | 0 | 118060 | PPPGMRPP                      | 2.14 | 0.01 | 0.78 | 3.75 | 1.13 | 1.39 |
| 54677 | 0 | 118060 | PPPGMRPP                      | 2.14 | 0.01 | 0.78 | 3.75 | 1.13 | 0.85 |
| 54678 | 0 | 118060 | PPPGMRPP                      | 2.14 | 0.01 | 0.78 | 3.75 | 1.13 | 0.85 |

|       |   |        |            |      |      |      |      |      |      |
|-------|---|--------|------------|------|------|------|------|------|------|
| 54679 | 0 | 118060 | PPPGMRPP   | 2.14 | 0.01 | 0.78 | 3.75 | 1.13 | 0.85 |
| 54680 | 0 | 118060 | PPPGMRPP   | 2.14 | 0.01 | 0.78 | 1.20 | 0.22 | 0.28 |
| 54681 | 0 | 118060 | PPPGMRPP   | 2.14 | 0.01 | 0.78 | 2.25 | 0.22 | 0.28 |
| 54682 | 0 | 118060 | PPPGMRPP   | 2.14 | 0.01 | 0.78 | 0.44 | 1.13 | 1.66 |
| 54683 | 0 | 118060 | PPPGMRPP   | 2.14 | 0.01 | 0.78 | 0.44 | 1.13 | 0.28 |
| 54684 | 0 | 118060 | PPPGMRPP   | 2.14 | 0.01 | 0.78 | 0.44 | 1.13 | 0.28 |
| 54685 | 0 | 118060 | PPPGMRPP   | 2.14 | 0.01 | 0.78 | 0.44 | 1.13 | 0.28 |
| 54686 | 0 | 118060 | PPPGMRPP   | 2.14 | 0.01 | 0.78 | 0.44 | 1.13 | 1.27 |
| 54687 | 0 | 118060 | PPPGMRPP   | 2.14 | 0.01 | 0.78 | 0.44 | 1.13 | 0.28 |
| 54688 | 0 | 118060 | PPPGMRPP   | 2.14 | 0.01 | 0.78 | 0.44 | 1.13 | 0.28 |
| 54689 | 0 | 118060 | PPPGMRPP   | 2.14 | 0.01 | 0.78 | 0.68 | 0.22 | 1.27 |
| 54690 | 0 | 118060 | PPPGMRPP   | 2.14 | 0.01 | 0.78 | 0.44 | 1.13 | 0.28 |
| 54691 | 0 | 118060 | PPPGMRPP   | 2.14 | 0.01 | 0.78 | 1.20 | 0.22 | 0.28 |
| 54692 | 0 | 118060 | PPPGMRPP   | 2.14 | 0.01 | 0.78 | 1.20 | 0.22 | 0.28 |
| 54693 | 0 | 118060 | PPPGMRPP   | 2.14 | 0.01 | 0.78 | 1.20 | 0.22 | 0.28 |
| 54694 | 0 | 118060 | PPPGMRPP   | 2.14 | 0.01 | 0.78 | 1.20 | 0.22 | 2.02 |
| 54695 | 0 | 118060 | PPPGMRPP   | 2.14 | 0.01 | 0.78 | 1.20 | 2.60 | 1.75 |
| 54696 | 0 | 118061 | PPPGMRPPMG | 2.36 | 0.01 | 0.78 | 3.05 | 1.13 | 0.28 |
| 54697 | 0 | 118970 | PPPGRRP    | 2.06 | 0.01 | 2.43 | 0.44 | 1.13 | 0.28 |
| 54698 | 0 | 118970 | PPPGRRP    | 2.06 | 0.01 | 2.43 | 1.20 | 0.22 | 0.28 |
| 54699 | 0 | 118970 | PPPGRRP    | 2.06 | 0.01 | 2.43 | 1.20 | 0.22 | 0.28 |
| 54700 | 0 | 118970 | PPPGRRP    | 2.06 | 0.01 | 2.43 | 1.20 | 0.22 | 0.28 |
| 54701 | 0 | 118970 | PPPGRRP    | 2.06 | 0.01 | 2.43 | 1.20 | 0.22 | 0.28 |
| 54702 | 0 | 118970 | PPPGRRP    | 2.06 | 0.01 | 2.43 | 1.20 | 0.22 | 0.28 |
| 54703 | 0 | 118970 | PPPGRRP    | 2.06 | 0.01 | 2.43 | 1.20 | 0.22 | 0.28 |
| 54704 | 0 | 118970 | PPPGRRP    | 2.06 | 0.01 | 2.43 | 1.20 | 0.22 | 0.28 |
| 54705 | 0 | 118970 | PPPGRRP    | 2.06 | 0.01 | 2.43 | 1.20 | 0.22 | 0.28 |
| 54706 | 0 | 118970 | PPPGRRP    | 2.06 | 0.01 | 2.43 | 1.20 | 0.22 | 0.28 |
| 54707 | 0 | 118970 | PPPGRRP    | 2.06 | 0.01 | 2.43 | 1.20 | 0.22 | 0.28 |
| 54708 | 0 | 118970 | PPPGRRP    | 2.06 | 0.01 | 2.43 | 1.20 | 0.22 | 0.28 |
| 54709 | 0 | 118970 | PPPGRRP    | 2.06 | 0.01 | 2.43 | 1.20 | 0.22 | 0.28 |
| 54710 | 0 | 118970 | PPPGRRP    | 2.06 | 0.01 | 2.43 | 1.20 | 0.22 | 0.28 |
| 54711 | 0 | 118970 | PPPGRRP    | 2.06 | 0.01 | 2.43 | 1.20 | 0.22 | 0.28 |
| 54712 | 0 | 118970 | PPPGRRP    | 2.06 | 0.01 | 2.43 | 1.20 | 0.22 | 0.28 |
| 54713 | 0 | 118970 | PPPGRRP    | 2.06 | 0.01 | 2.43 | 1.20 | 0.22 | 0.28 |
| 54714 | 0 | 118970 | PPPGRRP    | 2.06 | 0.01 | 2.43 | 1.20 | 0.22 | 0.28 |
| 54715 | 0 | 118970 | PPPGRRP    | 2.06 | 0.01 | 2.43 | 1.20 | 0.22 | 0.28 |
| 54716 | 0 | 118970 | PPPGRRP    | 2.06 | 0.01 | 2.43 | 1.20 | 0.22 | 0.28 |
| 54717 | 0 | 118970 | PPPGRRP    | 2.06 | 0.01 | 2.43 | 1.20 | 0.22 | 0.28 |
| 54718 | 0 | 118970 | PPPGRRP    | 2.06 | 0.01 | 2.43 | 1.20 | 0.22 | 0.28 |
| 54719 | 0 | 118970 | PPPGRRP    | 2.06 | 0.01 | 2.43 | 1.20 | 0.22 | 0.28 |
| 54720 | 0 | 118970 | PPPGRRP    | 2.06 | 0.01 | 2.43 | 1.20 | 0.22 | 0.28 |
| 54721 | 0 | 118970 | PPPGRRP    | 2.06 | 0.01 | 2.43 | 1.20 | 0.22 | 0.28 |
| 54722 | 0 | 118970 | PPPGRRP    | 2.06 | 0.01 | 2.43 | 1.20 | 0.22 | 0.28 |
| 54723 | 0 | 118970 | PPPGRRP    | 2.06 | 0.01 | 2.43 | 1.20 | 0.22 | 0.28 |
| 54724 | 0 | 118970 | PPPGRRP    | 2.06 | 0.01 | 2.43 | 1.20 | 2.60 | 0.28 |
| 54725 | 0 | 118970 | PPPGRRP    | 2.06 | 0.01 | 2.43 | 2.25 | 0.22 | 0.28 |

|       |   |        |                          |      |      |      |      |      |      |
|-------|---|--------|--------------------------|------|------|------|------|------|------|
| 54726 | 0 | 118970 | PPPGRRP                  | 2.06 | 0.01 | 2.43 | 2.25 | 0.22 | 0.28 |
| 54727 | 0 | 118970 | PPPGRRP                  | 2.06 | 0.01 | 2.43 | 0.44 | 1.13 | 0.28 |
| 54728 | 0 | 118970 | PPPGRRP                  | 2.06 | 0.01 | 2.43 | 0.44 | 1.13 | 0.28 |
| 54729 | 0 | 118970 | PPPGRRP                  | 2.06 | 0.01 | 2.43 | 0.44 | 1.74 | 0.28 |
| 54730 | 0 | 48852  | PPPGRRPFFHPVGE           | 2.64 | 0.01 | 2.48 | 0.44 | 0.85 | 0.28 |
| 54731 | 0 | 122167 | PPPITQGECKQL             | 2.45 | 0.01 | 2.73 | 0.68 | 0.22 | 0.85 |
| 54732 | 0 | 122167 | PPPITQGECKQL             | 2.45 | 0.01 | 2.73 | 0.68 | 0.22 | 0.28 |
| 54733 | 0 | 122167 | PPPITQGECKQL             | 2.45 | 0.01 | 2.73 | 0.68 | 0.22 | 1.48 |
| 54734 | 0 | 354239 | PPPKDSVDSREQDGE          | 2.68 | 0.01 | 1.61 | 0.44 | 0.85 | 1.28 |
| 54735 | 0 | 48854  | PPPLSEAAPKPRAAA          | 2.70 | 0.01 | 2.40 | 1.15 | 2.26 | 0.28 |
| 54736 | 0 | 48854  | PPPLSEAAPKPRAAA          | 2.70 | 0.01 | 2.40 | 1.15 | 2.26 | 0.85 |
| 54737 | 0 | 118971 | PPPPGMMMPV               | 2.27 | 0.01 | 0.78 | 0.44 | 1.13 | 0.28 |
| 54738 | 0 | 123622 | PPPPGMRPP                | 2.25 | 0.01 | 0.78 | 1.20 | 0.22 | 0.28 |
| 54739 | 0 | 354284 | PPPPKDSVDSREQDG          | 2.67 | 0.01 | 1.61 | 0.44 | 0.85 | 1.28 |
| 54740 | 0 | 48858  | PPPPNPNDPPPPNPND         | 2.80 | 0.01 | 3.01 | 2.16 | 0.22 | 1.48 |
| 54741 | 0 | 48858  | PPPPNPNDPPPPNPND         | 2.80 | 0.01 | 3.01 | 1.15 | 2.25 | 1.75 |
| 54742 | 0 | 48858  | PPPPNPNDPPPPNPND         | 2.80 | 0.01 | 3.01 | 2.16 | 0.22 | 1.57 |
| 54743 | 0 | 48858  | PPPPNPNDPPPPNPND         | 2.80 | 0.01 | 3.01 | 1.15 | 2.25 | 1.75 |
| 54744 | 0 | 48858  | PPPPNPNDPPPPNPND         | 2.80 | 0.01 | 3.01 | 2.16 | 0.22 | 0.28 |
| 54745 | 0 | 48858  | PPPPNPNDPPPPNPND         | 2.80 | 0.01 | 3.01 | 2.16 | 0.22 | 1.48 |
| 54746 | 0 | 48858  | PPPPNPNDPPPPNPND         | 2.80 | 0.01 | 3.01 | 2.16 | 0.22 | 1.48 |
| 54747 | 0 | 48858  | PPPPNPNDPPPPNPND         | 2.80 | 0.01 | 3.01 | 2.16 | 0.22 | 0.28 |
| 54748 | 0 | 48858  | PPPPNPNDPPPPNPND         | 2.80 | 0.01 | 3.01 | 2.16 | 2.25 | 1.75 |
| 54749 | 0 | 48858  | PPPPNPNDPPPPNPND         | 2.80 | 0.01 | 3.01 | 2.16 | 0.22 | 1.57 |
| 54750 | 0 | 48858  | PPPPNPNDPPPPNPND         | 2.80 | 0.01 | 3.01 | 0.68 | 0.22 | 1.57 |
| 54751 | 0 | 48858  | PPPPNPNDPPPPNPND         | 2.80 | 0.01 | 3.01 | 2.16 | 0.22 | 1.57 |
| 54752 | 0 | 48858  | PPPPNPNDPPPPNPND         | 2.80 | 0.01 | 4.23 | 0.68 | 0.22 | 0.28 |
| 54753 | 0 | 48858  | PPPPNPNDPPPPNPND         | 2.80 | 0.01 | 4.23 | 0.68 | 0.22 | 0.28 |
| 54754 | 0 | 48858  | PPPPNPNDPPPPNPND         | 2.80 | 0.01 | 3.01 | 2.16 | 0.22 | 1.75 |
| 54755 | 0 | 133664 | PPPPPPPPPP               | 2.37 | 0.01 | 0.78 | 0.68 | 0.22 | 2.92 |
| 54756 | 0 | 48864  | PPPPPPPPPPPPPPPPPP<br>pp | 3.03 | 0.01 | 2.43 | 0.44 | 1.59 | 0.28 |

|       |   |        |                                    |      |      |      |      |      |      |
|-------|---|--------|------------------------------------|------|------|------|------|------|------|
| 54757 | 0 | 48869  | PPPPRVQPRKTKSV                     | 2.64 | 0.01 | 2.71 | 2.13 | 0.22 | 0.28 |
| 54758 | 0 | 48869  | PPPPRVQPRKTKSV                     | 2.64 | 0.01 | 2.71 | 2.13 | 0.22 | 0.28 |
| 54759 | 0 | 118972 | PPPPSLPG                           | 2.17 | 0.01 | 0.78 | 0.44 | 1.13 | 0.28 |
| 54760 | 0 | 48870  | PPPPSSPTHDPDSDPQI<br>pp            | 2.98 | 0.01 | 2.04 | 0.44 | 0.85 | 0.28 |
| 54761 | 0 | 48870  | PPPPSSPTHDPDSDPQI<br>pp            | 2.98 | 0.01 | 2.04 | 0.44 | 0.85 | 0.28 |
| 54762 | 0 | 132011 | PPPPSSPTHDPDSDPQI<br>ppp           | 3.03 | 0.01 | 2.04 | 0.44 | 0.85 | 0.28 |
| 54763 | 0 | 132011 | PPPPSSPTHDPDSDPQI<br>ppp           | 3.03 | 0.01 | 2.04 | 0.44 | 1.13 | 0.28 |
| 54764 | 0 | 132011 | PPPPSSPTHDPDSDPQI<br>ppp           | 3.03 | 0.01 | 2.04 | 0.44 | 1.13 | 0.28 |
| 54765 | 0 | 132011 | PPPPSSPTHDPDSDPQI<br>ppp           | 3.03 | 0.01 | 2.04 | 1.12 | 0.22 | 0.28 |
| 54766 | 0 | 132011 | PPPPSSPTHDPDSDPQI<br>ppp           | 3.03 | 0.01 | 2.04 | 0.44 | 1.13 | 0.28 |
| 54767 | 0 | 132011 | PPPPSSPTHDPDSDPQI<br>ppp           | 3.03 | 0.01 | 2.04 | 0.44 | 1.13 | 0.28 |
| 54768 | 0 | 132011 | PPPPSSPTHDPDSDPQI<br>ppp           | 3.03 | 0.01 | 2.04 | 0.44 | 1.41 | 0.28 |
| 54769 | 0 | 132011 | PPPPSSPTHDPDSDPQI<br>ppp           | 3.03 | 0.01 | 2.04 | 1.12 | 0.22 | 0.28 |
| 54770 | 0 | 48871  | PPPPSSPTHDPDSDPQI<br>PPPYVEPTAPQVL | 3.38 | 0.01 | 2.04 | 0.44 | 0.85 | 0.28 |
| 54771 | 0 | 48871  | PPPPSSPTHDPDSDPQI<br>PPPYVEPTAPQVL | 3.38 | 0.01 | 2.04 | 0.44 | 0.85 | 0.28 |
| 54772 | 0 | 48871  | PPPPSSPTHDPDSDPQI<br>PPPYVEPTAPQVL | 3.38 | 0.01 | 2.04 | 0.44 | 0.85 | 0.85 |
| 54773 | 0 | 48871  | PPPPSSPTHDPDSDPQI<br>PPPYVEPTAPQVL | 3.38 | 0.01 | 2.04 | 0.44 | 0.85 | 1.48 |
| 54774 | 0 | 48871  | PPPPSSPTHDPDSDPQI<br>PPPYVEPTAPQVL | 3.38 | 0.01 | 2.04 | 0.44 | 0.85 | 0.28 |
| 54775 | 0 | 48871  | PPPPSSPTHDPDSDPQI<br>PPPYVEPTAPQVL | 3.38 | 0.01 | 2.04 | 0.44 | 1.59 | 1.27 |
| 54776 | 0 | 48871  | PPPPSSPTHDPDSDPQI<br>PPPYVEPTAPQVL | 3.38 | 0.01 | 2.04 | 0.44 | 1.59 | 0.28 |
| 54777 | 0 | 48871  | PPPPSSPTHDPDSDPQI<br>PPPYVEPTAPQVL | 3.38 | 0.01 | 2.04 | 0.44 | 0.85 | 1.27 |
| 54778 | 0 | 48871  | PPPPSSPTHDPDSDPQI<br>PPPYVEPTAPQVL | 3.38 | 0.01 | 2.04 | 0.44 | 1.41 | 0.28 |
| 54779 | 0 | 48871  | PPPPSSPTHDPDSDPQI<br>PPPYVEPTAPQVL | 3.38 | 0.01 | 2.04 | 0.44 | 0.85 | 0.28 |
| 54780 | 0 | 48871  | PPPPSSPTHDPDSDPQI<br>PPPYVEPTAPQVL | 3.38 | 0.01 | 2.04 | 0.44 | 0.85 | 0.28 |
| 54781 | 0 | 48871  | PPPPSSPTHDPDSDPQI<br>PPPYVEPTAPQVL | 3.38 | 0.01 | 2.04 | 0.44 | 0.85 | 0.28 |

|       |   |        |                                    |      |      |      |      |      |      |
|-------|---|--------|------------------------------------|------|------|------|------|------|------|
| 54782 | 0 | 48871  | PPPPSSPTHDPDSDPQI<br>PPPYVEPTAPQVL | 3.38 | 0.01 | 2.04 | 0.44 | 0.85 | 0.28 |
| 54783 | 0 | 48871  | PPPPSSPTHDPDSDPQI<br>PPPYVEPTAPQVL | 3.38 | 0.01 | 2.04 | 0.44 | 2.82 | 0.28 |
| 54784 | 0 | 48876  | PPPQAPYQGY                         | 2.36 | 0.01 | 2.48 | 0.68 | 0.22 | 2.02 |
| 54785 | 0 | 48876  | PPPQAPYQGY                         | 2.36 | 0.01 | 2.48 | 0.68 | 0.22 | 1.27 |
| 54786 | 0 | 48876  | PPPQAPYQGY                         | 2.36 | 0.01 | 2.48 | 0.68 | 0.22 | 0.28 |
| 54787 | 0 | 48877  | PPPQCSKAWPCPPTH                    | 2.68 | 0.01 | 0.90 | 1.15 | 0.22 | 1.27 |
| 54788 | 0 | 48878  | PPPQGRRRFGA                        | 2.41 | 0.01 | 2.69 | 1.12 | 0.22 | 0.28 |
| 54789 | 0 | 48878  | PPPQGRRRFGA                        | 2.41 | 0.01 | 2.69 | 1.12 | 0.22 | 0.28 |
| 54790 | 0 | 48879  | PPPQIFLKILPQSGPIGGI<br>K           | 2.99 | 0.01 | 2.75 | 0.44 | 0.85 | 0.85 |
| 54791 | 0 | 111639 | PPPSEVVSlyKSNNI                    | 2.67 | 0.01 | 3.20 | 1.12 | 0.22 | 0.85 |
| 54792 | 0 | 134189 | PPPSLPGPPRPG                       | 2.53 | 0.01 | 0.78 | 1.12 | 1.41 | 0.85 |
| 54793 | 0 | 354407 | PPPTEDSVDSREQDG                    | 2.68 | 0.01 | 1.61 | 0.44 | 0.85 | 1.28 |
| 54794 | 0 | 136077 | PPPTPPP                            | 2.03 | 0.01 | 0.78 | 1.12 | 0.22 | 0.28 |
| 54795 | 0 | 125519 | PPPVAAPPTPQPLAPT<br>PSTPCPAT       | 3.21 | 0.01 | 0.78 | 0.44 | 1.41 | 0.28 |
| 54796 | 0 | 125519 | PPPVAAPPTPQPLAPT<br>PSTPCPAT       | 3.21 | 0.01 | 0.78 | 0.44 | 1.13 | 0.28 |
| 54797 | 0 | 77968  | PPPYAPNPGPPPPYTGA                  | 2.84 | 0.01 | 3.42 | 1.15 | 0.22 | 0.28 |
| 54798 | 0 | 77968  | PPPYAPNPGPPPPYTGA                  | 2.84 | 0.01 | 3.42 | 0.44 | 0.85 | 0.28 |
| 54799 | 0 | 77968  | PPPYAPNPGPPPPYTGA                  | 2.84 | 0.01 | 3.42 | 2.13 | 0.22 | 0.28 |
| 54800 | 0 | 77968  | PPPYAPNPGPPPPYTGA                  | 2.84 | 0.01 | 3.42 | 0.44 | 0.85 | 0.28 |
| 54801 | 0 | 48894  | PPQGGVVTGSGSG                      | 2.66 | 0.01 | 2.69 | 0.44 | 0.85 | 0.28 |
| 54802 | 0 | 48894  | PPQGGVVTGSGSG                      | 2.66 | 0.01 | 2.69 | 0.44 | 0.85 | 0.28 |
| 54803 | 0 | 474412 | PPQGMAW                            | 2.01 | 0.01 | 3.51 | 0.68 | 0.22 | 0.28 |
| 54804 | 0 | 474412 | PPQGMAW                            | 2.01 | 0.01 | 3.51 | 0.68 | 0.22 | 0.28 |
| 54805 | 0 | 474412 | PPQGMAW                            | 2.01 | 0.01 | 3.51 | 0.68 | 0.22 | 1.34 |
| 54806 | 0 | 474412 | PPQGMAW                            | 2.01 | 0.01 | 3.51 | 0.68 | 0.22 | 0.28 |
| 54807 | 0 | 474412 | PPQGMAW                            | 2.01 | 0.01 | 3.51 | 0.68 | 0.22 | 0.28 |
| 54808 | 0 | 474412 | PPQGMAW                            | 2.01 | 0.01 | 3.51 | 0.68 | 0.22 | 0.28 |
| 54809 | 0 | 474412 | PPQGMAW                            | 2.01 | 0.01 | 3.51 | 0.68 | 0.22 | 0.28 |
| 54810 | 0 | 474412 | PPQGMAW                            | 2.01 | 0.01 | 3.51 | 0.68 | 0.22 | 0.28 |
| 54811 | 0 | 474412 | PPQGMAW                            | 2.01 | 0.01 | 3.51 | 0.68 | 0.22 | 0.28 |
| 54812 | 0 | 474412 | PPQGMAW                            | 2.01 | 0.01 | 3.51 | 0.68 | 0.22 | 0.28 |
| 54813 | 0 | 474412 | PPQGMAW                            | 2.01 | 0.01 | 3.51 | 0.68 | 0.22 | 0.28 |
| 54814 | 0 | 474412 | PPQGMAW                            | 2.01 | 0.01 | 3.51 | 0.68 | 0.22 | 0.28 |
| 54815 | 0 | 474412 | PPQGMAW                            | 2.01 | 0.01 | 3.51 | 0.68 | 0.22 | 0.28 |
| 54816 | 0 | 447051 | PPQGNWFGCTWMNST<br>GFTKT           | 2.95 | 0.01 | 1.96 | 0.68 | 0.22 | 1.34 |

|       |   |        |                                 |      |      |      |      |      |      |
|-------|---|--------|---------------------------------|------|------|------|------|------|------|
| 54817 | 0 | 447051 | PPQGNWFGCTWMNST<br>GFTKT        | 2.95 | 0.01 | 1.96 | 0.68 | 0.22 | 0.28 |
| 54818 | 0 | 105478 | PPQGNWFGCTWMNST<br>GFTKTCGGPPC  | 3.22 | 0.01 | 1.72 | 0.68 | 0.22 | 0.28 |
| 54819 | 0 | 489710 | PPQGRRRFGARAMVT                 | 2.68 | 0.01 | 2.69 | 3.05 | 0.85 | 1.28 |
| 54820 | 0 | 173954 | PPQQFPQQQFPIP                   | 2.61 | 0.01 | 1.86 | 0.44 | 1.23 | 0.85 |
| 54821 | 0 | 123624 | PPQQLMPG                        | 2.15 | 0.01 | 0.78 | 1.20 | 0.22 | 0.28 |
| 54822 | 0 | 123624 | PPQQLMPG                        | 2.15 | 0.01 | 0.78 | 0.44 | 1.13 | 0.28 |
| 54823 | 0 | 48898  | PPQQPPQQPPQQPPQ<br>Q            | 2.81 | 0.01 | 3.33 | 0.68 | 0.22 | 0.28 |
| 54824 | 0 | 98344  | PPQQPYQPQPFPSSQ<br>PY           | 2.91 | 0.01 | 1.86 | 0.44 | 1.93 | 0.28 |
| 54825 | 0 | 98344  | PPQQPYQPQPFPSSQ<br>PY           | 2.91 | 0.01 | 1.86 | 0.44 | 2.39 | 0.28 |
| 54826 | 0 | 125201 | PPQTEHIEL                       | 2.22 | 0.01 | 0.78 | 0.44 | 1.13 | 0.28 |
| 54827 | 0 | 48900  | PPQWKLQP                        | 2.16 | 0.01 | 2.40 | 2.43 | 0.22 | 0.28 |
| 54828 | 0 | 167791 | PPQWKLQPG                       | 2.25 | 0.01 | 2.40 | 2.43 | 0.22 | 0.28 |
| 54829 | 0 | 95676  | PPRPTRPTTLPPTLLT                | 2.86 | 0.01 | 2.43 | 0.44 | 1.59 | 0.28 |
| 54830 | 0 | 136557 | PPRRPPPGRPPFFHPVG<br>EADYFEYHQE | 3.25 | 0.01 | 2.43 | 0.44 | 1.74 | 0.28 |
| 54831 | 0 | 136557 | PPRRPPPGRPPFFHPVG<br>EADYFEYHQE | 3.25 | 0.01 | 2.43 | 0.44 | 1.74 | 0.28 |
| 54832 | 0 | 136557 | PPRRPPPGRPPFFHPVG<br>EADYFEYHQE | 3.25 | 0.01 | 2.43 | 0.44 | 1.74 | 0.28 |
| 54833 | 0 | 48905  | PPRRRAGR                        | 2.17 | 0.01 | 2.04 | 0.44 | 0.85 | 0.28 |
| 54834 | 0 | 48905  | PPRRRAGR                        | 2.17 | 0.01 | 2.04 | 0.44 | 0.85 | 0.28 |
| 54835 | 0 | 48905  | PPRRRAGR                        | 2.17 | 0.01 | 2.04 | 0.44 | 0.85 | 0.28 |
| 54836 | 0 | 48906  | PPRRVS                          | 1.91 | 0.01 | 2.40 | 1.15 | 0.22 | 0.28 |
| 54837 | 0 | 48906  | PPRRVS                          | 1.91 | 0.01 | 2.40 | 1.15 | 0.22 | 2.02 |
| 54838 | 0 | 48906  | PPRRVS                          | 1.91 | 0.01 | 2.40 | 1.15 | 0.22 | 0.85 |
| 54839 | 0 | 48906  | PPRRVS                          | 1.91 | 0.01 | 2.40 | 1.15 | 0.22 | 2.35 |
| 54840 | 0 | 48906  | PPRRVS                          | 1.91 | 0.01 | 2.40 | 1.15 | 0.22 | 1.34 |
| 54841 | 0 | 426698 | PPRYA                           | 1.75 | 0.01 | 2.89 | 0.68 | 0.22 | 0.85 |
| 54842 | 0 | 426698 | PPRYA                           | 1.75 | 0.01 | 2.89 | 0.68 | 0.22 | 1.48 |
| 54843 | 0 | 426698 | PPRYA                           | 1.75 | 0.01 | 2.89 | 0.68 | 0.22 | 0.28 |
| 54844 | 0 | 426698 | PPRYA                           | 1.75 | 0.01 | 2.89 | 0.68 | 0.22 | 1.48 |
| 54845 | 0 | 426698 | PPRYA                           | 1.75 | 0.01 | 2.89 | 0.68 | 0.22 | 1.48 |
| 54846 | 0 | 426698 | PPRYA                           | 1.75 | 0.01 | 2.89 | 0.68 | 0.22 | 1.48 |
| 54847 | 0 | 426698 | PPRYA                           | 1.75 | 0.01 | 2.89 | 0.68 | 0.22 | 1.48 |
| 54848 | 0 | 426698 | PPRYA                           | 1.75 | 0.01 | 2.89 | 0.68 | 0.22 | 1.48 |
| 54849 | 0 | 426698 | PPRYA                           | 1.75 | 0.01 | 2.89 | 0.68 | 0.22 | 1.48 |
| 54850 | 0 | 426698 | PPRYA                           | 1.75 | 0.01 | 2.89 | 0.68 | 0.22 | 1.48 |
| 54851 | 0 | 426698 | PPRYA                           | 1.75 | 0.01 | 2.89 | 0.68 | 0.22 | 1.48 |
| 54852 | 0 | 426698 | PPRYA                           | 1.75 | 0.01 | 2.89 | 0.68 | 0.22 | 1.48 |
| 54853 | 0 | 426698 | PPRYA                           | 1.75 | 0.01 | 2.89 | 0.68 | 0.22 | 1.48 |
| 54854 | 0 | 426698 | PPRYA                           | 1.75 | 0.01 | 2.89 | 0.68 | 0.22 | 1.48 |

|       |   |        |                         |      |      |      |      |      |      |
|-------|---|--------|-------------------------|------|------|------|------|------|------|
| 54855 | 0 | 426698 | PPRYA                   | 1.75 | 0.01 | 2.89 | 0.68 | 0.22 | 1.48 |
| 54856 | 0 | 426698 | PPRYA                   | 1.75 | 0.01 | 2.89 | 0.68 | 0.22 | 1.48 |
| 54857 | 0 | 426698 | PPRYA                   | 1.75 | 0.01 | 2.89 | 0.68 | 0.22 | 1.48 |
| 54858 | 0 | 426698 | PPRYA                   | 1.75 | 0.01 | 2.89 | 0.68 | 0.22 | 1.48 |
| 54859 | 0 | 426698 | PPRYA                   | 1.75 | 0.01 | 2.89 | 0.68 | 0.22 | 1.48 |
| 54860 | 0 | 426698 | PPRYA                   | 1.75 | 0.01 | 2.89 | 0.68 | 0.22 | 1.48 |
| 54861 | 0 | 426698 | PPRYA                   | 1.75 | 0.01 | 2.89 | 0.68 | 0.22 | 1.48 |
| 54862 | 0 | 426698 | PPRYA                   | 1.75 | 0.01 | 2.89 | 0.68 | 0.22 | 1.48 |
| 54863 | 0 | 426698 | PPRYA                   | 1.75 | 0.01 | 2.89 | 0.68 | 0.22 | 1.48 |
| 54864 | 0 | 426698 | PPRYA                   | 1.75 | 0.01 | 2.89 | 0.68 | 0.22 | 1.48 |
| 54865 | 0 | 426698 | PPRYA                   | 1.75 | 0.01 | 2.89 | 0.68 | 0.22 | 1.48 |
| 54866 | 0 | 426698 | PPRYA                   | 1.75 | 0.01 | 2.89 | 0.68 | 0.22 | 1.48 |
| 54867 | 0 | 48911  | PPSDIKGK                | 2.13 | 0.01 | 3.30 | 0.68 | 0.22 | 0.28 |
| 54868 | 0 | 48911  | PPSDIKGK                | 2.13 | 0.01 | 3.30 | 0.68 | 0.22 | 0.28 |
| 54869 | 0 | 48912  | PPSDIKGKYVKEVEVK        | 2.76 | 0.01 | 3.30 | 1.12 | 0.22 | 1.57 |
| 54870 | 0 | 48912  | PPSDIKGKYVKEVEVK        | 2.76 | 0.01 | 3.30 | 1.12 | 0.22 | 0.85 |
| 54871 | 0 | 48912  | PPSDIKGKYVKEVEVK        | 2.76 | 0.01 | 3.59 | 1.12 | 0.22 | 0.28 |
| 54872 | 0 | 48912  | PPSDIKGKYVKEVEVK        | 2.76 | 0.01 | 3.59 | 1.20 | 0.22 | 0.85 |
| 54873 | 0 | 48912  | PPSDIKGKYVKEVEVK        | 2.76 | 0.01 | 3.59 | 1.20 | 0.22 | 0.85 |
| 54874 | 0 | 48912  | PPSDIKGKYVKEVEVK        | 2.76 | 0.01 | 3.59 | 1.20 | 0.22 | 0.28 |
| 54875 | 0 | 48912  | PPSDIKGKYVKEVEVK        | 2.76 | 0.01 | 3.59 | 1.20 | 0.22 | 0.28 |
| 54876 | 0 | 48913  | PPSFCPNFIPCTDGL         | 2.68 | 0.01 | 0.90 | 1.15 | 0.22 | 1.27 |
| 54877 | 0 | 95677  | PPSGSGRR                | 2.13 | 0.01 | 0.90 | 2.59 | 0.22 | 0.28 |
| 54878 | 0 | 354548 | PPSGTENKPATGEAP         | 2.71 | 0.01 | 1.61 | 0.44 | 0.85 | 1.28 |
| 54879 | 0 | 127767 | PPSKMET                 | 2.01 | 0.01 | 0.90 | 0.44 | 1.13 | 1.39 |
| 54880 | 0 | 104181 | PPSLASSASQLSAPSLK<br>A  | 2.96 | 0.01 | 1.72 | 0.44 | 0.85 | 0.28 |
| 54881 | 0 | 115096 | PPSLLFLP                | 2.18 | 0.01 | 3.78 | 0.68 | 0.22 | 1.27 |
| 54882 | 0 | 115096 | PPSLLFLP                | 2.18 | 0.01 | 3.78 | 0.68 | 0.22 | 0.28 |
| 54883 | 0 | 139854 | PPSMVKHPEKALFTFKQ<br>V  | 2.83 | 0.01 | 3.93 | 2.00 | 0.22 | 0.28 |
| 54884 | 0 | 139854 | PPSMVKHPEKALFTFKQ<br>V  | 2.83 | 0.01 | 3.93 | 2.00 | 0.22 | 0.28 |
| 54885 | 0 | 48920  | PPSPEAHVPPPYVEPTTT<br>Q | 2.92 | 0.01 | 3.01 | 0.44 | 0.85 | 0.28 |
| 54886 | 0 | 48921  | PPSPGGESDSESCS          | 2.66 | 0.01 | 2.59 | 0.44 | 0.85 | 0.28 |
| 54887 | 0 | 109713 | PPSRDEL                 | 2.01 | 0.01 | 0.78 | 0.44 | 1.13 | 0.28 |
| 54888 | 0 | 109714 | PPSREEM                 | 2.02 | 0.01 | 0.78 | 0.44 | 1.13 | 0.28 |
| 54889 | 0 | 48926  | PPSSPPQW                | 2.17 | 0.01 | 2.40 | 2.43 | 0.22 | 0.28 |
| 54890 | 0 | 167792 | PPSSPPQWK               | 2.26 | 0.01 | 2.40 | 2.43 | 0.22 | 0.28 |
| 54891 | 0 | 48927  | PPSSPTHDPDSDP           | 2.68 | 0.01 | 2.04 | 1.20 | 0.22 | 1.57 |
| 54892 | 0 | 48927  | PPSSPTHDPDSDP           | 2.68 | 0.01 | 2.04 | 1.20 | 0.22 | 1.27 |
| 54893 | 0 | 48927  | PPSSPTHDPDSDP           | 2.68 | 0.01 | 2.04 | 0.44 | 0.85 | 1.57 |
| 54894 | 0 | 48928  | PPSSPTHDPDSDPQI         | 2.79 | 0.01 | 2.04 | 0.44 | 0.85 | 0.28 |
| 54895 | 0 | 48928  | PPSSPTHDPDSDPQI         | 2.79 | 0.01 | 2.04 | 0.44 | 0.85 | 0.28 |
| 54896 | 0 | 233246 | PPSSQF                  | 1.91 | 0.01 | 2.75 | 1.20 | 0.22 | 1.27 |
| 54897 | 0 | 95678  | PPSVPNLR                | 2.14 | 0.01 | 0.90 | 2.22 | 0.22 | 0.28 |

|       |   |        |                                      |      |      |      |      |      |      |
|-------|---|--------|--------------------------------------|------|------|------|------|------|------|
| 54898 | 0 | 48933  | PPTAPLLPHSNL                         | 2.59 | 0.01 | 2.04 | 0.44 | 0.85 | 0.28 |
| 54899 | 0 | 48933  | PPTAPLLPHSNL                         | 2.59 | 0.01 | 2.04 | 0.44 | 0.85 | 0.28 |
| 54900 | 0 | 48933  | PPTAPLLPHSNL                         | 2.59 | 0.01 | 2.04 | 0.44 | 0.85 | 0.85 |
| 54901 | 0 | 48933  | PPTAPLLPHSNL                         | 2.59 | 0.01 | 2.04 | 0.44 | 0.85 | 1.48 |
| 54902 | 0 | 48933  | PPTAPLLPHSNL                         | 2.59 | 0.01 | 2.04 | 0.44 | 0.85 | 1.34 |
| 54903 | 0 | 48933  | PPTAPLLPHSNL                         | 2.59 | 0.01 | 2.04 | 0.44 | 0.85 | 1.27 |
| 54904 | 0 | 48933  | PPTAPLLPHSNL                         | 2.59 | 0.01 | 2.04 | 0.44 | 0.85 | 1.34 |
| 54905 | 0 | 48933  | PPTAPLLPHSNL                         | 2.59 | 0.01 | 2.04 | 0.44 | 0.85 | 1.27 |
| 54906 | 0 | 523736 | PPTDPKTHPHGPADAPP<br>GSP             | 3.00 | 4.08 | 2.40 | 0.44 | 1.59 | 1.28 |
| 54907 | 0 | 523737 | PPTDPKTHPHGPADAPP<br>GSP             | 3.00 | 0.01 | 2.40 | 0.44 | 1.59 | 1.28 |
| 54908 | 0 | 354652 | PPTEDSVDSREQDGE                      | 2.69 | 0.01 | 1.61 | 0.44 | 0.85 | 1.28 |
| 54909 | 0 | 354653 | PPTEEADEDSDEEE                       | 2.71 | 0.01 | 1.61 | 0.44 | 0.85 | 1.28 |
| 54910 | 0 | 167992 | PPTLAYSPNRQICPAGTT<br>S              | 2.88 | 0.01 | 2.75 | 0.44 | 0.85 | 2.51 |
| 54911 | 0 | 167992 | PPTLAYSPNRQICPAGTT<br>S              | 2.88 | 0.01 | 2.75 | 0.44 | 0.85 | 2.51 |
| 54912 | 0 | 167992 | PPTLAYSPNRQICPAGTT<br>S              | 2.88 | 0.01 | 2.75 | 0.44 | 0.85 | 2.51 |
| 54913 | 0 | 106002 | PPTNVGSNTY                           | 2.32 | 0.01 | 0.90 | 0.68 | 0.22 | 1.27 |
| 54914 | 0 | 106002 | PPTNVGSNTY                           | 2.32 | 0.01 | 0.90 | 0.68 | 0.22 | 1.27 |
| 54915 | 0 | 106002 | PPTNVGSNTY                           | 2.32 | 0.01 | 0.90 | 0.68 | 0.22 | 1.27 |
| 54916 | 0 | 103493 | PPTPISVIFRSKSG                       | 2.68 | 0.01 | 2.04 | 0.44 | 0.85 | 1.28 |
| 54917 | 0 | 102723 | PPTPTPDQPEPNKPVEP<br>TYE             | 2.99 | 0.01 | 2.39 | 0.68 | 0.22 | 0.28 |
| 54918 | 0 | 78765  | PPTPWPTSQGLDRVFFS<br>DTQ             | 2.95 | 0.01 | 2.04 | 0.44 | 1.59 | 0.28 |
| 54919 | 0 | 106003 | PPTREPKK                             | 2.13 | 0.01 | 0.78 | 1.15 | 0.22 | 1.27 |
| 54920 | 0 | 102724 | PPTRTPDQAEPNKPTPP<br>TYE             | 2.97 | 0.01 | 2.39 | 0.68 | 0.22 | 0.28 |
| 54921 | 0 | 216572 | PPTTTTKKP                            | 2.28 | 4.93 | 0.78 | 0.44 | 0.85 | 1.28 |
| 54922 | 0 | 236279 | PPTYFDYVPQYLRWF                      | 2.68 | 0.01 | 1.66 | 0.44 | 0.85 | 1.28 |
| 54923 | 0 | 48940  | PPVADL                               | 1.89 | 0.01 | 3.27 | 0.44 | 1.59 | 0.28 |
| 54924 | 0 | 138215 | PPVANDTRIVMGRL                       | 2.58 | 0.01 | 2.51 | 1.20 | 0.22 | 0.28 |
| 54925 | 0 | 122523 | PPVEPRRISRLSPWL                      | 2.71 | 0.01 | 0.90 | 1.15 | 0.22 | 1.39 |
| 54926 | 0 | 176376 | PPVIETWKRPDYEPTVL<br>G               | 2.88 | 0.01 | 2.69 | 0.44 | 0.85 | 2.97 |
| 54927 | 0 | 102725 | PPVKPTAPT KPTYETEP<br>LK             | 3.00 | 0.01 | 2.39 | 0.44 | 1.59 | 0.28 |
| 54928 | 0 | 129641 | PPVLITRPLEDQLVMVG<br>QRVEFECEVSEEGAQ | 3.40 | 0.01 | 0.78 | 2.04 | 0.22 | 0.28 |
| 54929 | 0 | 134191 | PPVLKRHQREITRTT                      | 2.65 | 0.01 | 0.78 | 1.20 | 0.22 | 1.57 |
| 54930 | 0 | 48944  | PPVLYLPWLPWGSPV                      | 2.73 | 0.01 | 0.90 | 0.44 | 1.59 | 1.39 |



|       |   |        |                                     |      |      |      |      |      |      |
|-------|---|--------|-------------------------------------|------|------|------|------|------|------|
| 54931 | 0 | 233767 | PPVPAATPTFPDDDDND<br>GEAGAAPGAPGTNA | 3.39 | 0.01 | 3.67 | 2.61 | 0.85 | 1.28 |
| 54932 | 0 | 48947  | PPWDFDAGEGIIH                       | 2.46 | 0.01 | 0.90 | 2.71 | 0.22 | 1.39 |
| 54933 | 0 | 48947  | PPWDFDAGEGIIH                       | 2.46 | 0.01 | 0.90 | 0.68 | 0.22 | 1.34 |
| 54934 | 0 | 172731 | PPYEPLPENVKFYD                      | 2.69 | 0.01 | 0.78 | 0.44 | 1.41 | 0.28 |
| 54935 | 0 | 172731 | PPYEPLPENVKFYD                      | 2.69 | 0.01 | 0.78 | 0.44 | 1.13 | 0.28 |
| 54936 | 0 | 172731 | PPYEPLPENVKFYD                      | 2.69 | 0.01 | 0.78 | 2.79 | 1.13 | 1.28 |
| 54937 | 0 | 172731 | PPYEPLPENVKFYD                      | 2.69 | 0.01 | 0.78 | 2.79 | 1.13 | 1.28 |
| 54938 | 0 | 172731 | PPYEPLPENVKFYD                      | 2.69 | 0.01 | 0.78 | 1.81 | 1.41 | 1.28 |
| 54939 | 0 | 172731 | PPYEPLPENVKFYD                      | 2.69 | 0.01 | 0.78 | 1.81 | 1.41 | 1.28 |
| 54940 | 0 | 123626 | PPYMPPPG                            | 2.17 | 0.01 | 0.78 | 1.20 | 0.22 | 0.28 |
| 54941 | 0 | 123626 | PPYMPPPG                            | 2.17 | 0.01 | 0.78 | 0.44 | 1.13 | 0.28 |
| 54942 | 0 | 227454 | PPYPAWHAPGNI                        | 2.49 | 0.01 | 0.90 | 2.16 | 0.22 | 2.49 |
| 54943 | 0 | 48955  | PPYVEPTAPQVL                        | 2.49 | 0.01 | 2.04 | 0.44 | 0.85 | 0.28 |
| 54944 | 0 | 48955  | PPYVEPTAPQVL                        | 2.49 | 0.01 | 2.04 | 0.44 | 0.85 | 0.28 |
| 54945 | 0 | 48955  | PPYVEPTAPQVL                        | 2.49 | 0.01 | 2.04 | 0.44 | 1.59 | 0.28 |
| 54946 | 0 | 48958  | PQAEVTPVPQPQ                        | 2.61 | 0.01 | 2.67 | 2.22 | 0.22 | 0.85 |
| 54947 | 0 | 177913 | PQALPRYPREVPPRF                     | 2.70 | 0.01 | 0.78 | 0.44 | 1.13 | 0.85 |
| 54948 | 0 | 48966  | PQAMQWNSTAF                         | 2.39 | 0.01 | 2.58 | 1.15 | 0.22 | 0.28 |
| 54949 | 0 | 48967  | PQAMQWNSTAFH                        | 2.45 | 0.01 | 2.58 | 1.15 | 0.22 | 0.28 |
| 54950 | 0 | 79045  | PQANAKIWIAGQGPTKE<br>DDY            | 2.94 | 0.01 | 2.84 | 0.44 | 0.85 | 0.28 |
| 54951 | 0 | 523741 | PQAPAKTADTPATSK                     | 2.73 | 0.01 | 2.24 | 0.44 | 1.41 | 1.28 |
| 54952 | 0 | 48969  | PQAQNAPQAQNAP                       | 2.62 | 0.01 | 2.67 | 2.22 | 0.22 | 0.85 |
| 54953 | 0 | 48970  | PQAQNAPQVENAP                       | 2.61 | 0.01 | 2.67 | 2.22 | 0.22 | 0.85 |
| 54954 | 0 | 354822 | PQARKQQGRDAPQAR                     | 2.73 | 0.01 | 1.61 | 0.44 | 0.85 | 1.28 |
| 54955 | 0 | 354823 | PQARKQQGRNAPRSQ                     | 2.72 | 0.01 | 1.61 | 0.44 | 0.85 | 1.28 |
| 54956 | 0 | 354824 | PQARKQQGRNEPQAR                     | 2.72 | 0.01 | 1.61 | 0.44 | 0.85 | 1.28 |
| 54957 | 0 | 181763 | PQDANYFRNVSGTTM                     | 2.61 | 0.01 | 2.86 | 2.37 | 0.22 | 1.28 |
| 54958 | 0 | 181763 | PQDANYFRNVSGTTM                     | 2.61 | 0.01 | 2.86 | 2.36 | 0.22 | 1.28 |
| 54959 | 0 | 114224 | PQDENPVVHF                          | 2.31 | 0.01 | 1.60 | 0.68 | 0.22 | 1.27 |
| 54960 | 0 | 114224 | PQDENPVVHF                          | 2.31 | 0.01 | 1.60 | 0.68 | 0.22 | 1.27 |
| 54961 | 0 | 114224 | PQDENPVVHF                          | 2.31 | 0.01 | 1.60 | 0.68 | 0.22 | 1.57 |
| 54962 | 0 | 114224 | PQDENPVVHF                          | 2.31 | 0.01 | 1.60 | 0.68 | 0.22 | 1.57 |
| 54963 | 0 | 114224 | PQDENPVVHF                          | 2.31 | 0.01 | 1.60 | 0.68 | 0.22 | 1.27 |
| 54964 | 0 | 114224 | PQDENPVVHF                          | 2.31 | 0.01 | 1.60 | 0.68 | 0.22 | 1.27 |
| 54965 | 0 | 114224 | PQDENPVVHF                          | 2.31 | 0.01 | 1.60 | 0.68 | 0.22 | 1.57 |
| 54966 | 0 | 114224 | PQDENPVVHF                          | 2.31 | 0.01 | 1.60 | 0.68 | 0.22 | 1.27 |
| 54967 | 0 | 127768 | PQDPRSPGPAPRHRR                     | 2.70 | 0.01 | 0.78 | 0.44 | 1.13 | 0.85 |
| 54968 | 0 | 48981  | PQDVKFP                             | 2.03 | 0.01 | 1.72 | 0.44 | 1.59 | 0.28 |
| 54969 | 0 | 176377 | PQDVKFPGGG                          | 2.31 | 0.01 | 1.72 | 0.44 | 0.85 | 2.97 |

|       |   |        |                 |      |      |      |      |      |      |
|-------|---|--------|-----------------|------|------|------|------|------|------|
| 54970 | 0 | 48984  | PQDVKFPGGGQI    | 2.48 | 0.01 | 2.68 | 0.44 | 0.85 | 0.28 |
| 54971 | 0 | 354884 | PQEEEEVDVGPRHVD | 2.70 | 0.01 | 1.61 | 0.44 | 0.85 | 1.28 |
| 54972 | 0 | 354891 | PQEEQEDVGPRHVD  | 2.72 | 0.01 | 1.61 | 0.44 | 0.85 | 1.28 |
| 54973 | 0 | 124588 | PQEETLQAFDSHYDY | 2.72 | 0.01 | 0.78 | 0.44 | 1.13 | 0.28 |
| 54974 | 0 | 124588 | PQEETLQAFDSHYDY | 2.72 | 0.01 | 0.78 | 1.20 | 0.22 | 0.28 |
| 54975 | 0 | 124588 | PQEETLQAFDSHYDY | 2.72 | 0.01 | 0.78 | 1.20 | 0.22 | 0.28 |
| 54976 | 0 | 124588 | PQEETLQAFDSHYDY | 2.72 | 0.01 | 0.78 | 1.20 | 0.22 | 2.02 |
| 54977 | 0 | 124588 | PQEETLQAFDSHYDY | 2.72 | 0.01 | 0.78 | 1.20 | 0.22 | 1.34 |
| 54978 | 0 | 124588 | PQEETLQAFDSHYDY | 2.72 | 0.01 | 0.78 | 2.13 | 0.22 | 1.27 |
| 54979 | 0 | 124588 | PQEETLQAFDSHYDY | 2.72 | 0.01 | 0.78 | 2.00 | 0.22 | 0.85 |
| 54980 | 0 | 124588 | PQEETLQAFDSHYDY | 2.72 | 0.01 | 0.78 | 0.44 | 1.13 | 1.27 |
| 54981 | 0 | 48987  | PQEFSSKTYQ      | 2.30 | 0.01 | 2.72 | 0.44 | 1.23 | 0.85 |
| 54982 | 0 | 48988  | PQEFSSKYLQ      | 2.30 | 0.01 | 2.72 | 0.44 | 1.23 | 0.85 |
| 54983 | 0 | 48990  | PQEIPQPQ        | 2.18 | 0.01 | 2.40 | 2.43 | 0.22 | 0.28 |
| 54984 | 0 | 96748  | PQEIRDVL        | 2.26 | 0.01 | 2.39 | 0.44 | 0.85 | 0.28 |
| 54985 | 0 | 191683 | PQEITGIMKDFE    | 2.45 | 0.01 | 2.76 | 1.20 | 0.22 | 0.28 |
| 54986 | 0 | 48992  | PQEQTQHGSPYGR   | 2.67 | 0.01 | 2.14 | 1.20 | 0.22 | 0.28 |
| 54987 | 0 | 48992  | PQEQTQHGSPYGR   | 2.67 | 0.01 | 2.14 | 1.20 | 0.22 | 0.28 |
| 54988 | 0 | 48993  | PQEQTQHGSPYGR   | 2.80 | 0.01 | 2.14 | 1.15 | 0.22 | 1.27 |
| 54989 | 0 | 48993  | PQEQTQHGSPYGR   | 2.80 | 0.01 | 2.14 | 1.15 | 0.22 | 0.28 |
| 54990 | 0 | 48993  | PQEQTQHGSPYGR   | 2.80 | 0.01 | 2.14 | 1.20 | 0.22 | 0.28 |
| 54991 | 0 | 149411 | PQFEEIRNLA      | 2.28 | 0.01 | 1.86 | 0.44 | 1.93 | 0.85 |
| 54992 | 0 | 149411 | PQFEEIRNLA      | 2.28 | 0.01 | 1.86 | 2.74 | 0.22 | 0.85 |
| 54993 | 0 | 48996  | PQFKPQ          | 1.92 | 0.01 | 2.76 | 0.68 | 0.22 | 1.27 |
| 54994 | 0 | 48996  | PQFKPQ          | 1.92 | 0.01 | 2.76 | 0.68 | 0.22 | 0.85 |
| 54995 | 0 | 48996  | PQFKPQ          | 1.92 | 0.01 | 2.76 | 0.68 | 0.22 | 0.85 |
| 54996 | 0 | 236280 | PQFLRWFEWAEFC   | 2.69 | 0.01 | 1.66 | 0.44 | 0.85 | 1.28 |
| 54997 | 0 | 187181 | PQFSLWKR        | 2.10 | 0.01 | 4.93 | 0.68 | 0.22 | 2.49 |
| 54998 | 0 | 190513 | PQFVDFAPDSTGEY  | 2.65 | 0.01 | 3.97 | 2.00 | 1.41 | 0.28 |
| 54999 | 0 | 111640 | PQFYISTCRAGRD   | 2.49 | 0.01 | 3.33 | 0.44 | 1.23 | 0.85 |
| 55000 | 0 | 48999  | PQGG            | 1.55 | 0.01 | 2.52 | 1.15 | 0.22 | 0.85 |
| 55001 | 0 | 49000  | PQGGG           | 1.73 | 0.01 | 2.52 | 1.15 | 0.22 | 0.85 |
| 55002 | 0 | 134192 | PQGPADAWRAAV    | 2.49 | 0.01 | 0.78 | 0.68 | 0.22 | 0.28 |
| 55003 | 0 | 49005  | PQGPAPQGPAPQG   | 2.98 | 0.01 | 3.65 | 1.12 | 0.22 | 0.85 |
| 55004 | 0 | 49005  | PQGPAPQGPAPQG   | 2.98 | 0.01 | 3.65 | 0.68 | 0.22 | 0.28 |
| 55005 | 0 | 49006  | PQGQGKVT        | 2.14 | 0.01 | 2.24 | 1.20 | 0.22 | 0.28 |
| 55006 | 0 | 49006  | PQGQGKVT        | 2.14 | 0.01 | 2.24 | 1.20 | 0.22 | 0.85 |
| 55007 | 0 | 49006  | PQGQGKVT        | 2.14 | 0.01 | 2.24 | 0.68 | 0.22 | 0.28 |
| 55008 | 0 | 49006  | PQGQGKVT        | 2.14 | 0.01 | 2.24 | 0.68 | 0.22 | 0.28 |
| 55009 | 0 | 49006  | PQGQGKVT        | 2.14 | 0.01 | 2.24 | 0.68 | 0.22 | 1.75 |

|       |   |        |                                       |      |      |      |      |      |      |
|-------|---|--------|---------------------------------------|------|------|------|------|------|------|
| 55010 | 0 | 49008  | PQGQLTAYHVSTAPTGS<br>WFSAP            | 3.05 | 0.01 | 2.43 | 0.44 | 1.59 | 0.28 |
| 55011 | 0 | 145427 | PQGR                                  | 1.57 | 0.01 | 0.78 | 0.44 | 1.13 | 0.28 |
| 55012 | 0 | 77969  | PQIKVYANIAPTNVHVA<br>GEF              | 2.94 | 0.01 | 3.14 | 0.68 | 0.22 | 0.28 |
| 55013 | 0 | 49015  | PQIPPNWHIP                            | 2.36 | 0.01 | 3.36 | 1.20 | 0.22 | 0.28 |
| 55014 | 0 | 49015  | PQIPPNWHIP                            | 2.36 | 0.01 | 3.36 | 1.20 | 0.22 | 0.28 |
| 55015 | 0 | 49015  | PQIPPNWHIP                            | 2.36 | 0.01 | 3.36 | 1.20 | 0.22 | 1.34 |
| 55016 | 0 | 49015  | PQIPPNWHIP                            | 2.36 | 0.01 | 2.40 | 1.20 | 0.22 | 1.34 |
| 55017 | 0 | 49015  | PQIPPNWHIP                            | 2.36 | 0.01 | 2.40 | 1.20 | 0.22 | 1.34 |
| 55018 | 0 | 49016  | PQIPPPYVEPT                           | 2.43 | 0.01 | 2.04 | 0.44 | 1.59 | 1.27 |
| 55019 | 0 | 187182 | PQITLWQRR                             | 2.21 | 0.01 | 2.54 | 0.68 | 0.22 | 2.49 |
| 55020 | 0 | 187182 | PQITLWQRR                             | 2.21 | 0.01 | 2.54 | 0.68 | 0.22 | 1.34 |
| 55021 | 0 | 187182 | PQITLWQRR                             | 2.21 | 0.01 | 2.54 | 0.68 | 0.22 | 1.34 |
| 55022 | 0 | 132014 | PQIVPEPM                              | 2.15 | 0.01 | 0.78 | 1.12 | 0.22 | 0.85 |
| 55023 | 0 | 132014 | PQIVPEPM                              | 2.15 | 0.01 | 0.78 | 0.44 | 1.13 | 1.27 |
| 55024 | 0 | 132014 | PQIVPEPM                              | 2.15 | 0.01 | 0.78 | 0.44 | 1.13 | 0.85 |
| 55025 | 0 | 132014 | PQIVPEPM                              | 2.15 | 0.01 | 0.78 | 0.44 | 1.13 | 0.85 |
| 55026 | 0 | 187473 | PQIYRWIREWGRDYVS                      | 2.73 | 0.01 | 2.59 | 0.44 | 1.74 | 0.28 |
| 55027 | 0 | 355009 | PQKAAAPKKTAAPKK                       | 2.73 | 0.01 | 1.61 | 0.44 | 0.85 | 1.28 |
| 55028 | 0 | 115634 | PQKAQRPQDEN                           | 2.42 | 0.01 | 0.90 | 1.12 | 0.22 | 2.56 |
| 55029 | 0 | 115634 | PQKAQRPQDEN                           | 2.42 | 0.01 | 0.90 | 1.12 | 0.22 | 2.56 |
| 55030 | 0 | 115634 | PQKAQRPQDEN                           | 2.42 | 0.01 | 0.90 | 2.61 | 0.22 | 2.56 |
| 55031 | 0 | 114142 | PQKSQRSQDEN                           | 2.41 | 0.01 | 2.95 | 2.04 | 0.22 | 1.57 |
| 55032 | 0 | 114142 | PQKSQRSQDEN                           | 2.41 | 0.01 | 2.95 | 1.12 | 0.22 | 2.56 |
| 55033 | 0 | 114142 | PQKSQRSQDEN                           | 2.41 | 0.01 | 2.95 | 1.12 | 0.22 | 2.56 |
| 55034 | 0 | 114142 | PQKSQRSQDEN                           | 2.41 | 0.01 | 2.95 | 2.61 | 0.22 | 2.56 |
| 55035 | 0 | 113703 | PQKSQRSQDENG                          | 2.48 | 0.01 | 0.90 | 2.49 | 0.22 | 1.57 |
| 55036 | 0 | 113703 | PQKSQRSQDENG                          | 2.48 | 0.01 | 0.90 | 3.38 | 0.22 | 1.27 |
| 55037 | 0 | 113703 | PQKSQRSQDENG                          | 2.48 | 0.01 | 0.90 | 3.38 | 0.22 | 1.27 |
| 55038 | 0 | 49022  | PQLEIVPNSA                            | 2.30 | 0.01 | 1.60 | 0.44 | 1.23 | 0.28 |
| 55039 | 0 | 49023  | PQLGPR                                | 1.91 | 0.01 | 2.53 | 0.44 | 1.59 | 0.28 |
| 55040 | 0 | 49023  | PQLGPR                                | 1.91 | 0.01 | 2.53 | 0.44 | 1.59 | 0.28 |
| 55041 | 0 | 49024  | PQLGPRR                               | 2.02 | 4.45 | 2.70 | 0.44 | 0.85 | 0.28 |
| 55042 | 0 | 131006 | PQLGSRRSTTPSLTFQN<br>ASWFPAGGPCARSNRG | 3.46 | 0.01 | 0.90 | 0.44 | 1.93 | 0.85 |
| 55043 | 0 | 181425 | PQLLQYMYVPPGAPK                       | 2.69 | 0.01 | 2.82 | 1.15 | 0.22 | 0.28 |
| 55044 | 0 | 148726 | PQLPFPQQSE                            | 2.35 | 0.01 | 1.86 | 0.44 | 1.23 | 0.85 |
| 55045 | 0 | 141983 | PQLPYPQPQ                             | 2.28 | 4.63 | 1.86 | 3.55 | 0.22 | 1.27 |
| 55046 | 0 | 141983 | PQLPYPQPQ                             | 2.28 | 4.63 | 1.86 | 3.55 | 0.22 | 1.27 |
| 55047 | 0 | 149414 | PQLPYPQPQP                            | 2.38 | 0.01 | 1.86 | 2.74 | 0.22 | 0.85 |
| 55048 | 0 | 149414 | PQLPYPQPQP                            | 2.38 | 0.01 | 1.86 | 2.74 | 0.22 | 0.85 |
| 55049 | 0 | 131007 | PQLQPQNPSQQQPQE<br>QVPLVQQ            | 3.09 | 0.01 | 1.86 | 0.44 | 1.74 | 0.28 |

|       |   |        |                                       |      |      |      |      |      |      |
|-------|---|--------|---------------------------------------|------|------|------|------|------|------|
| 55050 | 0 | 131007 | PQLQPQNPSQQQPQE<br>QVPLVQQ            | 3.09 | 0.01 | 1.86 | 0.44 | 1.74 | 0.28 |
| 55051 | 0 | 131007 | PQLQPQNPSQQQPQE<br>QVPLVQQ            | 3.09 | 0.01 | 1.86 | 0.44 | 1.74 | 0.28 |
| 55052 | 0 | 131007 | PQLQPQNPSQQQPQE<br>QVPLVQQ            | 3.09 | 0.01 | 1.86 | 1.12 | 0.22 | 0.28 |
| 55053 | 0 | 131007 | PQLQPQNPSQQQPQE<br>QVPLVQQ            | 3.09 | 0.01 | 1.86 | 1.12 | 0.22 | 0.28 |
| 55054 | 0 | 131007 | PQLQPQNPSQQQPQE<br>QVPLVQQ            | 3.09 | 0.01 | 1.86 | 1.12 | 0.22 | 0.28 |
| 55055 | 0 | 131007 | PQLQPQNPSQQQPQE<br>QVPLVQQ            | 3.09 | 0.01 | 1.86 | 1.12 | 0.22 | 0.28 |
| 55056 | 0 | 131007 | PQLQPQNPSQQQPQE<br>QVPLVQQ            | 3.09 | 0.01 | 1.86 | 1.12 | 0.22 | 0.28 |
| 55057 | 0 | 131007 | PQLQPQNPSQQQPQE<br>QVPLVQQ            | 3.09 | 0.01 | 1.86 | 1.12 | 0.22 | 0.28 |
| 55058 | 0 | 131007 | PQLQPQNPSQQQPQE<br>QVPLVQQ            | 3.09 | 0.01 | 1.86 | 1.12 | 0.22 | 0.28 |
| 55059 | 0 | 131007 | PQLQPQNPSQQQPQE<br>QVPLVQQ            | 3.09 | 0.01 | 1.86 | 1.12 | 0.22 | 0.28 |
| 55060 | 0 | 131007 | PQLQPQNPSQQQPQE<br>QVPLVQQ            | 3.09 | 0.01 | 1.86 | 1.12 | 0.22 | 1.27 |
| 55061 | 0 | 131007 | PQLQPQNPSQQQPQE<br>QVPLVQQ            | 3.09 | 0.01 | 1.86 | 1.12 | 0.22 | 1.27 |
| 55062 | 0 | 131007 | PQLQPQNPSQQQPQE<br>QVPLVQQ            | 3.09 | 0.01 | 1.86 | 1.12 | 0.22 | 1.27 |
| 55063 | 0 | 131007 | PQLQPQNPSQQQPQE<br>QVPLVQQ            | 3.09 | 0.01 | 1.86 | 1.12 | 0.22 | 1.27 |
| 55064 | 0 | 131007 | PQLQPQNPSQQQPQE<br>QVPLVQQ            | 3.09 | 0.01 | 1.86 | 1.12 | 0.22 | 1.27 |
| 55065 | 0 | 131007 | PQLQPQNPSQQQPQE<br>QVPLVQQ            | 3.09 | 0.01 | 1.86 | 1.12 | 0.22 | 1.27 |
| 55066 | 0 | 131007 | PQLQPQNPSQQQPQE<br>QVPLVQQ            | 3.09 | 0.01 | 1.86 | 1.12 | 0.22 | 1.27 |
| 55067 | 0 | 131007 | PQLQPQNPSQQQPQE<br>QVPLVQQ            | 3.09 | 0.01 | 1.86 | 1.12 | 0.22 | 1.27 |
| 55068 | 0 | 131007 | PQLQPQNPSQQQPQE<br>QVPLVQQ            | 3.09 | 0.01 | 1.86 | 1.12 | 0.22 | 1.27 |
| 55069 | 0 | 131007 | PQLQPQNPSQQQPQE<br>QVPLVQQ            | 3.09 | 0.01 | 1.86 | 1.12 | 0.22 | 1.27 |
| 55070 | 0 | 49029  | PQLTDVLN                              | 2.12 | 0.01 | 2.66 | 2.61 | 0.22 | 0.28 |
| 55071 | 0 | 172736 | PQLYRPIETPCHFI                        | 2.66 | 0.01 | 0.78 | 0.44 | 1.41 | 0.28 |
| 55072 | 0 | 78247  | PQNAFDHL                              | 2.10 | 0.01 | 0.90 | 0.44 | 0.85 | 1.39 |
| 55073 | 0 | 157762 | PQNFAVVKRARD                          | 2.46 | 0.01 | 3.65 | 0.44 | 1.23 | 0.85 |
| 55074 | 0 | 49034  | PQNGAAEDKKTEYLLEQ<br>IKIPSWDRNNIPDENE | 3.42 | 0.01 | 2.22 | 0.44 | 0.85 | 0.28 |

|       |   |        |                                       |      |      |      |      |      |      |
|-------|---|--------|---------------------------------------|------|------|------|------|------|------|
| 55075 | 0 | 49034  | PQNGAAEDKKTEYLLEQ<br>IKIPSWDRNNIPDENE | 3.42 | 0.01 | 2.22 | 0.44 | 0.85 | 1.34 |
| 55076 | 0 | 489713 | PQNGTLTQQSAQPNA                       | 2.72 | 0.01 | 2.69 | 3.05 | 0.85 | 1.28 |
| 55077 | 0 | 115899 | PQNIPPLTQT                            | 2.35 | 0.01 | 1.60 | 0.44 | 1.23 | 0.85 |
| 55078 | 0 | 115899 | PQNIPPLTQT                            | 2.35 | 0.01 | 1.60 | 0.44 | 1.23 | 0.85 |
| 55079 | 0 | 164513 | PQNSPEPKRSRNNYQV<br>RCALHTYDNSMDVFE   | 3.34 | 0.01 | 3.81 | 0.68 | 0.22 | 0.85 |
| 55080 | 0 | 164513 | PQNSPEPKRSRNNYQV<br>RCALHTYDNSMDVFE   | 3.34 | 0.01 | 3.81 | 0.68 | 0.22 | 0.28 |
| 55081 | 0 | 164513 | PQNSPEPKRSRNNYQV<br>RCALHTYDNSMDVFE   | 3.34 | 0.01 | 3.81 | 0.68 | 0.22 | 1.48 |
| 55082 | 0 | 237880 | PQNTSDSQKECTDGNK<br>ENCG              | 2.98 | 0.01 | 2.96 | 0.44 | 1.74 | 0.28 |
| 55083 | 0 | 98938  | PQP                                   | 1.37 | 0.01 | 2.14 | 0.44 | 0.85 | 0.28 |
| 55084 | 0 | 98938  | PQP                                   | 1.37 | 0.01 | 2.14 | 0.68 | 0.22 | 0.28 |
| 55085 | 0 | 238871 | PQPEAPAPQPPAGR                        | 2.67 | 0.01 | 2.14 | 2.65 | 0.22 | 0.85 |
| 55086 | 0 | 49046  | PQPELPYP                              | 2.17 | 0.01 | 1.86 | 0.44 | 1.93 | 0.28 |
| 55087 | 0 | 462152 | PQPEQFPQPPEQFPQP<br>EQFPQP            | 3.21 | 0.01 | 0.90 | 0.44 | 1.93 | 2.35 |
| 55088 | 0 | 462152 | PQPEQFPQPPEQFPQP<br>EQFPQP            | 3.21 | 0.01 | 0.90 | 0.44 | 1.41 | 2.35 |
| 55089 | 0 | 462152 | PQPEQFPQPPEQFPQP<br>EQFPQP            | 3.21 | 0.01 | 0.90 | 0.44 | 1.13 | 2.35 |
| 55090 | 0 | 462152 | PQPEQFPQPPEQFPQP<br>EQFPQP            | 3.21 | 0.01 | 0.90 | 0.44 | 1.93 | 0.28 |
| 55091 | 0 | 49055  | PQPGLR                                | 1.91 | 0.01 | 3.27 | 0.44 | 1.59 | 0.28 |
| 55092 | 0 | 98939  | PQPGP                                 | 1.77 | 0.01 | 2.14 | 0.68 | 0.22 | 0.28 |
| 55093 | 0 | 98940  | PQPGPQPPQPQPQP                        | 2.76 | 0.01 | 2.14 | 0.68 | 0.22 | 0.28 |
| 55094 | 0 | 49057  | PQPGPQPPQPQPQPE<br>APAPQPPAG          | 3.24 | 0.01 | 2.14 | 1.20 | 0.22 | 0.28 |
| 55095 | 0 | 49057  | PQPGPQPPQPQPQPE<br>APAPQPPAG          | 3.24 | 0.01 | 2.14 | 1.20 | 0.22 | 0.28 |
| 55096 | 0 | 49057  | PQPGPQPPQPQPQPE<br>APAPQPPAG          | 3.24 | 0.01 | 2.14 | 0.44 | 0.85 | 0.28 |
| 55097 | 0 | 49057  | PQPGPQPPQPQPQPE<br>APAPQPPAG          | 3.24 | 0.01 | 2.14 | 0.44 | 0.22 | 0.28 |
| 55098 | 0 | 49057  | PQPGPQPPQPQPQPE<br>APAPQPPAG          | 3.24 | 0.01 | 2.14 | 0.44 | 0.22 | 0.28 |
| 55099 | 0 | 49057  | PQPGPQPPQPQPQPE<br>APAPQPPAG          | 3.24 | 0.01 | 2.14 | 0.44 | 0.85 | 0.28 |

|       |   |        |                              |      |      |      |      |      |      |
|-------|---|--------|------------------------------|------|------|------|------|------|------|
| 55100 | 0 | 523760 | PQPGYQPPPPMEHALP             | 2.75 | 0.01 | 2.78 | 2.49 | 0.85 | 0.28 |
| 55101 | 0 | 523760 | PQPGYQPPPPMEHALP             | 2.75 | 0.01 | 2.78 | 2.49 | 1.74 | 0.28 |
| 55102 | 0 | 148729 | PQPQLPFPQQ                   | 2.36 | 0.01 | 1.86 | 0.44 | 1.23 | 0.85 |
| 55103 | 0 | 228622 | PQPQLPFPQQPQQPFP<br>QPQQPQQP | 3.20 | 0.01 | 4.93 | 1.15 | 0.22 | 0.28 |
| 55104 | 0 | 137260 | PQPQLPYPQ                    | 2.28 | 4.15 | 1.86 | 0.44 | 1.23 | 0.28 |
| 55105 | 0 | 137260 | PQPQLPYPQ                    | 2.28 | 4.15 | 1.86 | 0.44 | 2.39 | 0.28 |
| 55106 | 0 | 137260 | PQPQLPYPQ                    | 2.28 | 4.15 | 1.86 | 0.44 | 1.23 | 0.28 |
| 55107 | 0 | 137260 | PQPQLPYPQ                    | 2.28 | 4.15 | 1.86 | 0.44 | 2.39 | 0.28 |
| 55108 | 0 | 462153 | PQPQLPYPQP                   | 2.38 | 4.15 | 1.86 | 0.44 | 1.93 | 0.28 |
| 55109 | 0 | 173955 | PQPQQFPQQQIPQ                | 2.62 | 0.01 | 1.86 | 0.44 | 1.23 | 0.85 |
| 55110 | 0 | 190896 | PQPQQIPQQQ                   | 2.35 | 0.01 | 1.86 | 0.44 | 1.23 | 0.28 |
| 55111 | 0 | 49068  | PQPQQPFCQQ                   | 2.36 | 0.01 | 1.86 | 0.68 | 0.22 | 0.85 |
| 55112 | 0 | 49068  | PQPQQPFCQQ                   | 2.36 | 0.01 | 1.86 | 0.68 | 0.22 | 0.28 |
| 55113 | 0 | 228623 | PQPQQPQLPFPQQPFP<br>QPQQPQQP | 3.20 | 0.01 | 4.93 | 1.15 | 0.22 | 0.28 |
| 55114 | 0 | 431726 | PQPQQPQQSFPQQQ               | 2.67 | 0.01 | 1.86 | 0.44 | 1.23 | 0.85 |
| 55115 | 0 | 482935 | PQPQQPQQSFPQQQRP<br>FI       | 2.91 | 0.01 | 1.86 | 1.20 | 0.22 | 0.28 |
| 55116 | 0 | 482935 | PQPQQPQQSFPQQQRP<br>FI       | 2.91 | 0.01 | 1.86 | 0.44 | 1.93 | 0.28 |
| 55117 | 0 | 49070  | PQPQQQFPQP                   | 2.37 | 0.01 | 1.86 | 0.68 | 0.22 | 0.85 |
| 55118 | 0 | 49070  | PQPQQQFPQP                   | 2.37 | 0.01 | 1.86 | 0.68 | 0.22 | 0.28 |
| 55119 | 0 | 49071  | PQPQQQLPLQ                   | 2.37 | 0.01 | 2.83 | 0.68 | 0.22 | 0.85 |
| 55120 | 0 | 49071  | PQPQQQLPLQ                   | 2.37 | 0.01 | 2.83 | 0.68 | 0.22 | 0.28 |
| 55121 | 0 | 49072  | PQPQWTPE                     | 2.17 | 0.01 | 2.40 | 2.43 | 0.22 | 0.28 |
| 55122 | 0 | 523762 | PQQCGLRAPQRCDLEVE<br>SGGRDRY | 3.13 | 0.01 | 2.16 | 0.44 | 1.23 | 1.39 |
| 55123 | 0 | 523762 | PQQCGLRAPQRCDLEVE<br>SGGRDRY | 3.13 | 0.01 | 2.16 | 0.44 | 1.23 | 0.85 |
| 55124 | 0 | 190897 | PQQIPQQQQI                   | 2.37 | 0.01 | 1.86 | 0.44 | 1.23 | 0.28 |
| 55125 | 0 | 173956 | PQQIPQQQQIPQQ                | 2.60 | 0.01 | 1.86 | 0.44 | 1.23 | 0.85 |
| 55126 | 0 | 123628 | PQQLMPGQ                     | 2.17 | 0.01 | 0.78 | 1.20 | 0.22 | 0.28 |
| 55127 | 0 | 147200 | PQQLPQ                       | 1.94 | 0.01 | 1.86 | 0.44 | 1.93 | 0.85 |
| 55128 | 0 | 147200 | PQQLPQ                       | 1.94 | 0.01 | 1.86 | 0.44 | 1.93 | 0.85 |
| 55129 | 0 | 149415 | PQQLPQFEEI                   | 2.35 | 0.01 | 1.86 | 0.44 | 1.93 | 0.85 |
| 55130 | 0 | 149415 | PQQLPQFEEI                   | 2.35 | 0.01 | 1.86 | 2.74 | 0.22 | 0.85 |
| 55131 | 0 | 148734 | PQQLPQQQIP                   | 2.37 | 0.01 | 1.86 | 0.44 | 1.23 | 0.85 |
| 55132 | 0 | 173958 | PQQLPQQQQIPQQ                | 2.60 | 0.01 | 1.86 | 0.44 | 1.23 | 0.85 |
| 55133 | 0 | 104183 | PQQMRNN                      | 2.00 | 0.01 | 0.90 | 1.15 | 0.22 | 1.39 |
| 55134 | 0 | 49078  | PQQPF                        | 1.78 | 0.01 | 1.86 | 0.44 | 1.93 | 0.28 |
| 55135 | 0 | 49079  | PQQPFCQQPQ                   | 2.38 | 0.01 | 1.86 | 0.68 | 0.22 | 0.85 |
| 55136 | 0 | 49079  | PQQPFCQQPQ                   | 2.38 | 0.01 | 1.86 | 0.68 | 0.22 | 0.28 |
| 55137 | 0 | 192579 | PQQPFP                       | 1.92 | 4.93 | 1.86 | 0.44 | 1.23 | 0.85 |
| 55138 | 0 | 49081  | PQQPFPLQPQ                   | 2.38 | 0.01 | 2.83 | 0.68 | 0.22 | 0.85 |

|       |   |        |                           |      |      |      |      |      |      |
|-------|---|--------|---------------------------|------|------|------|------|------|------|
| 55139 | 0 | 49081  | PQQPFPLQPQ                | 2.38 | 0.01 | 2.83 | 0.68 | 0.22 | 0.28 |
| 55140 | 0 | 49081  | PQQPFPLQPQ                | 2.38 | 0.01 | 2.83 | 0.68 | 0.22 | 0.28 |
| 55141 | 0 | 49081  | PQQPFPLQPQ                | 2.38 | 0.01 | 2.83 | 0.68 | 0.22 | 0.85 |
| 55142 | 0 | 462154 | PQQPFPQ                   | 2.07 | 4.93 | 1.86 | 0.44 | 1.93 | 0.28 |
| 55143 | 0 | 148736 | PQQPFPQLQQ                | 2.36 | 0.01 | 1.86 | 0.44 | 1.23 | 0.85 |
| 55144 | 0 | 49082  | PQQPFPQPQQ                | 2.36 | 0.01 | 2.83 | 0.68 | 0.22 | 0.28 |
| 55145 | 0 | 49082  | PQQPFPQPQQ                | 2.36 | 0.01 | 2.83 | 0.68 | 0.22 | 0.85 |
| 55146 | 0 | 49082  | PQQPFPQPQQ                | 2.36 | 0.01 | 1.86 | 0.44 | 1.23 | 0.85 |
| 55147 | 0 | 49082  | PQQPFPQPQQ                | 2.36 | 0.01 | 1.86 | 0.44 | 1.23 | 0.85 |
| 55148 | 0 | 49082  | PQQPFPQPQQ                | 2.36 | 0.01 | 1.86 | 0.44 | 1.23 | 0.28 |
| 55149 | 0 | 49085  | PQQPFPQQPE                | 2.37 | 0.01 | 2.83 | 0.68 | 0.22 | 0.28 |
| 55150 | 0 | 49085  | PQQPFPQQPE                | 2.37 | 0.01 | 2.83 | 0.68 | 0.22 | 0.85 |
| 55151 | 0 | 49086  | PQQPFPQQPG                | 2.37 | 0.01 | 2.83 | 0.68 | 0.22 | 0.28 |
| 55152 | 0 | 49086  | PQQPFPQQPG                | 2.37 | 0.01 | 2.83 | 0.68 | 0.22 | 0.85 |
| 55153 | 0 | 49087  | PQQPFPQQPQ                | 2.38 | 0.01 | 2.83 | 0.68 | 0.22 | 0.85 |
| 55154 | 0 | 49087  | PQQPFPQQPQ                | 2.38 | 0.01 | 2.83 | 0.68 | 0.22 | 0.28 |
| 55155 | 0 | 49087  | PQQPFPQQPQ                | 2.38 | 0.01 | 1.86 | 0.44 | 1.23 | 0.85 |
| 55156 | 0 | 148737 | PQQPFPQTQQ                | 2.36 | 0.01 | 1.86 | 0.44 | 1.23 | 0.85 |
| 55157 | 0 | 148737 | PQQPFPQTQQ                | 2.36 | 0.01 | 1.86 | 0.44 | 1.23 | 0.85 |
| 55158 | 0 | 148737 | PQQPFPQTQQ                | 2.36 | 0.01 | 1.86 | 0.44 | 1.23 | 0.28 |
| 55159 | 0 | 49092  | PQQPFSQQPQ                | 2.38 | 0.01 | 2.83 | 0.68 | 0.22 | 0.28 |
| 55160 | 0 | 49092  | PQQPFSQQPQ                | 2.38 | 0.01 | 2.83 | 0.68 | 0.22 | 0.85 |
| 55161 | 0 | 113709 | PQQPGQGQQPGQLQ            | 2.69 | 0.01 | 1.86 | 0.44 | 1.23 | 0.85 |
| 55162 | 0 | 431727 | PQQPISQQQAQQ              | 2.52 | 0.01 | 1.86 | 0.44 | 1.23 | 0.85 |
| 55163 | 0 | 149416 | PQQPISQQQQ                | 2.35 | 0.01 | 1.86 | 0.44 | 1.93 | 0.85 |
| 55164 | 0 | 149416 | PQQPISQQQQ                | 2.35 | 0.01 | 1.86 | 2.74 | 0.22 | 0.85 |
| 55165 | 0 | 149416 | PQQPISQQQQ                | 2.35 | 0.01 | 1.86 | 2.74 | 0.22 | 0.85 |
| 55166 | 0 | 98348  | PQQPISQQQQQQQQQ<br>QQQQQQ | 3.05 | 0.01 | 1.86 | 0.44 | 1.93 | 0.28 |
| 55167 | 0 | 98348  | PQQPISQQQQQQQQQ<br>QQQQQQ | 3.05 | 0.01 | 1.86 | 0.44 | 1.93 | 0.28 |
| 55168 | 0 | 190898 | PQQPQQFPQQ                | 2.37 | 0.01 | 1.86 | 0.44 | 1.23 | 0.28 |
| 55169 | 0 | 462155 | PQQPQQPFP                 | 2.28 | 4.63 | 1.86 | 0.44 | 1.93 | 0.28 |
| 55170 | 0 | 49097  | PQQPQQPFPQ                | 2.38 | 0.01 | 1.86 | 0.68 | 0.22 | 0.85 |
| 55171 | 0 | 49097  | PQQPQQPFPQ                | 2.38 | 0.01 | 1.86 | 0.68 | 0.22 | 0.28 |
| 55172 | 0 | 49097  | PQQPQQPFPQ                | 2.38 | 0.01 | 1.86 | 0.68 | 0.22 | 0.28 |
| 55173 | 0 | 49097  | PQQPQQPFPQ                | 2.38 | 0.01 | 1.86 | 0.44 | 1.23 | 0.85 |
| 55174 | 0 | 49097  | PQQPQQPFPQ                | 2.38 | 0.01 | 1.86 | 0.44 | 1.23 | 0.85 |
| 55175 | 0 | 49099  | PQQPQQSFPQ                | 2.38 | 0.01 | 2.83 | 0.68 | 0.22 | 0.85 |
| 55176 | 0 | 49099  | PQQPQQSFPQ                | 2.38 | 0.01 | 2.83 | 0.68 | 0.22 | 0.28 |
| 55177 | 0 | 431728 | PQQPQQSFPQQQ              | 2.53 | 0.01 | 1.86 | 0.44 | 1.23 | 0.85 |
| 55178 | 0 | 148742 | PQQPYQPQP                 | 2.38 | 0.01 | 1.86 | 0.44 | 1.93 | 0.85 |
| 55179 | 0 | 148742 | PQQPYQPQP                 | 2.38 | 0.01 | 1.86 | 2.74 | 0.22 | 0.85 |
| 55180 | 0 | 148742 | PQQPYQPQP                 | 2.38 | 0.01 | 1.86 | 0.68 | 0.22 | 0.28 |
| 55181 | 0 | 49106  | PQQQFPQPQQ                | 2.35 | 0.01 | 1.86 | 0.68 | 0.22 | 0.28 |
| 55182 | 0 | 49106  | PQQQFPQPQQ                | 2.35 | 0.01 | 1.86 | 0.68 | 0.22 | 0.85 |

|       |   |        |                          |      |      |      |      |      |      |
|-------|---|--------|--------------------------|------|------|------|------|------|------|
| 55183 | 0 | 173959 | PQQQFPQPQQIPQ            | 2.62 | 0.01 | 1.86 | 0.44 | 1.23 | 0.85 |
| 55184 | 0 | 190899 | PQQQFPQQQF               | 2.37 | 0.01 | 1.86 | 0.44 | 1.23 | 0.28 |
| 55185 | 0 | 190899 | PQQQFPQQQF               | 2.37 | 0.01 | 1.86 | 0.68 | 0.22 | 0.28 |
| 55186 | 0 | 173960 | PQQQFPQQQFPQ             | 2.61 | 0.01 | 1.86 | 0.44 | 1.23 | 0.85 |
| 55187 | 0 | 173960 | PQQQFPQQQFPQ             | 2.61 | 0.01 | 1.86 | 0.44 | 1.23 | 0.85 |
| 55188 | 0 | 49107  | PQQQFPQTQQ               | 2.35 | 0.01 | 1.86 | 0.68 | 0.22 | 0.85 |
| 55189 | 0 | 49107  | PQQQFPQTQQ               | 2.35 | 0.01 | 1.86 | 0.68 | 0.22 | 0.28 |
| 55190 | 0 | 226081 | PQQQIPQ                  | 2.07 | 0.01 | 1.86 | 2.66 | 0.22 | 1.27 |
| 55191 | 0 | 173961 | PQQQIPQQHPIQ             | 2.62 | 0.01 | 1.86 | 0.44 | 1.23 | 0.85 |
| 55192 | 0 | 173962 | PQQQIPQQHQIPQ            | 2.62 | 0.01 | 1.86 | 0.44 | 1.23 | 0.85 |
| 55193 | 0 | 226082 | PQQQLPQ                  | 2.07 | 0.01 | 1.86 | 2.66 | 0.22 | 1.27 |
| 55194 | 0 | 462156 | PQQQLQFQQ                | 2.25 | 4.93 | 1.86 | 0.44 | 1.93 | 0.28 |
| 55195 | 0 | 49108  | PQQQFPQPQ                | 2.37 | 0.01 | 1.86 | 0.68 | 0.22 | 0.85 |
| 55196 | 0 | 49108  | PQQQFPQPQ                | 2.37 | 0.01 | 1.86 | 0.68 | 0.22 | 0.28 |
| 55197 | 0 | 173963 | PQQQQFLQQQQIP            | 2.60 | 0.01 | 1.86 | 0.44 | 1.23 | 0.85 |
| 55198 | 0 | 173964 | PQQQQFPQPQQFP            | 2.61 | 0.01 | 1.86 | 0.44 | 1.23 | 0.85 |
| 55199 | 0 | 190900 | PQQQQFPQQQ               | 2.36 | 0.01 | 1.86 | 0.44 | 1.23 | 0.28 |
| 55200 | 0 | 190900 | PQQQQFPQQQ               | 2.36 | 0.01 | 1.86 | 0.68 | 0.22 | 0.28 |
| 55201 | 0 | 190900 | PQQQQFPQQQ               | 2.36 | 0.01 | 1.86 | 0.44 | 1.23 | 0.28 |
| 55202 | 0 | 173966 | PQQQQLPQQQFPQ            | 2.61 | 0.01 | 1.86 | 0.44 | 1.23 | 0.85 |
| 55203 | 0 | 114521 | PQQQSQQGQRQGQG<br>Q      | 2.74 | 0.01 | 3.48 | 0.44 | 1.23 | 0.85 |
| 55204 | 0 | 149417 | PQQQYPSGQG               | 2.37 | 0.01 | 1.86 | 0.44 | 1.93 | 0.85 |
| 55205 | 0 | 149417 | PQQQYPSGQG               | 2.37 | 0.01 | 1.86 | 2.74 | 0.22 | 0.85 |
| 55206 | 0 | 149417 | PQQQYPSGQG               | 2.37 | 0.01 | 1.86 | 2.74 | 0.22 | 0.85 |
| 55207 | 0 | 49110  | PQQSFPQPQH               | 2.37 | 0.01 | 2.83 | 0.68 | 0.22 | 0.28 |
| 55208 | 0 | 49110  | PQQSFPQPQH               | 2.37 | 0.01 | 2.83 | 0.68 | 0.22 | 0.85 |
| 55209 | 0 | 49112  | PQQSFPQQQQ               | 2.35 | 0.01 | 1.86 | 0.68 | 0.22 | 0.28 |
| 55210 | 0 | 49112  | PQQSFPQQQQ               | 2.35 | 0.01 | 1.86 | 0.68 | 0.22 | 0.85 |
| 55211 | 0 | 148748 | PQQSPEQQQF               | 2.36 | 0.01 | 1.86 | 0.44 | 1.23 | 0.85 |
| 55212 | 0 | 173967 | PQQSPEQQQFPQQ            | 2.60 | 0.01 | 1.86 | 0.44 | 1.23 | 0.85 |
| 55213 | 0 | 115900 | PQRDMPIQAF               | 2.32 | 0.01 | 1.60 | 0.44 | 1.23 | 0.85 |
| 55214 | 0 | 115900 | PQRDMPIQAF               | 2.32 | 0.01 | 1.60 | 0.44 | 1.23 | 0.85 |
| 55215 | 0 | 115424 | PQRDMPIQAFLLYQEPV<br>LGP | 2.93 | 0.01 | 1.60 | 0.44 | 1.23 | 1.28 |
| 55216 | 0 | 49116  | PQRKTKRNTNRR             | 2.50 | 0.01 | 2.68 | 0.44 | 0.85 | 0.28 |
| 55217 | 0 | 49116  | PQRKTKRNTNRR             | 2.50 | 0.01 | 2.68 | 0.44 | 0.85 | 0.28 |
| 55218 | 0 | 49116  | PQRKTKRNTNRR             | 2.50 | 0.01 | 2.68 | 2.74 | 0.22 | 0.28 |
| 55219 | 0 | 49118  | PQRPFAQQPE               | 2.35 | 0.01 | 2.83 | 0.68 | 0.22 | 0.28 |
| 55220 | 0 | 49118  | PQRPFAQQPE               | 2.35 | 0.01 | 2.83 | 0.68 | 0.22 | 0.85 |
| 55221 | 0 | 49119  | PQRPQQPFPQ               | 2.38 | 0.01 | 2.83 | 0.68 | 0.22 | 0.28 |
| 55222 | 0 | 49119  | PQRPQQPFPQ               | 2.38 | 0.01 | 2.83 | 0.68 | 0.22 | 0.85 |
| 55223 | 0 | 49119  | PQRPQQPFPQ               | 2.38 | 0.01 | 2.83 | 0.68 | 0.22 | 0.28 |
| 55224 | 0 | 49119  | PQRPQQPFPQ               | 2.38 | 0.01 | 2.83 | 0.68 | 0.22 | 0.85 |
| 55225 | 0 | 504025 | PQRRGGDNHGRGRGR<br>GRGRG | 3.01 | 3.24 | 2.48 | 0.44 | 1.74 | 0.28 |



|       |   |        |                            |      |      |      |      |      |      |
|-------|---|--------|----------------------------|------|------|------|------|------|------|
| 55226 | 0 | 504026 | PQRRGGDNHGRGRGR<br>GRGRG   | 3.01 | 3.67 | 2.48 | 0.44 | 1.74 | 0.28 |
| 55227 | 0 | 504027 | PQRRGGDNHGRGRGR<br>GRGRG   | 3.01 | 3.85 | 2.48 | 0.44 | 1.74 | 0.28 |
| 55228 | 0 | 504028 | PQRRGGDNHGRGRGR<br>GRGRG   | 3.01 | 4.23 | 2.48 | 0.44 | 1.74 | 0.28 |
| 55229 | 0 | 504029 | PQRRGGDNHGRGRGR<br>GRGRG   | 3.01 | 4.03 | 2.48 | 0.44 | 1.74 | 0.28 |
| 55230 | 0 | 504030 | PQRRGGDNHGRGRGR<br>GRGRG   | 3.01 | 3.97 | 2.48 | 0.44 | 1.74 | 0.28 |
| 55231 | 0 | 504025 | PQRRGGDNHGRGRGR<br>GRGRG   | 3.01 | 3.24 | 2.48 | 0.44 | 1.74 | 0.28 |
| 55232 | 0 | 504026 | PQRRGGDNHGRGRGR<br>GRGRG   | 3.01 | 3.67 | 2.48 | 0.44 | 1.74 | 0.28 |
| 55233 | 0 | 504027 | PQRRGGDNHGRGRGR<br>GRGRG   | 3.01 | 3.85 | 2.48 | 0.44 | 1.74 | 0.28 |
| 55234 | 0 | 504028 | PQRRGGDNHGRGRGR<br>GRGRG   | 3.01 | 4.23 | 2.48 | 0.44 | 1.74 | 0.28 |
| 55235 | 0 | 504029 | PQRRGGDNHGRGRGR<br>GRGRG   | 3.01 | 4.03 | 2.48 | 0.44 | 1.74 | 0.28 |
| 55236 | 0 | 118976 | PQRRGGDNHGRGRGR<br>GRGRG   | 3.01 | 0.01 | 2.43 | 0.44 | 1.13 | 1.27 |
| 55237 | 0 | 118976 | PQRRGGDNHGRGRGR<br>GRGRG   | 3.01 | 0.01 | 2.43 | 0.44 | 1.41 | 1.27 |
| 55238 | 0 | 49120  | PQSAVDSAARIHDFRYS<br>QLA   | 2.94 | 0.01 | 2.75 | 0.44 | 0.85 | 0.85 |
| 55239 | 0 | 49121  | PQSAVDSAARIHDFRYS<br>QLAKL | 3.03 | 0.01 | 2.75 | 1.12 | 0.22 | 0.85 |
| 55240 | 0 | 49121  | PQSAVDSAARIHDFRYS<br>QLAKL | 3.03 | 0.01 | 2.75 | 1.12 | 0.22 | 0.28 |
| 55241 | 0 | 49121  | PQSAVDSAARIHDFRYS<br>QLAKL | 3.03 | 0.01 | 2.75 | 1.12 | 0.22 | 1.34 |
| 55242 | 0 | 523766 | PQSLVGITGRTFIRMAR<br>PT    | 2.94 | 0.01 | 2.40 | 0.44 | 1.59 | 1.28 |
| 55243 | 0 | 78248  | PQSNLAKT                   | 2.10 | 0.01 | 0.90 | 0.44 | 0.85 | 1.39 |
| 55244 | 0 | 49127  | PQSNQRSAPRITFGG            | 2.67 | 0.01 | 3.30 | 0.68 | 0.22 | 0.28 |
| 55245 | 0 | 108580 | PQSPGSSFP                  | 2.27 | 0.01 | 0.90 | 0.44 | 1.13 | 1.39 |
| 55246 | 0 | 108580 | PQSPGSSFP                  | 2.27 | 0.01 | 0.90 | 0.44 | 1.13 | 1.39 |
| 55247 | 0 | 115901 | PQSVLSLSQS                 | 2.36 | 0.01 | 1.60 | 0.44 | 1.23 | 0.85 |
| 55248 | 0 | 115901 | PQSVLSLSQS                 | 2.36 | 0.01 | 1.60 | 0.44 | 1.23 | 0.85 |
| 55249 | 0 | 227458 | PQSVREAFNNLNSTT            | 2.64 | 0.01 | 2.97 | 0.44 | 1.59 | 0.28 |
| 55250 | 0 | 227458 | PQSVREAFNNLNSTT            | 2.64 | 0.01 | 2.97 | 0.44 | 0.85 | 0.28 |
| 55251 | 0 | 117059 | PQTDGSTRPRGL               | 2.50 | 0.01 | 0.90 | 1.15 | 0.22 | 0.28 |
| 55252 | 0 | 117059 | PQTDGSTRPRGL               | 2.50 | 0.01 | 0.90 | 0.44 | 0.85 | 0.28 |
| 55253 | 0 | 117059 | PQTDGSTRPRGL               | 2.50 | 0.01 | 0.90 | 0.44 | 0.85 | 1.39 |
| 55254 | 0 | 117059 | PQTDGSTRPRGL               | 2.50 | 0.01 | 0.90 | 0.44 | 0.85 | 1.39 |
| 55255 | 0 | 49133  | PQTNSSTK                   | 2.13 | 0.01 | 3.53 | 2.61 | 0.22 | 0.28 |

|       |   |        |                                  |      |      |      |      |      |      |
|-------|---|--------|----------------------------------|------|------|------|------|------|------|
| 55256 | 0 | 118560 | PQTPLHLQVPPCQVGIF<br>LD          | 2.91 | 0.01 | 0.78 | 0.44 | 1.13 | 0.28 |
| 55257 | 0 | 118560 | PQTPLHLQVPPCQVGIF<br>LD          | 2.91 | 0.01 | 0.78 | 0.44 | 1.13 | 0.28 |
| 55258 | 0 | 77970  | PQTQQFIP                         | 2.16 | 0.01 | 3.72 | 0.68 | 0.22 | 1.34 |
| 55259 | 0 | 77970  | PQTQQFIP                         | 2.16 | 0.01 | 3.72 | 0.68 | 0.22 | 0.28 |
| 55260 | 0 | 355323 | PQTTIKQPGGIKTPS                  | 2.73 | 0.01 | 1.61 | 0.44 | 0.85 | 1.28 |
| 55261 | 0 | 49137  | PQTTKPKEVPTT                     | 2.51 | 0.01 | 2.38 | 0.68 | 0.22 | 0.28 |
| 55262 | 0 | 49137  | PQTTKPKEVPTT                     | 2.51 | 0.01 | 2.38 | 0.44 | 1.59 | 0.28 |
| 55263 | 0 | 49137  | PQTTKPKEVPTT                     | 2.51 | 0.01 | 2.38 | 0.44 | 1.74 | 0.28 |
| 55264 | 0 | 49140  | PQTWWEKNAKDIWEG                  | 2.66 | 0.01 | 1.66 | 0.44 | 0.85 | 0.28 |
| 55265 | 0 | 49141  | PQVENAPQAEVTP                    | 2.60 | 0.01 | 2.67 | 2.22 | 0.22 | 0.85 |
| 55266 | 0 | 49142  | PQVENAPQAQNAP                    | 2.61 | 0.01 | 2.67 | 2.22 | 0.22 | 0.85 |
| 55267 | 0 | 107566 | PQVKFNW                          | 1.99 | 0.01 | 0.78 | 1.15 | 0.22 | 0.28 |
| 55268 | 0 | 107566 | PQVKFNW                          | 1.99 | 0.01 | 0.78 | 0.44 | 1.13 | 0.28 |
| 55269 | 0 | 49146  | PQVMFDFA                         | 2.12 | 0.01 | 3.78 | 0.68 | 0.22 | 0.85 |
| 55270 | 0 | 49147  | PQVNLVDT                         | 2.12 | 0.01 | 3.20 | 2.22 | 0.85 | 0.28 |
| 55271 | 0 | 131592 | PQVNNPKEWLQVDFQK<br>TMKV         | 2.94 | 0.01 | 0.78 | 0.44 | 2.35 | 0.28 |
| 55272 | 0 | 49150  | PQVVMG                           | 1.89 | 0.01 | 1.96 | 0.44 | 0.85 | 0.28 |
| 55273 | 0 | 108074 | PQVYTLP                          | 2.03 | 0.01 | 0.78 | 1.15 | 0.22 | 0.28 |
| 55274 | 0 | 108074 | PQVYTLP                          | 2.03 | 0.01 | 0.78 | 1.20 | 0.22 | 0.28 |
| 55275 | 0 | 108074 | PQVYTLP                          | 2.03 | 0.01 | 0.78 | 1.20 | 0.22 | 0.28 |
| 55276 | 0 | 108074 | PQVYTLP                          | 2.03 | 0.01 | 0.78 | 1.20 | 0.22 | 0.28 |
| 55277 | 0 | 108074 | PQVYTLP                          | 2.03 | 0.01 | 0.78 | 1.15 | 0.22 | 0.28 |
| 55278 | 0 | 108074 | PQVYTLP                          | 2.03 | 0.01 | 0.78 | 0.44 | 1.13 | 1.27 |
| 55279 | 0 | 108074 | PQVYTLP                          | 2.03 | 0.01 | 0.78 | 0.44 | 1.13 | 0.28 |
| 55280 | 0 | 225832 | PQVYVLAPHPDELSK                  | 2.67 | 0.01 | 3.28 | 0.44 | 0.22 | 0.85 |
| 55281 | 0 | 49151  | PQWKLQPG                         | 2.15 | 0.01 | 2.40 | 2.43 | 0.22 | 0.28 |
| 55282 | 0 | 49153  | PQWTPEED                         | 2.14 | 0.01 | 2.40 | 2.43 | 0.22 | 0.28 |
| 55283 | 0 | 49154  | PQWYKELNPRETVPTLQ<br>VDG         | 2.94 | 0.01 | 2.30 | 0.68 | 0.22 | 0.85 |
| 55284 | 0 | 167067 | PQYIAVHVVPDQLMAF<br>G            | 2.77 | 0.01 | 0.78 | 0.44 | 1.41 | 0.28 |
| 55285 | 0 | 167067 | PQYIAVHVVPDQLMAF<br>G            | 2.77 | 0.01 | 0.78 | 0.44 | 1.41 | 0.28 |
| 55286 | 0 | 95681  | PQYLKTVYQH                       | 2.31 | 0.01 | 1.60 | 0.44 | 1.23 | 0.85 |
| 55287 | 0 | 95682  | PQYLQYLYQG                       | 2.36 | 0.01 | 1.60 | 0.44 | 1.23 | 0.85 |
| 55288 | 0 | 114522 | PQYSNAPELIYIERG                  | 2.67 | 0.01 | 3.48 | 0.44 | 1.23 | 0.85 |
| 55289 | 0 | 98941  | PQYSQPQQPISQ<br>PRACQRPQLWQTIQTQ | 2.54 | 0.01 | 1.86 | 0.44 | 1.93 | 1.27 |
| 55290 | 0 | 127769 | GHFQLQLPPGKMCSAD<br>YADLLQ       | 3.56 | 0.01 | 0.78 | 1.12 | 0.22 | 0.85 |
| 55291 | 0 | 227460 | PRAGRRGPCVFTGDL                  | 2.68 | 0.01 | 2.48 | 0.44 | 1.59 | 0.28 |
| 55292 | 0 | 127770 | PRAPPARASYRRFRT                  | 2.73 | 0.01 | 0.78 | 0.44 | 1.13 | 0.85 |

|       |   |        |                               |      |      |      |      |      |      |
|-------|---|--------|-------------------------------|------|------|------|------|------|------|
| 55293 | 0 | 125520 | PRDLTEAFLAEMEKAKG<br>NPE      | 2.95 | 0.01 | 0.78 | 0.44 | 1.13 | 0.28 |
| 55294 | 0 | 108075 | PREPQVY                       | 2.03 | 0.01 | 0.78 | 1.15 | 0.22 | 0.28 |
| 55295 | 0 | 108075 | PREPQVY                       | 2.03 | 0.01 | 0.78 | 1.20 | 0.22 | 0.28 |
| 55296 | 0 | 108075 | PREPQVY                       | 2.03 | 0.01 | 0.78 | 1.20 | 0.22 | 0.28 |
| 55297 | 0 | 108075 | PREPQVY                       | 2.03 | 0.01 | 0.78 | 1.20 | 0.22 | 0.28 |
| 55298 | 0 | 108075 | PREPQVY                       | 2.03 | 0.01 | 0.78 | 1.15 | 0.22 | 1.27 |
| 55299 | 0 | 108075 | PREPQVY                       | 2.03 | 0.01 | 0.78 | 0.44 | 1.13 | 1.27 |
| 55300 | 0 | 108075 | PREPQVY                       | 2.03 | 0.01 | 0.78 | 0.44 | 1.13 | 0.28 |
| 55301 | 0 | 108075 | PREPQVY                       | 2.03 | 0.01 | 0.78 | 0.44 | 1.13 | 0.28 |
| 55302 | 0 | 106008 | PREQARQLKNNNPFK               | 2.69 | 0.01 | 2.16 | 0.44 | 1.23 | 0.85 |
| 55303 | 0 | 138217 | PREQQFN                       | 2.01 | 0.01 | 0.90 | 0.44 | 1.13 | 0.28 |
| 55304 | 0 | 107567 | PREQQYN                       | 2.01 | 0.01 | 0.78 | 0.44 | 1.13 | 0.28 |
| 55305 | 0 | 122525 | PRFLRLDLAQEGLK                | 2.68 | 0.01 | 0.78 | 0.44 | 1.13 | 0.85 |
| 55306 | 0 | 462414 | PRFRQE                        | 1.90 | 0.01 | 0.78 | 1.12 | 0.22 | 1.28 |
| 55307 | 0 | 49186  | PRGAETHL                      | 2.10 | 0.01 | 3.55 | 0.68 | 0.22 | 0.28 |
| 55308 | 0 | 182258 | PRGCAEGVAAAALTPE              | 2.69 | 0.01 | 0.78 | 0.44 | 1.13 | 0.85 |
| 55309 | 0 | 189139 | PRGEDTFKGKLVHPF               | 2.74 | 0.01 | 2.92 | 0.68 | 0.22 | 0.28 |
| 55310 | 0 | 189139 | PRGEDTFKGKLVHPF               | 2.74 | 0.01 | 2.92 | 0.68 | 0.22 | 0.28 |
| 55311 | 0 | 189139 | PRGEDTFKGKLVHPF               | 2.74 | 0.01 | 2.92 | 0.68 | 0.22 | 0.28 |
| 55312 | 0 | 189139 | PRGEDTFKGKLVHPF               | 2.74 | 0.01 | 2.92 | 0.68 | 0.22 | 1.48 |
| 55313 | 0 | 189139 | PRGEDTFKGKLVHPF               | 2.74 | 0.01 | 2.92 | 0.68 | 0.22 | 0.28 |
| 55314 | 0 | 189139 | PRGEDTFKGKLVHPF               | 2.74 | 0.01 | 2.92 | 0.68 | 0.22 | 0.28 |
| 55315 | 0 | 109728 | PRGEPGTP                      | 2.17 | 0.01 | 1.60 | 2.55 | 2.60 | 0.28 |
| 55316 | 0 | 109729 | PRGLPGER                      | 2.17 | 0.01 | 1.60 | 2.55 | 2.60 | 0.28 |
| 55317 | 0 | 49191  | PRGRRQPI                      | 2.16 | 0.01 | 1.72 | 0.68 | 0.22 | 1.48 |
| 55318 | 0 | 49193  | PRGRRQPIPKARRPE               | 2.71 | 0.01 | 2.41 | 0.44 | 1.59 | 0.28 |
| 55319 | 0 | 104184 | PRGRRQPIPKARRPEGR<br>TWA      | 2.98 | 0.01 | 1.72 | 0.44 | 0.85 | 0.28 |
| 55320 | 0 | 49195  | PRGSRPSWGPTDPRR               | 2.72 | 0.01 | 1.72 | 0.44 | 0.85 | 0.28 |
| 55321 | 0 | 78766  | PRGSRPSWGPTDPRRR              | 2.77 | 0.01 | 1.72 | 0.44 | 1.59 | 0.28 |
| 55322 | 0 | 78766  | PRGSRPSWGPTDPRRR              | 2.77 | 0.01 | 1.72 | 0.44 | 0.85 | 0.28 |
| 55323 | 0 | 49196  | PRGSRPSWGPTDPRRRS<br>RNLGKVID | 3.17 | 0.01 | 1.72 | 0.44 | 0.85 | 0.28 |
| 55324 | 0 | 49196  | PRGSRPSWGPTDPRRRS<br>RNLGKVID | 3.17 | 0.01 | 1.72 | 0.44 | 0.85 | 0.28 |
| 55325 | 0 | 106009 | PRGVTHDQ                      | 2.10 | 0.01 | 3.05 | 1.20 | 0.22 | 0.28 |
| 55326 | 0 | 122875 | PRGWNPGLYNGFPL                | 2.72 | 0.01 | 0.78 | 1.20 | 0.22 | 0.28 |

|       |   |        |                            |      |      |      |      |      |      |
|-------|---|--------|----------------------------|------|------|------|------|------|------|
| 55327 | 0 | 122875 | PRGWNPGFLYNGFPL            | 2.72 | 0.01 | 0.78 | 1.20 | 0.22 | 1.27 |
| 55328 | 0 | 225833 | PRGYFKIRSGKSSIMRSD<br>A    | 2.91 | 0.01 | 3.97 | 1.12 | 0.22 | 1.28 |
| 55329 | 0 | 103496 | PRGYPGQV                   | 2.15 | 0.01 | 0.78 | 0.68 | 0.22 | 2.49 |
| 55330 | 0 | 103496 | PRGYPGQV                   | 2.15 | 0.01 | 0.78 | 0.68 | 0.22 | 1.66 |
| 55331 | 0 | 103496 | PRGYPGQV                   | 2.15 | 0.01 | 0.78 | 0.68 | 0.22 | 1.66 |
| 55332 | 0 | 103496 | PRGYPGQV                   | 2.15 | 0.01 | 0.78 | 0.68 | 0.22 | 1.66 |
| 55333 | 0 | 103496 | PRGYPGQV                   | 2.15 | 0.01 | 0.78 | 0.68 | 0.22 | 1.66 |
| 55334 | 0 | 103496 | PRGYPGQV                   | 2.15 | 0.01 | 0.78 | 0.68 | 0.22 | 2.02 |
| 55335 | 0 | 103496 | PRGYPGQV                   | 2.15 | 0.01 | 0.78 | 0.68 | 0.22 | 1.27 |
| 55336 | 0 | 127771 | PRHGSQGPWKPSA              | 2.71 | 0.01 | 4.23 | 0.44 | 1.13 | 0.85 |
| 55337 | 0 | 78488  | PRHQAPT                    | 2.03 | 0.01 | 0.90 | 0.68 | 0.22 | 0.28 |
| 55338 | 0 | 127772 | PRHRHPQDPRSPGA             | 2.72 | 0.01 | 0.78 | 0.44 | 1.13 | 0.85 |
| 55339 | 0 | 127773 | PRHRRPPRPDPRAPP            | 2.74 | 0.01 | 0.78 | 0.44 | 1.13 | 0.85 |
| 55340 | 0 | 423461 | PRHTFDMDDMMEMPAT           | 2.70 | 0.01 | 2.51 | 0.44 | 1.59 | 1.28 |
| 55341 | 0 | 135736 | PRIGGQRELKKITE             | 2.61 | 0.01 | 2.69 | 0.68 | 0.22 | 0.28 |
| 55342 | 0 | 135736 | PRIGGQRELKKITE             | 2.61 | 0.01 | 2.69 | 0.68 | 0.22 | 0.28 |
| 55343 | 0 | 135736 | PRIGGQRELKKITE             | 2.61 | 0.01 | 2.69 | 0.68 | 2.25 | 1.75 |
| 55344 | 0 | 135736 | PRIGGQRELKKITE             | 2.61 | 0.01 | 2.69 | 0.68 | 0.22 | 1.75 |
| 55345 | 0 | 135736 | PRIGGQRELKKITE             | 2.61 | 0.01 | 2.69 | 0.68 | 0.22 | 1.75 |
| 55346 | 0 | 126844 | PRIGVAIGDQILDLS            | 2.68 | 0.01 | 1.75 | 0.68 | 0.22 | 0.28 |
| 55347 | 0 | 123629 | PRIMHHMP                   | 2.16 | 0.01 | 0.78 | 1.20 | 0.22 | 0.28 |
| 55348 | 0 | 49201  | PRIPPKPCPICVGPHWKS<br>DCPT | 3.05 | 0.01 | 2.04 | 0.44 | 0.85 | 0.28 |
| 55349 | 0 | 49201  | PRIPPKPCPICVGPHWKS<br>DCPT | 3.05 | 0.01 | 2.04 | 0.44 | 0.85 | 0.28 |
| 55350 | 0 | 49201  | PRIPPKPCPICVGPHWKS<br>DCPT | 3.05 | 0.01 | 2.04 | 0.44 | 1.59 | 0.28 |
| 55351 | 0 | 49201  | PRIPPKPCPICVGPHWKS<br>DCPT | 3.05 | 0.01 | 2.04 | 0.44 | 1.59 | 0.28 |
| 55352 | 0 | 240132 | PRKAFQLVELAKEAMY           | 2.73 | 0.01 | 2.70 | 0.68 | 0.22 | 0.28 |
| 55353 | 0 | 240132 | PRKAFQLVELAKEAMY           | 2.73 | 0.01 | 2.70 | 0.68 | 0.22 | 0.28 |
| 55354 | 0 | 240132 | PRKAFQLVELAKEAMY           | 2.73 | 0.01 | 2.70 | 0.68 | 0.22 | 0.28 |
| 55355 | 0 | 240132 | PRKAFQLVELAKEAMY           | 2.73 | 0.01 | 2.70 | 0.68 | 0.22 | 1.48 |
| 55356 | 0 | 240132 | PRKAFQLVELAKEAMY           | 2.73 | 0.01 | 2.70 | 0.68 | 0.22 | 1.48 |
| 55357 | 0 | 240132 | PRKAFQLVELAKEAMY           | 2.73 | 0.01 | 2.70 | 0.68 | 0.22 | 1.48 |
| 55358 | 0 | 240132 | PRKAFQLVELAKEAMY           | 2.73 | 0.01 | 2.70 | 0.68 | 0.22 | 1.48 |

|       |   |        |                  |      |      |      |      |      |      |
|-------|---|--------|------------------|------|------|------|------|------|------|
| 55359 | 0 | 240132 | PRKAFQLVELAKEAMY | 2.73 | 0.01 | 2.70 | 0.68 | 0.22 | 1.48 |
| 55360 | 0 | 240132 | PRKAFQLVELAKEAMY | 2.73 | 0.01 | 2.70 | 0.68 | 0.22 | 1.48 |
| 55361 | 0 | 240132 | PRKAFQLVELAKEAMY | 2.73 | 0.01 | 2.70 | 0.68 | 0.22 | 1.48 |
| 55362 | 0 | 240132 | PRKAFQLVELAKEAMY | 2.73 | 0.01 | 2.70 | 0.68 | 0.22 | 1.48 |
| 55363 | 0 | 240132 | PRKAFQLVELAKEAMY | 2.73 | 0.01 | 2.70 | 0.68 | 0.22 | 1.48 |
| 55364 | 0 | 240132 | PRKAFQLVELAKEAMY | 2.73 | 0.01 | 2.70 | 0.68 | 0.22 | 1.48 |
| 55365 | 0 | 240132 | PRKAFQLVELAKEAMY | 2.73 | 0.01 | 2.70 | 0.68 | 0.22 | 1.48 |
| 55366 | 0 | 240132 | PRKAFQLVELAKEAMY | 2.73 | 0.01 | 2.70 | 0.68 | 0.22 | 1.48 |
| 55367 | 0 | 240132 | PRKAFQLVELAKEAMY | 2.73 | 0.01 | 2.70 | 0.68 | 0.22 | 1.48 |
| 55368 | 0 | 240132 | PRKAFQLVELAKEAMY | 2.73 | 0.01 | 2.70 | 0.68 | 0.22 | 1.48 |
| 55369 | 0 | 240132 | PRKAFQLVELAKEAMY | 2.73 | 0.01 | 2.70 | 0.68 | 0.22 | 1.48 |
| 55370 | 0 | 240132 | PRKAFQLVELAKEAMY | 2.73 | 0.01 | 2.70 | 0.68 | 0.22 | 1.48 |
| 55371 | 0 | 240132 | PRKAFQLVELAKEAMY | 2.73 | 0.01 | 2.70 | 0.68 | 0.22 | 1.48 |
| 55372 | 0 | 240132 | PRKAFQLVELAKEAMY | 2.73 | 0.01 | 2.70 | 0.68 | 0.22 | 1.48 |
| 55373 | 0 | 240132 | PRKAFQLVELAKEAMY | 2.73 | 0.01 | 2.70 | 0.68 | 0.22 | 1.48 |
| 55374 | 0 | 240132 | PRKAFQLVELAKEAMY | 2.73 | 0.01 | 2.70 | 0.68 | 0.22 | 1.48 |
| 55375 | 0 | 240132 | PRKAFQLVELAKEAMY | 2.73 | 0.01 | 2.70 | 0.68 | 0.22 | 1.48 |
| 55376 | 0 | 240132 | PRKAFQLVELAKEAMY | 2.73 | 0.01 | 2.70 | 0.68 | 0.22 | 1.48 |
| 55377 | 0 | 240132 | PRKAFQLVELAKEAMY | 2.73 | 0.01 | 2.70 | 0.68 | 0.22 | 1.48 |
| 55378 | 0 | 240132 | PRKAFQLVELAKEAMY | 2.73 | 0.01 | 2.70 | 0.68 | 0.22 | 1.48 |
| 55379 | 0 | 178315 | PRKLNERLSLARA    | 2.57 | 0.01 | 3.93 | 0.68 | 0.22 | 0.85 |
| 55380 | 0 | 110967 | PRKLPQLCTELQTTI  | 2.70 | 0.01 | 1.86 | 0.44 | 2.82 | 0.28 |
| 55381 | 0 | 139569 | PRKQCSKEDGGGWWY  | 2.63 | 3.67 | 0.78 | 0.44 | 1.13 | 0.28 |
| 55382 | 0 | 153439 | PRKQCSKEDGGGWWY  | 2.63 | 0.01 | 0.78 | 2.79 | 1.13 | 1.28 |

|       |   |        |                               |      |      |      |      |      |      |
|-------|---|--------|-------------------------------|------|------|------|------|------|------|
| 55383 | 0 | 153439 | PRKQCSKEDGGGWWY               | 2.63 | 0.01 | 0.78 | 2.79 | 1.13 | 1.28 |
| 55384 | 0 | 153439 | PRKQCSKEDGGGWWY               | 2.63 | 0.01 | 0.78 | 2.79 | 1.13 | 1.28 |
| 55385 | 0 | 153439 | PRKQCSKEDGGGWWY               | 2.63 | 0.01 | 0.78 | 1.81 | 1.41 | 1.28 |
| 55386 | 0 | 153439 | PRKQCSKEDGGGWWY               | 2.63 | 0.01 | 0.78 | 1.81 | 1.41 | 1.28 |
| 55387 | 0 | 153439 | PRKQCSKEDGGGWWY               | 2.63 | 0.01 | 0.78 | 1.81 | 1.41 | 1.28 |
| 55388 | 0 | 49210  | PRLGVRAT                      | 2.12 | 0.01 | 1.72 | 0.44 | 0.85 | 0.28 |
| 55389 | 0 | 49210  | PRLGVRAT                      | 2.12 | 0.01 | 1.72 | 0.44 | 1.59 | 0.28 |
| 55390 | 0 | 49213  | PRLKHEQSV                     | 2.18 | 0.01 | 0.90 | 2.02 | 0.22 | 0.28 |
| 55391 | 0 | 153440 | PRLKNPPKKPKDDY                | 2.66 | 0.01 | 3.00 | 0.68 | 0.22 | 0.28 |
| 55392 | 0 | 49214  | PRLLYDEL                      | 2.14 | 0.01 | 3.65 | 0.44 | 0.85 | 0.28 |
| 55393 | 0 | 49214  | PRLLYDEL                      | 2.14 | 0.01 | 3.65 | 0.44 | 0.85 | 0.28 |
| 55394 | 0 | 49217  | PRLRLVDA                      | 2.14 | 0.01 | 2.85 | 0.44 | 0.22 | 0.28 |
| 55395 | 0 | 49223  | PRNNNRTRVHGDKAT               | 2.66 | 0.01 | 3.97 | 4.23 | 0.22 | 0.28 |
| 55396 | 0 | 49223  | PRNNNRTRVHGDKAT               | 2.66 | 0.01 | 3.97 | 2.37 | 0.22 | 0.28 |
| 55397 | 0 | 93578  | PRNVGGDLPSSIPDKE<br>QAIS      | 2.98 | 0.01 | 2.58 | 0.68 | 0.22 | 0.85 |
| 55398 | 0 | 93578  | PRNVGGDLPSSIPDKE<br>QAIS      | 2.98 | 0.01 | 2.58 | 0.68 | 0.22 | 1.34 |
| 55399 | 0 | 93578  | PRNVGGDLPSSIPDKE<br>QAIS      | 2.98 | 0.01 | 2.58 | 0.68 | 0.22 | 1.75 |
| 55400 | 0 | 93578  | PRNVGGDLPSSIPDKE<br>QAIS      | 2.98 | 0.01 | 2.58 | 0.68 | 0.22 | 0.28 |
| 55401 | 0 | 423462 | PRNVMTHEEAESRLY               | 2.64 | 0.01 | 2.51 | 0.44 | 2.35 | 1.28 |
| 55402 | 0 | 79626  | PRNVRVTGCYQCGTPAL<br>VEG      | 2.95 | 0.01 | 2.85 | 0.44 | 1.59 | 0.28 |
| 55403 | 0 | 113116 | PRPEVRPPPAKQRPPQK<br>SKQQPRSS | 3.20 | 0.01 | 0.78 | 4.15 | 0.22 | 0.28 |
| 55404 | 0 | 423463 | PRPPPLGRGRGAGGP               | 2.74 | 0.01 | 2.51 | 0.44 | 2.35 | 1.28 |
| 55405 | 0 | 148751 | PRPQQSPEQQ                    | 2.35 | 0.01 | 1.86 | 0.44 | 1.23 | 0.85 |
| 55406 | 0 | 135971 | PRPRDRSGLAPK                  | 2.50 | 0.01 | 0.78 | 0.44 | 1.13 | 0.28 |
| 55407 | 0 | 141985 | PRQQKKCSKAEECTCNN<br>GSCS     | 2.99 | 0.01 | 3.13 | 0.68 | 0.22 | 0.28 |
| 55408 | 0 | 98942  | PRREEGGRWG                    | 2.36 | 0.01 | 2.16 | 0.44 | 1.23 | 0.85 |
| 55409 | 0 | 523787 | PRREEGGRWGPAEPRE<br>REREEDWR  | 3.19 | 0.01 | 2.16 | 1.12 | 0.22 | 1.39 |
| 55410 | 0 | 523787 | PRREEGGRWGPAEPRE<br>REREEDWR  | 3.19 | 0.01 | 2.16 | 0.44 | 1.23 | 1.39 |
| 55411 | 0 | 49240  | PRRGPRLG                      | 2.18 | 0.01 | 1.72 | 0.44 | 0.85 | 0.28 |
| 55412 | 0 | 104187 | PRRGPRLGVRATRKTS<br>RSQ       | 2.96 | 0.01 | 1.72 | 0.44 | 0.85 | 0.28 |

|       |   |        |                                                      |      |      |      |      |      |      |
|-------|---|--------|------------------------------------------------------|------|------|------|------|------|------|
| 55413 | 0 | 49243  | PRRGPRLGVRATRKTS<br>RSQPRGRRQPIPKARRP<br>EGRTWAQPGYP | 3.77 | 0.01 | 1.72 | 0.44 | 0.85 | 0.28 |
| 55414 | 0 | 49243  | PRRGPRLGVRATRKTS<br>RSQPRGRRQPIPKARRP<br>EGRTWAQPGYP | 3.77 | 0.01 | 1.72 | 0.68 | 0.22 | 0.28 |
| 55415 | 0 | 138545 | PRRKAGI                                              | 2.01 | 0.01 | 0.78 | 0.44 | 1.13 | 0.28 |
| 55416 | 0 | 132548 | PRRLGGGLGG                                           | 2.34 | 0.01 | 0.78 | 0.44 | 1.13 | 0.28 |
| 55417 | 0 | 159053 | PRRLTATTEKLEIGWK                                     | 2.73 | 0.01 | 3.36 | 0.68 | 0.22 | 0.28 |
| 55418 | 0 | 135972 | PRRPGGLGSGG                                          | 2.52 | 0.01 | 0.78 | 0.44 | 1.41 | 0.28 |
| 55419 | 0 | 121717 | PRRPVDVGNYWNIPS                                      | 2.68 | 0.01 | 0.90 | 0.68 | 0.22 | 1.39 |
| 55420 | 0 | 121717 | PRRPVDVGNYWNIPS                                      | 2.68 | 0.01 | 0.90 | 0.68 | 0.22 | 0.28 |
| 55421 | 0 | 121717 | PRRPVDVGNYWNIPS                                      | 2.68 | 0.01 | 0.90 | 0.68 | 0.22 | 0.28 |
| 55422 | 0 | 49246  | PRRRAGRC                                             | 2.15 | 0.01 | 2.04 | 0.44 | 0.85 | 0.28 |
| 55423 | 0 | 49246  | PRRRAGRC                                             | 2.15 | 0.01 | 2.04 | 0.44 | 0.85 | 0.28 |
| 55424 | 0 | 49246  | PRRRAGRC                                             | 2.15 | 0.01 | 2.04 | 0.44 | 0.85 | 0.28 |
| 55425 | 0 | 108581 | PRRRCSPSEAAVRFVGF<br>PDKKHKLY                        | 3.14 | 0.01 | 1.60 | 0.68 | 0.22 | 0.28 |
| 55426 | 0 | 181764 | PRRRHICDQNLFLD                                       | 2.64 | 0.01 | 3.26 | 2.37 | 0.22 | 1.28 |
| 55427 | 0 | 108076 | PRRRQLCFSRIVRGCNLR<br>NLKEFKEEILKG                   | 3.35 | 0.01 | 0.90 | 1.12 | 0.22 | 0.28 |
| 55428 | 0 | 49248  | PRRRRSQSPRRR                                         | 2.52 | 0.01 | 2.08 | 0.44 | 1.59 | 0.85 |
| 55429 | 0 | 49248  | PRRRRSQSPRRR                                         | 2.52 | 0.01 | 2.08 | 0.68 | 0.22 | 0.85 |
| 55430 | 0 | 134761 | PRRRSPSPTPTPGPS                                      | 2.74 | 0.01 | 0.78 | 3.05 | 1.13 | 0.85 |
| 55431 | 0 | 134761 | PRRRSPSPTPTPGPS                                      | 2.74 | 0.01 | 0.78 | 0.44 | 1.13 | 0.28 |
| 55432 | 0 | 133288 | PRRRSRKPEA                                           | 2.35 | 0.01 | 0.78 | 0.44 | 1.13 | 0.28 |
| 55433 | 0 | 117345 | PRRRSRKPEAPRRRS                                      | 2.73 | 0.01 | 0.78 | 0.44 | 1.13 | 0.28 |
| 55434 | 0 | 117345 | PRRRSRKPEAPRRRS                                      | 2.73 | 0.01 | 0.78 | 0.44 | 1.13 | 0.28 |
| 55435 | 0 | 117345 | PRRRSRKPEAPRRRS                                      | 2.73 | 0.01 | 0.78 | 0.44 | 1.13 | 1.27 |
| 55436 | 0 | 236592 | PRRSPR                                               | 1.94 | 0.01 | 3.65 | 0.68 | 0.22 | 0.85 |
| 55437 | 0 | 236592 | PRRSPR                                               | 1.94 | 0.01 | 3.65 | 0.68 | 0.22 | 0.28 |
| 55438 | 0 | 236592 | PRRSPR                                               | 1.94 | 0.01 | 3.65 | 0.68 | 0.22 | 0.85 |
| 55439 | 0 | 236592 | PRRSPR                                               | 1.94 | 0.01 | 3.65 | 0.68 | 0.22 | 2.35 |
| 55440 | 0 | 236592 | PRRSPR                                               | 1.94 | 0.01 | 3.65 | 0.68 | 0.22 | 0.85 |
| 55441 | 0 | 132883 | PRSENGV                                              | 1.99 | 0.01 | 0.90 | 0.44 | 1.41 | 1.39 |
| 55442 | 0 | 133289 | PRSPKM                                               | 1.91 | 0.01 | 0.78 | 0.68 | 0.22 | 0.85 |
| 55443 | 0 | 133289 | PRSPKM                                               | 1.91 | 0.01 | 0.78 | 0.68 | 0.22 | 0.28 |
| 55444 | 0 | 133289 | PRSPKM                                               | 1.91 | 0.01 | 0.78 | 0.68 | 0.22 | 0.85 |
| 55445 | 0 | 115902 | PRSPRSEQRSPPRSE<br>RQ                                | 3.02 | 0.01 | 0.78 | 4.15 | 0.22 | 0.28 |
| 55446 | 0 | 504031 | PRSPSSQSSSGSPRRP<br>pp                               | 3.00 | 0.01 | 2.48 | 0.44 | 1.74 | 0.28 |

|       |   |        |                          |      |      |      |      |      |      |
|-------|---|--------|--------------------------|------|------|------|------|------|------|
| 55447 | 0 | 504031 | PRSPSSQSSSSGSPRRP<br>PP  | 3.00 | 0.01 | 2.48 | 0.44 | 1.74 | 0.28 |
| 55448 | 0 | 127776 | PRSRHPGGPGTPQIR          | 2.72 | 0.01 | 4.23 | 0.44 | 1.13 | 0.85 |
| 55449 | 0 | 127777 | PRSRLTP                  | 2.05 | 0.01 | 0.90 | 0.44 | 1.13 | 1.39 |
| 55450 | 0 | 127777 | PRSRLTP                  | 2.05 | 0.01 | 0.90 | 0.44 | 1.13 | 1.39 |
| 55451 | 0 | 49261  | PRTGLD                   | 1.88 | 0.01 | 2.40 | 0.44 | 0.85 | 0.28 |
| 55452 | 0 | 49270  | PRVRGLY                  | 2.02 | 0.01 | 2.08 | 0.68 | 0.22 | 0.85 |
| 55453 | 0 | 49271  | PRVRGLYF                 | 2.12 | 0.01 | 3.45 | 0.68 | 0.22 | 0.28 |
| 55454 | 0 | 49272  | PRVRGLYLPAGG             | 2.50 | 0.01 | 2.58 | 1.20 | 0.22 | 0.28 |
| 55455 | 0 | 49272  | PRVRGLYLPAGG             | 2.50 | 0.01 | 2.58 | 1.20 | 0.22 | 0.28 |
| 55456 | 0 | 49273  | PRVRSKPVV                | 2.25 | 0.01 | 0.90 | 1.12 | 0.22 | 0.85 |
| 55457 | 0 | 49273  | PRVRSKPVV                | 2.25 | 0.01 | 0.90 | 0.44 | 0.85 | 0.85 |
| 55458 | 0 | 49273  | PRVRSKPVV                | 2.25 | 0.01 | 0.90 | 0.68 | 0.22 | 0.85 |
| 55459 | 0 | 49273  | PRVRSKPVV                | 2.25 | 0.01 | 0.90 | 0.68 | 0.22 | 0.85 |
| 55460 | 0 | 49273  | PRVRSKPVV                | 2.25 | 0.01 | 0.90 | 0.68 | 0.22 | 0.85 |
| 55461 | 0 | 49275  | PRVVTYKAAA               | 2.29 | 0.01 | 2.84 | 0.44 | 0.85 | 0.28 |
| 55462 | 0 | 177211 | PRWNGEKLYQEARKIVG<br>AMV | 2.91 | 0.01 | 1.75 | 1.81 | 0.22 | 0.28 |
| 55463 | 0 | 49278  | PRWYFYLTGTGPEAS          | 2.66 | 0.01 | 2.45 | 1.20 | 0.22 | 0.85 |
| 55464 | 0 | 151044 | PRYAFAMERNAGSGI          | 2.66 | 0.01 | 2.87 | 0.44 | 0.85 | 0.28 |
| 55465 | 0 | 182259 | PRYSGGCVAMRGRHP          | 2.69 | 0.01 | 0.78 | 0.44 | 1.13 | 0.85 |
| 55466 | 0 | 149884 | PRYTPLRTAGSTSSL          | 2.71 | 0.01 | 4.03 | 1.12 | 0.22 | 0.28 |
| 55467 | 0 | 49287  | PSAAAKEEPEEDED<br>GMG    | 2.97 | 0.01 | 2.78 | 2.49 | 0.85 | 0.28 |
| 55468 | 0 | 462415 | PSAALTMMQL               | 2.31 | 0.01 | 0.78 | 1.12 | 0.22 | 1.28 |
| 55469 | 0 | 49289  | PSACLSPQAY               | 2.34 | 0.01 | 3.36 | 1.20 | 0.22 | 0.28 |
| 55470 | 0 | 49289  | PSACLSPQAY               | 2.34 | 0.01 | 3.36 | 1.20 | 0.22 | 0.28 |
| 55471 | 0 | 111645 | PSACWEAGAPSR             | 2.50 | 0.01 | 0.90 | 0.44 | 0.85 | 1.39 |
| 55472 | 0 | 49291  | PSAEECGYSDRVR<br>SITLGN  | 2.90 | 0.01 | 3.17 | 0.68 | 0.22 | 0.28 |
| 55473 | 0 | 49291  | PSAEECGYSDRVR<br>SITLGN  | 2.90 | 0.01 | 3.17 | 0.68 | 0.22 | 0.28 |
| 55474 | 0 | 49291  | PSAEECGYSDRVR<br>SITLGN  | 2.90 | 0.01 | 3.17 | 0.68 | 0.22 | 0.85 |
| 55475 | 0 | 49291  | PSAEECGYSDRVR<br>SITLGN  | 2.90 | 0.01 | 3.17 | 0.68 | 0.22 | 0.28 |
| 55476 | 0 | 172767 | PSAERLENVLF<br>GPHD      | 2.65 | 0.01 | 0.78 | 0.44 | 1.41 | 0.28 |
| 55477 | 0 | 139855 | PSAFHFL                  | 2.02 | 0.01 | 0.90 | 2.00 | 0.22 | 0.28 |
| 55478 | 0 | 419304 | PSAFPTS                  | 2.05 | 0.01 | 0.90 | 0.44 | 1.93 | 1.39 |
| 55479 | 0 | 117346 | PSALLRQFTTAL             | 2.48 | 0.01 | 0.90 | 0.44 | 1.23 | 0.28 |
| 55480 | 0 | 49295  | PSAPPL                   | 1.92 | 0.01 | 2.53 | 0.44 | 1.59 | 0.28 |
| 55481 | 0 | 49295  | PSAPPL                   | 1.92 | 0.01 | 3.27 | 0.44 | 1.59 | 0.28 |
| 55482 | 0 | 49296  | PSAPPLPHVV               | 2.34 | 4.45 | 2.70 | 0.44 | 0.85 | 0.28 |
| 55483 | 0 | 49297  | PSAPPLPHVVDLP<br>QLGPRR  | 2.90 | 0.01 | 2.53 | 2.37 | 0.22 | 0.85 |



|       |   |        |                                    |      |      |      |      |      |      |
|-------|---|--------|------------------------------------|------|------|------|------|------|------|
| 55484 | 0 | 49297  | PSAPPLPHVVDLPQLG<br>RR             | 2.90 | 0.01 | 2.53 | 2.37 | 0.22 | 0.28 |
| 55485 | 0 | 49297  | PSAPPLPHVVDLPQLG<br>RR             | 2.90 | 0.01 | 2.53 | 2.37 | 0.22 | 0.28 |
| 55486 | 0 | 49298  | PSAPPLPPVADLPQPGL<br>RR            | 2.92 | 0.01 | 3.27 | 2.37 | 0.22 | 0.85 |
| 55487 | 0 | 49298  | PSAPPLPPVADLPQPGL<br>RR            | 2.92 | 0.01 | 3.27 | 2.37 | 0.22 | 0.28 |
| 55488 | 0 | 49298  | PSAPPLPPVADLPQPGL<br>RR            | 2.92 | 0.01 | 3.27 | 2.37 | 0.22 | 0.28 |
| 55489 | 0 | 149418 | PSASLYAVKVLGADG                    | 2.70 | 0.01 | 3.67 | 3.16 | 0.22 | 0.28 |
| 55490 | 0 | 49302  | PSAVKL                             | 1.88 | 0.01 | 2.24 | 1.15 | 0.22 | 0.28 |
| 55491 | 0 | 355847 | PSAYKRALPLEEEED                    | 2.68 | 0.01 | 1.61 | 0.44 | 0.85 | 1.28 |
| 55492 | 0 | 355848 | PSAYKRALPLEEQED                    | 2.69 | 0.01 | 1.61 | 0.44 | 0.85 | 1.28 |
| 55493 | 0 | 355849 | PSAYKRALPQEEED                     | 2.66 | 0.01 | 1.61 | 0.44 | 0.85 | 1.28 |
| 55494 | 0 | 355850 | PSAYKRALPQEEQED                    | 2.69 | 0.01 | 1.61 | 0.44 | 0.85 | 1.28 |
| 55495 | 0 | 134478 | PSCCCTKPSD                         | 2.34 | 0.01 | 3.07 | 0.44 | 0.22 | 1.66 |
| 55496 | 0 | 134478 | PSCCCTKPSD                         | 2.34 | 0.01 | 3.07 | 0.44 | 0.22 | 0.28 |
| 55497 | 0 | 134478 | PSCCCTKPSD                         | 2.34 | 0.01 | 3.07 | 0.44 | 0.22 | 1.34 |
| 55498 | 0 | 49305  | PSCCCTKPSDGNCTCIPI<br>PSS          | 3.02 | 0.01 | 2.08 | 1.20 | 0.22 | 2.51 |
| 55499 | 0 | 49305  | PSCCCTKPSDGNCTCIPI<br>PSS          | 3.02 | 0.01 | 2.08 | 1.20 | 0.22 | 2.51 |
| 55500 | 0 | 49305  | PSCCCTKPSDGNCTCIPI<br>PSS          | 3.02 | 0.01 | 2.08 | 1.20 | 0.22 | 1.57 |
| 55501 | 0 | 49305  | PSCCCTKPSDGNCTCIPI<br>PSS          | 3.02 | 0.01 | 2.08 | 1.20 | 0.22 | 1.57 |
| 55502 | 0 | 49305  | PSCCCTKPSDGNCTCIPI<br>PSS          | 3.02 | 0.01 | 2.08 | 0.68 | 0.22 | 2.51 |
| 55503 | 0 | 49305  | PSCCCTKPSDGNCTCIPI<br>PSS          | 3.02 | 0.01 | 2.08 | 1.20 | 0.22 | 0.28 |
| 55504 | 0 | 49305  | PSCCCTKPSDGNCTCIPI<br>PSS          | 3.02 | 0.01 | 2.08 | 1.20 | 0.22 | 1.57 |
| 55505 | 0 | 49305  | PSCCCTKPSDGNCTCIPI<br>PSS          | 3.02 | 0.01 | 3.45 | 0.68 | 0.22 | 1.57 |
| 55506 | 0 | 49305  | PSCCCTKPSDGNCTCIPI<br>PSS          | 3.02 | 0.01 | 3.45 | 0.68 | 0.22 | 1.27 |
| 55507 | 0 | 49305  | PSCCCTKPSDGNCTCIPI<br>PSS          | 3.02 | 0.01 | 3.45 | 0.68 | 0.22 | 1.27 |
| 55508 | 0 | 49305  | PSCCCTKPSDGNCTCIPI<br>PSS          | 3.02 | 0.01 | 3.45 | 0.68 | 0.22 | 1.27 |
| 55509 | 0 | 135862 | PSCKASCKVPVKKATVV<br>YQGERVKIQEKFK | 3.34 | 0.01 | 0.78 | 0.44 | 1.93 | 1.27 |
| 55510 | 0 | 121718 | PSDDV                              | 1.75 | 0.01 | 2.26 | 1.20 | 0.22 | 0.28 |
| 55511 | 0 | 121718 | PSDDV                              | 1.75 | 0.01 | 2.26 | 1.20 | 0.22 | 0.28 |
| 55512 | 0 | 49317  | PSDKHIEQ                           | 2.10 | 0.01 | 3.37 | 1.12 | 0.22 | 0.28 |

|       |   |        |                          |      |      |      |      |      |      |
|-------|---|--------|--------------------------|------|------|------|------|------|------|
| 55513 | 0 | 49319  | PSDKHIEQYLKKIENSIS       | 2.84 | 0.01 | 1.66 | 2.42 | 0.22 | 0.28 |
| 55514 | 0 | 49319  | PSDKHIEQYLKKIENSIS       | 2.84 | 0.01 | 1.66 | 2.82 | 0.22 | 0.28 |
| 55515 | 0 | 49319  | PSDKHIEQYLKKIENSIS       | 2.84 | 0.01 | 1.66 | 1.81 | 0.22 | 0.28 |
| 55516 | 0 | 49319  | PSDKHIEQYLKKIENSIS       | 2.84 | 0.01 | 1.66 | 2.52 | 0.22 | 0.28 |
| 55517 | 0 | 49319  | PSDKHIEQYLKKIENSIS       | 2.84 | 0.01 | 1.66 | 3.23 | 0.22 | 0.28 |
| 55518 | 0 | 49319  | PSDKHIEQYLKKIENSIS       | 2.84 | 0.01 | 1.66 | 2.42 | 0.22 | 0.28 |
| 55519 | 0 | 49319  | PSDKHIEQYLKKIENSIS       | 2.84 | 0.01 | 1.66 | 2.82 | 0.22 | 0.28 |
| 55520 | 0 | 49321  | PSDKHIEQYLKKIKNSIS       | 2.85 | 0.01 | 3.29 | 2.42 | 0.22 | 0.28 |
| 55521 | 0 | 49321  | PSDKHIEQYLKKIKNSIS       | 2.85 | 0.01 | 3.29 | 2.42 | 0.22 | 0.28 |
| 55522 | 0 | 49324  | PSDKHIEQYLKKIQNSLS       | 2.84 | 0.01 | 3.37 | 0.44 | 1.74 | 0.28 |
| 55523 | 0 | 49325  | PSDKHIEQYLKKIQNSLS<br>TE | 2.94 | 0.01 | 1.66 | 0.44 | 0.85 | 0.28 |
| 55524 | 0 | 49333  | PSDLGGNNLPAKFLE          | 2.67 | 0.01 | 2.04 | 0.44 | 0.85 | 1.28 |
| 55525 | 0 | 49335  | PSDPLVYKRQTAKF           | 2.58 | 0.01 | 2.94 | 2.00 | 0.22 | 0.28 |
| 55526 | 0 | 49335  | PSDPLVYKRQTAKF           | 2.58 | 0.01 | 2.94 | 2.00 | 0.22 | 0.28 |
| 55527 | 0 | 49348  | PSDRLFPGLSDFGCS          | 2.72 | 0.01 | 0.90 | 0.44 | 1.59 | 1.39 |
| 55528 | 0 | 49349  | PSDTMQTRHVKNYHSR<br>SES  | 2.88 | 0.01 | 3.75 | 0.44 | 0.85 | 0.28 |
| 55529 | 0 | 100391 | PSDTVQTRHVQRR            | 2.62 | 0.01 | 2.96 | 0.44 | 0.22 | 0.28 |
| 55530 | 0 | 49350  | PSDVSGLLLRPPPAP          | 2.70 | 0.01 | 3.19 | 1.12 | 0.22 | 2.02 |
| 55531 | 0 | 112625 | PSEATVYLPPVPVSKVVS<br>TD | 2.97 | 0.01 | 1.86 | 2.37 | 0.22 | 0.28 |
| 55532 | 0 | 112625 | PSEATVYLPPVPVSKVVS<br>TD | 2.97 | 0.01 | 1.86 | 2.37 | 0.22 | 1.48 |
| 55533 | 0 | 112625 | PSEATVYLPPVPVSKVVS<br>TD | 2.97 | 0.01 | 1.86 | 2.37 | 0.22 | 0.28 |
| 55534 | 0 | 112625 | PSEATVYLPPVPVSKVVS<br>TD | 2.97 | 0.01 | 1.86 | 2.37 | 0.22 | 0.28 |
| 55535 | 0 | 112625 | PSEATVYLPPVPVSKVVS<br>TD | 2.97 | 0.01 | 1.86 | 2.37 | 0.22 | 0.28 |
| 55536 | 0 | 127778 | PSEFEADLMLGP             | 2.48 | 0.01 | 3.16 | 3.16 | 0.22 | 0.28 |
| 55537 | 0 | 172770 | PSEGAAPAVLGEVDT          | 2.70 | 0.01 | 0.78 | 0.44 | 1.41 | 0.28 |
| 55538 | 0 | 49352  | PSEGECEVIDSDSK           | 2.63 | 0.01 | 2.69 | 0.44 | 0.85 | 0.28 |
| 55539 | 0 | 49352  | PSEGECEVIDSDSK           | 2.63 | 0.01 | 2.69 | 0.44 | 0.85 | 0.28 |
| 55540 | 0 | 120135 | PSEKIWRPDLVLYNNA         | 2.69 | 0.01 | 0.78 | 2.04 | 0.22 | 0.28 |
| 55541 | 0 | 152900 | PSENQYFQSA               | 2.31 | 0.01 | 2.18 | 2.16 | 0.22 | 0.28 |

|       |   |        |                                                       |      |      |      |      |      |      |
|-------|---|--------|-------------------------------------------------------|------|------|------|------|------|------|
| 55542 | 0 | 174235 | PSEPGDPLEAVAFEEKEG<br>KA                              | 2.98 | 0.01 | 0.78 | 0.44 | 1.13 | 1.27 |
| 55543 | 0 | 174235 | PSEPGDPLEAVAFEEKEG<br>KA                              | 2.98 | 0.01 | 0.78 | 0.44 | 1.13 | 1.27 |
| 55544 | 0 | 174235 | PSEPGDPLEAVAFEEKEG<br>KA                              | 2.98 | 0.01 | 0.78 | 0.44 | 1.13 | 1.27 |
| 55545 | 0 | 174235 | PSEPGDPLEAVAFEEKEG<br>KA                              | 2.98 | 0.01 | 0.78 | 0.44 | 1.13 | 0.28 |
| 55546 | 0 | 49356  | PSERYLGYLE                                            | 2.33 | 0.01 | 1.60 | 0.44 | 1.23 | 0.28 |
| 55547 | 0 | 49356  | PSERYLGYLE                                            | 2.33 | 0.01 | 1.60 | 0.44 | 1.23 | 0.28 |
| 55548 | 0 | 108582 | PSFPPALRL                                             | 2.25 | 0.01 | 0.90 | 0.44 | 1.13 | 1.39 |
| 55549 | 0 | 49366  | PSFPTQRTSKTLKVLTPP<br>TT                              | 2.97 | 0.01 | 3.01 | 0.44 | 0.85 | 0.28 |
| 55550 | 0 | 49368  | PSFSDIPNPI                                            | 2.36 | 0.01 | 1.60 | 0.44 | 1.23 | 0.28 |
| 55551 | 0 | 49368  | PSFSDIPNPI                                            | 2.36 | 0.01 | 1.60 | 0.44 | 1.23 | 0.28 |
| 55552 | 0 | 49368  | PSFSDIPNPI                                            | 2.36 | 0.01 | 1.60 | 0.44 | 1.23 | 0.85 |
| 55553 | 0 | 49368  | PSFSDIPNPI                                            | 2.36 | 0.01 | 1.60 | 0.44 | 1.23 | 0.85 |
| 55554 | 0 | 193520 | PSGATPSST                                             | 2.27 | 0.01 | 2.51 | 0.44 | 2.39 | 0.28 |
| 55555 | 0 | 193520 | PSGATPSST                                             | 2.27 | 0.01 | 2.51 | 0.44 | 2.39 | 0.28 |
| 55556 | 0 | 115425 | PSGAWYYYVPLGTQYTD<br>APSF                             | 2.95 | 0.01 | 1.60 | 0.44 | 1.23 | 1.28 |
| 55557 | 0 | 49372  | PSGDRA                                                | 1.88 | 0.01 | 1.86 | 0.44 | 1.23 | 0.28 |
| 55558 | 0 | 49373  | PSGDSGLSTGADAA                                        | 2.64 | 0.01 | 2.69 | 0.44 | 1.41 | 0.28 |
| 55559 | 0 | 121719 | PSGKKCIAAKKIKQS                                       | 2.70 | 0.01 | 0.78 | 0.44 | 1.13 | 0.85 |
| 55560 | 0 | 121719 | PSGKKCIAAKKIKQS                                       | 2.70 | 0.01 | 0.78 | 0.44 | 1.41 | 0.85 |
| 55561 | 0 | 356056 | PSGKSAKAAAPAKA                                        | 2.75 | 0.01 | 1.61 | 0.44 | 0.85 | 1.28 |
| 55562 | 0 | 49377  | PSGLVIP                                               | 2.03 | 0.01 | 2.59 | 0.68 | 0.22 | 0.28 |
| 55563 | 0 | 188409 | PSGPNHTKVVQLPKISK<br>NALKANG                          | 3.13 | 0.01 | 2.14 | 0.68 | 0.22 | 0.85 |
| 55564 | 0 | 49386  | PSGPTPQHIPLF                                          | 2.48 | 0.01 | 2.40 | 0.44 | 1.59 | 1.27 |
| 55565 | 0 | 49388  | PSGQTADWYTIGVY                                        | 2.59 | 0.01 | 2.56 | 2.69 | 0.22 | 0.28 |
| 55566 | 0 | 110375 | PSGSMVTSDAQIFNK                                       | 2.62 | 0.01 | 1.86 | 0.68 | 0.22 | 0.28 |
| 55567 | 0 | 49391  | PSGTASTKGAIRSPG                                       | 2.72 | 0.01 | 3.97 | 0.44 | 0.85 | 0.28 |
| 55568 | 0 | 356104 | PSGTENKPATGEAPS                                       | 2.72 | 0.01 | 1.61 | 0.44 | 0.85 | 1.28 |
| 55569 | 0 | 49393  | PSGYCGRECGIKKGS                                       | 2.69 | 0.01 | 2.56 | 2.02 | 0.22 | 0.85 |
| 55570 | 0 | 49394  | PSHDILASHGFP                                          | 2.48 | 0.01 | 0.90 | 0.68 | 0.22 | 1.39 |
| 55571 | 0 | 49395  | PSHEAPNMTQTGT                                         | 2.54 | 0.01 | 3.17 | 0.44 | 0.85 | 0.85 |
| 55572 | 0 | 132017 | PSHFQQSCLQALEPQAV<br>SSYLSPGAPLKGRPPSPG<br>FQRQRQRQRR | 3.76 | 0.01 | 0.78 | 1.20 | 0.22 | 0.85 |
| 55573 | 0 | 132017 | PSHFQQSCLQALEPQAV<br>SSYLSPGAPLKGRPPSPG<br>FQRQRQRQRR | 3.76 | 0.01 | 0.78 | 0.44 | 1.13 | 0.85 |
| 55574 | 0 | 49398  | PSHLPYIEQGMQLAEQF<br>KQK                              | 2.94 | 0.01 | 1.72 | 0.44 | 0.85 | 0.28 |
| 55575 | 0 | 99545  | PSHQQPRKIRPEGRE                                       | 2.70 | 0.01 | 2.16 | 0.44 | 1.23 | 1.48 |
| 55576 | 0 | 99545  | PSHQQPRKIRPEGRE                                       | 2.70 | 0.01 | 2.16 | 0.44 | 1.23 | 1.48 |

|       |   |        |                          |      |      |      |      |      |      |
|-------|---|--------|--------------------------|------|------|------|------|------|------|
| 55577 | 0 | 49400  | PSHYVPRIY                | 2.24 | 0.01 | 0.90 | 0.44 | 1.59 | 0.28 |
| 55578 | 0 | 144036 | PSIIGGSSVDLV             | 2.49 | 0.01 | 0.90 | 0.44 | 0.85 | 0.28 |
| 55579 | 0 | 144036 | PSIIGGSSVDLV             | 2.49 | 0.01 | 0.90 | 1.20 | 0.22 | 1.39 |
| 55580 | 0 | 123631 | PSIKAYMES                | 2.21 | 0.01 | 2.28 | 2.00 | 0.22 | 0.28 |
| 55581 | 0 | 100392 | PSINLDVRKQ               | 2.26 | 0.01 | 2.18 | 2.16 | 0.22 | 0.28 |
| 55582 | 0 | 49405  | PSIPSRAATL               | 2.33 | 3.85 | 2.70 | 0.44 | 0.85 | 0.28 |
| 55583 | 0 | 147206 | PSKALDSKSYTSI            | 2.56 | 0.01 | 1.60 | 0.44 | 0.85 | 0.85 |
| 55584 | 0 | 106715 | PSKECCSGTKKL             | 2.47 | 0.01 | 3.08 | 0.44 | 1.23 | 0.85 |
| 55585 | 0 | 135973 | PSKFTEPVKDVM             | 2.48 | 0.01 | 3.34 | 0.44 | 1.41 | 0.28 |
| 55586 | 0 | 49413  | PSKPKTNLKHVAGAAAA<br>GAV | 2.96 | 0.01 | 1.75 | 3.40 | 0.22 | 0.28 |
| 55587 | 0 | 49413  | PSKPKTNLKHVAGAAAA<br>GAV | 2.96 | 0.01 | 1.75 | 3.40 | 0.22 | 0.28 |
| 55588 | 0 | 49414  | PSKPPTTKQRQNK            | 2.51 | 0.01 | 2.38 | 0.68 | 0.22 | 0.28 |
| 55589 | 0 | 49414  | PSKPPTTKQRQNK            | 2.51 | 0.01 | 2.38 | 0.68 | 0.22 | 0.28 |
| 55590 | 0 | 49414  | PSKPPTTKQRQNK            | 2.51 | 0.01 | 2.38 | 0.44 | 1.74 | 0.28 |
| 55591 | 0 | 356216 | PSLFGQAAAGDKPPP          | 2.66 | 0.01 | 1.61 | 0.44 | 0.85 | 1.28 |
| 55592 | 0 | 356217 | PSLFGQAAAGDKPSP          | 2.69 | 0.01 | 1.61 | 0.44 | 0.85 | 1.28 |
| 55593 | 0 | 133290 | PSLGASSHQH               | 2.32 | 0.01 | 0.78 | 0.44 | 1.13 | 0.28 |
| 55594 | 0 | 134763 | PSLGASSHQHSRRRQ          | 2.70 | 0.01 | 0.78 | 3.05 | 1.13 | 0.85 |
| 55595 | 0 | 121720 | PSLGHRAPVSQAAKF          | 2.66 | 0.01 | 0.78 | 0.44 | 1.13 | 0.85 |
| 55596 | 0 | 49421  | PSLIGLAMGDAGGYKAA<br>DMW | 2.95 | 0.01 | 3.78 | 1.12 | 0.22 | 0.28 |
| 55597 | 0 | 49421  | PSLIGLAMGDAGGYKAA<br>DMW | 2.95 | 0.01 | 2.04 | 0.44 | 0.85 | 0.28 |
| 55598 | 0 | 95686  | PSLKFILNTVNG             | 2.45 | 0.01 | 2.88 | 0.44 | 1.23 | 0.85 |
| 55599 | 0 | 95686  | PSLKFILNTVNG             | 2.45 | 0.01 | 2.88 | 1.12 | 0.22 | 0.85 |
| 55600 | 0 | 156940 | PSLKSPNGVRVLPMPVA<br>SS  | 3.54 | 0.01 | 0.78 | 0.44 | 2.82 | 1.39 |
| 55601 | 0 | 356238 | PSLPADSENSKTGCG          | 2.67 | 0.01 | 1.61 | 0.44 | 0.85 | 1.28 |
| 55602 | 0 | 451505 | PSLPSPSRLP               | 2.38 | 0.01 | 0.78 | 1.81 | 0.22 | 0.28 |
| 55603 | 0 | 451505 | PSLPSPSRLP               | 2.38 | 0.01 | 0.78 | 1.81 | 0.22 | 1.34 |
| 55604 | 0 | 141070 | PSLRDIFAW                | 2.18 | 0.01 | 4.03 | 2.00 | 0.22 | 0.28 |
| 55605 | 0 | 101139 | PSLSRQRHSYPA             | 2.50 | 0.01 | 0.90 | 0.68 | 0.22 | 1.39 |
| 55606 | 0 | 101139 | PSLSRQRHSYPA             | 2.50 | 0.01 | 0.90 | 0.68 | 0.22 | 1.27 |
| 55607 | 0 | 49436  | PSLVITD                  | 1.99 | 0.01 | 3.37 | 0.68 | 0.22 | 1.34 |
| 55608 | 0 | 49436  | PSLVITD                  | 1.99 | 0.01 | 3.37 | 0.68 | 0.22 | 0.28 |
| 55609 | 0 | 193522 | PSMDLTAQA                | 2.21 | 0.01 | 2.51 | 0.44 | 2.39 | 0.28 |
| 55610 | 0 | 193522 | PSMDLTAQA                | 2.21 | 0.01 | 2.51 | 0.44 | 2.39 | 0.28 |
| 55611 | 0 | 177915 | PSMGRDIKV                | 2.18 | 0.01 | 2.04 | 3.01 | 0.22 | 0.28 |
| 55612 | 0 | 106013 | PSMSLFGAF                | 2.23 | 0.01 | 0.90 | 3.01 | 0.22 | 0.28 |
| 55613 | 0 | 49444  | PSMTGFHNWLIG             | 2.43 | 0.01 | 0.90 | 0.68 | 0.22 | 1.39 |
| 55614 | 0 | 106716 | PSNCHTHEGG               | 2.29 | 0.01 | 2.75 | 0.44 | 1.23 | 0.85 |
| 55615 | 0 | 49447  | PSNCHTHEGGQLHCT          | 2.67 | 0.01 | 2.75 | 0.68 | 0.22 | 0.28 |
| 55616 | 0 | 49447  | PSNCHTHEGGQLHCT          | 2.67 | 0.01 | 2.75 | 0.68 | 0.22 | 0.28 |
| 55617 | 0 | 164325 | PSNEFE                   | 1.90 | 0.01 | 3.72 | 0.68 | 0.22 | 0.85 |

|       |   |        |                           |      |      |      |      |      |      |
|-------|---|--------|---------------------------|------|------|------|------|------|------|
| 55618 | 0 | 164325 | PSNEFE                    | 1.90 | 0.01 | 3.72 | 0.68 | 0.22 | 0.85 |
| 55619 | 0 | 164325 | PSNEFE                    | 1.90 | 0.01 | 3.72 | 0.68 | 0.22 | 0.85 |
| 55620 | 0 | 164325 | PSNEFE                    | 1.90 | 0.01 | 3.72 | 0.68 | 0.22 | 0.85 |
| 55621 | 0 | 164325 | PSNEFE                    | 1.90 | 0.01 | 3.72 | 0.68 | 0.22 | 0.85 |
| 55622 | 0 | 164325 | PSNEFE                    | 1.90 | 0.01 | 3.72 | 0.68 | 0.22 | 0.28 |
| 55623 | 0 | 164325 | PSNEFE                    | 1.90 | 0.01 | 3.72 | 0.68 | 0.22 | 0.85 |
| 55624 | 0 | 164325 | PSNEFE                    | 1.90 | 0.01 | 3.72 | 0.68 | 0.22 | 1.48 |
| 55625 | 0 | 49450  | PSNQDSFQWQ                | 2.33 | 0.01 | 3.67 | 0.68 | 0.22 | 0.28 |
| 55626 | 0 | 49450  | PSNQDSFQWQ                | 2.33 | 0.01 | 3.67 | 0.68 | 0.22 | 1.34 |
| 55627 | 0 | 49450  | PSNQDSFQWQ                | 2.33 | 0.01 | 3.48 | 0.68 | 0.22 | 2.02 |
| 55628 | 0 | 49450  | PSNQDSFQWQ                | 2.33 | 0.01 | 3.48 | 0.68 | 0.22 | 0.28 |
| 55629 | 0 | 49450  | PSNQDSFQWQ                | 2.33 | 0.01 | 3.48 | 0.68 | 0.22 | 1.34 |
| 55630 | 0 | 49450  | PSNQDSFQWQ                | 2.33 | 0.01 | 3.48 | 0.68 | 0.22 | 1.48 |
| 55631 | 0 | 135974 | PSNSASVPALTA              | 2.52 | 0.01 | 3.21 | 0.44 | 0.85 | 0.28 |
| 55632 | 0 | 135974 | PSNSASVPALTA              | 2.52 | 0.01 | 3.21 | 0.44 | 1.13 | 0.28 |
| 55633 | 0 | 49454  | PSPAPSRPFSVLRANDV         | 2.83 | 0.01 | 2.70 | 0.44 | 0.85 | 0.28 |
| 55634 | 0 | 128079 | PSPDITSTTKTRNFDLVN<br>CN  | 2.95 | 0.01 | 2.40 | 2.75 | 0.22 | 0.28 |
| 55635 | 0 | 128079 | PSPDITSTTKTRNFDLVN<br>CN  | 2.95 | 0.01 | 2.40 | 2.75 | 0.22 | 0.85 |
| 55636 | 0 | 122876 | PSPDSKPT                  | 2.17 | 0.01 | 2.26 | 2.04 | 0.22 | 0.28 |
| 55637 | 0 | 49455  | PSPEAHVPPPYVEPTTT<br>QCF  | 2.94 | 0.01 | 3.01 | 0.44 | 1.59 | 0.28 |
| 55638 | 0 | 49455  | PSPEAHVPPPYVEPTTT<br>QCF  | 2.94 | 0.01 | 3.01 | 0.44 | 1.59 | 1.27 |
| 55639 | 0 | 49455  | PSPEAHVPPPYVEPTTT<br>QCF  | 2.94 | 0.01 | 3.01 | 0.44 | 1.59 | 0.28 |
| 55640 | 0 | 139856 | PSPFAEAVCPKLTPEKM<br>A    | 2.86 | 0.01 | 3.93 | 1.12 | 0.22 | 0.28 |
| 55641 | 0 | 49459  | PSPFGQAAAGDK              | 2.48 | 0.01 | 2.30 | 0.44 | 0.85 | 0.28 |
| 55642 | 0 | 356350 | PSPFGQAAAGDKPPP           | 2.68 | 0.01 | 1.61 | 0.44 | 0.85 | 1.28 |
| 55643 | 0 | 356351 | PSPFGQAAAGDKPSL           | 2.69 | 0.01 | 1.61 | 0.44 | 0.85 | 1.28 |
| 55644 | 0 | 356352 | PSPFGQAAAGDKPSP           | 2.70 | 0.01 | 1.61 | 0.44 | 0.85 | 1.28 |
| 55645 | 0 | 356353 | PSPFGQAAAGGKPSP           | 2.71 | 0.01 | 1.61 | 0.44 | 0.85 | 1.28 |
| 55646 | 0 | 356354 | PSPFGQGTAFDASRS           | 2.71 | 0.01 | 1.61 | 0.44 | 0.85 | 1.28 |
| 55647 | 0 | 132552 | PSPLPHRDRD                | 2.36 | 0.01 | 0.78 | 0.44 | 1.13 | 0.28 |
| 55648 | 0 | 356402 | PSPPEEDVASREQDG           | 2.69 | 0.01 | 1.61 | 0.44 | 0.85 | 1.28 |
| 55649 | 0 | 49466  | PSPRRRSQSPRRRSQ<br>SRESQC | 3.14 | 4.93 | 2.08 | 0.44 | 1.59 | 1.27 |
| 55650 | 0 | 124590 | PSPRSQT                   | 2.05 | 0.01 | 0.90 | 0.44 | 1.13 | 0.28 |
| 55651 | 0 | 124590 | PSPRSQT                   | 2.05 | 0.01 | 0.90 | 0.44 | 1.13 | 1.34 |
| 55652 | 0 | 131009 | PSPSLSHPL                 | 2.28 | 0.01 | 0.90 | 0.44 | 1.13 | 1.39 |
| 55653 | 0 | 131595 | PSPSPIHPAHHKRDRRQI<br>F   | 2.91 | 0.01 | 0.78 | 0.68 | 0.22 | 1.27 |
| 55654 | 0 | 49470  | PSPSPTERAPASEEE           | 2.72 | 0.01 | 0.78 | 0.68 | 0.22 | 0.85 |
| 55655 | 0 | 99546  | PSQDPYSPSPYDRRG           | 2.73 | 0.01 | 2.16 | 0.44 | 1.23 | 1.48 |

|       |   |        |                                  |      |      |      |      |      |      |
|-------|---|--------|----------------------------------|------|------|------|------|------|------|
| 55656 | 0 | 116802 | PSQDPYSPSQDPDRR                  | 2.73 | 0.01 | 2.16 | 0.44 | 1.23 | 0.85 |
| 55657 | 0 | 49487  | PSQKIQL                          | 2.02 | 0.01 | 1.72 | 0.44 | 0.85 | 0.28 |
| 55658 | 0 | 141724 | PSQLPPTAPLLPHSNLD<br>HILEPSI     | 3.19 | 0.01 | 2.04 | 1.20 | 0.22 | 0.28 |
| 55659 | 0 | 141724 | PSQLPPTAPLLPHSNLD<br>HILEPSI     | 3.19 | 0.01 | 2.04 | 1.20 | 0.22 | 1.34 |
| 55660 | 0 | 141724 | PSQLPPTAPLLPHSNLD<br>HILEPSI     | 3.19 | 0.01 | 2.04 | 1.20 | 0.22 | 0.28 |
| 55661 | 0 | 141724 | PSQLPPTAPLLPHSNLD<br>HILEPSI     | 3.19 | 0.01 | 2.04 | 1.20 | 2.25 | 1.75 |
| 55662 | 0 | 164470 | PSQNFGHMHKVVLP<br>PCFLMFENV      | 3.22 | 4.93 | 0.90 | 2.37 | 0.22 | 1.34 |
| 55663 | 0 | 141725 | PSQNFGHMHKVVLP<br>PPPCFLMFENV    | 3.29 | 4.63 | 0.90 | 2.59 | 0.22 | 1.34 |
| 55664 | 0 | 141725 | PSQNFGHMHKVVLP<br>PPPCFLMFENV    | 3.29 | 4.63 | 0.90 | 2.37 | 0.22 | 1.34 |
| 55665 | 0 | 164471 | PSQNFGHMHKVVLP<br>PPPPPCFLMFENV  | 3.38 | 4.93 | 0.90 | 2.37 | 0.22 | 1.34 |
| 55666 | 0 | 49489  | PSQNFGHMHKVVLP<br>PPPPPPCFLMFENV | 3.41 | 4.03 | 0.90 | 2.59 | 0.22 | 1.34 |
| 55667 | 0 | 49489  | PSQNFGHMHKVVLP<br>PPPPPPCFLMFENV | 3.41 | 4.03 | 0.90 | 2.59 | 0.22 | 0.28 |
| 55668 | 0 | 49489  | PSQNFGHMHKVVLP<br>PPPPPPCFLMFENV | 3.41 | 4.03 | 0.90 | 2.59 | 0.22 | 0.28 |
| 55669 | 0 | 49489  | PSQNFGHMHKVVLP<br>PPPPPPCFLMFENV | 3.41 | 4.03 | 0.90 | 2.59 | 0.22 | 0.28 |
| 55670 | 0 | 49489  | PSQNFGHMHKVVLP<br>PPPPPPCFLMFENV | 3.41 | 4.03 | 0.90 | 2.59 | 0.22 | 2.35 |
| 55671 | 0 | 49489  | PSQNFGHMHKVVLP<br>PPPPPPCFLMFENV | 3.41 | 4.03 | 0.90 | 2.22 | 0.22 | 2.35 |
| 55672 | 0 | 49489  | PSQNFGHMHKVVLP<br>PPPPPPCFLMFENV | 3.41 | 4.03 | 0.90 | 2.37 | 0.22 | 1.75 |
| 55673 | 0 | 49489  | PSQNFGHMHKVVLP<br>PPPPPPCFLMFENV | 3.41 | 4.03 | 0.90 | 2.22 | 0.22 | 1.34 |
| 55674 | 0 | 164472 | PSQNFGHMHKVVLP<br>PPPPPPCFLMFENV | 3.41 | 4.15 | 0.90 | 2.37 | 0.22 | 2.35 |

|       |   |        |                                                        |      |      |      |      |      |      |
|-------|---|--------|--------------------------------------------------------|------|------|------|------|------|------|
| 55675 | 0 | 164472 | PSQNFGHMHKVVLP<br>PPPPPPPCFLMFENV<br>PY                | 3.41 | 4.15 | 0.90 | 2.22 | 0.22 | 2.35 |
| 55676 | 0 | 164472 | PSQNFGHMHKVVLP<br>PPPPPPPCFLMFENV<br>PY                | 3.41 | 4.15 | 0.90 | 2.22 | 0.22 | 0.28 |
| 55677 | 0 | 164472 | PSQNFGHMHKVVLP<br>PPPPPPPCFLMFENV<br>PY                | 3.41 | 4.15 | 0.90 | 2.37 | 0.22 | 0.28 |
| 55678 | 0 | 164472 | PSQNFGHMHKVVLP<br>PPPPPPPCFLMFENV<br>PY                | 3.41 | 4.15 | 0.90 | 2.37 | 0.22 | 1.34 |
| 55679 | 0 | 164472 | PSQNFGHMHKVVLP<br>PPPPPPPCFLMFENV<br>PY                | 3.41 | 4.15 | 0.90 | 2.37 | 0.22 | 1.75 |
| 55680 | 0 | 164473 | PSQNFGHMHKVVLP<br>PPPPPPPPPCFLMFENV<br>PY              | 3.47 | 4.93 | 0.90 | 2.37 | 0.22 | 1.34 |
| 55681 | 0 | 98944  | PSQQQPQEQVPL                                           | 2.52 | 0.01 | 1.86 | 0.44 | 1.93 | 1.27 |
| 55682 | 0 | 109733 | PSRDEL                                                 | 1.99 | 0.01 | 0.78 | 0.44 | 1.13 | 0.28 |
| 55683 | 0 | 109734 | PSREEM                                                 | 2.01 | 0.01 | 0.78 | 0.44 | 1.13 | 0.28 |
| 55684 | 0 | 451506 | PSRLPGPSDT                                             | 2.34 | 0.01 | 0.78 | 1.81 | 0.22 | 0.28 |
| 55685 | 0 | 451506 | PSRLPGPSDT                                             | 2.34 | 0.01 | 0.78 | 1.81 | 0.22 | 1.34 |
| 55686 | 0 | 356530 | PSRLREIDGSLSSA                                         | 2.68 | 0.01 | 1.61 | 0.44 | 0.85 | 1.28 |
| 55687 | 0 | 104938 | PSRLVNQ                                                | 1.99 | 0.01 | 0.90 | 0.44 | 1.13 | 1.27 |
| 55688 | 0 | 104938 | PSRLVNQ                                                | 1.99 | 0.01 | 0.90 | 0.44 | 1.41 | 1.27 |
| 55689 | 0 | 99547  | PSRRFSTRYGNQNGR                                        | 2.70 | 0.01 | 2.16 | 0.44 | 1.23 | 1.48 |
| 55690 | 0 | 99547  | PSRRFSTRYGNQNGR                                        | 2.70 | 0.01 | 2.16 | 0.44 | 1.23 | 1.48 |
| 55691 | 0 | 127779 | PSRRRRRRKATLAPA                                        | 2.70 | 0.01 | 3.93 | 0.44 | 1.13 | 0.85 |
| 55692 | 0 | 49498  | PSRSLPLPLLSPPRFH<br>PS                                 | 3.01 | 0.01 | 3.01 | 0.44 | 0.85 | 0.28 |
| 55693 | 0 | 103499 | PSRTWSPPFESEDSQK                                       | 2.75 | 0.01 | 0.78 | 1.12 | 0.22 | 0.85 |
| 55694 | 0 | 103499 | PSRTWSPPFESEDSQK                                       | 2.75 | 0.01 | 0.78 | 1.12 | 0.22 | 2.02 |
| 55695 | 0 | 49499  | PSSDPAWQRNDPSLHIP<br>ELVANNTLWIYCGNGT<br>PSELGGANVPAEF | 3.78 | 0.01 | 3.85 | 1.12 | 0.22 | 0.85 |
| 55696 | 0 | 49499  | PSSDPAWQRNDPSLHIP<br>ELVANNTLWIYCGNGT<br>PSELGGANVPAEF | 3.78 | 0.01 | 3.85 | 1.81 | 0.22 | 0.85 |
| 55697 | 0 | 152902 | PSSELENIPS                                             | 2.36 | 0.01 | 2.18 | 2.16 | 0.22 | 0.28 |
| 55698 | 0 | 504032 | PSSGSRPTSPSSGSR                                        | 2.75 | 0.01 | 3.29 | 4.03 | 0.22 | 0.85 |
| 55699 | 0 | 504032 | PSSGSRPTSPSSGSR                                        | 2.75 | 0.01 | 3.29 | 4.03 | 0.22 | 0.85 |
| 55700 | 0 | 504032 | PSSGSRPTSPSSGSR                                        | 2.75 | 0.01 | 3.29 | 2.13 | 0.22 | 0.85 |

|       |   |        |                                    |      |      |      |      |      |      |
|-------|---|--------|------------------------------------|------|------|------|------|------|------|
| 55701 | 0 | 504032 | PSSGSRPTSPSSGSR                    | 2.75 | 0.01 | 3.29 | 2.13 | 0.22 | 0.85 |
| 55702 | 0 | 504032 | PSSGSRPTSPSSGSR                    | 2.75 | 0.01 | 3.29 | 2.13 | 0.22 | 0.85 |
| 55703 | 0 | 504033 | PSSGSRPTYPPSSGSR                   | 2.74 | 0.01 | 3.29 | 4.03 | 0.22 | 0.85 |
| 55704 | 0 | 504033 | PSSGSRPTYPPSSGSR                   | 2.74 | 0.01 | 3.29 | 4.03 | 0.22 | 0.85 |
| 55705 | 0 | 504033 | PSSGSRPTYPPSSGSR                   | 2.74 | 0.01 | 3.29 | 2.13 | 0.22 | 0.85 |
| 55706 | 0 | 504033 | PSSGSRPTYPPSSGSR                   | 2.74 | 0.01 | 3.29 | 2.13 | 0.22 | 0.85 |
| 55707 | 0 | 504033 | PSSGSRPTYPPSSGSR                   | 2.74 | 0.01 | 3.29 | 2.13 | 0.22 | 0.85 |
| 55708 | 0 | 504034 | PSSGSRPTYPYTGSR                    | 2.74 | 0.01 | 3.29 | 4.03 | 0.22 | 0.85 |
| 55709 | 0 | 504034 | PSSGSRPTYPYTGSR                    | 2.74 | 0.01 | 3.29 | 4.03 | 0.22 | 0.85 |
| 55710 | 0 | 504034 | PSSGSRPTYPYTGSR                    | 2.74 | 0.01 | 3.29 | 2.13 | 0.22 | 0.85 |
| 55711 | 0 | 504034 | PSSGSRPTYPYTGSR                    | 2.74 | 0.01 | 3.29 | 2.13 | 0.22 | 0.85 |
| 55712 | 0 | 504034 | PSSGSRPTYPYTGSR                    | 2.74 | 0.01 | 3.29 | 2.13 | 0.22 | 0.85 |
| 55713 | 0 | 113117 | PSSISAFEG                          | 2.23 | 0.01 | 2.19 | 1.15 | 0.22 | 0.85 |
| 55714 | 0 | 49505  | PSSKRFQPFQQFGRD                    | 2.70 | 0.01 | 2.45 | 0.44 | 0.85 | 1.48 |
| 55715 | 0 | 49506  | PSSKRFQPFQQFGRDVS<br>DFT           | 2.97 | 0.01 | 2.45 | 1.20 | 0.22 | 0.85 |
| 55716 | 0 | 49506  | PSSKRFQPFQQFGRDVS<br>DFT           | 2.97 | 0.01 | 2.45 | 0.44 | 0.85 | 0.28 |
| 55717 | 0 | 49507  | PSSKRFQPFQQFGRDVS<br>DFTDSVRDPKTSE | 3.38 | 0.01 | 2.45 | 0.44 | 0.85 | 0.28 |
| 55718 | 0 | 49510  | PSSLVDSL                           | 2.16 | 0.01 | 3.51 | 2.36 | 0.22 | 0.28 |
| 55719 | 0 | 49510  | PSSLVDSL                           | 2.16 | 0.01 | 3.51 | 2.02 | 2.39 | 0.28 |
| 55720 | 0 | 49510  | PSSLVDSL                           | 2.16 | 0.01 | 3.51 | 1.12 | 0.22 | 0.28 |
| 55721 | 0 | 49513  | PSSPPQWK                           | 2.15 | 0.01 | 2.40 | 2.43 | 0.22 | 0.28 |
| 55722 | 0 | 98945  | PSSQVSFQQPLQ                       | 2.53 | 0.01 | 1.86 | 0.44 | 1.93 | 1.27 |
| 55723 | 0 | 49516  | PSSRRYPFV                          | 2.25 | 0.01 | 2.61 | 0.44 | 0.85 | 0.28 |
| 55724 | 0 | 49518  | PSSRSNTLPRSN                       | 2.53 | 0.01 | 3.26 | 0.44 | 0.85 | 0.28 |
| 55725 | 0 | 49518  | PSSRSNTLPRSN                       | 2.53 | 0.01 | 3.26 | 2.71 | 0.22 | 0.28 |
| 55726 | 0 | 102726 | PSSTCIDGKWNPVLPICV<br>RT           | 2.93 | 0.01 | 3.44 | 0.68 | 0.22 | 0.28 |
| 55727 | 0 | 49529  | PSTLQTPGSSSGASL                    | 2.73 | 0.01 | 1.66 | 0.44 | 0.85 | 0.28 |
| 55728 | 0 | 155473 | PSTP                               | 1.60 | 0.01 | 2.30 | 0.44 | 0.85 | 0.85 |
| 55729 | 0 | 49532  | PSTPAD                             | 1.91 | 0.01 | 2.30 | 1.15 | 0.22 | 0.85 |
| 55730 | 0 | 49532  | PSTPAD                             | 1.91 | 0.01 | 2.30 | 1.15 | 0.22 | 0.85 |
| 55731 | 0 | 125523 | PSTPCPATPAGPKGRVF<br>VDPLAKKL      | 3.18 | 0.01 | 0.78 | 0.44 | 1.13 | 0.28 |
| 55732 | 0 | 125523 | PSTPCPATPAGPKGRVF<br>VDPLAKKL      | 3.18 | 0.01 | 0.78 | 0.44 | 1.13 | 0.28 |
| 55733 | 0 | 49533  | PSTPGDNPLV                         | 2.32 | 0.01 | 0.90 | 0.44 | 1.23 | 0.28 |
| 55734 | 0 | 49533  | PSTPGDNPLV                         | 2.32 | 0.01 | 0.90 | 0.44 | 1.23 | 1.27 |
| 55735 | 0 | 49534  | PSTPGERVRH                         | 2.32 | 0.01 | 0.90 | 0.44 | 1.23 | 0.28 |
| 55736 | 0 | 49534  | PSTPGERVRH                         | 2.32 | 0.01 | 0.90 | 0.44 | 1.23 | 1.27 |
| 55737 | 0 | 49535  | PSTPGSRQNM                         | 2.32 | 0.01 | 0.90 | 0.44 | 1.23 | 0.28 |
| 55738 | 0 | 150805 | PSTQT                              | 1.75 | 0.01 | 2.19 | 0.44 | 1.13 | 1.34 |
| 55739 | 0 | 150805 | PSTQT                              | 1.75 | 0.01 | 2.19 | 0.44 | 1.13 | 1.57 |
| 55740 | 0 | 125524 | PSTQTLKLIETHLRTIPSH<br>A           | 2.97 | 0.01 | 0.78 | 0.44 | 1.13 | 0.28 |



|       |   |        |                              |      |      |      |      |      |      |
|-------|---|--------|------------------------------|------|------|------|------|------|------|
| 55741 | 0 | 125524 | PSTQTLKLIETHLRTIPSH<br>A     | 2.97 | 0.01 | 0.78 | 0.44 | 1.13 | 0.28 |
| 55742 | 0 | 125524 | PSTQTLKLIETHLRTIPSH<br>A     | 2.97 | 0.01 | 0.78 | 3.06 | 0.22 | 0.28 |
| 55743 | 0 | 131010 | PSTRWTELDDEVKRLKGSRS         | 2.95 | 0.01 | 0.78 | 0.44 | 1.13 | 0.85 |
| 55744 | 0 | 131010 | PSTRWTELDDEVKRLKGSRS         | 2.95 | 0.01 | 0.78 | 0.44 | 1.41 | 0.85 |
| 55745 | 0 | 131010 | PSTRWTELDDEVKRLKGSRS         | 2.95 | 0.01 | 0.78 | 3.65 | 0.22 | 0.28 |
| 55746 | 0 | 131010 | PSTRWTELDDEVKRLKGSRS         | 2.95 | 0.01 | 0.78 | 0.44 | 1.13 | 0.28 |
| 55747 | 0 | 122528 | PSTRWTELDDEVKRLKGSRSA        | 2.98 | 0.01 | 0.78 | 0.44 | 1.13 | 0.28 |
| 55748 | 0 | 122528 | PSTRWTELDDEVKRLKGSRSA        | 2.98 | 0.01 | 0.78 | 0.44 | 1.41 | 0.28 |
| 55749 | 0 | 122528 | PSTRWTELDDEVKRLKGSRSA        | 2.98 | 0.01 | 0.78 | 0.44 | 1.13 | 0.28 |
| 55750 | 0 | 110968 | PSTSRSLYASSPGGVYATRS         | 2.98 | 0.01 | 0.78 | 2.46 | 0.22 | 1.28 |
| 55751 | 0 | 49539  | PSTSSKLRPRWTFSTPPVTT         | 2.97 | 0.01 | 2.48 | 0.68 | 0.22 | 0.28 |
| 55752 | 0 | 49539  | PSTSSKLRPRWTFSTPPVTT         | 2.97 | 0.01 | 2.48 | 1.20 | 0.22 | 0.28 |
| 55753 | 0 | 49539  | PSTSSKLRPRWTFSTPPVTT         | 2.97 | 0.01 | 2.48 | 1.20 | 0.22 | 2.12 |
| 55754 | 0 | 49539  | PSTSSKLRPRWTFSTPPVTT         | 2.97 | 0.01 | 2.48 | 1.20 | 0.22 | 1.34 |
| 55755 | 0 | 356766 | PSTTTTRAPSRLEI               | 2.70 | 0.01 | 1.61 | 0.44 | 0.85 | 1.28 |
| 55756 | 0 | 113719 | PSTYTTTSHA                   | 2.33 | 0.01 | 1.86 | 1.12 | 0.22 | 0.28 |
| 55757 | 0 | 107570 | PSVFLFP                      | 2.05 | 0.01 | 0.78 | 0.44 | 1.13 | 0.28 |
| 55758 | 0 | 49547  | PSVKP                        | 1.77 | 0.01 | 4.08 | 0.68 | 0.22 | 0.28 |
| 55759 | 0 | 139857 | PSVLHGW                      | 1.99 | 0.01 | 0.90 | 2.00 | 0.22 | 0.28 |
| 55760 | 0 | 489717 | PSVQPWSTIVQGP                | 2.69 | 0.01 | 2.69 | 3.05 | 0.85 | 1.28 |
| 55761 | 0 | 49557  | PSVYAWERKKISNCVAD            | 2.75 | 0.01 | 2.48 | 0.44 | 0.85 | 0.28 |
| 55762 | 0 | 49557  | PSVYAWERKKISNCVAD            | 2.75 | 0.01 | 2.48 | 1.20 | 0.22 | 0.28 |
| 55763 | 0 | 150877 | PSVYVRQELTPDQR               | 2.62 | 0.01 | 4.33 | 1.12 | 0.22 | 0.85 |
| 55764 | 0 | 150877 | PSVYVRQELTPDQR               | 2.62 | 0.01 | 4.33 | 1.12 | 0.22 | 0.85 |
| 55765 | 0 | 49559  | PSWGLSRIS                    | 2.23 | 0.01 | 3.28 | 0.44 | 1.23 | 0.85 |
| 55766 | 0 | 120878 | PSWGLVVTMFAWGYLL<br>DHVGERMV | 3.08 | 0.01 | 2.86 | 0.44 | 0.85 | 0.28 |
| 55767 | 0 | 489719 | PSYNPPAGISPSDWL              | 2.69 | 0.01 | 2.69 | 3.05 | 0.85 | 1.28 |
| 55768 | 0 | 167362 | PSYPLSF                      | 2.05 | 0.01 | 0.90 | 0.44 | 0.85 | 1.39 |
| 55769 | 0 | 49566  | PSYQFGGHNS                   | 2.30 | 0.01 | 2.56 | 1.20 | 0.22 | 0.28 |

|       |   |        |                             |      |      |      |      |      |      |
|-------|---|--------|-----------------------------|------|------|------|------|------|------|
| 55770 | 0 | 523849 | PTADSPLTASPPATAPAP<br>SA    | 3.02 | 3.97 | 0.90 | 0.44 | 1.59 | 1.28 |
| 55771 | 0 | 523850 | PTADSPLTASPPATAPG<br>ASA    | 3.01 | 3.97 | 0.90 | 0.44 | 1.59 | 1.28 |
| 55772 | 0 | 523851 | PTADSPLTASPPATAPG<br>PAA    | 3.00 | 3.97 | 0.90 | 0.44 | 1.59 | 1.28 |
| 55773 | 0 | 523853 | PTADSPLTASPPATAPG<br>PSA    | 3.01 | 4.63 | 2.40 | 0.44 | 1.59 | 1.28 |
| 55774 | 0 | 523861 | PTADSPLTASPPATAPG<br>PSA    | 3.01 | 4.33 | 2.40 | 0.44 | 1.59 | 1.28 |
| 55775 | 0 | 523852 | PTADSPLTASPPATAPG<br>PSA    | 3.01 | 4.33 | 2.40 | 0.44 | 1.59 | 1.28 |
| 55776 | 0 | 523856 | PTADSPLTASPPATAPG<br>PSA    | 3.01 | 4.93 | 2.40 | 0.44 | 1.59 | 1.28 |
| 55777 | 0 | 523859 | PTADSPLTASPPATAPG<br>PSA    | 3.01 | 4.93 | 2.40 | 0.44 | 1.59 | 1.28 |
| 55778 | 0 | 523855 | PTADSPLTASPPATAPG<br>PSA    | 3.01 | 3.97 | 2.40 | 0.44 | 0.85 | 1.28 |
| 55779 | 0 | 523862 | PTADSPLTASPPATAPG<br>PSA    | 3.01 | 0.01 | 2.40 | 0.44 | 1.59 | 1.28 |
| 55780 | 0 | 49576  | PTAGAQIAA                   | 2.22 | 0.01 | 4.15 | 0.68 | 0.22 | 0.28 |
| 55781 | 0 | 49576  | PTAGAQIAA                   | 2.22 | 0.01 | 4.15 | 0.68 | 0.22 | 0.28 |
| 55782 | 0 | 49576  | PTAGAQIAA                   | 2.22 | 0.01 | 4.15 | 0.68 | 0.22 | 0.85 |
| 55783 | 0 | 49576  | PTAGAQIAA                   | 2.22 | 0.01 | 4.15 | 0.68 | 0.22 | 0.85 |
| 55784 | 0 | 49576  | PTAGAQIAA                   | 2.22 | 0.01 | 4.15 | 0.68 | 0.22 | 0.28 |
| 55785 | 0 | 49576  | PTAGAQIAA                   | 2.22 | 0.01 | 4.15 | 0.68 | 0.22 | 0.85 |
| 55786 | 0 | 172781 | PTAMRKYLPTYRSYN             | 2.69 | 0.01 | 0.78 | 0.44 | 1.13 | 0.28 |
| 55787 | 0 | 523865 | PTAPATTTTPDEMATQA<br>ATV    | 2.99 | 3.97 | 2.40 | 0.44 | 1.59 | 1.28 |
| 55788 | 0 | 523866 | PTAPATTTTPDEMATQA<br>ATV    | 2.99 | 4.08 | 2.40 | 0.44 | 1.59 | 1.28 |
| 55789 | 0 | 523867 | PTAPATTTTPDEMATQA<br>ATV    | 2.99 | 4.33 | 2.40 | 0.44 | 1.59 | 1.28 |
| 55790 | 0 | 523864 | PTAPATTTTPDEMATQA<br>ATV    | 2.99 | 4.23 | 2.40 | 0.44 | 1.59 | 1.28 |
| 55791 | 0 | 523868 | PTAPATTTTPDEMATQA<br>ATV    | 2.99 | 0.01 | 2.40 | 0.44 | 1.59 | 1.28 |
| 55792 | 0 | 49582  | PTAPLPGDMNPANWP             | 2.71 | 0.01 | 2.76 | 0.44 | 1.59 | 0.28 |
| 55793 | 0 | 141726 | PTAPPLLPHS                  | 2.35 | 0.01 | 2.04 | 3.37 | 0.22 | 0.28 |
| 55794 | 0 | 141726 | PTAPPLLPHS                  | 2.35 | 0.01 | 2.04 | 3.37 | 0.22 | 1.34 |
| 55795 | 0 | 141726 | PTAPPLLPHS                  | 2.35 | 0.01 | 2.04 | 3.37 | 0.22 | 0.28 |
| 55796 | 0 | 141726 | PTAPPLLPHS                  | 2.35 | 0.01 | 2.04 | 3.37 | 0.22 | 2.12 |
| 55797 | 0 | 49584  | PTAPPQAARAEGGPCV<br>PPVP    | 2.98 | 0.01 | 2.40 | 0.44 | 1.59 | 0.28 |
| 55798 | 0 | 122531 | PTARSVGAADGSSWEG<br>VGVVPDV | 3.11 | 0.01 | 1.60 | 2.04 | 0.22 | 0.28 |

|       |   |        |                               |      |      |      |      |      |      |
|-------|---|--------|-------------------------------|------|------|------|------|------|------|
| 55799 | 0 | 122531 | PTARSVGAADGSSWEG<br>VGVVPDV   | 3.11 | 0.01 | 1.60 | 2.04 | 0.22 | 0.28 |
| 55800 | 0 | 49585  | PTATHRPLATVF                  | 2.50 | 0.01 | 0.90 | 0.68 | 0.22 | 1.39 |
| 55801 | 0 | 49592  | PTCNENNGGC                    | 2.33 | 0.01 | 3.18 | 2.74 | 0.22 | 0.28 |
| 55802 | 0 | 94651  | PTCWAICKRIPN                  | 2.48 | 0.01 | 2.38 | 0.68 | 0.22 | 0.28 |
| 55803 | 0 | 94651  | PTCWAICKRIPN                  | 2.48 | 0.01 | 2.38 | 0.44 | 1.59 | 0.28 |
| 55804 | 0 | 94651  | PTCWAICKRIPN                  | 2.48 | 0.01 | 2.38 | 0.44 | 1.74 | 0.28 |
| 55805 | 0 | 94651  | PTCWAICKRIPN                  | 2.48 | 0.01 | 2.38 | 0.44 | 1.74 | 0.28 |
| 55806 | 0 | 97564  | PTDAGVAT                      | 2.14 | 0.01 | 2.87 | 1.81 | 0.22 | 0.28 |
| 55807 | 0 | 49595  | PTDCFRKH                      | 2.10 | 0.01 | 1.72 | 0.44 | 0.85 | 0.28 |
| 55808 | 0 | 356977 | PTDEHSDFLTMGSKM               | 2.66 | 0.01 | 1.61 | 0.44 | 0.85 | 1.28 |
| 55809 | 0 | 100394 | PTDFSVEFLE                    | 2.31 | 0.01 | 2.18 | 2.16 | 0.22 | 0.28 |
| 55810 | 0 | 118979 | PTDGNC                        | 1.88 | 0.01 | 2.08 | 0.68 | 0.22 | 0.28 |
| 55811 | 0 | 136561 | PTDNDHTFDALQ                  | 2.48 | 0.01 | 3.48 | 3.70 | 0.85 | 1.34 |
| 55812 | 0 | 49605  | PTDPRRRSRNLGKVIDTL<br>TCGFADL | 3.15 | 0.01 | 1.72 | 0.44 | 0.85 | 0.28 |
| 55813 | 0 | 49605  | PTDPRRRSRNLGKVIDTL<br>TCGFADL | 3.15 | 0.01 | 1.72 | 0.44 | 0.85 | 0.28 |
| 55814 | 0 | 49608  | PTDSTDNNQNGGRNG<br>ARPKQRRPQ  | 3.16 | 0.01 | 2.45 | 1.20 | 0.22 | 0.85 |
| 55815 | 0 | 49608  | PTDSTDNNQNGGRNG<br>ARPKQRRPQ  | 3.16 | 0.01 | 2.45 | 1.20 | 0.22 | 0.28 |
| 55816 | 0 | 49608  | PTDSTDNNQNGGRNG<br>ARPKQRRPQ  | 3.16 | 0.01 | 2.45 | 0.44 | 0.85 | 0.28 |
| 55817 | 0 | 79628  | PTDVSCEGLGAWVPTA<br>PCARI     | 2.99 | 0.01 | 2.85 | 0.44 | 1.59 | 0.28 |
| 55818 | 0 | 357020 | PTEDSVDSREQDGED               | 2.70 | 0.01 | 1.61 | 0.44 | 0.85 | 1.28 |
| 55819 | 0 | 357021 | PTEEAEDSDSEEEE                | 2.71 | 0.01 | 1.61 | 0.44 | 0.85 | 1.28 |
| 55820 | 0 | 357022 | PTEEEDDDEEDSD                 | 2.74 | 0.01 | 1.61 | 0.44 | 0.85 | 1.28 |
| 55821 | 0 | 357031 | PTEGSQSTLAATDTA               | 2.70 | 0.01 | 1.61 | 0.44 | 0.85 | 1.28 |
| 55822 | 0 | 156405 | PTEGTGDWSSEPEEEQ<br>EETG      | 3.03 | 0.01 | 1.60 | 1.20 | 0.22 | 1.48 |
| 55823 | 0 | 423464 | PTEISEATHPVLATM               | 2.69 | 0.01 | 2.51 | 0.44 | 2.35 | 1.28 |
| 55824 | 0 | 156941 | PTEKKHV                       | 2.01 | 0.01 | 0.90 | 2.74 | 0.22 | 1.27 |
| 55825 | 0 | 156941 | PTEKKHV                       | 2.01 | 0.01 | 0.90 | 0.68 | 0.22 | 0.28 |
| 55826 | 0 | 357052 | PTEPKSAEPKPAEPK               | 2.75 | 0.01 | 1.61 | 0.44 | 0.85 | 1.28 |
| 55827 | 0 | 534848 | PTFALA                        | 1.90 | 0.01 | 0.78 | 0.68 | 0.22 | 0.85 |
| 55828 | 0 | 534848 | PTFALA                        | 1.90 | 0.01 | 0.78 | 0.68 | 0.22 | 0.85 |
| 55829 | 0 | 534848 | PTFALA                        | 1.90 | 0.01 | 0.78 | 0.68 | 0.22 | 0.85 |
| 55830 | 0 | 534848 | PTFALA                        | 1.90 | 0.01 | 0.78 | 0.68 | 0.22 | 2.02 |
| 55831 | 0 | 534848 | PTFALA                        | 1.90 | 0.01 | 0.78 | 0.68 | 0.22 | 2.02 |
| 55832 | 0 | 49620  | PTFGS                         | 1.74 | 0.01 | 4.93 | 0.68 | 0.22 | 0.28 |
| 55833 | 0 | 49621  | PTFKTTKKDHKP                  | 2.52 | 0.01 | 2.38 | 0.44 | 1.74 | 0.28 |
| 55834 | 0 | 109736 | PTGASGPL                      | 2.15 | 0.01 | 1.60 | 2.55 | 2.60 | 0.28 |
| 55835 | 0 | 49629  | PTGDRHKQPLVAPAKQL<br>L        | 2.84 | 0.01 | 2.78 | 0.68 | 0.22 | 1.34 |

|       |   |        |                                |      |      |      |      |      |      |
|-------|---|--------|--------------------------------|------|------|------|------|------|------|
| 55836 | 0 | 49629  | PTGDRHKQPLVAPAKQL<br>L         | 2.84 | 0.01 | 2.78 | 0.68 | 0.22 | 0.85 |
| 55837 | 0 | 49629  | PTGDRHKQPLVAPAKQL<br>L         | 2.84 | 0.01 | 2.78 | 0.68 | 0.22 | 0.28 |
| 55838 | 0 | 49629  | PTGDRHKQPLVAPAKQL<br>L         | 2.84 | 0.01 | 2.78 | 0.68 | 0.22 | 0.85 |
| 55839 | 0 | 49629  | PTGDRHKQPLVAPAKQL<br>L         | 2.84 | 0.01 | 3.18 | 1.15 | 0.22 | 0.28 |
| 55840 | 0 | 49629  | PTGDRHKQPLVAPAKQL<br>L         | 2.84 | 0.01 | 2.78 | 1.15 | 0.22 | 0.28 |
| 55841 | 0 | 163082 | PTGHS                          | 1.74 | 0.01 | 0.78 | 0.44 | 1.41 | 2.49 |
| 55842 | 0 | 107223 | PTGPLGPKGQTGELGAP<br>GNKGEQGPK | 3.26 | 4.93 | 0.90 | 2.46 | 0.22 | 0.28 |
| 55843 | 0 | 106014 | PTGPLGPKGQTGELGIA<br>GFKGEQGPK | 3.25 | 0.01 | 2.25 | 2.46 | 2.25 | 1.75 |
| 55844 | 0 | 106014 | PTGPLGPKGQTGELGIA<br>GFKGEQGPK | 3.25 | 0.01 | 2.25 | 2.46 | 0.22 | 0.28 |
| 55845 | 0 | 49636  | PTGPTIAAGGEQPPS                | 2.70 | 0.01 | 3.37 | 2.22 | 0.22 | 0.28 |
| 55846 | 0 | 49637  | PTGQIHWGNLSKIGV                | 2.64 | 0.01 | 2.43 | 0.44 | 1.59 | 0.28 |
| 55847 | 0 | 97565  | PTGSAAAN                       | 2.12 | 0.01 | 2.87 | 0.68 | 0.22 | 0.28 |
| 55848 | 0 | 97565  | PTGSAAAN                       | 2.12 | 0.01 | 2.87 | 1.81 | 0.22 | 0.28 |
| 55849 | 0 | 187696 | PTGSGKST                       | 2.16 | 0.01 | 1.96 | 0.68 | 0.22 | 1.48 |
| 55850 | 0 | 187696 | PTGSGKST                       | 2.16 | 0.01 | 1.96 | 0.68 | 0.22 | 1.27 |
| 55851 | 0 | 187696 | PTGSGKST                       | 2.16 | 0.01 | 1.96 | 0.68 | 0.22 | 0.28 |
| 55852 | 0 | 187696 | PTGSGKST                       | 2.16 | 0.01 | 1.96 | 0.68 | 0.22 | 0.85 |
| 55853 | 0 | 187696 | PTGSGKST                       | 2.16 | 0.01 | 1.96 | 0.68 | 0.22 | 1.48 |
| 55854 | 0 | 187696 | PTGSGKST                       | 2.16 | 0.01 | 1.96 | 0.68 | 0.22 | 1.34 |
| 55855 | 0 | 49645  | PTGTAAANYKTP                   | 2.50 | 0.01 | 4.15 | 1.15 | 0.22 | 1.34 |
| 55856 | 0 | 49645  | PTGTAAANYKTP                   | 2.50 | 0.01 | 4.15 | 1.15 | 0.22 | 0.85 |
| 55857 | 0 | 49646  | PTGTPLDIDTASE                  | 2.56 | 0.01 | 2.43 | 0.68 | 0.22 | 0.28 |
| 55858 | 0 | 357150 | PTGTYQGDSDLQLER                | 2.68 | 0.01 | 1.61 | 0.44 | 0.85 | 1.28 |
| 55859 | 0 | 87427  | PTGYQFD                        | 1.99 | 0.01 | 3.59 | 0.44 | 0.85 | 0.28 |
| 55860 | 0 | 87427  | PTGYQFD                        | 1.99 | 0.01 | 3.59 | 0.44 | 0.85 | 0.28 |
| 55861 | 0 | 49649  | PTHYFGSPM                      | 2.22 | 0.01 | 0.90 | 0.44 | 0.85 | 1.39 |
| 55862 | 0 | 49650  | PTHYISSRH                      | 2.22 | 0.01 | 0.90 | 0.44 | 1.59 | 0.28 |
| 55863 | 0 | 49650  | PTHYISSRH                      | 2.22 | 0.01 | 0.90 | 0.68 | 0.22 | 0.28 |
| 55864 | 0 | 49651  | PTHYISTSL                      | 2.23 | 0.01 | 0.90 | 0.44 | 1.59 | 0.28 |
| 55865 | 0 | 49651  | PTHYISTSL                      | 2.23 | 0.01 | 0.90 | 0.44 | 0.85 | 1.39 |
| 55866 | 0 | 49652  | PTHYLLSQP                      | 2.23 | 0.01 | 0.90 | 0.44 | 0.85 | 1.39 |
| 55867 | 0 | 49653  | PTHYTTSAP                      | 2.25 | 0.01 | 0.90 | 0.44 | 1.59 | 0.28 |
| 55868 | 0 | 49656  | PTIAGA                         | 1.90 | 0.01 | 3.16 | 0.68 | 0.22 | 0.28 |
| 55869 | 0 | 49656  | PTIAGA                         | 1.90 | 0.01 | 2.40 | 2.52 | 0.22 | 0.28 |
| 55870 | 0 | 49656  | PTIAGA                         | 1.90 | 0.01 | 2.40 | 2.52 | 0.22 | 0.28 |
| 55871 | 0 | 49658  | PTIAGAGDVKTS AEG               | 2.68 | 0.01 | 3.03 | 1.15 | 0.22 | 0.85 |
| 55872 | 0 | 49658  | PTIAGAGDVKTS AEG               | 2.68 | 0.01 | 3.03 | 1.15 | 0.22 | 1.39 |
| 55873 | 0 | 49658  | PTIAGAGDVKTS AEG               | 2.68 | 0.01 | 3.03 | 1.15 | 0.22 | 0.85 |
| 55874 | 0 | 49659  | PTIAGAGEVK                     | 2.31 | 0.01 | 3.42 | 3.28 | 0.22 | 0.28 |

|       |   |        |                                    |      |      |      |      |      |      |
|-------|---|--------|------------------------------------|------|------|------|------|------|------|
| 55875 | 0 | 357173 | PTINGTGENLDGDEE                    | 2.70 | 0.01 | 1.61 | 0.44 | 0.85 | 1.28 |
| 55876 | 0 | 49680  | PTKEFFREA                          | 2.22 | 0.01 | 4.63 | 0.68 | 0.22 | 0.28 |
| 55877 | 0 | 49680  | PTKEFFREA                          | 2.22 | 0.01 | 4.63 | 2.22 | 0.22 | 2.35 |
| 55878 | 0 | 49680  | PTKEFFREA                          | 2.22 | 0.01 | 4.15 | 0.68 | 0.22 | 2.98 |
| 55879 | 0 | 49680  | PTKEFFREA                          | 2.22 | 0.01 | 4.15 | 0.68 | 0.22 | 2.02 |
| 55880 | 0 | 49680  | PTKEFFREA                          | 2.22 | 0.01 | 4.15 | 0.68 | 0.22 | 2.02 |
| 55881 | 0 | 49683  | PTKKPTFKTTKK                       | 2.52 | 0.01 | 2.38 | 0.68 | 0.22 | 0.28 |
| 55882 | 0 | 49683  | PTKKPTFKTTKK                       | 2.52 | 0.01 | 2.38 | 0.68 | 0.22 | 0.28 |
| 55883 | 0 | 49683  | PTKKPTFKTTKK                       | 2.52 | 0.01 | 2.38 | 0.44 | 1.74 | 0.28 |
| 55884 | 0 | 49683  | PTKKPTFKTTKK                       | 2.52 | 0.01 | 2.38 | 0.44 | 1.74 | 0.28 |
| 55885 | 0 | 134194 | PTKSDPRCLTRYSSFVN<br>ME            | 2.90 | 0.01 | 0.78 | 0.44 | 2.35 | 0.28 |
| 55886 | 0 | 118562 | PTKVVRTALLDAA                      | 2.54 | 0.01 | 0.78 | 0.44 | 1.74 | 0.85 |
| 55887 | 0 | 135975 | PTLAFLQDVMNI                       | 2.43 | 0.01 | 0.78 | 0.44 | 1.13 | 0.28 |
| 55888 | 0 | 49690  | PTLDHVLD                           | 2.14 | 0.01 | 2.40 | 2.43 | 0.22 | 0.28 |
| 55889 | 0 | 167793 | PTLDHVLDH                          | 2.25 | 0.01 | 2.40 | 2.43 | 0.22 | 0.28 |
| 55890 | 0 | 49691  | PTLDHVLDHVQT                       | 2.51 | 0.01 | 2.40 | 1.12 | 0.22 | 0.28 |
| 55891 | 0 | 49692  | PTLDVRMINI                         | 2.29 | 0.01 | 3.04 | 1.15 | 0.22 | 0.28 |
| 55892 | 0 | 49692  | PTLDVRMINI                         | 2.29 | 0.01 | 3.04 | 0.68 | 0.22 | 0.28 |
| 55893 | 0 | 49692  | PTLDVRMINI                         | 2.29 | 0.01 | 3.04 | 0.68 | 0.22 | 1.75 |
| 55894 | 0 | 110686 | PTLHEYMLDLQPETTDL<br>YCYEQLNDSSEEE | 3.35 | 0.01 | 1.86 | 0.44 | 0.85 | 0.28 |
| 55895 | 0 | 110686 | PTLHEYMLDLQPETTDL<br>YCYEQLNDSSEEE | 3.35 | 0.01 | 1.86 | 0.44 | 0.85 | 0.28 |
| 55896 | 0 | 110686 | PTLHEYMLDLQPETTDL<br>YCYEQLNDSSEEE | 3.35 | 0.01 | 1.86 | 0.44 | 0.85 | 0.28 |
| 55897 | 0 | 110686 | PTLHEYMLDLQPETTDL<br>YCYEQLNDSSEEE | 3.35 | 0.01 | 1.86 | 0.44 | 0.85 | 0.28 |
| 55898 | 0 | 49698  | PTLHGPTPLLYRLRGAV<br>QNEITLT       | 3.12 | 0.01 | 1.72 | 0.44 | 1.59 | 0.28 |
| 55899 | 0 | 357238 | PTLKAPAAPAAPAAA                    | 2.73 | 0.01 | 1.61 | 0.44 | 0.85 | 1.28 |
| 55900 | 0 | 49703  | PTLLGEAT                           | 2.13 | 0.01 | 3.06 | 1.12 | 0.22 | 0.28 |
| 55901 | 0 | 49705  | PTLNGDDRHKIVNVQDQ<br>RQYG          | 2.93 | 0.01 | 3.27 | 3.16 | 0.22 | 0.28 |
| 55902 | 0 | 49706  | PTLPGTNIVLGALPE                    | 2.71 | 0.01 | 2.40 | 1.12 | 0.22 | 0.28 |
| 55903 | 0 | 195050 | PTLQIPVS                           | 2.13 | 0.01 | 2.24 | 1.15 | 0.22 | 0.85 |
| 55904 | 0 | 195050 | PTLQIPVS                           | 2.13 | 0.01 | 2.24 | 1.81 | 0.22 | 0.28 |
| 55905 | 0 | 195050 | PTLQIPVS                           | 2.13 | 0.01 | 2.24 | 0.68 | 0.22 | 0.28 |
| 55906 | 0 | 195050 | PTLQIPVS                           | 2.13 | 0.01 | 2.24 | 1.15 | 0.22 | 0.85 |
| 55907 | 0 | 49707  | PTLSEIKGVIVHRLE                    | 2.66 | 0.01 | 2.43 | 0.44 | 1.59 | 0.28 |
| 55908 | 0 | 181766 | PTLSESHKSARNVLE                    | 2.66 | 0.01 | 3.26 | 2.37 | 0.22 | 1.28 |
| 55909 | 0 | 451507 | PTMTRVLQGVLPALPQ<br>VV             | 2.87 | 0.01 | 0.78 | 1.81 | 0.22 | 0.28 |
| 55910 | 0 | 132021 | PTMTRVLQGVLPALPQ<br>VVCN           | 2.96 | 0.01 | 0.78 | 0.68 | 0.22 | 1.57 |
| 55911 | 0 | 49716  | PTNAAFSKLPASTIDELK<br>TN           | 2.96 | 0.01 | 3.59 | 2.79 | 0.22 | 0.28 |

|       |   |        |                               |      |      |      |      |      |      |
|-------|---|--------|-------------------------------|------|------|------|------|------|------|
| 55912 | 0 | 101146 | PTNAHPQ                       | 2.03 | 0.01 | 0.90 | 0.44 | 1.13 | 1.39 |
| 55913 | 0 | 226375 | PTNENRE                       | 2.04 | 0.01 | 0.90 | 2.66 | 0.22 | 1.39 |
| 55914 | 0 | 78251  | PTNNLDHL                      | 2.13 | 0.01 | 0.90 | 0.44 | 0.85 | 1.39 |
| 55915 | 0 | 138218 | PTPAPGPGRR                    | 2.35 | 0.01 | 0.78 | 0.44 | 1.13 | 1.27 |
| 55916 | 0 | 138218 | PTPAPGPGRR                    | 2.35 | 0.01 | 0.78 | 0.68 | 0.22 | 0.28 |
| 55917 | 0 | 138218 | PTPAPGPGRR                    | 2.35 | 0.01 | 0.78 | 0.68 | 0.22 | 0.28 |
| 55918 | 0 | 138218 | PTPAPGPGRR                    | 2.35 | 0.01 | 0.78 | 0.68 | 0.22 | 0.28 |
| 55919 | 0 | 138218 | PTPAPGPGRR                    | 2.35 | 0.01 | 0.78 | 0.44 | 1.13 | 0.28 |
| 55920 | 0 | 138218 | PTPAPGPGRR                    | 2.35 | 0.01 | 0.78 | 0.44 | 1.13 | 0.28 |
| 55921 | 0 | 138218 | PTPAPGPGRR                    | 2.35 | 0.01 | 0.78 | 0.44 | 1.41 | 0.28 |
| 55922 | 0 | 138219 | PTPETGPLQR                    | 2.34 | 0.01 | 0.78 | 0.44 | 1.13 | 0.28 |
| 55923 | 0 | 138219 | PTPETGPLQR                    | 2.34 | 0.01 | 0.78 | 0.68 | 0.22 | 0.28 |
| 55924 | 0 | 180916 | PTPFSPPLRD                    | 2.33 | 0.01 | 2.08 | 0.44 | 0.85 | 2.75 |
| 55925 | 0 | 138220 | PTPGKGPADR                    | 2.34 | 0.01 | 0.78 | 0.68 | 0.22 | 0.28 |
| 55926 | 0 | 138220 | PTPGKGPADR                    | 2.34 | 0.01 | 0.78 | 0.68 | 0.22 | 0.28 |
| 55927 | 0 | 134764 | PTPGSRRGP                     | 2.36 | 0.01 | 0.78 | 0.44 | 1.13 | 0.85 |
| 55928 | 0 | 134764 | PTPGSRRGP                     | 2.36 | 0.01 | 0.78 | 0.44 | 1.13 | 0.85 |
| 55929 | 0 | 134764 | PTPGSRRGP                     | 2.36 | 0.01 | 0.78 | 0.44 | 1.13 | 0.85 |
| 55930 | 0 | 134764 | PTPGSRRGP                     | 2.36 | 0.01 | 0.78 | 0.44 | 1.13 | 0.85 |
| 55931 | 0 | 134764 | PTPGSRRGP                     | 2.36 | 0.01 | 0.78 | 0.44 | 1.13 | 0.85 |
| 55932 | 0 | 134764 | PTPGSRRGP                     | 2.36 | 0.01 | 0.78 | 0.44 | 1.13 | 0.85 |
| 55933 | 0 | 134764 | PTPGSRRGP                     | 2.36 | 0.01 | 0.78 | 3.05 | 1.13 | 0.28 |
| 55934 | 0 | 134764 | PTPGSRRGP                     | 2.36 | 0.01 | 0.78 | 2.79 | 1.13 | 1.28 |
| 55935 | 0 | 134765 | PTPGSRRGPSLGAS                | 2.73 | 0.01 | 0.78 | 3.05 | 1.13 | 0.85 |
| 55936 | 0 | 153284 | PTPLSPPLRNTHPQA               | 2.70 | 0.01 | 2.08 | 0.68 | 0.22 | 0.28 |
| 55937 | 0 | 153284 | PTPLSPPLRNTHPQA               | 2.70 | 0.01 | 2.08 | 0.68 | 0.22 | 0.28 |
| 55938 | 0 | 153284 | PTPLSPPLRNTHPQA               | 2.70 | 0.01 | 2.08 | 0.68 | 0.22 | 0.28 |
| 55939 | 0 | 153284 | PTPLSPPLRNTHPQA               | 2.70 | 0.01 | 2.08 | 0.68 | 0.22 | 0.28 |
| 55940 | 0 | 153284 | PTPLSPPLRNTHPQA               | 2.70 | 0.01 | 2.08 | 0.68 | 0.22 | 2.02 |
| 55941 | 0 | 153284 | PTPLSPPLRNTHPQA               | 2.70 | 0.01 | 2.08 | 0.68 | 0.22 | 0.28 |
| 55942 | 0 | 153284 | PTPLSPPLRNTHPQA               | 2.70 | 0.01 | 2.08 | 0.68 | 0.22 | 0.28 |
| 55943 | 0 | 153284 | PTPLSPPLRNTHPQA               | 2.70 | 0.01 | 2.08 | 0.68 | 0.22 | 0.28 |
| 55944 | 0 | 153284 | PTPLSPPLRNTHPQA               | 2.70 | 0.01 | 2.08 | 0.68 | 0.22 | 0.28 |
| 55945 | 0 | 153284 | PTPLSPPLRNTHPQA               | 2.70 | 0.01 | 2.08 | 0.68 | 0.22 | 0.28 |
| 55946 | 0 | 153284 | PTPLSPPLRNTHPQA               | 2.70 | 0.01 | 2.08 | 0.68 | 0.22 | 0.28 |
| 55947 | 0 | 96761  | PTPPVKPTAPTKPTYETE<br>K       | 2.96 | 0.01 | 2.39 | 0.44 | 1.59 | 0.28 |
| 55948 | 0 | 125527 | PTPQAAPAPTPAATASP<br>PTPSAQAP | 3.24 | 0.01 | 0.78 | 0.44 | 1.13 | 0.28 |
| 55949 | 0 | 125527 | PTPQAAPAPTPAATASP<br>PTPSAQAP | 3.24 | 0.01 | 0.78 | 0.44 | 1.13 | 0.28 |
| 55950 | 0 | 49745  | PTPQEIPQ                      | 2.17 | 0.01 | 2.40 | 2.43 | 0.22 | 0.28 |
| 55951 | 0 | 49746  | PTPQEIPQPQWTPEEDQ<br>KAREAF   | 3.11 | 0.01 | 2.40 | 0.68 | 0.22 | 0.85 |
| 55952 | 0 | 49746  | PTPQEIPQPQWTPEEDQ<br>KAREAF   | 3.11 | 0.01 | 2.40 | 0.68 | 0.22 | 0.85 |

|       |   |        |                                |      |      |      |      |      |      |
|-------|---|--------|--------------------------------|------|------|------|------|------|------|
| 55953 | 0 | 49746  | PTPQEIPQPQWTPPEEDQ<br>KAREAF   | 3.11 | 0.01 | 2.40 | 0.68 | 0.22 | 1.34 |
| 55954 | 0 | 49748  | PTPSAPARGE                     | 2.34 | 3.85 | 2.70 | 0.44 | 0.85 | 0.28 |
| 55955 | 0 | 125528 | PTPSAQAPGSSYP PHM<br>QVLLPALSP | 3.19 | 0.01 | 0.78 | 0.44 | 1.13 | 0.28 |
| 55956 | 0 | 49749  | PTPSDNPFSKLYKETIETF<br>D       | 2.97 | 0.01 | 2.67 | 1.15 | 0.22 | 0.28 |
| 55957 | 0 | 49749  | PTPSDNPFSKLYKETIETF<br>D       | 2.97 | 0.01 | 2.67 | 1.15 | 0.22 | 0.28 |
| 55958 | 0 | 49749  | PTPSDNPFSKLYKETIETF<br>D       | 2.97 | 0.01 | 2.67 | 0.44 | 0.85 | 0.28 |
| 55959 | 0 | 49749  | PTPSDNPFSKLYKETIETF<br>D       | 2.97 | 0.01 | 2.67 | 0.44 | 0.85 | 0.28 |
| 55960 | 0 | 49749  | PTPSDNPFSKLYKETIETF<br>D       | 2.97 | 0.01 | 2.67 | 1.12 | 0.22 | 0.28 |
| 55961 | 0 | 49749  | PTPSDNPFSKLYKETIETF<br>D       | 2.97 | 0.01 | 2.67 | 1.12 | 0.22 | 0.28 |
| 55962 | 0 | 49749  | PTPSDNPFSKLYKETIETF<br>D       | 2.97 | 0.01 | 2.67 | 1.15 | 0.22 | 2.02 |
| 55963 | 0 | 49749  | PTPSDNPFSKLYKETIETF<br>D       | 2.97 | 0.01 | 2.67 | 0.44 | 0.85 | 0.28 |
| 55964 | 0 | 175636 | PTPSGSMVTSDAQIFNK<br>PYW       | 2.90 | 0.01 | 1.86 | 3.65 | 0.22 | 2.75 |
| 55965 | 0 | 49750  | PTPSPAPSRPFVLRAND<br>VL        | 2.98 | 0.01 | 2.70 | 0.44 | 0.85 | 0.28 |
| 55966 | 0 | 95689  | PTPTPDQPEPNKPVEPT<br>YEV       | 2.99 | 0.01 | 2.39 | 2.25 | 0.22 | 0.28 |
| 55967 | 0 | 49756  | PTPVNPSTAPAPAPT                | 2.75 | 0.01 | 2.76 | 0.44 | 1.59 | 0.28 |
| 55968 | 0 | 49757  | PTPVSEIITPTLQA                 | 2.69 | 0.01 | 3.37 | 2.22 | 0.22 | 0.28 |
| 55969 | 0 | 49758  | PTQEVKKETT                     | 2.32 | 3.85 | 3.55 | 1.12 | 0.22 | 0.85 |
| 55970 | 0 | 357407 | PTQFSVGTPDAANAA                | 2.67 | 0.01 | 1.61 | 0.44 | 0.85 | 1.28 |
| 55971 | 0 | 115427 | PTQLEEQCHI                     | 2.30 | 0.01 | 1.60 | 0.44 | 1.23 | 0.85 |
| 55972 | 0 | 129659 | PTQYPPGR                       | 2.14 | 0.01 | 0.78 | 0.44 | 1.13 | 0.28 |
| 55973 | 0 | 49763  | PTRAETREERMERKRRE<br>KIE       | 2.99 | 0.01 | 0.78 | 0.44 | 1.13 | 0.28 |
| 55974 | 0 | 49763  | PTRAETREERMERKRRE<br>KIE       | 2.99 | 0.01 | 0.78 | 0.44 | 1.13 | 0.28 |
| 55975 | 0 | 117348 | PTRAPSGRPP                     | 2.43 | 0.01 | 0.78 | 1.12 | 0.22 | 0.28 |
| 55976 | 0 | 117348 | PTRAPSGRPP                     | 2.43 | 0.01 | 0.78 | 1.12 | 0.22 | 0.85 |
| 55977 | 0 | 117348 | PTRAPSGRPP                     | 2.43 | 0.01 | 0.78 | 1.12 | 0.22 | 0.28 |
| 55978 | 0 | 117348 | PTRAPSGRPP                     | 2.43 | 0.01 | 0.78 | 0.44 | 0.85 | 0.28 |
| 55979 | 0 | 117348 | PTRAPSGRPP                     | 2.43 | 0.01 | 0.78 | 0.44 | 1.13 | 0.28 |
| 55980 | 0 | 117348 | PTRAPSGRPP                     | 2.43 | 0.01 | 0.78 | 0.44 | 1.13 | 0.28 |
| 55981 | 0 | 117348 | PTRAPSGRPP                     | 2.43 | 0.01 | 0.78 | 0.44 | 1.13 | 0.28 |
| 55982 | 0 | 117348 | PTRAPSGRPP                     | 2.43 | 0.01 | 0.78 | 0.44 | 1.13 | 0.28 |
| 55983 | 0 | 117348 | PTRAPSGRPP                     | 2.43 | 0.01 | 0.78 | 0.44 | 1.13 | 0.28 |

|       |   |        |                          |      |      |      |      |      |      |
|-------|---|--------|--------------------------|------|------|------|------|------|------|
| 55984 | 0 | 117348 | PTRAPSGPRPP              | 2.43 | 0.01 | 0.78 | 0.44 | 0.85 | 0.28 |
| 55985 | 0 | 117348 | PTRAPSGPRPP              | 2.43 | 0.01 | 0.78 | 0.44 | 1.41 | 0.28 |
| 55986 | 0 | 117348 | PTRAPSGPRPP              | 2.43 | 0.01 | 0.78 | 1.12 | 0.22 | 0.85 |
| 55987 | 0 | 117348 | PTRAPSGPRPP              | 2.43 | 0.01 | 0.78 | 1.12 | 0.22 | 0.85 |
| 55988 | 0 | 117348 | PTRAPSGPRPP              | 2.43 | 0.01 | 0.78 | 1.12 | 0.22 | 0.28 |
| 55989 | 0 | 117348 | PTRAPSGPRPP              | 2.43 | 0.01 | 0.78 | 1.12 | 0.22 | 0.85 |
| 55990 | 0 | 132022 | PTRAPSGPRPPSRSAQ<br>TPPR | 3.06 | 0.01 | 0.78 | 0.44 | 0.85 | 0.28 |
| 55991 | 0 | 132022 | PTRAPSGPRPPSRSAQ<br>TPPR | 3.06 | 0.01 | 0.78 | 0.44 | 1.13 | 0.28 |
| 55992 | 0 | 132022 | PTRAPSGPRPPSRSAQ<br>TPPR | 3.06 | 0.01 | 0.78 | 0.44 | 1.13 | 0.28 |
| 55993 | 0 | 132022 | PTRAPSGPRPPSRSAQ<br>TPPR | 3.06 | 0.01 | 0.78 | 1.12 | 0.22 | 0.28 |
| 55994 | 0 | 132022 | PTRAPSGPRPPSRSAQ<br>TPPR | 3.06 | 0.01 | 0.78 | 1.12 | 0.22 | 0.28 |
| 55995 | 0 | 132022 | PTRAPSGPRPPSRSAQ<br>TPPR | 3.06 | 0.01 | 0.78 | 1.12 | 0.22 | 1.48 |
| 55996 | 0 | 132022 | PTRAPSGPRPPSRSAQ<br>TPPR | 3.06 | 0.01 | 0.78 | 0.44 | 1.13 | 0.28 |
| 55997 | 0 | 132022 | PTRAPSGPRPPSRSAQ<br>TPPR | 3.06 | 0.01 | 0.78 | 0.44 | 1.13 | 0.28 |
| 55998 | 0 | 132022 | PTRAPSGPRPPSRSAQ<br>TPPR | 3.06 | 0.01 | 0.78 | 0.44 | 1.41 | 0.28 |
| 55999 | 0 | 79977  | PTRMLVCGIAAK             | 2.42 | 0.01 | 2.14 | 3.26 | 0.22 | 0.28 |
| 56000 | 0 | 49764  | PTRTIGGSQA               | 2.30 | 0.01 | 2.83 | 0.44 | 0.85 | 0.28 |
| 56001 | 0 | 49764  | PTRTIGGSQA               | 2.30 | 0.01 | 2.83 | 1.12 | 0.22 | 0.28 |
| 56002 | 0 | 49764  | PTRTIGGSQA               | 2.30 | 0.01 | 2.83 | 0.44 | 0.85 | 0.28 |
| 56003 | 0 | 95690  | PTRTPDQAEPKPTPTY<br>ET   | 2.98 | 0.01 | 2.39 | 2.25 | 0.22 | 0.28 |
| 56004 | 0 | 49772  | PTSGDKIDMTPRAGVL<br>MLE  | 2.88 | 0.01 | 4.23 | 3.03 | 0.22 | 0.28 |
| 56005 | 0 | 49772  | PTSGDKIDMTPRAGVL<br>MLE  | 2.88 | 0.01 | 4.23 | 3.03 | 0.22 | 0.28 |
| 56006 | 0 | 49772  | PTSGDKIDMTPRAGVL<br>MLE  | 2.88 | 0.01 | 4.23 | 3.03 | 0.22 | 1.34 |
| 56007 | 0 | 49772  | PTSGDKIDMTPRAGVL<br>MLE  | 2.88 | 0.01 | 4.23 | 2.37 | 0.22 | 1.34 |
| 56008 | 0 | 49772  | PTSGDKIDMTPRAGVL<br>MLE  | 2.88 | 0.01 | 4.23 | 1.81 | 0.22 | 1.75 |
| 56009 | 0 | 113729 | PTSPQQPGQGQQPG           | 2.68 | 0.01 | 1.86 | 0.44 | 1.23 | 0.85 |
| 56010 | 0 | 113730 | PTSPQQSGQGQQPG           | 2.68 | 0.01 | 1.86 | 0.44 | 1.23 | 0.85 |
| 56011 | 0 | 113731 | PTSPQQSGQGQQPGQ<br>GQQ   | 2.91 | 0.01 | 0.90 | 0.44 | 1.23 | 2.75 |
| 56012 | 0 | 113731 | PTSPQQSGQGQQPGQ<br>GQQ   | 2.91 | 0.01 | 0.90 | 0.44 | 1.23 | 2.75 |



|       |   |        |                                                 |      |      |      |      |      |      |
|-------|---|--------|-------------------------------------------------|------|------|------|------|------|------|
| 56013 | 0 | 113731 | PTSPQQSGQGQQPGQ<br>GQQ                          | 2.91 | 0.01 | 0.90 | 0.44 | 1.23 | 1.27 |
| 56014 | 0 | 113731 | PTSPQQSGQGQQPGQ<br>GQQ                          | 2.91 | 0.01 | 1.86 | 0.44 | 1.23 | 2.51 |
| 56015 | 0 | 181428 | PTSRDSFAWQTATNP                                 | 2.69 | 0.01 | 2.82 | 1.15 | 0.22 | 0.28 |
| 56016 | 0 | 181428 | PTSRDSFAWQTATNP                                 | 2.69 | 0.01 | 2.82 | 1.15 | 0.22 | 1.27 |
| 56017 | 0 | 181428 | PTSRDSFAWQTATNP                                 | 2.69 | 0.01 | 2.82 | 0.68 | 0.22 | 0.28 |
| 56018 | 0 | 181428 | PTSRDSFAWQTATNP                                 | 2.69 | 0.01 | 2.82 | 0.68 | 0.22 | 1.48 |
| 56019 | 0 | 181428 | PTSRDSFAWQTATNP                                 | 2.69 | 0.01 | 2.82 | 0.68 | 0.22 | 0.85 |
| 56020 | 0 | 181428 | PTSRDSFAWQTATNP                                 | 2.69 | 0.01 | 2.82 | 0.68 | 0.22 | 1.34 |
| 56021 | 0 | 181428 | PTSRDSFAWQTATNP                                 | 2.69 | 0.01 | 2.82 | 0.68 | 0.22 | 1.34 |
| 56022 | 0 | 106720 | PTSSEQI                                         | 2.01 | 0.01 | 1.75 | 1.15 | 0.22 | 2.49 |
| 56023 | 0 | 49778  | PTSTFLLHTDFEQVMC                                | 2.70 | 0.01 | 2.75 | 0.44 | 0.85 | 0.28 |
| 56024 | 0 | 115428 | PTSTPTTEAVESTVATLE<br>DS                        | 3.00 | 0.01 | 1.60 | 0.44 | 1.23 | 1.28 |
| 56025 | 0 | 115428 | PTSTPTTEAVESTVATLE<br>DS                        | 3.00 | 0.01 | 1.60 | 0.44 | 1.41 | 0.28 |
| 56026 | 0 | 115428 | PTSTPTTEAVESTVATLE<br>DS                        | 3.00 | 0.01 | 1.60 | 0.44 | 1.93 | 0.28 |
| 56027 | 0 | 49779  | PTTAPQTERMMRINWK<br>KWWQV                       | 2.98 | 0.01 | 3.29 | 1.20 | 0.22 | 0.85 |
| 56028 | 0 | 49779  | PTTAPQTERMMRINWK<br>KWWQV                       | 2.98 | 0.01 | 3.29 | 1.20 | 0.22 | 1.57 |
| 56029 | 0 | 357528 | PTTGDDDDPAADGAGT                                | 2.75 | 0.01 | 1.61 | 0.44 | 0.85 | 1.28 |
| 56030 | 0 | 357529 | PTTGDDDDPAADVAGT                                | 2.74 | 0.01 | 1.61 | 0.44 | 0.85 | 1.28 |
| 56031 | 0 | 138550 | PTTIIPAHGGFSPFYLDV<br>QYSQFRQFIPRSQFIRET<br>GGI | 3.60 | 0.01 | 2.60 | 0.44 | 1.23 | 0.85 |
| 56032 | 0 | 49786  | PTTKQRQNKPPN                                    | 2.52 | 0.01 | 2.38 | 0.68 | 0.22 | 0.28 |
| 56033 | 0 | 49786  | PTTKQRQNKPPN                                    | 2.52 | 0.01 | 2.38 | 0.44 | 1.74 | 0.28 |
| 56034 | 0 | 87452  | PTTMGPKRIGTGDRLINL<br>VQGTYL                    | 3.12 | 0.01 | 3.27 | 1.20 | 0.22 | 0.28 |
| 56035 | 0 | 87452  | PTTMGPKRIGTGDRLINL<br>VQGTYL                    | 3.12 | 0.01 | 3.27 | 1.20 | 0.22 | 0.28 |
| 56036 | 0 | 87452  | PTTMGPKRIGTGDRLINL<br>VQGTYL                    | 3.12 | 0.01 | 3.27 | 1.20 | 0.22 | 0.28 |
| 56037 | 0 | 87452  | PTTMGPKRIGTGDRLINL<br>VQGTYL                    | 3.12 | 0.01 | 3.27 | 1.20 | 0.22 | 0.28 |
| 56038 | 0 | 87452  | PTTMGPKRIGTGDRLINL<br>VQGTYL                    | 3.12 | 0.01 | 3.27 | 1.20 | 0.22 | 0.28 |
| 56039 | 0 | 87452  | PTTMGPKRIGTGDRLINL<br>VQGTYL                    | 3.12 | 0.01 | 3.27 | 1.20 | 0.22 | 1.48 |
| 56040 | 0 | 87452  | PTTMGPKRIGTGDRLINL<br>VQGTYL                    | 3.12 | 0.01 | 3.27 | 1.20 | 0.22 | 1.34 |
| 56041 | 0 | 123635 | PTTMKMWSD                                       | 2.22 | 0.01 | 2.28 | 2.00 | 0.22 | 0.28 |

|       |   |        |                            |      |      |      |      |      |      |
|-------|---|--------|----------------------------|------|------|------|------|------|------|
| 56042 | 0 | 49790  | PTTNTGEGTSSPVTPTYT         | 2.89 | 0.01 | 3.75 | 3.97 | 0.22 | 0.28 |
| 56043 | 0 | 49790  | PTTNTGEGTSSPVTPTYT         | 2.89 | 0.01 | 3.75 | 3.97 | 0.22 | 0.28 |
| 56044 | 0 | 49790  | PTTNTGEGTSSPVTPTYT         | 2.89 | 0.01 | 3.75 | 3.97 | 0.22 | 0.28 |
| 56045 | 0 | 95691  | PTTNVA                     | 1.89 | 0.01 | 2.40 | 2.52 | 0.22 | 0.28 |
| 56046 | 0 | 95691  | PTTNVA                     | 1.89 | 0.01 | 2.40 | 2.52 | 0.22 | 0.28 |
| 56047 | 0 | 100398 | PTTPATPTTPK                | 2.55 | 0.01 | 2.88 | 0.44 | 1.23 | 0.85 |
| 56048 | 0 | 49791  | PTTPGPQTTPGPATPG<br>PVG    | 3.02 | 0.01 | 2.40 | 0.44 | 1.59 | 0.28 |
| 56049 | 0 | 49792  | PTTPKSILHFLPLF             | 2.71 | 0.01 | 0.90 | 0.44 | 0.85 | 1.39 |
| 56050 | 0 | 49793  | PTTPPSPAKT                 | 2.38 | 0.01 | 3.18 | 2.74 | 0.22 | 0.28 |
| 56051 | 0 | 122532 | PTTPYLDITYHFIMQRI          | 2.80 | 0.01 | 2.26 | 2.43 | 0.22 | 1.57 |
| 56052 | 0 | 141557 | PTTRKWWLKLKG               | 2.47 | 0.01 | 0.90 | 3.06 | 0.22 | 1.39 |
| 56053 | 0 | 49795  | PTTRTDDKLR                 | 2.34 | 0.01 | 2.43 | 1.20 | 0.22 | 0.28 |
| 56054 | 0 | 49795  | PTTRTDDKLR                 | 2.34 | 0.01 | 2.43 | 1.20 | 0.22 | 0.28 |
| 56055 | 0 | 49795  | PTTRTDDKLR                 | 2.34 | 0.01 | 2.43 | 1.20 | 0.22 | 0.28 |
| 56056 | 0 | 49795  | PTTRTDDKLR                 | 2.34 | 0.01 | 2.43 | 1.20 | 0.22 | 0.28 |
| 56057 | 0 | 49795  | PTTRTDDKLR                 | 2.34 | 0.01 | 2.43 | 1.20 | 0.22 | 0.28 |
| 56058 | 0 | 49795  | PTTRTDDKLR                 | 2.34 | 0.01 | 2.43 | 1.20 | 0.22 | 1.48 |
| 56059 | 0 | 95692  | PTTSDV                     | 1.89 | 0.01 | 2.40 | 2.52 | 0.22 | 0.28 |
| 56060 | 0 | 216760 | PTTTPK                     | 2.05 | 4.93 | 0.90 | 0.44 | 0.85 | 1.28 |
| 56061 | 0 | 216761 | PTTTPK                     | 2.05 | 4.93 | 0.90 | 0.44 | 0.85 | 1.28 |
| 56062 | 0 | 357593 | PTTTTTNAPSRLREI            | 2.67 | 0.01 | 1.61 | 0.44 | 0.85 | 1.28 |
| 56063 | 0 | 156545 | PTTTPNNTTNKYSTSPS          | 2.85 | 0.01 | 3.75 | 0.68 | 0.22 | 1.48 |
| 56064 | 0 | 156545 | PTTTPNNTTNKYSTSPS          | 2.85 | 0.01 | 3.75 | 0.68 | 0.22 | 1.34 |
| 56065 | 0 | 189140 | PTTVNFTVTGEGLEYT           | 2.76 | 0.01 | 2.92 | 0.68 | 0.22 | 0.28 |
| 56066 | 0 | 189140 | PTTVNFTVTGEGLEYT           | 2.76 | 0.01 | 2.92 | 3.61 | 0.22 | 0.28 |
| 56067 | 0 | 49801  | PTVAEEH                    | 2.01 | 0.01 | 1.66 | 0.44 | 0.85 | 0.28 |
| 56068 | 0 | 49802  | PTVAEEHV                   | 2.13 | 0.01 | 1.66 | 0.44 | 1.59 | 1.57 |
| 56069 | 0 | 49803  | PTVAEEHVE                  | 2.25 | 0.01 | 1.66 | 0.44 | 1.59 | 1.57 |
| 56070 | 0 | 172785 | PTVEEKWRLPAFLK             | 2.68 | 0.01 | 0.78 | 0.44 | 1.13 | 0.28 |
| 56071 | 0 | 49808  | PTVGEAALLHYVDPDTG<br>PNGAS | 3.60 | 0.01 | 3.78 | 0.68 | 0.22 | 0.28 |
| 56072 | 0 | 49808  | PTVGEAALLHYVDPDTG<br>PNGAS | 3.60 | 0.01 | 3.78 | 0.68 | 0.22 | 0.28 |
| 56073 | 0 | 49808  | PTVGEAALLHYVDPDTG<br>PNGAS | 3.60 | 0.01 | 3.78 | 0.68 | 0.22 | 0.28 |
| 56074 | 0 | 49808  | PTVGEAALLHYVDPDTG<br>PNGAS | 3.60 | 0.01 | 3.78 | 0.68 | 0.22 | 0.28 |

|       |   |        |                                                  |      |      |      |      |      |      |
|-------|---|--------|--------------------------------------------------|------|------|------|------|------|------|
| 56075 | 0 | 102731 | PTVHFHYFKLAVQPQVN<br>KEI                         | 2.94 | 0.01 | 2.39 | 4.08 | 0.22 | 0.28 |
| 56076 | 0 | 102731 | PTVHFHYFKLAVQPQVN<br>KEI                         | 2.94 | 0.01 | 2.39 | 0.44 | 1.59 | 0.28 |
| 56077 | 0 | 111651 | PTVIVDALGPTGVPIDPA<br>VPD                        | 3.05 | 0.01 | 3.55 | 2.22 | 0.22 | 0.28 |
| 56078 | 0 | 49810  | PTVKLYTSVENAQQDKG<br>IAIPHDID                    | 3.14 | 0.01 | 2.53 | 0.44 | 0.85 | 0.28 |
| 56079 | 0 | 49810  | PTVKLYTSVENAQQDKG<br>IAIPHDID                    | 3.14 | 0.01 | 2.53 | 0.44 | 0.85 | 0.28 |
| 56080 | 0 | 49811  | PTVKLYTSVENAQQDKG<br>IAIPHDIDLGESR               | 3.32 | 0.01 | 2.70 | 1.15 | 0.22 | 0.28 |
| 56081 | 0 | 49811  | PTVKLYTSVENAQQDKG<br>IAIPHDIDLGESR               | 3.32 | 0.01 | 2.53 | 0.44 | 0.85 | 0.28 |
| 56082 | 0 | 49811  | PTVKLYTSVENAQQDKG<br>IAIPHDIDLGESR               | 3.32 | 0.01 | 2.53 | 0.44 | 0.85 | 0.28 |
| 56083 | 0 | 115904 | PTVMFPPQSV                                       | 2.33 | 0.01 | 1.60 | 0.44 | 1.23 | 0.85 |
| 56084 | 0 | 115904 | PTVMFPPQSV                                       | 2.33 | 0.01 | 1.60 | 0.44 | 1.23 | 0.85 |
| 56085 | 0 | 49814  | PTVTLLPAADMDDFSRQ<br>LQN                         | 2.93 | 0.01 | 2.45 | 1.20 | 0.22 | 1.48 |
| 56086 | 0 | 122533 | PTYKPENNKNDNILLEH<br>VKITSWDKED                  | 3.24 | 0.01 | 2.22 | 0.44 | 1.74 | 1.34 |
| 56087 | 0 | 122533 | PTYKPENNKNDNILLEH<br>VKITSWDKED                  | 3.24 | 0.01 | 2.22 | 0.44 | 1.74 | 0.28 |
| 56088 | 0 | 122533 | PTYKPENNKNDNILLEH<br>VKITSWDKED                  | 3.24 | 0.01 | 2.22 | 0.44 | 1.74 | 0.28 |
| 56089 | 0 | 49823  | PTYRSHLGFWQEGWSG<br>QVYQDWL                      | 3.06 | 0.01 | 3.36 | 0.68 | 0.22 | 0.28 |
| 56090 | 0 | 49823  | PTYRSHLGFWQEGWSG<br>QVYQDWL                      | 3.06 | 0.01 | 3.36 | 0.68 | 0.22 | 0.28 |
| 56091 | 0 | 49823  | PTYRSHLGFWQEGWSG<br>QVYQDWL                      | 3.06 | 0.01 | 3.36 | 0.68 | 0.22 | 0.85 |
| 56092 | 0 | 49823  | PTYRSHLGFWQEGWSG<br>QVYQDWL                      | 3.06 | 0.01 | 3.36 | 0.68 | 0.22 | 1.48 |
| 56093 | 0 | 357660 | PVAATVIKTTTAATG                                  | 2.71 | 0.01 | 1.61 | 0.44 | 0.85 | 1.28 |
| 56094 | 0 | 49825  | PVADLP                                           | 1.91 | 0.01 | 3.27 | 0.44 | 1.59 | 0.28 |
| 56095 | 0 | 49825  | PVADLP                                           | 1.91 | 0.01 | 3.27 | 0.44 | 1.59 | 0.28 |
| 56096 | 0 | 49826  | PVAGAAIAAPLTGQQNII<br>DPWIMNNFVQAPGGEF<br>TVSPRN | 3.62 | 0.01 | 3.72 | 0.68 | 0.22 | 0.28 |
| 56097 | 0 | 49826  | PVAGAAIAAPLTGQQNII<br>DPWIMNNFVQAPGGEF<br>TVSPRN | 3.62 | 0.01 | 3.72 | 0.68 | 0.22 | 0.28 |
| 56098 | 0 | 49826  | PVAGAAIAAPLTGQQNII<br>DPWIMNNFVQAPGGEF<br>TVSPRN | 3.62 | 0.01 | 3.72 | 0.68 | 0.22 | 0.28 |

|       |   |        |                                                   |      |      |      |      |      |      |
|-------|---|--------|---------------------------------------------------|------|------|------|------|------|------|
| 56099 | 0 | 49826  | PVAGAAIAAPLTGQQNII<br>DPWIMNNFVQAPGGEF<br>TVSPRN  | 3.62 | 0.01 | 3.72 | 0.68 | 0.22 | 0.28 |
| 56100 | 0 | 49826  | PVAGAAIAAPLTGQQNII<br>DPWIMNNFVQAPGGEF<br>TVSPRN  | 3.62 | 0.01 | 3.72 | 1.12 | 0.22 | 0.28 |
| 56101 | 0 | 49826  | PVAGAAIAAPLTGQQNII<br>DPWIMNNFVQAPGGEF<br>TVSPRN  | 3.62 | 0.01 | 3.72 | 0.68 | 0.22 | 0.85 |
| 56102 | 0 | 49826  | PVAGAAIAAPLTGQQNII<br>DPWIMNNFVQAPGGEF<br>TVSPRN  | 3.62 | 0.01 | 3.72 | 0.68 | 0.22 | 0.85 |
| 56103 | 0 | 49826  | PVAGAAIAAPLTGQQNII<br>DPWIMNNFVQAPGGEF<br>TVSPRN  | 3.62 | 0.01 | 3.72 | 0.68 | 0.22 | 0.85 |
| 56104 | 0 | 49826  | PVAGAAIAAPLTGQQNII<br>DPWIMNNFVQAPGGEF<br>TVSPRN  | 3.62 | 0.01 | 3.72 | 1.81 | 0.22 | 0.28 |
| 56105 | 0 | 49826  | PVAGAAIAAPLTGQQNII<br>DPWIMNNFVQAPGGEF<br>TVSPRN  | 3.62 | 0.01 | 3.72 | 1.81 | 0.22 | 0.28 |
| 56106 | 0 | 49826  | PVAGAAIAAPLTGQQNII<br>DPWIMNNFVQAPGGEF<br>TVSPRN  | 3.62 | 0.01 | 3.72 | 1.81 | 0.22 | 0.28 |
| 56107 | 0 | 103501 | PVAGQVWEATATVNA                                   | 2.70 | 0.01 | 2.04 | 0.44 | 0.85 | 1.28 |
| 56108 | 0 | 49827  | PVAGSSTAVATAGQVN<br>PIDPWIINNFBVQAPQGE<br>FTISPNN | 3.65 | 0.01 | 3.78 | 1.81 | 0.22 | 0.28 |
| 56109 | 0 | 49827  | PVAGSSTAVATAGQVN<br>PIDPWIINNFBVQAPQGE<br>FTISPNN | 3.65 | 0.01 | 3.78 | 1.81 | 0.22 | 0.28 |
| 56110 | 0 | 49827  | PVAGSSTAVATAGQVN<br>PIDPWIINNFBVQAPQGE<br>FTISPNN | 3.65 | 0.01 | 3.78 | 1.81 | 0.22 | 0.28 |
| 56111 | 0 | 120880 | PVAGYIPFDQ                                        | 2.30 | 0.01 | 2.18 | 2.16 | 0.22 | 0.28 |
| 56112 | 0 | 49829  | PVAIEAVRSEATDGM LKIQF                             | 2.90 | 0.01 | 3.13 | 2.43 | 0.22 | 0.28 |
| 56113 | 0 | 99549  | PVAINASSELHLLGF                                   | 2.64 | 0.01 | 2.16 | 0.44 | 1.23 | 1.48 |
| 56114 | 0 | 115905 | PVALINNQFL                                        | 2.30 | 0.01 | 1.60 | 0.44 | 1.23 | 0.85 |
| 56115 | 0 | 115905 | PVALINNQFL                                        | 2.30 | 0.01 | 1.60 | 0.44 | 1.23 | 0.85 |
| 56116 | 0 | 101150 | PVAPNYPEKEP                                       | 2.34 | 0.01 | 3.18 | 3.75 | 0.22 | 0.28 |
| 56117 | 0 | 113734 | PVAPSDPSIV                                        | 2.36 | 0.01 | 3.85 | 1.12 | 0.22 | 0.28 |
| 56118 | 0 | 49835  | PVAPTQEVKK                                        | 2.32 | 3.85 | 3.55 | 1.12 | 0.22 | 0.85 |
| 56119 | 0 | 49836  | PVAQYCYAYPRLDDPGPLGS                              | 2.96 | 0.01 | 2.40 | 0.44 | 1.59 | 0.28 |
| 56120 | 0 | 49840  | PVCASFSP                                          | 2.15 | 0.01 | 3.72 | 2.37 | 0.22 | 0.85 |

|       |   |        |                          |      |      |      |      |      |      |
|-------|---|--------|--------------------------|------|------|------|------|------|------|
| 56121 | 0 | 114920 | PVCGTDGVTY               | 2.33 | 0.01 | 2.25 | 0.44 | 1.23 | 0.85 |
| 56122 | 0 | 129661 | PVDGVVLVD                | 2.27 | 0.01 | 1.60 | 0.68 | 0.22 | 1.27 |
| 56123 | 0 | 129661 | PVDGVVLVD                | 2.27 | 0.01 | 1.60 | 0.68 | 0.22 | 0.85 |
| 56124 | 0 | 523888 | PVDISIIDSVTDRTY          | 2.71 | 0.01 | 2.24 | 0.44 | 1.41 | 1.28 |
| 56125 | 0 | 357733 | PVDNDGDESSDKEDA          | 2.69 | 0.01 | 1.61 | 0.44 | 0.85 | 1.28 |
| 56126 | 0 | 357735 | PVDPSAYKRALPLEE          | 2.67 | 0.01 | 1.61 | 0.44 | 0.85 | 1.28 |
| 56127 | 0 | 357736 | PVDPSAYKRALPQEE          | 2.65 | 0.01 | 1.61 | 0.44 | 0.85 | 1.28 |
| 56128 | 0 | 49851  | PVDQY                    | 1.74 | 0.01 | 2.52 | 2.19 | 0.22 | 0.28 |
| 56129 | 0 | 49851  | PVDQY                    | 1.74 | 0.01 | 2.52 | 2.19 | 0.22 | 0.85 |
| 56130 | 0 | 357758 | PVEATAMKNTTATTG          | 2.69 | 0.01 | 1.61 | 0.44 | 0.85 | 1.28 |
| 56131 | 0 | 357760 | PVEATAMKTTTATTG          | 2.70 | 0.01 | 1.61 | 0.44 | 0.85 | 1.28 |
| 56132 | 0 | 357762 | PVEATATKNTTATTG          | 2.70 | 0.01 | 1.61 | 0.44 | 0.85 | 1.28 |
| 56133 | 0 | 357763 | PVEATATKTTTATTG          | 2.71 | 0.01 | 1.61 | 0.44 | 0.85 | 1.28 |
| 56134 | 0 | 357764 | PVEATAVKATTATTG          | 2.72 | 0.01 | 1.61 | 0.44 | 0.85 | 1.28 |
| 56135 | 0 | 230408 | PVEAVEEAVAT              | 2.44 | 0.01 | 3.33 | 2.49 | 0.85 | 0.28 |
| 56136 | 0 | 174238 | PVECSGEPVL               | 2.34 | 0.01 | 3.10 | 0.44 | 1.23 | 0.85 |
| 56137 | 0 | 174238 | PVECSGEPVL               | 2.34 | 0.01 | 3.10 | 0.44 | 1.23 | 0.85 |
| 56138 | 0 | 174238 | PVECSGEPVL               | 2.34 | 0.01 | 3.10 | 0.44 | 1.23 | 0.85 |
| 56139 | 0 | 174238 | PVECSGEPVL               | 2.34 | 0.01 | 3.10 | 0.44 | 1.23 | 0.85 |
| 56140 | 0 | 125529 | PVEGPAVICRCC             | 2.48 | 0.01 | 2.73 | 1.20 | 0.22 | 0.28 |
| 56141 | 0 | 125529 | PVEGPAVICRCC             | 2.48 | 0.01 | 2.73 | 1.20 | 0.22 | 0.28 |
| 56142 | 0 | 125529 | PVEGPAVICRCC             | 2.48 | 0.01 | 2.73 | 1.20 | 0.22 | 1.48 |
| 56143 | 0 | 357773 | PVEGTAMKTTTATTG          | 2.70 | 0.01 | 1.61 | 0.44 | 0.85 | 1.28 |
| 56144 | 0 | 49855  | PVEIRRGVML               | 2.30 | 0.01 | 0.78 | 0.44 | 1.41 | 0.28 |
| 56145 | 0 | 49855  | PVEIRRGVML               | 2.30 | 0.01 | 0.78 | 1.20 | 0.22 | 0.28 |
| 56146 | 0 | 158603 | PVELQLY                  | 2.02 | 0.01 | 0.90 | 0.44 | 1.13 | 1.39 |
| 56147 | 0 | 115906 | PVEPFTESQS               | 2.34 | 0.01 | 1.60 | 0.44 | 1.23 | 0.85 |
| 56148 | 0 | 115906 | PVEPFTESQS               | 2.34 | 0.01 | 1.60 | 0.44 | 1.23 | 0.85 |
| 56149 | 0 | 49858  | PVESKVT                  | 2.02 | 0.01 | 1.60 | 0.44 | 1.23 | 0.28 |
| 56150 | 0 | 357796 | PVESTAMKTTTATTG          | 2.68 | 0.01 | 1.61 | 0.44 | 0.85 | 1.28 |
| 56151 | 0 | 357798 | PVESTVMKTTTATTG          | 2.68 | 0.01 | 1.61 | 0.44 | 0.85 | 1.28 |
| 56152 | 0 | 357807 | PVETTTMKNNTTATTG         | 2.68 | 0.01 | 1.61 | 0.44 | 0.85 | 1.28 |
| 56153 | 0 | 49861  | PVEVLAVVDRRFNFPEP        | 3.82 | 0.01 | 2.24 | 0.68 | 0.22 | 1.34 |
|       |   |        | STPPDISTIRKLLSLRYFKE     |      |      |      |      |      |      |
|       |   |        | SIESTSKSNFQ              |      |      |      |      |      |      |
| 56154 | 0 | 49861  | PVEVLAVVDRRFNFPEP        | 3.82 | 0.01 | 2.24 | 0.68 | 0.22 | 0.85 |
|       |   |        | STPPDISTIRKLLSLRYFKE     |      |      |      |      |      |      |
|       |   |        | SIESTSKSNFQ              |      |      |      |      |      |      |
| 56155 | 0 | 49861  | PVEVLAVVDRRFNFPEP        | 3.82 | 0.01 | 2.24 | 0.68 | 0.22 | 0.85 |
|       |   |        | STPPDISTIRKLLSLRYFKE     |      |      |      |      |      |      |
|       |   |        | SIESTSKSNFQ              |      |      |      |      |      |      |
| 56156 | 0 | 113738 | PVEVSRKNPKFMETVAE<br>KAL | 2.95 | 0.01 | 0.78 | 1.81 | 0.22 | 0.28 |
| 56157 | 0 | 113738 | PVEVSRKNPKFMETVAE<br>KAL | 2.95 | 0.01 | 0.78 | 3.61 | 0.22 | 0.28 |
| 56158 | 0 | 185214 | PVEYLQVPS                | 2.24 | 0.01 | 2.86 | 0.44 | 1.74 | 0.28 |
| 56159 | 0 | 185214 | PVEYLQVPS                | 2.24 | 0.01 | 2.86 | 0.44 | 1.74 | 0.28 |

|       |   |        |                                                                  |      |      |      |      |      |      |
|-------|---|--------|------------------------------------------------------------------|------|------|------|------|------|------|
| 56160 | 0 | 132023 | PVFIPAPR                                                         | 2.15 | 0.01 | 4.03 | 0.44 | 1.74 | 0.85 |
| 56161 | 0 | 113739 | PVFITGSGFY                                                       | 2.31 | 0.01 | 3.85 | 1.12 | 0.22 | 0.28 |
| 56162 | 0 | 49865  | PVFLDGFYSCFSHSP                                                  | 2.69 | 0.01 | 0.90 | 1.15 | 0.22 | 0.85 |
| 56163 | 0 | 134197 | PVFPTAEQFRRM                                                     | 2.47 | 0.01 | 0.78 | 3.06 | 0.22 | 0.28 |
| 56164 | 0 | 49872  | PVGGQSSFYSDWYSPAC<br>GKA                                         | 2.94 | 0.01 | 3.78 | 1.15 | 0.22 | 0.28 |
| 56165 | 0 | 49872  | PVGGQSSFYSDWYSPAC<br>GKA                                         | 2.94 | 0.01 | 3.78 | 0.44 | 0.85 | 0.28 |
| 56166 | 0 | 49872  | PVGGQSSFYSDWYSPAC<br>GKA                                         | 2.94 | 0.01 | 2.04 | 0.44 | 0.85 | 0.28 |
| 56167 | 0 | 109738 | PVGPAGGP                                                         | 2.17 | 0.01 | 1.60 | 2.61 | 0.22 | 0.28 |
| 56168 | 0 | 123636 | PVGPAPGMRP                                                       | 2.36 | 0.01 | 0.78 | 0.44 | 1.13 | 0.28 |
| 56169 | 0 | 123636 | PVGPAPGMRP                                                       | 2.36 | 0.01 | 0.78 | 0.44 | 1.13 | 0.85 |
| 56170 | 0 | 123636 | PVGPAPGMRP                                                       | 2.36 | 0.01 | 0.78 | 0.44 | 1.13 | 0.85 |
| 56171 | 0 | 134198 | PVGPAPGMRPPMGG                                                   | 2.65 | 0.01 | 0.78 | 1.12 | 1.41 | 0.85 |
| 56172 | 0 | 145951 | PVGPSDPSIVSLVEE                                                  | 2.70 | 0.01 | 1.86 | 0.68 | 0.22 | 0.28 |
| 56173 | 0 | 145951 | PVGPSDPSIVSLVEE                                                  | 2.70 | 0.01 | 1.86 | 0.68 | 0.22 | 0.28 |
| 56174 | 0 | 158604 | PVGPWTN                                                          | 2.03 | 0.01 | 0.90 | 0.44 | 1.13 | 1.39 |
| 56175 | 0 | 49876  | PVGRLVTNPFVSMAT<br>ANAK                                          | 2.95 | 0.01 | 2.85 | 2.02 | 0.22 | 0.28 |
| 56176 | 0 | 423465 | PVGSMYRGSDALPAG                                                  | 2.69 | 0.01 | 2.51 | 0.44 | 2.35 | 1.28 |
| 56177 | 0 | 49877  | PVGSQGIRLSWEVQ<br>PVGTHKQIVYWKQWLS                               | 2.61 | 0.01 | 2.94 | 2.00 | 0.22 | 0.28 |
| 56178 | 0 | 97567  | LKNPTQGSLKTRVLKRW<br>KLF                                         | 3.53 | 0.01 | 3.09 | 0.44 | 0.85 | 0.28 |
| 56179 | 0 | 49878  | PVGTPE                                                           | 1.91 | 0.01 | 3.93 | 0.68 | 0.22 | 1.48 |
| 56180 | 0 | 49878  | PVGTPE                                                           | 1.91 | 0.01 | 3.93 | 0.68 | 0.22 | 1.48 |
| 56181 | 0 | 49878  | PVGTPE                                                           | 1.91 | 0.01 | 3.93 | 0.68 | 0.22 | 0.28 |
| 56182 | 0 | 49879  | PVGTVAPQIPPNWHIPS<br>IQD                                         | 2.95 | 0.01 | 2.40 | 0.68 | 0.22 | 0.28 |
| 56183 | 0 | 49879  | PVGTVAPQIPPNWHIPS<br>IQD                                         | 2.95 | 0.01 | 2.40 | 3.81 | 0.22 | 0.28 |
| 56184 | 0 | 151045 | PVHDCNTTCQTPKGA                                                  | 2.67 | 0.01 | 2.87 | 0.44 | 0.85 | 0.28 |
| 56185 | 0 | 121725 | PVHGLYSTNLDFRVK                                                  | 2.62 | 0.01 | 0.90 | 0.68 | 0.22 | 1.39 |
| 56186 | 0 | 121725 | PVHGLYSTNLDFRVK                                                  | 2.62 | 0.01 | 0.90 | 0.68 | 0.22 | 0.28 |
| 56187 | 0 | 121725 | PVHGLYSTNLDFRVK                                                  | 2.62 | 0.01 | 0.90 | 0.68 | 0.22 | 0.28 |
| 56188 | 0 | 177920 | PVIAANLGSVAVKVLN                                                 | 2.70 | 0.01 | 0.78 | 0.44 | 1.13 | 0.85 |
| 56189 | 0 | 103503 | PVIAENRAELMILIA                                                  | 2.70 | 0.01 | 2.04 | 0.44 | 0.85 | 1.28 |
| 56190 | 0 | 49883  | PVIGSQAR                                                         | 2.10 | 0.01 | 2.85 | 0.44 | 0.22 | 0.28 |
| 56191 | 0 | 104605 | PVIKARMMMEYGTTMV                                                 | 2.65 | 0.01 | 1.75 | 3.33 | 1.13 | 0.28 |
| 56192 | 0 | 108585 | PVIKARMMMEYGTTMVG<br>SPVIKARMMMEYGTTMV<br>GSPVIKARMMMEYGTTM<br>V | 3.86 | 0.01 | 0.90 | 2.37 | 0.22 | 0.85 |

|       |   |        |                                                                  |      |      |      |      |      |      |
|-------|---|--------|------------------------------------------------------------------|------|------|------|------|------|------|
| 56193 | 0 | 108585 | PVIKARMMMEYGTTMVG<br>SPVIKARMMMEYGTTMV<br>GSPVIKARMMMEYGTTM<br>V | 3.86 | 0.01 | 0.90 | 3.33 | 2.25 | 1.75 |
| 56194 | 0 | 167794 | PVIKTPPLK                                                        | 2.25 | 0.01 | 2.40 | 2.43 | 0.22 | 0.28 |
| 56195 | 0 | 236593 | PVIVEKGGKVEVEGH                                                  | 2.73 | 0.01 | 3.70 | 2.13 | 0.22 | 1.28 |
| 56196 | 0 | 49890  | PVIVPDREVLYREFDEM<br>EEC                                         | 2.96 | 0.01 | 1.72 | 0.44 | 0.85 | 0.28 |
| 56197 | 0 | 77974  | PVKDSSKQ                                                         | 2.13 | 0.01 | 3.72 | 0.68 | 0.22 | 1.34 |
| 56198 | 0 | 77974  | PVKDSSKQ                                                         | 2.13 | 0.01 | 3.72 | 0.68 | 0.22 | 0.28 |
| 56199 | 0 | 135976 | PVKDVMIKSLPAPALNS<br>PTVEEC                                      | 3.08 | 0.01 | 3.21 | 0.44 | 1.13 | 0.28 |
| 56200 | 0 | 49893  | PVKKPVALKVAKN                                                    | 2.68 | 0.01 | 2.88 | 2.22 | 0.22 | 0.28 |
| 56201 | 0 | 49893  | PVKKPVALKVAKN                                                    | 2.68 | 0.01 | 2.88 | 2.22 | 0.22 | 0.28 |
| 56202 | 0 | 49893  | PVKKPVALKVAKN                                                    | 2.68 | 0.01 | 2.96 | 2.22 | 0.22 | 0.28 |
| 56203 | 0 | 49895  | PVKNEEEI                                                         | 2.12 | 0.01 | 2.99 | 0.44 | 0.85 | 0.28 |
| 56204 | 0 | 95694  | PVKPTAPTKPTYETEKPL<br>KP                                         | 3.01 | 0.01 | 2.39 | 2.25 | 0.22 | 0.28 |
| 56205 | 0 | 95694  | PVKPTAPTKPTYETEKPL<br>KP                                         | 3.01 | 0.01 | 2.39 | 0.44 | 1.74 | 0.28 |
| 56206 | 0 | 95695  | PVKQTLPP                                                         | 2.12 | 0.01 | 0.90 | 2.22 | 0.22 | 0.28 |
| 56207 | 0 | 109740 | PVLDSTIDYFQPNNKRN<br>QLWL                                        | 2.97 | 0.01 | 3.42 | 0.68 | 0.22 | 1.48 |
| 56208 | 0 | 109740 | PVLDSTIDYFQPNNKRN<br>QLWL                                        | 2.97 | 0.01 | 3.42 | 0.68 | 0.22 | 1.48 |
| 56209 | 0 | 109740 | PVLDSTIDYFQPNNKRN<br>QLWL                                        | 2.97 | 0.01 | 3.42 | 0.68 | 0.22 | 0.28 |
| 56210 | 0 | 109741 | PVLDSTIDYFQPNNKRN<br>QLWLRLQTAGNVDHVG<br>LGT                     | 3.51 | 0.01 | 3.42 | 0.68 | 0.22 | 1.34 |
| 56211 | 0 | 109741 | PVLDSTIDYFQPNNKRN<br>QLWLRLQTAGNVDHVG<br>LGT                     | 3.51 | 0.01 | 3.42 | 0.68 | 0.22 | 1.48 |
| 56212 | 0 | 109741 | PVLDSTIDYFQPNNKRN<br>QLWLRLQTAGNVDHVG<br>LGT                     | 3.51 | 0.01 | 3.42 | 0.68 | 0.22 | 1.48 |
| 56213 | 0 | 109741 | PVLDSTIDYFQPNNKRN<br>QLWLRLQTAGNVDHVG<br>LGT                     | 3.51 | 0.01 | 3.42 | 0.68 | 0.22 | 0.28 |
| 56214 | 0 | 140891 | PVLESFKVSFLSALEEYTK<br>KLNT                                      | 3.09 | 0.01 | 0.78 | 1.15 | 0.22 | 0.28 |
| 56215 | 0 | 133665 | PVLLFCFLAGRCVSV                                                  | 2.70 | 0.01 | 0.90 | 1.15 | 0.22 | 0.28 |
| 56216 | 0 | 133665 | PVLLFCFLAGRCVSV                                                  | 2.70 | 0.01 | 0.90 | 1.15 | 0.22 | 0.28 |
| 56217 | 0 | 133665 | PVLLFCFLAGRCVSV                                                  | 2.70 | 0.01 | 0.90 | 1.15 | 0.22 | 2.12 |
| 56218 | 0 | 133665 | PVLLFCFLAGRCVSV                                                  | 2.70 | 0.01 | 0.90 | 1.15 | 0.22 | 1.27 |
| 56219 | 0 | 49910  | PVLTTASPLSSIFSRIGDP                                              | 2.90 | 0.01 | 2.71 | 1.12 | 0.22 | 0.28 |

|       |   |        |                                    |      |      |      |      |      |      |
|-------|---|--------|------------------------------------|------|------|------|------|------|------|
| 56220 | 0 | 49912  | PVLVYSNIGVCKSGSI                   | 2.75 | 0.01 | 3.93 | 0.68 | 0.22 | 0.28 |
| 56221 | 0 | 49915  | PVMHPHGAPPNHRPW<br>QMKDLQAIKQEVSSA | 3.32 | 0.01 | 2.04 | 0.44 | 0.85 | 0.28 |
| 56222 | 0 | 49915  | PVMHPHGAPPNHRPW<br>QMKDLQAIKQEVSSA | 3.32 | 0.01 | 2.04 | 0.44 | 1.59 | 0.28 |
| 56223 | 0 | 49915  | PVMHPHGAPPNHRPW<br>QMKDLQAIKQEVSSA | 3.32 | 0.01 | 2.04 | 0.44 | 0.85 | 0.28 |
| 56224 | 0 | 49915  | PVMHPHGAPPNHRPW<br>QMKDLQAIKQEVSSA | 3.32 | 0.01 | 2.04 | 0.44 | 0.85 | 0.28 |
| 56225 | 0 | 49915  | PVMHPHGAPPNHRPW<br>QMKDLQAIKQEVSSA | 3.32 | 0.01 | 2.04 | 0.44 | 1.59 | 0.28 |
| 56226 | 0 | 49915  | PVMHPHGAPPNHRPW<br>QMKDLQAIKQEVSSA | 3.32 | 0.01 | 2.04 | 0.44 | 2.82 | 0.28 |
| 56227 | 0 | 49920  | PVNPSTAPAPAPTPT                    | 2.75 | 0.01 | 2.76 | 0.44 | 1.59 | 0.28 |
| 56228 | 0 | 100400 | PVNTPGQFEDFFPASSR<br>DQS           | 2.94 | 0.01 | 2.16 | 0.44 | 2.39 | 0.28 |
| 56229 | 0 | 49928  | PVPAPRRKVGSDCGS                    | 2.70 | 0.01 | 2.71 | 0.68 | 0.22 | 0.28 |
| 56230 | 0 | 49928  | PVPAPRRKVGSDCGS                    | 2.70 | 0.01 | 2.71 | 2.78 | 0.22 | 0.28 |
| 56231 | 0 | 49928  | PVPAPRRKVGSDCGS                    | 2.70 | 0.01 | 2.71 | 0.68 | 0.22 | 0.85 |
| 56232 | 0 | 49928  | PVPAPRRKVGSDCGS                    | 2.70 | 0.01 | 2.71 | 0.68 | 0.22 | 1.48 |
| 56233 | 0 | 123637 | PVPGMPPM                           | 2.17 | 0.01 | 0.78 | 1.20 | 0.22 | 0.28 |
| 56234 | 0 | 138553 | PVPHGTQ                            | 2.03 | 0.01 | 0.78 | 0.44 | 1.13 | 0.28 |
| 56235 | 0 | 140324 | PVPHGTQC                           | 2.13 | 0.01 | 0.78 | 0.44 | 1.13 | 0.28 |
| 56236 | 0 | 138554 | PVPLNMACHKTESLRTL<br>ASV           | 2.94 | 0.01 | 2.60 | 0.44 | 1.23 | 0.85 |
| 56237 | 0 | 115430 | PVPQKAVPYPQRDMPI<br>QAFL           | 2.95 | 0.01 | 1.60 | 0.44 | 1.23 | 1.28 |
| 56238 | 0 | 131303 | PVPSTPPTPSPSTPPTPS<br>PS           | 3.03 | 0.01 | 0.78 | 0.44 | 1.93 | 1.27 |
| 56239 | 0 | 131303 | PVPSTPPTPSPSTPPTPS<br>PS           | 3.03 | 0.01 | 0.78 | 0.44 | 1.93 | 0.28 |
| 56240 | 0 | 131303 | PVPSTPPTPSPSTPPTPS<br>PS           | 3.03 | 0.01 | 0.78 | 1.12 | 0.22 | 0.28 |
| 56241 | 0 | 131303 | PVPSTPPTPSPSTPPTPS<br>PS           | 3.03 | 0.01 | 0.78 | 0.44 | 1.93 | 0.28 |
| 56242 | 0 | 111653 | PVPVSKVVSTDGYVA                    | 2.70 | 0.01 | 1.86 | 0.68 | 0.22 | 0.28 |
| 56243 | 0 | 134199 | PVQCSRDVVICPDS                     | 2.70 | 0.01 | 2.19 | 1.15 | 0.22 | 0.28 |
| 56244 | 0 | 358025 | PVQFSVGTPDAANAA                    | 2.67 | 0.01 | 1.61 | 0.44 | 0.85 | 1.28 |
| 56245 | 0 | 117609 | PVQLETLSIRGNNIR                    | 2.65 | 0.01 | 1.75 | 2.16 | 0.22 | 0.28 |
| 56246 | 0 | 117609 | PVQLETLSIRGNNIR                    | 2.65 | 0.01 | 1.75 | 2.16 | 0.22 | 2.02 |



|       |   |        |                                    |      |      |      |      |      |      |
|-------|---|--------|------------------------------------|------|------|------|------|------|------|
| 56247 | 0 | 117609 | PVQLETLSIRGNNIR                    | 2.65 | 0.01 | 1.75 | 2.16 | 0.22 | 0.28 |
| 56248 | 0 | 117609 | PVQLETLSIRGNNIR                    | 2.65 | 0.01 | 1.75 | 2.16 | 0.22 | 2.02 |
| 56249 | 0 | 117609 | PVQLETLSIRGNNIR                    | 2.65 | 0.01 | 1.75 | 2.16 | 0.22 | 2.02 |
| 56250 | 0 | 78252  | PVQNLT                             | 1.88 | 0.01 | 2.84 | 0.68 | 0.22 | 0.85 |
| 56251 | 0 | 78252  | PVQNLT                             | 1.88 | 0.01 | 2.84 | 0.68 | 0.22 | 0.85 |
| 56252 | 0 | 139860 | PVQRGAWRWPVVTNE                    | 2.68 | 0.01 | 0.90 | 0.68 | 0.22 | 1.27 |
| 56253 | 0 | 139860 | PVQRGAWRWPVVTNE                    | 2.68 | 0.01 | 0.90 | 0.68 | 0.22 | 0.28 |
| 56254 | 0 | 139860 | PVQRGAWRWPVVTNE                    | 2.68 | 0.01 | 0.90 | 0.68 | 0.22 | 1.34 |
| 56255 | 0 | 167647 | PVRDPQVPGRGE                       | 2.60 | 0.01 | 3.18 | 0.44 | 0.85 | 1.28 |
| 56256 | 0 | 167647 | PVRDPQVPGRGE                       | 2.60 | 0.01 | 3.18 | 0.44 | 0.85 | 1.28 |
| 56257 | 0 | 167647 | PVRDPQVPGRGE                       | 2.60 | 0.01 | 3.18 | 0.44 | 1.59 | 1.28 |
| 56258 | 0 | 167648 | PVRGPDQVPA                         | 2.34 | 0.01 | 3.10 | 0.44 | 0.85 | 1.28 |
| 56259 | 0 | 167648 | PVRGPDQVPA                         | 2.34 | 0.01 | 3.10 | 0.44 | 1.59 | 1.28 |
| 56260 | 0 | 132885 | PVRLAE                             | 1.88 | 0.01 | 2.19 | 1.12 | 0.22 | 0.85 |
| 56261 | 0 | 132885 | PVRLAE                             | 1.88 | 0.01 | 2.19 | 1.12 | 0.22 | 0.85 |
| 56262 | 0 | 132024 | PVRLAEL                            | 2.02 | 0.01 | 0.78 | 1.20 | 0.22 | 0.85 |
| 56263 | 0 | 132886 | PVRLAELHSDLKIQE                    | 2.64 | 0.01 | 2.19 | 1.12 | 0.22 | 0.85 |
| 56264 | 0 | 123638 | PVRLFLEYL                          | 2.23 | 0.01 | 2.28 | 2.00 | 0.22 | 0.28 |
| 56265 | 0 | 123638 | PVRLFLEYL                          | 2.23 | 0.01 | 2.28 | 2.00 | 0.22 | 0.28 |
| 56266 | 0 | 123639 | PVRLLEYG                           | 2.21 | 0.01 | 2.28 | 2.00 | 0.22 | 0.28 |
| 56267 | 0 | 123640 | PVRLLEYL                           | 2.25 | 0.01 | 2.28 | 2.00 | 0.22 | 0.28 |
| 56268 | 0 | 49950  | PVRVAWSSPVQNCEPW<br>IPP            | 2.89 | 0.01 | 3.89 | 0.68 | 0.22 | 0.28 |
| 56269 | 0 | 49950  | PVRVAWSSPVQNCEPW<br>IPP            | 2.89 | 0.01 | 3.89 | 0.68 | 0.22 | 0.85 |
| 56270 | 0 | 49950  | PVRVAWSSPVQNCEPW<br>IPP            | 2.89 | 0.01 | 3.89 | 1.15 | 0.22 | 0.85 |
| 56271 | 0 | 49950  | PVRVAWSSPVQNCEPW<br>IPP            | 2.89 | 0.01 | 3.89 | 0.68 | 0.22 | 0.28 |
| 56272 | 0 | 49954  | PVSATAMAPSVDSAEP<br>TAP            | 3.01 | 0.01 | 2.40 | 0.44 | 1.59 | 0.28 |
| 56273 | 0 | 110971 | PVSDLNLKIDGL                       | 2.48 | 0.01 | 3.15 | 3.53 | 0.22 | 0.28 |
| 56274 | 0 | 49961  | PVSGPFGPLPSLAFAVP<br>AD            | 3.01 | 0.01 | 2.08 | 0.68 | 0.22 | 0.85 |
| 56275 | 0 | 49961  | PVSGPFGPLPSLAFAVP<br>AD            | 3.01 | 0.01 | 2.08 | 0.68 | 0.22 | 0.85 |
| 56276 | 0 | 49961  | PVSGPFGPLPSLAFAVP<br>AD            | 3.01 | 0.01 | 2.08 | 0.68 | 0.22 | 0.28 |
| 56277 | 0 | 49961  | PVSGPFGPLPSLAFAVP<br>AD            | 3.01 | 0.01 | 2.08 | 0.68 | 0.22 | 1.48 |
| 56278 | 0 | 49961  | PVSGPFGPLPSLAFAVP<br>AD            | 3.01 | 0.01 | 2.08 | 0.68 | 0.22 | 0.28 |
| 56279 | 0 | 49965  | PVSISAVAVLAPHSALAL<br>LEDTMDYPARAH | 3.36 | 0.01 | 2.70 | 0.44 | 0.85 | 0.28 |

|       |   |        |                                                         |      |      |      |      |      |      |
|-------|---|--------|---------------------------------------------------------|------|------|------|------|------|------|
| 56280 | 0 | 49965  | PVSISAVAVLAPHSALAL<br>LEDTMDYPARAH                      | 3.36 | 0.01 | 2.70 | 0.44 | 0.85 | 0.28 |
| 56281 | 0 | 49966  | PVSISAVAVLAPHSALAL<br>LEDTMDYPARAHTFDDF<br>CPECRPLGLQGC | 3.79 | 0.01 | 2.70 | 0.44 | 0.85 | 0.28 |
| 56282 | 0 | 49967  | PVSLGGDVPNS                                             | 2.43 | 0.01 | 2.71 | 0.68 | 0.22 | 0.28 |
| 56283 | 0 | 49967  | PVSLGGDVPNS                                             | 2.43 | 0.01 | 2.71 | 2.78 | 0.22 | 0.28 |
| 56284 | 0 | 49967  | PVSLGGDVPNS                                             | 2.43 | 0.01 | 2.71 | 0.68 | 0.22 | 0.85 |
| 56285 | 0 | 49967  | PVSLGGDVPNS                                             | 2.43 | 0.01 | 2.71 | 0.68 | 0.22 | 1.48 |
| 56286 | 0 | 49968  | PVSMAKTSVDCNMYIC<br>GDS                                 | 2.88 | 0.01 | 2.48 | 0.44 | 0.85 | 0.28 |
| 56287 | 0 | 49968  | PVSMAKTSVDCNMYIC<br>GDS                                 | 2.88 | 0.01 | 2.48 | 0.68 | 0.22 | 0.28 |
| 56288 | 0 | 49968  | PVSMAKTSVDCNMYIC<br>GDS                                 | 2.88 | 0.01 | 2.48 | 1.20 | 0.22 | 0.28 |
| 56289 | 0 | 95696  | PVSQFHIQQQVY                                            | 2.48 | 0.01 | 2.88 | 0.44 | 1.23 | 0.85 |
| 56290 | 0 | 135977 | PVSRVLAPHLTR                                            | 2.50 | 0.01 | 0.78 | 0.44 | 1.41 | 0.28 |
| 56291 | 0 | 49975  | PVSSLTML                                                | 2.13 | 0.01 | 2.83 | 1.12 | 0.22 | 0.28 |
| 56292 | 0 | 108595 | PVSSTRGNM                                               | 2.20 | 0.01 | 0.90 | 0.44 | 1.13 | 0.28 |
| 56293 | 0 | 358123 | PVTAAAMKTTTATTG                                         | 2.71 | 0.01 | 1.61 | 0.44 | 0.85 | 1.28 |

|       |   |       |                     |      |      |      |      |      |      |
|-------|---|-------|---------------------|------|------|------|------|------|------|
|       |   |       | PVTINNFNYNDPIDNNN   |      |      |      |      |      |      |
|       |   |       | IIMMEPPFARGTGRIYK   |      |      |      |      |      |      |
|       |   |       | AFKITDRIWIIPERYTFGY |      |      |      |      |      |      |
|       |   |       | KPEDFNKSSGIFNRDVCE  |      |      |      |      |      |      |
|       |   |       | YYDPDYLNTNDKKNIFL   |      |      |      |      |      |      |
|       |   |       | QTMIKLFNRIKSKPLGEK  |      |      |      |      |      |      |
|       |   |       | LLEMIINGIPYLGDRRVP  |      |      |      |      |      |      |
|       |   |       | LEEFNTNIASVTVNKLIS  |      |      |      |      |      |      |
|       |   |       | NPGEVERKKGIFANLIIF  |      |      |      |      |      |      |
|       |   |       | GPGPVLNENETIDIGIQN  |      |      |      |      |      |      |
|       |   |       | HFASREGFGGIMQMKF    |      |      |      |      |      |      |
|       |   |       | CPEYVSVFNNVQENKG    |      |      |      |      |      |      |
| 56294 | 0 | 49982 | ASIFNRRGYFSDPALILM  | 6.07 | 0.01 | 4.33 | 1.15 | 0.22 | 0.28 |
|       |   |       | HELIHVLHGLYGIKVDDL  |      |      |      |      |      |      |
|       |   |       | PIVPNEKKFFMQSTDAI   |      |      |      |      |      |      |
|       |   |       | QAEELYTFGGQDPSIITP  |      |      |      |      |      |      |
|       |   |       | STDKSIYDKVLQNFRGIV  |      |      |      |      |      |      |
|       |   |       | DRLNKVLVCISDPNININI |      |      |      |      |      |      |
|       |   |       | YKNKFKDKYKFVEDSEG   |      |      |      |      |      |      |
|       |   |       | KYSIDVESFDKLYKSLMF  |      |      |      |      |      |      |
|       |   |       | GFTETNIAENYKIKTRAS  |      |      |      |      |      |      |
|       |   |       | YFSDSLPPVKIKNLLDNEI |      |      |      |      |      |      |
|       |   |       | YTIEEGFNISDKDMEKEY  |      |      |      |      |      |      |
|       |   |       | RGQNKAINKQAYEEISKE  |      |      |      |      |      |      |
|       |   |       | HLAVYKIQMCKSVK      |      |      |      |      |      |      |

|       |   |       |                     |      |      |      |      |      |      |
|-------|---|-------|---------------------|------|------|------|------|------|------|
|       |   |       | PVTINNFNYNDPIDNNN   |      |      |      |      |      |      |
|       |   |       | IIMMEPPFARGTGRIYK   |      |      |      |      |      |      |
|       |   |       | AFKITDRIWIIPERYTFGY |      |      |      |      |      |      |
|       |   |       | KPEDFNKSSGIFNRDVCE  |      |      |      |      |      |      |
|       |   |       | YYDPDYLNTNDKKNIFL   |      |      |      |      |      |      |
|       |   |       | QTMIKLFNRIKSKPLGEK  |      |      |      |      |      |      |
|       |   |       | LLEMIINGIPYLGDRRVP  |      |      |      |      |      |      |
|       |   |       | LEEFNTNIASVTVNKLIS  |      |      |      |      |      |      |
|       |   |       | NPGEVERKKGIFANLIIF  |      |      |      |      |      |      |
|       |   |       | GPGPVLNENETIDIGIQN  |      |      |      |      |      |      |
|       |   |       | HFASREGFGGIMQMKF    |      |      |      |      |      |      |
|       |   |       | CPEYVSVFNNVQENKG    |      |      |      |      |      |      |
| 56295 | 0 | 49982 | ASIFNRRGYFSDPALILM  | 6.07 | 0.01 | 4.33 | 1.15 | 0.22 | 0.28 |
|       |   |       | HELIHVLHGLYGIKVDDL  |      |      |      |      |      |      |
|       |   |       | PIVPNEKKFFMQSTDAI   |      |      |      |      |      |      |
|       |   |       | QAEELYTFGGQDPSIITP  |      |      |      |      |      |      |
|       |   |       | STDKSIYDKVLQNFRGIV  |      |      |      |      |      |      |
|       |   |       | DRLNKVLVCISDPNININI |      |      |      |      |      |      |
|       |   |       | YKNKFKDKYKFVEDSEG   |      |      |      |      |      |      |
|       |   |       | KYSIDVESFDKLYKSLMF  |      |      |      |      |      |      |
|       |   |       | GFTETNIAENYKIKTRAS  |      |      |      |      |      |      |
|       |   |       | YFSDSLPPVKIKNLLDNEI |      |      |      |      |      |      |
|       |   |       | YTIEEGFNISDKDMEKEY  |      |      |      |      |      |      |
|       |   |       | RGQNKAINKQAYEEISKE  |      |      |      |      |      |      |
|       |   |       | HLAVYKIQMCKSVK      |      |      |      |      |      |      |

|       |   |       |                     |      |      |      |      |      |      |
|-------|---|-------|---------------------|------|------|------|------|------|------|
|       |   |       | PVTINNFNYNDPIDNNN   |      |      |      |      |      |      |
|       |   |       | IIMMEPPFARGTGRIYK   |      |      |      |      |      |      |
|       |   |       | AFKITDRIWIIPERYTFGY |      |      |      |      |      |      |
|       |   |       | KPEDFNKSSGIFNRDVCE  |      |      |      |      |      |      |
|       |   |       | YYDPDYLNTNDKKNIFL   |      |      |      |      |      |      |
|       |   |       | QTMIKLFNRIKSKPLGEK  |      |      |      |      |      |      |
|       |   |       | LLEMIINGIPYLGDRRVP  |      |      |      |      |      |      |
|       |   |       | LEEFNTNIASVTVNKLIS  |      |      |      |      |      |      |
|       |   |       | NPGEVERKKGIFANLIIF  |      |      |      |      |      |      |
|       |   |       | GPGPVLNENETIDIGIQN  |      |      |      |      |      |      |
|       |   |       | HFASREGFGGIMQMKF    |      |      |      |      |      |      |
|       |   |       | CPEYVSVFNNVQENKG    |      |      |      |      |      |      |
| 56296 | 0 | 49982 | ASIFNRRGYFSDPALILM  | 6.07 | 0.01 | 2.08 | 1.15 | 0.22 | 0.85 |
|       |   |       | HELIHVLHGLYGIKVDDL  |      |      |      |      |      |      |
|       |   |       | PIVPNEKKFFMQSTDAI   |      |      |      |      |      |      |
|       |   |       | QAEELYTFGGQDPSIITP  |      |      |      |      |      |      |
|       |   |       | STDKSIYDKVLQNFRGIV  |      |      |      |      |      |      |
|       |   |       | DRLNKVLVCISDPNININI |      |      |      |      |      |      |
|       |   |       | YKNKFKDKYKFVEDSEG   |      |      |      |      |      |      |
|       |   |       | KYSIDVESFDKLYKSLMF  |      |      |      |      |      |      |
|       |   |       | GFTETNIAENYKIKTRAS  |      |      |      |      |      |      |
|       |   |       | YFSDSLPPVKIKNLLDNEI |      |      |      |      |      |      |
|       |   |       | YTIEEGFNISDKDMEKEY  |      |      |      |      |      |      |
|       |   |       | RGQNKAINKQAYEEISKE  |      |      |      |      |      |      |
|       |   |       | HLAVYKIQMCKSVK      |      |      |      |      |      |      |

|       |   |        |                                                                                                                                                                                                                                                                                        |      |      |      |      |      |      |
|-------|---|--------|----------------------------------------------------------------------------------------------------------------------------------------------------------------------------------------------------------------------------------------------------------------------------------------|------|------|------|------|------|------|
|       |   |        | PVTINNFNYNDPIDNNN<br>IIMMEPPFARGTGYYK<br>AFKITDRIWIIPERYTFGY<br>KPEDFNKSSGIFNRDVCE<br>YYDPDYLNNTNDKKNIFL<br>QTMIKLFNRIKSKPLGEK<br>LLEMIINGIPYLGDRRVP<br>LEEFNTNIASVTVNKLIS<br>NPGEVERKKGIFANLIIF<br>GPGPVLNENETIDIGIQN<br>HFASREGFGGIMQMKF<br>CPEYVSVFNNVQENKG                         |      |      |      |      |      |      |
| 56297 | 0 | 49982  | ASIFNRRGYFSDPALILM<br>HELIHVLHGLYGIKVDDL<br>PIVPNEKKFFMQSTDAI<br>QAEELYTFGGQDPSIITP<br>STDKSIYDKVLQNFRGIV<br>DRLNKVLVCISDPNININI<br>YKNKFKDKYKFVEDSEG<br>KYSIDVESFDKLYKSLMF<br>GFTETNIAENYKIKTRAS<br>YFSDSLPPVKIKNLLDNEI<br>YTIEEGFNISDKDMEKEY<br>RGQNKAINKQAYEEISKE<br>HLAVYKIQMCKSVK | 6.07 | 0.01 | 2.08 | 1.15 | 0.22 | 1.34 |
| 56298 | 0 | 49984  | PVTKGIPYAPEYKSNAAS<br>TTEIH                                                                                                                                                                                                                                                            | 3.08 | 0.01 | 2.95 | 0.44 | 0.22 | 0.28 |
| 56299 | 0 | 49987  | PVTLTITLNGTQETG                                                                                                                                                                                                                                                                        | 2.70 | 0.01 | 3.38 | 1.12 | 0.22 | 0.28 |
| 56300 | 0 | 181767 | PVTNVRGDLQVLAQKA<br>ART                                                                                                                                                                                                                                                                | 2.90 | 0.01 | 4.08 | 2.43 | 0.22 | 0.28 |
| 56301 | 0 | 181767 | PVTNVRGDLQVLAQKA<br>ART                                                                                                                                                                                                                                                                | 2.90 | 0.01 | 4.08 | 4.33 | 0.22 | 0.28 |
| 56302 | 0 | 181767 | PVTNVRGDLQVLAQKA<br>ART                                                                                                                                                                                                                                                                | 2.90 | 0.01 | 4.08 | 4.33 | 0.22 | 1.34 |
| 56303 | 0 | 181767 | PVTNVRGDLQVLAQKA<br>ART                                                                                                                                                                                                                                                                | 2.90 | 0.01 | 4.08 | 4.33 | 0.22 | 0.28 |
| 56304 | 0 | 181767 | PVTNVRGDLQVLAQKA<br>ART                                                                                                                                                                                                                                                                | 2.90 | 0.01 | 4.08 | 2.13 | 0.22 | 0.28 |
| 56305 | 0 | 181767 | PVTNVRGDLQVLAQKA<br>ART                                                                                                                                                                                                                                                                | 2.90 | 0.01 | 4.08 | 2.13 | 0.22 | 1.34 |
| 56306 | 0 | 181767 | PVTNVRGDLQVLAQKA<br>ART                                                                                                                                                                                                                                                                | 2.90 | 0.01 | 4.08 | 2.13 | 0.22 | 0.28 |
| 56307 | 0 | 118563 | PVTTPEEIAQVAT                                                                                                                                                                                                                                                                          | 2.59 | 0.01 | 0.78 | 0.44 | 1.59 | 0.85 |
| 56308 | 0 | 49989  | PVTTTVENYGGETQIQR<br>RQHTDVSFIM                                                                                                                                                                                                                                                        | 3.20 | 0.01 | 3.26 | 3.75 | 0.22 | 0.28 |

|       |   |        |                                 |      |      |      |      |      |      |
|-------|---|--------|---------------------------------|------|------|------|------|------|------|
| 56309 | 0 | 122877 | PVTVAVTNST                      | 2.35 | 0.01 | 1.60 | 0.68 | 0.22 | 1.27 |
| 56310 | 0 | 49993  | PVVAESPKKP                      | 2.34 | 0.01 | 2.97 | 0.44 | 0.85 | 0.28 |
| 56311 | 0 | 49993  | PVVAESPKKP                      | 2.34 | 0.01 | 2.97 | 0.68 | 0.22 | 2.98 |
| 56312 | 0 | 49993  | PVVAESPKKP                      | 2.34 | 0.01 | 2.97 | 0.44 | 0.85 | 0.28 |
| 56313 | 0 | 49993  | PVVAESPKKP                      | 2.34 | 0.01 | 2.97 | 2.82 | 0.22 | 0.28 |
| 56314 | 0 | 49993  | PVVAESPKKP                      | 2.34 | 0.01 | 2.97 | 0.44 | 0.85 | 0.28 |
| 56315 | 0 | 49993  | PVVAESPKKP                      | 2.34 | 0.01 | 2.97 | 0.44 | 0.85 | 0.28 |
| 56316 | 0 | 49993  | PVVAESPKKP                      | 2.34 | 0.01 | 2.97 | 0.44 | 0.85 | 0.28 |
| 56317 | 0 | 49993  | PVVAESPKKP                      | 2.34 | 0.01 | 2.97 | 0.44 | 0.85 | 0.28 |
| 56318 | 0 | 49993  | PVVAESPKKP                      | 2.34 | 0.01 | 2.97 | 0.44 | 0.85 | 0.28 |
| 56319 | 0 | 420652 | PVVDGIL                         | 2.01 | 0.01 | 3.44 | 0.68 | 0.22 | 0.85 |
| 56320 | 0 | 420652 | PVVDGIL                         | 2.01 | 0.01 | 3.44 | 0.68 | 0.22 | 0.85 |
| 56321 | 0 | 420652 | PVVDGIL                         | 2.01 | 0.01 | 3.44 | 0.68 | 0.22 | 1.48 |
| 56322 | 0 | 420652 | PVVDGIL                         | 2.01 | 0.01 | 3.44 | 0.68 | 0.22 | 0.28 |
| 56323 | 0 | 420652 | PVVDGIL                         | 2.01 | 0.01 | 3.44 | 0.68 | 0.22 | 0.28 |
| 56324 | 0 | 420652 | PVVDGIL                         | 2.01 | 0.01 | 3.44 | 0.68 | 0.22 | 2.02 |
| 56325 | 0 | 49998  | PVVEVNGVTIQVGS                  | 2.68 | 0.01 | 2.43 | 0.44 | 1.59 | 0.28 |
| 56326 | 0 | 49998  | PVVEVNGVTIQVGS                  | 2.68 | 0.01 | 2.43 | 0.68 | 0.22 | 0.28 |
| 56327 | 0 | 49998  | PVVEVNGVTIQVGS                  | 2.68 | 0.01 | 2.43 | 0.68 | 0.22 | 0.28 |
| 56328 | 0 | 49998  | PVVEVNGVTIQVGS                  | 2.68 | 0.01 | 2.72 | 0.68 | 0.22 | 0.28 |
| 56329 | 0 | 123641 | PVVGAVQG                        | 2.16 | 0.01 | 0.78 | 1.20 | 0.22 | 0.28 |
| 56330 | 0 | 116154 | PVVHFFKNIVTPRTP                 | 2.69 | 0.01 | 2.95 | 2.04 | 0.22 | 0.28 |
| 56331 | 0 | 50003  | PVVLENARILKNCV                  | 2.61 | 0.01 | 3.08 | 0.68 | 0.22 | 1.57 |
| 56332 | 0 | 152051 | PVVNSLDPPLL                     | 2.41 | 0.01 | 0.78 | 0.44 | 1.93 | 0.28 |
| 56333 | 0 | 152051 | PVVNSLDPPLL                     | 2.41 | 0.01 | 0.78 | 0.44 | 1.13 | 0.28 |
| 56334 | 0 | 134200 | PVVNSLDPPLLTRY                  | 2.61 | 0.01 | 0.78 | 1.20 | 0.22 | 0.28 |
| 56335 | 0 | 134200 | PVVNSLDPPLLTRY                  | 2.61 | 0.01 | 0.78 | 1.20 | 0.22 | 0.85 |
| 56336 | 0 | 134200 | PVVNSLDPPLLTRY                  | 2.61 | 0.01 | 0.78 | 0.44 | 1.41 | 0.85 |
| 56337 | 0 | 134200 | PVVNSLDPPLLTRY                  | 2.61 | 0.01 | 0.78 | 0.44 | 1.41 | 1.34 |
| 56338 | 0 | 134200 | PVVNSLDPPLLTRY                  | 2.61 | 0.01 | 0.78 | 1.12 | 0.22 | 0.28 |
| 56339 | 0 | 134200 | PVVNSLDPPLLTRY                  | 2.61 | 0.01 | 0.78 | 1.12 | 0.22 | 0.28 |
| 56340 | 0 | 98354  | PVVRNNIYHI                      | 2.31 | 0.01 | 3.57 | 0.44 | 0.85 | 0.28 |
| 56341 | 0 | 50009  | PVVVGTTDRLGNPTYS<br>WGEN        | 2.93 | 0.01 | 3.10 | 1.81 | 0.22 | 0.28 |
| 56342 | 0 | 50011  | PVVVHITDDNE                     | 2.38 | 0.01 | 2.53 | 0.44 | 1.23 | 0.85 |
| 56343 | 0 | 50012  | PVVVHITDDNEEPIAPYH<br>FDLSGHAFG | 3.22 | 0.01 | 2.53 | 0.44 | 1.23 | 0.85 |
| 56344 | 0 | 50012  | PVVVHITDDNEEPIAPYH<br>FDLSGHAFG | 3.22 | 0.01 | 2.53 | 0.44 | 1.23 | 0.85 |
| 56345 | 0 | 115907 | PVVVPPFLQP                      | 2.36 | 0.01 | 1.60 | 0.44 | 1.23 | 0.85 |
| 56346 | 0 | 115907 | PVVVPPFLQP                      | 2.36 | 0.01 | 1.60 | 0.44 | 1.23 | 0.85 |
| 56347 | 0 | 131304 | PVVWKN                          | 1.89 | 0.01 | 0.90 | 0.44 | 1.13 | 1.39 |
| 56348 | 0 | 131304 | PVVWKN                          | 1.89 | 0.01 | 0.90 | 0.44 | 1.13 | 1.27 |
| 56349 | 0 | 50016  | PVWARPDY                        | 2.13 | 0.01 | 2.68 | 0.44 | 1.59 | 0.28 |
| 56350 | 0 | 126857 | PVYEDGFSQPRG                    | 2.46 | 0.01 | 0.78 | 1.20 | 0.22 | 0.28 |
| 56351 | 0 | 126857 | PVYEDGFSQPRG                    | 2.46 | 0.01 | 0.78 | 1.20 | 0.22 | 0.28 |
| 56352 | 0 | 534849 | PVYGFQWRHF                      | 2.29 | 0.01 | 0.78 | 0.68 | 0.22 | 0.28 |

|       |   |        |                                                        |      |      |      |      |      |      |
|-------|---|--------|--------------------------------------------------------|------|------|------|------|------|------|
| 56353 | 0 | 534849 | PVYGFQWRHF                                             | 2.29 | 0.01 | 0.78 | 0.68 | 0.22 | 0.28 |
| 56354 | 0 | 534849 | PVYGFQWRHF                                             | 2.29 | 0.01 | 0.78 | 0.68 | 0.22 | 1.27 |
| 56355 | 0 | 534849 | PVYGFQWRHF                                             | 2.29 | 0.01 | 0.78 | 0.68 | 0.22 | 2.92 |
| 56356 | 0 | 101983 | PVYQQQP                                                | 2.05 | 0.01 | 3.10 | 1.15 | 0.22 | 0.28 |
| 56357 | 0 | 101983 | PVYQQQP                                                | 2.05 | 0.01 | 3.10 | 1.15 | 0.22 | 1.48 |
| 56358 | 0 | 101983 | PVYQQQP                                                | 2.05 | 0.01 | 3.10 | 1.15 | 0.22 | 1.48 |
| 56359 | 0 | 101983 | PVYQQQP                                                | 2.05 | 0.01 | 3.10 | 1.15 | 0.22 | 0.85 |
| 56360 | 0 | 101984 | PVYQQQPVQQPS                                           | 2.53 | 0.01 | 3.10 | 1.15 | 0.22 | 0.28 |
| 56361 | 0 | 101984 | PVYQQQPVQQPS                                           | 2.53 | 0.01 | 3.10 | 1.15 | 0.22 | 1.48 |
| 56362 | 0 | 101984 | PVYQQQPVQQPS                                           | 2.53 | 0.01 | 3.10 | 1.15 | 0.22 | 0.85 |
| 56363 | 0 | 101984 | PVYQQQPVQQPS                                           | 2.53 | 0.01 | 3.10 | 1.15 | 0.22 | 0.28 |
| 56364 | 0 | 101984 | PVYQQQPVQQPS                                           | 2.53 | 0.01 | 3.10 | 1.15 | 0.22 | 0.85 |
| 56365 | 0 | 101984 | PVYQQQPVQQPS                                           | 2.53 | 0.01 | 3.10 | 1.15 | 0.22 | 1.48 |
| 56366 | 0 | 101984 | PVYQQQPVQQPS                                           | 2.53 | 0.01 | 3.10 | 1.15 | 0.22 | 1.48 |
| 56367 | 0 | 101984 | PVYQQQPVQQPS                                           | 2.53 | 0.01 | 3.10 | 1.15 | 0.22 | 0.28 |
| 56368 | 0 | 101984 | PVYQQQPVQQPS                                           | 2.53 | 0.01 | 3.10 | 1.15 | 0.22 | 1.48 |
| 56369 | 0 | 101984 | PVYQQQPVQQPS                                           | 2.53 | 0.01 | 3.10 | 1.15 | 0.22 | 1.48 |
| 56370 | 0 | 101984 | PVYQQQPVQQPS                                           | 2.53 | 0.01 | 3.10 | 1.15 | 0.22 | 0.85 |
| 56371 | 0 | 50022  | PVYVFGDCVQADWCPV<br>SGGL                               | 2.94 | 0.01 | 3.01 | 0.44 | 0.85 | 0.28 |
| 56372 | 0 | 50023  | PVYVSDSVTLNVNATGA<br>QAVARSLDWTQVT                     | 3.35 | 0.01 | 2.70 | 1.15 | 0.22 | 0.28 |
| 56373 | 0 | 50023  | PVYVSDSVTLNVNATGA<br>QAVARSLDWTQVT                     | 3.35 | 0.01 | 2.53 | 0.44 | 0.85 | 0.28 |
| 56374 | 0 | 140582 | PWATLVAES                                              | 2.21 | 0.01 | 0.90 | 0.68 | 0.22 | 1.39 |
| 56375 | 0 | 140582 | PWATLVAES                                              | 2.21 | 0.01 | 0.90 | 0.68 | 0.22 | 1.27 |
| 56376 | 0 | 140582 | PWATLVAES                                              | 2.21 | 0.01 | 0.90 | 0.68 | 0.22 | 0.85 |
| 56377 | 0 | 140582 | PWATLVAES                                              | 2.21 | 0.01 | 0.90 | 0.44 | 1.13 | 1.27 |
| 56378 | 0 | 140583 | PWDKFBVHEQ                                             | 2.18 | 0.01 | 0.90 | 0.68 | 0.22 | 1.39 |
| 56379 | 0 | 140583 | PWDKFBVHEQ                                             | 2.18 | 0.01 | 0.90 | 0.68 | 0.22 | 0.85 |
| 56380 | 0 | 50027  | PWFLAHTTGGD                                            | 2.36 | 0.01 | 3.14 | 1.20 | 0.22 | 0.28 |
| 56381 | 0 | 50027  | PWFLAHTTGGD                                            | 2.36 | 0.01 | 3.14 | 2.13 | 1.59 | 0.28 |
| 56382 | 0 | 50029  | PWGNPLRYDTEYYLIPV<br>ASSSKD                            | 3.03 | 0.01 | 2.95 | 0.44 | 0.22 | 0.28 |
| 56383 | 0 | 190516 | PWGYFDFNRFHCHFS                                        | 2.66 | 0.01 | 3.19 | 2.00 | 1.41 | 0.28 |
| 56384 | 0 | 145953 | PWHLGKLEIDFGCEPGT<br>TVTIQEDCDHRGPSLRTT<br>TASGKLVTQWC | 3.76 | 0.01 | 3.78 | 0.68 | 0.22 | 0.85 |
| 56385 | 0 | 145953 | PWHLGKLEIDFGCEPGT<br>TVTIQEDCDHRGPSLRTT<br>TASGKLVTQWC | 3.76 | 0.01 | 3.78 | 0.68 | 0.22 | 1.48 |
| 56386 | 0 | 160438 | PWHLGKLELDFD                                           | 2.48 | 0.01 | 2.82 | 1.15 | 0.22 | 2.97 |
| 56387 | 0 | 160438 | PWHLGKLELDFD                                           | 2.48 | 0.01 | 2.82 | 1.15 | 0.22 | 0.28 |



|       |   |        |                    |      |      |      |      |      |      |
|-------|---|--------|--------------------|------|------|------|------|------|------|
| 56388 | 0 | 160438 | PWHLGKLELDFD       | 2.48 | 0.01 | 2.82 | 1.15 | 0.22 | 0.28 |
| 56389 | 0 | 160438 | PWHLGKLELDFD       | 2.48 | 0.01 | 2.82 | 1.15 | 0.22 | 0.28 |
| 56390 | 0 | 160438 | PWHLGKLELDFD       | 2.48 | 0.01 | 2.82 | 1.15 | 0.22 | 0.28 |
|       |   |        | PWHLGKLELDFNYCEGT  |      |      |      |      |      |      |
| 56391 | 0 | 145954 | TVVITESCGTRGPSLRTT | 3.76 | 0.01 | 4.03 | 0.68 | 0.22 | 0.85 |
|       |   |        | TVSGKLIHEWC        |      |      |      |      |      |      |
|       |   |        | PWHLGKLELDFNYCEGT  |      |      |      |      |      |      |
| 56392 | 0 | 145954 | TVVITESCGTRGPSLRTT | 3.76 | 0.01 | 4.03 | 0.68 | 0.22 | 1.48 |
|       |   |        | TVSGKLIHEWC        |      |      |      |      |      |      |
| 56393 | 0 | 50030  | PWHLGKLEM          | 2.21 | 0.01 | 2.87 | 0.44 | 0.85 | 0.28 |
| 56394 | 0 | 50030  | PWHLGKLEM          | 2.21 | 0.01 | 2.30 | 0.68 | 0.22 | 0.28 |
| 56395 | 0 | 50030  | PWHLGKLEM          | 2.21 | 0.01 | 2.87 | 0.68 | 0.22 | 0.28 |
|       |   |        | PWHLGKLEMDDFDCEG   |      |      |      |      |      |      |
| 56396 | 0 | 145955 | TTVVVTEDCGNRGPSLR  | 3.75 | 0.01 | 4.03 | 0.68 | 0.22 | 0.85 |
|       |   |        | TTTASGKLITEWC      |      |      |      |      |      |      |
|       |   |        | PWHLGKLEMDDFDCEG   |      |      |      |      |      |      |
| 56397 | 0 | 145955 | TTVVVTEDCGNRGPSLR  | 3.75 | 0.01 | 4.03 | 0.68 | 0.22 | 1.48 |
|       |   |        | TTTASGKLITEWC      |      |      |      |      |      |      |
| 56398 | 0 | 140584 | PWHQMAATS          | 2.20 | 0.01 | 0.90 | 0.68 | 0.22 | 1.39 |
| 56399 | 0 | 140584 | PWHQMAATS          | 2.20 | 0.01 | 0.90 | 0.68 | 0.22 | 0.85 |
|       |   |        | PWLAWHVAANVSSVT    |      |      |      |      |      |      |
| 56400 | 0 | 237885 | DRS                | 2.84 | 0.01 | 3.19 | 0.44 | 1.59 | 0.85 |
|       |   |        | PWLAWHVAANVSSVT    |      |      |      |      |      |      |
| 56401 | 0 | 237885 | DRS                | 2.84 | 0.01 | 3.19 | 0.44 | 0.85 | 0.85 |
|       |   |        | PWLAWHVAANVSSVT    |      |      |      |      |      |      |
| 56402 | 0 | 237885 | DRS                | 2.84 | 0.01 | 3.19 | 0.44 | 0.85 | 0.85 |
|       |   |        | PWLAWHVAANVSSVT    |      |      |      |      |      |      |
| 56403 | 0 | 237885 | DRS                | 2.84 | 0.01 | 3.19 | 0.44 | 0.85 | 0.85 |
|       |   |        | PWLAWHVAANVSSVT    |      |      |      |      |      |      |
| 56404 | 0 | 237885 | DRS                | 2.84 | 0.01 | 3.19 | 0.44 | 0.22 | 0.85 |
| 56405 | 0 | 50036  | PWLDISDFQ          | 2.21 | 0.01 | 0.90 | 1.15 | 0.22 | 0.28 |
| 56406 | 0 | 193523 | PWLIVAGLV          | 2.23 | 0.01 | 2.51 | 0.44 | 2.39 | 0.28 |
| 56407 | 0 | 193523 | PWLIVAGLV          | 2.23 | 0.01 | 2.51 | 0.44 | 2.39 | 0.28 |
| 56408 | 0 | 50039  | PWLPGA             | 1.91 | 0.01 | 2.40 | 0.44 | 0.85 | 0.28 |
| 56409 | 0 | 50043  | PWNPAY             | 1.91 | 0.01 | 0.90 | 0.68 | 0.22 | 1.39 |
| 56410 | 0 | 140585 | PWNTFATNA          | 2.25 | 0.01 | 0.90 | 0.68 | 0.22 | 1.39 |
| 56411 | 0 | 140585 | PWNTFATNA          | 2.25 | 0.01 | 0.90 | 0.68 | 0.22 | 0.85 |
| 56412 | 0 | 140586 | PWQLPLNFQ          | 2.26 | 0.01 | 0.90 | 0.68 | 0.22 | 1.39 |
| 56413 | 0 | 140586 | PWQLPLNFQ          | 2.26 | 0.01 | 0.90 | 0.68 | 0.22 | 0.85 |
| 56414 | 0 | 140587 | PWQRGLRDL          | 2.23 | 0.01 | 0.90 | 0.68 | 0.22 | 1.39 |
| 56415 | 0 | 140587 | PWQRGLRDL          | 2.23 | 0.01 | 0.90 | 0.68 | 0.22 | 0.85 |
| 56416 | 0 | 135737 | PWQVVLNG           | 2.11 | 0.01 | 0.78 | 0.44 | 2.35 | 0.28 |
| 56417 | 0 | 50049  | PWRELWASR          | 2.23 | 0.01 | 0.90 | 1.15 | 0.22 | 1.27 |
|       |   |        | PWRYLDFNALNLFFSPL  |      |      |      |      |      |      |
| 56418 | 0 | 50051  | EFQ                | 2.95 | 0.01 | 2.75 | 0.44 | 0.85 | 0.85 |
| 56419 | 0 | 156942 | PWSKMHI            | 1.99 | 0.01 | 0.90 | 2.74 | 0.22 | 0.85 |
| 56420 | 0 | 156942 | PWSKMHI            | 1.99 | 0.01 | 0.90 | 0.68 | 0.22 | 0.28 |

|       |   |        |                                    |      |      |      |      |      |      |
|-------|---|--------|------------------------------------|------|------|------|------|------|------|
| 56421 | 0 | 140588 | PWSRFSLSE                          | 2.23 | 0.01 | 0.90 | 0.68 | 0.22 | 1.39 |
| 56422 | 0 | 140588 | PWSRFSLSE                          | 2.23 | 0.01 | 0.90 | 0.68 | 0.22 | 0.85 |
| 56423 | 0 | 50052  | PWSWCD                             | 1.90 | 0.01 | 1.86 | 0.44 | 1.23 | 0.28 |
| 56424 | 0 | 104193 | PWYAPFR                            | 2.03 | 0.01 | 0.90 | 1.15 | 0.22 | 1.39 |
| 56425 | 0 | 139861 | PWYLSSL                            | 2.03 | 0.01 | 0.90 | 2.00 | 0.22 | 0.28 |
| 56426 | 0 | 139862 | PWYSSAL                            | 2.01 | 0.01 | 0.90 | 2.00 | 0.22 | 0.28 |
| 56427 | 0 | 50058  | PWYVWLGFIAGLIAIVM                  | 2.81 | 0.01 | 2.48 | 0.44 | 0.85 | 0.28 |
| 56428 | 0 | 95698  | PYACAGIGGNFVSVVDG<br>HINPKFAYRVKAG | 3.34 | 0.01 | 3.65 | 2.22 | 0.22 | 0.28 |
| 56429 | 0 | 419307 | PYADGQQGSPPPQGQL                   | 2.77 | 0.01 | 3.50 | 2.13 | 0.22 | 0.28 |
| 56430 | 0 | 493638 | PYAGP                              | 1.77 | 0.01 | 3.97 | 0.68 | 0.22 | 1.48 |
| 56431 | 0 | 493638 | PYAGP                              | 1.77 | 0.01 | 3.97 | 0.68 | 0.22 | 1.48 |
| 56432 | 0 | 493638 | PYAGP                              | 1.77 | 0.01 | 3.97 | 0.68 | 0.22 | 0.28 |
| 56433 | 0 | 493638 | PYAGP                              | 1.77 | 0.01 | 3.97 | 0.68 | 0.22 | 0.85 |
| 56434 | 0 | 493638 | PYAGP                              | 1.77 | 0.01 | 3.97 | 0.68 | 0.22 | 0.85 |
| 56435 | 0 | 493638 | PYAGP                              | 1.77 | 0.01 | 3.97 | 2.13 | 0.22 | 0.85 |
| 56436 | 0 | 493638 | PYAGP                              | 1.77 | 0.01 | 3.97 | 2.22 | 0.22 | 0.85 |
| 56437 | 0 | 116803 | PYALGKEERDRYR                      | 2.55 | 0.01 | 1.60 | 0.44 | 1.13 | 0.28 |
| 56438 | 0 | 233249 | PYCFDQLRR                          | 2.18 | 0.01 | 0.78 | 0.44 | 1.13 | 0.28 |
| 56439 | 0 | 152053 | PYCLGSPSQDGY                       | 2.50 | 0.01 | 2.80 | 2.78 | 0.22 | 0.28 |
| 56440 | 0 | 50067  | PYCWHYAP                           | 2.15 | 0.01 | 1.72 | 0.44 | 0.85 | 0.28 |
| 56441 | 0 | 447056 | PYCWHYAPRPCGIVPAS<br>QVC           | 2.95 | 0.01 | 1.96 | 0.68 | 0.22 | 1.34 |
| 56442 | 0 | 447056 | PYCWHYAPRPCGIVPAS<br>QVC           | 2.95 | 0.01 | 1.96 | 0.68 | 0.22 | 1.34 |
| 56443 | 0 | 447056 | PYCWHYAPRPCGIVPAS<br>QVC           | 2.95 | 0.01 | 1.96 | 0.68 | 0.22 | 0.28 |
| 56444 | 0 | 50070  | PYCWHYPPKPCGIVPA                   | 2.75 | 0.01 | 3.18 | 0.44 | 0.85 | 0.28 |
| 56445 | 0 | 50070  | PYCWHYPPKPCGIVPA                   | 2.75 | 0.01 | 2.41 | 0.44 | 0.85 | 0.28 |
| 56446 | 0 | 50072  | PYCYNNDSKNSMAESKE<br>AR            | 2.91 | 0.01 | 2.86 | 2.02 | 0.22 | 0.28 |
| 56447 | 0 | 50072  | PYCYNNDSKNSMAESKE<br>AR            | 2.91 | 0.01 | 2.86 | 2.02 | 1.59 | 0.28 |
| 56448 | 0 | 172797 | PYDYSQSDFKAFAGN                    | 2.68 | 0.01 | 0.78 | 0.44 | 1.41 | 0.28 |
| 56449 | 0 | 103507 | PYEDFAARLLEAIDAE                   | 2.75 | 0.01 | 3.50 | 2.37 | 0.22 | 1.27 |
| 56450 | 0 | 122878 | PYEFSRKVPTFATPWPDP<br>FVP          | 2.95 | 0.01 | 0.78 | 1.20 | 0.22 | 0.28 |
| 56451 | 0 | 122878 | PYEFSRKVPTFATPWPDP<br>FVP          | 2.95 | 0.01 | 0.78 | 1.20 | 0.22 | 0.28 |
| 56452 | 0 | 122878 | PYEFSRKVPTFATPWPDP<br>FVP          | 2.95 | 0.01 | 0.78 | 1.20 | 0.22 | 1.27 |
| 56453 | 0 | 122878 | PYEFSRKVPTFATPWPDP<br>FVP          | 2.95 | 0.01 | 0.78 | 1.20 | 0.22 | 1.27 |

|       |   |        |                                    |      |      |      |      |      |      |
|-------|---|--------|------------------------------------|------|------|------|------|------|------|
| 56454 | 0 | 122878 | PYEF SRKVPTFATP WPD<br>FVP         | 2.95 | 0.01 | 0.78 | 1.20 | 0.22 | 0.28 |
| 56455 | 0 | 122878 | PYEF SRKVPTFATP WPD<br>FVP         | 2.95 | 0.01 | 0.78 | 0.44 | 1.13 | 0.28 |
| 56456 | 0 | 122878 | PYEF SRKVPTFATP WPD<br>FVP         | 2.95 | 0.01 | 0.78 | 0.44 | 1.13 | 0.28 |
| 56457 | 0 | 122878 | PYEF SRKVPTFATP WPD<br>FVP         | 2.95 | 0.01 | 0.78 | 0.44 | 1.41 | 0.28 |
| 56458 | 0 | 50084  | PYFEQGMQLAEQFKQK<br>ALGL           | 2.98 | 0.01 | 2.41 | 0.44 | 0.85 | 0.28 |
| 56459 | 0 | 496846 | PYFINTSKGQKCEFQDA<br>YVLLSEKKISSIQ | 3.30 | 0.01 | 0.78 | 0.44 | 1.93 | 2.12 |
| 56460 | 0 | 139863 | PYGAHW F                           | 1.99 | 0.01 | 0.90 | 2.00 | 0.22 | 0.28 |
| 56461 | 0 | 129670 | PYGDSMDRIEKDRLQG                   | 2.71 | 0.01 | 0.78 | 0.44 | 1.13 | 0.85 |
| 56462 | 0 | 132887 | PYGLLTP                            | 2.04 | 0.01 | 0.90 | 0.44 | 1.41 | 1.39 |
| 56463 | 0 | 133296 | PYGQWAGR NAYNETKL<br>K             | 2.78 | 0.01 | 0.90 | 1.20 | 0.22 | 0.85 |
| 56464 | 0 | 133297 | PYGQWAYYYFNDINRTK                  | 2.74 | 0.01 | 0.90 | 1.20 | 0.22 | 0.85 |
| 56465 | 0 | 140589 | PYHELEQVP                          | 2.24 | 0.01 | 0.90 | 0.68 | 0.22 | 1.39 |
| 56466 | 0 | 140589 | PYHELEQVP                          | 2.24 | 0.01 | 0.90 | 0.68 | 0.22 | 0.85 |
| 56467 | 0 | 140590 | PYHLALAGV                          | 2.23 | 0.01 | 0.90 | 0.68 | 0.22 | 1.39 |
| 56468 | 0 | 140590 | PYHLALAGV                          | 2.23 | 0.01 | 0.90 | 0.68 | 0.22 | 0.85 |
| 56469 | 0 | 140591 | PYHQFQTGQ                          | 2.23 | 0.01 | 0.90 | 0.68 | 0.22 | 1.39 |
| 56470 | 0 | 140591 | PYHQFQTGQ                          | 2.23 | 0.01 | 0.90 | 0.68 | 0.22 | 0.85 |
| 56471 | 0 | 140592 | PYHQLTHGS                          | 2.21 | 0.01 | 0.90 | 0.68 | 0.22 | 1.39 |
| 56472 | 0 | 140592 | PYHQLTHGS                          | 2.21 | 0.01 | 0.90 | 0.68 | 0.22 | 0.85 |
| 56473 | 0 | 182262 | PYICKKYLNHIDHEI                    | 2.67 | 0.01 | 0.78 | 0.44 | 1.13 | 0.85 |
| 56474 | 0 | 50098  | PYIEQAQVI                          | 2.23 | 0.01 | 2.59 | 0.44 | 0.85 | 0.28 |
| 56475 | 0 | 50099  | PYIEQAQVIAHQFKEKIL<br>GL           | 2.95 | 0.01 | 1.96 | 0.44 | 0.85 | 0.28 |
| 56476 | 0 | 50100  | PYIEQAQVIAHQFKEKVL<br>GL           | 2.95 | 0.01 | 1.96 | 0.44 | 0.85 | 0.28 |
| 56477 | 0 | 50101  | PYIEQGMHLAEQFKQKA<br>LGL           | 2.95 | 0.01 | 2.41 | 0.44 | 0.85 | 0.28 |
| 56478 | 0 | 50102  | PYIEQGMML                          | 2.20 | 0.01 | 2.41 | 0.44 | 0.85 | 0.28 |
| 56479 | 0 | 50103  | PYIEQGMMLAEQFKQK<br>ALGL           | 2.95 | 0.01 | 1.96 | 0.44 | 0.85 | 0.28 |
| 56480 | 0 | 50104  | PYIEQGMQL                          | 2.21 | 0.01 | 1.72 | 0.44 | 0.85 | 2.51 |
| 56481 | 0 | 50105  | PYIEQGMQLAAEFKQKA<br>LGL           | 2.96 | 0.01 | 1.96 | 0.44 | 0.85 | 0.28 |
| 56482 | 0 | 50106  | PYIEQGMQLAEQFKQK<br>ALGL           | 2.96 | 0.01 | 1.96 | 0.44 | 0.85 | 0.28 |
| 56483 | 0 | 50107  | PYIEQGMQLAEQFKQK<br>ARGL           | 2.95 | 0.01 | 1.96 | 0.44 | 0.85 | 0.28 |

|       |   |        |                                       |      |      |      |      |      |      |
|-------|---|--------|---------------------------------------|------|------|------|------|------|------|
| 56484 | 0 | 50108  | PYIEQGMQLAEQLKQKA<br>LGL              | 2.98 | 0.01 | 1.96 | 0.44 | 0.85 | 0.28 |
| 56485 | 0 | 50109  | PYIEQGVQLAEQFKQKA<br>LGL              | 2.96 | 0.01 | 1.96 | 0.44 | 0.85 | 0.28 |
| 56486 | 0 | 132558 | PYKDR                                 | 1.74 | 0.01 | 0.78 | 0.68 | 0.22 | 2.35 |
| 56487 | 0 | 50119  | PYKELRLEVKGKQRLKYA<br>QEE             | 2.96 | 0.01 | 2.82 | 0.44 | 0.85 | 0.28 |
| 56488 | 0 | 50119  | PYKELRLEVKGKQRLKYA<br>QEE             | 2.96 | 0.01 | 2.82 | 0.44 | 1.41 | 0.28 |
| 56489 | 0 | 136566 | PYKYTFYKYD                            | 2.35 | 0.01 | 0.90 | 0.44 | 1.93 | 0.85 |
| 56490 | 0 | 50137  | PYLRRAKHNLNNLQGGI<br>NNLYSSVNVVYDNLFN | 3.41 | 0.01 | 2.22 | 0.44 | 1.74 | 0.28 |
| 56491 | 0 | 50137  | PYLRRAKHNLNNLQGGI<br>NNLYSSVNVVYDNLFN | 3.41 | 0.01 | 2.22 | 0.44 | 1.74 | 0.28 |
| 56492 | 0 | 123643 | PYMPPPGM                              | 2.16 | 0.01 | 0.78 | 1.20 | 0.22 | 0.28 |
| 56493 | 0 | 123643 | PYMPPPGM                              | 2.16 | 0.01 | 0.78 | 0.44 | 1.13 | 0.28 |
| 56494 | 0 | 108596 | PYPFAQKRL                             | 2.22 | 0.01 | 0.90 | 0.44 | 1.13 | 1.39 |
| 56495 | 0 | 50149  | PYPP                                  | 1.55 | 0.01 | 1.86 | 0.44 | 1.23 | 0.85 |
| 56496 | 0 | 173968 | PYPPQQSQEPSY                          | 2.62 | 0.01 | 1.86 | 0.44 | 1.23 | 0.85 |
| 56497 | 0 | 193524 | PYPQPGQYP                             | 2.28 | 0.01 | 2.51 | 0.44 | 2.39 | 0.28 |
| 56498 | 0 | 193524 | PYPQPGQYP                             | 2.28 | 0.01 | 2.51 | 0.44 | 2.39 | 0.28 |
| 56499 | 0 | 50151  | PYPQPQLPY                             | 2.28 | 3.97 | 1.86 | 0.44 | 2.39 | 0.28 |
| 56500 | 0 | 50151  | PYPQPQLPY                             | 2.28 | 3.97 | 1.86 | 0.44 | 2.39 | 0.28 |
| 56501 | 0 | 50151  | PYPQPQLPY                             | 2.28 | 3.97 | 1.86 | 0.44 | 1.23 | 0.28 |
| 56502 | 0 | 50151  | PYPQPQLPY                             | 2.28 | 3.97 | 1.86 | 0.44 | 1.23 | 0.28 |
| 56503 | 0 | 115909 | PYPQRDMPIQ                            | 2.34 | 0.01 | 1.60 | 0.44 | 1.23 | 0.85 |
| 56504 | 0 | 115909 | PYPQRDMPIQ                            | 2.34 | 0.01 | 1.60 | 0.44 | 1.23 | 0.85 |
| 56505 | 0 | 193525 | PYPYPPPGG                             | 2.25 | 0.01 | 2.51 | 0.44 | 2.39 | 0.28 |
| 56506 | 0 | 193525 | PYPYPPPGG                             | 2.25 | 0.01 | 2.51 | 0.44 | 2.39 | 0.28 |
| 56507 | 0 | 115910 | PYPYYAKPAA                            | 2.35 | 0.01 | 1.60 | 0.44 | 1.23 | 0.85 |
| 56508 | 0 | 115910 | PYPYYAKPAA                            | 2.35 | 0.01 | 1.60 | 0.44 | 1.23 | 0.85 |
| 56509 | 0 | 140593 | PYQFFTASE                             | 2.20 | 0.01 | 0.90 | 0.68 | 0.22 | 1.39 |
| 56510 | 0 | 140593 | PYQFFTASE                             | 2.20 | 0.01 | 0.90 | 0.68 | 0.22 | 0.85 |
| 56511 | 0 | 50156  | PYQSGKGVS                             | 2.33 | 0.01 | 2.43 | 1.20 | 0.22 | 0.28 |
| 56512 | 0 | 50156  | PYQSGKGVS                             | 2.33 | 0.01 | 2.43 | 1.20 | 0.22 | 0.28 |
| 56513 | 0 | 50156  | PYQSGKGVS                             | 2.33 | 0.01 | 2.43 | 1.20 | 0.22 | 0.28 |
| 56514 | 0 | 50156  | PYQSGKGVS                             | 2.33 | 0.01 | 2.43 | 1.15 | 2.26 | 0.28 |
| 56515 | 0 | 50156  | PYQSGKGVS                             | 2.33 | 0.01 | 2.43 | 1.15 | 2.26 | 0.28 |
| 56516 | 0 | 50160  | PYQPVSNTATTQGG                        | 2.68 | 0.01 | 2.84 | 0.68 | 0.22 | 0.28 |
| 56517 | 0 | 190904 | PYQQYPQQQP                            | 2.37 | 0.01 | 1.86 | 0.44 | 1.23 | 0.28 |
| 56518 | 0 | 50164  | PYRLWHYPCTIN                          | 2.46 | 0.01 | 2.68 | 2.74 | 0.22 | 0.28 |
| 56519 | 0 | 358392 | PYSAEPKPAEPKSAE                       | 2.75 | 0.01 | 1.61 | 0.44 | 0.85 | 1.28 |
| 56520 | 0 | 50168  | PYSASFT                               | 2.02 | 0.01 | 3.65 | 1.15 | 2.26 | 0.28 |
| 56521 | 0 | 181008 | PYSDFEKTG                             | 2.26 | 0.01 | 2.18 | 2.16 | 0.22 | 0.28 |
| 56522 | 0 | 152903 | PYSDFEKTGRIDKNV                       | 2.69 | 0.01 | 2.18 | 0.44 | 0.22 | 0.28 |

|       |   |        |                             |      |      |      |      |      |      |
|-------|---|--------|-----------------------------|------|------|------|------|------|------|
| 56523 | 0 | 152903 | PYSDFEKVTEGRIDKNV           | 2.69 | 0.01 | 2.18 | 0.44 | 0.22 | 0.28 |
| 56524 | 0 | 152903 | PYSDFEKVTEGRIDKNV           | 2.69 | 0.01 | 2.18 | 0.44 | 0.22 | 1.75 |
| 56525 | 0 | 152903 | PYSDFEKVTEGRIDKNV           | 2.69 | 0.01 | 2.18 | 0.44 | 0.22 | 1.34 |
| 56526 | 0 | 152903 | PYSDFEKVTEGRIDKNV           | 2.69 | 0.01 | 2.18 | 2.37 | 0.22 | 0.28 |
| 56527 | 0 | 152903 | PYSDFEKVTEGRIDKNV           | 2.69 | 0.01 | 2.18 | 1.81 | 0.22 | 0.28 |
| 56528 | 0 | 152903 | PYSDFEKVTEGRIDKNV           | 2.69 | 0.01 | 2.18 | 1.81 | 2.25 | 1.75 |
| 56529 | 0 | 226376 | PYSENRA                     | 1.99 | 0.01 | 0.90 | 2.66 | 0.22 | 1.39 |
| 56530 | 0 | 50170  | PYSLNWPDE                   | 2.22 | 0.01 | 0.90 | 2.55 | 0.22 | 0.28 |
| 56531 | 0 | 523922 | PYSPSQDPDRDPYSPS<br>PYDRRGA | 3.18 | 0.01 | 2.16 | 1.12 | 0.22 | 1.39 |
| 56532 | 0 | 523922 | PYSPSQDPDRDPYSPS<br>PYDRRGA | 3.18 | 0.01 | 2.16 | 0.44 | 1.23 | 1.39 |
| 56533 | 0 | 50171  | PYSPSQDPYSPSPYD             | 2.75 | 0.01 | 2.16 | 0.44 | 1.23 | 0.28 |
| 56534 | 0 | 50171  | PYSPSQDPYSPSPYD             | 2.75 | 0.01 | 2.16 | 1.12 | 0.22 | 0.85 |
| 56535 | 0 | 50171  | PYSPSQDPYSPSPYD             | 2.75 | 0.01 | 2.16 | 0.44 | 1.23 | 1.48 |
| 56536 | 0 | 50172  | PYSPSQDPYSPSQDP             | 2.75 | 0.01 | 2.16 | 0.44 | 1.23 | 0.85 |
| 56537 | 0 | 50172  | PYSPSQDPYSPSQDP             | 2.75 | 0.01 | 2.16 | 2.90 | 0.22 | 0.85 |
| 56538 | 0 | 98948  | PYSQPQFPRPQQ                | 2.51 | 0.01 | 1.86 | 0.44 | 1.93 | 1.27 |
| 56539 | 0 | 104942 | PYSWRSKYGW                  | 2.33 | 0.01 | 2.60 | 0.44 | 1.23 | 0.85 |
| 56540 | 0 | 504035 | PYTGSRPTPQKPVPF             | 2.69 | 0.01 | 3.29 | 2.13 | 0.22 | 0.85 |
| 56541 | 0 | 504035 | PYTGSRPTPQKPVPF             | 2.69 | 0.01 | 3.29 | 2.13 | 0.22 | 0.85 |
| 56542 | 0 | 504035 | PYTGSRPTPQKPVPF             | 2.69 | 0.01 | 3.29 | 2.13 | 0.22 | 0.85 |
| 56543 | 0 | 504036 | PYTGSRPTSPSSGSR             | 2.74 | 0.01 | 3.29 | 2.13 | 0.22 | 0.85 |
| 56544 | 0 | 504036 | PYTGSRPTSPSSGSR             | 2.74 | 0.01 | 3.29 | 2.13 | 0.22 | 0.85 |
| 56545 | 0 | 504036 | PYTGSRPTSPSSGSR             | 2.74 | 0.01 | 3.29 | 2.13 | 0.22 | 0.85 |
| 56546 | 0 | 50177  | PYTSTLLP                    | 2.16 | 0.01 | 2.40 | 1.15 | 0.22 | 0.85 |
| 56547 | 0 | 50180  | PYVEPTAPQVL                 | 2.42 | 0.01 | 2.04 | 0.44 | 0.85 | 0.85 |
| 56548 | 0 | 50180  | PYVEPTAPQVL                 | 2.42 | 0.01 | 2.04 | 1.20 | 0.22 | 0.85 |
| 56549 | 0 | 50180  | PYVEPTAPQVL                 | 2.42 | 0.01 | 2.04 | 1.20 | 0.22 | 1.57 |
| 56550 | 0 | 50180  | PYVEPTAPQVL                 | 2.42 | 0.01 | 2.04 | 1.20 | 0.22 | 1.27 |
| 56551 | 0 | 50180  | PYVEPTAPQVL                 | 2.42 | 0.01 | 2.04 | 1.15 | 2.26 | 1.27 |
| 56552 | 0 | 50180  | PYVEPTAPQVL                 | 2.42 | 0.01 | 2.04 | 1.15 | 2.26 | 1.57 |
| 56553 | 0 | 50180  | PYVEPTAPQVL                 | 2.42 | 0.01 | 2.04 | 0.44 | 0.85 | 1.57 |
| 56554 | 0 | 50180  | PYVEPTAPQVL                 | 2.42 | 0.01 | 2.04 | 1.12 | 0.22 | 2.35 |
| 56555 | 0 | 50181  | PYVEVCQGNVKGAKDF<br>AGDS    | 2.93 | 0.01 | 2.78 | 2.49 | 0.85 | 0.28 |
| 56556 | 0 | 50186  | PYVIWK                      | 1.88 | 0.01 | 0.90 | 0.44 | 1.59 | 1.39 |
| 56557 | 0 | 50188  | PYVKRVKT                    | 2.14 | 0.01 | 0.78 | 0.44 | 1.74 | 0.28 |
| 56558 | 0 | 79343  | PYVPCSTC                    | 2.15 | 0.01 | 4.45 | 0.68 | 0.22 | 0.28 |
| 56559 | 0 | 95132  | PYVTYG                      | 1.90 | 0.01 | 3.44 | 1.15 | 0.22 | 0.28 |
| 56560 | 0 | 95132  | PYVTYG                      | 1.90 | 0.01 | 3.44 | 1.15 | 0.22 | 0.28 |
| 56561 | 0 | 95132  | PYVTYG                      | 1.90 | 0.01 | 3.44 | 1.15 | 0.22 | 2.02 |
| 56562 | 0 | 95134  | PYVTYGKFCIKPDGLVHII<br>VPEE | 3.06 | 0.01 | 3.44 | 2.49 | 0.22 | 0.85 |
| 56563 | 0 | 50193  | PYWKSDSIKKHVLI              | 2.60 | 0.01 | 2.40 | 2.43 | 0.22 | 0.28 |
| 56564 | 0 | 50193  | PYWKSDSIKKHVLI              | 2.60 | 0.01 | 2.40 | 2.43 | 0.22 | 0.28 |
| 56565 | 0 | 50193  | PYWKSDSIKKHVLI              | 2.60 | 0.01 | 2.40 | 2.43 | 0.22 | 0.28 |

|       |   |        |                          |      |      |      |      |      |      |
|-------|---|--------|--------------------------|------|------|------|------|------|------|
| 56566 | 0 | 136567 | PYWKWQYKYD               | 2.35 | 0.01 | 0.90 | 0.44 | 1.93 | 2.56 |
| 56567 | 0 | 136567 | PYWKWQYKYD               | 2.35 | 0.01 | 0.90 | 1.15 | 0.22 | 2.56 |
| 56568 | 0 | 115911 | PYYAKPAAVR               | 2.34 | 0.01 | 1.60 | 0.44 | 1.23 | 0.85 |
| 56569 | 0 | 115911 | PYYAKPAAVR               | 2.34 | 0.01 | 1.60 | 0.44 | 1.23 | 0.85 |
| 56570 | 0 | 100405 | PYYGPGVDYKNNLD           | 2.64 | 0.01 | 2.96 | 1.12 | 0.22 | 0.28 |
| 56571 | 0 | 123644 | PYYIDDKCK                | 2.23 | 0.01 | 2.28 | 2.00 | 0.22 | 0.28 |
| 56572 | 0 | 123644 | PYYIDDKCK                | 2.23 | 0.01 | 2.28 | 2.00 | 0.22 | 0.28 |
| 56573 | 0 | 123644 | PYYIDDKCK                | 2.23 | 0.01 | 2.28 | 2.00 | 0.22 | 0.28 |
| 56574 | 0 | 136568 | PYYRVFYKYD               | 2.33 | 0.01 | 0.90 | 0.44 | 1.93 | 0.85 |
| 56575 | 0 | 136569 | PYYRWQYKYD               | 2.33 | 0.01 | 0.90 | 0.44 | 1.93 | 0.85 |
| 56576 | 0 | 136569 | PYYRWQYKYD               | 2.33 | 0.01 | 0.90 | 1.15 | 0.22 | 2.56 |
| 56577 | 0 | 50201  | QAAAAAPAGTKWKAE<br>YCGYY | 2.99 | 0.01 | 3.48 | 1.12 | 0.22 | 0.28 |
| 56578 | 0 | 358422 | QAAAADKPSLFGQAA          | 2.67 | 0.01 | 1.61 | 0.44 | 0.85 | 1.28 |
| 56579 | 0 | 50202  | QAAAAVPATKWKAEYC<br>GY   | 2.88 | 0.01 | 3.48 | 1.12 | 0.22 | 0.28 |
| 56580 | 0 | 50202  | QAAAAVPATKWKAEYC<br>GY   | 2.88 | 0.01 | 3.48 | 1.20 | 0.22 | 0.28 |
| 56581 | 0 | 462161 | QAAAEAYEPGRS             | 2.48 | 0.01 | 2.71 | 1.12 | 0.22 | 1.48 |
| 56582 | 0 | 462161 | QAAAEAYEPGRS             | 2.48 | 0.01 | 2.71 | 2.13 | 0.22 | 0.28 |
| 56583 | 0 | 462161 | QAAAEAYEPGRS             | 2.48 | 0.01 | 2.71 | 2.13 | 0.22 | 0.28 |
| 56584 | 0 | 462161 | QAAAEAYEPGRS             | 2.48 | 0.01 | 2.71 | 2.13 | 0.22 | 1.34 |
| 56585 | 0 | 462161 | QAAAEAYEPGRS             | 2.48 | 0.01 | 2.71 | 1.12 | 0.22 | 1.48 |
| 56586 | 0 | 358427 | QAAAGDKLSLFGQAA          | 2.69 | 0.01 | 1.61 | 0.44 | 0.85 | 1.28 |
| 56587 | 0 | 358428 | QAAAGDKPAPFGQAA          | 2.71 | 0.01 | 1.61 | 0.44 | 0.85 | 1.28 |
| 56588 | 0 | 358429 | QAAAGDKPPFGQAA           | 2.70 | 0.01 | 1.61 | 0.44 | 0.85 | 1.28 |
| 56589 | 0 | 50203  | QAAAGDKPS                | 2.21 | 0.01 | 2.30 | 0.44 | 0.85 | 0.28 |
| 56590 | 0 | 358430 | QAAAGDKPSLFGQAA          | 2.68 | 0.01 | 1.61 | 0.44 | 0.85 | 1.28 |
| 56591 | 0 | 358431 | QAAAGDKPSPFGQAA          | 2.69 | 0.01 | 1.61 | 0.44 | 0.85 | 1.28 |
| 56592 | 0 | 358432 | QAAAGDKPSPFGQGT          | 2.69 | 0.01 | 1.61 | 0.44 | 0.85 | 1.28 |
| 56593 | 0 | 358433 | QAAAGGKPSFGQAA           | 2.71 | 0.01 | 1.61 | 0.44 | 0.85 | 1.28 |
| 56594 | 0 | 116804 | QAADESERMKVLN            | 2.65 | 0.01 | 2.36 | 0.44 | 1.23 | 1.28 |
| 56595 | 0 | 116804 | QAADESERMKVLN            | 2.65 | 0.01 | 2.36 | 0.44 | 1.23 | 1.27 |
| 56596 | 0 | 116804 | QAADESERMKVLN            | 2.65 | 0.01 | 2.36 | 0.44 | 1.23 | 1.28 |
| 56597 | 0 | 358455 | QAAEGDKPPFGQAA           | 2.69 | 0.01 | 1.61 | 0.44 | 0.85 | 1.28 |
| 56598 | 0 | 127782 | QAAELTLGPSAC             | 2.47 | 0.01 | 3.16 | 3.16 | 0.22 | 0.28 |

|                  |   |        |                                        |      |      |      |      |      |      |
|------------------|---|--------|----------------------------------------|------|------|------|------|------|------|
| QAAHVWTPAAGSCSVS |   |        |                                        |      |      |      |      |      |      |
| 56599            | 0 | 174240 | CGRGLMELRFLCMDLSAL<br>RVPVQEELCGLASKPG | 3.83 | 0.01 | 0.78 | 1.15 | 0.22 | 1.34 |
| 56600            | 0 | 152056 | QAAKQRLEPGRN<br>QAANDSYAAGWGVMV        | 2.47 | 0.01 | 2.71 | 2.78 | 0.22 | 0.28 |
| 56601            | 0 | 50210  | SHRSGETEDTFIADLSVG<br>LRSGQI           | 3.59 | 0.01 | 2.69 | 0.44 | 1.23 | 0.85 |
| 56602            | 0 | 50213  | QAAPVQEGVQ                             | 2.35 | 0.01 | 2.73 | 0.44 | 0.85 | 0.28 |
| 56603            | 0 | 50213  | QAAPVQEGVQ                             | 2.35 | 0.01 | 2.73 | 1.15 | 0.22 | 0.28 |
| 56604            | 0 | 50215  | QAAPYIEQA                              | 2.26 | 0.01 | 2.59 | 0.44 | 0.85 | 0.28 |
| 56605            | 0 | 50216  | QAAPYIEQAQVIAHQF                       | 2.77 | 0.01 | 4.03 | 0.68 | 0.22 | 0.28 |
| 56606            | 0 | 152057 | QAARQRLEPGRN                           | 2.49 | 0.01 | 2.80 | 2.78 | 0.22 | 0.28 |
| 56607            | 0 | 152057 | QAARQRLEPGRN                           | 2.49 | 0.01 | 2.80 | 2.78 | 0.22 | 1.34 |
| 56608            | 0 | 50218  | QAASAALGALGRFDE                        | 2.69 | 0.01 | 2.59 | 0.68 | 0.22 | 0.28 |
| 56609            | 0 | 50218  | QAASAALGALGRFDE                        | 2.69 | 0.01 | 2.59 | 1.12 | 0.22 | 0.28 |
| 56610            | 0 | 152058 | QAASQRLEPGRN                           | 2.47 | 0.01 | 2.71 | 2.78 | 0.22 | 0.28 |
| 56611            | 0 | 137264 | QAAYEDGFHQCDAGW<br>LADQTVRYPI          | 3.12 | 0.01 | 1.75 | 0.68 | 0.22 | 0.28 |
| 56612            | 0 | 137264 | QAAYEDGFHQCDAGW<br>LADQTVRYPI          | 3.12 | 0.01 | 1.75 | 0.68 | 0.22 | 0.28 |
| 56613            | 0 | 50222  | QACKGKIQALCEN                          | 2.56 | 0.01 | 2.72 | 0.68 | 0.22 | 1.66 |
| 56614            | 0 | 50222  | QACKGKIQALCEN                          | 2.56 | 0.01 | 2.72 | 0.68 | 0.22 | 0.28 |
| 56615            | 0 | 50222  | QACKGKIQALCEN                          | 2.56 | 0.01 | 2.72 | 0.68 | 0.22 | 1.48 |
| 56616            | 0 | 50222  | QACKGKIQALCEN                          | 2.56 | 0.01 | 2.72 | 0.68 | 0.22 | 2.56 |
| 56617            | 0 | 77975  | QACQNNDTCPRL                           | 2.47 | 0.01 | 0.90 | 1.15 | 0.22 | 1.27 |
| 56618            | 0 | 77975  | QACQNNDTCPRL                           | 2.47 | 0.01 | 0.90 | 1.15 | 0.22 | 0.28 |
| 56619            | 0 | 123645 | QADIEARVLQ                             | 2.32 | 0.01 | 2.58 | 1.15 | 0.22 | 0.85 |
| 56620            | 0 | 123645 | QADIEARVLQ                             | 2.32 | 0.01 | 2.58 | 1.15 | 0.22 | 0.85 |
| 56621            | 0 | 123645 | QADIEARVLQ                             | 2.32 | 0.01 | 2.58 | 1.15 | 0.22 | 0.85 |
| 56622            | 0 | 123645 | QADIEARVLQ                             | 2.32 | 0.01 | 2.58 | 1.15 | 0.22 | 0.85 |
| 56623            | 0 | 123645 | QADIEARVLQ                             | 2.32 | 0.01 | 2.58 | 1.15 | 0.22 | 0.85 |
| 56624            | 0 | 123645 | QADIEARVLQ                             | 2.32 | 0.01 | 2.58 | 1.15 | 0.22 | 0.85 |
| 56625            | 0 | 123645 | QADIEARVLQ                             | 2.32 | 0.01 | 2.58 | 1.15 | 0.22 | 0.85 |
| 56626            | 0 | 358510 | QADQPTQFSVGTPDA                        | 2.71 | 0.01 | 1.61 | 0.44 | 0.85 | 1.28 |
| 56627            | 0 | 50227  | QAEDKVKQSREAKKQV<br>EKALKQLEDKVQ       | 3.33 | 0.01 | 2.24 | 2.42 | 0.22 | 0.28 |
| 56628            | 0 | 50227  | QAEDKVKQSREAKKQV<br>EKALKQLEDKVQ       | 3.33 | 0.01 | 3.78 | 2.42 | 0.22 | 0.28 |
| 56629            | 0 | 50227  | QAEDKVKQSREAKKQV<br>EKALKQLEDKVQ       | 3.33 | 0.01 | 3.78 | 2.42 | 0.22 | 0.28 |
| 56630            | 0 | 50227  | QAEDKVKQSREAKKQV<br>EKALKQLEDKVQ       | 3.33 | 0.01 | 3.78 | 2.42 | 0.22 | 0.28 |
| 56631            | 0 | 50227  | QAEDKVKQSREAKKQV<br>EKALKQLEDKVQ       | 3.33 | 0.01 | 0.90 | 2.42 | 0.22 | 0.28 |

|       |   |       |                                  |      |      |      |      |      |      |
|-------|---|-------|----------------------------------|------|------|------|------|------|------|
| 56632 | 0 | 50227 | QAEDKVKQSREAKKQV<br>EKALKQLEDKVQ | 3.33 | 0.01 | 0.90 | 2.42 | 0.22 | 1.34 |
| 56633 | 0 | 50227 | QAEDKVKQSREAKKQV<br>EKALKQLEDKVQ | 3.33 | 0.01 | 0.90 | 0.68 | 0.22 | 0.28 |
| 56634 | 0 | 50227 | QAEDKVKQSREAKKQV<br>EKALKQLEDKVQ | 3.33 | 0.01 | 0.90 | 2.42 | 0.22 | 0.28 |
| 56635 | 0 | 50227 | QAEDKVKQSREAKKQV<br>EKALKQLEDKVQ | 3.33 | 0.01 | 0.90 | 1.15 | 0.22 | 1.34 |
| 56636 | 0 | 50227 | QAEDKVKQSREAKKQV<br>EKALKQLEDKVQ | 3.33 | 0.01 | 0.90 | 2.42 | 0.22 | 0.28 |
| 56637 | 0 | 50227 | QAEDKVKQSREAKKQV<br>EKALKQLEDKVQ | 3.33 | 0.01 | 0.90 | 2.42 | 0.22 | 1.34 |
| 56638 | 0 | 50227 | QAEDKVKQSREAKKQV<br>EKALKQLEDKVQ | 3.33 | 0.01 | 0.90 | 2.42 | 0.22 | 1.75 |
| 56639 | 0 | 50227 | QAEDKVKQSREAKKQV<br>EKALKQLEDKVQ | 3.33 | 0.01 | 0.90 | 2.42 | 0.22 | 0.28 |
| 56640 | 0 | 50227 | QAEDKVKQSREAKKQV<br>EKALKQLEDKVQ | 3.33 | 0.01 | 0.90 | 2.42 | 0.22 | 0.28 |
| 56641 | 0 | 50227 | QAEDKVKQSREAKKQV<br>EKALKQLEDKVQ | 3.33 | 0.01 | 0.90 | 2.42 | 0.22 | 1.34 |
| 56642 | 0 | 50227 | QAEDKVKQSREAKKQV<br>EKALKQLEDKVQ | 3.33 | 0.01 | 0.90 | 2.42 | 0.22 | 1.27 |
| 56643 | 0 | 50227 | QAEDKVKQSREAKKQV<br>EKALKQLEDKVQ | 3.33 | 0.01 | 0.90 | 0.68 | 0.22 | 0.28 |
| 56644 | 0 | 50227 | QAEDKVKQSREAKKQV<br>EKALKQLEDKVQ | 3.33 | 0.01 | 0.90 | 0.68 | 0.22 | 0.28 |
| 56645 | 0 | 50227 | QAEDKVKQSREAKKQV<br>EKALKQLEDKVQ | 3.33 | 0.01 | 0.90 | 0.68 | 0.22 | 1.75 |
| 56646 | 0 | 50227 | QAEDKVKQSREAKKQV<br>EKALKQLEDKVQ | 3.33 | 0.01 | 0.90 | 0.68 | 0.22 | 1.75 |
| 56647 | 0 | 50227 | QAEDKVKQSREAKKQV<br>EKALKQLEDKVQ | 3.33 | 0.01 | 0.90 | 0.68 | 0.22 | 0.28 |
| 56648 | 0 | 50227 | QAEDKVKQSREAKKQV<br>EKALKQLEDKVQ | 3.33 | 0.01 | 0.90 | 0.68 | 0.22 | 1.48 |
| 56649 | 0 | 50227 | QAEDKVKQSREAKKQV<br>EKALKQLEDKVQ | 3.33 | 0.01 | 0.90 | 0.68 | 0.22 | 1.48 |
| 56650 | 0 | 50227 | QAEDKVKQSREAKKQV<br>EKALKQLEDKVQ | 3.33 | 0.01 | 0.90 | 0.68 | 0.22 | 1.48 |
| 56651 | 0 | 50227 | QAEDKVKQSREAKKQV<br>EKALKQLEDKVQ | 3.33 | 0.01 | 0.90 | 0.68 | 0.22 | 1.48 |
| 56652 | 0 | 50227 | QAEDKVKQSREAKKQV<br>EKALKQLEDKVQ | 3.33 | 0.01 | 0.90 | 0.68 | 0.22 | 1.34 |
| 56653 | 0 | 50227 | QAEDKVKQSREAKKQV<br>EKALKQLEDKVQ | 3.33 | 0.01 | 0.90 | 0.68 | 0.22 | 1.75 |
| 56654 | 0 | 50227 | QAEDKVKQSREAKKQV<br>EKALKQLEDKVQ | 3.33 | 0.01 | 0.90 | 2.82 | 0.22 | 1.75 |



|       |   |        |                                  |      |      |      |      |      |      |
|-------|---|--------|----------------------------------|------|------|------|------|------|------|
| 56655 | 0 | 50227  | QAEDKVQKSREAKKQV<br>EKALKQLEDKVQ | 3.33 | 0.01 | 0.90 | 2.61 | 0.22 | 0.28 |
| 56656 | 0 | 50235  | QAELDDKYAGKGYKLGS<br>K           | 2.88 | 0.01 | 3.75 | 2.75 | 0.22 | 0.85 |
| 56657 | 0 | 50236  | QAELDNKYAGKGYKLGS<br>K           | 2.87 | 0.01 | 3.75 | 2.75 | 0.22 | 0.85 |
| 56658 | 0 | 111661 | QAEP                             | 1.57 | 0.01 | 1.86 | 2.69 | 0.22 | 0.28 |
| 56659 | 0 | 110376 | QAEPD                            | 1.74 | 0.01 | 1.86 | 0.68 | 0.22 | 2.02 |
| 56660 | 0 | 110376 | QAEPD                            | 1.74 | 0.01 | 1.86 | 0.68 | 0.22 | 0.28 |
| 56661 | 0 | 110376 | QAEPD                            | 1.74 | 0.01 | 1.86 | 1.81 | 0.22 | 0.28 |
| 56662 | 0 | 110376 | QAEPD                            | 1.74 | 0.01 | 1.86 | 1.81 | 0.22 | 0.28 |
| 56663 | 0 | 110376 | QAEPD                            | 1.74 | 0.01 | 1.86 | 1.81 | 0.22 | 0.28 |
| 56664 | 0 | 110376 | QAEPD                            | 1.74 | 0.01 | 1.86 | 1.81 | 0.22 | 0.28 |
| 56665 | 0 | 110376 | QAEPD                            | 1.74 | 0.01 | 1.86 | 3.70 | 0.22 | 0.28 |
| 56666 | 0 | 50241  | QAEPDRAHYNIVTFCK<br>CD           | 2.83 | 0.01 | 1.86 | 1.15 | 0.22 | 0.28 |
| 56667 | 0 | 50241  | QAEPDRAHYNIVTFCK<br>CD           | 2.83 | 0.01 | 1.86 | 1.15 | 0.22 | 0.28 |
| 56668 | 0 | 130581 | QAFDSH                           | 1.88 | 0.01 | 0.78 | 1.15 | 0.22 | 1.28 |
| 56669 | 0 | 130581 | QAFDSH                           | 1.88 | 0.01 | 0.78 | 1.15 | 0.22 | 1.27 |
| 56670 | 0 | 50254  | QAGDQSYF                         | 2.13 | 0.01 | 3.55 | 0.68 | 0.22 | 0.28 |
| 56671 | 0 | 50255  | QAGDQSYFLR                       | 2.30 | 0.01 | 3.55 | 0.68 | 0.22 | 0.28 |
| 56672 | 0 | 50255  | QAGDQSYFLR                       | 2.30 | 0.01 | 3.55 | 0.68 | 0.22 | 0.28 |
| 56673 | 0 | 423739 | QAGGAYLKSIPR                     | 2.44 | 0.01 | 0.90 | 2.46 | 0.22 | 1.39 |
| 56674 | 0 | 423739 | QAGGAYLKSIPR                     | 2.44 | 0.01 | 0.90 | 0.44 | 1.13 | 0.28 |
| 56675 | 0 | 439654 | QAGPKAQVEAIQKYLDK<br>VKQ         | 2.97 | 0.01 | 0.90 | 0.68 | 0.22 | 0.28 |
| 56676 | 0 | 439654 | QAGPKAQVEAIQKYLDK<br>VKQ         | 2.97 | 0.01 | 0.90 | 0.68 | 0.22 | 0.28 |
| 56677 | 0 | 50271  | QAGPTIVSPTGPTIA                  | 2.72 | 0.01 | 3.37 | 2.22 | 0.22 | 0.28 |
| 56678 | 0 | 50272  | QAGQEMILAVQGVQD                  | 2.71 | 0.01 | 2.43 | 0.44 | 1.59 | 0.28 |
| 56679 | 0 | 50273  | QAGRTAHAVTNIFSVG                 | 2.73 | 0.01 | 3.10 | 0.44 | 0.85 | 0.28 |
| 56680 | 0 | 50273  | QAGRTAHAVTNIFSVG                 | 2.73 | 0.01 | 3.10 | 0.44 | 0.85 | 0.28 |
| 56681 | 0 | 50273  | QAGRTAHAVTNIFSVG                 | 2.73 | 0.01 | 3.10 | 0.68 | 0.22 | 0.28 |
| 56682 | 0 | 149895 | QAGTCPPDIVPKVEG                  | 2.66 | 0.01 | 4.03 | 1.12 | 0.22 | 0.28 |
| 56683 | 0 | 423740 | QAGWRTHTHHPY                     | 2.46 | 0.01 | 0.90 | 2.46 | 0.22 | 1.39 |
| 56684 | 0 | 423740 | QAGWRTHTHHPY                     | 2.46 | 0.01 | 0.90 | 0.44 | 1.13 | 0.28 |
| 56685 | 0 | 196961 | QAHNPNNRYMASW                    | 2.45 | 0.01 | 0.90 | 0.44 | 1.41 | 1.39 |
| 56686 | 0 | 196961 | QAHNPNNRYMASW                    | 2.45 | 0.01 | 0.90 | 0.44 | 1.41 | 0.28 |
| 56687 | 0 | 196961 | QAHNPNNRYMASW                    | 2.45 | 0.01 | 0.90 | 0.44 | 1.41 | 1.48 |
| 56688 | 0 | 196961 | QAHNPNNRYMASW                    | 2.45 | 0.01 | 0.90 | 0.44 | 1.41 | 1.34 |
| 56689 | 0 | 196961 | QAHNPNNRYMASW                    | 2.45 | 0.01 | 0.90 | 0.44 | 1.41 | 1.34 |
| 56690 | 0 | 196961 | QAHNPNNRYMASW                    | 2.45 | 0.01 | 0.90 | 0.44 | 1.41 | 1.34 |

|       |   |        |                                         |      |      |      |      |      |      |
|-------|---|--------|-----------------------------------------|------|------|------|------|------|------|
| 56691 | 0 | 167365 | QAHNWWYNHKPLP                           | 2.48 | 0.01 | 0.90 | 0.44 | 0.85 | 1.39 |
| 56692 | 0 | 112631 | QAHS�ERVCHCLGKWL<br>GHPDK               | 2.97 | 0.01 | 1.60 | 2.04 | 0.22 | 0.28 |
| 56693 | 0 | 149092 | QAHS�ERVCHCLGKWL<br>GHPDKFVGITYALT      | 3.30 | 0.01 | 1.75 | 2.25 | 2.60 | 1.75 |
| 56694 | 0 | 167366 | QAHTIST                                 | 2.02 | 0.01 | 0.90 | 0.44 | 0.85 | 1.39 |
| 56695 | 0 | 50281  | QAIKAKKLNVPQPKFEG                       | 2.80 | 0.01 | 3.32 | 2.49 | 0.22 | 0.28 |
| 56696 | 0 | 50281  | QAIKAKKLNVPQPKFEG                       | 2.80 | 0.01 | 3.32 | 2.49 | 0.22 | 0.28 |
| 56697 | 0 | 50282  | QAIKSL                                  | 1.88 | 0.01 | 1.96 | 0.44 | 0.85 | 0.28 |
| 56698 | 0 | 191686 | QAISVENIEGN                             | 2.48 | 0.01 | 2.76 | 1.20 | 0.22 | 0.28 |
| 56699 | 0 | 50296  | QAKLEAEAKALKEQLAK<br>QAE                | 3.03 | 0.01 | 2.85 | 2.52 | 0.22 | 0.28 |
| 56700 | 0 | 50296  | QAKLEAEAKALKEQLAK<br>QAE                | 3.03 | 0.01 | 2.85 | 2.52 | 0.22 | 0.28 |
| 56701 | 0 | 98359  | QAKLTAYQTE                              | 2.34 | 0.01 | 3.18 | 2.98 | 0.22 | 0.28 |
| 56702 | 0 | 236120 | QALAQISLPR                              | 2.34 | 0.01 | 0.78 | 0.44 | 1.13 | 2.66 |
| 56703 | 0 | 50299  | QALCENPECVPLKDN                         | 2.68 | 0.01 | 2.72 | 1.12 | 0.22 | 0.28 |
| 56704 | 0 | 50300  | QALDAHYSVLKDI                           | 2.61 | 0.01 | 2.69 | 0.44 | 0.85 | 0.28 |
| 56705 | 0 | 50300  | QALDAHYSVLKDI                           | 2.61 | 0.01 | 2.69 | 0.44 | 1.41 | 0.28 |
| 56706 | 0 | 462416 | QALDHF                                  | 1.99 | 0.01 | 0.78 | 1.12 | 0.22 | 1.28 |
| 56707 | 0 | 50304  | QALGALK                                 | 2.04 | 0.01 | 2.14 | 0.44 | 0.22 | 0.28 |
| 56708 | 0 | 50304  | QALGALK                                 | 2.04 | 0.01 | 2.14 | 0.44 | 0.85 | 0.28 |
| 56709 | 0 | 78490  | QALGALKLYFEPGITTNY<br>DTGDLIAYKQTYNASGN | 3.51 | 0.01 | 2.14 | 3.70 | 0.22 | 0.28 |
| 56710 | 0 | 78490  | QALGALKLYFEPGITTNY<br>DTGDLIAYKQTYNASGN | 3.51 | 0.01 | 2.14 | 3.70 | 0.22 | 0.28 |
| 56711 | 0 | 78490  | QALGALKLYFEPGITTNY<br>DTGDLIAYKQTYNASGN | 3.51 | 0.01 | 2.14 | 3.70 | 0.22 | 0.28 |
| 56712 | 0 | 78490  | QALGALKLYFEPGITTNY<br>DTGDLIAYKQTYNASGN | 3.51 | 0.01 | 2.14 | 3.70 | 0.22 | 0.28 |
| 56713 | 0 | 118565 | QALGITTKISRGT                           | 2.55 | 0.01 | 0.78 | 0.44 | 1.13 | 0.28 |
| 56714 | 0 | 50307  | QALIDQKVKEISNQ                          | 2.62 | 0.01 | 2.56 | 2.69 | 0.22 | 0.28 |
| 56715 | 0 | 50307  | QALIDQKVKEISNQ                          | 2.62 | 0.01 | 2.56 | 0.44 | 0.85 | 0.28 |
| 56716 | 0 | 50311  | QALNTLVKQLSSNFGAI                       | 2.79 | 0.01 | 2.48 | 0.44 | 0.85 | 0.28 |
| 56717 | 0 | 225839 | QALPAPVERTISKAT                         | 2.66 | 0.01 | 3.28 | 0.44 | 0.22 | 0.85 |
| 56718 | 0 | 185230 | QALQELISELDRRCH                         | 2.68 | 0.01 | 0.78 | 1.12 | 0.22 | 2.51 |
| 56719 | 0 | 238907 | QALQELISELDRRCHSSA                      | 2.86 | 0.01 | 0.78 | 0.44 | 1.13 | 0.28 |
| 56720 | 0 | 238907 | QALQELISELDRRCHSSA                      | 2.86 | 0.01 | 0.78 | 0.44 | 1.13 | 0.28 |

|       |   |        |                                      |      |      |      |      |      |      |
|-------|---|--------|--------------------------------------|------|------|------|------|------|------|
| 56721 | 0 | 457503 | QALRAKIESENP                         | 2.51 | 0.01 | 2.04 | 1.15 | 0.22 | 0.28 |
| 56722 | 0 | 129673 | QALRELIVQEKKLEVYQS<br>IADLMVGAKDQAVF | 3.42 | 0.01 | 0.78 | 2.04 | 0.22 | 0.28 |
| 56723 | 0 | 144439 | QALTGTNTGGGIDGVST<br>TD              | 2.91 | 0.01 | 3.63 | 0.68 | 0.22 | 0.85 |
| 56724 | 0 | 144439 | QALTGTNTGGGIDGVST<br>TD              | 2.91 | 0.01 | 3.63 | 0.68 | 0.22 | 2.12 |
| 56725 | 0 | 50324  | QANRIASEAQKHLKNS                     | 2.75 | 0.01 | 1.75 | 0.68 | 0.22 | 1.39 |
| 56726 | 0 | 523955 | QAPAKTADTPATSKA                      | 2.73 | 0.01 | 2.24 | 0.44 | 1.41 | 1.28 |
| 56727 | 0 | 115912 | QAPEY                                | 1.74 | 0.01 | 0.78 | 0.44 | 1.13 | 1.57 |
| 56728 | 0 | 115912 | QAPEY                                | 1.74 | 0.01 | 0.78 | 0.44 | 1.41 | 1.57 |
| 56729 | 0 | 115912 | QAPEY                                | 1.74 | 0.01 | 0.78 | 0.44 | 1.13 | 1.57 |
| 56730 | 0 | 115912 | QAPEY                                | 1.74 | 0.01 | 0.78 | 0.44 | 1.41 | 1.57 |
| 56731 | 0 | 115912 | QAPEY                                | 1.74 | 0.01 | 0.78 | 0.44 | 1.13 | 1.57 |
| 56732 | 0 | 115912 | QAPEY                                | 1.74 | 0.01 | 0.78 | 0.44 | 1.41 | 1.57 |
| 56733 | 0 | 115097 | QAPEYRGRTELLKDAIGE<br>GK             | 2.94 | 0.01 | 0.78 | 4.15 | 0.22 | 0.28 |
| 56734 | 0 | 121732 | QAPEYRGRTELLKESIGE                   | 2.83 | 0.01 | 2.19 | 4.15 | 0.22 | 0.28 |
| 56735 | 0 | 50328  | QAPKDVSSQIKMANK                      | 2.68 | 0.01 | 2.72 | 0.44 | 1.23 | 0.85 |
| 56736 | 0 | 50329  | QAPLPCVLWPVLPEPLP<br>QGQLT           | 3.08 | 0.01 | 2.43 | 0.44 | 1.59 | 0.28 |
| 56737 | 0 | 123648 | QAPRIMHH                             | 2.09 | 0.01 | 0.78 | 1.20 | 0.22 | 0.28 |
| 56738 | 0 | 138224 | QAPRLMSSLSYFPQS                      | 2.70 | 0.01 | 0.90 | 0.44 | 1.13 | 1.39 |
| 56739 | 0 | 50339  | QAQGDGANAGQP                         | 2.53 | 0.01 | 3.12 | 1.15 | 0.22 | 1.57 |
| 56740 | 0 | 50339  | QAQGDGANAGQP                         | 2.53 | 0.01 | 3.12 | 1.15 | 0.22 | 1.27 |
| 56741 | 0 | 50340  | QAQGDGANAGQPQAQ<br>GDGANAGQP         | 3.20 | 0.01 | 3.97 | 1.20 | 0.22 | 1.57 |
| 56742 | 0 | 50340  | QAQGDGANAGQPQAQ<br>GDGANAGQP         | 3.20 | 0.01 | 3.97 | 1.20 | 0.22 | 1.57 |
| 56743 | 0 | 50340  | QAQGDGANAGQPQAQ<br>GDGANAGQP         | 3.20 | 0.01 | 3.97 | 3.33 | 0.22 | 1.57 |
| 56744 | 0 | 50340  | QAQGDGANAGQPQAQ<br>GDGANAGQP         | 3.20 | 0.01 | 3.97 | 1.20 | 0.22 | 1.57 |
| 56745 | 0 | 50340  | QAQGDGANAGQPQAQ<br>GDGANAGQP         | 3.20 | 0.01 | 3.97 | 3.33 | 0.22 | 1.57 |
| 56746 | 0 | 50340  | QAQGDGANAGQPQAQ<br>GDGANAGQP         | 3.20 | 0.01 | 3.97 | 3.33 | 0.22 | 1.57 |
| 56747 | 0 | 50340  | QAQGDGANAGQPQAQ<br>GDGANAGQP         | 3.20 | 0.01 | 3.97 | 1.20 | 0.22 | 1.34 |
| 56748 | 0 | 50340  | QAQGDGANAGQPQAQ<br>GDGANAGQP         | 3.20 | 0.01 | 3.12 | 1.12 | 0.22 | 0.85 |
| 56749 | 0 | 50340  | QAQGDGANAGQPQAQ<br>GDGANAGQP         | 3.20 | 0.01 | 3.12 | 1.12 | 0.22 | 1.57 |

|       |   |        |                               |      |      |      |      |      |      |
|-------|---|--------|-------------------------------|------|------|------|------|------|------|
| 56750 | 0 | 50340  | QAQGDGANAGQPQAQ<br>GDGANAGQP  | 3.20 | 0.01 | 3.12 | 1.12 | 0.22 | 1.57 |
| 56751 | 0 | 50340  | QAQGDGANAGQPQAQ<br>GDGANAGQP  | 3.20 | 0.01 | 3.12 | 1.15 | 0.22 | 1.57 |
| 56752 | 0 | 50340  | QAQGDGANAGQPQAQ<br>GDGANAGQP  | 3.20 | 0.01 | 3.12 | 1.15 | 0.22 | 1.27 |
| 56753 | 0 | 50340  | QAQGDGANAGQPQAQ<br>GDGANAGQP  | 3.20 | 0.01 | 3.97 | 2.89 | 0.22 | 0.28 |
| 56754 | 0 | 180917 | QAQGLLTTVPAAPP                | 2.63 | 0.01 | 2.08 | 0.44 | 0.85 | 2.75 |
| 56755 | 0 | 122536 | QAQIHGPR                      | 2.13 | 0.01 | 1.75 | 0.68 | 0.22 | 0.28 |
| 56756 | 0 | 122536 | QAQIHGPR                      | 2.13 | 0.01 | 1.75 | 3.57 | 0.22 | 0.28 |
| 56757 | 0 | 122536 | QAQIHGPR                      | 2.13 | 0.01 | 1.75 | 3.57 | 0.22 | 3.16 |
| 56758 | 0 | 103510 | QAQLISSQAQGGGQQ               | 2.72 | 0.01 | 2.04 | 0.44 | 0.85 | 1.28 |
| 56759 | 0 | 115913 | QAQPTTMARH                    | 2.33 | 0.01 | 1.60 | 0.44 | 1.23 | 0.85 |
| 56760 | 0 | 50343  | QAQRPAVASRRRPTTA<br>GAAPLTAVA | 3.20 | 0.01 | 2.53 | 0.44 | 0.85 | 0.28 |
| 56761 | 0 | 50343  | QAQRPAVASRRRPTTA<br>GAAPLTAVA | 3.20 | 0.01 | 2.53 | 0.44 | 0.85 | 0.28 |
| 56762 | 0 | 50345  | QAQTASGLVS                    | 2.34 | 0.01 | 2.83 | 0.44 | 0.85 | 0.28 |
| 56763 | 0 | 50350  | QAQYNQMHML                    | 2.34 | 0.01 | 2.73 | 0.44 | 0.85 | 0.28 |
| 56764 | 0 | 50350  | QAQYNQMHML                    | 2.34 | 0.01 | 2.73 | 0.68 | 0.22 | 0.28 |
| 56765 | 0 | 103511 | QAQYVAQLHVWARRE               | 2.70 | 0.01 | 2.04 | 0.44 | 0.85 | 1.28 |
| 56766 | 0 | 174241 | QARGLLFSPAPQPRLLP<br>GPQEN    | 3.11 | 0.01 | 0.78 | 1.15 | 0.22 | 1.34 |
| 56767 | 0 | 358767 | QARKQQGRDAPQARK               | 2.73 | 0.01 | 1.61 | 0.44 | 0.85 | 1.28 |
| 56768 | 0 | 358768 | QARKQQGRNAPRSQK               | 2.72 | 0.01 | 1.61 | 0.44 | 0.85 | 1.28 |
| 56769 | 0 | 358769 | QARKQQGRNEPQARR               | 2.70 | 0.01 | 1.61 | 0.44 | 0.85 | 1.28 |
| 56770 | 0 | 227478 | QARLEPWQPLPGPQV               | 2.71 | 0.01 | 2.48 | 0.44 | 1.59 | 0.28 |
| 56771 | 0 | 139198 | QARNRPTT                      | 2.11 | 0.01 | 2.63 | 0.68 | 0.22 | 0.85 |
| 56772 | 0 | 176380 | QARNRPTTLTGCKKG               | 2.67 | 0.01 | 2.63 | 1.15 | 0.22 | 0.85 |
| 56773 | 0 | 176380 | QARNRPTTLTGCKKG               | 2.67 | 0.01 | 2.63 | 1.15 | 0.22 | 0.85 |
| 56774 | 0 | 176380 | QARNRPTTLTGCKKG               | 2.67 | 0.01 | 2.63 | 1.15 | 0.22 | 0.85 |
| 56775 | 0 | 176380 | QARNRPTTLTGCKKG               | 2.67 | 0.01 | 2.63 | 1.15 | 0.22 | 0.85 |
| 56776 | 0 | 176380 | QARNRPTTLTGCKKG               | 2.67 | 0.01 | 2.63 | 1.15 | 0.22 | 0.85 |
| 56777 | 0 | 106026 | QARQLKNNNPFKFFV               | 2.68 | 0.01 | 2.16 | 0.44 | 1.23 | 0.85 |
| 56778 | 0 | 156406 | QARQQKNLEFSKD                 | 2.53 | 0.01 | 2.83 | 4.15 | 0.22 | 0.28 |
| 56779 | 0 | 358783 | QARRQQGRNEPQARK               | 2.72 | 0.01 | 1.61 | 0.44 | 0.85 | 1.28 |
| 56780 | 0 | 190905 | QARSQSDRQS                    | 2.37 | 0.01 | 1.86 | 0.44 | 1.23 | 0.28 |
| 56781 | 0 | 190905 | QARSQSDRQS                    | 2.37 | 0.01 | 1.86 | 0.68 | 0.22 | 0.28 |

|       |   |        |                                    |      |      |      |      |      |      |
|-------|---|--------|------------------------------------|------|------|------|------|------|------|
| 56782 | 0 | 50354  | QASDDGDKGSDVES                     | 2.64 | 0.01 | 1.96 | 0.44 | 0.85 | 0.28 |
| 56783 | 0 | 50354  | QASDDGDKGSDVES                     | 2.64 | 0.01 | 1.96 | 0.44 | 0.85 | 0.28 |
| 56784 | 0 | 50354  | QASDDGDKGSDVES                     | 2.64 | 0.01 | 1.96 | 0.44 | 0.85 | 0.28 |
| 56785 | 0 | 50354  | QASDDGDKGSDVES                     | 2.64 | 0.01 | 1.96 | 0.44 | 1.41 | 0.28 |
| 56786 | 0 | 50357  | QASNVFGGVFLNMAM<br>REHDC           | 2.90 | 0.01 | 2.21 | 1.20 | 0.22 | 0.28 |
| 56787 | 0 | 50358  | QASNVFQGVFLTPMQ<br>KDDC            | 2.90 | 0.01 | 3.48 | 1.20 | 0.22 | 0.28 |
| 56788 | 0 | 50360  | QASRNTSKAI                         | 2.31 | 0.01 | 2.73 | 0.68 | 0.22 | 0.28 |
| 56789 | 0 | 50362  | QASTSS                             | 1.88 | 0.01 | 3.41 | 1.15 | 2.26 | 0.85 |
| 56790 | 0 | 50362  | QASTSS                             | 1.88 | 0.01 | 3.41 | 1.15 | 2.26 | 0.85 |
| 56791 | 0 | 50368  | QATGFGTNETEYLFE                    | 2.70 | 0.01 | 2.97 | 0.44 | 1.59 | 0.28 |
| 56792 | 0 | 232984 | QATHFHS                            | 2.02 | 0.01 | 0.90 | 2.49 | 0.85 | 1.39 |
| 56793 | 0 | 496848 | QATLVLNKLRGTNNVVA<br>VKAPGFGDRRKAM | 3.35 | 0.01 | 3.55 | 0.44 | 1.93 | 2.12 |
| 56794 | 0 | 50373  | QATRQAQDI                          | 2.26 | 0.01 | 2.69 | 0.44 | 0.85 | 0.28 |
| 56795 | 0 | 101991 | QATWYTW                            | 2.04 | 0.01 | 0.90 | 0.44 | 0.85 | 1.39 |
| 56796 | 0 | 50384  | QAVHAAHAEINE                       | 2.51 | 0.01 | 2.25 | 0.68 | 0.22 | 0.28 |
| 56797 | 0 | 50384  | QAVHAAHAEINE                       | 2.51 | 0.01 | 2.25 | 0.68 | 0.22 | 0.28 |
| 56798 | 0 | 50386  | QAVIEPIVA                          | 2.25 | 0.01 | 2.59 | 0.44 | 0.85 | 0.28 |
| 56799 | 0 | 179363 | QAVKEMQDGILELIK                    | 2.69 | 0.01 | 2.36 | 0.44 | 1.23 | 1.28 |
| 56800 | 0 | 179363 | QAVKEMQDGILELIK                    | 2.69 | 0.01 | 2.36 | 0.44 | 1.23 | 1.27 |
| 56801 | 0 | 179363 | QAVKEMQDGILELIK                    | 2.69 | 0.01 | 2.36 | 0.44 | 1.23 | 1.28 |
| 56802 | 0 | 144748 | QAVNPNAGN                          | 2.25 | 0.01 | 2.24 | 1.12 | 0.22 | 0.28 |
| 56803 | 0 | 144748 | QAVNPNAGN                          | 2.25 | 0.01 | 2.24 | 1.12 | 0.22 | 1.27 |
| 56804 | 0 | 144748 | QAVNPNAGN                          | 2.25 | 0.01 | 2.24 | 1.12 | 0.22 | 0.28 |
| 56805 | 0 | 144748 | QAVNPNAGN                          | 2.25 | 0.01 | 2.24 | 1.12 | 0.22 | 1.27 |
| 56806 | 0 | 137950 | QAVSLGQN                           | 2.13 | 0.01 | 2.21 | 1.20 | 0.22 | 0.28 |
| 56807 | 0 | 137950 | QAVSLGQN                           | 2.13 | 0.01 | 2.21 | 0.44 | 0.85 | 0.28 |
| 56808 | 0 | 137950 | QAVSLGQN                           | 2.13 | 0.01 | 2.21 | 0.44 | 0.85 | 0.28 |
| 56809 | 0 | 137950 | QAVSLGQN                           | 2.13 | 0.01 | 2.21 | 1.20 | 0.22 | 0.28 |
| 56810 | 0 | 137950 | QAVSLGQN                           | 2.13 | 0.01 | 2.21 | 1.20 | 0.22 | 0.28 |
| 56811 | 0 | 119626 | QAVSPSTSQGADVKKSS<br>CQSK          | 3.03 | 0.01 | 3.33 | 2.49 | 0.85 | 0.28 |
| 56812 | 0 | 50394  | QAYEINKKSGLNEEINNT<br>DL           | 2.92 | 0.01 | 3.47 | 0.44 | 0.22 | 0.85 |
| 56813 | 0 | 50396  | QAYQQGVTV                          | 2.33 | 0.01 | 2.40 | 1.12 | 0.22 | 0.85 |
| 56814 | 0 | 50396  | QAYQQGVTV                          | 2.33 | 0.01 | 2.40 | 1.12 | 0.22 | 0.85 |
| 56815 | 0 | 50396  | QAYQQGVTV                          | 2.33 | 0.01 | 3.36 | 1.20 | 0.22 | 0.28 |
| 56816 | 0 | 50396  | QAYQQGVTV                          | 2.33 | 0.01 | 3.36 | 1.20 | 0.22 | 0.28 |
| 56817 | 0 | 50396  | QAYQQGVTV                          | 2.33 | 0.01 | 3.36 | 1.20 | 0.22 | 0.28 |
| 56818 | 0 | 50396  | QAYQQGVTV                          | 2.33 | 0.01 | 2.40 | 1.20 | 0.22 | 1.34 |
| 56819 | 0 | 132888 | QAYVVSFGNEIFRC                     | 2.61 | 0.01 | 3.16 | 3.16 | 0.22 | 0.28 |
| 56820 | 0 | 121733 | QCALAIWNRKVL                       | 2.62 | 0.01 | 0.90 | 0.68 | 0.22 | 1.39 |
| 56821 | 0 | 121733 | QCALAIWNRKVL                       | 2.62 | 0.01 | 0.90 | 0.68 | 0.22 | 0.28 |
| 56822 | 0 | 121733 | QCALAIWNRKVL                       | 2.62 | 0.01 | 0.90 | 0.68 | 0.22 | 0.28 |

|       |   |        |                                      |      |      |      |      |      |      |
|-------|---|--------|--------------------------------------|------|------|------|------|------|------|
| 56823 | 0 | 50401  | QCAPAWRGRNCG                         | 2.49 | 0.01 | 0.90 | 0.68 | 0.22 | 0.28 |
| 56824 | 0 | 50402  | QCCDLA                               | 1.89 | 0.01 | 1.96 | 0.44 | 0.85 | 0.28 |
| 56825 | 0 | 121734 | QCCLADDECLSLPY                       | 2.69 | 0.01 | 0.90 | 0.68 | 0.22 | 1.39 |
| 56826 | 0 | 121734 | QCCLADDECLSLPY                       | 2.69 | 0.01 | 0.90 | 0.68 | 0.22 | 0.28 |
| 56827 | 0 | 121734 | QCCLADDECLSLPY                       | 2.69 | 0.01 | 0.90 | 0.68 | 0.22 | 0.28 |
| 56828 | 0 | 121735 | QCCLAIPHTENSLPY                      | 2.63 | 0.01 | 0.90 | 0.68 | 0.22 | 1.39 |
| 56829 | 0 | 121735 | QCCLAIPHTENSLPY                      | 2.63 | 0.01 | 0.90 | 0.68 | 0.22 | 0.28 |
| 56830 | 0 | 121735 | QCCLAIPHTENSLPY                      | 2.63 | 0.01 | 0.90 | 0.68 | 0.22 | 0.28 |
| 56831 | 0 | 79344  | QCDAFAVPVEGACM                       | 2.61 | 0.01 | 0.90 | 0.68 | 0.22 | 1.39 |
| 56832 | 0 | 79345  | QCDSFVISPPRCTG                       | 2.58 | 0.01 | 0.90 | 0.68 | 0.22 | 1.39 |
| 56833 | 0 | 79346  | QCETESDLLIPSCP                       | 2.62 | 0.01 | 0.90 | 0.68 | 0.22 | 1.39 |
| 56834 | 0 | 121736 | QCFLAITNIQLILPY                      | 2.69 | 0.01 | 0.90 | 0.68 | 0.22 | 1.39 |
| 56835 | 0 | 121736 | QCFLAITNIQLILPY                      | 2.69 | 0.01 | 0.90 | 0.68 | 0.22 | 0.28 |
| 56836 | 0 | 121736 | QCFLAITNIQLILPY                      | 2.69 | 0.01 | 0.90 | 0.68 | 0.22 | 0.28 |
| 56837 | 0 | 99556  | QCGLRAPQRCDLDVE                      | 2.69 | 0.01 | 2.16 | 0.44 | 1.23 | 1.48 |
| 56838 | 0 | 99556  | QCGLRAPQRCDLDVE                      | 2.69 | 0.01 | 2.16 | 0.44 | 1.23 | 1.48 |
| 56839 | 0 | 50409  | QCGTTDSTATTKISEVFT<br>EGTDTLLSV      | 3.24 | 0.01 | 3.65 | 2.22 | 0.22 | 0.28 |
| 56840 | 0 | 123653 | QCLEDFPKL                            | 2.21 | 0.01 | 2.28 | 2.00 | 0.22 | 0.28 |
| 56841 | 0 | 146504 | QCLVRTPEVDDEALEK                     | 2.72 | 0.01 | 1.60 | 1.20 | 0.22 | 1.27 |
| 56842 | 0 | 79347  | QCNAREWSANYICR                       | 2.61 | 0.01 | 0.90 | 0.68 | 0.22 | 1.39 |
| 56843 | 0 | 79348  | QCNSFAIPPSLLCT                       | 2.59 | 0.01 | 0.90 | 0.68 | 0.22 | 1.39 |
| 56844 | 0 | 172809 | QCPTLHFLEGGEDSD                      | 2.65 | 0.01 | 0.78 | 0.44 | 1.13 | 0.28 |
| 56845 | 0 | 50419  | QCQMRHCM                             | 2.17 | 0.01 | 3.89 | 0.44 | 1.23 | 0.85 |
| 56846 | 0 | 130583 | QCQTFGKTMLCT                         | 2.50 | 0.01 | 0.90 | 0.68 | 0.22 | 1.27 |
| 56847 | 0 | 130583 | QCQTFGKTMLCT                         | 2.50 | 0.01 | 0.90 | 0.68 | 0.22 | 1.27 |
| 56848 | 0 | 130583 | QCQTFGKTMLCT                         | 2.50 | 0.01 | 0.90 | 0.68 | 0.22 | 1.34 |
| 56849 | 0 | 121737 | QCRLAISRYVSGLPY                      | 2.66 | 0.01 | 0.90 | 0.68 | 0.22 | 1.39 |
| 56850 | 0 | 121737 | QCRLAISRYVSGLPY                      | 2.66 | 0.01 | 0.90 | 0.68 | 0.22 | 0.28 |
| 56851 | 0 | 121737 | QCRLAISRYVSGLPY                      | 2.66 | 0.01 | 0.90 | 0.68 | 0.22 | 0.28 |
| 56852 | 0 | 172810 | QCSDISTKQAAFKAV                      | 2.69 | 0.01 | 0.78 | 0.44 | 1.41 | 0.28 |
| 56853 | 0 | 129678 | QCSLADDAAYQCVVGG<br>EKCSTELFVKEPPVLI | 3.38 | 0.01 | 0.78 | 2.04 | 0.22 | 0.28 |
| 56854 | 0 | 121739 | QCSLAIRIPYQKLPY                      | 2.69 | 0.01 | 0.90 | 0.68 | 0.22 | 1.39 |
| 56855 | 0 | 121739 | QCSLAIRIPYQKLPY                      | 2.69 | 0.01 | 0.90 | 0.68 | 0.22 | 0.28 |
| 56856 | 0 | 121739 | QCSLAIRIPYQKLPY                      | 2.69 | 0.01 | 0.90 | 0.68 | 0.22 | 0.28 |
| 56857 | 0 | 121740 | QCSLAITIRPWMLPY                      | 2.64 | 0.01 | 0.90 | 0.68 | 0.22 | 1.39 |
| 56858 | 0 | 121740 | QCSLAITIRPWMLPY                      | 2.64 | 0.01 | 0.90 | 0.68 | 0.22 | 0.28 |
| 56859 | 0 | 121740 | QCSLAITIRPWMLPY                      | 2.64 | 0.01 | 0.90 | 0.68 | 0.22 | 0.28 |
| 56860 | 0 | 190906 | QCSPVAMPQS                           | 2.34 | 0.01 | 1.86 | 0.44 | 1.23 | 0.28 |
| 56861 | 0 | 190906 | QCSPVAMPQS                           | 2.34 | 0.01 | 1.86 | 0.44 | 1.74 | 0.28 |
| 56862 | 0 | 132027 | QCSTIGQMPNNQSIN                      | 2.70 | 0.01 | 0.78 | 0.44 | 1.13 | 0.85 |
| 56863 | 0 | 50424  | QCVKKQCP                             | 2.16 | 0.01 | 1.66 | 1.15 | 0.22 | 0.28 |
| 56864 | 0 | 121741 | QCVLAIFNDVYWLPLY                     | 2.64 | 0.01 | 0.90 | 0.68 | 0.22 | 1.39 |
| 56865 | 0 | 121741 | QCVLAIFNDVYWLPLY                     | 2.64 | 0.01 | 0.90 | 0.68 | 0.22 | 0.28 |

|       |   |        |                            |      |      |      |      |      |      |
|-------|---|--------|----------------------------|------|------|------|------|------|------|
| 56866 | 0 | 121741 | QCVLAIFNDVYWLPY            | 2.64 | 0.01 | 0.90 | 0.68 | 0.22 | 0.28 |
| 56867 | 0 | 121742 | QCVLAIFNNVYGLPY            | 2.65 | 0.01 | 0.90 | 0.68 | 0.22 | 1.39 |
| 56868 | 0 | 121742 | QCVLAIFNNVYGLPY            | 2.65 | 0.01 | 0.90 | 0.68 | 0.22 | 0.28 |
| 56869 | 0 | 121742 | QCVLAIFNNVYGLPY            | 2.65 | 0.01 | 0.90 | 0.68 | 0.22 | 0.28 |
| 56870 | 0 | 121743 | QCYLAIYNFFFLPY             | 2.67 | 0.01 | 0.90 | 0.68 | 0.22 | 1.39 |
| 56871 | 0 | 121743 | QCYLAIYNFFFLPY             | 2.67 | 0.01 | 0.90 | 0.68 | 0.22 | 0.28 |
| 56872 | 0 | 121743 | QCYLAIYNFFFLPY             | 2.67 | 0.01 | 0.90 | 0.68 | 0.22 | 0.28 |
| 56873 | 0 | 79349  | QCYPHVSTLGWSCE             | 2.57 | 0.01 | 0.90 | 0.68 | 0.22 | 1.39 |
| 56874 | 0 | 50427  | QDAATPYHPPATPNN            | 2.69 | 0.01 | 2.40 | 3.81 | 0.22 | 0.28 |
| 56875 | 0 | 358948 | QDADEEDEGEDEEEV            | 2.72 | 0.01 | 1.61 | 0.44 | 0.85 | 1.28 |
| 56876 | 0 | 50429  | QDADYHRV                   | 2.12 | 0.01 | 2.21 | 0.44 | 0.85 | 0.28 |
| 56877 | 0 | 50429  | QDADYHRV                   | 2.12 | 0.01 | 2.21 | 1.12 | 0.22 | 0.28 |
| 56878 | 0 | 50430  | QDADYHRVMY                 | 2.31 | 0.01 | 2.21 | 1.12 | 0.22 | 0.28 |
| 56879 | 0 | 94901  | QDAQPLTQHY                 | 2.32 | 0.01 | 4.93 | 0.44 | 0.85 | 0.28 |
| 56880 | 0 | 188415 | QDARGWGGDS                 | 2.32 | 0.01 | 2.92 | 1.81 | 0.22 | 0.85 |
| 56881 | 0 | 50433  | QDASNSSPASAPNVCTI<br>VVDLY | 3.61 | 0.01 | 3.28 | 0.44 | 1.23 | 1.39 |
| 56882 | 0 | 358968 | QDATIEEEGEFDEEE            | 2.68 | 0.01 | 1.61 | 0.44 | 0.85 | 1.28 |
| 56883 | 0 | 50439  | QDAYNAAG                   | 2.13 | 0.01 | 4.08 | 1.81 | 0.22 | 0.28 |
| 56884 | 0 | 50439  | QDAYNAAG                   | 2.13 | 0.01 | 4.08 | 1.81 | 0.22 | 0.28 |
| 56885 | 0 | 50442  | QDAYNAAGGHNAVFNF<br>PPNG   | 2.96 | 0.01 | 2.04 | 0.44 | 0.85 | 0.28 |
| 56886 | 0 | 358972 | QDAYRPVDPSAYKRA            | 2.70 | 0.01 | 1.61 | 0.44 | 0.85 | 1.28 |
| 56887 | 0 | 358973 | QDAYRPVDPSAYKRE            | 2.68 | 0.01 | 1.61 | 0.44 | 0.85 | 1.28 |
| 56888 | 0 | 50445  | QDCNCSIYPGHASGHR<br>MAWD   | 2.91 | 0.01 | 3.10 | 1.81 | 0.22 | 0.28 |
| 56889 | 0 | 50445  | QDCNCSIYPGHASGHR<br>MAWD   | 2.91 | 0.01 | 3.10 | 0.44 | 0.85 | 0.28 |
| 56890 | 0 | 447062 | QDCNCSIYPGHVSGHR<br>MAWD   | 2.90 | 0.01 | 1.96 | 0.68 | 0.22 | 0.28 |
| 56891 | 0 | 104948 | QDDVIPEDWKPDTVYKS<br>KIQF  | 3.00 | 0.01 | 3.10 | 0.44 | 1.23 | 0.28 |
| 56892 | 0 | 100406 | QDEIYEQVHS                 | 2.32 | 0.01 | 2.18 | 2.16 | 0.22 | 0.28 |
| 56893 | 0 | 93606  | QDELSKVVDN                 | 2.30 | 0.01 | 2.67 | 2.00 | 0.22 | 0.28 |
| 56894 | 0 | 156407 | QDEMKKDDQIAAAI             | 2.64 | 0.01 | 2.73 | 0.44 | 0.85 | 1.28 |
| 56895 | 0 | 156407 | QDEMKKDDQIAAAI             | 2.64 | 0.01 | 2.73 | 0.44 | 0.85 | 1.28 |
| 56896 | 0 | 167649 | QDEMKVIDDVQQ               | 2.49 | 0.01 | 3.44 | 0.44 | 0.85 | 1.28 |
| 56897 | 0 | 167649 | QDEMKVIDDVQQ               | 2.49 | 0.01 | 3.44 | 0.44 | 1.59 | 1.28 |
| 56898 | 0 | 167650 | QDEMNVIDDVQQ               | 2.49 | 0.01 | 3.18 | 0.44 | 0.85 | 1.28 |
| 56899 | 0 | 167650 | QDEMNVIDDVQQ               | 2.49 | 0.01 | 3.18 | 0.44 | 1.59 | 1.28 |
| 56900 | 0 | 113742 | QDENPVV                    | 1.99 | 0.01 | 0.78 | 1.12 | 0.22 | 0.85 |
| 56901 | 0 | 113742 | QDENPVV                    | 1.99 | 0.01 | 0.78 | 1.12 | 0.22 | 2.92 |
| 56902 | 0 | 113742 | QDENPVV                    | 1.99 | 0.01 | 0.78 | 0.68 | 0.22 | 1.48 |
| 56903 | 0 | 113742 | QDENPVV                    | 1.99 | 0.01 | 0.78 | 0.68 | 0.22 | 0.85 |
| 56904 | 0 | 114924 | QDENPVVHFFKNIV             | 2.60 | 0.01 | 0.78 | 2.55 | 0.22 | 0.28 |

|       |   |        |                               |      |      |      |      |      |      |
|-------|---|--------|-------------------------------|------|------|------|------|------|------|
| 56905 | 0 | 114924 | QDENPVVHFFKNIV                | 2.60 | 0.01 | 0.78 | 2.55 | 0.22 | 0.28 |
| 56906 | 0 | 114924 | QDENPVVHFFKNIV                | 2.60 | 0.01 | 0.78 | 2.55 | 0.22 | 0.28 |
| 56907 | 0 | 114924 | QDENPVVHFFKNIV                | 2.60 | 0.01 | 0.78 | 2.55 | 0.22 | 0.28 |
| 56908 | 0 | 114924 | QDENPVVHFFKNIV                | 2.60 | 0.01 | 0.78 | 2.55 | 0.22 | 0.28 |
| 56909 | 0 | 114924 | QDENPVVHFFKNIV                | 2.60 | 0.01 | 0.78 | 2.55 | 0.22 | 0.28 |
| 56910 | 0 | 120143 | QDENPVVHFFKNIVTPR<br>TPPPS    | 3.01 | 0.01 | 0.78 | 3.18 | 2.60 | 1.75 |
| 56911 | 0 | 116440 | QDENPVVHFFKNIVTPR<br>TPPPSQ   | 3.06 | 0.01 | 0.78 | 0.44 | 1.13 | 0.28 |
| 56912 | 0 | 50453  | QDETRSAVDSIPQAHCS             | 2.78 | 0.01 | 0.90 | 1.15 | 0.22 | 0.28 |
| 56913 | 0 | 118566 | QDFSYQRSLKFRPKG               | 2.69 | 0.01 | 3.78 | 0.44 | 1.13 | 0.85 |
| 56914 | 0 | 115638 | QDGDQAPEYRGR                  | 2.50 | 0.01 | 0.78 | 0.44 | 1.41 | 0.28 |
| 56915 | 0 | 115638 | QDGDQAPEYRGR                  | 2.50 | 0.01 | 0.78 | 0.44 | 1.13 | 0.28 |
| 56916 | 0 | 115638 | QDGDQAPEYRGR                  | 2.50 | 0.01 | 0.78 | 0.44 | 1.13 | 0.28 |
| 56917 | 0 | 115638 | QDGDQAPEYRGR                  | 2.50 | 0.01 | 0.78 | 0.44 | 1.13 | 0.28 |
| 56918 | 0 | 359036 | QDGEDTTSEGEKNVP               | 2.67 | 0.01 | 1.61 | 0.44 | 0.85 | 1.28 |
| 56919 | 0 | 152908 | QDGKTFIDFK                    | 2.33 | 0.01 | 2.18 | 2.16 | 0.22 | 0.28 |
| 56920 | 0 | 50464  | QDGTNTHIMATEASNY<br>AQYRVARAT | 3.16 | 0.01 | 2.53 | 0.44 | 0.85 | 0.28 |
| 56921 | 0 | 50464  | QDGTNTHIMATEASNY<br>AQYRVARAT | 3.16 | 0.01 | 2.53 | 0.44 | 0.85 | 0.28 |
| 56922 | 0 | 95700  | QDHGWDLNAA                    | 2.29 | 0.01 | 2.60 | 0.44 | 1.23 | 0.85 |
| 56923 | 0 | 50467  | QDHPLQKT                      | 2.13 | 0.01 | 0.78 | 0.44 | 1.74 | 0.28 |
| 56924 | 0 | 156408 | QDHQWTLR                      | 2.13 | 0.01 | 0.90 | 0.44 | 1.93 | 1.27 |
| 56925 | 0 | 188417 | QDHTQEARNQD                   | 2.42 | 0.01 | 3.21 | 1.12 | 0.22 | 0.28 |
| 56926 | 0 | 489730 | QDIKKEIENKAPGSQ               | 2.69 | 0.01 | 2.69 | 3.05 | 0.85 | 1.28 |
| 56927 | 0 | 180918 | QDIMKFLTVNWV                  | 2.43 | 0.01 | 0.90 | 0.68 | 0.22 | 1.34 |
| 56928 | 0 | 180918 | QDIMKFLTVNWV                  | 2.43 | 0.01 | 0.90 | 0.68 | 0.22 | 1.66 |
| 56929 | 0 | 180918 | QDIMKFLTVNWV                  | 2.43 | 0.01 | 0.90 | 0.68 | 0.22 | 0.28 |
| 56930 | 0 | 180918 | QDIMKFLTVNWV                  | 2.43 | 0.01 | 0.90 | 0.68 | 0.22 | 0.28 |
| 56931 | 0 | 180918 | QDIMKFLTVNWV                  | 2.43 | 0.01 | 0.90 | 0.68 | 0.22 | 0.28 |
| 56932 | 0 | 50476  | QDIQPAIQSSWPKL                | 2.63 | 0.01 | 2.69 | 0.44 | 0.85 | 0.28 |
| 56933 | 0 | 50476  | QDIQPAIQSSWPKL                | 2.63 | 0.01 | 2.69 | 0.44 | 0.85 | 0.28 |
| 56934 | 0 | 50476  | QDIQPAIQSSWPKL                | 2.63 | 0.01 | 2.69 | 0.44 | 0.85 | 0.28 |
| 56935 | 0 | 50477  | QDIQPAVQASWPKV                | 2.64 | 0.01 | 2.69 | 0.44 | 1.41 | 0.28 |
| 56936 | 0 | 50477  | QDIQPAVQASWPKV                | 2.64 | 0.01 | 2.69 | 0.44 | 0.85 | 0.28 |
| 56937 | 0 | 50477  | QDIQPAVQASWPKV                | 2.64 | 0.01 | 2.69 | 0.44 | 0.85 | 0.28 |
| 56938 | 0 | 50477  | QDIQPAVQASWPKV                | 2.64 | 0.01 | 2.69 | 0.44 | 0.85 | 0.28 |
| 56939 | 0 | 110974 | QDIVLHLEPQNEIPVDLL            | 2.87 | 0.01 | 3.11 | 3.57 | 0.22 | 0.28 |
| 56940 | 0 | 110974 | QDIVLHLEPQNEIPVDLL            | 2.87 | 0.01 | 3.11 | 3.89 | 2.82 | 0.28 |
| 56941 | 0 | 50480  | QDKGIAIPHDIDLGESRV            | 2.82 | 0.01 | 2.53 | 0.44 | 0.85 | 0.28 |
| 56942 | 0 | 50481  | QDKGIAIPHDIDLGESRV<br>VI      | 2.92 | 0.01 | 2.70 | 0.44 | 0.85 | 0.28 |



|       |   |        |                                    |      |      |      |      |      |      |
|-------|---|--------|------------------------------------|------|------|------|------|------|------|
| 56943 | 0 | 50482  | QDKGIAIPHDIDLGESRV<br>VIQDYDNQHEQD | 3.33 | 0.01 | 2.70 | 1.15 | 0.22 | 0.28 |
| 56944 | 0 | 50482  | QDKGIAIPHDIDLGESRV<br>VIQDYDNQHEQD | 3.33 | 0.01 | 2.53 | 0.44 | 0.85 | 0.28 |
| 56945 | 0 | 50482  | QDKGIAIPHDIDLGESRV<br>VIQDYDNQHEQD | 3.33 | 0.01 | 2.53 | 0.44 | 0.85 | 0.28 |
| 56946 | 0 | 115433 | QDKIHPFAQTQSLVYPF<br>PGP           | 2.92 | 0.01 | 1.60 | 0.44 | 1.23 | 1.28 |
| 56947 | 0 | 161668 | QDKIIPTIN                          | 2.32 | 0.01 | 0.78 | 0.44 | 1.23 | 0.85 |
| 56948 | 0 | 111663 | QDKILTHYENDSTD                     | 2.59 | 0.01 | 1.86 | 0.44 | 0.85 | 0.28 |
| 56949 | 0 | 161669 | QDKTEIPTIN                         | 2.31 | 0.01 | 1.60 | 0.44 | 1.23 | 0.85 |
| 56950 | 0 | 50487  | QDLDAIWRGFYIAGDPA<br>LAY           | 2.96 | 0.01 | 2.58 | 0.44 | 0.22 | 0.28 |
| 56951 | 0 | 100407 | QDLLFTNQLK                         | 2.34 | 0.01 | 2.18 | 2.16 | 0.22 | 0.28 |
| 56952 | 0 | 100407 | QDLLFTNQLK                         | 2.34 | 0.01 | 2.18 | 2.16 | 0.22 | 0.28 |
| 56953 | 0 | 228647 | QDLLQNLRDKGV                       | 2.50 | 0.01 | 3.57 | 0.68 | 0.22 | 0.28 |
| 56954 | 0 | 228647 | QDLLQNLRDKGV                       | 2.50 | 0.01 | 3.57 | 0.68 | 0.22 | 1.27 |
| 56955 | 0 | 228647 | QDLLQNLRDKGV                       | 2.50 | 0.01 | 3.57 | 0.68 | 0.22 | 2.92 |
| 56956 | 0 | 228647 | QDLLQNLRDKGV                       | 2.50 | 0.01 | 3.57 | 0.68 | 0.22 | 1.39 |
| 56957 | 0 | 228647 | QDLLQNLRDKGV                       | 2.50 | 0.01 | 3.57 | 0.68 | 0.22 | 1.39 |
| 56958 | 0 | 228647 | QDLLQNLRDKGV                       | 2.50 | 0.01 | 3.57 | 0.68 | 0.22 | 1.39 |
| 56959 | 0 | 50490  | QDLPGNDNNSTATLC                    | 2.67 | 0.01 | 3.04 | 1.12 | 0.22 | 2.02 |
| 56960 | 0 | 50490  | QDLPGNDNNSTATLC                    | 2.67 | 0.01 | 3.04 | 1.12 | 0.22 | 0.28 |
| 56961 | 0 | 50490  | QDLPGNDNNSTATLC                    | 2.67 | 0.01 | 3.04 | 1.12 | 0.22 | 0.28 |
|       |   |        | QDLPGNDNNSTATLCL                   |      |      |      |      |      |      |
| 56962 | 0 | 50491  | GHHAVPNGTLVKITND<br>QIE            | 3.52 | 0.01 | 3.04 | 1.12 | 0.22 | 0.28 |
|       |   |        | QDLPGNDNNSTATLCL                   |      |      |      |      |      |      |
| 56963 | 0 | 50491  | GHHAVPNGTLVKITND<br>QIE            | 3.52 | 0.01 | 3.04 | 1.12 | 0.22 | 0.28 |
|       |   |        | QDLPGNDNNSTATLCL                   |      |      |      |      |      |      |
| 56964 | 0 | 50491  | GHHAVPNGTLVKITND<br>QIE            | 3.52 | 0.01 | 3.04 | 1.12 | 0.22 | 0.28 |
|       |   |        | QDLPGNDNNSTATLCL                   |      |      |      |      |      |      |
| 56965 | 0 | 50492  | GHHAVPNGTLVKITND<br>QIEVTN         | 3.61 | 0.01 | 3.04 | 1.12 | 0.22 | 2.02 |
| 56966 | 0 | 101161 | QDLPTPPSDP                         | 2.35 | 0.01 | 3.18 | 2.98 | 0.22 | 0.28 |
| 56967 | 0 | 50493  | QDMLNISQ                           | 2.13 | 0.01 | 1.66 | 1.15 | 0.22 | 0.28 |
| 56968 | 0 | 50494  | QDMRNTIMASKTVG                     | 2.57 | 0.01 | 2.56 | 2.69 | 0.22 | 0.28 |
| 56969 | 0 | 50494  | QDMRNTIMASKTVG                     | 2.57 | 0.01 | 2.56 | 0.44 | 0.85 | 0.28 |
| 56970 | 0 | 120886 | QDNEEFPEKD                         | 2.33 | 0.01 | 2.18 | 2.16 | 0.22 | 0.28 |
| 56971 | 0 | 524010 | QDNEQKALTSAQEIYTN<br>TLA           | 2.97 | 0.01 | 2.24 | 0.44 | 1.41 | 1.28 |
| 56972 | 0 | 489731 | QDPDKFANPVKDIFT                    | 2.68 | 0.01 | 2.60 | 0.68 | 0.22 | 0.28 |
| 56973 | 0 | 489731 | QDPDKFANPVKDIFT                    | 2.68 | 0.01 | 2.60 | 0.68 | 0.22 | 0.28 |
| 56974 | 0 | 489731 | QDPDKFANPVKDIFT                    | 2.68 | 0.01 | 2.60 | 0.68 | 0.22 | 0.28 |
| 56975 | 0 | 489731 | QDPDKFANPVKDIFT                    | 2.68 | 0.01 | 2.60 | 0.68 | 0.22 | 1.34 |

|       |   |        |                                    |      |      |      |      |      |      |
|-------|---|--------|------------------------------------|------|------|------|------|------|------|
| 56976 | 0 | 50502  | QDPDNTDDNGPQDPD<br>NTD             | 2.92 | 0.01 | 2.48 | 0.68 | 0.22 | 1.27 |
| 56977 | 0 | 50502  | QDPDNTDDNGPQDPD<br>NTD             | 2.92 | 0.01 | 2.48 | 0.68 | 0.22 | 0.28 |
| 56978 | 0 | 50502  | QDPDNTDDNGPQDPD<br>NTD             | 2.92 | 0.01 | 2.48 | 0.68 | 0.22 | 1.48 |
| 56979 | 0 | 50504  | QDPDRRDPYSPSPYD                    | 2.73 | 0.01 | 2.16 | 0.44 | 1.23 | 0.85 |
| 56980 | 0 | 103516 | QDPEGWGKSPGFGTT                    | 2.66 | 0.01 | 2.04 | 0.44 | 0.85 | 1.28 |
| 56981 | 0 | 462418 | QDPNSFAEY                          | 2.18 | 0.01 | 0.78 | 1.12 | 0.22 | 1.28 |
| 56982 | 0 | 50505  | QDPR                               | 1.57 | 0.01 | 3.28 | 0.68 | 0.22 | 0.85 |
| 56983 | 0 | 50507  | QDPRVR                             | 1.90 | 0.01 | 2.08 | 1.20 | 0.22 | 0.28 |
| 56984 | 0 | 50507  | QDPRVR                             | 1.90 | 0.01 | 2.08 | 1.20 | 0.22 | 0.28 |
| 56985 | 0 | 50508  | QDPRVRGLYFPAGG                     | 2.59 | 0.01 | 2.08 | 0.68 | 0.22 | 0.28 |
| 56986 | 0 | 50508  | QDPRVRGLYFPAGG                     | 2.59 | 0.01 | 2.08 | 0.68 | 0.22 | 0.28 |
| 56987 | 0 | 50508  | QDPRVRGLYFPAGG                     | 2.59 | 0.01 | 2.08 | 0.68 | 0.22 | 0.28 |
| 56988 | 0 | 50508  | QDPRVRGLYFPAGG                     | 2.59 | 0.01 | 2.08 | 0.68 | 0.22 | 0.28 |
| 56989 | 0 | 50508  | QDPRVRGLYFPAGG                     | 2.59 | 0.01 | 2.08 | 0.68 | 0.22 | 0.28 |
| 56990 | 0 | 50508  | QDPRVRGLYFPAGG                     | 2.59 | 0.01 | 2.08 | 2.46 | 0.22 | 1.27 |
| 56991 | 0 | 50508  | QDPRVRGLYFPAGG                     | 2.59 | 0.01 | 2.08 | 2.46 | 0.22 | 0.28 |
| 56992 | 0 | 50508  | QDPRVRGLYFPAGG                     | 2.59 | 0.01 | 2.08 | 0.68 | 0.22 | 0.28 |
| 56993 | 0 | 50508  | QDPRVRGLYFPAGG                     | 2.59 | 0.01 | 2.08 | 1.15 | 2.26 | 0.28 |
| 56994 | 0 | 50508  | QDPRVRGLYFPAGG                     | 2.59 | 0.01 | 2.08 | 0.68 | 0.22 | 0.28 |
| 56995 | 0 | 50508  | QDPRVRGLYFPAGG                     | 2.59 | 0.01 | 2.71 | 1.15 | 0.22 | 1.27 |
| 56996 | 0 | 50508  | QDPRVRGLYFPAGG                     | 2.59 | 0.01 | 2.08 | 0.68 | 0.22 | 0.28 |
| 56997 | 0 | 50508  | QDPRVRGLYFPAGG                     | 2.59 | 0.01 | 2.08 | 0.68 | 0.22 | 0.28 |
| 56998 | 0 | 50510  | QDPSKFTEPVKD                       | 2.48 | 0.01 | 3.34 | 0.44 | 0.85 | 0.28 |
| 56999 | 0 | 50512  | QDPV                               | 1.57 | 0.01 | 3.20 | 1.15 | 0.22 | 0.28 |
| 57000 | 0 | 134767 | QDPYVKEAENLKKYFNA<br>G             | 2.83 | 0.01 | 0.78 | 0.68 | 0.22 | 1.34 |
| 57001 | 0 | 134767 | QDPYVKEAENLKKYFNA<br>G             | 2.83 | 0.01 | 0.78 | 0.68 | 0.22 | 1.27 |
| 57002 | 0 | 134767 | QDPYVKEAENLKKYFNA<br>G             | 2.83 | 0.01 | 0.78 | 0.68 | 0.22 | 0.28 |
| 57003 | 0 | 132563 | QDQPVPHGTQCLAMG                    | 2.67 | 0.01 | 0.78 | 1.12 | 0.22 | 0.28 |
| 57004 | 0 | 462419 | QDREDDFD                           | 2.16 | 0.01 | 0.78 | 1.12 | 0.22 | 1.28 |
| 57005 | 0 | 137554 | QDRHQKIRRFRRGDI                    | 2.71 | 0.01 | 3.12 | 0.44 | 1.23 | 0.85 |
| 57006 | 0 | 172815 | QDRPEDLDVPPALAD                    | 2.71 | 0.01 | 0.78 | 0.44 | 1.41 | 0.28 |
| 57007 | 0 | 50514  | QDRPTPSPAPSRPFSVLR<br>A            | 2.92 | 0.01 | 2.70 | 0.44 | 0.85 | 0.28 |
| 57008 | 0 | 131015 | QDRRLDEN                           | 2.13 | 0.01 | 2.19 | 1.20 | 0.22 | 0.85 |
| 57009 | 0 | 100408 | QDSLPTDKASGPAH<br>QDSRRSADALLRLQAM | 2.61 | 0.01 | 2.96 | 1.12 | 0.22 | 0.28 |
| 57010 | 0 | 133666 | AGISEEQGSDTDTPIVYN<br>DRN          | 3.55 | 0.01 | 2.72 | 0.44 | 0.85 | 0.28 |
| 57011 | 0 | 180919 | QDSRVRALYLPA                       | 2.48 | 0.01 | 2.08 | 0.44 | 0.85 | 2.75 |

|       |   |        |                                |      |      |      |      |      |      |
|-------|---|--------|--------------------------------|------|------|------|------|------|------|
| 57012 | 0 | 451508 | QDSSSSKAPP                     | 2.31 | 0.01 | 0.78 | 1.81 | 0.22 | 1.34 |
| 57013 | 0 | 133667 | QDVCTYRDFMYK                   | 2.45 | 0.01 | 1.60 | 0.68 | 0.22 | 0.28 |
| 57014 | 0 | 172817 | QDVFSATETSLWYDF                | 2.66 | 0.01 | 0.78 | 0.44 | 1.41 | 0.28 |
| 57015 | 0 | 172817 | QDVFSATETSLWYDF                | 2.66 | 0.01 | 0.78 | 0.44 | 1.13 | 0.28 |
| 57016 | 0 | 120887 | QDVGNYDAFISIRAAIRA<br>IESA     | 3.04 | 0.01 | 2.86 | 0.44 | 0.85 | 0.28 |
| 57017 | 0 | 50525  | QDVKFPGGGQIVGGV                | 2.70 | 0.01 | 1.72 | 0.44 | 1.59 | 0.28 |
| 57018 | 0 | 50525  | QDVKFPGGGQIVGGV                | 2.70 | 0.01 | 2.41 | 0.44 | 1.59 | 0.28 |
| 57019 | 0 | 50526  | QDVKFPGGGQIVGGVY<br>LLPRRG     | 3.04 | 0.01 | 1.72 | 0.44 | 0.85 | 0.28 |
| 57020 | 0 | 50527  | QDVKFPGGGQIVGGVY<br>LLPRRG PRL | 3.18 | 0.01 | 1.72 | 0.44 | 1.41 | 2.97 |
| 57021 | 0 | 50528  | QDVLDKNHVADIDK                 | 2.63 | 0.01 | 2.56 | 0.44 | 0.85 | 0.28 |
| 57022 | 0 | 50531  | QDVNCTDVSTAIHADQL<br>TPAWR     | 3.02 | 0.01 | 2.45 | 0.44 | 0.85 | 0.28 |
| 57023 | 0 | 50531  | QDVNCTDVSTAIHADQL<br>TPAWR     | 3.02 | 0.01 | 2.45 | 0.44 | 1.59 | 0.28 |
| 57024 | 0 | 50531  | QDVNCTDVSTAIHADQL<br>TPAWR     | 3.02 | 0.01 | 2.45 | 0.44 | 1.59 | 1.27 |
| 57025 | 0 | 50535  | QDVVVVL                        | 1.91 | 0.01 | 2.40 | 0.44 | 0.85 | 0.28 |
| 57026 | 0 | 50536  | QDVVVVLGS                      | 2.12 | 0.01 | 2.40 | 0.44 | 0.85 | 0.28 |
| 57027 | 0 | 50536  | QDVVVVLGS                      | 2.12 | 0.01 | 2.40 | 0.44 | 0.85 | 0.28 |
| 57028 | 0 | 50536  | QDVVVVLGS                      | 2.12 | 0.01 | 2.40 | 0.44 | 0.85 | 0.28 |
| 57029 | 0 | 119627 | QDWLNGKE                       | 2.10 | 0.01 | 0.78 | 0.44 | 1.93 | 0.28 |
| 57030 | 0 | 225840 | QDWLNGKKFKCKVNN                | 2.66 | 0.01 | 3.28 | 0.44 | 0.22 | 0.85 |
| 57031 | 0 | 50538  | QDYDNQHEQDRPTPSP<br>APSR       | 2.97 | 0.01 | 2.70 | 0.44 | 0.85 | 0.28 |
| 57032 | 0 | 50539  | QDYDNQHEQDRPTPSP<br>APSRPFSVL  | 3.16 | 0.01 | 2.53 | 0.44 | 0.85 | 0.28 |
| 57033 | 0 | 50539  | QDYDNQHEQDRPTPSP<br>APSRPFSVL  | 3.16 | 0.01 | 2.53 | 0.44 | 0.85 | 0.28 |
| 57034 | 0 | 50549  | QEAGNFERISGDLKT                | 2.62 | 0.01 | 2.04 | 0.44 | 0.85 | 1.28 |
| 57035 | 0 | 172820 | QECISQVGKGGGSVC                | 2.70 | 0.01 | 0.78 | 0.44 | 1.41 | 0.28 |
| 57036 | 0 | 238910 | QECISQVGKGGGSVCPV<br>C         | 2.87 | 0.01 | 0.78 | 0.44 | 1.13 | 0.28 |
| 57037 | 0 | 174242 | QEDKLRKAGE                     | 2.31 | 0.01 | 3.10 | 0.44 | 1.23 | 0.85 |
| 57038 | 0 | 174242 | QEDKLRKAGE                     | 2.31 | 0.01 | 3.10 | 0.44 | 1.23 | 0.85 |
| 57039 | 0 | 243067 | QEDLLVLWGIH                    | 2.38 | 0.01 | 3.72 | 0.68 | 0.22 | 0.85 |
| 57040 | 0 | 243067 | QEDLLVLWGIH                    | 2.38 | 0.01 | 3.72 | 0.68 | 0.22 | 0.28 |
| 57041 | 0 | 243067 | QEDLLVLWGIH                    | 2.38 | 0.01 | 3.72 | 0.68 | 0.22 | 0.28 |
| 57042 | 0 | 243067 | QEDLLVLWGIH                    | 2.38 | 0.01 | 3.72 | 0.68 | 0.22 | 0.85 |
| 57043 | 0 | 243067 | QEDLLVLWGIH                    | 2.38 | 0.01 | 3.72 | 0.68 | 0.22 | 0.85 |
| 57044 | 0 | 243067 | QEDLLVLWGIH                    | 2.38 | 0.01 | 3.72 | 0.68 | 0.22 | 1.48 |
| 57045 | 0 | 243067 | QEDLLVLWGIH                    | 2.38 | 0.01 | 3.72 | 0.68 | 0.22 | 1.48 |

|       |   |        |                                       |      |      |      |      |      |      |
|-------|---|--------|---------------------------------------|------|------|------|------|------|------|
| 57046 | 0 | 106031 | QEDREFSPRGQHGRR                       | 2.69 | 0.01 | 2.16 | 0.44 | 1.23 | 0.85 |
| 57047 | 0 | 359350 | QEDVGPRHVDPDHFR                       | 2.70 | 0.01 | 1.61 | 0.44 | 0.85 | 1.28 |
| 57048 | 0 | 230409 | QEEAEEEEAAVAGSAQ<br>PHP               | 2.98 | 0.01 | 3.47 | 2.49 | 0.85 | 0.28 |
| 57049 | 0 | 172822 | QEEAQCP TLHFLEGG                      | 2.67 | 0.01 | 0.78 | 0.44 | 1.13 | 0.28 |
| 57050 | 0 | 359379 | QEEEDVGPRHVDPD                        | 2.69 | 0.01 | 1.61 | 0.44 | 0.85 | 1.28 |
| 57051 | 0 | 50572  | QEEENEGGNIFSGFT                       | 2.70 | 0.01 | 2.16 | 0.44 | 1.23 | 0.85 |
| 57052 | 0 | 99558  | QEEENQGGKGPLLSI                       | 2.68 | 0.01 | 2.16 | 0.44 | 1.23 | 1.48 |
| 57053 | 0 | 359403 | QEEGERMTEKEDGDN                       | 2.70 | 0.01 | 1.61 | 0.44 | 0.85 | 1.28 |
| 57054 | 0 | 359410 | QEEGQYDAADVEAGD                       | 2.73 | 0.01 | 1.61 | 0.44 | 0.85 | 1.28 |
| 57055 | 0 | 100410 | QEEHLKEIMK                            | 2.33 | 0.01 | 2.18 | 2.16 | 0.22 | 0.28 |
| 57056 | 0 | 457552 | QEEIAGIAEIIIEEV                       | 2.73 | 0.01 | 2.04 | 1.15 | 0.22 | 0.28 |
| 57057 | 0 | 359420 | QEEISDDDEGEDEE                        | 2.71 | 0.01 | 1.61 | 0.44 | 0.85 | 1.28 |
| 57058 | 0 | 134488 | QEELWMFVRKKLMME<br>QENRNLR            | 3.06 | 0.01 | 0.78 | 2.49 | 1.13 | 0.28 |
| 57059 | 0 | 359454 | QEEQEDVGPRHVDPD                       | 2.72 | 0.01 | 1.61 | 0.44 | 0.85 | 1.28 |
| 57060 | 0 | 50578  | QEEQEQQEEQEQELE<br>Q                  | 2.87 | 0.01 | 3.36 | 0.44 | 2.82 | 0.28 |
| 57061 | 0 | 99559  | QEEREFSPRGQHSRR                       | 2.70 | 0.01 | 2.16 | 0.44 | 1.23 | 1.48 |
| 57062 | 0 | 50580  | QEERPPET                              | 2.15 | 0.01 | 2.40 | 2.43 | 0.22 | 0.28 |
| 57063 | 0 | 50584  | QEFECAGVALSRLVL                       | 2.68 | 0.01 | 2.16 | 0.44 | 1.23 | 0.85 |
| 57064 | 0 | 99560  | QEFLRYQQQSRQSRR                       | 2.71 | 0.01 | 2.16 | 0.44 | 1.23 | 1.48 |
| 57065 | 0 | 99560  | QEFLRYQQQSRQSRR                       | 2.71 | 0.01 | 2.16 | 0.44 | 1.23 | 1.48 |
| 57066 | 0 | 106032 | QEFLRYQQQSRRRSL                       | 2.71 | 0.01 | 2.16 | 0.44 | 1.23 | 0.85 |
| 57067 | 0 | 172826 | QEFQNFKTLHMDFEQ                       | 2.69 | 0.01 | 0.78 | 0.44 | 1.13 | 0.28 |
| 57068 | 0 | 50597  | QEGAQQPAPA                            | 2.36 | 0.01 | 2.73 | 0.44 | 0.85 | 0.28 |
| 57069 | 0 | 359492 | QEGEIMTENEDDDED                       | 2.70 | 0.01 | 1.61 | 0.44 | 0.85 | 1.28 |
| 57070 | 0 | 359499 | QEGGERMTEKEDGDN                       | 2.70 | 0.01 | 1.61 | 0.44 | 0.85 | 1.28 |
| 57071 | 0 | 195846 | QEGILEDMPVDPDNEAY<br>E                | 2.84 | 0.01 | 0.78 | 3.40 | 0.22 | 0.28 |
| 57072 | 0 | 195846 | QEGILEDMPVDPDNEAY<br>E                | 2.84 | 0.01 | 0.78 | 3.40 | 0.22 | 0.28 |
| 57073 | 0 | 195846 | QEGILEDMPVDPDNEAY<br>E                | 2.84 | 0.01 | 0.78 | 3.40 | 0.22 | 0.28 |
| 57074 | 0 | 195846 | QEGILEDMPVDPDNEAY<br>E                | 2.84 | 0.01 | 0.78 | 3.40 | 0.22 | 1.48 |
| 57075 | 0 | 195846 | QEGILEDMPVDPDNEAY<br>E                | 2.84 | 0.01 | 0.78 | 3.40 | 0.22 | 2.02 |
| 57076 | 0 | 229434 | QEGILEDMPVDPDNEAY<br>EMPSEEGYQDYEP EA | 3.43 | 0.01 | 0.78 | 0.44 | 1.41 | 0.85 |

|       |   |        |                                      |      |      |      |      |      |      |
|-------|---|--------|--------------------------------------|------|------|------|------|------|------|
| 57077 | 0 | 229434 | QEGILEDMPVDPDNEAY<br>EMPSEEGYQDYEPEA | 3.43 | 0.01 | 0.78 | 0.44 | 1.93 | 0.85 |
| 57078 | 0 | 133668 | QEGPEYWDRNT                          | 2.36 | 0.01 | 0.78 | 0.68 | 0.22 | 0.85 |
| 57079 | 0 | 133668 | QEGPEYWDRNT                          | 2.36 | 0.01 | 0.78 | 0.68 | 0.22 | 1.27 |
| 57080 | 0 | 174244 | QEGRQTPQSQVNVQPQ                     | 2.71 | 0.01 | 2.30 | 2.89 | 0.22 | 0.28 |
| 57081 | 0 | 174244 | QEGRQTPQSQVNVQPQ                     | 2.71 | 0.01 | 2.30 | 2.89 | 0.22 | 0.28 |
| 57082 | 0 | 50609  | QEGVQQEGA                            | 2.27 | 0.01 | 2.97 | 1.15 | 0.22 | 0.85 |
| 57083 | 0 | 50609  | QEGVQQEGA                            | 2.27 | 0.01 | 2.97 | 1.15 | 0.22 | 1.27 |
| 57084 | 0 | 50610  | QEGVQQEGAQQPAP                       | 2.67 | 0.01 | 2.97 | 0.44 | 0.85 | 0.85 |
| 57085 | 0 | 97572  | QEHKPKKDDFRNEFDH                     | 2.75 | 0.01 | 3.67 | 0.44 | 1.23 | 0.28 |
| 57086 | 0 | 181769 | QEHYKDVDGSGNYYK                      | 2.67 | 0.01 | 2.86 | 2.36 | 0.22 | 1.28 |
| 57087 | 0 | 225497 | QEIDYKVRNYLLKHKNLY                   | 2.85 | 0.01 | 2.61 | 0.68 | 0.22 | 0.28 |
| 57088 | 0 | 225497 | QEIDYKVRNYLLKHKNLY                   | 2.85 | 0.01 | 2.61 | 0.68 | 0.22 | 0.28 |
| 57089 | 0 | 225497 | QEIDYKVRNYLLKHKNLY                   | 2.85 | 0.01 | 2.61 | 0.68 | 0.22 | 0.28 |
| 57090 | 0 | 50617  | QEIENSDDYDREKLQ                      | 2.75 | 0.01 | 2.04 | 2.04 | 0.22 | 0.28 |
| 57091 | 0 | 99561  | QEIFIQQGRGYFGLI                      | 2.71 | 0.01 | 2.16 | 0.44 | 1.23 | 1.48 |
| 57092 | 0 | 226253 | QEILPKFKQIMDEEKE                     | 2.77 | 0.01 | 3.28 | 0.68 | 0.22 | 0.85 |
| 57093 | 0 | 226253 | QEILPKFKQIMDEEKE                     | 2.77 | 0.01 | 3.28 | 0.68 | 0.22 | 0.85 |
| 57094 | 0 | 226253 | QEILPKFKQIMDEEKE                     | 2.77 | 0.01 | 3.28 | 0.68 | 0.22 | 1.48 |
| 57095 | 0 | 226253 | QEILPKFKQIMDEEKE                     | 2.77 | 0.01 | 3.28 | 0.68 | 0.22 | 1.48 |
| 57096 | 0 | 226253 | QEILPKFKQIMDEEKE                     | 2.77 | 0.01 | 3.28 | 0.68 | 0.22 | 1.48 |
| 57097 | 0 | 226253 | QEILPKFKQIMDEEKE                     | 2.77 | 0.01 | 3.28 | 0.68 | 0.22 | 0.28 |
| 57098 | 0 | 469456 | QEINEDDKSAHIQHEIVE<br>VEEILPEDDKNE   | 3.36 | 0.01 | 1.66 | 0.44 | 0.85 | 1.28 |
| 57099 | 0 | 469456 | QEINEDDKSAHIQHEIVE<br>VEEILPEDDKNE   | 3.36 | 0.01 | 1.66 | 0.44 | 0.85 | 1.28 |
| 57100 | 0 | 100411 | QEINLSLEEL                           | 2.34 | 0.01 | 2.18 | 2.16 | 0.22 | 0.28 |
| 57101 | 0 | 50621  | QEIPQPQW                             | 2.17 | 0.01 | 2.40 | 2.43 | 0.22 | 0.28 |
| 57102 | 0 | 172828 | QEIVNLSKEAQKFDS                      | 2.67 | 0.01 | 0.78 | 0.44 | 1.13 | 0.28 |
| 57103 | 0 | 172829 | QEIVQMIGTEEHVMA                      | 2.70 | 0.01 | 0.78 | 0.44 | 1.13 | 0.28 |
| 57104 | 0 | 469457 | QEKEKEEVKEKEEVKEKE<br>EVKEKEEVKEKE   | 3.42 | 0.01 | 1.66 | 0.44 | 0.85 | 1.28 |
| 57105 | 0 | 469457 | QEKEKEEVKEKEEVKEKE<br>EVKEKEEVKEKE   | 3.42 | 0.01 | 1.66 | 0.44 | 0.85 | 1.28 |
| 57106 | 0 | 181770 | QEKEKVYPYENELKG                      | 2.70 | 0.01 | 1.66 | 2.36 | 0.22 | 1.28 |
| 57107 | 0 | 181771 | QEKIKKNPYEQQLKG                      | 2.69 | 0.01 | 2.86 | 2.37 | 0.22 | 1.28 |
| 57108 | 0 | 181771 | QEKIKKNPYEQQLKG                      | 2.69 | 0.01 | 2.86 | 2.36 | 0.22 | 1.28 |
| 57109 | 0 | 50627  | QEKISFGKSSQCREAV                     | 2.73 | 0.01 | 2.80 | 1.12 | 0.22 | 2.02 |
| 57110 | 0 | 359598 | QEKKEEEEEEDGIEQ                      | 2.72 | 0.01 | 1.61 | 0.44 | 0.85 | 1.28 |
| 57111 | 0 | 117613 | QEKLQVALGE                           | 2.34 | 0.01 | 0.78 | 0.44 | 1.13 | 0.28 |

|       |   |        |                                                                  |      |      |      |      |      |      |
|-------|---|--------|------------------------------------------------------------------|------|------|------|------|------|------|
| 57112 | 0 | 117613 | QEKLQVALGE                                                       | 2.34 | 0.01 | 0.78 | 0.44 | 1.13 | 0.85 |
| 57113 | 0 | 115434 | QEKNNMAINPSKENLCST<br>FCK                                        | 2.93 | 0.01 | 1.60 | 0.44 | 1.23 | 2.51 |
| 57114 | 0 | 227819 | QELAFPGSAQDVERLL                                                 | 2.72 | 0.01 | 2.72 | 1.20 | 1.59 | 0.28 |
| 57115 | 0 | 50636  | QELDCWHYHQYCITS                                                  | 2.67 | 0.01 | 3.50 | 2.37 | 0.22 | 2.02 |
| 57116 | 0 | 50636  | QELDCWHYHQYCITS                                                  | 2.67 | 0.01 | 3.81 | 3.26 | 0.22 | 1.39 |
| 57117 | 0 | 50636  | QELDCWHYHQYCITS                                                  | 2.67 | 0.01 | 3.50 | 3.26 | 0.22 | 0.28 |
| 57118 | 0 | 50636  | QELDCWHYHQYCITS                                                  | 2.67 | 0.01 | 3.50 | 3.26 | 0.85 | 0.28 |
| 57119 | 0 | 50637  | QELDCWHYQHYCVTST<br>KS                                           | 2.84 | 0.01 | 4.03 | 2.88 | 1.41 | 1.39 |
| 57120 | 0 | 50637  | QELDCWHYQHYCVTST<br>KS                                           | 2.84 | 0.01 | 4.03 | 2.88 | 1.41 | 0.28 |
| 57121 | 0 | 50637  | QELDCWHYQHYCVTST<br>KS                                           | 2.84 | 0.01 | 4.03 | 2.88 | 1.41 | 0.85 |
| 57122 | 0 | 50637  | QELDCWHYQHYCVTST<br>KS                                           | 2.84 | 0.01 | 4.03 | 2.88 | 1.41 | 1.48 |
| 57123 | 0 | 50637  | QELDCWHYQHYCVTST<br>KS                                           | 2.84 | 0.01 | 4.03 | 2.88 | 1.41 | 1.66 |
| 57124 | 0 | 50637  | QELDCWHYQHYCVTST<br>KS                                           | 2.84 | 0.01 | 4.03 | 2.88 | 1.41 | 1.66 |
| 57125 | 0 | 50637  | QELDCWHYQHYCVTST<br>KS                                           | 2.84 | 0.01 | 4.03 | 2.88 | 1.41 | 1.66 |
| 57126 | 0 | 50637  | QELDCWHYQHYCVTST<br>KS                                           | 2.84 | 0.01 | 4.03 | 2.88 | 1.41 | 1.66 |
| 57127 | 0 | 122538 | QELECDWEEVTTSGPCG<br>EES                                         | 2.94 | 0.01 | 0.78 | 0.44 | 1.13 | 0.28 |
| 57128 | 0 | 122538 | QELECDWEEVTTSGPCG<br>EES                                         | 2.94 | 0.01 | 0.78 | 0.44 | 1.13 | 1.27 |
| 57129 | 0 | 50648  | QELQEVDRRCRC                                                     | 2.52 | 0.01 | 3.12 | 0.44 | 1.23 | 0.85 |
| 57130 | 0 | 135843 | QELVDCASQHGCH                                                    | 2.54 | 0.01 | 2.78 | 1.12 | 0.22 | 1.57 |
| 57131 | 0 | 135843 | QELVDCASQHGCH                                                    | 2.54 | 0.01 | 2.78 | 1.12 | 0.22 | 1.57 |
| 57132 | 0 | 50650  | QELVDCASQHGCHGDTI<br>PRGIEYIQHNGVVQESY<br>YRYVAREQSCRRPNAQR<br>F | 3.90 | 0.01 | 2.78 | 0.44 | 1.23 | 1.57 |
| 57133 | 0 | 50650  | QELVDCASQHGCHGDTI<br>PRGIEYIQHNGVVQESY<br>YRYVAREQSCRRPNAQR<br>F | 3.90 | 0.01 | 2.78 | 0.44 | 1.23 | 1.57 |
| 57134 | 0 | 50650  | QELVDCASQHGCHGDTI<br>PRGIEYIQHNGVVQESY<br>YRYVAREQSCRRPNAQR<br>F | 3.90 | 0.01 | 2.78 | 1.12 | 0.22 | 1.57 |
| 57135 | 0 | 167370 | QELYPYSPHIHV                                                     | 2.48 | 0.01 | 0.90 | 0.44 | 0.85 | 1.39 |
| 57136 | 0 | 118077 | QEMPLTALLRNLGKMT                                                 | 2.73 | 0.01 | 0.78 | 0.68 | 0.22 | 0.28 |

|       |   |        |                                        |      |      |      |      |      |      |
|-------|---|--------|----------------------------------------|------|------|------|------|------|------|
| 57137 | 0 | 118077 | QEMPLTALLRNLGKMT                       | 2.73 | 0.01 | 0.78 | 0.68 | 0.22 | 0.28 |
| 57138 | 0 | 118077 | QEMPLTALLRNLGKMT                       | 2.73 | 0.01 | 0.78 | 0.68 | 0.22 | 0.28 |
| 57139 | 0 | 118077 | QEMPLTALLRNLGKMT                       | 2.73 | 0.01 | 0.78 | 0.68 | 0.22 | 0.28 |
| 57140 | 0 | 118077 | QEMPLTALLRNLGKMT                       | 2.73 | 0.01 | 0.78 | 0.68 | 0.22 | 0.85 |
| 57141 | 0 | 118077 | QEMPLTALLRNLGKMT                       | 2.73 | 0.01 | 0.78 | 0.44 | 1.13 | 0.28 |
| 57142 | 0 | 118077 | QEMPLTALLRNLGKMT                       | 2.73 | 0.01 | 0.78 | 0.44 | 1.13 | 0.28 |
| 57143 | 0 | 195847 | QENPFFSQPG                             | 2.33 | 0.01 | 0.78 | 1.15 | 0.22 | 1.57 |
| 57144 | 0 | 50660  | QENSTYAVRNSN                           | 2.48 | 0.01 | 2.69 | 0.68 | 0.22 | 0.28 |
| 57145 | 0 | 50660  | QENSTYAVRNSN                           | 2.48 | 0.01 | 2.69 | 1.20 | 0.22 | 0.28 |
| 57146 | 0 | 98953  | QEPDDLKQKA                             | 2.33 | 0.01 | 2.16 | 0.44 | 1.23 | 0.85 |
| 57147 | 0 | 127786 | QEPGNPSEFEAD                           | 2.48 | 0.01 | 3.16 | 3.16 | 0.22 | 0.28 |
| 57148 | 0 | 50666  | QEPIVA                                 | 1.88 | 0.01 | 2.19 | 0.68 | 0.22 | 0.28 |
| 57149 | 0 | 50666  | QEPIVA                                 | 1.88 | 0.01 | 2.19 | 0.68 | 0.22 | 1.34 |
| 57150 | 0 | 144042 | QEPLMGTVPIRA                           | 2.43 | 0.01 | 0.90 | 1.20 | 0.22 | 0.28 |
| 57151 | 0 | 144042 | QEPLMGTVPIRA                           | 2.43 | 0.01 | 0.90 | 1.20 | 0.22 | 0.28 |
| 57152 | 0 | 144042 | QEPLMGTVPIRA                           | 2.43 | 0.01 | 0.90 | 1.20 | 0.22 | 0.28 |
| 57153 | 0 | 144042 | QEPLMGTVPIRA                           | 2.43 | 0.01 | 0.90 | 0.44 | 0.85 | 0.28 |
| 57154 | 0 | 144042 | QEPLMGTVPIRA                           | 2.43 | 0.01 | 0.90 | 1.20 | 0.22 | 0.28 |
| 57155 | 0 | 50669  | QEPPAPQAPYQGYQEP<br>PPPQ               | 3.01 | 0.01 | 2.48 | 0.44 | 1.59 | 0.28 |
| 57156 | 0 | 50673  | QEQCRFPNITNSHVSILQ<br>ERPPLENRVLTGWGLN | 3.47 | 0.01 | 3.19 | 0.44 | 0.85 | 0.85 |
| 57157 | 0 | 50673  | QEQCRFPNITNSHVSILQ<br>ERPPLENRVLTGWGLN | 3.47 | 0.01 | 3.19 | 0.44 | 0.85 | 0.85 |
| 57158 | 0 | 50673  | QEQCRFPNITNSHVSILQ<br>ERPPLENRVLTGWGLN | 3.47 | 0.01 | 2.04 | 4.03 | 1.59 | 0.85 |
| 57159 | 0 | 50673  | QEQCRFPNITNSHVSILQ<br>ERPPLENRVLTGWGLN | 3.47 | 0.01 | 2.04 | 0.44 | 0.85 | 0.85 |
| 57160 | 0 | 50673  | QEQCRFPNITNSHVSILQ<br>ERPPLENRVLTGWGLN | 3.47 | 0.01 | 2.04 | 0.44 | 1.59 | 0.85 |
| 57161 | 0 | 50673  | QEQCRFPNITNSHVSILQ<br>ERPPLENRVLTGWGLN | 3.47 | 0.01 | 2.04 | 0.44 | 1.59 | 0.85 |
| 57162 | 0 | 50673  | QEQCRFPNITNSHVSILQ<br>ERPPLENRVLTGWGLN | 3.47 | 0.01 | 2.04 | 0.44 | 1.59 | 0.85 |

|       |   |        |                                      |      |      |      |      |      |      |
|-------|---|--------|--------------------------------------|------|------|------|------|------|------|
| 57163 | 0 | 50674  | QEQQEELEEVEEQEQE                     | 2.87 | 0.01 | 3.36 | 0.44 | 2.82 | 0.28 |
| 57164 | 0 | 50677  | QEIQKGEEVREL                         | 2.50 | 0.01 | 3.12 | 0.44 | 1.23 | 0.85 |
| 57165 | 0 | 50678  | QEQUITQHGSPLYGRC                     | 2.60 | 0.01 | 2.14 | 1.12 | 0.22 | 0.28 |
| 57166 | 0 | 148758 | QEQKQQLQQQ                           | 2.35 | 0.01 | 1.86 | 0.44 | 1.23 | 0.85 |
| 57167 | 0 | 148758 | QEQKQQLQQQ                           | 2.35 | 0.01 | 1.86 | 2.74 | 0.22 | 0.85 |
| 57168 | 0 | 148758 | QEQKQQLQQQ                           | 2.35 | 0.01 | 1.86 | 2.74 | 0.22 | 0.85 |
| 57169 | 0 | 148758 | QEQKQQLQQQ                           | 2.35 | 0.01 | 1.86 | 0.44 | 1.23 | 0.28 |
| 57170 | 0 | 115915 | QEQNQEQPIR                           | 2.36 | 0.01 | 1.60 | 0.44 | 1.23 | 0.85 |
| 57171 | 0 | 115435 | QEQNQEQPIRCEKDERF<br>FSD             | 2.96 | 0.01 | 1.60 | 0.44 | 1.23 | 2.51 |
| 57172 | 0 | 115916 | QEQPIRCEKD                           | 2.32 | 0.01 | 1.60 | 0.44 | 1.23 | 0.85 |
| 57173 | 0 | 148127 | QEQQNLRQCQEYIK                       | 2.63 | 0.01 | 2.75 | 0.44 | 1.23 | 0.28 |
| 57174 | 0 | 148127 | QEQQNLRQCQEYIK                       | 2.63 | 0.01 | 2.75 | 0.44 | 1.23 | 1.34 |
| 57175 | 0 | 149423 | QEQVPLVQEQ                           | 2.37 | 0.01 | 1.86 | 0.44 | 1.93 | 0.85 |
| 57176 | 0 | 149423 | QEQVPLVQEQ                           | 2.37 | 0.01 | 1.86 | 2.74 | 0.22 | 0.85 |
| 57177 | 0 | 148759 | QEQVPLVQQQ                           | 2.34 | 0.01 | 1.86 | 0.44 | 1.23 | 0.28 |
| 57178 | 0 | 98954  | QEQVPLVQQQQF                         | 2.51 | 0.01 | 1.86 | 0.44 | 1.93 | 1.27 |
| 57179 | 0 | 50686  | QERGHKAPHPAVLAGG<br>LSKQQVQVVEGGRSGL | 3.44 | 0.01 | 3.72 | 2.13 | 0.22 | 0.28 |
| 57180 | 0 | 50686  | QERGHKAPHPAVLAGG<br>LSKQQVQVVEGGRSGL | 3.44 | 0.01 | 3.72 | 2.13 | 0.22 | 0.28 |
| 57181 | 0 | 50688  | QERLAKLAGG                           | 2.31 | 0.01 | 2.84 | 0.44 | 0.85 | 0.28 |
| 57182 | 0 | 97573  | QERLAKLAGGVAVLY                      | 2.69 | 0.01 | 2.84 | 0.44 | 0.85 | 0.28 |
| 57183 | 0 | 131016 | QESLDMNSARDF                         | 2.45 | 0.01 | 0.78 | 1.20 | 0.22 | 0.28 |
| 57184 | 0 | 50696  | QESLLKANIQLVEKD                      | 2.69 | 0.01 | 3.15 | 0.44 | 1.23 | 0.85 |
| 57185 | 0 | 50696  | QESLLKANIQLVEKD                      | 2.69 | 0.01 | 2.36 | 0.44 | 1.23 | 1.28 |
| 57186 | 0 | 50696  | QESLLKANIQLVEKD                      | 2.69 | 0.01 | 2.36 | 0.44 | 1.23 | 1.27 |
| 57187 | 0 | 50696  | QESLLKANIQLVEKD                      | 2.69 | 0.01 | 2.36 | 0.44 | 1.23 | 1.28 |
| 57188 | 0 | 419314 | QESLPSIASSES                         | 2.51 | 0.01 | 0.90 | 0.44 | 1.93 | 1.39 |
| 57189 | 0 | 77976  | QESTRLTYAVWM                         | 2.43 | 0.01 | 0.90 | 1.15 | 0.22 | 0.85 |
| 57190 | 0 | 149424 | QESTYQLVQQ                           | 2.32 | 0.01 | 1.86 | 0.44 | 1.93 | 0.85 |
| 57191 | 0 | 149424 | QESTYQLVQQ                           | 2.32 | 0.01 | 1.86 | 2.74 | 0.22 | 0.85 |
| 57192 | 0 | 149424 | QESTYQLVQQ                           | 2.32 | 0.01 | 1.86 | 2.74 | 0.22 | 0.85 |
| 57193 | 0 | 135587 | QESYSSKKL                            | 2.23 | 0.01 | 0.78 | 1.12 | 0.22 | 0.28 |
| 57194 | 0 | 135587 | QESYSSKKL                            | 2.23 | 0.01 | 0.78 | 1.12 | 0.22 | 1.34 |
| 57195 | 0 | 135587 | QESYSSKKL                            | 2.23 | 0.01 | 0.78 | 1.12 | 0.22 | 0.28 |
| 57196 | 0 | 135588 | QESYSSKKLCT                          | 2.39 | 4.93 | 0.78 | 1.12 | 0.22 | 0.28 |
| 57197 | 0 | 181431 | QETAIGNFFSRAGLV                      | 2.63 | 0.01 | 2.82 | 1.15 | 0.22 | 0.28 |
| 57198 | 0 | 50705  | QETCGTMVRALMPCLP<br>FVQGKEKEPSKGCC   | 3.34 | 0.01 | 3.08 | 0.44 | 1.23 | 0.85 |
| 57199 | 0 | 187921 | QETGKNPAK                            | 2.21 | 0.01 | 3.65 | 2.02 | 0.22 | 0.85 |
| 57200 | 0 | 123654 | QETPATKK                             | 2.11 | 0.01 | 0.78 | 1.20 | 0.22 | 0.28 |
| 57201 | 0 | 118078 | QETPATKKA                            | 2.24 | 0.01 | 0.78 | 0.44 | 1.13 | 0.28 |
| 57202 | 0 | 450948 | QETRGTY                              | 2.02 | 0.01 | 0.90 | 0.44 | 1.41 | 1.39 |



|       |   |        |                          |      |      |      |      |      |      |
|-------|---|--------|--------------------------|------|------|------|------|------|------|
| 57203 | 0 | 114529 | QETTLVRSSRSSSER          | 2.71 | 0.01 | 3.48 | 0.44 | 1.23 | 0.85 |
| 57204 | 0 | 100412 | QEVFAKAFAY               | 2.33 | 0.01 | 2.18 | 2.16 | 0.22 | 0.28 |
| 57205 | 0 | 50716  | QEVFSLVKEPILKQTQAS<br>SS | 2.94 | 0.01 | 3.37 | 3.23 | 0.22 | 0.28 |
| 57206 | 0 | 50716  | QEVFSLVKEPILKQTQAS<br>SS | 2.94 | 0.01 | 3.37 | 3.23 | 0.22 | 1.34 |
| 57207 | 0 | 50716  | QEVFSLVKEPILKQTQAS<br>SS | 2.94 | 0.01 | 3.37 | 3.23 | 0.22 | 0.28 |
| 57208 | 0 | 50721  | QEVLNENLLR               | 2.34 | 0.01 | 1.60 | 0.44 | 1.23 | 0.28 |
| 57209 | 0 | 115436 | QEVLNENLLRFFVAPFPE<br>VF | 2.98 | 0.01 | 1.60 | 0.44 | 1.23 | 1.28 |
| 57210 | 0 | 148128 | QEVQRKDLSSCERYL          | 2.68 | 0.01 | 2.75 | 0.44 | 1.23 | 0.28 |
| 57211 | 0 | 148128 | QEVQRKDLSSCERYL          | 2.68 | 0.01 | 2.75 | 0.44 | 1.23 | 1.34 |
| 57212 | 0 | 139570 | QEWGTPGS                 | 2.12 | 0.01 | 2.16 | 0.44 | 1.41 | 0.28 |
| 57213 | 0 | 139570 | QEWGTPGS                 | 2.12 | 0.01 | 2.16 | 0.44 | 1.41 | 0.28 |
| 57214 | 0 | 137555 | QEWQQQDECQIDRLD          | 2.71 | 0.01 | 3.12 | 0.44 | 1.23 | 0.85 |
| 57215 | 0 | 125533 | QEYEENLGDSIVGYKEKS<br>KF | 2.94 | 0.01 | 0.78 | 0.44 | 1.13 | 1.34 |
| 57216 | 0 | 157770 | QEYEQHRRQQQH             | 2.52 | 0.01 | 3.65 | 0.44 | 1.23 | 0.85 |
| 57217 | 0 | 238911 | QEYQEKLQVALGELRRK<br>Q   | 2.88 | 0.01 | 0.78 | 0.44 | 1.13 | 0.28 |
| 57218 | 0 | 118984 | QEYSCVVKMPSGEFA          | 2.63 | 0.01 | 0.78 | 1.12 | 0.22 | 0.28 |
| 57219 | 0 | 50735  | QFAALGGWGLHQPPPQ<br>IFLK | 2.96 | 0.01 | 2.75 | 0.44 | 0.85 | 0.85 |
| 57220 | 0 | 106035 | QFAGKDLE                 | 2.10 | 0.01 | 3.05 | 1.20 | 0.22 | 0.28 |
| 57221 | 0 | 106036 | QFAGKDLESIK              | 2.36 | 0.01 | 3.05 | 0.68 | 0.22 | 1.27 |
| 57222 | 0 | 106036 | QFAGKDLESIK              | 2.36 | 0.01 | 3.05 | 0.68 | 0.22 | 0.28 |
| 57223 | 0 | 106036 | QFAGKDLESIK              | 2.36 | 0.01 | 3.05 | 0.68 | 0.22 | 0.28 |
| 57224 | 0 | 50741  | QFAPSASAFFGMSRIGM        | 2.82 | 0.01 | 2.91 | 0.44 | 0.85 | 0.28 |
| 57225 | 0 | 140730 | QFAYDGKDY                | 2.23 | 0.01 | 0.78 | 1.15 | 0.22 | 1.27 |
| 57226 | 0 | 140730 | QFAYDGKDY                | 2.23 | 0.01 | 0.78 | 1.15 | 0.22 | 2.12 |
| 57227 | 0 | 140730 | QFAYDGKDY                | 2.23 | 0.01 | 0.78 | 1.15 | 0.22 | 2.12 |
| 57228 | 0 | 140730 | QFAYDGKDY                | 2.23 | 0.01 | 0.78 | 1.15 | 0.22 | 2.12 |
| 57229 | 0 | 140730 | QFAYDGKDY                | 2.23 | 0.01 | 0.78 | 1.15 | 0.22 | 2.12 |
| 57230 | 0 | 140730 | QFAYDGKDY                | 2.23 | 0.01 | 0.78 | 1.15 | 0.22 | 2.12 |
| 57231 | 0 | 140730 | QFAYDGKDY                | 2.23 | 0.01 | 0.78 | 1.15 | 0.22 | 2.12 |
| 57232 | 0 | 140730 | QFAYDGKDY                | 2.23 | 0.01 | 0.78 | 1.15 | 0.22 | 2.12 |
| 57233 | 0 | 140730 | QFAYDGKDY                | 2.23 | 0.01 | 0.78 | 1.15 | 0.22 | 2.12 |
| 57234 | 0 | 140730 | QFAYDGKDY                | 2.23 | 0.01 | 0.78 | 1.15 | 0.22 | 2.12 |
| 57235 | 0 | 140730 | QFAYDGKDY                | 2.23 | 0.01 | 0.78 | 1.15 | 0.22 | 2.12 |
| 57236 | 0 | 140730 | QFAYDGKDY                | 2.23 | 0.01 | 0.78 | 1.15 | 0.22 | 2.12 |
| 57237 | 0 | 140730 | QFAYDGKDY                | 2.23 | 0.01 | 0.78 | 1.15 | 0.22 | 2.12 |
| 57238 | 0 | 140730 | QFAYDGKDY                | 2.23 | 0.01 | 0.78 | 1.15 | 0.22 | 2.12 |
| 57239 | 0 | 140730 | QFAYDGKDY                | 2.23 | 0.01 | 0.78 | 1.15 | 0.22 | 2.12 |
| 57240 | 0 | 140730 | QFAYDGKDY                | 2.23 | 0.01 | 0.78 | 1.15 | 0.22 | 2.12 |

|       |   |        |                              |      |      |      |      |      |      |
|-------|---|--------|------------------------------|------|------|------|------|------|------|
| 57241 | 0 | 140730 | QFAYDGKDY                    | 2.23 | 0.01 | 0.78 | 1.15 | 0.22 | 1.27 |
| 57242 | 0 | 140730 | QFAYDGKDY                    | 2.23 | 0.01 | 0.78 | 1.15 | 0.22 | 2.12 |
| 57243 | 0 | 140730 | QFAYDGKDY                    | 2.23 | 0.01 | 0.78 | 1.15 | 0.22 | 2.12 |
| 57244 | 0 | 140730 | QFAYDGKDY                    | 2.23 | 0.01 | 0.78 | 1.15 | 0.22 | 2.12 |
| 57245 | 0 | 140730 | QFAYDGKDY                    | 2.23 | 0.01 | 0.78 | 1.15 | 0.22 | 2.12 |
| 57246 | 0 | 140730 | QFAYDGKDY                    | 2.23 | 0.01 | 0.78 | 1.15 | 0.22 | 2.12 |
| 57247 | 0 | 140730 | QFAYDGKDY                    | 2.23 | 0.01 | 0.78 | 1.15 | 0.22 | 2.12 |
| 57248 | 0 | 50742  | QFCGWGEFEVRVLWP              | 2.68 | 0.01 | 0.90 | 0.44 | 0.85 | 1.39 |
| 57249 | 0 | 135739 | QFCKNSAD                     | 2.10 | 0.01 | 0.78 | 0.44 | 2.35 | 0.28 |
| 57250 | 0 | 421541 | QFCPEDAKCEQGKLFA             | 2.75 | 0.01 | 3.19 | 0.44 | 1.23 | 1.28 |
| 57251 | 0 | 421542 | QFCPEDAKCEQGKLFAN<br>C       | 2.86 | 0.01 | 3.19 | 0.44 | 1.23 | 1.28 |
| 57252 | 0 | 50744  | QFDEMEECASLPYMDE<br>TRA      | 2.93 | 0.01 | 1.96 | 0.44 | 0.85 | 0.28 |
| 57253 | 0 | 50745  | QFDEMEECSKHLPLVEH<br>GLQ     | 2.93 | 0.01 | 1.96 | 0.44 | 0.85 | 0.28 |
| 57254 | 0 | 50746  | QFDEMEECSRHIPYLA<br>GQQ      | 2.88 | 0.01 | 1.96 | 0.44 | 0.85 | 0.28 |
| 57255 | 0 | 98955  | QFEDFFPASSRDQSS              | 2.69 | 0.01 | 2.16 | 0.44 | 1.23 | 0.85 |
| 57256 | 0 | 524091 | QFEDFFPASSRDQSSYL<br>QGFSRNT | 3.12 | 0.01 | 2.16 | 0.44 | 1.23 | 1.39 |
| 57257 | 0 | 50752  | QFEEQQRFRNCQ                 | 2.52 | 0.01 | 3.12 | 0.44 | 1.23 | 0.85 |
| 57258 | 0 | 138559 | QFEFALTAVAE                  | 2.49 | 0.01 | 0.78 | 1.12 | 0.22 | 0.85 |
| 57259 | 0 | 138559 | QFEFALTAVAE                  | 2.49 | 0.01 | 0.78 | 1.12 | 0.22 | 0.85 |
| 57260 | 0 | 138559 | QFEFALTAVAE                  | 2.49 | 0.01 | 0.78 | 1.12 | 0.22 | 0.85 |
| 57261 | 0 | 96771  | QFFRRMDY                     | 2.12 | 0.01 | 0.90 | 0.68 | 0.22 | 0.28 |
| 57262 | 0 | 123655 | QFGGGDAPP                    | 2.21 | 0.01 | 2.28 | 2.00 | 0.22 | 0.28 |
| 57263 | 0 | 50759  | QFGGHNSVDFEEDT               | 2.59 | 0.01 | 2.56 | 1.20 | 0.22 | 0.28 |
| 57264 | 0 | 50759  | QFGGHNSVDFEEDT               | 2.59 | 0.01 | 2.56 | 1.20 | 0.22 | 1.34 |
| 57265 | 0 | 50759  | QFGGHNSVDFEEDT               | 2.59 | 0.01 | 2.56 | 1.20 | 0.22 | 0.28 |
| 57266 | 0 | 50759  | QFGGHNSVDFEEDT               | 2.59 | 0.01 | 2.56 | 1.20 | 0.22 | 1.34 |
| 57267 | 0 | 50767  | QFGRDVSDFDTSVRDPK            | 2.81 | 0.01 | 2.48 | 0.44 | 0.85 | 0.28 |
| 57268 | 0 | 50767  | QFGRDVSDFDTSVRDPK            | 2.81 | 0.01 | 2.48 | 0.68 | 0.22 | 0.28 |
| 57269 | 0 | 50767  | QFGRDVSDFDTSVRDPK            | 2.81 | 0.01 | 2.48 | 1.20 | 0.22 | 0.28 |
| 57270 | 0 | 158605 | QFGTFLW                      | 2.02 | 0.01 | 0.90 | 0.44 | 1.13 | 1.39 |
| 57271 | 0 | 152062 | QFICAHDGHNS                  | 2.43 | 0.01 | 2.80 | 2.78 | 0.22 | 0.28 |
| 57272 | 0 | 119508 | QFIGYPI                      | 2.02 | 0.01 | 0.78 | 0.44 | 0.85 | 0.28 |
| 57273 | 0 | 119508 | QFIGYPI                      | 2.02 | 0.01 | 0.78 | 0.44 | 0.85 | 0.28 |
| 57274 | 0 | 119508 | QFIGYPI                      | 2.02 | 0.01 | 0.78 | 0.44 | 1.13 | 0.28 |
| 57275 | 0 | 119508 | QFIGYPI                      | 2.02 | 0.01 | 0.78 | 0.44 | 0.85 | 0.28 |
| 57276 | 0 | 50774  | QFIKAPGITT                   | 2.29 | 4.08 | 2.70 | 0.44 | 0.85 | 0.28 |
| 57277 | 0 | 100414 | QFINDQIKFI                   | 2.36 | 0.01 | 2.18 | 2.16 | 0.22 | 0.28 |

|       |   |        |                                |      |      |      |      |      |      |
|-------|---|--------|--------------------------------|------|------|------|------|------|------|
| 57278 | 0 | 50781  | QFKDNVILLNKHIDAYK              | 2.79 | 0.01 | 2.91 | 0.44 | 0.85 | 0.28 |
| 57279 | 0 | 50783  | QFKEKVLGL                      | 2.23 | 0.01 | 2.59 | 0.44 | 0.85 | 0.28 |
| 57280 | 0 | 50785  | QFKPEEMKGIKEF                  | 2.64 | 0.01 | 3.34 | 1.12 | 0.22 | 0.85 |
| 57281 | 0 | 50795  | QFKTTDVLWFNFTTG                | 2.67 | 0.01 | 3.41 | 0.44 | 1.23 | 1.57 |
| 57282 | 0 | 50795  | QFKTTDVLWFNFTTG                | 2.67 | 0.01 | 3.41 | 1.15 | 0.22 | 1.57 |
| 57283 | 0 | 50795  | QFKTTDVLWFNFTTG                | 2.67 | 0.01 | 3.41 | 1.15 | 0.22 | 1.57 |
| 57284 | 0 | 50795  | QFKTTDVLWFNFTTG                | 2.67 | 0.01 | 3.41 | 3.04 | 0.22 | 1.57 |
| 57285 | 0 | 50795  | QFKTTDVLWFNFTTG                | 2.67 | 0.01 | 3.41 | 1.12 | 0.22 | 1.57 |
| 57286 | 0 | 50795  | QFKTTDVLWFNFTTG                | 2.67 | 0.01 | 3.41 | 0.44 | 1.23 | 1.57 |
| 57287 | 0 | 98363  | QFLGQQQPFPPQQPYP<br>QPQPF      | 3.06 | 0.01 | 1.86 | 0.44 | 1.93 | 0.28 |
| 57288 | 0 | 98363  | QFLGQQQPFPPQQPYP<br>QPQPF      | 3.06 | 0.01 | 1.86 | 0.44 | 1.93 | 0.28 |
| 57289 | 0 | 128083 | QFLGVPYAAPPLAERHF<br>QAP       | 2.96 | 0.01 | 0.78 | 0.44 | 1.13 | 0.28 |
| 57290 | 0 | 226501 | QFLGVPYAAPPLAERRF<br>QAP       | 2.97 | 0.01 | 0.78 | 2.25 | 0.22 | 0.28 |
| 57291 | 0 | 226501 | QFLGVPYAAPPLAERRF<br>QAP       | 2.97 | 0.01 | 0.78 | 2.25 | 0.22 | 0.28 |
| 57292 | 0 | 226501 | QFLGVPYAAPPLAERRF<br>QAP       | 2.97 | 0.01 | 0.78 | 1.81 | 0.22 | 0.28 |
| 57293 | 0 | 226501 | QFLGVPYAAPPLAERRF<br>QAP       | 2.97 | 0.01 | 0.78 | 1.81 | 0.22 | 0.28 |
| 57294 | 0 | 192584 | QFLQPQQPFPPQQPQ                | 2.69 | 4.93 | 1.86 | 0.44 | 1.23 | 0.85 |
| 57295 | 0 | 192585 | QFLQPQQPFPPQQPQ                | 2.69 | 0.01 | 1.86 | 0.44 | 1.23 | 0.28 |
| 57296 | 0 | 50809  | QFPFNASDSVGQQIKVI<br>PVD       | 2.96 | 0.01 | 2.82 | 0.44 | 0.85 | 0.28 |
| 57297 | 0 | 181432 | QFPFPRPPHQKEERKQE<br>EDEDEEQQR | 3.25 | 0.01 | 2.72 | 0.44 | 1.23 | 1.27 |
| 57298 | 0 | 148761 | QFPGQQQQFP                     | 2.36 | 0.01 | 1.86 | 0.44 | 1.23 | 0.85 |
| 57299 | 0 | 148761 | QFPGQQQQFP                     | 2.36 | 0.01 | 1.86 | 0.68 | 0.22 | 0.28 |
| 57300 | 0 | 135489 | QFPLGGV                        | 2.01 | 0.01 | 0.78 | 1.20 | 0.22 | 0.28 |
| 57301 | 0 | 173969 | QFPQQEFPPQQQF                  | 2.61 | 0.01 | 1.86 | 0.44 | 1.23 | 0.85 |
| 57302 | 0 | 148762 | QFPQQQFPQQ                     | 2.35 | 0.01 | 1.86 | 0.44 | 1.23 | 0.85 |
| 57303 | 0 | 148762 | QFPQQQFPQQ                     | 2.35 | 0.01 | 1.86 | 0.44 | 1.23 | 0.28 |
| 57304 | 0 | 148762 | QFPQQQFPQQ                     | 2.35 | 0.01 | 1.86 | 0.68 | 0.22 | 0.28 |
| 57305 | 0 | 226086 | QFPQQQI                        | 2.05 | 0.01 | 1.86 | 2.66 | 0.22 | 1.27 |
| 57306 | 0 | 173970 | QFPQQQQFPQQQS                  | 2.61 | 0.01 | 1.86 | 0.44 | 1.23 | 0.85 |
| 57307 | 0 | 173971 | QFPQQQSPQQQQF                  | 2.61 | 0.01 | 1.86 | 0.44 | 1.23 | 0.85 |
| 57308 | 0 | 50814  | QFQGQQQPFP                     | 2.36 | 0.01 | 1.86 | 0.68 | 0.22 | 0.85 |
| 57309 | 0 | 50814  | QFQGQQQPFP                     | 2.36 | 0.01 | 1.86 | 0.68 | 0.22 | 0.28 |
| 57310 | 0 | 50814  | QFQGQQQPFP                     | 2.36 | 0.01 | 1.86 | 0.44 | 1.93 | 0.85 |
| 57311 | 0 | 50814  | QFQGQQQPFP                     | 2.36 | 0.01 | 1.86 | 2.74 | 0.22 | 0.85 |
| 57312 | 0 | 50814  | QFQGQQQPFP                     | 2.36 | 0.01 | 1.86 | 2.74 | 0.22 | 0.85 |
| 57313 | 0 | 125209 | QFQIHGPR                       | 2.13 | 0.01 | 1.75 | 3.15 | 2.60 | 1.75 |
| 57314 | 0 | 125209 | QFQIHGPR                       | 2.13 | 0.01 | 1.75 | 2.16 | 0.22 | 0.28 |

|       |   |        |                          |      |      |      |      |      |      |
|-------|---|--------|--------------------------|------|------|------|------|------|------|
| 57315 | 0 | 125209 | QFQIHGPR                 | 2.13 | 0.01 | 1.75 | 3.15 | 0.22 | 0.28 |
| 57316 | 0 | 125209 | QFQIHGPR                 | 2.13 | 0.01 | 1.75 | 3.15 | 0.22 | 1.27 |
| 57317 | 0 | 125209 | QFQIHGPR                 | 2.13 | 0.01 | 1.75 | 3.15 | 0.22 | 1.48 |
| 57318 | 0 | 125209 | QFQIHGPR                 | 2.13 | 0.01 | 1.75 | 3.15 | 0.22 | 1.48 |
| 57319 | 0 | 125209 | QFQIHGPR                 | 2.13 | 0.01 | 1.75 | 3.15 | 0.22 | 3.16 |
| 57320 | 0 | 125209 | QFQIHGPR                 | 2.13 | 0.01 | 1.75 | 3.15 | 0.22 | 1.27 |
| 57321 | 0 | 50815  | QFQTQQ                   | 1.89 | 0.01 | 2.72 | 1.12 | 0.22 | 1.27 |
| 57322 | 0 | 186919 | QFRCAGVALVRHTIQ          | 2.67 | 0.01 | 3.12 | 2.37 | 0.22 | 2.66 |
| 57323 | 0 | 116807 | QFRHDDP                  | 2.01 | 0.01 | 0.90 | 1.20 | 0.22 | 0.28 |
| 57324 | 0 | 116808 | QFRHDWY                  | 1.99 | 0.01 | 0.90 | 1.20 | 0.22 | 0.28 |
| 57325 | 0 | 99566  | QFRQTYRQWIEAMS           | 2.66 | 0.01 | 2.86 | 2.02 | 0.85 | 0.85 |
| 57326 | 0 | 116809 | QFRSDST                  | 2.02 | 0.01 | 0.90 | 1.20 | 0.22 | 0.28 |
| 57327 | 0 | 115639 | QFRVIGPRHPIR             | 2.49 | 0.01 | 0.78 | 0.44 | 1.41 | 0.28 |
| 57328 | 0 | 115639 | QFRVIGPRHPIR             | 2.49 | 0.01 | 0.78 | 0.44 | 1.13 | 0.28 |
| 57329 | 0 | 115639 | QFRVIGPRHPIR             | 2.49 | 0.01 | 0.78 | 0.44 | 1.13 | 0.28 |
| 57330 | 0 | 115639 | QFRVIGPRHPIR             | 2.49 | 0.01 | 0.78 | 0.44 | 1.13 | 0.28 |
| 57331 | 0 | 115639 | QFRVIGPRHPIR             | 2.49 | 0.01 | 0.78 | 0.44 | 1.41 | 0.28 |
| 57332 | 0 | 116810 | QFRVPYP                  | 2.02 | 0.01 | 0.90 | 1.20 | 0.22 | 0.28 |
| 57333 | 0 | 360099 | QFSVGTPDAANAATH          | 2.65 | 0.01 | 1.61 | 0.44 | 0.85 | 1.28 |
| 57334 | 0 | 117065 | QFTGSTRQHAG              | 2.42 | 0.01 | 0.90 | 1.15 | 0.22 | 0.28 |
| 57335 | 0 | 117065 | QFTGSTRQHAG              | 2.42 | 0.01 | 0.90 | 0.44 | 0.85 | 0.28 |
| 57336 | 0 | 156943 | QFTPDKHMLMLP             | 2.48 | 0.01 | 0.90 | 2.74 | 0.22 | 0.85 |
| 57337 | 0 | 145447 | QFTSSTSYNRGDSTFESK       | 2.85 | 3.37 | 0.78 | 0.44 | 1.13 | 1.28 |
| 57338 | 0 | 177534 | QFTSSTSYNRGDSTFESK<br>SY | 2.96 | 3.37 | 0.78 | 0.44 | 2.26 | 0.28 |
| 57339 | 0 | 177534 | QFTSSTSYNRGDSTFESK<br>SY | 2.96 | 3.37 | 0.78 | 0.44 | 1.13 | 0.28 |
| 57340 | 0 | 95705  | QFVDCGDSFN               | 2.31 | 0.01 | 2.60 | 0.44 | 1.23 | 0.85 |
| 57341 | 0 | 95705  | QFVDCGDSFN               | 2.31 | 0.01 | 2.60 | 0.44 | 1.23 | 0.85 |
| 57342 | 0 | 50820  | QFVEFYEKVTGTDLELIQI<br>L | 2.97 | 0.01 | 2.75 | 0.44 | 0.85 | 0.85 |
| 57343 | 0 | 461850 | QFVGSSIHWWYQQRTN         | 2.63 | 0.01 | 1.75 | 0.44 | 0.22 | 1.28 |
| 57344 | 0 | 461850 | QFVGSSIHWWYQQRTN         | 2.63 | 0.01 | 1.75 | 0.44 | 1.41 | 1.28 |
| 57345 | 0 | 98364  | QFVPIQNSKS               | 2.32 | 0.01 | 3.08 | 0.68 | 0.22 | 0.28 |
| 57346 | 0 | 98364  | QFVPIQNSKS               | 2.32 | 0.01 | 3.08 | 1.20 | 0.22 | 0.28 |
| 57347 | 0 | 50823  | QFYQKFPQYL               | 2.36 | 0.01 | 1.60 | 0.44 | 1.23 | 0.85 |
| 57348 | 0 | 50823  | QFYQKFPQYL               | 2.36 | 0.01 | 1.60 | 0.44 | 1.23 | 0.85 |
| 57349 | 0 | 50824  | QFYQLDAYPSGAWYYV<br>PL   | 2.85 | 0.01 | 1.60 | 0.44 | 1.23 | 0.28 |
| 57350 | 0 | 50824  | QFYQLDAYPSGAWYYV<br>PL   | 2.85 | 0.01 | 1.60 | 1.12 | 0.22 | 1.27 |
| 57351 | 0 | 139865 | QGAFASPIQLQR             | 2.48 | 0.01 | 2.75 | 0.68 | 0.22 | 0.28 |

|       |   |        |                               |      |      |      |      |      |      |
|-------|---|--------|-------------------------------|------|------|------|------|------|------|
| 57352 | 0 | 139866 | QGAFASPIQLQRRNGSK<br>F        | 2.85 | 0.01 | 2.75 | 0.68 | 0.22 | 0.28 |
| 57353 | 0 | 139866 | QGAFASPIQLQRRNGSK<br>F        | 2.85 | 0.01 | 2.75 | 0.68 | 0.22 | 1.66 |
| 57354 | 0 | 139866 | QGAFASPIQLQRRNGSK<br>F        | 2.85 | 0.01 | 2.75 | 2.61 | 0.22 | 2.35 |
| 57355 | 0 | 139866 | QGAFASPIQLQRRNGSK<br>F        | 2.85 | 0.01 | 2.75 | 0.44 | 0.22 | 2.35 |
| 57356 | 0 | 139866 | QGAFASPIQLQRRNGSK<br>F        | 2.85 | 0.01 | 2.75 | 0.68 | 0.22 | 0.28 |
| 57357 | 0 | 504114 | QGALLNDKHSNGTIK               | 2.65 | 0.01 | 3.89 | 0.44 | 1.74 | 1.28 |
| 57358 | 0 | 190520 | QGALPGMVWQNRDVY               | 2.65 | 0.01 | 3.61 | 2.00 | 1.41 | 0.28 |
| 57359 | 0 | 109746 | QGAPGPAG                      | 2.16 | 0.01 | 1.60 | 2.55 | 2.60 | 0.28 |
| 57360 | 0 | 50832  | QGASGNWFHMTL                  | 2.43 | 0.01 | 0.90 | 0.68 | 0.22 | 1.39 |
| 57361 | 0 | 50833  | QGASVDKR                      | 2.10 | 0.01 | 2.25 | 0.44 | 1.23 | 0.85 |
| 57362 | 0 | 114927 | QGASVDKRHD                    | 2.29 | 0.01 | 2.25 | 0.44 | 1.23 | 0.85 |
| 57363 | 0 | 114927 | QGASVDKRHD                    | 2.29 | 0.01 | 2.25 | 0.44 | 1.23 | 0.85 |
| 57364 | 0 | 230248 | QGASVDKRHDGGCRKE<br>LAAV      | 2.93 | 0.01 | 2.25 | 0.44 | 1.23 | 0.28 |
| 57365 | 0 | 50836  | QGAWPAGA                      | 2.16 | 0.01 | 2.40 | 2.43 | 0.22 | 0.28 |
| 57366 | 0 | 50837  | QGCAFQSTVAELQRLK<br>MKVGKTREL | 3.17 | 0.01 | 2.53 | 0.44 | 0.85 | 0.28 |
| 57367 | 0 | 50837  | QGCAFQSTVAELQRLK<br>MKVGKTREL | 3.17 | 0.01 | 2.53 | 0.44 | 0.85 | 0.28 |
| 57368 | 0 | 108599 | QGDAAKGANLFKTRC               | 2.66 | 0.01 | 3.45 | 0.44 | 1.23 | 0.28 |
| 57369 | 0 | 108599 | QGDAAKGANLFKTRC               | 2.66 | 0.01 | 3.45 | 0.44 | 1.23 | 1.27 |
| 57370 | 0 | 50845  | QGDRGVGSSAVILDD               | 2.67 | 0.01 | 3.06 | 2.13 | 0.22 | 0.28 |
| 57371 | 0 | 50846  | QGDRRCSQLERANL                | 2.69 | 0.01 | 2.16 | 0.44 | 1.23 | 0.85 |
| 57372 | 0 | 50846  | QGDRRCSQLERANL                | 2.69 | 0.01 | 2.16 | 2.90 | 0.22 | 0.85 |
| 57373 | 0 | 50846  | QGDRRCSQLERANL                | 2.69 | 0.01 | 2.16 | 0.44 | 1.23 | 1.48 |
| 57374 | 0 | 50846  | QGDRRCSQLERANL                | 2.69 | 0.01 | 2.16 | 0.44 | 1.23 | 0.85 |
| 57375 | 0 | 157771 | QGDRTGEWYQGKK                 | 2.62 | 0.01 | 3.47 | 2.49 | 0.85 | 0.28 |
| 57376 | 0 | 360177 | QGDSDLQLERINVYF               | 2.65 | 0.01 | 1.61 | 0.44 | 0.85 | 1.28 |
| 57377 | 0 | 50851  | QGEDKTTDNTYKEMEE              | 2.74 | 0.01 | 1.66 | 0.68 | 0.22 | 0.85 |
| 57378 | 0 | 101164 | QGEGBSRWTM                    | 2.30 | 0.01 | 3.18 | 2.98 | 0.22 | 0.28 |
| 57379 | 0 | 137556 | QGEGMTGISYPGCPE               | 2.68 | 0.01 | 3.12 | 0.44 | 1.23 | 0.85 |
| 57380 | 0 | 104950 | QGERSGP                       | 2.02 | 0.01 | 0.90 | 0.44 | 1.13 | 1.39 |
| 57381 | 0 | 135741 | QGETEEALIQKRSY                | 2.59 | 0.01 | 2.69 | 0.68 | 0.22 | 0.28 |
| 57382 | 0 | 135741 | QGETEEALIQKRSY                | 2.59 | 0.01 | 2.69 | 0.68 | 0.22 | 0.28 |
| 57383 | 0 | 135741 | QGETEEALIQKRSY                | 2.59 | 0.01 | 2.69 | 0.68 | 2.25 | 1.75 |
| 57384 | 0 | 147217 | QGFFQP                        | 1.92 | 0.01 | 1.86 | 0.44 | 1.93 | 0.85 |
| 57385 | 0 | 149425 | QGFFQPSQQN                    | 2.34 | 0.01 | 1.86 | 0.44 | 1.93 | 0.85 |
| 57386 | 0 | 149425 | QGFFQPSQQN                    | 2.34 | 0.01 | 1.86 | 2.74 | 0.22 | 0.85 |
| 57387 | 0 | 149425 | QGFFQPSQQN                    | 2.34 | 0.01 | 1.86 | 2.74 | 0.22 | 0.85 |

|       |   |        |                             |      |      |      |      |      |      |
|-------|---|--------|-----------------------------|------|------|------|------|------|------|
| 57388 | 0 | 489735 | QGFNPQNGTLTQQSA             | 2.70 | 0.01 | 2.69 | 3.05 | 0.85 | 1.28 |
| 57389 | 0 | 117614 | QGFPFYDKPMRI                | 2.45 | 0.01 | 0.78 | 0.68 | 0.22 | 0.28 |
| 57390 | 0 | 117614 | QGFPFYDKPMRI                | 2.45 | 0.01 | 0.78 | 0.68 | 0.22 | 1.66 |
| 57391 | 0 | 117614 | QGFPFYDKPMRI                | 2.45 | 0.01 | 0.78 | 0.68 | 0.22 | 1.27 |
| 57392 | 0 | 117614 | QGFPFYDKPMRI                | 2.45 | 0.01 | 0.78 | 0.68 | 0.22 | 0.85 |
| 57393 | 0 | 117614 | QGFPFYDKPMRI                | 2.45 | 0.01 | 0.78 | 0.44 | 1.13 | 0.28 |
| 57394 | 0 | 227820 | QGFSHNILETSFHSEF            | 2.75 | 0.01 | 2.72 | 4.03 | 1.59 | 0.28 |
| 57395 | 0 | 50863  | QGFSRNTLEAAFNAE             | 2.68 | 0.01 | 2.16 | 0.44 | 1.23 | 0.85 |
| 57396 | 0 | 78253  | QGGCGRGWAFSATGAI<br>EA      | 2.85 | 0.01 | 2.72 | 0.68 | 0.22 | 0.28 |
| 57397 | 0 | 78253  | QGGCGRGWAFSATGAI<br>EA      | 2.85 | 0.01 | 2.72 | 0.68 | 0.22 | 0.85 |
| 57398 | 0 | 123659 | QGGGATPV                    | 2.12 | 0.01 | 0.78 | 1.20 | 0.22 | 0.28 |
| 57399 | 0 | 50864  | QGGGGWGWQPHGGG              | 2.59 | 0.01 | 2.52 | 1.20 | 0.22 | 0.28 |
| 57400 | 0 | 524123 | QGGGPPTRYALVNASLL<br>VPI    | 2.92 | 4.08 | 2.40 | 0.44 | 1.59 | 1.28 |
| 57401 | 0 | 524122 | QGGGPPTRYALVNASLL<br>VPI    | 2.92 | 4.63 | 2.40 | 0.44 | 1.59 | 1.28 |
| 57402 | 0 | 524124 | QGGGPPTRYALVNASLL<br>VPI    | 2.92 | 0.01 | 2.40 | 0.44 | 1.59 | 1.28 |
| 57403 | 0 | 50867  | QGGGTHSQWNKPSKPK<br>TNMK    | 2.97 | 0.01 | 0.78 | 2.19 | 0.22 | 0.28 |
| 57404 | 0 | 50867  | QGGGTHSQWNKPSKPK<br>TNMK    | 2.97 | 0.01 | 0.78 | 2.19 | 0.22 | 0.28 |
| 57405 | 0 | 50867  | QGGGTHSQWNKPSKPK<br>TNMK    | 2.97 | 0.01 | 0.78 | 2.19 | 0.22 | 0.28 |
| 57406 | 0 | 98365  | QGGLCKALQEQCRF              | 2.63 | 0.01 | 2.04 | 0.44 | 2.98 | 0.28 |
| 57407 | 0 | 78492  | QGGLCKALQEQCRFPNI<br>TNSHVP | 3.03 | 0.01 | 3.19 | 0.44 | 0.85 | 0.28 |
| 57408 | 0 | 50871  | QGGNIVDIDF                  | 2.32 | 0.01 | 2.56 | 1.20 | 0.22 | 0.28 |
| 57409 | 0 | 50871  | QGGNIVDIDF                  | 2.32 | 0.01 | 2.56 | 1.20 | 0.22 | 0.28 |
| 57410 | 0 | 50872  | QGGNIVDIDFDSVP              | 2.62 | 0.01 | 2.56 | 1.20 | 0.22 | 1.34 |
| 57411 | 0 | 50872  | QGGNIVDIDFDSVP              | 2.62 | 0.01 | 2.56 | 1.20 | 0.22 | 0.28 |
| 57412 | 0 | 50872  | QGGNIVDIDFDSVP              | 2.62 | 0.01 | 2.56 | 1.20 | 0.22 | 1.34 |
| 57413 | 0 | 50873  | QGGRKTTTGTRKPR              | 2.66 | 0.01 | 2.40 | 2.43 | 0.22 | 0.28 |
| 57414 | 0 | 50873  | QGGRKTTTGTRKPR              | 2.66 | 0.01 | 2.40 | 2.43 | 0.22 | 0.28 |
| 57415 | 0 | 50873  | QGGRKTTTGTRKPR              | 2.66 | 0.01 | 2.40 | 2.43 | 0.22 | 0.28 |
| 57416 | 0 | 111669 | QGGSEKGSQKLNS               | 2.67 | 0.01 | 3.33 | 0.44 | 1.23 | 0.85 |
| 57417 | 0 | 504037 | QGGSNPKFENIAEGLRA<br>LLA    | 2.94 | 0.01 | 2.48 | 0.44 | 1.74 | 0.28 |
| 57418 | 0 | 504037 | QGGSNPKFENIAEGLRA<br>LLA    | 2.94 | 0.01 | 2.48 | 0.44 | 1.74 | 0.28 |
| 57419 | 0 | 50875  | QGGTHGQWNKPSKPKT<br>NM      | 2.87 | 0.01 | 1.60 | 1.15 | 0.22 | 1.48 |
| 57420 | 0 | 181997 | QGGYVAYAGSGVIGAG            | 2.79 | 0.01 | 3.89 | 2.13 | 1.74 | 0.28 |

|       |   |        |                                |      |      |      |      |      |      |
|-------|---|--------|--------------------------------|------|------|------|------|------|------|
|       |   |        | QGIADGDAVHGIADDEEA             |      |      |      |      |      |      |
| 57421 | 0 | 156944 | AQGIANWDAVQDINNE<br>DGF        | 3.56 | 0.01 | 0.78 | 0.44 | 2.82 | 1.39 |
| 57422 | 0 | 100418 | QGIDCGPIQPGG                   | 2.51 | 0.01 | 2.88 | 1.20 | 0.22 | 0.85 |
| 57423 | 0 | 132567 | QGIDSFVIWGCATRL                | 2.62 | 0.01 | 0.78 | 0.44 | 1.13 | 0.28 |
| 57424 | 0 | 50884  | QGILFLQWVRDIIDDF               | 2.75 | 0.01 | 2.95 | 3.38 | 0.22 | 0.28 |
| 57425 | 0 | 50884  | QGILFLQWVRDIIDDF               | 2.75 | 0.01 | 2.95 | 3.38 | 0.22 | 1.34 |
| 57426 | 0 | 50887  | QGIVEFYT                       | 2.10 | 0.01 | 3.06 | 1.12 | 0.22 | 0.28 |
| 57427 | 0 | 164169 | QGKS                           | 1.57 | 0.01 | 2.77 | 1.15 | 0.22 | 1.48 |
| 57428 | 0 | 164169 | QGKS                           | 1.57 | 0.01 | 2.77 | 1.15 | 0.22 | 0.85 |
| 57429 | 0 | 164169 | QGKS                           | 1.57 | 0.01 | 2.77 | 1.15 | 0.22 | 0.85 |
| 57430 | 0 | 108080 | QGVKVGPSGAPG                   | 2.43 | 0.01 | 0.78 | 0.44 | 1.13 | 0.28 |
| 57431 | 0 | 190908 | QGLGIGESVELEMMGN<br>TYRV       | 2.94 | 0.01 | 3.50 | 2.13 | 0.22 | 0.28 |
| 57432 | 0 | 50900  | QGLPQEVLINE                    | 2.34 | 0.01 | 1.60 | 0.44 | 1.23 | 0.28 |
| 57433 | 0 | 50901  | QGLRGEEMEEMV                   | 2.50 | 0.01 | 3.27 | 0.44 | 1.23 | 0.85 |
| 57434 | 0 | 50901  | QGLRGEEMEEMV                   | 2.50 | 0.01 | 3.27 | 0.44 | 1.23 | 1.27 |
| 57435 | 0 | 50901  | QGLRGEEMEEMV                   | 2.50 | 0.01 | 3.27 | 0.44 | 1.23 | 0.85 |
| 57436 | 0 | 50901  | QGLRGEEMEEMV                   | 2.50 | 0.01 | 3.27 | 0.44 | 1.23 | 0.85 |
| 57437 | 0 | 524144 | QGLRRDLASREAKK                 | 2.68 | 0.01 | 2.24 | 0.44 | 1.41 | 1.28 |
| 57438 | 0 | 99569  | QGLSERRA                       | 2.11 | 0.01 | 2.24 | 0.68 | 0.22 | 0.28 |
| 57439 | 0 | 50903  | QGMHLAEQFKQKALGL<br>LQTA       | 2.97 | 0.01 | 2.41 | 0.44 | 0.85 | 0.28 |
| 57440 | 0 | 157772 | QGMMSPRGRSEEK                  | 2.47 | 0.01 | 3.40 | 2.49 | 0.85 | 0.28 |
| 57441 | 0 | 50911  | QGMQLAAEFKQKALGL<br>LQTA       | 2.98 | 0.01 | 1.96 | 0.44 | 0.85 | 0.28 |
| 57442 | 0 | 50913  | QGMQLAEQFKQKALGL<br>LQQA       | 2.99 | 0.01 | 1.72 | 0.44 | 0.85 | 0.28 |
| 57443 | 0 | 50914  | QGMQLAEQFKQKALGL<br>LQTA       | 2.99 | 0.01 | 1.96 | 0.44 | 0.85 | 0.28 |
| 57444 | 0 | 50916  | QGMQLAEQFKQKARGL<br>LQTA       | 2.97 | 0.01 | 1.96 | 0.44 | 0.85 | 0.28 |
| 57445 | 0 | 50917  | QGMQLAEQLKQKALGL<br>LQTA       | 3.00 | 0.01 | 1.96 | 0.44 | 0.85 | 0.28 |
| 57446 | 0 | 119628 | QGNVFSCS                       | 2.12 | 0.01 | 0.78 | 0.44 | 1.93 | 0.28 |
| 57447 | 0 | 136570 | QGPADDPGEGPSTGPR<br>GQGDGGRRKK | 3.22 | 0.01 | 2.43 | 0.44 | 1.74 | 0.28 |
| 57448 | 0 | 136570 | QGPADDPGEGPSTGPR<br>GQGDGGRRKK | 3.22 | 0.01 | 2.43 | 0.44 | 1.74 | 0.28 |
| 57449 | 0 | 136570 | QGPADDPGEGPSTGPR<br>GQGDGGRRKK | 3.22 | 0.01 | 2.43 | 0.44 | 1.74 | 0.28 |
| 57450 | 0 | 50929  | QGPGAP                         | 1.91 | 0.01 | 3.65 | 0.68 | 0.22 | 0.28 |
| 57451 | 0 | 50929  | QGPGAP                         | 1.91 | 0.01 | 3.65 | 0.68 | 0.22 | 1.27 |
| 57452 | 0 | 50929  | QGPGAP                         | 1.91 | 0.01 | 3.00 | 1.15 | 0.22 | 1.34 |
| 57453 | 0 | 50929  | QGPGAP                         | 1.91 | 0.01 | 3.00 | 1.15 | 2.25 | 1.75 |
| 57454 | 0 | 50929  | QGPGAP                         | 1.91 | 0.01 | 3.00 | 1.15 | 0.22 | 0.28 |
| 57455 | 0 | 50929  | QGPGAP                         | 1.91 | 0.01 | 3.00 | 1.15 | 0.22 | 0.85 |

|       |   |       |     |      |      |      |      |      |      |
|-------|---|-------|-----|------|------|------|------|------|------|
| 57456 | 0 | 50929 | QGP | 1.91 | 0.01 | 3.33 | 0.68 | 0.22 | 0.28 |
| 57457 | 0 | 50930 | QGP | 2.55 | 0.01 | 3.65 | 0.68 | 0.22 | 1.48 |
| 57458 | 0 | 50930 | QGP | 2.55 | 0.01 | 3.65 | 1.15 | 2.25 | 1.75 |
| 57459 | 0 | 50930 | QGP | 2.55 | 0.01 | 3.00 | 3.03 | 0.22 | 0.28 |
| 57460 | 0 | 50930 | QGP | 2.55 | 0.01 | 3.00 | 1.15 | 0.22 | 1.27 |
| 57461 | 0 | 50930 | QGP | 2.55 | 0.01 | 3.00 | 3.03 | 0.22 | 0.28 |
| 57462 | 0 | 50930 | QGP | 2.55 | 0.01 | 3.00 | 3.03 | 0.22 | 0.28 |
| 57463 | 0 | 50930 | QGP | 2.55 | 0.01 | 3.00 | 3.03 | 0.22 | 0.28 |
| 57464 | 0 | 50930 | QGP | 2.55 | 0.01 | 3.33 | 3.03 | 0.22 | 0.28 |
| 57465 | 0 | 50930 | QGP | 2.55 | 0.01 | 3.33 | 3.03 | 0.22 | 0.28 |
| 57466 | 0 | 50930 | QGP | 2.55 | 0.01 | 3.00 | 3.03 | 0.22 | 0.28 |
| 57467 | 0 | 50930 | QGP | 2.55 | 0.01 | 3.00 | 2.16 | 0.22 | 0.28 |
| 57468 | 0 | 50930 | QGP | 2.55 | 0.01 | 3.00 | 1.81 | 0.22 | 0.28 |
| 57469 | 0 | 50930 | QGP | 2.55 | 0.01 | 3.65 | 1.15 | 0.22 | 1.27 |
| 57470 | 0 | 50930 | QGP | 2.55 | 0.01 | 3.65 | 1.15 | 0.22 | 1.75 |
| 57471 | 0 | 50930 | QGP | 2.55 | 0.01 | 3.65 | 3.03 | 0.22 | 0.28 |
| 57472 | 0 | 50930 | QGP | 2.55 | 0.01 | 3.65 | 3.03 | 0.22 | 0.28 |
| 57473 | 0 | 50930 | QGP | 2.55 | 0.01 | 3.00 | 2.71 | 0.22 | 0.28 |
| 57474 | 0 | 50930 | QGP | 2.55 | 0.01 | 3.65 | 1.15 | 0.22 | 1.48 |
| 57475 | 0 | 50930 | QGP | 2.55 | 0.01 | 3.65 | 1.15 | 0.22 | 0.28 |
| 57476 | 0 | 50930 | QGP | 2.55 | 0.01 | 3.00 | 3.03 | 0.22 | 0.28 |
| 57477 | 0 | 50930 | QGP | 2.55 | 0.01 | 3.00 | 3.03 | 0.22 | 0.28 |
| 57478 | 0 | 50930 | QGP | 2.55 | 0.01 | 3.33 | 0.68 | 0.22 | 0.28 |
| 57479 | 0 | 50931 | QGP | 2.93 | 0.01 | 3.00 | 0.68 | 0.22 | 0.28 |
| 57480 | 0 | 50931 | QGP | 2.93 | 0.01 | 3.00 | 0.68 | 0.22 | 0.28 |
| 57481 | 0 | 50931 | QGP | 2.93 | 0.01 | 3.00 | 0.68 | 0.22 | 1.48 |
| 57482 | 0 | 50931 | QGP | 2.93 | 0.01 | 3.00 | 1.81 | 0.22 | 0.28 |
| 57483 | 0 | 50931 | QGP | 2.93 | 0.01 | 3.00 | 0.68 | 0.22 | 0.28 |
| 57484 | 0 | 50931 | QGP | 2.93 | 0.01 | 3.00 | 1.15 | 2.25 | 1.75 |
| 57485 | 0 | 50931 | QGP | 2.93 | 0.01 | 3.00 | 0.68 | 0.22 | 1.48 |
| 57486 | 0 | 50931 | QGP | 2.93 | 0.01 | 3.00 | 0.68 | 0.22 | 0.28 |
| 57487 | 0 | 50931 | QGP | 2.93 | 0.01 | 3.00 | 0.68 | 0.22 | 1.34 |
| 57488 | 0 | 50931 | QGP | 2.93 | 0.01 | 3.00 | 0.68 | 0.22 | 0.28 |
| 57489 | 0 | 50931 | QGP | 2.93 | 0.01 | 3.00 | 0.68 | 0.22 | 0.28 |
| 57490 | 0 | 50931 | QGP | 2.93 | 0.01 | 3.00 | 0.68 | 0.22 | 0.28 |



|       |   |       |                                 |      |      |      |      |      |      |
|-------|---|-------|---------------------------------|------|------|------|------|------|------|
| 57491 | 0 | 50931 | QGP GAP QGP GAP QGP GAP         | 2.93 | 0.01 | 3.65 | 0.68 | 0.22 | 0.28 |
| 57492 | 0 | 50931 | QGP GAP QGP GAP QGP GAP         | 2.93 | 0.01 | 3.65 | 0.68 | 0.22 | 0.28 |
| 57493 | 0 | 50931 | QGP GAP QGP GAP QGP GAP         | 2.93 | 0.01 | 3.00 | 3.70 | 0.22 | 0.28 |
| 57494 | 0 | 50931 | QGP GAP QGP GAP QGP GAP         | 2.93 | 0.01 | 3.00 | 0.68 | 0.22 | 0.28 |
| 57495 | 0 | 50931 | QGP GAP QGP GAP QGP GAP         | 2.93 | 0.01 | 3.00 | 3.70 | 0.22 | 0.28 |
| 57496 | 0 | 50931 | QGP GAP QGP GAP QGP GAP         | 2.93 | 0.01 | 3.00 | 0.68 | 0.22 | 0.28 |
| 57497 | 0 | 50931 | QGP GAP QGP GAP QGP GAP         | 2.93 | 0.01 | 3.33 | 0.68 | 0.22 | 0.28 |
| 57498 | 0 | 50931 | QGP GAP QGP GAP QGP GAP         | 2.93 | 0.01 | 0.90 | 0.68 | 0.22 | 0.28 |
| 57499 | 0 | 50931 | QGP GAP QGP GAP QGP GAP         | 2.93 | 0.01 | 0.90 | 0.68 | 0.22 | 0.28 |
| 57500 | 0 | 50931 | QGP GAP QGP GAP QGP GAP         | 2.93 | 0.01 | 3.33 | 0.68 | 0.22 | 0.28 |
| 57501 | 0 | 50932 | QGP GAP QGP GAP QGP GAP QG      | 3.03 | 0.01 | 3.00 | 2.16 | 0.22 | 1.48 |
| 57502 | 0 | 50932 | QGP GAP QGP GAP QGP GAP QG      | 3.03 | 0.01 | 3.00 | 2.42 | 0.22 | 0.28 |
| 57503 | 0 | 50932 | QGP GAP QGP GAP QGP GAP QG      | 3.03 | 0.01 | 3.00 | 2.16 | 2.25 | 1.75 |
| 57504 | 0 | 50933 | QGP GAP QGP GAP QGP GAP QGP GAP | 3.21 | 0.01 | 3.00 | 1.81 | 0.22 | 0.28 |
| 57505 | 0 | 50933 | QGP GAP QGP GAP QGP GAP QGP GAP | 3.21 | 0.01 | 3.00 | 0.68 | 0.22 | 0.28 |
| 57506 | 0 | 50933 | QGP GAP QGP GAP QGP GAP QGP GAP | 3.21 | 0.01 | 3.00 | 3.03 | 0.22 | 1.34 |
| 57507 | 0 | 50933 | QGP GAP QGP GAP QGP GAP QGP GAP | 3.21 | 0.01 | 3.00 | 3.03 | 0.22 | 0.28 |
| 57508 | 0 | 50933 | QGP GAP QGP GAP QGP GAP QGP GAP | 3.21 | 0.01 | 3.00 | 1.81 | 0.22 | 1.48 |
| 57509 | 0 | 50933 | QGP GAP QGP GAP QGP GAP QGP GAP | 3.21 | 0.01 | 3.00 | 3.03 | 0.22 | 1.48 |
| 57510 | 0 | 50933 | QGP GAP QGP GAP QGP GAP QGP GAP | 3.21 | 0.01 | 3.00 | 3.03 | 0.22 | 1.48 |
| 57511 | 0 | 50933 | QGP GAP QGP GAP QGP GAP QGP GAP | 3.21 | 0.01 | 3.00 | 2.16 | 0.22 | 1.48 |
| 57512 | 0 | 50933 | QGP GAP QGP GAP QGP GAP QGP GAP | 3.21 | 0.01 | 3.00 | 1.81 | 0.22 | 1.48 |
| 57513 | 0 | 50933 | QGP GAP QGP GAP QGP GAP QGP GAP | 3.21 | 0.01 | 3.00 | 1.15 | 2.25 | 1.75 |

|       |   |        |                                                             |      |      |      |      |      |      |
|-------|---|--------|-------------------------------------------------------------|------|------|------|------|------|------|
| 57514 | 0 | 50933  | QGP GAP QGP GAP QGP<br>GAP QGP GAP                          | 3.21 | 0.01 | 3.00 | 1.15 | 2.25 | 1.75 |
| 57515 | 0 | 50933  | QGP GAP QGP GAP QGP<br>GAP QGP GAP                          | 3.21 | 0.01 | 3.00 | 1.15 | 2.25 | 1.75 |
| 57516 | 0 | 50933  | QGP GAP QGP GAP QGP<br>GAP QGP GAP                          | 3.21 | 0.01 | 3.00 | 3.03 | 0.22 | 0.28 |
| 57517 | 0 | 50933  | QGP GAP QGP GAP QGP<br>GAP QGP GAP                          | 3.21 | 0.01 | 3.00 | 2.16 | 0.22 | 0.28 |
| 57518 | 0 | 50933  | QGP GAP QGP GAP QGP<br>GAP QGP GAP                          | 3.21 | 0.01 | 3.00 | 1.81 | 0.22 | 0.28 |
| 57519 | 0 | 50933  | QGP GAP QGP GAP QGP<br>GAP QGP GAP                          | 3.21 | 0.01 | 3.65 | 3.03 | 0.22 | 0.28 |
| 57520 | 0 | 50933  | QGP GAP QGP GAP QGP<br>GAP QGP GAP                          | 3.21 | 0.01 | 3.65 | 3.03 | 0.22 | 0.28 |
| 57521 | 0 | 50933  | QGP GAP QGP GAP QGP<br>GAP QGP GAP                          | 3.21 | 0.01 | 3.00 | 2.71 | 0.22 | 1.48 |
| 57522 | 0 | 50933  | QGP GAP QGP GAP QGP<br>GAP QGP GAP                          | 3.21 | 0.01 | 3.00 | 1.15 | 2.25 | 1.75 |
| 57523 | 0 | 50933  | QGP GAP QGP GAP QGP<br>GAP QGP GAP                          | 3.21 | 0.01 | 3.00 | 2.71 | 0.22 | 0.28 |
| 57524 | 0 | 50933  | QGP GAP QGP GAP QGP<br>GAP QGP GAP                          | 3.21 | 0.01 | 3.00 | 1.81 | 0.22 | 0.28 |
| 57525 | 0 | 50933  | QGP GAP QGP GAP QGP<br>GAP QGP GAP                          | 3.21 | 0.01 | 3.00 | 0.68 | 0.22 | 1.75 |
| 57526 | 0 | 50933  | QGP GAP QGP GAP QGP<br>GAP QGP GAP                          | 3.21 | 0.01 | 3.00 | 0.68 | 0.22 | 1.48 |
| 57527 | 0 | 124601 | QGP GLTDWLFPRR                                              | 2.53 | 0.01 | 0.78 | 0.68 | 0.22 | 0.28 |
| 57528 | 0 | 50934  | QGP HVISRIYQTAT                                             | 2.60 | 0.01 | 4.15 | 0.68 | 0.22 | 0.85 |
| 57529 | 0 | 50934  | QGP HVISRIYQTAT                                             | 2.60 | 0.01 | 4.15 | 0.68 | 0.22 | 0.28 |
| 57530 | 0 | 50934  | QGP HVISRIYQTAT                                             | 2.60 | 0.01 | 4.15 | 0.68 | 0.22 | 0.28 |
| 57531 | 0 | 50934  | QGP HVISRIYQTAT                                             | 2.60 | 0.01 | 4.15 | 1.20 | 0.22 | 0.85 |
| 57532 | 0 | 50934  | QGP HVISRIYQTAT                                             | 2.60 | 0.01 | 4.15 | 1.20 | 0.22 | 0.85 |
| 57533 | 0 | 50934  | QGP HVISRIYQTAT                                             | 2.60 | 0.01 | 4.15 | 0.44 | 1.23 | 0.85 |
| 57534 | 0 | 109750 | QGP KGEPG                                                   | 2.16 | 0.01 | 1.60 | 2.61 | 0.22 | 0.28 |
| 57535 | 0 | 50938  | QGP LPNTALL                                                 | 2.31 | 0.01 | 0.78 | 0.44 | 1.74 | 0.28 |
| 57536 | 0 | 230410 | QGP PPLASV                                                  | 2.21 | 0.01 | 3.47 | 2.49 | 0.85 | 0.28 |
| 57537 | 0 | 109751 | QGP RGE PG                                                  | 2.16 | 0.01 | 1.60 | 2.55 | 2.60 | 0.28 |
| 57538 | 0 | 123661 | QGP VPGMP                                                   | 2.16 | 0.01 | 0.78 | 1.20 | 0.22 | 0.28 |
| 57539 | 0 | 97574  | QGP QDTPWTQSTEHTNI<br>QKRGSGQQTQRLEHPN<br>STR LMDHYLRIMSPVG | 3.81 | 0.01 | 3.09 | 0.44 | 0.85 | 0.28 |
| 57540 | 0 | 483301 | QGP QGIIQPQQPAQLEAI<br>RSLV                                 | 3.03 | 0.01 | 1.86 | 1.20 | 0.22 | 0.28 |
| 57541 | 0 | 360384 | QGP QHRHDTDTEDSTK                                           | 2.71 | 0.01 | 1.61 | 0.44 | 0.85 | 1.28 |
| 57542 | 0 | 127788 | QGP QLMNEELTERLFVLS<br>NVG                                  | 2.96 | 0.01 | 1.75 | 1.81 | 0.22 | 0.28 |

|       |   |        |                                             |      |      |      |      |      |      |
|-------|---|--------|---------------------------------------------|------|------|------|------|------|------|
| 57543 | 0 | 132570 | QGQLRAVSNAQTADEE<br>RT                      | 2.85 | 0.01 | 0.78 | 1.12 | 0.22 | 1.39 |
| 57544 | 0 | 50941  | QGQLTAYHVSTAPTGS<br>WFSAPQPAPENAYQAY<br>AAP | 3.51 | 0.01 | 2.43 | 1.15 | 2.26 | 0.28 |
| 57545 | 0 | 157773 | QGQQEYEQHRRQ                                | 2.52 | 0.01 | 3.65 | 0.44 | 1.23 | 0.85 |
| 57546 | 0 | 114531 | QGQQEYEQHRRQQQR                             | 2.73 | 0.01 | 3.27 | 0.44 | 1.23 | 0.85 |
| 57547 | 0 | 113749 | QGQQGQQLGQGQQG                              | 2.69 | 0.01 | 1.86 | 0.44 | 1.23 | 0.85 |
| 57548 | 0 | 113750 | QGQQGQQPGQGQPG                              | 2.69 | 0.01 | 1.86 | 0.44 | 1.23 | 0.85 |
| 57549 | 0 | 113751 | QGQQGQQPGQGQQG                              | 2.69 | 0.01 | 1.86 | 0.44 | 1.23 | 0.85 |
| 57550 | 0 | 99834  | QGQQGYYP                                    | 2.16 | 0.01 | 1.86 | 0.68 | 0.22 | 0.28 |
| 57551 | 0 | 99834  | QGQQGYYP                                    | 2.16 | 0.01 | 1.86 | 0.68 | 0.22 | 2.02 |
| 57552 | 0 | 99834  | QGQQGYYP                                    | 2.16 | 0.01 | 1.86 | 0.68 | 0.22 | 2.02 |
| 57553 | 0 | 99834  | QGQQGYYP                                    | 2.16 | 0.01 | 1.86 | 0.68 | 0.22 | 0.85 |
| 57554 | 0 | 99834  | QGQQGYYP                                    | 2.16 | 0.01 | 1.86 | 0.68 | 0.22 | 0.85 |
| 57555 | 0 | 99834  | QGQQGYYP                                    | 2.16 | 0.01 | 1.86 | 0.68 | 0.22 | 0.85 |
| 57556 | 0 | 99834  | QGQQGYYP                                    | 2.16 | 0.01 | 1.86 | 0.68 | 0.22 | 0.85 |
| 57557 | 0 | 50944  | QGQQLADIGVPQPAPV<br>AAPARR                  | 3.07 | 0.01 | 2.43 | 0.44 | 1.59 | 0.28 |
| 57558 | 0 | 113753 | QGQQPGQGQHGGQP                              | 2.68 | 0.01 | 1.86 | 0.44 | 1.23 | 0.85 |
| 57559 | 0 | 113754 | QGQQPGQGQQGQP                               | 2.69 | 0.01 | 1.86 | 0.44 | 1.23 | 0.85 |
| 57560 | 0 | 113755 | QGQQPGQGQQPGQG                              | 2.69 | 0.01 | 1.86 | 0.44 | 1.23 | 0.85 |
| 57561 | 0 | 114532 | QGQQQFGQRRRQQQH                             | 2.73 | 0.01 | 3.48 | 0.44 | 1.23 | 0.85 |
| 57562 | 0 | 50945  | QGQQQPFPPQ                                  | 2.37 | 0.01 | 1.86 | 0.68 | 0.22 | 0.28 |
| 57563 | 0 | 50945  | QGQQQPFPPQ                                  | 2.37 | 0.01 | 1.86 | 0.68 | 0.22 | 0.85 |
| 57564 | 0 | 50945  | QGQQQPFPPQ                                  | 2.37 | 0.01 | 1.86 | 0.44 | 1.93 | 0.85 |
| 57565 | 0 | 50945  | QGQQQPFPPQ                                  | 2.37 | 0.01 | 1.86 | 2.74 | 0.22 | 0.85 |
| 57566 | 0 | 50945  | QGQQQPFPPQ                                  | 2.37 | 0.01 | 1.86 | 2.74 | 0.22 | 0.85 |
| 57567 | 0 | 113756 | QGQQSGQGQQGYYS                              | 2.68 | 0.01 | 1.86 | 0.44 | 1.23 | 0.85 |
| 57568 | 0 | 188419 | QGQRDAADPD                                  | 2.35 | 0.01 | 2.92 | 0.68 | 0.22 | 0.85 |
| 57569 | 0 | 188419 | QGQRDAADPD                                  | 2.35 | 0.01 | 2.92 | 3.37 | 0.22 | 0.85 |
| 57570 | 0 | 103519 | QGQWRGAAGTAAQAA                             | 2.73 | 0.01 | 2.04 | 0.44 | 0.85 | 1.28 |
| 57571 | 0 | 360400 | QGRDAPQARKQQGRD                             | 2.73 | 0.01 | 1.61 | 0.44 | 0.85 | 1.28 |
| 57572 | 0 | 360401 | QGRDAPQARKQQGRN                             | 2.71 | 0.01 | 1.61 | 0.44 | 0.85 | 1.28 |
| 57573 | 0 | 99571  | QGRGYFGLIFPGCPR                             | 2.70 | 0.01 | 2.16 | 0.44 | 1.23 | 1.48 |
| 57574 | 0 | 360411 | QGRHSHDTEDEDSTK                             | 2.70 | 0.01 | 1.61 | 0.44 | 0.85 | 1.28 |

|       |   |        |                                  |      |      |      |      |      |      |
|-------|---|--------|----------------------------------|------|------|------|------|------|------|
| 57575 | 0 | 360416 | QGRNEPQARKQQGRD                  | 2.70 | 0.01 | 1.61 | 0.44 | 0.85 | 1.28 |
| 57576 | 0 | 360417 | QGRNEPQARRQQGRN                  | 2.73 | 0.01 | 1.61 | 0.44 | 0.85 | 1.28 |
| 57577 | 0 | 149093 | QGRNPTQ                          | 2.03 | 0.01 | 0.90 | 2.13 | 1.59 | 1.39 |
| 57578 | 0 | 99572  | QGRQQEQQFKRELRN                  | 2.71 | 0.01 | 2.16 | 0.44 | 1.23 | 1.48 |
| 57579 | 0 | 156416 | QGRQQGRQQQEEGRQ                  | 2.75 | 0.01 | 3.67 | 0.44 | 1.23 | 1.27 |
| 57580 | 0 | 97575  | QGRTSPPGQ                        | 2.25 | 0.01 | 3.89 | 3.55 | 0.22 | 0.85 |
| 57581 | 0 | 97575  | QGRTSPPGQ                        | 2.25 | 0.01 | 3.89 | 1.15 | 0.22 | 0.85 |
| 57582 | 0 | 188420 | QGSESEALPINSKK                   | 2.59 | 0.01 | 4.93 | 1.12 | 0.22 | 0.28 |
| 57583 | 0 | 147218 | QGSFQP                           | 1.91 | 0.01 | 1.86 | 0.44 | 1.93 | 0.85 |
| 57584 | 0 | 98367  | QGSFRPSQQNPQAQGS<br>VQPQQ        | 3.03 | 0.01 | 1.86 | 0.44 | 1.93 | 0.28 |
| 57585 | 0 | 98367  | QGSFRPSQQNPQAQGS<br>VQPQQ        | 3.03 | 0.01 | 1.86 | 0.44 | 1.93 | 0.28 |
| 57586 | 0 | 98367  | QGSFRPSQQNPQAQGS<br>VQPQQ        | 3.03 | 0.01 | 1.86 | 0.44 | 2.39 | 0.28 |
| 57587 | 0 | 50957  | QGSGBKVSFQLVKLG                  | 2.73 | 0.01 | 2.72 | 0.44 | 0.85 | 0.28 |
| 57588 | 0 | 50959  | QGSNWI                           | 1.88 | 0.01 | 2.40 | 0.44 | 0.85 | 0.28 |
| 57589 | 0 | 180882 | QGSPGGN                          | 2.03 | 0.01 | 1.75 | 2.19 | 0.22 | 0.28 |
| 57590 | 0 | 180882 | QGSPGGN                          | 2.03 | 0.01 | 1.75 | 2.19 | 0.22 | 2.02 |
| 57591 | 0 | 180882 | QGSPGGN                          | 2.03 | 0.01 | 1.75 | 2.19 | 0.22 | 2.02 |
| 57592 | 0 | 180882 | QGSPGGN                          | 2.03 | 0.01 | 1.75 | 2.19 | 0.22 | 2.02 |
| 57593 | 0 | 180882 | QGSPGGN                          | 2.03 | 0.01 | 1.75 | 2.19 | 0.22 | 1.48 |
| 57594 | 0 | 180882 | QGSPGGN                          | 2.03 | 0.01 | 1.75 | 2.19 | 0.22 | 1.48 |
| 57595 | 0 | 180882 | QGSPGGN                          | 2.03 | 0.01 | 1.75 | 2.19 | 0.22 | 0.85 |
| 57596 | 0 | 180882 | QGSPGGN                          | 2.03 | 0.01 | 2.98 | 2.19 | 0.22 | 0.85 |
| 57597 | 0 | 180882 | QGSPGGN                          | 2.03 | 0.01 | 1.75 | 2.19 | 0.22 | 0.85 |
| 57598 | 0 | 180882 | QGSPGGN                          | 2.03 | 0.01 | 1.75 | 2.19 | 0.22 | 0.85 |
| 57599 | 0 | 180882 | QGSPGGN                          | 2.03 | 0.01 | 1.75 | 2.19 | 0.22 | 2.02 |
| 57600 | 0 | 180882 | QGSPGGN                          | 2.03 | 0.01 | 1.75 | 2.19 | 0.22 | 2.02 |
| 57601 | 0 | 98956  | QGSVQPQQLPQF                     | 2.52 | 0.01 | 1.86 | 0.44 | 1.93 | 1.27 |
| 57602 | 0 | 50965  | QGTDYKHW                         | 2.10 | 0.01 | 2.45 | 0.44 | 0.85 | 1.34 |
| 57603 | 0 | 50965  | QGTDYKHW                         | 2.10 | 0.01 | 2.45 | 0.44 | 0.85 | 1.34 |
| 57604 | 0 | 50965  | QGTDYKHW                         | 2.10 | 0.01 | 2.45 | 0.44 | 0.85 | 1.34 |
| 57605 | 0 | 50965  | QGTDYKHW                         | 2.10 | 0.01 | 2.45 | 0.44 | 0.85 | 1.34 |
| 57606 | 0 | 144750 | QGTHPGLWRXTLLLL                  | 2.66 | 0.01 | 0.90 | 0.68 | 0.22 | 0.28 |
| 57607 | 0 | 144750 | QGTHPGLWRXTLLLL                  | 2.66 | 0.01 | 0.90 | 0.68 | 0.22 | 1.48 |
| 57608 | 0 | 144750 | QGTHPGLWRXTLLLL                  | 2.66 | 0.01 | 0.90 | 0.68 | 0.22 | 1.27 |
| 57609 | 0 | 50971  | QGTRTAAIVET<br>QGTRTAAIVETVARMFP | 2.40 | 0.01 | 3.53 | 3.08 | 0.22 | 1.39 |
| 57610 | 0 | 50972  | DFRSEVSEKFGIDLAVSE<br>E          | 3.52 | 0.01 | 3.53 | 3.08 | 0.22 | 1.27 |

|       |   |        |                                                    |      |      |      |      |      |      |
|-------|---|--------|----------------------------------------------------|------|------|------|------|------|------|
| 57611 | 0 | 141379 | QGVNDNEEGFFSARGH<br>RPLDKKREEAPSLRPAPP<br>PISGGGYR | 3.65 | 0.01 | 0.78 | 1.20 | 0.22 | 0.85 |
| 57612 | 0 | 141379 | QGVNDNEEGFFSARGH<br>RPLDKKREEAPSLRPAPP<br>PISGGGYR | 3.65 | 0.01 | 0.78 | 1.20 | 0.22 | 1.27 |
| 57613 | 0 | 141379 | QGVNDNEEGFFSARGH<br>RPLDKKREEAPSLRPAPP<br>PISGGGYR | 3.65 | 0.01 | 0.78 | 1.20 | 0.22 | 1.27 |
| 57614 | 0 | 50977  | QGVPEPFSRTGEGLD                                    | 2.73 | 0.01 | 2.96 | 1.20 | 0.22 | 0.28 |
| 57615 | 0 | 50977  | QGVPEPFSRTGEGLD                                    | 2.73 | 0.01 | 2.96 | 1.20 | 0.22 | 2.02 |
| 57616 | 0 | 50977  | QGVPEPFSRTGEGLD                                    | 2.73 | 0.01 | 2.96 | 0.44 | 0.85 | 0.28 |
| 57617 | 0 | 50977  | QGVPEPFSRTGEGLD                                    | 2.73 | 0.01 | 2.96 | 2.74 | 0.22 | 0.28 |
| 57618 | 0 | 50977  | QGVPEPFSRTGEGLD                                    | 2.73 | 0.01 | 2.96 | 3.67 | 0.85 | 0.28 |
| 57619 | 0 | 419315 | QGVQPAPQAAGGPGSP<br>MNGG                           | 2.98 | 0.01 | 3.50 | 2.13 | 0.22 | 0.28 |
| 57620 | 0 | 50979  | QGVQDYINNELIPSM                                    | 2.64 | 0.01 | 2.43 | 0.44 | 1.59 | 0.28 |
| 57621 | 0 | 50980  | QGVQLAEQFKQKALGLL<br>QTA                           | 2.99 | 0.01 | 1.96 | 0.44 | 0.85 | 0.28 |
| 57622 | 0 | 50981  | QGVQQKWDATATELN<br>NALQNLART                       | 3.14 | 0.01 | 3.53 | 2.61 | 0.22 | 0.28 |
| 57623 | 0 | 50981  | QGVQQKWDATATELN<br>NALQNLART                       | 3.14 | 0.01 | 3.53 | 3.16 | 0.85 | 0.28 |
| 57624 | 0 | 119313 | QGVTAETPQASTTE                                     | 2.70 | 0.01 | 3.45 | 0.44 | 1.59 | 0.28 |
| 57625 | 0 | 119313 | QGVTAETPQASTTE                                     | 2.70 | 0.01 | 3.45 | 0.44 | 1.59 | 0.28 |
| 57626 | 0 | 114534 | QGVTEAAEKTKEGVLYV<br>GSKTSGVV                      | 3.19 | 0.01 | 1.75 | 2.04 | 0.22 | 0.28 |
| 57627 | 0 | 106728 | QGWVDHFADG                                         | 2.31 | 0.01 | 2.75 | 0.44 | 1.23 | 0.85 |
| 57628 | 0 | 50989  | QGYQEPPPPQAPYQGY<br>QEPP                           | 3.00 | 0.01 | 2.48 | 0.44 | 1.59 | 0.28 |
| 57629 | 0 | 50989  | QGYQEPPPPQAPYQGY<br>QEPP                           | 3.00 | 0.01 | 2.48 | 0.44 | 1.41 | 0.28 |
| 57630 | 0 | 50990  | QGYRVSSYLP                                         | 2.30 | 0.01 | 2.60 | 0.44 | 1.23 | 0.85 |
| 57631 | 0 | 137436 | QHDRLLMLSylv                                       | 2.47 | 0.01 | 0.90 | 0.68 | 0.22 | 1.39 |
| 57632 | 0 | 137436 | QHDRLLMLSylv                                       | 2.47 | 0.01 | 0.90 | 0.68 | 0.22 | 1.27 |
| 57633 | 0 | 450955 | QHDTVPP                                            | 1.99 | 0.01 | 0.90 | 0.44 | 1.41 | 1.39 |
| 57634 | 0 | 50995  | QHDVNFTQEVSRNLINL<br>HFSKCG                        | 3.05 | 0.01 | 2.04 | 0.44 | 0.85 | 0.28 |
| 57635 | 0 | 50995  | QHDVNFTQEVSRNLINL<br>HFSKCG                        | 3.05 | 0.01 | 2.04 | 0.44 | 1.59 | 0.28 |
| 57636 | 0 | 50998  | QHEQDRPTSPAPSRPF<br>SVL                            | 2.95 | 0.01 | 2.70 | 0.44 | 0.85 | 0.28 |

|       |   |        |                                          |      |      |      |      |      |      |
|-------|---|--------|------------------------------------------|------|------|------|------|------|------|
| 57637 | 0 | 423468 | QHERPSLYHDLCRSC                          | 2.68 | 0.01 | 2.51 | 0.44 | 2.35 | 1.28 |
| 57638 | 0 | 138563 | QHFNHLKEIVAQLRKD<br>LPLATFVHVVDIYSVKYSLF | 3.52 | 0.01 | 2.60 | 0.44 | 1.23 | 0.85 |
| 57639 | 0 | 106730 | QHFTKNPALLMA                             | 2.44 | 0.01 | 0.90 | 1.15 | 0.22 | 1.39 |
| 57640 | 0 | 104202 | QHGHLTSSQELEYTF<br>NP                    | 2.89 | 0.01 | 3.00 | 1.20 | 0.22 | 0.85 |
| 57641 | 0 | 51001  | QHGHEMHGS                                | 2.16 | 0.01 | 1.66 | 3.23 | 0.22 | 0.85 |
| 57642 | 0 | 51001  | QHGHEMHGS                                | 2.16 | 0.01 | 1.66 | 3.23 | 0.22 | 0.28 |
| 57643 | 0 | 51001  | QHGHEMHGS                                | 2.16 | 0.01 | 1.66 | 3.23 | 0.22 | 0.28 |
| 57644 | 0 | 51001  | QHGHEMHGS                                | 2.16 | 0.01 | 1.66 | 3.23 | 0.22 | 0.28 |
| 57645 | 0 | 51001  | QHGHEMHGS                                | 2.16 | 0.01 | 3.42 | 0.68 | 0.22 | 0.28 |
| 57646 | 0 | 51006  | QHIWDPLGSPNH                             | 2.45 | 0.01 | 0.90 | 0.68 | 0.22 | 1.39 |
| 57647 | 0 | 51012  | QHLLSPNVRPPH                             | 2.47 | 0.01 | 0.90 | 0.68 | 0.22 | 0.28 |
| 57648 | 0 | 51014  | QHLPYIEQG                                | 2.22 | 0.01 | 2.41 | 0.44 | 0.85 | 0.28 |
| 57649 | 0 | 51016  | QHLPYIEQGMMMLAEQF                        | 2.73 | 0.01 | 2.41 | 0.68 | 0.22 | 0.28 |
| 57650 | 0 | 164328 | QHLSSSS                                  | 2.02 | 0.01 | 0.90 | 1.20 | 0.22 | 1.39 |
| 57651 | 0 | 164329 | QHLSTPV                                  | 1.99 | 0.01 | 0.90 | 1.20 | 0.22 | 1.39 |
| 57652 | 0 | 138225 | QHNSPNLYWRS                              | 2.45 | 0.01 | 0.90 | 0.44 | 1.13 | 0.28 |
| 57653 | 0 | 145449 | QHNVSRPWVLF                              | 2.43 | 0.01 | 0.90 | 0.44 | 1.13 | 1.39 |
| 57654 | 0 | 51019  | QHPAKSMD                                 | 2.10 | 0.01 | 2.40 | 2.43 | 0.22 | 0.28 |
| 57655 | 0 | 167797 | QHPAKSMDV                                | 2.18 | 0.01 | 2.40 | 2.43 | 0.22 | 0.28 |
| 57656 | 0 | 113757 | QHPVTNISDT                               | 2.29 | 0.01 | 3.85 | 1.12 | 0.22 | 0.28 |
| 57657 | 0 | 173973 | QHQPQQQLPQQQ                             | 2.59 | 0.01 | 1.86 | 0.44 | 1.23 | 0.85 |
| 57658 | 0 | 360717 | QHQSDETQVQQHQQH                          | 2.73 | 0.01 | 1.61 | 0.44 | 0.85 | 1.28 |
| 57659 | 0 | 360722 | QHRHDTDTEDSTKNA                          | 2.68 | 0.01 | 1.61 | 0.44 | 0.85 | 1.28 |
| 57660 | 0 | 51027  | QHRLCVPS                                 | 2.10 | 0.01 | 3.72 | 2.37 | 0.22 | 0.85 |
| 57661 | 0 | 360734 | QHSHDTDTEDSTKNA                          | 2.70 | 0.01 | 1.61 | 0.44 | 0.85 | 1.28 |
| 57662 | 0 | 51030  | QHSTPPKKRKVEDPKD<br>FPSE                 | 3.00 | 0.01 | 3.36 | 3.89 | 1.59 | 0.28 |
| 57663 | 0 | 51030  | QHSTPPKKRKVEDPKD<br>FPSE                 | 3.00 | 0.01 | 3.36 | 1.81 | 0.22 | 2.12 |
| 57664 | 0 | 51031  | QHTFNLSQQARQVK                           | 2.67 | 0.01 | 2.72 | 0.44 | 1.23 | 0.85 |
| 57665 | 0 | 51034  | QHTSEGTYIHF                              | 2.39 | 0.01 | 3.89 | 1.20 | 0.22 | 2.75 |
| 57666 | 0 | 125211 | QHWSYGLRPG                               | 2.29 | 0.01 | 4.08 | 2.49 | 0.22 | 0.28 |
| 57667 | 0 | 125211 | QHWSYGLRPG                               | 2.29 | 0.01 | 4.08 | 2.49 | 0.22 | 3.16 |
| 57668 | 0 | 125212 | QHWSYGLRPGQHWSY<br>GLRPG                 | 2.99 | 0.01 | 0.90 | 2.13 | 0.22 | 3.16 |
| 57669 | 0 | 125212 | QHWSYGLRPGQHWSY<br>GLRPG                 | 2.99 | 0.01 | 0.90 | 2.13 | 0.22 | 1.57 |
| 57670 | 0 | 124603 | QHWSYPLRPG                               | 2.29 | 0.01 | 0.90 | 3.15 | 0.22 | 0.28 |
| 57671 | 0 | 124603 | QHWSYPLRPG                               | 2.29 | 0.01 | 0.90 | 4.63 | 0.22 | 0.28 |
| 57672 | 0 | 124603 | QHWSYPLRPG                               | 2.29 | 0.01 | 0.90 | 4.63 | 2.25 | 1.75 |
| 57673 | 0 | 106736 | QHYSPTPWQQWT                             | 2.51 | 0.01 | 0.90 | 1.15 | 0.22 | 1.39 |

|       |   |        |                             |      |      |      |      |      |      |
|-------|---|--------|-----------------------------|------|------|------|------|------|------|
| 57674 | 0 | 51040  | QIAATAAISA                  | 2.37 | 0.01 | 3.20 | 0.44 | 1.41 | 0.28 |
| 57675 | 0 | 178152 | QIADSQHRSHRQMVT<br>TNPL     | 2.92 | 0.01 | 3.51 | 1.12 | 0.22 | 1.27 |
| 57676 | 0 | 51043  | QIANQFNKAISQIQESL           | 2.83 | 0.01 | 2.48 | 0.44 | 0.85 | 0.28 |
| 57677 | 0 | 98957  | QIEKQAKDLAFPGSG             | 2.67 | 0.01 | 2.16 | 0.44 | 1.23 | 0.85 |
| 57678 | 0 | 98957  | QIEKQAKDLAFPGSG             | 2.67 | 0.01 | 2.16 | 0.44 | 1.23 | 1.48 |
| 57679 | 0 | 101166 | QIEKRIQEII                  | 2.35 | 0.01 | 0.78 | 0.44 | 0.85 | 0.28 |
| 57680 | 0 | 118567 | QIEKRIQEIIIEQL              | 2.60 | 0.01 | 0.78 | 0.44 | 1.59 | 0.85 |
| 57681 | 0 | 124604 | QIERDTERDRFLSAPEAV          | 2.84 | 0.01 | 2.24 | 0.44 | 2.39 | 0.28 |
| 57682 | 0 | 124604 | QIERDTERDRFLSAPEAV          | 2.84 | 0.01 | 2.24 | 1.12 | 0.22 | 0.28 |
| 57683 | 0 | 124604 | QIERDTERDRFLSAPEAV          | 2.84 | 0.01 | 2.24 | 0.44 | 1.13 | 0.28 |
| 57684 | 0 | 124604 | QIERDTERDRFLSAPEAV          | 2.84 | 0.01 | 2.24 | 0.44 | 1.41 | 0.28 |
| 57685 | 0 | 124604 | QIERDTERDRFLSAPEAV          | 2.84 | 0.01 | 2.24 | 0.44 | 2.39 | 1.27 |
| 57686 | 0 | 51063  | QIFLKILPQSGPIGGIKSM<br>G    | 2.99 | 0.01 | 2.75 | 0.44 | 0.85 | 0.85 |
| 57687 | 0 | 175639 | QIFNKPYWL                   | 2.18 | 0.01 | 1.86 | 0.68 | 0.22 | 2.75 |
| 57688 | 0 | 110975 | QIFNKPYWLQRAQGH             | 2.63 | 0.01 | 1.86 | 0.68 | 0.22 | 0.85 |
| 57689 | 0 | 110975 | QIFNKPYWLQRAQGH             | 2.63 | 0.01 | 1.86 | 0.68 | 0.22 | 0.28 |
| 57690 | 0 | 110975 | QIFNKPYWLQRAQGH             | 2.63 | 0.01 | 1.86 | 0.68 | 0.22 | 0.85 |
| 57691 | 0 | 110975 | QIFNKPYWLQRAQGH             | 2.63 | 0.01 | 1.86 | 0.68 | 0.22 | 0.85 |
| 57692 | 0 | 110975 | QIFNKPYWLQRAQGH             | 2.63 | 0.01 | 1.86 | 0.68 | 0.22 | 0.85 |
| 57693 | 0 | 110975 | QIFNKPYWLQRAQGH             | 2.63 | 0.01 | 1.86 | 0.68 | 0.22 | 0.85 |
| 57694 | 0 | 110975 | QIFNKPYWLQRAQGH             | 2.63 | 0.01 | 1.86 | 0.68 | 0.22 | 0.85 |
| 57695 | 0 | 110975 | QIFNKPYWLQRAQGH             | 2.63 | 0.01 | 1.86 | 0.68 | 0.22 | 0.85 |
| 57696 | 0 | 134769 | QIFNL                       | 1.74 | 0.01 | 0.78 | 0.68 | 0.22 | 1.57 |
| 57697 | 0 | 134769 | QIFNL                       | 1.74 | 0.01 | 0.78 | 0.68 | 0.22 | 1.34 |
| 57698 | 0 | 134769 | QIFNL                       | 1.74 | 0.01 | 0.78 | 0.68 | 0.22 | 1.27 |
| 57699 | 0 | 134770 | QIFNLFSTKDSSAA              | 2.58 | 0.01 | 0.78 | 0.68 | 0.22 | 1.57 |
| 57700 | 0 | 134770 | QIFNLFSTKDSSAA              | 2.58 | 0.01 | 0.78 | 0.68 | 0.22 | 1.34 |
| 57701 | 0 | 134770 | QIFNLFSTKDSSAA              | 2.58 | 0.01 | 0.78 | 0.68 | 0.22 | 1.27 |
| 57702 | 0 | 134770 | QIFNLFSTKDSSAA              | 2.58 | 0.01 | 0.78 | 1.15 | 0.22 | 1.27 |
| 57703 | 0 | 134771 | QIFNLFSTKDSSAAWDE<br>TLLDKF | 3.07 | 0.01 | 0.78 | 0.68 | 0.22 | 1.57 |

|       |   |        |                                                             |      |      |      |      |      |      |
|-------|---|--------|-------------------------------------------------------------|------|------|------|------|------|------|
| 57704 | 0 | 134771 | QIFNLFSTKDSSAAWDE<br>TLLDKF                                 | 3.07 | 0.01 | 0.78 | 0.68 | 0.22 | 1.34 |
| 57705 | 0 | 134771 | QIFNLFSTKDSSAAWDE<br>TLLDKF                                 | 3.07 | 0.01 | 0.78 | 0.68 | 0.22 | 1.27 |
| 57706 | 0 | 135490 | QIFNLFTTKDSSAA                                              | 2.57 | 0.01 | 0.78 | 0.68 | 0.22 | 0.28 |
| 57707 | 0 | 450958 | QIGHDGN                                                     | 2.02 | 0.01 | 0.90 | 0.44 | 1.41 | 1.39 |
| 57708 | 0 | 97577  | QIGNMISIWVSHSIHTG<br>NQHQSEPISNTNFLTEK<br>AVASVKLAGNSSLCPIN | 3.88 | 0.01 | 3.09 | 0.44 | 0.85 | 0.28 |
| 57709 | 0 | 51072  | QIGNTVTPTVTFTMDG<br>DTMT                                    | 2.98 | 0.01 | 2.93 | 1.81 | 0.22 | 0.28 |
| 57710 | 0 | 51072  | QIGNTVTPTVTFTMDG<br>DTMT                                    | 2.98 | 0.01 | 2.93 | 0.68 | 0.22 | 0.28 |
| 57711 | 0 | 51072  | QIGNTVTPTVTFTMDG<br>DTMT                                    | 2.98 | 0.01 | 2.93 | 1.81 | 0.22 | 0.28 |
| 57712 | 0 | 51072  | QIGNTVTPTVTFTMDG<br>DTMT                                    | 2.98 | 0.01 | 2.93 | 2.69 | 0.22 | 0.28 |
| 57713 | 0 | 51072  | QIGNTVTPTVTFTMDG<br>DTMT                                    | 2.98 | 0.01 | 2.93 | 0.68 | 0.22 | 0.28 |
| 57714 | 0 | 193339 | QIGVFDTSDGYKYFAPA<br>NTVND                                  | 3.03 | 0.01 | 3.04 | 1.12 | 0.22 | 0.28 |
| 57715 | 0 | 193339 | QIGVFDTSDGYKYFAPA<br>NTVND                                  | 3.03 | 0.01 | 3.04 | 1.12 | 0.22 | 0.28 |
| 57716 | 0 | 147220 | QIGYYRRATR                                                  | 2.32 | 0.01 | 2.91 | 0.68 | 0.22 | 0.28 |
| 57717 | 0 | 147220 | QIGYYRRATR                                                  | 2.32 | 0.01 | 2.91 | 0.68 | 0.22 | 0.28 |
| 57718 | 0 | 51074  | QIGYYRRATRRVRGGDG<br>K                                      | 2.86 | 0.01 | 2.91 | 0.44 | 0.85 | 0.28 |
| 57719 | 0 | 51074  | QIGYYRRATRRVRGGDG<br>K                                      | 2.86 | 0.01 | 2.91 | 0.68 | 0.22 | 0.28 |
| 57720 | 0 | 129688 | QIHGPR                                                      | 1.88 | 0.01 | 1.75 | 3.15 | 2.60 | 1.75 |
| 57721 | 0 | 129688 | QIHGPR                                                      | 1.88 | 0.01 | 1.75 | 3.15 | 0.22 | 3.16 |
| 57722 | 0 | 87580  | QIHLVSGYDND                                                 | 2.43 | 0.01 | 2.87 | 0.44 | 0.22 | 0.28 |
| 57723 | 0 | 87580  | QIHLVSGYDND                                                 | 2.43 | 0.01 | 2.90 | 0.68 | 0.22 | 0.28 |
| 57724 | 0 | 51077  | QIHTL                                                       | 1.74 | 0.01 | 3.24 | 1.12 | 0.22 | 0.28 |
| 57725 | 0 | 51078  | QIHTLN                                                      | 1.88 | 0.01 | 3.24 | 1.12 | 0.22 | 0.28 |
| 57726 | 0 | 51079  | QIICLAVLWV                                                  | 2.32 | 0.01 | 0.78 | 0.44 | 1.74 | 0.28 |
| 57727 | 0 | 51083  | QIINTY                                                      | 1.89 | 0.01 | 3.65 | 1.15 | 2.26 | 0.28 |
| 57728 | 0 | 51084  | QIISQQPFPL                                                  | 2.34 | 0.01 | 2.83 | 0.68 | 0.22 | 0.85 |
| 57729 | 0 | 51084  | QIISQQPFPL                                                  | 2.34 | 0.01 | 2.83 | 0.68 | 0.22 | 0.28 |
| 57730 | 0 | 51085  | QIISQQPQQP                                                  | 2.37 | 0.01 | 2.83 | 0.68 | 0.22 | 0.28 |
| 57731 | 0 | 51085  | QIISQQPQQP                                                  | 2.37 | 0.01 | 2.83 | 0.68 | 0.22 | 0.85 |
| 57732 | 0 | 111670 | QIKVSTAVDTGVLGT                                             | 2.68 | 0.01 | 3.20 | 1.12 | 0.22 | 0.85 |
| 57733 | 0 | 140892 | QILDAHAAYLNATPAAK<br>VLV                                    | 2.94 | 0.01 | 3.01 | 0.68 | 0.22 | 0.85 |
| 57734 | 0 | 140892 | QILDAHAAYLNATPAAK<br>VLV                                    | 2.94 | 0.01 | 3.01 | 0.68 | 0.22 | 0.85 |



|       |   |        |                                                  |      |      |      |      |      |      |
|-------|---|--------|--------------------------------------------------|------|------|------|------|------|------|
| 57735 | 0 | 140892 | QILDAHAAYLNATPAAK<br>VLV                         | 2.94 | 0.01 | 3.01 | 0.68 | 0.22 | 1.34 |
| 57736 | 0 | 489736 | QILEAHNQSPFCAKS                                  | 2.65 | 0.01 | 2.69 | 3.05 | 0.85 | 1.28 |
| 57737 | 0 | 156417 | QILGEKSLTALTN                                    | 2.54 | 0.01 | 2.83 | 1.12 | 0.22 | 0.85 |
| 57738 | 0 | 156417 | QILGEKSLTALTN                                    | 2.54 | 0.01 | 2.83 | 1.12 | 0.22 | 0.85 |
| 57739 | 0 | 156417 | QILGEKSLTALTN                                    | 2.54 | 0.01 | 2.83 | 4.15 | 0.22 | 0.28 |
| 57740 | 0 | 156417 | QILGEKSLTALTN                                    | 2.54 | 0.01 | 2.83 | 4.15 | 0.22 | 0.28 |
| 57741 | 0 | 156417 | QILGEKSLTALTN                                    | 2.54 | 0.01 | 2.83 | 1.12 | 0.22 | 0.85 |
| 57742 | 0 | 51094  | QILHDDLPPHRV                                     | 2.47 | 0.01 | 0.90 | 0.44 | 0.85 | 0.28 |
| 57743 | 0 | 51097  | QILPDPLKPTKRSFIEDLL<br>FNKVTLA                   | 3.19 | 4.08 | 2.45 | 0.44 | 0.85 | 0.85 |
| 57744 | 0 | 51097  | QILPDPLKPTKRSFIEDLL<br>FNKVTLA                   | 3.19 | 4.08 | 2.45 | 0.44 | 0.85 | 1.34 |
| 57745 | 0 | 148767 | QILQQILQQQ                                       | 2.35 | 0.01 | 1.86 | 0.44 | 1.23 | 0.28 |
| 57746 | 0 | 98958  | QILQQILQQQLI                                     | 2.54 | 0.01 | 1.86 | 0.44 | 1.93 | 1.27 |
| 57747 | 0 | 148768 | QILQQQLIPC                                       | 2.36 | 0.01 | 1.86 | 0.44 | 1.23 | 0.85 |
| 57748 | 0 | 172859 | QINALTSFVDASMVY                                  | 2.64 | 0.01 | 0.78 | 0.44 | 1.13 | 0.28 |
| 57749 | 0 | 161184 | QINSLSYSFYNHSLFRIL                               | 2.88 | 0.01 | 1.75 | 0.68 | 0.22 | 3.16 |
| 57750 | 0 | 161184 | QINSLSYSFYNHSLFRIL                               | 2.88 | 0.01 | 1.75 | 0.68 | 0.22 | 0.28 |
| 57751 | 0 | 161184 | QINSLSYSFYNHSLFRIL                               | 2.88 | 0.01 | 1.75 | 0.68 | 0.22 | 1.48 |
| 57752 | 0 | 510103 | QINTAKWWKTHF                                     | 2.46 | 0.01 | 0.90 | 1.12 | 0.22 | 1.27 |
| 57753 | 0 | 510103 | QINTAKWWKTHF                                     | 2.46 | 0.01 | 0.90 | 1.12 | 0.22 | 2.56 |
| 57754 | 0 | 123665 | QIPPGAMP                                         | 2.14 | 0.01 | 0.78 | 1.20 | 0.22 | 0.28 |
| 57755 | 0 | 226087 | QIPQQQL                                          | 2.05 | 0.01 | 0.90 | 2.66 | 0.22 | 1.27 |
| 57756 | 0 | 51119  | QIPTAF                                           | 1.88 | 0.01 | 3.70 | 0.44 | 0.85 | 0.28 |
| 57757 | 0 | 51121  | QIPYNLKIFAIELDTLKKLT                             | 2.94 | 0.01 | 0.90 | 2.63 | 0.22 | 1.48 |
| 57758 | 0 | 51122  | QIPYNLKIFAIMLDTHKM<br>LT                         | 2.93 | 0.01 | 0.90 | 2.63 | 0.22 | 1.48 |
| 57759 | 0 | 51123  | QIPYNLKIFAIMLDTHKM<br>LV                         | 2.91 | 0.01 | 0.90 | 2.63 | 0.22 | 1.48 |
| 57760 | 0 | 51124  | QIPYNLKIFANMLDTHK<br>MG                          | 2.86 | 0.01 | 0.90 | 2.63 | 0.22 | 1.48 |
| 57761 | 0 | 51125  | QIPYNLKIRAGGLDGGK<br>KLV                         | 2.93 | 0.01 | 0.90 | 2.63 | 0.22 | 1.48 |
| 57762 | 0 | 51125  | QIPYNLKIRAGGLDGGK<br>KLV                         | 2.93 | 0.01 | 0.90 | 2.63 | 2.25 | 1.75 |
| 57763 | 0 | 51125  | QIPYNLKIRAGGLDGGK<br>KLV                         | 2.93 | 0.01 | 0.90 | 2.74 | 0.22 | 1.48 |
| 57764 | 0 | 51127  | QIPYNLKIRANELDVLKK<br>LVFGYRKPLDNIKDNVG<br>KMEDY | 3.64 | 0.01 | 1.66 | 2.63 | 0.22 | 0.28 |
| 57765 | 0 | 134492 | QIQRRPSM                                         | 2.14 | 0.01 | 0.78 | 0.68 | 0.22 | 1.27 |
| 57766 | 0 | 134492 | QIQRRPSM                                         | 2.14 | 0.01 | 0.78 | 0.68 | 0.22 | 1.27 |

|       |   |        |                        |      |      |      |      |      |      |
|-------|---|--------|------------------------|------|------|------|------|------|------|
| 57767 | 0 | 134492 | QIQRRPSM               | 2.14 | 0.01 | 0.78 | 0.68 | 0.22 | 0.85 |
| 57768 | 0 | 134492 | QIQRRPSM               | 2.14 | 0.01 | 0.78 | 0.68 | 0.22 | 0.85 |
| 57769 | 0 | 134492 | QIQRRPSM               | 2.14 | 0.01 | 0.78 | 0.68 | 0.22 | 0.85 |
| 57770 | 0 | 134492 | QIQRRPSM               | 2.14 | 0.01 | 0.78 | 0.68 | 0.22 | 0.85 |
| 57771 | 0 | 134492 | QIQRRPSM               | 2.14 | 0.01 | 0.78 | 0.68 | 0.22 | 0.85 |
| 57772 | 0 | 134492 | QIQRRPSM               | 2.14 | 0.01 | 0.78 | 0.68 | 0.22 | 0.85 |
| 57773 | 0 | 134492 | QIQRRPSM               | 2.14 | 0.01 | 0.78 | 0.68 | 0.22 | 0.28 |
| 57774 | 0 | 450959 | QISAASQ                | 2.05 | 0.01 | 0.90 | 0.44 | 1.23 | 1.39 |
| 57775 | 0 | 489737 | QISLADNLPDGVPE         | 2.64 | 0.01 | 2.69 | 3.05 | 0.85 | 1.28 |
| 57776 | 0 | 120889 | QISYSCNVLIYPS          | 2.56 | 0.01 | 1.60 | 1.12 | 0.22 | 0.85 |
| 57777 | 0 | 120889 | QISYSCNVLIYPS          | 2.56 | 0.01 | 1.60 | 1.12 | 0.22 | 0.85 |
| 57778 | 0 | 360941 | QITDDDDPAADAAGT        | 2.71 | 0.01 | 1.61 | 0.44 | 0.85 | 1.28 |
| 57779 | 0 | 99574  | QITGMT                 | 1.90 | 0.01 | 2.24 | 1.20 | 0.22 | 0.28 |
| 57780 | 0 | 51145  | QIVGGV                 | 1.90 | 0.01 | 1.72 | 0.44 | 1.59 | 0.28 |
| 57781 | 0 | 51146  | QIVGGVYL               | 2.13 | 0.01 | 1.72 | 0.44 | 0.85 | 0.28 |
| 57782 | 0 | 51146  | QIVGGVYL               | 2.13 | 0.01 | 1.72 | 0.68 | 0.22 | 0.28 |
| 57783 | 0 | 51146  | QIVGGVYL               | 2.13 | 0.01 | 1.72 | 0.68 | 0.22 | 0.28 |
| 57784 | 0 | 51147  | QIVGGVYLL              | 2.22 | 0.01 | 1.72 | 1.15 | 0.22 | 2.49 |
| 57785 | 0 | 51147  | QIVGGVYLL              | 2.22 | 0.01 | 1.72 | 1.15 | 0.22 | 1.66 |
| 57786 | 0 | 51147  | QIVGGVYLL              | 2.22 | 0.01 | 1.72 | 1.15 | 0.22 | 1.66 |
| 57787 | 0 | 51147  | QIVGGVYLL              | 2.22 | 0.01 | 1.72 | 1.15 | 0.22 | 0.28 |
| 57788 | 0 | 51147  | QIVGGVYLL              | 2.22 | 0.01 | 1.72 | 1.15 | 0.22 | 0.28 |
| 57789 | 0 | 51147  | QIVGGVYLL              | 2.22 | 0.01 | 4.03 | 1.15 | 0.22 | 2.49 |
| 57790 | 0 | 51147  | QIVGGVYLL              | 2.22 | 0.01 | 4.03 | 1.15 | 0.22 | 2.49 |
| 57791 | 0 | 51147  | QIVGGVYLL              | 2.22 | 0.01 | 4.03 | 1.15 | 0.22 | 2.49 |
| 57792 | 0 | 51148  | QIVGGVYLLP             | 2.31 | 0.01 | 2.68 | 0.44 | 0.85 | 0.28 |
| 57793 | 0 | 51150  | QIVGGVYLLPRRGPR        | 2.70 | 0.01 | 2.41 | 0.44 | 1.59 | 0.28 |
| 57794 | 0 | 139202 | QIWYERTLPFTF           | 2.45 | 0.01 | 0.90 | 1.15 | 0.22 | 1.27 |
| 57795 | 0 | 139202 | QIWYERTLPFTF           | 2.45 | 0.01 | 0.90 | 0.44 | 1.41 | 1.27 |
| 57796 | 0 | 123666 | QIYERDDGE              | 2.22 | 0.01 | 2.28 | 2.00 | 0.22 | 0.28 |
| 57797 | 0 | 139203 | QIYKAQAQTDRESLRNL<br>R | 2.84 | 0.01 | 0.78 | 1.12 | 0.22 | 0.28 |
| 57798 | 0 | 139203 | QIYKAQAQTDRESLRNL<br>R | 2.84 | 0.01 | 0.78 | 3.23 | 0.22 | 0.28 |
| 57799 | 0 | 139203 | QIYKAQAQTDRESLRNL<br>R | 2.84 | 0.01 | 0.78 | 1.12 | 0.22 | 0.28 |
| 57800 | 0 | 139203 | QIYKAQAQTDRESLRNL<br>R | 2.84 | 0.01 | 0.78 | 1.12 | 0.22 | 2.02 |
| 57801 | 0 | 51161  | QIYTINDKIL             | 2.31 | 0.01 | 2.66 | 0.68 | 0.22 | 0.28 |
| 57802 | 0 | 360979 | QKAAAKKAAAPSGKK        | 2.71 | 0.01 | 1.61 | 0.44 | 0.85 | 1.28 |
| 57803 | 0 | 360980 | QKAAAPKKTAAAPKA        | 2.74 | 0.01 | 1.61 | 0.44 | 0.85 | 1.28 |
| 57804 | 0 | 360981 | QKAAEATKAAEAQ          | 2.75 | 0.01 | 1.61 | 0.44 | 0.85 | 1.28 |
| 57805 | 0 | 360982 | QKAAEATKAVEAEKR        | 2.73 | 0.01 | 1.61 | 0.44 | 0.85 | 1.28 |
| 57806 | 0 | 360983 | QKAAEATKAVETEK         | 2.73 | 0.01 | 1.61 | 0.44 | 0.85 | 1.28 |
| 57807 | 0 | 51163  | QKAAEATKVAEAEK         | 2.67 | 0.01 | 2.30 | 0.44 | 0.85 | 0.28 |

|       |   |        |                    |      |      |      |      |      |      |
|-------|---|--------|--------------------|------|------|------|------|------|------|
| 57808 | 0 | 51163  | QKAAEATKVAEAEK     | 2.67 | 0.01 | 2.30 | 1.20 | 0.22 | 0.85 |
| 57809 | 0 | 360984 | QKAAEATKVAEAEKQ    | 2.74 | 0.01 | 1.61 | 0.44 | 0.85 | 1.28 |
| 57810 | 0 | 360985 | QKAAEATKVAEAEKR    | 2.73 | 0.01 | 1.61 | 0.44 | 0.85 | 1.28 |
| 57811 | 0 | 360986 | QKAAEATKVAEAEERQ   | 2.73 | 0.01 | 1.61 | 0.44 | 0.85 | 1.28 |
| 57812 | 0 | 524208 | QKADKVSLEEKQAAN    | 2.69 | 0.01 | 2.24 | 0.44 | 1.41 | 1.28 |
|       |   |        | QKAIDGVTNKNVNSIIDK |      |      |      |      |      |      |
| 57813 | 0 | 97578  | MNTQFEAVGREFNNLE   | 3.66 | 0.01 | 3.09 | 0.44 | 0.85 | 0.28 |
|       |   |        | RRIENLNK           |      |      |      |      |      |      |
|       |   |        | QKAIDGVTNKNVNSIIDK |      |      |      |      |      |      |
| 57814 | 0 | 97578  | MNTQFEAVGREFNNLE   | 3.66 | 0.01 | 3.09 | 0.44 | 1.74 | 0.28 |
|       |   |        | RRIENLNK           |      |      |      |      |      |      |
| 57815 | 0 | 51166  | QKALGLLQT          | 2.25 | 0.01 | 2.41 | 0.44 | 0.85 | 0.28 |
| 57816 | 0 | 115437 | QKALNEINQFYQKFPQY  | 2.98 | 0.01 | 1.60 | 0.44 | 1.23 | 2.51 |
|       |   |        | LQY                |      |      |      |      |      |      |
| 57817 | 0 | 115437 | QKALNEINQFYQKFPQY  | 2.98 | 0.01 | 1.60 | 0.44 | 1.23 | 1.27 |
|       |   |        | LQY                |      |      |      |      |      |      |
| 57818 | 0 | 51168  | QKAREAFR           | 2.14 | 0.01 | 2.40 | 2.43 | 0.22 | 0.28 |
| 57819 | 0 | 87595  | QKASIAGTDSGW       | 2.48 | 0.01 | 2.87 | 0.44 | 0.22 | 0.28 |
| 57820 | 0 | 87595  | QKASIAGTDSGW       | 2.48 | 0.01 | 2.90 | 0.68 | 0.22 | 0.28 |
| 57821 | 0 | 51169  | QKAVPYPQRD         | 2.32 | 0.01 | 1.60 | 0.44 | 1.23 | 0.85 |
| 57822 | 0 | 51169  | QKAVPYPQRD         | 2.32 | 0.01 | 1.60 | 0.44 | 1.23 | 0.85 |
| 57823 | 0 | 51169  | QKAVPYPQRD         | 2.32 | 0.01 | 1.60 | 0.44 | 1.23 | 0.85 |
| 57824 | 0 | 51169  | QKAVPYPQRD         | 2.32 | 0.01 | 1.60 | 0.44 | 1.23 | 0.85 |
|       |   |        | QKAVPYPQRDMPIQAF   |      |      |      |      |      |      |
| 57825 | 0 | 115439 | LYQ                | 2.94 | 0.01 | 1.60 | 0.44 | 1.23 | 1.28 |
| 57826 | 0 | 51171  | QKDEPNGRASD        | 2.36 | 0.01 | 3.35 | 2.02 | 0.85 | 0.28 |
| 57827 | 0 | 51172  | QKDFACKHCKLPSP     | 2.61 | 0.01 | 0.90 | 0.44 | 0.85 | 1.39 |
| 57828 | 0 | 51172  | QKDFACKHCKLPSP     | 2.61 | 0.01 | 0.90 | 0.44 | 0.85 | 0.28 |
|       |   |        | QKDGDMKILQSQIISFY  |      |      |      |      |      |      |
| 57829 | 0 | 134772 | RLFVLK             | 3.16 | 0.01 | 1.75 | 1.20 | 0.22 | 0.28 |
|       |   |        | QKDGDMKILQSQIISFY  |      |      |      |      |      |      |
| 57830 | 0 | 134772 | RLFVLK             | 3.16 | 0.01 | 1.75 | 1.20 | 0.22 | 0.28 |
|       |   |        | QKDLVNEFPGLFIRQSRF |      |      |      |      |      |      |
| 57831 | 0 | 141989 | IPGRPSRRNIRFKP     | 3.43 | 0.01 | 3.13 | 2.13 | 0.22 | 0.28 |
| 57832 | 0 | 524216 | QKEAAEKAAAEALAQ    | 2.75 | 0.01 | 2.24 | 0.44 | 1.41 | 1.28 |
| 57833 | 0 | 115440 | QKEDVPSEYRGLYLEQLL | 2.96 | 0.01 | 1.60 | 0.44 | 1.23 | 1.28 |
|       |   |        | RL                 |      |      |      |      |      |      |
| 57834 | 0 | 227821 | QKEEGSKGRKGPFP     | 2.76 | 0.01 | 2.72 | 1.20 | 1.59 | 0.28 |
| 57835 | 0 | 361086 | QKEKTDEAEEDDED     | 2.72 | 0.01 | 1.61 | 0.44 | 0.85 | 1.28 |
| 57836 | 0 | 229767 | QKEMPPFKYPVEPFTES  | 2.81 | 0.01 | 1.60 | 0.44 | 1.23 | 1.28 |
| 57837 | 0 | 51181  | QKEPMIGVNQ         | 2.30 | 0.01 | 1.60 | 0.44 | 1.23 | 0.28 |
| 57838 | 0 | 153441 | QKESTLHLVLRRLGG    | 2.66 | 0.01 | 1.60 | 0.68 | 0.22 | 0.28 |
| 57839 | 0 | 116811 | QKEVDRLEDELVNEK    | 2.72 | 0.01 | 2.36 | 0.44 | 1.23 | 1.28 |
| 57840 | 0 | 116811 | QKEVDRLEDELVNEK    | 2.72 | 0.01 | 2.36 | 0.44 | 1.23 | 1.27 |
| 57841 | 0 | 116811 | QKEVDRLEDELVNEK    | 2.72 | 0.01 | 2.36 | 0.44 | 1.23 | 1.28 |
| 57842 | 0 | 116811 | QKEVDRLEDELVNEK    | 2.72 | 0.01 | 2.36 | 0.44 | 1.23 | 1.27 |

|       |   |        |                                             |      |      |      |      |      |      |
|-------|---|--------|---------------------------------------------|------|------|------|------|------|------|
| 57843 | 0 | 79049  | QKGIQKPKSGTQGNYP<br>DDWKGfy                 | 3.08 | 0.01 | 3.42 | 2.88 | 0.22 | 0.28 |
| 57844 | 0 | 79049  | QKGIQKPKSGTQGNYP<br>DDWKGfy                 | 3.08 | 0.01 | 3.42 | 2.88 | 0.22 | 0.28 |
| 57845 | 0 | 79049  | QKGIQKPKSGTQGNYP<br>DDWKGfy                 | 3.08 | 0.01 | 3.42 | 2.88 | 0.22 | 0.28 |
| 57846 | 0 | 79049  | QKGIQKPKSGTQGNYP<br>DDWKGfy                 | 3.08 | 0.01 | 3.42 | 2.88 | 0.22 | 1.27 |
| 57847 | 0 | 79049  | QKGIQKPKSGTQGNYP<br>DDWKGfy                 | 3.08 | 0.01 | 3.42 | 2.88 | 0.22 | 1.34 |
| 57848 | 0 | 361140 | QKGNVRKLQPQKQ                               | 2.72 | 0.01 | 1.61 | 0.44 | 0.85 | 1.28 |
| 57849 | 0 | 182270 | QKHIPLCALLSSNP<br>QKHWLSDRTYTCQVY           | 2.66 | 0.01 | 0.78 | 0.44 | 1.13 | 0.85 |
| 57850 | 0 | 96775  | QGHTFEDSTKKCADSNP<br>RGV                    | 3.49 | 0.01 | 0.78 | 0.68 | 0.22 | 0.28 |
| 57851 | 0 | 96775  | QKHWLSDRTYTCQVY<br>QGHTFEDSTKKCADSNP<br>RGV | 3.49 | 0.01 | 0.78 | 0.68 | 0.22 | 1.34 |
| 57852 | 0 | 96775  | QKHWLSDRTYTCQVY<br>QGHTFEDSTKKCADSNP<br>RGV | 3.49 | 0.01 | 0.78 | 0.68 | 0.22 | 2.12 |
| 57853 | 0 | 96775  | QKHWLSDRTYTCQVY<br>QGHTFEDSTKKCADSNP<br>RGV | 3.49 | 0.01 | 0.78 | 0.68 | 0.22 | 0.85 |
| 57854 | 0 | 51192  | QKIEHVAKIS                                  | 2.31 | 0.01 | 2.84 | 0.44 | 0.85 | 0.28 |
| 57855 | 0 | 51192  | QKIEHVAKIS                                  | 2.31 | 0.01 | 2.84 | 0.44 | 0.85 | 0.28 |
| 57856 | 0 | 118568 | QKIGIEIKRTLK                                | 2.56 | 0.01 | 0.78 | 0.44 | 1.74 | 0.85 |
| 57857 | 0 | 118568 | QKIGIEIKRTLK                                | 2.56 | 0.01 | 0.78 | 0.44 | 1.59 | 0.85 |
| 57858 | 0 | 118568 | QKIGIEIKRTLK                                | 2.56 | 0.01 | 0.78 | 0.44 | 1.74 | 0.85 |
| 57859 | 0 | 118569 | QKIGIEIKRTLKIPAMT                           | 2.85 | 0.01 | 0.78 | 1.20 | 0.22 | 0.85 |
| 57860 | 0 | 118569 | QKIGIEIKRTLKIPAMT                           | 2.85 | 0.01 | 0.78 | 1.20 | 0.22 | 0.85 |
| 57861 | 0 | 118569 | QKIGIEIKRTLKIPAMT                           | 2.85 | 0.01 | 0.78 | 1.20 | 0.22 | 1.48 |
| 57862 | 0 | 95712  | QKIIAPAK                                    | 2.15 | 0.01 | 3.48 | 2.22 | 0.22 | 0.28 |
| 57863 | 0 | 95712  | QKIIAPAK                                    | 2.15 | 0.01 | 3.48 | 2.22 | 0.22 | 0.28 |
| 57864 | 0 | 177923 | QKIKVPEQIKPSVSQ                             | 2.73 | 0.01 | 0.78 | 0.44 | 1.13 | 0.85 |
| 57865 | 0 | 179379 | QKIMRNLWNEIAELA                             | 2.68 | 0.01 | 2.36 | 0.44 | 1.23 | 1.28 |
| 57866 | 0 | 179379 | QKIMRNLWNEIAELA                             | 2.68 | 0.01 | 2.36 | 0.44 | 1.23 | 1.27 |
| 57867 | 0 | 179379 | QKIMRNLWNEIAELA                             | 2.68 | 0.01 | 2.36 | 0.44 | 1.23 | 1.28 |
| 57868 | 0 | 524226 | QKIQRDEDSYGRDPYSP<br>SQDPYSP                | 3.17 | 0.01 | 2.16 | 1.12 | 0.22 | 1.39 |
| 57869 | 0 | 524226 | QKIQRDEDSYGRDPYSP<br>SQDPYSP                | 3.17 | 0.01 | 2.16 | 0.44 | 1.23 | 1.39 |

|       |   |        |                                      |      |      |      |      |      |      |
|-------|---|--------|--------------------------------------|------|------|------|------|------|------|
| 57870 | 0 | 230582 | QKITDKVDNLNQAVSET<br>KL              | 2.91 | 0.01 | 2.93 | 0.44 | 1.59 | 1.28 |
| 57871 | 0 | 101172 | QKIVAP                               | 1.88 | 0.01 | 3.02 | 1.12 | 0.22 | 0.28 |
| 57872 | 0 | 95713  | QKIVAPVK                             | 2.14 | 0.01 | 2.96 | 2.22 | 0.22 | 0.28 |
| 57873 | 0 | 51199  | QKKAIE                               | 1.89 | 0.01 | 3.24 | 1.12 | 0.22 | 0.28 |
| 57874 | 0 | 108081 | QKKETQCEDNKGPLCM<br>NKVLNKMDPKYSEH   | 3.33 | 0.01 | 0.90 | 1.12 | 0.22 | 0.28 |
| 57875 | 0 | 130585 | QKKIRGILE                            | 2.22 | 0.01 | 0.78 | 0.68 | 0.22 | 1.28 |
| 57876 | 0 | 130585 | QKKIRGILE                            | 2.22 | 0.01 | 0.78 | 0.68 | 0.22 | 1.27 |
| 57877 | 0 | 423469 | QKKISQRPTPGTKK                       | 2.70 | 0.01 | 2.51 | 0.44 | 2.35 | 1.28 |
| 57878 | 0 | 119510 | QKKMVALSG                            | 2.20 | 0.01 | 0.90 | 0.44 | 1.13 | 0.28 |
| 57879 | 0 | 227489 | QKKNEISFQQTNAMV                      | 2.65 | 0.01 | 2.97 | 0.44 | 0.85 | 0.28 |
| 57880 | 0 | 51204  | QKKNKRNTNRRPQDV                      | 2.71 | 0.01 | 3.18 | 0.44 | 0.85 | 0.28 |
| 57881 | 0 | 51204  | QKKNKRNTNRRPQDV                      | 2.71 | 0.01 | 1.72 | 0.44 | 0.85 | 0.28 |
| 57882 | 0 | 99576  | QKKTENPCAQRCLQS                      | 2.66 | 0.01 | 2.16 | 0.44 | 1.23 | 1.48 |
| 57883 | 0 | 99576  | QKKTENPCAQRCLQS                      | 2.66 | 0.01 | 2.16 | 0.44 | 1.23 | 1.48 |
| 57884 | 0 | 139571 | QKLESDVSAQMEYCR                      | 2.65 | 3.85 | 0.78 | 0.44 | 1.13 | 0.28 |
| 57885 | 0 | 100425 | QKLFAMWRITYKDT                       | 2.57 | 0.01 | 2.96 | 0.44 | 0.22 | 0.28 |
| 57886 | 0 | 51214  | QKLEDVNAGFKTAV                       | 2.65 | 0.01 | 3.67 | 0.44 | 1.23 | 0.85 |
| 57887 | 0 | 51215  | QKLEDVNAGFKTAVAA<br>AANVPPADKYKTFEAA | 3.43 | 0.01 | 3.67 | 0.44 | 1.23 | 0.85 |
| 57888 | 0 | 51215  | QKLEDVNAGFKTAVAA<br>AANVPPADKYKTFEAA | 3.43 | 0.01 | 3.67 | 0.44 | 1.23 | 1.27 |
| 57889 | 0 | 51222  | QKLPGYPRFWLG                         | 2.48 | 0.01 | 0.90 | 0.68 | 0.22 | 1.39 |
| 57890 | 0 | 51223  | QKLQKEVDRLEDELV                      | 2.73 | 0.01 | 3.15 | 0.44 | 1.23 | 0.85 |
| 57891 | 0 | 51223  | QKLQKEVDRLEDELV                      | 2.73 | 0.01 | 2.36 | 0.44 | 1.23 | 1.28 |
| 57892 | 0 | 51223  | QKLQKEVDRLEDELV                      | 2.73 | 0.01 | 2.36 | 0.44 | 1.23 | 1.27 |
| 57893 | 0 | 51223  | QKLQKEVDRLEDELV                      | 2.73 | 0.01 | 2.36 | 0.44 | 1.23 | 1.28 |
| 57894 | 0 | 51223  | QKLQKEVDRLEDELV                      | 2.73 | 0.01 | 2.36 | 0.44 | 1.23 | 1.27 |
| 57895 | 0 | 164330 | QKLSANM                              | 1.99 | 0.01 | 0.90 | 1.20 | 0.22 | 1.39 |
| 57896 | 0 | 51224  | QKLSERRANAVRDV                       | 2.61 | 0.01 | 2.58 | 2.43 | 0.22 | 0.28 |
| 57897 | 0 | 51224  | QKLSERRANAVRDV                       | 2.61 | 0.01 | 2.58 | 2.43 | 0.22 | 0.28 |
| 57898 | 0 | 164331 | QKLSLPT                              | 2.02 | 0.01 | 0.90 | 1.20 | 0.22 | 1.39 |
| 57899 | 0 | 164332 | QKLSMPA                              | 1.99 | 0.01 | 0.90 | 1.20 | 0.22 | 1.39 |
| 57900 | 0 | 164333 | QKLSMPV                              | 1.99 | 0.01 | 0.90 | 1.20 | 0.22 | 1.39 |
| 57901 | 0 | 164334 | QKLSQAA                              | 2.02 | 0.01 | 0.90 | 1.20 | 0.22 | 1.39 |
| 57902 | 0 | 51225  | QKLSVPDGFK                           | 2.29 | 0.01 | 0.78 | 0.44 | 1.74 | 0.28 |
| 57903 | 0 | 100426 | QKLVFFAEDV                           | 2.30 | 0.01 | 0.78 | 0.44 | 1.93 | 0.28 |
| 57904 | 0 | 100426 | QKLVFFAEDV                           | 2.30 | 0.01 | 0.78 | 3.00 | 0.22 | 0.28 |
| 57905 | 0 | 105485 | QKLVFFAEDVGSNK                       | 2.58 | 0.01 | 0.78 | 1.20 | 0.22 | 0.28 |

|       |   |        |                  |      |      |      |      |      |      |
|-------|---|--------|------------------|------|------|------|------|------|------|
| 57906 | 0 | 153286 | QKLVFFAEDVGSNKGA | 2.72 | 0.01 | 0.78 | 1.12 | 0.22 | 1.57 |
| 57907 | 0 | 128084 | QKNACSFDCNSYDVL  | 2.73 | 0.01 | 2.40 | 1.12 | 0.22 | 0.28 |
| 57908 | 0 | 128084 | QKNACSFDCNSYDVL  | 2.73 | 0.01 | 2.40 | 0.44 | 0.85 | 0.28 |
| 57909 | 0 | 128084 | QKNACSFDCNSYDVL  | 2.73 | 0.01 | 2.40 | 2.75 | 0.22 | 0.28 |
| 57910 | 0 | 128084 | QKNACSFDCNSYDVL  | 2.73 | 0.01 | 2.40 | 2.75 | 0.22 | 0.28 |
| 57911 | 0 | 128084 | QKNACSFDCNSYDVL  | 2.73 | 0.01 | 2.40 | 2.75 | 0.22 | 0.85 |
| 57912 | 0 | 128084 | QKNACSFDCNSYDVL  | 2.73 | 0.01 | 2.40 | 2.75 | 0.22 | 1.34 |
| 57913 | 0 | 128084 | QKNACSFDCNSYDVL  | 2.73 | 0.01 | 2.40 | 2.75 | 0.22 | 0.28 |
| 57914 | 0 | 100427 | QKNAPKTFQF       | 2.34 | 0.01 | 2.18 | 2.16 | 0.22 | 0.28 |
| 57915 | 0 | 51233  | QKPLK            | 1.75 | 0.01 | 3.97 | 0.68 | 0.22 | 0.28 |
| 57916 | 0 | 51233  | QKPLK            | 1.75 | 0.01 | 3.97 | 0.68 | 0.22 | 0.28 |
| 57917 | 0 | 51233  | QKPLK            | 1.75 | 0.01 | 3.97 | 0.68 | 0.22 | 1.48 |
| 57918 | 0 | 51233  | QKPLK            | 1.75 | 0.01 | 3.97 | 2.22 | 0.22 | 2.35 |
| 57919 | 0 | 51233  | QKPLK            | 1.75 | 0.01 | 3.97 | 2.22 | 0.85 | 2.35 |
| 57920 | 0 | 51233  | QKPLK            | 1.75 | 0.01 | 3.97 | 2.13 | 0.22 | 2.35 |
| 57921 | 0 | 51233  | QKPLK            | 1.75 | 0.01 | 3.97 | 2.00 | 0.22 | 2.35 |
| 57922 | 0 | 51233  | QKPLK            | 1.75 | 0.01 | 3.97 | 2.37 | 0.22 | 2.35 |
| 57923 | 0 | 51233  | QKPLK            | 1.75 | 0.01 | 3.97 | 0.68 | 0.22 | 2.35 |
| 57924 | 0 | 51234  | QKPLKVKAKAPVVK   | 2.66 | 0.01 | 2.96 | 2.22 | 0.22 | 0.28 |
| 57925 | 0 | 115917 | QKPVALINNQ       | 2.31 | 0.01 | 1.60 | 0.44 | 1.23 | 0.85 |
| 57926 | 0 | 196736 | QKPVYTR          | 1.99 | 0.01 | 0.90 | 0.44 | 1.23 | 1.39 |
| 57927 | 0 | 121754 | QKQEKRLKISKKPK   | 2.72 | 0.01 | 0.78 | 0.44 | 1.13 | 0.85 |
| 57928 | 0 | 121754 | QKQEKRLKISKKPK   | 2.72 | 0.01 | 0.78 | 0.44 | 1.41 | 0.85 |
| 57929 | 0 | 148771 | QKQQLQQQQQ       | 2.36 | 0.01 | 1.86 | 0.44 | 1.93 | 0.85 |
| 57930 | 0 | 148771 | QKQQLQQQQQ       | 2.36 | 0.01 | 1.86 | 2.74 | 0.22 | 0.85 |
| 57931 | 0 | 148771 | QKQQLQQQQQ       | 2.36 | 0.01 | 1.86 | 2.74 | 0.22 | 0.85 |
| 57932 | 0 | 98961  | QKQQQPSSQVS      | 2.54 | 0.01 | 1.86 | 0.44 | 1.93 | 1.27 |
| 57933 | 0 | 138227 | QKRAA            | 1.72 | 0.01 | 0.78 | 1.15 | 0.22 | 2.12 |
| 57934 | 0 | 124606 | QKRAAQRAAGPSVAS  | 2.72 | 0.01 | 2.48 | 0.44 | 1.13 | 1.27 |
| 57935 | 0 | 106738 | QKRAAYDQYGHAAFE  | 2.68 | 0.01 | 2.24 | 0.44 | 1.13 | 1.27 |
| 57936 | 0 | 106738 | QKRAAYDQYGHAAFE  | 2.68 | 0.01 | 2.24 | 0.44 | 1.13 | 1.27 |
| 57937 | 0 | 119511 | QKRAKGLSA        | 2.23 | 0.01 | 0.90 | 0.44 | 1.13 | 0.28 |
| 57938 | 0 | 51246  | QKRDPKTN         | 2.12 | 0.01 | 4.63 | 1.15 | 0.22 | 1.27 |
| 57939 | 0 | 106739 | QKREACKIVRA      | 2.49 | 0.01 | 3.08 | 0.44 | 1.23 | 0.85 |
| 57940 | 0 | 135742 | QKSCEPAV         | 2.10 | 0.01 | 0.78 | 0.44 | 2.35 | 0.28 |
| 57941 | 0 | 172875 | QKSFETERDHLRGYI  | 2.62 | 0.01 | 0.78 | 0.44 | 1.41 | 0.28 |

|       |   |        |                             |      |      |      |      |      |      |
|-------|---|--------|-----------------------------|------|------|------|------|------|------|
| 57942 | 0 | 172875 | QKSFETERDHLRGYI             | 2.62 | 0.01 | 0.78 | 0.44 | 1.13 | 0.28 |
| 57943 | 0 | 109755 | QKSGSHENQNILTNGSN<br>Q      | 2.87 | 0.01 | 3.67 | 1.20 | 0.22 | 0.28 |
| 57944 | 0 | 114226 | QKSHGRTQDENPVVHF            | 2.69 | 0.01 | 0.78 | 0.68 | 0.22 | 0.28 |
| 57945 | 0 | 114226 | QKSHGRTQDENPVVHF            | 2.69 | 0.01 | 0.78 | 0.68 | 0.22 | 0.28 |
| 57946 | 0 | 114226 | QKSHGRTQDENPVVHF            | 2.69 | 0.01 | 0.78 | 0.68 | 0.22 | 0.28 |
| 57947 | 0 | 114226 | QKSHGRTQDENPVVHF            | 2.69 | 0.01 | 0.78 | 0.68 | 0.22 | 0.28 |
| 57948 | 0 | 114226 | QKSHGRTQDENPVVHF            | 2.69 | 0.01 | 0.78 | 0.68 | 0.22 | 0.28 |
| 57949 | 0 | 114226 | QKSHGRTQDENPVVHF            | 2.69 | 0.01 | 0.78 | 0.68 | 0.22 | 0.28 |
| 57950 | 0 | 114226 | QKSHGRTQDENPVVHF            | 2.69 | 0.01 | 0.78 | 0.68 | 0.22 | 0.28 |
| 57951 | 0 | 114226 | QKSHGRTQDENPVVHF            | 2.69 | 0.01 | 0.78 | 0.68 | 0.22 | 0.28 |
| 57952 | 0 | 114226 | QKSHGRTQDENPVVHF            | 2.69 | 0.01 | 0.78 | 0.68 | 0.22 | 1.27 |
| 57953 | 0 | 114226 | QKSHGRTQDENPVVHF            | 2.69 | 0.01 | 0.78 | 1.12 | 0.22 | 1.27 |
| 57954 | 0 | 79050  | QKSKPF                      | 1.90 | 0.01 | 0.90 | 0.68 | 0.22 | 1.39 |
| 57955 | 0 | 51252  | QKSKQNIGALKQEL              | 2.64 | 0.01 | 2.85 | 0.68 | 0.22 | 1.27 |
| 57956 | 0 | 51252  | QKSKQNIGALKQEL              | 2.64 | 0.01 | 2.85 | 0.44 | 2.26 | 0.85 |
| 57957 | 0 | 51252  | QKSKQNIGALKQEL              | 2.64 | 0.01 | 2.85 | 1.12 | 0.22 | 0.85 |
| 57958 | 0 | 51252  | QKSKQNIGALKQEL              | 2.64 | 0.01 | 2.85 | 0.44 | 1.13 | 1.27 |
| 57959 | 0 | 109756 | QKSLSLS                     | 2.04 | 0.01 | 0.78 | 0.44 | 1.13 | 0.28 |
| 57960 | 0 | 51254  | QKSPTTLQRITMTNSVD<br>DALINS | 3.07 | 0.01 | 2.95 | 0.44 | 0.22 | 0.28 |
| 57961 | 0 | 115640 | QKSQRSQDEN                  | 2.34 | 0.01 | 2.95 | 1.12 | 0.22 | 2.56 |
| 57962 | 0 | 115640 | QKSQRSQDEN                  | 2.34 | 0.01 | 2.95 | 1.12 | 0.22 | 2.56 |
| 57963 | 0 | 115640 | QKSQRSQDEN                  | 2.34 | 0.01 | 2.95 | 2.61 | 0.22 | 2.56 |
| 57964 | 0 | 110976 | QKSQRSQDENPVVHF             | 2.66 | 0.01 | 2.95 | 2.04 | 0.22 | 1.57 |
| 57965 | 0 | 181009 | QKSSNSRKKR                  | 2.36 | 0.01 | 2.18 | 2.16 | 0.22 | 0.28 |
| 57966 | 0 | 79051  | QKSSPY                      | 1.89 | 0.01 | 0.90 | 0.68 | 0.22 | 1.39 |
| 57967 | 0 | 134773 | QKSTHLLIRKLPSR              | 2.68 | 0.01 | 0.78 | 3.05 | 1.13 | 0.85 |
| 57968 | 0 | 51258  | QKTAASY                     | 2.01 | 0.01 | 0.90 | 0.44 | 1.23 | 1.27 |
| 57969 | 0 | 51258  | QKTAASY                     | 2.01 | 0.01 | 0.90 | 0.44 | 1.23 | 1.27 |
| 57970 | 0 | 51258  | QKTAASY                     | 2.01 | 0.01 | 0.90 | 0.44 | 1.23 | 1.27 |
| 57971 | 0 | 51258  | QKTAASY                     | 2.01 | 0.01 | 0.90 | 0.44 | 1.23 | 0.28 |
| 57972 | 0 | 361363 | QKTAPFGQAAAAGDKP            | 2.70 | 0.01 | 1.61 | 0.44 | 0.85 | 1.28 |
| 57973 | 0 | 524254 | QKTDDMLNSNDMIKL             | 2.70 | 0.01 | 2.24 | 0.44 | 1.41 | 1.28 |

|       |   |        |                                  |      |      |      |      |      |      |
|-------|---|--------|----------------------------------|------|------|------|------|------|------|
| 57974 | 0 | 191691 | QKTDEDD                          | 2.00 | 0.01 | 0.78 | 1.20 | 0.22 | 0.28 |
| 57975 | 0 | 51259  | QKTLTKTS                         | 2.16 | 0.01 | 2.83 | 2.61 | 0.22 | 0.28 |
| 57976 | 0 | 104208 | QKTNRLS                          | 1.99 | 0.01 | 0.90 | 1.15 | 0.22 | 1.39 |
| 57977 | 0 | 115918 | QKTRTSRRAKPPQRPKQ<br>QPAAP       | 3.10 | 0.01 | 0.78 | 4.15 | 0.22 | 0.28 |
| 57978 | 0 | 51262  | QKTTS                            | 1.75 | 0.01 | 4.33 | 0.68 | 0.22 | 1.34 |
| 57979 | 0 | 108082 | QKTTTRPYPNLQIDP                  | 2.67 | 0.01 | 0.90 | 0.44 | 1.13 | 1.39 |
| 57980 | 0 | 51263  | QKTYMVVDVT                       | 2.33 | 0.01 | 2.84 | 0.44 | 0.85 | 0.28 |
| 57981 | 0 | 51264  | QKTYNYNVLM                       | 2.31 | 0.01 | 0.78 | 0.44 | 1.74 | 0.28 |
| 57982 | 0 | 51266  | QKTYSQYK                         | 2.17 | 0.01 | 1.66 | 0.44 | 1.74 | 0.28 |
| 57983 | 0 | 115442 | QKVAGTWYSL                       | 2.26 | 0.01 | 1.60 | 0.44 | 1.23 | 0.85 |
| 57984 | 0 | 115442 | QKVAGTWYSL                       | 2.26 | 0.01 | 1.60 | 0.44 | 1.23 | 0.85 |
| 57985 | 0 | 96779  | QKVAGTWYSLAMAAS                  | 2.65 | 0.01 | 1.60 | 0.44 | 1.23 | 0.28 |
| 57986 | 0 | 95715  | QKVARTPC                         | 2.10 | 0.01 | 0.90 | 2.59 | 0.22 | 0.28 |
| 57987 | 0 | 95715  | QKVARTPC                         | 2.10 | 0.01 | 0.90 | 2.22 | 0.22 | 0.28 |
| 57988 | 0 | 120892 | QKVQAAGNNMAQT                    | 2.57 | 0.01 | 2.04 | 0.44 | 0.85 | 0.28 |
| 57989 | 0 | 115444 | QKWENGECaq                       | 2.32 | 0.01 | 1.60 | 0.44 | 1.23 | 0.85 |
| 57990 | 0 | 51271  | QKYLSTIQKQVD                     | 2.55 | 0.01 | 4.45 | 0.44 | 0.85 | 0.28 |
| 57991 | 0 | 172879 | QLADARRDLKSAKAD                  | 2.72 | 0.01 | 0.78 | 0.44 | 1.13 | 0.28 |
| 57992 | 0 | 51279  | QLADIN                           | 1.88 | 0.01 | 1.86 | 0.44 | 1.23 | 0.28 |
| 57993 | 0 | 51281  | QLAEQFKQK                        | 2.26 | 0.01 | 1.96 | 0.44 | 0.85 | 1.34 |
| 57994 | 0 | 51283  | QLAGRMIP                         | 2.10 | 0.01 | 2.40 | 2.43 | 0.22 | 0.28 |
| 57995 | 0 | 167798 | QLAGRMIPK                        | 2.18 | 0.01 | 2.40 | 2.43 | 0.22 | 0.28 |
| 57996 | 0 | 51286  | QLAKDKVNE                        | 2.21 | 0.01 | 3.51 | 1.15 | 0.22 | 0.28 |
| 57997 | 0 | 51286  | QLAKDKVNE                        | 2.21 | 0.01 | 3.67 | 1.12 | 0.22 | 0.28 |
| 57998 | 0 | 51286  | QLAKDKVNE                        | 2.21 | 0.01 | 3.67 | 3.93 | 0.22 | 0.28 |
| 57999 | 0 | 51286  | QLAKDKVNE                        | 2.21 | 0.01 | 3.67 | 3.93 | 0.22 | 1.34 |
| 58000 | 0 | 111673 | QLCLIGCKPPIGEHW                  | 2.67 | 0.01 | 1.86 | 0.68 | 0.22 | 0.28 |
| 58001 | 0 | 51296  | QLCQLL                           | 1.89 | 0.01 | 2.80 | 1.15 | 0.22 | 0.28 |
| 58002 | 0 | 51296  | QLCQLL                           | 1.89 | 0.01 | 2.80 | 1.15 | 0.22 | 0.28 |
| 58003 | 0 | 51296  | QLCQLL                           | 1.89 | 0.01 | 2.80 | 1.15 | 0.22 | 0.28 |
| 58004 | 0 | 51296  | QLCQLL                           | 1.89 | 0.01 | 2.80 | 1.15 | 0.22 | 0.28 |
| 58005 | 0 | 51297  | QLCQLLGAMI                       | 2.33 | 0.01 | 2.80 | 1.15 | 0.22 | 1.27 |
| 58006 | 0 | 51298  | QLCQMLGKIIAQQNQS<br>RGKGPGKKNKKK | 3.28 | 0.01 | 3.04 | 1.15 | 0.22 | 0.28 |
| 58007 | 0 | 51298  | QLCQMLGKIIAQQNQS<br>RGKGPGKKNKKK | 3.28 | 0.01 | 3.04 | 1.15 | 0.22 | 0.28 |
| 58008 | 0 | 51298  | QLCQMLGKIIAQQNQS<br>RGKGPGKKNKKK | 3.28 | 0.01 | 3.04 | 1.15 | 0.22 | 0.28 |
| 58009 | 0 | 51298  | QLCQMLGKIIAQQNQS<br>RGKGPGKKNKKK | 3.28 | 0.01 | 3.04 | 2.13 | 0.22 | 0.28 |
| 58010 | 0 | 51298  | QLCQMLGKIIAQQNQS<br>RGKGPGKKNKKK | 3.28 | 0.01 | 3.04 | 2.13 | 0.22 | 0.28 |
| 58011 | 0 | 51298  | QLCQMLGKIIAQQNQS<br>RGKGPGKKNKKK | 3.28 | 0.01 | 3.04 | 2.13 | 0.22 | 0.28 |



|       |   |        |                                             |      |      |      |      |      |      |
|-------|---|--------|---------------------------------------------|------|------|------|------|------|------|
| 58012 | 0 | 51298  | QLCQMLGKIIAQQNQS<br>RGKGP GKKNKKK           | 3.28 | 0.01 | 3.04 | 2.13 | 0.22 | 0.28 |
| 58013 | 0 | 51298  | QLCQMLGKIIAQQNQS<br>RGKGP GKKNKKK           | 3.28 | 0.01 | 3.04 | 2.13 | 0.22 | 0.28 |
| 58014 | 0 | 51298  | QLCQMLGKIIAQQNQS<br>RGKGP GKKNKKK           | 3.28 | 0.01 | 3.04 | 2.13 | 0.22 | 0.28 |
| 58015 | 0 | 51298  | QLCQMLGKIIAQQNQS<br>RGKGP GKKNKKK           | 3.28 | 0.01 | 3.04 | 2.13 | 0.22 | 0.28 |
| 58016 | 0 | 51298  | QLCQMLGKIIAQQNQS<br>RGKGP GKKNKKK           | 3.28 | 0.01 | 3.04 | 2.13 | 1.59 | 0.28 |
| 58017 | 0 | 51298  | QLCQMLGKIIAQQNQS<br>RGKGP GKKNKKK           | 3.28 | 0.01 | 3.04 | 2.13 | 0.22 | 1.27 |
| 58018 | 0 | 489739 | QLCQYIASPVDQTAH                             | 2.65 | 0.01 | 2.69 | 3.05 | 0.85 | 1.28 |
| 58019 | 0 | 182272 | QLCVSAEQSEGHWKV                             | 2.67 | 0.01 | 0.78 | 0.44 | 1.13 | 0.85 |
| 58020 | 0 | 51303  | QLDDAL                                      | 1.90 | 0.01 | 3.78 | 1.81 | 0.22 | 0.85 |
| 58021 | 0 | 138228 | QLDFEDV                                     | 2.02 | 0.01 | 0.78 | 4.93 | 0.22 | 0.28 |
| 58022 | 0 | 138228 | QLDFEDV                                     | 2.02 | 0.01 | 0.78 | 0.68 | 0.22 | 0.28 |
| 58023 | 0 | 79052  | QLDPAF                                      | 1.88 | 0.01 | 2.08 | 0.68 | 0.22 | 0.28 |
| 58024 | 0 | 51306  | QLDPAFG                                     | 1.99 | 0.01 | 2.08 | 1.15 | 2.26 | 1.27 |
| 58025 | 0 | 51307  | QLDPAFGA                                    | 2.12 | 0.01 | 2.08 | 0.68 | 0.22 | 0.28 |
| 58026 | 0 | 51307  | QLDPAFGA                                    | 2.12 | 0.01 | 2.08 | 0.44 | 1.59 | 2.35 |
| 58027 | 0 | 51309  | QLDPAFRA                                    | 2.12 | 0.01 | 4.63 | 0.68 | 0.22 | 0.28 |
| 58028 | 0 | 51313  | QLDQRIILLFMLEW                              | 2.63 | 0.01 | 2.56 | 2.69 | 0.22 | 0.28 |
| 58029 | 0 | 95717  | QLDTDGKGYE                                  | 2.31 | 0.01 | 2.60 | 1.12 | 0.22 | 0.85 |
| 58030 | 0 | 51316  | QLEDKVKQLRRDLASR<br>EAKEELQDKVK             | 3.32 | 0.01 | 0.90 | 0.68 | 0.22 | 0.28 |
| 58031 | 0 | 51321  | QLEEKTKQYNDLQNNM<br>KTIKEQNEHLKNKFQSM<br>GK | 3.51 | 0.01 | 2.22 | 0.44 | 1.74 | 0.28 |
| 58032 | 0 | 51321  | QLEEKTKQYNDLQNNM<br>KTIKEQNEHLKNKFQSM<br>GK | 3.51 | 0.01 | 2.22 | 0.44 | 1.74 | 0.28 |
| 58033 | 0 | 51321  | QLEEKTKQYNDLQNNM<br>KTIKEQNEHLKNKFQSM<br>GK | 3.51 | 0.01 | 1.66 | 0.44 | 1.59 | 0.28 |
| 58034 | 0 | 240909 | QLEFRALLFIPRRAPFDLF<br>ENKKKK               | 3.16 | 3.67 | 0.78 | 0.44 | 1.13 | 0.28 |
| 58035 | 0 | 136573 | QLEKALDCQIYG                                | 2.46 | 0.01 | 1.96 | 0.44 | 0.85 | 0.28 |
| 58036 | 0 | 136573 | QLEKALDCQIYG                                | 2.46 | 0.01 | 1.96 | 3.57 | 0.22 | 2.02 |
| 58037 | 0 | 113129 | QLELPAVTPEDDGE                              | 2.62 | 0.01 | 2.19 | 1.15 | 0.22 | 1.27 |
| 58038 | 0 | 113129 | QLELPAVTPEDDGE                              | 2.62 | 0.01 | 2.19 | 1.15 | 0.22 | 2.02 |
| 58039 | 0 | 133921 | QLELTEGMRFDKGYI                             | 2.64 | 0.01 | 2.51 | 0.44 | 1.13 | 0.28 |
| 58040 | 0 | 133921 | QLELTEGMRFDKGYI                             | 2.64 | 0.01 | 2.51 | 0.44 | 1.93 | 0.28 |
| 58041 | 0 | 116814 | QLENDLDQVQESLLK                             | 2.71 | 0.01 | 2.36 | 0.44 | 1.23 | 1.28 |
| 58042 | 0 | 116814 | QLENDLDQVQESLLK                             | 2.71 | 0.01 | 2.36 | 0.44 | 1.23 | 1.27 |
| 58043 | 0 | 51327  | QLERANLRPCEQHLM                             | 2.69 | 0.01 | 2.16 | 2.90 | 0.22 | 0.85 |

|       |   |        |                                                                                                                                                                                     |      |      |      |      |      |      |
|-------|---|--------|-------------------------------------------------------------------------------------------------------------------------------------------------------------------------------------|------|------|------|------|------|------|
| 58044 | 0 | 125535 | QLESHSFYNLSKVTHIEIR<br>NTRNLTYIDP                                                                                                                                                   | 3.30 | 0.01 | 0.78 | 0.44 | 1.13 | 1.34 |
| 58045 | 0 | 125535 | QLESHSFYNLSKVTHIEIR<br>NTRNLTYIDP                                                                                                                                                   | 3.30 | 0.01 | 0.78 | 0.44 | 1.13 | 1.27 |
| 58046 | 0 | 51332  | QLFDRILLF                                                                                                                                                                           | 2.33 | 0.01 | 0.78 | 0.44 | 1.74 | 0.28 |
| 58047 | 0 | 51344  | QLFNLESSKIEVILKNAIV<br>YNSMYENFSTSFWIRIPK<br>YFNSISLNNEYTIINCME<br>NNSGWKVS LNYGEIIWT<br>LQDTQEIKQRVVFKY SQ<br>MINISDYINRWIFVTITN<br>NRLNNSKIYINGRLIDQK<br>PISNLGNIHASNNIMFKL<br>DG | 4.94 | 0.01 | 2.08 | 2.02 | 0.22 | 0.85 |
| 58048 | 0 | 51344  | QLFNLESSKIEVILKNAIV<br>YNSMYENFSTSFWIRIPK<br>YFNSISLNNEYTIINCME<br>NNSGWKVS LNYGEIIWT<br>LQDTQEIKQRVVFKY SQ<br>MINISDYINRWIFVTITN<br>NRLNNSKIYINGRLIDQK<br>PISNLGNIHASNNIMFKL<br>DG | 4.94 | 0.01 | 2.08 | 3.23 | 0.22 | 0.28 |
| 58049 | 0 | 51344  | QLFNLESSKIEVILKNAIV<br>YNSMYENFSTSFWIRIPK<br>YFNSISLNNEYTIINCME<br>NNSGWKVS LNYGEIIWT<br>LQDTQEIKQRVVFKY SQ<br>MINISDYINRWIFVTITN<br>NRLNNSKIYINGRLIDQK<br>PISNLGNIHASNNIMFKL<br>DG | 4.94 | 0.01 | 2.08 | 3.23 | 0.22 | 0.85 |
| 58050 | 0 | 51346  | QLFTFSPRR                                                                                                                                                                           | 2.21 | 0.01 | 1.96 | 0.44 | 0.85 | 1.34 |
| 58051 | 0 | 51350  | QLFYSRPVVSANGEPTV<br>KLY                                                                                                                                                            | 2.91 | 0.01 | 2.70 | 0.44 | 0.85 | 0.28 |
| 58052 | 0 | 51361  | QLGPRR                                                                                                                                                                              | 1.86 | 0.01 | 2.53 | 0.44 | 1.59 | 0.28 |
| 58053 | 0 | 132029 | QLGPTCLSSL                                                                                                                                                                          | 2.32 | 0.01 | 0.78 | 0.44 | 1.13 | 1.27 |
| 58054 | 0 | 132029 | QLGPTCLSSL                                                                                                                                                                          | 2.32 | 0.01 | 0.78 | 0.44 | 2.35 | 1.27 |
| 58055 | 0 | 132029 | QLGPTCLSSL                                                                                                                                                                          | 2.32 | 0.01 | 0.78 | 0.44 | 1.93 | 1.27 |
| 58056 | 0 | 132029 | QLGPTCLSSL                                                                                                                                                                          | 2.32 | 0.01 | 0.78 | 0.44 | 1.41 | 0.28 |
| 58057 | 0 | 132030 | QLHRRLAMATFALFKDG<br>DQKLEKIICQ                                                                                                                                                     | 3.23 | 0.01 | 0.78 | 0.44 | 1.13 | 0.85 |
| 58058 | 0 | 156945 | QLHTSI                                                                                                                                                                              | 1.88 | 0.01 | 0.90 | 2.74 | 0.22 | 0.85 |

|       |   |        |                         |      |      |      |      |      |      |
|-------|---|--------|-------------------------|------|------|------|------|------|------|
| 58059 | 0 | 165642 | QLHVDKAVSGLRSLTTL<br>RA | 2.95 | 0.01 | 0.78 | 0.44 | 0.85 | 0.28 |
| 58060 | 0 | 450963 | QLIHWRH                 | 2.02 | 0.01 | 0.90 | 0.44 | 1.23 | 1.39 |
| 58061 | 0 | 51370  | QLINSNGSWHIN            | 2.49 | 0.01 | 1.72 | 1.15 | 0.22 | 0.28 |
| 58062 | 0 | 51370  | QLINSNGSWHIN            | 2.49 | 0.01 | 1.72 | 0.44 | 0.85 | 0.28 |
| 58063 | 0 | 51370  | QLINSNGSWHIN            | 2.49 | 0.01 | 1.72 | 2.36 | 0.22 | 0.28 |
| 58064 | 0 | 108600 | QLINTNGS                | 2.12 | 0.01 | 1.72 | 0.44 | 0.85 | 0.28 |
| 58065 | 0 | 108600 | QLINTNGS                | 2.12 | 0.01 | 1.72 | 2.37 | 0.22 | 0.28 |
| 58066 | 0 | 108600 | QLINTNGS                | 2.12 | 0.01 | 1.72 | 2.37 | 0.22 | 1.34 |
| 58067 | 0 | 108600 | QLINTNGS                | 2.12 | 0.01 | 1.72 | 2.37 | 0.22 | 1.48 |
| 58068 | 0 | 108600 | QLINTNGS                | 2.12 | 0.01 | 1.72 | 2.37 | 0.22 | 2.12 |
| 58069 | 0 | 108600 | QLINTNGS                | 2.12 | 0.01 | 1.72 | 2.37 | 0.22 | 1.48 |
| 58070 | 0 | 108600 | QLINTNGS                | 2.12 | 0.01 | 1.72 | 0.44 | 0.85 | 0.28 |
| 58071 | 0 | 108600 | QLINTNGS                | 2.12 | 0.01 | 1.72 | 0.44 | 0.85 | 0.28 |
| 58072 | 0 | 108600 | QLINTNGS                | 2.12 | 0.01 | 1.72 | 0.44 | 0.85 | 1.34 |
| 58073 | 0 | 509287 | QLINTNGSWHI             | 2.39 | 0.01 | 2.41 | 0.68 | 0.22 | 2.49 |
| 58074 | 0 | 509287 | QLINTNGSWHI             | 2.39 | 0.01 | 2.41 | 0.68 | 0.22 | 0.28 |
| 58075 | 0 | 509287 | QLINTNGSWHI             | 2.39 | 0.01 | 2.41 | 0.68 | 0.22 | 1.66 |
| 58076 | 0 | 509287 | QLINTNGSWHI             | 2.39 | 0.01 | 2.41 | 0.68 | 0.22 | 1.66 |
| 58077 | 0 | 509287 | QLINTNGSWHI             | 2.39 | 0.01 | 2.41 | 0.68 | 0.22 | 1.66 |
| 58078 | 0 | 509287 | QLINTNGSWHI             | 2.39 | 0.01 | 2.41 | 0.68 | 0.22 | 1.66 |
| 58079 | 0 | 509287 | QLINTNGSWHI             | 2.39 | 0.01 | 2.41 | 0.68 | 0.22 | 1.66 |
| 58080 | 0 | 509287 | QLINTNGSWHI             | 2.39 | 0.01 | 2.41 | 0.68 | 0.22 | 1.66 |
| 58081 | 0 | 509287 | QLINTNGSWHI             | 2.39 | 0.01 | 2.41 | 0.68 | 0.22 | 0.28 |
| 58082 | 0 | 509287 | QLINTNGSWHI             | 2.39 | 0.01 | 2.41 | 0.68 | 0.22 | 1.66 |
| 58083 | 0 | 509287 | QLINTNGSWHI             | 2.39 | 0.01 | 2.41 | 0.68 | 0.22 | 1.66 |
| 58084 | 0 | 509287 | QLINTNGSWHI             | 2.39 | 0.01 | 2.41 | 0.68 | 0.22 | 1.66 |
| 58085 | 0 | 509287 | QLINTNGSWHI             | 2.39 | 0.01 | 2.41 | 0.68 | 0.22 | 1.66 |
| 58086 | 0 | 509287 | QLINTNGSWHI             | 2.39 | 0.01 | 2.41 | 0.68 | 0.22 | 1.66 |
| 58087 | 0 | 509287 | QLINTNGSWHI             | 2.39 | 0.01 | 2.41 | 0.68 | 0.22 | 1.66 |
| 58088 | 0 | 509287 | QLINTNGSWHI             | 2.39 | 0.01 | 2.41 | 0.68 | 0.22 | 0.28 |
| 58089 | 0 | 509287 | QLINTNGSWHI             | 2.39 | 0.01 | 2.41 | 0.68 | 0.22 | 1.34 |
| 58090 | 0 | 51371  | QLINTNGSWHIN            | 2.48 | 0.01 | 3.42 | 0.68 | 0.22 | 0.28 |
| 58091 | 0 | 51371  | QLINTNGSWHIN            | 2.48 | 0.01 | 3.42 | 2.36 | 0.22 | 0.28 |
| 58092 | 0 | 51371  | QLINTNGSWHIN            | 2.48 | 0.01 | 3.42 | 0.68 | 0.22 | 0.28 |
| 58093 | 0 | 51371  | QLINTNGSWHIN            | 2.48 | 0.01 | 3.42 | 0.68 | 0.22 | 1.34 |
| 58094 | 0 | 51371  | QLINTNGSWHIN            | 2.48 | 0.01 | 4.08 | 1.15 | 0.22 | 0.28 |
| 58095 | 0 | 51371  | QLINTNGSWHIN            | 2.48 | 0.01 | 2.45 | 1.15 | 0.22 | 0.28 |
| 58096 | 0 | 51371  | QLINTNGSWHIN            | 2.48 | 0.01 | 1.72 | 0.68 | 0.22 | 0.28 |
| 58097 | 0 | 51371  | QLINTNGSWHIN            | 2.48 | 0.01 | 1.72 | 0.68 | 0.22 | 1.34 |
| 58098 | 0 | 51371  | QLINTNGSWHIN            | 2.48 | 0.01 | 2.45 | 0.68 | 0.22 | 0.28 |
| 58099 | 0 | 51371  | QLINTNGSWHIN            | 2.48 | 0.01 | 2.45 | 0.68 | 0.22 | 1.34 |
| 58100 | 0 | 51371  | QLINTNGSWHIN            | 2.48 | 0.01 | 2.45 | 1.15 | 0.22 | 2.98 |
| 58101 | 0 | 51371  | QLINTNGSWHIN            | 2.48 | 0.01 | 2.45 | 2.36 | 0.22 | 1.34 |
| 58102 | 0 | 51371  | QLINTNGSWHIN            | 2.48 | 0.01 | 2.45 | 2.36 | 0.22 | 1.34 |
| 58103 | 0 | 51371  | QLINTNGSWHIN            | 2.48 | 0.01 | 2.45 | 1.15 | 0.22 | 0.28 |
| 58104 | 0 | 51371  | QLINTNGSWHIN            | 2.48 | 0.01 | 1.72 | 0.68 | 0.22 | 0.28 |

|       |   |       |              |      |      |      |      |      |      |
|-------|---|-------|--------------|------|------|------|------|------|------|
| 58105 | 0 | 51371 | QLINTNGSWHIN | 2.48 | 0.01 | 1.72 | 0.68 | 0.22 | 2.35 |
| 58106 | 0 | 51371 | QLINTNGSWHIN | 2.48 | 0.01 | 1.72 | 2.36 | 0.22 | 2.35 |
| 58107 | 0 | 51371 | QLINTNGSWHIN | 2.48 | 0.01 | 1.72 | 1.15 | 0.22 | 2.35 |
| 58108 | 0 | 51371 | QLINTNGSWHIN | 2.48 | 0.01 | 1.72 | 0.44 | 0.85 | 0.28 |
| 58109 | 0 | 51371 | QLINTNGSWHIN | 2.48 | 0.01 | 2.45 | 3.27 | 0.22 | 0.28 |
| 58110 | 0 | 51371 | QLINTNGSWHIN | 2.48 | 0.01 | 2.45 | 3.27 | 0.22 | 0.28 |
| 58111 | 0 | 51371 | QLINTNGSWHIN | 2.48 | 0.01 | 2.45 | 3.27 | 0.22 | 1.34 |
| 58112 | 0 | 51371 | QLINTNGSWHIN | 2.48 | 0.01 | 2.45 | 3.27 | 0.22 | 1.34 |
| 58113 | 0 | 51371 | QLINTNGSWHIN | 2.48 | 0.01 | 2.45 | 3.27 | 0.22 | 1.34 |
| 58114 | 0 | 51371 | QLINTNGSWHIN | 2.48 | 0.01 | 2.45 | 3.27 | 0.22 | 1.34 |
| 58115 | 0 | 51371 | QLINTNGSWHIN | 2.48 | 0.01 | 2.45 | 3.27 | 0.22 | 1.34 |
| 58116 | 0 | 51371 | QLINTNGSWHIN | 2.48 | 0.01 | 2.45 | 3.27 | 0.22 | 1.34 |
| 58117 | 0 | 51371 | QLINTNGSWHIN | 2.48 | 0.01 | 2.45 | 3.27 | 0.22 | 0.28 |
| 58118 | 0 | 51371 | QLINTNGSWHIN | 2.48 | 0.01 | 2.45 | 3.27 | 0.22 | 1.66 |
| 58119 | 0 | 51371 | QLINTNGSWHIN | 2.48 | 0.01 | 2.45 | 3.27 | 0.22 | 0.28 |
| 58120 | 0 | 51371 | QLINTNGSWHIN | 2.48 | 0.01 | 1.72 | 0.68 | 0.22 | 0.28 |
| 58121 | 0 | 51371 | QLINTNGSWHIN | 2.48 | 0.01 | 2.45 | 0.44 | 0.85 | 0.28 |
| 58122 | 0 | 51371 | QLINTNGSWHIN | 2.48 | 0.01 | 2.45 | 0.44 | 0.85 | 0.28 |
| 58123 | 0 | 51371 | QLINTNGSWHIN | 2.48 | 0.01 | 2.45 | 0.44 | 0.85 | 0.28 |
| 58124 | 0 | 51371 | QLINTNGSWHIN | 2.48 | 0.01 | 2.45 | 0.44 | 0.85 | 0.28 |
| 58125 | 0 | 51371 | QLINTNGSWHIN | 2.48 | 0.01 | 2.45 | 0.44 | 0.85 | 1.34 |
| 58126 | 0 | 51371 | QLINTNGSWHIN | 2.48 | 0.01 | 2.45 | 0.44 | 0.85 | 1.34 |
| 58127 | 0 | 51371 | QLINTNGSWHIN | 2.48 | 0.01 | 2.45 | 0.44 | 0.85 | 1.34 |
| 58128 | 0 | 51371 | QLINTNGSWHIN | 2.48 | 0.01 | 2.45 | 0.44 | 0.85 | 1.34 |
| 58129 | 0 | 51371 | QLINTNGSWHIN | 2.48 | 0.01 | 2.45 | 0.44 | 0.85 | 1.34 |
| 58130 | 0 | 51371 | QLINTNGSWHIN | 2.48 | 0.01 | 2.45 | 0.44 | 0.85 | 0.28 |
| 58131 | 0 | 51371 | QLINTNGSWHIN | 2.48 | 0.01 | 2.45 | 0.44 | 0.85 | 0.28 |
| 58132 | 0 | 51371 | QLINTNGSWHIN | 2.48 | 0.01 | 2.45 | 3.27 | 0.22 | 1.27 |
| 58133 | 0 | 51371 | QLINTNGSWHIN | 2.48 | 0.01 | 2.45 | 3.27 | 0.22 | 1.75 |
| 58134 | 0 | 51371 | QLINTNGSWHIN | 2.48 | 0.01 | 2.45 | 3.27 | 0.22 | 2.56 |
| 58135 | 0 | 51371 | QLINTNGSWHIN | 2.48 | 0.01 | 1.72 | 0.68 | 0.22 | 2.49 |
| 58136 | 0 | 51371 | QLINTNGSWHIN | 2.48 | 0.01 | 1.72 | 0.68 | 0.22 | 0.28 |
| 58137 | 0 | 51371 | QLINTNGSWHIN | 2.48 | 0.01 | 1.72 | 0.68 | 0.22 | 1.34 |
| 58138 | 0 | 51371 | QLINTNGSWHIN | 2.48 | 0.01 | 2.45 | 3.27 | 0.22 | 1.34 |
| 58139 | 0 | 51371 | QLINTNGSWHIN | 2.48 | 0.01 | 1.72 | 0.68 | 0.22 | 1.27 |
| 58140 | 0 | 51371 | QLINTNGSWHIN | 2.48 | 0.01 | 1.72 | 0.68 | 0.22 | 0.28 |
| 58141 | 0 | 51371 | QLINTNGSWHIN | 2.48 | 0.01 | 1.72 | 0.68 | 0.22 | 2.49 |
| 58142 | 0 | 51371 | QLINTNGSWHIN | 2.48 | 0.01 | 1.72 | 0.68 | 0.22 | 2.49 |
| 58143 | 0 | 51371 | QLINTNGSWHIN | 2.48 | 0.01 | 1.72 | 0.68 | 0.22 | 1.66 |
| 58144 | 0 | 51371 | QLINTNGSWHIN | 2.48 | 0.01 | 1.72 | 0.68 | 0.22 | 1.66 |
| 58145 | 0 | 51371 | QLINTNGSWHIN | 2.48 | 0.01 | 1.72 | 0.68 | 0.22 | 0.28 |
| 58146 | 0 | 51371 | QLINTNGSWHIN | 2.48 | 0.01 | 1.72 | 0.68 | 0.22 | 0.28 |
| 58147 | 0 | 51371 | QLINTNGSWHIN | 2.48 | 0.01 | 1.72 | 0.68 | 0.22 | 1.34 |
| 58148 | 0 | 51371 | QLINTNGSWHIN | 2.48 | 0.01 | 1.72 | 0.68 | 0.22 | 1.66 |
| 58149 | 0 | 51371 | QLINTNGSWHIN | 2.48 | 0.01 | 1.72 | 0.68 | 0.22 | 1.66 |
| 58150 | 0 | 51371 | QLINTNGSWHIN | 2.48 | 0.01 | 1.72 | 0.68 | 0.22 | 1.66 |
| 58151 | 0 | 51371 | QLINTNGSWHIN | 2.48 | 0.01 | 1.72 | 0.68 | 0.22 | 1.66 |

|       |   |       |                 |      |      |      |      |      |      |
|-------|---|-------|-----------------|------|------|------|------|------|------|
| 58152 | 0 | 51371 | QLINTNGSWHIN    | 2.48 | 0.01 | 1.72 | 0.68 | 0.22 | 1.66 |
| 58153 | 0 | 51371 | QLINTNGSWHIN    | 2.48 | 0.01 | 1.72 | 0.68 | 0.22 | 1.66 |
| 58154 | 0 | 51371 | QLINTNGSWHIN    | 2.48 | 0.01 | 1.72 | 0.68 | 0.22 | 1.66 |
| 58155 | 0 | 51371 | QLINTNGSWHIN    | 2.48 | 0.01 | 1.72 | 0.68 | 0.22 | 1.66 |
| 58156 | 0 | 51371 | QLINTNGSWHIN    | 2.48 | 0.01 | 1.72 | 0.68 | 0.22 | 1.66 |
| 58157 | 0 | 51371 | QLINTNGSWHIN    | 2.48 | 0.01 | 1.72 | 0.68 | 0.22 | 1.66 |
| 58158 | 0 | 51371 | QLINTNGSWHIN    | 2.48 | 0.01 | 1.72 | 0.68 | 0.22 | 1.66 |
| 58159 | 0 | 51371 | QLINTNGSWHIN    | 2.48 | 0.01 | 1.72 | 0.68 | 0.22 | 1.66 |
| 58160 | 0 | 51371 | QLINTNGSWHIN    | 2.48 | 0.01 | 1.72 | 0.68 | 0.22 | 1.34 |
| 58161 | 0 | 51371 | QLINTNGSWHIN    | 2.48 | 0.01 | 1.72 | 0.68 | 0.22 | 1.34 |
| 58162 | 0 | 51371 | QLINTNGSWHIN    | 2.48 | 0.01 | 1.72 | 0.68 | 0.22 | 1.34 |
| 58163 | 0 | 51371 | QLINTNGSWHIN    | 2.48 | 0.01 | 1.72 | 0.68 | 0.22 | 1.34 |
| 58164 | 0 | 51371 | QLINTNGSWHIN    | 2.48 | 0.01 | 1.72 | 0.68 | 0.22 | 1.34 |
| 58165 | 0 | 51371 | QLINTNGSWHIN    | 2.48 | 0.01 | 1.72 | 0.68 | 0.22 | 1.34 |
| 58166 | 0 | 51371 | QLINTNGSWHIN    | 2.48 | 0.01 | 1.72 | 0.68 | 0.22 | 1.34 |
| 58167 | 0 | 51371 | QLINTNGSWHIN    | 2.48 | 0.01 | 1.72 | 0.68 | 0.22 | 1.34 |
| 58168 | 0 | 51371 | QLINTNGSWHIN    | 2.48 | 0.01 | 1.72 | 0.68 | 0.22 | 1.34 |
| 58169 | 0 | 51371 | QLINTNGSWHIN    | 2.48 | 0.01 | 1.72 | 0.68 | 0.22 | 0.28 |
| 58170 | 0 | 51371 | QLINTNGSWHIN    | 2.48 | 0.01 | 1.72 | 3.27 | 0.22 | 1.34 |
| 58171 | 0 | 51371 | QLINTNGSWHIN    | 2.48 | 0.01 | 1.72 | 3.27 | 0.22 | 1.34 |
| 58172 | 0 | 51371 | QLINTNGSWHIN    | 2.48 | 0.01 | 1.72 | 3.27 | 0.22 | 1.34 |
| 58173 | 0 | 51371 | QLINTNGSWHIN    | 2.48 | 0.01 | 1.72 | 3.27 | 0.22 | 0.28 |
| 58174 | 0 | 51371 | QLINTNGSWHIN    | 2.48 | 0.01 | 2.45 | 2.36 | 0.22 | 1.66 |
| 58175 | 0 | 51371 | QLINTNGSWHIN    | 2.48 | 0.01 | 2.45 | 2.36 | 0.22 | 1.66 |
| 58176 | 0 | 51371 | QLINTNGSWHIN    | 2.48 | 0.01 | 2.45 | 2.36 | 0.22 | 1.66 |
| 58177 | 0 | 51371 | QLINTNGSWHIN    | 2.48 | 0.01 | 2.45 | 0.68 | 0.22 | 1.66 |
| 58178 | 0 | 51371 | QLINTNGSWHIN    | 2.48 | 0.01 | 2.45 | 0.68 | 0.22 | 1.66 |
| 58179 | 0 | 51371 | QLINTNGSWHIN    | 2.48 | 0.01 | 2.45 | 0.68 | 0.22 | 1.66 |
| 58180 | 0 | 51371 | QLINTNGSWHIN    | 2.48 | 0.01 | 2.45 | 2.36 | 0.22 | 1.66 |
| 58181 | 0 | 51371 | QLINTNGSWHIN    | 2.48 | 0.01 | 2.45 | 2.36 | 0.22 | 1.66 |
| 58182 | 0 | 51371 | QLINTNGSWHIN    | 2.48 | 0.01 | 2.45 | 2.36 | 0.22 | 1.66 |
| 58183 | 0 | 51371 | QLINTNGSWHIN    | 2.48 | 0.01 | 2.45 | 0.68 | 0.22 | 1.66 |
| 58184 | 0 | 51371 | QLINTNGSWHIN    | 2.48 | 0.01 | 2.45 | 0.68 | 0.22 | 1.66 |
| 58185 | 0 | 51371 | QLINTNGSWHIN    | 2.48 | 0.01 | 2.45 | 0.68 | 0.22 | 1.66 |
| 58186 | 0 | 51371 | QLINTNGSWHIN    | 2.48 | 0.01 | 2.68 | 2.36 | 0.22 | 1.39 |
| 58187 | 0 | 51371 | QLINTNGSWHIN    | 2.48 | 0.01 | 1.72 | 0.44 | 0.85 | 2.49 |
| 58188 | 0 | 51371 | QLINTNGSWHIN    | 2.48 | 0.01 | 1.72 | 3.27 | 0.22 | 0.28 |
| 58189 | 0 | 51372 | QLINTNGSWHINSTA | 2.68 | 0.01 | 1.72 | 0.44 | 1.59 | 0.28 |
| 58190 | 0 | 51372 | QLINTNGSWHINSTA | 2.68 | 0.01 | 1.72 | 0.44 | 1.59 | 1.34 |
| 58191 | 0 | 51372 | QLINTNGSWHINSTA | 2.68 | 0.01 | 1.72 | 0.44 | 0.85 | 1.39 |
| 58192 | 0 | 51372 | QLINTNGSWHINSTA | 2.68 | 0.01 | 1.72 | 0.44 | 0.85 | 1.39 |
| 58193 | 0 | 51372 | QLINTNGSWHINSTA | 2.68 | 0.01 | 1.72 | 0.44 | 0.85 | 0.28 |
| 58194 | 0 | 51372 | QLINTNGSWHINSTA | 2.68 | 0.01 | 2.41 | 0.44 | 0.22 | 0.28 |
| 58195 | 0 | 51372 | QLINTNGSWHINSTA | 2.68 | 0.01 | 2.45 | 0.44 | 1.59 | 0.28 |
| 58196 | 0 | 51372 | QLINTNGSWHINSTA | 2.68 | 0.01 | 2.45 | 2.74 | 0.22 | 0.28 |
| 58197 | 0 | 51372 | QLINTNGSWHINSTA | 2.68 | 0.01 | 2.45 | 0.44 | 1.59 | 1.34 |
| 58198 | 0 | 51372 | QLINTNGSWHINSTA | 2.68 | 0.01 | 2.45 | 0.68 | 0.22 | 1.34 |

|       |   |        |                   |      |      |      |      |      |      |
|-------|---|--------|-------------------|------|------|------|------|------|------|
| 58199 | 0 | 51372  | QLINTNGSWHINSTA   | 2.68 | 0.01 | 2.45 | 2.74 | 0.22 | 0.28 |
| 58200 | 0 | 51372  | QLINTNGSWHINSTA   | 2.68 | 0.01 | 2.45 | 2.74 | 0.22 | 1.34 |
| 58201 | 0 | 51372  | QLINTNGSWHINSTA   | 2.68 | 0.01 | 1.72 | 3.23 | 0.22 | 0.28 |
| 58202 | 0 | 51372  | QLINTNGSWHINSTA   | 2.68 | 0.01 | 2.45 | 0.44 | 0.22 | 0.28 |
| 58203 | 0 | 51372  | QLINTNGSWHINSTA   | 2.68 | 0.01 | 2.45 | 0.44 | 1.41 | 0.28 |
| 58204 | 0 | 51372  | QLINTNGSWHINSTA   | 2.68 | 0.01 | 2.45 | 0.44 | 0.22 | 1.34 |
| 58205 | 0 | 51372  | QLINTNGSWHINSTA   | 2.68 | 0.01 | 2.45 | 0.44 | 0.22 | 1.34 |
| 58206 | 0 | 51372  | QLINTNGSWHINSTA   | 2.68 | 0.01 | 2.45 | 0.44 | 0.22 | 1.34 |
|       |   |        | QLINTNGSWHINSTALN |      |      |      |      |      |      |
| 58207 | 0 | 51373  | CNESLNTGWLGLFYQ   | 3.53 | 0.01 | 1.72 | 0.44 | 1.59 | 0.28 |
|       |   |        | HKF               |      |      |      |      |      |      |
| 58208 | 0 | 176383 | QLINTNGSWHVN      | 2.45 | 4.33 | 3.42 | 0.68 | 0.22 | 2.49 |
| 58209 | 0 | 176383 | QLINTNGSWHVN      | 2.45 | 4.33 | 3.42 | 0.68 | 0.22 | 0.28 |
| 58210 | 0 | 176383 | QLINTNGSWHVN      | 2.45 | 4.33 | 3.42 | 0.44 | 0.85 | 2.35 |
| 58211 | 0 | 176383 | QLINTNGSWHVN      | 2.45 | 4.33 | 3.42 | 0.44 | 0.85 | 2.35 |
| 58212 | 0 | 51374  | QLINTNGSWHVN      | 2.45 | 0.01 | 3.42 | 1.15 | 0.22 | 0.28 |
| 58213 | 0 | 51374  | QLINTNGSWHVN      | 2.45 | 0.01 | 1.72 | 1.15 | 0.22 | 0.28 |
| 58214 | 0 | 51374  | QLINTNGSWHVN      | 2.45 | 0.01 | 1.72 | 0.44 | 0.85 | 0.28 |
| 58215 | 0 | 51374  | QLINTNGSWHVN      | 2.45 | 0.01 | 1.72 | 2.36 | 0.22 | 0.28 |
| 58216 | 0 | 51374  | QLINTNGSWHVN      | 2.45 | 0.01 | 3.42 | 2.36 | 0.22 | 2.49 |
| 58217 | 0 | 51374  | QLINTNGSWHVN      | 2.45 | 0.01 | 3.42 | 2.36 | 0.22 | 1.34 |
| 58218 | 0 | 51374  | QLINTNGSWHVN      | 2.45 | 0.01 | 3.42 | 2.36 | 0.22 | 1.34 |
| 58219 | 0 | 51374  | QLINTNGSWHVN      | 2.45 | 0.01 | 3.42 | 0.68 | 0.22 | 1.34 |
| 58220 | 0 | 51374  | QLINTNGSWHVN      | 2.45 | 0.01 | 3.42 | 0.68 | 0.22 | 1.34 |
| 58221 | 0 | 51374  | QLINTNGSWHVN      | 2.45 | 0.01 | 3.42 | 2.36 | 0.22 | 2.49 |
| 58222 | 0 | 51374  | QLINTNGSWHVN      | 2.45 | 0.01 | 3.42 | 2.36 | 0.22 | 1.66 |
| 58223 | 0 | 51374  | QLINTNGSWHVN      | 2.45 | 0.01 | 3.42 | 2.36 | 0.22 | 1.66 |
| 58224 | 0 | 51374  | QLINTNGSWHVN      | 2.45 | 0.01 | 3.42 | 2.36 | 0.22 | 1.66 |
| 58225 | 0 | 51374  | QLINTNGSWHVN      | 2.45 | 0.01 | 3.42 | 0.68 | 0.22 | 1.66 |
| 58226 | 0 | 51374  | QLINTNGSWHVN      | 2.45 | 0.01 | 3.42 | 0.68 | 0.22 | 1.66 |
| 58227 | 0 | 51374  | QLINTNGSWHVN      | 2.45 | 0.01 | 3.42 | 0.68 | 0.22 | 1.66 |
| 58228 | 0 | 51374  | QLINTNGSWHVN      | 2.45 | 0.01 | 3.42 | 2.36 | 0.22 | 1.66 |
| 58229 | 0 | 51374  | QLINTNGSWHVN      | 2.45 | 0.01 | 3.42 | 2.36 | 0.22 | 1.66 |
| 58230 | 0 | 51374  | QLINTNGSWHVN      | 2.45 | 0.01 | 3.42 | 2.36 | 0.22 | 1.66 |
| 58231 | 0 | 51374  | QLINTNGSWHVN      | 2.45 | 0.01 | 3.42 | 2.36 | 0.22 | 1.66 |
| 58232 | 0 | 51374  | QLINTNGSWHVN      | 2.45 | 0.01 | 3.42 | 2.36 | 0.22 | 1.66 |
| 58233 | 0 | 51374  | QLINTNGSWHVN      | 2.45 | 0.01 | 3.42 | 2.36 | 0.22 | 1.66 |
| 58234 | 0 | 51374  | QLINTNGSWHVN      | 2.45 | 0.01 | 3.42 | 0.68 | 0.22 | 1.66 |
| 58235 | 0 | 51374  | QLINTNGSWHVN      | 2.45 | 0.01 | 3.42 | 0.68 | 0.22 | 1.66 |
| 58236 | 0 | 51374  | QLINTNGSWHVN      | 2.45 | 0.01 | 3.42 | 0.68 | 0.22 | 1.66 |
| 58237 | 0 | 51379  | QLIRAAEIRASANLAAT | 2.82 | 0.01 | 2.48 | 0.44 | 0.85 | 0.28 |
| 58238 | 0 | 51379  | QLIRAAEIRASANLAAT | 2.82 | 0.01 | 2.48 | 1.20 | 0.22 | 0.28 |
| 58239 | 0 | 51383  | QLITKPL           | 2.02 | 0.01 | 0.90 | 0.44 | 1.59 | 1.27 |
| 58240 | 0 | 123668 | QLKEGYLKD         | 2.23 | 0.01 | 2.28 | 2.00 | 0.22 | 0.28 |

|       |   |        |                          |      |      |      |      |      |      |
|-------|---|--------|--------------------------|------|------|------|------|------|------|
| 58241 | 0 | 434650 | QLKGQGKSRLGDLYEEE        | 2.81 | 2.84 | 0.78 | 0.44 | 1.13 | 0.28 |
| 58242 | 0 | 172884 | QLKHIFKTSLTVADK          | 2.66 | 0.01 | 0.78 | 0.44 | 1.41 | 0.28 |
| 58243 | 0 | 172884 | QLKHIFKTSLTVADK          | 2.66 | 0.01 | 0.78 | 0.44 | 1.13 | 0.28 |
| 58244 | 0 | 98373  | QLKKFLKIALETPARI         | 2.75 | 0.01 | 2.04 | 0.44 | 2.98 | 0.28 |
| 58245 | 0 | 51390  | QLKLDWFKKGSS             | 2.46 | 0.01 | 2.30 | 0.68 | 0.22 | 0.28 |
| 58246 | 0 | 51390  | QLKLDWFKKGSS             | 2.46 | 0.01 | 2.30 | 0.68 | 0.22 | 1.34 |
| 58247 | 0 | 51390  | QLKLDWFKKGSS             | 2.46 | 0.01 | 2.30 | 0.68 | 0.22 | 0.28 |
| 58248 | 0 | 51391  | QLKLNW                   | 1.90 | 0.01 | 2.40 | 0.44 | 0.85 | 0.28 |
| 58249 | 0 | 51392  | QLKLNWF                  | 2.02 | 0.01 | 2.40 | 0.44 | 0.85 | 0.28 |
| 58250 | 0 | 51392  | QLKLNWF                  | 2.02 | 0.01 | 2.40 | 0.44 | 0.85 | 0.28 |
| 58251 | 0 | 51392  | QLKLNWF                  | 2.02 | 0.01 | 2.40 | 0.44 | 0.85 | 0.28 |
| 58252 | 0 | 51392  | QLKLNWF                  | 2.02 | 0.01 | 2.40 | 0.44 | 0.85 | 0.28 |
| 58253 | 0 | 51393  | QLKLNWFKKGSS             | 2.46 | 0.01 | 3.65 | 1.20 | 0.22 | 0.28 |
| 58254 | 0 | 51393  | QLKLNWFKKGSS             | 2.46 | 0.01 | 3.65 | 1.15 | 0.22 | 0.28 |
| 58255 | 0 | 51393  | QLKLNWFKKGSS             | 2.46 | 0.01 | 3.65 | 1.15 | 0.22 | 0.28 |
| 58256 | 0 | 51393  | QLKLNWFKKGSS             | 2.46 | 0.01 | 3.65 | 1.20 | 0.22 | 2.02 |
| 58257 | 0 | 51393  | QLKLNWFKKGSS             | 2.46 | 0.01 | 3.65 | 1.15 | 0.22 | 2.02 |
| 58258 | 0 | 51393  | QLKLNWFKKGSS             | 2.46 | 0.01 | 3.65 | 1.20 | 0.22 | 1.34 |
| 58259 | 0 | 106042 | QLKNNNPFKFFVPPS          | 2.68 | 0.01 | 2.16 | 0.44 | 1.23 | 0.85 |
| 58260 | 0 | 98374  | QLKPPQEEGEPLL            | 2.59 | 0.01 | 2.04 | 0.44 | 2.98 | 0.28 |
| 58261 | 0 | 95719  | QLKTADLPAGRDETTSF<br>VLV | 2.92 | 0.01 | 2.39 | 2.25 | 0.22 | 0.28 |
| 58262 | 0 | 483417 | QLLNVTQMLNMSSA<br>HKC    | 2.85 | 0.01 | 3.12 | 0.68 | 0.22 | 0.28 |
| 58263 | 0 | 95720  | QLLPPSGS                 | 2.14 | 0.01 | 0.90 | 2.59 | 0.22 | 0.28 |
| 58264 | 0 | 148773 | QLLQIPEQSQ               | 2.35 | 0.01 | 1.86 | 0.44 | 1.23 | 0.85 |
| 58265 | 0 | 51428  | QLLRIPQAIMDM             | 2.49 | 0.01 | 2.68 | 0.44 | 0.85 | 0.28 |
| 58266 | 0 | 161271 | QLLRIPQAIMDMIAGAH<br>WGV | 2.94 | 0.01 | 2.45 | 0.68 | 0.22 | 0.28 |
| 58267 | 0 | 51431  | QLLRLKKYKV               | 2.35 | 0.01 | 1.60 | 0.44 | 1.23 | 0.28 |
| 58268 | 0 | 51431  | QLLRLKKYKV               | 2.35 | 0.01 | 1.60 | 0.44 | 1.23 | 0.28 |
| 58269 | 0 | 51438  | QLSSSKYTIQRSTGDNI<br>DT  | 2.95 | 0.01 | 3.00 | 0.68 | 0.22 | 0.28 |
| 58270 | 0 | 51438  | QLSSSKYTIQRSTGDNI<br>DT  | 2.95 | 0.01 | 3.00 | 0.68 | 0.22 | 1.48 |
| 58271 | 0 | 51438  | QLSSSKYTIQRSTGDNI<br>DT  | 2.95 | 0.01 | 3.00 | 0.68 | 0.22 | 1.57 |
| 58272 | 0 | 51438  | QLSSSKYTIQRSTGDNI<br>DT  | 2.95 | 0.01 | 3.00 | 0.68 | 0.22 | 0.28 |
| 58273 | 0 | 51439  | QLLTAIDLADNT             | 2.51 | 0.01 | 3.61 | 1.20 | 0.22 | 0.85 |
| 58274 | 0 | 156946 | QLLYGS                   | 1.89 | 0.01 | 0.90 | 2.74 | 0.22 | 0.85 |
| 58275 | 0 | 167068 | QLMAFGGSSE               | 2.29 | 0.01 | 0.78 | 0.44 | 1.41 | 0.28 |
| 58276 | 0 | 167068 | QLMAFGGSSE               | 2.29 | 0.01 | 0.78 | 0.44 | 1.41 | 0.28 |
| 58277 | 0 | 167068 | QLMAFGGSSE               | 2.29 | 0.01 | 0.78 | 0.44 | 1.41 | 1.34 |
| 58278 | 0 | 177926 | QLMEEKKKKKDDKKK          | 2.70 | 0.01 | 0.78 | 0.44 | 1.13 | 0.85 |
| 58279 | 0 | 111678 | QLNKIQHFTTNS             | 2.47 | 0.01 | 0.90 | 0.44 | 0.85 | 1.39 |

|       |   |        |                              |      |      |      |      |      |      |
|-------|---|--------|------------------------------|------|------|------|------|------|------|
| 58280 | 0 | 144046 | QLNKLQIPLSII                 | 2.50 | 0.01 | 0.90 | 0.44 | 0.85 | 0.28 |
| 58281 | 0 | 144046 | QLNKLQIPLSII                 | 2.50 | 0.01 | 0.90 | 1.20 | 0.22 | 1.39 |
| 58282 | 0 | 144046 | QLNKLQIPLSII                 | 2.50 | 0.01 | 0.90 | 0.44 | 1.41 | 0.28 |
| 58283 | 0 | 51454  | QLNPKDNDVEL                  | 2.41 | 0.01 | 2.67 | 0.68 | 0.22 | 0.28 |
| 58284 | 0 | 51454  | QLNPKDNDVEL                  | 2.41 | 0.01 | 2.67 | 1.12 | 0.22 | 0.28 |
| 58285 | 0 | 51454  | QLNPKDNDVEL                  | 2.41 | 0.01 | 2.67 | 1.12 | 0.22 | 0.28 |
| 58286 | 0 | 51454  | QLNPKDNDVEL                  | 2.41 | 0.01 | 2.67 | 1.12 | 0.22 | 0.85 |
| 58287 | 0 | 51454  | QLNPKDNDVEL                  | 2.41 | 0.01 | 2.67 | 0.44 | 0.85 | 0.28 |
| 58288 | 0 | 51454  | QLNPKDNDVEL                  | 2.41 | 0.01 | 2.67 | 0.44 | 0.85 | 0.28 |
| 58289 | 0 | 51456  | QLNRALSGIAAEQDRNT            | 2.79 | 0.01 | 2.48 | 0.44 | 0.85 | 0.28 |
| 58290 | 0 | 51456  | QLNRALSGIAAEQDRNT            | 2.79 | 0.01 | 2.48 | 0.68 | 0.22 | 0.28 |
| 58291 | 0 | 51458  | QLPAQWDKELDVAPPP<br>KPFGLAPE | 3.15 | 0.01 | 3.72 | 2.13 | 0.22 | 0.28 |
| 58292 | 0 | 51458  | QLPAQWDKELDVAPPP<br>KPFGLAPE | 3.15 | 0.01 | 3.72 | 2.13 | 0.22 | 0.28 |
| 58293 | 0 | 126884 | QLPEEARPAAGTAC               | 2.62 | 0.01 | 0.78 | 1.20 | 0.22 | 0.28 |
| 58294 | 0 | 126884 | QLPEEARPAAGTAC               | 2.62 | 0.01 | 0.78 | 1.20 | 0.22 | 0.28 |
| 58295 | 0 | 181010 | QLPELKQKSS                   | 2.34 | 0.01 | 2.18 | 2.16 | 0.22 | 0.28 |
| 58296 | 0 | 152917 | QLPELKQKSSNSRKKRST<br>SA     | 2.97 | 0.01 | 2.18 | 0.44 | 0.22 | 0.28 |
| 58297 | 0 | 152917 | QLPELKQKSSNSRKKRST<br>SA     | 2.97 | 0.01 | 2.18 | 0.44 | 0.22 | 0.28 |
| 58298 | 0 | 152917 | QLPELKQKSSNSRKKRST<br>SA     | 2.97 | 0.01 | 2.18 | 0.44 | 0.22 | 1.75 |
| 58299 | 0 | 152917 | QLPELKQKSSNSRKKRST<br>SA     | 2.97 | 0.01 | 2.18 | 0.44 | 0.22 | 1.34 |
| 58300 | 0 | 51463  | QLPFPQQPQQ                   | 2.36 | 0.01 | 1.86 | 0.68 | 0.22 | 0.28 |
| 58301 | 0 | 51463  | QLPFPQQPQQ                   | 2.36 | 0.01 | 1.86 | 0.68 | 0.22 | 0.85 |
| 58302 | 0 | 144751 | QLPHRHDAHRLF                 | 2.49 | 0.01 | 0.90 | 0.68 | 0.22 | 0.28 |
| 58303 | 0 | 51473  | QLPNVGIT                     | 2.10 | 0.01 | 3.06 | 1.12 | 0.22 | 0.28 |
| 58304 | 0 | 51474  | QLPNVGITQGIV                 | 2.50 | 0.01 | 3.06 | 1.12 | 0.22 | 0.28 |
| 58305 | 0 | 51474  | QLPNVGITQGIV                 | 2.50 | 0.01 | 3.06 | 2.00 | 0.85 | 0.28 |
| 58306 | 0 | 51474  | QLPNVGITQGIV                 | 2.50 | 0.01 | 3.06 | 2.22 | 1.93 | 0.28 |
| 58307 | 0 | 149427 | QLPQFEEIRN                   | 2.31 | 0.01 | 1.86 | 0.44 | 1.93 | 0.85 |
| 58308 | 0 | 149427 | QLPQFEEIRN                   | 2.31 | 0.01 | 1.86 | 2.74 | 0.22 | 0.85 |
| 58309 | 0 | 51483  | QLPQGTTLPKGFYAE              | 2.68 | 0.01 | 2.45 | 0.44 | 0.85 | 1.48 |
| 58310 | 0 | 51483  | QLPQGTTLPKGFYAE              | 2.68 | 0.01 | 2.45 | 0.44 | 0.85 | 1.48 |
| 58311 | 0 | 51483  | QLPQGTTLPKGFYAE              | 2.68 | 0.01 | 2.45 | 0.44 | 0.85 | 0.28 |
| 58312 | 0 | 51484  | QLPQGTTLPKGFYAEGS<br>R       | 2.83 | 0.01 | 2.91 | 0.44 | 0.85 | 0.28 |
| 58313 | 0 | 51484  | QLPQGTTLPKGFYAEGS<br>R       | 2.83 | 0.01 | 2.91 | 0.68 | 0.22 | 0.28 |
| 58314 | 0 | 51485  | QLPQGTTLPKGFYAEGS<br>RGGSQ   | 3.04 | 0.01 | 2.45 | 0.44 | 0.85 | 0.28 |
| 58315 | 0 | 138565 | QLPQQDQ                      | 2.07 | 0.01 | 0.78 | 0.44 | 1.13 | 0.28 |



|       |   |        |                                       |      |      |      |      |      |      |
|-------|---|--------|---------------------------------------|------|------|------|------|------|------|
| 58316 | 0 | 148777 | QLPQQQFPQQ                            | 2.35 | 0.01 | 1.86 | 0.44 | 1.23 | 0.85 |
| 58317 | 0 | 173974 | QLPQQQFPQQQFP                         | 2.61 | 0.01 | 1.86 | 0.44 | 1.23 | 0.85 |
| 58318 | 0 | 148778 | QLPQQQIPQQ                            | 2.35 | 0.01 | 1.86 | 0.44 | 1.23 | 0.85 |
| 58319 | 0 | 123670 | QLPSAPTADEWD                          | 2.48 | 0.01 | 3.93 | 0.68 | 0.22 | 0.28 |
| 58320 | 0 | 111679 | QLPTILGVPTQP                          | 2.52 | 0.01 | 0.90 | 0.44 | 0.85 | 1.39 |
| 58321 | 0 | 51488  | QLPYPQP                               | 2.06 | 0.01 | 1.86 | 1.15 | 0.22 | 0.28 |
| 58322 | 0 | 51488  | QLPYPQP                               | 2.06 | 0.01 | 1.86 | 1.15 | 0.22 | 0.28 |
| 58323 | 0 | 51488  | QLPYPQP                               | 2.06 | 0.01 | 1.86 | 1.15 | 0.22 | 0.28 |
| 58324 | 0 | 51488  | QLPYPQP                               | 2.06 | 0.01 | 1.86 | 1.15 | 0.22 | 0.28 |
| 58325 | 0 | 51488  | QLPYPQP                               | 2.06 | 0.01 | 1.86 | 1.15 | 0.22 | 0.28 |
| 58326 | 0 | 51488  | QLPYPQP                               | 2.06 | 0.01 | 1.86 | 1.15 | 0.22 | 0.28 |
| 58327 | 0 | 51488  | QLPYPQP                               | 2.06 | 0.01 | 1.86 | 1.15 | 0.22 | 0.28 |
| 58328 | 0 | 51488  | QLPYPQP                               | 2.06 | 0.01 | 1.86 | 1.15 | 0.22 | 0.28 |
| 58329 | 0 | 149428 | QLQLQNPSQQ                            | 2.35 | 0.01 | 1.86 | 0.44 | 1.93 | 0.85 |
| 58330 | 0 | 149428 | QLQLQNPSQQ                            | 2.35 | 0.01 | 1.86 | 2.74 | 0.22 | 0.85 |
| 58331 | 0 | 51499  | QLQLTEAQAANGGASG<br>QV                | 2.88 | 0.01 | 2.90 | 0.44 | 0.22 | 1.27 |
| 58332 | 0 | 147225 | QLQFPF                                | 1.92 | 0.01 | 1.86 | 0.44 | 1.93 | 0.85 |
| 58333 | 0 | 147225 | QLQFPF                                | 1.92 | 0.01 | 1.86 | 0.44 | 1.93 | 0.85 |
| 58334 | 0 | 51505  | QLQFPFPQ                              | 2.18 | 0.01 | 1.86 | 0.44 | 1.93 | 0.28 |
| 58335 | 0 | 51509  | QLQFPFPQPELPYPQPQS                    | 2.86 | 0.01 | 1.86 | 0.44 | 1.93 | 0.28 |
| 58336 | 0 | 51515  | QLQFPFPQQLPYPQPQ                      | 2.81 | 0.01 | 1.86 | 0.44 | 1.93 | 0.28 |
| 58337 | 0 | 51515  | QLQFPFPQQLPYPQPQ                      | 2.81 | 0.01 | 1.86 | 0.44 | 1.93 | 0.28 |
| 58338 | 0 | 148780 | QLQFPFPQP                             | 2.38 | 0.01 | 1.86 | 0.44 | 1.93 | 0.85 |
| 58339 | 0 | 148780 | QLQFPFPQP                             | 2.38 | 0.01 | 1.86 | 2.74 | 0.22 | 0.85 |
| 58340 | 0 | 148780 | QLQFPFPQP                             | 2.38 | 0.01 | 1.86 | 2.74 | 0.22 | 0.85 |
| 58341 | 0 | 98964  | QLQPQNPSQQQP                          | 2.53 | 0.01 | 1.86 | 0.44 | 1.93 | 1.27 |
| 58342 | 0 | 148782 | QLQQPQQPFP                            | 2.37 | 0.01 | 1.86 | 0.44 | 1.23 | 0.85 |
| 58343 | 0 | 114543 | QLQVIRPRWSREEQE                       | 2.70 | 0.01 | 3.27 | 0.44 | 1.23 | 0.85 |
| 58344 | 0 | 94658  | QLRHLPSRVRYPHYSLIK<br>PESSL           | 3.10 | 0.01 | 2.04 | 0.44 | 0.85 | 0.28 |
| 58345 | 0 | 94658  | QLRHLPSRVRYPHYSLIK<br>PESSL           | 3.10 | 0.01 | 2.04 | 0.44 | 1.59 | 0.28 |
| 58346 | 0 | 181773 | QLRKELNIESPGPSD                       | 2.66 | 0.01 | 1.66 | 2.36 | 0.22 | 1.28 |
| 58347 | 0 | 181433 | QLRRKCELFYMRFD                        | 2.66 | 0.01 | 2.82 | 1.15 | 0.22 | 0.28 |
| 58348 | 0 | 100430 | QLRRKLEFFYSRF                         | 2.63 | 0.01 | 2.96 | 0.44 | 0.22 | 0.28 |
| 58349 | 0 | 51529  | QLRRKLEFFYVRFD                        | 2.68 | 0.01 | 3.78 | 1.15 | 0.22 | 0.28 |
| 58350 | 0 | 51540  | QLSGTLERQWQR                          | 2.50 | 0.01 | 0.90 | 0.44 | 1.23 | 0.28 |
| 58351 | 0 | 230507 | QLSIGVRNKAEFHHS<br>QLSLGDPLFPELAEESLK | 2.61 | 0.01 | 0.78 | 0.44 | 1.13 | 0.28 |
| 58352 | 0 | 51541  | TFERVTEDCNENPEKDV<br>LAEL             | 3.61 | 0.01 | 3.75 | 0.68 | 0.22 | 1.48 |
| 58353 | 0 | 51548  | QLSNIT                                | 1.88 | 0.01 | 2.14 | 0.44 | 0.85 | 0.28 |
| 58354 | 0 | 131020 | QLSPESDYDDHGMRY                       | 2.65 | 0.01 | 0.90 | 0.44 | 1.13 | 0.28 |

|       |   |        |                                                     |      |      |      |      |      |      |
|-------|---|--------|-----------------------------------------------------|------|------|------|------|------|------|
| 58355 | 0 | 131020 | QLSPESDYDDHGMRY                                     | 2.65 | 0.01 | 0.90 | 0.44 | 1.13 | 1.66 |
| 58356 | 0 | 131020 | QLSPESDYDDHGMRY                                     | 2.65 | 0.01 | 0.90 | 0.44 | 1.13 | 1.66 |
| 58357 | 0 | 131020 | QLSPESDYDDHGMRY                                     | 2.65 | 0.01 | 0.90 | 0.44 | 1.13 | 1.66 |
| 58358 | 0 | 131020 | QLSPESDYDDHGMRY                                     | 2.65 | 0.01 | 0.90 | 0.44 | 1.13 | 1.27 |
| 58359 | 0 | 152918 | QLSQILAPNN                                          | 2.32 | 0.01 | 2.18 | 2.16 | 0.22 | 0.28 |
| 58360 | 0 | 176384 | QLTAQHRDSLSS                                        | 2.48 | 0.01 | 0.90 | 1.15 | 0.22 | 1.39 |
| 58361 | 0 | 79988  | QLTFEGKPALELIRMVEC<br>SGKQDCP                       | 3.13 | 0.01 | 2.14 | 3.26 | 0.22 | 0.28 |
| 58362 | 0 | 79988  | QLTFEGKPALELIRMVEC<br>SGKQDCP                       | 3.13 | 0.01 | 2.14 | 3.17 | 0.22 | 0.28 |
| 58363 | 0 | 97582  | QLTIVHTID                                           | 2.23 | 0.01 | 3.13 | 1.12 | 0.22 | 0.28 |
| 58364 | 0 | 240910 | QLTKDDLPTALTSQEA                                    | 2.76 | 0.01 | 4.93 | 0.44 | 1.41 | 0.28 |
| 58365 | 0 | 172890 | QLTPDQERSLMFMQW                                     | 2.67 | 0.01 | 0.78 | 0.44 | 1.13 | 0.28 |
| 58366 | 0 | 51570  | QLVKDKNIDISIKYDPRK<br>DSE                           | 3.00 | 0.01 | 2.80 | 1.15 | 0.22 | 1.27 |
| 58367 | 0 | 51570  | QLVKDKNIDISIKYDPRK<br>DSE                           | 3.00 | 0.01 | 2.80 | 1.12 | 0.22 | 1.27 |
| 58368 | 0 | 51570  | QLVKDKNIDISIKYDPRK<br>DSE                           | 3.00 | 0.01 | 2.80 | 1.15 | 0.22 | 1.27 |
| 58369 | 0 | 51570  | QLVKDKNIDISIKYDPRK<br>DSE                           | 3.00 | 0.01 | 2.80 | 1.15 | 0.22 | 1.27 |
| 58370 | 0 | 51570  | QLVKDKNIDISIKYDPRK<br>DSE                           | 3.00 | 0.01 | 2.80 | 1.15 | 0.22 | 0.28 |
| 58371 | 0 | 51570  | QLVKDKNIDISIKYDPRK<br>DSE                           | 3.00 | 0.01 | 2.80 | 1.15 | 0.22 | 0.28 |
| 58372 | 0 | 51570  | QLVKDKNIDISIKYDPRK<br>DSE                           | 3.00 | 0.01 | 2.80 | 0.68 | 0.22 | 0.28 |
| 58373 | 0 | 51570  | QLVKDKNIDISIKYDPRK<br>DSE                           | 3.00 | 0.01 | 2.80 | 1.15 | 0.22 | 0.85 |
| 58374 | 0 | 51570  | QLVKDKNIDISIKYDPRK<br>DSE                           | 3.00 | 0.01 | 2.80 | 0.68 | 0.22 | 0.28 |
| 58375 | 0 | 51570  | QLVKDKNIDISIKYDPRK<br>DSE                           | 3.00 | 0.01 | 2.80 | 1.15 | 0.22 | 0.28 |
| 58376 | 0 | 51572  | QLVLGENLDTERILAS                                    | 2.71 | 0.01 | 2.59 | 0.44 | 0.85 | 0.28 |
| 58377 | 0 | 51572  | QLVLGENLDTERILAS                                    | 2.71 | 0.01 | 2.59 | 0.44 | 0.85 | 0.28 |
| 58378 | 0 | 51574  | QLVNSNGSWHIN                                        | 2.48 | 0.01 | 1.72 | 0.44 | 0.85 | 0.28 |
| 58379 | 0 | 51574  | QLVNSNGSWHIN                                        | 2.48 | 0.01 | 1.72 | 1.15 | 0.22 | 0.28 |
| 58380 | 0 | 51574  | QLVNSNGSWHIN                                        | 2.48 | 0.01 | 1.72 | 2.36 | 0.22 | 0.28 |
| 58381 | 0 | 51575  | QLVNTNGSWHIN                                        | 2.45 | 0.01 | 1.72 | 1.15 | 0.22 | 0.28 |
| 58382 | 0 | 51575  | QLVNTNGSWHIN                                        | 2.45 | 0.01 | 1.72 | 0.44 | 0.85 | 0.28 |
| 58383 | 0 | 51575  | QLVNTNGSWHIN                                        | 2.45 | 0.01 | 1.72 | 2.36 | 0.22 | 0.28 |
| 58384 | 0 | 79053  | QLVNTNGSWHINRTAL<br>NC                              | 2.82 | 0.01 | 3.81 | 0.44 | 0.85 | 0.28 |
| 58385 | 0 | 51576  | QLVTARQKLKDAEKAVE<br>VDPDDVNKSTLQNRRA<br>AVSTLETKLG | 3.72 | 0.01 | 3.00 | 1.15 | 0.22 | 1.48 |

|       |   |        |                                                     |      |      |      |      |      |      |
|-------|---|--------|-----------------------------------------------------|------|------|------|------|------|------|
| 58386 | 0 | 51576  | QLVTARQKLKDAEKAVE<br>VDPDDVNKSTLQNRRA<br>AVSTLETKLG | 3.72 | 0.01 | 3.00 | 1.15 | 0.22 | 0.85 |
| 58387 | 0 | 51576  | QLVTARQKLKDAEKAVE<br>VDPDDVNKSTLQNRRA<br>AVSTLETKLG | 3.72 | 0.01 | 3.00 | 1.15 | 0.22 | 0.28 |
| 58388 | 0 | 51576  | QLVTARQKLKDAEKAVE<br>VDPDDVNKSTLQNRRA<br>AVSTLETKLG | 3.72 | 0.01 | 3.00 | 1.15 | 0.22 | 0.28 |
| 58389 | 0 | 51576  | QLVTARQKLKDAEKAVE<br>VDPDDVNKSTLQNRRA<br>AVSTLETKLG | 3.72 | 0.01 | 3.00 | 1.15 | 0.22 | 0.85 |
| 58390 | 0 | 51577  | QLVTARQKLKDAERAVE<br>LDPDDVNKSTLQSRRAA<br>VSALETKLG | 3.72 | 0.01 | 4.15 | 4.33 | 1.59 | 0.85 |
| 58391 | 0 | 51577  | QLVTARQKLKDAERAVE<br>LDPDDVNKSTLQSRRAA<br>VSALETKLG | 3.72 | 0.01 | 4.15 | 4.33 | 1.59 | 0.85 |
| 58392 | 0 | 51577  | QLVTARQKLKDAERAVE<br>LDPDDVNKSTLQSRRAA<br>VSALETKLG | 3.72 | 0.01 | 4.15 | 4.33 | 0.22 | 0.85 |
| 58393 | 0 | 51577  | QLVTARQKLKDAERAVE<br>LDPDDVNKSTLQSRRAA<br>VSALETKLG | 3.72 | 0.01 | 4.15 | 4.33 | 0.22 | 0.85 |
| 58394 | 0 | 51577  | QLVTARQKLKDAERAVE<br>LDPDDVNKSTLQSRRAA<br>VSALETKLG | 3.72 | 0.01 | 4.15 | 0.44 | 0.85 | 0.85 |
| 58395 | 0 | 51577  | QLVTARQKLKDAERAVE<br>LDPDDVNKSTLQSRRAA<br>VSALETKLG | 3.72 | 0.01 | 3.78 | 1.15 | 0.22 | 1.48 |
| 58396 | 0 | 51577  | QLVTARQKLKDAERAVE<br>LDPDDVNKSTLQSRRAA<br>VSALETKLG | 3.72 | 0.01 | 3.78 | 1.15 | 0.22 | 0.85 |
| 58397 | 0 | 51577  | QLVTARQKLKDAERAVE<br>LDPDDVNKSTLQSRRAA<br>VSALETKLG | 3.72 | 0.01 | 3.78 | 1.15 | 0.22 | 0.28 |
| 58398 | 0 | 51577  | QLVTARQKLKDAERAVE<br>LDPDDVNKSTLQSRRAA<br>VSALETKLG | 3.72 | 0.01 | 3.78 | 1.15 | 0.22 | 0.28 |
| 58399 | 0 | 51577  | QLVTARQKLKDAERAVE<br>LDPDDVNKSTLQSRRAA<br>VSALETKLG | 3.72 | 0.01 | 3.78 | 1.15 | 0.22 | 0.85 |
| 58400 | 0 | 79632  | QLVTDEL                                             | 2.02 | 0.01 | 0.90 | 1.12 | 0.22 | 0.28 |
| 58401 | 0 | 462165 | QLWQIPEQS                                           | 2.24 | 4.15 | 1.86 | 0.44 | 1.93 | 0.28 |
| 58402 | 0 | 149429 | QLWQIPEQSR                                          | 2.32 | 0.01 | 1.86 | 0.44 | 1.93 | 0.85 |
| 58403 | 0 | 149429 | QLWQIPEQSR                                          | 2.32 | 0.01 | 1.86 | 2.74 | 0.22 | 0.85 |
| 58404 | 0 | 149429 | QLWQIPEQSR                                          | 2.32 | 0.01 | 1.86 | 2.74 | 0.22 | 0.85 |

|       |   |        |                          |      |      |      |      |      |      |
|-------|---|--------|--------------------------|------|------|------|------|------|------|
| 58405 | 0 | 100432 | QLYAPEAFNY               | 2.31 | 0.01 | 2.18 | 2.16 | 0.22 | 0.28 |
| 58406 | 0 | 100432 | QLYAPEAFNY               | 2.31 | 0.01 | 2.18 | 2.16 | 0.22 | 0.28 |
| 58407 | 0 | 129695 | QLYKQK                   | 1.92 | 0.01 | 0.78 | 0.44 | 1.13 | 0.28 |
| 58408 | 0 | 450965 | QLYKTCCPPDIIPKV          | 2.66 | 0.01 | 0.90 | 1.12 | 0.22 | 0.28 |
| 58409 | 0 | 177451 | QLYKTCKQ                 | 2.15 | 0.01 | 1.86 | 0.68 | 0.22 | 0.28 |
| 58410 | 0 | 134494 | QLYKTCKQAGTCPPD          | 2.68 | 0.01 | 1.86 | 0.68 | 0.22 | 0.28 |
| 58411 | 0 | 134494 | QLYKTCKQAGTCPPD          | 2.68 | 0.01 | 1.86 | 1.81 | 0.22 | 0.28 |
| 58412 | 0 | 134494 | QLYKTCKQAGTCPPD          | 2.68 | 0.01 | 1.86 | 1.81 | 0.22 | 1.75 |
| 58413 | 0 | 134494 | QLYKTCKQAGTCPPD          | 2.68 | 0.01 | 1.86 | 1.81 | 0.22 | 1.75 |
| 58414 | 0 | 134494 | QLYKTCKQAGTCPPD          | 2.68 | 0.01 | 1.86 | 1.15 | 0.22 | 0.85 |
| 58415 | 0 | 134494 | QLYKTCKQAGTCPPD          | 2.68 | 0.01 | 1.86 | 0.68 | 0.22 | 0.28 |
| 58416 | 0 | 134494 | QLYKTCKQAGTCPPD          | 2.68 | 0.01 | 1.86 | 0.68 | 0.22 | 0.28 |
| 58417 | 0 | 134494 | QLYKTCKQAGTCPPD          | 2.68 | 0.01 | 1.86 | 0.68 | 0.22 | 0.28 |
| 58418 | 0 | 134494 | QLYKTCKQAGTCPPD          | 2.68 | 0.01 | 1.86 | 0.68 | 0.22 | 0.28 |
| 58419 | 0 | 134494 | QLYKTCKQAGTCPPD          | 2.68 | 0.01 | 1.86 | 0.68 | 0.22 | 0.28 |
| 58420 | 0 | 134494 | QLYKTCKQAGTCPPD          | 2.68 | 0.01 | 1.86 | 0.68 | 0.22 | 1.75 |
| 58421 | 0 | 134494 | QLYKTCKQAGTCPPD          | 2.68 | 0.01 | 1.86 | 0.68 | 0.22 | 1.75 |
| 58422 | 0 | 134494 | QLYKTCKQAGTCPPD          | 2.68 | 0.01 | 1.86 | 0.68 | 0.22 | 1.75 |
| 58423 | 0 | 134494 | QLYKTCKQAGTCPPD          | 2.68 | 0.01 | 1.86 | 0.68 | 0.22 | 1.75 |
| 58424 | 0 | 134494 | QLYKTCKQAGTCPPD          | 2.68 | 0.01 | 1.86 | 0.68 | 0.22 | 1.75 |
| 58425 | 0 | 134494 | QLYKTCKQAGTCPPD          | 2.68 | 0.01 | 1.86 | 0.68 | 0.22 | 1.75 |
| 58426 | 0 | 134494 | QLYKTCKQAGTCPPD          | 2.68 | 0.01 | 1.86 | 0.68 | 0.22 | 1.75 |
| 58427 | 0 | 134494 | QLYKTCKQAGTCPPD          | 2.68 | 0.01 | 1.86 | 0.68 | 0.22 | 1.75 |
| 58428 | 0 | 134494 | QLYKTCKQAGTCPPD          | 2.68 | 0.01 | 1.86 | 0.68 | 0.22 | 1.75 |
| 58429 | 0 | 134494 | QLYKTCKQAGTCPPD          | 2.68 | 0.01 | 1.86 | 0.68 | 0.22 | 1.75 |
| 58430 | 0 | 134494 | QLYKTCKQAGTCPPD          | 2.68 | 0.01 | 1.86 | 0.68 | 0.22 | 1.75 |
| 58431 | 0 | 134494 | QLYKTCKQAGTCPPD          | 2.68 | 0.01 | 1.86 | 0.68 | 0.22 | 0.28 |
| 58432 | 0 | 134494 | QLYKTCKQAGTCPPD          | 2.68 | 0.01 | 1.86 | 0.68 | 0.22 | 1.75 |
| 58433 | 0 | 134494 | QLYKTCKQAGTCPPD          | 2.68 | 0.01 | 1.86 | 0.68 | 0.22 | 0.28 |
| 58434 | 0 | 134494 | QLYKTCKQAGTCPPD          | 2.68 | 0.01 | 1.86 | 0.68 | 0.22 | 1.75 |
| 58435 | 0 | 110385 | QLYKTCKQAGTCPPDIIP<br>KV | 2.94 | 0.01 | 1.86 | 0.68 | 0.22 | 0.28 |
| 58436 | 0 | 110385 | QLYKTCKQAGTCPPDIIP<br>KV | 2.94 | 0.01 | 1.86 | 0.68 | 0.22 | 1.34 |
| 58437 | 0 | 110385 | QLYKTCKQAGTCPPDIIP<br>KV | 2.94 | 0.01 | 1.86 | 0.68 | 0.22 | 1.34 |
| 58438 | 0 | 110385 | QLYKTCKQAGTCPPDIIP<br>KV | 2.94 | 0.01 | 1.86 | 0.68 | 0.22 | 1.34 |
| 58439 | 0 | 110385 | QLYKTCKQAGTCPPDIIP<br>KV | 2.94 | 0.01 | 1.86 | 0.68 | 0.22 | 1.34 |
| 58440 | 0 | 110385 | QLYKTCKQAGTCPPDIIP<br>KV | 2.94 | 0.01 | 1.86 | 0.68 | 0.22 | 1.34 |
| 58441 | 0 | 110385 | QLYKTCKQAGTCPPDIIP<br>KV | 2.94 | 0.01 | 1.86 | 0.68 | 2.25 | 1.75 |
| 58442 | 0 | 110385 | QLYKTCKQAGTCPPDIIP<br>KV | 2.94 | 0.01 | 1.86 | 0.68 | 2.25 | 1.75 |

|       |   |        |                          |      |      |      |      |      |      |
|-------|---|--------|--------------------------|------|------|------|------|------|------|
| 58443 | 0 | 110385 | QLYKTCKQAGTCPPDIIP<br>KV | 2.94 | 0.01 | 1.86 | 1.12 | 0.22 | 1.34 |
| 58444 | 0 | 110385 | QLYKTCKQAGTCPPDIIP<br>KV | 2.94 | 0.01 | 1.86 | 1.12 | 0.22 | 1.34 |
| 58445 | 0 | 110385 | QLYKTCKQAGTCPPDIIP<br>KV | 2.94 | 0.01 | 1.86 | 1.12 | 0.22 | 1.34 |
| 58446 | 0 | 110385 | QLYKTCKQAGTCPPDIIP<br>KV | 2.94 | 0.01 | 1.86 | 1.12 | 0.22 | 1.34 |
| 58447 | 0 | 110385 | QLYKTCKQAGTCPPDIIP<br>KV | 2.94 | 0.01 | 1.86 | 1.12 | 0.22 | 1.34 |
| 58448 | 0 | 110385 | QLYKTCKQAGTCPPDIIP<br>KV | 2.94 | 0.01 | 1.86 | 1.12 | 0.22 | 1.34 |
| 58449 | 0 | 110385 | QLYKTCKQAGTCPPDIIP<br>KV | 2.94 | 0.01 | 1.86 | 1.12 | 0.22 | 1.34 |
| 58450 | 0 | 110385 | QLYKTCKQAGTCPPDIIP<br>KV | 2.94 | 0.01 | 1.86 | 1.12 | 0.22 | 1.34 |
| 58451 | 0 | 110385 | QLYKTCKQAGTCPPDIIP<br>KV | 2.94 | 0.01 | 1.86 | 1.12 | 0.22 | 1.34 |
| 58452 | 0 | 110385 | QLYKTCKQAGTCPPDIIP<br>KV | 2.94 | 0.01 | 1.86 | 1.12 | 0.22 | 1.27 |
| 58453 | 0 | 110385 | QLYKTCKQAGTCPPDIIP<br>KV | 2.94 | 0.01 | 1.86 | 1.12 | 0.22 | 1.27 |
| 58454 | 0 | 110385 | QLYKTCKQAGTCPPDIIP<br>KV | 2.94 | 0.01 | 1.86 | 0.44 | 2.82 | 1.27 |
| 58455 | 0 | 110385 | QLYKTCKQAGTCPPDIIP<br>KV | 2.94 | 0.01 | 1.86 | 1.20 | 0.22 | 1.34 |
| 58456 | 0 | 110385 | QLYKTCKQAGTCPPDIIP<br>KV | 2.94 | 0.01 | 1.86 | 1.20 | 0.22 | 1.34 |
| 58457 | 0 | 110385 | QLYKTCKQAGTCPPDIIP<br>KV | 2.94 | 0.01 | 1.86 | 1.20 | 0.22 | 1.34 |
| 58458 | 0 | 110385 | QLYKTCKQAGTCPPDIIP<br>KV | 2.94 | 0.01 | 1.86 | 1.20 | 0.22 | 1.34 |
| 58459 | 0 | 110385 | QLYKTCKQAGTCPPDIIP<br>KV | 2.94 | 0.01 | 1.86 | 1.20 | 0.22 | 1.34 |
| 58460 | 0 | 110385 | QLYKTCKQAGTCPPDIIP<br>KV | 2.94 | 0.01 | 1.86 | 1.20 | 0.22 | 1.34 |
| 58461 | 0 | 110385 | QLYKTCKQAGTCPPDIIP<br>KV | 2.94 | 0.01 | 1.86 | 1.20 | 0.22 | 1.34 |
| 58462 | 0 | 110385 | QLYKTCKQAGTCPPDIIP<br>KV | 2.94 | 0.01 | 1.86 | 1.20 | 0.22 | 1.34 |
| 58463 | 0 | 110385 | QLYKTCKQAGTCPPDIIP<br>KV | 2.94 | 0.01 | 1.86 | 1.20 | 0.22 | 1.34 |
| 58464 | 0 | 110385 | QLYKTCKQAGTCPPDIIP<br>KV | 2.94 | 0.01 | 1.86 | 1.20 | 0.22 | 1.34 |
| 58465 | 0 | 110385 | QLYKTCKQAGTCPPDIIP<br>KV | 2.94 | 0.01 | 1.86 | 0.68 | 0.22 | 1.34 |

|       |   |        |                          |      |      |      |      |      |      |
|-------|---|--------|--------------------------|------|------|------|------|------|------|
| 58466 | 0 | 110385 | QLYKTCKQAGTCPPDIIP<br>KV | 2.94 | 0.01 | 1.86 | 0.68 | 0.22 | 1.34 |
| 58467 | 0 | 110385 | QLYKTCKQAGTCPPDIIP<br>KV | 2.94 | 0.01 | 1.86 | 0.68 | 0.22 | 1.34 |
| 58468 | 0 | 110385 | QLYKTCKQAGTCPPDIIP<br>KV | 2.94 | 0.01 | 1.86 | 0.68 | 0.22 | 1.34 |
| 58469 | 0 | 110385 | QLYKTCKQAGTCPPDIIP<br>KV | 2.94 | 0.01 | 1.86 | 0.68 | 0.22 | 1.34 |
| 58470 | 0 | 110385 | QLYKTCKQAGTCPPDIIP<br>KV | 2.94 | 0.01 | 1.86 | 0.68 | 0.22 | 1.34 |
| 58471 | 0 | 110385 | QLYKTCKQAGTCPPDIIP<br>KV | 2.94 | 0.01 | 1.86 | 0.68 | 0.22 | 0.85 |
| 58472 | 0 | 110385 | QLYKTCKQAGTCPPDIIP<br>KV | 2.94 | 0.01 | 1.86 | 1.12 | 0.22 | 0.28 |
| 58473 | 0 | 110385 | QLYKTCKQAGTCPPDIIP<br>KV | 2.94 | 0.01 | 1.86 | 0.68 | 0.22 | 0.28 |
| 58474 | 0 | 110385 | QLYKTCKQAGTCPPDIIP<br>KV | 2.94 | 0.01 | 1.86 | 1.12 | 0.22 | 0.28 |
| 58475 | 0 | 110385 | QLYKTCKQAGTCPPDIIP<br>KV | 2.94 | 0.01 | 1.86 | 0.68 | 0.22 | 1.34 |
| 58476 | 0 | 110385 | QLYKTCKQAGTCPPDIIP<br>KV | 2.94 | 0.01 | 1.86 | 0.68 | 0.22 | 1.34 |
| 58477 | 0 | 110385 | QLYKTCKQAGTCPPDIIP<br>KV | 2.94 | 0.01 | 1.86 | 1.12 | 0.22 | 0.85 |
| 58478 | 0 | 110385 | QLYKTCKQAGTCPPDIIP<br>KV | 2.94 | 0.01 | 1.86 | 1.12 | 0.22 | 0.85 |
| 58479 | 0 | 110385 | QLYKTCKQAGTCPPDIIP<br>KV | 2.94 | 0.01 | 1.86 | 1.81 | 0.22 | 0.28 |
| 58480 | 0 | 110385 | QLYKTCKQAGTCPPDIIP<br>KV | 2.94 | 0.01 | 1.86 | 1.81 | 0.22 | 1.34 |
| 58481 | 0 | 110385 | QLYKTCKQAGTCPPDIIP<br>KV | 2.94 | 0.01 | 1.86 | 1.81 | 0.22 | 1.34 |
| 58482 | 0 | 110385 | QLYKTCKQAGTCPPDIIP<br>KV | 2.94 | 0.01 | 1.86 | 1.81 | 0.22 | 1.34 |
| 58483 | 0 | 110385 | QLYKTCKQAGTCPPDIIP<br>KV | 2.94 | 0.01 | 1.86 | 1.81 | 0.22 | 1.34 |
| 58484 | 0 | 110385 | QLYKTCKQAGTCPPDIIP<br>KV | 2.94 | 0.01 | 1.86 | 1.81 | 0.22 | 1.34 |
| 58485 | 0 | 110385 | QLYKTCKQAGTCPPDIIP<br>KV | 2.94 | 0.01 | 1.86 | 1.81 | 0.22 | 1.34 |
| 58486 | 0 | 110385 | QLYKTCKQAGTCPPDIIP<br>KV | 2.94 | 0.01 | 1.86 | 0.68 | 0.22 | 0.28 |
| 58487 | 0 | 110385 | QLYKTCKQAGTCPPDIIP<br>KV | 2.94 | 0.01 | 1.86 | 0.68 | 0.22 | 1.34 |
| 58488 | 0 | 110385 | QLYKTCKQAGTCPPDIIP<br>KV | 2.94 | 0.01 | 1.86 | 0.68 | 0.22 | 1.34 |

|       |   |        |                          |      |      |      |      |      |      |
|-------|---|--------|--------------------------|------|------|------|------|------|------|
| 58489 | 0 | 110385 | QLYKTCKQAGTCPPDIIP<br>KV | 2.94 | 0.01 | 1.86 | 0.68 | 0.22 | 1.34 |
| 58490 | 0 | 110385 | QLYKTCKQAGTCPPDIIP<br>KV | 2.94 | 0.01 | 1.86 | 0.68 | 0.22 | 1.34 |
| 58491 | 0 | 110385 | QLYKTCKQAGTCPPDIIP<br>KV | 2.94 | 0.01 | 1.86 | 0.68 | 0.22 | 1.34 |
| 58492 | 0 | 110385 | QLYKTCKQAGTCPPDIIP<br>KV | 2.94 | 0.01 | 1.86 | 0.68 | 0.22 | 1.34 |
| 58493 | 0 | 110385 | QLYKTCKQAGTCPPDIIP<br>KV | 2.94 | 0.01 | 1.86 | 0.68 | 0.22 | 1.34 |
| 58494 | 0 | 110385 | QLYKTCKQAGTCPPDIIP<br>KV | 2.94 | 0.01 | 1.86 | 1.12 | 0.22 | 0.28 |
| 58495 | 0 | 110385 | QLYKTCKQAGTCPPDIIP<br>KV | 2.94 | 0.01 | 1.86 | 1.12 | 0.22 | 1.34 |
| 58496 | 0 | 110385 | QLYKTCKQAGTCPPDIIP<br>KV | 2.94 | 0.01 | 1.86 | 1.12 | 0.22 | 1.34 |
| 58497 | 0 | 110385 | QLYKTCKQAGTCPPDIIP<br>KV | 2.94 | 0.01 | 1.86 | 1.12 | 0.22 | 1.34 |
| 58498 | 0 | 110385 | QLYKTCKQAGTCPPDIIP<br>KV | 2.94 | 0.01 | 1.86 | 1.12 | 0.22 | 1.34 |
| 58499 | 0 | 110385 | QLYKTCKQAGTCPPDIIP<br>KV | 2.94 | 0.01 | 1.86 | 1.12 | 0.22 | 1.34 |
| 58500 | 0 | 110385 | QLYKTCKQAGTCPPDIIP<br>KV | 2.94 | 0.01 | 1.86 | 1.12 | 0.22 | 1.34 |
| 58501 | 0 | 110385 | QLYKTCKQAGTCPPDIIP<br>KV | 2.94 | 0.01 | 1.86 | 1.12 | 0.22 | 1.75 |
| 58502 | 0 | 110385 | QLYKTCKQAGTCPPDIIP<br>KV | 2.94 | 0.01 | 1.86 | 0.68 | 0.22 | 1.75 |
| 58503 | 0 | 110385 | QLYKTCKQAGTCPPDIIP<br>KV | 2.94 | 0.01 | 1.86 | 1.12 | 0.22 | 0.28 |
| 58504 | 0 | 110385 | QLYKTCKQAGTCPPDIIP<br>KV | 2.94 | 0.01 | 1.86 | 1.12 | 0.22 | 1.75 |
| 58505 | 0 | 110385 | QLYKTCKQAGTCPPDIIP<br>KV | 2.94 | 0.01 | 1.86 | 1.12 | 0.22 | 0.28 |
| 58506 | 0 | 110385 | QLYKTCKQAGTCPPDIIP<br>KV | 2.94 | 0.01 | 1.86 | 1.81 | 0.22 | 0.85 |
| 58507 | 0 | 110385 | QLYKTCKQAGTCPPDIIP<br>KV | 2.94 | 0.01 | 1.86 | 0.68 | 0.22 | 0.28 |
| 58508 | 0 | 110385 | QLYKTCKQAGTCPPDIIP<br>KV | 2.94 | 0.01 | 1.86 | 0.68 | 0.22 | 0.28 |
| 58509 | 0 | 110385 | QLYKTCKQAGTCPPDIIP<br>KV | 2.94 | 0.01 | 1.86 | 0.68 | 0.22 | 1.34 |
| 58510 | 0 | 110385 | QLYKTCKQAGTCPPDIIP<br>KV | 2.94 | 0.01 | 1.86 | 0.68 | 0.22 | 0.28 |
| 58511 | 0 | 110385 | QLYKTCKQAGTCPPDIIP<br>KV | 2.94 | 0.01 | 1.86 | 0.68 | 0.22 | 0.28 |

|       |   |        |                          |      |      |      |      |      |      |
|-------|---|--------|--------------------------|------|------|------|------|------|------|
| 58512 | 0 | 110385 | QLYKTCKQAGTCPPDIIP<br>KV | 2.94 | 0.01 | 1.86 | 0.68 | 0.22 | 0.28 |
| 58513 | 0 | 110385 | QLYKTCKQAGTCPPDIIP<br>KV | 2.94 | 0.01 | 1.86 | 0.68 | 0.22 | 0.28 |
| 58514 | 0 | 110385 | QLYKTCKQAGTCPPDIIP<br>KV | 2.94 | 0.01 | 1.86 | 0.68 | 0.22 | 0.28 |
| 58515 | 0 | 110385 | QLYKTCKQAGTCPPDIIP<br>KV | 2.94 | 0.01 | 1.86 | 0.68 | 0.22 | 0.28 |
| 58516 | 0 | 110385 | QLYKTCKQAGTCPPDIIP<br>KV | 2.94 | 0.01 | 1.86 | 0.68 | 0.22 | 0.28 |
| 58517 | 0 | 110385 | QLYKTCKQAGTCPPDIIP<br>KV | 2.94 | 0.01 | 1.86 | 0.68 | 0.22 | 1.34 |
| 58518 | 0 | 110385 | QLYKTCKQAGTCPPDIIP<br>KV | 2.94 | 0.01 | 1.86 | 0.68 | 0.22 | 1.34 |
| 58519 | 0 | 110385 | QLYKTCKQAGTCPPDIIP<br>KV | 2.94 | 0.01 | 1.86 | 0.68 | 0.22 | 1.34 |
| 58520 | 0 | 110385 | QLYKTCKQAGTCPPDIIP<br>KV | 2.94 | 0.01 | 1.86 | 0.68 | 0.22 | 1.34 |
| 58521 | 0 | 110385 | QLYKTCKQAGTCPPDIIP<br>KV | 2.94 | 0.01 | 1.86 | 0.68 | 0.22 | 1.34 |
| 58522 | 0 | 110385 | QLYKTCKQAGTCPPDIIP<br>KV | 2.94 | 0.01 | 1.86 | 0.68 | 0.22 | 1.34 |
| 58523 | 0 | 110385 | QLYKTCKQAGTCPPDIIP<br>KV | 2.94 | 0.01 | 1.86 | 0.68 | 0.22 | 1.34 |
| 58524 | 0 | 110385 | QLYKTCKQAGTCPPDIIP<br>KV | 2.94 | 0.01 | 1.86 | 0.68 | 0.22 | 1.75 |
| 58525 | 0 | 110385 | QLYKTCKQAGTCPPDIIP<br>KV | 2.94 | 0.01 | 1.86 | 0.68 | 0.22 | 1.75 |
| 58526 | 0 | 110385 | QLYKTCKQAGTCPPDIIP<br>KV | 2.94 | 0.01 | 1.86 | 0.68 | 0.22 | 1.75 |
| 58527 | 0 | 110385 | QLYKTCKQAGTCPPDIIP<br>KV | 2.94 | 0.01 | 1.86 | 0.68 | 0.22 | 1.75 |
| 58528 | 0 | 110385 | QLYKTCKQAGTCPPDIIP<br>KV | 2.94 | 0.01 | 1.86 | 0.68 | 0.22 | 1.75 |
| 58529 | 0 | 110385 | QLYKTCKQAGTCPPDIIP<br>KV | 2.94 | 0.01 | 1.86 | 0.68 | 0.22 | 1.75 |
| 58530 | 0 | 110385 | QLYKTCKQAGTCPPDIIP<br>KV | 2.94 | 0.01 | 1.86 | 1.20 | 0.22 | 1.34 |
| 58531 | 0 | 110385 | QLYKTCKQAGTCPPDIIP<br>KV | 2.94 | 0.01 | 1.86 | 1.20 | 0.22 | 1.34 |
| 58532 | 0 | 110385 | QLYKTCKQAGTCPPDIIP<br>KV | 2.94 | 0.01 | 1.86 | 1.20 | 0.22 | 1.34 |
| 58533 | 0 | 110385 | QLYKTCKQAGTCPPDIIP<br>KV | 2.94 | 0.01 | 1.86 | 0.68 | 0.22 | 0.28 |
| 58534 | 0 | 110385 | QLYKTCKQAGTCPPDIIP<br>KV | 2.94 | 0.01 | 1.86 | 0.68 | 0.22 | 0.28 |



|       |   |        |                          |      |      |      |      |      |      |
|-------|---|--------|--------------------------|------|------|------|------|------|------|
| 58535 | 0 | 110385 | QLYKTCKQAGTCPPDIIP<br>KV | 2.94 | 0.01 | 1.86 | 1.12 | 0.22 | 0.28 |
| 58536 | 0 | 110385 | QLYKTCKQAGTCPPDIIP<br>KV | 2.94 | 0.01 | 1.86 | 1.12 | 0.22 | 0.28 |
| 58537 | 0 | 110385 | QLYKTCKQAGTCPPDIIP<br>KV | 2.94 | 0.01 | 1.86 | 1.12 | 0.22 | 0.28 |
| 58538 | 0 | 110385 | QLYKTCKQAGTCPPDIIP<br>KV | 2.94 | 0.01 | 1.86 | 1.12 | 0.22 | 0.28 |
| 58539 | 0 | 110385 | QLYKTCKQAGTCPPDIIP<br>KV | 2.94 | 0.01 | 1.86 | 1.12 | 0.22 | 0.28 |
| 58540 | 0 | 110385 | QLYKTCKQAGTCPPDIIP<br>KV | 2.94 | 0.01 | 1.86 | 1.12 | 0.22 | 0.28 |
| 58541 | 0 | 175641 | QLYQTCKAAGTCPSDVI<br>PKI | 2.93 | 0.01 | 3.21 | 1.12 | 0.22 | 0.85 |
| 58542 | 0 | 175641 | QLYQTCKAAGTCPSDVI<br>PKI | 2.93 | 0.01 | 3.21 | 1.12 | 0.22 | 0.85 |
| 58543 | 0 | 175641 | QLYQTCKAAGTCPSDVI<br>PKI | 2.93 | 0.01 | 3.21 | 1.81 | 0.22 | 0.28 |
| 58544 | 0 | 175641 | QLYQTCKAAGTCPSDVI<br>PKI | 2.93 | 0.01 | 3.21 | 1.81 | 0.22 | 1.34 |
| 58545 | 0 | 175641 | QLYQTCKAAGTCPSDVI<br>PKI | 2.93 | 0.01 | 3.21 | 1.81 | 0.22 | 1.34 |
| 58546 | 0 | 175641 | QLYQTCKAAGTCPSDVI<br>PKI | 2.93 | 0.01 | 3.21 | 1.81 | 0.22 | 1.34 |
| 58547 | 0 | 175641 | QLYQTCKAAGTCPSDVI<br>PKI | 2.93 | 0.01 | 3.21 | 1.81 | 0.22 | 1.34 |
| 58548 | 0 | 175641 | QLYQTCKAAGTCPSDVI<br>PKI | 2.93 | 0.01 | 3.21 | 1.81 | 0.22 | 1.34 |
| 58549 | 0 | 175641 | QLYQTCKAAGTCPSDVI<br>PKI | 2.93 | 0.01 | 3.21 | 1.81 | 0.22 | 1.34 |
| 58550 | 0 | 175641 | QLYQTCKAAGTCPSDVI<br>PKI | 2.93 | 0.01 | 3.21 | 0.68 | 0.22 | 0.28 |
| 58551 | 0 | 175641 | QLYQTCKAAGTCPSDVI<br>PKI | 2.93 | 0.01 | 3.21 | 0.68 | 0.22 | 1.34 |
| 58552 | 0 | 175641 | QLYQTCKAAGTCPSDVI<br>PKI | 2.93 | 0.01 | 3.21 | 0.68 | 0.22 | 1.34 |
| 58553 | 0 | 175641 | QLYQTCKAAGTCPSDVI<br>PKI | 2.93 | 0.01 | 3.21 | 0.68 | 0.22 | 1.34 |
| 58554 | 0 | 175641 | QLYQTCKAAGTCPSDVI<br>PKI | 2.93 | 0.01 | 3.21 | 0.68 | 0.22 | 1.34 |
| 58555 | 0 | 175641 | QLYQTCKAAGTCPSDVI<br>PKI | 2.93 | 0.01 | 3.21 | 0.68 | 0.22 | 1.34 |
| 58556 | 0 | 175641 | QLYQTCKAAGTCPSDVI<br>PKI | 2.93 | 0.01 | 3.21 | 0.68 | 0.22 | 1.34 |
| 58557 | 0 | 175641 | QLYQTCKAAGTCPSDVI<br>PKI | 2.93 | 0.01 | 3.21 | 0.68 | 0.22 | 1.34 |

|       |   |        |                                 |      |      |      |      |      |      |
|-------|---|--------|---------------------------------|------|------|------|------|------|------|
| 58558 | 0 | 175641 | QLYQTCKAAGTCPSDVI<br>PKI        | 2.93 | 0.01 | 3.21 | 1.12 | 0.22 | 0.28 |
| 58559 | 0 | 175641 | QLYQTCKAAGTCPSDVI<br>PKI        | 2.93 | 0.01 | 3.21 | 1.12 | 0.22 | 1.34 |
| 58560 | 0 | 175641 | QLYQTCKAAGTCPSDVI<br>PKI        | 2.93 | 0.01 | 3.21 | 1.12 | 0.22 | 1.34 |
| 58561 | 0 | 175641 | QLYQTCKAAGTCPSDVI<br>PKI        | 2.93 | 0.01 | 3.21 | 1.12 | 0.22 | 1.34 |
| 58562 | 0 | 175641 | QLYQTCKAAGTCPSDVI<br>PKI        | 2.93 | 0.01 | 3.21 | 1.12 | 0.22 | 1.34 |
| 58563 | 0 | 175641 | QLYQTCKAAGTCPSDVI<br>PKI        | 2.93 | 0.01 | 3.21 | 1.12 | 0.22 | 1.34 |
| 58564 | 0 | 175641 | QLYQTCKAAGTCPSDVI<br>PKI        | 2.93 | 0.01 | 3.21 | 1.12 | 0.22 | 1.34 |
| 58565 | 0 | 175641 | QLYQTCKAAGTCPSDVI<br>PKI        | 2.93 | 0.01 | 3.21 | 1.12 | 0.22 | 1.75 |
| 58566 | 0 | 175641 | QLYQTCKAAGTCPSDVI<br>PKI        | 2.93 | 0.01 | 3.21 | 1.12 | 0.22 | 0.28 |
| 58567 | 0 | 175641 | QLYQTCKAAGTCPSDVI<br>PKI        | 2.93 | 0.01 | 3.21 | 1.12 | 0.22 | 0.28 |
| 58568 | 0 | 175641 | QLYQTCKAAGTCPSDVI<br>PKI        | 2.93 | 0.01 | 3.21 | 1.12 | 0.22 | 0.28 |
| 58569 | 0 | 175641 | QLYQTCKAAGTCPSDVI<br>PKI        | 2.93 | 0.01 | 3.21 | 1.12 | 0.22 | 0.28 |
| 58570 | 0 | 447126 | QLYQTCKASGTCPPDVI<br>PKV        | 2.93 | 0.01 | 3.89 | 1.12 | 0.22 | 0.28 |
| 58571 | 0 | 189143 | QLYQTCKLTGTCPD                  | 2.70 | 0.01 | 3.25 | 0.68 | 0.22 | 0.28 |
| 58572 | 0 | 450966 | QLYREFN                         | 1.99 | 0.01 | 0.90 | 0.44 | 1.23 | 1.39 |
| 58573 | 0 | 450966 | QLYREFN                         | 1.99 | 0.01 | 0.90 | 0.44 | 1.41 | 1.39 |
| 58574 | 0 | 447127 | QLYRTCKAAGTCPPDVI<br>PKV        | 2.92 | 0.01 | 4.93 | 1.12 | 0.22 | 0.28 |
| 58575 | 0 | 181774 | QLYSIDKGPKTT                    | 2.43 | 0.01 | 0.90 | 0.68 | 0.22 | 0.28 |
| 58576 | 0 | 51602  | QMCVTQYQKESQAYYD<br>GRRS        | 2.92 | 0.01 | 1.75 | 2.16 | 0.22 | 0.28 |
| 58577 | 0 | 51602  | QMCVTQYQKESQAYYD<br>GRRS        | 2.92 | 0.01 | 1.75 | 1.81 | 0.22 | 0.28 |
| 58578 | 0 | 51602  | QMCVTQYQKESQAYYD<br>GRRS        | 2.92 | 0.01 | 1.75 | 3.40 | 0.22 | 0.28 |
| 58579 | 0 | 51607  | QMEGFQKQLDRLSDSLS<br>KIQKALGEYL | 3.25 | 0.01 | 3.44 | 0.44 | 1.74 | 0.28 |
| 58580 | 0 | 51607  | QMEGFQKQLDRLSDSLS<br>KIQKALGEYL | 3.25 | 0.01 | 3.44 | 0.44 | 1.74 | 0.28 |
| 58581 | 0 | 79633  | QMGAAPTTSDVAGLEK<br>DPVANVARP   | 3.14 | 0.01 | 3.21 | 2.16 | 0.22 | 0.28 |
| 58582 | 0 | 79633  | QMGAAPTTSDVAGLEK<br>DPVANVARP   | 3.14 | 0.01 | 3.21 | 2.16 | 0.22 | 0.28 |
| 58583 | 0 | 51613  | QMGVSELLIS                      | 2.30 | 0.01 | 0.78 | 0.44 | 1.74 | 0.28 |

|       |   |        |                                   |      |      |      |      |      |      |
|-------|---|--------|-----------------------------------|------|------|------|------|------|------|
| 58584 | 0 | 51621  | QMLRTGNNFTFSYTFED<br>VPF          | 2.90 | 0.01 | 3.19 | 0.44 | 1.59 | 1.27 |
| 58585 | 0 | 423470 | QMNHPPLPDPLGRPD                   | 2.70 | 0.01 | 2.51 | 0.44 | 2.35 | 1.28 |
| 58586 | 0 | 457828 | QMPQGGGGGIQPPPA<br>GIRA           | 2.94 | 0.01 | 2.40 | 2.82 | 0.22 | 0.28 |
| 58587 | 0 | 193044 | QMQADRTNGQFATEE<br>MQRAFQET       | 3.12 | 4.93 | 2.84 | 0.44 | 1.74 | 0.28 |
| 58588 | 0 | 161445 | QMQPVKAFKIHNKIWVI<br>PE           | 2.90 | 0.01 | 2.08 | 2.49 | 0.22 | 1.57 |
| 58589 | 0 | 161445 | QMQPVKAFKIHNKIWVI<br>PE           | 2.90 | 0.01 | 2.08 | 2.02 | 0.22 | 1.57 |
| 58590 | 0 | 51634  | QMQRQQMLSHCRMY                    | 2.64 | 0.01 | 4.08 | 0.44 | 1.23 | 0.28 |
| 58591 | 0 | 132575 | QMRGNPGSHFCGGTL                   | 2.63 | 0.01 | 0.78 | 0.44 | 1.41 | 0.28 |
| 58592 | 0 | 132575 | QMRGNPGSHFCGGTL                   | 2.63 | 0.01 | 0.78 | 0.44 | 1.13 | 0.28 |
| 58593 | 0 | 135979 | QMRPVSRVLAPH                      | 2.48 | 0.01 | 0.78 | 0.44 | 1.41 | 0.28 |
| 58594 | 0 | 148143 | QMSINVDNQ                         | 2.24 | 0.01 | 3.24 | 3.57 | 0.85 | 0.28 |
| 58595 | 0 | 182403 | QMSQELFEAETH                      | 2.48 | 0.01 | 0.90 | 0.68 | 0.22 | 0.28 |
| 58596 | 0 | 182403 | QMSQELFEAETH                      | 2.48 | 0.01 | 0.90 | 0.68 | 0.22 | 0.28 |
| 58597 | 0 | 153445 | QMTKLATTEELPDEFVV<br>VTA          | 2.94 | 0.01 | 2.45 | 1.12 | 0.22 | 2.92 |
| 58598 | 0 | 182275 | QMVWLNAQFDGNNET                   | 2.64 | 0.01 | 0.78 | 1.12 | 0.22 | 0.85 |
| 58599 | 0 | 111681 | QMWEAVSVKTEVV                     | 2.53 | 0.01 | 3.81 | 1.12 | 0.22 | 0.85 |
| 58600 | 0 | 103525 | QNAGGTHPTTTYKAF                   | 2.65 | 0.01 | 2.04 | 0.44 | 0.85 | 1.28 |
| 58601 | 0 | 225642 | QNAGVTYDKPPTVQDV<br>AARWDEITDLSAA | 3.27 | 0.01 | 2.51 | 2.00 | 0.22 | 0.28 |
| 58602 | 0 | 99578  | QNANEE                            | 1.88 | 0.01 | 2.86 | 2.02 | 0.85 | 0.85 |
| 58603 | 0 | 51669  | QNAPQAQNAPQAQ                     | 2.62 | 0.01 | 2.67 | 2.22 | 0.22 | 0.85 |
| 58604 | 0 | 51670  | QNAPQAQNAPQVE                     | 2.61 | 0.01 | 2.67 | 2.22 | 0.22 | 0.85 |
| 58605 | 0 | 51671  | QNAPQVENAPQAE                     | 2.61 | 0.01 | 2.67 | 2.22 | 0.22 | 0.85 |
| 58606 | 0 | 51672  | QNAPQVENAPQAQ                     | 2.61 | 0.01 | 2.67 | 2.22 | 0.22 | 0.85 |
| 58607 | 0 | 51673  | QNASQAQNAPQAQ                     | 2.62 | 0.01 | 2.67 | 2.22 | 0.22 | 0.85 |
| 58608 | 0 | 51674  | QNATEIR                           | 1.99 | 0.01 | 3.72 | 1.15 | 0.22 | 2.66 |
| 58609 | 0 | 172894 | QNATVAVMSYSGYDI                   | 2.66 | 0.01 | 0.78 | 0.44 | 1.41 | 0.28 |
| 58610 | 0 | 172894 | QNATVAVMSYSGYDI                   | 2.66 | 0.01 | 0.78 | 0.44 | 1.13 | 0.28 |
| 58611 | 0 | 51677  | QNCGYR                            | 1.88 | 0.01 | 1.96 | 0.44 | 0.85 | 0.28 |
| 58612 | 0 | 115158 | QNCSTSSSGNVHHCFS<br>SPNEWLQSVQ    | 3.23 | 0.01 | 0.78 | 0.44 | 1.13 | 0.28 |
| 58613 | 0 | 115158 | QNCSTSSSGNVHHCFS<br>SPNEWLQSVQ    | 3.23 | 0.01 | 0.78 | 0.44 | 1.41 | 0.28 |
| 58614 | 0 | 115158 | QNCSTSSSGNVHHCFS<br>SPNEWLQSVQ    | 3.23 | 0.01 | 0.78 | 0.44 | 1.41 | 0.28 |
| 58615 | 0 | 51678  | QNDNPQ                            | 1.92 | 0.01 | 0.90 | 1.15 | 0.22 | 1.39 |

|       |   |        |                                                                                       |      |      |      |      |      |      |
|-------|---|--------|---------------------------------------------------------------------------------------|------|------|------|------|------|------|
| 58616 | 0 | 95723  | QNDPTT                                                                                | 1.86 | 0.01 | 2.40 | 2.52 | 0.22 | 0.28 |
| 58617 | 0 | 95723  | QNDPTT                                                                                | 1.86 | 0.01 | 2.40 | 2.52 | 0.22 | 0.28 |
| 58618 | 0 | 95723  | QNDPTT                                                                                | 1.86 | 0.01 | 2.40 | 2.52 | 0.22 | 0.28 |
| 58619 | 0 | 137557 | QNFAVVKRAREERFE                                                                       | 2.70 | 0.01 | 3.12 | 0.44 | 1.23 | 0.85 |
| 58620 | 0 | 111682 | QNFGLFYPNKQPVYQ                                                                       | 2.71 | 0.01 | 3.20 | 1.12 | 0.22 | 0.85 |
| 58621 | 0 | 111682 | QNFGLFYPNKQPVYQ                                                                       | 2.71 | 0.01 | 3.20 | 0.44 | 1.23 | 1.27 |
| 58622 | 0 | 227822 | QNGRIRLLQRFNKRSP                                                                      | 2.75 | 0.01 | 2.72 | 4.03 | 1.59 | 0.28 |
| 58623 | 0 | 227822 | QNGRIRLLQRFNKRSP                                                                      | 2.75 | 0.01 | 2.72 | 1.20 | 1.59 | 0.28 |
| 58624 | 0 | 524325 | QNIAKLNAMISNPDAIT<br>KAAQTANDNTKALSS                                                  | 3.44 | 0.01 | 2.24 | 0.44 | 1.41 | 1.28 |
| 58625 | 0 | 152920 | QNIKNQLAEL                                                                            | 2.34 | 0.01 | 2.18 | 2.16 | 0.22 | 0.28 |
| 58626 | 0 | 51709  | QNIRPVQSVASSRRH                                                                       | 2.69 | 0.01 | 2.43 | 0.44 | 1.59 | 0.28 |
| 58627 | 0 | 99579  | QNIROGAKEPYPEFV                                                                       | 2.65 | 0.01 | 2.86 | 2.02 | 0.85 | 0.85 |
| 58628 | 0 | 51710  | QNITDL                                                                                | 1.88 | 0.01 | 3.24 | 1.12 | 0.22 | 0.28 |
| 58629 | 0 | 51720  | QNKGNQSFEF                                                                            | 2.32 | 0.01 | 2.56 | 1.20 | 0.22 | 0.28 |
| 58630 | 0 | 51726  | QNKMENDMNIIKNDM<br>NIMENDMNIMENDMN<br>IIKNDMNIMEKDMNIIK<br>NDMNIIKNNMNIKNE<br>MNIIKNV | 4.24 | 0.01 | 2.22 | 0.44 | 1.74 | 0.28 |
| 58631 | 0 | 51726  | QNKMENDMNIIKNDM<br>NIMENDMNIMENDMN<br>IIKNDMNIMEKDMNIIK<br>NDMNIIKNNMNIKNE<br>MNIIKNV | 4.24 | 0.01 | 2.22 | 0.44 | 1.74 | 0.28 |
| 58632 | 0 | 51726  | QNKMENDMNIIKNDM<br>NIMENDMNIMENDMN<br>IIKNDMNIMEKDMNIIK<br>NDMNIIKNNMNIKNE<br>MNIIKNV | 4.24 | 0.01 | 2.22 | 0.44 | 1.74 | 0.28 |
| 58633 | 0 | 51726  | QNKMENDMNIIKNDM<br>NIMENDMNIMENDMN<br>IIKNDMNIMEKDMNIIK<br>NDMNIIKNNMNIKNE<br>MNIIKNV | 4.24 | 0.01 | 2.22 | 0.44 | 0.85 | 1.48 |
| 58634 | 0 | 51726  | QNKMENDMNIIKNDM<br>NIMENDMNIMENDMN<br>IIKNDMNIMEKDMNIIK<br>NDMNIIKNNMNIKNE<br>MNIIKNV | 4.24 | 0.01 | 2.22 | 1.15 | 0.22 | 1.48 |
| 58635 | 0 | 51729  | QNKPPNKPNNDF                                                                          | 2.52 | 0.01 | 2.38 | 0.68 | 0.22 | 0.28 |
| 58636 | 0 | 51729  | QNKPPNKPNNDF                                                                          | 2.52 | 0.01 | 2.38 | 0.68 | 0.22 | 0.28 |
| 58637 | 0 | 51729  | QNKPPNKPNNDF                                                                          | 2.52 | 0.01 | 2.38 | 0.44 | 1.59 | 0.28 |
| 58638 | 0 | 51729  | QNKPPNKPNNDF                                                                          | 2.52 | 0.01 | 2.38 | 0.44 | 1.74 | 0.28 |

|       |   |        |                           |      |      |      |      |      |      |
|-------|---|--------|---------------------------|------|------|------|------|------|------|
| 58639 | 0 | 51729  | QNKPPNKPNNDF              | 2.52 | 0.01 | 2.38 | 0.44 | 1.74 | 0.28 |
| 58640 | 0 | 100433 | QNLRVAKISMPVNTPG<br>QFED  | 2.88 | 0.01 | 2.16 | 0.44 | 2.39 | 0.28 |
| 58641 | 0 | 147227 | QNLVQAWQAKHQG             | 2.56 | 0.01 | 1.60 | 0.44 | 0.85 | 0.85 |
| 58642 | 0 | 174705 | QNMNNWTLASIM              | 2.46 | 0.01 | 0.90 | 1.15 | 1.41 | 1.39 |
| 58643 | 0 | 51739  | QNNFVHDCVNITIKQHT<br>VTT  | 2.96 | 0.01 | 1.75 | 3.40 | 0.22 | 0.28 |
| 58644 | 0 | 87642  | QNNLPNDVFREA              | 2.45 | 0.01 | 2.48 | 0.44 | 1.59 | 0.28 |
| 58645 | 0 | 98377  | QNPSQQQPQEQVPLVQ<br>QQQFL | 3.03 | 0.01 | 1.86 | 0.44 | 1.93 | 0.28 |
| 58646 | 0 | 98377  | QNPSQQQPQEQVPLVQ<br>QQQFL | 3.03 | 0.01 | 1.86 | 0.44 | 1.93 | 0.28 |
| 58647 | 0 | 100434 | QNPTTPATPTPT              | 2.53 | 0.01 | 2.88 | 0.44 | 1.23 | 0.85 |
| 58648 | 0 | 115920 | QNQEQPIRCE                | 2.34 | 0.01 | 1.60 | 0.44 | 1.23 | 0.85 |
| 58649 | 0 | 51751  | QNQGAWPA                  | 2.15 | 0.01 | 2.40 | 2.43 | 0.22 | 0.28 |
| 58650 | 0 | 236121 | QNQIAVDEIR                | 2.32 | 0.01 | 0.78 | 0.44 | 1.13 | 2.66 |
| 58651 | 0 | 156423 | QNQLDQVPRRFYLAG           | 2.66 | 0.01 | 3.67 | 0.44 | 1.23 | 1.27 |
| 58652 | 0 | 51755  | QNQRPTL                   | 2.03 | 0.01 | 2.90 | 1.15 | 2.26 | 0.28 |
| 58653 | 0 | 51758  | QNRLESIKDS                | 2.29 | 0.01 | 2.73 | 0.44 | 0.85 | 0.28 |
| 58654 | 0 | 450971 | QNRLTPEEIERMVND AE        | 2.77 | 0.01 | 0.78 | 2.79 | 1.13 | 1.28 |
| 58655 | 0 | 167372 | QNRLTPEEIERMVND AE<br>KFA | 2.91 | 3.24 | 0.78 | 0.44 | 1.13 | 0.28 |
| 58656 | 0 | 51763  | QNSGNQS FEE               | 2.34 | 0.01 | 2.56 | 1.20 | 0.22 | 0.28 |
| 58657 | 0 | 98378  | QNSKSAYTPA                | 2.31 | 0.01 | 3.08 | 1.20 | 0.22 | 0.28 |
| 58658 | 0 | 450972 | QNSPFSE                   | 2.02 | 0.01 | 0.90 | 0.44 | 1.41 | 1.39 |
| 58659 | 0 | 524334 | QNTASTETTTTNEQP           | 2.71 | 0.01 | 2.24 | 0.44 | 1.41 | 1.28 |
| 58660 | 0 | 51771  | QNTEEMENLS DRV            | 2.53 | 0.01 | 3.02 | 0.68 | 0.22 | 0.85 |
| 58661 | 0 | 51771  | QNTEEMENLS DRV            | 2.53 | 0.01 | 3.02 | 2.25 | 0.22 | 0.85 |
| 58662 | 0 | 51771  | QNTEEMENLS DRV            | 2.53 | 0.01 | 3.02 | 1.81 | 0.22 | 0.85 |
| 58663 | 0 | 51772  | QNTEEMENLS DRVAS          | 2.66 | 0.01 | 3.02 | 2.25 | 0.22 | 0.28 |
| 58664 | 0 | 51772  | QNTEEMENLS DRVAS          | 2.66 | 0.01 | 3.02 | 1.81 | 0.22 | 0.85 |
| 58665 | 0 | 51772  | QNTEEMENLS DRVAS          | 2.66 | 0.01 | 3.02 | 0.68 | 0.22 | 0.85 |
| 58666 | 0 | 51772  | QNTEEMENLS DRVAS          | 2.66 | 0.01 | 3.02 | 0.68 | 0.22 | 0.85 |
| 58667 | 0 | 51772  | QNTEEMENLS DRVAS          | 2.66 | 0.01 | 3.02 | 1.81 | 0.22 | 0.28 |
| 58668 | 0 | 51772  | QNTEEMENLS DRVAS          | 2.66 | 0.01 | 3.02 | 1.81 | 0.22 | 0.85 |
| 58669 | 0 | 51772  | QNTEEMENLS DRVAS          | 2.66 | 0.01 | 3.02 | 1.81 | 0.22 | 1.34 |
| 58670 | 0 | 51772  | QNTEEMENLS DRVAS          | 2.66 | 0.01 | 3.02 | 2.25 | 0.22 | 0.28 |
| 58671 | 0 | 51772  | QNTEEMENLS DRVAS          | 2.66 | 0.01 | 3.02 | 2.25 | 0.22 | 0.28 |
| 58672 | 0 | 98379  | QNTK                      | 1.57 | 0.01 | 2.78 | 0.44 | 1.23 | 1.57 |
| 58673 | 0 | 51775  | QNTRNIVPV SIVSR           | 2.65 | 0.01 | 3.72 | 1.12 | 0.22 | 0.28 |
| 58674 | 0 | 51775  | QNTRNIVPV SIVSR           | 2.65 | 0.01 | 3.72 | 1.12 | 0.22 | 1.34 |
| 58675 | 0 | 51775  | QNTRNIVPV SIVSR           | 2.65 | 0.01 | 3.72 | 1.12 | 0.22 | 1.48 |
| 58676 | 0 | 51775  | QNTRNIVPV SIVSR           | 2.65 | 0.01 | 3.72 | 0.68 | 0.22 | 0.28 |
| 58677 | 0 | 51775  | QNTRNIVPV SIVSR           | 2.65 | 0.01 | 3.72 | 0.68 | 0.22 | 1.34 |
| 58678 | 0 | 51775  | QNTRNIVPV SIVSR           | 2.65 | 0.01 | 3.72 | 0.68 | 0.22 | 1.48 |
| 58679 | 0 | 51775  | QNTRNIVPV SIVSR           | 2.65 | 0.01 | 3.72 | 0.68 | 0.22 | 1.27 |

|       |   |        |                           |      |      |      |      |      |      |
|-------|---|--------|---------------------------|------|------|------|------|------|------|
| 58680 | 0 | 423471 | QNTVLITDQSREEFD           | 2.66 | 0.01 | 2.51 | 0.44 | 2.35 | 1.28 |
| 58681 | 0 | 137954 | QNVLSADF                  | 2.10 | 0.01 | 2.21 | 1.20 | 0.22 | 0.28 |
| 58682 | 0 | 137954 | QNVLSADF                  | 2.10 | 0.01 | 2.21 | 0.44 | 0.85 | 0.28 |
| 58683 | 0 | 137954 | QNVLSADF                  | 2.10 | 0.01 | 2.21 | 0.44 | 0.85 | 0.28 |
| 58684 | 0 | 137954 | QNVLSADF                  | 2.10 | 0.01 | 2.21 | 1.20 | 0.22 | 0.28 |
| 58685 | 0 | 51781  | QNVNRPSPRADVF             | 2.48 | 0.01 | 3.33 | 0.44 | 1.23 | 0.85 |
| 58686 | 0 | 423741 | QNVNSKYTLNHA              | 2.45 | 0.01 | 0.90 | 2.46 | 0.22 | 1.39 |
| 58687 | 0 | 423741 | QNVNSKYTLNHA              | 2.45 | 0.01 | 0.90 | 0.44 | 1.13 | 0.28 |
| 58688 | 0 | 51782  | QNVDPDPQVGITTMKDL<br>KGKA | 2.94 | 0.01 | 2.82 | 0.44 | 0.85 | 0.28 |
| 58689 | 0 | 51783  | QNVQLINTNGSWHLN           | 2.69 | 0.01 | 2.41 | 2.37 | 0.22 | 0.28 |
| 58690 | 0 | 107580 | QNWLDGK                   | 1.99 | 0.01 | 0.78 | 0.44 | 1.13 | 0.28 |
| 58691 | 0 | 51790  | QPACRKAGCQTYKWE           | 2.67 | 0.01 | 2.04 | 0.44 | 0.85 | 0.28 |
| 58692 | 0 | 51791  | QPADGSSAGGQQQESS          | 2.76 | 0.01 | 3.41 | 3.42 | 0.22 | 0.85 |
| 58693 | 0 | 51791  | QPADGSSAGGQQQESS          | 2.76 | 0.01 | 3.41 | 3.42 | 0.22 | 0.85 |
| 58694 | 0 | 51791  | QPADGSSAGGQQQESS          | 2.76 | 0.01 | 3.41 | 1.12 | 0.22 | 0.85 |
| 58695 | 0 | 153447 | QPAIWNPFPAPAWGGGS         | 2.75 | 0.01 | 0.90 | 0.68 | 0.22 | 0.28 |
| 58696 | 0 | 153447 | QPAIWNPFPAPAWGGGS         | 2.75 | 0.01 | 0.90 | 0.44 | 0.85 | 2.35 |
| 58697 | 0 | 51793  | QPAPATAPSQGGV             | 2.59 | 0.01 | 2.97 | 0.44 | 0.85 | 0.85 |
| 58698 | 0 | 138229 | QPAPNAQPAPGAPA            | 2.69 | 0.01 | 2.51 | 1.20 | 0.22 | 0.28 |
| 58699 | 0 | 138229 | QPAPNAQPAPGAPA            | 2.69 | 0.01 | 2.51 | 1.20 | 0.22 | 0.28 |
| 58700 | 0 | 113762 | QPAQGQQGQPGQA             | 2.69 | 0.01 | 1.86 | 0.44 | 1.23 | 0.85 |
| 58701 | 0 | 113763 | QPAQGQQPGQGGQG            | 2.68 | 0.01 | 1.86 | 0.44 | 1.23 | 0.85 |
| 58702 | 0 | 148146 | QPAVRNERA                 | 2.23 | 0.01 | 3.24 | 0.68 | 0.22 | 0.28 |
| 58703 | 0 | 102004 | QPD                       | 1.37 | 0.01 | 3.16 | 0.68 | 0.22 | 0.85 |
| 58704 | 0 | 102004 | QPD                       | 1.37 | 0.01 | 3.16 | 0.68 | 0.22 | 1.75 |
| 58705 | 0 | 94661  | QPDFGGFWDA                | 2.32 | 0.01 | 3.36 | 0.68 | 0.22 | 0.28 |
| 58706 | 0 | 94661  | QPDFGGFWDA                | 2.32 | 0.01 | 3.36 | 0.68 | 0.22 | 1.34 |
| 58707 | 0 | 148147 | QPDGGQPAV                 | 2.25 | 0.01 | 3.24 | 1.12 | 0.22 | 0.28 |
| 58708 | 0 | 79054  | QPDGGQPAVRNERAT           | 2.68 | 0.01 | 3.05 | 4.33 | 0.22 | 0.28 |
| 58709 | 0 | 79054  | QPDGGQPAVRNERAT           | 2.68 | 0.01 | 3.05 | 4.33 | 0.22 | 0.28 |
| 58710 | 0 | 79054  | QPDGGQPAVRNERAT           | 2.68 | 0.01 | 3.05 | 1.20 | 0.22 | 0.28 |
| 58711 | 0 | 79054  | QPDGGQPAVRNERAT           | 2.68 | 0.01 | 3.05 | 1.20 | 0.22 | 1.34 |

|       |   |        |                    |      |      |      |      |      |      |
|-------|---|--------|--------------------|------|------|------|------|------|------|
| 58712 | 0 | 79054  | QPDGGQPAVRNERAT    | 2.68 | 0.01 | 3.05 | 1.20 | 0.22 | 0.28 |
| 58713 | 0 | 51799  | QPDLIPL            | 2.04 | 0.01 | 2.24 | 1.12 | 0.22 | 0.28 |
| 58714 | 0 | 51799  | QPDLIPL            | 2.04 | 0.01 | 2.24 | 0.68 | 0.22 | 0.28 |
| 58715 | 0 | 102005 | QPDQHHQ            | 2.05 | 0.01 | 3.10 | 1.15 | 0.22 | 0.28 |
| 58716 | 0 | 102005 | QPDQHHQ            | 2.05 | 0.01 | 3.10 | 1.15 | 0.22 | 1.48 |
| 58717 | 0 | 102005 | QPDQHHQ            | 2.05 | 0.01 | 3.10 | 1.15 | 0.22 | 1.48 |
| 58718 | 0 | 102005 | QPDQHHQ            | 2.05 | 0.01 | 3.10 | 1.15 | 0.22 | 0.85 |
|       |   |        | QPEDIFSDHHTMCYCED  |      |      |      |      |      |      |
| 58719 | 0 | 134495 | GFMHCTMSGVPGSLLP   | 3.48 | 0.01 | 0.78 | 0.68 | 0.22 | 1.39 |
|       |   |        | DA                 |      |      |      |      |      |      |
|       |   |        | QPEDIFSDHHTMCYCED  |      |      |      |      |      |      |
| 58720 | 0 | 134495 | GFMHCTMSGVPGSLLP   | 3.48 | 0.01 | 0.78 | 0.68 | 0.22 | 0.85 |
|       |   |        | DA                 |      |      |      |      |      |      |
| 58721 | 0 | 164170 | QPEDMIETRYVITDQTR  | 2.98 | 0.01 | 4.23 | 1.12 | 0.22 | 0.28 |
|       |   |        | DET                |      |      |      |      |      |      |
| 58722 | 0 | 51804  | QPEKGG             | 1.86 | 0.01 | 1.96 | 0.44 | 0.85 | 0.28 |
| 58723 | 0 | 51806  | QPELAPEDPED        | 2.44 | 0.01 | 2.40 | 1.15 | 2.26 | 0.85 |
| 58724 | 0 | 51806  | QPELAPEDPED        | 2.44 | 0.01 | 2.40 | 0.44 | 0.85 | 0.85 |
| 58725 | 0 | 51806  | QPELAPEDPED        | 2.44 | 0.01 | 2.40 | 1.12 | 0.22 | 0.85 |
| 58726 | 0 | 51806  | QPELAPEDPED        | 2.44 | 0.01 | 2.40 | 1.15 | 2.26 | 1.48 |
| 58727 | 0 | 51806  | QPELAPEDPED        | 2.44 | 0.01 | 2.40 | 1.15 | 2.26 | 0.85 |
| 58728 | 0 | 51806  | QPELAPEDPED        | 2.44 | 0.01 | 2.40 | 3.41 | 0.22 | 0.28 |
| 58729 | 0 | 51807  | QPELPYPQ           | 2.17 | 0.01 | 1.86 | 0.44 | 1.93 | 0.28 |
| 58730 | 0 | 119629 | QPENNYKT           | 2.11 | 0.01 | 0.78 | 0.44 | 1.93 | 0.28 |
| 58731 | 0 | 131605 | QPERGLR            | 2.02 | 0.01 | 0.78 | 1.15 | 0.22 | 0.28 |
| 58732 | 0 | 111684 | QPETTDLYCYEQLSD    | 2.70 | 0.01 | 1.86 | 1.12 | 0.22 | 0.28 |
|       |   |        | QPFAIPYIHPTNPFAPDV |      |      |      |      |      |      |
| 58733 | 0 | 51811  | TAAAGAG            | 3.17 | 0.01 | 2.53 | 0.44 | 0.85 | 0.28 |
| 58734 | 0 | 149430 | QPFLPQQPYP         | 2.36 | 0.01 | 1.86 | 0.44 | 1.93 | 0.85 |
| 58735 | 0 | 149430 | QPFLPQQPYP         | 2.36 | 0.01 | 1.86 | 2.74 | 0.22 | 0.85 |
| 58736 | 0 | 149430 | QPFLPQQPYP         | 2.36 | 0.01 | 1.86 | 2.74 | 0.22 | 0.85 |
| 58737 | 0 | 51816  | QPFPLQPQQP         | 2.37 | 0.01 | 2.83 | 0.68 | 0.22 | 0.28 |
| 58738 | 0 | 51816  | QPFPLQPQQP         | 2.37 | 0.01 | 2.83 | 0.68 | 0.22 | 0.85 |
| 58739 | 0 | 148787 | QPFPPQLPYP         | 2.37 | 0.01 | 1.86 | 2.74 | 0.22 | 0.85 |
| 58740 | 0 | 148787 | QPFPPQLPYP         | 2.37 | 0.01 | 1.86 | 2.74 | 0.22 | 0.85 |
|       |   |        | QPFPPQLPYSQPQPFRR  |      |      |      |      |      |      |
| 58741 | 0 | 98381  | QQPY               | 3.06 | 0.01 | 1.86 | 0.44 | 2.39 | 0.28 |
|       |   |        | QPFPPQLPYSQPQPFRR  |      |      |      |      |      |      |
| 58742 | 0 | 98381  | QQPY               | 3.06 | 0.01 | 1.86 | 0.44 | 2.39 | 0.28 |
| 58743 | 0 | 149431 | QPFPPQQPYP         | 2.37 | 0.01 | 1.86 | 0.44 | 1.93 | 0.85 |
| 58744 | 0 | 149431 | QPFPPQQPYP         | 2.37 | 0.01 | 1.86 | 2.74 | 0.22 | 0.85 |
| 58745 | 0 | 149431 | QPFPPQQPYP         | 2.37 | 0.01 | 1.86 | 2.74 | 0.22 | 0.85 |
| 58746 | 0 | 51820  | QPFQPPEL           | 2.17 | 0.01 | 1.86 | 0.44 | 1.93 | 0.28 |
| 58747 | 0 | 51822  | QPFQPPELPYPQPQ     | 2.68 | 0.01 | 0.90 | 3.55 | 0.22 | 1.27 |
| 58748 | 0 | 99836  | QPFQPQ             | 2.06 | 0.01 | 1.86 | 0.68 | 0.22 | 0.28 |
| 58749 | 0 | 99836  | QPFQPQ             | 2.06 | 0.01 | 1.86 | 0.68 | 0.22 | 2.02 |

|       |   |        |                                                          |      |      |      |      |      |      |
|-------|---|--------|----------------------------------------------------------|------|------|------|------|------|------|
| 58750 | 0 | 99836  | QPFPQPQ                                                  | 2.06 | 0.01 | 1.86 | 0.68 | 0.22 | 2.02 |
| 58751 | 0 | 99836  | QPFPQPQ                                                  | 2.06 | 0.01 | 1.86 | 0.68 | 0.22 | 2.02 |
| 58752 | 0 | 99836  | QPFPQPQ                                                  | 2.06 | 0.01 | 1.86 | 0.68 | 0.22 | 2.02 |
| 58753 | 0 | 99836  | QPFPQPQ                                                  | 2.06 | 0.01 | 1.86 | 0.68 | 0.22 | 2.02 |
| 58754 | 0 | 99836  | QPFPQPQ                                                  | 2.06 | 0.01 | 1.86 | 0.68 | 0.22 | 0.28 |
| 58755 | 0 | 99836  | QPFPQPQ                                                  | 2.06 | 0.01 | 1.86 | 0.68 | 0.22 | 0.85 |
| 58756 | 0 | 99836  | QPFPQPQ                                                  | 2.06 | 0.01 | 1.86 | 0.68 | 0.22 | 0.85 |
| 58757 | 0 | 99836  | QPFPQPQ                                                  | 2.06 | 0.01 | 1.86 | 0.68 | 0.22 | 0.85 |
| 58758 | 0 | 99836  | QPFPQPQ                                                  | 2.06 | 0.01 | 1.86 | 0.68 | 0.22 | 0.85 |
| 58759 | 0 | 99836  | QPFPQPQ                                                  | 2.06 | 0.01 | 1.86 | 0.68 | 0.22 | 0.85 |
| 58760 | 0 | 99836  | QPFPQPQ                                                  | 2.06 | 0.01 | 1.86 | 0.68 | 0.22 | 0.28 |
| 58761 | 0 | 99836  | QPFPQPQ                                                  | 2.06 | 0.01 | 1.86 | 0.68 | 0.22 | 0.28 |
| 58762 | 0 | 99836  | QPFPQPQ                                                  | 2.06 | 0.01 | 1.86 | 0.68 | 0.22 | 0.28 |
| 58763 | 0 | 99836  | QPFPQPQ                                                  | 2.06 | 0.01 | 1.86 | 0.68 | 0.22 | 0.28 |
| 58764 | 0 | 98383  | QPFPQPQLPYP                                              | 2.46 | 0.01 | 1.86 | 0.68 | 0.22 | 0.28 |
| 58765 | 0 | 98383  | QPFPQPQLPYP                                              | 2.46 | 0.01 | 1.86 | 0.68 | 0.22 | 0.28 |
| 58766 | 0 | 98383  | QPFPQPQLPYP                                              | 2.46 | 0.01 | 1.86 | 0.68 | 0.22 | 0.28 |
| 58767 | 0 | 98383  | QPFPQPQLPYP                                              | 2.46 | 0.01 | 1.86 | 0.68 | 0.22 | 0.28 |
| 58768 | 0 | 98383  | QPFPQPQLPYP                                              | 2.46 | 0.01 | 1.86 | 0.68 | 0.22 | 0.28 |
| 58769 | 0 | 51826  | QPFPQPQLPYPQPQ                                           | 2.69 | 4.93 | 1.86 | 3.55 | 0.22 | 1.48 |
| 58770 | 0 | 51827  | QPFPQPQLPYPQPQ                                           | 2.69 | 0.01 | 1.86 | 3.55 | 0.22 | 1.27 |
| 58771 | 0 | 51827  | QPFPQPQLPYPQPQ                                           | 2.69 | 0.01 | 1.86 | 3.55 | 0.22 | 2.75 |
| 58772 | 0 | 51827  | QPFPQPQLPYPQPQ                                           | 2.69 | 0.01 | 1.86 | 3.55 | 0.22 | 1.48 |
| 58773 | 0 | 98384  | QPFPQPQLPYSQPQPF<br>PQQP                                 | 3.06 | 0.01 | 1.86 | 0.44 | 1.93 | 0.28 |
| 58774 | 0 | 98384  | QPFPQPQLPYSQPQPF<br>PQQP                                 | 3.06 | 0.01 | 1.86 | 0.44 | 2.39 | 0.28 |
| 58775 | 0 | 148789 | QPFPQPQPFP                                               | 2.38 | 0.01 | 1.86 | 0.44 | 1.93 | 0.85 |
| 58776 | 0 | 148789 | QPFPQPQPFP                                               | 2.38 | 0.01 | 1.86 | 2.74 | 0.22 | 0.85 |
| 58777 | 0 | 148789 | QPFPQPQPFP                                               | 2.38 | 0.01 | 1.86 | 2.74 | 0.22 | 0.85 |
| 58778 | 0 | 51828  | QPFPQPQQTf                                               | 2.37 | 0.01 | 1.86 | 0.68 | 0.22 | 0.28 |
| 58779 | 0 | 51828  | QPFPQPQQTf                                               | 2.37 | 0.01 | 1.86 | 0.68 | 0.22 | 0.85 |
| 58780 | 0 | 51830  | QPFPSQQPYL                                               | 2.35 | 0.01 | 1.86 | 0.44 | 1.93 | 0.85 |
| 58781 | 0 | 51830  | QPFPSQQPYL                                               | 2.35 | 0.01 | 1.86 | 2.74 | 0.22 | 0.85 |
| 58782 | 0 | 51830  | QPFPSQQPYL                                               | 2.35 | 0.01 | 1.86 | 2.74 | 0.22 | 0.85 |
| 58783 | 0 | 51830  | QPFPSQQPYL                                               | 2.35 | 0.01 | 1.86 | 0.68 | 0.22 | 0.28 |
| 58784 | 0 | 98385  | QPFPSQQPYLQLQFPQ<br>PQLP                                 | 3.07 | 0.01 | 1.86 | 0.44 | 1.93 | 0.28 |
| 58785 | 0 | 98385  | QPFPSQQPYLQLQFPQ<br>PQLP                                 | 3.07 | 0.01 | 1.86 | 0.44 | 1.93 | 0.28 |
| 58786 | 0 | 51831  | QPFQQFGRDVSDFTD<br>VRDPKTSEILDISPCSGG<br>VSVITPGTNASSEVA | 3.86 | 0.01 | 2.45 | 0.68 | 0.22 | 0.85 |
| 58787 | 0 | 51833  | QPFRRPQQPYP                                              | 2.36 | 0.01 | 1.86 | 0.68 | 0.22 | 0.85 |
| 58788 | 0 | 51833  | QPFRRPQQPYP                                              | 2.36 | 0.01 | 1.86 | 0.68 | 0.22 | 0.28 |



|       |   |        |                                   |      |      |      |      |      |      |
|-------|---|--------|-----------------------------------|------|------|------|------|------|------|
| 58789 | 0 | 98386  | QPFRPQQYPQPQPQY<br>SQPQQ          | 3.06 | 0.01 | 1.86 | 0.44 | 1.93 | 0.28 |
| 58790 | 0 | 98386  | QPFRPQQYPQPQPQY<br>SQPQQ          | 3.06 | 0.01 | 1.86 | 0.44 | 2.39 | 0.28 |
| 58791 | 0 | 98386  | QPFRPQQYPQPQPQY<br>SQPQQ          | 3.06 | 0.01 | 1.86 | 0.44 | 2.39 | 0.28 |
| 58792 | 0 | 122172 | QPFWLLQGGASRAETS<br>VQPVLVE       | 3.09 | 0.01 | 3.26 | 3.81 | 0.22 | 0.28 |
| 58793 | 0 | 122172 | QPFWLLQGGASRAETS<br>VQPVLVE       | 3.09 | 0.01 | 3.26 | 3.81 | 0.22 | 0.28 |
| 58794 | 0 | 51834  | QPGDDPLL                          | 2.12 | 0.01 | 2.40 | 2.43 | 0.22 | 0.28 |
| 58795 | 0 | 167799 | QPGDDPLL                          | 2.25 | 0.01 | 2.40 | 2.43 | 0.22 | 0.28 |
| 58796 | 0 | 51835  | QPGDGNPD                          | 2.16 | 0.01 | 3.29 | 1.20 | 0.22 | 0.28 |
| 58797 | 0 | 51837  | QPGHLA                            | 1.88 | 0.01 | 3.27 | 0.44 | 1.59 | 0.28 |
| 58798 | 0 | 51837  | QPGHLA                            | 1.88 | 0.01 | 3.27 | 2.37 | 0.22 | 0.28 |
| 58799 | 0 | 51839  | QPGIASLVIPSERLHYR<br>NQGWRSVETSGV | 3.34 | 0.01 | 2.70 | 1.15 | 0.22 | 0.28 |
| 58800 | 0 | 51839  | QPGIASLVIPSERLHYR<br>NQGWRSVETSGV | 3.34 | 0.01 | 2.53 | 0.44 | 0.85 | 0.28 |
| 58801 | 0 | 51841  | QPLRR                             | 1.86 | 0.01 | 3.27 | 0.44 | 1.59 | 0.28 |
| 58802 | 0 | 51841  | QPLRR                             | 1.86 | 0.01 | 3.27 | 0.44 | 1.59 | 0.28 |
| 58803 | 0 | 51844  | QGPSREYRYVLRISPP                  | 2.79 | 0.01 | 3.36 | 0.44 | 2.82 | 0.28 |
| 58804 | 0 | 113765 | QPGQGQQGQQPGQG                    | 2.69 | 0.01 | 1.86 | 0.44 | 1.23 | 0.85 |
| 58805 | 0 | 113766 | QPGQGQQGQQPGQG                    | 2.69 | 0.01 | 1.86 | 0.44 | 1.23 | 0.85 |
| 58806 | 0 | 113768 | QPGQGQQGQQWQQS                    | 2.68 | 0.01 | 1.86 | 0.44 | 1.23 | 0.85 |
| 58807 | 0 | 167800 | QPGTEGESQA                        | 2.34 | 0.01 | 2.75 | 0.44 | 0.85 | 0.85 |
| 58808 | 0 | 167800 | QPGTEGESQA                        | 2.34 | 0.01 | 2.75 | 0.44 | 0.85 | 0.85 |
| 58809 | 0 | 167800 | QPGTEGESQA                        | 2.34 | 0.01 | 2.75 | 0.44 | 0.85 | 0.85 |
| 58810 | 0 | 51847  | QPGVDIIEGPVKNVAVP<br>LY           | 2.88 | 0.01 | 2.60 | 0.44 | 1.23 | 0.28 |
| 58811 | 0 | 51847  | QPGVDIIEGPVKNVAVP<br>LY           | 2.88 | 0.01 | 2.60 | 1.20 | 0.22 | 0.28 |
| 58812 | 0 | 51847  | QPGVDIIEGPVKNVAVP<br>LY           | 2.88 | 0.01 | 2.60 | 0.44 | 1.23 | 1.27 |
| 58813 | 0 | 51849  | QPGYPWPL                          | 2.14 | 0.01 | 1.72 | 0.44 | 0.85 | 0.28 |
| 58814 | 0 | 51852  | QPHDLGKVGEVIVTKD                  | 2.73 | 0.01 | 0.78 | 2.04 | 0.22 | 0.28 |
| 58815 | 0 | 51852  | QPHDLGKVGEVIVTKD                  | 2.73 | 0.01 | 0.78 | 0.44 | 1.13 | 0.28 |
| 58816 | 0 | 51852  | QPHDLGKVGEVIVTKD                  | 2.73 | 0.01 | 0.78 | 0.44 | 1.13 | 0.28 |
| 58817 | 0 | 51852  | QPHDLGKVGEVIVTKD                  | 2.73 | 0.01 | 0.78 | 0.44 | 1.41 | 0.28 |

|       |   |        |                          |      |      |      |      |      |      |
|-------|---|--------|--------------------------|------|------|------|------|------|------|
| 58818 | 0 | 51852  | QPHDLGKVGEVIVTKD         | 2.73 | 0.01 | 0.78 | 0.44 | 1.41 | 0.28 |
| 58819 | 0 | 51852  | QPHDLGKVGEVIVTKD         | 2.73 | 0.01 | 0.78 | 0.44 | 1.13 | 0.28 |
| 58820 | 0 | 51852  | QPHDLGKVGEVIVTKD         | 2.73 | 0.01 | 0.78 | 0.44 | 1.13 | 0.28 |
| 58821 | 0 | 51852  | QPHDLGKVGEVIVTKD         | 2.73 | 0.01 | 0.78 | 0.44 | 1.13 | 0.28 |
| 58822 | 0 | 51852  | QPHDLGKVGEVIVTKD         | 2.73 | 0.01 | 0.78 | 0.44 | 1.13 | 0.28 |
| 58823 | 0 | 51853  | QPHGGGW                  | 2.02 | 0.01 | 1.75 | 2.19 | 0.22 | 1.27 |
| 58824 | 0 | 51853  | QPHGGGW                  | 2.02 | 0.01 | 1.75 | 2.19 | 0.22 | 0.85 |
| 58825 | 0 | 51853  | QPHGGGW                  | 2.02 | 0.01 | 1.75 | 2.19 | 0.22 | 1.66 |
| 58826 | 0 | 51853  | QPHGGGW                  | 2.02 | 0.01 | 2.98 | 2.19 | 0.22 | 1.48 |
| 58827 | 0 | 51853  | QPHGGGW                  | 2.02 | 0.01 | 1.75 | 2.19 | 0.22 | 2.92 |
| 58828 | 0 | 228680 | QPHGGGWGQPHGG            | 2.59 | 0.01 | 2.98 | 2.19 | 0.22 | 0.85 |
| 58829 | 0 | 135491 | WGQPHGGGWGQPHG<br>GGW    | 3.43 | 0.01 | 0.78 | 2.19 | 0.22 | 1.34 |
| 58830 | 0 | 135491 | WGQPHGGGWGQPHG<br>GGW    | 3.43 | 0.01 | 0.78 | 2.19 | 0.22 | 1.34 |
| 58831 | 0 | 135491 | WGQPHGGGWGQPHG<br>GGW    | 3.43 | 0.01 | 0.78 | 2.19 | 0.22 | 1.34 |
| 58832 | 0 | 135491 | WGQPHGGGWGQPHG<br>GGW    | 3.43 | 0.01 | 0.78 | 2.19 | 0.22 | 1.34 |
| 58833 | 0 | 135491 | WGQPHGGGWGQPHG<br>GGW    | 3.43 | 0.01 | 0.78 | 2.19 | 0.22 | 0.85 |
| 58834 | 0 | 51854  | QPHGGSW                  | 2.01 | 0.01 | 1.75 | 2.19 | 0.22 | 1.27 |
| 58835 | 0 | 51854  | QPHGGSW                  | 2.01 | 0.01 | 1.75 | 2.19 | 0.22 | 0.85 |
| 58836 | 0 | 51854  | QPHGGSW                  | 2.01 | 0.01 | 1.75 | 2.19 | 0.22 | 1.66 |
| 58837 | 0 | 138571 | QPHSRPY                  | 2.02 | 0.01 | 0.78 | 0.44 | 1.13 | 0.28 |
| 58838 | 0 | 138571 | QPHSRPY                  | 2.02 | 0.01 | 0.78 | 0.44 | 1.13 | 0.28 |
| 58839 | 0 | 140337 | QPHSRPYM                 | 2.12 | 0.01 | 0.78 | 0.44 | 1.13 | 0.28 |
| 58840 | 0 | 125217 | QPHVMS                   | 1.88 | 0.01 | 0.78 | 3.16 | 0.22 | 1.27 |
| 58841 | 0 | 125217 | QPHVMS                   | 1.88 | 0.01 | 0.78 | 3.16 | 0.22 | 1.27 |
| 58842 | 0 | 125217 | QPHVMS                   | 1.88 | 0.01 | 0.78 | 3.16 | 0.22 | 1.48 |
| 58843 | 0 | 125217 | QPHVMS                   | 1.88 | 0.01 | 0.78 | 3.16 | 0.22 | 1.34 |
| 58844 | 0 | 111685 | QPIENYKLMPST             | 2.43 | 0.01 | 0.90 | 0.44 | 0.85 | 1.39 |
| 58845 | 0 | 115922 | QPIRCEKDER               | 2.31 | 0.01 | 1.60 | 0.44 | 1.23 | 0.85 |
| 58846 | 0 | 115922 | QPIRCEKDER               | 2.31 | 0.01 | 1.60 | 0.44 | 1.23 | 0.85 |
| 58847 | 0 | 115449 | QPIRCEKDERFFSDKIAK<br>YI | 2.94 | 0.01 | 1.60 | 0.44 | 1.23 | 1.28 |
| 58848 | 0 | 149432 | QPISQQQQQQ               | 2.35 | 0.01 | 1.86 | 0.44 | 1.93 | 0.85 |

|       |   |        |                          |      |      |      |      |      |      |
|-------|---|--------|--------------------------|------|------|------|------|------|------|
| 58849 | 0 | 165196 | QPIYVYPD                 | 2.14 | 0.01 | 3.57 | 0.68 | 0.22 | 1.27 |
| 58850 | 0 | 165196 | QPIYVYPD                 | 2.14 | 0.01 | 3.57 | 0.68 | 0.22 | 0.28 |
| 58851 | 0 | 165196 | QPIYVYPD                 | 2.14 | 0.01 | 3.57 | 0.68 | 0.22 | 0.28 |
| 58852 | 0 | 165196 | QPIYVYPD                 | 2.14 | 0.01 | 3.57 | 0.68 | 0.22 | 0.28 |
| 58853 | 0 | 51861  | QPKLAAAV                 | 2.12 | 0.01 | 3.06 | 1.12 | 0.22 | 0.28 |
| 58854 | 0 | 51862  | QPKLATAIFD               | 2.29 | 0.01 | 3.42 | 3.28 | 0.22 | 0.28 |
|       |   |        | QPKLPTAVLNLTAWNPS        |      |      |      |      |      |      |
| 58855 | 0 | 97588  | LLGNATALSTTDSFSDF<br>M   | 3.50 | 0.01 | 2.87 | 0.68 | 0.22 | 0.28 |
|       |   |        | QPKLPTAVLNLTAWNPS        |      |      |      |      |      |      |
| 58856 | 0 | 97588  | LLGNATALSTTDSFSDF<br>M   | 3.50 | 0.01 | 2.87 | 0.68 | 0.22 | 0.85 |
|       |   |        | QPKLPTAVLNLTAWNPS        |      |      |      |      |      |      |
| 58857 | 0 | 97588  | LLGNATALSTTDSFSDF<br>M   | 3.50 | 0.01 | 2.87 | 1.81 | 0.22 | 0.28 |
|       |   |        | QPKLPTAVLNLTAWNPS        |      |      |      |      |      |      |
| 58858 | 0 | 97588  | LLGNATALSTTDSFSDF<br>M   | 3.50 | 0.01 | 2.87 | 1.81 | 0.22 | 0.85 |
| 58859 | 0 | 524376 | QPKPESELTEKAG            | 2.68 | 0.01 | 2.24 | 0.44 | 1.41 | 1.28 |
| 58860 | 0 | 51866  | QPKSAE                   | 1.88 | 0.01 | 2.40 | 2.52 | 0.22 | 0.28 |
| 58861 | 0 | 51867  | QPKVDANADEEAEAVG<br>EDDL | 2.97 | 0.01 | 2.78 | 2.49 | 0.85 | 0.28 |
| 58862 | 0 | 51867  | QPKVDANADEEAEAVG<br>EDDL | 2.97 | 0.01 | 2.78 | 4.03 | 0.22 | 0.28 |
| 58863 | 0 | 161676 | QPKVLPIQQVVP             | 2.59 | 0.01 | 0.78 | 0.44 | 1.23 | 0.85 |
| 58864 | 0 | 51868  | QPLEQIKLSES              | 2.43 | 0.01 | 3.34 | 1.12 | 0.22 | 0.85 |
| 58865 | 0 | 139871 | QPLFTFRQVGLICERMM<br>K   | 2.81 | 0.01 | 3.65 | 1.12 | 0.22 | 0.28 |
| 58866 | 0 | 139871 | QPLFTFRQVGLICERMM<br>K   | 2.81 | 0.01 | 3.65 | 1.12 | 0.22 | 0.28 |
| 58867 | 0 | 110980 | QPLGVGISGHPLLNKLD<br>DTE | 2.92 | 0.01 | 1.86 | 0.68 | 0.22 | 1.34 |
| 58868 | 0 | 110980 | QPLGVGISGHPLLNKLD<br>DTE | 2.92 | 0.01 | 1.86 | 0.68 | 0.22 | 1.34 |
| 58869 | 0 | 110980 | QPLGVGISGHPLLNKLD<br>DTE | 2.92 | 0.01 | 1.86 | 0.68 | 0.22 | 1.34 |
| 58870 | 0 | 110980 | QPLGVGISGHPLLNKLD<br>DTE | 2.92 | 0.01 | 1.86 | 0.68 | 0.22 | 0.28 |
| 58871 | 0 | 110980 | QPLGVGISGHPLLNKLD<br>DTE | 2.92 | 0.01 | 1.86 | 0.68 | 0.22 | 0.28 |
| 58872 | 0 | 110980 | QPLGVGISGHPLLNKLD<br>DTE | 2.92 | 0.01 | 1.86 | 0.68 | 0.22 | 0.28 |
| 58873 | 0 | 110980 | QPLGVGISGHPLLNKLD<br>DTE | 2.92 | 0.01 | 1.86 | 0.68 | 0.22 | 0.28 |
| 58874 | 0 | 110980 | QPLGVGISGHPLLNKLD<br>DTE | 2.92 | 0.01 | 1.86 | 0.68 | 0.22 | 0.28 |

|       |   |        |                          |      |      |      |      |      |      |
|-------|---|--------|--------------------------|------|------|------|------|------|------|
| 58875 | 0 | 110980 | QPLGVGISGHPLLNKLD<br>DTE | 2.92 | 0.01 | 1.86 | 0.68 | 0.22 | 0.28 |
| 58876 | 0 | 110980 | QPLGVGISGHPLLNKLD<br>DTE | 2.92 | 0.01 | 1.86 | 0.68 | 0.22 | 0.28 |
| 58877 | 0 | 110980 | QPLGVGISGHPLLNKLD<br>DTE | 2.92 | 0.01 | 1.86 | 0.68 | 0.22 | 0.28 |
| 58878 | 0 | 110980 | QPLGVGISGHPLLNKLD<br>DTE | 2.92 | 0.01 | 1.86 | 0.68 | 0.22 | 0.28 |
| 58879 | 0 | 110980 | QPLGVGISGHPLLNKLD<br>DTE | 2.92 | 0.01 | 1.86 | 0.68 | 0.22 | 0.28 |
| 58880 | 0 | 110980 | QPLGVGISGHPLLNKLD<br>DTE | 2.92 | 0.01 | 1.86 | 0.68 | 0.22 | 0.28 |
| 58881 | 0 | 110980 | QPLGVGISGHPLLNKLD<br>DTE | 2.92 | 0.01 | 1.86 | 0.68 | 0.22 | 0.85 |
| 58882 | 0 | 110980 | QPLGVGISGHPLLNKLD<br>DTE | 2.92 | 0.01 | 1.86 | 2.37 | 0.22 | 1.48 |
| 58883 | 0 | 110980 | QPLGVGISGHPLLNKLD<br>DTE | 2.92 | 0.01 | 1.86 | 2.37 | 0.22 | 0.28 |
| 58884 | 0 | 110980 | QPLGVGISGHPLLNKLD<br>DTE | 2.92 | 0.01 | 1.86 | 0.68 | 0.22 | 0.28 |
| 58885 | 0 | 51870  | QPLHSPL                  | 2.04 | 0.01 | 0.90 | 1.12 | 0.22 | 1.39 |
| 58886 | 0 | 109767 | QPLKEQPALNDSRYCL         | 2.72 | 0.01 | 0.78 | 0.44 | 1.13 | 0.28 |
| 58887 | 0 | 109767 | QPLKEQPALNDSRYCL         | 2.72 | 0.01 | 0.78 | 0.44 | 1.13 | 0.28 |
| 58888 | 0 | 109767 | QPLKEQPALNDSRYCL         | 2.72 | 0.01 | 0.78 | 0.44 | 1.41 | 0.28 |
| 58889 | 0 | 109767 | QPLKEQPALNDSRYCL         | 2.72 | 0.01 | 0.78 | 0.44 | 1.41 | 0.28 |
| 58890 | 0 | 109767 | QPLKEQPALNDSRYCL         | 2.72 | 0.01 | 0.78 | 0.44 | 1.13 | 0.28 |
| 58891 | 0 | 109767 | QPLKEQPALNDSRYCL         | 2.72 | 0.01 | 0.78 | 0.44 | 1.13 | 0.28 |
| 58892 | 0 | 51871  | QPLNLSLAAWP              | 2.42 | 0.01 | 3.72 | 2.13 | 0.22 | 0.28 |
| 58893 | 0 | 51871  | QPLNLSLAAWP              | 2.42 | 0.01 | 3.72 | 2.13 | 0.22 | 0.28 |
| 58894 | 0 | 115923 | QPLPPTVMFMP              | 2.33 | 0.01 | 1.60 | 0.44 | 1.23 | 0.85 |
| 58895 | 0 | 115923 | QPLPPTVMFMP              | 2.33 | 0.01 | 1.60 | 0.44 | 1.23 | 0.85 |
| 58896 | 0 | 51872  | QPLPPTVMFPPQ             | 2.51 | 0.01 | 1.60 | 0.44 | 1.23 | 0.85 |
| 58897 | 0 | 51874  | QPLPQRQKKQPTVTLL         | 2.77 | 0.01 | 2.91 | 0.44 | 0.85 | 0.28 |
| 58898 | 0 | 51874  | QPLPQRQKKQPTVTLL         | 2.77 | 0.01 | 2.91 | 0.68 | 0.22 | 0.28 |
| 58899 | 0 | 123673 | QPLRLLQG                 | 2.16 | 0.01 | 4.23 | 4.08 | 0.22 | 0.28 |
| 58900 | 0 | 149433 | QPLSQVSFQQ               | 2.34 | 0.01 | 1.86 | 0.44 | 1.93 | 0.85 |
| 58901 | 0 | 149433 | QPLSQVSFQQ               | 2.34 | 0.01 | 1.86 | 2.74 | 0.22 | 0.85 |
| 58902 | 0 | 149433 | QPLSQVSFQQ               | 2.34 | 0.01 | 1.86 | 2.74 | 0.22 | 0.85 |
| 58903 | 0 | 152067 | QPLTRTSAEQWEA            | 2.56 | 0.01 | 2.80 | 2.78 | 0.22 | 0.28 |

|       |   |        |                                   |      |      |      |      |      |      |
|-------|---|--------|-----------------------------------|------|------|------|------|------|------|
| 58904 | 0 | 109768 | QPLVHVLPSWID                      | 2.48 | 0.01 | 0.90 | 0.44 | 0.85 | 1.39 |
| 58905 | 0 | 159294 | QPLWLL                            | 1.88 | 0.01 | 0.78 | 1.20 | 0.22 | 0.85 |
| 58906 | 0 | 123675 | QPLWLLQG                          | 2.16 | 0.01 | 0.78 | 4.08 | 0.22 | 0.28 |
| 58907 | 0 | 123675 | QPLWLLQG                          | 2.16 | 0.01 | 0.78 | 4.08 | 0.22 | 0.28 |
| 58908 | 0 | 79352  | QPMEPQPLPMGPQ                     | 2.61 | 0.01 | 3.85 | 1.12 | 0.22 | 0.85 |
| 58909 | 0 | 79352  | QPMEPQPLPMGPQ                     | 2.61 | 0.01 | 3.85 | 1.12 | 0.22 | 0.85 |
| 58910 | 0 | 79352  | QPMEPQPLPMGPQ                     | 2.61 | 0.01 | 3.85 | 1.12 | 0.22 | 0.85 |
| 58911 | 0 | 79353  | QPMGPQPMGPQPMEP                   | 2.75 | 0.01 | 3.85 | 1.12 | 0.22 | 0.85 |
| 58912 | 0 | 79353  | QPMGPQPMGPQPMEP                   | 2.75 | 0.01 | 3.85 | 1.12 | 0.22 | 0.85 |
| 58913 | 0 | 79353  | QPMGPQPMGPQPMEP                   | 2.75 | 0.01 | 3.85 | 1.12 | 0.22 | 0.85 |
| 58914 | 0 | 79353  | QPMGPQPMGPQPMEP                   | 2.75 | 0.01 | 3.85 | 1.12 | 0.22 | 0.85 |
| 58915 | 0 | 153448 | QPNHRDHFKLPAGGGS                  | 2.69 | 0.01 | 0.90 | 0.68 | 0.22 | 1.39 |
| 58916 | 0 | 100437 | QPNNKRNQLWRLQTA<br>GN             | 2.87 | 0.01 | 3.06 | 0.68 | 0.22 | 1.48 |
| 58917 | 0 | 100437 | QPNNKRNQLWRLQTA<br>GN             | 2.87 | 0.01 | 3.06 | 0.68 | 0.22 | 1.48 |
| 58918 | 0 | 100437 | QPNNKRNQLWRLQTA<br>GN             | 2.87 | 0.01 | 3.06 | 0.68 | 0.22 | 0.28 |
| 58919 | 0 | 100437 | QPNNKRNQLWRLQTA<br>GN             | 2.87 | 0.01 | 3.06 | 0.68 | 0.22 | 0.28 |
| 58920 | 0 | 100437 | QPNNKRNQLWRLQTA<br>GN             | 2.87 | 0.01 | 3.06 | 0.68 | 0.22 | 0.28 |
| 58921 | 0 | 100437 | QPNNKRNQLWRLQTA<br>GN             | 2.87 | 0.01 | 3.06 | 0.68 | 0.22 | 0.28 |
| 58922 | 0 | 100437 | QPNNKRNQLWRLQTA<br>GN             | 2.87 | 0.01 | 3.06 | 0.68 | 0.22 | 1.48 |
| 58923 | 0 | 100437 | QPNNKRNQLWRLQTA<br>GN             | 2.87 | 0.01 | 3.06 | 0.68 | 0.22 | 1.48 |
| 58924 | 0 | 100437 | QPNNKRNQLWRLQTA<br>GN             | 2.87 | 0.01 | 3.06 | 0.68 | 0.22 | 1.48 |
| 58925 | 0 | 100437 | QPNNKRNQLWRLQTA<br>GN             | 2.87 | 0.01 | 3.06 | 2.13 | 0.22 | 0.28 |
| 58926 | 0 | 51885  | QPNYHAVNIVGYSNAQ<br>GVDYWIVRNSWDT | 3.31 | 0.01 | 2.78 | 0.44 | 1.23 | 1.57 |
| 58927 | 0 | 51885  | QPNYHAVNIVGYSNAQ<br>GVDYWIVRNSWDT | 3.31 | 0.01 | 2.78 | 0.44 | 1.23 | 1.57 |
| 58928 | 0 | 51885  | QPNYHAVNIVGYSNAQ<br>GVDYWIVRNSWDT | 3.31 | 0.01 | 2.78 | 1.12 | 0.22 | 1.57 |
| 58929 | 0 | 132031 | QPPAQPLSSSQPNLR                   | 2.72 | 0.01 | 0.78 | 0.44 | 1.13 | 0.85 |

|       |   |        |                                                      |      |      |      |      |      |      |
|-------|---|--------|------------------------------------------------------|------|------|------|------|------|------|
| 58930 | 0 | 98387  | QPPCPNLVSYSSYHATYS                                   | 2.85 | 0.01 | 2.04 | 0.44 | 2.98 | 0.28 |
| 58931 | 0 | 51887  | QPPLTLN                                              | 2.03 | 0.01 | 0.90 | 1.15 | 0.22 | 1.39 |
| 58932 | 0 | 149094 | QPPNITQ                                              | 2.04 | 0.01 | 0.90 | 2.13 | 1.59 | 1.39 |
| 58933 | 0 | 132032 | QPPPQAQPLLQ                                          | 2.54 | 0.01 | 0.78 | 1.12 | 0.22 | 1.48 |
| 58934 | 0 | 51889  | QPPPTSPPLVHDSLEH<br>VLTPTST                          | 3.12 | 0.01 | 3.01 | 0.44 | 0.85 | 0.28 |
| 58935 | 0 | 51890  | QPPPTSPPLVHDSLEH<br>VLTPTSTGGPPSPEAHVP<br>PPYVEPTTTQ | 3.74 | 0.01 | 0.90 | 0.44 | 0.85 | 0.28 |
| 58936 | 0 | 77979  | QPPQWLWPQKEV                                         | 2.52 | 0.01 | 0.90 | 1.15 | 0.22 | 0.85 |
| 58937 | 0 | 95728  | QPPVSQFHIQGG                                         | 2.49 | 0.01 | 2.88 | 0.44 | 1.23 | 0.85 |
| 58938 | 0 | 123676 | QPPYMPPP                                             | 2.14 | 0.01 | 0.78 | 1.20 | 0.22 | 0.28 |
| 58939 | 0 | 123676 | QPPYMPPP                                             | 2.14 | 0.01 | 0.78 | 0.44 | 1.13 | 0.28 |
| 58940 | 0 | 98388  | QPQEQVPLVQQQQFLG<br>QQQPF                            | 3.04 | 0.01 | 1.86 | 0.44 | 1.93 | 0.28 |
| 58941 | 0 | 98388  | QPQEQVPLVQQQQFLG<br>QQQPF                            | 3.04 | 0.01 | 1.86 | 0.44 | 1.93 | 0.28 |
| 58942 | 0 | 51896  | QPQLFPFQQP                                           | 2.37 | 0.01 | 1.86 | 0.68 | 0.22 | 0.85 |
| 58943 | 0 | 51896  | QPQLFPFQQP                                           | 2.37 | 0.01 | 1.86 | 0.68 | 0.22 | 0.28 |
| 58944 | 0 | 51898  | QPQLPY                                               | 1.92 | 0.01 | 1.86 | 1.15 | 0.22 | 0.28 |
| 58945 | 0 | 51898  | QPQLPY                                               | 1.92 | 0.01 | 1.86 | 1.15 | 0.22 | 0.28 |
| 58946 | 0 | 51898  | QPQLPY                                               | 1.92 | 0.01 | 1.86 | 1.15 | 0.22 | 0.28 |
| 58947 | 0 | 51898  | QPQLPY                                               | 1.92 | 0.01 | 1.86 | 1.15 | 0.22 | 0.28 |
| 58948 | 0 | 51898  | QPQLPY                                               | 1.92 | 0.01 | 1.86 | 1.15 | 0.22 | 0.28 |
| 58949 | 0 | 51898  | QPQLPY                                               | 1.92 | 0.01 | 1.86 | 1.15 | 0.22 | 0.28 |
| 58950 | 0 | 51898  | QPQLPY                                               | 1.92 | 0.01 | 1.86 | 1.15 | 0.22 | 0.28 |
| 58951 | 0 | 51898  | QPQLPY                                               | 1.92 | 0.01 | 1.86 | 1.15 | 0.22 | 0.28 |
| 58952 | 0 | 51898  | QPQLPY                                               | 1.92 | 0.01 | 1.86 | 1.15 | 0.22 | 0.28 |
| 58953 | 0 | 51898  | QPQLPY                                               | 1.92 | 0.01 | 1.86 | 1.15 | 0.22 | 0.28 |
| 58954 | 0 | 149434 | QPQPFLPQQP                                           | 2.37 | 0.01 | 1.86 | 0.44 | 1.93 | 0.85 |
| 58955 | 0 | 149434 | QPQPFLPQQP                                           | 2.37 | 0.01 | 1.86 | 2.74 | 0.22 | 0.85 |
| 58956 | 0 | 149434 | QPQPFLPQQP                                           | 2.37 | 0.01 | 1.86 | 2.74 | 0.22 | 0.85 |
| 58957 | 0 | 147231 | QPQPFP                                               | 1.92 | 0.01 | 1.86 | 0.44 | 1.93 | 0.85 |
| 58958 | 0 | 147231 | QPQPFP                                               | 1.92 | 0.01 | 1.86 | 0.44 | 1.93 | 0.85 |
| 58959 | 0 | 51906  | QPQPFPFQLP                                           | 2.38 | 0.01 | 1.86 | 0.68 | 0.22 | 0.85 |
| 58960 | 0 | 51906  | QPQPFPFQLP                                           | 2.38 | 0.01 | 1.86 | 0.68 | 0.22 | 0.28 |
| 58961 | 0 | 51906  | QPQPFPFQLP                                           | 2.38 | 0.01 | 1.86 | 0.44 | 1.93 | 0.85 |
| 58962 | 0 | 51906  | QPQPFPFQLP                                           | 2.38 | 0.01 | 1.86 | 2.74 | 0.22 | 0.85 |
| 58963 | 0 | 51906  | QPQPFPFQLP                                           | 2.38 | 0.01 | 1.86 | 2.74 | 0.22 | 0.85 |
| 58964 | 0 | 51908  | QPQPFPFQQP                                           | 2.37 | 0.01 | 1.86 | 0.68 | 0.22 | 0.85 |
| 58965 | 0 | 51908  | QPQPFPFQQP                                           | 2.37 | 0.01 | 1.86 | 0.68 | 0.22 | 0.28 |
| 58966 | 0 | 51908  | QPQPFPFQQP                                           | 2.37 | 0.01 | 1.86 | 0.44 | 1.93 | 0.85 |
| 58967 | 0 | 51908  | QPQPFPFQQP                                           | 2.37 | 0.01 | 1.86 | 2.74 | 0.22 | 0.85 |
| 58968 | 0 | 51908  | QPQPFPFQQP                                           | 2.37 | 0.01 | 1.86 | 2.74 | 0.22 | 0.85 |
| 58969 | 0 | 51912  | QPQPFRPQQP                                           | 2.37 | 0.01 | 1.86 | 0.68 | 0.22 | 0.85 |
| 58970 | 0 | 51912  | QPQPFRPQQP                                           | 2.37 | 0.01 | 1.86 | 0.68 | 0.22 | 0.28 |

|       |   |        |                                |      |      |      |      |      |      |
|-------|---|--------|--------------------------------|------|------|------|------|------|------|
| 58971 | 0 | 173975 | QPQQFLQQQQFPQ                  | 2.61 | 0.01 | 1.86 | 0.44 | 1.23 | 0.85 |
| 58972 | 0 | 190924 | QPQQFPQQQF                     | 2.37 | 0.01 | 1.86 | 0.44 | 1.23 | 0.28 |
| 58973 | 0 | 190924 | QPQQFPQQQF                     | 2.37 | 0.01 | 1.86 | 0.68 | 0.22 | 0.28 |
| 58974 | 0 | 190925 | QPQQFPQQQI                     | 2.37 | 0.01 | 1.86 | 0.44 | 1.23 | 0.28 |
| 58975 | 0 | 173976 | QPQQIPQQQQIPQ                  | 2.61 | 0.01 | 1.86 | 0.44 | 1.23 | 0.85 |
| 58976 | 0 | 148804 | QPQQLFPELQ                     | 2.37 | 0.01 | 1.86 | 0.44 | 1.23 | 0.85 |
| 58977 | 0 | 148804 | QPQQLFPELQ                     | 2.37 | 0.01 | 1.86 | 0.68 | 0.22 | 0.28 |
| 58978 | 0 | 190926 | QPQQLPQQQF                     | 2.37 | 0.01 | 1.86 | 0.44 | 1.23 | 0.28 |
| 58979 | 0 | 173977 | QPQQLPQQQQIPAT                 | 2.66 | 0.01 | 1.86 | 0.44 | 1.23 | 0.85 |
| 58980 | 0 | 147232 | QPQQPF                         | 1.92 | 0.01 | 1.86 | 0.44 | 1.93 | 0.85 |
| 58981 | 0 | 147232 | QPQQPF                         | 1.92 | 0.01 | 1.86 | 0.44 | 1.93 | 0.85 |
| 58982 | 0 | 462167 | QPQQPFP                        | 2.05 | 4.63 | 1.86 | 0.44 | 1.93 | 0.28 |
| 58983 | 0 | 462167 | QPQQPFP                        | 2.05 | 4.63 | 1.86 | 0.44 | 1.93 | 0.28 |
| 58984 | 0 | 174249 | QPQQPFP                        | 2.05 | 0.01 | 1.86 | 0.44 | 1.23 | 0.85 |
| 58985 | 0 | 174249 | QPQQPFP                        | 2.05 | 0.01 | 1.86 | 0.44 | 1.23 | 0.85 |
| 58986 | 0 | 51921  | QPQQPFPQP                      | 2.38 | 0.01 | 2.83 | 0.68 | 0.22 | 0.85 |
| 58987 | 0 | 51921  | QPQQPFPQP                      | 2.38 | 0.01 | 2.83 | 0.68 | 0.22 | 0.28 |
| 58988 | 0 | 422885 | QPQQPFPQ                       | 2.18 | 4.03 | 1.86 | 0.68 | 0.22 | 0.28 |
| 58989 | 0 | 422885 | QPQQPFPQ                       | 2.18 | 4.03 | 1.86 | 0.68 | 0.22 | 0.28 |
| 58990 | 0 | 422885 | QPQQPFPQ                       | 2.18 | 4.03 | 1.86 | 0.68 | 0.22 | 0.28 |
| 58991 | 0 | 422885 | QPQQPFPQ                       | 2.18 | 4.03 | 1.86 | 0.68 | 0.22 | 0.28 |
| 58992 | 0 | 422885 | QPQQPFPQ                       | 2.18 | 4.03 | 1.86 | 0.68 | 0.22 | 0.28 |
| 58993 | 0 | 422885 | QPQQPFPQ                       | 2.18 | 4.03 | 1.86 | 0.68 | 0.22 | 0.85 |
| 58994 | 0 | 422885 | QPQQPFPQ                       | 2.18 | 4.03 | 1.86 | 0.68 | 0.22 | 0.28 |
| 58995 | 0 | 422885 | QPQQPFPQ                       | 2.18 | 4.03 | 1.86 | 0.68 | 0.22 | 0.28 |
| 58996 | 0 | 422887 | QPQQPFPQ                       | 2.18 | 4.03 | 1.86 | 0.68 | 0.22 | 0.85 |
| 58997 | 0 | 422887 | QPQQPFPQ                       | 2.18 | 4.03 | 1.86 | 0.68 | 0.22 | 0.28 |
| 58998 | 0 | 422887 | QPQQPFPQ                       | 2.18 | 4.03 | 1.86 | 0.68 | 0.22 | 0.28 |
| 58999 | 0 | 422887 | QPQQPFPQ                       | 2.18 | 4.03 | 1.86 | 0.68 | 0.22 | 0.28 |
| 59000 | 0 | 422887 | QPQQPFPQ                       | 2.18 | 4.03 | 1.86 | 0.68 | 0.22 | 0.28 |
| 59001 | 0 | 422887 | QPQQPFPQ                       | 2.18 | 4.03 | 1.86 | 0.68 | 0.22 | 0.28 |
| 59002 | 0 | 422887 | QPQQPFPQ                       | 2.18 | 4.03 | 1.86 | 0.68 | 0.22 | 0.28 |
| 59003 | 0 | 422887 | QPQQPFPQ                       | 2.18 | 4.03 | 1.86 | 0.68 | 0.22 | 0.28 |
| 59004 | 0 | 422886 | QPQQPFPQ                       | 2.18 | 4.63 | 1.86 | 0.68 | 0.22 | 0.85 |
| 59005 | 0 | 422886 | QPQQPFPQ                       | 2.18 | 4.63 | 1.86 | 0.68 | 0.22 | 0.28 |
| 59006 | 0 | 422888 | QPQQPFPQ                       | 2.18 | 4.63 | 1.86 | 0.68 | 0.22 | 0.85 |
| 59007 | 0 | 422888 | QPQQPFPQ                       | 2.18 | 4.63 | 1.86 | 0.68 | 0.22 | 0.28 |
| 59008 | 0 | 174250 | QPQQPFPQ                       | 2.18 | 0.01 | 1.86 | 0.44 | 1.23 | 0.85 |
| 59009 | 0 | 174250 | QPQQPFPQ                       | 2.18 | 0.01 | 1.86 | 0.44 | 1.23 | 0.85 |
| 59010 | 0 | 174250 | QPQQPFPQ                       | 2.18 | 0.01 | 1.86 | 0.44 | 1.23 | 0.85 |
| 59011 | 0 | 51922  | QPQQPFPQPQ                     | 2.38 | 0.01 | 1.86 | 0.68 | 0.22 | 0.85 |
| 59012 | 0 | 51922  | QPQQPFPQPQ                     | 2.38 | 0.01 | 1.86 | 0.68 | 0.22 | 0.28 |
| 59013 | 0 | 51922  | QPQQPFPQPQ                     | 2.38 | 0.01 | 1.86 | 0.44 | 1.23 | 0.85 |
| 59014 | 0 | 148807 | QPQQPFPQQP                     | 2.37 | 0.01 | 1.86 | 0.44 | 1.23 | 0.85 |
| 59015 | 0 | 462168 | QPQQPFPQQPQQPQQ<br>PFPQPQQPFPW | 3.28 | 4.93 | 1.86 | 0.44 | 1.93 | 2.35 |

|       |   |        |                                |      |      |      |      |      |      |
|-------|---|--------|--------------------------------|------|------|------|------|------|------|
|       |   |        | QPQQPFPQQPQQPQQ                |      |      |      |      |      |      |
| 59016 | 0 | 462169 | PFPQPQQPFPWQPQQ<br>PFPQ        | 3.54 | 4.93 | 1.86 | 0.44 | 1.93 | 2.35 |
| 59017 | 0 | 51924  | QPQQPFPQRP                     | 2.38 | 0.01 | 2.83 | 0.68 | 0.22 | 0.85 |
| 59018 | 0 | 51924  | QPQQPFPQRP                     | 2.38 | 0.01 | 2.83 | 0.68 | 0.22 | 0.28 |
| 59019 | 0 | 51925  | QPQQPFPQSQ                     | 2.38 | 0.01 | 1.86 | 0.68 | 0.22 | 0.85 |
| 59020 | 0 | 51925  | QPQQPFPQSQ                     | 2.38 | 0.01 | 1.86 | 0.68 | 0.22 | 0.28 |
| 59021 | 0 | 148808 | QPQQPIPVQP                     | 2.38 | 0.01 | 1.86 | 0.44 | 1.23 | 0.85 |
| 59022 | 0 | 51929  | QPQQPQQSFP                     | 2.37 | 0.01 | 1.86 | 0.68 | 0.22 | 0.28 |
| 59023 | 0 | 51929  | QPQQPQQSFP                     | 2.37 | 0.01 | 1.86 | 0.68 | 0.22 | 0.85 |
| 59024 | 0 | 51930  | QPQQPQQSFPQQQRPF               | 2.80 | 0.01 | 1.86 | 0.44 | 1.93 | 0.28 |
| 59025 | 0 | 51930  | QPQQPQQSFPQQQRPF               | 2.80 | 0.01 | 1.86 | 0.44 | 1.93 | 0.28 |
| 59026 | 0 | 230411 | QPQQPVTQQPVYQPPP<br>PMEPV      | 3.05 | 0.01 | 3.40 | 2.49 | 0.85 | 0.28 |
| 59027 | 0 | 177930 | QPQQQPQALPRYPRE                | 2.73 | 0.01 | 0.78 | 0.44 | 1.13 | 0.85 |
| 59028 | 0 | 177931 | QPQQQPQQPQALP                  | 2.74 | 0.01 | 0.78 | 0.44 | 1.13 | 0.85 |
| 59029 | 0 | 483478 | QPQQQVPQPQQPQQP<br>FLQPQQPFPQQ | 3.27 | 0.01 | 1.86 | 0.44 | 1.93 | 0.28 |
| 59030 | 0 | 483478 | QPQQQVPQPQQPQQP<br>FLQPQQPFPQQ | 3.27 | 0.01 | 1.86 | 0.44 | 1.93 | 0.28 |
| 59031 | 0 | 483478 | QPQQQVPQPQQPQQP<br>FLQPQQPFPQQ | 3.27 | 0.01 | 1.86 | 1.12 | 0.22 | 0.28 |
| 59032 | 0 | 483478 | QPQQQVPQPQQPQQP<br>FLQPQQPFPQQ | 3.27 | 0.01 | 1.86 | 1.12 | 0.22 | 0.28 |
| 59033 | 0 | 483478 | QPQQQVPQPQQPQQP<br>FLQPQQPFPQQ | 3.27 | 0.01 | 1.86 | 1.20 | 0.22 | 0.28 |
| 59034 | 0 | 51933  | QPQQSFPQQP                     | 2.37 | 0.01 | 2.83 | 0.68 | 0.22 | 0.28 |
| 59035 | 0 | 51933  | QPQQSFPQQP                     | 2.37 | 0.01 | 2.83 | 0.68 | 0.22 | 0.85 |
| 59036 | 0 | 51935  | QPQQSFPQQQ                     | 2.35 | 0.01 | 1.86 | 0.44 | 1.23 | 0.85 |
| 59037 | 0 | 431885 | QPQQSFPQQQRP                   | 2.53 | 0.01 | 1.86 | 0.44 | 1.23 | 0.85 |
| 59038 | 0 | 51939  | QPQQTFPQPQ                     | 2.38 | 0.01 | 1.86 | 0.68 | 0.22 | 0.85 |
| 59039 | 0 | 51939  | QPQQTFPQPQ                     | 2.38 | 0.01 | 1.86 | 0.68 | 0.22 | 0.28 |
| 59040 | 0 | 51940  | QPQQTFPQPQ                     | 2.37 | 0.01 | 1.86 | 0.68 | 0.22 | 0.28 |
| 59041 | 0 | 51940  | QPQQTFPQPQ                     | 2.37 | 0.01 | 1.86 | 0.68 | 0.22 | 0.85 |
| 59042 | 0 | 51942  | QPQRPFQGP                      | 2.36 | 0.01 | 2.83 | 0.68 | 0.22 | 0.85 |
| 59043 | 0 | 51942  | QPQRPFQGP                      | 2.36 | 0.01 | 2.83 | 0.68 | 0.22 | 0.28 |
| 59044 | 0 | 51943  | QPQWTPEE                       | 2.14 | 0.01 | 2.40 | 2.43 | 0.22 | 0.28 |
| 59045 | 0 | 167802 | QPQWTPEED                      | 2.25 | 0.01 | 2.40 | 2.43 | 0.22 | 0.28 |
| 59046 | 0 | 149435 | QPQYSQPQQP                     | 2.37 | 0.01 | 1.86 | 0.44 | 1.93 | 0.85 |
| 59047 | 0 | 149435 | QPQYSQPQQP                     | 2.37 | 0.01 | 1.86 | 2.74 | 0.22 | 0.85 |
| 59048 | 0 | 149435 | QPQYSQPQQP                     | 2.37 | 0.01 | 1.86 | 2.74 | 0.22 | 0.85 |
| 59049 | 0 | 98389  | QPQYSQPQQPISQQQQ<br>QQQQQ      | 3.04 | 0.01 | 1.86 | 0.44 | 1.93 | 0.28 |



|       |   |        |                                       |      |      |      |      |      |      |
|-------|---|--------|---------------------------------------|------|------|------|------|------|------|
| 59050 | 0 | 98389  | QPQYSQPQQPISQQQQ<br>QQQQQ             | 3.04 | 0.01 | 1.86 | 0.44 | 1.93 | 0.28 |
| 59051 | 0 | 51948  | QPRDANGFAATL                          | 2.44 | 0.01 | 0.90 | 0.68 | 0.22 | 0.28 |
| 59052 | 0 | 100438 | QPREDWRRPSHQQPRK<br>IRPE              | 2.97 | 0.01 | 2.16 | 0.44 | 2.39 | 0.28 |
| 59053 | 0 | 109772 | QPREPQV                               | 2.05 | 0.01 | 0.78 | 0.44 | 1.13 | 0.28 |
| 59054 | 0 | 109772 | QPREPQV                               | 2.05 | 0.01 | 0.78 | 0.44 | 1.13 | 0.28 |
| 59055 | 0 | 109772 | QPREPQV                               | 2.05 | 0.01 | 0.78 | 0.44 | 1.13 | 0.28 |
| 59056 | 0 | 51949  | QPRGGQA                               | 2.04 | 0.01 | 2.80 | 1.15 | 0.22 | 0.28 |
| 59057 | 0 | 51949  | QPRGGQA                               | 2.04 | 0.01 | 2.80 | 1.15 | 0.22 | 0.28 |
| 59058 | 0 | 51949  | QPRGGQA                               | 2.04 | 0.01 | 2.80 | 1.15 | 0.22 | 0.28 |
| 59059 | 0 | 98966  | QPRKIRPEGR                            | 2.33 | 0.01 | 2.16 | 0.44 | 1.23 | 0.85 |
| 59060 | 0 | 51958  | QPRKTKPVKSLPERK                       | 2.70 | 0.01 | 2.71 | 0.68 | 0.22 | 0.28 |
| 59061 | 0 | 51958  | QPRKTKPVKSLPERK                       | 2.70 | 0.01 | 2.71 | 2.78 | 0.22 | 0.28 |
| 59062 | 0 | 51958  | QPRKTKPVKSLPERK                       | 2.70 | 0.01 | 2.71 | 0.68 | 0.22 | 0.85 |
| 59063 | 0 | 51958  | QPRKTKPVKSLPERK                       | 2.70 | 0.01 | 2.71 | 0.68 | 0.22 | 1.48 |
| 59064 | 0 | 51959  | QPRLQAITTDNCNNSI                      | 2.72 | 0.01 | 3.01 | 0.44 | 0.85 | 0.28 |
| 59065 | 0 | 181139 | QPRLRVKTPPPVTVPQV<br>PVK              | 3.01 | 0.01 | 3.97 | 2.02 | 0.22 | 0.28 |
| 59066 | 0 | 99580  | QPRQEEREFSRPGQH                       | 2.72 | 0.01 | 2.16 | 0.44 | 1.23 | 1.48 |
| 59067 | 0 | 99581  | QPRREEGGRWGPAGP                       | 2.72 | 0.01 | 2.16 | 0.44 | 1.23 | 1.48 |
| 59068 | 0 | 136579 | QPRRRANRRRS                           | 2.50 | 0.01 | 3.48 | 3.70 | 0.85 | 1.34 |
| 59069 | 0 | 136579 | QPRRRANRRRS                           | 2.50 | 0.01 | 3.48 | 0.68 | 0.22 | 1.34 |
| 59070 | 0 | 193048 | QPSGALNNAPKEPSAPP<br>LLP              | 2.97 | 0.01 | 3.14 | 2.49 | 0.85 | 0.28 |
| 59071 | 0 | 193049 | QPSGALNNAPKEPSAPP<br>LLPTLSPRQVLARYQM | 3.44 | 0.01 | 3.14 | 0.68 | 0.22 | 0.28 |
| 59072 | 0 | 193049 | QPSGALNNAPKEPSAPP<br>LLPTLSPRQVLARYQM | 3.44 | 0.01 | 3.14 | 0.68 | 0.22 | 0.28 |
| 59073 | 0 | 193049 | QPSGALNNAPKEPSAPP<br>LLPTLSPRQVLARYQM | 3.44 | 0.01 | 3.14 | 0.68 | 0.22 | 0.28 |
| 59074 | 0 | 193049 | QPSGALNNAPKEPSAPP<br>LLPTLSPRQVLARYQM | 3.44 | 0.01 | 3.14 | 2.49 | 0.22 | 0.28 |
| 59075 | 0 | 193049 | QPSGALNNAPKEPSAPP<br>LLPTLSPRQVLARYQM | 3.44 | 0.01 | 3.14 | 2.49 | 0.85 | 0.28 |
| 59076 | 0 | 193049 | QPSGALNNAPKEPSAPP<br>LLPTLSPRQVLARYQM | 3.44 | 0.01 | 3.14 | 2.49 | 0.22 | 2.35 |
| 59077 | 0 | 51965  | QPSGRRRGRRSGGSGG<br>GFWGDRVDS         | 3.20 | 0.01 | 2.53 | 0.44 | 0.85 | 0.28 |

|       |   |        |                                                   |      |      |      |      |      |      |
|-------|---|--------|---------------------------------------------------|------|------|------|------|------|------|
| 59078 | 0 | 51965  | QPSGRRRGRRSGGSGG<br>GFWGDRVDS                     | 3.20 | 0.01 | 2.53 | 0.44 | 0.85 | 0.28 |
| 59079 | 0 | 51966  | QPSGRRRGRRSGGSGG<br>GFWGDRVDSQPFAI                | 3.37 | 0.01 | 2.53 | 0.44 | 0.85 | 0.28 |
| 59080 | 0 | 51966  | QPSGRRRGRRSGGSGG<br>GFWGDRVDSQPFAI                | 3.37 | 0.01 | 2.53 | 0.44 | 0.85 | 0.28 |
| 59081 | 0 | 173978 | QPSGSNVISISGL                                     | 2.57 | 0.01 | 1.86 | 0.44 | 1.23 | 0.85 |
| 59082 | 0 | 51967  | QPSKPTTKQRQN                                      | 2.51 | 0.01 | 2.38 | 0.68 | 0.22 | 0.28 |
| 59083 | 0 | 51967  | QPSKPTTKQRQN                                      | 2.51 | 0.01 | 2.38 | 0.68 | 0.22 | 0.28 |
| 59084 | 0 | 51967  | QPSKPTTKQRQN                                      | 2.51 | 0.01 | 2.38 | 0.44 | 1.74 | 0.28 |
| 59085 | 0 | 51967  | QPSKPTTKQRQN                                      | 2.51 | 0.01 | 2.38 | 0.44 | 1.74 | 0.28 |
| 59086 | 0 | 120155 | QSPYNGWRMEI                                       | 2.43 | 0.01 | 0.90 | 2.04 | 0.22 | 2.56 |
| 59087 | 0 | 120155 | QSPYNGWRMEI                                       | 2.43 | 0.01 | 0.90 | 2.04 | 0.22 | 1.57 |
| 59088 | 0 | 120155 | QSPYNGWRMEI                                       | 2.43 | 0.01 | 0.90 | 2.04 | 0.22 | 1.66 |
| 59089 | 0 | 225844 | QPSQDELKDNTTVFT                                   | 2.67 | 0.01 | 2.19 | 0.44 | 1.41 | 0.28 |
| 59090 | 0 | 225844 | QPSQDELKDNTTVFT                                   | 2.67 | 0.01 | 2.19 | 0.44 | 1.41 | 0.85 |
| 59091 | 0 | 225844 | QPSQDELKDNTTVFT                                   | 2.67 | 0.01 | 2.19 | 0.44 | 1.41 | 1.48 |
| 59092 | 0 | 225844 | QPSQDELKDNTTVFT                                   | 2.67 | 0.01 | 2.19 | 0.44 | 1.41 | 1.48 |
| 59093 | 0 | 225844 | QPSQDELKDNTTVFT                                   | 2.67 | 0.01 | 2.19 | 0.44 | 1.41 | 2.75 |
| 59094 | 0 | 225844 | QPSQDELKDNTTVFT                                   | 2.67 | 0.01 | 2.19 | 0.44 | 1.41 | 1.27 |
| 59095 | 0 | 51969  | QPSQTPDDPTKQSRP                                   | 2.73 | 0.01 | 2.48 | 0.44 | 1.59 | 0.28 |
| 59096 | 0 | 98390  | QPSSQVSFQQPLQQYPL<br>GQGS                         | 3.05 | 0.01 | 1.86 | 0.44 | 1.93 | 0.28 |
| 59097 | 0 | 98390  | QPSSQVSFQQPLQQYPL<br>GQGS                         | 3.05 | 0.01 | 1.86 | 0.44 | 1.93 | 0.28 |
| 59098 | 0 | 51971  | QPSSRRYPF                                         | 2.23 | 0.01 | 2.61 | 0.44 | 0.85 | 0.28 |
| 59099 | 0 | 51973  | QPSYTVPIPRHA                                      | 2.45 | 0.01 | 0.90 | 1.15 | 0.22 | 0.28 |
| 59100 | 0 | 51973  | QPSYTVPIPRHA                                      | 2.45 | 0.01 | 0.90 | 1.15 | 0.22 | 0.28 |
| 59101 | 0 | 51974  | QPTELRYSW                                         | 2.18 | 0.01 | 2.87 | 1.15 | 0.22 | 0.28 |
| 59102 | 0 | 51974  | QPTELRYSW                                         | 2.18 | 0.01 | 2.87 | 1.15 | 0.22 | 0.28 |
| 59103 | 0 | 51976  | QPTLTFGAGVNPAG                                    | 2.70 | 0.01 | 2.76 | 0.44 | 1.59 | 0.28 |
| 59104 | 0 | 362859 | QPTQFSVGTPDAANA                                   | 2.69 | 0.01 | 1.61 | 0.44 | 0.85 | 1.28 |
| 59105 | 0 | 51979  | QPTQMSAQEDLGDDTG<br>IHVI                          | 2.93 | 0.01 | 3.27 | 2.89 | 0.22 | 0.28 |
| 59106 | 0 | 51979  | QPTQMSAQEDLGDDTG<br>IHVI                          | 2.93 | 0.01 | 3.27 | 3.16 | 0.22 | 0.28 |
| 59107 | 0 | 51979  | QPTQMSAQEDLGDDTG<br>IHVI                          | 2.93 | 0.01 | 3.27 | 3.16 | 0.22 | 0.28 |
| 59108 | 0 | 99837  | QPTTLRQPSDMTPAQD<br>APTETPPPLSTNTNRGFE<br>YFRVCGV | 3.65 | 0.01 | 4.45 | 0.68 | 0.22 | 0.85 |
| 59109 | 0 | 99837  | QPTTLRQPSDMTPAQD<br>APTETPPPLSTNTNRGFE<br>YFRVCGV | 3.65 | 0.01 | 4.45 | 0.68 | 0.22 | 2.12 |

|       |   |        |                               |      |      |      |      |      |      |
|-------|---|--------|-------------------------------|------|------|------|------|------|------|
|       |   |        | QPTTLRQPSDMTPAQD              |      |      |      |      |      |      |
| 59110 | 0 | 99837  | APTETPPPLSTNTNRGFE<br>YFRVCGV | 3.65 | 0.01 | 4.45 | 0.68 | 0.22 | 1.34 |
| 59111 | 0 | 115924 | QPTTMARHPH                    | 2.32 | 0.01 | 1.60 | 0.44 | 1.23 | 0.85 |
| 59112 | 0 | 115924 | QPTTMARHPH                    | 2.32 | 0.01 | 1.60 | 0.44 | 1.23 | 0.85 |
| 59113 | 0 | 115450 | QPTTMARHPHPLSFM<br>AIPP       | 2.94 | 0.01 | 1.60 | 0.44 | 1.23 | 2.51 |
| 59114 | 0 | 100439 | QPTTRAQKLFAMWR                | 2.61 | 0.01 | 2.96 | 0.44 | 0.22 | 0.28 |
| 59115 | 0 | 95136  | QPVGREKF                      | 2.10 | 0.01 | 3.13 | 1.20 | 0.22 | 0.85 |
| 59116 | 0 | 95136  | QPVGREKF                      | 2.10 | 0.01 | 3.13 | 1.20 | 0.22 | 0.85 |
| 59117 | 0 | 102747 | QPVKEKYSFGEYMTINC<br>DVG      | 2.90 | 0.01 | 3.44 | 0.68 | 0.22 | 0.28 |
| 59118 | 0 | 51986  | QPVQEFLLSGHVVRPY<br>KEK       | 2.94 | 0.01 | 3.47 | 0.44 | 0.22 | 0.85 |
| 59119 | 0 | 362880 | QPVQFSVGTPDAANA               | 2.69 | 0.01 | 1.61 | 0.44 | 0.85 | 1.28 |
| 59120 | 0 | 102006 | QPVQQPSGQQQQ                  | 2.51 | 0.01 | 3.10 | 1.15 | 0.22 | 0.28 |
| 59121 | 0 | 102006 | QPVQQPSGQQQQ                  | 2.51 | 0.01 | 3.10 | 1.15 | 0.22 | 0.85 |
| 59122 | 0 | 51987  | QPVTRN                        | 1.88 | 0.01 | 3.30 | 0.68 | 0.22 | 0.28 |
| 59123 | 0 | 51987  | QPVTRN                        | 1.88 | 0.01 | 3.30 | 0.68 | 0.22 | 0.28 |
| 59124 | 0 | 125537 | QPVWQDEGQRLRPSK               | 2.67 | 0.01 | 2.73 | 1.20 | 0.22 | 0.28 |
| 59125 | 0 | 125537 | QPVWQDEGQRLRPSK               | 2.67 | 0.01 | 2.73 | 1.20 | 0.22 | 0.28 |
| 59126 | 0 | 125537 | QPVWQDEGQRLRPSK               | 2.67 | 0.01 | 2.73 | 1.20 | 0.22 | 1.48 |
| 59127 | 0 | 115451 | QPWHAKHYKTYH                  | 2.49 | 0.01 | 0.90 | 0.68 | 0.22 | 1.39 |
| 59128 | 0 | 77982  | QPYDKNRGPTLN                  | 2.45 | 0.01 | 0.90 | 1.15 | 0.22 | 1.39 |
| 59129 | 0 | 240199 | QPYEEDIEGKMKRCGV              | 2.71 | 0.01 | 2.70 | 0.68 | 0.22 | 0.28 |
| 59130 | 0 | 51991  | QPYKLQAAATLY                  | 2.50 | 0.01 | 0.90 | 0.68 | 0.22 | 1.39 |
| 59131 | 0 | 148820 | QPYLQLQPFP                    | 2.37 | 0.01 | 1.86 | 0.44 | 1.93 | 0.85 |
| 59132 | 0 | 148820 | QPYLQLQPFP                    | 2.37 | 0.01 | 1.86 | 2.74 | 0.22 | 0.85 |
| 59133 | 0 | 148820 | QPYLQLQPFP                    | 2.37 | 0.01 | 1.86 | 2.74 | 0.22 | 0.85 |
| 59134 | 0 | 98392  | QPYLQLQPFPQPQLPYS<br>QPQP     | 3.07 | 0.01 | 1.86 | 0.44 | 1.93 | 0.28 |
| 59135 | 0 | 98392  | QPYLQLQPFPQPQLPYS<br>QPQP     | 3.07 | 0.01 | 1.86 | 0.44 | 2.39 | 0.28 |
| 59136 | 0 | 431886 | QPYLQLQPFPQPQFPFP<br>QLP      | 3.03 | 0.01 | 1.86 | 0.44 | 1.23 | 0.85 |
| 59137 | 0 | 148821 | QPYPQPQPFP                    | 2.38 | 0.01 | 1.86 | 0.44 | 1.93 | 0.85 |
| 59138 | 0 | 148821 | QPYPQPQPFP                    | 2.38 | 0.01 | 1.86 | 2.74 | 0.22 | 0.85 |
| 59139 | 0 | 148821 | QPYPQPQPFP                    | 2.38 | 0.01 | 1.86 | 2.74 | 0.22 | 0.85 |
| 59140 | 0 | 98393  | QPYPQPQFPSPQQPYL<br>QLQPF     | 3.07 | 0.01 | 1.86 | 0.44 | 1.93 | 0.28 |
| 59141 | 0 | 98393  | QPYPQPQFPSPQQPYL<br>QLQPF     | 3.07 | 0.01 | 1.86 | 0.44 | 1.93 | 0.28 |

|       |   |        |                                  |      |      |      |      |      |      |
|-------|---|--------|----------------------------------|------|------|------|------|------|------|
|       |   |        | QPYPQPQPFPSQQPYL                 |      |      |      |      |      |      |
| 59142 | 0 | 431887 | QLQPFPPQPFPPQLPY<br>PQPQS        | 3.65 | 0.01 | 1.86 | 0.44 | 1.23 | 0.85 |
| 59143 | 0 | 51997  | QPYPQPQPQY                       | 2.38 | 0.01 | 1.86 | 0.44 | 1.93 | 0.85 |
| 59144 | 0 | 51997  | QPYPQPQPQY                       | 2.38 | 0.01 | 1.86 | 2.74 | 0.22 | 0.85 |
| 59145 | 0 | 98394  | QPYPQPQPQYSQPQQP<br>ISQQQ        | 3.06 | 0.01 | 1.86 | 0.44 | 1.93 | 0.28 |
| 59146 | 0 | 98394  | QPYPQPQPQYSQPQQP<br>ISQQQ        | 3.06 | 0.01 | 1.86 | 0.44 | 1.93 | 0.28 |
| 59147 | 0 | 98394  | QPYPQPQPQYSQPQQP<br>ISQQQ        | 3.06 | 0.01 | 1.86 | 0.44 | 2.39 | 0.28 |
| 59148 | 0 | 52000  | QQACKGKIQALCENP                  | 2.68 | 0.01 | 2.43 | 0.68 | 0.22 | 0.28 |
| 59149 | 0 | 52000  | QQACKGKIQALCENP                  | 2.68 | 0.01 | 2.43 | 3.34 | 0.22 | 0.28 |
| 59150 | 0 | 52000  | QQACKGKIQALCENP                  | 2.68 | 0.01 | 2.43 | 0.44 | 0.85 | 0.28 |
| 59151 | 0 | 461407 | QQAEDYARRSEEEYNR<br>LPQQQPPKAEKP | 3.32 | 0.01 | 2.70 | 3.00 | 0.22 | 0.28 |
| 59152 | 0 | 461407 | QQAEDYARRSEEEYNR<br>LPQQQPPKAEKP | 3.32 | 0.01 | 2.70 | 3.00 | 0.22 | 1.27 |
| 59153 | 0 | 461407 | QQAEDYARRSEEEYNR<br>LPQQQPPKAEKP | 3.32 | 0.01 | 2.70 | 3.00 | 0.22 | 2.12 |
| 59154 | 0 | 461407 | QQAEDYARRSEEEYNR<br>LPQQQPPKAEKP | 3.32 | 0.01 | 2.70 | 3.00 | 0.22 | 1.75 |
| 59155 | 0 | 52003  | QQATRQAQD                        | 2.27 | 0.01 | 2.69 | 0.44 | 0.85 | 0.28 |
| 59156 | 0 | 52006  | QQDAKLWTR                        | 2.20 | 0.01 | 4.63 | 1.15 | 0.22 | 0.28 |
| 59157 | 0 | 52006  | QQDAKLWTR                        | 2.20 | 0.01 | 4.63 | 1.15 | 0.22 | 0.28 |
| 59158 | 0 | 52007  | QQDAKLWTRN                       | 2.28 | 0.01 | 4.15 | 1.15 | 0.22 | 0.28 |
| 59159 | 0 | 52007  | QQDAKLWTRN                       | 2.28 | 0.01 | 4.15 | 1.15 | 0.22 | 0.28 |
| 59160 | 0 | 157808 | QQDRHQKIRHFR                     | 2.51 | 0.01 | 3.65 | 0.44 | 1.23 | 0.85 |
| 59161 | 0 | 156424 | QQEEGRQQEQQQGQQ                  | 2.74 | 0.01 | 3.67 | 0.44 | 1.23 | 1.27 |
| 59162 | 0 | 190927 | QQEFPQQQF                        | 2.36 | 0.01 | 1.86 | 0.68 | 0.22 | 0.28 |
| 59163 | 0 | 52010  | QQEGAQQPAPATA                    | 2.59 | 0.01 | 2.97 | 0.44 | 0.85 | 0.85 |
| 59164 | 0 | 174251 | QQEKNEQELLELDKVAS<br>LWN         | 2.98 | 4.23 | 2.54 | 0.68 | 0.22 | 2.49 |
| 59165 | 0 | 174251 | QQEKNEQELLELDKVAS<br>LWN         | 2.98 | 4.23 | 2.54 | 0.68 | 0.22 | 1.66 |
| 59166 | 0 | 174251 | QQEKNEQELLELDKVAS<br>LWN         | 2.98 | 4.23 | 2.54 | 0.68 | 0.22 | 1.66 |
| 59167 | 0 | 174251 | QQEKNEQELLELDKVAS<br>LWN         | 2.98 | 4.23 | 2.54 | 0.68 | 0.22 | 1.66 |
| 59168 | 0 | 174251 | QQEKNEQELLELDKVAS<br>LWN         | 2.98 | 4.23 | 2.54 | 0.68 | 0.22 | 2.49 |
| 59169 | 0 | 96788  | QQEQQFK                          | 2.05 | 0.01 | 2.16 | 2.82 | 0.22 | 1.57 |
| 59170 | 0 | 52012  | QQEQQFKRELRLNPQ                  | 2.71 | 0.01 | 2.16 | 0.44 | 1.23 | 0.85 |
| 59171 | 0 | 52012  | QQEQQFKRELRLNPQ                  | 2.71 | 0.01 | 2.16 | 0.44 | 1.23 | 1.48 |
| 59172 | 0 | 156425 | QQEQQSGNNVFSGF                   | 2.71 | 0.01 | 3.67 | 0.44 | 1.23 | 1.27 |

|       |   |        |                          |      |      |      |      |      |      |
|-------|---|--------|--------------------------|------|------|------|------|------|------|
| 59173 | 0 | 156426 | QQEQQQERQGRQQGR          | 2.74 | 0.01 | 3.67 | 0.44 | 1.23 | 1.27 |
| 59174 | 0 | 52015  | QQESSVSSQSGQASTS         | 2.79 | 0.01 | 3.41 | 1.20 | 0.22 | 0.85 |
| 59175 | 0 | 52016  | QQEVDYIIDHVDQHN          | 2.70 | 0.01 | 2.28 | 0.68 | 0.22 | 0.28 |
| 59176 | 0 | 52016  | QQEVDYIIDHVDQHN          | 2.70 | 0.01 | 2.28 | 0.68 | 0.22 | 0.28 |
| 59177 | 0 | 52016  | QQEVDYIIDHVDQHN          | 2.70 | 0.01 | 2.28 | 1.20 | 0.22 | 0.28 |
| 59178 | 0 | 52016  | QQEVDYIIDHVDQHN          | 2.70 | 0.01 | 2.28 | 1.20 | 0.22 | 0.28 |
| 59179 | 0 | 52016  | QQEVDYIIDHVDQHN          | 2.70 | 0.01 | 2.28 | 2.89 | 0.22 | 0.28 |
| 59180 | 0 | 52016  | QQEVDYIIDHVDQHN          | 2.70 | 0.01 | 2.28 | 1.20 | 0.22 | 1.27 |
| 59181 | 0 | 52016  | QQEVDYIIDHVDQHN          | 2.70 | 0.01 | 2.28 | 0.68 | 0.22 | 0.28 |
| 59182 | 0 | 106741 | QQFAPWPNWTLV             | 2.46 | 0.01 | 0.90 | 1.15 | 0.22 | 1.39 |
| 59183 | 0 | 52020  | QQFGRD                   | 1.89 | 0.01 | 2.45 | 0.44 | 0.85 | 1.34 |
| 59184 | 0 | 52021  | QQFGRDVSDF               | 2.32 | 0.01 | 3.30 | 0.68 | 0.22 | 0.28 |
| 59185 | 0 | 52021  | QQFGRDVSDF               | 2.32 | 0.01 | 3.30 | 0.68 | 0.22 | 0.28 |
| 59186 | 0 | 52023  | QQFHQQQ                  | 2.03 | 0.01 | 1.86 | 0.44 | 1.23 | 0.28 |
| 59187 | 0 | 173979 | QQFHQQQLPQQQF            | 2.60 | 0.01 | 1.86 | 0.44 | 1.23 | 0.85 |
| 59188 | 0 | 52026  | QQFIYAGSLSALLDPSQG<br>MG | 2.95 | 0.01 | 2.04 | 0.44 | 0.85 | 0.28 |
| 59189 | 0 | 99582  | QQFKRELRLNPQQCG          | 2.67 | 0.01 | 2.16 | 0.44 | 1.23 | 1.48 |
| 59190 | 0 | 99582  | QQFKRELRLNPQQCG          | 2.67 | 0.01 | 2.16 | 0.44 | 1.23 | 1.28 |
| 59191 | 0 | 99582  | QQFKRELRLNPQQCG          | 2.67 | 0.01 | 2.16 | 0.44 | 1.23 | 1.27 |
| 59192 | 0 | 99582  | QQFKRELRLNPQQCG          | 2.67 | 0.01 | 2.16 | 0.44 | 1.23 | 1.28 |
| 59193 | 0 | 123677 | QQFMSRIEA                | 2.20 | 0.01 | 2.28 | 2.00 | 0.22 | 0.28 |
| 59194 | 0 | 104213 | QQFNQQAPLNLENTNN<br>GTL  | 2.92 | 0.01 | 3.00 | 1.20 | 0.22 | 0.85 |
| 59195 | 0 | 138230 | QQFNSTF                  | 2.03 | 0.01 | 0.90 | 0.44 | 1.13 | 0.28 |
| 59196 | 0 | 173980 | QQFPQQPPQQFPQ            | 2.62 | 0.01 | 1.86 | 0.44 | 1.23 | 0.85 |
| 59197 | 0 | 52028  | QQFPQQQ                  | 2.03 | 0.01 | 1.86 | 0.44 | 1.23 | 0.28 |
| 59198 | 0 | 52028  | QQFPQQQ                  | 2.03 | 0.01 | 1.86 | 0.44 | 1.23 | 0.85 |
| 59199 | 0 | 52028  | QQFPQQQ                  | 2.03 | 0.01 | 1.86 | 2.66 | 0.22 | 1.27 |
| 59200 | 0 | 190928 | QQFPQQQFEP               | 2.36 | 0.01 | 1.86 | 0.68 | 0.22 | 0.28 |
| 59201 | 0 | 148828 | QQFPQQQFPQ               | 2.37 | 0.01 | 1.86 | 0.44 | 1.23 | 0.85 |
| 59202 | 0 | 226089 | QQFPQQQIPQQQLPQQ<br>Q    | 2.84 | 0.01 | 0.90 | 2.66 | 0.22 | 1.27 |
| 59203 | 0 | 226089 | QQFPQQQIPQQQLPQQ<br>Q    | 2.84 | 0.01 | 0.90 | 2.66 | 0.22 | 1.27 |
| 59204 | 0 | 190929 | QQFPQQQPCS               | 2.35 | 0.01 | 1.86 | 0.44 | 1.23 | 0.28 |
| 59205 | 0 | 190930 | QQFPQQQQFL               | 2.36 | 0.01 | 1.86 | 0.44 | 1.23 | 0.28 |
| 59206 | 0 | 190931 | QQFPQQQQFP               | 2.36 | 0.01 | 1.86 | 0.44 | 1.23 | 0.28 |
| 59207 | 0 | 190931 | QQFPQQQQFP               | 2.36 | 0.01 | 1.86 | 0.68 | 0.22 | 0.28 |
| 59208 | 0 | 190932 | QQFPQQQQLP               | 2.36 | 0.01 | 1.86 | 0.44 | 1.23 | 0.28 |
| 59209 | 0 | 190932 | QQFPQQQQLP               | 2.36 | 0.01 | 1.86 | 0.68 | 0.22 | 0.28 |
| 59210 | 0 | 52031  | QQGNIGFGMIFPGCP          | 2.71 | 0.01 | 2.72 | 0.44 | 1.23 | 0.85 |
| 59211 | 0 | 119630 | QQGNVFSC                 | 2.11 | 0.01 | 0.78 | 0.44 | 1.93 | 0.28 |
| 59212 | 0 | 113773 | QQGQQLGQGQQGQQ           | 2.67 | 0.01 | 1.86 | 0.44 | 1.23 | 0.85 |

|       |   |        |                           |      |      |      |      |      |      |
|-------|---|--------|---------------------------|------|------|------|------|------|------|
| 59213 | 0 | 113774 | QQGQQPGQGQPGYY            | 2.67 | 0.01 | 1.86 | 0.44 | 1.23 | 0.85 |
| 59214 | 0 | 113775 | QQGQQPGQGQPGQ             | 2.69 | 0.01 | 1.86 | 0.44 | 1.23 | 0.85 |
| 59215 | 0 | 137558 | QQGQSGRFQDRHQKI           | 2.70 | 0.01 | 3.12 | 0.44 | 1.23 | 0.85 |
| 59216 | 0 | 363053 | QQGRDAPQARKQQGR           | 2.72 | 0.01 | 1.61 | 0.44 | 0.85 | 1.28 |
| 59217 | 0 | 363056 | QQGRNEPQARKQQGR           | 2.70 | 0.01 | 1.61 | 0.44 | 0.85 | 1.28 |
| 59218 | 0 | 363057 | QQGRNEPQARRQQGR           | 2.72 | 0.01 | 1.61 | 0.44 | 0.85 | 1.28 |
| 59219 | 0 | 106046 | QQGRRHQSQRPPRRF           | 2.71 | 0.01 | 2.16 | 0.44 | 1.23 | 0.85 |
| 59220 | 0 | 52034  | QQGVTVD SIGM              | 2.40 | 0.01 | 2.40 | 1.15 | 0.22 | 0.85 |
| 59221 | 0 | 181998 | QQGWPSNQNPNTN<br>RDKTNF   | 2.96 | 0.01 | 3.89 | 2.13 | 1.74 | 0.28 |
| 59222 | 0 | 230583 | QQGYPTSPQSGQGQ<br>QPGQGQ  | 3.10 | 0.01 | 1.86 | 0.44 | 1.23 | 0.85 |
| 59223 | 0 | 149436 | QQHHHHQEQK                | 2.36 | 0.01 | 1.86 | 0.44 | 1.93 | 0.85 |
| 59224 | 0 | 149436 | QQHHHHQEQK                | 2.36 | 0.01 | 1.86 | 2.74 | 0.22 | 0.85 |
| 59225 | 0 | 149436 | QQHHHHQEQK                | 2.36 | 0.01 | 1.86 | 2.74 | 0.22 | 0.85 |
| 59226 | 0 | 173981 | QQHPIPQQPQQLP             | 2.60 | 0.01 | 1.86 | 0.44 | 1.23 | 0.85 |
| 59227 | 0 | 173982 | QQHQIPQQPQQFP             | 2.60 | 0.01 | 1.86 | 0.44 | 1.23 | 0.85 |
| 59228 | 0 | 52038  | QQIEGYKRD MATGRRL<br>KEPV | 2.94 | 0.01 | 3.78 | 3.42 | 0.22 | 0.28 |
| 59229 | 0 | 52038  | QQIEGYKRD MATGRRL<br>KEPV | 2.94 | 0.01 | 3.78 | 2.22 | 0.22 | 0.28 |
| 59230 | 0 | 52040  | QQIGKR                    | 1.89 | 0.01 | 4.63 | 1.15 | 0.22 | 1.39 |
| 59231 | 0 | 52040  | QQIGKR                    | 1.89 | 0.01 | 4.63 | 1.15 | 0.22 | 0.85 |
| 59232 | 0 | 52042  | QQINHHWHKSGSSIGK<br>AFTT  | 2.93 | 0.01 | 2.85 | 2.02 | 0.22 | 1.48 |
| 59233 | 0 | 52042  | QQINHHWHKSGSSIGK<br>AFTT  | 2.93 | 0.01 | 2.85 | 2.02 | 0.22 | 1.48 |
| 59234 | 0 | 52042  | QQINHHWHKSGSSIGK<br>AFTT  | 2.93 | 0.01 | 2.85 | 2.02 | 0.22 | 1.48 |
| 59235 | 0 | 52042  | QQINHHWHKSGSSIGK<br>AFTT  | 2.93 | 0.01 | 2.85 | 2.02 | 0.22 | 1.48 |
| 59236 | 0 | 52042  | QQINHHWHKSGSSIGK<br>AFTT  | 2.93 | 0.01 | 2.85 | 2.02 | 0.22 | 1.48 |
| 59237 | 0 | 52042  | QQINHHWHKSGSSIGK<br>AFTT  | 2.93 | 0.01 | 2.85 | 2.02 | 0.22 | 1.48 |
| 59238 | 0 | 52042  | QQINHHWHKSGSSIGK<br>AFTT  | 2.93 | 0.01 | 2.85 | 2.02 | 0.22 | 0.28 |
| 59239 | 0 | 52042  | QQINHHWHKSGSSIGK<br>AFTT  | 2.93 | 0.01 | 2.85 | 2.02 | 0.22 | 0.28 |
| 59240 | 0 | 52042  | QQINHHWHKSGSSIGK<br>AFTT  | 2.93 | 0.01 | 2.85 | 2.02 | 0.22 | 0.28 |

|       |   |        |                           |      |      |      |      |      |      |
|-------|---|--------|---------------------------|------|------|------|------|------|------|
| 59241 | 0 | 52042  | QQINHHWHKSGSSIGK<br>AFTT  | 2.93 | 0.01 | 2.85 | 2.02 | 0.22 | 0.28 |
| 59242 | 0 | 173983 | QQIPQQPQQIPQQ             | 2.60 | 0.01 | 1.86 | 0.44 | 1.23 | 0.85 |
| 59243 | 0 | 52043  | QQIPQQQ                   | 2.03 | 0.01 | 1.86 | 0.44 | 1.23 | 0.28 |
| 59244 | 0 | 52043  | QQIPQQQ                   | 2.03 | 0.01 | 1.86 | 0.44 | 1.23 | 0.85 |
| 59245 | 0 | 52043  | QQIPQQQ                   | 2.03 | 0.01 | 1.86 | 2.66 | 0.22 | 1.27 |
| 59246 | 0 | 129698 | QQIRMSLRGKAVVLM           | 2.66 | 0.01 | 0.78 | 0.44 | 1.13 | 0.85 |
| 59247 | 0 | 461857 | QQITDA                    | 1.89 | 0.01 | 3.00 | 0.68 | 0.22 | 1.48 |
| 59248 | 0 | 461857 | QQITDA                    | 1.89 | 0.01 | 3.00 | 0.68 | 0.22 | 0.85 |
| 59249 | 0 | 461857 | QQITDA                    | 1.89 | 0.01 | 3.00 | 0.68 | 0.22 | 0.85 |
| 59250 | 0 | 461857 | QQITDA                    | 1.89 | 0.01 | 3.00 | 0.68 | 0.22 | 0.28 |
| 59251 | 0 | 461857 | QQITDA                    | 1.89 | 0.01 | 3.00 | 0.68 | 0.22 | 0.85 |
| 59252 | 0 | 461857 | QQITDA                    | 1.89 | 0.01 | 3.00 | 3.16 | 0.22 | 1.48 |
| 59253 | 0 | 115453 | QQKEPMIGVNQELAYFY<br>PEL  | 2.93 | 0.01 | 1.60 | 0.44 | 1.23 | 2.51 |
| 59254 | 0 | 136078 | QQKKEGPIPPDAQNP           | 2.69 | 0.01 | 0.78 | 1.20 | 0.22 | 0.28 |
| 59255 | 0 | 136078 | QQKKEGPIPPDAQNP           | 2.69 | 0.01 | 0.78 | 1.20 | 0.22 | 0.28 |
| 59256 | 0 | 179388 | QQKLIDDHFLFKEGD           | 2.69 | 0.01 | 2.36 | 0.44 | 1.23 | 1.28 |
| 59257 | 0 | 98395  | QQKQQQQPSSQVSFQ<br>QPLQQY | 3.03 | 0.01 | 1.86 | 0.44 | 1.93 | 0.28 |
| 59258 | 0 | 98395  | QQKQQQQPSSQVSFQ<br>QPLQQY | 3.03 | 0.01 | 1.86 | 0.44 | 2.39 | 0.28 |
| 59259 | 0 | 98395  | QQKQQQQPSSQVSFQ<br>QPLQQY | 3.03 | 0.01 | 1.86 | 0.44 | 2.39 | 0.28 |
| 59260 | 0 | 52048  | QQKWDATATELNN             | 2.52 | 0.01 | 2.04 | 0.44 | 0.85 | 1.28 |
| 59261 | 0 | 148830 | QQLAQIPQQL                | 2.36 | 0.01 | 1.86 | 0.44 | 1.23 | 0.85 |
| 59262 | 0 | 450979 | QQLAVDT                   | 2.01 | 0.01 | 0.90 | 0.44 | 1.41 | 1.39 |
| 59263 | 0 | 148832 | QQLFPELQQP                | 2.36 | 0.01 | 1.86 | 0.44 | 1.23 | 0.85 |
| 59264 | 0 | 148832 | QQLFPELQQP                | 2.36 | 0.01 | 1.86 | 0.68 | 0.22 | 0.28 |
| 59265 | 0 | 241050 | QQLGEVAPY                 | 2.20 | 0.01 | 3.35 | 2.37 | 0.22 | 0.85 |
| 59266 | 0 | 241050 | QQLGEVAPY                 | 2.20 | 0.01 | 3.35 | 1.20 | 0.22 | 0.85 |
| 59267 | 0 | 52058  | QQLIVARQKL                | 2.33 | 4.08 | 2.56 | 0.44 | 0.85 | 0.28 |
| 59268 | 0 | 52059  | QQLIVARQKLKDAE            | 2.63 | 0.01 | 3.16 | 2.69 | 0.22 | 0.28 |
| 59269 | 0 | 52059  | QQLIVARQKLKDAE            | 2.63 | 0.01 | 3.16 | 2.69 | 0.22 | 0.28 |
| 59270 | 0 | 52060  | QQLIVARQKLKDAER           | 2.70 | 4.93 | 2.56 | 0.44 | 0.85 | 0.28 |
| 59271 | 0 | 52061  | QQLIVKDAER                | 2.28 | 0.01 | 2.56 | 0.68 | 0.22 | 0.28 |
| 59272 | 0 | 111686 | QQLPQPQQPQQSFPQ<br>QQPF   | 2.96 | 0.01 | 1.86 | 0.44 | 1.74 | 0.28 |
| 59273 | 0 | 52066  | QQLPQQQ                   | 2.03 | 0.01 | 1.86 | 0.44 | 1.23 | 0.28 |
| 59274 | 0 | 52066  | QQLPQQQ                   | 2.03 | 0.01 | 1.86 | 0.44 | 1.23 | 0.85 |
| 59275 | 0 | 52066  | QQLPQQQ                   | 2.03 | 0.01 | 1.86 | 2.66 | 0.22 | 1.27 |
| 59276 | 0 | 173984 | QQLPQQQQIPQQP             | 2.61 | 0.01 | 1.86 | 0.44 | 1.23 | 0.85 |
| 59277 | 0 | 148834 | QQLQQPFPPLQ               | 2.37 | 0.01 | 1.86 | 0.44 | 1.23 | 0.28 |
| 59278 | 0 | 148835 | QQLQQQQQQQQ               | 2.36 | 0.01 | 1.86 | 2.74 | 0.22 | 0.85 |
| 59279 | 0 | 148835 | QQLQQQQQQQQ               | 2.36 | 0.01 | 1.86 | 2.74 | 0.22 | 0.85 |
| 59280 | 0 | 164337 | QQLSRNH                   | 2.01 | 0.01 | 0.90 | 1.20 | 0.22 | 1.39 |

|       |   |        |                 |      |      |      |      |      |      |
|-------|---|--------|-----------------|------|------|------|------|------|------|
| 59281 | 0 | 148150 | QQMSINVDN       | 2.22 | 0.01 | 3.24 | 3.57 | 0.85 | 0.28 |
| 59282 | 0 | 91854  | QQMSINVDNQFNYVP | 2.68 | 0.01 | 3.05 | 1.20 | 0.22 | 0.28 |
| 59283 | 0 | 91854  | QQMSINVDNQFNYVP | 2.68 | 0.01 | 3.05 | 1.20 | 0.22 | 0.28 |
| 59284 | 0 | 96790  | QQNIIDPWIMN     | 2.42 | 0.01 | 3.63 | 0.68 | 0.22 | 0.28 |
| 59285 | 0 | 96790  | QQNIIDPWIMN     | 2.42 | 0.01 | 3.63 | 0.68 | 0.22 | 0.28 |
| 59286 | 0 | 96790  | QQNIIDPWIMN     | 2.42 | 0.01 | 3.63 | 0.68 | 0.22 | 0.28 |
| 59287 | 0 | 96790  | QQNIIDPWIMN     | 2.42 | 0.01 | 3.63 | 0.68 | 0.22 | 0.28 |
| 59288 | 0 | 96790  | QQNIIDPWIMN     | 2.42 | 0.01 | 3.63 | 0.68 | 0.22 | 0.28 |
| 59289 | 0 | 96790  | QQNIIDPWIMN     | 2.42 | 0.01 | 3.63 | 0.68 | 0.22 | 0.28 |
| 59290 | 0 | 96790  | QQNIIDPWIMN     | 2.42 | 0.01 | 3.63 | 0.68 | 0.22 | 0.28 |
| 59291 | 0 | 96790  | QQNIIDPWIMN     | 2.42 | 0.01 | 3.63 | 0.68 | 0.22 | 0.28 |
| 59292 | 0 | 96790  | QQNIIDPWIMN     | 2.42 | 0.01 | 3.63 | 0.68 | 0.22 | 0.28 |
| 59293 | 0 | 96790  | QQNIIDPWIMN     | 2.42 | 0.01 | 3.63 | 0.68 | 0.22 | 0.28 |
| 59294 | 0 | 96790  | QQNIIDPWIMN     | 2.42 | 0.01 | 3.63 | 0.68 | 0.22 | 0.28 |
| 59295 | 0 | 96790  | QQNIIDPWIMN     | 2.42 | 0.01 | 3.63 | 0.68 | 0.22 | 0.28 |
| 59296 | 0 | 96790  | QQNIIDPWIMN     | 2.42 | 0.01 | 3.63 | 0.68 | 0.22 | 0.28 |
| 59297 | 0 | 96790  | QQNIIDPWIMN     | 2.42 | 0.01 | 3.63 | 0.68 | 0.22 | 0.28 |
| 59298 | 0 | 96790  | QQNIIDPWIMN     | 2.42 | 0.01 | 3.63 | 0.68 | 0.22 | 0.28 |
| 59299 | 0 | 96790  | QQNIIDPWIMN     | 2.42 | 0.01 | 3.63 | 0.68 | 0.22 | 0.28 |
| 59300 | 0 | 96790  | QQNIIDPWIMN     | 2.42 | 0.01 | 3.63 | 0.68 | 0.22 | 0.28 |
| 59301 | 0 | 96790  | QQNIIDPWIMN     | 2.42 | 0.01 | 3.63 | 0.68 | 0.22 | 0.28 |
| 59302 | 0 | 96790  | QQNIIDPWIMN     | 2.42 | 0.01 | 3.63 | 0.68 | 0.22 | 0.28 |
| 59303 | 0 | 98968  | QQNPQAQGSVQP    | 2.51 | 0.01 | 1.86 | 0.44 | 1.93 | 1.27 |
| 59304 | 0 | 240911 | QQPAMALQLFNPEDY | 2.68 | 0.01 | 3.81 | 0.44 | 1.41 | 1.28 |
| 59305 | 0 | 113777 | QQPAQGQQGQQPGQ  | 2.69 | 0.01 | 1.86 | 0.44 | 1.23 | 0.85 |
| 59306 | 0 | 52082  | QQPFP           | 1.75 | 0.01 | 2.83 | 1.15 | 0.22 | 1.27 |
| 59307 | 0 | 52082  | QQPFP           | 1.75 | 0.01 | 2.83 | 1.15 | 0.22 | 1.27 |
| 59308 | 0 | 52082  | QQPFP           | 1.75 | 0.01 | 2.83 | 1.15 | 0.22 | 1.27 |
| 59309 | 0 | 52082  | QQPFP           | 1.75 | 0.01 | 2.83 | 1.15 | 0.22 | 1.27 |
| 59310 | 0 | 52082  | QQPFP           | 1.75 | 0.01 | 1.86 | 1.15 | 0.22 | 1.27 |
| 59311 | 0 | 52082  | QQPFP           | 1.75 | 0.01 | 1.86 | 1.15 | 0.22 | 1.27 |
| 59312 | 0 | 52082  | QQPFP           | 1.75 | 0.01 | 1.86 | 1.15 | 0.22 | 1.27 |
| 59313 | 0 | 52082  | QQPFP           | 1.75 | 0.01 | 1.86 | 1.15 | 0.22 | 0.28 |
| 59314 | 0 | 52082  | QQPFP           | 1.75 | 0.01 | 1.86 | 0.44 | 1.93 | 0.28 |
| 59315 | 0 | 52082  | QQPFP           | 1.75 | 0.01 | 1.86 | 0.68 | 0.22 | 1.27 |
| 59316 | 0 | 52082  | QQPFP           | 1.75 | 0.01 | 1.86 | 0.68 | 0.22 | 1.27 |
| 59317 | 0 | 52082  | QQPFP           | 1.75 | 0.01 | 1.86 | 0.68 | 0.22 | 0.28 |
| 59318 | 0 | 52083  | QQPFPLQPQQ      | 2.35 | 0.01 | 2.83 | 0.68 | 0.22 | 0.28 |
| 59319 | 0 | 52083  | QQPFPLQPQQ      | 2.35 | 0.01 | 2.83 | 0.68 | 0.22 | 0.85 |
| 59320 | 0 | 52083  | QQPFPLQPQQ      | 2.35 | 0.01 | 2.83 | 0.68 | 0.22 | 0.85 |
| 59321 | 0 | 228683 | QQPFPQP         | 2.05 | 0.01 | 1.86 | 1.15 | 0.22 | 0.28 |
| 59322 | 0 | 228683 | QQPFPQP         | 2.05 | 0.01 | 1.86 | 1.15 | 0.22 | 0.28 |
| 59323 | 0 | 228683 | QQPFPQP         | 2.05 | 0.01 | 1.86 | 1.15 | 0.22 | 0.28 |



|       |   |        |                    |      |      |      |      |      |      |
|-------|---|--------|--------------------|------|------|------|------|------|------|
| 59324 | 0 | 52084  | QQPFPQPQQP         | 2.36 | 0.01 | 1.86 | 0.68 | 0.22 | 0.28 |
| 59325 | 0 | 52084  | QQPFPQPQQP         | 2.36 | 0.01 | 1.86 | 0.68 | 0.22 | 0.85 |
| 59326 | 0 | 52084  | QQPFPQPQQP         | 2.36 | 0.01 | 1.86 | 0.68 | 0.22 | 0.85 |
| 59327 | 0 | 52084  | QQPFPQPQQP         | 2.36 | 0.01 | 1.86 | 0.68 | 0.22 | 0.28 |
| 59328 | 0 | 52085  | QQPFPQPQQQ         | 2.34 | 0.01 | 1.86 | 0.68 | 0.22 | 0.85 |
| 59329 | 0 | 52085  | QQPFPQPQQQ         | 2.34 | 0.01 | 1.86 | 0.68 | 0.22 | 0.28 |
| 59330 | 0 | 52085  | QQPFPQPQQQ         | 2.34 | 0.01 | 2.83 | 0.68 | 0.22 | 0.85 |
| 59331 | 0 | 52085  | QQPFPQPQQQ         | 2.34 | 0.01 | 2.83 | 0.68 | 0.22 | 0.28 |
| 59332 | 0 | 52086  | QQPFPQPQQQ         | 2.35 | 0.01 | 2.83 | 0.68 | 0.22 | 0.85 |
| 59333 | 0 | 52086  | QQPFPQPQQQ         | 2.35 | 0.01 | 2.83 | 0.68 | 0.22 | 0.28 |
| 59334 | 0 | 52088  | QQPFPQRPQQ         | 2.35 | 0.01 | 2.83 | 0.68 | 0.22 | 0.28 |
| 59335 | 0 | 52088  | QQPFPQRPQQ         | 2.35 | 0.01 | 2.83 | 0.68 | 0.22 | 0.85 |
| 59336 | 0 | 52089  | QQPFPQSQQP         | 2.36 | 0.01 | 1.86 | 0.68 | 0.22 | 0.85 |
| 59337 | 0 | 52089  | QQPFPQSQQP         | 2.36 | 0.01 | 1.86 | 0.68 | 0.22 | 0.28 |
| 59338 | 0 | 52090  | QQPFSQPQQP         | 2.36 | 0.01 | 2.83 | 0.68 | 0.22 | 0.28 |
| 59339 | 0 | 52090  | QQPFSQPQQP         | 2.36 | 0.01 | 2.83 | 0.68 | 0.22 | 0.85 |
| 59340 | 0 | 52090  | QQPFSQPQQP         | 2.36 | 0.01 | 2.83 | 0.68 | 0.22 | 0.85 |
| 59341 | 0 | 52090  | QQPFSQPQQP         | 2.36 | 0.01 | 2.83 | 0.68 | 0.22 | 0.28 |
| 59342 | 0 | 113778 | QQPGQ              | 1.78 | 0.01 | 1.86 | 0.44 | 1.23 | 0.85 |
| 59343 | 0 | 113779 | QQPGQGQQ           | 2.14 | 0.01 | 1.86 | 0.44 | 1.23 | 0.85 |
| 59344 | 0 | 113780 | QQPGQGQQGQQPGQ     | 2.69 | 0.01 | 1.86 | 0.44 | 1.23 | 0.85 |
| 59345 | 0 | 113781 | QQPGQGQQPGQGQQ     | 2.67 | 0.01 | 1.86 | 0.44 | 1.23 | 0.85 |
| 59346 | 0 | 113782 | QQPGQLQQPAQGQQ     | 2.66 | 0.01 | 1.86 | 0.44 | 1.23 | 0.85 |
| 59347 | 0 | 148841 | QQPIPVQPQQ         | 2.35 | 0.01 | 1.86 | 0.44 | 1.23 | 0.28 |
| 59348 | 0 | 190933 | QQPIQQQPQQ         | 2.35 | 0.01 | 1.86 | 0.44 | 1.23 | 0.28 |
| 59349 | 0 | 98969  | QQPISQQILQQI       | 2.53 | 0.01 | 1.86 | 0.44 | 1.93 | 1.27 |
| 59350 | 0 | 52094  | QQPP               | 1.56 | 0.01 | 3.65 | 0.68 | 0.22 | 1.27 |
| 59351 | 0 | 52094  | QQPP               | 1.56 | 0.01 | 3.65 | 0.68 | 0.22 | 0.28 |
| 59352 | 0 | 153449 | QQPPGAPRLPQL       | 2.52 | 0.01 | 0.90 | 1.15 | 0.22 | 0.28 |
| 59353 | 0 | 52097  | QQPPQQ             | 1.89 | 0.01 | 1.86 | 0.44 | 1.23 | 0.28 |
| 59354 | 0 | 52098  | QQPPQQPPQQPP       | 2.53 | 0.01 | 3.00 | 3.03 | 0.22 | 0.28 |
| 59355 | 0 | 52098  | QQPPQQPPQQPP       | 2.53 | 0.01 | 3.00 | 3.03 | 0.22 | 0.28 |
| 59356 | 0 | 177933 | QQPQPQPQQQPQQ<br>Q | 2.72 | 0.01 | 0.78 | 0.44 | 1.13 | 0.85 |
| 59357 | 0 | 173985 | QQPQQFPQQQFPQ      | 2.61 | 0.01 | 1.86 | 0.44 | 1.23 | 0.85 |
| 59358 | 0 | 173986 | QQPQQFPQQQQFL      | 2.61 | 0.01 | 1.86 | 0.44 | 1.23 | 0.85 |
| 59359 | 0 | 148842 | QQPQQLPQQQ         | 2.35 | 0.01 | 1.86 | 0.44 | 1.23 | 0.85 |
| 59360 | 0 | 173987 | QQPQQLPQQQQFP      | 2.61 | 0.01 | 1.86 | 0.44 | 1.23 | 0.85 |
| 59361 | 0 | 52105  | QQPQQPFPLQ         | 2.37 | 0.01 | 2.83 | 0.68 | 0.22 | 0.85 |
| 59362 | 0 | 52105  | QQPQQPFPLQ         | 2.37 | 0.01 | 2.83 | 0.68 | 0.22 | 0.28 |
| 59363 | 0 | 52105  | QQPQQPFPLQ         | 2.37 | 0.01 | 2.83 | 0.68 | 0.22 | 0.85 |
| 59364 | 0 | 52105  | QQPQQPFPLQ         | 2.37 | 0.01 | 2.83 | 0.68 | 0.22 | 0.28 |
| 59365 | 0 | 52105  | QQPQQPFPLQ         | 2.37 | 0.01 | 1.86 | 0.44 | 1.23 | 0.28 |
| 59366 | 0 | 148843 | QQPQQPFPQL         | 2.37 | 0.01 | 1.86 | 0.44 | 1.23 | 0.85 |

|       |   |        |                           |      |      |      |      |      |      |
|-------|---|--------|---------------------------|------|------|------|------|------|------|
| 59367 | 0 | 148844 | QQPQQPFPQP                | 2.37 | 0.01 | 1.86 | 0.44 | 1.23 | 0.85 |
| 59368 | 0 | 148844 | QQPQQPFPQP                | 2.37 | 0.01 | 1.86 | 0.44 | 1.23 | 0.85 |
| 59369 | 0 | 148845 | QQPQQPFPQQ                | 2.35 | 0.01 | 1.86 | 0.44 | 1.23 | 0.85 |
| 59370 | 0 | 148845 | QQPQQPFPQQ                | 2.35 | 0.01 | 1.86 | 0.44 | 1.23 | 0.85 |
| 59371 | 0 | 148845 | QQPQQPFPQQ                | 2.35 | 0.01 | 1.86 | 0.44 | 1.23 | 0.85 |
| 59372 | 0 | 483518 | QQPQQPFPQQPQQPFP<br>QTQQ  | 3.01 | 0.01 | 1.86 | 1.20 | 0.22 | 0.28 |
| 59373 | 0 | 483518 | QQPQQPFPQQPQQPFP<br>QTQQ  | 3.01 | 0.01 | 1.86 | 0.44 | 1.93 | 0.28 |
| 59374 | 0 | 483518 | QQPQQPFPQQPQQPFP<br>QTQQ  | 3.01 | 0.01 | 1.86 | 0.44 | 1.93 | 0.28 |
| 59375 | 0 | 148846 | QQPQQPFPQT                | 2.37 | 0.01 | 1.86 | 0.44 | 1.23 | 0.85 |
| 59376 | 0 | 149438 | QQPQQQYPSG                | 2.35 | 0.01 | 1.86 | 0.44 | 1.93 | 0.85 |
| 59377 | 0 | 149438 | QQPQQQYPSG                | 2.35 | 0.01 | 1.86 | 2.74 | 0.22 | 0.85 |
| 59378 | 0 | 149438 | QQPQQQYPSG                | 2.35 | 0.01 | 1.86 | 2.74 | 0.22 | 0.85 |
| 59379 | 0 | 52106  | QQPQQSFPQQ                | 2.35 | 0.01 | 1.86 | 0.68 | 0.22 | 0.85 |
| 59380 | 0 | 52106  | QQPQQSFPQQ                | 2.35 | 0.01 | 1.86 | 0.68 | 0.22 | 0.28 |
| 59381 | 0 | 52106  | QQPQQSFPQQ                | 2.35 | 0.01 | 1.86 | 0.44 | 1.23 | 0.85 |
| 59382 | 0 | 483519 | QQPQQTFPQQQTTFPH<br>QPQQQ | 3.05 | 0.01 | 1.86 | 1.20 | 0.22 | 0.28 |
| 59383 | 0 | 483519 | QQPQQTFPQQQTTFPH<br>QPQQQ | 3.05 | 0.01 | 1.86 | 0.44 | 1.93 | 0.28 |
| 59384 | 0 | 52107  | QQPQRPFAQQ                | 2.34 | 0.01 | 2.83 | 0.68 | 0.22 | 0.28 |
| 59385 | 0 | 52107  | QQPQRPFAQQ                | 2.34 | 0.01 | 2.83 | 0.68 | 0.22 | 0.85 |
| 59386 | 0 | 99583  | QQPRKIRPEGREGEQ           | 2.73 | 0.01 | 2.16 | 0.44 | 1.23 | 1.48 |
| 59387 | 0 | 99583  | QQPRKIRPEGREGEQ           | 2.73 | 0.01 | 2.16 | 0.44 | 1.23 | 1.48 |
| 59388 | 0 | 173988 | QQPSGSNVISISG             | 2.58 | 0.01 | 1.86 | 0.44 | 1.23 | 0.85 |
| 59389 | 0 | 192607 | QQPVPQPHQPFSSQ            | 2.65 | 0.01 | 1.86 | 0.44 | 1.23 | 0.28 |
| 59390 | 0 | 123680 | QQPVRLLE                  | 2.23 | 0.01 | 2.28 | 2.00 | 0.22 | 0.28 |
| 59391 | 0 | 123680 | QQPVRLLE                  | 2.23 | 0.01 | 2.28 | 2.00 | 0.22 | 0.28 |
| 59392 | 0 | 107226 | QQPVSSWVVFSSDAI           | 2.68 | 0.01 | 0.90 | 0.44 | 1.23 | 0.28 |
| 59393 | 0 | 173989 | QQQEFPPQQFPQQ             | 2.59 | 0.01 | 1.86 | 0.44 | 1.23 | 0.85 |
| 59394 | 0 | 148854 | QQQFPEQSQQ                | 2.34 | 0.01 | 1.86 | 0.44 | 1.23 | 0.28 |
| 59395 | 0 | 148854 | QQQFPEQSQQ                | 2.34 | 0.01 | 1.86 | 0.68 | 0.22 | 0.28 |
| 59396 | 0 | 148855 | QQQFPGQQQQ                | 2.35 | 0.01 | 1.86 | 0.44 | 1.23 | 0.28 |
| 59397 | 0 | 148855 | QQQFPGQQQQ                | 2.35 | 0.01 | 1.86 | 0.68 | 0.22 | 0.28 |
| 59398 | 0 | 173990 | QQQFPIPYPPQQS             | 2.58 | 0.01 | 1.86 | 0.44 | 1.23 | 0.85 |
| 59399 | 0 | 190934 | QQQFPQQQFP                | 2.36 | 0.01 | 1.86 | 0.68 | 0.22 | 0.28 |
| 59400 | 0 | 148856 | QQQFPQQPPQ                | 2.37 | 0.01 | 1.86 | 0.44 | 1.23 | 0.85 |
| 59401 | 0 | 173991 | QQQFPQQQFHQQQ             | 2.59 | 0.01 | 1.86 | 0.44 | 1.23 | 0.85 |
| 59402 | 0 | 148857 | QQQFPQQQFP                | 2.36 | 0.01 | 1.86 | 0.44 | 1.23 | 0.85 |
| 59403 | 0 | 173992 | QQQFPQQQFPQQP             | 2.61 | 0.01 | 1.86 | 0.44 | 1.23 | 0.85 |
| 59404 | 0 | 173993 | QQQFPRPQQSPEQ             | 2.59 | 0.01 | 1.86 | 0.44 | 1.23 | 0.85 |
| 59405 | 0 | 52113  | QQQGLRGEEMEEM             | 2.58 | 0.01 | 3.27 | 0.44 | 1.23 | 0.85 |
| 59406 | 0 | 52117  | QQQGQTVTKSAAEAS<br>KK     | 2.87 | 0.01 | 2.91 | 0.44 | 0.85 | 0.28 |
| 59407 | 0 | 173994 | QQQIPATQFPQQQ             | 2.57 | 0.01 | 1.86 | 0.44 | 1.23 | 0.85 |

|       |   |        |                          |      |      |      |      |      |      |
|-------|---|--------|--------------------------|------|------|------|------|------|------|
| 59408 | 0 | 226090 | QQQIPQQ                  | 2.03 | 0.01 | 1.86 | 2.66 | 0.22 | 1.27 |
| 59409 | 0 | 173995 | QQQIPQQPQQFLQ            | 2.61 | 0.01 | 1.86 | 0.44 | 1.23 | 0.85 |
| 59410 | 0 | 173996 | QQQIPQQPQQLPQ            | 2.61 | 0.01 | 1.86 | 0.44 | 1.23 | 0.85 |
| 59411 | 0 | 148860 | QQQLPQPQQP               | 2.36 | 0.01 | 1.86 | 0.44 | 1.23 | 0.85 |
| 59412 | 0 | 226091 | QQQLPQQ                  | 2.03 | 0.01 | 1.86 | 2.66 | 0.22 | 1.27 |
| 59413 | 0 | 148861 | QQQLPQQQFP               | 2.36 | 0.01 | 1.86 | 0.44 | 1.23 | 0.85 |
| 59414 | 0 | 483520 | QQQLVPQLQQPLSQQP<br>QQTF | 3.00 | 0.01 | 1.86 | 0.44 | 1.93 | 0.28 |
| 59415 | 0 | 483520 | QQQLVPQLQQPLSQQP<br>QQTF | 3.00 | 0.01 | 1.86 | 1.20 | 0.22 | 0.28 |
| 59416 | 0 | 52120  | QQQP                     | 1.61 | 0.01 | 1.86 | 0.68 | 0.22 | 0.28 |
| 59417 | 0 | 52120  | QQQP                     | 1.61 | 0.01 | 1.86 | 0.68 | 0.22 | 0.28 |
| 59418 | 0 | 52120  | QQQP                     | 1.61 | 0.01 | 1.86 | 0.68 | 0.22 | 0.28 |
| 59419 | 0 | 52120  | QQQP                     | 1.61 | 0.01 | 1.86 | 0.68 | 0.22 | 0.28 |
| 59420 | 0 | 52120  | QQQP                     | 1.61 | 0.01 | 1.86 | 0.68 | 0.22 | 0.28 |
| 59421 | 0 | 125538 | QQQPFP                   | 1.91 | 0.01 | 1.86 | 0.68 | 0.22 | 0.85 |
| 59422 | 0 | 125538 | QQQPFP                   | 1.91 | 0.01 | 1.86 | 0.68 | 0.22 | 1.48 |
| 59423 | 0 | 125538 | QQQPFP                   | 1.91 | 0.01 | 1.86 | 0.68 | 0.22 | 2.75 |
| 59424 | 0 | 125538 | QQQPFP                   | 1.91 | 0.01 | 1.86 | 0.68 | 0.22 | 2.75 |
| 59425 | 0 | 125538 | QQQPFP                   | 1.91 | 0.01 | 1.86 | 0.44 | 1.93 | 0.85 |
| 59426 | 0 | 125538 | QQQPFP                   | 1.91 | 0.01 | 1.86 | 0.44 | 1.93 | 0.85 |
| 59427 | 0 | 52121  | QQQPFPQQP                | 2.37 | 0.01 | 1.86 | 0.68 | 0.22 | 0.28 |
| 59428 | 0 | 52121  | QQQPFPQQP                | 2.37 | 0.01 | 1.86 | 0.68 | 0.22 | 0.85 |
| 59429 | 0 | 52121  | QQQPFPQQP                | 2.37 | 0.01 | 1.86 | 0.44 | 1.93 | 0.85 |
| 59430 | 0 | 52121  | QQQPFPQQP                | 2.37 | 0.01 | 1.86 | 2.74 | 0.22 | 0.85 |
| 59431 | 0 | 52121  | QQQPFPQQP                | 2.37 | 0.01 | 1.86 | 2.74 | 0.22 | 0.85 |
| 59432 | 0 | 149439 | QQQPLSQVSF               | 2.34 | 0.01 | 1.86 | 0.44 | 1.93 | 0.85 |
| 59433 | 0 | 149439 | QQQPLSQVSF               | 2.34 | 0.01 | 1.86 | 2.74 | 0.22 | 0.85 |
| 59434 | 0 | 149439 | QQQPLSQVSF               | 2.34 | 0.01 | 1.86 | 2.74 | 0.22 | 0.85 |
| 59435 | 0 | 52124  | QQQPP                    | 1.75 | 0.01 | 1.86 | 0.44 | 1.23 | 0.28 |
| 59436 | 0 | 52124  | QQQPP                    | 1.75 | 0.01 | 1.86 | 0.44 | 1.23 | 1.27 |
| 59437 | 0 | 173997 | QQQPPQQHQFPQQ            | 2.60 | 0.01 | 1.86 | 0.44 | 1.23 | 0.85 |
| 59438 | 0 | 177934 | QQQPQQQPQPQPQQ<br>Q      | 2.72 | 0.01 | 0.78 | 0.44 | 1.13 | 0.85 |
| 59439 | 0 | 177935 | QQQPQQQPQQQPQ<br>P       | 2.74 | 0.01 | 0.78 | 0.44 | 1.13 | 0.85 |
| 59440 | 0 | 431888 | QQQPQYLQPQQPISQQ<br>QAQQ | 2.98 | 0.01 | 1.86 | 0.44 | 1.23 | 0.85 |
| 59441 | 0 | 431889 | QQQPSSQVSFQQ             | 2.51 | 0.01 | 1.86 | 0.44 | 1.23 | 0.85 |
| 59442 | 0 | 431890 | QQQPSSQVSFQQPQQ<br>QYPSS | 2.99 | 0.01 | 1.86 | 0.44 | 1.23 | 0.85 |
| 59443 | 0 | 98396  | QQQQFLGQQQPFPQ<br>QPY    | 2.90 | 0.01 | 1.86 | 0.44 | 1.93 | 0.28 |
| 59444 | 0 | 98396  | QQQQFLGQQQPFPQ<br>QPY    | 2.90 | 0.01 | 1.86 | 0.44 | 2.39 | 0.28 |
| 59445 | 0 | 148867 | QQQQFPPQQP               | 2.38 | 0.01 | 1.86 | 0.44 | 1.23 | 0.85 |
| 59446 | 0 | 148867 | QQQQFPPQQP               | 2.38 | 0.01 | 1.86 | 0.68 | 0.22 | 0.28 |

|       |   |        |                           |      |      |      |      |      |      |
|-------|---|--------|---------------------------|------|------|------|------|------|------|
| 59447 | 0 | 148868 | QQQQFPQPQQ                | 2.34 | 0.01 | 1.86 | 0.44 | 1.23 | 0.85 |
| 59448 | 0 | 173998 | QQQQFPQQQEFQP             | 2.61 | 0.01 | 1.86 | 0.44 | 1.23 | 0.85 |
| 59449 | 0 | 190935 | QQQQFPQQQF                | 2.37 | 0.01 | 1.86 | 0.68 | 0.22 | 0.28 |
| 59450 | 0 | 173999 | QQQQFPQQQPPQQ             | 2.60 | 0.01 | 1.86 | 0.44 | 1.23 | 0.85 |
| 59451 | 0 | 190936 | QQQQFPQQQQ                | 2.36 | 0.01 | 1.86 | 0.68 | 0.22 | 0.28 |
| 59452 | 0 | 174000 | QQQQFPQQQQLTQ             | 2.60 | 0.01 | 1.86 | 0.44 | 1.23 | 0.85 |
| 59453 | 0 | 190937 | QQQQFPQQQS                | 2.37 | 0.01 | 1.86 | 0.44 | 1.23 | 0.28 |
| 59454 | 0 | 52128  | QQQQGGSQSQKGKQQ           | 2.73 | 0.01 | 2.72 | 0.44 | 1.23 | 0.85 |
| 59455 | 0 | 174001 | QQQQIPQQPQQFP             | 2.61 | 0.01 | 1.86 | 0.44 | 1.23 | 0.85 |
| 59456 | 0 | 190938 | QQQQIPQQQI                | 2.37 | 0.01 | 1.86 | 0.44 | 1.23 | 0.28 |
| 59457 | 0 | 190939 | QQQQLPQQQF                | 2.37 | 0.01 | 1.86 | 0.44 | 1.23 | 0.28 |
| 59458 | 0 | 190939 | QQQQLPQQQF                | 2.37 | 0.01 | 1.86 | 0.68 | 0.22 | 0.28 |
| 59459 | 0 | 148870 | QQQQLQQQQQ                | 2.36 | 0.01 | 1.86 | 2.74 | 0.22 | 0.85 |
| 59460 | 0 | 148870 | QQQQLQQQQQ                | 2.36 | 0.01 | 1.86 | 2.74 | 0.22 | 0.85 |
| 59461 | 0 | 174002 | QQQQLTQQQFPRP             | 2.58 | 0.01 | 1.86 | 0.44 | 1.23 | 0.85 |
| 59462 | 0 | 98397  | QQQQPSSQVSFQQPLQ<br>QY    | 2.89 | 0.01 | 1.86 | 0.44 | 1.93 | 0.28 |
| 59463 | 0 | 98397  | QQQQPSSQVSFQQPLQ<br>QY    | 2.89 | 0.01 | 1.86 | 0.44 | 2.39 | 0.28 |
| 59464 | 0 | 148872 | QQQQQILQQI                | 2.37 | 0.01 | 1.86 | 0.44 | 1.93 | 0.85 |
| 59465 | 0 | 148872 | QQQQQILQQI                | 2.37 | 0.01 | 1.86 | 2.74 | 0.22 | 0.85 |
| 59466 | 0 | 149440 | QQQQQPLSQV                | 2.35 | 0.01 | 1.86 | 0.44 | 1.93 | 0.85 |
| 59467 | 0 | 149440 | QQQQQPLSQV                | 2.35 | 0.01 | 1.86 | 2.74 | 0.22 | 0.85 |
| 59468 | 0 | 149440 | QQQQQPLSQV                | 2.35 | 0.01 | 1.86 | 2.74 | 0.22 | 0.85 |
| 59469 | 0 | 148875 | QQQQQQQLQQQ               | 2.36 | 0.01 | 1.86 | 0.44 | 1.93 | 0.85 |
| 59470 | 0 | 148875 | QQQQQQQLQQQ               | 2.36 | 0.01 | 1.86 | 2.74 | 0.22 | 0.85 |
| 59471 | 0 | 148875 | QQQQQQQLQQQ               | 2.36 | 0.01 | 1.86 | 2.74 | 0.22 | 0.85 |
| 59472 | 0 | 148877 | QQQQQQQILQ                | 2.38 | 0.01 | 1.86 | 0.44 | 1.93 | 0.85 |
| 59473 | 0 | 148877 | QQQQQQQILQ                | 2.38 | 0.01 | 1.86 | 2.74 | 0.22 | 0.85 |
| 59474 | 0 | 148877 | QQQQQQQILQ                | 2.38 | 0.01 | 1.86 | 0.44 | 1.23 | 0.85 |
| 59475 | 0 | 149441 | QQQQQQQPLS                | 2.36 | 0.01 | 1.86 | 0.44 | 1.93 | 0.85 |
| 59476 | 0 | 149441 | QQQQQQQPLS                | 2.36 | 0.01 | 1.86 | 2.74 | 0.22 | 0.85 |
| 59477 | 0 | 149441 | QQQQQQQPLS                | 2.36 | 0.01 | 1.86 | 2.74 | 0.22 | 0.85 |
| 59478 | 0 | 148880 | QQQQQQQQQLQ               | 2.38 | 0.01 | 1.86 | 0.44 | 1.93 | 0.85 |
| 59479 | 0 | 148880 | QQQQQQQQQLQ               | 2.38 | 0.01 | 1.86 | 2.74 | 0.22 | 0.85 |
| 59480 | 0 | 148880 | QQQQQQQQQLQ               | 2.38 | 0.01 | 1.86 | 2.74 | 0.22 | 0.85 |
| 59481 | 0 | 177936 | QQQQQQQQQPQQQP<br>Q       | 2.74 | 0.01 | 0.78 | 0.44 | 1.13 | 0.85 |
| 59482 | 0 | 148881 | QQQQQQQQQI                | 2.40 | 0.01 | 1.86 | 0.44 | 1.93 | 0.85 |
| 59483 | 0 | 148881 | QQQQQQQQQI                | 2.40 | 0.01 | 1.86 | 2.74 | 0.22 | 0.85 |
| 59484 | 0 | 148882 | QQQQQQQQQP                | 2.40 | 0.01 | 1.86 | 2.74 | 0.22 | 0.85 |
| 59485 | 0 | 133669 | QQQQQQQQQQQ               | 2.46 | 0.01 | 0.78 | 0.68 | 0.22 | 2.92 |
| 59486 | 0 | 133669 | QQQQQQQQQQQ               | 2.46 | 0.01 | 0.78 | 0.68 | 0.22 | 2.92 |
| 59487 | 0 | 98399  | QQQQQQQQQQQQQIL<br>QQILQQ | 3.05 | 0.01 | 1.86 | 0.44 | 1.93 | 0.28 |

|       |   |        |                                |      |      |      |      |      |      |
|-------|---|--------|--------------------------------|------|------|------|------|------|------|
| 59488 | 0 | 98399  | QQQQQQQQQQQQQIL<br>QQILQQ      | 3.05 | 0.01 | 1.86 | 0.44 | 1.93 | 0.28 |
| 59489 | 0 | 426798 | QQQQQQQQQQQQQQ<br>QQ           | 2.82 | 0.01 | 0.78 | 0.68 | 0.22 | 0.85 |
| 59490 | 0 | 426798 | QQQQQQQQQQQQQQ<br>QQ           | 2.82 | 0.01 | 0.78 | 1.15 | 0.22 | 0.85 |
| 59491 | 0 | 98400  | QQQQQQQQQQQQQQ<br>QQQQQIL      | 3.08 | 0.01 | 1.86 | 0.44 | 1.93 | 0.28 |
| 59492 | 0 | 172914 | QQQQQQQQQQQQQQ<br>QQQQQQQQQQQQ | 3.25 | 0.01 | 0.78 | 1.15 | 0.22 | 2.02 |
| 59493 | 0 | 172914 | QQQQQQQQQQQQQQ<br>QQQQQQQQQQQQ | 3.25 | 0.01 | 0.78 | 1.15 | 0.22 | 0.85 |
| 59494 | 0 | 172914 | QQQQQQQQQQQQQQ<br>QQQQQQQQQQQQ | 3.25 | 0.01 | 0.78 | 1.15 | 0.22 | 1.34 |
| 59495 | 0 | 172914 | QQQQQQQQQQQQQQ<br>QQQQQQQQQQQQ | 3.25 | 0.01 | 0.78 | 1.15 | 0.22 | 2.98 |
| 59496 | 0 | 423473 | QQQQRHAAFSLVSPQ                | 2.67 | 0.01 | 2.51 | 0.44 | 2.35 | 1.28 |
| 59497 | 0 | 363386 | QQQSDEAQFQQHQQH                | 2.71 | 0.01 | 1.61 | 0.44 | 0.85 | 1.28 |
| 59498 | 0 | 363387 | QQQSDEAQVQQHQQH                | 2.71 | 0.01 | 1.61 | 0.44 | 0.85 | 1.28 |
| 59499 | 0 | 363388 | QQQSDEAQVQQHQRH                | 2.70 | 0.01 | 1.61 | 0.44 | 0.85 | 1.28 |
| 59500 | 0 | 363389 | QQQSDetQVQQHQQH                | 2.71 | 0.01 | 1.61 | 0.44 | 0.85 | 1.28 |
| 59501 | 0 | 363390 | QQQSDetQVQQHQRH                | 2.70 | 0.01 | 1.61 | 0.44 | 0.85 | 1.28 |
| 59502 | 0 | 363391 | QQQSDetQVQQQEHE                | 2.71 | 0.01 | 1.61 | 0.44 | 0.85 | 1.28 |
| 59503 | 0 | 106048 | QQQSRRLPYSPYS                  | 2.71 | 0.01 | 2.16 | 0.44 | 1.23 | 0.85 |
| 59504 | 0 | 52138  | QQQTAPKAPT                     | 2.35 | 4.08 | 3.55 | 1.12 | 0.22 | 0.85 |
| 59505 | 0 | 52139  | QQQTAPKAPTE                    | 2.42 | 0.01 | 3.55 | 1.20 | 0.22 | 0.85 |
| 59506 | 0 | 52139  | QQQTAPKAPTE                    | 2.42 | 0.01 | 3.55 | 1.20 | 0.22 | 0.28 |
| 59507 | 0 | 132033 | QQRKESKKPPAKLQPR               | 2.77 | 0.01 | 2.19 | 2.55 | 0.22 | 0.28 |
| 59508 | 0 | 172915 | QQRKIFSLIQEKNEl                | 2.70 | 0.01 | 0.78 | 0.44 | 1.41 | 0.28 |
| 59509 | 0 | 99838  | QQRPFi                         | 1.89 | 0.01 | 1.86 | 0.68 | 0.22 | 0.28 |
| 59510 | 0 | 99838  | QQRPFi                         | 1.89 | 0.01 | 1.86 | 0.68 | 0.22 | 0.28 |
| 59511 | 0 | 99838  | QQRPFi                         | 1.89 | 0.01 | 1.86 | 0.68 | 0.22 | 0.28 |
| 59512 | 0 | 99838  | QQRPFi                         | 1.89 | 0.01 | 1.86 | 0.68 | 0.22 | 0.85 |
| 59513 | 0 | 99838  | QQRPFi                         | 1.89 | 0.01 | 1.86 | 0.68 | 0.22 | 0.85 |
| 59514 | 0 | 99838  | QQRPFi                         | 1.89 | 0.01 | 1.86 | 0.68 | 0.22 | 0.85 |

|                  |   |        |                  |      |      |      |      |      |      |
|------------------|---|--------|------------------|------|------|------|------|------|------|
| 59515            | 0 | 99838  | QQRPFI           | 1.89 | 0.01 | 1.86 | 0.68 | 0.22 | 0.85 |
| 59516            | 0 | 99838  | QQRPFI           | 1.89 | 0.01 | 1.86 | 0.68 | 0.22 | 0.85 |
| 59517            | 0 | 99838  | QQRPFI           | 1.89 | 0.01 | 1.86 | 0.68 | 0.22 | 0.85 |
| 59518            | 0 | 98401  | QQRPFIQPSL       | 2.33 | 0.01 | 1.86 | 0.68 | 0.22 | 0.28 |
| 59519            | 0 | 98401  | QQRPFIQPSL       | 2.33 | 0.01 | 1.86 | 0.68 | 0.22 | 0.28 |
| 59520            | 0 | 98401  | QQRPFIQPSL       | 2.33 | 0.01 | 1.86 | 0.68 | 0.22 | 0.28 |
| 59521            | 0 | 98401  | QQRPFIQPSL       | 2.33 | 0.01 | 1.86 | 0.68 | 0.22 | 0.28 |
| 59522            | 0 | 98401  | QQRPFIQPSL       | 2.33 | 0.01 | 1.86 | 0.68 | 0.22 | 0.28 |
| 59523            | 0 | 98401  | QQRPFIQPSL       | 2.33 | 0.01 | 1.86 | 0.68 | 0.22 | 0.28 |
| 59524            | 0 | 98401  | QQRPFIQPSL       | 2.33 | 0.01 | 1.86 | 0.68 | 0.22 | 0.28 |
| 59525            | 0 | 363450 | QQSDEAQFQQHQQHE  | 2.72 | 0.01 | 1.61 | 0.44 | 0.85 | 1.28 |
| 59526            | 0 | 363451 | QQSDEAQVQQHQQHE  | 2.72 | 0.01 | 1.61 | 0.44 | 0.85 | 1.28 |
| 59527            | 0 | 363452 | QQSDEAQVQQHQRHE  | 2.71 | 0.01 | 1.61 | 0.44 | 0.85 | 1.28 |
| 59528            | 0 | 363453 | QQSDETQVQQHQQHE  | 2.72 | 0.01 | 1.61 | 0.44 | 0.85 | 1.28 |
| 59529            | 0 | 363454 | QQSDETQVQQHQRHE  | 2.71 | 0.01 | 1.61 | 0.44 | 0.85 | 1.28 |
| 59530            | 0 | 363455 | QQSDETQVQQQEHEH  | 2.71 | 0.01 | 1.61 | 0.44 | 0.85 | 1.28 |
| 59531            | 0 | 148885 | QQSEQIIPQQ       | 2.34 | 0.01 | 1.86 | 0.44 | 1.23 | 0.28 |
| 59532            | 0 | 186703 | QQSFMEKWLEYE     | 2.46 | 0.01 | 0.90 | 0.68 | 0.22 | 1.39 |
| 59533            | 0 | 186703 | QQSFMEKWLEYE     | 2.46 | 0.01 | 0.90 | 0.68 | 0.22 | 0.28 |
| 59534            | 0 | 186703 | QQSFMEKWLEYE     | 2.46 | 0.01 | 0.90 | 2.13 | 0.85 | 0.28 |
| QQSFMEKWLEYEGGGQ |   |        |                  |      |      |      |      |      |      |
| 59535            | 0 | 186704 | QSFMEKWLEYEGGGQQ | 3.80 | 0.01 | 0.90 | 3.47 | 0.22 | 0.28 |
| SFMEKWLEYEGKKK   |   |        |                  |      |      |      |      |      |      |
| QQSFMEKWLEYEGGGQ |   |        |                  |      |      |      |      |      |      |
| 59536            | 0 | 186704 | QSFMEKWLEYEGGGQQ | 3.80 | 0.01 | 0.90 | 3.47 | 0.22 | 0.28 |
| SFMEKWLEYEGKKK   |   |        |                  |      |      |      |      |      |      |
| QQSFMEKWLEYEGGGQ |   |        |                  |      |      |      |      |      |      |
| 59537            | 0 | 186704 | QSFMEKWLEYEGGGQQ | 3.80 | 0.01 | 0.90 | 3.47 | 0.22 | 0.28 |
| SFMEKWLEYEGKKK   |   |        |                  |      |      |      |      |      |      |
| 59538            | 0 | 148886 | QQSFPLQPQQ       | 2.34 | 0.01 | 1.86 | 0.44 | 1.23 | 0.28 |
| 59539            | 0 | 52148  | QQSFPQQPQR       | 2.37 | 0.01 | 2.83 | 0.68 | 0.22 | 0.28 |
| 59540            | 0 | 52148  | QQSFPQQPQR       | 2.37 | 0.01 | 2.83 | 0.68 | 0.22 | 0.85 |
| 59541            | 0 | 148889 | QQSFSYQQQP       | 2.35 | 0.01 | 1.86 | 0.44 | 1.23 | 0.85 |
| 59542            | 0 | 113783 | QQSGGQQ          | 2.05 | 0.01 | 1.86 | 0.44 | 1.23 | 0.85 |
| 59543            | 0 | 113784 | QQSGGQQQPGQLQQ   | 2.66 | 0.01 | 1.86 | 0.44 | 1.23 | 0.85 |
| 59544            | 0 | 52151  | QQSPEQQ          | 2.03 | 0.01 | 1.86 | 0.44 | 1.23 | 0.28 |
| 59545            | 0 | 52151  | QQSPEQQ          | 2.03 | 0.01 | 1.86 | 0.44 | 1.23 | 0.85 |

|       |   |        |                                      |      |      |      |      |      |      |
|-------|---|--------|--------------------------------------|------|------|------|------|------|------|
| 59546 | 0 | 52152  | QQSPQQQ                              | 2.03 | 0.01 | 1.86 | 0.44 | 1.23 | 0.28 |
| 59547 | 0 | 52152  | QQSPQQQ                              | 2.03 | 0.01 | 1.86 | 0.44 | 1.23 | 0.85 |
| 59548 | 0 | 190940 | QQSPQQQQFP                           | 2.36 | 0.01 | 1.86 | 0.68 | 0.22 | 0.28 |
| 59549 | 0 | 190522 | QQSRWGLGSPNCHGP<br>DWASPVQCRHSP      | 3.25 | 0.01 | 2.85 | 0.44 | 1.59 | 0.28 |
| 59550 | 0 | 190522 | QQSRWGLGSPNCHGP<br>DWASPVQCRHSP      | 3.25 | 0.01 | 2.85 | 0.68 | 0.22 | 0.28 |
| 59551 | 0 | 190522 | QQSRWGLGSPNCHGP<br>DWASPVQCRHSP      | 3.25 | 0.01 | 2.85 | 0.68 | 0.22 | 0.28 |
| 59552 | 0 | 190522 | QQSRWGLGSPNCHGP<br>DWASPVQCRHSP      | 3.25 | 0.01 | 2.85 | 0.68 | 0.22 | 0.28 |
| 59553 | 0 | 96792  | QQSYSIMSIKEEVLAYV<br>VQLPLYGVIDTPCWK | 3.41 | 0.01 | 2.38 | 1.15 | 0.22 | 0.28 |
| 59554 | 0 | 96792  | QQSYSIMSIKEEVLAYV<br>VQLPLYGVIDTPCWK | 3.41 | 0.01 | 2.38 | 1.15 | 0.22 | 0.85 |
| 59555 | 0 | 52156  | QQTAPKAPTE                           | 2.34 | 4.08 | 3.55 | 1.12 | 0.22 | 0.85 |
| 59556 | 0 | 115925 | QQTDELQDK                            | 2.35 | 0.01 | 1.60 | 0.44 | 1.23 | 0.85 |
| 59557 | 0 | 115925 | QQTDELQDK                            | 2.35 | 0.01 | 1.60 | 0.44 | 1.23 | 0.85 |
| 59558 | 0 | 52157  | QQTFPQPQQT                           | 2.36 | 0.01 | 1.86 | 0.68 | 0.22 | 0.28 |
| 59559 | 0 | 52157  | QQTFPQPQQT                           | 2.36 | 0.01 | 1.86 | 0.68 | 0.22 | 0.85 |
| 59560 | 0 | 52158  | QQTFPQQPQL                           | 2.37 | 0.01 | 1.86 | 0.68 | 0.22 | 0.85 |
| 59561 | 0 | 52158  | QQTFPQQPQL                           | 2.37 | 0.01 | 1.86 | 0.68 | 0.22 | 0.28 |
| 59562 | 0 | 52161  | QQTQQPFPLQ                           | 2.37 | 0.01 | 2.83 | 0.68 | 0.22 | 0.28 |
| 59563 | 0 | 52161  | QQTQQPFPLQ                           | 2.37 | 0.01 | 2.83 | 0.68 | 0.22 | 0.85 |
| 59564 | 0 | 52162  | QQTRANPNPYTSRRSVA<br>S               | 2.87 | 0.01 | 2.14 | 0.44 | 0.22 | 0.28 |
| 59565 | 0 | 52162  | QQTRANPNPYTSRRSVA<br>S               | 2.87 | 0.01 | 2.14 | 0.44 | 0.22 | 0.28 |
| 59566 | 0 | 181011 | QQT SQNIKNQ                          | 2.35 | 0.01 | 2.18 | 2.16 | 0.22 | 0.28 |
| 59567 | 0 | 152924 | QQT SQNIKNQLA                        | 2.49 | 0.01 | 2.18 | 0.44 | 0.22 | 0.28 |
| 59568 | 0 | 107583 | QQYNSTY                              | 2.03 | 0.01 | 0.78 | 0.44 | 1.13 | 0.28 |
| 59569 | 0 | 98402  | QQYPLGQGSFRPSQQN<br>PQAQG            | 3.02 | 0.01 | 1.86 | 0.44 | 1.93 | 0.28 |
| 59570 | 0 | 98402  | QQYPLGQGSFRPSQQN<br>PQAQG            | 3.02 | 0.01 | 1.86 | 0.44 | 1.93 | 0.28 |
| 59571 | 0 | 98402  | QQYPLGQGSFRPSQQN<br>PQAQG            | 3.02 | 0.01 | 1.86 | 0.44 | 2.39 | 0.28 |
| 59572 | 0 | 52180  | QQYPQQQ                              | 2.03 | 0.01 | 1.86 | 0.44 | 1.23 | 0.28 |
| 59573 | 0 | 52180  | QQYPQQQ                              | 2.03 | 0.01 | 1.86 | 0.44 | 1.23 | 0.85 |
| 59574 | 0 | 149442 | QQYPSQGFF                            | 2.33 | 0.01 | 1.86 | 0.44 | 1.93 | 0.85 |
| 59575 | 0 | 149442 | QQYPSQGFF                            | 2.33 | 0.01 | 1.86 | 2.74 | 0.22 | 0.85 |
| 59576 | 0 | 149442 | QQYPSQGFF                            | 2.33 | 0.01 | 1.86 | 2.74 | 0.22 | 0.85 |
| 59577 | 0 | 195051 | QRAAEATKVAEAEK                       | 2.66 | 0.01 | 2.30 | 0.44 | 0.85 | 0.28 |
| 59578 | 0 | 363565 | QRAAEATKVAEAEKQ                      | 2.73 | 0.01 | 1.61 | 0.44 | 0.85 | 1.28 |
| 59579 | 0 | 363566 | QRAAEATKVAEAEKR                      | 2.73 | 0.01 | 1.61 | 0.44 | 0.85 | 1.28 |

|       |   |        |                                              |      |      |      |      |      |      |
|-------|---|--------|----------------------------------------------|------|------|------|------|------|------|
| 59580 | 0 | 52184  | QRAKEALDKYELENH                              | 2.68 | 0.01 | 2.24 | 0.44 | 1.13 | 0.28 |
| 59581 | 0 | 52184  | QRAKEALDKYELENH                              | 2.68 | 0.01 | 2.24 | 0.44 | 1.41 | 0.28 |
| 59582 | 0 | 52186  | QRANLGAFQN                                   | 2.34 | 0.01 | 2.73 | 0.44 | 0.85 | 0.28 |
| 59583 | 0 | 132034 | QRAQSQRVPSGNRP                               | 2.72 | 0.01 | 0.78 | 0.44 | 1.13 | 0.85 |
| 59584 | 0 | 79055  | QRARSHRPHGLPWL                               | 2.68 | 0.01 | 0.90 | 2.16 | 0.22 | 1.39 |
| 59585 | 0 | 52188  | QRATQQQAV                                    | 2.26 | 0.01 | 2.59 | 0.44 | 0.85 | 0.28 |
| 59586 | 0 | 96793  | QRCDLDV                                      | 2.02 | 0.01 | 2.16 | 2.82 | 0.22 | 1.57 |
| 59587 | 0 | 52191  | QRCDLDVESGG                                  | 2.36 | 0.01 | 2.16 | 0.44 | 1.23 | 0.85 |
| 59588 | 0 | 99587  | QRCLQSCQQEPDDLK                              | 2.69 | 0.01 | 2.16 | 0.44 | 1.23 | 1.48 |
| 59589 | 0 | 188430 | QRDAADPDTL                                   | 2.32 | 0.01 | 2.92 | 0.68 | 0.22 | 0.85 |
| 59590 | 0 | 188430 | QRDAADPDTL                                   | 2.32 | 0.01 | 2.92 | 1.81 | 0.22 | 0.85 |
| 59591 | 0 | 188430 | QRDAADPDTL                                   | 2.32 | 0.01 | 2.92 | 3.37 | 0.22 | 0.85 |
| 59592 | 0 | 52194  | QRDEDSYGRDPYSPS                              | 2.72 | 0.01 | 2.16 | 0.44 | 1.23 | 0.85 |
| 59593 | 0 | 52194  | QRDEDSYGRDPYSPS                              | 2.72 | 0.01 | 2.16 | 2.90 | 0.22 | 0.85 |
| 59594 | 0 | 144449 | QRDFDLADALDDP                                | 2.58 | 0.01 | 0.78 | 1.20 | 0.22 | 1.34 |
| 59595 | 0 | 144449 | QRDFDLADALDDP                                | 2.58 | 0.01 | 0.78 | 0.68 | 0.22 | 1.34 |
| 59596 | 0 | 97590  | QRDKVNLT                                     | 2.21 | 0.01 | 3.13 | 1.12 | 0.22 | 0.28 |
| 59597 | 0 | 52196  | QRDTLSTQKETLEREVQ<br>N                       | 2.87 | 0.01 | 2.85 | 1.15 | 0.22 | 0.28 |
| 59598 | 0 | 52196  | QRDTLSTQKETLEREVQ<br>N                       | 2.87 | 0.01 | 2.85 | 0.68 | 0.22 | 0.28 |
| 59599 | 0 | 52198  | QREDPTEKGLDFKLYWT<br>DSQNKKEVISSDN           | 3.31 | 0.01 | 2.18 | 0.68 | 0.22 | 0.28 |
| 59600 | 0 | 157810 | QRELKMVVAQS                                  | 2.38 | 0.01 | 3.33 | 2.49 | 0.85 | 0.28 |
| 59601 | 0 | 230040 | QRESQAYYQ                                    | 2.25 | 0.01 | 2.52 | 3.15 | 0.22 | 0.85 |
| 59602 | 0 | 230040 | QRESQAYYQ                                    | 2.25 | 0.01 | 2.52 | 3.15 | 0.22 | 0.85 |
| 59603 | 0 | 181434 | QRESYFVDAQPKKKEEG<br>NKGRKGPLSSILR           | 3.32 | 0.01 | 2.72 | 0.44 | 1.23 | 1.27 |
| 59604 | 0 | 132579 | QRFNNFLKALQEKVEIK<br>QLNHFWIIVVQDGITLIT<br>K | 3.52 | 0.01 | 0.78 | 1.15 | 0.22 | 0.28 |
| 59605 | 0 | 132579 | QRFNNFLKALQEKVEIK<br>QLNHFWIIVVQDGITLIT<br>K | 3.52 | 0.01 | 0.78 | 1.15 | 0.22 | 1.34 |
| 59606 | 0 | 423475 | QRGDPFDKNYVGNSG                              | 2.66 | 0.01 | 2.51 | 0.44 | 2.35 | 1.28 |
| 59607 | 0 | 363733 | QRGGAQKGNVRKLQP                              | 2.70 | 0.01 | 1.61 | 0.44 | 0.85 | 1.28 |
| 59608 | 0 | 363735 | QRGGRDAPQARKQQG                              | 2.73 | 0.01 | 1.61 | 0.44 | 0.85 | 1.28 |
| 59609 | 0 | 134205 | QRGNQIMSDKRNVLFS<br>VFD                      | 2.95 | 0.01 | 0.78 | 0.44 | 2.35 | 0.28 |
| 59610 | 0 | 177937 | QRGPVSSTSDSSTNC                              | 2.67 | 0.01 | 0.78 | 0.44 | 1.13 | 0.85 |
| 59611 | 0 | 181778 | QRGVLNEWKHKA                                 | 2.43 | 0.01 | 0.90 | 0.68 | 0.22 | 0.28 |
| 59612 | 0 | 131610 | QRHLSSEPLSRKKL                               | 2.64 | 0.01 | 0.78 | 1.12 | 0.22 | 0.28 |



|       |   |        |                                       |      |      |      |      |      |      |
|-------|---|--------|---------------------------------------|------|------|------|------|------|------|
| 59613 | 0 | 176385 | QRIAEMLKSKIQGLL                       | 2.67 | 0.01 | 2.69 | 0.44 | 0.85 | 2.97 |
| 59614 | 0 | 52222  | QRKTKRN                               | 2.04 | 0.01 | 1.72 | 0.44 | 1.59 | 1.27 |
| 59615 | 0 | 52224  | QRKTKRNTNRRPQDVK<br>FPGGGQIVGGVYLLPRR | 3.43 | 0.01 | 1.72 | 0.44 | 0.85 | 0.28 |
| 59616 | 0 | 52225  | QRKTKRSTNRRPQDVKF<br>PGGGQIVGGVYLLPRR | 3.42 | 0.01 | 1.72 | 0.44 | 0.85 | 0.28 |
| 59617 | 0 | 434765 | QRKVAP                                | 1.88 | 0.01 | 4.33 | 0.68 | 0.22 | 0.85 |
| 59618 | 0 | 434765 | QRKVAP                                | 1.88 | 0.01 | 4.33 | 0.68 | 0.22 | 1.48 |
| 59619 | 0 | 434765 | QRKVAP                                | 1.88 | 0.01 | 4.33 | 0.68 | 0.22 | 0.28 |
| 59620 | 0 | 434765 | QRKVAP                                | 1.88 | 0.01 | 4.33 | 0.68 | 0.22 | 0.85 |
| 59621 | 0 | 52228  | QRLKYAQEELSNEVLPPP<br>RK              | 2.95 | 0.01 | 2.82 | 0.44 | 0.85 | 0.28 |
| 59622 | 0 | 52228  | QRLKYAQEELSNEVLPPP<br>RK              | 2.95 | 0.01 | 2.82 | 0.44 | 1.41 | 0.28 |
| 59623 | 0 | 164338 | QRLSFPI                               | 1.99 | 0.01 | 0.90 | 1.20 | 0.22 | 1.39 |
| 59624 | 0 | 164339 | QRLSGPY                               | 1.99 | 0.01 | 0.90 | 1.20 | 0.22 | 1.39 |
| 59625 | 0 | 164340 | QRLSLAA                               | 2.00 | 0.01 | 0.90 | 1.20 | 0.22 | 1.39 |
| 59626 | 0 | 164341 | QRLSLPS                               | 2.04 | 0.01 | 0.90 | 1.20 | 0.22 | 1.39 |
| 59627 | 0 | 164342 | QRLSNNY                               | 2.01 | 0.01 | 0.90 | 1.20 | 0.22 | 1.39 |
| 59628 | 0 | 164343 | QRLSTAH                               | 1.99 | 0.01 | 0.90 | 1.20 | 0.22 | 1.39 |
| 59629 | 0 | 164344 | QRLSTQL                               | 2.05 | 0.01 | 0.90 | 1.20 | 0.22 | 1.39 |
| 59630 | 0 | 112640 | QRLVWACVGVEVGRG<br>QPLGV              | 2.98 | 0.01 | 1.86 | 2.37 | 0.22 | 1.48 |
| 59631 | 0 | 112640 | QRLVWACVGVEVGRG<br>QPLGV              | 2.98 | 0.01 | 1.86 | 2.37 | 0.22 | 1.48 |
| 59632 | 0 | 196744 | QRMSNASGGGGGGMR<br>QNE                | 2.87 | 0.01 | 1.61 | 1.81 | 0.22 | 0.28 |
| 59633 | 0 | 196744 | QRMSNASGGGGGGMR<br>QNE                | 2.87 | 0.01 | 1.61 | 1.81 | 0.22 | 0.28 |
| 59634 | 0 | 196744 | QRMSNASGGGGGGMR<br>QNE                | 2.87 | 0.01 | 1.61 | 1.81 | 0.22 | 0.28 |
| 59635 | 0 | 196744 | QRMSNASGGGGGGMR<br>QNE                | 2.87 | 0.01 | 1.61 | 0.44 | 0.85 | 0.28 |
| 59636 | 0 | 196744 | QRMSNASGGGGGGMR<br>QNE                | 2.87 | 0.01 | 1.61 | 0.44 | 0.85 | 0.28 |
| 59637 | 0 | 196744 | QRMSNASGGGGGGMR<br>QNE                | 2.87 | 0.01 | 1.61 | 0.44 | 0.85 | 0.28 |
| 59638 | 0 | 167374 | QRNQTQD                               | 2.05 | 0.01 | 0.90 | 1.15 | 0.22 | 1.39 |
| 59639 | 0 | 172922 | QRNRIDTLMYLLAYP                       | 2.65 | 0.01 | 0.78 | 0.44 | 1.41 | 0.28 |
| 59640 | 0 | 52238  | QRNRWEWRPD                            | 2.33 | 0.01 | 4.63 | 3.16 | 0.22 | 0.28 |
| 59641 | 0 | 52239  | QRPFGQQPEQ                            | 2.36 | 0.01 | 2.83 | 0.68 | 0.22 | 0.85 |
| 59642 | 0 | 52239  | QRPFGQQPEQ                            | 2.36 | 0.01 | 2.83 | 0.68 | 0.22 | 0.28 |
| 59643 | 0 | 112273 | QRPFGYGGRASDYKSA<br>HKG               | 2.96 | 0.01 | 0.78 | 0.44 | 0.22 | 0.28 |
| 59644 | 0 | 79992  | QRPLRMFLGPKQ                          | 2.50 | 0.01 | 2.14 | 3.26 | 0.22 | 0.28 |

|       |   |        |                             |      |      |      |      |      |      |
|-------|---|--------|-----------------------------|------|------|------|------|------|------|
| 59645 | 0 | 79992  | QRPLRMFLGPKQ                | 2.50 | 0.01 | 2.14 | 3.17 | 0.22 | 0.28 |
| 59646 | 0 | 113135 | QRPPQKSKQQPRSSPLR<br>GPGASR | 3.13 | 0.01 | 0.78 | 4.15 | 0.22 | 0.28 |
| 59647 | 0 | 139874 | QRPTKRRRCHPFGSPSS<br>N      | 2.83 | 0.01 | 3.93 | 2.00 | 0.22 | 0.28 |
| 59648 | 0 | 119631 | QRPTPTQVLEEDPSVEE<br>EE     | 2.91 | 0.01 | 3.33 | 0.44 | 0.85 | 0.28 |
| 59649 | 0 | 141730 | QRPVKELAFPGSSRE             | 2.65 | 0.01 | 3.65 | 0.44 | 1.23 | 1.27 |
| 59650 | 0 | 423476 | QRQAVSRYSGWSTEY             | 2.69 | 0.01 | 2.51 | 0.44 | 2.35 | 1.28 |
| 59651 | 0 | 157811 | QRQCQQR CER                 | 2.37 | 0.01 | 3.27 | 0.44 | 1.23 | 0.85 |
| 59652 | 0 | 157811 | QRQCQQR CER                 | 2.37 | 0.01 | 3.27 | 0.44 | 1.23 | 1.27 |
| 59653 | 0 | 157811 | QRQCQQR CER                 | 2.37 | 0.01 | 3.27 | 0.44 | 1.23 | 0.85 |
| 59654 | 0 | 114552 | QRQGQGQSQRSEQDR             | 2.75 | 0.01 | 3.48 | 0.44 | 1.23 | 0.85 |
| 59655 | 0 | 227498 | QRQIQVHAEQGLIQY             | 2.69 | 0.01 | 2.97 | 0.44 | 0.85 | 0.28 |
| 59656 | 0 | 52244  | QRQKKQPTVTLLPAAD<br>MDDFSRQ | 3.07 | 0.01 | 2.45 | 0.44 | 0.85 | 0.28 |
| 59657 | 0 | 52244  | QRQKKQPTVTLLPAAD<br>MDDFSRQ | 3.07 | 0.01 | 2.45 | 0.44 | 0.85 | 0.28 |
| 59658 | 0 | 52245  | QRQNKPPNKPNN                | 2.52 | 0.01 | 2.38 | 0.68 | 0.22 | 0.28 |
| 59659 | 0 | 52245  | QRQNKPPNKPNN                | 2.52 | 0.01 | 2.38 | 0.68 | 0.22 | 0.28 |
| 59660 | 0 | 52245  | QRQNKPPNKPNN                | 2.52 | 0.01 | 2.38 | 0.44 | 1.74 | 0.28 |
| 59661 | 0 | 52249  | QRQYGDVFKGD                 | 2.42 | 0.01 | 3.41 | 0.68 | 0.22 | 0.85 |
| 59662 | 0 | 121764 | QRRATARS                    | 2.27 | 0.01 | 0.90 | 2.46 | 0.22 | 0.28 |
| 59663 | 0 | 140894 | QRRADAVKGYLA                | 2.46 | 0.01 | 3.01 | 1.12 | 0.22 | 0.28 |
| 59664 | 0 | 140895 | QRRADAVKGYLAGKGV<br>DAGK    | 2.98 | 0.01 | 3.01 | 1.12 | 0.22 | 0.28 |
| 59665 | 0 | 140895 | QRRADAVKGYLAGKGV<br>DAGK    | 2.98 | 0.01 | 3.01 | 0.68 | 0.22 | 0.85 |
| 59666 | 0 | 140895 | QRRADAVKGYLAGKGV<br>DAGK    | 2.98 | 0.01 | 3.01 | 0.68 | 0.22 | 0.85 |
| 59667 | 0 | 52252  | QRRQHTDVSFIMDRFVK           | 2.80 | 0.01 | 2.88 | 1.12 | 0.22 | 0.28 |
| 59668 | 0 | 106742 | QRRQIEAGLN                  | 2.31 | 0.01 | 2.75 | 0.44 | 1.23 | 0.85 |
| 59669 | 0 | 157813 | QRRQQEERER                  | 2.38 | 0.01 | 3.27 | 0.44 | 1.23 | 0.85 |
| 59670 | 0 | 157813 | QRRQQEERER                  | 2.38 | 0.01 | 3.27 | 0.44 | 1.23 | 0.85 |
| 59671 | 0 | 121765 | QRRSARLSAKPAPPK             | 2.72 | 0.01 | 2.73 | 1.12 | 0.22 | 0.28 |
| 59672 | 0 | 121765 | QRRSARLSAKPAPPK             | 2.72 | 0.01 | 2.73 | 0.44 | 1.13 | 0.28 |
| 59673 | 0 | 125539 | QRRVQQEIDDVIGQVRR<br>PEM    | 2.98 | 0.01 | 0.78 | 0.44 | 1.13 | 0.28 |
| 59674 | 0 | 52265  | QRSECSTSKCFVRK              | 2.63 | 0.01 | 0.90 | 0.44 | 0.85 | 1.39 |
| 59675 | 0 | 52265  | QRSECSTSKCFVRK              | 2.63 | 0.01 | 0.90 | 0.44 | 0.85 | 0.28 |
| 59676 | 0 | 114553 | QRSEQDRHQKIRHFR             | 2.71 | 0.01 | 3.48 | 0.44 | 1.23 | 0.85 |
| 59677 | 0 | 104955 | QRSGRGP                     | 2.04 | 0.01 | 0.90 | 0.44 | 1.13 | 1.39 |
| 59678 | 0 | 122543 | QRSQDEN                     | 2.03 | 0.01 | 2.95 | 2.04 | 0.22 | 1.57 |
| 59679 | 0 | 122543 | QRSQDEN                     | 2.03 | 0.01 | 2.95 | 2.04 | 0.22 | 1.57 |

|       |   |        |                         |      |      |      |      |      |      |
|-------|---|--------|-------------------------|------|------|------|------|------|------|
| 59680 | 0 | 172924 | QRSRDHGLPGYNAWR         | 2.64 | 0.01 | 0.78 | 0.44 | 1.13 | 0.28 |
| 59681 | 0 | 52273  | QRVEFL                  | 1.88 | 0.01 | 1.96 | 0.44 | 0.85 | 0.28 |
| 59682 | 0 | 119322 | QRVFKEKVDTKAPEPP        | 2.73 | 0.01 | 3.36 | 0.68 | 0.22 | 0.28 |
| 59683 | 0 | 119322 | QRVFKEKVDTKAPEPP        | 2.73 | 0.01 | 3.36 | 0.68 | 0.22 | 0.28 |
| 59684 | 0 | 119322 | QRVFKEKVDTKAPEPP        | 2.73 | 0.01 | 3.36 | 0.68 | 0.22 | 0.28 |
| 59685 | 0 | 119322 | QRVFKEKVDTKAPEPP        | 2.73 | 0.01 | 3.36 | 0.68 | 0.22 | 0.28 |
| 59686 | 0 | 119322 | QRVFKEKVDTKAPEPP        | 2.73 | 0.01 | 3.36 | 0.68 | 0.22 | 0.28 |
| 59687 | 0 | 119322 | QRVFKEKVDTKAPEPP        | 2.73 | 0.01 | 3.36 | 0.68 | 0.22 | 2.35 |
| 59688 | 0 | 119322 | QRVFKEKVDTKAPEPP        | 2.73 | 0.01 | 3.36 | 0.68 | 0.22 | 1.34 |
| 59689 | 0 | 190523 | QRVSKTSADNNNSEY         | 2.64 | 0.01 | 3.19 | 2.00 | 1.41 | 0.28 |
| 59690 | 0 | 52274  | QRVVFKYSQMINISDYIN<br>R | 2.91 | 0.01 | 3.03 | 0.68 | 0.22 | 1.57 |
| 59691 | 0 | 52274  | QRVVFKYSQMINISDYIN<br>R | 2.91 | 0.01 | 3.03 | 3.33 | 0.22 | 1.57 |
| 59692 | 0 | 52274  | QRVVFKYSQMINISDYIN<br>R | 2.91 | 0.01 | 2.08 | 0.44 | 0.22 | 1.57 |
| 59693 | 0 | 52274  | QRVVFKYSQMINISDYIN<br>R | 2.91 | 0.01 | 2.08 | 2.02 | 0.22 | 1.57 |
| 59694 | 0 | 52274  | QRVVFKYSQMINISDYIN<br>R | 2.91 | 0.01 | 2.08 | 1.15 | 0.22 | 1.57 |
| 59695 | 0 | 52274  | QRVVFKYSQMINISDYIN<br>R | 2.91 | 0.01 | 2.08 | 2.49 | 0.22 | 1.57 |
| 59696 | 0 | 52274  | QRVVFKYSQMINISDYIN<br>R | 2.91 | 0.01 | 2.08 | 2.25 | 0.22 | 1.57 |
| 59697 | 0 | 52274  | QRVVFKYSQMINISDYIN<br>R | 2.91 | 0.01 | 3.16 | 0.44 | 1.93 | 1.57 |
| 59698 | 0 | 52274  | QRVVFKYSQMINISDYIN<br>R | 2.91 | 0.01 | 2.08 | 2.02 | 0.22 | 1.57 |
| 59699 | 0 | 52274  | QRVVFKYSQMINISDYIN<br>R | 2.91 | 0.01 | 2.08 | 1.15 | 0.22 | 1.57 |
| 59700 | 0 | 52274  | QRVVFKYSQMINISDYIN<br>R | 2.91 | 0.01 | 2.08 | 0.44 | 0.22 | 1.57 |
| 59701 | 0 | 52274  | QRVVFKYSQMINISDYIN<br>R | 2.91 | 0.01 | 2.08 | 2.25 | 0.22 | 1.57 |
| 59702 | 0 | 52274  | QRVVFKYSQMINISDYIN<br>R | 2.91 | 0.01 | 2.08 | 0.68 | 0.22 | 1.57 |
| 59703 | 0 | 52274  | QRVVFKYSQMINISDYIN<br>R | 2.91 | 0.01 | 2.08 | 2.25 | 0.22 | 1.57 |

|       |   |        |                          |      |      |      |      |      |      |
|-------|---|--------|--------------------------|------|------|------|------|------|------|
| 59704 | 0 | 52274  | QRVVFKYSQMINISDYIN<br>R  | 2.91 | 0.01 | 2.08 | 0.68 | 0.22 | 1.57 |
| 59705 | 0 | 52274  | QRVVFKYSQMINISDYIN<br>R  | 2.91 | 0.01 | 2.08 | 0.68 | 0.22 | 1.57 |
| 59706 | 0 | 52274  | QRVVFKYSQMINISDYIN<br>R  | 2.91 | 0.01 | 2.08 | 2.25 | 0.22 | 1.57 |
| 59707 | 0 | 140896 | QRYNTVYFGFDKYDITG<br>EYV | 2.95 | 0.01 | 3.01 | 1.12 | 0.22 | 0.28 |
| 59708 | 0 | 95739  | QRYQKFALPQ               | 2.32 | 0.01 | 1.60 | 0.44 | 1.23 | 0.85 |
| 59709 | 0 | 117069 | QRYYSTRPRAL              | 2.40 | 0.01 | 0.90 | 1.15 | 0.22 | 0.28 |
| 59710 | 0 | 117069 | QRYYSTRPRAL              | 2.40 | 0.01 | 0.90 | 0.44 | 0.85 | 0.28 |
| 59711 | 0 | 52280  | QSAAIREWARRNGHNV         | 2.72 | 0.01 | 2.59 | 0.44 | 0.85 | 0.28 |
| 59712 | 0 | 450989 | QSADSSRHSGSGH            | 2.59 | 3.33 | 0.78 | 2.79 | 1.13 | 1.28 |
| 59713 | 0 | 450989 | QSADSSRHSGSGH            | 2.59 | 3.33 | 0.78 | 1.81 | 1.41 | 1.28 |
| 59714 | 0 | 450990 | QSADSSRHSGSGH            | 2.59 | 0.01 | 0.78 | 2.79 | 1.13 | 1.28 |
| 59715 | 0 | 100446 | QSAGRNSWNCDF             | 2.45 | 0.01 | 2.88 | 0.44 | 1.23 | 0.85 |
| 59716 | 0 | 131611 | QSALTQPPSASGSLGQ         | 2.79 | 0.01 | 0.78 | 0.44 | 1.41 | 0.28 |
| 59717 | 0 | 98972  | QSAPLRVYVE               | 2.29 | 0.01 | 1.60 | 0.44 | 1.23 | 0.85 |
| 59718 | 0 | 98972  | QSAPLRVYVE               | 2.29 | 0.01 | 1.60 | 0.44 | 1.23 | 0.85 |
| 59719 | 0 | 98972  | QSAPLRVYVE               | 2.29 | 0.01 | 1.60 | 0.44 | 2.98 | 0.85 |
| 59720 | 0 | 95741  | QSAPLRVYVEEL             | 2.46 | 0.01 | 1.60 | 0.44 | 1.23 | 1.27 |
| 59721 | 0 | 489744 | QSAQPNAGDLRSQYQ          | 2.69 | 0.01 | 2.69 | 3.05 | 0.85 | 1.28 |
| 59722 | 0 | 52291  | QSAQYTINRVMM             | 2.44 | 0.01 | 0.90 | 0.68 | 0.22 | 1.39 |
| 59723 | 0 | 52292  | QSARRGEK                 | 2.11 | 0.01 | 2.21 | 0.44 | 0.85 | 0.28 |
| 59724 | 0 | 52292  | QSARRGEK                 | 2.11 | 0.01 | 2.21 | 1.12 | 0.22 | 0.28 |
| 59725 | 0 | 52293  | QSARRGEKEA               | 2.32 | 0.01 | 2.21 | 1.12 | 0.22 | 0.28 |
| 59726 | 0 | 97591  | QSATAVLGA                | 2.23 | 0.01 | 3.13 | 1.12 | 0.22 | 0.28 |
| 59727 | 0 | 52304  | QSCSISNIETVIEFQQ         | 2.75 | 0.01 | 2.38 | 1.12 | 0.22 | 0.28 |
| 59728 | 0 | 52304  | QSCSISNIETVIEFQQ         | 2.75 | 0.01 | 2.38 | 0.68 | 0.22 | 0.28 |
| 59729 | 0 | 52304  | QSCSISNIETVIEFQQ         | 2.75 | 0.01 | 2.38 | 0.68 | 0.22 | 0.85 |
| 59730 | 0 | 52304  | QSCSISNIETVIEFQQ         | 2.75 | 0.01 | 2.38 | 0.68 | 0.22 | 0.28 |
| 59731 | 0 | 364193 | QSDEAQFQQHQHHEH          | 2.73 | 0.01 | 1.61 | 0.44 | 0.85 | 1.28 |
| 59732 | 0 | 364194 | QSDEAQVQQHQHHEH          | 2.73 | 0.01 | 1.61 | 0.44 | 0.85 | 1.28 |
| 59733 | 0 | 364195 | QSDEAQVQQHQHHER          | 2.72 | 0.01 | 1.61 | 0.44 | 0.85 | 1.28 |
| 59734 | 0 | 364196 | QSDetQVQQHQHHEH          | 2.73 | 0.01 | 1.61 | 0.44 | 0.85 | 1.28 |
| 59735 | 0 | 364197 | QSDetQVQQHQHHEH          | 2.72 | 0.01 | 1.61 | 0.44 | 0.85 | 1.28 |
| 59736 | 0 | 364198 | QSDetQVQQQEHEHP          | 2.70 | 0.01 | 1.61 | 0.44 | 0.85 | 1.28 |
| 59737 | 0 | 141731 | QSDKHWGMATPP             | 2.40 | 0.01 | 0.90 | 0.68 | 0.22 | 1.39 |

|       |   |        |                          |      |      |      |      |      |      |
|-------|---|--------|--------------------------|------|------|------|------|------|------|
| 59738 | 0 | 364220 | QSEADADDDDPQRPN          | 2.70 | 0.01 | 1.61 | 0.44 | 0.85 | 1.28 |
| 59739 | 0 | 364221 | QSEADADVDDPQRPN          | 2.70 | 0.01 | 1.61 | 0.44 | 0.85 | 1.28 |
| 59740 | 0 | 115456 | QSEEQQTDELQDKIH<br>PFA   | 2.94 | 0.01 | 1.60 | 0.44 | 1.23 | 2.51 |
| 59741 | 0 | 91860  | QSEGATNFGDIGVQQ          | 2.65 | 0.01 | 4.15 | 1.20 | 0.22 | 0.28 |
| 59742 | 0 | 91860  | QSEGATNFGDIGVQQ          | 2.65 | 0.01 | 4.15 | 1.20 | 0.22 | 0.28 |
| 59743 | 0 | 167803 | QSEPAVPVI                | 2.23 | 0.01 | 2.40 | 2.43 | 0.22 | 0.28 |
| 59744 | 0 | 167375 | QSERAIQ                  | 2.03 | 0.01 | 0.90 | 2.37 | 0.22 | 1.39 |
| 59745 | 0 | 364261 | QSEREDDEENDEEED          | 2.73 | 0.01 | 1.61 | 0.44 | 0.85 | 1.28 |
| 59746 | 0 | 52312  | QSESVEFTKDTQTGM          | 2.69 | 0.01 | 2.24 | 1.15 | 0.22 | 0.85 |
| 59747 | 0 | 52313  | QSESVEFTKDTQTGMS         | 2.75 | 0.01 | 2.24 | 0.68 | 0.22 | 0.28 |
| 59748 | 0 | 419318 | QSEYHFA                  | 1.99 | 4.63 | 0.90 | 1.20 | 2.60 | 1.75 |
| 59749 | 0 | 419318 | QSEYHFA                  | 1.99 | 4.63 | 0.90 | 1.20 | 0.22 | 1.34 |
| 59750 | 0 | 196745 | QSFQVQL                  | 2.03 | 0.01 | 0.90 | 0.44 | 1.23 | 1.39 |
| 59751 | 0 | 153450 | QSFKDHLPAQMRGGGS         | 2.69 | 0.01 | 0.90 | 0.68 | 0.22 | 1.39 |
| 59752 | 0 | 431959 | QSFPPQPPYPQQQP           | 2.68 | 0.01 | 1.86 | 0.44 | 1.23 | 0.85 |
| 59753 | 0 | 52321  | QSFRLGA                  | 2.11 | 0.01 | 2.21 | 1.12 | 0.22 | 0.28 |
| 59754 | 0 | 52321  | QSFRLGA                  | 2.11 | 0.01 | 2.21 | 0.44 | 0.85 | 0.28 |
| 59755 | 0 | 52322  | QSFRLGAAL                | 2.31 | 0.01 | 2.21 | 1.12 | 0.22 | 0.28 |
| 59756 | 0 | 52322  | QSFRLGAAL                | 2.31 | 0.01 | 2.21 | 1.12 | 0.22 | 0.28 |
| 59757 | 0 | 52324  | QSGASATSAQSGPSG          | 2.75 | 0.01 | 1.66 | 0.44 | 0.85 | 0.28 |
| 59758 | 0 | 103530 | QSGGNNSPAVYLLDG          | 2.66 | 0.01 | 2.04 | 0.44 | 0.85 | 1.28 |
| 59759 | 0 | 103531 | QSGLDNGYIPIPE            | 2.68 | 0.01 | 2.04 | 0.44 | 0.85 | 1.28 |
| 59760 | 0 | 131022 | QSGRKGADIM               | 2.29 | 0.01 | 0.78 | 0.44 | 1.93 | 0.85 |
| 59761 | 0 | 52330  | QSGRQPTPISP              | 2.43 | 0.01 | 2.58 | 1.15 | 0.22 | 0.28 |
| 59762 | 0 | 193340 | QSGVLQTVGFST             | 2.52 | 0.01 | 3.04 | 1.12 | 0.22 | 0.28 |
| 59763 | 0 | 52332  | QSHFLQGT                 | 2.23 | 0.01 | 0.90 | 0.68 | 0.22 | 0.28 |
| 59764 | 0 | 52333  | QSHGQLSDHPHALSSSS<br>SHA | 2.98 | 0.01 | 2.75 | 0.44 | 0.85 | 0.85 |
| 59765 | 0 | 181012 | QSHLRFWDHQT              | 2.46 | 0.01 | 0.90 | 0.68 | 0.22 | 1.39 |
| 59766 | 0 | 111688 | QSIAPSKTSASIGSL          | 2.75 | 0.01 | 0.78 | 0.44 | 1.13 | 0.28 |
| 59767 | 0 | 79056  | QSIGDLIAEAMDKVGNE<br>GV  | 2.89 | 0.01 | 3.20 | 2.04 | 0.22 | 1.27 |
| 59768 | 0 | 180710 | QSIGDLIAFAMDKVGNE<br>GV  | 2.88 | 0.01 | 2.04 | 0.44 | 1.13 | 0.28 |
| 59769 | 0 | 180710 | QSIGDLIAFAMDKVGNE<br>GV  | 2.88 | 0.01 | 2.04 | 0.44 | 1.13 | 1.27 |
| 59770 | 0 | 180710 | QSIGDLIAFAMDKVGNE<br>GV  | 2.88 | 0.01 | 2.04 | 0.44 | 1.13 | 1.27 |
| 59771 | 0 | 127790 | QSILPFP                  | 2.02 | 0.01 | 0.90 | 0.44 | 1.13 | 1.39 |
| 59772 | 0 | 122173 | QSIQQSIRLWCRLWPL<br>PFP  | 2.97 | 0.01 | 1.75 | 0.44 | 1.93 | 0.28 |

|       |   |        |                                                         |      |      |      |      |      |      |
|-------|---|--------|---------------------------------------------------------|------|------|------|------|------|------|
| 59773 | 0 | 122173 | QSIQQSIERLWCRLWPL<br>PFP                                | 2.97 | 0.01 | 1.75 | 0.44 | 1.41 | 0.28 |
| 59774 | 0 | 52345  | QSIRSTTRLHITLSL                                         | 2.73 | 0.01 | 0.90 | 0.44 | 1.59 | 1.39 |
| 59775 | 0 | 181779 | QSKDENSDDYTT                                            | 2.46 | 0.01 | 0.78 | 0.68 | 0.22 | 0.28 |
| 59776 | 0 | 52351  | QSKGKDISNGYGASYGD<br>QD                                 | 2.94 | 0.01 | 3.97 | 4.63 | 0.22 | 0.28 |
| 59777 | 0 | 132580 | QSKSRANGGVSP                                            | 2.46 | 0.01 | 0.90 | 1.15 | 0.22 | 1.39 |
| 59778 | 0 | 52357  | QSKSTSAASTSDELSGSE<br>GP                                | 2.97 | 0.01 | 1.66 | 1.15 | 0.22 | 0.28 |
| 59779 | 0 | 52357  | QSKSTSAASTSDELSGSE<br>GP                                | 2.97 | 0.01 | 1.66 | 1.15 | 0.22 | 0.28 |
| 59780 | 0 | 52358  | QSKVLPVPQK                                              | 2.36 | 0.01 | 1.60 | 0.44 | 1.23 | 0.85 |
| 59781 | 0 | 52358  | QSKVLPVPQK                                              | 2.36 | 0.01 | 1.60 | 0.44 | 1.23 | 0.85 |
| 59782 | 0 | 52358  | QSKVLPVPQK                                              | 2.36 | 0.01 | 1.60 | 0.44 | 1.23 | 0.85 |
| 59783 | 0 | 52358  | QSKVLPVPQK                                              | 2.36 | 0.01 | 1.60 | 0.44 | 1.23 | 0.85 |
| 59784 | 0 | 52359  | QSKVLPVPQKAV                                            | 2.52 | 0.01 | 1.60 | 0.44 | 1.23 | 0.85 |
| 59785 | 0 | 161678 | QSKVLPVPQKAVP                                           | 2.60 | 0.01 | 1.60 | 0.44 | 1.23 | 0.85 |
| 59786 | 0 | 95742  | QSLACQ                                                  | 1.91 | 0.01 | 1.60 | 0.44 | 1.23 | 0.28 |
| 59787 | 0 | 98973  | QSLACQCLVR                                              | 2.34 | 0.01 | 1.60 | 0.44 | 1.23 | 0.85 |
| 59788 | 0 | 98973  | QSLACQCLVR                                              | 2.34 | 0.01 | 1.60 | 0.44 | 1.23 | 0.85 |
| 59789 | 0 | 98973  | QSLACQCLVR                                              | 2.34 | 0.01 | 1.60 | 0.44 | 2.98 | 0.85 |
|       |   |        |                                                         |      |      |      |      |      |      |
| 59790 | 0 | 52362  | QSLDLAEQELVDCASQH<br>GCHGDTIPRGIEYIQHN<br>GVVQESYYRYVAR | 3.80 | 0.01 | 2.78 | 0.44 | 1.23 | 1.57 |
|       |   |        |                                                         |      |      |      |      |      |      |
| 59791 | 0 | 52362  | QSLDLAEQELVDCASQH<br>GCHGDTIPRGIEYIQHN<br>GVVQESYYRYVAR | 3.80 | 0.01 | 2.78 | 0.44 | 1.23 | 1.57 |
|       |   |        |                                                         |      |      |      |      |      |      |
| 59792 | 0 | 52362  | QSLDLAEQELVDCASQH<br>GCHGDTIPRGIEYIQHN<br>GVVQESYYRYVAR | 3.80 | 0.01 | 2.78 | 1.12 | 0.22 | 1.57 |
|       |   |        |                                                         |      |      |      |      |      |      |
| 59793 | 0 | 52362  | QSLDLAEQELVDCASQH<br>GCHGDTIPRGIEYIQHN<br>GVVQESYYRYVAR | 3.80 | 0.01 | 2.78 | 0.44 | 1.23 | 0.28 |
|       |   |        |                                                         |      |      |      |      |      |      |
| 59794 | 0 | 52362  | QSLDLAEQELVDCASQH<br>GCHGDTIPRGIEYIQHN<br>GVVQESYYRYVAR | 3.80 | 0.01 | 2.78 | 0.68 | 0.22 | 0.28 |
| 59795 | 0 | 190524 | QSLDRLMNPLIDQYL                                         | 2.69 | 0.01 | 3.19 | 2.00 | 1.41 | 0.28 |
| 59796 | 0 | 52369  | QSLLETHP                                                | 2.11 | 0.01 | 2.40 | 2.43 | 0.22 | 0.28 |
| 59797 | 0 | 52371  | QSLNWPRDV                                               | 2.18 | 0.01 | 0.90 | 2.55 | 0.22 | 0.28 |

|       |   |        |                                                                                                                                                                                                                                                             |      |      |      |      |      |      |
|-------|---|--------|-------------------------------------------------------------------------------------------------------------------------------------------------------------------------------------------------------------------------------------------------------------|------|------|------|------|------|------|
| 59798 | 0 | 97592  | QSLQQIESMIEAESSVKE<br>KDMTKEFFENKSETWPI<br>GESPKGVEEGSIGKV                                                                                                                                                                                                  | 3.85 | 0.01 | 3.09 | 0.44 | 0.85 | 0.28 |
| 59799 | 0 | 97592  | QSLQQIESMIEAESSVKE<br>KDMTKEFFENKSETWPI<br>GESPKGVEEGSIGKV                                                                                                                                                                                                  | 3.85 | 0.01 | 3.09 | 0.44 | 0.85 | 0.28 |
| 59800 | 0 | 125540 | QSLRQRKSVNALNSPLH<br>QEY                                                                                                                                                                                                                                    | 2.95 | 0.01 | 0.78 | 0.44 | 1.41 | 0.28 |
| 59801 | 0 | 125540 | QSLRQRKSVNALNSPLH<br>QEY                                                                                                                                                                                                                                    | 2.95 | 0.01 | 0.78 | 0.44 | 1.13 | 0.28 |
| 59802 | 0 | 125540 | QSLRQRKSVNALNSPLH<br>QEY                                                                                                                                                                                                                                    | 2.95 | 0.01 | 0.78 | 3.59 | 0.22 | 0.28 |
| 59803 | 0 | 524579 | QSLRRDLASREAKK                                                                                                                                                                                                                                              | 2.70 | 0.01 | 2.24 | 0.44 | 1.41 | 1.28 |
| 59804 | 0 | 164345 | QSLSFNL                                                                                                                                                                                                                                                     | 2.04 | 0.01 | 0.90 | 1.20 | 0.22 | 1.39 |
| 59805 | 0 | 164346 | QSLSQKL                                                                                                                                                                                                                                                     | 2.06 | 0.01 | 0.90 | 1.20 | 0.22 | 1.39 |
| 59806 | 0 | 164347 | QSLSRPL                                                                                                                                                                                                                                                     | 2.04 | 0.01 | 0.90 | 1.20 | 0.22 | 1.39 |
| 59807 | 0 | 164348 | QSLSVPR                                                                                                                                                                                                                                                     | 2.02 | 0.01 | 0.90 | 1.20 | 0.22 | 1.39 |
| 59808 | 0 | 133670 | QSLTANPSLEFPS                                                                                                                                                                                                                                               | 2.56 | 0.01 | 4.93 | 2.97 | 0.22 | 0.28 |
| 59809 | 0 | 115929 | QSLTLTDVEN                                                                                                                                                                                                                                                  | 2.31 | 0.01 | 1.60 | 0.44 | 1.23 | 0.85 |
| 59810 | 0 | 132035 | QSLTPSPGWQSLGSS                                                                                                                                                                                                                                             | 2.72 | 0.01 | 0.78 | 0.44 | 1.13 | 0.85 |
| 59811 | 0 | 165644 | QSLTRLP                                                                                                                                                                                                                                                     | 2.02 | 0.01 | 0.90 | 0.44 | 1.23 | 1.39 |
| 59812 | 0 | 165644 | QSLTRLP                                                                                                                                                                                                                                                     | 2.02 | 0.01 | 0.90 | 0.44 | 1.23 | 1.39 |
| 59813 | 0 | 52389  | QSNQRSAPRITFGGPTD<br>S                                                                                                                                                                                                                                      | 2.85 | 0.01 | 2.91 | 0.44 | 0.85 | 0.28 |
| 59814 | 0 | 188434 | QSNQTNNEDNVRNN                                                                                                                                                                                                                                              | 2.63 | 0.01 | 3.89 | 1.12 | 0.22 | 0.28 |
| 59815 | 0 | 188434 | QSNQTNNEDNVRNN                                                                                                                                                                                                                                              | 2.63 | 0.01 | 3.89 | 1.12 | 0.22 | 0.28 |
| 59816 | 0 | 52391  | QNSGILKDFWGDYLQY<br>DKPYMYMLNLYDPNKYVD<br>VNNVGIRGYMYLKGPR<br>GSVMTTNIYLNSSLYRGT<br>KFIKKYASGNKDNIVRN<br>NDRVYINVVVKNKEYRL<br>ATNASQAGVEKILSALEI<br>PDVGNLSQVVVMKSKN<br>DQGITNKCKMNLQDNN<br>GNDIGFIGFHQFNNAKL<br>VASNWYNRQIERSRTL<br>GCSWEFIPVDDGWGER<br>PL | 5.30 | 0.01 | 3.16 | 1.20 | 0.22 | 0.28 |
| 59817 | 0 | 102010 | QSNWITWQPLL                                                                                                                                                                                                                                                 | 2.49 | 0.01 | 0.90 | 0.44 | 0.85 | 1.39 |
| 59818 | 0 | 52394  | QSPARTSSDPGTNTT                                                                                                                                                                                                                                             | 2.67 | 0.01 | 2.97 | 0.44 | 0.85 | 0.28 |
| 59819 | 0 | 52395  | QSPEQQQ                                                                                                                                                                                                                                                     | 2.03 | 0.01 | 1.86 | 0.44 | 1.23 | 0.28 |

|       |   |        |                                 |      |      |      |      |      |      |
|-------|---|--------|---------------------------------|------|------|------|------|------|------|
| 59820 | 0 | 148898 | QSPEQQQFPQ                      | 2.37 | 0.01 | 1.86 | 0.44 | 1.23 | 0.85 |
| 59821 | 0 | 99839  | QSPF                            | 1.57 | 0.01 | 1.86 | 0.68 | 0.22 | 0.28 |
| 59822 | 0 | 510472 | QSPFHLF                         | 2.02 | 0.01 | 0.90 | 0.44 | 1.13 | 0.28 |
| 59823 | 0 | 510472 | QSPFHLF                         | 2.02 | 0.01 | 0.90 | 0.44 | 1.41 | 0.28 |
| 59824 | 0 | 52397  | QSPHLTYPEPMS                    | 2.48 | 0.01 | 0.90 | 0.68 | 0.22 | 0.28 |
| 59825 | 0 | 112277 | QSPKLLI                         | 2.01 | 0.01 | 0.78 | 0.44 | 1.13 | 0.28 |
| 59826 | 0 | 232990 | QSPPAL                          | 2.00 | 0.01 | 0.90 | 2.49 | 0.85 | 1.39 |
| 59827 | 0 | 108603 | QSPRLYPGS                       | 2.23 | 0.01 | 0.90 | 0.44 | 1.13 | 1.39 |
| 59828 | 0 | 52403  | QSPRRRSQSRE                     | 2.53 | 0.01 | 2.08 | 0.44 | 1.59 | 0.85 |
| 59829 | 0 | 52403  | QSPRRRSQSRE                     | 2.53 | 0.01 | 2.08 | 0.68 | 0.22 | 0.85 |
| 59830 | 0 | 241365 | QSPSYPDREYSDEDRQIK<br>QMLHQECPR | 3.29 | 0.01 | 2.16 | 2.49 | 0.22 | 1.66 |
| 59831 | 0 | 241365 | QSPSYPDREYSDEDRQIK<br>QMLHQECPR | 3.29 | 0.01 | 2.16 | 2.49 | 0.22 | 1.66 |
| 59832 | 0 | 241365 | QSPSYPDREYSDEDRQIK<br>QMLHQECPR | 3.29 | 0.01 | 2.16 | 2.49 | 0.22 | 1.66 |
| 59833 | 0 | 241365 | QSPSYPDREYSDEDRQIK<br>QMLHQECPR | 3.29 | 0.01 | 2.16 | 0.44 | 2.39 | 1.66 |
| 59834 | 0 | 241365 | QSPSYPDREYSDEDRQIK<br>QMLHQECPR | 3.29 | 0.01 | 2.16 | 0.44 | 2.39 | 1.66 |
| 59835 | 0 | 241365 | QSPSYPDREYSDEDRQIK<br>QMLHQECPR | 3.29 | 0.01 | 2.16 | 0.44 | 2.39 | 1.66 |
| 59836 | 0 | 241365 | QSPSYPDREYSDEDRQIK<br>QMLHQECPR | 3.29 | 0.01 | 2.16 | 0.44 | 1.23 | 1.66 |
| 59837 | 0 | 132890 | QSPWQTFWTRAL                    | 2.48 | 0.01 | 0.90 | 0.44 | 2.35 | 1.27 |
| 59838 | 0 | 132890 | QSPWQTFWTRAL                    | 2.48 | 0.01 | 0.90 | 0.44 | 2.35 | 0.28 |
| 59839 | 0 | 110696 | QSQAITCQKPTPEKEKP<br>DPYK       | 3.02 | 0.01 | 3.25 | 0.44 | 0.85 | 0.28 |
| 59840 | 0 | 110696 | QSQAITCQKPTPEKEKP<br>DPYK       | 3.02 | 0.01 | 3.25 | 0.44 | 0.85 | 0.28 |
| 59841 | 0 | 110696 | QSQAITCQKPTPEKEKP<br>DPYK       | 3.02 | 0.01 | 3.25 | 0.44 | 1.41 | 0.28 |
| 59842 | 0 | 52411  | QSQDNSGDQRQVDLTP<br>KK          | 2.84 | 0.01 | 3.40 | 0.44 | 1.74 | 0.28 |
| 59843 | 0 | 52411  | QSQDNSGDQRQVDLTP<br>KK          | 2.84 | 0.01 | 3.40 | 0.44 | 0.85 | 0.28 |
| 59844 | 0 | 78806  | QSQIESR                         | 2.05 | 0.01 | 3.27 | 1.12 | 0.22 | 0.28 |
| 59845 | 0 | 78806  | QSQIESR                         | 2.05 | 0.01 | 3.27 | 1.12 | 0.22 | 0.28 |
| 59846 | 0 | 78806  | QSQIESR                         | 2.05 | 0.01 | 3.27 | 1.12 | 0.22 | 0.28 |
| 59847 | 0 | 52414  | QSQLERANLRPCEQH                 | 2.69 | 0.01 | 2.16 | 2.90 | 0.22 | 0.85 |
| 59848 | 0 | 126897 | QSQQFSVSENLLKEA                 | 2.69 | 0.01 | 0.78 | 1.15 | 0.22 | 0.28 |
| 59849 | 0 | 126897 | QSQQFSVSENLLKEA                 | 2.69 | 0.01 | 0.78 | 1.15 | 0.22 | 0.28 |
| 59850 | 0 | 113791 | QSQQPGQGQQGQQV                  | 2.68 | 0.01 | 1.86 | 0.44 | 1.23 | 0.85 |
| 59851 | 0 | 52417  | QSQQQGNSRRGPRVVP                | 2.78 | 0.01 | 4.33 | 2.37 | 0.85 | 0.28 |



|       |   |        |                          |      |      |      |      |      |      |
|-------|---|--------|--------------------------|------|------|------|------|------|------|
| 59852 | 0 | 106051 | QSQRPPRRFQGQDQS          | 2.72 | 0.01 | 2.16 | 0.44 | 1.23 | 0.85 |
| 59853 | 0 | 110388 | QSQTPETPATPLSCCTET<br>QW | 2.99 | 0.01 | 1.86 | 0.44 | 0.85 | 0.28 |
| 59854 | 0 | 110388 | QSQTPETPATPLSCCTET<br>QW | 2.99 | 0.01 | 1.86 | 0.44 | 0.85 | 0.28 |
| 59855 | 0 | 110388 | QSQTPETPATPLSCCTET<br>QW | 2.99 | 0.01 | 1.86 | 0.44 | 1.41 | 0.28 |
| 59856 | 0 | 110388 | QSQTPETPATPLSCCTET<br>QW | 2.99 | 0.01 | 1.86 | 0.44 | 0.85 | 0.28 |
| 59857 | 0 | 110388 | QSQTPETPATPLSCCTET<br>QW | 2.99 | 0.01 | 1.86 | 0.44 | 0.85 | 0.28 |
| 59858 | 0 | 110388 | QSQTPETPATPLSCCTET<br>QW | 2.99 | 0.01 | 1.86 | 0.44 | 1.41 | 0.28 |
| 59859 | 0 | 105490 | QSRATLGI                 | 2.10 | 0.01 | 2.25 | 0.44 | 1.23 | 0.85 |
| 59860 | 0 | 52420  | QSRGEAR                  | 2.02 | 0.01 | 2.43 | 0.68 | 0.22 | 0.28 |
| 59861 | 0 | 52420  | QSRGEAR                  | 2.02 | 0.01 | 2.43 | 0.68 | 0.22 | 2.35 |
| 59862 | 0 | 52420  | QSRGEAR                  | 2.02 | 0.01 | 2.43 | 0.44 | 1.59 | 2.35 |
| 59863 | 0 | 52421  | QSRGEARESYRETGPSR<br>A   | 2.88 | 0.01 | 2.43 | 0.68 | 0.22 | 0.28 |
| 59864 | 0 | 52424  | QSRNWLPGPCYRQQRV<br>SKTS | 2.93 | 0.01 | 3.19 | 0.44 | 1.59 | 1.27 |
| 59865 | 0 | 52425  | QSRRRGDMST               | 2.31 | 0.01 | 3.21 | 1.12 | 0.22 | 1.34 |
| 59866 | 0 | 52425  | QSRRRGDMST               | 2.31 | 0.01 | 3.21 | 1.12 | 0.22 | 0.28 |
| 59867 | 0 | 52425  | QSRRRGDMST               | 2.31 | 0.01 | 3.21 | 1.12 | 0.22 | 0.28 |
| 59868 | 0 | 135980 | QSRRRGDMSTLN             | 2.45 | 0.01 | 3.21 | 0.44 | 0.85 | 0.28 |
| 59869 | 0 | 190942 | QSRYEAIRAI               | 2.33 | 0.01 | 1.86 | 0.44 | 1.23 | 0.28 |
| 59870 | 0 | 190943 | QSSAVSDRASLLGLLSG<br>GTG | 2.98 | 0.01 | 3.50 | 2.13 | 0.22 | 0.28 |
| 59871 | 0 | 78498  | QSSDSPPGGLQNDFF          | 2.71 | 0.01 | 0.90 | 0.68 | 0.22 | 0.28 |
| 59872 | 0 | 78498  | QSSDSPPGGLQNDFF          | 2.71 | 0.01 | 0.90 | 0.68 | 0.22 | 0.28 |
| 59873 | 0 | 103532 | QSSFYSDWYSPACGK          | 2.66 | 0.01 | 2.04 | 0.44 | 0.85 | 1.28 |
| 59874 | 0 | 238957 | QSSRGVKVDCCMRDK          | 2.68 | 0.01 | 2.56 | 2.02 | 0.22 | 0.85 |
| 59875 | 0 | 238957 | QSSRGVKVDCCMRDK          | 2.68 | 0.01 | 2.56 | 1.20 | 0.22 | 0.85 |
| 59876 | 0 | 52439  | QSSWPKLEQ                | 2.23 | 0.01 | 2.69 | 0.44 | 0.85 | 0.28 |
| 59877 | 0 | 52440  | QSTCLSHPLLCLSWN          | 2.70 | 0.01 | 0.90 | 0.44 | 1.41 | 0.28 |
| 59878 | 0 | 52441  | QSTHVDIRTLEDLLMGTL<br>GI | 2.94 | 0.01 | 1.86 | 3.22 | 0.22 | 0.28 |
| 59879 | 0 | 52441  | QSTHVDIRTLEDLLMGTL<br>GI | 2.94 | 0.01 | 1.86 | 2.69 | 0.22 | 0.28 |
| 59880 | 0 | 149445 | QSTLPGNKYGAYNGT          | 2.68 | 0.01 | 3.67 | 3.16 | 0.22 | 0.28 |
| 59881 | 0 | 52445  | QSTVAELQRLKMKVGKT<br>REL | 2.97 | 0.01 | 2.53 | 2.37 | 0.22 | 0.28 |
| 59882 | 0 | 52445  | QSTVAELQRLKMKVGKT<br>REL | 2.97 | 0.01 | 2.53 | 2.37 | 0.22 | 0.28 |

|       |   |        |                                    |      |      |      |      |      |      |
|-------|---|--------|------------------------------------|------|------|------|------|------|------|
| 59883 | 0 | 52445  | QSTVAELQRLKMKVGKT<br>REL           | 2.97 | 0.01 | 2.53 | 2.37 | 0.22 | 0.85 |
| 59884 | 0 | 103534 | QSVCPILAEPPGGSFN                   | 2.63 | 0.01 | 2.04 | 0.44 | 0.85 | 1.28 |
| 59885 | 0 | 112278 | QSVLYSS                            | 2.00 | 0.01 | 0.78 | 0.44 | 1.13 | 0.28 |
| 59886 | 0 | 131614 | QSWVHQIALRMEVLGC<br>EAQD           | 2.92 | 0.01 | 0.78 | 0.44 | 2.35 | 0.28 |
| 59887 | 0 | 113139 | QSYKFIPALE                         | 2.26 | 0.01 | 3.00 | 2.79 | 0.22 | 0.28 |
| 59888 | 0 | 52456  | QSYLRRTQSMGIQL                     | 2.63 | 0.01 | 2.56 | 2.69 | 0.22 | 0.28 |
| 59889 | 0 | 141733 | QSYSAKMWGQVG                       | 2.48 | 0.01 | 0.90 | 0.68 | 0.22 | 1.39 |
| 59890 | 0 | 174709 | QSYTNDDVLRIS                       | 2.44 | 0.01 | 0.90 | 1.15 | 1.41 | 1.39 |
| 59891 | 0 | 52463  | QTACNCLKNLAGSIS                    | 2.68 | 0.01 | 3.35 | 0.44 | 1.23 | 0.85 |
| 59892 | 0 | 52466  | QTADWYTIGVYVIG                     | 2.63 | 0.01 | 2.56 | 2.69 | 0.22 | 0.28 |
| 59893 | 0 | 52472  | QTAPKAPTEA                         | 2.35 | 4.08 | 3.55 | 1.12 | 0.22 | 0.85 |
| 59894 | 0 | 153451 | QTAPSPQDTVVS                       | 2.51 | 0.01 | 0.90 | 1.12 | 0.22 | 0.28 |
| 59895 | 0 | 229927 | QTAPVPMPLKKNVSKI<br>GSTENLKHQPGGGK | 3.36 | 0.01 | 0.78 | 0.44 | 1.41 | 0.28 |
| 59896 | 0 | 52474  | QTAQAAPVQEGVQ<br>QTARDEIRRAVVKNIPS | 2.59 | 0.01 | 2.97 | 0.44 | 0.85 | 0.85 |
| 59897 | 0 | 52475  | MKQENQMKVTPNIRNF<br>LFF            | 3.52 | 0.01 | 3.53 | 3.08 | 0.22 | 1.39 |
| 59898 | 0 | 52476  | QTASGLVSMF                         | 2.29 | 0.01 | 2.83 | 0.44 | 0.85 | 0.28 |
| 59899 | 0 | 52476  | QTASGLVSMF                         | 2.29 | 0.01 | 2.83 | 0.44 | 0.85 | 0.28 |
| 59900 | 0 | 52476  | QTASGLVSMF                         | 2.29 | 0.01 | 2.83 | 1.12 | 0.22 | 0.28 |
| 59901 | 0 | 52477  | QTASQVETEDTKEPG                    | 2.69 | 0.01 | 2.24 | 1.15 | 0.22 | 0.85 |
| 59902 | 0 | 52478  | QTASRQAEV                          | 2.24 | 0.01 | 2.41 | 0.44 | 0.85 | 0.28 |
| 59903 | 0 | 111690 | QTATLTY                            | 2.04 | 0.01 | 0.90 | 0.44 | 0.85 | 1.39 |
| 59904 | 0 | 181435 | QTATNPVSFVKMTDP                    | 2.66 | 0.01 | 2.82 | 1.15 | 0.22 | 0.28 |
| 59905 | 0 | 108085 | QTATYLTPHLKV                       | 2.48 | 0.01 | 0.90 | 0.68 | 0.22 | 1.39 |
| 59906 | 0 | 52484  | QTAVDDAEAAKCRHCI                   | 2.77 | 0.01 | 0.90 | 1.15 | 0.22 | 0.28 |
| 59907 | 0 | 77985  | QTCCDKNQGIFM                       | 2.45 | 0.01 | 0.90 | 1.15 | 0.22 | 0.85 |
| 59908 | 0 | 226379 | QTCKAAGTCPSDVIPKIE<br>H            | 2.87 | 0.01 | 3.21 | 0.68 | 0.22 | 1.34 |
| 59909 | 0 | 226379 | QTCKAAGTCPSDVIPKIE<br>H            | 2.87 | 0.01 | 3.21 | 0.68 | 0.22 | 1.34 |
| 59910 | 0 | 226379 | QTCKAAGTCPSDVIPKIE<br>H            | 2.87 | 0.01 | 3.21 | 0.68 | 0.22 | 1.34 |
| 59911 | 0 | 226379 | QTCKAAGTCPSDVIPKIE<br>H            | 2.87 | 0.01 | 3.21 | 0.68 | 0.22 | 1.34 |
| 59912 | 0 | 226379 | QTCKAAGTCPSDVIPKIE<br>H            | 2.87 | 0.01 | 3.21 | 0.68 | 0.22 | 1.34 |
| 59913 | 0 | 52487  | QTCKTVDSNDCL                       | 2.48 | 0.01 | 2.56 | 2.69 | 2.26 | 0.85 |
| 59914 | 0 | 232672 | QTCSPLRVNHAVLAVGY<br>GTQ           | 2.94 | 0.01 | 2.28 | 0.68 | 0.22 | 0.28 |

|       |   |        |                                       |      |      |      |      |      |      |
|-------|---|--------|---------------------------------------|------|------|------|------|------|------|
| 59915 | 0 | 232672 | QTCSPLRVNHAVLAVGY<br>GTQ              | 2.94 | 0.01 | 2.28 | 0.68 | 0.22 | 0.28 |
| 59916 | 0 | 232672 | QTCSPLRVNHAVLAVGY<br>GTQ              | 2.94 | 0.01 | 2.28 | 0.68 | 0.22 | 0.28 |
| 59917 | 0 | 232672 | QTCSPLRVNHAVLAVGY<br>GTQ              | 2.94 | 0.01 | 2.28 | 0.68 | 0.22 | 0.28 |
| 59918 | 0 | 52494  | QTDEIKNDNIQTDEIKN<br>DNI              | 3.02 | 0.01 | 1.66 | 0.68 | 0.22 | 0.28 |
| 59919 | 0 | 52494  | QTDEIKNDNIQTDEIKN<br>DNI              | 3.02 | 0.01 | 1.66 | 1.20 | 0.22 | 0.28 |
| 59920 | 0 | 52495  | QTDIAGTGLTFDIAKF<br>A SN              | 2.96 | 0.01 | 2.21 | 1.20 | 0.22 | 0.28 |
| 59921 | 0 | 79993  | QTDPSYGLTSDEV<br>LKRRK KYGLNQ         | 3.14 | 0.01 | 3.45 | 1.15 | 0.22 | 0.85 |
| 59922 | 0 | 79993  | QTDPSYGLTSDEV<br>LKRRK KYGLNQ         | 3.14 | 0.01 | 3.45 | 1.15 | 0.22 | 2.35 |
| 59923 | 0 | 79993  | QTDPSYGLTSDEV<br>LKRRK KYGLNQ         | 3.14 | 0.01 | 3.45 | 1.15 | 0.22 | 1.48 |
| 59924 | 0 | 120158 | QTDRED                                | 1.90 | 0.01 | 0.78 | 0.44 | 1.13 | 1.34 |
| 59925 | 0 | 115459 | QTEDELQDKIH<br>PFAQTQ SLV             | 2.94 | 0.01 | 1.60 | 0.44 | 1.23 | 2.51 |
| 59926 | 0 | 112279 | QTEDLAV                               | 1.99 | 0.01 | 0.78 | 0.44 | 1.13 | 0.28 |
| 59927 | 0 | 52501  | QTEKFVKE                              | 2.14 | 0.01 | 2.04 | 0.44 | 0.85 | 0.28 |
| 59928 | 0 | 52501  | QTEKFVKE                              | 2.14 | 0.01 | 2.04 | 0.44 | 0.85 | 0.28 |
| 59929 | 0 | 52501  | QTEKFVKE                              | 2.14 | 0.01 | 2.04 | 0.44 | 0.85 | 0.28 |
| 59930 | 0 | 96806  | QTELARVQKA                            | 2.32 | 0.01 | 2.39 | 0.44 | 0.85 | 0.28 |
| 59931 | 0 | 364782 | QTEQKTAPFG<br>QAAAG                   | 2.70 | 0.01 | 1.61 | 0.44 | 0.85 | 1.28 |
| 59932 | 0 | 177226 | QTESPELQSAPEN                         | 2.58 | 0.01 | 2.22 | 2.69 | 0.22 | 0.28 |
| 59933 | 0 | 177226 | QTESPELQSAPEN                         | 2.58 | 0.01 | 2.22 | 2.69 | 0.22 | 0.85 |
| 59934 | 0 | 87725  | QTEVAATLAYRF                          | 2.47 | 0.01 | 2.87 | 0.44 | 0.22 | 0.28 |
| 59935 | 0 | 142451 | QTGGNRERRNT<br>SDTVD DT               | 2.86 | 0.01 | 2.59 | 0.44 | 0.85 | 0.85 |
| 59936 | 0 | 128086 | QTGWCAFQLC<br>NSYDLF                  | 2.72 | 0.01 | 2.87 | 2.75 | 0.22 | 0.28 |
| 59937 | 0 | 169609 | QTHQSVAISRY<br>LGKQ                   | 2.65 | 0.01 | 3.36 | 0.44 | 1.23 | 0.85 |
| 59938 | 0 | 169609 | QTHQSVAISRY<br>LGKQ                   | 2.65 | 0.01 | 3.36 | 0.44 | 1.23 | 0.85 |
| 59939 | 0 | 169609 | QTHQSVAISRY<br>LGKQ                   | 2.65 | 0.01 | 3.36 | 0.44 | 1.23 | 0.85 |
| 59940 | 0 | 169609 | QTHQSVAISRY<br>LGKQ                   | 2.65 | 0.01 | 3.36 | 0.44 | 1.23 | 0.85 |
| 59941 | 0 | 52529  | QTHRPHPDAEL<br>VDA                    | 2.61 | 0.01 | 2.59 | 0.44 | 0.85 | 0.28 |
| 59942 | 0 | 172932 | QTHSQELCKLM<br>NLWT                   | 2.67 | 0.01 | 0.78 | 0.44 | 1.41 | 0.28 |
| 59943 | 0 | 52533  | QHTTTGGQAGH<br>QAHSL TGLFSPGA<br>AKQN | 3.30 | 0.01 | 0.90 | 0.44 | 0.85 | 0.28 |
| 59944 | 0 | 52533  | QHTTTGGQAGH<br>QAHSL TGLFSPGA<br>AKQN | 3.30 | 0.01 | 0.90 | 1.12 | 0.22 | 0.28 |
| 59945 | 0 | 52533  | QHTTTGGQAGH<br>QAHSL TGLFSPGA<br>AKQN | 3.30 | 0.01 | 0.90 | 1.12 | 0.22 | 0.28 |

|       |   |        |                      |      |      |      |      |      |      |
|-------|---|--------|----------------------|------|------|------|------|------|------|
| 59946 | 0 | 52533  | QTHTTGGQAGHQAHS<br>L | 3.30 | 0.01 | 0.90 | 0.68 | 0.22 | 0.28 |
| 59947 | 0 | 52534  | TGLFSPGAAKQN         |      |      |      |      |      |      |
| 59947 | 0 | 52534  | QTHTTGGQAGHQAHS<br>L | 3.27 | 0.01 | 0.90 | 0.44 | 0.85 | 0.28 |
| 59948 | 0 | 52534  | TGLFSPGAKQN          |      |      |      |      |      |      |
| 59948 | 0 | 52534  | QTHTTGGQAGHQAHS<br>L | 3.27 | 0.01 | 0.90 | 0.44 | 0.85 | 0.28 |
| 59949 | 0 | 52534  | TGLFSPGAKQN          |      |      |      |      |      |      |
| 59949 | 0 | 52534  | QTHTTGGQAGHQAHS<br>L | 3.27 | 0.01 | 0.90 | 0.44 | 1.59 | 0.28 |
| 59950 | 0 | 52534  | TGLFSPGAKQN          |      |      |      |      |      |      |
| 59950 | 0 | 52534  | QTHTTGGQAGHQAHS<br>L | 3.27 | 0.01 | 0.90 | 1.20 | 0.22 | 0.28 |
| 59951 | 0 | 52534  | TGLFSPGAKQN          |      |      |      |      |      |      |
| 59951 | 0 | 52534  | QTHTTGGQAGHQAHS<br>L | 3.27 | 0.01 | 0.90 | 1.81 | 0.22 | 0.28 |
| 59952 | 0 | 457890 | TGLFSPGAKQN          |      |      |      |      |      |      |
| 59952 | 0 | 457890 | QTHTTGGQAGHQAHS<br>L | 3.26 | 0.01 | 0.90 | 0.44 | 0.85 | 0.28 |
| 59953 | 0 | 457890 | TGLFSPGAKQN          |      |      |      |      |      |      |
| 59953 | 0 | 457890 | QTHTTGGQAGHQAHS<br>L | 3.26 | 0.01 | 0.90 | 0.44 | 1.41 | 0.28 |
| 59954 | 0 | 52535  | TGLFSPGAKQN          |      |      |      |      |      |      |
| 59954 | 0 | 52535  | QTHTTGGQASHQVSSL     | 3.26 | 0.01 | 0.90 | 0.44 | 0.85 | 0.28 |
| 59955 | 0 | 52535  | VSLFSPGAKQK          |      |      |      |      |      |      |
| 59955 | 0 | 52535  | QTHTTGGQASHQVSSL     | 3.26 | 0.01 | 0.90 | 0.44 | 0.85 | 0.28 |
| 59956 | 0 | 52536  | VSLFSPGAKQK          |      |      |      |      |      |      |
| 59956 | 0 | 52536  | QTHTTGGQASHQVSSL     | 3.26 | 0.01 | 0.90 | 0.44 | 0.85 | 0.28 |
| 59957 | 0 | 52536  | VSLFSPGAQQN          |      |      |      |      |      |      |
| 59957 | 0 | 52536  | QTHTTGGQASHQVSSL     | 3.26 | 0.01 | 0.90 | 0.44 | 0.85 | 0.28 |
| 59958 | 0 | 457891 | VSLFSPGAQQN          |      |      |      |      |      |      |
| 59958 | 0 | 457891 | QTHTTGGVQGHATSGL     | 3.27 | 0.01 | 0.90 | 0.44 | 0.85 | 0.28 |
| 59959 | 0 | 457891 | TSLFSPGPSQK          |      |      |      |      |      |      |
| 59959 | 0 | 457891 | QTHTTGGVQGHATSGL     | 3.27 | 0.01 | 0.90 | 0.44 | 1.41 | 0.28 |
| 59960 | 0 | 52537  | TSLFSPGPSQK          |      |      |      |      |      |      |
| 59960 | 0 | 52537  | QTHTTGGVVGHATSGL     | 3.26 | 0.01 | 0.90 | 0.44 | 0.85 | 0.28 |
| 59961 | 0 | 52538  | TFLFPGPSQK           |      |      |      |      |      |      |
| 59961 | 0 | 52538  | QTHTTGGVVGHATSGL     | 3.26 | 0.01 | 0.90 | 0.44 | 0.85 | 0.28 |
| 59962 | 0 | 52538  | TSLFSPGPSQK          |      |      |      |      |      |      |
| 59962 | 0 | 52538  | QTHTTGGVVGHATSGL     | 3.26 | 0.01 | 0.90 | 0.44 | 0.85 | 0.28 |
| 59963 | 0 | 52538  | TSLFSPGPSQK          |      |      |      |      |      |      |
| 59963 | 0 | 52538  | QTHTTGGVVGHATSGL     | 3.26 | 0.01 | 0.90 | 1.20 | 0.22 | 0.28 |
| 59964 | 0 | 52539  | TSLFSPGPSQK          |      |      |      |      |      |      |
| 59964 | 0 | 52539  | QTHTTGGVVGHATSGL     | 3.26 | 0.01 | 0.90 | 0.44 | 1.59 | 0.28 |
| 59965 | 0 | 52540  | TSLFSPGPSQN          |      |      |      |      |      |      |
| 59965 | 0 | 52540  | QTHTTGGVVSHQTRSLV    | 3.26 | 0.01 | 0.90 | 0.44 | 0.85 | 0.28 |
| 59966 | 0 | 52540  | GLFSPGPQQN           |      |      |      |      |      |      |
| 59966 | 0 | 52540  | QTHTTGGVVSHQTRSLV    | 3.26 | 0.01 | 0.90 | 1.20 | 0.22 | 0.28 |
| 59967 | 0 | 52541  | GLFSPGPQQN           |      |      |      |      |      |      |
| 59967 | 0 | 52541  | QTHTVGGQMGHGVRG      | 3.26 | 0.01 | 1.72 | 0.44 | 0.85 | 2.02 |
| 59968 | 0 | 52542  | LTNLFSAQSAQN         |      |      |      |      |      |      |
| 59968 | 0 | 52542  | QTHTVGGQMGHGVRG      | 3.26 | 0.01 | 1.72 | 0.44 | 0.85 | 2.02 |
|       |   |        | LTSLFSAQSAQN         |      |      |      |      |      |      |

|       |   |        |                                     |      |      |      |      |      |      |
|-------|---|--------|-------------------------------------|------|------|------|------|------|------|
| 59969 | 0 | 52543  | QTHVTGGTQGYTTQGF<br>VGLFTRGPSQKIQLV | 3.39 | 0.01 | 1.72 | 0.44 | 0.85 | 0.28 |
| 59970 | 0 | 52543  | QTHVTGGTQGYTTQGF<br>VGLFTRGPSQKIQLV | 3.39 | 0.01 | 1.72 | 2.74 | 0.22 | 0.28 |
| 59971 | 0 | 52543  | QTHVTGGTQGYTTQGF<br>VGLFTRGPSQKIQLV | 3.39 | 0.01 | 1.72 | 3.27 | 0.22 | 0.28 |
| 59972 | 0 | 52543  | QTHVTGGTQGYTTQGF<br>VGLFTRGPSQKIQLV | 3.39 | 0.01 | 1.72 | 2.74 | 0.22 | 0.28 |
| 59973 | 0 | 111691 | QTIGNAKPLGRV                        | 2.43 | 0.01 | 0.90 | 0.44 | 0.85 | 1.39 |
| 59974 | 0 | 52546  | QTI LAHDPVKMR                       | 2.40 | 0.01 | 0.90 | 2.74 | 0.22 | 1.27 |
| 59975 | 0 | 110389 | QTISTHLN                            | 2.12 | 0.01 | 3.81 | 0.68 | 0.22 | 0.28 |
| 59976 | 0 | 110389 | QTISTHLN                            | 2.12 | 0.01 | 3.81 | 0.68 | 0.22 | 0.28 |
| 59977 | 0 | 110389 | QTISTHLN                            | 2.12 | 0.01 | 3.81 | 0.68 | 0.22 | 0.28 |
| 59978 | 0 | 52548  | QTITNPAYDEKR                        | 2.43 | 0.01 | 3.53 | 1.12 | 0.22 | 0.28 |
| 59979 | 0 | 52548  | QTITNPAYDEKR                        | 2.43 | 0.01 | 3.53 | 1.12 | 0.22 | 0.28 |
| 59980 | 0 | 52551  | QTKILAKVFY                          | 2.29 | 0.01 | 2.60 | 0.68 | 0.22 | 0.28 |
| 59981 | 0 | 52551  | QTKILAKVFY                          | 2.29 | 0.01 | 2.60 | 0.68 | 0.22 | 0.28 |
| 59982 | 0 | 139214 | QTKLNLTAEIDQLEQRA<br>DNL            | 2.98 | 0.01 | 3.55 | 3.16 | 0.22 | 0.28 |
| 59983 | 0 | 156947 | QTKSECTEVCKNLT                      | 2.63 | 0.01 | 0.90 | 2.74 | 0.22 | 0.85 |
| 59984 | 0 | 156947 | QTKSECTEVCKNLT                      | 2.63 | 0.01 | 0.90 | 0.68 | 0.22 | 0.28 |
| 59985 | 0 | 110981 | QTL DHNTMYWYKQDSK<br>KLLKIM         | 3.04 | 0.01 | 1.75 | 4.23 | 2.25 | 1.75 |
| 59986 | 0 | 110981 | QTL DHNTMYWYKQDSK<br>KLLKIM         | 3.04 | 0.01 | 1.75 | 4.23 | 0.22 | 0.28 |
| 59987 | 0 | 187081 | QTLKKPADDANKAVND<br>S               | 2.80 | 0.01 | 2.80 | 0.68 | 0.22 | 1.27 |
| 59988 | 0 | 187081 | QTLKKPADDANKAVND<br>S               | 2.80 | 0.01 | 2.80 | 0.68 | 0.22 | 0.28 |
| 59989 | 0 | 187081 | QTLKKPADDANKAVND<br>S               | 2.80 | 0.01 | 2.80 | 0.68 | 0.22 | 0.28 |
| 59990 | 0 | 187081 | QTLKKPADDANKAVND<br>S               | 2.80 | 0.01 | 2.80 | 0.68 | 0.22 | 1.27 |
| 59991 | 0 | 95744  | QTLPPSVP                            | 2.14 | 0.01 | 0.90 | 2.59 | 0.22 | 0.28 |
| 59992 | 0 | 95744  | QTLPPSVP                            | 2.14 | 0.01 | 0.90 | 2.22 | 0.22 | 0.28 |
| 59993 | 0 | 164350 | QTL SKAH                            | 1.99 | 0.01 | 0.90 | 1.20 | 0.22 | 1.39 |
| 59994 | 0 | 52572  | QTMEEINT                            | 2.13 | 0.01 | 2.40 | 2.43 | 0.22 | 0.28 |
| 59995 | 0 | 167805 | QTMEEINTL                           | 2.22 | 0.01 | 2.40 | 2.43 | 0.22 | 0.28 |
| 59996 | 0 | 98974  | QTMKGLDIQK                          | 2.32 | 0.01 | 1.60 | 0.44 | 1.23 | 0.85 |
| 59997 | 0 | 98974  | QTMKGLDIQK                          | 2.32 | 0.01 | 1.60 | 0.44 | 1.23 | 0.85 |
| 59998 | 0 | 450996 | QTNMRAP                             | 1.99 | 0.01 | 0.90 | 0.44 | 1.41 | 1.39 |
| 59999 | 0 | 52582  | QTNQAGGEAPQPGDN<br>STVQTAA          | 3.06 | 0.01 | 2.43 | 0.44 | 1.59 | 0.28 |
| 60000 | 0 | 52587  | QTNYRG                              | 1.88 | 0.01 | 0.90 | 0.44 | 1.74 | 1.39 |
| 60001 | 0 | 364975 | QTPDDDDPAADAAGT                     | 2.72 | 0.01 | 1.61 | 0.44 | 0.85 | 1.28 |
| 60002 | 0 | 196747 | QTPESRS                             | 2.02 | 0.01 | 0.90 | 0.44 | 1.23 | 1.39 |

|       |   |        |                          |      |      |      |      |      |      |
|-------|---|--------|--------------------------|------|------|------|------|------|------|
| 60003 | 0 | 97594  | QTPLTETALKWH             | 2.48 | 0.01 | 0.90 | 0.68 | 0.22 | 1.39 |
| 60004 | 0 | 97594  | QTPLTETALKWH             | 2.48 | 0.01 | 0.90 | 0.68 | 0.22 | 2.12 |
| 60005 | 0 | 97594  | QTPLTETALKWH             | 2.48 | 0.01 | 0.90 | 0.68 | 0.22 | 1.27 |
| 60006 | 0 | 97594  | QTPLTETALKWH             | 2.48 | 0.01 | 0.90 | 0.68 | 0.22 | 0.28 |
| 60007 | 0 | 97594  | QTPLTETALKWH             | 2.48 | 0.01 | 0.90 | 0.68 | 0.22 | 0.28 |
| 60008 | 0 | 97595  | QTPLTMAALELF             | 2.48 | 0.01 | 0.90 | 0.68 | 0.22 | 1.39 |
| 60009 | 0 | 97595  | QTPLTMAALELF             | 2.48 | 0.01 | 0.90 | 0.68 | 0.22 | 1.27 |
| 60010 | 0 | 97595  | QTPLTMAALELF             | 2.48 | 0.01 | 0.90 | 0.68 | 0.22 | 2.12 |
| 60011 | 0 | 97595  | QTPLTMAALELF             | 2.48 | 0.01 | 0.90 | 0.68 | 0.22 | 0.28 |
| 60012 | 0 | 97595  | QTPLTMAALELF             | 2.48 | 0.01 | 0.90 | 0.68 | 0.22 | 0.28 |
| 60013 | 0 | 97596  | QTPLTMAALELL             | 2.48 | 0.01 | 0.90 | 0.68 | 0.22 | 1.39 |
| 60014 | 0 | 97596  | QTPLTMAALELL             | 2.48 | 0.01 | 0.90 | 0.68 | 0.22 | 1.27 |
| 60015 | 0 | 97596  | QTPLTMAALELL             | 2.48 | 0.01 | 0.90 | 0.68 | 0.22 | 2.12 |
| 60016 | 0 | 97596  | QTPLTMAALELL             | 2.48 | 0.01 | 0.90 | 0.68 | 0.22 | 0.28 |
| 60017 | 0 | 97596  | QTPLTMAALELL             | 2.48 | 0.01 | 0.90 | 0.68 | 0.22 | 0.28 |
| 60018 | 0 | 52594  | QTPPCPIEHCSFYQ           | 2.69 | 0.01 | 0.90 | 0.44 | 1.41 | 0.28 |
| 60019 | 0 | 52597  | QTPVNGNSPWAPTAPL<br>PGDM | 2.95 | 0.01 | 2.76 | 0.44 | 1.59 | 0.28 |
| 60020 | 0 | 52597  | QTPVNGNSPWAPTAPL<br>PGDM | 2.95 | 0.01 | 2.76 | 0.44 | 1.59 | 0.28 |
| 60021 | 0 | 115931 | QTPVVVPPFL               | 2.33 | 0.01 | 1.60 | 0.44 | 1.23 | 0.85 |
| 60022 | 0 | 115931 | QTPVVVPPFL               | 2.33 | 0.01 | 1.60 | 0.44 | 1.23 | 0.85 |
| 60023 | 0 | 115460 | QTPVVVPPFLQPEVMG<br>VSKV | 2.95 | 0.01 | 1.60 | 0.44 | 1.23 | 1.28 |
| 60024 | 0 | 188435 | QTQFRPIQNVPGPHRTI<br>HHA | 2.96 | 0.01 | 3.21 | 2.88 | 0.22 | 0.28 |
| 60025 | 0 | 188435 | QTQFRPIQNVPGPHRTI<br>HHA | 2.96 | 0.01 | 3.21 | 2.88 | 0.22 | 0.28 |
| 60026 | 0 | 188435 | QTQFRPIQNVPGPHRTI<br>HHA | 2.96 | 0.01 | 3.21 | 2.88 | 0.22 | 0.28 |
| 60027 | 0 | 188435 | QTQFRPIQNVPGPHRTI<br>HHA | 2.96 | 0.01 | 3.21 | 2.88 | 0.22 | 0.28 |
| 60028 | 0 | 188435 | QTQFRPIQNVPGPHRTI<br>HHA | 2.96 | 0.01 | 3.21 | 2.88 | 0.22 | 0.28 |
| 60029 | 0 | 188435 | QTQFRPIQNVPGPHRTI<br>HHA | 2.96 | 0.01 | 3.21 | 2.88 | 0.22 | 0.28 |
| 60030 | 0 | 164351 | QTQMLSGTLIPQ             | 2.50 | 0.01 | 0.90 | 1.20 | 0.22 | 1.39 |
| 60031 | 0 | 52599  | QTQPSKPTTKQR             | 2.52 | 0.01 | 2.38 | 0.68 | 0.22 | 0.28 |
| 60032 | 0 | 52599  | QTQPSKPTTKQR             | 2.52 | 0.01 | 2.38 | 0.44 | 1.74 | 0.28 |
| 60033 | 0 | 52599  | QTQPSKPTTKQR             | 2.52 | 0.01 | 2.38 | 0.44 | 1.74 | 0.28 |
| 60034 | 0 | 52600  | QTQQPQQPFP               | 2.37 | 0.01 | 1.86 | 0.68 | 0.22 | 0.85 |
| 60035 | 0 | 52600  | QTQQPQQPFP               | 2.37 | 0.01 | 1.86 | 0.68 | 0.22 | 0.28 |
| 60036 | 0 | 52600  | QTQQPQQPFP               | 2.37 | 0.01 | 1.86 | 0.44 | 1.23 | 0.85 |
| 60037 | 0 | 52600  | QTQQPQQPFP               | 2.37 | 0.01 | 1.86 | 0.44 | 1.23 | 0.85 |
| 60038 | 0 | 148903 | QTQQSFPLQP               | 2.36 | 0.01 | 1.86 | 0.44 | 1.23 | 0.85 |
| 60039 | 0 | 148903 | QTQQSFPLQP               | 2.36 | 0.01 | 1.86 | 0.68 | 0.22 | 0.28 |

|       |   |        |                                     |      |      |      |      |      |      |
|-------|---|--------|-------------------------------------|------|------|------|------|------|------|
| 60040 | 0 | 52602  | QTQSQVQDNVKQQQD                     | 2.72 | 0.01 | 3.37 | 2.22 | 0.22 | 0.28 |
| 60041 | 0 | 108086 | QTRGFPSCERGYLSP                     | 2.66 | 0.01 | 0.90 | 0.44 | 1.13 | 1.39 |
| 60042 | 0 | 52609  | QTRTTGGQASRQVSSLV<br>RLFRLGPKQK     | 3.26 | 0.01 | 0.90 | 0.44 | 0.85 | 0.28 |
| 60043 | 0 | 52610  | QTRTTGGQASRQVSSLV<br>RLFRRQGPQQN    | 3.26 | 0.01 | 0.90 | 0.44 | 0.85 | 0.28 |
| 60044 | 0 | 52611  | QTRTVGGANARNTYGL<br>TTLFTTGPKQN     | 3.25 | 0.01 | 1.72 | 0.44 | 0.85 | 0.28 |
| 60045 | 0 | 52611  | QTRTVGGANARNTYGL<br>TTLFTTGPKQN     | 3.25 | 0.01 | 1.72 | 0.44 | 0.85 | 0.28 |
| 60046 | 0 | 52611  | QTRTVGGANARNTYGL<br>TTLFTTGPKQN     | 3.25 | 0.01 | 1.72 | 0.68 | 0.22 | 0.28 |
| 60047 | 0 | 52611  | QTRTVGGANARNTYGL<br>TTLFTTGPKQN     | 3.25 | 0.01 | 1.72 | 0.68 | 0.22 | 0.28 |
| 60048 | 0 | 52611  | QTRTVGGANARNTYGL<br>TTLFTTGPKQN     | 3.25 | 0.01 | 1.72 | 1.12 | 0.22 | 0.28 |
| 60049 | 0 | 52611  | QTRTVGGANARNTYGL<br>TTLFTTGPKQN     | 3.25 | 0.01 | 1.72 | 1.12 | 0.22 | 0.28 |
| 60050 | 0 | 52612  | QTRTVGGQMGHGVVRG<br>LTSLSAGSAQN     | 3.26 | 0.01 | 1.72 | 0.44 | 0.85 | 2.02 |
| 60051 | 0 | 52613  | QTRTVGGQMGHGVVRG<br>LTSLSAGSARN     | 3.26 | 0.01 | 1.72 | 0.44 | 0.85 | 0.28 |
| 60052 | 0 | 52613  | QTRTVGGQMGHGVVRG<br>LTSLSAGSARN     | 3.26 | 0.01 | 1.72 | 0.44 | 0.85 | 0.28 |
| 60053 | 0 | 52613  | QTRTVGGQMGHGVVRG<br>LTSLSAGSARN     | 3.26 | 0.01 | 1.72 | 0.68 | 0.22 | 0.28 |
| 60054 | 0 | 52613  | QTRTVGGQMGHGVVRG<br>LTSLSAGSARN     | 3.26 | 0.01 | 1.72 | 1.12 | 0.22 | 0.28 |
| 60055 | 0 | 52613  | QTRTVGGQMGHGVVRG<br>LTSLSAGSARN     | 3.26 | 0.01 | 1.72 | 1.12 | 0.22 | 0.28 |
| 60056 | 0 | 52614  | QTRTVGGQVGHSVRGF<br>TSLFSAGSAQN     | 3.27 | 0.01 | 1.72 | 0.44 | 0.85 | 2.02 |
| 60057 | 0 | 52614  | QTRTVGGQVGHSVRGF<br>TSLFSAGSAQN     | 3.27 | 0.01 | 1.72 | 0.44 | 0.85 | 2.02 |
| 60058 | 0 | 52615  | QTRTVGGQVGHSVRGL<br>TSLFSAGSAQN     | 3.27 | 0.01 | 1.72 | 0.44 | 0.85 | 2.02 |
| 60059 | 0 | 52618  | QTRVTGGTAGHITSGLT<br>SLFVRGPSQKIQLI | 3.39 | 0.01 | 1.72 | 0.44 | 0.85 | 0.28 |
| 60060 | 0 | 52618  | QTRVTGGTAGHITSGLT<br>SLFVRGPSQKIQLI | 3.39 | 0.01 | 1.72 | 2.74 | 0.22 | 0.28 |
| 60061 | 0 | 52618  | QTRVTGGTAGHITSGLT<br>SLFVRGPSQKIQLI | 3.39 | 0.01 | 1.72 | 3.27 | 0.22 | 0.28 |
| 60062 | 0 | 52618  | QTRVTGGTAGHITSGLT<br>SLFVRGPSQKIQLI | 3.39 | 0.01 | 1.72 | 3.27 | 0.22 | 0.28 |
| 60063 | 0 | 365060 | QTSAAAAANDSSPAE                     | 2.69 | 0.01 | 1.61 | 0.44 | 0.85 | 1.28 |
| 60064 | 0 | 240912 | QTSGGVLPALTSQEI                     | 2.68 | 0.01 | 3.65 | 0.44 | 1.41 | 0.28 |

|       |   |        |                                 |      |      |      |      |      |      |
|-------|---|--------|---------------------------------|------|------|------|------|------|------|
| 60065 | 0 | 52620  | QTSGLKSSSPSSTKS                 | 2.72 | 0.01 | 1.66 | 1.15 | 0.22 | 0.28 |
| 60066 | 0 | 237898 | QTSGSTTPGPPTTTT                 | 2.65 | 0.01 | 3.33 | 0.44 | 0.85 | 0.28 |
| 60067 | 0 | 237898 | QTSGSTTPGPPTTTT                 | 2.65 | 0.01 | 3.33 | 0.44 | 0.85 | 0.28 |
| 60068 | 0 | 237898 | QTSGSTTPGPPTTTT                 | 2.65 | 0.01 | 3.33 | 2.49 | 0.85 | 0.28 |
| 60069 | 0 | 237898 | QTSGSTTPGPPTTTT                 | 2.65 | 0.01 | 3.33 | 2.49 | 0.22 | 0.28 |
| 60070 | 0 | 237898 | QTSGSTTPGPPTTTT                 | 2.65 | 0.01 | 3.33 | 0.44 | 0.85 | 1.27 |
| 60071 | 0 | 237898 | QTSGSTTPGPPTTTT                 | 2.65 | 0.01 | 3.33 | 0.44 | 0.85 | 1.27 |
| 60072 | 0 | 237898 | QTSGSTTPGPPTTTT                 | 2.65 | 0.01 | 3.33 | 2.49 | 0.85 | 1.27 |
| 60073 | 0 | 135745 | QTSKLTRA                        | 2.12 | 0.01 | 0.78 | 0.44 | 2.35 | 0.28 |
| 60074 | 0 | 232992 | QTSPLA                          | 2.01 | 0.01 | 0.90 | 2.49 | 0.85 | 1.39 |
| 60075 | 0 | 131023 | QTTANPSCPE                      | 2.30 | 0.01 | 2.19 | 2.97 | 0.22 | 0.28 |
| 60076 | 0 | 131024 | QTTANPSCPEG                     | 2.38 | 0.01 | 2.19 | 2.97 | 0.22 | 0.28 |
| 60077 | 0 | 131024 | QTTANPSCPEG                     | 2.38 | 0.01 | 2.19 | 2.97 | 2.60 | 1.75 |
| 60078 | 0 | 365112 | QTTGDDDDPAADGAGT                | 2.73 | 0.01 | 1.61 | 0.44 | 0.85 | 1.28 |
| 60079 | 0 | 365113 | QTTGDGDPAADGAGT                 | 2.74 | 0.01 | 1.61 | 0.44 | 0.85 | 1.28 |
| 60080 | 0 | 365120 | QTTIKQPGGIKTPSS                 | 2.71 | 0.01 | 1.61 | 0.44 | 0.85 | 1.28 |
| 60081 | 0 | 52638  | QTTKPKEVPTTK                    | 2.52 | 0.01 | 2.38 | 0.44 | 1.74 | 0.28 |
| 60082 | 0 | 78255  | QTTPEEKPAEP                     | 2.43 | 0.01 | 2.60 | 0.44 | 1.23 | 0.85 |
| 60083 | 0 | 52641  | QTTQVETEDTKEPGV                 | 2.78 | 0.01 | 2.24 | 0.68 | 0.22 | 0.28 |
| 60084 | 0 | 232673 | QTTSPLRVNHAVLAVGY<br>GTQ        | 2.95 | 0.01 | 0.90 | 0.68 | 0.22 | 0.28 |
| 60085 | 0 | 232673 | QTTSPLRVNHAVLAVGY<br>GTQ        | 2.95 | 0.01 | 0.90 | 0.68 | 0.22 | 0.28 |
| 60086 | 0 | 232673 | QTTSPLRVNHAVLAVGY<br>GTQ        | 2.95 | 0.01 | 0.90 | 0.68 | 0.22 | 0.28 |
| 60087 | 0 | 232673 | QTTSPLRVNHAVLAVGY<br>GTQ        | 2.95 | 0.01 | 0.90 | 0.68 | 0.22 | 0.28 |
| 60088 | 0 | 52645  | QTTTTGGQVSHATAGLT<br>GLFSLGPQQK | 3.25 | 0.01 | 0.90 | 0.44 | 0.85 | 0.28 |
| 60089 | 0 | 52646  | QTTTTGGQVSHATHGLT<br>GLFSLGPQQK | 3.25 | 0.01 | 0.90 | 0.44 | 0.85 | 0.28 |
| 60090 | 0 | 52646  | QTTTTGGQVSHATHGLT<br>GLFSLGPQQK | 3.25 | 0.01 | 0.90 | 1.20 | 0.22 | 0.28 |
| 60091 | 0 | 52647  | QTTTTGGQVSHATHGLT<br>GLFSLPGQQK | 3.25 | 0.01 | 0.90 | 0.44 | 0.85 | 0.28 |
| 60092 | 0 | 52648  | QTTTTGGSASHAVSSLT<br>GLFSPGSKQN | 3.25 | 0.01 | 0.90 | 0.44 | 0.85 | 0.28 |
| 60093 | 0 | 52648  | QTTTTGGSASHAVSSLT<br>GLFSPGSKQN | 3.25 | 0.01 | 0.90 | 0.44 | 0.85 | 0.28 |
| 60094 | 0 | 52648  | QTTTTGGSASHAVSSLT<br>GLFSPGSKQN | 3.25 | 0.01 | 0.90 | 0.44 | 0.85 | 0.28 |
| 60095 | 0 | 52650  | QTTVTGGQASHTTSSLT<br>GLFSPGASQK | 3.27 | 0.01 | 0.90 | 0.44 | 0.85 | 0.28 |



|       |   |        |                                 |      |      |      |      |      |      |
|-------|---|--------|---------------------------------|------|------|------|------|------|------|
| 60096 | 0 | 52651  | QTTVTGQASHTTSSLTG<br>LFSPGASQK  | 3.23 | 0.01 | 0.90 | 0.44 | 0.85 | 0.28 |
| 60097 | 0 | 52651  | QTTVTGQASHTTSSLTG<br>LFSPGASQK  | 3.23 | 0.01 | 0.90 | 0.44 | 0.85 | 0.28 |
| 60098 | 0 | 52651  | QTTVTGQASHTTSSLTG<br>LFSPGASQK  | 3.23 | 0.01 | 0.90 | 1.20 | 0.22 | 0.28 |
| 60099 | 0 | 457897 | QTTVVGGSQSHTVRGLT<br>SLFSLGPQKQ | 3.26 | 0.01 | 0.90 | 0.44 | 0.85 | 0.28 |
| 60100 | 0 | 457897 | QTTVVGGSQSHTVRGLT<br>SLFSLGPQKQ | 3.26 | 0.01 | 0.90 | 0.44 | 1.41 | 0.28 |
| 60101 | 0 | 52652  | QTTVVGGSQSHTVRGLT<br>SLFSPGASQN | 3.26 | 0.01 | 0.90 | 0.44 | 0.85 | 0.85 |
| 60102 | 0 | 52652  | QTTVVGGSQSHTVRGLT<br>SLFSPGASQN | 3.26 | 0.01 | 0.90 | 1.15 | 2.26 | 0.85 |
| 60103 | 0 | 52652  | QTTVVGGSQSHTVRGLT<br>SLFSPGASQN | 3.26 | 0.01 | 0.90 | 1.81 | 0.22 | 0.28 |
| 60104 | 0 | 52652  | QTTVVGGSQSHTVRGLT<br>SLFSPGASQN | 3.26 | 0.01 | 0.90 | 0.44 | 0.85 | 0.28 |
| 60105 | 0 | 52652  | QTTVVGGSQSHTVRGLT<br>SLFSPGASQN | 3.26 | 0.01 | 0.90 | 1.12 | 0.22 | 0.85 |
| 60106 | 0 | 52652  | QTTVVGGSQSHTVRGLT<br>SLFSPGASQN | 3.26 | 0.01 | 0.90 | 0.44 | 0.85 | 0.28 |
| 60107 | 0 | 52652  | QTTVVGGSQSHTVRGLT<br>SLFSPGASQN | 3.26 | 0.01 | 0.90 | 1.20 | 0.22 | 2.98 |
| 60108 | 0 | 52652  | QTTVVGGSQSHTVRGLT<br>SLFSPGASQN | 3.26 | 0.01 | 0.90 | 0.44 | 0.85 | 0.28 |
| 60109 | 0 | 52652  | QTTVVGGSQSHTVRGLT<br>SLFSPGASQN | 3.26 | 0.01 | 0.90 | 0.44 | 0.85 | 0.28 |
| 60110 | 0 | 52652  | QTTVVGGSQSHTVRGLT<br>SLFSPGASQN | 3.26 | 0.01 | 0.90 | 0.44 | 0.85 | 0.28 |
| 60111 | 0 | 52652  | QTTVVGGSQSHTVRGLT<br>SLFSPGASQN | 3.26 | 0.01 | 0.90 | 1.20 | 0.22 | 0.28 |
| 60112 | 0 | 52652  | QTTVVGGSQSHTVRGLT<br>SLFSPGASQN | 3.26 | 0.01 | 0.90 | 0.68 | 0.22 | 0.28 |
| 60113 | 0 | 52652  | QTTVVGGSQSHTVRGLT<br>SLFSPGASQN | 3.26 | 0.01 | 0.90 | 0.44 | 0.85 | 0.28 |
| 60114 | 0 | 52652  | QTTVVGGSQSHTVRGLT<br>SLFSPGASQN | 3.26 | 0.01 | 0.90 | 0.68 | 0.22 | 0.85 |
| 60115 | 0 | 52652  | QTTVVGGSQSHTVRGLT<br>SLFSPGASQN | 3.26 | 0.01 | 0.90 | 1.15 | 0.22 | 1.48 |
| 60116 | 0 | 52652  | QTTVVGGSQSHTVRGLT<br>SLFSPGASQN | 3.26 | 0.01 | 0.90 | 1.15 | 0.22 | 1.48 |
| 60117 | 0 | 52657  | QTVKFAP                         | 1.99 | 0.01 | 0.90 | 2.13 | 1.59 | 0.28 |
| 60118 | 0 | 181436 | QTVNNQVNRSLTALQ                 | 2.72 | 0.01 | 2.82 | 1.15 | 0.22 | 0.28 |
| 60119 | 0 | 52660  | QTVSALEDKLADYK                  | 2.61 | 0.01 | 2.56 | 2.69 | 0.22 | 0.28 |
| 60120 | 0 | 52660  | QTVSALEDKLADYK                  | 2.61 | 0.01 | 3.16 | 2.69 | 0.22 | 0.28 |

|       |   |        |                               |      |      |      |      |      |      |
|-------|---|--------|-------------------------------|------|------|------|------|------|------|
| 60121 | 0 | 52660  | QTVSALEDKLADYK                | 2.61 | 0.01 | 3.16 | 2.69 | 0.22 | 0.28 |
| 60122 | 0 | 238960 | QTVSVTCKDNGTKCK               | 2.70 | 0.01 | 2.56 | 2.02 | 0.22 | 0.85 |
| 60123 | 0 | 238960 | QTVSVTCKDNGTKCK               | 2.70 | 0.01 | 2.56 | 1.20 | 0.22 | 0.85 |
| 60124 | 0 | 450997 | QTWLEMG                       | 1.99 | 0.01 | 0.90 | 0.44 | 1.23 | 1.39 |
| 60125 | 0 | 524626 | QTYARPSGSGTSTNEILQ<br>EGYYK   | 3.08 | 3.93 | 4.03 | 0.44 | 1.13 | 0.28 |
| 60126 | 0 | 423479 | QTYCEDLEGRVSEAE               | 2.64 | 0.01 | 2.51 | 0.44 | 2.35 | 1.28 |
| 60127 | 0 | 126900 | QVAALTWVQTHIRGFG<br>GD        | 2.82 | 0.01 | 0.78 | 2.25 | 0.22 | 0.28 |
| 60128 | 0 | 122885 | QVAALTWVQTHIRGFG<br>GDPR      | 2.92 | 0.01 | 0.78 | 4.93 | 0.22 | 0.28 |
| 60129 | 0 | 122885 | QVAALTWVQTHIRGFG<br>GDPR      | 2.92 | 0.01 | 0.78 | 3.37 | 0.22 | 0.28 |
| 60130 | 0 | 122885 | QVAALTWVQTHIRGFG<br>GDPR      | 2.92 | 0.01 | 0.78 | 0.44 | 1.13 | 0.28 |
| 60131 | 0 | 117619 | QVAARGRGRGMGRGN               | 2.72 | 4.93 | 0.78 | 0.44 | 1.13 | 0.28 |
| 60132 | 0 | 78499  | QVADKE                        | 1.88 | 0.01 | 0.90 | 0.68 | 0.22 | 0.28 |
| 60133 | 0 | 179396 | QVAEFKEGFQLMDRD               | 2.67 | 0.01 | 2.36 | 0.44 | 1.23 | 1.28 |
| 60134 | 0 | 179396 | QVAEFKEGFQLMDRD               | 2.67 | 0.01 | 2.36 | 0.44 | 1.23 | 1.27 |
| 60135 | 0 | 179396 | QVAEFKEGFQLMDRD               | 2.67 | 0.01 | 2.36 | 0.44 | 1.23 | 1.28 |
| 60136 | 0 | 365196 | QVAGIKTTTATTGDS               | 2.68 | 0.01 | 1.61 | 0.44 | 0.85 | 1.28 |
| 60137 | 0 | 79636  | QVARTSF                       | 1.99 | 0.01 | 0.90 | 1.12 | 0.22 | 1.39 |
| 60138 | 0 | 52678  | QVATISAN                      | 2.12 | 0.01 | 2.93 | 0.44 | 1.59 | 0.28 |
| 60139 | 0 | 52679  | QVATVSSN                      | 2.13 | 0.01 | 2.99 | 0.44 | 0.85 | 0.28 |
| 60140 | 0 | 52680  | QVCGPVYCFT                    | 2.31 | 0.01 | 1.72 | 0.44 | 0.85 | 0.28 |
| 60141 | 0 | 52683  | QVDETKR                       | 1.99 | 0.01 | 3.78 | 1.81 | 0.22 | 0.85 |
| 60142 | 0 | 131616 | QVDFQKTMKVTGVTTQ<br>GVKS      | 2.99 | 0.01 | 0.78 | 0.44 | 2.35 | 0.28 |
| 60143 | 0 | 187698 | QVDLHDLAARGADISG              | 2.81 | 0.01 | 2.14 | 1.20 | 0.22 | 0.28 |
| 60144 | 0 | 510473 | QVDVKDCANHEIKKVLV<br>PGCHGSEP | 3.15 | 0.01 | 2.78 | 1.12 | 0.22 | 0.85 |
| 60145 | 0 | 510473 | QVDVKDCANHEIKKVLV<br>PGCHGSEP | 3.15 | 0.01 | 2.78 | 0.68 | 0.22 | 1.75 |
| 60146 | 0 | 98975  | QVEKLIKNQKESHFV               | 2.69 | 0.01 | 2.16 | 0.44 | 1.23 | 0.85 |
| 60147 | 0 | 52687  | QVELPKG                       | 1.99 | 0.01 | 0.90 | 0.44 | 1.23 | 1.27 |
| 60148 | 0 | 52687  | QVELPKG                       | 1.99 | 0.01 | 0.90 | 0.44 | 1.23 | 0.28 |
| 60149 | 0 | 52689  | QVESTAGSLQGQWRG               | 2.69 | 0.01 | 2.04 | 0.68 | 0.22 | 0.28 |
| 60150 | 0 | 52692  | QVETEDTKEPGVLMG               | 2.68 | 0.01 | 2.24 | 1.15 | 0.22 | 0.85 |
| 60151 | 0 | 52693  | QVETEDTKEPGVLMGG              | 2.73 | 0.01 | 2.24 | 1.15 | 0.22 | 0.28 |

|       |   |        |                              |      |      |      |      |      |      |
|-------|---|--------|------------------------------|------|------|------|------|------|------|
| 60152 | 0 | 52693  | QVETEDTKEPGVLMGG             | 2.73 | 0.01 | 2.24 | 0.68 | 0.22 | 0.28 |
| 60153 | 0 | 52694  | QVEVPG                       | 1.90 | 0.01 | 3.24 | 1.12 | 0.22 | 0.28 |
| 60154 | 0 | 52696  | QVFGAI                       | 1.88 | 0.01 | 2.40 | 0.44 | 0.85 | 0.28 |
| 60155 | 0 | 179397 | QVFRRLTSAVNEIEK              | 2.63 | 0.01 | 2.36 | 0.44 | 1.23 | 1.28 |
| 60156 | 0 | 179397 | QVFRRLTSAVNEIEK              | 2.63 | 0.01 | 2.36 | 0.44 | 1.23 | 1.27 |
| 60157 | 0 | 179397 | QVFRRLTSAVNEIEK              | 2.63 | 0.01 | 2.36 | 0.44 | 1.23 | 1.28 |
| 60158 | 0 | 52698  | QVG DGEAG                    | 2.14 | 0.01 | 2.04 | 0.44 | 0.85 | 0.28 |
| 60159 | 0 | 125541 | QVGKFPEDFESCD                | 2.54 | 0.01 | 0.78 | 0.44 | 1.13 | 0.28 |
| 60160 | 0 | 103536 | QVGSQFGPYQLLRLL              | 2.68 | 0.01 | 2.04 | 0.44 | 0.85 | 1.28 |
| 60161 | 0 | 144756 | QVGTHPGLANDYEYT              | 2.64 | 0.01 | 0.90 | 0.68 | 0.22 | 0.28 |
| 60162 | 0 | 144756 | QVGTHPGLANDYEYT              | 2.64 | 0.01 | 0.90 | 0.68 | 0.22 | 1.48 |
| 60163 | 0 | 144756 | QVGTHPGLANDYEYT              | 2.64 | 0.01 | 0.90 | 0.68 | 0.22 | 1.27 |
| 60164 | 0 | 156948 | QVHTSI                       | 1.88 | 0.01 | 0.90 | 2.74 | 0.22 | 0.85 |
| 60165 | 0 | 52713  | QVIAEHQFK                    | 2.22 | 0.01 | 2.59 | 0.44 | 0.85 | 0.28 |
| 60166 | 0 | 176401 | QVIAHQFKEKVLGLL              | 2.67 | 0.01 | 4.03 | 0.44 | 0.85 | 2.97 |
| 60167 | 0 | 113141 | QVIDKVDAAF                   | 2.32 | 0.01 | 3.00 | 2.79 | 0.22 | 0.28 |
| 60168 | 0 | 122544 | QVIKMDLPQYEPRLA              | 2.65 | 0.01 | 0.90 | 1.15 | 0.22 | 1.39 |
| 60169 | 0 | 111693 | QVILCPTSVFSSNEV              | 2.65 | 0.01 | 1.86 | 0.44 | 0.85 | 0.28 |
| 60170 | 0 | 126903 | QVINVREG                     | 2.12 | 0.01 | 0.78 | 0.44 | 1.13 | 0.85 |
| 60171 | 0 | 126903 | QVINVREG                     | 2.12 | 0.01 | 0.78 | 0.44 | 1.13 | 0.85 |
| 60172 | 0 | 52720  | QVKARNIISPVMG                | 2.50 | 0.01 | 3.00 | 0.44 | 0.85 | 0.28 |
| 60173 | 0 | 52720  | QVKARNIISPVMG                | 2.50 | 0.01 | 3.00 | 1.15 | 2.39 | 0.28 |
| 60174 | 0 | 107585 | QVKFNWY                      | 1.99 | 0.01 | 0.78 | 0.44 | 1.13 | 0.28 |
| 60175 | 0 | 117621 | QVKGfV                       | 1.90 | 0.01 | 0.78 | 0.44 | 1.13 | 0.85 |
| 60176 | 0 | 117621 | QVKGfV                       | 1.90 | 0.01 | 0.78 | 0.44 | 1.13 | 0.85 |
| 60177 | 0 | 125542 | QVKTGPDGRITKKDID<br>SFVPSKVA | 3.18 | 0.01 | 0.78 | 0.44 | 1.13 | 0.28 |
| 60178 | 0 | 96808  | QVKSGTIFDN                   | 2.26 | 0.01 | 0.78 | 0.44 | 1.93 | 0.85 |
| 60179 | 0 | 96808  | QVKSGTIFDN                   | 2.26 | 0.01 | 0.78 | 0.44 | 1.93 | 0.28 |
| 60180 | 0 | 96808  | QVKSGTIFDN                   | 2.26 | 0.01 | 0.78 | 0.44 | 1.13 | 0.28 |
| 60181 | 0 | 96808  | QVKSGTIFDN                   | 2.26 | 0.01 | 0.78 | 0.44 | 1.93 | 0.28 |
| 60182 | 0 | 96808  | QVKSGTIFDN                   | 2.26 | 0.01 | 0.78 | 0.44 | 1.23 | 0.28 |
| 60183 | 0 | 52727  | QVKTVDASSGSNRFAAL<br>PAF     | 2.92 | 0.01 | 3.14 | 1.20 | 0.22 | 0.28 |
| 60184 | 0 | 52727  | QVKTVDASSGSNRFAAL<br>PAF     | 2.92 | 0.01 | 3.14 | 1.20 | 0.22 | 0.28 |
| 60185 | 0 | 95747  | QVLAQKVA                     | 2.17 | 0.01 | 2.96 | 2.59 | 0.22 | 0.28 |
| 60186 | 0 | 95747  | QVLAQKVA                     | 2.17 | 0.01 | 2.96 | 2.22 | 0.22 | 0.28 |
| 60187 | 0 | 52732  | QVLDDHYKTALKEV               | 2.60 | 0.01 | 2.59 | 0.44 | 0.85 | 0.28 |
| 60188 | 0 | 52732  | QVLDDHYKTALKEV               | 2.60 | 0.01 | 2.59 | 0.44 | 0.85 | 0.28 |
| 60189 | 0 | 52735  | QVLDSHYQDVLKEV               | 2.64 | 0.01 | 2.41 | 0.44 | 0.85 | 0.28 |
| 60190 | 0 | 52735  | QVLDSHYQDVLKEV               | 2.64 | 0.01 | 2.41 | 0.44 | 1.41 | 0.28 |
| 60191 | 0 | 136079 | QVLLP                        | 1.75 | 0.01 | 0.78 | 2.04 | 0.22 | 0.28 |
| 60192 | 0 | 189145 | QVLMMRP                      | 2.01 | 0.01 | 0.90 | 2.13 | 0.22 | 0.28 |
| 60193 | 0 | 189145 | QVLMMRP                      | 2.01 | 0.01 | 0.90 | 3.41 | 0.22 | 0.28 |

|       |   |        |                           |      |      |      |      |      |      |
|-------|---|--------|---------------------------|------|------|------|------|------|------|
| 60194 | 0 | 52739  | QVLPCSFTTLPALSTGLI        | 2.85 | 0.01 | 3.18 | 0.44 | 1.59 | 0.28 |
| 60195 | 0 | 115932 | QVLSNTVPAK                | 2.29 | 0.01 | 1.60 | 0.44 | 1.23 | 0.85 |
| 60196 | 0 | 115932 | QVLSNTVPAK                | 2.29 | 0.01 | 1.60 | 0.44 | 1.23 | 0.85 |
| 60197 | 0 | 243101 | QVLSTKLAEQYDTFV           | 2.67 | 0.01 | 3.32 | 1.20 | 0.22 | 0.85 |
| 60198 | 0 | 243101 | QVLSTKLAEQYDTFV           | 2.67 | 0.01 | 3.32 | 1.20 | 0.22 | 0.85 |
| 60199 | 0 | 133671 | QVLTANPSSQSSP             | 2.57 | 0.01 | 0.78 | 2.97 | 0.22 | 0.28 |
| 60200 | 0 | 52745  | QVMFDFAS                  | 2.12 | 0.01 | 3.78 | 0.68 | 0.22 | 0.85 |
| 60201 | 0 | 52747  | QVMPYVQ                   | 2.05 | 0.01 | 0.90 | 0.44 | 0.85 | 1.39 |
| 60202 | 0 | 483646 | QVMRQQCCQQLAQIP<br>QQLQCA | 3.04 | 0.01 | 1.86 | 1.20 | 0.22 | 0.28 |
| 60203 | 0 | 483646 | QVMRQQCCQQLAQIP<br>QQLQCA | 3.04 | 0.01 | 1.86 | 0.44 | 1.93 | 0.28 |
| 60204 | 0 | 483646 | QVMRQQCCQQLAQIP<br>QQLQCA | 3.04 | 0.01 | 1.86 | 0.44 | 1.93 | 0.28 |
| 60205 | 0 | 52749  | QVMSRSANEGYD              | 2.43 | 0.01 | 2.40 | 1.20 | 0.22 | 0.28 |
| 60206 | 0 | 52749  | QVMSRSANEGYD              | 2.43 | 0.01 | 2.40 | 0.44 | 1.59 | 0.28 |
| 60207 | 0 | 52749  | QVMSRSANEGYD              | 2.43 | 0.01 | 2.40 | 0.44 | 1.59 | 0.28 |
| 60208 | 0 | 52749  | QVMSRSANEGYD              | 2.43 | 0.01 | 2.40 | 0.44 | 1.59 | 0.28 |
| 60209 | 0 | 129705 | QVMTPQGR                  | 2.13 | 0.01 | 0.78 | 0.44 | 1.13 | 0.28 |
| 60210 | 0 | 52750  | QVMYVPPGAP                | 2.33 | 0.01 | 3.67 | 0.68 | 0.22 | 0.28 |
| 60211 | 0 | 165200 | QVNETLAC                  | 2.10 | 4.63 | 0.90 | 1.20 | 0.22 | 0.85 |
| 60212 | 0 | 165200 | QVNETLAC                  | 2.10 | 4.63 | 0.90 | 1.20 | 0.22 | 3.25 |
| 60213 | 0 | 165201 | QVNETLQLHVDKAVSGL<br>RSC  | 2.92 | 0.01 | 0.90 | 1.20 | 0.22 | 2.51 |
| 60214 | 0 | 165201 | QVNETLQLHVDKAVSGL<br>RSC  | 2.92 | 0.01 | 0.90 | 1.20 | 0.22 | 0.28 |
| 60215 | 0 | 165201 | QVNETLQLHVDKAVSGL<br>RSC  | 2.92 | 0.01 | 0.90 | 1.20 | 0.22 | 0.28 |
| 60216 | 0 | 165201 | QVNETLQLHVDKAVSGL<br>RSC  | 2.92 | 0.01 | 0.90 | 1.20 | 0.22 | 0.28 |
| 60217 | 0 | 165201 | QVNETLQLHVDKAVSGL<br>RSC  | 2.92 | 0.01 | 0.90 | 1.20 | 0.22 | 0.28 |
| 60218 | 0 | 165201 | QVNETLQLHVDKAVSGL<br>RSC  | 2.92 | 0.01 | 0.90 | 1.20 | 0.22 | 3.25 |
| 60219 | 0 | 152075 | QVNNPKEWLQV               | 2.41 | 0.01 | 0.78 | 0.44 | 1.93 | 1.27 |
| 60220 | 0 | 52754  | QVNSLKKA                  | 2.11 | 0.01 | 2.83 | 2.61 | 0.22 | 0.28 |
| 60221 | 0 | 132036 | QVNTNKGGGVWESGA           | 2.67 | 0.01 | 0.78 | 0.44 | 1.13 | 0.85 |
| 60222 | 0 | 196749 | QVNYILTPVHGKSAF           | 2.60 | 0.01 | 3.72 | 1.12 | 0.22 | 0.28 |
| 60223 | 0 | 52755  | QVPEAV                    | 1.90 | 0.01 | 1.86 | 0.44 | 1.23 | 0.28 |
| 60224 | 0 | 147239 | QVPLVQEQ                  | 2.17 | 0.01 | 1.86 | 0.44 | 1.23 | 0.85 |
| 60225 | 0 | 149447 | QVPLVQEQQF                | 2.35 | 0.01 | 1.86 | 0.44 | 1.93 | 0.85 |
| 60226 | 0 | 149447 | QVPLVQEQQF                | 2.35 | 0.01 | 1.86 | 2.74 | 0.22 | 0.85 |
| 60227 | 0 | 148907 | QVPLVQQQF                 | 2.35 | 0.01 | 1.86 | 0.44 | 1.23 | 0.85 |
| 60228 | 0 | 52765  | QVPSSLSLLQSR              | 2.52 | 0.01 | 0.90 | 0.68 | 0.22 | 0.28 |

|       |   |        |                                                |      |      |      |      |      |      |
|-------|---|--------|------------------------------------------------|------|------|------|------|------|------|
| 60229 | 0 | 123683 | QVPTTEVVGTTPGQAP                               | 2.78 | 0.01 | 0.78 | 0.44 | 1.13 | 1.57 |
| 60230 | 0 | 164356 | QVQEVGAPEPVR                                   | 2.52 | 0.01 | 0.90 | 1.20 | 0.22 | 0.28 |
| 60231 | 0 | 121769 | QVRLAIDCPNHDAPS                                | 2.64 | 0.01 | 0.90 | 0.68 | 0.22 | 1.39 |
| 60232 | 0 | 121769 | QVRLAIDCPNHDAPS                                | 2.64 | 0.01 | 0.90 | 0.68 | 0.22 | 0.28 |
| 60233 | 0 | 121769 | QVRLAIDCPNHDAPS                                | 2.64 | 0.01 | 0.90 | 0.68 | 0.22 | 0.28 |
| 60234 | 0 | 52777  | QVRNIMSPVM                                     | 2.31 | 0.01 | 2.56 | 0.68 | 0.22 | 0.28 |
| 60235 | 0 | 52778  | QVRNIMSPVMGVIG                                 | 2.63 | 0.01 | 2.56 | 0.44 | 0.85 | 0.28 |
| 60236 | 0 | 237902 | QVRVENGTCVILATDM<br>GS                         | 2.80 | 0.01 | 3.19 | 0.44 | 0.22 | 0.85 |
| 60237 | 0 | 132891 | QVSCPAIQADEVLGE                                | 2.67 | 0.01 | 3.16 | 3.16 | 0.22 | 0.28 |
| 60238 | 0 | 148911 | QVSFQQPQQQ                                     | 2.35 | 0.01 | 1.86 | 0.44 | 1.23 | 0.85 |
| 60239 | 0 | 148911 | QVSFQQPQQQ                                     | 2.35 | 0.01 | 1.86 | 0.44 | 1.93 | 0.85 |
| 60240 | 0 | 148911 | QVSFQQPQQQ                                     | 2.35 | 0.01 | 1.86 | 2.74 | 0.22 | 0.85 |
| 60241 | 0 | 52789  | QVSFTPDIEGYAELAWG<br>IAS                       | 2.91 | 0.01 | 2.21 | 1.20 | 0.22 | 0.28 |
| 60242 | 0 | 113142 | QVSGPERTIPITREEKPA<br>VTAAPKK                  | 3.17 | 0.01 | 0.78 | 0.44 | 1.13 | 0.28 |
| 60243 | 0 | 113142 | QVSGPERTIPITREEKPA<br>VTAAPKK                  | 3.17 | 0.01 | 0.78 | 0.44 | 1.13 | 0.28 |
| 60244 | 0 | 113142 | QVSGPERTIPITREEKPA<br>VTAAPKK                  | 3.17 | 0.01 | 0.78 | 0.44 | 1.41 | 0.28 |
| 60245 | 0 | 113142 | QVSGPERTIPITREEKPA<br>VTAAPKK                  | 3.17 | 0.01 | 0.78 | 0.44 | 1.41 | 0.28 |
| 60246 | 0 | 52790  | QVSIQDTRNAVRACRIQ<br>YHHDPQPVGREKFTIRP<br>HYGK | 3.56 | 0.01 | 3.13 | 0.68 | 2.25 | 1.75 |
| 60247 | 0 | 52790  | QVSIQDTRNAVRACRIQ<br>YHHDPQPVGREKFTIRP<br>HYGK | 3.56 | 0.01 | 3.13 | 0.68 | 0.22 | 0.28 |
| 60248 | 0 | 52790  | QVSIQDTRNAVRACRIQ<br>YHHDPQPVGREKFTIRP<br>HYGK | 3.56 | 0.01 | 3.13 | 1.15 | 0.22 | 0.85 |
| 60249 | 0 | 52790  | QVSIQDTRNAVRACRIQ<br>YHHDPQPVGREKFTIRP<br>HYGK | 3.56 | 0.01 | 3.13 | 1.15 | 0.22 | 0.85 |
| 60250 | 0 | 52792  | QVSLESVDVYFQDVFGT<br>MWC                       | 2.94 | 0.01 | 2.48 | 1.20 | 0.22 | 0.28 |
| 60251 | 0 | 52792  | QVSLESVDVYFQDVFGT<br>MWC                       | 2.94 | 0.01 | 2.48 | 1.20 | 0.22 | 0.28 |
| 60252 | 0 | 52792  | QVSLESVDVYFQDVFGT<br>MWC                       | 2.94 | 0.01 | 2.48 | 1.20 | 0.22 | 2.12 |
| 60253 | 0 | 52793  | QVSLHTSRPCHIVDGHG<br>YFLLARCP                  | 3.13 | 0.01 | 3.59 | 0.68 | 0.22 | 0.28 |
| 60254 | 0 | 52793  | QVSLHTSRPCHIVDGHG<br>YFLLARCP                  | 3.13 | 0.01 | 3.59 | 0.68 | 0.22 | 0.28 |

|       |   |        |                                |      |      |      |      |      |      |
|-------|---|--------|--------------------------------|------|------|------|------|------|------|
| 60255 | 0 | 52793  | QVSLHTSRPCHIVDGHG<br>YFLLARCP  | 3.13 | 0.01 | 3.59 | 0.68 | 0.22 | 0.28 |
| 60256 | 0 | 109779 | QVSLTCL                        | 2.02 | 0.01 | 0.78 | 0.44 | 1.13 | 0.28 |
| 60257 | 0 | 52794  | QVSLYTSRPCHIVDGHG<br>YFLLARCP  | 3.13 | 0.01 | 3.36 | 0.68 | 0.22 | 0.28 |
| 60258 | 0 | 52794  | QVSLYTSRPCHIVDGHG<br>YFLLARCP  | 3.13 | 0.01 | 3.36 | 0.68 | 0.22 | 0.28 |
| 60259 | 0 | 52794  | QVSLYTSRPCHIVDGHG<br>YFLLARCP  | 3.13 | 0.01 | 3.36 | 0.68 | 0.22 | 0.28 |
| 60260 | 0 | 195052 | QVTVYPV                        | 2.04 | 0.01 | 2.24 | 1.15 | 0.22 | 0.85 |
| 60261 | 0 | 195052 | QVTVYPV                        | 2.04 | 0.01 | 2.24 | 1.81 | 0.22 | 0.28 |
| 60262 | 0 | 195052 | QVTVYPV                        | 2.04 | 0.01 | 2.24 | 1.15 | 0.22 | 0.85 |
| 60263 | 0 | 118572 | QVVAVKAPGFGDN                  | 2.55 | 0.01 | 0.78 | 0.44 | 1.74 | 0.85 |
| 60264 | 0 | 432081 | QVVHNSYNRPAYSPG                | 2.67 | 0.01 | 3.42 | 3.06 | 0.22 | 0.28 |
| 60265 | 0 | 141072 | QVVHVETHRCNI                   | 2.47 | 0.01 | 0.78 | 0.68 | 0.22 | 0.28 |
| 60266 | 0 | 87755  | QVVKQPDYLVVPGEVM<br>EYKPRR     | 3.05 | 0.01 | 3.93 | 3.16 | 0.22 | 0.28 |
| 60267 | 0 | 87755  | QVVKQPDYLVVPGEVM<br>EYKPRR     | 3.05 | 0.01 | 3.93 | 3.16 | 0.22 | 2.02 |
| 60268 | 0 | 87755  | QVVKQPDYLVVPGEVM<br>EYKPRR     | 3.05 | 0.01 | 3.93 | 3.16 | 2.25 | 1.75 |
| 60269 | 0 | 103537 | QVVLGWKVSDLKSST                | 2.69 | 0.01 | 2.04 | 0.44 | 0.85 | 1.28 |
| 60270 | 0 | 52806  | QVVMGS                         | 1.89 | 0.01 | 1.96 | 0.44 | 0.85 | 0.28 |
| 60271 | 0 | 225643 | QVVQATDKLVMHNRGL<br>VMSSAKVSSL | 3.20 | 0.01 | 3.57 | 2.75 | 0.22 | 0.28 |
| 60272 | 0 | 225643 | QVVQATDKLVMHNRGL<br>VMSSAKVSSL | 3.20 | 0.01 | 3.85 | 2.61 | 0.22 | 1.34 |
| 60273 | 0 | 225643 | QVVQATDKLVMHNRGL<br>VMSSAKVSSL | 3.20 | 0.01 | 3.85 | 0.68 | 0.22 | 1.34 |
| 60274 | 0 | 108605 | QVTERESEIESHQGETE<br>KESG      | 3.07 | 0.01 | 3.27 | 2.49 | 0.85 | 0.28 |
| 60275 | 0 | 108605 | QVTERESEIESHQGETE<br>KESG      | 3.07 | 0.01 | 3.27 | 0.44 | 0.85 | 0.28 |
| 60276 | 0 | 52813  | QVVVMKSKNDQGITNK<br>CKM        | 2.90 | 0.01 | 2.08 | 0.44 | 0.22 | 1.57 |
| 60277 | 0 | 52813  | QVVVMKSKNDQGITNK<br>CKM        | 2.90 | 0.01 | 2.08 | 0.44 | 0.22 | 1.57 |
| 60278 | 0 | 52814  | QVVYDYQH                       | 2.16 | 0.01 | 2.21 | 1.12 | 0.22 | 0.28 |
| 60279 | 0 | 52814  | QVVYDYQH                       | 2.16 | 0.01 | 2.21 | 0.44 | 0.85 | 0.28 |
| 60280 | 0 | 52815  | QVVYDYQHKE                     | 2.33 | 0.01 | 2.21 | 1.12 | 0.22 | 0.28 |
| 60281 | 0 | 52815  | QVVYDYQHKE                     | 2.33 | 0.01 | 2.21 | 1.12 | 0.22 | 0.28 |
| 60282 | 0 | 52817  | QVWIPPLNVR                     | 2.30 | 0.01 | 1.96 | 0.44 | 0.85 | 1.34 |
| 60283 | 0 | 52818  | QVWPSSH                        | 2.01 | 0.01 | 0.90 | 0.68 | 0.22 | 0.28 |
| 60284 | 0 | 118573 | QVYIRGSKI                      | 2.21 | 0.01 | 0.78 | 0.44 | 1.13 | 0.28 |
| 60285 | 0 | 52821  | QVYLHGDKTKPMILT                | 2.64 | 0.01 | 3.03 | 1.12 | 0.22 | 0.28 |
| 60286 | 0 | 52821  | QVYLHGDKTKPMILT                | 2.64 | 0.01 | 3.03 | 1.12 | 0.22 | 0.28 |

|       |   |        |                                    |      |      |      |      |      |      |
|-------|---|--------|------------------------------------|------|------|------|------|------|------|
| 60287 | 0 | 52822  | QVYLNGDKTKPVTLT                    | 2.68 | 0.01 | 3.38 | 1.12 | 0.22 | 0.28 |
| 60288 | 0 | 95749  | QVYNKLGMYPPN                       | 2.46 | 0.01 | 2.88 | 0.44 | 1.23 | 0.85 |
| 60289 | 0 | 95749  | QVYNKLGMYPPN                       | 2.46 | 0.01 | 2.88 | 1.12 | 0.22 | 0.85 |
| 60290 | 0 | 109780 | QVYTLPP                            | 1.99 | 0.01 | 0.78 | 0.44 | 1.13 | 0.28 |
| 60291 | 0 | 128088 | QVYYRPV                            | 2.03 | 0.01 | 2.52 | 2.00 | 0.22 | 0.28 |
| 60292 | 0 | 128088 | QVYYRPV                            | 2.03 | 0.01 | 2.52 | 2.00 | 0.22 | 0.28 |
| 60293 | 0 | 52825  | QVYYRPVDQ                          | 2.25 | 0.01 | 1.60 | 3.15 | 0.22 | 0.85 |
| 60294 | 0 | 52825  | QVYYRPVDQ                          | 2.25 | 0.01 | 1.60 | 3.15 | 0.22 | 0.85 |
| 60295 | 0 | 52825  | QVYYRPVDQ                          | 2.25 | 0.01 | 1.60 | 3.15 | 0.22 | 1.48 |
| 60296 | 0 | 52825  | QVYYRPVDQ                          | 2.25 | 0.01 | 1.60 | 3.15 | 0.22 | 0.28 |
| 60297 | 0 | 128089 | QVYYRPVDQYSNQN                     | 2.65 | 0.01 | 2.52 | 2.00 | 0.22 | 0.28 |
| 60298 | 0 | 128089 | QVYYRPVDQYSNQN                     | 2.65 | 0.01 | 2.52 | 2.00 | 0.22 | 0.85 |
| 60299 | 0 | 128089 | QVYYRPVDQYSNQN                     | 2.65 | 0.01 | 2.52 | 2.00 | 0.22 | 0.28 |
| 60300 | 0 | 128089 | QVYYRPVDQYSNQN                     | 2.65 | 0.01 | 2.52 | 2.00 | 0.22 | 0.28 |
| 60301 | 0 | 52826  | QVYYRPVDQYSNQNNF<br>VHDCVNITIKQHTV | 3.34 | 0.01 | 1.75 | 3.00 | 0.22 | 0.28 |
| 60302 | 0 | 165645 | QWAFaip                            | 2.02 | 0.01 | 0.90 | 0.44 | 1.23 | 1.39 |
| 60303 | 0 | 165645 | QWAFaip                            | 2.02 | 0.01 | 0.90 | 0.44 | 1.23 | 1.39 |
| 60304 | 0 | 227504 | QWAPATMQTPPRAPT                    | 2.73 | 0.01 | 2.48 | 0.44 | 1.59 | 0.28 |
| 60305 | 0 | 133327 | QWAPYGGRNAYNETKL<br>K              | 2.77 | 0.01 | 0.90 | 1.20 | 0.22 | 0.85 |
| 60306 | 0 | 133328 | QWAPYGYFRNAYNEIKL<br>K             | 2.82 | 0.01 | 0.90 | 1.20 | 0.22 | 0.85 |
| 60307 | 0 | 52829  | QWELQGDRRC                         | 2.31 | 0.01 | 2.16 | 0.44 | 1.23 | 0.85 |
| 60308 | 0 | 52830  | QWELQGDRRCQSQLE                    | 2.70 | 0.01 | 2.16 | 2.90 | 0.22 | 0.85 |
| 60309 | 0 | 52833  | QWFLDL                             | 1.90 | 0.01 | 2.40 | 0.44 | 0.85 | 0.28 |
| 60310 | 0 | 181437 | QWFYDGYPTFGEHLQ                    | 2.67 | 0.01 | 2.82 | 1.15 | 0.22 | 0.28 |
| 60311 | 0 | 110390 | QWGRL                              | 1.74 | 0.01 | 2.71 | 0.68 | 0.22 | 0.28 |
| 60312 | 0 | 110390 | QWGRL                              | 1.74 | 0.01 | 2.71 | 0.68 | 0.22 | 0.28 |
| 60313 | 0 | 110390 | QWGRL                              | 1.74 | 0.01 | 2.71 | 0.68 | 0.22 | 1.48 |
| 60314 | 0 | 52839  | QWIFGMS                            | 1.99 | 0.01 | 0.90 | 0.68 | 0.22 | 1.39 |
| 60315 | 0 | 52844  | QWKLPQGD                           | 2.13 | 0.01 | 2.40 | 2.43 | 0.22 | 0.28 |
| 60316 | 0 | 167806 | QWKLPQGDD                          | 2.22 | 0.01 | 2.40 | 2.43 | 0.22 | 0.28 |
| 60317 | 0 | 187699 | QWNK                               | 1.57 | 0.01 | 1.75 | 3.78 | 0.22 | 0.85 |
| 60318 | 0 | 187699 | QWNK                               | 1.57 | 0.01 | 1.75 | 3.78 | 0.22 | 0.85 |
| 60319 | 0 | 187699 | QWNK                               | 1.57 | 0.01 | 1.75 | 3.78 | 0.22 | 0.28 |
| 60320 | 0 | 187699 | QWNK                               | 1.57 | 0.01 | 1.75 | 3.78 | 0.22 | 0.28 |
| 60321 | 0 | 187699 | QWNK                               | 1.57 | 0.01 | 1.75 | 3.78 | 0.22 | 1.48 |
| 60322 | 0 | 187699 | QWNK                               | 1.57 | 0.01 | 1.75 | 3.78 | 0.22 | 1.75 |
| 60323 | 0 | 187699 | QWNK                               | 1.57 | 0.01 | 1.75 | 3.78 | 0.22 | 1.75 |
| 60324 | 0 | 187699 | QWNK                               | 1.57 | 0.01 | 1.75 | 3.78 | 0.22 | 0.85 |
| 60325 | 0 | 187699 | QWNK                               | 1.57 | 0.01 | 1.75 | 3.78 | 0.22 | 1.34 |
| 60326 | 0 | 228693 | QWNKP                              | 1.74 | 0.01 | 1.75 | 2.19 | 0.22 | 0.85 |
| 60327 | 0 | 228694 | QWNKPSK                            | 2.02 | 0.01 | 1.75 | 2.19 | 0.22 | 0.85 |

|       |   |        |                                                       |      |      |      |      |      |      |
|-------|---|--------|-------------------------------------------------------|------|------|------|------|------|------|
| 60328 | 0 | 52850  | QWNNKPSKPKTNM                                         | 2.49 | 0.01 | 1.60 | 1.20 | 0.22 | 0.28 |
| 60329 | 0 | 52850  | QWNNKPSKPKTNM                                         | 2.49 | 0.01 | 1.60 | 1.20 | 0.22 | 0.85 |
| 60330 | 0 | 167377 | QWNRTQY                                               | 2.03 | 0.01 | 0.90 | 1.15 | 0.22 | 1.39 |
| 60331 | 0 | 115933 | QWQVLSNTVP                                            | 2.32 | 0.01 | 1.60 | 0.44 | 1.23 | 0.85 |
| 60332 | 0 | 52863  | QWTPEEDQ                                              | 2.14 | 0.01 | 2.40 | 2.43 | 0.22 | 0.28 |
| 60333 | 0 | 167807 | QWTPEEDQK                                             | 2.23 | 0.01 | 2.40 | 2.43 | 0.22 | 0.28 |
| 60334 | 0 | 167378 | QWTWTQY                                               | 2.06 | 0.01 | 0.90 | 1.15 | 0.22 | 1.39 |
| 60335 | 0 | 52865  | QWVMAGLVSA                                            | 2.38 | 0.01 | 3.61 | 1.15 | 0.22 | 0.85 |
| 60336 | 0 | 52865  | QWVMAGLVSA                                            | 2.38 | 0.01 | 3.61 | 1.15 | 0.22 | 0.85 |
| 60337 | 0 | 52865  | QWVMAGLVSA                                            | 2.38 | 0.01 | 3.61 | 1.15 | 0.22 | 0.85 |
| 60338 | 0 | 52865  | QWVMAGLVSA                                            | 2.38 | 0.01 | 3.61 | 1.15 | 0.22 | 0.28 |
| 60339 | 0 | 52865  | QWVMAGLVSA                                            | 2.38 | 0.01 | 3.61 | 1.15 | 0.22 | 0.28 |
| 60340 | 0 | 234246 | QWVPGEQ                                               | 2.03 | 0.01 | 0.90 | 0.68 | 0.22 | 0.28 |
| 60341 | 0 | 52868  | QWYDDR                                                | 1.89 | 0.01 | 0.90 | 0.68 | 0.22 | 1.27 |
| 60342 | 0 | 52870  | QY                                                    | 1.10 | 0.01 | 4.45 | 1.12 | 0.22 | 0.28 |
| 60343 | 0 | 52870  | QY                                                    | 1.10 | 0.01 | 4.45 | 1.12 | 0.22 | 0.28 |
| 60344 | 0 | 52870  | QY                                                    | 1.10 | 0.01 | 4.45 | 1.15 | 0.22 | 0.28 |
| 60345 | 0 | 52871  | QYAAQNRRLDLL                                          | 2.54 | 0.01 | 2.04 | 1.20 | 0.22 | 0.85 |
| 60346 | 0 | 52871  | QYAAQNRRLDLL                                          | 2.54 | 0.01 | 2.04 | 1.20 | 0.22 | 0.85 |
| 60347 | 0 | 52871  | QYAAQNRRLDLL                                          | 2.54 | 0.01 | 2.04 | 1.20 | 0.22 | 0.85 |
| 60348 | 0 | 52871  | QYAAQNRRLDLL                                          | 2.54 | 0.01 | 2.04 | 1.20 | 0.22 | 0.85 |
| 60349 | 0 | 52871  | QYAAQNRRLDLL                                          | 2.54 | 0.01 | 2.04 | 1.20 | 0.22 | 0.85 |
| 60350 | 0 | 52871  | QYAAQNRRLDLL                                          | 2.54 | 0.01 | 2.04 | 1.20 | 0.22 | 0.85 |
| 60351 | 0 | 52871  | QYAAQNRRLDLL                                          | 2.54 | 0.01 | 2.04 | 1.20 | 0.22 | 0.85 |
| 60352 | 0 | 52871  | QYAAQNRRLDLL                                          | 2.54 | 0.01 | 2.04 | 1.20 | 0.22 | 0.85 |
| 60353 | 0 | 193053 | QYAKYASETANSSGASK<br>AEV                              | 2.97 | 0.01 | 3.47 | 2.00 | 0.22 | 0.28 |
| 60354 | 0 | 187183 | QYALWPPNLQAGVP                                        | 2.63 | 0.01 | 0.90 | 0.44 | 1.41 | 1.39 |
| 60355 | 0 | 187183 | QYALWPPNLQAGVP                                        | 2.63 | 0.01 | 0.90 | 0.44 | 1.41 | 0.28 |
| 60356 | 0 | 187183 | QYALWPPNLQAGVP                                        | 2.63 | 0.01 | 0.90 | 0.44 | 1.41 | 1.34 |
| 60357 | 0 | 365590 | QYDAADVEAGDGPDK                                       | 2.70 | 0.01 | 1.61 | 0.44 | 0.85 | 1.28 |
| 60358 | 0 | 52878  | QYDEMEECQAAPYIEQ<br>AQA                               | 2.98 | 0.01 | 1.96 | 0.44 | 0.85 | 0.28 |
| 60359 | 0 | 52879  | QYDEMEECQAAPYIEQ<br>AQV                               | 2.96 | 0.01 | 1.96 | 0.44 | 0.85 | 0.28 |
| 60360 | 0 | 52882  | QYDEMEECQSAPYIEQ<br>AQA                               | 2.98 | 0.01 | 1.96 | 0.44 | 0.85 | 0.28 |
| 60361 | 0 | 52883  | QYDIKYTWNVPKIAPKS<br>ENVVVTVKLIGDNGVLA<br>CAIATHGKIRD | 3.73 | 0.01 | 3.72 | 0.44 | 1.23 | 0.28 |
| 60362 | 0 | 52883  | QYDIKYTWNVPKIAPKS<br>ENVVVTVKLIGDNGVLA<br>CAIATHGKIRD | 3.73 | 0.01 | 3.72 | 0.44 | 1.23 | 3.40 |
| 60363 | 0 | 243104 | QYDQVLSTKLAEQYD                                       | 2.69 | 0.01 | 3.32 | 1.20 | 0.22 | 0.85 |
| 60364 | 0 | 243104 | QYDQVLSTKLAEQYD                                       | 2.69 | 0.01 | 3.32 | 1.20 | 0.22 | 0.85 |
| 60365 | 0 | 52891  | QYDSNGTKLE                                            | 2.26 | 0.01 | 2.73 | 0.68 | 0.22 | 0.28 |



|       |   |        |                                    |      |      |      |      |      |      |
|-------|---|--------|------------------------------------|------|------|------|------|------|------|
| 60366 | 0 | 52891  | QYDSNGTKLE                         | 2.26 | 0.01 | 2.73 | 0.68 | 0.22 | 0.85 |
| 60367 | 0 | 52891  | QYDSNGTKLE                         | 2.26 | 0.01 | 2.73 | 0.68 | 0.22 | 0.85 |
| 60368 | 0 | 52891  | QYDSNGTKLE                         | 2.26 | 0.01 | 2.73 | 0.68 | 0.22 | 1.34 |
| 60369 | 0 | 98408  | QYEADLAAVK                         | 2.30 | 0.01 | 2.39 | 0.68 | 0.22 | 0.28 |
| 60370 | 0 | 52893  | QYECETAKELES                       | 2.48 | 0.01 | 2.56 | 2.69 | 2.26 | 0.85 |
| 60371 | 0 | 52895  | QYEESFLRSAEANQGQF<br>EHFREC        | 3.09 | 0.01 | 3.89 | 0.44 | 1.23 | 0.85 |
| 60372 | 0 | 52898  | QYENLKYTVIITVHT                    | 2.67 | 0.01 | 3.45 | 0.44 | 1.59 | 0.28 |
| 60373 | 0 | 52898  | QYENLKYTVIITVHT                    | 2.67 | 0.01 | 3.45 | 0.44 | 1.59 | 0.28 |
| 60374 | 0 | 106762 | QYFALEAYAF                         | 2.35 | 0.01 | 2.75 | 0.44 | 1.23 | 0.85 |
| 60375 | 0 | 132039 | QYFVGKRTVPPGECFIQ<br>FLS           | 2.91 | 0.01 | 0.78 | 1.20 | 0.22 | 0.28 |
| 60376 | 0 | 132039 | QYFVGKRTVPPGECFIQ<br>FLS           | 2.91 | 0.01 | 0.78 | 1.20 | 0.22 | 1.34 |
| 60377 | 0 | 132039 | QYFVGKRTVPPGECFIQ<br>FLS           | 2.91 | 0.01 | 0.78 | 3.75 | 0.22 | 0.28 |
| 60378 | 0 | 133329 | QYFVGKRTVPPGECFIQ<br>FLSE          | 2.96 | 0.01 | 0.78 | 1.12 | 0.22 | 0.28 |
| 60379 | 0 | 133329 | QYFVGKRTVPPGECFIQ<br>FLSE          | 2.96 | 0.01 | 0.78 | 0.44 | 1.41 | 0.28 |
| 60380 | 0 | 133329 | QYFVGKRTVPPGECFIQ<br>FLSE          | 2.96 | 0.01 | 0.78 | 0.44 | 1.13 | 0.28 |
| 60381 | 0 | 133329 | QYFVGKRTVPPGECFIQ<br>FLSE          | 2.96 | 0.01 | 0.78 | 0.44 | 1.13 | 0.28 |
| 60382 | 0 | 133329 | QYFVGKRTVPPGECFIQ<br>FLSE          | 2.96 | 0.01 | 0.78 | 0.44 | 1.41 | 0.28 |
| 60383 | 0 | 133329 | QYFVGKRTVPPGECFIQ<br>FLSE          | 2.96 | 0.01 | 0.78 | 0.44 | 1.13 | 0.28 |
| 60384 | 0 | 133329 | QYFVGKRTVPPGECFIQ<br>FLSE          | 2.96 | 0.01 | 0.78 | 0.44 | 1.41 | 0.28 |
| 60385 | 0 | 133329 | QYFVGKRTVPPGECFIQ<br>FLSE          | 2.96 | 0.01 | 0.78 | 1.12 | 0.22 | 0.28 |
| 60386 | 0 | 133330 | QYFVGKRTVPPGECFIQ<br>FLSEPTITFGTAI | 3.33 | 0.01 | 0.78 | 0.44 | 1.41 | 0.28 |
| 60387 | 0 | 133330 | QYFVGKRTVPPGECFIQ<br>FLSEPTITFGTAI | 3.33 | 0.01 | 0.78 | 0.44 | 1.13 | 0.28 |
| 60388 | 0 | 133330 | QYFVGKRTVPPGECFIQ<br>FLSEPTITFGTAI | 3.33 | 0.01 | 0.78 | 0.44 | 1.41 | 0.28 |
| 60389 | 0 | 52910  | QYGLEKRDNGHQGE                     | 2.62 | 0.01 | 2.58 | 1.81 | 0.22 | 0.28 |
| 60390 | 0 | 52910  | QYGLEKRDNGHQGE                     | 2.62 | 0.01 | 2.58 | 2.43 | 0.22 | 0.28 |
| 60391 | 0 | 52910  | QYGLEKRDNGHQGE                     | 2.62 | 0.01 | 2.58 | 2.43 | 0.22 | 1.34 |
| 60392 | 0 | 113797 | QYGSMGVFFGGLGIGT<br>GSGT           | 2.97 | 0.01 | 1.86 | 2.37 | 0.22 | 0.28 |
| 60393 | 0 | 113797 | QYGSMGVFFGGLGIGT<br>GSGT           | 2.97 | 0.01 | 1.86 | 1.12 | 0.22 | 1.75 |
| 60394 | 0 | 113797 | QYGSMGVFFGGLGIGT<br>GSGT           | 2.97 | 0.01 | 1.86 | 1.12 | 0.22 | 0.28 |

|       |   |        |                                     |      |      |      |      |      |      |
|-------|---|--------|-------------------------------------|------|------|------|------|------|------|
| 60395 | 0 | 52929  | QYIKANSKFIGITE                      | 2.59 | 0.01 | 2.95 | 0.68 | 0.22 | 1.66 |
| 60396 | 0 | 52930  | QYIKANSKFIGITEL                     | 2.64 | 0.01 | 2.95 | 2.43 | 0.22 | 0.28 |
| 60397 | 0 | 52930  | QYIKANSKFIGITEL                     | 2.64 | 0.01 | 2.95 | 1.20 | 0.22 | 0.28 |
| 60398 | 0 | 52930  | QYIKANSKFIGITEL                     | 2.64 | 0.01 | 2.95 | 0.68 | 0.22 | 0.28 |
| 60399 | 0 | 180920 | QYIVNEDKFQILYNSIMY<br>GF            | 2.94 | 0.01 | 2.95 | 0.68 | 0.22 | 0.28 |
| 60400 | 0 | 52967  | QYIYNLTIC                           | 2.23 | 0.01 | 2.80 | 2.13 | 0.22 | 1.27 |
| 60401 | 0 | 52967  | QYIYNLTIC                           | 2.23 | 0.01 | 2.80 | 1.15 | 0.22 | 1.27 |
| 60402 | 0 | 52977  | QYLAGLSTLPGNPAIASL<br>MAFTAAB       | 3.16 | 0.01 | 1.72 | 0.44 | 1.59 | 0.28 |
| 60403 | 0 | 115462 | QYLQYLYQGPIVLNPWD<br>QVK            | 2.97 | 0.01 | 1.60 | 0.44 | 1.23 | 1.28 |
| 60404 | 0 | 112282 | QYLSSFT                             | 2.01 | 0.01 | 0.78 | 0.44 | 1.13 | 0.28 |
| 60405 | 0 | 133331 | QYLVGERTVLAGQCYIQ<br>FLSQ           | 2.99 | 0.01 | 0.78 | 1.12 | 0.22 | 0.28 |
| 60406 | 0 | 133331 | QYLVGERTVLAGQCYIQ<br>FLSQ           | 2.99 | 0.01 | 0.78 | 0.44 | 1.41 | 0.28 |
| 60407 | 0 | 133331 | QYLVGERTVLAGQCYIQ<br>FLSQ           | 2.99 | 0.01 | 0.78 | 0.44 | 1.13 | 0.28 |
| 60408 | 0 | 133331 | QYLVGERTVLAGQCYIQ<br>FLSQ           | 2.99 | 0.01 | 0.78 | 0.44 | 1.41 | 0.28 |
| 60409 | 0 | 133331 | QYLVGERTVLAGQCYIQ<br>FLSQ           | 2.99 | 0.01 | 0.78 | 0.44 | 1.41 | 0.28 |
| 60410 | 0 | 133331 | QYLVGERTVLAGQCYIQ<br>FLSQ           | 2.99 | 0.01 | 0.78 | 0.44 | 1.13 | 0.28 |
| 60411 | 0 | 133331 | QYLVGERTVLAGQCYIQ<br>FLSQ           | 2.99 | 0.01 | 0.78 | 0.44 | 1.41 | 0.28 |
| 60412 | 0 | 133331 | QYLVGERTVLAGQCYIQ<br>FLSQ           | 2.99 | 0.01 | 0.78 | 0.44 | 1.13 | 0.28 |
| 60413 | 0 | 53004  | QYLYGVGSSIASWAIKW<br>EYV            | 2.96 | 0.01 | 2.83 | 0.44 | 0.85 | 0.28 |
| 60414 | 0 | 53004  | QYLYGVGSSIASWAIKW<br>EYV            | 2.96 | 0.01 | 2.83 | 0.44 | 0.85 | 0.28 |
| 60415 | 0 | 53004  | QYLYGVGSSIASWAIKW<br>EYV            | 2.96 | 0.01 | 2.83 | 0.44 | 0.85 | 0.28 |
| 60416 | 0 | 95750  | QYLYQGPIVL                          | 2.34 | 0.01 | 1.60 | 0.44 | 1.23 | 0.85 |
| 60417 | 0 | 115463 | QYLYQGPIVLNPWDQV<br>KRNA            | 2.94 | 0.01 | 1.60 | 0.44 | 1.23 | 1.28 |
| 60418 | 0 | 226380 | QYMDRSQ                             | 2.03 | 0.01 | 0.90 | 2.66 | 0.22 | 1.39 |
| 60419 | 0 | 110982 | QYNKPLCDLL                          | 2.29 | 0.01 | 1.86 | 0.44 | 0.85 | 1.27 |
| 60420 | 0 | 53009  | QYNLAFSDRQSAQ                       | 2.56 | 0.01 | 4.45 | 1.15 | 0.22 | 0.28 |
| 60421 | 0 | 53009  | QYNLAFSDRQSAQ                       | 2.56 | 0.01 | 4.45 | 1.15 | 0.22 | 0.85 |
| 60422 | 0 | 53009  | QYNLAFSDRQSAQ                       | 2.56 | 0.01 | 4.45 | 1.15 | 0.22 | 1.48 |
| 60423 | 0 | 53010  | QYNLTFSDRQSAQ                       | 2.54 | 0.01 | 4.93 | 1.15 | 0.22 | 2.02 |
| 60424 | 0 | 175318 | QYNPTGKGIDDANKKA<br>CCAIRGSFYDLEIIK | 3.38 | 0.01 | 2.86 | 2.55 | 0.22 | 0.28 |

|       |   |        |                                                  |      |      |      |      |      |      |
|-------|---|--------|--------------------------------------------------|------|------|------|------|------|------|
| 60425 | 0 | 175318 | QYNPTGKGIDDANKKA<br>CCAIRGSFYDLEIIK              | 3.38 | 0.01 | 2.86 | 2.55 | 0.22 | 0.28 |
| 60426 | 0 | 53011  | QYNQLSTGLQEA                                     | 2.48 | 0.01 | 2.69 | 0.68 | 0.22 | 0.28 |
| 60427 | 0 | 53012  | QYNQMHMLSN                                       | 2.34 | 0.01 | 2.73 | 0.44 | 0.85 | 0.28 |
| 60428 | 0 | 53012  | QYNQMHMLSN                                       | 2.34 | 0.01 | 2.73 | 0.68 | 0.22 | 0.28 |
| 60429 | 0 | 107587 | QYNSTYR                                          | 2.02 | 0.01 | 0.78 | 0.44 | 1.13 | 0.28 |
| 60430 | 0 | 119632 | QYNSTYRV                                         | 2.12 | 0.01 | 0.78 | 0.44 | 1.93 | 0.28 |
| 60431 | 0 | 53014  | QYNTGNFSDGFYPFIN                                 | 2.75 | 0.01 | 3.44 | 2.49 | 0.22 | 0.28 |
| 60432 | 0 | 53014  | QYNTGNFSDGFYPFIN                                 | 2.75 | 0.01 | 3.44 | 2.49 | 0.22 | 0.28 |
| 60433 | 0 | 53014  | QYNTGNFSDGFYPFIN                                 | 2.75 | 0.01 | 3.44 | 2.49 | 0.22 | 1.27 |
| 60434 | 0 | 53015  | QYNTGNFSDGLYPFTN                                 | 2.75 | 0.01 | 3.32 | 2.49 | 0.22 | 0.28 |
| 60435 | 0 | 53015  | QYNTGNFSDGLYPFTN                                 | 2.75 | 0.01 | 3.32 | 2.49 | 0.22 | 0.28 |
| 60436 | 0 | 53015  | QYNTGNFSDGLYPFTN                                 | 2.75 | 0.01 | 3.32 | 2.49 | 0.22 | 0.28 |
| 60437 | 0 | 53015  | QYNTGNFSDGLYPFTN                                 | 2.75 | 0.01 | 3.32 | 2.49 | 0.22 | 0.28 |
| 60438 | 0 | 53018  | QYPALT                                           | 1.88 | 0.01 | 3.81 | 1.15 | 0.22 | 0.85 |
| 60439 | 0 | 53018  | QYPALT                                           | 1.88 | 0.01 | 3.81 | 1.15 | 0.22 | 0.85 |
| 60440 | 0 | 53018  | QYPALT                                           | 1.88 | 0.01 | 3.81 | 2.00 | 0.22 | 2.35 |
| 60441 | 0 | 53018  | QYPALT                                           | 1.88 | 0.01 | 3.81 | 2.00 | 0.22 | 2.35 |
| 60442 | 0 | 53018  | QYPALT                                           | 1.88 | 0.01 | 3.81 | 1.12 | 0.22 | 2.35 |
| 60443 | 0 | 53018  | QYPALT                                           | 1.88 | 0.01 | 3.81 | 1.12 | 0.22 | 2.35 |
| 60444 | 0 | 53018  | QYPALT                                           | 1.88 | 0.01 | 3.81 | 1.15 | 0.22 | 2.98 |
| 60445 | 0 | 78256  | QYPALTA                                          | 2.02 | 0.01 | 3.81 | 0.68 | 0.22 | 0.28 |
| 60446 | 0 | 78256  | QYPALTA                                          | 2.02 | 0.01 | 3.81 | 0.68 | 0.22 | 1.39 |
| 60447 | 0 | 78256  | QYPALTA                                          | 2.02 | 0.01 | 3.81 | 0.68 | 0.22 | 1.39 |
| 60448 | 0 | 78256  | QYPALTA                                          | 2.02 | 0.01 | 3.81 | 0.68 | 0.22 | 1.39 |
| 60449 | 0 | 78256  | QYPALTA                                          | 2.02 | 0.01 | 3.81 | 0.68 | 0.22 | 1.39 |
| 60450 | 0 | 78256  | QYPALTA                                          | 2.02 | 0.01 | 3.81 | 0.68 | 0.22 | 0.28 |
| 60451 | 0 | 98976  | QYPLGQGSFRPS                                     | 2.50 | 0.01 | 1.86 | 0.44 | 1.93 | 1.27 |
| 60452 | 0 | 117622 | QYPPGRGGPPPPMGRG<br>APPPGMMGPPPGMRP<br>PMGPPMGIP | 3.67 | 0.01 | 0.78 | 3.05 | 1.13 | 2.02 |
| 60453 | 0 | 117622 | QYPPGRGGPPPPMGRG<br>APPPGMMGPPPGMRP<br>PMGPPMGIP | 3.67 | 0.01 | 0.78 | 3.05 | 1.13 | 2.02 |
| 60454 | 0 | 117622 | QYPPGRGGPPPPMGRG<br>APPPGMMGPPPGMRP<br>PMGPPMGIP | 3.67 | 0.01 | 0.78 | 3.05 | 1.13 | 0.85 |
| 60455 | 0 | 117622 | QYPPGRGGPPPPMGRG<br>APPPGMMGPPPGMRP<br>PMGPPMGIP | 3.67 | 0.01 | 0.78 | 3.05 | 1.13 | 0.85 |

|       |   |        |                          |      |      |      |      |      |      |
|-------|---|--------|--------------------------|------|------|------|------|------|------|
| 60456 | 0 | 196751 | QYPRLTT                  | 1.99 | 0.01 | 0.90 | 0.44 | 1.23 | 1.39 |
| 60457 | 0 | 53022  | QYPTLL                   | 1.86 | 0.01 | 4.45 | 1.15 | 0.22 | 1.39 |
| 60458 | 0 | 53023  | QYPWRLA                  | 1.99 | 0.01 | 0.90 | 0.44 | 1.23 | 0.28 |
| 60459 | 0 | 53023  | QYPWRLA                  | 1.99 | 0.01 | 0.90 | 0.44 | 1.23 | 1.27 |
| 60460 | 0 | 53032  | QYSPGQ                   | 1.91 | 0.01 | 1.96 | 0.44 | 0.85 | 0.28 |
| 60461 | 0 | 149449 | QYSQPQQPIS               | 2.36 | 0.01 | 1.86 | 0.44 | 1.93 | 0.85 |
| 60462 | 0 | 149449 | QYSQPQQPIS               | 2.36 | 0.01 | 1.86 | 2.74 | 0.22 | 0.85 |
| 60463 | 0 | 149449 | QYSQPQQPIS               | 2.36 | 0.01 | 1.86 | 2.74 | 0.22 | 0.85 |
| 60464 | 0 | 190525 | QYSTGQVTVEMEWEL          | 2.69 | 0.01 | 3.97 | 2.00 | 1.41 | 0.28 |
| 60465 | 0 | 115100 | QYTDAPSFSDIP             | 2.48 | 0.01 | 1.60 | 0.44 | 1.23 | 0.28 |
| 60466 | 0 | 115100 | QYTDAPSFSDIP             | 2.48 | 0.01 | 1.60 | 0.44 | 1.23 | 0.28 |
| 60467 | 0 | 115464 | QYTDAPSFSDIPNPIGSE<br>NS | 2.95 | 0.01 | 1.60 | 0.44 | 1.23 | 1.28 |
| 60468 | 0 | 53039  | QYTDHHSSLLGP             | 2.44 | 0.01 | 0.90 | 2.22 | 0.85 | 1.39 |
| 60469 | 0 | 119633 | QYTGHTWTTPPAIFKS         | 2.70 | 0.01 | 0.78 | 1.15 | 0.22 | 1.57 |
| 60470 | 0 | 119633 | QYTGHTWTTPPAIFKS         | 2.70 | 0.01 | 0.78 | 0.44 | 1.13 | 1.57 |
| 60471 | 0 | 119633 | QYTGHTWTTPPAIFKS         | 2.70 | 0.01 | 0.78 | 0.44 | 1.41 | 1.57 |
| 60472 | 0 | 100451 | QYTHQDEIYE               | 2.34 | 0.01 | 2.18 | 2.16 | 0.22 | 0.28 |
| 60473 | 0 | 106763 | QYTMHPLELLVT             | 2.46 | 0.01 | 0.90 | 1.15 | 0.22 | 1.39 |
| 60474 | 0 | 113800 | QYTPTTQPYPRVT            | 2.61 | 0.01 | 3.67 | 0.68 | 0.22 | 0.85 |
| 60475 | 0 | 113800 | QYTPTTQPYPRVT            | 2.61 | 0.01 | 3.67 | 0.68 | 0.22 | 1.48 |
| 60476 | 0 | 113800 | QYTPTTQPYPRVT            | 2.61 | 0.01 | 3.67 | 0.68 | 0.22 | 0.85 |
| 60477 | 0 | 106764 | QYTSIHGCVVE              | 2.36 | 0.01 | 0.78 | 1.12 | 0.22 | 2.02 |
| 60478 | 0 | 106764 | QYTSIHGCVVE              | 2.36 | 0.01 | 0.78 | 1.12 | 0.22 | 2.66 |
| 60479 | 0 | 106764 | QYTSIHGCVVE              | 2.36 | 0.01 | 0.78 | 1.12 | 0.22 | 2.66 |
| 60480 | 0 | 121773 | QYVAMVADRLFLY            | 2.56 | 0.01 | 2.26 | 3.55 | 0.22 | 0.85 |
| 60481 | 0 | 121773 | QYVAMVADRLFLY            | 2.56 | 0.01 | 2.26 | 3.55 | 0.22 | 1.48 |
| 60482 | 0 | 135981 | QYVISQEMERIP             | 2.48 | 0.01 | 0.78 | 0.44 | 1.41 | 0.28 |
| 60483 | 0 | 53046  | QYVLATYDTSRVEHA          | 2.66 | 0.01 | 2.43 | 0.44 | 0.85 | 0.28 |
| 60484 | 0 | 115935 | QYVLSRYPY                | 2.33 | 0.01 | 1.60 | 0.44 | 1.23 | 0.85 |
| 60485 | 0 | 53047  | QYVLSRYPYGLNY            | 2.63 | 0.01 | 1.60 | 0.44 | 1.23 | 0.85 |
| 60486 | 0 | 240913 | QYVMDLPLALSQY            | 2.61 | 0.01 | 4.93 | 0.44 | 1.41 | 0.28 |
| 60487 | 0 | 193342 | QYYFNDDGIMQV             | 2.46 | 0.01 | 3.04 | 1.12 | 0.22 | 0.28 |
| 60488 | 0 | 193342 | QYYFNDDGIMQV             | 2.46 | 0.01 | 3.04 | 1.12 | 0.22 | 0.28 |
| 60489 | 0 | 128090 | QYYRLPMNAYRDFTSEP<br>LNS | 2.93 | 0.01 | 2.40 | 2.75 | 0.22 | 0.28 |
| 60490 | 0 | 128090 | QYYRLPMNAYRDFTSEP<br>LNS | 2.93 | 0.01 | 2.40 | 2.75 | 0.22 | 0.85 |
| 60491 | 0 | 53055  | RAAAEK                   | 1.91 | 0.01 | 3.78 | 1.81 | 0.22 | 0.85 |
| 60492 | 0 | 134206 | RAAEDPVAAAPR             | 2.52 | 0.01 | 0.78 | 3.06 | 0.22 | 0.28 |
| 60493 | 0 | 53068  | RAAKLQ                   | 1.89 | 0.01 | 1.96 | 0.44 | 0.85 | 0.28 |
| 60494 | 0 | 53069  | RAALIEEGQRIAEM           | 2.65 | 0.01 | 2.69 | 0.44 | 1.41 | 0.28 |
| 60495 | 0 | 53069  | RAALIEEGQRIAEM           | 2.65 | 0.01 | 2.69 | 0.44 | 0.85 | 0.28 |
| 60496 | 0 | 53069  | RAALIEEGQRIAEM           | 2.65 | 0.01 | 2.69 | 0.44 | 0.85 | 0.28 |
| 60497 | 0 | 144759 | RAALPSHVVT               | 2.29 | 0.01 | 0.78 | 0.44 | 1.13 | 0.28 |
| 60498 | 0 | 144759 | RAALPSHVVT               | 2.29 | 0.01 | 0.78 | 0.44 | 1.13 | 0.28 |

|       |   |        |                                                            |      |      |      |      |      |      |
|-------|---|--------|------------------------------------------------------------|------|------|------|------|------|------|
| 60499 | 0 | 144759 | RAALPSHVVT                                                 | 2.29 | 0.01 | 0.78 | 0.44 | 1.41 | 0.28 |
| 60500 | 0 | 144759 | RAALPSHVVT                                                 | 2.29 | 0.01 | 0.78 | 0.44 | 1.41 | 0.28 |
| 60501 | 0 | 144759 | RAALPSHVVT                                                 | 2.29 | 0.01 | 0.78 | 0.44 | 2.35 | 0.28 |
| 60502 | 0 | 144759 | RAALPSHVVT                                                 | 2.29 | 0.01 | 0.78 | 0.44 | 2.35 | 0.28 |
| 60503 | 0 | 108088 | RAAPFGNQW                                                  | 2.20 | 0.01 | 0.90 | 2.46 | 0.22 | 1.27 |
| 60504 | 0 | 108088 | RAAPFGNQW                                                  | 2.20 | 0.01 | 0.90 | 2.46 | 0.22 | 0.28 |
| 60505 | 0 | 108088 | RAAPFGNQW                                                  | 2.20 | 0.01 | 0.90 | 2.46 | 0.22 | 1.27 |
| 60506 | 0 | 53073  | RAAVCTRGVAKAVDFIP<br>VEN                                   | 2.93 | 0.01 | 1.72 | 0.44 | 0.85 | 0.28 |
| 60507 | 0 | 423481 | RACRPFDHMPAADFR                                            | 2.71 | 0.01 | 2.51 | 0.44 | 2.35 | 1.28 |
| 60508 | 0 | 174254 | RACYEIKCKE                                                 | 2.33 | 0.01 | 3.10 | 0.44 | 1.23 | 0.85 |
| 60509 | 0 | 174254 | RACYEIKCKE                                                 | 2.33 | 0.01 | 3.10 | 0.44 | 1.23 | 0.85 |
| 60510 | 0 | 174254 | RACYEIKCKE                                                 | 2.33 | 0.01 | 3.10 | 0.44 | 1.23 | 0.85 |
| 60511 | 0 | 140897 | RADAVKGYLAGK                                               | 2.49 | 0.01 | 3.01 | 1.12 | 0.22 | 0.28 |
| 60512 | 0 | 99596  | RADEEEYDEDEY                                               | 2.73 | 0.01 | 2.16 | 0.44 | 1.23 | 1.48 |
| 60513 | 0 | 53080  | RADEPARKGKV                                                | 2.42 | 0.01 | 3.13 | 2.43 | 0.22 | 0.28 |
| 60514 | 0 | 141734 | RADESKTDPQTEA                                              | 2.56 | 0.01 | 3.33 | 1.15 | 0.22 | 0.28 |
| 60515 | 0 | 141734 | RADESKTDPQTEA                                              | 2.56 | 0.01 | 3.33 | 0.44 | 0.85 | 0.28 |
| 60516 | 0 | 141734 | RADESKTDPQTEA                                              | 2.56 | 0.01 | 3.33 | 0.44 | 0.85 | 0.28 |
| 60517 | 0 | 240205 | RADGTMPDWNNLGSFL                                           | 2.70 | 0.01 | 2.70 | 0.68 | 0.22 | 0.28 |
| 60518 | 0 | 118574 | RADWKKTVETQKSRIHA                                          | 2.78 | 0.01 | 0.78 | 0.44 | 1.41 | 0.28 |
| 60519 | 0 | 134504 | RADYKSK                                                    | 2.02 | 0.01 | 2.95 | 1.15 | 0.22 | 1.27 |
| 60520 | 0 | 134504 | RADYKSK                                                    | 2.02 | 0.01 | 2.95 | 1.15 | 0.22 | 1.27 |
| 60521 | 0 | 174255 | RAEAPQAPSDTPPGN                                            | 2.67 | 0.01 | 2.30 | 2.89 | 0.22 | 0.28 |
| 60522 | 0 | 174255 | RAEAPQAPSDTPPGN                                            | 2.67 | 0.01 | 2.30 | 2.89 | 0.22 | 0.28 |
| 60523 | 0 | 135747 | RAEAVFPD                                                   | 2.12 | 0.01 | 0.78 | 0.44 | 2.35 | 0.28 |
| 60524 | 0 | 118991 | RAEDNADTLALVFEA                                            | 2.70 | 0.01 | 0.78 | 1.12 | 0.22 | 0.28 |
| 60525 | 0 | 118991 | RAEDNADTLALVFEA                                            | 2.70 | 0.01 | 0.78 | 1.12 | 0.22 | 0.85 |
| 60526 | 0 | 118991 | RAEDNADTLALVFEA                                            | 2.70 | 0.01 | 0.78 | 1.12 | 0.22 | 1.48 |
| 60527 | 0 | 116818 | RAEFAERSVQKLQKE                                            | 2.71 | 0.01 | 2.36 | 0.44 | 1.23 | 1.28 |
| 60528 | 0 | 116818 | RAEFAERSVQKLQKE                                            | 2.71 | 0.01 | 2.36 | 0.44 | 1.23 | 1.27 |
| 60529 | 0 | 53088  | RAEGPYAGPLERQKPLK<br>VRARLPQQEGPYAGPM<br>ERQKPLKVKAKAPVVKE | 3.90 | 0.01 | 4.15 | 2.13 | 0.22 | 0.85 |
| 60530 | 0 | 53088  | RAEGPYAGPLERQKPLK<br>VRARLPQQEGPYAGPM<br>ERQKPLKVKAKAPVVKE | 3.90 | 0.01 | 4.15 | 2.37 | 0.22 | 0.85 |
| 60531 | 0 | 53088  | RAEGPYAGPLERQKPLK<br>VRARLPQQEGPYAGPM<br>ERQKPLKVKAKAPVVKE | 3.90 | 0.01 | 4.15 | 2.37 | 0.22 | 0.85 |
| 60532 | 0 | 135492 | RAEIM                                                      | 1.74 | 0.01 | 0.78 | 1.12 | 0.22 | 1.27 |

|       |   |        |                                                   |      |      |      |      |      |      |
|-------|---|--------|---------------------------------------------------|------|------|------|------|------|------|
| 60533 | 0 | 135492 | RAEIM                                             | 1.74 | 0.01 | 0.78 | 1.12 | 0.22 | 1.27 |
| 60534 | 0 | 135492 | RAEIM                                             | 1.74 | 0.01 | 0.78 | 1.12 | 0.22 | 1.27 |
| 60535 | 0 | 135492 | RAEIM                                             | 1.74 | 0.01 | 0.78 | 1.12 | 0.22 | 0.85 |
| 60536 | 0 | 135492 | RAEIM                                             | 1.74 | 0.01 | 0.78 | 1.12 | 0.22 | 0.85 |
| 60537 | 0 | 135492 | RAEIM                                             | 1.74 | 0.01 | 0.78 | 1.12 | 0.22 | 1.27 |
| 60538 | 0 | 135492 | RAEIM                                             | 1.74 | 0.01 | 0.78 | 1.12 | 0.22 | 0.85 |
| 60539 | 0 | 114559 | RAESEGFEWVAFKTN                                   | 2.66 | 0.01 | 3.48 | 0.44 | 1.23 | 0.85 |
| 60540 | 0 | 53092  | RAETDDVEPSVAAEC                                   | 2.68 | 0.01 | 2.59 | 0.44 | 0.85 | 0.28 |
| 60541 | 0 | 53093  | RAEVSYPVHVNGAKF                                   | 2.59 | 0.01 | 3.24 | 1.12 | 0.22 | 0.85 |
| 60542 | 0 | 104216 | RAFAPKLSETDSPT                                    | 2.61 | 0.01 | 3.00 | 1.20 | 0.22 | 0.85 |
| 60543 | 0 | 122548 | RAFDFVGAGLDHRLT                                   | 2.71 | 0.01 | 0.90 | 1.15 | 0.22 | 1.39 |
| 60544 | 0 | 53100  | RAFMAVMHFSLTADRI<br>DDDI                          | 2.95 | 0.01 | 3.21 | 3.14 | 0.22 | 0.28 |
| 60545 | 0 | 114936 | RAFNPVCGTD                                        | 2.26 | 0.01 | 2.25 | 0.44 | 1.23 | 0.85 |
| 60546 | 0 | 172948 | RAFVRWLPAEYEDGF                                   | 2.67 | 0.01 | 0.78 | 0.44 | 1.41 | 0.28 |
| 60547 | 0 | 172948 | RAFVRWLPAEYEDGF                                   | 2.67 | 0.01 | 0.78 | 0.44 | 1.13 | 0.28 |
| 60548 | 0 | 95752  | RAGFITELSEFI                                      | 2.48 | 0.01 | 2.88 | 1.12 | 0.22 | 0.85 |
| 60549 | 0 | 95752  | RAGFITELSEFI                                      | 2.48 | 0.01 | 2.88 | 0.44 | 1.23 | 0.85 |
| 60550 | 0 | 489939 | RAGGFEEKHS                                        | 2.20 | 0.01 | 0.90 | 0.68 | 0.22 | 1.39 |
| 60551 | 0 | 233793 | RAGPLPLPSPLVPLLALA                                | 2.91 | 0.01 | 3.67 | 2.61 | 0.85 | 1.28 |
| 60552 | 0 | 53107  | RAGRCPPR                                          | 2.16 | 0.01 | 2.04 | 0.44 | 0.85 | 0.28 |
| 60553 | 0 | 108089 | RAGRFGYQR                                         | 2.26 | 0.01 | 0.90 | 2.46 | 0.22 | 0.28 |
| 60554 | 0 | 108089 | RAGRFGYQR                                         | 2.26 | 0.01 | 0.90 | 2.46 | 0.22 | 0.28 |
| 60555 | 0 | 136587 | RAGRINTVNSNNLPILEF<br>LQLSAQHVVLYKNAIIGP<br>RWNLN | 3.64 | 0.01 | 4.33 | 0.44 | 1.23 | 0.28 |
| 60556 | 0 | 136080 | RAGTDEGFG                                         | 2.23 | 0.01 | 4.33 | 0.44 | 2.39 | 1.27 |
| 60557 | 0 | 136080 | RAGTDEGFG                                         | 2.23 | 0.01 | 4.33 | 0.44 | 1.41 | 0.28 |
| 60558 | 0 | 136080 | RAGTDEGFG                                         | 2.23 | 0.01 | 4.33 | 0.44 | 1.13 | 0.28 |
| 60559 | 0 | 136080 | RAGTDEGFG                                         | 2.23 | 0.01 | 4.33 | 0.44 | 1.13 | 0.28 |
| 60560 | 0 | 53109  | RAGVCY                                            | 1.88 | 0.01 | 1.86 | 0.44 | 1.23 | 0.28 |
| 60561 | 0 | 127796 | RAHGEAGAGRVRTSA                                   | 2.72 | 0.01 | 0.78 | 0.44 | 1.13 | 0.85 |
| 60562 | 0 | 180713 | RAHLKQVKKE                                        | 2.30 | 0.01 | 0.78 | 0.68 | 0.22 | 0.28 |
| 60563 | 0 | 114562 | RAHPVYFFKSACPPA                                   | 2.66 | 0.01 | 2.43 | 0.44 | 1.74 | 1.57 |
| 60564 | 0 | 99597  | RAHVQVVDNSGNRVY                                   | 2.69 | 0.01 | 2.16 | 0.44 | 1.23 | 1.48 |
| 60565 | 0 | 53112  | RAHYNIVTF                                         | 2.18 | 0.01 | 1.86 | 0.44 | 2.82 | 0.28 |
| 60566 | 0 | 53112  | RAHYNIVTF                                         | 2.18 | 0.01 | 1.86 | 1.81 | 0.22 | 0.85 |
| 60567 | 0 | 109785 | RAHYNIVTFCKCDS                                    | 2.62 | 0.01 | 1.86 | 1.15 | 0.22 | 0.85 |
| 60568 | 0 | 109785 | RAHYNIVTFCKCDS                                    | 2.62 | 0.01 | 1.86 | 0.68 | 0.22 | 3.30 |
| 60569 | 0 | 53116  | RAILTAFSQAQDIWGTS                                 | 2.78 | 0.01 | 2.48 | 0.44 | 0.85 | 0.28 |
| 60570 | 0 | 53116  | RAILTAFSQAQDIWGTS                                 | 2.78 | 0.01 | 2.48 | 1.20 | 0.22 | 0.28 |
| 60571 | 0 | 53122  | RAISSWKQRNRWEWRP<br>D                             | 2.79 | 0.01 | 3.93 | 3.16 | 0.22 | 0.28 |

|       |   |        |                              |      |      |      |      |      |      |
|-------|---|--------|------------------------------|------|------|------|------|------|------|
| 60572 | 0 | 53122  | RAISSWKQRNRWEWRP<br>D        | 2.79 | 0.01 | 3.93 | 3.16 | 0.22 | 2.02 |
| 60573 | 0 | 53122  | RAISSWKQRNRWEWRP<br>D        | 2.79 | 0.01 | 3.93 | 3.16 | 0.22 | 1.34 |
| 60574 | 0 | 53122  | RAISSWKQRNRWEWRP<br>D        | 2.79 | 0.01 | 3.93 | 3.16 | 0.22 | 0.28 |
| 60575 | 0 | 53123  | RAIVAIGCMFMITFVVL<br>F YTNAT | 3.09 | 0.01 | 3.40 | 0.44 | 0.85 | 0.28 |
| 60576 | 0 | 53123  | RAIVAIGCMFMITFVVL<br>F YTNAT | 3.09 | 0.01 | 3.40 | 0.44 | 1.74 | 0.28 |
| 60577 | 0 | 53135  | RAKRTLSSATQATIEID<br>A L F   | 2.96 | 0.01 | 2.78 | 0.44 | 0.85 | 0.28 |
| 60578 | 0 | 227829 | RAKSSSRKTISSEDEP             | 2.75 | 0.01 | 2.72 | 1.20 | 1.59 | 0.28 |
| 60579 | 0 | 53145  | RALEDGINFA                   | 2.29 | 0.01 | 2.59 | 0.44 | 1.41 | 0.28 |
| 60580 | 0 | 148162 | RALGLPPFL                    | 2.24 | 0.01 | 3.24 | 0.68 | 0.22 | 0.28 |
| 60581 | 0 | 91876  | RALGLPPFLNSLPQS              | 2.70 | 0.01 | 4.15 | 1.20 | 0.22 | 0.28 |
| 60582 | 0 | 91876  | RALGLPPFLNSLPQS              | 2.70 | 0.01 | 4.15 | 1.20 | 0.22 | 0.28 |
| 60583 | 0 | 120904 | RALKRRNARTKAR                | 2.61 | 0.01 | 2.86 | 0.44 | 0.85 | 0.28 |
| 60584 | 0 | 120904 | RALKRRNARTKAR                | 2.61 | 0.01 | 2.86 | 0.44 | 1.41 | 0.28 |
| 60585 | 0 | 53152  | RALLGLAVCLFLMALCT            | 2.82 | 0.01 | 3.40 | 0.44 | 1.74 | 0.28 |
| 60586 | 0 | 53152  | RALLGLAVCLFLMALCT            | 2.82 | 0.01 | 3.40 | 0.44 | 0.85 | 0.28 |
| 60587 | 0 | 366012 | RALPEEEEDVGPRH               | 2.68 | 0.01 | 1.61 | 0.44 | 0.85 | 1.28 |
| 60588 | 0 | 366015 | RALPQEEEDVGPRH               | 2.66 | 0.01 | 1.61 | 0.44 | 0.85 | 1.28 |
| 60589 | 0 | 366016 | RALPQEEQEDVGPRH              | 2.69 | 0.01 | 1.61 | 0.44 | 0.85 | 1.28 |
| 60590 | 0 | 164515 | RALRAQKEAISPPD               | 2.61 | 0.01 | 0.78 | 1.12 | 0.22 | 0.28 |
| 60591 | 0 | 164515 | RALRAQKEAISPPD               | 2.61 | 0.01 | 0.78 | 1.12 | 0.22 | 0.28 |
| 60592 | 0 | 164515 | RALRAQKEAISPPD               | 2.61 | 0.01 | 0.78 | 1.12 | 0.22 | 0.28 |
| 60593 | 0 | 164515 | RALRAQKEAISPPD               | 2.61 | 0.01 | 0.78 | 1.12 | 0.22 | 0.85 |
| 60594 | 0 | 164515 | RALRAQKEAISPPD               | 2.61 | 0.01 | 0.78 | 1.12 | 0.22 | 1.27 |
| 60595 | 0 | 53159  | RALRTDPEGVDPDVRAP<br>RTG     | 2.99 | 0.01 | 2.40 | 0.44 | 1.59 | 0.28 |
| 60596 | 0 | 189823 | RALSDAETKVFLKAG              | 2.66 | 0.01 | 3.28 | 0.44 | 1.23 | 0.28 |
| 60597 | 0 | 53162  | RALSMPP                      | 1.99 | 0.01 | 0.90 | 0.44 | 0.85 | 1.39 |
| 60598 | 0 | 121774 | RALVGDEAELPCRISPGK           | 2.84 | 0.01 | 2.19 | 4.15 | 0.22 | 0.28 |
| 60599 | 0 | 53164  | RAMAGRCRLLLSIGS              | 2.70 | 0.01 | 0.90 | 1.15 | 0.22 | 0.85 |
| 60600 | 0 | 98409  | RAMVSTKAQS                   | 2.31 | 0.01 | 3.57 | 0.44 | 0.85 | 0.28 |
| 60601 | 0 | 240914 | RANAVNLPAFTSQEI              | 2.64 | 0.01 | 4.93 | 0.44 | 1.41 | 0.28 |
| 60602 | 0 | 53166  | RANDKGSVISLARLTEEL<br>KT     | 2.94 | 0.01 | 2.30 | 0.68 | 0.22 | 1.27 |
| 60603 | 0 | 53166  | RANDKGSVISLARLTEEL<br>KT     | 2.94 | 0.01 | 2.30 | 0.68 | 0.22 | 0.28 |
| 60604 | 0 | 53166  | RANDKGSVISLARLTEEL<br>KT     | 2.94 | 0.01 | 2.30 | 0.68 | 0.22 | 0.85 |

|       |   |        |                                    |      |      |      |      |      |      |
|-------|---|--------|------------------------------------|------|------|------|------|------|------|
| 60605 | 0 | 53166  | RANDKGSVISLARLTEEL<br>KT           | 2.94 | 0.01 | 2.30 | 0.68 | 0.22 | 1.48 |
| 60606 | 0 | 53169  | RANDVLWLSLTAAEYD<br>QSTYGSSTGPVYVS | 3.34 | 0.01 | 2.53 | 0.44 | 0.85 | 0.28 |
| 60607 | 0 | 191090 | RANEPKE                            | 2.02 | 0.01 | 4.03 | 3.55 | 0.22 | 0.85 |
| 60608 | 0 | 191090 | RANEPKE                            | 2.02 | 0.01 | 4.03 | 3.55 | 0.22 | 0.85 |
| 60609 | 0 | 191090 | RANEPKE                            | 2.02 | 0.01 | 0.90 | 4.93 | 0.22 | 0.28 |
| 60610 | 0 | 53173  | RANPNPYTSRRSV                      | 2.57 | 0.01 | 2.14 | 3.01 | 0.22 | 0.28 |
| 60611 | 0 | 93665  | RANVVNLL                           | 2.12 | 0.01 | 3.81 | 1.12 | 0.22 | 0.28 |
| 60612 | 0 | 93665  | RANVVNLL                           | 2.12 | 0.01 | 3.81 | 1.12 | 0.22 | 0.28 |
| 60613 | 0 | 93665  | RANVVNLL                           | 2.12 | 0.01 | 3.81 | 1.12 | 0.22 | 0.28 |
| 60614 | 0 | 93665  | RANVVNLL                           | 2.12 | 0.01 | 3.81 | 1.12 | 0.22 | 0.28 |
| 60615 | 0 | 93665  | RANVVNLL                           | 2.12 | 0.01 | 3.81 | 1.12 | 0.22 | 0.28 |
| 60616 | 0 | 53178  | RAPRTGRRMLALTEDTS<br>SDS           | 2.97 | 0.01 | 2.40 | 0.44 | 1.59 | 0.28 |
| 60617 | 0 | 127797 | RAPSGPRPPSRSAQ                     | 2.74 | 0.01 | 0.78 | 0.44 | 1.13 | 0.85 |
| 60618 | 0 | 366095 | RAPSRLREIDGSLSS                    | 2.69 | 0.01 | 1.61 | 0.44 | 0.85 | 1.28 |
| 60619 | 0 | 121775 | RAPVSQAAKFD PSTK                   | 2.67 | 0.01 | 0.78 | 0.44 | 1.13 | 0.85 |
| 60620 | 0 | 53186  | RAQEGAF LTG                        | 2.31 | 0.01 | 2.97 | 0.44 | 0.85 | 0.28 |
| 60621 | 0 | 111708 | RAQGHNNGICWGNQL                    | 2.68 | 0.01 | 1.86 | 0.68 | 0.22 | 0.28 |
| 60622 | 0 | 233795 | RARAAGKHVRLPELLDE<br>GPGPARRGAPY   | 3.30 | 0.01 | 3.67 | 2.61 | 0.85 | 1.28 |
| 60623 | 0 | 53189  | RARAGAAVPAAADDIYF<br>PVYGVWGSYRH   | 3.31 | 0.01 | 3.48 | 1.20 | 0.22 | 0.28 |
| 60624 | 0 | 131305 | RARAKW                             | 1.92 | 0.01 | 0.78 | 0.44 | 1.13 | 1.57 |
| 60625 | 0 | 121776 | RARARARA                           | 2.16 | 0.01 | 0.90 | 0.44 | 1.13 | 0.28 |
| 60626 | 0 | 53191  | RARFEELCGDLFRSTIQP<br>VE           | 2.91 | 0.01 | 2.78 | 0.44 | 0.85 | 0.28 |
| 60627 | 0 | 53194  | RARGIYETETRA                       | 2.52 | 0.01 | 0.90 | 0.68 | 0.22 | 0.28 |
| 60628 | 0 | 53194  | RARGIYETETRA                       | 2.52 | 0.01 | 0.90 | 1.15 | 2.26 | 0.85 |
| 60629 | 0 | 53194  | RARGIYETETRA                       | 2.52 | 0.01 | 0.90 | 1.15 | 2.26 | 1.39 |
| 60630 | 0 | 53195  | RARGRGRGRGEKRP                     | 2.68 | 0.01 | 2.48 | 1.20 | 0.22 | 0.28 |
| 60631 | 0 | 53195  | RARGRGRGRGEKRP                     | 2.68 | 0.01 | 2.43 | 0.44 | 1.59 | 0.28 |
| 60632 | 0 | 53195  | RARGRGRGRGEKRP                     | 2.68 | 0.01 | 2.43 | 0.44 | 1.59 | 0.28 |
| 60633 | 0 | 53195  | RARGRGRGRGEKRP                     | 2.68 | 0.01 | 2.43 | 0.44 | 1.74 | 1.27 |
| 60634 | 0 | 141735 | RARLSPGDVLVIPAG                    | 2.71 | 0.01 | 3.65 | 0.44 | 1.23 | 1.27 |
| 60635 | 0 | 110993 | RARPAKAAATQKKVERK<br>A             | 2.89 | 4.03 | 0.78 | 0.44 | 1.13 | 0.28 |
| 60636 | 0 | 110994 | RARPAKAAATQKKVERK<br>A             | 2.89 | 3.81 | 0.78 | 0.44 | 1.13 | 0.28 |
| 60637 | 0 | 110995 | RARPAKAAATQKKVERK<br>A             | 2.89 | 4.93 | 0.78 | 0.44 | 1.13 | 0.28 |
| 60638 | 0 | 110991 | RARPAKAAATQKKVERK<br>A             | 2.89 | 4.93 | 0.78 | 0.44 | 1.13 | 0.28 |
| 60639 | 0 | 110990 | RARPAKAAATQKKVERK<br>A             | 2.89 | 4.93 | 0.78 | 0.44 | 1.13 | 0.28 |



|       |   |        |                                    |      |      |      |      |      |      |
|-------|---|--------|------------------------------------|------|------|------|------|------|------|
| 60640 | 0 | 110996 | RARPAKAAATQKKVERK<br>A             | 2.89 | 0.01 | 0.78 | 0.44 | 1.13 | 0.28 |
| 60641 | 0 | 113145 | RARRLIELYKEAGIS                    | 2.70 | 0.01 | 0.78 | 1.20 | 0.22 | 0.85 |
| 60642 | 0 | 123685 | RARVSMIEG                          | 2.22 | 0.01 | 2.28 | 2.00 | 0.22 | 0.28 |
| 60643 | 0 | 53202  | RASANLAATKMSECVLG                  | 2.77 | 0.01 | 2.48 | 0.44 | 0.85 | 0.28 |
| 60644 | 0 | 53202  | RASANLAATKMSECVLG                  | 2.77 | 0.01 | 2.48 | 1.20 | 0.22 | 0.28 |
| 60645 | 0 | 53204  | RASDTAGQEQQ                        | 2.38 | 0.01 | 3.35 | 2.02 | 0.85 | 0.28 |
| 60646 | 0 | 53204  | RASDTAGQEQQ                        | 2.38 | 0.01 | 3.35 | 2.02 | 0.85 | 0.28 |
| 60647 | 0 | 116455 | RASDYKSAHKGFGVDA<br>QGTLKIFKL      | 3.24 | 0.01 | 0.78 | 0.44 | 1.13 | 0.28 |
| 60648 | 0 | 53207  | RASGARARCEHRSGLSL<br>SWQPSECSDSRTT | 3.35 | 0.01 | 0.90 | 1.15 | 0.22 | 1.27 |
| 60649 | 0 | 53209  | RASLETTNQAIEAIR                    | 2.70 | 0.01 | 2.43 | 0.44 | 1.59 | 0.28 |
| 60650 | 0 | 78500  | RASLSTWHVLYSPNVSV<br>PSS           | 2.95 | 0.01 | 3.19 | 0.44 | 0.85 | 0.28 |
| 60651 | 0 | 141995 | RASSFYPRNITL                       | 2.45 | 0.01 | 0.78 | 0.44 | 2.35 | 0.28 |
| 60652 | 0 | 151711 | RATHQE                             | 1.88 | 0.01 | 0.78 | 0.68 | 0.22 | 0.28 |
| 60653 | 0 | 151711 | RATHQE                             | 1.88 | 0.01 | 0.78 | 0.68 | 0.22 | 1.34 |
| 60654 | 0 | 151711 | RATHQE                             | 1.88 | 0.01 | 0.78 | 0.68 | 0.22 | 0.28 |
| 60655 | 0 | 151711 | RATHQE                             | 1.88 | 0.01 | 0.78 | 0.68 | 0.22 | 0.28 |
| 60656 | 0 | 106766 | RATKGISGIKNE                       | 2.48 | 0.01 | 3.08 | 0.44 | 1.23 | 0.85 |
| 60657 | 0 | 53220  | RATLSNEHGITI                       | 2.45 | 0.01 | 0.90 | 0.44 | 1.59 | 0.28 |
| 60658 | 0 | 53220  | RATLSNEHGITI                       | 2.45 | 0.01 | 0.90 | 0.44 | 1.59 | 0.28 |
| 60659 | 0 | 53220  | RATLSNEHGITI                       | 2.45 | 0.01 | 0.90 | 0.44 | 1.59 | 0.28 |
| 60660 | 0 | 53220  | RATLSNEHGITI                       | 2.45 | 0.01 | 0.90 | 0.44 | 1.59 | 0.28 |
| 60661 | 0 | 53220  | RATLSNEHGITI                       | 2.45 | 0.01 | 0.90 | 0.44 | 1.59 | 0.28 |
| 60662 | 0 | 53220  | RATLSNEHGITI                       | 2.45 | 0.01 | 0.90 | 0.44 | 1.59 | 0.28 |
| 60663 | 0 | 129718 | RATPPPGI                           | 2.12 | 0.01 | 0.78 | 0.44 | 1.13 | 0.28 |
| 60664 | 0 | 53223  | RATQQQAVI                          | 2.23 | 0.01 | 2.59 | 0.44 | 0.85 | 0.28 |
| 60665 | 0 | 118575 | RATWKSNY                           | 2.10 | 0.01 | 0.78 | 0.44 | 1.13 | 0.28 |
| 60666 | 0 | 79995  | RAVFMQQRPLRM                       | 2.49 | 0.01 | 2.14 | 3.17 | 0.22 | 0.28 |
| 60667 | 0 | 79995  | RAVFMQQRPLRM                       | 2.49 | 0.01 | 2.14 | 3.17 | 0.22 | 0.28 |
| 60668 | 0 | 79356  | RAVIWAWMWE                         | 2.33 | 0.01 | 0.90 | 0.68 | 0.22 | 0.28 |
| 60669 | 0 | 79356  | RAVIWAWMWE                         | 2.33 | 0.01 | 0.90 | 0.68 | 0.22 | 1.48 |
| 60670 | 0 | 79356  | RAVIWAWMWE                         | 2.33 | 0.01 | 0.90 | 0.68 | 0.22 | 1.75 |
| 60671 | 0 | 79356  | RAVIWAWMWE                         | 2.33 | 0.01 | 0.90 | 0.68 | 0.22 | 1.34 |
| 60672 | 0 | 100454 | RAVPYYGPGVDYKN                     | 2.63 | 0.01 | 2.96 | 1.12 | 0.22 | 0.28 |
| 60673 | 0 | 146516 | RAVPYYGPGVDYRN                     | 2.65 | 0.01 | 2.96 | 0.44 | 0.22 | 0.28 |
| 60674 | 0 | 53239  | RAVTPLGPPAA                        | 2.39 | 0.01 | 0.78 | 0.44 | 2.39 | 0.28 |
| 60675 | 0 | 53240  | RAVVAPDKEVLYE                      | 2.55 | 0.01 | 2.69 | 0.44 | 0.85 | 0.28 |
| 60676 | 0 | 53240  | RAVVAPDKEVLYE                      | 2.55 | 0.01 | 2.69 | 0.44 | 0.85 | 0.28 |
| 60677 | 0 | 53240  | RAVVAPDKEVLYE                      | 2.55 | 0.01 | 2.69 | 0.44 | 1.41 | 0.28 |
| 60678 | 0 | 53240  | RAVVAPDKEVLYE                      | 2.55 | 0.01 | 2.69 | 0.44 | 0.85 | 0.28 |
| 60679 | 0 | 53240  | RAVVAPDKEVLYE                      | 2.55 | 0.01 | 2.69 | 0.44 | 0.85 | 0.28 |
| 60680 | 0 | 489749 | RAWALRELQDIKKEI                    | 2.70 | 0.01 | 2.69 | 3.05 | 0.85 | 1.28 |

|       |   |        |                                |      |      |      |      |      |      |
|-------|---|--------|--------------------------------|------|------|------|------|------|------|
| 60681 | 0 | 53244  | RAWAYM                         | 1.90 | 0.01 | 0.90 | 0.68 | 0.22 | 1.39 |
| 60682 | 0 | 181439 | RAWIPRPLRNQPYLF                | 2.69 | 0.01 | 2.82 | 1.15 | 0.22 | 0.28 |
| 60683 | 0 | 53247  | RAYALWSARQQFKTT                | 2.66 | 0.01 | 3.41 | 0.44 | 1.23 | 1.57 |
| 60684 | 0 | 53247  | RAYALWSARQQFKTT                | 2.66 | 0.01 | 3.41 | 1.15 | 0.22 | 1.57 |
| 60685 | 0 | 53247  | RAYALWSARQQFKTT                | 2.66 | 0.01 | 3.41 | 1.15 | 0.22 | 1.57 |
| 60686 | 0 | 53247  | RAYALWSARQQFKTT                | 2.66 | 0.01 | 3.41 | 0.44 | 1.23 | 1.57 |
| 60687 | 0 | 53247  | RAYALWSARQQFKTT                | 2.66 | 0.01 | 3.41 | 3.04 | 0.22 | 1.57 |
| 60688 | 0 | 53247  | RAYALWSARQQFKTT                | 2.66 | 0.01 | 3.41 | 1.12 | 0.22 | 1.57 |
| 60689 | 0 | 131031 | RAYATEPHAK                     | 2.31 | 0.01 | 0.78 | 3.48 | 0.22 | 1.57 |
| 60690 | 0 | 131031 | RAYATEPHAK                     | 2.31 | 0.01 | 0.78 | 3.48 | 0.22 | 1.27 |
| 60691 | 0 | 131031 | RAYATEPHAK                     | 2.31 | 0.01 | 0.78 | 3.48 | 0.22 | 1.27 |
| 60692 | 0 | 131031 | RAYATEPHAK                     | 2.31 | 0.01 | 0.78 | 3.48 | 0.22 | 1.57 |
| 60693 | 0 | 131031 | RAYATEPHAK                     | 2.31 | 0.01 | 0.78 | 3.48 | 0.22 | 1.27 |
| 60694 | 0 | 131031 | RAYATEPHAK                     | 2.31 | 0.01 | 0.78 | 0.68 | 0.22 | 0.28 |
| 60695 | 0 | 118089 | RAYGLKSGLKKQELLEAL<br>TKHFQD   | 3.12 | 0.01 | 0.78 | 0.44 | 1.13 | 0.85 |
| 60696 | 0 | 94667  | RAYQTLLTL                      | 2.35 | 0.01 | 0.90 | 0.44 | 0.22 | 1.27 |
| 60697 | 0 | 53255  | RAYTYGVIEMPENY                 | 2.59 | 0.01 | 3.93 | 3.26 | 0.22 | 0.28 |
| 60698 | 0 | 53255  | RAYTYGVIEMPENY                 | 2.59 | 0.01 | 3.93 | 3.26 | 0.22 | 0.28 |
| 60699 | 0 | 120905 | RCARQRLRLRRRQRERE              | 2.86 | 0.01 | 2.19 | 1.12 | 0.22 | 0.28 |
| 60700 | 0 | 120905 | RCARQRLRLRRRQRERE              | 2.86 | 0.01 | 2.19 | 1.12 | 0.22 | 0.28 |
| 60701 | 0 | 53258  | RCAVGSCHSPIAIGAVKS<br>DGHDBGYV | 3.18 | 0.01 | 3.36 | 0.68 | 0.22 | 0.28 |
| 60702 | 0 | 53258  | RCAVGSCHSPIAIGAVKS<br>DGHDBGYV | 3.18 | 0.01 | 3.36 | 0.68 | 0.22 | 0.28 |
| 60703 | 0 | 53258  | RCAVGSCHSPIAIGAVKS<br>DGHDBGYV | 3.18 | 0.01 | 3.36 | 0.68 | 0.22 | 0.28 |
| 60704 | 0 | 238968 | RCAVHGERLHLFCEKDG<br>K         | 2.86 | 0.01 | 0.78 | 0.44 | 1.13 | 0.28 |
| 60705 | 0 | 141996 | RCAWEETKNIINDFLEIP<br>EERCT    | 3.07 | 0.01 | 3.13 | 2.13 | 0.22 | 0.28 |
| 60706 | 0 | 120166 | RCCRPRYRPRCRRH                 | 2.68 | 0.01 | 0.78 | 1.12 | 0.22 | 0.28 |
| 60707 | 0 | 79357  | RCDLRYDAFVPWCP                 | 2.62 | 0.01 | 0.90 | 0.68 | 0.22 | 1.39 |
| 60708 | 0 | 53263  | RCDLYPDGNLWGMPCP<br>TY         | 2.85 | 0.01 | 0.90 | 1.15 | 0.22 | 1.39 |
| 60709 | 0 | 152078 | RCEERDHDELLM                   | 2.51 | 0.01 | 2.80 | 2.78 | 0.22 | 0.28 |
| 60710 | 0 | 115465 | RCEKDERFFSDKIAYIPI<br>Q        | 2.94 | 0.01 | 1.60 | 0.44 | 1.23 | 2.51 |
| 60711 | 0 | 181781 | RCENACSNYTKWIEI                | 2.66 | 0.01 | 1.66 | 2.36 | 0.22 | 1.28 |
| 60712 | 0 | 53267  | RCEPVVCYLYGKRGGGK<br>SLT       | 2.94 | 0.01 | 2.82 | 0.44 | 0.85 | 0.28 |
| 60713 | 0 | 53267  | RCEPVVCYLYGKRGGGK<br>SLT       | 2.94 | 0.01 | 2.82 | 0.44 | 1.41 | 0.28 |
| 60714 | 0 | 79358  | RCEQSMWTQRLPCL                 | 2.62 | 0.01 | 0.90 | 0.68 | 0.22 | 1.39 |
| 60715 | 0 | 53269  | RCESALHVWVPPLLA                | 2.66 | 0.01 | 2.59 | 0.44 | 0.85 | 0.28 |

|       |   |        |                                    |      |      |      |      |      |      |
|-------|---|--------|------------------------------------|------|------|------|------|------|------|
| 60716 | 0 | 53270  | RCFDST                             | 1.88 | 0.01 | 1.96 | 0.44 | 0.85 | 0.28 |
| 60717 | 0 | 244270 | RCGCTSSTCLHKEWPHS<br>RN            | 2.89 | 0.01 | 3.61 | 0.44 | 0.85 | 0.28 |
| 60718 | 0 | 53273  | RCGDLS                             | 1.88 | 0.01 | 1.86 | 0.44 | 1.23 | 0.28 |
| 60719 | 0 | 79359  | RCGPASREKHALCT                     | 2.60 | 0.01 | 0.90 | 0.68 | 0.22 | 1.39 |
| 60720 | 0 | 53274  | RCGRLICGLSTTAQYPPT<br>RF           | 2.94 | 0.01 | 3.16 | 0.44 | 1.59 | 0.28 |
| 60721 | 0 | 110997 | RCHAANPNGRYYWGG<br>QYTWD           | 2.93 | 0.01 | 0.78 | 2.46 | 0.22 | 2.51 |
| 60722 | 0 | 110997 | RCHAANPNGRYYWGG<br>QYTWD           | 2.93 | 0.01 | 0.78 | 2.46 | 0.22 | 1.27 |
| 60723 | 0 | 53276  | RCHARKAVAHINSV                     | 2.64 | 0.01 | 2.41 | 0.44 | 0.85 | 0.28 |
| 60724 | 0 | 53276  | RCHARKAVAHINSV                     | 2.64 | 0.01 | 2.41 | 0.44 | 0.85 | 0.28 |
| 60725 | 0 | 53276  | RCHARKAVAHINSV                     | 2.64 | 0.01 | 2.41 | 0.44 | 0.85 | 0.28 |
| 60726 | 0 | 53276  | RCHARKAVAHINSV                     | 2.64 | 0.01 | 2.41 | 0.44 | 1.41 | 0.28 |
| 60727 | 0 | 53279  | RCHQNGVCMHRNVLLT<br>TY             | 2.84 | 0.01 | 0.90 | 1.15 | 0.22 | 1.39 |
| 60728 | 0 | 238969 | RCHSSALELLQEVIIVLE                 | 2.85 | 0.01 | 0.78 | 0.44 | 1.13 | 0.28 |
| 60729 | 0 | 53281  | RCIPALDSLT                         | 2.29 | 0.01 | 0.78 | 0.44 | 1.41 | 0.28 |
| 60730 | 0 | 118576 | RCIPALDSLTPAN                      | 2.54 | 0.01 | 0.78 | 0.44 | 1.59 | 0.85 |
| 60731 | 0 | 496882 | RCIPTLEAFLPMLTNEDE<br>QIGARIVLKALS | 3.31 | 0.01 | 2.87 | 0.44 | 1.93 | 2.12 |
| 60732 | 0 | 496882 | RCIPTLEAFLPMLTNEDE<br>QIGARIVLKALS | 3.31 | 0.01 | 2.87 | 0.44 | 1.93 | 2.12 |
| 60733 | 0 | 53282  | RCKANKIQDK                         | 2.31 | 0.01 | 2.72 | 0.44 | 1.23 | 0.85 |
| 60734 | 0 | 53282  | RCKANKIQDK                         | 2.31 | 0.01 | 2.72 | 0.44 | 1.23 | 0.85 |
| 60735 | 0 | 53284  | RCKDLLTLAKCH                       | 2.49 | 0.01 | 0.90 | 0.68 | 0.22 | 0.28 |
| 60736 | 0 | 130590 | RCKTFGKTTLCS                       | 2.48 | 0.01 | 0.90 | 0.68 | 0.22 | 1.27 |
| 60737 | 0 | 130590 | RCKTFGKTTLCS                       | 2.48 | 0.01 | 0.90 | 0.68 | 0.22 | 1.27 |
| 60738 | 0 | 130590 | RCKTFGKTTLCS                       | 2.48 | 0.01 | 0.90 | 0.68 | 0.22 | 1.34 |
| 60739 | 0 | 483774 | RCLLGFKVGGKCVASI                   | 2.82 | 0.01 | 3.12 | 0.68 | 0.22 | 0.28 |
| 60740 | 0 | 483774 | RCLLGFKVGGKCVASI                   | 2.82 | 0.01 | 3.12 | 0.68 | 0.22 | 0.85 |
| 60741 | 0 | 483774 | RCLLGFKVGGKCVASI                   | 2.82 | 0.01 | 3.12 | 0.68 | 0.22 | 0.28 |
| 60742 | 0 | 98977  | RCLQSCQQEPDDLKQ                    | 2.69 | 0.01 | 2.16 | 0.44 | 1.23 | 0.85 |
| 60743 | 0 | 98978  | RCLQSCQQEPDDLKQK<br>ACES           | 2.97 | 0.01 | 2.16 | 0.44 | 2.39 | 0.85 |
| 60744 | 0 | 98978  | RCLQSCQQEPDDLKQK<br>ACES           | 2.97 | 0.01 | 2.16 | 0.44 | 2.39 | 0.85 |
| 60745 | 0 | 432084 | RCNPNMEPPRCWAAE<br>GD              | 2.80 | 0.01 | 0.90 | 0.68 | 0.22 | 2.49 |
| 60746 | 0 | 182284 | RCNRKMITGPLQYSV                    | 2.60 | 0.01 | 0.78 | 0.44 | 1.13 | 0.85 |
| 60747 | 0 | 118577 | RCPAKPEEEGMMINI                    | 2.65 | 0.01 | 3.78 | 0.44 | 1.13 | 0.85 |
| 60748 | 0 | 53303  | RCPPRRRA                           | 2.17 | 0.01 | 2.04 | 0.44 | 0.85 | 0.28 |

|       |   |        |                          |      |      |      |      |      |      |
|-------|---|--------|--------------------------|------|------|------|------|------|------|
| 60749 | 0 | 53303  | RCPPRRRA                 | 2.17 | 0.01 | 2.04 | 0.44 | 0.85 | 0.28 |
| 60750 | 0 | 53303  | RCPPRRRA                 | 2.17 | 0.01 | 2.04 | 0.44 | 0.85 | 0.28 |
| 60751 | 0 | 79360  | RCYYTRHPSMRCN            | 2.63 | 0.01 | 0.90 | 0.68 | 0.22 | 1.39 |
| 60752 | 0 | 79361  | RCQALSRLFREKCT           | 2.62 | 0.01 | 0.90 | 0.68 | 0.22 | 1.39 |
| 60753 | 0 | 96815  | RCQSQLERA                | 2.24 | 0.01 | 2.16 | 2.82 | 0.22 | 1.57 |
| 60754 | 0 | 53308  | RCQSQLERANLRPCE          | 2.71 | 0.01 | 2.16 | 2.90 | 0.22 | 0.85 |
| 60755 | 0 | 79362  | RCRKVLICRRICP            | 2.59 | 0.01 | 0.90 | 0.68 | 0.22 | 1.39 |
| 60756 | 0 | 117623 | RCRLCDEGHGLE             | 2.52 | 0.01 | 0.78 | 0.44 | 1.13 | 0.85 |
| 60757 | 0 | 117623 | RCRLCDEGHGLE             | 2.52 | 0.01 | 0.78 | 0.44 | 1.13 | 0.85 |
| 60758 | 0 | 117623 | RCRLCDEGHGLE             | 2.52 | 0.01 | 0.78 | 0.44 | 1.13 | 0.85 |
| 60759 | 0 | 117623 | RCRLCDEGHGLE             | 2.52 | 0.01 | 0.78 | 0.44 | 1.41 | 0.85 |
| 60760 | 0 | 79363  | RCSCRPPSEATTCK           | 2.64 | 0.01 | 0.90 | 0.68 | 0.22 | 1.39 |
| 60761 | 0 | 238970 | RCSTKLTLYTSTCSS          | 2.71 | 0.01 | 2.56 | 2.02 | 0.22 | 0.85 |
| 60762 | 0 | 238970 | RCSTKLTLYTSTCSS          | 2.71 | 0.01 | 2.56 | 1.20 | 0.22 | 0.85 |
| 60763 | 0 | 99599  | RCTKLEYDPRCVYDP          | 2.69 | 0.01 | 2.16 | 0.44 | 1.23 | 1.48 |
| 60764 | 0 | 99599  | RCTKLEYDPRCVYDP          | 2.69 | 0.01 | 2.16 | 0.44 | 1.23 | 1.48 |
| 60765 | 0 | 100455 | RCTKLEYDPRCVYDPRG<br>HTG | 2.95 | 0.01 | 2.16 | 0.44 | 2.39 | 0.28 |
| 60766 | 0 | 130591 | RCTVYGKTVLCT             | 2.49 | 0.01 | 0.90 | 0.68 | 0.22 | 0.85 |
| 60767 | 0 | 130591 | RCTVYGKTVLCT             | 2.49 | 0.01 | 0.90 | 0.68 | 0.22 | 1.27 |
| 60768 | 0 | 79364  | RCVDSFVINNHMCD           | 2.60 | 0.01 | 0.90 | 0.68 | 0.22 | 1.39 |
| 60769 | 0 | 181440 | RCVLNHHSTQETAIG          | 2.61 | 0.01 | 2.82 | 1.15 | 0.22 | 0.28 |
| 60770 | 0 | 79365  | RCYNPAEWAELCY            | 2.63 | 0.01 | 0.90 | 0.68 | 0.22 | 1.39 |
| 60771 | 0 | 366473 | RDAAALMATDELTTT          | 2.71 | 0.01 | 1.61 | 0.44 | 0.85 | 1.28 |
| 60772 | 0 | 188440 | RDAADPDTLL               | 2.32 | 0.01 | 2.92 | 0.68 | 0.22 | 0.85 |
| 60773 | 0 | 188440 | RDAADPDTLL               | 2.32 | 0.01 | 2.92 | 1.81 | 0.22 | 0.85 |
| 60774 | 0 | 188440 | RDAADPDTLL               | 2.32 | 0.01 | 2.92 | 3.37 | 0.22 | 0.85 |
| 60775 | 0 | 53326  | RDALPNTEASGPTHSKE        | 2.78 | 0.01 | 2.57 | 1.20 | 0.22 | 1.27 |
| 60776 | 0 | 53326  | RDALPNTEASGPTHSKE        | 2.78 | 0.01 | 2.57 | 1.20 | 0.22 | 0.85 |
| 60777 | 0 | 53326  | RDALPNTEASGPTHSKE        | 2.78 | 0.01 | 2.57 | 1.20 | 0.22 | 1.34 |
| 60778 | 0 | 53326  | RDALPNTEASGPTHSKE        | 2.78 | 0.01 | 2.57 | 2.04 | 0.22 | 1.27 |
| 60779 | 0 | 53326  | RDALPNTEASGPTHSKE        | 2.78 | 0.01 | 2.57 | 2.04 | 0.22 | 0.85 |
| 60780 | 0 | 53326  | RDALPNTEASGPTHSKE        | 2.78 | 0.01 | 2.57 | 2.04 | 0.22 | 1.57 |
| 60781 | 0 | 366497 | RDAPQARKQQGRDAP          | 2.73 | 0.01 | 1.61 | 0.44 | 0.85 | 1.28 |
| 60782 | 0 | 366498 | RDAPQARKQQGRNAP          | 2.71 | 0.01 | 1.61 | 0.44 | 0.85 | 1.28 |
| 60783 | 0 | 366499 | RDAPQARKQQGRNEP          | 2.70 | 0.01 | 1.61 | 0.44 | 0.85 | 1.28 |
| 60784 | 0 | 366505 | RDATALMATDELTTT          | 2.72 | 0.01 | 1.61 | 0.44 | 0.85 | 1.28 |
| 60785 | 0 | 87807  | RDATAYPSAKTPSS           | 2.63 | 0.01 | 0.78 | 2.75 | 0.22 | 0.85 |

|       |   |        |                           |      |      |      |      |      |      |
|-------|---|--------|---------------------------|------|------|------|------|------|------|
| 60786 | 0 | 87807  | RDATAYPSAKTPSS            | 2.63 | 0.01 | 0.78 | 2.75 | 0.22 | 0.85 |
| 60787 | 0 | 87807  | RDATAYPSAKTPSS            | 2.63 | 0.01 | 0.78 | 2.75 | 0.22 | 0.85 |
| 60788 | 0 | 87807  | RDATAYPSAKTPSS            | 2.63 | 0.01 | 0.78 | 2.75 | 0.22 | 0.85 |
| 60789 | 0 | 87807  | RDATAYPSAKTPSS            | 2.63 | 0.01 | 0.78 | 2.75 | 0.22 | 0.85 |
| 60790 | 0 | 79366  | RDAVMI                    | 1.88 | 0.01 | 0.90 | 0.68 | 0.22 | 1.39 |
| 60791 | 0 | 123688 | RDDGEKWFS                 | 2.20 | 0.01 | 2.28 | 2.00 | 0.22 | 0.28 |
| 60792 | 0 | 53331  | RDDITFMVGLHSYT            | 2.56 | 0.01 | 2.59 | 0.44 | 0.85 | 0.28 |
| 60793 | 0 | 53331  | RDDITFMVGLHSYT            | 2.56 | 0.01 | 2.59 | 0.44 | 0.85 | 0.28 |
| 60794 | 0 | 157832 | RDDPHKVTPSDM              | 2.47 | 0.01 | 3.33 | 2.49 | 0.85 | 0.28 |
| 60795 | 0 | 121778 | RDDPQLFAEAYAFCF           | 2.67 | 0.01 | 0.90 | 0.68 | 0.22 | 1.39 |
| 60796 | 0 | 121778 | RDDPQLFAEAYAFCF           | 2.67 | 0.01 | 0.90 | 0.68 | 0.22 | 0.28 |
| 60797 | 0 | 121778 | RDDPQLFAEAYAFCF           | 2.67 | 0.01 | 0.90 | 0.68 | 0.22 | 0.28 |
| 60798 | 0 | 53332  | RDEALNNRFQIKGVELK<br>SGYK | 2.96 | 0.01 | 3.93 | 1.15 | 0.22 | 2.66 |
| 60799 | 0 | 53334  | RDEDSYERDPYSPSQ           | 2.73 | 0.01 | 2.16 | 0.44 | 1.23 | 0.28 |
| 60800 | 0 | 53334  | RDEDSYERDPYSPSQ           | 2.73 | 0.01 | 2.16 | 1.12 | 0.22 | 0.85 |
| 60801 | 0 | 116820 | RDEDSYGRDPYSPSQ           | 2.72 | 0.01 | 2.16 | 0.44 | 1.23 | 0.85 |
| 60802 | 0 | 366573 | RDEGGDEGNDEAEGG           | 2.72 | 0.01 | 1.61 | 0.44 | 0.85 | 1.28 |
| 60803 | 0 | 131032 | RDEIESVKELKDTGKDAV<br>N   | 2.89 | 0.01 | 0.78 | 1.12 | 0.22 | 0.85 |
| 60804 | 0 | 187082 | RDELNVL                   | 2.02 | 0.01 | 3.53 | 0.68 | 0.22 | 0.28 |
| 60805 | 0 | 187082 | RDELNVL                   | 2.02 | 0.01 | 3.53 | 0.68 | 0.22 | 0.85 |
| 60806 | 0 | 187082 | RDELNVL                   | 2.02 | 0.01 | 3.53 | 0.68 | 0.22 | 0.28 |
| 60807 | 0 | 187082 | RDELNVL                   | 2.02 | 0.01 | 3.53 | 0.68 | 0.22 | 0.28 |
| 60808 | 0 | 187082 | RDELNVL                   | 2.02 | 0.01 | 3.53 | 0.68 | 0.22 | 0.28 |
| 60809 | 0 | 95754  | RDETTSFVLVDPLPSGYQ<br>FN  | 2.92 | 0.01 | 2.39 | 0.44 | 1.74 | 0.28 |
| 60810 | 0 | 53336  | RDEVDFCVGLNSFV            | 2.61 | 0.01 | 2.69 | 0.44 | 0.85 | 0.28 |
| 60811 | 0 | 53337  | RDEVTFTVGLNSFV            | 2.61 | 0.01 | 2.69 | 0.44 | 0.85 | 0.28 |
| 60812 | 0 | 53337  | RDEVTFTVGLNSFV            | 2.61 | 0.01 | 2.69 | 0.44 | 0.85 | 0.28 |
| 60813 | 0 | 451002 | RDEVYFH                   | 1.99 | 0.01 | 0.90 | 0.44 | 1.41 | 1.39 |
| 60814 | 0 | 53338  | RDEWWKVIKDVWNVI<br>SWVF   | 2.97 | 0.01 | 1.66 | 1.20 | 0.22 | 0.28 |
| 60815 | 0 | 139880 | RDEYDHVLSAKLAEQYD<br>T    | 2.84 | 0.01 | 3.65 | 2.00 | 0.22 | 0.28 |
| 60816 | 0 | 139880 | RDEYDHVLSAKLAEQYD<br>T    | 2.84 | 0.01 | 3.65 | 2.00 | 0.22 | 0.28 |
| 60817 | 0 | 53342  | RDFSIRES                  | 2.15 | 0.01 | 3.27 | 2.02 | 0.22 | 0.28 |
| 60818 | 0 | 53342  | RDFSIRES                  | 2.15 | 0.01 | 3.27 | 2.82 | 0.22 | 0.28 |
| 60819 | 0 | 53343  | RDFVEG                    | 1.88 | 0.01 | 2.40 | 0.44 | 0.85 | 0.28 |
| 60820 | 0 | 53346  | RDGAAAYTLT                | 2.31 | 4.23 | 2.70 | 0.44 | 0.85 | 0.28 |
| 60821 | 0 | 194262 | RDGAENEIQT                | 2.29 | 0.01 | 4.23 | 0.68 | 0.22 | 0.85 |
| 60822 | 0 | 194262 | RDGAENEIQT                | 2.29 | 0.01 | 4.23 | 0.68 | 0.22 | 1.48 |
| 60823 | 0 | 194262 | RDGAENEIQT                | 2.29 | 0.01 | 4.23 | 0.68 | 0.22 | 0.85 |
| 60824 | 0 | 112283 | RDGAWFA                   | 2.02 | 0.01 | 0.78 | 0.44 | 1.13 | 1.27 |
| 60825 | 0 | 53347  | RDGDGRVIEPKIGLP           | 2.71 | 0.01 | 3.37 | 2.22 | 0.22 | 0.28 |

|       |   |        |                               |      |      |      |      |      |      |
|-------|---|--------|-------------------------------|------|------|------|------|------|------|
| 60826 | 0 | 172962 | RDGDRFWWENEGVFS               | 2.70 | 0.01 | 0.78 | 0.44 | 1.41 | 0.28 |
| 60827 | 0 | 172962 | RDGDRFWWENEGVFS               | 2.70 | 0.01 | 0.78 | 0.44 | 1.13 | 0.28 |
| 60828 | 0 | 53349  | RDGFLLQMDFGFPEHL<br>LVDFLQSL  | 3.21 | 0.01 | 0.78 | 1.81 | 0.22 | 0.28 |
| 60829 | 0 | 172963 | RDGGLRLGEMERDCL               | 2.73 | 0.01 | 0.78 | 0.44 | 1.13 | 0.28 |
| 60830 | 0 | 53351  | RDGKLPATQLRRHIDLLV<br>GSATLCS | 3.15 | 0.01 | 1.72 | 0.44 | 0.85 | 0.28 |
| 60831 | 0 | 53351  | RDGKLPATQLRRHIDLLV<br>GSATLCS | 3.15 | 0.01 | 1.72 | 0.44 | 0.85 | 0.28 |
| 60832 | 0 | 53355  | RDGQLTIKAERTEQKDF<br>DGR      | 2.97 | 0.01 | 2.04 | 0.44 | 0.85 | 0.28 |
| 60833 | 0 | 53355  | RDGQLTIKAERTEQKDF<br>DGR      | 2.97 | 0.01 | 2.04 | 0.68 | 0.22 | 1.27 |
| 60834 | 0 | 53355  | RDGQLTIKAERTEQKDF<br>DGR      | 2.97 | 0.01 | 2.04 | 0.68 | 0.22 | 0.28 |
| 60835 | 0 | 53355  | RDGQLTIKAERTEQKDF<br>DGR      | 2.97 | 0.01 | 2.04 | 0.68 | 0.22 | 0.85 |
| 60836 | 0 | 138231 | RDGQRLTSSKTMPLY               | 2.66 | 0.01 | 0.90 | 0.44 | 1.13 | 1.39 |
| 60837 | 0 | 53357  | RDGQSVIGACASPYEGR<br>YR       | 2.90 | 0.01 | 2.14 | 1.15 | 0.22 | 1.27 |
| 60838 | 0 | 53357  | RDGQSVIGACASPYEGR<br>YR       | 2.90 | 0.01 | 2.14 | 1.15 | 0.22 | 0.28 |
| 60839 | 0 | 53357  | RDGQSVIGACASPYEGR<br>YR       | 2.90 | 0.01 | 2.14 | 1.20 | 0.22 | 0.28 |
| 60840 | 0 | 238971 | RDHAMVPLEEAAQEYQ<br>EK        | 2.82 | 0.01 | 0.78 | 0.44 | 1.13 | 0.28 |
| 60841 | 0 | 238971 | RDHAMVPLEEAAQEYQ<br>EK        | 2.82 | 0.01 | 0.78 | 0.44 | 1.13 | 0.28 |
| 60842 | 0 | 152080 | RDHDELLMSIPS                  | 2.46 | 0.01 | 2.80 | 2.78 | 0.22 | 0.28 |
| 60843 | 0 | 115101 | RDHSYQEEAAMELKVED<br>PFY      | 2.90 | 0.01 | 0.78 | 3.01 | 0.22 | 0.28 |
| 60844 | 0 | 112828 | RDHSYQEEAAMELKVED<br>PFYWVSPG | 3.11 | 0.01 | 0.78 | 0.44 | 1.13 | 0.28 |
| 60845 | 0 | 112828 | RDHSYQEEAAMELKVED<br>PFYWVSPG | 3.11 | 0.01 | 0.78 | 0.44 | 1.41 | 0.28 |
| 60846 | 0 | 112828 | RDHSYQEEAAMELKVED<br>PFYWVSPG | 3.11 | 0.01 | 0.78 | 0.44 | 1.41 | 0.28 |
| 60847 | 0 | 112828 | RDHSYQEEAAMELKVED<br>PFYWVSPG | 3.11 | 0.01 | 0.78 | 0.44 | 1.13 | 0.28 |
| 60848 | 0 | 112828 | RDHSYQEEAAMELKVED<br>PFYWVSPG | 3.11 | 0.01 | 0.78 | 0.44 | 1.59 | 0.28 |
| 60849 | 0 | 53361  | RDHVNVLNIRDVS                 | 2.60 | 0.01 | 3.00 | 0.44 | 0.85 | 0.28 |
| 60850 | 0 | 121779 | RDIPQRFAEAQAFNF               | 2.71 | 0.01 | 0.90 | 0.68 | 0.22 | 1.39 |
| 60851 | 0 | 121779 | RDIPQRFAEAQAFNF               | 2.71 | 0.01 | 0.90 | 0.68 | 0.22 | 0.28 |
| 60852 | 0 | 121779 | RDIPQRFAEAQAFNF               | 2.71 | 0.01 | 0.90 | 0.68 | 0.22 | 0.28 |

|       |   |        |                                    |      |      |      |      |      |      |
|-------|---|--------|------------------------------------|------|------|------|------|------|------|
| 60853 | 0 | 167380 | RDISPLA                            | 1.99 | 0.01 | 0.90 | 0.44 | 0.85 | 1.39 |
| 60854 | 0 | 524773 | RDKDDHDHEHEDENE                    | 2.74 | 0.01 | 2.24 | 0.44 | 1.41 | 1.28 |
| 60855 | 0 | 152932 | RDKRFHYDRN                         | 2.34 | 0.01 | 2.18 | 2.16 | 0.22 | 0.28 |
| 60856 | 0 | 53373  | RDKSSTENDESPMKPRH<br>SIASR         | 3.05 | 0.01 | 2.86 | 1.81 | 0.22 | 0.85 |
| 60857 | 0 | 53373  | RDKSSTENDESPMKPRH<br>SIASR         | 3.05 | 0.01 | 2.86 | 2.89 | 0.22 | 1.27 |
| 60858 | 0 | 134209 | RDLASGLIGPLLCYKESV<br>D            | 2.92 | 0.01 | 0.78 | 0.44 | 2.35 | 0.28 |
| 60859 | 0 | 121780 | RDLCSLLPPTESKPLATKE<br>KAT         | 3.07 | 0.01 | 0.78 | 1.20 | 0.22 | 0.28 |
| 60860 | 0 | 230584 | RDLEDKLWAKGLSPQEA<br>NK            | 2.89 | 0.01 | 2.93 | 0.44 | 1.59 | 1.28 |
| 60861 | 0 | 97598  | RDLLKKGVD                          | 2.31 | 0.01 | 2.84 | 0.44 | 0.85 | 0.28 |
| 60862 | 0 | 97598  | RDLLKKGVD                          | 2.31 | 0.01 | 2.84 | 0.44 | 0.85 | 0.28 |
| 60863 | 0 | 188442 | RDMEYERTTE                         | 2.35 | 0.01 | 2.92 | 0.68 | 0.22 | 0.85 |
| 60864 | 0 | 188442 | RDMEYERTTE                         | 2.35 | 0.01 | 2.92 | 1.81 | 0.22 | 0.85 |
| 60865 | 0 | 188442 | RDMEYERTTE                         | 2.35 | 0.01 | 2.92 | 3.37 | 0.22 | 0.85 |
| 60866 | 0 | 118579 | RDMLLANKVPAAARA                    | 2.69 | 0.01 | 0.78 | 0.44 | 1.13 | 0.28 |
| 60867 | 0 | 118579 | RDMLLANKVPAAARA                    | 2.69 | 0.01 | 0.78 | 0.44 | 1.13 | 0.28 |
| 60868 | 0 | 115938 | RDMPIQAFLL                         | 2.26 | 0.01 | 1.60 | 0.44 | 1.23 | 0.85 |
| 60869 | 0 | 115938 | RDMPIQAFLL                         | 2.26 | 0.01 | 1.60 | 0.44 | 1.23 | 0.85 |
| 60870 | 0 | 161185 | RDNWRGSNR                          | 2.26 | 0.01 | 4.15 | 1.20 | 0.22 | 0.28 |
| 60871 | 0 | 161185 | RDNWRGSNR                          | 2.26 | 0.01 | 4.15 | 1.20 | 0.22 | 0.28 |
| 60872 | 0 | 108092 | RDPKLKFDFIYSSACEVE<br>RLKKVYGEAKTK | 3.33 | 0.01 | 0.90 | 1.12 | 0.22 | 0.28 |
| 60873 | 0 | 53406  | RDPSKMRDIDRHHEYN<br>VREGND         | 3.03 | 0.01 | 3.00 | 0.44 | 0.85 | 0.28 |
| 60874 | 0 | 53406  | RDPSKMRDIDRHHEYN<br>VREGND         | 3.03 | 0.01 | 3.00 | 0.44 | 0.85 | 0.28 |
| 60875 | 0 | 53406  | RDPSKMRDIDRHHEYN<br>VREGND         | 3.03 | 0.01 | 3.00 | 0.44 | 0.85 | 0.28 |
| 60876 | 0 | 53406  | RDPSKMRDIDRHHEYN<br>VREGND         | 3.03 | 0.01 | 3.00 | 0.44 | 0.85 | 0.28 |
| 60877 | 0 | 53406  | RDPSKMRDIDRHHEYN<br>VREGND         | 3.03 | 0.01 | 3.00 | 0.44 | 0.85 | 0.28 |
| 60878 | 0 | 53406  | RDPSKMRDIDRHHEYN<br>VREGND         | 3.03 | 0.01 | 3.00 | 0.44 | 0.85 | 0.28 |
| 60879 | 0 | 53406  | RDPSKMRDIDRHHEYN<br>VREGND         | 3.03 | 0.01 | 3.00 | 0.44 | 0.85 | 0.28 |
| 60880 | 0 | 53406  | RDPSKMRDIDRHHEYN<br>VREGND         | 3.03 | 0.01 | 3.00 | 0.44 | 0.85 | 0.28 |
| 60881 | 0 | 53406  | RDPSKMRDIDRHHEYN<br>VREGND         | 3.03 | 0.01 | 3.00 | 0.44 | 0.85 | 0.28 |

|       |   |        |                            |      |      |      |      |      |      |
|-------|---|--------|----------------------------|------|------|------|------|------|------|
| 60882 | 0 | 53406  | RDPSKMRDIDRHHEYN<br>VREGND | 3.03 | 0.01 | 3.00 | 0.44 | 0.85 | 0.28 |
| 60883 | 0 | 53406  | RDPSKMRDIDRHHEYN<br>VREGND | 3.03 | 0.01 | 3.00 | 0.44 | 0.85 | 0.28 |
| 60884 | 0 | 53406  | RDPSKMRDIDRHHEYN<br>VREGND | 3.03 | 0.01 | 3.00 | 0.44 | 0.85 | 0.28 |
| 60885 | 0 | 53406  | RDPSKMRDIDRHHEYN<br>VREGND | 3.03 | 0.01 | 3.00 | 0.44 | 2.39 | 0.28 |
| 60886 | 0 | 53406  | RDPSKMRDIDRHHEYN<br>VREGND | 3.03 | 0.01 | 3.00 | 0.44 | 2.39 | 0.28 |
| 60887 | 0 | 53406  | RDPSKMRDIDRHHEYN<br>VREGND | 3.03 | 0.01 | 3.00 | 2.22 | 0.22 | 0.28 |
| 60888 | 0 | 53406  | RDPSKMRDIDRHHEYN<br>VREGND | 3.03 | 0.01 | 3.00 | 2.22 | 0.22 | 0.28 |
| 60889 | 0 | 53406  | RDPSKMRDIDRHHEYN<br>VREGND | 3.03 | 0.01 | 3.00 | 2.22 | 0.22 | 0.28 |
| 60890 | 0 | 53406  | RDPSKMRDIDRHHEYN<br>VREGND | 3.03 | 0.01 | 3.00 | 3.57 | 0.22 | 0.28 |
| 60891 | 0 | 366777 | RDPTDEHSDFLTMG             | 2.66 | 0.01 | 1.61 | 0.44 | 0.85 | 1.28 |
| 60892 | 0 | 53407  | RDPVFYAFGFGVNYP            | 2.70 | 0.01 | 0.90 | 1.15 | 0.22 | 0.85 |
| 60893 | 0 | 524784 | RDYPSPYDRRGAGSS<br>QHQRCC  | 3.13 | 0.01 | 2.16 | 0.44 | 1.23 | 1.39 |
| 60894 | 0 | 157833 | RDYPSPSQDPYSPS             | 2.67 | 0.01 | 2.16 | 0.44 | 1.23 | 0.85 |
| 60895 | 0 | 157833 | RDYPSPSQDPYSPS             | 2.67 | 0.01 | 2.16 | 0.44 | 1.23 | 0.85 |
| 60896 | 0 | 53409  | RDYPSPSQDPYSPSQ            | 2.74 | 0.01 | 2.16 | 0.44 | 1.23 | 0.85 |
| 60897 | 0 | 53409  | RDYPSPSQDPYSPSQ            | 2.74 | 0.01 | 2.16 | 2.90 | 0.22 | 0.85 |
| 60898 | 0 | 151046 | RDQEGRMNYYWTLVE            | 2.64 | 0.01 | 2.87 | 0.44 | 0.85 | 0.28 |
| 60899 | 0 | 172969 | RDQFIATLREMIARD            | 2.69 | 0.01 | 0.78 | 0.44 | 1.41 | 0.28 |
| 60900 | 0 | 172969 | RDQFIATLREMIARD            | 2.69 | 0.01 | 0.78 | 0.44 | 1.13 | 0.28 |
| 60901 | 0 | 99602  | RDQSSYLQGFSRNTL            | 2.69 | 0.01 | 2.16 | 0.44 | 1.23 | 1.48 |
| 60902 | 0 | 181782 | RDQVWKAITYKAPQD            | 2.66 | 0.01 | 2.86 | 2.36 | 0.22 | 1.28 |
| 60903 | 0 | 105493 | RDRARVPL                   | 2.15 | 0.01 | 4.45 | 0.44 | 1.23 | 0.85 |
| 60904 | 0 | 118580 | RDRDRDRDRDR                | 2.46 | 0.01 | 0.78 | 3.44 | 1.13 | 1.27 |
| 60905 | 0 | 118581 | RDRDRDRE                   | 2.18 | 0.01 | 0.78 | 3.44 | 1.13 | 1.27 |
| 60906 | 0 | 118581 | RDRDRDRE                   | 2.18 | 0.01 | 0.78 | 3.44 | 1.13 | 0.28 |
| 60907 | 0 | 118581 | RDRDRDRE                   | 2.18 | 0.01 | 0.78 | 3.44 | 1.13 | 1.27 |
| 60908 | 0 | 118581 | RDRDRDRE                   | 2.18 | 0.01 | 1.75 | 3.07 | 1.13 | 0.28 |
| 60909 | 0 | 118581 | RDRDRDRE                   | 2.18 | 0.01 | 1.75 | 3.07 | 1.13 | 1.27 |
| 60910 | 0 | 123689 | RDRKREKR                   | 2.18 | 0.01 | 2.96 | 1.20 | 0.22 | 0.28 |
| 60911 | 0 | 123689 | RDRKREKR                   | 2.18 | 0.01 | 2.96 | 1.20 | 0.22 | 0.28 |
| 60912 | 0 | 135982 | RDRSGLAPKRPG               | 2.50 | 0.01 | 0.78 | 0.44 | 1.13 | 0.28 |
| 60913 | 0 | 135982 | RDRSGLAPKRPG               | 2.50 | 0.01 | 0.78 | 0.44 | 1.41 | 0.28 |
| 60914 | 0 | 53422  | RDSAWDVRPLTETRG            | 2.67 | 0.01 | 2.76 | 0.44 | 1.59 | 0.28 |
| 60915 | 0 | 125229 | RDSEGLVAEKL GPI            | 2.66 | 0.01 | 4.03 | 0.44 | 1.13 | 0.28 |
| 60916 | 0 | 125229 | RDSEGLVAEKL GPI            | 2.66 | 0.01 | 4.03 | 0.44 | 1.13 | 0.28 |



|       |   |        |                          |      |      |      |      |      |      |
|-------|---|--------|--------------------------|------|------|------|------|------|------|
| 60917 | 0 | 125229 | RDSEGD LVAEKL GPI        | 2.66 | 0.01 | 4.03 | 0.44 | 1.41 | 0.28 |
| 60918 | 0 | 125229 | RDSEGD LVAEKL GPI        | 2.66 | 0.01 | 4.03 | 0.44 | 1.41 | 0.28 |
| 60919 | 0 | 125229 | RDSEGD LVAEKL GPI        | 2.66 | 0.01 | 4.03 | 0.44 | 1.41 | 0.28 |
| 60920 | 0 | 125229 | RDSEGD LVAEKL GPI        | 2.66 | 0.01 | 4.03 | 0.44 | 1.13 | 0.28 |
| 60921 | 0 | 125229 | RDSEGD LVAEKL GPI        | 2.66 | 0.01 | 4.03 | 0.44 | 1.41 | 0.28 |
| 60922 | 0 | 125229 | RDSEGD LVAEKL GPI        | 2.66 | 0.01 | 4.03 | 0.44 | 1.13 | 1.27 |
| 60923 | 0 | 181441 | RDSFAWQTATNPSVF          | 2.66 | 0.01 | 2.82 | 1.15 | 0.22 | 0.28 |
| 60924 | 0 | 137962 | RDSPEDFV                 | 2.12 | 0.01 | 0.78 | 1.20 | 0.22 | 0.28 |
| 60925 | 0 | 137962 | RDSPEDFV                 | 2.12 | 0.01 | 0.78 | 1.20 | 0.22 | 2.12 |
| 60926 | 0 | 137962 | RDSPEDFV                 | 2.12 | 0.01 | 0.78 | 1.20 | 0.22 | 1.27 |
| 60927 | 0 | 113804 | RDTGILDSIGRFFSGDRG<br>AP | 2.97 | 0.01 | 1.75 | 2.25 | 0.22 | 0.28 |
| 60928 | 0 | 132041 | RDTKAVN                  | 1.99 | 0.01 | 4.45 | 0.68 | 0.22 | 0.85 |
| 60929 | 0 | 132041 | RDTKAVN                  | 1.99 | 0.01 | 4.45 | 0.68 | 0.22 | 1.39 |
| 60930 | 0 | 132041 | RDTKAVN                  | 1.99 | 0.01 | 4.45 | 0.68 | 0.22 | 0.85 |
| 60931 | 0 | 53429  | RD TLPQSPGPAFP           | 2.54 | 0.01 | 3.17 | 0.44 | 0.85 | 0.85 |
| 60932 | 0 | 187700 | RDVAAAADLALQ             | 2.51 | 0.01 | 2.14 | 1.20 | 0.22 | 0.28 |
| 60933 | 0 | 100458 | RDVLQLYAPE               | 2.29 | 0.01 | 2.18 | 2.16 | 0.22 | 0.28 |
| 60934 | 0 | 53435  | RDVSDFTDSVRDPKTSEI       | 2.87 | 0.01 | 2.45 | 0.44 | 0.85 | 1.48 |
| 60935 | 0 | 53436  | RDVSRITFFQ               | 2.31 | 4.33 | 2.70 | 0.44 | 0.85 | 0.28 |
| 60936 | 0 | 148917 | RDVVLQQHNI               | 2.29 | 0.01 | 1.86 | 0.44 | 1.93 | 0.85 |
| 60937 | 0 | 148917 | RDVVLQQHNI               | 2.29 | 0.01 | 1.86 | 2.74 | 0.22 | 0.85 |
| 60938 | 0 | 136590 | RDYFEEYGKIDTIEIT         | 2.82 | 0.01 | 0.78 | 4.63 | 0.22 | 0.28 |
| 60939 | 0 | 136590 | RDYFEEYGKIDTIEIT         | 2.82 | 0.01 | 0.78 | 0.44 | 1.13 | 0.28 |
| 60940 | 0 | 186705 | RDYHPMLDMTLP             | 2.49 | 0.01 | 0.90 | 0.68 | 0.22 | 1.39 |
| 60941 | 0 | 126918 | RDYIPRILGPEAFQQYVG<br>p  | 2.89 | 0.01 | 0.78 | 1.20 | 0.22 | 0.28 |
| 60942 | 0 | 126918 | RDYIPRILGPEAFQQYVG<br>p  | 2.89 | 0.01 | 0.78 | 1.20 | 0.22 | 0.28 |
| 60943 | 0 | 236122 | RDYLPLVLGPTAMR           | 2.62 | 0.01 | 0.78 | 0.44 | 1.41 | 2.66 |
| 60944 | 0 | 236122 | RDYLPLVLGPTAMR           | 2.62 | 0.01 | 0.78 | 0.44 | 1.13 | 2.66 |
| 60945 | 0 | 53447  | REACR                    | 1.77 | 0.01 | 3.85 | 1.20 | 0.22 | 2.35 |
| 60946 | 0 | 53447  | REACR                    | 1.77 | 0.01 | 3.85 | 1.15 | 0.22 | 1.34 |
| 60947 | 0 | 53447  | REACR                    | 1.77 | 0.01 | 3.85 | 1.15 | 0.22 | 1.48 |
| 60948 | 0 | 93679  | READFAKEVP               | 2.31 | 0.01 | 2.67 | 2.00 | 0.22 | 0.28 |
| 60949 | 0 | 93679  | READFAKEVP               | 2.31 | 0.01 | 2.67 | 2.00 | 0.22 | 0.28 |
| 60950 | 0 | 93679  | READFAKEVP               | 2.31 | 0.01 | 2.67 | 2.00 | 0.22 | 0.28 |
| 60951 | 0 | 139225 | REAEQRR                  | 2.03 | 0.01 | 0.78 | 1.12 | 0.22 | 1.27 |
| 60952 | 0 | 139225 | REAEQRR                  | 2.03 | 0.01 | 0.78 | 1.12 | 0.22 | 0.28 |
| 60953 | 0 | 139225 | REAEQRR                  | 2.03 | 0.01 | 0.78 | 1.12 | 0.22 | 1.27 |
| 60954 | 0 | 139225 | REAEQRR                  | 2.03 | 0.01 | 0.78 | 1.12 | 0.22 | 1.27 |
| 60955 | 0 | 53449  | REAFRRYQ                 | 2.14 | 0.01 | 2.40 | 2.43 | 0.22 | 0.28 |
| 60956 | 0 | 167809 | REAFRRYQE                | 2.25 | 0.01 | 2.40 | 2.43 | 0.22 | 0.28 |

|       |   |        |                                    |      |      |      |      |      |      |
|-------|---|--------|------------------------------------|------|------|------|------|------|------|
| 60957 | 0 | 237905 | REAGKTNDVCFAQMDA<br>IAKNVPSKEAWDKV | 3.31 | 0.01 | 2.74 | 1.20 | 0.22 | 0.28 |
| 60958 | 0 | 174256 | REAKELSFNMPREEI                    | 2.66 | 0.01 | 3.27 | 0.44 | 1.23 | 1.28 |
| 60959 | 0 | 53457  | REALPGPEPLTA                       | 2.51 | 0.01 | 0.90 | 0.68 | 0.22 | 0.28 |
| 60960 | 0 | 241052 | EAQRSAE                            | 2.17 | 0.01 | 3.35 | 2.37 | 0.22 | 0.85 |
| 60961 | 0 | 241052 | EAQRSAE                            | 2.17 | 0.01 | 3.35 | 1.20 | 0.22 | 0.85 |
| 60962 | 0 | 79998  | REARSGRLSQLRE                      | 2.60 | 0.01 | 4.03 | 1.12 | 0.22 | 0.85 |
| 60963 | 0 | 79998  | REARSGRLSQLRE                      | 2.60 | 0.01 | 4.03 | 1.12 | 0.22 | 0.85 |
| 60964 | 0 | 117625 | REAVAGRGRGRGR                      | 2.62 | 0.01 | 0.78 | 0.44 | 1.13 | 0.85 |
| 60965 | 0 | 121782 | REAVAGRGRGRGRGRG<br>RGRGRGRGGPRR   | 3.34 | 0.01 | 0.78 | 0.44 | 1.13 | 0.28 |
| 60966 | 0 | 121782 | REAVAGRGRGRGRGRG<br>RGRGRGRGGPRR   | 3.34 | 0.01 | 0.78 | 3.05 | 1.13 | 0.28 |
| 60967 | 0 | 121782 | REAVAGRGRGRGRGRG<br>RGRGRGRGGPRR   | 3.34 | 0.01 | 0.78 | 3.05 | 1.13 | 0.28 |
| 60968 | 0 | 141737 | REAYYLWKQYNPTGKG                   | 2.71 | 0.01 | 1.66 | 2.55 | 0.22 | 0.28 |
| 60969 | 0 | 53464  | RECCNEIRDVK                        | 2.41 | 0.01 | 3.89 | 0.44 | 1.23 | 0.85 |
| 60970 | 0 | 53466  | RECGIKKGSSGYCAW                    | 2.66 | 0.01 | 2.56 | 2.02 | 0.22 | 0.85 |
| 60971 | 0 | 367053 | REDDEENDEEEDGSE                    | 2.73 | 0.01 | 1.61 | 0.44 | 0.85 | 1.28 |
| 60972 | 0 | 53467  | REDDQPSS                           | 2.10 | 0.01 | 2.40 | 1.12 | 0.22 | 0.28 |
| 60973 | 0 | 53467  | REDDQPSS                           | 2.10 | 0.01 | 2.40 | 1.12 | 0.22 | 0.28 |
| 60974 | 0 | 53467  | REDDQPSS                           | 2.10 | 0.01 | 2.40 | 1.12 | 0.22 | 0.28 |
| 60975 | 0 | 53467  | REDDQPSS                           | 2.10 | 0.01 | 2.40 | 1.12 | 0.22 | 1.27 |
| 60976 | 0 | 53467  | REDDQPSS                           | 2.10 | 0.01 | 2.40 | 1.12 | 0.22 | 1.27 |
| 60977 | 0 | 53468  | REDERTLT                           | 2.17 | 0.01 | 3.18 | 1.12 | 0.22 | 0.28 |
| 60978 | 0 | 141738 | REDL                               | 1.57 | 0.01 | 0.78 | 0.68 | 0.22 | 0.28 |
| 60979 | 0 | 141738 | REDL                               | 1.57 | 0.01 | 0.78 | 0.68 | 0.22 | 1.34 |
| 60980 | 0 | 141738 | REDL                               | 1.57 | 0.01 | 0.78 | 0.68 | 0.22 | 0.28 |
| 60981 | 0 | 99604  | REDLR                              | 1.77 | 0.01 | 0.78 | 0.68 | 0.22 | 0.28 |
| 60982 | 0 | 53474  | REDNSSRCWVALTPTLA<br>ARN           | 2.94 | 0.01 | 2.83 | 1.12 | 0.22 | 0.28 |
| 60983 | 0 | 53478  | REDVTFQVGLNQYL                     | 2.59 | 0.01 | 1.96 | 0.44 | 0.85 | 0.28 |
| 60984 | 0 | 53478  | REDVTFQVGLNQYL                     | 2.59 | 0.01 | 1.96 | 0.44 | 0.85 | 0.28 |
| 60985 | 0 | 53478  | REDVTFQVGLNQYL                     | 2.59 | 0.01 | 1.96 | 0.44 | 0.85 | 0.28 |
| 60986 | 0 | 99605  | REDWRRPSHQQRKI                     | 2.68 | 0.01 | 2.16 | 0.44 | 1.23 | 1.48 |
| 60987 | 0 | 99605  | REDWRRPSHQQRKI                     | 2.68 | 0.01 | 2.16 | 0.44 | 1.23 | 1.48 |
| 60988 | 0 | 180341 | REDWWAINRKEVWKA                    | 2.70 | 0.01 | 4.63 | 1.12 | 0.22 | 0.28 |
| 60989 | 0 | 180341 | REDWWAINRKEVWKA                    | 2.70 | 0.01 | 4.63 | 3.06 | 0.22 | 0.28 |
| 60990 | 0 | 181783 | REDWWTANRDQVWK<br>A                | 2.69 | 0.01 | 2.86 | 2.36 | 0.22 | 1.28 |
| 60991 | 0 | 110999 | REEAENTLQSFRQDVNT<br>LQS           | 2.96 | 4.63 | 0.78 | 1.81 | 1.41 | 2.51 |

|       |   |        |                                                   |      |      |      |      |      |      |
|-------|---|--------|---------------------------------------------------|------|------|------|------|------|------|
| 60992 | 0 | 110999 | REEAENTLQSFRQDVNT<br>LQS                          | 2.96 | 4.63 | 0.78 | 1.81 | 1.41 | 1.27 |
| 60993 | 0 | 53481  | REEAYKEQIKTLTNK                                   | 2.68 | 0.01 | 3.15 | 0.44 | 1.23 | 0.85 |
| 60994 | 0 | 53483  | REECKCLLNKQEGDKC<br>VE                            | 2.90 | 0.01 | 1.66 | 0.44 | 1.74 | 0.28 |
| 60995 | 0 | 53484  | REEEDDDDEDFEDA                                    | 2.67 | 0.01 | 2.76 | 1.15 | 0.22 | 2.02 |
| 60996 | 0 | 53484  | REEEDDDDEDFEDA                                    | 2.67 | 0.01 | 2.76 | 1.15 | 0.22 | 0.85 |
| 60997 | 0 | 107228 | REEFRHEA                                          | 2.17 | 0.01 | 0.78 | 1.15 | 0.22 | 1.66 |
| 60998 | 0 | 107228 | REEFRHEA                                          | 2.17 | 0.01 | 0.78 | 0.68 | 0.22 | 2.49 |
| 60999 | 0 | 243123 | REEMRRLQRRKQLYF                                   | 2.70 | 0.01 | 3.32 | 1.20 | 0.22 | 0.85 |
| 61000 | 0 | 132595 | REERMERRR                                         | 2.36 | 0.01 | 0.78 | 0.44 | 1.13 | 0.28 |
| 61001 | 0 | 109797 | REESGKPGAHVTVKKLF<br>VGGIKED                      | 3.10 | 0.01 | 1.75 | 3.05 | 1.41 | 0.28 |
| 61002 | 0 | 99607  | REETSRNNPFYFPSR                                   | 2.70 | 0.01 | 2.16 | 0.44 | 1.23 | 1.48 |
| 61003 | 0 | 367191 | REEVELYSFEDDEED                                   | 2.70 | 0.01 | 1.61 | 0.44 | 0.85 | 1.28 |
| 61004 | 0 | 53494  | REEVSFRVGLHEYP                                    | 2.61 | 0.01 | 2.41 | 0.44 | 0.85 | 0.28 |
| 61005 | 0 | 53494  | REEVSFRVGLHEYP                                    | 2.61 | 0.01 | 2.41 | 0.44 | 0.85 | 0.28 |
| 61006 | 0 | 367205 | REFDYEDEDYEGYKS                                   | 2.72 | 0.01 | 1.61 | 0.44 | 0.85 | 1.28 |
| 61007 | 0 | 157835 | REFQQDRHQKIR                                      | 2.50 | 0.01 | 3.65 | 0.44 | 1.23 | 0.85 |
| 61008 | 0 | 114569 | REFQQDRHQKIRHFR                                   | 2.72 | 0.01 | 3.27 | 0.44 | 1.23 | 0.85 |
| 61009 | 0 | 106057 | REFSPRGQHRRERA                                    | 2.70 | 0.01 | 2.16 | 0.44 | 1.23 | 0.85 |
| 61010 | 0 | 106057 | REFSPRGQHRRERA                                    | 2.70 | 0.01 | 2.16 | 0.44 | 1.23 | 1.27 |
| 61011 | 0 | 53498  | REFSPRGQHSRRERA                                   | 2.70 | 0.01 | 2.16 | 0.44 | 1.23 | 1.48 |
| 61012 | 0 | 53499  | REFSVNAGVTTPVSTYM<br>LTNSELLSLINDMPITND<br>QKKLMS | 3.64 | 0.01 | 2.38 | 0.44 | 0.85 | 0.28 |
| 61013 | 0 | 53499  | REFSVNAGVTTPVSTYM<br>LTNSELLSLINDMPITND<br>QKKLMS | 3.64 | 0.01 | 2.38 | 1.20 | 0.22 | 0.28 |
| 61014 | 0 | 53499  | REFSVNAGVTTPVSTYM<br>LTNSELLSLINDMPITND<br>QKKLMS | 3.64 | 0.01 | 2.38 | 1.15 | 0.22 | 0.28 |
| 61015 | 0 | 53499  | REFSVNAGVTTPVSTYM<br>LTNSELLSLINDMPITND<br>QKKLMS | 3.64 | 0.01 | 2.38 | 1.15 | 0.22 | 0.28 |
| 61016 | 0 | 53499  | REFSVNAGVTTPVSTYM<br>LTNSELLSLINDMPITND<br>QKKLMS | 3.64 | 0.01 | 2.38 | 1.20 | 0.22 | 0.28 |
| 61017 | 0 | 53499  | REFSVNAGVTTPVSTYM<br>LTNSELLSLINDMPITND<br>QKKLMS | 3.64 | 0.01 | 2.38 | 1.20 | 0.22 | 0.28 |
| 61018 | 0 | 53499  | REFSVNAGVTTPVSTYM<br>LTNSELLSLINDMPITND<br>QKKLMS | 3.64 | 0.01 | 2.38 | 1.20 | 0.22 | 0.28 |
| 61019 | 0 | 53499  | REFSVNAGVTTPVSTYM<br>LTNSELLSLINDMPITND<br>QKKLMS | 3.64 | 0.01 | 2.38 | 1.20 | 0.22 | 0.28 |

|       |   |        |                          |      |      |      |      |      |      |
|-------|---|--------|--------------------------|------|------|------|------|------|------|
| 61020 | 0 | 193056 | REFVAEALKDGGQNWP<br>TSKE | 2.89 | 0.01 | 3.47 | 2.00 | 0.22 | 0.28 |
| 61021 | 0 | 98979  | REGEPDLSNNFGKLF          | 2.67 | 0.01 | 2.16 | 0.44 | 1.23 | 0.85 |
| 61022 | 0 | 53508  | REGKDEDK                 | 2.16 | 0.01 | 3.29 | 1.20 | 0.22 | 0.28 |
| 61023 | 0 | 53509  | REGKEV                   | 1.90 | 0.01 | 1.86 | 0.44 | 1.23 | 0.28 |
| 61024 | 0 | 87834  | REGVEEKTSEE              | 2.48 | 0.01 | 4.15 | 1.12 | 0.22 | 0.28 |
| 61025 | 0 | 141073 | REGVRWRVMAIQ             | 2.48 | 0.01 | 0.78 | 1.15 | 0.22 | 0.28 |
| 61026 | 0 | 141073 | REGVRWRVMAIQ             | 2.48 | 0.01 | 0.78 | 1.15 | 0.22 | 0.28 |
| 61027 | 0 | 367298 | REIDGSLSSSAWVCA          | 2.64 | 0.01 | 1.61 | 0.44 | 0.85 | 1.28 |
| 61028 | 0 | 131306 | REKAKW                   | 1.90 | 0.01 | 0.90 | 0.44 | 1.13 | 1.39 |
| 61029 | 0 | 131306 | REKAKW                   | 1.90 | 0.01 | 0.90 | 0.44 | 1.13 | 1.27 |
| 61030 | 0 | 367330 | REKDGEDTTSEDEKN          | 2.71 | 0.01 | 1.61 | 0.44 | 0.85 | 1.28 |
| 61031 | 0 | 53545  | REKEELKRDKEGKVSTLP<br>LD | 2.98 | 0.01 | 2.93 | 1.81 | 0.22 | 0.28 |
| 61032 | 0 | 53545  | REKEELKRDKEGKVSTLP<br>LD | 2.98 | 0.01 | 2.93 | 2.69 | 0.22 | 0.28 |
| 61033 | 0 | 53545  | REKEELKRDKEGKVSTLP<br>LD | 2.98 | 0.01 | 2.93 | 0.68 | 0.22 | 0.28 |
| 61034 | 0 | 172978 | REKFAWAIDMADEDY          | 2.68 | 0.01 | 0.78 | 0.44 | 1.41 | 0.28 |
| 61035 | 0 | 195053 | REKKLADRAFLDQK           | 2.65 | 0.01 | 2.30 | 0.44 | 0.85 | 0.28 |
| 61036 | 0 | 53548  | REKMITEF                 | 2.12 | 0.01 | 2.99 | 0.44 | 0.85 | 0.28 |
| 61037 | 0 | 123692 | REKRKPKS                 | 2.17 | 0.01 | 0.78 | 1.20 | 0.22 | 0.28 |
| 61038 | 0 | 123692 | REKRKPKS                 | 2.17 | 0.01 | 2.96 | 1.20 | 0.22 | 0.28 |
| 61039 | 0 | 123692 | REKRKPKS                 | 2.17 | 0.01 | 2.96 | 1.20 | 0.22 | 0.28 |
| 61040 | 0 | 123693 | REKWLGDKF                | 2.21 | 0.01 | 2.28 | 2.00 | 0.22 | 0.28 |
| 61041 | 0 | 123693 | REKWLGDKF                | 2.21 | 0.01 | 2.28 | 2.00 | 0.22 | 0.28 |
| 61042 | 0 | 94914  | RELADALLE                | 2.26 | 0.01 | 2.21 | 1.12 | 0.22 | 0.28 |
| 61043 | 0 | 94914  | RELADALLE                | 2.26 | 0.01 | 2.21 | 0.44 | 0.85 | 0.28 |
| 61044 | 0 | 53555  | RELADALLEK               | 2.34 | 0.01 | 2.21 | 1.12 | 0.22 | 0.28 |
| 61045 | 0 | 53555  | RELADALLEK               | 2.34 | 0.01 | 2.21 | 1.12 | 0.22 | 0.28 |
| 61046 | 0 | 227509 | RELDHLGLDDQEKKI          | 2.68 | 0.01 | 2.97 | 0.44 | 0.85 | 0.28 |
| 61047 | 0 | 115939 | RELEELNVP                | 2.32 | 0.01 | 1.60 | 0.44 | 1.23 | 0.85 |
| 61048 | 0 | 115939 | RELEELNVP                | 2.32 | 0.01 | 1.60 | 0.44 | 1.23 | 0.85 |
| 61049 | 0 | 53557  | RELEELNVPGEIVE           | 2.64 | 0.01 | 1.60 | 0.44 | 1.23 | 0.85 |
| 61050 | 0 | 115466 | RELEELNVPGEIVESLSS<br>E  | 2.97 | 0.01 | 1.60 | 0.44 | 1.23 | 1.28 |
| 61051 | 0 | 131307 | RELLKM                   | 1.89 | 0.01 | 0.90 | 0.44 | 1.13 | 1.39 |
| 61052 | 0 | 53572  | RELQKRLYSN               | 2.32 | 0.01 | 3.16 | 0.68 | 0.22 | 0.28 |
| 61053 | 0 | 53572  | RELQKRLYSN               | 2.32 | 0.01 | 3.16 | 0.68 | 0.22 | 0.28 |
| 61054 | 0 | 98980  | RELSA                    | 1.74 | 0.01 | 2.14 | 0.68 | 0.22 | 0.28 |
| 61055 | 0 | 159060 | RELTAETKAFLKAG           | 2.70 | 0.01 | 3.26 | 0.44 | 1.23 | 0.28 |
| 61056 | 0 | 140594 | RELVLAGTI                | 2.21 | 0.01 | 3.28 | 2.37 | 0.22 | 0.28 |
| 61057 | 0 | 140594 | RELVLAGTI                | 2.21 | 0.01 | 3.28 | 2.37 | 0.22 | 0.28 |
| 61058 | 0 | 53580  | REM                      | 1.37 | 0.01 | 3.24 | 1.12 | 0.22 | 0.28 |
| 61059 | 0 | 53581  | REMAII                   | 1.86 | 0.01 | 3.24 | 1.12 | 0.22 | 0.28 |
| 61060 | 0 | 53587  | REMVITFKS                | 2.28 | 0.01 | 2.66 | 0.68 | 0.22 | 0.28 |

|       |   |        |                          |      |      |      |      |      |      |
|-------|---|--------|--------------------------|------|------|------|------|------|------|
| 61061 | 0 | 53587  | REMVITFKS                | 2.28 | 0.01 | 2.66 | 0.68 | 0.22 | 0.28 |
| 61062 | 0 | 53587  | REMVITFKS                | 2.28 | 0.01 | 2.66 | 0.68 | 0.22 | 0.28 |
| 61063 | 0 | 53587  | REMVITFKS                | 2.28 | 0.01 | 2.66 | 0.68 | 0.22 | 0.28 |
| 61064 | 0 | 53587  | REMVITFKS                | 2.28 | 0.01 | 2.66 | 0.68 | 0.22 | 0.28 |
| 61065 | 0 | 53587  | REMVITFKS                | 2.28 | 0.01 | 2.66 | 0.68 | 0.22 | 0.28 |
| 61066 | 0 | 228706 | RENMNRYPNQVYY            | 2.56 | 0.01 | 2.98 | 2.19 | 0.22 | 0.85 |
| 61067 | 0 | 53595  | RENMRYPNQ                | 2.34 | 0.01 | 1.75 | 1.12 | 0.22 | 0.28 |
| 61068 | 0 | 53596  | REN                      | 1.57 | 0.01 | 3.70 | 0.68 | 0.22 | 0.85 |
| 61069 | 0 | 53596  | REN                      | 1.57 | 0.01 | 3.75 | 0.68 | 0.22 | 0.85 |
| 61070 | 0 | 53596  | REN                      | 1.57 | 0.01 | 3.70 | 0.68 | 0.22 | 0.85 |
| 61071 | 0 | 53596  | REN                      | 1.57 | 0.01 | 3.75 | 0.68 | 0.22 | 0.85 |
| 61072 | 0 | 53596  | REN                      | 1.57 | 0.01 | 3.70 | 0.68 | 0.22 | 0.85 |
| 61073 | 0 | 53596  | REN                      | 1.57 | 0.01 | 3.75 | 0.68 | 0.22 | 0.85 |
| 61074 | 0 | 194870 | REPLENALTVFTD            | 2.54 | 0.01 | 3.78 | 0.44 | 0.85 | 0.28 |
| 61075 | 0 | 53601  | REPPCVQVHCSTAK           | 2.58 | 0.01 | 0.90 | 0.44 | 1.41 | 0.28 |
| 61076 | 0 | 367537 | REPQTTIKQPGGIKT          | 2.70 | 0.01 | 1.61 | 0.44 | 0.85 | 1.28 |
| 61077 | 0 | 109798 | REPQVYT                  | 1.99 | 0.01 | 0.78 | 0.44 | 1.13 | 0.28 |
| 61078 | 0 | 109798 | REPQVYT                  | 1.99 | 0.01 | 0.78 | 0.44 | 1.13 | 0.28 |
| 61079 | 0 | 423489 | REPTKDLDDSFYLV           | 2.66 | 0.01 | 2.51 | 0.44 | 2.35 | 1.28 |
| 61080 | 0 | 138892 | REQAPNLVY                | 2.18 | 0.01 | 0.78 | 0.68 | 0.22 | 0.85 |
| 61081 | 0 | 138892 | REQAPNLVY                | 2.18 | 0.01 | 0.78 | 0.68 | 0.22 | 0.28 |
| 61082 | 0 | 138892 | REQAPNLVY                | 2.18 | 0.01 | 0.78 | 0.68 | 0.22 | 0.85 |
| 61083 | 0 | 138892 | REQAPNLVY                | 2.18 | 0.01 | 0.78 | 0.68 | 0.22 | 1.34 |
| 61084 | 0 | 367543 | REQDGEDATSEGKKN          | 2.67 | 0.01 | 1.61 | 0.44 | 0.85 | 1.28 |
| 61085 | 0 | 367544 | REQDGEDTTSEGEKN          | 2.69 | 0.01 | 1.61 | 0.44 | 0.85 | 1.28 |
| 61086 | 0 | 164546 | REQDRKPRNATPAP           | 2.64 | 0.01 | 3.93 | 0.68 | 0.22 | 0.28 |
| 61087 | 0 | 164546 | REQDRKPRNATPAP           | 2.64 | 0.01 | 3.93 | 0.68 | 0.22 | 2.97 |
| 61088 | 0 | 164546 | REQDRKPRNATPAP           | 2.64 | 0.01 | 3.93 | 0.68 | 0.22 | 1.34 |
| 61089 | 0 | 164546 | REQDRKPRNATPAP           | 2.64 | 0.01 | 3.93 | 0.68 | 2.25 | 1.75 |
| 61090 | 0 | 164546 | REQDRKPRNATPAP           | 2.64 | 0.01 | 3.93 | 0.68 | 2.25 | 1.75 |
| 61091 | 0 | 107592 | REQQYNS                  | 2.01 | 0.01 | 0.78 | 0.44 | 1.13 | 0.28 |
| 61092 | 0 | 174258 | REQSCRRPNAQRFGISN        | 3.53 | 0.01 | 2.78 | 1.12 | 0.22 | 0.85 |
|       |   |        | TH                       |      |      |      |      |      |      |
| 61093 | 0 | 106770 | RER                      | 1.37 | 0.01 | 0.78 | 1.15 | 0.22 | 1.75 |
| 61094 | 0 | 106770 | RER                      | 1.37 | 0.01 | 0.78 | 1.15 | 0.22 | 2.92 |
| 61095 | 0 | 98981  | REREEDWRQP               | 2.35 | 0.01 | 2.16 | 0.44 | 1.23 | 0.85 |
| 61096 | 0 | 98982  | REREREEDWRQPRED          | 2.74 | 0.01 | 2.16 | 0.44 | 1.23 | 0.85 |
| 61097 | 0 | 98982  | REREREEDWRQPRED          | 2.74 | 0.01 | 2.16 | 0.44 | 1.23 | 1.48 |
| 61098 | 0 | 100460 | REREREEDWRQPREDW<br>RRPS | 3.01 | 0.01 | 2.16 | 0.44 | 2.39 | 0.28 |
| 61099 | 0 | 132599 | RERERRERSR               | 2.38 | 0.01 | 0.78 | 0.44 | 1.13 | 0.28 |
| 61100 | 0 | 106771 | RRMS                     | 1.77 | 0.01 | 0.78 | 1.15 | 0.22 | 1.75 |
| 61101 | 0 | 106771 | RRMS                     | 1.77 | 0.01 | 0.78 | 1.15 | 0.22 | 2.92 |
| 61102 | 0 | 132601 | RERRERSRER               | 2.38 | 0.01 | 0.78 | 0.44 | 1.13 | 0.28 |
| 61103 | 0 | 125230 | RERRGIAL                 | 2.14 | 0.01 | 1.60 | 0.68 | 0.22 | 0.85 |
| 61104 | 0 | 125230 | RERRGIAL                 | 2.14 | 0.01 | 1.60 | 0.68 | 0.22 | 0.28 |

|       |   |        |                                      |      |      |      |      |      |      |
|-------|---|--------|--------------------------------------|------|------|------|------|------|------|
| 61105 | 0 | 125230 | RERRGIAL                             | 2.14 | 0.01 | 1.60 | 0.68 | 0.22 | 1.27 |
| 61106 | 0 | 126921 | RERRGIALD                            | 2.23 | 0.01 | 1.60 | 1.15 | 0.22 | 0.85 |
| 61107 | 0 | 129732 | RERRGIALDGKI                         | 2.49 | 0.01 | 1.60 | 0.68 | 0.22 | 1.27 |
| 61108 | 0 | 129732 | RERRGIALDGKI                         | 2.49 | 0.01 | 1.60 | 0.68 | 0.22 | 0.85 |
| 61109 | 0 | 129732 | RERRGIALDGKI                         | 2.49 | 0.01 | 1.60 | 0.68 | 0.22 | 1.48 |
| 61110 | 0 | 129732 | RERRGIALDGKI                         | 2.49 | 0.01 | 1.60 | 0.68 | 0.22 | 1.27 |
| 61111 | 0 | 129732 | RERRGIALDGKI                         | 2.49 | 0.01 | 1.60 | 0.68 | 0.22 | 1.27 |
| 61112 | 0 | 167382 | RERRRKKRGLFGAIA                      | 2.70 | 0.01 | 2.94 | 1.15 | 0.22 | 1.34 |
| 61113 | 0 | 167382 | RERRRKKRGLFGAIA                      | 2.70 | 0.01 | 2.94 | 1.15 | 0.22 | 0.85 |
| 61114 | 0 | 167382 | RERRRKKRGLFGAIA                      | 2.70 | 0.01 | 2.94 | 1.15 | 0.22 | 0.85 |
| 61115 | 0 | 167383 | RERRRKKRGLFGAIAAGFI                  | 2.89 | 0.01 | 2.94 | 1.15 | 0.22 | 1.34 |
| 61116 | 0 | 167383 | RERRRKKRGLFGAIAAGFI                  | 2.89 | 0.01 | 2.94 | 1.15 | 0.22 | 0.85 |
| 61117 | 0 | 167383 | RERRRKKRGLFGAIAAGFI                  | 2.89 | 0.01 | 2.94 | 1.15 | 0.22 | 0.85 |
| 61118 | 0 | 118993 | RERRRSHRSEERRRRDR<br>DRDRDRDREHKRGER | 3.47 | 0.01 | 0.78 | 0.44 | 1.13 | 0.28 |
| 61119 | 0 | 112285 | RESGVPD                              | 1.99 | 0.01 | 0.78 | 0.44 | 1.13 | 0.28 |
| 61120 | 0 | 53633  | RESNGETK                             | 2.12 | 0.01 | 3.27 | 2.02 | 0.22 | 0.28 |
| 61121 | 0 | 53633  | RESNGETK                             | 2.12 | 0.01 | 3.27 | 2.82 | 0.22 | 0.28 |
| 61122 | 0 | 53634  | RESQAYYQR                            | 2.25 | 0.01 | 2.52 | 2.19 | 0.22 | 2.02 |
| 61123 | 0 | 53634  | RESQAYYQR                            | 2.25 | 0.01 | 2.52 | 2.19 | 0.22 | 0.28 |
| 61124 | 0 | 53634  | RESQAYYQR                            | 2.25 | 0.01 | 0.78 | 2.19 | 0.22 | 1.34 |
| 61125 | 0 | 53634  | RESQAYYQR                            | 2.25 | 0.01 | 0.78 | 2.19 | 0.22 | 1.34 |
| 61126 | 0 | 53635  | RESQAYYQRGAS                         | 2.51 | 0.01 | 2.52 | 1.20 | 0.22 | 0.28 |
| 61127 | 0 | 53635  | RESQAYYQRGAS                         | 2.51 | 0.01 | 2.52 | 1.20 | 0.22 | 0.28 |
| 61128 | 0 | 53635  | RESQAYYQRGAS                         | 2.51 | 0.01 | 2.52 | 1.20 | 0.22 | 0.28 |
| 61129 | 0 | 53636  | RESQAYYQRGSS                         | 2.49 | 0.01 | 0.78 | 1.12 | 2.26 | 0.85 |
| 61130 | 0 | 53636  | RESQAYYQRGSS                         | 2.49 | 0.01 | 0.78 | 1.12 | 0.22 | 0.85 |
| 61131 | 0 | 53639  | RESRNPNGNA                           | 2.24 | 0.01 | 2.87 | 0.68 | 0.22 | 1.27 |
| 61132 | 0 | 53639  | RESRNPNGNA                           | 2.24 | 0.01 | 2.87 | 0.68 | 0.22 | 0.28 |
| 61133 | 0 | 53639  | RESRNPNGNA                           | 2.24 | 0.01 | 2.87 | 0.68 | 0.22 | 1.48 |
| 61134 | 0 | 53639  | RESRNPNGNA                           | 2.24 | 0.01 | 2.87 | 0.68 | 0.22 | 0.85 |
| 61135 | 0 | 53639  | RESRNPNGNA                           | 2.24 | 0.01 | 2.87 | 0.68 | 0.22 | 2.02 |
| 61136 | 0 | 53639  | RESRNPNGNA                           | 2.24 | 0.01 | 2.87 | 0.68 | 0.22 | 0.85 |
| 61137 | 0 | 53639  | RESRNPNGNA                           | 2.24 | 0.01 | 2.87 | 0.68 | 0.22 | 0.85 |
| 61138 | 0 | 53639  | RESRNPNGNA                           | 2.24 | 0.01 | 2.87 | 0.68 | 0.22 | 0.85 |
| 61139 | 0 | 53639  | RESRNPNGNA                           | 2.24 | 0.01 | 2.87 | 0.68 | 0.22 | 0.85 |
| 61140 | 0 | 53639  | RESRNPNGNA                           | 2.24 | 0.01 | 2.87 | 0.68 | 0.22 | 0.85 |
| 61141 | 0 | 53639  | RESRNPNGNA                           | 2.24 | 0.01 | 2.87 | 0.68 | 0.22 | 0.85 |
| 61142 | 0 | 53639  | RESRNPNGNA                           | 2.24 | 0.01 | 2.87 | 0.68 | 0.22 | 0.85 |
| 61143 | 0 | 191091 | RETGGLEVRT                           | 2.35 | 0.01 | 0.90 | 3.18 | 1.41 | 1.27 |
| 61144 | 0 | 191091 | RETGGLEVRT                           | 2.35 | 0.01 | 0.90 | 3.18 | 1.41 | 1.34 |
| 61145 | 0 | 191091 | RETGGLEVRT                           | 2.35 | 0.01 | 0.90 | 3.18 | 1.41 | 1.34 |
| 61146 | 0 | 191091 | RETGGLEVRT                           | 2.35 | 0.01 | 0.90 | 3.18 | 1.41 | 0.28 |

|       |   |        |                                |      |      |      |      |      |      |
|-------|---|--------|--------------------------------|------|------|------|------|------|------|
| 61147 | 0 | 172989 | RETLAKIQESQSKQE                | 2.70 | 0.01 | 0.78 | 0.44 | 1.13 | 0.28 |
| 61148 | 0 | 367746 | REVDDTMADELRSF                 | 2.69 | 0.01 | 1.61 | 0.44 | 0.85 | 1.28 |
| 61149 | 0 | 367747 | REVDGHDFIREHIQI                | 2.71 | 0.01 | 1.61 | 0.44 | 0.85 | 1.28 |
| 61150 | 0 | 193058 | REVELPTEPSLVYEAV               | 2.77 | 3.63 | 0.78 | 1.15 | 1.41 | 0.28 |
| 61151 | 0 | 53665  | REVLQYQEFDEMEECSQH<br>LPYIE    | 3.01 | 0.01 | 1.72 | 0.44 | 0.85 | 0.28 |
| 61152 | 0 | 53666  | REVLREFD                       | 2.24 | 0.01 | 2.41 | 0.44 | 0.85 | 0.28 |
| 61153 | 0 | 53667  | REVLREFDEME                    | 2.50 | 0.01 | 1.72 | 0.44 | 0.85 | 0.85 |
| 61154 | 0 | 53669  | REVQNTQYNNETLKIKN<br>G         | 2.85 | 0.01 | 2.85 | 0.68 | 0.22 | 0.28 |
| 61155 | 0 | 53676  | REWARRNGHNVSTRGR<br>I          | 2.80 | 0.01 | 2.59 | 0.44 | 0.85 | 0.28 |
| 61156 | 0 | 126922 | REWIKFAAACRE                   | 2.48 | 0.01 | 0.78 | 0.44 | 1.13 | 0.85 |
| 61157 | 0 | 121785 | REWVKFAKPCRE                   | 2.48 | 0.01 | 0.78 | 0.68 | 0.22 | 0.85 |
| 61158 | 0 | 121785 | REWVKFAKPCRE                   | 2.48 | 0.01 | 0.78 | 0.44 | 1.13 | 0.85 |
| 61159 | 0 | 121785 | REWVKFAKPCRE                   | 2.48 | 0.01 | 0.78 | 0.44 | 1.13 | 0.85 |
| 61160 | 0 | 129734 | REYRKMD                        | 2.14 | 0.01 | 0.78 | 0.44 | 1.13 | 0.28 |
| 61161 | 0 | 180342 | REYWWALNRKEVWKA                | 2.70 | 0.01 | 3.32 | 1.12 | 0.22 | 0.28 |
| 61162 | 0 | 180342 | REYWWALNRKEVWKA                | 2.70 | 0.01 | 3.32 | 3.06 | 0.22 | 0.28 |
| 61163 | 0 | 226095 | RFADIDTVIHA                    | 2.41 | 0.01 | 2.40 | 1.15 | 0.22 | 2.98 |
| 61164 | 0 | 226095 | RFADIDTVIHA                    | 2.41 | 0.01 | 2.40 | 1.15 | 0.22 | 0.28 |
| 61165 | 0 | 226095 | RFADIDTVIHA                    | 2.41 | 0.01 | 2.40 | 1.15 | 0.22 | 1.34 |
| 61166 | 0 | 226095 | RFADIDTVIHA                    | 2.41 | 0.01 | 2.40 | 1.15 | 0.22 | 1.66 |
| 61167 | 0 | 226095 | RFADIDTVIHA                    | 2.41 | 0.01 | 2.40 | 1.15 | 0.22 | 1.34 |
| 61168 | 0 | 53681  | RFKYQQQGRLEAR                  | 2.62 | 0.01 | 3.89 | 1.20 | 0.22 | 0.28 |
| 61169 | 0 | 53681  | RFKYQQQGRLEAR                  | 2.62 | 0.01 | 3.89 | 1.20 | 0.22 | 0.28 |
| 61170 | 0 | 53681  | RFKYQQQGRLEAR                  | 2.62 | 0.01 | 3.89 | 1.20 | 0.22 | 1.48 |
| 61171 | 0 | 53681  | RFKYQQQGRLEAR                  | 2.62 | 0.01 | 3.89 | 1.20 | 0.22 | 0.28 |
| 61172 | 0 | 53682  | RFAPALPV                       | 2.14 | 0.01 | 2.68 | 0.44 | 1.59 | 0.28 |
| 61173 | 0 | 98983  | RFAPQ                          | 1.74 | 0.01 | 2.14 | 0.68 | 0.22 | 0.28 |
| 61174 | 0 | 98983  | RFAPQ                          | 1.74 | 0.01 | 2.14 | 0.68 | 0.22 | 0.28 |
| 61175 | 0 | 181442 | RFDAEFTFVVAKPNG                | 2.65 | 0.01 | 2.82 | 1.15 | 0.22 | 0.28 |
| 61176 | 0 | 53687  | RFDEGDLIAVPTGVA                | 2.66 | 0.01 | 2.16 | 0.44 | 1.23 | 0.85 |
| 61177 | 0 | 53689  | RFDKGYISGY                     | 2.31 | 0.01 | 3.20 | 0.44 | 1.41 | 0.28 |
| 61178 | 0 | 53689  | RFDKGYISGY                     | 2.31 | 0.01 | 2.04 | 0.68 | 0.22 | 0.28 |
| 61179 | 0 | 53689  | RFDKGYISGY                     | 2.31 | 0.01 | 2.04 | 0.68 | 0.22 | 0.28 |
| 61180 | 0 | 53689  | RFDKGYISGY                     | 2.31 | 0.01 | 2.04 | 0.68 | 0.22 | 0.28 |
| 61181 | 0 | 53691  | RFDELTFVIT                     | 2.41 | 0.01 | 3.75 | 0.44 | 0.85 | 0.28 |
| 61182 | 0 | 53693  | RFDRGYIS                       | 2.13 | 0.01 | 2.99 | 0.44 | 0.85 | 0.28 |
| 61183 | 0 | 151397 | RFDSTLPGFETIMKVL               | 2.69 | 0.01 | 3.35 | 1.81 | 0.22 | 0.28 |
| 61184 | 0 | 451015 | RFDWSYP                        | 1.99 | 0.01 | 0.90 | 0.44 | 1.41 | 1.39 |
| 61185 | 0 | 132042 | RFEQPRV                        | 2.03 | 0.01 | 0.90 | 0.44 | 1.13 | 1.39 |
| 61186 | 0 | 132042 | RFEQPRV                        | 2.03 | 0.01 | 0.90 | 0.44 | 2.82 | 1.39 |
| 61187 | 0 | 116457 | RFFGGDRGAPKRGSGK<br>DSHHPARTAH | 3.24 | 0.01 | 0.78 | 0.44 | 1.13 | 0.28 |

|       |   |        |                                    |      |      |      |      |      |      |
|-------|---|--------|------------------------------------|------|------|------|------|------|------|
| 61188 | 0 | 53702  | RFFRDEKELQ                         | 2.33 | 0.01 | 3.89 | 1.15 | 2.26 | 0.28 |
| 61189 | 0 | 53702  | RFFRDEKELQ                         | 2.33 | 0.01 | 3.89 | 1.15 | 2.26 | 2.92 |
| 61190 | 0 | 53702  | RFFRDEKELQ                         | 2.33 | 0.01 | 3.89 | 1.15 | 2.26 | 0.85 |
| 61191 | 0 | 78257  | RFFSDKIAKYIPIQYVLSR<br>Y           | 2.94 | 0.01 | 1.60 | 0.44 | 1.23 | 1.28 |
| 61192 | 0 | 113805 | RFFSGDRGAPKRGSGKD<br>SHT           | 2.97 | 0.01 | 1.75 | 2.25 | 0.22 | 0.28 |
| 61193 | 0 | 115467 | RFFVAPFPEVFGKEKVN<br>ELS           | 2.96 | 0.01 | 1.60 | 0.44 | 1.23 | 1.28 |
| 61194 | 0 | 510474 | RFGGLIA                            | 2.01 | 0.01 | 0.90 | 0.44 | 1.13 | 0.28 |
| 61195 | 0 | 510474 | RFGGLIA                            | 2.01 | 0.01 | 0.90 | 0.44 | 1.41 | 0.28 |
| 61196 | 0 | 489752 | RFGRVPLVLATLNEV                    | 2.69 | 0.01 | 2.69 | 3.05 | 0.85 | 1.28 |
| 61197 | 0 | 181786 | RFHDGLHKAADLGVI                    | 2.67 | 0.01 | 2.86 | 2.37 | 0.22 | 1.28 |
| 61198 | 0 | 53716  | RFI                                | 1.37 | 0.01 | 2.40 | 1.15 | 0.22 | 0.85 |
| 61199 | 0 | 123695 | RFIKWPLNG                          | 2.18 | 0.01 | 2.28 | 2.00 | 0.22 | 0.28 |
| 61200 | 0 | 137964 | RFKEFGSV                           | 2.12 | 0.01 | 2.21 | 1.20 | 0.22 | 0.28 |
| 61201 | 0 | 53729  | RFKSQDAD                           | 2.12 | 0.01 | 2.21 | 1.12 | 0.22 | 0.28 |
| 61202 | 0 | 53729  | RFKSQDAD                           | 2.12 | 0.01 | 2.21 | 0.44 | 0.85 | 0.28 |
| 61203 | 0 | 53730  | RFKSQDADYH                         | 2.29 | 0.01 | 2.21 | 1.12 | 0.22 | 0.28 |
| 61204 | 0 | 367898 | RFLAAAMDKVFTTGF                    | 2.65 | 0.01 | 1.61 | 0.44 | 0.85 | 1.28 |
| 61205 | 0 | 494089 | RFLCFGSEG GTYYIK                   | 2.64 | 0.01 | 0.78 | 1.15 | 0.22 | 0.28 |
| 61206 | 0 | 494089 | RFLCFGSEG GTYYIK                   | 2.64 | 0.01 | 0.78 | 1.15 | 0.22 | 0.28 |
| 61207 | 0 | 494089 | RFLCFGSEG GTYYIK                   | 2.64 | 0.01 | 0.78 | 1.15 | 0.22 | 1.48 |
| 61208 | 0 | 121788 | RFLMKLSH                           | 2.12 | 0.01 | 0.78 | 0.44 | 1.13 | 0.28 |
| 61209 | 0 | 137965 | RFLPKYEGNIDI                       | 2.43 | 0.01 | 2.21 | 0.44 | 0.85 | 0.28 |
| 61210 | 0 | 137965 | RFLPKYEGNIDI                       | 2.43 | 0.01 | 2.21 | 1.20 | 0.22 | 0.28 |
| 61211 | 0 | 111718 | RFNPDQAPSWPP                       | 2.45 | 0.01 | 0.90 | 0.44 | 0.85 | 1.39 |
| 61212 | 0 | 53747  | RFNSAIEALNRFIQKYDS<br>VMQRLLDDTSGK | 3.31 | 0.01 | 3.21 | 3.14 | 0.22 | 0.28 |
| 61213 | 0 | 53747  | RFNSAIEALNRFIQKYDS<br>VMQRLLDDTSGK | 3.31 | 0.01 | 3.21 | 3.14 | 0.22 | 0.28 |
| 61214 | 0 | 53747  | RFNSAIEALNRFIQKYDS<br>VMQRLLDDTSGK | 3.31 | 0.01 | 3.21 | 3.14 | 0.22 | 0.28 |
| 61215 | 0 | 98984  | RFPDSDFKVYRYNA                     | 2.62 | 0.01 | 2.72 | 1.12 | 0.22 | 0.28 |
| 61216 | 0 | 114937 | RFPNATDKEG                         | 2.26 | 0.01 | 2.25 | 0.44 | 1.23 | 0.85 |
| 61217 | 0 | 230251 | RFPNATDKEGKDVLVCN<br>KDL           | 2.93 | 0.01 | 2.25 | 0.44 | 1.23 | 0.28 |
| 61218 | 0 | 53758  | RFPRGQGV PINTNSGPD<br>DQI          | 2.96 | 0.01 | 2.91 | 0.44 | 0.85 | 0.28 |
| 61219 | 0 | 53758  | RFPRGQGV PINTNSGPD<br>DQI          | 2.96 | 0.01 | 2.91 | 0.68 | 0.22 | 0.28 |
| 61220 | 0 | 78503  | RFPYWFWLPPIATVD                    | 2.65 | 0.01 | 0.90 | 0.68 | 0.22 | 0.28 |
| 61221 | 0 | 432087 | RFQEAANKQKQELDEIS<br>TNIRQA        | 3.09 | 0.01 | 2.04 | 0.44 | 0.85 | 0.28 |
| 61222 | 0 | 432087 | RFQEAANKQKQELDEIS<br>TNIRQA        | 3.09 | 0.01 | 2.04 | 0.44 | 1.93 | 0.28 |
| 61223 | 0 | 53763  | RFQEALKKSLKKP                      | 2.54 | 0.01 | 3.00 | 0.44 | 0.85 | 0.28 |



|       |   |        |                              |      |      |      |      |      |      |
|-------|---|--------|------------------------------|------|------|------|------|------|------|
| 61224 | 0 | 53763  | RFQEALKKSLKKP                | 2.54 | 0.01 | 3.00 | 1.15 | 2.39 | 0.28 |
| 61225 | 0 | 53766  | RFQPFQQFGRDVSDF<br>D         | 2.82 | 0.01 | 2.48 | 0.44 | 0.85 | 0.28 |
| 61226 | 0 | 53766  | RFQPFQQFGRDVSDF<br>D         | 2.82 | 0.01 | 2.48 | 0.68 | 0.22 | 0.28 |
| 61227 | 0 | 53766  | RFQPFQQFGRDVSDF<br>D         | 2.82 | 0.01 | 2.48 | 1.20 | 0.22 | 0.28 |
| 61228 | 0 | 120167 | RFQSSAVMALQEACEAY<br>L       | 2.84 | 0.01 | 1.60 | 2.84 | 1.13 | 1.66 |
| 61229 | 0 | 120167 | RFQSSAVMALQEACEAY<br>L       | 2.84 | 0.01 | 1.60 | 2.84 | 1.13 | 1.66 |
| 61230 | 0 | 120167 | RFQSSAVMALQEACEAY<br>L       | 2.84 | 0.01 | 1.60 | 2.84 | 1.13 | 1.66 |
| 61231 | 0 | 120167 | RFQSSAVMALQEACEAY<br>L       | 2.84 | 0.01 | 1.60 | 2.84 | 1.13 | 1.66 |
| 61232 | 0 | 120167 | RFQSSAVMALQEACEAY<br>L       | 2.84 | 0.01 | 1.60 | 2.84 | 1.13 | 1.66 |
| 61233 | 0 | 120167 | RFQSSAVMALQEACEAY<br>L       | 2.84 | 0.01 | 1.60 | 2.84 | 1.13 | 1.66 |
| 61234 | 0 | 53768  | RFRGKDLP                     | 2.13 | 0.01 | 2.40 | 1.12 | 0.22 | 0.85 |
| 61235 | 0 | 53770  | RFRGKNLP                     | 2.13 | 0.01 | 2.40 | 1.12 | 0.22 | 0.85 |
| 61236 | 0 | 53773  | RFRNCQRYVKQE                 | 2.48 | 0.01 | 3.12 | 0.44 | 1.23 | 0.85 |
| 61237 | 0 | 112832 | RFSDEGGFTCFRDHSY<br>QEAAAMEL | 3.13 | 0.01 | 0.78 | 0.44 | 1.13 | 0.28 |
| 61238 | 0 | 112832 | RFSDEGGFTCFRDHSY<br>QEAAAMEL | 3.13 | 0.01 | 0.78 | 0.44 | 1.41 | 0.28 |
| 61239 | 0 | 112832 | RFSDEGGFTCFRDHSY<br>QEAAAMEL | 3.13 | 0.01 | 0.78 | 0.44 | 1.13 | 0.28 |
| 61240 | 0 | 112832 | RFSDEGGFTCFRDHSY<br>QEAAAMEL | 3.13 | 0.01 | 0.78 | 0.44 | 1.59 | 0.28 |
| 61241 | 0 | 181787 | RFSNEGEAKCGSDKI              | 2.66 | 0.01 | 1.66 | 2.36 | 0.22 | 1.28 |
| 61242 | 0 | 181787 | RFSNEGEAKCGSDKI              | 2.66 | 0.01 | 1.66 | 0.44 | 0.85 | 1.28 |
| 61243 | 0 | 99609  | RFSTRYGNQNGRIRV              | 2.69 | 0.01 | 2.16 | 0.44 | 1.23 | 1.48 |
| 61244 | 0 | 53789  | RFTNFEPFT                    | 2.25 | 0.01 | 4.08 | 1.20 | 0.22 | 0.28 |
| 61245 | 0 | 108095 | RFTPEIAK                     | 2.10 | 0.01 | 3.48 | 1.15 | 0.22 | 2.66 |
| 61246 | 0 | 108095 | RFTPEIAK                     | 2.10 | 0.01 | 3.48 | 1.15 | 0.22 | 1.34 |
| 61247 | 0 | 224947 | RFTPKLGSLE                   | 2.29 | 0.01 | 4.03 | 1.12 | 0.22 | 0.28 |
| 61248 | 0 | 224947 | RFTPKLGSLE                   | 2.29 | 0.01 | 4.03 | 1.12 | 0.22 | 0.28 |
| 61249 | 0 | 100463 | RFVFTDITLP                   | 2.31 | 0.01 | 2.18 | 2.16 | 0.22 | 0.28 |
| 61250 | 0 | 53800  | RFVKTPSKKKTCSR               | 2.66 | 0.01 | 3.00 | 0.44 | 0.85 | 0.28 |
| 61251 | 0 | 53800  | RFVKTPSKKKTCSR               | 2.66 | 0.01 | 3.00 | 0.44 | 0.85 | 0.28 |
| 61252 | 0 | 53800  | RFVKTPSKKKTCSR               | 2.66 | 0.01 | 3.00 | 0.44 | 0.85 | 0.28 |
| 61253 | 0 | 53800  | RFVKTPSKKKTCSR               | 2.66 | 0.01 | 3.00 | 0.44 | 0.85 | 0.28 |
| 61254 | 0 | 53800  | RFVKTPSKKKTCSR               | 2.66 | 0.01 | 3.00 | 0.44 | 0.85 | 0.28 |
| 61255 | 0 | 53800  | RFVKTPSKKKTCSR               | 2.66 | 0.01 | 3.00 | 0.44 | 0.85 | 0.28 |
| 61256 | 0 | 53800  | RFVKTPSKKKTCSR               | 2.66 | 0.01 | 3.00 | 0.44 | 0.85 | 0.28 |
| 61257 | 0 | 53800  | RFVKTPSKKKTCSR               | 2.66 | 0.01 | 3.00 | 0.44 | 0.85 | 0.28 |

|       |   |        |                               |      |      |      |      |      |      |
|-------|---|--------|-------------------------------|------|------|------|------|------|------|
| 61258 | 0 | 53800  | RFVKTPSKKKTKSR                | 2.66 | 0.01 | 3.00 | 0.44 | 0.85 | 0.28 |
| 61259 | 0 | 53800  | RFVKTPSKKKTKSR                | 2.66 | 0.01 | 3.00 | 0.44 | 0.85 | 0.28 |
| 61260 | 0 | 53800  | RFVKTPSKKKTKSR                | 2.66 | 0.01 | 3.00 | 0.44 | 0.85 | 0.28 |
| 61261 | 0 | 53800  | RFVKTPSKKKTKSR                | 2.66 | 0.01 | 3.00 | 0.44 | 2.39 | 0.28 |
| 61262 | 0 | 53800  | RFVKTPSKKKTKSR                | 2.66 | 0.01 | 3.00 | 0.44 | 2.39 | 0.28 |
| 61263 | 0 | 53800  | RFVKTPSKKKTKSR                | 2.66 | 0.01 | 3.00 | 2.22 | 0.22 | 0.28 |
| 61264 | 0 | 53800  | RFVKTPSKKKTKSR                | 2.66 | 0.01 | 3.00 | 2.22 | 0.22 | 0.28 |
| 61265 | 0 | 53800  | RFVKTPSKKKTKSR                | 2.66 | 0.01 | 3.00 | 2.22 | 0.22 | 0.28 |
| 61266 | 0 | 53800  | RFVKTPSKKKTKSR                | 2.66 | 0.01 | 3.00 | 2.22 | 0.22 | 0.28 |
| 61267 | 0 | 53800  | RFVKTPSKKKTKSR                | 2.66 | 0.01 | 3.00 | 2.22 | 0.22 | 0.28 |
| 61268 | 0 | 53800  | RFVKTPSKKKTKSR                | 2.66 | 0.01 | 3.00 | 3.57 | 0.22 | 0.28 |
| 61269 | 0 | 510475 | RFWPPNLQAGVP                  | 2.45 | 0.01 | 0.90 | 3.07 | 1.13 | 1.39 |
| 61270 | 0 | 172997 | RFWWENEGVFSMQQR               | 2.67 | 0.01 | 0.78 | 0.44 | 1.41 | 0.28 |
| 61271 | 0 | 172997 | RFWWENEGVFSMQQR               | 2.67 | 0.01 | 0.78 | 0.44 | 1.13 | 0.28 |
| 61272 | 0 | 53810  | RFYLAGNQEQEFLKY               | 2.68 | 0.01 | 2.72 | 0.44 | 1.23 | 0.85 |
| 61273 | 0 | 119634 | RGAASSVAEGVGS AISQI<br>LSLS   | 3.08 | 0.01 | 3.27 | 0.44 | 0.85 | 0.28 |
| 61274 | 0 | 53814  | RGADCNE                       | 1.99 | 0.01 | 3.50 | 2.37 | 1.59 | 0.28 |
| 61275 | 0 | 53814  | RGADCNE                       | 1.99 | 0.01 | 3.50 | 1.12 | 0.22 | 0.28 |
| 61276 | 0 | 53816  | RGADGTAELTTTAATRF<br>MKDLYFTS | 3.17 | 0.01 | 2.53 | 0.44 | 0.85 | 0.28 |
| 61277 | 0 | 241053 | RGADLDNE                      | 2.12 | 0.01 | 3.35 | 2.37 | 0.22 | 0.85 |
| 61278 | 0 | 241053 | RGADLDNE                      | 2.12 | 0.01 | 3.35 | 1.20 | 0.22 | 0.85 |
| 61279 | 0 | 53817  | RGAETHLF                      | 2.10 | 0.01 | 3.55 | 0.68 | 0.22 | 0.28 |
| 61280 | 0 | 53822  | RGAKRM                        | 1.91 | 0.01 | 2.40 | 0.44 | 0.85 | 0.28 |
| 61281 | 0 | 53823  | RGAPGG                        | 1.88 | 0.01 | 2.96 | 0.44 | 0.85 | 0.28 |
| 61282 | 0 | 108607 | RGAQGPPGATGF                  | 2.50 | 0.01 | 0.78 | 2.46 | 0.22 | 0.28 |
| 61283 | 0 | 108607 | RGAQGPPGATGF                  | 2.50 | 0.01 | 0.78 | 2.46 | 0.22 | 0.28 |
| 61284 | 0 | 108607 | RGAQGPPGATGF                  | 2.50 | 0.01 | 1.75 | 2.46 | 0.22 | 1.48 |
| 61285 | 0 | 108607 | RGAQGPPGATGF                  | 2.50 | 0.01 | 1.75 | 2.46 | 0.22 | 1.75 |
| 61286 | 0 | 136877 | RGARRMAIL                     | 2.25 | 0.01 | 3.81 | 0.68 | 0.22 | 0.28 |
| 61287 | 0 | 53826  | RGATGKSVM                     | 2.21 | 0.01 | 3.28 | 0.44 | 1.23 | 0.85 |
| 61288 | 0 | 53829  | RGAYVEMHLPGSEVDSS<br>LVSLSGSS | 3.17 | 0.01 | 3.36 | 0.68 | 0.22 | 0.28 |
| 61289 | 0 | 53829  | RGAYVEMHLPGSEVDSS<br>LVSLSGSS | 3.17 | 0.01 | 3.36 | 0.68 | 0.22 | 0.28 |
| 61290 | 0 | 53829  | RGAYVEMHLPGSEVDSS<br>LVSLSGSS | 3.17 | 0.01 | 3.36 | 0.68 | 0.22 | 0.28 |
| 61291 | 0 | 77800  | RGCTFYGCWK                    | 2.31 | 0.01 | 3.93 | 0.44 | 1.59 | 0.28 |
| 61292 | 0 | 53832  | RGD                           | 1.37 | 0.01 | 2.59 | 0.44 | 0.85 | 1.27 |
| 61293 | 0 | 53833  | RGDANIGIGNIG                  | 2.52 | 0.01 | 2.86 | 0.44 | 0.85 | 0.28 |
| 61294 | 0 | 53833  | RGDANIGIGNIG                  | 2.52 | 0.01 | 2.86 | 0.44 | 0.85 | 0.28 |
| 61295 | 0 | 53833  | RGDANIGIGNIG                  | 2.52 | 0.01 | 2.86 | 0.44 | 0.85 | 0.28 |

|       |   |        |                          |      |      |      |      |      |      |
|-------|---|--------|--------------------------|------|------|------|------|------|------|
|       |   |        | RGDAYNFVESIINLFQVV       |      |      |      |      |      |      |
| 61296 | 0 | 180921 | HNSYNKKDAEFRHDSGY<br>EVH | 3.58 | 0.01 | 0.90 | 0.68 | 0.22 | 0.28 |
|       |   |        | RGDFLQTMVKLFNRIKN        |      |      |      |      |      |      |
| 61297 | 0 | 180922 | NVAGKKDAEFRHDSGYE<br>VH  | 3.50 | 0.01 | 0.90 | 0.68 | 0.22 | 0.28 |
| 61298 | 0 | 134781 | RGDGPFRLLG               | 2.34 | 0.01 | 0.78 | 0.44 | 1.13 | 0.85 |
| 61299 | 0 | 134781 | RGDGPFRLLG               | 2.34 | 0.01 | 0.78 | 3.05 | 1.13 | 0.85 |
|       |   |        | RGDIQMSDPAYNINISLP       |      |      |      |      |      |      |
| 61300 | 0 | 180923 | SYYPDKKDAEFRHDSGY<br>EVH | 3.56 | 0.01 | 0.90 | 1.81 | 0.22 | 0.28 |
|       |   |        | RGDKRWIILGLNKIVRM        |      |      |      |      |      |      |
| 61301 | 0 | 180924 | YKKDAEFRHDSGYEVH         | 3.42 | 0.01 | 0.90 | 0.68 | 0.22 | 0.28 |
| 61302 | 0 | 139881 | RGDKSRPPVWYVEGE          | 2.68 | 0.01 | 0.90 | 0.68 | 0.22 | 0.28 |
| 61303 | 0 | 139881 | RGDKSRPPVWYVEGE          | 2.68 | 0.01 | 0.90 | 0.68 | 0.22 | 1.34 |
| 61304 | 0 | 139881 | RGDKSRPPVWYVEGE          | 2.68 | 0.01 | 0.90 | 0.68 | 0.22 | 1.75 |
| 61305 | 0 | 139881 | RGDKSRPPVWYVEGE          | 2.68 | 0.01 | 0.90 | 0.68 | 0.22 | 0.28 |
| 61306 | 0 | 139881 | RGDKSRPPVWYVEGE          | 2.68 | 0.01 | 0.90 | 0.68 | 0.22 | 0.28 |
| 61307 | 0 | 139881 | RGDKSRPPVWYVEGE          | 2.68 | 0.01 | 0.90 | 0.68 | 0.22 | 0.28 |
| 61308 | 0 | 139881 | RGDKSRPPVWYVEGE          | 2.68 | 0.01 | 0.90 | 0.68 | 0.22 | 1.34 |
| 61309 | 0 | 79367  | RGDL                     | 1.57 | 0.01 | 2.78 | 1.15 | 0.22 | 1.27 |
| 61310 | 0 | 79367  | RGDL                     | 1.57 | 0.01 | 2.78 | 1.15 | 0.22 | 1.27 |
| 61311 | 0 | 79367  | RGDL                     | 1.57 | 0.01 | 2.78 | 1.15 | 0.22 | 1.27 |
| 61312 | 0 | 79367  | RGDL                     | 1.57 | 0.01 | 2.78 | 1.15 | 0.22 | 1.27 |
| 61313 | 0 | 79367  | RGDL                     | 1.57 | 0.01 | 2.78 | 1.15 | 0.22 | 1.27 |
| 61314 | 0 | 79367  | RGDL                     | 1.57 | 0.01 | 2.78 | 1.15 | 0.22 | 1.27 |
| 61315 | 0 | 79367  | RGDL                     | 1.57 | 0.01 | 2.78 | 1.15 | 0.22 | 1.27 |
| 61316 | 0 | 79367  | RGDL                     | 1.57 | 0.01 | 2.78 | 1.15 | 0.22 | 1.27 |
| 61317 | 0 | 79367  | RGDL                     | 1.57 | 0.01 | 2.78 | 1.15 | 0.22 | 1.27 |
| 61318 | 0 | 79367  | RGDL                     | 1.57 | 0.01 | 2.78 | 1.15 | 0.22 | 1.27 |
| 61319 | 0 | 79367  | RGDL                     | 1.57 | 0.01 | 2.78 | 1.15 | 0.22 | 1.27 |
| 61320 | 0 | 79367  | RGDL                     | 1.57 | 0.01 | 2.78 | 1.15 | 0.22 | 1.27 |
| 61321 | 0 | 79367  | RGDL                     | 1.57 | 0.01 | 2.78 | 1.15 | 0.22 | 1.27 |
| 61322 | 0 | 79367  | RGDL                     | 1.57 | 0.01 | 2.78 | 1.15 | 0.22 | 1.27 |
| 61323 | 0 | 79367  | RGDL                     | 1.57 | 0.01 | 2.78 | 1.15 | 0.22 | 1.27 |
| 61324 | 0 | 79368  | RGDLARGDLARGDL           | 2.69 | 0.01 | 0.90 | 2.59 | 0.22 | 1.34 |
| 61325 | 0 | 79368  | RGDLARGDLARGDL           | 2.69 | 0.01 | 0.90 | 2.59 | 0.22 | 1.34 |
| 61326 | 0 | 79368  | RGDLARGDLARGDL           | 2.69 | 0.01 | 0.90 | 2.59 | 0.22 | 1.34 |
| 61327 | 0 | 79368  | RGDLARGDLARGDL           | 2.69 | 0.01 | 0.90 | 1.20 | 0.22 | 1.34 |
| 61328 | 0 | 79368  | RGDLARGDLARGDL           | 2.69 | 0.01 | 0.90 | 1.20 | 0.22 | 1.34 |
| 61329 | 0 | 79368  | RGDLARGDLARGDL           | 2.69 | 0.01 | 0.90 | 2.59 | 0.22 | 0.85 |
| 61330 | 0 | 79368  | RGDLARGDLARGDL           | 2.69 | 0.01 | 0.90 | 1.20 | 0.22 | 0.85 |
| 61331 | 0 | 53838  | RGDLGPLAAR               | 2.35 | 0.01 | 3.78 | 1.15 | 0.22 | 0.28 |
| 61332 | 0 | 53838  | RGDLGPLAAR               | 2.35 | 0.01 | 3.78 | 1.15 | 0.22 | 1.34 |
| 61333 | 0 | 95759  | RGDLQVLA                 | 2.12 | 0.01 | 2.96 | 2.59 | 0.22 | 0.28 |
| 61334 | 0 | 53839  | RGDLQVLAQK               | 2.31 | 0.01 | 3.14 | 2.22 | 0.22 | 0.28 |

|       |   |        |                                                |      |      |      |      |      |      |
|-------|---|--------|------------------------------------------------|------|------|------|------|------|------|
| 61335 | 0 | 53839  | RGDLQVLAQK                                     | 2.31 | 0.01 | 3.14 | 2.22 | 0.22 | 0.28 |
| 61336 | 0 | 53839  | RGDLQVLAQK                                     | 2.31 | 0.01 | 3.14 | 2.22 | 0.22 | 0.28 |
| 61337 | 0 | 53839  | RGDLQVLAQK                                     | 2.31 | 0.01 | 3.14 | 2.22 | 0.22 | 0.28 |
| 61338 | 0 | 53839  | RGDLQVLAQK                                     | 2.31 | 0.01 | 3.26 | 2.37 | 0.22 | 0.85 |
| 61339 | 0 | 53839  | RGDLQVLAQK                                     | 2.31 | 0.01 | 3.26 | 2.59 | 0.22 | 0.85 |
| 61340 | 0 | 53839  | RGDLQVLAQK                                     | 2.31 | 0.01 | 3.14 | 0.68 | 0.22 | 0.28 |
| 61341 | 0 | 53839  | RGDLQVLAQK                                     | 2.31 | 0.01 | 3.14 | 0.68 | 0.22 | 0.28 |
| 61342 | 0 | 139227 | RGDLQVLTPK                                     | 2.29 | 0.01 | 3.02 | 2.13 | 0.22 | 0.85 |
| 61343 | 0 | 139227 | RGDLQVLTPK                                     | 2.29 | 0.01 | 3.02 | 0.68 | 0.22 | 1.48 |
| 61344 | 0 | 139227 | RGDLQVLTPK                                     | 2.29 | 0.01 | 3.02 | 0.68 | 0.22 | 0.85 |
| 61345 | 0 | 53840  | RGDLQVRGDLQVLAQK<br>VARTLPC                    | 3.11 | 0.01 | 0.90 | 2.59 | 0.22 | 1.34 |
| 61346 | 0 | 79369  | RGDLRGDLRGDL                                   | 2.55 | 0.01 | 0.90 | 2.59 | 0.22 | 1.34 |
| 61347 | 0 | 79369  | RGDLRGDLRGDL                                   | 2.55 | 0.01 | 0.90 | 2.59 | 0.22 | 1.34 |
| 61348 | 0 | 79369  | RGDLRGDLRGDL                                   | 2.55 | 0.01 | 0.90 | 2.59 | 0.22 | 1.34 |
| 61349 | 0 | 79369  | RGDLRGDLRGDL                                   | 2.55 | 0.01 | 0.90 | 1.20 | 0.22 | 1.34 |
| 61350 | 0 | 79369  | RGDLRGDLRGDL                                   | 2.55 | 0.01 | 0.90 | 1.20 | 0.22 | 1.34 |
| 61351 | 0 | 79369  | RGDLRGDLRGDL                                   | 2.55 | 0.01 | 0.90 | 2.59 | 0.22 | 0.85 |
| 61352 | 0 | 79369  | RGDLRGDLRGDL                                   | 2.55 | 0.01 | 0.90 | 1.20 | 0.22 | 0.85 |
| 61353 | 0 | 79370  | RGDLXRGDLXRGDL                                 | 2.69 | 0.01 | 0.90 | 2.59 | 0.22 | 1.34 |
| 61354 | 0 | 79370  | RGDLXRGDLXRGDL                                 | 2.69 | 0.01 | 0.90 | 2.59 | 0.22 | 1.34 |
| 61355 | 0 | 79370  | RGDLXRGDLXRGDL                                 | 2.69 | 0.01 | 0.90 | 2.59 | 0.22 | 1.34 |
| 61356 | 0 | 79370  | RGDLXRGDLXRGDL                                 | 2.69 | 0.01 | 0.90 | 1.20 | 0.22 | 1.34 |
| 61357 | 0 | 79370  | RGDLXRGDLXRGDL                                 | 2.69 | 0.01 | 0.90 | 1.20 | 0.22 | 1.34 |
| 61358 | 0 | 79370  | RGDLXRGDLXRGDL                                 | 2.69 | 0.01 | 0.90 | 1.20 | 0.22 | 1.34 |
| 61359 | 0 | 79370  | RGDLXRGDLXRGDL                                 | 2.69 | 0.01 | 0.90 | 2.59 | 0.22 | 0.85 |
| 61360 | 0 | 79370  | RGDLXRGDLXRGDL                                 | 2.69 | 0.01 | 0.90 | 1.20 | 0.22 | 0.85 |
| 61361 | 0 | 156435 | RGDQERQQEEQSQSR                                | 2.74 | 0.01 | 3.67 | 0.44 | 1.23 | 1.27 |
| 61362 | 0 | 180926 | RGDQYIVNEDKFQILYNS<br>IMYGFKKDAEFRHDSGY<br>EVH | 3.57 | 0.01 | 0.90 | 0.68 | 0.22 | 0.28 |
| 61363 | 0 | 53847  | RGDSPASSKP                                     | 2.32 | 0.01 | 0.78 | 1.12 | 0.22 | 0.28 |
| 61364 | 0 | 53847  | RGDSPASSKP                                     | 2.32 | 0.01 | 0.78 | 1.12 | 0.22 | 0.28 |
| 61365 | 0 | 53851  | RGDVTF                                         | 1.88 | 0.01 | 0.90 | 0.44 | 1.59 | 1.39 |
| 61366 | 0 | 151713 | RGEARK                                         | 1.91 | 0.01 | 2.30 | 0.44 | 1.41 | 0.28 |
| 61367 | 0 | 151713 | RGEARK                                         | 1.91 | 0.01 | 2.30 | 0.44 | 1.41 | 0.28 |
| 61368 | 0 | 151713 | RGEARK                                         | 1.91 | 0.01 | 2.30 | 0.44 | 1.41 | 0.28 |
| 61369 | 0 | 151713 | RGEARK                                         | 1.91 | 0.01 | 2.30 | 0.44 | 1.41 | 0.28 |
| 61370 | 0 | 151713 | RGEARK                                         | 1.91 | 0.01 | 2.30 | 0.44 | 1.41 | 1.66 |
| 61371 | 0 | 151713 | RGEARK                                         | 1.91 | 0.01 | 2.30 | 0.44 | 1.41 | 1.66 |
| 61372 | 0 | 151713 | RGEARK                                         | 1.91 | 0.01 | 2.30 | 0.44 | 1.41 | 1.66 |
| 61373 | 0 | 151713 | RGEARK                                         | 1.91 | 0.01 | 2.30 | 0.44 | 1.41 | 1.34 |
| 61374 | 0 | 151713 | RGEARK                                         | 1.91 | 0.01 | 2.30 | 0.44 | 1.41 | 1.34 |
| 61375 | 0 | 151713 | RGEARK                                         | 1.91 | 0.01 | 2.30 | 0.44 | 1.41 | 1.27 |
| 61376 | 0 | 151713 | RGEARK                                         | 1.91 | 0.01 | 2.30 | 0.44 | 1.41 | 1.66 |
| 61377 | 0 | 151713 | RGEARK                                         | 1.91 | 0.01 | 2.30 | 0.44 | 1.41 | 1.66 |

|       |   |        |                           |      |      |      |      |      |      |
|-------|---|--------|---------------------------|------|------|------|------|------|------|
| 61378 | 0 | 151713 | RGEARK                    | 1.91 | 0.01 | 2.30 | 0.44 | 1.41 | 1.66 |
| 61379 | 0 | 151713 | RGEARK                    | 1.91 | 0.01 | 2.30 | 0.44 | 1.41 | 1.66 |
| 61380 | 0 | 151713 | RGEARK                    | 1.91 | 0.01 | 2.30 | 0.44 | 1.41 | 1.66 |
| 61381 | 0 | 151713 | RGEARK                    | 1.91 | 0.01 | 2.30 | 0.44 | 1.41 | 1.66 |
| 61382 | 0 | 151713 | RGEARK                    | 1.91 | 0.01 | 2.30 | 0.44 | 1.41 | 1.66 |
| 61383 | 0 | 151713 | RGEARK                    | 1.91 | 0.01 | 2.30 | 0.44 | 1.41 | 1.66 |
| 61384 | 0 | 151713 | RGEARK                    | 1.91 | 0.01 | 2.30 | 0.44 | 1.41 | 1.66 |
| 61385 | 0 | 103544 | RGEHRDEHTQDAGDK           | 2.71 | 0.01 | 2.04 | 0.44 | 0.85 | 1.28 |
| 61386 | 0 | 120911 | RGEKVPFASR                | 2.30 | 0.01 | 2.18 | 2.16 | 0.22 | 0.28 |
| 61387 | 0 | 53858  | RGERCLEDLDRDR             | 2.53 | 0.01 | 4.08 | 1.15 | 0.22 | 0.28 |
| 61388 | 0 | 53858  | RGERCLEDLDRDR             | 2.53 | 0.01 | 4.08 | 1.15 | 0.22 | 0.28 |
| 61389 | 0 | 161274 | RGERCLEDLDRDRSELSPL<br>LL | 2.99 | 0.01 | 2.45 | 0.68 | 0.22 | 0.28 |
| 61390 | 0 | 161274 | RGERCLEDLDRDRSELSPL<br>LL | 2.99 | 0.01 | 2.45 | 0.68 | 0.22 | 1.27 |
| 61391 | 0 | 241054 | RGETPGQL                  | 2.12 | 0.01 | 3.35 | 2.37 | 0.22 | 0.85 |
| 61392 | 0 | 53859  | RGETPGQLLPEIMQ            | 2.62 | 0.01 | 3.50 | 2.37 | 1.59 | 0.28 |
| 61393 | 0 | 53859  | RGETPGQLLPEIMQ            | 2.62 | 0.01 | 3.50 | 1.20 | 0.22 | 0.28 |
| 61394 | 0 | 53859  | RGETPGQLLPEIMQ            | 2.62 | 0.01 | 3.50 | 1.20 | 0.22 | 0.28 |
| 61395 | 0 | 53859  | RGETPGQLLPEIMQ            | 2.62 | 0.01 | 3.50 | 1.20 | 0.22 | 0.85 |
| 61396 | 0 | 53860  | RGFDARTM                  | 2.13 | 0.01 | 2.99 | 0.44 | 0.85 | 0.28 |
| 61397 | 0 | 418483 | RGFFYTPKTRREAEDL          | 2.72 | 0.01 | 0.78 | 0.44 | 1.13 | 0.28 |
| 61398 | 0 | 418483 | RGFFYTPKTRREAEDL          | 2.72 | 0.01 | 0.78 | 0.44 | 1.41 | 0.28 |
| 61399 | 0 | 418483 | RGFFYTPKTRREAEDL          | 2.72 | 0.01 | 0.78 | 0.44 | 1.13 | 1.27 |
| 61400 | 0 | 418483 | RGFFYTPKTRREAEDL          | 2.72 | 0.01 | 0.78 | 0.44 | 1.13 | 0.28 |
| 61401 | 0 | 418483 | RGFFYTPKTRREAEDL          | 2.72 | 0.01 | 0.78 | 0.44 | 1.41 | 0.28 |
| 61402 | 0 | 418483 | RGFFYTPKTRREAEDL          | 2.72 | 0.01 | 0.78 | 0.44 | 1.74 | 0.28 |
| 61403 | 0 | 418483 | RGFFYTPKTRREAEDL          | 2.72 | 0.01 | 0.78 | 0.44 | 1.41 | 0.28 |
| 61404 | 0 | 109810 | RGFGFVTFSSMAEVDAA<br>MAAR | 3.01 | 0.01 | 1.75 | 4.23 | 1.13 | 0.28 |
| 61405 | 0 | 109810 | RGFGFVTFSSMAEVDAA<br>MAAR | 3.01 | 0.01 | 1.75 | 4.23 | 0.22 | 0.28 |
| 61406 | 0 | 109810 | RGFGFVTFSSMAEVDAA<br>MAAR | 3.01 | 0.01 | 1.75 | 4.23 | 0.22 | 1.75 |
| 61407 | 0 | 109810 | RGFGFVTFSSMAEVDAA<br>MAAR | 3.01 | 0.01 | 1.75 | 2.84 | 1.13 | 0.28 |
| 61408 | 0 | 109810 | RGFGFVTFSSMAEVDAA<br>MAAR | 3.01 | 0.01 | 1.75 | 3.05 | 1.41 | 0.28 |
| 61409 | 0 | 109810 | RGFGFVTFSSMAEVDAA<br>MAAR | 3.01 | 0.01 | 1.75 | 3.44 | 1.41 | 0.28 |
| 61410 | 0 | 109810 | RGFGFVTFSSMAEVDAA<br>MAAR | 3.01 | 0.01 | 1.75 | 0.44 | 1.13 | 0.28 |
| 61411 | 0 | 109810 | RGFGFVTFSSMAEVDAA<br>MAAR | 3.01 | 0.01 | 1.75 | 0.44 | 1.13 | 0.28 |
| 61412 | 0 | 109810 | RGFGFVTFSSMAEVDAA<br>MAAR | 3.01 | 0.01 | 1.75 | 0.44 | 1.13 | 0.28 |

|       |   |        |                                    |      |      |      |      |      |      |
|-------|---|--------|------------------------------------|------|------|------|------|------|------|
| 61413 | 0 | 128092 | RGFGGDPRRVSLAADR<br>GGAD           | 2.98 | 0.01 | 0.78 | 0.44 | 1.13 | 0.28 |
| 61414 | 0 | 53863  | RGFL                               | 1.57 | 0.01 | 2.61 | 0.44 | 0.85 | 0.28 |
| 61415 | 0 | 53864  | RGFLGRMLF                          | 2.27 | 0.01 | 2.61 | 0.44 | 0.85 | 0.28 |
| 61416 | 0 | 53866  | RGFRKEI                            | 2.03 | 0.01 | 3.65 | 1.15 | 0.22 | 0.28 |
| 61417 | 0 | 53866  | RGFRKEI                            | 2.03 | 0.01 | 3.65 | 0.44 | 0.85 | 0.28 |
| 61418 | 0 | 53868  | RGFTSLFSAFSAQ                      | 2.57 | 0.01 | 1.72 | 0.44 | 0.85 | 2.02 |
| 61419 | 0 | 53869  | RGFTSLFSAGS                        | 2.43 | 0.01 | 1.72 | 0.44 | 0.85 | 2.02 |
| 61420 | 0 | 53870  | RGFTSLFSAGSAQ                      | 2.57 | 0.01 | 1.72 | 0.44 | 0.85 | 2.02 |
| 61421 | 0 | 418484 | RGFVVLPTTRRDVTDV                   | 2.78 | 0.01 | 2.51 | 0.44 | 1.13 | 0.28 |
| 61422 | 0 | 418484 | RGFVVLPTTRRDVTDV                   | 2.78 | 0.01 | 2.51 | 0.44 | 1.41 | 0.28 |
| 61423 | 0 | 418484 | RGFVVLPTTRRDVTDV                   | 2.78 | 0.01 | 2.51 | 0.44 | 1.13 | 1.27 |
| 61424 | 0 | 418484 | RGFVVLPTTRRDVTDV                   | 2.78 | 0.01 | 2.51 | 0.44 | 1.74 | 0.28 |
| 61425 | 0 | 418484 | RGFVVLPTTRRDVTDV                   | 2.78 | 0.01 | 4.08 | 0.44 | 1.41 | 0.28 |
| 61426 | 0 | 418484 | RGFVVLPTTRRDVTDV                   | 2.78 | 0.01 | 2.51 | 0.44 | 1.74 | 0.28 |
| 61427 | 0 | 418484 | RGFVVLPTTRRDVTDV                   | 2.78 | 0.01 | 2.51 | 0.44 | 1.41 | 0.28 |
| 61428 | 0 | 368264 | RGGAQKGNVRKLQPQ                    | 2.70 | 0.01 | 1.61 | 0.44 | 0.85 | 1.28 |
| 61429 | 0 | 53874  | RGGDQPYIFLFAHIP                    | 2.65 | 0.01 | 0.90 | 0.44 | 1.59 | 1.39 |
| 61430 | 0 | 177535 | RGGGGNFGPGPGSNFR<br>GGSD           | 3.00 | 0.01 | 0.78 | 0.44 | 2.26 | 0.28 |
| 61431 | 0 | 53876  | RGGIPSLKKGKDIKV                    | 2.75 | 0.01 | 3.72 | 0.68 | 0.22 | 0.28 |
| 61432 | 0 | 108608 | RGGIRRQSL                          | 2.25 | 0.01 | 0.90 | 0.44 | 1.13 | 1.39 |
| 61433 | 0 | 135494 | RGGLGLVNGRSLRH                     | 2.67 | 0.01 | 0.90 | 3.05 | 1.13 | 1.39 |
| 61434 | 0 | 53877  | RGGLMRGGSSDTRLMG<br>WQSSSIYSFQARGS | 3.35 | 0.01 | 0.90 | 1.15 | 0.22 | 1.27 |
| 61435 | 0 | 133672 | RGGMR                              | 1.78 | 0.01 | 0.78 | 3.05 | 1.13 | 1.27 |
| 61436 | 0 | 181941 | RGGNFGFGDS                         | 2.35 | 0.01 | 0.78 | 0.44 | 1.13 | 0.28 |
| 61437 | 0 | 177536 | RGGNFGFGDSRGGGG<br>NFGPG           | 3.00 | 0.01 | 0.78 | 0.44 | 2.26 | 0.28 |
| 61438 | 0 | 53878  | RGGPDDLTAL                         | 2.31 | 0.01 | 0.90 | 0.44 | 1.23 | 0.28 |
| 61439 | 0 | 53878  | RGGPDDLTAL                         | 2.31 | 0.01 | 0.90 | 0.44 | 1.23 | 1.27 |
| 61440 | 0 | 368310 | RGGRDAPQARKQQGR                    | 2.73 | 0.01 | 1.61 | 0.44 | 0.85 | 1.28 |
| 61441 | 0 | 106067 | RGGSGGRGRGGSGG                     | 2.68 | 0.01 | 2.43 | 0.44 | 1.59 | 0.28 |
| 61442 | 0 | 504040 | RGGSGGRGRGGSGGRG<br>RGGS           | 3.03 | 4.15 | 2.48 | 0.44 | 1.74 | 0.28 |
| 61443 | 0 | 504043 | RGGSGGRGRGGSGGRG<br>RGGS           | 3.03 | 3.33 | 2.48 | 0.44 | 1.74 | 0.28 |

|       |   |        |                            |      |      |      |      |      |      |
|-------|---|--------|----------------------------|------|------|------|------|------|------|
| 61444 | 0 | 504044 | RGGSGGRGRGGSGGRG<br>RGGS   | 3.03 | 2.84 | 2.48 | 0.44 | 1.74 | 0.28 |
| 61445 | 0 | 504041 | RGGSGGRGRGGSGGRG<br>RGGS   | 3.03 | 3.85 | 2.48 | 0.44 | 1.74 | 0.28 |
| 61446 | 0 | 504042 | RGGSGGRGRGGSGGRG<br>RGGS   | 3.03 | 4.23 | 2.48 | 0.44 | 1.74 | 0.28 |
| 61447 | 0 | 53881  | RGGSRERARGRGRGRG<br>EKRP   | 3.01 | 0.01 | 2.43 | 0.44 | 1.59 | 0.28 |
| 61448 | 0 | 53881  | RGGSRERARGRGRGRG<br>EKRP   | 3.01 | 0.01 | 2.43 | 0.44 | 2.82 | 0.28 |
| 61449 | 0 | 53881  | RGGSRERARGRGRGRG<br>EKRP   | 3.01 | 0.01 | 2.43 | 0.44 | 2.82 | 0.28 |
| 61450 | 0 | 53881  | RGGSRERARGRGRGRG<br>EKRP   | 3.01 | 0.01 | 2.43 | 0.44 | 1.59 | 0.28 |
| 61451 | 0 | 139597 | RGHAKSRPVRIHTS             | 2.69 | 4.45 | 0.78 | 0.44 | 1.13 | 0.28 |
| 61452 | 0 | 139597 | RGHAKSRPVRIHTS             | 2.69 | 4.45 | 0.78 | 0.44 | 1.13 | 0.28 |
| 61453 | 0 | 139597 | RGHAKSRPVRIHTS             | 2.69 | 4.45 | 0.78 | 0.44 | 1.13 | 1.28 |
| 61454 | 0 | 95761  | RGHITVNYQF                 | 2.26 | 0.01 | 2.60 | 1.12 | 0.22 | 0.85 |
| 61455 | 0 | 187498 | RGHTLESAEGRKIFG            | 2.67 | 0.01 | 2.14 | 1.15 | 0.22 | 0.28 |
| 61456 | 0 | 187498 | RGHTLESAEGRKIFG            | 2.67 | 0.01 | 2.14 | 1.15 | 0.22 | 1.34 |
| 61457 | 0 | 187498 | RGHTLESAEGRKIFG            | 2.67 | 0.01 | 2.14 | 1.15 | 0.22 | 0.85 |
| 61458 | 0 | 187498 | RGHTLESAEGRKIFG            | 2.67 | 0.01 | 2.14 | 1.15 | 0.22 | 0.85 |
| 61459 | 0 | 53883  | RGIDKSVKSV                 | 2.33 | 0.01 | 2.84 | 0.44 | 0.85 | 0.28 |
| 61460 | 0 | 53884  | RGIDSGERLMQPTQMS<br>AQED   | 2.95 | 0.01 | 3.27 | 2.89 | 0.22 | 0.28 |
| 61461 | 0 | 161447 | RGIPFWGGSTIDTELKVI<br>D    | 2.87 | 0.01 | 2.08 | 2.49 | 0.22 | 1.57 |
| 61462 | 0 | 161447 | RGIPFWGGSTIDTELKVI<br>D    | 2.87 | 0.01 | 2.08 | 2.02 | 0.22 | 1.57 |
| 61463 | 0 | 161447 | RGIPFWGGSTIDTELKVI<br>D    | 2.87 | 0.01 | 2.08 | 2.43 | 0.22 | 1.57 |
| 61464 | 0 | 53894  | RGKDLPVLDQLTD              | 2.56 | 0.01 | 2.40 | 1.12 | 0.22 | 0.85 |
| 61465 | 0 | 53894  | RGKDLPVLDQLTD              | 2.56 | 0.01 | 2.40 | 1.12 | 0.22 | 0.85 |
| 61466 | 0 | 53894  | RGKDLPVLDQLTD              | 2.56 | 0.01 | 2.40 | 0.68 | 2.25 | 1.75 |
| 61467 | 0 | 174005 | RGKELHTPQEQFP              | 2.54 | 0.01 | 1.86 | 0.44 | 1.23 | 0.85 |
| 61468 | 0 | 53895  | RGKGEGLPGMCGGALV<br>SSNQ   | 2.91 | 0.01 | 2.82 | 0.44 | 0.85 | 0.28 |
| 61469 | 0 | 53895  | RGKGEGLPGMCGGALV<br>SSNQ   | 2.91 | 0.01 | 2.82 | 0.44 | 1.41 | 0.28 |
| 61470 | 0 | 94671  | RGKGP GKKNKKKNPEKP<br>HFLL | 3.02 | 0.01 | 2.71 | 1.15 | 0.22 | 2.02 |
| 61471 | 0 | 94671  | RGKGP GKKNKKKNPEKP<br>HFLL | 3.02 | 0.01 | 2.71 | 1.15 | 0.22 | 2.02 |
| 61472 | 0 | 94671  | RGKGP GKKNKKKNPEKP<br>HFLL | 3.02 | 0.01 | 2.71 | 1.15 | 0.22 | 2.02 |
| 61473 | 0 | 94671  | RGKGP GKKNKKKNPEKP<br>HFLL | 3.02 | 0.01 | 2.71 | 1.15 | 0.22 | 2.02 |

|       |   |        |                                   |      |      |      |      |      |      |
|-------|---|--------|-----------------------------------|------|------|------|------|------|------|
| 61474 | 0 | 191711 | RGKKGSGGITIK                      | 2.52 | 0.01 | 2.76 | 1.20 | 0.22 | 0.28 |
| 61475 | 0 | 237907 | RGKSVVCEAVIPA                     | 2.53 | 0.01 | 0.78 | 0.44 | 1.13 | 1.28 |
| 61476 | 0 | 53905  | RGLAQALIDQ                        | 2.33 | 0.01 | 2.56 | 0.44 | 0.85 | 0.28 |
| 61477 | 0 | 53906  | RGLAQSLIDQ                        | 2.31 | 0.01 | 3.41 | 2.69 | 0.22 | 0.28 |
| 61478 | 0 | 103547 | RGLGEAQLGNSSGNF                   | 2.69 | 0.01 | 2.04 | 0.44 | 0.85 | 1.28 |
| 61479 | 0 | 79371  | RGLIAEGE                          | 2.14 | 0.01 | 2.94 | 1.15 | 0.22 | 2.35 |
| 61480 | 0 | 53916  | RGLIVFHTSTEPSVNYDL<br>FG          | 2.91 | 0.01 | 2.56 | 1.12 | 0.22 | 0.28 |
| 61481 | 0 | 53916  | RGLIVFHTSTEPSVNYDL<br>FG          | 2.91 | 0.01 | 2.56 | 1.12 | 0.22 | 0.28 |
| 61482 | 0 | 53916  | RGLIVFHTSTEPSVNYDL<br>FG          | 2.91 | 0.01 | 2.56 | 3.12 | 0.22 | 0.28 |
| 61483 | 0 | 119513 | RGLKSKIAM                         | 2.21 | 0.01 | 0.90 | 0.44 | 1.13 | 0.28 |
| 61484 | 0 | 111722 | RGLPRYFNVTLRKRWV                  | 2.74 | 0.01 | 3.81 | 1.12 | 0.22 | 0.85 |
| 61485 | 0 | 103548 | RGLRAAAEAGVRLAF                   | 2.73 | 0.01 | 2.04 | 0.44 | 0.85 | 1.28 |
| 61486 | 0 | 95137  | RGLSLGMRLN                        | 2.43 | 0.01 | 2.24 | 2.25 | 0.22 | 2.02 |
| 61487 | 0 | 95137  | RGLSLGMRLN                        | 2.43 | 0.01 | 2.24 | 2.25 | 0.22 | 2.02 |
| 61488 | 0 | 95137  | RGLSLGMRLN                        | 2.43 | 0.01 | 2.24 | 2.25 | 0.22 | 1.34 |
| 61489 | 0 | 116458 | RGLSLSRFSWGAEGQRP<br>GFGYGGRAS    | 3.23 | 0.01 | 0.78 | 0.44 | 1.13 | 0.28 |
| 61490 | 0 | 53923  | RGLTSLFSAFSAQ                     | 2.57 | 0.01 | 1.72 | 0.44 | 0.85 | 2.02 |
| 61491 | 0 | 53924  | RGLYFPAG                          | 2.12 | 0.01 | 3.45 | 0.68 | 0.22 | 0.28 |
| 61492 | 0 | 87884  | RGNAELQTYLRQITPG                  | 2.74 | 0.01 | 2.14 | 3.44 | 0.22 | 0.85 |
| 61493 | 0 | 87884  | RGNAELQTYLRQITPG                  | 2.74 | 0.01 | 2.14 | 3.44 | 0.22 | 1.34 |
| 61494 | 0 | 117227 | RGNNIRYFILPDSL                    | 2.68 | 0.01 | 0.78 | 3.01 | 0.22 | 0.28 |
| 61495 | 0 | 53929  | RGNQGFWDILFPADP<br>PFSPQSC        | 3.08 | 0.01 | 2.96 | 0.44 | 0.85 | 0.28 |
| 61496 | 0 | 53929  | RGNQGFWDILFPADP<br>PFSPQSC        | 3.08 | 0.01 | 2.96 | 0.44 | 0.85 | 1.27 |
| 61497 | 0 | 53929  | RGNQGFWDILFPADP<br>PFSPQSC        | 3.08 | 0.01 | 2.96 | 0.44 | 0.85 | 0.28 |
| 61498 | 0 | 78258  | RGNVLR                            | 1.91 | 0.01 | 0.90 | 2.02 | 1.59 | 1.39 |
| 61499 | 0 | 109815 | RGNVPVWTQRSK                      | 2.46 | 0.01 | 0.90 | 1.15 | 0.22 | 1.39 |
| 61500 | 0 | 109815 | RGNVPVWTQRSK                      | 2.46 | 0.01 | 0.90 | 1.15 | 0.22 | 0.85 |
| 61501 | 0 | 53933  | RGPEQTQGNFGDQDLI<br>R             | 2.80 | 0.01 | 2.91 | 0.44 | 0.85 | 0.28 |
| 61502 | 0 | 156950 | RGPMFF                            | 1.86 | 0.01 | 0.90 | 2.74 | 0.22 | 0.85 |
| 61503 | 0 | 53939  | RGPRLGVR                          | 2.17 | 0.01 | 1.72 | 0.44 | 0.85 | 0.28 |
| 61504 | 0 | 53942  | RGPRLGVRATRKT                     | 2.64 | 0.01 | 1.72 | 1.15 | 0.22 | 0.28 |
| 61505 | 0 | 53942  | RGPRLGVRATRKT                     | 2.64 | 0.01 | 1.72 | 1.15 | 0.22 | 3.25 |
| 61506 | 0 | 53942  | RGPRLGVRATRKT                     | 2.64 | 0.01 | 1.72 | 1.15 | 0.22 | 0.28 |
| 61507 | 0 | 53942  | RGPRLGVRATRKT                     | 2.64 | 0.01 | 1.72 | 1.15 | 0.22 | 0.28 |
| 61508 | 0 | 53944  | RGPRLGVRATRKT<br>SERS<br>QPRGRRQ  | 3.15 | 0.01 | 1.72 | 0.44 | 0.85 | 0.28 |
| 61509 | 0 | 53945  | RGPRLGVRATRKT<br>SERS<br>QPRGRRQP | 3.19 | 0.01 | 1.72 | 0.44 | 0.85 | 0.28 |



|       |   |        |                             |      |      |      |      |      |      |
|-------|---|--------|-----------------------------|------|------|------|------|------|------|
| 61510 | 0 | 53945  | RGPRLGVRATRKTSE<br>QPRGRRQP | 3.19 | 0.01 | 1.72 | 0.44 | 0.85 | 0.28 |
| 61511 | 0 | 133336 | RGPSLGASSH                  | 2.32 | 0.01 | 0.78 | 0.44 | 1.13 | 0.28 |
| 61512 | 0 | 173007 | RGPSLGASSHQHSRR             | 2.70 | 0.01 | 0.78 | 0.44 | 1.13 | 0.28 |
| 61513 | 0 | 106070 | RGQGDGGRRKKGG               | 2.59 | 0.01 | 2.43 | 0.44 | 1.74 | 0.28 |
| 61514 | 0 | 504045 | RGQGDGGRRKKGGWF<br>GKHRG    | 3.00 | 4.15 | 2.48 | 0.44 | 1.74 | 0.28 |
| 61515 | 0 | 504046 | RGQGDGGRRKKGGWF<br>GKHRG    | 3.00 | 4.03 | 2.48 | 0.44 | 1.74 | 0.28 |
| 61516 | 0 | 504045 | RGQGDGGRRKKGGWF<br>GKHRG    | 3.00 | 4.15 | 2.48 | 0.44 | 1.74 | 0.28 |
| 61517 | 0 | 504046 | RGQGDGGRRKKGGWF<br>GKHRG    | 3.00 | 4.03 | 2.48 | 0.44 | 1.74 | 0.28 |
| 61518 | 0 | 53955  | RGQKAKSNPNRPLVPR<br>N       | 2.87 | 0.01 | 3.72 | 0.44 | 0.85 | 0.28 |
| 61519 | 0 | 53956  | RGQRTKTNARTRKGPRK<br>PIKK   | 3.03 | 0.01 | 2.24 | 0.68 | 0.22 | 0.28 |
| 61520 | 0 | 53956  | RGQRTKTNARTRKGPRK<br>PIKK   | 3.03 | 0.01 | 2.24 | 0.68 | 0.22 | 0.85 |
| 61521 | 0 | 53957  | RGQSATATYTNLQNSY<br>NG      | 2.93 | 0.01 | 2.39 | 0.68 | 0.22 | 0.28 |
| 61522 | 0 | 53957  | RGQSATATYTNLQNSY<br>NG      | 2.93 | 0.01 | 2.39 | 0.68 | 0.22 | 0.28 |
| 61523 | 0 | 53957  | RGQSATATYTNLQNSY<br>NG      | 2.93 | 0.01 | 2.39 | 0.68 | 0.22 | 0.28 |
| 61524 | 0 | 122551 | RGQYLQLQELEDWEE<br>VTTS     | 2.93 | 0.01 | 0.78 | 0.44 | 1.13 | 0.28 |
| 61525 | 0 | 122551 | RGQYLQLQELEDWEE<br>VTTS     | 2.93 | 0.01 | 0.78 | 0.44 | 1.13 | 1.27 |
| 61526 | 0 | 53960  | RGRAGRRRYAHPSVR             | 2.71 | 0.01 | 2.40 | 0.44 | 1.59 | 0.28 |
| 61527 | 0 | 53960  | RGRAGRRRYAHPSVR             | 2.71 | 0.01 | 2.40 | 0.44 | 1.59 | 0.28 |
| 61528 | 0 | 194961 | RGRAQPEQAFPESVG             | 2.71 | 0.01 | 0.90 | 0.44 | 1.93 | 0.28 |
| 61529 | 0 | 129747 | RGRDASKKALGPRRNSD<br>DE     | 3.58 | 0.01 | 0.78 | 0.44 | 1.13 | 0.85 |
| 61530 | 0 | 129747 | RGRDASKKALGPRRNSD<br>DE     | 3.58 | 0.01 | 0.78 | 0.44 | 1.13 | 0.85 |
| 61531 | 0 | 129747 | RGRDASKKALGPRRNSD<br>DE     | 3.58 | 0.01 | 0.78 | 0.44 | 1.13 | 0.85 |
| 61532 | 0 | 129747 | RGRDASKKALGPRRNSD<br>DE     | 3.58 | 0.01 | 0.78 | 0.44 | 1.41 | 0.85 |
| 61533 | 0 | 117629 | RGRGMGRGNIFQKRR             | 2.70 | 4.93 | 0.78 | 0.44 | 1.13 | 0.28 |

|       |   |        |                                |      |      |      |      |      |      |
|-------|---|--------|--------------------------------|------|------|------|------|------|------|
| 61534 | 0 | 53963  | RGRGRGEKRPRSPSSQS<br>SSS       | 2.99 | 0.01 | 2.43 | 0.44 | 2.82 | 0.28 |
| 61535 | 0 | 53963  | RGRGRGEKRPRSPSSQS<br>SSS       | 2.99 | 0.01 | 2.43 | 0.44 | 2.82 | 0.28 |
| 61536 | 0 | 53963  | RGRGRGEKRPRSPSSQS<br>SSS       | 2.99 | 0.01 | 2.43 | 0.44 | 1.59 | 0.28 |
| 61537 | 0 | 134782 | RGRGRGGPRR                     | 2.35 | 0.01 | 0.78 | 0.44 | 1.13 | 0.85 |
| 61538 | 0 | 134782 | RGRGRGGPRR                     | 2.35 | 0.01 | 0.78 | 3.05 | 1.13 | 0.85 |
| 61539 | 0 | 117631 | RGRGRGMGRGNIFQK                | 2.72 | 4.93 | 0.78 | 0.44 | 1.13 | 0.28 |
| 61540 | 0 | 504047 | RGRGRGRGRGGGRPGA<br>PGGS       | 3.02 | 4.15 | 2.48 | 0.44 | 1.74 | 0.28 |
| 61541 | 0 | 504048 | RGRGRGRGRGGGRPGA<br>PGGS       | 3.02 | 3.81 | 2.48 | 0.44 | 1.74 | 0.28 |
| 61542 | 0 | 504049 | RGRGRGRGRGGGRPGA<br>PGGS       | 3.02 | 3.93 | 2.48 | 0.44 | 1.74 | 0.28 |
| 61543 | 0 | 504050 | RGRGRGRGRGGGRPGA<br>PGGS       | 3.02 | 3.33 | 2.48 | 0.44 | 1.74 | 0.28 |
| 61544 | 0 | 504051 | RGRGRGRGRGGGRPGA<br>PGGS       | 3.02 | 2.84 | 2.48 | 0.44 | 1.74 | 0.28 |
| 61545 | 0 | 504047 | RGRGRGRGRGGGRPGA<br>PGGS       | 3.02 | 4.15 | 2.48 | 0.44 | 1.74 | 0.28 |
| 61546 | 0 | 504048 | RGRGRGRGRGGGRPGA<br>PGGS       | 3.02 | 3.81 | 2.48 | 0.44 | 1.74 | 0.28 |
| 61547 | 0 | 504049 | RGRGRGRGRGGGRPGA<br>PGGS       | 3.02 | 3.93 | 2.48 | 0.44 | 1.74 | 0.28 |
| 61548 | 0 | 504050 | RGRGRGRGRGGGRPGA<br>PGGS       | 3.02 | 3.33 | 2.48 | 0.44 | 1.74 | 0.28 |
| 61549 | 0 | 504051 | RGRGRGRGRGGGRPGA<br>PGGS       | 3.02 | 2.84 | 2.48 | 0.44 | 1.74 | 0.28 |
| 61550 | 0 | 118994 | RGRGRGRGRGGGRPGA<br>PGGS       | 3.02 | 0.01 | 2.43 | 0.44 | 1.13 | 1.27 |
| 61551 | 0 | 118994 | RGRGRGRGRGGGRPGA<br>PGGS       | 3.02 | 0.01 | 2.43 | 0.44 | 1.41 | 1.27 |
| 61552 | 0 | 451019 | RGRGRGRGRGRG                   | 2.54 | 0.01 | 0.78 | 2.79 | 1.13 | 1.28 |
| 61553 | 0 | 451019 | RGRGRGRGRGRG                   | 2.54 | 0.01 | 0.78 | 2.79 | 1.13 | 1.28 |
| 61554 | 0 | 451019 | RGRGRGRGRGRG                   | 2.54 | 0.01 | 0.78 | 1.81 | 1.41 | 1.28 |
| 61555 | 0 | 451019 | RGRGRGRGRGRG                   | 2.54 | 0.01 | 0.78 | 1.81 | 1.41 | 1.28 |
| 61556 | 0 | 117633 | RGRGRGRGRGRGG                  | 2.60 | 0.01 | 0.78 | 0.44 | 1.13 | 0.85 |
| 61557 | 0 | 117634 | RGRGRGRGRGRGR                  | 2.62 | 0.01 | 0.78 | 0.44 | 1.13 | 0.85 |
| 61558 | 0 | 53967  | RGRQAVKDNKGTRIRFK<br>DDSSFEEVN | 3.19 | 0.01 | 3.00 | 0.44 | 0.85 | 0.28 |
| 61559 | 0 | 53967  | RGRQAVKDNKGTRIRFK<br>DDSSFEEVN | 3.19 | 0.01 | 3.00 | 1.15 | 2.39 | 0.28 |
| 61560 | 0 | 97601  | RGRRQP                         | 1.92 | 0.01 | 1.72 | 1.15 | 0.22 | 1.39 |
| 61561 | 0 | 97601  | RGRRQP                         | 1.92 | 0.01 | 1.72 | 1.15 | 0.22 | 1.66 |
| 61562 | 0 | 97601  | RGRRQP                         | 1.92 | 0.01 | 1.72 | 1.15 | 0.22 | 0.28 |

|       |   |        |                           |      |      |      |      |      |      |
|-------|---|--------|---------------------------|------|------|------|------|------|------|
| 61563 | 0 | 53971  | RGRRQPIPKA                | 2.33 | 0.01 | 1.72 | 0.44 | 1.59 | 0.28 |
| 61564 | 0 | 109819 | RGRTGPAG                  | 2.17 | 0.01 | 1.60 | 2.55 | 2.60 | 0.28 |
| 61565 | 0 | 53977  | RSGGPEP                   | 2.04 | 0.01 | 2.24 | 0.68 | 0.22 | 0.28 |
| 61566 | 0 | 53977  | RSGGPEP                   | 2.04 | 0.01 | 2.24 | 0.68 | 0.22 | 0.85 |
| 61567 | 0 | 53977  | RSGGPEP                   | 2.04 | 0.01 | 2.24 | 0.68 | 0.22 | 0.85 |
| 61568 | 0 | 421613 | RSGGWMMTILG               | 2.40 | 0.01 | 3.19 | 0.44 | 1.23 | 1.28 |
| 61569 | 0 | 137278 | RSGGWMMTILGKSCD           | 2.65 | 0.01 | 3.19 | 0.44 | 1.23 | 0.28 |
| 61570 | 0 | 53984  | RGSQGF                    | 1.90 | 0.01 | 2.96 | 0.44 | 0.85 | 0.28 |
| 61571 | 0 | 462429 | RNLGKVIDTLTCGFADL<br>MG   | 3.48 | 0.01 | 1.96 | 2.90 | 0.22 | 0.28 |
| 61572 | 0 | 53988  | RGSRPSWGPTDPRRRSR<br>N    | 2.89 | 0.01 | 3.18 | 0.44 | 1.59 | 0.28 |
| 61573 | 0 | 53988  | RGSRPSWGPTDPRRRSR<br>N    | 2.89 | 0.01 | 3.18 | 0.44 | 1.59 | 0.28 |
| 61574 | 0 | 53989  | RGSRPSWGPTDPRRRSR<br>NLG  | 2.98 | 0.01 | 3.10 | 1.15 | 0.22 | 0.28 |
| 61575 | 0 | 53989  | RGSRPSWGPTDPRRRSR<br>NLG  | 2.98 | 0.01 | 3.10 | 0.44 | 0.85 | 0.28 |
| 61576 | 0 | 53990  | RGSRPSWGPTDPRRRSR<br>NLGK | 3.02 | 0.01 | 1.72 | 0.44 | 0.85 | 0.85 |
| 61577 | 0 | 53995  | RGTARTPPTDPKTHPHG<br>PAD  | 3.00 | 0.01 | 2.40 | 0.44 | 1.59 | 0.28 |
| 61578 | 0 | 122886 | RGTDEYFIRKPP              | 2.44 | 0.01 | 0.78 | 2.04 | 0.22 | 0.28 |
| 61579 | 0 | 122886 | RGTDEYFIRKPP              | 2.44 | 0.01 | 0.78 | 2.04 | 0.22 | 0.28 |
| 61580 | 0 | 122886 | RGTDEYFIRKPP              | 2.44 | 0.01 | 0.78 | 2.04 | 0.22 | 2.02 |
| 61581 | 0 | 80000  | RGTGSYNRSSFES             | 2.58 | 0.01 | 2.72 | 0.68 | 0.22 | 1.66 |
| 61582 | 0 | 80000  | RGTGSYNRSSFES             | 2.58 | 0.01 | 2.72 | 0.68 | 0.22 | 1.66 |
| 61583 | 0 | 80000  | RGTGSYNRSSFES             | 2.58 | 0.01 | 2.72 | 0.68 | 0.22 | 1.66 |
| 61584 | 0 | 80000  | RGTGSYNRSSFES             | 2.58 | 0.01 | 2.72 | 0.68 | 0.22 | 1.66 |
| 61585 | 0 | 80000  | RGTGSYNRSSFES             | 2.58 | 0.01 | 2.72 | 0.68 | 0.22 | 1.66 |
| 61586 | 0 | 80000  | RGTGSYNRSSFES             | 2.58 | 0.01 | 2.72 | 0.68 | 0.22 | 1.66 |
| 61587 | 0 | 80000  | RGTGSYNRSSFES             | 2.58 | 0.01 | 2.72 | 0.68 | 0.22 | 1.66 |
| 61588 | 0 | 80000  | RGTGSYNRSSFES             | 2.58 | 0.01 | 2.72 | 0.68 | 0.22 | 0.28 |
| 61589 | 0 | 80000  | RGTGSYNRSSFES             | 2.58 | 0.01 | 2.72 | 0.68 | 0.22 | 0.28 |
| 61590 | 0 | 80000  | RGTGSYNRSSFES             | 2.58 | 0.01 | 2.72 | 0.68 | 0.22 | 0.28 |
| 61591 | 0 | 80000  | RGTGSYNRSSFES             | 2.58 | 0.01 | 2.72 | 0.68 | 0.22 | 0.28 |
| 61592 | 0 | 80000  | RGTGSYNRSSFES             | 2.58 | 0.01 | 2.72 | 0.68 | 0.22 | 0.28 |
| 61593 | 0 | 80000  | RGTGSYNRSSFES             | 2.58 | 0.01 | 2.72 | 0.68 | 0.22 | 0.28 |
| 61594 | 0 | 53998  | RGTLIGQVDRLKDKVNN<br>TL   | 2.92 | 0.01 | 3.03 | 0.68 | 0.22 | 1.57 |
| 61595 | 0 | 53998  | RGTLIGQVDRLKDKVNN<br>TL   | 2.92 | 0.01 | 3.03 | 3.33 | 0.22 | 1.57 |
| 61596 | 0 | 53998  | RGTLIGQVDRLKDKVNN<br>TL   | 2.92 | 0.01 | 2.08 | 0.44 | 0.22 | 1.57 |

|       |   |        |                                      |      |      |      |      |      |      |
|-------|---|--------|--------------------------------------|------|------|------|------|------|------|
| 61597 | 0 | 53998  | RGTLIGQVDRLKDKVNN<br>TL              | 2.92 | 0.01 | 2.08 | 2.02 | 0.22 | 1.57 |
| 61598 | 0 | 53998  | RGTLIGQVDRLKDKVNN<br>TL              | 2.92 | 0.01 | 2.08 | 1.15 | 0.22 | 1.57 |
| 61599 | 0 | 53998  | RGTLIGQVDRLKDKVNN<br>TL              | 2.92 | 0.01 | 2.08 | 2.49 | 0.22 | 1.57 |
| 61600 | 0 | 53998  | RGTLIGQVDRLKDKVNN<br>TL              | 2.92 | 0.01 | 3.16 | 0.44 | 1.93 | 1.57 |
| 61601 | 0 | 53998  | RGTLIGQVDRLKDKVNN<br>TL              | 2.92 | 0.01 | 2.08 | 0.68 | 0.22 | 1.57 |
| 61602 | 0 | 119326 | RGTPIGMPPPGMRPPP<br>PGIRGPPPPGMRPPRP | 3.46 | 0.01 | 0.78 | 0.44 | 1.13 | 0.85 |
| 61603 | 0 | 129751 | RGTPPPPV                             | 2.14 | 0.01 | 0.78 | 0.44 | 1.13 | 0.28 |
| 61604 | 0 | 113808 | RGTQEWTELWVSFRA                      | 2.67 | 0.01 | 0.90 | 0.44 | 1.13 | 0.28 |
| 61605 | 0 | 244272 | RGTQQFPWGNTPRPP<br>RLPLEC            | 3.09 | 0.01 | 2.96 | 0.44 | 0.85 | 1.66 |
| 61606 | 0 | 147252 | RGTSIFGLAPSKA                        | 2.54 | 0.01 | 1.60 | 0.44 | 0.85 | 0.85 |
| 61607 | 0 | 54002  | RGTSMDDEADRY                         | 2.48 | 0.01 | 2.88 | 2.22 | 0.85 | 0.28 |
| 61608 | 0 | 54002  | RGTSMDDEADRY                         | 2.48 | 0.01 | 2.88 | 2.22 | 0.22 | 0.28 |
| 61609 | 0 | 54002  | RGTSMDDEADRY                         | 2.48 | 0.01 | 2.88 | 2.22 | 0.22 | 0.28 |
| 61610 | 0 | 54003  | RGTPPAYG                             | 2.23 | 0.01 | 2.85 | 0.68 | 0.22 | 0.28 |
| 61611 | 0 | 54003  | RGTPPAYG                             | 2.23 | 0.01 | 2.85 | 0.68 | 0.22 | 1.34 |
| 61612 | 0 | 127801 | RGTVLYKNEVGE                         | 2.48 | 0.01 | 0.90 | 3.06 | 0.22 | 0.85 |
| 61613 | 0 | 54004  | RGTYETGNKKVHGN                       | 2.62 | 0.01 | 2.58 | 2.43 | 0.22 | 0.28 |
| 61614 | 0 | 120912 | RGVAGKV VAGIGILAIR<br>WRLPSGT        | 3.15 | 0.01 | 2.86 | 0.44 | 0.85 | 0.28 |
| 61615 | 0 | 120912 | RGVAGKV VAGIGILAIR<br>WRLPSGT        | 3.15 | 0.01 | 2.86 | 0.44 | 1.41 | 0.28 |
| 61616 | 0 | 123701 | RGVGGPSQ                             | 2.13 | 0.01 | 0.78 | 1.20 | 0.22 | 0.28 |
| 61617 | 0 | 123701 | RGVGGPSQ                             | 2.13 | 0.01 | 0.78 | 0.44 | 1.13 | 0.28 |
| 61618 | 0 | 54008  | RGVGSTVVILDANFV                      | 2.66 | 0.01 | 4.23 | 2.13 | 0.22 | 0.28 |
| 61619 | 0 | 238975 | RGVKVDCCMRDKCNG                      | 2.72 | 0.01 | 2.56 | 2.02 | 0.22 | 0.85 |
| 61620 | 0 | 238975 | RGVKVDCCMRDKCNG                      | 2.72 | 0.01 | 2.56 | 1.20 | 0.22 | 0.85 |
| 61621 | 0 | 106073 | RGVTHDQL                             | 2.10 | 0.01 | 3.05 | 1.20 | 0.22 | 0.28 |
| 61622 | 0 | 188444 | RGWGGDSGER                           | 2.36 | 0.01 | 2.92 | 1.81 | 0.22 | 0.85 |
| 61623 | 0 | 54016  | RGWGNG                               | 1.91 | 0.01 | 2.40 | 0.44 | 0.85 | 0.28 |
| 61624 | 0 | 119635 | RGWKHSVTYSCCPDTPY                    | 2.77 | 0.01 | 0.78 | 1.81 | 2.25 | 1.75 |
| 61625 | 0 | 120168 | RGWKHSVTYSGGPDP<br>Y                 | 2.79 | 0.01 | 2.26 | 1.15 | 0.22 | 1.57 |
| 61626 | 0 | 120168 | RGWKHSVTYSGGPDP<br>Y                 | 2.79 | 0.01 | 2.26 | 0.44 | 1.41 | 1.57 |

|       |   |        |                                                                                                                                                                  |      |      |      |      |      |      |
|-------|---|--------|------------------------------------------------------------------------------------------------------------------------------------------------------------------|------|------|------|------|------|------|
| 61627 | 0 | 120168 | RGWKHSVTYSGPDTP<br>Y                                                                                                                                             | 2.79 | 0.01 | 2.26 | 0.44 | 1.13 | 1.57 |
| 61628 | 0 | 119514 | RGWKHWVYYTCCPDTP<br>Y                                                                                                                                            | 2.78 | 0.01 | 2.26 | 1.81 | 0.22 | 1.57 |
| 61629 | 0 | 119514 | RGWKHWVYYTCCPDTP<br>Y                                                                                                                                            | 2.78 | 0.01 | 2.26 | 1.81 | 0.22 | 1.57 |
| 61630 | 0 | 119514 | RGWKHWVYYTCCPDTP<br>Y                                                                                                                                            | 2.78 | 0.01 | 2.26 | 1.81 | 0.22 | 1.57 |
| 61631 | 0 | 119514 | RGWKHWVYYTCCPDTP<br>Y                                                                                                                                            | 2.78 | 0.01 | 2.26 | 1.81 | 0.22 | 1.57 |
| 61632 | 0 | 119514 | RGWKHWVYYTCCPDTP<br>Y                                                                                                                                            | 2.78 | 0.01 | 2.26 | 1.15 | 0.22 | 1.57 |
| 61633 | 0 | 119514 | RGWKHWVYYTCCPDTP<br>Y                                                                                                                                            | 2.78 | 0.01 | 2.26 | 1.12 | 0.22 | 1.57 |
| 61634 | 0 | 122553 | RGWKHWVYYTGPTTP<br>Y                                                                                                                                             | 2.81 | 0.01 | 2.26 | 2.43 | 0.22 | 1.57 |
| 61635 | 0 | 126926 | RGWNPGLYNGFP                                                                                                                                                     | 2.57 | 0.01 | 0.78 | 1.20 | 0.22 | 0.28 |
| 61636 | 0 | 126926 | RGWNPGLYNGFP                                                                                                                                                     | 2.57 | 0.01 | 0.78 | 1.20 | 0.22 | 0.28 |
| 61637 | 0 | 54019  | RGWVIHPLGL                                                                                                                                                       | 2.31 | 0.01 | 0.78 | 0.44 | 1.74 | 0.28 |
| 61638 | 0 | 131628 | RGYDSYA                                                                                                                                                          | 2.02 | 0.01 | 0.78 | 0.44 | 1.41 | 1.27 |
| 61639 | 0 | 131628 | RGYDSYA                                                                                                                                                          | 2.02 | 0.01 | 0.78 | 0.44 | 1.13 | 0.28 |
| 61640 | 0 | 131628 | RGYDSYA                                                                                                                                                          | 2.02 | 0.01 | 0.78 | 1.15 | 0.22 | 0.28 |
| 61641 | 0 | 131628 | RGYDSYA                                                                                                                                                          | 2.02 | 0.01 | 0.78 | 0.44 | 1.41 | 0.28 |
| 61642 | 0 | 118582 | RGYISPYFINTSK                                                                                                                                                    | 2.54 | 0.01 | 0.78 | 0.44 | 1.59 | 0.85 |
| 61643 | 0 | 496887 | RGYISPYFVTDNKMIAK<br>LENPYILITDKK                                                                                                                                | 3.31 | 0.01 | 3.15 | 0.44 | 1.93 | 2.12 |
| 61644 | 0 | 54023  | RGYISQYF                                                                                                                                                         | 2.12 | 0.01 | 2.99 | 0.44 | 0.85 | 0.28 |
| 61645 | 0 | 54028  | RGYMYLKGRGSVMTT<br>NIYLNSSLYRGTKFIIKKY<br>ASGNKDNIVRNNDRVYI<br>NVVVKNKEYRLATNASQ<br>AGVEKILSALEIPDVGNL<br>SQVVVMKSKNDQGITN<br>KCKMNLQDNNGNDIGF<br>IGFHQFNNAKLVAS | 4.86 | 0.01 | 2.08 | 0.44 | 0.22 | 0.28 |
| 61646 | 0 | 106775 | RHAKAHILRW                                                                                                                                                       | 2.34 | 0.01 | 2.75 | 0.44 | 1.23 | 0.85 |
| 61647 | 0 | 238976 | RHASDSQTTTCLSGICYK<br>K                                                                                                                                          | 2.84 | 0.01 | 2.56 | 1.20 | 0.22 | 0.85 |
| 61648 | 0 | 238976 | RHASDSQTTTCLSGICYK<br>K                                                                                                                                          | 2.84 | 0.01 | 2.56 | 2.02 | 0.22 | 0.85 |
| 61649 | 0 | 238976 | RHASDSQTTTCLSGICYK<br>K                                                                                                                                          | 2.84 | 0.01 | 2.56 | 1.20 | 0.22 | 0.28 |
| 61650 | 0 | 151048 | RHAYRSMAEWGFLYS                                                                                                                                                  | 2.67 | 0.01 | 0.90 | 2.04 | 2.60 | 1.75 |
| 61651 | 0 | 120913 | RHDFGFPPQEEFGNQ                                                                                                                                                  | 2.62 | 0.01 | 0.78 | 0.44 | 1.13 | 0.85 |
| 61652 | 0 | 104960 | RHDSGY                                                                                                                                                           | 1.88 | 0.01 | 0.78 | 1.15 | 0.22 | 1.66 |
| 61653 | 0 | 104960 | RHDSGY                                                                                                                                                           | 1.88 | 0.01 | 0.78 | 1.15 | 0.22 | 0.28 |

|       |   |        |                 |      |      |      |      |      |      |
|-------|---|--------|-----------------|------|------|------|------|------|------|
| 61654 | 0 | 105497 | RHDSGYE         | 1.99 | 0.01 | 0.78 | 3.00 | 0.22 | 0.28 |
| 61655 | 0 | 105497 | RHDSGYE         | 1.99 | 0.01 | 0.78 | 3.00 | 0.22 | 1.48 |
| 61656 | 0 | 105497 | RHDSGYE         | 1.99 | 0.01 | 0.78 | 3.00 | 1.93 | 1.75 |
| 61657 | 0 | 105498 | RHDSGYEV        | 2.10 | 0.01 | 0.78 | 0.68 | 0.22 | 2.02 |
| 61658 | 0 | 105498 | RHDSGYEV        | 2.10 | 0.01 | 0.78 | 0.68 | 0.22 | 2.02 |
| 61659 | 0 | 138893 | RHDSGYEVH       | 2.21 | 0.01 | 0.78 | 1.15 | 0.22 | 0.28 |
| 61660 | 0 | 138893 | RHDSGYEVH       | 2.21 | 0.01 | 0.78 | 1.15 | 0.22 | 0.28 |
| 61661 | 0 | 138893 | RHDSGYEVH       | 2.21 | 0.01 | 0.78 | 1.15 | 0.22 | 0.28 |
| 61662 | 0 | 138893 | RHDSGYEVH       | 2.21 | 0.01 | 0.78 | 1.15 | 0.22 | 1.48 |
| 61663 | 0 | 100465 | RHDSGYEVHH      | 2.29 | 0.01 | 0.78 | 0.44 | 1.93 | 0.28 |
| 61664 | 0 | 177947 | RHDSGYEVHHQKL   | 2.50 | 0.01 | 0.78 | 3.40 | 0.22 | 0.28 |
| 61665 | 0 | 177947 | RHDSGYEVHHQKL   | 2.50 | 0.01 | 0.78 | 3.40 | 0.22 | 0.28 |
| 61666 | 0 | 368771 | RHDTDTEDSTKNAAA | 2.67 | 0.01 | 1.61 | 0.44 | 0.85 | 1.28 |
| 61667 | 0 | 140595 | RHEDGDWPRV      | 2.32 | 0.01 | 0.90 | 0.68 | 0.22 | 0.28 |
| 61668 | 0 | 140595 | RHEDGDWPRV      | 2.32 | 0.01 | 0.90 | 0.68 | 0.22 | 1.27 |
| 61669 | 0 | 54047  | RHEQQLIVARQKLK  | 2.63 | 0.01 | 2.56 | 2.69 | 0.22 | 0.28 |
| 61670 | 0 | 107229 | RHEVTEMGQEV     | 2.49 | 0.01 | 0.78 | 1.12 | 0.22 | 0.28 |
| 61671 | 0 | 107229 | RHEVTEMGQEV     | 2.49 | 0.01 | 0.78 | 1.12 | 0.22 | 0.28 |
| 61672 | 0 | 107229 | RHEVTEMGQEV     | 2.49 | 0.01 | 0.78 | 1.12 | 0.22 | 0.28 |
| 61673 | 0 | 107229 | RHEVTEMGQEV     | 2.49 | 0.01 | 0.78 | 1.12 | 0.22 | 0.28 |
| 61674 | 0 | 107229 | RHEVTEMGQEV     | 2.49 | 0.01 | 0.78 | 1.12 | 0.22 | 0.85 |
| 61675 | 0 | 107229 | RHEVTEMGQEV     | 2.49 | 0.01 | 0.78 | 1.12 | 0.22 | 0.28 |
| 61676 | 0 | 107229 | RHEVTEMGQEV     | 2.49 | 0.01 | 0.78 | 1.12 | 0.22 | 0.85 |
| 61677 | 0 | 107229 | RHEVTEMGQEV     | 2.49 | 0.01 | 0.78 | 1.12 | 0.22 | 0.85 |
| 61678 | 0 | 107229 | RHEVTEMGQEV     | 2.49 | 0.01 | 0.78 | 1.12 | 0.22 | 0.85 |
| 61679 | 0 | 107229 | RHEVTEMGQEV     | 2.49 | 0.01 | 0.78 | 1.12 | 0.22 | 0.85 |
| 61680 | 0 | 107229 | RHEVTEMGQEV     | 2.49 | 0.01 | 0.78 | 1.12 | 0.22 | 0.85 |
| 61681 | 0 | 107229 | RHEVTEMGQEV     | 2.49 | 0.01 | 0.78 | 1.12 | 0.22 | 0.28 |
| 61682 | 0 | 107229 | RHEVTEMGQEV     | 2.49 | 0.01 | 0.78 | 1.12 | 0.22 | 0.28 |
| 61683 | 0 | 176438 | RHEWNKHGW       | 2.23 | 0.01 | 2.63 | 1.15 | 0.22 | 0.85 |
| 61684 | 0 | 176438 | RHEWNKHGW       | 2.23 | 0.01 | 2.63 | 1.15 | 0.22 | 1.48 |
| 61685 | 0 | 176438 | RHEWNKHGW       | 2.23 | 0.01 | 2.63 | 1.15 | 0.22 | 1.48 |
| 61686 | 0 | 176438 | RHEWNKHGW       | 2.23 | 0.01 | 2.63 | 1.15 | 0.22 | 0.85 |
| 61687 | 0 | 176439 | RHEWNKHGWCNWYNI | 2.68 | 0.01 | 2.63 | 1.15 | 0.22 | 0.85 |
| 61688 | 0 | 176439 | RHEWNKHGWCNWYNI | 2.68 | 0.01 | 2.63 | 1.15 | 0.22 | 0.85 |
| 61689 | 0 | 134509 | RHFFNRSQTV      | 2.31 | 0.01 | 3.21 | 0.68 | 0.22 | 1.39 |
| 61690 | 0 | 134509 | RHFFNRSQTV      | 2.31 | 0.01 | 3.21 | 0.68 | 0.22 | 1.34 |
| 61691 | 0 | 131257 | RHFPNDYNPFL     | 2.47 | 0.01 | 0.90 | 0.44 | 1.13 | 1.39 |
| 61692 | 0 | 131257 | RHFPNDYNPFL     | 2.47 | 0.01 | 0.90 | 0.44 | 1.13 | 1.39 |
| 61693 | 0 | 111725 | RHGEEYDLQFIFQLC | 2.65 | 0.01 | 1.86 | 0.68 | 0.22 | 0.28 |
| 61694 | 0 | 117229 | RHGFLPRHRD      | 2.34 | 0.01 | 0.78 | 0.44 | 1.93 | 0.28 |
| 61695 | 0 | 121792 | RHGLKR          | 1.91 | 0.01 | 2.26 | 2.04 | 0.22 | 0.28 |
| 61696 | 0 | 103549 | RHGLSSLGWNLCRIF | 2.68 | 0.01 | 2.04 | 0.44 | 0.85 | 1.28 |
| 61697 | 0 | 101194 | RHHTDV          | 1.89 | 0.01 | 3.18 | 1.12 | 0.22 | 0.28 |
| 61698 | 0 | 54053  | RHKIINIRPIRIKL  | 2.73 | 0.01 | 0.90 | 0.44 | 1.59 | 1.39 |

|       |   |        |                               |      |      |      |      |      |      |
|-------|---|--------|-------------------------------|------|------|------|------|------|------|
|       |   |        | RHKQKIIAPAKQLPPSG             |      |      |      |      |      |      |
| 61699 | 0 | 54056  | SGRRGDMGSLAARVVK<br>Q         | 3.50 | 0.01 | 0.90 | 2.22 | 2.25 | 1.75 |
|       |   |        | RHKQKIIAPAKQLPPSG             |      |      |      |      |      |      |
| 61700 | 0 | 54056  | SGRRGDMGSLAARVVK<br>Q         | 3.50 | 0.01 | 0.90 | 2.22 | 0.22 | 1.34 |
| 61701 | 0 | 139883 | RHKQKIVAPAKQLL                | 2.61 | 0.01 | 3.02 | 2.13 | 1.59 | 0.28 |
| 61702 | 0 | 54057  | RHKQKIVAPVK                   | 2.41 | 0.01 | 3.26 | 0.68 | 0.22 | 1.34 |
| 61703 | 0 | 54057  | RHKQKIVAPVK                   | 2.41 | 0.01 | 3.26 | 1.12 | 0.22 | 1.27 |
| 61704 | 0 | 54057  | RHKQKIVAPVK                   | 2.41 | 0.01 | 3.26 | 0.68 | 0.22 | 0.28 |
| 61705 | 0 | 54057  | RHKQKIVAPVK                   | 2.41 | 0.01 | 3.26 | 0.68 | 0.22 | 0.28 |
| 61706 | 0 | 54057  | RHKQKIVAPVK                   | 2.41 | 0.01 | 3.26 | 1.12 | 0.22 | 1.34 |
| 61707 | 0 | 54058  | RHKQKIVAPVKQTL                | 2.61 | 0.01 | 3.26 | 2.22 | 0.22 | 1.34 |
| 61708 | 0 | 54058  | RHKQKIVAPVKQTL                | 2.61 | 0.01 | 3.26 | 2.37 | 0.22 | 1.34 |
| 61709 | 0 | 54058  | RHKQKIVAPVKQTL                | 2.61 | 0.01 | 3.26 | 2.22 | 0.22 | 0.28 |
| 61710 | 0 | 54058  | RHKQKIVAPVKQTL                | 2.61 | 0.01 | 3.26 | 2.22 | 2.25 | 1.75 |
| 61711 | 0 | 54058  | RHKQKIVAPVKQTL                | 2.61 | 0.01 | 2.88 | 2.22 | 0.22 | 1.34 |
| 61712 | 0 | 54058  | RHKQKIVAPVKQTL                | 2.61 | 0.01 | 2.88 | 2.22 | 2.25 | 1.75 |
| 61713 | 0 | 54058  | RHKQKIVAPVKQTL                | 2.61 | 0.01 | 2.88 | 2.59 | 0.22 | 1.34 |
| 61714 | 0 | 54058  | RHKQKIVAPVKQTL                | 2.61 | 0.01 | 2.88 | 2.59 | 2.25 | 1.75 |
| 61715 | 0 | 54058  | RHKQKIVAPVKQTL                | 2.61 | 0.01 | 2.88 | 2.59 | 0.22 | 0.28 |
| 61716 | 0 | 54058  | RHKQKIVAPVKQTL                | 2.61 | 0.01 | 2.88 | 1.12 | 0.22 | 1.34 |
| 61717 | 0 | 54058  | RHKQKIVAPVKQTL                | 2.61 | 0.01 | 2.88 | 1.12 | 0.22 | 0.28 |
| 61718 | 0 | 54058  | RHKQKIVAPVKQTL                | 2.61 | 0.01 | 2.88 | 1.12 | 0.22 | 1.34 |
| 61719 | 0 | 54058  | RHKQKIVAPVKQTL                | 2.61 | 0.01 | 2.88 | 2.37 | 0.22 | 1.34 |
| 61720 | 0 | 54058  | RHKQKIVAPVKQTL                | 2.61 | 0.01 | 2.88 | 2.37 | 2.25 | 1.75 |
| 61721 | 0 | 54058  | RHKQKIVAPVKQTL                | 2.61 | 0.01 | 2.88 | 1.12 | 0.22 | 2.02 |
| 61722 | 0 | 54058  | RHKQKIVAPVKQTL                | 2.61 | 0.01 | 2.88 | 1.12 | 0.22 | 0.85 |
| 61723 | 0 | 54058  | RHKQKIVAPVKQTL                | 2.61 | 0.01 | 3.51 | 1.15 | 0.22 | 1.27 |
| 61724 | 0 | 54058  | RHKQKIVAPVKQTL                | 2.61 | 0.01 | 2.96 | 2.00 | 0.22 | 0.28 |
| 61725 | 0 | 54058  | RHKQKIVAPVKQTL                | 2.61 | 0.01 | 2.96 | 2.00 | 0.22 | 0.28 |
| 61726 | 0 | 54058  | RHKQKIVAPVKQTL                | 2.61 | 0.01 | 2.96 | 2.00 | 0.22 | 1.27 |
| 61727 | 0 | 54059  | RHKQKIVAPVKQTLPNL<br>RGDLQVLA | 3.17 | 0.01 | 0.90 | 2.37 | 0.22 | 1.34 |
| 61728 | 0 | 54059  | RHKQKIVAPVKQTLPNL<br>RGDLQVLA | 3.17 | 0.01 | 0.90 | 2.37 | 0.22 | 1.34 |
| 61729 | 0 | 54059  | RHKQKIVAPVKQTLPNL<br>RGDLQVLA | 3.17 | 0.01 | 0.90 | 2.13 | 0.22 | 1.34 |
| 61730 | 0 | 54059  | RHKQKIVAPVKQTLPNL<br>RGDLQVLA | 3.17 | 0.01 | 0.90 | 2.13 | 0.22 | 1.34 |
|       |   |        | RHKQPLIAPAKQLPPSA             |      |      |      |      |      |      |
| 61731 | 0 | 54060  | GARRGDLAHLAAAHAR<br>HLP       | 3.59 | 0.01 | 0.90 | 3.57 | 0.22 | 1.34 |
|       |   |        | RHKQPLIAPAKQLPPSA             |      |      |      |      |      |      |
| 61732 | 0 | 54060  | GARRGDLAHLAAAHAR<br>HLP       | 3.59 | 0.01 | 0.90 | 3.57 | 0.22 | 1.75 |
| 61733 | 0 | 54062  | RHLDEREE                      | 2.14 | 0.01 | 1.66 | 1.15 | 0.22 | 0.28 |

|       |   |        |                               |      |      |      |      |      |      |
|-------|---|--------|-------------------------------|------|------|------|------|------|------|
| 61734 | 0 | 102020 | RHLDEREEC                     | 2.25 | 0.01 | 1.66 | 0.44 | 1.59 | 2.97 |
| 61735 | 0 | 141074 | RHLEFEARTLSP                  | 2.48 | 0.01 | 0.78 | 0.68 | 0.22 | 0.28 |
| 61736 | 0 | 54064  | RHLIFCHSKKKCDELAALK<br>LSAL   | 3.05 | 0.01 | 1.72 | 0.44 | 0.85 | 0.28 |
| 61737 | 0 | 54065  | RHLLLCLLLLTVGG                | 2.62 | 0.01 | 2.59 | 0.44 | 0.85 | 0.28 |
| 61738 | 0 | 54065  | RHLLLCLLLLTVGG                | 2.62 | 0.01 | 2.59 | 0.44 | 0.85 | 0.28 |
| 61739 | 0 | 54065  | RHLLLCLLLLTVGG                | 2.62 | 0.01 | 2.59 | 0.44 | 1.41 | 0.28 |
| 61740 | 0 | 54065  | RHLLLCLLLLTVGG                | 2.62 | 0.01 | 2.59 | 0.44 | 0.85 | 0.28 |
| 61741 | 0 | 167386 | RHLPLTP                       | 2.04 | 0.01 | 0.90 | 0.44 | 0.85 | 1.39 |
| 61742 | 0 | 99613  | RHLRPE                        | 1.91 | 0.01 | 2.86 | 2.02 | 0.85 | 0.85 |
| 61743 | 0 | 54071  | RHNLSFDASQ                    | 2.29 | 4.23 | 2.70 | 0.44 | 0.85 | 0.28 |
| 61744 | 0 | 54072  | RHNTIRQRRKNHHL                | 2.70 | 0.01 | 0.90 | 0.44 | 1.59 | 1.39 |
| 61745 | 0 | 54078  | RHPHPHLSFM                    | 2.33 | 0.01 | 1.60 | 0.44 | 1.23 | 0.85 |
| 61746 | 0 | 54078  | RHPHPHLSFM                    | 2.33 | 0.01 | 1.60 | 0.44 | 1.23 | 0.85 |
| 61747 | 0 | 54078  | RHPHPHLSFM                    | 2.33 | 0.01 | 1.60 | 0.44 | 1.23 | 0.85 |
| 61748 | 0 | 54078  | RHPHPHLSFM                    | 2.33 | 0.01 | 1.60 | 0.44 | 1.23 | 0.85 |
| 61749 | 0 | 54079  | RHPHPHLSFMAI                  | 2.48 | 0.01 | 1.60 | 0.44 | 1.23 | 0.85 |
| 61750 | 0 | 115468 | RHPHPHLSFMAIPPKKN<br>QDK      | 2.92 | 0.01 | 1.60 | 0.44 | 1.23 | 1.28 |
| 61751 | 0 | 115468 | RHPHPHLSFMAIPPKKN<br>QDK      | 2.92 | 0.01 | 1.60 | 0.44 | 1.41 | 0.28 |
| 61752 | 0 | 115468 | RHPHPHLSFMAIPPKKN<br>QDK      | 2.92 | 0.01 | 1.60 | 0.44 | 1.93 | 0.28 |
| 61753 | 0 | 152937 | RHPLVAAYPI                    | 2.30 | 0.01 | 2.18 | 2.16 | 0.22 | 0.28 |
| 61754 | 0 | 157844 | RHQDTNAAPAGS                  | 2.45 | 0.01 | 3.47 | 2.49 | 0.85 | 0.28 |
| 61755 | 0 | 177948 | RHQEHKQLLKRQHF                | 2.71 | 0.01 | 0.78 | 0.44 | 1.13 | 0.85 |
| 61756 | 0 | 134212 | RHQREITR                      | 2.15 | 0.01 | 0.78 | 1.20 | 0.22 | 1.57 |
| 61757 | 0 | 131035 | RHQREITRTLQSDQ                | 2.70 | 0.01 | 0.78 | 1.20 | 0.22 | 1.57 |
| 61758 | 0 | 131035 | RHQREITRTLQSDQ                | 2.70 | 0.01 | 0.78 | 1.20 | 0.22 | 1.34 |
| 61759 | 0 | 112289 | RHRDTGILDSIGRFFGGD<br>RG      | 2.98 | 0.01 | 0.78 | 0.44 | 0.22 | 0.28 |
| 61760 | 0 | 54090  | RHRLRRGADGTAELTTT<br>AATRFMKD | 3.18 | 0.01 | 2.53 | 0.44 | 0.85 | 0.28 |
| 61761 | 0 | 54095  | RHRQPRGWEQ                    | 2.34 | 0.01 | 2.58 | 0.44 | 0.22 | 0.28 |
| 61762 | 0 | 133674 | RHRY                          | 1.60 | 0.01 | 2.25 | 1.12 | 0.22 | 1.27 |
| 61763 | 0 | 133674 | RHRY                          | 1.60 | 0.01 | 2.25 | 1.12 | 0.22 | 1.27 |
| 61764 | 0 | 368893 | RHSHDTEDEDSTKNA               | 2.70 | 0.01 | 1.61 | 0.44 | 0.85 | 1.28 |
| 61765 | 0 | 111729 | RHVGGGTPRRPGKEI               | 2.69 | 0.01 | 3.20 | 1.12 | 0.22 | 0.85 |
| 61766 | 0 | 126928 | RHVIQVSNEVVTDDDR              | 2.73 | 0.01 | 0.78 | 1.20 | 0.22 | 0.28 |
| 61767 | 0 | 126928 | RHVIQVSNEVVTDDDR              | 2.73 | 0.01 | 0.78 | 1.20 | 0.22 | 0.28 |
| 61768 | 0 | 126928 | RHVIQVSNEVVTDDDR              | 2.73 | 0.01 | 0.78 | 1.20 | 0.22 | 0.28 |
| 61769 | 0 | 126928 | RHVIQVSNEVVTDDDR              | 2.73 | 0.01 | 0.78 | 1.20 | 0.22 | 0.28 |
| 61770 | 0 | 54103  | RHVKNYHSRSESTIE               | 2.69 | 0.01 | 3.78 | 0.68 | 0.22 | 0.28 |



|       |   |        |                            |      |      |      |      |      |      |
|-------|---|--------|----------------------------|------|------|------|------|------|------|
| 61771 | 0 | 54103  | RHVKNYHSRSESTIE            | 2.69 | 0.01 | 3.78 | 1.15 | 0.22 | 0.28 |
| 61772 | 0 | 54104  | RHVLGR                     | 1.91 | 0.01 | 2.40 | 0.44 | 0.85 | 0.28 |
| 61773 | 0 | 54105  | RHVLGRLITVNP               | 2.48 | 0.01 | 2.40 | 0.44 | 0.85 | 0.28 |
| 61774 | 0 | 54105  | RHVLGRLITVNP               | 2.48 | 0.01 | 2.40 | 0.44 | 0.85 | 0.28 |
| 61775 | 0 | 54105  | RHVLGRLITVNP               | 2.48 | 0.01 | 2.40 | 0.44 | 0.85 | 0.28 |
| 61776 | 0 | 54105  | RHVLGRLITVNP               | 2.48 | 0.01 | 2.40 | 0.44 | 0.85 | 0.28 |
| 61777 | 0 | 144940 | RHVLGRLITVNPIVT            | 2.71 | 0.01 | 3.65 | 1.81 | 0.22 | 0.28 |
| 61778 | 0 | 144940 | RHVLGRLITVNPIVT            | 2.71 | 0.01 | 3.65 | 0.44 | 0.85 | 0.28 |
| 61779 | 0 | 54106  | RHVNAGSTGPIKSTI            | 2.66 | 0.01 | 3.78 | 2.02 | 0.22 | 0.28 |
| 61780 | 0 | 131036 | RHWTALGPAPHTCAD<br>LNYPLLS | 3.07 | 0.01 | 0.90 | 0.68 | 0.22 | 1.27 |
| 61781 | 0 | 131036 | RHWTALGPAPHTCAD<br>LNYPLLS | 3.07 | 0.01 | 0.90 | 0.68 | 0.22 | 1.34 |
| 61782 | 0 | 131036 | RHWTALGPAPHTCAD<br>LNYPLLS | 3.07 | 0.01 | 0.90 | 0.44 | 1.93 | 0.85 |
| 61783 | 0 | 131037 | RHWTTQGCNC                 | 2.30 | 0.01 | 1.96 | 0.68 | 0.22 | 0.85 |
| 61784 | 0 | 131037 | RHWTTQGCNC                 | 2.30 | 0.01 | 1.96 | 0.68 | 0.22 | 1.34 |
| 61785 | 0 | 136593 | RHYKQYQFHF                 | 2.35 | 0.01 | 0.90 | 0.44 | 1.93 | 2.56 |
| 61786 | 0 | 136593 | RHYKQYQFHF                 | 2.35 | 0.01 | 0.90 | 1.15 | 0.22 | 2.56 |
| 61787 | 0 | 136594 | RHYQNFQFHF                 | 2.35 | 0.01 | 0.90 | 0.44 | 1.93 | 0.85 |
| 61788 | 0 | 136595 | RHYQQYFQHF                 | 2.36 | 0.01 | 0.90 | 0.44 | 1.93 | 0.85 |
| 61789 | 0 | 136596 | RHYQYNFQHF                 | 2.35 | 0.01 | 0.90 | 0.44 | 1.93 | 2.56 |
| 61790 | 0 | 136596 | RHYQYNFQHF                 | 2.35 | 0.01 | 0.90 | 1.15 | 0.22 | 2.56 |
| 61791 | 0 | 152938 | RIAAVNPSDP                 | 2.30 | 0.01 | 2.18 | 2.16 | 0.22 | 0.28 |
| 61792 | 0 | 54118  | RIADQAQYNQ                 | 2.33 | 0.01 | 2.73 | 0.44 | 0.85 | 0.28 |
| 61793 | 0 | 54118  | RIADQAQYNQ                 | 2.33 | 0.01 | 2.73 | 0.68 | 0.22 | 0.28 |
| 61794 | 0 | 108098 | RIADTIHANNSRHIL            | 2.70 | 0.01 | 0.90 | 0.44 | 1.13 | 1.39 |
| 61795 | 0 | 54119  | RIAGINIPDHKKHAVIALTS<br>IY | 2.97 | 0.01 | 2.24 | 0.68 | 0.22 | 0.28 |
| 61796 | 0 | 118103 | RIANFKIEPPGLFRGRGN<br>HP   | 2.96 | 0.01 | 0.78 | 0.44 | 1.13 | 1.27 |
| 61797 | 0 | 173017 | RIANVFTNAFRYGHT            | 2.69 | 0.01 | 0.78 | 0.44 | 1.13 | 0.28 |
| 61798 | 0 | 54125  | RIAQPKLA                   | 2.12 | 0.01 | 3.06 | 1.12 | 0.22 | 0.28 |
| 61799 | 0 | 179426 | RIATDQELDEMLADA            | 2.70 | 0.01 | 2.36 | 0.44 | 1.23 | 1.28 |
| 61800 | 0 | 179426 | RIATDQELDEMLADA            | 2.70 | 0.01 | 2.36 | 0.44 | 1.23 | 1.27 |
| 61801 | 0 | 179426 | RIATDQELDEMLADA            | 2.70 | 0.01 | 2.36 | 0.44 | 1.23 | 1.28 |
| 61802 | 0 | 152939 | RIDKNVSPEA                 | 2.26 | 0.01 | 2.18 | 2.16 | 0.22 | 0.28 |
| 61803 | 0 | 123704 | RIEALPKIK                  | 2.23 | 0.01 | 2.28 | 2.00 | 0.22 | 0.28 |
| 61804 | 0 | 123705 | RIEDLPKIK                  | 2.23 | 0.01 | 2.28 | 2.00 | 0.22 | 0.28 |
| 61805 | 0 | 123705 | RIEDLPKIK                  | 2.23 | 0.01 | 2.28 | 2.00 | 0.22 | 0.28 |
| 61806 | 0 | 144763 | RIEDPPFNSSL                | 2.35 | 0.01 | 2.48 | 0.44 | 0.85 | 0.28 |
| 61807 | 0 | 144763 | RIEDPPFNSSL                | 2.35 | 0.01 | 2.48 | 0.44 | 0.85 | 0.28 |
| 61808 | 0 | 144763 | RIEDPPFNSSL                | 2.35 | 0.01 | 2.48 | 0.68 | 0.22 | 0.28 |
| 61809 | 0 | 144763 | RIEDPPFNSSL                | 2.35 | 0.01 | 2.48 | 0.68 | 0.22 | 1.48 |
| 61810 | 0 | 368992 | RIEEADDDDDDDDDDD           | 2.71 | 0.01 | 1.61 | 0.44 | 0.85 | 1.28 |
| 61811 | 0 | 54140  | RIEGGEIL                   | 2.15 | 0.01 | 2.40 | 2.43 | 0.22 | 0.28 |
| 61812 | 0 | 167811 | RIEGGEILL                  | 2.23 | 0.01 | 2.40 | 2.43 | 0.22 | 0.28 |

|       |   |        |                            |      |      |      |      |      |      |
|-------|---|--------|----------------------------|------|------|------|------|------|------|
| 61813 | 0 | 368998 | RIEIDFREERIKELE            | 2.73 | 0.01 | 1.61 | 0.44 | 0.85 | 1.28 |
| 61814 | 0 | 125236 | RIEKDTRDRDNFMSAEEA<br>Q    | 2.83 | 0.01 | 3.10 | 0.44 | 2.39 | 0.28 |
| 61815 | 0 | 125236 | RIEKDTRDRDNFMSAEEA<br>Q    | 2.83 | 0.01 | 3.10 | 0.44 | 2.39 | 1.27 |
| 61816 | 0 | 54145  | RIESEGGYIETWNPN            | 2.67 | 0.01 | 2.16 | 0.44 | 1.23 | 0.85 |
| 61817 | 0 | 141740 | RIEWNGMSNYNKIYR            | 2.75 | 0.01 | 2.86 | 2.55 | 0.22 | 0.28 |
| 61818 | 0 | 103550 | RIFYKDAFAKHQELF            | 2.66 | 0.01 | 2.04 | 0.44 | 0.85 | 1.28 |
| 61819 | 0 | 54157  | RIGYFGHQ                   | 2.12 | 0.01 | 2.04 | 0.44 | 0.85 | 0.28 |
| 61820 | 0 | 54157  | RIGYFGHQ                   | 2.12 | 0.01 | 2.04 | 0.44 | 0.85 | 0.28 |
| 61821 | 0 | 54157  | RIGYFGHQ                   | 2.12 | 0.01 | 2.04 | 0.44 | 0.85 | 0.28 |
| 61822 | 0 | 54158  | RIHDFRYSQLAKLGINPY<br>TH   | 2.90 | 0.01 | 2.75 | 0.44 | 0.85 | 0.85 |
| 61823 | 0 | 117071 | RIHMOVYKRSKGKPRGYA<br>FIEY | 2.99 | 3.63 | 0.78 | 0.44 | 1.13 | 1.75 |
| 61824 | 0 | 117359 | RIHMOVYKRSKGKPRGYA<br>FIEY | 2.99 | 4.03 | 1.75 | 0.68 | 0.22 | 1.27 |
| 61825 | 0 | 117071 | RIHMOVYKRSKGKPRGYA<br>FIEY | 2.99 | 3.63 | 1.75 | 0.68 | 0.22 | 1.27 |
| 61826 | 0 | 117071 | RIHMOVYKRSKGKPRGYA<br>FIEY | 2.99 | 3.63 | 1.75 | 3.05 | 1.13 | 0.28 |
| 61827 | 0 | 117071 | RIHMOVYKRSKGKPRGYA<br>FIEY | 2.99 | 3.63 | 0.78 | 0.44 | 1.13 | 0.28 |
| 61828 | 0 | 117071 | RIHMOVYKRSKGKPRGYA<br>FIEY | 2.99 | 3.63 | 0.78 | 0.44 | 1.13 | 0.28 |
| 61829 | 0 | 117360 | RIHMOVYKRSKGKPRGYA<br>FIEY | 2.99 | 0.01 | 1.75 | 0.68 | 0.22 | 1.27 |
| 61830 | 0 | 117360 | RIHMOVYKRSKGKPRGYA<br>FIEY | 2.99 | 0.01 | 1.75 | 0.68 | 0.22 | 1.27 |
| 61831 | 0 | 117360 | RIHMOVYKRSKGKPRGYA<br>FIEY | 2.99 | 0.01 | 1.75 | 0.68 | 0.22 | 1.27 |
| 61832 | 0 | 117360 | RIHMOVYKRSKGKPRGYA<br>FIEY | 2.99 | 0.01 | 1.75 | 3.05 | 1.41 | 0.28 |
| 61833 | 0 | 117360 | RIHMOVYKRSKGKPRGYA<br>FIEY | 2.99 | 0.01 | 1.75 | 3.05 | 1.13 | 0.28 |
| 61834 | 0 | 117360 | RIHMOVYKRSKGKPRGYA<br>FIEY | 2.99 | 0.01 | 1.75 | 2.84 | 1.13 | 0.28 |
| 61835 | 0 | 451025 | RIHVNHS                    | 2.02 | 0.01 | 0.90 | 0.44 | 1.41 | 1.39 |
| 61836 | 0 | 439961 | RIIASY                     | 1.89 | 0.01 | 0.78 | 1.20 | 0.22 | 0.85 |
| 61837 | 0 | 510476 | RIILRVLLRCIR               | 2.53 | 0.01 | 0.90 | 3.07 | 1.13 | 1.39 |
| 61838 | 0 | 179427 | RIISMQMGGDLGQVF            | 2.67 | 0.01 | 2.36 | 0.44 | 1.23 | 1.28 |
| 61839 | 0 | 179427 | RIISMQMGGDLGQVF            | 2.67 | 0.01 | 2.36 | 0.44 | 1.23 | 1.27 |
| 61840 | 0 | 134510 | RIIWRSTQ                   | 2.14 | 0.01 | 0.78 | 0.44 | 1.13 | 0.28 |
| 61841 | 0 | 134510 | RIIWRSTQ                   | 2.14 | 0.01 | 0.78 | 0.44 | 1.13 | 0.28 |
| 61842 | 0 | 95142  | RIKNTDGSIS                 | 2.31 | 0.01 | 2.56 | 0.68 | 0.22 | 1.27 |
| 61843 | 0 | 95142  | RIKNTDGSIS                 | 2.31 | 0.01 | 2.56 | 0.68 | 0.22 | 1.27 |

|       |   |        |                                    |      |      |      |      |      |      |
|-------|---|--------|------------------------------------|------|------|------|------|------|------|
| 61844 | 0 | 95142  | RIKNTDGSIS                         | 2.31 | 0.01 | 2.56 | 1.12 | 0.22 | 0.28 |
| 61845 | 0 | 95142  | RIKNTDGSIS                         | 2.31 | 0.01 | 2.56 | 1.12 | 0.22 | 1.34 |
| 61846 | 0 | 54180  | RILAGALATYQ                        | 2.41 | 0.01 | 2.14 | 0.68 | 0.22 | 0.28 |
| 61847 | 0 | 54181  | RILASYQEGVLKLSI                    | 2.66 | 0.01 | 2.59 | 0.44 | 0.85 | 0.28 |
| 61848 | 0 | 54181  | RILASYQEGVLKLSI                    | 2.66 | 0.01 | 2.59 | 0.44 | 0.85 | 0.28 |
|       |   |        | RILELDQFKGQQGQKRF                  |      |      |      |      |      |      |
| 61849 | 0 | 118104 | QDMMGHGSDYSLSEVL<br>W              | 3.46 | 0.01 | 0.78 | 0.44 | 1.13 | 0.85 |
|       |   |        | RILGRVIPKVAKKLGPKV                 |      |      |      |      |      |      |
| 61850 | 0 | 54185  | AKVLPKVMKEAIPMAVE<br>MAKSQEEQQPQ   | 3.80 | 0.01 | 4.63 | 0.44 | 1.23 | 2.35 |
| 61851 | 0 | 54190  | RILLLFKPPK                         | 2.33 | 0.01 | 0.78 | 0.44 | 1.74 | 0.28 |
| 61852 | 0 | 369092 | RILPDLPGGRAGRIF                    | 2.72 | 0.01 | 1.61 | 0.44 | 0.85 | 1.28 |
| 61853 | 0 | 106076 | RILSPDRKRRQQYER                    | 2.68 | 0.01 | 2.16 | 0.44 | 1.23 | 0.85 |
| 61854 | 0 | 106076 | RILSPDRKRRQQYER                    | 2.68 | 0.01 | 2.16 | 0.44 | 1.23 | 1.27 |
| 61855 | 0 | 131630 | RILTISS                            | 2.00 | 0.01 | 0.78 | 1.15 | 0.22 | 0.28 |
| 61856 | 0 | 131630 | RILTISS                            | 2.00 | 0.01 | 0.78 | 1.15 | 0.22 | 0.28 |
| 61857 | 0 | 103551 | RILTLPRSNPS                        | 2.43 | 0.01 | 0.78 | 1.12 | 0.22 | 2.35 |
| 61858 | 0 | 103551 | RILTLPRSNPS                        | 2.43 | 0.01 | 0.78 | 1.12 | 0.22 | 0.85 |
| 61859 | 0 | 123707 | RIMHHMPG                           | 2.13 | 0.01 | 0.78 | 1.20 | 0.22 | 0.28 |
| 61860 | 0 | 54197  | RIMKVEFTQCSMNVS<br>KTLF            | 2.92 | 0.01 | 2.82 | 0.44 | 0.85 | 0.28 |
| 61861 | 0 | 54197  | RIMKVEFTQCSMNVS<br>KTLF            | 2.92 | 0.01 | 2.82 | 0.44 | 1.41 | 0.28 |
| 61862 | 0 | 151715 | RIMNVIGEPIDERGPIKT                 | 2.86 | 3.67 | 1.75 | 2.46 | 0.22 | 0.85 |
| 61863 | 0 | 115943 | RINKKIEKFQ                         | 2.33 | 0.01 | 1.60 | 0.44 | 1.23 | 0.85 |
| 61864 | 0 | 115943 | RINKKIEKFQ                         | 2.33 | 0.01 | 1.60 | 0.44 | 1.23 | 0.85 |
| 61865 | 0 | 115943 | RINKKIEKFQ                         | 2.33 | 0.01 | 1.60 | 0.44 | 2.98 | 0.85 |
| 61866 | 0 | 78259  | RINKKIEKFQSEEQQQTE<br>DELQDKIH     | 3.21 | 0.01 | 1.60 | 0.44 | 1.23 | 1.28 |
| 61867 | 0 | 54206  | RIPADVIDAFHAAT                     | 2.62 | 0.01 | 2.59 | 0.44 | 0.85 | 0.28 |
| 61868 | 0 | 54214  | RIPNKKPGKKT                        | 2.48 | 0.01 | 2.38 | 0.68 | 0.22 | 0.28 |
| 61869 | 0 | 54214  | RIPNKKPGKKT                        | 2.48 | 0.01 | 2.38 | 0.68 | 0.22 | 0.28 |
| 61870 | 0 | 54214  | RIPNKKPGKKT                        | 2.48 | 0.01 | 2.38 | 0.44 | 1.59 | 0.28 |
| 61871 | 0 | 54214  | RIPNKKPGKKT                        | 2.48 | 0.01 | 2.38 | 0.44 | 1.74 | 0.28 |
| 61872 | 0 | 54214  | RIPNKKPGKKT                        | 2.48 | 0.01 | 2.38 | 0.44 | 1.74 | 0.28 |
| 61873 | 0 | 54216  | RIPPENIRRV                         | 2.42 | 0.01 | 2.14 | 0.44 | 0.22 | 0.28 |
| 61874 | 0 | 98985  | RIPSGFISYILNRHD                    | 2.67 | 0.01 | 2.16 | 0.44 | 1.23 | 1.48 |
| 61875 | 0 | 227512 | RIPVSDIFCDIENNP                    | 2.67 | 0.01 | 2.97 | 0.44 | 1.59 | 0.28 |
| 61876 | 0 | 227512 | RIPVSDIFCDIENNP                    | 2.67 | 0.01 | 2.97 | 0.44 | 0.85 | 0.28 |
| 61877 | 0 | 132043 | RIQDLEKYVEDTKIDLWS<br>YNAELLVALENQ | 3.34 | 0.01 | 3.78 | 0.68 | 0.22 | 0.85 |
| 61878 | 0 | 132043 | RIQDLEKYVEDTKIDLWS<br>YNAELLVALENQ | 3.34 | 0.01 | 3.78 | 0.68 | 0.22 | 0.28 |

|       |   |        |                                     |      |      |      |      |      |      |
|-------|---|--------|-------------------------------------|------|------|------|------|------|------|
| 61879 | 0 | 132043 | RIQDLEKYVEDTKIDLWS<br>YNAELLVALENQ  | 3.34 | 0.01 | 3.78 | 0.68 | 0.22 | 0.28 |
| 61880 | 0 | 132043 | RIQDLEKYVEDTKIDLWS<br>YNAELLVALENQ  | 3.34 | 0.01 | 3.78 | 0.68 | 0.22 | 1.34 |
| 61881 | 0 | 132043 | RIQDLEKYVEDTKIDLWS<br>YNAELLVALENQ  | 3.34 | 0.01 | 3.78 | 0.68 | 0.22 | 1.34 |
| 61882 | 0 | 132043 | RIQDLEKYVEDTKIDLWS<br>YNAELLVALENQ  | 3.34 | 0.01 | 3.78 | 0.68 | 0.22 | 1.75 |
| 61883 | 0 | 132043 | RIQDLEKYVEDTKIDLWS<br>YNAELLVALENQ  | 3.34 | 0.01 | 3.78 | 0.68 | 0.22 | 0.85 |
| 61884 | 0 | 189148 | RIQDLEKYVEDTKIDLWS<br>YNAELLVALENQH | 3.37 | 0.01 | 3.78 | 0.68 | 0.22 | 0.28 |
| 61885 | 0 | 189148 | RIQDLEKYVEDTKIDLWS<br>YNAELLVALENQH | 3.37 | 0.01 | 3.78 | 0.68 | 0.22 | 0.28 |
| 61886 | 0 | 54224  | RIQLLEEDLER                         | 2.45 | 0.01 | 3.15 | 0.44 | 1.23 | 0.85 |
| 61887 | 0 | 54225  | RIQLLEEDLERSEER                     | 2.73 | 0.01 | 3.15 | 0.44 | 1.23 | 0.85 |
| 61888 | 0 | 54225  | RIQLLEEDLERSEER                     | 2.73 | 0.01 | 2.36 | 0.44 | 1.23 | 1.28 |
| 61889 | 0 | 54225  | RIQLLEEDLERSEER                     | 2.73 | 0.01 | 2.36 | 0.44 | 1.23 | 1.27 |
| 61890 | 0 | 54225  | RIQLLEEDLERSEER                     | 2.73 | 0.01 | 2.36 | 0.44 | 1.23 | 1.28 |
| 61891 | 0 | 54225  | RIQLLEEDLERSEER                     | 2.73 | 0.01 | 2.36 | 0.44 | 1.23 | 1.27 |
| 61892 | 0 | 54229  | RIQRGSGRAFTIGK                      | 2.69 | 0.01 | 2.54 | 0.68 | 0.22 | 2.12 |
| 61893 | 0 | 54229  | RIQRGSGRAFTIGK                      | 2.69 | 0.01 | 2.54 | 0.68 | 0.22 | 2.12 |
| 61894 | 0 | 79059  | RIQSTWRQKTVDLPAGT<br>KYV            | 2.92 | 0.01 | 2.84 | 0.44 | 0.85 | 0.28 |
| 61895 | 0 | 122554 | RIQYQAISTVSL                        | 2.48 | 0.01 | 0.90 | 0.44 | 1.13 | 0.28 |
| 61896 | 0 | 54232  | RIRADFNASMDLL                       | 2.54 | 0.01 | 2.69 | 0.44 | 0.85 | 0.28 |
| 61897 | 0 | 54232  | RIRADFNASMDLL                       | 2.54 | 0.01 | 2.69 | 0.44 | 1.41 | 0.28 |
| 61898 | 0 | 54233  | RIREFMEKECPFIK                      | 2.65 | 0.01 | 2.56 | 2.69 | 0.22 | 0.28 |
| 61899 | 0 | 54233  | RIREFMEKECPFIK                      | 2.65 | 0.01 | 2.56 | 1.12 | 0.22 | 0.28 |
| 61900 | 0 | 54237  | RIRFKDDTSF                          | 2.33 | 4.23 | 2.56 | 0.44 | 0.85 | 0.28 |
| 61901 | 0 | 54238  | RIRFKDDTSF                          | 2.33 | 0.01 | 2.56 | 0.68 | 0.22 | 0.28 |
| 61902 | 0 | 54240  | RIRKDYNSTIDLL                       | 2.54 | 0.01 | 2.69 | 0.44 | 1.41 | 0.28 |
| 61903 | 0 | 143032 | RIRKVKVEFWPCSPI                     | 2.69 | 0.01 | 3.06 | 2.13 | 0.22 | 0.28 |
| 61904 | 0 | 129761 | RIRRSILPYGDSMDRI                    | 2.77 | 0.01 | 0.78 | 0.44 | 1.13 | 0.85 |
| 61905 | 0 | 134511 | RIRRSILPYGDSMDRIEK                  | 2.85 | 0.01 | 0.78 | 2.49 | 1.13 | 0.28 |
| 61906 | 0 | 54291  | RISNLND                             | 2.02 | 0.01 | 2.14 | 0.44 | 0.85 | 0.28 |
| 61907 | 0 | 121795 | RISPGKNATGMEVGWY<br>RS              | 2.80 | 0.01 | 2.19 | 4.33 | 0.22 | 0.28 |
| 61908 | 0 | 225507 | RISPGKNATGMEVGWY<br>RSPFSRV         | 3.05 | 0.01 | 1.75 | 1.81 | 0.22 | 0.28 |
| 61909 | 0 | 54293  | RISSKKSGA                           | 2.25 | 0.01 | 3.28 | 0.44 | 1.23 | 0.85 |
| 61910 | 0 | 54295  | RITFFQKDCN                          | 2.28 | 4.33 | 2.70 | 0.44 | 0.85 | 0.28 |
| 61911 | 0 | 54296  | RITFGGPTDSTDNNQNG<br>GR             | 2.92 | 0.01 | 2.91 | 0.44 | 0.85 | 0.28 |
| 61912 | 0 | 135495 | RITLYL                              | 1.90 | 0.01 | 0.78 | 1.12 | 0.22 | 0.28 |
| 61913 | 0 | 135495 | RITLYL                              | 1.90 | 0.01 | 0.78 | 1.12 | 0.22 | 0.28 |

|       |   |        |                              |      |      |      |      |      |      |
|-------|---|--------|------------------------------|------|------|------|------|------|------|
| 61914 | 0 | 122555 | RITNRDPRISSGSL               | 2.70 | 0.01 | 0.90 | 1.15 | 0.22 | 1.39 |
| 61915 | 0 | 54299  | RITQTTNRAA                   | 2.33 | 0.01 | 0.78 | 0.44 | 1.41 | 1.27 |
| 61916 | 0 | 54302  | RITYLTETKI                   | 2.33 | 0.01 | 2.66 | 0.68 | 0.22 | 0.28 |
| 61917 | 0 | 156437 | RIVFGASASDQPTQYEEE<br>MTDYQ  | 3.05 | 0.01 | 3.44 | 0.44 | 0.85 | 0.28 |
| 61918 | 0 | 156437 | RIVFGASASDQPTQYEEE<br>MTDYQ  | 3.05 | 0.01 | 3.44 | 0.44 | 1.59 | 0.28 |
| 61919 | 0 | 54304  | RIVGPKTCSNTWHG               | 2.57 | 0.01 | 1.96 | 0.44 | 1.41 | 0.28 |
| 61920 | 0 | 97605  | RIVRGPANLRNLKEFKE            | 2.80 | 0.01 | 2.22 | 0.44 | 1.59 | 0.28 |
| 61921 | 0 | 97605  | RIVRGPANLRNLKEFKE            | 2.80 | 0.01 | 2.22 | 1.12 | 0.22 | 0.28 |
| 61922 | 0 | 97605  | RIVRGPANLRNLKEFKE            | 2.80 | 0.01 | 2.22 | 1.12 | 0.22 | 2.12 |
| 61923 | 0 | 97605  | RIVRGPANLRNLKEFKE            | 2.80 | 0.01 | 2.22 | 1.12 | 0.22 | 0.28 |
| 61924 | 0 | 78260  | RIVSIT                       | 1.90 | 0.01 | 0.90 | 2.02 | 1.59 | 1.39 |
| 61925 | 0 | 369244 | RIYDREFDYEDDYE               | 2.75 | 0.01 | 1.61 | 0.44 | 0.85 | 1.28 |
| 61926 | 0 | 133676 | RIYMRMKHVR                   | 2.34 | 0.01 | 2.60 | 0.68 | 0.22 | 1.34 |
| 61927 | 0 | 133676 | RIYMRMKHVR                   | 2.34 | 0.01 | 2.60 | 0.68 | 0.22 | 0.28 |
| 61928 | 0 | 133676 | RIYMRMKHVR                   | 2.34 | 0.01 | 2.60 | 0.68 | 0.22 | 0.28 |
| 61929 | 0 | 133676 | RIYMRMKHVR                   | 2.34 | 0.01 | 2.60 | 0.68 | 0.22 | 0.28 |
| 61930 | 0 | 133676 | RIYMRMKHVR                   | 2.34 | 0.01 | 2.60 | 0.68 | 0.22 | 1.75 |
| 61931 | 0 | 159063 | RKAADTFNFKTFFHT              | 2.70 | 0.01 | 3.26 | 0.44 | 1.23 | 0.28 |
| 61932 | 0 | 159063 | RKAADTFNFKTFFHT              | 2.70 | 0.01 | 3.26 | 0.44 | 1.41 | 0.28 |
| 61933 | 0 | 369253 | RKAAEATKIAEAEKR              | 2.74 | 0.01 | 1.61 | 0.44 | 0.85 | 1.28 |
| 61934 | 0 | 369254 | RKAAEATKVAAEAKQ              | 2.73 | 0.01 | 1.61 | 0.44 | 0.85 | 1.28 |
| 61935 | 0 | 369255 | RKAAEATKVAAEAKR              | 2.74 | 0.01 | 1.61 | 0.44 | 0.85 | 1.28 |
| 61936 | 0 | 80002  | RKADLEKALEGAM                | 2.57 | 0.01 | 3.70 | 1.20 | 0.22 | 0.28 |
| 61937 | 0 | 80002  | RKADLEKALEGAM                | 2.57 | 0.01 | 3.70 | 1.20 | 0.22 | 1.34 |
| 61938 | 0 | 80002  | RKADLEKALEGAM                | 2.57 | 0.01 | 3.70 | 1.20 | 0.22 | 1.34 |
| 61939 | 0 | 80002  | RKADLEKALEGAM                | 2.57 | 0.01 | 3.70 | 1.20 | 0.22 | 1.27 |
| 61940 | 0 | 80002  | RKADLEKALEGAM                | 2.57 | 0.01 | 3.70 | 1.20 | 0.22 | 1.75 |
| 61941 | 0 | 80002  | RKADLEKALEGAM                | 2.57 | 0.01 | 3.70 | 1.20 | 0.22 | 1.27 |
| 61942 | 0 | 80002  | RKADLEKALEGAM                | 2.57 | 0.01 | 3.70 | 1.20 | 0.22 | 1.27 |
| 61943 | 0 | 182000 | RKADQENPKVSTWPIEG<br>TWNTQDT | 3.11 | 0.01 | 3.85 | 2.13 | 1.74 | 0.28 |
| 61944 | 0 | 132608 | RKAGICFGDSGGPLI              | 2.65 | 0.01 | 0.78 | 0.44 | 1.13 | 0.28 |
| 61945 | 0 | 108610 | RKALRLSAS                    | 2.27 | 0.01 | 0.90 | 0.44 | 1.13 | 1.39 |
| 61946 | 0 | 111733 | RKATPTTSSTSTAK               | 2.73 | 0.01 | 1.86 | 0.68 | 0.22 | 0.28 |
| 61947 | 0 | 181445 | RKCELFTYMRFDAEF              | 2.67 | 0.01 | 2.82 | 1.15 | 0.22 | 0.28 |
| 61948 | 0 | 167388 | RKDNRAVQKLRRVEKA<br>KRA      | 2.99 | 3.24 | 0.78 | 0.44 | 1.13 | 0.28 |
| 61949 | 0 | 167389 | RKDNRAVQKLRRVEKA<br>KRA      | 2.99 | 0.01 | 0.78 | 0.44 | 1.13 | 0.28 |
| 61950 | 0 | 54335  | RKDRVEDA                     | 2.15 | 0.01 | 2.99 | 0.44 | 0.85 | 0.28 |
| 61951 | 0 | 96823  | RKEEEEAEDK                   | 2.35 | 0.01 | 0.78 | 0.44 | 1.93 | 0.85 |

|       |   |        |                          |      |      |      |      |      |      |
|-------|---|--------|--------------------------|------|------|------|------|------|------|
| 61952 | 0 | 54340  | RKEVMK                   | 1.90 | 0.01 | 1.86 | 0.44 | 1.23 | 0.28 |
| 61953 | 0 | 78261  | RKFLAA                   | 1.86 | 0.01 | 0.90 | 2.02 | 1.59 | 1.39 |
| 61954 | 0 | 54345  | RKFNDSVVQSDMKHW<br>PFKVT | 2.93 | 0.01 | 2.78 | 0.44 | 0.85 | 0.28 |
| 61955 | 0 | 54346  | RKFPPALPIWARPDYNP<br>PLL | 2.94 | 0.01 | 1.72 | 0.44 | 0.85 | 0.28 |
| 61956 | 0 | 118105 | RKGHFLLSSKSGFWTIW<br>L   | 2.86 | 0.01 | 0.78 | 0.44 | 1.13 | 0.28 |
| 61957 | 0 | 118105 | RKGHFLLSSKSGFWTIW<br>L   | 2.86 | 0.01 | 0.78 | 0.44 | 1.13 | 0.28 |
| 61958 | 0 | 118105 | RKGHFLLSSKSGFWTIW<br>L   | 2.86 | 0.01 | 0.78 | 0.44 | 1.13 | 0.28 |
| 61959 | 0 | 118105 | RKGHFLLSSKSGFWTIW<br>L   | 2.86 | 0.01 | 0.78 | 0.44 | 1.41 | 0.28 |
| 61960 | 0 | 118105 | RKGHFLLSSKSGFWTIW<br>L   | 2.86 | 0.01 | 0.78 | 0.68 | 0.22 | 1.27 |
| 61961 | 0 | 118105 | RKGHFLLSSKSGFWTIW<br>L   | 2.86 | 0.01 | 0.78 | 0.44 | 1.13 | 0.28 |
| 61962 | 0 | 118105 | RKGHFLLSSKSGFWTIW<br>L   | 2.86 | 0.01 | 0.78 | 0.44 | 1.13 | 0.28 |
| 61963 | 0 | 118105 | RKGHFLLSSKSGFWTIW<br>L   | 2.86 | 0.01 | 0.78 | 0.44 | 1.13 | 0.28 |
| 61964 | 0 | 118105 | RKGHFLLSSKSGFWTIW<br>L   | 2.86 | 0.01 | 0.78 | 0.44 | 1.13 | 0.28 |
| 61965 | 0 | 118105 | RKGHFLLSSKSGFWTIW<br>L   | 2.86 | 0.01 | 0.78 | 0.44 | 1.13 | 0.28 |
| 61966 | 0 | 118105 | RKGHFLLSSKSGFWTIW<br>L   | 2.86 | 0.01 | 0.78 | 0.44 | 1.13 | 0.28 |
| 61967 | 0 | 118105 | RKGHFLLSSKSGFWTIW<br>L   | 2.86 | 0.01 | 0.78 | 0.44 | 1.13 | 1.27 |
| 61968 | 0 | 118105 | RKGHFLLSSKSGFWTIW<br>L   | 2.86 | 0.01 | 0.78 | 1.12 | 0.22 | 0.85 |
| 61969 | 0 | 54348  | RKGRGGANPVFRPTGG<br>TEVF | 2.97 | 0.01 | 4.63 | 1.15 | 0.22 | 0.85 |
| 61970 | 0 | 54348  | RKGRGGANPVFRPTGG<br>TEVF | 2.97 | 0.01 | 4.63 | 1.15 | 0.22 | 0.28 |
| 61971 | 0 | 439988 | RKGYRQRLELSD             | 2.48 | 0.01 | 0.78 | 1.15 | 0.22 | 0.85 |
| 61972 | 0 | 54352  | RKHKIMLTNRMH             | 2.50 | 0.01 | 0.90 | 1.20 | 0.22 | 1.39 |
| 61973 | 0 | 194871 | RKHPEATYTK               | 2.31 | 0.01 | 1.72 | 2.88 | 2.26 | 0.28 |
| 61974 | 0 | 226504 | RKIAEFIQNQWKKNLNI<br>NVQ | 2.95 | 0.01 | 2.97 | 0.44 | 0.85 | 0.28 |
| 61975 | 0 | 131038 | RKIAKDEGAK               | 2.33 | 0.01 | 0.78 | 0.44 | 1.41 | 0.85 |
| 61976 | 0 | 153693 | RKIFIDTIPN               | 2.31 | 0.01 | 2.26 | 0.68 | 0.22 | 2.02 |
| 61977 | 0 | 153693 | RKIFIDTIPN               | 2.31 | 0.01 | 2.26 | 0.68 | 0.22 | 0.28 |
| 61978 | 0 | 152943 | RKILSGYIVE               | 2.29 | 0.01 | 2.18 | 2.16 | 0.22 | 0.28 |
| 61979 | 0 | 120172 | RKIPKRPGSVHRTPSRQ        | 2.82 | 0.01 | 2.19 | 1.20 | 0.22 | 1.57 |

|       |   |        |                                                                                                     |      |      |      |      |      |      |
|-------|---|--------|-----------------------------------------------------------------------------------------------------|------|------|------|------|------|------|
| 61980 | 0 | 120172 | RKIPKRPGSVHRTPSRQ                                                                                   | 2.82 | 0.01 | 2.19 | 1.20 | 0.22 | 2.02 |
| 61981 | 0 | 120172 | RKIPKRPGSVHRTPSRQ                                                                                   | 2.82 | 0.01 | 2.19 | 1.20 | 0.22 | 1.27 |
| 61982 | 0 | 98986  | RKIRPEGREGGEQEWG                                                                                    | 2.72 | 0.01 | 2.16 | 0.44 | 1.23 | 0.85 |
| 61983 | 0 | 98986  | RKIRPEGREGGEQEWG                                                                                    | 2.72 | 0.01 | 2.16 | 0.44 | 1.23 | 1.48 |
| 61984 | 0 | 236123 | RKIVGAMVQIITY                                                                                       | 2.52 | 0.01 | 0.78 | 0.44 | 1.13 | 0.28 |
| 61985 | 0 | 236123 | RKIVGAMVQIITY                                                                                       | 2.52 | 0.01 | 0.78 | 0.44 | 1.13 | 1.34 |
| 61986 | 0 | 236123 | RKIVGAMVQIITY                                                                                       | 2.52 | 0.01 | 0.78 | 3.41 | 0.22 | 0.28 |
| 61987 | 0 | 54369  | RKKEMLED                                                                                            | 2.13 | 0.01 | 2.99 | 0.44 | 0.85 | 0.28 |
|       |   |        | RKKGGWFGKHRGQGG<br>SNPKFENIAEGLRALLAR<br>SHVERTTDEGTWVAGV<br>FVYGGSKTSLYNLRRGT                      |      |      |      |      |      |      |
| 61988 | 0 | 136599 | ALAIPQCRLTPLSRLPFG<br>MAPGPGPQPGPLRESIV<br>CYFMVFLQTHIFAEVLK<br>DAIKDLVMTKPAPTCNI<br>RVTVCSFDDGVDLP | 4.97 | 0.01 | 2.43 | 0.44 | 1.74 | 0.28 |
|       |   |        | RKKGGWFGKHRGQGG<br>SNPKFENIAEGLRALLAR<br>SHVERTTDEGTWVAGV<br>FVYGGSKTSLYNLRRGT                      |      |      |      |      |      |      |
| 61989 | 0 | 136599 | ALAIPQCRLTPLSRLPFG<br>MAPGPGPQPGPLRESIV<br>CYFMVFLQTHIFAEVLK<br>DAIKDLVMTKPAPTCNI<br>RVTVCSFDDGVDLP | 4.97 | 0.01 | 2.43 | 0.44 | 1.74 | 0.28 |
| 61990 | 0 | 119515 | RKKKPPGLA                                                                                           | 2.23 | 0.01 | 0.90 | 0.44 | 1.13 | 0.28 |
| 61991 | 0 | 129769 | RKKMDIPA                                                                                            | 2.11 | 0.01 | 0.78 | 0.44 | 1.13 | 0.28 |
| 61992 | 0 | 54375  | RKKMDTKPTD                                                                                          | 2.35 | 4.23 | 2.56 | 0.44 | 0.85 | 0.28 |
| 61993 | 0 | 54378  | RKKMKEALENQAEATKA<br>II                                                                             | 2.91 | 0.01 | 2.08 | 0.44 | 0.22 | 1.57 |
| 61994 | 0 | 163243 | RKKRGLFGAIAGFIE                                                                                     | 2.71 | 0.01 | 2.77 | 0.44 | 1.59 | 0.28 |
| 61995 | 0 | 163243 | RKKRGLFGAIAGFIE                                                                                     | 2.71 | 0.01 | 2.77 | 0.44 | 1.59 | 1.75 |
| 61996 | 0 | 163243 | RKKRGLFGAIAGFIE                                                                                     | 2.71 | 0.01 | 2.77 | 0.44 | 1.59 | 1.75 |
| 61997 | 0 | 163243 | RKKRGLFGAIAGFIE                                                                                     | 2.71 | 0.01 | 2.77 | 0.44 | 1.59 | 2.12 |
| 61998 | 0 | 163243 | RKKRGLFGAIAGFIE                                                                                     | 2.71 | 0.01 | 2.77 | 0.44 | 1.59 | 0.28 |
| 61999 | 0 | 163243 | RKKRGLFGAIAGFIE                                                                                     | 2.71 | 0.01 | 2.77 | 0.44 | 1.59 | 0.28 |
| 62000 | 0 | 163243 | RKKRGLFGAIAGFIE                                                                                     | 2.71 | 0.01 | 2.77 | 0.44 | 1.59 | 0.28 |
| 62001 | 0 | 163243 | RKKRGLFGAIAGFIE                                                                                     | 2.71 | 0.01 | 2.77 | 0.44 | 1.59 | 0.28 |
| 62002 | 0 | 163243 | RKKRGLFGAIAGFIE                                                                                     | 2.71 | 0.01 | 2.77 | 0.44 | 1.59 | 0.28 |
| 62003 | 0 | 163243 | RKKRGLFGAIAGFIE                                                                                     | 2.71 | 0.01 | 2.77 | 0.44 | 1.59 | 0.28 |
| 62004 | 0 | 163243 | RKKRGLFGAIAGFIE                                                                                     | 2.71 | 0.01 | 2.77 | 0.44 | 1.59 | 0.28 |
| 62005 | 0 | 163243 | RKKRGLFGAIAGFIE                                                                                     | 2.71 | 0.01 | 2.77 | 0.44 | 1.59 | 0.28 |

|       |   |        |                        |      |      |      |      |      |      |
|-------|---|--------|------------------------|------|------|------|------|------|------|
| 62006 | 0 | 163243 | RKKRGLFGAIAGFIE        | 2.71 | 0.01 | 2.77 | 0.44 | 1.59 | 0.28 |
| 62007 | 0 | 163243 | RKKRGLFGAIAGFIE        | 2.71 | 0.01 | 2.77 | 0.44 | 1.59 | 0.28 |
| 62008 | 0 | 163243 | RKKRGLFGAIAGFIE        | 2.71 | 0.01 | 2.77 | 0.44 | 1.59 | 0.28 |
| 62009 | 0 | 163243 | RKKRGLFGAIAGFIE        | 2.71 | 0.01 | 2.77 | 0.44 | 1.59 | 0.28 |
| 62010 | 0 | 163243 | RKKRGLFGAIAGFIE        | 2.71 | 0.01 | 2.77 | 0.44 | 1.59 | 0.28 |
| 62011 | 0 | 163243 | RKKRGLFGAIAGFIE        | 2.71 | 0.01 | 2.77 | 0.44 | 1.59 | 0.28 |
| 62012 | 0 | 163243 | RKKRGLFGAIAGFIE        | 2.71 | 0.01 | 2.77 | 0.44 | 1.59 | 0.28 |
| 62013 | 0 | 163243 | RKKRGLFGAIAGFIE        | 2.71 | 0.01 | 2.77 | 0.44 | 1.59 | 0.28 |
| 62014 | 0 | 163243 | RKKRGLFGAIAGFIE        | 2.71 | 0.01 | 2.77 | 0.44 | 1.59 | 2.12 |
| 62015 | 0 | 163243 | RKKRGLFGAIAGFIE        | 2.71 | 0.01 | 2.77 | 0.44 | 1.59 | 2.12 |
| 62016 | 0 | 163243 | RKKRGLFGAIAGFIE        | 2.71 | 0.01 | 2.77 | 0.44 | 1.59 | 2.12 |
| 62017 | 0 | 163243 | RKKRGLFGAIAGFIE        | 2.71 | 0.01 | 2.77 | 0.44 | 1.59 | 2.12 |
| 62018 | 0 | 163243 | RKKRGLFGAIAGFIE        | 2.71 | 0.01 | 2.77 | 0.44 | 1.59 | 2.12 |
| 62019 | 0 | 163243 | RKKRGLFGAIAGFIE        | 2.71 | 0.01 | 2.77 | 0.44 | 1.59 | 2.12 |
| 62020 | 0 | 163243 | RKKRGLFGAIAGFIE        | 2.71 | 0.01 | 2.77 | 0.44 | 1.59 | 2.12 |
| 62021 | 0 | 163243 | RKKRGLFGAIAGFIE        | 2.71 | 0.01 | 2.77 | 0.44 | 1.59 | 2.12 |
| 62022 | 0 | 163243 | RKKRGLFGAIAGFIE        | 2.71 | 0.01 | 2.77 | 0.44 | 1.59 | 1.34 |
| 62023 | 0 | 163243 | RKKRGLFGAIAGFIE        | 2.71 | 0.01 | 2.77 | 0.44 | 1.59 | 1.34 |
| 62024 | 0 | 163243 | RKKRGLFGAIAGFIE        | 2.71 | 0.01 | 2.77 | 0.44 | 1.59 | 1.34 |
| 62025 | 0 | 163243 | RKKRGLFGAIAGFIE        | 2.71 | 0.01 | 2.77 | 0.44 | 1.59 | 1.34 |
| 62026 | 0 | 163243 | RKKRGLFGAIAGFIE        | 2.71 | 0.01 | 2.77 | 0.44 | 1.59 | 1.34 |
| 62027 | 0 | 163243 | RKKRGLFGAIAGFIE        | 2.71 | 0.01 | 2.77 | 0.44 | 1.59 | 1.34 |
| 62028 | 0 | 163243 | RKKRGLFGAIAGFIE        | 2.71 | 0.01 | 2.77 | 0.44 | 1.59 | 1.34 |
| 62029 | 0 | 163243 | RKKRGLFGAIAGFIE        | 2.71 | 0.01 | 2.77 | 0.44 | 1.59 | 1.34 |
| 62030 | 0 | 163243 | RKKRGLFGAIAGFIE        | 2.71 | 0.01 | 2.77 | 0.44 | 1.59 | 1.34 |
| 62031 | 0 | 163243 | RKKRGLFGAIAGFIE        | 2.71 | 0.01 | 2.77 | 0.44 | 1.59 | 1.34 |
| 62032 | 0 | 163243 | RKKRGLFGAIAGFIE        | 2.71 | 0.01 | 2.77 | 0.44 | 1.59 | 1.34 |
| 62033 | 0 | 163243 | RKKRGLFGAIAGFIE        | 2.71 | 0.01 | 2.77 | 0.44 | 1.59 | 1.34 |
| 62034 | 0 | 163243 | RKKRGLFGAIAGFIE        | 2.71 | 0.01 | 2.77 | 0.44 | 1.59 | 1.34 |
| 62035 | 0 | 163243 | RKKRGLFGAIAGFIE        | 2.71 | 0.01 | 2.77 | 0.44 | 1.59 | 1.34 |
| 62036 | 0 | 163243 | RKKRGLFGAIAGFIE        | 2.71 | 0.01 | 2.77 | 0.44 | 1.59 | 1.34 |
| 62037 | 0 | 163243 | RKKRGLFGAIAGFIE        | 2.71 | 0.01 | 2.77 | 0.44 | 1.59 | 1.34 |
| 62038 | 0 | 163243 | RKKRGLFGAIAGFIE        | 2.71 | 0.01 | 2.77 | 0.44 | 1.59 | 1.34 |
| 62039 | 0 | 163243 | RKKRGLFGAIAGFIE        | 2.71 | 0.01 | 2.77 | 0.44 | 1.59 | 1.34 |
| 62040 | 0 | 163243 | RKKRGLFGAIAGFIE        | 2.71 | 0.01 | 2.77 | 0.44 | 1.59 | 1.34 |
| 62041 | 0 | 163243 | RKKRGLFGAIAGFIE        | 2.71 | 0.01 | 2.77 | 0.44 | 1.59 | 1.34 |
| 62042 | 0 | 163243 | RKKRGLFGAIAGFIE        | 2.71 | 0.01 | 2.77 | 0.44 | 1.59 | 1.34 |
| 62043 | 0 | 163243 | RKKRGLFGAIAGFIE        | 2.71 | 0.01 | 2.77 | 0.44 | 1.59 | 1.34 |
| 62044 | 0 | 163243 | RKKRGLFGAIAGFIE        | 2.71 | 0.01 | 2.77 | 0.44 | 1.59 | 1.34 |
| 62045 | 0 | 163243 | RKKRGLFGAIAGFIE        | 2.71 | 0.01 | 2.77 | 0.44 | 1.59 | 1.34 |
| 62046 | 0 | 163243 | RKKRGLFGAIAGFIE        | 2.71 | 0.01 | 2.77 | 0.44 | 1.59 | 2.98 |
| 62047 | 0 | 163243 | RKKRGLFGAIAGFIE        | 2.71 | 0.01 | 2.77 | 0.44 | 1.59 | 2.98 |
| 62048 | 0 | 177236 | RKKRGLFGAIAGFIEGG<br>W | 2.87 | 0.01 | 2.94 | 0.68 | 0.22 | 0.28 |
| 62049 | 0 | 152944 | RKKRSTSAGP             | 2.33 | 0.01 | 2.18 | 2.16 | 0.22 | 0.28 |
| 62050 | 0 | 119516 | RKLAHPGTS              | 2.18 | 0.01 | 0.90 | 0.44 | 1.13 | 0.28 |



|       |   |        |                               |      |      |      |      |      |      |
|-------|---|--------|-------------------------------|------|------|------|------|------|------|
| 62051 | 0 | 54382  | RKLFLVALVLTIGSLICAI           | 2.96 | 0.01 | 3.40 | 0.44 | 0.85 | 0.28 |
| 62052 | 0 | 54382  | RKLFLVALVLTIGSLICAI           | 2.96 | 0.01 | 3.40 | 0.44 | 1.74 | 0.28 |
| 62053 | 0 | 78262  | RKLGAA                        | 1.86 | 0.01 | 0.90 | 2.02 | 1.59 | 1.39 |
| 62054 | 0 | 134783 | RKLQKSTHLLIRKLP               | 2.70 | 0.01 | 0.78 | 3.05 | 1.13 | 0.85 |
| 62055 | 0 | 54393  | RKLWCHHFC                     | 2.22 | 0.01 | 3.81 | 1.15 | 0.22 | 0.28 |
| 62056 | 0 | 54393  | RKLWCHHFC                     | 2.22 | 0.01 | 3.81 | 1.15 | 0.22 | 0.85 |
| 62057 | 0 | 54393  | RKLWCHHFC                     | 2.22 | 0.01 | 3.81 | 1.15 | 0.22 | 0.28 |
| 62058 | 0 | 54393  | RKLWCHHFC                     | 2.22 | 0.01 | 3.81 | 2.37 | 2.98 | 0.28 |
| 62059 | 0 | 54393  | RKLWCHHFC                     | 2.22 | 0.01 | 3.81 | 2.37 | 2.98 | 2.35 |
| 62060 | 0 | 54393  | RKLWCHHFC                     | 2.22 | 0.01 | 2.88 | 0.68 | 0.22 | 1.48 |
| 62061 | 0 | 54393  | RKLWCHHFC                     | 2.22 | 0.01 | 2.88 | 0.68 | 0.22 | 0.85 |
| 62062 | 0 | 54393  | RKLWCHHFC                     | 2.22 | 0.01 | 2.88 | 0.68 | 0.22 | 0.28 |
| 62063 | 0 | 54393  | RKLWCHHFC                     | 2.22 | 0.01 | 2.88 | 2.22 | 0.22 | 0.28 |
| 62064 | 0 | 94675  | RKMWCDAFCSSRGKVV<br>E         | 2.76 | 0.01 | 3.10 | 1.12 | 0.22 | 1.27 |
| 62065 | 0 | 157852 | RKNIVKKCLEMFDE                | 2.58 | 0.01 | 3.47 | 2.49 | 0.85 | 0.28 |
| 62066 | 0 | 54396  | RKNKGKDLSTNLRAL               | 2.71 | 0.01 | 2.30 | 0.44 | 0.85 | 0.28 |
| 62067 | 0 | 54396  | RKNKGKDLSTNLRAL               | 2.71 | 0.01 | 2.30 | 0.44 | 1.41 | 0.28 |
| 62068 | 0 | 156438 | RKNLGNAKFGLWVDGN<br>CEEIPYVKE | 3.14 | 0.01 | 3.44 | 0.44 | 1.59 | 0.28 |
| 62069 | 0 | 156438 | RKNLGNAKFGLWVDGN<br>CEEIPYVKE | 3.14 | 0.01 | 3.44 | 0.44 | 0.85 | 0.28 |
| 62070 | 0 | 54399  | RKNPQRSTLRIN                  | 2.48 | 0.01 | 0.90 | 1.20 | 0.22 | 1.39 |
| 62071 | 0 | 54401  | RKPARL                        | 1.91 | 0.01 | 1.96 | 0.44 | 0.85 | 0.28 |
| 62072 | 0 | 54402  | RKPARLIVFPDL                  | 2.48 | 0.01 | 1.96 | 0.44 | 0.85 | 0.28 |
| 62073 | 0 | 123710 | RKPKSQET                      | 2.12 | 0.01 | 0.78 | 1.20 | 0.22 | 0.28 |
| 62074 | 0 | 106779 | RKPLSPGMTGR                   | 2.42 | 0.01 | 2.25 | 1.12 | 0.22 | 1.27 |
| 62075 | 0 | 106779 | RKPLSPGMTGR                   | 2.42 | 0.01 | 2.25 | 1.12 | 0.22 | 0.85 |
| 62076 | 0 | 54408  | RKPLVSFKEDPTPSDNPF<br>SK      | 2.96 | 0.01 | 2.67 | 0.44 | 0.85 | 0.28 |
| 62077 | 0 | 54409  | RKPPSGKK                      | 2.12 | 0.01 | 3.36 | 0.44 | 2.82 | 0.28 |
| 62078 | 0 | 54410  | RKPRYLTQS                     | 2.22 | 0.01 | 0.90 | 0.68 | 0.22 | 0.28 |
| 62079 | 0 | 369567 | RKQQGRDAPQARKQQ               | 2.72 | 0.01 | 1.61 | 0.44 | 0.85 | 1.28 |
| 62080 | 0 | 369568 | RKQQGRNEPQARRQQ               | 2.69 | 0.01 | 1.61 | 0.44 | 0.85 | 1.28 |
| 62081 | 0 | 233810 | RKRAKPRYSPLGDTDEEE<br>L       | 2.90 | 0.01 | 3.67 | 2.61 | 0.85 | 1.28 |
| 62082 | 0 | 123711 | RKREKRKP                      | 2.18 | 0.01 | 2.96 | 1.20 | 0.22 | 0.28 |
| 62083 | 0 | 123711 | RKREKRKP                      | 2.18 | 0.01 | 2.96 | 1.20 | 0.22 | 0.28 |
| 62084 | 0 | 146524 | RKRIHIGPGRAFYTT               | 2.67 | 0.01 | 3.70 | 0.44 | 0.85 | 2.49 |
| 62085 | 0 | 146524 | RKRIHIGPGRAFYTT               | 2.67 | 0.01 | 3.70 | 0.44 | 0.85 | 0.28 |
| 62086 | 0 | 146524 | RKRIHIGPGRAFYTT               | 2.67 | 0.01 | 2.54 | 0.44 | 0.85 | 2.49 |
| 62087 | 0 | 163244 | RKRIRVPGGQTVY                 | 2.56 | 0.01 | 4.23 | 0.44 | 0.85 | 2.49 |

|       |   |        |                                                         |      |      |      |      |      |      |
|-------|---|--------|---------------------------------------------------------|------|------|------|------|------|------|
| 62088 | 0 | 78811  | RKRNGVDVDPNKGKW<br>KEHI                                 | 2.91 | 0.01 | 3.11 | 1.12 | 0.22 | 0.28 |
| 62089 | 0 | 78811  | RKRNGVDVDPNKGKW<br>KEHI                                 | 2.91 | 0.01 | 3.11 | 1.12 | 0.22 | 0.28 |
| 62090 | 0 | 78811  | RKRNGVDVDPNKGKW<br>KEHI                                 | 2.91 | 0.01 | 3.11 | 1.12 | 0.22 | 0.28 |
| 62091 | 0 | 132612 | RKRREKIERR                                              | 2.36 | 0.01 | 0.78 | 0.44 | 1.13 | 0.28 |
| 62092 | 0 | 134784 | RKRSQMLFRGRRASQ                                         | 2.70 | 0.01 | 0.78 | 0.68 | 0.22 | 1.27 |
| 62093 | 0 | 134784 | RKRSQMLFRGRRASQ                                         | 2.70 | 0.01 | 0.78 | 0.68 | 0.22 | 1.34 |
| 62094 | 0 | 134784 | RKRSQMLFRGRRASQ                                         | 2.70 | 0.01 | 0.78 | 0.68 | 0.22 | 0.28 |
| 62095 | 0 | 121797 | RKRSSADPL                                               | 2.23 | 0.01 | 0.90 | 2.46 | 0.22 | 0.28 |
| 62096 | 0 | 119517 | RKRTRHLEG                                               | 2.24 | 0.01 | 0.90 | 0.44 | 1.13 | 0.28 |
| 62097 | 0 | 227513 | RKRVDHDAGGSAPAR                                         | 2.70 | 0.01 | 2.48 | 0.44 | 1.59 | 0.28 |
| 62098 | 0 | 161563 | RKSIRIQRGPGRAFTIG                                       | 2.86 | 0.01 | 4.93 | 0.68 | 0.22 | 3.30 |
| 62099 | 0 | 54425  | RKSITKGPRVIYAT                                          | 2.69 | 0.01 | 4.93 | 0.68 | 0.22 | 0.28 |
| 62100 | 0 | 54426  | RKSNSQSINDDIVRKEG<br>GNLNQ                              | 3.05 | 0.01 | 0.90 | 2.02 | 0.22 | 0.28 |
| 62101 | 0 | 54426  | RKSNSQSINDDIVRKEG<br>GNLNQ                              | 3.05 | 0.01 | 0.90 | 0.68 | 0.22 | 1.75 |
| 62102 | 0 | 119518 | RKTALGTRQ                                               | 2.24 | 0.01 | 0.90 | 0.44 | 1.13 | 0.28 |
| 62103 | 0 | 118997 | RKTHCSGRKH                                              | 2.34 | 0.01 | 0.78 | 0.44 | 1.13 | 0.28 |
| 62104 | 0 | 118997 | RKTHCSGRKH                                              | 2.34 | 0.01 | 0.78 | 0.44 | 1.13 | 0.85 |
| 62105 | 0 | 54430  | RKTKRNT                                                 | 2.06 | 0.01 | 1.72 | 0.44 | 0.85 | 0.28 |
| 62106 | 0 | 54431  | RKTKRNTN                                                | 2.18 | 0.01 | 1.72 | 0.44 | 1.59 | 0.28 |
| 62107 | 0 | 54431  | RKTKRNTN                                                | 2.18 | 0.01 | 1.72 | 0.44 | 1.59 | 0.28 |
| 62108 | 0 | 54432  | RKTKRNTNR                                               | 2.28 | 0.01 | 1.72 | 0.44 | 0.85 | 0.28 |
| 62109 | 0 | 54435  | RKTKRNTNRRPQDVKFP<br>GGGQIVGGVYLLPRRGP<br>RLGVRATRKTSER | 3.79 | 0.01 | 1.72 | 0.44 | 0.85 | 1.39 |
| 62110 | 0 | 54440  | RKTSERSQPRGRRQP                                         | 2.71 | 0.01 | 1.72 | 0.44 | 0.85 | 0.28 |
| 62111 | 0 | 54440  | RKTSERSQPRGRRQP                                         | 2.71 | 0.01 | 1.72 | 0.44 | 0.85 | 0.28 |
| 62112 | 0 | 54442  | RKTSERSQPRGRRQPIPK<br>ARRPEGR                           | 3.20 | 0.01 | 1.72 | 0.44 | 0.85 | 0.28 |
| 62113 | 0 | 54442  | RKTSERSQPRGRRQPIPK<br>ARRPEGR                           | 3.20 | 0.01 | 1.72 | 0.44 | 0.85 | 0.28 |
| 62114 | 0 | 54442  | RKTSERSQPRGRRQPIPK<br>ARRPEGR                           | 3.20 | 0.01 | 1.72 | 0.44 | 1.59 | 0.28 |
| 62115 | 0 | 54442  | RKTSERSQPRGRRQPIPK<br>ARRPEGR                           | 3.20 | 0.01 | 1.72 | 0.44 | 0.85 | 0.28 |
| 62116 | 0 | 79060  | RKVIGHLAHGNLEYKHP<br>YLEDR                              | 3.04 | 0.01 | 2.24 | 2.36 | 0.22 | 0.85 |
| 62117 | 0 | 79060  | RKVIGHLAHGNLEYKHP<br>YLEDR                              | 3.04 | 0.01 | 2.24 | 2.36 | 0.22 | 0.85 |
| 62118 | 0 | 54447  | RKVLENRSLSDERM                                          | 2.70 | 0.01 | 3.15 | 0.44 | 1.23 | 0.85 |

|       |   |        |                               |      |      |      |      |      |      |
|-------|---|--------|-------------------------------|------|------|------|------|------|------|
| 62119 | 0 | 54447  | RKVLENRSLSDDEERM              | 2.70 | 0.01 | 2.36 | 0.44 | 1.23 | 1.28 |
| 62120 | 0 | 54447  | RKVLENRSLSDDEERM              | 2.70 | 0.01 | 2.36 | 0.44 | 1.23 | 1.27 |
| 62121 | 0 | 54447  | RKVLENRSLSDDEERM              | 2.70 | 0.01 | 2.36 | 0.44 | 1.23 | 1.28 |
| 62122 | 0 | 144059 | RKVPLLSGTL PQ                 | 2.47 | 0.01 | 0.90 | 0.44 | 0.85 | 0.28 |
| 62123 | 0 | 144059 | RKVPLLSGTL PQ                 | 2.47 | 0.01 | 0.90 | 1.20 | 0.22 | 1.39 |
| 62124 | 0 | 144059 | RKVPLLSGTL PQ                 | 2.47 | 0.01 | 0.90 | 0.44 | 1.41 | 0.28 |
| 62125 | 0 | 369692 | RKVSGAVPEGEEYPT               | 2.67 | 0.01 | 1.61 | 0.44 | 0.85 | 1.28 |
| 62126 | 0 | 369695 | RKVSSAVPEGEEYPT               | 2.66 | 0.01 | 1.61 | 0.44 | 0.85 | 1.28 |
| 62127 | 0 | 119519 | RKVVTQSLE                     | 2.20 | 0.01 | 0.90 | 0.44 | 1.13 | 0.28 |
| 62128 | 0 | 114579 | RKVVTDFKNI PQRI               | 2.67 | 0.01 | 4.63 | 0.44 | 1.41 | 1.57 |
| 62129 | 0 | 103554 | RKVVTKDETTIVEG                | 2.70 | 0.01 | 2.04 | 0.44 | 0.85 | 1.28 |
| 62130 | 0 | 156439 | RKWLEEQLKQYRVKRQ<br>QERSSQ    | 3.08 | 0.01 | 0.78 | 1.20 | 0.22 | 1.48 |
| 62131 | 0 | 156439 | RKWLEEQLKQYRVKRQ<br>QERSSQ    | 3.08 | 0.01 | 0.78 | 1.20 | 0.22 | 1.34 |
| 62132 | 0 | 54451  | RKYCIE                        | 1.88 | 0.01 | 2.40 | 0.44 | 0.85 | 0.28 |
| 62133 | 0 | 116822 | RKYDEVARKLAMVEA               | 2.71 | 0.01 | 2.36 | 0.44 | 1.23 | 1.28 |
| 62134 | 0 | 116822 | RKYDEVARKLAMVEA               | 2.71 | 0.01 | 2.36 | 0.44 | 1.23 | 1.27 |
| 62135 | 0 | 116822 | RKYDEVARKLAMVEA               | 2.71 | 0.01 | 2.36 | 0.44 | 1.23 | 1.28 |
| 62136 | 0 | 54453  | RKYF                          | 1.57 | 0.01 | 2.69 | 0.68 | 0.22 | 0.28 |
| 62137 | 0 | 106780 | RKYFG                         | 1.74 | 0.01 | 2.75 | 0.44 | 1.23 | 0.85 |
| 62138 | 0 | 106781 | RKYFGNRPTM                    | 2.30 | 0.01 | 2.75 | 0.44 | 1.23 | 0.85 |
| 62139 | 0 | 131039 | RLAADVGKGA                    | 2.33 | 0.01 | 0.78 | 0.44 | 1.93 | 0.85 |
| 62140 | 0 | 496890 | RLAALGPEGAHGDTTFF<br>YQD      | 2.94 | 0.01 | 0.78 | 0.44 | 1.13 | 1.27 |
| 62141 | 0 | 109826 | RLAALGPEGAHGDTTFF<br>YQDL     | 2.99 | 0.01 | 0.78 | 0.44 | 1.13 | 1.27 |
| 62142 | 0 | 136601 | RLACKEDYRYAISSTDEIG<br>LLGAGG | 3.16 | 0.01 | 4.63 | 1.15 | 0.22 | 1.48 |
| 62143 | 0 | 122888 | RLAFGKDRECNPVKATR<br>AFAL     | 2.99 | 0.01 | 3.08 | 1.12 | 0.22 | 0.28 |
| 62144 | 0 | 54468  | RLAKLSDGVAVLKVG               | 2.72 | 0.01 | 0.78 | 0.44 | 0.85 | 0.28 |
| 62145 | 0 | 54469  | RLAKLSSGVAVIRVG               | 2.72 | 0.01 | 2.40 | 0.44 | 0.85 | 0.28 |
| 62146 | 0 | 54474  | RLANLNG                       | 2.04 | 0.01 | 2.14 | 0.44 | 0.22 | 0.28 |
| 62147 | 0 | 54474  | RLANLNG                       | 2.04 | 0.01 | 2.14 | 0.44 | 0.85 | 0.28 |
| 62148 | 0 | 131040 | RLAEPDDPITPMTK                | 2.67 | 0.01 | 0.90 | 0.44 | 1.13 | 0.28 |
| 62149 | 0 | 131040 | RLAEPDDPITPMTK                | 2.67 | 0.01 | 0.90 | 0.44 | 1.13 | 1.66 |
| 62150 | 0 | 131040 | RLAEPDDPITPMTK                | 2.67 | 0.01 | 0.90 | 0.44 | 1.13 | 1.66 |
| 62151 | 0 | 131040 | RLAEPDDPITPMTK                | 2.67 | 0.01 | 0.90 | 0.44 | 1.13 | 1.66 |
| 62152 | 0 | 131040 | RLAEPDDPITPMTK                | 2.67 | 0.01 | 0.90 | 0.44 | 1.13 | 1.27 |
| 62153 | 0 | 173049 | RLAREICVKFTRGVD               | 2.65 | 0.01 | 0.78 | 0.44 | 1.13 | 0.28 |
| 62154 | 0 | 151716 | RLASLSEKPPAIDWAYYR<br>A       | 2.90 | 3.97 | 1.75 | 2.25 | 0.22 | 0.85 |
| 62155 | 0 | 137279 | RLATVGELQAAWRNGF<br>DQCDYGWLS | 3.14 | 0.01 | 0.78 | 0.68 | 0.22 | 0.28 |
| 62156 | 0 | 54489  | RLCAGGASLIEPVYALRC<br>AE      | 2.96 | 0.01 | 0.90 | 2.69 | 2.26 | 0.85 |

|       |   |        |                                    |      |      |      |      |      |      |
|-------|---|--------|------------------------------------|------|------|------|------|------|------|
| 62157 | 0 | 54494  | RLCSVSYPEPSLLWTSSC<br>FD           | 2.93 | 0.01 | 0.90 | 2.69 | 2.26 | 0.85 |
| 62158 | 0 | 54495  | RLCVQPPFFLVQEKGIA<br>DTSR          | 2.94 | 0.01 | 2.86 | 2.02 | 1.59 | 0.28 |
| 62159 | 0 | 54495  | RLCVQPPFFLVQEKGIA<br>DTSR          | 2.94 | 0.01 | 2.86 | 2.02 | 0.22 | 0.28 |
| 62160 | 0 | 79061  | RLDAITGPEEEGGRLETIL<br>GWPLAER     | 3.24 | 0.01 | 2.58 | 2.88 | 0.22 | 0.28 |
| 62161 | 0 | 122889 | RLDASFQEHPDLPG                     | 2.59 | 0.01 | 0.78 | 1.20 | 0.22 | 0.28 |
| 62162 | 0 | 122889 | RLDASFQEHPDLPG                     | 2.59 | 0.01 | 0.78 | 1.20 | 0.22 | 1.27 |
| 62163 | 0 | 122889 | RLDASFQEHPDLPG                     | 2.59 | 0.01 | 0.78 | 1.20 | 0.22 | 0.28 |
| 62164 | 0 | 122889 | RLDASFQEHPDLPG                     | 2.59 | 0.01 | 0.78 | 1.20 | 0.22 | 0.28 |
| 62165 | 0 | 54504  | RLDGTTEV                           | 2.22 | 0.01 | 2.59 | 4.45 | 0.22 | 0.28 |
| 62166 | 0 | 54504  | RLDGTTEV                           | 2.22 | 0.01 | 2.59 | 4.45 | 0.22 | 0.28 |
| 62167 | 0 | 54504  | RLDGTTEV                           | 2.22 | 0.01 | 2.59 | 4.45 | 0.22 | 0.28 |
| 62168 | 0 | 54509  | RLDLAMLAAIRRVYG                    | 2.69 | 0.01 | 2.40 | 1.12 | 0.22 | 0.28 |
| 62169 | 0 | 145481 | RLDNRYQPMEPN                       | 2.48 | 0.01 | 0.78 | 0.44 | 1.13 | 0.28 |
| 62170 | 0 | 54511  | RLDQGEISAGDAAVV                    | 2.65 | 0.01 | 2.40 | 1.12 | 0.22 | 0.28 |
| 62171 | 0 | 129776 | RLDRCLKAVRKERSKESD<br>DN           | 2.97 | 0.01 | 0.78 | 3.01 | 0.22 | 0.28 |
| 62172 | 0 | 129776 | RLDRCLKAVRKERSKESD<br>DN           | 2.97 | 0.01 | 0.78 | 1.81 | 0.22 | 0.28 |
| 62173 | 0 | 54512  | RLDVGTNLGNIAIACL                   | 2.68 | 0.01 | 2.43 | 0.44 | 1.59 | 0.28 |
| 62174 | 0 | 188451 | RLEEETNDED                         | 2.34 | 0.01 | 2.92 | 0.68 | 0.22 | 0.85 |
| 62175 | 0 | 188451 | RLEEETNDED                         | 2.34 | 0.01 | 2.92 | 1.81 | 0.22 | 0.85 |
| 62176 | 0 | 188451 | RLEEETNDED                         | 2.34 | 0.01 | 2.92 | 3.37 | 0.22 | 0.85 |
| 62177 | 0 | 165210 | RLEKDRFSVNLDVKHFS<br>PEELKVKV      | 3.19 | 0.01 | 0.78 | 0.44 | 1.13 | 0.28 |
| 62178 | 0 | 165210 | RLEKDRFSVNLDVKHFS<br>PEELKVKV      | 3.19 | 0.01 | 0.78 | 0.44 | 1.13 | 0.28 |
| 62179 | 0 | 156748 | RLEMYGSFLAKVMVVN<br>MRIWAVTDNTLQTT | 3.30 | 0.01 | 3.29 | 0.68 | 0.22 | 1.48 |
| 62180 | 0 | 156748 | RLEMYGSFLAKVMVVN<br>MRIWAVTDNTLQTT | 3.30 | 0.01 | 3.29 | 0.68 | 0.22 | 1.48 |
| 62181 | 0 | 156748 | RLEMYGSFLAKVMVVN<br>MRIWAVTDNTLQTT | 3.30 | 0.01 | 3.29 | 0.68 | 2.25 | 1.75 |
| 62182 | 0 | 156748 | RLEMYGSFLAKVMVVN<br>MRIWAVTDNTLQTT | 3.30 | 0.01 | 3.29 | 0.68 | 0.22 | 0.28 |
| 62183 | 0 | 102766 | RLNHAETLRAAMISLAK<br>KI            | 2.96 | 0.01 | 3.44 | 0.68 | 0.22 | 0.28 |
| 62184 | 0 | 102766 | RLNHAETLRAAMISLAK<br>KI            | 2.96 | 0.01 | 3.10 | 0.68 | 0.22 | 0.28 |

|       |   |        |                                              |      |      |      |      |      |      |
|-------|---|--------|----------------------------------------------|------|------|------|------|------|------|
| 62185 | 0 | 102766 | RLENHAETLRAAMISLAK<br>KI                     | 2.96 | 0.01 | 3.10 | 0.68 | 0.22 | 1.34 |
| 62186 | 0 | 102766 | RLENHAETLRAAMISLAK<br>KI                     | 2.96 | 0.01 | 3.10 | 0.68 | 0.22 | 0.28 |
| 62187 | 0 | 102766 | RLENHAETLRAAMISLAK<br>KI                     | 2.96 | 0.01 | 3.10 | 0.68 | 0.22 | 0.28 |
| 62188 | 0 | 173058 | RLEVNAETVRSICT                               | 2.67 | 0.01 | 0.78 | 0.44 | 1.13 | 0.28 |
| 62189 | 0 | 87988  | RLFAQPQ                                      | 2.02 | 0.01 | 3.59 | 0.44 | 0.85 | 0.28 |
| 62190 | 0 | 87988  | RLFAQPQ                                      | 2.02 | 0.01 | 3.59 | 0.44 | 0.85 | 0.28 |
| 62191 | 0 | 134785 | RLFVLDKNQAISNNISV<br>IESHLITFFSNSKAKKDA<br>F | 3.58 | 0.01 | 1.75 | 1.20 | 0.22 | 0.28 |
| 62192 | 0 | 134785 | RLFVLDKNQAISNNISV<br>IESHLITFFSNSKAKKDA<br>F | 3.58 | 0.01 | 1.75 | 1.20 | 0.22 | 0.28 |
| 62193 | 0 | 93721  | RLFGGKGDDI                                   | 2.32 | 0.01 | 2.67 | 2.00 | 0.22 | 0.28 |
| 62194 | 0 | 93721  | RLFGGKGDDI                                   | 2.32 | 0.01 | 2.67 | 2.00 | 0.22 | 0.28 |
| 62195 | 0 | 93721  | RLFGGKGDDI                                   | 2.32 | 0.01 | 2.67 | 2.00 | 0.22 | 0.28 |
| 62196 | 0 | 120918 | RLFKHLFGGYNRWARP<br>V                        | 2.77 | 0.01 | 2.19 | 1.12 | 0.22 | 0.28 |
| 62197 | 0 | 120918 | RLFKHLFGGYNRWARP<br>V                        | 2.77 | 0.01 | 2.19 | 1.12 | 0.22 | 0.28 |
| 62198 | 0 | 123712 | RLFLEYLGE                                    | 2.25 | 0.01 | 2.28 | 2.00 | 0.22 | 0.28 |
| 62199 | 0 | 123712 | RLFLEYLGE                                    | 2.25 | 0.01 | 2.28 | 2.00 | 0.22 | 0.28 |
| 62200 | 0 | 78504  | RLFLHV                                       | 1.90 | 0.01 | 0.90 | 0.68 | 0.22 | 0.28 |
| 62201 | 0 | 54545  | RLGAALLQ                                     | 2.14 | 0.01 | 2.21 | 0.44 | 0.85 | 0.28 |
| 62202 | 0 | 54545  | RLGAALLQ                                     | 2.14 | 0.01 | 2.21 | 1.12 | 0.22 | 0.28 |
| 62203 | 0 | 54546  | RLGAALLQSA                                   | 2.34 | 0.01 | 2.21 | 1.12 | 0.22 | 0.28 |
| 62204 | 0 | 54546  | RLGAALLQSA                                   | 2.34 | 0.01 | 2.21 | 1.12 | 0.22 | 0.28 |
| 62205 | 0 | 54553  | RLGDTDLIAVEHDY                               | 2.66 | 0.01 | 2.93 | 0.44 | 1.13 | 1.27 |
| 62206 | 0 | 54553  | RLGDTDLIAVEHDY                               | 2.66 | 0.01 | 2.93 | 0.44 | 1.13 | 0.28 |
| 62207 | 0 | 78505  | RLGDYLDQGL                                   | 2.43 | 0.01 | 2.76 | 0.44 | 1.23 | 1.39 |
| 62208 | 0 | 238978 | RLGELRLNPAGGA                                | 2.64 | 0.01 | 2.14 | 2.65 | 0.22 | 0.85 |
| 62209 | 0 | 238978 | RLGELRLNPAGGA                                | 2.64 | 0.01 | 2.14 | 2.65 | 0.22 | 0.85 |
| 62210 | 0 | 127802 | RLGGEGPGAGDRRRE                              | 2.72 | 0.01 | 0.78 | 0.44 | 1.13 | 0.85 |
| 62211 | 0 | 132613 | RLGGGLGGTR                                   | 2.37 | 0.01 | 0.78 | 0.44 | 1.13 | 0.28 |
| 62212 | 0 | 136603 | RLGHAARIFQRY                                 | 2.47 | 0.01 | 3.48 | 3.70 | 0.85 | 1.34 |
| 62213 | 0 | 122175 | RLGKRDS                                      | 2.03 | 0.01 | 0.90 | 0.44 | 1.13 | 1.27 |
| 62214 | 0 | 111010 | RLGSEHVDRPLTTP                               | 2.61 | 0.01 | 3.03 | 0.44 | 1.41 | 0.28 |
| 62215 | 0 | 54566  | RLGVPTLGGDPKFRSL<br>THE                      | 2.94 | 0.01 | 2.75 | 0.44 | 0.85 | 0.85 |
| 62216 | 0 | 54568  | RLGVRATRK                                    | 2.24 | 0.01 | 1.96 | 0.44 | 0.85 | 1.34 |
| 62217 | 0 | 54570  | RLGVRATRKTS                                  | 2.48 | 0.01 | 2.68 | 0.44 | 0.85 | 0.28 |
| 62218 | 0 | 54577  | RLHLNDRVV                                    | 2.24 | 0.01 | 2.69 | 0.44 | 0.85 | 0.28 |
| 62219 | 0 | 113815 | RLHRPALTSR                                   | 2.34 | 0.01 | 3.97 | 1.12 | 0.22 | 0.28 |
| 62220 | 0 | 109828 | RLHSMKEGIHAQQKEP<br>MIGVNLQELAYFPE           | 3.32 | 0.01 | 1.60 | 0.44 | 1.23 | 0.85 |

|       |   |        |                    |      |      |      |      |      |      |
|-------|---|--------|--------------------|------|------|------|------|------|------|
| 62221 | 0 | 152089 | RLHYSGSINAW        | 2.36 | 0.01 | 0.78 | 0.44 | 1.13 | 0.28 |
| 62222 | 0 | 153453 | RLIFAGKQLEDGRTL    | 2.67 | 0.01 | 1.60 | 0.68 | 0.22 | 0.28 |
| 62223 | 0 | 54589  | RLIGRKFSDPVVQSD    | 2.66 | 0.01 | 2.30 | 0.44 | 0.85 | 0.28 |
| 62224 | 0 | 54589  | RLIGRKFSDPVVQSD    | 2.66 | 0.01 | 2.30 | 0.44 | 1.41 | 0.28 |
| 62225 | 0 | 137566 | RLIKQLKSEDNRRGI    | 2.68 | 0.01 | 3.12 | 0.44 | 1.23 | 0.85 |
| 62226 | 0 | 54591  | RLINNIEEIYNSNCEIQ  | 3.64 | 0.01 | 2.22 | 0.44 | 1.74 | 0.28 |
|       |   |        | NVRDEFAELKNDLNKIM  |      |      |      |      |      |      |
|       |   |        | NLINI              |      |      |      |      |      |      |
| 62227 | 0 | 54591  | RLINNIEEIYNSNCEIQ  | 3.64 | 0.01 | 2.22 | 0.44 | 1.74 | 0.28 |
|       |   |        | NVRDEFAELKNDLNKIM  |      |      |      |      |      |      |
|       |   |        | NLINI              |      |      |      |      |      |      |
| 62228 | 0 | 54599  | RLITGRQLQSLQTYVTQQ | 2.82 | 0.01 | 2.48 | 0.44 | 0.85 | 0.28 |
| 62229 | 0 | 54599  | RLITGRQLQSLQTYVTQQ | 2.82 | 0.01 | 2.48 | 0.68 | 0.22 | 0.28 |
| 62230 | 0 | 54601  | RLITVN             | 1.88 | 0.01 | 2.40 | 0.44 | 0.85 | 0.28 |
| 62231 | 0 | 54603  | RLIVFP             | 1.88 | 0.01 | 1.96 | 0.44 | 0.85 | 0.28 |
| 62232 | 0 | 144765 | RLIVFPDLGVRVCEKMA  | 3.14 | 0.01 | 1.72 | 0.68 | 0.22 | 0.28 |
|       |   |        | LYDVVSKL           |      |      |      |      |      |      |
| 62233 | 0 | 96828  | RLKEEEEDKK         | 2.32 | 0.01 | 0.78 | 0.44 | 1.93 | 0.85 |
| 62234 | 0 | 96828  | RLKEEEEDKK         | 2.32 | 0.01 | 0.78 | 0.44 | 1.23 | 0.28 |
| 62235 | 0 | 54612  | RLKGGAPIKG         | 2.33 | 0.01 | 3.30 | 0.68 | 0.22 | 0.28 |
| 62236 | 0 | 54612  | RLKGGAPIKG         | 2.33 | 0.01 | 3.30 | 0.68 | 0.22 | 0.28 |
| 62237 | 0 | 125237 | RLKNPPKKPKDDYHFEV  | 3.05 | 0.01 | 4.33 | 0.68 | 0.22 | 0.85 |
|       |   |        | FNFVP              |      |      |      |      |      |      |
| 62238 | 0 | 125237 | RLKNPPKKPKDDYHFEV  | 3.05 | 0.01 | 4.33 | 0.68 | 0.22 | 0.85 |
|       |   |        | FNFVP              |      |      |      |      |      |      |
| 62239 | 0 | 125237 | RLKNPPKKPKDDYHFEV  | 3.05 | 0.01 | 4.33 | 0.68 | 0.22 | 0.85 |
|       |   |        | FNFVP              |      |      |      |      |      |      |
| 62240 | 0 | 125237 | RLKNPPKKPKDDYHFEV  | 3.05 | 0.01 | 4.33 | 0.68 | 0.22 | 0.85 |
|       |   |        | FNFVP              |      |      |      |      |      |      |
| 62241 | 0 | 54629  | RLKSSR             | 1.92 | 0.01 | 0.90 | 2.02 | 0.22 | 0.28 |
| 62242 | 0 | 178155 | RLKVTENSFEQITFMQA  | 2.93 | 0.01 | 4.23 | 1.12 | 0.22 | 1.27 |
|       |   |        | LQL                |      |      |      |      |      |      |
| 62243 | 0 | 54633  | RLLARGGRAAICGK     | 2.65 | 0.01 | 2.41 | 0.44 | 0.85 | 0.28 |
| 62244 | 0 | 126948 | RLLIADPPSPRE       | 2.49 | 0.01 | 0.90 | 2.16 | 0.22 | 2.49 |
| 62245 | 0 | 123713 | RLLLEYGEK          | 2.23 | 0.01 | 2.28 | 2.00 | 0.22 | 0.28 |
| 62246 | 0 | 123714 | RLLLEYLGE          | 2.26 | 0.01 | 2.28 | 2.00 | 0.22 | 0.28 |
| 62247 | 0 | 149916 | RLLPQNTSSTPVGSG    | 2.69 | 0.01 | 4.03 | 1.12 | 0.22 | 0.28 |
| 62248 | 0 | 227832 | RLLQRFNKRSPQLENL   | 2.77 | 0.01 | 2.72 | 4.03 | 1.59 | 0.28 |
| 62249 | 0 | 227832 | RLLQRFNKRSPQLENL   | 2.77 | 0.01 | 2.72 | 1.20 | 1.59 | 0.28 |
|       |   |        | RLLSTDASHSRGSSSSSH |      |      |      |      |      |      |
| 62250 | 0 | 181238 | SSSVRRGSSYSMSTG    | 3.53 | 0.01 | 0.78 | 0.44 | 1.13 | 0.85 |

G

|       |   |       |                      |      |      |      |      |      |      |
|-------|---|-------|----------------------|------|------|------|------|------|------|
|       |   |       | RLLSTFTEYIKNIINTSILN |      |      |      |      |      |      |
|       |   |       | LRYESNHLIDLSRYASKIN  |      |      |      |      |      |      |
|       |   |       | IGSKVNFDPIDKNQIQLF   |      |      |      |      |      |      |
|       |   |       | NLESSKIEVILKNAIVYNS  |      |      |      |      |      |      |
|       |   |       | MYENFSTSFWIRIPKYFN   |      |      |      |      |      |      |
|       |   |       | SISLNNEYTIINCMENNS   |      |      |      |      |      |      |
|       |   |       | GWKVSLNYGEIWTLQD     |      |      |      |      |      |      |
|       |   |       | TQEIQRVVFKYSQMINI    |      |      |      |      |      |      |
|       |   |       | SDYINRWIFVTITNNRLN   |      |      |      |      |      |      |
|       |   |       | NSKIYINGRLIDQKPISNL  |      |      |      |      |      |      |
|       |   |       | GNIHASNNIMFKLDGCR    |      |      |      |      |      |      |
|       |   |       | DTHRYIWIKYFNLFDKEL   |      |      |      |      |      |      |
| 62251 | 0 | 54666 | NEKEIKDLYDNQNSGIL    | 6.06 | 0.01 | 2.08 | 0.68 | 0.22 | 1.66 |
|       |   |       | KDFWGDYLQYDKPYM      |      |      |      |      |      |      |
|       |   |       | LNLYDPNKYVDVNNVGI    |      |      |      |      |      |      |
|       |   |       | RGYMYLKGPRGSVMTT     |      |      |      |      |      |      |
|       |   |       | NIYLNSSLYRGTKFIIKKY  |      |      |      |      |      |      |
|       |   |       | ASGNKDNIVRNNDRVYI    |      |      |      |      |      |      |
|       |   |       | NVVVKNKEYRLATNASQ    |      |      |      |      |      |      |
|       |   |       | AGVEKILSALEIPDVGNL   |      |      |      |      |      |      |
|       |   |       | SQVVVMKSKNDQGITN     |      |      |      |      |      |      |
|       |   |       | KCKMNLQDNNGNDIGF     |      |      |      |      |      |      |
|       |   |       | IGFHQFNNAKLVASNW     |      |      |      |      |      |      |
|       |   |       | YNRQIERSSRTLGCSEF    |      |      |      |      |      |      |
|       |   |       | IPVDDGWGERPL         |      |      |      |      |      |      |

|       |   |       |                      |      |      |      |      |      |      |
|-------|---|-------|----------------------|------|------|------|------|------|------|
|       |   |       | RLLSTFTEYIKNIINTSILN |      |      |      |      |      |      |
|       |   |       | LRYESNHLIDLSRYASKIN  |      |      |      |      |      |      |
|       |   |       | IGSKVNFDPIDKNQIQLF   |      |      |      |      |      |      |
|       |   |       | NLESSKIEVILKNAIVYNS  |      |      |      |      |      |      |
|       |   |       | MYENFSTSFWIRIPKYFN   |      |      |      |      |      |      |
|       |   |       | SISLNNEYTIINCMENNS   |      |      |      |      |      |      |
|       |   |       | GWKVSLNYGEIITLQD     |      |      |      |      |      |      |
|       |   |       | TQEIQRVVFVKYSQMINI   |      |      |      |      |      |      |
|       |   |       | SDYINRWIFVTITNNRLN   |      |      |      |      |      |      |
|       |   |       | NSKIYINGRLIDQKPISNL  |      |      |      |      |      |      |
|       |   |       | GNIHASNNIMFKLDGCR    |      |      |      |      |      |      |
|       |   |       | DTHRYIWIKYFNLFDKEL   |      |      |      |      |      |      |
| 62252 | 0 | 54666 | NEKEIKDLYDNQNSGIL    | 6.06 | 0.01 | 2.08 | 0.68 | 0.22 | 0.28 |
|       |   |       | KDFWGDYLQYDKPYM      |      |      |      |      |      |      |
|       |   |       | LNLYDPNKYVDVNNVGI    |      |      |      |      |      |      |
|       |   |       | RGYMYLKGPRGSVMTT     |      |      |      |      |      |      |
|       |   |       | NIYLNSSLYRGTKFIIKKY  |      |      |      |      |      |      |
|       |   |       | ASGNKDNIVRNNDRVYI    |      |      |      |      |      |      |
|       |   |       | NVVVKNKEYRLATNASQ    |      |      |      |      |      |      |
|       |   |       | AGVEKILSALEIPDVGNL   |      |      |      |      |      |      |
|       |   |       | SQVVVMKSKNDQGITN     |      |      |      |      |      |      |
|       |   |       | KCKMNLQDNNGNDIGF     |      |      |      |      |      |      |
|       |   |       | IGFHQFNNAKLVASNW     |      |      |      |      |      |      |
|       |   |       | YNRQIERSSRTLGCSEF    |      |      |      |      |      |      |
|       |   |       | IPVDDGWGERPL         |      |      |      |      |      |      |



|       |   |       |                      |      |      |      |      |      |      |
|-------|---|-------|----------------------|------|------|------|------|------|------|
|       |   |       | RLLSTFTEYIKNIINTSILN |      |      |      |      |      |      |
|       |   |       | LRYESNHLIDLSRYASKIN  |      |      |      |      |      |      |
|       |   |       | IGSKVNFDPIDKNQIQLF   |      |      |      |      |      |      |
|       |   |       | NLESSKIEVILKNAIVYNS  |      |      |      |      |      |      |
|       |   |       | MYENFSTSFWIRIPKYFN   |      |      |      |      |      |      |
|       |   |       | SISLNNEYTIINCMENNS   |      |      |      |      |      |      |
|       |   |       | GWKVSLNYGEIWTLQD     |      |      |      |      |      |      |
|       |   |       | TQEIQRVVFKYSQMINI    |      |      |      |      |      |      |
|       |   |       | SDYINRWIFVTITNNRLN   |      |      |      |      |      |      |
|       |   |       | NSKIYINGRLIDQKPISNL  |      |      |      |      |      |      |
|       |   |       | GNIHASNNIMFKLDGCR    |      |      |      |      |      |      |
|       |   |       | DTHRYIWIKYFNLFDKEL   |      |      |      |      |      |      |
| 62253 | 0 | 54666 | NEKEIKDLYDNQNSGIL    | 6.06 | 0.01 | 2.08 | 0.68 | 0.22 | 1.66 |
|       |   |       | KDFWGDYLQYDKPYM      |      |      |      |      |      |      |
|       |   |       | LNLYDPNKYVDVNNVGI    |      |      |      |      |      |      |
|       |   |       | RGYMYLKGPRGSVMTT     |      |      |      |      |      |      |
|       |   |       | NIYLNSSLYRGTKFIIKKY  |      |      |      |      |      |      |
|       |   |       | ASGNKDNIVRNNDRVYI    |      |      |      |      |      |      |
|       |   |       | NVVVKNKEYRLATNASQ    |      |      |      |      |      |      |
|       |   |       | AGVEKILSALEIPDVGNL   |      |      |      |      |      |      |
|       |   |       | SQVVVMKSKNDQGITN     |      |      |      |      |      |      |
|       |   |       | KCKMNLQDNNGNDIGF     |      |      |      |      |      |      |
|       |   |       | IGFHQFNNAKLVASNW     |      |      |      |      |      |      |
|       |   |       | YNRQIERSSRTLGCSEF    |      |      |      |      |      |      |
|       |   |       | IPVDDGWGERPL         |      |      |      |      |      |      |

|       |   |       |                      |      |      |      |      |      |      |
|-------|---|-------|----------------------|------|------|------|------|------|------|
|       |   |       | RLLSTFTEYIKNIINTSILN |      |      |      |      |      |      |
|       |   |       | LRYESNHLIDLSRYASKIN  |      |      |      |      |      |      |
|       |   |       | IGSKVNFDPIDKNQIQLF   |      |      |      |      |      |      |
|       |   |       | NLESSKIEVILKNAIVYNS  |      |      |      |      |      |      |
|       |   |       | MYENFSTSFWIRIPKYFN   |      |      |      |      |      |      |
|       |   |       | SISLNNEYTIINCMENNS   |      |      |      |      |      |      |
|       |   |       | GWKVSLNYGEIITLQD     |      |      |      |      |      |      |
|       |   |       | TQEIQRVVFKYSQMINI    |      |      |      |      |      |      |
|       |   |       | SDYINRWIFVTITNNRLN   |      |      |      |      |      |      |
|       |   |       | NSKIYINGRLIDQKPISNL  |      |      |      |      |      |      |
|       |   |       | GNIHASNNIMFKLDGCR    |      |      |      |      |      |      |
|       |   |       | DTHRYIWIKYFNLFDKEL   |      |      |      |      |      |      |
| 62254 | 0 | 54666 | NEKEIKDLYDNQNSGIL    | 6.06 | 0.01 | 2.08 | 0.68 | 0.22 | 1.66 |
|       |   |       | KDFWGDYLQYDKPYM      |      |      |      |      |      |      |
|       |   |       | LNLYDPNKYVDVNNVGI    |      |      |      |      |      |      |
|       |   |       | RGYMYLKGPRGSVMTT     |      |      |      |      |      |      |
|       |   |       | NIYLNSSLYRGTKFIIKKY  |      |      |      |      |      |      |
|       |   |       | ASGNKDNIVRNNDRVYI    |      |      |      |      |      |      |
|       |   |       | NVVVKNKEYRLATNASQ    |      |      |      |      |      |      |
|       |   |       | AGVEKILSALEIPDVGNL   |      |      |      |      |      |      |
|       |   |       | SQVVVMKSKNDQGITN     |      |      |      |      |      |      |
|       |   |       | KCKMNLQDNNGNDIGF     |      |      |      |      |      |      |
|       |   |       | IGFHQFNNAKLVASNW     |      |      |      |      |      |      |
|       |   |       | YNRQIERSSRTLGCSEF    |      |      |      |      |      |      |
|       |   |       | IPVDDGWGERPL         |      |      |      |      |      |      |

|       |   |       |                      |      |      |      |      |      |      |
|-------|---|-------|----------------------|------|------|------|------|------|------|
|       |   |       | RLLSTFTEYIKNIINTSILN |      |      |      |      |      |      |
|       |   |       | LRYESNHLIDLSRYASKIN  |      |      |      |      |      |      |
|       |   |       | IGSKVNFDPIDKNQIQLF   |      |      |      |      |      |      |
|       |   |       | NLESSKIEVILKNAIVYNS  |      |      |      |      |      |      |
|       |   |       | MYENFSTSFWIRIPKYFN   |      |      |      |      |      |      |
|       |   |       | SISLNNEYTIINCMENNS   |      |      |      |      |      |      |
|       |   |       | GWKVSLENGEIIWTLQD    |      |      |      |      |      |      |
|       |   |       | TQEIQRVVFYKYSQMINI   |      |      |      |      |      |      |
|       |   |       | SDYINRWIFVTITNNRLN   |      |      |      |      |      |      |
|       |   |       | NSKIYINGRLIDQKPISNL  |      |      |      |      |      |      |
|       |   |       | GNIHASNNIMFKLDGCR    |      |      |      |      |      |      |
|       |   |       | DTHRYIWIKYFNLFDKEL   |      |      |      |      |      |      |
| 62255 | 0 | 54666 | NEKEIKDLYDNQNSGIL    | 6.06 | 0.01 | 2.08 | 0.68 | 0.22 | 1.34 |
|       |   |       | KDFWGDYLYDKPYM       |      |      |      |      |      |      |
|       |   |       | LNLYDPNKYVDVNNVGI    |      |      |      |      |      |      |
|       |   |       | RGYMYLKGPRGSVMTT     |      |      |      |      |      |      |
|       |   |       | NIYLNSSLYRGTKFIIKKY  |      |      |      |      |      |      |
|       |   |       | ASGNKDNIVRNNDRVYI    |      |      |      |      |      |      |
|       |   |       | NVVVKNKEYRLATNASQ    |      |      |      |      |      |      |
|       |   |       | AGVEKILSALEIPDVGNL   |      |      |      |      |      |      |
|       |   |       | SQVVVMKSKNDQGITN     |      |      |      |      |      |      |
|       |   |       | KCKMNLQDNNGNDIGF     |      |      |      |      |      |      |
|       |   |       | IGFHQFNNAKLVASNW     |      |      |      |      |      |      |
|       |   |       | YNRQIERSSRTLGCSEF    |      |      |      |      |      |      |
|       |   |       | IPVDDGWGERPL         |      |      |      |      |      |      |

|       |   |       |                      |      |      |      |      |      |      |
|-------|---|-------|----------------------|------|------|------|------|------|------|
|       |   |       | RLLSTFTEYIKNIINTSILN |      |      |      |      |      |      |
|       |   |       | LRYESNHLIDLSRYASKIN  |      |      |      |      |      |      |
|       |   |       | IGSKVNFDPIDKNQIQLF   |      |      |      |      |      |      |
|       |   |       | NLESSKIEVILKNAIVYNS  |      |      |      |      |      |      |
|       |   |       | MYENFSTSFWIRIPKYFN   |      |      |      |      |      |      |
|       |   |       | SISLNNEYTIINCMENNS   |      |      |      |      |      |      |
|       |   |       | GWKVSLENYGEIWTLQD    |      |      |      |      |      |      |
|       |   |       | TQEIQRVVFVKYSQMINI   |      |      |      |      |      |      |
|       |   |       | SDYINRWIFVTITNNRLN   |      |      |      |      |      |      |
|       |   |       | NSKIYINGRLIDQKPISNL  |      |      |      |      |      |      |
|       |   |       | GNIHASNNIMFKLDGCR    |      |      |      |      |      |      |
|       |   |       | DTHRYIWIKYFNLFDKEL   |      |      |      |      |      |      |
| 62256 | 0 | 54666 | NEKEIKDLYDNQNSGIL    | 6.06 | 0.01 | 2.08 | 0.68 | 0.22 | 1.66 |
|       |   |       | KDFWGDYLYDKPYM       |      |      |      |      |      |      |
|       |   |       | LNLYDPNKYVDVNNVGI    |      |      |      |      |      |      |
|       |   |       | RGYMYLKGPRGSVMTT     |      |      |      |      |      |      |
|       |   |       | NIYLNSSLYRGTKFIIKKY  |      |      |      |      |      |      |
|       |   |       | ASGNKDNIVRNNDRVYI    |      |      |      |      |      |      |
|       |   |       | NVVVKNKEYRLATNASQ    |      |      |      |      |      |      |
|       |   |       | AGVEKILSALEIPDVGNL   |      |      |      |      |      |      |
|       |   |       | SQVVVMKSKNDQGITN     |      |      |      |      |      |      |
|       |   |       | KCKMNLQDNNGNDIGF     |      |      |      |      |      |      |
|       |   |       | IGFHQFNNAKLVASNW     |      |      |      |      |      |      |
|       |   |       | YNRQIERSSRTLGCSEF    |      |      |      |      |      |      |
|       |   |       | IPVDDGWGERPL         |      |      |      |      |      |      |

|       |   |       |                      |      |      |      |      |      |      |
|-------|---|-------|----------------------|------|------|------|------|------|------|
|       |   |       | RLLSTFTEYIKNIINTSILN |      |      |      |      |      |      |
|       |   |       | LRYESNHLIDLSRYASKIN  |      |      |      |      |      |      |
|       |   |       | IGSKVNFDPIDKNQIQLF   |      |      |      |      |      |      |
|       |   |       | NLESSKIEVILKNAIVYNS  |      |      |      |      |      |      |
|       |   |       | MYENFSTSFWIRIPKYFN   |      |      |      |      |      |      |
|       |   |       | SISLNNEYTIINCMENNS   |      |      |      |      |      |      |
|       |   |       | GWKVSLENYGEIWTLQD    |      |      |      |      |      |      |
|       |   |       | TQEIQRVVFYKYSQMINI   |      |      |      |      |      |      |
|       |   |       | SDYINRWIFVTITNNRLN   |      |      |      |      |      |      |
|       |   |       | NSKIYINGRLIDQKPISNL  |      |      |      |      |      |      |
|       |   |       | GNIHASNNIMFKLDGCR    |      |      |      |      |      |      |
|       |   |       | DTHRYIWIKYFNLFDKEL   |      |      |      |      |      |      |
| 62257 | 0 | 54666 | NEKEIKDLYDNQNSGIL    | 6.06 | 0.01 | 2.08 | 0.68 | 0.22 | 1.66 |
|       |   |       | KDFWGDYLYDKPYM       |      |      |      |      |      |      |
|       |   |       | LNLYDPNKYVDVNNVGI    |      |      |      |      |      |      |
|       |   |       | RGYMYLKGPRGSVMTT     |      |      |      |      |      |      |
|       |   |       | NIYLNSSLYRGTKFIIKKY  |      |      |      |      |      |      |
|       |   |       | ASGNKDNIVRNNDRVYI    |      |      |      |      |      |      |
|       |   |       | NVVVKNKEYRLATNASQ    |      |      |      |      |      |      |
|       |   |       | AGVEKILSALEIPDVGNL   |      |      |      |      |      |      |
|       |   |       | SQVVVMKSKNDQGITN     |      |      |      |      |      |      |
|       |   |       | KCKMNLQDNNGNDIGF     |      |      |      |      |      |      |
|       |   |       | IGFHQFNNAKLVASNW     |      |      |      |      |      |      |
|       |   |       | YNRQIERSSRTLGCSEF    |      |      |      |      |      |      |
|       |   |       | IPVDDGWGERPL         |      |      |      |      |      |      |

|       |   |       |                      |      |      |      |      |      |      |
|-------|---|-------|----------------------|------|------|------|------|------|------|
|       |   |       | RLLSTFTEYIKNIINTSILN |      |      |      |      |      |      |
|       |   |       | LRYESNHLIDLSRYASKIN  |      |      |      |      |      |      |
|       |   |       | IGSKVNFDPIDKNQIQLF   |      |      |      |      |      |      |
|       |   |       | NLESSKIEVILKNAIVYNS  |      |      |      |      |      |      |
|       |   |       | MYENFSTSFWIRIPKYFN   |      |      |      |      |      |      |
|       |   |       | SISLNNEYTIINCMENNS   |      |      |      |      |      |      |
|       |   |       | GWKVSLNYGEIWTLQD     |      |      |      |      |      |      |
|       |   |       | TQEIQRVVFKYSQMINI    |      |      |      |      |      |      |
|       |   |       | SDYINRWIFVTITNNRLN   |      |      |      |      |      |      |
|       |   |       | NSKIYINGRLIDQKPISNL  |      |      |      |      |      |      |
|       |   |       | GNIHASNNIMFKLDGCR    |      |      |      |      |      |      |
|       |   |       | DTHRYIWIKYFNLFDKEL   |      |      |      |      |      |      |
| 62258 | 0 | 54666 | NEKEIKDLYDNQNSGIL    | 6.06 | 0.01 | 2.08 | 0.68 | 0.22 | 1.66 |
|       |   |       | KDFWGDYLQYDKPYM      |      |      |      |      |      |      |
|       |   |       | LNLYDPNKYVDVNNVGI    |      |      |      |      |      |      |
|       |   |       | RGYMYLKGPRGSVMTT     |      |      |      |      |      |      |
|       |   |       | NIYLNSSLYRGTKFIIKKY  |      |      |      |      |      |      |
|       |   |       | ASGNKDNIVRNNDRVYI    |      |      |      |      |      |      |
|       |   |       | NVVVKNKEYRLATNASQ    |      |      |      |      |      |      |
|       |   |       | AGVEKILSALEIPDVGNL   |      |      |      |      |      |      |
|       |   |       | SQVVVMKSKNDQGITN     |      |      |      |      |      |      |
|       |   |       | KCKMNLQDNNGNDIGF     |      |      |      |      |      |      |
|       |   |       | IGFHQFNNAKLVASNW     |      |      |      |      |      |      |
|       |   |       | YNRQIERSSRTLGCSEWF   |      |      |      |      |      |      |
|       |   |       | IPVDDGWGERPL         |      |      |      |      |      |      |

|       |   |       |                      |      |      |      |      |      |      |
|-------|---|-------|----------------------|------|------|------|------|------|------|
|       |   |       | RLLSTFTEYIKNIINTSILN |      |      |      |      |      |      |
|       |   |       | LRYESNHLIDLSRYASKIN  |      |      |      |      |      |      |
|       |   |       | IGSKVNFDPIDKNQIQLF   |      |      |      |      |      |      |
|       |   |       | NLESSKIEVILKNAIVYNS  |      |      |      |      |      |      |
|       |   |       | MYENFSTSFWIRIPKYFN   |      |      |      |      |      |      |
|       |   |       | SISLNNEYTIINCMENNS   |      |      |      |      |      |      |
|       |   |       | GWKVSLENYGEIWTLQD    |      |      |      |      |      |      |
|       |   |       | TQEIQRVVFYKYSQMINI   |      |      |      |      |      |      |
|       |   |       | SDYINRWIFVTITNNRLN   |      |      |      |      |      |      |
|       |   |       | NSKIYINGRLIDQKPISNL  |      |      |      |      |      |      |
|       |   |       | GNIHASNNIMFKLDGCR    |      |      |      |      |      |      |
|       |   |       | DTHRYIWIKYFNLFDKEL   |      |      |      |      |      |      |
| 62259 | 0 | 54666 | NEKEIKDLYDNQNSGIL    | 6.06 | 0.01 | 2.08 | 0.68 | 0.22 | 1.66 |
|       |   |       | KDFWGDYLYDKPYM       |      |      |      |      |      |      |
|       |   |       | LNLYDPNKYVDVNNVGI    |      |      |      |      |      |      |
|       |   |       | RGYMYLKGPRGSVMTT     |      |      |      |      |      |      |
|       |   |       | NIYLNSSLYRGTKFIIKKY  |      |      |      |      |      |      |
|       |   |       | ASGNKDNIVRNNDRVYI    |      |      |      |      |      |      |
|       |   |       | NVVVKNKEYRLATNASQ    |      |      |      |      |      |      |
|       |   |       | AGVEKILSALEIPDVGNL   |      |      |      |      |      |      |
|       |   |       | SQVVVMKSKNDQGITN     |      |      |      |      |      |      |
|       |   |       | KCKMNLQDNNGNDIGF     |      |      |      |      |      |      |
|       |   |       | IGFHQFNNAKLVASNW     |      |      |      |      |      |      |
|       |   |       | YNRQIERSSRTLGCSEF    |      |      |      |      |      |      |
|       |   |       | IPVDDGWGERPL         |      |      |      |      |      |      |

|       |   |       |                      |      |      |      |      |      |      |
|-------|---|-------|----------------------|------|------|------|------|------|------|
|       |   |       | RLLSTFTEYIKNIINTSILN |      |      |      |      |      |      |
|       |   |       | LRYESNHLIDLSRYASKIN  |      |      |      |      |      |      |
|       |   |       | IGSKVNFDPIDKNQIQLF   |      |      |      |      |      |      |
|       |   |       | NLESSKIEVILKNAIVYNS  |      |      |      |      |      |      |
|       |   |       | MYENFSTSFWIRIPKYFN   |      |      |      |      |      |      |
|       |   |       | SISLNNEYTIINCMENNS   |      |      |      |      |      |      |
|       |   |       | GWKVSLENYGEIWTLQD    |      |      |      |      |      |      |
|       |   |       | TQEIQRVVFVKYSQMINI   |      |      |      |      |      |      |
|       |   |       | SDYINRWIFVTITNNRLN   |      |      |      |      |      |      |
|       |   |       | NSKIYINGRLIDQKPISNL  |      |      |      |      |      |      |
|       |   |       | GNIHASNNIMFKLDGCR    |      |      |      |      |      |      |
|       |   |       | DTHRYIWIKYFNLFDKEL   |      |      |      |      |      |      |
| 62260 | 0 | 54666 | NEKEIKDLYDNQNSGIL    | 6.06 | 0.01 | 2.08 | 0.68 | 0.22 | 1.66 |
|       |   |       | KDFWGDYLQYDKPYM      |      |      |      |      |      |      |
|       |   |       | LNLYDPNKYVDVNNVGI    |      |      |      |      |      |      |
|       |   |       | RGYMYLKGPRGSVMTT     |      |      |      |      |      |      |
|       |   |       | NIYLNSSLYRGTKFIIKKY  |      |      |      |      |      |      |
|       |   |       | ASGNKDNIVRNNDRVYI    |      |      |      |      |      |      |
|       |   |       | NVVVKNKEYRLATNASQ    |      |      |      |      |      |      |
|       |   |       | AGVEKILSALEIPDVGNL   |      |      |      |      |      |      |
|       |   |       | SQVVVMKSKNDQGITN     |      |      |      |      |      |      |
|       |   |       | KCKMNLQDNNGNDIGF     |      |      |      |      |      |      |
|       |   |       | IGFHQFNNAKLVASNW     |      |      |      |      |      |      |
|       |   |       | YNRQIERSSRTLGCSEWF   |      |      |      |      |      |      |
|       |   |       | IPVDDGWGERPL         |      |      |      |      |      |      |



|       |   |       |                      |      |      |      |      |      |      |
|-------|---|-------|----------------------|------|------|------|------|------|------|
|       |   |       | RLLSTFTEYIKNIINTSILN |      |      |      |      |      |      |
|       |   |       | LRYESNHLIDLSRYASKIN  |      |      |      |      |      |      |
|       |   |       | IGSKVNFDPIDKNQIQLF   |      |      |      |      |      |      |
|       |   |       | NLESSKIEVILKNAIVYNS  |      |      |      |      |      |      |
|       |   |       | MYENFSTSFWIRIPKYFN   |      |      |      |      |      |      |
|       |   |       | SISLNNEYTIINCMENNS   |      |      |      |      |      |      |
|       |   |       | GWKVSLENYGEIWTLQD    |      |      |      |      |      |      |
|       |   |       | TQEIQRVVFYKYSQMINI   |      |      |      |      |      |      |
|       |   |       | SDYINRWIFVTITNNRLN   |      |      |      |      |      |      |
|       |   |       | NSKIYINGRLIDQKPISNL  |      |      |      |      |      |      |
|       |   |       | GNIHASNNIMFKLDGCR    |      |      |      |      |      |      |
|       |   |       | DTHRYIWIKYFNLFDKEL   |      |      |      |      |      |      |
| 62261 | 0 | 54666 | NEKEIKDLYDNQNSGIL    | 6.06 | 0.01 | 2.08 | 0.68 | 0.22 | 1.66 |
|       |   |       | KDFWGDYLYDKPYM       |      |      |      |      |      |      |
|       |   |       | LNLYDPNKYVDVNNVGI    |      |      |      |      |      |      |
|       |   |       | RGYMYLKGPRGSVMTT     |      |      |      |      |      |      |
|       |   |       | NIYLNSSLYRGTKFIIKKY  |      |      |      |      |      |      |
|       |   |       | ASGNKDNIVRNNDRVYI    |      |      |      |      |      |      |
|       |   |       | NVVVKNKEYRLATNASQ    |      |      |      |      |      |      |
|       |   |       | AGVEKILSALEIPDVGNL   |      |      |      |      |      |      |
|       |   |       | SQVVVMKSKNDQGITN     |      |      |      |      |      |      |
|       |   |       | KCKMNLQDNNGNDIGF     |      |      |      |      |      |      |
|       |   |       | IGFHQFNNAKLVASNW     |      |      |      |      |      |      |
|       |   |       | YNRQIERSSRTLGCSEF    |      |      |      |      |      |      |
|       |   |       | IPVDDGWGERPL         |      |      |      |      |      |      |

|       |   |       |                      |      |      |      |      |      |      |
|-------|---|-------|----------------------|------|------|------|------|------|------|
|       |   |       | RLLSTFTEYIKNIINTSILN |      |      |      |      |      |      |
|       |   |       | LRYESNHLIDLSRYASKIN  |      |      |      |      |      |      |
|       |   |       | IGSKVNFDPIDKNQIQLF   |      |      |      |      |      |      |
|       |   |       | NLESSKIEVILKNAIVYNS  |      |      |      |      |      |      |
|       |   |       | MYENFSTSFWIRIPKYFN   |      |      |      |      |      |      |
|       |   |       | SISLNNEYTIINCMENNS   |      |      |      |      |      |      |
|       |   |       | GWKVSLENYGEIWTQLD    |      |      |      |      |      |      |
|       |   |       | TQEIQRVVFYKYSQMINI   |      |      |      |      |      |      |
|       |   |       | SDYINRWIFVTITNNRLN   |      |      |      |      |      |      |
|       |   |       | NSKIYINGRLIDQKPISNL  |      |      |      |      |      |      |
|       |   |       | GNIHASNNIMFKLDGCR    |      |      |      |      |      |      |
|       |   |       | DTHRYIWIKYFNLFDKEL   |      |      |      |      |      |      |
| 62262 | 0 | 54666 | NEKEIKDLYDNQNSGIL    | 6.06 | 0.01 | 2.08 | 0.68 | 0.22 | 1.66 |
|       |   |       | KDFWGDYLYDKPYM       |      |      |      |      |      |      |
|       |   |       | LNLYDPNKYVDVNNVGI    |      |      |      |      |      |      |
|       |   |       | RGYMYLKGPRGSVMTT     |      |      |      |      |      |      |
|       |   |       | NIYLNSSLYRGTKFIIKKY  |      |      |      |      |      |      |
|       |   |       | ASGNKDNIVRNNDRVYI    |      |      |      |      |      |      |
|       |   |       | NVVVKNKEYRLATNASQ    |      |      |      |      |      |      |
|       |   |       | AGVEKILSALEIPDVGNL   |      |      |      |      |      |      |
|       |   |       | SQVVVMKSKNDQGITN     |      |      |      |      |      |      |
|       |   |       | KCKMNLQDNNGNDIGF     |      |      |      |      |      |      |
|       |   |       | IGFHQFNNAKLVASNW     |      |      |      |      |      |      |
|       |   |       | YNRQIERSSRTLGCSEF    |      |      |      |      |      |      |
|       |   |       | IPVDDGWGERPL         |      |      |      |      |      |      |

|       |   |       |                      |      |      |      |      |      |      |
|-------|---|-------|----------------------|------|------|------|------|------|------|
|       |   |       | RLLSTFTEYIKNIINTSILN |      |      |      |      |      |      |
|       |   |       | LRYESNHLIDLSRYASKIN  |      |      |      |      |      |      |
|       |   |       | IGSKVNFDPIDKNQIQLF   |      |      |      |      |      |      |
|       |   |       | NLESSKIEVILKNAIVYNS  |      |      |      |      |      |      |
|       |   |       | MYENFSTSFWIRIPKYFN   |      |      |      |      |      |      |
|       |   |       | SISLNNEYTIINCMENNS   |      |      |      |      |      |      |
|       |   |       | GWKVSLNYGEIWTLQD     |      |      |      |      |      |      |
|       |   |       | TQEIQRVVFKYSQMINI    |      |      |      |      |      |      |
|       |   |       | SDYINRWIFVTITNNRLN   |      |      |      |      |      |      |
|       |   |       | NSKIYINGRLIDQKPISNL  |      |      |      |      |      |      |
|       |   |       | GNIHASNNIMFKLDGCR    |      |      |      |      |      |      |
|       |   |       | DTHRYIWIKYFNLFDKEL   |      |      |      |      |      |      |
| 62263 | 0 | 54666 | NEKEIKDLYDNQNSGIL    | 6.06 | 0.01 | 2.08 | 0.68 | 0.22 | 1.66 |
|       |   |       | KDFWGDYLQYDKPYM      |      |      |      |      |      |      |
|       |   |       | LNLYDPNKYVDVNNVGI    |      |      |      |      |      |      |
|       |   |       | RGYMYLKGPRGSVMTT     |      |      |      |      |      |      |
|       |   |       | NIYLNSSLYRGTKFIIKKY  |      |      |      |      |      |      |
|       |   |       | ASGNKDNIVRNNDRVYI    |      |      |      |      |      |      |
|       |   |       | NVVVKNKEYRLATNASQ    |      |      |      |      |      |      |
|       |   |       | AGVEKILSALEIPDVGNL   |      |      |      |      |      |      |
|       |   |       | SQVVVMKSKNDQGITN     |      |      |      |      |      |      |
|       |   |       | KCKMNLQDNNGNDIGF     |      |      |      |      |      |      |
|       |   |       | IGFHQFNNAKLVASNW     |      |      |      |      |      |      |
|       |   |       | YNRQIERSSRTLGCSEF    |      |      |      |      |      |      |
|       |   |       | IPVDDGWGERPL         |      |      |      |      |      |      |

|       |   |       |                      |      |      |      |      |      |      |
|-------|---|-------|----------------------|------|------|------|------|------|------|
|       |   |       | RLLSTFTEYIKNIINTSILN |      |      |      |      |      |      |
|       |   |       | LRYESNHLIDLSRYASKIN  |      |      |      |      |      |      |
|       |   |       | IGSKVNFDPIDKNQIQLF   |      |      |      |      |      |      |
|       |   |       | NLESSKIEVILKNAIVYNS  |      |      |      |      |      |      |
|       |   |       | MYENFSTSFWIRIPKYFN   |      |      |      |      |      |      |
|       |   |       | SISLNNEYTIINCMENNS   |      |      |      |      |      |      |
|       |   |       | GWKVSLENYGEIWTLQD    |      |      |      |      |      |      |
|       |   |       | TQEIQRVVFVKYSQMINI   |      |      |      |      |      |      |
|       |   |       | SDYINRWIFVTITNNRLN   |      |      |      |      |      |      |
|       |   |       | NSKIYINGRLIDQKPISNL  |      |      |      |      |      |      |
|       |   |       | GNIHASNNIMFKLDGCR    |      |      |      |      |      |      |
|       |   |       | DTHRYIWIKYFNLFDKEL   |      |      |      |      |      |      |
| 62264 | 0 | 54666 | NEKEIKDLYDNQNSGIL    | 6.06 | 0.01 | 2.08 | 0.68 | 0.22 | 1.66 |
|       |   |       | KDFWGDYLYDKPYM       |      |      |      |      |      |      |
|       |   |       | LNLYDPNKYVDVNNVGI    |      |      |      |      |      |      |
|       |   |       | RGYMYLKGPRGSVMTT     |      |      |      |      |      |      |
|       |   |       | NIYLNSSLYRGTKFIIKKY  |      |      |      |      |      |      |
|       |   |       | ASGNKDNIVRNNDRVYI    |      |      |      |      |      |      |
|       |   |       | NVVVKNKEYRLATNASQ    |      |      |      |      |      |      |
|       |   |       | AGVEKILSALEIPDVGNL   |      |      |      |      |      |      |
|       |   |       | SQVVVMKSKNDQGITN     |      |      |      |      |      |      |
|       |   |       | KCKMNLQDNNGNDIGF     |      |      |      |      |      |      |
|       |   |       | IGFHQFNNAKLVASNW     |      |      |      |      |      |      |
|       |   |       | YNRQIERSSRTLGCSEF    |      |      |      |      |      |      |
|       |   |       | IPVDDGWGERPL         |      |      |      |      |      |      |

|       |   |       |                      |      |      |      |      |      |      |
|-------|---|-------|----------------------|------|------|------|------|------|------|
|       |   |       | RLLSTFTEYIKNIINTSILN |      |      |      |      |      |      |
|       |   |       | LRYESNHLIDLSRYASKIN  |      |      |      |      |      |      |
|       |   |       | IGSKVNFDPIDKNQIQLF   |      |      |      |      |      |      |
|       |   |       | NLESSKIEVILKNAIVYNS  |      |      |      |      |      |      |
|       |   |       | MYENFSTSFWIRIPKYFN   |      |      |      |      |      |      |
|       |   |       | SISLNNEYTIINCMENNS   |      |      |      |      |      |      |
|       |   |       | GWKVSLENYGEIWTLQD    |      |      |      |      |      |      |
|       |   |       | TQEIQRVVFVKYSQMINI   |      |      |      |      |      |      |
|       |   |       | SDYINRWIFVTITNNRLN   |      |      |      |      |      |      |
|       |   |       | NSKIYINGRLIDQKPISNL  |      |      |      |      |      |      |
|       |   |       | GNIHASNNIMFKLDGCR    |      |      |      |      |      |      |
|       |   |       | DTHRYIWIKYFNLFDKEL   |      |      |      |      |      |      |
| 62265 | 0 | 54666 | NEKEIKDLYDNQNSGIL    | 6.06 | 0.01 | 2.08 | 0.68 | 0.22 | 1.66 |
|       |   |       | KDFWGDYLQYDKPYM      |      |      |      |      |      |      |
|       |   |       | LNLYDPNKYVDVNNVGI    |      |      |      |      |      |      |
|       |   |       | RGYMYLKGPRGSVMTT     |      |      |      |      |      |      |
|       |   |       | NIYLNSSLYRGTKFIIKKY  |      |      |      |      |      |      |
|       |   |       | ASGNKDNIVRNNDRVYI    |      |      |      |      |      |      |
|       |   |       | NVVVKNKEYRLATNASQ    |      |      |      |      |      |      |
|       |   |       | AGVEKILSALEIPDVGNL   |      |      |      |      |      |      |
|       |   |       | SQVVVMKSKNDQGITN     |      |      |      |      |      |      |
|       |   |       | KCKMNLQDNNGNDIGF     |      |      |      |      |      |      |
|       |   |       | IGFHQFNNAKLVASNW     |      |      |      |      |      |      |
|       |   |       | YNRQIERSSRTLGCSEWF   |      |      |      |      |      |      |
|       |   |       | IPVDDGWGERPL         |      |      |      |      |      |      |

|       |   |       |                      |      |      |      |      |      |      |
|-------|---|-------|----------------------|------|------|------|------|------|------|
|       |   |       | RLLSTFTEYIKNIINTSILN |      |      |      |      |      |      |
|       |   |       | LRYESNHLIDLSRYASKIN  |      |      |      |      |      |      |
|       |   |       | IGSKVNFDPIDKNQIQLF   |      |      |      |      |      |      |
|       |   |       | NLESSKIEVILKNAIVYNS  |      |      |      |      |      |      |
|       |   |       | MYENFSTSFWIRIPKYFN   |      |      |      |      |      |      |
|       |   |       | SISLNNEYTIINCMENNS   |      |      |      |      |      |      |
|       |   |       | GWKVSLNYGEIITLQD     |      |      |      |      |      |      |
|       |   |       | TQEIQRVVFYKYSQMINI   |      |      |      |      |      |      |
|       |   |       | SDYINRWIFVTITNNRLN   |      |      |      |      |      |      |
|       |   |       | NSKIYINGRLIDQKPISNL  |      |      |      |      |      |      |
|       |   |       | GNIHASNNIMFKLDGCR    |      |      |      |      |      |      |
|       |   |       | DTHRYIWIKYFNLFDKEL   |      |      |      |      |      |      |
| 62266 | 0 | 54666 | NEKEIKDLYDNQNSGIL    | 6.06 | 0.01 | 2.08 | 0.68 | 0.22 | 1.66 |
|       |   |       | KDFWGDYLQYDKPYM      |      |      |      |      |      |      |
|       |   |       | LNLYDPNKYVDVNNVGI    |      |      |      |      |      |      |
|       |   |       | RGYMYLKGPRGSVMTT     |      |      |      |      |      |      |
|       |   |       | NIYLNSSLYRGTKFIIKKY  |      |      |      |      |      |      |
|       |   |       | ASGNKDNIVRNNDRVYI    |      |      |      |      |      |      |
|       |   |       | NVVVKNKEYRLATNASQ    |      |      |      |      |      |      |
|       |   |       | AGVEKILSALEIPDVGNL   |      |      |      |      |      |      |
|       |   |       | SQVVVMKSKNDQGITN     |      |      |      |      |      |      |
|       |   |       | KCKMNLQDNNGNDIGF     |      |      |      |      |      |      |
|       |   |       | IGFHQFNNAKLVASNW     |      |      |      |      |      |      |
|       |   |       | YNRQIERSSRTLGCSEF    |      |      |      |      |      |      |
|       |   |       | IPVDDGWGERPL         |      |      |      |      |      |      |

|       |   |       |                      |      |      |      |      |      |      |
|-------|---|-------|----------------------|------|------|------|------|------|------|
|       |   |       | RLLSTFTEYIKNIINTSILN |      |      |      |      |      |      |
|       |   |       | LRYESNHLIDLSRYASKIN  |      |      |      |      |      |      |
|       |   |       | IGSKVNFDPIDKNQIQLF   |      |      |      |      |      |      |
|       |   |       | NLESSKIEVILKNAIVYNS  |      |      |      |      |      |      |
|       |   |       | MYENFSTSFWIRIPKYFN   |      |      |      |      |      |      |
|       |   |       | SISLNNEYTIINCMENNS   |      |      |      |      |      |      |
|       |   |       | GWKVS LNYGEI IWT LQD |      |      |      |      |      |      |
|       |   |       | TQEIKQRV VFKYSQMINI  |      |      |      |      |      |      |
|       |   |       | SDYINRWIFVTITNNRLN   |      |      |      |      |      |      |
|       |   |       | NSKIYINGRLIDQKPISNL  |      |      |      |      |      |      |
|       |   |       | GNIHASNNIMFKLDGCR    |      |      |      |      |      |      |
|       |   |       | DTHRYIWIKYFNLFDKEL   |      |      |      |      |      |      |
| 62267 | 0 | 54666 | NEKEIKDLYDNQNSGIL    | 6.06 | 0.01 | 2.08 | 0.68 | 0.22 | 1.66 |
|       |   |       | KDFWGDYLQYDKPYM      |      |      |      |      |      |      |
|       |   |       | LNLYDPNKYVDVNNVGI    |      |      |      |      |      |      |
|       |   |       | RGYMYLKGPRGSVMTT     |      |      |      |      |      |      |
|       |   |       | NIYLNSSLYRGTKFIIKKY  |      |      |      |      |      |      |
|       |   |       | ASGNKDNIVRNNDRVYI    |      |      |      |      |      |      |
|       |   |       | NVVVKNKEYRLATNASQ    |      |      |      |      |      |      |
|       |   |       | AGVEKILSALEIPDVGNL   |      |      |      |      |      |      |
|       |   |       | SQVVVMKSKNDQGITN     |      |      |      |      |      |      |
|       |   |       | KCKMNLQDNNGNDIGF     |      |      |      |      |      |      |
|       |   |       | IGFHQFN NIAKLVASNW   |      |      |      |      |      |      |
|       |   |       | YNRQIERSSRTLGCSEF    |      |      |      |      |      |      |
|       |   |       | IPVDDGWGERPL         |      |      |      |      |      |      |

|       |   |       |                      |      |      |      |      |      |      |
|-------|---|-------|----------------------|------|------|------|------|------|------|
|       |   |       | RLLSTFTEYIKNIINTSILN |      |      |      |      |      |      |
|       |   |       | LRYESNHLIDLSRYASKIN  |      |      |      |      |      |      |
|       |   |       | IGSKVNFDPIDKNQIQLF   |      |      |      |      |      |      |
|       |   |       | NLESSKIEVILKNAIVYNS  |      |      |      |      |      |      |
|       |   |       | MYENFSTSFWIRIPKYFN   |      |      |      |      |      |      |
|       |   |       | SISLNNEYTIINCMENNS   |      |      |      |      |      |      |
|       |   |       | GWKVSLNYGEIITLQD     |      |      |      |      |      |      |
|       |   |       | TQEIQRVVFVKYSQMINI   |      |      |      |      |      |      |
|       |   |       | SDYINRWIFVTITNNRLN   |      |      |      |      |      |      |
|       |   |       | NSKIYINGRLIDQKPISNL  |      |      |      |      |      |      |
|       |   |       | GNIHASNNIMFKLDGCR    |      |      |      |      |      |      |
|       |   |       | DTHRYIWIKYFNLFDKEL   |      |      |      |      |      |      |
| 62268 | 0 | 54666 | NEKEIKDLYDNQNSGIL    | 6.06 | 0.01 | 2.08 | 0.44 | 0.22 | 0.28 |
|       |   |       | KDFWGDYLQYDKPYM      |      |      |      |      |      |      |
|       |   |       | LNLYDPNKYVDVNNVGI    |      |      |      |      |      |      |
|       |   |       | RGYMYLKGPRGSVMTT     |      |      |      |      |      |      |
|       |   |       | NIYLNSSLYRGTKFIIKKY  |      |      |      |      |      |      |
|       |   |       | ASGNKDNIVRNNDRVYI    |      |      |      |      |      |      |
|       |   |       | NVVVKNKEYRLATNASQ    |      |      |      |      |      |      |
|       |   |       | AGVEKILSALEIPDVGNL   |      |      |      |      |      |      |
|       |   |       | SQVVVMKSKNDQGITN     |      |      |      |      |      |      |
|       |   |       | KCKMNLQDNNGNDIGF     |      |      |      |      |      |      |
|       |   |       | IGFHQFNNAKLVASNW     |      |      |      |      |      |      |
|       |   |       | YNRQIERSSRTLGCSEF    |      |      |      |      |      |      |
|       |   |       | IPVDDGWGERPL         |      |      |      |      |      |      |



|       |   |       |                      |      |      |      |      |      |      |
|-------|---|-------|----------------------|------|------|------|------|------|------|
|       |   |       | RLLSTFTEYIKNIINTSILN |      |      |      |      |      |      |
|       |   |       | LRYESNHLIDLSRYASKIN  |      |      |      |      |      |      |
|       |   |       | IGSKVNFDPIDKNQIQLF   |      |      |      |      |      |      |
|       |   |       | NLESSKIEVILKNAIVYNS  |      |      |      |      |      |      |
|       |   |       | MYENFSTSFWIRIPKYFN   |      |      |      |      |      |      |
|       |   |       | SISLNNEYTIINCMENNS   |      |      |      |      |      |      |
|       |   |       | GWKVSLENYGEIWTLQD    |      |      |      |      |      |      |
|       |   |       | TQEIQRVVFYKYSQMINI   |      |      |      |      |      |      |
|       |   |       | SDYINRWIFVTITNNRLN   |      |      |      |      |      |      |
|       |   |       | NSKIYINGRLIDQKPISNL  |      |      |      |      |      |      |
|       |   |       | GNIHASNNIMFKLDGCR    |      |      |      |      |      |      |
|       |   |       | DTHRYIWIKYFNLFDKEL   |      |      |      |      |      |      |
| 62269 | 0 | 54666 | NEKEIKDLYDNQNSGIL    | 6.06 | 0.01 | 2.08 | 0.44 | 0.22 | 1.66 |
|       |   |       | KDFWGDYLYDKPYM       |      |      |      |      |      |      |
|       |   |       | LNLYDPNKYVDVNNVGI    |      |      |      |      |      |      |
|       |   |       | RGYMYLKGPRGSVMTT     |      |      |      |      |      |      |
|       |   |       | NIYLNSSLYRGTKFIIKKY  |      |      |      |      |      |      |
|       |   |       | ASGNKDNIVRNNDRVYI    |      |      |      |      |      |      |
|       |   |       | NVVVKNKEYRLATNASQ    |      |      |      |      |      |      |
|       |   |       | AGVEKILSALEIPDVGNL   |      |      |      |      |      |      |
|       |   |       | SQVVVMKSKNDQGITN     |      |      |      |      |      |      |
|       |   |       | KCKMNLQDNNGNDIGF     |      |      |      |      |      |      |
|       |   |       | IGFHQFNNAKLVASNW     |      |      |      |      |      |      |
|       |   |       | YNRQIERSSRTLGCSEF    |      |      |      |      |      |      |
|       |   |       | IPVDDGWGERPL         |      |      |      |      |      |      |

|       |   |       |                      |      |      |      |      |      |      |
|-------|---|-------|----------------------|------|------|------|------|------|------|
|       |   |       | RLLSTFTEYIKNIINTSILN |      |      |      |      |      |      |
|       |   |       | LRYESNHLIDLSRYASKIN  |      |      |      |      |      |      |
|       |   |       | IGSKVNFDPIDKNQIQLF   |      |      |      |      |      |      |
|       |   |       | NLESSKIEVILKNAIVYNS  |      |      |      |      |      |      |
|       |   |       | MYENFSTSFWIRIPKYFN   |      |      |      |      |      |      |
|       |   |       | SISLNNEYTIINCMENNS   |      |      |      |      |      |      |
|       |   |       | GWKVSLENYGEIWTQLD    |      |      |      |      |      |      |
|       |   |       | TQEIQRVVFYKYSQMINI   |      |      |      |      |      |      |
|       |   |       | SDYINRWIFVTITNNRLN   |      |      |      |      |      |      |
|       |   |       | NSKIYINGRLIDQKPISNL  |      |      |      |      |      |      |
|       |   |       | GNIHASNNIMFKLDGCR    |      |      |      |      |      |      |
|       |   |       | DTHRYIWIKYFNLFDKEL   |      |      |      |      |      |      |
| 62270 | 0 | 54666 | NEKEIKDLYDNQNSGIL    | 6.06 | 0.01 | 2.08 | 0.44 | 0.22 | 1.66 |
|       |   |       | KDFWGDYLYDKPYM       |      |      |      |      |      |      |
|       |   |       | LNLYDPNKYVDVNNVGI    |      |      |      |      |      |      |
|       |   |       | RGYMYLKGPRGSVMTT     |      |      |      |      |      |      |
|       |   |       | NIYLNSSLYRGTKFIIKKY  |      |      |      |      |      |      |
|       |   |       | ASGNKDNIVRNNDRVYI    |      |      |      |      |      |      |
|       |   |       | NVVVKNKEYRLATNASQ    |      |      |      |      |      |      |
|       |   |       | AGVEKILSALEIPDVGNL   |      |      |      |      |      |      |
|       |   |       | SQVVVMKSKNDQGITN     |      |      |      |      |      |      |
|       |   |       | KCKMNLQDNNGNDIGF     |      |      |      |      |      |      |
|       |   |       | IGFHQFNNAKLVASNW     |      |      |      |      |      |      |
|       |   |       | YNRQIERSSRTLGCSEF    |      |      |      |      |      |      |
|       |   |       | IPVDDGWGERPL         |      |      |      |      |      |      |

|       |   |       |                      |      |      |      |      |      |      |
|-------|---|-------|----------------------|------|------|------|------|------|------|
|       |   |       | RLLSTFTEYIKNIINTSILN |      |      |      |      |      |      |
|       |   |       | LRYESNHLIDLSRYASKIN  |      |      |      |      |      |      |
|       |   |       | IGSKVNFDPIDKNQIQLF   |      |      |      |      |      |      |
|       |   |       | NLESSKIEVILKNAIVYNS  |      |      |      |      |      |      |
|       |   |       | MYENFSTSFWIRIPKYFN   |      |      |      |      |      |      |
|       |   |       | SISLNNEYTIINCMENNS   |      |      |      |      |      |      |
|       |   |       | GWKVSLENYGEIWTLQD    |      |      |      |      |      |      |
|       |   |       | TQEIQRVVFYKYSQMINI   |      |      |      |      |      |      |
|       |   |       | SDYINRWIFVTITNNRLN   |      |      |      |      |      |      |
|       |   |       | NSKIYINGRLIDQKPISNL  |      |      |      |      |      |      |
|       |   |       | GNIHASNNIMFKLDGCR    |      |      |      |      |      |      |
|       |   |       | DTHRYIWIKYFNLFDKEL   |      |      |      |      |      |      |
| 62271 | 0 | 54666 | NEKEIKDLYDNQNSGIL    | 6.06 | 0.01 | 2.08 | 0.44 | 0.22 | 1.66 |
|       |   |       | KDFWGDYLYDKPYM       |      |      |      |      |      |      |
|       |   |       | LNLYDPNKYVDVNNVGI    |      |      |      |      |      |      |
|       |   |       | RGYMYLKGPRGSVMTT     |      |      |      |      |      |      |
|       |   |       | NIYLNSSLYRGTKFIIKKY  |      |      |      |      |      |      |
|       |   |       | ASGNKDNIVRNNDRVYI    |      |      |      |      |      |      |
|       |   |       | NVVVKNKEYRLATNASQ    |      |      |      |      |      |      |
|       |   |       | AGVEKILSALEIPDVGNL   |      |      |      |      |      |      |
|       |   |       | SQVVVMKSKNDQGITN     |      |      |      |      |      |      |
|       |   |       | KCKMNLQDNNGNDIGF     |      |      |      |      |      |      |
|       |   |       | IGFHQFNNAKLVASNW     |      |      |      |      |      |      |
|       |   |       | YNRQIERSSRTLGCSEF    |      |      |      |      |      |      |
|       |   |       | IPVDDGWGERPL         |      |      |      |      |      |      |

|       |   |       |                      |      |      |      |      |      |      |
|-------|---|-------|----------------------|------|------|------|------|------|------|
|       |   |       | RLLSTFTEYIKNIINTSILN |      |      |      |      |      |      |
|       |   |       | LRYESNHLIDLSRYASKIN  |      |      |      |      |      |      |
|       |   |       | IGSKVNFDPIDKNQIQLF   |      |      |      |      |      |      |
|       |   |       | NLESSKIEVILKNAIVYNS  |      |      |      |      |      |      |
|       |   |       | MYENFSTSFWIRIPKYFN   |      |      |      |      |      |      |
|       |   |       | SISLNNEYTIINCMENNS   |      |      |      |      |      |      |
|       |   |       | GWKVSLENYGEIWTQLD    |      |      |      |      |      |      |
|       |   |       | TQEIQRVVFYKYSQMINI   |      |      |      |      |      |      |
|       |   |       | SDYINRWIFVTITNNRLN   |      |      |      |      |      |      |
|       |   |       | NSKIYINGRLIDQKPISNL  |      |      |      |      |      |      |
|       |   |       | GNIHASNNIMFKLDGCR    |      |      |      |      |      |      |
|       |   |       | DTHRYIWIKYFNLFDKEL   |      |      |      |      |      |      |
| 62272 | 0 | 54666 | NEKEIKDLYDNQNSGIL    | 6.06 | 0.01 | 2.08 | 0.44 | 0.22 | 1.34 |
|       |   |       | KDFWGDYLYDKPYM       |      |      |      |      |      |      |
|       |   |       | LNLYDPNKYVDVNNVGI    |      |      |      |      |      |      |
|       |   |       | RGYMYLKGPRGSVMTT     |      |      |      |      |      |      |
|       |   |       | NIYLNSSLYRGTKFIIKKY  |      |      |      |      |      |      |
|       |   |       | ASGNKDNIVRNNDRVYI    |      |      |      |      |      |      |
|       |   |       | NVVVKNKEYRLATNASQ    |      |      |      |      |      |      |
|       |   |       | AGVEKILSALEIPDVGNL   |      |      |      |      |      |      |
|       |   |       | SQVVVMKSKNDQGITN     |      |      |      |      |      |      |
|       |   |       | KCKMNLQDNNGNDIGF     |      |      |      |      |      |      |
|       |   |       | IGFHQFNNAKLVASNW     |      |      |      |      |      |      |
|       |   |       | YNRQIERSSRTLGCSEF    |      |      |      |      |      |      |
|       |   |       | IPVDDGWGERPL         |      |      |      |      |      |      |

|       |   |       |                      |      |      |      |      |      |      |
|-------|---|-------|----------------------|------|------|------|------|------|------|
|       |   |       | RLLSTFTEYIKNIINTSILN |      |      |      |      |      |      |
|       |   |       | LRYESNHLIDLSRYASKIN  |      |      |      |      |      |      |
|       |   |       | IGSKVNFDPIDKNQIQLF   |      |      |      |      |      |      |
|       |   |       | NLESSKIEVILKNAIVYNS  |      |      |      |      |      |      |
|       |   |       | MYENFSTSFWIRIPKYFN   |      |      |      |      |      |      |
|       |   |       | SISLNNEYTIINCMENNS   |      |      |      |      |      |      |
|       |   |       | GWKVSLNYGEIWTLQD     |      |      |      |      |      |      |
|       |   |       | TQEIQRVVFKYSQMINI    |      |      |      |      |      |      |
|       |   |       | SDYINRWIFVTITNNRLN   |      |      |      |      |      |      |
|       |   |       | NSKIYINGRLIDQKPISNL  |      |      |      |      |      |      |
|       |   |       | GNIHASNNIMFKLDGCR    |      |      |      |      |      |      |
|       |   |       | DTHRYIWIKYFNLFDKEL   |      |      |      |      |      |      |
| 62273 | 0 | 54666 | NEKEIKDLYDNQNSGIL    | 6.06 | 0.01 | 2.08 | 0.44 | 0.22 | 1.66 |
|       |   |       | KDFWGDYLQYDKPYM      |      |      |      |      |      |      |
|       |   |       | LNLYDPNKYVDVNNVGI    |      |      |      |      |      |      |
|       |   |       | RGYMYLKGPRGSVMTT     |      |      |      |      |      |      |
|       |   |       | NIYLNSSLYRGTKFIIKKY  |      |      |      |      |      |      |
|       |   |       | ASGNKDNIVRNNDRVYI    |      |      |      |      |      |      |
|       |   |       | NVVVKNKEYRLATNASQ    |      |      |      |      |      |      |
|       |   |       | AGVEKILSALEIPDVGNL   |      |      |      |      |      |      |
|       |   |       | SQVVVMKSKNDQGITN     |      |      |      |      |      |      |
|       |   |       | KCKMNLQDNNGNDIGF     |      |      |      |      |      |      |
|       |   |       | IGFHQFNNAKLVASNW     |      |      |      |      |      |      |
|       |   |       | YNRQIERSSRTLGCSEF    |      |      |      |      |      |      |
|       |   |       | IPVDDGWGERPL         |      |      |      |      |      |      |

|       |   |       |                      |      |      |      |      |      |      |
|-------|---|-------|----------------------|------|------|------|------|------|------|
|       |   |       | RLLSTFTEYIKNIINTSILN |      |      |      |      |      |      |
|       |   |       | LRYESNHLIDLSRYASKIN  |      |      |      |      |      |      |
|       |   |       | IGSKVNFDPIDKNQIQLF   |      |      |      |      |      |      |
|       |   |       | NLESSKIEVILKNAIVYNS  |      |      |      |      |      |      |
|       |   |       | MYENFSTSFWIRIPKYFN   |      |      |      |      |      |      |
|       |   |       | SISLNNEYTIINCMENNS   |      |      |      |      |      |      |
|       |   |       | GWKVSLNYGEIITLQD     |      |      |      |      |      |      |
|       |   |       | TQEIQRVVFYKYSQMINI   |      |      |      |      |      |      |
|       |   |       | SDYINRWIFVTITNNRLN   |      |      |      |      |      |      |
|       |   |       | NSKIYINGRLIDQKPISNL  |      |      |      |      |      |      |
|       |   |       | GNIHASNNIMFKLDGCR    |      |      |      |      |      |      |
|       |   |       | DTHRYIWIKYFNLFDKEL   |      |      |      |      |      |      |
| 62274 | 0 | 54666 | NEKEIKDLYDNQNSGIL    | 6.06 | 0.01 | 2.08 | 0.44 | 0.22 | 1.66 |
|       |   |       | KDFWGDYLYDKPYM       |      |      |      |      |      |      |
|       |   |       | LNLYDPNKYVDVNNVGI    |      |      |      |      |      |      |
|       |   |       | RGYMYLKGPRGSVMTT     |      |      |      |      |      |      |
|       |   |       | NIYLNSSLYRGTKFIIKKY  |      |      |      |      |      |      |
|       |   |       | ASGNKDNIVRNNDRVYI    |      |      |      |      |      |      |
|       |   |       | NVVVKNKEYRLATNASQ    |      |      |      |      |      |      |
|       |   |       | AGVEKILSALEIPDVGNL   |      |      |      |      |      |      |
|       |   |       | SQVVVMKSKNDQGITN     |      |      |      |      |      |      |
|       |   |       | KCKMNLQDNNGNDIGF     |      |      |      |      |      |      |
|       |   |       | IGFHQFNNAKLVASNW     |      |      |      |      |      |      |
|       |   |       | YNRQIERSSRTLGCSEF    |      |      |      |      |      |      |
|       |   |       | IPVDDGWGERPL         |      |      |      |      |      |      |

|       |   |       |                      |      |      |      |      |      |      |
|-------|---|-------|----------------------|------|------|------|------|------|------|
|       |   |       | RLLSTFTEYIKNIINTSILN |      |      |      |      |      |      |
|       |   |       | LRYESNHLIDLSRYASKIN  |      |      |      |      |      |      |
|       |   |       | IGSKVNFDPIDKNQIQLF   |      |      |      |      |      |      |
|       |   |       | NLESSKIEVILKNAIVYNS  |      |      |      |      |      |      |
|       |   |       | MYENFSTFSWIRIPKYFN   |      |      |      |      |      |      |
|       |   |       | SISLNNEYTIINCMENNS   |      |      |      |      |      |      |
|       |   |       | GWKVSLENYGEIWTLQD    |      |      |      |      |      |      |
|       |   |       | TQEIQRVVFYKYSQMINI   |      |      |      |      |      |      |
|       |   |       | SDYINRWIFVTITNNRLN   |      |      |      |      |      |      |
|       |   |       | NSKIYINGRLIDQKPISNL  |      |      |      |      |      |      |
|       |   |       | GNIHASNNIMFKLDGCR    |      |      |      |      |      |      |
|       |   |       | DTHRYIWIKYFNLFDKEL   |      |      |      |      |      |      |
| 62275 | 0 | 54666 | NEKEIKDLYDNQNSGIL    | 6.06 | 0.01 | 2.08 | 0.44 | 0.22 | 1.66 |
|       |   |       | KDFWGDYLYDKPYM       |      |      |      |      |      |      |
|       |   |       | LNLYDPNKYVDVNNVGI    |      |      |      |      |      |      |
|       |   |       | RGYMYLKGPRGSVMTT     |      |      |      |      |      |      |
|       |   |       | NIYLNSSLYRGTKFIIKKY  |      |      |      |      |      |      |
|       |   |       | ASGNKDNIVRNNDRVYI    |      |      |      |      |      |      |
|       |   |       | NVVVKNKEYRLATNASQ    |      |      |      |      |      |      |
|       |   |       | AGVEKILSALEIPDVGNL   |      |      |      |      |      |      |
|       |   |       | SQVVVMKSKNDQGITN     |      |      |      |      |      |      |
|       |   |       | KCKMNLQDNNGNDIGF     |      |      |      |      |      |      |
|       |   |       | IGFHQFNNAKLVASNW     |      |      |      |      |      |      |
|       |   |       | YNRQIERSSRTLGCSEF    |      |      |      |      |      |      |
|       |   |       | IPVDDGWGERPL         |      |      |      |      |      |      |

|       |   |       |                      |      |      |      |      |      |      |
|-------|---|-------|----------------------|------|------|------|------|------|------|
|       |   |       | RLLSTFTEYIKNIINTSILN |      |      |      |      |      |      |
|       |   |       | LRYESNHLIDLSRYASKIN  |      |      |      |      |      |      |
|       |   |       | IGSKVNFDPIDKNQIQLF   |      |      |      |      |      |      |
|       |   |       | NLESSKIEVILKNAIVYNS  |      |      |      |      |      |      |
|       |   |       | MYENFSTSFWIRIPKYFN   |      |      |      |      |      |      |
|       |   |       | SISLNNEYTIINCMENNS   |      |      |      |      |      |      |
|       |   |       | GWKVSLNYGEIWTLQD     |      |      |      |      |      |      |
|       |   |       | TQEIQRVVFKYSQMINI    |      |      |      |      |      |      |
|       |   |       | SDYINRWIFVTITNNRLN   |      |      |      |      |      |      |
|       |   |       | NSKIYINGRLIDQKPISNL  |      |      |      |      |      |      |
|       |   |       | GNIHASNNIMFKLDGCR    |      |      |      |      |      |      |
|       |   |       | DTHRYIWIKYFNLFDKEL   |      |      |      |      |      |      |
| 62276 | 0 | 54666 | NEKEIKDLYDNQNSGIL    | 6.06 | 0.01 | 2.08 | 0.44 | 1.41 | 1.66 |
|       |   |       | KDFWGDYLQYDKPYM      |      |      |      |      |      |      |
|       |   |       | LNLYDPNKYVDVNNVGI    |      |      |      |      |      |      |
|       |   |       | RGYMYLKGPRGSVMTT     |      |      |      |      |      |      |
|       |   |       | NIYLNSSLYRGTKFIIKKY  |      |      |      |      |      |      |
|       |   |       | ASGNKDNIVRNNDRVYI    |      |      |      |      |      |      |
|       |   |       | NVVVKNKEYRLATNASQ    |      |      |      |      |      |      |
|       |   |       | AGVEKILSALEIPDVGNL   |      |      |      |      |      |      |
|       |   |       | SQVVVMKSKNDQGITN     |      |      |      |      |      |      |
|       |   |       | KCKMNLQDNNGNDIGF     |      |      |      |      |      |      |
|       |   |       | IGFHQFNNAKLVASNW     |      |      |      |      |      |      |
|       |   |       | YNRQIERSSRTLGCSEF    |      |      |      |      |      |      |
|       |   |       | IPVDDGWGERPL         |      |      |      |      |      |      |



|       |   |       |                      |      |      |      |      |      |      |
|-------|---|-------|----------------------|------|------|------|------|------|------|
|       |   |       | RLLSTFTEYIKNIINTSILN |      |      |      |      |      |      |
|       |   |       | LRYESNHLIDLSRYASKIN  |      |      |      |      |      |      |
|       |   |       | IGSKVNFDPIDKNQIQLF   |      |      |      |      |      |      |
|       |   |       | NLESSKIEVILKNAIVYNS  |      |      |      |      |      |      |
|       |   |       | MYENFSTSFWIRIPKYFN   |      |      |      |      |      |      |
|       |   |       | SISLNNEYTIINCMENNS   |      |      |      |      |      |      |
|       |   |       | GWKVSLENYGEIWTLQD    |      |      |      |      |      |      |
|       |   |       | TQEIQRVVFYKYSQMINI   |      |      |      |      |      |      |
|       |   |       | SDYINRWIFVTITNNRLN   |      |      |      |      |      |      |
|       |   |       | NSKIYINGRLIDQKPISNL  |      |      |      |      |      |      |
|       |   |       | GNIHASNNIMFKLDGCR    |      |      |      |      |      |      |
|       |   |       | DTHRYIWIKYFNLFDKEL   |      |      |      |      |      |      |
| 62277 | 0 | 54666 | NEKEIKDLYDNQNSGIL    | 6.06 | 0.01 | 2.08 | 0.68 | 0.22 | 1.34 |
|       |   |       | KDFWGDYLYDKPYM       |      |      |      |      |      |      |
|       |   |       | LNLYDPNKYVDVNNVGI    |      |      |      |      |      |      |
|       |   |       | RGYMYLKGPRGSVMTT     |      |      |      |      |      |      |
|       |   |       | NIYLNSSLYRGTKFIIKKY  |      |      |      |      |      |      |
|       |   |       | ASGNKDNIVRNNDRVYI    |      |      |      |      |      |      |
|       |   |       | NVVVKNKEYRLATNASQ    |      |      |      |      |      |      |
|       |   |       | AGVEKILSALEIPDVGNL   |      |      |      |      |      |      |
|       |   |       | SQVVVMKSKNDQGITN     |      |      |      |      |      |      |
|       |   |       | KCKMNLQDNNGNDIGF     |      |      |      |      |      |      |
|       |   |       | IGFHQFNNAKLVASNW     |      |      |      |      |      |      |
|       |   |       | YNRQIERSSRTLGCSEF    |      |      |      |      |      |      |
|       |   |       | IPVDDGWGERPL         |      |      |      |      |      |      |

|       |   |       |                      |      |      |      |      |      |      |
|-------|---|-------|----------------------|------|------|------|------|------|------|
|       |   |       | RLLSTFTEYIKNIINTSILN |      |      |      |      |      |      |
|       |   |       | LRYESNHLIDLSRYASKIN  |      |      |      |      |      |      |
|       |   |       | IGSKVNFDPIDKNQIQLF   |      |      |      |      |      |      |
|       |   |       | NLESSKIEVILKNAIVYNS  |      |      |      |      |      |      |
|       |   |       | MYENFSTSFWIRIPKYFN   |      |      |      |      |      |      |
|       |   |       | SISLNNEYTIINCMENNS   |      |      |      |      |      |      |
|       |   |       | GWKVSLNYGEIWTLQD     |      |      |      |      |      |      |
|       |   |       | TQEIQRVVFKYSQMINI    |      |      |      |      |      |      |
|       |   |       | SDYINRWIFVTITNNRLN   |      |      |      |      |      |      |
|       |   |       | NSKIYINGRLIDQKPISNL  |      |      |      |      |      |      |
|       |   |       | GNIHASNNIMFKLDGCR    |      |      |      |      |      |      |
|       |   |       | DTHRYIWIKYFNLFDKEL   |      |      |      |      |      |      |
| 62278 | 0 | 54666 | NEKEIKDLYDNQNSGIL    | 6.06 | 0.01 | 2.08 | 0.68 | 0.22 | 0.28 |
|       |   |       | KDFWGDYLQYDKPYM      |      |      |      |      |      |      |
|       |   |       | LNLYDPNKYVDVNNVGI    |      |      |      |      |      |      |
|       |   |       | RGYMYLKGPRGSVMTT     |      |      |      |      |      |      |
|       |   |       | NIYLNSSLYRGTKFIIKKY  |      |      |      |      |      |      |
|       |   |       | ASGNKDNIVRNNDRVYI    |      |      |      |      |      |      |
|       |   |       | NVVVKNKEYRLATNASQ    |      |      |      |      |      |      |
|       |   |       | AGVEKILSALEIPDVGNL   |      |      |      |      |      |      |
|       |   |       | SQVVVMKSKNDQGITN     |      |      |      |      |      |      |
|       |   |       | KCKMNLQDNNGNDIGF     |      |      |      |      |      |      |
|       |   |       | IGFHQFNNAKLVASNW     |      |      |      |      |      |      |
|       |   |       | YNRQIERSSRTLGCSEF    |      |      |      |      |      |      |
|       |   |       | IPVDDGWGERPL         |      |      |      |      |      |      |

RLLSTFTEYIKNIINTSILN  
LRYESNHLIDLSRYASKIN  
IGSKVNFDPIDKNQIQLF  
NLESSKIEVILKNAIVYNS  
MYENFSTSFWIRIPKYFN  
SISLNNEYTIINCMENNS  
GWKVS LNYGEI IWT LQD  
TQEIQRV VFKYSQMINI  
SDYINRWIFVTITNNRLN  
NSKIYINGRLIDQKPISNL  
GNIHASNNIMFKLDGCR  
DTHRYIWIKYFNLFDKEL  
NEKEIKDLYDNQNSGIL  
KDFWGDYLQYDKPYM  
LNLYDPNKYVDVNNVGI  
RGYMYLKGPRGSVMTT  
NIYLNSSLYRGTKFIIKKY  
ASGNKDNIVRNNDRVYI  
NVVVKNKEYRLATNASQ  
AGVEKILSALEIPDVGNL  
SQVVVMKSKNDQGITN  
KCKMNLQDNNGNDIGF  
IGFHQFN NIAKLVASNW  
YNRQIERSSRTLGCSEF  
IPVDDGWGERPL

62279    0    54666    6.06    0.01    3.30    1.15    0.22    0.28

|       |   |       |                      |      |      |      |      |      |      |
|-------|---|-------|----------------------|------|------|------|------|------|------|
|       |   |       | RLLSTFTEYIKNIINTSILN |      |      |      |      |      |      |
|       |   |       | LRYESNHLIDLSRYASKIN  |      |      |      |      |      |      |
|       |   |       | IGSKVNFDPIDKNQIQLF   |      |      |      |      |      |      |
|       |   |       | NLESSKIEVILKNAIVYNS  |      |      |      |      |      |      |
|       |   |       | MYENFSTSFWIRIPKYFN   |      |      |      |      |      |      |
|       |   |       | SISLNNEYTIINCMENNS   |      |      |      |      |      |      |
|       |   |       | GWKVSLENGEIIWTLQD    |      |      |      |      |      |      |
|       |   |       | TQEIQRVVFVKYSQMINI   |      |      |      |      |      |      |
|       |   |       | SDYINRWIFVTITNNRLN   |      |      |      |      |      |      |
|       |   |       | NSKIYINGRLIDQKPISNL  |      |      |      |      |      |      |
|       |   |       | GNIHASNNIMFKLDGCR    |      |      |      |      |      |      |
|       |   |       | DTHRYIWIKYFNLFDKEL   |      |      |      |      |      |      |
| 62280 | 0 | 54666 | NEKEIKDLYDNQNSGIL    | 6.06 | 0.01 | 3.30 | 1.15 | 0.22 | 0.28 |
|       |   |       | KDFWGDYLYDKPYM       |      |      |      |      |      |      |
|       |   |       | LNLYDPNKYVDVNNVGI    |      |      |      |      |      |      |
|       |   |       | RGYMYLKGPRGSVMTT     |      |      |      |      |      |      |
|       |   |       | NIYLNSSLYRGTKFIIKKY  |      |      |      |      |      |      |
|       |   |       | ASGNKDNIVRNNDRVYI    |      |      |      |      |      |      |
|       |   |       | NVVVKNKEYRLATNASQ    |      |      |      |      |      |      |
|       |   |       | AGVEKILSALEIPDVGNL   |      |      |      |      |      |      |
|       |   |       | SQVVVMKSKNDQGITN     |      |      |      |      |      |      |
|       |   |       | KCKMNLQDNNGNDIGF     |      |      |      |      |      |      |
|       |   |       | IGFHQFNNAKLVASNW     |      |      |      |      |      |      |
|       |   |       | YNRQIERSSRTLGCSEF    |      |      |      |      |      |      |
|       |   |       | IPVDDGWGERPL         |      |      |      |      |      |      |

|       |   |       |                      |      |      |      |      |      |      |
|-------|---|-------|----------------------|------|------|------|------|------|------|
|       |   |       | RLLSTFTEYIKNIINTSILN |      |      |      |      |      |      |
|       |   |       | LRYESNHLIDLSRYASKIN  |      |      |      |      |      |      |
|       |   |       | IGSKVNFDPIDKNQIQLF   |      |      |      |      |      |      |
|       |   |       | NLESSKIEVILKNAIVYNS  |      |      |      |      |      |      |
|       |   |       | MYENFSTSFWIRIPKYFN   |      |      |      |      |      |      |
|       |   |       | SISLNNEYTIINCMENNS   |      |      |      |      |      |      |
|       |   |       | GWKVSLENYGEIWTLQD    |      |      |      |      |      |      |
|       |   |       | TQEIQRVVFYKYSQMINI   |      |      |      |      |      |      |
|       |   |       | SDYINRWIFVTITNNRLN   |      |      |      |      |      |      |
|       |   |       | NSKIYINGRLIDQKPISNL  |      |      |      |      |      |      |
|       |   |       | GNIHASNNIMFKLDGCR    |      |      |      |      |      |      |
|       |   |       | DTHRYIWIKYFNLFDKEL   |      |      |      |      |      |      |
| 62281 | 0 | 54666 | NEKEIKDLYDNQNSGIL    | 6.06 | 0.01 | 3.30 | 1.15 | 0.22 | 1.34 |
|       |   |       | KDFWGDYLYDKPYM       |      |      |      |      |      |      |
|       |   |       | LNLYDPNKYVDVNNVGI    |      |      |      |      |      |      |
|       |   |       | RGYMYLKGPRGSVMTT     |      |      |      |      |      |      |
|       |   |       | NIYLNSSLYRGTKFIIKKY  |      |      |      |      |      |      |
|       |   |       | ASGNKDNIVRNNDRVYI    |      |      |      |      |      |      |
|       |   |       | NVVVKNKEYRLATNASQ    |      |      |      |      |      |      |
|       |   |       | AGVEKILSALEIPDVGNL   |      |      |      |      |      |      |
|       |   |       | SQVVVMKSKNDQGITN     |      |      |      |      |      |      |
|       |   |       | KCKMNLQDNNGNDIGF     |      |      |      |      |      |      |
|       |   |       | IGFHQFNNAKLVASNW     |      |      |      |      |      |      |
|       |   |       | YNRQIERSSRTLGCSEF    |      |      |      |      |      |      |
|       |   |       | IPVDDGWGERPL         |      |      |      |      |      |      |

|       |   |       |                      |      |      |      |      |      |      |
|-------|---|-------|----------------------|------|------|------|------|------|------|
|       |   |       | RLLSTFTEYIKNIINTSILN |      |      |      |      |      |      |
|       |   |       | LRYESNHLIDLSRYASKIN  |      |      |      |      |      |      |
|       |   |       | IGSKVNFDPIDKNQIQLF   |      |      |      |      |      |      |
|       |   |       | NLESSKIEVILKNAIVYNS  |      |      |      |      |      |      |
|       |   |       | MYENFSTSFWIRIPKYFN   |      |      |      |      |      |      |
|       |   |       | SISLNNEYTIINCMENNS   |      |      |      |      |      |      |
|       |   |       | GWKVSLNYGEIWTLQD     |      |      |      |      |      |      |
|       |   |       | TQEIQRVVFKYSQMINI    |      |      |      |      |      |      |
|       |   |       | SDYINRWIFVTITNNRLN   |      |      |      |      |      |      |
|       |   |       | NSKIYINGRLIDQKPISNL  |      |      |      |      |      |      |
|       |   |       | GNIHASNNIMFKLDGCR    |      |      |      |      |      |      |
|       |   |       | DTHRYIWIKYFNLFDKEL   |      |      |      |      |      |      |
| 62282 | 0 | 54666 | NEKEIKDLYDNQNSGIL    | 6.06 | 0.01 | 3.30 | 0.44 | 0.22 | 0.28 |
|       |   |       | KDFWGDYLQYDKPYM      |      |      |      |      |      |      |
|       |   |       | LNLYDPNKYVDVNNVGI    |      |      |      |      |      |      |
|       |   |       | RGYMYLKGPRGSVMTT     |      |      |      |      |      |      |
|       |   |       | NIYLNSSLYRGTKFIIKKY  |      |      |      |      |      |      |
|       |   |       | ASGNKDNIVRNNDRVYI    |      |      |      |      |      |      |
|       |   |       | NVVVKNKEYRLATNASQ    |      |      |      |      |      |      |
|       |   |       | AGVEKILSALEIPDVGNL   |      |      |      |      |      |      |
|       |   |       | SQVVVMKSKNDQGITN     |      |      |      |      |      |      |
|       |   |       | KCKMNLQDNNGNDIGF     |      |      |      |      |      |      |
|       |   |       | IGFHQFNNAKLVASNW     |      |      |      |      |      |      |
|       |   |       | YNRQIERSSRTLGCSEF    |      |      |      |      |      |      |
|       |   |       | IPVDDGWGERPL         |      |      |      |      |      |      |

|       |   |       |                      |      |      |      |      |      |      |
|-------|---|-------|----------------------|------|------|------|------|------|------|
|       |   |       | RLLSTFTEYIKNIINTSILN |      |      |      |      |      |      |
|       |   |       | LRYESNHLIDLSRYASKIN  |      |      |      |      |      |      |
|       |   |       | IGSKVNFDPIDKNQIQLF   |      |      |      |      |      |      |
|       |   |       | NLESSKIEVILKNAIVYNS  |      |      |      |      |      |      |
|       |   |       | MYENFSTSFWIRIPKYFN   |      |      |      |      |      |      |
|       |   |       | SISLNNEYTIINCMENNS   |      |      |      |      |      |      |
|       |   |       | GWKVSLNYGEIITLQD     |      |      |      |      |      |      |
|       |   |       | TQEIQRVVFKYSQMINI    |      |      |      |      |      |      |
|       |   |       | SDYINRWIFVTITNNRLN   |      |      |      |      |      |      |
|       |   |       | NSKIYINGRLIDQKPISNL  |      |      |      |      |      |      |
|       |   |       | GNIHASNNIMFKLDGCR    |      |      |      |      |      |      |
|       |   |       | DTHRYIWIKYFNLFDKEL   |      |      |      |      |      |      |
| 62283 | 0 | 54666 | NEKEIKDLYDNQNSGIL    | 6.06 | 0.01 | 3.30 | 0.44 | 0.22 | 1.34 |
|       |   |       | KDFWGDYLQYDKPYM      |      |      |      |      |      |      |
|       |   |       | LNLYDPNKYVDVNNVGI    |      |      |      |      |      |      |
|       |   |       | RGYMYLKGPRGSVMTT     |      |      |      |      |      |      |
|       |   |       | NIYLNSSLYRGTKFIIKKY  |      |      |      |      |      |      |
|       |   |       | ASGNKDNIVRNNDRVYI    |      |      |      |      |      |      |
|       |   |       | NVVVKNKEYRLATNASQ    |      |      |      |      |      |      |
|       |   |       | AGVEKILSALEIPDVGNL   |      |      |      |      |      |      |
|       |   |       | SQVVVMKSKNDQGITN     |      |      |      |      |      |      |
|       |   |       | KCKMNLQDNNGNDIGF     |      |      |      |      |      |      |
|       |   |       | IGFHQFNNAKLVASNW     |      |      |      |      |      |      |
|       |   |       | YNRQIERSSRTLGCSEF    |      |      |      |      |      |      |
|       |   |       | IPVDDGWGERPL         |      |      |      |      |      |      |

|       |   |       |                      |      |      |      |      |      |      |
|-------|---|-------|----------------------|------|------|------|------|------|------|
|       |   |       | RLLSTFTEYIKNIINTSILN |      |      |      |      |      |      |
|       |   |       | LRYESNHLIDLSRYASKIN  |      |      |      |      |      |      |
|       |   |       | IGSKVNFDPIDKNQIQLF   |      |      |      |      |      |      |
|       |   |       | NLESSKIEVILKNAIVYNS  |      |      |      |      |      |      |
|       |   |       | MYENFSTSFWIRIPKYFN   |      |      |      |      |      |      |
|       |   |       | SISLNNEYTIINCMENNS   |      |      |      |      |      |      |
|       |   |       | GWKVSLNYGEIWTLQD     |      |      |      |      |      |      |
|       |   |       | TQEIQRVVFKYSQMINI    |      |      |      |      |      |      |
|       |   |       | SDYINRWIFVTITNNRLN   |      |      |      |      |      |      |
|       |   |       | NSKIYINGRLIDQKPISNL  |      |      |      |      |      |      |
|       |   |       | GNIHASNNIMFKLDGCR    |      |      |      |      |      |      |
|       |   |       | DTHRYIWIKYFNLFDKEL   |      |      |      |      |      |      |
| 62284 | 0 | 54666 | NEKEIKDLYDNQNSGIL    | 6.06 | 0.01 | 3.16 | 0.68 | 0.22 | 1.66 |
|       |   |       | KDFWGDYLQYDKPYM      |      |      |      |      |      |      |
|       |   |       | LNLYDPNKYVDVNNVGI    |      |      |      |      |      |      |
|       |   |       | RGYMYLKGPRGSVMTT     |      |      |      |      |      |      |
|       |   |       | NIYLNSSLYRGTKFIIKKY  |      |      |      |      |      |      |
|       |   |       | ASGNKDNIVRNNDRVYI    |      |      |      |      |      |      |
|       |   |       | NVVVKNKEYRLATNASQ    |      |      |      |      |      |      |
|       |   |       | AGVEKILSALEIPDVGNL   |      |      |      |      |      |      |
|       |   |       | SQVVVMKSKNDQGITN     |      |      |      |      |      |      |
|       |   |       | KCKMNLQDNNGNDIGF     |      |      |      |      |      |      |
|       |   |       | IGFHQFNNAKLVASNW     |      |      |      |      |      |      |
|       |   |       | YNRQIERSSRTLGCSEF    |      |      |      |      |      |      |
|       |   |       | IPVDDGWGERPL         |      |      |      |      |      |      |



|       |   |       |                      |      |      |      |      |      |      |
|-------|---|-------|----------------------|------|------|------|------|------|------|
|       |   |       | RLLSTFTEYIKNIINTSILN |      |      |      |      |      |      |
|       |   |       | LRYESNHLIDLSRYASKIN  |      |      |      |      |      |      |
|       |   |       | IGSKVNFDPIDKNQIQLF   |      |      |      |      |      |      |
|       |   |       | NLESSKIEVILKNAIVYNS  |      |      |      |      |      |      |
|       |   |       | MYENFSTSFWIRIPKYFN   |      |      |      |      |      |      |
|       |   |       | SISLNNEYTIINCMENNS   |      |      |      |      |      |      |
|       |   |       | GWKVSLENYGEIWTLQD    |      |      |      |      |      |      |
|       |   |       | TQEIQRVVFYKYSQMINI   |      |      |      |      |      |      |
|       |   |       | SDYINRWIFVTITNNRLN   |      |      |      |      |      |      |
|       |   |       | NSKIYINGRLIDQKPISNL  |      |      |      |      |      |      |
|       |   |       | GNIHASNNIMFKLDGCR    |      |      |      |      |      |      |
|       |   |       | DTHRYIWIKYFNLFDKEL   |      |      |      |      |      |      |
| 62285 | 0 | 54666 | NEKEIKDLYDNQNSGIL    | 6.06 | 0.01 | 3.16 | 0.68 | 0.22 | 1.66 |
|       |   |       | KDFWGDYLYDKPYM       |      |      |      |      |      |      |
|       |   |       | LNLYDPNKYVDVNNVGI    |      |      |      |      |      |      |
|       |   |       | RGYMYLKGPRGSVMTT     |      |      |      |      |      |      |
|       |   |       | NIYLNSSLYRGTKFIIKKY  |      |      |      |      |      |      |
|       |   |       | ASGNKDNIVRNNDRVYI    |      |      |      |      |      |      |
|       |   |       | NVVVKNKEYRLATNASQ    |      |      |      |      |      |      |
|       |   |       | AGVEKILSALEIPDVGNL   |      |      |      |      |      |      |
|       |   |       | SQVVVMKSKNDQGITN     |      |      |      |      |      |      |
|       |   |       | KCKMNLQDNNGNDIGF     |      |      |      |      |      |      |
|       |   |       | IGFHQFNNAKLVASNW     |      |      |      |      |      |      |
|       |   |       | YNRQIERSSRTLGCSEF    |      |      |      |      |      |      |
|       |   |       | IPVDDGWGERPL         |      |      |      |      |      |      |

|       |   |       |                      |      |      |      |      |      |      |
|-------|---|-------|----------------------|------|------|------|------|------|------|
|       |   |       | RLLSTFTEYIKNIINTSILN |      |      |      |      |      |      |
|       |   |       | LRYESNHLIDLSRYASKIN  |      |      |      |      |      |      |
|       |   |       | IGSKVNFDPIDKNQIQLF   |      |      |      |      |      |      |
|       |   |       | NLESSKIEVILKNAIVYNS  |      |      |      |      |      |      |
|       |   |       | MYENFSTSFWIRIPKYFN   |      |      |      |      |      |      |
|       |   |       | SISLNNEYTIINCMENNS   |      |      |      |      |      |      |
|       |   |       | GWKVSLENYGEIWTQLD    |      |      |      |      |      |      |
|       |   |       | TQEIQRVVFYKYSQMINI   |      |      |      |      |      |      |
|       |   |       | SDYINRWIFVTITNNRLN   |      |      |      |      |      |      |
|       |   |       | NSKIYINGRLIDQKPISNL  |      |      |      |      |      |      |
|       |   |       | GNIHASNNIMFKLDGCR    |      |      |      |      |      |      |
|       |   |       | DTHRYIWIKYFNLFDKEL   |      |      |      |      |      |      |
| 62286 | 0 | 54666 | NEKEIKDLYDNQNSGIL    | 6.06 | 0.01 | 3.16 | 0.44 | 0.22 | 1.66 |
|       |   |       | KDFWGDYLYDKPYM       |      |      |      |      |      |      |
|       |   |       | LNLYDPNKYVDVNNVGI    |      |      |      |      |      |      |
|       |   |       | RGYMYLKGPRGSVMTT     |      |      |      |      |      |      |
|       |   |       | NIYLNSSLYRGTKFIIKKY  |      |      |      |      |      |      |
|       |   |       | ASGNKDNIVRNNDRVYI    |      |      |      |      |      |      |
|       |   |       | NVVVKNKEYRLATNASQ    |      |      |      |      |      |      |
|       |   |       | AGVEKILSALEIPDVGNL   |      |      |      |      |      |      |
|       |   |       | SQVVVMKSKNDQGITN     |      |      |      |      |      |      |
|       |   |       | KCKMNLQDNNGNDIGF     |      |      |      |      |      |      |
|       |   |       | IGFHQFNNAKLVASNW     |      |      |      |      |      |      |
|       |   |       | YNRQIERSSRTLGCSEF    |      |      |      |      |      |      |
|       |   |       | IPVDDGWGERPL         |      |      |      |      |      |      |

|       |   |       |                      |      |      |      |      |      |      |
|-------|---|-------|----------------------|------|------|------|------|------|------|
|       |   |       | RLLSTFTEYIKNIINTSILN |      |      |      |      |      |      |
|       |   |       | LRYESNHLIDLSRYASKIN  |      |      |      |      |      |      |
|       |   |       | IGSKVNFDPIDKNQIQLF   |      |      |      |      |      |      |
|       |   |       | NLESSKIEVILKNAIVYNS  |      |      |      |      |      |      |
|       |   |       | MYENFSTSFWIRIPKYFN   |      |      |      |      |      |      |
|       |   |       | SISLNNEYTIINCMENNS   |      |      |      |      |      |      |
|       |   |       | GWKVSLENYGEIWTQLD    |      |      |      |      |      |      |
|       |   |       | TQEIQRVVFYKYSQMINI   |      |      |      |      |      |      |
|       |   |       | SDYINRWIFVTITNNRLN   |      |      |      |      |      |      |
|       |   |       | NSKIYINGRLIDQKPISNL  |      |      |      |      |      |      |
|       |   |       | GNIHASNNIMFKLDGCR    |      |      |      |      |      |      |
|       |   |       | DTHRYIWIKYFNLFDKEL   |      |      |      |      |      |      |
| 62287 | 0 | 54666 | NEKEIKDLYDNQNSGIL    | 6.06 | 0.01 | 3.16 | 0.44 | 0.22 | 1.34 |
|       |   |       | KDFWGDYLYDKPYM       |      |      |      |      |      |      |
|       |   |       | LNLYDPNKYVDVNNVGI    |      |      |      |      |      |      |
|       |   |       | RGYMYLKGPRGSVMTT     |      |      |      |      |      |      |
|       |   |       | NIYLNSSLYRGTKFIIKKY  |      |      |      |      |      |      |
|       |   |       | ASGNKDNIVRNNDRVYI    |      |      |      |      |      |      |
|       |   |       | NVVVKNKEYRLATNASQ    |      |      |      |      |      |      |
|       |   |       | AGVEKILSALEIPDVGNL   |      |      |      |      |      |      |
|       |   |       | SQVVVMKSKNDQGITN     |      |      |      |      |      |      |
|       |   |       | KCKMNLQDNNGNDIGF     |      |      |      |      |      |      |
|       |   |       | IGFHQFNNAKLVASNW     |      |      |      |      |      |      |
|       |   |       | YNRQIERSSRTLGCSEF    |      |      |      |      |      |      |
|       |   |       | IPVDDGWGERPL         |      |      |      |      |      |      |

|       |   |       |                      |      |      |      |      |      |      |
|-------|---|-------|----------------------|------|------|------|------|------|------|
|       |   |       | RLLSTFTEYIKNIINTSILN |      |      |      |      |      |      |
|       |   |       | LRYESNHLIDLSRYASKIN  |      |      |      |      |      |      |
|       |   |       | IGSKVNFDPIDKNQIQLF   |      |      |      |      |      |      |
|       |   |       | NLESSKIEVILKNAIVYNS  |      |      |      |      |      |      |
|       |   |       | MYENFSTSFWIRIPKYFN   |      |      |      |      |      |      |
|       |   |       | SISLNNEYTIINCMENNS   |      |      |      |      |      |      |
|       |   |       | GWKVSLNYGEIWTLQD     |      |      |      |      |      |      |
|       |   |       | TQEIQRVVFKYSQMINI    |      |      |      |      |      |      |
|       |   |       | SDYINRWIFVTITNNRLN   |      |      |      |      |      |      |
|       |   |       | NSKIYINGRLIDQKPISNL  |      |      |      |      |      |      |
|       |   |       | GNIHASNNIMFKLDGCR    |      |      |      |      |      |      |
|       |   |       | DTHRYIWIKYFNLFDKEL   |      |      |      |      |      |      |
| 62288 | 0 | 54666 | NEKEIKDLYDNQNSGIL    | 6.06 | 0.01 | 3.16 | 0.68 | 0.22 | 1.34 |
|       |   |       | KDFWGDYLQYDKPYM      |      |      |      |      |      |      |
|       |   |       | LNLYDPNKYVDVNNVGI    |      |      |      |      |      |      |
|       |   |       | RGYMYLKGPRGSVMTT     |      |      |      |      |      |      |
|       |   |       | NIYLNSSLYRGTKFIIKKY  |      |      |      |      |      |      |
|       |   |       | ASGNKDNIVRNNDRVYI    |      |      |      |      |      |      |
|       |   |       | NVVVKNKEYRLATNASQ    |      |      |      |      |      |      |
|       |   |       | AGVEKILSALEIPDVGNL   |      |      |      |      |      |      |
|       |   |       | SQVVVMKSKNDQGITN     |      |      |      |      |      |      |
|       |   |       | KCKMNLQDNNGNDIGF     |      |      |      |      |      |      |
|       |   |       | IGFHQFNNAKLVASNW     |      |      |      |      |      |      |
|       |   |       | YNRQIERSSRTLGCSEF    |      |      |      |      |      |      |
|       |   |       | IPVDDGWGERPL         |      |      |      |      |      |      |

|       |   |       |                      |      |      |      |      |      |      |
|-------|---|-------|----------------------|------|------|------|------|------|------|
|       |   |       | RLLSTFTEYIKNIINTSILN |      |      |      |      |      |      |
|       |   |       | LRYESNHLIDLSRYASKIN  |      |      |      |      |      |      |
|       |   |       | IGSKVNFDPIDKNQIQLF   |      |      |      |      |      |      |
|       |   |       | NLESSKIEVILKNAIVYNS  |      |      |      |      |      |      |
|       |   |       | MYENFSTSFWIRIPKYFN   |      |      |      |      |      |      |
|       |   |       | SISLNNEYTIINCMENNS   |      |      |      |      |      |      |
|       |   |       | GWKVSLENYGEIWTLQD    |      |      |      |      |      |      |
|       |   |       | TQEIQRVVFYKYSQMINI   |      |      |      |      |      |      |
|       |   |       | SDYINRWIFVTITNNRLN   |      |      |      |      |      |      |
|       |   |       | NSKIYINGRLIDQKPISNL  |      |      |      |      |      |      |
|       |   |       | GNIHASNNIMFKLDGCR    |      |      |      |      |      |      |
|       |   |       | DTHRYIWIKYFNLFDKEL   |      |      |      |      |      |      |
| 62289 | 0 | 54666 | NEKEIKDLYDNQNSGIL    | 6.06 | 0.01 | 3.16 | 0.68 | 0.22 | 1.66 |
|       |   |       | KDFWGDYLYDKPYM       |      |      |      |      |      |      |
|       |   |       | LNLYDPNKYVDVNNVGI    |      |      |      |      |      |      |
|       |   |       | RGYMYLKGPRGSVMTT     |      |      |      |      |      |      |
|       |   |       | NIYLNSSLYRGTKFIIKKY  |      |      |      |      |      |      |
|       |   |       | ASGNKDNIVRNNDRVYI    |      |      |      |      |      |      |
|       |   |       | NVVVKNKEYRLATNASQ    |      |      |      |      |      |      |
|       |   |       | AGVEKILSALEIPDVGNL   |      |      |      |      |      |      |
|       |   |       | SQVVVMKSKNDQGITN     |      |      |      |      |      |      |
|       |   |       | KCKMNLQDNNGNDIGF     |      |      |      |      |      |      |
|       |   |       | IGFHQFNNAKLVASNW     |      |      |      |      |      |      |
|       |   |       | YNRQIERSSRTLGCSEF    |      |      |      |      |      |      |
|       |   |       | IPVDDGWGERPL         |      |      |      |      |      |      |

|       |   |       |                      |      |      |      |      |      |      |
|-------|---|-------|----------------------|------|------|------|------|------|------|
|       |   |       | RLLSTFTEYIKNIINTSILN |      |      |      |      |      |      |
|       |   |       | LRYESNHLIDLSRYASKIN  |      |      |      |      |      |      |
|       |   |       | IGSKVNFDPIDKNQIQLF   |      |      |      |      |      |      |
|       |   |       | NLESSKIEVILKNAIVYNS  |      |      |      |      |      |      |
|       |   |       | MYENFSTSFWIRIPKYFN   |      |      |      |      |      |      |
|       |   |       | SISLNNEYTIINCMENNS   |      |      |      |      |      |      |
|       |   |       | GWKVS LNYGEI IWT LQD |      |      |      |      |      |      |
|       |   |       | TQEIKQRV VFKYSQMINI  |      |      |      |      |      |      |
|       |   |       | SDYINRWIFVTITNNRLN   |      |      |      |      |      |      |
|       |   |       | NSKIYINGRLIDQKPISNL  |      |      |      |      |      |      |
|       |   |       | GNIHASNNIMFKLDGCR    |      |      |      |      |      |      |
|       |   |       | DTHRYIWIKYFNLFDKEL   |      |      |      |      |      |      |
| 62290 | 0 | 54666 | NEKEIKDLYDNQNSGIL    | 6.06 | 0.01 | 3.16 | 0.68 | 0.22 | 1.66 |
|       |   |       | KDFWGDY LQYDKPY YM   |      |      |      |      |      |      |
|       |   |       | LNLYDPNKYVDVNNVGI    |      |      |      |      |      |      |
|       |   |       | RGYMYLKGPRGSVMTT     |      |      |      |      |      |      |
|       |   |       | NIYLNSSLYRGTKFIIKKY  |      |      |      |      |      |      |
|       |   |       | ASGNKDNIVRNNDRVYI    |      |      |      |      |      |      |
|       |   |       | NVVVKNKEYRLATNASQ    |      |      |      |      |      |      |
|       |   |       | AGVEKILSALEIPDVGNL   |      |      |      |      |      |      |
|       |   |       | SQVVVMKSKNDQGITN     |      |      |      |      |      |      |
|       |   |       | KCKMNLQDNNGNDIGF     |      |      |      |      |      |      |
|       |   |       | IGFHQFN NIAKLVASNW   |      |      |      |      |      |      |
|       |   |       | YNRQIERSSRTLGCSEWF   |      |      |      |      |      |      |
|       |   |       | IPVDDGWGERPL         |      |      |      |      |      |      |

|       |   |       |                      |      |      |      |      |      |      |
|-------|---|-------|----------------------|------|------|------|------|------|------|
|       |   |       | RLLSTFTEYIKNIINTSILN |      |      |      |      |      |      |
|       |   |       | LRYESNHLIDLSRYASKIN  |      |      |      |      |      |      |
|       |   |       | IGSKVNFDPIDKNQIQLF   |      |      |      |      |      |      |
|       |   |       | NLESSKIEVILKNAIVYNS  |      |      |      |      |      |      |
|       |   |       | MYENFSTSFWIRIPKYFN   |      |      |      |      |      |      |
|       |   |       | SISLNNEYTIINCMENNS   |      |      |      |      |      |      |
|       |   |       | GWKVSLNYGEIWTLQD     |      |      |      |      |      |      |
|       |   |       | TQEIQRVVFKYSQMINI    |      |      |      |      |      |      |
|       |   |       | SDYINRWIFVTITNNRLN   |      |      |      |      |      |      |
|       |   |       | NSKIYINGRLIDQKPISNL  |      |      |      |      |      |      |
|       |   |       | GNIHASNNIMFKLDGCR    |      |      |      |      |      |      |
|       |   |       | DTHRYIWIKYFNLFDKEL   |      |      |      |      |      |      |
| 62291 | 0 | 54666 | NEKEIKDLYDNQNSGIL    | 6.06 | 0.01 | 3.16 | 0.68 | 0.22 | 1.66 |
|       |   |       | KDFWGDYLQYDKPYYM     |      |      |      |      |      |      |
|       |   |       | LNLYDPNKYVDVNNVGI    |      |      |      |      |      |      |
|       |   |       | RGYMYLKGPRGSVMTT     |      |      |      |      |      |      |
|       |   |       | NIYLNSSLYRGTKFIIKKY  |      |      |      |      |      |      |
|       |   |       | ASGNKDNIVRNNDRVYI    |      |      |      |      |      |      |
|       |   |       | NVVVKNKEYRLATNASQ    |      |      |      |      |      |      |
|       |   |       | AGVEKILSALEIPDVGNL   |      |      |      |      |      |      |
|       |   |       | SQVVVMKSKNDQGITN     |      |      |      |      |      |      |
|       |   |       | KCKMNLQDNNGNDIGF     |      |      |      |      |      |      |
|       |   |       | IGFHQFNNAKLVASNW     |      |      |      |      |      |      |
|       |   |       | YNRQIERSSRTLGCSEWF   |      |      |      |      |      |      |
|       |   |       | IPVDDGWGERPL         |      |      |      |      |      |      |

|       |   |       |                      |      |      |      |      |      |      |
|-------|---|-------|----------------------|------|------|------|------|------|------|
|       |   |       | RLLSTFTEYIKNIINTSILN |      |      |      |      |      |      |
|       |   |       | LRYESNHLIDLSRYASKIN  |      |      |      |      |      |      |
|       |   |       | IGSKVNFDPIDKNQIQLF   |      |      |      |      |      |      |
|       |   |       | NLESSKIEVILKNAIVYNS  |      |      |      |      |      |      |
|       |   |       | MYENFSTSFWIRIPKYFN   |      |      |      |      |      |      |
|       |   |       | SISLNNEYTIINCMENNS   |      |      |      |      |      |      |
|       |   |       | GWKVSLENYGEIWTQLD    |      |      |      |      |      |      |
|       |   |       | TQEIQRVVFYKYSQMINI   |      |      |      |      |      |      |
|       |   |       | SDYINRWIFVTITNNRLN   |      |      |      |      |      |      |
|       |   |       | NSKIYINGRLIDQKPISNL  |      |      |      |      |      |      |
|       |   |       | GNIHASNNIMFKLDGCR    |      |      |      |      |      |      |
|       |   |       | DTHRYIWIKYFNLFDKEL   |      |      |      |      |      |      |
| 62292 | 0 | 54666 | NEKEIKDLYDNQNSGIL    | 6.06 | 0.01 | 3.16 | 0.68 | 0.22 | 1.66 |
|       |   |       | KDFWGDYLYDKPYM       |      |      |      |      |      |      |
|       |   |       | LNLYDPNKYVDVNNVGI    |      |      |      |      |      |      |
|       |   |       | RGYMYLKGPRGSVMTT     |      |      |      |      |      |      |
|       |   |       | NIYLNSSLYRGTKFIIKKY  |      |      |      |      |      |      |
|       |   |       | ASGNKDNIVRNNDRVYI    |      |      |      |      |      |      |
|       |   |       | NVVVKNKEYRLATNASQ    |      |      |      |      |      |      |
|       |   |       | AGVEKILSALEIPDVGNL   |      |      |      |      |      |      |
|       |   |       | SQVVVMKSKNDQGITN     |      |      |      |      |      |      |
|       |   |       | KCKMNLQDNNGNDIGF     |      |      |      |      |      |      |
|       |   |       | IGFHQFNNAKLVASNW     |      |      |      |      |      |      |
|       |   |       | YNRQIERSSRTLGCSEF    |      |      |      |      |      |      |
|       |   |       | IPVDDGWGERPL         |      |      |      |      |      |      |



|       |   |       |                      |      |      |      |      |      |      |
|-------|---|-------|----------------------|------|------|------|------|------|------|
|       |   |       | RLLSTFTEYIKNIINTSILN |      |      |      |      |      |      |
|       |   |       | LRYESNHLIDLSRYASKIN  |      |      |      |      |      |      |
|       |   |       | IGSKVNFDPIDKNQIQLF   |      |      |      |      |      |      |
|       |   |       | NLESSKIEVILKNAIVYNS  |      |      |      |      |      |      |
|       |   |       | MYENFSTSFWIRIPKYFN   |      |      |      |      |      |      |
|       |   |       | SISLNNEYTIINCMENNS   |      |      |      |      |      |      |
|       |   |       | GWKVSLNYGEIWTLQD     |      |      |      |      |      |      |
|       |   |       | TQEIQRVVFKYSQMINI    |      |      |      |      |      |      |
|       |   |       | SDYINRWIFVTITNNRLN   |      |      |      |      |      |      |
|       |   |       | NSKIYINGRLIDQKPISNL  |      |      |      |      |      |      |
|       |   |       | GNIHASNNIMFKLDGCR    |      |      |      |      |      |      |
|       |   |       | DTHRYIWIKYFNLFDKEL   |      |      |      |      |      |      |
| 62293 | 0 | 54666 | NEKEIKDLYDNQNSGIL    | 6.06 | 0.01 | 3.16 | 0.44 | 0.22 | 1.66 |
|       |   |       | KDFWGDYLQYDKPYM      |      |      |      |      |      |      |
|       |   |       | LNLYDPNKYVDVNNVGI    |      |      |      |      |      |      |
|       |   |       | RGYMYLKGPRGSVMTT     |      |      |      |      |      |      |
|       |   |       | NIYLNSSLYRGTKFIIKKY  |      |      |      |      |      |      |
|       |   |       | ASGNKDNIVRNNDRVYI    |      |      |      |      |      |      |
|       |   |       | NVVVKNKEYRLATNASQ    |      |      |      |      |      |      |
|       |   |       | AGVEKILSALEIPDVGNL   |      |      |      |      |      |      |
|       |   |       | SQVVVMKSKNDQGITN     |      |      |      |      |      |      |
|       |   |       | KCKMNLQDNNGNDIGF     |      |      |      |      |      |      |
|       |   |       | IGFHQFNNAKLVASNW     |      |      |      |      |      |      |
|       |   |       | YNRQIERSSRTLGCSEF    |      |      |      |      |      |      |
|       |   |       | IPVDDGWGERPL         |      |      |      |      |      |      |

|       |   |       |                      |      |      |      |      |      |      |
|-------|---|-------|----------------------|------|------|------|------|------|------|
|       |   |       | RLLSTFTEYIKNIINTSILN |      |      |      |      |      |      |
|       |   |       | LRYESNHLIDLSRYASKIN  |      |      |      |      |      |      |
|       |   |       | IGSKVNFDPIDKNQIQLF   |      |      |      |      |      |      |
|       |   |       | NLESSKIEVILKNAIVYNS  |      |      |      |      |      |      |
|       |   |       | MYENFSTSFWIRIPKYFN   |      |      |      |      |      |      |
|       |   |       | SISLNNEYTIINCMENNS   |      |      |      |      |      |      |
|       |   |       | GWKVSLENYGEIWTLQD    |      |      |      |      |      |      |
|       |   |       | TQEIQRVVFYKYSQMINI   |      |      |      |      |      |      |
|       |   |       | SDYINRWIFVTITNNRLN   |      |      |      |      |      |      |
|       |   |       | NSKIYINGRLIDQKPISNL  |      |      |      |      |      |      |
|       |   |       | GNIHASNNIMFKLDGCR    |      |      |      |      |      |      |
|       |   |       | DTHRYIWIKYFNLFDKEL   |      |      |      |      |      |      |
| 62294 | 0 | 54666 | NEKEIKDLYDNQNSGIL    | 6.06 | 0.01 | 3.16 | 0.44 | 0.22 | 1.66 |
|       |   |       | KDFWGDYLYDKPYM       |      |      |      |      |      |      |
|       |   |       | LNLYDPNKYVDVNNVGI    |      |      |      |      |      |      |
|       |   |       | RGYMYLKGPRGSVMTT     |      |      |      |      |      |      |
|       |   |       | NIYLNSSLYRGTKFIIKKY  |      |      |      |      |      |      |
|       |   |       | ASGNKDNIVRNNDRVYI    |      |      |      |      |      |      |
|       |   |       | NVVVKKEYRLATNASQ     |      |      |      |      |      |      |
|       |   |       | AGVEKILSALEIPDVGNL   |      |      |      |      |      |      |
|       |   |       | SQVVVMKSKNDQGITN     |      |      |      |      |      |      |
|       |   |       | KCKMNLQDNNGNDIGF     |      |      |      |      |      |      |
|       |   |       | IGFHQFNNAKLVASNW     |      |      |      |      |      |      |
|       |   |       | YNRQIERSSRTLGCSEF    |      |      |      |      |      |      |
|       |   |       | IPVDDGWGERPL         |      |      |      |      |      |      |

|       |   |       |                      |      |      |      |      |      |      |
|-------|---|-------|----------------------|------|------|------|------|------|------|
|       |   |       | RLLSTFTEYIKNIINTSILN |      |      |      |      |      |      |
|       |   |       | LRYESNHLIDLSRYASKIN  |      |      |      |      |      |      |
|       |   |       | IGSKVNFDPIDKNQIQLF   |      |      |      |      |      |      |
|       |   |       | NLESSKIEVILKNAIVYNS  |      |      |      |      |      |      |
|       |   |       | MYENFSTSFWIRIPKYFN   |      |      |      |      |      |      |
|       |   |       | SISLNNEYTIINCMENNS   |      |      |      |      |      |      |
|       |   |       | GWKVSLNYGEIWTLQD     |      |      |      |      |      |      |
|       |   |       | TQEIQRVVFKYSQMINI    |      |      |      |      |      |      |
|       |   |       | SDYINRWIFVTITNNRLN   |      |      |      |      |      |      |
|       |   |       | NSKIYINGRLIDQKPISNL  |      |      |      |      |      |      |
|       |   |       | GNIHASNNIMFKLDGCR    |      |      |      |      |      |      |
|       |   |       | DTHRYIWIKYFNLFDKEL   |      |      |      |      |      |      |
| 62295 | 0 | 54666 | NEKEIKDLYDNQNSGIL    | 6.06 | 0.01 | 3.30 | 0.68 | 0.22 | 1.66 |
|       |   |       | KDFWGDYLQYDKPYM      |      |      |      |      |      |      |
|       |   |       | LNLYDPNKYVDVNNVGI    |      |      |      |      |      |      |
|       |   |       | RGYMYLKGPRGSVMTT     |      |      |      |      |      |      |
|       |   |       | NIYLNSSLYRGTKFIIKKY  |      |      |      |      |      |      |
|       |   |       | ASGNKDNIVRNNDRVYI    |      |      |      |      |      |      |
|       |   |       | NVVVKNKEYRLATNASQ    |      |      |      |      |      |      |
|       |   |       | AGVEKILSALEIPDVGNL   |      |      |      |      |      |      |
|       |   |       | SQVVVMKSKNDQGITN     |      |      |      |      |      |      |
|       |   |       | KCKMNLQDNNGNDIGF     |      |      |      |      |      |      |
|       |   |       | IGFHQFNNAKLVASNW     |      |      |      |      |      |      |
|       |   |       | YNRQIERSSRTLGCSEF    |      |      |      |      |      |      |
|       |   |       | IPVDDGWGERPL         |      |      |      |      |      |      |

|       |   |       |                      |      |      |      |      |      |      |
|-------|---|-------|----------------------|------|------|------|------|------|------|
|       |   |       | RLLSTFTEYIKNIINTSILN |      |      |      |      |      |      |
|       |   |       | LRYESNHLIDLSRYASKIN  |      |      |      |      |      |      |
|       |   |       | IGSKVNFDPIDKNQIQLF   |      |      |      |      |      |      |
|       |   |       | NLESSKIEVILKNAIVYNS  |      |      |      |      |      |      |
|       |   |       | MYENFSTSFWIRIPKYFN   |      |      |      |      |      |      |
|       |   |       | SISLNNEYTIINCMENNS   |      |      |      |      |      |      |
|       |   |       | GWKVSLENYGEIWTLQD    |      |      |      |      |      |      |
|       |   |       | TQEIQRVVFYKYSQMINI   |      |      |      |      |      |      |
|       |   |       | SDYINRWIFVTITNNRLN   |      |      |      |      |      |      |
|       |   |       | NSKIYINGRLIDQKPISNL  |      |      |      |      |      |      |
|       |   |       | GNIHASNNIMFKLDGCR    |      |      |      |      |      |      |
|       |   |       | DTHRYIWIKYFNLFDKEL   |      |      |      |      |      |      |
| 62296 | 0 | 54666 | NEKEIKDLYDNQNSGIL    | 6.06 | 0.01 | 3.30 | 0.68 | 0.22 | 1.66 |
|       |   |       | KDFWGDYLYDKPYM       |      |      |      |      |      |      |
|       |   |       | LNLYDPNKYVDVNNVGI    |      |      |      |      |      |      |
|       |   |       | RGYMYLKGPRGSVMTT     |      |      |      |      |      |      |
|       |   |       | NIYLNSSLYRGTKFIIKKY  |      |      |      |      |      |      |
|       |   |       | ASGNKDNIVRNNDRVYI    |      |      |      |      |      |      |
|       |   |       | NVVVKNKEYRLATNASQ    |      |      |      |      |      |      |
|       |   |       | AGVEKILSALEIPDVGNL   |      |      |      |      |      |      |
|       |   |       | SQVVVMKSKNDQGITN     |      |      |      |      |      |      |
|       |   |       | KCKMNLQDNNGNDIGF     |      |      |      |      |      |      |
|       |   |       | IGFHQFNNAKLVASNW     |      |      |      |      |      |      |
|       |   |       | YNRQIERSSRTLGCSEF    |      |      |      |      |      |      |
|       |   |       | IPVDDGWGERPL         |      |      |      |      |      |      |

|       |   |       |                      |      |      |      |      |      |      |
|-------|---|-------|----------------------|------|------|------|------|------|------|
|       |   |       | RLLSTFTEYIKNIINTSILN |      |      |      |      |      |      |
|       |   |       | LRYESNHLIDLSRYASKIN  |      |      |      |      |      |      |
|       |   |       | IGSKVNFDPIDKNQIQLF   |      |      |      |      |      |      |
|       |   |       | NLESSKIEVILKNAIVYNS  |      |      |      |      |      |      |
|       |   |       | MYENFSTSFWIRIPKYFN   |      |      |      |      |      |      |
|       |   |       | SISLNNEYTIINCMENNS   |      |      |      |      |      |      |
|       |   |       | GWKVSLNYGEIWTLQD     |      |      |      |      |      |      |
|       |   |       | TQEIQRVVFKYSQMINI    |      |      |      |      |      |      |
|       |   |       | SDYINRWIFVTITNNRLN   |      |      |      |      |      |      |
|       |   |       | NSKIYINGRLIDQKPISNL  |      |      |      |      |      |      |
|       |   |       | GNIHASNNIMFKLDGCR    |      |      |      |      |      |      |
|       |   |       | DTHRYIWIKYFNLFDKEL   |      |      |      |      |      |      |
| 62297 | 0 | 54666 | NEKEIKDLYDNQNSGIL    | 6.06 | 0.01 | 3.30 | 0.44 | 0.22 | 1.66 |
|       |   |       | KDFWGDYLQYDKPYM      |      |      |      |      |      |      |
|       |   |       | LNLYDPNKYVDVNNVGI    |      |      |      |      |      |      |
|       |   |       | RGYMYLKGPRGSVMTT     |      |      |      |      |      |      |
|       |   |       | NIYLNSSLYRGTKFIIKKY  |      |      |      |      |      |      |
|       |   |       | ASGNKDNIVRNNDRVYI    |      |      |      |      |      |      |
|       |   |       | NVVVKNKEYRLATNASQ    |      |      |      |      |      |      |
|       |   |       | AGVEKILSALEIPDVGNL   |      |      |      |      |      |      |
|       |   |       | SQVVVMKSKNDQGITN     |      |      |      |      |      |      |
|       |   |       | KCKMNLQDNNGNDIGF     |      |      |      |      |      |      |
|       |   |       | IGFHQFNNAKLVASNW     |      |      |      |      |      |      |
|       |   |       | YNRQIERSSRTLGCSEF    |      |      |      |      |      |      |
|       |   |       | IPVDDGWGERPL         |      |      |      |      |      |      |

|       |   |       |                      |      |      |      |      |      |      |
|-------|---|-------|----------------------|------|------|------|------|------|------|
|       |   |       | RLLSTFTEYIKNIINTSILN |      |      |      |      |      |      |
|       |   |       | LRYESNHLIDLSRYASKIN  |      |      |      |      |      |      |
|       |   |       | IGSKVNFDPIDKNQIQLF   |      |      |      |      |      |      |
|       |   |       | NLESSKIEVILKNAIVYNS  |      |      |      |      |      |      |
|       |   |       | MYENFSTSFWIRIPKYFN   |      |      |      |      |      |      |
|       |   |       | SISLNNEYTIINCMENNS   |      |      |      |      |      |      |
|       |   |       | GWKVSLNYGEIWTLQD     |      |      |      |      |      |      |
|       |   |       | TQEIQRVVFKYSQMINI    |      |      |      |      |      |      |
|       |   |       | SDYINRWIFVTITNNRLN   |      |      |      |      |      |      |
|       |   |       | NSKIYINGRLIDQKPISNL  |      |      |      |      |      |      |
|       |   |       | GNIHASNNIMFKLDGCR    |      |      |      |      |      |      |
|       |   |       | DTHRYIWIKYFNLFDKEL   |      |      |      |      |      |      |
| 62298 | 0 | 54666 | NEKEIKDLYDNQNSGIL    | 6.06 | 0.01 | 3.30 | 3.75 | 0.22 | 1.66 |
|       |   |       | KDFWGDYLQYDKPYM      |      |      |      |      |      |      |
|       |   |       | LNLYDPNKYVDVNNVGI    |      |      |      |      |      |      |
|       |   |       | RGYMYLKGPRGSVMTT     |      |      |      |      |      |      |
|       |   |       | NIYLNSSLYRGTKFIIKKY  |      |      |      |      |      |      |
|       |   |       | ASGNKDNIVRNNDRVYI    |      |      |      |      |      |      |
|       |   |       | NVVVKNKEYRLATNASQ    |      |      |      |      |      |      |
|       |   |       | AGVEKILSALEIPDVGNL   |      |      |      |      |      |      |
|       |   |       | SQVVVMKSKNDQGITN     |      |      |      |      |      |      |
|       |   |       | KCKMNLQDNNGNDIGF     |      |      |      |      |      |      |
|       |   |       | IGFHQFNNAKLVASNW     |      |      |      |      |      |      |
|       |   |       | YNRQIERSSRTLGCSEF    |      |      |      |      |      |      |
|       |   |       | IPVDDGWGERPL         |      |      |      |      |      |      |

|       |   |       |                      |      |      |      |      |      |      |
|-------|---|-------|----------------------|------|------|------|------|------|------|
|       |   |       | RLLSTFTEYIKNIINTSILN |      |      |      |      |      |      |
|       |   |       | LRYESNHLIDLSRYASKIN  |      |      |      |      |      |      |
|       |   |       | IGSKVNFDPIDKNQIQLF   |      |      |      |      |      |      |
|       |   |       | NLESSKIEVILKNAIVYNS  |      |      |      |      |      |      |
|       |   |       | MYENFSTSFWIRIPKYFN   |      |      |      |      |      |      |
|       |   |       | SISLNNEYTIINCMENNS   |      |      |      |      |      |      |
|       |   |       | GWKVSLNYGEIWTLQD     |      |      |      |      |      |      |
|       |   |       | TQEIQRVVFKYSQMINI    |      |      |      |      |      |      |
|       |   |       | SDYINRWIFVTITNNRLN   |      |      |      |      |      |      |
|       |   |       | NSKIYINGRLIDQKPISNL  |      |      |      |      |      |      |
|       |   |       | GNIHASNNIMFKLDGCR    |      |      |      |      |      |      |
|       |   |       | DTHRYIWIKYFNLFDKEL   |      |      |      |      |      |      |
| 62299 | 0 | 54666 | NEKEIKDLYDNQNSGIL    | 6.06 | 0.01 | 3.30 | 0.68 | 0.22 | 1.66 |
|       |   |       | KDFWGDYLQYDKPYM      |      |      |      |      |      |      |
|       |   |       | LNLYDPNKYVDVNNVGI    |      |      |      |      |      |      |
|       |   |       | RGYMYLKGPRGSVMTT     |      |      |      |      |      |      |
|       |   |       | NIYLNSSLYRGTKFIIKKY  |      |      |      |      |      |      |
|       |   |       | ASGNKDNIVRNNDRVYI    |      |      |      |      |      |      |
|       |   |       | NVVVKNKEYRLATNASQ    |      |      |      |      |      |      |
|       |   |       | AGVEKILSALEIPDVGNL   |      |      |      |      |      |      |
|       |   |       | SQVVVMKSKNDQGITN     |      |      |      |      |      |      |
|       |   |       | KCKMNLQDNNGNDIGF     |      |      |      |      |      |      |
|       |   |       | IGFHQFNNAKLVASNW     |      |      |      |      |      |      |
|       |   |       | YNRQIERSSRTLGCSEF    |      |      |      |      |      |      |
|       |   |       | IPVDDGWGERPL         |      |      |      |      |      |      |

|       |   |       |                      |      |      |      |      |      |      |
|-------|---|-------|----------------------|------|------|------|------|------|------|
|       |   |       | RLLSTFTEYIKNIINTSILN |      |      |      |      |      |      |
|       |   |       | LRYESNHLIDLSRYASKIN  |      |      |      |      |      |      |
|       |   |       | IGSKVNFDPIDKNQIQLF   |      |      |      |      |      |      |
|       |   |       | NLESSKIEVILKNAIVYNS  |      |      |      |      |      |      |
|       |   |       | MYENFSTSFWIRIPKYFN   |      |      |      |      |      |      |
|       |   |       | SISLNNEYTIINCMENNS   |      |      |      |      |      |      |
|       |   |       | GWKVSLENYGEIWTLQD    |      |      |      |      |      |      |
|       |   |       | TQEIQRVVFVKYSQMINI   |      |      |      |      |      |      |
|       |   |       | SDYINRWIFVTITNNRLN   |      |      |      |      |      |      |
|       |   |       | NSKIYINGRLIDQKPISNL  |      |      |      |      |      |      |
|       |   |       | GNIHASNNIMFKLDGCR    |      |      |      |      |      |      |
|       |   |       | DTHRYIWIKYFNLFDKEL   |      |      |      |      |      |      |
| 62300 | 0 | 54666 | NEKEIKDLYDNQNSGIL    | 6.06 | 0.01 | 3.30 | 0.68 | 0.22 | 1.66 |
|       |   |       | KDFWGDYLQYDKPYM      |      |      |      |      |      |      |
|       |   |       | LNLYDPNKYVDVNNVGI    |      |      |      |      |      |      |
|       |   |       | RGYMYLKGPRGSVMTT     |      |      |      |      |      |      |
|       |   |       | NIYLNSSLYRGTKFIIKKY  |      |      |      |      |      |      |
|       |   |       | ASGNKDNIVRNNDRVYI    |      |      |      |      |      |      |
|       |   |       | NVVVKNKEYRLATNASQ    |      |      |      |      |      |      |
|       |   |       | AGVEKILSALEIPDVGNL   |      |      |      |      |      |      |
|       |   |       | SQVVVMKSKNDQGITN     |      |      |      |      |      |      |
|       |   |       | KCKMNLQDNNGNDIGF     |      |      |      |      |      |      |
|       |   |       | IGFHQFNNAKLVASNW     |      |      |      |      |      |      |
|       |   |       | YNRQIERSSRTLGCSEWF   |      |      |      |      |      |      |
|       |   |       | IPVDDGWGERPL         |      |      |      |      |      |      |



RLLSTFTEYIKNIINTSILN  
LRYESNHLIDLSRYASKIN  
IGSKVNFDPIDKNQIQLF  
NLESSKIEVILKNAIVYNS  
MYENFSTSFWIRIPKYFN  
SISLNNEYTIINCMENNS  
GWKVSLNYGEIWTLQD  
TQEIQRVVFKYSQMINI  
SDYINRWIFVTITNNRLN  
NSKIYINGRLIDQKPISNL  
GNIHASNNIMFKLDGCR  
DTHRYIWIKYFNLFDKEL  
NEKEIKDLYDNQNSGIL  
KDFWGDYLQYDKPYM  
LNLYDPNKYVDVNNVGI  
RGYMYLKGPRGSVMTT  
NIYLNSSLYRGTKFIIKKY  
ASGNKDNIVRNNDRVYI  
NVVVKNKEYRLATNASQ  
AGVEKILSALEIPDVGNL  
SQVVVMKSKNDQGITN  
KCKMNLQDNNGNDIGF  
IGFHQFNNAKLVASNW  
YNRQIERSSRTLGCSEF  
IPVDDGWGERPL

62301 0 54666 6.06 0.01 3.30 0.44 0.22 1.66

|       |   |       |                      |      |      |      |      |      |      |
|-------|---|-------|----------------------|------|------|------|------|------|------|
|       |   |       | RLLSTFTEYIKNIINTSILN |      |      |      |      |      |      |
|       |   |       | LRYESNHLIDLSRYASKIN  |      |      |      |      |      |      |
|       |   |       | IGSKVNFDPIDKNQIQLF   |      |      |      |      |      |      |
|       |   |       | NLESSKIEVILKNAIVYNS  |      |      |      |      |      |      |
|       |   |       | MYENFSTSFWIRIPKYFN   |      |      |      |      |      |      |
|       |   |       | SISLNNEYTIINCMENNS   |      |      |      |      |      |      |
|       |   |       | GWKVSLENYGEIWTLQD    |      |      |      |      |      |      |
|       |   |       | TQEIQRVVFYKYSQMINI   |      |      |      |      |      |      |
|       |   |       | SDYINRWIFVTITNNRLN   |      |      |      |      |      |      |
|       |   |       | NSKIYINGRLIDQKPISNL  |      |      |      |      |      |      |
|       |   |       | GNIHASNNIMFKLDGCR    |      |      |      |      |      |      |
|       |   |       | DTHRYIWIKYFNLFDKEL   |      |      |      |      |      |      |
| 62302 | 0 | 54666 | NEKEIKDLYDNQNSGIL    | 6.06 | 0.01 | 3.30 | 3.75 | 0.22 | 1.66 |
|       |   |       | KDFWGDYLYDKPYM       |      |      |      |      |      |      |
|       |   |       | LNLYDPNKYVDVNNVGI    |      |      |      |      |      |      |
|       |   |       | RGYMYLKGPRGSVMTT     |      |      |      |      |      |      |
|       |   |       | NIYLNSSLYRGTKFIIKKY  |      |      |      |      |      |      |
|       |   |       | ASGNKDNIVRNNDRVYI    |      |      |      |      |      |      |
|       |   |       | NVVVKNKEYRLATNASQ    |      |      |      |      |      |      |
|       |   |       | AGVEKILSALEIPDVGNL   |      |      |      |      |      |      |
|       |   |       | SQVVVMKSKNDQGITN     |      |      |      |      |      |      |
|       |   |       | KCKMNLQDNNGNDIGF     |      |      |      |      |      |      |
|       |   |       | IGFHQFNNAKLVASNW     |      |      |      |      |      |      |
|       |   |       | YNRQIERSSRTLGCSEF    |      |      |      |      |      |      |
|       |   |       | IPVDDGWGERPL         |      |      |      |      |      |      |

|       |   |       |                      |      |      |      |      |      |      |
|-------|---|-------|----------------------|------|------|------|------|------|------|
|       |   |       | RLLSTFTEYIKNIINTSILN |      |      |      |      |      |      |
|       |   |       | LRYESNHLIDLSRYASKIN  |      |      |      |      |      |      |
|       |   |       | IGSKVNFDPIDKNQIQLF   |      |      |      |      |      |      |
|       |   |       | NLESSKIEVILKNAIVYNS  |      |      |      |      |      |      |
|       |   |       | MYENFSTSFWIRIPKYFN   |      |      |      |      |      |      |
|       |   |       | SISLNNEYTIINCMENNS   |      |      |      |      |      |      |
|       |   |       | GWKVSLNYGEIWTLQD     |      |      |      |      |      |      |
|       |   |       | TQEIQRVVFKYSQMINI    |      |      |      |      |      |      |
|       |   |       | SDYINRWIFVTITNNRLN   |      |      |      |      |      |      |
|       |   |       | NSKIYINGRLIDQKPISNL  |      |      |      |      |      |      |
|       |   |       | GNIHASNNIMFKLDGCR    |      |      |      |      |      |      |
|       |   |       | DTHRYIWIKYFNLFDKEL   |      |      |      |      |      |      |
| 62303 | 0 | 54666 | NEKEIKDLYDNQNSGIL    | 6.06 | 0.01 | 3.30 | 0.68 | 0.22 | 1.66 |
|       |   |       | KDFWGDYLQYDKPYM      |      |      |      |      |      |      |
|       |   |       | LNLYDPNKYVDVNNVGI    |      |      |      |      |      |      |
|       |   |       | RGYMYLKGPRGSVMTT     |      |      |      |      |      |      |
|       |   |       | NIYLNSSLYRGTKFIIKKY  |      |      |      |      |      |      |
|       |   |       | ASGNKDNIVRNNDRVYI    |      |      |      |      |      |      |
|       |   |       | NVVVKNKEYRLATNASQ    |      |      |      |      |      |      |
|       |   |       | AGVEKILSALEIPDVGNL   |      |      |      |      |      |      |
|       |   |       | SQVVVMKSKNDQGITN     |      |      |      |      |      |      |
|       |   |       | KCKMNLQDNNGNDIGF     |      |      |      |      |      |      |
|       |   |       | IGFHQFNNAKLVASNW     |      |      |      |      |      |      |
|       |   |       | YNRQIERSSRTLGCSEF    |      |      |      |      |      |      |
|       |   |       | IPVDDGWGERPL         |      |      |      |      |      |      |

|       |   |       |                      |      |      |      |      |      |      |
|-------|---|-------|----------------------|------|------|------|------|------|------|
|       |   |       | RLLSTFTEYIKNIINTSILN |      |      |      |      |      |      |
|       |   |       | LRYESNHLIDLSRYASKIN  |      |      |      |      |      |      |
|       |   |       | IGSKVNFDPIDKNQIQLF   |      |      |      |      |      |      |
|       |   |       | NLESSKIEVILKNAIVYNS  |      |      |      |      |      |      |
|       |   |       | MYENFSTSFWIRIPKYFN   |      |      |      |      |      |      |
|       |   |       | SISLNNEYTIINCMENNS   |      |      |      |      |      |      |
|       |   |       | GWKVSLENYGEIWTQLD    |      |      |      |      |      |      |
|       |   |       | TQEIQRVVFYKYSQMINI   |      |      |      |      |      |      |
|       |   |       | SDYINRWIFVTITNNRLN   |      |      |      |      |      |      |
|       |   |       | NSKIYINGRLIDQKPISNL  |      |      |      |      |      |      |
|       |   |       | GNIHASNNIMFKLDGCR    |      |      |      |      |      |      |
|       |   |       | DTHRYIWIKYFNLFDKEL   |      |      |      |      |      |      |
| 62304 | 0 | 54666 | NEKEIKDLYDNQNSGIL    | 6.06 | 0.01 | 3.30 | 0.68 | 0.22 | 1.66 |
|       |   |       | KDFWGDYLYDKPYM       |      |      |      |      |      |      |
|       |   |       | LNLYDPNKYVDVNNVGI    |      |      |      |      |      |      |
|       |   |       | RGYMYLKGPRGSVMTT     |      |      |      |      |      |      |
|       |   |       | NIYLNSSLYRGTKFIIKKY  |      |      |      |      |      |      |
|       |   |       | ASGNKDNIVRNNDRVYI    |      |      |      |      |      |      |
|       |   |       | NVVVKNKEYRLATNASQ    |      |      |      |      |      |      |
|       |   |       | AGVEKILSALEIPDVGNL   |      |      |      |      |      |      |
|       |   |       | SQVVVMKSKNDQGITN     |      |      |      |      |      |      |
|       |   |       | KCKMNLQDNNGNDIGF     |      |      |      |      |      |      |
|       |   |       | IGFHQFNNAKLVASNW     |      |      |      |      |      |      |
|       |   |       | YNRQIERSSRTLGCSEF    |      |      |      |      |      |      |
|       |   |       | IPVDDGWGERPL         |      |      |      |      |      |      |

|       |   |       |                      |      |      |      |      |      |      |
|-------|---|-------|----------------------|------|------|------|------|------|------|
|       |   |       | RLLSTFTEYIKNIINTSILN |      |      |      |      |      |      |
|       |   |       | LRYESNHLIDLSRYASKIN  |      |      |      |      |      |      |
|       |   |       | IGSKVNFDPIDKNQIQLF   |      |      |      |      |      |      |
|       |   |       | NLESSKIEVILKNAIVYNS  |      |      |      |      |      |      |
|       |   |       | MYENFSTSFWIRIPKYFN   |      |      |      |      |      |      |
|       |   |       | SISLNNEYTIINCMENNS   |      |      |      |      |      |      |
|       |   |       | GWKVS LNYGEI IWT LQD |      |      |      |      |      |      |
|       |   |       | TQEIKQRV VFKYSQMINI  |      |      |      |      |      |      |
|       |   |       | SDYINRWIFVTITNNRLN   |      |      |      |      |      |      |
|       |   |       | NSKIYINGRLIDQKPISNL  |      |      |      |      |      |      |
|       |   |       | GNIHASNNIMFKLDGCR    |      |      |      |      |      |      |
|       |   |       | DTHRYIWIKYFNLFDKEL   |      |      |      |      |      |      |
| 62305 | 0 | 54666 | NEKEIKDLYDNQNSGIL    | 6.06 | 0.01 | 3.30 | 0.44 | 0.22 | 1.66 |
|       |   |       | KDFWGDY LQYDKPY YM   |      |      |      |      |      |      |
|       |   |       | LNLYDPNKYVDVNNVGI    |      |      |      |      |      |      |
|       |   |       | RGYMYLKGPRGSVMTT     |      |      |      |      |      |      |
|       |   |       | NIYLNSSLYRGTKFIIKKY  |      |      |      |      |      |      |
|       |   |       | ASGNKDNIVRNNDRVYI    |      |      |      |      |      |      |
|       |   |       | NVVVKNKEYRLATNASQ    |      |      |      |      |      |      |
|       |   |       | AGVEKILSALEIPDVGNL   |      |      |      |      |      |      |
|       |   |       | SQVVVMKSKNDQGITN     |      |      |      |      |      |      |
|       |   |       | KCKMNLQDNNGNDIGF     |      |      |      |      |      |      |
|       |   |       | IGFHQFN NIAKLVASNW   |      |      |      |      |      |      |
|       |   |       | YNRQIERSSRTLGCSEWF   |      |      |      |      |      |      |
|       |   |       | IPVDDGWGERPL         |      |      |      |      |      |      |

|       |   |       |                      |      |      |      |      |      |      |
|-------|---|-------|----------------------|------|------|------|------|------|------|
|       |   |       | RLLSTFTEYIKNIINTSILN |      |      |      |      |      |      |
|       |   |       | LRYESNHLIDLSRYASKIN  |      |      |      |      |      |      |
|       |   |       | IGSKVNFDPIDKNQIQLF   |      |      |      |      |      |      |
|       |   |       | NLESSKIEVILKNAIVYNS  |      |      |      |      |      |      |
|       |   |       | MYENFSTSFWIRIPKYFN   |      |      |      |      |      |      |
|       |   |       | SISLNNEYTIINCMENNS   |      |      |      |      |      |      |
|       |   |       | GWKVSLENYGEIWTLQD    |      |      |      |      |      |      |
|       |   |       | TQEIQRVVFYKYSQMINI   |      |      |      |      |      |      |
|       |   |       | SDYINRWIFVTITNNRLN   |      |      |      |      |      |      |
|       |   |       | NSKIYINGRLIDQKPISNL  |      |      |      |      |      |      |
|       |   |       | GNIHASNNIMFKLDGCR    |      |      |      |      |      |      |
|       |   |       | DTHRYIWIKYFNLFDKEL   |      |      |      |      |      |      |
| 62306 | 0 | 54666 | NEKEIKDLYDNQNSGIL    | 6.06 | 0.01 | 3.30 | 3.75 | 0.22 | 1.66 |
|       |   |       | KDFWGDYLYDKPYM       |      |      |      |      |      |      |
|       |   |       | LNLYDPNKYVDVNNVGI    |      |      |      |      |      |      |
|       |   |       | RGYMYLKGPRGSVMTT     |      |      |      |      |      |      |
|       |   |       | NIYLNSSLYRGTKFIIKKY  |      |      |      |      |      |      |
|       |   |       | ASGNKDNIVRNNDRVYI    |      |      |      |      |      |      |
|       |   |       | NVVVKNKEYRLATNASQ    |      |      |      |      |      |      |
|       |   |       | AGVEKILSALEIPDVGNL   |      |      |      |      |      |      |
|       |   |       | SQVVVMKSKNDQGITN     |      |      |      |      |      |      |
|       |   |       | KCKMNLQDNNGNDIGF     |      |      |      |      |      |      |
|       |   |       | IGFHQFNNAKLVASNW     |      |      |      |      |      |      |
|       |   |       | YNRQIERSSRTLGCSEF    |      |      |      |      |      |      |
|       |   |       | IPVDDGWGERPL         |      |      |      |      |      |      |

|       |   |       |                      |      |      |      |      |      |      |
|-------|---|-------|----------------------|------|------|------|------|------|------|
|       |   |       | RLLSTFTEYIKNIINTSILN |      |      |      |      |      |      |
|       |   |       | LRYESNHLIDLSRYASKIN  |      |      |      |      |      |      |
|       |   |       | IGSKVNFDPIDKNQIQLF   |      |      |      |      |      |      |
|       |   |       | NLESSKIEVILKNAIVYNS  |      |      |      |      |      |      |
|       |   |       | MYENFSTSFWIRIPKYFN   |      |      |      |      |      |      |
|       |   |       | SISLNNEYTIINCMENNS   |      |      |      |      |      |      |
|       |   |       | GWKVSLENYGEIWTLQD    |      |      |      |      |      |      |
|       |   |       | TQEIQRVVFYKYSQMINI   |      |      |      |      |      |      |
|       |   |       | SDYINRWIFVTITNNRLN   |      |      |      |      |      |      |
|       |   |       | NSKIYINGRLIDQKPISNL  |      |      |      |      |      |      |
|       |   |       | GNIHASNNIMFKLDGCR    |      |      |      |      |      |      |
|       |   |       | DTHRYIWIKYFNLFDKEL   |      |      |      |      |      |      |
| 62307 | 0 | 54666 | NEKEIKDLYDNQNSGIL    | 6.06 | 0.01 | 3.30 | 0.68 | 0.22 | 1.66 |
|       |   |       | KDFWGDYLYDKPYM       |      |      |      |      |      |      |
|       |   |       | LNLYDPNKYVDVNNVGI    |      |      |      |      |      |      |
|       |   |       | RGYMYLKGPRGSVMTT     |      |      |      |      |      |      |
|       |   |       | NIYLNSSLYRGTKFIIKKY  |      |      |      |      |      |      |
|       |   |       | ASGNKDNIVRNNDRVYI    |      |      |      |      |      |      |
|       |   |       | NVVVKNKEYRLATNASQ    |      |      |      |      |      |      |
|       |   |       | AGVEKILSALEIPDVGNL   |      |      |      |      |      |      |
|       |   |       | SQVVVMKSKNDQGITN     |      |      |      |      |      |      |
|       |   |       | KCKMNLQDNNGNDIGF     |      |      |      |      |      |      |
|       |   |       | IGFHQFNNAKLVASNW     |      |      |      |      |      |      |
|       |   |       | YNRQIERSSRTLGCSEF    |      |      |      |      |      |      |
|       |   |       | IPVDDGWGERPL         |      |      |      |      |      |      |

|       |   |       |                      |      |      |      |      |      |      |
|-------|---|-------|----------------------|------|------|------|------|------|------|
|       |   |       | RLLSTFTEYIKNIINTSILN |      |      |      |      |      |      |
|       |   |       | LRYESNHLIDLSRYASKIN  |      |      |      |      |      |      |
|       |   |       | IGSKVNFDPIDKNQIQLF   |      |      |      |      |      |      |
|       |   |       | NLESSKIEVILKNAIVYNS  |      |      |      |      |      |      |
|       |   |       | MYENFSTSFWIRIPKYFN   |      |      |      |      |      |      |
|       |   |       | SISLNNEYTIINCMENNS   |      |      |      |      |      |      |
|       |   |       | GWKVSLNYGEIWTLQD     |      |      |      |      |      |      |
|       |   |       | TQEIQRVVFKYSQMINI    |      |      |      |      |      |      |
|       |   |       | SDYINRWIFVTITNNRLN   |      |      |      |      |      |      |
|       |   |       | NSKIYINGRLIDQKPISNL  |      |      |      |      |      |      |
|       |   |       | GNIHASNNIMFKLDGCR    |      |      |      |      |      |      |
|       |   |       | DTHRYIWIKYFNLFDKEL   |      |      |      |      |      |      |
| 62308 | 0 | 54666 | NEKEIKDLYDNQNSGIL    | 6.06 | 0.01 | 3.30 | 0.68 | 0.22 | 1.66 |
|       |   |       | KDFWGDYLQYDKPYM      |      |      |      |      |      |      |
|       |   |       | LNLYDPNKYVDVNNVGI    |      |      |      |      |      |      |
|       |   |       | RGYMYLKGPRGSVMTT     |      |      |      |      |      |      |
|       |   |       | NIYLNSSLYRGTKFIIKKY  |      |      |      |      |      |      |
|       |   |       | ASGNKDNIVRNNDRVYI    |      |      |      |      |      |      |
|       |   |       | NVVVKKEYRLATNASQ     |      |      |      |      |      |      |
|       |   |       | AGVEKILSALEIPDVGNL   |      |      |      |      |      |      |
|       |   |       | SQVVVMKSKNDQGITN     |      |      |      |      |      |      |
|       |   |       | KCKMNLQDNNGNDIGF     |      |      |      |      |      |      |
|       |   |       | IGFHQFNNAKLVASNW     |      |      |      |      |      |      |
|       |   |       | YNRQIERSRTLGCSEWF    |      |      |      |      |      |      |
|       |   |       | IPVDDGWGERPL         |      |      |      |      |      |      |



|       |   |       |                      |      |      |      |      |      |      |
|-------|---|-------|----------------------|------|------|------|------|------|------|
|       |   |       | RLLSTFTEYIKNIINTSILN |      |      |      |      |      |      |
|       |   |       | LRYESNHLIDLSRYASKIN  |      |      |      |      |      |      |
|       |   |       | IGSKVNFDPIDKNQIQLF   |      |      |      |      |      |      |
|       |   |       | NLESSKIEVILKNAIVYNS  |      |      |      |      |      |      |
|       |   |       | MYENFSTSFWIRIPKYFN   |      |      |      |      |      |      |
|       |   |       | SISLNNEYTIINCMENNS   |      |      |      |      |      |      |
|       |   |       | GWKVSLENYGEIWTLQD    |      |      |      |      |      |      |
|       |   |       | TQEIQRVVFYKYSQMINI   |      |      |      |      |      |      |
|       |   |       | SDYINRWIFVTITNNRLN   |      |      |      |      |      |      |
|       |   |       | NSKIYINGRLIDQKPISNL  |      |      |      |      |      |      |
|       |   |       | GNIHASNNIMFKLDGCR    |      |      |      |      |      |      |
|       |   |       | DTHRYIWIKYFNLFDKEL   |      |      |      |      |      |      |
| 62309 | 0 | 54666 | NEKEIKDLYDNQNSGIL    | 6.06 | 0.01 | 3.30 | 0.44 | 0.22 | 1.66 |
|       |   |       | KDFWGDYLYDKPYM       |      |      |      |      |      |      |
|       |   |       | LNLYDPNKYVDVNNVGI    |      |      |      |      |      |      |
|       |   |       | RGYMYLKGPRGSVMTT     |      |      |      |      |      |      |
|       |   |       | NIYLNSSLYRGTKFIIKKY  |      |      |      |      |      |      |
|       |   |       | ASGNKDNIVRNNDRVYI    |      |      |      |      |      |      |
|       |   |       | NVVVKNKEYRLATNASQ    |      |      |      |      |      |      |
|       |   |       | AGVEKILSALEIPDVGNL   |      |      |      |      |      |      |
|       |   |       | SQVVVMKSKNDQGITN     |      |      |      |      |      |      |
|       |   |       | KCKMNLQDNNGNDIGF     |      |      |      |      |      |      |
|       |   |       | IGFHQFNNAKLVASNW     |      |      |      |      |      |      |
|       |   |       | YNRQIERSSRTLGCSEF    |      |      |      |      |      |      |
|       |   |       | IPVDDGWGERPL         |      |      |      |      |      |      |

|       |   |       |                      |      |      |      |      |      |      |
|-------|---|-------|----------------------|------|------|------|------|------|------|
|       |   |       | RLLSTFTEYIKNIINTSILN |      |      |      |      |      |      |
|       |   |       | LRYESNHLIDLSRYASKIN  |      |      |      |      |      |      |
|       |   |       | IGSKVNFDPIDKNQIQLF   |      |      |      |      |      |      |
|       |   |       | NLESSKIEVILKNAIVYNS  |      |      |      |      |      |      |
|       |   |       | MYENFSTSFWIRIPKYFN   |      |      |      |      |      |      |
|       |   |       | SISLNNEYTIINCMENNS   |      |      |      |      |      |      |
|       |   |       | GWKVS LNYGEI IWT LQD |      |      |      |      |      |      |
|       |   |       | TQEIKQRV VFKYSQMINI  |      |      |      |      |      |      |
|       |   |       | SDYINRWIFVTITNNRLN   |      |      |      |      |      |      |
|       |   |       | NSKIYINGRLIDQKPISNL  |      |      |      |      |      |      |
|       |   |       | GNIHASNNIMFKLDGCR    |      |      |      |      |      |      |
|       |   |       | DTHRYIWIKYFNLFDKEL   |      |      |      |      |      |      |
| 62310 | 0 | 54666 | NEKEIKDLYDNQNSGIL    | 6.06 | 0.01 | 3.30 | 0.68 | 0.22 | 1.66 |
|       |   |       | KDFWGDY LQYDKPYM     |      |      |      |      |      |      |
|       |   |       | LNLYDPNKYVDVNNVGI    |      |      |      |      |      |      |
|       |   |       | RGYMYLKGPRGSVMTT     |      |      |      |      |      |      |
|       |   |       | NIYLNSSLYRGTKFIIKKY  |      |      |      |      |      |      |
|       |   |       | ASGNKDNIVRNNDRVYI    |      |      |      |      |      |      |
|       |   |       | NVVVK NKEYRLATNASQ   |      |      |      |      |      |      |
|       |   |       | AGVEKILSALEIPDVGNL   |      |      |      |      |      |      |
|       |   |       | SQVVVMKSKNDQGITN     |      |      |      |      |      |      |
|       |   |       | KCKMNLQDNNGNDIGF     |      |      |      |      |      |      |
|       |   |       | IGFHQFN NIAKLVASNW   |      |      |      |      |      |      |
|       |   |       | YNRQIERSSRTLGCSEWF   |      |      |      |      |      |      |
|       |   |       | IPVDDGWGERPL         |      |      |      |      |      |      |

|       |   |       |                      |      |      |      |      |      |      |
|-------|---|-------|----------------------|------|------|------|------|------|------|
|       |   |       | RLLSTFTEYIKNIINTSILN |      |      |      |      |      |      |
|       |   |       | LRYESNHLIDLSRYASKIN  |      |      |      |      |      |      |
|       |   |       | IGSKVNFDPIDKNQIQLF   |      |      |      |      |      |      |
|       |   |       | NLESSKIEVILKNAIVYNS  |      |      |      |      |      |      |
|       |   |       | MYENFSTSFWIRIPKYFN   |      |      |      |      |      |      |
|       |   |       | SISLNNEYTIINCMENNS   |      |      |      |      |      |      |
|       |   |       | GWKVS LNYGEI IWT LQD |      |      |      |      |      |      |
|       |   |       | TQEIKQRV VFKYSQMINI  |      |      |      |      |      |      |
|       |   |       | SDYINRWIFVTITNNRLN   |      |      |      |      |      |      |
|       |   |       | NSKIYINGRLIDQKPISNL  |      |      |      |      |      |      |
|       |   |       | GNIHASNNIMFKLDGCR    |      |      |      |      |      |      |
|       |   |       | DTHRYIWIKYFNLFDKEL   |      |      |      |      |      |      |
| 62311 | 0 | 54666 | NEKEIKDLYDNQNSGIL    | 6.06 | 0.01 | 3.30 | 0.68 | 0.22 | 1.66 |
|       |   |       | KDFWGDY LQYDKPY YM   |      |      |      |      |      |      |
|       |   |       | LNLYDPNKYVDVNNVGI    |      |      |      |      |      |      |
|       |   |       | RGYMYLKGPRGSVMTT     |      |      |      |      |      |      |
|       |   |       | NIYLNSSLYRGTKFIIKKY  |      |      |      |      |      |      |
|       |   |       | ASGNKDNIVRNNDRVYI    |      |      |      |      |      |      |
|       |   |       | NVVVKNKEYRLATNASQ    |      |      |      |      |      |      |
|       |   |       | AGVEKILSALEIPDVGNL   |      |      |      |      |      |      |
|       |   |       | SQVVVMKSKNDQGITN     |      |      |      |      |      |      |
|       |   |       | KCKMNLQDNNGNDIGF     |      |      |      |      |      |      |
|       |   |       | IGFHQFN NIAKLVASNW   |      |      |      |      |      |      |
|       |   |       | YNRQIERSSRTLGCSEWF   |      |      |      |      |      |      |
|       |   |       | IPVDDGWGERPL         |      |      |      |      |      |      |

|       |   |       |                      |      |      |      |      |      |      |
|-------|---|-------|----------------------|------|------|------|------|------|------|
|       |   |       | RLLSTFTEYIKNIINTSILN |      |      |      |      |      |      |
|       |   |       | LRYESNHLIDLSRYASKIN  |      |      |      |      |      |      |
|       |   |       | IGSKVNFDPIDKNQIQLF   |      |      |      |      |      |      |
|       |   |       | NLESSKIEVILKNAIVYNS  |      |      |      |      |      |      |
|       |   |       | MYENFSTSFWIRIPKYFN   |      |      |      |      |      |      |
|       |   |       | SISLNNEYTIINCMENNS   |      |      |      |      |      |      |
|       |   |       | GWKVS LNYGEI IWT LQD |      |      |      |      |      |      |
|       |   |       | TQEIKQRV VFKYSQMINI  |      |      |      |      |      |      |
|       |   |       | SDYINRWIFVTITNNRLN   |      |      |      |      |      |      |
|       |   |       | NSKIYINGRLIDQKPISNL  |      |      |      |      |      |      |
|       |   |       | GNIHASNNIMFKLDGCR    |      |      |      |      |      |      |
|       |   |       | DTHRYIWIKYFNLFDKEL   |      |      |      |      |      |      |
| 62312 | 0 | 54666 | NEKEIKDLYDNQNSGIL    | 6.06 | 0.01 | 3.30 | 0.44 | 0.22 | 1.66 |
|       |   |       | KDFWGDY LQYDKPY YM   |      |      |      |      |      |      |
|       |   |       | LNLYDPNKYVDVNNVGI    |      |      |      |      |      |      |
|       |   |       | RGYMYLKGPRGSVMTT     |      |      |      |      |      |      |
|       |   |       | NIYLNSSLYRGTKFIIKKY  |      |      |      |      |      |      |
|       |   |       | ASGNKDNIVRNNDRVYI    |      |      |      |      |      |      |
|       |   |       | NVVVKNKEYRLATNASQ    |      |      |      |      |      |      |
|       |   |       | AGVEKILSALEIPDVGNL   |      |      |      |      |      |      |
|       |   |       | SQVVVMKSKNDQGITN     |      |      |      |      |      |      |
|       |   |       | KCKMNLQDNNGNDIGF     |      |      |      |      |      |      |
|       |   |       | IGFHQFN NIAKLVASNW   |      |      |      |      |      |      |
|       |   |       | YNRQIERSSRTLGCSEWF   |      |      |      |      |      |      |
|       |   |       | IPVDDGWGERPL         |      |      |      |      |      |      |

|       |   |       |                      |      |      |      |      |      |      |
|-------|---|-------|----------------------|------|------|------|------|------|------|
|       |   |       | RLLSTFTEYIKNIINTSILN |      |      |      |      |      |      |
|       |   |       | LRYESNHLIDLSRYASKIN  |      |      |      |      |      |      |
|       |   |       | IGSKVNFDPIDKNQIQLF   |      |      |      |      |      |      |
|       |   |       | NLESSKIEVILKNAIVYNS  |      |      |      |      |      |      |
|       |   |       | MYENFSTSFWIRIPKYFN   |      |      |      |      |      |      |
|       |   |       | SISLNNEYTIINCMENNS   |      |      |      |      |      |      |
|       |   |       | GWKVSLENYGEIWTLQD    |      |      |      |      |      |      |
|       |   |       | TQEIQRVVFYKYSQMINI   |      |      |      |      |      |      |
|       |   |       | SDYINRWIFVTITNNRLN   |      |      |      |      |      |      |
|       |   |       | NSKIYINGRLIDQKPISNL  |      |      |      |      |      |      |
|       |   |       | GNIHASNNIMFKLDGCR    |      |      |      |      |      |      |
|       |   |       | DTHRYIWIKYFNLFDKEL   |      |      |      |      |      |      |
| 62313 | 0 | 54666 | NEKEIKDLYDNQNSGIL    | 6.06 | 0.01 | 3.30 | 0.68 | 0.22 | 1.66 |
|       |   |       | KDFWGDYLYDKPYM       |      |      |      |      |      |      |
|       |   |       | LNLYDPNKYVDVNNVGI    |      |      |      |      |      |      |
|       |   |       | RGYMYLKGPRGSVMTT     |      |      |      |      |      |      |
|       |   |       | NIYLNSSLYRGTKFIIKKY  |      |      |      |      |      |      |
|       |   |       | ASGNKDNIVRNNDRVYI    |      |      |      |      |      |      |
|       |   |       | NVVVKNKEYRLATNASQ    |      |      |      |      |      |      |
|       |   |       | AGVEKILSALEIPDVGNL   |      |      |      |      |      |      |
|       |   |       | SQVVVMKSKNDQGITN     |      |      |      |      |      |      |
|       |   |       | KCKMNLQDNNGNDIGF     |      |      |      |      |      |      |
|       |   |       | IGFHQFNNAKLVASNW     |      |      |      |      |      |      |
|       |   |       | YNRQIERSSRTLGCSEWF   |      |      |      |      |      |      |
|       |   |       | IPVDDGWGERPL         |      |      |      |      |      |      |

|       |   |       |                      |      |      |      |      |      |      |
|-------|---|-------|----------------------|------|------|------|------|------|------|
|       |   |       | RLLSTFTEYIKNIINTSILN |      |      |      |      |      |      |
|       |   |       | LRYESNHLIDLSRYASKIN  |      |      |      |      |      |      |
|       |   |       | IGSKVNFDPIDKNQIQLF   |      |      |      |      |      |      |
|       |   |       | NLESSKIEVILKNAIVYNS  |      |      |      |      |      |      |
|       |   |       | MYENFSTSFWIRIPKYFN   |      |      |      |      |      |      |
|       |   |       | SISLNNEYTIINCMENNS   |      |      |      |      |      |      |
|       |   |       | GWKVSLNYGEIWTLQD     |      |      |      |      |      |      |
|       |   |       | TQEIQRVVFKYSQMINI    |      |      |      |      |      |      |
|       |   |       | SDYINRWIFVTITNNRLN   |      |      |      |      |      |      |
|       |   |       | NSKIYINGRLIDQKPISNL  |      |      |      |      |      |      |
|       |   |       | GNIHASNNIMFKLDGCR    |      |      |      |      |      |      |
|       |   |       | DTHRYIWIKYFNLFDKEL   |      |      |      |      |      |      |
| 62314 | 0 | 54666 | NEKEIKDLYDNQNSGIL    | 6.06 | 0.01 | 3.30 | 0.68 | 0.22 | 1.66 |
|       |   |       | KDFWGDYLQYDKPYM      |      |      |      |      |      |      |
|       |   |       | LNLYDPNKYVDVNNVGI    |      |      |      |      |      |      |
|       |   |       | RGYMYLKGPRGSVMTT     |      |      |      |      |      |      |
|       |   |       | NIYLNSSLYRGTKFIIKKY  |      |      |      |      |      |      |
|       |   |       | ASGNKDNIVRNNDRVYI    |      |      |      |      |      |      |
|       |   |       | NVVVKNKEYRLATNASQ    |      |      |      |      |      |      |
|       |   |       | AGVEKILSALEIPDVGNL   |      |      |      |      |      |      |
|       |   |       | SQVVVMKSKNDQGITN     |      |      |      |      |      |      |
|       |   |       | KCKMNLQDNNGNDIGF     |      |      |      |      |      |      |
|       |   |       | IGFHQFNNAKLVASNW     |      |      |      |      |      |      |
|       |   |       | YNRQIERSSRTLGCSEF    |      |      |      |      |      |      |
|       |   |       | IPVDDGWGERPL         |      |      |      |      |      |      |

|       |   |       |                      |      |      |      |      |      |      |
|-------|---|-------|----------------------|------|------|------|------|------|------|
|       |   |       | RLLSTFTEYIKNIINTSILN |      |      |      |      |      |      |
|       |   |       | LRYESNHLIDLSRYASKIN  |      |      |      |      |      |      |
|       |   |       | IGSKVNFDPIDKNQIQLF   |      |      |      |      |      |      |
|       |   |       | NLESSKIEVILKNAIVYNS  |      |      |      |      |      |      |
|       |   |       | MYENFSTSFWIRIPKYFN   |      |      |      |      |      |      |
|       |   |       | SISLNNEYTIINCMENNS   |      |      |      |      |      |      |
|       |   |       | GWKVSLENYGEIWTLQD    |      |      |      |      |      |      |
|       |   |       | TQEIQRVVFVKYSQMINI   |      |      |      |      |      |      |
|       |   |       | SDYINRWIFVTITNNRLN   |      |      |      |      |      |      |
|       |   |       | NSKIYINGRLIDQKPISNL  |      |      |      |      |      |      |
|       |   |       | GNIHASNNIMFKLDGCR    |      |      |      |      |      |      |
|       |   |       | DTHRYIWIKYFNLFDKEL   |      |      |      |      |      |      |
| 62315 | 0 | 54666 | NEKEIKDLYDNQNSGIL    | 6.06 | 0.01 | 3.30 | 0.44 | 0.22 | 1.66 |
|       |   |       | KDFWGDYLQYDKPYM      |      |      |      |      |      |      |
|       |   |       | LNLYDPNKYVDVNNVGI    |      |      |      |      |      |      |
|       |   |       | RGYMYLKGPRGSVMTT     |      |      |      |      |      |      |
|       |   |       | NIYLNSSLYRGTKFIIKKY  |      |      |      |      |      |      |
|       |   |       | ASGNKDNIVRNNDRVYI    |      |      |      |      |      |      |
|       |   |       | NVVVKNKEYRLATNASQ    |      |      |      |      |      |      |
|       |   |       | AGVEKILSALEIPDVGNL   |      |      |      |      |      |      |
|       |   |       | SQVVVMKSKNDQGITN     |      |      |      |      |      |      |
|       |   |       | KCKMNLQDNNGNDIGF     |      |      |      |      |      |      |
|       |   |       | IGFHQFNNAKLVASNW     |      |      |      |      |      |      |
|       |   |       | YNRQIERSSRTLGCSEF    |      |      |      |      |      |      |
|       |   |       | IPVDDGWGERPL         |      |      |      |      |      |      |

|       |   |        |                      |      |      |      |      |      |      |
|-------|---|--------|----------------------|------|------|------|------|------|------|
|       |   |        | RLLSTFTEYIKNIINTSILN |      |      |      |      |      |      |
|       |   |        | LRYESNHLIDLSRYASKIN  |      |      |      |      |      |      |
|       |   |        | IGSKVNFDPIDKNQQLF    |      |      |      |      |      |      |
|       |   |        | NLESSKIEVILKNAIVYNS  |      |      |      |      |      |      |
|       |   |        | MYENFSTSFWIRIPKYFN   |      |      |      |      |      |      |
|       |   |        | SISLNNEYTIINCMENNS   |      |      |      |      |      |      |
|       |   |        | GWKVSLNYGEIITLQD     |      |      |      |      |      |      |
|       |   |        | TQEIQRVVFYKYSQMINI   |      |      |      |      |      |      |
|       |   |        | SDYINRWIFVTITNNRLN   |      |      |      |      |      |      |
|       |   |        | NSKIYINGRLIDQKPISNL  |      |      |      |      |      |      |
|       |   |        | GNIHASNNIMFKLDGCR    |      |      |      |      |      |      |
|       |   |        | DTHRYIWIKYFNLFDEL    |      |      |      |      |      |      |
| 62316 | 0 | 54666  | NEKEIKDLYDNQNSGIL    | 6.06 | 0.01 | 2.08 | 0.44 | 0.22 | 0.28 |
|       |   |        | KDFWGDYLYDKPYM       |      |      |      |      |      |      |
|       |   |        | LNLYDPNKYVDVNNVGI    |      |      |      |      |      |      |
|       |   |        | RGYMYLKGPRGSVMTT     |      |      |      |      |      |      |
|       |   |        | NIYLNSSLYRGTKFIIKKY  |      |      |      |      |      |      |
|       |   |        | ASGNKDNIVRNDRVYI     |      |      |      |      |      |      |
|       |   |        | NVVVKKEYRLATNASQ     |      |      |      |      |      |      |
|       |   |        | AGVEKILSALEIPDVGNL   |      |      |      |      |      |      |
|       |   |        | SQVVVMKSKNDQGITN     |      |      |      |      |      |      |
|       |   |        | KCKMNLQDNNGNDIGF     |      |      |      |      |      |      |
|       |   |        | IGFHQFNNAKLVASNW     |      |      |      |      |      |      |
|       |   |        | YNRQIERSRTLGCSEWF    |      |      |      |      |      |      |
|       |   |        | IPVDDGWGERPL         |      |      |      |      |      |      |
| 62317 | 0 | 156951 | RLLYGS               | 1.89 | 0.01 | 0.90 | 2.74 | 0.22 | 0.85 |
| 62318 | 0 | 510477 | RLNASSMISGRV         | 2.48 | 0.01 | 0.90 | 3.07 | 1.13 | 1.39 |
| 62319 | 0 | 120919 | RLNEAVKYTG           | 2.26 | 0.01 | 2.18 | 2.16 | 0.22 | 0.28 |
| 62320 | 0 | 54688  | RLNNSKIYINGRLIDQKPI  | 2.91 | 0.01 | 2.08 | 2.02 | 0.22 | 1.57 |
| 62321 | 0 | 54688  | RLNNSKIYINGRLIDQKPI  | 2.91 | 0.01 | 2.08 | 2.02 | 0.22 | 1.57 |
| 62322 | 0 | 54688  | RLNNSKIYINGRLIDQKPI  | 2.91 | 0.01 | 2.08 | 0.68 | 0.22 | 1.57 |
| 62323 | 0 | 54688  | RLNNSKIYINGRLIDQKPI  | 2.91 | 0.01 | 2.08 | 0.68 | 0.22 | 1.57 |
| 62324 | 0 | 510478 | RLNSSMNSGRV          | 2.52 | 0.01 | 0.90 | 3.07 | 1.13 | 1.39 |
| 62325 | 0 | 238979 | RLNPDAGGAWGRGF       | 2.63 | 0.01 | 2.14 | 2.65 | 0.22 | 0.85 |
| 62326 | 0 | 54689  | RLNPVY               | 1.88 | 0.01 | 0.90 | 0.68 | 0.22 | 1.39 |
| 62327 | 0 | 227516 | RLPKPTLQGRLEADF      | 2.67 | 0.01 | 2.48 | 0.44 | 1.59 | 0.28 |
| 62328 | 0 | 125238 | RLPLPPNQKR           | 2.35 | 0.01 | 3.23 | 0.68 | 0.22 | 1.48 |
| 62329 | 0 | 125238 | RLPLPPNQKR           | 2.35 | 0.01 | 3.23 | 0.68 | 0.22 | 0.85 |
| 62330 | 0 | 125238 | RLPLPPNQKR           | 2.35 | 0.01 | 3.23 | 0.68 | 0.22 | 0.85 |
| 62331 | 0 | 125238 | RLPLPPNQKR           | 2.35 | 0.01 | 3.23 | 0.68 | 0.22 | 0.85 |
| 62332 | 0 | 125238 | RLPLPPNQKR           | 2.35 | 0.01 | 3.23 | 0.68 | 0.22 | 0.85 |



|       |   |        |                              |      |      |      |      |      |      |
|-------|---|--------|------------------------------|------|------|------|------|------|------|
| 62333 | 0 | 132614 | RLPNPDTDLYWFTLY              | 2.70 | 0.01 | 0.78 | 0.44 | 1.13 | 1.39 |
| 62334 | 0 | 132615 | RLPPSDT                      | 2.01 | 0.01 | 0.78 | 1.15 | 2.26 | 2.12 |
| 62335 | 0 | 132615 | RLPPSDT                      | 2.01 | 0.01 | 0.78 | 1.15 | 2.26 | 0.85 |
| 62336 | 0 | 132615 | RLPPSDT                      | 2.01 | 0.01 | 0.78 | 1.15 | 2.26 | 0.85 |
| 62337 | 0 | 423493 | RLPRPDTPTPRQKK               | 2.72 | 0.01 | 2.51 | 0.44 | 2.35 | 1.28 |
| 62338 | 0 | 54707  | RLPRYMQEV                    | 2.22 | 0.01 | 0.90 | 0.68 | 0.22 | 0.28 |
| 62339 | 0 | 227517 | RLQDIRRGPLVAEGG              | 2.66 | 0.01 | 2.48 | 0.44 | 1.59 | 0.28 |
| 62340 | 0 | 138807 | RLQGISPKE                    | 2.21 | 0.01 | 0.78 | 0.44 | 1.41 | 0.28 |
| 62341 | 0 | 138807 | RLQGISPKE                    | 2.21 | 0.01 | 0.78 | 0.44 | 1.41 | 1.66 |
| 62342 | 0 | 138807 | RLQGISPKE                    | 2.21 | 0.01 | 0.78 | 0.44 | 1.41 | 1.66 |
| 62343 | 0 | 138807 | RLQGISPKE                    | 2.21 | 0.01 | 0.78 | 0.44 | 1.41 | 1.66 |
| 62344 | 0 | 138807 | RLQGISPKE                    | 2.21 | 0.01 | 0.78 | 0.44 | 1.41 | 1.66 |
| 62345 | 0 | 138807 | RLQGISPKE                    | 2.21 | 0.01 | 0.78 | 0.44 | 1.41 | 1.66 |
| 62346 | 0 | 138807 | RLQGISPKE                    | 2.21 | 0.01 | 0.78 | 0.44 | 1.41 | 1.66 |
| 62347 | 0 | 138807 | RLQGISPKE                    | 2.21 | 0.01 | 0.78 | 0.44 | 1.41 | 1.66 |
| 62348 | 0 | 138807 | RLQGISPKE                    | 2.21 | 0.01 | 0.78 | 0.44 | 1.41 | 1.66 |
| 62349 | 0 | 138807 | RLQGISPKE                    | 2.21 | 0.01 | 0.78 | 0.44 | 1.41 | 1.66 |
| 62350 | 0 | 138807 | RLQGISPKE                    | 2.21 | 0.01 | 0.78 | 0.44 | 1.41 | 1.66 |
| 62351 | 0 | 138807 | RLQGISPKE                    | 2.21 | 0.01 | 0.78 | 0.44 | 1.41 | 1.66 |
| 62352 | 0 | 525045 | RLQGRQQEQQFKRELR<br>NLPQQCGL | 3.16 | 0.01 | 2.16 | 1.12 | 0.22 | 1.39 |
| 62353 | 0 | 525045 | RLQGRQQEQQFKRELR<br>NLPQQCGL | 3.16 | 0.01 | 2.16 | 0.44 | 1.23 | 1.39 |
| 62354 | 0 | 173069 | RLQMFDDPRNKRGE               | 2.64 | 0.01 | 0.78 | 0.44 | 1.41 | 0.28 |
| 62355 | 0 | 173069 | RLQMFDDPRNKRGE               | 2.64 | 0.01 | 0.78 | 0.44 | 1.13 | 0.28 |
| 62356 | 0 | 54726  | RLQVLDDHYR                   | 2.33 | 0.01 | 1.96 | 0.44 | 0.85 | 1.34 |
| 62357 | 0 | 370200 | RLREIDGSLSSSAWV              | 2.67 | 0.01 | 1.61 | 0.44 | 0.85 | 1.28 |
| 62358 | 0 | 451034 | RLREKLQEEMLQREEAE            | 2.85 | 0.01 | 0.78 | 2.79 | 1.13 | 1.28 |
| 62359 | 0 | 102767 | RLRGDYNVGPIRFGWP<br>VAPN     | 2.95 | 0.01 | 0.90 | 1.20 | 0.22 | 0.28 |
| 62360 | 0 | 132044 | RLRKWTTVDSISVNT              | 2.69 | 0.01 | 0.78 | 0.44 | 1.13 | 0.85 |
| 62361 | 0 | 54736  | RLRLVDAD                     | 2.17 | 0.01 | 2.85 | 0.44 | 0.22 | 0.28 |
| 62362 | 0 | 135983 | RLRPPEPRPRDR                 | 2.54 | 0.01 | 0.78 | 0.44 | 1.13 | 0.28 |
| 62363 | 0 | 135983 | RLRPPEPRPRDR                 | 2.54 | 0.01 | 0.78 | 0.44 | 1.41 | 0.28 |
| 62364 | 0 | 120174 | RLRQQWIDVRLRWNPA<br>DYGG     | 2.93 | 0.01 | 2.26 | 2.04 | 0.22 | 1.57 |
| 62365 | 0 | 120174 | RLRQQWIDVRLRWNPA<br>DYGG     | 2.93 | 0.01 | 2.26 | 2.04 | 0.22 | 1.57 |
| 62366 | 0 | 120174 | RLRQQWIDVRLRWNPA<br>DYGG     | 2.93 | 0.01 | 2.26 | 2.04 | 0.22 | 1.57 |
| 62367 | 0 | 120174 | RLRQQWIDVRLRWNPA<br>DYGG     | 2.93 | 0.01 | 2.26 | 2.04 | 0.22 | 1.57 |
| 62368 | 0 | 120174 | RLRQQWIDVRLRWNPA<br>DYGG     | 2.93 | 0.01 | 2.26 | 2.04 | 0.22 | 1.57 |
| 62369 | 0 | 120174 | RLRQQWIDVRLRWNPA<br>DYGG     | 2.93 | 0.01 | 2.26 | 2.04 | 0.22 | 1.57 |

|       |   |        |                               |      |      |      |      |      |      |
|-------|---|--------|-------------------------------|------|------|------|------|------|------|
| 62370 | 0 | 54747  | RLRSSVPGVRLLQDSVD<br>FSL      | 2.99 | 0.01 | 0.78 | 0.44 | 0.85 | 0.28 |
| 62371 | 0 | 54747  | RLRSSVPGVRLLQDSVD<br>FSL      | 2.99 | 0.01 | 0.78 | 0.44 | 1.13 | 0.28 |
| 62372 | 0 | 54747  | RLRSSVPGVRLLQDSVD<br>FSL      | 2.99 | 0.01 | 0.78 | 0.44 | 1.13 | 0.28 |
| 62373 | 0 | 54747  | RLRSSVPGVRLLQDSVD<br>FSL      | 2.99 | 0.01 | 0.78 | 0.44 | 1.93 | 0.28 |
| 62374 | 0 | 54747  | RLRSSVPGVRLLQDSVD<br>FSL      | 2.99 | 0.01 | 0.78 | 0.44 | 1.93 | 0.28 |
| 62375 | 0 | 54748  | RLRVKN                        | 1.91 | 0.01 | 0.90 | 2.02 | 0.22 | 0.28 |
| 62376 | 0 | 54749  | RLRVTHQT                      | 2.15 | 0.01 | 3.55 | 0.68 | 0.22 | 0.28 |
| 62377 | 0 | 54749  | RLRVTHQT                      | 2.15 | 0.01 | 3.55 | 0.68 | 0.22 | 0.28 |
| 62378 | 0 | 54749  | RLRVTHQT                      | 2.15 | 0.01 | 3.55 | 0.68 | 0.22 | 0.28 |
| 62379 | 0 | 54752  | RLSAACNWTRGERCNLE<br>DRD      | 2.96 | 0.01 | 2.83 | 1.12 | 0.22 | 0.28 |
| 62380 | 0 | 121801 | RLSAKPAPPKPEKP                | 2.73 | 0.01 | 0.78 | 0.44 | 1.13 | 1.27 |
| 62381 | 0 | 136604 | RLSCKEDHRYAISSTNEI<br>GPLGAEG | 3.14 | 0.01 | 4.15 | 1.15 | 0.22 | 1.48 |
| 62382 | 0 | 136604 | RLSCKEDHRYAISSTNEI<br>GPLGAEG | 3.14 | 0.01 | 4.15 | 1.15 | 0.22 | 1.48 |
| 62383 | 0 | 54763  | RLSGVFLIELDKLII               | 2.66 | 0.01 | 3.97 | 1.12 | 0.22 | 0.85 |
| 62384 | 0 | 54765  | RLSKDEIERMVNDAMKY<br>EED      | 2.94 | 0.01 | 2.78 | 2.49 | 0.85 | 0.28 |
| 62385 | 0 | 54765  | RLSKDEIERMVNDAMKY<br>EED      | 2.94 | 0.01 | 2.78 | 0.44 | 0.85 | 0.28 |
| 62386 | 0 | 127804 | RLSPGHRALARGPPA               | 2.73 | 0.01 | 0.78 | 0.44 | 1.13 | 0.85 |
| 62387 | 0 | 54786  | RLTENTEPLL                    | 2.33 | 0.01 | 0.90 | 0.44 | 1.23 | 0.28 |
| 62388 | 0 | 54786  | RLTENTEPLL                    | 2.33 | 0.01 | 0.90 | 0.44 | 1.23 | 1.27 |
| 62389 | 0 | 54786  | RLTENTEPLL                    | 2.33 | 0.01 | 0.90 | 3.48 | 0.22 | 0.28 |
| 62390 | 0 | 137967 | RLTLIANGYRDV                  | 2.46 | 0.01 | 2.21 | 0.44 | 0.85 | 0.28 |
| 62391 | 0 | 173070 | RLTQILHENLEEMRS               | 2.68 | 0.01 | 0.78 | 0.44 | 1.13 | 0.28 |
| 62392 | 0 | 106782 | RLTRELYAQ                     | 2.24 | 0.01 | 0.90 | 0.44 | 1.13 | 1.39 |
| 62393 | 0 | 138232 | RLTSSLRYNP                    | 2.33 | 0.01 | 0.90 | 0.44 | 1.13 | 0.28 |
| 62394 | 0 | 138232 | RLTSSLRYNP                    | 2.33 | 0.01 | 0.90 | 1.12 | 0.22 | 0.28 |
| 62395 | 0 | 138232 | RLTSSLRYNP                    | 2.33 | 0.01 | 0.90 | 1.12 | 0.22 | 1.27 |
| 62396 | 0 | 54799  | RLVDADDP                      | 2.13 | 0.01 | 2.85 | 0.44 | 0.22 | 0.28 |
| 62397 | 0 | 79637  | RLVDADDP LLRTAPGPG<br>EVW     | 2.97 | 0.01 | 2.85 | 0.44 | 1.59 | 0.28 |
| 62398 | 0 | 120920 | RLVEHLLDPSRYNKLIR             | 2.78 | 0.01 | 2.19 | 1.12 | 0.22 | 0.28 |
| 62399 | 0 | 120920 | RLVEHLLDPSRYNKLIR             | 2.78 | 0.01 | 2.19 | 1.12 | 0.22 | 0.28 |
| 62400 | 0 | 120920 | RLVEHLLDPSRYNKLIR             | 2.78 | 0.01 | 2.19 | 1.12 | 0.22 | 0.85 |
| 62401 | 0 | 54807  | RLVGATPE                      | 2.10 | 0.01 | 2.85 | 0.44 | 0.22 | 0.28 |
| 62402 | 0 | 131041 | RLVGQQVMQ                     | 2.25 | 0.01 | 0.90 | 0.44 | 1.13 | 1.39 |
| 62403 | 0 | 131041 | RLVGQQVMQ                     | 2.25 | 0.01 | 0.90 | 0.44 | 1.13 | 0.28 |
| 62404 | 0 | 99619  | RLVLRRNALRRPFYS               | 2.69 | 0.01 | 2.16 | 0.44 | 1.23 | 1.48 |
| 62405 | 0 | 99619  | RLVLRRNALRRPFYS               | 2.69 | 0.01 | 2.16 | 0.44 | 1.23 | 1.48 |

|       |   |        |                          |      |      |      |      |      |      |
|-------|---|--------|--------------------------|------|------|------|------|------|------|
| 62406 | 0 | 99619  | RLVLRRNALRRPFYS          | 2.69 | 0.01 | 2.16 | 0.44 | 1.23 | 0.85 |
| 62407 | 0 | 79638  | RLVTDEI                  | 1.99 | 0.01 | 0.90 | 1.12 | 0.22 | 1.39 |
| 62408 | 0 | 370382 | RLWFEREVDGHDFIR          | 2.69 | 0.01 | 1.61 | 0.44 | 0.85 | 1.28 |
| 62409 | 0 | 447487 | RLWHYPCTVNFTIFK          | 2.62 | 0.01 | 1.96 | 0.68 | 0.22 | 0.28 |
| 62410 | 0 | 79373  | RLWIWAWNVG               | 2.31 | 0.01 | 0.90 | 0.68 | 0.22 | 0.28 |
| 62411 | 0 | 111736 | RLYDPNQAAALQALRN         | 2.72 | 0.01 | 3.20 | 1.12 | 0.22 | 0.85 |
| 62412 | 0 | 120175 | RLYHHLFNNDPGSR           | 2.67 | 0.01 | 0.78 | 3.81 | 0.22 | 0.28 |
| 62413 | 0 | 106783 | RLYHVPAVGQ               | 2.29 | 0.01 | 2.75 | 0.44 | 1.23 | 0.85 |
| 62414 | 0 | 54838  | RLYIGG                   | 1.86 | 0.01 | 1.96 | 0.44 | 0.85 | 0.28 |
| 62415 | 0 | 54848  | RMADAVSRKKMDTK           | 2.65 | 0.01 | 2.56 | 1.12 | 0.22 | 0.28 |
| 62416 | 0 | 54848  | RMADAVSRKKMDTK           | 2.65 | 0.01 | 2.56 | 0.44 | 0.85 | 0.28 |
| 62417 | 0 | 54850  | RMAILG                   | 1.88 | 0.01 | 2.40 | 0.44 | 0.85 | 0.28 |
| 62418 | 0 | 119636 | RMARMARKAGNFYVP<br>AEPK  | 2.91 | 0.01 | 0.78 | 0.44 | 1.13 | 0.85 |
| 62419 | 0 | 119636 | RMARMARKAGNFYVP<br>AEPK  | 2.91 | 0.01 | 0.78 | 0.44 | 1.13 | 0.85 |
| 62420 | 0 | 119636 | RMARMARKAGNFYVP<br>AEPK  | 2.91 | 0.01 | 0.78 | 0.44 | 1.13 | 0.85 |
| 62421 | 0 | 119636 | RMARMARKAGNFYVP<br>AEPK  | 2.91 | 0.01 | 0.78 | 0.44 | 1.13 | 0.85 |
| 62422 | 0 | 132045 | RMATPLLMRPMSM            | 2.59 | 0.01 | 1.75 | 1.12 | 0.22 | 0.28 |
| 62423 | 0 | 132045 | RMATPLLMRPMSM            | 2.59 | 0.01 | 1.75 | 1.12 | 0.22 | 2.02 |
| 62424 | 0 | 132045 | RMATPLLMRPMSM            | 2.59 | 0.01 | 1.75 | 1.12 | 0.22 | 2.12 |
| 62425 | 0 | 54859  | RMAWDM                   | 1.90 | 0.01 | 3.85 | 1.15 | 0.22 | 0.28 |
| 62426 | 0 | 54860  | RMAWDMMM                 | 2.00 | 0.01 | 3.18 | 0.44 | 0.85 | 0.85 |
| 62427 | 0 | 54861  | RMAWDMMM                 | 2.12 | 0.01 | 1.72 | 0.44 | 0.85 | 0.28 |
| 62428 | 0 | 54861  | RMAWDMMM                 | 2.12 | 0.01 | 1.72 | 0.44 | 0.85 | 2.97 |
| 62429 | 0 | 54862  | RMAWDMMMN                | 2.23 | 0.01 | 1.72 | 0.44 | 0.85 | 0.85 |
| 62430 | 0 | 54862  | RMAWDMMMN                | 2.23 | 0.01 | 1.72 | 0.44 | 0.85 | 0.85 |
| 62431 | 0 | 54863  | RMAWDMMMNW               | 2.33 | 0.01 | 2.68 | 0.44 | 0.85 | 0.28 |
| 62432 | 0 | 54863  | RMAWDMMMNW               | 2.33 | 0.01 | 1.72 | 0.68 | 0.22 | 0.28 |
| 62433 | 0 | 54873  | RMCSLDLGFCQTILR          | 2.67 | 0.01 | 0.90 | 1.15 | 0.22 | 0.85 |
| 62434 | 0 | 165647 | RMEVGQQAVEVWQGL<br>ALLSE | 2.97 | 0.01 | 0.78 | 0.44 | 0.85 | 0.28 |
| 62435 | 0 | 165647 | RMEVGQQAVEVWQGL<br>ALLSE | 2.97 | 0.01 | 0.78 | 0.44 | 0.85 | 1.27 |
| 62436 | 0 | 80008  | RMFLGPKQLTFE             | 2.45 | 0.01 | 2.14 | 3.26 | 0.22 | 0.28 |
| 62437 | 0 | 80008  | RMFLGPKQLTFE             | 2.45 | 0.01 | 2.14 | 3.17 | 0.22 | 0.28 |
| 62438 | 0 | 489346 | RMFPGEVAL                | 2.18 | 0.01 | 0.78 | 0.44 | 1.41 | 2.12 |
| 62439 | 0 | 489347 | RMFPTPSL                 | 2.22 | 0.01 | 0.78 | 0.44 | 1.41 | 2.12 |
| 62440 | 0 | 54900  | RMHLFTGIQI               | 2.29 | 0.01 | 0.78 | 0.44 | 1.74 | 0.28 |
| 62441 | 0 | 54906  | RMIPKGT                  | 2.10 | 0.01 | 2.40 | 2.43 | 0.22 | 0.28 |
| 62442 | 0 | 167812 | RMIPKGTLT                | 2.21 | 0.01 | 2.40 | 2.43 | 0.22 | 0.28 |
| 62443 | 0 | 54908  | RMKDTL                   | 1.88 | 0.01 | 3.24 | 1.12 | 0.22 | 0.28 |
| 62444 | 0 | 54909  | RMKDTLRITY               | 2.32 | 0.01 | 2.66 | 0.68 | 0.22 | 0.28 |
| 62445 | 0 | 54909  | RMKDTLRITY               | 2.32 | 0.01 | 2.66 | 0.68 | 0.22 | 0.28 |
| 62446 | 0 | 54909  | RMKDTLRITY               | 2.32 | 0.01 | 2.66 | 0.68 | 0.22 | 0.28 |

|       |   |        |                                       |      |      |      |      |      |      |
|-------|---|--------|---------------------------------------|------|------|------|------|------|------|
| 62447 | 0 | 54911  | RMKQLEPKVEELLPKNY<br>HLENEVARLKKLVGER | 3.45 | 0.01 | 0.90 | 0.68 | 0.22 | 1.66 |
| 62448 | 0 | 120921 | RMKRPGEDKVRPACQH<br>K                 | 2.78 | 0.01 | 2.19 | 1.12 | 0.22 | 0.28 |
| 62449 | 0 | 120921 | RMKRPGEDKVRPACQH<br>K                 | 2.78 | 0.01 | 2.19 | 1.12 | 0.22 | 0.28 |
| 62450 | 0 | 120921 | RMKRPGEDKVRPACQH<br>K                 | 2.78 | 0.01 | 2.19 | 1.12 | 0.22 | 0.28 |
| 62451 | 0 | 54912  | RMKSSR                                | 1.92 | 0.01 | 0.90 | 2.02 | 0.22 | 0.28 |
| 62452 | 0 | 54918  | RMLNILN                               | 2.04 | 0.01 | 3.65 | 1.15 | 0.22 | 0.28 |
| 62453 | 0 | 54918  | RMLNILN                               | 2.04 | 0.01 | 3.65 | 0.44 | 0.85 | 0.28 |
| 62454 | 0 | 54919  | RMLPASLHL                             | 2.23 | 0.01 | 0.90 | 1.15 | 0.22 | 1.39 |
| 62455 | 0 | 80009  | RMLVCGIAAKLG                          | 2.46 | 0.01 | 2.14 | 3.26 | 0.22 | 0.28 |
| 62456 | 0 | 54923  | RMMATKDSFQSFN                         | 2.52 | 0.01 | 3.00 | 0.44 | 0.85 | 0.28 |
| 62457 | 0 | 54923  | RMMATKDSFQSFN                         | 2.52 | 0.01 | 3.00 | 1.15 | 2.39 | 0.28 |
| 62458 | 0 | 243157 | RMMKERECQIREQYD                       | 2.70 | 0.01 | 3.33 | 1.20 | 0.22 | 0.85 |
| 62459 | 0 | 243158 | RMMKERESQIREQYD                       | 2.70 | 0.01 | 3.32 | 1.20 | 0.22 | 0.85 |
| 62460 | 0 | 243158 | RMMKERESQIREQYD                       | 2.70 | 0.01 | 3.32 | 1.20 | 0.22 | 0.85 |
| 62461 | 0 | 54936  | RMPPCMNAGECPTIA                       | 2.68 | 0.01 | 0.90 | 0.44 | 1.41 | 0.28 |
| 62462 | 0 | 54945  | RMQQLENDLDQVQES                       | 2.70 | 0.01 | 2.36 | 0.44 | 1.23 | 1.28 |
| 62463 | 0 | 54945  | RMQQLENDLDQVQES                       | 2.70 | 0.01 | 2.36 | 0.44 | 1.23 | 1.27 |
| 62464 | 0 | 54945  | RMQQLENDLDQVQES                       | 2.70 | 0.01 | 2.36 | 0.44 | 1.23 | 1.28 |
| 62465 | 0 | 112295 | RMRDGAW                               | 2.03 | 0.01 | 0.78 | 0.44 | 1.13 | 0.28 |
| 62466 | 0 | 370574 | RMTEKEDGDNEDEEV                       | 2.69 | 0.01 | 1.61 | 0.44 | 0.85 | 1.28 |
| 62467 | 0 | 233263 | RMTWDPAQPPRD                          | 2.49 | 0.01 | 0.78 | 0.44 | 1.13 | 0.28 |
| 62468 | 0 | 233263 | RMTWDPAQPPRD                          | 2.49 | 0.01 | 0.78 | 3.57 | 0.22 | 0.28 |
| 62469 | 0 | 80011  | RMVECSGKQDCP                          | 2.43 | 0.01 | 2.14 | 3.26 | 0.22 | 0.28 |
| 62470 | 0 | 80011  | RMVECSGKQDCP                          | 2.43 | 0.01 | 2.14 | 3.17 | 0.22 | 0.28 |
| 62471 | 0 | 370595 | RMWGPRHVDPDHFRS                       | 2.69 | 0.01 | 1.61 | 0.44 | 0.85 | 1.28 |
| 62472 | 0 | 494106 | RMYTPIAK                              | 2.10 | 0.01 | 3.65 | 0.68 | 0.22 | 0.28 |
| 62473 | 0 | 494106 | RMYTPIAK                              | 2.10 | 0.01 | 3.65 | 0.68 | 0.22 | 0.28 |
| 62474 | 0 | 494106 | RMYTPIAK                              | 2.10 | 0.01 | 3.65 | 0.68 | 0.22 | 0.85 |
| 62475 | 0 | 54965  | RMYVGGVEHR                            | 2.33 | 0.01 | 1.96 | 0.44 | 0.85 | 1.34 |
| 62476 | 0 | 54967  | RMYVGGVEHRLEAACN<br>WTRG              | 2.92 | 0.01 | 2.83 | 0.44 | 0.85 | 0.28 |
| 62477 | 0 | 128093 | RNAIELRFVL                            | 2.32 | 0.01 | 0.78 | 0.68 | 0.22 | 3.16 |
| 62478 | 0 | 54971  | RNALRRPSYTNGPQE                       | 2.66 | 0.01 | 2.72 | 0.44 | 1.23 | 0.85 |
| 62479 | 0 | 95766  | RNANEEYSI                             | 2.31 | 0.01 | 1.60 | 0.44 | 1.23 | 0.85 |
| 62480 | 0 | 133347 | RNAYNEIKLKESYKLD                      | 2.81 | 0.01 | 0.90 | 1.20 | 0.22 | 0.85 |
| 62481 | 0 | 54975  | RNCKKLGPENVA                          | 2.53 | 0.01 | 3.29 | 1.20 | 0.22 | 0.85 |

|       |   |        |                   |      |      |      |      |      |      |
|-------|---|--------|-------------------|------|------|------|------|------|------|
| 62482 | 0 | 54975  | RNCKKLGPRENVA     | 2.53 | 0.01 | 3.29 | 1.20 | 0.22 | 1.57 |
| 62483 | 0 | 108612 | RNDLITFLEQETK     | 2.54 | 0.01 | 3.45 | 0.44 | 1.23 | 1.27 |
| 62484 | 0 | 108612 | RNDLITFLEQETK     | 2.54 | 0.01 | 3.45 | 0.44 | 1.23 | 3.40 |
| 62485 | 0 | 131633 | RNDYSYWLSIPALMP   | 2.66 | 0.01 | 0.78 | 2.97 | 2.60 | 1.75 |
| 62486 | 0 | 525081 | RNEKLKNQARSAYKN   | 2.71 | 0.01 | 2.24 | 0.44 | 1.41 | 1.28 |
| 62487 | 0 | 181792 | RNEKRFSNEGEAKCG   | 2.71 | 0.01 | 1.66 | 2.36 | 0.22 | 1.28 |
| 62488 | 0 | 54980  | RNEKWREQLGQKFEE   | 2.69 | 0.01 | 3.89 | 0.44 | 1.74 | 1.28 |
| 62489 | 0 | 370697 | RNEPQARKQQGRDAP   | 2.70 | 0.01 | 1.61 | 0.44 | 0.85 | 1.28 |
| 62490 | 0 | 370698 | RNEPQARRQQGRNEP   | 2.73 | 0.01 | 1.61 | 0.44 | 0.85 | 1.28 |
| 62491 | 0 | 91903  | RNERATGSGNGSGGG   | 2.71 | 0.01 | 3.05 | 1.20 | 0.22 | 0.28 |
| 62492 | 0 | 91903  | RNERATGSGNGSGGG   | 2.71 | 0.01 | 3.05 | 1.20 | 0.22 | 0.28 |
| 62493 | 0 | 54982  | RNEYPPINK         | 2.12 | 0.01 | 2.83 | 2.61 | 0.22 | 0.28 |
| 62494 | 0 | 141741 | RNFLAGEEDNVISQI   | 2.63 | 0.01 | 3.65 | 0.44 | 1.23 | 1.27 |
| 62495 | 0 | 99622  | RNFRPLTPRGYTTWV   | 2.68 | 0.01 | 2.86 | 2.02 | 0.85 | 0.85 |
| 62496 | 0 | 54989  | RNFTTAPAICHEGKAYF | 2.75 | 0.01 | 2.48 | 0.44 | 0.85 | 0.28 |
| 62497 | 0 | 54989  | RNFTTAPAICHEGKAYF | 2.75 | 0.01 | 2.48 | 0.68 | 0.22 | 0.28 |
| 62498 | 0 | 54989  | RNFTTAPAICHEGKAYF | 2.75 | 0.01 | 2.48 | 1.20 | 0.22 | 0.28 |
| 62499 | 0 | 423494 | RNGATFSKGDIEGNF   | 2.66 | 0.01 | 2.51 | 0.44 | 2.35 | 1.28 |
| 62500 | 0 | 179889 | RNGDIALHFNPR      | 2.46 | 0.01 | 3.89 | 0.44 | 0.85 | 0.85 |
| 62501 | 0 | 54992  | RNGHNVSTRGRIPAD   | 2.67 | 0.01 | 2.59 | 0.44 | 0.85 | 0.28 |
| 62502 | 0 | 115645 | RNGKDQDGDQAP      | 2.49 | 0.01 | 0.78 | 0.44 | 1.41 | 0.28 |
| 62503 | 0 | 115645 | RNGKDQDGDQAP      | 2.49 | 0.01 | 0.78 | 0.44 | 1.13 | 0.28 |
| 62504 | 0 | 238982 | RNGSVTSSGQLSDD    | 2.61 | 0.01 | 2.14 | 2.65 | 0.22 | 0.85 |
| 62505 | 0 | 238982 | RNGSVTSSGQLSDD    | 2.61 | 0.01 | 2.14 | 2.65 | 0.22 | 0.85 |
| 62506 | 0 | 120922 | RNHKTEKNKT        | 2.35 | 0.01 | 2.18 | 2.16 | 0.22 | 0.28 |
| 62507 | 0 | 55001  | RNIGLSGNPF        | 2.31 | 0.01 | 2.84 | 0.44 | 0.85 | 0.28 |
| 62508 | 0 | 114581 | RNIGYIFFKNSTIDI   | 2.67 | 0.01 | 4.93 | 0.44 | 1.41 | 1.57 |
| 62509 | 0 | 181793 | RNISGNMKAFTSQGY   | 2.64 | 0.01 | 1.66 | 2.36 | 0.22 | 1.28 |
| 62510 | 0 | 177953 | RNITIMASGNTGGEK   | 2.67 | 0.01 | 0.78 | 0.44 | 1.13 | 0.85 |
| 62511 | 0 | 114582 | RNKIRQFFKNQDKEL   | 2.70 | 0.01 | 3.47 | 0.44 | 1.41 | 1.57 |
| 62512 | 0 | 55007  | RNKIYFMQRQDVLD    | 2.60 | 0.01 | 2.56 | 2.69 | 0.22 | 0.28 |
| 62513 | 0 | 55007  | RNKIYFMQRQDVLD    | 2.60 | 0.01 | 3.16 | 2.69 | 0.22 | 0.28 |
| 62514 | 0 | 100477 | RNKTQEEHLK        | 2.30 | 0.01 | 2.18 | 2.16 | 0.22 | 0.28 |
| 62515 | 0 | 148919 | RNLALQTLPA        | 2.33 | 0.01 | 1.86 | 0.44 | 1.93 | 0.85 |
| 62516 | 0 | 148919 | RNLALQTLPA        | 2.33 | 0.01 | 1.86 | 2.74 | 0.22 | 0.85 |
| 62517 | 0 | 148919 | RNLALQTLPA        | 2.33 | 0.01 | 1.86 | 2.74 | 0.22 | 0.85 |
| 62518 | 0 | 55010  | RNLFVD            | 1.88 | 0.01 | 0.90 | 0.44 | 1.59 | 1.39 |
| 62519 | 0 | 55019  | RNLPAGHGLN        | 2.33 | 0.01 | 3.20 | 0.44 | 1.41 | 0.28 |
| 62520 | 0 | 96831  | RNLPQQCGL         | 2.22 | 0.01 | 2.16 | 2.82 | 0.22 | 1.57 |
| 62521 | 0 | 55022  | RNLPRALSP         | 2.26 | 0.01 | 0.90 | 1.15 | 0.22 | 1.39 |

|       |   |        |                                |      |      |      |      |      |      |
|-------|---|--------|--------------------------------|------|------|------|------|------|------|
| 62522 | 0 | 55026  | RNLTPGNTNTRVSRYSSTARHRLRR      | 3.18 | 0.01 | 2.53 | 0.44 | 0.85 | 0.28 |
| 62523 | 0 | 55027  | RNLTPGNTNTRVSRYSSTARHRLRRGADGT | 3.36 | 0.01 | 2.70 | 1.15 | 0.22 | 0.28 |
| 62524 | 0 | 55027  | RNLTPGNTNTRVSRYSSTARHRLRRGADGT | 3.36 | 0.01 | 2.53 | 0.44 | 0.85 | 0.28 |
| 62525 | 0 | 55027  | RNLTPGNTNTRVSRYSSTARHRLRRGADGT | 3.36 | 0.01 | 2.53 | 0.44 | 0.85 | 0.28 |
| 62526 | 0 | 125551 | RNLTYIDPDALKELPLLKFL           | 2.94 | 0.01 | 0.78 | 0.44 | 1.13 | 0.28 |
| 62527 | 0 | 125551 | RNLTYIDPDALKELPLLKFL           | 2.94 | 0.01 | 0.78 | 0.44 | 1.13 | 0.28 |
| 62528 | 0 | 125551 | RNLTYIDPDALKELPLLKFL           | 2.94 | 0.01 | 0.78 | 1.20 | 0.22 | 0.28 |
| 62529 | 0 | 125551 | RNLTYIDPDALKELPLLKFL           | 2.94 | 0.01 | 0.78 | 0.68 | 0.22 | 0.28 |
| 62530 | 0 | 125551 | RNLTYIDPDALKELPLLKFL           | 2.94 | 0.01 | 0.78 | 1.20 | 0.22 | 0.28 |
| 62531 | 0 | 237912 | RNMGEEPNYQEEWVMHKK             | 2.81 | 0.01 | 3.26 | 1.81 | 0.22 | 0.28 |
| 62532 | 0 | 167653 | RNNDGGSSAP                     | 2.31 | 0.01 | 3.18 | 0.44 | 0.85 | 1.28 |
| 62533 | 0 | 167653 | RNNDGGSSAP                     | 2.31 | 0.01 | 3.18 | 0.44 | 1.59 | 1.28 |
| 62534 | 0 | 167654 | RNNDGSSAP                      | 2.21 | 0.01 | 3.44 | 0.44 | 0.85 | 1.28 |
| 62535 | 0 | 167654 | RNNDGSSAP                      | 2.21 | 0.01 | 3.44 | 0.44 | 1.59 | 1.28 |
| 62536 | 0 | 55035  | RNNHPQNT                       | 2.14 | 0.01 | 3.42 | 0.68 | 0.22 | 0.28 |
| 62537 | 0 | 55036  | RNNHPQNTSDSQKEATD              | 2.79 | 0.01 | 0.90 | 1.20 | 0.22 | 0.28 |
| 62538 | 0 | 55036  | RNNHPQNTSDSQKEATD              | 2.79 | 0.01 | 0.90 | 1.20 | 0.22 | 1.48 |
| 62539 | 0 | 55037  | RNNHPQNTSDSQKEATDGNK           | 2.94 | 0.01 | 0.90 | 1.20 | 0.22 | 0.28 |
| 62540 | 0 | 55038  | RNNHPQNTSDSQKECTDGNK           | 2.94 | 0.01 | 1.66 | 0.44 | 0.85 | 1.57 |
| 62541 | 0 | 55038  | RNNHPQNTSDSQKECTDGNK           | 2.94 | 0.01 | 1.66 | 0.44 | 1.74 | 1.57 |
| 62542 | 0 | 102770 | RNNNDINIDRTLVAKQSVVK           | 2.95 | 0.01 | 2.39 | 0.68 | 0.22 | 0.28 |
| 62543 | 0 | 102770 | RNNNDINIDRTLVAKQSVVK           | 2.95 | 0.01 | 2.39 | 0.44 | 1.59 | 0.28 |
| 62544 | 0 | 118585 | RNPLIAGK                       | 2.10 | 0.01 | 0.78 | 0.44 | 1.13 | 0.28 |
| 62545 | 0 | 177238 | RNPSDK                         | 1.88 | 0.01 | 0.78 | 1.12 | 0.22 | 1.48 |
| 62546 | 0 | 177238 | RNPSDK                         | 1.88 | 0.01 | 0.78 | 1.12 | 0.22 | 0.28 |
| 62547 | 0 | 177238 | RNPSDK                         | 1.88 | 0.01 | 0.78 | 1.12 | 0.22 | 1.27 |
| 62548 | 0 | 177238 | RNPSDK                         | 1.88 | 0.01 | 0.78 | 1.12 | 0.22 | 1.27 |
| 62549 | 0 | 55048  | RNQE                           | 1.57 | 0.01 | 2.19 | 0.68 | 0.22 | 0.28 |
| 62550 | 0 | 55048  | RNQE                           | 1.57 | 0.01 | 2.19 | 0.68 | 0.22 | 0.85 |

|       |   |        |                                                           |      |      |      |      |      |      |
|-------|---|--------|-----------------------------------------------------------|------|------|------|------|------|------|
| 62551 | 0 | 55049  | RNQGWRSVETSGVAEE<br>EATSGLVMLCIHGS                        | 3.33 | 0.01 | 2.53 | 0.44 | 0.85 | 0.28 |
| 62552 | 0 | 55050  | RNQMGVSELL                                                | 2.26 | 0.01 | 0.78 | 0.44 | 1.74 | 0.28 |
| 62553 | 0 | 489755 | RNRHRAWALRELQDI                                           | 2.69 | 0.01 | 2.69 | 3.05 | 0.85 | 1.28 |
| 62554 | 0 | 95768  | RNRRIEVENQANPTTAET<br>LDATRRVDDA                          | 3.29 | 0.01 | 2.72 | 0.68 | 0.22 | 0.28 |
| 62555 | 0 | 95768  | RNRRIEVENQANPTTAET<br>LDATRRVDDA                          | 3.29 | 0.01 | 2.72 | 0.68 | 0.22 | 0.28 |
| 62556 | 0 | 95768  | RNRRIEVENQANPTTAET<br>LDATRRVDDA                          | 3.29 | 0.01 | 2.72 | 0.68 | 0.22 | 0.28 |
| 62557 | 0 | 95768  | RNRRIEVENQANPTTAET<br>LDATRRVDDA                          | 3.29 | 0.01 | 2.72 | 1.12 | 0.22 | 0.28 |
| 62558 | 0 | 95768  | RNRRIEVENQANPTTAET<br>LDATRRVDDA                          | 3.29 | 0.01 | 2.72 | 0.68 | 0.22 | 0.28 |
| 62559 | 0 | 95768  | RNRRIEVENQANPTTAET<br>LDATRRVDDA                          | 3.29 | 0.01 | 2.72 | 0.68 | 0.22 | 0.28 |
| 62560 | 0 | 95768  | RNRRIEVENQANPTTAET<br>LDATRRVDDA                          | 3.29 | 0.01 | 2.72 | 0.68 | 0.22 | 0.28 |
| 62561 | 0 | 55055  | RNRSPERCDLGDDLHLQ                                         | 2.79 | 0.01 | 3.36 | 0.44 | 2.82 | 0.28 |
| 62562 | 0 | 80013  | RNSAPRRGANFSL                                             | 2.57 | 0.01 | 3.81 | 0.68 | 0.22 | 2.02 |
| 62563 | 0 | 181794 | RNSDGNNSCNLDHLFH                                          | 2.70 | 0.01 | 3.26 | 2.37 | 0.22 | 1.28 |
| 62564 | 0 | 55057  | RNSDKPK                                                   | 2.02 | 0.01 | 0.90 | 1.15 | 0.22 | 1.48 |
| 62565 | 0 | 55057  | RNSDKPK                                                   | 2.02 | 0.01 | 0.90 | 1.15 | 0.22 | 1.48 |
| 62566 | 0 | 55057  | RNSDKPK                                                   | 2.02 | 0.01 | 0.90 | 1.15 | 0.22 | 1.48 |
| 62567 | 0 | 55057  | RNSDKPK                                                   | 2.02 | 0.01 | 0.90 | 1.15 | 0.22 | 1.39 |
| 62568 | 0 | 55057  | RNSDKPK                                                   | 2.02 | 0.01 | 0.90 | 1.15 | 0.22 | 1.48 |
| 62569 | 0 | 134514 | RNSLENYCYGVKSSLED<br>QKIKEKLQPAEIETCMKT<br>ITTILEWLEKNQLA | 3.82 | 0.01 | 1.66 | 0.68 | 0.22 | 1.39 |
| 62570 | 0 | 55059  | RNSQFVALMPTA                                              | 2.43 | 0.01 | 2.40 | 1.12 | 0.22 | 0.85 |
| 62571 | 0 | 55059  | RNSQFVALMPTA                                              | 2.43 | 0.01 | 2.40 | 1.12 | 0.22 | 0.85 |
| 62572 | 0 | 55059  | RNSQFVALMPTA                                              | 2.43 | 0.01 | 2.40 | 1.12 | 0.22 | 0.85 |
| 62573 | 0 | 132046 | RNSTGLGSQNKFFVVG                                          | 2.67 | 0.01 | 0.78 | 0.44 | 1.13 | 0.85 |
| 62574 | 0 | 100479 | RNSWNCDFSQTA                                              | 2.45 | 0.01 | 2.88 | 0.44 | 1.23 | 0.85 |
| 62575 | 0 | 177453 | RNTHLPH                                                   | 2.02 | 0.01 | 0.90 | 2.13 | 0.22 | 0.28 |
| 62576 | 0 | 55066  | RNTIMASKTVGTAE                                            | 2.59 | 0.01 | 2.56 | 2.69 | 0.22 | 0.28 |
| 62577 | 0 | 55066  | RNTIMASKTVGTAE                                            | 2.59 | 0.01 | 2.56 | 0.44 | 0.85 | 0.28 |
| 62578 | 0 | 161448 | RNTNLAANFNGQNTET<br>NNM                                   | 2.89 | 0.01 | 2.08 | 2.25 | 0.22 | 1.57 |
| 62579 | 0 | 161448 | RNTNLAANFNGQNTET<br>NNM                                   | 2.89 | 0.01 | 2.08 | 2.49 | 0.22 | 1.57 |
| 62580 | 0 | 175646 | RNTNLAANFNGQNTET<br>NNMNFTK                               | 3.08 | 0.01 | 3.03 | 1.12 | 0.22 | 0.85 |
| 62581 | 0 | 55067  | RNTNRRP                                                   | 2.05 | 0.01 | 1.72 | 0.44 | 0.85 | 0.28 |
| 62582 | 0 | 55070  | RNTNRRPQDV                                                | 2.33 | 0.01 | 2.68 | 2.74 | 0.22 | 0.28 |

|       |   |        |                                  |      |      |      |      |      |      |
|-------|---|--------|----------------------------------|------|------|------|------|------|------|
| 62583 | 0 | 55071  | RNTNRRPQDVKF                     | 2.47 | 0.01 | 2.68 | 0.44 | 0.85 | 0.28 |
| 62584 | 0 | 78815  | RNTNRRPQDVKFPGGG<br>QI           | 2.83 | 0.01 | 1.72 | 3.63 | 0.22 | 0.28 |
| 62585 | 0 | 55073  | RNTNRRPQDVKFPGGG<br>QIVG         | 2.95 | 0.01 | 1.72 | 0.44 | 0.85 | 0.28 |
| 62586 | 0 | 55073  | RNTNRRPQDVKFPGGG<br>QIVG         | 2.95 | 0.01 | 1.72 | 0.44 | 0.85 | 1.27 |
| 62587 | 0 | 55074  | RNTNRRPQDVKFPGGG<br>QIVGGVYLLPRR | 3.26 | 0.01 | 1.72 | 0.44 | 1.59 | 0.28 |
| 62588 | 0 | 55077  | RNTREVFAQVKQMYKT<br>PTLKYFG      | 3.07 | 0.01 | 2.45 | 1.20 | 0.22 | 0.85 |
| 62589 | 0 | 126963 | RNTRNLTYIDPDALKE                 | 2.74 | 0.01 | 0.78 | 3.01 | 0.22 | 0.28 |
| 62590 | 0 | 109839 | RNTWDYWESLDV                     | 2.45 | 0.01 | 0.90 | 1.15 | 0.22 | 1.39 |
| 62591 | 0 | 55082  | RNVDENANA                        | 2.25 | 0.01 | 3.37 | 1.12 | 0.22 | 0.28 |
| 62592 | 0 | 55086  | RNVFLIRTE                        | 2.22 | 0.01 | 0.90 | 1.15 | 0.22 | 1.39 |
| 62593 | 0 | 134217 | RNVILFSVFDENRSWYLT<br>EN         | 2.95 | 0.01 | 0.78 | 0.44 | 2.35 | 0.28 |
| 62594 | 0 | 95771  | RNVPEKQT                         | 2.10 | 0.01 | 3.27 | 0.68 | 0.22 | 0.28 |
| 62595 | 0 | 95771  | RNVPEKQT                         | 2.10 | 0.01 | 3.97 | 0.68 | 0.22 | 0.28 |
| 62596 | 0 | 494107 | RNVPPIFNDVYWIAF                  | 2.67 | 0.01 | 0.90 | 1.81 | 2.25 | 1.75 |
| 62597 | 0 | 494107 | RNVPPIFNDVYWIAF                  | 2.67 | 0.01 | 0.90 | 1.81 | 0.22 | 0.28 |
| 62598 | 0 | 494107 | RNVPPIFNDVYWIAF                  | 2.67 | 0.01 | 0.90 | 1.81 | 0.22 | 0.85 |
| 62599 | 0 | 494107 | RNVPPIFNDVYWIAF                  | 2.67 | 0.01 | 0.90 | 1.81 | 0.22 | 2.75 |
| 62600 | 0 | 494107 | RNVPPIFNDVYWIAF                  | 2.67 | 0.01 | 0.90 | 1.81 | 0.22 | 1.34 |
| 62601 | 0 | 494107 | RNVPPIFNDVYWIAF                  | 2.67 | 0.01 | 0.90 | 1.15 | 0.22 | 0.85 |
| 62602 | 0 | 494107 | RNVPPIFNDVYWIAF                  | 2.67 | 0.01 | 0.90 | 1.15 | 0.22 | 0.28 |
| 62603 | 0 | 494107 | RNVPPIFNDVYWIAF                  | 2.67 | 0.01 | 0.90 | 1.15 | 0.22 | 0.85 |
| 62604 | 0 | 494107 | RNVPPIFNDVYWIAF                  | 2.67 | 0.01 | 0.90 | 1.15 | 0.22 | 2.75 |
| 62605 | 0 | 494107 | RNVPPIFNDVYWIAF                  | 2.67 | 0.01 | 0.90 | 1.12 | 0.22 | 0.28 |
| 62606 | 0 | 494107 | RNVPPIFNDVYWIAF                  | 2.67 | 0.01 | 0.90 | 1.15 | 0.22 | 1.39 |
| 62607 | 0 | 55087  | RNVPPIFNDVYWLAF                  | 2.65 | 0.01 | 0.90 | 1.15 | 0.22 | 0.28 |
| 62608 | 0 | 161276 | RNVTKHFKEMIAIAK                  | 2.66 | 0.01 | 2.74 | 0.44 | 0.85 | 0.28 |
| 62609 | 0 | 161277 | RNVTKQLKEMIAIAK                  | 2.66 | 0.01 | 2.74 | 0.44 | 0.85 | 0.28 |
| 62610 | 0 | 80014  | RNYPTGAEFLGEG                    | 2.54 | 0.01 | 2.58 | 1.12 | 0.22 | 1.27 |
| 62611 | 0 | 80014  | RNYPTGAEFLGEG                    | 2.54 | 0.01 | 2.58 | 1.12 | 0.22 | 1.34 |
| 62612 | 0 | 79375  | RNYTLT                           | 1.90 | 0.01 | 0.90 | 0.68 | 0.22 | 1.39 |
|       |   |        | RPAADRGLTTRPGSGLT                |      |      |      |      |      |      |
| 62613 | 0 | 106081 | NIKTEEISEVKMDAEFRH<br>DSGY       | 3.59 | 0.01 | 0.78 | 1.12 | 0.22 | 0.85 |
|       |   |        | RPAADRGLTTRPGSGLT                |      |      |      |      |      |      |
| 62614 | 0 | 106081 | NIKTEEISEVKMDAEFRH<br>DSGY       | 3.59 | 0.01 | 0.78 | 1.12 | 0.22 | 1.27 |
| 62615 | 0 | 55106  | RPADKTRHKFPTNINKQ                | 2.80 | 0.01 | 3.93 | 1.12 | 0.22 | 0.85 |
| 62616 | 0 | 55106  | RPADKTRHKFPTNINKQ                | 2.80 | 0.01 | 3.93 | 2.02 | 0.22 | 0.85 |



|       |   |        |                          |      |      |      |      |      |      |
|-------|---|--------|--------------------------|------|------|------|------|------|------|
| 62617 | 0 | 55106  | RPADKTRHKFPTNINKQ        | 2.80 | 0.01 | 3.93 | 1.12 | 0.22 | 0.85 |
| 62618 | 0 | 55106  | RPADKTRHKFPTNINKQ        | 2.80 | 0.01 | 3.93 | 1.15 | 0.22 | 0.85 |
| 62619 | 0 | 55106  | RPADKTRHKFPTNINKQ        | 2.80 | 0.01 | 3.93 | 1.12 | 0.22 | 0.28 |
| 62620 | 0 | 55115  | RPAPPKPTPQP              | 2.44 | 0.01 | 3.72 | 3.70 | 0.22 | 0.85 |
| 62621 | 0 | 55115  | RPAPPKPTPQP              | 2.44 | 0.01 | 3.72 | 3.70 | 0.22 | 0.85 |
| 62622 | 0 | 55115  | RPAPPKPTPQP              | 2.44 | 0.01 | 3.72 | 3.70 | 0.22 | 1.48 |
| 62623 | 0 | 55115  | RPAPPKPTPQP              | 2.44 | 0.01 | 3.72 | 3.70 | 0.22 | 1.48 |
| 62624 | 0 | 55115  | RPAPPKPTPQP              | 2.44 | 0.01 | 3.72 | 3.70 | 0.22 | 1.48 |
| 62625 | 0 | 55115  | RPAPPKPTPQP              | 2.44 | 0.01 | 3.72 | 3.70 | 0.22 | 1.27 |
| 62626 | 0 | 139598 | RPAPPPISGGGYRAR          | 2.71 | 3.72 | 0.78 | 0.44 | 1.13 | 0.28 |
| 62627 | 0 | 139598 | RPAPPPISGGGYRAR          | 2.71 | 3.72 | 0.78 | 0.44 | 1.13 | 0.28 |
| 62628 | 0 | 139598 | RPAPPPISGGGYRAR          | 2.71 | 3.72 | 0.78 | 0.44 | 1.13 | 1.66 |
| 62629 | 0 | 139598 | RPAPPPISGGGYRAR          | 2.71 | 3.72 | 0.78 | 0.44 | 1.93 | 0.28 |
| 62630 | 0 | 139598 | RPAPPPISGGGYRAR          | 2.71 | 3.72 | 0.78 | 0.44 | 1.13 | 0.28 |
| 62631 | 0 | 139598 | RPAPPPISGGGYRAR          | 2.71 | 3.72 | 0.78 | 0.44 | 1.13 | 0.28 |
| 62632 | 0 | 139598 | RPAPPPISGGGYRAR          | 2.71 | 3.72 | 0.78 | 0.44 | 1.41 | 0.28 |
| 62633 | 0 | 139598 | RPAPPPISGGGYRAR          | 2.71 | 3.72 | 0.78 | 0.44 | 1.93 | 0.28 |
| 62634 | 0 | 139598 | RPAPPPISGGGYRAR          | 2.71 | 3.72 | 0.78 | 0.44 | 1.13 | 1.27 |
| 62635 | 0 | 139598 | RPAPPPISGGGYRAR          | 2.71 | 3.72 | 4.93 | 0.44 | 1.13 | 1.28 |
| 62636 | 0 | 139598 | RPAPPPISGGGYRAR          | 2.71 | 3.72 | 0.78 | 0.44 | 1.13 | 1.27 |
| 62637 | 0 | 139598 | RPAPPPISGGGYRAR          | 2.71 | 3.72 | 0.78 | 0.44 | 1.13 | 0.28 |
| 62638 | 0 | 139598 | RPAPPPISGGGYRAR          | 2.71 | 3.72 | 0.78 | 2.04 | 2.60 | 1.75 |
| 62639 | 0 | 139598 | RPAPPPISGGGYRAR          | 2.71 | 3.72 | 0.78 | 0.44 | 1.13 | 0.28 |
| 62640 | 0 | 139598 | RPAPPPISGGGYRAR          | 2.71 | 3.72 | 0.78 | 0.44 | 1.13 | 2.75 |
| 62641 | 0 | 139598 | RPAPPPISGGGYRAR          | 2.71 | 3.72 | 0.78 | 0.44 | 1.13 | 0.28 |
| 62642 | 0 | 153454 | RPAPPPISGGGYRAR          | 2.71 | 0.01 | 0.78 | 2.79 | 1.13 | 1.28 |
| 62643 | 0 | 153454 | RPAPPPISGGGYRAR          | 2.71 | 0.01 | 0.78 | 2.79 | 1.13 | 1.28 |
| 62644 | 0 | 153454 | RPAPPPISGGGYRAR          | 2.71 | 0.01 | 0.78 | 1.81 | 1.41 | 1.28 |
| 62645 | 0 | 153454 | RPAPPPISGGGYRAR          | 2.71 | 0.01 | 0.78 | 1.81 | 1.41 | 1.28 |
| 62646 | 0 | 153454 | RPAPPPISGGGYRAR          | 2.71 | 0.01 | 0.78 | 0.44 | 1.13 | 0.28 |
| 62647 | 0 | 104225 | RPVIPDREVLYQEFDE<br>MEE  | 2.94 | 0.01 | 1.72 | 0.44 | 0.85 | 0.28 |
| 62648 | 0 | 55122  | RPAYSYRHRSHVALT          | 2.71 | 0.01 | 0.90 | 0.68 | 0.22 | 1.39 |
| 62649 | 0 | 243832 | RPCEQHLMQKI              | 2.36 | 0.01 | 2.16 | 0.44 | 1.23 | 1.28 |
| 62650 | 0 | 99623  | RPCEQHLMQKIQRDE          | 2.67 | 0.01 | 2.16 | 0.44 | 1.23 | 1.48 |
| 62651 | 0 | 117363 | RPDAEYWNSQKDLLEQ<br>KRGR | 2.93 | 0.01 | 0.78 | 0.44 | 1.13 | 0.28 |
| 62652 | 0 | 117363 | RPDAEYWNSQKDLLEQ<br>KRGR | 2.93 | 0.01 | 0.78 | 0.44 | 1.13 | 0.28 |
| 62653 | 0 | 117363 | RPDAEYWNSQKDLLEQ<br>KRGR | 2.93 | 0.01 | 0.78 | 0.44 | 1.13 | 0.28 |
| 62654 | 0 | 117364 | RPDAEYWNSQKDLLEQ<br>RRAA | 2.92 | 0.01 | 0.78 | 0.44 | 1.13 | 0.28 |
| 62655 | 0 | 55135  | RPDYNPLL                 | 2.11 | 0.01 | 2.68 | 0.44 | 1.59 | 0.28 |

|       |   |        |                              |      |      |      |      |      |      |
|-------|---|--------|------------------------------|------|------|------|------|------|------|
| 62656 | 0 | 55137  | RPDYQPATVAGCALPPP            | 2.77 | 0.01 | 2.69 | 0.44 | 0.85 | 0.28 |
| 62657 | 0 | 55137  | RPDYQPATVAGCALPPP            | 2.77 | 0.01 | 2.69 | 0.44 | 0.85 | 0.28 |
| 62658 | 0 | 55137  | RPDYQPATVAGCALPPP            | 2.77 | 0.01 | 2.69 | 0.44 | 0.85 | 0.28 |
| 62659 | 0 | 55137  | RPDYQPATVAGCALPPP            | 2.77 | 0.01 | 2.69 | 0.44 | 0.85 | 0.28 |
| 62660 | 0 | 462436 | RPED                         | 1.57 | 0.01 | 0.78 | 1.12 | 0.22 | 1.28 |
| 62661 | 0 | 99625  | RPEGREGEQEWGTPG              | 2.73 | 0.01 | 2.16 | 0.44 | 1.23 | 1.48 |
| 62662 | 0 | 55141  | RPEGRTWA                     | 2.13 | 0.01 | 1.72 | 0.44 | 0.85 | 0.28 |
| 62663 | 0 | 55143  | RPEGRTWAQPGYPWPL<br>YNEGCGWA | 3.18 | 0.01 | 1.72 | 0.44 | 0.85 | 0.28 |
| 62664 | 0 | 55143  | RPEGRTWAQPGYPWPL<br>YNEGCGWA | 3.18 | 0.01 | 1.72 | 0.44 | 0.85 | 0.28 |
| 62665 | 0 | 238985 | RPEMGCGCPQSSRGV              | 2.70 | 0.01 | 2.56 | 2.02 | 0.22 | 0.85 |
| 62666 | 0 | 238985 | RPEMGCGCPQSSRGV              | 2.70 | 0.01 | 2.56 | 1.20 | 0.22 | 0.85 |
| 62667 | 0 | 120924 | RPEPKKPWSGVWNA<br>STY        | 2.77 | 0.01 | 2.26 | 0.68 | 0.22 | 1.27 |
| 62668 | 0 | 120924 | RPEPKKPWSGVWNA<br>STY        | 2.77 | 0.01 | 2.26 | 0.68 | 0.22 | 0.28 |
| 62669 | 0 | 120924 | RPEPKKPWSGVWNA<br>STY        | 2.77 | 0.01 | 2.26 | 0.68 | 0.22 | 0.28 |
| 62670 | 0 | 238986 | RPEQGSIQSNP                  | 2.41 | 0.01 | 3.05 | 1.15 | 0.22 | 0.85 |
| 62671 | 0 | 238986 | RPEQGSIQSNP                  | 2.41 | 0.01 | 3.05 | 1.15 | 0.22 | 0.28 |
| 62672 | 0 | 238986 | RPEQGSIQSNP                  | 2.41 | 0.01 | 3.05 | 1.15 | 0.22 | 0.28 |
| 62673 | 0 | 238986 | RPEQGSIQSNP                  | 2.41 | 0.01 | 3.05 | 1.15 | 0.22 | 0.85 |
| 62674 | 0 | 131045 | RPFDVLAPGPSSGAST             | 2.79 | 0.01 | 0.90 | 0.44 | 1.93 | 0.85 |
| 62675 | 0 | 55148  | RPFERDISNV                   | 2.30 | 0.01 | 2.45 | 0.68 | 0.22 | 0.28 |
| 62676 | 0 | 55148  | RPFERDISNV                   | 2.30 | 0.01 | 2.45 | 0.68 | 0.22 | 0.28 |
| 62677 | 0 | 55148  | RPFERDISNV                   | 2.30 | 0.01 | 2.48 | 0.68 | 0.22 | 0.28 |
| 62678 | 0 | 55148  | RPFERDISNV                   | 2.30 | 0.01 | 2.48 | 0.68 | 0.22 | 0.28 |
| 62679 | 0 | 55148  | RPFERDISNV                   | 2.30 | 0.01 | 2.48 | 0.68 | 0.22 | 0.28 |
| 62680 | 0 | 55149  | RPFERDISNVPFSPDGK            | 2.80 | 0.01 | 2.48 | 0.44 | 0.85 | 0.28 |
| 62681 | 0 | 97616  | RPFTGLLVN                    | 2.20 | 0.01 | 3.13 | 1.12 | 0.22 | 0.28 |
| 62682 | 0 | 432111 | RPFYQGPVGDPD                 | 2.49 | 0.01 | 0.78 | 0.44 | 1.13 | 0.28 |
| 62683 | 0 | 432111 | RPFYQGPVGDPD                 | 2.49 | 0.01 | 0.78 | 0.44 | 1.41 | 0.28 |
| 62684 | 0 | 109841 | RPGEAGLP<br>RPGFAGPAVLDWEEWC | 2.14 | 0.01 | 1.60 | 2.55 | 2.60 | 0.28 |
| 62685 | 0 | 233374 | PLWAGNWGRRRAYQA<br>ASWAW     | 3.51 | 0.01 | 0.78 | 0.44 | 1.41 | 1.39 |

|       |   |        |                                                              |      |      |      |      |      |      |
|-------|---|--------|--------------------------------------------------------------|------|------|------|------|------|------|
| 62686 | 0 | 140497 | RPGFPPQPGMAPRPG<br>MPPHPGMAPRPGFPP<br>QPGMAPRPGMPPHPG<br>MAP | 3.87 | 0.01 | 3.65 | 0.44 | 0.85 | 0.28 |
| 62687 | 0 | 135984 | RPGGCSAVSAHG                                                 | 2.49 | 0.01 | 0.78 | 0.44 | 1.41 | 0.28 |
| 62688 | 0 | 111738 | RPGKEIEAYIFEMFN                                              | 2.66 | 0.01 | 3.20 | 1.12 | 0.22 | 0.85 |
| 62689 | 0 | 55157  | RPGDELSTLT                                                   | 2.48 | 0.01 | 2.86 | 0.44 | 0.85 | 0.28 |
| 62690 | 0 | 55157  | RPGDELSTLT                                                   | 2.48 | 0.01 | 2.86 | 0.44 | 0.85 | 0.28 |
| 62691 | 0 | 55157  | RPGDELSTLT                                                   | 2.48 | 0.01 | 2.86 | 0.44 | 0.85 | 0.28 |
| 62692 | 0 | 55158  | RPGDELSTLTGNPNR<br>PDGGILT                                   | 3.15 | 0.01 | 2.86 | 0.44 | 0.85 | 0.28 |
| 62693 | 0 | 55158  | RPGDELSTLTGNPNR<br>PDGGILT                                   | 3.15 | 0.01 | 2.86 | 0.44 | 0.85 | 0.28 |
| 62694 | 0 | 55158  | RPGDELSTLTGNPNR<br>PDGGILT                                   | 3.15 | 0.01 | 2.86 | 0.44 | 0.85 | 0.28 |
| 62695 | 0 | 55162  | RGPLPVEYLQVPSEA                                              | 2.68 | 0.01 | 2.59 | 0.44 | 0.85 | 0.28 |
| 62696 | 0 | 177540 | RPGRPRGETPGQLLEI<br>MP                                       | 2.93 | 0.01 | 3.50 | 2.37 | 0.85 | 0.28 |
| 62697 | 0 | 177540 | RPGRPRGETPGQLLEI<br>MP                                       | 2.93 | 0.01 | 3.50 | 2.37 | 0.85 | 0.28 |
| 62698 | 0 | 177540 | RPGRPRGETPGQLLEI<br>MP                                       | 2.93 | 0.01 | 3.50 | 1.20 | 0.22 | 0.28 |
| 62699 | 0 | 371114 | RPGRVKRVKRAAKK                                               | 2.72 | 0.01 | 1.61 | 0.44 | 0.85 | 1.28 |
| 62700 | 0 | 55168  | RPGYEPPTVLGCALPPT                                            | 2.80 | 0.01 | 2.69 | 0.44 | 0.85 | 0.28 |
| 62701 | 0 | 55168  | RPGYEPPTVLGCALPPT                                            | 2.80 | 0.01 | 2.69 | 0.44 | 0.85 | 0.28 |
| 62702 | 0 | 55168  | RPGYEPPTVLGCALPPT                                            | 2.80 | 0.01 | 2.69 | 0.44 | 0.85 | 0.28 |
| 62703 | 0 | 114939 | RPICGTDGVT                                                   | 2.31 | 0.01 | 2.25 | 0.44 | 1.23 | 0.85 |
| 62704 | 0 | 114939 | RPICGTDGVT                                                   | 2.31 | 0.01 | 2.25 | 0.44 | 1.23 | 0.85 |
| 62705 | 0 | 55174  | RPIDDFDQGWGPITY                                              | 2.68 | 0.01 | 1.72 | 0.44 | 1.59 | 0.28 |
| 62706 | 0 | 55174  | RPIDDFDQGWGPITY                                              | 2.68 | 0.01 | 1.72 | 0.44 | 0.85 | 2.35 |
| 62707 | 0 | 55174  | RPIDDFDQGWGPITY                                              | 2.68 | 0.01 | 1.72 | 0.44 | 0.85 | 0.28 |
| 62708 | 0 | 226505 | RPIFDNKGRVVAIVLGG<br>A                                       | 2.85 | 0.01 | 3.26 | 3.16 | 0.22 | 0.28 |
| 62709 | 0 | 181447 | RPIPFPRPQPRQEEHE<br>QREEQEWPR                                | 3.26 | 0.01 | 2.72 | 0.44 | 1.23 | 1.27 |
| 62710 | 0 | 55185  | RPKHPIKHQG                                                   | 2.33 | 0.01 | 1.60 | 0.44 | 1.23 | 0.28 |
| 62711 | 0 | 55185  | RPKHPIKHQG                                                   | 2.33 | 0.01 | 1.60 | 0.44 | 1.23 | 0.28 |
| 62712 | 0 | 55185  | RPKHPIKHQG                                                   | 2.33 | 0.01 | 1.60 | 0.44 | 1.23 | 1.27 |
| 62713 | 0 | 190530 | RPKHPIKHQGLPQEV                                              | 2.68 | 0.01 | 1.60 | 0.44 | 1.23 | 0.28 |
| 62714 | 0 | 55186  | RPKHPIKHQGLPQEV<br>LN<br>E                                   | 2.85 | 0.01 | 1.60 | 0.44 | 1.23 | 0.28 |
| 62715 | 0 | 55186  | RPKHPIKHQGLPQEV<br>LN<br>E                                   | 2.85 | 0.01 | 1.60 | 1.12 | 0.22 | 1.27 |

|       |   |        |                                     |      |      |      |      |      |      |
|-------|---|--------|-------------------------------------|------|------|------|------|------|------|
| 62716 | 0 | 55187  | RPKHPIKHQGLPQEVNL<br>ENL            | 2.96 | 0.01 | 1.60 | 0.44 | 1.23 | 0.28 |
| 62717 | 0 | 55187  | RPKHPIKHQGLPQEVNL<br>ENL            | 2.96 | 0.01 | 1.60 | 0.44 | 2.98 | 0.28 |
| 62718 | 0 | 55187  | RPKHPIKHQGLPQEVNL<br>ENL            | 2.96 | 0.01 | 1.60 | 2.82 | 0.22 | 0.28 |
| 62719 | 0 | 109844 | RPKHPIKHQGLPQEVNL<br>ENLLRFFVAPFPEV | 3.39 | 0.01 | 1.60 | 0.44 | 1.23 | 0.85 |
| 62720 | 0 | 109844 | RPKHPIKHQGLPQEVNL<br>ENLLRFFVAPFPEV | 3.39 | 0.01 | 1.60 | 0.44 | 1.23 | 1.34 |
| 62721 | 0 | 55193  | RPKPG                               | 1.75 | 0.01 | 0.78 | 3.85 | 0.22 | 0.28 |
| 62722 | 0 | 55193  | RPKPG                               | 1.75 | 0.01 | 0.78 | 3.85 | 0.22 | 0.85 |
| 62723 | 0 | 55193  | RPKPG                               | 1.75 | 0.01 | 0.78 | 3.85 | 0.22 | 1.48 |
| 62724 | 0 | 55194  | RPKPGGWNTGGSRYPG<br>QGSPGGNRY       | 3.20 | 0.01 | 0.78 | 2.49 | 0.22 | 0.28 |
| 62725 | 0 | 55194  | RPKPGGWNTGGSRYPG<br>QGSPGGNRY       | 3.20 | 0.01 | 0.78 | 2.49 | 0.22 | 0.85 |
| 62726 | 0 | 55196  | RPKQRRPQGLPNNTAS<br>WF              | 2.82 | 0.01 | 2.91 | 0.44 | 0.85 | 0.28 |
| 62727 | 0 | 114940 | RPLCGSDNKT                          | 2.26 | 0.01 | 2.25 | 0.44 | 1.23 | 0.85 |
| 62728 | 0 | 109845 | RPLGLQEESLDG                        | 2.48 | 0.01 | 0.90 | 1.15 | 0.22 | 1.39 |
| 62729 | 0 | 55207  | RPLGLQGCAFAQSTVAEL<br>QRLKMKVG      | 3.16 | 0.01 | 2.53 | 0.44 | 0.85 | 0.28 |
| 62730 | 0 | 55207  | RPLGLQGCAFAQSTVAEL<br>QRLKMKVG      | 3.16 | 0.01 | 2.53 | 0.44 | 0.85 | 0.28 |
| 62731 | 0 | 55208  | RPLGLQGCAFAQSTVAEL<br>QRLKMKVGKTREL | 3.35 | 0.01 | 2.70 | 1.15 | 0.22 | 0.28 |
| 62732 | 0 | 55208  | RPLGLQGCAFAQSTVAEL<br>QRLKMKVGKTREL | 3.35 | 0.01 | 2.53 | 0.44 | 0.85 | 0.28 |
| 62733 | 0 | 55208  | RPLGLQGCAFAQSTVAEL<br>QRLKMKVGKTREL | 3.35 | 0.01 | 2.53 | 0.44 | 0.85 | 0.28 |
| 62734 | 0 | 55211  | RPLIDFDQGWGPISY                     | 2.66 | 0.01 | 1.72 | 0.44 | 1.59 | 0.28 |
| 62735 | 0 | 55211  | RPLIDFDQGWGPISY                     | 2.66 | 0.01 | 1.72 | 0.44 | 0.85 | 0.28 |
| 62736 | 0 | 238987 | RPLNLINFQRMIQCT                     | 2.69 | 0.01 | 2.56 | 2.02 | 0.22 | 0.85 |
| 62737 | 0 | 238987 | RPLNLINFQRMIQCT                     | 2.69 | 0.01 | 2.56 | 1.20 | 0.22 | 0.85 |
| 62738 | 0 | 55227  | RPLTETRGDLSFGDEDS<br>DSSD           | 3.04 | 0.01 | 2.76 | 0.44 | 0.85 | 0.85 |
| 62739 | 0 | 233819 | RPLVSFRYEEGGPLVEG<br>Q              | 2.87 | 0.01 | 3.67 | 2.61 | 0.85 | 1.28 |
| 62740 | 0 | 131046 | RPLYSRRLPKGVKHLKDF<br>PILPGEI       | 3.16 | 0.01 | 0.78 | 1.15 | 0.22 | 2.56 |
| 62741 | 0 | 131046 | RPLYSRRLPKGVKHLKDF<br>PILPGEI       | 3.16 | 0.01 | 0.78 | 4.93 | 0.22 | 2.35 |
| 62742 | 0 | 131046 | RPLYSRRLPKGVKHLKDF<br>PILPGEI       | 3.16 | 0.01 | 0.78 | 0.44 | 1.93 | 1.34 |
| 62743 | 0 | 131046 | RPLYSRRLPKGVKHLKDF<br>PILPGEI       | 3.16 | 0.01 | 0.78 | 0.44 | 1.13 | 1.27 |

|       |   |        |                                |      |      |      |      |      |      |
|-------|---|--------|--------------------------------|------|------|------|------|------|------|
| 62744 | 0 | 130597 | RPLYSRRLPKGVKHLKDF<br>PILPGEIF | 3.21 | 0.01 | 0.78 | 1.15 | 0.22 | 1.27 |
| 62745 | 0 | 130597 | RPLYSRRLPKGVKHLKDF<br>PILPGEIF | 3.21 | 0.01 | 0.78 | 1.15 | 0.22 | 1.27 |
| 62746 | 0 | 130597 | RPLYSRRLPKGVKHLKDF<br>PILPGEIF | 3.21 | 0.01 | 0.78 | 1.15 | 0.22 | 1.27 |
| 62747 | 0 | 130597 | RPLYSRRLPKGVKHLKDF<br>PILPGEIF | 3.21 | 0.01 | 0.78 | 1.15 | 0.22 | 1.34 |
| 62748 | 0 | 130597 | RPLYSRRLPKGVKHLKDF<br>PILPGEIF | 3.21 | 0.01 | 0.78 | 1.15 | 0.22 | 1.34 |
| 62749 | 0 | 130597 | RPLYSRRLPKGVKHLKDF<br>PILPGEIF | 3.21 | 0.01 | 0.78 | 1.15 | 0.22 | 1.27 |
| 62750 | 0 | 55232  | RPMIHF                         | 1.88 | 0.01 | 1.75 | 2.19 | 0.22 | 1.48 |
| 62751 | 0 | 55232  | RPMIHF                         | 1.88 | 0.01 | 1.75 | 2.19 | 0.22 | 1.48 |
| 62752 | 0 | 55232  | RPMIHF                         | 1.88 | 0.01 | 1.75 | 2.19 | 0.22 | 0.85 |
| 62753 | 0 | 55232  | RPMIHF                         | 1.88 | 0.01 | 1.75 | 2.19 | 0.22 | 0.85 |
| 62754 | 0 | 55232  | RPMIHF                         | 1.88 | 0.01 | 1.75 | 2.19 | 0.22 | 0.85 |
| 62755 | 0 | 105502 | RPNATYSL                       | 2.10 | 0.01 | 2.25 | 0.44 | 1.23 | 0.85 |
| 62756 | 0 | 134515 | RPNHT                          | 1.74 | 4.93 | 0.90 | 0.44 | 1.13 | 1.27 |
| 62757 | 0 | 55248  | RPPETTTI                       | 2.14 | 0.01 | 2.40 | 2.43 | 0.22 | 0.28 |
| 62758 | 0 | 167813 | RPPETTTIP                      | 2.26 | 0.01 | 2.40 | 2.43 | 0.22 | 0.28 |
| 62759 | 0 | 108614 | RPPHSASWR                      | 2.25 | 0.01 | 0.90 | 0.44 | 1.13 | 1.39 |
| 62760 | 0 | 371245 | RPPKKS WKQISNLG                | 2.67 | 0.01 | 1.61 | 0.44 | 0.85 | 1.28 |
| 62761 | 0 | 55255  | RPPKWVSAQ                      | 2.20 | 0.01 | 0.90 | 0.68 | 0.22 | 0.28 |
| 62762 | 0 | 111740 | RPPLTVDPVGPSDPSIVS<br>LVEE     | 3.06 | 0.01 | 1.86 | 1.12 | 0.22 | 0.28 |
| 62763 | 0 | 111740 | RPPLTVDPVGPSDPSIVS<br>LVEE     | 3.06 | 0.01 | 1.86 | 1.12 | 0.22 | 0.28 |
| 62764 | 0 | 111740 | RPPLTVDPVGPSDPSIVS<br>LVEE     | 3.06 | 0.01 | 1.86 | 1.12 | 0.22 | 0.28 |
| 62765 | 0 | 111740 | RPPLTVDPVGPSDPSIVS<br>LVEE     | 3.06 | 0.01 | 1.86 | 1.12 | 0.22 | 0.28 |
| 62766 | 0 | 111740 | RPPLTVDPVGPSDPSIVS<br>LVEE     | 3.06 | 0.01 | 1.86 | 1.12 | 0.22 | 1.34 |
| 62767 | 0 | 111740 | RPPLTVDPVGPSDPSIVS<br>LVEE     | 3.06 | 0.01 | 1.86 | 1.12 | 0.22 | 1.34 |
| 62768 | 0 | 111740 | RPPLTVDPVGPSDPSIVS<br>LVEE     | 3.06 | 0.01 | 1.86 | 1.12 | 0.22 | 1.34 |
| 62769 | 0 | 111740 | RPPLTVDPVGPSDPSIVS<br>LVEE     | 3.06 | 0.01 | 1.86 | 1.12 | 0.22 | 1.34 |
| 62770 | 0 | 134218 | RPPMGGHMPMMPGP<br>PMMRPPAR     | 3.10 | 0.01 | 0.78 | 0.44 | 1.13 | 0.85 |
| 62771 | 0 | 134218 | RPPMGGHMPMMPGP<br>PMMRPPAR     | 3.10 | 0.01 | 0.78 | 1.12 | 0.22 | 0.85 |
| 62772 | 0 | 55260  | RPPNAP                         | 1.92 | 0.01 | 2.08 | 1.15 | 0.22 | 1.27 |
| 62773 | 0 | 55260  | RPPNAP                         | 1.92 | 0.01 | 2.08 | 1.15 | 0.22 | 1.57 |
| 62774 | 0 | 55260  | RPPNAP                         | 1.92 | 0.01 | 2.08 | 1.15 | 0.22 | 1.27 |

|       |   |        |                          |      |      |      |      |      |      |
|-------|---|--------|--------------------------|------|------|------|------|------|------|
| 62775 | 0 | 55260  | RPPNAP                   | 1.92 | 0.01 | 2.08 | 1.15 | 0.22 | 1.27 |
| 62776 | 0 | 55260  | RPPNAP                   | 1.92 | 0.01 | 2.08 | 1.15 | 0.22 | 0.28 |
| 62777 | 0 | 55260  | RPPNAP                   | 1.92 | 0.01 | 2.08 | 1.15 | 0.22 | 0.28 |
| 62778 | 0 | 55261  | RPPNAPIL                 | 2.14 | 0.01 | 2.08 | 1.15 | 0.22 | 0.85 |
| 62779 | 0 | 55261  | RPPNAPIL                 | 2.14 | 0.01 | 2.08 | 1.15 | 0.22 | 0.28 |
| 62780 | 0 | 55261  | RPPNAPIL                 | 2.14 | 0.01 | 2.08 | 1.15 | 0.22 | 0.28 |
| 62781 | 0 | 55263  | RPPPAPCL                 | 2.15 | 0.01 | 3.19 | 1.12 | 0.22 | 2.02 |
| 62782 | 0 | 129804 | RPPPPGIR                 | 2.17 | 0.01 | 0.78 | 0.44 | 1.13 | 0.28 |
| 62783 | 0 | 55264  | RPPQGNWFGCTWMNS<br>TGFTK | 2.94 | 0.01 | 3.10 | 1.81 | 0.22 | 0.28 |
| 62784 | 0 | 100482 | RPPRAVPYYGPGVD           | 2.66 | 0.01 | 2.96 | 1.12 | 0.22 | 0.28 |
| 62785 | 0 | 100482 | RPPRAVPYYGPGVD           | 2.66 | 0.01 | 2.96 | 0.44 | 0.22 | 0.28 |
| 62786 | 0 | 55266  | RPPRFQLSS                | 2.23 | 0.01 | 0.90 | 0.68 | 0.22 | 0.28 |
| 62787 | 0 | 55270  | RPPRYLANQ                | 2.23 | 0.01 | 0.90 | 0.68 | 0.22 | 0.28 |
| 62788 | 0 | 55271  | RPPRYLSQL                | 2.25 | 0.01 | 0.90 | 0.68 | 0.22 | 0.28 |
| 62789 | 0 | 55272  | RPPRYMVQS                | 2.23 | 0.01 | 0.90 | 0.68 | 0.22 | 0.28 |
| 62790 | 0 | 55275  | RPPTPWPISQSDRAS<br>MDT   | 2.96 | 0.01 | 3.01 | 0.44 | 0.85 | 0.28 |
| 62791 | 0 | 55276  | RPPTRYH                  | 2.04 | 0.01 | 0.90 | 0.44 | 0.85 | 1.39 |
| 62792 | 0 | 116468 | RPQDENPVVH               | 2.30 | 0.01 | 1.60 | 1.20 | 0.22 | 1.57 |
| 62793 | 0 | 116468 | RPQDENPVVH               | 2.30 | 0.01 | 1.60 | 1.20 | 0.22 | 1.27 |
| 62794 | 0 | 55293  | RPQDVKFP                 | 2.12 | 0.01 | 1.72 | 0.68 | 0.22 | 0.28 |
| 62795 | 0 | 55293  | RPQDVKFP                 | 2.12 | 0.01 | 1.72 | 0.44 | 0.85 | 0.28 |
| 62796 | 0 | 55293  | RPQDVKFP                 | 2.12 | 0.01 | 1.72 | 0.68 | 0.22 | 0.28 |
| 62797 | 0 | 104226 | RPQDVKFPGGGQIVGG<br>VYLL | 2.93 | 0.01 | 1.72 | 0.44 | 0.85 | 0.28 |
| 62798 | 0 | 104226 | RPQDVKFPGGGQIVGG<br>VYLL | 2.93 | 0.01 | 1.72 | 0.44 | 0.85 | 1.27 |
| 62799 | 0 | 55299  | RPQKRPSIGCKGTHGG<br>TGA  | 2.96 | 0.01 | 2.43 | 0.44 | 2.82 | 0.28 |
| 62800 | 0 | 55299  | RPQKRPSIGCKGTHGG<br>TGA  | 2.96 | 0.01 | 2.43 | 0.44 | 1.59 | 0.28 |
| 62801 | 0 | 55299  | RPQKRPSIGCKGTHGG<br>TGA  | 2.96 | 0.01 | 2.43 | 0.44 | 2.82 | 0.28 |
| 62802 | 0 | 55299  | RPQKRPSIGCKGTHGG<br>TGA  | 2.96 | 0.01 | 2.43 | 0.44 | 1.59 | 0.28 |
| 62803 | 0 | 191714 | RPQNCNLTTQPCDEIP         | 2.74 | 0.01 | 0.90 | 2.84 | 1.13 | 1.39 |
| 62804 | 0 | 191714 | RPQNCNLTTQPCDEIP         | 2.74 | 0.01 | 0.90 | 2.84 | 1.13 | 1.66 |
| 62805 | 0 | 55304  | RPQPTELRY                | 2.24 | 0.01 | 2.87 | 1.15 | 0.22 | 0.28 |
| 62806 | 0 | 55304  | RPQPTELRY                | 2.24 | 0.01 | 2.87 | 1.15 | 0.22 | 0.28 |
| 62807 | 0 | 55305  | RPQQPFPLQP               | 2.36 | 0.01 | 2.83 | 0.68 | 0.22 | 0.28 |
| 62808 | 0 | 55305  | RPQQPFPLQP               | 2.36 | 0.01 | 2.83 | 0.68 | 0.22 | 0.85 |
| 62809 | 0 | 55306  | RPQQPFPPQP               | 2.37 | 0.01 | 2.83 | 0.68 | 0.22 | 0.28 |
| 62810 | 0 | 55306  | RPQQPFPPQP               | 2.37 | 0.01 | 2.83 | 0.68 | 0.22 | 0.85 |
| 62811 | 0 | 55307  | RPQQPFPPQP               | 2.36 | 0.01 | 2.83 | 0.68 | 0.22 | 0.85 |

|       |   |        |                               |      |      |      |      |      |      |
|-------|---|--------|-------------------------------|------|------|------|------|------|------|
| 62812 | 0 | 55307  | RPQQPFPQQP                    | 2.36 | 0.01 | 2.83 | 0.68 | 0.22 | 0.28 |
| 62813 | 0 | 99842  | RPQQPYP                       | 2.04 | 0.01 | 1.86 | 0.68 | 0.22 | 0.28 |
| 62814 | 0 | 99842  | RPQQPYP                       | 2.04 | 0.01 | 1.86 | 0.68 | 0.22 | 0.28 |
| 62815 | 0 | 99842  | RPQQPYP                       | 2.04 | 0.01 | 1.86 | 0.68 | 0.22 | 0.28 |
| 62816 | 0 | 99842  | RPQQPYP                       | 2.04 | 0.01 | 1.86 | 0.68 | 0.22 | 2.02 |
| 62817 | 0 | 99842  | RPQQPYP                       | 2.04 | 0.01 | 1.86 | 0.68 | 0.22 | 2.02 |
| 62818 | 0 | 99842  | RPQQPYP                       | 2.04 | 0.01 | 1.86 | 0.68 | 0.22 | 2.02 |
| 62819 | 0 | 99842  | RPQQPYP                       | 2.04 | 0.01 | 1.86 | 0.68 | 0.22 | 0.28 |
| 62820 | 0 | 99842  | RPQQPYP                       | 2.04 | 0.01 | 1.86 | 0.68 | 0.22 | 0.85 |
| 62821 | 0 | 99842  | RPQQPYP                       | 2.04 | 0.01 | 1.86 | 0.68 | 0.22 | 0.85 |
| 62822 | 0 | 99842  | RPQQPYP                       | 2.04 | 0.01 | 1.86 | 0.68 | 0.22 | 0.85 |
| 62823 | 0 | 99842  | RPQQPYP                       | 2.04 | 0.01 | 1.86 | 0.68 | 0.22 | 0.85 |
| 62824 | 0 | 99842  | RPQQPYP                       | 2.04 | 0.01 | 1.86 | 0.68 | 0.22 | 0.85 |
| 62825 | 0 | 190954 | RPQQSPEQQQ                    | 2.34 | 0.01 | 1.86 | 0.44 | 1.23 | 0.28 |
| 62826 | 0 | 106084 | RPRSPSSQSSSGSPRR<br>P         | 2.97 | 0.01 | 2.43 | 0.44 | 1.59 | 0.28 |
| 62827 | 0 | 118587 | RPRVNYLQDFSQRS                | 2.69 | 0.01 | 3.78 | 0.44 | 1.13 | 0.85 |
| 62828 | 0 | 55335  | RPSAPP                        | 1.88 | 0.01 | 2.53 | 0.44 | 1.59 | 0.28 |
| 62829 | 0 | 55335  | RPSAPP                        | 1.88 | 0.01 | 3.27 | 0.44 | 1.59 | 0.28 |
| 62830 | 0 | 190313 | RPSELRR                       | 2.02 | 0.01 | 1.75 | 2.89 | 0.22 | 0.85 |
| 62831 | 0 | 55341  | RPSKRP                        | 1.92 | 0.01 | 0.90 | 0.68 | 0.22 | 1.39 |
| 62832 | 0 | 145490 | RPSQQDE                       | 2.01 | 0.01 | 0.78 | 1.12 | 0.22 | 2.35 |
| 62833 | 0 | 101204 | RPSTYPL                       | 2.02 | 0.01 | 0.90 | 0.44 | 1.13 | 1.39 |
| 62834 | 0 | 55351  | RPSWGPTDPRRRSRNL<br>GKVLDTLT  | 3.15 | 0.01 | 1.72 | 0.44 | 0.85 | 0.28 |
| 62835 | 0 | 525254 | RPTLPPGILGPLAPNTPR<br>PP      | 2.99 | 4.23 | 2.40 | 0.44 | 1.59 | 1.28 |
| 62836 | 0 | 525255 | RPTLPPGILGPLAPNTPR<br>PP      | 2.99 | 0.01 | 2.40 | 0.44 | 1.59 | 1.28 |
| 62837 | 0 | 195905 | RPTRKNTDLRYR                  | 2.50 | 0.01 | 0.90 | 0.44 | 1.41 | 0.28 |
| 62838 | 0 | 195905 | RPTRKNTDLRYR                  | 2.50 | 0.01 | 0.90 | 0.44 | 1.41 | 1.39 |
| 62839 | 0 | 504052 | RPTSPSSGSRPTYPS               | 2.74 | 0.01 | 3.29 | 4.03 | 0.22 | 0.85 |
| 62840 | 0 | 504052 | RPTSPSSGSRPTYPS               | 2.74 | 0.01 | 3.29 | 4.03 | 0.22 | 0.85 |
| 62841 | 0 | 504052 | RPTSPSSGSRPTYPS               | 2.74 | 0.01 | 3.29 | 2.13 | 0.22 | 0.85 |
| 62842 | 0 | 504052 | RPTSPSSGSRPTYPS               | 2.74 | 0.01 | 3.29 | 2.13 | 0.22 | 0.85 |
| 62843 | 0 | 504052 | RPTSPSSGSRPTYPS               | 2.74 | 0.01 | 3.29 | 2.13 | 0.22 | 0.85 |
| 62844 | 0 | 55362  | RPTTAGAAPLTAVAPAH<br>DTPPVPDV | 3.21 | 0.01 | 2.53 | 0.44 | 0.85 | 0.28 |
| 62845 | 0 | 55362  | RPTTAGAAPLTAVAPAH<br>DTPPVPDV | 3.21 | 0.01 | 2.53 | 0.44 | 0.85 | 0.28 |
| 62846 | 0 | 120177 | RPTVIRDRDEYRQASS              | 2.72 | 0.01 | 3.34 | 0.44 | 1.13 | 0.28 |
| 62847 | 0 | 371384 | RPVDPSAYKRALPLE               | 2.69 | 0.01 | 1.61 | 0.44 | 0.85 | 1.28 |
| 62848 | 0 | 371385 | RPVDPSAYKRALPQE               | 2.67 | 0.01 | 1.61 | 0.44 | 0.85 | 1.28 |
| 62849 | 0 | 134786 | RPVDQY                        | 1.88 | 0.01 | 2.52 | 1.15 | 0.22 | 0.85 |
| 62850 | 0 | 55365  | RPVDQYS                       | 1.99 | 0.01 | 1.75 | 2.19 | 0.22 | 0.28 |
| 62851 | 0 | 55365  | RPVDQYS                       | 1.99 | 0.01 | 1.75 | 2.19 | 0.22 | 0.85 |
| 62852 | 0 | 55365  | RPVDQYS                       | 1.99 | 0.01 | 1.75 | 2.19 | 0.22 | 0.85 |

|       |   |        |                             |      |      |      |      |      |      |
|-------|---|--------|-----------------------------|------|------|------|------|------|------|
| 62853 | 0 | 55365  | RPVDQYS                     | 1.99 | 0.01 | 1.75 | 2.19 | 0.22 | 0.85 |
| 62854 | 0 | 55365  | RPVDQYS                     | 1.99 | 0.01 | 1.75 | 1.15 | 0.22 | 1.48 |
| 62855 | 0 | 371387 | RPVEATATKNTTATT             | 2.70 | 0.01 | 1.61 | 0.44 | 0.85 | 1.28 |
| 62856 | 0 | 189150 | RPVGREKYRHPPEHGV            | 2.78 | 0.01 | 2.92 | 0.68 | 0.22 | 0.28 |
| 62857 | 0 | 189150 | RPVGREKYRHPPEHGV            | 2.78 | 0.01 | 2.92 | 0.68 | 0.22 | 0.28 |
| 62858 | 0 | 189150 | RPVGREKYRHPPEHGV            | 2.78 | 0.01 | 2.92 | 0.68 | 0.22 | 1.48 |
| 62859 | 0 | 189150 | RPVGREKYRHPPEHGV            | 2.78 | 0.01 | 2.92 | 0.68 | 0.22 | 0.28 |
| 62860 | 0 | 136608 | RPVRHAQCRVCDGNST<br>NPRERH  | 3.04 | 0.01 | 1.75 | 2.84 | 1.13 | 0.28 |
| 62861 | 0 | 144467 | RPWLHVPRHRY                 | 2.43 | 0.01 | 3.06 | 0.68 | 0.22 | 0.28 |
| 62862 | 0 | 144467 | RPWLHVPRHRY                 | 2.43 | 0.01 | 3.06 | 0.68 | 0.22 | 0.28 |
| 62863 | 0 | 144467 | RPWLHVPRHRY                 | 2.43 | 0.01 | 3.06 | 0.68 | 0.22 | 0.85 |
| 62864 | 0 | 144467 | RPWLHVPRHRY                 | 2.43 | 0.01 | 3.06 | 2.13 | 1.59 | 0.28 |
| 62865 | 0 | 55382  | RPYCWHYPP                   | 2.22 | 0.01 | 3.18 | 0.44 | 0.85 | 0.28 |
| 62866 | 0 | 55383  | RPYCWHYPPQQCGIVP<br>ASQV    | 2.94 | 0.01 | 3.10 | 1.81 | 0.22 | 0.28 |
| 62867 | 0 | 55383  | RPYCWHYPPQQCGIVP<br>ASQV    | 2.94 | 0.01 | 3.10 | 0.44 | 0.85 | 0.28 |
| 62868 | 0 | 134219 | RPYNIYPHGITDVRPLYS<br>RR    | 2.94 | 0.01 | 0.78 | 0.44 | 2.35 | 0.28 |
| 62869 | 0 | 55389  | RQAESSEAMAAWSERA<br>GEA     | 2.95 | 0.01 | 2.14 | 1.15 | 0.22 | 0.28 |
| 62870 | 0 | 55389  | RQAESSEAMAAWSERA<br>GEA     | 2.95 | 0.01 | 2.14 | 1.15 | 0.22 | 1.27 |
| 62871 | 0 | 55389  | RQAESSEAMAAWSERA<br>GEA     | 2.95 | 0.01 | 2.14 | 1.20 | 0.22 | 2.02 |
| 62872 | 0 | 55390  | RQAEVIAPA                   | 2.23 | 0.01 | 2.41 | 0.44 | 0.85 | 0.28 |
| 62873 | 0 | 55396  | RQAIKS                      | 1.88 | 0.01 | 1.96 | 0.44 | 0.85 | 0.28 |
| 62874 | 0 | 55402  | RQAQDIQPV                   | 2.23 | 0.01 | 2.69 | 0.44 | 0.85 | 0.28 |
| 62875 | 0 | 241057 | RQAQVSFL                    | 2.12 | 0.01 | 3.35 | 2.37 | 0.22 | 0.85 |
| 62876 | 0 | 241057 | RQAQVSFL                    | 2.12 | 0.01 | 3.35 | 1.20 | 0.22 | 0.85 |
| 62877 | 0 | 114941 | RQDENYEEAIVHLKVAA<br>LGS    | 2.90 | 0.01 | 1.60 | 0.44 | 1.13 | 0.28 |
| 62878 | 0 | 114941 | RQDENYEEAIVHLKVAA<br>LGS    | 2.90 | 0.01 | 1.60 | 0.44 | 1.41 | 0.28 |
| 62879 | 0 | 114941 | RQDENYEEAIVHLKVAA<br>LGS    | 2.90 | 0.01 | 1.60 | 0.44 | 1.59 | 0.28 |
| 62880 | 0 | 134787 | RQDPGKGLRLIYYSITES<br>DLQKG | 3.09 | 0.01 | 2.19 | 1.20 | 0.22 | 0.28 |
| 62881 | 0 | 134787 | RQDPGKGLRLIYYSITES<br>DLQKG | 3.09 | 0.01 | 2.19 | 1.20 | 0.22 | 0.28 |
| 62882 | 0 | 134787 | RQDPGKGLRLIYYSITES<br>DLQKG | 3.09 | 0.01 | 2.19 | 1.20 | 0.22 | 0.28 |



|       |   |        |                             |      |      |      |      |      |      |
|-------|---|--------|-----------------------------|------|------|------|------|------|------|
| 62883 | 0 | 134787 | RQDPGKGLRLIYYSITES<br>DLQKG | 3.09 | 0.01 | 2.19 | 1.20 | 0.22 | 0.28 |
| 62884 | 0 | 134787 | RQDPGKGLRLIYYSITES<br>DLQKG | 3.09 | 0.01 | 2.19 | 1.20 | 0.22 | 0.28 |
| 62885 | 0 | 134787 | RQDPGKGLRLIYYSITES<br>DLQKG | 3.09 | 0.01 | 2.19 | 1.20 | 0.22 | 0.28 |
| 62886 | 0 | 188456 | RQEDSATHGD                  | 2.29 | 0.01 | 2.92 | 3.37 | 0.22 | 0.85 |
| 62887 | 0 | 140738 | RQEEEMKKAEEELAKLK<br>EEFEK  | 3.09 | 0.01 | 2.93 | 1.81 | 0.22 | 0.28 |
| 62888 | 0 | 140738 | RQEEEMKKAEEELAKLK<br>EEFEK  | 3.09 | 0.01 | 2.93 | 1.81 | 2.25 | 1.75 |
| 62889 | 0 | 78816  | RQEIRKAWVKGMPYM<br>DFSK     | 2.84 | 0.01 | 3.11 | 1.15 | 0.22 | 0.28 |
| 62890 | 0 | 78816  | RQEIRKAWVKGMPYM<br>DFSK     | 2.84 | 0.01 | 3.11 | 1.15 | 0.22 | 0.28 |
| 62891 | 0 | 78816  | RQEIRKAWVKGMPYM<br>DFSK     | 2.84 | 0.01 | 3.11 | 1.12 | 0.22 | 0.28 |
| 62892 | 0 | 161278 | RQEKD                       | 1.74 | 0.01 | 2.60 | 0.68 | 0.22 | 0.85 |
| 62893 | 0 | 161278 | RQEKD                       | 1.74 | 0.01 | 2.60 | 0.68 | 0.22 | 0.85 |
| 62894 | 0 | 114586 | RQERESEQERERQRR             | 2.74 | 0.01 | 3.48 | 0.44 | 1.23 | 0.85 |
| 62895 | 0 | 55412  | RQESLRECCQEL                | 2.52 | 0.01 | 3.12 | 0.44 | 1.23 | 0.85 |
| 62896 | 0 | 114587 | RQEWERQERQERESE             | 2.75 | 0.01 | 3.48 | 0.44 | 1.23 | 0.85 |
| 62897 | 0 | 130598 | RQFECYTTCVG                 | 2.38 | 0.01 | 0.90 | 3.57 | 0.22 | 0.28 |
| 62898 | 0 | 130598 | RQFECYTTCVG                 | 2.38 | 0.01 | 0.90 | 0.68 | 0.22 | 1.75 |
| 62899 | 0 | 130598 | RQFECYTTCVG                 | 2.38 | 0.01 | 0.90 | 0.68 | 0.22 | 1.39 |
| 62900 | 0 | 102773 | RQFSKFKDASDRYGNYL<br>HFF    | 2.94 | 0.01 | 0.90 | 1.20 | 0.22 | 0.28 |
| 62901 | 0 | 102773 | RQFSKFKDASDRYGNYL<br>HFF    | 2.94 | 0.01 | 0.90 | 0.44 | 0.85 | 0.28 |
| 62902 | 0 | 55416  | RQFYQLDAYP                  | 2.31 | 0.01 | 1.60 | 0.44 | 1.23 | 0.28 |
| 62903 | 0 | 55416  | RQFYQLDAYP                  | 2.31 | 0.01 | 1.60 | 0.44 | 1.23 | 0.28 |
| 62904 | 0 | 190531 | RQFYQLDAYPSGAWY             | 2.66 | 0.01 | 1.60 | 0.44 | 1.23 | 0.28 |
| 62905 | 0 | 55419  | RQFYQLDAYPSGAWYY<br>VPLG    | 2.94 | 0.01 | 1.60 | 2.82 | 0.22 | 0.28 |
| 62906 | 0 | 55419  | RQFYQLDAYPSGAWYY<br>VPLG    | 2.94 | 0.01 | 1.60 | 0.44 | 1.23 | 2.51 |
| 62907 | 0 | 134220 | RQGAEPKKNFVKPNETK<br>TY     | 2.90 | 0.01 | 0.78 | 1.20 | 0.22 | 0.28 |
| 62908 | 0 | 134220 | RQGAEPKKNFVKPNETK<br>TY     | 2.90 | 0.01 | 0.78 | 1.20 | 0.22 | 0.85 |
| 62909 | 0 | 134220 | RQGAEPKKNFVKPNETK<br>TY     | 2.90 | 0.01 | 0.78 | 0.44 | 1.41 | 0.85 |
| 62910 | 0 | 134220 | RQGAEPKKNFVKPNETK<br>TY     | 2.90 | 0.01 | 0.78 | 0.44 | 1.41 | 1.34 |
| 62911 | 0 | 134220 | RQGAEPKKNFVKPNETK<br>TY     | 2.90 | 0.01 | 0.78 | 0.44 | 1.41 | 1.34 |

|       |   |        |                                                    |      |      |      |      |      |      |
|-------|---|--------|----------------------------------------------------|------|------|------|------|------|------|
| 62912 | 0 | 134220 | RQGAEPKRNFKVKNETK<br>TY                            | 2.90 | 0.01 | 0.78 | 1.12 | 0.22 | 0.28 |
| 62913 | 0 | 134220 | RQGAEPKRNFKVKNETK<br>TY                            | 2.90 | 0.01 | 0.78 | 1.12 | 0.22 | 0.28 |
| 62914 | 0 | 99631  | RQGAKEPYPEFVDRL                                    | 2.65 | 0.01 | 2.86 | 2.02 | 0.85 | 0.85 |
| 62915 | 0 | 130599 | RQGEEVYMWRDSMPA                                    | 2.64 | 0.01 | 0.90 | 3.57 | 0.22 | 0.28 |
| 62916 | 0 | 130599 | RQGEEVYMWRDSMPA                                    | 2.64 | 0.01 | 0.90 | 3.57 | 0.22 | 0.28 |
| 62917 | 0 | 130599 | RQGEEVYMWRDSMPA                                    | 2.64 | 0.01 | 0.90 | 0.68 | 0.22 | 1.75 |
| 62918 | 0 | 130599 | RQGEEVYMWRDSMPA                                    | 2.64 | 0.01 | 0.90 | 0.68 | 0.22 | 1.39 |
| 62919 | 0 | 128094 | RQGLKKADCSFWSKYIS<br>SLK                           | 2.92 | 0.01 | 0.78 | 0.44 | 1.13 | 0.28 |
| 62920 | 0 | 525280 | RQGLRRDLASREAK                                     | 2.70 | 0.01 | 2.24 | 0.44 | 1.41 | 1.28 |
| 62921 | 0 | 123719 | RQGLSRISY                                          | 2.24 | 0.01 | 2.28 | 2.00 | 0.22 | 0.28 |
| 62922 | 0 | 109850 | RQHARQQDKERLAALG<br>PEGA                           | 2.97 | 0.01 | 0.78 | 0.44 | 1.13 | 1.27 |
| 62923 | 0 | 109850 | RQHARQQDKERLAALG<br>PEGA                           | 2.97 | 0.01 | 0.78 | 0.44 | 1.41 | 1.57 |
| 62924 | 0 | 109850 | RQHARQQDKERLAALG<br>PEGA                           | 2.97 | 0.01 | 0.78 | 0.44 | 1.13 | 1.27 |
| 62925 | 0 | 109851 | RQHARQQDKERLAALG<br>PEGAHGDTTFEYQDLCR<br>QHMATKSLF | 3.68 | 0.01 | 0.78 | 0.44 | 1.13 | 1.57 |
| 62926 | 0 | 134221 | RQIFGDYKT                                          | 2.18 | 0.01 | 1.60 | 1.20 | 0.22 | 1.27 |
| 62927 | 0 | 134221 | RQIFGDYKT                                          | 2.18 | 0.01 | 1.60 | 1.20 | 0.22 | 1.27 |
| 62928 | 0 | 134221 | RQIFGDYKT                                          | 2.18 | 0.01 | 1.60 | 1.20 | 0.22 | 1.27 |
| 62929 | 0 | 117231 | RQIFGDYKTTICGK                                     | 2.60 | 0.01 | 0.78 | 2.25 | 0.22 | 1.27 |
| 62930 | 0 | 115473 | RQIFGDYKTTICGKGLSA<br>TVTGGQKGRGSRG                | 3.38 | 0.01 | 2.19 | 1.12 | 0.22 | 0.28 |
| 62931 | 0 | 142001 | RQKCRAK                                            | 2.05 | 0.01 | 0.78 | 0.44 | 2.35 | 0.28 |
| 62932 | 0 | 55435  | RQKKQPTVTLLPAAD                                    | 2.67 | 0.01 | 3.30 | 0.68 | 0.22 | 0.28 |
| 62933 | 0 | 119328 | RQKLEDSYRFQFFQRDA<br>EEL                           | 2.97 | 0.01 | 0.78 | 1.12 | 0.22 | 1.48 |
| 62934 | 0 | 55436  | RQKLKDAERAVEVD                                     | 2.65 | 0.01 | 2.56 | 0.44 | 0.85 | 0.28 |
| 62935 | 0 | 128095 | RQKPANVLNDAQTKLLA<br>VSG                           | 2.94 | 0.01 | 0.78 | 0.44 | 1.13 | 0.28 |
| 62936 | 0 | 238991 | RQLANMVNNLKEISQE<br>AR                             | 2.85 | 0.01 | 0.78 | 0.44 | 1.13 | 0.28 |
| 62937 | 0 | 122179 | RQLGRGS                                            | 2.05 | 0.01 | 0.90 | 0.44 | 1.13 | 1.27 |
| 62938 | 0 | 167998 | RQLHTDNGYFIGASCP                                   | 2.65 | 0.01 | 2.75 | 0.44 | 0.85 | 2.51 |
| 62939 | 0 | 173085 | RQLINTNGSWHIN                                      | 2.54 | 0.01 | 0.90 | 3.27 | 0.22 | 2.49 |
| 62940 | 0 | 173085 | RQLINTNGSWHIN                                      | 2.54 | 0.01 | 0.90 | 3.27 | 0.22 | 1.27 |
| 62941 | 0 | 173085 | RQLINTNGSWHIN                                      | 2.54 | 0.01 | 0.90 | 3.27 | 0.22 | 1.27 |

|       |   |        |                                              |      |      |      |      |      |      |
|-------|---|--------|----------------------------------------------|------|------|------|------|------|------|
| 62942 | 0 | 173085 | RQLINTNGSWHIN                                | 2.54 | 0.01 | 0.90 | 3.27 | 0.22 | 1.27 |
| 62943 | 0 | 173085 | RQLINTNGSWHIN                                | 2.54 | 0.01 | 0.90 | 3.27 | 0.22 | 0.28 |
| 62944 | 0 | 173085 | RQLINTNGSWHIN                                | 2.54 | 0.01 | 0.90 | 3.27 | 0.22 | 1.34 |
| 62945 | 0 | 173085 | RQLINTNGSWHIN                                | 2.54 | 0.01 | 0.90 | 3.27 | 0.22 | 1.34 |
| 62946 | 0 | 55449  | RQLQNSMSGASADSTQ<br>A                        | 2.81 | 0.01 | 2.45 | 1.12 | 0.22 | 2.92 |
| 62947 | 0 | 227834 | RQLSRRAKSSSRKTIS                             | 2.77 | 0.01 | 2.72 | 1.20 | 1.59 | 0.28 |
| 62948 | 0 | 141742 | RQLVWDAMQSGVRYA<br>V                         | 2.74 | 0.01 | 2.86 | 2.55 | 0.22 | 0.28 |
| 62949 | 0 | 109854 | RQMVEKESLDQA                                 | 2.45 | 0.01 | 0.90 | 1.15 | 0.22 | 1.39 |
| 62950 | 0 | 458562 | RQNAEENLKNFAKELKL<br>PDVAFDQNNTCI            | 3.30 | 0.01 | 2.40 | 2.82 | 0.22 | 0.28 |
| 62951 | 0 | 55456  | RQNEPEDIDCWCNSTST<br>WVTYGTCTTTGEHRREK<br>RS | 3.51 | 0.01 | 2.30 | 0.68 | 2.25 | 1.75 |
| 62952 | 0 | 55456  | RQNEPEDIDCWCNSTST<br>WVTYGTCTTTGEHRREK<br>RS | 3.51 | 0.01 | 2.30 | 0.68 | 0.22 | 0.28 |
| 62953 | 0 | 55456  | RQNEPEDIDCWCNSTST<br>WVTYGTCTTTGEHRREK<br>RS | 3.51 | 0.01 | 2.30 | 0.68 | 0.22 | 0.28 |
| 62954 | 0 | 55456  | RQNEPEDIDCWCNSTST<br>WVTYGTCTTTGEHRREK<br>RS | 3.51 | 0.01 | 2.30 | 0.68 | 0.22 | 0.28 |
| 62955 | 0 | 125241 | RQNKPPNKPNDDFHFE<br>VFNFVP                   | 3.06 | 0.01 | 4.33 | 0.68 | 0.22 | 0.85 |
| 62956 | 0 | 125241 | RQNKPPNKPNDDFHFE<br>VFNFVP                   | 3.06 | 0.01 | 4.33 | 0.68 | 0.22 | 0.85 |
| 62957 | 0 | 125241 | RQNKPPNKPNDDFHFE<br>VFNFVP                   | 3.06 | 0.01 | 4.33 | 0.68 | 0.22 | 0.85 |
| 62958 | 0 | 125241 | RQNKPPNKPNDDFHFE<br>VFNFVP                   | 3.06 | 0.01 | 4.33 | 0.68 | 0.22 | 0.85 |
| 62959 | 0 | 55457  | RQNKPPNKPNNND                                | 2.52 | 0.01 | 2.38 | 0.68 | 0.22 | 0.28 |
| 62960 | 0 | 55457  | RQNKPPNKPNNND                                | 2.52 | 0.01 | 2.38 | 0.68 | 0.22 | 0.28 |
| 62961 | 0 | 55457  | RQNKPPNKPNNND                                | 2.52 | 0.01 | 2.38 | 0.68 | 0.22 | 0.28 |
| 62962 | 0 | 55457  | RQNKPPNKPNNND                                | 2.52 | 0.01 | 2.38 | 0.44 | 1.74 | 0.28 |
| 62963 | 0 | 55458  | RQNKPPSKPNNDFH                               | 2.62 | 0.01 | 2.67 | 2.25 | 0.22 | 1.27 |
| 62964 | 0 | 125242 | RQNKPPSKPNNDFHFEV<br>FNFVP                   | 3.06 | 0.01 | 2.67 | 0.68 | 0.22 | 0.85 |
| 62965 | 0 | 125242 | RQNKPPSKPNNDFHFEV<br>FNFVP                   | 3.06 | 0.01 | 2.67 | 0.68 | 0.22 | 0.85 |
| 62966 | 0 | 125242 | RQNKPPSKPNNDFHFEV<br>FNFVP                   | 3.06 | 0.01 | 2.67 | 0.68 | 0.22 | 0.85 |
| 62967 | 0 | 125242 | RQNKPPSKPNNDFHFEV<br>FNFVP                   | 3.06 | 0.01 | 2.67 | 0.68 | 0.22 | 0.85 |
| 62968 | 0 | 125242 | RQNKPPSKPNNDFHFEV<br>FNFVP                   | 3.06 | 0.01 | 2.67 | 0.44 | 0.85 | 0.28 |

|       |   |        |                                              |      |      |      |      |      |      |
|-------|---|--------|----------------------------------------------|------|------|------|------|------|------|
| 62969 | 0 | 99633  | RQNNLSMFFAG                                  | 2.45 | 0.01 | 0.90 | 1.12 | 0.22 | 1.39 |
| 62970 | 0 | 55460  | RQPDLP                                       | 2.02 | 0.01 | 2.24 | 1.12 | 0.22 | 0.28 |
| 62971 | 0 | 55460  | RQPDLP                                       | 2.02 | 0.01 | 2.24 | 0.68 | 0.22 | 0.28 |
| 62972 | 0 | 88134  | RQPG                                         | 1.57 | 0.01 | 3.59 | 0.44 | 0.85 | 0.28 |
| 62973 | 0 | 88134  | RQPG                                         | 1.57 | 0.01 | 3.59 | 0.44 | 0.85 | 0.28 |
| 62974 | 0 | 104227 | RQPIPKARRPEGRTWA<br>QPGY                     | 2.96 | 0.01 | 1.72 | 0.44 | 0.85 | 0.28 |
| 62975 | 0 | 99634  | RQPREDWRRPSHQQP                              | 2.70 | 0.01 | 2.16 | 0.44 | 1.23 | 1.48 |
| 62976 | 0 | 98988  | RQPRREEGGRWGPA                               | 2.73 | 0.01 | 2.16 | 0.44 | 1.23 | 0.85 |
| 62977 | 0 | 55468  | RQQAQVEQVLKTEEEQF<br>ARTLERGLALLDEELAKL<br>S | 3.55 | 0.01 | 3.63 | 1.20 | 0.22 | 0.85 |
| 62978 | 0 | 106086 | RQQDRRRGRGSRGSG                              | 2.74 | 0.01 | 2.16 | 0.44 | 1.23 | 0.85 |
| 62979 | 0 | 227835 | RQQEGVIVELSKEQIR                             | 2.77 | 0.01 | 2.72 | 1.20 | 1.59 | 0.28 |
| 62980 | 0 | 55469  | RQQEPE                                       | 1.90 | 0.01 | 2.75 | 0.44 | 0.85 | 0.85 |
| 62981 | 0 | 371763 | RQQGRNEPQARKQQG                              | 2.71 | 0.01 | 1.61 | 0.44 | 0.85 | 1.28 |
| 62982 | 0 | 55473  | RQQQQQGLRGEEM                                | 2.58 | 0.01 | 3.27 | 0.44 | 1.23 | 0.85 |
| 62983 | 0 | 371779 | RQQQSDQVQVQQEH                               | 2.69 | 0.01 | 1.61 | 0.44 | 0.85 | 1.28 |
| 62984 | 0 | 96835  | RQQWELQGDRR                                  | 2.41 | 0.01 | 2.16 | 2.82 | 0.22 | 1.57 |
| 62985 | 0 | 55477  | RQQWELQGDRRCQSQ                              | 2.69 | 0.01 | 2.16 | 0.44 | 1.23 | 1.48 |
| 62986 | 0 | 55477  | RQQWELQGDRRCQSQ                              | 2.69 | 0.01 | 2.16 | 0.44 | 1.23 | 0.85 |
| 62987 | 0 | 55478  | RQQWELQGDRRCQSQL                             | 2.76 | 0.01 | 2.16 | 0.44 | 1.23 | 0.28 |
| 62988 | 0 | 420120 | RQQWELQGDRRCQSQL<br>ERANL                    | 3.01 | 0.01 | 2.16 | 0.44 | 1.23 | 1.27 |
| 62989 | 0 | 238992 | RQRFLKNLRPNRQLAN<br>M                        | 2.89 | 0.01 | 0.78 | 0.44 | 1.13 | 0.28 |
| 62990 | 0 | 238992 | RQRFLKNLRPNRQLAN<br>M                        | 2.89 | 0.01 | 0.78 | 0.44 | 1.13 | 0.28 |
| 62991 | 0 | 440203 | RQRLEL                                       | 1.92 | 0.01 | 0.78 | 1.20 | 0.22 | 0.85 |
| 62992 | 0 | 133683 | RQRY                                         | 1.60 | 0.01 | 2.19 | 1.12 | 0.22 | 1.27 |
| 62993 | 0 | 131048 | RQSDGQYQM                                    | 2.23 | 0.01 | 0.90 | 0.44 | 1.13 | 1.39 |
| 62994 | 0 | 131048 | RQSDGQYQM                                    | 2.23 | 0.01 | 0.90 | 0.44 | 1.13 | 0.28 |
| 62995 | 0 | 153287 | RQSGRQPTPLSPPLR                              | 2.73 | 0.01 | 2.08 | 0.68 | 0.22 | 0.28 |
| 62996 | 0 | 153287 | RQSGRQPTPLSPPLR                              | 2.73 | 0.01 | 2.08 | 0.68 | 0.22 | 0.28 |
| 62997 | 0 | 525305 | RQSLRRDLASREAK                               | 2.72 | 0.01 | 2.24 | 0.44 | 1.41 | 1.28 |
| 62998 | 0 | 114590 | RQSQQGQSREFQQDR                              | 2.73 | 0.01 | 3.27 | 0.44 | 1.23 | 0.85 |
| 62999 | 0 | 88141  | RQSQTGSKVATQRPQT<br>NESAPR                   | 3.07 | 0.01 | 3.27 | 0.68 | 0.22 | 0.28 |

|       |   |        |                               |      |      |      |      |      |      |
|-------|---|--------|-------------------------------|------|------|------|------|------|------|
| 63000 | 0 | 88141  | RQSQTGSKVATQRPQT<br>NESAPR    | 3.07 | 0.01 | 3.27 | 1.20 | 0.22 | 0.28 |
| 63001 | 0 | 88141  | RQSQTGSKVATQRPQT<br>NESAPR    | 3.07 | 0.01 | 3.27 | 3.16 | 0.22 | 0.28 |
| 63002 | 0 | 88141  | RQSQTGSKVATQRPQT<br>NESAPR    | 3.07 | 0.01 | 3.27 | 1.20 | 0.22 | 0.28 |
| 63003 | 0 | 88141  | RQSQTGSKVATQRPQT<br>NESAPR    | 3.07 | 0.01 | 3.27 | 1.20 | 0.22 | 0.28 |
| 63004 | 0 | 88141  | RQSQTGSKVATQRPQT<br>NESAPR    | 3.07 | 0.01 | 3.27 | 1.20 | 0.22 | 0.28 |
| 63005 | 0 | 88141  | RQSQTGSKVATQRPQT<br>NESAPR    | 3.07 | 0.01 | 3.27 | 1.20 | 0.22 | 0.28 |
| 63006 | 0 | 88141  | RQSQTGSKVATQRPQT<br>NESAPR    | 3.07 | 0.01 | 3.27 | 1.20 | 0.22 | 1.48 |
| 63007 | 0 | 88141  | RQSQTGSKVATQRPQT<br>NESAPR    | 3.07 | 0.01 | 3.27 | 1.20 | 0.22 | 1.34 |
| 63008 | 0 | 88141  | RQSQTGSKVATQRPQT<br>NESAPR    | 3.07 | 0.01 | 3.27 | 3.16 | 0.22 | 0.28 |
| 63009 | 0 | 55487  | RQSTPIGLGQALYTT               | 2.66 | 0.01 | 2.54 | 0.68 | 0.22 | 0.28 |
| 63010 | 0 | 80018  | RQTDR                         | 1.77 | 0.01 | 3.34 | 0.44 | 1.59 | 0.28 |
| 63011 | 0 | 55490  | RQTEPCNLWFCPQV                | 2.59 | 0.01 | 0.90 | 0.44 | 1.41 | 0.28 |
| 63012 | 0 | 109855 | RQTEVDSGRDLE                  | 2.48 | 0.01 | 0.90 | 1.15 | 0.22 | 1.39 |
| 63013 | 0 | 55492  | RQTITNPAYDEK                  | 2.43 | 0.01 | 3.53 | 1.12 | 0.22 | 0.28 |
| 63014 | 0 | 55494  | RQTVKENKGT                    | 2.31 | 4.23 | 2.56 | 0.44 | 0.85 | 0.28 |
| 63015 | 0 | 178156 | RQVDARRNVPQND                 | 2.59 | 3.33 | 0.78 | 0.44 | 1.13 | 0.28 |
| 63016 | 0 | 238993 | RQVRLGDTQQSIPGNEE<br>R        | 2.82 | 0.01 | 0.78 | 0.44 | 1.13 | 0.28 |
| 63017 | 0 | 238993 | RQVRLGDTQQSIPGNEE<br>R        | 2.82 | 0.01 | 0.78 | 0.44 | 1.13 | 0.28 |
| 63018 | 0 | 55508  | RQWFLD                        | 1.88 | 0.01 | 2.40 | 0.44 | 0.85 | 0.28 |
| 63019 | 0 | 99636  | RQWIEAMSEGIKVM                | 2.66 | 0.01 | 2.86 | 2.02 | 0.85 | 0.85 |
| 63020 | 0 | 120180 | RQWKAEFHRW                    | 2.32 | 0.01 | 0.78 | 0.68 | 0.22 | 0.28 |
| 63021 | 0 | 55511  | RQWVSAGRRVGGRRR<br>G          | 2.78 | 0.01 | 2.59 | 0.44 | 0.85 | 0.28 |
| 63022 | 0 | 55519  | RQYNLSTSPLTSSVATGT<br>NLVLYAA | 3.17 | 0.01 | 2.53 | 0.44 | 0.85 | 0.28 |
| 63023 | 0 | 140898 | RRADAVKGYLAG                  | 2.48 | 0.01 | 3.01 | 1.12 | 0.22 | 0.28 |
| 63024 | 0 | 131050 | RRAEITHPGMMLASG               | 2.64 | 0.01 | 0.90 | 0.68 | 0.22 | 1.27 |
| 63025 | 0 | 131050 | RRAEITHPGMMLASG               | 2.64 | 0.01 | 0.90 | 0.68 | 0.22 | 1.34 |
| 63026 | 0 | 55523  | RRAGRCPP                      | 2.13 | 0.01 | 2.04 | 0.44 | 0.85 | 0.28 |
| 63027 | 0 | 55523  | RRAGRCPP                      | 2.13 | 0.01 | 2.04 | 0.44 | 0.85 | 0.28 |
| 63028 | 0 | 55523  | RRAGRCPP                      | 2.13 | 0.01 | 2.04 | 0.44 | 0.85 | 0.28 |
| 63029 | 0 | 55524  | RRAL                          | 1.59 | 0.01 | 2.40 | 0.68 | 0.22 | 0.85 |
| 63030 | 0 | 158606 | RRALPPVSS                     | 2.21 | 0.01 | 0.90 | 0.44 | 0.85 | 1.27 |
| 63031 | 0 | 99637  | RRAQSVVD                      | 2.12 | 0.01 | 2.24 | 0.68 | 0.22 | 0.28 |
| 63032 | 0 | 121811 | RRARARAR                      | 2.16 | 0.01 | 0.90 | 0.44 | 1.13 | 0.28 |
| 63033 | 0 | 121812 | RRATQLAH                      | 2.13 | 0.01 | 0.78 | 0.68 | 0.22 | 0.28 |

|       |   |        |                                                  |      |      |      |      |      |      |
|-------|---|--------|--------------------------------------------------|------|------|------|------|------|------|
| 63034 | 0 | 120181 | RRATQLAHLV                                       | 2.32 | 0.01 | 0.78 | 2.66 | 0.22 | 0.28 |
| 63035 | 0 | 494148 | RRCHLAAGCYNNIAY                                  | 2.68 | 0.01 | 0.90 | 1.15 | 0.22 | 1.39 |
| 63036 | 0 | 243833 | RRCQSQLER                                        | 2.25 | 0.01 | 2.16 | 0.44 | 1.23 | 1.28 |
| 63037 | 0 | 99638  | RRCQSQLERANLRPC                                  | 2.70 | 0.01 | 2.16 | 0.44 | 1.23 | 1.48 |
| 63038 | 0 | 525320 | RRCQSQLERANLRPCEQ<br>HLMQKIQ                     | 3.12 | 0.01 | 2.16 | 1.12 | 0.22 | 1.39 |
| 63039 | 0 | 525320 | RRCQSQLERANLRPCEQ<br>HLMQKIQ                     | 3.12 | 0.01 | 2.16 | 0.44 | 1.23 | 1.39 |
| 63040 | 0 | 525320 | RRCQSQLERANLRPCEQ<br>HLMQKIQ                     | 3.12 | 0.01 | 2.16 | 0.44 | 1.23 | 0.85 |
| 63041 | 0 | 240329 | RRDFPTRDRSIVESRV                                 | 2.76 | 0.01 | 2.70 | 0.68 | 0.22 | 0.28 |
| 63042 | 0 | 55542  | RRDLASREAKK                                      | 2.49 | 0.01 | 2.85 | 4.08 | 0.85 | 0.28 |
| 63043 | 0 | 55542  | RRDLASREAKK                                      | 2.49 | 0.01 | 3.78 | 0.44 | 0.85 | 1.34 |
| 63044 | 0 | 142282 | RRDLASREAKKQLEAE<br>QQK                          | 2.99 | 0.01 | 2.24 | 0.44 | 0.85 | 0.28 |
| 63045 | 0 | 142282 | RRDLASREAKKQLEAE<br>QQK                          | 2.99 | 0.01 | 2.24 | 0.44 | 1.74 | 0.28 |
| 63046 | 0 | 240916 | RRDPDDLPAITSLAA                                  | 2.70 | 0.01 | 4.93 | 0.44 | 1.41 | 0.28 |
| 63047 | 0 | 423495 | RRDSAWDVRPLTETR                                  | 2.68 | 0.01 | 2.51 | 0.44 | 1.59 | 1.28 |
| 63048 | 0 | 109857 | RRDSGGFEQIWG                                     | 2.46 | 0.01 | 0.90 | 1.15 | 0.22 | 1.39 |
| 63049 | 0 | 126982 | RREFEFYG                                         | 2.15 | 0.01 | 4.15 | 0.44 | 1.13 | 0.28 |
| 63050 | 0 | 124673 | RREFEYVGPIKRIHMOVYS<br>KRSKGPRGYAFIEYHER<br>DMHS | 3.65 | 0.01 | 0.78 | 0.44 | 1.13 | 0.28 |
| 63051 | 0 | 193066 | RREILSRPSYRKILNDL                                | 2.86 | 3.63 | 0.78 | 1.15 | 1.41 | 0.28 |
| 63052 | 0 | 193066 | RREILSRPSYRKILNDL                                | 2.86 | 3.63 | 0.78 | 1.15 | 1.41 | 0.85 |
| 63053 | 0 | 462437 | RREiSELRTK                                       | 2.33 | 0.01 | 0.78 | 1.12 | 0.22 | 1.28 |
| 63054 | 0 | 132624 | RREKIERRQQ                                       | 2.34 | 0.01 | 0.78 | 0.44 | 1.13 | 0.28 |
| 63055 | 0 | 132048 | RRERGMMKGGNKQEE                                  | 2.70 | 0.01 | 0.78 | 0.44 | 1.13 | 0.85 |
| 63056 | 0 | 132625 | RRERSRERDK                                       | 2.36 | 0.01 | 0.78 | 0.44 | 1.13 | 0.28 |
| 63057 | 0 | 111742 | RRETQ                                            | 1.75 | 0.01 | 1.86 | 3.57 | 0.22 | 0.28 |
| 63058 | 0 | 178157 | RREVHIYYLEKSNKIKSEK<br>T                         | 2.95 | 0.01 | 3.51 | 1.12 | 0.22 | 1.27 |
| 63059 | 0 | 122561 | RRFDEPRLSTPALLR                                  | 2.69 | 0.01 | 0.90 | 1.15 | 0.22 | 1.39 |
| 63060 | 0 | 238994 | RRFDQKVAGFELGA                                   | 2.60 | 0.01 | 2.14 | 2.65 | 0.22 | 0.85 |
| 63061 | 0 | 238994 | RRFDQKVAGFELGA                                   | 2.60 | 0.01 | 2.14 | 2.65 | 0.22 | 0.85 |
| 63062 | 0 | 125552 | RRFEYDDPRFLRLDLAQ<br>EG                          | 2.97 | 0.01 | 0.78 | 0.44 | 1.13 | 0.28 |
| 63063 | 0 | 125552 | RRFEYDDPRFLRLDLAQ<br>EG                          | 2.97 | 0.01 | 0.78 | 0.44 | 0.85 | 0.28 |
| 63064 | 0 | 125552 | RRFEYDDPRFLRLDLAQ<br>EG                          | 2.97 | 0.01 | 0.78 | 0.44 | 1.13 | 1.34 |
| 63065 | 0 | 125552 | RRFEYDDPRFLRLDLAQ<br>EG                          | 2.97 | 0.01 | 0.78 | 0.44 | 0.85 | 1.34 |

|       |   |        |                                                         |      |      |      |      |      |      |
|-------|---|--------|---------------------------------------------------------|------|------|------|------|------|------|
| 63066 | 0 | 125552 | RRFEYDDPRFLRLDLAQ<br>EG                                 | 2.97 | 0.01 | 0.78 | 0.44 | 1.13 | 0.28 |
| 63067 | 0 | 55557  | RRFTEDPLGRNVTK                                          | 2.65 | 0.01 | 2.74 | 0.44 | 0.85 | 0.28 |
| 63068 | 0 | 103566 | RRFPLDPVPWTRFFG                                         | 2.69 | 0.01 | 2.04 | 0.44 | 0.85 | 1.28 |
| 63069 | 0 | 525347 | RRGAGSSQHQRCCNE<br>LNEFENNQ                             | 3.13 | 0.01 | 2.16 | 1.12 | 0.22 | 1.39 |
| 63070 | 0 | 525347 | RRGAGSSQHQRCCNE<br>LNEFENNQ                             | 3.13 | 0.01 | 2.16 | 0.44 | 1.23 | 1.39 |
| 63071 | 0 | 95806  | RRGDMGSL                                                | 2.13 | 0.01 | 3.48 | 2.22 | 0.22 | 0.28 |
| 63072 | 0 | 135985 | RRGDMSTLNTHG                                            | 2.46 | 0.01 | 3.21 | 0.44 | 0.85 | 0.28 |
| 63073 | 0 | 55567  | RRGEGPKIWPFTES                                          | 2.66 | 0.01 | 3.12 | 0.44 | 1.23 | 1.57 |
| 63074 | 0 | 55573  | RRGLAEEAEASPPPPSP<br>CPTETESSAGTTGATPPT<br>PNSPDATPEDST | 3.85 | 0.01 | 3.78 | 0.68 | 0.22 | 0.85 |
| 63075 | 0 | 180142 | RRGLETGWAYTHQGGI                                        | 2.71 | 0.01 | 4.15 | 2.22 | 0.22 | 0.28 |
| 63076 | 0 | 55575  | RRGMEPHMSECCEQ                                          | 2.61 | 0.01 | 4.08 | 0.44 | 1.23 | 0.85 |
| 63077 | 0 | 108615 | RRGPEAHQA                                               | 2.22 | 0.01 | 0.90 | 0.44 | 1.13 | 1.39 |
| 63078 | 0 | 55577  | RRGPRLGV                                                | 2.16 | 0.01 | 1.72 | 0.44 | 0.85 | 0.28 |
| 63079 | 0 | 55581  | RRGPRLGVRATRKT                                          | 2.70 | 0.01 | 1.72 | 0.44 | 1.59 | 0.28 |
| 63080 | 0 | 55581  | RRGPRLGVRATRKT                                          | 2.70 | 0.01 | 2.41 | 0.44 | 1.59 | 0.28 |
| 63081 | 0 | 55582  | RRGPRLGVRATRKT<br>SER<br>SQPRGRRQ                       | 3.18 | 0.01 | 1.72 | 0.44 | 1.41 | 2.97 |
| 63082 | 0 | 55582  | RRGPRLGVRATRKT<br>SER<br>SQPRGRRQ                       | 3.18 | 0.01 | 1.72 | 0.44 | 1.41 | 2.97 |
| 63083 | 0 | 79639  | RRGPRLGVRATRKT<br>SER<br>SQPRGRRQPIPKVRRPE<br>GR        | 3.55 | 0.01 | 4.23 | 0.44 | 0.85 | 0.28 |
| 63084 | 0 | 79639  | RRGPRLGVRATRKT<br>SER<br>SQPRGRRQPIPKVRRPE<br>GR        | 3.55 | 0.01 | 4.23 | 0.44 | 0.85 | 0.28 |
| 63085 | 0 | 55583  | RRGPRLGVRATRKT<br>SER<br>SQPRGRRQPIPKVRRPE<br>GRCV      | 3.60 | 0.01 | 4.23 | 0.68 | 0.22 | 1.27 |
| 63086 | 0 | 55583  | RRGPRLGVRATRKT<br>SER<br>SQPRGRRQPIPKVRRPE<br>GRCV      | 3.60 | 0.01 | 4.23 | 0.68 | 0.22 | 1.27 |
| 63087 | 0 | 134788 | RRGPSLGASSHQHSR                                         | 2.71 | 0.01 | 0.78 | 3.05 | 1.13 | 0.85 |
| 63088 | 0 | 55585  | RRGRGRERARGGSRE                                         | 2.74 | 0.01 | 2.43 | 0.44 | 1.59 | 0.28 |
| 63089 | 0 | 55585  | RRGRGRERARGGSRE                                         | 2.74 | 0.01 | 2.43 | 0.44 | 1.74 | 1.27 |
| 63090 | 0 | 142470 | RRGRRALRGTAG                                            | 2.53 | 0.01 | 0.90 | 0.68 | 0.22 | 0.85 |
| 63091 | 0 | 55587  | RRGRRSGGSGGGFWG<br>DRVDSQPFAI                           | 3.18 | 0.01 | 2.53 | 0.44 | 0.85 | 0.28 |
| 63092 | 0 | 55587  | RRGRRSGGSGGGFWG<br>DRVDSQPFAI                           | 3.18 | 0.01 | 2.53 | 0.44 | 0.85 | 0.28 |
| 63093 | 0 | 55588  | RRGRSPRRRTPS                                            | 2.52 | 0.01 | 2.08 | 0.44 | 1.59 | 0.85 |
| 63094 | 0 | 55588  | RRGRSPRRRTPS                                            | 2.52 | 0.01 | 2.08 | 0.68 | 0.22 | 0.85 |

|       |   |        |                           |      |      |      |      |      |      |
|-------|---|--------|---------------------------|------|------|------|------|------|------|
| 63095 | 0 | 504053 | RRGTALAIPQCRLTPLSR<br>LP  | 2.97 | 3.67 | 2.48 | 0.44 | 1.74 | 0.28 |
| 63096 | 0 | 504053 | RRGTALAIPQCRLTPLSR<br>LP  | 2.97 | 3.67 | 2.48 | 0.44 | 1.74 | 0.28 |
| 63097 | 0 | 118589 | RRGVMLAVDAVIA             | 2.56 | 0.01 | 0.78 | 0.44 | 1.74 | 0.85 |
| 63098 | 0 | 118589 | RRGVMLAVDAVIA             | 2.56 | 0.01 | 0.78 | 0.44 | 1.74 | 0.85 |
| 63099 | 0 | 55595  | RRHFLDQRQ                 | 2.25 | 0.01 | 0.90 | 0.68 | 0.22 | 0.28 |
| 63100 | 0 | 121813 | RRHKSAPSS                 | 2.22 | 0.01 | 0.90 | 2.46 | 0.22 | 0.28 |
| 63101 | 0 | 106089 | RRHQSQRPPRRFQGQ           | 2.71 | 0.01 | 2.16 | 0.44 | 1.23 | 0.85 |
| 63102 | 0 | 133684 | RRIASQVKYAGSQVAST<br>SE   | 2.90 | 0.01 | 0.78 | 0.68 | 0.22 | 0.85 |
| 63103 | 0 | 55608  | RRIEGGEI                  | 2.15 | 0.01 | 2.40 | 2.43 | 0.22 | 0.28 |
| 63104 | 0 | 55609  | RRIEGGEILLNQLAGRMI<br>P   | 2.92 | 0.01 | 2.40 | 1.12 | 0.22 | 0.28 |
| 63105 | 0 | 79376  | RRIFRD                    | 1.92 | 0.01 | 0.90 | 0.68 | 0.22 | 1.39 |
| 63106 | 0 | 55616  | RRIRMKHGTYRR              | 2.55 | 0.01 | 3.42 | 1.12 | 0.22 | 0.85 |
| 63107 | 0 | 55616  | RRIRMKHGTYRR              | 2.55 | 0.01 | 3.42 | 1.12 | 0.22 | 0.85 |
| 63108 | 0 | 55616  | RRIRMKHGTYRR              | 2.55 | 0.01 | 3.42 | 1.12 | 0.22 | 0.85 |
| 63109 | 0 | 55616  | RRIRMKHGTYRR              | 2.55 | 0.01 | 3.42 | 1.12 | 0.22 | 0.85 |
| 63110 | 0 | 55616  | RRIRMKHGTYRR              | 2.55 | 0.01 | 3.42 | 1.12 | 0.22 | 0.85 |
| 63111 | 0 | 423496 | RRITRPRQIPLCTGV           | 2.70 | 0.01 | 2.51 | 0.44 | 1.59 | 1.28 |
| 63112 | 0 | 55621  | RRKAHAGNKKAE DLTM<br>DDLE | 2.94 | 0.01 | 3.12 | 1.20 | 0.22 | 0.85 |
| 63113 | 0 | 55621  | RRKAHAGNKKAE DLTM<br>DDLE | 2.94 | 0.01 | 3.12 | 1.20 | 0.22 | 1.48 |
| 63114 | 0 | 55621  | RRKAHAGNKKAE DLTM<br>DDLE | 2.94 | 0.01 | 3.12 | 1.20 | 0.22 | 1.57 |
| 63115 | 0 | 55621  | RRKAHAGNKKAE DLTM<br>DDLE | 2.94 | 0.01 | 3.12 | 1.12 | 0.22 | 1.57 |
| 63116 | 0 | 55621  | RRKAHAGNKKAE DLTM<br>DDLE | 2.94 | 0.01 | 3.12 | 1.12 | 0.22 | 0.85 |
| 63117 | 0 | 55621  | RRKAHAGNKKAE DLTM<br>DDLE | 2.94 | 0.01 | 3.12 | 2.16 | 0.22 | 0.85 |
| 63118 | 0 | 55621  | RRKAHAGNKKAE DLTM<br>DDLE | 2.94 | 0.01 | 3.12 | 2.16 | 0.22 | 1.48 |
| 63119 | 0 | 55621  | RRKAHAGNKKAE DLTM<br>DDLE | 2.94 | 0.01 | 3.12 | 2.16 | 0.22 | 1.57 |
| 63120 | 0 | 55625  | RRKAMLQDMA                | 2.32 | 0.01 | 3.20 | 0.44 | 1.41 | 0.28 |
| 63121 | 0 | 119520 | RRKLRTNAG                 | 2.23 | 0.01 | 0.90 | 0.44 | 1.13 | 1.27 |
| 63122 | 0 | 55627  | RRKLTNPANKEES             | 2.54 | 0.01 | 3.00 | 0.44 | 0.85 | 0.28 |
| 63123 | 0 | 55627  | RRKLTNPANKEES             | 2.54 | 0.01 | 3.00 | 1.15 | 2.39 | 0.28 |
| 63124 | 0 | 119521 | RRKPGTEQL                 | 2.20 | 0.01 | 0.90 | 0.44 | 1.13 | 0.28 |
| 63125 | 0 | 167656 | RRKPKDEGAGVDKA            | 2.64 | 0.01 | 3.10 | 0.44 | 0.85 | 1.28 |
| 63126 | 0 | 167656 | RRKPKDEGAGVDKA            | 2.64 | 0.01 | 3.10 | 0.44 | 1.59 | 1.28 |
| 63127 | 0 | 55631  | RRKRELSHTRKKR             | 2.58 | 0.01 | 3.93 | 3.26 | 0.22 | 0.28 |
| 63128 | 0 | 55631  | RRKRELSHTRKKR             | 2.58 | 0.01 | 3.93 | 3.26 | 0.22 | 0.28 |



|       |   |        |                                    |      |      |      |      |      |      |
|-------|---|--------|------------------------------------|------|------|------|------|------|------|
| 63129 | 0 | 55639  | RRLGAALL                           | 2.13 | 0.01 | 2.21 | 1.12 | 0.22 | 0.28 |
| 63130 | 0 | 55639  | RRLGAALL                           | 2.13 | 0.01 | 2.21 | 0.44 | 0.85 | 0.28 |
| 63131 | 0 | 55640  | RRLGAALLQS                         | 2.33 | 0.01 | 2.21 | 1.12 | 0.22 | 0.28 |
| 63132 | 0 | 55640  | RRLGAALLQS                         | 2.33 | 0.01 | 2.21 | 1.12 | 0.22 | 0.28 |
| 63133 | 0 | 55641  | RRLGRQTYDNES                       | 2.45 | 0.01 | 0.90 | 0.68 | 0.22 | 0.28 |
| 63134 | 0 | 55641  | RRLGRQTYDNES                       | 2.45 | 0.01 | 0.90 | 0.68 | 0.22 | 1.27 |
| 63135 | 0 | 55641  | RRLGRQTYDNES                       | 2.45 | 0.01 | 0.90 | 0.44 | 1.59 | 0.28 |
| 63136 | 0 | 55643  | RRLHAWITEDCPVP                     | 2.56 | 0.01 | 2.69 | 0.44 | 0.85 | 0.28 |
| 63137 | 0 | 55643  | RRLHAWITEDCPVP                     | 2.56 | 0.01 | 2.69 | 0.44 | 1.41 | 0.28 |
| 63138 | 0 | 55643  | RRLHAWITEDCPVP                     | 2.56 | 0.01 | 2.69 | 0.44 | 0.85 | 0.28 |
| 63139 | 0 | 55643  | RRLHAWITEDCPVP                     | 2.56 | 0.01 | 2.69 | 0.44 | 0.85 | 0.28 |
| 63140 | 0 | 55644  | RRLHNEWITEDCPIP                    | 2.58 | 0.01 | 2.69 | 0.44 | 0.85 | 0.28 |
| 63141 | 0 | 55644  | RRLHNEWITEDCPIP                    | 2.58 | 0.01 | 2.69 | 0.44 | 0.85 | 0.28 |
| 63142 | 0 | 55645  | RRLHQWINEDYPSP                     | 2.56 | 0.01 | 2.59 | 0.44 | 0.85 | 0.28 |
| 63143 | 0 | 55645  | RRLHQWINEDYPSP                     | 2.56 | 0.01 | 2.59 | 0.44 | 0.85 | 0.28 |
| 63144 | 0 | 55645  | RRLHQWINEDYPSP                     | 2.56 | 0.01 | 2.59 | 0.44 | 0.85 | 0.28 |
| 63145 | 0 | 55646  | RRLHQWISSECTTP                     | 2.56 | 0.01 | 2.41 | 0.44 | 0.85 | 0.28 |
| 63146 | 0 | 55646  | RRLHQWISSECTTP                     | 2.56 | 0.01 | 2.41 | 0.44 | 1.41 | 0.28 |
| 63147 | 0 | 55646  | RRLHQWISSECTTP                     | 2.56 | 0.01 | 2.41 | 0.44 | 0.85 | 0.28 |
| 63148 | 0 | 120927 | RRLIESMHKMANAPRF<br>WPEPVGEPGILSDI | 3.32 | 0.01 | 2.19 | 1.12 | 0.22 | 0.28 |
| 63149 | 0 | 120927 | RRLIESMHKMANAPRF<br>WPEPVGEPGILSDI | 3.32 | 0.01 | 2.19 | 1.12 | 0.22 | 0.28 |
| 63150 | 0 | 125245 | RRLDQYQIHL                         | 2.42 | 0.01 | 0.78 | 3.15 | 0.22 | 1.27 |
| 63151 | 0 | 55654  | RRLPEELHR                          | 2.26 | 0.01 | 0.90 | 1.15 | 0.22 | 1.39 |
| 63152 | 0 | 108104 | RRLPFGSQM                          | 2.20 | 0.01 | 0.90 | 2.46 | 0.22 | 1.27 |
| 63153 | 0 | 108104 | RRLPFGSQM                          | 2.20 | 0.01 | 0.90 | 2.46 | 0.22 | 0.28 |
| 63154 | 0 | 108104 | RRLPFGSQM                          | 2.20 | 0.01 | 0.90 | 0.44 | 1.13 | 0.28 |
| 63155 | 0 | 108104 | RRLPFGSQM                          | 2.20 | 0.01 | 0.90 | 2.46 | 0.22 | 1.27 |
| 63156 | 0 | 108104 | RRLPFGSQM                          | 2.20 | 0.01 | 0.90 | 2.46 | 0.22 | 1.27 |
| 63157 | 0 | 108105 | RRLPFGSSL                          | 2.23 | 0.01 | 0.90 | 2.46 | 0.22 | 1.27 |
| 63158 | 0 | 108105 | RRLPFGSSL                          | 2.23 | 0.01 | 0.90 | 2.46 | 0.22 | 0.28 |
| 63159 | 0 | 108105 | RRLPFGSSL                          | 2.23 | 0.01 | 0.90 | 2.46 | 0.22 | 1.27 |
| 63160 | 0 | 108105 | RRLPFGSSL                          | 2.23 | 0.01 | 0.90 | 2.46 | 0.22 | 0.28 |
| 63161 | 0 | 130600 | RRLPKGVKHLKDFPILPG<br>EI           | 2.95 | 0.01 | 0.78 | 0.44 | 1.93 | 1.27 |
| 63162 | 0 | 130600 | RRLPKGVKHLKDFPILPG<br>EI           | 2.95 | 0.01 | 0.78 | 1.15 | 0.22 | 1.27 |
| 63163 | 0 | 130600 | RRLPKGVKHLKDFPILPG<br>EI           | 2.95 | 0.01 | 0.78 | 1.15 | 0.22 | 1.39 |
| 63164 | 0 | 130600 | RRLPKGVKHLKDFPILPG<br>EI           | 2.95 | 0.01 | 0.78 | 1.15 | 0.22 | 1.39 |
| 63165 | 0 | 130600 | RRLPKGVKHLKDFPILPG<br>EI           | 2.95 | 0.01 | 0.78 | 1.15 | 0.22 | 1.39 |
| 63166 | 0 | 130600 | RRLPKGVKHLKDFPILPG<br>EI           | 2.95 | 0.01 | 0.78 | 1.15 | 0.22 | 1.39 |

|       |   |        |                              |      |      |      |      |      |      |
|-------|---|--------|------------------------------|------|------|------|------|------|------|
| 63167 | 0 | 130600 | RRLPKGVKHLKDFPILPG<br>EI     | 2.95 | 0.01 | 0.78 | 1.15 | 0.22 | 1.39 |
| 63168 | 0 | 130600 | RRLPKGVKHLKDFPILPG<br>EI     | 2.95 | 0.01 | 0.78 | 1.15 | 0.22 | 1.39 |
| 63169 | 0 | 130600 | RRLPKGVKHLKDFPILPG<br>EI     | 2.95 | 0.01 | 0.78 | 1.15 | 0.22 | 1.27 |
| 63170 | 0 | 55655  | RRLPFAHP                     | 2.22 | 0.01 | 0.90 | 1.15 | 0.22 | 1.39 |
| 63171 | 0 | 129817 | RRMELK                       | 1.89 | 0.01 | 0.78 | 0.44 | 1.13 | 0.28 |
| 63172 | 0 | 434659 | RRMFGGPGTASRPSSSR            | 2.82 | 4.93 | 0.78 | 0.44 | 1.13 | 0.28 |
| 63173 | 0 | 55666  | RRPEGRTW                     | 2.14 | 0.01 | 1.72 | 0.44 | 0.85 | 0.28 |
| 63174 | 0 | 55668  | RRPEGRTWAQ                   | 2.31 | 0.01 | 2.68 | 2.74 | 0.22 | 0.28 |
| 63175 | 0 | 125553 | RRPEMGDQAHMPYT<br>TA<br>VIHE | 2.91 | 0.01 | 0.78 | 0.44 | 0.85 | 0.28 |
| 63176 | 0 | 55670  | RRPFFHPVGEADYFEYH<br>QEG     | 2.95 | 0.01 | 2.43 | 0.44 | 2.82 | 0.28 |
| 63177 | 0 | 55671  | RRPFNIGINNQQ                 | 2.47 | 0.01 | 3.78 | 0.44 | 1.41 | 1.27 |
| 63178 | 0 | 55671  | RRPFNIGINNQQ                 | 2.47 | 0.01 | 3.78 | 0.44 | 1.41 | 1.66 |
| 63179 | 0 | 55671  | RRPFNIGINNQQ                 | 2.47 | 0.01 | 3.78 | 0.44 | 1.41 | 1.66 |
| 63180 | 0 | 55671  | RRPFNIGINNQQ                 | 2.47 | 0.01 | 3.78 | 0.44 | 1.41 | 1.66 |
| 63181 | 0 | 55671  | RRPFNIGINNQQ                 | 2.47 | 0.01 | 3.78 | 0.44 | 2.26 | 1.27 |
| 63182 | 0 | 55671  | RRPFNIGINNQQ                 | 2.47 | 0.01 | 3.78 | 0.44 | 2.26 | 0.85 |
| 63183 | 0 | 55671  | RRPFNIGINNQQ                 | 2.47 | 0.01 | 3.78 | 0.44 | 2.26 | 0.28 |
| 63184 | 0 | 55675  | RRPKHLYVSMPTAQ               | 2.56 | 0.01 | 2.56 | 0.44 | 0.85 | 0.28 |
| 63185 | 0 | 55677  | RRPQDVK                      | 2.01 | 0.01 | 1.72 | 0.44 | 0.85 | 0.28 |
| 63186 | 0 | 55678  | RRPQDVKF                     | 2.11 | 0.01 | 1.72 | 0.44 | 0.85 | 0.28 |
| 63187 | 0 | 55680  | RRPQDVKFPG                   | 2.30 | 0.01 | 2.68 | 0.44 | 0.85 | 0.28 |
| 63188 | 0 | 55683  | RRPQGLPNNTASWFT              | 2.64 | 0.01 | 3.30 | 0.68 | 0.22 | 0.28 |
| 63189 | 0 | 119004 | RRPQKRPSIGCKGTHG<br>GTG      | 2.97 | 0.01 | 2.43 | 0.44 | 1.13 | 1.27 |
| 63190 | 0 | 119004 | RRPQKRPSIGCKGTHG<br>GTG      | 2.97 | 0.01 | 2.43 | 0.44 | 1.41 | 1.27 |
| 63191 | 0 | 119004 | RRPQKRPSIGCKGTHG<br>GTG      | 2.97 | 0.01 | 2.48 | 0.44 | 1.74 | 0.28 |
| 63192 | 0 | 119004 | RRPQKRPSIGCKGTHG<br>GTG      | 2.97 | 0.01 | 2.48 | 0.44 | 1.74 | 0.28 |
| 63193 | 0 | 98990  | RRPSHQPRKIRPEG               | 2.69 | 0.01 | 2.16 | 0.44 | 1.23 | 0.85 |
| 63194 | 0 | 525381 | RRPSHQPRKIRPEGRE<br>GEQEWGT  | 3.15 | 0.01 | 2.16 | 0.44 | 1.23 | 1.39 |
| 63195 | 0 | 55687  | RRPTTAGAAPLTAVAPA<br>H       | 2.89 | 0.01 | 2.53 | 0.44 | 0.85 | 0.28 |
| 63196 | 0 | 134789 | RRQGWLKEIRKLQKS              | 2.70 | 0.01 | 0.78 | 3.05 | 1.13 | 0.85 |
| 63197 | 0 | 106787 | RRQIEAGLNE                   | 2.30 | 0.01 | 2.75 | 0.44 | 1.23 | 0.85 |
| 63198 | 0 | 136612 | RRQKRF                       | 1.92 | 0.01 | 3.59 | 1.15 | 0.22 | 0.28 |
| 63199 | 0 | 136612 | RRQKRF                       | 1.92 | 0.01 | 3.59 | 2.49 | 0.22 | 0.28 |
| 63200 | 0 | 136612 | RRQKRF                       | 1.92 | 0.01 | 3.59 | 2.49 | 0.22 | 0.28 |

|       |   |        |                                            |      |      |      |      |      |      |
|-------|---|--------|--------------------------------------------|------|------|------|------|------|------|
| 63201 | 0 | 136612 | RRQKRF                                     | 1.92 | 0.01 | 3.59 | 2.74 | 0.22 | 0.28 |
| 63202 | 0 | 136612 | RRQKRF                                     | 1.92 | 0.01 | 3.59 | 2.74 | 0.22 | 0.28 |
| 63203 | 0 | 195054 | RRQL                                       | 1.59 | 0.01 | 2.30 | 0.44 | 0.85 | 0.28 |
| 63204 | 0 | 125246 | RRQPHVMS                                   | 2.11 | 0.01 | 0.78 | 3.16 | 0.22 | 0.28 |
| 63205 | 0 | 125246 | RRQPHVMS                                   | 2.11 | 0.01 | 0.78 | 4.63 | 0.22 | 0.28 |
| 63206 | 0 | 125246 | RRQPHVMS                                   | 2.11 | 0.01 | 0.78 | 4.63 | 0.22 | 1.48 |
| 63207 | 0 | 125246 | RRQPHVMS                                   | 2.11 | 0.01 | 0.78 | 3.16 | 0.22 | 1.48 |
| 63208 | 0 | 125246 | RRQPHVMS                                   | 2.11 | 0.01 | 0.78 | 1.20 | 0.22 | 0.85 |
| 63209 | 0 | 125246 | RRQPHVMS                                   | 2.11 | 0.01 | 0.78 | 3.16 | 0.22 | 1.34 |
| 63210 | 0 | 122562 | RRQPHVVSQW                                 | 2.31 | 0.01 | 3.26 | 0.68 | 0.22 | 1.27 |
| 63211 | 0 | 122562 | RRQPHVVSQW                                 | 2.31 | 0.01 | 3.26 | 0.68 | 0.22 | 2.51 |
| 63212 | 0 | 122562 | RRQPHVVSQW                                 | 2.31 | 0.01 | 3.26 | 0.68 | 0.22 | 2.51 |
| 63213 | 0 | 122562 | RRQPHVVSQW                                 | 2.31 | 0.01 | 3.26 | 0.68 | 0.22 | 3.16 |
| 63214 | 0 | 55698  | RRQPIKARRPE                                | 2.50 | 0.01 | 2.68 | 0.44 | 0.85 | 0.28 |
| 63215 | 0 | 55699  | RRQPIKARRPEGRAWA<br>QPG                    | 2.98 | 0.01 | 3.10 | 0.44 | 0.85 | 0.28 |
| 63216 | 0 | 462438 | RRQPIKARRPEGRTWA<br>QPGYPWPLYGNEGMG<br>WAG | 3.50 | 0.01 | 1.96 | 2.90 | 0.22 | 0.28 |
| 63217 | 0 | 462438 | RRQPIKARRPEGRTWA<br>QPGYPWPLYGNEGMG<br>WAG | 3.50 | 0.01 | 1.96 | 2.90 | 0.22 | 0.28 |
| 63218 | 0 | 372446 | RRQQGRNEPQARKQQ                            | 2.69 | 0.01 | 1.61 | 0.44 | 0.85 | 1.28 |
| 63219 | 0 | 91911  | RRQQRLQEIERRNA                             | 2.71 | 0.01 | 1.60 | 1.20 | 0.22 | 0.85 |
| 63220 | 0 | 55706  | RRRAGRCP                                   | 2.15 | 0.01 | 2.04 | 0.44 | 0.85 | 0.28 |
| 63221 | 0 | 55706  | RRRAGRCP                                   | 2.15 | 0.01 | 2.04 | 0.44 | 0.85 | 0.28 |
| 63222 | 0 | 55706  | RRRAGRCP                                   | 2.15 | 0.01 | 2.04 | 0.44 | 0.85 | 0.28 |
| 63223 | 0 | 120184 | RRRATQLAHL                                 | 2.33 | 0.01 | 0.78 | 2.66 | 0.22 | 0.28 |
| 63224 | 0 | 117366 | RRREGPDRSPR                                | 2.43 | 0.01 | 0.78 | 1.12 | 0.22 | 0.28 |
| 63225 | 0 | 117366 | RRREGPDRSPR                                | 2.43 | 0.01 | 0.78 | 1.12 | 0.22 | 0.85 |
| 63226 | 0 | 117366 | RRREGPDRSPR                                | 2.43 | 0.01 | 0.78 | 1.12 | 0.22 | 0.28 |
| 63227 | 0 | 117366 | RRREGPDRSPR                                | 2.43 | 0.01 | 0.78 | 0.44 | 0.85 | 0.28 |
| 63228 | 0 | 117366 | RRREGPDRSPR                                | 2.43 | 0.01 | 0.78 | 0.44 | 1.13 | 0.28 |
| 63229 | 0 | 117366 | RRREGPDRSPR                                | 2.43 | 0.01 | 0.78 | 0.44 | 1.13 | 0.28 |
| 63230 | 0 | 117366 | RRREGPDRSPR                                | 2.43 | 0.01 | 0.78 | 0.44 | 1.13 | 0.28 |
| 63231 | 0 | 117366 | RRREGPDRSPR                                | 2.43 | 0.01 | 0.78 | 0.44 | 1.13 | 0.28 |
| 63232 | 0 | 117366 | RRREGPDRSPR                                | 2.43 | 0.01 | 0.78 | 0.44 | 1.13 | 0.28 |
| 63233 | 0 | 117366 | RRREGPDRSPR                                | 2.43 | 0.01 | 0.78 | 0.44 | 0.85 | 0.28 |
| 63234 | 0 | 117366 | RRREGPDRSPR                                | 2.43 | 0.01 | 0.78 | 0.44 | 1.41 | 0.28 |
| 63235 | 0 | 117366 | RRREGPDRSPR                                | 2.43 | 0.01 | 0.78 | 1.12 | 0.22 | 0.85 |
| 63236 | 0 | 117366 | RRREGPDRSPR                                | 2.43 | 0.01 | 0.78 | 1.12 | 0.22 | 0.85 |
| 63237 | 0 | 117366 | RRREGPDRSPR                                | 2.43 | 0.01 | 0.78 | 1.12 | 0.22 | 0.85 |
| 63238 | 0 | 117366 | RRREGPDRSPR                                | 2.43 | 0.01 | 0.78 | 1.12 | 0.22 | 0.85 |
| 63239 | 0 | 117366 | RRREGPDRSPR                                | 2.43 | 0.01 | 0.78 | 1.12 | 0.22 | 0.28 |
| 63240 | 0 | 117366 | RRREGPDRSPR                                | 2.43 | 0.01 | 0.78 | 1.12 | 0.22 | 0.28 |
| 63241 | 0 | 117366 | RRREGPDRSPR                                | 2.43 | 0.01 | 0.78 | 1.12 | 0.22 | 0.85 |

|       |   |        |                                        |      |      |      |      |      |      |
|-------|---|--------|----------------------------------------|------|------|------|------|------|------|
| 63242 | 0 | 55707  | RRRFGARAMV                             | 2.34 | 0.01 | 2.69 | 1.12 | 0.22 | 0.28 |
| 63243 | 0 | 55707  | RRRFGARAMV                             | 2.34 | 0.01 | 2.69 | 1.12 | 0.22 | 0.28 |
| 63244 | 0 | 55707  | RRRFGARAMV                             | 2.34 | 0.01 | 2.69 | 1.12 | 0.22 | 1.34 |
| 63245 | 0 | 55707  | RRRFGARAMV                             | 2.34 | 0.01 | 2.69 | 1.12 | 0.22 | 0.28 |
| 63246 | 0 | 489760 | RRRFGARAMVTYDCE                        | 2.65 | 0.01 | 2.69 | 3.05 | 0.85 | 1.28 |
| 63247 | 0 | 55712  | RRRGRSPRRR                             | 2.34 | 0.01 | 2.08 | 0.44 | 0.85 | 1.27 |
| 63248 | 0 | 55713  | RRRGRSPRRRTPSPRRR<br>RSQSPRRRRSQSRESQC | 3.50 | 0.01 | 2.08 | 0.68 | 0.22 | 0.28 |
| 63249 | 0 | 55713  | RRRGRSPRRRTPSPRRR<br>RSQSPRRRRSQSRESQC | 3.50 | 0.01 | 2.08 | 0.44 | 0.85 | 0.28 |
| 63250 | 0 | 136613 | RRRKRF                                 | 1.93 | 0.01 | 3.59 | 2.74 | 0.22 | 0.28 |
| 63251 | 0 | 55719  | RRRLRGTWV                              | 2.25 | 0.01 | 0.90 | 1.12 | 0.22 | 0.85 |
| 63252 | 0 | 131052 | RRRMMMQSGR                             | 2.35 | 0.01 | 0.78 | 0.44 | 1.93 | 0.85 |
| 63253 | 0 | 55723  | RRRPFYHSP                              | 2.23 | 0.01 | 0.90 | 0.44 | 0.85 | 1.39 |
| 63254 | 0 | 121814 | RRRR                                   | 1.56 | 0.01 | 0.90 | 0.44 | 1.13 | 0.28 |
| 63255 | 0 | 55726  | RRRSQSPRRR                             | 2.43 | 4.45 | 2.08 | 0.68 | 0.22 | 0.28 |
| 63256 | 0 | 55726  | RRRSQSPRRR                             | 2.43 | 4.45 | 2.08 | 0.68 | 0.22 | 1.27 |
| 63257 | 0 | 55726  | RRRSQSPRRR                             | 2.43 | 4.45 | 2.08 | 0.44 | 1.59 | 1.27 |
| 63258 | 0 | 121815 | RRRSRERS                               | 2.16 | 0.01 | 0.78 | 0.44 | 1.13 | 0.28 |
| 63259 | 0 | 134791 | RRRSRKPEAPRRRSP                        | 2.72 | 0.01 | 0.78 | 3.05 | 1.13 | 0.85 |
| 63260 | 0 | 55732  | RRRTPSPRRRS                            | 2.52 | 0.01 | 2.08 | 0.44 | 1.59 | 0.85 |
| 63261 | 0 | 55732  | RRRTPSPRRRS                            | 2.52 | 0.01 | 2.08 | 0.68 | 0.22 | 0.85 |
| 63262 | 0 | 55733  | RRRTQKAPKIRLPH                         | 2.69 | 0.01 | 2.40 | 0.68 | 0.22 | 0.28 |
| 63263 | 0 | 55733  | RRRTQKAPKIRLPH                         | 2.69 | 0.01 | 2.40 | 3.81 | 0.22 | 0.28 |
| 63264 | 0 | 108616 | RRRVNRNSDT                             | 2.25 | 0.01 | 0.90 | 0.44 | 1.13 | 0.28 |
| 63265 | 0 | 193068 | RRRVVRLLSGDTYEAV<br>V                  | 2.84 | 3.63 | 0.78 | 1.15 | 1.41 | 0.28 |
| 63266 | 0 | 525394 | RRRYAHPSVRYVCLPPE<br>RD                | 2.89 | 4.33 | 2.40 | 0.44 | 1.59 | 1.28 |
| 63267 | 0 | 525395 | RRRYAHPSVRYVCLPPE<br>RD                | 2.89 | 0.01 | 2.40 | 0.44 | 1.59 | 1.28 |
| 63268 | 0 | 55739  | RRSGGSGGGFWGDRV<br>DSQ                 | 2.89 | 0.01 | 2.53 | 0.44 | 0.85 | 0.28 |
| 63269 | 0 | 121816 | RRSHRSER                               | 2.17 | 0.01 | 0.78 | 0.44 | 1.13 | 0.28 |
| 63270 | 0 | 129819 | RRSILPYGDSMDRIEK                       | 2.73 | 0.01 | 0.78 | 0.44 | 1.13 | 0.85 |
| 63271 | 0 | 55740  | RRSMANEG                               | 2.11 | 0.01 | 2.96 | 0.68 | 0.22 | 0.28 |
| 63272 | 0 | 55740  | RRSMANEG                               | 2.11 | 0.01 | 2.96 | 0.68 | 0.22 | 0.28 |
| 63273 | 0 | 120928 | RRSNVIWPVSKDQLLR                       | 2.72 | 0.01 | 3.35 | 2.02 | 0.85 | 0.28 |
| 63274 | 0 | 173097 | RRSRKPEAPRRRSPS                        | 2.72 | 0.01 | 0.78 | 0.44 | 1.13 | 0.28 |
| 63275 | 0 | 121817 | RRSRSDK                                | 2.17 | 0.01 | 0.78 | 0.44 | 1.13 | 0.28 |
| 63276 | 0 | 132631 | RRSS                                   | 1.56 | 0.01 | 0.78 | 0.68 | 0.22 | 0.85 |
| 63277 | 0 | 132631 | RRSS                                   | 1.56 | 0.01 | 0.78 | 0.68 | 0.22 | 0.85 |
| 63278 | 0 | 228730 | RRSSAVLF                               | 2.12 | 0.01 | 2.98 | 2.19 | 0.22 | 0.85 |
| 63279 | 0 | 132632 | RRSSN                                  | 1.77 | 0.01 | 0.78 | 0.68 | 0.22 | 0.85 |

|       |   |        |                                                  |      |      |      |      |      |      |
|-------|---|--------|--------------------------------------------------|------|------|------|------|------|------|
| 63280 | 0 | 132632 | RRSSN                                            | 1.77 | 0.01 | 0.78 | 0.68 | 0.22 | 0.85 |
| 63281 | 0 | 138234 | RRTPDPAVSPWQLTY                                  | 2.65 | 0.01 | 0.90 | 0.44 | 1.13 | 1.39 |
| 63282 | 0 | 55751  | RRTQSMGIQL                                       | 2.30 | 0.01 | 2.56 | 0.68 | 0.22 | 0.28 |
| 63283 | 0 | 55753  | RRTRKPQQPESLEECDSE<br>LEIKRYKNRVASRKCRACK<br>FKQ | 3.60 | 0.01 | 2.43 | 1.15 | 2.26 | 0.28 |
| 63284 | 0 | 79075  | RRVASFFSPGSAQKI                                  | 2.66 | 0.01 | 1.96 | 0.44 | 0.85 | 0.28 |
| 63285 | 0 | 55757  | RRVASFLIRGSAQKI                                  | 2.68 | 0.01 | 1.72 | 0.68 | 0.22 | 0.28 |
| 63286 | 0 | 99643  | RRVEIEVK                                         | 2.15 | 0.01 | 2.24 | 0.68 | 0.22 | 0.28 |
| 63287 | 0 | 178334 | RRVFATITGSRTV                                    | 2.57 | 0.01 | 3.93 | 0.68 | 0.22 | 0.85 |
| 63288 | 0 | 55760  | RRVGLSNP                                         | 2.11 | 0.01 | 2.40 | 2.43 | 0.22 | 0.28 |
| 63289 | 0 | 55761  | RRVGLSNPT                                        | 2.20 | 0.01 | 2.40 | 2.43 | 0.22 | 0.28 |
| 63290 | 0 | 55761  | RRVGLSNPT                                        | 2.20 | 0.01 | 2.40 | 2.43 | 0.22 | 0.28 |
| 63291 | 0 | 55765  | RRVNAANKKPEDLTND<br>LET                          | 2.96 | 0.01 | 2.59 | 4.23 | 1.74 | 0.28 |
| 63292 | 0 | 131053 | RRVQQEIDDVIGQVRRP<br>EMG                         | 2.97 | 0.01 | 0.78 | 0.44 | 1.13 | 0.28 |
| 63293 | 0 | 55769  | RRVVRHEPLGRSFLTGG<br>LVL                         | 2.96 | 0.01 | 2.40 | 0.44 | 1.59 | 0.28 |
| 63294 | 0 | 78819  | RRWQQRNTPFY                                      | 2.40 | 0.01 | 3.27 | 1.12 | 0.22 | 0.28 |
| 63295 | 0 | 78819  | RRWQQRNTPFY                                      | 2.40 | 0.01 | 3.27 | 1.12 | 0.22 | 0.28 |
| 63296 | 0 | 78819  | RRWQQRNTPFY                                      | 2.40 | 0.01 | 3.27 | 1.12 | 0.22 | 0.28 |
| 63297 | 0 | 55780  | RRYPDAVYLHRIDLG                                  | 2.68 | 0.01 | 2.43 | 0.44 | 1.59 | 0.28 |
| 63298 | 0 | 55781  | RRYPF                                            | 1.75 | 0.01 | 2.61 | 0.44 | 0.85 | 0.28 |
| 63299 | 0 | 55782  | RRYPFVKFT                                        | 2.22 | 0.01 | 2.61 | 0.44 | 0.85 | 0.28 |
| 63300 | 0 | 55783  | RRYQEERP                                         | 2.15 | 0.01 | 2.40 | 2.43 | 0.22 | 0.28 |
| 63301 | 0 | 167814 | RRYQEERPP                                        | 2.24 | 0.01 | 2.40 | 2.43 | 0.22 | 0.28 |
| 63302 | 0 | 55785  | RRYQKSTEL                                        | 2.20 | 0.01 | 0.78 | 0.68 | 0.22 | 2.12 |
| 63303 | 0 | 55785  | RRYQKSTEL                                        | 2.20 | 0.01 | 0.78 | 0.68 | 0.22 | 2.12 |
| 63304 | 0 | 55787  | RRYTARLKEG                                       | 2.31 | 0.01 | 2.16 | 0.44 | 1.23 | 0.85 |
| 63305 | 0 | 55787  | RRYTARLKEG                                       | 2.31 | 0.01 | 2.16 | 0.44 | 1.23 | 0.85 |
| 63306 | 0 | 55787  | RRYTARLKEG                                       | 2.31 | 0.01 | 2.16 | 0.44 | 1.23 | 0.85 |
| 63307 | 0 | 55787  | RRYTARLKEG                                       | 2.31 | 0.01 | 2.16 | 0.44 | 1.23 | 0.85 |
| 63308 | 0 | 434234 | RSAAGRA                                          | 2.07 | 0.01 | 0.90 | 2.36 | 0.22 | 1.39 |
| 63309 | 0 | 241058 | RSAEALFR                                         | 2.15 | 0.01 | 3.35 | 2.37 | 0.22 | 0.85 |
| 63310 | 0 | 179453 | RSFAEVKEIDDAYN                                   | 2.65 | 0.01 | 2.36 | 0.44 | 1.23 | 1.28 |
| 63311 | 0 | 55799  | RSAPRITFG                                        | 2.22 | 0.01 | 2.45 | 0.44 | 1.41 | 0.28 |
| 63312 | 0 | 55799  | RSAPRITFG                                        | 2.22 | 0.01 | 2.45 | 0.44 | 1.41 | 1.48 |
| 63313 | 0 | 55799  | RSAPRITFG                                        | 2.22 | 0.01 | 2.45 | 0.44 | 1.41 | 2.98 |
| 63314 | 0 | 55799  | RSAPRITFG                                        | 2.22 | 0.01 | 2.45 | 0.44 | 1.41 | 0.28 |
| 63315 | 0 | 55799  | RSAPRITFG                                        | 2.22 | 0.01 | 2.45 | 0.44 | 1.41 | 0.28 |
| 63316 | 0 | 55800  | RSAPRITFGGPTDST                                  | 2.70 | 0.01 | 3.30 | 0.68 | 0.22 | 0.28 |
| 63317 | 0 | 55802  | RSASAAAILEEDDSK                                  | 2.68 | 0.01 | 1.66 | 1.15 | 0.22 | 0.28 |
| 63318 | 0 | 55802  | RSASAAAILEEDDSK                                  | 2.68 | 0.01 | 1.66 | 1.15 | 0.22 | 0.28 |
| 63319 | 0 | 55806  | RSASVAGIVGADEEAPP<br>APKNTLTPLEELYPT             | 3.40 | 0.01 | 1.66 | 1.15 | 2.26 | 1.34 |

|       |   |        |                                                          |      |      |      |      |      |      |
|-------|---|--------|----------------------------------------------------------|------|------|------|------|------|------|
| 63320 | 0 | 55806  | RSASVAGIVGADEEAPP<br>APKNTLTPLEELYPT                     | 3.40 | 0.01 | 1.66 | 1.15 | 2.26 | 0.85 |
| 63321 | 0 | 103569 | RSCPGYTLDYNANGS                                          | 2.66 | 0.01 | 2.04 | 0.44 | 0.85 | 1.28 |
| 63322 | 0 | 193539 | RSDSIAAGK                                                | 2.22 | 0.01 | 2.51 | 0.44 | 2.39 | 0.28 |
| 63323 | 0 | 193539 | RSDSIAAGK                                                | 2.22 | 0.01 | 2.51 | 0.44 | 2.39 | 0.28 |
| 63324 | 0 | 109864 | RSDTDDERSESG                                             | 2.52 | 0.01 | 0.90 | 1.15 | 0.22 | 1.39 |
| 63325 | 0 | 78506  | RSDVVGLQSLFCCEI                                          | 2.64 | 0.01 | 0.90 | 0.68 | 0.22 | 0.28 |
| 63326 | 0 | 55818  | RSDYKFYEDANGTRDHK<br>KG                                  | 2.89 | 0.01 | 3.61 | 1.20 | 0.22 | 0.28 |
| 63327 | 0 | 55818  | RSDYKFYEDANGTRDHK<br>KG                                  | 2.89 | 0.01 | 3.61 | 3.63 | 0.22 | 0.28 |
| 63328 | 0 | 55818  | RSDYKFYEDANGTRDHK<br>KG                                  | 2.89 | 0.01 | 3.61 | 1.20 | 0.22 | 0.28 |
| 63329 | 0 | 55818  | RSDYKFYEDANGTRDHK<br>KG                                  | 2.89 | 0.01 | 3.61 | 3.63 | 0.22 | 0.28 |
| 63330 | 0 | 55818  | RSDYKFYEDANGTRDHK<br>KG                                  | 2.89 | 0.01 | 3.61 | 3.63 | 2.25 | 1.75 |
| 63331 | 0 | 55822  | RSEFPIWMMF                                               | 2.30 | 0.01 | 0.78 | 0.44 | 1.74 | 0.28 |
| 63332 | 0 | 55824  | RSELSPLLLSTTEWQILPC<br>S                                 | 2.96 | 0.01 | 2.83 | 1.12 | 0.22 | 0.28 |
| 63333 | 0 | 55825  | RSELSQLS                                                 | 2.16 | 0.01 | 2.43 | 0.68 | 0.22 | 1.34 |
| 63334 | 0 | 55825  | RSELSQLS                                                 | 2.16 | 0.01 | 2.43 | 0.68 | 0.22 | 1.75 |
| 63335 | 0 | 55825  | RSELSQLS                                                 | 2.16 | 0.01 | 2.43 | 0.68 | 0.22 | 0.28 |
| 63336 | 0 | 55825  | RSELSQLS                                                 | 2.16 | 0.01 | 2.43 | 0.68 | 0.22 | 1.34 |
| 63337 | 0 | 55825  | RSELSQLS                                                 | 2.16 | 0.01 | 2.43 | 0.68 | 0.22 | 0.28 |
| 63338 | 0 | 55826  | RSELSQLSMYRVFEV                                          | 2.71 | 0.01 | 2.43 | 0.68 | 0.22 | 0.28 |
| 63339 | 0 | 55826  | RSELSQLSMYRVFEV                                          | 2.71 | 0.01 | 2.43 | 0.68 | 0.22 | 0.28 |
| 63340 | 0 | 55826  | RSELSQLSMYRVFEV                                          | 2.71 | 0.01 | 2.43 | 0.44 | 0.85 | 0.28 |
| 63341 | 0 | 173099 | RSENLELKEKMKELA                                          | 2.72 | 0.01 | 0.78 | 0.44 | 1.13 | 0.28 |
| 63342 | 0 | 238999 | RSESWNLKDLDTSPELR                                        | 2.86 | 0.01 | 0.78 | 0.44 | 1.13 | 0.28 |
| 63343 | 0 | 106789 | RSFFSFLGEAFDGARDM                                        | 2.83 | 0.01 | 0.78 | 1.12 | 0.22 | 0.85 |
| 63344 | 0 | 55834  | RSFGSSSTSGITGD                                           | 2.65 | 0.01 | 2.41 | 0.44 | 1.41 | 0.28 |
| 63345 | 0 | 55834  | RSFGSSSTSGITGD                                           | 2.65 | 0.01 | 2.41 | 0.44 | 0.85 | 0.28 |
| 63346 | 0 | 149456 | RSFIEDLLFNKVTLADAG<br>FMKQYGECLGDINARDL<br>ICAQKFNGLTVLP | 3.81 | 0.01 | 2.91 | 1.20 | 0.22 | 0.85 |
| 63347 | 0 | 149456 | RSFIEDLLFNKVTLADAG<br>FMKQYGECLGDINARDL<br>ICAQKFNGLTVLP | 3.81 | 0.01 | 2.91 | 1.20 | 0.22 | 0.85 |

|       |   |        |                                                          |      |      |      |      |      |      |
|-------|---|--------|----------------------------------------------------------|------|------|------|------|------|------|
| 63348 | 0 | 149456 | RSFIEDLLFNKVTLADAG<br>FMKQYGECLGDINARDL<br>ICAQKFNGLTVLP | 3.81 | 0.01 | 2.91 | 1.20 | 0.22 | 2.12 |
| 63349 | 0 | 149456 | RSFIEDLLFNKVTLADAG<br>FMKQYGECLGDINARDL<br>ICAQKFNGLTVLP | 3.81 | 0.01 | 2.91 | 0.68 | 0.22 | 0.85 |
| 63350 | 0 | 149456 | RSFIEDLLFNKVTLADAG<br>FMKQYGECLGDINARDL<br>ICAQKFNGLTVLP | 3.81 | 0.01 | 2.91 | 0.68 | 0.22 | 0.85 |
| 63351 | 0 | 149456 | RSFIEDLLFNKVTLADAG<br>FMKQYGECLGDINARDL<br>ICAQKFNGLTVLP | 3.81 | 0.01 | 2.91 | 0.68 | 0.22 | 2.12 |
| 63352 | 0 | 149456 | RSFIEDLLFNKVTLADAG<br>FMKQYGECLGDINARDL<br>ICAQKFNGLTVLP | 3.81 | 0.01 | 2.91 | 0.68 | 0.22 | 1.34 |
| 63353 | 0 | 149456 | RSFIEDLLFNKVTLADAG<br>FMKQYGECLGDINARDL<br>ICAQKFNGLTVLP | 3.81 | 0.01 | 2.91 | 1.20 | 0.22 | 1.34 |
| 63354 | 0 | 55838  | RSFQNKKS LVAFKIMPLE<br>DM                                | 2.91 | 0.01 | 0.78 | 0.44 | 0.85 | 0.28 |
| 63355 | 0 | 55838  | RSFQNKKS LVAFKIMPLE<br>DM                                | 2.91 | 0.01 | 0.78 | 0.44 | 1.13 | 0.28 |
| 63356 | 0 | 132634 | RSFSQNPPVLKRHRQR                                         | 2.68 | 0.01 | 0.78 | 1.15 | 0.22 | 0.28 |
| 63357 | 0 | 132634 | RSFSQNPPVLKRHRQR                                         | 2.68 | 0.01 | 0.78 | 1.15 | 0.22 | 0.28 |
| 63358 | 0 | 107233 | RSFTLASSETG                                              | 2.40 | 0.01 | 0.78 | 0.68 | 0.22 | 2.12 |
| 63359 | 0 | 107233 | RSFTLASSETG                                              | 2.40 | 0.01 | 0.78 | 0.68 | 0.22 | 1.34 |
| 63360 | 0 | 107233 | RSFTLASSETG                                              | 2.40 | 0.01 | 0.78 | 0.68 | 0.22 | 1.48 |
| 63361 | 0 | 106790 | RSFTLASSETGVG                                            | 2.55 | 0.01 | 0.78 | 0.68 | 0.22 | 1.48 |
| 63362 | 0 | 101207 | RSGDLG                                                   | 1.90 | 0.01 | 3.18 | 1.12 | 0.22 | 0.28 |
| 63363 | 0 | 55845  | RSGGAVPPACCNGIR                                          | 2.69 | 0.01 | 3.35 | 1.12 | 0.22 | 0.85 |
| 63364 | 0 | 55846  | RSGGCVGGQYCLTPTH                                         | 2.72 | 0.01 | 0.90 | 0.44 | 1.41 | 0.28 |
| 63365 | 0 | 129828 | RSGKG                                                    | 1.75 | 0.01 | 0.78 | 0.44 | 1.13 | 0.28 |
| 63366 | 0 | 118116 | RSGKPRGYAF                                               | 2.32 | 0.01 | 0.78 | 0.44 | 1.13 | 0.28 |
| 63367 | 0 | 151722 | RSGPFGQIFRPDNFVFG<br>QSGAGNNWAKG                         | 3.28 | 3.37 | 1.75 | 2.25 | 0.22 | 0.85 |
| 63368 | 0 | 135986 | RSGPSNSASVPA                                             | 2.51 | 0.01 | 3.21 | 0.44 | 1.13 | 0.28 |
| 63369 | 0 | 240917 | RSGSSFYAEMK                                              | 2.38 | 0.01 | 4.23 | 1.12 | 0.22 | 0.28 |
| 63370 | 0 | 240917 | RSGSSFYAEMK                                              | 2.38 | 0.01 | 4.23 | 1.12 | 0.22 | 0.28 |
| 63371 | 0 | 240917 | RSGSSFYAEMK                                              | 2.38 | 0.01 | 4.23 | 1.12 | 0.22 | 0.85 |
| 63372 | 0 | 240917 | RSGSSFYAEMK                                              | 2.38 | 0.01 | 4.23 | 1.12 | 0.22 | 0.85 |

|       |   |        |                    |      |      |      |      |      |      |
|-------|---|--------|--------------------|------|------|------|------|------|------|
| 63373 | 0 | 240917 | RSGSSFYAEMK        | 2.38 | 0.01 | 4.23 | 1.12 | 0.22 | 0.85 |
| 63374 | 0 | 134516 | RSGTVG             | 1.90 | 0.01 | 3.21 | 0.68 | 0.22 | 1.34 |
| 63375 | 0 | 134516 | RSGTVG             | 1.90 | 0.01 | 3.21 | 0.68 | 0.22 | 1.39 |
| 63376 | 0 | 134517 | RSGTVGESVP         | 2.33 | 0.01 | 3.21 | 0.68 | 0.22 | 1.39 |
| 63377 | 0 | 134517 | RSGTVGESVP         | 2.33 | 0.01 | 3.21 | 0.68 | 0.22 | 1.34 |
| 63378 | 0 | 129829 | RSGVSLAALKKALAAA   | 2.76 | 0.01 | 0.78 | 0.44 | 1.13 | 0.28 |
| 63379 | 0 | 129829 | RSGVSLAALKKALAAA   | 2.76 | 0.01 | 0.78 | 0.44 | 1.13 | 0.28 |
| 63380 | 0 | 129829 | RSGVSLAALKKALAAA   | 2.76 | 0.01 | 0.78 | 1.12 | 0.22 | 0.28 |
| 63381 | 0 | 129829 | RSGVSLAALKKALAAA   | 2.76 | 0.01 | 0.78 | 0.44 | 1.13 | 0.28 |
| 63382 | 0 | 106092 | RSGYSSPGSPGTPGSRSR | 2.92 | 4.08 | 0.78 | 0.68 | 0.22 | 1.27 |
| 63383 | 0 | 106092 | RSGYSSPGSPGTPGSRSR | 2.92 | 4.08 | 0.78 | 0.68 | 0.22 | 1.48 |
| 63384 | 0 | 106092 | RSGYSSPGSPGTPGSRSR | 2.92 | 4.08 | 0.78 | 0.68 | 0.22 | 2.49 |
| 63385 | 0 | 106092 | RSGYSSPGSPGTPGSRSR | 2.92 | 4.08 | 0.78 | 0.68 | 0.22 | 1.66 |
| 63386 | 0 | 525422 | RSGYSSPGSPGTPGSRSR | 2.92 | 4.03 | 0.78 | 0.68 | 0.22 | 2.49 |
| 63387 | 0 | 525422 | RSGYSSPGSPGTPGSRSR | 2.92 | 4.03 | 0.78 | 0.68 | 0.22 | 1.66 |
| 63388 | 0 | 106092 | RSGYSSPGSPGTPGSRSR | 2.92 | 4.08 | 0.78 | 0.68 | 0.22 | 1.66 |
| 63389 | 0 | 106092 | RSGYSSPGSPGTPGSRSR | 2.92 | 4.08 | 0.78 | 0.68 | 0.22 | 1.66 |
| 63390 | 0 | 525422 | RSGYSSPGSPGTPGSRSR | 2.92 | 4.03 | 0.78 | 0.68 | 0.22 | 1.66 |
| 63391 | 0 | 525422 | RSGYSSPGSPGTPGSRSR | 2.92 | 4.03 | 0.78 | 0.68 | 0.22 | 1.66 |
| 63392 | 0 | 525421 | RSGYSSPGSPGTPGSRSR | 2.92 | 4.33 | 0.78 | 0.68 | 0.22 | 1.66 |
| 63393 | 0 | 525421 | RSGYSSPGSPGTPGSRSR | 2.92 | 4.33 | 0.78 | 0.68 | 0.22 | 1.66 |
| 63394 | 0 | 525421 | RSGYSSPGSPGTPGSRSR | 2.92 | 4.33 | 0.78 | 0.68 | 0.22 | 1.66 |
| 63395 | 0 | 525423 | RSGYSSPGSPGTPGSRSR | 2.92 | 4.33 | 0.78 | 0.68 | 0.22 | 1.66 |
| 63396 | 0 | 525423 | RSGYSSPGSPGTPGSRSR | 2.92 | 4.33 | 0.78 | 0.68 | 0.22 | 1.66 |
| 63397 | 0 | 525423 | RSGYSSPGSPGTPGSRSR | 2.92 | 4.33 | 0.78 | 0.68 | 0.22 | 1.66 |
| 63398 | 0 | 525420 | RSGYSSPGSPGTPGSRSR | 2.92 | 4.33 | 0.78 | 0.68 | 0.22 | 1.66 |



|       |   |        |                                         |      |      |      |      |      |      |
|-------|---|--------|-----------------------------------------|------|------|------|------|------|------|
| 63399 | 0 | 525420 | RSGYSSPGSPGTPGSRSR                      | 2.92 | 4.33 | 0.78 | 0.68 | 0.22 | 1.66 |
| 63400 | 0 | 525420 | RSGYSSPGSPGTPGSRSR                      | 2.92 | 4.33 | 0.78 | 0.68 | 0.22 | 1.66 |
| 63401 | 0 | 106092 | RSGYSSPGSPGTPGSRSR                      | 2.92 | 4.08 | 0.78 | 0.68 | 0.22 | 0.28 |
| 63402 | 0 | 525421 | RSGYSSPGSPGTPGSRSR                      | 2.92 | 4.33 | 0.78 | 0.68 | 0.22 | 0.28 |
| 63403 | 0 | 525423 | RSGYSSPGSPGTPGSRSR                      | 2.92 | 4.33 | 0.78 | 0.68 | 0.22 | 0.28 |
| 63404 | 0 | 525420 | RSGYSSPGSPGTPGSRSR                      | 2.92 | 4.33 | 0.78 | 0.68 | 0.22 | 0.28 |
| 63405 | 0 | 525422 | RSGYSSPGSPGTPGSRSR                      | 2.92 | 4.03 | 0.78 | 0.68 | 0.22 | 1.66 |
| 63406 | 0 | 525422 | RSGYSSPGSPGTPGSRSR                      | 2.92 | 4.03 | 0.78 | 0.68 | 0.22 | 1.66 |
| 63407 | 0 | 525422 | RSGYSSPGSPGTPGSRSR                      | 2.92 | 4.03 | 0.78 | 0.68 | 0.22 | 1.66 |
| 63408 | 0 | 55856  | RSHLGFWQEGWSGQV<br>YQDWLGRMNCSYENM<br>T | 3.36 | 0.01 | 3.36 | 0.44 | 1.59 | 0.28 |
| 63409 | 0 | 55856  | RSHLGFWQEGWSGQV<br>YQDWLGRMNCSYENM<br>T | 3.36 | 0.01 | 3.36 | 0.44 | 2.82 | 0.28 |
| 63410 | 0 | 118591 | RSIAKEGFEEKISK                          | 2.57 | 0.01 | 0.78 | 0.44 | 1.74 | 0.85 |
| 63411 | 0 | 55861  | RSILDLDLTK                              | 2.33 | 0.01 | 2.72 | 0.44 | 1.23 | 0.85 |
| 63412 | 0 | 132635 | RSILPYG                                 | 1.99 | 0.01 | 0.78 | 0.44 | 1.13 | 0.85 |
| 63413 | 0 | 122892 | RSILPYGDSMDRIE                          | 2.62 | 0.01 | 0.78 | 1.12 | 0.22 | 0.85 |
| 63414 | 0 | 122892 | RSILPYGDSMDRIE                          | 2.62 | 0.01 | 0.78 | 1.12 | 0.22 | 1.34 |
| 63415 | 0 | 122892 | RSILPYGDSMDRIE                          | 2.62 | 0.01 | 0.78 | 0.44 | 1.13 | 0.85 |
| 63416 | 0 | 122892 | RSILPYGDSMDRIE                          | 2.62 | 0.01 | 0.78 | 0.44 | 1.13 | 0.85 |
| 63417 | 0 | 122892 | RSILPYGDSMDRIE                          | 2.62 | 0.01 | 0.78 | 0.44 | 1.13 | 0.85 |
| 63418 | 0 | 122892 | RSILPYGDSMDRIE                          | 2.62 | 0.01 | 0.78 | 0.44 | 1.13 | 1.34 |
| 63419 | 0 | 122892 | RSILPYGDSMDRIE                          | 2.62 | 0.01 | 0.78 | 0.44 | 1.13 | 0.85 |
| 63420 | 0 | 122892 | RSILPYGDSMDRIE                          | 2.62 | 0.01 | 0.78 | 0.44 | 1.13 | 0.28 |
| 63421 | 0 | 122892 | RSILPYGDSMDRIE                          | 2.62 | 0.01 | 0.78 | 0.44 | 1.13 | 1.27 |
| 63422 | 0 | 122892 | RSILPYGDSMDRIE                          | 2.62 | 0.01 | 0.78 | 0.44 | 1.13 | 1.27 |
| 63423 | 0 | 122892 | RSILPYGDSMDRIE                          | 2.62 | 0.01 | 0.78 | 0.44 | 1.41 | 1.27 |
| 63424 | 0 | 129830 | RSILPYGDSMDRIEKD                        | 2.74 | 0.01 | 0.78 | 0.44 | 1.13 | 0.85 |
| 63425 | 0 | 122180 | RSILPYGDSMDRIEKDRL<br>QGMAP             | 3.08 | 0.01 | 0.78 | 0.44 | 1.13 | 0.28 |
| 63426 | 0 | 122180 | RSILPYGDSMDRIEKDRL<br>QGMAP             | 3.08 | 0.01 | 0.78 | 1.20 | 0.22 | 0.28 |
| 63427 | 0 | 129831 | RSILPYGDSMDRIEKDRL<br>QGMAPAAGAD        | 3.29 | 0.01 | 0.78 | 0.44 | 1.13 | 0.85 |

|       |   |        |                          |      |      |      |      |      |      |
|-------|---|--------|--------------------------|------|------|------|------|------|------|
|       |   |        | RSILPYGDSMDRIEKDRL       |      |      |      |      |      |      |
| 63428 | 0 | 130601 | QGMAPAAGADLDKIGL         | 3.70 | 0.01 | 0.78 | 0.44 | 1.13 | 0.85 |
|       |   |        | HSDSQEEL                 |      |      |      |      |      |      |
| 63429 | 0 | 135987 | RSITLGNSTITT             | 2.49 | 0.01 | 3.21 | 0.44 | 1.13 | 0.28 |
| 63430 | 0 | 151723 | RSITTIIDTFHQYSRK         | 2.74 | 3.85 | 1.75 | 2.46 | 0.22 | 0.85 |
| 63431 | 0 | 55870  | RSKFGYSAKDVRSL           | 2.62 | 0.01 | 2.59 | 0.44 | 0.85 | 0.28 |
| 63432 | 0 | 55870  | RSKFGYSAKDVRSL           | 2.62 | 0.01 | 2.59 | 0.44 | 0.85 | 0.28 |
| 63433 | 0 | 55870  | RSKFGYSAKDVRSL           | 2.62 | 0.01 | 2.59 | 0.44 | 0.85 | 0.28 |
| 63434 | 0 | 159077 | RSKHNRREGYKTQNQG         | 2.75 | 0.01 | 3.04 | 0.68 | 0.22 | 0.28 |
| 63435 | 0 | 159078 | RSKHNRREGYKVQVQG         | 2.75 | 0.01 | 3.22 | 0.68 | 0.22 | 0.28 |
| 63436 | 0 | 179456 | RSKKSGGGSNVFDMF          | 2.67 | 0.01 | 2.36 | 0.44 | 1.23 | 1.28 |
| 63437 | 0 | 179456 | RSKKSGGGSNVFDMF          | 2.67 | 0.01 | 2.36 | 0.44 | 1.23 | 1.27 |
| 63438 | 0 | 179456 | RSKKSGGGSNVFDMF          | 2.67 | 0.01 | 2.36 | 0.44 | 1.23 | 1.28 |
| 63439 | 0 | 55875  | RSKRIR                   | 1.92 | 0.01 | 3.72 | 0.68 | 0.22 | 0.28 |
| 63440 | 0 | 55877  | RSKYGFGAKEVRSL           | 2.62 | 0.01 | 2.69 | 0.44 | 0.85 | 0.28 |
| 63441 | 0 | 55877  | RSKYGFGAKEVRSL           | 2.62 | 0.01 | 2.69 | 0.44 | 0.85 | 0.28 |
| 63442 | 0 | 109865 | RSLDFQATTMF              | 2.38 | 0.01 | 0.78 | 0.44 | 1.41 | 0.28 |
| 63443 | 0 | 109865 | RSLDFQATTMF              | 2.38 | 0.01 | 0.78 | 0.44 | 1.41 | 0.28 |
| 63444 | 0 | 109865 | RSLDFQATTMF              | 2.38 | 0.01 | 0.78 | 0.44 | 1.41 | 0.28 |
| 63445 | 0 | 109865 | RSLDFQATTMF              | 2.38 | 0.01 | 0.78 | 0.44 | 1.41 | 0.28 |
| 63446 | 0 | 109865 | RSLDFQATTMF              | 2.38 | 0.01 | 0.78 | 0.44 | 1.13 | 0.28 |
| 63447 | 0 | 109865 | RSLDFQATTMF              | 2.38 | 0.01 | 0.78 | 0.44 | 1.13 | 0.28 |
| 63448 | 0 | 109865 | RSLDFQATTMF              | 2.38 | 0.01 | 0.78 | 0.44 | 1.13 | 0.28 |
| 63449 | 0 | 109865 | RSLDFQATTMF              | 2.38 | 0.01 | 0.78 | 0.44 | 1.13 | 0.28 |
| 63450 | 0 | 461874 | RSLGLPPK                 | 2.13 | 0.01 | 3.00 | 0.68 | 0.22 | 1.48 |
| 63451 | 0 | 461874 | RSLGLPPK                 | 2.13 | 0.01 | 3.00 | 0.68 | 0.22 | 0.85 |
| 63452 | 0 | 461874 | RSLGLPPK                 | 2.13 | 0.01 | 3.00 | 0.68 | 0.22 | 0.85 |
| 63453 | 0 | 461874 | RSLGLPPK                 | 2.13 | 0.01 | 3.00 | 0.68 | 0.22 | 0.28 |
| 63454 | 0 | 461874 | RSLGLPPK                 | 2.13 | 0.01 | 3.00 | 0.68 | 0.22 | 0.85 |
| 63455 | 0 | 55885  | RSLKAINAQMSMSHRT<br>MSIV | 2.95 | 0.01 | 3.78 | 2.49 | 0.85 | 0.28 |
| 63456 | 0 | 123721 | RSLKMRGQ                 | 2.13 | 0.01 | 2.96 | 1.20 | 0.22 | 0.28 |
| 63457 | 0 | 118119 | RSLKMRGQAF               | 2.30 | 0.01 | 0.78 | 0.44 | 1.13 | 1.27 |
| 63458 | 0 | 119522 | RSLKTKLPS                | 2.25 | 0.01 | 0.90 | 0.44 | 1.13 | 0.28 |
| 63459 | 0 | 117074 | RSLLSGGLP                | 2.26 | 0.01 | 0.90 | 3.70 | 0.22 | 1.27 |
| 63460 | 0 | 117074 | RSLLSGGLP                | 2.26 | 0.01 | 0.90 | 1.15 | 0.22 | 0.28 |
| 63461 | 0 | 55889  | RSLPPIVKDASIQQVSAIR      | 2.91 | 0.01 | 2.60 | 0.44 | 1.23 | 0.28 |
| 63462 | 0 | 55889  | RSLPPIVKDASIQQVSAIR      | 2.91 | 0.01 | 2.60 | 1.20 | 0.22 | 0.28 |
| 63463 | 0 | 106093 | RSLPYSPYSPQTQPK          | 2.72 | 0.01 | 2.16 | 0.44 | 1.23 | 0.85 |
| 63464 | 0 | 55893  | RSLSDEERMDALENQ          | 2.70 | 0.01 | 3.15 | 0.44 | 1.23 | 0.85 |
| 63465 | 0 | 55893  | RSLSDEERMDALENQ          | 2.70 | 0.01 | 3.15 | 0.44 | 1.23 | 0.85 |
| 63466 | 0 | 55893  | RSLSDEERMDALENQ          | 2.70 | 0.01 | 2.36 | 0.44 | 1.23 | 1.28 |
| 63467 | 0 | 55893  | RSLSDEERMDALENQ          | 2.70 | 0.01 | 2.36 | 0.44 | 1.23 | 1.27 |

|       |   |        |                       |      |      |      |      |      |      |
|-------|---|--------|-----------------------|------|------|------|------|------|------|
| 63468 | 0 | 55893  | RSLSDEERMDALENQ       | 2.70 | 0.01 | 2.36 | 0.44 | 1.23 | 1.28 |
| 63469 | 0 | 55894  | RSLSGRAVNHKSV         | 2.62 | 0.01 | 2.69 | 0.44 | 1.41 | 0.28 |
| 63470 | 0 | 55899  | RSLYLRWVNAVCGDA       | 2.67 | 0.01 | 3.50 | 2.22 | 0.22 | 0.28 |
| 63471 | 0 | 55900  | RSMANEGS              | 2.12 | 0.01 | 2.96 | 0.68 | 0.22 | 0.28 |
| 63472 | 0 | 55900  | RSMANEGS              | 2.12 | 0.01 | 2.96 | 0.68 | 0.22 | 0.28 |
| 63473 | 0 | 55902  | RSMAPEN               | 1.99 | 0.01 | 2.22 | 1.15 | 0.22 | 0.28 |
| 63474 | 0 | 373123 | RSMEIDGGEWNGTA        | 2.66 | 0.01 | 1.61 | 0.44 | 0.85 | 1.28 |
| 63475 | 0 | 129835 | RSNAWRP               | 2.03 | 0.01 | 0.78 | 2.88 | 2.35 | 1.34 |
| 63476 | 0 | 55909  | RSNGSGTMSDVVKGVE<br>W | 2.79 | 0.01 | 3.28 | 0.44 | 1.23 | 0.85 |
| 63477 | 0 | 159079 | RSNHNRPPGYKTQNNQ      | 2.75 | 0.01 | 3.05 | 0.68 | 0.22 | 0.28 |
| 63478 | 0 | 159079 | RSNHNRPPGYKTQNNQ      | 2.75 | 0.01 | 3.05 | 2.49 | 0.22 | 0.28 |
| 63479 | 0 | 159079 | RSNHNRPPGYKTQNNQ      | 2.75 | 0.01 | 3.05 | 3.55 | 0.22 | 0.28 |
| 63480 | 0 | 159079 | RSNHNRPPGYKTQNNQ      | 2.75 | 0.01 | 3.04 | 0.68 | 0.22 | 0.85 |
| 63481 | 0 | 159079 | RSNHNRPPGYKTQNNQ      | 2.75 | 0.01 | 3.04 | 0.68 | 0.22 | 0.85 |
| 63482 | 0 | 159080 | RSNHNRPPGYKTQSQQ      | 2.75 | 0.01 | 3.36 | 0.68 | 0.22 | 0.28 |
| 63483 | 0 | 502007 | RSNTTGTLIWKV          | 2.45 | 0.01 | 3.89 | 0.44 | 0.85 | 2.98 |
| 63484 | 0 | 502007 | RSNTTGTLIWKV          | 2.45 | 0.01 | 3.89 | 0.44 | 0.85 | 0.28 |
| 63485 | 0 | 502007 | RSNTTGTLIWKV          | 2.45 | 0.01 | 3.89 | 0.44 | 0.85 | 1.34 |
| 63486 | 0 | 187085 | RSNYDV                | 1.88 | 0.01 | 3.33 | 0.68 | 0.22 | 0.85 |
| 63487 | 0 | 187085 | RSNYDV                | 1.88 | 0.01 | 3.33 | 0.68 | 0.22 | 1.48 |
| 63488 | 0 | 187085 | RSNYDV                | 1.88 | 0.01 | 3.33 | 0.68 | 0.22 | 1.48 |
| 63489 | 0 | 187085 | RSNYDV                | 1.88 | 0.01 | 3.33 | 0.68 | 0.22 | 1.48 |
| 63490 | 0 | 187085 | RSNYDV                | 1.88 | 0.01 | 3.33 | 0.68 | 0.22 | 1.48 |
| 63491 | 0 | 187085 | RSNYDV                | 1.88 | 0.01 | 3.33 | 0.68 | 0.22 | 1.48 |
| 63492 | 0 | 187085 | RSNYDV                | 1.88 | 0.01 | 3.33 | 0.68 | 0.22 | 1.48 |
| 63493 | 0 | 187085 | RSNYDV                | 1.88 | 0.01 | 3.33 | 0.68 | 0.22 | 1.48 |
| 63494 | 0 | 187085 | RSNYDV                | 1.88 | 0.01 | 3.33 | 0.68 | 0.22 | 1.48 |
| 63495 | 0 | 187085 | RSNYDV                | 1.88 | 0.01 | 3.33 | 0.68 | 0.22 | 1.48 |
| 63496 | 0 | 187085 | RSNYDV                | 1.88 | 0.01 | 3.33 | 0.68 | 0.22 | 1.48 |
| 63497 | 0 | 187085 | RSNYDV                | 1.88 | 0.01 | 3.33 | 0.68 | 0.22 | 1.48 |
| 63498 | 0 | 187085 | RSNYDV                | 1.88 | 0.01 | 3.33 | 0.68 | 0.22 | 1.48 |
| 63499 | 0 | 187085 | RSNYDV                | 1.88 | 0.01 | 3.33 | 0.68 | 0.22 | 1.48 |
| 63500 | 0 | 187085 | RSNYDV                | 1.88 | 0.01 | 3.33 | 0.68 | 0.22 | 1.48 |
| 63501 | 0 | 187085 | RSNYDV                | 1.88 | 0.01 | 3.33 | 0.68 | 0.22 | 1.48 |
| 63502 | 0 | 187085 | RSNYDV                | 1.88 | 0.01 | 3.33 | 0.68 | 0.22 | 1.48 |
| 63503 | 0 | 187085 | RSNYDV                | 1.88 | 0.01 | 3.33 | 0.68 | 0.22 | 1.48 |
| 63504 | 0 | 187085 | RSNYDV                | 1.88 | 0.01 | 3.33 | 0.68 | 0.22 | 1.48 |
| 63505 | 0 | 187085 | RSNYDV                | 1.88 | 0.01 | 3.33 | 0.68 | 0.22 | 1.48 |

|       |   |        |                             |      |      |      |      |      |      |
|-------|---|--------|-----------------------------|------|------|------|------|------|------|
| 63506 | 0 | 187085 | RSNYDV                      | 1.88 | 0.01 | 3.33 | 0.68 | 0.22 | 1.48 |
| 63507 | 0 | 187085 | RSNYDV                      | 1.88 | 0.01 | 3.33 | 0.68 | 0.22 | 1.48 |
| 63508 | 0 | 187085 | RSNYDV                      | 1.88 | 0.01 | 3.33 | 0.68 | 0.22 | 1.48 |
| 63509 | 0 | 187085 | RSNYDV                      | 1.88 | 0.01 | 3.33 | 0.68 | 0.22 | 1.48 |
| 63510 | 0 | 187085 | RSNYDV                      | 1.88 | 0.01 | 3.33 | 0.68 | 0.22 | 1.48 |
| 63511 | 0 | 187085 | RSNYDV                      | 1.88 | 0.01 | 3.33 | 0.68 | 0.22 | 1.48 |
| 63512 | 0 | 187085 | RSNYDV                      | 1.88 | 0.01 | 3.33 | 0.68 | 0.22 | 1.39 |
| 63513 | 0 | 187085 | RSNYDV                      | 1.88 | 0.01 | 3.33 | 0.68 | 0.22 | 1.39 |
| 63514 | 0 | 187085 | RSNYDV                      | 1.88 | 0.01 | 3.33 | 0.68 | 0.22 | 1.39 |
| 63515 | 0 | 187085 | RSNYDV                      | 1.88 | 0.01 | 3.33 | 0.68 | 0.22 | 1.39 |
| 63516 | 0 | 187085 | RSNYDV                      | 1.88 | 0.01 | 3.33 | 0.68 | 0.22 | 1.39 |
| 63517 | 0 | 187085 | RSNYDV                      | 1.88 | 0.01 | 3.33 | 0.68 | 0.22 | 1.39 |
| 63518 | 0 | 187085 | RSNYDV                      | 1.88 | 0.01 | 3.33 | 0.68 | 0.22 | 1.39 |
| 63519 | 0 | 187085 | RSNYDV                      | 1.88 | 0.01 | 3.33 | 0.68 | 0.22 | 1.39 |
| 63520 | 0 | 187085 | RSNYDV                      | 1.88 | 0.01 | 3.33 | 0.68 | 0.22 | 1.39 |
| 63521 | 0 | 187085 | RSNYDV                      | 1.88 | 0.01 | 3.33 | 0.68 | 0.22 | 1.39 |
| 63522 | 0 | 187085 | RSNYDV                      | 1.88 | 0.01 | 3.33 | 0.68 | 0.22 | 0.28 |
| 63523 | 0 | 187085 | RSNYDV                      | 1.88 | 0.01 | 3.33 | 0.68 | 0.22 | 0.28 |
| 63524 | 0 | 187085 | RSNYDV                      | 1.88 | 0.01 | 3.33 | 0.68 | 0.22 | 0.28 |
| 63525 | 0 | 99645  | RSPPGERTGRQPGD              | 2.72 | 0.01 | 2.16 | 0.44 | 1.23 | 1.48 |
| 63526 | 0 | 134792 | RSPSPTPTGPSRRG              | 2.75 | 0.01 | 0.78 | 3.05 | 1.13 | 0.85 |
| 63527 | 0 | 236124 | RSPTLGASNR                  | 2.32 | 0.01 | 0.78 | 0.44 | 1.13 | 2.66 |
| 63528 | 0 | 236124 | RSPTLGASNR                  | 2.32 | 0.01 | 0.78 | 3.41 | 0.22 | 2.66 |
| 63529 | 0 | 236599 | RSPVIVEKGGKVEVE             | 2.71 | 0.01 | 3.70 | 2.13 | 0.22 | 1.28 |
| 63530 | 0 | 55924  | RSQDACIEFVQQEVD             | 2.67 | 0.01 | 2.28 | 0.68 | 0.22 | 0.28 |
| 63531 | 0 | 55924  | RSQDACIEFVQQEVD             | 2.67 | 0.01 | 2.28 | 1.20 | 0.22 | 0.28 |
| 63532 | 0 | 55924  | RSQDACIEFVQQEVD             | 2.67 | 0.01 | 2.28 | 1.20 | 0.22 | 0.28 |
| 63533 | 0 | 55924  | RSQDACIEFVQQEVD             | 2.67 | 0.01 | 2.28 | 1.20 | 0.22 | 1.27 |
| 63534 | 0 | 55930  | RSQPRGRRQPIP                | 2.52 | 0.01 | 2.68 | 0.44 | 0.85 | 0.28 |
| 63535 | 0 | 55930  | RSQPRGRRQPIP                | 2.52 | 0.01 | 2.68 | 2.74 | 0.22 | 0.28 |
| 63536 | 0 | 55932  | RSQQTII                     | 2.00 | 0.01 | 3.27 | 3.70 | 0.22 | 1.34 |
| 63537 | 0 | 55935  | RSQRQLLQW                   | 2.27 | 0.01 | 3.34 | 1.12 | 0.22 | 0.85 |
| 63538 | 0 | 55936  | RSQSRESQCKLG                | 2.50 | 0.01 | 2.08 | 0.68 | 0.22 | 0.85 |
| 63539 | 0 | 55936  | RSQSRESQCKLG                | 2.50 | 0.01 | 2.08 | 0.44 | 1.59 | 0.85 |
| 63540 | 0 | 534850 | RSQVETDDLILKPGVV            | 2.68 | 0.01 | 0.78 | 4.03 | 0.22 | 0.28 |
| 63541 | 0 | 55939  | RSREQLSKLFGIDLT             | 2.67 | 0.01 | 0.90 | 0.44 | 1.59 | 0.28 |
| 63542 | 0 | 55940  | RSRGNSRNSTPGSSR             | 2.74 | 0.01 | 2.91 | 0.44 | 0.85 | 0.28 |
| 63543 | 0 | 99646  | RSRQFQNLQNHRIVQ             | 2.71 | 0.01 | 2.16 | 0.44 | 1.23 | 1.48 |
| 63544 | 0 | 55950  | RSRRVPPVAVWLVSALA<br>MGAGVA | 3.13 | 0.01 | 2.04 | 0.44 | 0.85 | 0.28 |
| 63545 | 0 | 55951  | RSRSES                      | 1.92 | 0.01 | 2.57 | 1.20 | 0.22 | 0.28 |
| 63546 | 0 | 55951  | RSRSES                      | 1.92 | 0.01 | 2.57 | 2.04 | 0.22 | 0.28 |
| 63547 | 0 | 55951  | RSRSES                      | 1.92 | 0.01 | 2.57 | 3.16 | 0.22 | 0.28 |
| 63548 | 0 | 55951  | RSRSES                      | 1.92 | 0.01 | 2.57 | 1.20 | 0.22 | 1.34 |
| 63549 | 0 | 55951  | RSRSES                      | 1.92 | 0.01 | 2.57 | 1.20 | 0.22 | 1.34 |
| 63550 | 0 | 55951  | RSRSES                      | 1.92 | 0.01 | 2.57 | 1.15 | 0.22 | 0.28 |
| 63551 | 0 | 55951  | RSRSES                      | 1.92 | 0.01 | 2.57 | 1.12 | 0.22 | 1.34 |

|       |   |        |                                  |      |      |      |      |      |      |
|-------|---|--------|----------------------------------|------|------|------|------|------|------|
| 63552 | 0 | 55951  | RSRSES                           | 1.92 | 0.01 | 2.57 | 1.20 | 0.22 | 1.34 |
| 63553 | 0 | 55951  | RSRSES                           | 1.92 | 0.01 | 2.57 | 1.20 | 0.22 | 1.34 |
| 63554 | 0 | 55951  | RSRSES                           | 1.92 | 0.01 | 2.57 | 1.20 | 0.22 | 1.34 |
| 63555 | 0 | 55951  | RSRSES                           | 1.92 | 0.01 | 2.57 | 1.20 | 0.22 | 2.02 |
| 63556 | 0 | 55951  | RSRSES                           | 1.92 | 0.01 | 2.57 | 1.20 | 0.22 | 0.28 |
| 63557 | 0 | 55952  | RSRSESSIESF                      | 2.46 | 0.01 | 2.57 | 1.15 | 0.22 | 0.28 |
| 63558 | 0 | 55952  | RSRSESSIESF                      | 2.46 | 0.01 | 2.57 | 1.12 | 0.22 | 1.34 |
| 63559 | 0 | 55952  | RSRSESSIESF                      | 2.46 | 0.01 | 4.23 | 2.16 | 0.22 | 0.28 |
| 63560 | 0 | 55952  | RSRSESSIESF                      | 2.46 | 0.01 | 4.23 | 0.68 | 0.22 | 0.28 |
| 63561 | 0 | 55952  | RSRSESSIESF                      | 2.46 | 0.01 | 4.23 | 0.68 | 0.22 | 0.28 |
| 63562 | 0 | 55952  | RSRSESSIESF                      | 2.46 | 0.01 | 4.23 | 0.44 | 0.22 | 0.28 |
| 63563 | 0 | 55952  | RSRSESSIESF                      | 2.46 | 0.01 | 2.57 | 1.20 | 0.22 | 0.28 |
| 63564 | 0 | 189494 | RSRTPSLPTPPTREPK                 | 2.80 | 0.01 | 0.78 | 1.15 | 0.22 | 0.85 |
| 63565 | 0 | 189494 | RSRTPSLPTPPTREPK                 | 2.80 | 0.01 | 0.78 | 1.15 | 0.22 | 0.85 |
| 63566 | 0 | 189494 | RSRTPSLPTPPTREPK                 | 2.80 | 0.01 | 0.78 | 1.15 | 0.22 | 2.98 |
| 63567 | 0 | 189494 | RSRTPSLPTPPTREPK                 | 2.80 | 0.01 | 0.78 | 1.15 | 0.22 | 1.48 |
| 63568 | 0 | 173105 | RSSEMPELTSMTLL                   | 2.70 | 0.01 | 0.78 | 0.44 | 1.41 | 0.28 |
| 63569 | 0 | 173105 | RSSEMPELTSMTLL                   | 2.70 | 0.01 | 0.78 | 0.44 | 1.13 | 0.28 |
| 63570 | 0 | 190534 | RSSFYCLEYFPSQML                  | 2.68 | 0.01 | 3.97 | 2.00 | 1.41 | 0.28 |
| 63571 | 0 | 144768 | RSSGVDRVRS LGTHQLE<br>LVPTWWVGRE | 3.29 | 0.01 | 0.90 | 0.68 | 0.22 | 0.28 |
| 63572 | 0 | 144768 | RSSGVDRVRS LGTHQLE<br>LVPTWWVGRE | 3.29 | 0.01 | 0.90 | 0.68 | 0.22 | 1.48 |
| 63573 | 0 | 144768 | RSSGVDRVRS LGTHQLE<br>LVPTWWVGRE | 3.29 | 0.01 | 0.90 | 0.68 | 0.22 | 1.27 |
| 63574 | 0 | 144769 | RSSGVTASGPSGTHQLE<br>LVPTWWB GRE | 3.28 | 0.01 | 0.90 | 0.68 | 0.22 | 0.28 |
| 63575 | 0 | 144769 | RSSGVTASGPSGTHQLE<br>LVPTWWB GRE | 3.28 | 0.01 | 0.90 | 0.68 | 0.22 | 0.28 |
| 63576 | 0 | 144769 | RSSGVTASGPSGTHQLE<br>LVPTWWB GRE | 3.28 | 0.01 | 0.90 | 0.68 | 0.22 | 1.48 |
| 63577 | 0 | 144769 | RSSGVTASGPSGTHQLE<br>LVPTWWB GRE | 3.28 | 0.01 | 0.90 | 0.68 | 0.22 | 1.27 |
| 63578 | 0 | 55965  | RSSRPLSEENG EREYN                | 2.78 | 0.01 | 3.75 | 3.97 | 0.22 | 0.28 |
| 63579 | 0 | 55965  | RSSRPLSEENG EREYN                | 2.78 | 0.01 | 3.75 | 3.97 | 0.22 | 0.28 |
| 63580 | 0 | 55965  | RSSRPLSEENG EREYN                | 2.78 | 0.01 | 3.75 | 3.97 | 0.22 | 0.28 |
| 63581 | 0 | 111745 | RSSRTR                           | 1.92 | 0.01 | 1.86 | 3.57 | 0.22 | 0.28 |
| 63582 | 0 | 111746 | RSSRTRRETQ                       | 2.36 | 0.01 | 1.86 | 1.12 | 0.22 | 0.85 |
| 63583 | 0 | 55967  | RSSSGCVT                         | 2.12 | 0.01 | 2.04 | 0.44 | 0.85 | 0.28 |
| 63584 | 0 | 55967  | RSSSGCVT                         | 2.12 | 0.01 | 2.04 | 0.44 | 0.85 | 0.28 |
| 63585 | 0 | 55967  | RSSSGCVT                         | 2.12 | 0.01 | 2.04 | 0.44 | 0.85 | 0.28 |
| 63586 | 0 | 55968  | RSSSRSGNSRNSTP                   | 2.74 | 0.01 | 3.30 | 0.68 | 0.22 | 0.28 |
| 63587 | 0 | 55969  | RSSSSHHRSPSPRK                   | 2.67 | 0.01 | 2.40 | 2.43 | 0.22 | 0.28 |
| 63588 | 0 | 55969  | RSSSSHHRSPSPRK                   | 2.67 | 0.01 | 2.40 | 2.43 | 0.22 | 0.28 |
| 63589 | 0 | 133926 | RSSYWVYSPWRFISR                  | 2.72 | 0.01 | 0.90 | 1.15 | 0.22 | 1.27 |
| 63590 | 0 | 133926 | RSSYWVYSPWRFISR                  | 2.72 | 0.01 | 0.90 | 1.15 | 0.22 | 0.85 |

|       |   |        |                                  |      |      |      |      |      |      |
|-------|---|--------|----------------------------------|------|------|------|------|------|------|
| 63591 | 0 | 233011 | RSTGWGGYFVVGYNF                  | 2.69 | 0.01 | 2.89 | 1.12 | 0.22 | 1.28 |
| 63592 | 0 | 233011 | RSTGWGGYFVVGYNF                  | 2.69 | 0.01 | 2.89 | 1.12 | 0.22 | 1.28 |
| 63593 | 0 | 233011 | RSTGWGGYFVVGYNF                  | 2.69 | 0.01 | 2.89 | 1.12 | 0.22 | 1.28 |
| 63594 | 0 | 233011 | RSTGWGGYFVVGYNF                  | 2.69 | 0.01 | 2.89 | 1.12 | 0.22 | 1.28 |
| 63595 | 0 | 233011 | RSTGWGGYFVVGYNF                  | 2.69 | 0.01 | 2.89 | 1.12 | 0.22 | 1.28 |
| 63596 | 0 | 233011 | RSTGWGGYFVVGYNF                  | 2.69 | 0.01 | 2.89 | 1.12 | 0.22 | 1.28 |
| 63597 | 0 | 227532 | RSTKGGQQKNSQKGQ                  | 2.73 | 0.01 | 2.97 | 0.44 | 1.59 | 0.28 |
| 63598 | 0 | 227532 | RSTKGGQQKNSQKGQ                  | 2.73 | 0.01 | 2.97 | 0.44 | 0.85 | 0.28 |
| 63599 | 0 | 177541 | RSTLQHPDYLQEYST                  | 2.68 | 0.01 | 0.78 | 1.15 | 0.22 | 1.48 |
| 63600 | 0 | 55981  | RSTSLS                           | 1.91 | 0.01 | 2.40 | 0.44 | 0.85 | 0.28 |
| 63601 | 0 | 94919  | RSVFHQNGQVTE                     | 2.45 | 0.01 | 2.87 | 0.44 | 0.85 | 0.28 |
| 63602 | 0 | 55987  | RSVHDVVLVGGSTRIPK<br>VQS         | 2.94 | 0.01 | 2.78 | 2.49 | 0.85 | 0.28 |
| 63603 | 0 | 55987  | RSVHDVVLVGGSTRIPK<br>VQS         | 2.94 | 0.01 | 2.78 | 0.44 | 0.85 | 0.28 |
| 63604 | 0 | 55994  | RSVSKEEPM                        | 2.30 | 0.01 | 0.90 | 0.44 | 1.23 | 0.28 |
| 63605 | 0 | 55994  | RSVSKEEPM                        | 2.30 | 0.01 | 0.90 | 0.44 | 1.23 | 1.27 |
| 63606 | 0 | 189495 | RSVYFDFDSYSVQDQYQ<br>ALLQQHAQYLK | 3.30 | 0.01 | 4.15 | 1.20 | 0.22 | 2.66 |
| 63607 | 0 | 55996  | RSVYS                            | 1.75 | 0.01 | 2.51 | 0.68 | 0.22 | 0.85 |
| 63608 | 0 | 55996  | RSVYS                            | 1.75 | 0.01 | 2.51 | 0.68 | 0.22 | 2.02 |
| 63609 | 0 | 373454 | RSWPSAP                          | 2.04 | 0.01 | 2.40 | 1.20 | 0.22 | 0.28 |
| 63610 | 0 | 56007  | RSYQHDLRAYGFWRL                  | 2.67 | 0.01 | 0.90 | 0.68 | 0.22 | 1.39 |
| 63611 | 0 | 106791 | RSYTTRRWLV                       | 2.32 | 0.01 | 2.75 | 0.44 | 1.23 | 0.85 |
| 63612 | 0 | 122564 | RTAGFDIKLIDT                     | 2.48 | 0.01 | 0.90 | 0.44 | 1.13 | 0.28 |
| 63613 | 0 | 135988 | RTALLDAAGVAS                     | 2.48 | 0.01 | 0.78 | 0.44 | 1.13 | 0.28 |
| 63614 | 0 | 118592 | RTALLDAAGVASL                    | 2.57 | 0.01 | 0.78 | 0.44 | 1.74 | 0.85 |
| 63615 | 0 | 447993 | RTALNCNDSLNTGFL                  | 2.68 | 0.01 | 1.96 | 0.68 | 0.22 | 1.34 |
| 63616 | 0 | 447993 | RTALNCNDSLNTGFL                  | 2.68 | 0.01 | 1.96 | 0.68 | 0.22 | 0.28 |
| 63617 | 0 | 56017  | RTALNCNDSLQTGFLAA<br>LFY         | 2.94 | 0.01 | 3.10 | 0.44 | 0.85 | 0.28 |
| 63618 | 0 | 56019  | RTAPGPGE                         | 2.14 | 0.01 | 2.85 | 0.44 | 0.22 | 0.28 |
| 63619 | 0 | 56022  | RTCAHPGEH                        | 2.21 | 0.01 | 0.90 | 1.20 | 0.22 | 1.27 |
| 63620 | 0 | 56022  | RTCAHPGEH                        | 2.21 | 0.01 | 0.90 | 1.20 | 0.22 | 0.28 |
| 63621 | 0 | 56022  | RTCAHPGEH                        | 2.21 | 0.01 | 0.90 | 1.15 | 0.22 | 0.28 |
| 63622 | 0 | 56022  | RTCAHPGEH                        | 2.21 | 0.01 | 0.90 | 1.15 | 0.22 | 0.28 |
| 63623 | 0 | 56022  | RTCAHPGEH                        | 2.21 | 0.01 | 0.90 | 1.15 | 0.22 | 1.27 |
| 63624 | 0 | 239002 | RTCAVHITLDPDTANPW<br>L           | 2.84 | 0.01 | 0.78 | 0.44 | 1.13 | 0.28 |

|       |   |        |                                            |      |      |      |      |      |      |
|-------|---|--------|--------------------------------------------|------|------|------|------|------|------|
| 63625 | 0 | 239002 | RTCAVHITLDPDTANPW<br>L                     | 2.84 | 0.01 | 0.78 | 0.44 | 1.13 | 0.28 |
| 63626 | 0 | 95036  | RTCMTTAQGTSMYPSC                           | 2.75 | 0.01 | 2.71 | 1.15 | 0.22 | 1.27 |
| 63627 | 0 | 95036  | RTCMTTAQGTSMYPSC                           | 2.75 | 0.01 | 2.71 | 1.15 | 0.22 | 1.27 |
| 63628 | 0 | 95036  | RTCMTTAQGTSMYPSC                           | 2.75 | 0.01 | 2.71 | 1.15 | 0.22 | 1.27 |
| 63629 | 0 | 95036  | RTCMTTAQGTSMYPSC                           | 2.75 | 0.01 | 2.71 | 0.68 | 0.22 | 1.27 |
| 63630 | 0 | 95036  | RTCMTTAQGTSMYPSC                           | 2.75 | 0.01 | 2.71 | 0.68 | 0.22 | 1.57 |
| 63631 | 0 | 132640 | RTDDKMRMHSHLSHH                            | 2.70 | 0.01 | 0.90 | 2.46 | 0.22 | 0.28 |
| 63632 | 0 | 132640 | RTDDKMRMHSHLSHH                            | 2.70 | 0.01 | 0.90 | 2.46 | 0.22 | 1.39 |
| 63633 | 0 | 233830 | RTEHKARKKGTSALLSAK<br>VTNMVMRKR            | 3.26 | 0.01 | 3.67 | 2.61 | 0.85 | 1.28 |
| 63634 | 0 | 225646 | RTEIHRNERTFTGT                             | 2.65 | 0.01 | 3.57 | 2.61 | 0.22 | 0.28 |
| 63635 | 0 | 173111 | RTEKDSYVVAFSDEM                            | 2.65 | 0.01 | 0.78 | 0.44 | 1.41 | 0.28 |
| 63636 | 0 | 56043  | RTEQKDFDGRSEFAYGS<br>FVR                   | 2.95 | 0.01 | 2.04 | 0.44 | 0.85 | 0.28 |
| 63637 | 0 | 225851 | RTFPSVLQSSGLYSL                            | 2.68 | 0.01 | 3.28 | 0.44 | 0.22 | 0.85 |
| 63638 | 0 | 79076  | RTGAWQRKDWSRAPP<br>PPEERQESRSQTPAPKPS<br>R | 3.50 | 0.01 | 4.23 | 0.68 | 0.22 | 0.28 |
| 63639 | 0 | 79076  | RTGAWQRKDWSRAPP<br>PPEERQESRSQTPAPKPS<br>R | 3.50 | 0.01 | 4.23 | 0.68 | 0.22 | 0.85 |
| 63640 | 0 | 56059  | RTGEGGL                                    | 1.90 | 0.01 | 2.96 | 0.44 | 0.85 | 0.28 |
| 63641 | 0 | 510118 | RTGESVEFVCKR                               | 2.48 | 0.01 | 0.78 | 0.68 | 0.22 | 0.85 |
| 63642 | 0 | 510118 | RTGESVEFVCKR                               | 2.48 | 0.01 | 0.78 | 0.68 | 0.22 | 0.85 |
| 63643 | 0 | 510118 | RTGESVEFVCKR                               | 2.48 | 0.01 | 0.78 | 0.68 | 0.22 | 2.75 |
| 63644 | 0 | 510118 | RTGESVEFVCKR                               | 2.48 | 0.01 | 0.78 | 0.68 | 0.22 | 2.75 |
| 63645 | 0 | 56060  | RTGLDF                                     | 1.88 | 0.01 | 2.40 | 0.44 | 0.85 | 0.28 |
| 63646 | 0 | 56061  | RTGLDFN                                    | 1.99 | 0.01 | 2.40 | 0.44 | 0.85 | 0.28 |
| 63647 | 0 | 56061  | RTGLDFN                                    | 1.99 | 0.01 | 2.40 | 0.44 | 0.85 | 0.28 |
| 63648 | 0 | 56061  | RTGLDFN                                    | 1.99 | 0.01 | 2.40 | 0.44 | 0.85 | 0.28 |
| 63649 | 0 | 109870 | RTGPAGAA                                   | 2.13 | 0.01 | 1.60 | 2.55 | 2.60 | 0.28 |
| 63650 | 0 | 111013 | RTGYIPLGTRPPT                              | 2.59 | 0.01 | 1.86 | 0.68 | 0.22 | 0.28 |
| 63651 | 0 | 111013 | RTGYIPLGTRPPT                              | 2.59 | 0.01 | 1.86 | 0.44 | 0.85 | 0.28 |
| 63652 | 0 | 111013 | RTGYIPLGTRPPT                              | 2.59 | 0.01 | 1.86 | 0.44 | 0.85 | 0.28 |
| 63653 | 0 | 111013 | RTGYIPLGTRPPT                              | 2.59 | 0.01 | 1.86 | 0.68 | 0.22 | 0.28 |
| 63654 | 0 | 111013 | RTGYIPLGTRPPT                              | 2.59 | 0.01 | 1.86 | 1.20 | 0.22 | 0.85 |
| 63655 | 0 | 111013 | RTGYIPLGTRPPT                              | 2.59 | 0.01 | 1.86 | 1.20 | 0.22 | 0.28 |
| 63656 | 0 | 111013 | RTGYIPLGTRPPT                              | 2.59 | 0.01 | 1.86 | 1.20 | 0.22 | 1.34 |
| 63657 | 0 | 111013 | RTGYIPLGTRPPT                              | 2.59 | 0.01 | 1.86 | 1.20 | 0.22 | 1.34 |

|       |   |        |                                 |      |      |      |      |      |      |
|-------|---|--------|---------------------------------|------|------|------|------|------|------|
| 63658 | 0 | 56075  | RTHRQLY                         | 2.03 | 0.01 | 2.40 | 0.68 | 0.22 | 0.85 |
| 63659 | 0 | 56075  | RTHRQLY                         | 2.03 | 0.01 | 2.40 | 0.68 | 0.22 | 0.85 |
| 63660 | 0 | 56079  | RTIGGSQAQT                      | 2.32 | 0.01 | 2.83 | 0.44 | 0.85 | 0.28 |
| 63661 | 0 | 56079  | RTIGGSQAQT                      | 2.32 | 0.01 | 2.83 | 0.44 | 0.85 | 0.28 |
| 63662 | 0 | 56079  | RTIGGSQAQT                      | 2.32 | 0.01 | 2.83 | 1.12 | 0.22 | 0.28 |
| 63663 | 0 | 56084  | RTILMAGRQAEVTQSFP<br>GLFSLAPSQK | 3.24 | 0.01 | 1.72 | 0.68 | 0.22 | 0.28 |
| 63664 | 0 | 56084  | RTILMAGRQAEVTQSFP<br>GLFSLAPSQK | 3.24 | 0.01 | 1.72 | 0.68 | 0.22 | 0.28 |
| 63665 | 0 | 56084  | RTILMAGRQAEVTQSFP<br>GLFSLAPSQK | 3.24 | 0.01 | 1.72 | 1.12 | 0.22 | 0.28 |
| 63666 | 0 | 56084  | RTILMAGRQAEVTQSFP<br>GLFSLAPSQK | 3.24 | 0.01 | 1.72 | 1.12 | 0.22 | 0.28 |
| 63667 | 0 | 56084  | RTILMAGRQAEVTQSFP<br>GLFSLAPSQK | 3.24 | 0.01 | 1.72 | 1.12 | 0.22 | 0.28 |
| 63668 | 0 | 56086  | RTIPVPVDGMEYHWGN<br>NDPV        | 2.92 | 0.01 | 3.13 | 2.43 | 0.22 | 0.28 |
| 63669 | 0 | 56087  | RTIRNTMTMPNL                    | 2.52 | 0.01 | 0.90 | 1.20 | 0.22 | 1.39 |
| 63670 | 0 | 164548 | RTITADTFRKLFRVYSNFL<br>R        | 2.95 | 0.01 | 0.78 | 1.20 | 0.22 | 0.28 |
| 63671 | 0 | 164548 | RTITADTFRKLFRVYSNFL<br>R        | 2.95 | 0.01 | 0.78 | 1.20 | 0.22 | 2.02 |
| 63672 | 0 | 164548 | RTITADTFRKLFRVYSNFL<br>R        | 2.95 | 0.01 | 0.78 | 0.44 | 0.85 | 0.28 |
| 63673 | 0 | 56089  | RTIVCGLFPTQIQV                  | 2.61 | 0.01 | 2.56 | 2.69 | 0.22 | 0.28 |
| 63674 | 0 | 56102  | RTLDQQYKEVKRETDLS<br>HVQ        | 2.96 | 0.01 | 2.86 | 1.81 | 0.22 | 0.85 |
| 63675 | 0 | 56102  | RTLDQQYKEVKRETDLS<br>HVQ        | 2.96 | 0.01 | 2.86 | 2.89 | 0.22 | 1.27 |
| 63676 | 0 | 133686 | RTLDSHWIRVGG                    | 2.44 | 0.01 | 0.90 | 0.44 | 0.85 | 0.28 |
| 63677 | 0 | 101209 | RTLEDNEERMSRLSK                 | 2.70 | 0.01 | 0.78 | 0.44 | 1.13 | 2.02 |
| 63678 | 0 | 101209 | RTLEDNEERMSRLSK                 | 2.70 | 0.01 | 0.78 | 0.44 | 1.13 | 2.02 |
| 63679 | 0 | 56104  | RTLGEDPQYHEEWV                  | 2.56 | 0.01 | 3.13 | 2.43 | 0.22 | 0.85 |
| 63680 | 0 | 56104  | RTLGEDPQYHEEWV                  | 2.56 | 0.01 | 3.13 | 2.43 | 0.22 | 0.28 |
| 63681 | 0 | 56104  | RTLGEDPQYHEEWV                  | 2.56 | 0.01 | 3.13 | 2.43 | 2.25 | 1.75 |
| 63682 | 0 | 176539 | RTLGPSQEET                      | 2.30 | 0.01 | 0.78 | 0.44 | 1.13 | 2.12 |
| 63683 | 0 | 56107  | RTLKIPAMTI                      | 2.31 | 0.01 | 0.78 | 1.20 | 0.22 | 0.28 |
| 63684 | 0 | 373701 | RTLQVAGIKTTTATT                 | 2.67 | 0.01 | 1.61 | 0.44 | 0.85 | 1.28 |
| 63685 | 0 | 56119  | RTLSFGGLPGHTTHGFA<br>SLSAPGAKQN | 3.25 | 0.01 | 1.72 | 0.44 | 0.85 | 0.28 |
| 63686 | 0 | 56119  | RTLSFGGLPGHTTHGFA<br>SLSAPGAKQN | 3.25 | 0.01 | 1.72 | 0.44 | 0.85 | 0.28 |
| 63687 | 0 | 56119  | RTLSFGGLPGHTTHGFA<br>SLSAPGAKQN | 3.25 | 0.01 | 1.72 | 0.44 | 0.85 | 0.28 |
| 63688 | 0 | 56119  | RTLSFGGLPGHTTHGFA<br>SLSAPGAKQN | 3.25 | 0.01 | 1.72 | 1.12 | 0.22 | 0.28 |



|       |   |        |                                 |      |      |      |      |      |      |
|-------|---|--------|---------------------------------|------|------|------|------|------|------|
| 63689 | 0 | 56119  | RTLSFGGLPGHTTHGFA<br>SLSAPGAKQN | 3.25 | 0.01 | 1.72 | 1.12 | 0.22 | 0.28 |
| 63690 | 0 | 56122  | RTLTGMFSLGARQKI                 | 2.67 | 0.01 | 1.72 | 0.68 | 0.22 | 1.66 |
| 63691 | 0 | 56122  | RTLTGMFSLGARQKI                 | 2.67 | 0.01 | 1.72 | 0.68 | 0.22 | 0.28 |
| 63692 | 0 | 56122  | RTLTGMFSLGARQKI                 | 2.67 | 0.01 | 1.72 | 0.68 | 0.22 | 1.66 |
| 63693 | 0 | 56122  | RTLTGMFSLGARQKI                 | 2.67 | 0.01 | 1.72 | 0.68 | 0.22 | 1.66 |
| 63694 | 0 | 56122  | RTLTGMFSLGARQKI                 | 2.67 | 0.01 | 1.72 | 0.68 | 0.22 | 1.66 |
| 63695 | 0 | 56123  | RTLTKEYE                        | 2.14 | 0.01 | 3.18 | 1.12 | 0.22 | 0.28 |
| 63696 | 0 | 141558 | RTLTQNYKATHGNTV                 | 2.66 | 0.01 | 3.81 | 2.22 | 0.85 | 0.28 |
| 63697 | 0 | 165214 | RTLVTGNPGSA                     | 2.45 | 0.01 | 3.78 | 0.44 | 1.23 | 0.85 |
| 63698 | 0 | 88259  | RTLVMANTG                       | 2.30 | 0.01 | 3.06 | 0.44 | 0.85 | 0.28 |
| 63699 | 0 | 56128  | RTMHPSDEFLPLGMP                 | 2.66 | 0.01 | 0.90 | 0.44 | 1.41 | 0.28 |
| 63700 | 0 | 56133  | RTMQYVDM                        | 2.12 | 0.01 | 2.99 | 0.44 | 0.85 | 0.28 |
| 63701 | 0 | 373721 | RTMTALRVSPYSIFL                 | 2.67 | 0.01 | 1.61 | 0.44 | 0.85 | 1.28 |
| 63702 | 0 | 56138  | RTNHSGNSVDPK                    | 2.45 | 0.01 | 0.90 | 0.68 | 0.22 | 1.39 |
| 63703 | 0 | 56142  | RTNPSDNSSDSNIKT                 | 2.71 | 0.01 | 1.66 | 0.44 | 0.85 | 0.28 |
| 63704 | 0 | 137284 | RTNTTQGKVPSQ                    | 2.46 | 0.01 | 4.33 | 2.13 | 0.22 | 0.28 |
| 63705 | 0 | 137284 | RTNTTQGKVPSQ                    | 2.46 | 0.01 | 4.33 | 2.13 | 0.22 | 1.34 |
| 63706 | 0 | 137284 | RTNTTQGKVPSQ                    | 2.46 | 0.01 | 4.33 | 2.13 | 0.22 | 1.34 |
| 63707 | 0 | 56145  | RTPEVDDEALE                     | 2.40 | 0.01 | 1.60 | 0.44 | 1.23 | 1.57 |
| 63708 | 0 | 56146  | RTPEVDDEALEKFDKALK<br>AL        | 2.97 | 0.01 | 1.60 | 0.44 | 1.23 | 2.51 |
| 63709 | 0 | 227537 | RTPEWPVQEGGGQNV                 | 2.69 | 0.01 | 2.48 | 0.44 | 1.59 | 0.28 |
| 63710 | 0 | 525497 | RTPIQSLSPYVSDLDLSEI<br>DI       | 3.01 | 0.01 | 2.24 | 0.44 | 1.41 | 1.28 |
| 63711 | 0 | 489761 | RTPNGVAIPHGDHYHFI<br>PYS        | 2.93 | 0.01 | 2.70 | 0.44 | 0.85 | 0.28 |
| 63712 | 0 | 56150  | RTPPAYR                         | 2.04 | 0.01 | 2.08 | 1.15 | 0.22 | 1.27 |
| 63713 | 0 | 56150  | RTPPAYR                         | 2.04 | 0.01 | 2.08 | 1.15 | 0.22 | 1.57 |
| 63714 | 0 | 56150  | RTPPAYR                         | 2.04 | 0.01 | 2.08 | 1.15 | 0.22 | 1.27 |
| 63715 | 0 | 56150  | RTPPAYR                         | 2.04 | 0.01 | 2.08 | 1.15 | 0.22 | 1.27 |
| 63716 | 0 | 56150  | RTPPAYR                         | 2.04 | 0.01 | 2.08 | 1.15 | 0.22 | 1.27 |
| 63717 | 0 | 56152  | RTPPGYRPPNAP                    | 2.52 | 0.01 | 2.08 | 0.68 | 0.22 | 0.85 |
| 63718 | 0 | 56152  | RTPPGYRPPNAP                    | 2.52 | 0.01 | 2.08 | 0.44 | 1.59 | 0.85 |
| 63719 | 0 | 116164 | RTPPPSG                         | 2.02 | 0.01 | 0.90 | 2.49 | 0.22 | 1.57 |
| 63720 | 0 | 116164 | RTPPPSG                         | 2.02 | 0.01 | 0.90 | 1.20 | 0.22 | 1.57 |
| 63721 | 0 | 116164 | RTPPPSG                         | 2.02 | 0.01 | 0.90 | 1.20 | 0.22 | 1.57 |
| 63722 | 0 | 116164 | RTPPPSG                         | 2.02 | 0.01 | 0.90 | 1.20 | 0.22 | 1.57 |
| 63723 | 0 | 116164 | RTPPPSG                         | 2.02 | 0.01 | 0.90 | 1.20 | 0.22 | 1.57 |
| 63724 | 0 | 116164 | RTPPPSG                         | 2.02 | 0.01 | 0.90 | 1.20 | 0.22 | 1.57 |
| 63725 | 0 | 116164 | RTPPPSG                         | 2.02 | 0.01 | 0.90 | 1.20 | 0.22 | 1.57 |
| 63726 | 0 | 116164 | RTPPPSG                         | 2.02 | 0.01 | 0.90 | 2.04 | 0.22 | 1.57 |
| 63727 | 0 | 116164 | RTPPPSG                         | 2.02 | 0.01 | 0.90 | 2.49 | 0.22 | 1.27 |
| 63728 | 0 | 116164 | RTPPPSG                         | 2.02 | 0.01 | 0.90 | 2.49 | 0.22 | 1.27 |
| 63729 | 0 | 116164 | RTPPPSG                         | 2.02 | 0.01 | 0.90 | 2.49 | 0.22 | 1.27 |
| 63730 | 0 | 116164 | RTPPPSG                         | 2.02 | 0.01 | 0.90 | 1.20 | 0.22 | 1.27 |

|       |   |        |                                      |      |      |      |      |      |      |
|-------|---|--------|--------------------------------------|------|------|------|------|------|------|
| 63731 | 0 | 116164 | RTPPPSG                              | 2.02 | 0.01 | 0.90 | 1.20 | 0.22 | 1.27 |
| 63732 | 0 | 116164 | RTPPPSG                              | 2.02 | 0.01 | 0.90 | 1.20 | 0.22 | 1.27 |
| 63733 | 0 | 116164 | RTPPPSG                              | 2.02 | 0.01 | 0.90 | 1.20 | 0.22 | 1.27 |
| 63734 | 0 | 116164 | RTPPPSG                              | 2.02 | 0.01 | 0.90 | 1.20 | 0.22 | 1.27 |
| 63735 | 0 | 116164 | RTPPPSG                              | 2.02 | 0.01 | 0.90 | 1.20 | 0.22 | 1.27 |
| 63736 | 0 | 116164 | RTPPPSG                              | 2.02 | 0.01 | 0.90 | 1.20 | 0.22 | 1.27 |
| 63737 | 0 | 116164 | RTPPPSG                              | 2.02 | 0.01 | 0.90 | 1.20 | 0.22 | 1.27 |
| 63738 | 0 | 116164 | RTPPPSG                              | 2.02 | 0.01 | 0.90 | 1.20 | 0.22 | 1.27 |
| 63739 | 0 | 116164 | RTPPPSG                              | 2.02 | 0.01 | 0.90 | 1.20 | 0.22 | 1.27 |
| 63740 | 0 | 116164 | RTPPPSG                              | 2.02 | 0.01 | 0.90 | 1.20 | 0.22 | 1.27 |
| 63741 | 0 | 116164 | RTPPPSG                              | 2.02 | 0.01 | 0.90 | 2.49 | 0.22 | 1.57 |
| 63742 | 0 | 116164 | RTPPPSG                              | 2.02 | 0.01 | 0.90 | 1.20 | 0.22 | 1.57 |
| 63743 | 0 | 423497 | RTPRQKKISQRPPTP                      | 2.73 | 0.01 | 2.51 | 0.44 | 2.35 | 1.28 |
| 63744 | 0 | 124687 | RTQRYWIAY                            | 2.24 | 0.01 | 0.90 | 0.44 | 1.13 | 1.39 |
| 63745 | 0 | 151727 | RTREGNDLYHEMIESGVI<br>NLKD           | 3.02 | 3.81 | 1.75 | 2.25 | 0.22 | 0.85 |
| 63746 | 0 | 99647  | RTRGRQPGDYDDRR                       | 2.70 | 0.01 | 2.16 | 0.44 | 1.23 | 1.48 |
| 63747 | 0 | 104230 | RTRNQPN                              | 2.05 | 0.01 | 0.90 | 0.44 | 1.13 | 1.39 |
| 63748 | 0 | 56173  | RTRVHGDKATAHGRK                      | 2.72 | 0.01 | 3.97 | 4.23 | 0.22 | 0.28 |
| 63749 | 0 | 56173  | RTRVHGDKATAHGRK                      | 2.72 | 0.01 | 3.97 | 2.37 | 0.22 | 0.28 |
| 63750 | 0 | 423498 | RTRVSLGHRVAFGCS                      | 2.69 | 0.01 | 2.51 | 0.44 | 2.35 | 1.28 |
| 63751 | 0 | 56175  | RTS                                  | 1.37 | 0.01 | 3.89 | 2.88 | 2.26 | 0.85 |
| 63752 | 0 | 56181  | RTSP                                 | 1.57 | 0.01 | 3.89 | 2.88 | 2.26 | 0.85 |
| 63753 | 0 | 56182  | RTSPP                                | 1.72 | 0.01 | 3.89 | 2.88 | 2.26 | 0.85 |
| 63754 | 0 | 187509 | RTSSDPGTNTTTEDH                      | 2.67 | 0.01 | 2.97 | 0.44 | 0.85 | 0.28 |
| 63755 | 0 | 91929  | RTSYVMTFLWSLNA                       | 2.59 | 0.01 | 3.12 | 1.12 | 0.22 | 0.28 |
| 63756 | 0 | 56185  | RTTADRQTA                            | 2.28 | 0.01 | 3.35 | 1.12 | 0.22 | 1.27 |
| 63757 | 0 | 56185  | RTTADRQTA                            | 2.28 | 0.01 | 3.35 | 1.12 | 0.22 | 0.28 |
| 63758 | 0 | 56185  | RTTADRQTA                            | 2.28 | 0.01 | 3.35 | 1.12 | 0.22 | 0.28 |
| 63759 | 0 | 56185  | RTTADRQTA                            | 2.28 | 0.01 | 3.35 | 0.44 | 1.23 | 1.27 |
| 63760 | 0 | 56186  | RTTADRQTACNCLKN                      | 2.70 | 0.01 | 3.35 | 0.44 | 1.23 | 0.85 |
| 63761 | 0 | 56187  | RTTAGLVGLLTPGAKQN<br>I               | 2.84 | 0.01 | 1.72 | 1.12 | 0.22 | 0.28 |
| 63762 | 0 | 56188  | RTTCNPKEIQECQDK                      | 2.67 | 0.01 | 4.03 | 4.33 | 0.22 | 0.28 |
| 63763 | 0 | 56189  | RTTDFKREMSTS                         | 2.50 | 0.01 | 0.90 | 0.68 | 0.22 | 1.27 |
| 63764 | 0 | 135752 | RTTEFWKQ                             | 2.11 | 0.01 | 0.78 | 0.44 | 2.35 | 0.28 |
| 63765 | 0 | 151728 | RTTGIVLDSGDGVTHNV<br>PIYEGYALPHAIMRL | 3.40 | 4.93 | 1.75 | 2.46 | 0.22 | 0.85 |
| 63766 | 0 | 112835 | RTTHYGSLPQKSQHGR<br>TQDE             | 2.95 | 0.01 | 1.75 | 2.25 | 0.22 | 0.28 |
| 63767 | 0 | 239003 | RTTLAMALGALGAA                       | 2.65 | 0.01 | 2.14 | 2.65 | 0.22 | 0.85 |
| 63768 | 0 | 136081 | RTTLQSDQEEIDY                        | 2.54 | 0.01 | 0.78 | 1.20 | 0.22 | 0.28 |
| 63769 | 0 | 136081 | RTTLQSDQEEIDY                        | 2.54 | 0.01 | 0.78 | 1.20 | 0.22 | 0.85 |
| 63770 | 0 | 136081 | RTTLQSDQEEIDY                        | 2.54 | 0.01 | 0.78 | 0.44 | 1.41 | 0.85 |
| 63771 | 0 | 56194  | RTTNQALK                             | 2.11 | 0.01 | 2.83 | 2.61 | 0.22 | 0.28 |
| 63772 | 0 | 56195  | RTTPDRQAA                            | 2.23 | 0.01 | 3.33 | 1.12 | 0.22 | 0.28 |

|       |   |        |                  |      |      |      |      |      |      |
|-------|---|--------|------------------|------|------|------|------|------|------|
| 63773 | 0 | 56195  | RTTPDRQAA        | 2.23 | 0.01 | 3.33 | 1.12 | 0.22 | 0.28 |
| 63774 | 0 | 56195  | RTTPDRQAA        | 2.23 | 0.01 | 3.33 | 1.12 | 0.22 | 1.27 |
| 63775 | 0 | 56195  | RTTPDRQAA        | 2.23 | 0.01 | 3.33 | 0.44 | 1.23 | 1.27 |
| 63776 | 0 | 56200  | RTTSGLT          | 2.04 | 0.01 | 1.72 | 0.44 | 0.85 | 0.28 |
| 63777 | 0 | 56201  | RTTTASGKL        | 2.21 | 0.01 | 2.87 | 0.44 | 0.85 | 0.28 |
| 63778 | 0 | 56201  | RTTTASGKL        | 2.21 | 0.01 | 2.87 | 3.04 | 0.22 | 0.28 |
| 63779 | 0 | 56202  | RTTTASGKLIT      | 2.40 | 4.33 | 2.87 | 0.68 | 0.22 | 0.28 |
| 63780 | 0 | 56202  | RTTTASGKLIT      | 2.40 | 4.33 | 2.87 | 0.68 | 0.22 | 0.28 |
| 63781 | 0 | 179894 | RTTTASGKLV       | 2.40 | 0.01 | 3.78 | 0.68 | 0.22 | 0.28 |
| 63782 | 0 | 179894 | RTTTASGKLV       | 2.40 | 0.01 | 3.78 | 0.68 | 0.22 | 0.28 |
| 63783 | 0 | 179894 | RTTTASGKLV       | 2.40 | 0.01 | 3.78 | 0.68 | 0.22 | 0.28 |
| 63784 | 0 | 179894 | RTTTASGKLV       | 2.40 | 0.01 | 3.78 | 0.68 | 0.22 | 0.28 |
| 63785 | 0 | 179894 | RTTTASGKLV       | 2.40 | 0.01 | 3.78 | 0.68 | 0.22 | 0.28 |
| 63786 | 0 | 179894 | RTTTASGKLV       | 2.40 | 0.01 | 3.78 | 0.68 | 0.22 | 0.28 |
| 63787 | 0 | 179894 | RTTTASGKLV       | 2.40 | 0.01 | 3.78 | 0.68 | 0.22 | 0.28 |
| 63788 | 0 | 179894 | RTTTASGKLV       | 2.40 | 0.01 | 3.78 | 0.68 | 0.22 | 0.28 |
| 63789 | 0 | 179894 | RTTTASGKLV       | 2.40 | 0.01 | 3.78 | 0.68 | 0.22 | 0.28 |
| 63790 | 0 | 179894 | RTTTASGKLV       | 2.40 | 0.01 | 3.78 | 0.68 | 0.22 | 0.28 |
| 63791 | 0 | 56208  | RTVGSLSNS        | 2.23 | 0.01 | 0.78 | 0.44 | 1.41 | 1.27 |
| 63792 | 0 | 150555 | RTVGTSKSKYPLVIR  | 2.69 | 0.01 | 3.45 | 1.12 | 0.22 | 0.28 |
| 63793 | 0 | 157917 | RTVKKNIIEN       | 2.40 | 0.01 | 0.90 | 0.44 | 1.93 | 1.28 |
| 63794 | 0 | 157917 | RTVKKNIIEN       | 2.40 | 0.01 | 0.90 | 0.44 | 1.41 | 1.28 |
| 63795 | 0 | 157917 | RTVKKNIIEN       | 2.40 | 0.01 | 0.90 | 3.70 | 0.22 | 1.28 |
| 63796 | 0 | 56209  | RTVLEPIRDALNAMT  | 2.67 | 0.01 | 2.43 | 0.44 | 1.59 | 0.28 |
| 63797 | 0 | 121823 | RTVLVSMNY        | 2.21 | 0.01 | 0.78 | 0.68 | 0.22 | 0.28 |
| 63798 | 0 | 119331 | RTVLVSMNYR       | 2.32 | 0.01 | 0.78 | 2.66 | 0.22 | 1.27 |
| 63799 | 0 | 119331 | RTVLVSMNYR       | 2.32 | 0.01 | 0.78 | 2.66 | 0.22 | 0.85 |
| 63800 | 0 | 119331 | RTVLVSMNYR       | 2.32 | 0.01 | 0.78 | 2.66 | 0.22 | 0.85 |
| 63801 | 0 | 119331 | RTVLVSMNYR       | 2.32 | 0.01 | 0.78 | 2.66 | 0.22 | 0.28 |
| 63802 | 0 | 119331 | RTVLVSMNYR       | 2.32 | 0.01 | 0.78 | 1.15 | 0.22 | 0.28 |
| 63803 | 0 | 95808  | RTVNPLGFFKKE     | 2.43 | 0.01 | 2.88 | 1.12 | 0.22 | 0.85 |
| 63804 | 0 | 56216  | RTWAQPGY         | 2.10 | 0.01 | 1.72 | 0.44 | 0.85 | 0.28 |
|       |   |        | RTWAQPGYPWPLYGNE |      |      |      |      |      |      |
| 63805 | 0 | 56218  | GCGWAGWLLSPRGRS  | 3.69 | 0.01 | 1.72 | 0.44 | 0.85 | 0.28 |
|       |   |        | SWGPTDPRRR       |      |      |      |      |      |      |
| 63806 | 0 | 451056 | RTWEPYT          | 2.02 | 0.01 | 0.90 | 0.44 | 1.41 | 1.39 |
| 63807 | 0 | 56225  | RTWLSTPEKYRGRD   | 2.60 | 0.01 | 2.40 | 2.43 | 0.22 | 0.28 |
| 63808 | 0 | 56225  | RTWLSTPEKYRGRD   | 2.60 | 0.01 | 2.40 | 2.43 | 0.22 | 0.28 |
| 63809 | 0 | 56225  | RTWLSTPEKYRGRD   | 2.60 | 0.01 | 2.40 | 2.43 | 0.22 | 0.28 |
| 63810 | 0 | 181796 | RTYKDNITIFIDLNC  | 2.68 | 0.01 | 1.66 | 2.37 | 0.22 | 1.28 |
| 63811 | 0 | 174265 | RVADVI           | 1.90 | 0.01 | 3.00 | 0.68 | 0.22 | 1.48 |
| 63812 | 0 | 174265 | RVADVI           | 1.90 | 0.01 | 3.00 | 0.68 | 0.22 | 1.48 |
| 63813 | 0 | 174265 | RVADVI           | 1.90 | 0.01 | 3.00 | 0.68 | 0.22 | 1.48 |
| 63814 | 0 | 174265 | RVADVI           | 1.90 | 0.01 | 3.00 | 0.68 | 0.22 | 1.48 |
| 63815 | 0 | 174265 | RVADVI           | 1.90 | 0.01 | 3.00 | 0.68 | 0.22 | 1.48 |
| 63816 | 0 | 174265 | RVADVI           | 1.90 | 0.01 | 3.00 | 0.68 | 0.22 | 1.48 |
| 63817 | 0 | 174265 | RVADVI           | 1.90 | 0.01 | 3.00 | 0.68 | 0.22 | 1.48 |

|       |   |        |                                    |      |      |      |      |      |      |
|-------|---|--------|------------------------------------|------|------|------|------|------|------|
| 63818 | 0 | 174265 | RVADVI                             | 1.90 | 0.01 | 3.00 | 0.68 | 0.22 | 1.48 |
| 63819 | 0 | 174265 | RVADVI                             | 1.90 | 0.01 | 3.00 | 0.68 | 0.22 | 1.48 |
| 63820 | 0 | 174265 | RVADVI                             | 1.90 | 0.01 | 3.00 | 0.68 | 0.22 | 0.28 |
| 63821 | 0 | 174265 | RVADVI                             | 1.90 | 0.01 | 3.00 | 0.68 | 0.22 | 0.28 |
| 63822 | 0 | 174265 | RVADVI                             | 1.90 | 0.01 | 3.00 | 0.68 | 0.22 | 0.28 |
| 63823 | 0 | 174265 | RVADVI                             | 1.90 | 0.01 | 3.00 | 0.68 | 0.22 | 0.28 |
| 63824 | 0 | 174265 | RVADVI                             | 1.90 | 0.01 | 3.00 | 0.68 | 0.22 | 0.28 |
| 63825 | 0 | 174265 | RVADVI                             | 1.90 | 0.01 | 3.00 | 0.68 | 0.22 | 0.28 |
| 63826 | 0 | 174265 | RVADVI                             | 1.90 | 0.01 | 3.00 | 0.68 | 0.22 | 0.28 |
| 63827 | 0 | 174265 | RVADVI                             | 1.90 | 0.01 | 3.00 | 0.68 | 0.22 | 0.28 |
| 63828 | 0 | 174265 | RVADVI                             | 1.90 | 0.01 | 3.00 | 0.68 | 0.22 | 0.28 |
| 63829 | 0 | 174265 | RVADVI                             | 1.90 | 0.01 | 3.00 | 0.68 | 0.22 | 0.85 |
| 63830 | 0 | 174265 | RVADVI                             | 1.90 | 0.01 | 3.00 | 0.68 | 0.22 | 0.28 |
| 63831 | 0 | 174265 | RVADVI                             | 1.90 | 0.01 | 3.00 | 0.68 | 0.22 | 0.85 |
| 63832 | 0 | 174265 | RVADVI                             | 1.90 | 0.01 | 3.00 | 0.68 | 0.22 | 1.48 |
| 63833 | 0 | 174265 | RVADVI                             | 1.90 | 0.01 | 3.00 | 0.68 | 0.22 | 0.28 |
| 63834 | 0 | 195056 | RVAEAEKQRAAEAT                     | 2.67 | 0.01 | 2.30 | 0.44 | 0.85 | 0.85 |
| 63835 | 0 | 98429  | RVAI                               | 1.57 | 0.01 | 3.97 | 0.44 | 0.85 | 0.28 |
| 63836 | 0 | 56237  | RVAISTYTTSLGAGPVSIS<br>AVAVLAPHSVL | 3.37 | 0.01 | 3.93 | 2.74 | 0.22 | 2.02 |
| 63837 | 0 | 56237  | RVAISTYTTSLGAGPVSIS<br>AVAVLAPHSVL | 3.37 | 0.01 | 3.93 | 2.74 | 0.22 | 1.66 |
| 63838 | 0 | 56237  | RVAISTYTTSLGAGPVSIS<br>AVAVLAPHSVL | 3.37 | 0.01 | 3.93 | 2.74 | 0.22 | 1.66 |
| 63839 | 0 | 56237  | RVAISTYTTSLGAGPVSIS<br>AVAVLAPHSVL | 3.37 | 0.01 | 3.93 | 2.74 | 0.22 | 1.66 |
| 63840 | 0 | 56237  | RVAISTYTTSLGAGPVSIS<br>AVAVLAPHSVL | 3.37 | 0.01 | 3.93 | 2.74 | 0.22 | 1.66 |
| 63841 | 0 | 56237  | RVAISTYTTSLGAGPVSIS<br>AVAVLAPHSVL | 3.37 | 0.01 | 3.93 | 2.74 | 0.22 | 1.66 |
| 63842 | 0 | 56237  | RVAISTYTTSLGAGPVSIS<br>AVAVLAPHSVL | 3.37 | 0.01 | 3.93 | 2.74 | 0.22 | 1.66 |
| 63843 | 0 | 56237  | RVAISTYTTSLGAGPVSIS<br>AVAVLAPHSVL | 3.37 | 0.01 | 3.93 | 2.74 | 0.22 | 0.28 |
| 63844 | 0 | 56237  | RVAISTYTTSLGAGPVSIS<br>AVAVLAPHSVL | 3.37 | 0.01 | 3.93 | 2.74 | 0.22 | 1.34 |
| 63845 | 0 | 56237  | RVAISTYTTSLGAGPVSIS<br>AVAVLAPHSVL | 3.37 | 0.01 | 3.93 | 2.74 | 0.22 | 0.28 |
| 63846 | 0 | 56238  | RVAKGQGPLRVYLTQRR<br>KQGNASWEWEEFI | 3.31 | 0.01 | 0.90 | 1.15 | 0.22 | 1.27 |
| 63847 | 0 | 131309 | RVALTEDRLP                         | 2.32 | 0.01 | 0.78 | 0.44 | 1.13 | 2.02 |
| 63848 | 0 | 240919 | RVAPDDLPAITSLAA                    | 2.69 | 0.01 | 4.93 | 0.44 | 1.41 | 0.28 |
| 63849 | 0 | 451058 | RVASLAP                            | 2.02 | 0.01 | 0.90 | 0.44 | 1.23 | 1.39 |
| 63850 | 0 | 56246  | RVCEKM                             | 1.88 | 0.01 | 1.96 | 0.44 | 0.85 | 0.28 |
| 63851 | 0 | 56248  | RVCSCWMMMLISQAE<br>A               | 2.78 | 0.01 | 2.83 | 0.44 | 0.85 | 0.28 |

|       |   |        |                          |      |      |      |      |      |      |
|-------|---|--------|--------------------------|------|------|------|------|------|------|
| 63852 | 0 | 123723 | RVCYNPKFE                | 2.18 | 0.01 | 2.28 | 2.00 | 0.22 | 0.28 |
| 63853 | 0 | 123723 | RVCYNPKFE                | 2.18 | 0.01 | 2.28 | 2.00 | 0.22 | 0.28 |
| 63854 | 0 | 129847 | RVDELERIRRSILPYG         | 2.75 | 0.01 | 0.78 | 0.44 | 1.13 | 0.85 |
| 63855 | 0 | 121824 | RVDGQREAADEAQAF<br>WF    | 2.83 | 0.01 | 0.90 | 0.68 | 0.22 | 1.39 |
| 63856 | 0 | 121824 | RVDGQREAADEAQAF<br>WF    | 2.83 | 0.01 | 0.90 | 0.68 | 0.22 | 0.28 |
| 63857 | 0 | 121824 | RVDGQREAADEAQAF<br>WF    | 2.83 | 0.01 | 0.90 | 0.68 | 0.22 | 0.28 |
| 63858 | 0 | 132641 | RVDKVDE                  | 2.04 | 0.01 | 0.78 | 0.68 | 0.22 | 0.85 |
| 63859 | 0 | 132641 | RVDKVDE                  | 2.04 | 0.01 | 0.78 | 0.68 | 0.22 | 0.85 |
| 63860 | 0 | 148204 | RVDLLNYLSPPI             | 2.46 | 0.01 | 0.90 | 0.44 | 1.41 | 1.39 |
| 63861 | 0 | 56259  | RVEAQLHVWIPPLN           | 2.58 | 0.01 | 2.41 | 0.44 | 0.85 | 0.28 |
| 63862 | 0 | 56260  | RVEDALHA                 | 2.12 | 0.01 | 2.99 | 0.44 | 0.85 | 0.28 |
| 63863 | 0 | 56272  | RVEESI                   | 1.89 | 0.01 | 1.96 | 0.44 | 0.85 | 0.28 |
| 63864 | 0 | 56273  | RVEFLV                   | 1.90 | 0.01 | 1.96 | 0.44 | 0.85 | 0.28 |
| 63865 | 0 | 56275  | RVEHAVVYVYSPSR           | 2.72 | 0.01 | 2.43 | 0.68 | 0.22 | 0.28 |
| 63866 | 0 | 56275  | RVEHAVVYVYSPSR           | 2.72 | 0.01 | 2.43 | 3.34 | 0.22 | 0.28 |
| 63867 | 0 | 56275  | RVEHAVVYVYSPSR           | 2.72 | 0.01 | 2.43 | 0.44 | 0.85 | 0.28 |
| 63868 | 0 | 78265  | RVEYRGEDAP               | 2.32 | 0.01 | 3.45 | 0.68 | 0.22 | 0.28 |
| 63869 | 0 | 56283  | RVFEVGVIRNPGLGA          | 2.69 | 0.01 | 2.43 | 0.68 | 0.22 | 0.28 |
| 63870 | 0 | 56283  | RVFEVGVIRNPGLGA          | 2.69 | 0.01 | 2.43 | 0.68 | 0.22 | 0.28 |
| 63871 | 0 | 56283  | RVFEVGVIRNPGLGA          | 2.69 | 0.01 | 2.43 | 0.44 | 0.85 | 0.28 |
| 63872 | 0 | 173124 | RVFKVFLENVIWYAV          | 2.66 | 0.01 | 0.78 | 0.44 | 1.13 | 0.28 |
| 63873 | 0 | 96846  | RVFPRGTVENP              | 2.42 | 0.01 | 3.13 | 1.20 | 0.22 | 0.28 |
| 63874 | 0 | 96846  | RVFPRGTVENP              | 2.42 | 0.01 | 3.13 | 1.20 | 0.22 | 1.27 |
| 63875 | 0 | 56290  | RVFPRGTVENPDKAREL<br>LNK | 2.94 | 0.01 | 3.13 | 2.42 | 0.22 | 1.34 |
| 63876 | 0 | 56290  | RVFPRGTVENPDKAREL<br>LNK | 2.94 | 0.01 | 3.13 | 2.42 | 0.22 | 0.28 |
| 63877 | 0 | 56290  | RVFPRGTVENPDKAREL<br>LNK | 2.94 | 0.01 | 3.13 | 2.42 | 0.22 | 1.34 |
| 63878 | 0 | 56290  | RVFPRGTVENPDKAREL<br>LNK | 2.94 | 0.01 | 3.13 | 2.42 | 0.22 | 0.28 |
| 63879 | 0 | 56290  | RVFPRGTVENPDKAREL<br>LNK | 2.94 | 0.01 | 3.13 | 1.20 | 0.22 | 0.28 |
| 63880 | 0 | 56290  | RVFPRGTVENPDKAREL<br>LNK | 2.94 | 0.01 | 3.13 | 1.20 | 0.22 | 0.28 |
| 63881 | 0 | 56290  | RVFPRGTVENPDKAREL<br>LNK | 2.94 | 0.01 | 3.13 | 1.20 | 0.22 | 1.34 |
| 63882 | 0 | 56290  | RVFPRGTVENPDKAREL<br>LNK | 2.94 | 0.01 | 3.13 | 1.20 | 0.22 | 1.34 |
| 63883 | 0 | 56290  | RVFPRGTVENPDKAREL<br>LNK | 2.94 | 0.01 | 3.13 | 1.20 | 0.22 | 1.34 |
| 63884 | 0 | 56290  | RVFPRGTVENPDKAREL<br>LNK | 2.94 | 0.01 | 3.13 | 1.20 | 0.22 | 1.34 |

|       |   |        |                          |      |      |      |      |      |      |
|-------|---|--------|--------------------------|------|------|------|------|------|------|
| 63885 | 0 | 56290  | RVFPRGTVENPDKAREL<br>LNK | 2.94 | 0.01 | 3.13 | 1.20 | 0.22 | 0.28 |
| 63886 | 0 | 56290  | RVFPRGTVENPDKAREL<br>LNK | 2.94 | 0.01 | 3.13 | 1.20 | 0.22 | 0.28 |
| 63887 | 0 | 56290  | RVFPRGTVENPDKAREL<br>LNK | 2.94 | 0.01 | 3.13 | 1.20 | 0.22 | 0.28 |
| 63888 | 0 | 56290  | RVFPRGTVENPDKAREL<br>LNK | 2.94 | 0.01 | 3.13 | 1.20 | 0.22 | 0.28 |
| 63889 | 0 | 56290  | RVFPRGTVENPDKAREL<br>LNK | 2.94 | 0.01 | 3.13 | 1.20 | 0.22 | 0.28 |
| 63890 | 0 | 56290  | RVFPRGTVENPDKAREL<br>LNK | 2.94 | 0.01 | 3.13 | 1.20 | 0.22 | 0.28 |
| 63891 | 0 | 56290  | RVFPRGTVENPDKAREL<br>LNK | 2.94 | 0.01 | 3.13 | 1.20 | 0.22 | 0.28 |
| 63892 | 0 | 56290  | RVFPRGTVENPDKAREL<br>LNK | 2.94 | 0.01 | 3.13 | 1.20 | 0.22 | 0.28 |
| 63893 | 0 | 56290  | RVFPRGTVENPDKAREL<br>LNK | 2.94 | 0.01 | 3.13 | 1.20 | 0.22 | 1.34 |
| 63894 | 0 | 56291  | RVFPRGTVENPDKAREL<br>NKY | 2.94 | 0.01 | 0.90 | 3.27 | 0.22 | 0.28 |
| 63895 | 0 | 56294  | RVFTEAMTR                | 2.24 | 0.01 | 1.96 | 0.44 | 0.85 | 1.34 |
| 63896 | 0 | 138608 | RVGAHDP                  | 1.99 | 0.01 | 0.78 | 1.12 | 0.22 | 0.28 |
| 63897 | 0 | 138608 | RVGAHDP                  | 1.99 | 0.01 | 0.78 | 0.44 | 1.13 | 0.28 |
| 63898 | 0 | 138608 | RVGAHDP                  | 1.99 | 0.01 | 0.78 | 0.44 | 1.41 | 0.28 |
| 63899 | 0 | 138608 | RVGAHDP                  | 1.99 | 0.01 | 0.78 | 0.44 | 1.13 | 1.27 |
| 63900 | 0 | 138608 | RVGAHDP                  | 1.99 | 0.01 | 0.78 | 1.12 | 0.22 | 1.48 |
| 63901 | 0 | 138608 | RVGAHDP                  | 1.99 | 0.01 | 0.78 | 1.12 | 0.22 | 0.28 |
| 63902 | 0 | 138608 | RVGAHDP                  | 1.99 | 0.01 | 0.78 | 1.12 | 0.22 | 0.28 |
| 63903 | 0 | 138608 | RVGAHDP                  | 1.99 | 0.01 | 0.78 | 1.12 | 0.22 | 0.28 |
| 63904 | 0 | 138608 | RVGAHDP                  | 1.99 | 0.01 | 0.78 | 1.12 | 0.22 | 0.28 |
| 63905 | 0 | 135270 | RVGETPLM                 | 2.10 | 0.01 | 0.78 | 1.12 | 0.22 | 0.28 |
| 63906 | 0 | 374136 | RVGKKEEDNDDDDL           | 2.68 | 0.01 | 1.61 | 0.44 | 0.85 | 1.28 |
| 63907 | 0 | 56300  | RVGLSNPT                 | 2.10 | 0.01 | 2.40 | 2.43 | 0.22 | 0.28 |
| 63908 | 0 | 113833 | RVGLYSRALH               | 2.32 | 0.01 | 3.85 | 1.12 | 0.22 | 0.28 |
| 63909 | 0 | 179896 | RVGRNPKNEN               | 2.34 | 0.01 | 2.30 | 0.68 | 0.22 | 1.48 |
| 63910 | 0 | 179896 | RVGRNPKNEN               | 2.34 | 0.01 | 2.30 | 0.68 | 0.22 | 0.85 |
| 63911 | 0 | 179896 | RVGRNPKNEN               | 2.34 | 0.01 | 2.30 | 0.68 | 0.22 | 1.27 |
| 63912 | 0 | 179896 | RVGRNPKNEN               | 2.34 | 0.01 | 2.30 | 0.68 | 0.22 | 0.28 |
| 63913 | 0 | 179896 | RVGRNPKNEN               | 2.34 | 0.01 | 2.30 | 0.68 | 0.22 | 0.28 |
| 63914 | 0 | 179896 | RVGRNPKNEN               | 2.34 | 0.01 | 2.30 | 0.68 | 0.22 | 0.85 |
| 63915 | 0 | 179896 | RVGRNPKNEN               | 2.34 | 0.01 | 2.30 | 0.68 | 0.22 | 1.48 |
| 63916 | 0 | 88292  | RVHVSKEEQYYDYED          | 2.69 | 0.01 | 2.14 | 3.44 | 0.22 | 0.28 |
| 63917 | 0 | 88292  | RVHVSKEEQYYDYED          | 2.69 | 0.01 | 2.14 | 3.44 | 0.22 | 0.28 |
| 63918 | 0 | 56306  | RVHVSKEEQYYDYEDAT<br>FE  | 2.89 | 0.01 | 2.14 | 1.15 | 0.22 | 1.27 |
| 63919 | 0 | 56306  | RVHVSKEEQYYDYEDAT<br>FE  | 2.89 | 0.01 | 2.14 | 1.15 | 0.22 | 0.28 |

|       |   |        |                                    |      |      |      |      |      |      |
|-------|---|--------|------------------------------------|------|------|------|------|------|------|
| 63920 | 0 | 56306  | RVHVSKEEQYYDYEDAT<br>FE            | 2.89 | 0.01 | 2.14 | 1.20 | 0.22 | 0.28 |
| 63921 | 0 | 173125 | RVILAQGDNKNVDDRD                   | 2.69 | 0.01 | 0.78 | 0.44 | 1.41 | 0.28 |
| 63922 | 0 | 423499 | RVINMKAALSSIAAS                    | 2.69 | 0.01 | 2.51 | 0.44 | 2.35 | 1.28 |
| 63923 | 0 | 56329  | RVKMEKLKLGTTYGM<br>C               | 2.80 | 0.01 | 3.22 | 0.68 | 0.22 | 0.28 |
| 63924 | 0 | 56329  | RVKMEKLKLGTTYGM<br>C               | 2.80 | 0.01 | 3.22 | 0.68 | 0.22 | 0.28 |
| 63925 | 0 | 56330  | RVKN                               | 1.57 | 0.01 | 2.45 | 0.44 | 0.85 | 1.34 |
| 63926 | 0 | 56330  | RVKN                               | 1.57 | 0.01 | 2.45 | 0.44 | 0.85 | 1.34 |
| 63927 | 0 | 56330  | RVKN                               | 1.57 | 0.01 | 2.45 | 0.44 | 0.85 | 1.34 |
| 63928 | 0 | 56331  | RVKNYHSRSE                         | 2.32 | 0.01 | 3.17 | 0.68 | 0.22 | 0.28 |
| 63929 | 0 | 56331  | RVKNYHSRSE                         | 2.32 | 0.01 | 3.17 | 0.68 | 0.22 | 0.28 |
| 63930 | 0 | 56331  | RVKNYHSRSE                         | 2.32 | 0.01 | 3.17 | 0.68 | 0.22 | 0.85 |
| 63931 | 0 | 56331  | RVKNYHSRSE                         | 2.32 | 0.01 | 3.17 | 0.68 | 0.22 | 0.28 |
| 63932 | 0 | 374205 | RVKRVKRKAACKGAA                    | 2.73 | 0.01 | 1.61 | 0.44 | 0.85 | 1.28 |
| 63933 | 0 | 56335  | RVKTRWRMH                          | 2.13 | 0.01 | 0.78 | 0.44 | 1.74 | 0.28 |
| 63934 | 0 | 135989 | RVLAPHLTRAYA                       | 2.50 | 0.01 | 0.78 | 0.44 | 1.41 | 0.28 |
| 63935 | 0 | 496916 | RVLAPHLTRAYAKDKF<br>GADARALMLQGVD  | 3.35 | 0.01 | 0.78 | 0.44 | 1.93 | 2.12 |
| 63936 | 0 | 243209 | RVLRLLRTLRLPLRVI                   | 2.74 | 0.01 | 0.78 | 0.44 | 1.59 | 0.28 |
| 63937 | 0 | 149099 | RVLTSM                             | 1.99 | 0.01 | 0.90 | 2.13 | 1.59 | 1.39 |
| 63938 | 0 | 122894 | RVMGGPVTPRKGPPKF<br>KQRQTRQFKSKPPK | 3.38 | 0.01 | 1.60 | 2.04 | 0.22 | 0.28 |
| 63939 | 0 | 56364  | RVMYASSG                           | 2.11 | 0.01 | 2.21 | 1.12 | 0.22 | 0.28 |
| 63940 | 0 | 56364  | RVMYASSG                           | 2.11 | 0.01 | 2.21 | 0.44 | 0.85 | 0.28 |
| 63941 | 0 | 56365  | RVMYASSGIG                         | 2.30 | 0.01 | 2.21 | 1.12 | 0.22 | 0.28 |
| 63942 | 0 | 56365  | RVMYASSGIG                         | 2.30 | 0.01 | 2.21 | 1.12 | 0.22 | 0.28 |
| 63943 | 0 | 56366  | RVNAANKKPEDLTLNDL<br>ETD           | 2.96 | 0.01 | 2.59 | 0.44 | 0.85 | 0.28 |
| 63944 | 0 | 56366  | RVNAANKKPEDLTLNDL<br>ETD           | 2.96 | 0.01 | 2.59 | 3.05 | 0.85 | 0.28 |
| 63945 | 0 | 56373  | RVNQVAEVLQL                        | 2.43 | 0.01 | 3.53 | 0.68 | 0.22 | 0.85 |
| 63946 | 0 | 56373  | RVNQVAEVLQL                        | 2.43 | 0.01 | 3.53 | 0.68 | 0.22 | 1.27 |
| 63947 | 0 | 56373  | RVNQVAEVLQL                        | 2.43 | 0.01 | 3.53 | 0.68 | 0.22 | 1.27 |
| 63948 | 0 | 56373  | RVNQVAEVLQL                        | 2.43 | 0.01 | 3.53 | 0.68 | 0.22 | 1.34 |
| 63949 | 0 | 153455 | RVPNVLPFLPFLGGGS                   | 2.76 | 0.01 | 0.90 | 0.68 | 0.22 | 1.39 |
| 63950 | 0 | 153455 | RVPNVLPFLPFLGGGS                   | 2.76 | 0.01 | 0.90 | 0.68 | 0.22 | 0.28 |
| 63951 | 0 | 182004 | RVPPQGDSELPKKKEFST<br>GT           | 2.93 | 0.01 | 3.85 | 2.13 | 1.74 | 0.28 |
| 63952 | 0 | 125248 | RVPPRYHAKISPMVN                    | 2.67 | 0.01 | 0.90 | 1.15 | 0.22 | 1.27 |
| 63953 | 0 | 125248 | RVPPRYHAKISPMVN                    | 2.67 | 0.01 | 0.90 | 1.15 | 0.22 | 0.28 |
| 63954 | 0 | 127811 | RVPRIPRDP RPP                      | 2.74 | 0.01 | 2.40 | 0.44 | 1.13 | 0.85 |
| 63955 | 0 | 138025 | RVPRISCGINYG                       | 2.48 | 0.01 | 2.21 | 0.44 | 0.85 | 0.28 |

|       |   |        |                               |      |      |      |      |      |      |
|-------|---|--------|-------------------------------|------|------|------|------|------|------|
| 63956 | 0 | 138025 | RVPRISCGINYG                  | 2.48 | 0.01 | 2.21 | 1.20 | 0.22 | 0.28 |
| 63957 | 0 | 98433  | RVQKANADAK                    | 2.33 | 0.01 | 2.39 | 0.68 | 0.22 | 0.28 |
| 63958 | 0 | 56386  | RVQYEG                        | 1.88 | 0.01 | 2.40 | 0.44 | 0.85 | 0.28 |
| 63959 | 0 | 56388  | RVRAYTYGVIDLPQSYEK<br>INLKRRK | 3.14 | 0.01 | 3.50 | 3.26 | 1.59 | 0.28 |
| 63960 | 0 | 56388  | RVRAYTYGVIDLPQSYEK<br>INLKRRK | 3.14 | 0.01 | 3.50 | 2.00 | 1.59 | 0.28 |
| 63961 | 0 | 109886 | RVRAYTYGVIDMPKNYE<br>KTNLNRKK | 3.14 | 0.01 | 4.63 | 2.00 | 0.22 | 0.28 |
| 63962 | 0 | 109886 | RVRAYTYGVIDMPKNYE<br>KTNLNRKK | 3.14 | 0.01 | 4.63 | 2.00 | 0.22 | 0.28 |
| 63963 | 0 | 56389  | RVRAYTYGVIEMPKNYE<br>KVSLNRKK | 3.14 | 0.01 | 3.50 | 2.00 | 1.59 | 0.28 |
| 63964 | 0 | 56389  | RVRAYTYGVIEMPKNYE<br>KVSLNRKK | 3.14 | 0.01 | 3.50 | 3.26 | 1.59 | 0.28 |
| 63965 | 0 | 179467 | RVRCGRSLQGYPFNP               | 2.67 | 0.01 | 2.36 | 0.44 | 1.23 | 1.28 |
| 63966 | 0 | 179467 | RVRCGRSLQGYPFNP               | 2.67 | 0.01 | 2.36 | 0.44 | 1.23 | 1.27 |
| 63967 | 0 | 179467 | RVRCGRSLQGYPFNP               | 2.67 | 0.01 | 2.36 | 0.44 | 1.23 | 1.28 |
| 63968 | 0 | 56396  | RVRGLYLPAGG                   | 2.41 | 0.01 | 2.58 | 2.25 | 0.22 | 1.57 |
| 63969 | 0 | 56397  | RVRGLYLPAGGS                  | 2.49 | 0.01 | 2.08 | 0.68 | 0.22 | 2.35 |
| 63970 | 0 | 56397  | RVRGLYLPAGGS                  | 2.49 | 0.01 | 2.08 | 0.68 | 0.22 | 0.28 |
| 63971 | 0 | 134522 | RVRVSWSP                      | 2.17 | 0.01 | 0.78 | 0.44 | 1.13 | 0.28 |
| 63972 | 0 | 134522 | RVRVSWSP                      | 2.17 | 0.01 | 0.78 | 0.44 | 1.13 | 0.28 |
| 63973 | 0 | 56411  | RVRYFI                        | 1.91 | 0.01 | 0.90 | 0.44 | 1.59 | 1.39 |
| 63974 | 0 | 423500 | RVSAFVAYAVARNRR               | 2.72 | 0.01 | 2.51 | 0.44 | 2.35 | 1.28 |
| 63975 | 0 | 123725 | RVSMIEGAA                     | 2.18 | 0.01 | 2.28 | 2.00 | 0.22 | 0.28 |
| 63976 | 0 | 374485 | RVSPYSIFLQELARK               | 2.65 | 0.01 | 1.61 | 0.44 | 0.85 | 1.28 |
| 63977 | 0 | 434236 | RVSRRAGR                      | 2.17 | 0.01 | 0.90 | 2.36 | 0.22 | 1.39 |
| 63978 | 0 | 134523 | RVSWSPVP                      | 2.16 | 0.01 | 0.78 | 0.44 | 1.13 | 0.28 |
| 63979 | 0 | 134523 | RVSWSPVP                      | 2.16 | 0.01 | 0.78 | 0.44 | 1.13 | 0.28 |
| 63980 | 0 | 137286 | RVTAAQGRIYTR                  | 2.49 | 0.01 | 4.23 | 2.13 | 0.22 | 0.28 |
| 63981 | 0 | 137286 | RVTAAQGRIYTR                  | 2.49 | 0.01 | 4.23 | 2.13 | 0.22 | 1.34 |
| 63982 | 0 | 137286 | RVTAAQGRIYTR                  | 2.49 | 0.01 | 4.23 | 2.13 | 0.22 | 1.34 |
| 63983 | 0 | 56430  | RVTREECPGTRVTINAD<br>CDKRG    | 3.09 | 0.01 | 3.72 | 0.68 | 0.22 | 0.28 |
| 63984 | 0 | 176593 | RVTSWLGRQLRIAGK               | 2.67 | 0.01 | 2.63 | 1.15 | 0.22 | 0.85 |
| 63985 | 0 | 176593 | RVTSWLGRQLRIAGK               | 2.67 | 0.01 | 2.63 | 1.15 | 0.22 | 0.85 |
| 63986 | 0 | 176593 | RVTSWLGRQLRIAGK               | 2.67 | 0.01 | 2.63 | 1.15 | 0.22 | 0.85 |
| 63987 | 0 | 102783 | RVTTPGKPNPDNPNN<br>NYIK       | 2.96 | 0.01 | 2.39 | 0.68 | 0.22 | 0.28 |
| 63988 | 0 | 56432  | RVTTRSQAQDAAGLKEK<br>AD       | 2.90 | 0.01 | 4.63 | 2.42 | 0.22 | 0.28 |
| 63989 | 0 | 56432  | RVTTRSQAQDAAGLKEK<br>AD       | 2.90 | 0.01 | 4.63 | 2.42 | 0.22 | 1.34 |
| 63990 | 0 | 56432  | RVTTRSQAQDAAGLKEK<br>AD       | 2.90 | 0.01 | 2.24 | 2.42 | 0.22 | 0.28 |



|       |   |        |                                           |      |      |      |      |      |      |
|-------|---|--------|-------------------------------------------|------|------|------|------|------|------|
| 63991 | 0 | 56432  | RVTTTSQAQDAAGLKEK<br>AD                   | 2.90 | 0.01 | 2.24 | 2.42 | 0.22 | 1.34 |
| 63992 | 0 | 56434  | RVTVSTRRSQQTIIIPNIG                       | 2.87 | 0.01 | 2.36 | 0.44 | 0.85 | 1.57 |
| 63993 | 0 | 56434  | RVTVSTRRSQQTIIIPNIG                       | 2.87 | 0.01 | 2.36 | 1.15 | 0.22 | 1.57 |
| 63994 | 0 | 56434  | RVTVSTRRSQQTIIIPNIG                       | 2.87 | 0.01 | 2.36 | 1.15 | 0.22 | 1.57 |
| 63995 | 0 | 56434  | RVTVSTRRSQQTIIIPNIG                       | 2.87 | 0.01 | 2.36 | 1.15 | 0.22 | 1.57 |
| 63996 | 0 | 156952 | RVVE                                      | 1.59 | 4.15 | 0.78 | 0.44 | 1.13 | 0.28 |
| 63997 | 0 | 135753 | RVVGGEDA                                  | 2.12 | 0.01 | 0.78 | 0.44 | 2.35 | 0.28 |
| 63998 | 0 | 121826 | RVVGPYSTSTWFRVK                           | 2.69 | 0.01 | 0.90 | 0.68 | 0.22 | 1.39 |
| 63999 | 0 | 121826 | RVVGPYSTSTWFRVK                           | 2.69 | 0.01 | 0.90 | 0.68 | 0.22 | 0.28 |
| 64000 | 0 | 121826 | RVVGPYSTSTWFRVK                           | 2.69 | 0.01 | 0.90 | 0.68 | 0.22 | 0.28 |
| 64001 | 0 | 56443  | RVVIQDYDNQHEQDRP<br>TPSP                  | 2.94 | 0.01 | 2.70 | 0.44 | 0.85 | 0.28 |
| 64002 | 0 | 79379  | RVVIWAKDWE                                | 2.30 | 0.01 | 0.90 | 0.68 | 0.22 | 0.28 |
| 64003 | 0 | 121827 | RVVPLLADPLVDPF                            | 2.73 | 0.01 | 0.90 | 0.68 | 0.22 | 1.39 |
| 64004 | 0 | 121827 | RVVPLLADPLVDPF                            | 2.73 | 0.01 | 0.90 | 0.68 | 0.22 | 0.28 |
| 64005 | 0 | 121827 | RVVPLLADPLVDPF                            | 2.73 | 0.01 | 0.90 | 0.68 | 0.22 | 0.28 |
| 64006 | 0 | 131055 | RVVRDPQGIRAWVAW<br>RAHCQNRDLSQYIRNCG<br>V | 3.44 | 0.01 | 1.75 | 0.68 | 0.22 | 0.28 |
| 64007 | 0 | 131055 | RVVRDPQGIRAWVAW<br>RAHCQNRDLSQYIRNCG<br>V | 3.44 | 0.01 | 1.75 | 0.68 | 0.22 | 0.28 |
| 64008 | 0 | 131055 | RVVRDPQGIRAWVAW<br>RAHCQNRDLSQYIRNCG<br>V | 3.44 | 0.01 | 1.75 | 0.68 | 0.22 | 0.28 |
| 64009 | 0 | 225854 | RVVSVLRIQHQDWLN                           | 2.69 | 0.01 | 3.28 | 0.44 | 0.22 | 0.85 |
| 64010 | 0 | 107607 | RVVSVLT                                   | 2.04 | 0.01 | 0.78 | 0.44 | 1.13 | 0.28 |
| 64011 | 0 | 188469 | RVVTKKGRTFLYPNDLL<br>Q                    | 2.82 | 0.01 | 3.75 | 1.12 | 0.22 | 0.28 |
| 64012 | 0 | 188469 | RVVTKKGRTFLYPNDLL<br>Q                    | 2.82 | 0.01 | 3.75 | 1.12 | 0.22 | 0.85 |
| 64013 | 0 | 188469 | RVVTKKGRTFLYPNDLL<br>Q                    | 2.82 | 0.01 | 3.75 | 1.12 | 0.22 | 0.85 |
| 64014 | 0 | 188469 | RVVTKKGRTFLYPNDLL<br>Q                    | 2.82 | 0.01 | 3.75 | 1.12 | 0.22 | 0.85 |
| 64015 | 0 | 188469 | RVVTKKGRTFLYPNDLL<br>Q                    | 2.82 | 0.01 | 3.75 | 1.12 | 0.22 | 0.85 |
| 64016 | 0 | 56448  | RVVVTPDKEILYEA                            | 2.57 | 0.01 | 2.69 | 0.44 | 1.41 | 0.28 |
| 64017 | 0 | 56448  | RVVVTPDKEILYEA                            | 2.57 | 0.01 | 2.69 | 0.44 | 0.85 | 0.28 |
| 64018 | 0 | 56448  | RVVVTPDKEILYEA                            | 2.57 | 0.01 | 2.69 | 0.44 | 0.85 | 0.28 |
| 64019 | 0 | 56448  | RVVVTPDKEILYEA                            | 2.57 | 0.01 | 2.69 | 0.44 | 0.85 | 0.28 |

|       |   |        |                              |      |      |      |      |      |      |
|-------|---|--------|------------------------------|------|------|------|------|------|------|
| 64020 | 0 | 56453  | RVWQVILTGSYWMNF<br>SHEP      | 2.87 | 0.01 | 2.93 | 2.69 | 0.22 | 0.28 |
| 64021 | 0 | 121828 | RVYA                         | 1.57 | 0.01 | 0.78 | 0.68 | 0.22 | 0.28 |
| 64022 | 0 | 56461  | RVYHNGITGET                  | 2.39 | 0.01 | 2.14 | 1.81 | 0.22 | 0.28 |
| 64023 | 0 | 181452 | RVYMRIKHVRAWIPR              | 2.69 | 0.01 | 2.82 | 1.15 | 0.22 | 0.28 |
| 64024 | 0 | 115474 | RVYVEELKPTPEGDLEILL<br>Q     | 2.94 | 0.01 | 1.60 | 0.44 | 1.23 | 1.28 |
| 64025 | 0 | 56467  | RVYVPRSSLPGFYRTSLT<br>LA     | 2.98 | 0.01 | 2.58 | 0.44 | 0.22 | 0.28 |
| 64026 | 0 | 56469  | RWAPTGAPADVTDQL              | 2.68 | 0.01 | 3.02 | 1.81 | 0.22 | 0.85 |
| 64027 | 0 | 56469  | RWAPTGAPADVTDQL              | 2.68 | 0.01 | 3.02 | 2.25 | 0.22 | 0.85 |
| 64028 | 0 | 56469  | RWAPTGAPADVTDQL              | 2.68 | 0.01 | 3.02 | 1.81 | 0.22 | 0.85 |
| 64029 | 0 | 56469  | RWAPTGAPADVTDQL              | 2.68 | 0.01 | 3.02 | 1.81 | 0.22 | 0.85 |
| 64030 | 0 | 56469  | RWAPTGAPADVTDQL              | 2.68 | 0.01 | 3.02 | 2.25 | 0.22 | 0.28 |
| 64031 | 0 | 56469  | RWAPTGAPADVTDQL              | 2.68 | 0.01 | 3.02 | 2.25 | 0.22 | 0.28 |
| 64032 | 0 | 56469  | RWAPTGAPADVTDQL              | 2.68 | 0.01 | 3.02 | 2.25 | 0.22 | 0.85 |
| 64033 | 0 | 56469  | RWAPTGAPADVTDQL              | 2.68 | 0.01 | 3.02 | 2.25 | 2.25 | 1.75 |
| 64034 | 0 | 178407 | RWDATRE                      | 2.03 | 0.01 | 0.90 | 1.12 | 0.22 | 1.27 |
| 64035 | 0 | 114945 | RWFREKVSPAVFVSREG<br>QEQEGE  | 3.11 | 0.01 | 1.60 | 0.44 | 1.13 | 0.28 |
| 64036 | 0 | 114945 | RWFREKVSPAVFVSREG<br>QEQEGE  | 3.11 | 0.01 | 1.60 | 0.44 | 1.41 | 0.28 |
| 64037 | 0 | 114945 | RWFREKVSPAVFVSREG<br>QEQEGE  | 3.11 | 0.01 | 1.60 | 0.44 | 1.59 | 0.28 |
| 64038 | 0 | 131638 | RWGNQPERLNA                  | 2.40 | 0.01 | 0.78 | 1.12 | 0.22 | 0.28 |
| 64039 | 0 | 152103 | RWGQRDNIEETICTM<br>RLKENINDP | 3.15 | 0.01 | 3.12 | 0.68 | 0.22 | 2.66 |
| 64040 | 0 | 56479  | RWGSYAIGGSASPWILT<br>QTN     | 2.94 | 0.01 | 0.90 | 0.68 | 0.22 | 0.28 |
| 64041 | 0 | 56479  | RWGSYAIGGSASPWILT<br>QTN     | 2.94 | 0.01 | 0.90 | 0.68 | 0.22 | 0.28 |
| 64042 | 0 | 56479  | RWGSYAIGGSASPWILT<br>QTN     | 2.94 | 0.01 | 0.90 | 0.68 | 0.22 | 0.28 |
| 64043 | 0 | 173130 | RWLPAEYEDGFSLPY              | 2.66 | 0.01 | 0.78 | 0.44 | 1.13 | 0.28 |
| 64044 | 0 | 173130 | RWLPAEYEDGFSLPY              | 2.66 | 0.01 | 0.78 | 2.79 | 1.13 | 1.28 |
| 64045 | 0 | 173130 | RWLPAEYEDGFSLPY              | 2.66 | 0.01 | 0.78 | 2.79 | 1.13 | 1.28 |
| 64046 | 0 | 173130 | RWLPAEYEDGFSLPY              | 2.66 | 0.01 | 0.78 | 1.81 | 1.41 | 1.28 |
| 64047 | 0 | 173130 | RWLPAEYEDGFSLPY              | 2.66 | 0.01 | 0.78 | 1.81 | 1.41 | 1.28 |
| 64048 | 0 | 122895 | RWLPPVYEDGFS                 | 2.42 | 0.01 | 0.78 | 1.20 | 0.22 | 0.28 |

|       |   |        |                           |      |      |      |      |      |      |
|-------|---|--------|---------------------------|------|------|------|------|------|------|
| 64049 | 0 | 122895 | RWLPPVYEDGFS              | 2.42 | 0.01 | 0.78 | 1.20 | 0.22 | 1.27 |
| 64050 | 0 | 508009 | RWNGQ                     | 1.74 | 0.01 | 3.81 | 0.68 | 0.22 | 0.28 |
| 64051 | 0 | 508009 | RWNGQ                     | 1.74 | 0.01 | 3.81 | 0.68 | 0.22 | 1.48 |
| 64052 | 0 | 508009 | RWNGQ                     | 1.74 | 0.01 | 3.81 | 0.68 | 0.22 | 0.85 |
| 64053 | 0 | 56491  | RWNLNAHSALYV              | 2.48 | 0.01 | 3.33 | 0.44 | 1.23 | 0.85 |
| 64054 | 0 | 122896 | RWNPADYGGIK               | 2.35 | 0.01 | 2.26 | 2.04 | 0.22 | 1.57 |
| 64055 | 0 | 122896 | RWNPADYGGIK               | 2.35 | 0.01 | 2.26 | 2.04 | 0.22 | 1.57 |
| 64056 | 0 | 122896 | RWNPADYGGIK               | 2.35 | 0.01 | 2.26 | 2.04 | 0.22 | 1.57 |
| 64057 | 0 | 122896 | RWNPADYGGIK               | 2.35 | 0.01 | 2.26 | 2.04 | 0.22 | 1.57 |
| 64058 | 0 | 122896 | RWNPADYGGIK               | 2.35 | 0.01 | 2.26 | 2.04 | 0.22 | 1.57 |
| 64059 | 0 | 122896 | RWNPADYGGIK               | 2.35 | 0.01 | 2.26 | 2.04 | 0.22 | 1.57 |
| 64060 | 0 | 122896 | RWNPADYGGIK               | 2.35 | 0.01 | 2.26 | 2.04 | 0.22 | 1.57 |
| 64061 | 0 | 122896 | RWNPADYGGIK               | 2.35 | 0.01 | 2.26 | 2.04 | 0.22 | 1.57 |
| 64062 | 0 | 122896 | RWNPADYGGIK               | 2.35 | 0.01 | 2.26 | 2.04 | 0.22 | 1.57 |
| 64063 | 0 | 95037  | RWNPADYGGIKKIRLPS         | 2.76 | 0.01 | 2.26 | 2.36 | 0.22 | 2.02 |
| 64064 | 0 | 139239 | RWPEFSKFGGFDPQG           | 2.68 | 0.01 | 0.78 | 1.20 | 0.22 | 0.28 |
| 64065 | 0 | 139239 | RWPEFSKFGGFDPQG           | 2.68 | 0.01 | 0.78 | 1.20 | 0.22 | 0.28 |
| 64066 | 0 | 109891 | RWQEGNV                   | 1.99 | 0.01 | 0.78 | 0.44 | 1.13 | 0.28 |
| 64067 | 0 | 119638 | RWQQGNVF                  | 2.11 | 0.01 | 0.78 | 0.44 | 1.93 | 0.28 |
| 64068 | 0 | 236601 | RWRSPVIVEKGKVE            | 2.70 | 0.01 | 3.70 | 2.13 | 0.22 | 1.28 |
| 64069 | 0 | 121829 | RWSSYMVHWK                | 2.30 | 0.01 | 0.78 | 0.68 | 0.22 | 0.28 |
| 64070 | 0 | 111750 | RWTGRCMSCCRSSRTR<br>RETQL | 3.01 | 0.01 | 1.86 | 0.44 | 0.85 | 0.28 |
| 64071 | 0 | 111750 | RWTGRCMSCCRSSRTR<br>RETQL | 3.01 | 0.01 | 1.86 | 0.44 | 0.85 | 0.28 |
| 64072 | 0 | 111750 | RWTGRCMSCCRSSRTR<br>RETQL | 3.01 | 0.01 | 1.86 | 2.37 | 0.22 | 0.28 |
| 64073 | 0 | 102784 | RWWS                      | 1.59 | 0.01 | 2.25 | 0.68 | 0.22 | 0.85 |
| 64074 | 0 | 102784 | RWWS                      | 1.59 | 0.01 | 2.25 | 0.68 | 0.22 | 0.85 |
| 64075 | 0 | 143055 | RYAERLRAYLEGTCV           | 2.71 | 0.01 | 2.19 | 3.42 | 0.22 | 1.57 |
| 64076 | 0 | 108107 | RYAFGSQIA                 | 2.21 | 0.01 | 0.90 | 2.46 | 0.22 | 0.28 |
| 64077 | 0 | 108107 | RYAFGSQIA                 | 2.21 | 0.01 | 0.90 | 2.46 | 0.22 | 0.28 |
| 64078 | 0 | 108107 | RYAFGSQIA                 | 2.21 | 0.01 | 0.90 | 2.46 | 0.22 | 1.27 |
| 64079 | 0 | 56501  | RYAHPs                    | 1.88 | 0.01 | 2.40 | 0.44 | 1.59 | 1.27 |
| 64080 | 0 | 56502  | RYAPACKPL                 | 2.23 | 0.01 | 1.96 | 0.44 | 0.85 | 0.28 |
| 64081 | 0 | 56502  | RYAPACKPL                 | 2.23 | 0.01 | 1.96 | 0.44 | 0.85 | 1.48 |
| 64082 | 0 | 56508  | RYASALEE                  | 2.11 | 0.01 | 3.53 | 2.61 | 0.22 | 0.28 |
| 64083 | 0 | 226097 | RYCYVLYNGTALKYLGTL<br>PP  | 2.95 | 0.01 | 3.93 | 3.16 | 0.22 | 0.28 |
| 64084 | 0 | 187704 | RYDERY                    | 1.92 | 0.01 | 4.33 | 0.44 | 1.41 | 0.28 |
| 64085 | 0 | 187704 | RYDERY                    | 1.92 | 0.01 | 4.33 | 4.23 | 0.22 | 0.28 |
| 64086 | 0 | 187704 | RYDERY                    | 1.92 | 0.01 | 4.33 | 0.44 | 1.41 | 0.28 |
| 64087 | 0 | 176595 | RYDKDADVNVVTQAR           | 2.70 | 0.01 | 2.63 | 1.15 | 0.22 | 0.85 |
| 64088 | 0 | 176595 | RYDKDADVNVVTQAR           | 2.70 | 0.01 | 2.63 | 1.15 | 0.22 | 0.85 |

|       |   |        |                                                 |      |      |      |      |      |      |
|-------|---|--------|-------------------------------------------------|------|------|------|------|------|------|
| 64089 | 0 | 176595 | RYDKDADVNVVTQAR                                 | 2.70 | 0.01 | 2.63 | 1.15 | 0.22 | 0.85 |
| 64090 | 0 | 176595 | RYDKDADVNVVTQAR                                 | 2.70 | 0.01 | 2.63 | 1.15 | 0.22 | 0.85 |
| 64091 | 0 | 176595 | RYDKDADVNVVTQAR                                 | 2.70 | 0.01 | 2.63 | 1.15 | 0.22 | 0.85 |
| 64092 | 0 | 108618 | RYDREMKNYVPPKGD                                 | 2.68 | 0.01 | 0.78 | 0.44 | 1.13 | 1.27 |
| 64093 | 0 | 56519  | RYDSRPPEDVF                                     | 2.41 | 0.01 | 2.14 | 0.68 | 0.22 | 0.28 |
| 64094 | 0 | 56519  | RYDSRPPEDVF                                     | 2.41 | 0.01 | 2.14 | 3.01 | 0.22 | 0.28 |
| 64095 | 0 | 56528  | RYEKWIEVYKLVKAKWL<br>GTVNTQ                     | 3.08 | 0.01 | 2.95 | 0.44 | 0.22 | 0.28 |
| 64096 | 0 | 56529  | RYETSNDNSLI                                     | 2.39 | 0.01 | 2.30 | 1.12 | 0.22 | 0.85 |
| 64097 | 0 | 56529  | RYETSNDNSLI                                     | 2.39 | 0.01 | 2.30 | 1.12 | 0.22 | 0.85 |
| 64098 | 0 | 56529  | RYETSNDNSLI                                     | 2.39 | 0.01 | 2.30 | 1.12 | 0.22 | 0.85 |
| 64099 | 0 | 56529  | RYETSNDNSLI                                     | 2.39 | 0.01 | 2.30 | 1.12 | 0.22 | 0.85 |
| 64100 | 0 | 56529  | RYETSNDNSLI                                     | 2.39 | 0.01 | 2.30 | 0.68 | 0.22 | 0.85 |
| 64101 | 0 | 56529  | RYETSNDNSLI                                     | 2.39 | 0.01 | 2.30 | 0.68 | 0.22 | 0.85 |
| 64102 | 0 | 56529  | RYETSNDNSLI                                     | 2.39 | 0.01 | 2.30 | 0.68 | 0.22 | 0.85 |
| 64103 | 0 | 56529  | RYETSNDNSLI                                     | 2.39 | 0.01 | 2.30 | 1.12 | 0.22 | 0.85 |
| 64104 | 0 | 56529  | RYETSNDNSLI                                     | 2.39 | 0.01 | 2.30 | 0.68 | 0.22 | 0.85 |
| 64105 | 0 | 56534  | RYFTYEPPNDGE                                    | 2.47 | 0.01 | 2.88 | 2.37 | 0.22 | 0.28 |
| 64106 | 0 | 56534  | RYFTYEPPNDGE                                    | 2.47 | 0.01 | 2.88 | 2.22 | 0.85 | 0.28 |
| 64107 | 0 | 56534  | RYFTYEPPNDGE                                    | 2.47 | 0.01 | 2.88 | 2.22 | 0.22 | 0.28 |
| 64108 | 0 | 56534  | RYFTYEPPNDGE                                    | 2.47 | 0.01 | 2.88 | 2.22 | 0.22 | 0.28 |
| 64109 | 0 | 56537  | RYGNVLDVNAIDIE                                  | 2.61 | 0.01 | 2.56 | 1.12 | 0.22 | 0.28 |
| 64110 | 0 | 56537  | RYGNVLDVNAIDIE                                  | 2.61 | 0.01 | 2.56 | 0.44 | 0.85 | 0.28 |
| 64111 | 0 | 56541  | RYGWYL                                          | 1.90 | 0.01 | 0.90 | 0.44 | 1.74 | 1.39 |
| 64112 | 0 | 56543  | RYHNTVTKTIETHDNIE<br>TNMDENLRIPVTAEVGS<br>GYFKM | 3.62 | 0.01 | 3.97 | 0.68 | 0.22 | 0.28 |
| 64113 | 0 | 56543  | RYHNTVTKTIETHDNIE<br>TNMDENLRIPVTAEVGS<br>GYFKM | 3.62 | 0.01 | 3.97 | 0.68 | 0.22 | 0.28 |
| 64114 | 0 | 56543  | RYHNTVTKTIETHDNIE<br>TNMDENLRIPVTAEVGS<br>GYFKM | 3.62 | 0.01 | 3.97 | 0.68 | 0.22 | 0.28 |
| 64115 | 0 | 117169 | RYHRFKELSTLRR                                   | 2.54 | 0.01 | 0.78 | 0.44 | 1.13 | 0.28 |
| 64116 | 0 | 141745 | RYHTSQSGDE                                      | 2.29 | 0.01 | 0.78 | 0.44 | 1.93 | 0.28 |
| 64117 | 0 | 123726 | RYIADKHGM                                       | 2.18 | 0.01 | 2.28 | 2.00 | 0.22 | 0.28 |
| 64118 | 0 | 56557  | RYIWIKYFNLFDKELNEK<br>E                         | 2.92 | 0.01 | 3.03 | 3.33 | 0.22 | 1.57 |
| 64119 | 0 | 56557  | RYIWIKYFNLFDKELNEK<br>E                         | 2.92 | 0.01 | 3.16 | 0.44 | 1.93 | 1.57 |
| 64120 | 0 | 56564  | RYKQKIIAPAKQ                                    | 2.50 | 0.01 | 3.37 | 1.12 | 0.22 | 1.34 |
| 64121 | 0 | 56564  | RYKQKIIAPAKQ                                    | 2.50 | 0.01 | 3.37 | 1.12 | 0.22 | 0.28 |
| 64122 | 0 | 56565  | RYKQKIIAPAKQLL                                  | 2.62 | 0.01 | 4.33 | 3.57 | 0.22 | 0.28 |

|       |   |        |                          |      |      |      |      |      |      |
|-------|---|--------|--------------------------|------|------|------|------|------|------|
| 64123 | 0 | 56565  | RYKQKIIAPAKQLL           | 2.62 | 0.01 | 4.33 | 3.57 | 0.22 | 1.34 |
| 64124 | 0 | 159083 | RYKYLPEPKQLAKVV          | 2.73 | 0.01 | 3.22 | 0.68 | 0.22 | 0.28 |
| 64125 | 0 | 159084 | RYKYLPEPRSLAKIV          | 2.74 | 0.01 | 3.04 | 0.68 | 0.22 | 0.28 |
| 64126 | 0 | 159085 | RYKYYPETPQGLAKII         | 2.70 | 0.01 | 3.05 | 0.68 | 0.22 | 0.28 |
| 64127 | 0 | 159085 | RYKYYPETPQGLAKII         | 2.70 | 0.01 | 3.05 | 0.68 | 0.22 | 0.28 |
| 64128 | 0 | 159085 | RYKYYPETPQGLAKII         | 2.70 | 0.01 | 3.05 | 0.68 | 0.22 | 1.48 |
| 64129 | 0 | 159085 | RYKYYPETPQGLAKII         | 2.70 | 0.01 | 3.05 | 0.68 | 0.22 | 1.48 |
| 64130 | 0 | 159085 | RYKYYPETPQGLAKII         | 2.70 | 0.01 | 3.05 | 0.68 | 0.22 | 0.28 |
| 64131 | 0 | 159085 | RYKYYPETPQGLAKII         | 2.70 | 0.01 | 3.05 | 0.68 | 0.22 | 0.28 |
| 64132 | 0 | 159085 | RYKYYPETPQGLAKII         | 2.70 | 0.01 | 3.05 | 0.68 | 0.22 | 0.28 |
| 64133 | 0 | 159085 | RYKYYPETPQGLAKII         | 2.70 | 0.01 | 3.04 | 0.68 | 0.22 | 0.85 |
| 64134 | 0 | 159085 | RYKYYPETPQGLAKII         | 2.70 | 0.01 | 3.04 | 0.68 | 0.22 | 0.85 |
| 64135 | 0 | 161451 | RYLASLHKKALPTSV          | 2.67 | 0.01 | 3.21 | 1.15 | 0.22 | 0.28 |
| 64136 | 0 | 161451 | RYLASLHKKALPTSV          | 2.67 | 0.01 | 3.21 | 2.13 | 0.22 | 0.28 |
| 64137 | 0 | 161451 | RYLASLHKKALPTSV          | 2.67 | 0.01 | 3.21 | 2.13 | 0.22 | 0.28 |
| 64138 | 0 | 161451 | RYLASLHKKALPTSV          | 2.67 | 0.01 | 3.21 | 1.15 | 0.22 | 0.85 |
| 64139 | 0 | 485096 | RYLDGTEEWRCLLGFKE<br>V   | 2.83 | 0.01 | 3.12 | 0.68 | 0.22 | 0.28 |
| 64140 | 0 | 165649 | RYLLEAKEAENITTGCAE<br>HC | 2.93 | 0.01 | 0.78 | 0.44 | 0.85 | 0.28 |
| 64141 | 0 | 131639 | RYLMKIN                  | 1.99 | 0.01 | 0.78 | 1.15 | 0.22 | 0.28 |
| 64142 | 0 | 56583  | RYLQEKYNLYNSDVFDG<br>KVQ | 2.95 | 0.01 | 2.56 | 1.12 | 0.22 | 0.28 |
| 64143 | 0 | 56583  | RYLQEKYNLYNSDVFDG<br>KVQ | 2.95 | 0.01 | 2.56 | 1.12 | 0.22 | 0.28 |
| 64144 | 0 | 56583  | RYLQEKYNLYNSDVFDG<br>KVQ | 2.95 | 0.01 | 2.56 | 3.12 | 0.22 | 0.28 |
| 64145 | 0 | 56583  | RYLQEKYNLYNSDVFDG<br>KVQ | 2.95 | 0.01 | 2.56 | 3.12 | 0.22 | 1.34 |
| 64146 | 0 | 56587  | RYLSQLCSGGYT             | 2.48 | 0.01 | 2.69 | 0.68 | 0.22 | 0.28 |
| 64147 | 0 | 56587  | RYLSQLCSGGYT             | 2.48 | 0.01 | 2.69 | 1.20 | 0.22 | 0.28 |
| 64148 | 0 | 509290 | RYLTDMTLEEMSR            | 2.57 | 0.01 | 2.94 | 0.68 | 0.22 | 1.48 |
| 64149 | 0 | 509290 | RYLTDMTLEEMSR            | 2.57 | 0.01 | 2.94 | 0.68 | 0.22 | 1.28 |
| 64150 | 0 | 225517 | RYLYDDKHVSEINIKAQE       | 2.81 | 0.01 | 2.61 | 0.68 | 0.22 | 0.28 |
| 64151 | 0 | 225517 | RYLYDDKHVSEINIKAQE       | 2.81 | 0.01 | 2.61 | 0.68 | 0.22 | 0.28 |
| 64152 | 0 | 225517 | RYLYDDKHVSEINIKAQE       | 2.81 | 0.01 | 2.61 | 0.68 | 0.22 | 0.28 |
| 64153 | 0 | 98434  | RYMDQPSRD                | 2.24 | 0.01 | 2.58 | 0.68 | 0.22 | 0.28 |
| 64154 | 0 | 98434  | RYMDQPSRD                | 2.24 | 0.01 | 2.58 | 1.20 | 0.22 | 0.28 |
| 64155 | 0 | 98434  | RYMDQPSRD                | 2.24 | 0.01 | 2.58 | 1.20 | 0.22 | 0.28 |
| 64156 | 0 | 98434  | RYMDQPSRD                | 2.24 | 0.01 | 2.58 | 1.20 | 0.22 | 0.28 |
| 64157 | 0 | 98434  | RYMDQPSRD                | 2.24 | 0.01 | 2.58 | 1.20 | 0.22 | 0.28 |
| 64158 | 0 | 98434  | RYMDQPSRD                | 2.24 | 0.01 | 2.58 | 1.20 | 0.22 | 0.28 |
| 64159 | 0 | 98434  | RYMDQPSRD                | 2.24 | 0.01 | 2.58 | 1.20 | 0.22 | 0.28 |
| 64160 | 0 | 98434  | RYMDQPSRD                | 2.24 | 0.01 | 2.58 | 1.20 | 0.22 | 0.28 |

|       |   |        |                                |      |      |      |      |      |      |
|-------|---|--------|--------------------------------|------|------|------|------|------|------|
| 64161 | 0 | 98434  | RYMDQPSRD                      | 2.24 | 0.01 | 2.58 | 1.20 | 0.22 | 1.34 |
| 64162 | 0 | 98434  | RYMDQPSRD                      | 2.24 | 0.01 | 2.58 | 1.20 | 0.22 | 1.34 |
| 64163 | 0 | 98434  | RYMDQPSRD                      | 2.24 | 0.01 | 2.58 | 1.20 | 0.22 | 1.34 |
| 64164 | 0 | 98434  | RYMDQPSRD                      | 2.24 | 0.01 | 2.58 | 1.20 | 0.22 | 1.34 |
| 64165 | 0 | 56599  | RYNLVFSGSDRCSNR<br>A           | 2.84 | 0.01 | 3.48 | 0.68 | 0.22 | 2.02 |
| 64166 | 0 | 56599  | RYNLVFSGSDRCSNR<br>A           | 2.84 | 0.01 | 3.48 | 0.68 | 0.22 | 0.28 |
| 64167 | 0 | 56599  | RYNLVFSGSDRCSNR<br>A           | 2.84 | 0.01 | 3.48 | 0.68 | 0.22 | 1.34 |
| 64168 | 0 | 56599  | RYNLVFSGSDRCSNR<br>A           | 2.84 | 0.01 | 3.48 | 0.68 | 0.22 | 1.48 |
| 64169 | 0 | 56599  | RYNLVFSGSDRCSNR<br>A           | 2.84 | 0.01 | 3.48 | 0.68 | 0.22 | 0.85 |
| 64170 | 0 | 78266  | RYNPPD                         | 1.89 | 0.01 | 0.90 | 2.02 | 1.59 | 0.28 |
| 64171 | 0 | 56602  | RYNRNAVPNLRGDLQV<br>LAQK       | 2.97 | 0.01 | 2.88 | 2.37 | 0.22 | 0.28 |
| 64172 | 0 | 56602  | RYNRNAVPNLRGDLQV<br>LAQK       | 2.97 | 0.01 | 2.88 | 2.37 | 0.22 | 0.28 |
| 64173 | 0 | 56602  | RYNRNAVPNLRGDLQV<br>LAQK       | 2.97 | 0.01 | 2.88 | 2.37 | 0.22 | 1.34 |
| 64174 | 0 | 56602  | RYNRNAVPNLRGDLQV<br>LAQK       | 2.97 | 0.01 | 2.88 | 2.37 | 2.25 | 1.75 |
| 64175 | 0 | 56602  | RYNRNAVPNLRGDLQV<br>LAQK       | 2.97 | 0.01 | 2.96 | 4.63 | 0.22 | 1.34 |
| 64176 | 0 | 56602  | RYNRNAVPNLRGDLQV<br>LAQK       | 2.97 | 0.01 | 2.96 | 4.63 | 2.25 | 1.75 |
| 64177 | 0 | 56603  | RYNRNAVPNLRGDLQV<br>LAQKVARTLP | 3.22 | 0.01 | 2.96 | 2.59 | 0.22 | 1.34 |
| 64178 | 0 | 56603  | RYNRNAVPNLRGDLQV<br>LAQKVARTLP | 3.22 | 0.01 | 2.96 | 2.22 | 0.22 | 1.34 |
| 64179 | 0 | 56603  | RYNRNAVPNLRGDLQV<br>LAQKVARTLP | 3.22 | 0.01 | 2.88 | 2.89 | 0.22 | 0.28 |
| 64180 | 0 | 56603  | RYNRNAVPNLRGDLQV<br>LAQKVARTLP | 3.22 | 0.01 | 2.88 | 1.15 | 0.22 | 0.85 |
| 64181 | 0 | 196965 | RYPGQGSP                       | 2.14 | 0.01 | 1.75 | 0.68 | 0.22 | 1.48 |
| 64182 | 0 | 196965 | RYPGQGSP                       | 2.14 | 0.01 | 1.75 | 0.68 | 0.22 | 0.85 |
| 64183 | 0 | 56610  | RYPGQGSPGGNRYPPQ<br>G          | 2.85 | 0.01 | 1.75 | 1.12 | 0.22 | 0.85 |
| 64184 | 0 | 56610  | RYPGQGSPGGNRYPPQ<br>G          | 2.85 | 0.01 | 2.52 | 2.90 | 0.22 | 0.85 |
| 64185 | 0 | 56610  | RYPGQGSPGGNRYPPQ<br>G          | 2.85 | 0.01 | 2.52 | 3.93 | 0.22 | 0.85 |
| 64186 | 0 | 56610  | RYPGQGSPGGNRYPPQ<br>G          | 2.85 | 0.01 | 2.52 | 1.15 | 0.22 | 0.28 |
| 64187 | 0 | 56610  | RYPGQGSPGGNRYPPQ<br>G          | 2.85 | 0.01 | 2.52 | 2.90 | 0.22 | 0.28 |

|       |   |        |                                                 |      |      |      |      |      |      |
|-------|---|--------|-------------------------------------------------|------|------|------|------|------|------|
| 64188 | 0 | 56610  | RYPGQGSPGGNRYPPQ<br>G                           | 2.85 | 0.01 | 0.78 | 2.19 | 0.22 | 0.28 |
| 64189 | 0 | 56610  | RYPGQGSPGGNRYPPQ<br>G                           | 2.85 | 0.01 | 0.78 | 2.19 | 0.22 | 1.48 |
| 64190 | 0 | 56610  | RYPGQGSPGGNRYPPQ<br>G                           | 2.85 | 0.01 | 0.78 | 2.19 | 0.22 | 0.85 |
| 64191 | 0 | 56614  | RYPHYSLIKPESSL                                  | 2.62 | 0.01 | 2.04 | 0.44 | 0.85 | 0.28 |
| 64192 | 0 | 56614  | RYPHYSLIKPESSL                                  | 2.62 | 0.01 | 2.04 | 1.20 | 0.22 | 0.85 |
| 64193 | 0 | 56614  | RYPHYSLIKPESSL                                  | 2.62 | 0.01 | 2.04 | 1.20 | 0.22 | 2.02 |
| 64194 | 0 | 56614  | RYPHYSLIKPESSL                                  | 2.62 | 0.01 | 2.04 | 0.44 | 1.59 | 1.57 |
| 64195 | 0 | 98435  | RYPHYSSLIKPESSL                                 | 2.69 | 0.01 | 2.04 | 0.44 | 2.98 | 0.28 |
| 64196 | 0 | 135496 | RYPNQVY                                         | 2.02 | 0.01 | 0.78 | 2.19 | 0.22 | 0.85 |
| 64197 | 0 | 135496 | RYPNQVY                                         | 2.02 | 0.01 | 0.78 | 2.19 | 0.22 | 0.85 |
| 64198 | 0 | 135497 | RYPNQVYYRPM                                     | 2.43 | 0.01 | 0.78 | 2.19 | 0.22 | 1.34 |
| 64199 | 0 | 135497 | RYPNQVYYRPM                                     | 2.43 | 0.01 | 0.78 | 2.19 | 0.22 | 1.34 |
| 64200 | 0 | 56622  | RYPNQVYYRPV                                     | 2.44 | 0.01 | 2.52 | 2.19 | 0.22 | 2.02 |
| 64201 | 0 | 56622  | RYPNQVYYRPV                                     | 2.44 | 0.01 | 2.52 | 2.19 | 0.22 | 0.28 |
| 64202 | 0 | 56625  | RYPPQGGGGWGQPHG<br>GGWGQPHGGWGQP<br>HGGGWGQPHGG | 3.67 | 0.01 | 2.52 | 1.15 | 0.22 | 0.85 |
| 64203 | 0 | 177967 | RYPREVPPRFHQEH                                  | 2.71 | 0.01 | 0.78 | 0.44 | 1.13 | 0.85 |
| 64204 | 0 | 78267  | RYPSYGLNYYQQKPVALI<br>NN                        | 2.92 | 0.01 | 1.60 | 0.44 | 1.23 | 1.28 |
| 64205 | 0 | 78267  | RYPSYGLNYYQQKPVALI<br>NN                        | 2.92 | 0.01 | 1.60 | 0.44 | 1.23 | 2.51 |
| 64206 | 0 | 78267  | RYPSYGLNYYQQKPVALI<br>NN                        | 2.92 | 0.01 | 1.60 | 0.44 | 1.23 | 1.28 |
| 64207 | 0 | 56627  | RYQEERPP                                        | 2.13 | 0.01 | 2.40 | 2.43 | 0.22 | 0.28 |
| 64208 | 0 | 120930 | RYRPGTVALREIRRYQ                                | 2.73 | 0.01 | 1.60 | 0.44 | 1.13 | 0.28 |
| 64209 | 0 | 120930 | RYRPGTVALREIRRYQ                                | 2.73 | 0.01 | 1.60 | 0.44 | 1.41 | 0.28 |
| 64210 | 0 | 120930 | RYRPGTVALREIRRYQ                                | 2.73 | 0.01 | 1.60 | 1.20 | 0.22 | 0.28 |
| 64211 | 0 | 122897 | RYSDLLMAWGQYIDHDI<br>A                          | 2.83 | 0.01 | 0.78 | 1.20 | 0.22 | 0.28 |
| 64212 | 0 | 122897 | RYSDLLMAWGQYIDHDI<br>A                          | 2.83 | 0.01 | 0.78 | 1.20 | 0.22 | 0.28 |
| 64213 | 0 | 122897 | RYSDLLMAWGQYIDHDI<br>A                          | 2.83 | 0.01 | 0.78 | 1.20 | 0.22 | 0.28 |
| 64214 | 0 | 122897 | RYSDLLMAWGQYIDHDI<br>A                          | 2.83 | 0.01 | 0.78 | 1.20 | 0.22 | 0.28 |
| 64215 | 0 | 151729 | RYSPSLNTRL                                      | 2.34 | 0.01 | 0.78 | 0.68 | 0.22 | 2.49 |
| 64216 | 0 | 151729 | RYSPSLNTRL                                      | 2.34 | 0.01 | 0.78 | 0.68 | 0.22 | 0.85 |
| 64217 | 0 | 165650 | RYSRNAVPNLRGDLQVL<br>AQKVART                    | 3.13 | 0.01 | 3.63 | 2.13 | 0.22 | 0.28 |
| 64218 | 0 | 165650 | RYSRNAVPNLRGDLQVL<br>AQKVART                    | 3.13 | 0.01 | 3.63 | 2.59 | 0.22 | 0.28 |
| 64219 | 0 | 165650 | RYSRNAVPNLRGDLQVL<br>AQKVART                    | 3.13 | 0.01 | 3.63 | 2.59 | 0.22 | 0.28 |

|       |   |        |                                |      |      |      |      |      |      |
|-------|---|--------|--------------------------------|------|------|------|------|------|------|
| 64220 | 0 | 165650 | RYSRNAVPNLRGDLQVL<br>AQKVART   | 3.13 | 0.01 | 3.63 | 2.59 | 0.22 | 2.97 |
| 64221 | 0 | 165650 | RYSRNAVPNLRGDLQVL<br>AQKVART   | 3.13 | 0.01 | 3.63 | 2.59 | 0.22 | 2.97 |
| 64222 | 0 | 165650 | RYSRNAVPNLRGDLQVL<br>AQKVART   | 3.13 | 0.01 | 3.63 | 2.59 | 0.22 | 0.28 |
| 64223 | 0 | 165650 | RYSRNAVPNLRGDLQVL<br>AQKVART   | 3.13 | 0.01 | 3.63 | 2.59 | 0.22 | 0.28 |
| 64224 | 0 | 56657  | RYSRNAVPNV                     | 2.34 | 0.01 | 3.02 | 0.68 | 0.22 | 0.28 |
| 64225 | 0 | 56657  | RYSRNAVPNV                     | 2.34 | 0.01 | 3.02 | 1.15 | 2.25 | 1.75 |
| 64226 | 0 | 56657  | RYSRNAVPNV                     | 2.34 | 0.01 | 3.14 | 2.22 | 0.22 | 0.28 |
| 64227 | 0 | 56657  | RYSRNAVPNV                     | 2.34 | 0.01 | 3.14 | 2.22 | 0.22 | 0.28 |
| 64228 | 0 | 56657  | RYSRNAVPNV                     | 2.34 | 0.01 | 3.14 | 2.22 | 0.22 | 0.28 |
| 64229 | 0 | 56657  | RYSRNAVPNV                     | 2.34 | 0.01 | 3.14 | 2.22 | 0.22 | 1.34 |
| 64230 | 0 | 56657  | RYSRNAVPNV                     | 2.34 | 0.01 | 3.14 | 2.22 | 0.22 | 1.34 |
| 64231 | 0 | 56657  | RYSRNAVPNV                     | 2.34 | 0.01 | 3.14 | 3.63 | 0.22 | 1.34 |
| 64232 | 0 | 56657  | RYSRNAVPNV                     | 2.34 | 0.01 | 3.14 | 3.63 | 0.22 | 0.28 |
| 64233 | 0 | 56657  | RYSRNAVPNV                     | 2.34 | 0.01 | 3.14 | 3.63 | 0.22 | 0.28 |
| 64234 | 0 | 56657  | RYSRNAVPNV                     | 2.34 | 0.01 | 3.14 | 3.63 | 0.22 | 0.28 |
| 64235 | 0 | 56657  | RYSRNAVPNV                     | 2.34 | 0.01 | 3.14 | 3.63 | 0.85 | 0.28 |
| 64236 | 0 | 56657  | RYSRNAVPNV                     | 2.34 | 0.01 | 3.14 | 0.68 | 0.22 | 0.28 |
| 64237 | 0 | 56657  | RYSRNAVPNV                     | 2.34 | 0.01 | 3.14 | 0.68 | 0.22 | 0.28 |
| 64238 | 0 | 56657  | RYSRNAVPNV                     | 2.34 | 0.01 | 3.14 | 0.68 | 0.22 | 1.34 |
| 64239 | 0 | 56657  | RYSRNAVPNV                     | 2.34 | 0.01 | 3.14 | 0.68 | 2.25 | 1.75 |
| 64240 | 0 | 56657  | RYSRNAVPNV                     | 2.34 | 0.01 | 3.14 | 0.68 | 0.22 | 0.28 |
| 64241 | 0 | 56658  | RYSRNAVPNVRGDLQV<br>LAQKVARTLP | 3.21 | 0.01 | 3.14 | 2.22 | 0.22 | 0.28 |
| 64242 | 0 | 56658  | RYSRNAVPNVRGDLQV<br>LAQKVARTLP | 3.21 | 0.01 | 3.14 | 2.22 | 0.22 | 0.28 |
| 64243 | 0 | 56658  | RYSRNAVPNVRGDLQV<br>LAQKVARTLP | 3.21 | 0.01 | 3.14 | 2.22 | 0.22 | 1.34 |
| 64244 | 0 | 56658  | RYSRNAVPNVRGDLQV<br>LAQKVARTLP | 3.21 | 0.01 | 3.14 | 2.37 | 2.25 | 1.75 |
| 64245 | 0 | 56658  | RYSRNAVPNVRGDLQV<br>LAQKVARTLP | 3.21 | 0.01 | 3.14 | 2.37 | 0.22 | 1.34 |
| 64246 | 0 | 56658  | RYSRNAVPNVRGDLQV<br>LAQKVARTLP | 3.21 | 0.01 | 3.14 | 0.68 | 0.22 | 1.34 |
| 64247 | 0 | 56658  | RYSRNAVPNVRGDLQV<br>LAQKVARTLP | 3.21 | 0.01 | 3.14 | 0.68 | 2.25 | 1.75 |
| 64248 | 0 | 56658  | RYSRNAVPNVRGDLQV<br>LAQKVARTLP | 3.21 | 0.01 | 3.14 | 0.68 | 0.22 | 0.28 |
| 64249 | 0 | 56658  | RYSRNAVPNVRGDLQV<br>LAQKVARTLP | 3.21 | 0.01 | 3.14 | 1.15 | 0.22 | 0.28 |
| 64250 | 0 | 56658  | RYSRNAVPNVRGDLQV<br>LAQKVARTLP | 3.21 | 0.01 | 3.14 | 0.68 | 0.22 | 0.28 |
| 64251 | 0 | 56660  | RYSSTARHRLRRGADGT<br>AELTTTAA  | 3.17 | 0.01 | 2.53 | 0.44 | 0.85 | 0.28 |



|       |   |        |                                      |      |      |      |      |      |      |
|-------|---|--------|--------------------------------------|------|------|------|------|------|------|
| 64252 | 0 | 99653  | RYTARLKEGDVFI MP                     | 2.60 | 0.01 | 2.16 | 0.44 | 1.23 | 1.48 |
| 64253 | 0 | 489763 | RYTLDVNGYPKIYW                       | 2.62 | 0.01 | 2.69 | 3.05 | 0.85 | 1.28 |
| 64254 | 0 | 132052 | RYTPGSSWGESSSGR                      | 2.70 | 0.01 | 0.78 | 0.44 | 1.13 | 0.85 |
| 64255 | 0 | 132052 | RYTPGSSWGESSSGR                      | 2.70 | 0.01 | 0.78 | 0.44 | 1.13 | 0.85 |
| 64256 | 0 | 56667  | RYTTEGGTKTEAE                        | 2.58 | 0.01 | 2.53 | 0.44 | 1.23 | 0.85 |
| 64257 | 0 | 56668  | RYTTEGGTKTEAEDVIPE<br>GWKADTSYESK    | 3.32 | 0.01 | 2.53 | 0.44 | 1.23 | 0.85 |
| 64258 | 0 | 56675  | RYVKQEVQRGGR                         | 2.51 | 0.01 | 3.12 | 0.44 | 1.23 | 0.85 |
| 64259 | 0 | 135754 | RYVNWIKE                             | 2.10 | 0.01 | 0.78 | 0.44 | 2.35 | 0.28 |
| 64260 | 0 | 236606 | RYVRMGTESMN                          | 2.40 | 0.01 | 3.51 | 0.68 | 0.22 | 1.34 |
| 64261 | 0 | 236606 | RYVRMGTESMN                          | 2.40 | 0.01 | 3.51 | 0.68 | 0.22 | 1.34 |
| 64262 | 0 | 236606 | RYVRMGTESMN                          | 2.40 | 0.01 | 3.51 | 0.68 | 0.22 | 0.85 |
| 64263 | 0 | 236606 | RYVRMGTESMN                          | 2.40 | 0.01 | 3.51 | 0.68 | 0.22 | 0.85 |
| 64264 | 0 | 236606 | RYVRMGTESMN                          | 2.40 | 0.01 | 3.51 | 1.15 | 0.22 | 1.34 |
| 64265 | 0 | 236606 | RYVRMGTESMN                          | 2.40 | 0.01 | 3.51 | 1.15 | 0.22 | 0.85 |
| 64266 | 0 | 236606 | RYVRMGTESMN                          | 2.40 | 0.01 | 3.51 | 1.15 | 0.22 | 0.85 |
| 64267 | 0 | 56679  | RYVSAESNGFGW                         | 2.45 | 0.01 | 0.90 | 0.68 | 0.22 | 1.39 |
| 64268 | 0 | 131310 | RYVVAGKMS                            | 2.20 | 0.01 | 0.78 | 0.44 | 1.13 | 2.02 |
| 64269 | 0 | 56686  | RYYRE                                | 1.78 | 0.01 | 1.75 | 2.19 | 0.22 | 0.28 |
| 64270 | 0 | 56686  | RYYRE                                | 1.78 | 0.01 | 1.75 | 2.19 | 0.22 | 0.85 |
| 64271 | 0 | 56686  | RYYRE                                | 1.78 | 0.01 | 1.75 | 2.19 | 0.22 | 0.85 |
| 64272 | 0 | 56686  | RYYRE                                | 1.78 | 0.01 | 1.75 | 2.19 | 0.22 | 0.85 |
| 64273 | 0 | 56687  | RYYREN M                             | 2.04 | 0.01 | 1.75 | 1.15 | 0.22 | 1.48 |
| 64274 | 0 | 134224 | RYYSSFVNMERDLASGLI<br>GP             | 2.90 | 0.01 | 0.78 | 0.44 | 2.35 | 0.28 |
| 64275 | 0 | 504056 | RYYVIDFTLKEIQSLEMTE<br>NFETKDGKQAQVY | 3.39 | 0.01 | 3.72 | 0.44 | 1.41 | 0.28 |
| 64276 | 0 | 233014 | SAAAFFLVRMFGHSP                      | 2.67 | 0.01 | 2.89 | 1.12 | 0.22 | 1.28 |
| 64277 | 0 | 233014 | SAAAFFLVRMFGHSP                      | 2.67 | 0.01 | 2.89 | 1.12 | 0.22 | 1.28 |
| 64278 | 0 | 233014 | SAAAFFLVRMFGHSP                      | 2.67 | 0.01 | 2.89 | 1.12 | 0.22 | 1.28 |
| 64279 | 0 | 103577 | SAAAKNTPGSITYNE                      | 2.67 | 0.01 | 2.04 | 0.44 | 0.85 | 1.28 |
| 64280 | 0 | 97628  | SAAANYTT                             | 2.12 | 0.01 | 2.87 | 0.68 | 0.22 | 0.28 |
| 64281 | 0 | 97628  | SAAANYTT                             | 2.12 | 0.01 | 2.87 | 0.68 | 0.22 | 0.28 |
| 64282 | 0 | 97628  | SAAANYTT                             | 2.12 | 0.01 | 2.87 | 1.81 | 0.22 | 0.28 |
| 64283 | 0 | 56692  | SAACRA                               | 1.92 | 0.01 | 1.96 | 0.44 | 0.85 | 0.28 |
| 64284 | 0 | 104231 | SAADEKFIKETEHA KDYG                  | 2.85 | 0.01 | 3.00 | 1.20 | 0.22 | 0.85 |
| 64285 | 0 | 193072 | SAADNSGRKETY PFIGEP                  | 2.81 | 3.70 | 2.84 | 0.44 | 1.74 | 0.28 |
| 64286 | 0 | 56699  | SAAFYYRV                             | 2.12 | 0.01 | 3.29 | 0.68 | 0.22 | 0.28 |
| 64287 | 0 | 56699  | SAAFYYRV                             | 2.12 | 0.01 | 3.29 | 0.68 | 0.22 | 1.34 |
| 64288 | 0 | 56699  | SAAFYYRV                             | 2.12 | 0.01 | 3.29 | 0.68 | 0.22 | 1.48 |
| 64289 | 0 | 56699  | SAAFYYRV                             | 2.12 | 0.01 | 3.29 | 0.68 | 0.22 | 1.27 |
| 64290 | 0 | 142471 | SAAGAKRSGRSS                         | 2.52 | 0.01 | 0.90 | 0.68 | 0.22 | 0.85 |
| 64291 | 0 | 111752 | SAAGDWIRRN VVAYW                     | 2.66 | 0.01 | 3.20 | 0.44 | 1.23 | 0.85 |

|       |   |        |                                 |      |      |      |      |      |      |
|-------|---|--------|---------------------------------|------|------|------|------|------|------|
| 64292 | 0 | 111752 | SAAGDWIRRNVVAYW                 | 2.66 | 0.01 | 3.20 | 1.12 | 0.22 | 0.85 |
| 64293 | 0 | 56700  | SAAGLEVRYV                      | 2.30 | 3.93 | 2.70 | 0.44 | 0.85 | 0.28 |
| 64294 | 0 | 56701  | SAAHTAFGIANLFRMG                | 2.73 | 0.01 | 1.96 | 0.44 | 0.85 | 1.27 |
| 64295 | 0 | 56701  | SAAHTAFGIANLFRMG                | 2.73 | 0.01 | 1.96 | 0.44 | 0.85 | 0.28 |
| 64296 | 0 | 56701  | SAAHTAFGIANLFRMG                | 2.73 | 0.01 | 1.96 | 0.44 | 0.85 | 1.27 |
| 64297 | 0 | 56701  | SAAHTAFGIANLFRMG                | 2.73 | 0.01 | 1.96 | 0.44 | 0.85 | 0.28 |
| 64298 | 0 | 374958 | SAAHTSAPAAGGFGS                 | 2.73 | 0.01 | 1.61 | 0.44 | 0.85 | 1.28 |
| 64299 | 0 | 167659 | SAAIGGRMVSRTRLRDN<br>PG         | 2.89 | 0.01 | 2.75 | 0.44 | 0.85 | 1.28 |
| 64300 | 0 | 167659 | SAAIGGRMVSRTRLRDN<br>PG         | 2.89 | 0.01 | 2.75 | 0.44 | 1.59 | 1.28 |
| 64301 | 0 | 103578 | SAAIGLSMAGSSAMI                 | 2.74 | 0.01 | 2.04 | 0.44 | 0.85 | 1.28 |
| 64302 | 0 | 422945 | SAAKHARKERNITGGHP<br>VSR        | 2.94 | 0.01 | 3.36 | 0.68 | 0.22 | 0.28 |
| 64303 | 0 | 374969 | SAAKPAAKPAAKPAA                 | 2.74 | 0.01 | 1.61 | 0.44 | 0.85 | 1.28 |
| 64304 | 0 | 56710  | SAAPAAPAPRASGGV<br>AATVAANGGPAS | 3.33 | 0.01 | 2.40 | 0.44 | 1.59 | 0.85 |
| 64305 | 0 | 525583 | SAAPTADSPLTASPPATA<br>PG        | 3.01 | 4.93 | 2.40 | 0.44 | 1.59 | 1.28 |
| 64306 | 0 | 56711  | SAAQEKISF                       | 2.23 | 0.01 | 2.80 | 1.15 | 0.22 | 0.28 |
| 64307 | 0 | 187705 | SAARGADISGEG                    | 2.52 | 0.01 | 2.14 | 1.20 | 0.22 | 0.28 |
| 64308 | 0 | 56712  | SAARIHDFRYSQLAKLGI<br>NP        | 2.91 | 0.01 | 2.75 | 0.44 | 0.85 | 0.85 |
| 64309 | 0 | 56713  | SAARSTGSFAKLFMPG                | 2.75 | 0.01 | 3.10 | 0.44 | 0.85 | 0.28 |
| 64310 | 0 | 56713  | SAARSTGSFAKLFMPG                | 2.75 | 0.01 | 3.10 | 0.44 | 0.85 | 0.28 |
| 64311 | 0 | 56713  | SAARSTGSFAKLFMPG                | 2.75 | 0.01 | 3.10 | 0.68 | 0.22 | 0.28 |
| 64312 | 0 | 56714  | SAASANGPLWFFIF                  | 2.63 | 0.01 | 2.69 | 0.44 | 1.41 | 0.28 |
| 64313 | 0 | 56715  | SAASCNGFLYFVIF                  | 2.61 | 0.01 | 2.69 | 0.44 | 0.85 | 0.28 |
| 64314 | 0 | 56715  | SAASCNGFLYFVIF                  | 2.61 | 0.01 | 2.69 | 0.44 | 0.85 | 0.28 |
| 64315 | 0 | 432168 | SAATSSTPREAPYELN                | 2.76 | 0.01 | 2.04 | 0.44 | 0.85 | 0.28 |
| 64316 | 0 | 432168 | SAATSSTPREAPYELN                | 2.76 | 0.01 | 2.04 | 0.44 | 1.93 | 0.28 |
| 64317 | 0 | 451066 | SAAWNKS                         | 2.04 | 0.01 | 0.90 | 0.44 | 1.23 | 1.39 |
| 64318 | 0 | 56718  | SAAYATSSFSSLFTRG                | 2.77 | 0.01 | 3.10 | 0.44 | 0.85 | 0.28 |
| 64319 | 0 | 56718  | SAAYATSSFSSLFTRG                | 2.77 | 0.01 | 3.10 | 0.44 | 0.85 | 0.28 |
| 64320 | 0 | 56718  | SAAYATSSFSSLFTRG                | 2.77 | 0.01 | 3.10 | 0.44 | 0.85 | 1.27 |
| 64321 | 0 | 56718  | SAAYATSSFSSLFTRG                | 2.77 | 0.01 | 3.10 | 0.44 | 0.85 | 1.27 |
| 64322 | 0 | 56719  | SAAYTAFGIANLFRVG                | 2.73 | 0.01 | 1.96 | 0.44 | 0.85 | 0.28 |
| 64323 | 0 | 56719  | SAAYTAFGIANLFRVG                | 2.73 | 0.01 | 1.96 | 0.44 | 0.85 | 0.28 |

|       |   |        |                                 |      |      |      |      |      |      |
|-------|---|--------|---------------------------------|------|------|------|------|------|------|
| 64324 | 0 | 56719  | SAAYTAFGIANLFRVG                | 2.73 | 0.01 | 1.96 | 0.44 | 0.85 | 1.27 |
| 64325 | 0 | 56719  | SAAYTAFGIANLFRVG                | 2.73 | 0.01 | 1.96 | 0.44 | 0.85 | 1.27 |
| 64326 | 0 | 117368 | SACNCLRGIA                      | 2.31 | 0.01 | 1.86 | 0.44 | 1.23 | 0.85 |
| 64327 | 0 | 423501 | SACTWTSCTSLSPCS                 | 2.73 | 0.01 | 2.51 | 0.44 | 2.35 | 1.28 |
| 64328 | 0 | 159086 | SADDVKKAFKVIDQD                 | 2.71 | 0.01 | 3.26 | 0.44 | 1.23 | 0.28 |
| 64329 | 0 | 138027 | SADFTPGT                        | 2.12 | 0.01 | 2.21 | 0.44 | 0.85 | 0.28 |
| 64330 | 0 | 138027 | SADFTPGT                        | 2.12 | 0.01 | 2.21 | 1.20 | 0.22 | 0.28 |
| 64331 | 0 | 56730  | SADGTTVTSGSTKDTSL<br>Q          | 2.89 | 0.01 | 2.76 | 0.44 | 1.59 | 0.28 |
| 64332 | 0 | 112655 | SADLDQFPLGRKFLL                 | 2.66 | 0.01 | 1.86 | 1.12 | 0.22 | 0.28 |
| 64333 | 0 | 112655 | SADLDQFPLGRKFLL                 | 2.66 | 0.01 | 1.86 | 2.37 | 0.22 | 0.28 |
| 64334 | 0 | 113838 | SADLDQFPLGRKFLLQA<br>GLK        | 2.97 | 0.01 | 1.86 | 2.37 | 0.22 | 0.28 |
| 64335 | 0 | 56734  | SADNNNSEYSWT                    | 2.48 | 0.01 | 3.19 | 0.68 | 0.22 | 0.28 |
| 64336 | 0 | 56734  | SADNNNSEYSWT                    | 2.48 | 0.01 | 3.19 | 0.68 | 0.22 | 1.27 |
| 64337 | 0 | 56734  | SADNNNSEYSWT                    | 2.48 | 0.01 | 3.19 | 0.68 | 0.22 | 2.02 |
| 64338 | 0 | 56734  | SADNNNSEYSWT                    | 2.48 | 0.01 | 3.19 | 0.68 | 0.22 | 1.34 |
| 64339 | 0 | 106098 | SADQISTV                        | 2.13 | 0.01 | 3.05 | 1.20 | 0.22 | 0.28 |
| 64340 | 0 | 105505 | SAE                             | 1.37 | 0.01 | 3.21 | 1.20 | 0.22 | 0.28 |
| 64341 | 0 | 105505 | SAE                             | 1.37 | 0.01 | 3.03 | 1.20 | 0.22 | 0.28 |
| 64342 | 0 | 105505 | SAE                             | 1.37 | 0.01 | 3.89 | 1.20 | 0.22 | 0.28 |
| 64343 | 0 | 105505 | SAE                             | 1.37 | 0.01 | 3.03 | 1.20 | 0.22 | 0.28 |
| 64344 | 0 | 105505 | SAE                             | 1.37 | 0.01 | 3.45 | 1.20 | 0.22 | 0.28 |
| 64345 | 0 | 133687 | SAEALLRLQA                      | 2.35 | 0.01 | 2.72 | 0.44 | 0.85 | 0.28 |
| 64346 | 0 | 56742  | SAEASRDKAFAVSKDLA               | 2.83 | 0.01 | 3.59 | 2.02 | 0.22 | 0.28 |
| 64347 | 0 | 56747  | SAEEKGTGKRNIQIVL                | 2.63 | 0.01 | 2.30 | 0.44 | 0.85 | 0.28 |
| 64348 | 0 | 56747  | SAEEKGTGKRNIQIVL                | 2.63 | 0.01 | 2.30 | 0.44 | 1.41 | 0.28 |
| 64349 | 0 | 56749  | SAEERLHSMK                      | 2.31 | 0.01 | 1.60 | 0.44 | 1.23 | 0.28 |
| 64350 | 0 | 115476 | SAEERLHSMKEGIHAQQ<br>KEP        | 2.94 | 0.01 | 1.60 | 0.44 | 1.23 | 1.28 |
| 64351 | 0 | 56751  | SAEGQL                          | 1.88 | 0.01 | 3.16 | 0.68 | 0.22 | 0.28 |
| 64352 | 0 | 56751  | SAEGQL                          | 1.88 | 0.01 | 2.40 | 2.52 | 0.22 | 0.28 |
| 64353 | 0 | 56751  | SAEGQL                          | 1.88 | 0.01 | 3.03 | 1.20 | 0.22 | 0.28 |
| 64354 | 0 | 56751  | SAEGQL                          | 1.88 | 0.01 | 3.03 | 1.20 | 0.22 | 0.28 |
| 64355 | 0 | 525593 | SAEKEKKSEDKKKS                  | 2.74 | 0.01 | 2.24 | 0.44 | 1.41 | 1.28 |
| 64356 | 0 | 56755  | SAEKKDEKEASEQGEES<br>HKKENSQESA | 3.29 | 0.01 | 1.66 | 2.74 | 0.22 | 0.28 |
| 64357 | 0 | 56755  | SAEKKDEKEASEQGEES<br>HKKENSQESA | 3.29 | 0.01 | 1.66 | 3.67 | 0.22 | 0.28 |
| 64358 | 0 | 56755  | SAEKKDEKEASEQGEES<br>HKKENSQESA | 3.29 | 0.01 | 1.66 | 0.44 | 1.74 | 1.48 |
| 64359 | 0 | 56755  | SAEKKDEKEASEQGEES<br>HKKENSQESA | 3.29 | 0.01 | 1.66 | 0.44 | 1.74 | 0.28 |
| 64360 | 0 | 56755  | SAEKKDEKEASEQGEES<br>HKKENSQESA | 3.29 | 0.01 | 1.66 | 2.89 | 0.22 | 0.28 |

|       |   |        |                                        |      |      |      |      |      |      |
|-------|---|--------|----------------------------------------|------|------|------|------|------|------|
| 64361 | 0 | 56755  | SAEKKDEKEASEQGEES<br>HKKENSQESA        | 3.29 | 0.01 | 1.66 | 2.89 | 0.22 | 0.28 |
| 64362 | 0 | 56755  | SAEKKDEKEASEQGEES<br>HKKENSQESA        | 3.29 | 0.01 | 1.66 | 2.89 | 0.22 | 0.28 |
| 64363 | 0 | 451067 | SAEKLLR                                | 2.01 | 0.01 | 0.90 | 0.44 | 1.41 | 1.39 |
| 64364 | 0 | 105506 | SAENEL                                 | 1.90 | 0.01 | 3.89 | 1.20 | 0.22 | 0.28 |
| 64365 | 0 | 375194 | SAEPEPAEPKSAEPK                        | 2.75 | 0.01 | 1.61 | 0.44 | 0.85 | 1.28 |
| 64366 | 0 | 375201 | SAEPKPAEPKSAELN                        | 2.73 | 0.01 | 1.61 | 0.44 | 0.85 | 1.28 |
| 64367 | 0 | 375202 | SAEPKPAEPKSAEPE                        | 2.75 | 0.01 | 1.61 | 0.44 | 0.85 | 1.28 |
| 64368 | 0 | 375203 | SAEPKPAEPKSAEPK                        | 2.75 | 0.01 | 1.61 | 0.44 | 0.85 | 1.28 |
| 64369 | 0 | 375204 | SAEPKPAEPKSAGPK                        | 2.75 | 0.01 | 1.61 | 0.44 | 0.85 | 1.28 |
| 64370 | 0 | 375208 | SAEPKPAESKSAEPK                        | 2.75 | 0.01 | 1.61 | 0.44 | 0.85 | 1.28 |
| 64371 | 0 | 375209 | SAEPKPAESKSAGPK                        | 2.75 | 0.01 | 1.61 | 0.44 | 0.85 | 1.28 |
| 64372 | 0 | 103579 | SAERCGSPAOWLPTV                        | 2.65 | 0.01 | 2.04 | 0.44 | 0.85 | 1.28 |
| 64373 | 0 | 96849  | SAETIF                                 | 1.88 | 0.01 | 3.03 | 1.20 | 0.22 | 0.28 |
| 64374 | 0 | 96849  | SAETIF                                 | 1.88 | 0.01 | 2.40 | 3.42 | 0.22 | 0.28 |
| 64375 | 0 | 96849  | SAETIF                                 | 1.88 | 0.01 | 2.40 | 3.42 | 0.22 | 0.28 |
| 64376 | 0 | 96849  | SAETIF                                 | 1.88 | 0.01 | 2.40 | 2.52 | 0.22 | 0.28 |
| 64377 | 0 | 96849  | SAETIF                                 | 1.88 | 0.01 | 2.40 | 2.52 | 0.22 | 0.28 |
| 64378 | 0 | 56763  | SAETIFD                                | 1.99 | 0.01 | 3.03 | 1.20 | 0.22 | 0.28 |
| 64379 | 0 | 56764  | SAETIFDVTTT                            | 2.38 | 0.01 | 4.33 | 1.12 | 0.22 | 0.85 |
| 64380 | 0 | 56764  | SAETIFDVTTT                            | 2.38 | 0.01 | 4.33 | 1.12 | 0.22 | 0.85 |
| 64381 | 0 | 56764  | SAETIFDVTTT                            | 2.38 | 0.01 | 3.03 | 3.28 | 0.22 | 0.85 |
| 64382 | 0 | 56765  | SAETIFDVTTTLDPLNPTIA<br>GAGDV          | 3.13 | 0.01 | 0.90 | 1.12 | 0.22 | 0.85 |
| 64383 | 0 | 56765  | SAETIFDVTTTLDPLNPTIA<br>GAGDV          | 3.13 | 0.01 | 0.90 | 1.12 | 0.22 | 0.85 |
| 64384 | 0 | 56765  | SAETIFDVTTTLDPLNPTIA<br>GAGDV          | 3.13 | 0.01 | 0.90 | 2.82 | 0.22 | 0.28 |
| 64385 | 0 | 78507  | SAETIFDVTTTLDPLNPTIAGS<br>DVAGLQNDPTTN | 3.35 | 0.01 | 0.90 | 0.68 | 0.22 | 1.27 |
| 64386 | 0 | 78507  | SAETIFDVTTTLDPLNPTIAGS<br>DVAGLQNDPTTN | 3.35 | 0.01 | 0.90 | 0.68 | 0.22 | 1.27 |
| 64387 | 0 | 78507  | SAETIFDVTTTLDPLNPTIAGS<br>DVAGLQNDPTTN | 3.35 | 0.01 | 2.40 | 0.68 | 0.22 | 0.28 |
| 64388 | 0 | 78507  | SAETIFDVTTTLDPLNPTIAGS<br>DVAGLQNDPTTN | 3.35 | 0.01 | 2.40 | 0.68 | 0.22 | 0.28 |
| 64389 | 0 | 78507  | SAETIFDVTTTLDPLNPTIAGS<br>DVAGLQNDPTTN | 3.35 | 0.01 | 2.40 | 0.68 | 0.22 | 0.28 |
| 64390 | 0 | 78507  | SAETIFDVTTTLDPLNPTIAGS<br>DVAGLQNDPTTN | 3.35 | 0.01 | 0.90 | 2.52 | 0.22 | 0.28 |
| 64391 | 0 | 78507  | SAETIFDVTTTLDPLNPTIAGS<br>DVAGLQNDPTTN | 3.35 | 0.01 | 0.90 | 2.52 | 0.22 | 0.28 |
| 64392 | 0 | 78507  | SAETIFDVTTTLDPLNPTIAGS<br>DVAGLQNDPTTN | 3.35 | 0.01 | 0.90 | 2.52 | 0.22 | 0.28 |
| 64393 | 0 | 78507  | SAETIFDVTTTLDPLNPTIAGS<br>DVAGLQNDPTTN | 3.35 | 0.01 | 0.90 | 2.52 | 0.22 | 0.28 |

|       |   |        |                                                          |      |      |      |      |      |      |
|-------|---|--------|----------------------------------------------------------|------|------|------|------|------|------|
| 64394 | 0 | 115477 | SAEVATEEVKITVDDKHY<br>QK                                 | 2.95 | 0.01 | 1.60 | 0.44 | 1.23 | 2.51 |
| 64395 | 0 | 237922 | SAEVKAWLETSEG                                            | 2.56 | 0.01 | 0.78 | 0.44 | 1.13 | 1.28 |
| 64396 | 0 | 56768  | SAEYEKSVNKYLKTIMP<br>F                                   | 2.88 | 0.01 | 2.08 | 2.02 | 0.22 | 1.57 |
| 64397 | 0 | 103580 | SAFAAKAGLMRHTIG                                          | 2.66 | 0.01 | 2.04 | 0.44 | 0.85 | 1.28 |
| 64398 | 0 | 129859 | SAFAPMY                                                  | 2.02 | 0.01 | 0.90 | 2.88 | 2.35 | 0.28 |
| 64399 | 0 | 56771  | SAFDDNLTAANAMGLIL<br>NKR                                 | 2.94 | 0.01 | 0.90 | 2.63 | 0.22 | 1.48 |
| 64400 | 0 | 56771  | SAFDDNLTAANAMGLIL<br>NKR                                 | 2.94 | 0.01 | 0.90 | 2.63 | 2.25 | 1.75 |
| 64401 | 0 | 56771  | SAFDDNLTAANAMGLIL<br>NKR                                 | 2.94 | 0.01 | 0.90 | 2.63 | 2.25 | 1.75 |
| 64402 | 0 | 56771  | SAFDDNLTAANAMGLIL<br>NKR                                 | 2.94 | 0.01 | 0.90 | 2.63 | 0.22 | 1.48 |
| 64403 | 0 | 56772  | SAFDDNLTAMNAMGLI<br>LNKR                                 | 2.94 | 0.01 | 0.90 | 2.63 | 0.22 | 1.48 |
| 64404 | 0 | 56772  | SAFDDNLTAMNAMGLI<br>LNKR                                 | 2.94 | 0.01 | 0.90 | 2.63 | 2.25 | 1.75 |
| 64405 | 0 | 56772  | SAFDDNLTAMNAMGLI<br>LNKR                                 | 2.94 | 0.01 | 0.90 | 2.63 | 2.25 | 1.75 |
| 64406 | 0 | 56772  | SAFDDNLTAMNAMGLI<br>LNKR                                 | 2.94 | 0.01 | 0.90 | 2.63 | 0.22 | 1.48 |
| 64407 | 0 | 56776  | SAFLESQSMNKIGDD                                          | 2.63 | 0.01 | 1.66 | 1.20 | 0.22 | 0.28 |
| 64408 | 0 | 121832 | SAFLGIPFAEPPGNMRF<br>RRPEPKKP                            | 3.17 | 0.01 | 0.78 | 0.68 | 0.22 | 0.28 |
| 64409 | 0 | 121832 | SAFLGIPFAEPPGNMRF<br>RRPEPKKP                            | 3.17 | 0.01 | 0.78 | 0.68 | 0.22 | 0.28 |
| 64410 | 0 | 56787  | SAFSPTHYK                                                | 2.22 | 0.01 | 0.90 | 0.44 | 0.85 | 1.39 |
| 64411 | 0 | 56788  | SAFVFPTKD                                                | 2.21 | 0.01 | 2.51 | 0.68 | 0.22 | 0.28 |
| 64412 | 0 | 56788  | SAFVFPTKD                                                | 2.21 | 0.01 | 2.51 | 0.68 | 0.22 | 2.02 |
| 64413 | 0 | 525606 | SAGAGGSGTPVDELDRS<br>SKVGGGAGGALSFGRA<br>PYNKNNENINPNRSR | 3.82 | 0.01 | 0.90 | 0.68 | 0.22 | 0.28 |
| 64414 | 0 | 112303 | SAGEKVT                                                  | 1.99 | 0.01 | 0.78 | 0.44 | 1.13 | 0.28 |
| 64415 | 0 | 173136 | SAGFENDGTKLA                                             | 2.45 | 0.01 | 0.90 | 0.44 | 0.85 | 1.39 |
| 64416 | 0 | 173136 | SAGFENDGTKLA                                             | 2.45 | 0.01 | 0.90 | 0.44 | 0.85 | 0.28 |
| 64417 | 0 | 56796  | SAGGQLFYSRPVVSANG<br>E                                   | 2.83 | 0.01 | 2.53 | 0.44 | 0.85 | 0.28 |
| 64418 | 0 | 375376 | SAGPKPAEPKSAEPK                                          | 2.75 | 0.01 | 1.61 | 0.44 | 0.85 | 1.28 |
| 64419 | 0 | 152964 | SAGPTVPDRD                                               | 2.31 | 0.01 | 2.18 | 2.16 | 0.22 | 0.28 |
| 64420 | 0 | 79381  | SAGQRTLVMANTGA<br>MELVG                                  | 2.96 | 0.01 | 2.84 | 2.55 | 0.22 | 0.85 |
| 64421 | 0 | 56804  | SAGRSTGSLVRLFAPG                                         | 2.77 | 0.01 | 3.10 | 0.44 | 0.85 | 0.28 |
| 64422 | 0 | 56804  | SAGRSTGSLVRLFAPG                                         | 2.77 | 0.01 | 3.10 | 0.44 | 0.85 | 0.28 |

|       |   |        |                             |      |      |      |      |      |      |
|-------|---|--------|-----------------------------|------|------|------|------|------|------|
| 64423 | 0 | 161280 | SAGRTTAGLVGLLTPGA<br>KQN    | 2.95 | 0.01 | 2.41 | 0.68 | 0.22 | 1.34 |
| 64424 | 0 | 88362  | SAGTGALASSAP                | 2.52 | 0.01 | 2.48 | 0.44 | 1.59 | 0.28 |
| 64425 | 0 | 375426 | SAGTTGATPFTPNSPDA<br>TPEDST | 3.13 | 0.01 | 3.75 | 0.68 | 0.22 | 0.28 |
| 64426 | 0 | 56807  | SAHGTSTGVRGP                | 2.50 | 0.01 | 0.90 | 0.68 | 0.22 | 0.28 |
| 64427 | 0 | 56807  | SAHGTSTGVRGP                | 2.50 | 0.01 | 0.90 | 0.68 | 0.22 | 1.27 |
| 64428 | 0 | 56807  | SAHGTSTGVRGP                | 2.50 | 0.01 | 0.90 | 0.44 | 1.23 | 1.27 |
| 64429 | 0 | 56807  | SAHGTSTGVRGP                | 2.50 | 0.01 | 0.90 | 0.68 | 0.22 | 0.85 |
| 64430 | 0 | 56807  | SAHGTSTGVRGP                | 2.50 | 0.01 | 0.90 | 0.68 | 0.22 | 1.27 |
| 64431 | 0 | 112304 | SAHKGFKGVDAQGTLSK<br>IFK    | 2.95 | 0.01 | 0.78 | 0.44 | 0.22 | 0.28 |
| 64432 | 0 | 88363  | SAHLNVQCTV                  | 2.29 | 0.01 | 3.06 | 0.44 | 0.85 | 0.28 |
| 64433 | 0 | 56810  | SAHSTP                      | 1.91 | 0.01 | 2.30 | 1.15 | 0.22 | 0.85 |
| 64434 | 0 | 56810  | SAHSTP                      | 1.91 | 0.01 | 2.30 | 1.15 | 0.22 | 0.85 |
| 64435 | 0 | 56810  | SAHSTP                      | 1.91 | 0.01 | 2.30 | 1.15 | 2.26 | 1.39 |
| 64436 | 0 | 56810  | SAHSTP                      | 1.91 | 0.01 | 2.30 | 1.15 | 2.26 | 1.39 |
| 64437 | 0 | 56810  | SAHSTP                      | 1.91 | 0.01 | 2.30 | 1.15 | 2.26 | 1.39 |
| 64438 | 0 | 56810  | SAHSTP                      | 1.91 | 0.01 | 2.30 | 1.15 | 2.26 | 1.39 |
| 64439 | 0 | 155744 | SAHSTPS                     | 2.05 | 0.01 | 2.30 | 1.20 | 0.22 | 0.85 |
| 64440 | 0 | 155744 | SAHSTPS                     | 2.05 | 0.01 | 2.30 | 1.20 | 0.22 | 0.85 |
| 64441 | 0 | 155744 | SAHSTPS                     | 2.05 | 0.01 | 2.30 | 0.44 | 0.85 | 0.85 |
| 64442 | 0 | 144772 | SAHTSHLVGS                  | 2.34 | 0.01 | 0.78 | 0.44 | 1.41 | 0.28 |
| 64443 | 0 | 144772 | SAHTSHLVGS                  | 2.34 | 0.01 | 0.78 | 0.44 | 2.35 | 0.28 |
| 64444 | 0 | 144772 | SAHTSHLVGS                  | 2.34 | 0.01 | 0.78 | 0.44 | 2.35 | 0.28 |
| 64445 | 0 | 120931 | SAIEGVKYIAEHMKSDEE<br>SSN   | 2.99 | 0.01 | 2.26 | 2.04 | 0.22 | 1.27 |
| 64446 | 0 | 120931 | SAIEGVKYIAEHMKSDEE<br>SSN   | 2.99 | 0.01 | 2.26 | 3.55 | 0.22 | 1.27 |
| 64447 | 0 | 230515 | SAIKKPVT                    | 2.11 | 0.01 | 0.90 | 2.25 | 0.22 | 1.39 |
| 64448 | 0 | 230515 | SAIKKPVT                    | 2.11 | 0.01 | 0.90 | 2.25 | 0.22 | 1.34 |
| 64449 | 0 | 230515 | SAIKKPVT                    | 2.11 | 0.01 | 0.90 | 2.25 | 0.22 | 1.48 |
| 64450 | 0 | 230515 | SAIKKPVT                    | 2.11 | 0.01 | 0.90 | 2.25 | 0.22 | 0.28 |
| 64451 | 0 | 230515 | SAIKKPVT                    | 2.11 | 0.01 | 0.90 | 2.25 | 0.22 | 1.34 |
| 64452 | 0 | 230515 | SAIKKPVT                    | 2.11 | 0.01 | 0.90 | 2.25 | 0.22 | 1.48 |
| 64453 | 0 | 167400 | SAIPTTWNPLAV                | 2.46 | 0.01 | 0.90 | 1.15 | 0.22 | 1.39 |
| 64454 | 0 | 173138 | SAIQGYNGTIFAYGQ             | 2.70 | 0.01 | 0.78 | 0.44 | 1.13 | 0.28 |
| 64455 | 0 | 56837  | SAIRAAPEAARSLASSLP<br>G     | 2.94 | 0.01 | 2.60 | 0.44 | 1.23 | 0.28 |
| 64456 | 0 | 131641 | SAISVARTLLVF                | 2.49 | 0.01 | 0.78 | 0.44 | 1.93 | 1.27 |
| 64457 | 0 | 131641 | SAISVARTLLVF                | 2.49 | 0.01 | 0.78 | 0.44 | 1.93 | 1.27 |
| 64458 | 0 | 375485 | SAKAAAPAKAAAAPA             | 2.74 | 0.01 | 1.61 | 0.44 | 0.85 | 1.28 |
| 64459 | 0 | 375488 | SAKAATAPAKAAAAP             | 2.73 | 0.01 | 1.61 | 0.44 | 0.85 | 1.28 |
| 64460 | 0 | 173139 | SAKCTEEKWSPPLP              | 2.69 | 0.01 | 0.78 | 0.44 | 1.13 | 0.28 |
| 64461 | 0 | 132644 | SAKEK                       | 1.75 | 0.01 | 2.73 | 1.15 | 0.22 | 0.28 |

|       |   |        |                                |      |      |      |      |      |      |
|-------|---|--------|--------------------------------|------|------|------|------|------|------|
| 64462 | 0 | 132644 | SAKEK                          | 1.75 | 0.01 | 2.73 | 1.15 | 0.22 | 0.85 |
| 64463 | 0 | 132644 | SAKEK                          | 1.75 | 0.01 | 2.73 | 1.15 | 0.22 | 0.85 |
| 64464 | 0 | 132644 | SAKEK                          | 1.75 | 0.01 | 2.73 | 1.15 | 0.22 | 0.85 |
| 64465 | 0 | 375510 | SAKGKATGGSAGEDG                | 2.73 | 0.01 | 1.61 | 0.44 | 0.85 | 1.28 |
| 64466 | 0 | 375511 | SAKGKATGGSAGEDS                | 2.73 | 0.01 | 1.61 | 0.44 | 0.85 | 1.28 |
| 64467 | 0 | 375512 | SAKGKATGSSAGEDG                | 2.73 | 0.01 | 1.61 | 0.44 | 0.85 | 1.28 |
| 64468 | 0 | 56841  | SAKIMPALPGLPFI                 | 2.63 | 0.01 | 2.59 | 0.44 | 1.41 | 0.28 |
| 64469 | 0 | 139891 | SAKLAEQYDTFVKFTYD<br>Q         | 2.85 | 0.01 | 3.65 | 2.00 | 0.22 | 0.28 |
| 64470 | 0 | 139891 | SAKLAEQYDTFVKFTYD<br>Q         | 2.85 | 0.01 | 3.65 | 2.00 | 0.22 | 0.28 |
| 64471 | 0 | 375523 | SAKLGKSVGLTAALS                | 2.73 | 0.01 | 1.61 | 0.44 | 0.85 | 1.28 |
| 64472 | 0 | 56846  | SAKREMAQKLAEIDQLT              | 2.79 | 0.01 | 3.59 | 2.02 | 0.22 | 0.28 |
| 64473 | 0 | 132645 | SAKRRALEAHVA                   | 2.48 | 0.01 | 0.90 | 1.15 | 0.22 | 1.39 |
| 64474 | 0 | 226381 | SALAENK                        | 2.02 | 0.01 | 0.90 | 2.66 | 0.22 | 1.39 |
| 64475 | 0 | 56852  | SALEDKLADYKRRM                 | 2.62 | 0.01 | 2.56 | 2.69 | 0.22 | 0.28 |
| 64476 | 0 | 56852  | SALEDKLADYKRRM                 | 2.62 | 0.01 | 3.16 | 2.69 | 0.22 | 0.28 |
| 64477 | 0 | 56852  | SALEDKLADYKRRM                 | 2.62 | 0.01 | 3.16 | 2.69 | 0.22 | 0.28 |
| 64478 | 0 | 56856  | SALEWIDLSSL                    | 2.51 | 0.01 | 2.56 | 0.44 | 0.85 | 0.85 |
| 64479 | 0 | 130604 | SALHPGRLLKGWKHLKD<br>MPILPGETF | 3.18 | 0.01 | 2.73 | 1.15 | 0.22 | 1.27 |
| 64480 | 0 | 130604 | SALHPGRLLKGWKHLKD<br>MPILPGETF | 3.18 | 0.01 | 2.73 | 1.15 | 0.22 | 1.27 |
| 64481 | 0 | 130604 | SALHPGRLLKGWKHLKD<br>MPILPGETF | 3.18 | 0.01 | 2.73 | 1.15 | 0.22 | 1.27 |
| 64482 | 0 | 130604 | SALHPGRLLKGWKHLKD<br>MPILPGETF | 3.18 | 0.01 | 2.73 | 1.15 | 0.22 | 1.27 |
| 64483 | 0 | 56862  | SALLED                         | 1.89 | 0.01 | 2.40 | 0.68 | 0.22 | 0.28 |
| 64484 | 0 | 56862  | SALLED                         | 1.89 | 0.01 | 2.40 | 0.68 | 0.22 | 0.28 |
| 64485 | 0 | 56862  | SALLED                         | 1.89 | 0.01 | 2.40 | 1.81 | 2.25 | 1.75 |
| 64486 | 0 | 56862  | SALLED                         | 1.89 | 0.01 | 2.40 | 0.68 | 2.25 | 1.75 |
| 64487 | 0 | 56862  | SALLED                         | 1.89 | 0.01 | 2.40 | 1.81 | 0.22 | 0.28 |
| 64488 | 0 | 56864  | SALLEDPVG                      | 2.20 | 0.01 | 2.40 | 1.15 | 0.22 | 0.28 |
| 64489 | 0 | 56864  | SALLEDPVG                      | 2.20 | 0.01 | 2.40 | 1.15 | 2.25 | 1.75 |
| 64490 | 0 | 56865  | SALLEDPVGTVPQI                 | 2.65 | 0.01 | 2.40 | 0.44 | 1.59 | 0.28 |
| 64491 | 0 | 101219 | SALLVREEGLMQNC                 | 2.58 | 0.01 | 0.78 | 1.20 | 0.22 | 2.02 |
| 64492 | 0 | 101219 | SALLVREEGLMQNC                 | 2.58 | 0.01 | 0.78 | 1.20 | 0.22 | 1.57 |
| 64493 | 0 | 177969 | SALTNQPPQNNGEVQ                | 2.67 | 0.01 | 0.78 | 0.44 | 1.13 | 0.85 |
| 64494 | 0 | 106811 | SALTQPASVSGSPGQSIT             | 2.89 | 0.01 | 0.78 | 1.12 | 0.22 | 0.28 |
| 64495 | 0 | 56885  | SALTSIAIGFVFSC                 | 2.64 | 0.01 | 2.94 | 4.03 | 0.22 | 0.28 |
| 64496 | 0 | 56885  | SALTSIAIGFVFSC                 | 2.64 | 0.01 | 2.94 | 4.03 | 0.22 | 0.28 |
| 64497 | 0 | 56885  | SALTSIAIGFVFSC                 | 2.64 | 0.01 | 2.94 | 2.00 | 0.22 | 0.28 |
| 64498 | 0 | 56885  | SALTSIAIGFVFSC                 | 2.64 | 0.01 | 2.94 | 2.00 | 0.22 | 0.28 |
| 64499 | 0 | 56885  | SALTSIAIGFVFSC                 | 2.64 | 0.01 | 2.94 | 2.00 | 0.22 | 0.28 |

|       |   |        |                                    |      |      |      |      |      |      |
|-------|---|--------|------------------------------------|------|------|------|------|------|------|
| 64500 | 0 | 56885  | SALTSIAIGFVFSC                     | 2.64 | 0.01 | 2.94 | 2.00 | 0.22 | 1.34 |
| 64501 | 0 | 56885  | SALTSIAIGFVFSC                     | 2.64 | 0.01 | 2.94 | 2.00 | 0.22 | 0.28 |
| 64502 | 0 | 135755 | SALVLQYL                           | 2.14 | 0.01 | 0.78 | 0.44 | 2.35 | 0.28 |
| 64503 | 0 | 56888  | SALYVGDLCG                         | 2.31 | 0.01 | 2.68 | 0.44 | 0.85 | 0.28 |
| 64504 | 0 | 56895  | SAMILAAYHPQQFIYAG<br>SLS           | 2.96 | 0.01 | 3.78 | 0.44 | 0.85 | 0.28 |
| 64505 | 0 | 56895  | SAMILAAYHPQQFIYAG<br>SLS           | 2.96 | 0.01 | 3.78 | 1.12 | 0.22 | 0.28 |
| 64506 | 0 | 56895  | SAMILAAYHPQQFIYAG<br>SLS           | 2.96 | 0.01 | 2.04 | 0.44 | 0.85 | 0.28 |
| 64507 | 0 | 193073 | SAMQDTINKLENELRS                   | 2.72 | 0.01 | 1.75 | 2.25 | 0.22 | 0.28 |
| 64508 | 0 | 56899  | SAMSRPMIHFGNDWE<br>DRYYR           | 2.91 | 0.01 | 1.75 | 1.81 | 0.22 | 0.28 |
| 64509 | 0 | 56899  | SAMSRPMIHFGNDWE<br>DRYYR           | 2.91 | 0.01 | 1.75 | 3.40 | 0.22 | 0.28 |
| 64510 | 0 | 56900  | SAMSTTDLEAYFKDC                    | 2.66 | 0.01 | 2.08 | 0.44 | 0.85 | 0.28 |
| 64511 | 0 | 56900  | SAMSTTDLEAYFKDC                    | 2.66 | 0.01 | 2.08 | 0.44 | 0.85 | 0.28 |
| 64512 | 0 | 100492 | SAMTVDDFGVLAVR                     | 2.60 | 0.01 | 2.96 | 0.44 | 0.22 | 0.28 |
| 64513 | 0 | 104232 | SAMWDF                             | 1.88 | 0.01 | 0.90 | 1.15 | 0.22 | 0.28 |
| 64514 | 0 | 104232 | SAMWDF                             | 1.88 | 0.01 | 0.90 | 1.15 | 0.22 | 0.28 |
| 64515 | 0 | 56904  | SANASVERIKTTSSIEFAR<br>LQF         | 3.04 | 0.01 | 3.67 | 0.68 | 0.22 | 0.28 |
| 64516 | 0 | 434518 | SANGEPTVKLYTSVE                    | 2.67 | 0.01 | 2.70 | 0.68 | 0.22 | 0.28 |
| 64517 | 0 | 434518 | SANGEPTVKLYTSVE                    | 2.67 | 0.01 | 2.70 | 0.68 | 0.22 | 0.85 |
| 64518 | 0 | 56905  | SANGEPTVKLYTSVENA<br>Q             | 2.84 | 0.01 | 2.53 | 0.44 | 0.85 | 0.28 |
| 64519 | 0 | 56906  | SANGEPTVKLYTSVENA<br>QQ            | 2.88 | 0.01 | 2.70 | 0.44 | 0.85 | 0.28 |
| 64520 | 0 | 56908  | SANGEPTVKLYTSVENA<br>QQDKGIAI      | 3.15 | 0.01 | 2.53 | 0.44 | 0.85 | 0.28 |
| 64521 | 0 | 56908  | SANGEPTVKLYTSVENA<br>QQDKGIAI      | 3.15 | 0.01 | 2.53 | 0.44 | 0.85 | 0.28 |
| 64522 | 0 | 56909  | SANGEPTVKLYTSVENA<br>QQDKGIAIPHDID | 3.33 | 0.01 | 2.70 | 1.15 | 0.22 | 0.28 |
| 64523 | 0 | 56909  | SANGEPTVKLYTSVENA<br>QQDKGIAIPHDID | 3.33 | 0.01 | 2.53 | 0.44 | 0.85 | 0.28 |
| 64524 | 0 | 56909  | SANGEPTVKLYTSVENA<br>QQDKGIAIPHDID | 3.33 | 0.01 | 2.53 | 0.44 | 0.85 | 0.28 |
| 64525 | 0 | 375662 | SANKPASKPAAKPAA                    | 2.74 | 0.01 | 1.61 | 0.44 | 0.85 | 1.28 |
| 64526 | 0 | 102789 | SANLNFFSPDFGLYTPN<br>ASA           | 2.98 | 0.01 | 0.90 | 1.20 | 0.22 | 0.28 |
| 64527 | 0 | 56917  | SANMPTN                            | 2.02 | 0.01 | 0.90 | 0.68 | 0.22 | 0.85 |
| 64528 | 0 | 56918  | SANNDAEIGNLI                       | 2.49 | 0.01 | 2.40 | 0.44 | 2.39 | 0.28 |
| 64529 | 0 | 56918  | SANNDAEIGNLI                       | 2.49 | 0.01 | 2.40 | 1.20 | 0.22 | 0.28 |
| 64530 | 0 | 56918  | SANNDAEIGNLI                       | 2.49 | 0.01 | 2.40 | 0.44 | 1.59 | 0.28 |
| 64531 | 0 | 56918  | SANNDAEIGNLI                       | 2.49 | 0.01 | 2.40 | 0.44 | 1.59 | 0.28 |



|       |   |        |                                    |      |      |      |      |      |      |
|-------|---|--------|------------------------------------|------|------|------|------|------|------|
| 64532 | 0 | 56918  | SANNDAEIGNLI                       | 2.49 | 0.01 | 2.40 | 0.44 | 1.59 | 0.28 |
| 64533 | 0 | 56918  | SANNDAEIGNLI                       | 2.49 | 0.01 | 2.40 | 0.44 | 0.85 | 0.28 |
|       |   |        | SANVKKIYDLGARTFWI                  |      |      |      |      |      |      |
| 64534 | 0 | 138612 | HNTGPIGCLSFILTYFPW<br>AEKD         | 3.58 | 0.01 | 2.60 | 0.44 | 1.23 | 0.85 |
| 64535 | 0 | 56923  | SANVRRD                            | 2.01 | 0.01 | 3.89 | 2.88 | 2.26 | 0.85 |
| 64536 | 0 | 375684 | SAPAAGGFGSAAHTS                    | 2.73 | 0.01 | 1.61 | 0.44 | 0.85 | 1.28 |
| 64537 | 0 | 375685 | SAPAAGGFGSATHTS                    | 2.73 | 0.01 | 1.61 | 0.44 | 0.85 | 1.28 |
| 64538 | 0 | 375686 | SAPAAGGFGSATTTTS                   | 2.73 | 0.01 | 1.61 | 0.44 | 0.85 | 1.28 |
| 64539 | 0 | 375698 | SAPAKAAAPPAAARS                    | 2.73 | 0.01 | 1.61 | 0.44 | 0.85 | 1.28 |
| 64540 | 0 | 118599 | SAPAPKKGSKKAV                      | 2.60 | 0.01 | 1.75 | 3.05 | 1.13 | 1.27 |
| 64541 | 0 | 118599 | SAPAPKKGSKKAV                      | 2.60 | 0.01 | 1.75 | 3.05 | 1.13 | 1.48 |
| 64542 | 0 | 127046 | SAPATGGVKKPHRYRPG<br>T             | 2.86 | 0.01 | 0.78 | 3.05 | 1.13 | 1.27 |
| 64543 | 0 | 375704 | SAPAVGGFGSAAHTS                    | 2.71 | 0.01 | 1.61 | 0.44 | 0.85 | 1.28 |
| 64544 | 0 | 375705 | SAPAVGGFGSATHTS                    | 2.72 | 0.01 | 1.61 | 0.44 | 0.85 | 1.28 |
| 64545 | 0 | 375706 | SAPAVGGFGSATTTTS                   | 2.72 | 0.01 | 1.61 | 0.44 | 0.85 | 1.28 |
| 64546 | 0 | 117232 | SAPDTRPAP                          | 2.25 | 0.01 | 0.78 | 0.68 | 0.22 | 2.49 |
| 64547 | 0 | 117232 | SAPDTRPAP                          | 2.25 | 0.01 | 0.78 | 0.68 | 0.22 | 2.56 |
| 64548 | 0 | 56924  | SAPECHLYYCPEQA                     | 2.62 | 0.01 | 0.90 | 0.44 | 1.41 | 0.28 |
| 64549 | 0 | 56925  | SAPEPKISFKDSMLTALE<br>GSIGYSIGGARV | 3.33 | 0.01 | 3.65 | 2.22 | 0.22 | 0.28 |
| 64550 | 0 | 56929  | SAPLGV                             | 1.88 | 0.01 | 2.53 | 0.44 | 1.59 | 0.28 |
| 64551 | 0 | 56931  | SAPLKQIAANAG                       | 2.47 | 0.01 | 2.40 | 0.44 | 1.59 | 0.28 |
| 64552 | 0 | 56931  | SAPLKQIAANAG                       | 2.47 | 0.01 | 2.40 | 0.44 | 1.59 | 0.28 |
| 64553 | 0 | 56931  | SAPLKQIAANAG                       | 2.47 | 0.01 | 2.40 | 0.44 | 1.59 | 0.28 |
| 64554 | 0 | 96853  | SAPLRVYVEELKPTP                    | 2.67 | 0.01 | 1.60 | 0.44 | 1.23 | 0.28 |
| 64555 | 0 | 56936  | SAPPLP                             | 1.92 | 0.01 | 2.53 | 0.44 | 1.59 | 0.28 |
| 64556 | 0 | 56936  | SAPPLP                             | 1.92 | 0.01 | 3.27 | 0.44 | 1.59 | 0.28 |
| 64557 | 0 | 423749 | SAPPLPPVVDLP                       | 2.52 | 0.01 | 3.78 | 0.68 | 0.22 | 1.48 |
| 64558 | 0 | 423749 | SAPPLPPVVDLP                       | 2.52 | 0.01 | 3.78 | 0.68 | 0.22 | 0.28 |
| 64559 | 0 | 423749 | SAPPLPPVVDLP                       | 2.52 | 0.01 | 3.78 | 0.68 | 0.22 | 0.28 |
| 64560 | 0 | 423749 | SAPPLPPVVDLP                       | 2.52 | 0.01 | 3.78 | 0.68 | 0.22 | 0.28 |
| 64561 | 0 | 423749 | SAPPLPPVVDLP                       | 2.52 | 0.01 | 3.78 | 0.68 | 0.22 | 0.28 |
| 64562 | 0 | 423749 | SAPPLPPVVDLP                       | 2.52 | 0.01 | 3.78 | 0.68 | 0.22 | 0.28 |
| 64563 | 0 | 423749 | SAPPLPPVVDLP                       | 2.52 | 0.01 | 3.78 | 0.68 | 0.22 | 0.28 |
| 64564 | 0 | 423749 | SAPPLPPVVDLP                       | 2.52 | 0.01 | 3.78 | 0.68 | 0.22 | 0.28 |
| 64565 | 0 | 423749 | SAPPLPPVVDLP                       | 2.52 | 0.01 | 3.78 | 0.68 | 0.22 | 0.28 |
| 64566 | 0 | 423749 | SAPPLPPVVDLP                       | 2.52 | 0.01 | 3.78 | 0.68 | 0.22 | 0.28 |
| 64567 | 0 | 423749 | SAPPLPPVVDLP                       | 2.52 | 0.01 | 3.78 | 0.68 | 0.22 | 0.28 |
| 64568 | 0 | 423749 | SAPPLPPVVDLP                       | 2.52 | 0.01 | 3.78 | 0.68 | 0.22 | 0.28 |
| 64569 | 0 | 423749 | SAPPLPPVVDLP                       | 2.52 | 0.01 | 3.78 | 0.68 | 0.22 | 0.28 |
| 64570 | 0 | 423749 | SAPPLPPVVDLP                       | 2.52 | 0.01 | 3.78 | 0.68 | 0.22 | 0.85 |
| 64571 | 0 | 56937  | SAPPTRVRR                          | 2.22 | 0.01 | 2.69 | 1.12 | 0.22 | 0.28 |
| 64572 | 0 | 56937  | SAPPTRVRR                          | 2.22 | 0.01 | 2.69 | 1.12 | 0.22 | 0.28 |
| 64573 | 0 | 56937  | SAPPTRVRR                          | 2.22 | 0.01 | 2.69 | 1.12 | 0.22 | 0.28 |
| 64574 | 0 | 56937  | SAPPTRVRR                          | 2.22 | 0.01 | 2.69 | 1.12 | 0.22 | 2.35 |

|       |   |        |                          |      |      |      |      |      |      |
|-------|---|--------|--------------------------|------|------|------|------|------|------|
| 64575 | 0 | 167401 | SAPRQAD                  | 2.02 | 0.01 | 0.90 | 2.37 | 0.22 | 1.39 |
| 64576 | 0 | 96854  | SAPSISTE                 | 2.15 | 0.01 | 3.81 | 0.68 | 0.22 | 0.28 |
| 64577 | 0 | 96854  | SAPSISTE                 | 2.15 | 0.01 | 3.81 | 0.68 | 0.22 | 0.85 |
| 64578 | 0 | 96854  | SAPSISTE                 | 2.15 | 0.01 | 3.81 | 0.68 | 0.22 | 1.34 |
| 64579 | 0 | 56942  | SAPSSKN                  | 2.04 | 0.01 | 0.90 | 0.44 | 1.59 | 1.27 |
| 64580 | 0 | 127814 | SAPWPPT                  | 2.03 | 0.01 | 0.90 | 0.44 | 1.13 | 0.28 |
| 64581 | 0 | 533631 | SAQEDLGDDTGIHVI          | 2.65 | 0.01 | 3.41 | 0.68 | 0.22 | 0.28 |
| 64582 | 0 | 533631 | SAQEDLGDDTGIHVI          | 2.65 | 0.01 | 3.41 | 0.68 | 0.22 | 0.85 |
| 64583 | 0 | 533631 | SAQEDLGDDTGIHVI          | 2.65 | 0.01 | 3.41 | 0.68 | 0.22 | 1.34 |
| 64584 | 0 | 533631 | SAQEDLGDDTGIHVI          | 2.65 | 0.01 | 3.41 | 0.68 | 0.22 | 1.48 |
| 64585 | 0 | 533631 | SAQEDLGDDTGIHVI          | 2.65 | 0.01 | 3.41 | 0.68 | 0.22 | 0.28 |
| 64586 | 0 | 533631 | SAQEDLGDDTGIHVI          | 2.65 | 0.01 | 3.41 | 0.68 | 0.22 | 0.85 |
| 64587 | 0 | 533631 | SAQEDLGDDTGIHVI          | 2.65 | 0.01 | 3.41 | 0.68 | 0.22 | 1.48 |
| 64588 | 0 | 56949  | SAQEDLGDDTGIHVIPTL<br>NG | 2.92 | 0.01 | 3.27 | 2.89 | 0.22 | 0.28 |
| 64589 | 0 | 56949  | SAQEDLGDDTGIHVIPTL<br>NG | 2.92 | 0.01 | 3.27 | 3.16 | 0.22 | 0.28 |
| 64590 | 0 | 113842 | SAQGQKGQQPGQGQ           | 2.67 | 0.01 | 1.86 | 0.44 | 1.23 | 0.85 |
| 64591 | 0 | 111758 | SAQLPGETSASDNVY          | 2.65 | 0.01 | 3.55 | 2.22 | 0.22 | 0.28 |
| 64592 | 0 | 193540 | SAQNATDCT                | 2.23 | 0.01 | 2.51 | 0.44 | 2.39 | 0.28 |
| 64593 | 0 | 193540 | SAQNATDCT                | 2.23 | 0.01 | 2.51 | 0.44 | 2.39 | 0.28 |
| 64594 | 0 | 95814  | SAQSGASQSGA              | 2.55 | 0.01 | 1.66 | 0.44 | 1.74 | 0.28 |
| 64595 | 0 | 95814  | SAQSGASQSGA              | 2.55 | 0.01 | 1.66 | 1.15 | 0.22 | 0.28 |
| 64596 | 0 | 95815  | SAQSGASQSGT              | 2.54 | 0.01 | 1.66 | 0.44 | 1.74 | 0.28 |
| 64597 | 0 | 95815  | SAQSGASQSGT              | 2.54 | 0.01 | 1.66 | 1.15 | 0.22 | 0.28 |
| 64598 | 0 | 56956  | SAQSGPSGTSAPSGS          | 2.75 | 0.01 | 1.66 | 0.44 | 0.85 | 0.28 |
| 64599 | 0 | 95816  | SAQSGTSAQSGT             | 2.54 | 0.01 | 1.66 | 0.44 | 1.74 | 0.28 |
| 64600 | 0 | 95816  | SAQSGTSAQSGT             | 2.54 | 0.01 | 1.66 | 0.44 | 1.74 | 0.28 |
| 64601 | 0 | 95817  | SAQSGTSGPSGP             | 2.53 | 0.01 | 1.66 | 0.44 | 1.74 | 0.28 |
| 64602 | 0 | 95818  | SAQSGTSGTSAQ             | 2.54 | 0.01 | 1.66 | 0.44 | 1.74 | 0.28 |
| 64603 | 0 | 95818  | SAQSGTSGTSAQ             | 2.54 | 0.01 | 1.66 | 0.68 | 0.22 | 0.28 |
| 64604 | 0 | 95818  | SAQSGTSGTSAQ             | 2.54 | 0.01 | 1.66 | 0.44 | 1.74 | 0.28 |
| 64605 | 0 | 56958  | SAQSGTSGTSAQSGT          | 2.75 | 0.01 | 3.26 | 0.44 | 0.85 | 0.28 |
| 64606 | 0 | 56958  | SAQSGTSGTSAQSGT          | 2.75 | 0.01 | 3.26 | 2.71 | 0.22 | 0.28 |
| 64607 | 0 | 56959  | SAQSGTSGTSAQSGTSG<br>T   | 2.93 | 0.01 | 1.66 | 4.45 | 0.22 | 0.28 |
| 64608 | 0 | 95819  | SAQSGTSGTSGT             | 2.54 | 0.01 | 1.66 | 0.44 | 1.74 | 0.28 |
| 64609 | 0 | 95819  | SAQSGTSGTSGT             | 2.54 | 0.01 | 1.66 | 0.68 | 0.22 | 0.28 |
| 64610 | 0 | 56960  | SAQSGTSGTSGTSGTSG<br>T   | 2.93 | 0.01 | 1.66 | 4.45 | 0.22 | 0.28 |
| 64611 | 0 | 164369 | SAQSLTL                  | 2.05 | 0.01 | 0.90 | 1.20 | 0.22 | 1.39 |
| 64612 | 0 | 151731 | SAQSQRAPDR               | 2.36 | 0.01 | 0.78 | 0.68 | 0.22 | 2.49 |
| 64613 | 0 | 151731 | SAQSQRAPDR               | 2.36 | 0.01 | 0.78 | 0.68 | 0.22 | 2.12 |
| 64614 | 0 | 151731 | SAQSQRAPDR               | 2.36 | 0.01 | 0.78 | 0.68 | 0.22 | 1.57 |
| 64615 | 0 | 151731 | SAQSQRAPDR               | 2.36 | 0.01 | 0.78 | 0.68 | 0.22 | 1.75 |
| 64616 | 0 | 151731 | SAQSQRAPDR               | 2.36 | 0.01 | 0.78 | 0.68 | 0.22 | 1.75 |

|       |   |        |                                      |      |      |      |      |      |      |
|-------|---|--------|--------------------------------------|------|------|------|------|------|------|
| 64617 | 0 | 151731 | SAQSQRAPDR                           | 2.36 | 0.01 | 0.78 | 0.68 | 0.22 | 1.75 |
| 64618 | 0 | 151731 | SAQSQRAPDR                           | 2.36 | 0.01 | 0.78 | 0.68 | 0.22 | 1.34 |
| 64619 | 0 | 56962  | SARDGIRDAMIGLREEM<br>IEK             | 2.97 | 0.01 | 2.67 | 1.15 | 0.22 | 0.28 |
| 64620 | 0 | 56962  | SARDGIRDAMIGLREEM<br>IEK             | 2.97 | 0.01 | 2.67 | 0.44 | 0.85 | 0.28 |
| 64621 | 0 | 56962  | SARDGIRDAMIGLREEM<br>IEK             | 2.97 | 0.01 | 2.67 | 0.44 | 0.85 | 0.28 |
| 64622 | 0 | 56962  | SARDGIRDAMIGLREEM<br>IEK             | 2.97 | 0.01 | 2.67 | 1.12 | 0.22 | 0.28 |
| 64623 | 0 | 56962  | SARDGIRDAMIGLREEM<br>IEK             | 2.97 | 0.01 | 2.67 | 1.15 | 0.22 | 2.02 |
| 64624 | 0 | 56967  | SARGWVIHPL                           | 2.26 | 0.01 | 0.78 | 0.44 | 1.74 | 0.28 |
| 64625 | 0 | 145508 | SARIPCFLAG                           | 2.29 | 0.01 | 0.78 | 0.44 | 1.13 | 0.28 |
| 64626 | 0 | 56971  | SARQQWELQGDRRCQ                      | 2.67 | 0.01 | 2.16 | 0.44 | 1.23 | 0.85 |
| 64627 | 0 | 56977  | SASAEPHKAAVDVGPLS                    | 2.81 | 0.01 | 3.51 | 0.68 | 0.22 | 0.28 |
| 64628 | 0 | 145997 | SASDQPTQYEEEMTDY<br>QK               | 2.86 | 0.01 | 2.59 | 0.44 | 0.85 | 0.28 |
| 64629 | 0 | 56984  | SASDTRTIGGSQARFAS<br>GIVSMFTIGPSQK   | 3.36 | 0.01 | 2.83 | 1.12 | 0.22 | 0.28 |
| 64630 | 0 | 56984  | SASDTRTIGGSQARFAS<br>GIVSMFTIGPSQK   | 3.36 | 0.01 | 2.83 | 0.44 | 0.85 | 0.28 |
| 64631 | 0 | 56984  | SASDTRTIGGSQARFAS<br>GIVSMFTIGPSQK   | 3.36 | 0.01 | 2.83 | 0.44 | 0.85 | 0.28 |
| 64632 | 0 | 56985  | SASFT                                | 1.77 | 0.01 | 3.65 | 1.15 | 2.26 | 0.28 |
| 64633 | 0 | 152108 | SASGNRAYAVRK                         | 2.50 | 0.01 | 2.80 | 2.78 | 0.22 | 0.28 |
| 64634 | 0 | 138029 | SASGSDVSLTA                          | 2.43 | 0.01 | 0.78 | 1.12 | 0.22 | 1.57 |
| 64635 | 0 | 138029 | SASGSDVSLTA                          | 2.43 | 0.01 | 0.78 | 1.12 | 0.22 | 2.56 |
| 64636 | 0 | 56987  | SASGSGVRGDFGSLAPR<br>VARQLPASF       | 3.25 | 0.01 | 3.14 | 2.59 | 0.22 | 1.34 |
| 64637 | 0 | 78268  | SASGSGVRGDFGSLAPR<br>VARQLPASFNYGAIK | 3.42 | 0.01 | 3.14 | 2.22 | 0.22 | 1.34 |
| 64638 | 0 | 78268  | SASGSGVRGDFGSLAPR<br>VARQLPASFNYGAIK | 3.42 | 0.01 | 3.14 | 2.22 | 0.22 | 1.75 |
| 64639 | 0 | 78268  | SASGSGVRGDFGSLAPR<br>VARQLPASFNYGAIK | 3.42 | 0.01 | 3.14 | 2.59 | 0.22 | 1.34 |
| 64640 | 0 | 78268  | SASGSGVRGDFGSLAPR<br>VARQLPASFNYGAIK | 3.42 | 0.01 | 3.14 | 3.47 | 0.22 | 1.34 |
| 64641 | 0 | 78268  | SASGSGVRGDFGSLAPR<br>VARQLPASFNYGAIK | 3.42 | 0.01 | 3.14 | 3.47 | 0.22 | 1.34 |

|       |   |        |                                      |      |      |      |      |      |      |
|-------|---|--------|--------------------------------------|------|------|------|------|------|------|
| 64642 | 0 | 78268  | SASGSGVRGDFGSLAPR<br>VARQLPASFNYGAIK | 3.42 | 0.01 | 3.14 | 3.47 | 0.22 | 1.75 |
| 64643 | 0 | 78268  | SASGSGVRGDFGSLAPR<br>VARQLPASFNYGAIK | 3.42 | 0.01 | 3.14 | 3.47 | 0.22 | 1.75 |
| 64644 | 0 | 78268  | SASGSGVRGDFGSLAPR<br>VARQLPASFNYGAIK | 3.42 | 0.01 | 3.14 | 3.67 | 0.22 | 1.34 |
| 64645 | 0 | 78268  | SASGSGVRGDFGSLAPR<br>VARQLPASFNYGAIK | 3.42 | 0.01 | 3.14 | 3.67 | 0.22 | 1.34 |
| 64646 | 0 | 78268  | SASGSGVRGDFGSLAPR<br>VARQLPASFNYGAIK | 3.42 | 0.01 | 3.14 | 3.67 | 0.22 | 1.27 |
| 64647 | 0 | 78268  | SASGSGVRGDFGSLAPR<br>VARQLPASFNYGAIK | 3.42 | 0.01 | 3.14 | 3.67 | 0.22 | 1.27 |
| 64648 | 0 | 78268  | SASGSGVRGDFGSLAPR<br>VARQLPASFNYGAIK | 3.42 | 0.01 | 3.14 | 3.67 | 0.22 | 1.57 |
| 64649 | 0 | 78268  | SASGSGVRGDFGSLAPR<br>VARQLPASFNYGAIK | 3.42 | 0.01 | 3.14 | 3.67 | 0.22 | 1.57 |
| 64650 | 0 | 78268  | SASGSGVRGDFGSLAPR<br>VARQLPASFNYGAIK | 3.42 | 0.01 | 3.14 | 3.67 | 0.22 | 1.57 |
| 64651 | 0 | 111759 | SASHPPP                              | 2.03 | 0.01 | 0.90 | 0.44 | 0.85 | 1.39 |
| 64652 | 0 | 79640  | SASIRPQ                              | 2.03 | 0.01 | 0.90 | 1.12 | 0.22 | 1.39 |
| 64653 | 0 | 56993  | SASLPYMDETRAIAGQF<br>KEK             | 2.90 | 0.01 | 1.96 | 0.44 | 0.85 | 0.28 |
| 64654 | 0 | 435974 | SASPHHHSRLRSESGG                     | 2.75 | 0.01 | 0.90 | 1.15 | 0.22 | 0.28 |
| 64655 | 0 | 435974 | SASPHHHSRLRSESGG                     | 2.75 | 0.01 | 0.90 | 1.12 | 0.22 | 0.28 |
| 64656 | 0 | 435974 | SASPHHHSRLRSESGG                     | 2.75 | 0.01 | 0.90 | 0.68 | 0.22 | 0.28 |
| 64657 | 0 | 435974 | SASPHHHSRLRSESGG                     | 2.75 | 0.01 | 0.90 | 0.68 | 0.22 | 0.28 |
| 64658 | 0 | 435974 | SASPHHHSRLRSESGG                     | 2.75 | 0.01 | 0.90 | 0.68 | 0.22 | 0.28 |
| 64659 | 0 | 435974 | SASPHHHSRLRSESGG                     | 2.75 | 0.01 | 0.90 | 0.68 | 2.25 | 1.75 |
| 64660 | 0 | 435974 | SASPHHHSRLRSESGG                     | 2.75 | 0.01 | 0.90 | 0.68 | 2.25 | 1.75 |
| 64661 | 0 | 56995  | SASPIPR                              | 2.05 | 0.01 | 2.04 | 0.44 | 0.85 | 1.57 |
| 64662 | 0 | 56996  | SASQLSAPSLKATCTTHH<br>DS             | 2.97 | 0.01 | 1.72 | 0.44 | 0.85 | 0.28 |
| 64663 | 0 | 132646 | SASRKLQLK                            | 2.26 | 0.01 | 0.78 | 0.68 | 0.22 | 0.85 |
| 64664 | 0 | 132646 | SASRKLQLK                            | 2.26 | 0.01 | 0.78 | 0.68 | 0.22 | 0.85 |
| 64665 | 0 | 132646 | SASRKLQLK                            | 2.26 | 0.01 | 0.78 | 0.68 | 0.22 | 0.28 |
| 64666 | 0 | 56998  | SASRSCIGSQCSTTA                      | 2.71 | 0.01 | 0.90 | 0.68 | 0.22 | 0.28 |
| 64667 | 0 | 56998  | SASRSCIGSQCSTTA                      | 2.71 | 0.01 | 0.90 | 1.81 | 0.22 | 0.28 |
| 64668 | 0 | 56998  | SASRSCIGSQCSTTA                      | 2.71 | 0.01 | 0.90 | 1.81 | 0.22 | 1.75 |

|       |   |        |                                    |      |      |      |      |      |      |
|-------|---|--------|------------------------------------|------|------|------|------|------|------|
| 64669 | 0 | 56998  | SASRSCIGSQCSTTA                    | 2.71 | 0.01 | 0.90 | 1.81 | 0.22 | 0.28 |
| 64670 | 0 | 57001  | SASTKNKD                           | 2.15 | 0.01 | 3.70 | 1.15 | 0.22 | 0.28 |
| 64671 | 0 | 135990 | SASVPALTAVET                       | 2.52 | 0.01 | 3.21 | 0.44 | 1.13 | 0.28 |
| 64672 | 0 | 135990 | SASVPALTAVET                       | 2.52 | 0.01 | 3.21 | 0.44 | 1.41 | 0.28 |
| 64673 | 0 | 135990 | SASVPALTAVET                       | 2.52 | 0.01 | 3.21 | 0.44 | 0.85 | 0.28 |
| 64674 | 0 | 57005  | SASVRIRYKKMKVFC                    | 2.69 | 0.01 | 3.02 | 2.69 | 0.22 | 0.28 |
| 64675 | 0 | 142472 | SATAAETAKNNAVS                     | 2.66 | 0.01 | 2.59 | 0.44 | 0.85 | 0.85 |
| 64676 | 0 | 88382  | SATAIF                             | 1.90 | 0.01 | 3.16 | 0.68 | 0.22 | 0.28 |
| 64677 | 0 | 88382  | SATAIF                             | 1.90 | 0.01 | 2.40 | 2.52 | 0.22 | 0.28 |
| 64678 | 0 | 57009  | SATAIFDTTTLNPTIAG                  | 2.80 | 0.01 | 3.16 | 2.52 | 0.22 | 0.28 |
| 64679 | 0 | 57009  | SATAIFDTTTLNPTIAG                  | 2.80 | 0.01 | 3.16 | 2.52 | 0.22 | 0.28 |
| 64680 | 0 | 57010  | SATAIFDTTTLNPTIAGA<br>GDVKASAEGQLG | 3.34 | 0.01 | 3.16 | 1.81 | 0.22 | 0.28 |
| 64681 | 0 | 57010  | SATAIFDTTTLNPTIAGA<br>GDVKASAEGQLG | 3.34 | 0.01 | 3.16 | 1.81 | 0.22 | 0.28 |
| 64682 | 0 | 57010  | SATAIFDTTTLNPTIAGA<br>GDVKASAEGQLG | 3.34 | 0.01 | 3.16 | 1.81 | 0.22 | 0.28 |
| 64683 | 0 | 57010  | SATAIFDTTTLNPTIAGA<br>GDVKASAEGQLG | 3.34 | 0.01 | 3.16 | 1.81 | 0.22 | 1.34 |
| 64684 | 0 | 57010  | SATAIFDTTTLNPTIAGA<br>GDVKASAEGQLG | 3.34 | 0.01 | 3.16 | 2.82 | 0.22 | 0.28 |
| 64685 | 0 | 57010  | SATAIFDTTTLNPTIAGA<br>GDVKASAEGQLG | 3.34 | 0.01 | 3.16 | 2.82 | 0.22 | 0.28 |
| 64686 | 0 | 57010  | SATAIFDTTTLNPTIAGA<br>GDVKASAEGQLG | 3.34 | 0.01 | 3.16 | 2.82 | 0.22 | 0.28 |
| 64687 | 0 | 57010  | SATAIFDTTTLNPTIAGA<br>GDVKASAEGQLG | 3.34 | 0.01 | 3.16 | 0.68 | 0.22 | 0.85 |
| 64688 | 0 | 57010  | SATAIFDTTTLNPTIAGA<br>GDVKASAEGQLG | 3.34 | 0.01 | 3.16 | 0.68 | 0.22 | 0.85 |
| 64689 | 0 | 57010  | SATAIFDTTTLNPTIAGA<br>GDVKASAEGQLG | 3.34 | 0.01 | 3.16 | 0.68 | 0.22 | 0.85 |
| 64690 | 0 | 57010  | SATAIFDTTTLNPTIAGA<br>GDVKASAEGQLG | 3.34 | 0.01 | 3.16 | 0.68 | 0.22 | 0.85 |
| 64691 | 0 | 57010  | SATAIFDTTTLNPTIAGA<br>GDVKASAEGQLG | 3.34 | 0.01 | 3.16 | 0.68 | 0.22 | 0.85 |
| 64692 | 0 | 57010  | SATAIFDTTTLNPTIAGA<br>GDVKASAEGQLG | 3.34 | 0.01 | 3.16 | 0.68 | 0.22 | 0.85 |
| 64693 | 0 | 57010  | SATAIFDTTTLNPTIAGA<br>GDVKASAEGQLG | 3.34 | 0.01 | 3.16 | 0.68 | 0.22 | 0.85 |
| 64694 | 0 | 57010  | SATAIFDTTTLNPTIAGA<br>GDVKASAEGQLG | 3.34 | 0.01 | 3.16 | 0.68 | 0.22 | 0.85 |
| 64695 | 0 | 57010  | SATAIFDTTTLNPTIAGA<br>GDVKASAEGQLG | 3.34 | 0.01 | 3.16 | 0.68 | 0.22 | 0.85 |
| 64696 | 0 | 57010  | SATAIFDTTTLNPTIAGA<br>GDVKASAEGQLG | 3.34 | 0.01 | 3.16 | 0.68 | 0.22 | 0.85 |
| 64697 | 0 | 57010  | SATAIFDTTTLNPTIAGA<br>GDVKASAEGQLG | 3.34 | 0.01 | 3.16 | 0.68 | 0.22 | 0.85 |

|       |   |        |                                     |      |      |      |      |      |      |
|-------|---|--------|-------------------------------------|------|------|------|------|------|------|
| 64698 | 0 | 57010  | SATAIFDTTTTLNPTIAGA<br>GDVKASAEGQLG | 3.34 | 0.01 | 3.16 | 0.68 | 0.22 | 0.85 |
| 64699 | 0 | 57010  | SATAIFDTTTTLNPTIAGA<br>GDVKASAEGQLG | 3.34 | 0.01 | 3.16 | 0.68 | 0.22 | 0.85 |
| 64700 | 0 | 57010  | SATAIFDTTTTLNPTIAGA<br>GDVKASAEGQLG | 3.34 | 0.01 | 3.16 | 0.68 | 0.22 | 0.85 |
| 64701 | 0 | 57010  | SATAIFDTTTTLNPTIAGA<br>GDVKASAEGQLG | 3.34 | 0.01 | 3.16 | 0.68 | 0.22 | 0.85 |
| 64702 | 0 | 57010  | SATAIFDTTTTLNPTIAGA<br>GDVKASAEGQLG | 3.34 | 0.01 | 3.16 | 0.68 | 0.22 | 1.34 |
| 64703 | 0 | 57010  | SATAIFDTTTTLNPTIAGA<br>GDVKASAEGQLG | 3.34 | 0.01 | 3.16 | 0.68 | 0.22 | 1.34 |
| 64704 | 0 | 57010  | SATAIFDTTTTLNPTIAGA<br>GDVKASAEGQLG | 3.34 | 0.01 | 3.16 | 0.68 | 0.22 | 1.34 |
| 64705 | 0 | 57010  | SATAIFDTTTTLNPTIAGA<br>GDVKASAEGQLG | 3.34 | 0.01 | 3.16 | 0.68 | 0.22 | 1.34 |
| 64706 | 0 | 57010  | SATAIFDTTTTLNPTIAGA<br>GDVKASAEGQLG | 3.34 | 0.01 | 3.16 | 0.68 | 0.22 | 1.34 |
| 64707 | 0 | 57010  | SATAIFDTTTTLNPTIAGA<br>GDVKASAEGQLG | 3.34 | 0.01 | 3.16 | 0.68 | 0.22 | 1.34 |
| 64708 | 0 | 57010  | SATAIFDTTTTLNPTIAGA<br>GDVKASAEGQLG | 3.34 | 0.01 | 3.16 | 0.68 | 0.22 | 1.34 |
| 64709 | 0 | 57010  | SATAIFDTTTTLNPTIAGA<br>GDVKASAEGQLG | 3.34 | 0.01 | 3.16 | 0.68 | 0.22 | 1.34 |
| 64710 | 0 | 57010  | SATAIFDTTTTLNPTIAGA<br>GDVKASAEGQLG | 3.34 | 0.01 | 3.16 | 0.68 | 0.22 | 1.34 |
| 64711 | 0 | 173143 | SATETSLWYDFLPDQ                     | 2.67 | 0.01 | 0.78 | 0.44 | 1.41 | 0.28 |
| 64712 | 0 | 173143 | SATETSLWYDFLPDQ                     | 2.67 | 0.01 | 0.78 | 0.44 | 1.13 | 0.28 |
| 64713 | 0 | 173143 | SATETSLWYDFLPDQ                     | 2.67 | 0.01 | 0.78 | 2.79 | 1.13 | 1.28 |
| 64714 | 0 | 173143 | SATETSLWYDFLPDQ                     | 2.67 | 0.01 | 0.78 | 1.81 | 1.41 | 1.28 |
| 64715 | 0 | 57012  | SATFPAFRLE                          | 2.31 | 0.01 | 3.85 | 0.44 | 1.23 | 0.85 |
| 64716 | 0 | 109899 | SATFWQNPRNHFRCQV                    | 2.71 | 0.01 | 0.78 | 0.44 | 1.13 | 0.28 |
| 64717 | 0 | 188474 | SATHGDEGRN                          | 2.29 | 0.01 | 2.92 | 1.81 | 0.22 | 0.85 |
| 64718 | 0 | 57016  | SATHSNSQ                            | 2.15 | 0.01 | 3.18 | 2.74 | 0.22 | 0.28 |
| 64719 | 0 | 375995 | SATHTSAPAAGGFGS                     | 2.73 | 0.01 | 1.61 | 0.44 | 0.85 | 1.28 |
| 64720 | 0 | 375997 | SATHTSTPAAGGFGS                     | 2.73 | 0.01 | 1.61 | 0.44 | 0.85 | 1.28 |
| 64721 | 0 | 196768 | SATMGKA                             | 2.02 | 0.01 | 0.90 | 0.44 | 1.23 | 1.39 |
| 64722 | 0 | 376008 | SATNTSAPAAGGFGS                     | 2.73 | 0.01 | 1.61 | 0.44 | 0.85 | 1.28 |
| 64723 | 0 | 111760 | SATQLYKTCKQAG                       | 2.56 | 0.01 | 1.86 | 1.12 | 0.22 | 0.28 |
| 64724 | 0 | 111760 | SATQLYKTCKQAG                       | 2.56 | 0.01 | 1.86 | 1.12 | 0.22 | 0.28 |
| 64725 | 0 | 155760 | SATQLYKTCKQAGT                      | 2.63 | 0.01 | 1.86 | 1.12 | 0.22 | 1.34 |
| 64726 | 0 | 155760 | SATQLYKTCKQAGT                      | 2.63 | 0.01 | 1.86 | 1.12 | 0.22 | 1.34 |
| 64727 | 0 | 177455 | SATQLYKTCKQAGTCPP<br>DIIPKVEGKT     | 3.23 | 0.01 | 1.86 | 1.15 | 0.22 | 0.85 |
| 64728 | 0 | 177455 | SATQLYKTCKQAGTCPP<br>DIIPKVEGKT     | 3.23 | 0.01 | 1.86 | 0.68 | 0.22 | 0.28 |

|       |   |        |                                    |      |      |      |      |      |      |
|-------|---|--------|------------------------------------|------|------|------|------|------|------|
| 64729 | 0 | 177455 | SATQLYKTCKQAGTCPP<br>DIIPKVEGKT    | 3.23 | 0.01 | 1.86 | 0.68 | 0.22 | 0.28 |
| 64730 | 0 | 177455 | SATQLYKTCKQAGTCPP<br>DIIPKVEGKT    | 3.23 | 0.01 | 1.86 | 0.68 | 0.22 | 0.28 |
| 64731 | 0 | 177455 | SATQLYKTCKQAGTCPP<br>DIIPKVEGKT    | 3.23 | 0.01 | 1.86 | 0.68 | 0.22 | 0.28 |
| 64732 | 0 | 177455 | SATQLYKTCKQAGTCPP<br>DIIPKVEGKT    | 3.23 | 0.01 | 1.86 | 0.68 | 0.22 | 0.28 |
| 64733 | 0 | 423059 | SATREDELMA SLSD                    | 2.72 | 0.01 | 0.78 | 0.44 | 1.41 | 2.49 |
| 64734 | 0 | 423059 | SATREDELMA SLSD                    | 2.72 | 0.01 | 0.78 | 0.44 | 1.41 | 1.66 |
| 64735 | 0 | 423059 | SATREDELMA SLSD                    | 2.72 | 0.01 | 0.78 | 0.44 | 1.41 | 1.48 |
| 64736 | 0 | 423059 | SATREDELMA SLSD                    | 2.72 | 0.01 | 0.78 | 0.44 | 1.41 | 2.02 |
| 64737 | 0 | 423059 | SATREDELMA SLSD                    | 2.72 | 0.01 | 0.78 | 0.44 | 1.41 | 2.02 |
| 64738 | 0 | 57022  | SATSIINTILNNIYV                    | 2.71 | 0.01 | 3.50 | 2.22 | 0.22 | 0.28 |
| 64739 | 0 | 131058 | SATTANPSCPEGT                      | 2.58 | 0.01 | 0.90 | 2.97 | 0.22 | 0.28 |
| 64740 | 0 | 376038 | SATTT SAPAAGGFGS                   | 2.73 | 0.01 | 1.61 | 0.44 | 0.85 | 1.28 |
| 64741 | 0 | 376041 | SATTTSTPAAGGFGS                    | 2.73 | 0.01 | 1.61 | 0.44 | 0.85 | 1.28 |
| 64742 | 0 | 57024  | SATTVFDVTTLNPTIAGA<br>GDVKASAEGQLG | 3.34 | 0.01 | 3.45 | 1.15 | 0.22 | 0.85 |
| 64743 | 0 | 57024  | SATTVFDVTTLNPTIAGA<br>GDVKASAEGQLG | 3.34 | 0.01 | 3.45 | 1.15 | 0.22 | 1.39 |
| 64744 | 0 | 57024  | SATTVFDVTTLNPTIAGA<br>GDVKASAEGQLG | 3.34 | 0.01 | 3.45 | 1.15 | 0.22 | 0.85 |
| 64745 | 0 | 98438  | SAVGKTVKVY                         | 2.33 | 0.01 | 3.57 | 0.44 | 0.85 | 0.28 |
| 64746 | 0 | 510479 | SAVIKSS                            | 2.02 | 0.01 | 0.90 | 0.44 | 1.13 | 0.28 |
| 64747 | 0 | 510479 | SAVIKSS                            | 2.02 | 0.01 | 0.90 | 0.44 | 1.41 | 0.28 |
| 64748 | 0 | 164370 | SAVLTDIHPVLP                       | 2.48 | 0.01 | 0.90 | 1.20 | 0.22 | 1.39 |
| 64749 | 0 | 376123 | SAVPEGE EYPTEAER                   | 2.70 | 0.01 | 1.61 | 0.44 | 0.85 | 1.28 |
| 64750 | 0 | 104233 | SAVPSP                             | 2.03 | 0.01 | 0.90 | 0.44 | 1.13 | 1.39 |
| 64751 | 0 | 180072 | SAVRARSSVPGVR                      | 2.60 | 3.50 | 0.78 | 0.44 | 1.13 | 1.28 |
| 64752 | 0 | 180072 | SAVRARSSVPGVR                      | 2.60 | 3.50 | 0.78 | 0.44 | 1.13 | 1.27 |
| 64753 | 0 | 180072 | SAVRARSSVPGVR                      | 2.60 | 3.50 | 0.78 | 0.44 | 1.41 | 1.28 |
| 64754 | 0 | 180072 | SAVRARSSVPGVR                      | 2.60 | 3.50 | 0.78 | 0.44 | 1.13 | 0.28 |
| 64755 | 0 | 138236 | SAVRARSSVPGVR                      | 2.60 | 0.01 | 0.78 | 0.44 | 1.13 | 0.28 |
| 64756 | 0 | 138236 | SAVRARSSVPGVR                      | 2.60 | 0.01 | 0.78 | 0.44 | 1.13 | 0.28 |
| 64757 | 0 | 138236 | SAVRARSSVPGVR                      | 2.60 | 0.01 | 0.78 | 0.44 | 1.41 | 0.28 |
| 64758 | 0 | 138236 | SAVRARSSVPGVR                      | 2.60 | 0.01 | 0.78 | 0.44 | 1.41 | 0.28 |
| 64759 | 0 | 434767 | SAVRARSSVPGVRK                     | 2.66 | 3.50 | 0.78 | 0.44 | 1.13 | 0.28 |
| 64760 | 0 | 158607 | SAVSRPMIHFGNDWED<br>RYYRENMY       | 3.09 | 0.01 | 1.75 | 0.68 | 0.22 | 0.28 |
| 64761 | 0 | 158607 | SAVSRPMIHFGNDWED<br>RYYRENMY       | 3.09 | 0.01 | 1.75 | 0.68 | 0.22 | 0.28 |
| 64762 | 0 | 376144 | SAVSSVPSLPADSE                     | 2.73 | 0.01 | 1.61 | 0.44 | 0.85 | 1.28 |
| 64763 | 0 | 57045  | SAWDVRPLTETR GDL                   | 2.66 | 0.01 | 2.76 | 0.44 | 1.59 | 0.28 |
| 64764 | 0 | 88388  | SAWNSDSEKPFDDHL                    | 2.66 | 0.01 | 2.39 | 1.12 | 0.22 | 0.85 |
| 64765 | 0 | 88388  | SAWNSDSEKPFDDHL                    | 2.66 | 0.01 | 2.39 | 2.88 | 0.22 | 0.85 |
| 64766 | 0 | 88388  | SAWNSDSEKPFDDHL                    | 2.66 | 0.01 | 2.39 | 1.81 | 0.22 | 0.28 |

|       |   |        |                                    |      |      |      |      |      |      |
|-------|---|--------|------------------------------------|------|------|------|------|------|------|
| 64767 | 0 | 57050  | SAWRDQAQRPAVASRR<br>RPTTAGAAPLTAVA | 3.37 | 0.01 | 2.53 | 0.44 | 0.85 | 0.28 |
| 64768 | 0 | 57050  | SAWRDQAQRPAVASRR<br>RPTTAGAAPLTAVA | 3.37 | 0.01 | 2.53 | 0.44 | 0.85 | 0.28 |
| 64769 | 0 | 95821  | SAYCSTWDAN                         | 2.32 | 0.01 | 2.60 | 0.44 | 1.23 | 0.85 |
| 64770 | 0 | 95821  | SAYCSTWDAN                         | 2.32 | 0.01 | 2.60 | 0.44 | 1.23 | 0.85 |
| 64771 | 0 | 173148 | SAYDDVKRFYTN                       | 2.44 | 0.01 | 0.90 | 0.44 | 0.85 | 1.39 |
| 64772 | 0 | 376179 | SAYKRALPLEEEEDV                    | 2.65 | 0.01 | 1.61 | 0.44 | 0.85 | 1.28 |
| 64773 | 0 | 376180 | SAYKRALPLEEQEDV                    | 2.66 | 0.01 | 1.61 | 0.44 | 0.85 | 1.28 |
| 64774 | 0 | 132649 | SAYLLSKNNAIEPRSF                   | 2.72 | 0.01 | 0.78 | 1.15 | 0.22 | 0.28 |
| 64775 | 0 | 181454 | SAYQWFYDGYPTFGE                    | 2.66 | 0.01 | 2.82 | 1.15 | 0.22 | 0.28 |
| 64776 | 0 | 98439  | SAYTPAYYTK                         | 2.34 | 0.01 | 3.08 | 0.68 | 0.22 | 0.28 |
| 64777 | 0 | 98439  | SAYTPAYYTK                         | 2.34 | 0.01 | 3.08 | 1.20 | 0.22 | 0.28 |
| 64778 | 0 | 57062  | SAYTPAYYTKDTNNNLTL                 | 2.86 | 0.01 | 2.90 | 0.44 | 0.22 | 0.28 |
| 64779 | 0 | 57062  | SAYTPAYYTKDTNNNLTL                 | 2.86 | 0.01 | 2.90 | 0.68 | 0.22 | 0.28 |
| 64780 | 0 | 57062  | SAYTPAYYTKDTNNNLTL                 | 2.86 | 0.01 | 2.90 | 0.44 | 0.22 | 1.27 |
| 64781 | 0 | 57064  | SCATTVDAKFRPNGCTD                  | 2.77 | 0.01 | 4.15 | 1.12 | 0.22 | 1.66 |
| 64782 | 0 | 57064  | SCATTVDAKFRPNGCTD                  | 2.77 | 0.01 | 4.15 | 1.12 | 0.22 | 1.66 |
| 64783 | 0 | 57064  | SCATTVDAKFRPNGCTD                  | 2.77 | 0.01 | 4.15 | 1.12 | 0.22 | 1.66 |
| 64784 | 0 | 57064  | SCATTVDAKFRPNGCTD                  | 2.77 | 0.01 | 4.15 | 1.12 | 0.22 | 1.66 |
| 64785 | 0 | 57064  | SCATTVDAKFRPNGCTD                  | 2.77 | 0.01 | 4.15 | 1.15 | 0.22 | 3.30 |
| 64786 | 0 | 78509  | SCDARSERYXACS                      | 2.58 | 4.93 | 0.90 | 0.68 | 0.22 | 0.28 |
| 64787 | 0 | 78510  | SCDATQRAQGRCs                      | 2.58 | 0.01 | 0.90 | 0.68 | 0.22 | 0.28 |
| 64788 | 0 | 78511  | SCDESRRRQGRCS                      | 2.59 | 0.01 | 0.90 | 0.68 | 0.22 | 0.28 |
| 64789 | 0 | 78512  | SCDSSQKKQGRCS                      | 2.59 | 0.01 | 0.90 | 0.68 | 0.22 | 0.28 |
| 64790 | 0 | 79383  | SCDVFLTMFYPGCK                     | 2.57 | 0.01 | 0.90 | 0.68 | 0.22 | 1.39 |
| 64791 | 0 | 57089  | SCESPSWIVQYWLRW<br>V               | 2.80 | 0.01 | 0.90 | 0.68 | 0.22 | 1.27 |
| 64792 | 0 | 111762 | SCFFGRL                            | 2.01 | 0.01 | 0.90 | 0.44 | 0.85 | 1.39 |
| 64793 | 0 | 57102  | SCISAACFCI                         | 2.36 | 0.01 | 0.90 | 1.15 | 0.22 | 0.28 |
| 64794 | 0 | 135756 | SCKDDINS                           | 2.14 | 0.01 | 0.78 | 0.44 | 2.35 | 0.28 |
| 64795 | 0 | 448110 | SCKLDFREIQYKKLRTSS<br>FALNLPT      | 3.17 | 0.01 | 0.78 | 0.44 | 1.41 | 0.28 |
| 64796 | 0 | 448110 | SCKLDFREIQYKKLRTSS<br>FALNLPT      | 3.17 | 0.01 | 0.78 | 0.44 | 1.93 | 0.28 |
| 64797 | 0 | 135498 | SCKLPVKKATVVQGERV<br>KIQ           | 2.92 | 0.01 | 0.78 | 0.44 | 1.13 | 0.28 |



|       |   |        |                                                 |      |      |      |      |      |      |
|-------|---|--------|-------------------------------------------------|------|------|------|------|------|------|
| 64798 | 0 | 134227 | SCKLPVKKATVVYQGER<br>VKIQ                       | 2.96 | 0.01 | 0.78 | 0.44 | 1.13 | 0.28 |
| 64799 | 0 | 142003 | SCLDAVKMDKRNKIDS<br>KISSCE                      | 3.09 | 0.01 | 3.13 | 0.68 | 0.22 | 0.28 |
| 64800 | 0 | 57119  | SCMVCVDRSSLSSW                                  | 2.64 | 0.01 | 3.01 | 1.20 | 0.22 | 1.34 |
| 64801 | 0 | 57119  | SCMVCVDRSSLSSW                                  | 2.64 | 0.01 | 3.01 | 1.20 | 0.22 | 1.34 |
| 64802 | 0 | 106816 | SCNATQRRQI                                      | 2.30 | 0.01 | 2.75 | 0.44 | 1.23 | 0.85 |
| 64803 | 0 | 57120  | SCNATQYNQLST                                    | 2.50 | 0.01 | 2.69 | 0.68 | 0.22 | 0.28 |
| 64804 | 0 | 57120  | SCNATQYNQLST                                    | 2.50 | 0.01 | 2.69 | 1.20 | 0.22 | 0.28 |
| 64805 | 0 | 57121  | SCNDNKSVP C IVPQL                               | 2.69 | 0.01 | 0.90 | 2.02 | 0.22 | 0.28 |
| 64806 | 0 | 79384  | SCNSFMIPAQP SCT                                 | 2.62 | 0.01 | 0.90 | 0.68 | 0.22 | 1.39 |
| 64807 | 0 | 145510 | SCNYHGRTLTCW                                    | 2.45 | 0.01 | 0.90 | 0.44 | 1.13 | 0.28 |
| 64808 | 0 | 145511 | SCNYHHTYLTCW                                    | 2.48 | 0.01 | 0.90 | 0.44 | 1.13 | 1.39 |
| 64809 | 0 | 57125  | SCPGEDCHTMYPFTYKG<br>Y                          | 2.84 | 0.01 | 0.90 | 1.15 | 0.22 | 1.39 |
| 64810 | 0 | 95144  | SCPYVTYGKFCIKPDGL                               | 2.78 | 0.01 | 3.44 | 2.49 | 0.22 | 0.85 |
| 64811 | 0 | 145513 | SCQLVRTIWSCS                                    | 2.48 | 0.01 | 0.90 | 0.44 | 1.13 | 1.39 |
| 64812 | 0 | 102793 | SCQQKCDIPSLSNGLISG<br>ST                        | 2.96 | 0.01 | 3.44 | 0.68 | 0.22 | 0.28 |
| 64813 | 0 | 130605 | SCRLFGKTYLCH                                    | 2.45 | 0.01 | 0.90 | 0.68 | 0.22 | 1.27 |
| 64814 | 0 | 130605 | SCRLFGKTYLCH                                    | 2.45 | 0.01 | 0.90 | 0.68 | 0.22 | 1.27 |
| 64815 | 0 | 130605 | SCRLFGKTYLCH                                    | 2.45 | 0.01 | 0.90 | 0.68 | 0.22 | 1.34 |
| 64816 | 0 | 79385  | SCRLSTFSMRMVCN<br>SCSAAAEPAAAAPAAPS             | 2.64 | 0.01 | 0.90 | 0.68 | 0.22 | 1.39 |
| 64817 | 0 | 57134  | AAAKEEPEESEDDEDFGM<br>GGLF                      | 3.59 | 0.01 | 2.78 | 2.49 | 0.85 | 0.28 |
| 64818 | 0 | 57134  | SCSAAAEPAAAAPAAPS<br>AAAKEEPEESEDDEDFGM<br>GGLF | 3.59 | 0.01 | 2.78 | 2.49 | 0.85 | 0.85 |
| 64819 | 0 | 57135  | SCSACSSSSCXXVA                                  | 2.72 | 0.01 | 0.90 | 0.68 | 0.22 | 1.39 |
| 64820 | 0 | 225520 | SCSLLFMLNGNPKPEQL<br>N                          | 2.85 | 0.01 | 2.61 | 0.68 | 0.22 | 0.28 |
| 64821 | 0 | 225520 | SCSLLFMLNGNPKPEQL<br>N                          | 2.85 | 0.01 | 2.61 | 0.68 | 0.22 | 0.28 |
| 64822 | 0 | 225520 | SCSLLFMLNGNPKPEQL<br>N                          | 2.85 | 0.01 | 2.61 | 0.68 | 0.22 | 0.28 |
| 64823 | 0 | 79386  | SCSPTVYLTSTKCP                                  | 2.65 | 0.01 | 0.90 | 0.68 | 0.22 | 1.39 |
| 64824 | 0 | 139601 | SCSRALAREVDLKDY                                 | 2.69 | 4.23 | 0.78 | 0.44 | 1.13 | 0.28 |
| 64825 | 0 | 153457 | SCSRALAREVDLKDY                                 | 2.69 | 0.01 | 0.78 | 2.79 | 1.13 | 1.28 |
| 64826 | 0 | 57142  | SCSTKSTFHA                                      | 2.34 | 3.93 | 2.70 | 0.44 | 0.85 | 0.28 |
| 64827 | 0 | 109901 | SCSVMHE                                         | 2.03 | 0.01 | 0.78 | 0.44 | 1.13 | 0.28 |
| 64828 | 0 | 119639 | SCSVMHEA                                        | 2.13 | 0.01 | 0.78 | 0.44 | 1.93 | 0.28 |
| 64829 | 0 | 510480 | SCTGLLSYHSRC                                    | 2.49 | 0.01 | 0.90 | 3.07 | 1.13 | 1.39 |
| 64830 | 0 | 79387  | SCTSPVSQGTQ PCK                                 | 2.65 | 0.01 | 0.90 | 0.68 | 0.22 | 1.39 |
| 64831 | 0 | 57147  | SCTVTREDGT                                      | 2.31 | 0.01 | 2.43 | 1.20 | 0.22 | 0.28 |
| 64832 | 0 | 130606 | SCTVYGKTP LCG                                   | 2.48 | 0.01 | 0.90 | 0.68 | 0.22 | 1.27 |

|       |   |        |                            |      |      |      |      |      |      |
|-------|---|--------|----------------------------|------|------|------|------|------|------|
| 64833 | 0 | 130606 | SCTVYGKTPLCG               | 2.48 | 0.01 | 0.90 | 0.68 | 0.22 | 1.27 |
| 64834 | 0 | 130606 | SCTVYGKTPLCG               | 2.48 | 0.01 | 0.90 | 0.68 | 0.22 | 1.34 |
| 64835 | 0 | 79388  | SCTYSGRADAVVCR             | 2.63 | 0.01 | 0.90 | 0.68 | 0.22 | 1.39 |
| 64836 | 0 | 57148  | SCVGVWQNERVDIIAN<br>DQGN   | 2.94 | 0.01 | 2.78 | 2.49 | 0.85 | 0.28 |
| 64837 | 0 | 376353 | SCVSLAARSMEIDGG            | 2.64 | 0.01 | 1.61 | 0.44 | 0.85 | 1.28 |
| 64838 | 0 | 128098 | SCWQPGTRTSTSPGVSE<br>DCL   | 2.95 | 0.01 | 0.78 | 0.44 | 1.13 | 0.28 |
| 64839 | 0 | 189838 | SDAETKVFLKAGDSD            | 2.69 | 0.01 | 3.28 | 0.44 | 1.23 | 0.28 |
| 64840 | 0 | 189839 | SDAHKKNLYDHAL              | 2.56 | 0.01 | 3.47 | 0.44 | 0.85 | 0.28 |
| 64841 | 0 | 189839 | SDAHKKNLYDHAL              | 2.56 | 0.01 | 3.47 | 0.44 | 0.85 | 0.28 |
| 64842 | 0 | 525689 | SDALEALADQTDALQ            | 2.73 | 0.01 | 2.24 | 0.44 | 1.41 | 1.28 |
| 64843 | 0 | 525689 | SDALEALADQTDALQ            | 2.73 | 0.01 | 2.24 | 0.44 | 1.41 | 1.28 |
| 64844 | 0 | 57162  | SDANDKAKKPAGKGS            | 2.73 | 0.01 | 1.66 | 0.44 | 0.85 | 0.28 |
| 64845 | 0 | 57164  | SDAQMKKE                   | 1.99 | 0.01 | 3.97 | 0.68 | 0.22 | 0.28 |
| 64846 | 0 | 57164  | SDAQMKKE                   | 1.99 | 0.01 | 3.97 | 0.68 | 0.22 | 0.28 |
| 64847 | 0 | 57164  | SDAQMKKE                   | 1.99 | 0.01 | 3.97 | 0.68 | 0.22 | 0.28 |
| 64848 | 0 | 106817 | SDARENIQRFFGHG             | 2.58 | 0.01 | 0.78 | 1.12 | 0.22 | 0.28 |
| 64849 | 0 | 57166  | SDARQRVADRKREKYD<br>SFF    | 2.97 | 0.01 | 2.78 | 2.49 | 0.85 | 0.28 |
| 64850 | 0 | 57166  | SDARQRVADRKREKYD<br>SFF    | 2.97 | 0.01 | 2.78 | 0.44 | 0.85 | 0.28 |
| 64851 | 0 | 57166  | SDARQRVADRKREKYD<br>SFF    | 2.97 | 0.01 | 2.78 | 4.03 | 0.22 | 0.28 |
| 64852 | 0 | 156451 | SDATSWR                    | 2.03 | 0.01 | 0.90 | 0.44 | 1.93 | 1.27 |
| 64853 | 0 | 188747 | SDAYDTAVAHWPFGFI           | 2.64 | 0.01 | 0.90 | 0.68 | 0.22 | 1.39 |
| 64854 | 0 | 188747 | SDAYDTAVAHWPFGFI           | 2.64 | 0.01 | 0.90 | 0.68 | 0.22 | 0.28 |
| 64855 | 0 | 57168  | SDDDDDEDSQENADKNE<br>DGGEK | 3.03 | 0.01 | 3.36 | 3.89 | 1.59 | 0.28 |
| 64856 | 0 | 57168  | SDDDDDEDSQENADKNE<br>DGGEK | 3.03 | 0.01 | 3.36 | 0.68 | 0.22 | 0.28 |
| 64857 | 0 | 57168  | SDDDDDEDSQENADKNE<br>DGGEK | 3.03 | 0.01 | 3.36 | 0.68 | 0.22 | 0.28 |
| 64858 | 0 | 57168  | SDDDDDEDSQENADKNE<br>DGGEK | 3.03 | 0.01 | 3.36 | 0.68 | 0.22 | 2.12 |
| 64859 | 0 | 57168  | SDDDDDEDSQENADKNE<br>DGGEK | 3.03 | 0.01 | 3.36 | 0.68 | 0.22 | 1.75 |
| 64860 | 0 | 376470 | SDDDDDEGEDEEEGPS           | 2.73 | 0.01 | 1.61 | 0.44 | 0.85 | 1.28 |
| 64861 | 0 | 534629 | SDDDGPNASN                 | 2.25 | 0.01 | 3.78 | 1.15 | 0.22 | 0.28 |
| 64862 | 0 | 534629 | SDDDGPNASN                 | 2.25 | 0.01 | 3.78 | 1.15 | 0.22 | 0.85 |
| 64863 | 0 | 534629 | SDDDGPNASN                 | 2.25 | 0.01 | 3.78 | 1.15 | 0.22 | 0.28 |
| 64864 | 0 | 118127 | SDDDMGFGLFD                | 2.43 | 0.01 | 0.78 | 0.44 | 1.13 | 0.28 |
| 64865 | 0 | 118127 | SDDDMGFGLFD                | 2.43 | 0.01 | 0.78 | 0.44 | 0.85 | 0.28 |
| 64866 | 0 | 118127 | SDDDMGFGLFD                | 2.43 | 0.01 | 0.78 | 0.44 | 0.85 | 1.27 |
| 64867 | 0 | 118127 | SDDDMGFGLFD                | 2.43 | 0.01 | 0.78 | 0.44 | 1.13 | 1.27 |
| 64868 | 0 | 118127 | SDDDMGFGLFD                | 2.43 | 0.01 | 0.78 | 0.44 | 1.13 | 0.28 |

|       |   |        |                           |      |      |      |      |      |      |
|-------|---|--------|---------------------------|------|------|------|------|------|------|
| 64869 | 0 | 150883 | SDDEDLATS                 | 2.26 | 0.01 | 3.81 | 1.15 | 0.22 | 0.85 |
| 64870 | 0 | 150883 | SDDEDLATS                 | 2.26 | 0.01 | 3.81 | 1.15 | 0.22 | 0.28 |
| 64871 | 0 | 150883 | SDDEDLATS                 | 2.26 | 0.01 | 3.81 | 1.15 | 0.22 | 1.27 |
| 64872 | 0 | 150883 | SDDEDLATS                 | 2.26 | 0.01 | 3.81 | 1.15 | 0.22 | 1.75 |
| 64873 | 0 | 224955 | SDDFDQNKPT                | 2.31 | 0.01 | 4.03 | 1.12 | 0.22 | 0.28 |
| 64874 | 0 | 224955 | SDDFDQNKPT                | 2.31 | 0.01 | 4.03 | 1.12 | 0.22 | 0.28 |
| 64875 | 0 | 114603 | SDDFIHFFKAASYDD           | 2.69 | 0.01 | 4.93 | 0.44 | 1.41 | 1.57 |
| 64876 | 0 | 124702 | SDDNYDKTED                | 2.33 | 0.01 | 0.78 | 0.44 | 1.13 | 1.27 |
| 64877 | 0 | 124703 | SDDNYDKTEDVDIEEMA<br>LKL  | 2.94 | 0.01 | 0.78 | 0.44 | 1.13 | 0.28 |
| 64878 | 0 | 136082 | SDDPSPGAIDSNNNS           | 2.66 | 0.01 | 0.78 | 1.20 | 0.22 | 0.28 |
| 64879 | 0 | 136082 | SDDPSPGAIDSNNNS           | 2.66 | 0.01 | 0.78 | 1.20 | 0.22 | 0.85 |
| 64880 | 0 | 136082 | SDDPSPGAIDSNNNS           | 2.66 | 0.01 | 0.78 | 0.44 | 1.41 | 0.85 |
| 64881 | 0 | 193544 | SDDQGPNLI                 | 2.20 | 0.01 | 2.51 | 0.44 | 2.39 | 0.28 |
| 64882 | 0 | 193544 | SDDQGPNLI                 | 2.20 | 0.01 | 2.51 | 0.44 | 2.39 | 0.28 |
| 64883 | 0 | 100495 | SDDQLTGNINYA              | 2.44 | 0.01 | 2.88 | 1.20 | 0.22 | 0.85 |
| 64884 | 0 | 106818 | SDDYAPFGLDII              | 2.45 | 0.01 | 0.90 | 1.15 | 0.22 | 1.39 |
| 64885 | 0 | 141559 | SDEALPLGSPR               | 2.42 | 0.01 | 0.78 | 0.68 | 0.22 | 1.27 |
| 64886 | 0 | 141559 | SDEALPLGSPR               | 2.42 | 0.01 | 0.78 | 0.68 | 0.22 | 0.28 |
| 64887 | 0 | 137444 | SDEALPLGSPRCD             | 2.56 | 0.01 | 0.78 | 1.15 | 0.22 | 0.28 |
| 64888 | 0 | 137444 | SDEALPLGSPRCD             | 2.56 | 0.01 | 0.78 | 1.15 | 0.22 | 0.28 |
| 64889 | 0 | 137444 | SDEALPLGSPRCD             | 2.56 | 0.01 | 0.78 | 1.15 | 0.22 | 0.28 |
| 64890 | 0 | 141560 | SDEALPPGSPR               | 2.41 | 0.01 | 0.78 | 0.68 | 0.22 | 1.27 |
| 64891 | 0 | 141560 | SDEALPPGSPR               | 2.41 | 0.01 | 0.78 | 0.68 | 0.22 | 0.28 |
| 64892 | 0 | 137445 | SDEALPPGSPRCD             | 2.56 | 0.01 | 0.78 | 1.15 | 0.22 | 0.28 |
| 64893 | 0 | 137445 | SDEALPPGSPRCD             | 2.56 | 0.01 | 0.78 | 1.15 | 0.22 | 0.28 |
| 64894 | 0 | 137445 | SDEALPPGSPRCD             | 2.56 | 0.01 | 0.78 | 1.15 | 0.22 | 0.28 |
| 64895 | 0 | 376527 | SDEAQFQQHQQHEHP           | 2.70 | 0.01 | 1.61 | 0.44 | 0.85 | 1.28 |
| 64896 | 0 | 376528 | SDEAQVQQHQQHEHP           | 2.70 | 0.01 | 1.61 | 0.44 | 0.85 | 1.28 |
| 64897 | 0 | 376529 | SDEAQVQQHQRHERP           | 2.70 | 0.01 | 1.61 | 0.44 | 0.85 | 1.28 |
| 64898 | 0 | 509291 | SDEDMGFGGLFD              | 2.43 | 0.01 | 0.78 | 0.44 | 1.13 | 0.28 |
| 64899 | 0 | 376535 | SDEEDQDEDEDEGIT           | 2.73 | 0.01 | 1.61 | 0.44 | 0.85 | 1.28 |
| 64900 | 0 | 116825 | SDEERMDALENQLKE           | 2.68 | 0.01 | 2.36 | 0.44 | 1.23 | 1.28 |
| 64901 | 0 | 116825 | SDEERMDALENQLKE           | 2.68 | 0.01 | 2.36 | 0.44 | 1.23 | 1.27 |
| 64902 | 0 | 116825 | SDEERMDALENQLKE           | 2.68 | 0.01 | 2.36 | 0.44 | 1.23 | 1.28 |
| 64903 | 0 | 122567 | SDEESSNAAEEWKYVA<br>MVIDH | 2.98 | 0.01 | 2.26 | 2.43 | 0.22 | 1.57 |
| 64904 | 0 | 125250 | SDEFNPCEDIMGYK            | 2.57 | 0.01 | 0.78 | 1.81 | 0.22 | 0.28 |
| 64905 | 0 | 125250 | SDEFNPCEDIMGYK            | 2.57 | 0.01 | 0.78 | 1.81 | 0.22 | 1.34 |
| 64906 | 0 | 125250 | SDEFNPCEDIMGYK            | 2.57 | 0.01 | 0.78 | 1.15 | 0.22 | 0.28 |
| 64907 | 0 | 125250 | SDEFNPCEDIMGYK            | 2.57 | 0.01 | 0.78 | 1.81 | 0.22 | 0.85 |
| 64908 | 0 | 125250 | SDEFNPCEDIMGYK            | 2.57 | 0.01 | 0.78 | 1.81 | 0.22 | 2.02 |
| 64909 | 0 | 125250 | SDEFNPCEDIMGYK            | 2.57 | 0.01 | 0.78 | 1.81 | 0.22 | 2.02 |

|       |   |        |                          |      |      |      |      |      |      |
|-------|---|--------|--------------------------|------|------|------|------|------|------|
| 64910 | 0 | 115106 | SDEGGFTCFFRDHSYQE<br>EAA | 2.91 | 0.01 | 0.78 | 0.44 | 1.13 | 0.28 |
| 64911 | 0 | 115106 | SDEGGFTCFFRDHSYQE<br>EAA | 2.91 | 0.01 | 0.78 | 0.44 | 1.13 | 0.28 |
| 64912 | 0 | 113159 | SDEGGYTCFFRDHSYQE<br>E   | 2.83 | 0.01 | 2.19 | 3.81 | 0.22 | 1.75 |
| 64913 | 0 | 113159 | SDEGGYTCFFRDHSYQE<br>E   | 2.83 | 0.01 | 2.19 | 3.81 | 0.22 | 1.75 |
| 64914 | 0 | 113159 | SDEGGYTCFFRDHSYQE<br>E   | 2.83 | 0.01 | 2.19 | 3.81 | 0.22 | 0.28 |
| 64915 | 0 | 113159 | SDEGGYTCFFRDHSYQE<br>E   | 2.83 | 0.01 | 2.19 | 2.04 | 0.22 | 0.28 |
| 64916 | 0 | 113159 | SDEGGYTCFFRDHSYQE<br>E   | 2.83 | 0.01 | 2.19 | 4.33 | 0.22 | 0.28 |
| 64917 | 0 | 132893 | SDELRQRL                 | 2.14 | 0.01 | 0.78 | 0.68 | 0.22 | 0.85 |
| 64918 | 0 | 376581 | SDETQVQQHQQHEHP          | 2.70 | 0.01 | 1.61 | 0.44 | 0.85 | 1.28 |
| 64919 | 0 | 376582 | SDETQVQQHQRHEHP          | 2.70 | 0.01 | 1.61 | 0.44 | 0.85 | 1.28 |
| 64920 | 0 | 376583 | SDETQVQQQEHEHPA          | 2.68 | 0.01 | 1.61 | 0.44 | 0.85 | 1.28 |
| 64921 | 0 | 57184  | SDEV RKHTYNLTIA          | 2.55 | 0.01 | 2.40 | 1.12 | 0.22 | 0.85 |
| 64922 | 0 | 57184  | SDEV RKHTYNLTIA          | 2.55 | 0.01 | 2.40 | 1.12 | 0.22 | 0.85 |
| 64923 | 0 | 181013 | SDFEKVTGRI               | 2.26 | 0.01 | 2.18 | 2.16 | 0.22 | 0.28 |
| 64924 | 0 | 181799 | SDFFCPSCKTECTNY          | 2.68 | 0.01 | 2.86 | 2.36 | 0.22 | 1.28 |
| 64925 | 0 | 96862  | SDFFPSVRDLLDTASALY<br>RE | 2.96 | 0.01 | 2.71 | 0.44 | 0.85 | 0.28 |
| 64926 | 0 | 127818 | SDFGKFV                  | 2.02 | 0.01 | 0.78 | 0.44 | 1.13 | 0.28 |
| 64927 | 0 | 127818 | SDFGKFV                  | 2.02 | 0.01 | 0.78 | 0.44 | 1.93 | 0.28 |
| 64928 | 0 | 123728 | SDFLGDRHY                | 2.21 | 0.01 | 2.28 | 2.00 | 0.22 | 0.28 |
| 64929 | 0 | 123729 | SDFLGDRQY                | 2.21 | 0.01 | 2.28 | 2.00 | 0.22 | 0.28 |
| 64930 | 0 | 376602 | SDFLLMTREVDDTM           | 2.67 | 0.01 | 1.61 | 0.44 | 0.85 | 1.28 |
| 64931 | 0 | 142005 | SDFRRQNRRGGTNKRTT        | 2.80 | 0.01 | 2.76 | 1.20 | 0.22 | 1.34 |
| 64932 | 0 | 57196  | SDFTDSVRDPKTS            | 2.58 | 0.01 | 2.48 | 0.68 | 0.22 | 0.28 |
| 64933 | 0 | 148221 | SDGAVQPDG                | 2.23 | 0.01 | 3.24 | 3.57 | 0.85 | 0.28 |
| 64934 | 0 | 229481 | SDGEQAGQYLAAAE           | 2.68 | 0.01 | 2.70 | 0.68 | 0.22 | 0.28 |
| 64935 | 0 | 93846  | SDGNDKLSFS               | 2.34 | 0.01 | 2.67 | 2.00 | 0.22 | 0.28 |
| 64936 | 0 | 93846  | SDGNDKLSFS               | 2.34 | 0.01 | 2.67 | 2.00 | 0.22 | 0.28 |
| 64937 | 0 | 93846  | SDGNDKLSFS               | 2.34 | 0.01 | 2.67 | 2.00 | 0.22 | 0.28 |
| 64938 | 0 | 173151 | SDGQVGGFINYRDSK          | 2.66 | 0.01 | 0.78 | 0.44 | 1.41 | 0.28 |
| 64939 | 0 | 173151 | SDGQVGGFINYRDSK          | 2.66 | 0.01 | 0.78 | 0.44 | 1.13 | 0.28 |
| 64940 | 0 | 109902 | SDGSFFL                  | 2.04 | 0.01 | 0.78 | 0.44 | 1.13 | 0.28 |
| 64941 | 0 | 57209  | SDGYDHPPTRV              | 2.46 | 0.01 | 0.90 | 0.44 | 0.85 | 0.28 |
| 64942 | 0 | 57210  | SDGYPPNRQDPRFTD          | 2.68 | 0.01 | 2.76 | 0.44 | 1.59 | 0.28 |
| 64943 | 0 | 57211  | SDGYPPNRQDPRFTDL<br>VD   | 2.89 | 0.01 | 2.76 | 0.44 | 1.59 | 0.28 |

|       |   |        |                             |      |      |      |      |      |      |
|-------|---|--------|-----------------------------|------|------|------|------|------|------|
| 64944 | 0 | 112306 | SDHKNYL                     | 1.99 | 0.01 | 0.78 | 0.44 | 1.13 | 0.28 |
| 64945 | 0 | 138034 | SDHSRNGFDTDS                | 2.50 | 0.01 | 0.78 | 0.68 | 0.22 | 0.85 |
| 64946 | 0 | 138034 | SDHSRNGFDTDS                | 2.50 | 0.01 | 0.78 | 0.68 | 0.22 | 0.85 |
| 64947 | 0 | 189151 | SDHTTTCTDVKQCRAY            | 2.72 | 0.01 | 2.92 | 0.68 | 0.22 | 0.28 |
| 64948 | 0 | 189151 | SDHTTTCTDVKQCRAY            | 2.72 | 0.01 | 2.92 | 2.49 | 0.22 | 0.28 |
| 64949 | 0 | 189151 | SDHTTTCTDVKQCRAY            | 2.72 | 0.01 | 2.92 | 3.61 | 0.22 | 0.28 |
| 64950 | 0 | 104235 | SDIDFLIEEIERLGQDL           | 2.82 | 0.01 | 2.19 | 1.12 | 0.22 | 0.85 |
| 64951 | 0 | 104235 | SDIDFLIEEIERLGQDL           | 2.82 | 0.01 | 2.19 | 1.12 | 0.22 | 0.85 |
| 64952 | 0 | 104235 | SDIDFLIEEIERLGQDL           | 2.82 | 0.01 | 2.19 | 1.12 | 0.22 | 0.85 |
| 64953 | 0 | 146538 | SDIDLLSQV                   | 2.25 | 0.01 | 0.90 | 1.20 | 0.22 | 1.39 |
| 64954 | 0 | 57215  | SDIEKKVN                    | 2.11 | 0.01 | 2.99 | 0.44 | 0.85 | 0.28 |
| 64955 | 0 | 188475 | SDIERRIAMR                  | 2.33 | 0.01 | 2.92 | 1.81 | 0.22 | 0.85 |
| 64956 | 0 | 188475 | SDIERRIAMR                  | 2.33 | 0.01 | 2.92 | 3.37 | 0.22 | 0.85 |
| 64957 | 0 | 227547 | SDIFCDIENNPGLCY             | 2.65 | 0.01 | 2.97 | 0.44 | 1.59 | 0.28 |
| 64958 | 0 | 227547 | SDIFCDIENNPGLCY             | 2.65 | 0.01 | 2.97 | 0.44 | 0.85 | 0.28 |
| 64959 | 0 | 57218  | SDIKTTTSSHPVSSLT            | 2.75 | 0.01 | 2.83 | 3.03 | 0.22 | 0.85 |
| 64960 | 0 | 57218  | SDIKTTTSSHPVSSLT            | 2.75 | 0.01 | 2.83 | 3.03 | 0.22 | 0.28 |
| 64961 | 0 | 57218  | SDIKTTTSSHPVSSLT            | 2.75 | 0.01 | 2.83 | 3.03 | 0.22 | 0.28 |
| 64962 | 0 | 177973 | SDINHSTSGSHYENS             | 2.71 | 0.01 | 0.78 | 0.44 | 1.13 | 0.85 |
| 64963 | 0 | 229781 | SDIPNPIGSENSEK              | 2.65 | 0.01 | 1.60 | 0.44 | 1.23 | 1.28 |
| 64964 | 0 | 229781 | SDIPNPIGSENSEK              | 2.65 | 0.01 | 1.60 | 0.44 | 1.23 | 1.28 |
| 64965 | 0 | 229782 | SDIPNPIGSENSGK              | 2.65 | 0.01 | 1.60 | 0.44 | 1.23 | 1.28 |
| 64966 | 0 | 229782 | SDIPNPIGSENSGK              | 2.65 | 0.01 | 1.60 | 0.44 | 1.23 | 1.28 |
| 64967 | 0 | 138035 | SDISGKQVT                   | 2.22 | 0.01 | 2.26 | 2.36 | 0.22 | 0.28 |
| 64968 | 0 | 95038  | SDISGKQVTGEVIFQT            | 2.75 | 0.01 | 2.26 | 2.36 | 0.22 | 2.02 |
| 64969 | 0 | 97633  | SDISLELPLSQETFSGL           | 2.82 | 0.01 | 1.75 | 0.68 | 0.22 | 2.02 |
| 64970 | 0 | 97633  | SDISLELPLSQETFSGL           | 2.82 | 0.01 | 1.75 | 0.68 | 0.22 | 2.02 |
| 64971 | 0 | 98997  | SDISLLDAQS                  | 2.35 | 0.01 | 1.60 | 0.44 | 1.23 | 0.85 |
| 64972 | 0 | 156452 | SDISSTTGKPDSTG              | 2.66 | 0.01 | 2.73 | 0.44 | 0.85 | 1.28 |
| 64973 | 0 | 132651 | SDKDASNGGTSS                | 2.49 | 0.01 | 0.90 | 1.15 | 0.22 | 1.39 |
| 64974 | 0 | 133690 | SDKFPVYKYPGKGCPTL<br>GDEGDT | 3.09 | 0.01 | 0.90 | 1.15 | 0.22 | 0.28 |
| 64975 | 0 | 133690 | SDKFPVYKYPGKGCPTL<br>GDEGDT | 3.09 | 0.01 | 0.90 | 1.15 | 0.22 | 0.28 |
| 64976 | 0 | 133690 | SDKFPVYKYPGKGCPTL<br>GDEGDT | 3.09 | 0.01 | 0.90 | 1.15 | 0.22 | 2.12 |
| 64977 | 0 | 133690 | SDKFPVYKYPGKGCPTL<br>GDEGDT | 3.09 | 0.01 | 0.90 | 1.15 | 0.22 | 1.27 |
| 64978 | 0 | 133690 | SDKFPVYKYPGKGCPTL<br>GDEGDT | 3.09 | 0.01 | 0.90 | 1.15 | 0.22 | 1.66 |
| 64979 | 0 | 167661 | SDKGATLTIKKEAFP             | 2.65 | 0.01 | 3.10 | 0.44 | 0.85 | 1.28 |
| 64980 | 0 | 167661 | SDKGATLTIKKEAFP             | 2.65 | 0.01 | 3.10 | 0.44 | 0.85 | 1.28 |
| 64981 | 0 | 167661 | SDKGATLTIKKEAFP             | 2.65 | 0.01 | 3.10 | 0.44 | 1.59 | 1.28 |
| 64982 | 0 | 181942 | SDKMWHPMYAAP                | 2.46 | 0.01 | 0.90 | 3.15 | 0.22 | 1.39 |

|       |   |        |                                    |      |      |      |      |      |      |
|-------|---|--------|------------------------------------|------|------|------|------|------|------|
| 64983 | 0 | 57229  | SDKPDNKP                           | 2.16 | 0.01 | 3.45 | 0.44 | 0.85 | 0.28 |
| 64984 | 0 | 179899 | SDLHGSFSVELFDPFKEA<br>VQLGNDLQQSSD | 3.35 | 0.01 | 3.27 | 1.15 | 0.22 | 0.85 |
| 64985 | 0 | 179899 | SDLHGSFSVELFDPFKEA<br>VQLGNDLQQSSD | 3.35 | 0.01 | 3.27 | 1.15 | 0.22 | 0.28 |
| 64986 | 0 | 179899 | SDLHGSFSVELFDPFKEA<br>VQLGNDLQQSSD | 3.35 | 0.01 | 3.27 | 1.12 | 0.22 | 0.28 |
| 64987 | 0 | 179899 | SDLHGSFSVELFDPFKEA<br>VQLGNDLQQSSD | 3.35 | 0.01 | 3.27 | 1.12 | 0.22 | 1.34 |
| 64988 | 0 | 179899 | SDLHGSFSVELFDPFKEA<br>VQLGNDLQQSSD | 3.35 | 0.01 | 3.27 | 1.12 | 0.22 | 1.27 |
| 64989 | 0 | 179899 | SDLHGSFSVELFDPFKEA<br>VQLGNDLQQSSD | 3.35 | 0.01 | 3.27 | 1.15 | 0.22 | 1.75 |
| 64990 | 0 | 179899 | SDLHGSFSVELFDPFKEA<br>VQLGNDLQQSSD | 3.35 | 0.01 | 3.27 | 1.81 | 0.22 | 0.28 |
| 64991 | 0 | 132894 | SDLKIQE                            | 1.99 | 0.01 | 2.19 | 1.12 | 0.22 | 0.85 |
| 64992 | 0 | 57240  | SDLMHRLYHVPVAVGQ                   | 2.64 | 0.01 | 2.75 | 0.68 | 0.22 | 0.28 |
| 64993 | 0 | 57244  | SDLRSSSG                           | 2.15 | 0.01 | 2.04 | 0.44 | 0.85 | 0.28 |
| 64994 | 0 | 137288 | SDLSVIGHPIDSE                      | 2.56 | 0.01 | 0.78 | 0.68 | 0.22 | 0.28 |
| 64995 | 0 | 57245  | SDLWK                              | 1.74 | 0.01 | 0.78 | 1.15 | 0.22 | 1.39 |
| 64996 | 0 | 57245  | SDLWK                              | 1.74 | 0.01 | 0.78 | 1.15 | 0.22 | 0.85 |
| 64997 | 0 | 57250  | SDMYGLIVAQWLSTVN<br>TQF            | 2.86 | 0.01 | 2.08 | 2.02 | 0.22 | 1.57 |
| 64998 | 0 | 57250  | SDMYGLIVAQWLSTVN<br>TQF            | 2.86 | 0.01 | 3.45 | 0.44 | 0.22 | 1.57 |
| 64999 | 0 | 152109 | SDNLAAGTDNT                        | 2.42 | 0.01 | 0.78 | 0.44 | 1.93 | 0.28 |
| 65000 | 0 | 106821 | SDPAHKARLE                         | 2.29 | 0.01 | 3.08 | 0.44 | 1.23 | 0.85 |
| 65001 | 0 | 106822 | SDPAHKARLERP                       | 2.48 | 0.01 | 3.08 | 0.44 | 1.23 | 0.85 |
| 65002 | 0 | 57257  | SDPDTSFLEGLDLGVDV<br>RTY           | 2.97 | 0.01 | 2.21 | 1.20 | 0.22 | 0.28 |
| 65003 | 0 | 168002 | SDPPLVANQVVTCPDKK<br>S             | 2.84 | 0.01 | 2.75 | 0.44 | 1.59 | 2.51 |
| 65004 | 0 | 168002 | SDPPLVANQVVTCPDKK<br>S             | 2.84 | 0.01 | 2.75 | 0.44 | 0.85 | 2.51 |
| 65005 | 0 | 168002 | SDPPLVANQVVTCPDKK<br>S             | 2.84 | 0.01 | 2.75 | 0.44 | 0.85 | 2.51 |
| 65006 | 0 | 168002 | SDPPLVANQVVTCPDKK<br>S             | 2.84 | 0.01 | 2.75 | 0.44 | 0.85 | 2.51 |
| 65007 | 0 | 57259  | SDPPLVANQVVTCPDKK<br>STA           | 2.95 | 0.01 | 4.08 | 3.38 | 0.22 | 0.85 |
| 65008 | 0 | 57259  | SDPPLVANQVVTCPDKK<br>STA           | 2.95 | 0.01 | 4.08 | 3.38 | 0.22 | 0.85 |
| 65009 | 0 | 151424 | SDPQFPILAEAPTAGAF<br>F             | 2.89 | 0.01 | 3.35 | 1.81 | 0.22 | 0.85 |
| 65010 | 0 | 153288 | SDPRKMCY                           | 2.18 | 0.01 | 0.90 | 1.15 | 0.22 | 1.27 |

|       |   |        |                                 |      |      |      |      |      |      |
|-------|---|--------|---------------------------------|------|------|------|------|------|------|
| 65011 | 0 | 169690 | SDPSETS DSHSFAMPNV<br>VSHT      | 3.01 | 0.01 | 3.78 | 2.02 | 1.59 | 0.85 |
| 65012 | 0 | 57261  | SDPSQGGGKITHFTTW<br>TSI         | 2.95 | 0.01 | 2.82 | 0.44 | 0.85 | 0.28 |
| 65013 | 0 | 152969 | SDPYSDFEKV                      | 2.32 | 0.01 | 2.18 | 2.16 | 0.22 | 0.28 |
| 65014 | 0 | 138036 | SDQAVSLG                        | 2.13 | 0.01 | 2.21 | 0.44 | 0.85 | 0.28 |
| 65015 | 0 | 138036 | SDQAVSLG                        | 2.13 | 0.01 | 2.21 | 0.44 | 0.85 | 0.28 |
| 65016 | 0 | 182405 | SDQHVLLELLTHL                   | 2.49 | 0.01 | 0.90 | 0.68 | 0.22 | 0.28 |
| 65017 | 0 | 182405 | SDQHVLLELLTHL                   | 2.49 | 0.01 | 0.90 | 0.68 | 0.22 | 0.28 |
| 65018 | 0 | 57265  | SDQRANLGAF                      | 2.29 | 0.01 | 2.73 | 0.44 | 0.85 | 0.28 |
| 65019 | 0 | 169691 | SDQTRTGY                        | 2.12 | 0.01 | 2.16 | 0.44 | 1.23 | 1.27 |
| 65020 | 0 | 164371 | SDRISGTSPTL                     | 2.50 | 0.01 | 0.90 | 1.20 | 0.22 | 1.39 |
| 65021 | 0 | 142006 | SDSAQGS DVS LTA                 | 2.58 | 0.01 | 0.78 | 1.12 | 0.22 | 0.28 |
| 65022 | 0 | 142006 | SDSAQGS DVS LTA                 | 2.58 | 0.01 | 0.78 | 1.12 | 0.22 | 0.28 |
| 65023 | 0 | 142006 | SDSAQGS DVS LTA                 | 2.58 | 0.01 | 0.78 | 1.12 | 0.22 | 0.28 |
| 65024 | 0 | 142006 | SDSAQGS DVS LTA                 | 2.58 | 0.01 | 0.78 | 1.12 | 0.22 | 2.12 |
| 65025 | 0 | 142006 | SDSAQGS DVS LTA                 | 2.58 | 0.01 | 0.78 | 1.12 | 0.22 | 0.85 |
| 65026 | 0 | 142006 | SDSAQGS DVS LTA                 | 2.58 | 0.01 | 0.78 | 1.12 | 0.22 | 2.12 |
| 65027 | 0 | 142006 | SDSAQGS DVS LTA                 | 2.58 | 0.01 | 0.78 | 1.12 | 0.22 | 0.28 |
| 65028 | 0 | 142006 | SDSAQGS DVS LTA                 | 2.58 | 0.01 | 0.78 | 1.12 | 0.22 | 0.28 |
| 65029 | 0 | 57276  | SDSDKPK                         | 2.06 | 0.01 | 0.90 | 1.15 | 0.22 | 1.39 |
| 65030 | 0 | 57276  | SDSDKPK                         | 2.06 | 0.01 | 0.90 | 1.15 | 0.22 | 1.48 |
| 65031 | 0 | 57276  | SDSDKPK                         | 2.06 | 0.01 | 0.90 | 1.15 | 0.22 | 1.48 |
| 65032 | 0 | 57276  | SDSDKPK                         | 2.06 | 0.01 | 0.90 | 1.15 | 0.22 | 1.48 |
| 65033 | 0 | 57276  | SDSDKPK                         | 2.06 | 0.01 | 0.90 | 1.15 | 0.22 | 1.48 |
| 65034 | 0 | 57277  | SDSDNDGVCDNVDK                  | 2.67 | 0.01 | 2.58 | 2.43 | 0.22 | 0.28 |
| 65035 | 0 | 111015 | SDSEENDEIDGVNHQH<br>LPARRAEPQRH | 3.28 | 0.01 | 3.11 | 0.44 | 0.85 | 0.28 |
| 65036 | 0 | 111015 | SDSEENDEIDGVNHQH<br>LPARRAEPQRH | 3.28 | 0.01 | 3.11 | 0.44 | 1.59 | 0.28 |
| 65037 | 0 | 57279  | SDSESCSSMPPLEG                  | 2.64 | 0.01 | 2.59 | 0.44 | 0.85 | 0.28 |
| 65038 | 0 | 57279  | SDSESCSSMPPLEG                  | 2.64 | 0.01 | 2.59 | 0.44 | 1.41 | 0.28 |
| 65039 | 0 | 57281  | SDSGSDSGASST                    | 2.53 | 0.01 | 2.69 | 1.20 | 0.22 | 0.28 |
| 65040 | 0 | 111763 | SDSHVGKLSLAH                    | 2.50 | 0.01 | 0.90 | 0.44 | 0.85 | 1.39 |
| 65041 | 0 | 105510 | SDSKL                           | 1.77 | 0.01 | 3.45 | 1.20 | 0.22 | 0.28 |
| 65042 | 0 | 139602 | SDSMLSW                         | 2.05 | 0.01 | 0.90 | 1.20 | 0.22 | 0.28 |
| 65043 | 0 | 139602 | SDSMLSW                         | 2.05 | 0.01 | 0.90 | 1.20 | 0.22 | 2.35 |
| 65044 | 0 | 139602 | SDSMLSW                         | 2.05 | 0.01 | 0.90 | 0.44 | 0.85 | 0.28 |
| 65045 | 0 | 93854  | SDSNLKDLTF                      | 2.34 | 0.01 | 2.67 | 2.00 | 0.22 | 0.28 |
| 65046 | 0 | 93854  | SDSNLKDLTF                      | 2.34 | 0.01 | 2.67 | 2.00 | 0.22 | 0.28 |
| 65047 | 0 | 57286  | SDSNVSGKLEDSDKATL<br>NKE        | 2.98 | 0.01 | 2.78 | 0.44 | 0.85 | 0.28 |
| 65048 | 0 | 57288  | SDSQKECT                        | 2.13 | 0.01 | 3.42 | 0.68 | 0.22 | 0.28 |
| 65049 | 0 | 57289  | SDSQITNPAYD                     | 2.48 | 0.01 | 3.53 | 1.12 | 0.22 | 0.28 |
| 65050 | 0 | 57290  | SDSQTPDTKPGNKAVP<br>GKGQ        | 2.98 | 0.01 | 2.85 | 2.42 | 0.22 | 0.28 |
| 65051 | 0 | 57292  | SDSSFFSYGEIPFG                  | 2.65 | 0.01 | 3.51 | 1.12 | 0.22 | 0.28 |

|       |   |        |                                   |      |      |      |      |      |      |
|-------|---|--------|-----------------------------------|------|------|------|------|------|------|
| 65052 | 0 | 57292  | SDSSFFSYGEIPFG                    | 2.65 | 0.01 | 3.51 | 1.12 | 0.22 | 0.28 |
| 65053 | 0 | 57292  | SDSSFFSYGEIPFG                    | 2.65 | 0.01 | 3.51 | 1.12 | 0.22 | 1.34 |
| 65054 | 0 | 57296  | SDSVGQQIKVIPVDPYFF<br>QM          | 2.96 | 0.01 | 2.82 | 0.44 | 0.85 | 0.28 |
| 65055 | 0 | 57299  | SDTRGDPVFNLPFQ                    | 2.59 | 0.01 | 0.90 | 1.15 | 0.22 | 1.27 |
| 65056 | 0 | 57299  | SDTRGDPVFNLPFQ                    | 2.59 | 0.01 | 0.90 | 1.15 | 0.22 | 0.28 |
| 65057 | 0 | 57300  | SDTRGDPVFNLPFQF                   | 2.66 | 0.01 | 0.90 | 1.15 | 0.22 | 0.85 |
| 65058 | 0 | 57300  | SDTRGDPVFNLPFQF                   | 2.66 | 0.01 | 0.90 | 1.15 | 0.22 | 0.85 |
| 65059 | 0 | 57300  | SDTRGDPVFNLPFQF                   | 2.66 | 0.01 | 0.90 | 1.15 | 0.22 | 1.27 |
| 65060 | 0 | 88446  | SDTVQTRHVVQHRSR                   | 2.73 | 0.01 | 2.57 | 0.44 | 0.85 | 0.28 |
| 65061 | 0 | 95824  | SDVAGL                            | 1.88 | 0.01 | 2.40 | 2.52 | 0.22 | 0.28 |
| 65062 | 0 | 95824  | SDVAGL                            | 1.88 | 0.01 | 2.40 | 2.52 | 0.22 | 0.28 |
| 65063 | 0 | 95824  | SDVAGL                            | 1.88 | 0.01 | 2.40 | 2.52 | 0.22 | 0.28 |
| 65064 | 0 | 57303  | SDVAGLEKDPVAN                     | 2.54 | 0.01 | 3.36 | 2.16 | 0.22 | 0.28 |
| 65065 | 0 | 57303  | SDVAGLEKDPVAN                     | 2.54 | 0.01 | 3.36 | 2.16 | 0.22 | 0.28 |
| 65066 | 0 | 57303  | SDVAGLEKDPVAN                     | 2.54 | 0.01 | 3.36 | 2.16 | 0.22 | 1.34 |
| 65067 | 0 | 57303  | SDVAGLEKDPVAN                     | 2.54 | 0.01 | 3.36 | 2.16 | 0.22 | 0.28 |
| 65068 | 0 | 57303  | SDVAGLEKDPVAN                     | 2.54 | 0.01 | 3.36 | 2.16 | 0.22 | 0.28 |
| 65069 | 0 | 57303  | SDVAGLEKDPVAN                     | 2.54 | 0.01 | 3.36 | 2.16 | 0.22 | 0.28 |
| 65070 | 0 | 79389  | SDVAGLQNDPTT                      | 2.43 | 0.01 | 2.40 | 0.68 | 0.22 | 1.27 |
| 65071 | 0 | 79389  | SDVAGLQNDPTT                      | 2.43 | 0.01 | 2.40 | 0.68 | 0.22 | 0.28 |
| 65072 | 0 | 79389  | SDVAGLQNDPTT                      | 2.43 | 0.01 | 2.40 | 0.68 | 0.22 | 0.28 |
| 65073 | 0 | 79389  | SDVAGLQNDPTT                      | 2.43 | 0.01 | 2.40 | 0.68 | 0.22 | 0.28 |
| 65074 | 0 | 57306  | SDVEGLQNDP                        | 2.29 | 0.01 | 3.13 | 1.12 | 0.22 | 0.28 |
| 65075 | 0 | 57306  | SDVEGLQNDP                        | 2.29 | 0.01 | 3.13 | 0.68 | 0.22 | 0.28 |
| 65076 | 0 | 57306  | SDVEGLQNDP                        | 2.29 | 0.01 | 3.13 | 0.68 | 0.22 | 1.34 |
| 65077 | 0 | 57306  | SDVEGLQNDP                        | 2.29 | 0.01 | 3.13 | 0.68 | 0.22 | 0.28 |
| 65078 | 0 | 57306  | SDVEGLQNDP                        | 2.29 | 0.01 | 3.13 | 0.68 | 0.22 | 0.28 |
| 65079 | 0 | 57306  | SDVEGLQNDP                        | 2.29 | 0.01 | 3.13 | 0.68 | 0.22 | 0.28 |
| 65080 | 0 | 57306  | SDVEGLQNDP                        | 2.29 | 0.01 | 3.13 | 2.36 | 0.22 | 0.28 |
| 65081 | 0 | 57306  | SDVEGLQNDP                        | 2.29 | 0.01 | 3.13 | 2.36 | 0.22 | 0.28 |
| 65082 | 0 | 57306  | SDVEGLQNDP                        | 2.29 | 0.01 | 3.13 | 2.36 | 0.22 | 0.28 |
| 65083 | 0 | 57306  | SDVEGLQNDP                        | 2.29 | 0.01 | 3.13 | 0.68 | 0.22 | 1.34 |
| 65084 | 0 | 57306  | SDVEGLQNDP                        | 2.29 | 0.01 | 3.13 | 1.12 | 0.22 | 0.85 |
| 65085 | 0 | 57306  | SDVEGLQNDP                        | 2.29 | 0.01 | 3.13 | 0.68 | 0.22 | 0.28 |
| 65086 | 0 | 57306  | SDVEGLQNDP                        | 2.29 | 0.01 | 3.13 | 0.68 | 0.22 | 0.28 |
| 65087 | 0 | 57306  | SDVEGLQNDP                        | 2.29 | 0.01 | 3.13 | 0.68 | 0.22 | 0.28 |
| 65088 | 0 | 57307  | SDVININIYNPCVVPNIN<br>NA          | 2.98 | 0.01 | 3.10 | 1.12 | 0.22 | 0.28 |
| 65089 | 0 | 100498 | SDVLEMYKAI                        | 2.26 | 0.01 | 2.18 | 2.16 | 0.22 | 0.28 |
| 65090 | 0 | 57311  | SDVVKGVEWAAEAHIKK<br>SKKGDK       | 3.12 | 0.01 | 3.28 | 0.44 | 1.23 | 0.85 |
| 65091 | 0 | 57312  | SDVWSFGILLWETFSLG<br>ASPYPNLSNQQR | 3.32 | 0.01 | 4.93 | 3.65 | 0.22 | 0.85 |
| 65092 | 0 | 98442  | SDVYYAGLNY                        | 2.31 | 0.01 | 3.08 | 1.20 | 0.22 | 0.28 |
| 65093 | 0 | 57314  | SDWDCCDVCCNPACAG<br>C             | 2.82 | 0.01 | 3.53 | 0.68 | 0.22 | 1.27 |



|       |   |        |                                |      |      |      |      |      |      |
|-------|---|--------|--------------------------------|------|------|------|------|------|------|
| 65094 | 0 | 57314  | SDWDCCDVCCNPACAG<br>C          | 2.82 | 0.01 | 3.53 | 0.68 | 0.22 | 1.27 |
| 65095 | 0 | 57314  | SDWDCCDVCCNPACAG<br>C          | 2.82 | 0.01 | 3.53 | 0.68 | 0.22 | 1.27 |
| 65096 | 0 | 57314  | SDWDCCDVCCNPACAG<br>C          | 2.82 | 0.01 | 3.53 | 0.68 | 0.22 | 1.27 |
| 65097 | 0 | 142007 | SDWRFLRGYHQYA                  | 2.51 | 0.01 | 0.78 | 0.44 | 1.41 | 1.34 |
| 65098 | 0 | 142007 | SDWRFLRGYHQYA                  | 2.51 | 0.01 | 0.78 | 0.44 | 1.41 | 2.12 |
| 65099 | 0 | 142007 | SDWRFLRGYHQYA                  | 2.51 | 0.01 | 0.78 | 0.44 | 1.41 | 2.02 |
| 65100 | 0 | 142007 | SDWRFLRGYHQYA                  | 2.51 | 0.01 | 0.78 | 0.44 | 1.41 | 2.12 |
| 65101 | 0 | 144072 | SDWRLMFESWIR                   | 2.48 | 0.01 | 0.90 | 0.68 | 0.22 | 1.39 |
| 65102 | 0 | 227838 | SDWVPSVRSWA                    | 2.43 | 0.01 | 2.69 | 0.68 | 0.22 | 0.28 |
| 65103 | 0 | 489768 | SDWVPSVRSWALLN                 | 2.69 | 0.01 | 2.69 | 3.05 | 0.85 | 1.28 |
| 65104 | 0 | 104238 | SDWWDF                         | 1.90 | 0.01 | 0.90 | 1.15 | 0.22 | 0.28 |
| 65105 | 0 | 104238 | SDWWDF                         | 1.90 | 0.01 | 0.90 | 1.15 | 0.22 | 0.28 |
| 65106 | 0 | 57320  | SDYEDRYREN                     | 2.43 | 0.01 | 0.78 | 2.19 | 0.22 | 0.28 |
| 65107 | 0 | 57320  | SDYEDRYREN                     | 2.43 | 0.01 | 0.78 | 2.19 | 0.22 | 2.02 |
| 65108 | 0 | 57320  | SDYEDRYREN                     | 2.43 | 0.01 | 0.78 | 2.19 | 0.22 | 2.02 |
| 65109 | 0 | 57320  | SDYEDRYREN                     | 2.43 | 0.01 | 0.78 | 2.19 | 0.22 | 2.02 |
| 65110 | 0 | 57320  | SDYEDRYREN                     | 2.43 | 0.01 | 0.78 | 2.19 | 0.22 | 2.02 |
| 65111 | 0 | 57320  | SDYEDRYREN                     | 2.43 | 0.01 | 0.78 | 2.19 | 0.22 | 1.34 |
| 65112 | 0 | 149927 | SDYHKNLINNAK                   | 2.46 | 0.01 | 3.53 | 0.44 | 0.22 | 0.28 |
| 65113 | 0 | 88450  | SDYIPTSGNTVGYTFKGI<br>DGLVLGAN | 3.21 | 0.01 | 3.04 | 1.12 | 0.22 | 0.28 |
| 65114 | 0 | 88450  | SDYIPTSGNTVGYTFKGI<br>DGLVLGAN | 3.21 | 0.01 | 3.04 | 1.12 | 0.22 | 0.28 |
| 65115 | 0 | 88450  | SDYIPTSGNTVGYTFKGI<br>DGLVLGAN | 3.21 | 0.01 | 3.04 | 1.81 | 0.22 | 0.28 |
| 65116 | 0 | 88450  | SDYIPTSGNTVGYTFKGI<br>DGLVLGAN | 3.21 | 0.01 | 3.04 | 1.12 | 0.22 | 0.28 |
| 65117 | 0 | 119523 | SDYKSAHKGFKGVDAQ<br>GTLS       | 2.95 | 0.01 | 0.78 | 0.44 | 1.13 | 0.28 |
| 65118 | 0 | 156955 | SDYTLTAVIPAPRSL                | 2.69 | 0.01 | 0.90 | 2.74 | 0.22 | 0.85 |
| 65119 | 0 | 189273 | SDYTTACTNLKQCRA Y              | 2.73 | 0.01 | 2.92 | 2.49 | 0.22 | 0.28 |
| 65120 | 0 | 189273 | SDYTTACTNLKQCRA Y              | 2.73 | 0.01 | 2.92 | 3.61 | 0.22 | 0.28 |
| 65121 | 0 | 189153 | SDYTTTCTDVKQCRA Y              | 2.74 | 0.01 | 2.92 | 0.68 | 0.22 | 0.28 |
| 65122 | 0 | 189153 | SDYTTTCTDVKQCRA Y              | 2.74 | 0.01 | 2.92 | 0.68 | 0.22 | 0.28 |
| 65123 | 0 | 189153 | SDYTTTCTDVKQCRA Y              | 2.74 | 0.01 | 2.92 | 0.68 | 0.22 | 0.28 |
| 65124 | 0 | 189153 | SDYTTTCTDVKQCRA Y              | 2.74 | 0.01 | 2.92 | 0.68 | 0.22 | 0.28 |

|       |   |        |                                |      |      |      |      |      |      |
|-------|---|--------|--------------------------------|------|------|------|------|------|------|
| 65125 | 0 | 189153 | SDYTTTCTDVKQCRA Y              | 2.74 | 0.01 | 2.92 | 0.68 | 0.22 | 1.48 |
| 65126 | 0 | 189153 | SDYTTTCTDVKQCRA Y              | 2.74 | 0.01 | 2.92 | 0.68 | 0.22 | 1.48 |
| 65127 | 0 | 189153 | SDYTTTCTDVKQCRA Y              | 2.74 | 0.01 | 2.92 | 2.49 | 0.22 | 0.28 |
| 65128 | 0 | 189153 | SDYTTTCTDVKQCRA Y              | 2.74 | 0.01 | 2.92 | 3.61 | 0.22 | 0.28 |
| 65129 | 0 | 149928 | SDYYKNLINNAK                   | 2.47 | 0.01 | 3.53 | 0.68 | 0.22 | 0.28 |
| 65130 | 0 | 149928 | SDYYKNLINNAK                   | 2.47 | 0.01 | 3.53 | 0.68 | 0.22 | 0.28 |
| 65131 | 0 | 226506 | SDYYSSAVNAIFYS                 | 2.72 | 0.01 | 2.97 | 0.44 | 0.85 | 0.28 |
| 65132 | 0 | 226507 | SDYYSSAVNAIFYSFNT<br>HIKPLD    | 3.12 | 0.01 | 2.97 | 0.44 | 0.85 | 0.28 |
| 65133 | 0 | 229482 | SEAAKHYEEV                     | 2.40 | 0.01 | 2.70 | 0.68 | 0.22 | 0.28 |
| 65134 | 0 | 377238 | SEADADDDDPQRPNP                | 2.69 | 0.01 | 1.61 | 0.44 | 0.85 | 1.28 |
| 65135 | 0 | 98443  | SEAETRGITGYNPLA                | 2.66 | 0.01 | 2.04 | 0.44 | 2.98 | 0.28 |
| 65136 | 0 | 57351  | SEAFMSTNKMFL                   | 2.54 | 0.01 | 3.00 | 0.44 | 0.85 | 0.28 |
| 65137 | 0 | 142288 | SEASRKGLRRDLASRE<br>AKK        | 2.99 | 0.01 | 2.24 | 0.44 | 0.85 | 0.28 |
| 65138 | 0 | 142288 | SEASRKGLRRDLASRE<br>AKK        | 2.99 | 0.01 | 2.24 | 0.44 | 1.74 | 0.28 |
| 65139 | 0 | 142288 | SEASRKGLRRDLASRE<br>AKK        | 2.99 | 0.01 | 2.24 | 1.15 | 0.22 | 0.28 |
| 65140 | 0 | 165227 | SEASTSSQLGA                    | 2.43 | 0.01 | 3.41 | 2.22 | 0.85 | 0.28 |
| 65141 | 0 | 165227 | SEASTSSQLGA                    | 2.43 | 0.01 | 3.41 | 2.22 | 0.85 | 0.28 |
| 65142 | 0 | 165227 | SEASTSSQLGA                    | 2.43 | 0.01 | 3.41 | 0.68 | 0.22 | 1.75 |
| 65143 | 0 | 165227 | SEASTSSQLGA                    | 2.43 | 0.01 | 3.41 | 0.68 | 0.22 | 0.28 |
| 65144 | 0 | 165227 | SEASTSSQLGA                    | 2.43 | 0.01 | 3.41 | 0.68 | 0.22 | 0.28 |
| 65145 | 0 | 165227 | SEASTSSQLGA                    | 2.43 | 0.01 | 3.41 | 0.68 | 0.22 | 0.28 |
| 65146 | 0 | 165227 | SEASTSSQLGA                    | 2.43 | 0.01 | 3.41 | 0.68 | 0.22 | 0.28 |
| 65147 | 0 | 142008 | SEATGLSSEKITKL                 | 2.64 | 0.01 | 2.73 | 0.44 | 0.85 | 0.28 |
| 65148 | 0 | 134794 | SEATVAESDSF                    | 2.43 | 0.01 | 2.72 | 1.15 | 0.22 | 0.85 |
| 65149 | 0 | 57359  | SEAVSHRANETIYNTTLK<br>YGDV     | 3.01 | 0.01 | 2.76 | 0.44 | 1.59 | 0.28 |
| 65150 | 0 | 57359  | SEAVSHRANETIYNTTLK<br>YGDV     | 3.01 | 0.01 | 2.76 | 0.44 | 1.59 | 0.28 |
| 65151 | 0 | 142009 | SECAEHLTNKDSCLSKKI             | 2.85 | 0.01 | 3.13 | 0.68 | 0.22 | 0.28 |
| 65152 | 0 | 145998 | SECPNERRAWNPLEVED<br>YGFMTTNIW | 3.22 | 0.01 | 3.78 | 0.68 | 0.22 | 0.85 |
| 65153 | 0 | 145998 | SECPNERRAWNPLEVED<br>YGFMTTNIW | 3.22 | 0.01 | 3.78 | 0.68 | 0.22 | 1.48 |
| 65154 | 0 | 240920 | SEDEDDLALTSSNQ                 | 2.69 | 0.01 | 4.93 | 0.44 | 1.41 | 0.28 |
| 65155 | 0 | 377344 | SEDEEEDDADGDEED                | 2.74 | 0.01 | 1.61 | 0.44 | 0.85 | 1.28 |
| 65156 | 0 | 377367 | SEDKEEDDADGDEED                | 2.73 | 0.01 | 1.61 | 0.44 | 0.85 | 1.28 |

|       |   |        |                                                           |      |      |      |      |      |      |
|-------|---|--------|-----------------------------------------------------------|------|------|------|------|------|------|
| 65157 | 0 | 181455 | SEDKPFNLRSRDPISNK<br>LGKFFEITPEKN                         | 3.36 | 0.01 | 2.72 | 0.44 | 1.23 | 1.27 |
| 65158 | 0 | 186930 | SEDNRGGIVKVKDD                                            | 2.60 | 0.01 | 3.12 | 2.37 | 0.22 | 2.66 |
| 65159 | 0 | 88461  | SEDRETRPHGRNNENFP<br>YNR                                  | 2.96 | 0.01 | 0.90 | 2.74 | 0.22 | 1.48 |
| 65160 | 0 | 88462  | SEDRETRPHGRNNENFV<br>YNR                                  | 2.94 | 0.01 | 0.90 | 2.74 | 0.22 | 1.48 |
| 65161 | 0 | 88466  | SEDRETRPHGRNNFMR<br>SYNR                                  | 2.95 | 0.01 | 0.90 | 2.74 | 0.22 | 1.48 |
| 65162 | 0 | 88467  | SEDRETRPHGRNNLMR<br>SYNR                                  | 2.95 | 0.01 | 0.90 | 2.74 | 0.22 | 1.48 |
| 65163 | 0 | 88469  | SEDRETRPHGRNNMNF<br>VYNR                                  | 2.93 | 0.01 | 0.90 | 2.74 | 0.22 | 1.48 |
| 65164 | 0 | 88470  | SEDREVFDHGRNNMIF<br>VYNR                                  | 2.94 | 0.01 | 0.90 | 2.74 | 0.22 | 1.48 |
| 65165 | 0 | 182294 | SEECVSMPISICKRK                                           | 2.70 | 0.01 | 0.78 | 0.44 | 1.13 | 0.85 |
| 65166 | 0 | 57379  | SEEDAAEWI                                                 | 2.25 | 0.01 | 4.15 | 1.15 | 0.22 | 0.85 |
| 65167 | 0 | 57379  | SEEDAAEWI                                                 | 2.25 | 0.01 | 4.15 | 1.15 | 0.22 | 0.85 |
| 65168 | 0 | 153885 | SEEEDEIDGPAGQAEPD<br>RAH                                  | 2.97 | 0.01 | 1.86 | 2.37 | 0.22 | 2.02 |
| 65169 | 0 | 377424 | SEEDKEEEEEDDDDD                                           | 2.72 | 0.01 | 1.61 | 0.44 | 0.85 | 1.28 |
| 65170 | 0 | 99657  | SEEEGDITNPINLRE                                           | 2.67 | 0.01 | 2.16 | 0.44 | 1.23 | 1.48 |
| 65171 | 0 | 100501 | SEEEKELLNR                                                | 2.34 | 0.01 | 2.18 | 2.16 | 0.22 | 0.28 |
| 65172 | 0 | 118129 | SEEEKLTHISKG                                              | 2.48 | 0.01 | 0.78 | 0.44 | 1.13 | 0.85 |
| 65173 | 0 | 118130 | SEEEKLTHISKGTLGKFTV<br>PMLKEACRAYGLKSLK<br>KQELLEALTKHFQD | 3.84 | 0.01 | 0.78 | 0.44 | 1.13 | 0.85 |
| 65174 | 0 | 109905 | SEEEND                                                    | 1.91 | 0.01 | 3.11 | 0.68 | 0.22 | 0.28 |
| 65175 | 0 | 109905 | SEEEND                                                    | 1.91 | 0.01 | 3.11 | 0.68 | 0.22 | 0.28 |
| 65176 | 0 | 109905 | SEEEND                                                    | 1.91 | 0.01 | 3.11 | 0.68 | 0.22 | 2.02 |
| 65177 | 0 | 109905 | SEEEND                                                    | 1.91 | 0.01 | 3.11 | 0.68 | 0.22 | 1.48 |
| 65178 | 0 | 109905 | SEEEND                                                    | 1.91 | 0.01 | 3.11 | 3.70 | 0.22 | 0.28 |
| 65179 | 0 | 377449 | SEEGEIDDDSDVQNE                                           | 2.71 | 0.01 | 1.61 | 0.44 | 0.85 | 1.28 |
| 65180 | 0 | 57386  | SEEGKQET                                                  | 2.14 | 0.01 | 2.30 | 0.44 | 0.85 | 0.85 |
| 65181 | 0 | 57386  | SEEGKQET                                                  | 2.14 | 0.01 | 2.30 | 1.12 | 0.22 | 0.85 |
| 65182 | 0 | 57386  | SEEGKQET                                                  | 2.14 | 0.01 | 2.30 | 1.15 | 0.22 | 0.85 |
| 65183 | 0 | 100502 | SEEGRLLKK                                                 | 2.31 | 0.01 | 2.18 | 2.16 | 0.22 | 0.28 |
| 65184 | 0 | 153886 | SEKANQREEAYKEQ                                            | 2.71 | 0.01 | 3.93 | 0.44 | 1.23 | 1.27 |
| 65185 | 0 | 57389  | SEEKFVTMTDLVPGI                                           | 2.63 | 0.01 | 2.88 | 2.22 | 0.22 | 0.28 |
| 65186 | 0 | 57389  | SEEKFVTMTDLVPGI                                           | 2.63 | 0.01 | 2.88 | 2.22 | 0.22 | 0.28 |
| 65187 | 0 | 57389  | SEEKFVTMTDLVPGI                                           | 2.63 | 0.01 | 2.96 | 2.22 | 0.22 | 0.28 |
| 65188 | 0 | 57389  | SEEKFVTMTDLVPGI                                           | 2.63 | 0.01 | 2.96 | 2.22 | 0.22 | 0.28 |
| 65189 | 0 | 78513  | SEELLVESSAIRSRE                                           | 2.73 | 0.01 | 0.90 | 0.68 | 0.22 | 0.28 |
| 65190 | 0 | 173158 | SEENFRVMSGKLTVQ                                           | 2.64 | 0.01 | 0.78 | 0.44 | 1.41 | 0.28 |
| 65191 | 0 | 119640 | SEEQLQELSEEITDIVQGL<br>PPITSE                             | 3.20 | 0.01 | 3.33 | 0.44 | 0.85 | 0.28 |

|       |   |        |                                                  |      |      |      |      |      |      |
|-------|---|--------|--------------------------------------------------|------|------|------|------|------|------|
| 65192 | 0 | 123731 | SEESAEVATEEV                                     | 2.53 | 0.01 | 1.60 | 0.44 | 1.13 | 0.28 |
| 65193 | 0 | 123731 | SEESAEVATEEV                                     | 2.53 | 0.01 | 1.60 | 0.44 | 1.41 | 0.28 |
| 65194 | 0 | 115479 | SEESAEVATEEVKITVDD<br>KH                         | 2.98 | 0.01 | 1.60 | 0.44 | 1.23 | 2.51 |
| 65195 | 0 | 115954 | SEESITRINK                                       | 2.33 | 0.01 | 1.60 | 0.44 | 1.23 | 0.85 |
| 65196 | 0 | 115954 | SEESITRINK                                       | 2.33 | 0.01 | 1.60 | 0.44 | 1.23 | 0.85 |
| 65197 | 0 | 236092 | SEEVKTTEQKREACKCIV<br>RATKGISGIKNELVAEVP<br>KKCD | 3.63 | 0.01 | 3.08 | 0.44 | 1.23 | 0.85 |
| 65198 | 0 | 236092 | SEEVKTTEQKREACKCIV<br>RATKGISGIKNELVAEVP<br>KKCD | 3.63 | 0.01 | 3.08 | 0.44 | 1.23 | 0.85 |
| 65199 | 0 | 57415  | SEFAYGSFVRTVSL                                   | 2.62 | 0.01 | 2.86 | 0.68 | 0.22 | 0.28 |
| 65200 | 0 | 57415  | SEFAYGSFVRTVSL                                   | 2.62 | 0.01 | 2.86 | 0.68 | 0.22 | 0.28 |
| 65201 | 0 | 57415  | SEFAYGSFVRTVSL                                   | 2.62 | 0.01 | 2.86 | 0.68 | 0.22 | 0.28 |
| 65202 | 0 | 103589 | SEFDVILEAAGDKKI                                  | 2.66 | 0.01 | 2.04 | 0.44 | 0.85 | 1.28 |
| 65203 | 0 | 106824 | SEFRHGL                                          | 1.99 | 0.01 | 0.90 | 3.00 | 1.93 | 0.28 |
| 65204 | 0 | 136083 | SEGAEYDDQTSQREKED<br>DK                          | 2.92 | 0.01 | 0.78 | 1.20 | 0.22 | 0.28 |
| 65205 | 0 | 136083 | SEGAEYDDQTSQREKED<br>DK                          | 2.92 | 0.01 | 0.78 | 1.20 | 0.22 | 0.85 |
| 65206 | 0 | 136083 | SEGAEYDDQTSQREKED<br>DK                          | 2.92 | 0.01 | 0.78 | 0.44 | 1.41 | 0.85 |
| 65207 | 0 | 148223 | SEGATNFGD                                        | 2.21 | 0.01 | 3.24 | 1.12 | 0.22 | 0.28 |
| 65208 | 0 | 138910 | SEGGDEYVTKEGVVETD                                | 2.83 | 0.01 | 3.33 | 0.44 | 1.74 | 0.28 |
| 65209 | 0 | 138910 | SEGGDEYVTKEGVVETD                                | 2.83 | 0.01 | 3.33 | 0.44 | 0.85 | 0.28 |
| 65210 | 0 | 138910 | SEGGDEYVTKEGVVETD                                | 2.83 | 0.01 | 3.33 | 0.68 | 0.22 | 0.28 |
| 65211 | 0 | 138910 | SEGGDEYVTKEGVVETD                                | 2.83 | 0.01 | 3.33 | 1.15 | 0.22 | 0.28 |
| 65212 | 0 | 173160 | SEGGTYIYKEQKLGL                                  | 2.69 | 0.01 | 0.78 | 0.44 | 1.13 | 0.28 |
| 65213 | 0 | 121837 | SEGLAIVT                                         | 2.10 | 0.01 | 0.78 | 0.44 | 1.13 | 0.28 |
| 65214 | 0 | 78001  | SEGLKEET                                         | 2.13 | 0.01 | 3.72 | 0.68 | 0.22 | 1.34 |
| 65215 | 0 | 78001  | SEGLKEET                                         | 2.13 | 0.01 | 3.72 | 0.68 | 0.22 | 0.28 |
| 65216 | 0 | 489769 | SEGNRNRHRAWALRE                                  | 2.70 | 0.01 | 2.69 | 3.05 | 0.85 | 1.28 |
| 65217 | 0 | 57452  | SEGSVEKNAPWGLARIS<br>HRESLS                      | 3.08 | 0.01 | 3.28 | 0.44 | 1.23 | 0.85 |
| 65218 | 0 | 131651 | SEGTGQALASPGSCLE                                 | 2.77 | 0.01 | 0.78 | 2.97 | 0.22 | 0.28 |
| 65219 | 0 | 131651 | SEGTGQALASPGSCLE                                 | 2.77 | 0.01 | 0.78 | 2.97 | 2.60 | 1.75 |
| 65220 | 0 | 128099 | SEGWPAIDGSFLAAVGN<br>LIV                         | 2.94 | 0.01 | 0.78 | 0.44 | 1.13 | 0.28 |
| 65221 | 0 | 119641 | SEHETRLVAKLFDYS                                  | 2.72 | 0.01 | 0.78 | 1.15 | 0.22 | 1.57 |
| 65222 | 0 | 119641 | SEHETRLVAKLFDYS                                  | 2.72 | 0.01 | 0.78 | 0.44 | 1.13 | 1.57 |
| 65223 | 0 | 119641 | SEHETRLVAKLFDYS                                  | 2.72 | 0.01 | 0.78 | 0.44 | 1.41 | 1.57 |

|       |   |        |                                                |      |      |      |      |      |      |
|-------|---|--------|------------------------------------------------|------|------|------|------|------|------|
| 65224 | 0 | 120197 | SEHETRLVANLLENYN                               | 2.74 | 0.01 | 2.26 | 1.15 | 0.22 | 1.57 |
| 65225 | 0 | 120197 | SEHETRLVANLLENYN                               | 2.74 | 0.01 | 2.26 | 1.12 | 0.22 | 1.57 |
| 65226 | 0 | 120197 | SEHETRLVANLLENYN                               | 2.74 | 0.01 | 2.26 | 2.43 | 0.22 | 1.57 |
| 65227 | 0 | 120197 | SEHETRLVANLLENYN                               | 2.74 | 0.01 | 2.26 | 2.25 | 0.22 | 1.57 |
| 65228 | 0 | 120197 | SEHETRLVANLLENYN                               | 2.74 | 0.01 | 2.26 | 3.65 | 0.22 | 1.57 |
| 65229 | 0 | 119642 | SEHETRLVANLLENYNK<br>VIR                       | 2.94 | 0.01 | 2.26 | 1.12 | 0.22 | 1.57 |
| 65230 | 0 | 119642 | SEHETRLVANLLENYNK<br>VIR                       | 2.94 | 0.01 | 2.26 | 1.12 | 0.22 | 1.27 |
| 65231 | 0 | 119642 | SEHETRLVANLLENYNK<br>VIR                       | 2.94 | 0.01 | 2.26 | 1.12 | 0.22 | 1.27 |
| 65232 | 0 | 119642 | SEHETRLVANLLENYNK<br>VIR                       | 2.94 | 0.01 | 2.26 | 1.12 | 0.22 | 1.57 |
| 65233 | 0 | 119642 | SEHETRLVANLLENYNK<br>VIR                       | 2.94 | 0.01 | 2.26 | 1.12 | 0.22 | 1.27 |
| 65234 | 0 | 119642 | SEHETRLVANLLENYNK<br>VIR                       | 2.94 | 0.01 | 2.26 | 1.12 | 0.22 | 1.57 |
| 65235 | 0 | 119642 | SEHETRLVANLLENYNK<br>VIR                       | 2.94 | 0.01 | 2.26 | 1.15 | 0.22 | 0.85 |
| 65236 | 0 | 119642 | SEHETRLVANLLENYNK<br>VIR                       | 2.94 | 0.01 | 2.26 | 0.68 | 0.22 | 0.28 |
| 65237 | 0 | 225857 | SEHETRLVANLLGGGSL<br>RWNPADYGGIKKIRGSL<br>DYGK | 3.59 | 0.01 | 0.90 | 2.04 | 0.22 | 0.85 |
| 65238 | 0 | 225857 | SEHETRLVANLLGGGSL<br>RWNPADYGGIKKIRGSL<br>DYGK | 3.59 | 0.01 | 0.90 | 2.04 | 0.22 | 0.85 |
| 65239 | 0 | 225857 | SEHETRLVANLLGGGSL<br>RWNPADYGGIKKIRGSL<br>DYGK | 3.59 | 0.01 | 0.90 | 2.04 | 0.22 | 0.85 |
| 65240 | 0 | 225857 | SEHETRLVANLLGGGSL<br>RWNPADYGGIKKIRGSL<br>DYGK | 3.59 | 0.01 | 0.90 | 2.04 | 0.22 | 2.75 |
| 65241 | 0 | 225857 | SEHETRLVANLLGGGSL<br>RWNPADYGGIKKIRGSL<br>DYGK | 3.59 | 0.01 | 0.90 | 2.04 | 0.22 | 2.75 |
| 65242 | 0 | 225857 | SEHETRLVANLLGGGSL<br>RWNPADYGGIKKIRGSL<br>DYGK | 3.59 | 0.01 | 0.90 | 2.04 | 0.22 | 2.75 |
| 65243 | 0 | 225857 | SEHETRLVANLLGGGSL<br>RWNPADYGGIKKIRGSL<br>DYGK | 3.59 | 0.01 | 0.90 | 2.04 | 0.22 | 2.75 |
| 65244 | 0 | 225857 | SEHETRLVANLLGGGSL<br>RWNPADYGGIKKIRGSL<br>DYGK | 3.59 | 0.01 | 0.90 | 2.04 | 0.22 | 2.75 |

|       |   |        |                                   |      |      |      |      |      |      |
|-------|---|--------|-----------------------------------|------|------|------|------|------|------|
|       |   |        | SEHETRLVANLLGGGSL                 |      |      |      |      |      |      |
| 65245 | 0 | 225857 | RWNPADYGGIKKIRGSL<br>DYGK         | 3.59 | 0.01 | 0.90 | 2.04 | 0.22 | 2.75 |
|       |   |        | SEHETRLVANLLGGGSL                 |      |      |      |      |      |      |
| 65246 | 0 | 225857 | RWNPADYGGIKKIRGSL<br>DYGK         | 3.59 | 0.01 | 0.90 | 2.04 | 0.22 | 2.75 |
|       |   |        | SEHETRLVANLLGGGSL                 |      |      |      |      |      |      |
| 65247 | 0 | 225857 | RWNPADYGGIKKIRGSL<br>DYGK         | 3.59 | 0.01 | 0.90 | 2.36 | 0.22 | 1.27 |
| 65248 | 0 | 448151 | SEHGRNC                           | 1.99 | 0.01 | 0.90 | 2.66 | 0.22 | 1.39 |
| 65249 | 0 | 79079  | SEHYAVYASSTGNDASN<br>FTN          | 2.96 | 0.01 | 2.84 | 0.44 | 0.85 | 0.28 |
| 65250 | 0 | 137290 | SEIEKLKNKYEVAGIP                  | 2.73 | 0.01 | 3.81 | 0.68 | 0.22 | 1.27 |
| 65251 | 0 | 137290 | SEIEKLKNKYEVAGIP                  | 2.73 | 0.01 | 3.81 | 0.68 | 0.22 | 1.27 |
| 65252 | 0 | 137290 | SEIEKLKNKYEVAGIP                  | 2.73 | 0.01 | 3.81 | 0.68 | 0.22 | 1.27 |
| 65253 | 0 | 137290 | SEIEKLKNKYEVAGIP                  | 2.73 | 0.01 | 3.81 | 0.68 | 0.22 | 0.85 |
| 65254 | 0 | 137290 | SEIEKLKNKYEVAGIP                  | 2.73 | 0.01 | 3.81 | 0.44 | 0.85 | 0.28 |
| 65255 | 0 | 144776 | SEISTGLVGITSVAS                   | 2.72 | 0.01 | 2.24 | 1.12 | 0.22 | 0.28 |
| 65256 | 0 | 144776 | SEISTGLVGITSVAS                   | 2.72 | 0.01 | 2.24 | 1.12 | 0.22 | 0.28 |
| 65257 | 0 | 144776 | SEISTGLVGITSVAS                   | 2.72 | 0.01 | 2.24 | 1.12 | 0.22 | 0.28 |
| 65258 | 0 | 106825 | SEIYRKYFGN                        | 2.29 | 0.01 | 2.75 | 0.44 | 1.23 | 0.85 |
| 65259 | 0 | 135991 | SEKISSIQSIV                       | 2.52 | 0.01 | 0.78 | 0.44 | 1.41 | 0.28 |
| 65260 | 0 | 175500 | SEKLDKDRVQSKIGSLD<br>NITHVPGGGNKK | 3.32 | 4.93 | 0.78 | 0.68 | 0.22 | 2.66 |
| 65261 | 0 | 142289 | SEKLHNTTVELAILDNIN<br>N           | 2.94 | 0.01 | 3.93 | 3.16 | 0.22 | 0.28 |
| 65262 | 0 | 57504  | SEKSEEIN                          | 2.16 | 0.01 | 2.56 | 1.12 | 0.22 | 1.27 |
| 65263 | 0 | 57504  | SEKSEEIN                          | 2.16 | 0.01 | 2.56 | 0.68 | 0.22 | 0.28 |
| 65264 | 0 | 57504  | SEKSEEIN                          | 2.16 | 0.01 | 2.56 | 0.68 | 0.22 | 0.28 |
| 65265 | 0 | 57505  | SEKSEEINEKDLRKKSELQ<br>G          | 2.97 | 0.01 | 2.56 | 1.12 | 0.22 | 0.28 |
| 65266 | 0 | 57505  | SEKSEEINEKDLRKKSELQ<br>G          | 2.97 | 0.01 | 2.56 | 1.12 | 0.22 | 0.28 |
| 65267 | 0 | 57505  | SEKSEEINEKDLRKKSELQ<br>G          | 2.97 | 0.01 | 2.56 | 3.12 | 0.22 | 0.28 |
| 65268 | 0 | 57506  | SEKSKCEENTMFQPY                   | 2.66 | 0.01 | 2.86 | 2.02 | 0.22 | 0.28 |
| 65269 | 0 | 57506  | SEKSKCEENTMFQPY                   | 2.66 | 0.01 | 2.86 | 2.02 | 1.59 | 0.28 |
| 65270 | 0 | 57508  | SEKTIWSLIAWQRSNAE<br>FEQ          | 2.95 | 0.01 | 2.82 | 0.44 | 0.85 | 0.28 |
| 65271 | 0 | 57508  | SEKTIWSLIAWQRSNAE<br>FEQ          | 2.95 | 0.01 | 2.82 | 0.44 | 1.41 | 0.28 |
| 65272 | 0 | 57509  | SEKTTMPLW                         | 2.20 | 0.01 | 1.60 | 0.44 | 1.23 | 0.28 |
| 65273 | 0 | 57509  | SEKTTMPLW                         | 2.20 | 0.01 | 1.60 | 0.44 | 1.23 | 0.28 |
| 65274 | 0 | 57510  | SEKYPSTSVNSAEAST<br>GAGGG         | 3.04 | 0.01 | 2.75 | 1.12 | 0.22 | 1.34 |
| 65275 | 0 | 57510  | SEKYPSTSVNSAEAST<br>GAGGG         | 3.04 | 0.01 | 2.75 | 1.12 | 0.22 | 0.85 |

|       |   |        |                              |      |      |      |      |      |      |
|-------|---|--------|------------------------------|------|------|------|------|------|------|
| 65276 | 0 | 57510  | SEKYPSTSVNSAEAST<br>GAGGG    | 3.04 | 0.01 | 2.75 | 1.12 | 0.22 | 0.28 |
| 65277 | 0 | 57510  | SEKYPSTSVNSAEAST<br>GAGGG    | 3.04 | 0.01 | 2.75 | 1.12 | 0.22 | 0.85 |
| 65278 | 0 | 57512  | SELCIGSVCTFWTTRMR            | 2.77 | 0.01 | 0.90 | 0.68 | 0.22 | 0.28 |
| 65279 | 0 | 485592 | SELE                         | 1.57 | 0.01 | 1.75 | 1.12 | 0.22 | 0.85 |
| 65280 | 0 | 152972 | SELENIPSEN                   | 2.36 | 0.01 | 2.18 | 2.16 | 0.22 | 0.28 |
| 65281 | 0 | 57523  | SELLISTAVQ                   | 2.31 | 0.01 | 0.78 | 0.44 | 1.74 | 0.28 |
| 65282 | 0 | 494734 | SELLSKINDMPITNDQKK<br>LMSN   | 3.06 | 0.01 | 0.90 | 0.68 | 0.22 | 0.28 |
| 65283 | 0 | 494734 | SELLSKINDMPITNDQKK<br>LMSN   | 3.06 | 0.01 | 0.90 | 0.68 | 0.22 | 0.28 |
| 65284 | 0 | 494734 | SELLSKINDMPITNDQKK<br>LMSN   | 3.06 | 0.01 | 0.90 | 0.68 | 0.22 | 0.28 |
| 65285 | 0 | 494734 | SELLSKINDMPITNDQKK<br>LMSN   | 3.06 | 0.01 | 0.90 | 0.68 | 0.22 | 1.34 |
| 65286 | 0 | 494734 | SELLSKINDMPITNDQKK<br>LMSN   | 3.06 | 0.01 | 0.90 | 0.68 | 0.22 | 2.75 |
| 65287 | 0 | 494734 | SELLSKINDMPITNDQKK<br>LMSN   | 3.06 | 0.01 | 0.90 | 0.68 | 0.22 | 2.75 |
| 65288 | 0 | 494734 | SELLSKINDMPITNDQKK<br>LMSN   | 3.06 | 0.01 | 0.90 | 0.68 | 0.22 | 2.75 |
| 65289 | 0 | 57524  | SELLSLINDMPITNDQKK<br>LMS    | 3.01 | 0.01 | 2.38 | 0.44 | 0.85 | 0.28 |
| 65290 | 0 | 57524  | SELLSLINDMPITNDQKK<br>LMS    | 3.01 | 0.01 | 2.38 | 1.20 | 0.22 | 0.28 |
| 65291 | 0 | 57524  | SELLSLINDMPITNDQKK<br>LMS    | 3.01 | 0.01 | 2.38 | 1.20 | 0.22 | 0.28 |
| 65292 | 0 | 57524  | SELLSLINDMPITNDQKK<br>LMS    | 3.01 | 0.01 | 2.38 | 1.20 | 0.22 | 0.28 |
| 65293 | 0 | 57524  | SELLSLINDMPITNDQKK<br>LMS    | 3.01 | 0.01 | 2.38 | 1.20 | 0.22 | 0.28 |
| 65294 | 0 | 57524  | SELLSLINDMPITNDQKK<br>LMS    | 3.01 | 0.01 | 2.38 | 2.22 | 0.22 | 0.28 |
| 65295 | 0 | 57525  | SELLSLINDMPITNDQKK<br>LMSNNV | 3.13 | 0.01 | 2.38 | 0.68 | 0.22 | 0.28 |
| 65296 | 0 | 57525  | SELLSLINDMPITNDQKK<br>LMSNNV | 3.13 | 0.01 | 2.38 | 0.68 | 0.22 | 0.28 |
| 65297 | 0 | 57525  | SELLSLINDMPITNDQKK<br>LMSNNV | 3.13 | 0.01 | 2.38 | 0.68 | 0.22 | 0.28 |
| 65298 | 0 | 57525  | SELLSLINDMPITNDQKK<br>LMSNNV | 3.13 | 0.01 | 2.38 | 0.68 | 0.22 | 0.28 |
| 65299 | 0 | 57525  | SELLSLINDMPITNDQKK<br>LMSNNV | 3.13 | 0.01 | 2.38 | 0.68 | 0.22 | 1.34 |
| 65300 | 0 | 57525  | SELLSLINDMPITNDQKK<br>LMSNNV | 3.13 | 0.01 | 2.38 | 0.68 | 0.22 | 0.28 |

|       |   |        |                                             |      |      |      |      |      |      |
|-------|---|--------|---------------------------------------------|------|------|------|------|------|------|
| 65301 | 0 | 57525  | SELLSLINDMPITNDQKK<br>LMSNNV                | 3.13 | 0.01 | 2.38 | 0.68 | 0.22 | 0.28 |
| 65302 | 0 | 57525  | SELLSLINDMPITNDQKK<br>LMSNNV                | 3.13 | 0.01 | 2.38 | 0.68 | 0.22 | 0.28 |
| 65303 | 0 | 57525  | SELLSLINDMPITNDQKK<br>LMSNNV                | 3.13 | 0.01 | 2.38 | 0.68 | 0.22 | 0.28 |
| 65304 | 0 | 57525  | SELLSLINDMPITNDQKK<br>LMSNNV                | 3.13 | 0.01 | 2.38 | 0.68 | 2.25 | 1.75 |
| 65305 | 0 | 57525  | SELLSLINDMPITNDQKK<br>LMSNNV                | 3.13 | 0.01 | 2.38 | 1.12 | 0.22 | 0.28 |
| 65306 | 0 | 57525  | SELLSLINDMPITNDQKK<br>LMSNNV                | 3.13 | 0.01 | 3.00 | 0.68 | 0.22 | 0.28 |
| 65307 | 0 | 57525  | SELLSLINDMPITNDQKK<br>LMSNNV                | 3.13 | 0.01 | 3.00 | 0.68 | 0.22 | 0.28 |
| 65308 | 0 | 57525  | SELLSLINDMPITNDQKK<br>LMSNNV                | 3.13 | 0.01 | 3.00 | 0.68 | 0.22 | 1.34 |
| 65309 | 0 | 57525  | SELLSLINDMPITNDQKK<br>LMSNNV                | 3.13 | 0.01 | 3.00 | 0.68 | 0.22 | 0.28 |
| 65310 | 0 | 57525  | SELLSLINDMPITNDQKK<br>LMSNNV                | 3.13 | 0.01 | 3.00 | 1.12 | 0.22 | 0.28 |
| 65311 | 0 | 57525  | SELLSLINDMPITNDQKK<br>LMSNNV                | 3.13 | 0.01 | 3.00 | 1.12 | 0.22 | 0.28 |
| 65312 | 0 | 57525  | SELLSLINDMPITNDQKK<br>LMSNNV                | 3.13 | 0.01 | 3.00 | 1.12 | 0.22 | 1.34 |
| 65313 | 0 | 57525  | SELLSLINDMPITNDQKK<br>LMSNNV                | 3.13 | 0.01 | 3.00 | 1.12 | 0.22 | 0.28 |
| 65314 | 0 | 57525  | SELLSLINDMPITNDQKK<br>LMSNNV                | 3.13 | 0.01 | 3.00 | 0.68 | 0.22 | 0.28 |
| 65315 | 0 | 57525  | SELLSLINDMPITNDQKK<br>LMSNNV                | 3.13 | 0.01 | 3.00 | 0.68 | 0.22 | 0.28 |
| 65316 | 0 | 57526  | SELLSLINDMPITNDQKK<br>LMSNNVQIVRQQSYSI<br>M | 3.50 | 0.01 | 2.67 | 0.68 | 0.22 | 1.66 |
| 65317 | 0 | 57530  | SELPQLS                                     | 2.05 | 0.01 | 0.90 | 1.15 | 0.22 | 1.27 |
| 65318 | 0 | 57530  | SELPQLS                                     | 2.05 | 0.01 | 0.90 | 1.15 | 0.22 | 1.39 |
| 65319 | 0 | 57531  | SELPQWD                                     | 1.99 | 0.01 | 0.90 | 1.15 | 0.22 | 1.27 |
| 65320 | 0 | 57531  | SELPQWD                                     | 1.99 | 0.01 | 0.90 | 1.15 | 0.22 | 1.39 |
| 65321 | 0 | 57532  | SELPQWI                                     | 1.99 | 0.01 | 0.90 | 1.15 | 0.22 | 1.27 |
| 65322 | 0 | 57535  | SELRRHKKNPNFLFG                             | 2.67 | 0.01 | 2.72 | 2.13 | 0.22 | 0.85 |
| 65323 | 0 | 153458 | SELSPAMLHFMFGGGS                            | 2.75 | 0.01 | 0.90 | 0.68 | 0.22 | 1.39 |
| 65324 | 0 | 153458 | SELSPAMLHFMFGGGS                            | 2.75 | 0.01 | 0.90 | 0.68 | 0.22 | 0.28 |
| 65325 | 0 | 57540  | SELSPLLLTTTQWQVLPC<br>SF                    | 2.96 | 0.01 | 2.83 | 0.44 | 0.85 | 0.28 |
| 65326 | 0 | 57541  | SELSQL                                      | 1.92 | 0.01 | 2.43 | 1.15 | 0.22 | 1.27 |
| 65327 | 0 | 57541  | SELSQL                                      | 1.92 | 0.01 | 2.43 | 1.15 | 0.22 | 1.27 |



|       |   |        |                                    |      |      |      |      |      |      |
|-------|---|--------|------------------------------------|------|------|------|------|------|------|
| 65328 | 0 | 57542  | SELSQLS                            | 2.06 | 0.01 | 2.43 | 1.15 | 0.22 | 0.28 |
| 65329 | 0 | 57542  | SELSQLS                            | 2.06 | 0.01 | 2.43 | 1.15 | 0.22 | 1.27 |
| 65330 | 0 | 57542  | SELSQLS                            | 2.06 | 0.01 | 2.43 | 0.68 | 0.22 | 0.28 |
| 65331 | 0 | 57542  | SELSQLS                            | 2.06 | 0.01 | 2.43 | 0.68 | 0.22 | 0.28 |
| 65332 | 0 | 57542  | SELSQLS                            | 2.06 | 0.01 | 2.43 | 0.68 | 0.22 | 0.28 |
| 65333 | 0 | 57542  | SELSQLS                            | 2.06 | 0.01 | 2.43 | 0.68 | 0.22 | 2.12 |
| 65334 | 0 | 57542  | SELSQLS                            | 2.06 | 0.01 | 2.43 | 0.68 | 0.22 | 0.28 |
| 65335 | 0 | 57542  | SELSQLS                            | 2.06 | 0.01 | 2.43 | 0.68 | 0.22 | 1.27 |
| 65336 | 0 | 57542  | SELSQLS                            | 2.06 | 0.01 | 2.43 | 0.68 | 0.22 | 1.75 |
| 65337 | 0 | 57542  | SELSQLS                            | 2.06 | 0.01 | 2.43 | 0.68 | 0.22 | 1.34 |
| 65338 | 0 | 525845 | SELTTEKAGQKTDDM                    | 2.67 | 0.01 | 2.24 | 0.44 | 1.41 | 1.28 |
| 65339 | 0 | 57548  | SELVIPSERLHYRNQGW<br>RSVETSGVAEEEE | 3.33 | 0.01 | 2.70 | 1.15 | 0.22 | 0.28 |
| 65340 | 0 | 57548  | SELVIPSERLHYRNQGW<br>RSVETSGVAEEEE | 3.33 | 0.01 | 2.53 | 0.44 | 0.85 | 0.28 |
| 65341 | 0 | 57548  | SELVIPSERLHYRNQGW<br>RSVETSGVAEEEE | 3.33 | 0.01 | 2.53 | 0.44 | 0.85 | 0.28 |
| 65342 | 0 | 57556  | SEMPQLP                            | 2.02 | 0.01 | 0.90 | 1.15 | 0.22 | 1.27 |
| 65343 | 0 | 57557  | SEMPQLPSEMPQLP                     | 2.68 | 0.01 | 0.90 | 0.68 | 0.22 | 0.28 |
| 65344 | 0 | 57557  | SEMPQLPSEMPQLP                     | 2.68 | 0.01 | 0.90 | 0.68 | 0.22 | 0.28 |
| 65345 | 0 | 57557  | SEMPQLPSEMPQLP                     | 2.68 | 0.01 | 0.90 | 0.68 | 0.22 | 0.28 |
| 65346 | 0 | 105515 | SEN                                | 1.37 | 0.01 | 4.15 | 1.20 | 0.22 | 0.28 |
| 65347 | 0 | 57563  | SENELQAGLQEKERELE<br>DLK           | 3.02 | 0.01 | 2.24 | 2.42 | 0.22 | 0.28 |
| 65348 | 0 | 57563  | SENELQAGLQEKERELE<br>DLK           | 3.02 | 0.01 | 2.24 | 2.42 | 0.22 | 1.34 |
| 65349 | 0 | 57566  | SENGD                              | 1.74 | 0.01 | 2.18 | 1.81 | 0.22 | 0.28 |
| 65350 | 0 | 57569  | SENHGNYSAQVGASQ                    | 2.71 | 0.01 | 4.33 | 1.15 | 0.22 | 0.28 |
| 65351 | 0 | 57569  | SENHGNYSAQVGASQ                    | 2.71 | 0.01 | 4.33 | 1.15 | 0.22 | 1.48 |
| 65352 | 0 | 57569  | SENHGNYSAQVGASQ                    | 2.71 | 0.01 | 4.33 | 1.15 | 0.22 | 1.34 |
| 65353 | 0 | 57569  | SENHGNYSAQVGASQ                    | 2.71 | 0.01 | 3.04 | 1.15 | 0.22 | 0.28 |
| 65354 | 0 | 78002  | SENHTAFG                           | 2.10 | 0.01 | 3.72 | 0.68 | 0.22 | 1.34 |
| 65355 | 0 | 78002  | SENHTAFG                           | 2.10 | 0.01 | 3.72 | 0.68 | 0.22 | 0.28 |
| 65356 | 0 | 57575  | SENMHIDIYLYTS                      | 2.54 | 0.01 | 2.56 | 1.12 | 0.22 | 0.28 |
| 65357 | 0 | 57575  | SENMHIDIYLYTS                      | 2.54 | 0.01 | 2.56 | 3.12 | 0.22 | 0.28 |
| 65358 | 0 | 115107 | SENSEKTTMPLW                       | 2.47 | 0.01 | 1.60 | 0.44 | 1.23 | 1.27 |
| 65359 | 0 | 115107 | SENSEKTTMPLW                       | 2.47 | 0.01 | 1.60 | 0.44 | 1.23 | 0.28 |
| 65360 | 0 | 142011 | SEPELMDLIEMEKSISE<br>ERLKN         | 3.12 | 0.01 | 3.13 | 0.68 | 0.22 | 0.28 |
| 65361 | 0 | 182406 | SEQEMMETKTHH                       | 2.48 | 0.01 | 0.90 | 0.68 | 0.22 | 0.28 |
| 65362 | 0 | 182406 | SEQEMMETKTHH                       | 2.48 | 0.01 | 0.90 | 0.68 | 0.22 | 0.28 |
| 65363 | 0 | 120939 | SEQSKEVYYE                         | 2.35 | 0.01 | 2.18 | 2.16 | 0.22 | 0.28 |

|       |   |        |                              |      |      |      |      |      |      |
|-------|---|--------|------------------------------|------|------|------|------|------|------|
| 65364 | 0 | 190972 | SEQTLQLEDAVSAVASV<br>VQD     | 3.00 | 0.01 | 3.50 | 2.13 | 0.22 | 0.28 |
| 65365 | 0 | 378008 | SEREDDEENDEEEDG              | 2.73 | 0.01 | 1.61 | 0.44 | 0.85 | 1.28 |
| 65366 | 0 | 57608  | SERQPSL                      | 2.03 | 0.01 | 3.37 | 0.68 | 0.22 | 1.34 |
| 65367 | 0 | 57608  | SERQPSL                      | 2.03 | 0.01 | 3.37 | 0.68 | 0.22 | 0.28 |
| 65368 | 0 | 57609  | SERQPSLGPSLVITD              | 2.67 | 0.01 | 3.37 | 2.22 | 0.22 | 0.28 |
| 65369 | 0 | 99661  | SERRAQSV                     | 2.14 | 0.01 | 2.24 | 0.68 | 0.22 | 0.28 |
| 65370 | 0 | 57612  | SERSQPRG                     | 2.15 | 0.01 | 1.72 | 0.44 | 0.85 | 0.28 |
| 65371 | 0 | 57617  | SERSQPRGRRQPIPKAR<br>RPEGRT  | 3.12 | 0.01 | 1.72 | 0.44 | 0.85 | 0.85 |
| 65372 | 0 | 57618  | SERVQLLHSQNTSLINQK           | 2.85 | 0.01 | 0.78 | 0.44 | 1.13 | 0.85 |
| 65373 | 0 | 57618  | SERVQLLHSQNTSLINQK           | 2.85 | 0.01 | 0.78 | 0.44 | 1.13 | 1.27 |
| 65374 | 0 | 57618  | SERVQLLHSQNTSLINQK           | 2.85 | 0.01 | 0.78 | 0.44 | 1.13 | 1.27 |
| 65375 | 0 | 57618  | SERVQLLHSQNTSLINQK           | 2.85 | 0.01 | 0.78 | 0.44 | 1.13 | 1.27 |
| 65376 | 0 | 57618  | SERVQLLHSQNTSLINQK           | 2.85 | 0.01 | 0.78 | 0.44 | 1.13 | 1.34 |
| 65377 | 0 | 115482 | SERYLGYLEQLRLKKYK<br>VP      | 2.97 | 0.01 | 1.60 | 0.44 | 1.23 | 2.51 |
| 65378 | 0 | 115482 | SERYLGYLEQLRLKKYK<br>VP      | 2.97 | 0.01 | 1.60 | 0.44 | 1.41 | 0.28 |
| 65379 | 0 | 115482 | SERYLGYLEQLRLKKYK<br>VP      | 2.97 | 0.01 | 1.60 | 0.44 | 1.93 | 0.28 |
| 65380 | 0 | 139247 | SESDEEFDDGSNDETDD<br>KEDEGNS | 3.18 | 0.01 | 3.33 | 0.44 | 1.74 | 0.28 |
| 65381 | 0 | 139247 | SESDEEFDDGSNDETDD<br>KEDEGNS | 3.18 | 0.01 | 3.33 | 0.44 | 0.85 | 0.28 |
| 65382 | 0 | 139247 | SESDEEFDDGSNDETDD<br>KEDEGNS | 3.18 | 0.01 | 3.33 | 0.44 | 0.85 | 0.28 |
| 65383 | 0 | 139247 | SESDEEFDDGSNDETDD<br>KEDEGNS | 3.18 | 0.01 | 3.33 | 0.68 | 0.22 | 0.28 |
| 65384 | 0 | 139247 | SESDEEFDDGSNDETDD<br>KEDEGNS | 3.18 | 0.01 | 3.33 | 1.15 | 0.22 | 0.28 |
| 65385 | 0 | 111766 | SESGWPSAGGGAEAS              | 2.73 | 0.01 | 3.20 | 1.12 | 0.22 | 0.85 |
| 65386 | 0 | 57620  | SESHNFDAVMSKLGVS<br>WATR     | 2.90 | 0.01 | 2.93 | 0.68 | 0.22 | 0.28 |
| 65387 | 0 | 57620  | SESHNFDAVMSKLGVS<br>WATR     | 2.90 | 0.01 | 2.93 | 1.81 | 0.22 | 0.28 |
| 65388 | 0 | 57620  | SESHNFDAVMSKLGVS<br>WATR     | 2.90 | 0.01 | 2.93 | 2.69 | 0.22 | 0.28 |
| 65389 | 0 | 510481 | SESPGIA                      | 2.03 | 0.01 | 0.90 | 0.44 | 1.41 | 0.28 |
| 65390 | 0 | 95146  | SESPNK                       | 1.91 | 0.01 | 3.42 | 1.20 | 0.22 | 0.28 |
| 65391 | 0 | 106827 | SESPYPSLMMVS                 | 2.51 | 0.01 | 0.90 | 1.15 | 0.22 | 1.39 |
| 65392 | 0 | 118133 | SESQTLDKVYQM                 | 2.46 | 0.01 | 0.78 | 0.44 | 1.13 | 0.85 |

|       |   |        |                          |      |      |      |      |      |      |
|-------|---|--------|--------------------------|------|------|------|------|------|------|
| 65393 | 0 | 118133 | SESQTLDKVYQM             | 2.46 | 0.01 | 0.78 | 0.44 | 1.41 | 0.85 |
| 65394 | 0 | 88495  | SESSIESFFARGACV          | 2.69 | 0.01 | 2.57 | 0.44 | 0.85 | 0.28 |
| 65395 | 0 | 57630  | SESTEDQAMEDIKQME<br>AE   | 2.89 | 0.01 | 1.60 | 0.44 | 1.23 | 0.28 |
| 65396 | 0 | 57630  | SESTEDQAMEDIKQME<br>AE   | 2.89 | 0.01 | 1.60 | 1.12 | 0.22 | 1.27 |
| 65397 | 0 | 57631  | SESTEDQAMEDIKQME<br>AESI | 2.99 | 0.01 | 1.60 | 2.82 | 0.22 | 0.28 |
| 65398 | 0 | 57631  | SESTEDQAMEDIKQME<br>AESI | 2.99 | 0.01 | 1.60 | 2.82 | 0.22 | 0.28 |
| 65399 | 0 | 57631  | SESTEDQAMEDIKQME<br>AESI | 2.99 | 0.01 | 1.60 | 2.82 | 0.22 | 0.28 |
| 65400 | 0 | 57631  | SESTEDQAMEDIKQME<br>AESI | 2.99 | 0.01 | 1.60 | 0.44 | 1.23 | 2.51 |
| 65401 | 0 | 57632  | SESTEGDAMEDIKQME<br>AESI | 2.98 | 0.01 | 1.60 | 0.44 | 1.23 | 0.28 |
| 65402 | 0 | 57632  | SESTEGDAMEDIKQME<br>AESI | 2.98 | 0.01 | 1.60 | 0.44 | 1.23 | 0.28 |
| 65403 | 0 | 57632  | SESTEGDAMEDIKQME<br>AESI | 2.98 | 0.01 | 1.60 | 0.44 | 2.98 | 0.28 |
| 65404 | 0 | 57635  | SESTIGDVLQQMAI           | 2.59 | 0.01 | 2.69 | 0.44 | 0.85 | 0.28 |
| 65405 | 0 | 108619 | SESTIQNLR                | 2.22 | 0.01 | 0.90 | 0.44 | 1.13 | 1.39 |
| 65406 | 0 | 57637  | SESVEFTKDTQTGMS          | 2.69 | 0.01 | 2.24 | 1.15 | 0.22 | 0.85 |
| 65407 | 0 | 57638  | SESVEFTKDTQTGMSG         | 2.75 | 0.01 | 2.24 | 0.68 | 0.22 | 0.28 |
| 65408 | 0 | 129881 | SETAPAAPAAPAPAEK         | 2.80 | 0.01 | 0.78 | 0.44 | 1.13 | 0.28 |
| 65409 | 0 | 129881 | SETAPAAPAAPAPAEK         | 2.80 | 0.01 | 0.78 | 0.44 | 1.13 | 0.28 |
| 65410 | 0 | 129881 | SETAPAAPAAPAPAEK         | 2.80 | 0.01 | 0.78 | 0.44 | 1.13 | 0.28 |
| 65411 | 0 | 129881 | SETAPAAPAAPAPAEK         | 2.80 | 0.01 | 0.78 | 0.44 | 1.13 | 0.28 |
| 65412 | 0 | 57644  | SETFTNKLKEKHTDLGKE<br>G  | 2.92 | 0.01 | 2.97 | 2.82 | 0.22 | 0.85 |
| 65413 | 0 | 57644  | SETFTNKLKEKHTDLGKE<br>G  | 2.92 | 0.01 | 2.97 | 2.82 | 0.22 | 0.28 |
| 65414 | 0 | 57644  | SETFTNKLKEKHTDLGKE<br>G  | 2.92 | 0.01 | 2.97 | 2.82 | 0.22 | 1.48 |
| 65415 | 0 | 57644  | SETFTNKLKEKHTDLGKE<br>G  | 2.92 | 0.01 | 2.97 | 2.82 | 0.22 | 1.34 |
| 65416 | 0 | 230586 | SETKLTGDFSKVEQALAE<br>L  | 2.91 | 0.01 | 2.93 | 0.44 | 1.59 | 1.28 |
| 65417 | 0 | 57648  | SETLKS                   | 1.91 | 0.01 | 3.38 | 1.15 | 0.22 | 1.34 |
| 65418 | 0 | 57648  | SETLKS                   | 1.91 | 0.01 | 3.38 | 1.15 | 0.22 | 0.85 |
| 65419 | 0 | 57650  | SETNKNPTSHSNSTTSL<br>NNN | 3.02 | 0.01 | 2.22 | 0.44 | 0.85 | 0.28 |

|       |   |        |                                                     |      |      |      |      |      |      |
|-------|---|--------|-----------------------------------------------------|------|------|------|------|------|------|
| 65420 | 0 | 57650  | SETNKNPTSHSNSTTTSL<br>NNN                           | 3.02 | 0.01 | 2.22 | 0.44 | 0.85 | 1.34 |
| 65421 | 0 | 106829 | SETPANRLHFYV                                        | 2.40 | 0.01 | 0.90 | 3.00 | 1.93 | 0.28 |
| 65422 | 0 | 57654  | SETQKSQNY                                           | 2.24 | 0.01 | 2.83 | 0.68 | 0.22 | 0.28 |
| 65423 | 0 | 57654  | SETQKSQNY                                           | 2.24 | 0.01 | 2.83 | 0.68 | 0.22 | 2.35 |
| 65424 | 0 | 181014 | SETRTISKNT                                          | 2.34 | 0.01 | 2.18 | 2.16 | 0.22 | 0.28 |
| 65425 | 0 | 152975 | SETRTISKNTTSTR                                      | 2.67 | 0.01 | 2.18 | 0.44 | 0.22 | 0.28 |
| 65426 | 0 | 100504 | SEVAQGALTLSLPK                                      | 2.62 | 0.01 | 2.96 | 1.12 | 0.22 | 0.28 |
| 65427 | 0 | 100504 | SEVAQGALTLSLPK                                      | 2.62 | 0.01 | 2.96 | 0.44 | 0.22 | 0.28 |
| 65428 | 0 | 122900 | SEVATEVPFRLMH                                       | 2.51 | 0.01 | 1.60 | 2.04 | 0.22 | 0.28 |
| 65429 | 0 | 122900 | SEVATEVPFRLMH                                       | 2.51 | 0.01 | 1.60 | 2.04 | 0.22 | 0.28 |
| 65430 | 0 | 132056 | SEVDMNSPKSKKAKKKE<br>EPSQN                          | 3.06 | 0.01 | 0.78 | 0.44 | 1.13 | 0.85 |
| 65431 | 0 | 132057 | SEVDMNSPKSKKAKKKE<br>EPSQNDISPKTKSLRKKK<br>EPIEKKVV | 3.70 | 0.01 | 0.78 | 0.44 | 1.41 | 0.85 |
| 65432 | 0 | 132057 | SEVDMNSPKSKKAKKKE<br>EPSQNDISPKTKSLRKKK<br>EPIEKKVV | 3.70 | 0.01 | 0.78 | 1.20 | 0.22 | 0.85 |
| 65433 | 0 | 57661  | SEVEDVIPEGWKADTSY<br>SAK                            | 2.95 | 0.01 | 3.22 | 0.44 | 1.23 | 0.85 |
| 65434 | 0 | 99662  | SEVIFR                                              | 1.88 | 0.01 | 2.24 | 1.20 | 0.22 | 0.28 |
| 65435 | 0 | 132058 | SEVSGTQKVSFSGQP                                     | 2.71 | 0.01 | 0.78 | 0.44 | 1.13 | 0.85 |
| 65436 | 0 | 111768 | SEVVSLYKSNNIARMRLY<br>DPNQAA                        | 3.09 | 0.01 | 3.20 | 0.44 | 1.23 | 0.85 |
| 65437 | 0 | 57679  | SEVYCPRPDRCLRAP                                     | 2.68 | 0.01 | 0.90 | 0.44 | 1.41 | 0.28 |
| 65438 | 0 | 57680  | SEWRSPADTSRPLP                                      | 2.71 | 0.01 | 2.86 | 1.12 | 0.22 | 0.28 |
| 65439 | 0 | 57680  | SEWRSPADTSRPLP                                      | 2.71 | 0.01 | 2.86 | 1.12 | 0.22 | 0.28 |
| 65440 | 0 | 237924 | SEWTNVDIQPARSWG<br>TV                               | 2.80 | 0.01 | 3.19 | 0.44 | 1.59 | 0.85 |
| 65441 | 0 | 237924 | SEWTNVDIQPARSWG<br>TV                               | 2.80 | 0.01 | 3.19 | 0.44 | 0.85 | 0.85 |
| 65442 | 0 | 237924 | SEWTNVDIQPARSWG<br>TV                               | 2.80 | 0.01 | 3.19 | 0.44 | 0.85 | 0.85 |
| 65443 | 0 | 57686  | SEYIENWNLQNRQR                                      | 2.70 | 0.01 | 3.75 | 0.68 | 0.22 | 0.28 |
| 65444 | 0 | 57692  | SEYLAHRRIPPENIRRV<br>TV                             | 2.93 | 0.01 | 2.14 | 0.44 | 0.22 | 0.28 |
| 65445 | 0 | 57692  | SEYLAHRRIPPENIRRV<br>TV                             | 2.93 | 0.01 | 2.14 | 0.44 | 0.22 | 0.28 |
| 65446 | 0 | 57692  | SEYLAHRRIPPENIRRV<br>TV                             | 2.93 | 0.01 | 2.14 | 3.00 | 0.22 | 0.28 |
| 65447 | 0 | 114946 | SEYKPDCTA                                           | 2.29 | 0.01 | 2.25 | 0.44 | 1.23 | 0.85 |
| 65448 | 0 | 230252 | SEYKPDCTAEDRPLCGS<br>DN                             | 2.94 | 0.01 | 2.25 | 0.44 | 1.23 | 0.28 |
| 65449 | 0 | 57704  | SEYPPQPSS                                           | 2.25 | 0.01 | 4.93 | 0.44 | 0.85 | 0.28 |
| 65450 | 0 | 57705  | SEYPSQPLS                                           | 2.26 | 0.01 | 3.00 | 0.44 | 0.85 | 0.28 |
| 65451 | 0 | 57706  | SEYPSQPPS                                           | 2.27 | 0.01 | 3.75 | 0.44 | 0.85 | 0.28 |

|       |   |        |                             |      |      |      |      |      |      |
|-------|---|--------|-----------------------------|------|------|------|------|------|------|
| 65452 | 0 | 57707  | SEYPSQPPSPSN                | 2.53 | 0.01 | 3.75 | 0.44 | 0.85 | 0.28 |
| 65453 | 0 | 57707  | SEYPSQPPSPSN                | 2.53 | 0.01 | 3.75 | 0.44 | 0.85 | 0.28 |
| 65454 | 0 | 57708  | SEYPSQPSS                   | 2.25 | 0.01 | 2.67 | 0.44 | 0.85 | 0.28 |
| 65455 | 0 | 57709  | SEYQSQPPS                   | 2.27 | 0.01 | 3.00 | 0.44 | 0.85 | 0.28 |
| 65456 | 0 | 57716  | SEYSSQPSS                   | 2.25 | 0.01 | 4.23 | 0.44 | 0.85 | 0.28 |
| 65457 | 0 | 423506 | SFAATLLHRYPINPS             | 2.65 | 0.01 | 2.51 | 0.44 | 2.35 | 1.28 |
| 65458 | 0 | 236321 | SFADIGDIIRGRDLY             | 2.69 | 0.01 | 1.66 | 0.44 | 0.85 | 1.28 |
| 65459 | 0 | 139248 | SFAGTVIE                    | 2.10 | 0.01 | 2.63 | 0.68 | 0.22 | 0.85 |
| 65460 | 0 | 57723  | SFAIKWEYVL                  | 2.26 | 0.01 | 1.72 | 0.44 | 0.85 | 2.51 |
| 65461 | 0 | 57726  | SFANTNTNTNSK                | 2.53 | 0.01 | 4.33 | 1.15 | 0.22 | 1.34 |
| 65462 | 0 | 57726  | SFANTNTNTNSK                | 2.53 | 0.01 | 4.33 | 1.15 | 0.22 | 2.35 |
| 65463 | 0 | 57726  | SFANTNTNTNSK                | 2.53 | 0.01 | 4.33 | 1.15 | 0.22 | 0.85 |
| 65464 | 0 | 57726  | SFANTNTNTNSK                | 2.53 | 0.01 | 4.33 | 1.15 | 0.22 | 0.85 |
| 65465 | 0 | 113162 | SFAQAVACAEAGVTL             | 2.68 | 0.01 | 0.78 | 0.44 | 1.13 | 0.85 |
| 65466 | 0 | 57733  | SFCIMPPSISEG                | 2.49 | 0.01 | 3.61 | 1.20 | 0.22 | 0.85 |
| 65467 | 0 | 118600 | SFCQECISQVGKGGGSV<br>CAVCRQ | 3.10 | 0.01 | 0.78 | 0.44 | 1.13 | 0.28 |
| 65468 | 0 | 118600 | SFCQECISQVGKGGGSV<br>CAVCRQ | 3.10 | 0.01 | 0.78 | 0.44 | 1.41 | 0.28 |
| 65469 | 0 | 180742 | SFCQVRVRSQDWKGYTG<br>KTI    | 2.88 | 4.33 | 0.78 | 0.44 | 1.13 | 0.28 |
| 65470 | 0 | 180742 | SFCQVRVRSQDWKGYTG<br>KTI    | 2.88 | 4.33 | 0.78 | 0.44 | 1.13 | 0.28 |
| 65471 | 0 | 180742 | SFCQVRVRSQDWKGYTG<br>KTI    | 2.88 | 4.33 | 0.78 | 0.44 | 1.13 | 0.28 |
| 65472 | 0 | 180742 | SFCQVRVRSQDWKGYTG<br>KTI    | 2.88 | 4.33 | 0.78 | 0.44 | 1.41 | 0.28 |
| 65473 | 0 | 57736  | SFDADTIRIA                  | 2.33 | 0.01 | 3.42 | 3.28 | 0.22 | 0.28 |
| 65474 | 0 | 93874  | SFDADTIRIAQP                | 2.48 | 0.01 | 3.03 | 3.28 | 0.22 | 0.28 |
| 65475 | 0 | 57737  | SFDASQSTMA                  | 2.34 | 3.93 | 2.70 | 0.44 | 0.85 | 0.28 |
| 65476 | 0 | 57739  | SFDEDFY                     | 2.14 | 0.01 | 3.81 | 0.44 | 1.23 | 1.27 |
| 65477 | 0 | 106101 | SFDKVKGD                    | 2.14 | 0.01 | 3.05 | 1.20 | 0.22 | 0.28 |
| 65478 | 0 | 57741  | SFDLYNKY                    | 2.12 | 0.01 | 3.18 | 2.74 | 0.22 | 0.28 |
| 65479 | 0 | 131652 | SFDSSNPEYFDGYWGYS           | 2.83 | 0.01 | 0.78 | 1.12 | 0.22 | 1.27 |
| 65480 | 0 | 131652 | SFDSSNPEYFDGYWGYS           | 2.83 | 0.01 | 0.78 | 1.12 | 0.22 | 0.28 |
| 65481 | 0 | 57743  | SFDVPSKQPTIDIDL             | 2.69 | 0.01 | 2.28 | 0.68 | 0.22 | 0.28 |
| 65482 | 0 | 57743  | SFDVPSKQPTIDIDL             | 2.69 | 0.01 | 2.28 | 0.68 | 0.22 | 0.28 |
| 65483 | 0 | 57743  | SFDVPSKQPTIDIDL             | 2.69 | 0.01 | 2.28 | 1.20 | 0.22 | 0.28 |
| 65484 | 0 | 57743  | SFDVPSKQPTIDIDL             | 2.69 | 0.01 | 2.28 | 1.20 | 0.22 | 0.28 |
| 65485 | 0 | 57743  | SFDVPSKQPTIDIDL             | 2.69 | 0.01 | 2.28 | 2.89 | 0.22 | 0.28 |
| 65486 | 0 | 57743  | SFDVPSKQPTIDIDL             | 2.69 | 0.01 | 2.28 | 1.20 | 0.22 | 1.27 |
| 65487 | 0 | 57743  | SFDVPSKQPTIDIDL             | 2.69 | 0.01 | 2.28 | 0.68 | 0.22 | 0.28 |
| 65488 | 0 | 226100 | SFDYGRNYGVVYDALGY<br>TDM    | 2.94 | 0.01 | 2.24 | 0.68 | 0.22 | 0.28 |

|       |   |        |                               |      |      |      |      |      |      |
|-------|---|--------|-------------------------------|------|------|------|------|------|------|
| 65489 | 0 | 226100 | SFDYGRNYGVVYDALGY<br>TDM      | 2.94 | 0.01 | 2.24 | 3.06 | 0.22 | 0.28 |
| 65490 | 0 | 157929 | SFEDQGRR                      | 2.09 | 0.01 | 4.63 | 0.44 | 1.23 | 0.85 |
| 65491 | 0 | 157929 | SFEDQGRR                      | 2.09 | 0.01 | 4.63 | 0.44 | 1.23 | 0.85 |
| 65492 | 0 | 57746  | SFEEDTEEDK                    | 2.34 | 0.01 | 2.56 | 1.20 | 0.22 | 0.28 |
| 65493 | 0 | 57747  | SFEEDTEKDK                    | 2.35 | 0.01 | 2.56 | 1.20 | 0.22 | 0.28 |
| 65494 | 0 | 173173 | SFEKTADHLFDAAYF               | 2.67 | 0.01 | 0.78 | 0.44 | 1.41 | 0.28 |
| 65495 | 0 | 173173 | SFEKTADHLFDAAYF               | 2.67 | 0.01 | 0.78 | 0.44 | 1.13 | 0.28 |
| 65496 | 0 | 173173 | SFEKTADHLFDAAYF               | 2.67 | 0.01 | 0.78 | 2.79 | 1.13 | 1.28 |
| 65497 | 0 | 173173 | SFEKTADHLFDAAYF               | 2.67 | 0.01 | 0.78 | 1.81 | 1.41 | 1.28 |
| 65498 | 0 | 173173 | SFEKTADHLFDAAYF               | 2.67 | 0.01 | 0.78 | 1.81 | 1.41 | 1.28 |
| 65499 | 0 | 229484 | SFEPWYPRG                     | 2.21 | 0.01 | 0.90 | 0.68 | 0.22 | 1.39 |
| 65500 | 0 | 124708 | SFERFEIF                      | 2.16 | 0.01 | 2.97 | 1.12 | 0.22 | 1.27 |
| 65501 | 0 | 57751  | SFERFEIFPKE                   | 2.43 | 0.01 | 2.97 | 1.12 | 0.22 | 1.57 |
| 65502 | 0 | 57751  | SFERFEIFPKE                   | 2.43 | 0.01 | 2.97 | 1.20 | 0.22 | 1.57 |
| 65503 | 0 | 57751  | SFERFEIFPKE                   | 2.43 | 0.01 | 2.97 | 1.20 | 0.22 | 1.27 |
| 65504 | 0 | 57751  | SFERFEIFPKE                   | 2.43 | 0.01 | 2.97 | 1.12 | 0.22 | 1.27 |
| 65505 | 0 | 57751  | SFERFEIFPKE                   | 2.43 | 0.01 | 2.97 | 1.20 | 0.22 | 1.57 |
| 65506 | 0 | 109907 | SFETTEESLRNYEQWG<br>KLTDC     | 3.01 | 0.01 | 0.78 | 1.81 | 0.22 | 0.28 |
| 65507 | 0 | 109907 | SFETTEESLRNYEQWG<br>KLTDC     | 3.01 | 0.01 | 0.78 | 3.61 | 0.22 | 0.28 |
| 65508 | 0 | 109907 | SFETTEESLRNYEQWG<br>KLTDC     | 3.01 | 0.01 | 1.75 | 1.81 | 0.22 | 0.28 |
| 65509 | 0 | 153460 | SFEVDPIDENSG                  | 2.48 | 0.01 | 0.90 | 2.16 | 0.22 | 0.85 |
| 65510 | 0 | 153460 | SFEVDPIDENSG                  | 2.48 | 0.01 | 0.90 | 2.16 | 0.22 | 0.85 |
| 65511 | 0 | 117640 | SFEYFPSHFFVPELEVTIIC          | 2.95 | 0.01 | 0.90 | 0.68 | 0.22 | 1.27 |
| 65512 | 0 | 117640 | SFEYFPSHFFVPELEVTIIC          | 2.95 | 0.01 | 0.90 | 0.68 | 0.22 | 0.28 |
| 65513 | 0 | 117640 | SFEYFPSHFFVPELEVTIIC          | 2.95 | 0.01 | 0.90 | 0.68 | 0.22 | 0.28 |
| 65514 | 0 | 57753  | SFFARGACVTIMTVDNP<br>ASTTNKDK | 3.14 | 0.01 | 2.57 | 1.20 | 0.22 | 0.28 |
| 65515 | 0 | 57753  | SFFARGACVTIMTVDNP<br>ASTTNKDK | 3.14 | 0.01 | 2.57 | 1.20 | 0.22 | 1.34 |
| 65516 | 0 | 57753  | SFFARGACVTIMTVDNP<br>ASTTNKDK | 3.14 | 0.01 | 2.57 | 1.15 | 0.22 | 1.27 |
| 65517 | 0 | 129882 | SFFCEL                        | 1.89 | 0.01 | 0.78 | 0.44 | 1.13 | 1.27 |
| 65518 | 0 | 57754  | SFFD                          | 1.59 | 0.01 | 2.18 | 0.68 | 0.22 | 1.39 |
| 65519 | 0 | 57754  | SFFD                          | 1.59 | 0.01 | 2.18 | 0.68 | 0.22 | 1.34 |
| 65520 | 0 | 57754  | SFFD                          | 1.59 | 0.01 | 2.18 | 0.68 | 0.22 | 0.28 |
| 65521 | 0 | 152977 | SFFDIGGSVS                    | 2.34 | 0.01 | 2.18 | 2.16 | 0.22 | 0.28 |
| 65522 | 0 | 115483 | SFFDIGGSVSAGFSN               | 2.72 | 0.01 | 2.18 | 0.68 | 0.22 | 0.85 |
| 65523 | 0 | 115483 | SFFDIGGSVSAGFSN               | 2.72 | 0.01 | 2.18 | 0.68 | 0.22 | 0.28 |
| 65524 | 0 | 78003  | SFFDKNSAHWSP                  | 2.47 | 0.01 | 0.90 | 1.15 | 0.22 | 1.39 |
| 65525 | 0 | 109908 | SFFLYSK                       | 2.04 | 0.01 | 0.78 | 0.44 | 1.13 | 0.28 |

|       |   |        |                |      |      |      |      |      |      |
|-------|---|--------|----------------|------|------|------|------|------|------|
| 65526 | 0 | 57766  | SFFSYGEI       | 2.14 | 0.01 | 3.51 | 1.15 | 0.22 | 0.28 |
| 65527 | 0 | 57766  | SFFSYGEI       | 2.14 | 0.01 | 3.67 | 1.12 | 0.22 | 0.28 |
| 65528 | 0 | 57766  | SFFSYGEI       | 2.14 | 0.01 | 3.67 | 1.12 | 0.22 | 0.28 |
| 65529 | 0 | 57766  | SFFSYGEI       | 2.14 | 0.01 | 3.67 | 1.12 | 0.22 | 0.28 |
| 65530 | 0 | 57766  | SFFSYGEI       | 2.14 | 0.01 | 3.67 | 3.93 | 0.22 | 0.28 |
| 65531 | 0 | 57766  | SFFSYGEI       | 2.14 | 0.01 | 3.67 | 3.93 | 0.22 | 1.34 |
| 65532 | 0 | 57767  | SFFVKDWPER     | 2.28 | 0.01 | 3.41 | 0.68 | 0.22 | 0.28 |
| 65533 | 0 | 57770  | SFFVKDWSER     | 2.31 | 0.01 | 2.56 | 0.68 | 0.22 | 0.28 |
| 65534 | 0 | 57771  | SFFVKDWSERIREF | 2.63 | 0.01 | 2.56 | 2.69 | 0.22 | 0.28 |
| 65535 | 0 | 134795 | SFGAYGAQEAAQC  | 2.56 | 0.01 | 0.78 | 1.12 | 0.22 | 1.48 |
